# Supplementary material for: Radiomic feature stability across 4D respiratory phases and its impact on lung tumor prognosis prediction
Source: PubMed Central journal article supplement (PMC6504105; doi:10.1371/journal.pone.0216480), 2019-05-07
Supplement: pone.0216480.s003.pdf [file pone.0216480.s003.pdf]

## Supplementary File 3: List of all feature data

| Image type | Feature Class | Feature Name                         |                                                                                                                                                                                                                                                                                                                                                                                                                                           |
|------------|---------------|--------------------------------------|-------------------------------------------------------------------------------------------------------------------------------------------------------------------------------------------------------------------------------------------------------------------------------------------------------------------------------------------------------------------------------------------------------------------------------------------|
| general    | info          | BoundingBox                          | 11: RTSTRUCT: C99-DNU_segment_ITV-LUL<br>(0, 1, 1, 7, 6, 5)                                                                                                                                                                                                                                                                                                                                                                               |
| general    | info          | EnabledImageTypes                    | {u'Original': {}, u'Wavelet': {}}                                                                                                                                                                                                                                                                                                                                                                                                         |
|            |               |                                      | {'distances': [1], 'additionalInfo': True, 'force2D':<br>False, 'interpolator': 'sitkBSpline',<br>'resampledPixelSpacing': [3.0], 'label': 1,<br>'normalizeScale': 1, 'normalize': False,<br>'force2Ddimension': 0, 'removeOutliers': None,<br>'minimumROISize': None, u'binWidth': 25.0,<br>'minimumROIDimensions': 1, u'correctMask':<br>True, 'preCrop': False, u'symmetricalGLCM':<br>True, 'resegmentRange': None, 'padDistance': 5} |
| general    | info          | GeneralSettings                      |                                                                                                                                                                                                                                                                                                                                                                                                                                           |
| general    | info          | ImageHash                            | 13441ddb8b7f5355e5cf424418097e0e8466ade8<br>(0.9765625000000002, 0.9765625000000002,<br>2.0)                                                                                                                                                                                                                                                                                                                                              |
| general    | info          | ImageSpacing                         |                                                                                                                                                                                                                                                                                                                                                                                                                                           |
| general    | info          | MaskHash                             | 510484d399f8bebe2145cd5dfa62bb28cf8603e15                                                                                                                                                                                                                                                                                                                                                                                                 |
| general    | info          | NumpyVersion                         | 1.13.1                                                                                                                                                                                                                                                                                                                                                                                                                                    |
| general    | info          | PyWaveletVersion                     | 0.5.2                                                                                                                                                                                                                                                                                                                                                                                                                                     |
| general    | info          | SimpleITKVersion                     | 1.1.0                                                                                                                                                                                                                                                                                                                                                                                                                                     |
| general    | info          | Version                              | 1.3.0.post102+g1b0eb74                                                                                                                                                                                                                                                                                                                                                                                                                    |
| general    | info          | VolumeNum                            | 1                                                                                                                                                                                                                                                                                                                                                                                                                                         |
| general    | info          | VoxelNum                             | 97                                                                                                                                                                                                                                                                                                                                                                                                                                        |
| original   | shape         | Maximum3DDiameter                    | 20.34698995                                                                                                                                                                                                                                                                                                                                                                                                                               |
| original   | shape         | Maximum2DDiameterSlice               | 18.97366596                                                                                                                                                                                                                                                                                                                                                                                                                               |
| original   | shape         | Sphericity                           | 0.846749749                                                                                                                                                                                                                                                                                                                                                                                                                               |
| original   | shape         | MinorAxis                            | 16.17708417                                                                                                                                                                                                                                                                                                                                                                                                                               |
| original   | shape         | Elongation                           | 0.839009922                                                                                                                                                                                                                                                                                                                                                                                                                               |
| original   | shape         | SurfaceVolumeRatio                   | 0.414333977                                                                                                                                                                                                                                                                                                                                                                                                                               |
| original   | shape         | Volume                               | 2619                                                                                                                                                                                                                                                                                                                                                                                                                                      |
| original   | shape         | MajorAxis                            | 19.28115955                                                                                                                                                                                                                                                                                                                                                                                                                               |
| original   | shape         | SurfaceArea                          | 1085.140686                                                                                                                                                                                                                                                                                                                                                                                                                               |
| original   | shape         | Flatness                             | 0.662809184                                                                                                                                                                                                                                                                                                                                                                                                                               |
| original   | shape         | LeastAxis                            | 12.77972962                                                                                                                                                                                                                                                                                                                                                                                                                               |
| original   | shape         | Maximum2DDiameterColumn              | 19.20937271                                                                                                                                                                                                                                                                                                                                                                                                                               |
| original   | shape         | Maximum2DDiameterRow                 | 17.49285568                                                                                                                                                                                                                                                                                                                                                                                                                               |
| original   | gldm          | GrayLevelVariance                    | 100.4349028                                                                                                                                                                                                                                                                                                                                                                                                                               |
| original   | gldm          | HighGrayLevelEmphasis                | 519.628866                                                                                                                                                                                                                                                                                                                                                                                                                                |
| original   | gldm          | DependenceEntropy                    | 5.496618512                                                                                                                                                                                                                                                                                                                                                                                                                               |
| original   | gldm          | DependenceNonUniformity              | 42.15463918                                                                                                                                                                                                                                                                                                                                                                                                                               |
| original   | gldm          | GrayLevelNonUniformity               | 3.865979381                                                                                                                                                                                                                                                                                                                                                                                                                               |
| original   | gldm          | SmallDependenceEmphasis              | 0.682701802                                                                                                                                                                                                                                                                                                                                                                                                                               |
| original   | gldm          | SmallDependenceHighGrayLevelEmphasis | 253.4345178                                                                                                                                                                                                                                                                                                                                                                                                                               |
| original   | gldm          | DependenceNonUniformityNormalized    | 0.434583909                                                                                                                                                                                                                                                                                                                                                                                                                               |
| original   | gldm          | LargeDependenceEmphasis              | 4.525773196                                                                                                                                                                                                                                                                                                                                                                                                                               |
| original   | gldm          | LargeDependenceLowGrayLevelEmphasis  | 0.032447205                                                                                                                                                                                                                                                                                                                                                                                                                               |
| original   | gldm          | DependenceVariance                   | 1.490275268                                                                                                                                                                                                                                                                                                                                                                                                                               |
| original   | gldm          | LargeDependenceHighGrayLevelEmphasis | 4152.082474                                                                                                                                                                                                                                                                                                                                                                                                                               |
| original   | gldm          | SmallDependenceLowGrayLevelEmphasis  | 0.027197922                                                                                                                                                                                                                                                                                                                                                                                                                               |
| original   | gldm          | LowGrayLevelEmphasis                 | 0.027810052                                                                                                                                                                                                                                                                                                                                                                                                                               |
| original   | glcm          | JointAverage                         | 23.26080762                                                                                                                                                                                                                                                                                                                                                                                                                               |
| original   | glcm          | SumAverage                           | 46.52161523                                                                                                                                                                                                                                                                                                                                                                                                                               |

|          |            |                                  |              |
|----------|------------|----------------------------------|--------------|
| original | glcm       | JointEntropy                     | 6.602887119  |
| original | glcm       | ClusterShade                     | -1026.389778 |
| original | glcm       | MaximumProbability               | 0.027240005  |
| original | glcm       | Idmn                             | 0.905618795  |
| original | glcm       | JointEnergy                      | 0.011127664  |
| original | glcm       | Contrast                         | 158.9469443  |
| original | glcm       | DifferenceEntropy                | 4.237238526  |
| original | glcm       | InverseVariance                  | 0.129852614  |
| original | glcm       | DifferenceVariance               | 59.87710115  |
| original | glcm       | Idn                              | 0.806996059  |
| original | glcm       | Idm                              | 0.124776724  |
| original | glcm       | Correlation                      | 0.203276077  |
| original | glcm       | Autocorrelation                  | 561.2335003  |
| original | glcm       | SumEntropy                       | 5.013575556  |
| original | glcm       | SumSquares                       | 99.40605072  |
| original | glcm       | ClusterProminence                | 125526.7419  |
| original | glcm       | Imc2                             | 0.997697742  |
| original | glcm       | Imc1                             | -0.580989124 |
| original | glcm       | DifferenceAverage                | 9.85318638   |
| original | glcm       | Id                               | 0.201413977  |
| original | glcm       | ClusterTendency                  | 238.6772586  |
| original | firstorder | InterquartileRange               | 437          |
| original | firstorder | Skewness                         | -0.044193001 |
| original | firstorder | Uniformity                       | 0.039855458  |
| original | firstorder | Median                           | -361         |
| original | firstorder | Energy                           | 16385078     |
| original | firstorder | RobustMeanAbsoluteDeviation      | 173.8684432  |
| original | firstorder | MeanAbsoluteDeviation            | 216.1511319  |
| original | firstorder | TotalEnergy                      | 442397106    |
| original | firstorder | Maximum                          | 56           |
| original | firstorder | RootMeanSquared                  | 410.9967517  |
| original | firstorder | 90Percentile                     | 20.2         |
| original | firstorder | Minimum                          | -815         |
| original | firstorder | Entropy                          | 4.837091002  |
| original | firstorder | Range                            | 871          |
| original | firstorder | Variance                         | 62467.49516  |
| original | firstorder | 10Percentile                     | -652.6       |
| original | firstorder | Kurtosis                         | 1.8165423    |
| original | firstorder | Mean                             | -326.2680412 |
| original | glrlm      | ShortRunLowGrayLevelEmphasis     | 0.028564966  |
| original | glrlm      | GrayLevelVariance                | 98.9942949   |
| original | glrlm      | LowGrayLevelRunEmphasis          | 0.028596092  |
| original | glrlm      | GrayLevelNonUniformityNormalized | 0.039012984  |
| original | glrlm      | RunVariance                      | 0.031854639  |
| original | glrlm      | GrayLevelNonUniformity           | 3.67677289   |
| original | glrlm      | LongRunEmphasis                  | 1.093190844  |
| original | glrlm      | ShortRunHighGrayLevelEmphasis    | 485.545775   |
| original | glrlm      | RunLengthNonUniformity           | 89.21100424  |
| original | glrlm      | ShortRunEmphasis                 | 0.978592573  |
| original | glrlm      | LongRunHighGrayLevelEmphasis     | 594.8858686  |
| original | glrlm      | RunPercentage                    | 0.971451229  |
| original | glrlm      | LongRunLowGrayLevelEmphasis      | 0.028746765  |
| original | glrlm      | RunEntropy                       | 4.936245325  |
| original | glrlm      | HighGrayLevelRunEmphasis         | 506.4325587  |
| original | glrlm      | RunLengthNonUniformityNormalized | 0.94586137   |

|             |       |                                      |              |
|-------------|-------|--------------------------------------|--------------|
| original    | glszm | GrayLevelVariance                    | 83.41184414  |
| original    | glszm | ZoneVariance                         | 1.11554784   |
| original    | glszm | GrayLevelNonUniformityNormalized     | 0.038580247  |
| original    | glszm | SizeZoneNonUniformityNormalized      | 0.705246914  |
| original    | glszm | SizeZoneNonUniformity                | 50.77777778  |
| original    | glszm | GrayLevelNonUniformity               | 2.777777778  |
| original    | glszm | LargeAreaEmphasis                    | 2.930555556  |
| original    | glszm | SmallAreaHighGrayLevelEmphasis       | 299.3736497  |
| original    | glszm | ZonePercentage                       | 0.742268041  |
| original    | glszm | LargeAreaLowGrayLevelEmphasis        | 0.039650779  |
| original    | glszm | LargeAreaHighGrayLevelEmphasis       | 2301.666667  |
| original    | glszm | HighGrayLevelZoneEmphasis            | 396.0138889  |
| original    | glszm | SmallAreaEmphasis                    | 0.862365934  |
| original    | glszm | LowGrayLevelZoneEmphasis             | 0.036832719  |
| original    | glszm | ZoneEntropy                          | 5.110693578  |
| original    | glszm | SmallAreaLowGrayLevelEmphasis        | 0.036508883  |
| original    | ngtdm | Coarseness                           | 0.036433476  |
| original    | ngtdm | Complexity                           | 3536.953427  |
| original    | ngtdm | Strength                             | 20.30119245  |
| original    | ngtdm | Contrast                             | 1.288494025  |
| original    | ngtdm | Busyness                             | 0.041594592  |
| wavelet-HHH | gldm  | GrayLevelVariance                    | 5.858220852  |
| wavelet-HHH | gldm  | HighGrayLevelEmphasis                | 36.16494845  |
| wavelet-HHH | gldm  | DependenceEntropy                    | 5.041843936  |
| wavelet-HHH | gldm  | DependenceNonUniformity              | 20.38144433  |
| wavelet-HHH | gldm  | GrayLevelNonUniformity               | 11.45360825  |
| wavelet-HHH | gldm  | SmallDependenceEmphasis              | 0.338708126  |
| wavelet-HHH | gldm  | SmallDependenceHighGrayLevelEmphasis | 16.46649116  |
| wavelet-HHH | gldm  | DependenceNonUniformityNormalized    | 0.210117972  |
| wavelet-HHH | gldm  | LargeDependenceEmphasis              | 10.07216495  |
| wavelet-HHH | gldm  | LargeDependenceLowGrayLevelEmphasis  | 0.671372686  |
| wavelet-HHH | gldm  | DependenceVariance                   | 2.38154958   |
| wavelet-HHH | gldm  | LargeDependenceHighGrayLevelEmphasis | 288.6597938  |
| wavelet-HHH | gldm  | SmallDependenceLowGrayLevelEmphasis  | 0.045176147  |
| wavelet-HHH | gldm  | LowGrayLevelEmphasis                 | 0.11084716   |
| wavelet-HHH | glcm  | JointAverage                         | 5.463783872  |
| wavelet-HHH | glcm  | SumAverage                           | 10.92756774  |
| wavelet-HHH | glcm  | JointEntropy                         | 5.723762733  |
| wavelet-HHH | glcm  | ClusterShade                         | 6.107989548  |
| wavelet-HHH | glcm  | MaximumProbability                   | 0.047347194  |
| wavelet-HHH | glcm  | Idmn                                 | 0.92699797   |
| wavelet-HHH | glcm  | JointEnergy                          | 0.022166676  |
| wavelet-HHH | glcm  | Contrast                             | 12.94841198  |
| wavelet-HHH | glcm  | DifferenceEntropy                    | 2.831868009  |
| wavelet-HHH | glcm  | InverseVariance                      | 0.294573541  |
| wavelet-HHH | glcm  | DifferenceVariance                   | 4.584006088  |
| wavelet-HHH | glcm  | Idn                                  | 0.82475134   |
| wavelet-HHH | glcm  | Idm                                  | 0.289680156  |
| wavelet-HHH | glcm  | Correlation                          | -0.027223539 |
| wavelet-HHH | glcm  | Autocorrelation                      | 29.68691258  |
| wavelet-HHH | glcm  | SumEntropy                           | 3.582645787  |
| wavelet-HHH | glcm  | SumSquares                           | 6.302391826  |
| wavelet-HHH | glcm  | ClusterProminence                    | 444.4833422  |
| wavelet-HHH | glcm  | Imc2                                 | 0.886394285  |
| wavelet-HHH | glcm  | Imc1                                 | -0.241390898 |

|             |            |                                  |              |
|-------------|------------|----------------------------------|--------------|
| wavelet-HHH | glcm       | DifferenceAverage                | 2.847931369  |
| wavelet-HHH | glcm       | Id                               | 0.377698619  |
| wavelet-HHH | glcm       | ClusterTendency                  | 12.26115533  |
| wavelet-HHH | firstorder | InterquartileRange               | 82.2214901   |
| wavelet-HHH | firstorder | Skewness                         | 0.079710856  |
| wavelet-HHH | firstorder | Uniformity                       | 0.118078436  |
| wavelet-HHH | firstorder | Median                           | -2.494598284 |
| wavelet-HHH | firstorder | Energy                           | 361974.1236  |
| wavelet-HHH | firstorder | RobustMeanAbsoluteDeviation      | 34.26159143  |
| wavelet-HHH | firstorder | MeanAbsoluteDeviation            | 49.02167823  |
| wavelet-HHH | firstorder | TotalEnergy                      | 9773301.337  |
| wavelet-HHH | firstorder | Maximum                          | 156.070323   |
| wavelet-HHH | firstorder | RootMeanSquared                  | 61.08757644  |
| wavelet-HHH | firstorder | 90Percentile                     | 72.18066914  |
| wavelet-HHH | firstorder | Minimum                          | -122.9512672 |
| wavelet-HHH | firstorder | Entropy                          | 3.239957914  |
| wavelet-HHH | firstorder | Range                            | 279.0215903  |
| wavelet-HHH | firstorder | Variance                         | 3731.594561  |
| wavelet-HHH | firstorder | 10Percentile                     | -83.31122652 |
| wavelet-HHH | firstorder | Kurtosis                         | 2.767126685  |
| wavelet-HHH | firstorder | Mean                             | 0.312145255  |
| wavelet-HHH | glrlm      | ShortRunLowGrayLevelEmphasis     | 0.109758916  |
| wavelet-HHH | glrlm      | GrayLevelVariance                | 6.079350711  |
| wavelet-HHH | glrlm      | LowGrayLevelRunEmphasis          | 0.113651266  |
| wavelet-HHH | glrlm      | GrayLevelNonUniformityNormalized | 0.115991848  |
| wavelet-HHH | glrlm      | RunVariance                      | 0.074520833  |
| wavelet-HHH | glrlm      | GrayLevelNonUniformity           | 10.48414332  |
| wavelet-HHH | glrlm      | LongRunEmphasis                  | 1.228393749  |
| wavelet-HHH | glrlm      | ShortRunHighGrayLevelEmphasis    | 35.13897476  |
| wavelet-HHH | glrlm      | RunLengthNonUniformity           | 78.75845136  |
| wavelet-HHH | glrlm      | ShortRunEmphasis                 | 0.946691197  |
| wavelet-HHH | glrlm      | LongRunHighGrayLevelEmphasis     | 43.2122206   |
| wavelet-HHH | glrlm      | RunPercentage                    | 0.931800159  |
| wavelet-HHH | glrlm      | LongRunLowGrayLevelEmphasis      | 0.130273315  |
| wavelet-HHH | glrlm      | RunEntropy                       | 3.544362028  |
| wavelet-HHH | glrlm      | HighGrayLevelRunEmphasis         | 36.70386665  |
| wavelet-HHH | glrlm      | RunLengthNonUniformityNormalized | 0.870210513  |
| wavelet-HHH | glszm      | GrayLevelVariance                | 9.204470743  |
| wavelet-HHH | glszm      | ZoneVariance                     | 8.813938199  |
| wavelet-HHH | glszm      | GrayLevelNonUniformityNormalized | 0.111111111  |
| wavelet-HHH | glszm      | SizeZoneNonUniformityNormalized  | 0.392504931  |
| wavelet-HHH | glszm      | SizeZoneNonUniformity            | 15.30769231  |
| wavelet-HHH | glszm      | GrayLevelNonUniformity           | 4.333333333  |
| wavelet-HHH | glszm      | LargeAreaEmphasis                | 15           |
| wavelet-HHH | glszm      | SmallAreaHighGrayLevelEmphasis   | 34.98857128  |
| wavelet-HHH | glszm      | ZonePercentage                   | 0.402061856  |
| wavelet-HHH | glszm      | LargeAreaLowGrayLevelEmphasis    | 0.902259891  |
| wavelet-HHH | glszm      | LargeAreaHighGrayLevelEmphasis   | 483.1282051  |
| wavelet-HHH | glszm      | HighGrayLevelZoneEmphasis        | 44.8974359   |
| wavelet-HHH | glszm      | SmallAreaEmphasis                | 0.646895324  |
| wavelet-HHH | glszm      | LowGrayLevelZoneEmphasis         | 0.14854193   |
| wavelet-HHH | glszm      | ZoneEntropy                      | 4.404260476  |
| wavelet-HHH | glszm      | SmallAreaLowGrayLevelEmphasis    | 0.088106412  |
| wavelet-HHH | ngtdm      | Coarseness                       | 0.054302131  |
| wavelet-HHH | ngtdm      | Complexity                       | 112.600775   |

|             |            |                                      |              |
|-------------|------------|--------------------------------------|--------------|
| wavelet-HHH | ngtdm      | Strength                             | 2.230602818  |
| wavelet-HHH | ngtdm      | Contrast                             | 0.184747465  |
| wavelet-HHH | ngtdm      | Busyness                             | 0.333514174  |
| wavelet-HLL | gldm       | GrayLevelVariance                    | 77.72536933  |
| wavelet-HLL | gldm       | HighGrayLevelEmphasis                | 372.3608247  |
| wavelet-HLL | gldm       | DependenceEntropy                    | 5.586875084  |
| wavelet-HLL | gldm       | DependenceNonUniformity              | 36.31958763  |
| wavelet-HLL | gldm       | GrayLevelNonUniformity               | 3.804123711  |
| wavelet-HLL | gldm       | SmallDependenceEmphasis              | 0.594716495  |
| wavelet-HLL | gldm       | SmallDependenceHighGrayLevelEmphasis | 261.2484966  |
| wavelet-HLL | gldm       | DependenceNonUniformityNormalized    | 0.374428738  |
| wavelet-HLL | gldm       | LargeDependenceEmphasis              | 3.845360825  |
| wavelet-HLL | gldm       | LargeDependenceLowGrayLevelEmphasis  | 0.063393053  |
| wavelet-HLL | gldm       | DependenceVariance                   | 0.809862897  |
| wavelet-HLL | gldm       | LargeDependenceHighGrayLevelEmphasis | 932.5876289  |
| wavelet-HLL | gldm       | SmallDependenceLowGrayLevelEmphasis  | 0.019008563  |
| wavelet-HLL | gldm       | LowGrayLevelEmphasis                 | 0.02381652   |
| wavelet-HLL | glcm       | JointAverage                         | 15.89084836  |
| wavelet-HLL | glcm       | SumAverage                           | 31.78169673  |
| wavelet-HLL | glcm       | JointEntropy                         | 6.611299698  |
| wavelet-HLL | glcm       | ClusterShade                         | 997.2611855  |
| wavelet-HLL | glcm       | MaximumProbability                   | 0.021623228  |
| wavelet-HLL | glcm       | Idmn                                 | 0.932790545  |
| wavelet-HLL | glcm       | JointEnergy                          | 0.010848768  |
| wavelet-HLL | glcm       | Contrast                             | 97.62609071  |
| wavelet-HLL | glcm       | DifferenceEntropy                    | 3.895785224  |
| wavelet-HLL | glcm       | InverseVariance                      | 0.144282216  |
| wavelet-HLL | glcm       | DifferenceVariance                   | 37.1758853   |
| wavelet-HLL | glcm       | Idn                                  | 0.836092669  |
| wavelet-HLL | glcm       | Idm                                  | 0.136060521  |
| wavelet-HLL | glcm       | Correlation                          | 0.371779182  |
| wavelet-HLL | glcm       | Autocorrelation                      | 282.8399359  |
| wavelet-HLL | glcm       | SumEntropy                           | 4.964577356  |
| wavelet-HLL | glcm       | SumSquares                           | 78.94409583  |
| wavelet-HLL | glcm       | ClusterProminence                    | 107412.6049  |
| wavelet-HLL | glcm       | Imc2                                 | 0.998054898  |
| wavelet-HLL | glcm       | Imc1                                 | -0.594099053 |
| wavelet-HLL | glcm       | DifferenceAverage                    | 7.527066116  |
| wavelet-HLL | glcm       | Id                                   | 0.223933772  |
| wavelet-HLL | glcm       | ClusterTendency                      | 218.1502926  |
| wavelet-HLL | firstorder | InterquartileRange                   | 322.6237991  |
| wavelet-HLL | firstorder | Skewness                             | 0.18539487   |
| wavelet-HLL | firstorder | Uniformity                           | 0.03921777   |
| wavelet-HLL | firstorder | Median                               | -101.1848328 |
| wavelet-HLL | firstorder | Energy                               | 5299933.742  |
| wavelet-HLL | firstorder | RobustMeanAbsoluteDeviation          | 142.5581464  |
| wavelet-HLL | firstorder | MeanAbsoluteDeviation                | 185.1078684  |
| wavelet-HLL | firstorder | TotalEnergy                          | 143098211    |
| wavelet-HLL | firstorder | Maximum                              | 338.5350391  |
| wavelet-HLL | firstorder | RootMeanSquared                      | 233.7487801  |
| wavelet-HLL | firstorder | 90Percentile                         | 221.4411504  |
| wavelet-HLL | firstorder | Minimum                              | -475.9200324 |
| wavelet-HLL | firstorder | Entropy                              | 4.836687909  |
| wavelet-HLL | firstorder | Range                                | 814.4550715  |
| wavelet-HLL | firstorder | Variance                             | 47704.93587  |

|             |            |                                      |              |
|-------------|------------|--------------------------------------|--------------|
| wavelet-HLL | firstorder | 10Percentile                         | -363.7216081 |
| wavelet-HLL | firstorder | Kurtosis                             | 1.979360103  |
| wavelet-HLL | firstorder | Mean                                 | -83.26797894 |
| wavelet-HLL | glrlm      | ShortRunLowGrayLevelEmphasis         | 0.023844508  |
| wavelet-HLL | glrlm      | GrayLevelVariance                    | 77.90380351  |
| wavelet-HLL | glrlm      | LowGrayLevelRunEmphasis              | 0.024136669  |
| wavelet-HLL | glrlm      | GrayLevelNonUniformityNormalized     | 0.0389489    |
| wavelet-HLL | glrlm      | RunVariance                          | 0.030187404  |
| wavelet-HLL | glrlm      | GrayLevelNonUniformity               | 3.670399865  |
| wavelet-HLL | glrlm      | LongRunEmphasis                      | 1.091649145  |
| wavelet-HLL | glrlm      | ShortRunHighGrayLevelEmphasis        | 371.7931055  |
| wavelet-HLL | glrlm      | RunLengthNonUniformity               | 89.08625287  |
| wavelet-HLL | glrlm      | ShortRunEmphasis                     | 0.978048052  |
| wavelet-HLL | glrlm      | LongRunHighGrayLevelEmphasis         | 397.3201433  |
| wavelet-HLL | glrlm      | RunPercentage                        | 0.971451229  |
| wavelet-HLL | glrlm      | LongRunLowGrayLevelEmphasis          | 0.025328043  |
| wavelet-HLL | glrlm      | RunEntropy                           | 4.925423626  |
| wavelet-HLL | glrlm      | HighGrayLevelRunEmphasis             | 376.7686754  |
| wavelet-HLL | glrlm      | RunLengthNonUniformityNormalized     | 0.944403144  |
| wavelet-HLL | glszm      | GrayLevelVariance                    | 80.81577189  |
| wavelet-HLL | glszm      | ZoneVariance                         | 0.724883047  |
| wavelet-HLL | glszm      | GrayLevelNonUniformityNormalized     | 0.036310982  |
| wavelet-HLL | glszm      | SizeZoneNonUniformityNormalized      | 0.550011138  |
| wavelet-HLL | glszm      | SizeZoneNonUniformity                | 36.85074627  |
| wavelet-HLL | glszm      | GrayLevelNonUniformity               | 2.432835821  |
| wavelet-HLL | glszm      | LargeAreaEmphasis                    | 2.820895522  |
| wavelet-HLL | glszm      | SmallAreaHighGrayLevelEmphasis       | 351.3198549  |
| wavelet-HLL | glszm      | ZonePercentage                       | 0.690721649  |
| wavelet-HLL | glszm      | LargeAreaLowGrayLevelEmphasis        | 0.050860767  |
| wavelet-HLL | glszm      | LargeAreaHighGrayLevelEmphasis       | 825.2686567  |
| wavelet-HLL | glszm      | HighGrayLevelZoneEmphasis            | 424.4477612  |
| wavelet-HLL | glszm      | SmallAreaEmphasis                    | 0.770290216  |
| wavelet-HLL | glszm      | LowGrayLevelZoneEmphasis             | 0.029211656  |
| wavelet-HLL | glszm      | ZoneEntropy                          | 5.386838817  |
| wavelet-HLL | glszm      | SmallAreaLowGrayLevelEmphasis        | 0.026582452  |
| wavelet-HLL | ngtdm      | Coarseness                           | 0.061382561  |
| wavelet-HLL | ngtdm      | Complexity                           | 1973.642819  |
| wavelet-HLL | ngtdm      | Strength                             | 24.58097021  |
| wavelet-HLL | ngtdm      | Contrast                             | 0.696488662  |
| wavelet-HLL | ngtdm      | Busyness                             | 0.037610753  |
| wavelet-LHL | gldm       | GrayLevelVariance                    | 71.41226485  |
| wavelet-LHL | gldm       | HighGrayLevelEmphasis                | 555.8659794  |
| wavelet-LHL | gldm       | DependenceEntropy                    | 5.411415806  |
| wavelet-LHL | gldm       | DependenceNonUniformity              | 38.15463918  |
| wavelet-LHL | gldm       | GrayLevelNonUniformity               | 3.742268041  |
| wavelet-LHL | gldm       | SmallDependenceEmphasis              | 0.620418099  |
| wavelet-LHL | gldm       | SmallDependenceHighGrayLevelEmphasis | 320.1204181  |
| wavelet-LHL | gldm       | DependenceNonUniformityNormalized    | 0.393346796  |
| wavelet-LHL | gldm       | LargeDependenceEmphasis              | 3.391752577  |
| wavelet-LHL | gldm       | LargeDependenceLowGrayLevelEmphasis  | 0.02042573   |
| wavelet-LHL | gldm       | DependenceVariance                   | 0.636837071  |
| wavelet-LHL | gldm       | LargeDependenceHighGrayLevelEmphasis | 2114.051546  |
| wavelet-LHL | gldm       | SmallDependenceLowGrayLevelEmphasis  | 0.013674908  |
| wavelet-LHL | gldm       | LowGrayLevelEmphasis                 | 0.014670156  |
| wavelet-LHL | glcm       | JointAverage                         | 21.3931924   |

|             |            |                                  |              |
|-------------|------------|----------------------------------|--------------|
| wavelet-LHL | glcm       | SumAverage                       | 42.7863848   |
| wavelet-LHL | glcm       | JointEntropy                     | 6.664870476  |
| wavelet-LHL | glcm       | ClusterShade                     | 221.2365245  |
| wavelet-LHL | glcm       | MaximumProbability               | 0.018301398  |
| wavelet-LHL | glcm       | Idmn                             | 0.941386161  |
| wavelet-LHL | glcm       | JointEnergy                      | 0.010283709  |
| wavelet-LHL | glcm       | Contrast                         | 92.44765563  |
| wavelet-LHL | glcm       | DifferenceEntropy                | 3.899226982  |
| wavelet-LHL | glcm       | InverseVariance                  | 0.166546566  |
| wavelet-LHL | glcm       | DifferenceVariance               | 33.80178355  |
| wavelet-LHL | glcm       | Idn                              | 0.844913203  |
| wavelet-LHL | glcm       | Idm                              | 0.141146183  |
| wavelet-LHL | glcm       | Correlation                      | 0.315401655  |
| wavelet-LHL | glcm       | Autocorrelation                  | 479.757582   |
| wavelet-LHL | glcm       | SumEntropy                       | 4.920342969  |
| wavelet-LHL | glcm       | SumSquares                       | 68.08493802  |
| wavelet-LHL | glcm       | ClusterProminence                | 73712.45355  |
| wavelet-LHL | glcm       | Imc2                             | 0.997911568  |
| wavelet-LHL | glcm       | Imc1                             | -0.585634639 |
| wavelet-LHL | glcm       | DifferenceAverage                | 7.381000396  |
| wavelet-LHL | glcm       | Id                               | 0.225723411  |
| wavelet-LHL | glcm       | ClusterTendency                  | 179.8920964  |
| wavelet-LHL | firstorder | InterquartileRange               | 352.0220645  |
| wavelet-LHL | firstorder | Skewness                         | -0.305313326 |
| wavelet-LHL | firstorder | Uniformity                       | 0.038580083  |
| wavelet-LHL | firstorder | Median                           | -31.02497234 |
| wavelet-LHL | firstorder | Energy                           | 4447889.484  |
| wavelet-LHL | firstorder | RobustMeanAbsoluteDeviation      | 138.7350689  |
| wavelet-LHL | firstorder | MeanAbsoluteDeviation            | 179.0619812  |
| wavelet-LHL | firstorder | TotalEnergy                      | 120093016.1  |
| wavelet-LHL | firstorder | Maximum                          | 324.401999   |
| wavelet-LHL | firstorder | RootMeanSquared                  | 214.1367105  |
| wavelet-LHL | firstorder | 90Percentile                     | 236.4596262  |
| wavelet-LHL | firstorder | Minimum                          | -561.7843263 |
| wavelet-LHL | firstorder | Entropy                          | 4.800410823  |
| wavelet-LHL | firstorder | Range                            | 886.1863253  |
| wavelet-LHL | firstorder | Variance                         | 44523.47141  |
| wavelet-LHL | firstorder | 10Percentile                     | -316.8495364 |
| wavelet-LHL | firstorder | Kurtosis                         | 2.171075155  |
| wavelet-LHL | firstorder | Mean                             | -36.4836861  |
| wavelet-LHL | glrlm      | ShortRunLowGrayLevelEmphasis     | 0.014942401  |
| wavelet-LHL | glrlm      | GrayLevelVariance                | 71.78175494  |
| wavelet-LHL | glrlm      | LowGrayLevelRunEmphasis          | 0.014991548  |
| wavelet-LHL | glrlm      | GrayLevelNonUniformityNormalized | 0.038454533  |
| wavelet-LHL | glrlm      | RunVariance                      | 0.025323982  |
| wavelet-LHL | glrlm      | GrayLevelNonUniformity           | 3.636099834  |
| wavelet-LHL | glrlm      | LongRunEmphasis                  | 1.079123915  |
| wavelet-LHL | glrlm      | ShortRunHighGrayLevelEmphasis    | 540.9516665  |
| wavelet-LHL | glrlm      | RunLengthNonUniformity           | 89.80898753  |
| wavelet-LHL | glrlm      | ShortRunEmphasis                 | 0.980219021  |
| wavelet-LHL | glrlm      | LongRunHighGrayLevelEmphasis     | 604.3268316  |
| wavelet-LHL | glrlm      | RunPercentage                    | 0.974623315  |
| wavelet-LHL | glrlm      | LongRunLowGrayLevelEmphasis      | 0.015188133  |
| wavelet-LHL | glrlm      | RunEntropy                       | 4.878806774  |
| wavelet-LHL | glrlm      | HighGrayLevelRunEmphasis         | 553.6266995  |

|             |       |                                      |              |
|-------------|-------|--------------------------------------|--------------|
| wavelet-LHL | glrlm | RunLengthNonUniformityNormalized     | 0.949352035  |
| wavelet-LHL | glszm | GrayLevelVariance                    | 76.74984247  |
| wavelet-LHL | glszm | ZoneVariance                         | 0.646922915  |
| wavelet-LHL | glszm | GrayLevelNonUniformityNormalized     | 0.038857383  |
| wavelet-LHL | glszm | SizeZoneNonUniformityNormalized      | 0.577399706  |
| wavelet-LHL | glszm | SizeZoneNonUniformity                | 39.84057971  |
| wavelet-LHL | glszm | GrayLevelNonUniformity               | 2.68115942   |
| wavelet-LHL | glszm | LargeAreaEmphasis                    | 2.623188406  |
| wavelet-LHL | glszm | SmallAreaHighGrayLevelEmphasis       | 399.9695692  |
| wavelet-LHL | glszm | ZonePercentage                       | 0.711340206  |
| wavelet-LHL | glszm | LargeAreaLowGrayLevelEmphasis        | 0.023547995  |
| wavelet-LHL | glszm | LargeAreaHighGrayLevelEmphasis       | 1594.565217  |
| wavelet-LHL | glszm | HighGrayLevelZoneEmphasis            | 526.9275362  |
| wavelet-LHL | glszm | SmallAreaEmphasis                    | 0.788522544  |
| wavelet-LHL | glszm | LowGrayLevelZoneEmphasis             | 0.019569523  |
| wavelet-LHL | glszm | ZoneEntropy                          | 5.195197645  |
| wavelet-LHL | glszm | SmallAreaLowGrayLevelEmphasis        | 0.018990169  |
| wavelet-LHL | ngtdm | Coarseness                           | 0.052196871  |
| wavelet-LHL | ngtdm | Complexity                           | 2020.176824  |
| wavelet-LHL | ngtdm | Strength                             | 19.64004188  |
| wavelet-LHL | ngtdm | Contrast                             | 0.822680953  |
| wavelet-LHL | ngtdm | Busyness                             | 0.037768249  |
| wavelet-LHH | gldm  | GrayLevelVariance                    | 11.996599    |
| wavelet-LHH | gldm  | HighGrayLevelEmphasis                | 85.56701031  |
| wavelet-LHH | gldm  | DependenceEntropy                    | 4.963127729  |
| wavelet-LHH | gldm  | DependenceNonUniformity              | 25.24742268  |
| wavelet-LHH | gldm  | GrayLevelNonUniformity               | 10.19587629  |
| wavelet-LHH | gldm  | SmallDependenceEmphasis              | 0.505084391  |
| wavelet-LHH | gldm  | SmallDependenceHighGrayLevelEmphasis | 46.21777784  |
| wavelet-LHH | gldm  | DependenceNonUniformityNormalized    | 0.260282708  |
| wavelet-LHH | gldm  | LargeDependenceEmphasis              | 9            |
| wavelet-LHH | gldm  | LargeDependenceLowGrayLevelEmphasis  | 0.242734754  |
| wavelet-LHH | gldm  | DependenceVariance                   | 2.929110426  |
| wavelet-LHH | gldm  | LargeDependenceHighGrayLevelEmphasis | 684.9278351  |
| wavelet-LHH | gldm  | SmallDependenceLowGrayLevelEmphasis  | 0.021558721  |
| wavelet-LHH | gldm  | LowGrayLevelEmphasis                 | 0.047943047  |
| wavelet-LHH | glcm  | JointAverage                         | 8.603135519  |
| wavelet-LHH | glcm  | SumAverage                           | 17.20627104  |
| wavelet-LHH | glcm  | JointEntropy                         | 6.010741723  |
| wavelet-LHH | glcm  | ClusterShade                         | -7.149271747 |
| wavelet-LHH | glcm  | MaximumProbability                   | 0.054770664  |
| wavelet-LHH | glcm  | Idmn                                 | 0.939849602  |
| wavelet-LHH | glcm  | JointEnergy                          | 0.019009613  |
| wavelet-LHH | glcm  | Contrast                             | 26.09521328  |
| wavelet-LHH | glcm  | DifferenceEntropy                    | 3.235039516  |
| wavelet-LHH | glcm  | InverseVariance                      | 0.214727735  |
| wavelet-LHH | glcm  | DifferenceVariance                   | 9.532771445  |
| wavelet-LHH | glcm  | Idn                                  | 0.84067278   |
| wavelet-LHH | glcm  | Idm                                  | 0.226589489  |
| wavelet-LHH | glcm  | Correlation                          | -0.013441422 |
| wavelet-LHH | glcm  | Autocorrelation                      | 73.8354825   |
| wavelet-LHH | glcm  | SumEntropy                           | 3.957585766  |
| wavelet-LHH | glcm  | SumSquares                           | 12.85173229  |
| wavelet-LHH | glcm  | ClusterProminence                    | 1981.729421  |
| wavelet-LHH | glcm  | Imc2                                 | 0.956321074  |



|             |            |                                  |              |
|-------------|------------|----------------------------------|--------------|
| wavelet-LHH | glcm       | Imc1                             | -0.344169636 |
| wavelet-LHH | glcm       | DifferenceAverage                | 3.998009773  |
| wavelet-LHH | glcm       | Id                               | 0.320403452  |
| wavelet-LHH | glcm       | ClusterTendency                  | 25.3117159   |
| wavelet-LHH | firstorder | InterquartileRange               | 95.40852768  |
| wavelet-LHH | firstorder | Skewness                         | 0.11079303   |
| wavelet-LHH | firstorder | Uniformity                       | 0.105112127  |
| wavelet-LHH | firstorder | Median                           | 5.988001591  |
| wavelet-LHH | firstorder | Energy                           | 727748.636   |
| wavelet-LHH | firstorder | RobustMeanAbsoluteDeviation      | 41.50687293  |
| wavelet-LHH | firstorder | MeanAbsoluteDeviation            | 65.39695608  |
| wavelet-LHH | firstorder | TotalEnergy                      | 19649213.17  |
| wavelet-LHH | firstorder | Maximum                          | 252.2683445  |
| wavelet-LHH | firstorder | RootMeanSquared                  | 86.61733809  |
| wavelet-LHH | firstorder | 90Percentile                     | 115.7678078  |
| wavelet-LHH | firstorder | Minimum                          | -189.6512649 |
| wavelet-LHH | firstorder | Entropy                          | 3.611650886  |
| wavelet-LHH | firstorder | Range                            | 441.9196094  |
| wavelet-LHH | firstorder | Variance                         | 7496.998197  |
| wavelet-LHH | firstorder | 10Percentile                     | -117.3452557 |
| wavelet-LHH | firstorder | Kurtosis                         | 3.122361321  |
| wavelet-LHH | firstorder | Mean                             | 2.359038141  |
| wavelet-LHH | glrlm      | ShortRunLowGrayLevelEmphasis     | 0.047522607  |
| wavelet-LHH | glrlm      | GrayLevelVariance                | 12.45764179  |
| wavelet-LHH | glrlm      | LowGrayLevelRunEmphasis          | 0.048937551  |
| wavelet-LHH | glrlm      | GrayLevelNonUniformityNormalized | 0.098809591  |
| wavelet-LHH | glrlm      | RunVariance                      | 0.061083166  |
| wavelet-LHH | glrlm      | GrayLevelNonUniformity           | 9.055822076  |
| wavelet-LHH | glrlm      | LongRunEmphasis                  | 1.187483294  |
| wavelet-LHH | glrlm      | ShortRunHighGrayLevelEmphasis    | 82.7276808   |
| wavelet-LHH | glrlm      | RunLengthNonUniformity           | 81.83416666  |
| wavelet-LHH | glrlm      | ShortRunEmphasis                 | 0.956025141  |
| wavelet-LHH | glrlm      | LongRunHighGrayLevelEmphasis     | 100.4488918  |
| wavelet-LHH | glrlm      | RunPercentage                    | 0.94369548   |
| wavelet-LHH | glrlm      | LongRunLowGrayLevelEmphasis      | 0.054770629  |
| wavelet-LHH | glrlm      | RunEntropy                       | 3.882841343  |
| wavelet-LHH | glrlm      | HighGrayLevelRunEmphasis         | 86.10830884  |
| wavelet-LHH | glrlm      | RunLengthNonUniformityNormalized | 0.892241069  |
| wavelet-LHH | glszm      | GrayLevelVariance                | 16.05994898  |
| wavelet-LHH | glszm      | ZoneVariance                     | 3.517538265  |
| wavelet-LHH | glszm      | GrayLevelNonUniformityNormalized | 0.075255102  |
| wavelet-LHH | glszm      | SizeZoneNonUniformityNormalized  | 0.581632653  |
| wavelet-LHH | glszm      | SizeZoneNonUniformity            | 32.57142857  |
| wavelet-LHH | glszm      | GrayLevelNonUniformity           | 4.214285714  |
| wavelet-LHH | glszm      | LargeAreaEmphasis                | 6.517857143  |
| wavelet-LHH | glszm      | SmallAreaHighGrayLevelEmphasis   | 72.67879588  |
| wavelet-LHH | glszm      | ZonePercentage                   | 0.577319588  |
| wavelet-LHH | glszm      | LargeAreaLowGrayLevelEmphasis    | 0.19918563   |
| wavelet-LHH | glszm      | LargeAreaHighGrayLevelEmphasis   | 502.1428571  |
| wavelet-LHH | glszm      | HighGrayLevelZoneEmphasis        | 90.14285714  |
| wavelet-LHH | glszm      | SmallAreaEmphasis                | 0.788128445  |
| wavelet-LHH | glszm      | LowGrayLevelZoneEmphasis         | 0.05029515   |
| wavelet-LHH | glszm      | ZoneEntropy                      | 4.496924958  |
| wavelet-LHH | glszm      | SmallAreaLowGrayLevelEmphasis    | 0.030591783  |
| wavelet-LHH | ngtdm      | Coarseness                       | 0.058023003  |

|             |            |                                      |              |
|-------------|------------|--------------------------------------|--------------|
| wavelet-LHH | ngtdm      | Complexity                           | 299.0286784  |
| wavelet-LHH | ngtdm      | Strength                             | 4.840620481  |
| wavelet-LHH | ngtdm      | Contrast                             | 0.24522807   |
| wavelet-LHH | ngtdm      | Busyness                             | 0.119855949  |
| wavelet-LLH | gldm       | GrayLevelVariance                    | 69.77404613  |
| wavelet-LLH | gldm       | HighGrayLevelEmphasis                | 538.4742268  |
| wavelet-LLH | gldm       | DependenceEntropy                    | 5.34450627   |
| wavelet-LLH | gldm       | DependenceNonUniformity              | 37.6185567   |
| wavelet-LLH | gldm       | GrayLevelNonUniformity               | 4.154639175  |
| wavelet-LLH | gldm       | SmallDependenceEmphasis              | 0.624982818  |
| wavelet-LLH | gldm       | SmallDependenceHighGrayLevelEmphasis | 363.4297652  |
| wavelet-LLH | gldm       | DependenceNonUniformityNormalized    | 0.387820172  |
| wavelet-LLH | gldm       | LargeDependenceEmphasis              | 3.721649485  |
| wavelet-LLH | gldm       | LargeDependenceLowGrayLevelEmphasis  | 0.027258122  |
| wavelet-LLH | gldm       | DependenceVariance                   | 0.828143267  |
| wavelet-LLH | gldm       | LargeDependenceHighGrayLevelEmphasis | 1667.443299  |
| wavelet-LLH | gldm       | SmallDependenceLowGrayLevelEmphasis  | 0.014355637  |
| wavelet-LLH | gldm       | LowGrayLevelEmphasis                 | 0.016002964  |
| wavelet-LLH | glcm       | JointAverage                         | 21.19070485  |
| wavelet-LLH | glcm       | SumAverage                           | 42.38140971  |
| wavelet-LLH | glcm       | JointEntropy                         | 6.639111129  |
| wavelet-LLH | glcm       | ClusterShade                         | 241.4688331  |
| wavelet-LLH | glcm       | MaximumProbability                   | 0.020664583  |
| wavelet-LLH | glcm       | Idmn                                 | 0.949691313  |
| wavelet-LLH | glcm       | JointEnergy                          | 0.010571525  |
| wavelet-LLH | glcm       | Contrast                             | 94.41956971  |
| wavelet-LLH | glcm       | DifferenceEntropy                    | 3.937016398  |
| wavelet-LLH | glcm       | InverseVariance                      | 0.138375923  |
| wavelet-LLH | glcm       | DifferenceVariance                   | 34.14316062  |
| wavelet-LLH | glcm       | Idn                                  | 0.853224536  |
| wavelet-LLH | glcm       | Idm                                  | 0.131277204  |
| wavelet-LLH | glcm       | Correlation                          | 0.276248142  |
| wavelet-LLH | glcm       | Autocorrelation                      | 468.0096058  |
| wavelet-LLH | glcm       | SumEntropy                           | 4.911159241  |
| wavelet-LLH | glcm       | SumSquares                           | 66.11101345  |
| wavelet-LLH | glcm       | ClusterProminence                    | 76569.10418  |
| wavelet-LLH | glcm       | Imc2                                 | 0.997191794  |
| wavelet-LLH | glcm       | Imc1                                 | -0.564165981 |
| wavelet-LLH | glcm       | DifferenceAverage                    | 7.579615533  |
| wavelet-LLH | glcm       | Id                                   | 0.218067474  |
| wavelet-LLH | glcm       | ClusterTendency                      | 170.0244841  |
| wavelet-LLH | firstorder | InterquartileRange                   | 301.0678901  |
| wavelet-LLH | firstorder | Skewness                             | -0.347586077 |
| wavelet-LLH | firstorder | Uniformity                           | 0.042831332  |
| wavelet-LLH | firstorder | Median                               | -24.99054137 |
| wavelet-LLH | firstorder | Energy                               | 4493064.386  |
| wavelet-LLH | firstorder | RobustMeanAbsoluteDeviation          | 115.7761731  |
| wavelet-LLH | firstorder | MeanAbsoluteDeviation                | 169.1285682  |
| wavelet-LLH | firstorder | TotalEnergy                          | 121312738.4  |
| wavelet-LLH | firstorder | Maximum                              | 402.650138   |
| wavelet-LLH | firstorder | RootMeanSquared                      | 215.2214009  |
| wavelet-LLH | firstorder | 90Percentile                         | 190.8638033  |
| wavelet-LLH | firstorder | Minimum                              | -573.0955312 |
| wavelet-LLH | firstorder | Entropy                              | 4.707757627  |
| wavelet-LLH | firstorder | Range                                | 975.7456692  |

|             |            |                                      |              |
|-------------|------------|--------------------------------------|--------------|
| wavelet-LLH | firstorder | Variance                             | 44159.67464  |
| wavelet-LLH | firstorder | 10Percentile                         | -337.2903284 |
| wavelet-LLH | firstorder | Kurtosis                             | 2.699168096  |
| wavelet-LLH | firstorder | Mean                                 | -46.48200466 |
| wavelet-LLH | glrlm      | ShortRunLowGrayLevelEmphasis         | 0.016245519  |
| wavelet-LLH | glrlm      | GrayLevelVariance                    | 70.45112559  |
| wavelet-LLH | glrlm      | LowGrayLevelRunEmphasis              | 0.016333421  |
| wavelet-LLH | glrlm      | GrayLevelNonUniformityNormalized     | 0.042748393  |
| wavelet-LLH | glrlm      | RunVariance                          | 0.028583622  |
| wavelet-LLH | glrlm      | GrayLevelNonUniformity               | 4.035087961  |
| wavelet-LLH | glrlm      | LongRunEmphasis                      | 1.085797105  |
| wavelet-LLH | glrlm      | ShortRunHighGrayLevelEmphasis        | 532.5286661  |
| wavelet-LLH | glrlm      | RunLengthNonUniformity               | 89.49693076  |
| wavelet-LLH | glrlm      | ShortRunEmphasis                     | 0.979479746  |
| wavelet-LLH | glrlm      | LongRunHighGrayLevelEmphasis         | 579.0357565  |
| wavelet-LLH | glrlm      | RunPercentage                        | 0.973037272  |
| wavelet-LLH | glrlm      | LongRunLowGrayLevelEmphasis          | 0.016690973  |
| wavelet-LLH | glrlm      | RunEntropy                           | 4.787005748  |
| wavelet-LLH | glrlm      | HighGrayLevelRunEmphasis             | 541.3655729  |
| wavelet-LLH | glrlm      | RunLengthNonUniformityNormalized     | 0.947631359  |
| wavelet-LLH | glszm      | GrayLevelVariance                    | 79.5442134   |
| wavelet-LLH | glszm      | ZoneVariance                         | 0.820835959  |
| wavelet-LLH | glszm      | GrayLevelNonUniformityNormalized     | 0.04515858   |
| wavelet-LLH | glszm      | SizeZoneNonUniformityNormalized      | 0.597143457  |
| wavelet-LLH | glszm      | SizeZoneNonUniformity                | 41.20289855  |
| wavelet-LLH | glszm      | GrayLevelNonUniformity               | 3.115942029  |
| wavelet-LLH | glszm      | LargeAreaEmphasis                    | 2.797101449  |
| wavelet-LLH | glszm      | SmallAreaHighGrayLevelEmphasis       | 473.5802093  |
| wavelet-LLH | glszm      | ZonePercentage                       | 0.711340206  |
| wavelet-LLH | glszm      | LargeAreaLowGrayLevelEmphasis        | 0.027770571  |
| wavelet-LLH | glszm      | LargeAreaHighGrayLevelEmphasis       | 1373.855072  |
| wavelet-LLH | glszm      | HighGrayLevelZoneEmphasis            | 571.8695652  |
| wavelet-LLH | glszm      | SmallAreaEmphasis                    | 0.800901771  |
| wavelet-LLH | glszm      | LowGrayLevelZoneEmphasis             | 0.020772183  |
| wavelet-LLH | glszm      | ZoneEntropy                          | 5.079255616  |
| wavelet-LLH | glszm      | SmallAreaLowGrayLevelEmphasis        | 0.019838442  |
| wavelet-LLH | ngtdm      | Coarseness                           | 0.050553699  |
| wavelet-LLH | ngtdm      | Complexity                           | 2241.828731  |
| wavelet-LLH | ngtdm      | Strength                             | 21.31606404  |
| wavelet-LLH | ngtdm      | Contrast                             | 0.801949779  |
| wavelet-LLH | ngtdm      | Busyness                             | 0.037274687  |
| wavelet-LLL | gldm       | GrayLevelVariance                    | 571.7376979  |
| wavelet-LLL | gldm       | HighGrayLevelEmphasis                | 2151.185567  |
| wavelet-LLL | gldm       | DependenceEntropy                    | 5.952955239  |
| wavelet-LLL | gldm       | DependenceNonUniformity              | 59.96907216  |
| wavelet-LLL | gldm       | GrayLevelNonUniformity               | 1.865979381  |
| wavelet-LLL | gldm       | SmallDependenceEmphasis              | 0.811569301  |
| wavelet-LLL | gldm       | SmallDependenceHighGrayLevelEmphasis | 1727.485682  |
| wavelet-LLL | gldm       | DependenceNonUniformityNormalized    | 0.618237857  |
| wavelet-LLL | gldm       | LargeDependenceEmphasis              | 1.845360825  |
| wavelet-LLL | gldm       | LargeDependenceLowGrayLevelEmphasis  | 0.021112738  |
| wavelet-LLL | gldm       | DependenceVariance                   | 0.237432246  |
| wavelet-LLL | gldm       | LargeDependenceHighGrayLevelEmphasis | 4266.237113  |
| wavelet-LLL | gldm       | SmallDependenceLowGrayLevelEmphasis  | 0.013629961  |
| wavelet-LLL | gldm       | LowGrayLevelEmphasis                 | 0.015120887  |

|             |            |                                  |              |
|-------------|------------|----------------------------------|--------------|
| wavelet-LLL | glcm       | JointAverage                     | 47.45218233  |
| wavelet-LLL | glcm       | SumAverage                       | 94.90436466  |
| wavelet-LLL | glcm       | JointEntropy                     | 6.799087597  |
| wavelet-LLL | glcm       | ClusterShade                     | 4539.030939  |
| wavelet-LLL | glcm       | MaximumProbability               | 0.014892405  |
| wavelet-LLL | glcm       | Idmn                             | 0.92187971   |
| wavelet-LLL | glcm       | JointEnergy                      | 0.009148933  |
| wavelet-LLL | glcm       | Contrast                         | 857.7849235  |
| wavelet-LLL | glcm       | DifferenceEntropy                | 4.954306345  |
| wavelet-LLL | glcm       | InverseVariance                  | 0.032019161  |
| wavelet-LLL | glcm       | DifferenceVariance               | 262.4292058  |
| wavelet-LLL | glcm       | Idn                              | 0.813085521  |
| wavelet-LLL | glcm       | Idm                              | 0.038530664  |
| wavelet-LLL | glcm       | Correlation                      | 0.301008513  |
| wavelet-LLL | glcm       | Autocorrelation                  | 2431.139963  |
| wavelet-LLL | glcm       | SumEntropy                       | 5.45705745   |
| wavelet-LLL | glcm       | SumSquares                       | 606.0056309  |
| wavelet-LLL | glcm       | ClusterProminence                | 5525903.682  |
| wavelet-LLL | glcm       | Imc2                             | 0.999948162  |
| wavelet-LLL | glcm       | Imc1                             | -0.807625835 |
| wavelet-LLL | glcm       | DifferenceAverage                | 24.03901275  |
| wavelet-LLL | glcm       | Id                               | 0.091558108  |
| wavelet-LLL | glcm       | ClusterTendency                  | 1566.2376    |
| wavelet-LLL | firstorder | InterquartileRange               | 906.1623342  |
| wavelet-LLL | firstorder | Skewness                         | 0.426073379  |
| wavelet-LLL | firstorder | Uniformity                       | 0.019236901  |
| wavelet-LLL | firstorder | Median                           | -1099.526443 |
| wavelet-LLL | firstorder | Energy                           | 135440714    |
| wavelet-LLL | firstorder | RobustMeanAbsoluteDeviation      | 371.9773088  |
| wavelet-LLL | firstorder | MeanAbsoluteDeviation            | 498.6845269  |
| wavelet-LLL | firstorder | TotalEnergy                      | 3656899279   |
| wavelet-LLL | firstorder | Maximum                          | 359.3122504  |
| wavelet-LLL | firstorder | RootMeanSquared                  | 1181.649703  |
| wavelet-LLL | firstorder | 90Percentile                     | -169.2985768 |
| wavelet-LLL | firstorder | Minimum                          | -1982.001143 |
| wavelet-LLL | firstorder | Entropy                          | 5.867752533  |
| wavelet-LLL | firstorder | Range                            | 2341.313393  |
| wavelet-LLL | firstorder | Variance                         | 355490.3431  |
| wavelet-LLL | firstorder | 10Percentile                     | -1758.604321 |
| wavelet-LLL | firstorder | Kurtosis                         | 2.257652837  |
| wavelet-LLL | firstorder | Mean                             | -1020.198842 |
| wavelet-LLL | glrlm      | ShortRunLowGrayLevelEmphasis     | 0.015142178  |
| wavelet-LLL | glrlm      | GrayLevelVariance                | 569.8576184  |
| wavelet-LLL | glrlm      | LowGrayLevelRunEmphasis          | 0.01520133   |
| wavelet-LLL | glrlm      | GrayLevelNonUniformityNormalized | 0.019161291  |
| wavelet-LLL | glrlm      | RunVariance                      | 0.010303299  |
| wavelet-LLL | glrlm      | GrayLevelNonUniformity           | 1.839506168  |
| wavelet-LLL | glrlm      | LongRunEmphasis                  | 1.031607481  |
| wavelet-LLL | glrlm      | ShortRunHighGrayLevelEmphasis    | 2129.715804  |
| wavelet-LLL | glrlm      | RunLengthNonUniformity           | 94.04395046  |
| wavelet-LLL | glrlm      | ShortRunEmphasis                 | 0.99209813   |
| wavelet-LLL | glrlm      | LongRunHighGrayLevelEmphasis     | 2224.289266  |
| wavelet-LLL | glrlm      | RunPercentage                    | 0.989690722  |
| wavelet-LLL | glrlm      | LongRunLowGrayLevelEmphasis      | 0.015437936  |
| wavelet-LLL | glrlm      | RunEntropy                       | 5.883663491  |

|             |       |                                      |             |
|-------------|-------|--------------------------------------|-------------|
| wavelet-LLL | glrlm | HighGrayLevelRunEmphasis             | 2148.630496 |
| wavelet-LLL | glrlm | RunLengthNonUniformityNormalizd      | 0.979393403 |
| wavelet-LLL | glszm | GrayLevelVariance                    | 544.7147109 |
| wavelet-LLL | glszm | ZoneVariance                         | 0.178429705 |
| wavelet-LLL | glszm | GrayLevelNonUniformityNormalized     | 0.018424036 |
| wavelet-LLL | glszm | SizeZoneNonUniformityNormalized      | 0.767290249 |
| wavelet-LLL | glszm | SizeZoneNonUniformity                | 64.45238095 |
| wavelet-LLL | glszm | GrayLevelNonUniformity               | 1.547619048 |
| wavelet-LLL | glszm | LargeAreaEmphasis                    | 1.511904762 |
| wavelet-LLL | glszm | SmallAreaHighGrayLevelEmphasis       | 1902.167989 |
| wavelet-LLL | glszm | ZonePercentage                       | 0.865979381 |
| wavelet-LLL | glszm | LargeAreaLowGrayLevelEmphasis        | 0.019777163 |
| wavelet-LLL | glszm | LargeAreaHighGrayLevelEmphasis       | 3443.821429 |
| wavelet-LLL | glszm | HighGrayLevelZoneEmphasis            | 2113.440476 |
| wavelet-LLL | glszm | SmallAreaEmphasis                    | 0.898478836 |
| wavelet-LLL | glszm | LowGrayLevelZoneEmphasis             | 0.016310269 |
| wavelet-LLL | glszm | ZoneEntropy                          | 5.930949714 |
| wavelet-LLL | glszm | SmallAreaLowGrayLevelEmphasis        | 0.015451671 |
| wavelet-LLL | ngtdm | Coarseness                           | 0.035666164 |
| wavelet-LLL | ngtdm | Complexity                           | 33400.42581 |
| wavelet-LLL | ngtdm | Strength                             | 105.0977232 |
| wavelet-LLL | ngtdm | Contrast                             | 4.21759204  |
| wavelet-LLL | ngtdm | Busyness                             | 0.013920157 |
| wavelet-HHL | gldm  | GrayLevelVariance                    | 9.058135827 |
| wavelet-HHL | gldm  | HighGrayLevelEmphasis                | 53          |
| wavelet-HHL | gldm  | DependenceEntropy                    | 5.169313296 |
| wavelet-HHL | gldm  | DependenceNonUniformity              | 23.37113402 |
| wavelet-HHL | gldm  | GrayLevelNonUniformity               | 10.15463918 |
| wavelet-HHL | gldm  | SmallDependenceEmphasis              | 0.417393868 |
| wavelet-HHL | gldm  | SmallDependenceHighGrayLevelEmphasis | 24.63687355 |
| wavelet-HHL | gldm  | DependenceNonUniformityNormalized    | 0.240939526 |
| wavelet-HHL | gldm  | LargeDependenceEmphasis              | 8.154639175 |
| wavelet-HHL | gldm  | LargeDependenceLowGrayLevelEmphasis  | 0.351498261 |
| wavelet-HHL | gldm  | DependenceVariance                   | 2.184929323 |
| wavelet-HHL | gldm  | LargeDependenceHighGrayLevelEmphasis | 361.7835052 |
| wavelet-HHL | gldm  | SmallDependenceLowGrayLevelEmphasis  | 0.049817075 |
| wavelet-HHL | gldm  | LowGrayLevelEmphasis                 | 0.072912515 |
| wavelet-HHL | glcm  | JointAverage                         | 6.721500282 |
| wavelet-HHL | glcm  | SumAverage                           | 13.44300056 |
| wavelet-HHL | glcm  | JointEntropy                         | 5.937086068 |
| wavelet-HHL | glcm  | ClusterShade                         | 26.14663427 |
| wavelet-HHL | glcm  | MaximumProbability                   | 0.050109558 |
| wavelet-HHL | glcm  | Idmn                                 | 0.921731068 |
| wavelet-HHL | glcm  | JointEnergy                          | 0.019651851 |
| wavelet-HHL | glcm  | Contrast                             | 18.94649624 |
| wavelet-HHL | glcm  | DifferenceEntropy                    | 3.046402801 |
| wavelet-HHL | glcm  | InverseVariance                      | 0.233155031 |
| wavelet-HHL | glcm  | DifferenceVariance                   | 6.00398522  |
| wavelet-HHL | glcm  | Idn                                  | 0.816098813 |
| wavelet-HHL | glcm  | Idm                                  | 0.236490668 |
| wavelet-HHL | glcm  | Correlation                          | 0.029433918 |
| wavelet-HHL | glcm  | Autocorrelation                      | 45.50730742 |
| wavelet-HHL | glcm  | SumEntropy                           | 3.882511556 |
| wavelet-HHL | glcm  | SumSquares                           | 9.792493757 |
| wavelet-HHL | glcm  | ClusterProminence                    | 1100.80218  |

|             |            |                                  |              |
|-------------|------------|----------------------------------|--------------|
| wavelet-HHL | glcm       | Imc2                             | 0.927351521  |
| wavelet-HHL | glcm       | Imc1                             | -0.290426033 |
| wavelet-HHL | glcm       | DifferenceAverage                | 3.506036896  |
| wavelet-HHL | glcm       | Id                               | 0.33229093   |
| wavelet-HHL | glcm       | ClusterTendency                  | 20.22347879  |
| wavelet-HHL | firstorder | InterquartileRange               | 103.3129412  |
| wavelet-HHL | firstorder | Skewness                         | 0.248454321  |
| wavelet-HHL | firstorder | Uniformity                       | 0.104687002  |
| wavelet-HHL | firstorder | Median                           | 3.088045405  |
| wavelet-HHL | firstorder | Energy                           | 546370.1703  |
| wavelet-HHL | firstorder | RobustMeanAbsoluteDeviation      | 45.17729176  |
| wavelet-HHL | firstorder | MeanAbsoluteDeviation            | 62.03939103  |
| wavelet-HHL | firstorder | TotalEnergy                      | 14751994.6   |
| wavelet-HHL | firstorder | Maximum                          | 177.9927838  |
| wavelet-HHL | firstorder | RootMeanSquared                  | 75.05119698  |
| wavelet-HHL | firstorder | 90Percentile                     | 107.2439139  |
| wavelet-HHL | firstorder | Minimum                          | -148.6919385 |
| wavelet-HHL | firstorder | Entropy                          | 3.48004055   |
| wavelet-HHL | firstorder | Range                            | 326.6847223  |
| wavelet-HHL | firstorder | Variance                         | 5617.123009  |
| wavelet-HHL | firstorder | 10Percentile                     | -84.31567414 |
| wavelet-HHL | firstorder | Kurtosis                         | 2.44995876   |
| wavelet-HHL | firstorder | Mean                             | 3.944509994  |
| wavelet-HHL | glrlm      | ShortRunLowGrayLevelEmphasis     | 0.073299859  |
| wavelet-HHL | glrlm      | GrayLevelVariance                | 9.236064257  |
| wavelet-HHL | glrlm      | LowGrayLevelRunEmphasis          | 0.074978175  |
| wavelet-HHL | glrlm      | GrayLevelNonUniformityNormalized | 0.103092999  |
| wavelet-HHL | glrlm      | RunVariance                      | 0.062120568  |
| wavelet-HHL | glrlm      | GrayLevelNonUniformity           | 9.445552724  |
| wavelet-HHL | glrlm      | LongRunEmphasis                  | 1.185719034  |
| wavelet-HHL | glrlm      | ShortRunHighGrayLevelEmphasis    | 51.48756722  |
| wavelet-HHL | glrlm      | RunLengthNonUniformity           | 81.99379981  |
| wavelet-HHL | glrlm      | ShortRunEmphasis                 | 0.956983512  |
| wavelet-HHL | glrlm      | LongRunHighGrayLevelEmphasis     | 62.34002421  |
| wavelet-HHL | glrlm      | RunPercentage                    | 0.944488501  |
| wavelet-HHL | glrlm      | LongRunLowGrayLevelEmphasis      | 0.081928983  |
| wavelet-HHL | glrlm      | RunEntropy                       | 3.71709191   |
| wavelet-HHL | glrlm      | HighGrayLevelRunEmphasis         | 53.4031035   |
| wavelet-HHL | glrlm      | RunLengthNonUniformityNormalized | 0.893703029  |
| wavelet-HHL | glszm      | GrayLevelVariance                | 12.38026256  |
| wavelet-HHL | glszm      | ZoneVariance                     | 5.251244907  |
| wavelet-HHL | glszm      | GrayLevelNonUniformityNormalized | 0.089180625  |
| wavelet-HHL | glszm      | SizeZoneNonUniformityNormalized  | 0.451335446  |
| wavelet-HHL | glszm      | SizeZoneNonUniformity            | 21.21276596  |
| wavelet-HHL | glszm      | GrayLevelNonUniformity           | 4.191489362  |
| wavelet-HHL | glszm      | LargeAreaEmphasis                | 9.510638298  |
| wavelet-HHL | glszm      | SmallAreaHighGrayLevelEmphasis   | 42.71768643  |
| wavelet-HHL | glszm      | ZonePercentage                   | 0.484536082  |
| wavelet-HHL | glszm      | LargeAreaLowGrayLevelEmphasis    | 0.425116715  |
| wavelet-HHL | glszm      | LargeAreaHighGrayLevelEmphasis   | 412.8297872  |
| wavelet-HHL | glszm      | HighGrayLevelZoneEmphasis        | 58.44680851  |
| wavelet-HHL | glszm      | SmallAreaEmphasis                | 0.695337005  |
| wavelet-HHL | glszm      | LowGrayLevelZoneEmphasis         | 0.110139932  |
| wavelet-HHL | glszm      | ZoneEntropy                      | 4.572908735  |
| wavelet-HHL | glszm      | SmallAreaLowGrayLevelEmphasis    | 0.096099115  |

|             |            |                                      |              |
|-------------|------------|--------------------------------------|--------------|
| wavelet-HHL | ngtdm      | Coarseness                           | 0.049141821  |
| wavelet-HHL | ngtdm      | Complexity                           | 177.2476032  |
| wavelet-HHL | ngtdm      | Strength                             | 3.019545908  |
| wavelet-HHL | ngtdm      | Contrast                             | 0.248046624  |
| wavelet-HHL | ngtdm      | Busyness                             | 0.27777636   |
| wavelet-HLH | gldm       | GrayLevelVariance                    | 15.91072378  |
| wavelet-HLH | gldm       | HighGrayLevelEmphasis                | 114.2680412  |
| wavelet-HLH | gldm       | DependenceEntropy                    | 5.23689223   |
| wavelet-HLH | gldm       | DependenceNonUniformity              | 25.6185567   |
| wavelet-HLH | gldm       | GrayLevelNonUniformity               | 8.422680412  |
| wavelet-HLH | gldm       | SmallDependenceEmphasis              | 0.4639748    |
| wavelet-HLH | gldm       | SmallDependenceHighGrayLevelEmphasis | 59.91408648  |
| wavelet-HLH | gldm       | DependenceNonUniformityNormalized    | 0.264108832  |
| wavelet-HLH | gldm       | LargeDependenceEmphasis              | 7.041237113  |
| wavelet-HLH | gldm       | LargeDependenceLowGrayLevelEmphasis  | 0.110805392  |
| wavelet-HLH | gldm       | DependenceVariance                   | 1.850356042  |
| wavelet-HLH | gldm       | LargeDependenceHighGrayLevelEmphasis | 686.4123711  |
| wavelet-HLH | gldm       | SmallDependenceLowGrayLevelEmphasis  | 0.021132471  |
| wavelet-HLH | gldm       | LowGrayLevelEmphasis                 | 0.029306725  |
| wavelet-HLH | glcm       | JointAverage                         | 9.992700843  |
| wavelet-HLH | glcm       | SumAverage                           | 19.98540169  |
| wavelet-HLH | glcm       | JointEntropy                         | 6.174111585  |
| wavelet-HLH | glcm       | ClusterShade                         | 48.49915774  |
| wavelet-HLH | glcm       | MaximumProbability                   | 0.03768224   |
| wavelet-HLH | glcm       | Idmn                                 | 0.950595619  |
| wavelet-HLH | glcm       | JointEnergy                          | 0.016032005  |
| wavelet-HLH | glcm       | Contrast                             | 30.73308286  |
| wavelet-HLH | glcm       | DifferenceEntropy                    | 3.385670253  |
| wavelet-HLH | glcm       | InverseVariance                      | 0.220186322  |
| wavelet-HLH | glcm       | DifferenceVariance                   | 11.7846826   |
| wavelet-HLH | glcm       | Idn                                  | 0.855194212  |
| wavelet-HLH | glcm       | Idm                                  | 0.215303179  |
| wavelet-HLH | glcm       | Correlation                          | -0.023447396 |
| wavelet-HLH | glcm       | Autocorrelation                      | 99.56252294  |
| wavelet-HLH | glcm       | SumEntropy                           | 4.038414071  |
| wavelet-HLH | glcm       | SumSquares                           | 15.00427881  |
| wavelet-HLH | glcm       | ClusterProminence                    | 2987.346062  |
| wavelet-HLH | glcm       | Imc2                                 | 0.964197948  |
| wavelet-HLH | glcm       | Imc1                                 | -0.357037043 |
| wavelet-HLH | glcm       | DifferenceAverage                    | 4.296444079  |
| wavelet-HLH | glcm       | Id                                   | 0.307546337  |
| wavelet-HLH | glcm       | ClusterTendency                      | 29.28403237  |
| wavelet-HLH | firstorder | InterquartileRange                   | 110.3706016  |
| wavelet-HLH | firstorder | Skewness                             | 0.600216032  |
| wavelet-HLH | firstorder | Uniformity                           | 0.086831757  |
| wavelet-HLH | firstorder | Median                               | -9.404327624 |
| wavelet-HLH | firstorder | Energy                               | 954851.9076  |
| wavelet-HLH | firstorder | RobustMeanAbsoluteDeviation          | 52.38039858  |
| wavelet-HLH | firstorder | MeanAbsoluteDeviation                | 77.80995944  |
| wavelet-HLH | firstorder | TotalEnergy                          | 25781001.5   |
| wavelet-HLH | firstorder | Maximum                              | 341.6425766  |
| wavelet-HLH | firstorder | RootMeanSquared                      | 99.21609798  |
| wavelet-HLH | firstorder | 90Percentile                         | 143.8983466  |
| wavelet-HLH | firstorder | Minimum                              | -202.9168611 |
| wavelet-HLH | firstorder | Entropy                              | 3.819739676  |

|             |            |                                  |              |
|-------------|------------|----------------------------------|--------------|
| wavelet-HLH | firstorder | Range                            | 544.5594378  |
| wavelet-HLH | firstorder | Variance                         | 9729.674109  |
| wavelet-HLH | firstorder | 10Percentile                     | -98.53546179 |
| wavelet-HLH | firstorder | Kurtosis                         | 3.659831693  |
| wavelet-HLH | firstorder | Mean                             | 10.68456784  |
| wavelet-HLH | glrlm      | ShortRunLowGrayLevelEmphasis     | 0.029574747  |
| wavelet-HLH | glrlm      | GrayLevelVariance                | 16.44046652  |
| wavelet-HLH | glrlm      | LowGrayLevelRunEmphasis          | 0.030108758  |
| wavelet-HLH | glrlm      | GrayLevelNonUniformityNormalized | 0.084224557  |
| wavelet-HLH | glrlm      | RunVariance                      | 0.052426061  |
| wavelet-HLH | glrlm      | GrayLevelNonUniformity           | 7.769628631  |
| wavelet-HLH | glrlm      | LongRunEmphasis                  | 1.159755473  |
| wavelet-HLH | glrlm      | ShortRunHighGrayLevelEmphasis    | 111.4093578  |
| wavelet-HLH | glrlm      | RunLengthNonUniformity           | 83.4960702   |
| wavelet-HLH | glrlm      | ShortRunEmphasis                 | 0.96198205   |
| wavelet-HLH | glrlm      | LongRunHighGrayLevelEmphasis     | 130.8775831  |
| wavelet-HLH | glrlm      | RunPercentage                    | 0.950832672  |
| wavelet-HLH | glrlm      | LongRunLowGrayLevelEmphasis      | 0.032314685  |
| wavelet-HLH | glrlm      | RunEntropy                       | 4.040898142  |
| wavelet-HLH | glrlm      | HighGrayLevelRunEmphasis         | 115.1101512  |
| wavelet-HLH | glrlm      | RunLengthNonUniformityNormalized | 0.904702161  |
| wavelet-HLH | glszm      | GrayLevelVariance                | 24.51980008  |
| wavelet-HLH | glszm      | ZoneVariance                     | 3.774702038  |
| wavelet-HLH | glszm      | GrayLevelNonUniformityNormalized | 0.065743945  |
| wavelet-HLH | glszm      | SizeZoneNonUniformityNormalized  | 0.500961169  |
| wavelet-HLH | glszm      | SizeZoneNonUniformity            | 25.54901961  |
| wavelet-HLH | glszm      | GrayLevelNonUniformity           | 3.352941176  |
| wavelet-HLH | glszm      | LargeAreaEmphasis                | 7.392156863  |
| wavelet-HLH | glszm      | SmallAreaHighGrayLevelEmphasis   | 98.71464839  |
| wavelet-HLH | glszm      | ZonePercentage                   | 0.525773196  |
| wavelet-HLH | glszm      | LargeAreaLowGrayLevelEmphasis    | 0.125443362  |
| wavelet-HLH | glszm      | LargeAreaHighGrayLevelEmphasis   | 747.8039216  |
| wavelet-HLH | glszm      | HighGrayLevelZoneEmphasis        | 126.4901961  |
| wavelet-HLH | glszm      | SmallAreaEmphasis                | 0.733432129  |
| wavelet-HLH | glszm      | LowGrayLevelZoneEmphasis         | 0.042799529  |
| wavelet-HLH | glszm      | ZoneEntropy                      | 4.880964009  |
| wavelet-HLH | glszm      | SmallAreaLowGrayLevelEmphasis    | 0.037859433  |
| wavelet-HLH | ngtdm      | Coarseness                       | 0.048274309  |
| wavelet-HLH | ngtdm      | Complexity                       | 465.3319554  |
| wavelet-HLH | ngtdm      | Strength                         | 6.224588977  |
| wavelet-HLH | ngtdm      | Contrast                         | 0.30741188   |
| wavelet-HLH | ngtdm      | Busyness                         | 0.123303287  |



| Image type | Feature Class | Feature Name                         |                                                                                                                                                                                                                                                                                                                                                                                                                                              |
|------------|---------------|--------------------------------------|----------------------------------------------------------------------------------------------------------------------------------------------------------------------------------------------------------------------------------------------------------------------------------------------------------------------------------------------------------------------------------------------------------------------------------------------|
| general    | info          | BoundingBox                          | 29: RTSTRUCT: C99-DNU_segment_ITV<br>(0, 3, 1, 7, 10, 4)                                                                                                                                                                                                                                                                                                                                                                                     |
| general    | info          | EnabledImageTypes                    | {u'Original': {}, u'Wavelet': {}}                                                                                                                                                                                                                                                                                                                                                                                                            |
|            |               |                                      | {'distances': [1], 'additionalInfo': True,<br>'force2D': False, 'interpolator': 'sitkBSpline',<br>'resampledPixelSpacing': [3.0], 'label': 1,<br>'normalizeScale': 1, 'normalize': False,<br>'force2Ddimension': 0, 'removeOutliers':<br>None, 'minimumROISize': None, u'binWidth':<br>25.0, 'minimumROIDimensions': 1,<br>u'correctMask': True, 'preCrop': False,<br>u'symmetricalGLCM': True,<br>'resegmentRange': None, 'padDistance': 5} |
| general    | info          | GeneralSettings                      | e7637080b00ff9d669859e77dad4297181c53                                                                                                                                                                                                                                                                                                                                                                                                        |
| general    | info          | ImageHash                            | f72                                                                                                                                                                                                                                                                                                                                                                                                                                          |
| general    | info          | ImageSpacing                         | (0.9765625000000002,<br>0.9765625000000002, 2.0)                                                                                                                                                                                                                                                                                                                                                                                             |
| general    | info          | MaskHash                             | e1153147483252c3f75ab462c6ae369a76ba6                                                                                                                                                                                                                                                                                                                                                                                                        |
| general    | info          | NumpyVersion                         | da9                                                                                                                                                                                                                                                                                                                                                                                                                                          |
| general    | info          | PyWaveletVersion                     | 1.13.1                                                                                                                                                                                                                                                                                                                                                                                                                                       |
| general    | info          | SimpleITKVersion                     | 0.5.2                                                                                                                                                                                                                                                                                                                                                                                                                                        |
| general    | info          | Version                              | 1.1.0                                                                                                                                                                                                                                                                                                                                                                                                                                        |
| general    | info          | VolumeNum                            | 1.3.0.post102+g1b0eb74                                                                                                                                                                                                                                                                                                                                                                                                                       |
| general    | info          | VoxelNum                             | 1                                                                                                                                                                                                                                                                                                                                                                                                                                            |
| original   | shape         | Maximum3DDiameter                    | 108                                                                                                                                                                                                                                                                                                                                                                                                                                          |
| original   | shape         | Maximum2DDiameterSlice               | 27.82085549                                                                                                                                                                                                                                                                                                                                                                                                                                  |
| original   | shape         | Sphericity                           | 24.73863375                                                                                                                                                                                                                                                                                                                                                                                                                                  |
| original   | shape         | MinorAxis                            | 0.825062707                                                                                                                                                                                                                                                                                                                                                                                                                                  |
| original   | shape         | Elongation                           | 15.6109778                                                                                                                                                                                                                                                                                                                                                                                                                                   |
| original   | shape         | SurfaceVolumeRatio                   | 0.635107016                                                                                                                                                                                                                                                                                                                                                                                                                                  |
| original   | shape         | Volume                               | 0.41026833                                                                                                                                                                                                                                                                                                                                                                                                                                   |
| original   | shape         | MajorAxis                            | 2916                                                                                                                                                                                                                                                                                                                                                                                                                                         |
| original   | shape         | SurfaceArea                          | 24.58007454                                                                                                                                                                                                                                                                                                                                                                                                                                  |
| original   | shape         | Flatness                             | 1196.342452                                                                                                                                                                                                                                                                                                                                                                                                                                  |
| original   | shape         | LeastAxis                            | 0.469128985                                                                                                                                                                                                                                                                                                                                                                                                                                  |
| original   | shape         | Maximum2DDiameterColumn              | 11.53122542                                                                                                                                                                                                                                                                                                                                                                                                                                  |
| original   | shape         | Maximum2DDiameterRow                 | 18                                                                                                                                                                                                                                                                                                                                                                                                                                           |
| original   | gldm          | GrayLevelVariance                    | 27.65863337                                                                                                                                                                                                                                                                                                                                                                                                                                  |
| original   | gldm          | HighGrayLevelEmphasis                | 104.4451303                                                                                                                                                                                                                                                                                                                                                                                                                                  |
| original   | gldm          | DependenceEntropy                    | 373.6481481                                                                                                                                                                                                                                                                                                                                                                                                                                  |
| original   | gldm          | DependenceNonUniformity              | 5.473372428                                                                                                                                                                                                                                                                                                                                                                                                                                  |
| original   | gldm          | GrayLevelNonUniformity               | 51.77777778                                                                                                                                                                                                                                                                                                                                                                                                                                  |
| original   | gldm          | SmallDependenceEmphasis              | 3.907407407                                                                                                                                                                                                                                                                                                                                                                                                                                  |
| original   | gldm          | SmallDependenceHighGrayLevelEmphasis | 0.708461934                                                                                                                                                                                                                                                                                                                                                                                                                                  |
| original   | gldm          | DependenceNonUniformityNormalized    | 235.9691358                                                                                                                                                                                                                                                                                                                                                                                                                                  |
| original   | gldm          | LargeDependenceEmphasis              | 0.479423868                                                                                                                                                                                                                                                                                                                                                                                                                                  |
| original   | gldm          | LargeDependenceLowGrayLevelEmphasis  | 2.703703704                                                                                                                                                                                                                                                                                                                                                                                                                                  |
| original   | gldm          | DependenceVariance                   | 0.057599223                                                                                                                                                                                                                                                                                                                                                                                                                                  |
| original   | gldm          | LargeDependenceHighGrayLevelEmphasis | 0.508916324                                                                                                                                                                                                                                                                                                                                                                                                                                  |
| original   | gldm          | SmallDependenceLowGrayLevelEmphasis  | 1163.87037                                                                                                                                                                                                                                                                                                                                                                                                                                   |
|            |               |                                      | 0.032766931                                                                                                                                                                                                                                                                                                                                                                                                                                  |

|          |            |                                  |              |
|----------|------------|----------------------------------|--------------|
| original | gldm       | LowGrayLevelEmphasis             | 0.036656296  |
| original | glcm       | JointAverage                     | 19.02193139  |
| original | glcm       | SumAverage                       | 38.04386278  |
| original | glcm       | JointEntropy                     | 6.847560626  |
| original | glcm       | ClusterShade                     | 1044.516773  |
| original | glcm       | MaximumProbability               | 0.018681754  |
| original | glcm       | Idmn                             | 0.915318328  |
| original | glcm       | JointEnergy                      | 0.009092243  |
| original | glcm       | Contrast                         | 171.5303328  |
| original | glcm       | DifferenceEntropy                | 4.362871633  |
| original | glcm       | InverseVariance                  | 0.095318572  |
| original | glcm       | DifferenceVariance               | 58.65535591  |
| original | glcm       | Idn                              | 0.809275954  |
| original | glcm       | Idm                              | 0.089957972  |
| original | glcm       | Correlation                      | 0.245782237  |
| original | glcm       | Autocorrelation                  | 389.4932219  |
| original | glcm       | SumEntropy                       | 5.154410129  |
| original | glcm       | SumSquares                       | 113.0422628  |
| original | glcm       | ClusterProminence                | 180085.7205  |
| original | glcm       | Imc2                             | 0.998829246  |
| original | glcm       | Imc1                             | -0.6180506   |
| original | glcm       | DifferenceAverage                | 10.52193429  |
| original | glcm       | Id                               | 0.168763174  |
| original | glcm       | ClusterTendency                  | 280.6387185  |
| original | firstorder | InterquartileRange               | 402.25       |
| original | firstorder | Skewness                         | 0.46127002   |
| original | firstorder | Uniformity                       | 0.036179698  |
| original | firstorder | Median                           | -574.5       |
| original | firstorder | Energy                           | 37219210     |
| original | firstorder | RobustMeanAbsoluteDeviation      | 169.3904813  |
| original | firstorder | MeanAbsoluteDeviation            | 218.5576132  |
| original | firstorder | TotalEnergy                      | 1004918670   |
| original | firstorder | Maximum                          | 51           |
| original | firstorder | RootMeanSquared                  | 587.0454112  |
| original | firstorder | 90Percentile                     | -161.8       |
| original | firstorder | Minimum                          | -923         |
| original | firstorder | Entropy                          | 4.98815365   |
| original | firstorder | Range                            | 974          |
| original | firstorder | Variance                         | 65329.63855  |
| original | firstorder | 10Percentile                     | -837.3       |
| original | firstorder | Kurtosis                         | 2.18064826   |
| original | firstorder | Mean                             | -528.4814815 |
| original | glrlm      | ShortRunLowGrayLevelEmphasis     | 0.036945711  |
| original | glrlm      | GrayLevelVariance                | 103.7746701  |
| original | glrlm      | LowGrayLevelRunEmphasis          | 0.037114837  |
| original | glrlm      | GrayLevelNonUniformityNormalized | 0.035906855  |
| original | glrlm      | RunVariance                      | 0.02148847   |
| original | glrlm      | GrayLevelNonUniformity           | 3.806705402  |
| original | glrlm      | LongRunEmphasis                  | 1.060549698  |
| original | glrlm      | ShortRunHighGrayLevelEmphasis    | 365.0547215  |
| original | glrlm      | RunLengthNonUniformity           | 102.4103575  |
| original | glrlm      | ShortRunEmphasis                 | 0.986530642  |
| original | glrlm      | LongRunHighGrayLevelEmphasis     | 399.0873273  |

|             |       |                                      |              |
|-------------|-------|--------------------------------------|--------------|
| original    | glrlm | RunPercentage                        | 0.981481481  |
| original    | glrlm | LongRunLowGrayLevelEmphasis          | 0.037895595  |
| original    | glrlm | RunEntropy                           | 5.038376154  |
| original    | glrlm | HighGrayLevelRunEmphasis             | 371.7758376  |
| original    | glrlm | RunLengthNonUniformityNormalized     | 0.965631135  |
| original    | glszm | GrayLevelVariance                    | 93.13078821  |
| original    | glszm | ZoneVariance                         | 0.764697344  |
| original    | glszm | GrayLevelNonUniformityNormalized     | 0.035563943  |
| original    | glszm | SizeZoneNonUniformityNormalized      | 0.689650167  |
| original    | glszm | SizeZoneNonUniformity                | 57.24096386  |
| original    | glszm | GrayLevelNonUniformity               | 2.951807229  |
| original    | glszm | LargeAreaEmphasis                    | 2.457831325  |
| original    | glszm | SmallAreaHighGrayLevelEmphasis       | 273.1234473  |
| original    | glszm | ZonePercentage                       | 0.768518519  |
| original    | glszm | LargeAreaLowGrayLevelEmphasis        | 0.061076376  |
| original    | glszm | LargeAreaHighGrayLevelEmphasis       | 1000.578313  |
| original    | glszm | HighGrayLevelZoneEmphasis            | 339.2048193  |
| original    | glszm | SmallAreaEmphasis                    | 0.855814824  |
| original    | glszm | LowGrayLevelZoneEmphasis             | 0.043928161  |
| original    | glszm | ZoneEntropy                          | 5.231739998  |
| original    | glszm | SmallAreaLowGrayLevelEmphasis        | 0.041802595  |
| original    | ngtdm | Coarseness                           | 0.035198864  |
| original    | ngtdm | Complexity                           | 4156.088884  |
| original    | ngtdm | Strength                             | 22.529406    |
| original    | ngtdm | Contrast                             | 1.107331548  |
| original    | ngtdm | Busyness                             | 0.065910827  |
| wavelet-HHH | gldm  | GrayLevelVariance                    | 12.58256173  |
| wavelet-HHH | gldm  | HighGrayLevelEmphasis                | 280.2685185  |
| wavelet-HHH | gldm  | DependenceEntropy                    | 5.10171534   |
| wavelet-HHH | gldm  | DependenceNonUniformity              | 29.61111111  |
| wavelet-HHH | gldm  | GrayLevelNonUniformity               | 11.07407407  |
| wavelet-HHH | gldm  | SmallDependenceEmphasis              | 0.380156736  |
| wavelet-HHH | gldm  | SmallDependenceHighGrayLevelEmphasis | 108.9177964  |
| wavelet-HHH | gldm  | DependenceNonUniformityNormalized    | 0.274176955  |
| wavelet-HHH | gldm  | LargeDependenceEmphasis              | 7.796296296  |
| wavelet-HHH | gldm  | LargeDependenceLowGrayLevelEmphasis  | 0.04022582   |
| wavelet-HHH | gldm  | DependenceVariance                   | 1.911179698  |
| wavelet-HHH | gldm  | LargeDependenceHighGrayLevelEmphasis | 2086.046296  |
| wavelet-HHH | gldm  | SmallDependenceLowGrayLevelEmphasis  | 0.010939643  |
| wavelet-HHH | gldm  | LowGrayLevelEmphasis                 | 0.013390039  |
| wavelet-HHH | glcm  | JointAverage                         | 16.41922894  |
| wavelet-HHH | glcm  | SumAverage                           | 32.83845788  |
| wavelet-HHH | glcm  | JointEntropy                         | 6.102563414  |
| wavelet-HHH | glcm  | ClusterShade                         | -18.00052019 |
| wavelet-HHH | glcm  | MaximumProbability                   | 0.045865987  |
| wavelet-HHH | glcm  | Idmn                                 | 0.970058836  |
| wavelet-HHH | glcm  | JointEnergy                          | 0.017450322  |
| wavelet-HHH | glcm  | Contrast                             | 27.17433497  |
| wavelet-HHH | glcm  | DifferenceEntropy                    | 3.227193987  |
| wavelet-HHH | glcm  | InverseVariance                      | 0.256847116  |
| wavelet-HHH | glcm  | DifferenceVariance                   | 12.00081093  |
| wavelet-HHH | glcm  | Idn                                  | 0.8891221    |
| wavelet-HHH | glcm  | Idm                                  | 0.246999249  |

|             |            |                                  |              |
|-------------|------------|----------------------------------|--------------|
| wavelet-HHH | glcm       | Correlation                      | -0.043153558 |
| wavelet-HHH | glcm       | Autocorrelation                  | 269.0513173  |
| wavelet-HHH | glcm       | SumEntropy                       | 3.96727229   |
| wavelet-HHH | glcm       | SumSquares                       | 13.04004476  |
| wavelet-HHH | glcm       | ClusterProminence                | 3262.407293  |
| wavelet-HHH | glcm       | Imc2                             | 0.944765309  |
| wavelet-HHH | glcm       | Imc1                             | -0.311330564 |
| wavelet-HHH | glcm       | DifferenceAverage                | 3.826691507  |
| wavelet-HHH | glcm       | Id                               | 0.336300651  |
| wavelet-HHH | glcm       | ClusterTendency                  | 24.98584409  |
| wavelet-HHH | firstorder | InterquartileRange               | 83.4153275   |
| wavelet-HHH | firstorder | Skewness                         | -0.282551059 |
| wavelet-HHH | firstorder | Uniformity                       | 0.102537723  |
| wavelet-HHH | firstorder | Median                           | -3.806025117 |
| wavelet-HHH | firstorder | Energy                           | 832739.1986  |
| wavelet-HHH | firstorder | RobustMeanAbsoluteDeviation      | 38.4946778   |
| wavelet-HHH | firstorder | MeanAbsoluteDeviation            | 62.82762315  |
| wavelet-HHH | firstorder | TotalEnergy                      | 22483958.36  |
| wavelet-HHH | firstorder | Maximum                          | 285.4428839  |
| wavelet-HHH | firstorder | RootMeanSquared                  | 87.80972688  |
| wavelet-HHH | firstorder | 90Percentile                     | 91.21558434  |
| wavelet-HHH | firstorder | Minimum                          | -377.0098483 |
| wavelet-HHH | firstorder | Entropy                          | 3.594080099  |
| wavelet-HHH | firstorder | Range                            | 662.4527322  |
| wavelet-HHH | firstorder | Variance                         | 7699.354942  |
| wavelet-HHH | firstorder | 10Percentile                     | -104.3134182 |
| wavelet-HHH | firstorder | Kurtosis                         | 6.180240589  |
| wavelet-HHH | firstorder | Mean                             | -3.345623102 |
| wavelet-HHH | glrlm      | ShortRunLowGrayLevelEmphasis     | 0.013783247  |
| wavelet-HHH | glrlm      | GrayLevelVariance                | 13.07102611  |
| wavelet-HHH | glrlm      | LowGrayLevelRunEmphasis          | 0.013945095  |
| wavelet-HHH | glrlm      | GrayLevelNonUniformityNormalized | 0.100097441  |
| wavelet-HHH | glrlm      | RunVariance                      | 0.065404875  |
| wavelet-HHH | glrlm      | GrayLevelNonUniformity           | 10.21887198  |
| wavelet-HHH | glrlm      | LongRunEmphasis                  | 1.187032321  |
| wavelet-HHH | glrlm      | ShortRunHighGrayLevelEmphasis    | 269.6738042  |
| wavelet-HHH | glrlm      | RunLengthNonUniformity           | 91.81243698  |
| wavelet-HHH | glrlm      | ShortRunEmphasis                 | 0.958867414  |
| wavelet-HHH | glrlm      | LongRunHighGrayLevelEmphasis     | 331.241124   |
| wavelet-HHH | glrlm      | RunPercentage                    | 0.945156695  |
| wavelet-HHH | glrlm      | LongRunLowGrayLevelEmphasis      | 0.014682623  |
| wavelet-HHH | glrlm      | RunEntropy                       | 3.844875806  |
| wavelet-HHH | glrlm      | HighGrayLevelRunEmphasis         | 280.8414114  |
| wavelet-HHH | glrlm      | RunLengthNonUniformityNormalized | 0.898400392  |
| wavelet-HHH | glszm      | GrayLevelVariance                | 21.6001666   |
| wavelet-HHH | glszm      | ZoneVariance                     | 7.264473136  |
| wavelet-HHH | glszm      | GrayLevelNonUniformityNormalized | 0.082882132  |
| wavelet-HHH | glszm      | SizeZoneNonUniformityNormalized  | 0.402748855  |
| wavelet-HHH | glszm      | SizeZoneNonUniformity            | 19.73469388  |
| wavelet-HHH | glszm      | GrayLevelNonUniformity           | 4.06122449   |
| wavelet-HHH | glszm      | LargeAreaEmphasis                | 12.12244898  |
| wavelet-HHH | glszm      | SmallAreaHighGrayLevelEmphasis   | 182.9740244  |
| wavelet-HHH | glszm      | ZonePercentage                   | 0.453703704  |

|             |            |                                      |              |
|-------------|------------|--------------------------------------|--------------|
| wavelet-HHH | glszm      | LargeAreaLowGrayLevelEmphasis        | 0.068576277  |
| wavelet-HHH | glszm      | LargeAreaHighGrayLevelEmphasis       | 3217.081633  |
| wavelet-HHH | glszm      | HighGrayLevelZoneEmphasis            | 287.4897959  |
| wavelet-HHH | glszm      | SmallAreaEmphasis                    | 0.635041393  |
| wavelet-HHH | glszm      | LowGrayLevelZoneEmphasis             | 0.02477612   |
| wavelet-HHH | glszm      | ZoneEntropy                          | 4.792982038  |
| wavelet-HHH | glszm      | SmallAreaLowGrayLevelEmphasis        | 0.023311587  |
| wavelet-HHH | ngtdm      | Coarseness                           | 0.053453657  |
| wavelet-HHH | ngtdm      | Complexity                           | 379.7808232  |
| wavelet-HHH | ngtdm      | Strength                             | 6.701656986  |
| wavelet-HHH | ngtdm      | Contrast                             | 0.223600238  |
| wavelet-HHH | ngtdm      | Busyness                             | 0.0634521    |
| wavelet-HLL | gldm       | GrayLevelVariance                    | 126.5729595  |
| wavelet-HLL | gldm       | HighGrayLevelEmphasis                | 807.8796296  |
| wavelet-HLL | gldm       | DependenceEntropy                    | 5.593923817  |
| wavelet-HLL | gldm       | DependenceNonUniformity              | 47.88888889  |
| wavelet-HLL | gldm       | GrayLevelNonUniformity               | 3.685185185  |
| wavelet-HLL | gldm       | SmallDependenceEmphasis              | 0.660300926  |
| wavelet-HLL | gldm       | SmallDependenceHighGrayLevelEmphasis | 495.7431199  |
| wavelet-HLL | gldm       | DependenceNonUniformityNormalized    | 0.443415638  |
| wavelet-HLL | gldm       | LargeDependenceEmphasis              | 2.833333333  |
| wavelet-HLL | gldm       | LargeDependenceLowGrayLevelEmphasis  | 0.02162383   |
| wavelet-HLL | gldm       | DependenceVariance                   | 0.47085048   |
| wavelet-HLL | gldm       | LargeDependenceHighGrayLevelEmphasis | 2648.175926  |
| wavelet-HLL | gldm       | SmallDependenceLowGrayLevelEmphasis  | 0.015902536  |
| wavelet-HLL | gldm       | LowGrayLevelEmphasis                 | 0.016915286  |
| wavelet-HLL | glcm       | JointAverage                         | 25.81025168  |
| wavelet-HLL | glcm       | SumAverage                           | 51.62050335  |
| wavelet-HLL | glcm       | JointEntropy                         | 6.836170689  |
| wavelet-HLL | glcm       | ClusterShade                         | -916.740353  |
| wavelet-HLL | glcm       | MaximumProbability                   | 0.021855784  |
| wavelet-HLL | glcm       | Idmn                                 | 0.930688725  |
| wavelet-HLL | glcm       | JointEnergy                          | 0.009223398  |
| wavelet-HLL | glcm       | Contrast                             | 205.1735981  |
| wavelet-HLL | glcm       | DifferenceEntropy                    | 4.327113897  |
| wavelet-HLL | glcm       | InverseVariance                      | 0.104953687  |
| wavelet-HLL | glcm       | DifferenceVariance                   | 76.42250153  |
| wavelet-HLL | glcm       | Idn                                  | 0.833632553  |
| wavelet-HLL | glcm       | Idm                                  | 0.098085832  |
| wavelet-HLL | glcm       | Correlation                          | 0.234478388  |
| wavelet-HLL | glcm       | Autocorrelation                      | 699.0387242  |
| wavelet-HLL | glcm       | SumEntropy                           | 5.1664442    |
| wavelet-HLL | glcm       | SumSquares                           | 135.0380994  |
| wavelet-HLL | glcm       | ClusterProminence                    | 294049.6145  |
| wavelet-HLL | glcm       | Imc2                                 | 0.999032337  |
| wavelet-HLL | glcm       | Imc1                                 | -0.630047371 |
| wavelet-HLL | glcm       | DifferenceAverage                    | 10.85088253  |
| wavelet-HLL | glcm       | Id                                   | 0.177159927  |
| wavelet-HLL | glcm       | ClusterTendency                      | 334.9787994  |
| wavelet-HLL | firstorder | InterquartileRange                   | 367.0300998  |
| wavelet-HLL | firstorder | Skewness                             | -0.298502044 |
| wavelet-HLL | firstorder | Uniformity                           | 0.034122085  |
| wavelet-HLL | firstorder | Median                               | -34.01615026 |

|             |            |                                  |              |
|-------------|------------|----------------------------------|--------------|
| wavelet-HLL | firstorder | Energy                           | 8874418.183  |
| wavelet-HLL | firstorder | RobustMeanAbsoluteDeviation      | 163.963716   |
| wavelet-HLL | firstorder | MeanAbsoluteDeviation            | 229.3385992  |
| wavelet-HLL | firstorder | TotalEnergy                      | 239609290.9  |
| wavelet-HLL | firstorder | Maximum                          | 495.7614681  |
| wavelet-HLL | firstorder | RootMeanSquared                  | 286.6540401  |
| wavelet-HLL | firstorder | 90Percentile                     | 272.2054434  |
| wavelet-HLL | firstorder | Minimum                          | -690.8684633 |
| wavelet-HLL | firstorder | Entropy                          | 5.035555646  |
| wavelet-HLL | firstorder | Range                            | 1186.629931  |
| wavelet-HLL | firstorder | Variance                         | 78664.40464  |
| wavelet-HLL | firstorder | 10Percentile                     | -470.1358239 |
| wavelet-HLL | firstorder | Kurtosis                         | 2.45362445   |
| wavelet-HLL | firstorder | Mean                             | -59.21261763 |
| wavelet-HLL | grlm       | ShortRunLowGrayLevelEmphasis     | 0.017176477  |
| wavelet-HLL | grlm       | GrayLevelVariance                | 126.2050356  |
| wavelet-HLL | grlm       | LowGrayLevelRunEmphasis          | 0.01722039   |
| wavelet-HLL | grlm       | GrayLevelNonUniformityNormalized | 0.034108676  |
| wavelet-HLL | grlm       | RunVariance                      | 0.02060686   |
| wavelet-HLL | grlm       | GrayLevelNonUniformity           | 3.607112704  |
| wavelet-HLL | grlm       | LongRunEmphasis                  | 1.064495721  |
| wavelet-HLL | grlm       | ShortRunHighGrayLevelEmphasis    | 788.4797606  |
| wavelet-HLL | grlm       | RunLengthNonUniformity           | 101.4898457  |
| wavelet-HLL | grlm       | ShortRunEmphasis                 | 0.98387607   |
| wavelet-HLL | grlm       | LongRunHighGrayLevelEmphasis     | 867.2686078  |
| wavelet-HLL | grlm       | RunPercentage                    | 0.979344729  |
| wavelet-HLL | grlm       | LongRunLowGrayLevelEmphasis      | 0.017396041  |
| wavelet-HLL | grlm       | RunEntropy                       | 5.081441254  |
| wavelet-HLL | grlm       | HighGrayLevelRunEmphasis         | 804.2375301  |
| wavelet-HLL | grlm       | RunLengthNonUniformityNormalized | 0.95878628   |
| wavelet-HLL | glszm      | GrayLevelVariance                | 124.5910684  |
| wavelet-HLL | glszm      | ZoneVariance                     | 0.444444444  |
| wavelet-HLL | glszm      | GrayLevelNonUniformityNormalized | 0.03368389   |
| wavelet-HLL | glszm      | SizeZoneNonUniformityNormalized  | 0.603414114  |
| wavelet-HLL | glszm      | SizeZoneNonUniformity            | 48.87654321  |
| wavelet-HLL | glszm      | GrayLevelNonUniformity           | 2.728395062  |
| wavelet-HLL | glszm      | LargeAreaEmphasis                | 2.222222222  |
| wavelet-HLL | glszm      | SmallAreaHighGrayLevelEmphasis   | 597.3203875  |
| wavelet-HLL | glszm      | ZonePercentage                   | 0.75         |
| wavelet-HLL | glszm      | LargeAreaLowGrayLevelEmphasis    | 0.024840447  |
| wavelet-HLL | glszm      | LargeAreaHighGrayLevelEmphasis   | 1914.135802  |
| wavelet-HLL | glszm      | HighGrayLevelZoneEmphasis        | 771.382716   |
| wavelet-HLL | glszm      | SmallAreaEmphasis                | 0.805041152  |
| wavelet-HLL | glszm      | LowGrayLevelZoneEmphasis         | 0.021591592  |
| wavelet-HLL | glszm      | ZoneEntropy                      | 5.427821571  |
| wavelet-HLL | glszm      | SmallAreaLowGrayLevelEmphasis    | 0.020968577  |
| wavelet-HLL | ngtdm      | Coarseness                       | 0.042862834  |
| wavelet-HLL | ngtdm      | Complexity                       | 4657.547406  |
| wavelet-HLL | ngtdm      | Strength                         | 30.04661728  |
| wavelet-HLL | ngtdm      | Contrast                         | 1.269333927  |
| wavelet-HLL | ngtdm      | Busyness                         | 0.027604301  |
| wavelet-LHL | gldm       | GrayLevelVariance                | 45.96879287  |
| wavelet-LHL | gldm       | HighGrayLevelEmphasis            | 281.6481481  |

|             |            |                                      |              |
|-------------|------------|--------------------------------------|--------------|
| wavelet-LHL | gldm       | DependenceEntropy                    | 5.424806572  |
| wavelet-LHL | gldm       | DependenceNonUniformity              | 40.7962963   |
| wavelet-LHL | gldm       | GrayLevelNonUniformity               | 5.148148148  |
| wavelet-LHL | gldm       | SmallDependenceEmphasis              | 0.599215535  |
| wavelet-LHL | gldm       | SmallDependenceHighGrayLevelEmphasis | 164.7602238  |
| wavelet-LHL | gldm       | DependenceNonUniformityNormalized    | 0.377743484  |
| wavelet-LHL | gldm       | LargeDependenceEmphasis              | 3.574074074  |
| wavelet-LHL | gldm       | LargeDependenceLowGrayLevelEmphasis  | 0.045915292  |
| wavelet-LHL | gldm       | DependenceVariance                   | 0.671467764  |
| wavelet-LHL | gldm       | LargeDependenceHighGrayLevelEmphasis | 1008.648148  |
| wavelet-LHL | gldm       | SmallDependenceLowGrayLevelEmphasis  | 0.017557971  |
| wavelet-LHL | gldm       | LowGrayLevelEmphasis                 | 0.021892166  |
| wavelet-LHL | glcm       | JointAverage                         | 14.96545504  |
| wavelet-LHL | glcm       | SumAverage                           | 29.93091009  |
| wavelet-LHL | glcm       | JointEntropy                         | 6.703252034  |
| wavelet-LHL | glcm       | ClusterShade                         | -17.14985743 |
| wavelet-LHL | glcm       | MaximumProbability                   | 0.023782045  |
| wavelet-LHL | glcm       | ldmn                                 | 0.932631432  |
| wavelet-LHL | glcm       | JointEnergy                          | 0.010375342  |
| wavelet-LHL | glcm       | Contrast                             | 73.682525    |
| wavelet-LHL | glcm       | DifferenceEntropy                    | 3.840177254  |
| wavelet-LHL | glcm       | InverseVariance                      | 0.13739056   |
| wavelet-LHL | glcm       | DifferenceVariance                   | 24.81650802  |
| wavelet-LHL | glcm       | ldn                                  | 0.829039291  |
| wavelet-LHL | glcm       | ldm                                  | 0.132762179  |
| wavelet-LHL | glcm       | Correlation                          | 0.220777905  |
| wavelet-LHL | glcm       | Autocorrelation                      | 234.7049289  |
| wavelet-LHL | glcm       | SumEntropy                           | 4.86131902   |
| wavelet-LHL | glcm       | SumSquares                           | 47.46044808  |
| wavelet-LHL | glcm       | ClusterProminence                    | 29362.00657  |
| wavelet-LHL | glcm       | lmc2                                 | 0.995544915  |
| wavelet-LHL | glcm       | lmc1                                 | -0.525825421 |
| wavelet-LHL | glcm       | DifferenceAverage                    | 6.846453997  |
| wavelet-LHL | glcm       | ld                                   | 0.223658537  |
| wavelet-LHL | glcm       | ClusterTendency                      | 116.1592673  |
| wavelet-LHL | firstorder | InterquartileRange                   | 272.0384764  |
| wavelet-LHL | firstorder | Skewness                             | -0.134160837 |
| wavelet-LHL | firstorder | Uniformity                           | 0.047668038  |
| wavelet-LHL | firstorder | Median                               | -8.003181937 |
| wavelet-LHL | firstorder | Energy                               | 3217046.391  |
| wavelet-LHL | firstorder | RobustMeanAbsoluteDeviation          | 106.6379084  |
| wavelet-LHL | firstorder | MeanAbsoluteDeviation                | 141.9556894  |
| wavelet-LHL | firstorder | TotalEnergy                          | 86860252.55  |
| wavelet-LHL | firstorder | Maximum                              | 333.7555564  |
| wavelet-LHL | firstorder | RootMeanSquared                      | 172.5904591  |
| wavelet-LHL | firstorder | 90Percentile                         | 176.6378578  |
| wavelet-LHL | firstorder | Minimum                              | -383.9696248 |
| wavelet-LHL | firstorder | Entropy                              | 4.586876773  |
| wavelet-LHL | firstorder | Range                                | 717.7251811  |
| wavelet-LHL | firstorder | Variance                             | 28918.85587  |
| wavelet-LHL | firstorder | 10Percentile                         | -272.8367273 |
| wavelet-LHL | firstorder | Kurtosis                             | 2.17272586   |
| wavelet-LHL | firstorder | Mean                                 | -29.4722024  |

|             |       |                                      |             |
|-------------|-------|--------------------------------------|-------------|
| wavelet-LHL | grlm  | ShortRunLowGrayLevelEmphasis         | 0.022018366 |
| wavelet-LHL | grlm  | GrayLevelVariance                    | 46.24518915 |
| wavelet-LHL | grlm  | LowGrayLevelRunEmphasis              | 0.022227366 |
| wavelet-LHL | grlm  | GrayLevelNonUniformityNormalized     | 0.047280511 |
| wavelet-LHL | grlm  | RunVariance                          | 0.027025358 |
| wavelet-LHL | grlm  | GrayLevelNonUniformity               | 4.968136262 |
| wavelet-LHL | grlm  | LongRunEmphasis                      | 1.084121287 |
| wavelet-LHL | grlm  | ShortRunHighGrayLevelEmphasis        | 275.5151714 |
| wavelet-LHL | grlm  | RunLengthNonUniformity               | 99.44134806 |
| wavelet-LHL | grlm  | ShortRunEmphasis                     | 0.978969678 |
| wavelet-LHL | grlm  | LongRunHighGrayLevelEmphasis         | 305.5805536 |
| wavelet-LHL | grlm  | RunPercentage                        | 0.972934473 |
| wavelet-LHL | grlm  | LongRunLowGrayLevelEmphasis          | 0.023063365 |
| wavelet-LHL | grlm  | RunEntropy                           | 4.684598403 |
| wavelet-LHL | grlm  | HighGrayLevelRunEmphasis             | 281.5282478 |
| wavelet-LHL | grlm  | RunLengthNonUniformityNormalized     | 0.945949284 |
| wavelet-LHL | glszm | GrayLevelVariance                    | 49.91837107 |
| wavelet-LHL | glszm | ZoneVariance                         | 0.842951059 |
| wavelet-LHL | glszm | GrayLevelNonUniformityNormalized     | 0.044558072 |
| wavelet-LHL | glszm | SizeZoneNonUniformityNormalized      | 0.562089116 |
| wavelet-LHL | glszm | SizeZoneNonUniformity                | 41.59459459 |
| wavelet-LHL | glszm | GrayLevelNonUniformity               | 3.297297297 |
| wavelet-LHL | glszm | LargeAreaEmphasis                    | 2.972972973 |
| wavelet-LHL | glszm | SmallAreaHighGrayLevelEmphasis       | 213.3564189 |
| wavelet-LHL | glszm | ZonePercentage                       | 0.685185185 |
| wavelet-LHL | glszm | LargeAreaLowGrayLevelEmphasis        | 0.046058255 |
| wavelet-LHL | glszm | LargeAreaHighGrayLevelEmphasis       | 814.1081081 |
| wavelet-LHL | glszm | HighGrayLevelZoneEmphasis            | 281.0405405 |
| wavelet-LHL | glszm | SmallAreaEmphasis                    | 0.777965465 |
| wavelet-LHL | glszm | LowGrayLevelZoneEmphasis             | 0.027091032 |
| wavelet-LHL | glszm | ZoneEntropy                          | 5.165072115 |
| wavelet-LHL | glszm | SmallAreaLowGrayLevelEmphasis        | 0.024487736 |
| wavelet-LHL | ngtdm | Coarseness                           | 0.046777368 |
| wavelet-LHL | ngtdm | Complexity                           | 1506.405643 |
| wavelet-LHL | ngtdm | Strength                             | 13.19277143 |
| wavelet-LHL | ngtdm | Contrast                             | 0.543745411 |
| wavelet-LHL | ngtdm | Busyness                             | 0.055789891 |
| wavelet-LHH | gldm  | GrayLevelVariance                    | 14.41529492 |
| wavelet-LHH | gldm  | HighGrayLevelEmphasis                | 71.22222222 |
| wavelet-LHH | gldm  | DependenceEntropy                    | 5.033467104 |
| wavelet-LHH | gldm  | DependenceNonUniformity              | 31.51851852 |
| wavelet-LHH | gldm  | GrayLevelNonUniformity               | 9.87037037  |
| wavelet-LHH | gldm  | SmallDependenceEmphasis              | 0.444125514 |
| wavelet-LHH | gldm  | SmallDependenceHighGrayLevelEmphasis | 42.95283951 |
| wavelet-LHH | gldm  | DependenceNonUniformityNormalized    | 0.291838134 |
| wavelet-LHH | gldm  | LargeDependenceEmphasis              | 5.703703704 |
| wavelet-LHH | gldm  | LargeDependenceLowGrayLevelEmphasis  | 0.346602111 |
| wavelet-LHH | gldm  | DependenceVariance                   | 1.168381344 |
| wavelet-LHH | gldm  | LargeDependenceHighGrayLevelEmphasis | 330.1111111 |
| wavelet-LHH | gldm  | SmallDependenceLowGrayLevelEmphasis  | 0.025372902 |
| wavelet-LHH | gldm  | LowGrayLevelEmphasis                 | 0.076810774 |
| wavelet-LHH | glcm  | JointAverage                         | 7.542238654 |
| wavelet-LHH | glcm  | SumAverage                           | 15.08447731 |



|             |            |                                  |              |
|-------------|------------|----------------------------------|--------------|
| wavelet-LHH | glcm       | JointEntropy                     | 6.17052066   |
| wavelet-LHH | glcm       | ClusterShade                     | 53.17291812  |
| wavelet-LHH | glcm       | MaximumProbability               | 0.043871497  |
| wavelet-LHH | glcm       | Idmn                             | 0.94360941   |
| wavelet-LHH | glcm       | JointEnergy                      | 0.016629034  |
| wavelet-LHH | glcm       | Contrast                         | 29.72039214  |
| wavelet-LHH | glcm       | DifferenceEntropy                | 3.320033665  |
| wavelet-LHH | glcm       | InverseVariance                  | 0.214704938  |
| wavelet-LHH | glcm       | DifferenceVariance               | 10.61962772  |
| wavelet-LHH | glcm       | Idn                              | 0.843561379  |
| wavelet-LHH | glcm       | Idm                              | 0.204808551  |
| wavelet-LHH | glcm       | Correlation                      | -0.009653727 |
| wavelet-LHH | glcm       | Autocorrelation                  | 56.70952628  |
| wavelet-LHH | glcm       | SumEntropy                       | 4.072087822  |
| wavelet-LHH | glcm       | SumSquares                       | 14.6745395   |
| wavelet-LHH | glcm       | ClusterProminence                | 2664.501712  |
| wavelet-LHH | glcm       | Imc2                             | 0.957407263  |
| wavelet-LHH | glcm       | Imc1                             | -0.339972134 |
| wavelet-LHH | glcm       | DifferenceAverage                | 4.293801244  |
| wavelet-LHH | glcm       | Id                               | 0.299300938  |
| wavelet-LHH | glcm       | ClusterTendency                  | 28.97776587  |
| wavelet-LHH | firstorder | InterquartileRange               | 127.0437763  |
| wavelet-LHH | firstorder | Skewness                         | 0.472863263  |
| wavelet-LHH | firstorder | Uniformity                       | 0.091392318  |
| wavelet-LHH | firstorder | Median                           | 5.398601485  |
| wavelet-LHH | firstorder | Energy                           | 967510.6341  |
| wavelet-LHH | firstorder | RobustMeanAbsoluteDeviation      | 52.33717381  |
| wavelet-LHH | firstorder | MeanAbsoluteDeviation            | 74.48998562  |
| wavelet-LHH | firstorder | TotalEnergy                      | 26122787.12  |
| wavelet-LHH | firstorder | Maximum                          | 330.4606659  |
| wavelet-LHH | firstorder | RootMeanSquared                  | 94.64899259  |
| wavelet-LHH | firstorder | 90Percentile                     | 124.7901377  |
| wavelet-LHH | firstorder | Minimum                          | -170.8416239 |
| wavelet-LHH | firstorder | Entropy                          | 3.724401479  |
| wavelet-LHH | firstorder | Range                            | 501.3022897  |
| wavelet-LHH | firstorder | Variance                         | 8958.427906  |
| wavelet-LHH | firstorder | 10Percentile                     | -124.3436195 |
| wavelet-LHH | firstorder | Kurtosis                         | 3.35500083   |
| wavelet-LHH | firstorder | Mean                             | 0.062382871  |
| wavelet-LHH | grlm       | ShortRunLowGrayLevelEmphasis     | 0.074788637  |
| wavelet-LHH | grlm       | GrayLevelVariance                | 14.73922563  |
| wavelet-LHH | grlm       | LowGrayLevelRunEmphasis          | 0.077143757  |
| wavelet-LHH | grlm       | GrayLevelNonUniformityNormalized | 0.089033776  |
| wavelet-LHH | grlm       | RunVariance                      | 0.049367133  |
| wavelet-LHH | grlm       | GrayLevelNonUniformity           | 9.200675994  |
| wavelet-LHH | grlm       | LongRunEmphasis                  | 1.143515654  |
| wavelet-LHH | grlm       | ShortRunHighGrayLevelEmphasis    | 70.29499106  |
| wavelet-LHH | grlm       | RunLengthNonUniformity           | 94.95034854  |
| wavelet-LHH | grlm       | ShortRunEmphasis                 | 0.967489447  |
| wavelet-LHH | grlm       | LongRunHighGrayLevelEmphasis     | 79.74053882  |
| wavelet-LHH | grlm       | RunPercentage                    | 0.956552707  |
| wavelet-LHH | grlm       | LongRunLowGrayLevelEmphasis      | 0.086815896  |
| wavelet-LHH | grlm       | RunEntropy                       | 3.924206581  |

|             |       |                                      |              |
|-------------|-------|--------------------------------------|--------------|
| wavelet-LHH | grlm  | HighGrayLevelRunEmphasis             | 72.03059627  |
| wavelet-LHH | grlm  | RunLengthNonUniformityNormalized     | 0.918468334  |
| wavelet-LHH | glszm | GrayLevelVariance                    | 19.62468112  |
| wavelet-LHH | glszm | ZoneVariance                         | 5.280612245  |
| wavelet-LHH | glszm | GrayLevelNonUniformityNormalized     | 0.070153061  |
| wavelet-LHH | glszm | SizeZoneNonUniformityNormalized      | 0.439413265  |
| wavelet-LHH | glszm | SizeZoneNonUniformity                | 24.60714286  |
| wavelet-LHH | glszm | GrayLevelNonUniformity               | 3.928571429  |
| wavelet-LHH | glszm | LargeAreaEmphasis                    | 9            |
| wavelet-LHH | glszm | SmallAreaHighGrayLevelEmphasis       | 74.11587913  |
| wavelet-LHH | glszm | ZonePercentage                       | 0.518518519  |
| wavelet-LHH | glszm | LargeAreaLowGrayLevelEmphasis        | 0.400203488  |
| wavelet-LHH | glszm | LargeAreaHighGrayLevelEmphasis       | 560.25       |
| wavelet-LHH | glszm | HighGrayLevelZoneEmphasis            | 87.98214286  |
| wavelet-LHH | glszm | SmallAreaEmphasis                    | 0.685919924  |
| wavelet-LHH | glszm | LowGrayLevelZoneEmphasis             | 0.075504181  |
| wavelet-LHH | glszm | ZoneEntropy                          | 4.76691452   |
| wavelet-LHH | glszm | SmallAreaLowGrayLevelEmphasis        | 0.0321318    |
| wavelet-LHH | ngtdm | Coarseness                           | 0.044576322  |
| wavelet-LHH | ngtdm | Complexity                           | 373.7504438  |
| wavelet-LHH | ngtdm | Strength                             | 4.652602817  |
| wavelet-LHH | ngtdm | Contrast                             | 0.337117987  |
| wavelet-LHH | ngtdm | Busyness                             | 0.212975643  |
| wavelet-LLH | gldm  | GrayLevelVariance                    | 62.31987311  |
| wavelet-LLH | gldm  | HighGrayLevelEmphasis                | 521.787037   |
| wavelet-LLH | gldm  | DependenceEntropy                    | 5.582394998  |
| wavelet-LLH | gldm  | DependenceNonUniformity              | 40.27777778  |
| wavelet-LLH | gldm  | GrayLevelNonUniformity               | 4.796296296  |
| wavelet-LLH | gldm  | SmallDependenceEmphasis              | 0.573109568  |
| wavelet-LLH | gldm  | SmallDependenceHighGrayLevelEmphasis | 287.3881173  |
| wavelet-LLH | gldm  | DependenceNonUniformityNormalized    | 0.372942387  |
| wavelet-LLH | gldm  | LargeDependenceEmphasis              | 3.722222222  |
| wavelet-LLH | gldm  | LargeDependenceLowGrayLevelEmphasis  | 0.022627291  |
| wavelet-LLH | gldm  | DependenceVariance                   | 0.692043896  |
| wavelet-LLH | gldm  | LargeDependenceHighGrayLevelEmphasis | 2170.787037  |
| wavelet-LLH | gldm  | SmallDependenceLowGrayLevelEmphasis  | 0.012988306  |
| wavelet-LLH | gldm  | LowGrayLevelEmphasis                 | 0.014280006  |
| wavelet-LLH | glcm  | JointAverage                         | 21.44302385  |
| wavelet-LLH | glcm  | SumAverage                           | 42.88604769  |
| wavelet-LLH | glcm  | JointEntropy                         | 6.687605363  |
| wavelet-LLH | glcm  | ClusterShade                         | -983.1814593 |
| wavelet-LLH | glcm  | MaximumProbability                   | 0.023753883  |
| wavelet-LLH | glcm  | ldmn                                 | 0.947764326  |
| wavelet-LLH | glcm  | JointEnergy                          | 0.010503567  |
| wavelet-LLH | glcm  | Contrast                             | 66.01664424  |
| wavelet-LLH | glcm  | DifferenceEntropy                    | 3.727948179  |
| wavelet-LLH | glcm  | InverseVariance                      | 0.149894421  |
| wavelet-LLH | glcm  | DifferenceVariance                   | 20.91748502  |
| wavelet-LLH | glcm  | ldn                                  | 0.847924257  |
| wavelet-LLH | glcm  | ldm                                  | 0.140100969  |
| wavelet-LLH | glcm  | Correlation                          | 0.483415877  |
| wavelet-LLH | glcm  | Autocorrelation                      | 491.9291044  |
| wavelet-LLH | glcm  | SumEntropy                           | 4.961477382  |

|             |            |                                  |              |
|-------------|------------|----------------------------------|--------------|
| wavelet-LLH | glcm       | SumSquares                       | 64.63966726  |
| wavelet-LLH | glcm       | ClusterProminence                | 83452.79539  |
| wavelet-LLH | glcm       | Imc2                             | 0.99684638   |
| wavelet-LLH | glcm       | Imc1                             | -0.552911242 |
| wavelet-LLH | glcm       | DifferenceAverage                | 6.478238378  |
| wavelet-LLH | glcm       | Id                               | 0.231642299  |
| wavelet-LLH | glcm       | ClusterTendency                  | 192.5420248  |
| wavelet-LLH | firstorder | InterquartileRange               | 323.7861948  |
| wavelet-LLH | firstorder | Skewness                         | -0.410600163 |
| wavelet-LLH | firstorder | Uniformity                       | 0.044410151  |
| wavelet-LLH | firstorder | Median                           | -29.7811619  |
| wavelet-LLH | firstorder | Energy                           | 4459132.027  |
| wavelet-LLH | firstorder | RobustMeanAbsoluteDeviation      | 130.3166746  |
| wavelet-LLH | firstorder | MeanAbsoluteDeviation            | 167.3448749  |
| wavelet-LLH | firstorder | TotalEnergy                      | 120396564.7  |
| wavelet-LLH | firstorder | Maximum                          | 234.5304497  |
| wavelet-LLH | firstorder | RootMeanSquared                  | 203.1951267  |
| wavelet-LLH | firstorder | 90Percentile                     | 191.7497355  |
| wavelet-LLH | firstorder | Minimum                          | -571.0494603 |
| wavelet-LLH | firstorder | Entropy                          | 4.647358893  |
| wavelet-LLH | firstorder | Range                            | 805.5799101  |
| wavelet-LLH | firstorder | Variance                         | 38582.45544  |
| wavelet-LLH | firstorder | 10Percentile                     | -301.5212687 |
| wavelet-LLH | firstorder | Kurtosis                         | 2.328909314  |
| wavelet-LLH | firstorder | Mean                             | -52.01734396 |
| wavelet-LLH | glrlm      | ShortRunLowGrayLevelEmphasis     | 0.014560136  |
| wavelet-LLH | glrlm      | GrayLevelVariance                | 62.23303871  |
| wavelet-LLH | glrlm      | LowGrayLevelRunEmphasis          | 0.014621549  |
| wavelet-LLH | glrlm      | GrayLevelNonUniformityNormalized | 0.044293419  |
| wavelet-LLH | glrlm      | RunVariance                      | 0.033147296  |
| wavelet-LLH | glrlm      | GrayLevelNonUniformity           | 4.64768821   |
| wavelet-LLH | glrlm      | LongRunEmphasis                  | 1.096048552  |
| wavelet-LLH | glrlm      | ShortRunHighGrayLevelEmphasis    | 507.1236295  |
| wavelet-LLH | glrlm      | RunLengthNonUniformity           | 99.49687223  |
| wavelet-LLH | glrlm      | ShortRunEmphasis                 | 0.978686917  |
| wavelet-LLH | glrlm      | LongRunHighGrayLevelEmphasis     | 575.490704   |
| wavelet-LLH | glrlm      | RunPercentage                    | 0.971509972  |
| wavelet-LLH | glrlm      | LongRunLowGrayLevelEmphasis      | 0.014925236  |
| wavelet-LLH | glrlm      | RunEntropy                       | 4.73756378   |
| wavelet-LLH | glrlm      | HighGrayLevelRunEmphasis         | 519.8225055  |
| wavelet-LLH | glrlm      | RunLengthNonUniformityNormalized | 0.946746108  |
| wavelet-LLH | glszm      | GrayLevelVariance                | 63.82022894  |
| wavelet-LLH | glszm      | ZoneVariance                     | 0.742728467  |
| wavelet-LLH | glszm      | GrayLevelNonUniformityNormalized | 0.042972415  |
| wavelet-LLH | glszm      | SizeZoneNonUniformityNormalized  | 0.520735598  |
| wavelet-LLH | glszm      | SizeZoneNonUniformity            | 38.01369863  |
| wavelet-LLH | glszm      | GrayLevelNonUniformity           | 3.136986301  |
| wavelet-LLH | glszm      | LargeAreaEmphasis                | 2.931506849  |
| wavelet-LLH | glszm      | SmallAreaHighGrayLevelEmphasis   | 374.0973135  |
| wavelet-LLH | glszm      | ZonePercentage                   | 0.675925926  |
| wavelet-LLH | glszm      | LargeAreaLowGrayLevelEmphasis    | 0.026032015  |
| wavelet-LLH | glszm      | LargeAreaHighGrayLevelEmphasis   | 1595.767123  |
| wavelet-LLH | glszm      | HighGrayLevelZoneEmphasis        | 506.5479452  |

|             |            |                                      |             |
|-------------|------------|--------------------------------------|-------------|
| wavelet-LLH | glszm      | SmallAreaEmphasis                    | 0.747408676 |
| wavelet-LLH | glszm      | LowGrayLevelZoneEmphasis             | 0.01963339  |
| wavelet-LLH | glszm      | ZoneEntropy                          | 5.381337572 |
| wavelet-LLH | glszm      | SmallAreaLowGrayLevelEmphasis        | 0.018892633 |
| wavelet-LLH | ngtdm      | Coarseness                           | 0.053727115 |
| wavelet-LLH | ngtdm      | Complexity                           | 1562.303775 |
| wavelet-LLH | ngtdm      | Strength                             | 22.18229702 |
| wavelet-LLH | ngtdm      | Contrast                             | 0.569782072 |
| wavelet-LLH | ngtdm      | Busyness                             | 0.032108076 |
| wavelet-LLL | gldm       | GrayLevelVariance                    | 482.861797  |
| wavelet-LLL | gldm       | HighGrayLevelEmphasis                | 1785.537037 |
| wavelet-LLL | gldm       | DependenceEntropy                    | 6.03266528  |
| wavelet-LLL | gldm       | DependenceNonUniformity              | 70.66666667 |
| wavelet-LLL | gldm       | GrayLevelNonUniformity               | 2.166666667 |
| wavelet-LLL | gldm       | SmallDependenceEmphasis              | 0.833333333 |
| wavelet-LLL | gldm       | SmallDependenceHighGrayLevelEmphasis | 1455.759259 |
| wavelet-LLL | gldm       | DependenceNonUniformityNormalized    | 0.654320988 |
| wavelet-LLL | gldm       | LargeDependenceEmphasis              | 1.666666667 |
| wavelet-LLL | gldm       | LargeDependenceLowGrayLevelEmphasis  | 0.014495496 |
| wavelet-LLL | gldm       | DependenceVariance                   | 0.172839506 |
| wavelet-LLL | gldm       | LargeDependenceHighGrayLevelEmphasis | 3104.648148 |
| wavelet-LLL | gldm       | SmallDependenceLowGrayLevelEmphasis  | 0.013191401 |
| wavelet-LLL | gldm       | LowGrayLevelEmphasis                 | 0.01345222  |
| wavelet-LLL | glcm       | JointAverage                         | 42.4479866  |
| wavelet-LLL | glcm       | SumAverage                           | 84.89597321 |
| wavelet-LLL | glcm       | JointEntropy                         | 6.95128779  |
| wavelet-LLL | glcm       | ClusterShade                         | 19204.74165 |
| wavelet-LLL | glcm       | MaximumProbability                   | 0.01471801  |
| wavelet-LLL | glcm       | ldmn                                 | 0.941742577 |
| wavelet-LLL | glcm       | JointEnergy                          | 0.008273869 |
| wavelet-LLL | glcm       | Contrast                             | 681.6614667 |
| wavelet-LLL | glcm       | DifferenceEntropy                    | 4.972806369 |
| wavelet-LLL | glcm       | InverseVariance                      | 0.05837112  |
| wavelet-LLL | glcm       | DifferenceVariance                   | 222.1847079 |
| wavelet-LLL | glcm       | ldn                                  | 0.838258213 |
| wavelet-LLL | glcm       | ldm                                  | 0.048658858 |
| wavelet-LLL | glcm       | Correlation                          | 0.36805102  |
| wavelet-LLL | glcm       | Autocorrelation                      | 1996.188394 |
| wavelet-LLL | glcm       | SumEntropy                           | 5.595781637 |
| wavelet-LLL | glcm       | SumSquares                           | 532.9896738 |
| wavelet-LLL | glcm       | ClusterProminence                    | 5133450.626 |
| wavelet-LLL | glcm       | lmc2                                 | 0.999932755 |
| wavelet-LLL | glcm       | lmc1                                 | -0.78407939 |
| wavelet-LLL | glcm       | DifferenceAverage                    | 21.10231643 |
| wavelet-LLL | glcm       | ld                                   | 0.104177524 |
| wavelet-LLL | glcm       | ClusterTendency                      | 1450.297229 |
| wavelet-LLL | firstorder | InterquartileRange                   | 788.1868138 |
| wavelet-LLL | firstorder | Skewness                             | 0.696255992 |
| wavelet-LLL | firstorder | Uniformity                           | 0.020061728 |
| wavelet-LLL | firstorder | Median                               | -1663.14799 |
| wavelet-LLL | firstorder | Energy                               | 287250391.1 |
| wavelet-LLL | firstorder | RobustMeanAbsoluteDeviation          | 324.199099  |
| wavelet-LLL | firstorder | MeanAbsoluteDeviation                | 449.9604674 |

|             |            |                                  |              |
|-------------|------------|----------------------------------|--------------|
| wavelet-LLL | firstorder | TotalEnergy                      | 7755760559   |
| wavelet-LLL | firstorder | Maximum                          | 57.28774842  |
| wavelet-LLL | firstorder | RootMeanSquared                  | 1630.866593  |
| wavelet-LLL | firstorder | 90Percentile                     | -791.9379591 |
| wavelet-LLL | firstorder | Minimum                          | -2414.402377 |
| wavelet-LLL | firstorder | Entropy                          | 5.791562502  |
| wavelet-LLL | firstorder | Range                            | 2471.690125  |
| wavelet-LLL | firstorder | Variance                         | 301349.8514  |
| wavelet-LLL | firstorder | 10Percentile                     | -2140.170695 |
| wavelet-LLL | firstorder | Kurtosis                         | 2.821541444  |
| wavelet-LLL | firstorder | Mean                             | -1535.700489 |
| wavelet-LLL | grlm       | ShortRunLowGrayLevelEmphasis     | 0.013545713  |
| wavelet-LLL | grlm       | GrayLevelVariance                | 483.5219246  |
| wavelet-LLL | grlm       | LowGrayLevelRunEmphasis          | 0.013555933  |
| wavelet-LLL | grlm       | GrayLevelNonUniformityNormalized | 0.020030042  |
| wavelet-LLL | grlm       | RunVariance                      | 0.008542764  |
| wavelet-LLL | grlm       | GrayLevelNonUniformity           | 2.144828228  |
| wavelet-LLL | grlm       | LongRunEmphasis                  | 1.026167837  |
| wavelet-LLL | grlm       | ShortRunHighGrayLevelEmphasis    | 1770.944573  |
| wavelet-LLL | grlm       | RunLengthNonUniformity           | 105.2686996  |
| wavelet-LLL | grlm       | ShortRunEmphasis                 | 0.993458041  |
| wavelet-LLL | grlm       | LongRunHighGrayLevelEmphasis     | 1835.588169  |
| wavelet-LLL | grlm       | RunPercentage                    | 0.991452991  |
| wavelet-LLL | grlm       | LongRunLowGrayLevelEmphasis      | 0.013596811  |
| wavelet-LLL | grlm       | RunEntropy                       | 5.807111361  |
| wavelet-LLL | grlm       | HighGrayLevelRunEmphasis         | 1783.873292  |
| wavelet-LLL | grlm       | RunLengthNonUniformityNormalized | 0.982914472  |
| wavelet-LLL | glszm      | GrayLevelVariance                | 492.2552083  |
| wavelet-LLL | glszm      | ZoneVariance                     | 0.109375     |
| wavelet-LLL | glszm      | GrayLevelNonUniformityNormalized | 0.019314236  |
| wavelet-LLL | glszm      | SizeZoneNonUniformityNormalized  | 0.78125      |
| wavelet-LLL | glszm      | SizeZoneNonUniformity            | 75           |
| wavelet-LLL | glszm      | GrayLevelNonUniformity           | 1.854166667  |
| wavelet-LLL | glszm      | LargeAreaEmphasis                | 1.375        |
| wavelet-LLL | glszm      | SmallAreaHighGrayLevelEmphasis   | 1575.895833  |
| wavelet-LLL | glszm      | ZonePercentage                   | 0.888888889  |
| wavelet-LLL | glszm      | LargeAreaLowGrayLevelEmphasis    | 0.015524976  |
| wavelet-LLL | glszm      | LargeAreaHighGrayLevelEmphasis   | 2503.395833  |
| wavelet-LLL | glszm      | HighGrayLevelZoneEmphasis        | 1761.395833  |
| wavelet-LLL | glszm      | SmallAreaEmphasis                | 0.90625      |
| wavelet-LLL | glszm      | LowGrayLevelZoneEmphasis         | 0.014938134  |
| wavelet-LLL | glszm      | ZoneEntropy                      | 6.022462501  |
| wavelet-LLL | glszm      | SmallAreaLowGrayLevelEmphasis    | 0.014791423  |
| wavelet-LLL | ngtdm      | Coarseness                       | 0.03681095   |
| wavelet-LLL | ngtdm      | Complexity                       | 24693.18768  |
| wavelet-LLL | ngtdm      | Strength                         | 97.87014333  |
| wavelet-LLL | ngtdm      | Contrast                         | 3.199564287  |
| wavelet-LLL | ngtdm      | Busyness                         | 0.017100564  |
| wavelet-HHL | gldm       | GrayLevelVariance                | 28.33950617  |
| wavelet-HHL | gldm       | HighGrayLevelEmphasis            | 212.0925926  |
| wavelet-HHL | gldm       | DependenceEntropy                | 5.488515688  |
| wavelet-HHL | gldm       | DependenceNonUniformity          | 31.2962963   |
| wavelet-HHL | gldm       | GrayLevelNonUniformity           | 7.722222222  |

|             |            |                                      |              |
|-------------|------------|--------------------------------------|--------------|
| wavelet-HHL | gldm       | SmallDependenceEmphasis              | 0.459025206  |
| wavelet-HHL | gldm       | SmallDependenceHighGrayLevelEmphasis | 105.4984851  |
| wavelet-HHL | gldm       | DependenceNonUniformityNormalized    | 0.289780521  |
| wavelet-HHL | gldm       | LargeDependenceEmphasis              | 5.481481481  |
| wavelet-HHL | gldm       | LargeDependenceLowGrayLevelEmphasis  | 0.05665539   |
| wavelet-HHL | gldm       | DependenceVariance                   | 1.102537723  |
| wavelet-HHL | gldm       | LargeDependenceHighGrayLevelEmphasis | 1069.407407  |
| wavelet-HHL | gldm       | SmallDependenceLowGrayLevelEmphasis  | 0.016044449  |
| wavelet-HHL | gldm       | LowGrayLevelEmphasis                 | 0.020919293  |
| wavelet-HHL | glcm       | JointAverage                         | 13.60507307  |
| wavelet-HHL | glcm       | SumAverage                           | 27.21014613  |
| wavelet-HHL | glcm       | JointEntropy                         | 6.486705974  |
| wavelet-HHL | glcm       | ClusterShade                         | 65.03373038  |
| wavelet-HHL | glcm       | MaximumProbability                   | 0.029703124  |
| wavelet-HHL | glcm       | Idmn                                 | 0.948536571  |
| wavelet-HHL | glcm       | JointEnergy                          | 0.012548713  |
| wavelet-HHL | glcm       | Contrast                             | 59.95376392  |
| wavelet-HHL | glcm       | DifferenceEntropy                    | 3.701927864  |
| wavelet-HHL | glcm       | InverseVariance                      | 0.193162264  |
| wavelet-HHL | glcm       | DifferenceVariance                   | 24.88491607  |
| wavelet-HHL | glcm       | Idn                                  | 0.857410864  |
| wavelet-HHL | glcm       | Idm                                  | 0.185184588  |
| wavelet-HHL | glcm       | Correlation                          | -0.023700836 |
| wavelet-HHL | glcm       | Autocorrelation                      | 184.3889617  |
| wavelet-HHL | glcm       | SumEntropy                           | 4.377179879  |
| wavelet-HHL | glcm       | SumSquares                           | 29.24392752  |
| wavelet-HHL | glcm       | ClusterProminence                    | 12347.3019   |
| wavelet-HHL | glcm       | Imc2                                 | 0.982132404  |
| wavelet-HHL | glcm       | Imc1                                 | -0.413884359 |
| wavelet-HHL | glcm       | DifferenceAverage                    | 5.781603506  |
| wavelet-HHL | glcm       | Id                                   | 0.272875038  |
| wavelet-HHL | glcm       | ClusterTendency                      | 57.02194614  |
| wavelet-HHL | firstorder | InterquartileRange                   | 122.9245352  |
| wavelet-HHL | firstorder | Skewness                             | 0.411222613  |
| wavelet-HHL | firstorder | Uniformity                           | 0.071502058  |
| wavelet-HHL | firstorder | Median                               | -2.348332645 |
| wavelet-HHL | firstorder | Energy                               | 1872086.242  |
| wavelet-HHL | firstorder | RobustMeanAbsoluteDeviation          | 59.05781934  |
| wavelet-HHL | firstorder | MeanAbsoluteDeviation                | 96.33114901  |
| wavelet-HHL | firstorder | TotalEnergy                          | 50546328.53  |
| wavelet-HHL | firstorder | Maximum                              | 430.3419204  |
| wavelet-HHL | firstorder | RootMeanSquared                      | 131.6591503  |
| wavelet-HHL | firstorder | 90Percentile                         | 154.7691241  |
| wavelet-HHL | firstorder | Minimum                              | -308.6657658 |
| wavelet-HHL | firstorder | Entropy                              | 4.067205196  |
| wavelet-HHL | firstorder | Range                                | 739.0076863  |
| wavelet-HHL | firstorder | Variance                             | 17333.5689   |
| wavelet-HHL | firstorder | 10Percentile                         | -176.1473972 |
| wavelet-HHL | firstorder | Kurtosis                             | 3.942480521  |
| wavelet-HHL | firstorder | Mean                                 | 0.750312563  |
| wavelet-HHL | glrlm      | ShortRunLowGrayLevelEmphasis         | 0.021227856  |
| wavelet-HHL | glrlm      | GrayLevelVariance                    | 28.99143456  |
| wavelet-HHL | glrlm      | LowGrayLevelRunEmphasis              | 0.021477405  |

|             |       |                                      |             |
|-------------|-------|--------------------------------------|-------------|
| wavelet-HHL | glrlm | GrayLevelNonUniformityNormalized     | 0.070530834 |
| wavelet-HHL | glrlm | RunVariance                          | 0.049619005 |
| wavelet-HHL | glrlm | GrayLevelNonUniformity               | 7.297509175 |
| wavelet-HHL | glrlm | LongRunEmphasis                      | 1.143438914 |
| wavelet-HHL | glrlm | ShortRunHighGrayLevelEmphasis        | 206.8876602 |
| wavelet-HHL | glrlm | RunLengthNonUniformity               | 95.61761119 |
| wavelet-HHL | glrlm | ShortRunEmphasis                     | 0.968556984 |
| wavelet-HHL | glrlm | LongRunHighGrayLevelEmphasis         | 241.0068474 |
| wavelet-HHL | glrlm | RunPercentage                        | 0.957977208 |
| wavelet-HHL | glrlm | LongRunLowGrayLevelEmphasis          | 0.02276978  |
| wavelet-HHL | glrlm | RunEntropy                           | 4.241907777 |
| wavelet-HHL | glrlm | HighGrayLevelRunEmphasis             | 212.9077594 |
| wavelet-HHL | glrlm | RunLengthNonUniformityNormalized     | 0.922343128 |
| wavelet-HHL | glszm | GrayLevelVariance                    | 38.26083333 |
| wavelet-HHL | glszm | ZoneVariance                         | 1.593333333 |
| wavelet-HHL | glszm | GrayLevelNonUniformityNormalized     | 0.058888889 |
| wavelet-HHL | glszm | SizeZoneNonUniformityNormalized      | 0.430555556 |
| wavelet-HHL | glszm | SizeZoneNonUniformity                | 25.83333333 |
| wavelet-HHL | glszm | GrayLevelNonUniformity               | 3.533333333 |
| wavelet-HHL | glszm | LargeAreaEmphasis                    | 4.833333333 |
| wavelet-HHL | glszm | SmallAreaHighGrayLevelEmphasis       | 159.6652376 |
| wavelet-HHL | glszm | ZonePercentage                       | 0.555555556 |
| wavelet-HHL | glszm | LargeAreaLowGrayLevelEmphasis        | 0.062648109 |
| wavelet-HHL | glszm | LargeAreaHighGrayLevelEmphasis       | 966.1666667 |
| wavelet-HHL | glszm | HighGrayLevelZoneEmphasis            | 224.5833333 |
| wavelet-HHL | glszm | SmallAreaEmphasis                    | 0.67441421  |
| wavelet-HHL | glszm | LowGrayLevelZoneEmphasis             | 0.030453383 |
| wavelet-HHL | glszm | ZoneEntropy                          | 5.177316637 |
| wavelet-HHL | glszm | SmallAreaLowGrayLevelEmphasis        | 0.027348182 |
| wavelet-HHL | ngtdm | Coarseness                           | 0.050981016 |
| wavelet-HHL | ngtdm | Complexity                           | 956.056885  |
| wavelet-HHL | ngtdm | Strength                             | 10.04637765 |
| wavelet-HHL | ngtdm | Contrast                             | 0.456245823 |
| wavelet-HHL | ngtdm | Busyness                             | 0.068187061 |
| wavelet-HLH | gldm  | GrayLevelVariance                    | 16.97085048 |
| wavelet-HLH | gldm  | HighGrayLevelEmphasis                | 128         |
| wavelet-HLH | gldm  | DependenceEntropy                    | 5.397772456 |
| wavelet-HLH | gldm  | DependenceNonUniformity              | 28.11111111 |
| wavelet-HLH | gldm  | GrayLevelNonUniformity               | 8.685185185 |
| wavelet-HLH | gldm  | SmallDependenceEmphasis              | 0.496651077 |
| wavelet-HLH | gldm  | SmallDependenceHighGrayLevelEmphasis | 76.16073549 |
| wavelet-HLH | gldm  | DependenceNonUniformityNormalized    | 0.260288066 |
| wavelet-HLH | gldm  | LargeDependenceEmphasis              | 7.944444444 |
| wavelet-HLH | gldm  | LargeDependenceLowGrayLevelEmphasis  | 0.111976385 |
| wavelet-HLH | gldm  | DependenceVariance                   | 2.413237311 |
| wavelet-HLH | gldm  | LargeDependenceHighGrayLevelEmphasis | 798.9259259 |
| wavelet-HLH | gldm  | SmallDependenceLowGrayLevelEmphasis  | 0.018077742 |
| wavelet-HLH | gldm  | LowGrayLevelEmphasis                 | 0.025719993 |
| wavelet-HLH | glcm  | JointAverage                         | 10.62814983 |
| wavelet-HLH | glcm  | SumAverage                           | 21.25629966 |
| wavelet-HLH | glcm  | JointEntropy                         | 6.296226284 |
| wavelet-HLH | glcm  | ClusterShade                         | 63.70673086 |
| wavelet-HLH | glcm  | MaximumProbability                   | 0.039646531 |

|             |            |                                  |              |
|-------------|------------|----------------------------------|--------------|
| wavelet-HLH | glcm       | Idmn                             | 0.939514809  |
| wavelet-HLH | glcm       | JointEnergy                      | 0.015087221  |
| wavelet-HLH | glcm       | Contrast                         | 32.11331061  |
| wavelet-HLH | glcm       | DifferenceEntropy                | 3.411744962  |
| wavelet-HLH | glcm       | InverseVariance                  | 0.215321824  |
| wavelet-HLH | glcm       | DifferenceVariance               | 11.83031879  |
| wavelet-HLH | glcm       | Idn                              | 0.840594843  |
| wavelet-HLH | glcm       | Idm                              | 0.216073762  |
| wavelet-HLH | glcm       | Correlation                      | 0.008173649  |
| wavelet-HLH | glcm       | Autocorrelation                  | 113.4538303  |
| wavelet-HLH | glcm       | SumEntropy                       | 4.123768464  |
| wavelet-HLH | glcm       | SumSquares                       | 16.42318532  |
| wavelet-HLH | glcm       | ClusterProminence                | 3677.633371  |
| wavelet-HLH | glcm       | Imc2                             | 0.972461301  |
| wavelet-HLH | glcm       | Imc1                             | -0.384129442 |
| wavelet-HLH | glcm       | DifferenceAverage                | 4.42706054   |
| wavelet-HLH | glcm       | Id                               | 0.306332088  |
| wavelet-HLH | glcm       | ClusterTendency                  | 33.57943065  |
| wavelet-HLH | firstorder | InterquartileRange               | 114.906577   |
| wavelet-HLH | firstorder | Skewness                         | 0.318929834  |
| wavelet-HLH | firstorder | Uniformity                       | 0.080418381  |
| wavelet-HLH | firstorder | Median                           | -10.26725591 |
| wavelet-HLH | firstorder | Energy                           | 1158221.847  |
| wavelet-HLH | firstorder | RobustMeanAbsoluteDeviation      | 52.07263325  |
| wavelet-HLH | firstorder | MeanAbsoluteDeviation            | 79.82321949  |
| wavelet-HLH | firstorder | TotalEnergy                      | 31271989.87  |
| wavelet-HLH | firstorder | Maximum                          | 265.1796799  |
| wavelet-HLH | firstorder | RootMeanSquared                  | 103.5580821  |
| wavelet-HLH | firstorder | 90Percentile                     | 143.4986008  |
| wavelet-HLH | firstorder | Minimum                          | -227.9130539 |
| wavelet-HLH | firstorder | Entropy                          | 3.908958413  |
| wavelet-HLH | firstorder | Range                            | 493.0927338  |
| wavelet-HLH | firstorder | Variance                         | 10723.85109  |
| wavelet-HLH | firstorder | 10Percentile                     | -130.4699855 |
| wavelet-HLH | firstorder | Kurtosis                         | 3.023030923  |
| wavelet-HLH | firstorder | Mean                             | 0.652127229  |
| wavelet-HLH | grlm       | ShortRunLowGrayLevelEmphasis     | 0.025900971  |
| wavelet-HLH | grlm       | GrayLevelVariance                | 17.64000013  |
| wavelet-HLH | grlm       | LowGrayLevelRunEmphasis          | 0.026417261  |
| wavelet-HLH | grlm       | GrayLevelNonUniformityNormalized | 0.078028622  |
| wavelet-HLH | grlm       | RunVariance                      | 0.061107032  |
| wavelet-HLH | grlm       | GrayLevelNonUniformity           | 7.991451711  |
| wavelet-HLH | grlm       | LongRunEmphasis                  | 1.176113292  |
| wavelet-HLH | grlm       | ShortRunHighGrayLevelEmphasis    | 125.6500356  |
| wavelet-HLH | grlm       | RunLengthNonUniformity           | 92.52714892  |
| wavelet-HLH | grlm       | ShortRunEmphasis                 | 0.960781094  |
| wavelet-HLH | grlm       | LongRunHighGrayLevelEmphasis     | 146.854503   |
| wavelet-HLH | grlm       | RunPercentage                    | 0.948005698  |
| wavelet-HLH | grlm       | LongRunLowGrayLevelEmphasis      | 0.028741383  |
| wavelet-HLH | grlm       | RunEntropy                       | 4.143226086  |
| wavelet-HLH | grlm       | HighGrayLevelRunEmphasis         | 129.5968052  |
| wavelet-HLH | grlm       | RunLengthNonUniformityNormalized | 0.902693909  |
| wavelet-HLH | glszm      | GrayLevelVariance                | 24.24993701  |



|             |       |                                  |             |
|-------------|-------|----------------------------------|-------------|
| wavelet-HLH | glszm | ZoneVariance                     | 2.712018141 |
| wavelet-HLH | glszm | GrayLevelNonUniformityNormalized | 0.06122449  |
| wavelet-HLH | glszm | SizeZoneNonUniformityNormalized  | 0.536407155 |
| wavelet-HLH | glszm | SizeZoneNonUniformity            | 33.79365079 |
| wavelet-HLH | glszm | GrayLevelNonUniformity           | 3.857142857 |
| wavelet-HLH | glszm | LargeAreaEmphasis                | 5.650793651 |
| wavelet-HLH | glszm | SmallAreaHighGrayLevelEmphasis   | 120.6645237 |
| wavelet-HLH | glszm | ZonePercentage                   | 0.583333333 |
| wavelet-HLH | glszm | LargeAreaLowGrayLevelEmphasis    | 0.094321746 |
| wavelet-HLH | glszm | LargeAreaHighGrayLevelEmphasis   | 589.8095238 |
| wavelet-HLH | glszm | HighGrayLevelZoneEmphasis        | 146.6507937 |
| wavelet-HLH | glszm | SmallAreaEmphasis                | 0.759488266 |
| wavelet-HLH | glszm | LowGrayLevelZoneEmphasis         | 0.033800633 |
| wavelet-HLH | glszm | ZoneEntropy                      | 4.972768614 |
| wavelet-HLH | glszm | SmallAreaLowGrayLevelEmphasis    | 0.029400548 |
| wavelet-HLH | ngtdm | Coarseness                       | 0.048781303 |
| wavelet-HLH | ngtdm | Complexity                       | 487.1054275 |
| wavelet-HLH | ngtdm | Strength                         | 5.88121162  |
| wavelet-HLH | ngtdm | Contrast                         | 0.292789583 |
| wavelet-HLH | ngtdm | Busyness                         | 0.114004275 |

| Image type | Feature Class | Feature Name                         |                                                                                                                                                                                                                                                                                                                                                                                                                                              |
|------------|---------------|--------------------------------------|----------------------------------------------------------------------------------------------------------------------------------------------------------------------------------------------------------------------------------------------------------------------------------------------------------------------------------------------------------------------------------------------------------------------------------------------|
| general    | info          | BoundingBox                          | 4: RTSTRUCT: C99-DNU_segment_GTV<br>(1, 0, 0, 9, 13, 24)                                                                                                                                                                                                                                                                                                                                                                                     |
| general    | info          | EnabledImageTypes                    | {u'Original': {}, u'Wavelet': {}}                                                                                                                                                                                                                                                                                                                                                                                                            |
|            |               |                                      | {'distances': [1], 'additionalInfo': True,<br>'force2D': False, 'interpolator': 'sitkBSpline',<br>'resampledPixelSpacing': [3.0], 'label': 1,<br>'normalizeScale': 1, 'normalize': False,<br>'force2Ddimension': 0, 'removeOutliers':<br>None, 'minimumROISize': None, u'binWidth':<br>25.0, 'minimumROIDimensions': 1,<br>u'correctMask': True, 'preCrop': False,<br>u'symmetricalGLCM': True,<br>'resegmentRange': None, 'padDistance': 5} |
| general    | info          | GeneralSettings                      | ea31af20167ef08dc6aa5b7621a600b8085ca                                                                                                                                                                                                                                                                                                                                                                                                        |
| general    | info          | ImageHash                            | 9ba<br>(0.9765624999999998,<br>0.9765624999999998,<br>1.9999999999999996)                                                                                                                                                                                                                                                                                                                                                                    |
| general    | info          | ImageSpacing                         | daef1add07c8c8d9d1b302b7789fa22c00595                                                                                                                                                                                                                                                                                                                                                                                                        |
| general    | info          | MaskHash                             | b3f                                                                                                                                                                                                                                                                                                                                                                                                                                          |
| general    | info          | NumpyVersion                         | 1.13.1                                                                                                                                                                                                                                                                                                                                                                                                                                       |
| general    | info          | PyWaveletVersion                     | 0.5.2                                                                                                                                                                                                                                                                                                                                                                                                                                        |
| general    | info          | SimpleITKVersion                     | 1.1.0                                                                                                                                                                                                                                                                                                                                                                                                                                        |
| general    | info          | Version                              | 1.3.0.post102+g1b0eb74                                                                                                                                                                                                                                                                                                                                                                                                                       |
| general    | info          | VolumeNum                            | 1                                                                                                                                                                                                                                                                                                                                                                                                                                            |
| general    | info          | VoxelNum                             | 876                                                                                                                                                                                                                                                                                                                                                                                                                                          |
| original   | shape         | Maximum3DDiameter                    | 71.81225522                                                                                                                                                                                                                                                                                                                                                                                                                                  |
| original   | shape         | Maximum2DDiameterSlice               | 30                                                                                                                                                                                                                                                                                                                                                                                                                                           |
| original   | shape         | Sphericity                           | 0.632903127                                                                                                                                                                                                                                                                                                                                                                                                                                  |
| original   | shape         | MinorAxis                            | 27.79280797                                                                                                                                                                                                                                                                                                                                                                                                                                  |
| original   | shape         | Elongation                           | 0.307012037                                                                                                                                                                                                                                                                                                                                                                                                                                  |
| original   | shape         | SurfaceVolumeRatio                   | 0.266189504                                                                                                                                                                                                                                                                                                                                                                                                                                  |
| original   | shape         | Volume                               | 23652                                                                                                                                                                                                                                                                                                                                                                                                                                        |
| original   | shape         | MajorAxis                            | 90.52676974                                                                                                                                                                                                                                                                                                                                                                                                                                  |
| original   | shape         | SurfaceArea                          | 6295.914137                                                                                                                                                                                                                                                                                                                                                                                                                                  |
| original   | shape         | Flatness                             | 0.22402172                                                                                                                                                                                                                                                                                                                                                                                                                                   |
| original   | shape         | LeastAxis                            | 20.27996262                                                                                                                                                                                                                                                                                                                                                                                                                                  |
| original   | shape         | Maximum2DDiameterColumn              | 70.61161378                                                                                                                                                                                                                                                                                                                                                                                                                                  |
| original   | shape         | Maximum2DDiameterRow                 | 71.30918594                                                                                                                                                                                                                                                                                                                                                                                                                                  |
| original   | gldm          | GrayLevelVariance                    | 99.23273467                                                                                                                                                                                                                                                                                                                                                                                                                                  |
| original   | gldm          | HighGrayLevelEmphasis                | 1193.28653                                                                                                                                                                                                                                                                                                                                                                                                                                   |
| original   | gldm          | DependenceEntropy                    | 6.687263549                                                                                                                                                                                                                                                                                                                                                                                                                                  |
| original   | gldm          | DependenceNonUniformity              | 253.3196347                                                                                                                                                                                                                                                                                                                                                                                                                                  |
| original   | gldm          | GrayLevelNonUniformity               | 33.69634703                                                                                                                                                                                                                                                                                                                                                                                                                                  |
| original   | gldm          | SmallDependenceEmphasis              | 0.528369116                                                                                                                                                                                                                                                                                                                                                                                                                                  |
| original   | gldm          | SmallDependenceHighGrayLevelEmphasis | 516.1245179                                                                                                                                                                                                                                                                                                                                                                                                                                  |
| original   | gldm          | DependenceNonUniformityNormalized    | 0.289177665                                                                                                                                                                                                                                                                                                                                                                                                                                  |
| original   | gldm          | LargeDependenceEmphasis              | 11.29680365                                                                                                                                                                                                                                                                                                                                                                                                                                  |
| original   | gldm          | LargeDependenceLowGrayLevelEmphasis  | 0.010642565                                                                                                                                                                                                                                                                                                                                                                                                                                  |
| original   | gldm          | DependenceVariance                   | 5.183039344                                                                                                                                                                                                                                                                                                                                                                                                                                  |
| original   | gldm          | LargeDependenceHighGrayLevelEmphasis | 20048.77511                                                                                                                                                                                                                                                                                                                                                                                                                                  |

|          |            |                                     |              |
|----------|------------|-------------------------------------|--------------|
| original | gldm       | SmallDependenceLowGrayLevelEmphasis | 0.003594954  |
| original | gldm       | LowGrayLevelEmphasis                | 0.004081027  |
| original | glcm       | JointAverage                        | 34.04221583  |
| original | glcm       | SumAverage                          | 68.08443167  |
| original | glcm       | JointEntropy                        | 8.803216877  |
| original | glcm       | ClusterShade                        | -2853.112573 |
| original | glcm       | MaximumProbability                  | 0.027408169  |
| original | glcm       | Idmn                                | 0.956155577  |
| original | glcm       | JointEnergy                         | 0.00442688   |
| original | glcm       | Contrast                            | 125.8088994  |
| original | glcm       | DifferenceEntropy                   | 4.45585701   |
| original | glcm       | InverseVariance                     | 0.173184769  |
| original | glcm       | DifferenceVariance                  | 59.58821044  |
| original | glcm       | Idn                                 | 0.872170695  |
| original | glcm       | Idm                                 | 0.177568227  |
| original | glcm       | Correlation                         | 0.390989246  |
| original | glcm       | Autocorrelation                     | 1199.038048  |
| original | glcm       | SumEntropy                          | 5.770555478  |
| original | glcm       | SumSquares                          | 103.0455625  |
| original | glcm       | ClusterProminence                   | 214677.4012  |
| original | glcm       | Imc2                                | 0.937080214  |
| original | glcm       | Imc1                                | -0.214088549 |
| original | glcm       | DifferenceAverage                   | 8.095364426  |
| original | glcm       | Id                                  | 0.253437221  |
| original | glcm       | ClusterTendency                     | 286.3733505  |
| original | firstorder | InterquartileRange                  | 399.25       |
| original | firstorder | Skewness                            | -0.644158423 |
| original | firstorder | Uniformity                          | 0.03846615   |
| original | firstorder | Median                              | -231         |
| original | firstorder | Energy                              | 114151711    |
| original | firstorder | RobustMeanAbsoluteDeviation         | 163.7305298  |
| original | firstorder | MeanAbsoluteDeviation               | 210.5360449  |
| original | firstorder | TotalEnergy                         | 3082096197   |
| original | firstorder | Maximum                             | 133          |
| original | firstorder | RootMeanSquared                     | 360.985003   |
| original | firstorder | 90Percentile                        | 23           |
| original | firstorder | Minimum                             | -1056        |
| original | firstorder | Entropy                             | 5.007005577  |
| original | firstorder | Range                               | 1189         |
| original | firstorder | Variance                            | 62010.88464  |
| original | firstorder | 10Percentile                        | -590         |
| original | firstorder | Kurtosis                            | 2.685328607  |
| original | firstorder | Mean                                | -261.3413242 |
| original | glrlm      | ShortRunLowGrayLevelEmphasis        | 0.004248173  |
| original | glrlm      | GrayLevelVariance                   | 98.44449935  |
| original | glrlm      | LowGrayLevelRunEmphasis             | 0.00428014   |
| original | glrlm      | GrayLevelNonUniformityNormalized    | 0.03574623   |
| original | glrlm      | RunVariance                         | 0.075706231  |
| original | glrlm      | GrayLevelNonUniformity              | 29.54479843  |
| original | glrlm      | LongRunEmphasis                     | 1.199869817  |
| original | glrlm      | ShortRunHighGrayLevelEmphasis       | 1097.042554  |
| original | glrlm      | RunLengthNonUniformity              | 744.6016305  |
| original | glrlm      | ShortRunEmphasis                    | 0.959957985  |

|             |       |                                      |              |
|-------------|-------|--------------------------------------|--------------|
| original    | glrlm | LongRunHighGrayLevelEmphasis         | 1505.108354  |
| original    | glrlm | RunPercentage                        | 0.943361433  |
| original    | glrlm | LongRunLowGrayLevelEmphasis          | 0.004430599  |
| original    | glrlm | RunEntropy                           | 5.300771644  |
| original    | glrlm | HighGrayLevelRunEmphasis             | 1163.544187  |
| original    | glrlm | RunLengthNonUniformityNormalized     | 0.900842424  |
| original    | glszm | GrayLevelVariance                    | 91.43629002  |
| original    | glszm | ZoneVariance                         | 12.09809867  |
| original    | glszm | GrayLevelNonUniformityNormalized     | 0.031133838  |
| original    | glszm | SizeZoneNonUniformityNormalized      | 0.577270935  |
| original    | glszm | SizeZoneNonUniformity                | 300.7581574  |
| original    | glszm | GrayLevelNonUniformity               | 16.22072937  |
| original    | glszm | LargeAreaEmphasis                    | 14.92514395  |
| original    | glszm | SmallAreaHighGrayLevelEmphasis       | 741.6554604  |
| original    | glszm | ZonePercentage                       | 0.594748858  |
| original    | glszm | LargeAreaLowGrayLevelEmphasis        | 0.014508132  |
| original    | glszm | LargeAreaHighGrayLevelEmphasis       | 27050.61228  |
| original    | glszm | HighGrayLevelZoneEmphasis            | 989.2495202  |
| original    | glszm | SmallAreaEmphasis                    | 0.78813641   |
| original    | glszm | LowGrayLevelZoneEmphasis             | 0.006205858  |
| original    | glszm | ZoneEntropy                          | 6.193424511  |
| original    | glszm | SmallAreaLowGrayLevelEmphasis        | 0.005923459  |
| original    | ngtdm | Coarseness                           | 0.006087012  |
| original    | ngtdm | Complexity                           | 5652.519617  |
| original    | ngtdm | Strength                             | 6.637933123  |
| original    | ngtdm | Contrast                             | 0.508141404  |
| original    | ngtdm | Busyness                             | 0.088947289  |
| wavelet-HHH | gldm  | GrayLevelVariance                    | 21.75450366  |
| wavelet-HHH | gldm  | HighGrayLevelEmphasis                | 569.5068493  |
| wavelet-HHH | gldm  | DependenceEntropy                    | 6.20019861   |
| wavelet-HHH | gldm  | DependenceNonUniformity              | 180.3424658  |
| wavelet-HHH | gldm  | GrayLevelNonUniformity               | 66.27853881  |
| wavelet-HHH | gldm  | SmallDependenceEmphasis              | 0.402143859  |
| wavelet-HHH | gldm  | SmallDependenceHighGrayLevelEmphasis | 237.9667989  |
| wavelet-HHH | gldm  | DependenceNonUniformityNormalized    | 0.205870395  |
| wavelet-HHH | gldm  | LargeDependenceEmphasis              | 11.55251142  |
| wavelet-HHH | gldm  | LargeDependenceLowGrayLevelEmphasis  | 0.023010057  |
| wavelet-HHH | gldm  | DependenceVariance                   | 3.806837847  |
| wavelet-HHH | gldm  | LargeDependenceHighGrayLevelEmphasis | 6396.203196  |
| wavelet-HHH | gldm  | SmallDependenceLowGrayLevelEmphasis  | 0.002145359  |
| wavelet-HHH | gldm  | LowGrayLevelEmphasis                 | 0.003305758  |
| wavelet-HHH | glcm  | JointAverage                         | 23.45859771  |
| wavelet-HHH | glcm  | SumAverage                           | 46.91719542  |
| wavelet-HHH | glcm  | JointEntropy                         | 7.651004698  |
| wavelet-HHH | glcm  | ClusterShade                         | -8.325939425 |
| wavelet-HHH | glcm  | MaximumProbability                   | 0.027403984  |
| wavelet-HHH | glcm  | Idmn                                 | 0.981045818  |
| wavelet-HHH | glcm  | JointEnergy                          | 0.008090852  |
| wavelet-HHH | glcm  | Contrast                             | 40.3493523   |
| wavelet-HHH | glcm  | DifferenceEntropy                    | 3.677773571  |
| wavelet-HHH | glcm  | InverseVariance                      | 0.232215655  |
| wavelet-HHH | glcm  | DifferenceVariance                   | 19.21127807  |
| wavelet-HHH | glcm  | Idn                                  | 0.91270578   |

|             |            |                                  |              |
|-------------|------------|----------------------------------|--------------|
| wavelet-HHH | glcm       | Idm                              | 0.231491652  |
| wavelet-HHH | glcm       | Correlation                      | -0.027818313 |
| wavelet-HHH | glcm       | Autocorrelation                  | 549.7872766  |
| wavelet-HHH | glcm       | SumEntropy                       | 4.51089184   |
| wavelet-HHH | glcm       | SumSquares                       | 19.65277391  |
| wavelet-HHH | glcm       | ClusterProminence                | 8032.02363   |
| wavelet-HHH | glcm       | Imc2                             | 0.783088874  |
| wavelet-HHH | glcm       | Imc1                             | -0.117767004 |
| wavelet-HHH | glcm       | DifferenceAverage                | 4.560449464  |
| wavelet-HHH | glcm       | Id                               | 0.318849129  |
| wavelet-HHH | glcm       | ClusterTendency                  | 38.26174334  |
| wavelet-HHH | firstorder | InterquartileRange               | 117.8266487  |
| wavelet-HHH | firstorder | Skewness                         | -0.035107484 |
| wavelet-HHH | firstorder | Uniformity                       | 0.075660432  |
| wavelet-HHH | firstorder | Median                           | -3.831928935 |
| wavelet-HHH | firstorder | Energy                           | 11943457.98  |
| wavelet-HHH | firstorder | RobustMeanAbsoluteDeviation      | 50.33821806  |
| wavelet-HHH | firstorder | MeanAbsoluteDeviation            | 83.59011825  |
| wavelet-HHH | firstorder | TotalEnergy                      | 322473365.5  |
| wavelet-HHH | firstorder | Maximum                          | 505.3836829  |
| wavelet-HHH | firstorder | RootMeanSquared                  | 116.7650823  |
| wavelet-HHH | firstorder | 90Percentile                     | 131.3405986  |
| wavelet-HHH | firstorder | Minimum                          | -569.3292807 |
| wavelet-HHH | firstorder | Entropy                          | 4.131771249  |
| wavelet-HHH | firstorder | Range                            | 1074.712964  |
| wavelet-HHH | firstorder | Variance                         | 13627.20905  |
| wavelet-HHH | firstorder | 10Percentile                     | -127.5522523 |
| wavelet-HHH | firstorder | Kurtosis                         | 5.315167188  |
| wavelet-HHH | firstorder | Mean                             | -2.622098434 |
| wavelet-HHH | glrlm      | ShortRunLowGrayLevelEmphasis     | 0.003311954  |
| wavelet-HHH | glrlm      | GrayLevelVariance                | 22.93558516  |
| wavelet-HHH | glrlm      | LowGrayLevelRunEmphasis          | 0.003410047  |
| wavelet-HHH | glrlm      | GrayLevelNonUniformityNormalized | 0.072002233  |
| wavelet-HHH | glrlm      | RunVariance                      | 0.080841701  |
| wavelet-HHH | glrlm      | GrayLevelNonUniformity           | 58.74977687  |
| wavelet-HHH | glrlm      | LongRunEmphasis                  | 1.234111237  |
| wavelet-HHH | glrlm      | ShortRunHighGrayLevelEmphasis    | 542.2166314  |
| wavelet-HHH | glrlm      | RunLengthNonUniformity           | 712.7396325  |
| wavelet-HHH | glrlm      | ShortRunEmphasis                 | 0.948364574  |
| wavelet-HHH | glrlm      | LongRunHighGrayLevelEmphasis     | 700.2396511  |
| wavelet-HHH | glrlm      | RunPercentage                    | 0.931419038  |
| wavelet-HHH | glrlm      | LongRunLowGrayLevelEmphasis      | 0.003852067  |
| wavelet-HHH | glrlm      | RunEntropy                       | 4.517312091  |
| wavelet-HHH | glrlm      | HighGrayLevelRunEmphasis         | 570.7356169  |
| wavelet-HHH | glrlm      | RunLengthNonUniformityNormalized | 0.873250913  |
| wavelet-HHH | glszm      | GrayLevelVariance                | 39.27826296  |
| wavelet-HHH | glszm      | ZoneVariance                     | 23.37859225  |
| wavelet-HHH | glszm      | GrayLevelNonUniformityNormalized | 0.050317576  |
| wavelet-HHH | glszm      | SizeZoneNonUniformityNormalized  | 0.506689921  |
| wavelet-HHH | glszm      | SizeZoneNonUniformity            | 198.622449   |
| wavelet-HHH | glszm      | GrayLevelNonUniformity           | 19.7244898   |
| wavelet-HHH | glszm      | LargeAreaEmphasis                | 28.37244898  |
| wavelet-HHH | glszm      | SmallAreaHighGrayLevelEmphasis   | 442.8459296  |

|             |            |                                      |              |
|-------------|------------|--------------------------------------|--------------|
| wavelet-HHH | glszm      | ZonePercentage                       | 0.447488584  |
| wavelet-HHH | glszm      | LargeAreaLowGrayLevelEmphasis        | 0.055717354  |
| wavelet-HHH | glszm      | LargeAreaHighGrayLevelEmphasis       | 15611.78061  |
| wavelet-HHH | glszm      | HighGrayLevelZoneEmphasis            | 589.252551   |
| wavelet-HHH | glszm      | SmallAreaEmphasis                    | 0.739012509  |
| wavelet-HHH | glszm      | LowGrayLevelZoneEmphasis             | 0.005014503  |
| wavelet-HHH | glszm      | ZoneEntropy                          | 5.845210321  |
| wavelet-HHH | glszm      | SmallAreaLowGrayLevelEmphasis        | 0.004478878  |
| wavelet-HHH | ngtdm      | Coarseness                           | 0.008087421  |
| wavelet-HHH | ngtdm      | Complexity                           | 1770.714759  |
| wavelet-HHH | ngtdm      | Strength                             | 3.227133502  |
| wavelet-HHH | ngtdm      | Contrast                             | 0.127014752  |
| wavelet-HHH | ngtdm      | Busyness                             | 0.119175642  |
| wavelet-HLL | gldm       | GrayLevelVariance                    | 46.28760868  |
| wavelet-HLL | gldm       | HighGrayLevelEmphasis                | 403.652968   |
| wavelet-HLL | gldm       | DependenceEntropy                    | 6.594503651  |
| wavelet-HLL | gldm       | DependenceNonUniformity              | 238.9360731  |
| wavelet-HLL | gldm       | GrayLevelNonUniformity               | 39.55251142  |
| wavelet-HLL | gldm       | SmallDependenceEmphasis              | 0.465686886  |
| wavelet-HLL | gldm       | SmallDependenceHighGrayLevelEmphasis | 215.9901827  |
| wavelet-HLL | gldm       | DependenceNonUniformityNormalized    | 0.272758074  |
| wavelet-HLL | gldm       | LargeDependenceEmphasis              | 6.785388128  |
| wavelet-HLL | gldm       | LargeDependenceLowGrayLevelEmphasis  | 0.032266925  |
| wavelet-HLL | gldm       | DependenceVariance                   | 1.840349451  |
| wavelet-HLL | gldm       | LargeDependenceHighGrayLevelEmphasis | 2332.650685  |
| wavelet-HLL | gldm       | SmallDependenceLowGrayLevelEmphasis  | 0.00656672   |
| wavelet-HLL | gldm       | LowGrayLevelEmphasis                 | 0.008839851  |
| wavelet-HLL | glcm       | JointAverage                         | 18.4697743   |
| wavelet-HLL | glcm       | SumAverage                           | 36.93954859  |
| wavelet-HLL | glcm       | JointEntropy                         | 8.712599119  |
| wavelet-HLL | glcm       | ClusterShade                         | 506.6117926  |
| wavelet-HLL | glcm       | MaximumProbability                   | 0.010694084  |
| wavelet-HLL | glcm       | ldmn                                 | 0.966466921  |
| wavelet-HLL | glcm       | JointEnergy                          | 0.003168914  |
| wavelet-HLL | glcm       | Contrast                             | 82.28352506  |
| wavelet-HLL | glcm       | DifferenceEntropy                    | 4.137163745  |
| wavelet-HLL | glcm       | InverseVariance                      | 0.176128987  |
| wavelet-HLL | glcm       | DifferenceVariance                   | 36.8467738   |
| wavelet-HLL | glcm       | ldn                                  | 0.885314336  |
| wavelet-HLL | glcm       | ldm                                  | 0.17017231   |
| wavelet-HLL | glcm       | Correlation                          | 0.139931019  |
| wavelet-HLL | glcm       | Autocorrelation                      | 348.1753594  |
| wavelet-HLL | glcm       | SumEntropy                           | 5.300088903  |
| wavelet-HLL | glcm       | SumSquares                           | 48.1702146   |
| wavelet-HLL | glcm       | ClusterProminence                    | 45527.44577  |
| wavelet-HLL | glcm       | lmc2                                 | 0.894713889  |
| wavelet-HLL | glcm       | lmc1                                 | -0.172212612 |
| wavelet-HLL | glcm       | DifferenceAverage                    | 6.59362281   |
| wavelet-HLL | glcm       | ld                                   | 0.257050613  |
| wavelet-HLL | glcm       | ClusterTendency                      | 110.3973333  |
| wavelet-HLL | firstorder | InterquartileRange                   | 202.4119929  |
| wavelet-HLL | firstorder | Skewness                             | 0.390972232  |
| wavelet-HLL | firstorder | Uniformity                           | 0.045151269  |

|             |            |                                  |              |
|-------------|------------|----------------------------------|--------------|
| wavelet-HLL | firstorder | Median                           | -21.66921058 |
| wavelet-HLL | firstorder | Energy                           | 25467535.1   |
| wavelet-HLL | firstorder | RobustMeanAbsoluteDeviation      | 85.11384008  |
| wavelet-HLL | firstorder | MeanAbsoluteDeviation            | 129.8176891  |
| wavelet-HLL | firstorder | TotalEnergy                      | 687623447.8  |
| wavelet-HLL | firstorder | Maximum                          | 663.9303276  |
| wavelet-HLL | firstorder | RootMeanSquared                  | 170.5066821  |
| wavelet-HLL | firstorder | 90Percentile                     | 215.7031568  |
| wavelet-HLL | firstorder | Minimum                          | -469.0298626 |
| wavelet-HLL | firstorder | Entropy                          | 4.752025642  |
| wavelet-HLL | firstorder | Range                            | 1132.96019   |
| wavelet-HLL | firstorder | Variance                         | 28852.90382  |
| wavelet-HLL | firstorder | 10Percentile                     | -226.1142688 |
| wavelet-HLL | firstorder | Kurtosis                         | 3.620836612  |
| wavelet-HLL | firstorder | Mean                             | -14.81974479 |
| wavelet-HLL | grlm       | ShortRunLowGrayLevelEmphasis     | 0.008926685  |
| wavelet-HLL | grlm       | GrayLevelVariance                | 47.4610618   |
| wavelet-HLL | grlm       | LowGrayLevelRunEmphasis          | 0.00907349   |
| wavelet-HLL | grlm       | GrayLevelNonUniformityNormalized | 0.044402839  |
| wavelet-HLL | grlm       | RunVariance                      | 0.053985686  |
| wavelet-HLL | grlm       | GrayLevelNonUniformity           | 37.06547805  |
| wavelet-HLL | grlm       | LongRunEmphasis                  | 1.155916364  |
| wavelet-HLL | grlm       | ShortRunHighGrayLevelEmphasis    | 394.9676923  |
| wavelet-HLL | grlm       | RunLengthNonUniformity           | 761.4247634  |
| wavelet-HLL | grlm       | ShortRunEmphasis                 | 0.96485344   |
| wavelet-HLL | grlm       | LongRunHighGrayLevelEmphasis     | 459.7766513  |
| wavelet-HLL | grlm       | RunPercentage                    | 0.952932912  |
| wavelet-HLL | grlm       | LongRunLowGrayLevelEmphasis      | 0.009711733  |
| wavelet-HLL | grlm       | RunEntropy                       | 5.018347742  |
| wavelet-HLL | grlm       | HighGrayLevelRunEmphasis         | 406.8645748  |
| wavelet-HLL | grlm       | RunLengthNonUniformityNormalized | 0.91179644   |
| wavelet-HLL | glszm      | GrayLevelVariance                | 64.2382247   |
| wavelet-HLL | glszm      | ZoneVariance                     | 5.566944425  |
| wavelet-HLL | glszm      | GrayLevelNonUniformityNormalized | 0.036146812  |
| wavelet-HLL | glszm      | SizeZoneNonUniformityNormalized  | 0.474834051  |
| wavelet-HLL | glszm      | SizeZoneNonUniformity            | 226.0210084  |
| wavelet-HLL | glszm      | GrayLevelNonUniformity           | 17.20588235  |
| wavelet-HLL | glszm      | LargeAreaEmphasis                | 8.953781513  |
| wavelet-HLL | glszm      | SmallAreaHighGrayLevelEmphasis   | 347.0163288  |
| wavelet-HLL | glszm      | ZonePercentage                   | 0.543378995  |
| wavelet-HLL | glszm      | LargeAreaLowGrayLevelEmphasis    | 0.041748414  |
| wavelet-HLL | glszm      | LargeAreaHighGrayLevelEmphasis   | 3146.781513  |
| wavelet-HLL | glszm      | HighGrayLevelZoneEmphasis        | 453.2226891  |
| wavelet-HLL | glszm      | SmallAreaEmphasis                | 0.715925841  |
| wavelet-HLL | glszm      | LowGrayLevelZoneEmphasis         | 0.012758522  |
| wavelet-HLL | glszm      | ZoneEntropy                      | 6.296563482  |
| wavelet-HLL | glszm      | SmallAreaLowGrayLevelEmphasis    | 0.011477769  |
| wavelet-HLL | ngtdm      | Coarseness                       | 0.008423331  |
| wavelet-HLL | ngtdm      | Complexity                       | 3104.923386  |
| wavelet-HLL | ngtdm      | Strength                         | 4.449008237  |
| wavelet-HLL | ngtdm      | Contrast                         | 0.243723738  |
| wavelet-HLL | ngtdm      | Busyness                         | 0.144322229  |
| wavelet-LHL | gldm       | GrayLevelVariance                | 74.77189148  |

|             |            |                                      |              |
|-------------|------------|--------------------------------------|--------------|
| wavelet-LHL | gldm       | HighGrayLevelEmphasis                | 1486.592466  |
| wavelet-LHL | gldm       | DependenceEntropy                    | 6.717611436  |
| wavelet-LHL | gldm       | DependenceNonUniformity              | 275.4063927  |
| wavelet-LHL | gldm       | GrayLevelNonUniformity               | 32.84703196  |
| wavelet-LHL | gldm       | SmallDependenceEmphasis              | 0.544952516  |
| wavelet-LHL | gldm       | SmallDependenceHighGrayLevelEmphasis | 854.4513436  |
| wavelet-LHL | gldm       | DependenceNonUniformityNormalized    | 0.314390859  |
| wavelet-LHL | gldm       | LargeDependenceEmphasis              | 5.716894977  |
| wavelet-LHL | gldm       | LargeDependenceLowGrayLevelEmphasis  | 0.005751011  |
| wavelet-LHL | gldm       | DependenceVariance                   | 1.652712621  |
| wavelet-LHL | gldm       | LargeDependenceHighGrayLevelEmphasis | 7809.603881  |
| wavelet-LHL | gldm       | SmallDependenceLowGrayLevelEmphasis  | 0.001615886  |
| wavelet-LHL | gldm       | LowGrayLevelEmphasis                 | 0.001985036  |
| wavelet-LHL | glcm       | JointAverage                         | 37.50462767  |
| wavelet-LHL | glcm       | SumAverage                           | 75.00925535  |
| wavelet-LHL | glcm       | JointEntropy                         | 9.050147309  |
| wavelet-LHL | glcm       | ClusterShade                         | 1052.439269  |
| wavelet-LHL | glcm       | MaximumProbability                   | 0.009713465  |
| wavelet-LHL | glcm       | ldmn                                 | 0.97601451   |
| wavelet-LHL | glcm       | JointEnergy                          | 0.002494314  |
| wavelet-LHL | glcm       | Contrast                             | 134.3119158  |
| wavelet-LHL | glcm       | DifferenceEntropy                    | 4.471531409  |
| wavelet-LHL | glcm       | InverseVariance                      | 0.142344456  |
| wavelet-LHL | glcm       | DifferenceVariance                   | 59.47572906  |
| wavelet-LHL | glcm       | ldn                                  | 0.901377124  |
| wavelet-LHL | glcm       | ldm                                  | 0.140062703  |
| wavelet-LHL | glcm       | Correlation                          | 0.108228114  |
| wavelet-LHL | glcm       | Autocorrelation                      | 1414.641758  |
| wavelet-LHL | glcm       | SumEntropy                           | 5.580052881  |
| wavelet-LHL | glcm       | SumSquares                           | 75.19258053  |
| wavelet-LHL | glcm       | ClusterProminence                    | 105951.0866  |
| wavelet-LHL | glcm       | lmc2                                 | 0.928509458  |
| wavelet-LHL | glcm       | lmc1                                 | -0.198646134 |
| wavelet-LHL | glcm       | DifferenceAverage                    | 8.462650563  |
| wavelet-LHL | glcm       | ld                                   | 0.223148022  |
| wavelet-LHL | glcm       | ClusterTendency                      | 166.4584064  |
| wavelet-LHL | firstorder | InterquartileRange                   | 246.8323232  |
| wavelet-LHL | firstorder | Skewness                             | 0.449333395  |
| wavelet-LHL | firstorder | Uniformity                           | 0.037496612  |
| wavelet-LHL | firstorder | Median                               | -18.99723911 |
| wavelet-LHL | firstorder | Energy                               | 41091545.2   |
| wavelet-LHL | firstorder | RobustMeanAbsoluteDeviation          | 105.918825   |
| wavelet-LHL | firstorder | MeanAbsoluteDeviation                | 163.6567421  |
| wavelet-LHL | firstorder | TotalEnergy                          | 1109471720   |
| wavelet-LHL | firstorder | Maximum                              | 845.1718589  |
| wavelet-LHL | firstorder | RootMeanSquared                      | 216.5829093  |
| wavelet-LHL | firstorder | 90Percentile                         | 288.3651158  |
| wavelet-LHL | firstorder | Minimum                              | -912.4936941 |
| wavelet-LHL | firstorder | Entropy                              | 5.041056236  |
| wavelet-LHL | firstorder | Range                                | 1757.665553  |
| wavelet-LHL | firstorder | Variance                             | 46905.17812  |
| wavelet-LHL | firstorder | 10Percentile                         | -242.1933471 |
| wavelet-LHL | firstorder | Kurtosis                             | 4.096083145  |



|             |            |                                      |             |
|-------------|------------|--------------------------------------|-------------|
| wavelet-LHL | firstorder | Mean                                 | 1.725831957 |
| wavelet-LHL | glrlm      | ShortRunLowGrayLevelEmphasis         | 0.002009829 |
| wavelet-LHL | glrlm      | GrayLevelVariance                    | 76.55579386 |
| wavelet-LHL | glrlm      | LowGrayLevelRunEmphasis              | 0.002033291 |
| wavelet-LHL | glrlm      | GrayLevelNonUniformityNormalized     | 0.036688991 |
| wavelet-LHL | glrlm      | RunVariance                          | 0.043608314 |
| wavelet-LHL | glrlm      | GrayLevelNonUniformity               | 30.88363257 |
| wavelet-LHL | glrlm      | LongRunEmphasis                      | 1.127182949 |
| wavelet-LHL | glrlm      | ShortRunHighGrayLevelEmphasis        | 1451.7266   |
| wavelet-LHL | glrlm      | RunLengthNonUniformity               | 779.4678883 |
| wavelet-LHL | glrlm      | ShortRunEmphasis                     | 0.970675649 |
| wavelet-LHL | glrlm      | LongRunHighGrayLevelEmphasis         | 1663.940154 |
| wavelet-LHL | glrlm      | RunPercentage                        | 0.960923779 |
| wavelet-LHL | glrlm      | LongRunLowGrayLevelEmphasis          | 0.002135998 |
| wavelet-LHL | glrlm      | RunEntropy                           | 5.265471591 |
| wavelet-LHL | glrlm      | HighGrayLevelRunEmphasis             | 1491.780445 |
| wavelet-LHL | glrlm      | RunLengthNonUniformityNormalized     | 0.925686752 |
| wavelet-LHL | glszm      | GrayLevelVariance                    | 97.92770918 |
| wavelet-LHL | glszm      | ZoneVariance                         | 3.592387469 |
| wavelet-LHL | glszm      | GrayLevelNonUniformityNormalized     | 0.030431535 |
| wavelet-LHL | glszm      | SizeZoneNonUniformityNormalized      | 0.563343097 |
| wavelet-LHL | glszm      | SizeZoneNonUniformity                | 303.6419295 |
| wavelet-LHL | glszm      | GrayLevelNonUniformity               | 16.4025974  |
| wavelet-LHL | glszm      | LargeAreaEmphasis                    | 6.233766234 |
| wavelet-LHL | glszm      | SmallAreaHighGrayLevelEmphasis       | 1238.773938 |
| wavelet-LHL | glszm      | ZonePercentage                       | 0.615296804 |
| wavelet-LHL | glszm      | LargeAreaLowGrayLevelEmphasis        | 0.006909597 |
| wavelet-LHL | glszm      | LargeAreaHighGrayLevelEmphasis       | 8470.907236 |
| wavelet-LHL | glszm      | HighGrayLevelZoneEmphasis            | 1558.330241 |
| wavelet-LHL | glszm      | SmallAreaEmphasis                    | 0.778785939 |
| wavelet-LHL | glszm      | LowGrayLevelZoneEmphasis             | 0.002718746 |
| wavelet-LHL | glszm      | ZoneEntropy                          | 6.335183114 |
| wavelet-LHL | glszm      | SmallAreaLowGrayLevelEmphasis        | 0.002538839 |
| wavelet-LHL | ngtdm      | Coarseness                           | 0.007350171 |
| wavelet-LHL | ngtdm      | Complexity                           | 7404.755388 |
| wavelet-LHL | ngtdm      | Strength                             | 7.349429067 |
| wavelet-LHL | ngtdm      | Contrast                             | 0.320383429 |
| wavelet-LHL | ngtdm      | Busyness                             | 0.06351471  |
| wavelet-LHH | gldm       | GrayLevelVariance                    | 68.08354705 |
| wavelet-LHH | gldm       | HighGrayLevelEmphasis                | 1725.205479 |
| wavelet-LHH | gldm       | DependenceEntropy                    | 6.576177185 |
| wavelet-LHH | gldm       | DependenceNonUniformity              | 263.3493151 |
| wavelet-LHH | gldm       | GrayLevelNonUniformity               | 39.7260274  |
| wavelet-LHH | gldm       | SmallDependenceEmphasis              | 0.532935001 |
| wavelet-LHH | gldm       | SmallDependenceHighGrayLevelEmphasis | 940.2581918 |
| wavelet-LHH | gldm       | DependenceNonUniformityNormalized    | 0.300627072 |
| wavelet-LHH | gldm       | LargeDependenceEmphasis              | 7.198630137 |
| wavelet-LHH | gldm       | LargeDependenceLowGrayLevelEmphasis  | 0.005737669 |
| wavelet-LHH | gldm       | DependenceVariance                   | 2.533819145 |
| wavelet-LHH | gldm       | LargeDependenceHighGrayLevelEmphasis | 11882.5411  |
| wavelet-LHH | gldm       | SmallDependenceLowGrayLevelEmphasis  | 0.001570676 |
| wavelet-LHH | gldm       | LowGrayLevelEmphasis                 | 0.001864733 |
| wavelet-LHH | glcm       | JointAverage                         | 40.58969055 |

|             |            |                                  |              |
|-------------|------------|----------------------------------|--------------|
| wavelet-LHH | glcm       | SumAverage                       | 81.17938109  |
| wavelet-LHH | glcm       | JointEntropy                     | 8.747997952  |
| wavelet-LHH | glcm       | ClusterShade                     | -17.23252095 |
| wavelet-LHH | glcm       | MaximumProbability               | 0.015736003  |
| wavelet-LHH | glcm       | Idmn                             | 0.98143316   |
| wavelet-LHH | glcm       | JointEnergy                      | 0.00338455   |
| wavelet-LHH | glcm       | Contrast                         | 132.4548262  |
| wavelet-LHH | glcm       | DifferenceEntropy                | 4.435849692  |
| wavelet-LHH | glcm       | InverseVariance                  | 0.152570816  |
| wavelet-LHH | glcm       | DifferenceVariance               | 65.03787845  |
| wavelet-LHH | glcm       | Idn                              | 0.91493284   |
| wavelet-LHH | glcm       | Idm                              | 0.152896634  |
| wavelet-LHH | glcm       | Correlation                      | -0.028081848 |
| wavelet-LHH | glcm       | Autocorrelation                  | 1646.061065  |
| wavelet-LHH | glcm       | SumEntropy                       | 5.297222364  |
| wavelet-LHH | glcm       | SumSquares                       | 64.75793394  |
| wavelet-LHH | glcm       | ClusterProminence                | 106086.6731  |
| wavelet-LHH | glcm       | Imc2                             | 0.923172204  |
| wavelet-LHH | glcm       | Imc1                             | -0.198043353 |
| wavelet-LHH | glcm       | DifferenceAverage                | 8.089258271  |
| wavelet-LHH | glcm       | Id                               | 0.236150617  |
| wavelet-LHH | glcm       | ClusterTendency                  | 126.5769096  |
| wavelet-LHH | firstorder | InterquartileRange               | 194.1213569  |
| wavelet-LHH | firstorder | Skewness                         | 0.07209414   |
| wavelet-LHH | firstorder | Uniformity                       | 0.045349346  |
| wavelet-LHH | firstorder | Median                           | 2.585738275  |
| wavelet-LHH | firstorder | Energy                           | 37172246.29  |
| wavelet-LHH | firstorder | RobustMeanAbsoluteDeviation      | 83.0584458   |
| wavelet-LHH | firstorder | MeanAbsoluteDeviation            | 142.3690117  |
| wavelet-LHH | firstorder | TotalEnergy                      | 1003650650   |
| wavelet-LHH | firstorder | Maximum                          | 979.6825592  |
| wavelet-LHH | firstorder | RootMeanSquared                  | 205.9953182  |
| wavelet-LHH | firstorder | 90Percentile                     | 227.8008624  |
| wavelet-LHH | firstorder | Minimum                          | -990.7494776 |
| wavelet-LHH | firstorder | Entropy                          | 4.893100632  |
| wavelet-LHH | firstorder | Range                            | 1970.432037  |
| wavelet-LHH | firstorder | Variance                         | 42406.48839  |
| wavelet-LHH | firstorder | 10Percentile                     | -227.7694955 |
| wavelet-LHH | firstorder | Kurtosis                         | 6.510462397  |
| wavelet-LHH | firstorder | Mean                             | 5.251924632  |
| wavelet-LHH | grlm       | ShortRunLowGrayLevelEmphasis     | 0.001902572  |
| wavelet-LHH | grlm       | GrayLevelVariance                | 70.65374459  |
| wavelet-LHH | grlm       | LowGrayLevelRunEmphasis          | 0.001922896  |
| wavelet-LHH | grlm       | GrayLevelNonUniformityNormalized | 0.043625427  |
| wavelet-LHH | grlm       | RunVariance                      | 0.054867904  |
| wavelet-LHH | grlm       | GrayLevelNonUniformity           | 36.51641575  |
| wavelet-LHH | grlm       | LongRunEmphasis                  | 1.151260122  |
| wavelet-LHH | grlm       | ShortRunHighGrayLevelEmphasis    | 1674.494676  |
| wavelet-LHH | grlm       | RunLengthNonUniformity           | 769.0408076  |
| wavelet-LHH | grlm       | ShortRunEmphasis                 | 0.967516606  |
| wavelet-LHH | grlm       | LongRunHighGrayLevelEmphasis     | 1978.42256   |
| wavelet-LHH | grlm       | RunPercentage                    | 0.95539164   |
| wavelet-LHH | grlm       | LongRunLowGrayLevelEmphasis      | 0.002017618  |

|             |       |                                      |             |
|-------------|-------|--------------------------------------|-------------|
| wavelet-LHH | grlm  | RunEntropy                           | 5.153063631 |
| wavelet-LHH | grlm  | HighGrayLevelRunEmphasis             | 1728.438829 |
| wavelet-LHH | grlm  | RunLengthNonUniformityNormalized     | 0.918499304 |
| wavelet-LHH | glszm | GrayLevelVariance                    | 101.7990502 |
| wavelet-LHH | glszm | ZoneVariance                         | 6.67088165  |
| wavelet-LHH | glszm | GrayLevelNonUniformityNormalized     | 0.032333489 |
| wavelet-LHH | glszm | SizeZoneNonUniformityNormalized      | 0.569059204 |
| wavelet-LHH | glszm | SizeZoneNonUniformity                | 298.1870229 |
| wavelet-LHH | glszm | GrayLevelNonUniformity               | 16.94274809 |
| wavelet-LHH | glszm | LargeAreaEmphasis                    | 9.465648855 |
| wavelet-LHH | glszm | SmallAreaHighGrayLevelEmphasis       | 1388.778722 |
| wavelet-LHH | glszm | ZonePercentage                       | 0.598173516 |
| wavelet-LHH | glszm | LargeAreaLowGrayLevelEmphasis        | 0.007942299 |
| wavelet-LHH | glszm | LargeAreaHighGrayLevelEmphasis       | 15648.00382 |
| wavelet-LHH | glszm | HighGrayLevelZoneEmphasis            | 1761.583969 |
| wavelet-LHH | glszm | SmallAreaEmphasis                    | 0.782547395 |
| wavelet-LHH | glszm | LowGrayLevelZoneEmphasis             | 0.002695201 |
| wavelet-LHH | glszm | ZoneEntropy                          | 6.265352378 |
| wavelet-LHH | glszm | SmallAreaLowGrayLevelEmphasis        | 0.002557039 |
| wavelet-LHH | ngtdm | Coarseness                           | 0.008253425 |
| wavelet-LHH | ngtdm | Complexity                           | 9031.017994 |
| wavelet-LHH | ngtdm | Strength                             | 10.11170397 |
| wavelet-LHH | ngtdm | Contrast                             | 0.22820271  |
| wavelet-LHH | ngtdm | Busyness                             | 0.038639891 |
| wavelet-LLH | gldm  | GrayLevelVariance                    | 128.2015492 |
| wavelet-LLH | gldm  | HighGrayLevelEmphasis                | 1257.038813 |
| wavelet-LLH | gldm  | DependenceEntropy                    | 6.725805491 |
| wavelet-LLH | gldm  | DependenceNonUniformity              | 359.326484  |
| wavelet-LLH | gldm  | GrayLevelNonUniformity               | 26.41780822 |
| wavelet-LLH | gldm  | SmallDependenceEmphasis              | 0.653388935 |
| wavelet-LLH | gldm  | SmallDependenceHighGrayLevelEmphasis | 874.239722  |
| wavelet-LLH | gldm  | DependenceNonUniformityNormalized    | 0.41019005  |
| wavelet-LLH | gldm  | LargeDependenceEmphasis              | 4.075342466 |
| wavelet-LLH | gldm  | LargeDependenceLowGrayLevelEmphasis  | 0.007038958 |
| wavelet-LLH | gldm  | DependenceVariance                   | 1.158889514 |
| wavelet-LLH | gldm  | LargeDependenceHighGrayLevelEmphasis | 4527.175799 |
| wavelet-LLH | gldm  | SmallDependenceLowGrayLevelEmphasis  | 0.003347062 |
| wavelet-LLH | gldm  | LowGrayLevelEmphasis                 | 0.003738834 |
| wavelet-LLH | glcm  | JointAverage                         | 33.70702212 |
| wavelet-LLH | glcm  | SumAverage                           | 67.41404425 |
| wavelet-LLH | glcm  | JointEntropy                         | 9.353392944 |
| wavelet-LLH | glcm  | ClusterShade                         | 2176.668513 |
| wavelet-LLH | glcm  | MaximumProbability                   | 0.008220403 |
| wavelet-LLH | glcm  | ldmn                                 | 0.963898164 |
| wavelet-LLH | glcm  | JointEnergy                          | 0.001984027 |
| wavelet-LLH | glcm  | Contrast                             | 237.6910212 |
| wavelet-LLH | glcm  | DifferenceEntropy                    | 4.837179054 |
| wavelet-LLH | glcm  | InverseVariance                      | 0.118337886 |
| wavelet-LLH | glcm  | DifferenceVariance                   | 104.5521132 |
| wavelet-LLH | glcm  | ldn                                  | 0.881434709 |
| wavelet-LLH | glcm  | ldm                                  | 0.109376849 |
| wavelet-LLH | glcm  | Correlation                          | 0.054449808 |
| wavelet-LLH | glcm  | Autocorrelation                      | 1143.563537 |

|             |            |                                  |              |
|-------------|------------|----------------------------------|--------------|
| wavelet-LLH | glcm       | SumEntropy                       | 5.849101323  |
| wavelet-LLH | glcm       | SumSquares                       | 126.2100227  |
| wavelet-LLH | glcm       | ClusterProminence                | 302383.1648  |
| wavelet-LLH | glcm       | Imc2                             | 0.969183747  |
| wavelet-LLH | glcm       | Imc1                             | -0.261748167 |
| wavelet-LLH | glcm       | DifferenceAverage                | 11.2053866   |
| wavelet-LLH | glcm       | Id                               | 0.187083581  |
| wavelet-LLH | glcm       | ClusterTendency                  | 267.1490697  |
| wavelet-LLH | firstorder | InterquartileRange               | 311.4311062  |
| wavelet-LLH | firstorder | Skewness                         | 0.335164319  |
| wavelet-LLH | firstorder | Uniformity                       | 0.030157315  |
| wavelet-LLH | firstorder | Median                           | -26.52394102 |
| wavelet-LLH | firstorder | Energy                           | 70122585.52  |
| wavelet-LLH | firstorder | RobustMeanAbsoluteDeviation      | 134.021259   |
| wavelet-LLH | firstorder | MeanAbsoluteDeviation            | 211.7892907  |
| wavelet-LLH | firstorder | TotalEnergy                      | 1893309809   |
| wavelet-LLH | firstorder | Maximum                          | 1041.886988  |
| wavelet-LLH | firstorder | RootMeanSquared                  | 282.928637   |
| wavelet-LLH | firstorder | 90Percentile                     | 386.0867543  |
| wavelet-LLH | firstorder | Minimum                          | -819.3409705 |
| wavelet-LLH | firstorder | Entropy                          | 5.415572301  |
| wavelet-LLH | firstorder | Range                            | 1861.227958  |
| wavelet-LLH | firstorder | Variance                         | 80043.42703  |
| wavelet-LLH | firstorder | 10Percentile                     | -317.3446829 |
| wavelet-LLH | firstorder | Kurtosis                         | 3.786360448  |
| wavelet-LLH | firstorder | Mean                             | 2.277407171  |
| wavelet-LLH | glrlm      | ShortRunLowGrayLevelEmphasis     | 0.003790894  |
| wavelet-LLH | glrlm      | GrayLevelVariance                | 130.6818139  |
| wavelet-LLH | glrlm      | LowGrayLevelRunEmphasis          | 0.003813038  |
| wavelet-LLH | glrlm      | GrayLevelNonUniformityNormalized | 0.029472802  |
| wavelet-LLH | glrlm      | RunVariance                      | 0.030286739  |
| wavelet-LLH | glrlm      | GrayLevelNonUniformity           | 25.11646772  |
| wavelet-LLH | glrlm      | LongRunEmphasis                  | 1.087425043  |
| wavelet-LLH | glrlm      | ShortRunHighGrayLevelEmphasis    | 1240.227031  |
| wavelet-LLH | glrlm      | RunLengthNonUniformity           | 808.2353338  |
| wavelet-LLH | glrlm      | ShortRunEmphasis                 | 0.979816848  |
| wavelet-LLH | glrlm      | LongRunHighGrayLevelEmphasis     | 1356.030442  |
| wavelet-LLH | glrlm      | RunPercentage                    | 0.972778363  |
| wavelet-LLH | glrlm      | LongRunLowGrayLevelEmphasis      | 0.003909271  |
| wavelet-LLH | glrlm      | RunEntropy                       | 5.576269109  |
| wavelet-LLH | glrlm      | HighGrayLevelRunEmphasis         | 1262.064328  |
| wavelet-LLH | glrlm      | RunLengthNonUniformityNormalized | 0.948248714  |
| wavelet-LLH | glszm      | GrayLevelVariance                | 160.3831872  |
| wavelet-LLH | glszm      | ZoneVariance                     | 1.74180994   |
| wavelet-LLH | glszm      | GrayLevelNonUniformityNormalized | 0.024152377  |
| wavelet-LLH | glszm      | SizeZoneNonUniformityNormalized  | 0.660233664  |
| wavelet-LLH | glszm      | SizeZoneNonUniformity            | 413.9665072  |
| wavelet-LLH | glszm      | GrayLevelNonUniformity           | 15.14354067  |
| wavelet-LLH | glszm      | LargeAreaEmphasis                | 3.693779904  |
| wavelet-LLH | glszm      | SmallAreaHighGrayLevelEmphasis   | 1138.963714  |
| wavelet-LLH | glszm      | ZonePercentage                   | 0.715753425  |
| wavelet-LLH | glszm      | LargeAreaLowGrayLevelEmphasis    | 0.007620134  |
| wavelet-LLH | glszm      | LargeAreaHighGrayLevelEmphasis   | 4182.421053  |

|             |            |                                      |              |
|-------------|------------|--------------------------------------|--------------|
| wavelet-LLH | glszm      | HighGrayLevelZoneEmphasis            | 1322.899522  |
| wavelet-LLH | glszm      | SmallAreaEmphasis                    | 0.838880977  |
| wavelet-LLH | glszm      | LowGrayLevelZoneEmphasis             | 0.004778575  |
| wavelet-LLH | glszm      | ZoneEntropy                          | 6.423065063  |
| wavelet-LLH | glszm      | SmallAreaLowGrayLevelEmphasis        | 0.004590648  |
| wavelet-LLH | ngtdm      | Coarseness                           | 0.00717891   |
| wavelet-LLH | ngtdm      | Complexity                           | 15084.51357  |
| wavelet-LLH | ngtdm      | Strength                             | 10.47575974  |
| wavelet-LLH | ngtdm      | Contrast                             | 0.452389928  |
| wavelet-LLH | ngtdm      | Busyness                             | 0.05598401   |
| wavelet-LLL | gldm       | GrayLevelVariance                    | 485.5824524  |
| wavelet-LLL | gldm       | HighGrayLevelEmphasis                | 4264.182648  |
| wavelet-LLL | gldm       | DependenceEntropy                    | 7.332105024  |
| wavelet-LLL | gldm       | DependenceNonUniformity              | 401.2283105  |
| wavelet-LLL | gldm       | GrayLevelNonUniformity               | 12.01598174  |
| wavelet-LLL | gldm       | SmallDependenceEmphasis              | 0.689954021  |
| wavelet-LLL | gldm       | SmallDependenceHighGrayLevelEmphasis | 2725.130439  |
| wavelet-LLL | gldm       | DependenceNonUniformityNormalized    | 0.458023186  |
| wavelet-LLL | gldm       | LargeDependenceEmphasis              | 2.997716895  |
| wavelet-LLL | gldm       | LargeDependenceLowGrayLevelEmphasis  | 0.002615649  |
| wavelet-LLL | gldm       | DependenceVariance                   | 0.636793436  |
| wavelet-LLL | gldm       | LargeDependenceHighGrayLevelEmphasis | 15547.11416  |
| wavelet-LLL | gldm       | SmallDependenceLowGrayLevelEmphasis  | 0.001754815  |
| wavelet-LLL | gldm       | LowGrayLevelEmphasis                 | 0.001887254  |
| wavelet-LLL | glcm       | JointAverage                         | 64.03482455  |
| wavelet-LLL | glcm       | SumAverage                           | 128.0696491  |
| wavelet-LLL | glcm       | JointEntropy                         | 9.979380566  |
| wavelet-LLL | glcm       | ClusterShade                         | -17676.58363 |
| wavelet-LLL | glcm       | MaximumProbability                   | 0.004541633  |
| wavelet-LLL | glcm       | Idmn                                 | 0.972350578  |
| wavelet-LLL | glcm       | JointEnergy                          | 0.001097183  |
| wavelet-LLL | glcm       | Contrast                             | 333.2467984  |
| wavelet-LLL | glcm       | DifferenceEntropy                    | 5.154290222  |
| wavelet-LLL | glcm       | InverseVariance                      | 0.082155856  |
| wavelet-LLL | glcm       | DifferenceVariance                   | 126.13175    |
| wavelet-LLL | glcm       | Idn                                  | 0.888388897  |
| wavelet-LLL | glcm       | Idm                                  | 0.078916985  |
| wavelet-LLL | glcm       | Correlation                          | 0.663116496  |
| wavelet-LLL | glcm       | Autocorrelation                      | 4427.066373  |
| wavelet-LLL | glcm       | SumEntropy                           | 7.047046398  |
| wavelet-LLL | glcm       | SumSquares                           | 492.9683313  |
| wavelet-LLL | glcm       | ClusterProminence                    | 6024843.721  |
| wavelet-LLL | glcm       | Imc2                                 | 0.99708191   |
| wavelet-LLL | glcm       | Imc1                                 | -0.410152853 |
| wavelet-LLL | glcm       | DifferenceAverage                    | 14.2042021   |
| wavelet-LLL | glcm       | Id                                   | 0.148795677  |
| wavelet-LLL | glcm       | ClusterTendency                      | 1638.626527  |
| wavelet-LLL | firstorder | InterquartileRange                   | 841.0213178  |
| wavelet-LLL | firstorder | Skewness                             | -0.16336332  |
| wavelet-LLL | firstorder | Uniformity                           | 0.013716874  |
| wavelet-LLL | firstorder | Median                               | -728.7527612 |
| wavelet-LLL | firstorder | Energy                               | 759404142.8  |
| wavelet-LLL | firstorder | RobustMeanAbsoluteDeviation          | 353.4396909  |

|             |            |                                  |              |
|-------------|------------|----------------------------------|--------------|
| wavelet-LLL | firstorder | MeanAbsoluteDeviation            | 463.9243279  |
| wavelet-LLL | firstorder | TotalEnergy                      | 20503911857  |
| wavelet-LLL | firstorder | Maximum                          | 327.933613   |
| wavelet-LLL | firstorder | RootMeanSquared                  | 931.0744903  |
| wavelet-LLL | firstorder | 90Percentile                     | 22.70194935  |
| wavelet-LLL | firstorder | Minimum                          | -2262.407394 |
| wavelet-LLL | firstorder | Entropy                          | 6.315918865  |
| wavelet-LLL | firstorder | Range                            | 2590.341007  |
| wavelet-LLL | firstorder | Variance                         | 303215.2737  |
| wavelet-LLL | firstorder | 10Percentile                     | -1485.97678  |
| wavelet-LLL | firstorder | Kurtosis                         | 2.196091261  |
| wavelet-LLL | firstorder | Mean                             | -750.7892066 |
| wavelet-LLL | grlm       | ShortRunLowGrayLevelEmphasis     | 0.00191293   |
| wavelet-LLL | grlm       | GrayLevelVariance                | 482.6367394  |
| wavelet-LLL | grlm       | LowGrayLevelRunEmphasis          | 0.001918857  |
| wavelet-LLL | grlm       | GrayLevelNonUniformityNormalized | 0.013690834  |
| wavelet-LLL | grlm       | RunVariance                      | 0.023149059  |
| wavelet-LLL | grlm       | GrayLevelNonUniformity           | 11.74573579  |
| wavelet-LLL | grlm       | LongRunEmphasis                  | 1.065884867  |
| wavelet-LLL | grlm       | ShortRunHighGrayLevelEmphasis    | 4160.752141  |
| wavelet-LLL | grlm       | RunLengthNonUniformity           | 824.4710043  |
| wavelet-LLL | grlm       | ShortRunEmphasis                 | 0.9848853    |
| wavelet-LLL | grlm       | LongRunHighGrayLevelEmphasis     | 4592.369962  |
| wavelet-LLL | grlm       | RunPercentage                    | 0.979364243  |
| wavelet-LLL | grlm       | LongRunLowGrayLevelEmphasis      | 0.001944557  |
| wavelet-LLL | grlm       | RunEntropy                       | 6.409537878  |
| wavelet-LLL | grlm       | HighGrayLevelRunEmphasis         | 4241.519553  |
| wavelet-LLL | grlm       | RunLengthNonUniformityNormalized | 0.960928451  |
| wavelet-LLL | glszm      | GrayLevelVariance                | 446.5923423  |
| wavelet-LLL | glszm      | ZoneVariance                     | 0.789465141  |
| wavelet-LLL | glszm      | GrayLevelNonUniformityNormalized | 0.013806599  |
| wavelet-LLL | glszm      | SizeZoneNonUniformityNormalized  | 0.662739316  |
| wavelet-LLL | glszm      | SizeZoneNonUniformity            | 441.3843844  |
| wavelet-LLL | glszm      | GrayLevelNonUniformity           | 9.195195195  |
| wavelet-LLL | glszm      | LargeAreaEmphasis                | 2.51951952   |
| wavelet-LLL | glszm      | SmallAreaHighGrayLevelEmphasis   | 3262.081211  |
| wavelet-LLL | glszm      | ZonePercentage                   | 0.760273973  |
| wavelet-LLL | glszm      | LargeAreaLowGrayLevelEmphasis    | 0.002863922  |
| wavelet-LLL | glszm      | LargeAreaHighGrayLevelEmphasis   | 13144.16216  |
| wavelet-LLL | glszm      | HighGrayLevelZoneEmphasis        | 3986.842342  |
| wavelet-LLL | glszm      | SmallAreaEmphasis                | 0.840925924  |
| wavelet-LLL | glszm      | LowGrayLevelZoneEmphasis         | 0.002353752  |
| wavelet-LLL | glszm      | ZoneEntropy                      | 7.020440241  |
| wavelet-LLL | glszm      | SmallAreaLowGrayLevelEmphasis    | 0.002279177  |
| wavelet-LLL | ngtdm      | Coarseness                       | 0.010830181  |
| wavelet-LLL | ngtdm      | Complexity                       | 29718.94011  |
| wavelet-LLL | ngtdm      | Strength                         | 36.59177326  |
| wavelet-LLL | ngtdm      | Contrast                         | 0.855591457  |
| wavelet-LLL | ngtdm      | Busyness                         | 0.018218064  |
| wavelet-HHL | gldm       | GrayLevelVariance                | 24.02508288  |
| wavelet-HHL | gldm       | HighGrayLevelEmphasis            | 405.6118721  |
| wavelet-HHL | gldm       | DependenceEntropy                | 6.300281092  |
| wavelet-HHL | gldm       | DependenceNonUniformity          | 187.6872146  |

|             |            |                                      |              |
|-------------|------------|--------------------------------------|--------------|
| wavelet-HHL | gldm       | GrayLevelNonUniformity               | 63.456621    |
| wavelet-HHL | gldm       | SmallDependenceEmphasis              | 0.407314587  |
| wavelet-HHL | gldm       | SmallDependenceHighGrayLevelEmphasis | 172.9811067  |
| wavelet-HHL | gldm       | DependenceNonUniformityNormalized    | 0.214254811  |
| wavelet-HHL | gldm       | LargeDependenceEmphasis              | 10.41780822  |
| wavelet-HHL | gldm       | LargeDependenceLowGrayLevelEmphasis  | 0.039811313  |
| wavelet-HHL | gldm       | DependenceVariance                   | 3.233450095  |
| wavelet-HHL | gldm       | LargeDependenceHighGrayLevelEmphasis | 4050.639269  |
| wavelet-HHL | gldm       | SmallDependenceLowGrayLevelEmphasis  | 0.003039312  |
| wavelet-HHL | gldm       | LowGrayLevelEmphasis                 | 0.006611982  |
| wavelet-HHL | glcm       | JointAverage                         | 19.55173925  |
| wavelet-HHL | glcm       | SumAverage                           | 39.10347849  |
| wavelet-HHL | glcm       | JointEntropy                         | 7.771102012  |
| wavelet-HHL | glcm       | ClusterShade                         | -20.05361016 |
| wavelet-HHL | glcm       | MaximumProbability                   | 0.021807036  |
| wavelet-HHL | glcm       | Idmn                                 | 0.978440318  |
| wavelet-HHL | glcm       | JointEnergy                          | 0.007088232  |
| wavelet-HHL | glcm       | Contrast                             | 47.51544743  |
| wavelet-HHL | glcm       | DifferenceEntropy                    | 3.750542385  |
| wavelet-HHL | glcm       | InverseVariance                      | 0.224629404  |
| wavelet-HHL | glcm       | DifferenceVariance                   | 23.49776569  |
| wavelet-HHL | glcm       | Idn                                  | 0.908485756  |
| wavelet-HHL | glcm       | Idm                                  | 0.22132688   |
| wavelet-HHL | glcm       | Correlation                          | -0.027804498 |
| wavelet-HHL | glcm       | Autocorrelation                      | 381.6219219  |
| wavelet-HHL | glcm       | SumEntropy                           | 4.599816305  |
| wavelet-HHL | glcm       | SumSquares                           | 23.10491671  |
| wavelet-HHL | glcm       | ClusterProminence                    | 12921.5913   |
| wavelet-HHL | glcm       | Imc2                                 | 0.80478286   |
| wavelet-HHL | glcm       | Imc1                                 | -0.126803612 |
| wavelet-HHL | glcm       | DifferenceAverage                    | 4.846230982  |
| wavelet-HHL | glcm       | Id                                   | 0.309130444  |
| wavelet-HHL | glcm       | ClusterTendency                      | 44.90421941  |
| wavelet-HHL | firstorder | InterquartileRange                   | 120.0976795  |
| wavelet-HHL | firstorder | Skewness                             | 0.047666068  |
| wavelet-HHL | firstorder | Uniformity                           | 0.072439065  |
| wavelet-HHL | firstorder | Median                               | 2.472511186  |
| wavelet-HHL | firstorder | Energy                               | 13096075.56  |
| wavelet-HHL | firstorder | RobustMeanAbsoluteDeviation          | 52.12521327  |
| wavelet-HHL | firstorder | MeanAbsoluteDeviation                | 86.34836936  |
| wavelet-HHL | firstorder | TotalEnergy                          | 353594040.2  |
| wavelet-HHL | firstorder | Maximum                              | 620.2050653  |
| wavelet-HHL | firstorder | RootMeanSquared                      | 122.2696117  |
| wavelet-HHL | firstorder | 90Percentile                         | 129.8771317  |
| wavelet-HHL | firstorder | Minimum                              | -471.7458808 |
| wavelet-HHL | firstorder | Entropy                              | 4.180254559  |
| wavelet-HHL | firstorder | Range                                | 1091.950946  |
| wavelet-HHL | firstorder | Variance                             | 14949.35589  |
| wavelet-HHL | firstorder | 10Percentile                         | -142.0442605 |
| wavelet-HHL | firstorder | Kurtosis                             | 6.049230594  |
| wavelet-HHL | firstorder | Mean                                 | 0.70855878   |
| wavelet-HHL | glrlm      | ShortRunLowGrayLevelEmphasis         | 0.006556493  |
| wavelet-HHL | glrlm      | GrayLevelVariance                    | 25.18171834  |

|             |       |                                      |              |
|-------------|-------|--------------------------------------|--------------|
| wavelet-HHL | glrlm | LowGrayLevelRunEmphasis              | 0.006770693  |
| wavelet-HHL | glrlm | GrayLevelNonUniformityNormalized     | 0.069579367  |
| wavelet-HHL | glrlm | RunVariance                          | 0.07885369   |
| wavelet-HHL | glrlm | GrayLevelNonUniformity               | 57.01396411  |
| wavelet-HHL | glrlm | LongRunEmphasis                      | 1.222941856  |
| wavelet-HHL | glrlm | ShortRunHighGrayLevelEmphasis        | 388.0375608  |
| wavelet-HHL | glrlm | RunLengthNonUniformity               | 723.1310564  |
| wavelet-HHL | glrlm | ShortRunEmphasis                     | 0.952029732  |
| wavelet-HHL | glrlm | LongRunHighGrayLevelEmphasis         | 493.4157677  |
| wavelet-HHL | glrlm | RunPercentage                        | 0.935370566  |
| wavelet-HHL | glrlm | LongRunLowGrayLevelEmphasis          | 0.007711345  |
| wavelet-HHL | glrlm | RunEntropy                           | 4.546289011  |
| wavelet-HHL | glrlm | HighGrayLevelRunEmphasis             | 406.7481917  |
| wavelet-HHL | glrlm | RunLengthNonUniformityNormalized     | 0.882042477  |
| wavelet-HHL | glszm | GrayLevelVariance                    | 41.10629469  |
| wavelet-HHL | glszm | ZoneVariance                         | 19.05053645  |
| wavelet-HHL | glszm | GrayLevelNonUniformityNormalized     | 0.048912181  |
| wavelet-HHL | glszm | SizeZoneNonUniformityNormalized      | 0.498455037  |
| wavelet-HHL | glszm | SizeZoneNonUniformity                | 197.8866499  |
| wavelet-HHL | glszm | GrayLevelNonUniformity               | 19.41813602  |
| wavelet-HHL | glszm | LargeAreaEmphasis                    | 23.91939547  |
| wavelet-HHL | glszm | SmallAreaHighGrayLevelEmphasis       | 316.0350394  |
| wavelet-HHL | glszm | ZonePercentage                       | 0.453196347  |
| wavelet-HHL | glszm | LargeAreaLowGrayLevelEmphasis        | 0.07725252   |
| wavelet-HHL | glszm | LargeAreaHighGrayLevelEmphasis       | 9403.853904  |
| wavelet-HHL | glszm | HighGrayLevelZoneEmphasis            | 421.7984887  |
| wavelet-HHL | glszm | SmallAreaEmphasis                    | 0.733101649  |
| wavelet-HHL | glszm | LowGrayLevelZoneEmphasis             | 0.008424199  |
| wavelet-HHL | glszm | ZoneEntropy                          | 5.969889087  |
| wavelet-HHL | glszm | SmallAreaLowGrayLevelEmphasis        | 0.005532045  |
| wavelet-HHL | ngtdm | Coarseness                           | 0.007980539  |
| wavelet-HHL | ngtdm | Complexity                           | 2291.252988  |
| wavelet-HHL | ngtdm | Strength                             | 3.985128646  |
| wavelet-HHL | ngtdm | Contrast                             | 0.117072752  |
| wavelet-HHL | ngtdm | Busyness                             | 0.122652389  |
| wavelet-HLH | gldm  | GrayLevelVariance                    | 25.65222785  |
| wavelet-HLH | gldm  | HighGrayLevelEmphasis                | 489.7694064  |
| wavelet-HLH | gldm  | DependenceEntropy                    | 6.264727154  |
| wavelet-HLH | gldm  | DependenceNonUniformity              | 208.7853881  |
| wavelet-HLH | gldm  | GrayLevelNonUniformity               | 58.73287671  |
| wavelet-HLH | gldm  | SmallDependenceEmphasis              | 0.425293383  |
| wavelet-HLH | gldm  | SmallDependenceHighGrayLevelEmphasis | 216.9041068  |
| wavelet-HLH | gldm  | DependenceNonUniformityNormalized    | 0.238339484  |
| wavelet-HLH | gldm  | LargeDependenceEmphasis              | 8.751141553  |
| wavelet-HLH | gldm  | LargeDependenceLowGrayLevelEmphasis  | 0.021890252  |
| wavelet-HLH | gldm  | DependenceVariance                   | 2.614775547  |
| wavelet-HLH | gldm  | LargeDependenceHighGrayLevelEmphasis | 4113.584475  |
| wavelet-HLH | gldm  | SmallDependenceLowGrayLevelEmphasis  | 0.002999823  |
| wavelet-HLH | gldm  | LowGrayLevelEmphasis                 | 0.004363618  |
| wavelet-HLH | glcm  | JointAverage                         | 21.57286059  |
| wavelet-HLH | glcm  | SumAverage                           | 43.14572119  |
| wavelet-HLH | glcm  | JointEntropy                         | 7.973109557  |
| wavelet-HLH | glcm  | ClusterShade                         | -64.43770689 |



|             |            |                                  |              |
|-------------|------------|----------------------------------|--------------|
| wavelet-HLH | glcm       | MaximumProbability               | 0.019538405  |
| wavelet-HLH | glcm       | Idmn                             | 0.971413914  |
| wavelet-HLH | glcm       | JointEnergy                      | 0.005904643  |
| wavelet-HLH | glcm       | Contrast                         | 52.93160111  |
| wavelet-HLH | glcm       | DifferenceEntropy                | 3.84378695   |
| wavelet-HLH | glcm       | InverseVariance                  | 0.2065759    |
| wavelet-HLH | glcm       | DifferenceVariance               | 24.67960716  |
| wavelet-HLH | glcm       | Idn                              | 0.893444192  |
| wavelet-HLH | glcm       | Idm                              | 0.201052935  |
| wavelet-HLH | glcm       | Correlation                      | -0.02538763  |
| wavelet-HLH | glcm       | Autocorrelation                  | 464.7137081  |
| wavelet-HLH | glcm       | SumEntropy                       | 4.704517525  |
| wavelet-HLH | glcm       | SumSquares                       | 25.78904743  |
| wavelet-HLH | glcm       | ClusterProminence                | 13572.19035  |
| wavelet-HLH | glcm       | Imc2                             | 0.826800834  |
| wavelet-HLH | glcm       | Imc1                             | -0.135850488 |
| wavelet-HLH | glcm       | DifferenceAverage                | 5.245753494  |
| wavelet-HLH | glcm       | Id                               | 0.290014263  |
| wavelet-HLH | glcm       | ClusterTendency                  | 50.22458859  |
| wavelet-HLH | firstorder | InterquartileRange               | 132.8613369  |
| wavelet-HLH | firstorder | Skewness                         | -0.173431859 |
| wavelet-HLH | firstorder | Uniformity                       | 0.067046663  |
| wavelet-HLH | firstorder | Median                           | 3.564328762  |
| wavelet-HLH | firstorder | Energy                           | 14058563.4   |
| wavelet-HLH | firstorder | RobustMeanAbsoluteDeviation      | 56.47920428  |
| wavelet-HLH | firstorder | MeanAbsoluteDeviation            | 91.83424897  |
| wavelet-HLH | firstorder | TotalEnergy                      | 379581211.9  |
| wavelet-HLH | firstorder | Maximum                          | 462.4455252  |
| wavelet-HLH | firstorder | RootMeanSquared                  | 126.6830232  |
| wavelet-HLH | firstorder | 90Percentile                     | 141.5500075  |
| wavelet-HLH | firstorder | Minimum                          | -510.1406382 |
| wavelet-HLH | firstorder | Entropy                          | 4.280095054  |
| wavelet-HLH | firstorder | Range                            | 972.5861634  |
| wavelet-HLH | firstorder | Variance                         | 16047.11154  |
| wavelet-HLH | firstorder | 10Percentile                     | -142.9821592 |
| wavelet-HLH | firstorder | Kurtosis                         | 4.856250178  |
| wavelet-HLH | firstorder | Mean                             | 1.215243514  |
| wavelet-HLH | gllm       | ShortRunLowGrayLevelEmphasis     | 0.004391001  |
| wavelet-HLH | gllm       | GrayLevelVariance                | 26.73968824  |
| wavelet-HLH | gllm       | LowGrayLevelRunEmphasis          | 0.004488593  |
| wavelet-HLH | gllm       | GrayLevelNonUniformityNormalized | 0.064685832  |
| wavelet-HLH | gllm       | RunVariance                      | 0.066314069  |
| wavelet-HLH | gllm       | GrayLevelNonUniformity           | 53.44656262  |
| wavelet-HLH | gllm       | LongRunEmphasis                  | 1.191151747  |
| wavelet-HLH | gllm       | ShortRunHighGrayLevelEmphasis    | 470.7673488  |
| wavelet-HLH | gllm       | RunLengthNonUniformity           | 739.2684791  |
| wavelet-HLH | gllm       | ShortRunEmphasis                 | 0.957483114  |
| wavelet-HLH | gllm       | LongRunHighGrayLevelEmphasis     | 580.6969541  |
| wavelet-HLH | gllm       | RunPercentage                    | 0.94318581   |
| wavelet-HLH | gllm       | LongRunLowGrayLevelEmphasis      | 0.004927805  |
| wavelet-HLH | gllm       | RunEntropy                       | 4.607832708  |
| wavelet-HLH | gllm       | HighGrayLevelRunEmphasis         | 490.8862533  |
| wavelet-HLH | gllm       | RunLengthNonUniformityNormalized | 0.894398045  |

|             |       |                                  |             |
|-------------|-------|----------------------------------|-------------|
| wavelet-HLH | glszm | GrayLevelVariance                | 42.63990188 |
| wavelet-HLH | glszm | ZoneVariance                     | 12.12771449 |
| wavelet-HLH | glszm | GrayLevelNonUniformityNormalized | 0.046168565 |
| wavelet-HLH | glszm | SizeZoneNonUniformityNormalized  | 0.472220986 |
| wavelet-HLH | glszm | SizeZoneNonUniformity            | 200.2216981 |
| wavelet-HLH | glszm | GrayLevelNonUniformity           | 19.5754717  |
| wavelet-HLH | glszm | LargeAreaEmphasis                | 16.39622642 |
| wavelet-HLH | glszm | SmallAreaHighGrayLevelEmphasis   | 369.6419966 |
| wavelet-HLH | glszm | ZonePercentage                   | 0.484018265 |
| wavelet-HLH | glszm | LargeAreaLowGrayLevelEmphasis    | 0.041069961 |
| wavelet-HLH | glszm | LargeAreaHighGrayLevelEmphasis   | 7599.589623 |
| wavelet-HLH | glszm | HighGrayLevelZoneEmphasis        | 506.615566  |
| wavelet-HLH | glszm | SmallAreaEmphasis                | 0.714422898 |
| wavelet-HLH | glszm | LowGrayLevelZoneEmphasis         | 0.0065256   |
| wavelet-HLH | glszm | ZoneEntropy                      | 6.073769808 |
| wavelet-HLH | glszm | SmallAreaLowGrayLevelEmphasis    | 0.005801525 |
| wavelet-HLH | ngtdm | Coarseness                       | 0.007854449 |
| wavelet-HLH | ngtdm | Complexity                       | 2261.734885 |
| wavelet-HLH | ngtdm | Strength                         | 3.542109404 |
| wavelet-HLH | ngtdm | Contrast                         | 0.140077826 |
| wavelet-HLH | ngtdm | Busyness                         | 0.122173917 |

| Image type | Feature Class | Feature Name                         |                                                                                                                                                                                                                                                                                                                                                                                                                   |
|------------|---------------|--------------------------------------|-------------------------------------------------------------------------------------------------------------------------------------------------------------------------------------------------------------------------------------------------------------------------------------------------------------------------------------------------------------------------------------------------------------------|
| general    | info          | BoundingBox                          | 4: RTSTRUCT: C99-DNU_segment_RLL ITV<br>(0, 0, 1, 8, 12, 6)                                                                                                                                                                                                                                                                                                                                                       |
| general    | info          | EnabledImageTypes                    | {u'Original': {}, u'Wavelet': {}}                                                                                                                                                                                                                                                                                                                                                                                 |
|            |               |                                      | {'distances': [1], 'additionalInfo': True, 'force2D': False, 'interpolator': 'sitkBSpline', 'resampledPixelSpacing': [3.0], 'label': 1, 'normalizeScale': 1, 'normalize': False, 'force2Ddimension': 0, 'removeOutliers': None, 'minimumROISize': None, u'binWidth': 25.0, 'minimumROIDimensions': 1, u'correctMask': True, 'preCrop': False, u'symmetricalGLCM': True, 'resegmentRange': None, 'padDistance': 5} |
| general    | info          | GeneralSettings                      |                                                                                                                                                                                                                                                                                                                                                                                                                   |
| general    | info          | ImageHash                            | d1a7603fbbe1e90d89e6f947f5bc075365f4aa8d                                                                                                                                                                                                                                                                                                                                                                          |
| general    | info          | ImageSpacing                         | (0.9765625000000002, 0.9765625000000002, 2.0)                                                                                                                                                                                                                                                                                                                                                                     |
| general    | info          | MaskHash                             | 1a7cb3ffca3a0646ef1907b65cf8b31c4b8d4e63                                                                                                                                                                                                                                                                                                                                                                          |
| general    | info          | NumpyVersion                         | 1.13.1                                                                                                                                                                                                                                                                                                                                                                                                            |
| general    | info          | PyWaveletVersion                     | 0.5.2                                                                                                                                                                                                                                                                                                                                                                                                             |
| general    | info          | SimpleITKVersion                     | 1.1.0                                                                                                                                                                                                                                                                                                                                                                                                             |
| general    | info          | Version                              | 1.3.0.post102+g1b0eb74                                                                                                                                                                                                                                                                                                                                                                                            |
| general    | info          | VolumeNum                            | 1                                                                                                                                                                                                                                                                                                                                                                                                                 |
| general    | info          | VoxelNum                             | 276                                                                                                                                                                                                                                                                                                                                                                                                               |
| original   | shape         | Maximum3DDiameter                    | 36.74234614                                                                                                                                                                                                                                                                                                                                                                                                       |
| original   | shape         | Maximum2DDiameterSlice               | 30.88689042                                                                                                                                                                                                                                                                                                                                                                                                       |
| original   | shape         | Sphericity                           | 0.814666979                                                                                                                                                                                                                                                                                                                                                                                                       |
| original   | shape         | MinorAxis                            | 20.46006431                                                                                                                                                                                                                                                                                                                                                                                                       |
| original   | shape         | Elongation                           | 0.645145694                                                                                                                                                                                                                                                                                                                                                                                                       |
| original   | shape         | SurfaceVolumeRatio                   | 0.303910983                                                                                                                                                                                                                                                                                                                                                                                                       |
| original   | shape         | Volume                               | 7452                                                                                                                                                                                                                                                                                                                                                                                                              |
| original   | shape         | MajorAxis                            | 31.71386637                                                                                                                                                                                                                                                                                                                                                                                                       |
| original   | shape         | SurfaceArea                          | 2264.744647                                                                                                                                                                                                                                                                                                                                                                                                       |
| original   | shape         | Flatness                             | 0.53391955                                                                                                                                                                                                                                                                                                                                                                                                        |
| original   | shape         | LeastAxis                            | 16.93265327                                                                                                                                                                                                                                                                                                                                                                                                       |
| original   | shape         | Maximum2DDiameterColumn              | 21.84032967                                                                                                                                                                                                                                                                                                                                                                                                       |
| original   | shape         | Maximum2DDiameterRow                 | 36.24913792                                                                                                                                                                                                                                                                                                                                                                                                       |
| original   | gldm          | GrayLevelVariance                    | 98.62522317                                                                                                                                                                                                                                                                                                                                                                                                       |
| original   | gldm          | HighGrayLevelEmphasis                | 889.7427536                                                                                                                                                                                                                                                                                                                                                                                                       |
| original   | gldm          | DependenceEntropy                    | 5.984623567                                                                                                                                                                                                                                                                                                                                                                                                       |
| original   | gldm          | DependenceNonUniformity              | 70.53623188                                                                                                                                                                                                                                                                                                                                                                                                       |
| original   | gldm          | GrayLevelNonUniformity               | 23.80434783                                                                                                                                                                                                                                                                                                                                                                                                       |
| original   | gldm          | SmallDependenceEmphasis              | 0.520025946                                                                                                                                                                                                                                                                                                                                                                                                       |
| original   | gldm          | SmallDependenceHighGrayLevelEmphasis | 315.7264647                                                                                                                                                                                                                                                                                                                                                                                                       |
| original   | gldm          | DependenceNonUniformityNormalized    | 0.255566058                                                                                                                                                                                                                                                                                                                                                                                                       |
| original   | gldm          | LargeDependenceEmphasis              | 28.33333333                                                                                                                                                                                                                                                                                                                                                                                                       |
| original   | gldm          | LargeDependenceLowGrayLevelEmphasis  | 0.03373579                                                                                                                                                                                                                                                                                                                                                                                                        |
| original   | gldm          | DependenceVariance                   | 15.04783659                                                                                                                                                                                                                                                                                                                                                                                                       |
| original   | gldm          | LargeDependenceHighGrayLevelEmphasis | 36110.97464                                                                                                                                                                                                                                                                                                                                                                                                       |
| original   | gldm          | SmallDependenceLowGrayLevelEmphasis  | 0.011069406                                                                                                                                                                                                                                                                                                                                                                                                       |
| original   | gldm          | LowGrayLevelEmphasis                 | 0.011678418                                                                                                                                                                                                                                                                                                                                                                                                       |

|          |            |                                  |              |
|----------|------------|----------------------------------|--------------|
| original | glcm       | JointAverage                     | 30.34127901  |
| original | glcm       | SumAverage                       | 60.68255802  |
| original | glcm       | JointEntropy                     | 6.653905093  |
| original | glcm       | ClusterShade                     | -2838.329952 |
| original | glcm       | MaximumProbability               | 0.10820817   |
| original | glcm       | Idmn                             | 0.936378037  |
| original | glcm       | JointEnergy                      | 0.025826327  |
| original | glcm       | Contrast                         | 126.6996251  |
| original | glcm       | DifferenceEntropy                | 4.075743382  |
| original | glcm       | InverseVariance                  | 0.26419504   |
| original | glcm       | DifferenceVariance               | 70.00287943  |
| original | glcm       | Idn                              | 0.863548784  |
| original | glcm       | Idm                              | 0.287694802  |
| original | glcm       | Correlation                      | 0.187715803  |
| original | glcm       | Autocorrelation                  | 936.3928498  |
| original | glcm       | SumEntropy                       | 4.789347543  |
| original | glcm       | SumSquares                       | 78.88926467  |
| original | glcm       | ClusterProminence                | 124032.4597  |
| original | glcm       | Imc2                             | 0.954834522  |
| original | glcm       | Imc1                             | -0.314254228 |
| original | glcm       | DifferenceAverage                | 7.452341657  |
| original | glcm       | Id                               | 0.342969957  |
| original | glcm       | ClusterTendency                  | 188.8574336  |
| original | firstorder | InterquartileRange               | 378.25       |
| original | firstorder | Skewness                         | -0.965443874 |
| original | firstorder | Uniformity                       | 0.086247637  |
| original | firstorder | Median                           | -40.5        |
| original | firstorder | Energy                           | 26360391     |
| original | firstorder | RobustMeanAbsoluteDeviation      | 163.3995868  |
| original | firstorder | MeanAbsoluteDeviation            | 212.4017801  |
| original | firstorder | TotalEnergy                      | 711730557    |
| original | firstorder | Maximum                          | 77           |
| original | firstorder | RootMeanSquared                  | 309.044759   |
| original | firstorder | 90Percentile                     | 31           |
| original | firstorder | Minimum                          | -866         |
| original | firstorder | Entropy                          | 4.39816226   |
| original | firstorder | Range                            | 943          |
| original | firstorder | Variance                         | 61557.9302   |
| original | firstorder | 10Percentile                     | -597         |
| original | firstorder | Kurtosis                         | 2.732030101  |
| original | firstorder | Mean                             | -184.2572464 |
| original | glrlm      | ShortRunLowGrayLevelEmphasis     | 0.01284683   |
| original | glrlm      | GrayLevelVariance                | 101.7277544  |
| original | glrlm      | LowGrayLevelRunEmphasis          | 0.012909989  |
| original | glrlm      | GrayLevelNonUniformityNormalized | 0.065017016  |
| original | glrlm      | RunVariance                      | 0.172396498  |
| original | glrlm      | GrayLevelNonUniformity           | 16.14634676  |
| original | glrlm      | LongRunEmphasis                  | 1.414989436  |
| original | glrlm      | ShortRunHighGrayLevelEmphasis    | 760.1232397  |
| original | glrlm      | RunLengthNonUniformity           | 208.4022106  |
| original | glrlm      | ShortRunEmphasis                 | 0.931922194  |
| original | glrlm      | LongRunHighGrayLevelEmphasis     | 1375.462215  |
| original | glrlm      | RunPercentage                    | 0.898272018  |
| original | glrlm      | LongRunLowGrayLevelEmphasis      | 0.013272741  |

|             |       |                                      |              |
|-------------|-------|--------------------------------------|--------------|
| original    | glrlm | RunEntropy                           | 4.935737956  |
| original    | glrlm | HighGrayLevelRunEmphasis             | 846.2017112  |
| original    | glrlm | RunLengthNonUniformityNormalized     | 0.839745512  |
| original    | glszm | GrayLevelVariance                    | 93.64466471  |
| original    | glszm | ZoneVariance                         | 29.70545152  |
| original    | glszm | GrayLevelNonUniformityNormalized     | 0.033200298  |
| original    | glszm | SizeZoneNonUniformityNormalized      | 0.74913381   |
| original    | glszm | SizeZoneNonUniformity                | 113.1192053  |
| original    | glszm | GrayLevelNonUniformity               | 5.013245033  |
| original    | glszm | LargeAreaEmphasis                    | 33.04635762  |
| original    | glszm | SmallAreaHighGrayLevelEmphasis       | 506.7242525  |
| original    | glszm | ZonePercentage                       | 0.547101449  |
| original    | glszm | LargeAreaLowGrayLevelEmphasis        | 0.046085753  |
| original    | glszm | LargeAreaHighGrayLevelEmphasis       | 41867.54305  |
| original    | glszm | HighGrayLevelZoneEmphasis            | 612.3377483  |
| original    | glszm | SmallAreaEmphasis                    | 0.884887407  |
| original    | glszm | LowGrayLevelZoneEmphasis             | 0.02041591   |
| original    | glszm | ZoneEntropy                          | 5.451181712  |
| original    | glszm | SmallAreaLowGrayLevelEmphasis        | 0.020109487  |
| original    | ngtdm | Coarseness                           | 0.009801992  |
| original    | ngtdm | Complexity                           | 4084.504674  |
| original    | ngtdm | Strength                             | 12.1239673   |
| original    | ngtdm | Contrast                             | 0.903405207  |
| original    | ngtdm | Busyness                             | 0.070309837  |
| wavelet-HHH | gldm  | GrayLevelVariance                    | 11.3227657   |
| wavelet-HHH | gldm  | HighGrayLevelEmphasis                | 169.6630435  |
| wavelet-HHH | gldm  | DependenceEntropy                    | 5.7261501    |
| wavelet-HHH | gldm  | DependenceNonUniformity              | 49.74637681  |
| wavelet-HHH | gldm  | GrayLevelNonUniformity               | 27.60144928  |
| wavelet-HHH | gldm  | SmallDependenceEmphasis              | 0.345463916  |
| wavelet-HHH | gldm  | SmallDependenceHighGrayLevelEmphasis | 61.34347688  |
| wavelet-HHH | gldm  | DependenceNonUniformityNormalized    | 0.180240496  |
| wavelet-HHH | gldm  | LargeDependenceEmphasis              | 14.37681159  |
| wavelet-HHH | gldm  | LargeDependenceLowGrayLevelEmphasis  | 0.097660976  |
| wavelet-HHH | gldm  | DependenceVariance                   | 4.667716866  |
| wavelet-HHH | gldm  | LargeDependenceHighGrayLevelEmphasis | 2369.612319  |
| wavelet-HHH | gldm  | SmallDependenceLowGrayLevelEmphasis  | 0.007634413  |
| wavelet-HHH | gldm  | LowGrayLevelEmphasis                 | 0.012164787  |
| wavelet-HHH | glcm  | JointAverage                         | 12.54982311  |
| wavelet-HHH | glcm  | SumAverage                           | 25.09964622  |
| wavelet-HHH | glcm  | JointEntropy                         | 6.674583725  |
| wavelet-HHH | glcm  | ClusterShade                         | 5.703925931  |
| wavelet-HHH | glcm  | MaximumProbability                   | 0.048547429  |
| wavelet-HHH | glcm  | Idmn                                 | 0.976212538  |
| wavelet-HHH | glcm  | JointEnergy                          | 0.014055243  |
| wavelet-HHH | glcm  | Contrast                             | 22.12845827  |
| wavelet-HHH | glcm  | DifferenceEntropy                    | 3.279666797  |
| wavelet-HHH | glcm  | InverseVariance                      | 0.270845556  |
| wavelet-HHH | glcm  | DifferenceVariance                   | 9.76240675   |
| wavelet-HHH | glcm  | Idn                                  | 0.899880863  |
| wavelet-HHH | glcm  | Idm                                  | 0.274079585  |
| wavelet-HHH | glcm  | Correlation                          | -0.029686622 |
| wavelet-HHH | glcm  | Autocorrelation                      | 157.1792955  |
| wavelet-HHH | glcm  | SumEntropy                           | 4.059798971  |

|             |            |                                  |              |
|-------------|------------|----------------------------------|--------------|
| wavelet-HHH | glcm       | SumSquares                       | 10.74275915  |
| wavelet-HHH | glcm       | ClusterProminence                | 1853.711748  |
| wavelet-HHH | glcm       | Imc2                             | 0.829754597  |
| wavelet-HHH | glcm       | Imc1                             | -0.16116876  |
| wavelet-HHH | glcm       | DifferenceAverage                | 3.496952767  |
| wavelet-HHH | glcm       | Id                               | 0.359471947  |
| wavelet-HHH | glcm       | ClusterTendency                  | 20.84257833  |
| wavelet-HHH | firstorder | InterquartileRange               | 83.49754242  |
| wavelet-HHH | firstorder | Skewness                         | 0.239204953  |
| wavelet-HHH | firstorder | Uniformity                       | 0.100005251  |
| wavelet-HHH | firstorder | Median                           | 2.433736287  |
| wavelet-HHH | firstorder | Energy                           | 1918061.674  |
| wavelet-HHH | firstorder | RobustMeanAbsoluteDeviation      | 37.07237812  |
| wavelet-HHH | firstorder | MeanAbsoluteDeviation            | 60.09272045  |
| wavelet-HHH | firstorder | TotalEnergy                      | 51787665.19  |
| wavelet-HHH | firstorder | Maximum                          | 416.4757545  |
| wavelet-HHH | firstorder | RootMeanSquared                  | 83.36365406  |
| wavelet-HHH | firstorder | 90Percentile                     | 96.07202932  |
| wavelet-HHH | firstorder | Minimum                          | -280.6320514 |
| wavelet-HHH | firstorder | Entropy                          | 3.670680449  |
| wavelet-HHH | firstorder | Range                            | 697.1078059  |
| wavelet-HHH | firstorder | Variance                         | 6945.437676  |
| wavelet-HHH | firstorder | 10Percentile                     | -101.1409659 |
| wavelet-HHH | firstorder | Kurtosis                         | 5.41819349   |
| wavelet-HHH | firstorder | Mean                             | 2.015227441  |
| wavelet-HHH | glrlm      | ShortRunLowGrayLevelEmphasis     | 0.012256866  |
| wavelet-HHH | glrlm      | GrayLevelVariance                | 12.07192465  |
| wavelet-HHH | glrlm      | LowGrayLevelRunEmphasis          | 0.012661985  |
| wavelet-HHH | glrlm      | GrayLevelNonUniformityNormalized | 0.093780617  |
| wavelet-HHH | glrlm      | RunVariance                      | 0.097822848  |
| wavelet-HHH | glrlm      | GrayLevelNonUniformity           | 23.78205318  |
| wavelet-HHH | glrlm      | LongRunEmphasis                  | 1.283935796  |
| wavelet-HHH | glrlm      | ShortRunHighGrayLevelEmphasis    | 159.882206   |
| wavelet-HHH | glrlm      | RunLengthNonUniformity           | 215.7489166  |
| wavelet-HHH | glrlm      | ShortRunEmphasis                 | 0.938233818  |
| wavelet-HHH | glrlm      | LongRunHighGrayLevelEmphasis     | 216.6494233  |
| wavelet-HHH | glrlm      | RunPercentage                    | 0.918617614  |
| wavelet-HHH | glrlm      | LongRunLowGrayLevelEmphasis      | 0.014531207  |
| wavelet-HHH | glrlm      | RunEntropy                       | 4.088413733  |
| wavelet-HHH | glrlm      | HighGrayLevelRunEmphasis         | 170.110737   |
| wavelet-HHH | glrlm      | RunLengthNonUniformityNormalized | 0.85052202   |
| wavelet-HHH | glszm      | GrayLevelVariance                | 22.23111189  |
| wavelet-HHH | glszm      | ZoneVariance                     | 30.82312866  |
| wavelet-HHH | glszm      | GrayLevelNonUniformityNormalized | 0.067866189  |
| wavelet-HHH | glszm      | SizeZoneNonUniformityNormalized  | 0.451480479  |
| wavelet-HHH | glszm      | SizeZoneNonUniformity            | 48.30841121  |
| wavelet-HHH | glszm      | GrayLevelNonUniformity           | 7.261682243  |
| wavelet-HHH | glszm      | LargeAreaEmphasis                | 37.47663551  |
| wavelet-HHH | glszm      | SmallAreaHighGrayLevelEmphasis   | 126.4490356  |
| wavelet-HHH | glszm      | ZonePercentage                   | 0.387681159  |
| wavelet-HHH | glszm      | LargeAreaLowGrayLevelEmphasis    | 0.253353045  |
| wavelet-HHH | glszm      | LargeAreaHighGrayLevelEmphasis   | 6086.64486   |
| wavelet-HHH | glszm      | HighGrayLevelZoneEmphasis        | 178.8317757  |
| wavelet-HHH | glszm      | SmallAreaEmphasis                | 0.697590291  |

|             |            |                                      |              |
|-------------|------------|--------------------------------------|--------------|
| wavelet-HHH | glszm      | LowGrayLevelZoneEmphasis             | 0.020500439  |
| wavelet-HHH | glszm      | ZoneEntropy                          | 5.171791781  |
| wavelet-HHH | glszm      | SmallAreaLowGrayLevelEmphasis        | 0.018251101  |
| wavelet-HHH | ngtdm      | Coarseness                           | 0.025378764  |
| wavelet-HHH | ngtdm      | Complexity                           | 462.0678378  |
| wavelet-HHH | ngtdm      | Strength                             | 3.423651841  |
| wavelet-HHH | ngtdm      | Contrast                             | 0.138990368  |
| wavelet-HHH | ngtdm      | Busyness                             | 0.13290358   |
| wavelet-HLL | gldm       | GrayLevelVariance                    | 108.4972038  |
| wavelet-HLL | gldm       | HighGrayLevelEmphasis                | 748.2572464  |
| wavelet-HLL | gldm       | DependenceEntropy                    | 6.265278244  |
| wavelet-HLL | gldm       | DependenceNonUniformity              | 99.53623188  |
| wavelet-HLL | gldm       | GrayLevelNonUniformity               | 8.514492754  |
| wavelet-HLL | gldm       | SmallDependenceEmphasis              | 0.593486312  |
| wavelet-HLL | gldm       | SmallDependenceHighGrayLevelEmphasis | 473.8104891  |
| wavelet-HLL | gldm       | DependenceNonUniformityNormalized    | 0.360638521  |
| wavelet-HLL | gldm       | LargeDependenceEmphasis              | 4.036231884  |
| wavelet-HLL | gldm       | LargeDependenceLowGrayLevelEmphasis  | 0.01686213   |
| wavelet-HLL | gldm       | DependenceVariance                   | 0.884320521  |
| wavelet-HLL | gldm       | LargeDependenceHighGrayLevelEmphasis | 2667.713768  |
| wavelet-HLL | gldm       | SmallDependenceLowGrayLevelEmphasis  | 0.007008366  |
| wavelet-HLL | gldm       | LowGrayLevelEmphasis                 | 0.008107426  |
| wavelet-HLL | glcm       | JointAverage                         | 24.53366835  |
| wavelet-HLL | glcm       | SumAverage                           | 49.06733669  |
| wavelet-HLL | glcm       | JointEntropy                         | 8.123621353  |
| wavelet-HLL | glcm       | ClusterShade                         | 1446.132121  |
| wavelet-HLL | glcm       | MaximumProbability                   | 0.012713209  |
| wavelet-HLL | glcm       | Idmn                                 | 0.950436488  |
| wavelet-HLL | glcm       | JointEnergy                          | 0.004040327  |
| wavelet-HLL | glcm       | Contrast                             | 140.1509302  |
| wavelet-HLL | glcm       | DifferenceEntropy                    | 4.383677522  |
| wavelet-HLL | glcm       | InverseVariance                      | 0.136731386  |
| wavelet-HLL | glcm       | DifferenceVariance                   | 49.81812645  |
| wavelet-HLL | glcm       | Idn                                  | 0.857176821  |
| wavelet-HLL | glcm       | Idm                                  | 0.124062732  |
| wavelet-HLL | glcm       | Correlation                          | 0.235172987  |
| wavelet-HLL | glcm       | Autocorrelation                      | 626.8791969  |
| wavelet-HLL | glcm       | SumEntropy                           | 5.574038504  |
| wavelet-HLL | glcm       | SumSquares                           | 94.96383895  |
| wavelet-HLL | glcm       | ClusterProminence                    | 175111.4018  |
| wavelet-HLL | glcm       | Imc2                                 | 0.991974545  |
| wavelet-HLL | glcm       | Imc1                                 | -0.408724335 |
| wavelet-HLL | glcm       | DifferenceAverage                    | 9.059661826  |
| wavelet-HLL | glcm       | Id                                   | 0.204838863  |
| wavelet-HLL | glcm       | ClusterTendency                      | 239.7044255  |
| wavelet-HLL | firstorder | InterquartileRange                   | 380.4718462  |
| wavelet-HLL | firstorder | Skewness                             | 0.104299105  |
| wavelet-HLL | firstorder | Uniformity                           | 0.030849611  |
| wavelet-HLL | firstorder | Median                               | -78.13532009 |
| wavelet-HLL | firstorder | Energy                               | 20416860.71  |
| wavelet-HLL | firstorder | RobustMeanAbsoluteDeviation          | 153.221645   |
| wavelet-HLL | firstorder | MeanAbsoluteDeviation                | 211.6276495  |
| wavelet-HLL | firstorder | TotalEnergy                          | 551255239.2  |
| wavelet-HLL | firstorder | Maximum                              | 511.9212296  |

|             |            |                                      |              |
|-------------|------------|--------------------------------------|--------------|
| wavelet-HLL | firstorder | RootMeanSquared                      | 271.9818615  |
| wavelet-HLL | firstorder | 90Percentile                         | 284.508592   |
| wavelet-HLL | firstorder | Minimum                              | -697.0171925 |
| wavelet-HLL | firstorder | Entropy                              | 5.219176947  |
| wavelet-HLL | firstorder | Range                                | 1208.938422  |
| wavelet-HLL | firstorder | Variance                             | 67575.77236  |
| wavelet-HLL | firstorder | 10Percentile                         | -393.9549378 |
| wavelet-HLL | firstorder | Kurtosis                             | 2.351618505  |
| wavelet-HLL | firstorder | Mean                                 | -79.98975341 |
| wavelet-HLL | glrlm      | ShortRunLowGrayLevelEmphasis         | 0.008210251  |
| wavelet-HLL | glrlm      | GrayLevelVariance                    | 109.7456813  |
| wavelet-HLL | glrlm      | LowGrayLevelRunEmphasis              | 0.008272393  |
| wavelet-HLL | glrlm      | GrayLevelNonUniformityNormalized     | 0.03039591   |
| wavelet-HLL | glrlm      | RunVariance                          | 0.031498833  |
| wavelet-HLL | glrlm      | GrayLevelNonUniformity               | 8.140601348  |
| wavelet-HLL | glrlm      | LongRunEmphasis                      | 1.095596113  |
| wavelet-HLL | glrlm      | ShortRunHighGrayLevelEmphasis        | 736.2810759  |
| wavelet-HLL | glrlm      | RunLengthNonUniformity               | 252.4969753  |
| wavelet-HLL | glrlm      | ShortRunEmphasis                     | 0.977083802  |
| wavelet-HLL | glrlm      | LongRunHighGrayLevelEmphasis         | 812.5331826  |
| wavelet-HLL | glrlm      | RunPercentage                        | 0.970178372  |
| wavelet-HLL | glrlm      | LongRunLowGrayLevelEmphasis          | 0.008552283  |
| wavelet-HLL | glrlm      | RunEntropy                           | 5.355670235  |
| wavelet-HLL | glrlm      | HighGrayLevelRunEmphasis             | 751.386158   |
| wavelet-HLL | glrlm      | RunLengthNonUniformityNormalized     | 0.942020189  |
| wavelet-HLL | glszm      | GrayLevelVariance                    | 125.1923922  |
| wavelet-HLL | glszm      | ZoneVariance                         | 1.389524801  |
| wavelet-HLL | glszm      | GrayLevelNonUniformityNormalized     | 0.0267661    |
| wavelet-HLL | glszm      | SizeZoneNonUniformityNormalized      | 0.577870274  |
| wavelet-HLL | glszm      | SizeZoneNonUniformity                | 107.483871   |
| wavelet-HLL | glszm      | GrayLevelNonUniformity               | 4.978494624  |
| wavelet-HLL | glszm      | LargeAreaEmphasis                    | 3.591397849  |
| wavelet-HLL | glszm      | SmallAreaHighGrayLevelEmphasis       | 638.7250932  |
| wavelet-HLL | glszm      | ZonePercentage                       | 0.673913043  |
| wavelet-HLL | glszm      | LargeAreaLowGrayLevelEmphasis        | 0.019166604  |
| wavelet-HLL | glszm      | LargeAreaHighGrayLevelEmphasis       | 2272.607527  |
| wavelet-HLL | glszm      | HighGrayLevelZoneEmphasis            | 791.7204301  |
| wavelet-HLL | glszm      | SmallAreaEmphasis                    | 0.788575272  |
| wavelet-HLL | glszm      | LowGrayLevelZoneEmphasis             | 0.010660122  |
| wavelet-HLL | glszm      | ZoneEntropy                          | 6.054785178  |
| wavelet-HLL | glszm      | SmallAreaLowGrayLevelEmphasis        | 0.010153539  |
| wavelet-HLL | ngtdm      | Coarseness                           | 0.020016092  |
| wavelet-HLL | ngtdm      | Complexity                           | 5348.178593  |
| wavelet-HLL | ngtdm      | Strength                             | 15.10906887  |
| wavelet-HLL | ngtdm      | Contrast                             | 0.687686423  |
| wavelet-HLL | ngtdm      | Busyness                             | 0.054667985  |
| wavelet-LHL | gldm       | GrayLevelVariance                    | 41.97840527  |
| wavelet-LHL | gldm       | HighGrayLevelEmphasis                | 376.8949275  |
| wavelet-LHL | gldm       | DependenceEntropy                    | 6.184667791  |
| wavelet-LHL | gldm       | DependenceNonUniformity              | 82.03623188  |
| wavelet-LHL | gldm       | GrayLevelNonUniformity               | 13.42753623  |
| wavelet-LHL | gldm       | SmallDependenceEmphasis              | 0.521342671  |
| wavelet-LHL | gldm       | SmallDependenceHighGrayLevelEmphasis | 199.2039403  |
| wavelet-LHL | gldm       | DependenceNonUniformityNormalized    | 0.297232724  |



|             |            |                                      |              |
|-------------|------------|--------------------------------------|--------------|
| wavelet-LHL | gldm       | LargeDependenceEmphasis              | 6.760869565  |
| wavelet-LHL | gldm       | LargeDependenceLowGrayLevelEmphasis  | 0.027733929  |
| wavelet-LHL | gldm       | DependenceVariance                   | 2.191188826  |
| wavelet-LHL | gldm       | LargeDependenceHighGrayLevelEmphasis | 2544.307971  |
| wavelet-LHL | gldm       | SmallDependenceLowGrayLevelEmphasis  | 0.007079217  |
| wavelet-LHL | gldm       | LowGrayLevelEmphasis                 | 0.009067358  |
| wavelet-LHL | glcm       | JointAverage                         | 18.20231247  |
| wavelet-LHL | glcm       | SumAverage                           | 36.40462495  |
| wavelet-LHL | glcm       | JointEntropy                         | 7.741225443  |
| wavelet-LHL | glcm       | ClusterShade                         | 191.2071479  |
| wavelet-LHL | glcm       | MaximumProbability                   | 0.019338097  |
| wavelet-LHL | glcm       | Idmn                                 | 0.966034802  |
| wavelet-LHL | glcm       | JointEnergy                          | 0.005734651  |
| wavelet-LHL | glcm       | Contrast                             | 56.21952468  |
| wavelet-LHL | glcm       | DifferenceEntropy                    | 3.840862396  |
| wavelet-LHL | glcm       | InverseVariance                      | 0.19400198   |
| wavelet-LHL | glcm       | DifferenceVariance                   | 23.34975744  |
| wavelet-LHL | glcm       | Idn                                  | 0.881046638  |
| wavelet-LHL | glcm       | Idm                                  | 0.179401631  |
| wavelet-LHL | glcm       | Correlation                          | 0.249118431  |
| wavelet-LHL | glcm       | Autocorrelation                      | 341.0223739  |
| wavelet-LHL | glcm       | SumEntropy                           | 5.087232416  |
| wavelet-LHL | glcm       | SumSquares                           | 37.79903277  |
| wavelet-LHL | glcm       | ClusterProminence                    | 30753.63067  |
| wavelet-LHL | glcm       | Imc2                                 | 0.960341431  |
| wavelet-LHL | glcm       | Imc1                                 | -0.284284912 |
| wavelet-LHL | glcm       | DifferenceAverage                    | 5.623471352  |
| wavelet-LHL | glcm       | Id                                   | 0.269058341  |
| wavelet-LHL | glcm       | ClusterTendency                      | 94.97660639  |
| wavelet-LHL | firstorder | InterquartileRange                   | 193.6401981  |
| wavelet-LHL | firstorder | Skewness                             | 0.145735854  |
| wavelet-LHL | firstorder | Uniformity                           | 0.048650494  |
| wavelet-LHL | firstorder | Median                               | -21.62405289 |
| wavelet-LHL | firstorder | Energy                               | 7513719.566  |
| wavelet-LHL | firstorder | RobustMeanAbsoluteDeviation          | 83.86452871  |
| wavelet-LHL | firstorder | MeanAbsoluteDeviation                | 125.5988447  |
| wavelet-LHL | firstorder | TotalEnergy                          | 202870428.3  |
| wavelet-LHL | firstorder | Maximum                              | 454.00866    |
| wavelet-LHL | firstorder | RootMeanSquared                      | 164.995823   |
| wavelet-LHL | firstorder | 90Percentile                         | 195.5498497  |
| wavelet-LHL | firstorder | Minimum                              | -453.7160984 |
| wavelet-LHL | firstorder | Entropy                              | 4.616280715  |
| wavelet-LHL | firstorder | Range                                | 907.7247584  |
| wavelet-LHL | firstorder | Variance                             | 26313.61389  |
| wavelet-LHL | firstorder | 10Percentile                         | -246.2302765 |
| wavelet-LHL | firstorder | Kurtosis                             | 3.074117997  |
| wavelet-LHL | firstorder | Mean                                 | -30.16633426 |
| wavelet-LHL | glrlm      | ShortRunLowGrayLevelEmphasis         | 0.009205597  |
| wavelet-LHL | glrlm      | GrayLevelVariance                    | 43.21012546  |
| wavelet-LHL | glrlm      | LowGrayLevelRunEmphasis              | 0.009318957  |
| wavelet-LHL | glrlm      | GrayLevelNonUniformityNormalized     | 0.047357745  |
| wavelet-LHL | glrlm      | RunVariance                          | 0.05364389   |
| wavelet-LHL | glrlm      | GrayLevelNonUniformity               | 12.49967627  |
| wavelet-LHL | glrlm      | LongRunEmphasis                      | 1.147837464  |

|             |       |                                      |              |
|-------------|-------|--------------------------------------|--------------|
| wavelet-LHL | glrlm | ShortRunHighGrayLevelEmphasis        | 365.2251551  |
| wavelet-LHL | glrlm | RunLengthNonUniformity               | 243.0976731  |
| wavelet-LHL | glrlm | ShortRunEmphasis                     | 0.968444669  |
| wavelet-LHL | glrlm | LongRunHighGrayLevelEmphasis         | 431.8071794  |
| wavelet-LHL | glrlm | RunPercentage                        | 0.956243032  |
| wavelet-LHL | glrlm | LongRunLowGrayLevelEmphasis          | 0.0098492    |
| wavelet-LHL | glrlm | RunEntropy                           | 4.833988569  |
| wavelet-LHL | glrlm | HighGrayLevelRunEmphasis             | 377.0954192  |
| wavelet-LHL | glrlm | RunLengthNonUniformityNormalized     | 0.920828112  |
| wavelet-LHL | glszm | GrayLevelVariance                    | 59.55397785  |
| wavelet-LHL | glszm | ZoneVariance                         | 5.712118139  |
| wavelet-LHL | glszm | GrayLevelNonUniformityNormalized     | 0.038906244  |
| wavelet-LHL | glszm | SizeZoneNonUniformityNormalized      | 0.577832772  |
| wavelet-LHL | glszm | SizeZoneNonUniformity                | 90.71974522  |
| wavelet-LHL | glszm | GrayLevelNonUniformity               | 6.108280255  |
| wavelet-LHL | glszm | LargeAreaEmphasis                    | 8.802547771  |
| wavelet-LHL | glszm | SmallAreaHighGrayLevelEmphasis       | 302.6646626  |
| wavelet-LHL | glszm | ZonePercentage                       | 0.56884058   |
| wavelet-LHL | glszm | LargeAreaLowGrayLevelEmphasis        | 0.037499252  |
| wavelet-LHL | glszm | LargeAreaHighGrayLevelEmphasis       | 3242.859873  |
| wavelet-LHL | glszm | HighGrayLevelZoneEmphasis            | 383.0955414  |
| wavelet-LHL | glszm | SmallAreaEmphasis                    | 0.787338759  |
| wavelet-LHL | glszm | LowGrayLevelZoneEmphasis             | 0.012998253  |
| wavelet-LHL | glszm | ZoneEntropy                          | 5.658332199  |
| wavelet-LHL | glszm | SmallAreaLowGrayLevelEmphasis        | 0.011878786  |
| wavelet-LHL | ngtdm | Coarseness                           | 0.027352877  |
| wavelet-LHL | ngtdm | Complexity                           | 1603.820968  |
| wavelet-LHL | ngtdm | Strength                             | 8.922167412  |
| wavelet-LHL | ngtdm | Contrast                             | 0.307760426  |
| wavelet-LHL | ngtdm | Busyness                             | 0.067486732  |
| wavelet-LHH | gldm  | GrayLevelVariance                    | 25.35868252  |
| wavelet-LHH | gldm  | HighGrayLevelEmphasis                | 577.4384058  |
| wavelet-LHH | gldm  | DependenceEntropy                    | 5.93606932   |
| wavelet-LHH | gldm  | DependenceNonUniformity              | 64.23913043  |
| wavelet-LHH | gldm  | GrayLevelNonUniformity               | 20.5         |
| wavelet-LHH | gldm  | SmallDependenceEmphasis              | 0.454678704  |
| wavelet-LHH | gldm  | SmallDependenceHighGrayLevelEmphasis | 278.8231285  |
| wavelet-LHH | gldm  | DependenceNonUniformityNormalized    | 0.232750473  |
| wavelet-LHH | gldm  | LargeDependenceEmphasis              | 9.905797101  |
| wavelet-LHH | gldm  | LargeDependenceLowGrayLevelEmphasis  | 0.022728586  |
| wavelet-LHH | gldm  | DependenceVariance                   | 3.325456837  |
| wavelet-LHH | gldm  | LargeDependenceHighGrayLevelEmphasis | 5414.068841  |
| wavelet-LHH | gldm  | SmallDependenceLowGrayLevelEmphasis  | 0.004689329  |
| wavelet-LHH | gldm  | LowGrayLevelEmphasis                 | 0.005776234  |
| wavelet-LHH | glcm  | JointAverage                         | 23.60301533  |
| wavelet-LHH | glcm  | SumAverage                           | 47.20603066  |
| wavelet-LHH | glcm  | JointEntropy                         | 7.108754098  |
| wavelet-LHH | glcm  | ClusterShade                         | -20.70598489 |
| wavelet-LHH | glcm  | MaximumProbability                   | 0.033521325  |
| wavelet-LHH | glcm  | Idmn                                 | 0.975169655  |
| wavelet-LHH | glcm  | JointEnergy                          | 0.010341981  |
| wavelet-LHH | glcm  | Contrast                             | 47.60319744  |
| wavelet-LHH | glcm  | DifferenceEntropy                    | 3.671372382  |
| wavelet-LHH | glcm  | InverseVariance                      | 0.246857457  |

|             |            |                                  |              |
|-------------|------------|----------------------------------|--------------|
| wavelet-LHH | glcm       | DifferenceVariance               | 23.34294025  |
| wavelet-LHH | glcm       | Idn                              | 0.902680051  |
| wavelet-LHH | glcm       | Idm                              | 0.229747866  |
| wavelet-LHH | glcm       | Correlation                      | -0.043328011 |
| wavelet-LHH | glcm       | Autocorrelation                  | 556.0805774  |
| wavelet-LHH | glcm       | SumEntropy                       | 4.489216559  |
| wavelet-LHH | glcm       | SumSquares                       | 22.75983523  |
| wavelet-LHH | glcm       | ClusterProminence                | 9368.747608  |
| wavelet-LHH | glcm       | Imc2                             | 0.913198672  |
| wavelet-LHH | glcm       | Imc1                             | -0.225751793 |
| wavelet-LHH | glcm       | DifferenceAverage                | 4.864946614  |
| wavelet-LHH | glcm       | Id                               | 0.313358416  |
| wavelet-LHH | glcm       | ClusterTendency                  | 43.43614348  |
| wavelet-LHH | firstorder | InterquartileRange               | 134.7391721  |
| wavelet-LHH | firstorder | Skewness                         | -0.138129732 |
| wavelet-LHH | firstorder | Uniformity                       | 0.074275362  |
| wavelet-LHH | firstorder | Median                           | -10.15202455 |
| wavelet-LHH | firstorder | Energy                           | 4371201.895  |
| wavelet-LHH | firstorder | RobustMeanAbsoluteDeviation      | 54.47446686  |
| wavelet-LHH | firstorder | MeanAbsoluteDeviation            | 89.73047038  |
| wavelet-LHH | firstorder | TotalEnergy                      | 118022451.2  |
| wavelet-LHH | firstorder | Maximum                          | 434.1902517  |
| wavelet-LHH | firstorder | RootMeanSquared                  | 125.8478765  |
| wavelet-LHH | firstorder | 90Percentile                     | 156.3340693  |
| wavelet-LHH | firstorder | Minimum                          | -567.1296398 |
| wavelet-LHH | firstorder | Entropy                          | 4.122084875  |
| wavelet-LHH | firstorder | Range                            | 1001.319891  |
| wavelet-LHH | firstorder | Variance                         | 15837.4755   |
| wavelet-LHH | firstorder | 10Percentile                     | -123.4786262 |
| wavelet-LHH | firstorder | Kurtosis                         | 5.46853984   |
| wavelet-LHH | firstorder | Mean                             | -0.461005451 |
| wavelet-LHH | glrlm      | ShortRunLowGrayLevelEmphasis     | 0.005939425  |
| wavelet-LHH | glrlm      | GrayLevelVariance                | 26.59206195  |
| wavelet-LHH | glrlm      | LowGrayLevelRunEmphasis          | 0.006024592  |
| wavelet-LHH | glrlm      | GrayLevelNonUniformityNormalized | 0.070791589  |
| wavelet-LHH | glrlm      | RunVariance                      | 0.075468012  |
| wavelet-LHH | glrlm      | GrayLevelNonUniformity           | 18.36653522  |
| wavelet-LHH | glrlm      | LongRunEmphasis                  | 1.209524453  |
| wavelet-LHH | glrlm      | ShortRunHighGrayLevelEmphasis    | 555.5202715  |
| wavelet-LHH | glrlm      | RunLengthNonUniformity           | 231.5918954  |
| wavelet-LHH | glrlm      | ShortRunEmphasis                 | 0.955983935  |
| wavelet-LHH | glrlm      | LongRunHighGrayLevelEmphasis     | 693.4002571  |
| wavelet-LHH | glrlm      | RunPercentage                    | 0.939799331  |
| wavelet-LHH | glrlm      | LongRunLowGrayLevelEmphasis      | 0.006429792  |
| wavelet-LHH | glrlm      | RunEntropy                       | 4.434900473  |
| wavelet-LHH | glrlm      | HighGrayLevelRunEmphasis         | 579.5550254  |
| wavelet-LHH | glrlm      | RunLengthNonUniformityNormalized | 0.891973148  |
| wavelet-LHH | glszm      | GrayLevelVariance                | 42.70134083  |
| wavelet-LHH | glszm      | ZoneVariance                     | 13.46972318  |
| wavelet-LHH | glszm      | GrayLevelNonUniformityNormalized | 0.051362457  |
| wavelet-LHH | glszm      | SizeZoneNonUniformityNormalized  | 0.573529412  |
| wavelet-LHH | glszm      | SizeZoneNonUniformity            | 78           |
| wavelet-LHH | glszm      | GrayLevelNonUniformity           | 6.985294118  |
| wavelet-LHH | glszm      | LargeAreaEmphasis                | 17.58823529  |

|             |            |                                      |              |
|-------------|------------|--------------------------------------|--------------|
| wavelet-LHH | glszm      | SmallAreaHighGrayLevelEmphasis       | 489.0673866  |
| wavelet-LHH | glszm      | ZonePercentage                       | 0.492753623  |
| wavelet-LHH | glszm      | LargeAreaLowGrayLevelEmphasis        | 0.041393224  |
| wavelet-LHH | glszm      | LargeAreaHighGrayLevelEmphasis       | 9481.066176  |
| wavelet-LHH | glszm      | HighGrayLevelZoneEmphasis            | 608.1617647  |
| wavelet-LHH | glszm      | SmallAreaEmphasis                    | 0.783749664  |
| wavelet-LHH | glszm      | LowGrayLevelZoneEmphasis             | 0.009703522  |
| wavelet-LHH | glszm      | ZoneEntropy                          | 5.383501173  |
| wavelet-LHH | glszm      | SmallAreaLowGrayLevelEmphasis        | 0.009235118  |
| wavelet-LHH | ngtdm      | Coarseness                           | 0.022531579  |
| wavelet-LHH | ngtdm      | Complexity                           | 1372.702261  |
| wavelet-LHH | ngtdm      | Strength                             | 6.681861082  |
| wavelet-LHH | ngtdm      | Contrast                             | 0.238199345  |
| wavelet-LHH | ngtdm      | Busyness                             | 0.058618901  |
| wavelet-LLH | gldm       | GrayLevelVariance                    | 112.7217496  |
| wavelet-LLH | gldm       | HighGrayLevelEmphasis                | 994.1231884  |
| wavelet-LLH | gldm       | DependenceEntropy                    | 6.354919195  |
| wavelet-LLH | gldm       | DependenceNonUniformity              | 85.98550725  |
| wavelet-LLH | gldm       | GrayLevelNonUniformity               | 10.60144928  |
| wavelet-LLH | gldm       | SmallDependenceEmphasis              | 0.549564566  |
| wavelet-LLH | gldm       | SmallDependenceHighGrayLevelEmphasis | 566.8155111  |
| wavelet-LLH | gldm       | DependenceNonUniformityNormalized    | 0.311541693  |
| wavelet-LLH | gldm       | LargeDependenceEmphasis              | 6.115942029  |
| wavelet-LLH | gldm       | LargeDependenceLowGrayLevelEmphasis  | 0.011644283  |
| wavelet-LLH | gldm       | DependenceVariance                   | 1.910470489  |
| wavelet-LLH | gldm       | LargeDependenceHighGrayLevelEmphasis | 5927.297101  |
| wavelet-LLH | gldm       | SmallDependenceLowGrayLevelEmphasis  | 0.004756583  |
| wavelet-LLH | gldm       | LowGrayLevelEmphasis                 | 0.005415483  |
| wavelet-LLH | glcm       | JointAverage                         | 29.18014842  |
| wavelet-LLH | glcm       | SumAverage                           | 58.36029684  |
| wavelet-LLH | glcm       | JointEntropy                         | 7.944002531  |
| wavelet-LLH | glcm       | ClusterShade                         | 3602.713967  |
| wavelet-LLH | glcm       | MaximumProbability                   | 0.019578253  |
| wavelet-LLH | glcm       | Idmn                                 | 0.975535992  |
| wavelet-LLH | glcm       | JointEnergy                          | 0.004966615  |
| wavelet-LLH | glcm       | Contrast                             | 172.4076913  |
| wavelet-LLH | glcm       | DifferenceEntropy                    | 4.403702382  |
| wavelet-LLH | glcm       | InverseVariance                      | 0.141923798  |
| wavelet-LLH | glcm       | DifferenceVariance                   | 88.70473726  |
| wavelet-LLH | glcm       | Idn                                  | 0.905708027  |
| wavelet-LLH | glcm       | Idm                                  | 0.144952642  |
| wavelet-LLH | glcm       | Correlation                          | 0.098368023  |
| wavelet-LLH | glcm       | Autocorrelation                      | 862.5500628  |
| wavelet-LLH | glcm       | SumEntropy                           | 5.403996069  |
| wavelet-LLH | glcm       | SumSquares                           | 97.23707383  |
| wavelet-LLH | glcm       | ClusterProminence                    | 351041.4526  |
| wavelet-LLH | glcm       | Imc2                                 | 0.989118493  |
| wavelet-LLH | glcm       | Imc1                                 | -0.390320792 |
| wavelet-LLH | glcm       | DifferenceAverage                    | 8.893616966  |
| wavelet-LLH | glcm       | Id                                   | 0.227366757  |
| wavelet-LLH | glcm       | ClusterTendency                      | 216.540604   |
| wavelet-LLH | firstorder | InterquartileRange                   | 250.314113   |
| wavelet-LLH | firstorder | Skewness                             | 0.972471663  |
| wavelet-LLH | firstorder | Uniformity                           | 0.038411048  |

|             |            |                                  |              |
|-------------|------------|----------------------------------|--------------|
| wavelet-LLH | firstorder | Median                           | -56.77217172 |
| wavelet-LLH | firstorder | Energy                           | 19984689.06  |
| wavelet-LLH | firstorder | RobustMeanAbsoluteDeviation      | 111.9811085  |
| wavelet-LLH | firstorder | MeanAbsoluteDeviation            | 188.0762838  |
| wavelet-LLH | firstorder | TotalEnergy                      | 539586604.7  |
| wavelet-LLH | firstorder | Maximum                          | 1148.25271   |
| wavelet-LLH | firstorder | RootMeanSquared                  | 269.0878922  |
| wavelet-LLH | firstorder | 90Percentile                     | 228.4255616  |
| wavelet-LLH | firstorder | Minimum                          | -774.968352  |
| wavelet-LLH | firstorder | Entropy                          | 5.084449673  |
| wavelet-LLH | firstorder | Range                            | 1923.221062  |
| wavelet-LLH | firstorder | Variance                         | 70311.80476  |
| wavelet-LLH | firstorder | 10Percentile                     | -349.2798442 |
| wavelet-LLH | firstorder | Kurtosis                         | 5.903297781  |
| wavelet-LLH | firstorder | Mean                             | -45.7874322  |
| wavelet-LLH | glrlm      | ShortRunLowGrayLevelEmphasis     | 0.005548593  |
| wavelet-LLH | glrlm      | GrayLevelVariance                | 115.9585773  |
| wavelet-LLH | glrlm      | LowGrayLevelRunEmphasis          | 0.005589017  |
| wavelet-LLH | glrlm      | GrayLevelNonUniformityNormalized | 0.037083921  |
| wavelet-LLH | glrlm      | RunVariance                      | 0.043850583  |
| wavelet-LLH | glrlm      | GrayLevelNonUniformity           | 9.823099198  |
| wavelet-LLH | glrlm      | LongRunEmphasis                  | 1.130317463  |
| wavelet-LLH | glrlm      | ShortRunHighGrayLevelEmphasis    | 966.3960191  |
| wavelet-LLH | glrlm      | RunLengthNonUniformity           | 244.3427495  |
| wavelet-LLH | glrlm      | ShortRunEmphasis                 | 0.969382047  |
| wavelet-LLH | glrlm      | LongRunHighGrayLevelEmphasis     | 1120.621773  |
| wavelet-LLH | glrlm      | RunPercentage                    | 0.959587514  |
| wavelet-LLH | glrlm      | LongRunLowGrayLevelEmphasis      | 0.005758558  |
| wavelet-LLH | glrlm      | RunEntropy                       | 5.284948236  |
| wavelet-LLH | glrlm      | HighGrayLevelRunEmphasis         | 995.6664096  |
| wavelet-LLH | glrlm      | RunLengthNonUniformityNormalized | 0.92235368   |
| wavelet-LLH | glszm      | GrayLevelVariance                | 157.1020623  |
| wavelet-LLH | glszm      | ZoneVariance                     | 3.332866496  |
| wavelet-LLH | glszm      | GrayLevelNonUniformityNormalized | 0.028745492  |
| wavelet-LLH | glszm      | SizeZoneNonUniformityNormalized  | 0.584258254  |
| wavelet-LLH | glszm      | SizeZoneNonUniformity            | 98.73964497  |
| wavelet-LLH | glszm      | GrayLevelNonUniformity           | 4.857988166  |
| wavelet-LLH | glszm      | LargeAreaEmphasis                | 6            |
| wavelet-LLH | glszm      | SmallAreaHighGrayLevelEmphasis   | 827.8388925  |
| wavelet-LLH | glszm      | ZonePercentage                   | 0.612318841  |
| wavelet-LLH | glszm      | LargeAreaLowGrayLevelEmphasis    | 0.013965378  |
| wavelet-LLH | glszm      | LargeAreaHighGrayLevelEmphasis   | 5770.994083  |
| wavelet-LLH | glszm      | HighGrayLevelZoneEmphasis        | 1027.526627  |
| wavelet-LLH | glszm      | SmallAreaEmphasis                | 0.791167953  |
| wavelet-LLH | glszm      | LowGrayLevelZoneEmphasis         | 0.007960798  |
| wavelet-LLH | glszm      | ZoneEntropy                      | 6.068998188  |
| wavelet-LLH | glszm      | SmallAreaLowGrayLevelEmphasis    | 0.00760382   |
| wavelet-LLH | ngtdm      | Coarseness                       | 0.023715848  |
| wavelet-LLH | ngtdm      | Complexity                       | 7379.284744  |
| wavelet-LLH | ngtdm      | Strength                         | 25.20071277  |
| wavelet-LLH | ngtdm      | Contrast                         | 0.579554062  |
| wavelet-LLH | ngtdm      | Busyness                         | 0.028196139  |
| wavelet-LLL | gldm       | GrayLevelVariance                | 582.4531611  |
| wavelet-LLL | gldm       | HighGrayLevelEmphasis            | 3711.963768  |

|             |            |                                      |              |
|-------------|------------|--------------------------------------|--------------|
| wavelet-LLL | gldm       | DependenceEntropy                    | 6.579756558  |
| wavelet-LLL | gldm       | DependenceNonUniformity              | 165.5724638  |
| wavelet-LLL | gldm       | GrayLevelNonUniformity               | 4.449275362  |
| wavelet-LLL | gldm       | SmallDependenceEmphasis              | 0.802614139  |
| wavelet-LLL | gldm       | SmallDependenceHighGrayLevelEmphasis | 2545.513434  |
| wavelet-LLL | gldm       | DependenceNonUniformityNormalized    | 0.599900231  |
| wavelet-LLL | gldm       | LargeDependenceEmphasis              | 3.094202899  |
| wavelet-LLL | gldm       | LargeDependenceLowGrayLevelEmphasis  | 0.009524652  |
| wavelet-LLL | gldm       | DependenceVariance                   | 1.035601764  |
| wavelet-LLL | gldm       | LargeDependenceHighGrayLevelEmphasis | 18006.1087   |
| wavelet-LLL | gldm       | SmallDependenceLowGrayLevelEmphasis  | 0.009040617  |
| wavelet-LLL | gldm       | LowGrayLevelEmphasis                 | 0.009102044  |
| wavelet-LLL | glcm       | JointAverage                         | 62.70881017  |
| wavelet-LLL | glcm       | SumAverage                           | 125.4176203  |
| wavelet-LLL | glcm       | JointEntropy                         | 8.424694714  |
| wavelet-LLL | glcm       | ClusterShade                         | -23848.39102 |
| wavelet-LLL | glcm       | MaximumProbability                   | 0.010777064  |
| wavelet-LLL | glcm       | Idmn                                 | 0.936291318  |
| wavelet-LLL | glcm       | JointEnergy                          | 0.003104392  |
| wavelet-LLL | glcm       | Contrast                             | 679.0281951  |
| wavelet-LLL | glcm       | DifferenceEntropy                    | 5.403467588  |
| wavelet-LLL | glcm       | InverseVariance                      | 0.06378017   |
| wavelet-LLL | glcm       | DifferenceVariance                   | 250.5481221  |
| wavelet-LLL | glcm       | Idn                                  | 0.838596901  |
| wavelet-LLL | glcm       | Idm                                  | 0.063394442  |
| wavelet-LLL | glcm       | Correlation                          | 0.332931988  |
| wavelet-LLL | glcm       | Autocorrelation                      | 4108.965318  |
| wavelet-LLL | glcm       | SumEntropy                           | 6.429612961  |
| wavelet-LLL | glcm       | SumSquares                           | 513.7060197  |
| wavelet-LLL | glcm       | ClusterProminence                    | 4394958.524  |
| wavelet-LLL | glcm       | Imc2                                 | 0.99959122   |
| wavelet-LLL | glcm       | Imc1                                 | -0.594198357 |
| wavelet-LLL | glcm       | DifferenceAverage                    | 20.24212717  |
| wavelet-LLL | glcm       | Id                                   | 0.124168695  |
| wavelet-LLL | glcm       | ClusterTendency                      | 1375.795883  |
| wavelet-LLL | firstorder | InterquartileRange                   | 1071.238393  |
| wavelet-LLL | firstorder | Skewness                             | -0.269906982 |
| wavelet-LLL | firstorder | Uniformity                           | 0.016120563  |
| wavelet-LLL | firstorder | Median                               | -564.7385892 |
| wavelet-LLL | firstorder | Energy                               | 205005648.6  |
| wavelet-LLL | firstorder | RobustMeanAbsoluteDeviation          | 419.2245947  |
| wavelet-LLL | firstorder | MeanAbsoluteDeviation                | 523.7218606  |
| wavelet-LLL | firstorder | TotalEnergy                          | 5535152513   |
| wavelet-LLL | firstorder | Maximum                              | 340.5577511  |
| wavelet-LLL | firstorder | RootMeanSquared                      | 861.843425   |
| wavelet-LLL | firstorder | 90Percentile                         | 139.0205545  |
| wavelet-LLL | firstorder | Minimum                              | -1992.514165 |
| wavelet-LLL | firstorder | Entropy                              | 6.159806095  |
| wavelet-LLL | firstorder | Range                                | 2333.071916  |
| wavelet-LLL | firstorder | Variance                             | 363977.0026  |
| wavelet-LLL | firstorder | 10Percentile                         | -1415.104832 |
| wavelet-LLL | firstorder | Kurtosis                             | 1.934643812  |
| wavelet-LLL | firstorder | Mean                                 | -615.4649353 |
| wavelet-LLL | glrlm      | ShortRunLowGrayLevelEmphasis         | 0.009251119  |

|             |       |                                      |              |
|-------------|-------|--------------------------------------|--------------|
| wavelet-LLL | glrlm | GrayLevelVariance                    | 579.4298988  |
| wavelet-LLL | glrlm | LowGrayLevelRunEmphasis              | 0.009254145  |
| wavelet-LLL | glrlm | GrayLevelNonUniformityNormalized     | 0.015806003  |
| wavelet-LLL | glrlm | RunVariance                          | 0.018436821  |
| wavelet-LLL | glrlm | GrayLevelNonUniformity               | 4.290116895  |
| wavelet-LLL | glrlm | LongRunEmphasis                      | 1.053221876  |
| wavelet-LLL | glrlm | ShortRunHighGrayLevelEmphasis        | 3584.67473   |
| wavelet-LLL | glrlm | RunLengthNonUniformity               | 262.8177764  |
| wavelet-LLL | glrlm | ShortRunEmphasis                     | 0.987654932  |
| wavelet-LLL | glrlm | LongRunHighGrayLevelEmphasis         | 4011.216485  |
| wavelet-LLL | glrlm | RunPercentage                        | 0.983277592  |
| wavelet-LLL | glrlm | LongRunLowGrayLevelEmphasis          | 0.009266768  |
| wavelet-LLL | glrlm | RunEntropy                           | 6.221696336  |
| wavelet-LLL | glrlm | HighGrayLevelRunEmphasis             | 3664.300583  |
| wavelet-LLL | glrlm | RunLengthNonUniformityNormalized     | 0.968156436  |
| wavelet-LLL | glszm | GrayLevelVariance                    | 551.2697239  |
| wavelet-LLL | glszm | ZoneVariance                         | 0.523339908  |
| wavelet-LLL | glszm | GrayLevelNonUniformityNormalized     | 0.015121631  |
| wavelet-LLL | glszm | SizeZoneNonUniformityNormalized      | 0.804551099  |
| wavelet-LLL | glszm | SizeZoneNonUniformity                | 188.2649573  |
| wavelet-LLL | glszm | GrayLevelNonUniformity               | 3.538461538  |
| wavelet-LLL | glszm | LargeAreaEmphasis                    | 1.914529915  |
| wavelet-LLL | glszm | SmallAreaHighGrayLevelEmphasis       | 2824.818521  |
| wavelet-LLL | glszm | ZonePercentage                       | 0.847826087  |
| wavelet-LLL | glszm | LargeAreaLowGrayLevelEmphasis        | 0.010889689  |
| wavelet-LLL | glszm | LargeAreaHighGrayLevelEmphasis       | 9359.666667  |
| wavelet-LLL | glszm | HighGrayLevelZoneEmphasis            | 3280.662393  |
| wavelet-LLL | glszm | SmallAreaEmphasis                    | 0.914961354  |
| wavelet-LLL | glszm | LowGrayLevelZoneEmphasis             | 0.01068417   |
| wavelet-LLL | glszm | ZoneEntropy                          | 6.401666953  |
| wavelet-LLL | glszm | SmallAreaLowGrayLevelEmphasis        | 0.010652189  |
| wavelet-LLL | ngtdm | Coarseness                           | 0.017358041  |
| wavelet-LLL | ngtdm | Complexity                           | 41168.11347  |
| wavelet-LLL | ngtdm | Strength                             | 54.77709829  |
| wavelet-LLL | ngtdm | Contrast                             | 2.289823952  |
| wavelet-LLL | ngtdm | Busyness                             | 0.013166778  |
| wavelet-HHL | gldm  | GrayLevelVariance                    | 15.31005829  |
| wavelet-HHL | gldm  | HighGrayLevelEmphasis                | 202.5833333  |
| wavelet-HHL | gldm  | DependenceEntropy                    | 5.983739948  |
| wavelet-HHL | gldm  | DependenceNonUniformity              | 57.39130435  |
| wavelet-HHL | gldm  | GrayLevelNonUniformity               | 21.20289855  |
| wavelet-HHL | gldm  | SmallDependenceEmphasis              | 0.373178548  |
| wavelet-HHL | gldm  | SmallDependenceHighGrayLevelEmphasis | 80.54650981  |
| wavelet-HHL | gldm  | DependenceNonUniformityNormalized    | 0.207939509  |
| wavelet-HHL | gldm  | LargeDependenceEmphasis              | 10.52898551  |
| wavelet-HHL | gldm  | LargeDependenceLowGrayLevelEmphasis  | 0.072262997  |
| wavelet-HHL | gldm  | DependenceVariance                   | 3.026149968  |
| wavelet-HHL | gldm  | LargeDependenceHighGrayLevelEmphasis | 1919.663043  |
| wavelet-HHL | gldm  | SmallDependenceLowGrayLevelEmphasis  | 0.008760481  |
| wavelet-HHL | gldm  | LowGrayLevelEmphasis                 | 0.012764241  |
| wavelet-HHL | glcm  | JointAverage                         | 13.65741544  |
| wavelet-HHL | glcm  | SumAverage                           | 27.31483087  |
| wavelet-HHL | glcm  | JointEntropy                         | 7.110571807  |
| wavelet-HHL | glcm  | ClusterShade                         | -26.79505191 |

|             |            |                                  |              |
|-------------|------------|----------------------------------|--------------|
| wavelet-HHL | glcm       | MaximumProbability               | 0.026012242  |
| wavelet-HHL | glcm       | Idmn                             | 0.954116783  |
| wavelet-HHL | glcm       | JointEnergy                      | 0.009107267  |
| wavelet-HHL | glcm       | Contrast                         | 30.9859095   |
| wavelet-HHL | glcm       | DifferenceEntropy                | 3.486125798  |
| wavelet-HHL | glcm       | InverseVariance                  | 0.237887375  |
| wavelet-HHL | glcm       | DifferenceVariance               | 12.63602748  |
| wavelet-HHL | glcm       | Idn                              | 0.863189321  |
| wavelet-HHL | glcm       | Idm                              | 0.235817713  |
| wavelet-HHL | glcm       | Correlation                      | -0.001791544 |
| wavelet-HHL | glcm       | Autocorrelation                  | 186.5127407  |
| wavelet-HHL | glcm       | SumEntropy                       | 4.343607727  |
| wavelet-HHL | glcm       | SumSquares                       | 15.46747081  |
| wavelet-HHL | glcm       | ClusterProminence                | 3491.570578  |
| wavelet-HHL | glcm       | Imc2                             | 0.882656611  |
| wavelet-HHL | glcm       | Imc1                             | -0.193548286 |
| wavelet-HHL | glcm       | DifferenceAverage                | 4.219482238  |
| wavelet-HHL | glcm       | Id                               | 0.323310498  |
| wavelet-HHL | glcm       | ClusterTendency                  | 30.88397375  |
| wavelet-HHL | firstorder | InterquartileRange               | 124.2504275  |
| wavelet-HHL | firstorder | Skewness                         | -0.099056839 |
| wavelet-HHL | firstorder | Uniformity                       | 0.076822096  |
| wavelet-HHL | firstorder | Median                           | -2.056747312 |
| wavelet-HHL | firstorder | Energy                           | 2681799.835  |
| wavelet-HHL | firstorder | RobustMeanAbsoluteDeviation      | 52.53611048  |
| wavelet-HHL | firstorder | MeanAbsoluteDeviation            | 77.24796377  |
| wavelet-HHL | firstorder | TotalEnergy                      | 72408595.54  |
| wavelet-HHL | firstorder | Maximum                          | 274.4623182  |
| wavelet-HHL | firstorder | RootMeanSquared                  | 98.57315085  |
| wavelet-HHL | firstorder | 90Percentile                     | 136.5075518  |
| wavelet-HHL | firstorder | Minimum                          | -312.6139999 |
| wavelet-HHL | firstorder | Entropy                          | 3.945016953  |
| wavelet-HHL | firstorder | Range                            | 587.0763181  |
| wavelet-HHL | firstorder | Variance                         | 9693.001069  |
| wavelet-HHL | firstorder | 10Percentile                     | -109.3418555 |
| wavelet-HHL | firstorder | Kurtosis                         | 3.401616257  |
| wavelet-HHL | firstorder | Mean                             | 4.864668381  |
| wavelet-HHL | glrlm      | ShortRunLowGrayLevelEmphasis     | 0.012926515  |
| wavelet-HHL | glrlm      | GrayLevelVariance                | 15.92912515  |
| wavelet-HHL | glrlm      | LowGrayLevelRunEmphasis          | 0.013235672  |
| wavelet-HHL | glrlm      | GrayLevelNonUniformityNormalized | 0.074854714  |
| wavelet-HHL | glrlm      | RunVariance                      | 0.084657769  |
| wavelet-HHL | glrlm      | GrayLevelNonUniformity           | 19.27963823  |
| wavelet-HHL | glrlm      | LongRunEmphasis                  | 1.235339102  |
| wavelet-HHL | glrlm      | ShortRunHighGrayLevelEmphasis    | 194.4758057  |
| wavelet-HHL | glrlm      | RunLengthNonUniformity           | 226.6176018  |
| wavelet-HHL | glrlm      | ShortRunEmphasis                 | 0.950528471  |
| wavelet-HHL | glrlm      | LongRunHighGrayLevelEmphasis     | 247.9914968  |
| wavelet-HHL | glrlm      | RunPercentage                    | 0.933110368  |
| wavelet-HHL | glrlm      | LongRunLowGrayLevelEmphasis      | 0.014703443  |
| wavelet-HHL | glrlm      | RunEntropy                       | 4.27747409   |
| wavelet-HHL | glrlm      | HighGrayLevelRunEmphasis         | 203.6934224  |
| wavelet-HHL | glrlm      | RunLengthNonUniformityNormalized | 0.879047562  |
| wavelet-HHL | glszm      | GrayLevelVariance                | 24.51083963  |



|             |       |                                      |              |
|-------------|-------|--------------------------------------|--------------|
| wavelet-HHL | glszm | ZoneVariance                         | 9.64592896   |
| wavelet-HHL | glszm | GrayLevelNonUniformityNormalized     | 0.060377092  |
| wavelet-HHL | glszm | SizeZoneNonUniformityNormalized      | 0.426170468  |
| wavelet-HHL | glszm | SizeZoneNonUniformity                | 50.71428571  |
| wavelet-HHL | glszm | GrayLevelNonUniformity               | 7.18487395   |
| wavelet-HHL | glszm | LargeAreaEmphasis                    | 15.02521008  |
| wavelet-HHL | glszm | SmallAreaHighGrayLevelEmphasis       | 149.991862   |
| wavelet-HHL | glszm | ZonePercentage                       | 0.43115942   |
| wavelet-HHL | glszm | LargeAreaLowGrayLevelEmphasis        | 0.112138938  |
| wavelet-HHL | glszm | LargeAreaHighGrayLevelEmphasis       | 2612.159664  |
| wavelet-HHL | glszm | HighGrayLevelZoneEmphasis            | 217.697479   |
| wavelet-HHL | glszm | SmallAreaEmphasis                    | 0.677753055  |
| wavelet-HHL | glszm | LowGrayLevelZoneEmphasis             | 0.021183653  |
| wavelet-HHL | glszm | ZoneEntropy                          | 5.494654979  |
| wavelet-HHL | glszm | SmallAreaLowGrayLevelEmphasis        | 0.019063547  |
| wavelet-HHL | ngtdm | Coarseness                           | 0.020905419  |
| wavelet-HHL | ngtdm | Complexity                           | 652.45611    |
| wavelet-HHL | ngtdm | Strength                             | 3.358619188  |
| wavelet-HHL | ngtdm | Contrast                             | 0.190671941  |
| wavelet-HHL | ngtdm | Busyness                             | 0.153944947  |
| wavelet-HLH | gldm  | GrayLevelVariance                    | 18.99657372  |
| wavelet-HLH | gldm  | HighGrayLevelEmphasis                | 262.9673913  |
| wavelet-HLH | gldm  | DependenceEntropy                    | 5.737733107  |
| wavelet-HLH | gldm  | DependenceNonUniformity              | 71.89130435  |
| wavelet-HLH | gldm  | GrayLevelNonUniformity               | 18.66666667  |
| wavelet-HLH | gldm  | SmallDependenceEmphasis              | 0.400312922  |
| wavelet-HLH | gldm  | SmallDependenceHighGrayLevelEmphasis | 106.3783387  |
| wavelet-HLH | gldm  | DependenceNonUniformityNormalized    | 0.26047574   |
| wavelet-HLH | gldm  | LargeDependenceEmphasis              | 8.282608696  |
| wavelet-HLH | gldm  | LargeDependenceLowGrayLevelEmphasis  | 0.044369377  |
| wavelet-HLH | gldm  | DependenceVariance                   | 2.31910313   |
| wavelet-HLH | gldm  | LargeDependenceHighGrayLevelEmphasis | 1977.684783  |
| wavelet-HLH | gldm  | SmallDependenceLowGrayLevelEmphasis  | 0.006177006  |
| wavelet-HLH | gldm  | LowGrayLevelEmphasis                 | 0.00897881   |
| wavelet-HLH | glcm  | JointAverage                         | 15.67149807  |
| wavelet-HLH | glcm  | SumAverage                           | 31.34299613  |
| wavelet-HLH | glcm  | JointEntropy                         | 7.353658034  |
| wavelet-HLH | glcm  | ClusterShade                         | 12.91992475  |
| wavelet-HLH | glcm  | MaximumProbability                   | 0.025149179  |
| wavelet-HLH | glcm  | Idmn                                 | 0.959786138  |
| wavelet-HLH | glcm  | JointEnergy                          | 0.007610158  |
| wavelet-HLH | glcm  | Contrast                             | 35.98625259  |
| wavelet-HLH | glcm  | DifferenceEntropy                    | 3.601404841  |
| wavelet-HLH | glcm  | InverseVariance                      | 0.201649058  |
| wavelet-HLH | glcm  | DifferenceVariance                   | 13.69120572  |
| wavelet-HLH | glcm  | Idn                                  | 0.867238131  |
| wavelet-HLH | glcm  | Idm                                  | 0.19938999   |
| wavelet-HLH | glcm  | Correlation                          | 0.018474584  |
| wavelet-HLH | glcm  | Autocorrelation                      | 245.9117364  |
| wavelet-HLH | glcm  | SumEntropy                           | 4.505876566  |
| wavelet-HLH | glcm  | SumSquares                           | 18.28717409  |
| wavelet-HLH | glcm  | ClusterProminence                    | 4193.529058  |
| wavelet-HLH | glcm  | Imc2                                 | 0.886852037  |
| wavelet-HLH | glcm  | Imc1                                 | -0.191458736 |

|             |            |                                  |              |
|-------------|------------|----------------------------------|--------------|
| wavelet-HLH | glcm       | DifferenceAverage                | 4.676231389  |
| wavelet-HLH | glcm       | Id                               | 0.292027254  |
| wavelet-HLH | glcm       | ClusterTendency                  | 37.16244377  |
| wavelet-HLH | firstorder | InterquartileRange               | 150.937609   |
| wavelet-HLH | firstorder | Skewness                         | 0.0356386    |
| wavelet-HLH | firstorder | Uniformity                       | 0.06763285   |
| wavelet-HLH | firstorder | Median                           | -3.939378094 |
| wavelet-HLH | firstorder | Energy                           | 3250248.571  |
| wavelet-HLH | firstorder | RobustMeanAbsoluteDeviation      | 61.78797518  |
| wavelet-HLH | firstorder | MeanAbsoluteDeviation            | 87.09781338  |
| wavelet-HLH | firstorder | TotalEnergy                      | 87756711.43  |
| wavelet-HLH | firstorder | Maximum                          | 301.8129473  |
| wavelet-HLH | firstorder | RootMeanSquared                  | 108.5184912  |
| wavelet-HLH | firstorder | 90Percentile                     | 155.374027   |
| wavelet-HLH | firstorder | Minimum                          | -357.6645861 |
| wavelet-HLH | firstorder | Entropy                          | 4.087685345  |
| wavelet-HLH | firstorder | Range                            | 659.4775334  |
| wavelet-HLH | firstorder | Variance                         | 11766.12998  |
| wavelet-HLH | firstorder | 10Percentile                     | -131.1153367 |
| wavelet-HLH | firstorder | Kurtosis                         | 2.856767375  |
| wavelet-HLH | firstorder | Mean                             | 3.183230515  |
| wavelet-HLH | glrlm      | ShortRunLowGrayLevelEmphasis     | 0.009033511  |
| wavelet-HLH | glrlm      | GrayLevelVariance                | 19.53288615  |
| wavelet-HLH | glrlm      | LowGrayLevelRunEmphasis          | 0.009230941  |
| wavelet-HLH | glrlm      | GrayLevelNonUniformityNormalized | 0.066108274  |
| wavelet-HLH | glrlm      | RunVariance                      | 0.066123998  |
| wavelet-HLH | glrlm      | GrayLevelNonUniformity           | 17.23382347  |
| wavelet-HLH | glrlm      | LongRunEmphasis                  | 1.190835333  |
| wavelet-HLH | glrlm      | ShortRunHighGrayLevelEmphasis    | 253.5326249  |
| wavelet-HLH | glrlm      | RunLengthNonUniformity           | 234.4220552  |
| wavelet-HLH | glrlm      | ShortRunEmphasis                 | 0.958324663  |
| wavelet-HLH | glrlm      | LongRunHighGrayLevelEmphasis     | 310.8491578  |
| wavelet-HLH | glrlm      | RunPercentage                    | 0.944537347  |
| wavelet-HLH | glrlm      | LongRunLowGrayLevelEmphasis      | 0.010145124  |
| wavelet-HLH | glrlm      | RunEntropy                       | 4.3560502    |
| wavelet-HLH | glrlm      | HighGrayLevelRunEmphasis         | 263.9081713  |
| wavelet-HLH | glrlm      | RunLengthNonUniformityNormalized | 0.897653305  |
| wavelet-HLH | glszm      | GrayLevelVariance                | 26.83994959  |
| wavelet-HLH | glszm      | ZoneVariance                     | 5.84057971   |
| wavelet-HLH | glszm      | GrayLevelNonUniformityNormalized | 0.059126234  |
| wavelet-HLH | glszm      | SizeZoneNonUniformityNormalized  | 0.392039488  |
| wavelet-HLH | glszm      | SizeZoneNonUniformity            | 54.10144928  |
| wavelet-HLH | glszm      | GrayLevelNonUniformity           | 8.15942029   |
| wavelet-HLH | glszm      | LargeAreaEmphasis                | 9.84057971   |
| wavelet-HLH | glszm      | SmallAreaHighGrayLevelEmphasis   | 169.2443309  |
| wavelet-HLH | glszm      | ZonePercentage                   | 0.5          |
| wavelet-HLH | glszm      | LargeAreaLowGrayLevelEmphasis    | 0.054951616  |
| wavelet-HLH | glszm      | LargeAreaHighGrayLevelEmphasis   | 2331.615942  |
| wavelet-HLH | glszm      | HighGrayLevelZoneEmphasis        | 269.115942   |
| wavelet-HLH | glszm      | SmallAreaEmphasis                | 0.637696747  |
| wavelet-HLH | glszm      | LowGrayLevelZoneEmphasis         | 0.01328075   |
| wavelet-HLH | glszm      | ZoneEntropy                      | 5.435754965  |
| wavelet-HLH | glszm      | SmallAreaLowGrayLevelEmphasis    | 0.011594305  |
| wavelet-HLH | ngtdm      | Coarseness                       | 0.021213251  |

|             |       |            |             |
|-------------|-------|------------|-------------|
| wavelet-HLH | ngtdm | Complexity | 706.8984962 |
| wavelet-HLH | ngtdm | Strength   | 3.29952043  |
| wavelet-HLH | ngtdm | Contrast   | 0.260044433 |
| wavelet-HLH | ngtdm | Busyness   | 0.154002364 |

|            |               |                                      |                                                                                                                                                                                                                                                                                                                                                                                                                   |
|------------|---------------|--------------------------------------|-------------------------------------------------------------------------------------------------------------------------------------------------------------------------------------------------------------------------------------------------------------------------------------------------------------------------------------------------------------------------------------------------------------------|
| Image type | Feature Class | Feature Name                         | 5: RTSTRUCT: C99-DNU_segment_ITV                                                                                                                                                                                                                                                                                                                                                                                  |
| general    | info          | BoundingBox                          | (0, 3, 0, 12, 10, 10)                                                                                                                                                                                                                                                                                                                                                                                             |
| general    | info          | EnabledImageTypes                    | {u'Original': {}, u'Wavelet': {}}                                                                                                                                                                                                                                                                                                                                                                                 |
|            |               |                                      | {'distances': [1], 'additionalInfo': True, 'force2D': False, 'interpolator': 'sitkBSpline', 'resampledPixelSpacing': [3.0], 'label': 1, 'normalizeScale': 1, 'normalize': False, 'force2Ddimension': 0, 'removeOutliers': None, 'minimumROISize': None, u'binWidth': 25.0, 'minimumROIDimensions': 1, u'correctMask': True, 'preCrop': False, u'symmetricalGLCM': True, 'resegmentRange': None, 'padDistance': 5} |
| general    | info          | GeneralSettings                      | 55fd05158524f46486093103894daba5afe4                                                                                                                                                                                                                                                                                                                                                                              |
| general    | info          | ImageHash                            | df18                                                                                                                                                                                                                                                                                                                                                                                                              |
|            |               |                                      | (0.9765624999999998, 0.9765624999999998, 1.9999999999999996)                                                                                                                                                                                                                                                                                                                                                      |
| general    | info          | ImageSpacing                         | 633e3f8839b7db403f68de34ba35f444602f6                                                                                                                                                                                                                                                                                                                                                                             |
| general    | info          | MaskHash                             | c91                                                                                                                                                                                                                                                                                                                                                                                                               |
| general    | info          | NumpyVersion                         | 1.13.1                                                                                                                                                                                                                                                                                                                                                                                                            |
| general    | info          | PyWaveletVersion                     | 0.5.2                                                                                                                                                                                                                                                                                                                                                                                                             |
| general    | info          | SimpleITKVersion                     | 1.1.0                                                                                                                                                                                                                                                                                                                                                                                                             |
| general    | info          | Version                              | 1.3.0.post102+g1b0eb74                                                                                                                                                                                                                                                                                                                                                                                            |
| general    | info          | VolumeNum                            | 1                                                                                                                                                                                                                                                                                                                                                                                                                 |
| general    | info          | VoxelNum                             | 145                                                                                                                                                                                                                                                                                                                                                                                                               |
| original   | shape         | Maximum3DDiameter                    | 40.36087214                                                                                                                                                                                                                                                                                                                                                                                                       |
| original   | shape         | Maximum2DDiameterSlice               | 27.16615541                                                                                                                                                                                                                                                                                                                                                                                                       |
| original   | shape         | Sphericity                           | 0.558727255                                                                                                                                                                                                                                                                                                                                                                                                       |
| original   | shape         | MinorAxis                            | 21.10596198                                                                                                                                                                                                                                                                                                                                                                                                       |
| original   | shape         | Elongation                           | 0.462367615                                                                                                                                                                                                                                                                                                                                                                                                       |
| original   | shape         | SurfaceVolumeRatio                   | 0.549170262                                                                                                                                                                                                                                                                                                                                                                                                       |
| original   | shape         | Volume                               | 3915                                                                                                                                                                                                                                                                                                                                                                                                              |
| original   | shape         | MajorAxis                            | 45.6475784                                                                                                                                                                                                                                                                                                                                                                                                        |
| original   | shape         | SurfaceArea                          | 2150.001577                                                                                                                                                                                                                                                                                                                                                                                                       |
| original   | shape         | Flatness                             | 0.261062003                                                                                                                                                                                                                                                                                                                                                                                                       |
| original   | shape         | LeastAxis                            | 11.91684824                                                                                                                                                                                                                                                                                                                                                                                                       |
| original   | shape         | Maximum2DDiameterColumn              | 27                                                                                                                                                                                                                                                                                                                                                                                                                |
| original   | shape         | Maximum2DDiameterRow                 | 30                                                                                                                                                                                                                                                                                                                                                                                                                |
| original   | gldm          | GrayLevelVariance                    | 61.75524376                                                                                                                                                                                                                                                                                                                                                                                                       |
| original   | gldm          | HighGrayLevelEmphasis                | 412.6068966                                                                                                                                                                                                                                                                                                                                                                                                       |
| original   | gldm          | DependenceEntropy                    | 5.577593315                                                                                                                                                                                                                                                                                                                                                                                                       |
| original   | gldm          | DependenceNonUniformity              | 58.77931034                                                                                                                                                                                                                                                                                                                                                                                                       |
| original   | gldm          | GrayLevelNonUniformity               | 5.910344828                                                                                                                                                                                                                                                                                                                                                                                                       |
| original   | gldm          | SmallDependenceEmphasis              | 0.647821839                                                                                                                                                                                                                                                                                                                                                                                                       |
| original   | gldm          | SmallDependenceHighGrayLevelEmphasis | 233.2907969                                                                                                                                                                                                                                                                                                                                                                                                       |
| original   | gldm          | DependenceNonUniformityNormalized    | 0.405374554                                                                                                                                                                                                                                                                                                                                                                                                       |
| original   | gldm          | LargeDependenceEmphasis              | 3.689655172                                                                                                                                                                                                                                                                                                                                                                                                       |
| original   | gldm          | LargeDependenceLowGrayLevelEmphasis  | 0.031144276                                                                                                                                                                                                                                                                                                                                                                                                       |
| original   | gldm          | DependenceVariance                   | 0.881141498                                                                                                                                                                                                                                                                                                                                                                                                       |

|          |            |                                      |              |
|----------|------------|--------------------------------------|--------------|
| original | gldm       | LargeDependenceHighGrayLevelEmphasis | 1956.331034  |
| original | gldm       | SmallDependenceLowGrayLevelEmphasis  | 0.016384939  |
| original | gldm       | LowGrayLevelEmphasis                 | 0.018645394  |
| original | glcm       | JointAverage                         | 19.74611128  |
| original | glcm       | SumAverage                           | 39.49222257  |
| original | glcm       | JointEntropy                         | 6.842587721  |
| original | glcm       | ClusterShade                         | -317.8832222 |
| original | glcm       | MaximumProbability                   | 0.021410558  |
| original | glcm       | ldmn                                 | 0.926249486  |
| original | glcm       | JointEnergy                          | 0.009412349  |
| original | glcm       | Contrast                             | 106.091459   |
| original | glcm       | DifferenceEntropy                    | 4.116305144  |
| original | glcm       | InverseVariance                      | 0.121505819  |
| original | glcm       | DifferenceVariance                   | 40.46681568  |
| original | glcm       | ldn                                  | 0.826000352  |
| original | glcm       | ldm                                  | 0.131381587  |
| original | glcm       | Correlation                          | 0.165570372  |
| original | glcm       | Autocorrelation                      | 400.5325496  |
| original | glcm       | SumEntropy                           | 4.983051851  |
| original | glcm       | SumSquares                           | 63.1759854   |
| original | glcm       | ClusterProminence                    | 57417.09116  |
| original | glcm       | lmc2                                 | 0.995484794  |
| original | glcm       | lmc1                                 | -0.519394939 |
| original | glcm       | DifferenceAverage                    | 8.050042376  |
| original | glcm       | ld                                   | 0.217200449  |
| original | glcm       | ClusterTendency                      | 146.6124826  |
| original | firstorder | InterquartileRange                   | 293          |
| original | firstorder | Skewness                             | -0.254208599 |
| original | firstorder | Uniformity                           | 0.040760999  |
| original | firstorder | Median                               | -291         |
| original | firstorder | Energy                               | 18181282     |
| original | firstorder | RobustMeanAbsoluteDeviation          | 119.0564839  |
| original | firstorder | MeanAbsoluteDeviation                | 161.762283   |
| original | firstorder | TotalEnergy                          | 490894614    |
| original | firstorder | Maximum                              | 90           |
| original | firstorder | RootMeanSquared                      | 354.1018946  |
| original | firstorder | 90Percentile                         | -40.4        |
| original | firstorder | Minimum                              | -738         |
| original | firstorder | Entropy                              | 4.749343386  |
| original | firstorder | Range                                | 828          |
| original | firstorder | Variance                             | 38651.80851  |
| original | firstorder | 10Percentile                         | -568.8       |
| original | firstorder | Kurtosis                             | 2.261924305  |
| original | firstorder | Mean                                 | -294.5103448 |
| original | glrlm      | ShortRunLowGrayLevelEmphasis         | 0.018895116  |
| original | glrlm      | GrayLevelVariance                    | 61.60422152  |
| original | glrlm      | LowGrayLevelRunEmphasis              | 0.019001862  |
| original | glrlm      | GrayLevelNonUniformityNormalized     | 0.040622653  |
| original | glrlm      | RunVariance                          | 0.027041273  |
| original | glrlm      | GrayLevelNonUniformity               | 5.736963023  |
| original | glrlm      | LongRunEmphasis                      | 1.081526237  |
| original | glrlm      | ShortRunHighGrayLevelEmphasis        | 398.0088154  |

|             |       |                                      |              |
|-------------|-------|--------------------------------------|--------------|
| original    | glrlm | RunLengthNonUniformity               | 134.0813358  |
| original    | glrlm | ShortRunEmphasis                     | 0.980216134  |
| original    | glrlm | LongRunHighGrayLevelEmphasis         | 453.5246993  |
| original    | glrlm | RunPercentage                        | 0.974005305  |
| original    | glrlm | LongRunLowGrayLevelEmphasis          | 0.019435469  |
| original    | glrlm | RunEntropy                           | 4.838692345  |
| original    | glrlm | HighGrayLevelRunEmphasis             | 408.9393784  |
| original    | glrlm | RunLengthNonUniformityNormalized     | 0.949122426  |
| original    | glszm | GrayLevelVariance                    | 60.31800454  |
| original    | glszm | ZoneVariance                         | 1.016780045  |
| original    | glszm | GrayLevelNonUniformityNormalized     | 0.041814059  |
| original    | glszm | SizeZoneNonUniformityNormalized      | 0.634829932  |
| original    | glszm | SizeZoneNonUniformity                | 66.65714286  |
| original    | glszm | GrayLevelNonUniformity               | 4.39047619   |
| original    | glszm | LargeAreaEmphasis                    | 2.923809524  |
| original    | glszm | SmallAreaHighGrayLevelEmphasis       | 288.5687831  |
| original    | glszm | ZonePercentage                       | 0.724137931  |
| original    | glszm | LargeAreaLowGrayLevelEmphasis        | 0.031776809  |
| original    | glszm | LargeAreaHighGrayLevelEmphasis       | 1487.752381  |
| original    | glszm | HighGrayLevelZoneEmphasis            | 369.7428571  |
| original    | glszm | SmallAreaEmphasis                    | 0.824074735  |
| original    | glszm | LowGrayLevelZoneEmphasis             | 0.023532093  |
| original    | glszm | ZoneEntropy                          | 5.273138495  |
| original    | glszm | SmallAreaLowGrayLevelEmphasis        | 0.022148234  |
| original    | ngtdm | Coarseness                           | 0.032089326  |
| original    | ngtdm | Complexity                           | 2220.785037  |
| original    | ngtdm | Strength                             | 10.7995569   |
| original    | ngtdm | Contrast                             | 0.801138444  |
| original    | ngtdm | Busyness                             | 0.069058512  |
| wavelet-HHH | gldm  | GrayLevelVariance                    | 16.01284185  |
| wavelet-HHH | gldm  | HighGrayLevelEmphasis                | 173.5586207  |
| wavelet-HHH | gldm  | DependenceEntropy                    | 5.358728918  |
| wavelet-HHH | gldm  | DependenceNonUniformity              | 46.46206897  |
| wavelet-HHH | gldm  | GrayLevelNonUniformity               | 10.95862069  |
| wavelet-HHH | gldm  | SmallDependenceEmphasis              | 0.553436782  |
| wavelet-HHH | gldm  | SmallDependenceHighGrayLevelEmphasis | 96.02611303  |
| wavelet-HHH | gldm  | DependenceNonUniformityNormalized    | 0.320428062  |
| wavelet-HHH | gldm  | LargeDependenceEmphasis              | 4.931034483  |
| wavelet-HHH | gldm  | LargeDependenceLowGrayLevelEmphasis  | 0.044074252  |
| wavelet-HHH | gldm  | DependenceVariance                   | 1.175457788  |
| wavelet-HHH | gldm  | LargeDependenceHighGrayLevelEmphasis | 903.3517241  |
| wavelet-HHH | gldm  | SmallDependenceLowGrayLevelEmphasis  | 0.012867244  |
| wavelet-HHH | gldm  | LowGrayLevelEmphasis                 | 0.016367526  |
| wavelet-HHH | glcm  | JointAverage                         | 12.62209082  |
| wavelet-HHH | glcm  | SumAverage                           | 25.24418165  |
| wavelet-HHH | glcm  | JointEntropy                         | 6.440122357  |
| wavelet-HHH | glcm  | ClusterShade                         | -14.91753664 |
| wavelet-HHH | glcm  | MaximumProbability                   | 0.031778283  |
| wavelet-HHH | glcm  | ldmn                                 | 0.936323686  |
| wavelet-HHH | glcm  | JointEnergy                          | 0.013246346  |
| wavelet-HHH | glcm  | Contrast                             | 36.92881621  |
| wavelet-HHH | glcm  | DifferenceEntropy                    | 3.498465746  |

|             |            |                                  |              |
|-------------|------------|----------------------------------|--------------|
| wavelet-HHH | glcm       | InverseVariance                  | 0.173803405  |
| wavelet-HHH | glcm       | DifferenceVariance               | 12.28741772  |
| wavelet-HHH | glcm       | Idn                              | 0.832788241  |
| wavelet-HHH | glcm       | Idm                              | 0.186217225  |
| wavelet-HHH | glcm       | Correlation                      | -0.036896114 |
| wavelet-HHH | glcm       | Autocorrelation                  | 158.6859846  |
| wavelet-HHH | glcm       | SumEntropy                       | 4.221028855  |
| wavelet-HHH | glcm       | SumSquares                       | 17.78810189  |
| wavelet-HHH | glcm       | ClusterProminence                | 3442.943156  |
| wavelet-HHH | glcm       | Imc2                             | 0.967531175  |
| wavelet-HHH | glcm       | Imc1                             | -0.359123197 |
| wavelet-HHH | glcm       | DifferenceAverage                | 4.868273163  |
| wavelet-HHH | glcm       | Id                               | 0.280844165  |
| wavelet-HHH | glcm       | ClusterTendency                  | 34.22359136  |
| wavelet-HHH | firstorder | InterquartileRange               | 140.2079432  |
| wavelet-HHH | firstorder | Skewness                         | -0.175854657 |
| wavelet-HHH | firstorder | Uniformity                       | 0.075576694  |
| wavelet-HHH | firstorder | Median                           | 3.459345795  |
| wavelet-HHH | firstorder | Energy                           | 1434310.016  |
| wavelet-HHH | firstorder | RobustMeanAbsoluteDeviation      | 59.19295245  |
| wavelet-HHH | firstorder | MeanAbsoluteDeviation            | 81.67223495  |
| wavelet-HHH | firstorder | TotalEnergy                      | 38726370.43  |
| wavelet-HHH | firstorder | Maximum                          | 235.4673792  |
| wavelet-HHH | firstorder | RootMeanSquared                  | 99.45749451  |
| wavelet-HHH | firstorder | 90Percentile                     | 129.7294817  |
| wavelet-HHH | firstorder | Minimum                          | -278.1971252 |
| wavelet-HHH | firstorder | Entropy                          | 3.920905375  |
| wavelet-HHH | firstorder | Range                            | 513.6645044  |
| wavelet-HHH | firstorder | Variance                         | 9891.397871  |
| wavelet-HHH | firstorder | 10Percentile                     | -132.862918  |
| wavelet-HHH | firstorder | Kurtosis                         | 2.639157632  |
| wavelet-HHH | firstorder | Mean                             | 0.628763589  |
| wavelet-HHH | glrlm      | ShortRunLowGrayLevelEmphasis     | 0.016503974  |
| wavelet-HHH | glrlm      | GrayLevelVariance                | 16.21197017  |
| wavelet-HHH | glrlm      | LowGrayLevelRunEmphasis          | 0.016706115  |
| wavelet-HHH | glrlm      | GrayLevelNonUniformityNormalized | 0.074872865  |
| wavelet-HHH | glrlm      | RunVariance                      | 0.039329546  |
| wavelet-HHH | glrlm      | GrayLevelNonUniformity           | 10.46509043  |
| wavelet-HHH | glrlm      | LongRunEmphasis                  | 1.116196961  |
| wavelet-HHH | glrlm      | ShortRunHighGrayLevelEmphasis    | 168.3939112  |
| wavelet-HHH | glrlm      | RunLengthNonUniformity           | 130.1646774  |
| wavelet-HHH | glrlm      | ShortRunEmphasis                 | 0.97280028   |
| wavelet-HHH | glrlm      | LongRunHighGrayLevelEmphasis     | 194.3690196  |
| wavelet-HHH | glrlm      | RunPercentage                    | 0.963925729  |
| wavelet-HHH | glrlm      | LongRunLowGrayLevelEmphasis      | 0.017556566  |
| wavelet-HHH | glrlm      | RunEntropy                       | 4.092291053  |
| wavelet-HHH | glrlm      | HighGrayLevelRunEmphasis         | 173.2873237  |
| wavelet-HHH | glrlm      | RunLengthNonUniformityNormalized | 0.930939604  |
| wavelet-HHH | glszm      | GrayLevelVariance                | 18.86530235  |
| wavelet-HHH | glszm      | ZoneVariance                     | 1.343276679  |
| wavelet-HHH | glszm      | GrayLevelNonUniformityNormalized | 0.067869118  |
| wavelet-HHH | glszm      | SizeZoneNonUniformityNormalized  | 0.546074691  |

|             |       |                                      |              |
|-------------|-------|--------------------------------------|--------------|
| wavelet-HHH | glszm | SizeZoneNonUniformity                | 50.78494624  |
| wavelet-HHH | glszm | GrayLevelNonUniformity               | 6.311827957  |
| wavelet-HHH | glszm | LargeAreaEmphasis                    | 3.774193548  |
| wavelet-HHH | glszm | SmallAreaHighGrayLevelEmphasis       | 133.7735474  |
| wavelet-HHH | glszm | ZonePercentage                       | 0.64137931   |
| wavelet-HHH | glszm | LargeAreaLowGrayLevelEmphasis        | 0.041497135  |
| wavelet-HHH | glszm | LargeAreaHighGrayLevelEmphasis       | 684.4301075  |
| wavelet-HHH | glszm | HighGrayLevelZoneEmphasis            | 172.8387097  |
| wavelet-HHH | glszm | SmallAreaEmphasis                    | 0.766343903  |
| wavelet-HHH | glszm | LowGrayLevelZoneEmphasis             | 0.021168996  |
| wavelet-HHH | glszm | ZoneEntropy                          | 4.989729172  |
| wavelet-HHH | glszm | SmallAreaLowGrayLevelEmphasis        | 0.019250897  |
| wavelet-HHH | ngtdm | Coarseness                           | 0.031064392  |
| wavelet-HHH | ngtdm | Complexity                           | 552.5860114  |
| wavelet-HHH | ngtdm | Strength                             | 4.020447455  |
| wavelet-HHH | ngtdm | Contrast                             | 0.302326756  |
| wavelet-HHH | ngtdm | Busyness                             | 0.140155051  |
| wavelet-HLL | gldm  | GrayLevelVariance                    | 96.44870392  |
| wavelet-HLL | gldm  | HighGrayLevelEmphasis                | 733.9241379  |
| wavelet-HLL | gldm  | DependenceEntropy                    | 5.62880657   |
| wavelet-HLL | gldm  | DependenceNonUniformity              | 81.49655172  |
| wavelet-HLL | gldm  | GrayLevelNonUniformity               | 4.875862069  |
| wavelet-HLL | gldm  | SmallDependenceEmphasis              | 0.768582375  |
| wavelet-HLL | gldm  | SmallDependenceHighGrayLevelEmphasis | 555.3766284  |
| wavelet-HLL | gldm  | DependenceNonUniformityNormalized    | 0.562045184  |
| wavelet-HLL | gldm  | LargeDependenceEmphasis              | 2.048275862  |
| wavelet-HLL | gldm  | LargeDependenceLowGrayLevelEmphasis  | 0.013841682  |
| wavelet-HLL | gldm  | DependenceVariance                   | 0.276623068  |
| wavelet-HLL | gldm  | LargeDependenceHighGrayLevelEmphasis | 1578.903448  |
| wavelet-HLL | gldm  | SmallDependenceLowGrayLevelEmphasis  | 0.011352376  |
| wavelet-HLL | gldm  | LowGrayLevelEmphasis                 | 0.011820457  |
| wavelet-HLL | glcm  | JointAverage                         | 24.77337991  |
| wavelet-HLL | glcm  | SumAverage                           | 49.54675981  |
| wavelet-HLL | glcm  | JointEntropy                         | 6.899461471  |
| wavelet-HLL | glcm  | ClusterShade                         | -22.72948354 |
| wavelet-HLL | glcm  | MaximumProbability                   | 0.016614721  |
| wavelet-HLL | glcm  | ldmn                                 | 0.921826217  |
| wavelet-HLL | glcm  | JointEnergy                          | 0.008827238  |
| wavelet-HLL | glcm  | Contrast                             | 211.5128076  |
| wavelet-HLL | glcm  | DifferenceEntropy                    | 4.355624027  |
| wavelet-HLL | glcm  | InverseVariance                      | 0.101507794  |
| wavelet-HLL | glcm  | DifferenceVariance                   | 72.46498738  |
| wavelet-HLL | glcm  | ldn                                  | 0.820436671  |
| wavelet-HLL | glcm  | ldm                                  | 0.088271302  |
| wavelet-HLL | glcm  | Correlation                          | -0.045479401 |
| wavelet-HLL | glcm  | Autocorrelation                      | 607.7784362  |
| wavelet-HLL | glcm  | SumEntropy                           | 5.033248737  |
| wavelet-HLL | glcm  | SumSquares                           | 99.70508472  |
| wavelet-HLL | glcm  | ClusterProminence                    | 109442.0367  |
| wavelet-HLL | glcm  | lmc2                                 | 0.998848785  |
| wavelet-HLL | glcm  | lmc1                                 | -0.618732961 |
| wavelet-HLL | glcm  | DifferenceAverage                    | 11.34443044  |



|             |            |                                  |              |
|-------------|------------|----------------------------------|--------------|
| wavelet-HLL | glcm       | Id                               | 0.165783091  |
| wavelet-HLL | glcm       | ClusterTendency                  | 187.3075313  |
| wavelet-HLL | firstorder | InterquartileRange               | 321.6747492  |
| wavelet-HLL | firstorder | Skewness                         | -0.16896623  |
| wavelet-HLL | firstorder | Uniformity                       | 0.033626635  |
| wavelet-HLL | firstorder | Median                           | -70.71805401 |
| wavelet-HLL | firstorder | Energy                           | 9736399.248  |
| wavelet-HLL | firstorder | RobustMeanAbsoluteDeviation      | 136.0154485  |
| wavelet-HLL | firstorder | MeanAbsoluteDeviation            | 197.0353723  |
| wavelet-HLL | firstorder | TotalEnergy                      | 262882779.7  |
| wavelet-HLL | firstorder | Maximum                          | 436.7500587  |
| wavelet-HLL | firstorder | RootMeanSquared                  | 259.1285029  |
| wavelet-HLL | firstorder | 90Percentile                     | 251.9479007  |
| wavelet-HLL | firstorder | Minimum                          | -694.2592204 |
| wavelet-HLL | firstorder | Entropy                          | 5.068312436  |
| wavelet-HLL | firstorder | Range                            | 1131.009279  |
| wavelet-HLL | firstorder | Variance                         | 60513.90651  |
| wavelet-HLL | firstorder | 10Percentile                     | -423.4184031 |
| wavelet-HLL | firstorder | Kurtosis                         | 2.617212216  |
| wavelet-HLL | firstorder | Mean                             | -81.44737264 |
| wavelet-HLL | glrlm      | ShortRunLowGrayLevelEmphasis     | 0.011929391  |
| wavelet-HLL | glrlm      | GrayLevelVariance                | 96.78589632  |
| wavelet-HLL | glrlm      | LowGrayLevelRunEmphasis          | 0.011948653  |
| wavelet-HLL | glrlm      | GrayLevelNonUniformityNormalized | 0.033565376  |
| wavelet-HLL | glrlm      | RunVariance                      | 0.012724032  |
| wavelet-HLL | glrlm      | GrayLevelNonUniformity           | 4.80495999   |
| wavelet-HLL | glrlm      | LongRunEmphasis                  | 1.039053895  |
| wavelet-HLL | glrlm      | ShortRunHighGrayLevelEmphasis    | 725.4332577  |
| wavelet-HLL | glrlm      | RunLengthNonUniformity           | 139.5444406  |
| wavelet-HLL | glrlm      | ShortRunEmphasis                 | 0.990236526  |
| wavelet-HLL | glrlm      | LongRunHighGrayLevelEmphasis     | 764.101284   |
| wavelet-HLL | glrlm      | RunPercentage                    | 0.987267905  |
| wavelet-HLL | glrlm      | LongRunLowGrayLevelEmphasis      | 0.012025699  |
| wavelet-HLL | glrlm      | RunEntropy                       | 5.111385339  |
| wavelet-HLL | glrlm      | HighGrayLevelRunEmphasis         | 733.166863   |
| wavelet-HLL | glrlm      | RunLengthNonUniformityNormalized | 0.974551935  |
| wavelet-HLL | glszm      | GrayLevelVariance                | 101.6130046  |
| wavelet-HLL | glszm      | ZoneVariance                     | 0.241650161  |
| wavelet-HLL | glszm      | GrayLevelNonUniformityNormalized | 0.032716345  |
| wavelet-HLL | glszm      | SizeZoneNonUniformityNormalized  | 0.716822621  |
| wavelet-HLL | glszm      | SizeZoneNonUniformity            | 86.73553719  |
| wavelet-HLL | glszm      | GrayLevelNonUniformity           | 3.958677686  |
| wavelet-HLL | glszm      | LargeAreaEmphasis                | 1.67768595   |
| wavelet-HLL | glszm      | SmallAreaHighGrayLevelEmphasis   | 627.4167241  |
| wavelet-HLL | glszm      | ZonePercentage                   | 0.834482759  |
| wavelet-HLL | glszm      | LargeAreaLowGrayLevelEmphasis    | 0.015036785  |
| wavelet-HLL | glszm      | LargeAreaHighGrayLevelEmphasis   | 1289.181818  |
| wavelet-HLL | glszm      | HighGrayLevelZoneEmphasis        | 722.4876033  |
| wavelet-HLL | glszm      | SmallAreaEmphasis                | 0.872187787  |
| wavelet-HLL | glszm      | LowGrayLevelZoneEmphasis         | 0.013774705  |
| wavelet-HLL | glszm      | ZoneEntropy                      | 5.522913936  |
| wavelet-HLL | glszm      | SmallAreaLowGrayLevelEmphasis    | 0.013507001  |

|             |            |                                      |              |
|-------------|------------|--------------------------------------|--------------|
| wavelet-HLL | ngtdm      | Coarseness                           | 0.032233967  |
| wavelet-HLL | ngtdm      | Complexity                           | 4984.649944  |
| wavelet-HLL | ngtdm      | Strength                             | 17.66149047  |
| wavelet-HLL | ngtdm      | Contrast                             | 0.971118936  |
| wavelet-HLL | ngtdm      | Busyness                             | 0.036369196  |
| wavelet-LHL | gldm       | GrayLevelVariance                    | 173.6349108  |
| wavelet-LHL | gldm       | HighGrayLevelEmphasis                | 1487.572414  |
| wavelet-LHL | gldm       | DependenceEntropy                    | 5.946577452  |
| wavelet-LHL | gldm       | DependenceNonUniformity              | 72.90344828  |
| wavelet-LHL | gldm       | GrayLevelNonUniformity               | 4.117241379  |
| wavelet-LHL | gldm       | SmallDependenceEmphasis              | 0.732136015  |
| wavelet-LHL | gldm       | SmallDependenceHighGrayLevelEmphasis | 1134.593439  |
| wavelet-LHL | gldm       | DependenceNonUniformityNormalized    | 0.502782402  |
| wavelet-LHL | gldm       | LargeDependenceEmphasis              | 2.64137931   |
| wavelet-LHL | gldm       | LargeDependenceLowGrayLevelEmphasis  | 0.010582155  |
| wavelet-LHL | gldm       | DependenceVariance                   | 0.523852556  |
| wavelet-LHL | gldm       | LargeDependenceHighGrayLevelEmphasis | 3388.924138  |
| wavelet-LHL | gldm       | SmallDependenceLowGrayLevelEmphasis  | 0.00813659   |
| wavelet-LHL | gldm       | LowGrayLevelEmphasis                 | 0.008450251  |
| wavelet-LHL | glcm       | JointAverage                         | 35.40344061  |
| wavelet-LHL | glcm       | SumAverage                           | 70.80688122  |
| wavelet-LHL | glcm       | JointEntropy                         | 6.910907029  |
| wavelet-LHL | glcm       | ClusterShade                         | 4982.974521  |
| wavelet-LHL | glcm       | MaximumProbability                   | 0.018868447  |
| wavelet-LHL | glcm       | ldmn                                 | 0.966948861  |
| wavelet-LHL | glcm       | JointEnergy                          | 0.008831048  |
| wavelet-LHL | glcm       | Contrast                             | 234.6265473  |
| wavelet-LHL | glcm       | DifferenceEntropy                    | 4.390475742  |
| wavelet-LHL | glcm       | InverseVariance                      | 0.08687137   |
| wavelet-LHL | glcm       | DifferenceVariance                   | 88.1892837   |
| wavelet-LHL | glcm       | ldn                                  | 0.880625697  |
| wavelet-LHL | glcm       | ldm                                  | 0.089544175  |
| wavelet-LHL | glcm       | Correlation                          | 0.231114876  |
| wavelet-LHL | glcm       | Autocorrelation                      | 1288.802272  |
| wavelet-LHL | glcm       | SumEntropy                           | 5.241860161  |
| wavelet-LHL | glcm       | SumSquares                           | 152.251367   |
| wavelet-LHL | glcm       | ClusterProminence                    | 543889.9911  |
| wavelet-LHL | glcm       | lmc2                                 | 0.999377795  |
| wavelet-LHL | glcm       | lmc1                                 | -0.654731451 |
| wavelet-LHL | glcm       | DifferenceAverage                    | 11.66454009  |
| wavelet-LHL | glcm       | ld                                   | 0.167251946  |
| wavelet-LHL | glcm       | ClusterTendency                      | 374.3789207  |
| wavelet-LHL | firstorder | InterquartileRange                   | 387.8741365  |
| wavelet-LHL | firstorder | Skewness                             | 0.338543543  |
| wavelet-LHL | firstorder | Uniformity                           | 0.028394768  |
| wavelet-LHL | firstorder | Median                               | 49.01239093  |
| wavelet-LHL | firstorder | Energy                               | 15986914.42  |
| wavelet-LHL | firstorder | RobustMeanAbsoluteDeviation          | 173.3659783  |
| wavelet-LHL | firstorder | MeanAbsoluteDeviation                | 256.642492   |
| wavelet-LHL | firstorder | TotalEnergy                          | 431646689.2  |
| wavelet-LHL | firstorder | Maximum                              | 1100.022994  |
| wavelet-LHL | firstorder | RootMeanSquared                      | 332.0460543  |

|             |            |                                      |              |
|-------------|------------|--------------------------------------|--------------|
| wavelet-LHL | firstorder | 90Percentile                         | 439.8656887  |
| wavelet-LHL | firstorder | Minimum                              | -837.6407153 |
| wavelet-LHL | firstorder | Entropy                              | 5.370605257  |
| wavelet-LHL | firstorder | Range                                | 1937.663709  |
| wavelet-LHL | firstorder | Variance                             | 108327.6816  |
| wavelet-LHL | firstorder | 10Percentile                         | -334.5729625 |
| wavelet-LHL | firstorder | Kurtosis                             | 3.512925562  |
| wavelet-LHL | firstorder | Mean                                 | 43.89647518  |
| wavelet-LHL | glrlm      | ShortRunLowGrayLevelEmphasis         | 0.008566435  |
| wavelet-LHL | glrlm      | GrayLevelVariance                    | 174.4733447  |
| wavelet-LHL | glrlm      | LowGrayLevelRunEmphasis              | 0.008582642  |
| wavelet-LHL | glrlm      | GrayLevelNonUniformityNormalized     | 0.028147962  |
| wavelet-LHL | glrlm      | RunVariance                          | 0.018513026  |
| wavelet-LHL | glrlm      | GrayLevelNonUniformity               | 4.011087553  |
| wavelet-LHL | glrlm      | LongRunEmphasis                      | 1.056101897  |
| wavelet-LHL | glrlm      | ShortRunHighGrayLevelEmphasis        | 1475.289879  |
| wavelet-LHL | glrlm      | RunLengthNonUniformity               | 137.7774958  |
| wavelet-LHL | glrlm      | ShortRunEmphasis                     | 0.986572219  |
| wavelet-LHL | glrlm      | LongRunHighGrayLevelEmphasis         | 1560.717749  |
| wavelet-LHL | glrlm      | RunPercentage                        | 0.982493369  |
| wavelet-LHL | glrlm      | LongRunLowGrayLevelEmphasis          | 0.008652893  |
| wavelet-LHL | glrlm      | RunEntropy                           | 5.429617976  |
| wavelet-LHL | glrlm      | HighGrayLevelRunEmphasis             | 1492.164587  |
| wavelet-LHL | glrlm      | RunLengthNonUniformityNormalized     | 0.966178919  |
| wavelet-LHL | glszm      | GrayLevelVariance                    | 185.1361474  |
| wavelet-LHL | glszm      | ZoneVariance                         | 0.42887931   |
| wavelet-LHL | glszm      | GrayLevelNonUniformityNormalized     | 0.026010702  |
| wavelet-LHL | glszm      | SizeZoneNonUniformityNormalized      | 0.702288942  |
| wavelet-LHL | glszm      | SizeZoneNonUniformity                | 81.46551724  |
| wavelet-LHL | glszm      | GrayLevelNonUniformity               | 3.017241379  |
| wavelet-LHL | glszm      | LargeAreaEmphasis                    | 1.99137931   |
| wavelet-LHL | glszm      | SmallAreaHighGrayLevelEmphasis       | 1349.575081  |
| wavelet-LHL | glszm      | ZonePercentage                       | 0.8          |
| wavelet-LHL | glszm      | LargeAreaLowGrayLevelEmphasis        | 0.011547686  |
| wavelet-LHL | glszm      | LargeAreaHighGrayLevelEmphasis       | 2673.775862  |
| wavelet-LHL | glszm      | HighGrayLevelZoneEmphasis            | 1543.948276  |
| wavelet-LHL | glszm      | SmallAreaEmphasis                    | 0.863251916  |
| wavelet-LHL | glszm      | LowGrayLevelZoneEmphasis             | 0.010261748  |
| wavelet-LHL | glszm      | ZoneEntropy                          | 5.8358394    |
| wavelet-LHL | glszm      | SmallAreaLowGrayLevelEmphasis        | 0.010110421  |
| wavelet-LHL | ngtdm      | Coarseness                           | 0.037252996  |
| wavelet-LHL | ngtdm      | Complexity                           | 9091.868889  |
| wavelet-LHL | ngtdm      | Strength                             | 41.51133657  |
| wavelet-LHL | ngtdm      | Contrast                             | 1.120887879  |
| wavelet-LHL | ngtdm      | Busyness                             | 0.018982036  |
| wavelet-LHH | gldm       | GrayLevelVariance                    | 34.28156956  |
| wavelet-LHH | gldm       | HighGrayLevelEmphasis                | 473.8344828  |
| wavelet-LHH | gldm       | DependenceEntropy                    | 5.296591705  |
| wavelet-LHH | gldm       | DependenceNonUniformity              | 54.1862069   |
| wavelet-LHH | gldm       | GrayLevelNonUniformity               | 8.682758621  |
| wavelet-LHH | gldm       | SmallDependenceEmphasis              | 0.586781609  |
| wavelet-LHH | gldm       | SmallDependenceHighGrayLevelEmphasis | 289.9703065  |

|             |            |                                      |              |
|-------------|------------|--------------------------------------|--------------|
| wavelet-LHH | gldm       | DependenceNonUniformityNormalized    | 0.373697979  |
| wavelet-LHH | gldm       | LargeDependenceEmphasis              | 3.606896552  |
| wavelet-LHH | gldm       | LargeDependenceLowGrayLevelEmphasis  | 0.017101408  |
| wavelet-LHH | gldm       | DependenceVariance                   | 0.657978597  |
| wavelet-LHH | gldm       | LargeDependenceHighGrayLevelEmphasis | 1639.793103  |
| wavelet-LHH | gldm       | SmallDependenceLowGrayLevelEmphasis  | 0.008646759  |
| wavelet-LHH | gldm       | LowGrayLevelEmphasis                 | 0.009870771  |
| wavelet-LHH | glcm       | JointAverage                         | 20.79399508  |
| wavelet-LHH | glcm       | SumAverage                           | 41.58799015  |
| wavelet-LHH | glcm       | JointEntropy                         | 6.685683261  |
| wavelet-LHH | glcm       | ClusterShade                         | -98.75442499 |
| wavelet-LHH | glcm       | MaximumProbability                   | 0.023853653  |
| wavelet-LHH | glcm       | Idmn                                 | 0.969925747  |
| wavelet-LHH | glcm       | JointEnergy                          | 0.010608429  |
| wavelet-LHH | glcm       | Contrast                             | 74.96543939  |
| wavelet-LHH | glcm       | DifferenceEntropy                    | 3.887503155  |
| wavelet-LHH | glcm       | InverseVariance                      | 0.144594696  |
| wavelet-LHH | glcm       | DifferenceVariance                   | 30.01371485  |
| wavelet-LHH | glcm       | Idn                                  | 0.884932761  |
| wavelet-LHH | glcm       | Idm                                  | 0.147885552  |
| wavelet-LHH | glcm       | Correlation                          | -0.031414662 |
| wavelet-LHH | glcm       | Autocorrelation                      | 431.0533405  |
| wavelet-LHH | glcm       | SumEntropy                           | 4.532903582  |
| wavelet-LHH | glcm       | SumSquares                           | 36.06294763  |
| wavelet-LHH | glcm       | ClusterProminence                    | 17182.84336  |
| wavelet-LHH | glcm       | Imc2                                 | 0.988544181  |
| wavelet-LHH | glcm       | Imc1                                 | -0.448582313 |
| wavelet-LHH | glcm       | DifferenceAverage                    | 6.621928524  |
| wavelet-LHH | glcm       | Id                                   | 0.238518277  |
| wavelet-LHH | glcm       | ClusterTendency                      | 69.28635112  |
| wavelet-LHH | firstorder | InterquartileRange                   | 177.0315602  |
| wavelet-LHH | firstorder | Skewness                             | 0.158867481  |
| wavelet-LHH | firstorder | Uniformity                           | 0.059881094  |
| wavelet-LHH | firstorder | Median                               | 2.665958062  |
| wavelet-LHH | firstorder | Energy                               | 3150982.428  |
| wavelet-LHH | firstorder | RobustMeanAbsoluteDeviation          | 71.26281244  |
| wavelet-LHH | firstorder | MeanAbsoluteDeviation                | 110.176472   |
| wavelet-LHH | firstorder | TotalEnergy                          | 85076525.55  |
| wavelet-LHH | firstorder | Maximum                              | 659.6603001  |
| wavelet-LHH | firstorder | RootMeanSquared                      | 147.4140878  |
| wavelet-LHH | firstorder | 90Percentile                         | 193.8764488  |
| wavelet-LHH | firstorder | Minimum                              | -494.1974659 |
| wavelet-LHH | firstorder | Entropy                              | 4.305410707  |
| wavelet-LHH | firstorder | Range                                | 1153.857766  |
| wavelet-LHH | firstorder | Variance                             | 21602.89534  |
| wavelet-LHH | firstorder | 10Percentile                         | -141.2205059 |
| wavelet-LHH | firstorder | Kurtosis                             | 5.422326263  |
| wavelet-LHH | firstorder | Mean                                 | 11.31450198  |
| wavelet-LHH | glrlm      | ShortRunLowGrayLevelEmphasis         | 0.010010913  |
| wavelet-LHH | glrlm      | GrayLevelVariance                    | 34.72708083  |
| wavelet-LHH | glrlm      | LowGrayLevelRunEmphasis              | 0.010072157  |
| wavelet-LHH | glrlm      | GrayLevelNonUniformityNormalzied     | 0.059252424  |

|             |       |                                      |              |
|-------------|-------|--------------------------------------|--------------|
| wavelet-LHH | glrlm | RunVariance                          | 0.027533887  |
| wavelet-LHH | glrlm | GrayLevelNonUniformity               | 8.355283054  |
| wavelet-LHH | glrlm | LongRunEmphasis                      | 1.086024834  |
| wavelet-LHH | glrlm | ShortRunHighGrayLevelEmphasis        | 465.0240774  |
| wavelet-LHH | glrlm | RunLengthNonUniformity               | 133.315734   |
| wavelet-LHH | glrlm | ShortRunEmphasis                     | 0.978493791  |
| wavelet-LHH | glrlm | LongRunHighGrayLevelEmphasis         | 513.018898   |
| wavelet-LHH | glrlm | RunPercentage                        | 0.972413793  |
| wavelet-LHH | glrlm | LongRunLowGrayLevelEmphasis          | 0.010317131  |
| wavelet-LHH | glrlm | RunEntropy                           | 4.434877102  |
| wavelet-LHH | glrlm | HighGrayLevelRunEmphasis             | 474.6230415  |
| wavelet-LHH | glrlm | RunLengthNonUniformityNormalized     | 0.944932226  |
| wavelet-LHH | glszm | GrayLevelVariance                    | 41.01765126  |
| wavelet-LHH | glszm | ZoneVariance                         | 0.915416794  |
| wavelet-LHH | glszm | GrayLevelNonUniformityNormalized     | 0.053361902  |
| wavelet-LHH | glszm | SizeZoneNonUniformityNormalized      | 0.546985002  |
| wavelet-LHH | glszm | SizeZoneNonUniformity                | 54.15151515  |
| wavelet-LHH | glszm | GrayLevelNonUniformity               | 5.282828283  |
| wavelet-LHH | glszm | LargeAreaEmphasis                    | 3.060606061  |
| wavelet-LHH | glszm | SmallAreaHighGrayLevelEmphasis       | 382.1835908  |
| wavelet-LHH | glszm | ZonePercentage                       | 0.682758621  |
| wavelet-LHH | glszm | LargeAreaLowGrayLevelEmphasis        | 0.018629838  |
| wavelet-LHH | glszm | LargeAreaHighGrayLevelEmphasis       | 1429.636364  |
| wavelet-LHH | glszm | HighGrayLevelZoneEmphasis            | 484.1414141  |
| wavelet-LHH | glszm | SmallAreaEmphasis                    | 0.765972136  |
| wavelet-LHH | glszm | LowGrayLevelZoneEmphasis             | 0.013127295  |
| wavelet-LHH | glszm | ZoneEntropy                          | 5.147766793  |
| wavelet-LHH | glszm | SmallAreaLowGrayLevelEmphasis        | 0.012389225  |
| wavelet-LHH | ngtdm | Coarseness                           | 0.035497117  |
| wavelet-LHH | ngtdm | Complexity                           | 1348.487124  |
| wavelet-LHH | ngtdm | Strength                             | 9.693055514  |
| wavelet-LHH | ngtdm | Contrast                             | 0.489702548  |
| wavelet-LHH | ngtdm | Busyness                             | 0.05927616   |
| wavelet-LLH | gldm  | GrayLevelVariance                    | 84.98758621  |
| wavelet-LLH | gldm  | HighGrayLevelEmphasis                | 824.8275862  |
| wavelet-LLH | gldm  | DependenceEntropy                    | 5.760683532  |
| wavelet-LLH | gldm  | DependenceNonUniformity              | 74.35172414  |
| wavelet-LLH | gldm  | GrayLevelNonUniformity               | 5.055172414  |
| wavelet-LLH | gldm  | SmallDependenceEmphasis              | 0.736015326  |
| wavelet-LLH | gldm  | SmallDependenceHighGrayLevelEmphasis | 599.6302682  |
| wavelet-LLH | gldm  | DependenceNonUniformityNormalized    | 0.512770511  |
| wavelet-LLH | gldm  | LargeDependenceEmphasis              | 2.393103448  |
| wavelet-LLH | gldm  | LargeDependenceLowGrayLevelEmphasis  | 0.011743879  |
| wavelet-LLH | gldm  | DependenceVariance                   | 0.394292509  |
| wavelet-LLH | gldm  | LargeDependenceHighGrayLevelEmphasis | 1980.206897  |
| wavelet-LLH | gldm  | SmallDependenceLowGrayLevelEmphasis  | 0.009403453  |
| wavelet-LLH | gldm  | LowGrayLevelEmphasis                 | 0.009775931  |
| wavelet-LLH | glcm  | JointAverage                         | 27.03164581  |
| wavelet-LLH | glcm  | SumAverage                           | 54.06329162  |
| wavelet-LLH | glcm  | JointEntropy                         | 6.925769504  |
| wavelet-LLH | glcm  | ClusterShade                         | -216.3520541 |
| wavelet-LLH | glcm  | MaximumProbability                   | 0.015979263  |

|             |            |                                  |              |
|-------------|------------|----------------------------------|--------------|
| wavelet-LLH | glcm       | Idmn                             | 0.942771565  |
| wavelet-LLH | glcm       | JointEnergy                      | 0.008674149  |
| wavelet-LLH | glcm       | Contrast                         | 144.7148953  |
| wavelet-LLH | glcm       | DifferenceEntropy                | 4.176572163  |
| wavelet-LLH | glcm       | InverseVariance                  | 0.126344037  |
| wavelet-LLH | glcm       | DifferenceVariance               | 58.96543744  |
| wavelet-LLH | glcm       | Idn                              | 0.847408687  |
| wavelet-LLH | glcm       | Idm                              | 0.110499719  |
| wavelet-LLH | glcm       | Correlation                      | 0.151761789  |
| wavelet-LLH | glcm       | Autocorrelation                  | 743.5408128  |
| wavelet-LLH | glcm       | SumEntropy                       | 5.079187725  |
| wavelet-LLH | glcm       | SumSquares                       | 85.1237514   |
| wavelet-LLH | glcm       | ClusterProminence                | 123048.6371  |
| wavelet-LLH | glcm       | Imc2                             | 0.998600722  |
| wavelet-LLH | glcm       | Imc1                             | -0.604439485 |
| wavelet-LLH | glcm       | DifferenceAverage                | 9.081517823  |
| wavelet-LLH | glcm       | Id                               | 0.194715514  |
| wavelet-LLH | glcm       | ClusterTendency                  | 195.7801103  |
| wavelet-LLH | firstorder | InterquartileRange               | 305.456777   |
| wavelet-LLH | firstorder | Skewness                         | -0.316569281 |
| wavelet-LLH | firstorder | Uniformity                       | 0.034863258  |
| wavelet-LLH | firstorder | Median                           | -38.20983734 |
| wavelet-LLH | firstorder | Energy                           | 7756215.983  |
| wavelet-LLH | firstorder | RobustMeanAbsoluteDeviation      | 128.0892161  |
| wavelet-LLH | firstorder | MeanAbsoluteDeviation            | 183.2182529  |
| wavelet-LLH | firstorder | TotalEnergy                      | 209417831.5  |
| wavelet-LLH | firstorder | Maximum                          | 408.0503535  |
| wavelet-LLH | firstorder | RootMeanSquared                  | 231.281527   |
| wavelet-LLH | firstorder | 90Percentile                     | 277.1021457  |
| wavelet-LLH | firstorder | Minimum                          | -676.4207981 |
| wavelet-LLH | firstorder | Entropy                          | 5.046250799  |
| wavelet-LLH | firstorder | Range                            | 1084.471152  |
| wavelet-LLH | firstorder | Variance                         | 52421.58641  |
| wavelet-LLH | firstorder | 10Percentile                     | -309.9824697 |
| wavelet-LLH | firstorder | Kurtosis                         | 2.889307606  |
| wavelet-LLH | firstorder | Mean                             | -32.70410222 |
| wavelet-LLH | glrlm      | ShortRunLowGrayLevelEmphasis     | 0.009895176  |
| wavelet-LLH | glrlm      | GrayLevelVariance                | 85.73638686  |
| wavelet-LLH | glrlm      | LowGrayLevelRunEmphasis          | 0.00991249   |
| wavelet-LLH | glrlm      | GrayLevelNonUniformityNormalized | 0.03463104   |
| wavelet-LLH | glrlm      | RunVariance                      | 0.015901813  |
| wavelet-LLH | glrlm      | GrayLevelNonUniformity           | 4.941841906  |
| wavelet-LLH | glrlm      | LongRunEmphasis                  | 1.048991268  |
| wavelet-LLH | glrlm      | ShortRunHighGrayLevelEmphasis    | 814.3599783  |
| wavelet-LLH | glrlm      | RunLengthNonUniformity           | 138.1973611  |
| wavelet-LLH | glrlm      | ShortRunEmphasis                 | 0.987752183  |
| wavelet-LLH | glrlm      | LongRunHighGrayLevelEmphasis     | 865.6543878  |
| wavelet-LLH | glrlm      | RunPercentage                    | 0.984084881  |
| wavelet-LLH | glrlm      | LongRunLowGrayLevelEmphasis      | 0.009981749  |
| wavelet-LLH | glrlm      | RunEntropy                       | 5.108771323  |
| wavelet-LLH | glrlm      | HighGrayLevelRunEmphasis         | 824.6188602  |
| wavelet-LLH | glrlm      | RunLengthNonUniformityNormalized | 0.968196374  |

|             |       |                                      |             |
|-------------|-------|--------------------------------------|-------------|
| wavelet-LLH | glszm | GrayLevelVariance                    | 95.4503616  |
| wavelet-LLH | glszm | ZoneVariance                         | 0.318796114 |
| wavelet-LLH | glszm | GrayLevelNonUniformityNormalized     | 0.031485134 |
| wavelet-LLH | glszm | SizeZoneNonUniformityNormalized      | 0.691577179 |
| wavelet-LLH | glszm | SizeZoneNonUniformity                | 80.91452991 |
| wavelet-LLH | glszm | GrayLevelNonUniformity               | 3.683760684 |
| wavelet-LLH | glszm | LargeAreaEmphasis                    | 1.854700855 |
| wavelet-LLH | glszm | SmallAreaHighGrayLevelEmphasis       | 697.4537037 |
| wavelet-LLH | glszm | ZonePercentage                       | 0.806896552 |
| wavelet-LLH | glszm | LargeAreaLowGrayLevelEmphasis        | 0.013012138 |
| wavelet-LLH | glszm | LargeAreaHighGrayLevelEmphasis       | 1517.350427 |
| wavelet-LLH | glszm | HighGrayLevelZoneEmphasis            | 821.6837607 |
| wavelet-LLH | glszm | SmallAreaEmphasis                    | 0.857846629 |
| wavelet-LLH | glszm | LowGrayLevelZoneEmphasis             | 0.011774036 |
| wavelet-LLH | glszm | ZoneEntropy                          | 5.654314027 |
| wavelet-LLH | glszm | SmallAreaLowGrayLevelEmphasis        | 0.01157556  |
| wavelet-LLH | ngtdm | Coarseness                           | 0.037484051 |
| wavelet-LLH | ngtdm | Complexity                           | 4038.943467 |
| wavelet-LLH | ngtdm | Strength                             | 19.82610227 |
| wavelet-LLH | ngtdm | Contrast                             | 0.730413798 |
| wavelet-LLH | ngtdm | Busyness                             | 0.03040552  |
| wavelet-LLL | gldm  | GrayLevelVariance                    | 242.6851843 |
| wavelet-LLL | gldm  | HighGrayLevelEmphasis                | 1181.57931  |
| wavelet-LLL | gldm  | DependenceEntropy                    | 5.865981463 |
| wavelet-LLL | gldm  | DependenceNonUniformity              | 90.88965517 |
| wavelet-LLL | gldm  | GrayLevelNonUniformity               | 3.965517241 |
| wavelet-LLL | gldm  | SmallDependenceEmphasis              | 0.81901341  |
| wavelet-LLL | gldm  | SmallDependenceHighGrayLevelEmphasis | 892.4569444 |
| wavelet-LLL | gldm  | DependenceNonUniformityNormalized    | 0.626825208 |
| wavelet-LLL | gldm  | LargeDependenceEmphasis              | 1.924137931 |
| wavelet-LLL | gldm  | LargeDependenceLowGrayLevelEmphasis  | 0.012243105 |
| wavelet-LLL | gldm  | DependenceVariance                   | 0.296313912 |
| wavelet-LLL | gldm  | LargeDependenceHighGrayLevelEmphasis | 2812.682759 |
| wavelet-LLL | gldm  | SmallDependenceLowGrayLevelEmphasis  | 0.010632601 |
| wavelet-LLL | gldm  | LowGrayLevelEmphasis                 | 0.010935679 |
| wavelet-LLL | glcm  | JointAverage                         | 34.23375701 |
| wavelet-LLL | glcm  | SumAverage                           | 68.46751402 |
| wavelet-LLL | glcm  | JointEntropy                         | 6.964888781 |
| wavelet-LLL | glcm  | ClusterShade                         | 11496.94461 |
| wavelet-LLL | glcm  | MaximumProbability                   | 0.015982539 |
| wavelet-LLL | glcm  | Idmn                                 | 0.951707268 |
| wavelet-LLL | glcm  | JointEnergy                          | 0.008405233 |
| wavelet-LLL | glcm  | Contrast                             | 356.1757388 |
| wavelet-LLL | glcm  | DifferenceEntropy                    | 4.707806659 |
| wavelet-LLL | glcm  | InverseVariance                      | 0.065473662 |
| wavelet-LLL | glcm  | DifferenceVariance                   | 124.318144  |
| wavelet-LLL | glcm  | Idn                                  | 0.853410001 |
| wavelet-LLL | glcm  | Idm                                  | 0.064066325 |
| wavelet-LLL | glcm  | Correlation                          | 0.3748889   |
| wavelet-LLL | glcm  | Autocorrelation                      | 1277.48527  |
| wavelet-LLL | glcm  | SumEntropy                           | 5.457055444 |
| wavelet-LLL | glcm  | SumSquares                           | 280.9586189 |

|             |            |                                  |              |
|-------------|------------|----------------------------------|--------------|
| wavelet-LLL | glcm       | ClusterProminence                | 1722026.306  |
| wavelet-LLL | glcm       | Imc2                             | 0.999632875  |
| wavelet-LLL | glcm       | Imc1                             | -0.690189908 |
| wavelet-LLL | glcm       | DifferenceAverage                | 15.00227588  |
| wavelet-LLL | glcm       | Id                               | 0.133377853  |
| wavelet-LLL | glcm       | ClusterTendency                  | 767.6587367  |
| wavelet-LLL | firstorder | InterquartileRange               | 513.5187111  |
| wavelet-LLL | firstorder | Skewness                         | 0.565117713  |
| wavelet-LLL | firstorder | Uniformity                       | 0.027348395  |
| wavelet-LLL | firstorder | Median                           | -1048.29685  |
| wavelet-LLL | firstorder | Energy                           | 173099562.8  |
| wavelet-LLL | firstorder | RobustMeanAbsoluteDeviation      | 207.0829269  |
| wavelet-LLL | firstorder | MeanAbsoluteDeviation            | 305.2067021  |
| wavelet-LLL | firstorder | TotalEnergy                      | 4673688195   |
| wavelet-LLL | firstorder | Maximum                          | 216.5948308  |
| wavelet-LLL | firstorder | RootMeanSquared                  | 1092.607014  |
| wavelet-LLL | firstorder | 90Percentile                     | -497.1082802 |
| wavelet-LLL | firstorder | Minimum                          | -1760.872359 |
| wavelet-LLL | firstorder | Entropy                          | 5.458998878  |
| wavelet-LLL | firstorder | Range                            | 1977.46719   |
| wavelet-LLL | firstorder | Variance                         | 151921.2061  |
| wavelet-LLL | firstorder | 10Percentile                     | -1521.141496 |
| wavelet-LLL | firstorder | Kurtosis                         | 3.354252145  |
| wavelet-LLL | firstorder | Mean                             | -1020.719786 |
| wavelet-LLL | glrlm      | ShortRunLowGrayLevelEmphasis     | 0.011024924  |
| wavelet-LLL | glrlm      | GrayLevelVariance                | 242.6137803  |
| wavelet-LLL | glrlm      | LowGrayLevelRunEmphasis          | 0.011037242  |
| wavelet-LLL | glrlm      | GrayLevelNonUniformityNormalized | 0.027270254  |
| wavelet-LLL | glrlm      | RunVariance                      | 0.010606547  |
| wavelet-LLL | glrlm      | GrayLevelNonUniformity           | 3.912290558  |
| wavelet-LLL | glrlm      | LongRunEmphasis                  | 1.032367452  |
| wavelet-LLL | glrlm      | ShortRunHighGrayLevelEmphasis    | 1162.356725  |
| wavelet-LLL | glrlm      | RunLengthNonUniformity           | 140.436546   |
| wavelet-LLL | glrlm      | ShortRunEmphasis                 | 0.991908137  |
| wavelet-LLL | glrlm      | LongRunHighGrayLevelEmphasis     | 1230.86563   |
| wavelet-LLL | glrlm      | RunPercentage                    | 0.98938992   |
| wavelet-LLL | glrlm      | LongRunLowGrayLevelEmphasis      | 0.011086513  |
| wavelet-LLL | glrlm      | RunEntropy                       | 5.492490612  |
| wavelet-LLL | glrlm      | HighGrayLevelRunEmphasis         | 1176.058506  |
| wavelet-LLL | glrlm      | RunLengthNonUniformityNormalized | 0.978786906  |
| wavelet-LLL | glszm      | GrayLevelVariance                | 242.9324767  |
| wavelet-LLL | glszm      | ZoneVariance                     | 0.207420005  |
| wavelet-LLL | glszm      | GrayLevelNonUniformityNormalized | 0.026581003  |
| wavelet-LLL | glszm      | SizeZoneNonUniformityNormalized  | 0.785462333  |
| wavelet-LLL | glszm      | SizeZoneNonUniformity            | 98.96825397  |
| wavelet-LLL | glszm      | GrayLevelNonUniformity           | 3.349206349  |
| wavelet-LLL | glszm      | LargeAreaEmphasis                | 1.531746032  |
| wavelet-LLL | glszm      | SmallAreaHighGrayLevelEmphasis   | 971.7006724  |
| wavelet-LLL | glszm      | ZonePercentage                   | 0.868965517  |
| wavelet-LLL | glszm      | LargeAreaLowGrayLevelEmphasis    | 0.013103887  |
| wavelet-LLL | glszm      | LargeAreaHighGrayLevelEmphasis   | 2029.468254  |
| wavelet-LLL | glszm      | HighGrayLevelZoneEmphasis        | 1113.650794  |



|             |            |                                      |              |
|-------------|------------|--------------------------------------|--------------|
| wavelet-LLL | glszm      | SmallAreaEmphasis                    | 0.907021605  |
| wavelet-LLL | glszm      | LowGrayLevelZoneEmphasis             | 0.012345423  |
| wavelet-LLL | glszm      | ZoneEntropy                          | 5.750934639  |
| wavelet-LLL | glszm      | SmallAreaLowGrayLevelEmphasis        | 0.012176893  |
| wavelet-LLL | ngtdm      | Coarseness                           | 0.027873071  |
| wavelet-LLL | ngtdm      | Complexity                           | 14022.15921  |
| wavelet-LLL | ngtdm      | Strength                             | 47.80915168  |
| wavelet-LLL | ngtdm      | Contrast                             | 1.640815817  |
| wavelet-LLL | ngtdm      | Busyness                             | 0.024080032  |
| wavelet-HHL | gldm       | GrayLevelVariance                    | 45.16166468  |
| wavelet-HHL | gldm       | HighGrayLevelEmphasis                | 442.6827586  |
| wavelet-HHL | gldm       | DependenceEntropy                    | 5.484999611  |
| wavelet-HHL | gldm       | DependenceNonUniformity              | 63.20689655  |
| wavelet-HHL | gldm       | GrayLevelNonUniformity               | 7.220689655  |
| wavelet-HHL | gldm       | SmallDependenceEmphasis              | 0.662643678  |
| wavelet-HHL | gldm       | SmallDependenceHighGrayLevelEmphasis | 284.4114943  |
| wavelet-HHL | gldm       | DependenceNonUniformityNormalized    | 0.435909631  |
| wavelet-HHL | gldm       | LargeDependenceEmphasis              | 3.027586207  |
| wavelet-HHL | gldm       | LargeDependenceLowGrayLevelEmphasis  | 0.022475402  |
| wavelet-HHL | gldm       | DependenceVariance                   | 0.576741974  |
| wavelet-HHL | gldm       | LargeDependenceHighGrayLevelEmphasis | 1354.434483  |
| wavelet-HHL | gldm       | SmallDependenceLowGrayLevelEmphasis  | 0.016567241  |
| wavelet-HHL | gldm       | LowGrayLevelEmphasis                 | 0.017399376  |
| wavelet-HHL | glcm       | JointAverage                         | 20.1458765   |
| wavelet-HHL | glcm       | SumAverage                           | 40.29175301  |
| wavelet-HHL | glcm       | JointEntropy                         | 6.696964799  |
| wavelet-HHL | glcm       | ClusterShade                         | 240.7429087  |
| wavelet-HHL | glcm       | MaximumProbability                   | 0.026416009  |
| wavelet-HHL | glcm       | ldmn                                 | 0.96180427   |
| wavelet-HHL | glcm       | JointEnergy                          | 0.010736147  |
| wavelet-HHL | glcm       | Contrast                             | 74.53989803  |
| wavelet-HHL | glcm       | DifferenceEntropy                    | 3.825749484  |
| wavelet-HHL | glcm       | InverseVariance                      | 0.15457295   |
| wavelet-HHL | glcm       | DifferenceVariance                   | 28.58501621  |
| wavelet-HHL | glcm       | ldn                                  | 0.87164744   |
| wavelet-HHL | glcm       | ldm                                  | 0.141356971  |
| wavelet-HHL | glcm       | Correlation                          | 0.040445316  |
| wavelet-HHL | glcm       | Autocorrelation                      | 408.4534248  |
| wavelet-HHL | glcm       | SumEntropy                           | 4.600951488  |
| wavelet-HHL | glcm       | SumSquares                           | 39.43049265  |
| wavelet-HHL | glcm       | ClusterProminence                    | 32341.95027  |
| wavelet-HHL | glcm       | lmc2                                 | 0.99230534   |
| wavelet-HHL | glcm       | lmc1                                 | -0.480160887 |
| wavelet-HHL | glcm       | DifferenceAverage                    | 6.602773871  |
| wavelet-HHL | glcm       | ld                                   | 0.232878619  |
| wavelet-HHL | glcm       | ClusterTendency                      | 83.18207255  |
| wavelet-HHL | firstorder | InterquartileRange                   | 195.3359022  |
| wavelet-HHL | firstorder | Skewness                             | 0.123010332  |
| wavelet-HHL | firstorder | Uniformity                           | 0.04979786   |
| wavelet-HHL | firstorder | Median                               | -16.05199026 |
| wavelet-HHL | firstorder | Energy                               | 4100119.982  |
| wavelet-HHL | firstorder | RobustMeanAbsoluteDeviation          | 82.02090235  |

|             |            |                                  |              |
|-------------|------------|----------------------------------|--------------|
| wavelet-HHL | firstorder | MeanAbsoluteDeviation            | 127.5005559  |
| wavelet-HHL | firstorder | TotalEnergy                      | 110703239.5  |
| wavelet-HHL | firstorder | Maximum                          | 509.3378098  |
| wavelet-HHL | firstorder | RootMeanSquared                  | 168.156741   |
| wavelet-HHL | firstorder | 90Percentile                     | 193.3638753  |
| wavelet-HHL | firstorder | Minimum                          | -495.41691   |
| wavelet-HHL | firstorder | Entropy                          | 4.588774383  |
| wavelet-HHL | firstorder | Range                            | 1004.75472   |
| wavelet-HHL | firstorder | Variance                         | 28089.25597  |
| wavelet-HHL | firstorder | 10Percentile                     | -207.8862975 |
| wavelet-HHL | firstorder | Kurtosis                         | 3.751702425  |
| wavelet-HHL | firstorder | Mean                             | -13.69063774 |
| wavelet-HHL | grlm       | ShortRunLowGrayLevelEmphasis     | 0.017692922  |
| wavelet-HHL | grlm       | GrayLevelVariance                | 45.78186312  |
| wavelet-HHL | grlm       | LowGrayLevelRunEmphasis          | 0.017733277  |
| wavelet-HHL | grlm       | GrayLevelNonUniformityNormalized | 0.049198481  |
| wavelet-HHL | grlm       | RunVariance                      | 0.022841901  |
| wavelet-HHL | grlm       | GrayLevelNonUniformity           | 6.979535269  |
| wavelet-HHL | grlm       | LongRunEmphasis                  | 1.068311691  |
| wavelet-HHL | grlm       | ShortRunHighGrayLevelEmphasis    | 434.7806341  |
| wavelet-HHL | grlm       | RunLengthNonUniformity           | 135.8602454  |
| wavelet-HHL | grlm       | ShortRunEmphasis                 | 0.983541426  |
| wavelet-HHL | grlm       | LongRunHighGrayLevelEmphasis     | 473.2999687  |
| wavelet-HHL | grlm       | RunPercentage                    | 0.978249337  |
| wavelet-HHL | grlm       | LongRunLowGrayLevelEmphasis      | 0.01790571   |
| wavelet-HHL | grlm       | RunEntropy                       | 4.685961612  |
| wavelet-HHL | grlm       | HighGrayLevelRunEmphasis         | 442.3730183  |
| wavelet-HHL | grlm       | RunLengthNonUniformityNormalized | 0.957515267  |
| wavelet-HHL | glszm      | GrayLevelVariance                | 54.92844429  |
| wavelet-HHL | glszm      | ZoneVariance                     | 1.062744749  |
| wavelet-HHL | glszm      | GrayLevelNonUniformityNormalized | 0.042719829  |
| wavelet-HHL | glszm      | SizeZoneNonUniformityNormalized  | 0.64257743   |
| wavelet-HHL | glszm      | SizeZoneNonUniformity            | 68.11320755  |
| wavelet-HHL | glszm      | GrayLevelNonUniformity           | 4.528301887  |
| wavelet-HHL | glszm      | LargeAreaEmphasis                | 2.933962264  |
| wavelet-HHL | glszm      | SmallAreaHighGrayLevelEmphasis   | 352.4608495  |
| wavelet-HHL | glszm      | ZonePercentage                   | 0.731034483  |
| wavelet-HHL | glszm      | LargeAreaLowGrayLevelEmphasis    | 0.027777726  |
| wavelet-HHL | glszm      | LargeAreaHighGrayLevelEmphasis   | 1281.915094  |
| wavelet-HHL | glszm      | HighGrayLevelZoneEmphasis        | 436.2830189  |
| wavelet-HHL | glszm      | SmallAreaEmphasis                | 0.828285428  |
| wavelet-HHL | glszm      | LowGrayLevelZoneEmphasis         | 0.022886844  |
| wavelet-HHL | glszm      | ZoneEntropy                      | 5.317569399  |
| wavelet-HHL | glszm      | SmallAreaLowGrayLevelEmphasis    | 0.022469101  |
| wavelet-HHL | ngtdm      | Coarseness                       | 0.036575433  |
| wavelet-HHL | ngtdm      | Complexity                       | 2100.63649   |
| wavelet-HHL | ngtdm      | Strength                         | 12.47572605  |
| wavelet-HHL | ngtdm      | Contrast                         | 0.474466312  |
| wavelet-HHL | ngtdm      | Busyness                         | 0.048713593  |
| wavelet-HLH | gldm       | GrayLevelVariance                | 33.14311534  |
| wavelet-HLH | gldm       | HighGrayLevelEmphasis            | 275.2137931  |
| wavelet-HLH | gldm       | DependenceEntropy                | 5.373518252  |

|             |            |                                      |              |
|-------------|------------|--------------------------------------|--------------|
| wavelet-HLH | gldm       | DependenceNonUniformity              | 57.02758621  |
| wavelet-HLH | gldm       | GrayLevelNonUniformity               | 8.131034483  |
| wavelet-HLH | gldm       | SmallDependenceEmphasis              | 0.633273946  |
| wavelet-HLH | gldm       | SmallDependenceHighGrayLevelEmphasis | 181.8031341  |
| wavelet-HLH | gldm       | DependenceNonUniformityNormalized    | 0.393293698  |
| wavelet-HLH | gldm       | LargeDependenceEmphasis              | 3.882758621  |
| wavelet-HLH | gldm       | LargeDependenceLowGrayLevelEmphasis  | 0.035748539  |
| wavelet-HLH | gldm       | DependenceVariance                   | 0.88627824   |
| wavelet-HLH | gldm       | LargeDependenceHighGrayLevelEmphasis | 987.6551724  |
| wavelet-HLH | gldm       | SmallDependenceLowGrayLevelEmphasis  | 0.018178213  |
| wavelet-HLH | gldm       | LowGrayLevelEmphasis                 | 0.02024569   |
| wavelet-HLH | glcm       | JointAverage                         | 15.26113906  |
| wavelet-HLH | glcm       | SumAverage                           | 30.52227812  |
| wavelet-HLH | glcm       | JointEntropy                         | 6.703834211  |
| wavelet-HLH | glcm       | ClusterShade                         | 66.4537865   |
| wavelet-HLH | glcm       | MaximumProbability                   | 0.025984901  |
| wavelet-HLH | glcm       | Idmn                                 | 0.946907266  |
| wavelet-HLH | glcm       | JointEnergy                          | 0.010574666  |
| wavelet-HLH | glcm       | Contrast                             | 67.95156666  |
| wavelet-HLH | glcm       | DifferenceEntropy                    | 3.859210212  |
| wavelet-HLH | glcm       | InverseVariance                      | 0.147136001  |
| wavelet-HLH | glcm       | DifferenceVariance                   | 24.42679091  |
| wavelet-HLH | glcm       | Idn                                  | 0.847789639  |
| wavelet-HLH | glcm       | Idm                                  | 0.149867234  |
| wavelet-HLH | glcm       | Correlation                          | -0.001007833 |
| wavelet-HLH | glcm       | Autocorrelation                      | 233.3977095  |
| wavelet-HLH | glcm       | SumEntropy                           | 4.591446599  |
| wavelet-HLH | glcm       | SumSquares                           | 33.98339686  |
| wavelet-HLH | glcm       | ClusterProminence                    | 13741.6015   |
| wavelet-HLH | glcm       | Imc2                                 | 0.988043708  |
| wavelet-HLH | glcm       | Imc1                                 | -0.442585951 |
| wavelet-HLH | glcm       | DifferenceAverage                    | 6.511186885  |
| wavelet-HLH | glcm       | Id                                   | 0.239313005  |
| wavelet-HLH | glcm       | ClusterTendency                      | 67.98202077  |
| wavelet-HLH | firstorder | InterquartileRange                   | 185.3480772  |
| wavelet-HLH | firstorder | Skewness                             | 0.16720247   |
| wavelet-HLH | firstorder | Uniformity                           | 0.0560761    |
| wavelet-HLH | firstorder | Median                               | -15.88689199 |
| wavelet-HLH | firstorder | Energy                               | 2951491.661  |
| wavelet-HLH | firstorder | RobustMeanAbsoluteDeviation          | 81.98149766  |
| wavelet-HLH | firstorder | MeanAbsoluteDeviation                | 115.4062531  |
| wavelet-HLH | firstorder | TotalEnergy                          | 79690274.84  |
| wavelet-HLH | firstorder | Maximum                              | 432.2376218  |
| wavelet-HLH | firstorder | RootMeanSquared                      | 142.6713528  |
| wavelet-HLH | firstorder | 90Percentile                         | 189.5907699  |
| wavelet-HLH | firstorder | Minimum                              | -370.1938885 |
| wavelet-HLH | firstorder | Entropy                              | 4.378297139  |
| wavelet-HLH | firstorder | Range                                | 802.4315103  |
| wavelet-HLH | firstorder | Variance                             | 20351.21291  |
| wavelet-HLH | firstorder | 10Percentile                         | -163.1766986 |
| wavelet-HLH | firstorder | Kurtosis                             | 2.914282594  |
| wavelet-HLH | firstorder | Mean                                 | 1.975344871  |

|             |       |                                  |             |
|-------------|-------|----------------------------------|-------------|
| wavelet-HLH | glrlm | ShortRunLowGrayLevelEmphasis     | 0.020565205 |
| wavelet-HLH | glrlm | GrayLevelVariance                | 33.57880327 |
| wavelet-HLH | glrlm | LowGrayLevelRunEmphasis          | 0.02067942  |
| wavelet-HLH | glrlm | GrayLevelNonUniformityNormalized | 0.055374408 |
| wavelet-HLH | glrlm | RunVariance                      | 0.030297321 |
| wavelet-HLH | glrlm | GrayLevelNonUniformity           | 7.803928541 |
| wavelet-HLH | glrlm | LongRunEmphasis                  | 1.090012675 |
| wavelet-HLH | glrlm | ShortRunHighGrayLevelEmphasis    | 270.4802159 |
| wavelet-HLH | glrlm | RunLengthNonUniformity           | 133.3639576 |
| wavelet-HLH | glrlm | ShortRunEmphasis                 | 0.978740444 |
| wavelet-HLH | glrlm | LongRunHighGrayLevelEmphasis     | 298.3132639 |
| wavelet-HLH | glrlm | RunPercentage                    | 0.971883289 |
| wavelet-HLH | glrlm | LongRunLowGrayLevelEmphasis      | 0.021170823 |
| wavelet-HLH | glrlm | RunEntropy                       | 4.506730488 |
| wavelet-HLH | glrlm | HighGrayLevelRunEmphasis         | 275.9035614 |
| wavelet-HLH | glrlm | RunLengthNonUniformityNormalized | 0.945798754 |
| wavelet-HLH | glszm | GrayLevelVariance                | 38.51239514 |
| wavelet-HLH | glszm | ZoneVariance                     | 1.057027053 |
| wavelet-HLH | glszm | GrayLevelNonUniformityNormalized | 0.048920728 |
| wavelet-HLH | glszm | SizeZoneNonUniformityNormalized  | 0.636157979 |
| wavelet-HLH | glszm | SizeZoneNonUniformity            | 65.52427184 |
| wavelet-HLH | glszm | GrayLevelNonUniformity           | 5.038834951 |
| wavelet-HLH | glszm | LargeAreaEmphasis                | 3.038834951 |
| wavelet-HLH | glszm | SmallAreaHighGrayLevelEmphasis   | 238.5275755 |
| wavelet-HLH | glszm | ZonePercentage                   | 0.710344828 |
| wavelet-HLH | glszm | LargeAreaLowGrayLevelEmphasis    | 0.037461066 |
| wavelet-HLH | glszm | LargeAreaHighGrayLevelEmphasis   | 791.3980583 |
| wavelet-HLH | glszm | HighGrayLevelZoneEmphasis        | 284.0582524 |
| wavelet-HLH | glszm | SmallAreaEmphasis                | 0.822764968 |
| wavelet-HLH | glszm | LowGrayLevelZoneEmphasis         | 0.026226019 |
| wavelet-HLH | glszm | ZoneEntropy                      | 5.114776533 |
| wavelet-HLH | glszm | SmallAreaLowGrayLevelEmphasis    | 0.025180655 |
| wavelet-HLH | ngtdm | Coarseness                       | 0.033192344 |
| wavelet-HLH | ngtdm | Complexity                       | 1313.431243 |
| wavelet-HLH | ngtdm | Strength                         | 8.011540058 |
| wavelet-HLH | ngtdm | Contrast                         | 0.445721516 |
| wavelet-HLH | ngtdm | Busyness                         | 0.084099746 |

| Image type | Feature Class | Feature Name                         |                                                                                                                                                                                                                                                                                                                                                                                                                   |
|------------|---------------|--------------------------------------|-------------------------------------------------------------------------------------------------------------------------------------------------------------------------------------------------------------------------------------------------------------------------------------------------------------------------------------------------------------------------------------------------------------------|
| general    | info          | BoundingBox                          | 16: RTSTRUCT: C99-DNU_segment_RUL ITV<br>(0, 1, 1, 13, 12, 8)                                                                                                                                                                                                                                                                                                                                                     |
| general    | info          | EnabledImageTypes                    | {u'Original': {}, u'Wavelet': {}}                                                                                                                                                                                                                                                                                                                                                                                 |
|            |               |                                      | {'distances': [1], 'additionalInfo': True, 'force2D': False, 'interpolator': 'sitkBSpline', 'resampledPixelSpacing': [3.0], 'label': 1, 'normalizeScale': 1, 'normalize': False, 'force2Ddimension': 0, 'removeOutliers': None, 'minimumROISize': None, u'binWidth': 25.0, 'minimumROIDimensions': 1, u'correctMask': True, 'preCrop': False, u'symmetricalGLCM': True, 'resegmentRange': None, 'padDistance': 5} |
| general    | info          | GeneralSettings                      |                                                                                                                                                                                                                                                                                                                                                                                                                   |
| general    | info          | ImageHash                            | fd3d409fa12697949ef9a04d708a8555202436da                                                                                                                                                                                                                                                                                                                                                                          |
| general    | info          | ImageSpacing                         | (0.9765625000000002, 0.9765625000000002, 2.0)                                                                                                                                                                                                                                                                                                                                                                     |
| general    | info          | MaskHash                             | 6a784867dbfd5c52e4d2181b82e0b113c27c893a                                                                                                                                                                                                                                                                                                                                                                          |
| general    | info          | NumpyVersion                         | 1.13.1                                                                                                                                                                                                                                                                                                                                                                                                            |
| general    | info          | PyWaveletVersion                     | 0.5.2                                                                                                                                                                                                                                                                                                                                                                                                             |
| general    | info          | SimpleITKVersion                     | 1.1.0                                                                                                                                                                                                                                                                                                                                                                                                             |
| general    | info          | Version                              | 1.3.0.post102+g1b0eb74                                                                                                                                                                                                                                                                                                                                                                                            |
| general    | info          | VolumeNum                            | 1                                                                                                                                                                                                                                                                                                                                                                                                                 |
| general    | info          | VoxelNum                             | 550                                                                                                                                                                                                                                                                                                                                                                                                               |
| original   | shape         | Maximum3DDiameter                    | 37.58989226                                                                                                                                                                                                                                                                                                                                                                                                       |
| original   | shape         | Maximum2DDiameterSlice               | 35.11409973                                                                                                                                                                                                                                                                                                                                                                                                       |
| original   | shape         | Sphericity                           | 0.857953351                                                                                                                                                                                                                                                                                                                                                                                                       |
| original   | shape         | MinorAxis                            | 29.98654485                                                                                                                                                                                                                                                                                                                                                                                                       |
| original   | shape         | Elongation                           | 0.986368653                                                                                                                                                                                                                                                                                                                                                                                                       |
| original   | shape         | SurfaceVolumeRatio                   | 0.229321601                                                                                                                                                                                                                                                                                                                                                                                                       |
| original   | shape         | Volume                               | 14850                                                                                                                                                                                                                                                                                                                                                                                                             |
| original   | shape         | MajorAxis                            | 30.40095075                                                                                                                                                                                                                                                                                                                                                                                                       |
| original   | shape         | SurfaceArea                          | 3405.425774                                                                                                                                                                                                                                                                                                                                                                                                       |
| original   | shape         | Flatness                             | 0.760512986                                                                                                                                                                                                                                                                                                                                                                                                       |
| original   | shape         | LeastAxis                            | 23.12031783                                                                                                                                                                                                                                                                                                                                                                                                       |
| original   | shape         | Maximum2DDiameterColumn              | 34.20526275                                                                                                                                                                                                                                                                                                                                                                                                       |
| original   | shape         | Maximum2DDiameterRow                 | 33.54101966                                                                                                                                                                                                                                                                                                                                                                                                       |
| original   | gldm          | GrayLevelVariance                    | 59.96653223                                                                                                                                                                                                                                                                                                                                                                                                       |
| original   | gldm          | HighGrayLevelEmphasis                | 1157.141818                                                                                                                                                                                                                                                                                                                                                                                                       |
| original   | gldm          | DependenceEntropy                    | 6.121182914                                                                                                                                                                                                                                                                                                                                                                                                       |
| original   | gldm          | DependenceNonUniformity              | 75.85090909                                                                                                                                                                                                                                                                                                                                                                                                       |
| original   | gldm          | GrayLevelNonUniformity               | 79.20363636                                                                                                                                                                                                                                                                                                                                                                                                       |
| original   | gldm          | SmallDependenceEmphasis              | 0.360895956                                                                                                                                                                                                                                                                                                                                                                                                       |
| original   | gldm          | SmallDependenceHighGrayLevelEmphasis | 284.989895                                                                                                                                                                                                                                                                                                                                                                                                        |
| original   | gldm          | DependenceNonUniformityNormalized    | 0.137910744                                                                                                                                                                                                                                                                                                                                                                                                       |
| original   | gldm          | LargeDependenceEmphasis              | 54.97454545                                                                                                                                                                                                                                                                                                                                                                                                       |
| original   | gldm          | LargeDependenceLowGrayLevelEmphasis  | 0.041696145                                                                                                                                                                                                                                                                                                                                                                                                       |
| original   | gldm          | DependenceVariance                   | 23.85843306                                                                                                                                                                                                                                                                                                                                                                                                       |
| original   | gldm          | LargeDependenceHighGrayLevelEmphasis | 78266.25818                                                                                                                                                                                                                                                                                                                                                                                                       |
| original   | gldm          | SmallDependenceLowGrayLevelEmphasis  | 0.00314918                                                                                                                                                                                                                                                                                                                                                                                                        |
| original   | gldm          | LowGrayLevelEmphasis                 | 0.003662095                                                                                                                                                                                                                                                                                                                                                                                                       |
| original   | glcm          | JointAverage                         | 34.67595149                                                                                                                                                                                                                                                                                                                                                                                                       |
| original   | glcm          | SumAverage                           | 69.35190298                                                                                                                                                                                                                                                                                                                                                                                                       |

|          |            |                                  |              |
|----------|------------|----------------------------------|--------------|
| original | glcm       | JointEntropy                     | 6.016367816  |
| original | glcm       | ClusterShade                     | -2015.873591 |
| original | glcm       | MaximumProbability               | 0.158518603  |
| original | glcm       | Idmn                             | 0.968251151  |
| original | glcm       | JointEnergy                      | 0.050402386  |
| original | glcm       | Contrast                         | 62.50186233  |
| original | glcm       | DifferenceEntropy                | 3.532230656  |
| original | glcm       | InverseVariance                  | 0.320592095  |
| original | glcm       | DifferenceVariance               | 40.96528054  |
| original | glcm       | Idn                              | 0.911373708  |
| original | glcm       | Idm                              | 0.398613867  |
| original | glcm       | Correlation                      | 0.240590128  |
| original | glcm       | Autocorrelation                  | 1212.319857  |
| original | glcm       | SumEntropy                       | 4.241858738  |
| original | glcm       | SumSquares                       | 41.13047053  |
| original | glcm       | ClusterProminence                | 72429.79814  |
| original | glcm       | Imc2                             | 0.829647747  |
| original | glcm       | Imc1                             | -0.178465287 |
| original | glcm       | DifferenceAverage                | 4.630005116  |
| original | glcm       | Id                               | 0.447583476  |
| original | glcm       | ClusterTendency                  | 102.0200198  |
| original | firstorder | InterquartileRange               | 179          |
| original | firstorder | Skewness                         | -1.737800022 |
| original | firstorder | Uniformity                       | 0.144006612  |
| original | firstorder | Median                           | 14.5         |
| original | firstorder | Energy                           | 24547079     |
| original | firstorder | RobustMeanAbsoluteDeviation      | 92.07481405  |
| original | firstorder | MeanAbsoluteDeviation            | 148.7771835  |
| original | firstorder | TotalEnergy                      | 662771133    |
| original | firstorder | Maximum                          | 96           |
| original | firstorder | RootMeanSquared                  | 211.2606275  |
| original | firstorder | 90Percentile                     | 49.1         |
| original | firstorder | Minimum                          | -880         |
| original | firstorder | Entropy                          | 3.777124094  |
| original | firstorder | Range                            | 976          |
| original | firstorder | Variance                         | 37349.99897  |
| original | firstorder | 10Percentile                     | -373.9       |
| original | firstorder | Kurtosis                         | 5.342134308  |
| original | firstorder | Mean                             | -85.32909091 |
| original | glrlm      | ShortRunLowGrayLevelEmphasis     | 0.004208462  |
| original | glrlm      | GrayLevelVariance                | 66.93384043  |
| original | glrlm      | LowGrayLevelRunEmphasis          | 0.004293235  |
| original | glrlm      | GrayLevelNonUniformityNormalized | 0.101218213  |
| original | glrlm      | RunVariance                      | 0.368388019  |
| original | glrlm      | GrayLevelNonUniformity           | 45.92174215  |
| original | glrlm      | LongRunEmphasis                  | 1.844904604  |
| original | glrlm      | ShortRunHighGrayLevelEmphasis    | 938.1275973  |
| original | glrlm      | RunLengthNonUniformity           | 336.7204206  |
| original | glrlm      | ShortRunEmphasis                 | 0.884039151  |
| original | glrlm      | LongRunHighGrayLevelEmphasis     | 2301.817685  |
| original | glrlm      | RunPercentage                    | 0.823916084  |
| original | glrlm      | LongRunLowGrayLevelEmphasis      | 0.004898115  |
| original | glrlm      | RunEntropy                       | 4.701129228  |
| original | glrlm      | HighGrayLevelRunEmphasis         | 1101.550809  |
| original | glrlm      | RunLengthNonUniformityNormalized | 0.742554805  |

|             |       |                                      |              |
|-------------|-------|--------------------------------------|--------------|
| original    | glszm | GrayLevelVariance                    | 77.05725624  |
| original    | glszm | ZoneVariance                         | 176.8453515  |
| original    | glszm | GrayLevelNonUniformityNormalized     | 0.040907029  |
| original    | glszm | SizeZoneNonUniformityNormalized      | 0.684988662  |
| original    | glszm | SizeZoneNonUniformity                | 143.847619   |
| original    | glszm | GrayLevelNonUniformity               | 8.59047619   |
| original    | glszm | LargeAreaEmphasis                    | 183.7047619  |
| original    | glszm | SmallAreaHighGrayLevelEmphasis       | 631.6627436  |
| original    | glszm | ZonePercentage                       | 0.381818182  |
| original    | glszm | LargeAreaLowGrayLevelEmphasis        | 0.136738258  |
| original    | glszm | LargeAreaHighGrayLevelEmphasis       | 261567.3143  |
| original    | glszm | HighGrayLevelZoneEmphasis            | 799.6428571  |
| original    | glszm | SmallAreaEmphasis                    | 0.851701954  |
| original    | glszm | LowGrayLevelZoneEmphasis             | 0.008326262  |
| original    | glszm | ZoneEntropy                          | 5.464540277  |
| original    | glszm | SmallAreaLowGrayLevelEmphasis        | 0.008150936  |
| original    | ngtdm | Coarseness                           | 0.005213922  |
| original    | ngtdm | Complexity                           | 2824.608655  |
| original    | ngtdm | Strength                             | 9.622847096  |
| original    | ngtdm | Contrast                             | 0.387084003  |
| original    | ngtdm | Busyness                             | 0.102490797  |
| wavelet-HHH | gldm  | GrayLevelVariance                    | 10.85567273  |
| wavelet-HHH | gldm  | HighGrayLevelEmphasis                | 222.2672727  |
| wavelet-HHH | gldm  | DependenceEntropy                    | 6.12925928   |
| wavelet-HHH | gldm  | DependenceNonUniformity              | 75.42181818  |
| wavelet-HHH | gldm  | GrayLevelNonUniformity               | 62.79272727  |
| wavelet-HHH | gldm  | SmallDependenceEmphasis              | 0.302581327  |
| wavelet-HHH | gldm  | SmallDependenceHighGrayLevelEmphasis | 70.54104811  |
| wavelet-HHH | gldm  | DependenceNonUniformityNormalized    | 0.137130579  |
| wavelet-HHH | gldm  | LargeDependenceEmphasis              | 32.14909091  |
| wavelet-HHH | gldm  | LargeDependenceLowGrayLevelEmphasis  | 0.161432756  |
| wavelet-HHH | gldm  | DependenceVariance                   | 13.48669091  |
| wavelet-HHH | gldm  | LargeDependenceHighGrayLevelEmphasis | 6694.634545  |
| wavelet-HHH | gldm  | SmallDependenceLowGrayLevelEmphasis  | 0.004090416  |
| wavelet-HHH | gldm  | LowGrayLevelEmphasis                 | 0.007787708  |
| wavelet-HHH | glcm  | JointAverage                         | 14.50833414  |
| wavelet-HHH | glcm  | SumAverage                           | 29.01666829  |
| wavelet-HHH | glcm  | JointEntropy                         | 6.597742237  |
| wavelet-HHH | glcm  | ClusterShade                         | -2.662307562 |
| wavelet-HHH | glcm  | MaximumProbability                   | 0.078417646  |
| wavelet-HHH | glcm  | Idmn                                 | 0.974961033  |
| wavelet-HHH | glcm  | JointEnergy                          | 0.023122878  |
| wavelet-HHH | glcm  | Contrast                             | 20.64225335  |
| wavelet-HHH | glcm  | DifferenceEntropy                    | 3.221423577  |
| wavelet-HHH | glcm  | InverseVariance                      | 0.309740208  |
| wavelet-HHH | glcm  | DifferenceVariance                   | 10.49181858  |
| wavelet-HHH | glcm  | Idn                                  | 0.904532011  |
| wavelet-HHH | glcm  | Idm                                  | 0.340425381  |
| wavelet-HHH | glcm  | Correlation                          | -0.034308339 |
| wavelet-HHH | glcm  | Autocorrelation                      | 210.1406685  |
| wavelet-HHH | glcm  | SumEntropy                           | 3.974428951  |
| wavelet-HHH | glcm  | SumSquares                           | 9.96702133   |
| wavelet-HHH | glcm  | ClusterProminence                    | 1920.477381  |
| wavelet-HHH | glcm  | Imc2                                 | 0.767557795  |
| wavelet-HHH | glcm  | Imc1                                 | -0.127247304 |

|             |            |                                  |              |
|-------------|------------|----------------------------------|--------------|
| wavelet-HHH | glcm       | DifferenceAverage                | 3.156432948  |
| wavelet-HHH | glcm       | Id                               | 0.412659953  |
| wavelet-HHH | glcm       | ClusterTendency                  | 19.22583198  |
| wavelet-HHH | firstorder | InterquartileRange               | 74.44516151  |
| wavelet-HHH | firstorder | Skewness                         | -0.137033356 |
| wavelet-HHH | firstorder | Uniformity                       | 0.114168595  |
| wavelet-HHH | firstorder | Median                           | 1.057296503  |
| wavelet-HHH | firstorder | Energy                           | 3722941.218  |
| wavelet-HHH | firstorder | RobustMeanAbsoluteDeviation      | 33.6088838   |
| wavelet-HHH | firstorder | MeanAbsoluteDeviation            | 57.84768519  |
| wavelet-HHH | firstorder | TotalEnergy                      | 100519412.9  |
| wavelet-HHH | firstorder | Maximum                          | 301.9543249  |
| wavelet-HHH | firstorder | RootMeanSquared                  | 82.27383565  |
| wavelet-HHH | firstorder | 90Percentile                     | 103.9889499  |
| wavelet-HHH | firstorder | Minimum                          | -348.2743503 |
| wavelet-HHH | firstorder | Entropy                          | 3.624556983  |
| wavelet-HHH | firstorder | Range                            | 650.2286752  |
| wavelet-HHH | firstorder | Variance                         | 6767.587915  |
| wavelet-HHH | firstorder | 10Percentile                     | -96.0239452  |
| wavelet-HHH | firstorder | Kurtosis                         | 4.843279613  |
| wavelet-HHH | firstorder | Mean                             | 1.181574308  |
| wavelet-HHH | glrlm      | ShortRunLowGrayLevelEmphasis     | 0.007738161  |
| wavelet-HHH | glrlm      | GrayLevelVariance                | 12.11697627  |
| wavelet-HHH | glrlm      | LowGrayLevelRunEmphasis          | 0.008196063  |
| wavelet-HHH | glrlm      | GrayLevelNonUniformityNormalized | 0.098980913  |
| wavelet-HHH | glrlm      | RunVariance                      | 0.1987421    |
| wavelet-HHH | glrlm      | GrayLevelNonUniformity           | 47.50907656  |
| wavelet-HHH | glrlm      | LongRunEmphasis                  | 1.515413706  |
| wavelet-HHH | glrlm      | ShortRunHighGrayLevelEmphasis    | 204.623417   |
| wavelet-HHH | glrlm      | RunLengthNonUniformity           | 379.5701135  |
| wavelet-HHH | glrlm      | ShortRunEmphasis                 | 0.909062776  |
| wavelet-HHH | glrlm      | LongRunHighGrayLevelEmphasis     | 332.3276005  |
| wavelet-HHH | glrlm      | RunPercentage                    | 0.872307692  |
| wavelet-HHH | glrlm      | LongRunLowGrayLevelEmphasis      | 0.010771048  |
| wavelet-HHH | glrlm      | RunEntropy                       | 4.266236999  |
| wavelet-HHH | glrlm      | HighGrayLevelRunEmphasis         | 223.912829   |
| wavelet-HHH | glrlm      | RunLengthNonUniformityNormalized | 0.790399945  |
| wavelet-HHH | glszm      | GrayLevelVariance                | 22.89760817  |
| wavelet-HHH | glszm      | ZoneVariance                     | 110.2458718  |
| wavelet-HHH | glszm      | GrayLevelNonUniformityNormalized | 0.062139807  |
| wavelet-HHH | glszm      | SizeZoneNonUniformityNormalized  | 0.476425095  |
| wavelet-HHH | glszm      | SizeZoneNonUniformity            | 87.18579235  |
| wavelet-HHH | glszm      | GrayLevelNonUniformity           | 11.3715847   |
| wavelet-HHH | glszm      | LargeAreaEmphasis                | 119.2786885  |
| wavelet-HHH | glszm      | SmallAreaHighGrayLevelEmphasis   | 168.9614184  |
| wavelet-HHH | glszm      | ZonePercentage                   | 0.332727273  |
| wavelet-HHH | glszm      | LargeAreaLowGrayLevelEmphasis    | 0.585104568  |
| wavelet-HHH | glszm      | LargeAreaHighGrayLevelEmphasis   | 25081.84153  |
| wavelet-HHH | glszm      | HighGrayLevelZoneEmphasis        | 235.7704918  |
| wavelet-HHH | glszm      | SmallAreaEmphasis                | 0.716942071  |
| wavelet-HHH | glszm      | LowGrayLevelZoneEmphasis         | 0.012900371  |
| wavelet-HHH | glszm      | ZoneEntropy                      | 5.407756491  |
| wavelet-HHH | glszm      | SmallAreaLowGrayLevelEmphasis    | 0.011176829  |
| wavelet-HHH | ngtdm      | Coarseness                       | 0.013786286  |
| wavelet-HHH | ngtdm      | Complexity                       | 658.7191539  |



|             |            |                                      |              |
|-------------|------------|--------------------------------------|--------------|
| wavelet-HHH | ngtdm      | Strength                             | 2.620709521  |
| wavelet-HHH | ngtdm      | Contrast                             | 0.082074502  |
| wavelet-HHH | ngtdm      | Busyness                             | 0.14657369   |
| wavelet-HLL | gldm       | GrayLevelVariance                    | 140.7715702  |
| wavelet-HLL | gldm       | HighGrayLevelEmphasis                | 793.3418182  |
| wavelet-HLL | gldm       | DependenceEntropy                    | 6.803535972  |
| wavelet-HLL | gldm       | DependenceNonUniformity              | 150.64       |
| wavelet-HLL | gldm       | GrayLevelNonUniformity               | 20.18909091  |
| wavelet-HLL | gldm       | SmallDependenceEmphasis              | 0.513303474  |
| wavelet-HLL | gldm       | SmallDependenceHighGrayLevelEmphasis | 500.3889302  |
| wavelet-HLL | gldm       | DependenceNonUniformityNormalized    | 0.273890909  |
| wavelet-HLL | gldm       | LargeDependenceEmphasis              | 9.967272727  |
| wavelet-HLL | gldm       | LargeDependenceLowGrayLevelEmphasis  | 0.024983217  |
| wavelet-HLL | gldm       | DependenceVariance                   | 4.154790083  |
| wavelet-HLL | gldm       | LargeDependenceHighGrayLevelEmphasis | 7017.254545  |
| wavelet-HLL | gldm       | SmallDependenceLowGrayLevelEmphasis  | 0.004686004  |
| wavelet-HLL | gldm       | LowGrayLevelEmphasis                 | 0.006612439  |
| wavelet-HLL | glcm       | JointAverage                         | 24.52358412  |
| wavelet-HLL | glcm       | SumAverage                           | 49.04716823  |
| wavelet-HLL | glcm       | JointEntropy                         | 8.473216787  |
| wavelet-HLL | glcm       | ClusterShade                         | 6252.00564   |
| wavelet-HLL | glcm       | MaximumProbability                   | 0.019678272  |
| wavelet-HLL | glcm       | Idmn                                 | 0.971966859  |
| wavelet-HLL | glcm       | JointEnergy                          | 0.00430978   |
| wavelet-HLL | glcm       | Contrast                             | 187.6734163  |
| wavelet-HLL | glcm       | DifferenceEntropy                    | 4.429598198  |
| wavelet-HLL | glcm       | InverseVariance                      | 0.172692804  |
| wavelet-HLL | glcm       | DifferenceVariance                   | 105.561789   |
| wavelet-HLL | glcm       | Idn                                  | 0.905868281  |
| wavelet-HLL | glcm       | Idm                                  | 0.172080542  |
| wavelet-HLL | glcm       | Correlation                          | 0.146076398  |
| wavelet-HLL | glcm       | Autocorrelation                      | 621.8168957  |
| wavelet-HLL | glcm       | SumEntropy                           | 5.564874471  |
| wavelet-HLL | glcm       | SumSquares                           | 114.1019428  |
| wavelet-HLL | glcm       | ClusterProminence                    | 557514.8772  |
| wavelet-HLL | glcm       | Imc2                                 | 0.976543455  |
| wavelet-HLL | glcm       | Imc1                                 | -0.310907115 |
| wavelet-HLL | glcm       | DifferenceAverage                    | 8.754447792  |
| wavelet-HLL | glcm       | Id                                   | 0.251772952  |
| wavelet-HLL | glcm       | ClusterTendency                      | 268.7343548  |
| wavelet-HLL | firstorder | InterquartileRange                   | 242.3924984  |
| wavelet-HLL | firstorder | Skewness                             | 1.303679196  |
| wavelet-HLL | firstorder | Uniformity                           | 0.036707438  |
| wavelet-HLL | firstorder | Median                               | -68.51053154 |
| wavelet-HLL | firstorder | Energy                               | 49687196.97  |
| wavelet-HLL | firstorder | RobustMeanAbsoluteDeviation          | 116.0253931  |
| wavelet-HLL | firstorder | MeanAbsoluteDeviation                | 204.6728723  |
| wavelet-HLL | firstorder | TotalEnergy                          | 1341554318   |
| wavelet-HLL | firstorder | Maximum                              | 1171.059976  |
| wavelet-HLL | firstorder | RootMeanSquared                      | 300.5667282  |
| wavelet-HLL | firstorder | 90Percentile                         | 347.5114772  |
| wavelet-HLL | firstorder | Minimum                              | -656.8967649 |
| wavelet-HLL | firstorder | Entropy                              | 5.199572584  |
| wavelet-HLL | firstorder | Range                                | 1827.956741  |
| wavelet-HLL | firstorder | Variance                             | 87958.57689  |

|             |            |                                      |              |
|-------------|------------|--------------------------------------|--------------|
| wavelet-HLL | firstorder | 10Percentile                         | -374.6369815 |
| wavelet-HLL | firstorder | Kurtosis                             | 5.450977461  |
| wavelet-HLL | firstorder | Mean                                 | -48.80349609 |
| wavelet-HLL | glrlm      | ShortRunLowGrayLevelEmphasis         | 0.006727042  |
| wavelet-HLL | glrlm      | GrayLevelVariance                    | 147.2390104  |
| wavelet-HLL | glrlm      | LowGrayLevelRunEmphasis              | 0.006839188  |
| wavelet-HLL | glrlm      | GrayLevelNonUniformityNormalized     | 0.034970173  |
| wavelet-HLL | glrlm      | RunVariance                          | 0.077916809  |
| wavelet-HLL | glrlm      | GrayLevelNonUniformity               | 18.20506815  |
| wavelet-HLL | glrlm      | LongRunEmphasis                      | 1.200002946  |
| wavelet-HLL | glrlm      | ShortRunHighGrayLevelEmphasis        | 777.1774369  |
| wavelet-HLL | glrlm      | RunLengthNonUniformity               | 472.5456418  |
| wavelet-HLL | glrlm      | ShortRunEmphasis                     | 0.961967555  |
| wavelet-HLL | glrlm      | LongRunHighGrayLevelEmphasis         | 933.726951   |
| wavelet-HLL | glrlm      | RunPercentage                        | 0.945734266  |
| wavelet-HLL | glrlm      | LongRunLowGrayLevelEmphasis          | 0.007356922  |
| wavelet-HLL | glrlm      | RunEntropy                           | 5.474919878  |
| wavelet-HLL | glrlm      | HighGrayLevelRunEmphasis             | 801.5910448  |
| wavelet-HLL | glrlm      | RunLengthNonUniformityNormalized     | 0.906878014  |
| wavelet-HLL | glszm      | GrayLevelVariance                    | 211.3442858  |
| wavelet-HLL | glszm      | ZoneVariance                         | 9.52127063   |
| wavelet-HLL | glszm      | GrayLevelNonUniformityNormalized     | 0.026317898  |
| wavelet-HLL | glszm      | SizeZoneNonUniformityNormalized      | 0.581216952  |
| wavelet-HLL | glszm      | SizeZoneNonUniformity                | 183.664557   |
| wavelet-HLL | glszm      | GrayLevelNonUniformity               | 8.316455696  |
| wavelet-HLL | glszm      | LargeAreaEmphasis                    | 12.55063291  |
| wavelet-HLL | glszm      | SmallAreaHighGrayLevelEmphasis       | 812.391709   |
| wavelet-HLL | glszm      | ZonePercentage                       | 0.574545455  |
| wavelet-HLL | glszm      | LargeAreaLowGrayLevelEmphasis        | 0.030508327  |
| wavelet-HLL | glszm      | LargeAreaHighGrayLevelEmphasis       | 8896.050633  |
| wavelet-HLL | glszm      | HighGrayLevelZoneEmphasis            | 928.9398734  |
| wavelet-HLL | glszm      | SmallAreaEmphasis                    | 0.79012605   |
| wavelet-HLL | glszm      | LowGrayLevelZoneEmphasis             | 0.00893348   |
| wavelet-HLL | glszm      | ZoneEntropy                          | 6.412794989  |
| wavelet-HLL | glszm      | SmallAreaLowGrayLevelEmphasis        | 0.007658505  |
| wavelet-HLL | ngtdm      | Coarseness                           | 0.013217831  |
| wavelet-HLL | ngtdm      | Complexity                           | 11477.91472  |
| wavelet-HLL | ngtdm      | Strength                             | 20.81626155  |
| wavelet-HLL | ngtdm      | Contrast                             | 0.491002903  |
| wavelet-HLL | ngtdm      | Busyness                             | 0.045161016  |
| wavelet-LHL | gldm       | GrayLevelVariance                    | 48.24935207  |
| wavelet-LHL | gldm       | HighGrayLevelEmphasis                | 603.58       |
| wavelet-LHL | gldm       | DependenceEntropy                    | 6.542545806  |
| wavelet-LHL | gldm       | DependenceNonUniformity              | 116.9236364  |
| wavelet-LHL | gldm       | GrayLevelNonUniformity               | 32.85454545  |
| wavelet-LHL | gldm       | SmallDependenceEmphasis              | 0.440685393  |
| wavelet-LHL | gldm       | SmallDependenceHighGrayLevelEmphasis | 263.1124639  |
| wavelet-LHL | gldm       | DependenceNonUniformityNormalized    | 0.21258843   |
| wavelet-LHL | gldm       | LargeDependenceEmphasis              | 19.32727273  |
| wavelet-LHL | gldm       | LargeDependenceLowGrayLevelEmphasis  | 0.034590773  |
| wavelet-LHL | gldm       | DependenceVariance                   | 8.947160331  |
| wavelet-LHL | gldm       | LargeDependenceHighGrayLevelEmphasis | 12483.76909  |
| wavelet-LHL | gldm       | SmallDependenceLowGrayLevelEmphasis  | 0.003882743  |
| wavelet-LHL | gldm       | LowGrayLevelEmphasis                 | 0.004980502  |
| wavelet-LHL | glcm       | JointAverage                         | 23.39799916  |

|             |            |                                  |              |
|-------------|------------|----------------------------------|--------------|
| wavelet-LHL | glcm       | SumAverage                       | 46.79599833  |
| wavelet-LHL | glcm       | JointEntropy                     | 7.765673412  |
| wavelet-LHL | glcm       | ClusterShade                     | 216.0654403  |
| wavelet-LHL | glcm       | MaximumProbability               | 0.044200122  |
| wavelet-LHL | glcm       | Idmn                             | 0.974753336  |
| wavelet-LHL | glcm       | JointEnergy                      | 0.00922839   |
| wavelet-LHL | glcm       | Contrast                         | 67.79531665  |
| wavelet-LHL | glcm       | DifferenceEntropy                | 3.932617751  |
| wavelet-LHL | glcm       | InverseVariance                  | 0.224016164  |
| wavelet-LHL | glcm       | DifferenceVariance               | 35.60277619  |
| wavelet-LHL | glcm       | Idn                              | 0.905769853  |
| wavelet-LHL | glcm       | Idm                              | 0.239802276  |
| wavelet-LHL | glcm       | Correlation                      | 0.160356316  |
| wavelet-LHL | glcm       | Autocorrelation                  | 554.3575711  |
| wavelet-LHL | glcm       | SumEntropy                       | 4.983080029  |
| wavelet-LHL | glcm       | SumSquares                       | 40.7819226   |
| wavelet-LHL | glcm       | ClusterProminence                | 48644.67599  |
| wavelet-LHL | glcm       | Imc2                             | 0.932823318  |
| wavelet-LHL | glcm       | Imc1                             | -0.234450361 |
| wavelet-LHL | glcm       | DifferenceAverage                | 5.566093244  |
| wavelet-LHL | glcm       | Id                               | 0.318451432  |
| wavelet-LHL | glcm       | ClusterTendency                  | 95.33237376  |
| wavelet-LHL | firstorder | InterquartileRange               | 161.4488449  |
| wavelet-LHL | firstorder | Skewness                         | 0.16450686   |
| wavelet-LHL | firstorder | Uniformity                       | 0.059735537  |
| wavelet-LHL | firstorder | Median                           | -31.27530288 |
| wavelet-LHL | firstorder | Energy                           | 17796889.19  |
| wavelet-LHL | firstorder | RobustMeanAbsoluteDeviation      | 76.09538935  |
| wavelet-LHL | firstorder | MeanAbsoluteDeviation            | 126.0889157  |
| wavelet-LHL | firstorder | TotalEnergy                      | 480516008.2  |
| wavelet-LHL | firstorder | Maximum                          | 568.4533895  |
| wavelet-LHL | firstorder | RootMeanSquared                  | 179.8832409  |
| wavelet-LHL | firstorder | 90Percentile                     | 164.1172504  |
| wavelet-LHL | firstorder | Minimum                          | -603.6526991 |
| wavelet-LHL | firstorder | Entropy                          | 4.598546329  |
| wavelet-LHL | firstorder | Range                            | 1172.106089  |
| wavelet-LHL | firstorder | Variance                         | 30044.91269  |
| wavelet-LHL | firstorder | 10Percentile                     | -265.7140314 |
| wavelet-LHL | firstorder | Kurtosis                         | 4.153795626  |
| wavelet-LHL | firstorder | Mean                             | -48.09436209 |
| wavelet-LHL | glrlm      | ShortRunLowGrayLevelEmphasis     | 0.005181583  |
| wavelet-LHL | glrlm      | GrayLevelVariance                | 51.44645859  |
| wavelet-LHL | glrlm      | LowGrayLevelRunEmphasis          | 0.005287908  |
| wavelet-LHL | glrlm      | GrayLevelNonUniformityNormalized | 0.053156278  |
| wavelet-LHL | glrlm      | RunVariance                      | 0.122240194  |
| wavelet-LHL | glrlm      | GrayLevelNonUniformity           | 26.75147546  |
| wavelet-LHL | glrlm      | LongRunEmphasis                  | 1.321265119  |
| wavelet-LHL | glrlm      | ShortRunHighGrayLevelEmphasis    | 562.0066783  |
| wavelet-LHL | glrlm      | RunLengthNonUniformity           | 430.9069258  |
| wavelet-LHL | glrlm      | ShortRunEmphasis                 | 0.939309708  |
| wavelet-LHL | glrlm      | LongRunHighGrayLevelEmphasis     | 805.4767782  |
| wavelet-LHL | glrlm      | RunPercentage                    | 0.914545455  |
| wavelet-LHL | glrlm      | LongRunLowGrayLevelEmphasis      | 0.005836556  |
| wavelet-LHL | glrlm      | RunEntropy                       | 5.037373453  |
| wavelet-LHL | glrlm      | HighGrayLevelRunEmphasis         | 600.4801881  |

|             |       |                                      |              |
|-------------|-------|--------------------------------------|--------------|
| wavelet-LHL | glrlm | RunLengthNonUniformityNormalized     | 0.855309617  |
| wavelet-LHL | glszm | GrayLevelVariance                    | 75.32889339  |
| wavelet-LHL | glszm | ZoneVariance                         | 24.47439928  |
| wavelet-LHL | glszm | GrayLevelNonUniformityNormalized     | 0.034658213  |
| wavelet-LHL | glszm | SizeZoneNonUniformityNormalized      | 0.544914487  |
| wavelet-LHL | glszm | SizeZoneNonUniformity                | 149.3065693  |
| wavelet-LHL | glszm | GrayLevelNonUniformity               | 9.496350365  |
| wavelet-LHL | glszm | LargeAreaEmphasis                    | 28.50364964  |
| wavelet-LHL | glszm | SmallAreaHighGrayLevelEmphasis       | 458.7541136  |
| wavelet-LHL | glszm | ZonePercentage                       | 0.498181818  |
| wavelet-LHL | glszm | LargeAreaLowGrayLevelEmphasis        | 0.051611104  |
| wavelet-LHL | glszm | LargeAreaHighGrayLevelEmphasis       | 18478.62409  |
| wavelet-LHL | glszm | HighGrayLevelZoneEmphasis            | 592.6423358  |
| wavelet-LHL | glszm | SmallAreaEmphasis                    | 0.766021779  |
| wavelet-LHL | glszm | LowGrayLevelZoneEmphasis             | 0.008089356  |
| wavelet-LHL | glszm | ZoneEntropy                          | 6.038535317  |
| wavelet-LHL | glszm | SmallAreaLowGrayLevelEmphasis        | 0.007541208  |
| wavelet-LHL | ngtdm | Coarseness                           | 0.012131508  |
| wavelet-LHL | ngtdm | Complexity                           | 3393.066163  |
| wavelet-LHL | ngtdm | Strength                             | 8.286414046  |
| wavelet-LHL | ngtdm | Contrast                             | 0.212798101  |
| wavelet-LHL | ngtdm | Busyness                             | 0.064342125  |
| wavelet-LHH | gldm  | GrayLevelVariance                    | 18.08415207  |
| wavelet-LHH | gldm  | HighGrayLevelEmphasis                | 364.5854545  |
| wavelet-LHH | gldm  | DependenceEntropy                    | 6.280457383  |
| wavelet-LHH | gldm  | DependenceNonUniformity              | 81.25090909  |
| wavelet-LHH | gldm  | GrayLevelNonUniformity               | 53.88363636  |
| wavelet-LHH | gldm  | SmallDependenceEmphasis              | 0.334298781  |
| wavelet-LHH | gldm  | SmallDependenceHighGrayLevelEmphasis | 132.6241056  |
| wavelet-LHH | gldm  | DependenceNonUniformityNormalized    | 0.147728926  |
| wavelet-LHH | gldm  | LargeDependenceEmphasis              | 25.98545455  |
| wavelet-LHH | gldm  | LargeDependenceLowGrayLevelEmphasis  | 0.08219732   |
| wavelet-LHH | gldm  | DependenceVariance                   | 10.56198347  |
| wavelet-LHH | gldm  | LargeDependenceHighGrayLevelEmphasis | 8681.48      |
| wavelet-LHH | gldm  | SmallDependenceLowGrayLevelEmphasis  | 0.003678005  |
| wavelet-LHH | gldm  | LowGrayLevelEmphasis                 | 0.005774078  |
| wavelet-LHH | glcm  | JointAverage                         | 18.6105414   |
| wavelet-LHH | glcm  | SumAverage                           | 37.22108281  |
| wavelet-LHH | glcm  | JointEntropy                         | 6.877849495  |
| wavelet-LHH | glcm  | ClusterShade                         | 50.91275556  |
| wavelet-LHH | glcm  | MaximumProbability                   | 0.064653307  |
| wavelet-LHH | glcm  | Idmn                                 | 0.979771167  |
| wavelet-LHH | glcm  | JointEnergy                          | 0.018099511  |
| wavelet-LHH | glcm  | Contrast                             | 31.29737511  |
| wavelet-LHH | glcm  | DifferenceEntropy                    | 3.420308749  |
| wavelet-LHH | glcm  | InverseVariance                      | 0.301189873  |
| wavelet-LHH | glcm  | DifferenceVariance                   | 17.14865542  |
| wavelet-LHH | glcm  | Idn                                  | 0.916582909  |
| wavelet-LHH | glcm  | Idm                                  | 0.316036726  |
| wavelet-LHH | glcm  | Correlation                          | -0.008011165 |
| wavelet-LHH | glcm  | Autocorrelation                      | 346.2135618  |
| wavelet-LHH | glcm  | SumEntropy                           | 4.232343127  |
| wavelet-LHH | glcm  | SumSquares                           | 15.50408864  |
| wavelet-LHH | glcm  | ClusterProminence                    | 6237.570638  |
| wavelet-LHH | glcm  | Imc2                                 | 0.832935636  |

|             |            |                                  |              |
|-------------|------------|----------------------------------|--------------|
| wavelet-LHH | glcm       | Imc1                             | -0.159336255 |
| wavelet-LHH | glcm       | DifferenceAverage                | 3.729370753  |
| wavelet-LHH | glcm       | Id                               | 0.389036616  |
| wavelet-LHH | glcm       | ClusterTendency                  | 30.71897947  |
| wavelet-LHH | firstorder | InterquartileRange               | 92.04877094  |
| wavelet-LHH | firstorder | Skewness                         | 0.280579985  |
| wavelet-LHH | firstorder | Uniformity                       | 0.097970248  |
| wavelet-LHH | firstorder | Median                           | -5.250998945 |
| wavelet-LHH | firstorder | Energy                           | 6175497.328  |
| wavelet-LHH | firstorder | RobustMeanAbsoluteDeviation      | 39.68481054  |
| wavelet-LHH | firstorder | MeanAbsoluteDeviation            | 71.82722819  |
| wavelet-LHH | firstorder | TotalEnergy                      | 166738427.8  |
| wavelet-LHH | firstorder | Maximum                          | 470.4010881  |
| wavelet-LHH | firstorder | RootMeanSquared                  | 105.9630924  |
| wavelet-LHH | firstorder | 90Percentile                     | 122.2088531  |
| wavelet-LHH | firstorder | Minimum                          | -438.1052473 |
| wavelet-LHH | firstorder | Entropy                          | 3.877702235  |
| wavelet-LHH | firstorder | Range                            | 908.5063354  |
| wavelet-LHH | firstorder | Variance                         | 11220.55644  |
| wavelet-LHH | firstorder | 10Percentile                     | -101.0408845 |
| wavelet-LHH | firstorder | Kurtosis                         | 6.222909117  |
| wavelet-LHH | firstorder | Mean                             | 2.760529129  |
| wavelet-LHH | glrlm      | ShortRunLowGrayLevelEmphasis     | 0.00587562   |
| wavelet-LHH | glrlm      | GrayLevelVariance                | 19.98512938  |
| wavelet-LHH | glrlm      | LowGrayLevelRunEmphasis          | 0.00611766   |
| wavelet-LHH | glrlm      | GrayLevelNonUniformityNormalized | 0.08654951   |
| wavelet-LHH | glrlm      | RunVariance                      | 0.181004347  |
| wavelet-LHH | glrlm      | GrayLevelNonUniformity           | 42.26400043  |
| wavelet-LHH | glrlm      | LongRunEmphasis                  | 1.453682233  |
| wavelet-LHH | glrlm      | ShortRunHighGrayLevelEmphasis    | 341.6137667  |
| wavelet-LHH | glrlm      | RunLengthNonUniformity           | 399.2755918  |
| wavelet-LHH | glrlm      | ShortRunEmphasis                 | 0.921638169  |
| wavelet-LHH | glrlm      | LongRunHighGrayLevelEmphasis     | 520.3955509  |
| wavelet-LHH | glrlm      | RunPercentage                    | 0.887412587  |
| wavelet-LHH | glrlm      | LongRunLowGrayLevelEmphasis      | 0.007515531  |
| wavelet-LHH | glrlm      | RunEntropy                       | 4.455460549  |
| wavelet-LHH | glrlm      | HighGrayLevelRunEmphasis         | 368.1274474  |
| wavelet-LHH | glrlm      | RunLengthNonUniformityNormalized | 0.817080867  |
| wavelet-LHH | glszm      | GrayLevelVariance                | 38.82474757  |
| wavelet-LHH | glszm      | ZoneVariance                     | 78.57661014  |
| wavelet-LHH | glszm      | GrayLevelNonUniformityNormalized | 0.04950495   |
| wavelet-LHH | glszm      | SizeZoneNonUniformityNormalized  | 0.514263308  |
| wavelet-LHH | glszm      | SizeZoneNonUniformity            | 103.8811881  |
| wavelet-LHH | glszm      | GrayLevelNonUniformity           | 10           |
| wavelet-LHH | glszm      | LargeAreaEmphasis                | 85.99009901  |
| wavelet-LHH | glszm      | SmallAreaHighGrayLevelEmphasis   | 299.8271748  |
| wavelet-LHH | glszm      | ZonePercentage                   | 0.367272727  |
| wavelet-LHH | glszm      | LargeAreaLowGrayLevelEmphasis    | 0.273605234  |
| wavelet-LHH | glszm      | LargeAreaHighGrayLevelEmphasis   | 28208.59406  |
| wavelet-LHH | glszm      | HighGrayLevelZoneEmphasis        | 398.1336634  |
| wavelet-LHH | glszm      | SmallAreaEmphasis                | 0.743897734  |
| wavelet-LHH | glszm      | LowGrayLevelZoneEmphasis         | 0.010343842  |
| wavelet-LHH | glszm      | ZoneEntropy                      | 5.661392561  |
| wavelet-LHH | glszm      | SmallAreaLowGrayLevelEmphasis    | 0.009486245  |
| wavelet-LHH | ngtdm      | Coarseness                       | 0.012979979  |

|             |            |                                      |              |
|-------------|------------|--------------------------------------|--------------|
| wavelet-LHH | ngtdm      | Complexity                           | 1200.560862  |
| wavelet-LHH | ngtdm      | Strength                             | 4.304887491  |
| wavelet-LHH | ngtdm      | Contrast                             | 0.117376714  |
| wavelet-LHH | ngtdm      | Busyness                             | 0.103007976  |
| wavelet-LLH | gldm       | GrayLevelVariance                    | 72.54479669  |
| wavelet-LLH | gldm       | HighGrayLevelEmphasis                | 852.1727273  |
| wavelet-LLH | gldm       | DependenceEntropy                    | 6.69451228   |
| wavelet-LLH | gldm       | DependenceNonUniformity              | 127.5854545  |
| wavelet-LLH | gldm       | GrayLevelNonUniformity               | 28.45454545  |
| wavelet-LLH | gldm       | SmallDependenceEmphasis              | 0.462362433  |
| wavelet-LLH | gldm       | SmallDependenceHighGrayLevelEmphasis | 414.2270313  |
| wavelet-LLH | gldm       | DependenceNonUniformityNormalized    | 0.231973554  |
| wavelet-LLH | gldm       | LargeDependenceEmphasis              | 17.05818182  |
| wavelet-LLH | gldm       | LargeDependenceLowGrayLevelEmphasis  | 0.023396706  |
| wavelet-LLH | gldm       | DependenceVariance                   | 8.101765289  |
| wavelet-LLH | gldm       | LargeDependenceHighGrayLevelEmphasis | 14690.11091  |
| wavelet-LLH | gldm       | SmallDependenceLowGrayLevelEmphasis  | 0.003083366  |
| wavelet-LLH | gldm       | LowGrayLevelEmphasis                 | 0.003906443  |
| wavelet-LLH | glcm       | JointAverage                         | 27.67867733  |
| wavelet-LLH | glcm       | SumAverage                           | 55.35735466  |
| wavelet-LLH | glcm       | JointEntropy                         | 7.998697703  |
| wavelet-LLH | glcm       | ClusterShade                         | 722.1286884  |
| wavelet-LLH | glcm       | MaximumProbability                   | 0.040718868  |
| wavelet-LLH | glcm       | Idmn                                 | 0.971616842  |
| wavelet-LLH | glcm       | JointEnergy                          | 0.008267634  |
| wavelet-LLH | glcm       | Contrast                             | 101.3210745  |
| wavelet-LLH | glcm       | DifferenceEntropy                    | 4.146541331  |
| wavelet-LLH | glcm       | InverseVariance                      | 0.217641461  |
| wavelet-LLH | glcm       | DifferenceVariance                   | 55.26488581  |
| wavelet-LLH | glcm       | Idn                                  | 0.903264139  |
| wavelet-LLH | glcm       | Idm                                  | 0.225006578  |
| wavelet-LLH | glcm       | Correlation                          | 0.172101131  |
| wavelet-LLH | glcm       | Autocorrelation                      | 777.1907619  |
| wavelet-LLH | glcm       | SumEntropy                           | 5.229614614  |
| wavelet-LLH | glcm       | SumSquares                           | 61.72179309  |
| wavelet-LLH | glcm       | ClusterProminence                    | 105744.7822  |
| wavelet-LLH | glcm       | Imc2                                 | 0.960978731  |
| wavelet-LLH | glcm       | Imc1                                 | -0.278400756 |
| wavelet-LLH | glcm       | DifferenceAverage                    | 6.657097112  |
| wavelet-LLH | glcm       | Id                                   | 0.301068681  |
| wavelet-LLH | glcm       | ClusterTendency                      | 145.5660978  |
| wavelet-LLH | firstorder | InterquartileRange                   | 183.9506586  |
| wavelet-LLH | firstorder | Skewness                             | 0.2716589    |
| wavelet-LLH | firstorder | Uniformity                           | 0.051735537  |
| wavelet-LLH | firstorder | Median                               | -32.86100055 |
| wavelet-LLH | firstorder | Energy                               | 25672005.95  |
| wavelet-LLH | firstorder | RobustMeanAbsoluteDeviation          | 86.59574007  |
| wavelet-LLH | firstorder | MeanAbsoluteDeviation                | 150.3953399  |
| wavelet-LLH | firstorder | TotalEnergy                          | 693144160.6  |
| wavelet-LLH | firstorder | Maximum                              | 634.8972956  |
| wavelet-LLH | firstorder | RootMeanSquared                      | 216.0471579  |
| wavelet-LLH | firstorder | 90Percentile                         | 249.9259084  |
| wavelet-LLH | firstorder | Minimum                              | -706.9116888 |
| wavelet-LLH | firstorder | Entropy                              | 4.837121685  |
| wavelet-LLH | firstorder | Range                                | 1341.808984  |

|             |            |                                      |              |
|-------------|------------|--------------------------------------|--------------|
| wavelet-LLH | firstorder | Variance                             | 45124.73133  |
| wavelet-LLH | firstorder | 10Percentile                         | -287.1802088 |
| wavelet-LLH | firstorder | Kurtosis                             | 3.965355437  |
| wavelet-LLH | firstorder | Mean                                 | -39.3909015  |
| wavelet-LLH | glrlm      | ShortRunLowGrayLevelEmphasis         | 0.004050526  |
| wavelet-LLH | glrlm      | GrayLevelVariance                    | 77.28529443  |
| wavelet-LLH | glrlm      | LowGrayLevelRunEmphasis              | 0.004122664  |
| wavelet-LLH | glrlm      | GrayLevelNonUniformityNormalized     | 0.045999587  |
| wavelet-LLH | glrlm      | RunVariance                          | 0.10952484   |
| wavelet-LLH | glrlm      | GrayLevelNonUniformity               | 23.36885808  |
| wavelet-LLH | glrlm      | LongRunEmphasis                      | 1.283673425  |
| wavelet-LLH | glrlm      | ShortRunHighGrayLevelEmphasis        | 807.7200021  |
| wavelet-LLH | glrlm      | RunLengthNonUniformity               | 441.6162525  |
| wavelet-LLH | glrlm      | ShortRunEmphasis                     | 0.946056849  |
| wavelet-LLH | glrlm      | LongRunHighGrayLevelEmphasis         | 1092.773624  |
| wavelet-LLH | glrlm      | RunPercentage                        | 0.923356643  |
| wavelet-LLH | glrlm      | LongRunLowGrayLevelEmphasis          | 0.004490311  |
| wavelet-LLH | glrlm      | RunEntropy                           | 5.237082326  |
| wavelet-LLH | glrlm      | HighGrayLevelRunEmphasis             | 852.9677549  |
| wavelet-LLH | glrlm      | RunLengthNonUniformityNormalized     | 0.869194005  |
| wavelet-LLH | glszm      | GrayLevelVariance                    | 113.4121473  |
| wavelet-LLH | glszm      | ZoneVariance                         | 23.49757934  |
| wavelet-LLH | glszm      | GrayLevelNonUniformityNormalized     | 0.029952565  |
| wavelet-LLH | glszm      | SizeZoneNonUniformityNormalized      | 0.557949044  |
| wavelet-LLH | glszm      | SizeZoneNonUniformity                | 159.5734266  |
| wavelet-LLH | glszm      | GrayLevelNonUniformity               | 8.566433566  |
| wavelet-LLH | glszm      | LargeAreaEmphasis                    | 27.1958042   |
| wavelet-LLH | glszm      | SmallAreaHighGrayLevelEmphasis       | 705.0984113  |
| wavelet-LLH | glszm      | ZonePercentage                       | 0.52         |
| wavelet-LLH | glszm      | LargeAreaLowGrayLevelEmphasis        | 0.037619609  |
| wavelet-LLH | glszm      | LargeAreaHighGrayLevelEmphasis       | 23337.12937  |
| wavelet-LLH | glszm      | HighGrayLevelZoneEmphasis            | 883.3776224  |
| wavelet-LLH | glszm      | SmallAreaEmphasis                    | 0.774843881  |
| wavelet-LLH | glszm      | LowGrayLevelZoneEmphasis             | 0.006156074  |
| wavelet-LLH | glszm      | ZoneEntropy                          | 6.211977146  |
| wavelet-LLH | glszm      | SmallAreaLowGrayLevelEmphasis        | 0.005733319  |
| wavelet-LLH | ngtdm      | Coarseness                           | 0.014103624  |
| wavelet-LLH | ngtdm      | Complexity                           | 4692.886929  |
| wavelet-LLH | ngtdm      | Strength                             | 10.34421842  |
| wavelet-LLH | ngtdm      | Contrast                             | 0.299883539  |
| wavelet-LLH | ngtdm      | Busyness                             | 0.044418729  |
| wavelet-LLL | gldm       | GrayLevelVariance                    | 442.7011868  |
| wavelet-LLL | gldm       | HighGrayLevelEmphasis                | 4092.838182  |
| wavelet-LLL | gldm       | DependenceEntropy                    | 7.014264903  |
| wavelet-LLL | gldm       | DependenceNonUniformity              | 207.6472727  |
| wavelet-LLL | gldm       | GrayLevelNonUniformity               | 14.81090909  |
| wavelet-LLL | gldm       | SmallDependenceEmphasis              | 0.637309986  |
| wavelet-LLL | gldm       | SmallDependenceHighGrayLevelEmphasis | 2106.563548  |
| wavelet-LLL | gldm       | DependenceNonUniformityNormalized    | 0.377540496  |
| wavelet-LLL | gldm       | LargeDependenceEmphasis              | 8.72         |
| wavelet-LLL | gldm       | LargeDependenceLowGrayLevelEmphasis  | 0.004916751  |
| wavelet-LLL | gldm       | DependenceVariance                   | 4.007153719  |
| wavelet-LLL | gldm       | LargeDependenceHighGrayLevelEmphasis | 49518.05636  |
| wavelet-LLL | gldm       | SmallDependenceLowGrayLevelEmphasis  | 0.003426342  |
| wavelet-LLL | gldm       | LowGrayLevelEmphasis                 | 0.00351426   |

|             |            |                                  |              |
|-------------|------------|----------------------------------|--------------|
| wavelet-LLL | glcm       | JointAverage                     | 65.66194734  |
| wavelet-LLL | glcm       | SumAverage                       | 131.3238947  |
| wavelet-LLL | glcm       | JointEntropy                     | 8.74904446   |
| wavelet-LLL | glcm       | ClusterShade                     | -31235.19922 |
| wavelet-LLL | glcm       | MaximumProbability               | 0.018296021  |
| wavelet-LLL | glcm       | Idmn                             | 0.951719597  |
| wavelet-LLL | glcm       | JointEnergy                      | 0.003739167  |
| wavelet-LLL | glcm       | Contrast                         | 433.1977476  |
| wavelet-LLL | glcm       | DifferenceEntropy                | 5.113834374  |
| wavelet-LLL | glcm       | InverseVariance                  | 0.146262127  |
| wavelet-LLL | glcm       | DifferenceVariance               | 221.1370395  |
| wavelet-LLL | glcm       | Idn                              | 0.872864357  |
| wavelet-LLL | glcm       | Idm                              | 0.144060657  |
| wavelet-LLL | glcm       | Correlation                      | 0.368680217  |
| wavelet-LLL | glcm       | Autocorrelation                  | 4438.825168  |
| wavelet-LLL | glcm       | SumEntropy                       | 6.169209307  |
| wavelet-LLL | glcm       | SumSquares                       | 343.5532231  |
| wavelet-LLL | glcm       | ClusterProminence                | 3078480.23   |
| wavelet-LLL | glcm       | Imc2                             | 0.992074788  |
| wavelet-LLL | glcm       | Imc1                             | -0.384563127 |
| wavelet-LLL | glcm       | DifferenceAverage                | 14.45891661  |
| wavelet-LLL | glcm       | Id                               | 0.209849944  |
| wavelet-LLL | glcm       | ClusterTendency                  | 941.015145   |
| wavelet-LLL | firstorder | InterquartileRange               | 844.9296499  |
| wavelet-LLL | firstorder | Skewness                         | -0.824917382 |
| wavelet-LLL | firstorder | Uniformity                       | 0.026928926  |
| wavelet-LLL | firstorder | Median                           | -125.4401126 |
| wavelet-LLL | firstorder | Energy                           | 211148555.4  |
| wavelet-LLL | firstorder | RobustMeanAbsoluteDeviation      | 351.0729739  |
| wavelet-LLL | firstorder | MeanAbsoluteDeviation            | 450.9795143  |
| wavelet-LLL | firstorder | TotalEnergy                      | 5701010995   |
| wavelet-LLL | firstorder | Maximum                          | 316.9473062  |
| wavelet-LLL | firstorder | RootMeanSquared                  | 619.6018595  |
| wavelet-LLL | firstorder | 90Percentile                     | 180.1489175  |
| wavelet-LLL | firstorder | Minimum                          | -1815.879043 |
| wavelet-LLL | firstorder | Entropy                          | 5.741571894  |
| wavelet-LLL | firstorder | Range                            | 2132.826349  |
| wavelet-LLL | firstorder | Variance                         | 276878.7977  |
| wavelet-LLL | firstorder | 10Percentile                     | -1091.612519 |
| wavelet-LLL | firstorder | Kurtosis                         | 2.599752075  |
| wavelet-LLL | firstorder | Mean                             | -327.1508316 |
| wavelet-LLL | glrlm      | ShortRunLowGrayLevelEmphasis     | 0.00366502   |
| wavelet-LLL | glrlm      | GrayLevelVariance                | 448.3220387  |
| wavelet-LLL | glrlm      | LowGrayLevelRunEmphasis          | 0.00367148   |
| wavelet-LLL | glrlm      | GrayLevelNonUniformityNormalized | 0.024692017  |
| wavelet-LLL | glrlm      | RunVariance                      | 0.057996762  |
| wavelet-LLL | glrlm      | GrayLevelNonUniformity           | 12.97417374  |
| wavelet-LLL | glrlm      | LongRunEmphasis                  | 1.155336887  |
| wavelet-LLL | glrlm      | ShortRunHighGrayLevelEmphasis    | 3827.657061  |
| wavelet-LLL | glrlm      | RunLengthNonUniformity           | 483.3126999  |
| wavelet-LLL | glrlm      | ShortRunEmphasis                 | 0.967973505  |
| wavelet-LLL | glrlm      | LongRunHighGrayLevelEmphasis     | 4914.480624  |
| wavelet-LLL | glrlm      | RunPercentage                    | 0.954965035  |
| wavelet-LLL | glrlm      | LongRunLowGrayLevelEmphasis      | 0.003701867  |
| wavelet-LLL | glrlm      | RunEntropy                       | 5.988122837  |



|             |       |                                      |              |
|-------------|-------|--------------------------------------|--------------|
| wavelet-LLL | glrlm | HighGrayLevelRunEmphasis             | 4012.353693  |
| wavelet-LLL | glrlm | RunLengthNonUniformityNormalized     | 0.919872402  |
| wavelet-LLL | glszm | GrayLevelVariance                    | 452.1771916  |
| wavelet-LLL | glszm | ZoneVariance                         | 7.766274811  |
| wavelet-LLL | glszm | GrayLevelNonUniformityNormalized     | 0.016141895  |
| wavelet-LLL | glszm | SizeZoneNonUniformityNormalized      | 0.754031782  |
| wavelet-LLL | glszm | SizeZoneNonUniformity                | 277.4836957  |
| wavelet-LLL | glszm | GrayLevelNonUniformity               | 5.940217391  |
| wavelet-LLL | glszm | LargeAreaEmphasis                    | 10           |
| wavelet-LLL | glszm | SmallAreaHighGrayLevelEmphasis       | 2809.751962  |
| wavelet-LLL | glszm | ZonePercentage                       | 0.669090909  |
| wavelet-LLL | glszm | LargeAreaLowGrayLevelEmphasis        | 0.006716755  |
| wavelet-LLL | glszm | LargeAreaHighGrayLevelEmphasis       | 57129.8125   |
| wavelet-LLL | glszm | HighGrayLevelZoneEmphasis            | 3326.652174  |
| wavelet-LLL | glszm | SmallAreaEmphasis                    | 0.887889615  |
| wavelet-LLL | glszm | LowGrayLevelZoneEmphasis             | 0.005142667  |
| wavelet-LLL | glszm | ZoneEntropy                          | 6.592582952  |
| wavelet-LLL | glszm | SmallAreaLowGrayLevelEmphasis        | 0.005103209  |
| wavelet-LLL | ngtdm | Coarseness                           | 0.008719326  |
| wavelet-LLL | ngtdm | Complexity                           | 30126.75559  |
| wavelet-LLL | ngtdm | Strength                             | 31.66998309  |
| wavelet-LLL | ngtdm | Contrast                             | 1.589610097  |
| wavelet-LLL | ngtdm | Busyness                             | 0.019328067  |
| wavelet-HHL | gldm  | GrayLevelVariance                    | 17.66355372  |
| wavelet-HHL | gldm  | HighGrayLevelEmphasis                | 261.3072727  |
| wavelet-HHL | gldm  | DependenceEntropy                    | 6.341748113  |
| wavelet-HHL | gldm  | DependenceNonUniformity              | 82.43636364  |
| wavelet-HHL | gldm  | GrayLevelNonUniformity               | 53.51272727  |
| wavelet-HHL | gldm  | SmallDependenceEmphasis              | 0.329307926  |
| wavelet-HHL | gldm  | SmallDependenceHighGrayLevelEmphasis | 100.0855063  |
| wavelet-HHL | gldm  | DependenceNonUniformityNormalized    | 0.149884298  |
| wavelet-HHL | gldm  | LargeDependenceEmphasis              | 27.20727273  |
| wavelet-HHL | gldm  | LargeDependenceLowGrayLevelEmphasis  | 0.124751562  |
| wavelet-HHL | gldm  | DependenceVariance                   | 11.38134215  |
| wavelet-HHL | gldm  | LargeDependenceHighGrayLevelEmphasis | 6375.881818  |
| wavelet-HHL | gldm  | SmallDependenceLowGrayLevelEmphasis  | 0.004853186  |
| wavelet-HHL | gldm  | LowGrayLevelEmphasis                 | 0.00828574   |
| wavelet-HHL | glcm  | JointAverage                         | 15.61572477  |
| wavelet-HHL | glcm  | SumAverage                           | 31.23144954  |
| wavelet-HHL | glcm  | JointEntropy                         | 6.949035413  |
| wavelet-HHL | glcm  | ClusterShade                         | 67.10425053  |
| wavelet-HHL | glcm  | MaximumProbability                   | 0.06657914   |
| wavelet-HHL | glcm  | Idmn                                 | 0.970832177  |
| wavelet-HHL | glcm  | JointEnergy                          | 0.017254375  |
| wavelet-HHL | glcm  | Contrast                             | 30.84309904  |
| wavelet-HHL | glcm  | DifferenceEntropy                    | 3.432384857  |
| wavelet-HHL | glcm  | InverseVariance                      | 0.296960143  |
| wavelet-HHL | glcm  | DifferenceVariance                   | 16.60977681  |
| wavelet-HHL | glcm  | Idn                                  | 0.900371279  |
| wavelet-HHL | glcm  | Idm                                  | 0.316080743  |
| wavelet-HHL | glcm  | Correlation                          | -0.000969946 |
| wavelet-HHL | glcm  | Autocorrelation                      | 243.8890147  |
| wavelet-HHL | glcm  | SumEntropy                           | 4.275015737  |
| wavelet-HHL | glcm  | SumSquares                           | 15.44660496  |
| wavelet-HHL | glcm  | ClusterProminence                    | 5173.997426  |

|             |            |                                  |              |
|-------------|------------|----------------------------------|--------------|
| wavelet-HHL | glcm       | Imc2                             | 0.823007044  |
| wavelet-HHL | glcm       | Imc1                             | -0.152021626 |
| wavelet-HHL | glcm       | DifferenceAverage                | 3.738177363  |
| wavelet-HHL | glcm       | Id                               | 0.389109537  |
| wavelet-HHL | glcm       | ClusterTendency                  | 30.94332079  |
| wavelet-HHL | firstorder | InterquartileRange               | 83.48978338  |
| wavelet-HHL | firstorder | Skewness                         | 0.256580487  |
| wavelet-HHL | firstorder | Uniformity                       | 0.097295868  |
| wavelet-HHL | firstorder | Median                           | -7.295755812 |
| wavelet-HHL | firstorder | Energy                           | 6056381.257  |
| wavelet-HHL | firstorder | RobustMeanAbsoluteDeviation      | 39.96260696  |
| wavelet-HHL | firstorder | MeanAbsoluteDeviation            | 72.3565676   |
| wavelet-HHL | firstorder | TotalEnergy                      | 163522293.9  |
| wavelet-HHL | firstorder | Maximum                          | 351.1356037  |
| wavelet-HHL | firstorder | RootMeanSquared                  | 104.936182   |
| wavelet-HHL | firstorder | 90Percentile                     | 140.4710148  |
| wavelet-HHL | firstorder | Minimum                          | -373.6126143 |
| wavelet-HHL | firstorder | Entropy                          | 3.89918335   |
| wavelet-HHL | firstorder | Range                            | 724.748218   |
| wavelet-HHL | firstorder | Variance                         | 11003.95264  |
| wavelet-HHL | firstorder | 10Percentile                     | -105.3091044 |
| wavelet-HHL | firstorder | Kurtosis                         | 4.760164937  |
| wavelet-HHL | firstorder | Mean                             | 2.76579915   |
| wavelet-HHL | glrlm      | ShortRunLowGrayLevelEmphasis     | 0.008387301  |
| wavelet-HHL | glrlm      | GrayLevelVariance                | 19.4476008   |
| wavelet-HHL | glrlm      | LowGrayLevelRunEmphasis          | 0.008761405  |
| wavelet-HHL | glrlm      | GrayLevelNonUniformityNormalized | 0.085392893  |
| wavelet-HHL | glrlm      | RunVariance                      | 0.17998448   |
| wavelet-HHL | glrlm      | GrayLevelNonUniformity           | 41.5960573   |
| wavelet-HHL | glrlm      | LongRunEmphasis                  | 1.457269095  |
| wavelet-HHL | glrlm      | ShortRunHighGrayLevelEmphasis    | 245.8802265  |
| wavelet-HHL | glrlm      | RunLengthNonUniformity           | 396.3272984  |
| wavelet-HHL | glrlm      | ShortRunEmphasis                 | 0.919984794  |
| wavelet-HHL | glrlm      | LongRunHighGrayLevelEmphasis     | 371.8125238  |
| wavelet-HHL | glrlm      | RunPercentage                    | 0.885454545  |
| wavelet-HHL | glrlm      | LongRunLowGrayLevelEmphasis      | 0.01085973   |
| wavelet-HHL | glrlm      | RunEntropy                       | 4.488803199  |
| wavelet-HHL | glrlm      | HighGrayLevelRunEmphasis         | 264.7473704  |
| wavelet-HHL | glrlm      | RunLengthNonUniformityNormalized | 0.813248848  |
| wavelet-HHL | glszm      | GrayLevelVariance                | 34.849375    |
| wavelet-HHL | glszm      | ZoneVariance                     | 89.2675      |
| wavelet-HHL | glszm      | GrayLevelNonUniformityNormalized | 0.0515       |
| wavelet-HHL | glszm      | SizeZoneNonUniformityNormalized  | 0.4938       |
| wavelet-HHL | glszm      | SizeZoneNonUniformity            | 98.76        |
| wavelet-HHL | glszm      | GrayLevelNonUniformity           | 10.3         |
| wavelet-HHL | glszm      | LargeAreaEmphasis                | 96.83        |
| wavelet-HHL | glszm      | SmallAreaHighGrayLevelEmphasis   | 231.3302198  |
| wavelet-HHL | glszm      | ZonePercentage                   | 0.363636364  |
| wavelet-HHL | glszm      | LargeAreaLowGrayLevelEmphasis    | 0.444773958  |
| wavelet-HHL | glszm      | LargeAreaHighGrayLevelEmphasis   | 22022.935    |
| wavelet-HHL | glszm      | HighGrayLevelZoneEmphasis        | 301.355      |
| wavelet-HHL | glszm      | SmallAreaEmphasis                | 0.729755139  |
| wavelet-HHL | glszm      | LowGrayLevelZoneEmphasis         | 0.014133947  |
| wavelet-HHL | glszm      | ZoneEntropy                      | 5.61460242   |
| wavelet-HHL | glszm      | SmallAreaLowGrayLevelEmphasis    | 0.012353188  |

|             |            |                                      |              |
|-------------|------------|--------------------------------------|--------------|
| wavelet-HHL | ngtdm      | Coarseness                           | 0.013995246  |
| wavelet-HHL | ngtdm      | Complexity                           | 931.0884747  |
| wavelet-HHL | ngtdm      | Strength                             | 3.228647735  |
| wavelet-HHL | ngtdm      | Contrast                             | 0.128641899  |
| wavelet-HHL | ngtdm      | Busyness                             | 0.128763253  |
| wavelet-HLH | gldm       | GrayLevelVariance                    | 26.04793388  |
| wavelet-HLH | gldm       | HighGrayLevelEmphasis                | 452.6581818  |
| wavelet-HLH | gldm       | DependenceEntropy                    | 6.475899878  |
| wavelet-HLH | gldm       | DependenceNonUniformity              | 97.59272727  |
| wavelet-HLH | gldm       | GrayLevelNonUniformity               | 43.30909091  |
| wavelet-HLH | gldm       | SmallDependenceEmphasis              | 0.389819953  |
| wavelet-HLH | gldm       | SmallDependenceHighGrayLevelEmphasis | 186.7302872  |
| wavelet-HLH | gldm       | DependenceNonUniformityNormalized    | 0.177441322  |
| wavelet-HLH | gldm       | LargeDependenceEmphasis              | 22.6         |
| wavelet-HLH | gldm       | LargeDependenceLowGrayLevelEmphasis  | 0.059016826  |
| wavelet-HLH | gldm       | DependenceVariance                   | 9.978128926  |
| wavelet-HLH | gldm       | LargeDependenceHighGrayLevelEmphasis | 9312.138182  |
| wavelet-HLH | gldm       | SmallDependenceLowGrayLevelEmphasis  | 0.003355982  |
| wavelet-HLH | gldm       | LowGrayLevelEmphasis                 | 0.004929491  |
| wavelet-HLH | glcm       | JointAverage                         | 20.72405111  |
| wavelet-HLH | glcm       | SumAverage                           | 41.44810223  |
| wavelet-HLH | glcm       | JointEntropy                         | 7.375358362  |
| wavelet-HLH | glcm       | ClusterShade                         | 68.79287427  |
| wavelet-HLH | glcm       | MaximumProbability                   | 0.061637768  |
| wavelet-HLH | glcm       | Idmn                                 | 0.971398673  |
| wavelet-HLH | glcm       | JointEnergy                          | 0.01310791   |
| wavelet-HLH | glcm       | Contrast                             | 45.32394351  |
| wavelet-HLH | glcm       | DifferenceEntropy                    | 3.67784319   |
| wavelet-HLH | glcm       | InverseVariance                      | 0.266398385  |
| wavelet-HLH | glcm       | DifferenceVariance                   | 23.98619555  |
| wavelet-HLH | glcm       | Idn                                  | 0.900718007  |
| wavelet-HLH | glcm       | Idm                                  | 0.279112369  |
| wavelet-HLH | glcm       | Correlation                          | 0.011940761  |
| wavelet-HLH | glcm       | Autocorrelation                      | 429.8480255  |
| wavelet-HLH | glcm       | SumEntropy                           | 4.58250195   |
| wavelet-HLH | glcm       | SumSquares                           | 22.99881486  |
| wavelet-HLH | glcm       | ClusterProminence                    | 10732.92093  |
| wavelet-HLH | glcm       | Imc2                                 | 0.87236569   |
| wavelet-HLH | glcm       | Imc1                                 | -0.178000961 |
| wavelet-HLH | glcm       | DifferenceAverage                    | 4.576895922  |
| wavelet-HLH | glcm       | Id                                   | 0.354411604  |
| wavelet-HLH | glcm       | ClusterTendency                      | 46.67131591  |
| wavelet-HLH | firstorder | InterquartileRange                   | 116.0845775  |
| wavelet-HLH | firstorder | Skewness                             | 0.147205169  |
| wavelet-HLH | firstorder | Uniformity                           | 0.078743802  |
| wavelet-HLH | firstorder | Median                               | -8.238608914 |
| wavelet-HLH | firstorder | Energy                               | 8952835.361  |
| wavelet-HLH | firstorder | RobustMeanAbsoluteDeviation          | 52.15437674  |
| wavelet-HLH | firstorder | MeanAbsoluteDeviation                | 90.5591782   |
| wavelet-HLH | firstorder | TotalEnergy                          | 241726554.8  |
| wavelet-HLH | firstorder | Maximum                              | 404.3703006  |
| wavelet-HLH | firstorder | RootMeanSquared                      | 127.584805   |
| wavelet-HLH | firstorder | 90Percentile                         | 172.0863266  |
| wavelet-HLH | firstorder | Minimum                              | -487.8138831 |
| wavelet-HLH | firstorder | Entropy                              | 4.190856343  |

|             |            |                                  |              |
|-------------|------------|----------------------------------|--------------|
| wavelet-HLH | firstorder | Range                            | 892.1841837  |
| wavelet-HLH | firstorder | Variance                         | 16264.66438  |
| wavelet-HLH | firstorder | 10Percentile                     | -132.8257165 |
| wavelet-HLH | firstorder | Kurtosis                         | 4.367820797  |
| wavelet-HLH | firstorder | Mean                             | 3.635669758  |
| wavelet-HLH | glrlm      | ShortRunLowGrayLevelEmphasis     | 0.005021473  |
| wavelet-HLH | glrlm      | GrayLevelVariance                | 28.2446391   |
| wavelet-HLH | glrlm      | LowGrayLevelRunEmphasis          | 0.005192743  |
| wavelet-HLH | glrlm      | GrayLevelNonUniformityNormalized | 0.068845223  |
| wavelet-HLH | glrlm      | RunVariance                      | 0.153084792  |
| wavelet-HLH | glrlm      | GrayLevelNonUniformity           | 34.16387501  |
| wavelet-HLH | glrlm      | LongRunEmphasis                  | 1.385317561  |
| wavelet-HLH | glrlm      | ShortRunHighGrayLevelEmphasis    | 428.0451791  |
| wavelet-HLH | glrlm      | RunLengthNonUniformity           | 416.8830028  |
| wavelet-HLH | glrlm      | ShortRunEmphasis                 | 0.932361635  |
| wavelet-HLH | glrlm      | LongRunHighGrayLevelEmphasis     | 617.0973088  |
| wavelet-HLH | glrlm      | RunPercentage                    | 0.901818182  |
| wavelet-HLH | glrlm      | LongRunLowGrayLevelEmphasis      | 0.006165773  |
| wavelet-HLH | glrlm      | RunEntropy                       | 4.693690733  |
| wavelet-HLH | glrlm      | HighGrayLevelRunEmphasis         | 456.4400578  |
| wavelet-HLH | glrlm      | RunLengthNonUniformityNormalized | 0.839838977  |
| wavelet-HLH | glszm      | GrayLevelVariance                | 46.62372522  |
| wavelet-HLH | glszm      | ZoneVariance                     | 52.04330652  |
| wavelet-HLH | glszm      | GrayLevelNonUniformityNormalized | 0.04567653   |
| wavelet-HLH | glszm      | SizeZoneNonUniformityNormalized  | 0.548226084  |
| wavelet-HLH | glszm      | SizeZoneNonUniformity            | 129.3813559  |
| wavelet-HLH | glszm      | GrayLevelNonUniformity           | 10.77966102  |
| wavelet-HLH | glszm      | LargeAreaEmphasis                | 57.47457627  |
| wavelet-HLH | glszm      | SmallAreaHighGrayLevelEmphasis   | 370.2131249  |
| wavelet-HLH | glszm      | ZonePercentage                   | 0.429090909  |
| wavelet-HLH | glszm      | LargeAreaLowGrayLevelEmphasis    | 0.148986625  |
| wavelet-HLH | glszm      | LargeAreaHighGrayLevelEmphasis   | 23434.07627  |
| wavelet-HLH | glszm      | HighGrayLevelZoneEmphasis        | 481.0635593  |
| wavelet-HLH | glszm      | SmallAreaEmphasis                | 0.767396417  |
| wavelet-HLH | glszm      | LowGrayLevelZoneEmphasis         | 0.008075469  |
| wavelet-HLH | glszm      | ZoneEntropy                      | 5.70584196   |
| wavelet-HLH | glszm      | SmallAreaLowGrayLevelEmphasis    | 0.007454084  |
| wavelet-HLH | ngtdm      | Coarseness                       | 0.013632404  |
| wavelet-HLH | ngtdm      | Complexity                       | 1608.410379  |
| wavelet-HLH | ngtdm      | Strength                         | 4.42200622   |
| wavelet-HLH | ngtdm      | Contrast                         | 0.167431982  |
| wavelet-HLH | ngtdm      | Busyness                         | 0.087263481  |

| Image type | Feature Class | Feature Name                         |                                                                                                                                                                                                                                                                                                                                                                                                                                              |
|------------|---------------|--------------------------------------|----------------------------------------------------------------------------------------------------------------------------------------------------------------------------------------------------------------------------------------------------------------------------------------------------------------------------------------------------------------------------------------------------------------------------------------------|
| general    | info          | BoundingBox                          | 4: RTSTRUCT: C99-DNU_segment_ITV<br>(1, 1, 1, 6, 5, 6)                                                                                                                                                                                                                                                                                                                                                                                       |
| general    | info          | EnabledImageTypes                    | {u'Original': {}, u'Wavelet': {}}                                                                                                                                                                                                                                                                                                                                                                                                            |
|            |               |                                      | {'distances': [1], 'additionalInfo': True,<br>'force2D': False, 'interpolator': 'sitkBSpline',<br>'resampledPixelSpacing': [3.0], 'label': 1,<br>'normalizeScale': 1, 'normalize': False,<br>'force2Ddimension': 0, 'removeOutliers':<br>None, 'minimumROISize': None, u'binWidth':<br>25.0, 'minimumROIDimensions': 1,<br>u'correctMask': True, 'preCrop': False,<br>u'symmetricalGLCM': True,<br>'resegmentRange': None, 'padDistance': 5} |
| general    | info          | GeneralSettings                      | 70aeba6c3849b93060ce5b4fbb5f55b0c1b256                                                                                                                                                                                                                                                                                                                                                                                                       |
| general    | info          | ImageHash                            | 56                                                                                                                                                                                                                                                                                                                                                                                                                                           |
| general    | info          | ImageSpacing                         | (0.9765625000000002, 0.9765625000000002,<br>2.0)                                                                                                                                                                                                                                                                                                                                                                                             |
| general    | info          | MaskHash                             | cbe7e1c709dc3ebdcb8a8f49f7a40fde700cee8                                                                                                                                                                                                                                                                                                                                                                                                      |
| general    | info          | NumpyVersion                         | 1.13.1                                                                                                                                                                                                                                                                                                                                                                                                                                       |
| general    | info          | PyWaveletVersion                     | 0.5.2                                                                                                                                                                                                                                                                                                                                                                                                                                        |
| general    | info          | SimpleITKVersion                     | 1.1.0                                                                                                                                                                                                                                                                                                                                                                                                                                        |
| general    | info          | Version                              | 1.3.0.post102+g1b0eb74                                                                                                                                                                                                                                                                                                                                                                                                                       |
| general    | info          | VolumeNum                            | 1                                                                                                                                                                                                                                                                                                                                                                                                                                            |
| general    | info          | VoxelNum                             | 91                                                                                                                                                                                                                                                                                                                                                                                                                                           |
| original   | shape         | Maximum3DDiameter                    | 19.20937271                                                                                                                                                                                                                                                                                                                                                                                                                                  |
| original   | shape         | Maximum2DDiameterSlice               | 17.49285568                                                                                                                                                                                                                                                                                                                                                                                                                                  |
| original   | shape         | Sphericity                           | 0.88996661                                                                                                                                                                                                                                                                                                                                                                                                                                   |
| original   | shape         | MinorAxis                            | 15.0332627                                                                                                                                                                                                                                                                                                                                                                                                                                   |
| original   | shape         | Elongation                           | 0.849763562                                                                                                                                                                                                                                                                                                                                                                                                                                  |
| original   | shape         | SurfaceVolumeRatio                   | 0.402694186                                                                                                                                                                                                                                                                                                                                                                                                                                  |
| original   | shape         | Volume                               | 2457                                                                                                                                                                                                                                                                                                                                                                                                                                         |
| original   | shape         | MajorAxis                            | 17.69111241                                                                                                                                                                                                                                                                                                                                                                                                                                  |
| original   | shape         | SurfaceArea                          | 989.4196152                                                                                                                                                                                                                                                                                                                                                                                                                                  |
| original   | shape         | Flatness                             | 0.766313213                                                                                                                                                                                                                                                                                                                                                                                                                                  |
| original   | shape         | LeastAxis                            | 13.5569332                                                                                                                                                                                                                                                                                                                                                                                                                                   |
| original   | shape         | Maximum2DDiameterColumn              | 16.97056275                                                                                                                                                                                                                                                                                                                                                                                                                                  |
| original   | shape         | Maximum2DDiameterRow                 | 17.49285568                                                                                                                                                                                                                                                                                                                                                                                                                                  |
| original   | gldm          | GrayLevelVariance                    | 58.92935636                                                                                                                                                                                                                                                                                                                                                                                                                                  |
| original   | gldm          | HighGrayLevelEmphasis                | 447.5824176                                                                                                                                                                                                                                                                                                                                                                                                                                  |
| original   | gldm          | DependenceEntropy                    | 5.504671426                                                                                                                                                                                                                                                                                                                                                                                                                                  |
| original   | gldm          | DependenceNonUniformity              | 27.57142857                                                                                                                                                                                                                                                                                                                                                                                                                                  |
| original   | gldm          | GrayLevelNonUniformity               | 4.824175824                                                                                                                                                                                                                                                                                                                                                                                                                                  |
| original   | gldm          | SmallDependenceEmphasis              | 0.540034823                                                                                                                                                                                                                                                                                                                                                                                                                                  |
| original   | gldm          | SmallDependenceHighGrayLevelEmphasis | 187.9645803                                                                                                                                                                                                                                                                                                                                                                                                                                  |
| original   | gldm          | DependenceNonUniformityNormalized    | 0.302982732                                                                                                                                                                                                                                                                                                                                                                                                                                  |
| original   | gldm          | LargeDependenceEmphasis              | 7.285714286                                                                                                                                                                                                                                                                                                                                                                                                                                  |
| original   | gldm          | LargeDependenceLowGrayLevelEmphasis  | 0.032876907                                                                                                                                                                                                                                                                                                                                                                                                                                  |
| original   | gldm          | DependenceVariance                   | 2.503562372                                                                                                                                                                                                                                                                                                                                                                                                                                  |
| original   | gldm          | LargeDependenceHighGrayLevelEmphasis | 4973.120879                                                                                                                                                                                                                                                                                                                                                                                                                                  |
| original   | gldm          | SmallDependenceLowGrayLevelEmphasis  | 0.014365511                                                                                                                                                                                                                                                                                                                                                                                                                                  |

|          |            |                                  |              |
|----------|------------|----------------------------------|--------------|
| original | gldm       | LowGrayLevelEmphasis             | 0.016903203  |
| original | glcm       | JointAverage                     | 21.51113495  |
| original | glcm       | SumAverage                       | 43.02226991  |
| original | glcm       | JointEntropy                     | 6.394346338  |
| original | glcm       | ClusterShade                     | -1211.663906 |
| original | glcm       | MaximumProbability               | 0.038760813  |
| original | glcm       | ldmn                             | 0.938819624  |
| original | glcm       | JointEnergy                      | 0.013617969  |
| original | glcm       | Contrast                         | 71.3690936   |
| original | glcm       | DifferenceEntropy                | 3.825625789  |
| original | glcm       | InverseVariance                  | 0.169549167  |
| original | glcm       | DifferenceVariance               | 28.42752913  |
| original | glcm       | ldn                              | 0.843519108  |
| original | glcm       | ldm                              | 0.178304272  |
| original | glcm       | Correlation                      | 0.314497269  |
| original | glcm       | Autocorrelation                  | 479.8677349  |
| original | glcm       | SumEntropy                       | 4.710577784  |
| original | glcm       | SumSquares                       | 52.73385968  |
| original | glcm       | ClusterProminence                | 56071.34055  |
| original | glcm       | lmc2                             | 0.992757245  |
| original | glcm       | lmc1                             | -0.499940328 |
| original | glcm       | DifferenceAverage                | 6.461330458  |
| original | glcm       | ld                               | 0.262339303  |
| original | glcm       | ClusterTendency                  | 139.5663451  |
| original | firstorder | InterquartileRange               | 308          |
| original | firstorder | Skewness                         | -0.536502694 |
| original | firstorder | Uniformity                       | 0.053012921  |
| original | firstorder | Median                           | -177         |
| original | firstorder | Energy                           | 6744175      |
| original | firstorder | RobustMeanAbsoluteDeviation      | 125.7770689  |
| original | firstorder | MeanAbsoluteDeviation            | 161.1373023  |
| original | firstorder | TotalEnergy                      | 182092725    |
| original | firstorder | Maximum                          | 97           |
| original | firstorder | RootMeanSquared                  | 272.2348493  |
| original | firstorder | 90Percentile                     | 22           |
| original | firstorder | Minimum                          | -659         |
| original | firstorder | Entropy                          | 4.457539105  |
| original | firstorder | Range                            | 756          |
| original | firstorder | Variance                         | 36599.35998  |
| original | firstorder | 10Percentile                     | -490         |
| original | firstorder | Kurtosis                         | 2.206320929  |
| original | firstorder | Mean                             | -193.6813187 |
| original | glrlm      | ShortRunLowGrayLevelEmphasis     | 0.017424542  |
| original | glrlm      | GrayLevelVariance                | 58.53519479  |
| original | glrlm      | LowGrayLevelRunEmphasis          | 0.017549527  |
| original | glrlm      | GrayLevelNonUniformityNormalized | 0.050757528  |
| original | glrlm      | RunVariance                      | 0.047281001  |
| original | glrlm      | GrayLevelNonUniformity           | 4.409321664  |
| original | glrlm      | LongRunEmphasis                  | 1.146241019  |
| original | glrlm      | ShortRunHighGrayLevelEmphasis    | 413.4922309  |
| original | glrlm      | RunLengthNonUniformity           | 79.12657651  |
| original | glrlm      | ShortRunEmphasis                 | 0.964433583  |
| original | glrlm      | LongRunHighGrayLevelEmphasis     | 534.616488   |

|             |       |                                      |              |
|-------------|-------|--------------------------------------|--------------|
| original    | glrlm | RunPercentage                        | 0.954353339  |
| original    | glrlm | LongRunLowGrayLevelEmphasis          | 0.018054539  |
| original    | glrlm | RunEntropy                           | 4.635308215  |
| original    | glrlm | HighGrayLevelRunEmphasis             | 437.093747   |
| original    | glrlm | RunLengthNonUniformityNormalized     | 0.910555108  |
| original    | glszm | GrayLevelVariance                    | 52.90446281  |
| original    | glszm | ZoneVariance                         | 2.95338843   |
| original    | glszm | GrayLevelNonUniformityNormalized     | 0.04661157   |
| original    | glszm | SizeZoneNonUniformityNormalized      | 0.579504132  |
| original    | glszm | SizeZoneNonUniformity                | 31.87272727  |
| original    | glszm | GrayLevelNonUniformity               | 2.563636364  |
| original    | glszm | LargeAreaEmphasis                    | 5.690909091  |
| original    | glszm | SmallAreaHighGrayLevelEmphasis       | 259.0274665  |
| original    | glszm | ZonePercentage                       | 0.604395604  |
| original    | glszm | LargeAreaLowGrayLevelEmphasis        | 0.037941586  |
| original    | glszm | LargeAreaHighGrayLevelEmphasis       | 3526.909091  |
| original    | glszm | HighGrayLevelZoneEmphasis            | 352.5090909  |
| original    | glszm | SmallAreaEmphasis                    | 0.78802132   |
| original    | glszm | LowGrayLevelZoneEmphasis             | 0.024937796  |
| original    | glszm | ZoneEntropy                          | 4.962822441  |
| original    | glszm | SmallAreaLowGrayLevelEmphasis        | 0.023088912  |
| original    | ngtdm | Coarseness                           | 0.04945409   |
| original    | ngtdm | Complexity                           | 1341.077954  |
| original    | ngtdm | Strength                             | 16.64477736  |
| original    | ngtdm | Contrast                             | 0.852298099  |
| original    | ngtdm | Busyness                             | 0.041191137  |
| wavelet-HHH | gldm  | GrayLevelVariance                    | 7.942035986  |
| wavelet-HHH | gldm  | HighGrayLevelEmphasis                | 97.87912088  |
| wavelet-HHH | gldm  | DependenceEntropy                    | 4.793930845  |
| wavelet-HHH | gldm  | DependenceNonUniformity              | 24.03296703  |
| wavelet-HHH | gldm  | GrayLevelNonUniformity               | 9.901098901  |
| wavelet-HHH | gldm  | SmallDependenceEmphasis              | 0.481480464  |
| wavelet-HHH | gldm  | SmallDependenceHighGrayLevelEmphasis | 47.06506105  |
| wavelet-HHH | gldm  | DependenceNonUniformityNormalized    | 0.264098539  |
| wavelet-HHH | gldm  | LargeDependenceEmphasis              | 6.714285714  |
| wavelet-HHH | gldm  | LargeDependenceLowGrayLevelEmphasis  | 0.088102218  |
| wavelet-HHH | gldm  | DependenceVariance                   | 1.63941553   |
| wavelet-HHH | gldm  | LargeDependenceHighGrayLevelEmphasis | 673.5274725  |
| wavelet-HHH | gldm  | SmallDependenceLowGrayLevelEmphasis  | 0.019622721  |
| wavelet-HHH | gldm  | LowGrayLevelEmphasis                 | 0.025688126  |
| wavelet-HHH | glcm  | JointAverage                         | 9.519672672  |
| wavelet-HHH | glcm  | SumAverage                           | 19.03934534  |
| wavelet-HHH | glcm  | JointEntropy                         | 5.875625741  |
| wavelet-HHH | glcm  | ClusterShade                         | -10.46488268 |
| wavelet-HHH | glcm  | MaximumProbability                   | 0.048410768  |
| wavelet-HHH | glcm  | Idmn                                 | 0.949220267  |
| wavelet-HHH | glcm  | JointEnergy                          | 0.02005871   |
| wavelet-HHH | glcm  | Contrast                             | 17.23781179  |
| wavelet-HHH | glcm  | DifferenceEntropy                    | 3.000597291  |
| wavelet-HHH | glcm  | InverseVariance                      | 0.280171202  |
| wavelet-HHH | glcm  | DifferenceVariance                   | 6.290720925  |
| wavelet-HHH | glcm  | Idn                                  | 0.850349299  |
| wavelet-HHH | glcm  | Idm                                  | 0.247319706  |

|             |            |                                  |              |
|-------------|------------|----------------------------------|--------------|
| wavelet-HHH | glcm       | Correlation                      | -0.030688813 |
| wavelet-HHH | glcm       | Autocorrelation                  | 90.40278051  |
| wavelet-HHH | glcm       | SumEntropy                       | 3.726016298  |
| wavelet-HHH | glcm       | SumSquares                       | 8.387315708  |
| wavelet-HHH | glcm       | ClusterProminence                | 919.7547474  |
| wavelet-HHH | glcm       | Imc2                             | 0.928545154  |
| wavelet-HHH | glcm       | Imc1                             | -0.292658697 |
| wavelet-HHH | glcm       | DifferenceAverage                | 3.278641816  |
| wavelet-HHH | glcm       | Id                               | 0.34020465   |
| wavelet-HHH | glcm       | ClusterTendency                  | 16.31145104  |
| wavelet-HHH | firstorder | InterquartileRange               | 92.13036794  |
| wavelet-HHH | firstorder | Skewness                         | -0.23490678  |
| wavelet-HHH | firstorder | Uniformity                       | 0.108803285  |
| wavelet-HHH | firstorder | Median                           | 4.065513537  |
| wavelet-HHH | firstorder | Energy                           | 464484.0546  |
| wavelet-HHH | firstorder | RobustMeanAbsoluteDeviation      | 40.22332373  |
| wavelet-HHH | firstorder | MeanAbsoluteDeviation            | 56.99948216  |
| wavelet-HHH | firstorder | TotalEnergy                      | 12541069.47  |
| wavelet-HHH | firstorder | Maximum                          | 181.7941692  |
| wavelet-HHH | firstorder | RootMeanSquared                  | 71.44382675  |
| wavelet-HHH | firstorder | 90Percentile                     | 81.9859238   |
| wavelet-HHH | firstorder | Minimum                          | -205.7543774 |
| wavelet-HHH | firstorder | Entropy                          | 3.428686183  |
| wavelet-HHH | firstorder | Range                            | 387.5485466  |
| wavelet-HHH | firstorder | Variance                         | 5102.672982  |
| wavelet-HHH | firstorder | 10Percentile                     | -99.24059903 |
| wavelet-HHH | firstorder | Kurtosis                         | 2.946025461  |
| wavelet-HHH | firstorder | Mean                             | -1.243944398 |
| wavelet-HHH | glrlm      | ShortRunLowGrayLevelEmphasis     | 0.026008257  |
| wavelet-HHH | glrlm      | GrayLevelVariance                | 8.223017294  |
| wavelet-HHH | glrlm      | LowGrayLevelRunEmphasis          | 0.026430592  |
| wavelet-HHH | glrlm      | GrayLevelNonUniformityNormalized | 0.106007164  |
| wavelet-HHH | glrlm      | RunVariance                      | 0.0498229    |
| wavelet-HHH | glrlm      | GrayLevelNonUniformity           | 9.183117096  |
| wavelet-HHH | glrlm      | LongRunEmphasis                  | 1.155024495  |
| wavelet-HHH | glrlm      | ShortRunHighGrayLevelEmphasis    | 93.99295109  |
| wavelet-HHH | glrlm      | RunLengthNonUniformity           | 78.49151042  |
| wavelet-HHH | glrlm      | ShortRunEmphasis                 | 0.962261377  |
| wavelet-HHH | glrlm      | LongRunHighGrayLevelEmphasis     | 113.3297402  |
| wavelet-HHH | glrlm      | RunPercentage                    | 0.951817413  |
| wavelet-HHH | glrlm      | LongRunLowGrayLevelEmphasis      | 0.028153571  |
| wavelet-HHH | glrlm      | RunEntropy                       | 3.655976579  |
| wavelet-HHH | glrlm      | HighGrayLevelRunEmphasis         | 97.76181481  |
| wavelet-HHH | glrlm      | RunLengthNonUniformityNormalized | 0.905456241  |
| wavelet-HHH | glszm      | GrayLevelVariance                | 12.62200091  |
| wavelet-HHH | glszm      | ZoneVariance                     | 5.251244907  |
| wavelet-HHH | glszm      | GrayLevelNonUniformityNormalized | 0.083748302  |
| wavelet-HHH | glszm      | SizeZoneNonUniformityNormalized  | 0.596197374  |
| wavelet-HHH | glszm      | SizeZoneNonUniformity            | 28.0212766   |
| wavelet-HHH | glszm      | GrayLevelNonUniformity           | 3.936170213  |
| wavelet-HHH | glszm      | LargeAreaEmphasis                | 9            |
| wavelet-HHH | glszm      | SmallAreaHighGrayLevelEmphasis   | 77.73788416  |
| wavelet-HHH | glszm      | ZonePercentage                   | 0.516483516  |



|             |            |                                      |              |
|-------------|------------|--------------------------------------|--------------|
| wavelet-HHH | glszm      | LargeAreaLowGrayLevelEmphasis        | 0.121222399  |
| wavelet-HHH | glszm      | LargeAreaHighGrayLevelEmphasis       | 951.5957447  |
| wavelet-HHH | glszm      | HighGrayLevelZoneEmphasis            | 95.93617021  |
| wavelet-HHH | glszm      | SmallAreaEmphasis                    | 0.790636492  |
| wavelet-HHH | glszm      | LowGrayLevelZoneEmphasis             | 0.039044864  |
| wavelet-HHH | glszm      | ZoneEntropy                          | 4.35801798   |
| wavelet-HHH | glszm      | SmallAreaLowGrayLevelEmphasis        | 0.036210889  |
| wavelet-HHH | ngtdm      | Coarseness                           | 0.061992864  |
| wavelet-HHH | ngtdm      | Complexity                           | 173.6321889  |
| wavelet-HHH | ngtdm      | Strength                             | 3.564501526  |
| wavelet-HHH | ngtdm      | Contrast                             | 0.205917177  |
| wavelet-HHH | ngtdm      | Busyness                             | 0.139138474  |
| wavelet-HLL | gldm       | GrayLevelVariance                    | 52.38497766  |
| wavelet-HLL | gldm       | HighGrayLevelEmphasis                | 212.0879121  |
| wavelet-HLL | gldm       | DependenceEntropy                    | 5.393683893  |
| wavelet-HLL | gldm       | DependenceNonUniformity              | 27.98901099  |
| wavelet-HLL | gldm       | GrayLevelNonUniformity               | 4.736263736  |
| wavelet-HLL | gldm       | SmallDependenceEmphasis              | 0.521083639  |
| wavelet-HLL | gldm       | SmallDependenceHighGrayLevelEmphasis | 113.7966178  |
| wavelet-HLL | gldm       | DependenceNonUniformityNormalized    | 0.307571549  |
| wavelet-HLL | gldm       | LargeDependenceEmphasis              | 5.373626374  |
| wavelet-HLL | gldm       | LargeDependenceLowGrayLevelEmphasis  | 0.093316199  |
| wavelet-HLL | gldm       | DependenceVariance                   | 1.329549571  |
| wavelet-HLL | gldm       | LargeDependenceHighGrayLevelEmphasis | 1149.516484  |
| wavelet-HLL | gldm       | SmallDependenceLowGrayLevelEmphasis  | 0.022524902  |
| wavelet-HLL | gldm       | LowGrayLevelEmphasis                 | 0.030716226  |
| wavelet-HLL | glcm       | JointAverage                         | 12.1847551   |
| wavelet-HLL | glcm       | SumAverage                           | 24.3695102   |
| wavelet-HLL | glcm       | JointEntropy                         | 6.439603788  |
| wavelet-HLL | glcm       | ClusterShade                         | 1464.389328  |
| wavelet-HLL | glcm       | MaximumProbability                   | 0.028967206  |
| wavelet-HLL | glcm       | Idmn                                 | 0.942043531  |
| wavelet-HLL | glcm       | JointEnergy                          | 0.012563327  |
| wavelet-HLL | glcm       | Contrast                             | 61.32907854  |
| wavelet-HLL | glcm       | DifferenceEntropy                    | 3.651219372  |
| wavelet-HLL | glcm       | InverseVariance                      | 0.17877494   |
| wavelet-HLL | glcm       | DifferenceVariance                   | 25.45505028  |
| wavelet-HLL | glcm       | Idn                                  | 0.848404676  |
| wavelet-HLL | glcm       | Idm                                  | 0.173995493  |
| wavelet-HLL | glcm       | Correlation                          | 0.411241032  |
| wavelet-HLL | glcm       | Autocorrelation                      | 170.2964787  |
| wavelet-HLL | glcm       | SumEntropy                           | 4.683919534  |
| wavelet-HLL | glcm       | SumSquares                           | 52.34869755  |
| wavelet-HLL | glcm       | ClusterProminence                    | 61982.73889  |
| wavelet-HLL | glcm       | Imc2                                 | 0.994395753  |
| wavelet-HLL | glcm       | Imc1                                 | -0.521324924 |
| wavelet-HLL | glcm       | DifferenceAverage                    | 5.842725117  |
| wavelet-HLL | glcm       | Id                                   | 0.264883211  |
| wavelet-HLL | glcm       | ClusterTendency                      | 148.0657117  |
| wavelet-HLL | firstorder | InterquartileRange                   | 253.013789   |
| wavelet-HLL | firstorder | Skewness                             | 0.642621641  |
| wavelet-HLL | firstorder | Uniformity                           | 0.052046854  |
| wavelet-HLL | firstorder | Median                               | -121.1223076 |

|             |            |                                  |              |
|-------------|------------|----------------------------------|--------------|
| wavelet-HLL | firstorder | Energy                           | 3408401.353  |
| wavelet-HLL | firstorder | RobustMeanAbsoluteDeviation      | 110.4985988  |
| wavelet-HLL | firstorder | MeanAbsoluteDeviation            | 149.199557   |
| wavelet-HLL | firstorder | TotalEnergy                      | 92026836.54  |
| wavelet-HLL | firstorder | Maximum                          | 345.6994752  |
| wavelet-HLL | firstorder | RootMeanSquared                  | 193.5328394  |
| wavelet-HLL | firstorder | 90Percentile                     | 217.0418214  |
| wavelet-HLL | firstorder | Minimum                          | -354.1762696 |
| wavelet-HLL | firstorder | Entropy                          | 4.471812295  |
| wavelet-HLL | firstorder | Range                            | 699.8757448  |
| wavelet-HLL | firstorder | Variance                         | 32499.30999  |
| wavelet-HLL | firstorder | 10Percentile                     | -278.3128697 |
| wavelet-HLL | firstorder | Kurtosis                         | 2.425556052  |
| wavelet-HLL | firstorder | Mean                             | -70.39637733 |
| wavelet-HLL | grlm       | ShortRunLowGrayLevelEmphasis     | 0.030877872  |
| wavelet-HLL | grlm       | GrayLevelVariance                | 52.28410655  |
| wavelet-HLL | grlm       | LowGrayLevelRunEmphasis          | 0.031346715  |
| wavelet-HLL | grlm       | GrayLevelNonUniformityNormalized | 0.051267514  |
| wavelet-HLL | grlm       | RunVariance                      | 0.040595193  |
| wavelet-HLL | grlm       | GrayLevelNonUniformity           | 4.484838494  |
| wavelet-HLL | grlm       | LongRunEmphasis                  | 1.124923505  |
| wavelet-HLL | grlm       | ShortRunHighGrayLevelEmphasis    | 205.6453573  |
| wavelet-HLL | grlm       | RunLengthNonUniformity           | 80.8888564   |
| wavelet-HLL | grlm       | ShortRunEmphasis                 | 0.969798884  |
| wavelet-HLL | grlm       | LongRunHighGrayLevelEmphasis     | 238.5175076  |
| wavelet-HLL | grlm       | RunPercentage                    | 0.961115807  |
| wavelet-HLL | grlm       | LongRunLowGrayLevelEmphasis      | 0.03324646   |
| wavelet-HLL | grlm       | RunEntropy                       | 4.603973901  |
| wavelet-HLL | grlm       | HighGrayLevelRunEmphasis         | 212.0805638  |
| wavelet-HLL | grlm       | RunLengthNonUniformityNormalized | 0.923901342  |
| wavelet-HLL | glszm      | GrayLevelVariance                | 53.62446281  |
| wavelet-HLL | glszm      | ZoneVariance                     | 1.680661157  |
| wavelet-HLL | glszm      | GrayLevelNonUniformityNormalized | 0.045289256  |
| wavelet-HLL | glszm      | SizeZoneNonUniformityNormalized  | 0.509421488  |
| wavelet-HLL | glszm      | SizeZoneNonUniformity            | 28.01818182  |
| wavelet-HLL | glszm      | GrayLevelNonUniformity           | 2.490909091  |
| wavelet-HLL | glszm      | LargeAreaEmphasis                | 4.418181818  |
| wavelet-HLL | glszm      | SmallAreaHighGrayLevelEmphasis   | 166.318788   |
| wavelet-HLL | glszm      | ZonePercentage                   | 0.604395604  |
| wavelet-HLL | glszm      | LargeAreaLowGrayLevelEmphasis    | 0.089078547  |
| wavelet-HLL | glszm      | LargeAreaHighGrayLevelEmphasis   | 888.8363636  |
| wavelet-HLL | glszm      | HighGrayLevelZoneEmphasis        | 219.8        |
| wavelet-HLL | glszm      | SmallAreaEmphasis                | 0.741754896  |
| wavelet-HLL | glszm      | LowGrayLevelZoneEmphasis         | 0.040144272  |
| wavelet-HLL | glszm      | ZoneEntropy                      | 5.07191335   |
| wavelet-HLL | glszm      | SmallAreaLowGrayLevelEmphasis    | 0.035104693  |
| wavelet-HLL | ngtdm      | Coarseness                       | 0.062181214  |
| wavelet-HLL | ngtdm      | Complexity                       | 1172.421503  |
| wavelet-HLL | ngtdm      | Strength                         | 18.42912927  |
| wavelet-HLL | ngtdm      | Contrast                         | 0.599058434  |
| wavelet-HLL | ngtdm      | Busyness                         | 0.065368256  |
| wavelet-LHL | gldm       | GrayLevelVariance                | 59.61188262  |
| wavelet-LHL | gldm       | HighGrayLevelEmphasis            | 945.1648352  |

|             |            |                                      |              |
|-------------|------------|--------------------------------------|--------------|
| wavelet-LHL | gldm       | DependenceEntropy                    | 5.526649448  |
| wavelet-LHL | gldm       | DependenceNonUniformity              | 29.50549451  |
| wavelet-LHL | gldm       | GrayLevelNonUniformity               | 4.384615385  |
| wavelet-LHL | gldm       | SmallDependenceEmphasis              | 0.500973748  |
| wavelet-LHL | gldm       | SmallDependenceHighGrayLevelEmphasis | 504.6479518  |
| wavelet-LHL | gldm       | DependenceNonUniformityNormalized    | 0.324236203  |
| wavelet-LHL | gldm       | LargeDependenceEmphasis              | 4.516483516  |
| wavelet-LHL | gldm       | LargeDependenceLowGrayLevelEmphasis  | 0.017158498  |
| wavelet-LHL | gldm       | DependenceVariance                   | 0.818258664  |
| wavelet-LHL | gldm       | LargeDependenceHighGrayLevelEmphasis | 3892.769231  |
| wavelet-LHL | gldm       | SmallDependenceLowGrayLevelEmphasis  | 0.011590341  |
| wavelet-LHL | gldm       | LowGrayLevelEmphasis                 | 0.012266632  |
| wavelet-LHL | glcm       | JointAverage                         | 29.21864813  |
| wavelet-LHL | glcm       | SumAverage                           | 58.43729626  |
| wavelet-LHL | glcm       | JointEntropy                         | 6.465803121  |
| wavelet-LHL | glcm       | ClusterShade                         | 744.1221502  |
| wavelet-LHL | glcm       | MaximumProbability                   | 0.028315252  |
| wavelet-LHL | glcm       | ldmn                                 | 0.972796419  |
| wavelet-LHL | glcm       | JointEnergy                          | 0.012301172  |
| wavelet-LHL | glcm       | Contrast                             | 69.06474757  |
| wavelet-LHL | glcm       | DifferenceEntropy                    | 3.785568046  |
| wavelet-LHL | glcm       | InverseVariance                      | 0.142777529  |
| wavelet-LHL | glcm       | DifferenceVariance                   | 25.70050284  |
| wavelet-LHL | glcm       | ldn                                  | 0.888641014  |
| wavelet-LHL | glcm       | ldm                                  | 0.146712414  |
| wavelet-LHL | glcm       | Correlation                          | 0.289329878  |
| wavelet-LHL | glcm       | Autocorrelation                      | 868.6401266  |
| wavelet-LHL | glcm       | SumEntropy                           | 4.679892433  |
| wavelet-LHL | glcm       | SumSquares                           | 49.26069414  |
| wavelet-LHL | glcm       | ClusterProminence                    | 49931.35296  |
| wavelet-LHL | glcm       | lmc2                                 | 0.995851041  |
| wavelet-LHL | glcm       | lmc1                                 | -0.543503384 |
| wavelet-LHL | glcm       | DifferenceAverage                    | 6.466478722  |
| wavelet-LHL | glcm       | ld                                   | 0.238385925  |
| wavelet-LHL | glcm       | ClusterTendency                      | 127.978029   |
| wavelet-LHL | firstorder | InterquartileRange                   | 238.3683414  |
| wavelet-LHL | firstorder | Skewness                             | 0.063470891  |
| wavelet-LHL | firstorder | Uniformity                           | 0.048182587  |
| wavelet-LHL | firstorder | Median                               | -45.08504377 |
| wavelet-LHL | firstorder | Energy                               | 3444686.606  |
| wavelet-LHL | firstorder | RobustMeanAbsoluteDeviation          | 106.3364201  |
| wavelet-LHL | firstorder | MeanAbsoluteDeviation                | 152.0150034  |
| wavelet-LHL | firstorder | TotalEnergy                          | 93006538.36  |
| wavelet-LHL | firstorder | Maximum                              | 431.1899488  |
| wavelet-LHL | firstorder | RootMeanSquared                      | 194.5602708  |
| wavelet-LHL | firstorder | 90Percentile                         | 273.1741792  |
| wavelet-LHL | firstorder | Minimum                              | -731.6675433 |
| wavelet-LHL | firstorder | Entropy                              | 4.580780943  |
| wavelet-LHL | firstorder | Range                                | 1162.857492  |
| wavelet-LHL | firstorder | Variance                             | 37529.53927  |
| wavelet-LHL | firstorder | 10Percentile                         | -213.8815396 |
| wavelet-LHL | firstorder | Kurtosis                             | 4.061136915  |
| wavelet-LHL | firstorder | Mean                                 | -18.00443564 |

|             |       |                                      |             |
|-------------|-------|--------------------------------------|-------------|
| wavelet-LHL | grlm  | ShortRunLowGrayLevelEmphasis         | 0.012643795 |
| wavelet-LHL | grlm  | GrayLevelVariance                    | 60.34529422 |
| wavelet-LHL | grlm  | LowGrayLevelRunEmphasis              | 0.012680924 |
| wavelet-LHL | grlm  | GrayLevelNonUniformityNormalized     | 0.047708519 |
| wavelet-LHL | grlm  | RunVariance                          | 0.040783852 |
| wavelet-LHL | grlm  | GrayLevelNonUniformity               | 4.188088059 |
| wavelet-LHL | grlm  | LongRunEmphasis                      | 1.11969078  |
| wavelet-LHL | grlm  | ShortRunHighGrayLevelEmphasis        | 925.5963364 |
| wavelet-LHL | grlm  | RunLengthNonUniformity               | 82.14035168 |
| wavelet-LHL | grlm  | ShortRunEmphasis                     | 0.973142356 |
| wavelet-LHL | grlm  | LongRunHighGrayLevelEmphasis         | 1050.536286 |
| wavelet-LHL | grlm  | RunPercentage                        | 0.964497041 |
| wavelet-LHL | grlm  | LongRunLowGrayLevelEmphasis          | 0.01284605  |
| wavelet-LHL | grlm  | RunEntropy                           | 4.694937027 |
| wavelet-LHL | grlm  | HighGrayLevelRunEmphasis             | 948.6319788 |
| wavelet-LHL | grlm  | RunLengthNonUniformityNormalized     | 0.933860207 |
| wavelet-LHL | glszm | GrayLevelVariance                    | 71.97959184 |
| wavelet-LHL | glszm | ZoneVariance                         | 1.091517857 |
| wavelet-LHL | glszm | GrayLevelNonUniformityNormalized     | 0.041454082 |
| wavelet-LHL | glszm | SizeZoneNonUniformityNormalized      | 0.453443878 |
| wavelet-LHL | glszm | SizeZoneNonUniformity                | 25.39285714 |
| wavelet-LHL | glszm | GrayLevelNonUniformity               | 2.321428571 |
| wavelet-LHL | glszm | LargeAreaEmphasis                    | 3.732142857 |
| wavelet-LHL | glszm | SmallAreaHighGrayLevelEmphasis       | 714.3973264 |
| wavelet-LHL | glszm | ZonePercentage                       | 0.615384615 |
| wavelet-LHL | glszm | LargeAreaLowGrayLevelEmphasis        | 0.022844648 |
| wavelet-LHL | glszm | LargeAreaHighGrayLevelEmphasis       | 3264.892857 |
| wavelet-LHL | glszm | HighGrayLevelZoneEmphasis            | 993.5357143 |
| wavelet-LHL | glszm | SmallAreaEmphasis                    | 0.695282738 |
| wavelet-LHL | glszm | LowGrayLevelZoneEmphasis             | 0.019082804 |
| wavelet-LHL | glszm | ZoneEntropy                          | 5.436731931 |
| wavelet-LHL | glszm | SmallAreaLowGrayLevelEmphasis        | 0.018675844 |
| wavelet-LHL | ngtdm | Coarseness                           | 0.067097517 |
| wavelet-LHL | ngtdm | Complexity                           | 1622.30336  |
| wavelet-LHL | ngtdm | Strength                             | 24.72207906 |
| wavelet-LHL | ngtdm | Contrast                             | 0.653378791 |
| wavelet-LHL | ngtdm | Busyness                             | 0.027743945 |
| wavelet-LHH | gldm  | GrayLevelVariance                    | 29.80340539 |
| wavelet-LHH | gldm  | HighGrayLevelEmphasis                | 235.1428571 |
| wavelet-LHH | gldm  | DependenceEntropy                    | 5.32884725  |
| wavelet-LHH | gldm  | DependenceNonUniformity              | 26.05494505 |
| wavelet-LHH | gldm  | GrayLevelNonUniformity               | 6.67032967  |
| wavelet-LHH | gldm  | SmallDependenceEmphasis              | 0.511736874 |
| wavelet-LHH | gldm  | SmallDependenceHighGrayLevelEmphasis | 125.8463004 |
| wavelet-LHH | gldm  | DependenceNonUniformityNormalized    | 0.286318078 |
| wavelet-LHH | gldm  | LargeDependenceEmphasis              | 5.857142857 |
| wavelet-LHH | gldm  | LargeDependenceLowGrayLevelEmphasis  | 0.049915697 |
| wavelet-LHH | gldm  | DependenceVariance                   | 1.451757034 |
| wavelet-LHH | gldm  | LargeDependenceHighGrayLevelEmphasis | 1278.087912 |
| wavelet-LHH | gldm  | SmallDependenceLowGrayLevelEmphasis  | 0.018657226 |
| wavelet-LHH | gldm  | LowGrayLevelEmphasis                 | 0.022048373 |
| wavelet-LHH | glcm  | JointAverage                         | 14.26540654 |
| wavelet-LHH | glcm  | SumAverage                           | 28.53081308 |

|             |            |                                  |              |
|-------------|------------|----------------------------------|--------------|
| wavelet-LHH | glcm       | JointEntropy                     | 6.200714418  |
| wavelet-LHH | glcm       | ClusterShade                     | -25.26864322 |
| wavelet-LHH | glcm       | MaximumProbability               | 0.038883958  |
| wavelet-LHH | glcm       | Idmn                             | 0.951369737  |
| wavelet-LHH | glcm       | JointEnergy                      | 0.015667635  |
| wavelet-LHH | glcm       | Contrast                         | 51.49864847  |
| wavelet-LHH | glcm       | DifferenceEntropy                | 3.469979644  |
| wavelet-LHH | glcm       | InverseVariance                  | 0.238526692  |
| wavelet-LHH | glcm       | DifferenceVariance               | 23.7327617   |
| wavelet-LHH | glcm       | Idn                              | 0.865425757  |
| wavelet-LHH | glcm       | Idm                              | 0.212562262  |
| wavelet-LHH | glcm       | Correlation                      | 0.030110959  |
| wavelet-LHH | glcm       | Autocorrelation                  | 204.4306733  |
| wavelet-LHH | glcm       | SumEntropy                       | 4.210895949  |
| wavelet-LHH | glcm       | SumSquares                       | 26.60368404  |
| wavelet-LHH | glcm       | ClusterProminence                | 13885.81866  |
| wavelet-LHH | glcm       | Imc2                             | 0.98719327   |
| wavelet-LHH | glcm       | Imc1                             | -0.459636012 |
| wavelet-LHH | glcm       | DifferenceAverage                | 5.120425034  |
| wavelet-LHH | glcm       | Id                               | 0.298173478  |
| wavelet-LHH | glcm       | ClusterTendency                  | 54.91608769  |
| wavelet-LHH | firstorder | InterquartileRange               | 123.124496   |
| wavelet-LHH | firstorder | Skewness                         | 0.182219991  |
| wavelet-LHH | firstorder | Uniformity                       | 0.073300326  |
| wavelet-LHH | firstorder | Median                           | -3.612598096 |
| wavelet-LHH | firstorder | Energy                           | 1709632.547  |
| wavelet-LHH | firstorder | RobustMeanAbsoluteDeviation      | 56.02278478  |
| wavelet-LHH | firstorder | MeanAbsoluteDeviation            | 97.09431068  |
| wavelet-LHH | firstorder | TotalEnergy                      | 46160078.78  |
| wavelet-LHH | firstorder | Maximum                          | 372.6351217  |
| wavelet-LHH | firstorder | RootMeanSquared                  | 137.0663009  |
| wavelet-LHH | firstorder | 90Percentile                     | 166.7271248  |
| wavelet-LHH | firstorder | Minimum                          | -340.8016736 |
| wavelet-LHH | firstorder | Entropy                          | 4.129380873  |
| wavelet-LHH | firstorder | Range                            | 713.4367953  |
| wavelet-LHH | firstorder | Variance                         | 18775.77497  |
| wavelet-LHH | firstorder | 10Percentile                     | -190.8116824 |
| wavelet-LHH | firstorder | Kurtosis                         | 3.851958426  |
| wavelet-LHH | firstorder | Mean                             | -3.375779075 |
| wavelet-LHH | grlm       | ShortRunLowGrayLevelEmphasis     | 0.022557693  |
| wavelet-LHH | grlm       | GrayLevelVariance                | 30.73058493  |
| wavelet-LHH | grlm       | LowGrayLevelRunEmphasis          | 0.022756942  |
| wavelet-LHH | grlm       | GrayLevelNonUniformityNormalized | 0.070779816  |
| wavelet-LHH | grlm       | RunVariance                      | 0.045670011  |
| wavelet-LHH | grlm       | GrayLevelNonUniformity           | 6.170184545  |
| wavelet-LHH | grlm       | LongRunEmphasis                  | 1.137061076  |
| wavelet-LHH | grlm       | ShortRunHighGrayLevelEmphasis    | 228.9026577  |
| wavelet-LHH | grlm       | RunLengthNonUniformity           | 80.14541754  |
| wavelet-LHH | grlm       | ShortRunEmphasis                 | 0.96769982   |
| wavelet-LHH | grlm       | LongRunHighGrayLevelEmphasis     | 265.7128217  |
| wavelet-LHH | grlm       | RunPercentage                    | 0.957734573  |
| wavelet-LHH | grlm       | LongRunLowGrayLevelEmphasis      | 0.023592635  |
| wavelet-LHH | grlm       | RunEntropy                       | 4.326874969  |

|             |       |                                      |             |
|-------------|-------|--------------------------------------|-------------|
| wavelet-LHH | grlm  | HighGrayLevelRunEmphasis             | 235.9314114 |
| wavelet-LHH | grlm  | RunLengthNonUniformityNormalized     | 0.918902646 |
| wavelet-LHH | glszm | GrayLevelVariance                    | 44.6212995  |
| wavelet-LHH | glszm | ZoneVariance                         | 4.051518647 |
| wavelet-LHH | glszm | GrayLevelNonUniformityNormalized     | 0.048058439 |
| wavelet-LHH | glszm | SizeZoneNonUniformityNormalized      | 0.574778931 |
| wavelet-LHH | glszm | SizeZoneNonUniformity                | 29.31372549 |
| wavelet-LHH | glszm | GrayLevelNonUniformity               | 2.450980392 |
| wavelet-LHH | glszm | LargeAreaEmphasis                    | 7.235294118 |
| wavelet-LHH | glszm | SmallAreaHighGrayLevelEmphasis       | 195.2579316 |
| wavelet-LHH | glszm | ZonePercentage                       | 0.56043956  |
| wavelet-LHH | glszm | LargeAreaLowGrayLevelEmphasis        | 0.068803045 |
| wavelet-LHH | glszm | LargeAreaHighGrayLevelEmphasis       | 1558.666667 |
| wavelet-LHH | glszm | HighGrayLevelZoneEmphasis            | 247.8235294 |
| wavelet-LHH | glszm | SmallAreaEmphasis                    | 0.782577614 |
| wavelet-LHH | glszm | LowGrayLevelZoneEmphasis             | 0.034268816 |
| wavelet-LHH | glszm | ZoneEntropy                          | 4.99095696  |
| wavelet-LHH | glszm | SmallAreaLowGrayLevelEmphasis        | 0.032341778 |
| wavelet-LHH | ngtdm | Coarseness                           | 0.067857196 |
| wavelet-LHH | ngtdm | Complexity                           | 899.5451471 |
| wavelet-LHH | ngtdm | Strength                             | 11.87785996 |
| wavelet-LHH | ngtdm | Contrast                             | 0.413829908 |
| wavelet-LHH | ngtdm | Busyness                             | 0.043048651 |
| wavelet-LLH | gldm  | GrayLevelVariance                    | 94.74846033 |
| wavelet-LLH | gldm  | HighGrayLevelEmphasis                | 988.8241758 |
| wavelet-LLH | gldm  | DependenceEntropy                    | 5.485601783 |
| wavelet-LLH | gldm  | DependenceNonUniformity              | 31.87912088 |
| wavelet-LLH | gldm  | GrayLevelNonUniformity               | 3.879120879 |
| wavelet-LLH | gldm  | SmallDependenceEmphasis              | 0.592014652 |
| wavelet-LLH | gldm  | SmallDependenceHighGrayLevelEmphasis | 666.6298657 |
| wavelet-LLH | gldm  | DependenceNonUniformityNormalized    | 0.35032001  |
| wavelet-LLH | gldm  | LargeDependenceEmphasis              | 4.428571429 |
| wavelet-LLH | gldm  | LargeDependenceLowGrayLevelEmphasis  | 0.017920229 |
| wavelet-LLH | gldm  | DependenceVariance                   | 1.060741456 |
| wavelet-LLH | gldm  | LargeDependenceHighGrayLevelEmphasis | 3392.472527 |
| wavelet-LLH | gldm  | SmallDependenceLowGrayLevelEmphasis  | 0.011789933 |
| wavelet-LLH | gldm  | LowGrayLevelEmphasis                 | 0.012430314 |
| wavelet-LLH | glcm  | JointAverage                         | 30.0303913  |
| wavelet-LLH | glcm  | SumAverage                           | 60.06078261 |
| wavelet-LLH | glcm  | JointEntropy                         | 6.581252005 |
| wavelet-LLH | glcm  | ClusterShade                         | 1601.847528 |
| wavelet-LLH | glcm  | MaximumProbability                   | 0.025540807 |
| wavelet-LLH | glcm  | ldmn                                 | 0.959255414 |
| wavelet-LLH | glcm  | JointEnergy                          | 0.011074081 |
| wavelet-LLH | glcm  | Contrast                             | 131.375612  |
| wavelet-LLH | glcm  | DifferenceEntropy                    | 4.09221996  |
| wavelet-LLH | glcm  | InverseVariance                      | 0.133255058 |
| wavelet-LLH | glcm  | DifferenceVariance                   | 54.12585665 |
| wavelet-LLH | glcm  | ldn                                  | 0.871803476 |
| wavelet-LLH | glcm  | ldm                                  | 0.136015721 |
| wavelet-LLH | glcm  | Correlation                          | 0.241953724 |
| wavelet-LLH | glcm  | Autocorrelation                      | 923.1592197 |
| wavelet-LLH | glcm  | SumEntropy                           | 4.943200678 |

|             |            |                                  |              |
|-------------|------------|----------------------------------|--------------|
| wavelet-LLH | glcm       | SumSquares                       | 86.93803856  |
| wavelet-LLH | glcm       | ClusterProminence                | 124874.9009  |
| wavelet-LLH | glcm       | Imc2                             | 0.998215021  |
| wavelet-LLH | glcm       | Imc1                             | -0.601974805 |
| wavelet-LLH | glcm       | DifferenceAverage                | 8.485076792  |
| wavelet-LLH | glcm       | Id                               | 0.219503196  |
| wavelet-LLH | glcm       | ClusterTendency                  | 216.3765423  |
| wavelet-LLH | firstorder | InterquartileRange               | 343.6472918  |
| wavelet-LLH | firstorder | Skewness                         | 0.239930673  |
| wavelet-LLH | firstorder | Uniformity                       | 0.042627702  |
| wavelet-LLH | firstorder | Median                           | -47.32414491 |
| wavelet-LLH | firstorder | Energy                           | 5323763.658  |
| wavelet-LLH | firstorder | RobustMeanAbsoluteDeviation      | 144.7405651  |
| wavelet-LLH | firstorder | MeanAbsoluteDeviation            | 198.7552207  |
| wavelet-LLH | firstorder | TotalEnergy                      | 143741618.8  |
| wavelet-LLH | firstorder | Maximum                          | 552.3308945  |
| wavelet-LLH | firstorder | RootMeanSquared                  | 241.8737219  |
| wavelet-LLH | firstorder | 90Percentile                     | 371.4121283  |
| wavelet-LLH | firstorder | Minimum                          | -710.0906371 |
| wavelet-LLH | firstorder | Entropy                          | 4.828310162  |
| wavelet-LLH | firstorder | Range                            | 1262.421532  |
| wavelet-LLH | firstorder | Variance                         | 58397.64218  |
| wavelet-LLH | firstorder | 10Percentile                     | -269.313995  |
| wavelet-LLH | firstorder | Kurtosis                         | 2.852808536  |
| wavelet-LLH | firstorder | Mean                             | 10.25939387  |
| wavelet-LLH | glrlm      | ShortRunLowGrayLevelEmphasis     | 0.01275379   |
| wavelet-LLH | glrlm      | GrayLevelVariance                | 96.40813556  |
| wavelet-LLH | glrlm      | LowGrayLevelRunEmphasis          | 0.012792878  |
| wavelet-LLH | glrlm      | GrayLevelNonUniformityNormalized | 0.041355099  |
| wavelet-LLH | glrlm      | RunVariance                      | 0.033806596  |
| wavelet-LLH | glrlm      | GrayLevelNonUniformity           | 3.643035543  |
| wavelet-LLH | glrlm      | LongRunEmphasis                  | 1.102083935  |
| wavelet-LLH | glrlm      | ShortRunHighGrayLevelEmphasis    | 979.4201938  |
| wavelet-LLH | glrlm      | RunLengthNonUniformity           | 82.6150035   |
| wavelet-LLH | glrlm      | ShortRunEmphasis                 | 0.975450267  |
| wavelet-LLH | glrlm      | LongRunHighGrayLevelEmphasis     | 1072.033493  |
| wavelet-LLH | glrlm      | RunPercentage                    | 0.967878276  |
| wavelet-LLH | glrlm      | LongRunLowGrayLevelEmphasis      | 0.012954977  |
| wavelet-LLH | glrlm      | RunEntropy                       | 4.949811899  |
| wavelet-LLH | glrlm      | HighGrayLevelRunEmphasis         | 997.4176011  |
| wavelet-LLH | glrlm      | RunLengthNonUniformityNormalized | 0.937512364  |
| wavelet-LLH | glszm      | GrayLevelVariance                | 116.5163889  |
| wavelet-LLH | glszm      | ZoneVariance                     | 1.849722222  |
| wavelet-LLH | glszm      | GrayLevelNonUniformityNormalized | 0.033333333  |
| wavelet-LLH | glszm      | SizeZoneNonUniformityNormalized  | 0.611666667  |
| wavelet-LLH | glszm      | SizeZoneNonUniformity            | 36.7         |
| wavelet-LLH | glszm      | GrayLevelNonUniformity           | 2            |
| wavelet-LLH | glszm      | LargeAreaEmphasis                | 4.15         |
| wavelet-LLH | glszm      | SmallAreaHighGrayLevelEmphasis   | 937.9510231  |
| wavelet-LLH | glszm      | ZonePercentage                   | 0.659340659  |
| wavelet-LLH | glszm      | LargeAreaLowGrayLevelEmphasis    | 0.02308672   |
| wavelet-LLH | glszm      | LargeAreaHighGrayLevelEmphasis   | 3280.65      |
| wavelet-LLH | glszm      | HighGrayLevelZoneEmphasis        | 1107.716667  |

|             |            |                                      |              |
|-------------|------------|--------------------------------------|--------------|
| wavelet-LLH | glszm      | SmallAreaEmphasis                    | 0.808395576  |
| wavelet-LLH | glszm      | LowGrayLevelZoneEmphasis             | 0.018037683  |
| wavelet-LLH | glszm      | ZoneEntropy                          | 5.315061012  |
| wavelet-LLH | glszm      | SmallAreaLowGrayLevelEmphasis        | 0.017741444  |
| wavelet-LLH | ngtdm      | Coarseness                           | 0.054198699  |
| wavelet-LLH | ngtdm      | Complexity                           | 3323.396314  |
| wavelet-LLH | ngtdm      | Strength                             | 29.89244793  |
| wavelet-LLH | ngtdm      | Contrast                             | 0.99522155   |
| wavelet-LLH | ngtdm      | Busyness                             | 0.026852084  |
| wavelet-LLL | gldm       | GrayLevelVariance                    | 370.8619732  |
| wavelet-LLL | gldm       | HighGrayLevelEmphasis                | 2163.593407  |
| wavelet-LLL | gldm       | DependenceEntropy                    | 5.784998624  |
| wavelet-LLL | gldm       | DependenceNonUniformity              | 51.43956044  |
| wavelet-LLL | gldm       | GrayLevelNonUniformity               | 2.054945055  |
| wavelet-LLL | gldm       | SmallDependenceEmphasis              | 0.772893773  |
| wavelet-LLL | gldm       | SmallDependenceHighGrayLevelEmphasis | 1638.313187  |
| wavelet-LLL | gldm       | DependenceNonUniformityNormalized    | 0.565269895  |
| wavelet-LLL | gldm       | LargeDependenceEmphasis              | 2.054945055  |
| wavelet-LLL | gldm       | LargeDependenceLowGrayLevelEmphasis  | 0.015300442  |
| wavelet-LLL | gldm       | DependenceVariance                   | 0.286921869  |
| wavelet-LLL | gldm       | LargeDependenceHighGrayLevelEmphasis | 5156.142857  |
| wavelet-LLL | gldm       | SmallDependenceLowGrayLevelEmphasis  | 0.014059915  |
| wavelet-LLL | gldm       | LowGrayLevelEmphasis                 | 0.014303204  |
| wavelet-LLL | glcm       | JointAverage                         | 47.59604772  |
| wavelet-LLL | glcm       | SumAverage                           | 95.19209543  |
| wavelet-LLL | glcm       | JointEntropy                         | 6.730238185  |
| wavelet-LLL | glcm       | ClusterShade                         | -7382.254355 |
| wavelet-LLL | glcm       | MaximumProbability                   | 0.014755929  |
| wavelet-LLL | glcm       | ldmn                                 | 0.934815985  |
| wavelet-LLL | glcm       | JointEnergy                          | 0.009593411  |
| wavelet-LLL | glcm       | Contrast                             | 479.264849   |
| wavelet-LLL | glcm       | DifferenceEntropy                    | 4.696801323  |
| wavelet-LLL | glcm       | InverseVariance                      | 0.04937718   |
| wavelet-LLL | glcm       | DifferenceVariance                   | 151.9507282  |
| wavelet-LLL | glcm       | ldn                                  | 0.829643554  |
| wavelet-LLL | glcm       | ldm                                  | 0.05362505   |
| wavelet-LLL | glcm       | Correlation                          | 0.350173721  |
| wavelet-LLL | glcm       | Autocorrelation                      | 2399.181169  |
| wavelet-LLL | glcm       | SumEntropy                           | 5.299291947  |
| wavelet-LLL | glcm       | SumSquares                           | 372.6511325  |
| wavelet-LLL | glcm       | ClusterProminence                    | 2624132.502  |
| wavelet-LLL | glcm       | lmc2                                 | 0.999902071  |
| wavelet-LLL | glcm       | lmc1                                 | -0.777367691 |
| wavelet-LLL | glcm       | DifferenceAverage                    | 17.80131804  |
| wavelet-LLL | glcm       | ld                                   | 0.117474592  |
| wavelet-LLL | glcm       | ClusterTendency                      | 1011.339681  |
| wavelet-LLL | firstorder | InterquartileRange                   | 602.5832511  |
| wavelet-LLL | firstorder | Skewness                             | -0.008024673 |
| wavelet-LLL | firstorder | Uniformity                           | 0.022581814  |
| wavelet-LLL | firstorder | Median                               | -701.8469864 |
| wavelet-LLL | firstorder | Energy                               | 60048569.06  |
| wavelet-LLL | firstorder | RobustMeanAbsoluteDeviation          | 277.3768239  |
| wavelet-LLL | firstorder | MeanAbsoluteDeviation                | 388.4106668  |



|             |            |                                  |              |
|-------------|------------|----------------------------------|--------------|
| wavelet-LLL | firstorder | TotalEnergy                      | 1621311364   |
| wavelet-LLL | firstorder | Maximum                          | 252.68055    |
| wavelet-LLL | firstorder | RootMeanSquared                  | 812.3265262  |
| wavelet-LLL | firstorder | 90Percentile                     | 58.85361775  |
| wavelet-LLL | firstorder | Minimum                          | -1676.801628 |
| wavelet-LLL | firstorder | Entropy                          | 5.633631178  |
| wavelet-LLL | firstorder | Range                            | 1929.482178  |
| wavelet-LLL | firstorder | Variance                         | 231049.2366  |
| wavelet-LLL | firstorder | 10Percentile                     | -1278.753356 |
| wavelet-LLL | firstorder | Kurtosis                         | 2.424889772  |
| wavelet-LLL | firstorder | Mean                             | -654.847424  |
| wavelet-LLL | grlm       | ShortRunLowGrayLevelEmphasis     | 0.014467875  |
| wavelet-LLL | grlm       | GrayLevelVariance                | 369.8892396  |
| wavelet-LLL | grlm       | LowGrayLevelRunEmphasis          | 0.014477702  |
| wavelet-LLL | grlm       | GrayLevelNonUniformityNormalized | 0.022577077  |
| wavelet-LLL | grlm       | RunVariance                      | 0.012660374  |
| wavelet-LLL | grlm       | GrayLevelNonUniformity           | 2.028519895  |
| wavelet-LLL | grlm       | LongRunEmphasis                  | 1.039347907  |
| wavelet-LLL | grlm       | ShortRunHighGrayLevelEmphasis    | 2131.983801  |
| wavelet-LLL | grlm       | RunLengthNonUniformity           | 87.6178756   |
| wavelet-LLL | grlm       | ShortRunEmphasis                 | 0.990163023  |
| wavelet-LLL | grlm       | LongRunHighGrayLevelEmphasis     | 2260.527865  |
| wavelet-LLL | grlm       | RunPercentage                    | 0.987320372  |
| wavelet-LLL | grlm       | LongRunLowGrayLevelEmphasis      | 0.014517009  |
| wavelet-LLL | grlm       | RunEntropy                       | 5.649119869  |
| wavelet-LLL | grlm       | HighGrayLevelRunEmphasis         | 2157.692614  |
| wavelet-LLL | grlm       | RunLengthNonUniformityNormalized | 0.974679253  |
| wavelet-LLL | glszm      | GrayLevelVariance                | 368.0978243  |
| wavelet-LLL | glszm      | ZoneVariance                     | 0.174734357  |
| wavelet-LLL | glszm      | GrayLevelNonUniformityNormalized | 0.022432113  |
| wavelet-LLL | glszm      | SizeZoneNonUniformityNormalized  | 0.715297689  |
| wavelet-LLL | glszm      | SizeZoneNonUniformity            | 55.07792208  |
| wavelet-LLL | glszm      | GrayLevelNonUniformity           | 1.727272727  |
| wavelet-LLL | glszm      | LargeAreaEmphasis                | 1.571428571  |
| wavelet-LLL | glszm      | SmallAreaHighGrayLevelEmphasis   | 1850.282468  |
| wavelet-LLL | glszm      | ZonePercentage                   | 0.846153846  |
| wavelet-LLL | glszm      | LargeAreaLowGrayLevelEmphasis    | 0.017292369  |
| wavelet-LLL | glszm      | LargeAreaHighGrayLevelEmphasis   | 3577.831169  |
| wavelet-LLL | glszm      | HighGrayLevelZoneEmphasis        | 2125.558442  |
| wavelet-LLL | glszm      | SmallAreaEmphasis                | 0.871572872  |
| wavelet-LLL | glszm      | LowGrayLevelZoneEmphasis         | 0.01671163   |
| wavelet-LLL | glszm      | ZoneEntropy                      | 5.786013164  |
| wavelet-LLL | glszm      | SmallAreaLowGrayLevelEmphasis    | 0.016568817  |
| wavelet-LLL | ngtdm      | Coarseness                       | 0.048279664  |
| wavelet-LLL | ngtdm      | Complexity                       | 17673.38356  |
| wavelet-LLL | ngtdm      | Strength                         | 90.53037348  |
| wavelet-LLL | ngtdm      | Contrast                         | 2.785263213  |
| wavelet-LLL | ngtdm      | Busyness                         | 0.01127371   |
| wavelet-HHL | gldm       | GrayLevelVariance                | 17.12884917  |
| wavelet-HHL | gldm       | HighGrayLevelEmphasis            | 127.7252747  |
| wavelet-HHL | gldm       | DependenceEntropy                | 5.069684514  |
| wavelet-HHL | gldm       | DependenceNonUniformity          | 27.35164835  |
| wavelet-HHL | gldm       | GrayLevelNonUniformity           | 7.285714286  |

|             |            |                                      |              |
|-------------|------------|--------------------------------------|--------------|
| wavelet-HHL | gldm       | SmallDependenceEmphasis              | 0.425518926  |
| wavelet-HHL | gldm       | SmallDependenceHighGrayLevelEmphasis | 61.93017399  |
| wavelet-HHL | gldm       | DependenceNonUniformityNormalized    | 0.300567564  |
| wavelet-HHL | gldm       | LargeDependenceEmphasis              | 5.263736264  |
| wavelet-HHL | gldm       | LargeDependenceLowGrayLevelEmphasis  | 0.078926832  |
| wavelet-HHL | gldm       | DependenceVariance                   | 0.858350441  |
| wavelet-HHL | gldm       | LargeDependenceHighGrayLevelEmphasis | 598.4285714  |
| wavelet-HHL | gldm       | SmallDependenceLowGrayLevelEmphasis  | 0.016935166  |
| wavelet-HHL | gldm       | LowGrayLevelEmphasis                 | 0.024386243  |
| wavelet-HHL | glcm       | JointAverage                         | 10.18638536  |
| wavelet-HHL | glcm       | SumAverage                           | 20.37277072  |
| wavelet-HHL | glcm       | JointEntropy                         | 6.127922774  |
| wavelet-HHL | glcm       | ClusterShade                         | 99.57371016  |
| wavelet-HHL | glcm       | MaximumProbability                   | 0.036778585  |
| wavelet-HHL | glcm       | Idmn                                 | 0.959152594  |
| wavelet-HHL | glcm       | JointEnergy                          | 0.016325296  |
| wavelet-HHL | glcm       | Contrast                             | 29.40555924  |
| wavelet-HHL | glcm       | DifferenceEntropy                    | 3.295668461  |
| wavelet-HHL | glcm       | InverseVariance                      | 0.212923306  |
| wavelet-HHL | glcm       | DifferenceVariance                   | 10.73824076  |
| wavelet-HHL | glcm       | Idn                                  | 0.865129435  |
| wavelet-HHL | glcm       | Idm                                  | 0.199993309  |
| wavelet-HHL | glcm       | Correlation                          | -0.012940496 |
| wavelet-HHL | glcm       | Autocorrelation                      | 103.7824767  |
| wavelet-HHL | glcm       | SumEntropy                           | 3.977060869  |
| wavelet-HHL | glcm       | SumSquares                           | 14.68120265  |
| wavelet-HHL | glcm       | ClusterProminence                    | 3596.372237  |
| wavelet-HHL | glcm       | Imc2                                 | 0.968772168  |
| wavelet-HHL | glcm       | Imc1                                 | -0.376449311 |
| wavelet-HHL | glcm       | DifferenceAverage                    | 4.243560593  |
| wavelet-HHL | glcm       | Id                                   | 0.296960883  |
| wavelet-HHL | glcm       | ClusterTendency                      | 29.31925138  |
| wavelet-HHL | firstorder | InterquartileRange                   | 129.6160897  |
| wavelet-HHL | firstorder | Skewness                             | 0.862236508  |
| wavelet-HHL | firstorder | Uniformity                           | 0.080062794  |
| wavelet-HHL | firstorder | Median                               | 14.92774315  |
| wavelet-HHL | firstorder | Energy                               | 1009093.658  |
| wavelet-HHL | firstorder | RobustMeanAbsoluteDeviation          | 53.67534023  |
| wavelet-HHL | firstorder | MeanAbsoluteDeviation                | 78.91276145  |
| wavelet-HHL | firstorder | TotalEnergy                          | 27245528.77  |
| wavelet-HHL | firstorder | Maximum                              | 384.6854079  |
| wavelet-HHL | firstorder | RootMeanSquared                      | 105.3040422  |
| wavelet-HHL | firstorder | 90Percentile                         | 168.5060036  |
| wavelet-HHL | firstorder | Minimum                              | -212.8680804 |
| wavelet-HHL | firstorder | Entropy                              | 3.858599616  |
| wavelet-HHL | firstorder | Range                                | 597.5534883  |
| wavelet-HHL | firstorder | Variance                             | 10451.2583   |
| wavelet-HHL | firstorder | 10Percentile                         | -78.4321026  |
| wavelet-HHL | firstorder | Kurtosis                             | 4.353870259  |
| wavelet-HHL | firstorder | Mean                                 | 25.25238596  |
| wavelet-HHL | glrlm      | ShortRunLowGrayLevelEmphasis         | 0.024473104  |
| wavelet-HHL | glrlm      | GrayLevelVariance                    | 17.50391264  |
| wavelet-HHL | glrlm      | LowGrayLevelRunEmphasis              | 0.024904612  |

|             |       |                                      |              |
|-------------|-------|--------------------------------------|--------------|
| wavelet-HHL | grlm  | GrayLevelNonUniformityNormalized     | 0.079352751  |
| wavelet-HHL | grlm  | RunVariance                          | 0.043825129  |
| wavelet-HHL | grlm  | GrayLevelNonUniformity               | 6.916105245  |
| wavelet-HHL | grlm  | LongRunEmphasis                      | 1.13696021   |
| wavelet-HHL | grlm  | ShortRunHighGrayLevelEmphasis        | 124.7231782  |
| wavelet-HHL | grlm  | RunLengthNonUniformity               | 80.10200227  |
| wavelet-HHL | grlm  | ShortRunEmphasis                     | 0.966753786  |
| wavelet-HHL | grlm  | LongRunHighGrayLevelEmphasis         | 143.8357956  |
| wavelet-HHL | grlm  | RunPercentage                        | 0.957734573  |
| wavelet-HHL | grlm  | LongRunLowGrayLevelEmphasis          | 0.026658249  |
| wavelet-HHL | grlm  | RunEntropy                           | 4.032316009  |
| wavelet-HHL | grlm  | HighGrayLevelRunEmphasis             | 128.4312115  |
| wavelet-HHL | grlm  | RunLengthNonUniformityNormalized     | 0.917466853  |
| wavelet-HHL | glszm | GrayLevelVariance                    | 25.00226347  |
| wavelet-HHL | glszm | ZoneVariance                         | 2.400181077  |
| wavelet-HHL | glszm | GrayLevelNonUniformityNormalized     | 0.06926211   |
| wavelet-HHL | glszm | SizeZoneNonUniformityNormalized      | 0.387958352  |
| wavelet-HHL | glszm | SizeZoneNonUniformity                | 18.23404255  |
| wavelet-HHL | glszm | GrayLevelNonUniformity               | 3.255319149  |
| wavelet-HHL | glszm | LargeAreaEmphasis                    | 6.14893617   |
| wavelet-HHL | glszm | SmallAreaHighGrayLevelEmphasis       | 97.57545656  |
| wavelet-HHL | glszm | ZonePercentage                       | 0.516483516  |
| wavelet-HHL | glszm | LargeAreaLowGrayLevelEmphasis        | 0.096339964  |
| wavelet-HHL | glszm | LargeAreaHighGrayLevelEmphasis       | 750.7446809  |
| wavelet-HHL | glszm | HighGrayLevelZoneEmphasis            | 137.7234043  |
| wavelet-HHL | glszm | SmallAreaEmphasis                    | 0.642722928  |
| wavelet-HHL | glszm | LowGrayLevelZoneEmphasis             | 0.035574054  |
| wavelet-HHL | glszm | ZoneEntropy                          | 4.93502682   |
| wavelet-HHL | glszm | SmallAreaLowGrayLevelEmphasis        | 0.030592069  |
| wavelet-HHL | ngtdm | Coarseness                           | 0.055738402  |
| wavelet-HHL | ngtdm | Complexity                           | 489.5513819  |
| wavelet-HHL | ngtdm | Strength                             | 7.940726922  |
| wavelet-HHL | ngtdm | Contrast                             | 0.325769535  |
| wavelet-HHL | ngtdm | Busyness                             | 0.119309167  |
| wavelet-HLH | gldm  | GrayLevelVariance                    | 17.3674677   |
| wavelet-HLH | gldm  | HighGrayLevelEmphasis                | 203.9450549  |
| wavelet-HLH | gldm  | DependenceEntropy                    | 5.205558448  |
| wavelet-HLH | gldm  | DependenceNonUniformity              | 23.83516484  |
| wavelet-HLH | gldm  | GrayLevelNonUniformity               | 7.285714286  |
| wavelet-HLH | gldm  | SmallDependenceEmphasis              | 0.414151404  |
| wavelet-HLH | gldm  | SmallDependenceHighGrayLevelEmphasis | 85.69677656  |
| wavelet-HLH | gldm  | DependenceNonUniformityNormalized    | 0.261924888  |
| wavelet-HLH | gldm  | LargeDependenceEmphasis              | 6.494505495  |
| wavelet-HLH | gldm  | LargeDependenceLowGrayLevelEmphasis  | 0.05275008   |
| wavelet-HLH | gldm  | DependenceVariance                   | 1.320130419  |
| wavelet-HLH | gldm  | LargeDependenceHighGrayLevelEmphasis | 1324.164835  |
| wavelet-HLH | gldm  | SmallDependenceLowGrayLevelEmphasis  | 0.015202399  |
| wavelet-HLH | gldm  | LowGrayLevelEmphasis                 | 0.019231579  |
| wavelet-HLH | glcm  | JointAverage                         | 13.5791124   |
| wavelet-HLH | glcm  | SumAverage                           | 27.1582248   |
| wavelet-HLH | glcm  | JointEntropy                         | 6.260051114  |
| wavelet-HLH | glcm  | ClusterShade                         | -99.07517196 |
| wavelet-HLH | glcm  | MaximumProbability                   | 0.035668371  |

|             |            |                                  |              |
|-------------|------------|----------------------------------|--------------|
| wavelet-HLH | glcm       | Idmn                             | 0.934637666  |
| wavelet-HLH | glcm       | JointEnergy                      | 0.014819338  |
| wavelet-HLH | glcm       | Contrast                         | 39.49628068  |
| wavelet-HLH | glcm       | DifferenceEntropy                | 3.435703218  |
| wavelet-HLH | glcm       | InverseVariance                  | 0.206629531  |
| wavelet-HLH | glcm       | DifferenceVariance               | 15.09561928  |
| wavelet-HLH | glcm       | Idn                              | 0.837227292  |
| wavelet-HLH | glcm       | Idm                              | 0.203755671  |
| wavelet-HLH | glcm       | Correlation                      | -0.029431356 |
| wavelet-HLH | glcm       | Autocorrelation                  | 184.0229254  |
| wavelet-HLH | glcm       | SumEntropy                       | 4.189144636  |
| wavelet-HLH | glcm       | SumSquares                       | 19.28073914  |
| wavelet-HLH | glcm       | ClusterProminence                | 4954.065734  |
| wavelet-HLH | glcm       | Imc2                             | 0.978918285  |
| wavelet-HLH | glcm       | Imc1                             | -0.408402824 |
| wavelet-HLH | glcm       | DifferenceAverage                | 4.811376194  |
| wavelet-HLH | glcm       | Id                               | 0.294335275  |
| wavelet-HLH | glcm       | ClusterTendency                  | 37.62667588  |
| wavelet-HLH | firstorder | InterquartileRange               | 135.5256315  |
| wavelet-HLH | firstorder | Skewness                         | -0.539840664 |
| wavelet-HLH | firstorder | Uniformity                       | 0.080062794  |
| wavelet-HLH | firstorder | Median                           | 4.315141353  |
| wavelet-HLH | firstorder | Energy                           | 972830.279   |
| wavelet-HLH | firstorder | RobustMeanAbsoluteDeviation      | 60.05035508  |
| wavelet-HLH | firstorder | MeanAbsoluteDeviation            | 83.33924582  |
| wavelet-HLH | firstorder | TotalEnergy                      | 26266417.53  |
| wavelet-HLH | firstorder | Maximum                          | 202.3423312  |
| wavelet-HLH | firstorder | RootMeanSquared                  | 103.3945967  |
| wavelet-HLH | firstorder | 90Percentile                     | 129.6317447  |
| wavelet-HLH | firstorder | Minimum                          | -314.5413561 |
| wavelet-HLH | firstorder | Entropy                          | 3.917004811  |
| wavelet-HLH | firstorder | Range                            | 516.8836873  |
| wavelet-HLH | firstorder | Variance                         | 10675.28896  |
| wavelet-HLH | firstorder | 10Percentile                     | -130.4818242 |
| wavelet-HLH | firstorder | Kurtosis                         | 3.149964336  |
| wavelet-HLH | firstorder | Mean                             | 3.892771478  |
| wavelet-HLH | grlm       | ShortRunLowGrayLevelEmphasis     | 0.019661871  |
| wavelet-HLH | grlm       | GrayLevelVariance                | 17.79821466  |
| wavelet-HLH | grlm       | LowGrayLevelRunEmphasis          | 0.019905673  |
| wavelet-HLH | grlm       | GrayLevelNonUniformityNormalized | 0.078093786  |
| wavelet-HLH | grlm       | RunVariance                      | 0.050617496  |
| wavelet-HLH | grlm       | GrayLevelNonUniformity           | 6.758697116  |
| wavelet-HLH | grlm       | LongRunEmphasis                  | 1.158502584  |
| wavelet-HLH | grlm       | ShortRunHighGrayLevelEmphasis    | 196.0629693  |
| wavelet-HLH | grlm       | RunLengthNonUniformity           | 78.31789914  |
| wavelet-HLH | grlm       | ShortRunEmphasis                 | 0.961391855  |
| wavelet-HLH | grlm       | LongRunHighGrayLevelEmphasis     | 236.1320536  |
| wavelet-HLH | grlm       | RunPercentage                    | 0.950972105  |
| wavelet-HLH | grlm       | LongRunLowGrayLevelEmphasis      | 0.020909143  |
| wavelet-HLH | grlm       | RunEntropy                       | 4.130652123  |
| wavelet-HLH | grlm       | HighGrayLevelRunEmphasis         | 203.95957    |
| wavelet-HLH | grlm       | RunLengthNonUniformityNormalized | 0.90386705   |
| wavelet-HLH | glszm      | GrayLevelVariance                | 24.66162571  |

|             |       |                                  |             |
|-------------|-------|----------------------------------|-------------|
| wavelet-HLH | glszm | ZoneVariance                     | 3.325614367 |
| wavelet-HLH | glszm | GrayLevelNonUniformityNormalized | 0.063327032 |
| wavelet-HLH | glszm | SizeZoneNonUniformityNormalized  | 0.402646503 |
| wavelet-HLH | glszm | SizeZoneNonUniformity            | 18.52173913 |
| wavelet-HLH | glszm | GrayLevelNonUniformity           | 2.913043478 |
| wavelet-HLH | glszm | LargeAreaEmphasis                | 7.239130435 |
| wavelet-HLH | glszm | SmallAreaHighGrayLevelEmphasis   | 135.8857126 |
| wavelet-HLH | glszm | ZonePercentage                   | 0.505494505 |
| wavelet-HLH | glszm | LargeAreaLowGrayLevelEmphasis    | 0.06872353  |
| wavelet-HLH | glszm | LargeAreaHighGrayLevelEmphasis   | 1502.586957 |
| wavelet-HLH | glszm | HighGrayLevelZoneEmphasis        | 202.826087  |
| wavelet-HLH | glszm | SmallAreaEmphasis                | 0.654621075 |
| wavelet-HLH | glszm | LowGrayLevelZoneEmphasis         | 0.031658559 |
| wavelet-HLH | glszm | ZoneEntropy                      | 4.882045108 |
| wavelet-HLH | glszm | SmallAreaLowGrayLevelEmphasis    | 0.028916857 |
| wavelet-HLH | ngtdm | Coarseness                       | 0.050924059 |
| wavelet-HLH | ngtdm | Complexity                       | 546.0622701 |
| wavelet-HLH | ngtdm | Strength                         | 6.807111556 |
| wavelet-HLH | ngtdm | Contrast                         | 0.326465363 |
| wavelet-HLH | ngtdm | Busyness                         | 0.075546402 |

| Image type | Feature Class | Feature Name                         |                                                                                                                                                                                                                                                                                                                                                                                                                   |
|------------|---------------|--------------------------------------|-------------------------------------------------------------------------------------------------------------------------------------------------------------------------------------------------------------------------------------------------------------------------------------------------------------------------------------------------------------------------------------------------------------------|
| general    | info          | BoundingBox                          | 22: RTSTRUCT: C99-DNU_segment_PTVfinal<br>(0, 0, 1, 6, 6, 9)                                                                                                                                                                                                                                                                                                                                                      |
| general    | info          | EnabledImageTypes                    | {u'Original': {}, u'Wavelet': {}}                                                                                                                                                                                                                                                                                                                                                                                 |
|            |               |                                      | {'distances': [1], 'additionalInfo': True, 'force2D': False, 'interpolator': 'sitkBSpline', 'resampledPixelSpacing': [3.0], 'label': 1, 'normalizeScale': 1, 'normalize': False, 'force2Ddimension': 0, 'removeOutliers': None, 'minimumROISize': None, u'binWidth': 25.0, 'minimumROIDimensions': 1, u'correctMask': True, 'preCrop': False, u'symmetricalGLCM': True, 'resegmentRange': None, 'padDistance': 5} |
| general    | info          | GeneralSettings                      |                                                                                                                                                                                                                                                                                                                                                                                                                   |
| general    | info          | ImageHash                            | 555703461e58463dd16fd03b3d4ce9c3dd0a688e<br>(0.9765624999999998, 0.9765624999999998, 1.9999999999999999)                                                                                                                                                                                                                                                                                                          |
| general    | info          | ImageSpacing                         |                                                                                                                                                                                                                                                                                                                                                                                                                   |
| general    | info          | MaskHash                             | e3f27d17a56970fa75baf44bd5b89045dc242dcf                                                                                                                                                                                                                                                                                                                                                                          |
| general    | info          | NumpyVersion                         | 1.13.1                                                                                                                                                                                                                                                                                                                                                                                                            |
| general    | info          | PyWaveletVersion                     | 0.5.2                                                                                                                                                                                                                                                                                                                                                                                                             |
| general    | info          | SimpleITKVersion                     | 1.1.0                                                                                                                                                                                                                                                                                                                                                                                                             |
| general    | info          | Version                              | 1.3.0.post102+g1b0eb74                                                                                                                                                                                                                                                                                                                                                                                            |
| general    | info          | VolumeNum                            | 1                                                                                                                                                                                                                                                                                                                                                                                                                 |
| general    | info          | VoxelNum                             | 136                                                                                                                                                                                                                                                                                                                                                                                                               |
| original   | shape         | Maximum3DDiameter                    | 29.69848481                                                                                                                                                                                                                                                                                                                                                                                                       |
| original   | shape         | Maximum2DDiameterSlice               | 15.29705854                                                                                                                                                                                                                                                                                                                                                                                                       |
| original   | shape         | Sphericity                           | 0.787650513                                                                                                                                                                                                                                                                                                                                                                                                       |
| original   | shape         | MinorAxis                            | 15.01009793                                                                                                                                                                                                                                                                                                                                                                                                       |
| original   | shape         | Elongation                           | 0.486190879                                                                                                                                                                                                                                                                                                                                                                                                       |
| original   | shape         | SurfaceVolumeRatio                   | 0.397969394                                                                                                                                                                                                                                                                                                                                                                                                       |
| original   | shape         | Volume                               | 3672                                                                                                                                                                                                                                                                                                                                                                                                              |
| original   | shape         | MajorAxis                            | 30.87284968                                                                                                                                                                                                                                                                                                                                                                                                       |
| original   | shape         | SurfaceArea                          | 1461.343613                                                                                                                                                                                                                                                                                                                                                                                                       |
| original   | shape         | Flatness                             | 0.399954236                                                                                                                                                                                                                                                                                                                                                                                                       |
| original   | shape         | LeastAxis                            | 12.34772699                                                                                                                                                                                                                                                                                                                                                                                                       |
| original   | shape         | Maximum2DDiameterColumn              | 25.63201124                                                                                                                                                                                                                                                                                                                                                                                                       |
| original   | shape         | Maximum2DDiameterRow                 | 28.3019434                                                                                                                                                                                                                                                                                                                                                                                                        |
| original   | gldm          | GrayLevelVariance                    | 23.316609                                                                                                                                                                                                                                                                                                                                                                                                         |
| original   | gldm          | HighGrayLevelEmphasis                | 120.3970588                                                                                                                                                                                                                                                                                                                                                                                                       |
| original   | gldm          | DependenceEntropy                    | 5.588289522                                                                                                                                                                                                                                                                                                                                                                                                       |
| original   | gldm          | DependenceNonUniformity              | 37.01470588                                                                                                                                                                                                                                                                                                                                                                                                       |
| original   | gldm          | GrayLevelNonUniformity               | 8.485294118                                                                                                                                                                                                                                                                                                                                                                                                       |
| original   | gldm          | SmallDependenceEmphasis              | 0.412826797                                                                                                                                                                                                                                                                                                                                                                                                       |
| original   | gldm          | SmallDependenceHighGrayLevelEmphasis | 42.06948121                                                                                                                                                                                                                                                                                                                                                                                                       |
| original   | gldm          | DependenceNonUniformityNormalized    | 0.272166955                                                                                                                                                                                                                                                                                                                                                                                                       |
| original   | gldm          | LargeDependenceEmphasis              | 6.352941176                                                                                                                                                                                                                                                                                                                                                                                                       |
| original   | gldm          | LargeDependenceLowGrayLevelEmphasis  | 0.223356544                                                                                                                                                                                                                                                                                                                                                                                                       |
| original   | gldm          | DependenceVariance                   | 1.290441176                                                                                                                                                                                                                                                                                                                                                                                                       |
| original   | gldm          | LargeDependenceHighGrayLevelEmphasis | 916.9558824                                                                                                                                                                                                                                                                                                                                                                                                       |
| original   | gldm          | SmallDependenceLowGrayLevelEmphasis  | 0.031272021                                                                                                                                                                                                                                                                                                                                                                                                       |
| original   | gldm          | LowGrayLevelEmphasis                 | 0.057003501                                                                                                                                                                                                                                                                                                                                                                                                       |
| original   | glcm          | JointAverage                         | 10.95267373                                                                                                                                                                                                                                                                                                                                                                                                       |
| original   | glcm          | SumAverage                           | 21.90534747                                                                                                                                                                                                                                                                                                                                                                                                       |

|          |            |                                  |              |
|----------|------------|----------------------------------|--------------|
| original | glcm       | JointEntropy                     | 6.733525365  |
| original | glcm       | ClusterShade                     | -65.70042926 |
| original | glcm       | MaximumProbability               | 0.027808468  |
| original | glcm       | Idmn                             | 0.94747867   |
| original | glcm       | JointEnergy                      | 0.010783607  |
| original | glcm       | Contrast                         | 24.66081445  |
| original | glcm       | DifferenceEntropy                | 3.25135542   |
| original | glcm       | InverseVariance                  | 0.239312872  |
| original | glcm       | DifferenceVariance               | 8.621505773  |
| original | glcm       | Idn                              | 0.848207362  |
| original | glcm       | Idm                              | 0.220505212  |
| original | glcm       | Correlation                      | 0.433559116  |
| original | glcm       | Autocorrelation                  | 129.5107022  |
| original | glcm       | SumEntropy                       | 4.634078347  |
| original | glcm       | SumSquares                       | 21.79280423  |
| original | glcm       | ClusterProminence                | 8659.663224  |
| original | glcm       | Imc2                             | 0.969545786  |
| original | glcm       | Imc1                             | -0.350221683 |
| original | glcm       | DifferenceAverage                | 3.928473542  |
| original | glcm       | Id                               | 0.313607581  |
| original | glcm       | ClusterTendency                  | 62.51040246  |
| original | firstorder | InterquartileRange               | 210.75       |
| original | firstorder | Skewness                         | -0.000404194 |
| original | firstorder | Uniformity                       | 0.062391869  |
| original | firstorder | Median                           | -514.5       |
| original | firstorder | Energy                           | 38340302     |
| original | firstorder | RobustMeanAbsoluteDeviation      | 79.81504132  |
| original | firstorder | MeanAbsoluteDeviation            | 101.9878893  |
| original | firstorder | TotalEnergy                      | 1035188154   |
| original | firstorder | Maximum                          | -256         |
| original | firstorder | RootMeanSquared                  | 530.9557282  |
| original | firstorder | 90Percentile                     | -368         |
| original | firstorder | Minimum                          | -742         |
| original | firstorder | Entropy                          | 4.127973134  |
| original | firstorder | Range                            | 486          |
| original | firstorder | Variance                         | 14533.74221  |
| original | firstorder | 10Percentile                     | -681         |
| original | firstorder | Kurtosis                         | 2.056247162  |
| original | firstorder | Mean                             | -517.0882353 |
| original | glrlm      | ShortRunLowGrayLevelEmphasis     | 0.056894258  |
| original | glrlm      | GrayLevelVariance                | 23.31887217  |
| original | glrlm      | LowGrayLevelRunEmphasis          | 0.058076052  |
| original | glrlm      | GrayLevelNonUniformityNormalized | 0.061976597  |
| original | glrlm      | RunVariance                      | 0.053974647  |
| original | glrlm      | GrayLevelNonUniformity           | 8.02166953   |
| original | glrlm      | LongRunEmphasis                  | 1.159970385  |
| original | glrlm      | ShortRunHighGrayLevelEmphasis    | 113.8391707  |
| original | glrlm      | RunLengthNonUniformity           | 117.8518299  |
| original | glrlm      | ShortRunEmphasis                 | 0.963427779  |
| original | glrlm      | LongRunHighGrayLevelEmphasis     | 141.4981246  |
| original | glrlm      | RunPercentage                    | 0.951923077  |
| original | glrlm      | LongRunLowGrayLevelEmphasis      | 0.064299755  |
| original | glrlm      | RunEntropy                       | 4.315108409  |
| original | glrlm      | HighGrayLevelRunEmphasis         | 119.2462196  |
| original | glrlm      | RunLengthNonUniformityNormalized | 0.909144964  |

|             |       |                                      |              |
|-------------|-------|--------------------------------------|--------------|
| original    | glszm | GrayLevelVariance                    | 24.13213668  |
| original    | glszm | ZoneVariance                         | 3.588235294  |
| original    | glszm | GrayLevelNonUniformityNormalized     | 0.061851211  |
| original    | glszm | SizeZoneNonUniformityNormalized      | 0.39532872   |
| original    | glszm | SizeZoneNonUniformity                | 26.88235294  |
| original    | glszm | GrayLevelNonUniformity               | 4.205882353  |
| original    | glszm | LargeAreaEmphasis                    | 7.588235294  |
| original    | glszm | SmallAreaHighGrayLevelEmphasis       | 62.81799897  |
| original    | glszm | ZonePercentage                       | 0.5          |
| original    | glszm | LargeAreaLowGrayLevelEmphasis        | 0.247457245  |
| original    | glszm | LargeAreaHighGrayLevelEmphasis       | 1093.058824  |
| original    | glszm | HighGrayLevelZoneEmphasis            | 105.3970588  |
| original    | glszm | SmallAreaEmphasis                    | 0.650263692  |
| original    | glszm | LowGrayLevelZoneEmphasis             | 0.074332334  |
| original    | glszm | ZoneEntropy                          | 5.107621805  |
| original    | glszm | SmallAreaLowGrayLevelEmphasis        | 0.053946096  |
| original    | ngtdm | Coarseness                           | 0.047351197  |
| original    | ngtdm | Complexity                           | 409.5425215  |
| original    | ngtdm | Strength                             | 6.129198708  |
| original    | ngtdm | Contrast                             | 0.335576828  |
| original    | ngtdm | Busyness                             | 0.134187791  |
| wavelet-HHH | gldm  | GrayLevelVariance                    | 1.470588235  |
| wavelet-HHH | gldm  | HighGrayLevelEmphasis                | 13.72058824  |
| wavelet-HHH | gldm  | DependenceEntropy                    | 4.758220722  |
| wavelet-HHH | gldm  | DependenceNonUniformity              | 14.76470588  |
| wavelet-HHH | gldm  | GrayLevelNonUniformity               | 34.73529412  |
| wavelet-HHH | gldm  | SmallDependenceEmphasis              | 0.114419169  |
| wavelet-HHH | gldm  | SmallDependenceHighGrayLevelEmphasis | 2.107779953  |
| wavelet-HHH | gldm  | DependenceNonUniformityNormalized    | 0.108564014  |
| wavelet-HHH | gldm  | LargeDependenceEmphasis              | 35.05882353  |
| wavelet-HHH | gldm  | LargeDependenceLowGrayLevelEmphasis  | 3.52875817   |
| wavelet-HHH | gldm  | DependenceVariance                   | 7.031141869  |
| wavelet-HHH | gldm  | LargeDependenceHighGrayLevelEmphasis | 420.3970588  |
| wavelet-HHH | gldm  | SmallDependenceLowGrayLevelEmphasis  | 0.037335573  |
| wavelet-HHH | gldm  | LowGrayLevelEmphasis                 | 0.130890523  |
| wavelet-HHH | glcm  | JointAverage                         | 3.489098105  |
| wavelet-HHH | glcm  | SumAverage                           | 6.978196209  |
| wavelet-HHH | glcm  | JointEntropy                         | 4.119880885  |
| wavelet-HHH | glcm  | ClusterShade                         | 2.403950408  |
| wavelet-HHH | glcm  | MaximumProbability                   | 0.132516865  |
| wavelet-HHH | glcm  | Idmn                                 | 0.975139609  |
| wavelet-HHH | glcm  | JointEnergy                          | 0.073548478  |
| wavelet-HHH | glcm  | Contrast                             | 2.779179153  |
| wavelet-HHH | glcm  | DifferenceEntropy                    | 1.930224241  |
| wavelet-HHH | glcm  | InverseVariance                      | 0.458151714  |
| wavelet-HHH | glcm  | DifferenceVariance                   | 1.227060363  |
| wavelet-HHH | glcm  | Idn                                  | 0.898993306  |
| wavelet-HHH | glcm  | Idm                                  | 0.524692219  |
| wavelet-HHH | glcm  | Correlation                          | -0.044744162 |
| wavelet-HHH | glcm  | Autocorrelation                      | 12.10683015  |
| wavelet-HHH | glcm  | SumEntropy                           | 2.566906889  |
| wavelet-HHH | glcm  | SumSquares                           | 1.321908309  |
| wavelet-HHH | glcm  | ClusterProminence                    | 28.50239518  |
| wavelet-HHH | glcm  | Imc2                                 | 0.55729692   |
| wavelet-HHH | glcm  | Imc1                                 | -0.092653508 |



|             |            |                                  |              |
|-------------|------------|----------------------------------|--------------|
| wavelet-HHH | glcm       | DifferenceAverage                | 1.225091583  |
| wavelet-HHH | glcm       | Id                               | 0.570402814  |
| wavelet-HHH | glcm       | ClusterTendency                  | 2.508454084  |
| wavelet-HHH | firstorder | InterquartileRange               | 35.30531263  |
| wavelet-HHH | firstorder | Skewness                         | 0.84206504   |
| wavelet-HHH | firstorder | Uniformity                       | 0.255406574  |
| wavelet-HHH | firstorder | Median                           | -0.255835577 |
| wavelet-HHH | firstorder | Energy                           | 122602.3332  |
| wavelet-HHH | firstorder | RobustMeanAbsoluteDeviation      | 15.1790229   |
| wavelet-HHH | firstorder | MeanAbsoluteDeviation            | 22.56454685  |
| wavelet-HHH | firstorder | TotalEnergy                      | 3310262.996  |
| wavelet-HHH | firstorder | Maximum                          | 158.173551   |
| wavelet-HHH | firstorder | RootMeanSquared                  | 30.02478549  |
| wavelet-HHH | firstorder | 90Percentile                     | 37.14336319  |
| wavelet-HHH | firstorder | Minimum                          | -74.47608972 |
| wavelet-HHH | firstorder | Entropy                          | 2.197213468  |
| wavelet-HHH | firstorder | Range                            | 232.6496407  |
| wavelet-HHH | firstorder | Variance                         | 901.4547199  |
| wavelet-HHH | firstorder | 10Percentile                     | -38.45793144 |
| wavelet-HHH | firstorder | Kurtosis                         | 7.467397776  |
| wavelet-HHH | firstorder | Mean                             | 0.181725316  |
| wavelet-HHH | glrlm      | ShortRunLowGrayLevelEmphasis     | 0.122485743  |
| wavelet-HHH | glrlm      | GrayLevelVariance                | 1.641151245  |
| wavelet-HHH | glrlm      | LowGrayLevelRunEmphasis          | 0.136444691  |
| wavelet-HHH | glrlm      | GrayLevelNonUniformityNormalized | 0.240805614  |
| wavelet-HHH | glrlm      | RunVariance                      | 0.211297289  |
| wavelet-HHH | glrlm      | GrayLevelNonUniformity           | 27.33718441  |
| wavelet-HHH | glrlm      | LongRunEmphasis                  | 1.653855104  |
| wavelet-HHH | glrlm      | ShortRunHighGrayLevelEmphasis    | 12.38296576  |
| wavelet-HHH | glrlm      | RunLengthNonUniformity           | 80.46829085  |
| wavelet-HHH | glrlm      | ShortRunEmphasis                 | 0.865055222  |
| wavelet-HHH | glrlm      | LongRunHighGrayLevelEmphasis     | 21.97806657  |
| wavelet-HHH | glrlm      | RunPercentage                    | 0.834841629  |
| wavelet-HHH | glrlm      | LongRunLowGrayLevelEmphasis      | 0.203704824  |
| wavelet-HHH | glrlm      | RunEntropy                       | 2.929730243  |
| wavelet-HHH | glrlm      | HighGrayLevelRunEmphasis         | 14.02879369  |
| wavelet-HHH | glrlm      | RunLengthNonUniformityNormalized | 0.706424255  |
| wavelet-HHH | glszm      | GrayLevelVariance                | 5.96484375   |
| wavelet-HHH | glszm      | ZoneVariance                     | 198.25       |
| wavelet-HHH | glszm      | GrayLevelNonUniformityNormalized | 0.1875       |
| wavelet-HHH | glszm      | SizeZoneNonUniformityNormalized  | 0.25         |
| wavelet-HHH | glszm      | SizeZoneNonUniformity            | 4            |
| wavelet-HHH | glszm      | GrayLevelNonUniformity           | 3            |
| wavelet-HHH | glszm      | LargeAreaEmphasis                | 270.5        |
| wavelet-HHH | glszm      | SmallAreaHighGrayLevelEmphasis   | 9.950420511  |
| wavelet-HHH | glszm      | ZonePercentage                   | 0.117647059  |
| wavelet-HHH | glszm      | LargeAreaLowGrayLevelEmphasis    | 25.83263889  |
| wavelet-HHH | glszm      | LargeAreaHighGrayLevelEmphasis   | 3346.875     |
| wavelet-HHH | glszm      | HighGrayLevelZoneEmphasis        | 19.5625      |
| wavelet-HHH | glszm      | SmallAreaEmphasis                | 0.491024386  |
| wavelet-HHH | glszm      | LowGrayLevelZoneEmphasis         | 0.321822917  |
| wavelet-HHH | glszm      | ZoneEntropy                      | 3.375        |
| wavelet-HHH | glszm      | SmallAreaLowGrayLevelEmphasis    | 0.2709435    |
| wavelet-HHH | ngtdm      | Coarseness                       | 0.041549989  |
| wavelet-HHH | ngtdm      | Complexity                       | 23.7983302   |

|             |            |                                      |              |
|-------------|------------|--------------------------------------|--------------|
| wavelet-HHH | ngtdm      | Strength                             | 1.03853459   |
| wavelet-HHH | ngtdm      | Contrast                             | 0.06945661   |
| wavelet-HHH | ngtdm      | Busyness                             | 0.989469693  |
| wavelet-HLL | gldm       | GrayLevelVariance                    | 4.850291955  |
| wavelet-HLL | gldm       | HighGrayLevelEmphasis                | 47.77205882  |
| wavelet-HLL | gldm       | DependenceEntropy                    | 5.440260916  |
| wavelet-HLL | gldm       | DependenceNonUniformity              | 19.41176471  |
| wavelet-HLL | gldm       | GrayLevelNonUniformity               | 19.16176471  |
| wavelet-HLL | gldm       | SmallDependenceEmphasis              | 0.130373085  |
| wavelet-HLL | gldm       | SmallDependenceHighGrayLevelEmphasis | 7.229727367  |
| wavelet-HLL | gldm       | DependenceNonUniformityNormalized    | 0.142733564  |
| wavelet-HLL | gldm       | LargeDependenceEmphasis              | 23.92647059  |
| wavelet-HLL | gldm       | LargeDependenceLowGrayLevelEmphasis  | 0.809825016  |
| wavelet-HLL | gldm       | DependenceVariance                   | 4.462802768  |
| wavelet-HLL | gldm       | LargeDependenceHighGrayLevelEmphasis | 1019.580882  |
| wavelet-HLL | gldm       | SmallDependenceLowGrayLevelEmphasis  | 0.007687931  |
| wavelet-HLL | gldm       | LowGrayLevelEmphasis                 | 0.047846076  |
| wavelet-HLL | glcm       | JointAverage                         | 6.380431295  |
| wavelet-HLL | glcm       | SumAverage                           | 12.76086259  |
| wavelet-HLL | glcm       | JointEntropy                         | 5.465376872  |
| wavelet-HLL | glcm       | ClusterShade                         | 18.19613123  |
| wavelet-HLL | glcm       | MaximumProbability                   | 0.067293813  |
| wavelet-HLL | glcm       | Idmn                                 | 0.970834902  |
| wavelet-HLL | glcm       | JointEnergy                          | 0.029767617  |
| wavelet-HLL | glcm       | Contrast                             | 5.461194633  |
| wavelet-HLL | glcm       | DifferenceEntropy                    | 2.335113613  |
| wavelet-HLL | glcm       | InverseVariance                      | 0.40471693   |
| wavelet-HLL | glcm       | DifferenceVariance                   | 2.279982278  |
| wavelet-HLL | glcm       | Idn                                  | 0.891340949  |
| wavelet-HLL | glcm       | Idm                                  | 0.439381871  |
| wavelet-HLL | glcm       | Correlation                          | 0.440376871  |
| wavelet-HLL | glcm       | Autocorrelation                      | 42.92865642  |
| wavelet-HLL | glcm       | SumEntropy                           | 3.750211636  |
| wavelet-HLL | glcm       | SumSquares                           | 4.942378686  |
| wavelet-HLL | glcm       | ClusterProminence                    | 656.9009793  |
| wavelet-HLL | glcm       | Imc2                                 | 0.84495373   |
| wavelet-HLL | glcm       | Imc1                                 | -0.221139929 |
| wavelet-HLL | glcm       | DifferenceAverage                    | 1.735851498  |
| wavelet-HLL | glcm       | Id                                   | 0.500960478  |
| wavelet-HLL | glcm       | ClusterTendency                      | 14.30832011  |
| wavelet-HLL | firstorder | InterquartileRange                   | 62.2875002   |
| wavelet-HLL | firstorder | Skewness                             | 0.298948926  |
| wavelet-HLL | firstorder | Uniformity                           | 0.140895329  |
| wavelet-HLL | firstorder | Median                               | -27.64358743 |
| wavelet-HLL | firstorder | Energy                               | 479643.6694  |
| wavelet-HLL | firstorder | RobustMeanAbsoluteDeviation          | 26.99332394  |
| wavelet-HLL | firstorder | MeanAbsoluteDeviation                | 41.7948173   |
| wavelet-HLL | firstorder | TotalEnergy                          | 12950379.07  |
| wavelet-HLL | firstorder | Maximum                              | 149.4192476  |
| wavelet-HLL | firstorder | RootMeanSquared                      | 59.38679724  |
| wavelet-HLL | firstorder | 90Percentile                         | 60.03457732  |
| wavelet-HLL | firstorder | Minimum                              | -171.6938212 |
| wavelet-HLL | firstorder | Entropy                              | 3.071718526  |
| wavelet-HLL | firstorder | Range                                | 321.1130688  |
| wavelet-HLL | firstorder | Variance                             | 2994.392002  |

|             |            |                                      |              |
|-------------|------------|--------------------------------------|--------------|
| wavelet-HLL | firstorder | 10Percentile                         | -84.69465826 |
| wavelet-HLL | firstorder | Kurtosis                             | 3.471093106  |
| wavelet-HLL | firstorder | Mean                                 | -23.07378782 |
| wavelet-HLL | glrlm      | ShortRunLowGrayLevelEmphasis         | 0.045466644  |
| wavelet-HLL | glrlm      | GrayLevelVariance                    | 5.047350438  |
| wavelet-HLL | glrlm      | LowGrayLevelRunEmphasis              | 0.049505665  |
| wavelet-HLL | glrlm      | GrayLevelNonUniformityNormalized     | 0.136743747  |
| wavelet-HLL | glrlm      | RunVariance                          | 0.163995111  |
| wavelet-HLL | glrlm      | GrayLevelNonUniformity               | 16.16268405  |
| wavelet-HLL | glrlm      | LongRunEmphasis                      | 1.505725356  |
| wavelet-HLL | glrlm      | ShortRunHighGrayLevelEmphasis        | 43.5975139   |
| wavelet-HLL | glrlm      | RunLengthNonUniformity               | 90.88419306  |
| wavelet-HLL | glrlm      | ShortRunEmphasis                     | 0.893418137  |
| wavelet-HLL | glrlm      | LongRunHighGrayLevelEmphasis         | 70.54596058  |
| wavelet-HLL | glrlm      | RunPercentage                        | 0.868778281  |
| wavelet-HLL | glrlm      | LongRunLowGrayLevelEmphasis          | 0.067986807  |
| wavelet-HLL | glrlm      | RunEntropy                           | 3.637835284  |
| wavelet-HLL | glrlm      | HighGrayLevelRunEmphasis             | 48.34056918  |
| wavelet-HLL | glrlm      | RunLengthNonUniformityNormalized     | 0.763795362  |
| wavelet-HLL | glszm      | GrayLevelVariance                    | 8.222222222  |
| wavelet-HLL | glszm      | ZoneVariance                         | 47.63888889  |
| wavelet-HLL | glszm      | GrayLevelNonUniformityNormalized     | 0.125        |
| wavelet-HLL | glszm      | SizeZoneNonUniformityNormalized      | 0.163194444  |
| wavelet-HLL | glszm      | SizeZoneNonUniformity                | 3.916666667  |
| wavelet-HLL | glszm      | GrayLevelNonUniformity               | 3            |
| wavelet-HLL | glszm      | LargeAreaEmphasis                    | 79.75        |
| wavelet-HLL | glszm      | SmallAreaHighGrayLevelEmphasis       | 22.11092866  |
| wavelet-HLL | glszm      | ZonePercentage                       | 0.176470588  |
| wavelet-HLL | glszm      | LargeAreaLowGrayLevelEmphasis        | 2.421817015  |
| wavelet-HLL | glszm      | LargeAreaHighGrayLevelEmphasis       | 3476.375     |
| wavelet-HLL | glszm      | HighGrayLevelZoneEmphasis            | 52.66666667  |
| wavelet-HLL | glszm      | SmallAreaEmphasis                    | 0.357585328  |
| wavelet-HLL | glszm      | LowGrayLevelZoneEmphasis             | 0.079128034  |
| wavelet-HLL | glszm      | ZoneEntropy                          | 4.334962501  |
| wavelet-HLL | glszm      | SmallAreaLowGrayLevelEmphasis        | 0.020560269  |
| wavelet-HLL | ngtdm      | Coarseness                           | 0.054316891  |
| wavelet-HLL | ngtdm      | Complexity                           | 65.24798925  |
| wavelet-HLL | ngtdm      | Strength                             | 2.676735456  |
| wavelet-HLL | ngtdm      | Contrast                             | 0.086051602  |
| wavelet-HLL | ngtdm      | Busyness                             | 0.252758447  |
| wavelet-LHL | gldm       | GrayLevelVariance                    | 19.39570718  |
| wavelet-LHL | gldm       | HighGrayLevelEmphasis                | 130.4191176  |
| wavelet-LHL | gldm       | DependenceEntropy                    | 5.477117349  |
| wavelet-LHL | gldm       | DependenceNonUniformity              | 37.48529412  |
| wavelet-LHL | gldm       | GrayLevelNonUniformity               | 9.544117647  |
| wavelet-LHL | gldm       | SmallDependenceEmphasis              | 0.448415033  |
| wavelet-LHL | gldm       | SmallDependenceHighGrayLevelEmphasis | 67.1358844   |
| wavelet-LHL | gldm       | DependenceNonUniformityNormalized    | 0.275627163  |
| wavelet-LHL | gldm       | LargeDependenceEmphasis              | 5.691176471  |
| wavelet-LHL | gldm       | LargeDependenceLowGrayLevelEmphasis  | 0.114662077  |
| wavelet-LHL | gldm       | DependenceVariance                   | 1.081314879  |
| wavelet-LHL | gldm       | LargeDependenceHighGrayLevelEmphasis | 652.0808824  |
| wavelet-LHL | gldm       | SmallDependenceLowGrayLevelEmphasis  | 0.014996522  |
| wavelet-LHL | gldm       | LowGrayLevelEmphasis                 | 0.024690019  |
| wavelet-LHL | glcm       | JointAverage                         | 10.28882869  |

|             |            |                                  |              |
|-------------|------------|----------------------------------|--------------|
| wavelet-LHL | glcm       | SumAverage                       | 20.57765739  |
| wavelet-LHL | glcm       | JointEntropy                     | 6.580483138  |
| wavelet-LHL | glcm       | ClusterShade                     | 167.4049421  |
| wavelet-LHL | glcm       | MaximumProbability               | 0.028425932  |
| wavelet-LHL | glcm       | Idmn                             | 0.945485056  |
| wavelet-LHL | glcm       | JointEnergy                      | 0.012144993  |
| wavelet-LHL | glcm       | Contrast                         | 34.93534311  |
| wavelet-LHL | glcm       | DifferenceEntropy                | 3.350814861  |
| wavelet-LHL | glcm       | InverseVariance                  | 0.197034622  |
| wavelet-LHL | glcm       | DifferenceVariance               | 11.59800059  |
| wavelet-LHL | glcm       | Idn                              | 0.845947415  |
| wavelet-LHL | glcm       | Idm                              | 0.188849509  |
| wavelet-LHL | glcm       | Correlation                      | 0.130316477  |
| wavelet-LHL | glcm       | Autocorrelation                  | 108.5496134  |
| wavelet-LHL | glcm       | SumEntropy                       | 4.36897933   |
| wavelet-LHL | glcm       | SumSquares                       | 20.14661835  |
| wavelet-LHL | glcm       | ClusterProminence                | 7146.44292   |
| wavelet-LHL | glcm       | Imc2                             | 0.972933619  |
| wavelet-LHL | glcm       | Imc1                             | -0.367197392 |
| wavelet-LHL | glcm       | DifferenceAverage                | 4.617815794  |
| wavelet-LHL | glcm       | Id                               | 0.284870471  |
| wavelet-LHL | glcm       | ClusterTendency                  | 45.65113029  |
| wavelet-LHL | firstorder | InterquartileRange               | 145.4929546  |
| wavelet-LHL | firstorder | Skewness                         | 0.43221909   |
| wavelet-LHL | firstorder | Uniformity                       | 0.070177336  |
| wavelet-LHL | firstorder | Median                           | -22.91829763 |
| wavelet-LHL | firstorder | Energy                           | 1704760.811  |
| wavelet-LHL | firstorder | RobustMeanAbsoluteDeviation      | 62.91853355  |
| wavelet-LHL | firstorder | MeanAbsoluteDeviation            | 88.80715745  |
| wavelet-LHL | firstorder | TotalEnergy                      | 46028541.9   |
| wavelet-LHL | firstorder | Maximum                          | 299.9122676  |
| wavelet-LHL | firstorder | RootMeanSquared                  | 111.9598409  |
| wavelet-LHL | firstorder | 90Percentile                     | 124.3923666  |
| wavelet-LHL | firstorder | Minimum                          | -262.7463048 |
| wavelet-LHL | firstorder | Entropy                          | 4.042295159  |
| wavelet-LHL | firstorder | Range                            | 562.6585724  |
| wavelet-LHL | firstorder | Variance                         | 12008.28524  |
| wavelet-LHL | firstorder | 10Percentile                     | -156.3011392 |
| wavelet-LHL | firstorder | Kurtosis                         | 2.900709244  |
| wavelet-LHL | firstorder | Mean                             | -22.95039699 |
| wavelet-LHL | glrlm      | ShortRunLowGrayLevelEmphasis     | 0.024351115  |
| wavelet-LHL | glrlm      | GrayLevelVariance                | 19.57461226  |
| wavelet-LHL | glrlm      | LowGrayLevelRunEmphasis          | 0.024996521  |
| wavelet-LHL | glrlm      | GrayLevelNonUniformityNormalized | 0.069791757  |
| wavelet-LHL | glrlm      | RunVariance                      | 0.05123344   |
| wavelet-LHL | glrlm      | GrayLevelNonUniformity           | 9.077125652  |
| wavelet-LHL | glrlm      | LongRunEmphasis                  | 1.153127085  |
| wavelet-LHL | glrlm      | ShortRunHighGrayLevelEmphasis    | 127.3901711  |
| wavelet-LHL | glrlm      | RunLengthNonUniformity           | 119.7088882  |
| wavelet-LHL | glrlm      | ShortRunEmphasis                 | 0.965670702  |
| wavelet-LHL | glrlm      | LongRunHighGrayLevelEmphasis     | 148.6568504  |
| wavelet-LHL | glrlm      | RunPercentage                    | 0.955882353  |
| wavelet-LHL | glrlm      | LongRunLowGrayLevelEmphasis      | 0.027746685  |
| wavelet-LHL | glrlm      | RunEntropy                       | 4.22331592   |
| wavelet-LHL | glrlm      | HighGrayLevelRunEmphasis         | 131.2587819  |

|             |       |                                      |              |
|-------------|-------|--------------------------------------|--------------|
| wavelet-LHL | glrlm | RunLengthNonUniformityNormalized     | 0.917338309  |
| wavelet-LHL | glszm | GrayLevelVariance                    | 22.21805217  |
| wavelet-LHL | glszm | ZoneVariance                         | 2.227810096  |
| wavelet-LHL | glszm | GrayLevelNonUniformityNormalized     | 0.066241321  |
| wavelet-LHL | glszm | SizeZoneNonUniformityNormalized      | 0.433289548  |
| wavelet-LHL | glszm | SizeZoneNonUniformity                | 31.63013699  |
| wavelet-LHL | glszm | GrayLevelNonUniformity               | 4.835616438  |
| wavelet-LHL | glszm | LargeAreaEmphasis                    | 5.698630137  |
| wavelet-LHL | glszm | SmallAreaHighGrayLevelEmphasis       | 108.7309928  |
| wavelet-LHL | glszm | ZonePercentage                       | 0.536764706  |
| wavelet-LHL | glszm | LargeAreaLowGrayLevelEmphasis        | 0.136268546  |
| wavelet-LHL | glszm | LargeAreaHighGrayLevelEmphasis       | 610.5890411  |
| wavelet-LHL | glszm | HighGrayLevelZoneEmphasis            | 147.7808219  |
| wavelet-LHL | glszm | SmallAreaEmphasis                    | 0.68385738   |
| wavelet-LHL | glszm | LowGrayLevelZoneEmphasis             | 0.029907783  |
| wavelet-LHL | glszm | ZoneEntropy                          | 5.239357737  |
| wavelet-LHL | glszm | SmallAreaLowGrayLevelEmphasis        | 0.02518587   |
| wavelet-LHL | ngtdm | Coarseness                           | 0.037018937  |
| wavelet-LHL | ngtdm | Complexity                           | 609.7566662  |
| wavelet-LHL | ngtdm | Strength                             | 6.150875799  |
| wavelet-LHL | ngtdm | Contrast                             | 0.27672301   |
| wavelet-LHL | ngtdm | Busyness                             | 0.139274977  |
| wavelet-LHH | gldm  | GrayLevelVariance                    | 19.92733564  |
| wavelet-LHH | gldm  | HighGrayLevelEmphasis                | 185.8823529  |
| wavelet-LHH | gldm  | DependenceEntropy                    | 5.312194852  |
| wavelet-LHH | gldm  | DependenceNonUniformity              | 36.88235294  |
| wavelet-LHH | gldm  | GrayLevelNonUniformity               | 10.47058824  |
| wavelet-LHH | gldm  | SmallDependenceEmphasis              | 0.409726307  |
| wavelet-LHH | gldm  | SmallDependenceHighGrayLevelEmphasis | 93.19719567  |
| wavelet-LHH | gldm  | DependenceNonUniformityNormalized    | 0.271193772  |
| wavelet-LHH | gldm  | LargeDependenceEmphasis              | 6.485294118  |
| wavelet-LHH | gldm  | LargeDependenceLowGrayLevelEmphasis  | 0.110600292  |
| wavelet-LHH | gldm  | DependenceVariance                   | 1.356401384  |
| wavelet-LHH | gldm  | LargeDependenceHighGrayLevelEmphasis | 1020.647059  |
| wavelet-LHH | gldm  | SmallDependenceLowGrayLevelEmphasis  | 0.007468055  |
| wavelet-LHH | gldm  | LowGrayLevelEmphasis                 | 0.023530868  |
| wavelet-LHH | glcm  | JointAverage                         | 12.71937207  |
| wavelet-LHH | glcm  | SumAverage                           | 25.43874414  |
| wavelet-LHH | glcm  | JointEntropy                         | 6.462350692  |
| wavelet-LHH | glcm  | ClusterShade                         | 65.30361632  |
| wavelet-LHH | glcm  | MaximumProbability                   | 0.033308797  |
| wavelet-LHH | glcm  | Idmn                                 | 0.950964804  |
| wavelet-LHH | glcm  | JointEnergy                          | 0.013511071  |
| wavelet-LHH | glcm  | Contrast                             | 40.05773849  |
| wavelet-LHH | glcm  | DifferenceEntropy                    | 3.448969387  |
| wavelet-LHH | glcm  | InverseVariance                      | 0.215149947  |
| wavelet-LHH | glcm  | DifferenceVariance                   | 15.73205854  |
| wavelet-LHH | glcm  | Idn                                  | 0.857537969  |
| wavelet-LHH | glcm  | Idm                                  | 0.203121236  |
| wavelet-LHH | glcm  | Correlation                          | -0.099586261 |
| wavelet-LHH | glcm  | Autocorrelation                      | 160.3764412  |
| wavelet-LHH | glcm  | SumEntropy                           | 4.077971291  |
| wavelet-LHH | glcm  | SumSquares                           | 18.58438428  |
| wavelet-LHH | glcm  | ClusterProminence                    | 5750.453212  |
| wavelet-LHH | glcm  | Imc2                                 | 0.974313092  |

|             |            |                                  |              |
|-------------|------------|----------------------------------|--------------|
| wavelet-LHH | glcm       | Imc1                             | -0.379665567 |
| wavelet-LHH | glcm       | DifferenceAverage                | 4.797080267  |
| wavelet-LHH | glcm       | Id                               | 0.29327871   |
| wavelet-LHH | glcm       | ClusterTendency                  | 34.27979864  |
| wavelet-LHH | firstorder | InterquartileRange               | 127.4340182  |
| wavelet-LHH | firstorder | Skewness                         | 0.302159969  |
| wavelet-LHH | firstorder | Uniformity                       | 0.076989619  |
| wavelet-LHH | firstorder | Median                           | -3.99087698  |
| wavelet-LHH | firstorder | Energy                           | 1712800.163  |
| wavelet-LHH | firstorder | RobustMeanAbsoluteDeviation      | 52.36108331  |
| wavelet-LHH | firstorder | MeanAbsoluteDeviation            | 83.60326245  |
| wavelet-LHH | firstorder | TotalEnergy                      | 46245604.4   |
| wavelet-LHH | firstorder | Maximum                          | 336.001785   |
| wavelet-LHH | firstorder | RootMeanSquared                  | 112.2235218  |
| wavelet-LHH | firstorder | 90Percentile                     | 146.4652703  |
| wavelet-LHH | firstorder | Minimum                          | -278.2552978 |
| wavelet-LHH | firstorder | Entropy                          | 4.023432798  |
| wavelet-LHH | firstorder | Range                            | 614.2570828  |
| wavelet-LHH | firstorder | Variance                         | 12509.33597  |
| wavelet-LHH | firstorder | 10Percentile                     | -118.1250094 |
| wavelet-LHH | firstorder | Kurtosis                         | 3.68957601   |
| wavelet-LHH | firstorder | Mean                             | 9.207761866  |
| wavelet-LHH | glrlm      | ShortRunLowGrayLevelEmphasis     | 0.022807249  |
| wavelet-LHH | glrlm      | GrayLevelVariance                | 20.42454606  |
| wavelet-LHH | glrlm      | LowGrayLevelRunEmphasis          | 0.02365904   |
| wavelet-LHH | glrlm      | GrayLevelNonUniformityNormalized | 0.075143984  |
| wavelet-LHH | glrlm      | RunVariance                      | 0.053051742  |
| wavelet-LHH | glrlm      | GrayLevelNonUniformity           | 9.726975122  |
| wavelet-LHH | glrlm      | LongRunEmphasis                  | 1.167621217  |
| wavelet-LHH | glrlm      | ShortRunHighGrayLevelEmphasis    | 181.6376951  |
| wavelet-LHH | glrlm      | RunLengthNonUniformity           | 117.8834846  |
| wavelet-LHH | glrlm      | ShortRunEmphasis                 | 0.960747258  |
| wavelet-LHH | glrlm      | LongRunHighGrayLevelEmphasis     | 213.8556884  |
| wavelet-LHH | glrlm      | RunPercentage                    | 0.951357466  |
| wavelet-LHH | glrlm      | LongRunLowGrayLevelEmphasis      | 0.027115765  |
| wavelet-LHH | glrlm      | RunEntropy                       | 4.242807068  |
| wavelet-LHH | glrlm      | HighGrayLevelRunEmphasis         | 187.5978781  |
| wavelet-LHH | glrlm      | RunLengthNonUniformityNormalized | 0.906939093  |
| wavelet-LHH | glszm      | GrayLevelVariance                | 27.37660155  |
| wavelet-LHH | glszm      | ZoneVariance                     | 3.883217811  |
| wavelet-LHH | glszm      | GrayLevelNonUniformityNormalized | 0.056920815  |
| wavelet-LHH | glszm      | SizeZoneNonUniformityNormalized  | 0.397185465  |
| wavelet-LHH | glszm      | SizeZoneNonUniformity            | 27.4057971   |
| wavelet-LHH | glszm      | GrayLevelNonUniformity           | 3.927536232  |
| wavelet-LHH | glszm      | LargeAreaEmphasis                | 7.768115942  |
| wavelet-LHH | glszm      | SmallAreaHighGrayLevelEmphasis   | 156.8235829  |
| wavelet-LHH | glszm      | ZonePercentage                   | 0.507352941  |
| wavelet-LHH | glszm      | LargeAreaLowGrayLevelEmphasis    | 0.118080969  |
| wavelet-LHH | glszm      | LargeAreaHighGrayLevelEmphasis   | 1242.26087   |
| wavelet-LHH | glszm      | HighGrayLevelZoneEmphasis        | 214.5507246  |
| wavelet-LHH | glszm      | SmallAreaEmphasis                | 0.640716586  |
| wavelet-LHH | glszm      | LowGrayLevelZoneEmphasis         | 0.023922888  |
| wavelet-LHH | glszm      | ZoneEntropy                      | 5.231287862  |
| wavelet-LHH | glszm      | SmallAreaLowGrayLevelEmphasis    | 0.009662772  |
| wavelet-LHH | ngtdm      | Coarseness                       | 0.042899231  |

|             |            |                                      |              |
|-------------|------------|--------------------------------------|--------------|
| wavelet-LHH | ngtdm      | Complexity                           | 713.9043061  |
| wavelet-LHH | ngtdm      | Strength                             | 6.448511274  |
| wavelet-LHH | ngtdm      | Contrast                             | 0.284986684  |
| wavelet-LHH | ngtdm      | Busyness                             | 0.085607583  |
| wavelet-LLH | gldm       | GrayLevelVariance                    | 160.2499459  |
| wavelet-LLH | gldm       | HighGrayLevelEmphasis                | 1965.875     |
| wavelet-LLH | gldm       | DependenceEntropy                    | 5.869169896  |
| wavelet-LLH | gldm       | DependenceNonUniformity              | 48.38235294  |
| wavelet-LLH | gldm       | GrayLevelNonUniformity               | 5.485294118  |
| wavelet-LLH | gldm       | SmallDependenceEmphasis              | 0.600324755  |
| wavelet-LLH | gldm       | SmallDependenceHighGrayLevelEmphasis | 1145.344457  |
| wavelet-LLH | gldm       | DependenceNonUniformityNormalized    | 0.355752595  |
| wavelet-LLH | gldm       | LargeDependenceEmphasis              | 4.441176471  |
| wavelet-LLH | gldm       | LargeDependenceLowGrayLevelEmphasis  | 0.011281626  |
| wavelet-LLH | gldm       | DependenceVariance                   | 1.062067474  |
| wavelet-LLH | gldm       | LargeDependenceHighGrayLevelEmphasis | 9058.330882  |
| wavelet-LLH | gldm       | SmallDependenceLowGrayLevelEmphasis  | 0.008548349  |
| wavelet-LLH | gldm       | LowGrayLevelEmphasis                 | 0.008911003  |
| wavelet-LLH | glcm       | JointAverage                         | 43.17479837  |
| wavelet-LLH | glcm       | SumAverage                           | 86.34959674  |
| wavelet-LLH | glcm       | JointEntropy                         | 7.018646035  |
| wavelet-LLH | glcm       | ClusterShade                         | -6632.449589 |
| wavelet-LLH | glcm       | MaximumProbability                   | 0.022052435  |
| wavelet-LLH | glcm       | Idmn                                 | 0.945738959  |
| wavelet-LLH | glcm       | JointEnergy                          | 0.008525454  |
| wavelet-LLH | glcm       | Contrast                             | 285.2937358  |
| wavelet-LLH | glcm       | DifferenceEntropy                    | 4.292493353  |
| wavelet-LLH | glcm       | InverseVariance                      | 0.109572509  |
| wavelet-LLH | glcm       | DifferenceVariance                   | 134.8556657  |
| wavelet-LLH | glcm       | Idn                                  | 0.863540789  |
| wavelet-LLH | glcm       | Idm                                  | 0.11641402   |
| wavelet-LLH | glcm       | Correlation                          | -0.003923726 |
| wavelet-LLH | glcm       | Autocorrelation                      | 1869.28359   |
| wavelet-LLH | glcm       | SumEntropy                           | 5.145477089  |
| wavelet-LLH | glcm       | SumSquares                           | 147.3679405  |
| wavelet-LLH | glcm       | ClusterProminence                    | 503185.018   |
| wavelet-LLH | glcm       | Imc2                                 | 0.997644495  |
| wavelet-LLH | glcm       | Imc1                                 | -0.557187823 |
| wavelet-LLH | glcm       | DifferenceAverage                    | 11.57131111  |
| wavelet-LLH | glcm       | Id                                   | 0.195011396  |
| wavelet-LLH | glcm       | ClusterTendency                      | 304.1780262  |
| wavelet-LLH | firstorder | InterquartileRange                   | 279.9219711  |
| wavelet-LLH | firstorder | Skewness                             | -1.401462759 |
| wavelet-LLH | firstorder | Uniformity                           | 0.040333045  |
| wavelet-LLH | firstorder | Median                               | 1.798618373  |
| wavelet-LLH | firstorder | Energy                               | 14422825.73  |
| wavelet-LLH | firstorder | RobustMeanAbsoluteDeviation          | 121.8964964  |
| wavelet-LLH | firstorder | MeanAbsoluteDeviation                | 226.8640768  |
| wavelet-LLH | firstorder | TotalEnergy                          | 389416294.7  |
| wavelet-LLH | firstorder | Maximum                              | 431.8769066  |
| wavelet-LLH | firstorder | RootMeanSquared                      | 325.6534802  |
| wavelet-LLH | firstorder | 90Percentile                         | 222.8784441  |
| wavelet-LLH | firstorder | Minimum                              | -1117.992834 |
| wavelet-LLH | firstorder | Entropy                              | 4.955326075  |
| wavelet-LLH | firstorder | Range                                | 1549.869741  |

|             |            |                                      |              |
|-------------|------------|--------------------------------------|--------------|
| wavelet-LLH | firstorder | Variance                             | 100452.7116  |
| wavelet-LLH | firstorder | 10Percentile                         | -603.2711562 |
| wavelet-LLH | firstorder | Kurtosis                             | 4.717796536  |
| wavelet-LLH | firstorder | Mean                                 | -74.81629247 |
| wavelet-LLH | glrlm      | ShortRunLowGrayLevelEmphasis         | 0.009175703  |
| wavelet-LLH | glrlm      | GrayLevelVariance                    | 163.1749225  |
| wavelet-LLH | glrlm      | LowGrayLevelRunEmphasis              | 0.009195321  |
| wavelet-LLH | glrlm      | GrayLevelNonUniformityNormalized     | 0.039479915  |
| wavelet-LLH | glrlm      | RunVariance                          | 0.037069878  |
| wavelet-LLH | glrlm      | GrayLevelNonUniformity               | 5.199584982  |
| wavelet-LLH | glrlm      | LongRunEmphasis                      | 1.110048476  |
| wavelet-LLH | glrlm      | ShortRunHighGrayLevelEmphasis        | 1912.227897  |
| wavelet-LLH | glrlm      | RunLengthNonUniformity               | 123.9745148  |
| wavelet-LLH | glrlm      | ShortRunEmphasis                     | 0.975363182  |
| wavelet-LLH | glrlm      | LongRunHighGrayLevelEmphasis         | 2188.940164  |
| wavelet-LLH | glrlm      | RunPercentage                        | 0.967760181  |
| wavelet-LLH | glrlm      | LongRunLowGrayLevelEmphasis          | 0.00927942   |
| wavelet-LLH | glrlm      | RunEntropy                           | 5.08118718   |
| wavelet-LLH | glrlm      | HighGrayLevelRunEmphasis             | 1962.796518  |
| wavelet-LLH | glrlm      | RunLengthNonUniformityNormalized     | 0.939473118  |
| wavelet-LLH | glszm      | GrayLevelVariance                    | 191.9209157  |
| wavelet-LLH | glszm      | ZoneVariance                         | 1.065787952  |
| wavelet-LLH | glszm      | GrayLevelNonUniformityNormalized     | 0.032951786  |
| wavelet-LLH | glszm      | SizeZoneNonUniformityNormalized      | 0.603884842  |
| wavelet-LLH | glszm      | SizeZoneNonUniformity                | 56.16129032  |
| wavelet-LLH | glszm      | GrayLevelNonUniformity               | 3.064516129  |
| wavelet-LLH | glszm      | LargeAreaEmphasis                    | 3.204301075  |
| wavelet-LLH | glszm      | SmallAreaHighGrayLevelEmphasis       | 1520.287485  |
| wavelet-LLH | glszm      | ZonePercentage                       | 0.683823529  |
| wavelet-LLH | glszm      | LargeAreaLowGrayLevelEmphasis        | 0.014202753  |
| wavelet-LLH | glszm      | LargeAreaHighGrayLevelEmphasis       | 6520.053763  |
| wavelet-LLH | glszm      | HighGrayLevelZoneEmphasis            | 1920.870968  |
| wavelet-LLH | glszm      | SmallAreaEmphasis                    | 0.803240741  |
| wavelet-LLH | glszm      | LowGrayLevelZoneEmphasis             | 0.012642217  |
| wavelet-LLH | glszm      | ZoneEntropy                          | 5.639709989  |
| wavelet-LLH | glszm      | SmallAreaLowGrayLevelEmphasis        | 0.012424227  |
| wavelet-LLH | ngtdm      | Coarseness                           | 0.03476393   |
| wavelet-LLH | ngtdm      | Complexity                           | 7789.250034  |
| wavelet-LLH | ngtdm      | Strength                             | 35.903998    |
| wavelet-LLH | ngtdm      | Contrast                             | 1.579699125  |
| wavelet-LLH | ngtdm      | Busyness                             | 0.015662813  |
| wavelet-LLL | gldm       | GrayLevelVariance                    | 182.4299308  |
| wavelet-LLL | gldm       | HighGrayLevelEmphasis                | 981.3235294  |
| wavelet-LLL | gldm       | DependenceEntropy                    | 5.96684793   |
| wavelet-LLL | gldm       | DependenceNonUniformity              | 69.82352941  |
| wavelet-LLL | gldm       | GrayLevelNonUniformity               | 3.529411765  |
| wavelet-LLL | gldm       | SmallDependenceEmphasis              | 0.736111111  |
| wavelet-LLL | gldm       | SmallDependenceHighGrayLevelEmphasis | 666.1768791  |
| wavelet-LLL | gldm       | DependenceNonUniformityNormalized    | 0.513408304  |
| wavelet-LLL | gldm       | LargeDependenceEmphasis              | 2.382352941  |
| wavelet-LLL | gldm       | LargeDependenceLowGrayLevelEmphasis  | 0.013277715  |
| wavelet-LLL | gldm       | DependenceVariance                   | 0.389273356  |
| wavelet-LLL | gldm       | LargeDependenceHighGrayLevelEmphasis | 2736.485294  |
| wavelet-LLL | gldm       | SmallDependenceLowGrayLevelEmphasis  | 0.011158479  |
| wavelet-LLL | gldm       | LowGrayLevelEmphasis                 | 0.011512302  |



|             |            |                                  |              |
|-------------|------------|----------------------------------|--------------|
| wavelet-LLL | glcm       | JointAverage                     | 30.8822397   |
| wavelet-LLL | glcm       | SumAverage                       | 61.76447941  |
| wavelet-LLL | glcm       | JointEntropy                     | 7.218692114  |
| wavelet-LLL | glcm       | ClusterShade                     | 461.8360543  |
| wavelet-LLL | glcm       | MaximumProbability               | 0.013554145  |
| wavelet-LLL | glcm       | Idmn                             | 0.953475252  |
| wavelet-LLL | glcm       | JointEnergy                      | 0.007005549  |
| wavelet-LLL | glcm       | Contrast                         | 178.2053168  |
| wavelet-LLL | glcm       | DifferenceEntropy                | 4.382969903  |
| wavelet-LLL | glcm       | InverseVariance                  | 0.097276529  |
| wavelet-LLL | glcm       | DifferenceVariance               | 56.61363685  |
| wavelet-LLL | glcm       | Idn                              | 0.853718399  |
| wavelet-LLL | glcm       | Idm                              | 0.086708627  |
| wavelet-LLL | glcm       | Correlation                      | 0.490967409  |
| wavelet-LLL | glcm       | Autocorrelation                  | 1040.021125  |
| wavelet-LLL | glcm       | SumEntropy                       | 5.533097966  |
| wavelet-LLL | glcm       | SumSquares                       | 174.6277752  |
| wavelet-LLL | glcm       | ClusterProminence                | 594194.6766  |
| wavelet-LLL | glcm       | Imc2                             | 0.999504314  |
| wavelet-LLL | glcm       | Imc1                             | -0.651460311 |
| wavelet-LLL | glcm       | DifferenceAverage                | 10.773446    |
| wavelet-LLL | glcm       | Id                               | 0.16406213   |
| wavelet-LLL | glcm       | ClusterTendency                  | 520.3057841  |
| wavelet-LLL | firstorder | InterquartileRange               | 488.7304208  |
| wavelet-LLL | firstorder | Skewness                         | 0.208686989  |
| wavelet-LLL | firstorder | Uniformity                       | 0.025951557  |
| wavelet-LLL | firstorder | Median                           | -1464.509022 |
| wavelet-LLL | firstorder | Energy                           | 304226026.9  |
| wavelet-LLL | firstorder | RobustMeanAbsoluteDeviation      | 201.4172484  |
| wavelet-LLL | firstorder | MeanAbsoluteDeviation            | 276.6476506  |
| wavelet-LLL | firstorder | TotalEnergy                      | 8214102725   |
| wavelet-LLL | firstorder | Maximum                          | -720.8855309 |
| wavelet-LLL | firstorder | RootMeanSquared                  | 1495.645707  |
| wavelet-LLL | firstorder | 90Percentile                     | -998.9388563 |
| wavelet-LLL | firstorder | Minimum                          | -2149.346628 |
| wavelet-LLL | firstorder | Entropy                          | 5.457050761  |
| wavelet-LLL | firstorder | Range                            | 1428.461097  |
| wavelet-LLL | firstorder | Variance                         | 115268.6322  |
| wavelet-LLL | firstorder | 10Percentile                     | -1897.885492 |
| wavelet-LLL | firstorder | Kurtosis                         | 2.274369923  |
| wavelet-LLL | firstorder | Mean                             | -1456.601335 |
| wavelet-LLL | glrlm      | ShortRunLowGrayLevelEmphasis     | 0.011661576  |
| wavelet-LLL | glrlm      | GrayLevelVariance                | 183.0965542  |
| wavelet-LLL | glrlm      | LowGrayLevelRunEmphasis          | 0.011677377  |
| wavelet-LLL | glrlm      | GrayLevelNonUniformityNormalized | 0.02581992   |
| wavelet-LLL | glrlm      | RunVariance                      | 0.015829258  |
| wavelet-LLL | glrlm      | GrayLevelNonUniformity           | 3.455978112  |
| wavelet-LLL | glrlm      | LongRunEmphasis                  | 1.04850745   |
| wavelet-LLL | glrlm      | ShortRunHighGrayLevelEmphasis    | 962.115056   |
| wavelet-LLL | glrlm      | RunLengthNonUniformity           | 129.628778   |
| wavelet-LLL | glrlm      | ShortRunEmphasis                 | 0.987873138  |
| wavelet-LLL | glrlm      | LongRunHighGrayLevelEmphasis     | 1037.277143  |
| wavelet-LLL | glrlm      | RunPercentage                    | 0.984162896  |
| wavelet-LLL | glrlm      | LongRunLowGrayLevelEmphasis      | 0.011740583  |
| wavelet-LLL | glrlm      | RunEntropy                       | 5.507846236  |

|             |       |                                      |             |
|-------------|-------|--------------------------------------|-------------|
| wavelet-LLL | glrlm | HighGrayLevelRunEmphasis             | 977.1474734 |
| wavelet-LLL | glrlm | RunLengthNonUniformityNormalized     | 0.968341484 |
| wavelet-LLL | glszm | GrayLevelVariance                    | 195.0999074 |
| wavelet-LLL | glszm | ZoneVariance                         | 0.333136941 |
| wavelet-LLL | glszm | GrayLevelNonUniformityNormalized     | 0.024324552 |
| wavelet-LLL | glszm | SizeZoneNonUniformityNormalized      | 0.697331874 |
| wavelet-LLL | glszm | SizeZoneNonUniformity                | 76.00917431 |
| wavelet-LLL | glszm | GrayLevelNonUniformity               | 2.651376147 |
| wavelet-LLL | glszm | LargeAreaEmphasis                    | 1.889908257 |
| wavelet-LLL | glszm | SmallAreaHighGrayLevelEmphasis       | 764.1106014 |
| wavelet-LLL | glszm | ZonePercentage                       | 0.801470588 |
| wavelet-LLL | glszm | LargeAreaLowGrayLevelEmphasis        | 0.015208104 |
| wavelet-LLL | glszm | LargeAreaHighGrayLevelEmphasis       | 1996.330275 |
| wavelet-LLL | glszm | HighGrayLevelZoneEmphasis            | 929.559633  |
| wavelet-LLL | glszm | SmallAreaEmphasis                    | 0.859072375 |
| wavelet-LLL | glszm | LowGrayLevelZoneEmphasis             | 0.014033144 |
| wavelet-LLL | glszm | ZoneEntropy                          | 5.835627073 |
| wavelet-LLL | glszm | SmallAreaLowGrayLevelEmphasis        | 0.013840779 |
| wavelet-LLL | ngtdm | Coarseness                           | 0.043889998 |
| wavelet-LLL | ngtdm | Complexity                           | 7445.182962 |
| wavelet-LLL | ngtdm | Strength                             | 48.25760272 |
| wavelet-LLL | ngtdm | Contrast                             | 0.959856448 |
| wavelet-LLL | ngtdm | Busyness                             | 0.01948203  |
| wavelet-HHL | gldm  | GrayLevelVariance                    | 1.534115484 |
| wavelet-HHL | gldm  | HighGrayLevelEmphasis                | 23.61029412 |
| wavelet-HHL | gldm  | DependenceEntropy                    | 4.967418957 |
| wavelet-HHL | gldm  | DependenceNonUniformity              | 16.45588235 |
| wavelet-HHL | gldm  | GrayLevelNonUniformity               | 30.80882353 |
| wavelet-HHL | gldm  | SmallDependenceEmphasis              | 0.15978292  |
| wavelet-HHL | gldm  | SmallDependenceHighGrayLevelEmphasis | 3.937709162 |
| wavelet-HHL | gldm  | DependenceNonUniformityNormalized    | 0.120999135 |
| wavelet-HHL | gldm  | LargeDependenceEmphasis              | 31.10294118 |
| wavelet-HHL | gldm  | LargeDependenceLowGrayLevelEmphasis  | 1.460688119 |
| wavelet-HHL | gldm  | DependenceVariance                   | 7.551903114 |
| wavelet-HHL | gldm  | LargeDependenceHighGrayLevelEmphasis | 750.375     |
| wavelet-HHL | gldm  | SmallDependenceLowGrayLevelEmphasis  | 0.018022934 |
| wavelet-HHL | gldm  | LowGrayLevelEmphasis                 | 0.063276154 |
| wavelet-HHL | glcm  | JointAverage                         | 4.695501481 |
| wavelet-HHL | glcm  | SumAverage                           | 9.391002963 |
| wavelet-HHL | glcm  | JointEntropy                         | 4.368159922 |
| wavelet-HHL | glcm  | ClusterShade                         | 0.277802417 |
| wavelet-HHL | glcm  | MaximumProbability                   | 0.125980103 |
| wavelet-HHL | glcm  | Idmn                                 | 0.955872314 |
| wavelet-HHL | glcm  | JointEnergy                          | 0.060016437 |
| wavelet-HHL | glcm  | Contrast                             | 3.220408304 |
| wavelet-HHL | glcm  | DifferenceEntropy                    | 2.049641596 |
| wavelet-HHL | glcm  | InverseVariance                      | 0.424849405 |
| wavelet-HHL | glcm  | DifferenceVariance                   | 1.243980804 |
| wavelet-HHL | glcm  | Idn                                  | 0.864757093 |
| wavelet-HHL | glcm  | Idm                                  | 0.481396597 |
| wavelet-HHL | glcm  | Correlation                          | -0.06774166 |
| wavelet-HHL | glcm  | Autocorrelation                      | 21.94251834 |
| wavelet-HHL | glcm  | SumEntropy                           | 2.669619094 |
| wavelet-HHL | glcm  | SumSquares                           | 1.503770901 |
| wavelet-HHL | glcm  | ClusterProminence                    | 22.60949895 |

|             |            |                                  |              |
|-------------|------------|----------------------------------|--------------|
| wavelet-HHL | glcm       | Imc2                             | 0.601989334  |
| wavelet-HHL | glcm       | Imc1                             | -0.106264645 |
| wavelet-HHL | glcm       | DifferenceAverage                | 1.381676652  |
| wavelet-HHL | glcm       | Id                               | 0.537996426  |
| wavelet-HHL | glcm       | ClusterTendency                  | 2.7946753    |
| wavelet-HHL | firstorder | InterquartileRange               | 44.12241125  |
| wavelet-HHL | firstorder | Skewness                         | -0.151216698 |
| wavelet-HHL | firstorder | Uniformity                       | 0.226535467  |
| wavelet-HHL | firstorder | Median                           | 5.237027513  |
| wavelet-HHL | firstorder | Energy                           | 125870.0918  |
| wavelet-HHL | firstorder | RobustMeanAbsoluteDeviation      | 17.0539314   |
| wavelet-HHL | firstorder | MeanAbsoluteDeviation            | 24.25291631  |
| wavelet-HHL | firstorder | TotalEnergy                      | 3398492.479  |
| wavelet-HHL | firstorder | Maximum                          | 76.12770474  |
| wavelet-HHL | firstorder | RootMeanSquared                  | 30.42228428  |
| wavelet-HHL | firstorder | 90Percentile                     | 40.43192236  |
| wavelet-HHL | firstorder | Minimum                          | -89.20619165 |
| wavelet-HHL | firstorder | Entropy                          | 2.333536963  |
| wavelet-HHL | firstorder | Range                            | 165.3338964  |
| wavelet-HHL | firstorder | Variance                         | 910.7977148  |
| wavelet-HHL | firstorder | 10Percentile                     | -35.23581893 |
| wavelet-HHL | firstorder | Kurtosis                         | 2.793963865  |
| wavelet-HHL | firstorder | Mean                             | 3.83636105   |
| wavelet-HHL | glrlm      | ShortRunLowGrayLevelEmphasis     | 0.059740826  |
| wavelet-HHL | glrlm      | GrayLevelVariance                | 1.659988987  |
| wavelet-HHL | glrlm      | LowGrayLevelRunEmphasis          | 0.065698917  |
| wavelet-HHL | glrlm      | GrayLevelNonUniformityNormalized | 0.216243416  |
| wavelet-HHL | glrlm      | RunVariance                      | 0.191614615  |
| wavelet-HHL | glrlm      | GrayLevelNonUniformity           | 25.03580761  |
| wavelet-HHL | glrlm      | LongRunEmphasis                  | 1.580729322  |
| wavelet-HHL | glrlm      | ShortRunHighGrayLevelEmphasis    | 20.79188773  |
| wavelet-HHL | glrlm      | RunLengthNonUniformity           | 85.72049414  |
| wavelet-HHL | glrlm      | ShortRunEmphasis                 | 0.881340777  |
| wavelet-HHL | glrlm      | LongRunHighGrayLevelEmphasis     | 37.44519093  |
| wavelet-HHL | glrlm      | RunPercentage                    | 0.851809955  |
| wavelet-HHL | glrlm      | LongRunLowGrayLevelEmphasis      | 0.09422064   |
| wavelet-HHL | glrlm      | RunEntropy                       | 2.990778436  |
| wavelet-HHL | glrlm      | HighGrayLevelRunEmphasis         | 23.587799    |
| wavelet-HHL | glrlm      | RunLengthNonUniformityNormalized | 0.736775701  |
| wavelet-HHL | glszm      | GrayLevelVariance                | 3.623263889  |
| wavelet-HHL | glszm      | ZoneVariance                     | 105.8888889  |
| wavelet-HHL | glszm      | GrayLevelNonUniformityNormalized | 0.173611111  |
| wavelet-HHL | glszm      | SizeZoneNonUniformityNormalized  | 0.336805556  |
| wavelet-HHL | glszm      | SizeZoneNonUniformity            | 8.083333333  |
| wavelet-HHL | glszm      | GrayLevelNonUniformity           | 4.166666667  |
| wavelet-HHL | glszm      | LargeAreaEmphasis                | 138          |
| wavelet-HHL | glszm      | SmallAreaHighGrayLevelEmphasis   | 14.9765507   |
| wavelet-HHL | glszm      | ZonePercentage                   | 0.176470588  |
| wavelet-HHL | glszm      | LargeAreaLowGrayLevelEmphasis    | 6.565540497  |
| wavelet-HHL | glszm      | LargeAreaHighGrayLevelEmphasis   | 3231.125     |
| wavelet-HHL | glszm      | HighGrayLevelZoneEmphasis        | 25.79166667  |
| wavelet-HHL | glszm      | SmallAreaEmphasis                | 0.582876816  |
| wavelet-HHL | glszm      | LowGrayLevelZoneEmphasis         | 0.108728328  |
| wavelet-HHL | glszm      | ZoneEntropy                      | 3.803508855  |
| wavelet-HHL | glszm      | SmallAreaLowGrayLevelEmphasis    | 0.082943121  |

|             |            |                                      |              |
|-------------|------------|--------------------------------------|--------------|
| wavelet-HHL | ngtdm      | Coarseness                           | 0.039819256  |
| wavelet-HHL | ngtdm      | Complexity                           | 27.39501416  |
| wavelet-HHL | ngtdm      | Strength                             | 0.741092397  |
| wavelet-HHL | ngtdm      | Contrast                             | 0.059349601  |
| wavelet-HHL | ngtdm      | Busyness                             | 0.641275444  |
| wavelet-HLH | gldm       | GrayLevelVariance                    | 2.837316176  |
| wavelet-HLH | gldm       | HighGrayLevelEmphasis                | 110.4779412  |
| wavelet-HLH | gldm       | DependenceEntropy                    | 5.072116243  |
| wavelet-HLH | gldm       | DependenceNonUniformity              | 15.02941176  |
| wavelet-HLH | gldm       | GrayLevelNonUniformity               | 29.20588235  |
| wavelet-HLH | gldm       | SmallDependenceEmphasis              | 0.218720765  |
| wavelet-HLH | gldm       | SmallDependenceHighGrayLevelEmphasis | 22.62560818  |
| wavelet-HLH | gldm       | DependenceNonUniformityNormalized    | 0.110510381  |
| wavelet-HLH | gldm       | LargeDependenceEmphasis              | 33.73529412  |
| wavelet-HLH | gldm       | LargeDependenceLowGrayLevelEmphasis  | 0.301947423  |
| wavelet-HLH | gldm       | DependenceVariance                   | 10.7517301   |
| wavelet-HLH | gldm       | LargeDependenceHighGrayLevelEmphasis | 3932.375     |
| wavelet-HLH | gldm       | SmallDependenceLowGrayLevelEmphasis  | 0.010297215  |
| wavelet-HLH | gldm       | LowGrayLevelEmphasis                 | 0.017609635  |
| wavelet-HLH | glcm       | JointAverage                         | 10.46221675  |
| wavelet-HLH | glcm       | SumAverage                           | 20.92443349  |
| wavelet-HLH | glcm       | JointEntropy                         | 4.490602772  |
| wavelet-HLH | glcm       | ClusterShade                         | -13.01738173 |
| wavelet-HLH | glcm       | MaximumProbability                   | 0.153236264  |
| wavelet-HLH | glcm       | Idmn                                 | 0.981201989  |
| wavelet-HLH | glcm       | JointEnergy                          | 0.065102281  |
| wavelet-HLH | glcm       | Contrast                             | 4.154248709  |
| wavelet-HLH | glcm       | DifferenceEntropy                    | 2.131619687  |
| wavelet-HLH | glcm       | InverseVariance                      | 0.458484648  |
| wavelet-HLH | glcm       | DifferenceVariance                   | 2.0452979    |
| wavelet-HLH | glcm       | Idn                                  | 0.913448665  |
| wavelet-HLH | glcm       | Idm                                  | 0.488957607  |
| wavelet-HLH | glcm       | Correlation                          | 0.018622882  |
| wavelet-HLH | glcm       | Autocorrelation                      | 109.5253957  |
| wavelet-HLH | glcm       | SumEntropy                           | 2.825910411  |
| wavelet-HLH | glcm       | SumSquares                           | 2.140526642  |
| wavelet-HLH | glcm       | ClusterProminence                    | 158.5355716  |
| wavelet-HLH | glcm       | Imc2                                 | 0.636939301  |
| wavelet-HLH | glcm       | Imc1                                 | -0.111657842 |
| wavelet-HLH | glcm       | DifferenceAverage                    | 1.441018097  |
| wavelet-HLH | glcm       | Id                                   | 0.539211912  |
| wavelet-HLH | glcm       | ClusterTendency                      | 4.407857859  |
| wavelet-HLH | firstorder | InterquartileRange                   | 44.49085717  |
| wavelet-HLH | firstorder | Skewness                             | -2.03201421  |
| wavelet-HLH | firstorder | Uniformity                           | 0.214749135  |
| wavelet-HLH | firstorder | Median                               | 2.742828105  |
| wavelet-HLH | firstorder | Energy                               | 223686.6648  |
| wavelet-HLH | firstorder | RobustMeanAbsoluteDeviation          | 17.02351417  |
| wavelet-HLH | firstorder | MeanAbsoluteDeviation                | 28.01451092  |
| wavelet-HLH | firstorder | TotalEnergy                          | 6039539.948  |
| wavelet-HLH | firstorder | Maximum                              | 81.21203967  |
| wavelet-HLH | firstorder | RootMeanSquared                      | 40.55557777  |
| wavelet-HLH | firstorder | 90Percentile                         | 36.7788006   |
| wavelet-HLH | firstorder | Minimum                              | -227.4901752 |
| wavelet-HLH | firstorder | Entropy                              | 2.531852901  |

|             |            |                                  |              |
|-------------|------------|----------------------------------|--------------|
| wavelet-HLH | firstorder | Range                            | 308.7022148  |
| wavelet-HLH | firstorder | Variance                         | 1638.377211  |
| wavelet-HLH | firstorder | 10Percentile                     | -37.79810484 |
| wavelet-HLH | firstorder | Kurtosis                         | 11.5988944   |
| wavelet-HLH | firstorder | Mean                             | -2.525406272 |
| wavelet-HLH | glrlm      | ShortRunLowGrayLevelEmphasis     | 0.018126089  |
| wavelet-HLH | glrlm      | GrayLevelVariance                | 3.198950725  |
| wavelet-HLH | glrlm      | LowGrayLevelRunEmphasis          | 0.019122761  |
| wavelet-HLH | glrlm      | GrayLevelNonUniformityNormalized | 0.19436988   |
| wavelet-HLH | glrlm      | RunVariance                      | 0.215609476  |
| wavelet-HLH | glrlm      | GrayLevelNonUniformity           | 22.59368039  |
| wavelet-HLH | glrlm      | LongRunEmphasis                  | 1.598148189  |
| wavelet-HLH | glrlm      | ShortRunHighGrayLevelEmphasis    | 97.01390892  |
| wavelet-HLH | glrlm      | RunLengthNonUniformity           | 87.50034538  |
| wavelet-HLH | glrlm      | ShortRunEmphasis                 | 0.889139294  |
| wavelet-HLH | glrlm      | LongRunHighGrayLevelEmphasis     | 178.7483426  |
| wavelet-HLH | glrlm      | RunPercentage                    | 0.854072398  |
| wavelet-HLH | glrlm      | LongRunLowGrayLevelEmphasis      | 0.024424449  |
| wavelet-HLH | glrlm      | RunEntropy                       | 3.202547229  |
| wavelet-HLH | glrlm      | HighGrayLevelRunEmphasis         | 109.6949351  |
| wavelet-HLH | glrlm      | RunLengthNonUniformityNormalized | 0.750684972  |
| wavelet-HLH | glszm      | GrayLevelVariance                | 8.126951093  |
| wavelet-HLH | glszm      | ZoneVariance                     | 87.91467222  |
| wavelet-HLH | glszm      | GrayLevelNonUniformityNormalized | 0.152965661  |
| wavelet-HLH | glszm      | SizeZoneNonUniformityNormalized  | 0.448491155  |
| wavelet-HLH | glszm      | SizeZoneNonUniformity            | 13.90322581  |
| wavelet-HLH | glszm      | GrayLevelNonUniformity           | 4.741935484  |
| wavelet-HLH | glszm      | LargeAreaEmphasis                | 107.1612903  |
| wavelet-HLH | glszm      | SmallAreaHighGrayLevelEmphasis   | 69.49641378  |
| wavelet-HLH | glszm      | ZonePercentage                   | 0.227941176  |
| wavelet-HLH | glszm      | LargeAreaLowGrayLevelEmphasis    | 0.987351057  |
| wavelet-HLH | glszm      | LargeAreaHighGrayLevelEmphasis   | 12262.35484  |
| wavelet-HLH | glszm      | HighGrayLevelZoneEmphasis        | 103.0322581  |
| wavelet-HLH | glszm      | SmallAreaEmphasis                | 0.690604421  |
| wavelet-HLH | glszm      | LowGrayLevelZoneEmphasis         | 0.045834432  |
| wavelet-HLH | glszm      | ZoneEntropy                      | 3.953565665  |
| wavelet-HLH | glszm      | SmallAreaLowGrayLevelEmphasis    | 0.042506419  |
| wavelet-HLH | ngtdm      | Coarseness                       | 0.046796245  |
| wavelet-HLH | ngtdm      | Complexity                       | 59.50660522  |
| wavelet-HLH | ngtdm      | Strength                         | 2.691369584  |
| wavelet-HLH | ngtdm      | Contrast                         | 0.073306515  |
| wavelet-HLH | ngtdm      | Busyness                         | 0.174673402  |

| Image type | Feature Class | Feature Name                         | Value                                                                                                                                                                                                                                                                                                                                                                                                                                        |
|------------|---------------|--------------------------------------|----------------------------------------------------------------------------------------------------------------------------------------------------------------------------------------------------------------------------------------------------------------------------------------------------------------------------------------------------------------------------------------------------------------------------------------------|
| general    | info          | BoundingBox                          | 502: RTSTRUCT: C99-DNU_segment_ITV<br>(1, 0, 1, 2, 4, 3)                                                                                                                                                                                                                                                                                                                                                                                     |
| general    | info          | EnabledImageTypes                    | {u'Original': {}, u'Wavelet': {}}                                                                                                                                                                                                                                                                                                                                                                                                            |
|            |               |                                      | {'distances': [1], 'additionalInfo': True,<br>'force2D': False, 'interpolator': 'sitkBSpline',<br>'resampledPixelSpacing': [3.0], 'label': 1,<br>'normalizeScale': 1, 'normalize': False,<br>'force2Ddimension': 0, 'removeOutliers':<br>None, 'minimumROISize': None, u'binWidth':<br>25.0, 'minimumROIDimensions': 1,<br>u'correctMask': True, 'preCrop': False,<br>u'symmetricalGLCM': True,<br>'resegmentRange': None, 'padDistance': 5} |
| general    | info          | GeneralSettings                      | d17f0cc2f36e31c3c4a6b75adf86b46ae70033                                                                                                                                                                                                                                                                                                                                                                                                       |
| general    | info          | ImageHash                            | e8                                                                                                                                                                                                                                                                                                                                                                                                                                           |
| general    | info          | ImageSpacing                         | (0.9765625000000002,<br>0.9765625000000002, 2.0)                                                                                                                                                                                                                                                                                                                                                                                             |
| general    | info          | MaskHash                             | 32f349f3554876128e26aa60830c8eba3eec95                                                                                                                                                                                                                                                                                                                                                                                                       |
| general    | info          | NumpyVersion                         | 28                                                                                                                                                                                                                                                                                                                                                                                                                                           |
| general    | info          | PyWaveletVersion                     | 1.13.1                                                                                                                                                                                                                                                                                                                                                                                                                                       |
| general    | info          | SimpleITKVersion                     | 0.5.2                                                                                                                                                                                                                                                                                                                                                                                                                                        |
| general    | info          | Version                              | 1.1.0                                                                                                                                                                                                                                                                                                                                                                                                                                        |
| general    | info          | VolumeNum                            | 1.3.0.post102+g1b0eb74                                                                                                                                                                                                                                                                                                                                                                                                                       |
| general    | info          | VoxelNum                             | 1                                                                                                                                                                                                                                                                                                                                                                                                                                            |
| original   | shape         | Maximum3DDiameter                    | 14                                                                                                                                                                                                                                                                                                                                                                                                                                           |
| original   | shape         | Maximum2DDiameterSlice               | 9.486832981                                                                                                                                                                                                                                                                                                                                                                                                                                  |
| original   | shape         | Sphericity                           | 6.708203932                                                                                                                                                                                                                                                                                                                                                                                                                                  |
| original   | shape         | MinorAxis                            | 1.021993642                                                                                                                                                                                                                                                                                                                                                                                                                                  |
| original   | shape         | Elongation                           | 8.22013146                                                                                                                                                                                                                                                                                                                                                                                                                                   |
| original   | shape         | SurfaceVolumeRatio                   | 0.814762667                                                                                                                                                                                                                                                                                                                                                                                                                                  |
| original   | shape         | Volume                               | 0.654443257                                                                                                                                                                                                                                                                                                                                                                                                                                  |
| original   | shape         | MajorAxis                            | 378                                                                                                                                                                                                                                                                                                                                                                                                                                          |
| original   | shape         | SurfaceArea                          | 10.08898885                                                                                                                                                                                                                                                                                                                                                                                                                                  |
| original   | shape         | Flatness                             | 247.3795511                                                                                                                                                                                                                                                                                                                                                                                                                                  |
| original   | shape         | LeastAxis                            | 0.585439383                                                                                                                                                                                                                                                                                                                                                                                                                                  |
| original   | shape         | Maximum2DDiameterColumn              | 5.906491407                                                                                                                                                                                                                                                                                                                                                                                                                                  |
| original   | shape         | Maximum2DDiameterRow                 | 6.708203932                                                                                                                                                                                                                                                                                                                                                                                                                                  |
| original   | gldm          | GrayLevelVariance                    | 9.486832981                                                                                                                                                                                                                                                                                                                                                                                                                                  |
| original   | gldm          | HighGrayLevelEmphasis                | 82.45408163                                                                                                                                                                                                                                                                                                                                                                                                                                  |
| original   | gldm          | DependenceEntropy                    | 398.7857143                                                                                                                                                                                                                                                                                                                                                                                                                                  |
| original   | gldm          | DependenceNonUniformity              | 3.521640636                                                                                                                                                                                                                                                                                                                                                                                                                                  |
| original   | gldm          | GrayLevelNonUniformity               | 10.57142857                                                                                                                                                                                                                                                                                                                                                                                                                                  |
| original   | gldm          | SmallDependenceEmphasis              | 1.285714286                                                                                                                                                                                                                                                                                                                                                                                                                                  |
| original   | gldm          | SmallDependenceHighGrayLevelEmphasis | 0.892857143                                                                                                                                                                                                                                                                                                                                                                                                                                  |
| original   | gldm          | DependenceNonUniformityNormalized    | 346.9285714                                                                                                                                                                                                                                                                                                                                                                                                                                  |
| original   | gldm          | LargeDependenceEmphasis              | 0.755102041                                                                                                                                                                                                                                                                                                                                                                                                                                  |
| original   | gldm          | LargeDependenceLowGrayLevelEmphasis  | 0.755102041                                                                                                                                                                                                                                                                                                                                                                                                                                  |
| original   | gldm          | DependenceVariance                   | 1.428571429                                                                                                                                                                                                                                                                                                                                                                                                                                  |
| original   | gldm          | LargeDependenceHighGrayLevelEmphasis | 0.077152378                                                                                                                                                                                                                                                                                                                                                                                                                                  |
| original   | gldm          | SmallDependenceLowGrayLevelEmphasis  | 0.12244898                                                                                                                                                                                                                                                                                                                                                                                                                                   |
| original   | gldm          | SmallDependenceHighGrayLevelEmphasis | 606.2142857                                                                                                                                                                                                                                                                                                                                                                                                                                  |
| original   | gldm          | SmallDependenceLowGrayLevelEmphasis  | 0.076045531                                                                                                                                                                                                                                                                                                                                                                                                                                  |

|          |            |                                  |              |
|----------|------------|----------------------------------|--------------|
| original | gldm       | LowGrayLevelEmphasis             | 0.0762669    |
| original | glcm       | JointAverage                     | 19.63814103  |
| original | glcm       | SumAverage                       | 39.27628205  |
| original | glcm       | JointEntropy                     | 3.070262097  |
| original | glcm       | ClusterShade                     | 224.866705   |
| original | glcm       | MaximumProbability               | 0.139102564  |
| original | glcm       | Idmn                             | 0.871814377  |
| original | glcm       | JointEnergy                      | 0.130555556  |
| original | glcm       | Contrast                         | 175.2455128  |
| original | glcm       | DifferenceEntropy                | 1.942056969  |
| original | glcm       | InverseVariance                  | 0.115967093  |
| original | glcm       | DifferenceVariance               | 44.83899038  |
| original | glcm       | Idn                              | 0.76264734   |
| original | glcm       | Idm                              | 0.091001994  |
| original | glcm       | Correlation                      | -0.199994719 |
| original | glcm       | Autocorrelation                  | 372.4064103  |
| original | glcm       | SumEntropy                       | 2.039492867  |
| original | glcm       | SumSquares                       | 72.15069311  |
| original | glcm       | ClusterProminence                | 29921.0159   |
| original | glcm       | Imc2                             | 0.99713051   |
| original | glcm       | Imc1                             | -0.941722085 |
| original | glcm       | DifferenceAverage                | 11.12115385  |
| original | glcm       | Id                               | 0.160007549  |
| original | glcm       | ClusterTendency                  | 113.3572596  |
| original | firstorder | InterquartileRange               | 305          |
| original | firstorder | Skewness                         | 0.022957734  |
| original | firstorder | Uniformity                       | 0.091836735  |
| original | firstorder | Median                           | -351         |
| original | firstorder | Energy                           | 2357716      |
| original | firstorder | RobustMeanAbsoluteDeviation      | 130.92       |
| original | firstorder | MeanAbsoluteDeviation            | 191.2040816  |
| original | firstorder | TotalEnergy                      | 63658332     |
| original | firstorder | Maximum                          | 6            |
| original | firstorder | RootMeanSquared                  | 410.375786   |
| original | firstorder | 90Percentile                     | -15.1        |
| original | firstorder | Minimum                          | -755         |
| original | firstorder | Entropy                          | 3.521640636  |
| original | firstorder | Range                            | 761          |
| original | firstorder | Variance                         | 51737.2449   |
| original | firstorder | 10Percentile                     | -594.4       |
| original | firstorder | Kurtosis                         | 2.016056657  |
| original | firstorder | Mean                             | -341.5714286 |
| original | glrlm      | ShortRunLowGrayLevelEmphasis     | 0.076696789  |
| original | glrlm      | GrayLevelVariance                | 82.8288018   |
| original | glrlm      | LowGrayLevelRunEmphasis          | 0.076705958  |
| original | glrlm      | GrayLevelNonUniformityNormalized | 0.091599863  |
| original | glrlm      | RunVariance                      | 0.005461994  |
| original | glrlm      | GrayLevelNonUniformity           | 1.275570583  |
| original | glrlm      | LongRunEmphasis                  | 1.017751479  |
| original | glrlm      | ShortRunHighGrayLevelEmphasis    | 396.1335587  |
| original | glrlm      | RunLengthNonUniformity           | 13.78106509  |
| original | glrlm      | ShortRunEmphasis                 | 0.99556213   |
| original | glrlm      | LongRunHighGrayLevelEmphasis     | 406.8732037  |

|             |       |                                      |             |
|-------------|-------|--------------------------------------|-------------|
| original    | glrlm | RunPercentage                        | 0.994505495 |
| original    | glrlm | LongRunLowGrayLevelEmphasis          | 0.076742635 |
| original    | glrlm | RunEntropy                           | 3.523560092 |
| original    | glrlm | HighGrayLevelRunEmphasis             | 398.2814877 |
| original    | glrlm | RunLengthNonUniformityNormalized     | 0.989076013 |
| original    | glszm | GrayLevelVariance                    | 87.32544379 |
| original    | glszm | ZoneVariance                         | 0.071005917 |
| original    | glszm | GrayLevelNonUniformityNormalized     | 0.088757396 |
| original    | glszm | SizeZoneNonUniformityNormalized      | 0.857988166 |
| original    | glszm | SizeZoneNonUniformity                | 11.15384615 |
| original    | glszm | GrayLevelNonUniformity               | 1.153846154 |
| original    | glszm | LargeAreaEmphasis                    | 1.230769231 |
| original    | glszm | SmallAreaHighGrayLevelEmphasis       | 364.3076923 |
| original    | glszm | ZonePercentage                       | 0.928571429 |
| original    | glszm | LargeAreaLowGrayLevelEmphasis        | 0.082451449 |
| original    | glszm | LargeAreaHighGrayLevelEmphasis       | 503.9230769 |
| original    | glszm | HighGrayLevelZoneEmphasis            | 392.2307692 |
| original    | glszm | SmallAreaEmphasis                    | 0.942307692 |
| original    | glszm | LowGrayLevelZoneEmphasis             | 0.081974653 |
| original    | glszm | ZoneEntropy                          | 3.546593564 |
| original    | glszm | SmallAreaLowGrayLevelEmphasis        | 0.081855454 |
| original    | ngtdm | Coarseness                           | 0.094800484 |
| original    | ngtdm | Complexity                           | 1290.650227 |
| original    | ngtdm | Strength                             | 33.37535817 |
| original    | ngtdm | Contrast                             | 11.12263238 |
| original    | ngtdm | Busyness                             | 0.077971791 |
| wavelet-HHH | gldm  | GrayLevelVariance                    | 6.37244898  |
| wavelet-HHH | gldm  | HighGrayLevelEmphasis                | 46.78571429 |
| wavelet-HHH | gldm  | DependenceEntropy                    | 3.093069208 |
| wavelet-HHH | gldm  | DependenceNonUniformity              | 8.285714286 |
| wavelet-HHH | gldm  | GrayLevelNonUniformity               | 1.714285714 |
| wavelet-HHH | gldm  | SmallDependenceEmphasis              | 0.785714286 |
| wavelet-HHH | gldm  | SmallDependenceHighGrayLevelEmphasis | 37.25       |
| wavelet-HHH | gldm  | DependenceNonUniformityNormalized    | 0.591836735 |
| wavelet-HHH | gldm  | LargeDependenceEmphasis              | 1.857142857 |
| wavelet-HHH | gldm  | LargeDependenceLowGrayLevelEmphasis  | 0.124809191 |
| wavelet-HHH | gldm  | DependenceVariance                   | 0.204081633 |
| wavelet-HHH | gldm  | LargeDependenceHighGrayLevelEmphasis | 84.92857143 |
| wavelet-HHH | gldm  | SmallDependenceLowGrayLevelEmphasis  | 0.095010084 |
| wavelet-HHH | gldm  | LowGrayLevelEmphasis                 | 0.100969905 |
| wavelet-HHH | glcm  | JointAverage                         | 6.186217949 |
| wavelet-HHH | glcm  | SumAverage                           | 12.3724359  |
| wavelet-HHH | glcm  | JointEntropy                         | 3.067056969 |
| wavelet-HHH | glcm  | ClusterShade                         | 0.157442219 |
| wavelet-HHH | glcm  | MaximumProbability                   | 0.140705128 |
| wavelet-HHH | glcm  | ldmn                                 | 0.899696826 |
| wavelet-HHH | glcm  | JointEnergy                          | 0.129286859 |
| wavelet-HHH | glcm  | Contrast                             | 13.24423077 |
| wavelet-HHH | glcm  | DifferenceEntropy                    | 1.520570551 |
| wavelet-HHH | glcm  | InverseVariance                      | 0.345113409 |
| wavelet-HHH | glcm  | DifferenceVariance                   | 3.484887821 |
| wavelet-HHH | glcm  | ldn                                  | 0.788082888 |
| wavelet-HHH | glcm  | ldm                                  | 0.23197847  |



|             |            |                                  |              |
|-------------|------------|----------------------------------|--------------|
| wavelet-HHH | glcm       | Correlation                      | -0.1939022   |
| wavelet-HHH | glcm       | Autocorrelation                  | 37.60128205  |
| wavelet-HHH | glcm       | SumEntropy                       | 1.875409573  |
| wavelet-HHH | glcm       | SumSquares                       | 5.65018563   |
| wavelet-HHH | glcm       | ClusterProminence                | 234.8358254  |
| wavelet-HHH | glcm       | Imc2                             | 0.986745554  |
| wavelet-HHH | glcm       | Imc1                             | -0.813551315 |
| wavelet-HHH | glcm       | DifferenceAverage                | 2.98525641   |
| wavelet-HHH | glcm       | Id                               | 0.326441036  |
| wavelet-HHH | glcm       | ClusterTendency                  | 9.356511752  |
| wavelet-HHH | firstorder | InterquartileRange               | 82.74569186  |
| wavelet-HHH | firstorder | Skewness                         | -0.487554289 |
| wavelet-HHH | firstorder | Uniformity                       | 0.12244898   |
| wavelet-HHH | firstorder | Median                           | 22.65594672  |
| wavelet-HHH | firstorder | Energy                           | 56125.57429  |
| wavelet-HHH | firstorder | RobustMeanAbsoluteDeviation      | 28.87040243  |
| wavelet-HHH | firstorder | MeanAbsoluteDeviation            | 47.75543442  |
| wavelet-HHH | firstorder | TotalEnergy                      | 1515390.506  |
| wavelet-HHH | firstorder | Maximum                          | 109.2329345  |
| wavelet-HHH | firstorder | RootMeanSquared                  | 63.31642435  |
| wavelet-HHH | firstorder | 90Percentile                     | 93.56470856  |
| wavelet-HHH | firstorder | Minimum                          | -114.9660454 |
| wavelet-HHH | firstorder | Entropy                          | 3.093069208  |
| wavelet-HHH | firstorder | Range                            | 224.1989799  |
| wavelet-HHH | firstorder | Variance                         | 3610.440196  |
| wavelet-HHH | firstorder | 10Percentile                     | -47.70262492 |
| wavelet-HHH | firstorder | Kurtosis                         | 2.726623692  |
| wavelet-HHH | firstorder | Mean                             | 19.96320105  |
| wavelet-HHH | glrlm      | ShortRunLowGrayLevelEmphasis     | 0.101588817  |
| wavelet-HHH | glrlm      | GrayLevelVariance                | 6.418927016  |
| wavelet-HHH | glrlm      | LowGrayLevelRunEmphasis          | 0.101835673  |
| wavelet-HHH | glrlm      | GrayLevelNonUniformityNormalized | 0.122727653  |
| wavelet-HHH | glrlm      | RunVariance                      | 0.010923987  |
| wavelet-HHH | glrlm      | GrayLevelNonUniformity           | 1.699070161  |
| wavelet-HHH | glrlm      | LongRunEmphasis                  | 1.035502959  |
| wavelet-HHH | glrlm      | ShortRunHighGrayLevelEmphasis    | 46.41779374  |
| wavelet-HHH | glrlm      | RunLengthNonUniformity           | 13.56213018  |
| wavelet-HHH | glrlm      | ShortRunEmphasis                 | 0.99112426   |
| wavelet-HHH | glrlm      | LongRunHighGrayLevelEmphasis     | 48.39264582  |
| wavelet-HHH | glrlm      | RunPercentage                    | 0.989010989  |
| wavelet-HHH | glrlm      | LongRunLowGrayLevelEmphasis      | 0.102823099  |
| wavelet-HHH | glrlm      | RunEntropy                       | 3.091836269  |
| wavelet-HHH | glrlm      | HighGrayLevelRunEmphasis         | 46.81276416  |
| wavelet-HHH | glrlm      | RunLengthNonUniformityNormalized | 0.978152025  |
| wavelet-HHH | glszm      | GrayLevelVariance                | 7.055555556  |
| wavelet-HHH | glszm      | ZoneVariance                     | 0.138888889  |
| wavelet-HHH | glszm      | GrayLevelNonUniformityNormalized | 0.125        |
| wavelet-HHH | glszm      | SizeZoneNonUniformityNormalized  | 0.722222222  |
| wavelet-HHH | glszm      | SizeZoneNonUniformity            | 8.666666667  |
| wavelet-HHH | glszm      | GrayLevelNonUniformity           | 1.5          |
| wavelet-HHH | glszm      | LargeAreaEmphasis                | 1.5          |
| wavelet-HHH | glszm      | SmallAreaHighGrayLevelEmphasis   | 41.60416667  |
| wavelet-HHH | glszm      | ZonePercentage                   | 0.857142857  |

|             |            |                                      |              |
|-------------|------------|--------------------------------------|--------------|
| wavelet-HHH | glszm      | LargeAreaLowGrayLevelEmphasis        | 0.127069056  |
| wavelet-HHH | glszm      | LargeAreaHighGrayLevelEmphasis       | 69.41666667  |
| wavelet-HHH | glszm      | HighGrayLevelZoneEmphasis            | 47.16666667  |
| wavelet-HHH | glszm      | SmallAreaEmphasis                    | 0.875        |
| wavelet-HHH | glszm      | LowGrayLevelZoneEmphasis             | 0.113162806  |
| wavelet-HHH | glszm      | ZoneEntropy                          | 3.084962501  |
| wavelet-HHH | glszm      | SmallAreaLowGrayLevelEmphasis        | 0.109686244  |
| wavelet-HHH | ngtdm      | Coarseness                           | 0.265073819  |
| wavelet-HHH | ngtdm      | Complexity                           | 77.65008503  |
| wavelet-HHH | ngtdm      | Strength                             | 7.567187774  |
| wavelet-HHH | ngtdm      | Contrast                             | 0.428457483  |
| wavelet-HHH | ngtdm      | Busyness                             | 0.09568021   |
| wavelet-HLL | gldm       | GrayLevelVariance                    | 130.6938776  |
| wavelet-HLL | gldm       | HighGrayLevelEmphasis                | 449.5714286  |
| wavelet-HLL | gldm       | DependenceEntropy                    | 3.235926351  |
| wavelet-HLL | gldm       | DependenceNonUniformity              | 7.142857143  |
| wavelet-HLL | gldm       | GrayLevelNonUniformity               | 1.571428571  |
| wavelet-HLL | gldm       | SmallDependenceEmphasis              | 0.571428571  |
| wavelet-HLL | gldm       | SmallDependenceHighGrayLevelEmphasis | 343.8214286  |
| wavelet-HLL | gldm       | DependenceNonUniformityNormalized    | 0.510204082  |
| wavelet-HLL | gldm       | LargeDependenceEmphasis              | 2.714285714  |
| wavelet-HLL | gldm       | LargeDependenceLowGrayLevelEmphasis  | 0.611421141  |
| wavelet-HLL | gldm       | DependenceVariance                   | 0.244897959  |
| wavelet-HLL | gldm       | LargeDependenceHighGrayLevelEmphasis | 872.5714286  |
| wavelet-HLL | gldm       | SmallDependenceLowGrayLevelEmphasis  | 0.039997249  |
| wavelet-HLL | gldm       | LowGrayLevelEmphasis                 | 0.154282027  |
| wavelet-HLL | glcm       | JointAverage                         | 19.06346154  |
| wavelet-HLL | glcm       | SumAverage                           | 38.12692308  |
| wavelet-HLL | glcm       | JointEntropy                         | 3.022185174  |
| wavelet-HLL | glcm       | ClusterShade                         | -836.8709551 |
| wavelet-HLL | glcm       | MaximumProbability                   | 0.147115385  |
| wavelet-HLL | glcm       | Idmn                                 | 0.883773013  |
| wavelet-HLL | glcm       | JointEnergy                          | 0.132625534  |
| wavelet-HLL | glcm       | Contrast                             | 193.4487179  |
| wavelet-HLL | glcm       | DifferenceEntropy                    | 1.915567666  |
| wavelet-HLL | glcm       | InverseVariance                      | 0.086015042  |
| wavelet-HLL | glcm       | DifferenceVariance                   | 52.24596154  |
| wavelet-HLL | glcm       | Idn                                  | 0.788180017  |
| wavelet-HLL | glcm       | Idm                                  | 0.112177546  |
| wavelet-HLL | glcm       | Correlation                          | 0.100551485  |
| wavelet-HLL | glcm       | Autocorrelation                      | 387.1371795  |
| wavelet-HLL | glcm       | SumEntropy                           | 2.031800559  |
| wavelet-HLL | glcm       | SumSquares                           | 117.3534669  |
| wavelet-HLL | glcm       | ClusterProminence                    | 154422.3307  |
| wavelet-HLL | glcm       | Imc2                                 | 0.995051549  |
| wavelet-HLL | glcm       | Imc1                                 | -0.895169795 |
| wavelet-HLL | glcm       | DifferenceAverage                    | 10.91923077  |
| wavelet-HLL | glcm       | Id                                   | 0.19146362   |
| wavelet-HLL | glcm       | ClusterTendency                      | 275.9651496  |
| wavelet-HLL | firstorder | InterquartileRange                   | 544.1159694  |
| wavelet-HLL | firstorder | Skewness                             | -0.330878524 |
| wavelet-HLL | firstorder | Uniformity                           | 0.112244898  |
| wavelet-HLL | firstorder | Median                               | 108.4339559  |

|             |            |                                  |              |
|-------------|------------|----------------------------------|--------------|
| wavelet-HLL | firstorder | Energy                           | 1159433.589  |
| wavelet-HLL | firstorder | RobustMeanAbsoluteDeviation      | 201.8387503  |
| wavelet-HLL | firstorder | MeanAbsoluteDeviation            | 260.0460068  |
| wavelet-HLL | firstorder | TotalEnergy                      | 31304706.9   |
| wavelet-HLL | firstorder | Maximum                          | 432.0162078  |
| wavelet-HLL | firstorder | RootMeanSquared                  | 287.778882   |
| wavelet-HLL | firstorder | 90Percentile                     | 299.3422795  |
| wavelet-HLL | firstorder | Minimum                          | -423.4255926 |
| wavelet-HLL | firstorder | Entropy                          | 3.235926351  |
| wavelet-HLL | firstorder | Range                            | 855.4418003  |
| wavelet-HLL | firstorder | Variance                         | 82779.53547  |
| wavelet-HLL | firstorder | 10Percentile                     | -394.2369183 |
| wavelet-HLL | firstorder | Kurtosis                         | 1.591561384  |
| wavelet-HLL | firstorder | Mean                             | 6.095034119  |
| wavelet-HLL | grlm       | ShortRunLowGrayLevelEmphasis     | 0.146123699  |
| wavelet-HLL | grlm       | GrayLevelVariance                | 130.1282337  |
| wavelet-HLL | grlm       | LowGrayLevelRunEmphasis          | 0.151250324  |
| wavelet-HLL | grlm       | GrayLevelNonUniformityNormalized | 0.112185551  |
| wavelet-HLL | grlm       | RunVariance                      | 0.021607748  |
| wavelet-HLL | grlm       | GrayLevelNonUniformity           | 1.536207382  |
| wavelet-HLL | grlm       | LongRunEmphasis                  | 1.073964497  |
| wavelet-HLL | grlm       | ShortRunHighGrayLevelEmphasis    | 450.4204529  |
| wavelet-HLL | grlm       | RunLengthNonUniformity           | 13.15187377  |
| wavelet-HLL | grlm       | ShortRunEmphasis                 | 0.981508876  |
| wavelet-HLL | grlm       | LongRunHighGrayLevelEmphasis     | 472.3527754  |
| wavelet-HLL | grlm       | RunPercentage                    | 0.978021978  |
| wavelet-HLL | grlm       | LongRunLowGrayLevelEmphasis      | 0.171756826  |
| wavelet-HLL | grlm       | RunEntropy                       | 3.237591937  |
| wavelet-HLL | grlm       | HighGrayLevelRunEmphasis         | 454.8069174  |
| wavelet-HLL | grlm       | RunLengthNonUniformityNormalized | 0.956784504  |
| wavelet-HLL | glszm      | GrayLevelVariance                | 126.69       |
| wavelet-HLL | glszm      | ZoneVariance                     | 0.24         |
| wavelet-HLL | glszm      | GrayLevelNonUniformityNormalized | 0.1          |
| wavelet-HLL | glszm      | SizeZoneNonUniformityNormalized  | 0.52         |
| wavelet-HLL | glszm      | SizeZoneNonUniformity            | 5.2          |
| wavelet-HLL | glszm      | GrayLevelNonUniformity           | 1            |
| wavelet-HLL | glszm      | LargeAreaEmphasis                | 2.2          |
| wavelet-HLL | glszm      | SmallAreaHighGrayLevelEmphasis   | 456.675      |
| wavelet-HLL | glszm      | ZonePercentage                   | 0.714285714  |
| wavelet-HLL | glszm      | LargeAreaLowGrayLevelEmphasis    | 0.429326425  |
| wavelet-HLL | glszm      | LargeAreaHighGrayLevelEmphasis   | 826.8        |
| wavelet-HLL | glszm      | HighGrayLevelZoneEmphasis        | 530.7        |
| wavelet-HLL | glszm      | SmallAreaEmphasis                | 0.7          |
| wavelet-HLL | glszm      | LowGrayLevelZoneEmphasis         | 0.109329045  |
| wavelet-HLL | glszm      | ZoneEntropy                      | 3.321928095  |
| wavelet-HLL | glszm      | SmallAreaLowGrayLevelEmphasis    | 0.0293297    |
| wavelet-HLL | ngtdm      | Coarseness                       | 0.08362964   |
| wavelet-HLL | ngtdm      | Complexity                       | 1194.437925  |
| wavelet-HLL | ngtdm      | Strength                         | 50.55108359  |
| wavelet-HLL | ngtdm      | Contrast                         | 21.53781758  |
| wavelet-HLL | ngtdm      | Busyness                         | 0.105153745  |
| wavelet-LHL | gldm       | GrayLevelVariance                | 187.6938776  |
| wavelet-LHL | gldm       | HighGrayLevelEmphasis            | 622.7142857  |

|             |            |                                      |              |
|-------------|------------|--------------------------------------|--------------|
| wavelet-LHL | gldm       | DependenceEntropy                    | 3.521640636  |
| wavelet-LHL | gldm       | DependenceNonUniformity              | 8.285714286  |
| wavelet-LHL | gldm       | GrayLevelNonUniformity               | 1.571428571  |
| wavelet-LHL | gldm       | SmallDependenceEmphasis              | 0.785714286  |
| wavelet-LHL | gldm       | SmallDependenceHighGrayLevelEmphasis | 334.5        |
| wavelet-LHL | gldm       | DependenceNonUniformityNormalized    | 0.591836735  |
| wavelet-LHL | gldm       | LargeDependenceEmphasis              | 1.857142857  |
| wavelet-LHL | gldm       | LargeDependenceLowGrayLevelEmphasis  | 0.079516873  |
| wavelet-LHL | gldm       | DependenceVariance                   | 0.204081633  |
| wavelet-LHL | gldm       | LargeDependenceHighGrayLevelEmphasis | 1775.571429  |
| wavelet-LHL | gldm       | SmallDependenceLowGrayLevelEmphasis  | 0.078590145  |
| wavelet-LHL | gldm       | LowGrayLevelEmphasis                 | 0.078775491  |
| wavelet-LHL | glcm       | JointAverage                         | 20.71955128  |
| wavelet-LHL | glcm       | SumAverage                           | 41.43910256  |
| wavelet-LHL | glcm       | JointEntropy                         | 3.0478262    |
| wavelet-LHL | glcm       | ClusterShade                         | -456.2263733 |
| wavelet-LHL | glcm       | MaximumProbability                   | 0.140705128  |
| wavelet-LHL | glcm       | ldmn                                 | 0.844633315  |
| wavelet-LHL | glcm       | JointEnergy                          | 0.130488782  |
| wavelet-LHL | glcm       | Contrast                             | 408.3762821  |
| wavelet-LHL | glcm       | DifferenceEntropy                    | 1.974542025  |
| wavelet-LHL | glcm       | InverseVariance                      | 0.052574649  |
| wavelet-LHL | glcm       | DifferenceVariance                   | 69.94369124  |
| wavelet-LHL | glcm       | ldn                                  | 0.7451247    |
| wavelet-LHL | glcm       | ldm                                  | 0.065098001  |
| wavelet-LHL | glcm       | Correlation                          | -0.109626766 |
| wavelet-LHL | glcm       | Autocorrelation                      | 424.7153846  |
| wavelet-LHL | glcm       | SumEntropy                           | 2.018980046  |
| wavelet-LHL | glcm       | SumSquares                           | 185.8259014  |
| wavelet-LHL | glcm       | ClusterProminence                    | 254629.8492  |
| wavelet-LHL | glcm       | lmc2                                 | 0.996155555  |
| wavelet-LHL | glcm       | lmc1                                 | -0.917713221 |
| wavelet-LHL | glcm       | DifferenceAverage                    | 16.79423077  |
| wavelet-LHL | glcm       | ld                                   | 0.129345871  |
| wavelet-LHL | glcm       | ClusterTendency                      | 334.9273237  |
| wavelet-LHL | firstorder | InterquartileRange                   | 510.3712911  |
| wavelet-LHL | firstorder | Skewness                             | 0.191305817  |
| wavelet-LHL | firstorder | Uniformity                           | 0.112244898  |
| wavelet-LHL | firstorder | Median                               | 22.66556479  |
| wavelet-LHL | firstorder | Energy                               | 1675786.218  |
| wavelet-LHL | firstorder | RobustMeanAbsoluteDeviation          | 247.9485672  |
| wavelet-LHL | firstorder | MeanAbsoluteDeviation                | 320.7307846  |
| wavelet-LHL | firstorder | TotalEnergy                          | 45246227.88  |
| wavelet-LHL | firstorder | Maximum                              | 574.0651467  |
| wavelet-LHL | firstorder | RootMeanSquared                      | 345.9754551  |
| wavelet-LHL | firstorder | 90Percentile                         | 485.7899297  |
| wavelet-LHL | firstorder | Minimum                              | -493.0221614 |
| wavelet-LHL | firstorder | Entropy                              | 3.324862958  |
| wavelet-LHL | firstorder | Range                                | 1067.087308  |
| wavelet-LHL | firstorder | Variance                             | 119589.6115  |
| wavelet-LHL | firstorder | 10Percentile                         | -369.549198  |
| wavelet-LHL | firstorder | Kurtosis                             | 1.66088208   |
| wavelet-LHL | firstorder | Mean                                 | 10.45964136  |

|             |       |                                      |             |
|-------------|-------|--------------------------------------|-------------|
| wavelet-LHL | grlm  | ShortRunLowGrayLevelEmphasis         | 0.079689832 |
| wavelet-LHL | grlm  | GrayLevelVariance                    | 186.3681922 |
| wavelet-LHL | grlm  | LowGrayLevelRunEmphasis              | 0.079697509 |
| wavelet-LHL | grlm  | GrayLevelNonUniformityNormalized     | 0.111362433 |
| wavelet-LHL | grlm  | RunVariance                          | 0.010923987 |
| wavelet-LHL | grlm  | GrayLevelNonUniformity               | 1.542688081 |
| wavelet-LHL | grlm  | LongRunEmphasis                      | 1.035502959 |
| wavelet-LHL | grlm  | ShortRunHighGrayLevelEmphasis        | 602.228656  |
| wavelet-LHL | grlm  | RunLengthNonUniformity               | 13.56213018 |
| wavelet-LHL | grlm  | ShortRunEmphasis                     | 0.99112426  |
| wavelet-LHL | grlm  | LongRunHighGrayLevelEmphasis         | 661.9180051 |
| wavelet-LHL | grlm  | RunPercentage                        | 0.989010989 |
| wavelet-LHL | grlm  | LongRunLowGrayLevelEmphasis          | 0.079728217 |
| wavelet-LHL | grlm  | RunEntropy                           | 3.342674249 |
| wavelet-LHL | grlm  | HighGrayLevelRunEmphasis             | 614.1665258 |
| wavelet-LHL | grlm  | RunLengthNonUniformityNormalized     | 0.978152025 |
| wavelet-LHL | glszm | GrayLevelVariance                    | 166.2222222 |
| wavelet-LHL | glszm | ZoneVariance                         | 0.138888889 |
| wavelet-LHL | glszm | GrayLevelNonUniformityNormalized     | 0.097222222 |
| wavelet-LHL | glszm | SizeZoneNonUniformityNormalized      | 0.722222222 |
| wavelet-LHL | glszm | SizeZoneNonUniformity                | 8.666666667 |
| wavelet-LHL | glszm | GrayLevelNonUniformity               | 1.166666667 |
| wavelet-LHL | glszm | LargeAreaEmphasis                    | 1.5         |
| wavelet-LHL | glszm | SmallAreaHighGrayLevelEmphasis       | 334.2083333 |
| wavelet-LHL | glszm | ZonePercentage                       | 0.857142857 |
| wavelet-LHL | glszm | LargeAreaLowGrayLevelEmphasis        | 0.092193055 |
| wavelet-LHL | glszm | LargeAreaHighGrayLevelEmphasis       | 1174.833333 |
| wavelet-LHL | glszm | HighGrayLevelZoneEmphasis            | 502.3333333 |
| wavelet-LHL | glszm | SmallAreaEmphasis                    | 0.875       |
| wavelet-LHL | glszm | LowGrayLevelZoneEmphasis             | 0.091760581 |
| wavelet-LHL | glszm | ZoneEntropy                          | 3.584962501 |
| wavelet-LHL | glszm | SmallAreaLowGrayLevelEmphasis        | 0.091652463 |
| wavelet-LHL | ngtdm | Coarseness                           | 0.054474708 |
| wavelet-LHL | ngtdm | Complexity                           | 2437.327338 |
| wavelet-LHL | ngtdm | Strength                             | 49.10673754 |
| wavelet-LHL | ngtdm | Contrast                             | 40.40003345 |
| wavelet-LHL | ngtdm | Busyness                             | 0.073428571 |
| wavelet-LHH | gldm  | GrayLevelVariance                    | 61.26530612 |
| wavelet-LHH | gldm  | HighGrayLevelEmphasis                | 185.4285714 |
| wavelet-LHH | gldm  | DependenceEntropy                    | 3.664497779 |
| wavelet-LHH | gldm  | DependenceNonUniformity              | 10.57142857 |
| wavelet-LHH | gldm  | GrayLevelNonUniformity               | 1.142857143 |
| wavelet-LHH | gldm  | SmallDependenceEmphasis              | 0.892857143 |
| wavelet-LHH | gldm  | SmallDependenceHighGrayLevelEmphasis | 178.5714286 |
| wavelet-LHH | gldm  | DependenceNonUniformityNormalized    | 0.755102041 |
| wavelet-LHH | gldm  | LargeDependenceEmphasis              | 1.428571429 |
| wavelet-LHH | gldm  | LargeDependenceLowGrayLevelEmphasis  | 0.113059758 |
| wavelet-LHH | gldm  | DependenceVariance                   | 0.12244898  |
| wavelet-LHH | gldm  | LargeDependenceHighGrayLevelEmphasis | 212.8571429 |
| wavelet-LHH | gldm  | SmallDependenceLowGrayLevelEmphasis  | 0.104689222 |
| wavelet-LHH | gldm  | LowGrayLevelEmphasis                 | 0.106363329 |
| wavelet-LHH | glcm  | JointAverage                         | 11.37083333 |
| wavelet-LHH | glcm  | SumAverage                           | 22.74166667 |

|             |            |                                  |              |
|-------------|------------|----------------------------------|--------------|
| wavelet-LHH | glcm       | JointEntropy                     | 3.076672354  |
| wavelet-LHH | glcm       | ClusterShade                     | 49.75133752  |
| wavelet-LHH | glcm       | MaximumProbability               | 0.135897436  |
| wavelet-LHH | glcm       | Idmn                             | 0.885031775  |
| wavelet-LHH | glcm       | JointEnergy                      | 0.128685897  |
| wavelet-LHH | glcm       | Contrast                         | 136.2224359  |
| wavelet-LHH | glcm       | DifferenceEntropy                | 1.921977923  |
| wavelet-LHH | glcm       | InverseVariance                  | 0.090892469  |
| wavelet-LHH | glcm       | DifferenceVariance               | 38.87467415  |
| wavelet-LHH | glcm       | Idn                              | 0.780945118  |
| wavelet-LHH | glcm       | Idm                              | 0.081787553  |
| wavelet-LHH | glcm       | Correlation                      | -0.317438374 |
| wavelet-LHH | glcm       | Autocorrelation                  | 123.1628205  |
| wavelet-LHH | glcm       | SumEntropy                       | 1.96256979   |
| wavelet-LHH | glcm       | SumSquares                       | 52.43126469  |
| wavelet-LHH | glcm       | ClusterProminence                | 16943.69321  |
| wavelet-LHH | glcm       | Imc2                             | 0.997811269  |
| wavelet-LHH | glcm       | Imc1                             | -0.970296312 |
| wavelet-LHH | glcm       | DifferenceAverage                | 9.282692308  |
| wavelet-LHH | glcm       | Id                               | 0.171425457  |
| wavelet-LHH | glcm       | ClusterTendency                  | 73.50262286  |
| wavelet-LHH | firstorder | InterquartileRange               | 250.0850004  |
| wavelet-LHH | firstorder | Skewness                         | 0.692440212  |
| wavelet-LHH | firstorder | Uniformity                       | 0.081632653  |
| wavelet-LHH | firstorder | Median                           | 5.427713947  |
| wavelet-LHH | firstorder | Energy                           | 578205.2661  |
| wavelet-LHH | firstorder | RobustMeanAbsoluteDeviation      | 104.7903966  |
| wavelet-LHH | firstorder | MeanAbsoluteDeviation            | 164.2150835  |
| wavelet-LHH | firstorder | TotalEnergy                      | 15611542.18  |
| wavelet-LHH | firstorder | Maximum                          | 488.3643101  |
| wavelet-LHH | firstorder | RootMeanSquared                  | 203.2249398  |
| wavelet-LHH | firstorder | 90Percentile                     | 294.4083542  |
| wavelet-LHH | firstorder | Minimum                          | -218.8322862 |
| wavelet-LHH | firstorder | Entropy                          | 3.664497779  |
| wavelet-LHH | firstorder | Range                            | 707.1965963  |
| wavelet-LHH | firstorder | Variance                         | 39805.1812   |
| wavelet-LHH | firstorder | 10Percentile                     | -192.0463784 |
| wavelet-LHH | firstorder | Kurtosis                         | 2.739656119  |
| wavelet-LHH | firstorder | Mean                             | 38.66775073  |
| wavelet-LHH | grlm       | ShortRunLowGrayLevelEmphasis     | 0.1068309    |
| wavelet-LHH | grlm       | GrayLevelVariance                | 61.56487975  |
| wavelet-LHH | grlm       | LowGrayLevelRunEmphasis          | 0.106900242  |
| wavelet-LHH | grlm       | GrayLevelNonUniformityNormalized | 0.081270378  |
| wavelet-LHH | grlm       | RunVariance                      | 0.005461994  |
| wavelet-LHH | grlm       | GrayLevelNonUniformity           | 1.131868132  |
| wavelet-LHH | grlm       | LongRunEmphasis                  | 1.017751479  |
| wavelet-LHH | grlm       | ShortRunHighGrayLevelEmphasis    | 185.86306    |
| wavelet-LHH | grlm       | RunLengthNonUniformity           | 13.78106509  |
| wavelet-LHH | grlm       | ShortRunEmphasis                 | 0.99556213   |
| wavelet-LHH | grlm       | LongRunHighGrayLevelEmphasis     | 187.2831784  |
| wavelet-LHH | grlm       | RunPercentage                    | 0.994505495  |
| wavelet-LHH | grlm       | LongRunLowGrayLevelEmphasis      | 0.107177609  |
| wavelet-LHH | grlm       | RunEntropy                       | 3.667262544  |

|             |       |                                      |              |
|-------------|-------|--------------------------------------|--------------|
| wavelet-LHH | grlm  | HighGrayLevelRunEmphasis             | 186.1470837  |
| wavelet-LHH | grlm  | RunLengthNonUniformityNormalized     | 0.989076013  |
| wavelet-LHH | glszm | GrayLevelVariance                    | 65.15976331  |
| wavelet-LHH | glszm | ZoneVariance                         | 0.071005917  |
| wavelet-LHH | glszm | GrayLevelNonUniformityNormalized     | 0.076923077  |
| wavelet-LHH | glszm | SizeZoneNonUniformityNormalized      | 0.857988166  |
| wavelet-LHH | glszm | SizeZoneNonUniformity                | 11.15384615  |
| wavelet-LHH | glszm | GrayLevelNonUniformity               | 1            |
| wavelet-LHH | glszm | LargeAreaEmphasis                    | 1.230769231  |
| wavelet-LHH | glszm | SmallAreaHighGrayLevelEmphasis       | 191.0769231  |
| wavelet-LHH | glszm | ZonePercentage                       | 0.928571429  |
| wavelet-LHH | glszm | LargeAreaLowGrayLevelEmphasis        | 0.11694897   |
| wavelet-LHH | glszm | LargeAreaHighGrayLevelEmphasis       | 209.5384615  |
| wavelet-LHH | glszm | HighGrayLevelZoneEmphasis            | 194.7692308  |
| wavelet-LHH | glszm | SmallAreaEmphasis                    | 0.942307692  |
| wavelet-LHH | glszm | LowGrayLevelZoneEmphasis             | 0.1133432    |
| wavelet-LHH | glszm | ZoneEntropy                          | 3.700439718  |
| wavelet-LHH | glszm | SmallAreaLowGrayLevelEmphasis        | 0.112441758  |
| wavelet-LHH | ngtdm | Coarseness                           | 0.125166303  |
| wavelet-LHH | ngtdm | Complexity                           | 1039.13407   |
| wavelet-LHH | ngtdm | Strength                             | 31.46062297  |
| wavelet-LHH | ngtdm | Contrast                             | 5.864512694  |
| wavelet-LHH | ngtdm | Busyness                             | 0.073201041  |
| wavelet-LLH | gldm  | GrayLevelVariance                    | 108.7755102  |
| wavelet-LLH | gldm  | HighGrayLevelEmphasis                | 355.7142857  |
| wavelet-LLH | gldm  | DependenceEntropy                    | 3.664497779  |
| wavelet-LLH | gldm  | DependenceNonUniformity              | 10.57142857  |
| wavelet-LLH | gldm  | GrayLevelNonUniformity               | 1.142857143  |
| wavelet-LLH | gldm  | SmallDependenceEmphasis              | 0.892857143  |
| wavelet-LLH | gldm  | SmallDependenceHighGrayLevelEmphasis | 350.4642857  |
| wavelet-LLH | gldm  | DependenceNonUniformityNormalized    | 0.755102041  |
| wavelet-LLH | gldm  | LargeDependenceEmphasis              | 1.428571429  |
| wavelet-LLH | gldm  | LargeDependenceLowGrayLevelEmphasis  | 0.095944074  |
| wavelet-LLH | gldm  | DependenceVariance                   | 0.12244898   |
| wavelet-LLH | gldm  | LargeDependenceHighGrayLevelEmphasis | 376.7142857  |
| wavelet-LLH | gldm  | SmallDependenceLowGrayLevelEmphasis  | 0.08501113   |
| wavelet-LLH | gldm  | LowGrayLevelEmphasis                 | 0.087197719  |
| wavelet-LLH | glcm  | JointAverage                         | 16.46762821  |
| wavelet-LLH | glcm  | SumAverage                           | 32.93525641  |
| wavelet-LLH | glcm  | JointEntropy                         | 3.080518508  |
| wavelet-LLH | glcm  | ClusterShade                         | 941.3487971  |
| wavelet-LLH | glcm  | MaximumProbability                   | 0.133974359  |
| wavelet-LLH | glcm  | ldmn                                 | 0.82011063   |
| wavelet-LLH | glcm  | JointEnergy                          | 0.127820513  |
| wavelet-LLH | glcm  | Contrast                             | 322.4019231  |
| wavelet-LLH | glcm  | DifferenceEntropy                    | 1.954877482  |
| wavelet-LLH | glcm  | InverseVariance                      | 0.035765948  |
| wavelet-LLH | glcm  | DifferenceVariance                   | 33.89305021  |
| wavelet-LLH | glcm  | ldn                                  | 0.716806679  |
| wavelet-LLH | glcm  | ldm                                  | 0.042893459  |
| wavelet-LLH | glcm  | Correlation                          | -0.341800051 |
| wavelet-LLH | glcm  | Autocorrelation                      | 231.0564103  |
| wavelet-LLH | glcm  | SumEntropy                           | 2.018980046  |

|             |            |                                  |              |
|-------------|------------|----------------------------------|--------------|
| wavelet-LLH | glcm       | SumSquares                       | 117.4755596  |
| wavelet-LLH | glcm       | ClusterProminence                | 80143.34583  |
| wavelet-LLH | glcm       | Imc2                             | 0.997639633  |
| wavelet-LLH | glcm       | Imc1                             | -0.960891446 |
| wavelet-LLH | glcm       | DifferenceAverage                | 15.46730769  |
| wavelet-LLH | glcm       | Id                               | 0.110554856  |
| wavelet-LLH | glcm       | ClusterTendency                  | 147.5003152  |
| wavelet-LLH | firstorder | InterquartileRange               | 386.5746601  |
| wavelet-LLH | firstorder | Skewness                         | 0.340612728  |
| wavelet-LLH | firstorder | Uniformity                       | 0.081632653  |
| wavelet-LLH | firstorder | Median                           | 78.7805313   |
| wavelet-LLH | firstorder | Energy                           | 1046827.15   |
| wavelet-LLH | firstorder | RobustMeanAbsoluteDeviation      | 152.7178351  |
| wavelet-LLH | firstorder | MeanAbsoluteDeviation            | 222.8484378  |
| wavelet-LLH | firstorder | TotalEnergy                      | 28264333.06  |
| wavelet-LLH | firstorder | Maximum                          | 567.3203821  |
| wavelet-LLH | firstorder | RootMeanSquared                  | 273.447194   |
| wavelet-LLH | firstorder | 90Percentile                     | 447.5790465  |
| wavelet-LLH | firstorder | Minimum                          | -291.6866362 |
| wavelet-LLH | firstorder | Entropy                          | 3.664497779  |
| wavelet-LLH | firstorder | Range                            | 859.0070183  |
| wavelet-LLH | firstorder | Variance                         | 68094.72636  |
| wavelet-LLH | firstorder | 10Percentile                     | -222.6555327 |
| wavelet-LLH | firstorder | Kurtosis                         | 2.016435031  |
| wavelet-LLH | firstorder | Mean                             | 81.7229559   |
| wavelet-LLH | glrlm      | ShortRunLowGrayLevelEmphasis     | 0.087502354  |
| wavelet-LLH | glrlm      | GrayLevelVariance                | 108.9352457  |
| wavelet-LLH | glrlm      | LowGrayLevelRunEmphasis          | 0.087592923  |
| wavelet-LLH | glrlm      | GrayLevelNonUniformityNormalized | 0.081270378  |
| wavelet-LLH | glrlm      | RunVariance                      | 0.005461994  |
| wavelet-LLH | glrlm      | GrayLevelNonUniformity           | 1.131868132  |
| wavelet-LLH | glrlm      | LongRunEmphasis                  | 1.017751479  |
| wavelet-LLH | glrlm      | ShortRunHighGrayLevelEmphasis    | 357.3117075  |
| wavelet-LLH | glrlm      | RunLengthNonUniformity           | 13.78106509  |
| wavelet-LLH | glrlm      | ShortRunEmphasis                 | 0.99556213   |
| wavelet-LLH | glrlm      | LongRunHighGrayLevelEmphasis     | 358.3989856  |
| wavelet-LLH | glrlm      | RunPercentage                    | 0.994505495  |
| wavelet-LLH | glrlm      | LongRunLowGrayLevelEmphasis      | 0.087955198  |
| wavelet-LLH | glrlm      | RunEntropy                       | 3.667262544  |
| wavelet-LLH | glrlm      | HighGrayLevelRunEmphasis         | 357.5291631  |
| wavelet-LLH | glrlm      | RunLengthNonUniformityNormalized | 0.989076013  |
| wavelet-LLH | glszm      | GrayLevelVariance                | 110.852071   |
| wavelet-LLH | glszm      | ZoneVariance                     | 0.071005917  |
| wavelet-LLH | glszm      | GrayLevelNonUniformityNormalized | 0.076923077  |
| wavelet-LLH | glszm      | SizeZoneNonUniformityNormalized  | 0.857988166  |
| wavelet-LLH | glszm      | SizeZoneNonUniformity            | 11.15384615  |
| wavelet-LLH | glszm      | GrayLevelNonUniformity           | 1            |
| wavelet-LLH | glszm      | LargeAreaEmphasis                | 1.230769231  |
| wavelet-LLH | glszm      | SmallAreaHighGrayLevelEmphasis   | 376.4807692  |
| wavelet-LLH | glszm      | ZonePercentage                   | 0.928571429  |
| wavelet-LLH | glszm      | LargeAreaLowGrayLevelEmphasis    | 0.097044953  |
| wavelet-LLH | glszm      | LargeAreaHighGrayLevelEmphasis   | 390.6153846  |
| wavelet-LLH | glszm      | HighGrayLevelZoneEmphasis        | 379.3076923  |



|             |            |                                      |              |
|-------------|------------|--------------------------------------|--------------|
| wavelet-LLH | glszm      | SmallAreaEmphasis                    | 0.942307692  |
| wavelet-LLH | glszm      | LowGrayLevelZoneEmphasis             | 0.092335377  |
| wavelet-LLH | glszm      | ZoneEntropy                          | 3.700439718  |
| wavelet-LLH | glszm      | SmallAreaLowGrayLevelEmphasis        | 0.091157983  |
| wavelet-LLH | ngtdm      | Coarseness                           | 0.089121291  |
| wavelet-LLH | ngtdm      | Complexity                           | 1774.61593   |
| wavelet-LLH | ngtdm      | Strength                             | 41.61274404  |
| wavelet-LLH | ngtdm      | Contrast                             | 13.69714297  |
| wavelet-LLH | ngtdm      | Busyness                             | 0.079821792  |
| wavelet-LLL | gldm       | GrayLevelVariance                    | 177.2040816  |
| wavelet-LLL | gldm       | HighGrayLevelEmphasis                | 890.8571429  |
| wavelet-LLL | gldm       | DependenceEntropy                    | 3.324862958  |
| wavelet-LLL | gldm       | DependenceNonUniformity              | 6.714285714  |
| wavelet-LLL | gldm       | GrayLevelNonUniformity               | 1.571428571  |
| wavelet-LLL | gldm       | SmallDependenceEmphasis              | 0.702380952  |
| wavelet-LLL | gldm       | SmallDependenceHighGrayLevelEmphasis | 662.4285714  |
| wavelet-LLL | gldm       | DependenceNonUniformityNormalized    | 0.479591837  |
| wavelet-LLL | gldm       | LargeDependenceEmphasis              | 3.142857143  |
| wavelet-LLL | gldm       | LargeDependenceLowGrayLevelEmphasis  | 0.077259691  |
| wavelet-LLL | gldm       | DependenceVariance                   | 0.673469388  |
| wavelet-LLL | gldm       | LargeDependenceHighGrayLevelEmphasis | 2841.714286  |
| wavelet-LLL | gldm       | SmallDependenceLowGrayLevelEmphasis  | 0.072777362  |
| wavelet-LLL | gldm       | LowGrayLevelEmphasis                 | 0.073498919  |
| wavelet-LLL | glcm       | JointAverage                         | 29.44134615  |
| wavelet-LLL | glcm       | SumAverage                           | 58.88269231  |
| wavelet-LLL | glcm       | JointEntropy                         | 3.035005687  |
| wavelet-LLL | glcm       | ClusterShade                         | -556.399746  |
| wavelet-LLL | glcm       | MaximumProbability                   | 0.156730769  |
| wavelet-LLL | glcm       | ldmn                                 | 0.893961823  |
| wavelet-LLL | glcm       | JointEnergy                          | 0.133293269  |
| wavelet-LLL | glcm       | Contrast                             | 322.6903846  |
| wavelet-LLL | glcm       | DifferenceEntropy                    | 1.936928764  |
| wavelet-LLL | glcm       | InverseVariance                      | 0.062392851  |
| wavelet-LLL | glcm       | DifferenceVariance                   | 104.8825588  |
| wavelet-LLL | glcm       | ldn                                  | 0.793766886  |
| wavelet-LLL | glcm       | ldm                                  | 0.104645476  |
| wavelet-LLL | glcm       | Correlation                          | -0.082956349 |
| wavelet-LLL | glcm       | Autocorrelation                      | 857.9442308  |
| wavelet-LLL | glcm       | SumEntropy                           | 2.070262097  |
| wavelet-LLL | glcm       | SumSquares                           | 147.9971568  |
| wavelet-LLL | glcm       | ClusterProminence                    | 136369.8708  |
| wavelet-LLL | glcm       | lmc2                                 | 0.994187518  |
| wavelet-LLL | glcm       | lmc1                                 | -0.87963057  |
| wavelet-LLL | glcm       | DifferenceAverage                    | 14.26602564  |
| wavelet-LLL | glcm       | ld                                   | 0.171974232  |
| wavelet-LLL | glcm       | ClusterTendency                      | 269.2982425  |
| wavelet-LLL | firstorder | InterquartileRange                   | 492.8033416  |
| wavelet-LLL | firstorder | Skewness                             | -0.19540392  |
| wavelet-LLL | firstorder | Uniformity                           | 0.112244898  |
| wavelet-LLL | firstorder | Median                               | -1165.954412 |
| wavelet-LLL | firstorder | Energy                               | 25125891.4   |
| wavelet-LLL | firstorder | RobustMeanAbsoluteDeviation          | 222.7981013  |
| wavelet-LLL | firstorder | MeanAbsoluteDeviation                | 298.6887959  |

|             |            |                                  |              |
|-------------|------------|----------------------------------|--------------|
| wavelet-LLL | firstorder | TotalEnergy                      | 678399067.8  |
| wavelet-LLL | firstorder | Maximum                          | -773.5859349 |
| wavelet-LLL | firstorder | RootMeanSquared                  | 1339.666574  |
| wavelet-LLL | firstorder | 90Percentile                     | -886.5622198 |
| wavelet-LLL | firstorder | Minimum                          | -1933.843033 |
| wavelet-LLL | firstorder | Entropy                          | 3.324862958  |
| wavelet-LLL | firstorder | Range                            | 1160.257099  |
| wavelet-LLL | firstorder | Variance                         | 110959.1299  |
| wavelet-LLL | firstorder | 10Percentile                     | -1638.352163 |
| wavelet-LLL | firstorder | Kurtosis                         | 1.950854794  |
| wavelet-LLL | firstorder | Mean                             | -1297.592925 |
| wavelet-LLL | grlm       | ShortRunLowGrayLevelEmphasis     | 0.07515718   |
| wavelet-LLL | grlm       | GrayLevelVariance                | 179.6128394  |
| wavelet-LLL | grlm       | LowGrayLevelRunEmphasis          | 0.075192048  |
| wavelet-LLL | grlm       | GrayLevelNonUniformityNormalized | 0.109569636  |
| wavelet-LLL | grlm       | RunVariance                      | 0.021847975  |
| wavelet-LLL | grlm       | GrayLevelNonUniformity           | 1.502113271  |
| wavelet-LLL | grlm       | LongRunEmphasis                  | 1.071005917  |
| wavelet-LLL | grlm       | ShortRunHighGrayLevelEmphasis    | 876.0830516  |
| wavelet-LLL | grlm       | RunLengthNonUniformity           | 13.12426036  |
| wavelet-LLL | grlm       | ShortRunEmphasis                 | 0.982248521  |
| wavelet-LLL | grlm       | LongRunHighGrayLevelEmphasis     | 952.9247675  |
| wavelet-LLL | grlm       | RunPercentage                    | 0.978021978  |
| wavelet-LLL | grlm       | LongRunLowGrayLevelEmphasis      | 0.075331519  |
| wavelet-LLL | grlm       | RunEntropy                       | 3.37678665   |
| wavelet-LLL | grlm       | HighGrayLevelRunEmphasis         | 891.4513948  |
| wavelet-LLL | grlm       | RunLengthNonUniformityNormalized | 0.956304051  |
| wavelet-LLL | glszm      | GrayLevelVariance                | 203.6528926  |
| wavelet-LLL | glszm      | ZoneVariance                     | 0.380165289  |
| wavelet-LLL | glszm      | GrayLevelNonUniformityNormalized | 0.090909091  |
| wavelet-LLL | glszm      | SizeZoneNonUniformityNormalized  | 0.685950413  |
| wavelet-LLL | glszm      | SizeZoneNonUniformity            | 7.545454545  |
| wavelet-LLL | glszm      | GrayLevelNonUniformity           | 1            |
| wavelet-LLL | glszm      | LargeAreaEmphasis                | 2            |
| wavelet-LLL | glszm      | SmallAreaHighGrayLevelEmphasis   | 816.6363636  |
| wavelet-LLL | glszm      | ZonePercentage                   | 0.785714286  |
| wavelet-LLL | glszm      | LargeAreaLowGrayLevelEmphasis    | 0.094972599  |
| wavelet-LLL | glszm      | LargeAreaHighGrayLevelEmphasis   | 1763.454545  |
| wavelet-LLL | glszm      | HighGrayLevelZoneEmphasis        | 918          |
| wavelet-LLL | glszm      | SmallAreaEmphasis                | 0.851010101  |
| wavelet-LLL | glszm      | LowGrayLevelZoneEmphasis         | 0.092913298  |
| wavelet-LLL | glszm      | ZoneEntropy                      | 3.459431619  |
| wavelet-LLL | glszm      | SmallAreaLowGrayLevelEmphasis    | 0.092491227  |
| wavelet-LLL | ngtdm      | Coarseness                       | 0.069368253  |
| wavelet-LLL | ngtdm      | Complexity                       | 2305.673158  |
| wavelet-LLL | ngtdm      | Strength                         | 51.26176256  |
| wavelet-LLL | ngtdm      | Contrast                         | 37.61614163  |
| wavelet-LLL | ngtdm      | Busyness                         | 0.066127598  |
| wavelet-HHL | gldm       | GrayLevelVariance                | 19.22959184  |
| wavelet-HHL | gldm       | HighGrayLevelEmphasis            | 77.64285714  |
| wavelet-HHL | gldm       | DependenceEntropy                | 3.378783493  |
| wavelet-HHL | gldm       | DependenceNonUniformity          | 8.285714286  |
| wavelet-HHL | gldm       | GrayLevelNonUniformity           | 1.428571429  |

|             |            |                                      |              |
|-------------|------------|--------------------------------------|--------------|
| wavelet-HHL | gldm       | SmallDependenceEmphasis              | 0.785714286  |
| wavelet-HHL | gldm       | SmallDependenceHighGrayLevelEmphasis | 70.35714286  |
| wavelet-HHL | gldm       | DependenceNonUniformityNormalized    | 0.591836735  |
| wavelet-HHL | gldm       | LargeDependenceEmphasis              | 1.857142857  |
| wavelet-HHL | gldm       | LargeDependenceLowGrayLevelEmphasis  | 0.239169988  |
| wavelet-HHL | gldm       | DependenceVariance                   | 0.204081633  |
| wavelet-HHL | gldm       | LargeDependenceHighGrayLevelEmphasis | 106.7857143  |
| wavelet-HHL | gldm       | SmallDependenceLowGrayLevelEmphasis  | 0.096870881  |
| wavelet-HHL | gldm       | LowGrayLevelEmphasis                 | 0.125330703  |
| wavelet-HHL | glcm       | JointAverage                         | 7.307692308  |
| wavelet-HHL | glcm       | SumAverage                           | 14.61538462  |
| wavelet-HHL | glcm       | JointEntropy                         | 3.063851841  |
| wavelet-HHL | glcm       | ClusterShade                         | -3.860924145 |
| wavelet-HHL | glcm       | MaximumProbability                   | 0.142307692  |
| wavelet-HHL | glcm       | Idmn                                 | 0.85162489   |
| wavelet-HHL | glcm       | JointEnergy                          | 0.129754274  |
| wavelet-HHL | glcm       | Contrast                             | 42.63589744  |
| wavelet-HHL | glcm       | DifferenceEntropy                    | 1.824686617  |
| wavelet-HHL | glcm       | InverseVariance                      | 0.240838855  |
| wavelet-HHL | glcm       | DifferenceVariance                   | 9.721826923  |
| wavelet-HHL | glcm       | Idn                                  | 0.754353808  |
| wavelet-HHL | glcm       | Idm                                  | 0.170500559  |
| wavelet-HHL | glcm       | Correlation                          | -0.071718612 |
| wavelet-HHL | glcm       | Autocorrelation                      | 51.94807692  |
| wavelet-HHL | glcm       | SumEntropy                           | 1.981800559  |
| wavelet-HHL | glcm       | SumSquares                           | 19.0592281   |
| wavelet-HHL | glcm       | ClusterProminence                    | 2580.999898  |
| wavelet-HHL | glcm       | Imc2                                 | 0.991687418  |
| wavelet-HHL | glcm       | Imc1                                 | -0.885640001 |
| wavelet-HHL | glcm       | DifferenceAverage                    | 5.276923077  |
| wavelet-HHL | glcm       | Id                                   | 0.257360517  |
| wavelet-HHL | glcm       | ClusterTendency                      | 33.60101496  |
| wavelet-HHL | firstorder | InterquartileRange                   | 203.9338031  |
| wavelet-HHL | firstorder | Skewness                             | -0.041336484 |
| wavelet-HHL | firstorder | Uniformity                           | 0.102040816  |
| wavelet-HHL | firstorder | Median                               | 30.19755645  |
| wavelet-HHL | firstorder | Energy                               | 177719.83    |
| wavelet-HHL | firstorder | RobustMeanAbsoluteDeviation          | 71.97380458  |
| wavelet-HHL | firstorder | MeanAbsoluteDeviation                | 94.63231802  |
| wavelet-HHL | firstorder | TotalEnergy                          | 4798435.409  |
| wavelet-HHL | firstorder | Maximum                              | 192.1366739  |
| wavelet-HHL | firstorder | RootMeanSquared                      | 112.6688669  |
| wavelet-HHL | firstorder | 90Percentile                         | 157.8928915  |
| wavelet-HHL | firstorder | Minimum                              | -133.6551542 |
| wavelet-HHL | firstorder | Entropy                              | 3.378783493  |
| wavelet-HHL | firstorder | Range                                | 325.7918281  |
| wavelet-HHL | firstorder | Variance                             | 12040.2181   |
| wavelet-HHL | firstorder | 10Percentile                         | -119.3477363 |
| wavelet-HHL | firstorder | Kurtosis                             | 1.612954809  |
| wavelet-HHL | firstorder | Mean                                 | 25.57450813  |
| wavelet-HHL | grlm       | ShortRunLowGrayLevelEmphasis         | 0.124063351  |
| wavelet-HHL | grlm       | GrayLevelVariance                    | 19.25344161  |
| wavelet-HHL | grlm       | LowGrayLevelRunEmphasis              | 0.125242161  |

|             |       |                                      |             |
|-------------|-------|--------------------------------------|-------------|
| wavelet-HHL | grlm  | GrayLevelNonUniformityNormalized     | 0.101817878 |
| wavelet-HHL | grlm  | RunVariance                          | 0.010923987 |
| wavelet-HHL | grlm  | GrayLevelNonUniformity               | 1.409974641 |
| wavelet-HHL | grlm  | LongRunEmphasis                      | 1.035502959 |
| wavelet-HHL | grlm  | ShortRunHighGrayLevelEmphasis        | 77.85756551 |
| wavelet-HHL | grlm  | RunLengthNonUniformity               | 13.56213018 |
| wavelet-HHL | grlm  | ShortRunEmphasis                     | 0.99112426  |
| wavelet-HHL | grlm  | LongRunHighGrayLevelEmphasis         | 79.36644125 |
| wavelet-HHL | grlm  | RunPercentage                        | 0.989010989 |
| wavelet-HHL | grlm  | LongRunLowGrayLevelEmphasis          | 0.129957397 |
| wavelet-HHL | grlm  | RunEntropy                           | 3.380931788 |
| wavelet-HHL | grlm  | HighGrayLevelRunEmphasis             | 78.15934066 |
| wavelet-HHL | grlm  | RunLengthNonUniformityNormalized     | 0.978152025 |
| wavelet-HHL | glszm | GrayLevelVariance                    | 19.57638889 |
| wavelet-HHL | glszm | ZoneVariance                         | 0.138888889 |
| wavelet-HHL | glszm | GrayLevelNonUniformityNormalized     | 0.097222222 |
| wavelet-HHL | glszm | SizeZoneNonUniformityNormalized      | 0.722222222 |
| wavelet-HHL | glszm | SizeZoneNonUniformity                | 8.666666667 |
| wavelet-HHL | glszm | GrayLevelNonUniformity               | 1.166666667 |
| wavelet-HHL | glszm | LargeAreaEmphasis                    | 1.5         |
| wavelet-HHL | glszm | SmallAreaHighGrayLevelEmphasis       | 80.66666667 |
| wavelet-HHL | glszm | ZonePercentage                       | 0.857142857 |
| wavelet-HHL | glszm | LargeAreaLowGrayLevelEmphasis        | 0.190489986 |
| wavelet-HHL | glszm | LargeAreaHighGrayLevelEmphasis       | 101.9166667 |
| wavelet-HHL | glszm | HighGrayLevelZoneEmphasis            | 84.91666667 |
| wavelet-HHL | glszm | SmallAreaEmphasis                    | 0.875       |
| wavelet-HHL | glszm | LowGrayLevelZoneEmphasis             | 0.124083736 |
| wavelet-HHL | glszm | ZoneEntropy                          | 3.418295834 |
| wavelet-HHL | glszm | SmallAreaLowGrayLevelEmphasis        | 0.107482174 |
| wavelet-HHL | ngtdm | Coarseness                           | 0.174106151 |
| wavelet-HHL | ngtdm | Complexity                           | 258.0620748 |
| wavelet-HHL | ngtdm | Strength                             | 15.25881081 |
| wavelet-HHL | ngtdm | Contrast                             | 1.375028792 |
| wavelet-HHL | ngtdm | Busyness                             | 0.088949905 |
| wavelet-HLH | gldm  | GrayLevelVariance                    | 25.48979592 |
| wavelet-HLH | gldm  | HighGrayLevelEmphasis                | 85          |
| wavelet-HLH | gldm  | DependenceEntropy                    | 3.521640636 |
| wavelet-HLH | gldm  | DependenceNonUniformity              | 10.57142857 |
| wavelet-HLH | gldm  | GrayLevelNonUniformity               | 1.285714286 |
| wavelet-HLH | gldm  | SmallDependenceEmphasis              | 0.892857143 |
| wavelet-HLH | gldm  | SmallDependenceHighGrayLevelEmphasis | 84.03571429 |
| wavelet-HLH | gldm  | DependenceNonUniformityNormalized    | 0.755102041 |
| wavelet-HLH | gldm  | LargeDependenceEmphasis              | 1.428571429 |
| wavelet-HLH | gldm  | LargeDependenceLowGrayLevelEmphasis  | 0.166038346 |
| wavelet-HLH | gldm  | DependenceVariance                   | 0.12244898  |
| wavelet-HLH | gldm  | LargeDependenceHighGrayLevelEmphasis | 88.85714286 |
| wavelet-HLH | gldm  | SmallDependenceLowGrayLevelEmphasis  | 0.106514537 |
| wavelet-HLH | gldm  | LowGrayLevelEmphasis                 | 0.118419298 |
| wavelet-HLH | glcm  | JointAverage                         | 7.213141026 |
| wavelet-HLH | glcm  | SumAverage                           | 14.42628205 |
| wavelet-HLH | glcm  | JointEntropy                         | 3.070262097 |
| wavelet-HLH | glcm  | ClusterShade                         | 87.85724938 |
| wavelet-HLH | glcm  | MaximumProbability                   | 0.139102564 |

|             |            |                                  |              |
|-------------|------------|----------------------------------|--------------|
| wavelet-HLH | glcm       | Idmn                             | 0.884775381  |
| wavelet-HLH | glcm       | JointEnergy                      | 0.130555556  |
| wavelet-HLH | glcm       | Contrast                         | 57.64294872  |
| wavelet-HLH | glcm       | DifferenceEntropy                | 1.858723636  |
| wavelet-HLH | glcm       | InverseVariance                  | 0.165929987  |
| wavelet-HLH | glcm       | DifferenceVariance               | 14.48033654  |
| wavelet-HLH | glcm       | Idn                              | 0.779099591  |
| wavelet-HLH | glcm       | Idm                              | 0.129358334  |
| wavelet-HLH | glcm       | Correlation                      | -0.328501277 |
| wavelet-HLH | glcm       | Autocorrelation                  | 47.60961538  |
| wavelet-HLH | glcm       | SumEntropy                       | 1.910005687  |
| wavelet-HLH | glcm       | SumSquares                       | 20.77347089  |
| wavelet-HLH | glcm       | ClusterProminence                | 2765.187341  |
| wavelet-HLH | glcm       | Imc2                             | 0.997085323  |
| wavelet-HLH | glcm       | Imc1                             | -0.942068175 |
| wavelet-HLH | glcm       | DifferenceAverage                | 6.109615385  |
| wavelet-HLH | glcm       | Id                               | 0.224857621  |
| wavelet-HLH | glcm       | ClusterTendency                  | 25.45093483  |
| wavelet-HLH | firstorder | InterquartileRange               | 172.9857674  |
| wavelet-HLH | firstorder | Skewness                         | 0.698788231  |
| wavelet-HLH | firstorder | Uniformity                       | 0.091836735  |
| wavelet-HLH | firstorder | Median                           | 7.536349735  |
| wavelet-HLH | firstorder | Energy                           | 225008.6487  |
| wavelet-HLH | firstorder | RobustMeanAbsoluteDeviation      | 67.75933765  |
| wavelet-HLH | firstorder | MeanAbsoluteDeviation            | 102.7654575  |
| wavelet-HLH | firstorder | TotalEnergy                      | 6075233.515  |
| wavelet-HLH | firstorder | Maximum                          | 295.5367848  |
| wavelet-HLH | firstorder | RootMeanSquared                  | 126.7755747  |
| wavelet-HLH | firstorder | 90Percentile                     | 156.2047351  |
| wavelet-HLH | firstorder | Minimum                          | -155.547354  |
| wavelet-HLH | firstorder | Entropy                          | 3.521640636  |
| wavelet-HLH | firstorder | Range                            | 451.0841388  |
| wavelet-HLH | firstorder | Variance                         | 16059.74546  |
| wavelet-HLH | firstorder | 10Percentile                     | -140.5790801 |
| wavelet-HLH | firstorder | Kurtosis                         | 2.770027135  |
| wavelet-HLH | firstorder | Mean                             | 3.507260843  |
| wavelet-HLH | grlm       | ShortRunLowGrayLevelEmphasis     | 0.117969446  |
| wavelet-HLH | grlm       | GrayLevelVariance                | 25.49900142  |
| wavelet-HLH | grlm       | LowGrayLevelRunEmphasis          | 0.118462542  |
| wavelet-HLH | grlm       | GrayLevelNonUniformityNormalized | 0.091599863  |
| wavelet-HLH | grlm       | RunVariance                      | 0.005461994  |
| wavelet-HLH | grlm       | GrayLevelNonUniformity           | 1.275570583  |
| wavelet-HLH | grlm       | LongRunEmphasis                  | 1.017751479  |
| wavelet-HLH | grlm       | ShortRunHighGrayLevelEmphasis    | 85.40976331  |
| wavelet-HLH | grlm       | RunLengthNonUniformity           | 13.78106509  |
| wavelet-HLH | grlm       | ShortRunEmphasis                 | 0.99556213   |
| wavelet-HLH | grlm       | LongRunHighGrayLevelEmphasis     | 85.60946746  |
| wavelet-HLH | grlm       | RunPercentage                    | 0.994505495  |
| wavelet-HLH | grlm       | LongRunLowGrayLevelEmphasis      | 0.120434929  |
| wavelet-HLH | grlm       | RunEntropy                       | 3.523560092  |
| wavelet-HLH | grlm       | HighGrayLevelRunEmphasis         | 85.44970414  |
| wavelet-HLH | grlm       | RunLengthNonUniformityNormalized | 0.989076013  |
| wavelet-HLH | glszm      | GrayLevelVariance                | 25.60946746  |

|             |       |                                  |             |
|-------------|-------|----------------------------------|-------------|
| wavelet-HLH | glszm | ZoneVariance                     | 0.071005917 |
| wavelet-HLH | glszm | GrayLevelNonUniformityNormalized | 0.088757396 |
| wavelet-HLH | glszm | SizeZoneNonUniformityNormalized  | 0.857988166 |
| wavelet-HLH | glszm | SizeZoneNonUniformity            | 11.15384615 |
| wavelet-HLH | glszm | GrayLevelNonUniformity           | 1.153846154 |
| wavelet-HLH | glszm | LargeAreaEmphasis                | 1.230769231 |
| wavelet-HLH | glszm | SmallAreaHighGrayLevelEmphasis   | 90.32692308 |
| wavelet-HLH | glszm | ZonePercentage                   | 0.928571429 |
| wavelet-HLH | glszm | LargeAreaLowGrayLevelEmphasis    | 0.144622492 |
| wavelet-HLH | glszm | LargeAreaHighGrayLevelEmphasis   | 92.92307692 |
| wavelet-HLH | glszm | HighGrayLevelZoneEmphasis        | 90.84615385 |
| wavelet-HLH | glszm | SmallAreaEmphasis                | 0.942307692 |
| wavelet-HLH | glszm | LowGrayLevelZoneEmphasis         | 0.118981467 |
| wavelet-HLH | glszm | ZoneEntropy                      | 3.546593564 |
| wavelet-HLH | glszm | SmallAreaLowGrayLevelEmphasis    | 0.11257121  |
| wavelet-HLH | ngtdm | Coarseness                       | 0.176074263 |
| wavelet-HLH | ngtdm | Complexity                       | 391.8897392 |
| wavelet-HLH | ngtdm | Strength                         | 19.30706962 |
| wavelet-HLH | ngtdm | Contrast                         | 1.825625844 |
| wavelet-HLH | ngtdm | Busyness                         | 0.084587133 |

| Image type | Feature Class | Feature Name                         |                                                                                                                                                                                                                                                                                                                                                                                                                   |
|------------|---------------|--------------------------------------|-------------------------------------------------------------------------------------------------------------------------------------------------------------------------------------------------------------------------------------------------------------------------------------------------------------------------------------------------------------------------------------------------------------------|
| general    | info          | BoundingBox                          | 5: RTSTRUCT: C99-DNU_segment_RLL ITV<br>(0, 0, 1, 6, 6, 5)                                                                                                                                                                                                                                                                                                                                                        |
| general    | info          | EnabledImageTypes                    | {u'Original': {}, u'Wavelet': {}}                                                                                                                                                                                                                                                                                                                                                                                 |
|            |               |                                      | {'distances': [1], 'additionalInfo': True, 'force2D': False, 'interpolator': 'sitkBSpline', 'resampledPixelSpacing': [3.0], 'label': 1, 'normalizeScale': 1, 'normalize': False, 'force2Ddimension': 0, 'removeOutliers': None, 'minimumROISize': None, u'binWidth': 25.0, 'minimumROIDimensions': 1, u'correctMask': True, 'preCrop': False, u'symmetricalGLCM': True, 'resegmentRange': None, 'padDistance': 5} |
| general    | info          | GeneralSettings                      |                                                                                                                                                                                                                                                                                                                                                                                                                   |
| general    | info          | ImageHash                            | e3bdc7d86304f67a6c6990c4ac4705cf9bef30b3                                                                                                                                                                                                                                                                                                                                                                          |
| general    | info          | ImageSpacing                         | (0.9765625000000002, 0.9765625000000002, 2.0)                                                                                                                                                                                                                                                                                                                                                                     |
| general    | info          | MaskHash                             | ac293e89147ec8672d7beb3a90db0b75b9785bf1                                                                                                                                                                                                                                                                                                                                                                          |
| general    | info          | NumpyVersion                         | 1.13.1                                                                                                                                                                                                                                                                                                                                                                                                            |
| general    | info          | PyWaveletVersion                     | 0.5.2                                                                                                                                                                                                                                                                                                                                                                                                             |
| general    | info          | SimpleITKVersion                     | 1.1.0                                                                                                                                                                                                                                                                                                                                                                                                             |
| general    | info          | Version                              | 1.3.0.post102+g1b0eb74                                                                                                                                                                                                                                                                                                                                                                                            |
| general    | info          | VolumeNum                            | 1                                                                                                                                                                                                                                                                                                                                                                                                                 |
| general    | info          | VoxelNum                             | 48                                                                                                                                                                                                                                                                                                                                                                                                                |
| original   | shape         | Maximum3DDiameter                    | 17.49285568                                                                                                                                                                                                                                                                                                                                                                                                       |
| original   | shape         | Maximum2DDiameterSlice               | 17.49285568                                                                                                                                                                                                                                                                                                                                                                                                       |
| original   | shape         | Sphericity                           | 0.805725279                                                                                                                                                                                                                                                                                                                                                                                                       |
| original   | shape         | MinorAxis                            | 13.21850847                                                                                                                                                                                                                                                                                                                                                                                                       |
| original   | shape         | Elongation                           | 0.751768025                                                                                                                                                                                                                                                                                                                                                                                                       |
| original   | shape         | SurfaceVolumeRatio                   | 0.550506098                                                                                                                                                                                                                                                                                                                                                                                                       |
| original   | shape         | Volume                               | 1296                                                                                                                                                                                                                                                                                                                                                                                                              |
| original   | shape         | MajorAxis                            | 17.58322784                                                                                                                                                                                                                                                                                                                                                                                                       |
| original   | shape         | SurfaceArea                          | 713.4559033                                                                                                                                                                                                                                                                                                                                                                                                       |
| original   | shape         | Flatness                             | 0.55151147                                                                                                                                                                                                                                                                                                                                                                                                        |
| original   | shape         | LeastAxis                            | 9.697351826                                                                                                                                                                                                                                                                                                                                                                                                       |
| original   | shape         | Maximum2DDiameterColumn              | 15                                                                                                                                                                                                                                                                                                                                                                                                                |
| original   | shape         | Maximum2DDiameterRow                 | 15.29705854                                                                                                                                                                                                                                                                                                                                                                                                       |
| original   | gldm          | GrayLevelVariance                    | 110.468316                                                                                                                                                                                                                                                                                                                                                                                                        |
| original   | gldm          | HighGrayLevelEmphasis                | 833.8541667                                                                                                                                                                                                                                                                                                                                                                                                       |
| original   | gldm          | DependenceEntropy                    | 4.829448699                                                                                                                                                                                                                                                                                                                                                                                                       |
| original   | gldm          | DependenceNonUniformity              | 26.875                                                                                                                                                                                                                                                                                                                                                                                                            |
| original   | gldm          | GrayLevelNonUniformity               | 2.208333333                                                                                                                                                                                                                                                                                                                                                                                                       |
| original   | gldm          | SmallDependenceEmphasis              | 0.774594907                                                                                                                                                                                                                                                                                                                                                                                                       |
| original   | gldm          | SmallDependenceHighGrayLevelEmphasis | 512.6539352                                                                                                                                                                                                                                                                                                                                                                                                       |
| original   | gldm          | DependenceNonUniformityNormalized    | 0.559895833                                                                                                                                                                                                                                                                                                                                                                                                       |
| original   | gldm          | LargeDependenceEmphasis              | 2.833333333                                                                                                                                                                                                                                                                                                                                                                                                       |
| original   | gldm          | LargeDependenceLowGrayLevelEmphasis  | 0.02564929                                                                                                                                                                                                                                                                                                                                                                                                        |
| original   | gldm          | DependenceVariance                   | 0.706597222                                                                                                                                                                                                                                                                                                                                                                                                       |
| original   | gldm          | LargeDependenceHighGrayLevelEmphasis | 3485.4375                                                                                                                                                                                                                                                                                                                                                                                                         |
| original   | gldm          | SmallDependenceLowGrayLevelEmphasis  | 0.024212397                                                                                                                                                                                                                                                                                                                                                                                                       |
| original   | gldm          | LowGrayLevelEmphasis                 | 0.024372677                                                                                                                                                                                                                                                                                                                                                                                                       |
| original   | glcm          | JointAverage                         | 29.25731939                                                                                                                                                                                                                                                                                                                                                                                                       |
| original   | glcm          | SumAverage                           | 58.51463878                                                                                                                                                                                                                                                                                                                                                                                                       |

|          |            |                                  |              |
|----------|------------|----------------------------------|--------------|
| original | glcm       | JointEntropy                     | 5.328424272  |
| original | glcm       | ClusterShade                     | -2434.897836 |
| original | glcm       | MaximumProbability               | 0.042034929  |
| original | glcm       | Idmn                             | 0.915027384  |
| original | glcm       | JointEnergy                      | 0.026179269  |
| original | glcm       | Contrast                         | 172.5257406  |
| original | glcm       | DifferenceEntropy                | 3.575673813  |
| original | glcm       | InverseVariance                  | 0.134115829  |
| original | glcm       | DifferenceVariance               | 64.27272399  |
| original | glcm       | Idn                              | 0.814231771  |
| original | glcm       | Idm                              | 0.117393065  |
| original | glcm       | Correlation                      | 0.08197597   |
| original | glcm       | Autocorrelation                  | 867.8582934  |
| original | glcm       | SumEntropy                       | 4.02116507   |
| original | glcm       | SumSquares                       | 96.91898424  |
| original | glcm       | ClusterProminence                | 146471.792   |
| original | glcm       | Imc2                             | 0.999002228  |
| original | glcm       | Imc1                             | -0.745799059 |
| original | glcm       | DifferenceAverage                | 10.32847849  |
| original | glcm       | Id                               | 0.191365034  |
| original | glcm       | ClusterTendency                  | 215.1501964  |
| original | firstorder | InterquartileRange               | 449          |
| original | firstorder | Skewness                         | -0.589176063 |
| original | firstorder | Uniformity                       | 0.046006944  |
| original | firstorder | Median                           | -237.5       |
| original | firstorder | Energy                           | 7331516      |
| original | firstorder | RobustMeanAbsoluteDeviation      | 172.8808864  |
| original | firstorder | MeanAbsoluteDeviation            | 224.96875    |
| original | firstorder | TotalEnergy                      | 197950932    |
| original | firstorder | Maximum                          | 42           |
| original | firstorder | RootMeanSquared                  | 390.8195449  |
| original | firstorder | 90Percentile                     | 7.2          |
| original | firstorder | Minimum                          | -930         |
| original | firstorder | Entropy                          | 4.621115365  |
| original | firstorder | Range                            | 972          |
| original | firstorder | Variance                         | 69747.90972  |
| original | firstorder | 10Percentile                     | -635.6       |
| original | firstorder | Kurtosis                         | 2.374581729  |
| original | firstorder | Mean                             | -288.0833333 |
| original | glrlm      | ShortRunLowGrayLevelEmphasis     | 0.024794316  |
| original | glrlm      | GrayLevelVariance                | 110.1483783  |
| original | glrlm      | LowGrayLevelRunEmphasis          | 0.024803895  |
| original | glrlm      | GrayLevelNonUniformityNormalized | 0.045323009  |
| original | glrlm      | RunVariance                      | 0.017606401  |
| original | glrlm      | GrayLevelNonUniformity           | 2.137624825  |
| original | glrlm      | LongRunEmphasis                  | 1.054650253  |
| original | glrlm      | ShortRunHighGrayLevelEmphasis    | 803.1556889  |
| original | glrlm      | RunLengthNonUniformity           | 45.51803885  |
| original | glrlm      | ShortRunEmphasis                 | 0.986337437  |
| original | glrlm      | LongRunHighGrayLevelEmphasis     | 901.4883847  |
| original | glrlm      | RunPercentage                    | 0.982371795  |
| original | glrlm      | LongRunLowGrayLevelEmphasis      | 0.024842213  |
| original | glrlm      | RunEntropy                       | 4.671688442  |
| original | glrlm      | HighGrayLevelRunEmphasis         | 822.8222281  |
| original | glrlm      | RunLengthNonUniformityNormalized | 0.964787198  |



|             |       |                                      |              |
|-------------|-------|--------------------------------------|--------------|
| original    | glszm | GrayLevelVariance                    | 103.499375   |
| original    | glszm | ZoneVariance                         | 0.36         |
| original    | glszm | GrayLevelNonUniformityNormalized     | 0.0425       |
| original    | glszm | SizeZoneNonUniformityNormalized      | 0.7725       |
| original    | glszm | SizeZoneNonUniformity                | 30.9         |
| original    | glszm | GrayLevelNonUniformity               | 1.7          |
| original    | glszm | LargeAreaEmphasis                    | 1.8          |
| original    | glszm | SmallAreaHighGrayLevelEmphasis       | 571.09375    |
| original    | glszm | ZonePercentage                       | 0.833333333  |
| original    | glszm | LargeAreaLowGrayLevelEmphasis        | 0.029667275  |
| original    | glszm | LargeAreaHighGrayLevelEmphasis       | 1864.875     |
| original    | glszm | HighGrayLevelZoneEmphasis            | 714.825      |
| original    | glszm | SmallAreaEmphasis                    | 0.898090278  |
| original    | glszm | LowGrayLevelZoneEmphasis             | 0.029105557  |
| original    | glszm | ZoneEntropy                          | 4.78418372   |
| original    | glszm | SmallAreaLowGrayLevelEmphasis        | 0.029032083  |
| original    | ngtdm | Coarseness                           | 0.061181759  |
| original    | ngtdm | Complexity                           | 3230.078487  |
| original    | ngtdm | Strength                             | 35.99074075  |
| original    | ngtdm | Contrast                             | 2.300013529  |
| original    | ngtdm | Busyness                             | 0.022978958  |
| wavelet-HHH | gldm  | GrayLevelVariance                    | 14.13888889  |
| wavelet-HHH | gldm  | HighGrayLevelEmphasis                | 107.5833333  |
| wavelet-HHH | gldm  | DependenceEntropy                    | 4.337581189  |
| wavelet-HHH | gldm  | DependenceNonUniformity              | 17.20833333  |
| wavelet-HHH | gldm  | GrayLevelNonUniformity               | 4.791666667  |
| wavelet-HHH | gldm  | SmallDependenceEmphasis              | 0.579826389  |
| wavelet-HHH | gldm  | SmallDependenceHighGrayLevelEmphasis | 61.00274306  |
| wavelet-HHH | gldm  | DependenceNonUniformityNormalized    | 0.358506944  |
| wavelet-HHH | gldm  | LargeDependenceEmphasis              | 4.125        |
| wavelet-HHH | gldm  | LargeDependenceLowGrayLevelEmphasis  | 0.067279827  |
| wavelet-HHH | gldm  | DependenceVariance                   | 0.914930556  |
| wavelet-HHH | gldm  | LargeDependenceHighGrayLevelEmphasis | 462.8333333  |
| wavelet-HHH | gldm  | SmallDependenceLowGrayLevelEmphasis  | 0.033115056  |
| wavelet-HHH | gldm  | LowGrayLevelEmphasis                 | 0.037464309  |
| wavelet-HHH | glcm  | JointAverage                         | 9.511926706  |
| wavelet-HHH | glcm  | SumAverage                           | 19.02385341  |
| wavelet-HHH | glcm  | JointEntropy                         | 5.048558472  |
| wavelet-HHH | glcm  | ClusterShade                         | 16.86978001  |
| wavelet-HHH | glcm  | MaximumProbability                   | 0.058691959  |
| wavelet-HHH | glcm  | Idmn                                 | 0.935487048  |
| wavelet-HHH | glcm  | JointEnergy                          | 0.033443441  |
| wavelet-HHH | glcm  | Contrast                             | 28.2661769   |
| wavelet-HHH | glcm  | DifferenceEntropy                    | 3.004580596  |
| wavelet-HHH | glcm  | InverseVariance                      | 0.221640699  |
| wavelet-HHH | glcm  | DifferenceVariance                   | 9.90733379   |
| wavelet-HHH | glcm  | Idn                                  | 0.832716653  |
| wavelet-HHH | glcm  | Idm                                  | 0.20076313   |
| wavelet-HHH | glcm  | Correlation                          | -0.011814275 |
| wavelet-HHH | glcm  | Autocorrelation                      | 90.23731479  |
| wavelet-HHH | glcm  | SumEntropy                           | 3.575832272  |
| wavelet-HHH | glcm  | SumSquares                           | 13.83504949  |
| wavelet-HHH | glcm  | ClusterProminence                    | 2309.034078  |
| wavelet-HHH | glcm  | Imc2                                 | 0.986033097  |
| wavelet-HHH | glcm  | Imc1                                 | -0.533973747 |

|             |            |                                  |              |
|-------------|------------|----------------------------------|--------------|
| wavelet-HHH | glcm       | DifferenceAverage                | 4.221700547  |
| wavelet-HHH | glcm       | Id                               | 0.296338629  |
| wavelet-HHH | glcm       | ClusterTendency                  | 27.07402104  |
| wavelet-HHH | firstorder | InterquartileRange               | 99.2245139   |
| wavelet-HHH | firstorder | Skewness                         | 0.308483749  |
| wavelet-HHH | firstorder | Uniformity                       | 0.099826389  |
| wavelet-HHH | firstorder | Median                           | 7.835259786  |
| wavelet-HHH | firstorder | Energy                           | 414069.9798  |
| wavelet-HHH | firstorder | RobustMeanAbsoluteDeviation      | 46.02912334  |
| wavelet-HHH | firstorder | MeanAbsoluteDeviation            | 70.52026133  |
| wavelet-HHH | firstorder | TotalEnergy                      | 11179889.46  |
| wavelet-HHH | firstorder | Maximum                          | 246.3736617  |
| wavelet-HHH | firstorder | RootMeanSquared                  | 92.87872692  |
| wavelet-HHH | firstorder | 90Percentile                     | 142.9281309  |
| wavelet-HHH | firstorder | Minimum                          | -218.8171937 |
| wavelet-HHH | firstorder | Entropy                          | 3.563388283  |
| wavelet-HHH | firstorder | Range                            | 465.1908554  |
| wavelet-HHH | firstorder | Variance                         | 8609.328247  |
| wavelet-HHH | firstorder | 10Percentile                     | -92.68077123 |
| wavelet-HHH | firstorder | Kurtosis                         | 3.168325879  |
| wavelet-HHH | firstorder | Mean                             | 4.138800166  |
| wavelet-HHH | glrlm      | ShortRunLowGrayLevelEmphasis     | 0.038129575  |
| wavelet-HHH | glrlm      | GrayLevelVariance                | 14.48846416  |
| wavelet-HHH | glrlm      | LowGrayLevelRunEmphasis          | 0.03836452   |
| wavelet-HHH | glrlm      | GrayLevelNonUniformityNormalized | 0.098109546  |
| wavelet-HHH | glrlm      | RunVariance                      | 0.033628843  |
| wavelet-HHH | glrlm      | GrayLevelNonUniformity           | 4.568746322  |
| wavelet-HHH | glrlm      | LongRunEmphasis                  | 1.101510721  |
| wavelet-HHH | glrlm      | ShortRunHighGrayLevelEmphasis    | 104.8373021  |
| wavelet-HHH | glrlm      | RunLengthNonUniformity           | 43.96458238  |
| wavelet-HHH | glrlm      | ShortRunEmphasis                 | 0.976521655  |
| wavelet-HHH | glrlm      | LongRunHighGrayLevelEmphasis     | 118.8176848  |
| wavelet-HHH | glrlm      | RunPercentage                    | 0.969551282  |
| wavelet-HHH | glrlm      | LongRunLowGrayLevelEmphasis      | 0.039367088  |
| wavelet-HHH | glrlm      | RunEntropy                       | 3.673907888  |
| wavelet-HHH | glrlm      | HighGrayLevelRunEmphasis         | 107.449523   |
| wavelet-HHH | glrlm      | RunLengthNonUniformityNormalized | 0.942542884  |
| wavelet-HHH | glszm      | GrayLevelVariance                | 19.21484375  |
| wavelet-HHH | glszm      | ZoneVariance                     | 1.125        |
| wavelet-HHH | glszm      | GrayLevelNonUniformityNormalized | 0.087890625  |
| wavelet-HHH | glszm      | SizeZoneNonUniformityNormalized  | 0.5546875    |
| wavelet-HHH | glszm      | SizeZoneNonUniformity            | 17.75        |
| wavelet-HHH | glszm      | GrayLevelNonUniformity           | 2.8125       |
| wavelet-HHH | glszm      | LargeAreaEmphasis                | 3.375        |
| wavelet-HHH | glszm      | SmallAreaHighGrayLevelEmphasis   | 80.87413194  |
| wavelet-HHH | glszm      | ZonePercentage                   | 0.666666667  |
| wavelet-HHH | glszm      | LargeAreaLowGrayLevelEmphasis    | 0.07401228   |
| wavelet-HHH | glszm      | LargeAreaHighGrayLevelEmphasis   | 372.875      |
| wavelet-HHH | glszm      | HighGrayLevelZoneEmphasis        | 105.9375     |
| wavelet-HHH | glszm      | SmallAreaEmphasis                | 0.771918403  |
| wavelet-HHH | glszm      | LowGrayLevelZoneEmphasis         | 0.0511212    |
| wavelet-HHH | glszm      | ZoneEntropy                      | 4.176108501  |
| wavelet-HHH | glszm      | SmallAreaLowGrayLevelEmphasis    | 0.048633282  |
| wavelet-HHH | ngtdm      | Coarseness                       | 0.097028383  |
| wavelet-HHH | ngtdm      | Complexity                       | 295.5132997  |

|             |            |                                      |              |
|-------------|------------|--------------------------------------|--------------|
| wavelet-HHH | ngtdm      | Strength                             | 8.496372396  |
| wavelet-HHH | ngtdm      | Contrast                             | 0.417182855  |
| wavelet-HHH | ngtdm      | Busyness                             | 0.081904074  |
| wavelet-HLL | gldm       | GrayLevelVariance                    | 172.280816   |
| wavelet-HLL | gldm       | HighGrayLevelEmphasis                | 880.0625     |
| wavelet-HLL | gldm       | DependenceEntropy                    | 4.902569011  |
| wavelet-HLL | gldm       | DependenceNonUniformity              | 28.16666667  |
| wavelet-HLL | gldm       | GrayLevelNonUniformity               | 2.125        |
| wavelet-HLL | gldm       | SmallDependenceEmphasis              | 0.78125      |
| wavelet-HLL | gldm       | SmallDependenceHighGrayLevelEmphasis | 615.90625    |
| wavelet-HLL | gldm       | DependenceNonUniformityNormalized    | 0.586805556  |
| wavelet-HLL | gldm       | LargeDependenceEmphasis              | 1.875        |
| wavelet-HLL | gldm       | LargeDependenceLowGrayLevelEmphasis  | 0.03078856   |
| wavelet-HLL | gldm       | DependenceVariance                   | 0.206597222  |
| wavelet-HLL | gldm       | LargeDependenceHighGrayLevelEmphasis | 1936.6875    |
| wavelet-HLL | gldm       | SmallDependenceLowGrayLevelEmphasis  | 0.02573652   |
| wavelet-HLL | gldm       | LowGrayLevelEmphasis                 | 0.026746928  |
| wavelet-HLL | glcm       | JointAverage                         | 25.56032472  |
| wavelet-HLL | glcm       | SumAverage                           | 51.12064944  |
| wavelet-HLL | glcm       | JointEntropy                         | 5.389626966  |
| wavelet-HLL | glcm       | ClusterShade                         | -1611.375184 |
| wavelet-HLL | glcm       | MaximumProbability                   | 0.033540855  |
| wavelet-HLL | glcm       | Idmn                                 | 0.894590305  |
| wavelet-HLL | glcm       | JointEnergy                          | 0.024798135  |
| wavelet-HLL | glcm       | Contrast                             | 306.0915426  |
| wavelet-HLL | glcm       | DifferenceEntropy                    | 3.581433285  |
| wavelet-HLL | glcm       | InverseVariance                      | 0.087954243  |
| wavelet-HLL | glcm       | DifferenceVariance                   | 72.18706026  |
| wavelet-HLL | glcm       | Idn                                  | 0.793802626  |
| wavelet-HLL | glcm       | Idm                                  | 0.076023233  |
| wavelet-HLL | glcm       | Correlation                          | 0.212407313  |
| wavelet-HLL | glcm       | Autocorrelation                      | 686.6146363  |
| wavelet-HLL | glcm       | SumEntropy                           | 4.178379642  |
| wavelet-HLL | glcm       | SumSquares                           | 185.5911701  |
| wavelet-HLL | glcm       | ClusterProminence                    | 407416.7032  |
| wavelet-HLL | glcm       | Imc2                                 | 0.999567818  |
| wavelet-HLL | glcm       | Imc1                                 | -0.798757849 |
| wavelet-HLL | glcm       | DifferenceAverage                    | 13.92953868  |
| wavelet-HLL | glcm       | Id                                   | 0.14756541   |
| wavelet-HLL | glcm       | ClusterTendency                      | 436.2731379  |
| wavelet-HLL | firstorder | InterquartileRange                   | 592.7828171  |
| wavelet-HLL | firstorder | Skewness                             | -0.285798163 |
| wavelet-HLL | firstorder | Uniformity                           | 0.044270833  |
| wavelet-HLL | firstorder | Median                               | 32.45267764  |
| wavelet-HLL | firstorder | Energy                               | 5425175.688  |
| wavelet-HLL | firstorder | RobustMeanAbsoluteDeviation          | 241.6856937  |
| wavelet-HLL | firstorder | MeanAbsoluteDeviation                | 294.551457   |
| wavelet-HLL | firstorder | TotalEnergy                          | 146479743.6  |
| wavelet-HLL | firstorder | Maximum                              | 428.288359   |
| wavelet-HLL | firstorder | RootMeanSquared                      | 336.1911562  |
| wavelet-HLL | firstorder | 90Percentile                         | 294.7685453  |
| wavelet-HLL | firstorder | Minimum                              | -706.3488917 |
| wavelet-HLL | firstorder | Entropy                              | 4.712581189  |
| wavelet-HLL | firstorder | Range                                | 1134.637251  |
| wavelet-HLL | firstorder | Variance                             | 107598.4911  |

|             |            |                                      |              |
|-------------|------------|--------------------------------------|--------------|
| wavelet-HLL | firstorder | 10Percentile                         | -524.8655403 |
| wavelet-HLL | firstorder | Kurtosis                             | 1.70446527   |
| wavelet-HLL | firstorder | Mean                                 | -73.66140407 |
| wavelet-HLL | glrlm      | ShortRunLowGrayLevelEmphasis         | 0.026966232  |
| wavelet-HLL | glrlm      | GrayLevelVariance                    | 172.22917    |
| wavelet-HLL | glrlm      | LowGrayLevelRunEmphasis              | 0.027006073  |
| wavelet-HLL | glrlm      | GrayLevelNonUniformityNormalized     | 0.043996277  |
| wavelet-HLL | glrlm      | RunVariance                          | 0.011193679  |
| wavelet-HLL | glrlm      | GrayLevelNonUniformity               | 2.088306965  |
| wavelet-HLL | glrlm      | LongRunEmphasis                      | 1.03502455   |
| wavelet-HLL | glrlm      | ShortRunHighGrayLevelEmphasis        | 865.7087198  |
| wavelet-HLL | glrlm      | RunLengthNonUniformity               | 46.42847791  |
| wavelet-HLL | glrlm      | ShortRunEmphasis                     | 0.991243863  |
| wavelet-HLL | glrlm      | LongRunHighGrayLevelEmphasis         | 918.4838152  |
| wavelet-HLL | glrlm      | RunPercentage                        | 0.988782051  |
| wavelet-HLL | glrlm      | LongRunLowGrayLevelEmphasis          | 0.027165436  |
| wavelet-HLL | glrlm      | RunEntropy                           | 4.734547558  |
| wavelet-HLL | glrlm      | HighGrayLevelRunEmphasis             | 876.2637389  |
| wavelet-HLL | glrlm      | RunLengthNonUniformityNormalized     | 0.977612641  |
| wavelet-HLL | glszm      | GrayLevelVariance                    | 170.7828673  |
| wavelet-HLL | glszm      | ZoneVariance                         | 0.141582391  |
| wavelet-HLL | glszm      | GrayLevelNonUniformityNormalized     | 0.039857228  |
| wavelet-HLL | glszm      | SizeZoneNonUniformityNormalized      | 0.716835217  |
| wavelet-HLL | glszm      | SizeZoneNonUniformity                | 29.3902439   |
| wavelet-HLL | glszm      | GrayLevelNonUniformity               | 1.634146341  |
| wavelet-HLL | glszm      | LargeAreaEmphasis                    | 1.512195122  |
| wavelet-HLL | glszm      | SmallAreaHighGrayLevelEmphasis       | 669.5182927  |
| wavelet-HLL | glszm      | ZonePercentage                       | 0.854166667  |
| wavelet-HLL | glszm      | LargeAreaLowGrayLevelEmphasis        | 0.032890699  |
| wavelet-HLL | glszm      | LargeAreaHighGrayLevelEmphasis       | 1442.658537  |
| wavelet-HLL | glszm      | HighGrayLevelZoneEmphasis            | 824.1463415  |
| wavelet-HLL | glszm      | SmallAreaEmphasis                    | 0.87195122   |
| wavelet-HLL | glszm      | LowGrayLevelZoneEmphasis             | 0.030524865  |
| wavelet-HLL | glszm      | ZoneEntropy                          | 4.948896212  |
| wavelet-HLL | glszm      | SmallAreaLowGrayLevelEmphasis        | 0.029933407  |
| wavelet-HLL | ngtdm      | Coarseness                           | 0.049169952  |
| wavelet-HLL | ngtdm      | Complexity                           | 5290.443115  |
| wavelet-HLL | ngtdm      | Strength                             | 47.09046734  |
| wavelet-HLL | ngtdm      | Contrast                             | 3.803439968  |
| wavelet-HLL | ngtdm      | Busyness                             | 0.027190852  |
| wavelet-LHL | gldm       | GrayLevelVariance                    | 195.3398438  |
| wavelet-LHL | gldm       | HighGrayLevelEmphasis                | 836.0625     |
| wavelet-LHL | gldm       | DependenceEntropy                    | 5.110902344  |
| wavelet-LHL | gldm       | DependenceNonUniformity              | 32.625       |
| wavelet-LHL | gldm       | GrayLevelNonUniformity               | 1.666666667  |
| wavelet-LHL | gldm       | SmallDependenceEmphasis              | 0.850694444  |
| wavelet-LHL | gldm       | SmallDependenceHighGrayLevelEmphasis | 705.625      |
| wavelet-LHL | gldm       | DependenceNonUniformityNormalized    | 0.6796875    |
| wavelet-LHL | gldm       | LargeDependenceEmphasis              | 1.875        |
| wavelet-LHL | gldm       | LargeDependenceLowGrayLevelEmphasis  | 0.044301537  |
| wavelet-LHL | gldm       | DependenceVariance                   | 0.3125       |
| wavelet-LHL | gldm       | LargeDependenceHighGrayLevelEmphasis | 1367.8125    |
| wavelet-LHL | gldm       | SmallDependenceLowGrayLevelEmphasis  | 0.028431462  |
| wavelet-LHL | gldm       | LowGrayLevelEmphasis                 | 0.030062267  |
| wavelet-LHL | glcm       | JointAverage                         | 24.28320034  |

|             |            |                                  |              |
|-------------|------------|----------------------------------|--------------|
| wavelet-LHL | glcm       | SumAverage                       | 48.56640068  |
| wavelet-LHL | glcm       | JointEntropy                     | 5.412816206  |
| wavelet-LHL | glcm       | ClusterShade                     | 2626.370744  |
| wavelet-LHL | glcm       | MaximumProbability               | 0.031997302  |
| wavelet-LHL | glcm       | Idmn                             | 0.898541583  |
| wavelet-LHL | glcm       | JointEnergy                      | 0.024410702  |
| wavelet-LHL | glcm       | Contrast                         | 375.6285112  |
| wavelet-LHL | glcm       | DifferenceEntropy                | 3.833416518  |
| wavelet-LHL | glcm       | InverseVariance                  | 0.081627035  |
| wavelet-LHL | glcm       | DifferenceVariance               | 101.9085283  |
| wavelet-LHL | glcm       | Idn                              | 0.795838343  |
| wavelet-LHL | glcm       | Idm                              | 0.069579644  |
| wavelet-LHL | glcm       | Correlation                      | 0.133198191  |
| wavelet-LHL | glcm       | Autocorrelation                  | 617.0262775  |
| wavelet-LHL | glcm       | SumEntropy                       | 4.273582191  |
| wavelet-LHL | glcm       | SumSquares                       | 213.8885378  |
| wavelet-LHL | glcm       | ClusterProminence                | 547639.6188  |
| wavelet-LHL | glcm       | Imc2                             | 0.999741709  |
| wavelet-LHL | glcm       | Imc1                             | -0.829624037 |
| wavelet-LHL | glcm       | DifferenceAverage                | 15.43769242  |
| wavelet-LHL | glcm       | Id                               | 0.135836501  |
| wavelet-LHL | glcm       | ClusterTendency                  | 479.9256399  |
| wavelet-LHL | firstorder | InterquartileRange               | 539.3265339  |
| wavelet-LHL | firstorder | Skewness                         | -0.035785255 |
| wavelet-LHL | firstorder | Uniformity                       | 0.034722222  |
| wavelet-LHL | firstorder | Median                           | 0.008843474  |
| wavelet-LHL | firstorder | Energy                           | 5825114.526  |
| wavelet-LHL | firstorder | RobustMeanAbsoluteDeviation      | 230.0143887  |
| wavelet-LHL | firstorder | MeanAbsoluteDeviation            | 295.3968102  |
| wavelet-LHL | firstorder | TotalEnergy                      | 157278092.2  |
| wavelet-LHL | firstorder | Maximum                          | 681.3657444  |
| wavelet-LHL | firstorder | RootMeanSquared                  | 348.362674   |
| wavelet-LHL | firstorder | 90Percentile                     | 460.6317321  |
| wavelet-LHL | firstorder | Minimum                          | -606.8942751 |
| wavelet-LHL | firstorder | Entropy                          | 4.996115365  |
| wavelet-LHL | firstorder | Range                            | 1288.26002   |
| wavelet-LHL | firstorder | Variance                         | 121333.2471  |
| wavelet-LHL | firstorder | 10Percentile                     | -499.6760044 |
| wavelet-LHL | firstorder | Kurtosis                         | 1.915682874  |
| wavelet-LHL | firstorder | Mean                             | -4.827577868 |
| wavelet-LHL | glrlm      | ShortRunLowGrayLevelEmphasis     | 0.03011353   |
| wavelet-LHL | glrlm      | GrayLevelVariance                | 194.4561986  |
| wavelet-LHL | glrlm      | LowGrayLevelRunEmphasis          | 0.030220891  |
| wavelet-LHL | glrlm      | GrayLevelNonUniformityNormalized | 0.034412323  |
| wavelet-LHL | glrlm      | RunVariance                      | 0.009591841  |
| wavelet-LHL | glrlm      | GrayLevelNonUniformity           | 1.63647936   |
| wavelet-LHL | glrlm      | LongRunEmphasis                  | 1.030114566  |
| wavelet-LHL | glrlm      | ShortRunHighGrayLevelEmphasis    | 832.0205378  |
| wavelet-LHL | glrlm      | RunLengthNonUniformity           | 46.65597381  |
| wavelet-LHL | glrlm      | ShortRunEmphasis                 | 0.992471358  |
| wavelet-LHL | glrlm      | LongRunHighGrayLevelEmphasis     | 858.6659279  |
| wavelet-LHL | glrlm      | RunPercentage                    | 0.990384615  |
| wavelet-LHL | glrlm      | LongRunLowGrayLevelEmphasis      | 0.030650333  |
| wavelet-LHL | glrlm      | RunEntropy                       | 5.019254482  |
| wavelet-LHL | glrlm      | HighGrayLevelRunEmphasis         | 837.3496158  |

|             |       |                                      |              |
|-------------|-------|--------------------------------------|--------------|
| wavelet-LHL | glrlm | RunLengthNonUniformityNormalized     | 0.980816319  |
| wavelet-LHL | glszm | GrayLevelVariance                    | 187.5511087  |
| wavelet-LHL | glszm | ZoneVariance                         | 0.149269876  |
| wavelet-LHL | glszm | GrayLevelNonUniformityNormalized     | 0.03190914   |
| wavelet-LHL | glszm | SizeZoneNonUniformityNormalized      | 0.828015143  |
| wavelet-LHL | glszm | SizeZoneNonUniformity                | 35.60465116  |
| wavelet-LHL | glszm | GrayLevelNonUniformity               | 1.372093023  |
| wavelet-LHL | glszm | LargeAreaEmphasis                    | 1.395348837  |
| wavelet-LHL | glszm | SmallAreaHighGrayLevelEmphasis       | 763.5930233  |
| wavelet-LHL | glszm | ZonePercentage                       | 0.895833333  |
| wavelet-LHL | glszm | LargeAreaLowGrayLevelEmphasis        | 0.037564223  |
| wavelet-LHL | glszm | LargeAreaHighGrayLevelEmphasis       | 1129.465116  |
| wavelet-LHL | glszm | HighGrayLevelZoneEmphasis            | 836.0232558  |
| wavelet-LHL | glszm | SmallAreaEmphasis                    | 0.927002584  |
| wavelet-LHL | glszm | LowGrayLevelZoneEmphasis             | 0.032200703  |
| wavelet-LHL | glszm | ZoneEntropy                          | 5.147194987  |
| wavelet-LHL | glszm | SmallAreaLowGrayLevelEmphasis        | 0.031577595  |
| wavelet-LHL | ngtdm | Coarseness                           | 0.053666584  |
| wavelet-LHL | ngtdm | Complexity                           | 7459.939381  |
| wavelet-LHL | ngtdm | Strength                             | 52.70597463  |
| wavelet-LHL | ngtdm | Contrast                             | 3.518360587  |
| wavelet-LHL | ngtdm | Busyness                             | 0.027192366  |
| wavelet-LHH | gldm  | GrayLevelVariance                    | 36.41493056  |
| wavelet-LHH | gldm  | HighGrayLevelEmphasis                | 424.8333333  |
| wavelet-LHH | gldm  | DependenceEntropy                    | 4.662782032  |
| wavelet-LHH | gldm  | DependenceNonUniformity              | 22.625       |
| wavelet-LHH | gldm  | GrayLevelNonUniformity               | 3.125        |
| wavelet-LHH | gldm  | SmallDependenceEmphasis              | 0.703269676  |
| wavelet-LHH | gldm  | SmallDependenceHighGrayLevelEmphasis | 306.7877604  |
| wavelet-LHH | gldm  | DependenceNonUniformityNormalized    | 0.471354167  |
| wavelet-LHH | gldm  | LargeDependenceEmphasis              | 2.791666667  |
| wavelet-LHH | gldm  | LargeDependenceLowGrayLevelEmphasis  | 0.029057208  |
| wavelet-LHH | gldm  | DependenceVariance                   | 0.541666667  |
| wavelet-LHH | gldm  | LargeDependenceHighGrayLevelEmphasis | 1163.708333  |
| wavelet-LHH | gldm  | SmallDependenceLowGrayLevelEmphasis  | 0.023616621  |
| wavelet-LHH | gldm  | LowGrayLevelEmphasis                 | 0.024430477  |
| wavelet-LHH | glcm  | JointAverage                         | 19.40746652  |
| wavelet-LHH | glcm  | SumAverage                           | 38.81493304  |
| wavelet-LHH | glcm  | JointEntropy                         | 5.254504792  |
| wavelet-LHH | glcm  | ClusterShade                         | -177.015426  |
| wavelet-LHH | glcm  | MaximumProbability                   | 0.051558738  |
| wavelet-LHH | glcm  | Idmn                                 | 0.944952432  |
| wavelet-LHH | glcm  | JointEnergy                          | 0.028301264  |
| wavelet-LHH | glcm  | Contrast                             | 68.98018119  |
| wavelet-LHH | glcm  | DifferenceEntropy                    | 3.344895133  |
| wavelet-LHH | glcm  | InverseVariance                      | 0.171477506  |
| wavelet-LHH | glcm  | DifferenceVariance                   | 27.26806036  |
| wavelet-LHH | glcm  | Idn                                  | 0.848839502  |
| wavelet-LHH | glcm  | Idm                                  | 0.145109086  |
| wavelet-LHH | glcm  | Correlation                          | -0.004589844 |
| wavelet-LHH | glcm  | Autocorrelation                      | 377.0737718  |
| wavelet-LHH | glcm  | SumEntropy                           | 3.895373489  |
| wavelet-LHH | glcm  | SumSquares                           | 34.50169366  |
| wavelet-LHH | glcm  | ClusterProminence                    | 17407.72749  |
| wavelet-LHH | glcm  | Imc2                                 | 0.997372778  |

|             |            |                                  |              |
|-------------|------------|----------------------------------|--------------|
| wavelet-LHH | glcm       | Imc1                             | -0.674890096 |
| wavelet-LHH | glcm       | DifferenceAverage                | 6.344328028  |
| wavelet-LHH | glcm       | Id                               | 0.237065998  |
| wavelet-LHH | glcm       | ClusterTendency                  | 69.02659344  |
| wavelet-LHH | firstorder | InterquartileRange               | 138.3588168  |
| wavelet-LHH | firstorder | Skewness                         | -0.656878632 |
| wavelet-LHH | firstorder | Uniformity                       | 0.065104167  |
| wavelet-LHH | firstorder | Median                           | 20.70008959  |
| wavelet-LHH | firstorder | Energy                           | 1110978.15   |
| wavelet-LHH | firstorder | RobustMeanAbsoluteDeviation      | 66.81193629  |
| wavelet-LHH | firstorder | MeanAbsoluteDeviation            | 111.3070756  |
| wavelet-LHH | firstorder | TotalEnergy                      | 29996410.04  |
| wavelet-LHH | firstorder | Maximum                          | 321.9912054  |
| wavelet-LHH | firstorder | RootMeanSquared                  | 152.1360513  |
| wavelet-LHH | firstorder | 90Percentile                     | 168.4485497  |
| wavelet-LHH | firstorder | Minimum                          | -472.6782132 |
| wavelet-LHH | firstorder | Entropy                          | 4.215199877  |
| wavelet-LHH | firstorder | Range                            | 794.6694185  |
| wavelet-LHH | firstorder | Variance                         | 23118.98104  |
| wavelet-LHH | firstorder | 10Percentile                     | -161.2298297 |
| wavelet-LHH | firstorder | Kurtosis                         | 4.205452935  |
| wavelet-LHH | firstorder | Mean                             | 5.137808738  |
| wavelet-LHH | glrlm      | ShortRunLowGrayLevelEmphasis     | 0.02482542   |
| wavelet-LHH | glrlm      | GrayLevelVariance                | 36.99906076  |
| wavelet-LHH | glrlm      | LowGrayLevelRunEmphasis          | 0.024864823  |
| wavelet-LHH | glrlm      | GrayLevelNonUniformityNormalized | 0.064008928  |
| wavelet-LHH | glrlm      | RunVariance                      | 0.019198265  |
| wavelet-LHH | glrlm      | GrayLevelNonUniformity           | 3.014387596  |
| wavelet-LHH | glrlm      | LongRunEmphasis                  | 1.059787946  |
| wavelet-LHH | glrlm      | ShortRunHighGrayLevelEmphasis    | 419.0768958  |
| wavelet-LHH | glrlm      | RunLengthNonUniformity           | 45.29782964  |
| wavelet-LHH | glrlm      | ShortRunEmphasis                 | 0.985053014  |
| wavelet-LHH | glrlm      | LongRunHighGrayLevelEmphasis     | 449.5549135  |
| wavelet-LHH | glrlm      | RunPercentage                    | 0.980769231  |
| wavelet-LHH | glrlm      | LongRunLowGrayLevelEmphasis      | 0.025022435  |
| wavelet-LHH | glrlm      | RunEntropy                       | 4.281928999  |
| wavelet-LHH | glrlm      | HighGrayLevelRunEmphasis         | 425.1724993  |
| wavelet-LHH | glrlm      | RunLengthNonUniformityNormalized | 0.961603471  |
| wavelet-LHH | glszm      | GrayLevelVariance                | 45.03871439  |
| wavelet-LHH | glszm      | ZoneVariance                     | 0.749452155  |
| wavelet-LHH | glszm      | GrayLevelNonUniformityNormalized | 0.056245435  |
| wavelet-LHH | glszm      | SizeZoneNonUniformityNormalized  | 0.684441198  |
| wavelet-LHH | glszm      | SizeZoneNonUniformity            | 25.32432432  |
| wavelet-LHH | glszm      | GrayLevelNonUniformity           | 2.081081081  |
| wavelet-LHH | glszm      | LargeAreaEmphasis                | 2.432432432  |
| wavelet-LHH | glszm      | SmallAreaHighGrayLevelEmphasis   | 374.1959459  |
| wavelet-LHH | glszm      | ZonePercentage                   | 0.770833333  |
| wavelet-LHH | glszm      | LargeAreaLowGrayLevelEmphasis    | 0.034511484  |
| wavelet-LHH | glszm      | LargeAreaHighGrayLevelEmphasis   | 1029.567568  |
| wavelet-LHH | glszm      | HighGrayLevelZoneEmphasis        | 431.1081081  |
| wavelet-LHH | glszm      | SmallAreaEmphasis                | 0.852102102  |
| wavelet-LHH | glszm      | LowGrayLevelZoneEmphasis         | 0.030897504  |
| wavelet-LHH | glszm      | ZoneEntropy                      | 4.60770573   |
| wavelet-LHH | glszm      | SmallAreaLowGrayLevelEmphasis    | 0.030470676  |
| wavelet-LHH | ngtdm      | Coarseness                       | 0.094863789  |

|             |            |                                      |              |
|-------------|------------|--------------------------------------|--------------|
| wavelet-LHH | ngtdm      | Complexity                           | 1087.238492  |
| wavelet-LHH | ngtdm      | Strength                             | 19.94632562  |
| wavelet-LHH | ngtdm      | Contrast                             | 0.702957915  |
| wavelet-LHH | ngtdm      | Busyness                             | 0.026920017  |
| wavelet-LLH | gldm       | GrayLevelVariance                    | 140.2252604  |
| wavelet-LLH | gldm       | HighGrayLevelEmphasis                | 498.8541667  |
| wavelet-LLH | gldm       | DependenceEntropy                    | 4.803508855  |
| wavelet-LLH | gldm       | DependenceNonUniformity              | 25.125       |
| wavelet-LLH | gldm       | GrayLevelNonUniformity               | 2.375        |
| wavelet-LLH | gldm       | SmallDependenceEmphasis              | 0.739583333  |
| wavelet-LLH | gldm       | SmallDependenceHighGrayLevelEmphasis | 455.1990741  |
| wavelet-LLH | gldm       | DependenceNonUniformityNormalized    | 0.5234375    |
| wavelet-LLH | gldm       | LargeDependenceEmphasis              | 2.875        |
| wavelet-LLH | gldm       | LargeDependenceLowGrayLevelEmphasis  | 0.060812723  |
| wavelet-LLH | gldm       | DependenceVariance                   | 0.625        |
| wavelet-LLH | gldm       | LargeDependenceHighGrayLevelEmphasis | 821.4375     |
| wavelet-LLH | gldm       | SmallDependenceLowGrayLevelEmphasis  | 0.03135429   |
| wavelet-LLH | gldm       | LowGrayLevelEmphasis                 | 0.035078624  |
| wavelet-LLH | glcm       | JointAverage                         | 17.35344537  |
| wavelet-LLH | glcm       | SumAverage                           | 34.70689074  |
| wavelet-LLH | glcm       | JointEntropy                         | 5.315201637  |
| wavelet-LLH | glcm       | ClusterShade                         | 5913.823702  |
| wavelet-LLH | glcm       | MaximumProbability                   | 0.048064814  |
| wavelet-LLH | glcm       | Idmn                                 | 0.935181328  |
| wavelet-LLH | glcm       | JointEnergy                          | 0.026962142  |
| wavelet-LLH | glcm       | Contrast                             | 209.2276767  |
| wavelet-LLH | glcm       | DifferenceEntropy                    | 3.686793662  |
| wavelet-LLH | glcm       | InverseVariance                      | 0.103081342  |
| wavelet-LLH | glcm       | DifferenceVariance                   | 88.50413872  |
| wavelet-LLH | glcm       | Idn                                  | 0.841635363  |
| wavelet-LLH | glcm       | Idm                                  | 0.105892365  |
| wavelet-LLH | glcm       | Correlation                          | 0.204244507  |
| wavelet-LLH | glcm       | Autocorrelation                      | 329.261294   |
| wavelet-LLH | glcm       | SumEntropy                           | 4.121926871  |
| wavelet-LLH | glcm       | SumSquares                           | 132.3439686  |
| wavelet-LLH | glcm       | ClusterProminence                    | 379700.3778  |
| wavelet-LLH | glcm       | Imc2                                 | 0.999195551  |
| wavelet-LLH | glcm       | Imc1                                 | -0.765383825 |
| wavelet-LLH | glcm       | DifferenceAverage                    | 10.71588355  |
| wavelet-LLH | glcm       | Id                                   | 0.185982317  |
| wavelet-LLH | glcm       | ClusterTendency                      | 320.1481977  |
| wavelet-LLH | firstorder | InterquartileRange                   | 302.2251395  |
| wavelet-LLH | firstorder | Skewness                             | 0.859535235  |
| wavelet-LLH | firstorder | Uniformity                           | 0.049479167  |
| wavelet-LLH | firstorder | Median                               | -64.08211405 |
| wavelet-LLH | firstorder | Energy                               | 4248633.215  |
| wavelet-LLH | firstorder | RobustMeanAbsoluteDeviation          | 149.0100925  |
| wavelet-LLH | firstorder | MeanAbsoluteDeviation                | 230.4115341  |
| wavelet-LLH | firstorder | TotalEnergy                          | 114713096.8  |
| wavelet-LLH | firstorder | Maximum                              | 785.4636787  |
| wavelet-LLH | firstorder | RootMeanSquared                      | 297.511667   |
| wavelet-LLH | firstorder | 90Percentile                         | 528.2608978  |
| wavelet-LLH | firstorder | Minimum                              | -448.8575542 |
| wavelet-LLH | firstorder | Entropy                              | 4.595175521  |
| wavelet-LLH | firstorder | Range                                | 1234.321233  |



|             |            |                                      |             |
|-------------|------------|--------------------------------------|-------------|
| wavelet-LLH | firstorder | Variance                             | 88390.97504 |
| wavelet-LLH | firstorder | 10Percentile                         | -337.846511 |
| wavelet-LLH | firstorder | Kurtosis                             | 3.096191391 |
| wavelet-LLH | firstorder | Mean                                 | 11.05517687 |
| wavelet-LLH | glrlm      | ShortRunLowGrayLevelEmphasis         | 0.035302046 |
| wavelet-LLH | glrlm      | GrayLevelVariance                    | 141.645142  |
| wavelet-LLH | glrlm      | LowGrayLevelRunEmphasis              | 0.035511475 |
| wavelet-LLH | glrlm      | GrayLevelNonUniformityNormalized     | 0.048801426 |
| wavelet-LLH | glrlm      | RunVariance                          | 0.019158164 |
| wavelet-LLH | glrlm      | GrayLevelNonUniformity               | 2.298292018 |
| wavelet-LLH | glrlm      | LongRunEmphasis                      | 1.060899323 |
| wavelet-LLH | glrlm      | ShortRunHighGrayLevelEmphasis        | 502.9053249 |
| wavelet-LLH | glrlm      | RunLengthNonUniformity               | 45.33339371 |
| wavelet-LLH | glrlm      | ShortRunEmphasis                     | 0.984775169 |
| wavelet-LLH | glrlm      | LongRunHighGrayLevelEmphasis         | 515.9241865 |
| wavelet-LLH | glrlm      | RunPercentage                        | 0.980769231 |
| wavelet-LLH | glrlm      | LongRunLowGrayLevelEmphasis          | 0.036349188 |
| wavelet-LLH | glrlm      | RunEntropy                           | 4.638785177 |
| wavelet-LLH | glrlm      | HighGrayLevelRunEmphasis             | 505.5090972 |
| wavelet-LLH | glrlm      | RunLengthNonUniformityNormalized     | 0.961683671 |
| wavelet-LLH | glszm      | GrayLevelVariance                    | 153.0616343 |
| wavelet-LLH | glszm      | ZoneVariance                         | 0.56232687  |
| wavelet-LLH | glszm      | GrayLevelNonUniformityNormalized     | 0.04432133  |
| wavelet-LLH | glszm      | SizeZoneNonUniformityNormalized      | 0.760387812 |
| wavelet-LLH | glszm      | SizeZoneNonUniformity                | 28.89473684 |
| wavelet-LLH | glszm      | GrayLevelNonUniformity               | 1.684210526 |
| wavelet-LLH | glszm      | LargeAreaEmphasis                    | 2.157894737 |
| wavelet-LLH | glszm      | SmallAreaHighGrayLevelEmphasis       | 568.4161184 |
| wavelet-LLH | glszm      | ZonePercentage                       | 0.791666667 |
| wavelet-LLH | glszm      | LargeAreaLowGrayLevelEmphasis        | 0.060138754 |
| wavelet-LLH | glszm      | LargeAreaHighGrayLevelEmphasis       | 757.0263158 |
| wavelet-LLH | glszm      | HighGrayLevelZoneEmphasis            | 588.5526316 |
| wavelet-LLH | glszm      | SmallAreaEmphasis                    | 0.887792398 |
| wavelet-LLH | glszm      | LowGrayLevelZoneEmphasis             | 0.040182747 |
| wavelet-LLH | glszm      | ZoneEntropy                          | 4.807009421 |
| wavelet-LLH | glszm      | SmallAreaLowGrayLevelEmphasis        | 0.038758498 |
| wavelet-LLH | ngtdm      | Coarseness                           | 0.080313262 |
| wavelet-LLH | ngtdm      | Complexity                           | 3665.049175 |
| wavelet-LLH | ngtdm      | Strength                             | 57.4522212  |
| wavelet-LLH | ngtdm      | Contrast                             | 2.4689757   |
| wavelet-LLH | ngtdm      | Busyness                             | 0.035206156 |
| wavelet-LLL | gldm       | GrayLevelVariance                    | 479.6349826 |
| wavelet-LLL | gldm       | HighGrayLevelEmphasis                | 3370.9375   |
| wavelet-LLL | gldm       | DependenceEntropy                    | 5.293295834 |
| wavelet-LLL | gldm       | DependenceNonUniformity              | 48          |
| wavelet-LLL | gldm       | GrayLevelNonUniformity               | 1.291666667 |
| wavelet-LLL | gldm       | SmallDependenceEmphasis              | 1           |
| wavelet-LLL | gldm       | SmallDependenceHighGrayLevelEmphasis | 3370.9375   |
| wavelet-LLL | gldm       | DependenceNonUniformityNormalized    | 1           |
| wavelet-LLL | gldm       | LargeDependenceEmphasis              | 1           |
| wavelet-LLL | gldm       | LargeDependenceLowGrayLevelEmphasis  | 0.021551644 |
| wavelet-LLL | gldm       | DependenceVariance                   | 0           |
| wavelet-LLL | gldm       | LargeDependenceHighGrayLevelEmphasis | 3370.9375   |
| wavelet-LLL | gldm       | SmallDependenceLowGrayLevelEmphasis  | 0.021551644 |
| wavelet-LLL | gldm       | LowGrayLevelEmphasis                 | 0.021551644 |

|             |            |                                  |              |
|-------------|------------|----------------------------------|--------------|
| wavelet-LLL | glcm       | JointAverage                     | 60.62060879  |
| wavelet-LLL | glcm       | SumAverage                       | 121.2412176  |
| wavelet-LLL | glcm       | JointEntropy                     | 5.432790957  |
| wavelet-LLL | glcm       | ClusterShade                     | -7280.520067 |
| wavelet-LLL | glcm       | MaximumProbability               | 0.025128206  |
| wavelet-LLL | glcm       | Idmn                             | 0.933755985  |
| wavelet-LLL | glcm       | JointEnergy                      | 0.023967556  |
| wavelet-LLL | glcm       | Contrast                         | 777.304666   |
| wavelet-LLL | glcm       | DifferenceEntropy                | 4.002723352  |
| wavelet-LLL | glcm       | InverseVariance                  | 0.038023186  |
| wavelet-LLL | glcm       | DifferenceVariance               | 227.0591548  |
| wavelet-LLL | glcm       | Idn                              | 0.824570441  |
| wavelet-LLL | glcm       | Idm                              | 0.025859368  |
| wavelet-LLL | glcm       | Correlation                      | 0.162568817  |
| wavelet-LLL | glcm       | Autocorrelation                  | 3761.557559  |
| wavelet-LLL | glcm       | SumEntropy                       | 4.285212222  |
| wavelet-LLL | glcm       | SumSquares                       | 471.6301982  |
| wavelet-LLL | glcm       | ClusterProminence                | 3259790.993  |
| wavelet-LLL | glcm       | Imc2                             | 0.999927406  |
| wavelet-LLL | glcm       | Imc1                             | -0.902089237 |
| wavelet-LLL | glcm       | DifferenceAverage                | 23.13430475  |
| wavelet-LLL | glcm       | Id                               | 0.081792228  |
| wavelet-LLL | glcm       | ClusterTendency                  | 1109.216127  |
| wavelet-LLL | firstorder | InterquartileRange               | 794.3621131  |
| wavelet-LLL | firstorder | Skewness                         | 0.047494837  |
| wavelet-LLL | firstorder | Uniformity                       | 0.026909722  |
| wavelet-LLL | firstorder | Median                           | -1143.337376 |
| wavelet-LLL | firstorder | Energy                           | 66759956.02  |
| wavelet-LLL | firstorder | RobustMeanAbsoluteDeviation      | 328.9906491  |
| wavelet-LLL | firstorder | MeanAbsoluteDeviation            | 453.6305366  |
| wavelet-LLL | firstorder | TotalEnergy                      | 1802518813   |
| wavelet-LLL | firstorder | Maximum                          | 123.7826367  |
| wavelet-LLL | firstorder | RootMeanSquared                  | 1179.335583  |
| wavelet-LLL | firstorder | 90Percentile                     | -300.0637549 |
| wavelet-LLL | firstorder | Minimum                          | -2352.126062 |
| wavelet-LLL | firstorder | Entropy                          | 5.293295834  |
| wavelet-LLL | firstorder | Range                            | 2475.908699  |
| wavelet-LLL | firstorder | Variance                         | 299316.8602  |
| wavelet-LLL | firstorder | 10Percentile                     | -1599.707036 |
| wavelet-LLL | firstorder | Kurtosis                         | 2.59248085   |
| wavelet-LLL | firstorder | Mean                             | -1044.756219 |
| wavelet-LLL | glrlm      | ShortRunLowGrayLevelEmphasis     | 0.021551644  |
| wavelet-LLL | glrlm      | GrayLevelVariance                | 479.6349826  |
| wavelet-LLL | glrlm      | LowGrayLevelRunEmphasis          | 0.021551644  |
| wavelet-LLL | glrlm      | GrayLevelNonUniformityNormalized | 0.026909722  |
| wavelet-LLL | glrlm      | RunVariance                      | 0            |
| wavelet-LLL | glrlm      | GrayLevelNonUniformity           | 1.291666667  |
| wavelet-LLL | glrlm      | LongRunEmphasis                  | 1            |
| wavelet-LLL | glrlm      | ShortRunHighGrayLevelEmphasis    | 3370.9375    |
| wavelet-LLL | glrlm      | RunLengthNonUniformity           | 48           |
| wavelet-LLL | glrlm      | ShortRunEmphasis                 | 1            |
| wavelet-LLL | glrlm      | LongRunHighGrayLevelEmphasis     | 3370.9375    |
| wavelet-LLL | glrlm      | RunPercentage                    | 1            |
| wavelet-LLL | glrlm      | LongRunLowGrayLevelEmphasis      | 0.021551644  |
| wavelet-LLL | glrlm      | RunEntropy                       | 5.293295834  |

|             |       |                                      |              |
|-------------|-------|--------------------------------------|--------------|
| wavelet-LLL | glrlm | HighGrayLevelRunEmphasis             | 3370.9375    |
| wavelet-LLL | glrlm | RunLengthNonUniformityNormalized     | 1            |
| wavelet-LLL | glszm | GrayLevelVariance                    | 479.6349826  |
| wavelet-LLL | glszm | ZoneVariance                         | 0            |
| wavelet-LLL | glszm | GrayLevelNonUniformityNormalized     | 0.026909722  |
| wavelet-LLL | glszm | SizeZoneNonUniformityNormalized      | 1            |
| wavelet-LLL | glszm | SizeZoneNonUniformity                | 48           |
| wavelet-LLL | glszm | GrayLevelNonUniformity               | 1.291666667  |
| wavelet-LLL | glszm | LargeAreaEmphasis                    | 1            |
| wavelet-LLL | glszm | SmallAreaHighGrayLevelEmphasis       | 3370.9375    |
| wavelet-LLL | glszm | ZonePercentage                       | 1            |
| wavelet-LLL | glszm | LargeAreaLowGrayLevelEmphasis        | 0.021551644  |
| wavelet-LLL | glszm | LargeAreaHighGrayLevelEmphasis       | 3370.9375    |
| wavelet-LLL | glszm | HighGrayLevelZoneEmphasis            | 3370.9375    |
| wavelet-LLL | glszm | SmallAreaEmphasis                    | 1            |
| wavelet-LLL | glszm | LowGrayLevelZoneEmphasis             | 0.021551644  |
| wavelet-LLL | glszm | ZoneEntropy                          | 5.293295834  |
| wavelet-LLL | glszm | SmallAreaLowGrayLevelEmphasis        | 0.021551644  |
| wavelet-LLL | ngtdm | Coarseness                           | 0.051243548  |
| wavelet-LLL | ngtdm | Complexity                           | 18263.30948  |
| wavelet-LLL | ngtdm | Strength                             | 110.1072962  |
| wavelet-LLL | ngtdm | Contrast                             | 9.133528156  |
| wavelet-LLL | ngtdm | Busyness                             | 0.016456488  |
| wavelet-HHL | gldm  | GrayLevelVariance                    | 20.59331597  |
| wavelet-HHL | gldm  | HighGrayLevelEmphasis                | 105.7708333  |
| wavelet-HHL | gldm  | DependenceEntropy                    | 4.735902344  |
| wavelet-HHL | gldm  | DependenceNonUniformity              | 18.91666667  |
| wavelet-HHL | gldm  | GrayLevelNonUniformity               | 3.458333333  |
| wavelet-HHL | gldm  | SmallDependenceEmphasis              | 0.559751157  |
| wavelet-HHL | gldm  | SmallDependenceHighGrayLevelEmphasis | 61.72395833  |
| wavelet-HHL | gldm  | DependenceNonUniformityNormalized    | 0.394097222  |
| wavelet-HHL | gldm  | LargeDependenceEmphasis              | 3.458333333  |
| wavelet-HHL | gldm  | LargeDependenceLowGrayLevelEmphasis  | 0.11643115   |
| wavelet-HHL | gldm  | DependenceVariance                   | 0.539930556  |
| wavelet-HHL | gldm  | LargeDependenceHighGrayLevelEmphasis | 360.3958333  |
| wavelet-HHL | gldm  | SmallDependenceLowGrayLevelEmphasis  | 0.040113786  |
| wavelet-HHL | gldm  | LowGrayLevelEmphasis                 | 0.054071337  |
| wavelet-HHL | glcm  | JointAverage                         | 9.037791475  |
| wavelet-HHL | glcm  | SumAverage                           | 18.07558295  |
| wavelet-HHL | glcm  | JointEntropy                         | 5.177084492  |
| wavelet-HHL | glcm  | ClusterShade                         | 42.01845077  |
| wavelet-HHL | glcm  | MaximumProbability                   | 0.052519298  |
| wavelet-HHL | glcm  | Idmn                                 | 0.930518428  |
| wavelet-HHL | glcm  | JointEnergy                          | 0.02998224   |
| wavelet-HHL | glcm  | Contrast                             | 41.64642884  |
| wavelet-HHL | glcm  | DifferenceEntropy                    | 3.196220151  |
| wavelet-HHL | glcm  | InverseVariance                      | 0.191527174  |
| wavelet-HHL | glcm  | DifferenceVariance                   | 14.57135318  |
| wavelet-HHL | glcm  | Idn                                  | 0.827806073  |
| wavelet-HHL | glcm  | Idm                                  | 0.175726982  |
| wavelet-HHL | glcm  | Correlation                          | -0.073680137 |
| wavelet-HHL | glcm  | Autocorrelation                      | 80.7104739   |
| wavelet-HHL | glcm  | SumEntropy                           | 3.67380891   |
| wavelet-HHL | glcm  | SumSquares                           | 19.52585014  |
| wavelet-HHL | glcm  | ClusterProminence                    | 4063.054135  |

|             |            |                                  |              |
|-------------|------------|----------------------------------|--------------|
| wavelet-HHL | glcm       | Imc2                             | 0.995851824  |
| wavelet-HHL | glcm       | Imc1                             | -0.644817846 |
| wavelet-HHL | glcm       | DifferenceAverage                | 5.093497935  |
| wavelet-HHL | glcm       | Id                               | 0.269411794  |
| wavelet-HHL | glcm       | ClusterTendency                  | 36.45697171  |
| wavelet-HHL | firstorder | InterquartileRange               | 161.9025054  |
| wavelet-HHL | firstorder | Skewness                         | 0.405461894  |
| wavelet-HHL | firstorder | Uniformity                       | 0.072048611  |
| wavelet-HHL | firstorder | Median                           | 19.87160248  |
| wavelet-HHL | firstorder | Energy                           | 624086.8981  |
| wavelet-HHL | firstorder | RobustMeanAbsoluteDeviation      | 60.41483478  |
| wavelet-HHL | firstorder | MeanAbsoluteDeviation            | 87.95891766  |
| wavelet-HHL | firstorder | TotalEnergy                      | 16850346.25  |
| wavelet-HHL | firstorder | Maximum                          | 343.618223   |
| wavelet-HHL | firstorder | RootMeanSquared                  | 114.0254813  |
| wavelet-HHL | firstorder | 90Percentile                     | 153.9240321  |
| wavelet-HHL | firstorder | Minimum                          | -178.1764724 |
| wavelet-HHL | firstorder | Entropy                          | 3.957067386  |
| wavelet-HHL | firstorder | Range                            | 521.7946954  |
| wavelet-HHL | firstorder | Variance                         | 12695.85578  |
| wavelet-HHL | firstorder | 10Percentile                     | -128.0525294 |
| wavelet-HHL | firstorder | Kurtosis                         | 3.18939886   |
| wavelet-HHL | firstorder | Mean                             | 17.49155795  |
| wavelet-HHL | glrlm      | ShortRunLowGrayLevelEmphasis     | 0.054239928  |
| wavelet-HHL | glrlm      | GrayLevelVariance                | 20.87524345  |
| wavelet-HHL | glrlm      | LowGrayLevelRunEmphasis          | 0.054831133  |
| wavelet-HHL | glrlm      | GrayLevelNonUniformityNormalized | 0.071684024  |
| wavelet-HHL | glrlm      | RunVariance                      | 0.027152774  |
| wavelet-HHL | glrlm      | GrayLevelNonUniformity           | 3.347186104  |
| wavelet-HHL | glrlm      | LongRunEmphasis                  | 1.085890428  |
| wavelet-HHL | glrlm      | ShortRunHighGrayLevelEmphasis    | 103.6522449  |
| wavelet-HHL | glrlm      | RunLengthNonUniformity           | 44.21003215  |
| wavelet-HHL | glrlm      | ShortRunEmphasis                 | 0.978527393  |
| wavelet-HHL | glrlm      | LongRunHighGrayLevelEmphasis     | 114.6811502  |
| wavelet-HHL | glrlm      | RunPercentage                    | 0.97275641   |
| wavelet-HHL | glrlm      | LongRunLowGrayLevelEmphasis      | 0.057195954  |
| wavelet-HHL | glrlm      | RunEntropy                       | 4.033405     |
| wavelet-HHL | glrlm      | HighGrayLevelRunEmphasis         | 105.858026   |
| wavelet-HHL | glrlm      | RunLengthNonUniformityNormalized | 0.945694451  |
| wavelet-HHL | glszm      | GrayLevelVariance                | 25.30859375  |
| wavelet-HHL | glszm      | ZoneVariance                     | 0.625        |
| wavelet-HHL | glszm      | GrayLevelNonUniformityNormalized | 0.068359375  |
| wavelet-HHL | glszm      | SizeZoneNonUniformityNormalized  | 0.48828125   |
| wavelet-HHL | glszm      | SizeZoneNonUniformity            | 15.625       |
| wavelet-HHL | glszm      | GrayLevelNonUniformity           | 2.1875       |
| wavelet-HHL | glszm      | LargeAreaEmphasis                | 2.875        |
| wavelet-HHL | glszm      | SmallAreaHighGrayLevelEmphasis   | 80.64930556  |
| wavelet-HHL | glszm      | ZonePercentage                   | 0.666666667  |
| wavelet-HHL | glszm      | LargeAreaLowGrayLevelEmphasis    | 0.113545548  |
| wavelet-HHL | glszm      | LargeAreaHighGrayLevelEmphasis   | 304.46875    |
| wavelet-HHL | glszm      | HighGrayLevelZoneEmphasis        | 107.4375     |
| wavelet-HHL | glszm      | SmallAreaEmphasis                | 0.723307292  |
| wavelet-HHL | glszm      | LowGrayLevelZoneEmphasis         | 0.066612961  |
| wavelet-HHL | glszm      | ZoneEntropy                      | 4.5          |
| wavelet-HHL | glszm      | SmallAreaLowGrayLevelEmphasis    | 0.056633973  |

|             |            |                                      |              |
|-------------|------------|--------------------------------------|--------------|
| wavelet-HHL | ngtdm      | Coarseness                           | 0.096396289  |
| wavelet-HHL | ngtdm      | Complexity                           | 483.4487963  |
| wavelet-HHL | ngtdm      | Strength                             | 10.68848339  |
| wavelet-HHL | ngtdm      | Contrast                             | 0.513021243  |
| wavelet-HHL | ngtdm      | Busyness                             | 0.084483285  |
| wavelet-HLH | gldm       | GrayLevelVariance                    | 52.86414931  |
| wavelet-HLH | gldm       | HighGrayLevelEmphasis                | 351.1458333  |
| wavelet-HLH | gldm       | DependenceEntropy                    | 4.777569011  |
| wavelet-HLH | gldm       | DependenceNonUniformity              | 20.29166667  |
| wavelet-HLH | gldm       | GrayLevelNonUniformity               | 2.791666667  |
| wavelet-HLH | gldm       | SmallDependenceEmphasis              | 0.626157407  |
| wavelet-HLH | gldm       | SmallDependenceHighGrayLevelEmphasis | 213.744213   |
| wavelet-HLH | gldm       | DependenceNonUniformityNormalized    | 0.422743056  |
| wavelet-HLH | gldm       | LargeDependenceEmphasis              | 2.958333333  |
| wavelet-HLH | gldm       | LargeDependenceLowGrayLevelEmphasis  | 0.034971787  |
| wavelet-HLH | gldm       | DependenceVariance                   | 0.451388889  |
| wavelet-HLH | gldm       | LargeDependenceHighGrayLevelEmphasis | 1087.604167  |
| wavelet-HLH | gldm       | SmallDependenceLowGrayLevelEmphasis  | 0.026623978  |
| wavelet-HLH | gldm       | LowGrayLevelEmphasis                 | 0.028055567  |
| wavelet-HLH | glcm       | JointAverage                         | 17.60236957  |
| wavelet-HLH | glcm       | SumAverage                           | 35.20473913  |
| wavelet-HLH | glcm       | JointEntropy                         | 5.292567051  |
| wavelet-HLH | glcm       | ClusterShade                         | 111.1560583  |
| wavelet-HLH | glcm       | MaximumProbability                   | 0.040565147  |
| wavelet-HLH | glcm       | Idmn                                 | 0.927157189  |
| wavelet-HLH | glcm       | JointEnergy                          | 0.026989347  |
| wavelet-HLH | glcm       | Contrast                             | 111.3237332  |
| wavelet-HLH | glcm       | DifferenceEntropy                    | 3.573219208  |
| wavelet-HLH | glcm       | InverseVariance                      | 0.112938158  |
| wavelet-HLH | glcm       | DifferenceVariance                   | 34.60257846  |
| wavelet-HLH | glcm       | Idn                                  | 0.824738966  |
| wavelet-HLH | glcm       | Idm                                  | 0.114995996  |
| wavelet-HLH | glcm       | Correlation                          | -0.022376922 |
| wavelet-HLH | glcm       | Autocorrelation                      | 308.9661208  |
| wavelet-HLH | glcm       | SumEntropy                           | 3.917400962  |
| wavelet-HLH | glcm       | SumSquares                           | 54.64163853  |
| wavelet-HLH | glcm       | ClusterProminence                    | 33409.46636  |
| wavelet-HLH | glcm       | Imc2                                 | 0.998580048  |
| wavelet-HLH | glcm       | Imc1                                 | -0.723663831 |
| wavelet-HLH | glcm       | DifferenceAverage                    | 8.309262424  |
| wavelet-HLH | glcm       | Id                                   | 0.201734417  |
| wavelet-HLH | glcm       | ClusterTendency                      | 107.2428209  |
| wavelet-HLH | firstorder | InterquartileRange                   | 209.7829601  |
| wavelet-HLH | firstorder | Skewness                             | 0.200108883  |
| wavelet-HLH | firstorder | Uniformity                           | 0.058159722  |
| wavelet-HLH | firstorder | Median                               | 23.55187836  |
| wavelet-HLH | firstorder | Energy                               | 1623962.84   |
| wavelet-HLH | firstorder | RobustMeanAbsoluteDeviation          | 91.59520905  |
| wavelet-HLH | firstorder | MeanAbsoluteDeviation                | 141.0439847  |
| wavelet-HLH | firstorder | TotalEnergy                          | 43846996.67  |
| wavelet-HLH | firstorder | Maximum                              | 463.2229923  |
| wavelet-HLH | firstorder | RootMeanSquared                      | 183.936291   |
| wavelet-HLH | firstorder | 90Percentile                         | 269.422826   |
| wavelet-HLH | firstorder | Minimum                              | -379.6981828 |
| wavelet-HLH | firstorder | Entropy                              | 4.304047012  |

|             |            |                                  |              |
|-------------|------------|----------------------------------|--------------|
| wavelet-HLH | firstorder | Range                            | 842.9211751  |
| wavelet-HLH | firstorder | Variance                         | 33463.34228  |
| wavelet-HLH | firstorder | 10Percentile                     | -202.6308603 |
| wavelet-HLH | firstorder | Kurtosis                         | 2.94564709   |
| wavelet-HLH | firstorder | Mean                             | 19.21501698  |
| wavelet-HLH | glrlm      | ShortRunLowGrayLevelEmphasis     | 0.028569907  |
| wavelet-HLH | glrlm      | GrayLevelVariance                | 53.45343002  |
| wavelet-HLH | glrlm      | LowGrayLevelRunEmphasis          | 0.028634625  |
| wavelet-HLH | glrlm      | GrayLevelNonUniformityNormalized | 0.057730878  |
| wavelet-HLH | glrlm      | RunVariance                      | 0.022352626  |
| wavelet-HLH | glrlm      | GrayLevelNonUniformity           | 2.709194791  |
| wavelet-HLH | glrlm      | LongRunEmphasis                  | 1.071146245  |
| wavelet-HLH | glrlm      | ShortRunHighGrayLevelEmphasis    | 343.94887    |
| wavelet-HLH | glrlm      | RunLengthNonUniformity           | 44.89206446  |
| wavelet-HLH | glrlm      | ShortRunEmphasis                 | 0.982213439  |
| wavelet-HLH | glrlm      | LongRunHighGrayLevelEmphasis     | 377.2157254  |
| wavelet-HLH | glrlm      | RunPercentage                    | 0.977564103  |
| wavelet-HLH | glrlm      | LongRunLowGrayLevelEmphasis      | 0.028893498  |
| wavelet-HLH | glrlm      | RunEntropy                       | 4.360803847  |
| wavelet-HLH | glrlm      | HighGrayLevelRunEmphasis         | 350.6022411  |
| wavelet-HLH | glrlm      | RunLengthNonUniformityNormalized | 0.955294748  |
| wavelet-HLH | glszm      | GrayLevelVariance                | 61.64571429  |
| wavelet-HLH | glszm      | ZoneVariance                     | 0.404897959  |
| wavelet-HLH | glszm      | GrayLevelNonUniformityNormalized | 0.051428571  |
| wavelet-HLH | glszm      | SizeZoneNonUniformityNormalized  | 0.55755102   |
| wavelet-HLH | glszm      | SizeZoneNonUniformity            | 19.51428571  |
| wavelet-HLH | glszm      | GrayLevelNonUniformity           | 1.8          |
| wavelet-HLH | glszm      | LargeAreaEmphasis                | 2.285714286  |
| wavelet-HLH | glszm      | SmallAreaHighGrayLevelEmphasis   | 261.8880952  |
| wavelet-HLH | glszm      | ZonePercentage                   | 0.729166667  |
| wavelet-HLH | glszm      | LargeAreaLowGrayLevelEmphasis    | 0.04169888   |
| wavelet-HLH | glszm      | LargeAreaHighGrayLevelEmphasis   | 826.5428571  |
| wavelet-HLH | glszm      | HighGrayLevelZoneEmphasis        | 343.8857143  |
| wavelet-HLH | glszm      | SmallAreaEmphasis                | 0.773809524  |
| wavelet-HLH | glszm      | LowGrayLevelZoneEmphasis         | 0.03708917   |
| wavelet-HLH | glszm      | ZoneEntropy                      | 4.729283017  |
| wavelet-HLH | glszm      | SmallAreaLowGrayLevelEmphasis    | 0.036185967  |
| wavelet-HLH | ngtdm      | Coarseness                       | 0.08176811   |
| wavelet-HLH | ngtdm      | Complexity                       | 1571.779827  |
| wavelet-HLH | ngtdm      | Strength                         | 21.46330704  |
| wavelet-HLH | ngtdm      | Contrast                         | 1.279880698  |
| wavelet-HLH | ngtdm      | Busyness                         | 0.038247715  |

| Image type | Feature Class | Feature Name                         | Value                                                                                                                                                                                                                                                                                                                                                                                                                                        |
|------------|---------------|--------------------------------------|----------------------------------------------------------------------------------------------------------------------------------------------------------------------------------------------------------------------------------------------------------------------------------------------------------------------------------------------------------------------------------------------------------------------------------------------|
| general    | info          | BoundingBox                          | 502: RTSTRUCT: C99-DNU_segment_GTV<br>(0, 0, 1, 8, 9, 8)                                                                                                                                                                                                                                                                                                                                                                                     |
| general    | info          | EnabledImageTypes                    | {u'Original': {}, u'Wavelet': {}}                                                                                                                                                                                                                                                                                                                                                                                                            |
|            |               |                                      | {'distances': [1], 'additionalInfo': True,<br>'force2D': False, 'interpolator': 'sitkBSpline',<br>'resampledPixelSpacing': [3.0], 'label': 1,<br>'normalizeScale': 1, 'normalize': False,<br>'force2Ddimension': 0, 'removeOutliers':<br>None, 'minimumROISize': None, u'binWidth':<br>25.0, 'minimumROIDimensions': 1,<br>u'correctMask': True, 'preCrop': False,<br>u'symmetricalGLCM': True,<br>'resegmentRange': None, 'padDistance': 5} |
| general    | info          | GeneralSettings                      | 2613ada59c4ec173b0181541f10145f9c39ed<br>3b6                                                                                                                                                                                                                                                                                                                                                                                                 |
| general    | info          | ImageHash                            | (0.9765625000000002,<br>0.9765625000000002, 2.0)                                                                                                                                                                                                                                                                                                                                                                                             |
| general    | info          | ImageSpacing                         | 6b62bcb21eccdfed8c631916314275b29fe18<br>170                                                                                                                                                                                                                                                                                                                                                                                                 |
| general    | info          | MaskHash                             | 170                                                                                                                                                                                                                                                                                                                                                                                                                                          |
| general    | info          | NumpyVersion                         | 1.13.1                                                                                                                                                                                                                                                                                                                                                                                                                                       |
| general    | info          | PyWaveletVersion                     | 0.5.2                                                                                                                                                                                                                                                                                                                                                                                                                                        |
| general    | info          | SimpleITKVersion                     | 1.1.0                                                                                                                                                                                                                                                                                                                                                                                                                                        |
| general    | info          | Version                              | 1.3.0.post102+g1b0eb74                                                                                                                                                                                                                                                                                                                                                                                                                       |
| general    | info          | VolumeNum                            | 1                                                                                                                                                                                                                                                                                                                                                                                                                                            |
| general    | info          | VoxelNum                             | 233                                                                                                                                                                                                                                                                                                                                                                                                                                          |
| original   | shape         | Maximum3DDiameter                    | 26.4952826                                                                                                                                                                                                                                                                                                                                                                                                                                   |
| original   | shape         | Maximum2DDiameterSlice               | 24.18677324                                                                                                                                                                                                                                                                                                                                                                                                                                  |
| original   | shape         | Sphericity                           | 0.836787372                                                                                                                                                                                                                                                                                                                                                                                                                                  |
| original   | shape         | MinorAxis                            | 21.09864038                                                                                                                                                                                                                                                                                                                                                                                                                                  |
| original   | shape         | Elongation                           | 0.89313084                                                                                                                                                                                                                                                                                                                                                                                                                                   |
| original   | shape         | SurfaceVolumeRatio                   | 0.313061103                                                                                                                                                                                                                                                                                                                                                                                                                                  |
| original   | shape         | Volume                               | 6291                                                                                                                                                                                                                                                                                                                                                                                                                                         |
| original   | shape         | MajorAxis                            | 23.62323575                                                                                                                                                                                                                                                                                                                                                                                                                                  |
| original   | shape         | SurfaceArea                          | 1969.467402                                                                                                                                                                                                                                                                                                                                                                                                                                  |
| original   | shape         | Flatness                             | 0.819117552                                                                                                                                                                                                                                                                                                                                                                                                                                  |
| original   | shape         | LeastAxis                            | 19.35020704                                                                                                                                                                                                                                                                                                                                                                                                                                  |
| original   | shape         | Maximum2DDiameterColumn              | 25.8069758                                                                                                                                                                                                                                                                                                                                                                                                                                   |
| original   | shape         | Maximum2DDiameterRow                 | 25.63201124                                                                                                                                                                                                                                                                                                                                                                                                                                  |
| original   | gldm          | GrayLevelVariance                    | 44.62141502                                                                                                                                                                                                                                                                                                                                                                                                                                  |
| original   | gldm          | HighGrayLevelEmphasis                | 486.8841202                                                                                                                                                                                                                                                                                                                                                                                                                                  |
| original   | gldm          | DependenceEntropy                    | 6.206215278                                                                                                                                                                                                                                                                                                                                                                                                                                  |
| original   | gldm          | DependenceNonUniformity              | 55.54935622                                                                                                                                                                                                                                                                                                                                                                                                                                  |
| original   | gldm          | GrayLevelNonUniformity               | 11.22317597                                                                                                                                                                                                                                                                                                                                                                                                                                  |
| original   | gldm          | SmallDependenceEmphasis              | 0.370556973                                                                                                                                                                                                                                                                                                                                                                                                                                  |
| original   | gldm          | SmallDependenceHighGrayLevelEmphasis | 167.1899103                                                                                                                                                                                                                                                                                                                                                                                                                                  |
| original   | gldm          | DependenceNonUniformityNormalized    | 0.238409254                                                                                                                                                                                                                                                                                                                                                                                                                                  |
| original   | gldm          | LargeDependenceEmphasis              | 7.901287554                                                                                                                                                                                                                                                                                                                                                                                                                                  |
| original   | gldm          | LargeDependenceLowGrayLevelEmphasis  | 0.029771437                                                                                                                                                                                                                                                                                                                                                                                                                                  |
| original   | gldm          | DependenceVariance                   | 1.726169206                                                                                                                                                                                                                                                                                                                                                                                                                                  |
| original   | gldm          | LargeDependenceHighGrayLevelEmphasis | 4341.236052                                                                                                                                                                                                                                                                                                                                                                                                                                  |
| original   | gldm          | SmallDependenceLowGrayLevelEmphasis  | 0.00658196                                                                                                                                                                                                                                                                                                                                                                                                                                   |

|          |            |                                  |              |
|----------|------------|----------------------------------|--------------|
| original | gldm       | LowGrayLevelEmphasis             | 0.008705658  |
| original | glcm       | JointAverage                     | 21.4543418   |
| original | glcm       | SumAverage                       | 42.9086836   |
| original | glcm       | JointEntropy                     | 7.428406734  |
| original | glcm       | ClusterShade                     | -879.3975693 |
| original | glcm       | MaximumProbability               | 0.017970421  |
| original | glcm       | ldmn                             | 0.974548968  |
| original | glcm       | JointEnergy                      | 0.006774966  |
| original | glcm       | Contrast                         | 28.39121744  |
| original | glcm       | DifferenceEntropy                | 3.399344399  |
| original | glcm       | InverseVariance                  | 0.217712255  |
| original | glcm       | DifferenceVariance               | 10.26929395  |
| original | glcm       | ldn                              | 0.891897625  |
| original | glcm       | ldm                              | 0.213688204  |
| original | glcm       | Correlation                      | 0.635921263  |
| original | glcm       | Autocorrelation                  | 485.0668303  |
| original | glcm       | SumEntropy                       | 5.140312548  |
| original | glcm       | SumSquares                       | 38.93247477  |
| original | glcm       | ClusterProminence                | 44854.52874  |
| original | glcm       | lmc2                             | 0.973623958  |
| original | glcm       | lmc1                             | -0.334430958 |
| original | glcm       | DifferenceAverage                | 4.158983924  |
| original | glcm       | ld                               | 0.308077352  |
| original | glcm       | ClusterTendency                  | 127.3386816  |
| original | firstorder | InterquartileRange               | 235          |
| original | firstorder | Skewness                         | -0.675866586 |
| original | firstorder | Uniformity                       | 0.048168137  |
| original | firstorder | Median                           | -237         |
| original | firstorder | Energy                           | 22528691     |
| original | firstorder | RobustMeanAbsoluteDeviation      | 98.42974434  |
| original | firstorder | MeanAbsoluteDeviation            | 136.6271252  |
| original | firstorder | TotalEnergy                      | 608274657    |
| original | firstorder | Maximum                          | 14           |
| original | firstorder | RootMeanSquared                  | 310.9496116  |
| original | firstorder | 90Percentile                     | -64.2        |
| original | firstorder | Minimum                          | -771         |
| original | firstorder | Entropy                          | 4.544692394  |
| original | firstorder | Range                            | 785          |
| original | firstorder | Variance                         | 28025.41911  |
| original | firstorder | 10Percentile                     | -512.2       |
| original | firstorder | Kurtosis                         | 2.823462193  |
| original | firstorder | Mean                             | -262.0386266 |
| original | glrlm      | ShortRunLowGrayLevelEmphasis     | 0.0089036    |
| original | glrlm      | GrayLevelVariance                | 44.78613504  |
| original | glrlm      | LowGrayLevelRunEmphasis          | 0.009041351  |
| original | glrlm      | GrayLevelNonUniformityNormalized | 0.047795599  |
| original | glrlm      | RunVariance                      | 0.067493395  |
| original | glrlm      | GrayLevelNonUniformity           | 10.5007065   |
| original | glrlm      | LongRunEmphasis                  | 1.195197659  |
| original | glrlm      | ShortRunHighGrayLevelEmphasis    | 461.5445394  |
| original | glrlm      | RunLengthNonUniformity           | 196.796364   |
| original | glrlm      | ShortRunEmphasis                 | 0.956990773  |
| original | glrlm      | LongRunHighGrayLevelEmphasis     | 588.4097002  |



|             |       |                                      |             |
|-------------|-------|--------------------------------------|-------------|
| original    | glrlm | RunPercentage                        | 0.942885441 |
| original    | glrlm | LongRunLowGrayLevelEmphasis          | 0.009679354 |
| original    | glrlm | RunEntropy                           | 4.782810046 |
| original    | glrlm | HighGrayLevelRunEmphasis             | 484.2109525 |
| original    | glrlm | RunLengthNonUniformityNormalized     | 0.894382892 |
| original    | glszm | GrayLevelVariance                    | 50.98940904 |
| original    | glszm | ZoneVariance                         | 4.121128515 |
| original    | glszm | GrayLevelNonUniformityNormalized     | 0.046635813 |
| original    | glszm | SizeZoneNonUniformityNormalized      | 0.365966536 |
| original    | glszm | SizeZoneNonUniformity                | 38.79245283 |
| original    | glszm | GrayLevelNonUniformity               | 4.943396226 |
| original    | glszm | LargeAreaEmphasis                    | 8.952830189 |
| original    | glszm | SmallAreaHighGrayLevelEmphasis       | 272.3884152 |
| original    | glszm | ZonePercentage                       | 0.454935622 |
| original    | glszm | LargeAreaLowGrayLevelEmphasis        | 0.038599107 |
| original    | glszm | LargeAreaHighGrayLevelEmphasis       | 4733.490566 |
| original    | glszm | HighGrayLevelZoneEmphasis            | 456.6698113 |
| original    | glszm | SmallAreaEmphasis                    | 0.626000247 |
| original    | glszm | LowGrayLevelZoneEmphasis             | 0.015157712 |
| original    | glszm | ZoneEntropy                          | 5.72779528  |
| original    | glszm | SmallAreaLowGrayLevelEmphasis        | 0.013827983 |
| original    | ngtdm | Coarseness                           | 0.038514986 |
| original    | ngtdm | Complexity                           | 1012.354615 |
| original    | ngtdm | Strength                             | 14.52877496 |
| original    | ngtdm | Contrast                             | 0.24978163  |
| original    | ngtdm | Busyness                             | 0.039235175 |
| wavelet-HHH | gldm  | GrayLevelVariance                    | 2.580891157 |
| wavelet-HHH | gldm  | HighGrayLevelEmphasis                | 59.76824034 |
| wavelet-HHH | gldm  | DependenceEntropy                    | 5.177943716 |
| wavelet-HHH | gldm  | DependenceNonUniformity              | 31.17167382 |
| wavelet-HHH | gldm  | GrayLevelNonUniformity               | 42.31330472 |
| wavelet-HHH | gldm  | SmallDependenceEmphasis              | 0.182033262 |
| wavelet-HHH | gldm  | SmallDependenceHighGrayLevelEmphasis | 12.40150976 |
| wavelet-HHH | gldm  | DependenceNonUniformityNormalized    | 0.133784008 |
| wavelet-HHH | gldm  | LargeDependenceEmphasis              | 21.9527897  |
| wavelet-HHH | gldm  | LargeDependenceLowGrayLevelEmphasis  | 0.414119644 |
| wavelet-HHH | gldm  | DependenceVariance                   | 4.870710457 |
| wavelet-HHH | gldm  | LargeDependenceHighGrayLevelEmphasis | 1259.914163 |
| wavelet-HHH | gldm  | SmallDependenceLowGrayLevelEmphasis  | 0.007999678 |
| wavelet-HHH | gldm  | LowGrayLevelEmphasis                 | 0.024164248 |
| wavelet-HHH | glcm  | JointAverage                         | 7.532312389 |
| wavelet-HHH | glcm  | SumAverage                           | 15.06462478 |
| wavelet-HHH | glcm  | JointEntropy                         | 5.067665377 |
| wavelet-HHH | glcm  | ClusterShade                         | 0.45483101  |
| wavelet-HHH | glcm  | MaximumProbability                   | 0.077160253 |
| wavelet-HHH | glcm  | Idmn                                 | 0.968516338 |
| wavelet-HHH | glcm  | JointEnergy                          | 0.03843043  |
| wavelet-HHH | glcm  | Contrast                             | 5.006421513 |
| wavelet-HHH | glcm  | DifferenceEntropy                    | 2.327065494 |
| wavelet-HHH | glcm  | InverseVariance                      | 0.416372107 |
| wavelet-HHH | glcm  | DifferenceVariance                   | 1.911150183 |
| wavelet-HHH | glcm  | Idn                                  | 0.88149153  |
| wavelet-HHH | glcm  | Idm                                  | 0.409558741 |

|             |            |                                  |              |
|-------------|------------|----------------------------------|--------------|
| wavelet-HHH | glcm       | Correlation                      | -0.051258907 |
| wavelet-HHH | glcm       | Autocorrelation                  | 56.61405289  |
| wavelet-HHH | glcm       | SumEntropy                       | 3.040767849  |
| wavelet-HHH | glcm       | SumSquares                       | 2.380231963  |
| wavelet-HHH | glcm       | ClusterProminence                | 65.24050217  |
| wavelet-HHH | glcm       | Imc2                             | 0.581315346  |
| wavelet-HHH | glcm       | Imc1                             | -0.081462782 |
| wavelet-HHH | glcm       | DifferenceAverage                | 1.745046735  |
| wavelet-HHH | glcm       | Id                               | 0.477233323  |
| wavelet-HHH | glcm       | ClusterTendency                  | 4.514506341  |
| wavelet-HHH | firstorder | InterquartileRange               | 49.39968858  |
| wavelet-HHH | firstorder | Skewness                         | 0.011234116  |
| wavelet-HHH | firstorder | Uniformity                       | 0.181602166  |
| wavelet-HHH | firstorder | Median                           | 0.045535456  |
| wavelet-HHH | firstorder | Energy                           | 362039.6723  |
| wavelet-HHH | firstorder | RobustMeanAbsoluteDeviation      | 21.20393994  |
| wavelet-HHH | firstorder | MeanAbsoluteDeviation            | 30.79777893  |
| wavelet-HHH | firstorder | TotalEnergy                      | 9775071.151  |
| wavelet-HHH | firstorder | Maximum                          | 123.6357343  |
| wavelet-HHH | firstorder | RootMeanSquared                  | 39.41850246  |
| wavelet-HHH | firstorder | 90Percentile                     | 53.22993906  |
| wavelet-HHH | firstorder | Minimum                          | -157.5774285 |
| wavelet-HHH | firstorder | Entropy                          | 2.689494917  |
| wavelet-HHH | firstorder | Range                            | 281.2131628  |
| wavelet-HHH | firstorder | Variance                         | 1552.343188  |
| wavelet-HHH | firstorder | 10Percentile                     | -45.54383765 |
| wavelet-HHH | firstorder | Kurtosis                         | 3.745781169  |
| wavelet-HHH | firstorder | Mean                             | 1.21455679   |
| wavelet-HHH | glrlm      | ShortRunLowGrayLevelEmphasis     | 0.023124696  |
| wavelet-HHH | glrlm      | GrayLevelVariance                | 2.777032194  |
| wavelet-HHH | glrlm      | LowGrayLevelRunEmphasis          | 0.02487644   |
| wavelet-HHH | glrlm      | GrayLevelNonUniformityNormalized | 0.172954653  |
| wavelet-HHH | glrlm      | RunVariance                      | 0.158727532  |
| wavelet-HHH | glrlm      | GrayLevelNonUniformity           | 35.43942923  |
| wavelet-HHH | glrlm      | LongRunEmphasis                  | 1.455796264  |
| wavelet-HHH | glrlm      | ShortRunHighGrayLevelEmphasis    | 54.78121126  |
| wavelet-HHH | glrlm      | RunLengthNonUniformity           | 161.7736182  |
| wavelet-HHH | glrlm      | ShortRunEmphasis                 | 0.907811741  |
| wavelet-HHH | glrlm      | LongRunHighGrayLevelEmphasis     | 86.16363046  |
| wavelet-HHH | glrlm      | RunPercentage                    | 0.879498184  |
| wavelet-HHH | glrlm      | LongRunLowGrayLevelEmphasis      | 0.033552534  |
| wavelet-HHH | glrlm      | RunEntropy                       | 3.274164024  |
| wavelet-HHH | glrlm      | HighGrayLevelRunEmphasis         | 60.09460164  |
| wavelet-HHH | glrlm      | RunLengthNonUniformityNormalized | 0.787813933  |
| wavelet-HHH | glszm      | GrayLevelVariance                | 6.68537415   |
| wavelet-HHH | glszm      | ZoneVariance                     | 153.6286848  |
| wavelet-HHH | glszm      | GrayLevelNonUniformityNormalized | 0.139455782  |
| wavelet-HHH | glszm      | SizeZoneNonUniformityNormalized  | 0.339002268  |
| wavelet-HHH | glszm      | SizeZoneNonUniformity            | 14.23809524  |
| wavelet-HHH | glszm      | GrayLevelNonUniformity           | 5.857142857  |
| wavelet-HHH | glszm      | LargeAreaEmphasis                | 184.4047619  |
| wavelet-HHH | glszm      | SmallAreaHighGrayLevelEmphasis   | 44.34512367  |
| wavelet-HHH | glszm      | ZonePercentage                   | 0.180257511  |

|             |            |                                      |              |
|-------------|------------|--------------------------------------|--------------|
| wavelet-HHH | glszm      | LargeAreaLowGrayLevelEmphasis        | 3.515972048  |
| wavelet-HHH | glszm      | LargeAreaHighGrayLevelEmphasis       | 10215.7619   |
| wavelet-HHH | glszm      | HighGrayLevelZoneEmphasis            | 69.54761905  |
| wavelet-HHH | glszm      | SmallAreaEmphasis                    | 0.599176953  |
| wavelet-HHH | glszm      | LowGrayLevelZoneEmphasis             | 0.044564998  |
| wavelet-HHH | glszm      | ZoneEntropy                          | 4.451608494  |
| wavelet-HHH | glszm      | SmallAreaLowGrayLevelEmphasis        | 0.035876443  |
| wavelet-HHH | ngtdm      | Coarseness                           | 0.024848429  |
| wavelet-HHH | ngtdm      | Complexity                           | 57.33275983  |
| wavelet-HHH | ngtdm      | Strength                             | 0.822615851  |
| wavelet-HHH | ngtdm      | Contrast                             | 0.07815665   |
| wavelet-HHH | ngtdm      | Busyness                             | 0.525490371  |
| wavelet-HLL | gldm       | GrayLevelVariance                    | 20.36729356  |
| wavelet-HLL | gldm       | HighGrayLevelEmphasis                | 109.6008584  |
| wavelet-HLL | gldm       | DependenceEntropy                    | 5.736936012  |
| wavelet-HLL | gldm       | DependenceNonUniformity              | 36.44206009  |
| wavelet-HLL | gldm       | GrayLevelNonUniformity               | 26.03004292  |
| wavelet-HLL | gldm       | SmallDependenceEmphasis              | 0.259601311  |
| wavelet-HLL | gldm       | SmallDependenceHighGrayLevelEmphasis | 42.97905701  |
| wavelet-HLL | gldm       | DependenceNonUniformityNormalized    | 0.156403691  |
| wavelet-HLL | gldm       | LargeDependenceEmphasis              | 16.88841202  |
| wavelet-HLL | gldm       | LargeDependenceLowGrayLevelEmphasis  | 0.282437829  |
| wavelet-HLL | gldm       | DependenceVariance                   | 4.533036158  |
| wavelet-HLL | gldm       | LargeDependenceHighGrayLevelEmphasis | 1312.055794  |
| wavelet-HLL | gldm       | SmallDependenceLowGrayLevelEmphasis  | 0.009585325  |
| wavelet-HLL | gldm       | LowGrayLevelEmphasis                 | 0.024308995  |
| wavelet-HLL | glcm       | JointAverage                         | 9.117446914  |
| wavelet-HLL | glcm       | SumAverage                           | 18.23489383  |
| wavelet-HLL | glcm       | JointEntropy                         | 6.246853777  |
| wavelet-HLL | glcm       | ClusterShade                         | 535.9834371  |
| wavelet-HLL | glcm       | MaximumProbability                   | 0.048790979  |
| wavelet-HLL | glcm       | Idmn                                 | 0.973806519  |
| wavelet-HLL | glcm       | JointEnergy                          | 0.018591862  |
| wavelet-HLL | glcm       | Contrast                             | 21.17313599  |
| wavelet-HLL | glcm       | DifferenceEntropy                    | 2.971270641  |
| wavelet-HLL | glcm       | InverseVariance                      | 0.331669235  |
| wavelet-HLL | glcm       | DifferenceVariance                   | 11.24455024  |
| wavelet-HLL | glcm       | Idn                                  | 0.906166335  |
| wavelet-HLL | glcm       | Idm                                  | 0.329899765  |
| wavelet-HLL | glcm       | Correlation                          | 0.310116774  |
| wavelet-HLL | glcm       | Autocorrelation                      | 89.04931544  |
| wavelet-HLL | glcm       | SumEntropy                           | 4.131432929  |
| wavelet-HLL | glcm       | SumSquares                           | 16.45429754  |
| wavelet-HLL | glcm       | ClusterProminence                    | 14530.74012  |
| wavelet-HLL | glcm       | Imc2                                 | 0.862961215  |
| wavelet-HLL | glcm       | Imc1                                 | -0.211494344 |
| wavelet-HLL | glcm       | DifferenceAverage                    | 3.025251299  |
| wavelet-HLL | glcm       | Id                                   | 0.406942185  |
| wavelet-HLL | glcm       | ClusterTendency                      | 44.64405419  |
| wavelet-HLL | firstorder | InterquartileRange                   | 76.63003964  |
| wavelet-HLL | firstorder | Skewness                             | 1.799691265  |
| wavelet-HLL | firstorder | Uniformity                           | 0.111716922  |
| wavelet-HLL | firstorder | Median                               | -0.588105927 |

|             |            |                                  |              |
|-------------|------------|----------------------------------|--------------|
| wavelet-HLL | firstorder | Energy                           | 3053088.315  |
| wavelet-HLL | firstorder | RobustMeanAbsoluteDeviation      | 33.93873438  |
| wavelet-HLL | firstorder | MeanAbsoluteDeviation            | 73.35760674  |
| wavelet-HLL | firstorder | TotalEnergy                      | 82433384.5   |
| wavelet-HLL | firstorder | Maximum                          | 448.7922782  |
| wavelet-HLL | firstorder | RootMeanSquared                  | 114.4700106  |
| wavelet-HLL | firstorder | 90Percentile                     | 190.9198335  |
| wavelet-HLL | firstorder | Minimum                          | -195.2508769 |
| wavelet-HLL | firstorder | Entropy                          | 3.625485313  |
| wavelet-HLL | firstorder | Range                            | 644.0431551  |
| wavelet-HLL | firstorder | Variance                         | 12529.43617  |
| wavelet-HLL | firstorder | 10Percentile                     | -72.43481011 |
| wavelet-HLL | firstorder | Kurtosis                         | 6.60168491   |
| wavelet-HLL | firstorder | Mean                             | 23.95719422  |
| wavelet-HLL | grlm       | ShortRunLowGrayLevelEmphasis     | 0.023719168  |
| wavelet-HLL | grlm       | GrayLevelVariance                | 21.78409449  |
| wavelet-HLL | grlm       | LowGrayLevelRunEmphasis          | 0.025030818  |
| wavelet-HLL | grlm       | GrayLevelNonUniformityNormalized | 0.105309974  |
| wavelet-HLL | grlm       | RunVariance                      | 0.12482579   |
| wavelet-HLL | grlm       | GrayLevelNonUniformity           | 22.16355432  |
| wavelet-HLL | grlm       | LongRunEmphasis                  | 1.355216704  |
| wavelet-HLL | grlm       | ShortRunHighGrayLevelEmphasis    | 107.2060342  |
| wavelet-HLL | grlm       | RunLengthNonUniformity           | 174.90801    |
| wavelet-HLL | grlm       | ShortRunEmphasis                 | 0.927312706  |
| wavelet-HLL | grlm       | LongRunHighGrayLevelEmphasis     | 140.9272953  |
| wavelet-HLL | grlm       | RunPercentage                    | 0.903268405  |
| wavelet-HLL | grlm       | LongRunLowGrayLevelEmphasis      | 0.031205408  |
| wavelet-HLL | grlm       | RunEntropy                       | 4.10548362   |
| wavelet-HLL | grlm       | HighGrayLevelRunEmphasis         | 112.9386737  |
| wavelet-HLL | grlm       | RunLengthNonUniformityNormalized | 0.829154605  |
| wavelet-HLL | glszm      | GrayLevelVariance                | 40.26381012  |
| wavelet-HLL | glszm      | ZoneVariance                     | 45.16236085  |
| wavelet-HLL | glszm      | GrayLevelNonUniformityNormalized | 0.064902331  |
| wavelet-HLL | glszm      | SizeZoneNonUniformityNormalized  | 0.377021634  |
| wavelet-HLL | glszm      | SizeZoneNonUniformity            | 26.01449275  |
| wavelet-HLL | glszm      | GrayLevelNonUniformity           | 4.47826087   |
| wavelet-HLL | glszm      | LargeAreaEmphasis                | 56.56521739  |
| wavelet-HLL | glszm      | SmallAreaHighGrayLevelEmphasis   | 118.4570423  |
| wavelet-HLL | glszm      | ZonePercentage                   | 0.296137339  |
| wavelet-HLL | glszm      | LargeAreaLowGrayLevelEmphasis    | 0.905455233  |
| wavelet-HLL | glszm      | LargeAreaHighGrayLevelEmphasis   | 4185.202899  |
| wavelet-HLL | glszm      | HighGrayLevelZoneEmphasis        | 169.6956522  |
| wavelet-HLL | glszm      | SmallAreaEmphasis                | 0.624880401  |
| wavelet-HLL | glszm      | LowGrayLevelZoneEmphasis         | 0.037279353  |
| wavelet-HLL | glszm      | ZoneEntropy                      | 5.124232472  |
| wavelet-HLL | glszm      | SmallAreaLowGrayLevelEmphasis    | 0.027034835  |
| wavelet-HLL | ngtdm      | Coarseness                       | 0.025045618  |
| wavelet-HLL | ngtdm      | Complexity                       | 591.3025846  |
| wavelet-HLL | ngtdm      | Strength                         | 8.218994074  |
| wavelet-HLL | ngtdm      | Contrast                         | 0.16956864   |
| wavelet-HLL | ngtdm      | Busyness                         | 0.160291958  |
| wavelet-LHL | gldm       | GrayLevelVariance                | 67.33964523  |
| wavelet-LHL | gldm       | HighGrayLevelEmphasis            | 2969.450644  |

|             |            |                                      |              |
|-------------|------------|--------------------------------------|--------------|
| wavelet-LHL | gldm       | DependenceEntropy                    | 5.870624234  |
| wavelet-LHL | gldm       | DependenceNonUniformity              | 50.87124464  |
| wavelet-LHL | gldm       | GrayLevelNonUniformity               | 17.25751073  |
| wavelet-LHL | gldm       | SmallDependenceEmphasis              | 0.352426644  |
| wavelet-LHL | gldm       | SmallDependenceHighGrayLevelEmphasis | 962.5475203  |
| wavelet-LHL | gldm       | DependenceNonUniformityNormalized    | 0.218331522  |
| wavelet-LHL | gldm       | LargeDependenceEmphasis              | 8.545064378  |
| wavelet-LHL | gldm       | LargeDependenceLowGrayLevelEmphasis  | 0.007196088  |
| wavelet-LHL | gldm       | DependenceVariance                   | 1.758256737  |
| wavelet-LHL | gldm       | LargeDependenceHighGrayLevelEmphasis | 26337.38197  |
| wavelet-LHL | gldm       | SmallDependenceLowGrayLevelEmphasis  | 0.004516495  |
| wavelet-LHL | gldm       | LowGrayLevelEmphasis                 | 0.004728395  |
| wavelet-LHL | glcm       | JointAverage                         | 54.61203906  |
| wavelet-LHL | glcm       | SumAverage                           | 109.2240781  |
| wavelet-LHL | glcm       | JointEntropy                         | 7.012348584  |
| wavelet-LHL | glcm       | ClusterShade                         | -4812.437166 |
| wavelet-LHL | glcm       | MaximumProbability                   | 0.024057572  |
| wavelet-LHL | glcm       | ldmn                                 | 0.986260007  |
| wavelet-LHL | glcm       | JointEnergy                          | 0.009398756  |
| wavelet-LHL | glcm       | Contrast                             | 72.53589033  |
| wavelet-LHL | glcm       | DifferenceEntropy                    | 3.407963779  |
| wavelet-LHL | glcm       | InverseVariance                      | 0.253343261  |
| wavelet-LHL | glcm       | DifferenceVariance                   | 47.78509719  |
| wavelet-LHL | glcm       | ldn                                  | 0.937683019  |
| wavelet-LHL | glcm       | ldm                                  | 0.238798135  |
| wavelet-LHL | glcm       | Correlation                          | 0.266497494  |
| wavelet-LHL | glcm       | Autocorrelation                      | 2994.558288  |
| wavelet-LHL | glcm       | SumEntropy                           | 4.53878847   |
| wavelet-LHL | glcm       | SumSquares                           | 48.32846     |
| wavelet-LHL | glcm       | ClusterProminence                    | 333103.5183  |
| wavelet-LHL | glcm       | lmc2                                 | 0.910115345  |
| wavelet-LHL | glcm       | lmc1                                 | -0.228509752 |
| wavelet-LHL | glcm       | DifferenceAverage                    | 4.768022967  |
| wavelet-LHL | glcm       | ld                                   | 0.326752763  |
| wavelet-LHL | glcm       | ClusterTendency                      | 120.7779497  |
| wavelet-LHL | firstorder | InterquartileRange                   | 134.580258   |
| wavelet-LHL | firstorder | Skewness                             | -3.700685784 |
| wavelet-LHL | firstorder | Uniformity                           | 0.07406657   |
| wavelet-LHL | firstorder | Median                               | -12.6818723  |
| wavelet-LHL | firstorder | Energy                               | 10221739.73  |
| wavelet-LHL | firstorder | RobustMeanAbsoluteDeviation          | 54.75252468  |
| wavelet-LHL | firstorder | MeanAbsoluteDeviation                | 109.8157299  |
| wavelet-LHL | firstorder | TotalEnergy                          | 275986972.6  |
| wavelet-LHL | firstorder | Maximum                              | 217.0080702  |
| wavelet-LHL | firstorder | RootMeanSquared                      | 209.4519696  |
| wavelet-LHL | firstorder | 90Percentile                         | 115.0579308  |
| wavelet-LHL | firstorder | Minimum                              | -1367.316887 |
| wavelet-LHL | firstorder | Entropy                              | 4.023912624  |
| wavelet-LHL | firstorder | Range                                | 1584.324957  |
| wavelet-LHL | firstorder | Variance                             | 42215.78931  |
| wavelet-LHL | firstorder | 10Percentile                         | -139.128132  |
| wavelet-LHL | firstorder | Kurtosis                             | 19.54658583  |
| wavelet-LHL | firstorder | Mean                                 | -40.67355738 |

|             |       |                                      |             |
|-------------|-------|--------------------------------------|-------------|
| wavelet-LHL | grlm  | ShortRunLowGrayLevelEmphasis         | 0.005008352 |
| wavelet-LHL | grlm  | GrayLevelVariance                    | 70.93617262 |
| wavelet-LHL | grlm  | LowGrayLevelRunEmphasis              | 0.005023185 |
| wavelet-LHL | grlm  | GrayLevelNonUniformityNormalized     | 0.073395347 |
| wavelet-LHL | grlm  | RunVariance                          | 0.078816269 |
| wavelet-LHL | grlm  | GrayLevelNonUniformity               | 16.04250524 |
| wavelet-LHL | grlm  | LongRunEmphasis                      | 1.21864792  |
| wavelet-LHL | grlm  | ShortRunHighGrayLevelEmphasis        | 2818.572041 |
| wavelet-LHL | grlm  | RunLengthNonUniformity               | 194.5687432 |
| wavelet-LHL | grlm  | ShortRunEmphasis                     | 0.954348218 |
| wavelet-LHL | grlm  | LongRunHighGrayLevelEmphasis         | 3632.833327 |
| wavelet-LHL | grlm  | RunPercentage                        | 0.938263453 |
| wavelet-LHL | grlm  | LongRunLowGrayLevelEmphasis          | 0.005095325 |
| wavelet-LHL | grlm  | RunEntropy                           | 4.318086655 |
| wavelet-LHL | grlm  | HighGrayLevelRunEmphasis             | 2960.996549 |
| wavelet-LHL | grlm  | RunLengthNonUniformityNormalized     | 0.888495337 |
| wavelet-LHL | glszm | GrayLevelVariance                    | 140.0724826 |
| wavelet-LHL | glszm | ZoneVariance                         | 8.390516493 |
| wavelet-LHL | glszm | GrayLevelNonUniformityNormalized     | 0.059678819 |
| wavelet-LHL | glszm | SizeZoneNonUniformityNormalized      | 0.392144097 |
| wavelet-LHL | glszm | SizeZoneNonUniformity                | 37.64583333 |
| wavelet-LHL | glszm | GrayLevelNonUniformity               | 5.729166667 |
| wavelet-LHL | glszm | LargeAreaEmphasis                    | 14.28125    |
| wavelet-LHL | glszm | SmallAreaHighGrayLevelEmphasis       | 1699.098163 |
| wavelet-LHL | glszm | ZonePercentage                       | 0.412017167 |
| wavelet-LHL | glszm | LargeAreaLowGrayLevelEmphasis        | 0.015406839 |
| wavelet-LHL | glszm | LargeAreaHighGrayLevelEmphasis       | 43262.75    |
| wavelet-LHL | glszm | HighGrayLevelZoneEmphasis            | 2803.0625   |
| wavelet-LHL | glszm | SmallAreaEmphasis                    | 0.649802502 |
| wavelet-LHL | glszm | LowGrayLevelZoneEmphasis             | 0.011007655 |
| wavelet-LHL | glszm | ZoneEntropy                          | 5.561372266 |
| wavelet-LHL | glszm | SmallAreaLowGrayLevelEmphasis        | 0.010894662 |
| wavelet-LHL | ngtdm | Coarseness                           | 0.024459554 |
| wavelet-LHL | ngtdm | Complexity                           | 2184.603642 |
| wavelet-LHL | ngtdm | Strength                             | 32.62526627 |
| wavelet-LHL | ngtdm | Contrast                             | 0.700997246 |
| wavelet-LHL | ngtdm | Busyness                             | 0.024732653 |
| wavelet-LHH | gldm  | GrayLevelVariance                    | 8.85811122  |
| wavelet-LHH | gldm  | HighGrayLevelEmphasis                | 80.48927039 |
| wavelet-LHH | gldm  | DependenceEntropy                    | 5.578571863 |
| wavelet-LHH | gldm  | DependenceNonUniformity              | 43.88412017 |
| wavelet-LHH | gldm  | GrayLevelNonUniformity               | 23.31759657 |
| wavelet-LHH | gldm  | SmallDependenceEmphasis              | 0.321788318 |
| wavelet-LHH | gldm  | SmallDependenceHighGrayLevelEmphasis | 25.04106507 |
| wavelet-LHH | gldm  | DependenceNonUniformityNormalized    | 0.188343863 |
| wavelet-LHH | gldm  | LargeDependenceEmphasis              | 11.59227468 |
| wavelet-LHH | gldm  | LargeDependenceLowGrayLevelEmphasis  | 0.199484557 |
| wavelet-LHH | gldm  | DependenceVariance                   | 2.847943414 |
| wavelet-LHH | gldm  | LargeDependenceHighGrayLevelEmphasis | 954.6351931 |
| wavelet-LHH | gldm  | SmallDependenceLowGrayLevelEmphasis  | 0.018758851 |
| wavelet-LHH | gldm  | LowGrayLevelEmphasis                 | 0.032652823 |
| wavelet-LHH | glcm  | JointAverage                         | 8.524674947 |
| wavelet-LHH | glcm  | SumAverage                           | 17.04934989 |

|             |            |                                  |              |
|-------------|------------|----------------------------------|--------------|
| wavelet-LHH | glcm       | JointEntropy                     | 6.429029144  |
| wavelet-LHH | glcm       | ClusterShade                     | -4.840238794 |
| wavelet-LHH | glcm       | MaximumProbability               | 0.037626115  |
| wavelet-LHH | glcm       | Idmn                             | 0.95620666   |
| wavelet-LHH | glcm       | JointEnergy                      | 0.014736021  |
| wavelet-LHH | glcm       | Contrast                         | 16.41579074  |
| wavelet-LHH | glcm       | DifferenceEntropy                | 3.063852448  |
| wavelet-LHH | glcm       | InverseVariance                  | 0.272568501  |
| wavelet-LHH | glcm       | DifferenceVariance               | 6.236617643  |
| wavelet-LHH | glcm       | Idn                              | 0.862282577  |
| wavelet-LHH | glcm       | Idm                              | 0.269990892  |
| wavelet-LHH | glcm       | Correlation                      | -0.001157765 |
| wavelet-LHH | glcm       | Autocorrelation                  | 72.68903254  |
| wavelet-LHH | glcm       | SumEntropy                       | 3.917448695  |
| wavelet-LHH | glcm       | SumSquares                       | 8.221791683  |
| wavelet-LHH | glcm       | ClusterProminence                | 913.5417815  |
| wavelet-LHH | glcm       | Imc2                             | 0.801023869  |
| wavelet-LHH | glcm       | Imc1                             | -0.150106896 |
| wavelet-LHH | glcm       | DifferenceAverage                | 3.150213584  |
| wavelet-LHH | glcm       | Id                               | 0.360524291  |
| wavelet-LHH | glcm       | ClusterTendency                  | 16.47137599  |
| wavelet-LHH | firstorder | InterquartileRange               | 101.1451338  |
| wavelet-LHH | firstorder | Skewness                         | 0.051180468  |
| wavelet-LHH | firstorder | Uniformity                       | 0.100075522  |
| wavelet-LHH | firstorder | Median                           | -4.972836387 |
| wavelet-LHH | firstorder | Energy                           | 1264271.523  |
| wavelet-LHH | firstorder | RobustMeanAbsoluteDeviation      | 40.10129236  |
| wavelet-LHH | firstorder | MeanAbsoluteDeviation            | 58.53707806  |
| wavelet-LHH | firstorder | TotalEnergy                      | 34135331.12  |
| wavelet-LHH | firstorder | Maximum                          | 232.8241207  |
| wavelet-LHH | firstorder | RootMeanSquared                  | 73.6617814   |
| wavelet-LHH | firstorder | 90Percentile                     | 90.37906201  |
| wavelet-LHH | firstorder | Minimum                          | -199.3494455 |
| wavelet-LHH | firstorder | Entropy                          | 3.551718891  |
| wavelet-LHH | firstorder | Range                            | 432.1735662  |
| wavelet-LHH | firstorder | Variance                         | 5424.216945  |
| wavelet-LHH | firstorder | 10Percentile                     | -99.19629291 |
| wavelet-LHH | firstorder | Kurtosis                         | 3.096394759  |
| wavelet-LHH | firstorder | Mean                             | -1.35686918  |
| wavelet-LHH | grlm       | ShortRunLowGrayLevelEmphasis     | 0.032944568  |
| wavelet-LHH | grlm       | GrayLevelVariance                | 9.191467391  |
| wavelet-LHH | grlm       | LowGrayLevelRunEmphasis          | 0.033935189  |
| wavelet-LHH | grlm       | GrayLevelNonUniformityNormalized | 0.097294049  |
| wavelet-LHH | grlm       | RunVariance                      | 0.093904404  |
| wavelet-LHH | grlm       | GrayLevelNonUniformity           | 20.97063588  |
| wavelet-LHH | grlm       | LongRunEmphasis                  | 1.267965518  |
| wavelet-LHH | grlm       | ShortRunHighGrayLevelEmphasis    | 75.5972459   |
| wavelet-LHH | grlm       | RunLengthNonUniformity           | 186.2437367  |
| wavelet-LHH | grlm       | ShortRunEmphasis                 | 0.943026307  |
| wavelet-LHH | grlm       | LongRunHighGrayLevelEmphasis     | 102.3212121  |
| wavelet-LHH | grlm       | RunPercentage                    | 0.924727633  |
| wavelet-LHH | grlm       | LongRunLowGrayLevelEmphasis      | 0.03849765   |
| wavelet-LHH | grlm       | RunEntropy                       | 3.921249438  |

|             |       |                                      |             |
|-------------|-------|--------------------------------------|-------------|
| wavelet-LHH | grlm  | HighGrayLevelRunEmphasis             | 80.31709838 |
| wavelet-LHH | grlm  | RunLengthNonUniformityNormalized     | 0.862595734 |
| wavelet-LHH | glszm | GrayLevelVariance                    | 14.14612234 |
| wavelet-LHH | glszm | ZoneVariance                         | 18.10331616 |
| wavelet-LHH | glszm | GrayLevelNonUniformityNormalized     | 0.085480248 |
| wavelet-LHH | glszm | SizeZoneNonUniformityNormalized      | 0.401770379 |
| wavelet-LHH | glszm | SizeZoneNonUniformity                | 34.95402299 |
| wavelet-LHH | glszm | GrayLevelNonUniformity               | 7.436781609 |
| wavelet-LHH | glszm | LargeAreaEmphasis                    | 25.27586207 |
| wavelet-LHH | glszm | SmallAreaHighGrayLevelEmphasis       | 50.6171659  |
| wavelet-LHH | glszm | ZonePercentage                       | 0.373390558 |
| wavelet-LHH | glszm | LargeAreaLowGrayLevelEmphasis        | 0.403931675 |
| wavelet-LHH | glszm | LargeAreaHighGrayLevelEmphasis       | 2166.505747 |
| wavelet-LHH | glszm | HighGrayLevelZoneEmphasis            | 77.22988506 |
| wavelet-LHH | glszm | SmallAreaEmphasis                    | 0.656285081 |
| wavelet-LHH | glszm | LowGrayLevelZoneEmphasis             | 0.055912426 |
| wavelet-LHH | glszm | ZoneEntropy                          | 5.036005243 |
| wavelet-LHH | glszm | SmallAreaLowGrayLevelEmphasis        | 0.045350215 |
| wavelet-LHH | ngtdm | Coarseness                           | 0.024560992 |
| wavelet-LHH | ngtdm | Complexity                           | 265.6376437 |
| wavelet-LHH | ngtdm | Strength                             | 2.074446105 |
| wavelet-LHH | ngtdm | Contrast                             | 0.156734255 |
| wavelet-LHH | ngtdm | Busyness                             | 0.285396741 |
| wavelet-LLH | gldm  | GrayLevelVariance                    | 20.21956566 |
| wavelet-LLH | gldm  | HighGrayLevelEmphasis                | 247.0257511 |
| wavelet-LLH | gldm  | DependenceEntropy                    | 5.87748764  |
| wavelet-LLH | gldm  | DependenceNonUniformity              | 56.95708155 |
| wavelet-LLH | gldm  | GrayLevelNonUniformity               | 15.21459227 |
| wavelet-LLH | gldm  | SmallDependenceEmphasis              | 0.409293038 |
| wavelet-LLH | gldm  | SmallDependenceHighGrayLevelEmphasis | 103.2561826 |
| wavelet-LLH | gldm  | DependenceNonUniformityNormalized    | 0.244450994 |
| wavelet-LLH | gldm  | LargeDependenceEmphasis              | 7.060085837 |
| wavelet-LLH | gldm  | LargeDependenceLowGrayLevelEmphasis  | 0.043400328 |
| wavelet-LLH | gldm  | DependenceVariance                   | 1.508298182 |
| wavelet-LLH | gldm  | LargeDependenceHighGrayLevelEmphasis | 1767.72103  |
| wavelet-LLH | gldm  | SmallDependenceLowGrayLevelEmphasis  | 0.006876061 |
| wavelet-LLH | gldm  | LowGrayLevelEmphasis                 | 0.010312267 |
| wavelet-LLH | glcm  | JointAverage                         | 15.05257525 |
| wavelet-LLH | glcm  | SumAverage                           | 30.10515051 |
| wavelet-LLH | glcm  | JointEntropy                         | 7.233265661 |
| wavelet-LLH | glcm  | ClusterShade                         | 17.77334161 |
| wavelet-LLH | glcm  | MaximumProbability                   | 0.020036061 |
| wavelet-LLH | glcm  | ldmn                                 | 0.954689965 |
| wavelet-LLH | glcm  | JointEnergy                          | 0.007741768 |
| wavelet-LLH | glcm  | Contrast                             | 35.3282803  |
| wavelet-LLH | glcm  | DifferenceEntropy                    | 3.462642039 |
| wavelet-LLH | glcm  | InverseVariance                      | 0.204752716 |
| wavelet-LLH | glcm  | DifferenceVariance                   | 11.90931118 |
| wavelet-LLH | glcm  | ldn                                  | 0.859247455 |
| wavelet-LLH | glcm  | ldm                                  | 0.198117406 |
| wavelet-LLH | glcm  | Correlation                          | 0.118209802 |
| wavelet-LLH | glcm  | Autocorrelation                      | 229.0426738 |
| wavelet-LLH | glcm  | SumEntropy                           | 4.548039423 |



|             |            |                                  |              |
|-------------|------------|----------------------------------|--------------|
| wavelet-LLH | glcm       | SumSquares                       | 20.11156092  |
| wavelet-LLH | glcm       | ClusterProminence                | 5515.02019   |
| wavelet-LLH | glcm       | Imc2                             | 0.922150981  |
| wavelet-LLH | glcm       | Imc1                             | -0.235500544 |
| wavelet-LLH | glcm       | DifferenceAverage                | 4.66096159   |
| wavelet-LLH | glcm       | Id                               | 0.290646187  |
| wavelet-LLH | glcm       | ClusterTendency                  | 45.11796339  |
| wavelet-LLH | firstorder | InterquartileRange               | 165.6934133  |
| wavelet-LLH | firstorder | Skewness                         | -0.047575109 |
| wavelet-LLH | firstorder | Uniformity                       | 0.065298679  |
| wavelet-LLH | firstorder | Median                           | -9.237148753 |
| wavelet-LLH | firstorder | Energy                           | 2965349.164  |
| wavelet-LLH | firstorder | RobustMeanAbsoluteDeviation      | 65.32074725  |
| wavelet-LLH | firstorder | MeanAbsoluteDeviation            | 90.89498728  |
| wavelet-LLH | firstorder | TotalEnergy                      | 80064427.44  |
| wavelet-LLH | firstorder | Maximum                          | 259.066441   |
| wavelet-LLH | firstorder | RootMeanSquared                  | 112.8132104  |
| wavelet-LLH | firstorder | 90Percentile                     | 141.1336876  |
| wavelet-LLH | firstorder | Minimum                          | -372.7427932 |
| wavelet-LLH | firstorder | Entropy                          | 4.115797982  |
| wavelet-LLH | firstorder | Range                            | 631.8092342  |
| wavelet-LLH | firstorder | Variance                         | 12608.62293  |
| wavelet-LLH | firstorder | 10Percentile                     | -160.3988832 |
| wavelet-LLH | firstorder | Kurtosis                         | 2.671194916  |
| wavelet-LLH | firstorder | Mean                             | -10.87186809 |
| wavelet-LLH | gllm       | ShortRunLowGrayLevelEmphasis     | 0.010349693  |
| wavelet-LLH | gllm       | GrayLevelVariance                | 20.4435117   |
| wavelet-LLH | gllm       | LowGrayLevelRunEmphasis          | 0.010574566  |
| wavelet-LLH | gllm       | GrayLevelNonUniformityNormalized | 0.064807325  |
| wavelet-LLH | gllm       | RunVariance                      | 0.059773416  |
| wavelet-LLH | gllm       | GrayLevelNonUniformity           | 14.31139635  |
| wavelet-LLH | gllm       | LongRunEmphasis                  | 1.17713381   |
| wavelet-LLH | gllm       | ShortRunHighGrayLevelEmphasis    | 237.0619185  |
| wavelet-LLH | gllm       | RunLengthNonUniformity           | 199.7103821  |
| wavelet-LLH | gllm       | ShortRunEmphasis                 | 0.96018954   |
| wavelet-LLH | gllm       | LongRunHighGrayLevelEmphasis     | 290.6455222  |
| wavelet-LLH | gllm       | RunPercentage                    | 0.94783757   |
| wavelet-LLH | gllm       | LongRunLowGrayLevelEmphasis      | 0.011578118  |
| wavelet-LLH | gllm       | RunEntropy                       | 4.364860675  |
| wavelet-LLH | gllm       | HighGrayLevelRunEmphasis         | 246.9885605  |
| wavelet-LLH | gllm       | RunLengthNonUniformityNormalized | 0.902302565  |
| wavelet-LLH | glszm      | GrayLevelVariance                | 24.91764987  |
| wavelet-LLH | glszm      | ZoneVariance                     | 4.93104273   |
| wavelet-LLH | glszm      | GrayLevelNonUniformityNormalized | 0.058832908  |
| wavelet-LLH | glszm      | SizeZoneNonUniformityNormalized  | 0.432397959  |
| wavelet-LLH | glszm      | SizeZoneNonUniformity            | 48.42857143  |
| wavelet-LLH | glszm      | GrayLevelNonUniformity           | 6.589285714  |
| wavelet-LLH | glszm      | LargeAreaEmphasis                | 9.258928571  |
| wavelet-LLH | glszm      | SmallAreaHighGrayLevelEmphasis   | 174.4857097  |
| wavelet-LLH | glszm      | ZonePercentage                   | 0.480686695  |
| wavelet-LLH | glszm      | LargeAreaLowGrayLevelEmphasis    | 0.059317803  |
| wavelet-LLH | glszm      | LargeAreaHighGrayLevelEmphasis   | 2227.919643  |
| wavelet-LLH | glszm      | HighGrayLevelZoneEmphasis        | 251.2589286  |

|             |            |                                      |              |
|-------------|------------|--------------------------------------|--------------|
| wavelet-LLH | glszm      | SmallAreaEmphasis                    | 0.682242665  |
| wavelet-LLH | glszm      | LowGrayLevelZoneEmphasis             | 0.015273597  |
| wavelet-LLH | glszm      | ZoneEntropy                          | 5.357179561  |
| wavelet-LLH | glszm      | SmallAreaLowGrayLevelEmphasis        | 0.013311151  |
| wavelet-LLH | ngtdm      | Coarseness                           | 0.024050963  |
| wavelet-LLH | ngtdm      | Complexity                           | 689.7527841  |
| wavelet-LLH | ngtdm      | Strength                             | 3.919178152  |
| wavelet-LLH | ngtdm      | Contrast                             | 0.271744134  |
| wavelet-LLH | ngtdm      | Busyness                             | 0.141999321  |
| wavelet-LLL | gldm       | GrayLevelVariance                    | 353.0049918  |
| wavelet-LLL | gldm       | HighGrayLevelEmphasis                | 3431.111588  |
| wavelet-LLL | gldm       | DependenceEntropy                    | 6.610742503  |
| wavelet-LLL | gldm       | DependenceNonUniformity              | 96.70815451  |
| wavelet-LLL | gldm       | GrayLevelNonUniformity               | 4.407725322  |
| wavelet-LLL | gldm       | SmallDependenceEmphasis              | 0.649484979  |
| wavelet-LLL | gldm       | SmallDependenceHighGrayLevelEmphasis | 1974.432433  |
| wavelet-LLL | gldm       | DependenceNonUniformityNormalized    | 0.415056457  |
| wavelet-LLL | gldm       | LargeDependenceEmphasis              | 3.497854077  |
| wavelet-LLL | gldm       | LargeDependenceLowGrayLevelEmphasis  | 0.005671607  |
| wavelet-LLL | gldm       | DependenceVariance                   | 0.79585183   |
| wavelet-LLL | gldm       | LargeDependenceHighGrayLevelEmphasis | 14144.18455  |
| wavelet-LLL | gldm       | SmallDependenceLowGrayLevelEmphasis  | 0.004846153  |
| wavelet-LLL | gldm       | LowGrayLevelEmphasis                 | 0.004954554  |
| wavelet-LLL | glcm       | JointAverage                         | 56.5071532   |
| wavelet-LLL | glcm       | SumAverage                           | 113.0143064  |
| wavelet-LLL | glcm       | JointEntropy                         | 8.148113551  |
| wavelet-LLL | glcm       | ClusterShade                         | -17394.06872 |
| wavelet-LLL | glcm       | MaximumProbability                   | 0.010359935  |
| wavelet-LLL | glcm       | ldmn                                 | 0.982225742  |
| wavelet-LLL | glcm       | JointEnergy                          | 0.003739531  |
| wavelet-LLL | glcm       | Contrast                             | 174.1654128  |
| wavelet-LLL | glcm       | DifferenceEntropy                    | 4.482779295  |
| wavelet-LLL | glcm       | InverseVariance                      | 0.108264519  |
| wavelet-LLL | glcm       | DifferenceVariance                   | 61.74791241  |
| wavelet-LLL | glcm       | ldn                                  | 0.909248797  |
| wavelet-LLL | glcm       | ldm                                  | 0.103631713  |
| wavelet-LLL | glcm       | Correlation                          | 0.710321237  |
| wavelet-LLL | glcm       | Autocorrelation                      | 3407.427441  |
| wavelet-LLL | glcm       | SumEntropy                           | 6.253271004  |
| wavelet-LLL | glcm       | SumSquares                           | 301.1201263  |
| wavelet-LLL | glcm       | ClusterProminence                    | 2688870.157  |
| wavelet-LLL | glcm       | lmc2                                 | 0.999521171  |
| wavelet-LLL | glcm       | lmc1                                 | -0.599777478 |
| wavelet-LLL | glcm       | DifferenceAverage                    | 10.19195229  |
| wavelet-LLL | glcm       | ld                                   | 0.18326081   |
| wavelet-LLL | glcm       | ClusterTendency                      | 1030.315092  |
| wavelet-LLL | firstorder | InterquartileRange                   | 692.2295003  |
| wavelet-LLL | firstorder | Skewness                             | -0.485296895 |
| wavelet-LLL | firstorder | Uniformity                           | 0.018917276  |
| wavelet-LLL | firstorder | Median                               | -676.074207  |
| wavelet-LLL | firstorder | Energy                               | 182603118.9  |
| wavelet-LLL | firstorder | RobustMeanAbsoluteDeviation          | 290.1442178  |
| wavelet-LLL | firstorder | MeanAbsoluteDeviation                | 390.418424   |

|             |            |                                  |              |
|-------------|------------|----------------------------------|--------------|
| wavelet-LLL | firstorder | TotalEnergy                      | 4930284209   |
| wavelet-LLL | firstorder | Maximum                          | 268.6031789  |
| wavelet-LLL | firstorder | RootMeanSquared                  | 885.2707907  |
| wavelet-LLL | firstorder | 90Percentile                     | -209.8738253 |
| wavelet-LLL | firstorder | Minimum                          | -2123.193741 |
| wavelet-LLL | firstorder | Entropy                          | 5.919146854  |
| wavelet-LLL | firstorder | Range                            | 2391.79692   |
| wavelet-LLL | firstorder | Variance                         | 219975.0381  |
| wavelet-LLL | firstorder | 10Percentile                     | -1450.394187 |
| wavelet-LLL | firstorder | Kurtosis                         | 2.563241265  |
| wavelet-LLL | firstorder | Mean                             | -750.8191092 |
| wavelet-LLL | grlm       | ShortRunLowGrayLevelEmphasis     | 0.005068083  |
| wavelet-LLL | grlm       | GrayLevelVariance                | 355.6419321  |
| wavelet-LLL | grlm       | LowGrayLevelRunEmphasis          | 0.005073563  |
| wavelet-LLL | grlm       | GrayLevelNonUniformityNormalized | 0.01871053   |
| wavelet-LLL | grlm       | RunVariance                      | 0.027455737  |
| wavelet-LLL | grlm       | GrayLevelNonUniformity           | 4.251748496  |
| wavelet-LLL | grlm       | LongRunEmphasis                  | 1.079359652  |
| wavelet-LLL | grlm       | ShortRunHighGrayLevelEmphasis    | 3332.967721  |
| wavelet-LLL | grlm       | RunLengthNonUniformity           | 216.6285154  |
| wavelet-LLL | grlm       | ShortRunEmphasis                 | 0.981672847  |
| wavelet-LLL | grlm       | LongRunHighGrayLevelEmphasis     | 3747.368187  |
| wavelet-LLL | grlm       | RunPercentage                    | 0.975239353  |
| wavelet-LLL | grlm       | LongRunLowGrayLevelEmphasis      | 0.005096855  |
| wavelet-LLL | grlm       | RunEntropy                       | 6.001585328  |
| wavelet-LLL | grlm       | HighGrayLevelRunEmphasis         | 3410.487806  |
| wavelet-LLL | grlm       | RunLengthNonUniformityNormalized | 0.953058463  |
| wavelet-LLL | glszm      | GrayLevelVariance                | 383.7432526  |
| wavelet-LLL | glszm      | ZoneVariance                     | 0.70384083   |
| wavelet-LLL | glszm      | GrayLevelNonUniformityNormalized | 0.01716263   |
| wavelet-LLL | glszm      | SizeZoneNonUniformityNormalized  | 0.621107266  |
| wavelet-LLL | glszm      | SizeZoneNonUniformity            | 105.5882353  |
| wavelet-LLL | glszm      | GrayLevelNonUniformity           | 2.917647059  |
| wavelet-LLL | glszm      | LargeAreaEmphasis                | 2.582352941  |
| wavelet-LLL | glszm      | SmallAreaHighGrayLevelEmphasis   | 2394.403595  |
| wavelet-LLL | glszm      | ZonePercentage                   | 0.729613734  |
| wavelet-LLL | glszm      | LargeAreaLowGrayLevelEmphasis    | 0.007129705  |
| wavelet-LLL | glszm      | LargeAreaHighGrayLevelEmphasis   | 9936.029412  |
| wavelet-LLL | glszm      | HighGrayLevelZoneEmphasis        | 3143.082353  |
| wavelet-LLL | glszm      | SmallAreaEmphasis                | 0.815227124  |
| wavelet-LLL | glszm      | LowGrayLevelZoneEmphasis         | 0.006679326  |
| wavelet-LLL | glszm      | ZoneEntropy                      | 6.423961269  |
| wavelet-LLL | glszm      | SmallAreaLowGrayLevelEmphasis    | 0.006618993  |
| wavelet-LLL | ngtdm      | Coarseness                       | 0.044284016  |
| wavelet-LLL | ngtdm      | Complexity                       | 12158.42876  |
| wavelet-LLL | ngtdm      | Strength                         | 95.60913887  |
| wavelet-LLL | ngtdm      | Contrast                         | 0.810650387  |
| wavelet-LLL | ngtdm      | Busyness                         | 0.006396033  |
| wavelet-HHL | gldm       | GrayLevelVariance                | 6.083552838  |
| wavelet-HHL | gldm       | HighGrayLevelEmphasis            | 63.20600858  |
| wavelet-HHL | gldm       | DependenceEntropy                | 5.361414973  |
| wavelet-HHL | gldm       | DependenceNonUniformity          | 27.93562232  |
| wavelet-HHL | gldm       | GrayLevelNonUniformity           | 40.20171674  |

|             |            |                                      |              |
|-------------|------------|--------------------------------------|--------------|
| wavelet-HHL | gldm       | SmallDependenceEmphasis              | 0.218509423  |
| wavelet-HHL | gldm       | SmallDependenceHighGrayLevelEmphasis | 17.60156262  |
| wavelet-HHL | gldm       | DependenceNonUniformityNormalized    | 0.119895375  |
| wavelet-HHL | gldm       | LargeDependenceEmphasis              | 26.49356223  |
| wavelet-HHL | gldm       | LargeDependenceLowGrayLevelEmphasis  | 0.567650785  |
| wavelet-HHL | gldm       | DependenceVariance                   | 7.291863913  |
| wavelet-HHL | gldm       | LargeDependenceHighGrayLevelEmphasis | 1525.369099  |
| wavelet-HHL | gldm       | SmallDependenceLowGrayLevelEmphasis  | 0.01377297   |
| wavelet-HHL | gldm       | LowGrayLevelEmphasis                 | 0.039131624  |
| wavelet-HHL | glcm       | JointAverage                         | 7.549418622  |
| wavelet-HHL | glcm       | SumAverage                           | 15.09883724  |
| wavelet-HHL | glcm       | JointEntropy                         | 5.254610319  |
| wavelet-HHL | glcm       | ClusterShade                         | 45.79768818  |
| wavelet-HHL | glcm       | MaximumProbability                   | 0.089550508  |
| wavelet-HHL | glcm       | Idmn                                 | 0.986844901  |
| wavelet-HHL | glcm       | JointEnergy                          | 0.039529575  |
| wavelet-HHL | glcm       | Contrast                             | 9.756713808  |
| wavelet-HHL | glcm       | DifferenceEntropy                    | 2.5391233    |
| wavelet-HHL | glcm       | InverseVariance                      | 0.403207475  |
| wavelet-HHL | glcm       | DifferenceVariance                   | 5.571589569  |
| wavelet-HHL | glcm       | Idn                                  | 0.930677676  |
| wavelet-HHL | glcm       | Idm                                  | 0.413456077  |
| wavelet-HHL | glcm       | Correlation                          | -0.057878086 |
| wavelet-HHL | glcm       | Autocorrelation                      | 56.76416073  |
| wavelet-HHL | glcm       | SumEntropy                           | 3.223757344  |
| wavelet-HHL | glcm       | SumSquares                           | 4.646496664  |
| wavelet-HHL | glcm       | ClusterProminence                    | 1521.272456  |
| wavelet-HHL | glcm       | Imc2                                 | 0.698821729  |
| wavelet-HHL | glcm       | Imc1                                 | -0.123849917 |
| wavelet-HHL | glcm       | DifferenceAverage                    | 2.025040958  |
| wavelet-HHL | glcm       | Id                                   | 0.477832437  |
| wavelet-HHL | glcm       | ClusterTendency                      | 8.829272847  |
| wavelet-HHL | firstorder | InterquartileRange                   | 48.83578737  |
| wavelet-HHL | firstorder | Skewness                             | 2.464402161  |
| wavelet-HHL | firstorder | Uniformity                           | 0.172539557  |
| wavelet-HHL | firstorder | Median                               | 0.405341738  |
| wavelet-HHL | firstorder | Energy                               | 887398.9836  |
| wavelet-HHL | firstorder | RobustMeanAbsoluteDeviation          | 22.10309252  |
| wavelet-HHL | firstorder | MeanAbsoluteDeviation                | 38.35688447  |
| wavelet-HHL | firstorder | TotalEnergy                          | 23959772.56  |
| wavelet-HHL | firstorder | Maximum                              | 443.7514641  |
| wavelet-HHL | firstorder | RootMeanSquared                      | 61.71368834  |
| wavelet-HHL | firstorder | 90Percentile                         | 55.10029813  |
| wavelet-HHL | firstorder | Minimum                              | -169.9581326 |
| wavelet-HHL | firstorder | Entropy                              | 2.911556863  |
| wavelet-HHL | firstorder | Range                                | 613.7095967  |
| wavelet-HHL | firstorder | Variance                             | 3806.247524  |
| wavelet-HHL | firstorder | 10Percentile                         | -56.96230224 |
| wavelet-HHL | firstorder | Kurtosis                             | 21.74710542  |
| wavelet-HHL | firstorder | Mean                                 | 1.527024872  |
| wavelet-HHL | glrlm      | ShortRunLowGrayLevelEmphasis         | 0.039131931  |
| wavelet-HHL | glrlm      | GrayLevelVariance                    | 6.81793863   |
| wavelet-HHL | glrlm      | LowGrayLevelRunEmphasis              | 0.041376991  |

|             |       |                                      |              |
|-------------|-------|--------------------------------------|--------------|
| wavelet-HHL | glrlm | GrayLevelNonUniformityNormalized     | 0.158126017  |
| wavelet-HHL | glrlm | RunVariance                          | 0.175981526  |
| wavelet-HHL | glrlm | GrayLevelNonUniformity               | 32.06211894  |
| wavelet-HHL | glrlm | LongRunEmphasis                      | 1.504317506  |
| wavelet-HHL | glrlm | ShortRunHighGrayLevelEmphasis        | 58.24410023  |
| wavelet-HHL | glrlm | RunLengthNonUniformity               | 157.0479026  |
| wavelet-HHL | glrlm | ShortRunEmphasis                     | 0.900150207  |
| wavelet-HHL | glrlm | LongRunHighGrayLevelEmphasis         | 93.00994358  |
| wavelet-HHL | glrlm | RunPercentage                        | 0.869924067  |
| wavelet-HHL | glrlm | LongRunLowGrayLevelEmphasis          | 0.054210322  |
| wavelet-HHL | glrlm | RunEntropy                           | 3.54781909   |
| wavelet-HHL | glrlm | HighGrayLevelRunEmphasis             | 64.03789109  |
| wavelet-HHL | glrlm | RunLengthNonUniformityNormalized     | 0.772674984  |
| wavelet-HHL | glszm | GrayLevelVariance                    | 19.30049587  |
| wavelet-HHL | glszm | ZoneVariance                         | 120.1441322  |
| wavelet-HHL | glszm | GrayLevelNonUniformityNormalized     | 0.110743802  |
| wavelet-HHL | glszm | SizeZoneNonUniformityNormalized      | 0.393057851  |
| wavelet-HHL | glszm | SizeZoneNonUniformity                | 21.61818182  |
| wavelet-HHL | glszm | GrayLevelNonUniformity               | 6.090909091  |
| wavelet-HHL | glszm | LargeAreaEmphasis                    | 138.0909091  |
| wavelet-HHL | glszm | SmallAreaHighGrayLevelEmphasis       | 58.46784274  |
| wavelet-HHL | glszm | ZonePercentage                       | 0.236051502  |
| wavelet-HHL | glszm | LargeAreaLowGrayLevelEmphasis        | 2.699404734  |
| wavelet-HHL | glszm | LargeAreaHighGrayLevelEmphasis       | 7895.509091  |
| wavelet-HHL | glszm | HighGrayLevelZoneEmphasis            | 80.70909091  |
| wavelet-HHL | glszm | SmallAreaEmphasis                    | 0.645823578  |
| wavelet-HHL | glszm | LowGrayLevelZoneEmphasis             | 0.067188777  |
| wavelet-HHL | glszm | ZoneEntropy                          | 4.53883796   |
| wavelet-HHL | glszm | SmallAreaLowGrayLevelEmphasis        | 0.043520668  |
| wavelet-HHL | ngtdm | Coarseness                           | 0.027623058  |
| wavelet-HHL | ngtdm | Complexity                           | 188.5252579  |
| wavelet-HHL | ngtdm | Strength                             | 4.230140857  |
| wavelet-HHL | ngtdm | Contrast                             | 0.110717016  |
| wavelet-HHL | ngtdm | Busyness                             | 0.280586194  |
| wavelet-HLH | gldm  | GrayLevelVariance                    | 2.450662197  |
| wavelet-HLH | gldm  | HighGrayLevelEmphasis                | 56.94420601  |
| wavelet-HLH | gldm  | DependenceEntropy                    | 5.225870316  |
| wavelet-HLH | gldm  | DependenceNonUniformity              | 28.08154506  |
| wavelet-HLH | gldm  | GrayLevelNonUniformity               | 45.61802575  |
| wavelet-HLH | gldm  | SmallDependenceEmphasis              | 0.205189695  |
| wavelet-HLH | gldm  | SmallDependenceHighGrayLevelEmphasis | 12.43952178  |
| wavelet-HLH | gldm  | DependenceNonUniformityNormalized    | 0.120521653  |
| wavelet-HLH | gldm  | LargeDependenceEmphasis              | 27.32618026  |
| wavelet-HLH | gldm  | LargeDependenceLowGrayLevelEmphasis  | 0.525643535  |
| wavelet-HLH | gldm  | DependenceVariance                   | 6.824329054  |
| wavelet-HLH | gldm  | LargeDependenceHighGrayLevelEmphasis | 1522.248927  |
| wavelet-HLH | gldm  | SmallDependenceLowGrayLevelEmphasis  | 0.010261398  |
| wavelet-HLH | gldm  | LowGrayLevelEmphasis                 | 0.025918356  |
| wavelet-HLH | glcm  | JointAverage                         | 7.386624899  |
| wavelet-HLH | glcm  | SumAverage                           | 14.7732498   |
| wavelet-HLH | glcm  | JointEntropy                         | 5.03573777   |
| wavelet-HLH | glcm  | ClusterShade                         | -1.634797198 |
| wavelet-HLH | glcm  | MaximumProbability                   | 0.080009276  |

|             |            |                                  |              |
|-------------|------------|----------------------------------|--------------|
| wavelet-HLH | glcm       | Idmn                             | 0.969348255  |
| wavelet-HLH | glcm       | JointEnergy                      | 0.041051746  |
| wavelet-HLH | glcm       | Contrast                         | 4.932640985  |
| wavelet-HLH | glcm       | DifferenceEntropy                | 2.333068987  |
| wavelet-HLH | glcm       | InverseVariance                  | 0.411505108  |
| wavelet-HLH | glcm       | DifferenceVariance               | 2.017471348  |
| wavelet-HLH | glcm       | Idn                              | 0.884972123  |
| wavelet-HLH | glcm       | Idm                              | 0.426185436  |
| wavelet-HLH | glcm       | Correlation                      | -0.029774594 |
| wavelet-HLH | glcm       | Autocorrelation                  | 54.48279611  |
| wavelet-HLH | glcm       | SumEntropy                       | 3.064117824  |
| wavelet-HLH | glcm       | SumSquares                       | 2.386499996  |
| wavelet-HLH | glcm       | ClusterProminence                | 82.64507791  |
| wavelet-HLH | glcm       | Imc2                             | 0.56890528   |
| wavelet-HLH | glcm       | Imc1                             | -0.076602923 |
| wavelet-HLH | glcm       | DifferenceAverage                | 1.695725283  |
| wavelet-HLH | glcm       | Id                               | 0.491364662  |
| wavelet-HLH | glcm       | ClusterTendency                  | 4.613358998  |
| wavelet-HLH | firstorder | InterquartileRange               | 46.29584214  |
| wavelet-HLH | firstorder | Skewness                         | -0.324923876 |
| wavelet-HLH | firstorder | Uniformity                       | 0.195785518  |
| wavelet-HLH | firstorder | Median                           | -0.795801572 |
| wavelet-HLH | firstorder | Energy                           | 341261.6378  |
| wavelet-HLH | firstorder | RobustMeanAbsoluteDeviation      | 18.79412971  |
| wavelet-HLH | firstorder | MeanAbsoluteDeviation            | 28.83481509  |
| wavelet-HLH | firstorder | TotalEnergy                      | 9214064.221  |
| wavelet-HLH | firstorder | Maximum                          | 103.6618906  |
| wavelet-HLH | firstorder | RootMeanSquared                  | 38.27064439  |
| wavelet-HLH | firstorder | 90Percentile                     | 39.96745888  |
| wavelet-HLH | firstorder | Minimum                          | -160.6221348 |
| wavelet-HLH | firstorder | Entropy                          | 2.631964643  |
| wavelet-HLH | firstorder | Range                            | 264.2840254  |
| wavelet-HLH | firstorder | Variance                         | 1460.711318  |
| wavelet-HLH | firstorder | 10Percentile                     | -45.97684742 |
| wavelet-HLH | firstorder | Kurtosis                         | 4.656296414  |
| wavelet-HLH | firstorder | Mean                             | -1.982650838 |
| wavelet-HLH | grlm       | ShortRunLowGrayLevelEmphasis     | 0.024990932  |
| wavelet-HLH | grlm       | GrayLevelVariance                | 2.697476043  |
| wavelet-HLH | grlm       | LowGrayLevelRunEmphasis          | 0.026992261  |
| wavelet-HLH | grlm       | GrayLevelNonUniformityNormalized | 0.184741979  |
| wavelet-HLH | grlm       | RunVariance                      | 0.185702606  |
| wavelet-HLH | grlm       | GrayLevelNonUniformity           | 37.2059951   |
| wavelet-HLH | grlm       | LongRunEmphasis                  | 1.530167939  |
| wavelet-HLH | grlm       | ShortRunHighGrayLevelEmphasis    | 51.22525329  |
| wavelet-HLH | grlm       | RunLengthNonUniformity           | 153.9116993  |
| wavelet-HLH | grlm       | ShortRunEmphasis                 | 0.895481274  |
| wavelet-HLH | grlm       | LongRunHighGrayLevelEmphasis     | 86.65131114  |
| wavelet-HLH | grlm       | RunPercentage                    | 0.864311654  |
| wavelet-HLH | grlm       | LongRunLowGrayLevelEmphasis      | 0.037151785  |
| wavelet-HLH | grlm       | RunEntropy                       | 3.294727796  |
| wavelet-HLH | grlm       | HighGrayLevelRunEmphasis         | 57.09952167  |
| wavelet-HLH | grlm       | RunLengthNonUniformityNormalized | 0.762625948  |
| wavelet-HLH | glszm      | GrayLevelVariance                | 7.982222222  |

|             |       |                                  |             |
|-------------|-------|----------------------------------|-------------|
| wavelet-HLH | glszm | ZoneVariance                     | 166.0128395 |
| wavelet-HLH | glszm | GrayLevelNonUniformityNormalized | 0.130864198 |
| wavelet-HLH | glszm | SizeZoneNonUniformityNormalized  | 0.53382716  |
| wavelet-HLH | glszm | SizeZoneNonUniformity            | 24.02222222 |
| wavelet-HLH | glszm | GrayLevelNonUniformity           | 5.888888889 |
| wavelet-HLH | glszm | LargeAreaEmphasis                | 192.8222222 |
| wavelet-HLH | glszm | SmallAreaHighGrayLevelEmphasis   | 46.99523633 |
| wavelet-HLH | glszm | ZonePercentage                   | 0.193133047 |
| wavelet-HLH | glszm | LargeAreaLowGrayLevelEmphasis    | 3.56017897  |
| wavelet-HLH | glszm | LargeAreaHighGrayLevelEmphasis   | 11094.13333 |
| wavelet-HLH | glszm | HighGrayLevelZoneEmphasis        | 59.82222222 |
| wavelet-HLH | glszm | SmallAreaEmphasis                | 0.75129968  |
| wavelet-HLH | glszm | LowGrayLevelZoneEmphasis         | 0.053088844 |
| wavelet-HLH | glszm | ZoneEntropy                      | 3.899658863 |
| wavelet-HLH | glszm | SmallAreaLowGrayLevelEmphasis    | 0.04673681  |
| wavelet-HLH | ngtdm | Coarseness                       | 0.024734464 |
| wavelet-HLH | ngtdm | Complexity                       | 66.32940948 |
| wavelet-HLH | ngtdm | Strength                         | 1.069817615 |
| wavelet-HLH | ngtdm | Contrast                         | 0.057233413 |
| wavelet-HLH | ngtdm | Busyness                         | 0.426246806 |

| Image type | Feature Class | Feature Name                         |                                                                                                                                                                                                                                                                                                                                                                                                                                              |
|------------|---------------|--------------------------------------|----------------------------------------------------------------------------------------------------------------------------------------------------------------------------------------------------------------------------------------------------------------------------------------------------------------------------------------------------------------------------------------------------------------------------------------------|
| general    | info          | BoundingBox                          | 3: RTSTRUCT: C99-DNU_segment_GTVp<br>(0, 1, 1, 6, 6, 8)                                                                                                                                                                                                                                                                                                                                                                                      |
| general    | info          | EnabledImageTypes                    | {u'Original': {}, u'Wavelet': {}}                                                                                                                                                                                                                                                                                                                                                                                                            |
|            |               |                                      | {'distances': [1], 'additionalInfo': True,<br>'force2D': False, 'interpolator': 'sitkBSpline',<br>'resampledPixelSpacing': [3.0], 'label': 1,<br>'normalizeScale': 1, 'normalize': False,<br>'force2Ddimension': 0, 'removeOutliers':<br>None, 'minimumROISize': None, u'binWidth':<br>25.0, 'minimumROIDimensions': 1,<br>u'correctMask': True, 'preCrop': False,<br>u'symmetricalGLCM': True,<br>'resegmentRange': None, 'padDistance': 5} |
| general    | info          | GeneralSettings                      | 0b6693ea7244013f6d10c816f1260cc7f9a710<br>09                                                                                                                                                                                                                                                                                                                                                                                                 |
| general    | info          | ImageHash                            | (0.9765625000000002,<br>0.9765625000000002, 2.0)                                                                                                                                                                                                                                                                                                                                                                                             |
| general    | info          | ImageSpacing                         | 8d143361cfde157532bbb89b9f2636ced632c<br>83f                                                                                                                                                                                                                                                                                                                                                                                                 |
| general    | info          | MaskHash                             |                                                                                                                                                                                                                                                                                                                                                                                                                                              |
| general    | info          | NumpyVersion                         | 1.13.1                                                                                                                                                                                                                                                                                                                                                                                                                                       |
| general    | info          | PyWaveletVersion                     | 0.5.2                                                                                                                                                                                                                                                                                                                                                                                                                                        |
| general    | info          | SimpleITKVersion                     | 1.1.0                                                                                                                                                                                                                                                                                                                                                                                                                                        |
| general    | info          | Version                              | 1.3.0.post102+g1b0eb74                                                                                                                                                                                                                                                                                                                                                                                                                       |
| general    | info          | VolumeNum                            | 1                                                                                                                                                                                                                                                                                                                                                                                                                                            |
| general    | info          | VoxelNum                             | 122                                                                                                                                                                                                                                                                                                                                                                                                                                          |
| original   | shape         | Maximum3DDiameter                    | 25.98076211                                                                                                                                                                                                                                                                                                                                                                                                                                  |
| original   | shape         | Maximum2DDiameterSlice               | 15                                                                                                                                                                                                                                                                                                                                                                                                                                           |
| original   | shape         | Sphericity                           | 0.816037497                                                                                                                                                                                                                                                                                                                                                                                                                                  |
| original   | shape         | MinorAxis                            | 15.25586653                                                                                                                                                                                                                                                                                                                                                                                                                                  |
| original   | shape         | Elongation                           | 0.576940621                                                                                                                                                                                                                                                                                                                                                                                                                                  |
| original   | shape         | SurfaceVolumeRatio                   | 0.398290069                                                                                                                                                                                                                                                                                                                                                                                                                                  |
| original   | shape         | Volume                               | 3294                                                                                                                                                                                                                                                                                                                                                                                                                                         |
| original   | shape         | MajorAxis                            | 26.44269788                                                                                                                                                                                                                                                                                                                                                                                                                                  |
| original   | shape         | SurfaceArea                          | 1311.967488                                                                                                                                                                                                                                                                                                                                                                                                                                  |
| original   | shape         | Flatness                             | 0.473869799                                                                                                                                                                                                                                                                                                                                                                                                                                  |
| original   | shape         | LeastAxis                            | 12.53039592                                                                                                                                                                                                                                                                                                                                                                                                                                  |
| original   | shape         | Maximum2DDiameterColumn              | 25.8069758                                                                                                                                                                                                                                                                                                                                                                                                                                   |
| original   | shape         | Maximum2DDiameterRow                 | 22.84731932                                                                                                                                                                                                                                                                                                                                                                                                                                  |
| original   | gldm          | GrayLevelVariance                    | 131.6205321                                                                                                                                                                                                                                                                                                                                                                                                                                  |
| original   | gldm          | HighGrayLevelEmphasis                | 1034.57377                                                                                                                                                                                                                                                                                                                                                                                                                                   |
| original   | gldm          | DependenceEntropy                    | 5.770369408                                                                                                                                                                                                                                                                                                                                                                                                                                  |
| original   | gldm          | DependenceNonUniformity              | 32.39344262                                                                                                                                                                                                                                                                                                                                                                                                                                  |
| original   | gldm          | GrayLevelNonUniformity               | 7.163934426                                                                                                                                                                                                                                                                                                                                                                                                                                  |
| original   | gldm          | SmallDependenceEmphasis              | 0.508254172                                                                                                                                                                                                                                                                                                                                                                                                                                  |
| original   | gldm          | SmallDependenceHighGrayLevelEmphasis | 362.2087877                                                                                                                                                                                                                                                                                                                                                                                                                                  |
| original   | gldm          | DependenceNonUniformityNormalized    | 0.265520021                                                                                                                                                                                                                                                                                                                                                                                                                                  |
| original   | gldm          | LargeDependenceEmphasis              | 11.73770492                                                                                                                                                                                                                                                                                                                                                                                                                                  |
| original   | gldm          | LargeDependenceLowGrayLevelEmphasis  | 0.022213398                                                                                                                                                                                                                                                                                                                                                                                                                                  |
| original   | gldm          | DependenceVariance                   | 4.943563558                                                                                                                                                                                                                                                                                                                                                                                                                                  |
| original   | gldm          | LargeDependenceHighGrayLevelEmphasis | 17694.29508                                                                                                                                                                                                                                                                                                                                                                                                                                  |
| original   | gldm          | SmallDependenceLowGrayLevelEmphasis  | 0.014217629                                                                                                                                                                                                                                                                                                                                                                                                                                  |



|          |            |                                  |              |
|----------|------------|----------------------------------|--------------|
| original | gldm       | LowGrayLevelEmphasis             | 0.014711659  |
| original | glcm       | JointAverage                     | 32.02772767  |
| original | glcm       | SumAverage                       | 64.05545534  |
| original | glcm       | JointEntropy                     | 6.550440201  |
| original | glcm       | ClusterShade                     | -3421.567126 |
| original | glcm       | MaximumProbability               | 0.057366541  |
| original | glcm       | ldmn                             | 0.911623965  |
| original | glcm       | JointEnergy                      | 0.014094141  |
| original | glcm       | Contrast                         | 215.1083244  |
| original | glcm       | DifferenceEntropy                | 4.417170919  |
| original | glcm       | InverseVariance                  | 0.133917948  |
| original | glcm       | DifferenceVariance               | 102.4925639  |
| original | glcm       | ldn                              | 0.826795607  |
| original | glcm       | ldm                              | 0.179767185  |
| original | glcm       | Correlation                      | 0.030523928  |
| original | glcm       | Autocorrelation                  | 1029.636804  |
| original | glcm       | SumEntropy                       | 4.924946213  |
| original | glcm       | SumSquares                       | 111.1989118  |
| original | glcm       | ClusterProminence                | 181573.1328  |
| original | glcm       | lmc2                             | 0.991166394  |
| original | glcm       | lmc1                             | -0.474928984 |
| original | glcm       | DifferenceAverage                | 10.50835503  |
| original | glcm       | ld                               | 0.248582826  |
| original | glcm       | ClusterTendency                  | 229.6873228  |
| original | firstorder | InterquartileRange               | 373.25       |
| original | firstorder | Skewness                         | -1.007583874 |
| original | firstorder | Uniformity                       | 0.058720774  |
| original | firstorder | Median                           | -111.5       |
| original | firstorder | Energy                           | 15555011     |
| original | firstorder | RobustMeanAbsoluteDeviation      | 169.59375    |
| original | firstorder | MeanAbsoluteDeviation            | 236.2639076  |
| original | firstorder | TotalEnergy                      | 419985297    |
| original | firstorder | Maximum                          | 97           |
| original | firstorder | RootMeanSquared                  | 357.0715477  |
| original | firstorder | 90Percentile                     | 49.9         |
| original | firstorder | Minimum                          | -937         |
| original | firstorder | Entropy                          | 4.584700872  |
| original | firstorder | Range                            | 1034         |
| original | firstorder | Variance                         | 82864.86946  |
| original | firstorder | 10Percentile                     | -715.4       |
| original | firstorder | Kurtosis                         | 2.77989594   |
| original | firstorder | Mean                             | -211.2704918 |
| original | glrlm      | ShortRunLowGrayLevelEmphasis     | 0.015600355  |
| original | glrlm      | GrayLevelVariance                | 134.0399161  |
| original | glrlm      | LowGrayLevelRunEmphasis          | 0.015636766  |
| original | glrlm      | GrayLevelNonUniformityNormalized | 0.052121093  |
| original | glrlm      | RunVariance                      | 0.078164754  |
| original | glrlm      | GrayLevelNonUniformity           | 5.97131766   |
| original | glrlm      | LongRunEmphasis                  | 1.216055774  |
| original | glrlm      | ShortRunHighGrayLevelEmphasis    | 936.3586994  |
| original | glrlm      | RunLengthNonUniformity           | 101.711684   |
| original | glrlm      | ShortRunEmphasis                 | 0.954559321  |
| original | glrlm      | LongRunHighGrayLevelEmphasis     | 1329.085165  |

|             |       |                                      |              |
|-------------|-------|--------------------------------------|--------------|
| original    | glrlm | RunPercentage                        | 0.938209332  |
| original    | glrlm | LongRunLowGrayLevelEmphasis          | 0.015803745  |
| original    | glrlm | RunEntropy                           | 4.855701907  |
| original    | glrlm | HighGrayLevelRunEmphasis             | 1003.878932  |
| original    | glrlm | RunLengthNonUniformityNormalized     | 0.888008411  |
| original    | glszm | GrayLevelVariance                    | 141.5420408  |
| original    | glszm | ZoneVariance                         | 5.733877551  |
| original    | glszm | GrayLevelNonUniformityNormalized     | 0.035918367  |
| original    | glszm | SizeZoneNonUniformityNormalized      | 0.573877551  |
| original    | glszm | SizeZoneNonUniformity                | 40.17142857  |
| original    | glszm | GrayLevelNonUniformity               | 2.514285714  |
| original    | glszm | LargeAreaEmphasis                    | 8.771428571  |
| original    | glszm | SmallAreaHighGrayLevelEmphasis       | 504.2821103  |
| original    | glszm | ZonePercentage                       | 0.573770492  |
| original    | glszm | LargeAreaLowGrayLevelEmphasis        | 0.030501861  |
| original    | glszm | LargeAreaHighGrayLevelEmphasis       | 12741.91429  |
| original    | glszm | HighGrayLevelZoneEmphasis            | 758          |
| original    | glszm | SmallAreaEmphasis                    | 0.784243717  |
| original    | glszm | LowGrayLevelZoneEmphasis             | 0.024952612  |
| original    | glszm | ZoneEntropy                          | 5.339508552  |
| original    | glszm | SmallAreaLowGrayLevelEmphasis        | 0.024660241  |
| original    | ngtdm | Coarseness                           | 0.019867356  |
| original    | ngtdm | Complexity                           | 5065.315141  |
| original    | ngtdm | Strength                             | 21.25275265  |
| original    | ngtdm | Contrast                             | 2.191213235  |
| original    | ngtdm | Busyness                             | 0.042665266  |
| wavelet-HHH | gldm  | GrayLevelVariance                    | 21.00080623  |
| wavelet-HHH | gldm  | HighGrayLevelEmphasis                | 178.6885246  |
| wavelet-HHH | gldm  | DependenceEntropy                    | 5.322566666  |
| wavelet-HHH | gldm  | DependenceNonUniformity              | 40.62295082  |
| wavelet-HHH | gldm  | GrayLevelNonUniformity               | 8.459016393  |
| wavelet-HHH | gldm  | SmallDependenceEmphasis              | 0.572318919  |
| wavelet-HHH | gldm  | SmallDependenceHighGrayLevelEmphasis | 102.1882073  |
| wavelet-HHH | gldm  | DependenceNonUniformityNormalized    | 0.332975007  |
| wavelet-HHH | gldm  | LargeDependenceEmphasis              | 5.180327869  |
| wavelet-HHH | gldm  | LargeDependenceLowGrayLevelEmphasis  | 0.049655413  |
| wavelet-HHH | gldm  | DependenceVariance                   | 1.438323031  |
| wavelet-HHH | gldm  | LargeDependenceHighGrayLevelEmphasis | 963.6065574  |
| wavelet-HHH | gldm  | SmallDependenceLowGrayLevelEmphasis  | 0.018352685  |
| wavelet-HHH | gldm  | LowGrayLevelEmphasis                 | 0.021535074  |
| wavelet-HHH | glcm  | JointAverage                         | 12.49654737  |
| wavelet-HHH | glcm  | SumAverage                           | 24.99309474  |
| wavelet-HHH | glcm  | JointEntropy                         | 6.592575455  |
| wavelet-HHH | glcm  | ClusterShade                         | -3.349021764 |
| wavelet-HHH | glcm  | MaximumProbability                   | 0.027278571  |
| wavelet-HHH | glcm  | ldmn                                 | 0.940659955  |
| wavelet-HHH | glcm  | JointEnergy                          | 0.011727194  |
| wavelet-HHH | glcm  | Contrast                             | 40.50781807  |
| wavelet-HHH | glcm  | DifferenceEntropy                    | 3.592952241  |
| wavelet-HHH | glcm  | InverseVariance                      | 0.166559033  |
| wavelet-HHH | glcm  | DifferenceVariance                   | 13.83060063  |
| wavelet-HHH | glcm  | ldn                                  | 0.836663612  |
| wavelet-HHH | glcm  | ldm                                  | 0.162858363  |

|             |            |                                  |              |
|-------------|------------|----------------------------------|--------------|
| wavelet-HHH | glcm       | Correlation                      | -0.037047923 |
| wavelet-HHH | glcm       | Autocorrelation                  | 155.3974818  |
| wavelet-HHH | glcm       | SumEntropy                       | 4.304982298  |
| wavelet-HHH | glcm       | SumSquares                       | 19.47750787  |
| wavelet-HHH | glcm       | ClusterProminence                | 4089.2029    |
| wavelet-HHH | glcm       | Imc2                             | 0.967913459  |
| wavelet-HHH | glcm       | Imc1                             | -0.347992034 |
| wavelet-HHH | glcm       | DifferenceAverage                | 5.129320896  |
| wavelet-HHH | glcm       | Id                               | 0.260511509  |
| wavelet-HHH | glcm       | ClusterTendency                  | 37.40221341  |
| wavelet-HHH | firstorder | InterquartileRange               | 166.9563597  |
| wavelet-HHH | firstorder | Skewness                         | -0.005293269 |
| wavelet-HHH | firstorder | Uniformity                       | 0.0693362    |
| wavelet-HHH | firstorder | Median                           | -3.870859641 |
| wavelet-HHH | firstorder | Energy                           | 1562554.321  |
| wavelet-HHH | firstorder | RobustMeanAbsoluteDeviation      | 62.51298402  |
| wavelet-HHH | firstorder | MeanAbsoluteDeviation            | 90.38906366  |
| wavelet-HHH | firstorder | TotalEnergy                      | 42188966.66  |
| wavelet-HHH | firstorder | Maximum                          | 283.8686598  |
| wavelet-HHH | firstorder | RootMeanSquared                  | 113.1716497  |
| wavelet-HHH | firstorder | 90Percentile                     | 152.0743549  |
| wavelet-HHH | firstorder | Minimum                          | -283.045641  |
| wavelet-HHH | firstorder | Entropy                          | 4.068025378  |
| wavelet-HHH | firstorder | Range                            | 566.9143009  |
| wavelet-HHH | firstorder | Variance                         | 12806.41029  |
| wavelet-HHH | firstorder | 10Percentile                     | -140.8298243 |
| wavelet-HHH | firstorder | Kurtosis                         | 2.799595177  |
| wavelet-HHH | firstorder | Mean                             | 1.188279291  |
| wavelet-HHH | glrlm      | ShortRunLowGrayLevelEmphasis     | 0.021894597  |
| wavelet-HHH | glrlm      | GrayLevelVariance                | 21.38391606  |
| wavelet-HHH | glrlm      | LowGrayLevelRunEmphasis          | 0.022081454  |
| wavelet-HHH | glrlm      | GrayLevelNonUniformityNormalized | 0.068415479  |
| wavelet-HHH | glrlm      | RunVariance                      | 0.041211306  |
| wavelet-HHH | glrlm      | GrayLevelNonUniformity           | 8.048880443  |
| wavelet-HHH | glrlm      | LongRunEmphasis                  | 1.118492326  |
| wavelet-HHH | glrlm      | ShortRunHighGrayLevelEmphasis    | 173.6627513  |
| wavelet-HHH | glrlm      | RunLengthNonUniformity           | 109.7875232  |
| wavelet-HHH | glrlm      | ShortRunEmphasis                 | 0.973363058  |
| wavelet-HHH | glrlm      | LongRunHighGrayLevelEmphasis     | 200.0630969  |
| wavelet-HHH | glrlm      | RunPercentage                    | 0.96406053   |
| wavelet-HHH | glrlm      | LongRunLowGrayLevelEmphasis      | 0.022918742  |
| wavelet-HHH | glrlm      | RunEntropy                       | 4.220386102  |
| wavelet-HHH | glrlm      | HighGrayLevelRunEmphasis         | 178.549784   |
| wavelet-HHH | glrlm      | RunLengthNonUniformityNormalized | 0.932783889  |
| wavelet-HHH | glszm      | GrayLevelVariance                | 26.28617209  |
| wavelet-HHH | glszm      | ZoneVariance                     | 1.513859958  |
| wavelet-HHH | glszm      | GrayLevelNonUniformityNormalized | 0.061688832  |
| wavelet-HHH | glszm      | SizeZoneNonUniformityNormalized  | 0.579234097  |
| wavelet-HHH | glszm      | SizeZoneNonUniformity            | 45.75949367  |
| wavelet-HHH | glszm      | GrayLevelNonUniformity           | 4.873417722  |
| wavelet-HHH | glszm      | LargeAreaEmphasis                | 3.898734177  |
| wavelet-HHH | glszm      | SmallAreaHighGrayLevelEmphasis   | 141.0986197  |
| wavelet-HHH | glszm      | ZonePercentage                   | 0.647540984  |

|             |            |                                      |              |
|-------------|------------|--------------------------------------|--------------|
| wavelet-HHH | glszm      | LargeAreaLowGrayLevelEmphasis        | 0.050110347  |
| wavelet-HHH | glszm      | LargeAreaHighGrayLevelEmphasis       | 694.278481   |
| wavelet-HHH | glszm      | HighGrayLevelZoneEmphasis            | 179.5443038  |
| wavelet-HHH | glszm      | SmallAreaEmphasis                    | 0.787833821  |
| wavelet-HHH | glszm      | LowGrayLevelZoneEmphasis             | 0.029214771  |
| wavelet-HHH | glszm      | ZoneEntropy                          | 4.934933084  |
| wavelet-HHH | glszm      | SmallAreaLowGrayLevelEmphasis        | 0.027588798  |
| wavelet-HHH | ngtdm      | Coarseness                           | 0.041086988  |
| wavelet-HHH | ngtdm      | Complexity                           | 717.7074604  |
| wavelet-HHH | ngtdm      | Strength                             | 6.140175739  |
| wavelet-HHH | ngtdm      | Contrast                             | 0.351878688  |
| wavelet-HHH | ngtdm      | Busyness                             | 0.10095573   |
| wavelet-HLL | gldm       | GrayLevelVariance                    | 53.19356356  |
| wavelet-HLL | gldm       | HighGrayLevelEmphasis                | 345.8278689  |
| wavelet-HLL | gldm       | DependenceEntropy                    | 5.384487674  |
| wavelet-HLL | gldm       | DependenceNonUniformity              | 51.18032787  |
| wavelet-HLL | gldm       | GrayLevelNonUniformity               | 5.721311475  |
| wavelet-HLL | gldm       | SmallDependenceEmphasis              | 0.65253643   |
| wavelet-HLL | gldm       | SmallDependenceHighGrayLevelEmphasis | 243.2159927  |
| wavelet-HLL | gldm       | DependenceNonUniformityNormalized    | 0.419510884  |
| wavelet-HLL | gldm       | LargeDependenceEmphasis              | 3.868852459  |
| wavelet-HLL | gldm       | LargeDependenceLowGrayLevelEmphasis  | 0.040152372  |
| wavelet-HLL | gldm       | DependenceVariance                   | 1.072829884  |
| wavelet-HLL | gldm       | LargeDependenceHighGrayLevelEmphasis | 1096.97541   |
| wavelet-HLL | gldm       | SmallDependenceLowGrayLevelEmphasis  | 0.012214712  |
| wavelet-HLL | gldm       | LowGrayLevelEmphasis                 | 0.01519949   |
| wavelet-HLL | glcm       | JointAverage                         | 16.48098034  |
| wavelet-HLL | glcm       | SumAverage                           | 32.96196068  |
| wavelet-HLL | glcm       | JointEntropy                         | 6.847634956  |
| wavelet-HLL | glcm       | ClusterShade                         | 396.4426849  |
| wavelet-HLL | glcm       | MaximumProbability                   | 0.024607248  |
| wavelet-HLL | glcm       | Idmn                                 | 0.958164961  |
| wavelet-HLL | glcm       | JointEnergy                          | 0.009543697  |
| wavelet-HLL | glcm       | Contrast                             | 73.97662978  |
| wavelet-HLL | glcm       | DifferenceEntropy                    | 3.874931185  |
| wavelet-HLL | glcm       | InverseVariance                      | 0.154003687  |
| wavelet-HLL | glcm       | DifferenceVariance                   | 28.77572474  |
| wavelet-HLL | glcm       | Idn                                  | 0.865471738  |
| wavelet-HLL | glcm       | Idm                                  | 0.137070232  |
| wavelet-HLL | glcm       | Correlation                          | 0.114385799  |
| wavelet-HLL | glcm       | Autocorrelation                      | 277.588316   |
| wavelet-HLL | glcm       | SumEntropy                           | 4.7283888    |
| wavelet-HLL | glcm       | SumSquares                           | 42.85610547  |
| wavelet-HLL | glcm       | ClusterProminence                    | 37903.65168  |
| wavelet-HLL | glcm       | Imc2                                 | 0.992965618  |
| wavelet-HLL | glcm       | Imc1                                 | -0.477724222 |
| wavelet-HLL | glcm       | DifferenceAverage                    | 6.638389138  |
| wavelet-HLL | glcm       | Id                                   | 0.229005191  |
| wavelet-HLL | glcm       | ClusterTendency                      | 97.44779209  |
| wavelet-HLL | firstorder | InterquartileRange                   | 208.6940393  |
| wavelet-HLL | firstorder | Skewness                             | 0.542629201  |
| wavelet-HLL | firstorder | Uniformity                           | 0.046895996  |
| wavelet-HLL | firstorder | Median                               | -24.02036667 |

|             |            |                                  |              |
|-------------|------------|----------------------------------|--------------|
| wavelet-HLL | firstorder | Energy                           | 4093737.837  |
| wavelet-HLL | firstorder | RobustMeanAbsoluteDeviation      | 89.78788296  |
| wavelet-HLL | firstorder | MeanAbsoluteDeviation            | 140.2604994  |
| wavelet-HLL | firstorder | TotalEnergy                      | 110530921.6  |
| wavelet-HLL | firstorder | Maximum                          | 548.2743151  |
| wavelet-HLL | firstorder | RootMeanSquared                  | 183.1808619  |
| wavelet-HLL | firstorder | 90Percentile                     | 198.3987175  |
| wavelet-HLL | firstorder | Minimum                          | -405.1456597 |
| wavelet-HLL | firstorder | Entropy                          | 4.617465266  |
| wavelet-HLL | firstorder | Range                            | 953.4199748  |
| wavelet-HLL | firstorder | Variance                         | 33441.8695   |
| wavelet-HLL | firstorder | 10Percentile                     | -229.4688611 |
| wavelet-HLL | firstorder | Kurtosis                         | 3.563916725  |
| wavelet-HLL | firstorder | Mean                             | -10.64700297 |
| wavelet-HLL | grlm       | ShortRunLowGrayLevelEmphasis     | 0.015179902  |
| wavelet-HLL | grlm       | GrayLevelVariance                | 53.60636927  |
| wavelet-HLL | grlm       | LowGrayLevelRunEmphasis          | 0.015361943  |
| wavelet-HLL | grlm       | GrayLevelNonUniformityNormalized | 0.046325114  |
| wavelet-HLL | grlm       | RunVariance                      | 0.027135227  |
| wavelet-HLL | grlm       | GrayLevelNonUniformity           | 5.505813816  |
| wavelet-HLL | grlm       | LongRunEmphasis                  | 1.081713848  |
| wavelet-HLL | grlm       | ShortRunHighGrayLevelEmphasis    | 342.3793139  |
| wavelet-HLL | grlm       | RunLengthNonUniformity           | 112.902912   |
| wavelet-HLL | grlm       | ShortRunEmphasis                 | 0.980308349  |
| wavelet-HLL | grlm       | LongRunHighGrayLevelEmphasis     | 370.084495   |
| wavelet-HLL | grlm       | RunPercentage                    | 0.974148802  |
| wavelet-HLL | grlm       | LongRunLowGrayLevelEmphasis      | 0.016101617  |
| wavelet-HLL | grlm       | RunEntropy                       | 4.71464113   |
| wavelet-HLL | grlm       | HighGrayLevelRunEmphasis         | 347.7694512  |
| wavelet-HLL | grlm       | RunLengthNonUniformityNormalized | 0.949536827  |
| wavelet-HLL | glszm      | GrayLevelVariance                | 57.08271948  |
| wavelet-HLL | glszm      | ZoneVariance                     | 0.752083082  |
| wavelet-HLL | glszm      | GrayLevelNonUniformityNormalized | 0.043835286  |
| wavelet-HLL | glszm      | SizeZoneNonUniformityNormalized  | 0.615263857  |
| wavelet-HLL | glszm      | SizeZoneNonUniformity            | 55.98901099  |
| wavelet-HLL | glszm      | GrayLevelNonUniformity           | 3.989010989  |
| wavelet-HLL | glszm      | LargeAreaEmphasis                | 2.549450549  |
| wavelet-HLL | glszm      | SmallAreaHighGrayLevelEmphasis   | 305.964591   |
| wavelet-HLL | glszm      | ZonePercentage                   | 0.745901639  |
| wavelet-HLL | glszm      | LargeAreaLowGrayLevelEmphasis    | 0.029787033  |
| wavelet-HLL | glszm      | LargeAreaHighGrayLevelEmphasis   | 788.1868132  |
| wavelet-HLL | glszm      | HighGrayLevelZoneEmphasis        | 365.0659341  |
| wavelet-HLL | glszm      | SmallAreaEmphasis                | 0.811527015  |
| wavelet-HLL | glszm      | LowGrayLevelZoneEmphasis         | 0.017430331  |
| wavelet-HLL | glszm      | ZoneEntropy                      | 5.209848113  |
| wavelet-HLL | glszm      | SmallAreaLowGrayLevelEmphasis    | 0.015926534  |
| wavelet-HLL | ngtdm      | Coarseness                       | 0.047494443  |
| wavelet-HLL | ngtdm      | Complexity                       | 1774.619654  |
| wavelet-HLL | ngtdm      | Strength                         | 15.28887755  |
| wavelet-HLL | ngtdm      | Contrast                         | 0.600220232  |
| wavelet-HLL | ngtdm      | Busyness                         | 0.052978624  |
| wavelet-LHL | gldm       | GrayLevelVariance                | 251.2790245  |
| wavelet-LHL | gldm       | HighGrayLevelEmphasis            | 1330.02459   |

|             |            |                                      |              |
|-------------|------------|--------------------------------------|--------------|
| wavelet-LHL | gldm       | DependenceEntropy                    | 5.903817563  |
| wavelet-LHL | gldm       | DependenceNonUniformity              | 62.70491803  |
| wavelet-LHL | gldm       | GrayLevelNonUniformity               | 3.278688525  |
| wavelet-LHL | gldm       | SmallDependenceEmphasis              | 0.73712204   |
| wavelet-LHL | gldm       | SmallDependenceHighGrayLevelEmphasis | 1066.488379  |
| wavelet-LHL | gldm       | DependenceNonUniformityNormalized    | 0.513974738  |
| wavelet-LHL | gldm       | LargeDependenceEmphasis              | 2.508196721  |
| wavelet-LHL | gldm       | LargeDependenceLowGrayLevelEmphasis  | 0.014953349  |
| wavelet-LHL | gldm       | DependenceVariance                   | 0.474066111  |
| wavelet-LHL | gldm       | LargeDependenceHighGrayLevelEmphasis | 2805.270492  |
| wavelet-LHL | gldm       | SmallDependenceLowGrayLevelEmphasis  | 0.010476609  |
| wavelet-LHL | gldm       | LowGrayLevelEmphasis                 | 0.011241461  |
| wavelet-LHL | glcm       | JointAverage                         | 32.31906077  |
| wavelet-LHL | glcm       | SumAverage                           | 64.63812153  |
| wavelet-LHL | glcm       | JointEntropy                         | 7.076562646  |
| wavelet-LHL | glcm       | ClusterShade                         | 3341.006832  |
| wavelet-LHL | glcm       | MaximumProbability                   | 0.014379361  |
| wavelet-LHL | glcm       | ldmn                                 | 0.918954916  |
| wavelet-LHL | glcm       | JointEnergy                          | 0.007698335  |
| wavelet-LHL | glcm       | Contrast                             | 497.1136726  |
| wavelet-LHL | glcm       | DifferenceEntropy                    | 4.794780438  |
| wavelet-LHL | glcm       | InverseVariance                      | 0.082593389  |
| wavelet-LHL | glcm       | DifferenceVariance                   | 189.9233675  |
| wavelet-LHL | glcm       | ldn                                  | 0.825099686  |
| wavelet-LHL | glcm       | ldm                                  | 0.078647195  |
| wavelet-LHL | glcm       | Correlation                          | 0.020206857  |
| wavelet-LHL | glcm       | Autocorrelation                      | 1048.963922  |
| wavelet-LHL | glcm       | SumEntropy                           | 5.402495865  |
| wavelet-LHL | glcm       | SumSquares                           | 252.9716422  |
| wavelet-LHL | glcm       | ClusterProminence                    | 726720.3846  |
| wavelet-LHL | glcm       | lmc2                                 | 0.999673718  |
| wavelet-LHL | glcm       | lmc1                                 | -0.685144824 |
| wavelet-LHL | glcm       | DifferenceAverage                    | 16.65662848  |
| wavelet-LHL | glcm       | ld                                   | 0.146434741  |
| wavelet-LHL | glcm       | ClusterTendency                      | 514.7728962  |
| wavelet-LHL | firstorder | InterquartileRange                   | 629.1368381  |
| wavelet-LHL | firstorder | Skewness                             | 0.164679388  |
| wavelet-LHL | firstorder | Uniformity                           | 0.026874496  |
| wavelet-LHL | firstorder | Median                               | -124.9533639 |
| wavelet-LHL | firstorder | Energy                               | 19724455.54  |
| wavelet-LHL | firstorder | RobustMeanAbsoluteDeviation          | 252.5858775  |
| wavelet-LHL | firstorder | MeanAbsoluteDeviation                | 339.2993309  |
| wavelet-LHL | firstorder | TotalEnergy                          | 532560299.7  |
| wavelet-LHL | firstorder | Maximum                              | 802.6842682  |
| wavelet-LHL | firstorder | RootMeanSquared                      | 402.0893745  |
| wavelet-LHL | firstorder | 90Percentile                         | 511.4188854  |
| wavelet-LHL | firstorder | Minimum                              | -852.8906077 |
| wavelet-LHL | firstorder | Entropy                              | 5.480180887  |
| wavelet-LHL | firstorder | Range                                | 1655.574876  |
| wavelet-LHL | firstorder | Variance                             | 157182.4944  |
| wavelet-LHL | firstorder | 10Percentile                         | -563.9586072 |
| wavelet-LHL | firstorder | Kurtosis                             | 2.167937284  |
| wavelet-LHL | firstorder | Mean                                 | -67.03260958 |

|             |       |                                      |             |
|-------------|-------|--------------------------------------|-------------|
| wavelet-LHL | grlm  | ShortRunLowGrayLevelEmphasis         | 0.011352607 |
| wavelet-LHL | grlm  | GrayLevelVariance                    | 252.8383314 |
| wavelet-LHL | grlm  | LowGrayLevelRunEmphasis              | 0.011385851 |
| wavelet-LHL | grlm  | GrayLevelNonUniformityNormalized     | 0.026607124 |
| wavelet-LHL | grlm  | RunVariance                          | 0.016381381 |
| wavelet-LHL | grlm  | GrayLevelNonUniformity               | 3.193037147 |
| wavelet-LHL | grlm  | LongRunEmphasis                      | 1.050362636 |
| wavelet-LHL | grlm  | ShortRunHighGrayLevelEmphasis        | 1323.197129 |
| wavelet-LHL | grlm  | RunLengthNonUniformity               | 116.0961611 |
| wavelet-LHL | grlm  | ShortRunEmphasis                     | 0.987409341 |
| wavelet-LHL | grlm  | LongRunHighGrayLevelEmphasis         | 1385.672791 |
| wavelet-LHL | grlm  | RunPercentage                        | 0.983606557 |
| wavelet-LHL | grlm  | LongRunLowGrayLevelEmphasis          | 0.011518829 |
| wavelet-LHL | grlm  | RunEntropy                           | 5.531849163 |
| wavelet-LHL | grlm  | HighGrayLevelRunEmphasis             | 1335.692262 |
| wavelet-LHL | grlm  | RunLengthNonUniformityNormalized     | 0.967237239 |
| wavelet-LHL | glszm | GrayLevelVariance                    | 271.4777176 |
| wavelet-LHL | glszm | ZoneVariance                         | 0.409412745 |
| wavelet-LHL | glszm | GrayLevelNonUniformityNormalized     | 0.024156601 |
| wavelet-LHL | glszm | SizeZoneNonUniformityNormalized      | 0.701374427 |
| wavelet-LHL | glszm | SizeZoneNonUniformity                | 68.73469388 |
| wavelet-LHL | glszm | GrayLevelNonUniformity               | 2.367346939 |
| wavelet-LHL | glszm | LargeAreaEmphasis                    | 1.959183673 |
| wavelet-LHL | glszm | SmallAreaHighGrayLevelEmphasis       | 1271.311567 |
| wavelet-LHL | glszm | ZonePercentage                       | 0.803278689 |
| wavelet-LHL | glszm | LargeAreaLowGrayLevelEmphasis        | 0.015628721 |
| wavelet-LHL | glszm | LargeAreaHighGrayLevelEmphasis       | 2402.622449 |
| wavelet-LHL | glszm | HighGrayLevelZoneEmphasis            | 1406.755102 |
| wavelet-LHL | glszm | SmallAreaEmphasis                    | 0.86300737  |
| wavelet-LHL | glszm | LowGrayLevelZoneEmphasis             | 0.013322321 |
| wavelet-LHL | glszm | ZoneEntropy                          | 5.813390201 |
| wavelet-LHL | glszm | SmallAreaLowGrayLevelEmphasis        | 0.012883225 |
| wavelet-LHL | ngtdm | Coarseness                           | 0.030499493 |
| wavelet-LHL | ngtdm | Complexity                           | 16091.91557 |
| wavelet-LHL | ngtdm | Strength                             | 42.90571164 |
| wavelet-LHL | ngtdm | Contrast                             | 2.196547242 |
| wavelet-LHL | ngtdm | Busyness                             | 0.021926583 |
| wavelet-LHH | gldm  | GrayLevelVariance                    | 50.69020425 |
| wavelet-LHH | gldm  | HighGrayLevelEmphasis                | 292.4672131 |
| wavelet-LHH | gldm  | DependenceEntropy                    | 5.387132625 |
| wavelet-LHH | gldm  | DependenceNonUniformity              | 49.70491803 |
| wavelet-LHH | gldm  | GrayLevelNonUniformity               | 5.754098361 |
| wavelet-LHH | gldm  | SmallDependenceEmphasis              | 0.639615209 |
| wavelet-LHH | gldm  | SmallDependenceHighGrayLevelEmphasis | 209.8609973 |
| wavelet-LHH | gldm  | DependenceNonUniformityNormalized    | 0.407417361 |
| wavelet-LHH | gldm  | LargeDependenceEmphasis              | 3.393442623 |
| wavelet-LHH | gldm  | LargeDependenceLowGrayLevelEmphasis  | 0.043571021 |
| wavelet-LHH | gldm  | DependenceVariance                   | 0.705993013 |
| wavelet-LHH | gldm  | LargeDependenceHighGrayLevelEmphasis | 856.8114754 |
| wavelet-LHH | gldm  | SmallDependenceLowGrayLevelEmphasis  | 0.017539149 |
| wavelet-LHH | gldm  | LowGrayLevelEmphasis                 | 0.021651919 |
| wavelet-LHH | glcm  | JointAverage                         | 15.65779215 |
| wavelet-LHH | glcm  | SumAverage                           | 31.31558429 |

|             |            |                                  |              |
|-------------|------------|----------------------------------|--------------|
| wavelet-LHH | glcm       | JointEntropy                     | 6.894161509  |
| wavelet-LHH | glcm       | ClusterShade                     | 151.3350829  |
| wavelet-LHH | glcm       | MaximumProbability               | 0.023518632  |
| wavelet-LHH | glcm       | Idmn                             | 0.919112847  |
| wavelet-LHH | glcm       | JointEnergy                      | 0.009177147  |
| wavelet-LHH | glcm       | Contrast                         | 101.6804254  |
| wavelet-LHH | glcm       | DifferenceEntropy                | 4.144350408  |
| wavelet-LHH | glcm       | InverseVariance                  | 0.111027934  |
| wavelet-LHH | glcm       | DifferenceVariance               | 31.80471498  |
| wavelet-LHH | glcm       | Idn                              | 0.809901775  |
| wavelet-LHH | glcm       | Idm                              | 0.109659028  |
| wavelet-LHH | glcm       | Correlation                      | -0.007873974 |
| wavelet-LHH | glcm       | Autocorrelation                  | 244.7106532  |
| wavelet-LHH | glcm       | SumEntropy                       | 4.824776904  |
| wavelet-LHH | glcm       | SumSquares                       | 50.3351393   |
| wavelet-LHH | glcm       | ClusterProminence                | 26607.66814  |
| wavelet-LHH | glcm       | Imc2                             | 0.993007041  |
| wavelet-LHH | glcm       | Imc1                             | -0.476579414 |
| wavelet-LHH | glcm       | DifferenceAverage                | 8.279417383  |
| wavelet-LHH | glcm       | Id                               | 0.194259146  |
| wavelet-LHH | glcm       | ClusterTendency                  | 99.66013185  |
| wavelet-LHH | firstorder | InterquartileRange               | 263.3119538  |
| wavelet-LHH | firstorder | Skewness                         | 0.1689544    |
| wavelet-LHH | firstorder | Uniformity                       | 0.047164741  |
| wavelet-LHH | firstorder | Median                           | 16.18530974  |
| wavelet-LHH | firstorder | Energy                           | 3968633.299  |
| wavelet-LHH | firstorder | RobustMeanAbsoluteDeviation      | 105.7782779  |
| wavelet-LHH | firstorder | MeanAbsoluteDeviation            | 147.6737005  |
| wavelet-LHH | firstorder | TotalEnergy                      | 107153099.1  |
| wavelet-LHH | firstorder | Maximum                          | 443.0582815  |
| wavelet-LHH | firstorder | RootMeanSquared                  | 180.3601429  |
| wavelet-LHH | firstorder | 90Percentile                     | 288.3167674  |
| wavelet-LHH | firstorder | Minimum                          | -337.5133952 |
| wavelet-LHH | firstorder | Entropy                          | 4.631988226  |
| wavelet-LHH | firstorder | Range                            | 780.5716767  |
| wavelet-LHH | firstorder | Variance                         | 31836.55997  |
| wavelet-LHH | firstorder | 10Percentile                     | -188.7147389 |
| wavelet-LHH | firstorder | Kurtosis                         | 2.390318165  |
| wavelet-LHH | firstorder | Mean                             | 26.32909362  |
| wavelet-LHH | grlm       | ShortRunLowGrayLevelEmphasis     | 0.021757173  |
| wavelet-LHH | grlm       | GrayLevelVariance                | 51.28613059  |
| wavelet-LHH | grlm       | LowGrayLevelRunEmphasis          | 0.021947803  |
| wavelet-LHH | grlm       | GrayLevelNonUniformityNormalized | 0.046542921  |
| wavelet-LHH | grlm       | RunVariance                      | 0.025880542  |
| wavelet-LHH | grlm       | GrayLevelNonUniformity           | 5.539458136  |
| wavelet-LHH | grlm       | LongRunEmphasis                  | 1.077727084  |
| wavelet-LHH | grlm       | ShortRunHighGrayLevelEmphasis    | 289.7167817  |
| wavelet-LHH | grlm       | RunLengthNonUniformity           | 113.3478859  |
| wavelet-LHH | grlm       | ShortRunEmphasis                 | 0.98130504   |
| wavelet-LHH | grlm       | LongRunHighGrayLevelEmphasis     | 312.2868483  |
| wavelet-LHH | grlm       | RunPercentage                    | 0.975409836  |
| wavelet-LHH | grlm       | LongRunLowGrayLevelEmphasis      | 0.02271769   |
| wavelet-LHH | grlm       | RunEntropy                       | 4.730227581  |



|             |       |                                      |             |
|-------------|-------|--------------------------------------|-------------|
| wavelet-LHH | grlm  | HighGrayLevelRunEmphasis             | 293.9950155 |
| wavelet-LHH | grlm  | RunLengthNonUniformityNormalized     | 0.952046197 |
| wavelet-LHH | glszm | GrayLevelVariance                    | 59.40018496 |
| wavelet-LHH | glszm | ZoneVariance                         | 1.091029198 |
| wavelet-LHH | glszm | GrayLevelNonUniformityNormalized     | 0.042145594 |
| wavelet-LHH | glszm | SizeZoneNonUniformityNormalized      | 0.623728366 |
| wavelet-LHH | glszm | SizeZoneNonUniformity                | 54.26436782 |
| wavelet-LHH | glszm | GrayLevelNonUniformity               | 3.666666667 |
| wavelet-LHH | glszm | LargeAreaEmphasis                    | 3.057471264 |
| wavelet-LHH | glszm | SmallAreaHighGrayLevelEmphasis       | 276.1055587 |
| wavelet-LHH | glszm | ZonePercentage                       | 0.713114754 |
| wavelet-LHH | glszm | LargeAreaLowGrayLevelEmphasis        | 0.043181937 |
| wavelet-LHH | glszm | LargeAreaHighGrayLevelEmphasis       | 839.0689655 |
| wavelet-LHH | glszm | HighGrayLevelZoneEmphasis            | 316.8735632 |
| wavelet-LHH | glszm | SmallAreaEmphasis                    | 0.816313059 |
| wavelet-LHH | glszm | LowGrayLevelZoneEmphasis             | 0.026119392 |
| wavelet-LHH | glszm | ZoneEntropy                          | 5.228109192 |
| wavelet-LHH | glszm | SmallAreaLowGrayLevelEmphasis        | 0.02364345  |
| wavelet-LHH | ngtdm | Coarseness                           | 0.033065271 |
| wavelet-LHH | ngtdm | Complexity                           | 2268.686702 |
| wavelet-LHH | ngtdm | Strength                             | 10.9296356  |
| wavelet-LHH | ngtdm | Contrast                             | 0.682363074 |
| wavelet-LHH | ngtdm | Busyness                             | 0.072125888 |
| wavelet-LLH | gldm  | GrayLevelVariance                    | 169.2610185 |
| wavelet-LLH | gldm  | HighGrayLevelEmphasis                | 933.647541  |
| wavelet-LLH | gldm  | DependenceEntropy                    | 5.812674813 |
| wavelet-LLH | gldm  | DependenceNonUniformity              | 59.04918033 |
| wavelet-LLH | gldm  | GrayLevelNonUniformity               | 3.704918033 |
| wavelet-LLH | gldm  | SmallDependenceEmphasis              | 0.709984062 |
| wavelet-LLH | gldm  | SmallDependenceHighGrayLevelEmphasis | 693.6442395 |
| wavelet-LLH | gldm  | DependenceNonUniformityNormalized    | 0.484009675 |
| wavelet-LLH | gldm  | LargeDependenceEmphasis              | 2.803278689 |
| wavelet-LLH | gldm  | LargeDependenceLowGrayLevelEmphasis  | 0.017952538 |
| wavelet-LLH | gldm  | DependenceVariance                   | 0.577801666 |
| wavelet-LLH | gldm  | LargeDependenceHighGrayLevelEmphasis | 2167.319672 |
| wavelet-LLH | gldm  | SmallDependenceLowGrayLevelEmphasis  | 0.011308366 |
| wavelet-LLH | gldm  | LowGrayLevelEmphasis                 | 0.012288026 |
| wavelet-LLH | glcm  | JointAverage                         | 26.37964688 |
| wavelet-LLH | glcm  | SumAverage                           | 52.75929376 |
| wavelet-LLH | glcm  | JointEntropy                         | 7.037467695 |
| wavelet-LLH | glcm  | ClusterShade                         | 2886.166358 |
| wavelet-LLH | glcm  | MaximumProbability                   | 0.01740936  |
| wavelet-LLH | glcm  | ldmn                                 | 0.933374627 |
| wavelet-LLH | glcm  | JointEnergy                          | 0.00799728  |
| wavelet-LLH | glcm  | Contrast                             | 258.187796  |
| wavelet-LLH | glcm  | DifferenceEntropy                    | 4.541596102 |
| wavelet-LLH | glcm  | InverseVariance                      | 0.097512762 |
| wavelet-LLH | glcm  | DifferenceVariance                   | 94.1735534  |
| wavelet-LLH | glcm  | ldn                                  | 0.835700421 |
| wavelet-LLH | glcm  | ldm                                  | 0.092053535 |
| wavelet-LLH | glcm  | Correlation                          | 0.154516885 |
| wavelet-LLH | glcm  | Autocorrelation                      | 720.3866568 |
| wavelet-LLH | glcm  | SumEntropy                           | 5.273720587 |

|             |            |                                  |              |
|-------------|------------|----------------------------------|--------------|
| wavelet-LLH | glcm       | SumSquares                       | 153.3587117  |
| wavelet-LLH | glcm       | ClusterProminence                | 373097.0112  |
| wavelet-LLH | glcm       | Imc2                             | 0.999366217  |
| wavelet-LLH | glcm       | Imc1                             | -0.645617952 |
| wavelet-LLH | glcm       | DifferenceAverage                | 12.37753709  |
| wavelet-LLH | glcm       | Id                               | 0.166394979  |
| wavelet-LLH | glcm       | ClusterTendency                  | 355.247051   |
| wavelet-LLH | firstorder | InterquartileRange               | 501.274393   |
| wavelet-LLH | firstorder | Skewness                         | 0.197169152  |
| wavelet-LLH | firstorder | Uniformity                       | 0.030368181  |
| wavelet-LLH | firstorder | Median                           | -110.5457948 |
| wavelet-LLH | firstorder | Energy                           | 13604160.92  |
| wavelet-LLH | firstorder | RobustMeanAbsoluteDeviation      | 207.7551793  |
| wavelet-LLH | firstorder | MeanAbsoluteDeviation            | 278.8835145  |
| wavelet-LLH | firstorder | TotalEnergy                      | 367312344.8  |
| wavelet-LLH | firstorder | Maximum                          | 632.2598979  |
| wavelet-LLH | firstorder | RootMeanSquared                  | 333.9304055  |
| wavelet-LLH | firstorder | 90Percentile                     | 411.6754444  |
| wavelet-LLH | firstorder | Minimum                          | -747.6573876 |
| wavelet-LLH | firstorder | Entropy                          | 5.317220125  |
| wavelet-LLH | firstorder | Range                            | 1379.917285  |
| wavelet-LLH | firstorder | Variance                         | 106433.907   |
| wavelet-LLH | firstorder | 10Percentile                     | -478.1098607 |
| wavelet-LLH | firstorder | Kurtosis                         | 2.16726832   |
| wavelet-LLH | firstorder | Mean                             | -71.24330651 |
| wavelet-LLH | grlm       | ShortRunLowGrayLevelEmphasis     | 0.012418199  |
| wavelet-LLH | grlm       | GrayLevelVariance                | 170.1689688  |
| wavelet-LLH | grlm       | LowGrayLevelRunEmphasis          | 0.012465245  |
| wavelet-LLH | grlm       | GrayLevelNonUniformityNormalized | 0.029964958  |
| wavelet-LLH | grlm       | RunVariance                      | 0.018892341  |
| wavelet-LLH | grlm       | GrayLevelNonUniformity           | 3.58720189   |
| wavelet-LLH | grlm       | LongRunEmphasis                  | 1.058580768  |
| wavelet-LLH | grlm       | ShortRunHighGrayLevelEmphasis    | 926.3820181  |
| wavelet-LLH | grlm       | RunLengthNonUniformity           | 115.2261076  |
| wavelet-LLH | grlm       | ShortRunEmphasis                 | 0.985354808  |
| wavelet-LLH | grlm       | LongRunHighGrayLevelEmphasis     | 981.0179889  |
| wavelet-LLH | grlm       | RunPercentage                    | 0.981084489  |
| wavelet-LLH | grlm       | LongRunLowGrayLevelEmphasis      | 0.01265343   |
| wavelet-LLH | grlm       | RunEntropy                       | 5.379620021  |
| wavelet-LLH | grlm       | HighGrayLevelRunEmphasis         | 937.3092122  |
| wavelet-LLH | grlm       | RunLengthNonUniformityNormalized | 0.962215319  |
| wavelet-LLH | glszm      | GrayLevelVariance                | 182.2803305  |
| wavelet-LLH | glszm      | ZoneVariance                     | 0.847442282  |
| wavelet-LLH | glszm      | GrayLevelNonUniformityNormalized | 0.027387958  |
| wavelet-LLH | glszm      | SizeZoneNonUniformityNormalized  | 0.693526483  |
| wavelet-LLH | glszm      | SizeZoneNonUniformity            | 65.19148936  |
| wavelet-LLH | glszm      | GrayLevelNonUniformity           | 2.574468085  |
| wavelet-LLH | glszm      | LargeAreaEmphasis                | 2.531914894  |
| wavelet-LLH | glszm      | SmallAreaHighGrayLevelEmphasis   | 846.9804588  |
| wavelet-LLH | glszm      | ZonePercentage                   | 0.770491803  |
| wavelet-LLH | glszm      | LargeAreaLowGrayLevelEmphasis    | 0.01956879   |
| wavelet-LLH | glszm      | LargeAreaHighGrayLevelEmphasis   | 1944.946809  |
| wavelet-LLH | glszm      | HighGrayLevelZoneEmphasis        | 981.2446809  |

|             |            |                                      |              |
|-------------|------------|--------------------------------------|--------------|
| wavelet-LLH | glszm      | SmallAreaEmphasis                    | 0.857639628  |
| wavelet-LLH | glszm      | LowGrayLevelZoneEmphasis             | 0.0149832    |
| wavelet-LLH | glszm      | ZoneEntropy                          | 5.664708634  |
| wavelet-LLH | glszm      | SmallAreaLowGrayLevelEmphasis        | 0.01446489   |
| wavelet-LLH | ngtdm      | Coarseness                           | 0.034274539  |
| wavelet-LLH | ngtdm      | Complexity                           | 8623.081849  |
| wavelet-LLH | ngtdm      | Strength                             | 34.29333976  |
| wavelet-LLH | ngtdm      | Contrast                             | 1.384946465  |
| wavelet-LLH | ngtdm      | Busyness                             | 0.029047131  |
| wavelet-LLL | gldm       | GrayLevelVariance                    | 514.6764983  |
| wavelet-LLL | gldm       | HighGrayLevelEmphasis                | 3148.385246  |
| wavelet-LLL | gldm       | DependenceEntropy                    | 6.207256497  |
| wavelet-LLL | gldm       | DependenceNonUniformity              | 74.37704918  |
| wavelet-LLL | gldm       | GrayLevelNonUniformity               | 2.37704918   |
| wavelet-LLL | gldm       | SmallDependenceEmphasis              | 0.806010929  |
| wavelet-LLL | gldm       | SmallDependenceHighGrayLevelEmphasis | 2441.348361  |
| wavelet-LLL | gldm       | DependenceNonUniformityNormalized    | 0.609647944  |
| wavelet-LLL | gldm       | LargeDependenceEmphasis              | 1.885245902  |
| wavelet-LLL | gldm       | LargeDependenceLowGrayLevelEmphasis  | 0.012250181  |
| wavelet-LLL | gldm       | DependenceVariance                   | 0.250201559  |
| wavelet-LLL | gldm       | LargeDependenceHighGrayLevelEmphasis | 6575.221311  |
| wavelet-LLL | gldm       | SmallDependenceLowGrayLevelEmphasis  | 0.011753985  |
| wavelet-LLL | gldm       | LowGrayLevelEmphasis                 | 0.011849228  |
| wavelet-LLL | glcm       | JointAverage                         | 56.66865172  |
| wavelet-LLL | glcm       | SumAverage                           | 113.3373034  |
| wavelet-LLL | glcm       | JointEntropy                         | 7.124123789  |
| wavelet-LLL | glcm       | ClusterShade                         | -17572.74598 |
| wavelet-LLL | glcm       | MaximumProbability                   | 0.013733639  |
| wavelet-LLL | glcm       | ldmn                                 | 0.931361933  |
| wavelet-LLL | glcm       | JointEnergy                          | 0.007380037  |
| wavelet-LLL | glcm       | Contrast                             | 703.8496969  |
| wavelet-LLL | glcm       | DifferenceEntropy                    | 5.016911479  |
| wavelet-LLL | glcm       | InverseVariance                      | 0.050861432  |
| wavelet-LLL | glcm       | DifferenceVariance                   | 232.7607723  |
| wavelet-LLL | glcm       | ldn                                  | 0.828619912  |
| wavelet-LLL | glcm       | ldm                                  | 0.050929598  |
| wavelet-LLL | glcm       | Correlation                          | 0.249420823  |
| wavelet-LLL | glcm       | Autocorrelation                      | 3322.675117  |
| wavelet-LLL | glcm       | SumEntropy                           | 5.59912256   |
| wavelet-LLL | glcm       | SumSquares                           | 462.3628348  |
| wavelet-LLL | glcm       | ClusterProminence                    | 3557671.33   |
| wavelet-LLL | glcm       | lmc2                                 | 0.999900425  |
| wavelet-LLL | glcm       | lmc1                                 | -0.750327496 |
| wavelet-LLL | glcm       | DifferenceAverage                    | 21.11740843  |
| wavelet-LLL | glcm       | ld                                   | 0.108970567  |
| wavelet-LLL | glcm       | ClusterTendency                      | 1145.601642  |
| wavelet-LLL | firstorder | InterquartileRange                   | 889.1756494  |
| wavelet-LLL | firstorder | Skewness                             | -0.329004013 |
| wavelet-LLL | firstorder | Uniformity                           | 0.01948401   |
| wavelet-LLL | firstorder | Median                               | -600.7122584 |
| wavelet-LLL | firstorder | Energy                               | 95375307.01  |
| wavelet-LLL | firstorder | RobustMeanAbsoluteDeviation          | 352.821653   |
| wavelet-LLL | firstorder | MeanAbsoluteDeviation                | 475.4274759  |

|             |            |                                  |              |
|-------------|------------|----------------------------------|--------------|
| wavelet-LLL | firstorder | TotalEnergy                      | 2575133289   |
| wavelet-LLL | firstorder | Maximum                          | 348.0749654  |
| wavelet-LLL | firstorder | RootMeanSquared                  | 884.1746499  |
| wavelet-LLL | firstorder | 90Percentile                     | -19.54505979 |
| wavelet-LLL | firstorder | Minimum                          | -1935.384884 |
| wavelet-LLL | firstorder | Entropy                          | 5.881448252  |
| wavelet-LLL | firstorder | Range                            | 2283.459849  |
| wavelet-LLL | firstorder | Variance                         | 321361.8999  |
| wavelet-LLL | firstorder | 10Percentile                     | -1483.645473 |
| wavelet-LLL | firstorder | Kurtosis                         | 2.224982358  |
| wavelet-LLL | firstorder | Mean                             | -678.5299637 |
| wavelet-LLL | grlm       | ShortRunLowGrayLevelEmphasis     | 0.011969954  |
| wavelet-LLL | grlm       | GrayLevelVariance                | 516.2406492  |
| wavelet-LLL | grlm       | LowGrayLevelRunEmphasis          | 0.011973803  |
| wavelet-LLL | grlm       | GrayLevelNonUniformityNormalized | 0.019380873  |
| wavelet-LLL | grlm       | RunVariance                      | 0.010713202  |
| wavelet-LLL | grlm       | GrayLevelNonUniformity           | 2.33928701   |
| wavelet-LLL | grlm       | LongRunEmphasis                  | 1.03283938   |
| wavelet-LLL | grlm       | ShortRunHighGrayLevelEmphasis    | 3110.507003  |
| wavelet-LLL | grlm       | RunLengthNonUniformity           | 118.1324747  |
| wavelet-LLL | grlm       | ShortRunEmphasis                 | 0.991790155  |
| wavelet-LLL | grlm       | LongRunHighGrayLevelEmphasis     | 3265.525396  |
| wavelet-LLL | grlm       | RunPercentage                    | 0.989281211  |
| wavelet-LLL | grlm       | LongRunLowGrayLevelEmphasis      | 0.011989199  |
| wavelet-LLL | grlm       | RunEntropy                       | 5.908118234  |
| wavelet-LLL | grlm       | HighGrayLevelRunEmphasis         | 3141.510681  |
| wavelet-LLL | grlm       | RunLengthNonUniformityNormalized | 0.978573596  |
| wavelet-LLL | glszm      | GrayLevelVariance                | 537.1528345  |
| wavelet-LLL | glszm      | ZoneVariance                     | 0.211882086  |
| wavelet-LLL | glszm      | GrayLevelNonUniformityNormalized | 0.018049887  |
| wavelet-LLL | glszm      | SizeZoneNonUniformityNormalized  | 0.764353741  |
| wavelet-LLL | glszm      | SizeZoneNonUniformity            | 80.25714286  |
| wavelet-LLL | glszm      | GrayLevelNonUniformity           | 1.895238095  |
| wavelet-LLL | glszm      | LargeAreaEmphasis                | 1.561904762  |
| wavelet-LLL | glszm      | SmallAreaHighGrayLevelEmphasis   | 2688.591071  |
| wavelet-LLL | glszm      | ZonePercentage                   | 0.860655738  |
| wavelet-LLL | glszm      | LargeAreaLowGrayLevelEmphasis    | 0.013933315  |
| wavelet-LLL | glszm      | LargeAreaHighGrayLevelEmphasis   | 5301.171429  |
| wavelet-LLL | glszm      | HighGrayLevelZoneEmphasis        | 3046.685714  |
| wavelet-LLL | glszm      | SmallAreaEmphasis                | 0.896891534  |
| wavelet-LLL | glszm      | LowGrayLevelZoneEmphasis         | 0.013691771  |
| wavelet-LLL | glszm      | ZoneEntropy                      | 6.15934397   |
| wavelet-LLL | glszm      | SmallAreaLowGrayLevelEmphasis    | 0.013638188  |
| wavelet-LLL | ngtdm      | Coarseness                       | 0.031115353  |
| wavelet-LLL | ngtdm      | Complexity                       | 32710.63596  |
| wavelet-LLL | ngtdm      | Strength                         | 85.2358517   |
| wavelet-LLL | ngtdm      | Contrast                         | 3.343564568  |
| wavelet-LLL | ngtdm      | Busyness                         | 0.011042719  |
| wavelet-HHL | gldm       | GrayLevelVariance                | 39.11851653  |
| wavelet-HHL | gldm       | HighGrayLevelEmphasis            | 320.9180328  |
| wavelet-HHL | gldm       | DependenceEntropy                | 5.344827219  |
| wavelet-HHL | gldm       | DependenceNonUniformity          | 51.03278689  |
| wavelet-HHL | gldm       | GrayLevelNonUniformity           | 6.868852459  |

|             |            |                                      |              |
|-------------|------------|--------------------------------------|--------------|
| wavelet-HHL | gldm       | SmallDependenceEmphasis              | 0.643214936  |
| wavelet-HHL | gldm       | SmallDependenceHighGrayLevelEmphasis | 207.4173497  |
| wavelet-HHL | gldm       | DependenceNonUniformityNormalized    | 0.418301532  |
| wavelet-HHL | gldm       | LargeDependenceEmphasis              | 3.196721311  |
| wavelet-HHL | gldm       | LargeDependenceLowGrayLevelEmphasis  | 0.026322665  |
| wavelet-HHL | gldm       | DependenceVariance                   | 0.615694706  |
| wavelet-HHL | gldm       | LargeDependenceHighGrayLevelEmphasis | 992.2295082  |
| wavelet-HHL | gldm       | SmallDependenceLowGrayLevelEmphasis  | 0.015406782  |
| wavelet-HHL | gldm       | LowGrayLevelEmphasis                 | 0.016972974  |
| wavelet-HHL | glcm       | JointAverage                         | 16.64446602  |
| wavelet-HHL | glcm       | SumAverage                           | 33.28893204  |
| wavelet-HHL | glcm       | JointEntropy                         | 6.850969707  |
| wavelet-HHL | glcm       | ClusterShade                         | -16.6182441  |
| wavelet-HHL | glcm       | MaximumProbability                   | 0.02394719   |
| wavelet-HHL | glcm       | Idmn                                 | 0.936366871  |
| wavelet-HHL | glcm       | JointEnergy                          | 0.009495648  |
| wavelet-HHL | glcm       | Contrast                             | 88.55639055  |
| wavelet-HHL | glcm       | DifferenceEntropy                    | 3.995478338  |
| wavelet-HHL | glcm       | InverseVariance                      | 0.151599487  |
| wavelet-HHL | glcm       | DifferenceVariance                   | 31.10360628  |
| wavelet-HHL | glcm       | Idn                                  | 0.835418013  |
| wavelet-HHL | glcm       | Idm                                  | 0.13221535   |
| wavelet-HHL | glcm       | Correlation                          | -0.005798652 |
| wavelet-HHL | glcm       | Autocorrelation                      | 276.8715012  |
| wavelet-HHL | glcm       | SumEntropy                           | 4.713650816  |
| wavelet-HHL | glcm       | SumSquares                           | 44.08990484  |
| wavelet-HHL | glcm       | ClusterProminence                    | 21899.43887  |
| wavelet-HHL | glcm       | Imc2                                 | 0.991792755  |
| wavelet-HHL | glcm       | Imc1                                 | -0.46783506  |
| wavelet-HHL | glcm       | DifferenceAverage                    | 7.431202068  |
| wavelet-HHL | glcm       | Id                                   | 0.218213894  |
| wavelet-HHL | glcm       | ClusterTendency                      | 87.80322881  |
| wavelet-HHL | firstorder | InterquartileRange                   | 168.6880422  |
| wavelet-HHL | firstorder | Skewness                             | 0.026860859  |
| wavelet-HHL | firstorder | Uniformity                           | 0.056302069  |
| wavelet-HHL | firstorder | Median                               | -1.158625066 |
| wavelet-HHL | firstorder | Energy                               | 2970059.936  |
| wavelet-HHL | firstorder | RobustMeanAbsoluteDeviation          | 75.35198508  |
| wavelet-HHL | firstorder | MeanAbsoluteDeviation                | 118.4801223  |
| wavelet-HHL | firstorder | TotalEnergy                          | 80191618.27  |
| wavelet-HHL | firstorder | Maximum                              | 448.4454213  |
| wavelet-HHL | firstorder | RootMeanSquared                      | 156.0280538  |
| wavelet-HHL | firstorder | 90Percentile                         | 235.4143957  |
| wavelet-HHL | firstorder | Minimum                              | -394.0061341 |
| wavelet-HHL | firstorder | Entropy                              | 4.437295298  |
| wavelet-HHL | firstorder | Range                                | 842.4515554  |
| wavelet-HHL | firstorder | Variance                             | 24278.03473  |
| wavelet-HHL | firstorder | 10Percentile                         | -186.1859283 |
| wavelet-HHL | firstorder | Kurtosis                             | 3.121300714  |
| wavelet-HHL | firstorder | Mean                                 | 8.168160144  |
| wavelet-HHL | glrlm      | ShortRunLowGrayLevelEmphasis         | 0.017201556  |
| wavelet-HHL | glrlm      | GrayLevelVariance                    | 39.52361472  |
| wavelet-HHL | glrlm      | LowGrayLevelRunEmphasis              | 0.017277447  |

|             |       |                                      |              |
|-------------|-------|--------------------------------------|--------------|
| wavelet-HHL | glrlm | GrayLevelNonUniformityNormalized     | 0.05553255   |
| wavelet-HHL | glrlm | RunVariance                          | 0.024609152  |
| wavelet-HHL | glrlm | GrayLevelNonUniformity               | 6.617515373  |
| wavelet-HHL | glrlm | LongRunEmphasis                      | 1.073422098  |
| wavelet-HHL | glrlm | ShortRunHighGrayLevelEmphasis        | 315.64579    |
| wavelet-HHL | glrlm | RunLengthNonUniformity               | 113.776966   |
| wavelet-HHL | glrlm | ShortRunEmphasis                     | 0.982368798  |
| wavelet-HHL | glrlm | LongRunHighGrayLevelEmphasis         | 343.8707212  |
| wavelet-HHL | glrlm | RunPercentage                        | 0.97667087   |
| wavelet-HHL | glrlm | LongRunLowGrayLevelEmphasis          | 0.017593884  |
| wavelet-HHL | glrlm | RunEntropy                           | 4.543012764  |
| wavelet-HHL | glrlm | HighGrayLevelRunEmphasis             | 321.1603982  |
| wavelet-HHL | glrlm | RunLengthNonUniformityNormalized     | 0.954593597  |
| wavelet-HHL | glszm | GrayLevelVariance                    | 45.46360153  |
| wavelet-HHL | glszm | ZoneVariance                         | 0.884132646  |
| wavelet-HHL | glszm | GrayLevelNonUniformityNormalized     | 0.047958779  |
| wavelet-HHL | glszm | SizeZoneNonUniformityNormalized      | 0.615801295  |
| wavelet-HHL | glszm | SizeZoneNonUniformity                | 53.57471264  |
| wavelet-HHL | glszm | GrayLevelNonUniformity               | 4.172413793  |
| wavelet-HHL | glszm | LargeAreaEmphasis                    | 2.850574713  |
| wavelet-HHL | glszm | SmallAreaHighGrayLevelEmphasis       | 261.5898679  |
| wavelet-HHL | glszm | ZonePercentage                       | 0.713114754  |
| wavelet-HHL | glszm | LargeAreaLowGrayLevelEmphasis        | 0.029888352  |
| wavelet-HHL | glszm | LargeAreaHighGrayLevelEmphasis       | 878.4827586  |
| wavelet-HHL | glszm | HighGrayLevelZoneEmphasis            | 323.2413793  |
| wavelet-HHL | glszm | SmallAreaEmphasis                    | 0.811358459  |
| wavelet-HHL | glszm | LowGrayLevelZoneEmphasis             | 0.022066599  |
| wavelet-HHL | glszm | ZoneEntropy                          | 5.211236421  |
| wavelet-HHL | glszm | SmallAreaLowGrayLevelEmphasis        | 0.02121247   |
| wavelet-HHL | ngtdm | Coarseness                           | 0.043271585  |
| wavelet-HHL | ngtdm | Complexity                           | 1623.0842    |
| wavelet-HHL | ngtdm | Strength                             | 11.35063418  |
| wavelet-HHL | ngtdm | Contrast                             | 0.481142497  |
| wavelet-HHL | ngtdm | Busyness                             | 0.049612905  |
| wavelet-HLH | gldm  | GrayLevelVariance                    | 20.73078474  |
| wavelet-HLH | gldm  | HighGrayLevelEmphasis                | 161.795082   |
| wavelet-HLH | gldm  | DependenceEntropy                    | 5.428298969  |
| wavelet-HLH | gldm  | DependenceNonUniformity              | 32.42622951  |
| wavelet-HLH | gldm  | GrayLevelNonUniformity               | 8.557377049  |
| wavelet-HLH | gldm  | SmallDependenceEmphasis              | 0.482008057  |
| wavelet-HLH | gldm  | SmallDependenceHighGrayLevelEmphasis | 85.93831098  |
| wavelet-HLH | gldm  | DependenceNonUniformityNormalized    | 0.265788766  |
| wavelet-HLH | gldm  | LargeDependenceEmphasis              | 7            |
| wavelet-HLH | gldm  | LargeDependenceLowGrayLevelEmphasis  | 0.081793469  |
| wavelet-HLH | gldm  | DependenceVariance                   | 1.955925826  |
| wavelet-HLH | gldm  | LargeDependenceHighGrayLevelEmphasis | 1046.92623   |
| wavelet-HLH | gldm  | SmallDependenceLowGrayLevelEmphasis  | 0.02383334   |
| wavelet-HLH | gldm  | LowGrayLevelEmphasis                 | 0.029196326  |
| wavelet-HLH | glcm  | JointAverage                         | 11.93774038  |
| wavelet-HLH | glcm  | SumAverage                           | 23.87548076  |
| wavelet-HLH | glcm  | JointEntropy                         | 6.527564949  |
| wavelet-HLH | glcm  | ClusterShade                         | -9.336841052 |
| wavelet-HLH | glcm  | MaximumProbability                   | 0.033899352  |

|             |            |                                  |              |
|-------------|------------|----------------------------------|--------------|
| wavelet-HLH | glcm       | Idmn                             | 0.928988548  |
| wavelet-HLH | glcm       | JointEnergy                      | 0.012527467  |
| wavelet-HLH | glcm       | Contrast                         | 42.6337061   |
| wavelet-HLH | glcm       | DifferenceEntropy                | 3.625549502  |
| wavelet-HLH | glcm       | InverseVariance                  | 0.166786993  |
| wavelet-HLH | glcm       | DifferenceVariance               | 15.4857696   |
| wavelet-HLH | glcm       | Idn                              | 0.826500032  |
| wavelet-HLH | glcm       | Idm                              | 0.183209976  |
| wavelet-HLH | glcm       | Correlation                      | -0.075869334 |
| wavelet-HLH | glcm       | Autocorrelation                  | 141.100644   |
| wavelet-HLH | glcm       | SumEntropy                       | 4.284280689  |
| wavelet-HLH | glcm       | SumSquares                       | 19.87279954  |
| wavelet-HLH | glcm       | ClusterProminence                | 4187.746532  |
| wavelet-HLH | glcm       | Imc2                             | 0.971826045  |
| wavelet-HLH | glcm       | Imc1                             | -0.367791485 |
| wavelet-HLH | glcm       | DifferenceAverage                | 5.150601688  |
| wavelet-HLH | glcm       | Id                               | 0.276892661  |
| wavelet-HLH | glcm       | ClusterTendency                  | 36.85749206  |
| wavelet-HLH | firstorder | InterquartileRange               | 160.0769468  |
| wavelet-HLH | firstorder | Skewness                         | -0.089956044 |
| wavelet-HLH | firstorder | Uniformity                       | 0.070142435  |
| wavelet-HLH | firstorder | Median                           | 7.765154102  |
| wavelet-HLH | firstorder | Energy                           | 1613501.25   |
| wavelet-HLH | firstorder | RobustMeanAbsoluteDeviation      | 63.11643335  |
| wavelet-HLH | firstorder | MeanAbsoluteDeviation            | 91.42966237  |
| wavelet-HLH | firstorder | TotalEnergy                      | 43564533.75  |
| wavelet-HLH | firstorder | Maximum                          | 260.9864532  |
| wavelet-HLH | firstorder | RootMeanSquared                  | 115.0018264  |
| wavelet-HLH | firstorder | 90Percentile                     | 167.9715397  |
| wavelet-HLH | firstorder | Minimum                          | -272.0094992 |
| wavelet-HLH | firstorder | Entropy                          | 4.059629118  |
| wavelet-HLH | firstorder | Range                            | 532.9959524  |
| wavelet-HLH | firstorder | Variance                         | 13146.21684  |
| wavelet-HLH | firstorder | 10Percentile                     | -150.0290571 |
| wavelet-HLH | firstorder | Kurtosis                         | 2.609908993  |
| wavelet-HLH | firstorder | Mean                             | 8.899620107  |
| wavelet-HLH | grlm       | ShortRunLowGrayLevelEmphasis     | 0.029863045  |
| wavelet-HLH | grlm       | GrayLevelVariance                | 21.34090426  |
| wavelet-HLH | grlm       | LowGrayLevelRunEmphasis          | 0.030203622  |
| wavelet-HLH | grlm       | GrayLevelNonUniformityNormalized | 0.068281127  |
| wavelet-HLH | grlm       | RunVariance                      | 0.054587448  |
| wavelet-HLH | grlm       | GrayLevelNonUniformity           | 7.932014464  |
| wavelet-HLH | grlm       | LongRunEmphasis                  | 1.159287949  |
| wavelet-HLH | grlm       | ShortRunHighGrayLevelEmphasis    | 157.1137513  |
| wavelet-HLH | grlm       | RunLengthNonUniformity           | 105.7734712  |
| wavelet-HLH | grlm       | ShortRunEmphasis                 | 0.963995564  |
| wavelet-HLH | grlm       | LongRunHighGrayLevelEmphasis     | 185.9682379  |
| wavelet-HLH | grlm       | RunPercentage                    | 0.952080706  |
| wavelet-HLH | grlm       | LongRunLowGrayLevelEmphasis      | 0.031685571  |
| wavelet-HLH | grlm       | RunEntropy                       | 4.27248488   |
| wavelet-HLH | grlm       | HighGrayLevelRunEmphasis         | 162.4865139  |
| wavelet-HLH | grlm       | RunLengthNonUniformityNormalized | 0.909989903  |
| wavelet-HLH | glszm      | GrayLevelVariance                | 29.54453627  |

|             |       |                                  |             |
|-------------|-------|----------------------------------|-------------|
| wavelet-HLH | glszm | ZoneVariance                     | 3.886134068 |
| wavelet-HLH | glszm | GrayLevelNonUniformityNormalized | 0.058769513 |
| wavelet-HLH | glszm | SizeZoneNonUniformityNormalized  | 0.529384757 |
| wavelet-HLH | glszm | SizeZoneNonUniformity            | 34.93939394 |
| wavelet-HLH | glszm | GrayLevelNonUniformity           | 3.878787879 |
| wavelet-HLH | glszm | LargeAreaEmphasis                | 7.303030303 |
| wavelet-HLH | glszm | SmallAreaHighGrayLevelEmphasis   | 139.3471149 |
| wavelet-HLH | glszm | ZonePercentage                   | 0.540983607 |
| wavelet-HLH | glszm | LargeAreaLowGrayLevelEmphasis    | 0.099076548 |
| wavelet-HLH | glszm | LargeAreaHighGrayLevelEmphasis   | 1140.893939 |
| wavelet-HLH | glszm | HighGrayLevelZoneEmphasis        | 172.8181818 |
| wavelet-HLH | glszm | SmallAreaEmphasis                | 0.753169986 |
| wavelet-HLH | glszm | LowGrayLevelZoneEmphasis         | 0.045472039 |
| wavelet-HLH | glszm | ZoneEntropy                      | 4.903724233 |
| wavelet-HLH | glszm | SmallAreaLowGrayLevelEmphasis    | 0.042456277 |
| wavelet-HLH | ngtdm | Coarseness                       | 0.040911566 |
| wavelet-HLH | ngtdm | Complexity                       | 632.3525254 |
| wavelet-HLH | ngtdm | Strength                         | 5.125923276 |
| wavelet-HLH | ngtdm | Contrast                         | 0.38719794  |
| wavelet-HLH | ngtdm | Busyness                         | 0.112343348 |



| Image type | Feature Class | Feature Name                         |                                                                                                                                                                                                                                                                                                                                                                                                                   |
|------------|---------------|--------------------------------------|-------------------------------------------------------------------------------------------------------------------------------------------------------------------------------------------------------------------------------------------------------------------------------------------------------------------------------------------------------------------------------------------------------------------|
| general    | info          | BoundingBox                          | 36: RTSTRUCT: C99-DNU_segment_Left_Lung_GTV<br>(0, 1, 1, 31, 33, 25)                                                                                                                                                                                                                                                                                                                                              |
| general    | info          | EnabledImageTypes                    | {u'Original': {}, u'Wavelet': {}}                                                                                                                                                                                                                                                                                                                                                                                 |
|            |               |                                      | {'distances': [1], 'additionalInfo': True, 'force2D': False, 'interpolator': 'sitkBSpline', 'resampledPixelSpacing': [3.0], 'label': 1, 'normalizeScale': 1, 'normalize': False, 'force2Ddimension': 0, 'removeOutliers': None, 'minimumROISize': None, u'binWidth': 25.0, 'minimumROIDimensions': 1, u'correctMask': True, 'preCrop': False, u'symmetricalGLCM': True, 'resegmentRange': None, 'padDistance': 5} |
| general    | info          | GeneralSettings                      |                                                                                                                                                                                                                                                                                                                                                                                                                   |
| general    | info          | ImageHash                            | 4d527653aaa4d1426738551132625c03e96c48e9<br>(0.9765624999999998, 0.9765624999999998,<br>1.9999999999999999)                                                                                                                                                                                                                                                                                                       |
| general    | info          | ImageSpacing                         |                                                                                                                                                                                                                                                                                                                                                                                                                   |
| general    | info          | MaskHash                             | 7f98fb588ee7d20734c970ab4042e348d5c12f4b                                                                                                                                                                                                                                                                                                                                                                          |
| general    | info          | NumpyVersion                         | 1.13.1                                                                                                                                                                                                                                                                                                                                                                                                            |
| general    | info          | PyWaveletVersion                     | 0.5.2                                                                                                                                                                                                                                                                                                                                                                                                             |
| general    | info          | SimpleITKVersion                     | 1.1.0                                                                                                                                                                                                                                                                                                                                                                                                             |
| general    | info          | Version                              | 1.3.0.post102+g1b0eb74                                                                                                                                                                                                                                                                                                                                                                                            |
| general    | info          | VolumeNum                            | 1                                                                                                                                                                                                                                                                                                                                                                                                                 |
| general    | info          | VoxelNum                             | 7698                                                                                                                                                                                                                                                                                                                                                                                                              |
| original   | shape         | Maximum3DDiameter                    | 116.1507641                                                                                                                                                                                                                                                                                                                                                                                                       |
| original   | shape         | Maximum2DDiameterSlice               | 89.49860334                                                                                                                                                                                                                                                                                                                                                                                                       |
| original   | shape         | Sphericity                           | 0.670519105                                                                                                                                                                                                                                                                                                                                                                                                       |
| original   | shape         | MinorAxis                            | 74.40511291                                                                                                                                                                                                                                                                                                                                                                                                       |
| original   | shape         | Elongation                           | 0.817139631                                                                                                                                                                                                                                                                                                                                                                                                       |
| original   | shape         | SurfaceVolumeRatio                   | 0.121756572                                                                                                                                                                                                                                                                                                                                                                                                       |
| original   | shape         | Volume                               | 207846                                                                                                                                                                                                                                                                                                                                                                                                            |
| original   | shape         | MajorAxis                            | 91.05556756                                                                                                                                                                                                                                                                                                                                                                                                       |
| original   | shape         | SurfaceArea                          | 25306.61637                                                                                                                                                                                                                                                                                                                                                                                                       |
| original   | shape         | Flatness                             | 0.534589989                                                                                                                                                                                                                                                                                                                                                                                                       |
| original   | shape         | LeastAxis                            | 48.67739482                                                                                                                                                                                                                                                                                                                                                                                                       |
| original   | shape         | Maximum2DDiameterColumn              | 90.04998612                                                                                                                                                                                                                                                                                                                                                                                                       |
| original   | shape         | Maximum2DDiameterRow                 | 115.8015544                                                                                                                                                                                                                                                                                                                                                                                                       |
| original   | gldm          | GrayLevelVariance                    | 132.1839884                                                                                                                                                                                                                                                                                                                                                                                                       |
| original   | gldm          | HighGrayLevelEmphasis                | 1460.520395                                                                                                                                                                                                                                                                                                                                                                                                       |
| original   | gldm          | DependenceEntropy                    | 7.179779892                                                                                                                                                                                                                                                                                                                                                                                                       |
| original   | gldm          | DependenceNonUniformity              | 757.1228891                                                                                                                                                                                                                                                                                                                                                                                                       |
| original   | gldm          | GrayLevelNonUniformity               | 846.4250455                                                                                                                                                                                                                                                                                                                                                                                                       |
| original   | gldm          | SmallDependenceEmphasis              | 0.278086883                                                                                                                                                                                                                                                                                                                                                                                                       |
| original   | gldm          | SmallDependenceHighGrayLevelEmphasis | 250.8933204                                                                                                                                                                                                                                                                                                                                                                                                       |
| original   | gldm          | DependenceNonUniformityNormalized    | 0.098353194                                                                                                                                                                                                                                                                                                                                                                                                       |
| original   | gldm          | LargeDependenceEmphasis              | 62.29020525                                                                                                                                                                                                                                                                                                                                                                                                       |
| original   | gldm          | LargeDependenceLowGrayLevelEmphasis  | 0.038731668                                                                                                                                                                                                                                                                                                                                                                                                       |
| original   | gldm          | DependenceVariance                   | 24.85132227                                                                                                                                                                                                                                                                                                                                                                                                       |
| original   | gldm          | LargeDependenceHighGrayLevelEmphasis | 115950.8124                                                                                                                                                                                                                                                                                                                                                                                                       |
| original   | gldm          | SmallDependenceLowGrayLevelEmphasis  | 0.001297991                                                                                                                                                                                                                                                                                                                                                                                                       |
| original   | gldm          | LowGrayLevelEmphasis                 | 0.002206709                                                                                                                                                                                                                                                                                                                                                                                                       |
| original   | glcm          | JointAverage                         | 37.81862967                                                                                                                                                                                                                                                                                                                                                                                                       |
| original   | glcm          | SumAverage                           | 75.63725934                                                                                                                                                                                                                                                                                                                                                                                                       |
| original   | glcm          | JointEntropy                         | 7.371523323                                                                                                                                                                                                                                                                                                                                                                                                       |
| original   | glcm          | ClusterShade                         | -10365.899                                                                                                                                                                                                                                                                                                                                                                                                        |
| original   | glcm          | MaximumProbability                   | 0.089509566                                                                                                                                                                                                                                                                                                                                                                                                       |
| original   | glcm          | Idmn                                 | 0.976094209                                                                                                                                                                                                                                                                                                                                                                                                       |
| original   | glcm          | JointEnergy                          | 0.031073481                                                                                                                                                                                                                                                                                                                                                                                                       |
| original   | glcm          | Contrast                             | 86.36953628                                                                                                                                                                                                                                                                                                                                                                                                       |

|          |            |                                  |              |
|----------|------------|----------------------------------|--------------|
| original | glcm       | DifferenceEntropy                | 3.561535821  |
| original | glcm       | InverseVariance                  | 0.343052132  |
| original | glcm       | DifferenceVariance               | 60.28328217  |
| original | glcm       | Idn                              | 0.928479956  |
| original | glcm       | Idm                              | 0.407674649  |
| original | glcm       | Correlation                      | 0.603712224  |
| original | glcm       | Autocorrelation                  | 1497.147702  |
| original | glcm       | SumEntropy                       | 4.944892121  |
| original | glcm       | SumSquares                       | 110.0038158  |
| original | glcm       | ClusterProminence                | 531279.1308  |
| original | glcm       | Imc2                             | 0.799047191  |
| original | glcm       | Imc1                             | -0.134751288 |
| original | glcm       | DifferenceAverage                | 5.048430058  |
| original | glcm       | Id                               | 0.454244001  |
| original | glcm       | ClusterTendency                  | 353.6457271  |
| original | firstorder | InterquartileRange               | 276.75       |
| original | firstorder | Skewness                         | -1.354804255 |
| original | firstorder | Uniformity                       | 0.10995389   |
| original | firstorder | Median                           | 28           |
| original | firstorder | Energy                           | 758987654    |
| original | firstorder | RobustMeanAbsoluteDeviation      | 157.6002427  |
| original | firstorder | MeanAbsoluteDeviation            | 234.1415368  |
| original | firstorder | TotalEnergy                      | 20492666658  |
| original | firstorder | Maximum                          | 342          |
| original | firstorder | RootMeanSquared                  | 313.9990994  |
| original | firstorder | 90Percentile                     | 73           |
| original | firstorder | Minimum                          | -1017        |
| original | firstorder | Entropy                          | 4.185412839  |
| original | firstorder | Range                            | 1359         |
| original | firstorder | Variance                         | 82546.25071  |
| original | firstorder | 10Percentile                     | -671         |
| original | firstorder | Kurtosis                         | 3.321852251  |
| original | firstorder | Mean                             | -126.6853728 |
| original | glrlm      | ShortRunLowGrayLevelEmphasis     | 0.002466657  |
| original | glrlm      | GrayLevelVariance                | 147.146464   |
| original | glrlm      | LowGrayLevelRunEmphasis          | 0.00257048   |
| original | glrlm      | GrayLevelNonUniformityNormalized | 0.079638881  |
| original | glrlm      | RunVariance                      | 0.449873403  |
| original | glrlm      | GrayLevelNonUniformity           | 492.66983    |
| original | glrlm      | LongRunEmphasis                  | 2.003135803  |
| original | glrlm      | ShortRunHighGrayLevelEmphasis    | 1133.460889  |
| original | glrlm      | RunLengthNonUniformity           | 4425.980781  |
| original | glrlm      | ShortRunEmphasis                 | 0.869757743  |
| original | glrlm      | LongRunHighGrayLevelEmphasis     | 3218.585251  |
| original | glrlm      | RunPercentage                    | 0.803125687  |
| original | glrlm      | LongRunLowGrayLevelEmphasis      | 0.00325451   |
| original | glrlm      | RunEntropy                       | 5.251257827  |
| original | glrlm      | HighGrayLevelRunEmphasis         | 1369.450794  |
| original | glrlm      | RunLengthNonUniformityNormalized | 0.715283703  |
| original | glszm      | GrayLevelVariance                | 141.522278   |
| original | glszm      | ZoneVariance                     | 2414.986887  |
| original | glszm      | GrayLevelNonUniformityNormalized | 0.025779836  |
| original | glszm      | SizeZoneNonUniformityNormalized  | 0.592707773  |
| original | glszm      | SizeZoneNonUniformity            | 1356.115385  |
| original | glszm      | GrayLevelNonUniformity           | 58.98426573  |
| original | glszm      | LargeAreaEmphasis                | 2426.306818  |
| original | glszm      | SmallAreaHighGrayLevelEmphasis   | 664.3189413  |
| original | glszm      | ZonePercentage                   | 0.297220057  |

|             |            |                                      |              |
|-------------|------------|--------------------------------------|--------------|
| original    | glszm      | LargeAreaLowGrayLevelEmphasis        | 1.29561653   |
| original    | glszm      | LargeAreaHighGrayLevelEmphasis       | 4582810.228  |
| original    | glszm      | HighGrayLevelZoneEmphasis            | 856.8977273  |
| original    | glszm      | SmallAreaEmphasis                    | 0.797465257  |
| original    | glszm      | LowGrayLevelZoneEmphasis             | 0.004775011  |
| original    | glszm      | ZoneEntropy                          | 6.521097015  |
| original    | glszm      | SmallAreaLowGrayLevelEmphasis        | 0.004021076  |
| original    | ngtdm      | Coarseness                           | 0.000625048  |
| original    | ngtdm      | Complexity                           | 4384.645107  |
| original    | ngtdm      | Strength                             | 1.516168279  |
| original    | ngtdm      | Contrast                             | 0.410462481  |
| original    | ngtdm      | Busyness                             | 0.574035129  |
| wavelet-HHH | gldm       | GrayLevelVariance                    | 5.651918257  |
| wavelet-HHH | gldm       | HighGrayLevelEmphasis                | 311.8291764  |
| wavelet-HHH | gldm       | DependenceEntropy                    | 6.1380304    |
| wavelet-HHH | gldm       | DependenceNonUniformity              | 616.0958691  |
| wavelet-HHH | gldm       | GrayLevelNonUniformity               | 1423.858145  |
| wavelet-HHH | gldm       | SmallDependenceEmphasis              | 0.186836077  |
| wavelet-HHH | gldm       | SmallDependenceHighGrayLevelEmphasis | 60.88344517  |
| wavelet-HHH | gldm       | DependenceNonUniformityNormalized    | 0.080033238  |
| wavelet-HHH | gldm       | LargeDependenceEmphasis              | 65.81995323  |
| wavelet-HHH | gldm       | LargeDependenceLowGrayLevelEmphasis  | 0.21576271   |
| wavelet-HHH | gldm       | DependenceVariance                   | 21.74539503  |
| wavelet-HHH | gldm       | LargeDependenceHighGrayLevelEmphasis | 20258.00637  |
| wavelet-HHH | gldm       | SmallDependenceLowGrayLevelEmphasis  | 0.000894421  |
| wavelet-HHH | gldm       | LowGrayLevelEmphasis                 | 0.003635362  |
| wavelet-HHH | glcm       | JointAverage                         | 17.49632985  |
| wavelet-HHH | glcm       | SumAverage                           | 34.99265971  |
| wavelet-HHH | glcm       | JointEntropy                         | 5.709517123  |
| wavelet-HHH | glcm       | ClusterShade                         | 0.116298183  |
| wavelet-HHH | glcm       | MaximumProbability                   | 0.123921856  |
| wavelet-HHH | glcm       | Idmn                                 | 0.991614022  |
| wavelet-HHH | glcm       | JointEnergy                          | 0.054450713  |
| wavelet-HHH | glcm       | Contrast                             | 10.98983748  |
| wavelet-HHH | glcm       | DifferenceEntropy                    | 2.737326094  |
| wavelet-HHH | glcm       | InverseVariance                      | 0.39025839   |
| wavelet-HHH | glcm       | DifferenceVariance                   | 6.55522409   |
| wavelet-HHH | glcm       | Idn                                  | 0.947517368  |
| wavelet-HHH | glcm       | Idm                                  | 0.458771012  |
| wavelet-HHH | glcm       | Correlation                          | -0.034957282 |
| wavelet-HHH | glcm       | Autocorrelation                      | 305.9268706  |
| wavelet-HHH | glcm       | SumEntropy                           | 3.438233929  |
| wavelet-HHH | glcm       | SumSquares                           | 5.300213563  |
| wavelet-HHH | glcm       | ClusterProminence                    | 883.7486515  |
| wavelet-HHH | glcm       | Imc2                                 | 0.547944853  |
| wavelet-HHH | glcm       | Imc1                                 | -0.062331276 |
| wavelet-HHH | glcm       | DifferenceAverage                    | 2.093669147  |
| wavelet-HHH | glcm       | Id                                   | 0.512046132  |
| wavelet-HHH | glcm       | ClusterTendency                      | 10.21101677  |
| wavelet-HHH | firstorder | InterquartileRange                   | 39.20401598  |
| wavelet-HHH | firstorder | Skewness                             | 0.048349561  |
| wavelet-HHH | firstorder | Uniformity                           | 0.184964685  |
| wavelet-HHH | firstorder | Median                               | 0.440137207  |
| wavelet-HHH | firstorder | Energy                               | 26737432.1   |
| wavelet-HHH | firstorder | RobustMeanAbsoluteDeviation          | 18.8955223   |
| wavelet-HHH | firstorder | MeanAbsoluteDeviation                | 37.54411111  |
| wavelet-HHH | firstorder | TotalEnergy                          | 721910666.8  |
| wavelet-HHH | firstorder | Maximum                              | 428.8538433  |

|             |            |                                      |              |
|-------------|------------|--------------------------------------|--------------|
| wavelet-HHH | firstorder | RootMeanSquared                      | 58.93467515  |
| wavelet-HHH | firstorder | 90Percentile                         | 61.68248425  |
| wavelet-HHH | firstorder | Minimum                              | -419.5746315 |
| wavelet-HHH | firstorder | Entropy                              | 3.029985068  |
| wavelet-HHH | firstorder | Range                                | 848.4284749  |
| wavelet-HHH | firstorder | Variance                             | 3473.295609  |
| wavelet-HHH | firstorder | 10Percentile                         | -63.50050575 |
| wavelet-HHH | firstorder | Kurtosis                             | 8.003237282  |
| wavelet-HHH | firstorder | Mean                                 | -0.018041958 |
| wavelet-HHH | glrlm      | ShortRunLowGrayLevelEmphasis         | 0.003236187  |
| wavelet-HHH | glrlm      | GrayLevelVariance                    | 6.959537009  |
| wavelet-HHH | glrlm      | LowGrayLevelRunEmphasis              | 0.003730803  |
| wavelet-HHH | glrlm      | GrayLevelNonUniformityNormalized     | 0.148965311  |
| wavelet-HHH | glrlm      | RunVariance                          | 0.494616897  |
| wavelet-HHH | glrlm      | GrayLevelNonUniformity               | 898.8969936  |
| wavelet-HHH | glrlm      | LongRunEmphasis                      | 2.131683553  |
| wavelet-HHH | glrlm      | ShortRunHighGrayLevelEmphasis        | 266.7755955  |
| wavelet-HHH | glrlm      | RunLengthNonUniformity               | 4098.046387  |
| wavelet-HHH | glrlm      | ShortRunEmphasis                     | 0.850188492  |
| wavelet-HHH | glrlm      | LongRunHighGrayLevelEmphasis         | 661.1173193  |
| wavelet-HHH | glrlm      | RunPercentage                        | 0.783120491  |
| wavelet-HHH | glrlm      | LongRunLowGrayLevelEmphasis          | 0.007450889  |
| wavelet-HHH | glrlm      | RunEntropy                           | 4.103958562  |
| wavelet-HHH | glrlm      | HighGrayLevelRunEmphasis             | 312.9301397  |
| wavelet-HHH | glrlm      | RunLengthNonUniformityNormalized     | 0.678998617  |
| wavelet-HHH | glszm      | GrayLevelVariance                    | 19.88106854  |
| wavelet-HHH | glszm      | ZoneVariance                         | 6106.116746  |
| wavelet-HHH | glszm      | GrayLevelNonUniformityNormalized     | 0.071047249  |
| wavelet-HHH | glszm      | SizeZoneNonUniformityNormalized      | 0.485837383  |
| wavelet-HHH | glszm      | SizeZoneNonUniformity                | 714.1809524  |
| wavelet-HHH | glszm      | GrayLevelNonUniformity               | 104.4394558  |
| wavelet-HHH | glszm      | LargeAreaEmphasis                    | 6133.540136  |
| wavelet-HHH | glszm      | SmallAreaHighGrayLevelEmphasis       | 240.1251079  |
| wavelet-HHH | glszm      | ZonePercentage                       | 0.190958691  |
| wavelet-HHH | glszm      | LargeAreaLowGrayLevelEmphasis        | 20.01327772  |
| wavelet-HHH | glszm      | LargeAreaHighGrayLevelEmphasis       | 1886508.267  |
| wavelet-HHH | glszm      | HighGrayLevelZoneEmphasis            | 326.655102   |
| wavelet-HHH | glszm      | SmallAreaEmphasis                    | 0.724327131  |
| wavelet-HHH | glszm      | LowGrayLevelZoneEmphasis             | 0.004827476  |
| wavelet-HHH | glszm      | ZoneEntropy                          | 5.696542262  |
| wavelet-HHH | glszm      | SmallAreaLowGrayLevelEmphasis        | 0.003780316  |
| wavelet-HHH | ngtdm      | Coarseness                           | 9.65E-04     |
| wavelet-HHH | ngtdm      | Complexity                           | 772.3623778  |
| wavelet-HHH | ngtdm      | Strength                             | 0.489300929  |
| wavelet-HHH | ngtdm      | Contrast                             | 0.018750448  |
| wavelet-HHH | ngtdm      | Busyness                             | 1.147021489  |
| wavelet-HLL | gldm       | GrayLevelVariance                    | 26.67140566  |
| wavelet-HLL | gldm       | HighGrayLevelEmphasis                | 761.6673162  |
| wavelet-HLL | gldm       | DependenceEntropy                    | 7.026661951  |
| wavelet-HLL | gldm       | DependenceNonUniformity              | 825.0626137  |
| wavelet-HLL | gldm       | GrayLevelNonUniformity               | 799.4572616  |
| wavelet-HLL | gldm       | SmallDependenceEmphasis              | 0.256379658  |
| wavelet-HLL | gldm       | SmallDependenceHighGrayLevelEmphasis | 210.2974211  |
| wavelet-HLL | gldm       | DependenceNonUniformityNormalized    | 0.107178827  |
| wavelet-HLL | gldm       | LargeDependenceEmphasis              | 50.75136399  |
| wavelet-HLL | gldm       | LargeDependenceLowGrayLevelEmphasis  | 0.068587358  |
| wavelet-HLL | gldm       | DependenceVariance                   | 21.28640871  |
| wavelet-HLL | gldm       | LargeDependenceHighGrayLevelEmphasis | 38269.48389  |

|             |            |                                     |              |
|-------------|------------|-------------------------------------|--------------|
| wavelet-HLL | gldm       | SmallDependenceLowGrayLevelEmphasis | 0.000589409  |
| wavelet-HLL | gldm       | LowGrayLevelEmphasis                | 0.001693098  |
| wavelet-HLL | glcm       | JointAverage                        | 26.97813623  |
| wavelet-HLL | glcm       | SumAverage                          | 53.95627246  |
| wavelet-HLL | glcm       | JointEntropy                        | 7.449071149  |
| wavelet-HLL | glcm       | ClusterShade                        | 223.8275401  |
| wavelet-HLL | glcm       | MaximumProbability                  | 0.082668438  |
| wavelet-HLL | glcm       | ldmn                                | 0.989995837  |
| wavelet-HLL | glcm       | JointEnergy                         | 0.025660392  |
| wavelet-HLL | glcm       | Contrast                            | 35.36066385  |
| wavelet-HLL | glcm       | DifferenceEntropy                   | 3.401328624  |
| wavelet-HLL | glcm       | InverseVariance                     | 0.317980855  |
| wavelet-HLL | glcm       | DifferenceVariance                  | 21.7276569   |
| wavelet-HLL | glcm       | ldn                                 | 0.945017602  |
| wavelet-HLL | glcm       | ldm                                 | 0.368522057  |
| wavelet-HLL | glcm       | Correlation                         | 0.28717474   |
| wavelet-HLL | glcm       | Autocorrelation                     | 735.2247872  |
| wavelet-HLL | glcm       | SumEntropy                          | 4.638705244  |
| wavelet-HLL | glcm       | SumSquares                          | 25.08323066  |
| wavelet-HLL | glcm       | ClusterProminence                   | 27433.58039  |
| wavelet-HLL | glcm       | lmc2                                | 0.753536394  |
| wavelet-HLL | glcm       | lmc1                                | -0.112946165 |
| wavelet-HLL | glcm       | DifferenceAverage                   | 3.628840868  |
| wavelet-HLL | glcm       | ld                                  | 0.431273947  |
| wavelet-HLL | glcm       | ClusterTendency                     | 64.97225878  |
| wavelet-HLL | firstorder | InterquartileRange                  | 81.84523508  |
| wavelet-HLL | firstorder | Skewness                            | 0.376890456  |
| wavelet-HLL | firstorder | Uniformity                          | 0.103852593  |
| wavelet-HLL | firstorder | Median                              | -4.782951004 |
| wavelet-HLL | firstorder | Energy                              | 128740672    |
| wavelet-HLL | firstorder | RobustMeanAbsoluteDeviation         | 41.68075728  |
| wavelet-HLL | firstorder | MeanAbsoluteDeviation               | 83.04694182  |
| wavelet-HLL | firstorder | TotalEnergy                         | 3475998143   |
| wavelet-HLL | firstorder | Maximum                             | 742.083972   |
| wavelet-HLL | firstorder | RootMeanSquared                     | 129.3209637  |
| wavelet-HLL | firstorder | 90Percentile                        | 138.8038758  |
| wavelet-HLL | firstorder | Minimum                             | -665.7291316 |
| wavelet-HLL | firstorder | Entropy                             | 4.049597627  |
| wavelet-HLL | firstorder | Range                               | 1407.813104  |
| wavelet-HLL | firstorder | Variance                            | 16627.21138  |
| wavelet-HLL | firstorder | 10Percentile                        | -162.4680788 |
| wavelet-HLL | firstorder | Kurtosis                            | 6.108410402  |
| wavelet-HLL | firstorder | Mean                                | -9.833630031 |
| wavelet-HLL | glrlm      | ShortRunLowGrayLevelEmphasis        | 0.001599095  |
| wavelet-HLL | glrlm      | GrayLevelVariance                   | 31.10150047  |
| wavelet-HLL | glrlm      | LowGrayLevelRunEmphasis             | 0.001757759  |
| wavelet-HLL | glrlm      | GrayLevelNonUniformityNormalized    | 0.080360152  |
| wavelet-HLL | glrlm      | RunVariance                         | 0.377656925  |
| wavelet-HLL | glrlm      | GrayLevelNonUniformity              | 514.4193041  |
| wavelet-HLL | glrlm      | LongRunEmphasis                     | 1.840021068  |
| wavelet-HLL | glrlm      | ShortRunHighGrayLevelEmphasis       | 679.8131394  |
| wavelet-HLL | glrlm      | RunLengthNonUniformity              | 4786.415067  |
| wavelet-HLL | glrlm      | ShortRunEmphasis                    | 0.886770165  |
| wavelet-HLL | glrlm      | LongRunHighGrayLevelEmphasis        | 1395.018714  |
| wavelet-HLL | glrlm      | RunPercentage                       | 0.829686032  |
| wavelet-HLL | glrlm      | LongRunLowGrayLevelEmphasis         | 0.002907137  |
| wavelet-HLL | glrlm      | RunEntropy                          | 4.948809415  |
| wavelet-HLL | glrlm      | HighGrayLevelRunEmphasis            | 764.3165969  |

|             |       |                                      |              |
|-------------|-------|--------------------------------------|--------------|
| wavelet-HLL | glrlm | RunLengthNonUniformityNormalized     | 0.747623654  |
| wavelet-HLL | glszm | GrayLevelVariance                    | 61.15487858  |
| wavelet-HLL | glszm | ZoneVariance                         | 1890.699295  |
| wavelet-HLL | glszm | GrayLevelNonUniformityNormalized     | 0.03723777   |
| wavelet-HLL | glszm | SizeZoneNonUniformityNormalized      | 0.450338024  |
| wavelet-HLL | glszm | SizeZoneNonUniformity                | 990.2933151  |
| wavelet-HLL | glszm | GrayLevelNonUniformity               | 81.88585721  |
| wavelet-HLL | glszm | LargeAreaEmphasis                    | 1902.95407   |
| wavelet-HLL | glszm | SmallAreaHighGrayLevelEmphasis       | 588.7854814  |
| wavelet-HLL | glszm | ZonePercentage                       | 0.285658613  |
| wavelet-HLL | glszm | LargeAreaLowGrayLevelEmphasis        | 2.520951454  |
| wavelet-HLL | glszm | LargeAreaHighGrayLevelEmphasis       | 1440004.846  |
| wavelet-HLL | glszm | HighGrayLevelZoneEmphasis            | 814.4938608  |
| wavelet-HLL | glszm | SmallAreaEmphasis                    | 0.697871427  |
| wavelet-HLL | glszm | LowGrayLevelZoneEmphasis             | 0.002262828  |
| wavelet-HLL | glszm | ZoneEntropy                          | 6.643662979  |
| wavelet-HLL | glszm | SmallAreaLowGrayLevelEmphasis        | 0.001738427  |
| wavelet-HLL | ngtdm | Coarseness                           | 0.001083096  |
| wavelet-HLL | ngtdm | Complexity                           | 2937.388804  |
| wavelet-HLL | ngtdm | Strength                             | 1.335563419  |
| wavelet-HLL | ngtdm | Contrast                             | 0.05438061   |
| wavelet-HLL | ngtdm | Busyness                             | 0.450415078  |
| wavelet-LHL | gldm  | GrayLevelVariance                    | 58.69040759  |
| wavelet-LHL | gldm  | HighGrayLevelEmphasis                | 1754.358275  |
| wavelet-LHL | gldm  | DependenceEntropy                    | 7.21290666   |
| wavelet-LHL | gldm  | DependenceNonUniformity              | 1045.291244  |
| wavelet-LHL | gldm  | GrayLevelNonUniformity               | 642.2307093  |
| wavelet-LHL | gldm  | SmallDependenceEmphasis              | 0.336886494  |
| wavelet-LHL | gldm  | SmallDependenceHighGrayLevelEmphasis | 614.327846   |
| wavelet-LHL | gldm  | DependenceNonUniformityNormalized    | 0.135787379  |
| wavelet-LHL | gldm  | LargeDependenceEmphasis              | 39.76877111  |
| wavelet-LHL | gldm  | LargeDependenceLowGrayLevelEmphasis  | 0.023574962  |
| wavelet-LHL | gldm  | DependenceVariance                   | 17.81848713  |
| wavelet-LHL | gldm  | LargeDependenceHighGrayLevelEmphasis | 68439.14315  |
| wavelet-LHL | gldm  | SmallDependenceLowGrayLevelEmphasis  | 0.000403613  |
| wavelet-LHL | gldm  | LowGrayLevelEmphasis                 | 0.000819983  |
| wavelet-LHL | glcm  | JointAverage                         | 41.08298829  |
| wavelet-LHL | glcm  | SumAverage                           | 82.16597658  |
| wavelet-LHL | glcm  | JointEntropy                         | 8.216342663  |
| wavelet-LHL | glcm  | ClusterShade                         | 230.096906   |
| wavelet-LHL | glcm  | MaximumProbability                   | 0.066982282  |
| wavelet-LHL | glcm  | ldmn                                 | 0.988741891  |
| wavelet-LHL | glcm  | JointEnergy                          | 0.018297539  |
| wavelet-LHL | glcm  | Contrast                             | 87.89874737  |
| wavelet-LHL | glcm  | DifferenceEntropy                    | 3.875514937  |
| wavelet-LHL | glcm  | InverseVariance                      | 0.283742122  |
| wavelet-LHL | glcm  | DifferenceVariance                   | 56.33025325  |
| wavelet-LHL | glcm  | ldn                                  | 0.94444361   |
| wavelet-LHL | glcm  | ldm                                  | 0.318926426  |
| wavelet-LHL | glcm  | Correlation                          | 0.188438563  |
| wavelet-LHL | glcm  | Autocorrelation                      | 1698.292801  |
| wavelet-LHL | glcm  | SumEntropy                           | 5.038463264  |
| wavelet-LHL | glcm  | SumSquares                           | 54.42864203  |
| wavelet-LHL | glcm  | ClusterProminence                    | 116736.5437  |
| wavelet-LHL | glcm  | lmc2                                 | 0.809639433  |
| wavelet-LHL | glcm  | lmc1                                 | -0.128050762 |
| wavelet-LHL | glcm  | DifferenceAverage                    | 5.482907267  |
| wavelet-LHL | glcm  | ld                                   | 0.382414888  |

|             |            |                                  |              |
|-------------|------------|----------------------------------|--------------|
| wavelet-LHL | glcm       | ClusterTendency                  | 129.8158208  |
| wavelet-LHL | firstorder | InterquartileRange               | 97.01236895  |
| wavelet-LHL | firstorder | Skewness                         | 0.100772011  |
| wavelet-LHL | firstorder | Uniformity                       | 0.083428255  |
| wavelet-LHL | firstorder | Median                           | -3.366613546 |
| wavelet-LHL | firstorder | Energy                           | 282550007.3  |
| wavelet-LHL | firstorder | RobustMeanAbsoluteDeviation      | 54.06205581  |
| wavelet-LHL | firstorder | MeanAbsoluteDeviation            | 118.1593262  |
| wavelet-LHL | firstorder | TotalEnergy                      | 7628850198   |
| wavelet-LHL | firstorder | Maximum                          | 1057.697763  |
| wavelet-LHL | firstorder | RootMeanSquared                  | 191.5837669  |
| wavelet-LHL | firstorder | 90Percentile                     | 200.454096   |
| wavelet-LHL | firstorder | Minimum                          | -1013.123305 |
| wavelet-LHL | firstorder | Entropy                          | 4.502924712  |
| wavelet-LHL | firstorder | Range                            | 2070.821068  |
| wavelet-LHL | firstorder | Variance                         | 36637.72376  |
| wavelet-LHL | firstorder | 10Percentile                     | -224.6951795 |
| wavelet-LHL | firstorder | Kurtosis                         | 6.507136692  |
| wavelet-LHL | firstorder | Mean                             | -8.161861529 |
| wavelet-LHL | glrlm      | ShortRunLowGrayLevelEmphasis     | 0.000799983  |
| wavelet-LHL | glrlm      | GrayLevelVariance                | 67.10347185  |
| wavelet-LHL | glrlm      | LowGrayLevelRunEmphasis          | 0.000857069  |
| wavelet-LHL | glrlm      | GrayLevelNonUniformityNormalized | 0.065097357  |
| wavelet-LHL | glrlm      | RunVariance                      | 0.280993336  |
| wavelet-LHL | glrlm      | GrayLevelNonUniformity           | 430.8580936  |
| wavelet-LHL | glrlm      | LongRunEmphasis                  | 1.64541967   |
| wavelet-LHL | glrlm      | ShortRunHighGrayLevelEmphasis    | 1598.244685  |
| wavelet-LHL | glrlm      | RunLengthNonUniformity           | 5189.73811   |
| wavelet-LHL | glrlm      | ShortRunEmphasis                 | 0.905212587  |
| wavelet-LHL | glrlm      | LongRunHighGrayLevelEmphasis     | 2869.070847  |
| wavelet-LHL | glrlm      | RunPercentage                    | 0.858264884  |
| wavelet-LHL | glrlm      | LongRunLowGrayLevelEmphasis      | 0.001240928  |
| wavelet-LHL | glrlm      | RunEntropy                       | 5.291808068  |
| wavelet-LHL | glrlm      | HighGrayLevelRunEmphasis         | 1760.779996  |
| wavelet-LHL | glrlm      | RunLengthNonUniformityNormalized | 0.783933225  |
| wavelet-LHL | glszm      | GrayLevelVariance                | 124.4891822  |
| wavelet-LHL | glszm      | ZoneVariance                     | 1103.574682  |
| wavelet-LHL | glszm      | GrayLevelNonUniformityNormalized | 0.026895476  |
| wavelet-LHL | glszm      | SizeZoneNonUniformityNormalized  | 0.55166621   |
| wavelet-LHL | glszm      | SizeZoneNonUniformity            | 1571.145365  |
| wavelet-LHL | glszm      | GrayLevelNonUniformity           | 76.59831461  |
| wavelet-LHL | glszm      | LargeAreaEmphasis                | 1110.880618  |
| wavelet-LHL | glszm      | SmallAreaHighGrayLevelEmphasis   | 1419.328196  |
| wavelet-LHL | glszm      | ZonePercentage                   | 0.369966225  |
| wavelet-LHL | glszm      | LargeAreaLowGrayLevelEmphasis    | 0.646733788  |
| wavelet-LHL | glszm      | LargeAreaHighGrayLevelEmphasis   | 1912045.102  |
| wavelet-LHL | glszm      | HighGrayLevelZoneEmphasis        | 1824.661517  |
| wavelet-LHL | glszm      | SmallAreaEmphasis                | 0.771111296  |
| wavelet-LHL | glszm      | LowGrayLevelZoneEmphasis         | 0.001159609  |
| wavelet-LHL | glszm      | ZoneEntropy                      | 6.787366935  |
| wavelet-LHL | glszm      | SmallAreaLowGrayLevelEmphasis    | 0.000997319  |
| wavelet-LHL | ngtdm      | Coarseness                       | 0.00102895   |
| wavelet-LHL | ngtdm      | Complexity                       | 9864.092121  |
| wavelet-LHL | ngtdm      | Strength                         | 2.599748404  |
| wavelet-LHL | ngtdm      | Contrast                         | 0.088236421  |
| wavelet-LHL | ngtdm      | Busyness                         | 0.208786846  |
| wavelet-LHH | gldm       | GrayLevelVariance                | 24.85048561  |
| wavelet-LHH | gldm       | HighGrayLevelEmphasis            | 1510.55339   |

|             |            |                                      |              |
|-------------|------------|--------------------------------------|--------------|
| wavelet-LHH | gldm       | DependenceEntropy                    | 6.705665752  |
| wavelet-LHH | gldm       | DependenceNonUniformity              | 856.0984671  |
| wavelet-LHH | gldm       | GrayLevelNonUniformity               | 896.5331255  |
| wavelet-LHH | gldm       | SmallDependenceEmphasis              | 0.277365507  |
| wavelet-LHH | gldm       | SmallDependenceHighGrayLevelEmphasis | 435.7224434  |
| wavelet-LHH | gldm       | DependenceNonUniformityNormalized    | 0.111210505  |
| wavelet-LHH | gldm       | LargeDependenceEmphasis              | 45.56923876  |
| wavelet-LHH | gldm       | LargeDependenceLowGrayLevelEmphasis  | 0.031102316  |
| wavelet-LHH | gldm       | DependenceVariance                   | 18.28225489  |
| wavelet-LHH | gldm       | LargeDependenceHighGrayLevelEmphasis | 67467.04131  |
| wavelet-LHH | gldm       | SmallDependenceLowGrayLevelEmphasis  | 0.000385257  |
| wavelet-LHH | gldm       | LowGrayLevelEmphasis                 | 0.000883742  |
| wavelet-LHH | glcm       | JointAverage                         | 38.53832886  |
| wavelet-LHH | glcm       | SumAverage                           | 77.07665772  |
| wavelet-LHH | glcm       | JointEntropy                         | 7.204569319  |
| wavelet-LHH | glcm       | ClusterShade                         | 7.799229533  |
| wavelet-LHH | glcm       | MaximumProbability                   | 0.08647349   |
| wavelet-LHH | glcm       | ldmn                                 | 0.992491331  |
| wavelet-LHH | glcm       | JointEnergy                          | 0.027824517  |
| wavelet-LHH | glcm       | Contrast                             | 45.82084401  |
| wavelet-LHH | glcm       | DifferenceEntropy                    | 3.477122367  |
| wavelet-LHH | glcm       | InverseVariance                      | 0.323501607  |
| wavelet-LHH | glcm       | DifferenceVariance                   | 29.74955368  |
| wavelet-LHH | glcm       | ldn                                  | 0.95388121   |
| wavelet-LHH | glcm       | ldm                                  | 0.36373068   |
| wavelet-LHH | glcm       | Correlation                          | -0.013036591 |
| wavelet-LHH | glcm       | Autocorrelation                      | 1484.900417  |
| wavelet-LHH | glcm       | SumEntropy                           | 4.294033822  |
| wavelet-LHH | glcm       | SumSquares                           | 22.60770482  |
| wavelet-LHH | glcm       | ClusterProminence                    | 24464.8246   |
| wavelet-LHH | glcm       | lmc2                                 | 0.722211795  |
| wavelet-LHH | glcm       | lmc1                                 | -0.100608084 |
| wavelet-LHH | glcm       | DifferenceAverage                    | 3.950877128  |
| wavelet-LHH | glcm       | ld                                   | 0.425321232  |
| wavelet-LHH | glcm       | ClusterTendency                      | 44.60997527  |
| wavelet-LHH | firstorder | InterquartileRange                   | 64.73613838  |
| wavelet-LHH | firstorder | Skewness                             | -0.019339719 |
| wavelet-LHH | firstorder | Uniformity                           | 0.116463124  |
| wavelet-LHH | firstorder | Median                               | -0.837194322 |
| wavelet-LHH | firstorder | Energy                               | 119019658.4  |
| wavelet-LHH | firstorder | RobustMeanAbsoluteDeviation          | 33.49243056  |
| wavelet-LHH | firstorder | MeanAbsoluteDeviation                | 74.10853371  |
| wavelet-LHH | firstorder | TotalEnergy                          | 3213530777   |
| wavelet-LHH | firstorder | Maximum                              | 913.3792769  |
| wavelet-LHH | firstorder | RootMeanSquared                      | 124.3427295  |
| wavelet-LHH | firstorder | 90Percentile                         | 125.8148457  |
| wavelet-LHH | firstorder | Minimum                              | -933.8643123 |
| wavelet-LHH | firstorder | Entropy                              | 3.901571656  |
| wavelet-LHH | firstorder | Range                                | 1847.243589  |
| wavelet-LHH | firstorder | Variance                             | 15459.83815  |
| wavelet-LHH | firstorder | 10Percentile                         | -117.2612251 |
| wavelet-LHH | firstorder | Kurtosis                             | 10.06871724  |
| wavelet-LHH | firstorder | Mean                                 | 1.129697046  |
| wavelet-LHH | glrlm      | ShortRunLowGrayLevelEmphasis         | 0.000848513  |
| wavelet-LHH | glrlm      | GrayLevelVariance                    | 29.14555122  |
| wavelet-LHH | glrlm      | LowGrayLevelRunEmphasis              | 0.000923592  |
| wavelet-LHH | glrlm      | GrayLevelNonUniformityNormalized     | 0.092694094  |
| wavelet-LHH | glrlm      | RunVariance                          | 0.330466509  |



|             |       |                                      |             |
|-------------|-------|--------------------------------------|-------------|
| wavelet-LHH | glrlm | GrayLevelNonUniformity               | 598.390547  |
| wavelet-LHH | glrlm | LongRunEmphasis                      | 1.763014622 |
| wavelet-LHH | glrlm | ShortRunHighGrayLevelEmphasis        | 1352.595355 |
| wavelet-LHH | glrlm | RunLengthNonUniformity               | 4864.466407 |
| wavelet-LHH | glrlm | ShortRunEmphasis                     | 0.88978399  |
| wavelet-LHH | glrlm | LongRunHighGrayLevelEmphasis         | 2646.304108 |
| wavelet-LHH | glrlm | RunPercentage                        | 0.837550213 |
| wavelet-LHH | glrlm | LongRunLowGrayLevelEmphasis          | 0.001442187 |
| wavelet-LHH | glrlm | RunEntropy                           | 4.774039013 |
| wavelet-LHH | glrlm | HighGrayLevelRunEmphasis             | 1516.107138 |
| wavelet-LHH | glrlm | RunLengthNonUniformityNormalized     | 0.753033986 |
| wavelet-LHH | glszm | GrayLevelVariance                    | 66.51211147 |
| wavelet-LHH | glszm | ZoneVariance                         | 2066.074147 |
| wavelet-LHH | glszm | GrayLevelNonUniformityNormalized     | 0.038457657 |
| wavelet-LHH | glszm | SizeZoneNonUniformityNormalized      | 0.520196084 |
| wavelet-LHH | glszm | SizeZoneNonUniformity                | 1194.370209 |
| wavelet-LHH | glszm | GrayLevelNonUniformity               | 88.29878049 |
| wavelet-LHH | glszm | LargeAreaEmphasis                    | 2077.315331 |
| wavelet-LHH | glszm | SmallAreaHighGrayLevelEmphasis       | 1190.728432 |
| wavelet-LHH | glszm | ZonePercentage                       | 0.298259288 |
| wavelet-LHH | glszm | LargeAreaLowGrayLevelEmphasis        | 1.406943349 |
| wavelet-LHH | glszm | LargeAreaHighGrayLevelEmphasis       | 3071299.307 |
| wavelet-LHH | glszm | HighGrayLevelZoneEmphasis            | 1568.783537 |
| wavelet-LHH | glszm | SmallAreaEmphasis                    | 0.749210908 |
| wavelet-LHH | glszm | LowGrayLevelZoneEmphasis             | 0.001346855 |
| wavelet-LHH | glszm | ZoneEntropy                          | 6.421407207 |
| wavelet-LHH | glszm | SmallAreaLowGrayLevelEmphasis        | 0.001164117 |
| wavelet-LHH | ngtdm | Coarseness                           | 1.11E-03    |
| wavelet-LHH | ngtdm | Complexity                           | 5995.083482 |
| wavelet-LHH | ngtdm | Strength                             | 2.263333426 |
| wavelet-LHH | ngtdm | Contrast                             | 0.037232495 |
| wavelet-LHH | ngtdm | Busyness                             | 0.219026043 |
| wavelet-LLH | gldm  | GrayLevelVariance                    | 60.55354346 |
| wavelet-LLH | gldm  | HighGrayLevelEmphasis                | 2211.534554 |
| wavelet-LLH | gldm  | DependenceEntropy                    | 7.11710481  |
| wavelet-LLH | gldm  | DependenceNonUniformity              | 963.0259808 |
| wavelet-LLH | gldm  | GrayLevelNonUniformity               | 738.0426085 |
| wavelet-LLH | gldm  | SmallDependenceEmphasis              | 0.310283365 |
| wavelet-LLH | gldm  | SmallDependenceHighGrayLevelEmphasis | 716.5220236 |
| wavelet-LLH | gldm  | DependenceNonUniformityNormalized    | 0.125100803 |
| wavelet-LLH | gldm  | LargeDependenceEmphasis              | 42.87113536 |
| wavelet-LLH | gldm  | LargeDependenceLowGrayLevelEmphasis  | 0.020121078 |
| wavelet-LLH | gldm  | DependenceVariance                   | 18.50104757 |
| wavelet-LLH | gldm  | LargeDependenceHighGrayLevelEmphasis | 92849.53949 |
| wavelet-LLH | gldm  | SmallDependenceLowGrayLevelEmphasis  | 0.000344627 |
| wavelet-LLH | gldm  | LowGrayLevelEmphasis                 | 0.00067798  |
| wavelet-LLH | glcm  | JointAverage                         | 46.3700077  |
| wavelet-LLH | glcm  | SumAverage                           | 92.7400154  |
| wavelet-LLH | glcm  | JointEntropy                         | 7.936622409 |
| wavelet-LLH | glcm  | ClusterShade                         | 747.0844838 |
| wavelet-LLH | glcm  | MaximumProbability                   | 0.075788369 |
| wavelet-LLH | glcm  | Idmn                                 | 0.992551621 |
| wavelet-LLH | glcm  | JointEnergy                          | 0.02246613  |
| wavelet-LLH | glcm  | Contrast                             | 88.38882292 |
| wavelet-LLH | glcm  | DifferenceEntropy                    | 3.784135848 |
| wavelet-LLH | glcm  | InverseVariance                      | 0.299255248 |
| wavelet-LLH | glcm  | DifferenceVariance                   | 60.29854866 |
| wavelet-LLH | glcm  | Idn                                  | 0.956543756 |

|             |            |                                  |              |
|-------------|------------|----------------------------------|--------------|
| wavelet-LLH | glcm       | Idm                              | 0.337654247  |
| wavelet-LLH | glcm       | Correlation                      | 0.169671856  |
| wavelet-LLH | glcm       | Autocorrelation                  | 2159.84709   |
| wavelet-LLH | glcm       | SumEntropy                       | 4.895745915  |
| wavelet-LLH | glcm       | SumSquares                       | 53.86165174  |
| wavelet-LLH | glcm       | ClusterProminence                | 162762.0608  |
| wavelet-LLH | glcm       | Imc2                             | 0.816401737  |
| wavelet-LLH | glcm       | Imc1                             | -0.134781355 |
| wavelet-LLH | glcm       | DifferenceAverage                | 5.193022045  |
| wavelet-LLH | glcm       | Id                               | 0.399242304  |
| wavelet-LLH | glcm       | ClusterTendency                  | 127.057784   |
| wavelet-LLH | firstorder | InterquartileRange               | 79.80413744  |
| wavelet-LLH | firstorder | Skewness                         | 0.292854303  |
| wavelet-LLH | firstorder | Uniformity                       | 0.095874592  |
| wavelet-LLH | firstorder | Median                           | -2.149769001 |
| wavelet-LLH | firstorder | Energy                           | 290661553.4  |
| wavelet-LLH | firstorder | RobustMeanAbsoluteDeviation      | 47.26598023  |
| wavelet-LLH | firstorder | MeanAbsoluteDeviation            | 112.7199116  |
| wavelet-LLH | firstorder | TotalEnergy                      | 7847861942   |
| wavelet-LLH | firstorder | Maximum                          | 1432.25413   |
| wavelet-LLH | firstorder | RootMeanSquared                  | 194.3143355  |
| wavelet-LLH | firstorder | 90Percentile                     | 192.0665481  |
| wavelet-LLH | firstorder | Minimum                          | -1140.618256 |
| wavelet-LLH | firstorder | Entropy                          | 4.389784336  |
| wavelet-LLH | firstorder | Range                            | 2572.872386  |
| wavelet-LLH | firstorder | Variance                         | 37748.98164  |
| wavelet-LLH | firstorder | 10Percentile                     | -195.6219157 |
| wavelet-LLH | firstorder | Kurtosis                         | 8.750814197  |
| wavelet-LLH | firstorder | Mean                             | -3.013193874 |
| wavelet-LLH | glrlm      | ShortRunLowGrayLevelEmphasis     | 0.000668018  |
| wavelet-LLH | glrlm      | GrayLevelVariance                | 70.27041301  |
| wavelet-LLH | glrlm      | LowGrayLevelRunEmphasis          | 0.000715678  |
| wavelet-LLH | glrlm      | GrayLevelNonUniformityNormalized | 0.073550674  |
| wavelet-LLH | glrlm      | RunVariance                      | 0.310640548  |
| wavelet-LLH | glrlm      | GrayLevelNonUniformity           | 481.4364581  |
| wavelet-LLH | glrlm      | LongRunEmphasis                  | 1.7065877    |
| wavelet-LLH | glrlm      | ShortRunHighGrayLevelEmphasis    | 2001.45863   |
| wavelet-LLH | glrlm      | RunLengthNonUniformity           | 5046.563025  |
| wavelet-LLH | glrlm      | ShortRunEmphasis                 | 0.89880636   |
| wavelet-LLH | glrlm      | LongRunHighGrayLevelEmphasis     | 3748.725086  |
| wavelet-LLH | glrlm      | RunPercentage                    | 0.848592042  |
| wavelet-LLH | glrlm      | LongRunLowGrayLevelEmphasis      | 0.001046085  |
| wavelet-LLH | glrlm      | RunEntropy                       | 5.24134701   |
| wavelet-LLH | glrlm      | HighGrayLevelRunEmphasis         | 2220.335161  |
| wavelet-LLH | glrlm      | RunLengthNonUniformityNormalized | 0.771022858  |
| wavelet-LLH | glszm      | GrayLevelVariance                | 143.1217106  |
| wavelet-LLH | glszm      | ZoneVariance                     | 1499.963984  |
| wavelet-LLH | glszm      | GrayLevelNonUniformityNormalized | 0.026966484  |
| wavelet-LLH | glszm      | SizeZoneNonUniformityNormalized  | 0.516979653  |
| wavelet-LLH | glszm      | SizeZoneNonUniformity            | 1366.377223  |
| wavelet-LLH | glszm      | GrayLevelNonUniformity           | 71.27241771  |
| wavelet-LLH | glszm      | LargeAreaEmphasis                | 1508.447219  |
| wavelet-LLH | glszm      | SmallAreaHighGrayLevelEmphasis   | 1745.896317  |
| wavelet-LLH | glszm      | ZonePercentage                   | 0.343335931  |
| wavelet-LLH | glszm      | LargeAreaLowGrayLevelEmphasis    | 0.698318524  |
| wavelet-LLH | glszm      | LargeAreaHighGrayLevelEmphasis   | 3263590.118  |
| wavelet-LLH | glszm      | HighGrayLevelZoneEmphasis        | 2304.896708  |
| wavelet-LLH | glszm      | SmallAreaEmphasis                | 0.747147271  |

|             |            |                                      |              |
|-------------|------------|--------------------------------------|--------------|
| wavelet-LLH | glszm      | LowGrayLevelZoneEmphasis             | 0.001056722  |
| wavelet-LLH | glszm      | ZoneEntropy                          | 6.952220033  |
| wavelet-LLH | glszm      | SmallAreaLowGrayLevelEmphasis        | 0.000924538  |
| wavelet-LLH | ngtdm      | Coarseness                           | 0.001024978  |
| wavelet-LLH | ngtdm      | Complexity                           | 13293.55174  |
| wavelet-LLH | ngtdm      | Strength                             | 4.258988607  |
| wavelet-LLH | ngtdm      | Contrast                             | 0.063399314  |
| wavelet-LLH | ngtdm      | Busyness                             | 0.149988964  |
| wavelet-LLL | gldm       | GrayLevelVariance                    | 856.8802827  |
| wavelet-LLL | gldm       | HighGrayLevelEmphasis                | 8478.047805  |
| wavelet-LLL | gldm       | DependenceEntropy                    | 8.158674796  |
| wavelet-LLL | gldm       | DependenceNonUniformity              | 1501.157963  |
| wavelet-LLL | gldm       | GrayLevelNonUniformity               | 278.0698883  |
| wavelet-LLL | gldm       | SmallDependenceEmphasis              | 0.444225671  |
| wavelet-LLL | gldm       | SmallDependenceHighGrayLevelEmphasis | 2605.229066  |
| wavelet-LLL | gldm       | DependenceNonUniformityNormalized    | 0.195006231  |
| wavelet-LLL | gldm       | LargeDependenceEmphasis              | 29.08469732  |
| wavelet-LLL | gldm       | LargeDependenceLowGrayLevelEmphasis  | 0.003504683  |
| wavelet-LLL | gldm       | DependenceVariance                   | 13.89313289  |
| wavelet-LLL | gldm       | LargeDependenceHighGrayLevelEmphasis | 329967.6293  |
| wavelet-LLL | gldm       | SmallDependenceLowGrayLevelEmphasis  | 0.0006909    |
| wavelet-LLL | gldm       | LowGrayLevelEmphasis                 | 0.000796864  |
| wavelet-LLL | glcm       | JointAverage                         | 90.93086676  |
| wavelet-LLL | glcm       | SumAverage                           | 181.8617335  |
| wavelet-LLL | glcm       | JointEntropy                         | 9.908905794  |
| wavelet-LLL | glcm       | ClusterShade                         | -169776.9842 |
| wavelet-LLL | glcm       | MaximumProbability                   | 0.03098996   |
| wavelet-LLL | glcm       | Idmn                                 | 0.982314683  |
| wavelet-LLL | glcm       | JointEnergy                          | 0.00600679   |
| wavelet-LLL | glcm       | Contrast                             | 379.8501902  |
| wavelet-LLL | glcm       | DifferenceEntropy                    | 4.717299103  |
| wavelet-LLL | glcm       | InverseVariance                      | 0.238169918  |
| wavelet-LLL | glcm       | DifferenceVariance                   | 240.1748401  |
| wavelet-LLL | glcm       | Idn                                  | 0.931644324  |
| wavelet-LLL | glcm       | Idm                                  | 0.259058454  |
| wavelet-LLL | glcm       | Correlation                          | 0.728465131  |
| wavelet-LLL | glcm       | Autocorrelation                      | 8787.645042  |
| wavelet-LLL | glcm       | SumEntropy                           | 6.548537394  |
| wavelet-LLL | glcm       | SumSquares                           | 708.5255622  |
| wavelet-LLL | glcm       | ClusterProminence                    | 23089602.64  |
| wavelet-LLL | glcm       | Imc2                                 | 0.958593807  |
| wavelet-LLL | glcm       | Imc1                                 | -0.229835138 |
| wavelet-LLL | glcm       | DifferenceAverage                    | 11.59461568  |
| wavelet-LLL | glcm       | Id                                   | 0.315418282  |
| wavelet-LLL | glcm       | ClusterTendency                      | 2454.252059  |
| wavelet-LLL | firstorder | InterquartileRange                   | 926.6227731  |
| wavelet-LLL | firstorder | Skewness                             | -1.198671782 |
| wavelet-LLL | firstorder | Uniformity                           | 0.036122355  |
| wavelet-LLL | firstorder | Median                               | 55.19957022  |
| wavelet-LLL | firstorder | Energy                               | 5092796489   |
| wavelet-LLL | firstorder | RobustMeanAbsoluteDeviation          | 433.2165631  |
| wavelet-LLL | firstorder | MeanAbsoluteDeviation                | 607.9799138  |
| wavelet-LLL | firstorder | TotalEnergy                          | 1.37506E+11  |
| wavelet-LLL | firstorder | Maximum                              | 932.2823549  |
| wavelet-LLL | firstorder | RootMeanSquared                      | 813.3719806  |
| wavelet-LLL | firstorder | 90Percentile                         | 202.4727266  |
| wavelet-LLL | firstorder | Minimum                              | -2502.326196 |
| wavelet-LLL | firstorder | Entropy                              | 5.825538983  |

|             |            |                                      |              |
|-------------|------------|--------------------------------------|--------------|
| wavelet-LLL | firstorder | Range                                | 3434.608551  |
| wavelet-LLL | firstorder | Variance                             | 535521.9412  |
| wavelet-LLL | firstorder | 10Percentile                         | -1649.322756 |
| wavelet-LLL | firstorder | Kurtosis                             | 3.096177528  |
| wavelet-LLL | firstorder | Mean                                 | -355.0380791 |
| wavelet-LLL | glrlm      | ShortRunLowGrayLevelEmphasis         | 0.000873499  |
| wavelet-LLL | glrlm      | GrayLevelVariance                    | 903.894497   |
| wavelet-LLL | glrlm      | LowGrayLevelRunEmphasis              | 0.000882642  |
| wavelet-LLL | glrlm      | GrayLevelNonUniformityNormalized     | 0.028640873  |
| wavelet-LLL | glrlm      | RunVariance                          | 0.198474889  |
| wavelet-LLL | glrlm      | GrayLevelNonUniformity               | 196.0586716  |
| wavelet-LLL | glrlm      | LongRunEmphasis                      | 1.466986864  |
| wavelet-LLL | glrlm      | ShortRunHighGrayLevelEmphasis        | 7300.671465  |
| wavelet-LLL | glrlm      | RunLengthNonUniformity               | 5658.721656  |
| wavelet-LLL | glrlm      | ShortRunEmphasis                     | 0.926069331  |
| wavelet-LLL | glrlm      | LongRunHighGrayLevelEmphasis         | 13408.25886  |
| wavelet-LLL | glrlm      | RunPercentage                        | 0.888552471  |
| wavelet-LLL | glrlm      | LongRunLowGrayLevelEmphasis          | 0.000934359  |
| wavelet-LLL | glrlm      | RunEntropy                           | 6.479122234  |
| wavelet-LLL | glrlm      | HighGrayLevelRunEmphasis             | 8127.813966  |
| wavelet-LLL | glrlm      | RunLengthNonUniformityNormalized     | 0.826767757  |
| wavelet-LLL | glszm      | GrayLevelVariance                    | 959.8638898  |
| wavelet-LLL | glszm      | ZoneVariance                         | 306.8301014  |
| wavelet-LLL | glszm      | GrayLevelNonUniformityNormalized     | 0.010219994  |
| wavelet-LLL | glszm      | SizeZoneNonUniformityNormalized      | 0.688717358  |
| wavelet-LLL | glszm      | SizeZoneNonUniformity                | 2491.090683  |
| wavelet-LLL | glszm      | GrayLevelNonUniformity               | 36.96571745  |
| wavelet-LLL | glszm      | LargeAreaEmphasis                    | 311.3596904  |
| wavelet-LLL | glszm      | SmallAreaHighGrayLevelEmphasis       | 4687.322115  |
| wavelet-LLL | glszm      | ZonePercentage                       | 0.469862302  |
| wavelet-LLL | glszm      | LargeAreaLowGrayLevelEmphasis        | 0.028512291  |
| wavelet-LLL | glszm      | LargeAreaHighGrayLevelEmphasis       | 3612624.744  |
| wavelet-LLL | glszm      | HighGrayLevelZoneEmphasis            | 5847.485762  |
| wavelet-LLL | glszm      | SmallAreaEmphasis                    | 0.854454286  |
| wavelet-LLL | glszm      | LowGrayLevelZoneEmphasis             | 0.001510106  |
| wavelet-LLL | glszm      | ZoneEntropy                          | 7.576194044  |
| wavelet-LLL | glszm      | SmallAreaLowGrayLevelEmphasis        | 0.001441528  |
| wavelet-LLL | ngtdm      | Coarseness                           | 0.001143795  |
| wavelet-LLL | ngtdm      | Complexity                           | 53471.03235  |
| wavelet-LLL | ngtdm      | Strength                             | 13.52323087  |
| wavelet-LLL | ngtdm      | Contrast                             | 0.673993961  |
| wavelet-LLL | ngtdm      | Busyness                             | 0.050016156  |
| wavelet-HHL | gldm       | GrayLevelVariance                    | 9.237051919  |
| wavelet-HHL | gldm       | HighGrayLevelEmphasis                | 314.5375422  |
| wavelet-HHL | gldm       | DependenceEntropy                    | 6.42597965   |
| wavelet-HHL | gldm       | DependenceNonUniformity              | 678.4466095  |
| wavelet-HHL | gldm       | GrayLevelNonUniformity               | 1187.524032  |
| wavelet-HHL | gldm       | SmallDependenceEmphasis              | 0.206367339  |
| wavelet-HHL | gldm       | SmallDependenceHighGrayLevelEmphasis | 69.71132167  |
| wavelet-HHL | gldm       | DependenceNonUniformityNormalized    | 0.088132841  |
| wavelet-HHL | gldm       | LargeDependenceEmphasis              | 60.47778644  |
| wavelet-HHL | gldm       | LargeDependenceLowGrayLevelEmphasis  | 0.201664377  |
| wavelet-HHL | gldm       | DependenceVariance                   | 21.9662333   |
| wavelet-HHL | gldm       | LargeDependenceHighGrayLevelEmphasis | 18391.21044  |
| wavelet-HHL | gldm       | SmallDependenceLowGrayLevelEmphasis  | 0.001180959  |
| wavelet-HHL | gldm       | LowGrayLevelEmphasis                 | 0.003942635  |
| wavelet-HHL | glcm       | JointAverage                         | 17.50930741  |
| wavelet-HHL | glcm       | SumAverage                           | 35.01861482  |

|             |            |                                  |              |
|-------------|------------|----------------------------------|--------------|
| wavelet-HHL | glcm       | JointEntropy                     | 6.288660596  |
| wavelet-HHL | glcm       | ClusterShade                     | 14.14496389  |
| wavelet-HHL | glcm       | MaximumProbability               | 0.110168397  |
| wavelet-HHL | glcm       | Idmn                             | 0.989107757  |
| wavelet-HHL | glcm       | JointEnergy                      | 0.04191324   |
| wavelet-HHL | glcm       | Contrast                         | 17.12233671  |
| wavelet-HHL | glcm       | DifferenceEntropy                | 2.988811741  |
| wavelet-HHL | glcm       | InverseVariance                  | 0.361857165  |
| wavelet-HHL | glcm       | DifferenceVariance               | 10.36558798  |
| wavelet-HHL | glcm       | Idn                              | 0.941575336  |
| wavelet-HHL | glcm       | Idm                              | 0.425315859  |
| wavelet-HHL | glcm       | Correlation                      | -0.00720017  |
| wavelet-HHL | glcm       | Autocorrelation                  | 306.5424158  |
| wavelet-HHL | glcm       | SumEntropy                       | 3.773536717  |
| wavelet-HHL | glcm       | SumSquares                       | 8.527551467  |
| wavelet-HHL | glcm       | ClusterProminence                | 2329.537105  |
| wavelet-HHL | glcm       | Imc2                             | 0.602808725  |
| wavelet-HHL | glcm       | Imc1                             | -0.071946328 |
| wavelet-HHL | glcm       | DifferenceAverage                | 2.579131605  |
| wavelet-HHL | glcm       | Id                               | 0.482496007  |
| wavelet-HHL | glcm       | ClusterTendency                  | 16.98786916  |
| wavelet-HHL | firstorder | InterquartileRange               | 48.18324309  |
| wavelet-HHL | firstorder | Skewness                         | 0.188081499  |
| wavelet-HHL | firstorder | Uniformity                       | 0.154263969  |
| wavelet-HHL | firstorder | Median                           | -2.022260204 |
| wavelet-HHL | firstorder | Energy                           | 44170424.12  |
| wavelet-HHL | firstorder | RobustMeanAbsoluteDeviation      | 23.88684979  |
| wavelet-HHL | firstorder | MeanAbsoluteDeviation            | 48.13631839  |
| wavelet-HHL | firstorder | TotalEnergy                      | 1192601451   |
| wavelet-HHL | firstorder | Maximum                          | 504.240628   |
| wavelet-HHL | firstorder | RootMeanSquared                  | 75.74898734  |
| wavelet-HHL | firstorder | 90Percentile                     | 82.64113885  |
| wavelet-HHL | firstorder | Minimum                          | -420.8987613 |
| wavelet-HHL | firstorder | Entropy                          | 3.350837817  |
| wavelet-HHL | firstorder | Range                            | 925.1393894  |
| wavelet-HHL | firstorder | Variance                         | 5737.459036  |
| wavelet-HHL | firstorder | 10Percentile                     | -77.03300132 |
| wavelet-HHL | firstorder | Kurtosis                         | 7.298715255  |
| wavelet-HHL | firstorder | Mean                             | -0.670855608 |
| wavelet-HHL | glrlm      | ShortRunLowGrayLevelEmphasis     | 0.003626798  |
| wavelet-HHL | glrlm      | GrayLevelVariance                | 11.17410242  |
| wavelet-HHL | glrlm      | LowGrayLevelRunEmphasis          | 0.004090437  |
| wavelet-HHL | glrlm      | GrayLevelNonUniformityNormalized | 0.122841207  |
| wavelet-HHL | glrlm      | RunVariance                      | 0.448000781  |
| wavelet-HHL | glrlm      | GrayLevelNonUniformity           | 757.1164709  |
| wavelet-HHL | glrlm      | LongRunEmphasis                  | 2.019301671  |
| wavelet-HHL | glrlm      | ShortRunHighGrayLevelEmphasis    | 274.9325098  |
| wavelet-HHL | glrlm      | RunLengthNonUniformity           | 4324.382653  |
| wavelet-HHL | glrlm      | ShortRunEmphasis                 | 0.862491904  |
| wavelet-HHL | glrlm      | LongRunHighGrayLevelEmphasis     | 627.3083681  |
| wavelet-HHL | glrlm      | RunPercentage                    | 0.799778164  |
| wavelet-HHL | glrlm      | LongRunLowGrayLevelEmphasis      | 0.007501997  |
| wavelet-HHL | glrlm      | RunEntropy                       | 4.364405853  |
| wavelet-HHL | glrlm      | HighGrayLevelRunEmphasis         | 316.9531237  |
| wavelet-HHL | glrlm      | RunLengthNonUniformityNormalized | 0.701297918  |
| wavelet-HHL | glszm      | GrayLevelVariance                | 28.28993078  |
| wavelet-HHL | glszm      | ZoneVariance                     | 3965.463926  |
| wavelet-HHL | glszm      | GrayLevelNonUniformityNormalized | 0.056340963  |

|             |            |                                      |              |
|-------------|------------|--------------------------------------|--------------|
| wavelet-HHL | glszm      | SizeZoneNonUniformityNormalized      | 0.446599348  |
| wavelet-HHL | glszm      | SizeZoneNonUniformity                | 759.6654909  |
| wavelet-HHL | glszm      | GrayLevelNonUniformity               | 95.83597884  |
| wavelet-HHL | glszm      | LargeAreaEmphasis                    | 3985.944738  |
| wavelet-HHL | glszm      | SmallAreaHighGrayLevelEmphasis       | 240.0145117  |
| wavelet-HHL | glszm      | ZonePercentage                       | 0.220966485  |
| wavelet-HHL | glszm      | LargeAreaLowGrayLevelEmphasis        | 13.18547759  |
| wavelet-HHL | glszm      | LargeAreaHighGrayLevelEmphasis       | 1209673.412  |
| wavelet-HHL | glszm      | HighGrayLevelZoneEmphasis            | 339.7989418  |
| wavelet-HHL | glszm      | SmallAreaEmphasis                    | 0.694995664  |
| wavelet-HHL | glszm      | LowGrayLevelZoneEmphasis             | 0.005678029  |
| wavelet-HHL | glszm      | ZoneEntropy                          | 6.112004795  |
| wavelet-HHL | glszm      | SmallAreaLowGrayLevelEmphasis        | 0.004457541  |
| wavelet-HHL | ngtdm      | Coarseness                           | 1.01E-03     |
| wavelet-HHL | ngtdm      | Complexity                           | 1072.507267  |
| wavelet-HHL | ngtdm      | Strength                             | 0.517478955  |
| wavelet-HHL | ngtdm      | Contrast                             | 0.031311057  |
| wavelet-HHL | ngtdm      | Busyness                             | 1.038805684  |
| wavelet-HLH | gldm       | GrayLevelVariance                    | 9.111229996  |
| wavelet-HLH | gldm       | HighGrayLevelEmphasis                | 821.0354638  |
| wavelet-HLH | gldm       | DependenceEntropy                    | 6.425225075  |
| wavelet-HLH | gldm       | DependenceNonUniformity              | 644.0771629  |
| wavelet-HLH | gldm       | GrayLevelNonUniformity               | 1252.191478  |
| wavelet-HLH | gldm       | SmallDependenceEmphasis              | 0.194160827  |
| wavelet-HLH | gldm       | SmallDependenceHighGrayLevelEmphasis | 164.8910034  |
| wavelet-HLH | gldm       | DependenceNonUniformityNormalized    | 0.083668117  |
| wavelet-HLH | gldm       | LargeDependenceEmphasis              | 63.87529228  |
| wavelet-HLH | gldm       | LargeDependenceLowGrayLevelEmphasis  | 0.079446268  |
| wavelet-HLH | gldm       | DependenceVariance                   | 22.57404929  |
| wavelet-HLH | gldm       | LargeDependenceHighGrayLevelEmphasis | 51676.13445  |
| wavelet-HLH | gldm       | SmallDependenceLowGrayLevelEmphasis  | 0.000421535  |
| wavelet-HLH | gldm       | LowGrayLevelEmphasis                 | 0.001434233  |
| wavelet-HLH | glcm       | JointAverage                         | 28.50004271  |
| wavelet-HLH | glcm       | SumAverage                           | 57.00008543  |
| wavelet-HLH | glcm       | JointEntropy                         | 6.139089189  |
| wavelet-HLH | glcm       | ClusterShade                         | -16.34805084 |
| wavelet-HLH | glcm       | MaximumProbability                   | 0.115042708  |
| wavelet-HLH | glcm       | Idmn                                 | 0.993502468  |
| wavelet-HLH | glcm       | JointEnergy                          | 0.045822393  |
| wavelet-HLH | glcm       | Contrast                             | 16.72564527  |
| wavelet-HLH | glcm       | DifferenceEntropy                    | 2.92675635   |
| wavelet-HLH | glcm       | InverseVariance                      | 0.370799361  |
| wavelet-HLH | glcm       | DifferenceVariance                   | 10.55241915  |
| wavelet-HLH | glcm       | Idn                                  | 0.955416554  |
| wavelet-HLH | glcm       | Idm                                  | 0.439188009  |
| wavelet-HLH | glcm       | Correlation                          | -0.005577866 |
| wavelet-HLH | glcm       | Autocorrelation                      | 812.2120896  |
| wavelet-HLH | glcm       | SumEntropy                           | 3.706522863  |
| wavelet-HLH | glcm       | SumSquares                           | 8.322387853  |
| wavelet-HLH | glcm       | ClusterProminence                    | 3297.348831  |
| wavelet-HLH | glcm       | Imc2                                 | 0.608249674  |
| wavelet-HLH | glcm       | Imc1                                 | -0.074914214 |
| wavelet-HLH | glcm       | DifferenceAverage                    | 2.464499575  |
| wavelet-HLH | glcm       | Id                                   | 0.494298601  |
| wavelet-HLH | glcm       | ClusterTendency                      | 16.56390615  |
| wavelet-HLH | firstorder | InterquartileRange                   | 45.0155171   |
| wavelet-HLH | firstorder | Skewness                             | -0.175493747 |
| wavelet-HLH | firstorder | Uniformity                           | 0.16266452   |

|             |            |                                  |              |
|-------------|------------|----------------------------------|--------------|
| wavelet-HLH | firstorder | Median                           | -1.106514976 |
| wavelet-HLH | firstorder | Energy                           | 43383150.4   |
| wavelet-HLH | firstorder | RobustMeanAbsoluteDeviation      | 22.34278694  |
| wavelet-HLH | firstorder | MeanAbsoluteDeviation            | 46.04841644  |
| wavelet-HLH | firstorder | TotalEnergy                      | 1171345061   |
| wavelet-HLH | firstorder | Maximum                          | 505.9433053  |
| wavelet-HLH | firstorder | RootMeanSquared                  | 75.07089435  |
| wavelet-HLH | firstorder | 90Percentile                     | 77.55300376  |
| wavelet-HLH | firstorder | Minimum                          | -676.9170504 |
| wavelet-HLH | firstorder | Entropy                          | 3.288085905  |
| wavelet-HLH | firstorder | Range                            | 1182.860356  |
| wavelet-HLH | firstorder | Variance                         | 5635.61734   |
| wavelet-HLH | firstorder | 10Percentile                     | -72.5980977  |
| wavelet-HLH | firstorder | Kurtosis                         | 10.65224677  |
| wavelet-HLH | firstorder | Mean                             | -0.147781896 |
| wavelet-HLH | glrlm      | ShortRunLowGrayLevelEmphasis     | 0.001308168  |
| wavelet-HLH | glrlm      | GrayLevelVariance                | 11.136938    |
| wavelet-HLH | glrlm      | LowGrayLevelRunEmphasis          | 0.001484816  |
| wavelet-HLH | glrlm      | GrayLevelNonUniformityNormalized | 0.129038859  |
| wavelet-HLH | glrlm      | RunVariance                      | 0.48138494   |
| wavelet-HLH | glrlm      | GrayLevelNonUniformity           | 786.7248177  |
| wavelet-HLH | glrlm      | LongRunEmphasis                  | 2.085856794  |
| wavelet-HLH | glrlm      | ShortRunHighGrayLevelEmphasis    | 708.8213729  |
| wavelet-HLH | glrlm      | RunLengthNonUniformity           | 4231.038871  |
| wavelet-HLH | glrlm      | ShortRunEmphasis                 | 0.858130723  |
| wavelet-HLH | glrlm      | LongRunHighGrayLevelEmphasis     | 1702.879035  |
| wavelet-HLH | glrlm      | RunPercentage                    | 0.79128445   |
| wavelet-HLH | glrlm      | LongRunLowGrayLevelEmphasis      | 0.002834657  |
| wavelet-HLH | glrlm      | RunEntropy                       | 4.342351448  |
| wavelet-HLH | glrlm      | HighGrayLevelRunEmphasis         | 823.9011223  |
| wavelet-HLH | glrlm      | RunLengthNonUniformityNormalized | 0.693607203  |
| wavelet-HLH | glszm      | GrayLevelVariance                | 30.25983603  |
| wavelet-HLH | glszm      | ZoneVariance                     | 4818.299745  |
| wavelet-HLH | glszm      | GrayLevelNonUniformityNormalized | 0.058117805  |
| wavelet-HLH | glszm      | SizeZoneNonUniformityNormalized  | 0.442877369  |
| wavelet-HLH | glszm      | SizeZoneNonUniformity            | 700.1891208  |
| wavelet-HLH | glszm      | GrayLevelNonUniformity           | 91.88425047  |
| wavelet-HLH | glszm      | LargeAreaEmphasis                | 4842.00759   |
| wavelet-HLH | glszm      | SmallAreaHighGrayLevelEmphasis   | 595.0297248  |
| wavelet-HLH | glszm      | ZonePercentage                   | 0.20537802   |
| wavelet-HLH | glszm      | LargeAreaLowGrayLevelEmphasis    | 5.987720018  |
| wavelet-HLH | glszm      | LargeAreaHighGrayLevelEmphasis   | 3921503.258  |
| wavelet-HLH | glszm      | HighGrayLevelZoneEmphasis        | 850.6963947  |
| wavelet-HLH | glszm      | SmallAreaEmphasis                | 0.692150103  |
| wavelet-HLH | glszm      | LowGrayLevelZoneEmphasis         | 0.002133731  |
| wavelet-HLH | glszm      | ZoneEntropy                      | 6.142867706  |
| wavelet-HLH | glszm      | SmallAreaLowGrayLevelEmphasis    | 0.001727297  |
| wavelet-HLH | ngtdm      | Coarseness                       | 1.01E-03     |
| wavelet-HLH | ngtdm      | Complexity                       | 1630.963115  |
| wavelet-HLH | ngtdm      | Strength                         | 1.031134647  |
| wavelet-HLH | ngtdm      | Contrast                         | 0.020610683  |
| wavelet-HLH | ngtdm      | Busyness                         | 0.50180798   |

| Image type | Feature Class | Feature Name                         |                                                                                                                                                                                                                                                                                                                                                                                                                   |
|------------|---------------|--------------------------------------|-------------------------------------------------------------------------------------------------------------------------------------------------------------------------------------------------------------------------------------------------------------------------------------------------------------------------------------------------------------------------------------------------------------------|
| general    | info          | BoundingBox                          | 4: RTSTRUCT: C99-DNU_segment_LLL GTV<br>(0, 1, 1, 12, 8, 12)                                                                                                                                                                                                                                                                                                                                                      |
| general    | info          | EnabledImageTypes                    | {u'Original': {}, u'Wavelet': {}}                                                                                                                                                                                                                                                                                                                                                                                 |
|            |               |                                      | {'distances': [1], 'additionalInfo': True, 'force2D': False, 'interpolator': 'sitkBSpline', 'resampledPixelSpacing': [3.0], 'label': 1, 'normalizeScale': 1, 'normalize': False, 'force2Ddimension': 0, 'removeOutliers': None, 'minimumROISize': None, u'binWidth': 25.0, 'minimumROIDimensions': 1, u'correctMask': True, 'preCrop': False, u'symmetricalGLCM': True, 'resegmentRange': None, 'padDistance': 5} |
| general    | info          | GeneralSettings                      | 81bccdd5954e665c14134ddfe97a0ae7d55f4074                                                                                                                                                                                                                                                                                                                                                                          |
| general    | info          | ImageHash                            | 3                                                                                                                                                                                                                                                                                                                                                                                                                 |
| general    | info          | ImageSpacing                         | (0.9765625000000002, 0.9765625000000002, 2.0)                                                                                                                                                                                                                                                                                                                                                                     |
| general    | info          | MaskHash                             | e1fc0199032d4204995cab73655c8bff6f1ef1ff                                                                                                                                                                                                                                                                                                                                                                          |
| general    | info          | NumpyVersion                         | 1.13.1                                                                                                                                                                                                                                                                                                                                                                                                            |
| general    | info          | PyWaveletVersion                     | 0.5.2                                                                                                                                                                                                                                                                                                                                                                                                             |
| general    | info          | SimpleITKVersion                     | 1.1.0                                                                                                                                                                                                                                                                                                                                                                                                             |
| general    | info          | Version                              | 1.3.0.post102+g1b0eb74                                                                                                                                                                                                                                                                                                                                                                                            |
| general    | info          | VolumeNum                            | 1                                                                                                                                                                                                                                                                                                                                                                                                                 |
| general    | info          | VoxelNum                             | 445                                                                                                                                                                                                                                                                                                                                                                                                               |
| original   | shape         | Maximum3DDiameter                    | 39.57271787                                                                                                                                                                                                                                                                                                                                                                                                       |
| original   | shape         | Maximum2DDiameterSlice               | 34.98571137                                                                                                                                                                                                                                                                                                                                                                                                       |
| original   | shape         | Sphericity                           | 0.740832595                                                                                                                                                                                                                                                                                                                                                                                                       |
| original   | shape         | MinorAxis                            | 30.04289044                                                                                                                                                                                                                                                                                                                                                                                                       |
| original   | shape         | Elongation                           | 0.834303214                                                                                                                                                                                                                                                                                                                                                                                                       |
| original   | shape         | SurfaceVolumeRatio                   | 0.285007388                                                                                                                                                                                                                                                                                                                                                                                                       |
| original   | shape         | Volume                               | 12015                                                                                                                                                                                                                                                                                                                                                                                                             |
| original   | shape         | MajorAxis                            | 36.00955856                                                                                                                                                                                                                                                                                                                                                                                                       |
| original   | shape         | SurfaceArea                          | 3424.363764                                                                                                                                                                                                                                                                                                                                                                                                       |
| original   | shape         | Flatness                             | 0.501833748                                                                                                                                                                                                                                                                                                                                                                                                       |
| original   | shape         | LeastAxis                            | 18.07081175                                                                                                                                                                                                                                                                                                                                                                                                       |
| original   | shape         | Maximum2DDiameterColumn              | 34.20526275                                                                                                                                                                                                                                                                                                                                                                                                       |
| original   | shape         | Maximum2DDiameterRow                 | 37.58989226                                                                                                                                                                                                                                                                                                                                                                                                       |
| original   | gldm          | GrayLevelVariance                    | 179.4656432                                                                                                                                                                                                                                                                                                                                                                                                       |
| original   | gldm          | HighGrayLevelEmphasis                | 498.1483146                                                                                                                                                                                                                                                                                                                                                                                                       |
| original   | gldm          | DependenceEntropy                    | 6.575614146                                                                                                                                                                                                                                                                                                                                                                                                       |
| original   | gldm          | DependenceNonUniformity              | 130.105618                                                                                                                                                                                                                                                                                                                                                                                                        |
| original   | gldm          | GrayLevelNonUniformity               | 16.86966292                                                                                                                                                                                                                                                                                                                                                                                                       |
| original   | gldm          | SmallDependenceEmphasis              | 0.506474995                                                                                                                                                                                                                                                                                                                                                                                                       |
| original   | gldm          | SmallDependenceHighGrayLevelEmphasis | 265.829494                                                                                                                                                                                                                                                                                                                                                                                                        |
| original   | gldm          | DependenceNonUniformityNormalized    | 0.292372175                                                                                                                                                                                                                                                                                                                                                                                                       |
| original   | gldm          | LargeDependenceEmphasis              | 7.269662921                                                                                                                                                                                                                                                                                                                                                                                                       |
| original   | gldm          | LargeDependenceLowGrayLevelEmphasis  | 0.250116752                                                                                                                                                                                                                                                                                                                                                                                                       |
| original   | gldm          | DependenceVariance                   | 2.469132685                                                                                                                                                                                                                                                                                                                                                                                                       |
| original   | gldm          | LargeDependenceHighGrayLevelEmphasis | 2769.680899                                                                                                                                                                                                                                                                                                                                                                                                       |
| original   | gldm          | SmallDependenceLowGrayLevelEmphasis  | 0.012745564                                                                                                                                                                                                                                                                                                                                                                                                       |
| original   | gldm          | LowGrayLevelEmphasis                 | 0.028733258                                                                                                                                                                                                                                                                                                                                                                                                       |
| original   | glcm          | JointAverage                         | 19.28086632                                                                                                                                                                                                                                                                                                                                                                                                       |
| original   | glcm          | SumAverage                           | 38.56173263                                                                                                                                                                                                                                                                                                                                                                                                       |



|          |            |                                  |              |
|----------|------------|----------------------------------|--------------|
| original | glcm       | JointEntropy                     | 8.519128367  |
| original | glcm       | ClusterShade                     | 5032.305256  |
| original | glcm       | MaximumProbability               | 0.014193365  |
| original | glcm       | Idmn                             | 0.916850734  |
| original | glcm       | JointEnergy                      | 0.003506903  |
| original | glcm       | Contrast                         | 216.152062   |
| original | glcm       | DifferenceEntropy                | 4.726138627  |
| original | glcm       | InverseVariance                  | 0.152813635  |
| original | glcm       | DifferenceVariance               | 100.6975824  |
| original | glcm       | Idn                              | 0.830031887  |
| original | glcm       | Idm                              | 0.153107947  |
| original | glcm       | Correlation                      | 0.431115198  |
| original | glcm       | Autocorrelation                  | 453.3934117  |
| original | glcm       | SumEntropy                       | 6.025104785  |
| original | glcm       | SumSquares                       | 189.6458674  |
| original | glcm       | ClusterProminence                | 558003.9655  |
| original | glcm       | Imc2                             | 0.980277535  |
| original | glcm       | Imc1                             | -0.320095778 |
| original | glcm       | DifferenceAverage                | 10.64050471  |
| original | glcm       | Id                               | 0.225075632  |
| original | glcm       | ClusterTendency                  | 542.4314075  |
| original | firstorder | InterquartileRange               | 561          |
| original | firstorder | Skewness                         | 0.637468678  |
| original | firstorder | Uniformity                       | 0.037909355  |
| original | firstorder | Median                           | -716         |
| original | firstorder | Energy                           | 193079199    |
| original | firstorder | RobustMeanAbsoluteDeviation      | 240.3412656  |
| original | firstorder | MeanAbsoluteDeviation            | 295.6017978  |
| original | firstorder | TotalEnergy                      | 5213138373   |
| original | firstorder | Maximum                          | 87           |
| original | firstorder | RootMeanSquared                  | 658.7001142  |
| original | firstorder | 90Percentile                     | -4.4         |
| original | firstorder | Minimum                          | -987         |
| original | firstorder | Entropy                          | 5.04680003   |
| original | firstorder | Range                            | 1074         |
| original | firstorder | Variance                         | 111973.6811  |
| original | firstorder | 10Percentile                     | -899.6       |
| original | firstorder | Kurtosis                         | 1.920649991  |
| original | firstorder | Mean                             | -567.3730337 |
| original | glrlm      | ShortRunLowGrayLevelEmphasis     | 0.027358637  |
| original | glrlm      | GrayLevelVariance                | 177.8544386  |
| original | glrlm      | LowGrayLevelRunEmphasis          | 0.028506659  |
| original | glrlm      | GrayLevelNonUniformityNormalized | 0.036773559  |
| original | glrlm      | RunVariance                      | 0.051870064  |
| original | glrlm      | GrayLevelNonUniformity           | 15.61609201  |
| original | glrlm      | LongRunEmphasis                  | 1.151088132  |
| original | glrlm      | ShortRunHighGrayLevelEmphasis    | 487.0431997  |
| original | glrlm      | RunLengthNonUniformity           | 388.2654641  |
| original | glrlm      | ShortRunEmphasis                 | 0.965679274  |
| original | glrlm      | LongRunHighGrayLevelEmphasis     | 564.6098787  |
| original | glrlm      | RunPercentage                    | 0.954191876  |
| original | glrlm      | LongRunLowGrayLevelEmphasis      | 0.033554135  |
| original | glrlm      | RunEntropy                       | 5.280426595  |
| original | glrlm      | HighGrayLevelRunEmphasis         | 501.8251518  |
| original | glrlm      | RunLengthNonUniformityNormalized | 0.913925612  |

|             |       |                                      |              |
|-------------|-------|--------------------------------------|--------------|
| original    | glszm | GrayLevelVariance                    | 160.0313082  |
| original    | glszm | ZoneVariance                         | 3.214966048  |
| original    | glszm | GrayLevelNonUniformityNormalized     | 0.028453819  |
| original    | glszm | SizeZoneNonUniformityNormalized      | 0.521453038  |
| original    | glszm | SizeZoneNonUniformity                | 134.5348837  |
| original    | glszm | GrayLevelNonUniformity               | 7.341085271  |
| original    | glszm | LargeAreaEmphasis                    | 6.189922481  |
| original    | glszm | SmallAreaHighGrayLevelEmphasis       | 399.9298661  |
| original    | glszm | ZonePercentage                       | 0.579775281  |
| original    | glszm | LargeAreaLowGrayLevelEmphasis        | 0.188492676  |
| original    | glszm | LargeAreaHighGrayLevelEmphasis       | 2422.023256  |
| original    | glszm | HighGrayLevelZoneEmphasis            | 531.1162791  |
| original    | glszm | SmallAreaEmphasis                    | 0.74989895   |
| original    | glszm | LowGrayLevelZoneEmphasis             | 0.026075602  |
| original    | glszm | ZoneEntropy                          | 6.227957831  |
| original    | glszm | SmallAreaLowGrayLevelEmphasis        | 0.017748835  |
| original    | ngtdm | Coarseness                           | 0.008780493  |
| original    | ngtdm | Complexity                           | 6370.407487  |
| original    | ngtdm | Strength                             | 9.841278052  |
| original    | ngtdm | Contrast                             | 1.381200137  |
| original    | ngtdm | Busyness                             | 0.178666461  |
| wavelet-HHH | gldm  | GrayLevelVariance                    | 16.77538695  |
| wavelet-HHH | gldm  | HighGrayLevelEmphasis                | 289.7303371  |
| wavelet-HHH | gldm  | DependenceEntropy                    | 5.85617478   |
| wavelet-HHH | gldm  | DependenceNonUniformity              | 103.8719101  |
| wavelet-HHH | gldm  | GrayLevelNonUniformity               | 35.3505618   |
| wavelet-HHH | gldm  | SmallDependenceEmphasis              | 0.419297871  |
| wavelet-HHH | gldm  | SmallDependenceHighGrayLevelEmphasis | 123.1720134  |
| wavelet-HHH | gldm  | DependenceNonUniformityNormalized    | 0.233420023  |
| wavelet-HHH | gldm  | LargeDependenceEmphasis              | 7.907865169  |
| wavelet-HHH | gldm  | LargeDependenceLowGrayLevelEmphasis  | 0.034440631  |
| wavelet-HHH | gldm  | DependenceVariance                   | 1.96303497   |
| wavelet-HHH | gldm  | LargeDependenceHighGrayLevelEmphasis | 2174.579775  |
| wavelet-HHH | gldm  | SmallDependenceLowGrayLevelEmphasis  | 0.004736808  |
| wavelet-HHH | gldm  | LowGrayLevelEmphasis                 | 0.007001386  |
| wavelet-HHH | glcm  | JointAverage                         | 16.5081808   |
| wavelet-HHH | glcm  | SumAverage                           | 33.0163616   |
| wavelet-HHH | glcm  | JointEntropy                         | 7.457804467  |
| wavelet-HHH | glcm  | ClusterShade                         | 7.184006502  |
| wavelet-HHH | glcm  | MaximumProbability                   | 0.023160528  |
| wavelet-HHH | glcm  | Idmn                                 | 0.964672946  |
| wavelet-HHH | glcm  | JointEnergy                          | 0.007938502  |
| wavelet-HHH | glcm  | Contrast                             | 36.37029236  |
| wavelet-HHH | glcm  | DifferenceEntropy                    | 3.619470709  |
| wavelet-HHH | glcm  | InverseVariance                      | 0.227362304  |
| wavelet-HHH | glcm  | DifferenceVariance                   | 15.19620148  |
| wavelet-HHH | glcm  | Idn                                  | 0.878208629  |
| wavelet-HHH | glcm  | Idm                                  | 0.212190442  |
| wavelet-HHH | glcm  | Correlation                          | -0.039411484 |
| wavelet-HHH | glcm  | Autocorrelation                      | 271.8250601  |
| wavelet-HHH | glcm  | SumEntropy                           | 4.442944162  |
| wavelet-HHH | glcm  | SumSquares                           | 17.48804903  |
| wavelet-HHH | glcm  | ClusterProminence                    | 4490.653928  |
| wavelet-HHH | glcm  | Imc2                                 | 0.839229836  |
| wavelet-HHH | glcm  | Imc1                                 | -0.151503436 |

|             |            |                                  |              |
|-------------|------------|----------------------------------|--------------|
| wavelet-HHH | glcm       | DifferenceAverage                | 4.558419335  |
| wavelet-HHH | glcm       | Id                               | 0.302274753  |
| wavelet-HHH | glcm       | ClusterTendency                  | 33.58190375  |
| wavelet-HHH | firstorder | InterquartileRange               | 109.1906251  |
| wavelet-HHH | firstorder | Skewness                         | 0.037360773  |
| wavelet-HHH | firstorder | Uniformity                       | 0.079439465  |
| wavelet-HHH | firstorder | Median                           | -2.62725605  |
| wavelet-HHH | firstorder | Energy                           | 4597948.802  |
| wavelet-HHH | firstorder | RobustMeanAbsoluteDeviation      | 48.38712642  |
| wavelet-HHH | firstorder | MeanAbsoluteDeviation            | 76.2352387   |
| wavelet-HHH | firstorder | TotalEnergy                      | 124144617.7  |
| wavelet-HHH | firstorder | Maximum                          | 341.8628868  |
| wavelet-HHH | firstorder | RootMeanSquared                  | 101.6487541  |
| wavelet-HHH | firstorder | 90Percentile                     | 136.3812461  |
| wavelet-HHH | firstorder | Minimum                          | -398.3740039 |
| wavelet-HHH | firstorder | Entropy                          | 3.993611385  |
| wavelet-HHH | firstorder | Range                            | 740.2368907  |
| wavelet-HHH | firstorder | Variance                         | 10331.56023  |
| wavelet-HHH | firstorder | 10Percentile                     | -122.0733506 |
| wavelet-HHH | firstorder | Kurtosis                         | 3.928967658  |
| wavelet-HHH | firstorder | Mean                             | 0.953408744  |
| wavelet-HHH | glrlm      | ShortRunLowGrayLevelEmphasis     | 0.007019594  |
| wavelet-HHH | glrlm      | GrayLevelVariance                | 17.40256795  |
| wavelet-HHH | glrlm      | LowGrayLevelRunEmphasis          | 0.00718136   |
| wavelet-HHH | glrlm      | GrayLevelNonUniformityNormalized | 0.077162376  |
| wavelet-HHH | glrlm      | RunVariance                      | 0.066139839  |
| wavelet-HHH | glrlm      | GrayLevelNonUniformity           | 32.44233288  |
| wavelet-HHH | glrlm      | LongRunEmphasis                  | 1.187785171  |
| wavelet-HHH | glrlm      | ShortRunHighGrayLevelEmphasis    | 279.0099367  |
| wavelet-HHH | glrlm      | RunLengthNonUniformity           | 377.9305539  |
| wavelet-HHH | glrlm      | ShortRunEmphasis                 | 0.959012195  |
| wavelet-HHH | glrlm      | LongRunHighGrayLevelEmphasis     | 342.5485588  |
| wavelet-HHH | glrlm      | RunPercentage                    | 0.944684529  |
| wavelet-HHH | glrlm      | LongRunLowGrayLevelEmphasis      | 0.007922768  |
| wavelet-HHH | glrlm      | RunEntropy                       | 4.292594312  |
| wavelet-HHH | glrlm      | HighGrayLevelRunEmphasis         | 290.4185289  |
| wavelet-HHH | glrlm      | RunLengthNonUniformityNormalized | 0.898460907  |
| wavelet-HHH | glszm      | GrayLevelVariance                | 27.89849133  |
| wavelet-HHH | glszm      | ZoneVariance                     | 9.643597903  |
| wavelet-HHH | glszm      | GrayLevelNonUniformityNormalized | 0.053913601  |
| wavelet-HHH | glszm      | SizeZoneNonUniformityNormalized  | 0.486550216  |
| wavelet-HHH | glszm      | SizeZoneNonUniformity            | 101.6889952  |
| wavelet-HHH | glszm      | GrayLevelNonUniformity           | 11.26794258  |
| wavelet-HHH | glszm      | LargeAreaEmphasis                | 14.17703349  |
| wavelet-HHH | glszm      | SmallAreaHighGrayLevelEmphasis   | 212.705163   |
| wavelet-HHH | glszm      | ZonePercentage                   | 0.469662921  |
| wavelet-HHH | glszm      | LargeAreaLowGrayLevelEmphasis    | 0.061608038  |
| wavelet-HHH | glszm      | LargeAreaHighGrayLevelEmphasis   | 3913.023923  |
| wavelet-HHH | glszm      | HighGrayLevelZoneEmphasis        | 297.3923445  |
| wavelet-HHH | glszm      | SmallAreaEmphasis                | 0.723870503  |
| wavelet-HHH | glszm      | LowGrayLevelZoneEmphasis         | 0.010489738  |
| wavelet-HHH | glszm      | ZoneEntropy                      | 5.593451667  |
| wavelet-HHH | glszm      | SmallAreaLowGrayLevelEmphasis    | 0.009436062  |
| wavelet-HHH | ngtdm      | Coarseness                       | 0.014847354  |
| wavelet-HHH | ngtdm      | Complexity                       | 849.5562278  |

|             |            |                                      |              |
|-------------|------------|--------------------------------------|--------------|
| wavelet-HHH | ngtdm      | Strength                             | 2.851985599  |
| wavelet-HHH | ngtdm      | Contrast                             | 0.167469224  |
| wavelet-HHH | ngtdm      | Busyness                             | 0.142692346  |
| wavelet-HLL | gldm       | GrayLevelVariance                    | 103.1334629  |
| wavelet-HLL | gldm       | HighGrayLevelEmphasis                | 1342.489888  |
| wavelet-HLL | gldm       | DependenceEntropy                    | 6.480030168  |
| wavelet-HLL | gldm       | DependenceNonUniformity              | 176.1325843  |
| wavelet-HLL | gldm       | GrayLevelNonUniformity               | 14.28089888  |
| wavelet-HLL | gldm       | SmallDependenceEmphasis              | 0.633674157  |
| wavelet-HLL | gldm       | SmallDependenceHighGrayLevelEmphasis | 848.2240462  |
| wavelet-HLL | gldm       | DependenceNonUniformityNormalized    | 0.39580356   |
| wavelet-HLL | gldm       | LargeDependenceEmphasis              | 3.77752809   |
| wavelet-HLL | gldm       | LargeDependenceLowGrayLevelEmphasis  | 0.006223982  |
| wavelet-HLL | gldm       | DependenceVariance                   | 0.898977402  |
| wavelet-HLL | gldm       | LargeDependenceHighGrayLevelEmphasis | 5089.438202  |
| wavelet-HLL | gldm       | SmallDependenceLowGrayLevelEmphasis  | 0.00322849   |
| wavelet-HLL | gldm       | LowGrayLevelEmphasis                 | 0.003604343  |
| wavelet-HLL | glcm       | JointAverage                         | 34.62037852  |
| wavelet-HLL | glcm       | SumAverage                           | 69.24075705  |
| wavelet-HLL | glcm       | JointEntropy                         | 8.731412941  |
| wavelet-HLL | glcm       | ClusterShade                         | -2241.367804 |
| wavelet-HLL | glcm       | MaximumProbability                   | 0.009799693  |
| wavelet-HLL | glcm       | Idmn                                 | 0.956998728  |
| wavelet-HLL | glcm       | JointEnergy                          | 0.002727529  |
| wavelet-HLL | glcm       | Contrast                             | 164.8054463  |
| wavelet-HLL | glcm       | DifferenceEntropy                    | 4.580393757  |
| wavelet-HLL | glcm       | InverseVariance                      | 0.115714754  |
| wavelet-HLL | glcm       | DifferenceVariance                   | 66.8412208   |
| wavelet-HLL | glcm       | Idn                                  | 0.866794535  |
| wavelet-HLL | glcm       | Idm                                  | 0.109372223  |
| wavelet-HLL | glcm       | Correlation                          | 0.245170186  |
| wavelet-HLL | glcm       | Autocorrelation                      | 1225.206742  |
| wavelet-HLL | glcm       | SumEntropy                           | 5.811968548  |
| wavelet-HLL | glcm       | SumSquares                           | 108.9863226  |
| wavelet-HLL | glcm       | ClusterProminence                    | 220494.9899  |
| wavelet-HLL | glcm       | Imc2                                 | 0.98511789   |
| wavelet-HLL | glcm       | Imc1                                 | -0.336318671 |
| wavelet-HLL | glcm       | DifferenceAverage                    | 9.68533314   |
| wavelet-HLL | glcm       | Id                                   | 0.19168239   |
| wavelet-HLL | glcm       | ClusterTendency                      | 271.1398443  |
| wavelet-HLL | firstorder | InterquartileRange                   | 340.8335165  |
| wavelet-HLL | firstorder | Skewness                             | -0.57854514  |
| wavelet-HLL | firstorder | Uniformity                           | 0.032091908  |
| wavelet-HLL | firstorder | Median                               | 15.55491316  |
| wavelet-HLL | firstorder | Energy                               | 29018305.09  |
| wavelet-HLL | firstorder | RobustMeanAbsoluteDeviation          | 141.2095162  |
| wavelet-HLL | firstorder | MeanAbsoluteDeviation                | 203.3518564  |
| wavelet-HLL | firstorder | TotalEnergy                          | 783494237.5  |
| wavelet-HLL | firstorder | Maximum                              | 516.204376   |
| wavelet-HLL | firstorder | RootMeanSquared                      | 255.3618499  |
| wavelet-HLL | firstorder | 90Percentile                         | 249.0811438  |
| wavelet-HLL | firstorder | Minimum                              | -898.6488146 |
| wavelet-HLL | firstorder | Entropy                              | 5.231746305  |
| wavelet-HLL | firstorder | Range                                | 1414.853191  |
| wavelet-HLL | firstorder | Variance                             | 64197.42984  |

|             |            |                                      |              |
|-------------|------------|--------------------------------------|--------------|
| wavelet-HLL | firstorder | 10Percentile                         | -401.2369377 |
| wavelet-HLL | firstorder | Kurtosis                             | 3.056377134  |
| wavelet-HLL | firstorder | Mean                                 | -31.8157906  |
| wavelet-HLL | glrlm      | ShortRunLowGrayLevelEmphasis         | 0.003657434  |
| wavelet-HLL | glrlm      | GrayLevelVariance                    | 104.2110945  |
| wavelet-HLL | glrlm      | LowGrayLevelRunEmphasis              | 0.003677064  |
| wavelet-HLL | glrlm      | GrayLevelNonUniformityNormalized     | 0.031848222  |
| wavelet-HLL | glrlm      | RunVariance                          | 0.028575152  |
| wavelet-HLL | glrlm      | GrayLevelNonUniformity               | 13.79261358  |
| wavelet-HLL | glrlm      | LongRunEmphasis                      | 1.084735246  |
| wavelet-HLL | glrlm      | ShortRunHighGrayLevelEmphasis        | 1314.82586   |
| wavelet-HLL | glrlm      | RunLengthNonUniformity               | 410.6539739  |
| wavelet-HLL | glrlm      | ShortRunEmphasis                     | 0.979823238  |
| wavelet-HLL | glrlm      | LongRunHighGrayLevelEmphasis         | 1456.598633  |
| wavelet-HLL | glrlm      | RunPercentage                        | 0.973206569  |
| wavelet-HLL | glrlm      | LongRunLowGrayLevelEmphasis          | 0.003759582  |
| wavelet-HLL | glrlm      | RunEntropy                           | 5.363921542  |
| wavelet-HLL | glrlm      | HighGrayLevelRunEmphasis             | 1342.199919  |
| wavelet-HLL | glrlm      | RunLengthNonUniformityNormalized     | 0.948051145  |
| wavelet-HLL | glszm      | GrayLevelVariance                    | 117.3260195  |
| wavelet-HLL | glszm      | ZoneVariance                         | 0.937780404  |
| wavelet-HLL | glszm      | GrayLevelNonUniformityNormalized     | 0.028881589  |
| wavelet-HLL | glszm      | SizeZoneNonUniformityNormalized      | 0.616227367  |
| wavelet-HLL | glszm      | SizeZoneNonUniformity                | 194.7278481  |
| wavelet-HLL | glszm      | GrayLevelNonUniformity               | 9.126582278  |
| wavelet-HLL | glszm      | LargeAreaEmphasis                    | 2.920886076  |
| wavelet-HLL | glszm      | SmallAreaHighGrayLevelEmphasis       | 1086.587569  |
| wavelet-HLL | glszm      | ZonePercentage                       | 0.71011236   |
| wavelet-HLL | glszm      | LargeAreaLowGrayLevelEmphasis        | 0.006465167  |
| wavelet-HLL | glszm      | LargeAreaHighGrayLevelEmphasis       | 3949.949367  |
| wavelet-HLL | glszm      | HighGrayLevelZoneEmphasis            | 1336.794304  |
| wavelet-HLL | glszm      | SmallAreaEmphasis                    | 0.812398856  |
| wavelet-HLL | glszm      | LowGrayLevelZoneEmphasis             | 0.004669007  |
| wavelet-HLL | glszm      | ZoneEntropy                          | 6.161564271  |
| wavelet-HLL | glszm      | SmallAreaLowGrayLevelEmphasis        | 0.004462968  |
| wavelet-HLL | ngtdm      | Coarseness                           | 0.014857714  |
| wavelet-HLL | ngtdm      | Complexity                           | 6840.006059  |
| wavelet-HLL | ngtdm      | Strength                             | 13.77056479  |
| wavelet-HLL | ngtdm      | Contrast                             | 0.469848245  |
| wavelet-HLL | ngtdm      | Busyness                             | 0.034134579  |
| wavelet-LHL | gldm       | GrayLevelVariance                    | 137.1975559  |
| wavelet-LHL | gldm       | HighGrayLevelEmphasis                | 2332.067416  |
| wavelet-LHL | gldm       | DependenceEntropy                    | 6.588277018  |
| wavelet-LHL | gldm       | DependenceNonUniformity              | 172.6179775  |
| wavelet-LHL | gldm       | GrayLevelNonUniformity               | 14.6988764   |
| wavelet-LHL | gldm       | SmallDependenceEmphasis              | 0.628966254  |
| wavelet-LHL | gldm       | SmallDependenceHighGrayLevelEmphasis | 1451.144833  |
| wavelet-LHL | gldm       | DependenceNonUniformityNormalized    | 0.387905567  |
| wavelet-LHL | gldm       | LargeDependenceEmphasis              | 4.195505618  |
| wavelet-LHL | gldm       | LargeDependenceLowGrayLevelEmphasis  | 0.004322467  |
| wavelet-LHL | gldm       | DependenceVariance                   | 1.146754198  |
| wavelet-LHL | gldm       | LargeDependenceHighGrayLevelEmphasis | 10099.70337  |
| wavelet-LHL | gldm       | SmallDependenceLowGrayLevelEmphasis  | 0.002720638  |
| wavelet-LHL | gldm       | LowGrayLevelEmphasis                 | 0.002899041  |
| wavelet-LHL | glcm       | JointAverage                         | 46.65792807  |

|             |            |                                  |              |
|-------------|------------|----------------------------------|--------------|
| wavelet-LHL | glcm       | SumAverage                       | 93.31585614  |
| wavelet-LHL | glcm       | JointEntropy                     | 8.773653235  |
| wavelet-LHL | glcm       | ClusterShade                     | -4290.802302 |
| wavelet-LHL | glcm       | MaximumProbability               | 0.010119346  |
| wavelet-LHL | glcm       | Idmn                             | 0.963819095  |
| wavelet-LHL | glcm       | JointEnergy                      | 0.002691244  |
| wavelet-LHL | glcm       | Contrast                         | 245.4068371  |
| wavelet-LHL | glcm       | DifferenceEntropy                | 4.800301529  |
| wavelet-LHL | glcm       | InverseVariance                  | 0.113284107  |
| wavelet-LHL | glcm       | DifferenceVariance               | 111.5484261  |
| wavelet-LHL | glcm       | Idn                              | 0.882359129  |
| wavelet-LHL | glcm       | Idm                              | 0.110346584  |
| wavelet-LHL | glcm       | Correlation                      | 0.183706157  |
| wavelet-LHL | glcm       | Autocorrelation                  | 2205.115816  |
| wavelet-LHL | glcm       | SumEntropy                       | 5.931672847  |
| wavelet-LHL | glcm       | SumSquares                       | 150.8135401  |
| wavelet-LHL | glcm       | ClusterProminence                | 507485.557   |
| wavelet-LHL | glcm       | Imc2                             | 0.991815419  |
| wavelet-LHL | glcm       | Imc1                             | -0.381252653 |
| wavelet-LHL | glcm       | DifferenceAverage                | 11.28872716  |
| wavelet-LHL | glcm       | Id                               | 0.18884282   |
| wavelet-LHL | glcm       | ClusterTendency                  | 357.8473233  |
| wavelet-LHL | firstorder | InterquartileRange               | 294.1621331  |
| wavelet-LHL | firstorder | Skewness                         | -0.580415765 |
| wavelet-LHL | firstorder | Uniformity                       | 0.033031183  |
| wavelet-LHL | firstorder | Median                           | -4.606720433 |
| wavelet-LHL | firstorder | Energy                           | 38821394.64  |
| wavelet-LHL | firstorder | RobustMeanAbsoluteDeviation      | 128.4395777  |
| wavelet-LHL | firstorder | MeanAbsoluteDeviation            | 214.6142021  |
| wavelet-LHL | firstorder | TotalEnergy                      | 1048177655   |
| wavelet-LHL | firstorder | Maximum                          | 683.8044161  |
| wavelet-LHL | firstorder | RootMeanSquared                  | 295.3626399  |
| wavelet-LHL | firstorder | 90Percentile                     | 299.0458942  |
| wavelet-LHL | firstorder | Minimum                          | -1181.288791 |
| wavelet-LHL | firstorder | Entropy                          | 5.356970511  |
| wavelet-LHL | firstorder | Range                            | 1865.093207  |
| wavelet-LHL | firstorder | Variance                         | 85570.75752  |
| wavelet-LHL | firstorder | 10Percentile                     | -427.0390779 |
| wavelet-LHL | firstorder | Kurtosis                         | 4.017226492  |
| wavelet-LHL | firstorder | Mean                             | -40.84521457 |
| wavelet-LHL | glrlm      | ShortRunLowGrayLevelEmphasis     | 0.002961583  |
| wavelet-LHL | glrlm      | GrayLevelVariance                | 139.8585586  |
| wavelet-LHL | glrlm      | LowGrayLevelRunEmphasis          | 0.002971583  |
| wavelet-LHL | glrlm      | GrayLevelNonUniformityNormalized | 0.032276755  |
| wavelet-LHL | glrlm      | RunVariance                      | 0.030459364  |
| wavelet-LHL | glrlm      | GrayLevelNonUniformity           | 13.9516246   |
| wavelet-LHL | glrlm      | LongRunEmphasis                  | 1.090977532  |
| wavelet-LHL | glrlm      | ShortRunHighGrayLevelEmphasis    | 2277.152844  |
| wavelet-LHL | glrlm      | RunLengthNonUniformity           | 408.2739958  |
| wavelet-LHL | glrlm      | ShortRunEmphasis                 | 0.978261552  |
| wavelet-LHL | glrlm      | LongRunHighGrayLevelEmphasis     | 2549.634454  |
| wavelet-LHL | glrlm      | RunPercentage                    | 0.971305099  |
| wavelet-LHL | glrlm      | LongRunLowGrayLevelEmphasis      | 0.003013165  |
| wavelet-LHL | glrlm      | RunEntropy                       | 5.514950699  |
| wavelet-LHL | glrlm      | HighGrayLevelRunEmphasis         | 2329.581534  |

|             |       |                                      |              |
|-------------|-------|--------------------------------------|--------------|
| wavelet-LHL | glrlm | RunLengthNonUniformityNormalized     | 0.944271262  |
| wavelet-LHL | glszm | GrayLevelVariance                    | 172.2171912  |
| wavelet-LHL | glszm | ZoneVariance                         | 1.349304372  |
| wavelet-LHL | glszm | GrayLevelNonUniformityNormalized     | 0.025405996  |
| wavelet-LHL | glszm | SizeZoneNonUniformityNormalized      | 0.619981831  |
| wavelet-LHL | glszm | SizeZoneNonUniformity                | 194.0543131  |
| wavelet-LHL | glszm | GrayLevelNonUniformity               | 7.952076677  |
| wavelet-LHL | glszm | LargeAreaEmphasis                    | 3.370607029  |
| wavelet-LHL | glszm | SmallAreaHighGrayLevelEmphasis       | 1876.379335  |
| wavelet-LHL | glszm | ZonePercentage                       | 0.703370787  |
| wavelet-LHL | glszm | LargeAreaLowGrayLevelEmphasis        | 0.004971277  |
| wavelet-LHL | glszm | LargeAreaHighGrayLevelEmphasis       | 8093.214058  |
| wavelet-LHL | glszm | HighGrayLevelZoneEmphasis            | 2304.709265  |
| wavelet-LHL | glszm | SmallAreaEmphasis                    | 0.815025339  |
| wavelet-LHL | glszm | LowGrayLevelZoneEmphasis             | 0.003923193  |
| wavelet-LHL | glszm | ZoneEntropy                          | 6.376114853  |
| wavelet-LHL | glszm | SmallAreaLowGrayLevelEmphasis        | 0.003829103  |
| wavelet-LHL | ngtdm | Coarseness                           | 0.014137543  |
| wavelet-LHL | ngtdm | Complexity                           | 12093.83842  |
| wavelet-LHL | ngtdm | Strength                             | 20.15833999  |
| wavelet-LHL | ngtdm | Contrast                             | 0.51684565   |
| wavelet-LHL | ngtdm | Busyness                             | 0.021213821  |
| wavelet-LHH | gldm  | GrayLevelVariance                    | 34.56631233  |
| wavelet-LHH | gldm  | HighGrayLevelEmphasis                | 494.5483146  |
| wavelet-LHH | gldm  | DependenceEntropy                    | 6.063954523  |
| wavelet-LHH | gldm  | DependenceNonUniformity              | 127.7370787  |
| wavelet-LHH | gldm  | GrayLevelNonUniformity               | 25.59775281  |
| wavelet-LHH | gldm  | SmallDependenceEmphasis              | 0.503803957  |
| wavelet-LHH | gldm  | SmallDependenceHighGrayLevelEmphasis | 261.2907147  |
| wavelet-LHH | gldm  | DependenceNonUniformityNormalized    | 0.287049615  |
| wavelet-LHH | gldm  | LargeDependenceEmphasis              | 5.898876404  |
| wavelet-LHH | gldm  | LargeDependenceLowGrayLevelEmphasis  | 0.017355769  |
| wavelet-LHH | gldm  | DependenceVariance                   | 1.484156041  |
| wavelet-LHH | gldm  | LargeDependenceHighGrayLevelEmphasis | 2739.878652  |
| wavelet-LHH | gldm  | SmallDependenceLowGrayLevelEmphasis  | 0.004374152  |
| wavelet-LHH | gldm  | LowGrayLevelEmphasis                 | 0.005610097  |
| wavelet-LHH | glcm  | JointAverage                         | 21.47621428  |
| wavelet-LHH | glcm  | SumAverage                           | 42.95242856  |
| wavelet-LHH | glcm  | JointEntropy                         | 7.98278869   |
| wavelet-LHH | glcm  | ClusterShade                         | 73.26170214  |
| wavelet-LHH | glcm  | MaximumProbability                   | 0.017275035  |
| wavelet-LHH | glcm  | Idmn                                 | 0.96989212   |
| wavelet-LHH | glcm  | JointEnergy                          | 0.005136904  |
| wavelet-LHH | glcm  | Contrast                             | 68.99278837  |
| wavelet-LHH | glcm  | DifferenceEntropy                    | 4.02225299   |
| wavelet-LHH | glcm  | InverseVariance                      | 0.172791492  |
| wavelet-LHH | glcm  | DifferenceVariance                   | 29.59179591  |
| wavelet-LHH | glcm  | Idn                                  | 0.88792826   |
| wavelet-LHH | glcm  | Idm                                  | 0.165487446  |
| wavelet-LHH | glcm  | Correlation                          | -0.034563086 |
| wavelet-LHH | glcm  | Autocorrelation                      | 460.0617731  |
| wavelet-LHH | glcm  | SumEntropy                           | 4.874679562  |
| wavelet-LHH | glcm  | SumSquares                           | 33.32620405  |
| wavelet-LHH | glcm  | ClusterProminence                    | 17647.42119  |
| wavelet-LHH | glcm  | Imc2                                 | 0.914415121  |

|             |            |                                  |              |
|-------------|------------|----------------------------------|--------------|
| wavelet-LHH | glcm       | Imc1                             | -0.204268405 |
| wavelet-LHH | glcm       | DifferenceAverage                | 6.202710119  |
| wavelet-LHH | glcm       | Id                               | 0.255399065  |
| wavelet-LHH | glcm       | ClusterTendency                  | 64.31202783  |
| wavelet-LHH | firstorder | InterquartileRange               | 159.9308654  |
| wavelet-LHH | firstorder | Skewness                         | 0.226171186  |
| wavelet-LHH | firstorder | Uniformity                       | 0.05752304   |
| wavelet-LHH | firstorder | Median                           | -8.790470334 |
| wavelet-LHH | firstorder | Energy                           | 9585139.435  |
| wavelet-LHH | firstorder | RobustMeanAbsoluteDeviation      | 67.76576773  |
| wavelet-LHH | firstorder | MeanAbsoluteDeviation            | 108.4854119  |
| wavelet-LHH | firstorder | TotalEnergy                      | 258798764.7  |
| wavelet-LHH | firstorder | Maximum                          | 594.5229214  |
| wavelet-LHH | firstorder | RootMeanSquared                  | 146.7638892  |
| wavelet-LHH | firstorder | 90Percentile                     | 187.8952285  |
| wavelet-LHH | firstorder | Minimum                          | -502.0820134 |
| wavelet-LHH | firstorder | Entropy                          | 4.463513729  |
| wavelet-LHH | firstorder | Range                            | 1096.604935  |
| wavelet-LHH | firstorder | Variance                         | 21538.7605   |
| wavelet-LHH | firstorder | 10Percentile                     | -176.8414271 |
| wavelet-LHH | firstorder | Kurtosis                         | 4.29183987   |
| wavelet-LHH | firstorder | Mean                             | -0.937380474 |
| wavelet-LHH | glrlm      | ShortRunLowGrayLevelEmphasis     | 0.005673445  |
| wavelet-LHH | glrlm      | GrayLevelVariance                | 35.6139315   |
| wavelet-LHH | glrlm      | LowGrayLevelRunEmphasis          | 0.005751708  |
| wavelet-LHH | glrlm      | GrayLevelNonUniformityNormalized | 0.056044659  |
| wavelet-LHH | glrlm      | RunVariance                      | 0.046234044  |
| wavelet-LHH | glrlm      | GrayLevelNonUniformity           | 23.8873039   |
| wavelet-LHH | glrlm      | LongRunEmphasis                  | 1.137356529  |
| wavelet-LHH | glrlm      | ShortRunHighGrayLevelEmphasis    | 481.0200897  |
| wavelet-LHH | glrlm      | RunLengthNonUniformity           | 391.6419323  |
| wavelet-LHH | glrlm      | ShortRunEmphasis                 | 0.967790248  |
| wavelet-LHH | glrlm      | LongRunHighGrayLevelEmphasis     | 559.6045143  |
| wavelet-LHH | glrlm      | RunPercentage                    | 0.957649092  |
| wavelet-LHH | glrlm      | LongRunLowGrayLevelEmphasis      | 0.006084034  |
| wavelet-LHH | glrlm      | RunEntropy                       | 4.699835908  |
| wavelet-LHH | glrlm      | HighGrayLevelRunEmphasis         | 495.9366453  |
| wavelet-LHH | glrlm      | RunLengthNonUniformityNormalized | 0.918633286  |
| wavelet-LHH | glszm      | GrayLevelVariance                | 51.13970178  |
| wavelet-LHH | glszm      | ZoneVariance                     | 3.147141794  |
| wavelet-LHH | glszm      | GrayLevelNonUniformityNormalized | 0.042842086  |
| wavelet-LHH | glszm      | SizeZoneNonUniformityNormalized  | 0.529326059  |
| wavelet-LHH | glszm      | SizeZoneNonUniformity            | 134.4488189  |
| wavelet-LHH | glszm      | GrayLevelNonUniformity           | 10.88188976  |
| wavelet-LHH | glszm      | LargeAreaEmphasis                | 6.216535433  |
| wavelet-LHH | glszm      | SmallAreaHighGrayLevelEmphasis   | 396.9299039  |
| wavelet-LHH | glszm      | ZonePercentage                   | 0.570786517  |
| wavelet-LHH | glszm      | LargeAreaLowGrayLevelEmphasis    | 0.020219944  |
| wavelet-LHH | glszm      | LargeAreaHighGrayLevelEmphasis   | 2939.724409  |
| wavelet-LHH | glszm      | HighGrayLevelZoneEmphasis        | 513.7283465  |
| wavelet-LHH | glszm      | SmallAreaEmphasis                | 0.754905549  |
| wavelet-LHH | glszm      | LowGrayLevelZoneEmphasis         | 0.007991644  |
| wavelet-LHH | glszm      | ZoneEntropy                      | 5.845507569  |
| wavelet-LHH | glszm      | SmallAreaLowGrayLevelEmphasis    | 0.007343752  |
| wavelet-LHH | ngtdm      | Coarseness                       | 0.014061709  |



|             |            |                                      |              |
|-------------|------------|--------------------------------------|--------------|
| wavelet-LHH | ngtdm      | Complexity                           | 2500.661685  |
| wavelet-LHH | ngtdm      | Strength                             | 5.798858562  |
| wavelet-LHH | ngtdm      | Contrast                             | 0.240070447  |
| wavelet-LHH | ngtdm      | Busyness                             | 0.080730986  |
| wavelet-LLH | gldm       | GrayLevelVariance                    | 85.61307916  |
| wavelet-LLH | gldm       | HighGrayLevelEmphasis                | 1069.739326  |
| wavelet-LLH | gldm       | DependenceEntropy                    | 6.449946311  |
| wavelet-LLH | gldm       | DependenceNonUniformity              | 164.6134831  |
| wavelet-LLH | gldm       | GrayLevelNonUniformity               | 15.65168539  |
| wavelet-LLH | gldm       | SmallDependenceEmphasis              | 0.613479363  |
| wavelet-LLH | gldm       | SmallDependenceHighGrayLevelEmphasis | 674.10168    |
| wavelet-LLH | gldm       | DependenceNonUniformityNormalized    | 0.36991794   |
| wavelet-LLH | gldm       | LargeDependenceEmphasis              | 4.53258427   |
| wavelet-LLH | gldm       | LargeDependenceLowGrayLevelEmphasis  | 0.010145417  |
| wavelet-LLH | gldm       | DependenceVariance                   | 1.260143921  |
| wavelet-LLH | gldm       | LargeDependenceHighGrayLevelEmphasis | 4761.788764  |
| wavelet-LLH | gldm       | SmallDependenceLowGrayLevelEmphasis  | 0.005655044  |
| wavelet-LLH | gldm       | LowGrayLevelEmphasis                 | 0.006159712  |
| wavelet-LLH | glcm       | JointAverage                         | 30.86348163  |
| wavelet-LLH | glcm       | SumAverage                           | 61.72696326  |
| wavelet-LLH | glcm       | JointEntropy                         | 8.642022552  |
| wavelet-LLH | glcm       | ClusterShade                         | -619.8186339 |
| wavelet-LLH | glcm       | MaximumProbability                   | 0.011194389  |
| wavelet-LLH | glcm       | Idmn                                 | 0.962811943  |
| wavelet-LLH | glcm       | JointEnergy                          | 0.003009795  |
| wavelet-LLH | glcm       | Contrast                             | 158.4694824  |
| wavelet-LLH | glcm       | DifferenceEntropy                    | 4.554132753  |
| wavelet-LLH | glcm       | InverseVariance                      | 0.124586438  |
| wavelet-LLH | glcm       | DifferenceVariance                   | 63.95181323  |
| wavelet-LLH | glcm       | Idn                                  | 0.875907007  |
| wavelet-LLH | glcm       | Idm                                  | 0.119731956  |
| wavelet-LLH | glcm       | Correlation                          | 0.095163857  |
| wavelet-LLH | glcm       | Autocorrelation                      | 960.6694381  |
| wavelet-LLH | glcm       | SumEntropy                           | 5.571131696  |
| wavelet-LLH | glcm       | SumSquares                           | 87.32773955  |
| wavelet-LLH | glcm       | ClusterProminence                    | 126253.433   |
| wavelet-LLH | glcm       | Imc2                                 | 0.978619883  |
| wavelet-LLH | glcm       | Imc1                                 | -0.310736212 |
| wavelet-LLH | glcm       | DifferenceAverage                    | 9.500397821  |
| wavelet-LLH | glcm       | Id                                   | 0.200424849  |
| wavelet-LLH | glcm       | ClusterTendency                      | 190.8414759  |
| wavelet-LLH | firstorder | InterquartileRange                   | 280.191342   |
| wavelet-LLH | firstorder | Skewness                             | -0.36051136  |
| wavelet-LLH | firstorder | Uniformity                           | 0.035172327  |
| wavelet-LLH | firstorder | Median                               | -1.402350075 |
| wavelet-LLH | firstorder | Energy                               | 24111720.28  |
| wavelet-LLH | firstorder | RobustMeanAbsoluteDeviation          | 118.7304502  |
| wavelet-LLH | firstorder | MeanAbsoluteDeviation                | 178.7219684  |
| wavelet-LLH | firstorder | TotalEnergy                          | 651016447.6  |
| wavelet-LLH | firstorder | Maximum                              | 704.3705005  |
| wavelet-LLH | firstorder | RootMeanSquared                      | 232.7737981  |
| wavelet-LLH | firstorder | 90Percentile                         | 237.3721798  |
| wavelet-LLH | firstorder | Minimum                              | -799.2603775 |
| wavelet-LLH | firstorder | Entropy                              | 5.107689789  |
| wavelet-LLH | firstorder | Range                                | 1503.630878  |

|             |            |                                      |              |
|-------------|------------|--------------------------------------|--------------|
| wavelet-LLH | firstorder | Variance                             | 53357.27554  |
| wavelet-LLH | firstorder | 10Percentile                         | -339.2949022 |
| wavelet-LLH | firstorder | Kurtosis                             | 3.476623446  |
| wavelet-LLH | firstorder | Mean                                 | -28.74657445 |
| wavelet-LLH | glrlm      | ShortRunLowGrayLevelEmphasis         | 0.006291644  |
| wavelet-LLH | glrlm      | GrayLevelVariance                    | 87.27105682  |
| wavelet-LLH | glrlm      | LowGrayLevelRunEmphasis              | 0.00632022   |
| wavelet-LLH | glrlm      | GrayLevelNonUniformityNormalized     | 0.034500345  |
| wavelet-LLH | glrlm      | RunVariance                          | 0.032517061  |
| wavelet-LLH | glrlm      | GrayLevelNonUniformity               | 14.87657156  |
| wavelet-LLH | glrlm      | LongRunEmphasis                      | 1.098439614  |
| wavelet-LLH | glrlm      | ShortRunHighGrayLevelEmphasis        | 1046.117487  |
| wavelet-LLH | glrlm      | RunLengthNonUniformity               | 405.0610514  |
| wavelet-LLH | glrlm      | ShortRunEmphasis                     | 0.976200471  |
| wavelet-LLH | glrlm      | LongRunHighGrayLevelEmphasis         | 1173.166839  |
| wavelet-LLH | glrlm      | RunPercentage                        | 0.968885048  |
| wavelet-LLH | glrlm      | LongRunLowGrayLevelEmphasis          | 0.006437336  |
| wavelet-LLH | glrlm      | RunEntropy                           | 5.272494191  |
| wavelet-LLH | glrlm      | HighGrayLevelRunEmphasis             | 1070.760475  |
| wavelet-LLH | glrlm      | RunLengthNonUniformityNormalized     | 0.939116496  |
| wavelet-LLH | glszm      | GrayLevelVariance                    | 104.79534    |
| wavelet-LLH | glszm      | ZoneVariance                         | 1.309340152  |
| wavelet-LLH | glszm      | GrayLevelNonUniformityNormalized     | 0.030334539  |
| wavelet-LLH | glszm      | SizeZoneNonUniformityNormalized      | 0.608462689  |
| wavelet-LLH | glszm      | SizeZoneNonUniformity                | 186.7980456  |
| wavelet-LLH | glszm      | GrayLevelNonUniformity               | 9.312703583  |
| wavelet-LLH | glszm      | LargeAreaEmphasis                    | 3.410423453  |
| wavelet-LLH | glszm      | SmallAreaHighGrayLevelEmphasis       | 895.2908317  |
| wavelet-LLH | glszm      | ZonePercentage                       | 0.68988764   |
| wavelet-LLH | glszm      | LargeAreaLowGrayLevelEmphasis        | 0.011132634  |
| wavelet-LLH | glszm      | LargeAreaHighGrayLevelEmphasis       | 3599.237785  |
| wavelet-LLH | glszm      | HighGrayLevelZoneEmphasis            | 1089.364821  |
| wavelet-LLH | glszm      | SmallAreaEmphasis                    | 0.807614811  |
| wavelet-LLH | glszm      | LowGrayLevelZoneEmphasis             | 0.008356941  |
| wavelet-LLH | glszm      | ZoneEntropy                          | 6.126775969  |
| wavelet-LLH | glszm      | SmallAreaLowGrayLevelEmphasis        | 0.008082896  |
| wavelet-LLH | ngtdm      | Coarseness                           | 0.013667536  |
| wavelet-LLH | ngtdm      | Complexity                           | 6309.603443  |
| wavelet-LLH | ngtdm      | Strength                             | 10.4623425   |
| wavelet-LLH | ngtdm      | Contrast                             | 0.488523956  |
| wavelet-LLH | ngtdm      | Busyness                             | 0.046342973  |
| wavelet-LLL | gldm       | GrayLevelVariance                    | 901.018023   |
| wavelet-LLL | gldm       | HighGrayLevelEmphasis                | 3260.139326  |
| wavelet-LLL | gldm       | DependenceEntropy                    | 7.14566863   |
| wavelet-LLL | gldm       | DependenceNonUniformity              | 236.5685393  |
| wavelet-LLL | gldm       | GrayLevelNonUniformity               | 5.808988764  |
| wavelet-LLL | gldm       | SmallDependenceEmphasis              | 0.755489388  |
| wavelet-LLL | gldm       | SmallDependenceHighGrayLevelEmphasis | 2623.5478    |
| wavelet-LLL | gldm       | DependenceNonUniformityNormalized    | 0.531614695  |
| wavelet-LLL | gldm       | LargeDependenceEmphasis              | 2.514606742  |
| wavelet-LLL | gldm       | LargeDependenceLowGrayLevelEmphasis  | 0.008617791  |
| wavelet-LLL | gldm       | DependenceVariance                   | 0.503946471  |
| wavelet-LLL | gldm       | LargeDependenceHighGrayLevelEmphasis | 7013.658427  |
| wavelet-LLL | gldm       | SmallDependenceLowGrayLevelEmphasis  | 0.003519814  |
| wavelet-LLL | gldm       | LowGrayLevelEmphasis                 | 0.004133572  |

|             |            |                                  |              |
|-------------|------------|----------------------------------|--------------|
| wavelet-LLL | glcm       | JointAverage                     | 52.63694696  |
| wavelet-LLL | glcm       | SumAverage                       | 105.2738939  |
| wavelet-LLL | glcm       | JointEntropy                     | 9.17461596   |
| wavelet-LLL | glcm       | ClusterShade                     | 42165.20313  |
| wavelet-LLL | glcm       | MaximumProbability               | 0.0057584    |
| wavelet-LLL | glcm       | Idmn                             | 0.955733556  |
| wavelet-LLL | glcm       | JointEnergy                      | 0.001813913  |
| wavelet-LLL | glcm       | Contrast                         | 756.916648   |
| wavelet-LLL | glcm       | DifferenceEntropy                | 5.589879829  |
| wavelet-LLL | glcm       | InverseVariance                  | 0.060358531  |
| wavelet-LLL | glcm       | DifferenceVariance               | 295.5283657  |
| wavelet-LLL | glcm       | Idn                              | 0.864098382  |
| wavelet-LLL | glcm       | Idm                              | 0.060370289  |
| wavelet-LLL | glcm       | Correlation                      | 0.603027242  |
| wavelet-LLL | glcm       | Autocorrelation                  | 3343.42185   |
| wavelet-LLL | glcm       | SumEntropy                       | 7.092112852  |
| wavelet-LLL | glcm       | SumSquares                       | 950.7229246  |
| wavelet-LLL | glcm       | ClusterProminence                | 17905099.77  |
| wavelet-LLL | glcm       | Imc2                             | 0.999748881  |
| wavelet-LLL | glcm       | Imc1                             | -0.586438819 |
| wavelet-LLL | glcm       | DifferenceAverage                | 21.15396556  |
| wavelet-LLL | glcm       | Id                               | 0.120472537  |
| wavelet-LLL | glcm       | ClusterTendency                  | 3045.97505   |
| wavelet-LLL | firstorder | InterquartileRange               | 1276.628228  |
| wavelet-LLL | firstorder | Skewness                         | 0.504871004  |
| wavelet-LLL | firstorder | Uniformity                       | 0.013053907  |
| wavelet-LLL | firstorder | Median                           | -1765.063067 |
| wavelet-LLL | firstorder | Energy                           | 1422269609   |
| wavelet-LLL | firstorder | RobustMeanAbsoluteDeviation      | 504.8203993  |
| wavelet-LLL | firstorder | MeanAbsoluteDeviation            | 642.4923946  |
| wavelet-LLL | firstorder | TotalEnergy                      | 38401279443  |
| wavelet-LLL | firstorder | Maximum                          | 223.1794571  |
| wavelet-LLL | firstorder | RootMeanSquared                  | 1787.767177  |
| wavelet-LLL | firstorder | 90Percentile                     | -498.9959735 |
| wavelet-LLL | firstorder | Minimum                          | -2819.03277  |
| wavelet-LLL | firstorder | Entropy                          | 6.473104206  |
| wavelet-LLL | firstorder | Range                            | 3042.212227  |
| wavelet-LLL | firstorder | Variance                         | 563218.2164  |
| wavelet-LLL | firstorder | 10Percentile                     | -2483.940641 |
| wavelet-LLL | firstorder | Kurtosis                         | 2.104308572  |
| wavelet-LLL | firstorder | Mean                             | -1622.61926  |
| wavelet-LLL | glrlm      | ShortRunLowGrayLevelEmphasis     | 0.004123052  |
| wavelet-LLL | glrlm      | GrayLevelVariance                | 896.8393851  |
| wavelet-LLL | glrlm      | LowGrayLevelRunEmphasis          | 0.004156057  |
| wavelet-LLL | glrlm      | GrayLevelNonUniformityNormalized | 0.012952482  |
| wavelet-LLL | glrlm      | RunVariance                      | 0.017492401  |
| wavelet-LLL | glrlm      | GrayLevelNonUniformity           | 5.671300387  |
| wavelet-LLL | glrlm      | LongRunEmphasis                  | 1.050663703  |
| wavelet-LLL | glrlm      | ShortRunHighGrayLevelEmphasis    | 3241.778283  |
| wavelet-LLL | glrlm      | RunLengthNonUniformity           | 424.4045924  |
| wavelet-LLL | glrlm      | ShortRunEmphasis                 | 0.988125483  |
| wavelet-LLL | glrlm      | LongRunHighGrayLevelEmphasis     | 3402.741718  |
| wavelet-LLL | glrlm      | RunPercentage                    | 0.983923941  |
| wavelet-LLL | glrlm      | LongRunLowGrayLevelEmphasis      | 0.004295454  |
| wavelet-LLL | glrlm      | RunEntropy                       | 6.537032477  |

|             |       |                                      |              |
|-------------|-------|--------------------------------------|--------------|
| wavelet-LLL | glrlm | HighGrayLevelRunEmphasis             | 3271.679409  |
| wavelet-LLL | glrlm | RunLengthNonUniformityNormalized     | 0.969174875  |
| wavelet-LLL | glszm | GrayLevelVariance                    | 848.3604861  |
| wavelet-LLL | glszm | ZoneVariance                         | 0.469251543  |
| wavelet-LLL | glszm | GrayLevelNonUniformityNormalized     | 0.011990741  |
| wavelet-LLL | glszm | SizeZoneNonUniformityNormalized      | 0.741188272  |
| wavelet-LLL | glszm | SizeZoneNonUniformity                | 266.8277778  |
| wavelet-LLL | glszm | GrayLevelNonUniformity               | 4.316666667  |
| wavelet-LLL | glszm | LargeAreaEmphasis                    | 1.997222222  |
| wavelet-LLL | glszm | SmallAreaHighGrayLevelEmphasis       | 3117.403085  |
| wavelet-LLL | glszm | ZonePercentage                       | 0.808988764  |
| wavelet-LLL | glszm | LargeAreaLowGrayLevelEmphasis        | 0.007560346  |
| wavelet-LLL | glszm | LargeAreaHighGrayLevelEmphasis       | 5596.933333  |
| wavelet-LLL | glszm | HighGrayLevelZoneEmphasis            | 3443.413889  |
| wavelet-LLL | glszm | SmallAreaEmphasis                    | 0.88258642   |
| wavelet-LLL | glszm | LowGrayLevelZoneEmphasis             | 0.004474617  |
| wavelet-LLL | glszm | ZoneEntropy                          | 6.945371956  |
| wavelet-LLL | glszm | SmallAreaLowGrayLevelEmphasis        | 0.004220342  |
| wavelet-LLL | ngtdm | Coarseness                           | 0.015405958  |
| wavelet-LLL | ngtdm | Complexity                           | 56996.25418  |
| wavelet-LLL | ngtdm | Strength                             | 83.36597895  |
| wavelet-LLL | ngtdm | Contrast                             | 1.859204157  |
| wavelet-LLL | ngtdm | Busyness                             | 0.018490047  |
| wavelet-HHL | gldm  | GrayLevelVariance                    | 37.68990784  |
| wavelet-HHL | gldm  | HighGrayLevelEmphasis                | 460.1078652  |
| wavelet-HHL | gldm  | DependenceEntropy                    | 6.156346603  |
| wavelet-HHL | gldm  | DependenceNonUniformity              | 129.6831461  |
| wavelet-HHL | gldm  | GrayLevelNonUniformity               | 24.91011236  |
| wavelet-HHL | gldm  | SmallDependenceEmphasis              | 0.502431906  |
| wavelet-HHL | gldm  | SmallDependenceHighGrayLevelEmphasis | 238.7048458  |
| wavelet-HHL | gldm  | DependenceNonUniformityNormalized    | 0.2914228    |
| wavelet-HHL | gldm  | LargeDependenceEmphasis              | 5.782022472  |
| wavelet-HHL | gldm  | LargeDependenceLowGrayLevelEmphasis  | 0.018374409  |
| wavelet-HHL | gldm  | DependenceVariance                   | 1.461229643  |
| wavelet-HHL | gldm  | LargeDependenceHighGrayLevelEmphasis | 2497.977528  |
| wavelet-HHL | gldm  | SmallDependenceLowGrayLevelEmphasis  | 0.00460936   |
| wavelet-HHL | gldm  | LowGrayLevelEmphasis                 | 0.005932303  |
| wavelet-HHL | glcm  | JointAverage                         | 20.54312602  |
| wavelet-HHL | glcm  | SumAverage                           | 41.08625204  |
| wavelet-HHL | glcm  | JointEntropy                         | 8.119041981  |
| wavelet-HHL | glcm  | ClusterShade                         | 277.6225299  |
| wavelet-HHL | glcm  | MaximumProbability                   | 0.015528586  |
| wavelet-HHL | glcm  | Idmn                                 | 0.96472048   |
| wavelet-HHL | glcm  | JointEnergy                          | 0.004602553  |
| wavelet-HHL | glcm  | Contrast                             | 82.5164271   |
| wavelet-HHL | glcm  | DifferenceEntropy                    | 4.136164487  |
| wavelet-HHL | glcm  | InverseVariance                      | 0.155214057  |
| wavelet-HHL | glcm  | DifferenceVariance                   | 35.33157374  |
| wavelet-HHL | glcm  | Idn                                  | 0.879332573  |
| wavelet-HHL | glcm  | Idm                                  | 0.15405885   |
| wavelet-HHL | glcm  | Correlation                          | -0.017753966 |
| wavelet-HHL | glcm  | Autocorrelation                      | 421.3542426  |
| wavelet-HHL | glcm  | SumEntropy                           | 4.980673258  |
| wavelet-HHL | glcm  | SumSquares                           | 40.58837089  |
| wavelet-HHL | glcm  | ClusterProminence                    | 28284.57279  |

|             |            |                                  |              |
|-------------|------------|----------------------------------|--------------|
| wavelet-HHL | glcm       | Imc2                             | 0.937840073  |
| wavelet-HHL | glcm       | Imc1                             | -0.231713328 |
| wavelet-HHL | glcm       | DifferenceAverage                | 6.787461365  |
| wavelet-HHL | glcm       | Id                               | 0.243146192  |
| wavelet-HHL | glcm       | ClusterTendency                  | 79.83705647  |
| wavelet-HHL | firstorder | InterquartileRange               | 153.1900785  |
| wavelet-HHL | firstorder | Skewness                         | 0.354705069  |
| wavelet-HHL | firstorder | Uniformity                       | 0.055977781  |
| wavelet-HHL | firstorder | Median                           | -5.613338562 |
| wavelet-HHL | firstorder | Energy                           | 10488153.56  |
| wavelet-HHL | firstorder | RobustMeanAbsoluteDeviation      | 68.2417969   |
| wavelet-HHL | firstorder | MeanAbsoluteDeviation            | 111.993116   |
| wavelet-HHL | firstorder | TotalEnergy                      | 283180146.1  |
| wavelet-HHL | firstorder | Maximum                          | 613.5034722  |
| wavelet-HHL | firstorder | RootMeanSquared                  | 153.5216089  |
| wavelet-HHL | firstorder | 90Percentile                     | 184.3437046  |
| wavelet-HHL | firstorder | Minimum                          | -490.9071754 |
| wavelet-HHL | firstorder | Entropy                          | 4.532572528  |
| wavelet-HHL | firstorder | Range                            | 1104.410648  |
| wavelet-HHL | firstorder | Variance                         | 23567.39319  |
| wavelet-HHL | firstorder | 10Percentile                     | -178.888405  |
| wavelet-HHL | firstorder | Kurtosis                         | 4.534690083  |
| wavelet-HHL | firstorder | Mean                             | 1.221152994  |
| wavelet-HHL | glrlm      | ShortRunLowGrayLevelEmphasis     | 0.005994859  |
| wavelet-HHL | glrlm      | GrayLevelVariance                | 38.76086033  |
| wavelet-HHL | glrlm      | LowGrayLevelRunEmphasis          | 0.006076993  |
| wavelet-HHL | glrlm      | GrayLevelNonUniformityNormalized | 0.05463215   |
| wavelet-HHL | glrlm      | RunVariance                      | 0.045430262  |
| wavelet-HHL | glrlm      | GrayLevelNonUniformity           | 23.30478892  |
| wavelet-HHL | glrlm      | LongRunEmphasis                  | 1.135043434  |
| wavelet-HHL | glrlm      | ShortRunHighGrayLevelEmphasis    | 447.5036809  |
| wavelet-HHL | glrlm      | RunLengthNonUniformity           | 392.9115657  |
| wavelet-HHL | glrlm      | ShortRunEmphasis                 | 0.968506549  |
| wavelet-HHL | glrlm      | LongRunHighGrayLevelEmphasis     | 519.7827667  |
| wavelet-HHL | glrlm      | RunPercentage                    | 0.958513397  |
| wavelet-HHL | glrlm      | LongRunLowGrayLevelEmphasis      | 0.006431529  |
| wavelet-HHL | glrlm      | RunEntropy                       | 4.764322557  |
| wavelet-HHL | glrlm      | HighGrayLevelRunEmphasis         | 461.2250334  |
| wavelet-HHL | glrlm      | RunLengthNonUniformityNormalized | 0.920590401  |
| wavelet-HHL | glszm      | GrayLevelVariance                | 53.67066681  |
| wavelet-HHL | glszm      | ZoneVariance                     | 2.457238264  |
| wavelet-HHL | glszm      | GrayLevelNonUniformityNormalized | 0.042083451  |
| wavelet-HHL | glszm      | SizeZoneNonUniformityNormalized  | 0.502750406  |
| wavelet-HHL | glszm      | SizeZoneNonUniformity            | 130.2123552  |
| wavelet-HHL | glszm      | GrayLevelNonUniformity           | 10.8996139   |
| wavelet-HHL | glszm      | LargeAreaEmphasis                | 5.409266409  |
| wavelet-HHL | glszm      | SmallAreaHighGrayLevelEmphasis   | 353.1121255  |
| wavelet-HHL | glszm      | ZonePercentage                   | 0.582022472  |
| wavelet-HHL | glszm      | LargeAreaLowGrayLevelEmphasis    | 0.019942051  |
| wavelet-HHL | glszm      | LargeAreaHighGrayLevelEmphasis   | 2321.088803  |
| wavelet-HHL | glszm      | HighGrayLevelZoneEmphasis        | 474.4749035  |
| wavelet-HHL | glszm      | SmallAreaEmphasis                | 0.736947252  |
| wavelet-HHL | glszm      | LowGrayLevelZoneEmphasis         | 0.008294091  |
| wavelet-HHL | glszm      | ZoneEntropy                      | 5.974603386  |
| wavelet-HHL | glszm      | SmallAreaLowGrayLevelEmphasis    | 0.007581076  |

|             |            |                                      |              |
|-------------|------------|--------------------------------------|--------------|
| wavelet-HHL | ngtdm      | Coarseness                           | 0.014776387  |
| wavelet-HHL | ngtdm      | Complexity                           | 2944.32154   |
| wavelet-HHL | ngtdm      | Strength                             | 7.155898051  |
| wavelet-HHL | ngtdm      | Contrast                             | 0.226645461  |
| wavelet-HHL | ngtdm      | Busyness                             | 0.071725022  |
| wavelet-HLH | gldm       | GrayLevelVariance                    | 27.83660649  |
| wavelet-HLH | gldm       | HighGrayLevelEmphasis                | 303.9191011  |
| wavelet-HLH | gldm       | DependenceEntropy                    | 6.129841848  |
| wavelet-HLH | gldm       | DependenceNonUniformity              | 124.9011236  |
| wavelet-HLH | gldm       | GrayLevelNonUniformity               | 25.80449438  |
| wavelet-HLH | gldm       | SmallDependenceEmphasis              | 0.476304444  |
| wavelet-HLH | gldm       | SmallDependenceHighGrayLevelEmphasis | 155.9067941  |
| wavelet-HLH | gldm       | DependenceNonUniformityNormalized    | 0.280676682  |
| wavelet-HLH | gldm       | LargeDependenceEmphasis              | 6.074157303  |
| wavelet-HLH | gldm       | LargeDependenceLowGrayLevelEmphasis  | 0.031881492  |
| wavelet-HLH | gldm       | DependenceVariance                   | 1.487822245  |
| wavelet-HLH | gldm       | LargeDependenceHighGrayLevelEmphasis | 1693.460674  |
| wavelet-HLH | gldm       | SmallDependenceLowGrayLevelEmphasis  | 0.005477309  |
| wavelet-HLH | gldm       | LowGrayLevelEmphasis                 | 0.008095004  |
| wavelet-HLH | glcm       | JointAverage                         | 16.64659748  |
| wavelet-HLH | glcm       | SumAverage                           | 33.29319497  |
| wavelet-HLH | glcm       | JointEntropy                         | 8.035869392  |
| wavelet-HLH | glcm       | ClusterShade                         | 65.78367154  |
| wavelet-HLH | glcm       | MaximumProbability                   | 0.014963269  |
| wavelet-HLH | glcm       | Idmn                                 | 0.961781713  |
| wavelet-HLH | glcm       | JointEnergy                          | 0.004786693  |
| wavelet-HLH | glcm       | Contrast                             | 59.54768874  |
| wavelet-HLH | glcm       | DifferenceEntropy                    | 3.953236959  |
| wavelet-HLH | glcm       | InverseVariance                      | 0.167367901  |
| wavelet-HLH | glcm       | DifferenceVariance                   | 23.38635511  |
| wavelet-HLH | glcm       | Idn                                  | 0.87163217   |
| wavelet-HLH | glcm       | Idm                                  | 0.164320947  |
| wavelet-HLH | glcm       | Correlation                          | -0.013566604 |
| wavelet-HLH | glcm       | Autocorrelation                      | 276.7479537  |
| wavelet-HLH | glcm       | SumEntropy                           | 4.828877604  |
| wavelet-HLH | glcm       | SumSquares                           | 29.40971582  |
| wavelet-HLH | glcm       | ClusterProminence                    | 11870.39803  |
| wavelet-HLH | glcm       | Imc2                                 | 0.891015235  |
| wavelet-HLH | glcm       | Imc1                                 | -0.179826753 |
| wavelet-HLH | glcm       | DifferenceAverage                    | 5.953101114  |
| wavelet-HLH | glcm       | Id                                   | 0.255479297  |
| wavelet-HLH | glcm       | ClusterTendency                      | 58.09117454  |
| wavelet-HLH | firstorder | InterquartileRange                   | 155.3972897  |
| wavelet-HLH | firstorder | Skewness                             | 0.16961292   |
| wavelet-HLH | firstorder | Uniformity                           | 0.057987628  |
| wavelet-HLH | firstorder | Median                               | 3.4705715    |
| wavelet-HLH | firstorder | Energy                               | 7685157.316  |
| wavelet-HLH | firstorder | RobustMeanAbsoluteDeviation          | 65.63697189  |
| wavelet-HLH | firstorder | MeanAbsoluteDeviation                | 100.7405535  |
| wavelet-HLH | firstorder | TotalEnergy                          | 207499247.5  |
| wavelet-HLH | firstorder | Maximum                              | 509.0736546  |
| wavelet-HLH | firstorder | RootMeanSquared                      | 131.4154346  |
| wavelet-HLH | firstorder | 90Percentile                         | 167.5099914  |
| wavelet-HLH | firstorder | Minimum                              | -377.8708366 |
| wavelet-HLH | firstorder | Entropy                              | 4.384980502  |

|             |            |                                  |              |
|-------------|------------|----------------------------------|--------------|
| wavelet-HLH | firstorder | Range                            | 886.9444912  |
| wavelet-HLH | firstorder | Variance                         | 17258.19072  |
| wavelet-HLH | firstorder | 10Percentile                     | -169.5750764 |
| wavelet-HLH | firstorder | Kurtosis                         | 3.564564635  |
| wavelet-HLH | firstorder | Mean                             | 3.438855073  |
| wavelet-HLH | glrlm      | ShortRunLowGrayLevelEmphasis     | 0.008086375  |
| wavelet-HLH | glrlm      | GrayLevelVariance                | 28.45537932  |
| wavelet-HLH | glrlm      | LowGrayLevelRunEmphasis          | 0.00824529   |
| wavelet-HLH | glrlm      | GrayLevelNonUniformityNormalized | 0.057083803  |
| wavelet-HLH | glrlm      | RunVariance                      | 0.051097737  |
| wavelet-HLH | glrlm      | GrayLevelNonUniformity           | 24.28721554  |
| wavelet-HLH | glrlm      | LongRunEmphasis                  | 1.145757049  |
| wavelet-HLH | glrlm      | ShortRunHighGrayLevelEmphasis    | 296.2016067  |
| wavelet-HLH | glrlm      | RunLengthNonUniformity           | 390.8720158  |
| wavelet-HLH | glrlm      | ShortRunEmphasis                 | 0.96752751   |
| wavelet-HLH | glrlm      | LongRunHighGrayLevelEmphasis     | 345.4628229  |
| wavelet-HLH | glrlm      | RunPercentage                    | 0.956093345  |
| wavelet-HLH | glrlm      | LongRunLowGrayLevelEmphasis      | 0.008944333  |
| wavelet-HLH | glrlm      | RunEntropy                       | 4.617772036  |
| wavelet-HLH | glrlm      | HighGrayLevelRunEmphasis         | 305.1848535  |
| wavelet-HLH | glrlm      | RunLengthNonUniformityNormalized | 0.918351775  |
| wavelet-HLH | glszm      | GrayLevelVariance                | 38.3713779   |
| wavelet-HLH | glszm      | ZoneVariance                     | 6.063566399  |
| wavelet-HLH | glszm      | GrayLevelNonUniformityNormalized | 0.047123844  |
| wavelet-HLH | glszm      | SizeZoneNonUniformityNormalized  | 0.499629827  |
| wavelet-HLH | glszm      | SizeZoneNonUniformity            | 120.4107884  |
| wavelet-HLH | glszm      | GrayLevelNonUniformity           | 11.35684647  |
| wavelet-HLH | glszm      | LargeAreaEmphasis                | 9.473029046  |
| wavelet-HLH | glszm      | SmallAreaHighGrayLevelEmphasis   | 246.1139054  |
| wavelet-HLH | glszm      | ZonePercentage                   | 0.541573034  |
| wavelet-HLH | glszm      | LargeAreaLowGrayLevelEmphasis    | 0.047296714  |
| wavelet-HLH | glszm      | LargeAreaHighGrayLevelEmphasis   | 2601.369295  |
| wavelet-HLH | glszm      | HighGrayLevelZoneEmphasis        | 324.6970954  |
| wavelet-HLH | glszm      | SmallAreaEmphasis                | 0.734268148  |
| wavelet-HLH | glszm      | LowGrayLevelZoneEmphasis         | 0.010829917  |
| wavelet-HLH | glszm      | ZoneEntropy                      | 5.772767657  |
| wavelet-HLH | glszm      | SmallAreaLowGrayLevelEmphasis    | 0.009396331  |
| wavelet-HLH | ngtdm      | Coarseness                       | 0.01481453   |
| wavelet-HLH | ngtdm      | Complexity                       | 1510.95531   |
| wavelet-HLH | ngtdm      | Strength                         | 3.928398002  |
| wavelet-HLH | ngtdm      | Contrast                         | 0.24752601   |
| wavelet-HLH | ngtdm      | Busyness                         | 0.129884279  |

| Image type | Feature Class | Feature Name                         |                                                                                                                                                                                                                                                                                                                                                                                                                   |
|------------|---------------|--------------------------------------|-------------------------------------------------------------------------------------------------------------------------------------------------------------------------------------------------------------------------------------------------------------------------------------------------------------------------------------------------------------------------------------------------------------------|
| general    | info          | BoundingBox                          | 5: RTSTRUCT: C99-DNU_segment_LLL GTV<br>(1, 1, 1, 9, 8, 6)                                                                                                                                                                                                                                                                                                                                                        |
| general    | info          | EnabledImageTypes                    | {u'Original': {}, u'Wavelet': {}}                                                                                                                                                                                                                                                                                                                                                                                 |
|            |               |                                      | {'distances': [1], 'additionalInfo': True, 'force2D': False, 'interpolator': 'sitkBSpline', 'resampledPixelSpacing': [3.0], 'label': 1, 'normalizeScale': 1, 'normalize': False, 'force2Ddimension': 0, 'removeOutliers': None, 'minimumROISize': None, u'binWidth': 25.0, 'minimumROIDimensions': 1, u'correctMask': True, 'preCrop': False, u'symmetricalGLCM': True, 'resegmentRange': None, 'padDistance': 5} |
| general    | info          | GeneralSettings                      |                                                                                                                                                                                                                                                                                                                                                                                                                   |
| general    | info          | ImageHash                            | 4075865a58efec90b69044c0e5454e4b5f26a091                                                                                                                                                                                                                                                                                                                                                                          |
| general    | info          | ImageSpacing                         | (1.6015625, 1.6015625, 2.0)                                                                                                                                                                                                                                                                                                                                                                                       |
| general    | info          | MaskHash                             | d9f2bf06d98723392469aea92f05345f390cd2c9                                                                                                                                                                                                                                                                                                                                                                          |
| general    | info          | NumpyVersion                         | 1.13.1                                                                                                                                                                                                                                                                                                                                                                                                            |
| general    | info          | PyWaveletVersion                     | 0.5.2                                                                                                                                                                                                                                                                                                                                                                                                             |
| general    | info          | SimpleITKVersion                     | 1.1.0                                                                                                                                                                                                                                                                                                                                                                                                             |
| general    | info          | Version                              | 1.3.0.post102+g1b0eb74                                                                                                                                                                                                                                                                                                                                                                                            |
| general    | info          | VolumeNum                            | 1                                                                                                                                                                                                                                                                                                                                                                                                                 |
| general    | info          | VoxelNum                             | 197                                                                                                                                                                                                                                                                                                                                                                                                               |
| original   | shape         | Maximum3DDiameter                    | 25.45584412                                                                                                                                                                                                                                                                                                                                                                                                       |
| original   | shape         | Maximum2DDiameterSlice               | 22.84731932                                                                                                                                                                                                                                                                                                                                                                                                       |
| original   | shape         | Sphericity                           | 0.869271948                                                                                                                                                                                                                                                                                                                                                                                                       |
| original   | shape         | MinorAxis                            | 21.32120371                                                                                                                                                                                                                                                                                                                                                                                                       |
| original   | shape         | Elongation                           | 0.940875629                                                                                                                                                                                                                                                                                                                                                                                                       |
| original   | shape         | SurfaceVolumeRatio                   | 0.31870225                                                                                                                                                                                                                                                                                                                                                                                                        |
| original   | shape         | Volume                               | 5319                                                                                                                                                                                                                                                                                                                                                                                                              |
| original   | shape         | MajorAxis                            | 22.66102241                                                                                                                                                                                                                                                                                                                                                                                                       |
| original   | shape         | SurfaceArea                          | 1695.177267                                                                                                                                                                                                                                                                                                                                                                                                       |
| original   | shape         | Flatness                             | 0.721036538                                                                                                                                                                                                                                                                                                                                                                                                       |
| original   | shape         | LeastAxis                            | 16.33942515                                                                                                                                                                                                                                                                                                                                                                                                       |
| original   | shape         | Maximum2DDiameterColumn              | 24.73863375                                                                                                                                                                                                                                                                                                                                                                                                       |
| original   | shape         | Maximum2DDiameterRow                 | 21.84032967                                                                                                                                                                                                                                                                                                                                                                                                       |
| original   | gldm          | GrayLevelVariance                    | 61.59287794                                                                                                                                                                                                                                                                                                                                                                                                       |
| original   | gldm          | HighGrayLevelEmphasis                | 578.751269                                                                                                                                                                                                                                                                                                                                                                                                        |
| original   | gldm          | DependenceEntropy                    | 6.048019366                                                                                                                                                                                                                                                                                                                                                                                                       |
| original   | gldm          | DependenceNonUniformity              | 38.89847716                                                                                                                                                                                                                                                                                                                                                                                                       |
| original   | gldm          | GrayLevelNonUniformity               | 15.28426396                                                                                                                                                                                                                                                                                                                                                                                                       |
| original   | gldm          | SmallDependenceEmphasis              | 0.436177092                                                                                                                                                                                                                                                                                                                                                                                                       |
| original   | gldm          | SmallDependenceHighGrayLevelEmphasis | 171.2622509                                                                                                                                                                                                                                                                                                                                                                                                       |
| original   | gldm          | DependenceNonUniformityNormalized    | 0.197454199                                                                                                                                                                                                                                                                                                                                                                                                       |
| original   | gldm          | LargeDependenceEmphasis              | 19.69035533                                                                                                                                                                                                                                                                                                                                                                                                       |
| original   | gldm          | LargeDependenceLowGrayLevelEmphasis  | 0.038015059                                                                                                                                                                                                                                                                                                                                                                                                       |
| original   | gldm          | DependenceVariance                   | 8.157953052                                                                                                                                                                                                                                                                                                                                                                                                       |
| original   | gldm          | LargeDependenceHighGrayLevelEmphasis | 15892.75127                                                                                                                                                                                                                                                                                                                                                                                                       |
| original   | gldm          | SmallDependenceLowGrayLevelEmphasis  | 0.010347547                                                                                                                                                                                                                                                                                                                                                                                                       |
| original   | gldm          | LowGrayLevelEmphasis                 | 0.011751437                                                                                                                                                                                                                                                                                                                                                                                                       |
| original   | glcm          | JointAverage                         | 24.32666427                                                                                                                                                                                                                                                                                                                                                                                                       |
| original   | glcm          | SumAverage                           | 48.65332853                                                                                                                                                                                                                                                                                                                                                                                                       |
| original   | glcm          | JointEntropy                         | 6.53288696                                                                                                                                                                                                                                                                                                                                                                                                        |



|          |            |                                  |              |
|----------|------------|----------------------------------|--------------|
| original | glcm       | ClusterShade                     | -1652.538563 |
| original | glcm       | MaximumProbability               | 0.070064053  |
| original | glcm       | Idmn                             | 0.969803249  |
| original | glcm       | JointEnergy                      | 0.018794343  |
| original | glcm       | Contrast                         | 66.61442018  |
| original | glcm       | DifferenceEntropy                | 3.795631561  |
| original | glcm       | InverseVariance                  | 0.259807574  |
| original | glcm       | DifferenceVariance               | 35.17894326  |
| original | glcm       | Idn                              | 0.899949596  |
| original | glcm       | Idm                              | 0.279502319  |
| original | glcm       | Correlation                      | 0.298652733  |
| original | glcm       | Autocorrelation                  | 606.3858092  |
| original | glcm       | SumEntropy                       | 4.669579478  |
| original | glcm       | SumSquares                       | 47.78163533  |
| original | glcm       | ClusterProminence                | 60286.37357  |
| original | glcm       | Imc2                             | 0.954926509  |
| original | glcm       | Imc1                             | -0.317204655 |
| original | glcm       | DifferenceAverage                | 5.528143881  |
| original | glcm       | Id                               | 0.347598456  |
| original | glcm       | ClusterTendency                  | 124.5121211  |
| original | firstorder | InterquartileRange               | 275          |
| original | firstorder | Skewness                         | -0.919417492 |
| original | firstorder | Uniformity                       | 0.077585096  |
| original | firstorder | Median                           | -63          |
| original | firstorder | Energy                           | 11551210     |
| original | firstorder | RobustMeanAbsoluteDeviation      | 119.1574506  |
| original | firstorder | MeanAbsoluteDeviation            | 162.1375454  |
| original | firstorder | TotalEnergy                      | 311882670    |
| original | firstorder | Maximum                          | 384          |
| original | firstorder | RootMeanSquared                  | 242.1478552  |
| original | firstorder | 90Percentile                     | 24.8         |
| original | firstorder | Minimum                          | -690         |
| original | firstorder | Entropy                          | 4.247973494  |
| original | firstorder | Range                            | 1074         |
| original | firstorder | Variance                         | 38010.54152  |
| original | firstorder | 10Percentile                     | -445.4       |
| original | firstorder | Kurtosis                         | 3.019055797  |
| original | firstorder | Mean                             | -143.6142132 |
| original | glrlm      | ShortRunLowGrayLevelEmphasis     | 0.012666597  |
| original | glrlm      | GrayLevelVariance                | 63.58676774  |
| original | glrlm      | LowGrayLevelRunEmphasis          | 0.012786927  |
| original | glrlm      | GrayLevelNonUniformityNormalized | 0.066839947  |
| original | glrlm      | RunVariance                      | 0.117095199  |
| original | glrlm      | GrayLevelNonUniformity           | 11.968273    |
| original | glrlm      | LongRunEmphasis                  | 1.334621502  |
| original | glrlm      | ShortRunHighGrayLevelEmphasis    | 501.5185109  |
| original | glrlm      | RunLengthNonUniformity           | 149.6391635  |
| original | glrlm      | ShortRunEmphasis                 | 0.930266265  |
| original | glrlm      | LongRunHighGrayLevelEmphasis     | 823.5336561  |
| original | glrlm      | RunPercentage                    | 0.907848497  |
| original | glrlm      | LongRunLowGrayLevelEmphasis      | 0.013334819  |
| original | glrlm      | RunEntropy                       | 4.698708586  |
| original | glrlm      | HighGrayLevelRunEmphasis         | 556.5967312  |
| original | glrlm      | RunLengthNonUniformityNormalized | 0.834965272  |
| original | glszm      | GrayLevelVariance                | 64.42881394  |

|             |       |                                      |              |
|-------------|-------|--------------------------------------|--------------|
| original    | glszm | ZoneVariance                         | 20.40572657  |
| original    | glszm | GrayLevelNonUniformityNormalized     | 0.043005885  |
| original    | glszm | SizeZoneNonUniformityNormalized      | 0.619284744  |
| original    | glszm | SizeZoneNonUniformity                | 58.21276596  |
| original    | glszm | GrayLevelNonUniformity               | 4.042553191  |
| original    | glszm | LargeAreaEmphasis                    | 24.79787234  |
| original    | glszm | SmallAreaHighGrayLevelEmphasis       | 296.1383054  |
| original    | glszm | ZonePercentage                       | 0.47715736   |
| original    | glszm | LargeAreaLowGrayLevelEmphasis        | 0.055194383  |
| original    | glszm | LargeAreaHighGrayLevelEmphasis       | 19891.19149  |
| original    | glszm | HighGrayLevelZoneEmphasis            | 396.5212766  |
| original    | glszm | SmallAreaEmphasis                    | 0.811199881  |
| original    | glszm | LowGrayLevelZoneEmphasis             | 0.022116262  |
| original    | glszm | ZoneEntropy                          | 5.366391145  |
| original    | glszm | SmallAreaLowGrayLevelEmphasis        | 0.021265823  |
| original    | ngtdm | Coarseness                           | 0.019578331  |
| original    | ngtdm | Complexity                           | 1958.665546  |
| original    | ngtdm | Strength                             | 12.82397857  |
| original    | ngtdm | Contrast                             | 0.614526476  |
| original    | ngtdm | Busyness                             | 0.055187052  |
| wavelet-HHH | gldm  | GrayLevelVariance                    | 8.879280579  |
| wavelet-HHH | gldm  | HighGrayLevelEmphasis                | 140.8375635  |
| wavelet-HHH | gldm  | DependenceEntropy                    | 5.605282737  |
| wavelet-HHH | gldm  | DependenceNonUniformity              | 33.07106599  |
| wavelet-HHH | gldm  | GrayLevelNonUniformity               | 22.36040609  |
| wavelet-HHH | gldm  | SmallDependenceEmphasis              | 0.308676841  |
| wavelet-HHH | gldm  | SmallDependenceHighGrayLevelEmphasis | 48.50674917  |
| wavelet-HHH | gldm  | DependenceNonUniformityNormalized    | 0.167873431  |
| wavelet-HHH | gldm  | LargeDependenceEmphasis              | 14.87817259  |
| wavelet-HHH | gldm  | LargeDependenceLowGrayLevelEmphasis  | 0.125789395  |
| wavelet-HHH | gldm  | DependenceVariance                   | 4.224741684  |
| wavelet-HHH | gldm  | LargeDependenceHighGrayLevelEmphasis | 2013.22335   |
| wavelet-HHH | gldm  | SmallDependenceLowGrayLevelEmphasis  | 0.008408426  |
| wavelet-HHH | gldm  | LowGrayLevelEmphasis                 | 0.014728923  |
| wavelet-HHH | glcm  | JointAverage                         | 11.50602701  |
| wavelet-HHH | glcm  | SumAverage                           | 23.01205402  |
| wavelet-HHH | glcm  | JointEntropy                         | 6.23344852   |
| wavelet-HHH | glcm  | ClusterShade                         | 6.580341878  |
| wavelet-HHH | glcm  | MaximumProbability                   | 0.044163033  |
| wavelet-HHH | glcm  | Idmn                                 | 0.96560904   |
| wavelet-HHH | glcm  | JointEnergy                          | 0.018245833  |
| wavelet-HHH | glcm  | Contrast                             | 17.4985919   |
| wavelet-HHH | glcm  | DifferenceEntropy                    | 3.107380477  |
| wavelet-HHH | glcm  | InverseVariance                      | 0.298493009  |
| wavelet-HHH | glcm  | DifferenceVariance                   | 7.8756505    |
| wavelet-HHH | glcm  | Idn                                  | 0.882282906  |
| wavelet-HHH | glcm  | Idm                                  | 0.300851627  |
| wavelet-HHH | glcm  | Correlation                          | -0.034156314 |
| wavelet-HHH | glcm  | Autocorrelation                      | 132.0867985  |
| wavelet-HHH | glcm  | SumEntropy                           | 3.835792398  |
| wavelet-HHH | glcm  | SumSquares                           | 8.443385085  |
| wavelet-HHH | glcm  | ClusterProminence                    | 1164.519631  |
| wavelet-HHH | glcm  | Imc2                                 | 0.838477893  |
| wavelet-HHH | glcm  | Imc1                                 | -0.17900954  |
| wavelet-HHH | glcm  | DifferenceAverage                    | 3.089615406  |

|             |            |                                  |              |
|-------------|------------|----------------------------------|--------------|
| wavelet-HHH | glcm       | Id                               | 0.383445352  |
| wavelet-HHH | glcm       | ClusterTendency                  | 16.27494844  |
| wavelet-HHH | firstorder | InterquartileRange               | 70.83078711  |
| wavelet-HHH | firstorder | Skewness                         | 0.146278438  |
| wavelet-HHH | firstorder | Uniformity                       | 0.113504599  |
| wavelet-HHH | firstorder | Median                           | -5.669275023 |
| wavelet-HHH | firstorder | Energy                           | 1060745.169  |
| wavelet-HHH | firstorder | RobustMeanAbsoluteDeviation      | 31.59345479  |
| wavelet-HHH | firstorder | MeanAbsoluteDeviation            | 53.13526216  |
| wavelet-HHH | firstorder | TotalEnergy                      | 28640119.56  |
| wavelet-HHH | firstorder | Maximum                          | 248.9024478  |
| wavelet-HHH | firstorder | RootMeanSquared                  | 73.37910631  |
| wavelet-HHH | firstorder | 90Percentile                     | 85.73222595  |
| wavelet-HHH | firstorder | Minimum                          | -251.7538667 |
| wavelet-HHH | firstorder | Entropy                          | 3.475033148  |
| wavelet-HHH | firstorder | Range                            | 500.6563145  |
| wavelet-HHH | firstorder | Variance                         | 5383.605642  |
| wavelet-HHH | firstorder | 10Percentile                     | -79.38683927 |
| wavelet-HHH | firstorder | Kurtosis                         | 4.668692466  |
| wavelet-HHH | firstorder | Mean                             | -0.942125675 |
| wavelet-HHH | glrlm      | ShortRunLowGrayLevelEmphasis     | 0.014773466  |
| wavelet-HHH | glrlm      | GrayLevelVariance                | 9.418784341  |
| wavelet-HHH | glrlm      | LowGrayLevelRunEmphasis          | 0.015339607  |
| wavelet-HHH | glrlm      | GrayLevelNonUniformityNormalized | 0.108437177  |
| wavelet-HHH | glrlm      | RunVariance                      | 0.100807289  |
| wavelet-HHH | glrlm      | GrayLevelNonUniformity           | 19.506438    |
| wavelet-HHH | glrlm      | LongRunEmphasis                  | 1.301890183  |
| wavelet-HHH | glrlm      | ShortRunHighGrayLevelEmphasis    | 132.4308533  |
| wavelet-HHH | glrlm      | RunLengthNonUniformity           | 150.8533709  |
| wavelet-HHH | glrlm      | ShortRunEmphasis                 | 0.932654934  |
| wavelet-HHH | glrlm      | LongRunHighGrayLevelEmphasis     | 182.0344989  |
| wavelet-HHH | glrlm      | RunPercentage                    | 0.912924639  |
| wavelet-HHH | glrlm      | LongRunLowGrayLevelEmphasis      | 0.017848585  |
| wavelet-HHH | glrlm      | RunEntropy                       | 3.913630844  |
| wavelet-HHH | glrlm      | HighGrayLevelRunEmphasis         | 141.465024   |
| wavelet-HHH | glrlm      | RunLengthNonUniformityNormalized | 0.838236051  |
| wavelet-HHH | glszm      | GrayLevelVariance                | 17.23875433  |
| wavelet-HHH | glszm      | ZoneVariance                     | 24.94528547  |
| wavelet-HHH | glszm      | GrayLevelNonUniformityNormalized | 0.076124567  |
| wavelet-HHH | glszm      | SizeZoneNonUniformityNormalized  | 0.428200692  |
| wavelet-HHH | glszm      | SizeZoneNonUniformity            | 29.11764706  |
| wavelet-HHH | glszm      | GrayLevelNonUniformity           | 5.176470588  |
| wavelet-HHH | glszm      | LargeAreaEmphasis                | 33.33823529  |
| wavelet-HHH | glszm      | SmallAreaHighGrayLevelEmphasis   | 112.1960429  |
| wavelet-HHH | glszm      | ZonePercentage                   | 0.345177665  |
| wavelet-HHH | glszm      | LargeAreaLowGrayLevelEmphasis    | 0.278147996  |
| wavelet-HHH | glszm      | LargeAreaHighGrayLevelEmphasis   | 4557.455882  |
| wavelet-HHH | glszm      | HighGrayLevelZoneEmphasis        | 155.6470588  |
| wavelet-HHH | glszm      | SmallAreaEmphasis                | 0.677348357  |
| wavelet-HHH | glszm      | LowGrayLevelZoneEmphasis         | 0.025900764  |
| wavelet-HHH | glszm      | ZoneEntropy                      | 4.947377732  |
| wavelet-HHH | glszm      | SmallAreaLowGrayLevelEmphasis    | 0.022189133  |
| wavelet-HHH | ngtdm      | Coarseness                       | 0.033415945  |
| wavelet-HHH | ngtdm      | Complexity                       | 287.8000731  |
| wavelet-HHH | ngtdm      | Strength                         | 3.168995682  |

|             |            |                                      |              |
|-------------|------------|--------------------------------------|--------------|
| wavelet-HHH | ngtdm      | Contrast                             | 0.133180788  |
| wavelet-HHH | ngtdm      | Busyness                             | 0.13341003   |
| wavelet-HLL | gldm       | GrayLevelVariance                    | 78.73668479  |
| wavelet-HLL | gldm       | HighGrayLevelEmphasis                | 464.6497462  |
| wavelet-HLL | gldm       | DependenceEntropy                    | 6.04531767   |
| wavelet-HLL | gldm       | DependenceNonUniformity              | 62.59390863  |
| wavelet-HLL | gldm       | GrayLevelNonUniformity               | 7.791878173  |
| wavelet-HLL | gldm       | SmallDependenceEmphasis              | 0.523389735  |
| wavelet-HLL | gldm       | SmallDependenceHighGrayLevelEmphasis | 275.2635716  |
| wavelet-HLL | gldm       | DependenceNonUniformityNormalized    | 0.317735577  |
| wavelet-HLL | gldm       | LargeDependenceEmphasis              | 4.969543147  |
| wavelet-HLL | gldm       | LargeDependenceLowGrayLevelEmphasis  | 0.063466951  |
| wavelet-HLL | gldm       | DependenceVariance                   | 1.150197119  |
| wavelet-HLL | gldm       | LargeDependenceHighGrayLevelEmphasis | 1883.583756  |
| wavelet-HLL | gldm       | SmallDependenceLowGrayLevelEmphasis  | 0.005044873  |
| wavelet-HLL | gldm       | LowGrayLevelEmphasis                 | 0.014651915  |
| wavelet-HLL | glcm       | JointAverage                         | 18.77438783  |
| wavelet-HLL | glcm       | SumAverage                           | 37.54877567  |
| wavelet-HLL | glcm       | JointEntropy                         | 7.548434181  |
| wavelet-HLL | glcm       | ClusterShade                         | 2614.143776  |
| wavelet-HLL | glcm       | MaximumProbability                   | 0.016398375  |
| wavelet-HLL | glcm       | Idmn                                 | 0.97008422   |
| wavelet-HLL | glcm       | JointEnergy                          | 0.006013038  |
| wavelet-HLL | glcm       | Contrast                             | 87.36815313  |
| wavelet-HLL | glcm       | DifferenceEntropy                    | 4.099958126  |
| wavelet-HLL | glcm       | InverseVariance                      | 0.154559915  |
| wavelet-HLL | glcm       | DifferenceVariance                   | 35.80368245  |
| wavelet-HLL | glcm       | Idn                                  | 0.887412941  |
| wavelet-HLL | glcm       | Idm                                  | 0.147195962  |
| wavelet-HLL | glcm       | Correlation                          | 0.313696079  |
| wavelet-HLL | glcm       | Autocorrelation                      | 372.7251971  |
| wavelet-HLL | glcm       | SumEntropy                           | 5.13332646   |
| wavelet-HLL | glcm       | SumSquares                           | 63.88894332  |
| wavelet-HLL | glcm       | ClusterProminence                    | 151556.6468  |
| wavelet-HLL | glcm       | Imc2                                 | 0.988033508  |
| wavelet-HLL | glcm       | Imc1                                 | -0.399452105 |
| wavelet-HLL | glcm       | DifferenceAverage                    | 7.046115882  |
| wavelet-HLL | glcm       | Id                                   | 0.235128618  |
| wavelet-HLL | glcm       | ClusterTendency                      | 168.1876201  |
| wavelet-HLL | firstorder | InterquartileRange                   | 253.5633028  |
| wavelet-HLL | firstorder | Skewness                             | 0.915435707  |
| wavelet-HLL | firstorder | Uniformity                           | 0.039552681  |
| wavelet-HLL | firstorder | Median                               | -101.5654979 |
| wavelet-HLL | firstorder | Energy                               | 10720201.15  |
| wavelet-HLL | firstorder | RobustMeanAbsoluteDeviation          | 112.9549694  |
| wavelet-HLL | firstorder | MeanAbsoluteDeviation                | 170.9067067  |
| wavelet-HLL | firstorder | TotalEnergy                          | 289445430.9  |
| wavelet-HLL | firstorder | Maximum                              | 722.0825205  |
| wavelet-HLL | firstorder | RootMeanSquared                      | 233.2750838  |
| wavelet-HLL | firstorder | 90Percentile                         | 250.5097186  |
| wavelet-HLL | firstorder | Minimum                              | -535.8485652 |
| wavelet-HLL | firstorder | Entropy                              | 4.881537864  |
| wavelet-HLL | firstorder | Range                                | 1257.931086  |
| wavelet-HLL | firstorder | Variance                             | 49260.97057  |
| wavelet-HLL | firstorder | 10Percentile                         | -314.9271291 |

|             |            |                                      |              |
|-------------|------------|--------------------------------------|--------------|
| wavelet-HLL | firstorder | Kurtosis                             | 3.990633983  |
| wavelet-HLL | firstorder | Mean                                 | -71.80734035 |
| wavelet-HLL | glrlm      | ShortRunLowGrayLevelEmphasis         | 0.01416709   |
| wavelet-HLL | glrlm      | GrayLevelVariance                    | 79.86817633  |
| wavelet-HLL | glrlm      | LowGrayLevelRunEmphasis              | 0.014612825  |
| wavelet-HLL | glrlm      | GrayLevelNonUniformityNormalized     | 0.039299505  |
| wavelet-HLL | glrlm      | RunVariance                          | 0.040804032  |
| wavelet-HLL | glrlm      | GrayLevelNonUniformity               | 7.457752378  |
| wavelet-HLL | glrlm      | LongRunEmphasis                      | 1.119740373  |
| wavelet-HLL | glrlm      | ShortRunHighGrayLevelEmphasis        | 457.8901871  |
| wavelet-HLL | glrlm      | RunLengthNonUniformity               | 176.632263   |
| wavelet-HLL | glrlm      | ShortRunEmphasis                     | 0.972406725  |
| wavelet-HLL | glrlm      | LongRunHighGrayLevelEmphasis         | 512.148639   |
| wavelet-HLL | glrlm      | RunPercentage                        | 0.963295588  |
| wavelet-HLL | glrlm      | LongRunLowGrayLevelEmphasis          | 0.016444846  |
| wavelet-HLL | glrlm      | RunEntropy                           | 5.025915762  |
| wavelet-HLL | glrlm      | HighGrayLevelRunEmphasis             | 468.2702428  |
| wavelet-HLL | glrlm      | RunLengthNonUniformityNormalized     | 0.93017943   |
| wavelet-HLL | glszm      | GrayLevelVariance                    | 95.91926781  |
| wavelet-HLL | glszm      | ZoneVariance                         | 1.440202172  |
| wavelet-HLL | glszm      | GrayLevelNonUniformityNormalized     | 0.035994809  |
| wavelet-HLL | glszm      | SizeZoneNonUniformityNormalized      | 0.500717164  |
| wavelet-HLL | glszm      | SizeZoneNonUniformity                | 60.58677686  |
| wavelet-HLL | glszm      | GrayLevelNonUniformity               | 4.355371901  |
| wavelet-HLL | glszm      | LargeAreaEmphasis                    | 4.090909091  |
| wavelet-HLL | glszm      | SmallAreaHighGrayLevelEmphasis       | 400.7650666  |
| wavelet-HLL | glszm      | ZonePercentage                       | 0.614213198  |
| wavelet-HLL | glszm      | LargeAreaLowGrayLevelEmphasis        | 0.050809759  |
| wavelet-HLL | glszm      | LargeAreaHighGrayLevelEmphasis       | 1624.479339  |
| wavelet-HLL | glszm      | HighGrayLevelZoneEmphasis            | 516.677686   |
| wavelet-HLL | glszm      | SmallAreaEmphasis                    | 0.733760904  |
| wavelet-HLL | glszm      | LowGrayLevelZoneEmphasis             | 0.012933727  |
| wavelet-HLL | glszm      | ZoneEntropy                          | 5.770368304  |
| wavelet-HLL | glszm      | SmallAreaLowGrayLevelEmphasis        | 0.005688077  |
| wavelet-HLL | ngtdm      | Coarseness                           | 0.033177868  |
| wavelet-HLL | ngtdm      | Complexity                           | 2927.557381  |
| wavelet-HLL | ngtdm      | Strength                             | 19.19720934  |
| wavelet-HLL | ngtdm      | Contrast                             | 0.553405226  |
| wavelet-HLL | ngtdm      | Busyness                             | 0.056924619  |
| wavelet-LHL | gldm       | GrayLevelVariance                    | 53.01893891  |
| wavelet-LHL | gldm       | HighGrayLevelEmphasis                | 500.2233503  |
| wavelet-LHL | gldm       | DependenceEntropy                    | 6.043775728  |
| wavelet-LHL | gldm       | DependenceNonUniformity              | 58.88832487  |
| wavelet-LHL | gldm       | GrayLevelNonUniformity               | 9.588832487  |
| wavelet-LHL | gldm       | SmallDependenceEmphasis              | 0.515679639  |
| wavelet-LHL | gldm       | SmallDependenceHighGrayLevelEmphasis | 280.5566004  |
| wavelet-LHL | gldm       | DependenceNonUniformityNormalized    | 0.298925507  |
| wavelet-LHL | gldm       | LargeDependenceEmphasis              | 5.406091371  |
| wavelet-LHL | gldm       | LargeDependenceLowGrayLevelEmphasis  | 0.055711002  |
| wavelet-LHL | gldm       | DependenceVariance                   | 1.262696797  |
| wavelet-LHL | gldm       | LargeDependenceHighGrayLevelEmphasis | 2534.781726  |
| wavelet-LHL | gldm       | SmallDependenceLowGrayLevelEmphasis  | 0.004563712  |
| wavelet-LHL | gldm       | LowGrayLevelEmphasis                 | 0.013592358  |
| wavelet-LHL | glcm       | JointAverage                         | 21.0608298   |
| wavelet-LHL | glcm       | SumAverage                           | 42.12165959  |

|             |            |                                  |              |
|-------------|------------|----------------------------------|--------------|
| wavelet-LHL | glcm       | JointEntropy                     | 7.459546947  |
| wavelet-LHL | glcm       | ClusterShade                     | 443.1266976  |
| wavelet-LHL | glcm       | MaximumProbability               | 0.018722737  |
| wavelet-LHL | glcm       | Idmn                             | 0.966410612  |
| wavelet-LHL | glcm       | JointEnergy                      | 0.006625003  |
| wavelet-LHL | glcm       | Contrast                         | 70.3652918   |
| wavelet-LHL | glcm       | DifferenceEntropy                | 3.960236995  |
| wavelet-LHL | glcm       | InverseVariance                  | 0.181549499  |
| wavelet-LHL | glcm       | DifferenceVariance               | 29.11266856  |
| wavelet-LHL | glcm       | Idn                              | 0.881666682  |
| wavelet-LHL | glcm       | Idm                              | 0.167276245  |
| wavelet-LHL | glcm       | Correlation                      | 0.236462444  |
| wavelet-LHL | glcm       | Autocorrelation                  | 455.132455   |
| wavelet-LHL | glcm       | SumEntropy                       | 5.039657273  |
| wavelet-LHL | glcm       | SumSquares                       | 46.73512258  |
| wavelet-LHL | glcm       | ClusterProminence                | 54687.55578  |
| wavelet-LHL | glcm       | Imc2                             | 0.984127439  |
| wavelet-LHL | glcm       | Imc1                             | -0.378445068 |
| wavelet-LHL | glcm       | DifferenceAverage                | 6.319724912  |
| wavelet-LHL | glcm       | Id                               | 0.254516789  |
| wavelet-LHL | glcm       | ClusterTendency                  | 116.5751985  |
| wavelet-LHL | firstorder | InterquartileRange               | 186.0376496  |
| wavelet-LHL | firstorder | Skewness                         | 0.170560277  |
| wavelet-LHL | firstorder | Uniformity                       | 0.048674277  |
| wavelet-LHL | firstorder | Median                           | -61.82151147 |
| wavelet-LHL | firstorder | Energy                           | 7256822.146  |
| wavelet-LHL | firstorder | RobustMeanAbsoluteDeviation      | 85.33566802  |
| wavelet-LHL | firstorder | MeanAbsoluteDeviation            | 136.7069573  |
| wavelet-LHL | firstorder | TotalEnergy                      | 195934197.9  |
| wavelet-LHL | firstorder | Maximum                          | 494.6537253  |
| wavelet-LHL | firstorder | RootMeanSquared                  | 191.9287905  |
| wavelet-LHL | firstorder | 90Percentile                     | 171.321446   |
| wavelet-LHL | firstorder | Minimum                          | -568.325629  |
| wavelet-LHL | firstorder | Entropy                          | 4.705110138  |
| wavelet-LHL | firstorder | Range                            | 1062.979354  |
| wavelet-LHL | firstorder | Variance                         | 33487.21395  |
| wavelet-LHL | firstorder | 10Percentile                     | -299.5452095 |
| wavelet-LHL | firstorder | Kurtosis                         | 3.516729122  |
| wavelet-LHL | firstorder | Mean                             | -57.87440444 |
| wavelet-LHL | glrlm      | ShortRunLowGrayLevelEmphasis     | 0.01321041   |
| wavelet-LHL | glrlm      | GrayLevelVariance                | 54.15542414  |
| wavelet-LHL | glrlm      | LowGrayLevelRunEmphasis          | 0.013617407  |
| wavelet-LHL | glrlm      | GrayLevelNonUniformityNormalized | 0.047699184  |
| wavelet-LHL | glrlm      | RunVariance                      | 0.043028812  |
| wavelet-LHL | glrlm      | GrayLevelNonUniformity           | 9.022192977  |
| wavelet-LHL | glrlm      | LongRunEmphasis                  | 1.129236075  |
| wavelet-LHL | glrlm      | ShortRunHighGrayLevelEmphasis    | 488.1626942  |
| wavelet-LHL | glrlm      | RunLengthNonUniformity           | 174.8128982  |
| wavelet-LHL | glrlm      | ShortRunEmphasis                 | 0.969549189  |
| wavelet-LHL | glrlm      | LongRunHighGrayLevelEmphasis     | 561.3389174  |
| wavelet-LHL | glrlm      | RunPercentage                    | 0.960171808  |
| wavelet-LHL | glrlm      | LongRunLowGrayLevelEmphasis      | 0.015259984  |
| wavelet-LHL | glrlm      | RunEntropy                       | 4.88697726   |
| wavelet-LHL | glrlm      | HighGrayLevelRunEmphasis         | 502.0235915  |
| wavelet-LHL | glrlm      | RunLengthNonUniformityNormalized | 0.923403115  |

|             |       |                                      |              |
|-------------|-------|--------------------------------------|--------------|
| wavelet-LHL | glszm | GrayLevelVariance                    | 68.26235277  |
| wavelet-LHL | glszm | ZoneVariance                         | 1.695848894  |
| wavelet-LHL | glszm | GrayLevelNonUniformityNormalized     | 0.038207412  |
| wavelet-LHL | glszm | SizeZoneNonUniformityNormalized      | 0.514076415  |
| wavelet-LHL | glszm | SizeZoneNonUniformity                | 60.66101695  |
| wavelet-LHL | glszm | GrayLevelNonUniformity               | 4.508474576  |
| wavelet-LHL | glszm | LargeAreaEmphasis                    | 4.483050847  |
| wavelet-LHL | glszm | SmallAreaHighGrayLevelEmphasis       | 416.3641227  |
| wavelet-LHL | glszm | ZonePercentage                       | 0.598984772  |
| wavelet-LHL | glszm | LargeAreaLowGrayLevelEmphasis        | 0.047231265  |
| wavelet-LHL | glszm | LargeAreaHighGrayLevelEmphasis       | 2099.288136  |
| wavelet-LHL | glszm | HighGrayLevelZoneEmphasis            | 533.4322034  |
| wavelet-LHL | glszm | SmallAreaEmphasis                    | 0.743732273  |
| wavelet-LHL | glszm | LowGrayLevelZoneEmphasis             | 0.012293226  |
| wavelet-LHL | glszm | ZoneEntropy                          | 5.707488045  |
| wavelet-LHL | glszm | SmallAreaLowGrayLevelEmphasis        | 0.005140089  |
| wavelet-LHL | ngtdm | Coarseness                           | 0.03196996   |
| wavelet-LHL | ngtdm | Complexity                           | 2263.703442  |
| wavelet-LHL | ngtdm | Strength                             | 13.55040063  |
| wavelet-LHL | ngtdm | Contrast                             | 0.391854789  |
| wavelet-LHL | ngtdm | Busyness                             | 0.044821317  |
| wavelet-LHH | gldm  | GrayLevelVariance                    | 27.99216677  |
| wavelet-LHH | gldm  | HighGrayLevelEmphasis                | 372.5939086  |
| wavelet-LHH | gldm  | DependenceEntropy                    | 5.964149239  |
| wavelet-LHH | gldm  | DependenceNonUniformity              | 42.38071066  |
| wavelet-LHH | gldm  | GrayLevelNonUniformity               | 14.95939086  |
| wavelet-LHH | gldm  | SmallDependenceEmphasis              | 0.442802546  |
| wavelet-LHH | gldm  | SmallDependenceHighGrayLevelEmphasis | 170.6708275  |
| wavelet-LHH | gldm  | DependenceNonUniformityNormalized    | 0.215130511  |
| wavelet-LHH | gldm  | LargeDependenceEmphasis              | 13.24365482  |
| wavelet-LHH | gldm  | LargeDependenceLowGrayLevelEmphasis  | 0.046397768  |
| wavelet-LHH | gldm  | DependenceVariance                   | 5.076245201  |
| wavelet-LHH | gldm  | LargeDependenceHighGrayLevelEmphasis | 4554.989848  |
| wavelet-LHH | gldm  | SmallDependenceLowGrayLevelEmphasis  | 0.007678456  |
| wavelet-LHH | gldm  | LowGrayLevelEmphasis                 | 0.009370183  |
| wavelet-LHH | glcm  | JointAverage                         | 18.48950297  |
| wavelet-LHH | glcm  | SumAverage                           | 36.97900594  |
| wavelet-LHH | glcm  | JointEntropy                         | 6.782908795  |
| wavelet-LHH | glcm  | ClusterShade                         | -8.675860826 |
| wavelet-LHH | glcm  | MaximumProbability                   | 0.039850441  |
| wavelet-LHH | glcm  | Idmn                                 | 0.984209716  |
| wavelet-LHH | glcm  | JointEnergy                          | 0.012588239  |
| wavelet-LHH | glcm  | Contrast                             | 46.80372775  |
| wavelet-LHH | glcm  | DifferenceEntropy                    | 3.542462282  |
| wavelet-LHH | glcm  | InverseVariance                      | 0.263071836  |
| wavelet-LHH | glcm  | DifferenceVariance                   | 26.07985842  |
| wavelet-LHH | glcm  | Idn                                  | 0.925258755  |
| wavelet-LHH | glcm  | Idm                                  | 0.258935312  |
| wavelet-LHH | glcm  | Correlation                          | -0.044033918 |
| wavelet-LHH | glcm  | Autocorrelation                      | 341.0781934  |
| wavelet-LHH | glcm  | SumEntropy                           | 4.304524439  |
| wavelet-LHH | glcm  | SumSquares                           | 22.58966338  |
| wavelet-LHH | glcm  | ClusterProminence                    | 14727.77764  |
| wavelet-LHH | glcm  | Imc2                                 | 0.945942126  |
| wavelet-LHH | glcm  | Imc1                                 | -0.286357057 |

|             |            |                                  |              |
|-------------|------------|----------------------------------|--------------|
| wavelet-LHH | glcm       | DifferenceAverage                | 4.512428704  |
| wavelet-LHH | glcm       | Id                               | 0.34039551   |
| wavelet-LHH | glcm       | ClusterTendency                  | 43.55492576  |
| wavelet-LHH | firstorder | InterquartileRange               | 109.9588952  |
| wavelet-LHH | firstorder | Skewness                         | 0.950319645  |
| wavelet-LHH | firstorder | Uniformity                       | 0.075935994  |
| wavelet-LHH | firstorder | Median                           | -0.130316494 |
| wavelet-LHH | firstorder | Energy                           | 3400135.22   |
| wavelet-LHH | firstorder | RobustMeanAbsoluteDeviation      | 48.70483066  |
| wavelet-LHH | firstorder | MeanAbsoluteDeviation            | 86.67759289  |
| wavelet-LHH | firstorder | TotalEnergy                      | 91803650.93  |
| wavelet-LHH | firstorder | Maximum                          | 814.7863951  |
| wavelet-LHH | firstorder | RootMeanSquared                  | 131.3756813  |
| wavelet-LHH | firstorder | 90Percentile                     | 134.1296665  |
| wavelet-LHH | firstorder | Minimum                          | -441.9530127 |
| wavelet-LHH | firstorder | Entropy                          | 4.090008593  |
| wavelet-LHH | firstorder | Range                            | 1256.739408  |
| wavelet-LHH | firstorder | Variance                         | 17254.75112  |
| wavelet-LHH | firstorder | 10Percentile                     | -131.1529973 |
| wavelet-LHH | firstorder | Kurtosis                         | 10.74887411  |
| wavelet-LHH | firstorder | Mean                             | 2.195113957  |
| wavelet-LHH | glrlm      | ShortRunLowGrayLevelEmphasis     | 0.009705144  |
| wavelet-LHH | glrlm      | GrayLevelVariance                | 29.8169387   |
| wavelet-LHH | glrlm      | LowGrayLevelRunEmphasis          | 0.009862431  |
| wavelet-LHH | glrlm      | GrayLevelNonUniformityNormalized | 0.071450808  |
| wavelet-LHH | glrlm      | RunVariance                      | 0.092097222  |
| wavelet-LHH | glrlm      | GrayLevelNonUniformity           | 13.07364417  |
| wavelet-LHH | glrlm      | LongRunEmphasis                  | 1.253304244  |
| wavelet-LHH | glrlm      | ShortRunHighGrayLevelEmphasis    | 356.1626353  |
| wavelet-LHH | glrlm      | RunLengthNonUniformity           | 159.9125029  |
| wavelet-LHH | glrlm      | ShortRunEmphasis                 | 0.947991207  |
| wavelet-LHH | glrlm      | LongRunHighGrayLevelEmphasis     | 463.1306191  |
| wavelet-LHH | glrlm      | RunPercentage                    | 0.928543538  |
| wavelet-LHH | glrlm      | LongRunLowGrayLevelEmphasis      | 0.010622312  |
| wavelet-LHH | glrlm      | RunEntropy                       | 4.428453568  |
| wavelet-LHH | glrlm      | HighGrayLevelRunEmphasis         | 374.3269172  |
| wavelet-LHH | glrlm      | RunLengthNonUniformityNormalized | 0.873572677  |
| wavelet-LHH | glszm      | GrayLevelVariance                | 51.71978271  |
| wavelet-LHH | glszm      | ZoneVariance                     | 12.7674287   |
| wavelet-LHH | glszm      | GrayLevelNonUniformityNormalized | 0.050475328  |
| wavelet-LHH | glszm      | SizeZoneNonUniformityNormalized  | 0.588727931  |
| wavelet-LHH | glszm      | SizeZoneNonUniformity            | 55.34042553  |
| wavelet-LHH | glszm      | GrayLevelNonUniformity           | 4.744680851  |
| wavelet-LHH | glszm      | LargeAreaEmphasis                | 17.15957447  |
| wavelet-LHH | glszm      | SmallAreaHighGrayLevelEmphasis   | 307.3286026  |
| wavelet-LHH | glszm      | ZonePercentage                   | 0.47715736   |
| wavelet-LHH | glszm      | LargeAreaLowGrayLevelEmphasis    | 0.065332837  |
| wavelet-LHH | glszm      | LargeAreaHighGrayLevelEmphasis   | 5872.287234  |
| wavelet-LHH | glszm      | HighGrayLevelZoneEmphasis        | 386.5319149  |
| wavelet-LHH | glszm      | SmallAreaEmphasis                | 0.792523431  |
| wavelet-LHH | glszm      | LowGrayLevelZoneEmphasis         | 0.016348891  |
| wavelet-LHH | glszm      | ZoneEntropy                      | 5.280667512  |
| wavelet-LHH | glszm      | SmallAreaLowGrayLevelEmphasis    | 0.015679077  |
| wavelet-LHH | ngtdm      | Coarseness                       | 0.033938838  |
| wavelet-LHH | ngtdm      | Complexity                       | 1236.789644  |



|             |            |                                      |              |
|-------------|------------|--------------------------------------|--------------|
| wavelet-LHH | ngtdm      | Strength                             | 10.60673973  |
| wavelet-LHH | ngtdm      | Contrast                             | 0.29316488   |
| wavelet-LHH | ngtdm      | Busyness                             | 0.053291952  |
| wavelet-LLH | gldm       | GrayLevelVariance                    | 138.5651266  |
| wavelet-LLH | gldm       | HighGrayLevelEmphasis                | 2608.705584  |
| wavelet-LLH | gldm       | DependenceEntropy                    | 6.393866525  |
| wavelet-LLH | gldm       | DependenceNonUniformity              | 57.81218274  |
| wavelet-LLH | gldm       | GrayLevelNonUniformity               | 8.076142132  |
| wavelet-LLH | gldm       | SmallDependenceEmphasis              | 0.536691342  |
| wavelet-LLH | gldm       | SmallDependenceHighGrayLevelEmphasis | 1448.392523  |
| wavelet-LLH | gldm       | DependenceNonUniformityNormalized    | 0.293462857  |
| wavelet-LLH | gldm       | LargeDependenceEmphasis              | 6.85786802   |
| wavelet-LLH | gldm       | LargeDependenceLowGrayLevelEmphasis  | 0.008088113  |
| wavelet-LLH | gldm       | DependenceVariance                   | 2.159756757  |
| wavelet-LLH | gldm       | LargeDependenceHighGrayLevelEmphasis | 17243.80203  |
| wavelet-LLH | gldm       | SmallDependenceLowGrayLevelEmphasis  | 0.005492819  |
| wavelet-LLH | gldm       | LowGrayLevelEmphasis                 | 0.005688774  |
| wavelet-LLH | glcm       | JointAverage                         | 50.10363873  |
| wavelet-LLH | glcm       | SumAverage                           | 100.2072775  |
| wavelet-LLH | glcm       | JointEntropy                         | 7.46337174   |
| wavelet-LLH | glcm       | ClusterShade                         | -1216.370915 |
| wavelet-LLH | glcm       | MaximumProbability                   | 0.019684314  |
| wavelet-LLH | glcm       | Idmn                                 | 0.97516286   |
| wavelet-LLH | glcm       | JointEnergy                          | 0.006781972  |
| wavelet-LLH | glcm       | Contrast                             | 206.566985   |
| wavelet-LLH | glcm       | DifferenceEntropy                    | 4.275801963  |
| wavelet-LLH | glcm       | InverseVariance                      | 0.184267241  |
| wavelet-LLH | glcm       | DifferenceVariance                   | 119.9786202  |
| wavelet-LLH | glcm       | Idn                                  | 0.912565685  |
| wavelet-LLH | glcm       | Idm                                  | 0.175218788  |
| wavelet-LLH | glcm       | Correlation                          | 0.078734106  |
| wavelet-LLH | glcm       | Autocorrelation                      | 2522.913821  |
| wavelet-LLH | glcm       | SumEntropy                           | 5.192543166  |
| wavelet-LLH | glcm       | SumSquares                           | 115.7082183  |
| wavelet-LLH | glcm       | ClusterProminence                    | 489734.2798  |
| wavelet-LLH | glcm       | Imc2                                 | 0.993829999  |
| wavelet-LLH | glcm       | Imc1                                 | -0.45761171  |
| wavelet-LLH | glcm       | DifferenceAverage                    | 8.941604881  |
| wavelet-LLH | glcm       | Id                                   | 0.254088825  |
| wavelet-LLH | glcm       | ClusterTendency                      | 256.2658882  |
| wavelet-LLH | firstorder | InterquartileRange                   | 211.2293242  |
| wavelet-LLH | firstorder | Skewness                             | -0.456216589 |
| wavelet-LLH | firstorder | Uniformity                           | 0.040995645  |
| wavelet-LLH | firstorder | Median                               | -25.87987158 |
| wavelet-LLH | firstorder | Energy                               | 17149865.25  |
| wavelet-LLH | firstorder | RobustMeanAbsoluteDeviation          | 102.0890997  |
| wavelet-LLH | firstorder | MeanAbsoluteDeviation                | 194.2413616  |
| wavelet-LLH | firstorder | TotalEnergy                          | 463046361.8  |
| wavelet-LLH | firstorder | Maximum                              | 799.0397481  |
| wavelet-LLH | firstorder | RootMeanSquared                      | 295.0511033  |
| wavelet-LLH | firstorder | 90Percentile                         | 376.5801691  |
| wavelet-LLH | firstorder | Minimum                              | -1238.859506 |
| wavelet-LLH | firstorder | Entropy                              | 5.080808451  |
| wavelet-LLH | firstorder | Range                                | 2037.899254  |
| wavelet-LLH | firstorder | Variance                             | 86682.26667  |

|             |            |                                      |              |
|-------------|------------|--------------------------------------|--------------|
| wavelet-LLH | firstorder | 10Percentile                         | -307.8457805 |
| wavelet-LLH | firstorder | Kurtosis                             | 5.993708862  |
| wavelet-LLH | firstorder | Mean                                 | -19.31027943 |
| wavelet-LLH | glrlm      | ShortRunLowGrayLevelEmphasis         | 0.005923667  |
| wavelet-LLH | glrlm      | GrayLevelVariance                    | 144.1344174  |
| wavelet-LLH | glrlm      | LowGrayLevelRunEmphasis              | 0.005937942  |
| wavelet-LLH | glrlm      | GrayLevelNonUniformityNormalized     | 0.039289176  |
| wavelet-LLH | glrlm      | RunVariance                          | 0.048066625  |
| wavelet-LLH | glrlm      | GrayLevelNonUniformity               | 7.393687848  |
| wavelet-LLH | glrlm      | LongRunEmphasis                      | 1.145026647  |
| wavelet-LLH | glrlm      | ShortRunHighGrayLevelEmphasis        | 2528.068126  |
| wavelet-LLH | glrlm      | RunLengthNonUniformity               | 171.912087   |
| wavelet-LLH | glrlm      | ShortRunEmphasis                     | 0.965574085  |
| wavelet-LLH | glrlm      | LongRunHighGrayLevelEmphasis         | 2975.775514  |
| wavelet-LLH | glrlm      | RunPercentage                        | 0.955095666  |
| wavelet-LLH | glrlm      | LongRunLowGrayLevelEmphasis          | 0.005998084  |
| wavelet-LLH | glrlm      | RunEntropy                           | 5.302029917  |
| wavelet-LLH | glrlm      | HighGrayLevelRunEmphasis             | 2614.046608  |
| wavelet-LLH | glrlm      | RunLengthNonUniformityNormalized     | 0.913288802  |
| wavelet-LLH | glszm      | GrayLevelVariance                    | 210.478356   |
| wavelet-LLH | glszm      | ZoneVariance                         | 3.805663442  |
| wavelet-LLH | glszm      | GrayLevelNonUniformityNormalized     | 0.027611044  |
| wavelet-LLH | glszm      | SizeZoneNonUniformityNormalized      | 0.584351388  |
| wavelet-LLH | glszm      | SizeZoneNonUniformity                | 69.53781513  |
| wavelet-LLH | glszm      | GrayLevelNonUniformity               | 3.285714286  |
| wavelet-LLH | glszm      | LargeAreaEmphasis                    | 6.546218487  |
| wavelet-LLH | glszm      | SmallAreaHighGrayLevelEmphasis       | 2154.861159  |
| wavelet-LLH | glszm      | ZonePercentage                       | 0.604060914  |
| wavelet-LLH | glszm      | LargeAreaLowGrayLevelEmphasis        | 0.011411626  |
| wavelet-LLH | glszm      | LargeAreaHighGrayLevelEmphasis       | 16510.69748  |
| wavelet-LLH | glszm      | HighGrayLevelZoneEmphasis            | 2684.495798  |
| wavelet-LLH | glszm      | SmallAreaEmphasis                    | 0.791368292  |
| wavelet-LLH | glszm      | LowGrayLevelZoneEmphasis             | 0.009141797  |
| wavelet-LLH | glszm      | ZoneEntropy                          | 6.097390427  |
| wavelet-LLH | glszm      | SmallAreaLowGrayLevelEmphasis        | 0.009051269  |
| wavelet-LLH | ngtdm      | Coarseness                           | 0.033707954  |
| wavelet-LLH | ngtdm      | Complexity                           | 8987.352237  |
| wavelet-LLH | ngtdm      | Strength                             | 40.60959668  |
| wavelet-LLH | ngtdm      | Contrast                             | 0.674753121  |
| wavelet-LLH | ngtdm      | Busyness                             | 0.010369878  |
| wavelet-LLL | gldm       | GrayLevelVariance                    | 430.0213868  |
| wavelet-LLL | gldm       | HighGrayLevelEmphasis                | 3528.045685  |
| wavelet-LLL | gldm       | DependenceEntropy                    | 6.405869205  |
| wavelet-LLL | gldm       | DependenceNonUniformity              | 91.64974619  |
| wavelet-LLL | gldm       | GrayLevelNonUniformity               | 3.944162437  |
| wavelet-LLL | gldm       | SmallDependenceEmphasis              | 0.702711506  |
| wavelet-LLL | gldm       | SmallDependenceHighGrayLevelEmphasis | 2115.364796  |
| wavelet-LLL | gldm       | DependenceNonUniformityNormalized    | 0.465227138  |
| wavelet-LLL | gldm       | LargeDependenceEmphasis              | 3.131979695  |
| wavelet-LLL | gldm       | LargeDependenceLowGrayLevelEmphasis  | 0.006410156  |
| wavelet-LLL | gldm       | DependenceVariance                   | 0.734984153  |
| wavelet-LLL | gldm       | LargeDependenceHighGrayLevelEmphasis | 14093.91371  |
| wavelet-LLL | gldm       | SmallDependenceLowGrayLevelEmphasis  | 0.00568084   |
| wavelet-LLL | gldm       | LowGrayLevelEmphasis                 | 0.005780089  |
| wavelet-LLL | glcm       | JointAverage                         | 60.33985226  |

|             |            |                                  |              |
|-------------|------------|----------------------------------|--------------|
| wavelet-LLL | glcm       | SumAverage                       | 120.6797045  |
| wavelet-LLL | glcm       | JointEntropy                     | 7.925628791  |
| wavelet-LLL | glcm       | ClusterShade                     | -20079.82589 |
| wavelet-LLL | glcm       | MaximumProbability               | 0.010373271  |
| wavelet-LLL | glcm       | Idmn                             | 0.96198981   |
| wavelet-LLL | glcm       | JointEnergy                      | 0.004307781  |
| wavelet-LLL | glcm       | Contrast                         | 437.2061458  |
| wavelet-LLL | glcm       | DifferenceEntropy                | 5.040496515  |
| wavelet-LLL | glcm       | InverseVariance                  | 0.087399874  |
| wavelet-LLL | glcm       | DifferenceVariance               | 171.487599   |
| wavelet-LLL | glcm       | Idn                              | 0.874034558  |
| wavelet-LLL | glcm       | Idm                              | 0.083145656  |
| wavelet-LLL | glcm       | Correlation                      | 0.400679155  |
| wavelet-LLL | glcm       | Autocorrelation                  | 3787.961829  |
| wavelet-LLL | glcm       | SumEntropy                       | 6.081322932  |
| wavelet-LLL | glcm       | SumSquares                       | 364.7208964  |
| wavelet-LLL | glcm       | ClusterProminence                | 2703677.614  |
| wavelet-LLL | glcm       | Imc2                             | 0.999404876  |
| wavelet-LLL | glcm       | Imc1                             | -0.597169357 |
| wavelet-LLL | glcm       | DifferenceAverage                | 15.97781763  |
| wavelet-LLL | glcm       | Id                               | 0.149402561  |
| wavelet-LLL | glcm       | ClusterTendency                  | 1021.67744   |
| wavelet-LLL | firstorder | InterquartileRange               | 809.1114347  |
| wavelet-LLL | firstorder | Skewness                         | -0.357112931 |
| wavelet-LLL | firstorder | Uniformity                       | 0.020021129  |
| wavelet-LLL | firstorder | Median                           | -421.2510613 |
| wavelet-LLL | firstorder | Energy                           | 96617423.67  |
| wavelet-LLL | firstorder | RobustMeanAbsoluteDeviation      | 356.2907405  |
| wavelet-LLL | firstorder | MeanAbsoluteDeviation            | 450.0437911  |
| wavelet-LLL | firstorder | TotalEnergy                      | 2608670439   |
| wavelet-LLL | firstorder | Maximum                          | 664.7857729  |
| wavelet-LLL | firstorder | RootMeanSquared                  | 700.3169104  |
| wavelet-LLL | firstorder | 90Percentile                     | 119.3635116  |
| wavelet-LLL | firstorder | Minimum                          | -1845.726933 |
| wavelet-LLL | firstorder | Entropy                          | 5.847639462  |
| wavelet-LLL | firstorder | Range                            | 2510.512706  |
| wavelet-LLL | firstorder | Variance                         | 268614.5188  |
| wavelet-LLL | firstorder | 10Percentile                     | -1186.500806 |
| wavelet-LLL | firstorder | Kurtosis                         | 2.154267435  |
| wavelet-LLL | firstorder | Mean                             | -470.9875329 |
| wavelet-LLL | glrlm      | ShortRunLowGrayLevelEmphasis     | 0.005894069  |
| wavelet-LLL | glrlm      | GrayLevelVariance                | 430.5552632  |
| wavelet-LLL | glrlm      | LowGrayLevelRunEmphasis          | 0.005899035  |
| wavelet-LLL | glrlm      | GrayLevelNonUniformityNormalized | 0.01980905   |
| wavelet-LLL | glrlm      | RunVariance                      | 0.024349055  |
| wavelet-LLL | glrlm      | GrayLevelNonUniformity           | 3.820509362  |
| wavelet-LLL | glrlm      | LongRunEmphasis                  | 1.068553166  |
| wavelet-LLL | glrlm      | ShortRunHighGrayLevelEmphasis    | 3424.458029  |
| wavelet-LLL | glrlm      | RunLengthNonUniformity           | 185.2091145  |
| wavelet-LLL | glrlm      | ShortRunEmphasis                 | 0.984474702  |
| wavelet-LLL | glrlm      | LongRunHighGrayLevelEmphasis     | 3836.562174  |
| wavelet-LLL | glrlm      | RunPercentage                    | 0.978914487  |
| wavelet-LLL | glrlm      | LongRunLowGrayLevelEmphasis      | 0.005919954  |
| wavelet-LLL | glrlm      | RunEntropy                       | 5.918397146  |
| wavelet-LLL | glrlm      | HighGrayLevelRunEmphasis         | 3498.992844  |

|             |       |                                      |             |
|-------------|-------|--------------------------------------|-------------|
| wavelet-LLL | glrlm | RunLengthNonUniformityNormalized     | 0.960057916 |
| wavelet-LLL | glszm | GrayLevelVariance                    | 425.6789614 |
| wavelet-LLL | glszm | ZoneVariance                         | 0.635673874 |
| wavelet-LLL | glszm | GrayLevelNonUniformityNormalized     | 0.018288672 |
| wavelet-LLL | glszm | SizeZoneNonUniformityNormalized      | 0.687996141 |
| wavelet-LLL | glszm | SizeZoneNonUniformity                | 103.8874172 |
| wavelet-LLL | glszm | GrayLevelNonUniformity               | 2.761589404 |
| wavelet-LLL | glszm | LargeAreaEmphasis                    | 2.337748344 |
| wavelet-LLL | glszm | SmallAreaHighGrayLevelEmphasis       | 2464.497265 |
| wavelet-LLL | glszm | ZonePercentage                       | 0.766497462 |
| wavelet-LLL | glszm | LargeAreaLowGrayLevelEmphasis        | 0.007857482 |
| wavelet-LLL | glszm | LargeAreaHighGrayLevelEmphasis       | 9655.503311 |
| wavelet-LLL | glszm | HighGrayLevelZoneEmphasis            | 3147.615894 |
| wavelet-LLL | glszm | SmallAreaEmphasis                    | 0.853960633 |
| wavelet-LLL | glszm | LowGrayLevelZoneEmphasis             | 0.007440113 |
| wavelet-LLL | glszm | ZoneEntropy                          | 6.211526262 |
| wavelet-LLL | glszm | SmallAreaLowGrayLevelEmphasis        | 0.007389177 |
| wavelet-LLL | ngtdm | Coarseness                           | 0.024760097 |
| wavelet-LLL | ngtdm | Complexity                           | 23669.57008 |
| wavelet-LLL | ngtdm | Strength                             | 60.08799712 |
| wavelet-LLL | ngtdm | Contrast                             | 2.136365228 |
| wavelet-LLL | ngtdm | Busyness                             | 0.011418085 |
| wavelet-HHL | gldm  | GrayLevelVariance                    | 18.46324306 |
| wavelet-HHL | gldm  | HighGrayLevelEmphasis                | 156.9137056 |
| wavelet-HHL | gldm  | DependenceEntropy                    | 5.719232234 |
| wavelet-HHL | gldm  | DependenceNonUniformity              | 46.16751269 |
| wavelet-HHL | gldm  | GrayLevelNonUniformity               | 15.55837563 |
| wavelet-HHL | gldm  | SmallDependenceEmphasis              | 0.369621275 |
| wavelet-HHL | gldm  | SmallDependenceHighGrayLevelEmphasis | 64.0352143  |
| wavelet-HHL | gldm  | DependenceNonUniformityNormalized    | 0.234352856 |
| wavelet-HHL | gldm  | LargeDependenceEmphasis              | 8.644670051 |
| wavelet-HHL | gldm  | LargeDependenceLowGrayLevelEmphasis  | 0.133103805 |
| wavelet-HHL | gldm  | DependenceVariance                   | 2.125331753 |
| wavelet-HHL | gldm  | LargeDependenceHighGrayLevelEmphasis | 1151.187817 |
| wavelet-HHL | gldm  | SmallDependenceLowGrayLevelEmphasis  | 0.009086935 |
| wavelet-HHL | gldm  | LowGrayLevelEmphasis                 | 0.024099305 |
| wavelet-HHL | glcm  | JointAverage                         | 11.77855459 |
| wavelet-HHL | glcm  | SumAverage                           | 23.55710918 |
| wavelet-HHL | glcm  | JointEntropy                         | 6.925244524 |
| wavelet-HHL | glcm  | ClusterShade                         | 82.42460941 |
| wavelet-HHL | glcm  | MaximumProbability                   | 0.030114263 |
| wavelet-HHL | glcm  | Idmn                                 | 0.950103453 |
| wavelet-HHL | glcm  | JointEnergy                          | 0.010357792 |
| wavelet-HHL | glcm  | Contrast                             | 34.09865124 |
| wavelet-HHL | glcm  | DifferenceEntropy                    | 3.525419638 |
| wavelet-HHL | glcm  | InverseVariance                      | 0.213944277 |
| wavelet-HHL | glcm  | DifferenceVariance                   | 13.74285575 |
| wavelet-HHL | glcm  | Idn                                  | 0.856543602 |
| wavelet-HHL | glcm  | Idm                                  | 0.216985231 |
| wavelet-HHL | glcm  | Correlation                          | 0.085160409 |
| wavelet-HHL | glcm  | Autocorrelation                      | 140.4764956 |
| wavelet-HHL | glcm  | SumEntropy                           | 4.477065914 |
| wavelet-HHL | glcm  | SumSquares                           | 18.75490636 |
| wavelet-HHL | glcm  | ClusterProminence                    | 5711.770594 |
| wavelet-HHL | glcm  | Imc2                                 | 0.930768627 |

|             |            |                                  |              |
|-------------|------------|----------------------------------|--------------|
| wavelet-HHL | glcm       | Imc1                             | -0.255670906 |
| wavelet-HHL | glcm       | DifferenceAverage                | 4.461665842  |
| wavelet-HHL | glcm       | Id                               | 0.30815037   |
| wavelet-HHL | glcm       | ClusterTendency                  | 40.92097419  |
| wavelet-HHL | firstorder | InterquartileRange               | 133.971468   |
| wavelet-HHL | firstorder | Skewness                         | 0.325195074  |
| wavelet-HHL | firstorder | Uniformity                       | 0.078976526  |
| wavelet-HHL | firstorder | Median                           | -4.451016223 |
| wavelet-HHL | firstorder | Energy                           | 2261781.053  |
| wavelet-HHL | firstorder | RobustMeanAbsoluteDeviation      | 53.04223401  |
| wavelet-HHL | firstorder | MeanAbsoluteDeviation            | 81.64969717  |
| wavelet-HHL | firstorder | TotalEnergy                      | 61068088.44  |
| wavelet-HHL | firstorder | Maximum                          | 307.8501821  |
| wavelet-HHL | firstorder | RootMeanSquared                  | 107.1499981  |
| wavelet-HHL | firstorder | 90Percentile                     | 144.7826457  |
| wavelet-HHL | firstorder | Minimum                          | -264.0223822 |
| wavelet-HHL | firstorder | Entropy                          | 3.981918407  |
| wavelet-HHL | firstorder | Range                            | 571.8725644  |
| wavelet-HHL | firstorder | Variance                         | 11449.32844  |
| wavelet-HHL | firstorder | 10Percentile                     | -106.5432351 |
| wavelet-HHL | firstorder | Kurtosis                         | 3.520212896  |
| wavelet-HHL | firstorder | Mean                             | 5.638586296  |
| wavelet-HHL | glrlm      | ShortRunLowGrayLevelEmphasis     | 0.023686053  |
| wavelet-HHL | glrlm      | GrayLevelVariance                | 18.94795735  |
| wavelet-HHL | glrlm      | LowGrayLevelRunEmphasis          | 0.024509512  |
| wavelet-HHL | glrlm      | GrayLevelNonUniformityNormalized | 0.076925899  |
| wavelet-HHL | glrlm      | RunVariance                      | 0.074612628  |
| wavelet-HHL | glrlm      | GrayLevelNonUniformity           | 14.25079586  |
| wavelet-HHL | glrlm      | LongRunEmphasis                  | 1.209500616  |
| wavelet-HHL | glrlm      | ShortRunHighGrayLevelEmphasis    | 151.7767161  |
| wavelet-HHL | glrlm      | RunLengthNonUniformity           | 165.3168871  |
| wavelet-HHL | glrlm      | ShortRunEmphasis                 | 0.955294504  |
| wavelet-HHL | glrlm      | LongRunHighGrayLevelEmphasis     | 186.562618   |
| wavelet-HHL | glrlm      | RunPercentage                    | 0.940257712  |
| wavelet-HHL | glrlm      | LongRunLowGrayLevelEmphasis      | 0.028113173  |
| wavelet-HHL | glrlm      | RunEntropy                       | 4.267734189  |
| wavelet-HHL | glrlm      | HighGrayLevelRunEmphasis         | 158.1035275  |
| wavelet-HHL | glrlm      | RunLengthNonUniformityNormalized | 0.890828357  |
| wavelet-HHL | glszm      | GrayLevelVariance                | 26.44074514  |
| wavelet-HHL | glszm      | ZoneVariance                     | 7.366891267  |
| wavelet-HHL | glszm      | GrayLevelNonUniformityNormalized | 0.058263971  |
| wavelet-HHL | glszm      | SizeZoneNonUniformityNormalized  | 0.382216938  |
| wavelet-HHL | glszm      | SizeZoneNonUniformity            | 33.25287356  |
| wavelet-HHL | glszm      | GrayLevelNonUniformity           | 5.068965517  |
| wavelet-HHL | glszm      | LargeAreaEmphasis                | 12.49425287  |
| wavelet-HHL | glszm      | SmallAreaHighGrayLevelEmphasis   | 115.2012869  |
| wavelet-HHL | glszm      | ZonePercentage                   | 0.441624365  |
| wavelet-HHL | glszm      | LargeAreaLowGrayLevelEmphasis    | 0.182431966  |
| wavelet-HHL | glszm      | LargeAreaHighGrayLevelEmphasis   | 1570.413793  |
| wavelet-HHL | glszm      | HighGrayLevelZoneEmphasis        | 173.7701149  |
| wavelet-HHL | glszm      | SmallAreaEmphasis                | 0.636893192  |
| wavelet-HHL | glszm      | LowGrayLevelZoneEmphasis         | 0.029079777  |
| wavelet-HHL | glszm      | ZoneEntropy                      | 5.417434519  |
| wavelet-HHL | glszm      | SmallAreaLowGrayLevelEmphasis    | 0.015240617  |
| wavelet-HHL | ngtdm      | Coarseness                       | 0.030592674  |

|             |            |                                      |              |
|-------------|------------|--------------------------------------|--------------|
| wavelet-HHL | ngtdm      | Complexity                           | 654.2606951  |
| wavelet-HHL | ngtdm      | Strength                             | 5.28546076   |
| wavelet-HHL | ngtdm      | Contrast                             | 0.206363839  |
| wavelet-HHL | ngtdm      | Busyness                             | 0.115892488  |
| wavelet-HLH | gldm       | GrayLevelVariance                    | 18.27163802  |
| wavelet-HLH | gldm       | HighGrayLevelEmphasis                | 176.8781726  |
| wavelet-HLH | gldm       | DependenceEntropy                    | 5.830056899  |
| wavelet-HLH | gldm       | DependenceNonUniformity              | 42.82741117  |
| wavelet-HLH | gldm       | GrayLevelNonUniformity               | 15.06091371  |
| wavelet-HLH | gldm       | SmallDependenceEmphasis              | 0.393542818  |
| wavelet-HLH | gldm       | SmallDependenceHighGrayLevelEmphasis | 76.83664883  |
| wavelet-HLH | gldm       | DependenceNonUniformityNormalized    | 0.217398026  |
| wavelet-HLH | gldm       | LargeDependenceEmphasis              | 10.23857868  |
| wavelet-HLH | gldm       | LargeDependenceLowGrayLevelEmphasis  | 0.119053282  |
| wavelet-HLH | gldm       | DependenceVariance                   | 3.027854364  |
| wavelet-HLH | gldm       | LargeDependenceHighGrayLevelEmphasis | 1632.035533  |
| wavelet-HLH | gldm       | SmallDependenceLowGrayLevelEmphasis  | 0.007808082  |
| wavelet-HLH | gldm       | LowGrayLevelEmphasis                 | 0.020594446  |
| wavelet-HLH | glcm       | JointAverage                         | 12.55580872  |
| wavelet-HLH | glcm       | SumAverage                           | 25.11161744  |
| wavelet-HLH | glcm       | JointEntropy                         | 6.881322497  |
| wavelet-HLH | glcm       | ClusterShade                         | 12.51119193  |
| wavelet-HLH | glcm       | MaximumProbability                   | 0.028262283  |
| wavelet-HLH | glcm       | Idmn                                 | 0.95723117   |
| wavelet-HLH | glcm       | JointEnergy                          | 0.010756925  |
| wavelet-HLH | glcm       | Contrast                             | 34.60427646  |
| wavelet-HLH | glcm       | DifferenceEntropy                    | 3.493771445  |
| wavelet-HLH | glcm       | InverseVariance                      | 0.244532558  |
| wavelet-HLH | glcm       | DifferenceVariance                   | 15.60613918  |
| wavelet-HLH | glcm       | Idn                                  | 0.8709422    |
| wavelet-HLH | glcm       | Idm                                  | 0.238899539  |
| wavelet-HLH | glcm       | Correlation                          | 0.020524317  |
| wavelet-HLH | glcm       | Autocorrelation                      | 158.0622337  |
| wavelet-HLH | glcm       | SumEntropy                           | 4.370068577  |
| wavelet-HLH | glcm       | SumSquares                           | 17.71185329  |
| wavelet-HLH | glcm       | ClusterProminence                    | 5533.987619  |
| wavelet-HLH | glcm       | Imc2                                 | 0.926221786  |
| wavelet-HLH | glcm       | Imc1                                 | -0.250630544 |
| wavelet-HLH | glcm       | DifferenceAverage                    | 4.306422908  |
| wavelet-HLH | glcm       | Id                                   | 0.325549496  |
| wavelet-HLH | glcm       | ClusterTendency                      | 36.24313672  |
| wavelet-HLH | firstorder | InterquartileRange                   | 118.2118692  |
| wavelet-HLH | firstorder | Skewness                             | 0.244359893  |
| wavelet-HLH | firstorder | Uniformity                           | 0.076451339  |
| wavelet-HLH | firstorder | Median                               | -3.317269378 |
| wavelet-HLH | firstorder | Energy                               | 2255375.925  |
| wavelet-HLH | firstorder | RobustMeanAbsoluteDeviation          | 50.66524942  |
| wavelet-HLH | firstorder | MeanAbsoluteDeviation                | 80.38952216  |
| wavelet-HLH | firstorder | TotalEnergy                          | 60895149.99  |
| wavelet-HLH | firstorder | Maximum                              | 333.9197657  |
| wavelet-HLH | firstorder | RootMeanSquared                      | 106.9981718  |
| wavelet-HLH | firstorder | 90Percentile                         | 130.4971307  |
| wavelet-HLH | firstorder | Minimum                              | -299.0084681 |
| wavelet-HLH | firstorder | Entropy                              | 3.990757248  |
| wavelet-HLH | firstorder | Range                                | 632.9282337  |

|             |            |                                  |              |
|-------------|------------|----------------------------------|--------------|
| wavelet-HLH | firstorder | Variance                         | 11443.5959   |
| wavelet-HLH | firstorder | 10Percentile                     | -117.8769787 |
| wavelet-HLH | firstorder | Kurtosis                         | 3.906765754  |
| wavelet-HLH | firstorder | Mean                             | 2.238940437  |
| wavelet-HLH | glrlm      | ShortRunLowGrayLevelEmphasis     | 0.020345191  |
| wavelet-HLH | glrlm      | GrayLevelVariance                | 18.99961097  |
| wavelet-HLH | glrlm      | LowGrayLevelRunEmphasis          | 0.021059597  |
| wavelet-HLH | glrlm      | GrayLevelNonUniformityNormalized | 0.074266463  |
| wavelet-HLH | glrlm      | RunVariance                      | 0.074529983  |
| wavelet-HLH | glrlm      | GrayLevelNonUniformity           | 13.68358171  |
| wavelet-HLH | glrlm      | LongRunEmphasis                  | 1.221035442  |
| wavelet-HLH | glrlm      | ShortRunHighGrayLevelEmphasis    | 169.9297497  |
| wavelet-HLH | glrlm      | RunLengthNonUniformity           | 162.2372061  |
| wavelet-HLH | glrlm      | ShortRunEmphasis                 | 0.950422817  |
| wavelet-HLH | glrlm      | LongRunHighGrayLevelEmphasis     | 213.4578153  |
| wavelet-HLH | glrlm      | RunPercentage                    | 0.93518157   |
| wavelet-HLH | glrlm      | LongRunLowGrayLevelEmphasis      | 0.024077953  |
| wavelet-HLH | glrlm      | RunEntropy                       | 4.30591975   |
| wavelet-HLH | glrlm      | HighGrayLevelRunEmphasis         | 177.9749829  |
| wavelet-HLH | glrlm      | RunLengthNonUniformityNormalized | 0.879109653  |
| wavelet-HLH | glszm      | GrayLevelVariance                | 27.63654321  |
| wavelet-HLH | glszm      | ZoneVariance                     | 8.597654321  |
| wavelet-HLH | glszm      | GrayLevelNonUniformityNormalized | 0.058024691  |
| wavelet-HLH | glszm      | SizeZoneNonUniformityNormalized  | 0.444691358  |
| wavelet-HLH | glszm      | SizeZoneNonUniformity            | 40.02222222  |
| wavelet-HLH | glszm      | GrayLevelNonUniformity           | 5.222222222  |
| wavelet-HLH | glszm      | LargeAreaEmphasis                | 13.38888889  |
| wavelet-HLH | glszm      | SmallAreaHighGrayLevelEmphasis   | 140.4058349  |
| wavelet-HLH | glszm      | ZonePercentage                   | 0.456852792  |
| wavelet-HLH | glszm      | LargeAreaLowGrayLevelEmphasis    | 0.154819347  |
| wavelet-HLH | glszm      | LargeAreaHighGrayLevelEmphasis   | 1989.455556  |
| wavelet-HLH | glszm      | HighGrayLevelZoneEmphasis        | 194.3333333  |
| wavelet-HLH | glszm      | SmallAreaEmphasis                | 0.691508012  |
| wavelet-HLH | glszm      | LowGrayLevelZoneEmphasis         | 0.024224079  |
| wavelet-HLH | glszm      | ZoneEntropy                      | 5.258124625  |
| wavelet-HLH | glszm      | SmallAreaLowGrayLevelEmphasis    | 0.012750138  |
| wavelet-HLH | ngtdm      | Coarseness                       | 0.03170504   |
| wavelet-HLH | ngtdm      | Complexity                       | 646.0490212  |
| wavelet-HLH | ngtdm      | Strength                         | 5.058705563  |
| wavelet-HLH | ngtdm      | Contrast                         | 0.229614405  |
| wavelet-HLH | ngtdm      | Busyness                         | 0.113775783  |

| Image type | Feature Class | Feature Name                         | Value                                                                                                                                                                                                                                                                                                                                                                                                             |
|------------|---------------|--------------------------------------|-------------------------------------------------------------------------------------------------------------------------------------------------------------------------------------------------------------------------------------------------------------------------------------------------------------------------------------------------------------------------------------------------------------------|
| general    | info          | BoundingBox                          | 516: RTSTRUCT: C99-DNU-A_segment_ITV 2 VV<br>(0, 1, 1, 4, 4, 3)                                                                                                                                                                                                                                                                                                                                                   |
| general    | info          | EnabledImageTypes                    | {u'Original': {}, u'Wavelet': {}}                                                                                                                                                                                                                                                                                                                                                                                 |
|            |               |                                      | {'distances': [1], 'additionalInfo': True, 'force2D': False, 'interpolator': 'sitkBSpline', 'resampledPixelSpacing': [3.0], 'label': 1, 'normalizeScale': 1, 'normalize': False, 'force2Ddimension': 0, 'removeOutliers': None, 'minimumROISize': None, u'binWidth': 25.0, 'minimumROIDimensions': 1, u'correctMask': True, 'preCrop': False, u'symmetricalGLCM': True, 'resegmentRange': None, 'padDistance': 5} |
| general    | info          | GeneralSettings                      |                                                                                                                                                                                                                                                                                                                                                                                                                   |
| general    | info          | ImageHash                            | 4c6240de0f6117db1228d81e5dcef82752837487                                                                                                                                                                                                                                                                                                                                                                          |
| general    | info          | ImageSpacing                         | (0.9765625000000002, 0.9765625000000002, 2.0)                                                                                                                                                                                                                                                                                                                                                                     |
| general    | info          | MaskHash                             | ca8b648c7c82d383da4fbde908ce67d5797735eb                                                                                                                                                                                                                                                                                                                                                                          |
| general    | info          | NumpyVersion                         | 1.13.1                                                                                                                                                                                                                                                                                                                                                                                                            |
| general    | info          | PyWaveletVersion                     | 0.5.2                                                                                                                                                                                                                                                                                                                                                                                                             |
| general    | info          | SimpleITKVersion                     | 1.1.0                                                                                                                                                                                                                                                                                                                                                                                                             |
| general    | info          | Version                              | 1.3.0.post102+g1b0eb74                                                                                                                                                                                                                                                                                                                                                                                            |
| general    | info          | VolumeNum                            | 1                                                                                                                                                                                                                                                                                                                                                                                                                 |
| general    | info          | VoxelNum                             | 19                                                                                                                                                                                                                                                                                                                                                                                                                |
| original   | shape         | Maximum3DDiameter                    | 10.39230485                                                                                                                                                                                                                                                                                                                                                                                                       |
| original   | shape         | Maximum2DDiameterSlice               | 9.486832981                                                                                                                                                                                                                                                                                                                                                                                                       |
| original   | shape         | Sphericity                           | 0.981107832                                                                                                                                                                                                                                                                                                                                                                                                       |
| original   | shape         | MinorAxis                            | 8.48860303                                                                                                                                                                                                                                                                                                                                                                                                        |
| original   | shape         | Elongation                           | 0.768400872                                                                                                                                                                                                                                                                                                                                                                                                       |
| original   | shape         | SurfaceVolumeRatio                   | 0.61573654                                                                                                                                                                                                                                                                                                                                                                                                        |
| original   | shape         | Volume                               | 513                                                                                                                                                                                                                                                                                                                                                                                                               |
| original   | shape         | MajorAxis                            | 11.04710229                                                                                                                                                                                                                                                                                                                                                                                                       |
| original   | shape         | SurfaceArea                          | 315.872845                                                                                                                                                                                                                                                                                                                                                                                                        |
| original   | shape         | Flatness                             | 0.694144837                                                                                                                                                                                                                                                                                                                                                                                                       |
| original   | shape         | LeastAxis                            | 7.668289019                                                                                                                                                                                                                                                                                                                                                                                                       |
| original   | shape         | Maximum2DDiameterColumn              | 8.485281374                                                                                                                                                                                                                                                                                                                                                                                                       |
| original   | shape         | Maximum2DDiameterRow                 | 9.486832981                                                                                                                                                                                                                                                                                                                                                                                                       |
| original   | gldm          | GrayLevelVariance                    | 10.7700831                                                                                                                                                                                                                                                                                                                                                                                                        |
| original   | gldm          | HighGrayLevelEmphasis                | 65.84210526                                                                                                                                                                                                                                                                                                                                                                                                       |
| original   | gldm          | DependenceEntropy                    | 3.471354487                                                                                                                                                                                                                                                                                                                                                                                                       |
| original   | gldm          | DependenceNonUniformity              | 8.684210526                                                                                                                                                                                                                                                                                                                                                                                                       |
| original   | gldm          | GrayLevelNonUniformity               | 2.052631579                                                                                                                                                                                                                                                                                                                                                                                                       |
| original   | gldm          | SmallDependenceEmphasis              | 0.558479532                                                                                                                                                                                                                                                                                                                                                                                                       |
| original   | gldm          | SmallDependenceHighGrayLevelEmphasis | 30.78947368                                                                                                                                                                                                                                                                                                                                                                                                       |
| original   | gldm          | DependenceNonUniformityNormalized    | 0.457063712                                                                                                                                                                                                                                                                                                                                                                                                       |
| original   | gldm          | LargeDependenceEmphasis              | 3                                                                                                                                                                                                                                                                                                                                                                                                                 |
| original   | gldm          | LargeDependenceLowGrayLevelEmphasis  | 0.462793526                                                                                                                                                                                                                                                                                                                                                                                                       |
| original   | gldm          | DependenceVariance                   | 0.337950139                                                                                                                                                                                                                                                                                                                                                                                                       |
| original   | gldm          | LargeDependenceHighGrayLevelEmphasis | 225                                                                                                                                                                                                                                                                                                                                                                                                               |
| original   | gldm          | SmallDependenceLowGrayLevelEmphasis  | 0.043348263                                                                                                                                                                                                                                                                                                                                                                                                       |
| original   | gldm          | LowGrayLevelEmphasis                 | 0.12665974                                                                                                                                                                                                                                                                                                                                                                                                        |
| original   | glcm          | JointAverage                         | 7.76023421                                                                                                                                                                                                                                                                                                                                                                                                        |
| original   | glcm          | SumAverage                           | 15.52046842                                                                                                                                                                                                                                                                                                                                                                                                       |
| original   | glcm          | JointEntropy                         | 3.676768938                                                                                                                                                                                                                                                                                                                                                                                                       |
| original   | glcm          | ClusterShade                         | -45.05131998                                                                                                                                                                                                                                                                                                                                                                                                      |
| original   | glcm          | MaximumProbability                   | 0.107678433                                                                                                                                                                                                                                                                                                                                                                                                       |
| original   | glcm          | ldmn                                 | 0.893673304                                                                                                                                                                                                                                                                                                                                                                                                       |
| original   | glcm          | JointEnergy                          | 0.084902617                                                                                                                                                                                                                                                                                                                                                                                                       |



|          |            |                                  |              |
|----------|------------|----------------------------------|--------------|
| original | glcm       | Contrast                         | 20.74061494  |
| original | glcm       | DifferenceEntropy                | 2.160416721  |
| original | glcm       | InverseVariance                  | 0.261730353  |
| original | glcm       | DifferenceVariance               | 6.557449591  |
| original | glcm       | Idn                              | 0.791346842  |
| original | glcm       | Idm                              | 0.237617908  |
| original | glcm       | Correlation                      | -0.000858293 |
| original | glcm       | Autocorrelation                  | 60.62113442  |
| original | glcm       | SumEntropy                       | 2.543241354  |
| original | glcm       | SumSquares                       | 10.57135603  |
| original | glcm       | ClusterProminence                | 1449.507352  |
| original | glcm       | Imc2                             | 0.99577651   |
| original | glcm       | Imc1                             | -0.806678521 |
| original | glcm       | DifferenceAverage                | 3.60997891   |
| original | glcm       | Id                               | 0.329227063  |
| original | glcm       | ClusterTendency                  | 21.54480919  |
| original | firstorder | InterquartileRange               | 107          |
| original | firstorder | Skewness                         | -0.488481503 |
| original | firstorder | Uniformity                       | 0.108033241  |
| original | firstorder | Median                           | -64          |
| original | firstorder | Energy                           | 246277       |
| original | firstorder | RobustMeanAbsoluteDeviation      | 46.45333333  |
| original | firstorder | MeanAbsoluteDeviation            | 66.52077562  |
| original | firstorder | TotalEnergy                      | 6649479      |
| original | firstorder | Maximum                          | 43           |
| original | firstorder | RootMeanSquared                  | 113.8505484  |
| original | firstorder | 90Percentile                     | 19           |
| original | firstorder | Minimum                          | -241         |
| original | firstorder | Entropy                          | 3.326360408  |
| original | firstorder | Range                            | 284          |
| original | firstorder | Variance                         | 6620.759003  |
| original | firstorder | 10Percentile                     | -190         |
| original | firstorder | Kurtosis                         | 2.383111789  |
| original | firstorder | Mean                             | -79.63157895 |
| original | glrlm      | ShortRunLowGrayLevelEmphasis     | 0.121226653  |
| original | glrlm      | GrayLevelVariance                | 10.68460644  |
| original | glrlm      | LowGrayLevelRunEmphasis          | 0.125033976  |
| original | glrlm      | GrayLevelNonUniformityNormalized | 0.108371897  |
| original | glrlm      | RunVariance                      | 0.023827012  |
| original | glrlm      | GrayLevelNonUniformity           | 2.008659469  |
| original | glrlm      | LongRunEmphasis                  | 1.081730769  |
| original | glrlm      | ShortRunHighGrayLevelEmphasis    | 63.87880258  |
| original | glrlm      | RunLengthNonUniformity           | 17.7275641   |
| original | glrlm      | ShortRunEmphasis                 | 0.979567308  |
| original | glrlm      | LongRunHighGrayLevelEmphasis     | 71.92968399  |
| original | glrlm      | RunPercentage                    | 0.975708502  |
| original | glrlm      | LongRunLowGrayLevelEmphasis      | 0.140263267  |
| original | glrlm      | RunEntropy                       | 3.343686539  |
| original | glrlm      | HighGrayLevelRunEmphasis         | 65.48897886  |
| original | glrlm      | RunLengthNonUniformityNormalized | 0.952345976  |
| original | glszm      | GrayLevelVariance                | 9.455621302  |
| original | glszm      | ZoneVariance                     | 0.402366864  |
| original | glszm      | GrayLevelNonUniformityNormalized | 0.112426036  |
| original | glszm      | SizeZoneNonUniformityNormalized  | 0.479289941  |
| original | glszm      | SizeZoneNonUniformity            | 6.230769231  |
| original | glszm      | GrayLevelNonUniformity           | 1.461538462  |

|             |            |                                      |              |
|-------------|------------|--------------------------------------|--------------|
| original    | glszm      | LargeAreaEmphasis                    | 2.538461538  |
| original    | glszm      | SmallAreaHighGrayLevelEmphasis       | 35.82692308  |
| original    | glszm      | ZonePercentage                       | 0.684210526  |
| original    | glszm      | LargeAreaLowGrayLevelEmphasis        | 0.350141791  |
| original    | glszm      | LargeAreaHighGrayLevelEmphasis       | 182.0769231  |
| original    | glszm      | HighGrayLevelZoneEmphasis            | 59.53846154  |
| original    | glszm      | SmallAreaEmphasis                    | 0.700854701  |
| original    | glszm      | LowGrayLevelZoneEmphasis             | 0.103555895  |
| original    | glszm      | ZoneEntropy                          | 3.334679141  |
| original    | glszm      | SmallAreaLowGrayLevelEmphasis        | 0.042964608  |
| original    | ngtdm      | Coarseness                           | 0.234095746  |
| original    | ngtdm      | Complexity                           | 127.1087024  |
| original    | ngtdm      | Strength                             | 10.33935376  |
| original    | ngtdm      | Contrast                             | 0.482977321  |
| original    | ngtdm      | Busyness                             | 0.065243868  |
| wavelet-HHH | gldm       | GrayLevelVariance                    | 10.24930748  |
| wavelet-HHH | gldm       | HighGrayLevelEmphasis                | 121.0526316  |
| wavelet-HHH | gldm       | DependenceEntropy                    | 3.300559092  |
| wavelet-HHH | gldm       | DependenceNonUniformity              | 6.789473684  |
| wavelet-HHH | gldm       | GrayLevelNonUniformity               | 2.578947368  |
| wavelet-HHH | gldm       | SmallDependenceEmphasis              | 0.486842105  |
| wavelet-HHH | gldm       | SmallDependenceHighGrayLevelEmphasis | 62.90789474  |
| wavelet-HHH | gldm       | DependenceNonUniformityNormalized    | 0.35734072   |
| wavelet-HHH | gldm       | LargeDependenceEmphasis              | 5.421052632  |
| wavelet-HHH | gldm       | LargeDependenceLowGrayLevelEmphasis  | 0.110999443  |
| wavelet-HHH | gldm       | DependenceVariance                   | 1.207756233  |
| wavelet-HHH | gldm       | LargeDependenceHighGrayLevelEmphasis | 545.4736842  |
| wavelet-HHH | gldm       | SmallDependenceLowGrayLevelEmphasis  | 0.057289836  |
| wavelet-HHH | gldm       | LowGrayLevelEmphasis                 | 0.062183804  |
| wavelet-HHH | glcm       | JointAverage                         | 10.59424187  |
| wavelet-HHH | glcm       | SumAverage                           | 21.18848374  |
| wavelet-HHH | glcm       | JointEntropy                         | 3.570070081  |
| wavelet-HHH | glcm       | ClusterShade                         | -53.74613218 |
| wavelet-HHH | glcm       | MaximumProbability                   | 0.120668221  |
| wavelet-HHH | glcm       | Idmn                                 | 0.935539374  |
| wavelet-HHH | glcm       | JointEnergy                          | 0.089625719  |
| wavelet-HHH | glcm       | Contrast                             | 19.38575314  |
| wavelet-HHH | glcm       | DifferenceEntropy                    | 2.18872707   |
| wavelet-HHH | glcm       | InverseVariance                      | 0.305454131  |
| wavelet-HHH | glcm       | DifferenceVariance                   | 8.382440671  |
| wavelet-HHH | glcm       | Idn                                  | 0.842773643  |
| wavelet-HHH | glcm       | Idm                                  | 0.277913724  |
| wavelet-HHH | glcm       | Correlation                          | -0.060559446 |
| wavelet-HHH | glcm       | Autocorrelation                      | 111.7433178  |
| wavelet-HHH | glcm       | SumEntropy                           | 2.430740864  |
| wavelet-HHH | glcm       | SumSquares                           | 8.868567433  |
| wavelet-HHH | glcm       | ClusterProminence                    | 1045.064551  |
| wavelet-HHH | glcm       | Imc2                                 | 0.986497407  |
| wavelet-HHH | glcm       | Imc1                                 | -0.688975119 |
| wavelet-HHH | glcm       | DifferenceAverage                    | 3.204123654  |
| wavelet-HHH | glcm       | Id                                   | 0.364878039  |
| wavelet-HHH | glcm       | ClusterTendency                      | 16.0885166   |
| wavelet-HHH | firstorder | InterquartileRange                   | 81.04711654  |
| wavelet-HHH | firstorder | Skewness                             | -1.422219659 |
| wavelet-HHH | firstorder | Uniformity                           | 0.135734072  |
| wavelet-HHH | firstorder | Median                               | 18.69617023  |

|             |            |                                  |              |
|-------------|------------|----------------------------------|--------------|
| wavelet-HHH | firstorder | Energy                           | 120267.41    |
| wavelet-HHH | firstorder | RobustMeanAbsoluteDeviation      | 33.05318594  |
| wavelet-HHH | firstorder | MeanAbsoluteDeviation            | 57.68402379  |
| wavelet-HHH | firstorder | TotalEnergy                      | 3247220.071  |
| wavelet-HHH | firstorder | Maximum                          | 119.4819423  |
| wavelet-HHH | firstorder | RootMeanSquared                  | 79.56044046  |
| wavelet-HHH | firstorder | 90Percentile                     | 79.82026383  |
| wavelet-HHH | firstorder | Minimum                          | -238.614198  |
| wavelet-HHH | firstorder | Entropy                          | 3.010570934  |
| wavelet-HHH | firstorder | Range                            | 358.0961403  |
| wavelet-HHH | firstorder | Variance                         | 6321.618804  |
| wavelet-HHH | firstorder | 10Percentile                     | -57.08803761 |
| wavelet-HHH | firstorder | Kurtosis                         | 5.305063178  |
| wavelet-HHH | firstorder | Mean                             | 2.871390253  |
| wavelet-HHH | grlm       | ShortRunLowGrayLevelEmphasis     | 0.064099142  |
| wavelet-HHH | grlm       | GrayLevelVariance                | 10.59338927  |
| wavelet-HHH | grlm       | LowGrayLevelRunEmphasis          | 0.064443978  |
| wavelet-HHH | grlm       | GrayLevelNonUniformityNormalized | 0.133745385  |
| wavelet-HHH | grlm       | RunVariance                      | 0.040186713  |
| wavelet-HHH | grlm       | GrayLevelNonUniformity           | 2.438861104  |
| wavelet-HHH | grlm       | LongRunEmphasis                  | 1.131221719  |
| wavelet-HHH | grlm       | ShortRunHighGrayLevelEmphasis    | 118.5297326  |
| wavelet-HHH | grlm       | RunLengthNonUniformity           | 16.81598793  |
| wavelet-HHH | grlm       | ShortRunEmphasis                 | 0.96719457   |
| wavelet-HHH | grlm       | LongRunHighGrayLevelEmphasis     | 135.2821836  |
| wavelet-HHH | grlm       | RunPercentage                    | 0.95951417   |
| wavelet-HHH | grlm       | LongRunLowGrayLevelEmphasis      | 0.065823323  |
| wavelet-HHH | grlm       | RunEntropy                       | 3.111362573  |
| wavelet-HHH | grlm       | HighGrayLevelRunEmphasis         | 121.8802228  |
| wavelet-HHH | grlm       | RunLengthNonUniformityNormalized | 0.919626574  |
| wavelet-HHH | glszm      | GrayLevelVariance                | 14.90972222  |
| wavelet-HHH | glszm      | ZoneVariance                     | 0.743055556  |
| wavelet-HHH | glszm      | GrayLevelNonUniformityNormalized | 0.125        |
| wavelet-HHH | glszm      | SizeZoneNonUniformityNormalized  | 0.458333333  |
| wavelet-HHH | glszm      | SizeZoneNonUniformity            | 5.5          |
| wavelet-HHH | glszm      | GrayLevelNonUniformity           | 1.5          |
| wavelet-HHH | glszm      | LargeAreaEmphasis                | 3.25         |
| wavelet-HHH | glszm      | SmallAreaHighGrayLevelEmphasis   | 87.21354167  |
| wavelet-HHH | glszm      | ZonePercentage                   | 0.631578947  |
| wavelet-HHH | glszm      | LargeAreaLowGrayLevelEmphasis    | 0.115991047  |
| wavelet-HHH | glszm      | LargeAreaHighGrayLevelEmphasis   | 361.6666667  |
| wavelet-HHH | glszm      | HighGrayLevelZoneEmphasis        | 126.9166667  |
| wavelet-HHH | glszm      | SmallAreaEmphasis                | 0.671875     |
| wavelet-HHH | glszm      | LowGrayLevelZoneEmphasis         | 0.092777432  |
| wavelet-HHH | glszm      | ZoneEntropy                      | 3.418295834  |
| wavelet-HHH | glszm      | SmallAreaLowGrayLevelEmphasis    | 0.089867546  |
| wavelet-HHH | ngtdm      | Coarseness                       | 0.199016712  |
| wavelet-HHH | ngtdm      | Complexity                       | 110.1217572  |
| wavelet-HHH | ngtdm      | Strength                         | 10.74263058  |
| wavelet-HHH | ngtdm      | Contrast                         | 0.716219218  |
| wavelet-HHH | ngtdm      | Busyness                         | 0.086163691  |
| wavelet-HLL | gldm       | GrayLevelVariance                | 35.36842105  |
| wavelet-HLL | gldm       | HighGrayLevelEmphasis            | 260.3684211  |
| wavelet-HLL | gldm       | DependenceEntropy                | 3.576617645  |
| wavelet-HLL | gldm       | DependenceNonUniformity          | 12.68421053  |
| wavelet-HLL | gldm       | GrayLevelNonUniformity           | 1.736842105  |

|             |            |                                      |              |
|-------------|------------|--------------------------------------|--------------|
| wavelet-HLL | gldm       | SmallDependenceEmphasis              | 0.842105263  |
| wavelet-HLL | gldm       | SmallDependenceHighGrayLevelEmphasis | 231.5526316  |
| wavelet-HLL | gldm       | DependenceNonUniformityNormalized    | 0.667590028  |
| wavelet-HLL | gldm       | LargeDependenceEmphasis              | 1.631578947  |
| wavelet-HLL | gldm       | LargeDependenceLowGrayLevelEmphasis  | 0.061638336  |
| wavelet-HLL | gldm       | DependenceVariance                   | 0.166204986  |
| wavelet-HLL | gldm       | LargeDependenceHighGrayLevelEmphasis | 375.6315789  |
| wavelet-HLL | gldm       | SmallDependenceLowGrayLevelEmphasis  | 0.057288651  |
| wavelet-HLL | gldm       | LowGrayLevelEmphasis                 | 0.058158588  |
| wavelet-HLL | glcm       | JointAverage                         | 14.5454157   |
| wavelet-HLL | glcm       | SumAverage                           | 29.09083139  |
| wavelet-HLL | glcm       | JointEntropy                         | 3.76922648   |
| wavelet-HLL | glcm       | ClusterShade                         | -25.87790621 |
| wavelet-HLL | glcm       | MaximumProbability                   | 0.085808636  |
| wavelet-HLL | glcm       | ldmn                                 | 0.93056419   |
| wavelet-HLL | glcm       | JointEnergy                          | 0.077288116  |
| wavelet-HLL | glcm       | Contrast                             | 60.703108    |
| wavelet-HLL | glcm       | DifferenceEntropy                    | 2.298446684  |
| wavelet-HLL | glcm       | InverseVariance                      | 0.195941988  |
| wavelet-HLL | glcm       | DifferenceVariance                   | 18.9647581   |
| wavelet-HLL | glcm       | ldn                                  | 0.825525013  |
| wavelet-HLL | glcm       | ldm                                  | 0.13573049   |
| wavelet-HLL | glcm       | Correlation                          | 0.048593728  |
| wavelet-HLL | glcm       | Autocorrelation                      | 215.0132923  |
| wavelet-HLL | glcm       | SumEntropy                           | 2.641436724  |
| wavelet-HLL | glcm       | SumSquares                           | 32.94400562  |
| wavelet-HLL | glcm       | ClusterProminence                    | 14854.64122  |
| wavelet-HLL | glcm       | lmc2                                 | 0.997644602  |
| wavelet-HLL | glcm       | lmc1                                 | -0.843027788 |
| wavelet-HLL | glcm       | DifferenceAverage                    | 6.295238095  |
| wavelet-HLL | glcm       | ld                                   | 0.22456797   |
| wavelet-HLL | glcm       | ClusterTendency                      | 71.07291449  |
| wavelet-HLL | firstorder | InterquartileRange                   | 111.9209674  |
| wavelet-HLL | firstorder | Skewness                             | -0.262793847 |
| wavelet-HLL | firstorder | Uniformity                           | 0.091412742  |
| wavelet-HLL | firstorder | Median                               | -42.26422493 |
| wavelet-HLL | firstorder | Energy                               | 444779.3348  |
| wavelet-HLL | firstorder | RobustMeanAbsoluteDeviation          | 59.62184989  |
| wavelet-HLL | firstorder | MeanAbsoluteDeviation                | 106.3680513  |
| wavelet-HLL | firstorder | TotalEnergy                          | 12009042.04  |
| wavelet-HLL | firstorder | Maximum                              | 258.7379929  |
| wavelet-HLL | firstorder | RootMeanSquared                      | 153.0014336  |
| wavelet-HLL | firstorder | 90Percentile                         | 96.35295181  |
| wavelet-HLL | firstorder | Minimum                              | -396.8664995 |
| wavelet-HLL | firstorder | Entropy                              | 3.576617645  |
| wavelet-HLL | firstorder | Range                                | 655.6044924  |
| wavelet-HLL | firstorder | Variance                             | 21947.97478  |
| wavelet-HLL | firstorder | 10Percentile                         | -219.7591252 |
| wavelet-HLL | firstorder | Kurtosis                             | 3.563701983  |
| wavelet-HLL | firstorder | Mean                                 | -38.2290975  |
| wavelet-HLL | glrlm      | ShortRunLowGrayLevelEmphasis         | 0.058573261  |
| wavelet-HLL | glrlm      | GrayLevelVariance                    | 35.64816064  |
| wavelet-HLL | glrlm      | LowGrayLevelRunEmphasis              | 0.058608579  |
| wavelet-HLL | glrlm      | GrayLevelNonUniformityNormalized     | 0.091594258  |
| wavelet-HLL | glrlm      | RunVariance                          | 0.008072175  |
| wavelet-HLL | glrlm      | GrayLevelNonUniformity               | 1.726045884  |

|             |       |                                      |              |
|-------------|-------|--------------------------------------|--------------|
| wavelet-HLL | glrlm | LongRunEmphasis                      | 1.025641026  |
| wavelet-HLL | glrlm | ShortRunHighGrayLevelEmphasis        | 259.8640913  |
| wavelet-HLL | glrlm | RunLengthNonUniformity               | 18.55555556  |
| wavelet-HLL | glrlm | ShortRunEmphasis                     | 0.993589744  |
| wavelet-HLL | glrlm | LongRunHighGrayLevelEmphasis         | 265.7134503  |
| wavelet-HLL | glrlm | RunPercentage                        | 0.991902834  |
| wavelet-HLL | glrlm | LongRunLowGrayLevelEmphasis          | 0.058749851  |
| wavelet-HLL | glrlm | RunEntropy                           | 3.575973584  |
| wavelet-HLL | glrlm | HighGrayLevelRunEmphasis             | 261.0339631  |
| wavelet-HLL | glrlm | RunLengthNonUniformityNormalized     | 0.983855651  |
| wavelet-HLL | glszm | GrayLevelVariance                    | 39.20415225  |
| wavelet-HLL | glszm | ZoneVariance                         | 0.103806228  |
| wavelet-HLL | glszm | GrayLevelNonUniformityNormalized     | 0.093425606  |
| wavelet-HLL | glszm | SizeZoneNonUniformityNormalized      | 0.792387543  |
| wavelet-HLL | glszm | SizeZoneNonUniformity                | 13.47058824  |
| wavelet-HLL | glszm | GrayLevelNonUniformity               | 1.588235294  |
| wavelet-HLL | glszm | LargeAreaEmphasis                    | 1.352941176  |
| wavelet-HLL | glszm | SmallAreaHighGrayLevelEmphasis       | 253.4264706  |
| wavelet-HLL | glszm | ZonePercentage                       | 0.894736842  |
| wavelet-HLL | glszm | LargeAreaLowGrayLevelEmphasis        | 0.066297151  |
| wavelet-HLL | glszm | LargeAreaHighGrayLevelEmphasis       | 333.9411765  |
| wavelet-HLL | glszm | HighGrayLevelZoneEmphasis            | 269.5294118  |
| wavelet-HLL | glszm | SmallAreaEmphasis                    | 0.911764706  |
| wavelet-HLL | glszm | LowGrayLevelZoneEmphasis             | 0.064352587  |
| wavelet-HLL | glszm | ZoneEntropy                          | 3.572469459  |
| wavelet-HLL | glszm | SmallAreaLowGrayLevelEmphasis        | 0.063866445  |
| wavelet-HLL | ngtdm | Coarseness                           | 0.176774386  |
| wavelet-HLL | ngtdm | Complexity                           | 457.1285819  |
| wavelet-HLL | ngtdm | Strength                             | 29.17363613  |
| wavelet-HLL | ngtdm | Contrast                             | 1.807533811  |
| wavelet-HLL | ngtdm | Busyness                             | 0.042855516  |
| wavelet-LHL | gldm  | GrayLevelVariance                    | 46.99722992  |
| wavelet-LHL | gldm  | HighGrayLevelEmphasis                | 273.5789474  |
| wavelet-LHL | gldm  | DependenceEntropy                    | 3.721611724  |
| wavelet-LHL | gldm  | DependenceNonUniformity              | 9.526315789  |
| wavelet-LHL | gldm  | GrayLevelNonUniformity               | 1.736842105  |
| wavelet-LHL | gldm  | SmallDependenceEmphasis              | 0.605263158  |
| wavelet-LHL | gldm  | SmallDependenceHighGrayLevelEmphasis | 123.3421053  |
| wavelet-LHL | gldm  | DependenceNonUniformityNormalized    | 0.501385042  |
| wavelet-LHL | gldm  | LargeDependenceEmphasis              | 2.578947368  |
| wavelet-LHL | gldm  | LargeDependenceLowGrayLevelEmphasis  | 0.077692475  |
| wavelet-LHL | gldm  | DependenceVariance                   | 0.249307479  |
| wavelet-LHL | gldm  | LargeDependenceHighGrayLevelEmphasis | 874.5263158  |
| wavelet-LHL | gldm  | SmallDependenceLowGrayLevelEmphasis  | 0.07228179   |
| wavelet-LHL | gldm  | LowGrayLevelEmphasis                 | 0.073363927  |
| wavelet-LHL | glcm  | JointAverage                         | 15.87951493  |
| wavelet-LHL | glcm  | SumAverage                           | 31.75902986  |
| wavelet-LHL | glcm  | JointEntropy                         | 3.724870836  |
| wavelet-LHL | glcm  | ClusterShade                         | -967.9691576 |
| wavelet-LHL | glcm  | MaximumProbability                   | 0.100643801  |
| wavelet-LHL | glcm  | ldmn                                 | 0.894110111  |
| wavelet-LHL | glcm  | JointEnergy                          | 0.079945069  |
| wavelet-LHL | glcm  | Contrast                             | 82.43696304  |
| wavelet-LHL | glcm  | DifferenceEntropy                    | 2.324255055  |
| wavelet-LHL | glcm  | InverseVariance                      | 0.185785771  |
| wavelet-LHL | glcm  | DifferenceVariance                   | 29.63714526  |

|             |            |                                  |              |
|-------------|------------|----------------------------------|--------------|
| wavelet-LHL | glcm       | Idn                              | 0.804985557  |
| wavelet-LHL | glcm       | Idm                              | 0.164019949  |
| wavelet-LHL | glcm       | Correlation                      | -0.021277028 |
| wavelet-LHL | glcm       | Autocorrelation                  | 252.4049728  |
| wavelet-LHL | glcm       | SumEntropy                       | 2.43622973   |
| wavelet-LHL | glcm       | SumSquares                       | 40.53478317  |
| wavelet-LHL | glcm       | ClusterProminence                | 29736.05158  |
| wavelet-LHL | glcm       | Imc2                             | 0.997083421  |
| wavelet-LHL | glcm       | Imc1                             | -0.831277773 |
| wavelet-LHL | glcm       | DifferenceAverage                | 6.653579754  |
| wavelet-LHL | glcm       | Id                               | 0.253149004  |
| wavelet-LHL | glcm       | ClusterTendency                  | 79.70216964  |
| wavelet-LHL | firstorder | InterquartileRange               | 190.000185   |
| wavelet-LHL | firstorder | Skewness                         | -0.900540313 |
| wavelet-LHL | firstorder | Uniformity                       | 0.091412742  |
| wavelet-LHL | firstorder | Median                           | -75.89897282 |
| wavelet-LHL | firstorder | Energy                           | 899424.1779  |
| wavelet-LHL | firstorder | RobustMeanAbsoluteDeviation      | 96.58331384  |
| wavelet-LHL | firstorder | MeanAbsoluteDeviation            | 139.7150417  |
| wavelet-LHL | firstorder | TotalEnergy                      | 24284452.8   |
| wavelet-LHL | firstorder | Maximum                          | 60.11513303  |
| wavelet-LHL | firstorder | RootMeanSquared                  | 217.5732397  |
| wavelet-LHL | firstorder | 90Percentile                     | 49.7529522   |
| wavelet-LHL | firstorder | Minimum                          | -481.0249289 |
| wavelet-LHL | firstorder | Entropy                          | 3.576617645  |
| wavelet-LHL | firstorder | Range                            | 541.140062   |
| wavelet-LHL | firstorder | Variance                         | 28945.29544  |
| wavelet-LHL | firstorder | 10Percentile                     | -417.7515126 |
| wavelet-LHL | firstorder | Kurtosis                         | 2.481757361  |
| wavelet-LHL | firstorder | Mean                             | -135.6201283 |
| wavelet-LHL | glrlm      | ShortRunLowGrayLevelEmphasis     | 0.074863027  |
| wavelet-LHL | glrlm      | GrayLevelVariance                | 47.49661667  |
| wavelet-LHL | glrlm      | LowGrayLevelRunEmphasis          | 0.074908194  |
| wavelet-LHL | glrlm      | GrayLevelNonUniformityNormalized | 0.091307512  |
| wavelet-LHL | glrlm      | RunVariance                      | 0.020093357  |
| wavelet-LHL | glrlm      | GrayLevelNonUniformity           | 1.700166706  |
| wavelet-LHL | glrlm      | LongRunEmphasis                  | 1.06561086   |
| wavelet-LHL | glrlm      | ShortRunHighGrayLevelEmphasis    | 265.0606891  |
| wavelet-LHL | glrlm      | RunLengthNonUniformity           | 17.90799397  |
| wavelet-LHL | glrlm      | ShortRunEmphasis                 | 0.983597285  |
| wavelet-LHL | glrlm      | LongRunHighGrayLevelEmphasis     | 296.1353497  |
| wavelet-LHL | glrlm      | RunPercentage                    | 0.979757085  |
| wavelet-LHL | glrlm      | LongRunLowGrayLevelEmphasis      | 0.075088863  |
| wavelet-LHL | glrlm      | RunEntropy                       | 3.587798017  |
| wavelet-LHL | glrlm      | HighGrayLevelRunEmphasis         | 271.2756212  |
| wavelet-LHL | glrlm      | RunLengthNonUniformityNormalized | 0.959813287  |
| wavelet-LHL | glszm      | GrayLevelVariance                | 53.10714286  |
| wavelet-LHL | glszm      | ZoneVariance                     | 0.229591837  |
| wavelet-LHL | glszm      | GrayLevelNonUniformityNormalized | 0.081632653  |
| wavelet-LHL | glszm      | SizeZoneNonUniformityNormalized  | 0.540816327  |
| wavelet-LHL | glszm      | SizeZoneNonUniformity            | 7.571428571  |
| wavelet-LHL | glszm      | GrayLevelNonUniformity           | 1.142857143  |
| wavelet-LHL | glszm      | LargeAreaEmphasis                | 2.071428571  |
| wavelet-LHL | glszm      | SmallAreaHighGrayLevelEmphasis   | 133.4107143  |
| wavelet-LHL | glszm      | ZonePercentage                   | 0.736842105  |
| wavelet-LHL | glszm      | LargeAreaLowGrayLevelEmphasis    | 0.101523482  |

|             |            |                                      |              |
|-------------|------------|--------------------------------------|--------------|
| wavelet-LHL | glszm      | LargeAreaHighGrayLevelEmphasis       | 643.1428571  |
| wavelet-LHL | glszm      | HighGrayLevelZoneEmphasis            | 235.3571429  |
| wavelet-LHL | glszm      | SmallAreaEmphasis                    | 0.732142857  |
| wavelet-LHL | glszm      | LowGrayLevelZoneEmphasis             | 0.098586253  |
| wavelet-LHL | glszm      | ZoneEntropy                          | 3.807354922  |
| wavelet-LHL | glszm      | SmallAreaLowGrayLevelEmphasis        | 0.097851946  |
| wavelet-LHL | ngtdm      | Coarseness                           | 0.135059064  |
| wavelet-LHL | ngtdm      | Complexity                           | 617.8252088  |
| wavelet-LHL | ngtdm      | Strength                             | 27.66916182  |
| wavelet-LHL | ngtdm      | Contrast                             | 3.173410427  |
| wavelet-LHL | ngtdm      | Busyness                             | 0.042837756  |
| wavelet-LHH | gldm       | GrayLevelVariance                    | 7.163434903  |
| wavelet-LHH | gldm       | HighGrayLevelEmphasis                | 51.84210526  |
| wavelet-LHH | gldm       | DependenceEntropy                    | 3.366091329  |
| wavelet-LHH | gldm       | DependenceNonUniformity              | 6.789473684  |
| wavelet-LHH | gldm       | GrayLevelNonUniformity               | 2.157894737  |
| wavelet-LHH | gldm       | SmallDependenceEmphasis              | 0.497076023  |
| wavelet-LHH | gldm       | SmallDependenceHighGrayLevelEmphasis | 25.05263158  |
| wavelet-LHH | gldm       | DependenceNonUniformityNormalized    | 0.35734072   |
| wavelet-LHH | gldm       | LargeDependenceEmphasis              | 3.947368421  |
| wavelet-LHH | gldm       | LargeDependenceLowGrayLevelEmphasis  | 0.148267649  |
| wavelet-LHH | gldm       | DependenceVariance                   | 0.55401662   |
| wavelet-LHH | gldm       | LargeDependenceHighGrayLevelEmphasis | 224.2631579  |
| wavelet-LHH | gldm       | SmallDependenceLowGrayLevelEmphasis  | 0.076966925  |
| wavelet-LHH | gldm       | LowGrayLevelEmphasis                 | 0.088194798  |
| wavelet-LHH | glcm       | JointAverage                         | 6.662409812  |
| wavelet-LHH | glcm       | SumAverage                           | 13.32481962  |
| wavelet-LHH | glcm       | JointEntropy                         | 3.650051211  |
| wavelet-LHH | glcm       | ClusterShade                         | -4.875812694 |
| wavelet-LHH | glcm       | MaximumProbability                   | 0.120942946  |
| wavelet-LHH | glcm       | ldmn                                 | 0.892834356  |
| wavelet-LHH | glcm       | JointEnergy                          | 0.085854368  |
| wavelet-LHH | glcm       | Contrast                             | 17.32617383  |
| wavelet-LHH | glcm       | DifferenceEntropy                    | 2.108640001  |
| wavelet-LHH | glcm       | InverseVariance                      | 0.255227382  |
| wavelet-LHH | glcm       | DifferenceVariance                   | 5.544174559  |
| wavelet-LHH | glcm       | ldn                                  | 0.787491656  |
| wavelet-LHH | glcm       | ldm                                  | 0.245015435  |
| wavelet-LHH | glcm       | Correlation                          | -0.251473333 |
| wavelet-LHH | glcm       | Autocorrelation                      | 42.86881452  |
| wavelet-LHH | glcm       | SumEntropy                           | 2.299881405  |
| wavelet-LHH | glcm       | SumSquares                           | 6.880473535  |
| wavelet-LHH | glcm       | ClusterProminence                    | 290.9931961  |
| wavelet-LHH | glcm       | lmc2                                 | 0.992769383  |
| wavelet-LHH | glcm       | lmc1                                 | -0.752493363 |
| wavelet-LHH | glcm       | DifferenceAverage                    | 3.356132756  |
| wavelet-LHH | glcm       | ld                                   | 0.338893602  |
| wavelet-LHH | glcm       | ClusterTendency                      | 10.19572031  |
| wavelet-LHH | firstorder | InterquartileRange                   | 91.44841137  |
| wavelet-LHH | firstorder | Skewness                             | -0.340960016 |
| wavelet-LHH | firstorder | Uniformity                           | 0.113573407  |
| wavelet-LHH | firstorder | Median                               | 16.7768505   |
| wavelet-LHH | firstorder | Energy                               | 87923.67276  |
| wavelet-LHH | firstorder | RobustMeanAbsoluteDeviation          | 39.29640134  |
| wavelet-LHH | firstorder | MeanAbsoluteDeviation                | 56.06040286  |
| wavelet-LHH | firstorder | TotalEnergy                          | 2373939.164  |

|             |            |                                      |              |
|-------------|------------|--------------------------------------|--------------|
| wavelet-LHH | firstorder | Maximum                              | 123.3974348  |
| wavelet-LHH | firstorder | RootMeanSquared                      | 68.02618411  |
| wavelet-LHH | firstorder | 90Percentile                         | 87.02825919  |
| wavelet-LHH | firstorder | Minimum                              | -147.5416359 |
| wavelet-LHH | firstorder | Entropy                              | 3.22109725   |
| wavelet-LHH | firstorder | Range                                | 270.9390707  |
| wavelet-LHH | firstorder | Variance                             | 4606.259204  |
| wavelet-LHH | firstorder | 10Percentile                         | -70.7134568  |
| wavelet-LHH | firstorder | Kurtosis                             | 2.614311973  |
| wavelet-LHH | firstorder | Mean                                 | 4.615465306  |
| wavelet-LHH | glrlm      | ShortRunLowGrayLevelEmphasis         | 0.089980951  |
| wavelet-LHH | glrlm      | GrayLevelVariance                    | 7.310477515  |
| wavelet-LHH | glrlm      | LowGrayLevelRunEmphasis              | 0.090526692  |
| wavelet-LHH | glrlm      | GrayLevelNonUniformityNormalized     | 0.113433818  |
| wavelet-LHH | glrlm      | RunVariance                          | 0.032201619  |
| wavelet-LHH | glrlm      | GrayLevelNonUniformity               | 2.085443624  |
| wavelet-LHH | glrlm      | LongRunEmphasis                      | 1.104072398  |
| wavelet-LHH | glrlm      | ShortRunHighGrayLevelEmphasis        | 50.18894049  |
| wavelet-LHH | glrlm      | RunLengthNonUniformity               | 17.2413273   |
| wavelet-LHH | glrlm      | ShortRunEmphasis                     | 0.9739819    |
| wavelet-LHH | glrlm      | LongRunHighGrayLevelEmphasis         | 57.58524516  |
| wavelet-LHH | glrlm      | RunPercentage                        | 0.967611336  |
| wavelet-LHH | glrlm      | LongRunLowGrayLevelEmphasis          | 0.092709654  |
| wavelet-LHH | glrlm      | RunEntropy                           | 3.266070339  |
| wavelet-LHH | glrlm      | HighGrayLevelRunEmphasis             | 51.66820142  |
| wavelet-LHH | glrlm      | RunLengthNonUniformityNormalized     | 0.935596763  |
| wavelet-LHH | glszm      | GrayLevelVariance                    | 9.909722222  |
| wavelet-LHH | glszm      | ZoneVariance                         | 0.576388889  |
| wavelet-LHH | glszm      | GrayLevelNonUniformityNormalized     | 0.111111111  |
| wavelet-LHH | glszm      | SizeZoneNonUniformityNormalized      | 0.430555556  |
| wavelet-LHH | glszm      | SizeZoneNonUniformity                | 5.166666667  |
| wavelet-LHH | glszm      | GrayLevelNonUniformity               | 1.333333333  |
| wavelet-LHH | glszm      | LargeAreaEmphasis                    | 3.083333333  |
| wavelet-LHH | glszm      | SmallAreaHighGrayLevelEmphasis       | 33.79166667  |
| wavelet-LHH | glszm      | ZonePercentage                       | 0.631578947  |
| wavelet-LHH | glszm      | LargeAreaLowGrayLevelEmphasis        | 0.172375686  |
| wavelet-LHH | glszm      | LargeAreaHighGrayLevelEmphasis       | 163.5833333  |
| wavelet-LHH | glszm      | HighGrayLevelZoneEmphasis            | 51.08333333  |
| wavelet-LHH | glszm      | SmallAreaEmphasis                    | 0.664351852  |
| wavelet-LHH | glszm      | LowGrayLevelZoneEmphasis             | 0.126618424  |
| wavelet-LHH | glszm      | ZoneEntropy                          | 3.251629167  |
| wavelet-LHH | glszm      | SmallAreaLowGrayLevelEmphasis        | 0.118894243  |
| wavelet-LHH | ngtdm      | Coarseness                           | 0.188684999  |
| wavelet-LHH | ngtdm      | Complexity                           | 105.4179526  |
| wavelet-LHH | ngtdm      | Strength                             | 6.469229619  |
| wavelet-LHH | ngtdm      | Contrast                             | 0.448649217  |
| wavelet-LHH | ngtdm      | Busyness                             | 0.116817784  |
| wavelet-LLH | gldm       | GrayLevelVariance                    | 72.84764543  |
| wavelet-LLH | gldm       | HighGrayLevelEmphasis                | 179.2631579  |
| wavelet-LLH | gldm       | DependenceEntropy                    | 3.616348566  |
| wavelet-LLH | gldm       | DependenceNonUniformity              | 8.684210526  |
| wavelet-LLH | gldm       | GrayLevelNonUniformity               | 1.842105263  |
| wavelet-LLH | gldm       | SmallDependenceEmphasis              | 0.558479532  |
| wavelet-LLH | gldm       | SmallDependenceHighGrayLevelEmphasis | 146.6637427  |
| wavelet-LLH | gldm       | DependenceNonUniformityNormalized    | 0.457063712  |
| wavelet-LLH | gldm       | LargeDependenceEmphasis              | 3            |



|             |            |                                      |              |
|-------------|------------|--------------------------------------|--------------|
| wavelet-LLH | gldm       | LargeDependenceLowGrayLevelEmphasis  | 0.108670949  |
| wavelet-LLH | gldm       | DependenceVariance                   | 0.337950139  |
| wavelet-LLH | gldm       | LargeDependenceHighGrayLevelEmphasis | 324.6315789  |
| wavelet-LLH | gldm       | SmallDependenceLowGrayLevelEmphasis  | 0.061229843  |
| wavelet-LLH | gldm       | LowGrayLevelEmphasis                 | 0.06998707   |
| wavelet-LLH | glcm       | JointAverage                         | 9.37004662   |
| wavelet-LLH | glcm       | SumAverage                           | 18.74009324  |
| wavelet-LLH | glcm       | JointEntropy                         | 3.693824105  |
| wavelet-LLH | glcm       | ClusterShade                         | 1142.213886  |
| wavelet-LLH | glcm       | MaximumProbability                   | 0.104551005  |
| wavelet-LLH | glcm       | ldmn                                 | 0.968521739  |
| wavelet-LLH | glcm       | JointEnergy                          | 0.081666988  |
| wavelet-LLH | glcm       | Contrast                             | 80.22455322  |
| wavelet-LLH | glcm       | DifferenceEntropy                    | 2.294832328  |
| wavelet-LLH | glcm       | InverseVariance                      | 0.194646498  |
| wavelet-LLH | glcm       | DifferenceVariance                   | 43.82895721  |
| wavelet-LLH | glcm       | ldn                                  | 0.894628867  |
| wavelet-LLH | glcm       | ldm                                  | 0.168343231  |
| wavelet-LLH | glcm       | Correlation                          | -0.273128701 |
| wavelet-LLH | glcm       | Autocorrelation                      | 84.41990787  |
| wavelet-LLH | glcm       | SumEntropy                           | 2.444834476  |
| wavelet-LLH | glcm       | SumSquares                           | 35.87831978  |
| wavelet-LLH | glcm       | ClusterProminence                    | 40573.29311  |
| wavelet-LLH | glcm       | lmc2                                 | 0.994147533  |
| wavelet-LLH | glcm       | lmc1                                 | -0.768023395 |
| wavelet-LLH | glcm       | DifferenceAverage                    | 5.749173049  |
| wavelet-LLH | glcm       | ld                                   | 0.263667621  |
| wavelet-LLH | glcm       | ClusterTendency                      | 63.28872591  |
| wavelet-LLH | firstorder | InterquartileRange                   | 160.2698691  |
| wavelet-LLH | firstorder | Skewness                             | 2.813452063  |
| wavelet-LLH | firstorder | Uniformity                           | 0.096952909  |
| wavelet-LLH | firstorder | Median                               | -200.4811943 |
| wavelet-LLH | firstorder | Energy                               | 1307523.233  |
| wavelet-LLH | firstorder | RobustMeanAbsoluteDeviation          | 55.93788585  |
| wavelet-LLH | firstorder | MeanAbsoluteDeviation                | 127.4130432  |
| wavelet-LLH | firstorder | TotalEnergy                          | 35303127.28  |
| wavelet-LLH | firstorder | Maximum                              | 654.9032972  |
| wavelet-LLH | firstorder | RootMeanSquared                      | 262.3299682  |
| wavelet-LLH | firstorder | 90Percentile                         | -59.30166146 |
| wavelet-LLH | firstorder | Minimum                              | -395.1708138 |
| wavelet-LLH | firstorder | Entropy                              | 3.471354487  |
| wavelet-LLH | firstorder | Range                                | 1050.074111  |
| wavelet-LLH | firstorder | Variance                             | 44957.89013  |
| wavelet-LLH | firstorder | 10Percentile                         | -296.7056859 |
| wavelet-LLH | firstorder | Kurtosis                             | 11.31990209  |
| wavelet-LLH | firstorder | Mean                                 | -154.4639832 |
| wavelet-LLH | glrlm      | ShortRunLowGrayLevelEmphasis         | 0.071021748  |
| wavelet-LLH | glrlm      | GrayLevelVariance                    | 74.5177691   |
| wavelet-LLH | glrlm      | LowGrayLevelRunEmphasis              | 0.071369239  |
| wavelet-LLH | glrlm      | GrayLevelNonUniformityNormalized     | 0.097124806  |
| wavelet-LLH | glrlm      | RunVariance                          | 0.033442397  |
| wavelet-LLH | glrlm      | GrayLevelNonUniformity               | 1.800944669  |
| wavelet-LLH | glrlm      | LongRunEmphasis                      | 1.091346154  |
| wavelet-LLH | glrlm      | ShortRunHighGrayLevelEmphasis        | 180.8564651  |
| wavelet-LLH | glrlm      | RunLengthNonUniformity               | 17.82371795  |
| wavelet-LLH | glrlm      | ShortRunEmphasis                     | 0.982505342  |

|             |       |                                      |              |
|-------------|-------|--------------------------------------|--------------|
| wavelet-LLH | glrlm | LongRunHighGrayLevelEmphasis         | 188.7377418  |
| wavelet-LLH | glrlm | RunPercentage                        | 0.975708502  |
| wavelet-LLH | glrlm | LongRunLowGrayLevelEmphasis          | 0.07309307   |
| wavelet-LLH | glrlm | RunEntropy                           | 3.47124237   |
| wavelet-LLH | glrlm | HighGrayLevelRunEmphasis             | 182.1592161  |
| wavelet-LLH | glrlm | RunLengthNonUniformityNormalized     | 0.958355591  |
| wavelet-LLH | glszm | GrayLevelVariance                    | 100.3668639  |
| wavelet-LLH | glszm | ZoneVariance                         | 0.402366864  |
| wavelet-LLH | glszm | GrayLevelNonUniformityNormalized     | 0.088757396  |
| wavelet-LLH | glszm | SizeZoneNonUniformityNormalized      | 0.479289941  |
| wavelet-LLH | glszm | SizeZoneNonUniformity                | 6.230769231  |
| wavelet-LLH | glszm | GrayLevelNonUniformity               | 1.153846154  |
| wavelet-LLH | glszm | LargeAreaEmphasis                    | 2.538461538  |
| wavelet-LLH | glszm | SmallAreaHighGrayLevelEmphasis       | 205.9123932  |
| wavelet-LLH | glszm | ZonePercentage                       | 0.684210526  |
| wavelet-LLH | glszm | LargeAreaLowGrayLevelEmphasis        | 0.122737351  |
| wavelet-LLH | glszm | LargeAreaHighGrayLevelEmphasis       | 339.3846154  |
| wavelet-LLH | glszm | HighGrayLevelZoneEmphasis            | 228.2307692  |
| wavelet-LLH | glszm | SmallAreaEmphasis                    | 0.700854701  |
| wavelet-LLH | glszm | LowGrayLevelZoneEmphasis             | 0.093266439  |
| wavelet-LLH | glszm | ZoneEntropy                          | 3.546593564  |
| wavelet-LLH | glszm | SmallAreaLowGrayLevelEmphasis        | 0.087234181  |
| wavelet-LLH | ngtdm | Coarseness                           | 0.13926128   |
| wavelet-LLH | ngtdm | Complexity                           | 918.9056631  |
| wavelet-LLH | ngtdm | Strength                             | 42.81649011  |
| wavelet-LLH | ngtdm | Contrast                             | 5.939662825  |
| wavelet-LLH | ngtdm | Busyness                             | 0.077696008  |
| wavelet-LLL | gldm  | GrayLevelVariance                    | 172.1108033  |
| wavelet-LLL | gldm  | HighGrayLevelEmphasis                | 1152.789474  |
| wavelet-LLL | gldm  | DependenceEntropy                    | 3.93213804   |
| wavelet-LLL | gldm  | DependenceNonUniformity              | 15.42105263  |
| wavelet-LLL | gldm  | GrayLevelNonUniformity               | 1.315789474  |
| wavelet-LLL | gldm  | SmallDependenceEmphasis              | 0.921052632  |
| wavelet-LLL | gldm  | SmallDependenceHighGrayLevelEmphasis | 1066.815789  |
| wavelet-LLL | gldm  | DependenceNonUniformityNormalized    | 0.811634349  |
| wavelet-LLL | gldm  | LargeDependenceEmphasis              | 1.315789474  |
| wavelet-LLL | gldm  | LargeDependenceLowGrayLevelEmphasis  | 0.05447622   |
| wavelet-LLL | gldm  | DependenceVariance                   | 0.094182825  |
| wavelet-LLL | gldm  | LargeDependenceHighGrayLevelEmphasis | 1496.684211  |
| wavelet-LLL | gldm  | SmallDependenceLowGrayLevelEmphasis  | 0.054113744  |
| wavelet-LLL | gldm  | LowGrayLevelEmphasis                 | 0.054186239  |
| wavelet-LLL | glcm  | JointAverage                         | 33.14558497  |
| wavelet-LLL | glcm  | SumAverage                           | 66.29116994  |
| wavelet-LLL | glcm  | JointEntropy                         | 3.762666374  |
| wavelet-LLL | glcm  | ClusterShade                         | -3686.603186 |
| wavelet-LLL | glcm  | MaximumProbability                   | 0.085242535  |
| wavelet-LLL | glcm  | ldmn                                 | 0.899152984  |
| wavelet-LLL | glcm  | JointEnergy                          | 0.077456036  |
| wavelet-LLL | glcm  | Contrast                             | 327.5200633  |
| wavelet-LLL | glcm  | DifferenceEntropy                    | 2.502458392  |
| wavelet-LLL | glcm  | InverseVariance                      | 0.064394793  |
| wavelet-LLL | glcm  | DifferenceVariance                   | 84.38312852  |
| wavelet-LLL | glcm  | ldn                                  | 0.788055183  |
| wavelet-LLL | glcm  | ldm                                  | 0.050241288  |
| wavelet-LLL | glcm  | Correlation                          | -0.030775507 |
| wavelet-LLL | glcm  | Autocorrelation                      | 1094.541536  |

|             |            |                                  |              |
|-------------|------------|----------------------------------|--------------|
| wavelet-LLL | glcm       | SumEntropy                       | 2.651610763  |
| wavelet-LLL | glcm       | SumSquares                       | 157.7305303  |
| wavelet-LLL | glcm       | ClusterProminence                | 284349.3951  |
| wavelet-LLL | glcm       | Imc2                             | 0.998694293  |
| wavelet-LLL | glcm       | Imc1                             | -0.903514949 |
| wavelet-LLL | glcm       | DifferenceAverage                | 14.92411477  |
| wavelet-LLL | glcm       | Id                               | 0.117591749  |
| wavelet-LLL | glcm       | ClusterTendency                  | 303.4020578  |
| wavelet-LLL | firstorder | InterquartileRange               | 461.9295031  |
| wavelet-LLL | firstorder | Skewness                         | -0.514814709 |
| wavelet-LLL | firstorder | Uniformity                       | 0.069252078  |
| wavelet-LLL | firstorder | Median                           | -353.1322204 |
| wavelet-LLL | firstorder | Energy                           | 5196742.973  |
| wavelet-LLL | firstorder | RobustMeanAbsoluteDeviation      | 196.2427568  |
| wavelet-LLL | firstorder | MeanAbsoluteDeviation            | 273.7263504  |
| wavelet-LLL | firstorder | TotalEnergy                      | 140312060.3  |
| wavelet-LLL | firstorder | Maximum                          | 60.47465718  |
| wavelet-LLL | firstorder | RootMeanSquared                  | 522.9845008  |
| wavelet-LLL | firstorder | 90Percentile                     | -0.764642069 |
| wavelet-LLL | firstorder | Minimum                          | -1162.216667 |
| wavelet-LLL | firstorder | Entropy                          | 3.93213804   |
| wavelet-LLL | firstorder | Range                            | 1222.691324  |
| wavelet-LLL | firstorder | Variance                         | 107903.2342  |
| wavelet-LLL | firstorder | 10Percentile                     | -784.3729707 |
| wavelet-LLL | firstorder | Kurtosis                         | 2.54860754   |
| wavelet-LLL | firstorder | Mean                             | -406.9515375 |
| wavelet-LLL | glrlm      | ShortRunLowGrayLevelEmphasis     | 0.054410937  |
| wavelet-LLL | glrlm      | GrayLevelVariance                | 172.8335241  |
| wavelet-LLL | glrlm      | LowGrayLevelRunEmphasis          | 0.05441388   |
| wavelet-LLL | glrlm      | GrayLevelNonUniformityNormalized | 0.069148167  |
| wavelet-LLL | glrlm      | RunVariance                      | 0.004036087  |
| wavelet-LLL | glrlm      | GrayLevelNonUniformity           | 1.308591993  |
| wavelet-LLL | glrlm      | LongRunEmphasis                  | 1.012820513  |
| wavelet-LLL | glrlm      | ShortRunHighGrayLevelEmphasis    | 1149.571694  |
| wavelet-LLL | glrlm      | RunLengthNonUniformity           | 18.77777778  |
| wavelet-LLL | glrlm      | ShortRunEmphasis                 | 0.996794872  |
| wavelet-LLL | glrlm      | LongRunHighGrayLevelEmphasis     | 1167.023617  |
| wavelet-LLL | glrlm      | RunPercentage                    | 0.995951417  |
| wavelet-LLL | glrlm      | LongRunLowGrayLevelEmphasis      | 0.054425653  |
| wavelet-LLL | glrlm      | RunEntropy                       | 3.933335327  |
| wavelet-LLL | glrlm      | HighGrayLevelRunEmphasis         | 1153.062078  |
| wavelet-LLL | glrlm      | RunLengthNonUniformityNormalized | 0.991927825  |
| wavelet-LLL | glszm      | GrayLevelVariance                | 181.5061728  |
| wavelet-LLL | glszm      | ZoneVariance                     | 0.052469136  |
| wavelet-LLL | glszm      | GrayLevelNonUniformityNormalized | 0.067901235  |
| wavelet-LLL | glszm      | SizeZoneNonUniformityNormalized  | 0.895061728  |
| wavelet-LLL | glszm      | SizeZoneNonUniformity            | 16.11111111  |
| wavelet-LLL | glszm      | GrayLevelNonUniformity           | 1.222222222  |
| wavelet-LLL | glszm      | LargeAreaEmphasis                | 1.166666667  |
| wavelet-LLL | glszm      | SmallAreaHighGrayLevelEmphasis   | 1110.958333  |
| wavelet-LLL | glszm      | ZonePercentage                   | 0.947368421  |
| wavelet-LLL | glszm      | LargeAreaLowGrayLevelEmphasis    | 0.057298616  |
| wavelet-LLL | glszm      | LargeAreaHighGrayLevelEmphasis   | 1337.833333  |
| wavelet-LLL | glszm      | HighGrayLevelZoneEmphasis        | 1156.333333  |
| wavelet-LLL | glszm      | SmallAreaEmphasis                | 0.958333333  |
| wavelet-LLL | glszm      | LowGrayLevelZoneEmphasis         | 0.05714557   |

|             |            |                                      |              |
|-------------|------------|--------------------------------------|--------------|
| wavelet-LLL | glszm      | ZoneEntropy                          | 3.947702779  |
| wavelet-LLL | glszm      | SmallAreaLowGrayLevelEmphasis        | 0.057107309  |
| wavelet-LLL | ngtdm      | Coarseness                           | 0.07880524   |
| wavelet-LLL | ngtdm      | Complexity                           | 3105.069506  |
| wavelet-LLL | ngtdm      | Strength                             | 56.82764246  |
| wavelet-LLL | ngtdm      | Contrast                             | 15.87102709  |
| wavelet-LLL | ngtdm      | Busyness                             | 0.045268629  |
| wavelet-HHL | gldm       | GrayLevelVariance                    | 8.847645429  |
| wavelet-HHL | gldm       | HighGrayLevelEmphasis                | 27.47368421  |
| wavelet-HHL | gldm       | DependenceEntropy                    | 3.576617645  |
| wavelet-HHL | gldm       | DependenceNonUniformity              | 6.789473684  |
| wavelet-HHL | gldm       | GrayLevelNonUniformity               | 2.578947368  |
| wavelet-HHL | gldm       | SmallDependenceEmphasis              | 0.497076023  |
| wavelet-HHL | gldm       | SmallDependenceHighGrayLevelEmphasis | 22.64912281  |
| wavelet-HHL | gldm       | DependenceNonUniformityNormalized    | 0.35734072   |
| wavelet-HHL | gldm       | LargeDependenceEmphasis              | 3.947368421  |
| wavelet-HHL | gldm       | LargeDependenceLowGrayLevelEmphasis  | 1.690229816  |
| wavelet-HHL | gldm       | DependenceVariance                   | 0.55401662   |
| wavelet-HHL | gldm       | LargeDependenceHighGrayLevelEmphasis | 49.57894737  |
| wavelet-HHL | gldm       | SmallDependenceLowGrayLevelEmphasis  | 0.051734851  |
| wavelet-HHL | gldm       | LowGrayLevelEmphasis                 | 0.233884786  |
| wavelet-HHL | glcm       | JointAverage                         | 4.067177267  |
| wavelet-HHL | glcm       | SumAverage                           | 8.134354534  |
| wavelet-HHL | glcm       | JointEntropy                         | 3.590954752  |
| wavelet-HHL | glcm       | ClusterShade                         | 65.15070619  |
| wavelet-HHL | glcm       | MaximumProbability                   | 0.127658453  |
| wavelet-HHL | glcm       | ldmn                                 | 0.916202855  |
| wavelet-HHL | glcm       | JointEnergy                          | 0.090981798  |
| wavelet-HHL | glcm       | Contrast                             | 16.36409146  |
| wavelet-HHL | glcm       | DifferenceEntropy                    | 2.124989036  |
| wavelet-HHL | glcm       | InverseVariance                      | 0.316549988  |
| wavelet-HHL | glcm       | DifferenceVariance                   | 6.537367768  |
| wavelet-HHL | glcm       | ldn                                  | 0.818266626  |
| wavelet-HHL | glcm       | ldm                                  | 0.276647522  |
| wavelet-HHL | glcm       | Correlation                          | 0.045960595  |
| wavelet-HHL | glcm       | Autocorrelation                      | 17.12515818  |
| wavelet-HHL | glcm       | SumEntropy                           | 2.46781035   |
| wavelet-HHL | glcm       | SumSquares                           | 8.638464862  |
| wavelet-HHL | glcm       | ClusterProminence                    | 1038.607114  |
| wavelet-HHL | glcm       | lmc2                                 | 0.977668862  |
| wavelet-HHL | glcm       | lmc1                                 | -0.656307177 |
| wavelet-HHL | glcm       | DifferenceAverage                    | 3.058086358  |
| wavelet-HHL | glcm       | ld                                   | 0.36395226   |
| wavelet-HHL | glcm       | ClusterTendency                      | 18.18976798  |
| wavelet-HHL | firstorder | InterquartileRange                   | 78.14842265  |
| wavelet-HHL | firstorder | Skewness                             | 1.126175454  |
| wavelet-HHL | firstorder | Uniformity                           | 0.135734072  |
| wavelet-HHL | firstorder | Median                               | 3.561133683  |
| wavelet-HHL | firstorder | Energy                               | 116197.6693  |
| wavelet-HHL | firstorder | RobustMeanAbsoluteDeviation          | 38.11952145  |
| wavelet-HHL | firstorder | MeanAbsoluteDeviation                | 59.32763408  |
| wavelet-HHL | firstorder | TotalEnergy                          | 3137337.072  |
| wavelet-HHL | firstorder | Maximum                              | 211.566385   |
| wavelet-HHL | firstorder | RootMeanSquared                      | 78.20272889  |
| wavelet-HHL | firstorder | 90Percentile                         | 128.8423871  |
| wavelet-HHL | firstorder | Minimum                              | -68.50943329 |

|             |            |                                      |              |
|-------------|------------|--------------------------------------|--------------|
| wavelet-HHL | firstorder | Entropy                              | 2.996641329  |
| wavelet-HHL | firstorder | Range                                | 280.0758183  |
| wavelet-HHL | firstorder | Variance                             | 5673.555963  |
| wavelet-HHL | firstorder | 10Percentile                         | -55.31146655 |
| wavelet-HHL | firstorder | Kurtosis                             | 3.441563497  |
| wavelet-HHL | firstorder | Mean                                 | 21.02643202  |
| wavelet-HHL | glrlm      | ShortRunLowGrayLevelEmphasis         | 0.214806887  |
| wavelet-HHL | glrlm      | GrayLevelVariance                    | 8.961415863  |
| wavelet-HHL | glrlm      | LowGrayLevelRunEmphasis              | 0.226460408  |
| wavelet-HHL | glrlm      | GrayLevelNonUniformityNormalized     | 0.13570518   |
| wavelet-HHL | glrlm      | RunVariance                          | 0.032201619  |
| wavelet-HHL | glrlm      | GrayLevelNonUniformity               | 2.494959117  |
| wavelet-HHL | glrlm      | LongRunEmphasis                      | 1.104072398  |
| wavelet-HHL | glrlm      | ShortRunHighGrayLevelEmphasis        | 27.92174063  |
| wavelet-HHL | glrlm      | RunLengthNonUniformity               | 17.2413273   |
| wavelet-HHL | glrlm      | ShortRunEmphasis                     | 0.9739819    |
| wavelet-HHL | glrlm      | LongRunHighGrayLevelEmphasis         | 29.00394274  |
| wavelet-HHL | glrlm      | RunPercentage                        | 0.967611336  |
| wavelet-HHL | glrlm      | LongRunLowGrayLevelEmphasis          | 0.273074494  |
| wavelet-HHL | glrlm      | RunEntropy                           | 3.069839463  |
| wavelet-HHL | glrlm      | HighGrayLevelRunEmphasis             | 28.13818105  |
| wavelet-HHL | glrlm      | RunLengthNonUniformityNormalized     | 0.935596763  |
| wavelet-HHL | glszm      | GrayLevelVariance                    | 10.52083333  |
| wavelet-HHL | glszm      | ZoneVariance                         | 0.576388889  |
| wavelet-HHL | glszm      | GrayLevelNonUniformityNormalized     | 0.125        |
| wavelet-HHL | glszm      | SizeZoneNonUniformityNormalized      | 0.430555556  |
| wavelet-HHL | glszm      | SizeZoneNonUniformity                | 5.166666667  |
| wavelet-HHL | glszm      | GrayLevelNonUniformity               | 1.5          |
| wavelet-HHL | glszm      | LargeAreaEmphasis                    | 3.083333333  |
| wavelet-HHL | glszm      | SmallAreaHighGrayLevelEmphasis       | 34.53009259  |
| wavelet-HHL | glszm      | ZonePercentage                       | 0.631578947  |
| wavelet-HHL | glszm      | LargeAreaLowGrayLevelEmphasis        | 0.984623134  |
| wavelet-HHL | glszm      | LargeAreaHighGrayLevelEmphasis       | 56           |
| wavelet-HHL | glszm      | HighGrayLevelZoneEmphasis            | 38.08333333  |
| wavelet-HHL | glszm      | SmallAreaEmphasis                    | 0.664351852  |
| wavelet-HHL | glszm      | LowGrayLevelZoneEmphasis             | 0.155757393  |
| wavelet-HHL | glszm      | ZoneEntropy                          | 3.584962501  |
| wavelet-HHL | glszm      | SmallAreaLowGrayLevelEmphasis        | 0.051421616  |
| wavelet-HHL | ngtdm      | Coarseness                           | 0.226094407  |
| wavelet-HHL | ngtdm      | Complexity                           | 82.48844387  |
| wavelet-HHL | ngtdm      | Strength                             | 10.24388692  |
| wavelet-HHL | ngtdm      | Contrast                             | 0.531405465  |
| wavelet-HHL | ngtdm      | Busyness                             | 0.269345167  |
| wavelet-HLH | gldm       | GrayLevelVariance                    | 14.45429363  |
| wavelet-HLH | gldm       | HighGrayLevelEmphasis                | 43.84210526  |
| wavelet-HLH | gldm       | DependenceEntropy                    | 3.471354487  |
| wavelet-HLH | gldm       | DependenceNonUniformity              | 7.210526316  |
| wavelet-HLH | gldm       | GrayLevelNonUniformity               | 2.684210526  |
| wavelet-HLH | gldm       | SmallDependenceEmphasis              | 0.543859649  |
| wavelet-HLH | gldm       | SmallDependenceHighGrayLevelEmphasis | 36.4122807   |
| wavelet-HLH | gldm       | DependenceNonUniformityNormalized    | 0.379501385  |
| wavelet-HLH | gldm       | LargeDependenceEmphasis              | 3.526315789  |
| wavelet-HLH | gldm       | LargeDependenceLowGrayLevelEmphasis  | 0.596905071  |
| wavelet-HLH | gldm       | DependenceVariance                   | 0.509695291  |
| wavelet-HLH | gldm       | LargeDependenceHighGrayLevelEmphasis | 76.36842105  |
| wavelet-HLH | gldm       | SmallDependenceLowGrayLevelEmphasis  | 0.079638691  |

|             |            |                                  |              |
|-------------|------------|----------------------------------|--------------|
| wavelet-HLH | gldm       | LowGrayLevelEmphasis             | 0.148004248  |
| wavelet-HLH | glcm       | JointAverage                     | 5.226101676  |
| wavelet-HLH | glcm       | SumAverage                       | 10.45220335  |
| wavelet-HLH | glcm       | JointEntropy                     | 3.584944096  |
| wavelet-HLH | glcm       | ClusterShade                     | 71.16226383  |
| wavelet-HLH | glcm       | MaximumProbability               | 0.135625486  |
| wavelet-HLH | glcm       | ldmn                             | 0.887518077  |
| wavelet-HLH | glcm       | JointEnergy                      | 0.094036296  |
| wavelet-HLH | glcm       | Contrast                         | 26.78184038  |
| wavelet-HLH | glcm       | DifferenceEntropy                | 2.105733441  |
| wavelet-HLH | glcm       | InverseVariance                  | 0.247936099  |
| wavelet-HLH | glcm       | DifferenceVariance               | 9.550405074  |
| wavelet-HLH | glcm       | ldn                              | 0.786160848  |
| wavelet-HLH | glcm       | ldm                              | 0.21234798   |
| wavelet-HLH | glcm       | Correlation                      | -0.074994291 |
| wavelet-HLH | glcm       | Autocorrelation                  | 27.00841936  |
| wavelet-HLH | glcm       | SumEntropy                       | 2.394848456  |
| wavelet-HLH | glcm       | SumSquares                       | 12.75812025  |
| wavelet-HLH | glcm       | ClusterProminence                | 1600.515193  |
| wavelet-HLH | glcm       | lmc2                             | 0.989508664  |
| wavelet-HLH | glcm       | lmc1                             | -0.724758316 |
| wavelet-HLH | glcm       | DifferenceAverage                | 4.064923965  |
| wavelet-HLH | glcm       | ld                               | 0.305516702  |
| wavelet-HLH | glcm       | ClusterTendency                  | 24.25064062  |
| wavelet-HLH | firstorder | InterquartileRange               | 138.831382   |
| wavelet-HLH | firstorder | Skewness                         | 0.727481688  |
| wavelet-HLH | firstorder | Uniformity                       | 0.141274238  |
| wavelet-HLH | firstorder | Median                           | -34.55693841 |
| wavelet-HLH | firstorder | Energy                           | 171939.9837  |
| wavelet-HLH | firstorder | RobustMeanAbsoluteDeviation      | 65.08095228  |
| wavelet-HLH | firstorder | MeanAbsoluteDeviation            | 82.40368112  |
| wavelet-HLH | firstorder | TotalEnergy                      | 4642379.56   |
| wavelet-HLH | firstorder | Maximum                          | 190.2238424  |
| wavelet-HLH | firstorder | RootMeanSquared                  | 95.12871715  |
| wavelet-HLH | firstorder | 90Percentile                     | 154.1217476  |
| wavelet-HLH | firstorder | Minimum                          | -110.8412944 |
| wavelet-HLH | firstorder | Entropy                          | 3.070847094  |
| wavelet-HLH | firstorder | Range                            | 301.0651368  |
| wavelet-HLH | firstorder | Variance                         | 9044.961901  |
| wavelet-HLH | firstorder | 10Percentile                     | -90.22029918 |
| wavelet-HLH | firstorder | Kurtosis                         | 2.135776343  |
| wavelet-HLH | firstorder | Mean                             | -2.123893895 |
| wavelet-HLH | glrlm      | ShortRunLowGrayLevelEmphasis     | 0.143572651  |
| wavelet-HLH | glrlm      | GrayLevelVariance                | 14.6463621   |
| wavelet-HLH | glrlm      | LowGrayLevelRunEmphasis          | 0.147433179  |
| wavelet-HLH | glrlm      | GrayLevelNonUniformityNormalized | 0.138563436  |
| wavelet-HLH | glrlm      | RunVariance                      | 0.028078451  |
| wavelet-HLH | glrlm      | GrayLevelNonUniformity           | 2.560318594  |
| wavelet-HLH | glrlm      | LongRunEmphasis                  | 1.092760181  |
| wavelet-HLH | glrlm      | ShortRunHighGrayLevelEmphasis    | 44.42124778  |
| wavelet-HLH | glrlm      | RunLengthNonUniformity           | 17.4826546   |
| wavelet-HLH | glrlm      | ShortRunEmphasis                 | 0.976809955  |
| wavelet-HLH | glrlm      | LongRunHighGrayLevelEmphasis     | 46.0850864   |
| wavelet-HLH | glrlm      | RunPercentage                    | 0.971659919  |
| wavelet-HLH | glrlm      | LongRunLowGrayLevelEmphasis      | 0.162875287  |
| wavelet-HLH | glrlm      | RunEntropy                       | 3.150805419  |

|             |       |                                  |             |
|-------------|-------|----------------------------------|-------------|
| wavelet-HLH | glrlm | HighGrayLevelRunEmphasis         | 44.75401551 |
| wavelet-HLH | glrlm | RunLengthNonUniformityNormalized | 0.943843098 |
| wavelet-HLH | glszm | GrayLevelVariance                | 16.98224852 |
| wavelet-HLH | glszm | ZoneVariance                     | 0.402366864 |
| wavelet-HLH | glszm | GrayLevelNonUniformityNormalized | 0.112426036 |
| wavelet-HLH | glszm | SizeZoneNonUniformityNormalized  | 0.479289941 |
| wavelet-HLH | glszm | SizeZoneNonUniformity            | 6.230769231 |
| wavelet-HLH | glszm | GrayLevelNonUniformity           | 1.461538462 |
| wavelet-HLH | glszm | LargeAreaEmphasis                | 2.538461538 |
| wavelet-HLH | glszm | SmallAreaHighGrayLevelEmphasis   | 51.47649573 |
| wavelet-HLH | glszm | ZonePercentage                   | 0.684210526 |
| wavelet-HLH | glszm | LargeAreaLowGrayLevelEmphasis    | 0.396547635 |
| wavelet-HLH | glszm | LargeAreaHighGrayLevelEmphasis   | 79.30769231 |
| wavelet-HLH | glszm | HighGrayLevelZoneEmphasis        | 56.76923077 |
| wavelet-HLH | glszm | SmallAreaEmphasis                | 0.700854701 |
| wavelet-HLH | glszm | LowGrayLevelZoneEmphasis         | 0.145427803 |
| wavelet-HLH | glszm | ZoneEntropy                      | 3.546593564 |
| wavelet-HLH | glszm | SmallAreaLowGrayLevelEmphasis    | 0.104015366 |
| wavelet-HLH | ngtdm | Coarseness                       | 0.110287475 |
| wavelet-HLH | ngtdm | Complexity                       | 185.5971382 |
| wavelet-HLH | ngtdm | Strength                         | 10.21283245 |
| wavelet-HLH | ngtdm | Contrast                         | 1.041812345 |
| wavelet-HLH | ngtdm | Busyness                         | 0.282421381 |

| Image type | Feature Class | Feature Name                         |                                                                                                                                                                                                                                                                                                                                                                                                                                                 |
|------------|---------------|--------------------------------------|-------------------------------------------------------------------------------------------------------------------------------------------------------------------------------------------------------------------------------------------------------------------------------------------------------------------------------------------------------------------------------------------------------------------------------------------------|
| general    | info          | BoundingBox                          | 4: RTSTRUCT: C99-DNU_segment_ITV<br>(0, 1, 1, 7, 6, 15)                                                                                                                                                                                                                                                                                                                                                                                         |
| general    | info          | EnabledImageTypes                    | {u'Original': {}, u'Wavelet': {}}                                                                                                                                                                                                                                                                                                                                                                                                               |
|            |               |                                      | {'distances': [1], 'additionalInfo': True,<br>'force2D': False, 'interpolator': 'sitkBSpline',<br>'resampledPixelSpacing': [3.0], 'label': 1,<br>'normalizeScale': 1, 'normalize': False,<br>'force2Ddimension': 0, 'removeOutliers':<br>None, 'minimumROISize': None,<br>u'binWidth': 25.0,<br>'minimumROIDimensions': 1,<br>u'correctMask': True, 'preCrop': False,<br>u'symmetricalGLCM': True,<br>'resegmentRange': None, 'padDistance': 5} |
| general    | info          | GeneralSettings                      | a3dd8b75e538c3806eb22051287f3de22e6<br>e57f7                                                                                                                                                                                                                                                                                                                                                                                                    |
| general    | info          | ImageHash                            | (0.9765625000000002,<br>0.9765625000000002, 2.0)                                                                                                                                                                                                                                                                                                                                                                                                |
| general    | info          | ImageSpacing                         | 137a80e6dcc20888afb4cf6c4703a7c8b99e<br>a9aa                                                                                                                                                                                                                                                                                                                                                                                                    |
| general    | info          | MaskHash                             | 1.13.1                                                                                                                                                                                                                                                                                                                                                                                                                                          |
| general    | info          | NumpyVersion                         | 0.5.2                                                                                                                                                                                                                                                                                                                                                                                                                                           |
| general    | info          | PyWaveletVersion                     | 1.1.0                                                                                                                                                                                                                                                                                                                                                                                                                                           |
| general    | info          | SimpleITKVersion                     | 1.3.0.post102+g1b0eb74                                                                                                                                                                                                                                                                                                                                                                                                                          |
| general    | info          | Version                              |                                                                                                                                                                                                                                                                                                                                                                                                                                                 |
| general    | info          | VolumeNum                            | 1                                                                                                                                                                                                                                                                                                                                                                                                                                               |
| general    | info          | VoxelNum                             | 80                                                                                                                                                                                                                                                                                                                                                                                                                                              |
| original   | shape         | Maximum3DDiameter                    | 44.69899328                                                                                                                                                                                                                                                                                                                                                                                                                                     |
| original   | shape         | Maximum2DDiameterSlice               | 13.41640786                                                                                                                                                                                                                                                                                                                                                                                                                                     |
| original   | shape         | Sphericity                           | 0.60890928                                                                                                                                                                                                                                                                                                                                                                                                                                      |
| original   | shape         | MinorAxis                            | 13.11607348                                                                                                                                                                                                                                                                                                                                                                                                                                     |
| original   | shape         | Elongation                           | 0.283684812                                                                                                                                                                                                                                                                                                                                                                                                                                     |
| original   | shape         | SurfaceVolumeRatio                   | 0.614393975                                                                                                                                                                                                                                                                                                                                                                                                                                     |
| original   | shape         | Volume                               | 2160                                                                                                                                                                                                                                                                                                                                                                                                                                            |
| original   | shape         | MajorAxis                            | 46.23466931                                                                                                                                                                                                                                                                                                                                                                                                                                     |
| original   | shape         | SurfaceArea                          | 1327.090985                                                                                                                                                                                                                                                                                                                                                                                                                                     |
| original   | shape         | Flatness                             | 0.228136557                                                                                                                                                                                                                                                                                                                                                                                                                                     |
| original   | shape         | LeastAxis                            | 10.54781829                                                                                                                                                                                                                                                                                                                                                                                                                                     |
| original   | shape         | Maximum2DDiameterColumn              | 28.46049894                                                                                                                                                                                                                                                                                                                                                                                                                                     |
| original   | shape         | Maximum2DDiameterRow                 | 44.59820624                                                                                                                                                                                                                                                                                                                                                                                                                                     |
| original   | gldm          | GrayLevelVariance                    | 153.1560938                                                                                                                                                                                                                                                                                                                                                                                                                                     |
| original   | gldm          | HighGrayLevelEmphasis                | 790.0875                                                                                                                                                                                                                                                                                                                                                                                                                                        |
| original   | gldm          | DependenceEntropy                    | 5.245191026                                                                                                                                                                                                                                                                                                                                                                                                                                     |
| original   | gldm          | DependenceNonUniformity              | 43.975                                                                                                                                                                                                                                                                                                                                                                                                                                          |
| original   | gldm          | GrayLevelNonUniformity               | 2.775                                                                                                                                                                                                                                                                                                                                                                                                                                           |
| original   | gldm          | SmallDependenceEmphasis              | 0.760416667                                                                                                                                                                                                                                                                                                                                                                                                                                     |
| original   | gldm          | SmallDependenceHighGrayLevelEmphasis | 565.6979167                                                                                                                                                                                                                                                                                                                                                                                                                                     |
| original   | gldm          | DependenceNonUniformityNormalized    | 0.5496875                                                                                                                                                                                                                                                                                                                                                                                                                                       |
| original   | gldm          | LargeDependenceEmphasis              | 2.125                                                                                                                                                                                                                                                                                                                                                                                                                                           |
| original   | gldm          | LargeDependenceLowGrayLevelEmphasis  | 0.031999392                                                                                                                                                                                                                                                                                                                                                                                                                                     |
| original   | gldm          | DependenceVariance                   | 0.3025                                                                                                                                                                                                                                                                                                                                                                                                                                          |



|          |            |                                      |              |
|----------|------------|--------------------------------------|--------------|
| original | gldm       | LargeDependenceHighGrayLevelEmphasis | 1967.8125    |
| original | gldm       | SmallDependenceLowGrayLevelEmphasis  | 0.015899541  |
| original | gldm       | LowGrayLevelEmphasis                 | 0.019099682  |
| original | glcm       | JointAverage                         | 25.81411597  |
| original | glcm       | SumAverage                           | 51.62823193  |
| original | glcm       | JointEntropy                         | 5.858171973  |
| original | glcm       | ClusterShade                         | -398.384314  |
| original | glcm       | MaximumProbability                   | 0.030727493  |
| original | glcm       | ldmn                                 | 0.952177642  |
| original | glcm       | JointEnergy                          | 0.018273415  |
| original | glcm       | Contrast                             | 222.9597218  |
| original | glcm       | DifferenceEntropy                    | 4.048414288  |
| original | glcm       | InverseVariance                      | 0.066074976  |
| original | glcm       | DifferenceVariance                   | 74.71578919  |
| original | glcm       | ldn                                  | 0.851537987  |
| original | glcm       | ldm                                  | 0.075174118  |
| original | glcm       | Correlation                          | 0.197578451  |
| original | glcm       | Autocorrelation                      | 694.8298678  |
| original | glcm       | SumEntropy                           | 4.50630159   |
| original | glcm       | SumSquares                           | 138.8716556  |
| original | glcm       | ClusterProminence                    | 280107.1181  |
| original | glcm       | lmc2                                 | 0.999424462  |
| original | glcm       | lmc1                                 | -0.739491428 |
| original | glcm       | DifferenceAverage                    | 12.09344292  |
| original | glcm       | ld                                   | 0.151153001  |
| original | glcm       | ClusterTendency                      | 332.5269005  |
| original | firstorder | InterquartileRange                   | 493.25       |
| original | firstorder | Skewness                             | 0.178684315  |
| original | firstorder | Uniformity                           | 0.0346875    |
| original | firstorder | Median                               | -351         |
| original | firstorder | Energy                               | 17885547     |
| original | firstorder | RobustMeanAbsoluteDeviation          | 197.6699219  |
| original | firstorder | MeanAbsoluteDeviation                | 258.0221875  |
| original | firstorder | TotalEnergy                          | 482909769    |
| original | firstorder | Maximum                              | 615          |
| original | firstorder | RootMeanSquared                      | 472.8311935  |
| original | firstorder | 90Percentile                         | 29.1         |
| original | firstorder | Minimum                              | -953         |
| original | firstorder | Entropy                              | 5.001641733  |
| original | firstorder | Range                                | 1568         |
| original | firstorder | Variance                             | 95843.51234  |
| original | firstorder | 10Percentile                         | -749.7       |
| original | firstorder | Kurtosis                             | 2.740521214  |
| original | firstorder | Mean                                 | -357.3875    |
| original | glrlm      | ShortRunLowGrayLevelEmphasis         | 0.019068503  |
| original | glrlm      | GrayLevelVariance                    | 152.4351949  |
| original | glrlm      | LowGrayLevelRunEmphasis              | 0.019195118  |
| original | glrlm      | GrayLevelNonUniformityNormalized     | 0.034646661  |
| original | glrlm      | RunVariance                          | 0.013447431  |
| original | glrlm      | GrayLevelNonUniformity               | 2.734403757  |
| original | glrlm      | LongRunEmphasis                      | 1.041506846  |
| original | glrlm      | ShortRunHighGrayLevelEmphasis        | 776.8107783  |

|             |       |                                      |              |
|-------------|-------|--------------------------------------|--------------|
| original    | glrlm | RunLengthNonUniformity               | 76.82908304  |
| original    | glrlm | ShortRunEmphasis                     | 0.989623289  |
| original    | glrlm | LongRunHighGrayLevelEmphasis         | 828.6852104  |
| original    | glrlm | RunPercentage                        | 0.986538462  |
| original    | glrlm | LongRunLowGrayLevelEmphasis          | 0.019701578  |
| original    | glrlm | RunEntropy                           | 5.026172103  |
| original    | glrlm | HighGrayLevelRunEmphasis             | 787.1856647  |
| original    | glrlm | RunLengthNonUniformityNormalized     | 0.973105138  |
| original    | glszm | GrayLevelVariance                    | 143.8578748  |
| original    | glszm | ZoneVariance                         | 0.186233014  |
| original    | glszm | GrayLevelNonUniformityNormalized     | 0.034528848  |
| original    | glszm | SizeZoneNonUniformityNormalized      | 0.701047004  |
| original    | glszm | SizeZoneNonUniformity                | 46.97014925  |
| original    | glszm | GrayLevelNonUniformity               | 2.313432836  |
| original    | glszm | LargeAreaEmphasis                    | 1.611940299  |
| original    | glszm | SmallAreaHighGrayLevelEmphasis       | 636.3810116  |
| original    | glszm | ZonePercentage                       | 0.8375       |
| original    | glszm | LargeAreaLowGrayLevelEmphasis        | 0.027922046  |
| original    | glszm | LargeAreaHighGrayLevelEmphasis       | 1361.955224  |
| original    | glszm | HighGrayLevelZoneEmphasis            | 759.1940299  |
| original    | glszm | SmallAreaEmphasis                    | 0.863598673  |
| original    | glszm | LowGrayLevelZoneEmphasis             | 0.020256242  |
| original    | glszm | ZoneEntropy                          | 5.209610415  |
| original    | glszm | SmallAreaLowGrayLevelEmphasis        | 0.018349656  |
| original    | ngtdm | Coarseness                           | 0.041000662  |
| original    | ngtdm | Complexity                           | 5869.81821   |
| original    | ngtdm | Strength                             | 33.68424807  |
| original    | ngtdm | Contrast                             | 2.227971643  |
| original    | ngtdm | Busyness                             | 0.033471507  |
| wavelet-HHH | gldm  | GrayLevelVariance                    | 40.724375    |
| wavelet-HHH | gldm  | HighGrayLevelEmphasis                | 897.75       |
| wavelet-HHH | gldm  | DependenceEntropy                    | 4.841882745  |
| wavelet-HHH | gldm  | DependenceNonUniformity              | 33.9         |
| wavelet-HHH | gldm  | GrayLevelNonUniformity               | 6.075        |
| wavelet-HHH | gldm  | SmallDependenceEmphasis              | 0.656944444  |
| wavelet-HHH | gldm  | SmallDependenceHighGrayLevelEmphasis | 591.6381944  |
| wavelet-HHH | gldm  | DependenceNonUniformityNormalized    | 0.42375      |
| wavelet-HHH | gldm  | LargeDependenceEmphasis              | 3.15         |
| wavelet-HHH | gldm  | LargeDependenceLowGrayLevelEmphasis  | 0.016443694  |
| wavelet-HHH | gldm  | DependenceVariance                   | 0.59         |
| wavelet-HHH | gldm  | LargeDependenceHighGrayLevelEmphasis | 2807.975     |
| wavelet-HHH | gldm  | SmallDependenceLowGrayLevelEmphasis  | 0.013548651  |
| wavelet-HHH | gldm  | LowGrayLevelEmphasis                 | 0.013945653  |
| wavelet-HHH | glcm  | JointAverage                         | 29.47224697  |
| wavelet-HHH | glcm  | SumAverage                           | 58.94449395  |
| wavelet-HHH | glcm  | JointEntropy                         | 5.62575843   |
| wavelet-HHH | glcm  | ClusterShade                         | -419.5528854 |
| wavelet-HHH | glcm  | MaximumProbability                   | 0.041218008  |
| wavelet-HHH | glcm  | ldmn                                 | 0.980175012  |
| wavelet-HHH | glcm  | JointEnergy                          | 0.022258742  |
| wavelet-HHH | glcm  | Contrast                             | 63.25672953  |
| wavelet-HHH | glcm  | DifferenceEntropy                    | 3.391310432  |

|             |            |                                  |              |
|-------------|------------|----------------------------------|--------------|
| wavelet-HHH | glcm       | InverseVariance                  | 0.200284782  |
| wavelet-HHH | glcm       | DifferenceVariance               | 31.28101598  |
| wavelet-HHH | glcm       | Idn                              | 0.910773164  |
| wavelet-HHH | glcm       | Idm                              | 0.177567255  |
| wavelet-HHH | glcm       | Correlation                      | -0.08058241  |
| wavelet-HHH | glcm       | Autocorrelation                  | 866.842281   |
| wavelet-HHH | glcm       | SumEntropy                       | 3.845982385  |
| wavelet-HHH | glcm       | SumSquares                       | 29.55617292  |
| wavelet-HHH | glcm       | ClusterProminence                | 28531.27483  |
| wavelet-HHH | glcm       | Imc2                             | 0.986432944  |
| wavelet-HHH | glcm       | Imc1                             | -0.49439665  |
| wavelet-HHH | glcm       | DifferenceAverage                | 5.54423314   |
| wavelet-HHH | glcm       | Id                               | 0.269408426  |
| wavelet-HHH | glcm       | ClusterTendency                  | 54.96796214  |
| wavelet-HHH | firstorder | InterquartileRange               | 142.6107848  |
| wavelet-HHH | firstorder | Skewness                         | -1.048720209 |
| wavelet-HHH | firstorder | Uniformity                       | 0.0759375    |
| wavelet-HHH | firstorder | Median                           | -15.96943222 |
| wavelet-HHH | firstorder | Energy                           | 2067719.54   |
| wavelet-HHH | firstorder | RobustMeanAbsoluteDeviation      | 61.2090332   |
| wavelet-HHH | firstorder | MeanAbsoluteDeviation            | 104.0495826  |
| wavelet-HHH | firstorder | TotalEnergy                      | 55828427.58  |
| wavelet-HHH | firstorder | Maximum                          | 554.3859859  |
| wavelet-HHH | firstorder | RootMeanSquared                  | 160.7684492  |
| wavelet-HHH | firstorder | 90Percentile                     | 123.6131687  |
| wavelet-HHH | firstorder | Minimum                          | -722.8156954 |
| wavelet-HHH | firstorder | Entropy                          | 3.958206219  |
| wavelet-HHH | firstorder | Range                            | 1277.201681  |
| wavelet-HHH | firstorder | Variance                         | 25809.16586  |
| wavelet-HHH | firstorder | 10Percentile                     | -117.3215676 |
| wavelet-HHH | firstorder | Kurtosis                         | 9.600523214  |
| wavelet-HHH | firstorder | Mean                             | -6.10969628  |
| wavelet-HHH | glrlm      | ShortRunLowGrayLevelEmphasis     | 0.014229831  |
| wavelet-HHH | glrlm      | GrayLevelVariance                | 41.51554753  |
| wavelet-HHH | glrlm      | LowGrayLevelRunEmphasis          | 0.014250575  |
| wavelet-HHH | glrlm      | GrayLevelNonUniformityNormalized | 0.075235641  |
| wavelet-HHH | glrlm      | RunVariance                      | 0.023049818  |
| wavelet-HHH | glrlm      | GrayLevelNonUniformity           | 5.880263626  |
| wavelet-HHH | glrlm      | LongRunEmphasis                  | 1.071544814  |
| wavelet-HHH | glrlm      | ShortRunHighGrayLevelEmphasis    | 882.0039255  |
| wavelet-HHH | glrlm      | RunLengthNonUniformity           | 74.58495416  |
| wavelet-HHH | glrlm      | ShortRunEmphasis                 | 0.982113797  |
| wavelet-HHH | glrlm      | LongRunHighGrayLevelEmphasis     | 961.6236254  |
| wavelet-HHH | glrlm      | RunPercentage                    | 0.976923077  |
| wavelet-HHH | glrlm      | LongRunLowGrayLevelEmphasis      | 0.014333549  |
| wavelet-HHH | glrlm      | RunEntropy                       | 4.059757547  |
| wavelet-HHH | glrlm      | HighGrayLevelRunEmphasis         | 897.9278655  |
| wavelet-HHH | glrlm      | RunLengthNonUniformityNormalized | 0.953900364  |
| wavelet-HHH | glszm      | GrayLevelVariance                | 52.28784832  |
| wavelet-HHH | glszm      | ZoneVariance                     | 0.602125826  |
| wavelet-HHH | glszm      | GrayLevelNonUniformityNormalized | 0.068083884  |
| wavelet-HHH | glszm      | SizeZoneNonUniformityNormalized  | 0.629416834  |

|             |       |                                      |              |
|-------------|-------|--------------------------------------|--------------|
| wavelet-HHH | glszm | SizeZoneNonUniformity                | 37.13559322  |
| wavelet-HHH | glszm | GrayLevelNonUniformity               | 4.016949153  |
| wavelet-HHH | glszm | LargeAreaEmphasis                    | 2.440677966  |
| wavelet-HHH | glszm | SmallAreaHighGrayLevelEmphasis       | 736.3308098  |
| wavelet-HHH | glszm | ZonePercentage                       | 0.7375       |
| wavelet-HHH | glszm | LargeAreaLowGrayLevelEmphasis        | 0.020097647  |
| wavelet-HHH | glszm | LargeAreaHighGrayLevelEmphasis       | 2243.59322   |
| wavelet-HHH | glszm | HighGrayLevelZoneEmphasis            | 894.2711864  |
| wavelet-HHH | glszm | SmallAreaEmphasis                    | 0.819416196  |
| wavelet-HHH | glszm | LowGrayLevelZoneEmphasis             | 0.018503864  |
| wavelet-HHH | glszm | ZoneEntropy                          | 4.706641728  |
| wavelet-HHH | glszm | SmallAreaLowGrayLevelEmphasis        | 0.018291177  |
| wavelet-HHH | ngtdm | Coarseness                           | 0.049779342  |
| wavelet-HHH | ngtdm | Complexity                           | 1340.316873  |
| wavelet-HHH | ngtdm | Strength                             | 18.02197015  |
| wavelet-HHH | ngtdm | Contrast                             | 0.947314974  |
| wavelet-HHH | ngtdm | Busyness                             | 0.036897152  |
| wavelet-HLL | gldm  | GrayLevelVariance                    | 73.71234375  |
| wavelet-HLL | gldm  | HighGrayLevelEmphasis                | 858.4125     |
| wavelet-HLL | gldm  | DependenceEntropy                    | 5.178378802  |
| wavelet-HLL | gldm  | DependenceNonUniformity              | 37.7         |
| wavelet-HLL | gldm  | GrayLevelNonUniformity               | 3.875        |
| wavelet-HLL | gldm  | SmallDependenceEmphasis              | 0.689583333  |
| wavelet-HLL | gldm  | SmallDependenceHighGrayLevelEmphasis | 580.2520833  |
| wavelet-HLL | gldm  | DependenceNonUniformityNormalized    | 0.47125      |
| wavelet-HLL | gldm  | LargeDependenceEmphasis              | 2.575        |
| wavelet-HLL | gldm  | LargeDependenceLowGrayLevelEmphasis  | 0.016943259  |
| wavelet-HLL | gldm  | DependenceVariance                   | 0.399375     |
| wavelet-HLL | gldm  | LargeDependenceHighGrayLevelEmphasis | 2254.3875    |
| wavelet-HLL | gldm  | SmallDependenceLowGrayLevelEmphasis  | 0.014583667  |
| wavelet-HLL | gldm  | LowGrayLevelEmphasis                 | 0.014973723  |
| wavelet-HLL | glcm  | JointAverage                         | 28.18024193  |
| wavelet-HLL | glcm  | SumAverage                           | 56.36048386  |
| wavelet-HLL | glcm  | JointEntropy                         | 5.775632037  |
| wavelet-HLL | glcm  | ClusterShade                         | -1556.899995 |
| wavelet-HLL | glcm  | MaximumProbability                   | 0.03490667   |
| wavelet-HLL | glcm  | ldmn                                 | 0.945508516  |
| wavelet-HLL | glcm  | JointEnergy                          | 0.019765639  |
| wavelet-HLL | glcm  | Contrast                             | 137.4464926  |
| wavelet-HLL | glcm  | DifferenceEntropy                    | 3.670256238  |
| wavelet-HLL | glcm  | InverseVariance                      | 0.148804543  |
| wavelet-HLL | glcm  | DifferenceVariance                   | 59.21585879  |
| wavelet-HLL | glcm  | ldn                                  | 0.856046696  |
| wavelet-HLL | glcm  | ldm                                  | 0.135094323  |
| wavelet-HLL | glcm  | Correlation                          | 0.108313511  |
| wavelet-HLL | glcm  | Autocorrelation                      | 802.67637    |
| wavelet-HLL | glcm  | SumEntropy                           | 4.261735515  |
| wavelet-HLL | glcm  | SumSquares                           | 76.81202177  |
| wavelet-HLL | glcm  | ClusterProminence                    | 114267.1592  |
| wavelet-HLL | glcm  | lmc2                                 | 0.998556552  |
| wavelet-HLL | glcm  | lmc1                                 | -0.690166703 |
| wavelet-HLL | glcm  | DifferenceAverage                    | 8.578493696  |

|             |            |                                  |              |
|-------------|------------|----------------------------------|--------------|
| wavelet-HLL | glcm       | Id                               | 0.21806719   |
| wavelet-HLL | glcm       | ClusterTendency                  | 169.8015945  |
| wavelet-HLL | firstorder | InterquartileRange               | 213.2481605  |
| wavelet-HLL | firstorder | Skewness                         | -0.686340923 |
| wavelet-HLL | firstorder | Uniformity                       | 0.0484375    |
| wavelet-HLL | firstorder | Median                           | 11.39430057  |
| wavelet-HLL | firstorder | Energy                           | 3705868.038  |
| wavelet-HLL | firstorder | RobustMeanAbsoluteDeviation      | 107.2485599  |
| wavelet-HLL | firstorder | MeanAbsoluteDeviation            | 162.0370395  |
| wavelet-HLL | firstorder | TotalEnergy                      | 100058437    |
| wavelet-HLL | firstorder | Maximum                          | 439.2871968  |
| wavelet-HLL | firstorder | RootMeanSquared                  | 215.2286005  |
| wavelet-HLL | firstorder | 90Percentile                     | 260.9638783  |
| wavelet-HLL | firstorder | Minimum                          | -658.9825792 |
| wavelet-HLL | firstorder | Entropy                          | 4.613662903  |
| wavelet-HLL | firstorder | Range                            | 1098.269776  |
| wavelet-HLL | firstorder | Variance                         | 46166.73567  |
| wavelet-HLL | firstorder | 10Percentile                     | -273.5448547 |
| wavelet-HLL | firstorder | Kurtosis                         | 3.7908054    |
| wavelet-HLL | firstorder | Mean                             | 12.51458349  |
| wavelet-HLL | glrlm      | ShortRunLowGrayLevelEmphasis     | 0.015215396  |
| wavelet-HLL | glrlm      | GrayLevelVariance                | 74.59785447  |
| wavelet-HLL | glrlm      | LowGrayLevelRunEmphasis          | 0.015233179  |
| wavelet-HLL | glrlm      | GrayLevelNonUniformityNormalized | 0.04818478   |
| wavelet-HLL | glrlm      | RunVariance                      | 0.018238921  |
| wavelet-HLL | glrlm      | GrayLevelNonUniformity           | 3.784383797  |
| wavelet-HLL | glrlm      | LongRunEmphasis                  | 1.056732751  |
| wavelet-HLL | glrlm      | ShortRunHighGrayLevelEmphasis    | 845.1935486  |
| wavelet-HLL | glrlm      | RunLengthNonUniformity           | 75.71805442  |
| wavelet-HLL | glrlm      | ShortRunEmphasis                 | 0.985816812  |
| wavelet-HLL | glrlm      | LongRunHighGrayLevelEmphasis     | 908.3056607  |
| wavelet-HLL | glrlm      | RunPercentage                    | 0.981730769  |
| wavelet-HLL | glrlm      | LongRunLowGrayLevelEmphasis      | 0.015304311  |
| wavelet-HLL | glrlm      | RunEntropy                       | 4.669670926  |
| wavelet-HLL | glrlm      | HighGrayLevelRunEmphasis         | 857.815971   |
| wavelet-HLL | glrlm      | RunLengthNonUniformityNormalized | 0.963522158  |
| wavelet-HLL | glszm      | GrayLevelVariance                | 85.75963719  |
| wavelet-HLL | glszm      | ZoneVariance                     | 0.260519022  |
| wavelet-HLL | glszm      | GrayLevelNonUniformityNormalized | 0.046107332  |
| wavelet-HLL | glszm      | SizeZoneNonUniformityNormalized  | 0.624086672  |
| wavelet-HLL | glszm      | SizeZoneNonUniformity            | 39.31746032  |
| wavelet-HLL | glszm      | GrayLevelNonUniformity           | 2.904761905  |
| wavelet-HLL | glszm      | LargeAreaEmphasis                | 1.873015873  |
| wavelet-HLL | glszm      | SmallAreaHighGrayLevelEmphasis   | 683.9545855  |
| wavelet-HLL | glszm      | ZonePercentage                   | 0.7875       |
| wavelet-HLL | glszm      | LargeAreaLowGrayLevelEmphasis    | 0.019769954  |
| wavelet-HLL | glszm      | LargeAreaHighGrayLevelEmphasis   | 1626.968254  |
| wavelet-HLL | glszm      | HighGrayLevelZoneEmphasis        | 848.5714286  |
| wavelet-HLL | glszm      | SmallAreaEmphasis                | 0.8170194    |
| wavelet-HLL | glszm      | LowGrayLevelZoneEmphasis         | 0.018675382  |
| wavelet-HLL | glszm      | ZoneEntropy                      | 5.120547091  |
| wavelet-HLL | glszm      | SmallAreaLowGrayLevelEmphasis    | 0.018445053  |

|             |            |                                      |              |
|-------------|------------|--------------------------------------|--------------|
| wavelet-HLL | ngtdm      | Coarseness                           | 0.055980623  |
| wavelet-HLL | ngtdm      | Complexity                           | 2378.595796  |
| wavelet-HLL | ngtdm      | Strength                             | 26.81395533  |
| wavelet-HLL | ngtdm      | Contrast                             | 0.946021492  |
| wavelet-HLL | ngtdm      | Busyness                             | 0.024164935  |
| wavelet-LHL | gldm       | GrayLevelVariance                    | 448.374375   |
| wavelet-LHL | gldm       | HighGrayLevelEmphasis                | 3476.125     |
| wavelet-LHL | gldm       | DependenceEntropy                    | 5.543619814  |
| wavelet-LHL | gldm       | DependenceNonUniformity              | 51.3         |
| wavelet-LHL | gldm       | GrayLevelNonUniformity               | 2.375        |
| wavelet-LHL | gldm       | SmallDependenceEmphasis              | 0.827777778  |
| wavelet-LHL | gldm       | SmallDependenceHighGrayLevelEmphasis | 2847.234028  |
| wavelet-LHL | gldm       | DependenceNonUniformityNormalized    | 0.64125      |
| wavelet-LHL | gldm       | LargeDependenceEmphasis              | 1.8          |
| wavelet-LHL | gldm       | LargeDependenceLowGrayLevelEmphasis  | 0.013381057  |
| wavelet-LHL | gldm       | DependenceVariance                   | 0.2375       |
| wavelet-LHL | gldm       | LargeDependenceHighGrayLevelEmphasis | 6226.8       |
| wavelet-LHL | gldm       | SmallDependenceLowGrayLevelEmphasis  | 0.01298789   |
| wavelet-LHL | gldm       | LowGrayLevelEmphasis                 | 0.013056021  |
| wavelet-LHL | glcm       | JointAverage                         | 57.87966393  |
| wavelet-LHL | glcm       | SumAverage                           | 115.7593279  |
| wavelet-LHL | glcm       | JointEntropy                         | 5.863370583  |
| wavelet-LHL | glcm       | ClusterShade                         | 4441.600725  |
| wavelet-LHL | glcm       | MaximumProbability                   | 0.032169801  |
| wavelet-LHL | glcm       | Idmn                                 | 0.924712198  |
| wavelet-LHL | glcm       | JointEnergy                          | 0.018504851  |
| wavelet-LHL | glcm       | Contrast                             | 925.2883913  |
| wavelet-LHL | glcm       | DifferenceEntropy                    | 4.251947519  |
| wavelet-LHL | glcm       | InverseVariance                      | 0.045152742  |
| wavelet-LHL | glcm       | DifferenceVariance                   | 253.4400593  |
| wavelet-LHL | glcm       | Idn                                  | 0.821849508  |
| wavelet-LHL | glcm       | Idm                                  | 0.053410597  |
| wavelet-LHL | glcm       | Correlation                          | -0.04948864  |
| wavelet-LHL | glcm       | Autocorrelation                      | 3331.042626  |
| wavelet-LHL | glcm       | SumEntropy                           | 4.641090319  |
| wavelet-LHL | glcm       | SumSquares                           | 439.127337   |
| wavelet-LHL | glcm       | ClusterProminence                    | 2364089.769  |
| wavelet-LHL | glcm       | Imc2                                 | 0.999858585  |
| wavelet-LHL | glcm       | Imc1                                 | -0.827136529 |
| wavelet-LHL | glcm       | DifferenceAverage                    | 24.19850329  |
| wavelet-LHL | glcm       | Id                                   | 0.106514386  |
| wavelet-LHL | glcm       | ClusterTendency                      | 831.2209567  |
| wavelet-LHL | firstorder | InterquartileRange                   | 649.9451346  |
| wavelet-LHL | firstorder | Skewness                             | 0.101659687  |
| wavelet-LHL | firstorder | Uniformity                           | 0.0296875    |
| wavelet-LHL | firstorder | Median                               | -164.0450758 |
| wavelet-LHL | firstorder | Energy                               | 23046628.64  |
| wavelet-LHL | firstorder | RobustMeanAbsoluteDeviation          | 298.6748928  |
| wavelet-LHL | firstorder | MeanAbsoluteDeviation                | 426.9094932  |
| wavelet-LHL | firstorder | TotalEnergy                          | 622258973.3  |
| wavelet-LHL | firstorder | Maximum                              | 1042.948057  |
| wavelet-LHL | firstorder | RootMeanSquared                      | 536.7335074  |

|             |            |                                      |              |
|-------------|------------|--------------------------------------|--------------|
| wavelet-LHL | firstorder | 90Percentile                         | 619.4240523  |
| wavelet-LHL | firstorder | Minimum                              | -1438.95261  |
| wavelet-LHL | firstorder | Entropy                              | 5.305875438  |
| wavelet-LHL | firstorder | Range                                | 2481.900667  |
| wavelet-LHL | firstorder | Variance                             | 280566.0454  |
| wavelet-LHL | firstorder | 10Percentile                         | -768.3907006 |
| wavelet-LHL | firstorder | Kurtosis                             | 2.69820603   |
| wavelet-LHL | firstorder | Mean                                 | -86.69955366 |
| wavelet-LHL | glrlm      | ShortRunLowGrayLevelEmphasis         | 0.013177814  |
| wavelet-LHL | glrlm      | GrayLevelVariance                    | 449.6205284  |
| wavelet-LHL | glrlm      | LowGrayLevelRunEmphasis              | 0.013180497  |
| wavelet-LHL | glrlm      | GrayLevelNonUniformityNormalized     | 0.029522242  |
| wavelet-LHL | glrlm      | RunVariance                          | 0.011582406  |
| wavelet-LHL | glrlm      | GrayLevelNonUniformity               | 2.339291064  |
| wavelet-LHL | glrlm      | LongRunEmphasis                      | 1.031483285  |
| wavelet-LHL | glrlm      | ShortRunHighGrayLevelEmphasis        | 3450.917235  |
| wavelet-LHL | glrlm      | RunLengthNonUniformity               | 77.87568971  |
| wavelet-LHL | glrlm      | ShortRunEmphasis                     | 0.993224949  |
| wavelet-LHL | glrlm      | LongRunHighGrayLevelEmphasis         | 3583.83886   |
| wavelet-LHL | glrlm      | RunPercentage                        | 0.990384615  |
| wavelet-LHL | glrlm      | LongRunLowGrayLevelEmphasis          | 0.013193297  |
| wavelet-LHL | glrlm      | RunEntropy                           | 5.322963278  |
| wavelet-LHL | glrlm      | HighGrayLevelRunEmphasis             | 3475.64664   |
| wavelet-LHL | glrlm      | RunLengthNonUniformityNormalized     | 0.982676487  |
| wavelet-LHL | glszm      | GrayLevelVariance                    | 467.4540816  |
| wavelet-LHL | glszm      | ZoneVariance                         | 0.208163265  |
| wavelet-LHL | glszm      | GrayLevelNonUniformityNormalized     | 0.027346939  |
| wavelet-LHL | glszm      | SizeZoneNonUniformityNormalized      | 0.794693878  |
| wavelet-LHL | glszm      | SizeZoneNonUniformity                | 55.62857143  |
| wavelet-LHL | glszm      | GrayLevelNonUniformity               | 1.914285714  |
| wavelet-LHL | glszm      | LargeAreaEmphasis                    | 1.514285714  |
| wavelet-LHL | glszm      | SmallAreaHighGrayLevelEmphasis       | 3130.764286  |
| wavelet-LHL | glszm      | ZonePercentage                       | 0.875        |
| wavelet-LHL | glszm      | LargeAreaLowGrayLevelEmphasis        | 0.015076496  |
| wavelet-LHL | glszm      | LargeAreaHighGrayLevelEmphasis       | 5161.657143  |
| wavelet-LHL | glszm      | HighGrayLevelZoneEmphasis            | 3468.928571  |
| wavelet-LHL | glszm      | SmallAreaEmphasis                    | 0.911607143  |
| wavelet-LHL | glszm      | LowGrayLevelZoneEmphasis             | 0.014863756  |
| wavelet-LHL | glszm      | ZoneEntropy                          | 5.496930695  |
| wavelet-LHL | glszm      | SmallAreaLowGrayLevelEmphasis        | 0.014829559  |
| wavelet-LHL | ngtdm      | Coarseness                           | 0.024860472  |
| wavelet-LHL | ngtdm      | Complexity                           | 26834.51523  |
| wavelet-LHL | ngtdm      | Strength                             | 61.85418032  |
| wavelet-LHL | ngtdm      | Contrast                             | 7.971305435  |
| wavelet-LHL | ngtdm      | Busyness                             | 0.024126254  |
| wavelet-LHH | gldm       | GrayLevelVariance                    | 44.71484375  |
| wavelet-LHH | gldm       | HighGrayLevelEmphasis                | 310.8125     |
| wavelet-LHH | gldm       | DependenceEntropy                    | 4.986077827  |
| wavelet-LHH | gldm       | DependenceNonUniformity              | 41.3         |
| wavelet-LHH | gldm       | GrayLevelNonUniformity               | 4.525        |
| wavelet-LHH | gldm       | SmallDependenceEmphasis              | 0.742361111  |
| wavelet-LHH | gldm       | SmallDependenceHighGrayLevelEmphasis | 247.2777778  |

|             |            |                                      |              |
|-------------|------------|--------------------------------------|--------------|
| wavelet-LHH | gldm       | DependenceNonUniformityNormalized    | 0.51625      |
| wavelet-LHH | gldm       | LargeDependenceEmphasis              | 2.475        |
| wavelet-LHH | gldm       | LargeDependenceLowGrayLevelEmphasis  | 0.030422161  |
| wavelet-LHH | gldm       | DependenceVariance                   | 0.444375     |
| wavelet-LHH | gldm       | LargeDependenceHighGrayLevelEmphasis | 684.0625     |
| wavelet-LHH | gldm       | SmallDependenceLowGrayLevelEmphasis  | 0.020007196  |
| wavelet-LHH | gldm       | LowGrayLevelEmphasis                 | 0.021526187  |
| wavelet-LHH | glcm       | JointAverage                         | 16.29540878  |
| wavelet-LHH | glcm       | SumAverage                           | 32.59081756  |
| wavelet-LHH | glcm       | JointEntropy                         | 5.769816832  |
| wavelet-LHH | glcm       | ClusterShade                         | 330.6575945  |
| wavelet-LHH | glcm       | MaximumProbability                   | 0.035481767  |
| wavelet-LHH | glcm       | ldmn                                 | 0.955550894  |
| wavelet-LHH | glcm       | JointEnergy                          | 0.019839127  |
| wavelet-LHH | glcm       | Contrast                             | 72.65752995  |
| wavelet-LHH | glcm       | DifferenceEntropy                    | 3.595080619  |
| wavelet-LHH | glcm       | InverseVariance                      | 0.13636758   |
| wavelet-LHH | glcm       | DifferenceVariance                   | 23.64000461  |
| wavelet-LHH | glcm       | ldn                                  | 0.855839055  |
| wavelet-LHH | glcm       | ldm                                  | 0.12533154   |
| wavelet-LHH | glcm       | Correlation                          | 0.056256593  |
| wavelet-LHH | glcm       | Autocorrelation                      | 268.3906708  |
| wavelet-LHH | glcm       | SumEntropy                           | 4.14053321   |
| wavelet-LHH | glcm       | SumSquares                           | 38.53441745  |
| wavelet-LHH | glcm       | ClusterProminence                    | 22192.60069  |
| wavelet-LHH | glcm       | lmc2                                 | 0.996674596  |
| wavelet-LHH | glcm       | lmc1                                 | -0.620054225 |
| wavelet-LHH | glcm       | DifferenceAverage                    | 6.91275102   |
| wavelet-LHH | glcm       | ld                                   | 0.215567194  |
| wavelet-LHH | glcm       | ClusterTendency                      | 81.48013986  |
| wavelet-LHH | firstorder | InterquartileRange                   | 222.266468   |
| wavelet-LHH | firstorder | Skewness                             | 0.329980595  |
| wavelet-LHH | firstorder | Uniformity                           | 0.0565625    |
| wavelet-LHH | firstorder | Median                               | 1.408779381  |
| wavelet-LHH | firstorder | Energy                               | 2236550.035  |
| wavelet-LHH | firstorder | RobustMeanAbsoluteDeviation          | 94.3034337   |
| wavelet-LHH | firstorder | MeanAbsoluteDeviation                | 132.6876733  |
| wavelet-LHH | firstorder | TotalEnergy                          | 60386850.95  |
| wavelet-LHH | firstorder | Maximum                              | 545.2927523  |
| wavelet-LHH | firstorder | RootMeanSquared                      | 167.2030964  |
| wavelet-LHH | firstorder | 90Percentile                         | 187.5524353  |
| wavelet-LHH | firstorder | Minimum                              | -398.1917508 |
| wavelet-LHH | firstorder | Entropy                              | 4.432769546  |
| wavelet-LHH | firstorder | Range                                | 943.4845031  |
| wavelet-LHH | firstorder | Variance                             | 27933.52951  |
| wavelet-LHH | firstorder | 10Percentile                         | -210.4046123 |
| wavelet-LHH | firstorder | Kurtosis                             | 3.535457376  |
| wavelet-LHH | firstorder | Mean                                 | -4.831762032 |
| wavelet-LHH | glrlm      | ShortRunLowGrayLevelEmphasis         | 0.021710996  |
| wavelet-LHH | glrlm      | GrayLevelVariance                    | 45.0939511   |
| wavelet-LHH | glrlm      | LowGrayLevelRunEmphasis              | 0.021786593  |
| wavelet-LHH | glrlm      | GrayLevelNonUniformityNormalized     | 0.056197202  |



|             |       |                                      |              |
|-------------|-------|--------------------------------------|--------------|
| wavelet-LHH | glrlm | RunVariance                          | 0.016332833  |
| wavelet-LHH | glrlm | GrayLevelNonUniformity               | 4.422423495  |
| wavelet-LHH | glrlm | LongRunEmphasis                      | 1.050339145  |
| wavelet-LHH | glrlm | ShortRunHighGrayLevelEmphasis        | 308.6913606  |
| wavelet-LHH | glrlm | RunLengthNonUniformity               | 76.14629285  |
| wavelet-LHH | glrlm | ShortRunEmphasis                     | 0.987415214  |
| wavelet-LHH | glrlm | LongRunHighGrayLevelEmphasis         | 324.4123989  |
| wavelet-LHH | glrlm | RunPercentage                        | 0.983653846  |
| wavelet-LHH | glrlm | LongRunLowGrayLevelEmphasis          | 0.022088984  |
| wavelet-LHH | glrlm | RunEntropy                           | 4.493813576  |
| wavelet-LHH | glrlm | HighGrayLevelRunEmphasis             | 311.8355683  |
| wavelet-LHH | glrlm | RunLengthNonUniformityNormalized     | 0.967334334  |
| wavelet-LHH | glszm | GrayLevelVariance                    | 50.46059172  |
| wavelet-LHH | glszm | ZoneVariance                         | 0.331360947  |
| wavelet-LHH | glszm | GrayLevelNonUniformityNormalized     | 0.050887574  |
| wavelet-LHH | glszm | SizeZoneNonUniformityNormalized      | 0.706508876  |
| wavelet-LHH | glszm | SizeZoneNonUniformity                | 45.92307692  |
| wavelet-LHH | glszm | GrayLevelNonUniformity               | 3.307692308  |
| wavelet-LHH | glszm | LargeAreaEmphasis                    | 1.846153846  |
| wavelet-LHH | glszm | SmallAreaHighGrayLevelEmphasis       | 292.5894231  |
| wavelet-LHH | glszm | ZonePercentage                       | 0.8125       |
| wavelet-LHH | glszm | LargeAreaLowGrayLevelEmphasis        | 0.029942186  |
| wavelet-LHH | glszm | LargeAreaHighGrayLevelEmphasis       | 540.3538462  |
| wavelet-LHH | glszm | HighGrayLevelZoneEmphasis            | 325          |
| wavelet-LHH | glszm | SmallAreaEmphasis                    | 0.865918803  |
| wavelet-LHH | glszm | LowGrayLevelZoneEmphasis             | 0.025154081  |
| wavelet-LHH | glszm | ZoneEntropy                          | 4.90539306   |
| wavelet-LHH | glszm | SmallAreaLowGrayLevelEmphasis        | 0.024356575  |
| wavelet-LHH | ngtdm | Coarseness                           | 0.050702179  |
| wavelet-LHH | ngtdm | Complexity                           | 1732.908299  |
| wavelet-LHH | ngtdm | Strength                             | 16.58710894  |
| wavelet-LHH | ngtdm | Contrast                             | 0.642805631  |
| wavelet-LHH | ngtdm | Busyness                             | 0.049602058  |
| wavelet-LLH | gldm  | GrayLevelVariance                    | 231.774375   |
| wavelet-LLH | gldm  | HighGrayLevelEmphasis                | 2014.725     |
| wavelet-LLH | gldm  | DependenceEntropy                    | 5.370191026  |
| wavelet-LLH | gldm  | DependenceNonUniformity              | 63.825       |
| wavelet-LLH | gldm  | GrayLevelNonUniformity               | 2.625        |
| wavelet-LLH | gldm  | SmallDependenceEmphasis              | 0.913888889  |
| wavelet-LLH | gldm  | SmallDependenceHighGrayLevelEmphasis | 1879.797222  |
| wavelet-LLH | gldm  | DependenceNonUniformityNormalized    | 0.7978125    |
| wavelet-LLH | gldm  | LargeDependenceEmphasis              | 1.4          |
| wavelet-LLH | gldm  | LargeDependenceLowGrayLevelEmphasis  | 0.016776939  |
| wavelet-LLH | gldm  | DependenceVariance                   | 0.134375     |
| wavelet-LLH | gldm  | LargeDependenceHighGrayLevelEmphasis | 2643.325     |
| wavelet-LLH | gldm  | SmallDependenceLowGrayLevelEmphasis  | 0.01643912   |
| wavelet-LLH | gldm  | LowGrayLevelEmphasis                 | 0.016499739  |
| wavelet-LLH | glcm  | JointAverage                         | 41.0514451   |
| wavelet-LLH | glcm  | SumAverage                           | 82.1028902   |
| wavelet-LLH | glcm  | JointEntropy                         | 5.864858923  |
| wavelet-LLH | glcm  | ClusterShade                         | -2021.381207 |
| wavelet-LLH | glcm  | MaximumProbability                   | 0.028242456  |

|             |            |                                  |              |
|-------------|------------|----------------------------------|--------------|
| wavelet-LLH | glcm       | Idmn                             | 0.952263715  |
| wavelet-LLH | glcm       | JointEnergy                      | 0.018235597  |
| wavelet-LLH | glcm       | Contrast                         | 273.8172612  |
| wavelet-LLH | glcm       | DifferenceEntropy                | 4.08877416   |
| wavelet-LLH | glcm       | InverseVariance                  | 0.070852621  |
| wavelet-LLH | glcm       | DifferenceVariance               | 98.82971025  |
| wavelet-LLH | glcm       | Idn                              | 0.854121062  |
| wavelet-LLH | glcm       | Idm                              | 0.05911644   |
| wavelet-LLH | glcm       | Correlation                      | 0.255880078  |
| wavelet-LLH | glcm       | Autocorrelation                  | 1736.404213  |
| wavelet-LLH | glcm       | SumEntropy                       | 4.600109121  |
| wavelet-LLH | glcm       | SumSquares                       | 185.9722361  |
| wavelet-LLH | glcm       | ClusterProminence                | 645441.8605  |
| wavelet-LLH | glcm       | Imc2                             | 0.999601862  |
| wavelet-LLH | glcm       | Imc1                             | -0.763188993 |
| wavelet-LLH | glcm       | DifferenceAverage                | 12.90203737  |
| wavelet-LLH | glcm       | Id                               | 0.136268085  |
| wavelet-LLH | glcm       | ClusterTendency                  | 470.0716834  |
| wavelet-LLH | firstorder | InterquartileRange               | 470.1126643  |
| wavelet-LLH | firstorder | Skewness                         | -0.488548121 |
| wavelet-LLH | firstorder | Uniformity                       | 0.0328125    |
| wavelet-LLH | firstorder | Median                           | 121.1600309  |
| wavelet-LLH | firstorder | Energy                           | 12170548.83  |
| wavelet-LLH | firstorder | RobustMeanAbsoluteDeviation      | 210.0757298  |
| wavelet-LLH | firstorder | MeanAbsoluteDeviation            | 301.9222179  |
| wavelet-LLH | firstorder | TotalEnergy                      | 328604818.4  |
| wavelet-LLH | firstorder | Maximum                          | 765.4454572  |
| wavelet-LLH | firstorder | RootMeanSquared                  | 390.0408445  |
| wavelet-LLH | firstorder | 90Percentile                     | 560.6275102  |
| wavelet-LLH | firstorder | Minimum                          | -929.1799223 |
| wavelet-LLH | firstorder | Entropy                          | 5.173822202  |
| wavelet-LLH | firstorder | Range                            | 1694.62538   |
| wavelet-LLH | firstorder | Variance                         | 143617.4452  |
| wavelet-LLH | firstorder | 10Percentile                     | -432.7216736 |
| wavelet-LLH | firstorder | Kurtosis                         | 2.946604417  |
| wavelet-LLH | firstorder | Mean                             | 92.27358862  |
| wavelet-LLH | glrlm      | ShortRunLowGrayLevelEmphasis     | 0.016574515  |
| wavelet-LLH | glrlm      | GrayLevelVariance                | 232.7007884  |
| wavelet-LLH | glrlm      | LowGrayLevelRunEmphasis          | 0.016577072  |
| wavelet-LLH | glrlm      | GrayLevelNonUniformityNormalized | 0.03270003   |
| wavelet-LLH | glrlm      | RunVariance                      | 0.004805966  |
| wavelet-LLH | glrlm      | GrayLevelNonUniformity           | 2.6035659    |
| wavelet-LLH | glrlm      | LongRunEmphasis                  | 1.014680548  |
| wavelet-LLH | glrlm      | ShortRunHighGrayLevelEmphasis    | 2011.125871  |
| wavelet-LLH | glrlm      | RunLengthNonUniformity           | 78.85988565  |
| wavelet-LLH | glrlm      | ShortRunEmphasis                 | 0.996329863  |
| wavelet-LLH | glrlm      | LongRunHighGrayLevelEmphasis     | 2039.96491   |
| wavelet-LLH | glrlm      | RunPercentage                    | 0.995192308  |
| wavelet-LLH | glrlm      | LongRunLowGrayLevelEmphasis      | 0.016587299  |
| wavelet-LLH | glrlm      | RunEntropy                       | 5.188347886  |
| wavelet-LLH | glrlm      | HighGrayLevelRunEmphasis         | 2016.893679  |
| wavelet-LLH | glrlm      | RunLengthNonUniformityNormalized | 0.990388068  |

|             |       |                                      |             |
|-------------|-------|--------------------------------------|-------------|
| wavelet-LLH | glszm | GrayLevelVariance                    | 244.3779556 |
| wavelet-LLH | glszm | ZoneVariance                         | 0.088888889 |
| wavelet-LLH | glszm | GrayLevelNonUniformityNormalized     | 0.031466667 |
| wavelet-LLH | glszm | SizeZoneNonUniformityNormalized      | 0.897955556 |
| wavelet-LLH | glszm | SizeZoneNonUniformity                | 67.34666667 |
| wavelet-LLH | glszm | GrayLevelNonUniformity               | 2.36        |
| wavelet-LLH | glszm | LargeAreaEmphasis                    | 1.226666667 |
| wavelet-LLH | glszm | SmallAreaHighGrayLevelEmphasis       | 1978.957037 |
| wavelet-LLH | glszm | ZonePercentage                       | 0.9375      |
| wavelet-LLH | glszm | LargeAreaLowGrayLevelEmphasis        | 0.017709393 |
| wavelet-LLH | glszm | LargeAreaHighGrayLevelEmphasis       | 2400.986667 |
| wavelet-LLH | glszm | HighGrayLevelZoneEmphasis            | 2044.4      |
| wavelet-LLH | glszm | SmallAreaEmphasis                    | 0.958148148 |
| wavelet-LLH | glszm | LowGrayLevelZoneEmphasis             | 0.01755322  |
| wavelet-LLH | glszm | ZoneEntropy                          | 5.320299151 |
| wavelet-LLH | glszm | SmallAreaLowGrayLevelEmphasis        | 0.017523436 |
| wavelet-LLH | ngtdm | Coarseness                           | 0.049516106 |
| wavelet-LLH | ngtdm | Complexity                           | 9145.79827  |
| wavelet-LLH | ngtdm | Strength                             | 64.50675657 |
| wavelet-LLH | ngtdm | Contrast                             | 2.361555826 |
| wavelet-LLH | ngtdm | Busyness                             | 0.012991604 |
| wavelet-LLL | gldm  | GrayLevelVariance                    | 562.25      |
| wavelet-LLL | gldm  | HighGrayLevelEmphasis                | 2866.25     |
| wavelet-LLL | gldm  | DependenceEntropy                    | 5.718619814 |
| wavelet-LLL | gldm  | DependenceNonUniformity              | 47.675      |
| wavelet-LLL | gldm  | GrayLevelNonUniformity               | 1.975       |
| wavelet-LLL | gldm  | SmallDependenceEmphasis              | 0.797916667 |
| wavelet-LLL | gldm  | SmallDependenceHighGrayLevelEmphasis | 2380.104167 |
| wavelet-LLL | gldm  | DependenceNonUniformityNormalized    | 0.5959375   |
| wavelet-LLL | gldm  | LargeDependenceEmphasis              | 1.975       |
| wavelet-LLL | gldm  | LargeDependenceLowGrayLevelEmphasis  | 0.014494529 |
| wavelet-LLL | gldm  | DependenceVariance                   | 0.285       |
| wavelet-LLL | gldm  | LargeDependenceHighGrayLevelEmphasis | 5133.5      |
| wavelet-LLL | gldm  | SmallDependenceLowGrayLevelEmphasis  | 0.013409425 |
| wavelet-LLL | gldm  | LowGrayLevelEmphasis                 | 0.013609228 |
| wavelet-LLL | glcm  | JointAverage                         | 49.72880221 |
| wavelet-LLL | glcm  | SumAverage                           | 99.45760441 |
| wavelet-LLL | glcm  | JointEntropy                         | 5.888292773 |
| wavelet-LLL | glcm  | ClusterShade                         | 9079.201769 |
| wavelet-LLL | glcm  | MaximumProbability                   | 0.029765955 |
| wavelet-LLL | glcm  | Idmn                                 | 0.959015082 |
| wavelet-LLL | glcm  | JointEnergy                          | 0.017886047 |
| wavelet-LLL | glcm  | Contrast                             | 607.3352572 |
| wavelet-LLL | glcm  | DifferenceEntropy                    | 4.298182612 |
| wavelet-LLL | glcm  | InverseVariance                      | 0.06024031  |
| wavelet-LLL | glcm  | DifferenceVariance                   | 214.168196  |
| wavelet-LLL | glcm  | Idn                                  | 0.864301061 |
| wavelet-LLL | glcm  | Idm                                  | 0.06598073  |
| wavelet-LLL | glcm  | Correlation                          | 0.471514761 |
| wavelet-LLL | glcm  | Autocorrelation                      | 2738.201365 |
| wavelet-LLL | glcm  | SumEntropy                           | 4.766383295 |
| wavelet-LLL | glcm  | SumSquares                           | 563.9479391 |

|             |            |                                  |              |
|-------------|------------|----------------------------------|--------------|
| wavelet-LLL | glcm       | ClusterProminence                | 5245340.197  |
| wavelet-LLL | glcm       | Imc2                             | 0.999934555  |
| wavelet-LLL | glcm       | Imc1                             | -0.866855244 |
| wavelet-LLL | glcm       | DifferenceAverage                | 19.45147421  |
| wavelet-LLL | glcm       | Id                               | 0.123402176  |
| wavelet-LLL | glcm       | ClusterTendency                  | 1648.456499  |
| wavelet-LLL | firstorder | InterquartileRange               | 928.1684194  |
| wavelet-LLL | firstorder | Skewness                         | 0.431009447  |
| wavelet-LLL | firstorder | Uniformity                       | 0.0246875    |
| wavelet-LLL | firstorder | Median                           | -1333.033882 |
| wavelet-LLL | firstorder | Energy                           | 150448549.6  |
| wavelet-LLL | firstorder | RobustMeanAbsoluteDeviation      | 343.2282859  |
| wavelet-LLL | firstorder | MeanAbsoluteDeviation            | 481.5954158  |
| wavelet-LLL | firstorder | TotalEnergy                      | 4062110840   |
| wavelet-LLL | firstorder | Maximum                          | 408.8449784  |
| wavelet-LLL | firstorder | RootMeanSquared                  | 1371.352205  |
| wavelet-LLL | firstorder | 90Percentile                     | -448.2417077 |
| wavelet-LLL | firstorder | Minimum                          | -2420.617554 |
| wavelet-LLL | firstorder | Entropy                          | 5.567371495  |
| wavelet-LLL | firstorder | Range                            | 2829.462533  |
| wavelet-LLL | firstorder | Variance                         | 351608.019   |
| wavelet-LLL | firstorder | 10Percentile                     | -1926.287344 |
| wavelet-LLL | firstorder | Kurtosis                         | 2.627705686  |
| wavelet-LLL | firstorder | Mean                             | -1236.526931 |
| wavelet-LLL | glrlm      | ShortRunLowGrayLevelEmphasis     | 0.013750241  |
| wavelet-LLL | glrlm      | GrayLevelVariance                | 564.8158422  |
| wavelet-LLL | glrlm      | LowGrayLevelRunEmphasis          | 0.01375854   |
| wavelet-LLL | glrlm      | GrayLevelNonUniformityNormalized | 0.024547331  |
| wavelet-LLL | glrlm      | RunVariance                      | 0.011532788  |
| wavelet-LLL | glrlm      | GrayLevelNonUniformity           | 1.941274686  |
| wavelet-LLL | glrlm      | LongRunEmphasis                  | 1.035353157  |
| wavelet-LLL | glrlm      | ShortRunHighGrayLevelEmphasis    | 2851.467587  |
| wavelet-LLL | glrlm      | RunLengthNonUniformity           | 77.27011709  |
| wavelet-LLL | glrlm      | ShortRunEmphasis                 | 0.991161711  |
| wavelet-LLL | glrlm      | LongRunHighGrayLevelEmphasis     | 2955.523463  |
| wavelet-LLL | glrlm      | RunPercentage                    | 0.988461538  |
| wavelet-LLL | glrlm      | LongRunLowGrayLevelEmphasis      | 0.013791734  |
| wavelet-LLL | glrlm      | RunEntropy                       | 5.585742634  |
| wavelet-LLL | glrlm      | HighGrayLevelRunEmphasis         | 2872.278762  |
| wavelet-LLL | glrlm      | RunLengthNonUniformityNormalized | 0.976934424  |
| wavelet-LLL | glszm      | GrayLevelVariance                | 592.4515858  |
| wavelet-LLL | glszm      | ZoneVariance                     | 0.162990968  |
| wavelet-LLL | glszm      | GrayLevelNonUniformityNormalized | 0.02289435   |
| wavelet-LLL | glszm      | SizeZoneNonUniformityNormalized  | 0.748372191  |
| wavelet-LLL | glszm      | SizeZoneNonUniformity            | 51.63768116  |
| wavelet-LLL | glszm      | GrayLevelNonUniformity           | 1.579710145  |
| wavelet-LLL | glszm      | LargeAreaEmphasis                | 1.507246377  |
| wavelet-LLL | glszm      | SmallAreaHighGrayLevelEmphasis   | 2671.834944  |
| wavelet-LLL | glszm      | ZonePercentage                   | 0.8625       |
| wavelet-LLL | glszm      | LargeAreaLowGrayLevelEmphasis    | 0.016105988  |
| wavelet-LLL | glszm      | LargeAreaHighGrayLevelEmphasis   | 4143.304348  |
| wavelet-LLL | glszm      | HighGrayLevelZoneEmphasis        | 2941.188406  |

|             |            |                                      |              |
|-------------|------------|--------------------------------------|--------------|
| wavelet-LLL | glszm      | SmallAreaEmphasis                    | 0.889291465  |
| wavelet-LLL | glszm      | LowGrayLevelZoneEmphasis             | 0.015622714  |
| wavelet-LLL | glszm      | ZoneEntropy                          | 5.738817573  |
| wavelet-LLL | glszm      | SmallAreaLowGrayLevelEmphasis        | 0.015510213  |
| wavelet-LLL | ngtdm      | Coarseness                           | 0.037319558  |
| wavelet-LLL | ngtdm      | Complexity                           | 24913.47998  |
| wavelet-LLL | ngtdm      | Strength                             | 127.3508513  |
| wavelet-LLL | ngtdm      | Contrast                             | 5.289053619  |
| wavelet-LLL | ngtdm      | Busyness                             | 0.014890582  |
| wavelet-HHL | gldm       | GrayLevelVariance                    | 35.69359375  |
| wavelet-HHL | gldm       | HighGrayLevelEmphasis                | 208.2875     |
| wavelet-HHL | gldm       | DependenceEntropy                    | 4.866359695  |
| wavelet-HHL | gldm       | DependenceNonUniformity              | 40.25        |
| wavelet-HHL | gldm       | GrayLevelNonUniformity               | 5.125        |
| wavelet-HHL | gldm       | SmallDependenceEmphasis              | 0.731944444  |
| wavelet-HHL | gldm       | SmallDependenceHighGrayLevelEmphasis | 167.2486111  |
| wavelet-HHL | gldm       | DependenceNonUniformityNormalized    | 0.503125     |
| wavelet-HHL | gldm       | LargeDependenceEmphasis              | 2.85         |
| wavelet-HHL | gldm       | LargeDependenceLowGrayLevelEmphasis  | 0.074990444  |
| wavelet-HHL | gldm       | DependenceVariance                   | 0.674375     |
| wavelet-HHL | gldm       | LargeDependenceHighGrayLevelEmphasis | 512.3875     |
| wavelet-HHL | gldm       | SmallDependenceLowGrayLevelEmphasis  | 0.035275464  |
| wavelet-HHL | gldm       | LowGrayLevelEmphasis                 | 0.042319395  |
| wavelet-HHL | glcm       | JointAverage                         | 12.65105825  |
| wavelet-HHL | glcm       | SumAverage                           | 25.30211651  |
| wavelet-HHL | glcm       | JointEntropy                         | 5.692340368  |
| wavelet-HHL | glcm       | ClusterShade                         | 135.4621611  |
| wavelet-HHL | glcm       | MaximumProbability                   | 0.038837282  |
| wavelet-HHL | glcm       | Idmn                                 | 0.947886777  |
| wavelet-HHL | glcm       | JointEnergy                          | 0.021276555  |
| wavelet-HHL | glcm       | Contrast                             | 72.31721541  |
| wavelet-HHL | glcm       | DifferenceEntropy                    | 3.535481482  |
| wavelet-HHL | glcm       | InverseVariance                      | 0.158158065  |
| wavelet-HHL | glcm       | DifferenceVariance                   | 26.29927307  |
| wavelet-HHL | glcm       | Idn                                  | 0.849787384  |
| wavelet-HHL | glcm       | Idm                                  | 0.139562054  |
| wavelet-HHL | glcm       | Correlation                          | -0.087186512 |
| wavelet-HHL | glcm       | Autocorrelation                      | 157.4418185  |
| wavelet-HHL | glcm       | SumEntropy                           | 4.069120674  |
| wavelet-HHL | glcm       | SumSquares                           | 33.44315175  |
| wavelet-HHL | glcm       | ClusterProminence                    | 14689.77696  |
| wavelet-HHL | glcm       | Imc2                                 | 0.995243306  |
| wavelet-HHL | glcm       | Imc1                                 | -0.590474168 |
| wavelet-HHL | glcm       | DifferenceAverage                    | 6.623193825  |
| wavelet-HHL | glcm       | Id                                   | 0.229970128  |
| wavelet-HHL | glcm       | ClusterTendency                      | 61.45539158  |
| wavelet-HHL | firstorder | InterquartileRange                   | 181.5981632  |
| wavelet-HHL | firstorder | Skewness                             | 0.410159212  |
| wavelet-HHL | firstorder | Uniformity                           | 0.0640625    |
| wavelet-HHL | firstorder | Median                               | 5.853889355  |
| wavelet-HHL | firstorder | Energy                               | 1775186.254  |
| wavelet-HHL | firstorder | RobustMeanAbsoluteDeviation          | 74.96479727  |

|             |            |                                  |              |
|-------------|------------|----------------------------------|--------------|
| wavelet-HHL | firstorder | MeanAbsoluteDeviation            | 113.3640093  |
| wavelet-HHL | firstorder | TotalEnergy                      | 47930028.86  |
| wavelet-HHL | firstorder | Maximum                          | 519.8967379  |
| wavelet-HHL | firstorder | RootMeanSquared                  | 148.9625059  |
| wavelet-HHL | firstorder | 90Percentile                     | 173.4245082  |
| wavelet-HHL | firstorder | Minimum                          | -316.238285  |
| wavelet-HHL | firstorder | Entropy                          | 4.244179226  |
| wavelet-HHL | firstorder | Range                            | 836.1350229  |
| wavelet-HHL | firstorder | Variance                         | 22098.20215  |
| wavelet-HHL | firstorder | 10Percentile                     | -177.8423948 |
| wavelet-HHL | firstorder | Kurtosis                         | 4.023787698  |
| wavelet-HHL | firstorder | Mean                             | -9.572148656 |
| wavelet-HHL | gllm       | ShortRunLowGrayLevelEmphasis     | 0.042404819  |
| wavelet-HHL | gllm       | GrayLevelVariance                | 36.02605313  |
| wavelet-HHL | gllm       | LowGrayLevelRunEmphasis          | 0.042713059  |
| wavelet-HHL | gllm       | GrayLevelNonUniformityNormalized | 0.063211967  |
| wavelet-HHL | gllm       | RunVariance                      | 0.018231844  |
| wavelet-HHL | gllm       | GrayLevelNonUniformity           | 4.964653696  |
| wavelet-HHL | gllm       | LongRunEmphasis                  | 1.057041262  |
| wavelet-HHL | gllm       | ShortRunHighGrayLevelEmphasis    | 206.980507   |
| wavelet-HHL | gllm       | RunLengthNonUniformity           | 75.73450836  |
| wavelet-HHL | gllm       | ShortRunEmphasis                 | 0.985739684  |
| wavelet-HHL | gllm       | LongRunHighGrayLevelEmphasis     | 218.2676219  |
| wavelet-HHL | gllm       | RunPercentage                    | 0.981730769  |
| wavelet-HHL | gllm       | LongRunLowGrayLevelEmphasis      | 0.04394602   |
| wavelet-HHL | gllm       | RunEntropy                       | 4.313365961  |
| wavelet-HHL | gllm       | HighGrayLevelRunEmphasis         | 209.23793    |
| wavelet-HHL | gllm       | RunLengthNonUniformityNormalized | 0.963536313  |
| wavelet-HHL | glszm      | GrayLevelVariance                | 39.99546485  |
| wavelet-HHL | glszm      | ZoneVariance                     | 0.895439657  |
| wavelet-HHL | glszm      | GrayLevelNonUniformityNormalized | 0.057193248  |
| wavelet-HHL | glszm      | SizeZoneNonUniformityNormalized  | 0.72436382   |
| wavelet-HHL | glszm      | SizeZoneNonUniformity            | 45.63492063  |
| wavelet-HHL | glszm      | GrayLevelNonUniformity           | 3.603174603  |
| wavelet-HHL | glszm      | LargeAreaEmphasis                | 2.507936508  |
| wavelet-HHL | glszm      | SmallAreaHighGrayLevelEmphasis   | 203.8810626  |
| wavelet-HHL | glszm      | ZonePercentage                   | 0.7875       |
| wavelet-HHL | glszm      | LargeAreaLowGrayLevelEmphasis    | 0.069789099  |
| wavelet-HHL | glszm      | LargeAreaHighGrayLevelEmphasis   | 484.7777778  |
| wavelet-HHL | glszm      | HighGrayLevelZoneEmphasis        | 221.6031746  |
| wavelet-HHL | glszm      | SmallAreaEmphasis                | 0.875027557  |
| wavelet-HHL | glszm      | LowGrayLevelZoneEmphasis         | 0.047545685  |
| wavelet-HHL | glszm      | ZoneEntropy                      | 4.660840289  |
| wavelet-HHL | glszm      | SmallAreaLowGrayLevelEmphasis    | 0.04332638   |
| wavelet-HHL | ngtdm      | Coarseness                       | 0.055543777  |
| wavelet-HHL | ngtdm      | Complexity                       | 1096.115888  |
| wavelet-HHL | ngtdm      | Strength                         | 11.28472009  |
| wavelet-HHL | ngtdm      | Contrast                         | 0.703990667  |
| wavelet-HHL | ngtdm      | Busyness                         | 0.075125463  |
| wavelet-HLH | gldm       | GrayLevelVariance                | 41.8775      |
| wavelet-HLH | gldm       | HighGrayLevelEmphasis            | 360.5        |
| wavelet-HLH | gldm       | DependenceEntropy                | 5.115311532  |

|             |            |                                      |              |
|-------------|------------|--------------------------------------|--------------|
| wavelet-HLH | gldm       | DependenceNonUniformity              | 33.375       |
| wavelet-HLH | gldm       | GrayLevelNonUniformity               | 4.325        |
| wavelet-HLH | gldm       | SmallDependenceEmphasis              | 0.627517361  |
| wavelet-HLH | gldm       | SmallDependenceHighGrayLevelEmphasis | 227.8858507  |
| wavelet-HLH | gldm       | DependenceNonUniformityNormalized    | 0.4171875    |
| wavelet-HLH | gldm       | LargeDependenceEmphasis              | 3.075        |
| wavelet-HLH | gldm       | LargeDependenceLowGrayLevelEmphasis  | 0.028670344  |
| wavelet-HLH | gldm       | DependenceVariance                   | 0.515        |
| wavelet-HLH | gldm       | LargeDependenceHighGrayLevelEmphasis | 1064.875     |
| wavelet-HLH | gldm       | SmallDependenceLowGrayLevelEmphasis  | 0.018849654  |
| wavelet-HLH | gldm       | LowGrayLevelEmphasis                 | 0.020373912  |
| wavelet-HLH | glcm       | JointAverage                         | 17.86747509  |
| wavelet-HLH | glcm       | SumAverage                           | 35.73495018  |
| wavelet-HLH | glcm       | JointEntropy                         | 5.772443844  |
| wavelet-HLH | glcm       | ClusterShade                         | 11.92819704  |
| wavelet-HLH | glcm       | MaximumProbability                   | 0.035214673  |
| wavelet-HLH | glcm       | ldmn                                 | 0.95153579   |
| wavelet-HLH | glcm       | JointEnergy                          | 0.019813336  |
| wavelet-HLH | glcm       | Contrast                             | 73.42156286  |
| wavelet-HLH | glcm       | DifferenceEntropy                    | 3.526361257  |
| wavelet-HLH | glcm       | InverseVariance                      | 0.127152939  |
| wavelet-HLH | glcm       | DifferenceVariance                   | 26.3685038   |
| wavelet-HLH | glcm       | ldn                                  | 0.854187527  |
| wavelet-HLH | glcm       | ldm                                  | 0.138921593  |
| wavelet-HLH | glcm       | Correlation                          | -0.051352486 |
| wavelet-HLH | glcm       | Autocorrelation                      | 317.9234952  |
| wavelet-HLH | glcm       | SumEntropy                           | 4.112714956  |
| wavelet-HLH | glcm       | SumSquares                           | 34.71693416  |
| wavelet-HLH | glcm       | ClusterProminence                    | 15325.87521  |
| wavelet-HLH | glcm       | lmc2                                 | 0.997093287  |
| wavelet-HLH | glcm       | lmc1                                 | -0.624570305 |
| wavelet-HLH | glcm       | DifferenceAverage                    | 6.733615343  |
| wavelet-HLH | glcm       | ld                                   | 0.231050806  |
| wavelet-HLH | glcm       | ClusterTendency                      | 65.44617377  |
| wavelet-HLH | firstorder | InterquartileRange                   | 181.3594037  |
| wavelet-HLH | firstorder | Skewness                             | -0.164945258 |
| wavelet-HLH | firstorder | Uniformity                           | 0.0540625    |
| wavelet-HLH | firstorder | Median                               | -6.187844462 |
| wavelet-HLH | firstorder | Energy                               | 2103123.801  |
| wavelet-HLH | firstorder | RobustMeanAbsoluteDeviation          | 85.42299761  |
| wavelet-HLH | firstorder | MeanAbsoluteDeviation                | 125.4574094  |
| wavelet-HLH | firstorder | TotalEnergy                          | 56784342.64  |
| wavelet-HLH | firstorder | Maximum                              | 441.8283419  |
| wavelet-HLH | firstorder | RootMeanSquared                      | 162.1389759  |
| wavelet-HLH | firstorder | 90Percentile                         | 168.7366909  |
| wavelet-HLH | firstorder | Minimum                              | -432.05882   |
| wavelet-HLH | firstorder | Entropy                              | 4.433460515  |
| wavelet-HLH | firstorder | Range                                | 873.8871619  |
| wavelet-HLH | firstorder | Variance                             | 26029.16086  |
| wavelet-HLH | firstorder | 10Percentile                         | -239.1288259 |
| wavelet-HLH | firstorder | Kurtosis                             | 3.230313745  |
| wavelet-HLH | firstorder | Mean                                 | -16.12100045 |

|             |       |                                  |             |
|-------------|-------|----------------------------------|-------------|
| wavelet-HLH | glrlm | ShortRunLowGrayLevelEmphasis     | 0.020693707 |
| wavelet-HLH | glrlm | GrayLevelVariance                | 42.37430356 |
| wavelet-HLH | glrlm | LowGrayLevelRunEmphasis          | 0.020765838 |
| wavelet-HLH | glrlm | GrayLevelNonUniformityNormalized | 0.05369434  |
| wavelet-HLH | glrlm | RunVariance                      | 0.023036006 |
| wavelet-HLH | glrlm | GrayLevelNonUniformity           | 4.196940745 |
| wavelet-HLH | glrlm | LongRunEmphasis                  | 1.071871459 |
| wavelet-HLH | glrlm | ShortRunHighGrayLevelEmphasis    | 354.5790974 |
| wavelet-HLH | glrlm | RunLengthNonUniformity           | 74.60237523 |
| wavelet-HLH | glrlm | ShortRunEmphasis                 | 0.982032135 |
| wavelet-HLH | glrlm | LongRunHighGrayLevelEmphasis     | 385.7736465 |
| wavelet-HLH | glrlm | RunPercentage                    | 0.976923077 |
| wavelet-HLH | glrlm | LongRunLowGrayLevelEmphasis      | 0.021054363 |
| wavelet-HLH | glrlm | RunEntropy                       | 4.510301138 |
| wavelet-HLH | glrlm | HighGrayLevelRunEmphasis         | 360.8180072 |
| wavelet-HLH | glrlm | RunLengthNonUniformityNormalized | 0.953927988 |
| wavelet-HLH | glszm | GrayLevelVariance                | 49.52794293 |
| wavelet-HLH | glszm | ZoneVariance                     | 0.476813317 |
| wavelet-HLH | glszm | GrayLevelNonUniformityNormalized | 0.048156956 |
| wavelet-HLH | glszm | SizeZoneNonUniformityNormalized  | 0.565398335 |
| wavelet-HLH | glszm | SizeZoneNonUniformity            | 32.79310345 |
| wavelet-HLH | glszm | GrayLevelNonUniformity           | 2.793103448 |
| wavelet-HLH | glszm | LargeAreaEmphasis                | 2.379310345 |
| wavelet-HLH | glszm | SmallAreaHighGrayLevelEmphasis   | 284.2898707 |
| wavelet-HLH | glszm | ZonePercentage                   | 0.725       |
| wavelet-HLH | glszm | LargeAreaLowGrayLevelEmphasis    | 0.032112013 |
| wavelet-HLH | glszm | LargeAreaHighGrayLevelEmphasis   | 829.5862069 |
| wavelet-HLH | glszm | HighGrayLevelZoneEmphasis        | 364.8965517 |
| wavelet-HLH | glszm | SmallAreaEmphasis                | 0.780292146 |
| wavelet-HLH | glszm | LowGrayLevelZoneEmphasis         | 0.026561282 |
| wavelet-HLH | glszm | ZoneEntropy                      | 5.086345004 |
| wavelet-HLH | glszm | SmallAreaLowGrayLevelEmphasis    | 0.025649651 |
| wavelet-HLH | ngtdm | Coarseness                       | 0.054071094 |
| wavelet-HLH | ngtdm | Complexity                       | 1565.828522 |
| wavelet-HLH | ngtdm | Strength                         | 13.092956   |
| wavelet-HLH | ngtdm | Contrast                         | 0.744998773 |
| wavelet-HLH | ngtdm | Busyness                         | 0.046339689 |



| Image type | Feature Class | Feature Name                         |                                                                                                                                                                                                                                                                                                                                                                                                                                              |
|------------|---------------|--------------------------------------|----------------------------------------------------------------------------------------------------------------------------------------------------------------------------------------------------------------------------------------------------------------------------------------------------------------------------------------------------------------------------------------------------------------------------------------------|
| general    | info          | BoundingBox                          | 4: RTSTRUCT: C99-DNU_segment_GTV<br>(1, 1, 1, 9, 8, 6)                                                                                                                                                                                                                                                                                                                                                                                       |
| general    | info          | EnabledImageTypes                    | {u'Original': {}, u'Wavelet': {}}                                                                                                                                                                                                                                                                                                                                                                                                            |
|            |               |                                      | {'distances': [1], 'additionalInfo': True,<br>'force2D': False, 'interpolator': 'sitkBSpline',<br>'resampledPixelSpacing': [3.0], 'label': 1,<br>'normalizeScale': 1, 'normalize': False,<br>'force2Ddimension': 0, 'removeOutliers':<br>None, 'minimumROISize': None, u'binWidth':<br>25.0, 'minimumROIDimensions': 1,<br>u'correctMask': True, 'preCrop': False,<br>u'symmetricalGLCM': True, 'resegmentRange':<br>None, 'padDistance': 5} |
| general    | info          | GeneralSettings                      | fb903779eda4d6a3b7f16a49487ba60614877                                                                                                                                                                                                                                                                                                                                                                                                        |
| general    | info          | ImageHash                            | 219                                                                                                                                                                                                                                                                                                                                                                                                                                          |
| general    | info          | ImageSpacing                         | (0.9765625000000002, 0.9765625000000002,<br>2.0)                                                                                                                                                                                                                                                                                                                                                                                             |
| general    | info          | MaskHash                             | 6a4dd7c53befe42661a583ae26ecc80d128598                                                                                                                                                                                                                                                                                                                                                                                                       |
| general    | info          | NumpyVersion                         | 1b                                                                                                                                                                                                                                                                                                                                                                                                                                           |
| general    | info          | PyWaveletVersion                     | 1.13.1                                                                                                                                                                                                                                                                                                                                                                                                                                       |
| general    | info          | SimpleITKVersion                     | 0.5.2                                                                                                                                                                                                                                                                                                                                                                                                                                        |
| general    | info          | Version                              | 1.1.0                                                                                                                                                                                                                                                                                                                                                                                                                                        |
| general    | info          | VolumeNum                            | 1.3.0.post102+g1b0eb74                                                                                                                                                                                                                                                                                                                                                                                                                       |
| general    | info          | VoxelNum                             | 1                                                                                                                                                                                                                                                                                                                                                                                                                                            |
| original   | shape         | Maximum3DDiameter                    | 210                                                                                                                                                                                                                                                                                                                                                                                                                                          |
| original   | shape         | Maximum2DDiameterSlice               | 29.69848481                                                                                                                                                                                                                                                                                                                                                                                                                                  |
| original   | shape         | Sphericity                           | 28.3019434                                                                                                                                                                                                                                                                                                                                                                                                                                   |
| original   | shape         | MinorAxis                            | 0.830953464                                                                                                                                                                                                                                                                                                                                                                                                                                  |
| original   | shape         | Elongation                           | 19.43341552                                                                                                                                                                                                                                                                                                                                                                                                                                  |
| original   | shape         | SurfaceVolumeRatio                   | 0.722978895                                                                                                                                                                                                                                                                                                                                                                                                                                  |
| original   | shape         | Volume                               | 0.326372133                                                                                                                                                                                                                                                                                                                                                                                                                                  |
| original   | shape         | MajorAxis                            | 5670                                                                                                                                                                                                                                                                                                                                                                                                                                         |
| original   | shape         | SurfaceArea                          | 26.87964429                                                                                                                                                                                                                                                                                                                                                                                                                                  |
| original   | shape         | Flatness                             | 1850.529991                                                                                                                                                                                                                                                                                                                                                                                                                                  |
| original   | shape         | LeastAxis                            | 0.590661645                                                                                                                                                                                                                                                                                                                                                                                                                                  |
| original   | shape         | Maximum2DDiameterColumn              | 15.87677492                                                                                                                                                                                                                                                                                                                                                                                                                                  |
| original   | shape         | Maximum2DDiameterRow                 | 25.63201124                                                                                                                                                                                                                                                                                                                                                                                                                                  |
| original   | gldm          | GrayLevelVariance                    | 21.63330765                                                                                                                                                                                                                                                                                                                                                                                                                                  |
| original   | gldm          | HighGrayLevelEmphasis                | 75.53868481                                                                                                                                                                                                                                                                                                                                                                                                                                  |
| original   | gldm          | DependenceEntropy                    | 567.5333333                                                                                                                                                                                                                                                                                                                                                                                                                                  |
| original   | gldm          | DependenceNonUniformity              | 5.902540643                                                                                                                                                                                                                                                                                                                                                                                                                                  |
| original   | gldm          | GrayLevelNonUniformity               | 52.36190476                                                                                                                                                                                                                                                                                                                                                                                                                                  |
| original   | gldm          | SmallDependenceEmphasis              | 13.28571429                                                                                                                                                                                                                                                                                                                                                                                                                                  |
| original   | gldm          | SmallDependenceHighGrayLevelEmphasis | 0.504589006                                                                                                                                                                                                                                                                                                                                                                                                                                  |
| original   | gldm          | DependenceNonUniformityNormalized    | 183.2284815                                                                                                                                                                                                                                                                                                                                                                                                                                  |
| original   | gldm          | LargeDependenceEmphasis              | 0.249342404                                                                                                                                                                                                                                                                                                                                                                                                                                  |
| original   | gldm          | LargeDependenceLowGrayLevelEmphasis  | 15.62857143                                                                                                                                                                                                                                                                                                                                                                                                                                  |
| original   | gldm          | DependenceVariance                   | 0.032395015                                                                                                                                                                                                                                                                                                                                                                                                                                  |
| original   | gldm          | LargeDependenceHighGrayLevelEmphasis | 7.079909297                                                                                                                                                                                                                                                                                                                                                                                                                                  |
| original   | gldm          | SmallDependenceLowGrayLevelEmphasis  | 13515.1619                                                                                                                                                                                                                                                                                                                                                                                                                                   |
|            |               |                                      | 0.00922689                                                                                                                                                                                                                                                                                                                                                                                                                                   |

|          |            |                                  |              |
|----------|------------|----------------------------------|--------------|
| original | gldm       | LowGrayLevelEmphasis             | 0.010972732  |
| original | glcm       | JointAverage                     | 24.21689344  |
| original | glcm       | SumAverage                       | 48.43378687  |
| original | glcm       | JointEntropy                     | 6.902932769  |
| original | glcm       | ClusterShade                     | -1888.063444 |
| original | glcm       | MaximumProbability               | 0.055566513  |
| original | glcm       | ldmn                             | 0.928698439  |
| original | glcm       | JointEnergy                      | 0.014008235  |
| original | glcm       | Contrast                         | 99.52699988  |
| original | glcm       | DifferenceEntropy                | 4.05244682   |
| original | glcm       | InverseVariance                  | 0.231437564  |
| original | glcm       | DifferenceVariance               | 47.23036405  |
| original | glcm       | ldn                              | 0.846148057  |
| original | glcm       | ldm                              | 0.237877878  |
| original | glcm       | Correlation                      | 0.229286644  |
| original | glcm       | Autocorrelation                  | 601.9067016  |
| original | glcm       | SumEntropy                       | 4.923828017  |
| original | glcm       | SumSquares                       | 65.06161498  |
| original | glcm       | ClusterProminence                | 79161.47308  |
| original | glcm       | lmc2                             | 0.964928512  |
| original | glcm       | lmc1                             | -0.328949172 |
| original | glcm       | DifferenceAverage                | 7.082793872  |
| original | glcm       | ld                               | 0.304545644  |
| original | glcm       | ClusterTendency                  | 160.71946    |
| original | firstorder | InterquartileRange               | 373          |
| original | firstorder | Skewness                         | -0.649206355 |
| original | firstorder | Uniformity                       | 0.063265306  |
| original | firstorder | Median                           | -95.5        |
| original | firstorder | Energy                           | 16915690     |
| original | firstorder | RobustMeanAbsoluteDeviation      | 156.1955782  |
| original | firstorder | MeanAbsoluteDeviation            | 191.4767347  |
| original | firstorder | TotalEnergy                      | 456723630    |
| original | firstorder | Maximum                          | 83           |
| original | firstorder | RootMeanSquared                  | 283.8149129  |
| original | firstorder | 90Percentile                     | 32.2         |
| original | firstorder | Minimum                          | -718         |
| original | firstorder | Entropy                          | 4.469079255  |
| original | firstorder | Range                            | 801          |
| original | firstorder | Variance                         | 47142.02821  |
| original | firstorder | 10Percentile                     | -534.2       |
| original | firstorder | Kurtosis                         | 2.033779665  |
| original | firstorder | Mean                             | -182.7809524 |
| original | glrlm      | ShortRunLowGrayLevelEmphasis     | 0.011580892  |
| original | glrlm      | GrayLevelVariance                | 76.00819797  |
| original | glrlm      | LowGrayLevelRunEmphasis          | 0.011694864  |
| original | glrlm      | GrayLevelNonUniformityNormalized | 0.055378826  |
| original | glrlm      | RunVariance                      | 0.093416299  |
| original | glrlm      | GrayLevelNonUniformity           | 10.77549168  |
| original | glrlm      | LongRunEmphasis                  | 1.261299175  |
| original | glrlm      | ShortRunHighGrayLevelEmphasis    | 497.7757005  |
| original | glrlm      | RunLengthNonUniformity           | 168.8084243  |
| original | glrlm      | ShortRunEmphasis                 | 0.945378538  |
| original | glrlm      | LongRunHighGrayLevelEmphasis     | 769.0788251  |

|             |       |                                      |             |
|-------------|-------|--------------------------------------|-------------|
| original    | glrlm | RunPercentage                        | 0.926007326 |
| original    | glrlm | LongRunLowGrayLevelEmphasis          | 0.012198085 |
| original    | glrlm | RunEntropy                           | 4.832397006 |
| original    | glrlm | HighGrayLevelRunEmphasis             | 544.2860912 |
| original    | glrlm | RunLengthNonUniformityNormalized     | 0.86735631  |
| original    | glszm | GrayLevelVariance                    | 60.17194707 |
| original    | glszm | ZoneVariance                         | 14.19584121 |
| original    | glszm | GrayLevelNonUniformityNormalized     | 0.042722117 |
| original    | glszm | SizeZoneNonUniformityNormalized      | 0.657013233 |
| original    | glszm | SizeZoneNonUniformity                | 75.55652174 |
| original    | glszm | GrayLevelNonUniformity               | 4.913043478 |
| original    | glszm | LargeAreaEmphasis                    | 17.53043478 |
| original    | glszm | SmallAreaHighGrayLevelEmphasis       | 277.5755438 |
| original    | glszm | ZonePercentage                       | 0.547619048 |
| original    | glszm | LargeAreaLowGrayLevelEmphasis        | 0.040780464 |
| original    | glszm | LargeAreaHighGrayLevelEmphasis       | 15106.62609 |
| original    | glszm | HighGrayLevelZoneEmphasis            | 372.0782609 |
| original    | glszm | SmallAreaEmphasis                    | 0.835678125 |
| original    | glszm | LowGrayLevelZoneEmphasis             | 0.017591414 |
| original    | glszm | ZoneEntropy                          | 5.182155305 |
| original    | glszm | SmallAreaLowGrayLevelEmphasis        | 0.016371817 |
| original    | ngtdm | Coarseness                           | 0.015854388 |
| original    | ngtdm | Complexity                           | 2519.81904  |
| original    | ngtdm | Strength                             | 9.588214394 |
| original    | ngtdm | Contrast                             | 0.896612329 |
| original    | ngtdm | Busyness                             | 0.07340041  |
| wavelet-HHH | gldm  | GrayLevelVariance                    | 8.791746032 |
| wavelet-HHH | gldm  | HighGrayLevelEmphasis                | 98.40952381 |
| wavelet-HHH | gldm  | DependenceEntropy                    | 5.600279495 |
| wavelet-HHH | gldm  | DependenceNonUniformity              | 38.2        |
| wavelet-HHH | gldm  | GrayLevelNonUniformity               | 22.66666667 |
| wavelet-HHH | gldm  | SmallDependenceEmphasis              | 0.3381721   |
| wavelet-HHH | gldm  | SmallDependenceHighGrayLevelEmphasis | 31.60821233 |
| wavelet-HHH | gldm  | DependenceNonUniformityNormalized    | 0.181904762 |
| wavelet-HHH | gldm  | LargeDependenceEmphasis              | 12.34285714 |
| wavelet-HHH | gldm  | LargeDependenceLowGrayLevelEmphasis  | 0.15764324  |
| wavelet-HHH | gldm  | DependenceVariance                   | 3.342857143 |
| wavelet-HHH | gldm  | LargeDependenceHighGrayLevelEmphasis | 1220.904762 |
| wavelet-HHH | gldm  | SmallDependenceLowGrayLevelEmphasis  | 0.019243292 |
| wavelet-HHH | gldm  | LowGrayLevelEmphasis                 | 0.028067596 |
| wavelet-HHH | glcm  | JointAverage                         | 9.464795729 |
| wavelet-HHH | glcm  | SumAverage                           | 18.92959146 |
| wavelet-HHH | glcm  | JointEntropy                         | 6.355092073 |
| wavelet-HHH | glcm  | ClusterShade                         | -15.0429497 |
| wavelet-HHH | glcm  | MaximumProbability                   | 0.043208701 |
| wavelet-HHH | glcm  | ldmn                                 | 0.95107267  |
| wavelet-HHH | glcm  | JointEnergy                          | 0.016403952 |
| wavelet-HHH | glcm  | Contrast                             | 16.69195452 |
| wavelet-HHH | glcm  | DifferenceEntropy                    | 3.095279874 |
| wavelet-HHH | glcm  | InverseVariance                      | 0.277569309 |
| wavelet-HHH | glcm  | DifferenceVariance                   | 6.606516909 |
| wavelet-HHH | glcm  | ldn                                  | 0.856371838 |
| wavelet-HHH | glcm  | ldm                                  | 0.276427922 |

|             |            |                                  |              |
|-------------|------------|----------------------------------|--------------|
| wavelet-HHH | glcm       | Correlation                      | -0.028593553 |
| wavelet-HHH | glcm       | Autocorrelation                  | 89.330958    |
| wavelet-HHH | glcm       | SumEntropy                       | 3.879813335  |
| wavelet-HHH | glcm       | SumSquares                       | 8.089935396  |
| wavelet-HHH | glcm       | ClusterProminence                | 840.6767448  |
| wavelet-HHH | glcm       | Imc2                             | 0.819724535  |
| wavelet-HHH | glcm       | Imc1                             | -0.162895372 |
| wavelet-HHH | glcm       | DifferenceAverage                | 3.150171901  |
| wavelet-HHH | glcm       | Id                               | 0.365031764  |
| wavelet-HHH | glcm       | ClusterTendency                  | 15.66778707  |
| wavelet-HHH | firstorder | InterquartileRange               | 84.95398056  |
| wavelet-HHH | firstorder | Skewness                         | -0.319557242 |
| wavelet-HHH | firstorder | Uniformity                       | 0.107936508  |
| wavelet-HHH | firstorder | Median                           | 3.811263588  |
| wavelet-HHH | firstorder | Energy                           | 1159017.267  |
| wavelet-HHH | firstorder | RobustMeanAbsoluteDeviation      | 37.51105762  |
| wavelet-HHH | firstorder | MeanAbsoluteDeviation            | 57.06841513  |
| wavelet-HHH | firstorder | TotalEnergy                      | 31293466.22  |
| wavelet-HHH | firstorder | Maximum                          | 187.4856989  |
| wavelet-HHH | firstorder | RootMeanSquared                  | 74.29084631  |
| wavelet-HHH | firstorder | 90Percentile                     | 96.55990029  |
| wavelet-HHH | firstorder | Minimum                          | -203.9240533 |
| wavelet-HHH | firstorder | Entropy                          | 3.514888855  |
| wavelet-HHH | firstorder | Range                            | 391.4097521  |
| wavelet-HHH | firstorder | Variance                         | 5518.738713  |
| wavelet-HHH | firstorder | 10Percentile                     | -97.57614013 |
| wavelet-HHH | firstorder | Kurtosis                         | 3.358742101  |
| wavelet-HHH | firstorder | Mean                             | -0.625405518 |
| wavelet-HHH | glrlm      | ShortRunLowGrayLevelEmphasis     | 0.028694442  |
| wavelet-HHH | glrlm      | GrayLevelVariance                | 9.249280073  |
| wavelet-HHH | glrlm      | LowGrayLevelRunEmphasis          | 0.029423226  |
| wavelet-HHH | glrlm      | GrayLevelNonUniformityNormalized | 0.103049694  |
| wavelet-HHH | glrlm      | RunVariance                      | 0.085802322  |
| wavelet-HHH | glrlm      | GrayLevelNonUniformity           | 19.98246951  |
| wavelet-HHH | glrlm      | LongRunEmphasis                  | 1.262330128  |
| wavelet-HHH | glrlm      | ShortRunHighGrayLevelEmphasis    | 92.30163047  |
| wavelet-HHH | glrlm      | RunLengthNonUniformity           | 165.8744864  |
| wavelet-HHH | glrlm      | ShortRunEmphasis                 | 0.939565099  |
| wavelet-HHH | glrlm      | LongRunHighGrayLevelEmphasis     | 124.4838167  |
| wavelet-HHH | glrlm      | RunPercentage                    | 0.923076923  |
| wavelet-HHH | glrlm      | LongRunLowGrayLevelEmphasis      | 0.032544412  |
| wavelet-HHH | glrlm      | RunEntropy                       | 3.901941636  |
| wavelet-HHH | glrlm      | HighGrayLevelRunEmphasis         | 98.31011132  |
| wavelet-HHH | glrlm      | RunLengthNonUniformityNormalized | 0.854289975  |
| wavelet-HHH | glszm      | GrayLevelVariance                | 15.13146936  |
| wavelet-HHH | glszm      | ZoneVariance                     | 23.41701368  |
| wavelet-HHH | glszm      | GrayLevelNonUniformityNormalized | 0.076145152  |
| wavelet-HHH | glszm      | SizeZoneNonUniformityNormalized  | 0.436644854  |
| wavelet-HHH | glszm      | SizeZoneNonUniformity            | 35.80487805  |
| wavelet-HHH | glszm      | GrayLevelNonUniformity           | 6.243902439  |
| wavelet-HHH | glszm      | LargeAreaEmphasis                | 29.97560976  |
| wavelet-HHH | glszm      | SmallAreaHighGrayLevelEmphasis   | 61.88904261  |
| wavelet-HHH | glszm      | ZonePercentage                   | 0.39047619   |

|             |            |                                      |              |
|-------------|------------|--------------------------------------|--------------|
| wavelet-HHH | glszm      | LargeAreaLowGrayLevelEmphasis        | 0.371743309  |
| wavelet-HHH | glszm      | LargeAreaHighGrayLevelEmphasis       | 2935.341463  |
| wavelet-HHH | glszm      | HighGrayLevelZoneEmphasis            | 93.95121951  |
| wavelet-HHH | glszm      | SmallAreaEmphasis                    | 0.682803535  |
| wavelet-HHH | glszm      | LowGrayLevelZoneEmphasis             | 0.052119418  |
| wavelet-HHH | glszm      | ZoneEntropy                          | 5.043034322  |
| wavelet-HHH | glszm      | SmallAreaLowGrayLevelEmphasis        | 0.046579688  |
| wavelet-HHH | ngtdm      | Coarseness                           | 0.029941522  |
| wavelet-HHH | ngtdm      | Complexity                           | 216.3631055  |
| wavelet-HHH | ngtdm      | Strength                             | 2.051811884  |
| wavelet-HHH | ngtdm      | Contrast                             | 0.173328313  |
| wavelet-HHH | ngtdm      | Busyness                             | 0.216204422  |
| wavelet-HLL | gldm       | GrayLevelVariance                    | 101.1509297  |
| wavelet-HLL | gldm       | HighGrayLevelEmphasis                | 529.8380952  |
| wavelet-HLL | gldm       | DependenceEntropy                    | 6.232598125  |
| wavelet-HLL | gldm       | DependenceNonUniformity              | 72.41904762  |
| wavelet-HLL | gldm       | GrayLevelNonUniformity               | 7.114285714  |
| wavelet-HLL | gldm       | SmallDependenceEmphasis              | 0.581797619  |
| wavelet-HLL | gldm       | SmallDependenceHighGrayLevelEmphasis | 321.7134775  |
| wavelet-HLL | gldm       | DependenceNonUniformityNormalized    | 0.344852608  |
| wavelet-HLL | gldm       | LargeDependenceEmphasis              | 4.6          |
| wavelet-HLL | gldm       | LargeDependenceLowGrayLevelEmphasis  | 0.027126021  |
| wavelet-HLL | gldm       | DependenceVariance                   | 1.151020408  |
| wavelet-HLL | gldm       | LargeDependenceHighGrayLevelEmphasis | 2065.590476  |
| wavelet-HLL | gldm       | SmallDependenceLowGrayLevelEmphasis  | 0.009159129  |
| wavelet-HLL | gldm       | LowGrayLevelEmphasis                 | 0.011051417  |
| wavelet-HLL | glcm       | JointAverage                         | 20.02457273  |
| wavelet-HLL | glcm       | SumAverage                           | 40.04914546  |
| wavelet-HLL | glcm       | JointEntropy                         | 7.752147002  |
| wavelet-HLL | glcm       | ClusterShade                         | 2730.253183  |
| wavelet-HLL | glcm       | MaximumProbability                   | 0.013533228  |
| wavelet-HLL | glcm       | Idmn                                 | 0.943253915  |
| wavelet-HLL | glcm       | JointEnergy                          | 0.005107239  |
| wavelet-HLL | glcm       | Contrast                             | 130.4994852  |
| wavelet-HLL | glcm       | DifferenceEntropy                    | 4.260793023  |
| wavelet-HLL | glcm       | InverseVariance                      | 0.137398078  |
| wavelet-HLL | glcm       | DifferenceVariance                   | 52.09388997  |
| wavelet-HLL | glcm       | Idn                                  | 0.85159763   |
| wavelet-HLL | glcm       | Idm                                  | 0.132734595  |
| wavelet-HLL | glcm       | Correlation                          | 0.31884249   |
| wavelet-HLL | glcm       | Autocorrelation                      | 433.250502   |
| wavelet-HLL | glcm       | SumEntropy                           | 5.420184322  |
| wavelet-HLL | glcm       | SumSquares                           | 97.4018759   |
| wavelet-HLL | glcm       | ClusterProminence                    | 175296.7805  |
| wavelet-HLL | glcm       | Imc2                                 | 0.994722151  |
| wavelet-HLL | glcm       | Imc1                                 | -0.45599131  |
| wavelet-HLL | glcm       | DifferenceAverage                    | 8.470249981  |
| wavelet-HLL | glcm       | Id                                   | 0.217117232  |
| wavelet-HLL | glcm       | ClusterTendency                      | 259.1080184  |
| wavelet-HLL | firstorder | InterquartileRange                   | 407.9334018  |
| wavelet-HLL | firstorder | Skewness                             | 0.383218444  |
| wavelet-HLL | firstorder | Uniformity                           | 0.033877551  |
| wavelet-HLL | firstorder | Median                               | -117.2942973 |

|             |            |                                  |              |
|-------------|------------|----------------------------------|--------------|
| wavelet-HLL | firstorder | Energy                           | 14400079.24  |
| wavelet-HLL | firstorder | RobustMeanAbsoluteDeviation      | 163.8501122  |
| wavelet-HLL | firstorder | MeanAbsoluteDeviation            | 213.1401341  |
| wavelet-HLL | firstorder | TotalEnergy                      | 388802139.5  |
| wavelet-HLL | firstorder | Maximum                          | 496.9633659  |
| wavelet-HLL | firstorder | RootMeanSquared                  | 261.8621888  |
| wavelet-HLL | firstorder | 90Percentile                     | 300.589066   |
| wavelet-HLL | firstorder | Minimum                          | -571.8838035 |
| wavelet-HLL | firstorder | Entropy                          | 5.096459549  |
| wavelet-HLL | firstorder | Range                            | 1068.847169  |
| wavelet-HLL | firstorder | Variance                         | 63653.49075  |
| wavelet-HLL | firstorder | 10Percentile                     | -355.1593875 |
| wavelet-HLL | firstorder | Kurtosis                         | 2.081220501  |
| wavelet-HLL | firstorder | Mean                             | -70.13070055 |
| wavelet-HLL | grlm       | ShortRunLowGrayLevelEmphasis     | 0.011167442  |
| wavelet-HLL | grlm       | GrayLevelVariance                | 101.907067   |
| wavelet-HLL | grlm       | LowGrayLevelRunEmphasis          | 0.01127665   |
| wavelet-HLL | grlm       | GrayLevelNonUniformityNormalized | 0.033291426  |
| wavelet-HLL | grlm       | RunVariance                      | 0.036773672  |
| wavelet-HLL | grlm       | GrayLevelNonUniformity           | 6.761711635  |
| wavelet-HLL | grlm       | LongRunEmphasis                  | 1.106931095  |
| wavelet-HLL | grlm       | ShortRunHighGrayLevelEmphasis    | 520.9680217  |
| wavelet-HLL | grlm       | RunLengthNonUniformity           | 190.342944   |
| wavelet-HLL | grlm       | ShortRunEmphasis                 | 0.975216732  |
| wavelet-HLL | grlm       | LongRunHighGrayLevelEmphasis     | 579.7463353  |
| wavelet-HLL | grlm       | RunPercentage                    | 0.967032967  |
| wavelet-HLL | grlm       | LongRunLowGrayLevelEmphasis      | 0.011765404  |
| wavelet-HLL | grlm       | RunEntropy                       | 5.240033068  |
| wavelet-HLL | grlm       | HighGrayLevelRunEmphasis         | 532.4851115  |
| wavelet-HLL | grlm       | RunLengthNonUniformityNormalized | 0.936867264  |
| wavelet-HLL | glszm      | GrayLevelVariance                | 109.2482158  |
| wavelet-HLL | glszm      | ZoneVariance                     | 1.733347751  |
| wavelet-HLL | glszm      | GrayLevelNonUniformityNormalized | 0.029736159  |
| wavelet-HLL | glszm      | SizeZoneNonUniformityNormalized  | 0.594290657  |
| wavelet-HLL | glszm      | SizeZoneNonUniformity            | 80.82352941  |
| wavelet-HLL | glszm      | GrayLevelNonUniformity           | 4.044117647  |
| wavelet-HLL | glszm      | LargeAreaEmphasis                | 4.117647059  |
| wavelet-HLL | glszm      | SmallAreaHighGrayLevelEmphasis   | 442.8921474  |
| wavelet-HLL | glszm      | ZonePercentage                   | 0.647619048  |
| wavelet-HLL | glszm      | LargeAreaLowGrayLevelEmphasis    | 0.029000675  |
| wavelet-HLL | glszm      | LargeAreaHighGrayLevelEmphasis   | 1899.044118  |
| wavelet-HLL | glszm      | HighGrayLevelZoneEmphasis        | 554.2720588  |
| wavelet-HLL | glszm      | SmallAreaEmphasis                | 0.797574312  |
| wavelet-HLL | glszm      | LowGrayLevelZoneEmphasis         | 0.014599775  |
| wavelet-HLL | glszm      | ZoneEntropy                      | 5.848656504  |
| wavelet-HLL | glszm      | SmallAreaLowGrayLevelEmphasis    | 0.01368346   |
| wavelet-HLL | ngtdm      | Coarseness                       | 0.027215117  |
| wavelet-HLL | ngtdm      | Complexity                       | 3987.568804  |
| wavelet-HLL | ngtdm      | Strength                         | 16.52016105  |
| wavelet-HLL | ngtdm      | Contrast                         | 0.717407834  |
| wavelet-HLL | ngtdm      | Busyness                         | 0.055029952  |
| wavelet-LHL | gldm       | GrayLevelVariance                | 55.21045351  |
| wavelet-LHL | gldm       | HighGrayLevelEmphasis            | 386.6238095  |

|             |            |                                      |              |
|-------------|------------|--------------------------------------|--------------|
| wavelet-LHL | gldm       | DependenceEntropy                    | 6.048051042  |
| wavelet-LHL | gldm       | DependenceNonUniformity              | 71.43809524  |
| wavelet-LHL | gldm       | GrayLevelNonUniformity               | 9.133333333  |
| wavelet-LHL | gldm       | SmallDependenceEmphasis              | 0.561888889  |
| wavelet-LHL | gldm       | SmallDependenceHighGrayLevelEmphasis | 235.8572526  |
| wavelet-LHL | gldm       | DependenceNonUniformityNormalized    | 0.340181406  |
| wavelet-LHL | gldm       | LargeDependenceEmphasis              | 4.285714286  |
| wavelet-LHL | gldm       | LargeDependenceLowGrayLevelEmphasis  | 0.024892588  |
| wavelet-LHL | gldm       | DependenceVariance                   | 0.907120181  |
| wavelet-LHL | gldm       | LargeDependenceHighGrayLevelEmphasis | 1528.7       |
| wavelet-LHL | gldm       | SmallDependenceLowGrayLevelEmphasis  | 0.009387984  |
| wavelet-LHL | gldm       | LowGrayLevelEmphasis                 | 0.011411906  |
| wavelet-LHL | glcm       | JointAverage                         | 17.68770267  |
| wavelet-LHL | glcm       | SumAverage                           | 35.37540534  |
| wavelet-LHL | glcm       | JointEntropy                         | 7.603638718  |
| wavelet-LHL | glcm       | ClusterShade                         | 627.0253853  |
| wavelet-LHL | glcm       | MaximumProbability                   | 0.013541238  |
| wavelet-LHL | glcm       | ldmn                                 | 0.960278492  |
| wavelet-LHL | glcm       | JointEnergy                          | 0.005744421  |
| wavelet-LHL | glcm       | Contrast                             | 77.37291641  |
| wavelet-LHL | glcm       | DifferenceEntropy                    | 4.007296899  |
| wavelet-LHL | glcm       | InverseVariance                      | 0.153155158  |
| wavelet-LHL | glcm       | DifferenceVariance                   | 30.53422879  |
| wavelet-LHL | glcm       | ldn                                  | 0.870214275  |
| wavelet-LHL | glcm       | ldm                                  | 0.142077211  |
| wavelet-LHL | glcm       | Correlation                          | 0.159615898  |
| wavelet-LHL | glcm       | Autocorrelation                      | 321.3211539  |
| wavelet-LHL | glcm       | SumEntropy                           | 5.060228629  |
| wavelet-LHL | glcm       | SumSquares                           | 47.12994726  |
| wavelet-LHL | glcm       | ClusterProminence                    | 46902.53753  |
| wavelet-LHL | glcm       | lmc2                                 | 0.983095453  |
| wavelet-LHL | glcm       | lmc1                                 | -0.366888457 |
| wavelet-LHL | glcm       | DifferenceAverage                    | 6.710012168  |
| wavelet-LHL | glcm       | ld                                   | 0.233365686  |
| wavelet-LHL | glcm       | ClusterTendency                      | 111.1468726  |
| wavelet-LHL | firstorder | InterquartileRange                   | 223.728592   |
| wavelet-LHL | firstorder | Skewness                             | 0.518884932  |
| wavelet-LHL | firstorder | Uniformity                           | 0.043492063  |
| wavelet-LHL | firstorder | Median                               | -75.85099663 |
| wavelet-LHL | firstorder | Energy                               | 7927199.42   |
| wavelet-LHL | firstorder | RobustMeanAbsoluteDeviation          | 97.99524903  |
| wavelet-LHL | firstorder | MeanAbsoluteDeviation                | 145.0405234  |
| wavelet-LHL | firstorder | TotalEnergy                          | 214034384.3  |
| wavelet-LHL | firstorder | Maximum                              | 509.2613036  |
| wavelet-LHL | firstorder | RootMeanSquared                      | 194.2899088  |
| wavelet-LHL | firstorder | 90Percentile                         | 210.1425056  |
| wavelet-LHL | firstorder | Minimum                              | -479.7042011 |
| wavelet-LHL | firstorder | Entropy                              | 4.78432658   |
| wavelet-LHL | firstorder | Range                                | 988.9655047  |
| wavelet-LHL | firstorder | Variance                             | 34474.82132  |
| wavelet-LHL | firstorder | 10Percentile                         | -266.1637197 |
| wavelet-LHL | firstorder | Kurtosis                             | 3.21481848   |
| wavelet-LHL | firstorder | Mean                                 | -57.21667015 |

|             |       |                                      |             |
|-------------|-------|--------------------------------------|-------------|
| wavelet-LHL | grlm  | ShortRunLowGrayLevelEmphasis         | 0.011546211 |
| wavelet-LHL | grlm  | GrayLevelVariance                    | 56.09907423 |
| wavelet-LHL | grlm  | LowGrayLevelRunEmphasis              | 0.011651463 |
| wavelet-LHL | grlm  | GrayLevelNonUniformityNormalized     | 0.042964976 |
| wavelet-LHL | grlm  | RunVariance                          | 0.034420513 |
| wavelet-LHL | grlm  | GrayLevelNonUniformity               | 8.731628233 |
| wavelet-LHL | grlm  | LongRunEmphasis                      | 1.103224393 |
| wavelet-LHL | grlm  | ShortRunHighGrayLevelEmphasis        | 379.4100582 |
| wavelet-LHL | grlm  | RunLengthNonUniformity               | 190.7176336 |
| wavelet-LHL | grlm  | ShortRunEmphasis                     | 0.975452981 |
| wavelet-LHL | grlm  | LongRunHighGrayLevelEmphasis         | 423.5313097 |
| wavelet-LHL | grlm  | RunPercentage                        | 0.967765568 |
| wavelet-LHL | grlm  | LongRunLowGrayLevelEmphasis          | 0.0120951   |
| wavelet-LHL | grlm  | RunEntropy                           | 4.934144974 |
| wavelet-LHL | grlm  | HighGrayLevelRunEmphasis             | 387.9764939 |
| wavelet-LHL | grlm  | RunLengthNonUniformityNormalized     | 0.937800713 |
| wavelet-LHL | glszm | GrayLevelVariance                    | 68.49689986 |
| wavelet-LHL | glszm | ZoneVariance                         | 1.491358025 |
| wavelet-LHL | glszm | GrayLevelNonUniformityNormalized     | 0.037037037 |
| wavelet-LHL | glszm | SizeZoneNonUniformityNormalized      | 0.546776406 |
| wavelet-LHL | glszm | SizeZoneNonUniformity                | 73.81481481 |
| wavelet-LHL | glszm | GrayLevelNonUniformity               | 5           |
| wavelet-LHL | glszm | LargeAreaEmphasis                    | 3.911111111 |
| wavelet-LHL | glszm | SmallAreaHighGrayLevelEmphasis       | 331.6148583 |
| wavelet-LHL | glszm | ZonePercentage                       | 0.642857143 |
| wavelet-LHL | glszm | LargeAreaLowGrayLevelEmphasis        | 0.027789438 |
| wavelet-LHL | glszm | LargeAreaHighGrayLevelEmphasis       | 1363.962963 |
| wavelet-LHL | glszm | HighGrayLevelZoneEmphasis            | 413.3555556 |
| wavelet-LHL | glszm | SmallAreaEmphasis                    | 0.767913403 |
| wavelet-LHL | glszm | LowGrayLevelZoneEmphasis             | 0.015238309 |
| wavelet-LHL | glszm | ZoneEntropy                          | 5.793420182 |
| wavelet-LHL | glszm | SmallAreaLowGrayLevelEmphasis        | 0.014084907 |
| wavelet-LHL | ngtdm | Coarseness                           | 0.029248906 |
| wavelet-LHL | ngtdm | Complexity                           | 2669.621513 |
| wavelet-LHL | ngtdm | Strength                             | 13.78814952 |
| wavelet-LHL | ngtdm | Contrast                             | 0.385304755 |
| wavelet-LHL | ngtdm | Busyness                             | 0.057963895 |
| wavelet-LHH | gldm  | GrayLevelVariance                    | 21.01789116 |
| wavelet-LHH | gldm  | HighGrayLevelEmphasis                | 374.9952381 |
| wavelet-LHH | gldm  | DependenceEntropy                    | 5.749804521 |
| wavelet-LHH | gldm  | DependenceNonUniformity              | 44.56190476 |
| wavelet-LHH | gldm  | GrayLevelNonUniformity               | 16.01904762 |
| wavelet-LHH | gldm  | SmallDependenceEmphasis              | 0.407089785 |
| wavelet-LHH | gldm  | SmallDependenceHighGrayLevelEmphasis | 167.6598646 |
| wavelet-LHH | gldm  | DependenceNonUniformityNormalized    | 0.212199546 |
| wavelet-LHH | gldm  | LargeDependenceEmphasis              | 9.733333333 |
| wavelet-LHH | gldm  | LargeDependenceLowGrayLevelEmphasis  | 0.037590286 |
| wavelet-LHH | gldm  | DependenceVariance                   | 2.723446712 |
| wavelet-LHH | gldm  | LargeDependenceHighGrayLevelEmphasis | 3242.080952 |
| wavelet-LHH | gldm  | SmallDependenceLowGrayLevelEmphasis  | 0.007248079 |
| wavelet-LHH | gldm  | LowGrayLevelEmphasis                 | 0.009149675 |
| wavelet-LHH | glcm  | JointAverage                         | 18.77490796 |
| wavelet-LHH | glcm  | SumAverage                           | 37.54981591 |



|             |            |                                  |              |
|-------------|------------|----------------------------------|--------------|
| wavelet-LHH | glcm       | JointEntropy                     | 6.902689289  |
| wavelet-LHH | glcm       | ClusterShade                     | 88.87984182  |
| wavelet-LHH | glcm       | MaximumProbability               | 0.03118518   |
| wavelet-LHH | glcm       | Idmn                             | 0.969121405  |
| wavelet-LHH | glcm       | JointEnergy                      | 0.010744009  |
| wavelet-LHH | glcm       | Contrast                         | 38.62644193  |
| wavelet-LHH | glcm       | DifferenceEntropy                | 3.568471298  |
| wavelet-LHH | glcm       | InverseVariance                  | 0.224190014  |
| wavelet-LHH | glcm       | DifferenceVariance               | 17.35701336  |
| wavelet-LHH | glcm       | Idn                              | 0.888890757  |
| wavelet-LHH | glcm       | Idm                              | 0.227051761  |
| wavelet-LHH | glcm       | Correlation                      | 0.005134007  |
| wavelet-LHH | glcm       | Autocorrelation                  | 352.7800507  |
| wavelet-LHH | glcm       | SumEntropy                       | 4.383114189  |
| wavelet-LHH | glcm       | SumSquares                       | 19.54396817  |
| wavelet-LHH | glcm       | ClusterProminence                | 7600.199171  |
| wavelet-LHH | glcm       | Imc2                             | 0.92605727   |
| wavelet-LHH | glcm       | Imc1                             | -0.250089112 |
| wavelet-LHH | glcm       | DifferenceAverage                | 4.539192131  |
| wavelet-LHH | glcm       | Id                               | 0.315735781  |
| wavelet-LHH | glcm       | ClusterTendency                  | 39.54943076  |
| wavelet-LHH | firstorder | InterquartileRange               | 130.2827432  |
| wavelet-LHH | firstorder | Skewness                         | 0.0779981    |
| wavelet-LHH | firstorder | Uniformity                       | 0.076281179  |
| wavelet-LHH | firstorder | Median                           | -2.94823443  |
| wavelet-LHH | firstorder | Energy                           | 2756846.363  |
| wavelet-LHH | firstorder | RobustMeanAbsoluteDeviation      | 55.8106921   |
| wavelet-LHH | firstorder | MeanAbsoluteDeviation            | 85.7787895   |
| wavelet-LHH | firstorder | TotalEnergy                      | 74434851.81  |
| wavelet-LHH | firstorder | Maximum                          | 353.0052541  |
| wavelet-LHH | firstorder | RootMeanSquared                  | 114.5767857  |
| wavelet-LHH | firstorder | 90Percentile                     | 140.1267214  |
| wavelet-LHH | firstorder | Minimum                          | -444.8218981 |
| wavelet-LHH | firstorder | Entropy                          | 4.042669481  |
| wavelet-LHH | firstorder | Range                            | 797.8271522  |
| wavelet-LHH | firstorder | Variance                         | 13068.89174  |
| wavelet-LHH | firstorder | 10Percentile                     | -125.8626234 |
| wavelet-LHH | firstorder | Kurtosis                         | 4.798048468  |
| wavelet-LHH | firstorder | Mean                             | 7.677765808  |
| wavelet-LHH | grlm       | ShortRunLowGrayLevelEmphasis     | 0.009393956  |
| wavelet-LHH | grlm       | GrayLevelVariance                | 21.93486825  |
| wavelet-LHH | grlm       | LowGrayLevelRunEmphasis          | 0.009552694  |
| wavelet-LHH | grlm       | GrayLevelNonUniformityNormalized | 0.073592438  |
| wavelet-LHH | grlm       | RunVariance                      | 0.069282867  |
| wavelet-LHH | grlm       | GrayLevelNonUniformity           | 14.47639615  |
| wavelet-LHH | grlm       | LongRunEmphasis                  | 1.210772778  |
| wavelet-LHH | grlm       | ShortRunHighGrayLevelEmphasis    | 361.0193954  |
| wavelet-LHH | grlm       | RunLengthNonUniformity           | 173.0617664  |
| wavelet-LHH | grlm       | ShortRunEmphasis                 | 0.950809537  |
| wavelet-LHH | grlm       | LongRunHighGrayLevelEmphasis     | 448.1975697  |
| wavelet-LHH | grlm       | RunPercentage                    | 0.936630037  |
| wavelet-LHH | grlm       | LongRunLowGrayLevelEmphasis      | 0.010236381  |
| wavelet-LHH | grlm       | RunEntropy                       | 4.36631235   |

|             |       |                                      |             |
|-------------|-------|--------------------------------------|-------------|
| wavelet-LHH | grlm  | HighGrayLevelRunEmphasis             | 377.6438676 |
| wavelet-LHH | grlm  | RunLengthNonUniformityNormalized     | 0.879033531 |
| wavelet-LHH | glszm | GrayLevelVariance                    | 34.62817576 |
| wavelet-LHH | glszm | ZoneVariance                         | 9.285714286 |
| wavelet-LHH | glszm | GrayLevelNonUniformityNormalized     | 0.056226572 |
| wavelet-LHH | glszm | SizeZoneNonUniformityNormalized      | 0.485422741 |
| wavelet-LHH | glszm | SizeZoneNonUniformity                | 47.57142857 |
| wavelet-LHH | glszm | GrayLevelNonUniformity               | 5.510204082 |
| wavelet-LHH | glszm | LargeAreaEmphasis                    | 13.87755102 |
| wavelet-LHH | glszm | SmallAreaHighGrayLevelEmphasis       | 303.7198267 |
| wavelet-LHH | glszm | ZonePercentage                       | 0.466666667 |
| wavelet-LHH | glszm | LargeAreaLowGrayLevelEmphasis        | 0.057731172 |
| wavelet-LHH | glszm | LargeAreaHighGrayLevelEmphasis       | 4650.132653 |
| wavelet-LHH | glszm | HighGrayLevelZoneEmphasis            | 406.1734694 |
| wavelet-LHH | glszm | SmallAreaEmphasis                    | 0.722258231 |
| wavelet-LHH | glszm | LowGrayLevelZoneEmphasis             | 0.015959999 |
| wavelet-LHH | glszm | ZoneEntropy                          | 5.298447411 |
| wavelet-LHH | glszm | SmallAreaLowGrayLevelEmphasis        | 0.01506427  |
| wavelet-LHH | ngtdm | Coarseness                           | 0.025591266 |
| wavelet-LHH | ngtdm | Complexity                           | 1012.951911 |
| wavelet-LHH | ngtdm | Strength                             | 6.550453936 |
| wavelet-LHH | ngtdm | Contrast                             | 0.232209547 |
| wavelet-LHH | ngtdm | Busyness                             | 0.077971956 |
| wavelet-LLH | gldm  | GrayLevelVariance                    | 41.76419501 |
| wavelet-LLH | gldm  | HighGrayLevelEmphasis                | 361.8333333 |
| wavelet-LLH | gldm  | DependenceEntropy                    | 6.014857562 |
| wavelet-LLH | gldm  | DependenceNonUniformity              | 56.02857143 |
| wavelet-LLH | gldm  | GrayLevelNonUniformity               | 11.35238095 |
| wavelet-LLH | gldm  | SmallDependenceEmphasis              | 0.493291545 |
| wavelet-LLH | gldm  | SmallDependenceHighGrayLevelEmphasis | 208.3206359 |
| wavelet-LLH | gldm  | DependenceNonUniformityNormalized    | 0.266802721 |
| wavelet-LLH | gldm  | LargeDependenceEmphasis              | 6.971428571 |
| wavelet-LLH | gldm  | LargeDependenceLowGrayLevelEmphasis  | 0.032798892 |
| wavelet-LLH | gldm  | DependenceVariance                   | 1.919637188 |
| wavelet-LLH | gldm  | LargeDependenceHighGrayLevelEmphasis | 2337.957143 |
| wavelet-LLH | gldm  | SmallDependenceLowGrayLevelEmphasis  | 0.008812968 |
| wavelet-LLH | gldm  | LowGrayLevelEmphasis                 | 0.011004147 |
| wavelet-LLH | glcm  | JointAverage                         | 17.43995235 |
| wavelet-LLH | glcm  | SumAverage                           | 34.8799047  |
| wavelet-LLH | glcm  | JointEntropy                         | 7.325478253 |
| wavelet-LLH | glcm  | ClusterShade                         | 392.7656109 |
| wavelet-LLH | glcm  | MaximumProbability                   | 0.02547928  |
| wavelet-LLH | glcm  | ldmn                                 | 0.973617136 |
| wavelet-LLH | glcm  | JointEnergy                          | 0.007590436 |
| wavelet-LLH | glcm  | Contrast                             | 55.9967005  |
| wavelet-LLH | glcm  | DifferenceEntropy                    | 3.756799721 |
| wavelet-LLH | glcm  | InverseVariance                      | 0.19850255  |
| wavelet-LLH | glcm  | DifferenceVariance                   | 25.64504045 |
| wavelet-LLH | glcm  | ldn                                  | 0.896905598 |
| wavelet-LLH | glcm  | ldm                                  | 0.190913331 |
| wavelet-LLH | glcm  | Correlation                          | 0.195098123 |
| wavelet-LLH | glcm  | Autocorrelation                      | 311.6692747 |
| wavelet-LLH | glcm  | SumEntropy                           | 4.859641254 |

|             |            |                                  |              |
|-------------|------------|----------------------------------|--------------|
| wavelet-LLH | glcm       | SumSquares                       | 35.48482603  |
| wavelet-LLH | glcm       | ClusterProminence                | 36817.00884  |
| wavelet-LLH | glcm       | Imc2                             | 0.970767815  |
| wavelet-LLH | glcm       | Imc1                             | -0.329744873 |
| wavelet-LLH | glcm       | DifferenceAverage                | 5.410443365  |
| wavelet-LLH | glcm       | Id                               | 0.28123382   |
| wavelet-LLH | glcm       | ClusterTendency                  | 85.94260362  |
| wavelet-LLH | firstorder | InterquartileRange               | 177.7772846  |
| wavelet-LLH | firstorder | Skewness                         | 0.535949971  |
| wavelet-LLH | firstorder | Uniformity                       | 0.054058957  |
| wavelet-LLH | firstorder | Median                           | -43.45421306 |
| wavelet-LLH | firstorder | Energy                           | 5866003.753  |
| wavelet-LLH | firstorder | RobustMeanAbsoluteDeviation      | 78.47164545  |
| wavelet-LLH | firstorder | MeanAbsoluteDeviation            | 121.8657361  |
| wavelet-LLH | firstorder | TotalEnergy                      | 158382101.3  |
| wavelet-LLH | firstorder | Maximum                          | 592.4221682  |
| wavelet-LLH | firstorder | RootMeanSquared                  | 167.1327353  |
| wavelet-LLH | firstorder | 90Percentile                     | 158.4690064  |
| wavelet-LLH | firstorder | Minimum                          | -456.8788246 |
| wavelet-LLH | firstorder | Entropy                          | 4.528496158  |
| wavelet-LLH | firstorder | Range                            | 1049.300993  |
| wavelet-LLH | firstorder | Variance                         | 26328.47253  |
| wavelet-LLH | firstorder | 10Percentile                     | -230.2496445 |
| wavelet-LLH | firstorder | Kurtosis                         | 4.176507077  |
| wavelet-LLH | firstorder | Mean                             | -40.06093703 |
| wavelet-LLH | glrlm      | ShortRunLowGrayLevelEmphasis     | 0.011225022  |
| wavelet-LLH | glrlm      | GrayLevelVariance                | 43.25161345  |
| wavelet-LLH | glrlm      | LowGrayLevelRunEmphasis          | 0.011364051  |
| wavelet-LLH | glrlm      | GrayLevelNonUniformityNormalized | 0.052443036  |
| wavelet-LLH | glrlm      | RunVariance                      | 0.061110278  |
| wavelet-LLH | glrlm      | GrayLevelNonUniformity           | 10.48716676  |
| wavelet-LLH | glrlm      | LongRunEmphasis                  | 1.165658655  |
| wavelet-LLH | glrlm      | ShortRunHighGrayLevelEmphasis    | 353.1580056  |
| wavelet-LLH | glrlm      | RunLengthNonUniformity           | 182.7609467  |
| wavelet-LLH | glrlm      | ShortRunEmphasis                 | 0.965364491  |
| wavelet-LLH | glrlm      | LongRunHighGrayLevelEmphasis     | 417.2723728  |
| wavelet-LLH | glrlm      | RunPercentage                    | 0.952014652  |
| wavelet-LLH | glrlm      | LongRunLowGrayLevelEmphasis      | 0.012000102  |
| wavelet-LLH | glrlm      | RunEntropy                       | 4.754643708  |
| wavelet-LLH | glrlm      | HighGrayLevelRunEmphasis         | 364.0468554  |
| wavelet-LLH | glrlm      | RunLengthNonUniformityNormalized | 0.913615654  |
| wavelet-LLH | glszm      | GrayLevelVariance                | 64.00635161  |
| wavelet-LLH | glszm      | ZoneVariance                     | 4.821928166  |
| wavelet-LLH | glszm      | GrayLevelNonUniformityNormalized | 0.039848771  |
| wavelet-LLH | glszm      | SizeZoneNonUniformityNormalized  | 0.562192817  |
| wavelet-LLH | glszm      | SizeZoneNonUniformity            | 64.65217391  |
| wavelet-LLH | glszm      | GrayLevelNonUniformity           | 4.582608696  |
| wavelet-LLH | glszm      | LargeAreaEmphasis                | 8.156521739  |
| wavelet-LLH | glszm      | SmallAreaHighGrayLevelEmphasis   | 343.4932537  |
| wavelet-LLH | glszm      | ZonePercentage                   | 0.547619048  |
| wavelet-LLH | glszm      | LargeAreaLowGrayLevelEmphasis    | 0.04125327   |
| wavelet-LLH | glszm      | LargeAreaHighGrayLevelEmphasis   | 2854.773913  |
| wavelet-LLH | glszm      | HighGrayLevelZoneEmphasis        | 406.7391304  |

|             |            |                                      |              |
|-------------|------------|--------------------------------------|--------------|
| wavelet-LLH | glszm      | SmallAreaEmphasis                    | 0.774015987  |
| wavelet-LLH | glszm      | LowGrayLevelZoneEmphasis             | 0.016633715  |
| wavelet-LLH | glszm      | ZoneEntropy                          | 5.561673343  |
| wavelet-LLH | glszm      | SmallAreaLowGrayLevelEmphasis        | 0.015497166  |
| wavelet-LLH | ngtdm      | Coarseness                           | 0.035340976  |
| wavelet-LLH | ngtdm      | Complexity                           | 1731.914543  |
| wavelet-LLH | ngtdm      | Strength                             | 13.74156756  |
| wavelet-LLH | ngtdm      | Contrast                             | 0.283502097  |
| wavelet-LLH | ngtdm      | Busyness                             | 0.048041904  |
| wavelet-LLL | gldm       | GrayLevelVariance                    | 488.9808617  |
| wavelet-LLL | gldm       | HighGrayLevelEmphasis                | 2793.895238  |
| wavelet-LLL | gldm       | DependenceEntropy                    | 6.45504119   |
| wavelet-LLL | gldm       | DependenceNonUniformity              | 124.3238095  |
| wavelet-LLL | gldm       | GrayLevelNonUniformity               | 3.695238095  |
| wavelet-LLL | gldm       | SmallDependenceEmphasis              | 0.797669312  |
| wavelet-LLL | gldm       | SmallDependenceHighGrayLevelEmphasis | 1892.004614  |
| wavelet-LLL | gldm       | DependenceNonUniformityNormalized    | 0.592018141  |
| wavelet-LLL | gldm       | LargeDependenceEmphasis              | 2.619047619  |
| wavelet-LLL | gldm       | LargeDependenceLowGrayLevelEmphasis  | 0.007306611  |
| wavelet-LLL | gldm       | DependenceVariance                   | 0.685623583  |
| wavelet-LLL | gldm       | LargeDependenceHighGrayLevelEmphasis | 11213.57143  |
| wavelet-LLL | gldm       | SmallDependenceLowGrayLevelEmphasis  | 0.006664833  |
| wavelet-LLL | gldm       | LowGrayLevelEmphasis                 | 0.006765905  |
| wavelet-LLL | glcm       | JointAverage                         | 54.31830851  |
| wavelet-LLL | glcm       | SumAverage                           | 108.636617   |
| wavelet-LLL | glcm       | JointEntropy                         | 8.028899915  |
| wavelet-LLL | glcm       | ClusterShade                         | -16326.34315 |
| wavelet-LLL | glcm       | MaximumProbability                   | 0.010080484  |
| wavelet-LLL | glcm       | ldmn                                 | 0.931011792  |
| wavelet-LLL | glcm       | JointEnergy                          | 0.003996823  |
| wavelet-LLL | glcm       | Contrast                             | 602.2980365  |
| wavelet-LLL | glcm       | DifferenceEntropy                    | 5.223584344  |
| wavelet-LLL | glcm       | InverseVariance                      | 0.069006272  |
| wavelet-LLL | glcm       | DifferenceVariance                   | 204.5434621  |
| wavelet-LLL | glcm       | ldn                                  | 0.830395087  |
| wavelet-LLL | glcm       | ldm                                  | 0.063928995  |
| wavelet-LLL | glcm       | Correlation                          | 0.327815601  |
| wavelet-LLL | glcm       | Autocorrelation                      | 3100.556404  |
| wavelet-LLL | glcm       | SumEntropy                           | 6.206737574  |
| wavelet-LLL | glcm       | SumSquares                           | 449.7663662  |
| wavelet-LLL | glcm       | ClusterProminence                    | 3302350.67   |
| wavelet-LLL | glcm       | lmc2                                 | 0.999718609  |
| wavelet-LLL | glcm       | lmc1                                 | -0.637290561 |
| wavelet-LLL | glcm       | DifferenceAverage                    | 19.37418193  |
| wavelet-LLL | glcm       | ld                                   | 0.124380414  |
| wavelet-LLL | glcm       | ClusterTendency                      | 1196.767428  |
| wavelet-LLL | firstorder | InterquartileRange                   | 950.6804834  |
| wavelet-LLL | firstorder | Skewness                             | -0.143802534 |
| wavelet-LLL | firstorder | Uniformity                           | 0.017596372  |
| wavelet-LLL | firstorder | Median                               | -574.2372694 |
| wavelet-LLL | firstorder | Energy                               | 142682974.9  |
| wavelet-LLL | firstorder | RobustMeanAbsoluteDeviation          | 383.9538246  |
| wavelet-LLL | firstorder | MeanAbsoluteDeviation                | 480.5271885  |

|             |            |                                  |              |
|-------------|------------|----------------------------------|--------------|
| wavelet-LLL | firstorder | TotalEnergy                      | 3852440322   |
| wavelet-LLL | firstorder | Maximum                          | 322.7714677  |
| wavelet-LLL | firstorder | RootMeanSquared                  | 824.2831659  |
| wavelet-LLL | firstorder | 90Percentile                     | 113.6960563  |
| wavelet-LLL | firstorder | Minimum                          | -1784.691668 |
| wavelet-LLL | firstorder | Entropy                          | 6.03324344   |
| wavelet-LLL | firstorder | Range                            | 2107.463136  |
| wavelet-LLL | firstorder | Variance                         | 305609.175   |
| wavelet-LLL | firstorder | 10Percentile                     | -1363.04134  |
| wavelet-LLL | firstorder | Kurtosis                         | 1.886347267  |
| wavelet-LLL | firstorder | Mean                             | -611.4193018 |
| wavelet-LLL | grlm       | ShortRunLowGrayLevelEmphasis     | 0.006859206  |
| wavelet-LLL | grlm       | GrayLevelVariance                | 486.0731769  |
| wavelet-LLL | grlm       | LowGrayLevelRunEmphasis          | 0.006863704  |
| wavelet-LLL | grlm       | GrayLevelNonUniformityNormalized | 0.017443992  |
| wavelet-LLL | grlm       | RunVariance                      | 0.016514104  |
| wavelet-LLL | grlm       | GrayLevelNonUniformity           | 3.608492337  |
| wavelet-LLL | grlm       | LongRunEmphasis                  | 1.047574605  |
| wavelet-LLL | grlm       | ShortRunHighGrayLevelEmphasis    | 2707.161965  |
| wavelet-LLL | grlm       | RunLengthNonUniformity           | 200.9678869  |
| wavelet-LLL | grlm       | ShortRunEmphasis                 | 0.988942287  |
| wavelet-LLL | grlm       | LongRunHighGrayLevelEmphasis     | 2996.683985  |
| wavelet-LLL | grlm       | RunPercentage                    | 0.984981685  |
| wavelet-LLL | grlm       | LongRunLowGrayLevelEmphasis      | 0.006882273  |
| wavelet-LLL | grlm       | RunEntropy                       | 6.079778039  |
| wavelet-LLL | grlm       | HighGrayLevelRunEmphasis         | 2761.203666  |
| wavelet-LLL | grlm       | RunLengthNonUniformityNormalized | 0.971386031  |
| wavelet-LLL | glszm      | GrayLevelVariance                | 459.3798571  |
| wavelet-LLL | glszm      | ZoneVariance                     | 0.366655223  |
| wavelet-LLL | glszm      | GrayLevelNonUniformityNormalized | 0.017009457  |
| wavelet-LLL | glszm      | SizeZoneNonUniformityNormalized  | 0.779594894  |
| wavelet-LLL | glszm      | SizeZoneNonUniformity            | 139.547486   |
| wavelet-LLL | glszm      | GrayLevelNonUniformity           | 3.044692737  |
| wavelet-LLL | glszm      | LargeAreaEmphasis                | 1.74301676   |
| wavelet-LLL | glszm      | SmallAreaHighGrayLevelEmphasis   | 2089.833425  |
| wavelet-LLL | glszm      | ZonePercentage                   | 0.852380952  |
| wavelet-LLL | glszm      | LargeAreaLowGrayLevelEmphasis    | 0.008138866  |
| wavelet-LLL | glszm      | LargeAreaHighGrayLevelEmphasis   | 6178.726257  |
| wavelet-LLL | glszm      | HighGrayLevelZoneEmphasis        | 2483.877095  |
| wavelet-LLL | glszm      | SmallAreaEmphasis                | 0.903939276  |
| wavelet-LLL | glszm      | LowGrayLevelZoneEmphasis         | 0.007856079  |
| wavelet-LLL | glszm      | ZoneEntropy                      | 6.327820616  |
| wavelet-LLL | glszm      | SmallAreaLowGrayLevelEmphasis    | 0.007800588  |
| wavelet-LLL | ngtdm      | Coarseness                       | 0.020587013  |
| wavelet-LLL | ngtdm      | Complexity                       | 33932.04501  |
| wavelet-LLL | ngtdm      | Strength                         | 58.55958541  |
| wavelet-LLL | ngtdm      | Contrast                         | 2.219440205  |
| wavelet-LLL | ngtdm      | Busyness                         | 0.014364137  |
| wavelet-HHL | gldm       | GrayLevelVariance                | 20.41188209  |
| wavelet-HHL | gldm       | HighGrayLevelEmphasis            | 230.8        |
| wavelet-HHL | gldm       | DependenceEntropy                | 5.773002055  |
| wavelet-HHL | gldm       | DependenceNonUniformity          | 54.62857143  |
| wavelet-HHL | gldm       | GrayLevelNonUniformity           | 14.18095238  |

|             |            |                                      |              |
|-------------|------------|--------------------------------------|--------------|
| wavelet-HHL | gldm       | SmallDependenceEmphasis              | 0.426213584  |
| wavelet-HHL | gldm       | SmallDependenceHighGrayLevelEmphasis | 110.5665547  |
| wavelet-HHL | gldm       | DependenceNonUniformityNormalized    | 0.260136054  |
| wavelet-HHL | gldm       | LargeDependenceEmphasis              | 7.095238095  |
| wavelet-HHL | gldm       | LargeDependenceLowGrayLevelEmphasis  | 0.049164484  |
| wavelet-HHL | gldm       | DependenceVariance                   | 1.783310658  |
| wavelet-HHL | gldm       | LargeDependenceHighGrayLevelEmphasis | 1430.2       |
| wavelet-HHL | gldm       | SmallDependenceLowGrayLevelEmphasis  | 0.008541659  |
| wavelet-HHL | gldm       | LowGrayLevelEmphasis                 | 0.012173509  |
| wavelet-HHL | glcm       | JointAverage                         | 14.63688261  |
| wavelet-HHL | glcm       | SumAverage                           | 29.27376523  |
| wavelet-HHL | glcm       | JointEntropy                         | 7.12682541   |
| wavelet-HHL | glcm       | ClusterShade                         | 48.25657842  |
| wavelet-HHL | glcm       | MaximumProbability                   | 0.023818998  |
| wavelet-HHL | glcm       | Idmn                                 | 0.956989212  |
| wavelet-HHL | glcm       | JointEnergy                          | 0.008647817  |
| wavelet-HHL | glcm       | Contrast                             | 39.28997058  |
| wavelet-HHL | glcm       | DifferenceEntropy                    | 3.620251922  |
| wavelet-HHL | glcm       | InverseVariance                      | 0.194110064  |
| wavelet-HHL | glcm       | DifferenceVariance                   | 15.2649305   |
| wavelet-HHL | glcm       | Idn                                  | 0.864066132  |
| wavelet-HHL | glcm       | Idm                                  | 0.192866817  |
| wavelet-HHL | glcm       | Correlation                          | -0.005465002 |
| wavelet-HHL | glcm       | Autocorrelation                      | 214.1510007  |
| wavelet-HHL | glcm       | SumEntropy                           | 4.443206648  |
| wavelet-HHL | glcm       | SumSquares                           | 19.45988582  |
| wavelet-HHL | glcm       | ClusterProminence                    | 5395.268187  |
| wavelet-HHL | glcm       | Imc2                                 | 0.930666133  |
| wavelet-HHL | glcm       | Imc1                                 | -0.249230262 |
| wavelet-HHL | glcm       | DifferenceAverage                    | 4.833646613  |
| wavelet-HHL | glcm       | Id                                   | 0.286472363  |
| wavelet-HHL | glcm       | ClusterTendency                      | 38.5495727   |
| wavelet-HHL | firstorder | InterquartileRange                   | 144.1884671  |
| wavelet-HHL | firstorder | Skewness                             | 0.274454621  |
| wavelet-HHL | firstorder | Uniformity                           | 0.067528345  |
| wavelet-HHL | firstorder | Median                               | -8.693651397 |
| wavelet-HHL | firstorder | Energy                               | 2643807.73   |
| wavelet-HHL | firstorder | RobustMeanAbsoluteDeviation          | 62.74315796  |
| wavelet-HHL | firstorder | MeanAbsoluteDeviation                | 89.65184987  |
| wavelet-HHL | firstorder | TotalEnergy                          | 71382808.7   |
| wavelet-HHL | firstorder | Maximum                              | 345.5427407  |
| wavelet-HHL | firstorder | RootMeanSquared                      | 112.2032113  |
| wavelet-HHL | firstorder | 90Percentile                         | 154.3463953  |
| wavelet-HHL | firstorder | Minimum                              | -327.1175584 |
| wavelet-HHL | firstorder | Entropy                              | 4.127539612  |
| wavelet-HHL | firstorder | Range                                | 672.6602991  |
| wavelet-HHL | firstorder | Variance                             | 12589.33252  |
| wavelet-HHL | firstorder | 10Percentile                         | -130.3580811 |
| wavelet-HHL | firstorder | Kurtosis                             | 3.253362758  |
| wavelet-HHL | firstorder | Mean                                 | 0.47759828   |
| wavelet-HHL | glrlm      | ShortRunLowGrayLevelEmphasis         | 0.012261329  |
| wavelet-HHL | glrlm      | GrayLevelVariance                    | 20.88501569  |
| wavelet-HHL | glrlm      | LowGrayLevelRunEmphasis              | 0.012492525  |

|             |       |                                      |              |
|-------------|-------|--------------------------------------|--------------|
| wavelet-HHL | grlm  | GrayLevelNonUniformityNormalized     | 0.066412858  |
| wavelet-HHL | grlm  | RunVariance                          | 0.058541836  |
| wavelet-HHL | grlm  | GrayLevelNonUniformity               | 13.24770805  |
| wavelet-HHL | grlm  | LongRunEmphasis                      | 1.167931492  |
| wavelet-HHL | grlm  | ShortRunHighGrayLevelEmphasis        | 224.6504711  |
| wavelet-HHL | grlm  | RunLengthNonUniformity               | 180.9349368  |
| wavelet-HHL | grlm  | ShortRunEmphasis                     | 0.96256198   |
| wavelet-HHL | grlm  | LongRunHighGrayLevelEmphasis         | 266.0682648  |
| wavelet-HHL | grlm  | RunPercentage                        | 0.94981685   |
| wavelet-HHL | grlm  | LongRunLowGrayLevelEmphasis          | 0.013527453  |
| wavelet-HHL | grlm  | RunEntropy                           | 4.364407349  |
| wavelet-HHL | grlm  | HighGrayLevelRunEmphasis             | 232.3013934  |
| wavelet-HHL | grlm  | RunLengthNonUniformityNormalized     | 0.906636571  |
| wavelet-HHL | glszm | GrayLevelVariance                    | 27.63691206  |
| wavelet-HHL | glszm | ZoneVariance                         | 5.357715148  |
| wavelet-HHL | glszm | GrayLevelNonUniformityNormalized     | 0.057027053  |
| wavelet-HHL | glszm | SizeZoneNonUniformityNormalized      | 0.441794703  |
| wavelet-HHL | glszm | SizeZoneNonUniformity                | 45.50485437  |
| wavelet-HHL | glszm | GrayLevelNonUniformity               | 5.873786408  |
| wavelet-HHL | glszm | LargeAreaEmphasis                    | 9.514563107  |
| wavelet-HHL | glszm | SmallAreaHighGrayLevelEmphasis       | 187.1896001  |
| wavelet-HHL | glszm | ZonePercentage                       | 0.49047619   |
| wavelet-HHL | glszm | LargeAreaLowGrayLevelEmphasis        | 0.070845515  |
| wavelet-HHL | glszm | LargeAreaHighGrayLevelEmphasis       | 1854.524272  |
| wavelet-HHL | glszm | HighGrayLevelZoneEmphasis            | 256.1456311  |
| wavelet-HHL | glszm | SmallAreaEmphasis                    | 0.69104945   |
| wavelet-HHL | glszm | LowGrayLevelZoneEmphasis             | 0.018318992  |
| wavelet-HHL | glszm | ZoneEntropy                          | 5.403848741  |
| wavelet-HHL | glszm | SmallAreaLowGrayLevelEmphasis        | 0.016282967  |
| wavelet-HHL | ngtdm | Coarseness                           | 0.025864202  |
| wavelet-HHL | ngtdm | Complexity                           | 889.4237706  |
| wavelet-HHL | ngtdm | Strength                             | 5.029964996  |
| wavelet-HHL | ngtdm | Contrast                             | 0.249725987  |
| wavelet-HHL | ngtdm | Busyness                             | 0.115858025  |
| wavelet-HLH | gldm  | GrayLevelVariance                    | 12.06249433  |
| wavelet-HLH | gldm  | HighGrayLevelEmphasis                | 146.1809524  |
| wavelet-HLH | gldm  | DependenceEntropy                    | 5.74052594   |
| wavelet-HLH | gldm  | DependenceNonUniformity              | 45.59047619  |
| wavelet-HLH | gldm  | GrayLevelNonUniformity               | 18.54285714  |
| wavelet-HLH | gldm  | SmallDependenceEmphasis              | 0.40413208   |
| wavelet-HLH | gldm  | SmallDependenceHighGrayLevelEmphasis | 62.09230956  |
| wavelet-HLH | gldm  | DependenceNonUniformityNormalized    | 0.217097506  |
| wavelet-HLH | gldm  | LargeDependenceEmphasis              | 10.43809524  |
| wavelet-HLH | gldm  | LargeDependenceLowGrayLevelEmphasis  | 0.097111617  |
| wavelet-HLH | gldm  | DependenceVariance                   | 3.225034014  |
| wavelet-HLH | gldm  | LargeDependenceHighGrayLevelEmphasis | 1392.104762  |
| wavelet-HLH | gldm  | SmallDependenceLowGrayLevelEmphasis  | 0.010919062  |
| wavelet-HLH | gldm  | LowGrayLevelEmphasis                 | 0.016236103  |
| wavelet-HLH | glcm  | JointAverage                         | 11.63227131  |
| wavelet-HLH | glcm  | SumAverage                           | 23.26454262  |
| wavelet-HLH | glcm  | JointEntropy                         | 6.707513729  |
| wavelet-HLH | glcm  | ClusterShade                         | -9.832132464 |
| wavelet-HLH | glcm  | MaximumProbability                   | 0.032621522  |

|             |            |                                  |              |
|-------------|------------|----------------------------------|--------------|
| wavelet-HLH | glcm       | Idmn                             | 0.960616225  |
| wavelet-HLH | glcm       | JointEnergy                      | 0.012125836  |
| wavelet-HLH | glcm       | Contrast                         | 24.01896071  |
| wavelet-HLH | glcm       | DifferenceEntropy                | 3.310193492  |
| wavelet-HLH | glcm       | InverseVariance                  | 0.257095443  |
| wavelet-HLH | glcm       | DifferenceVariance               | 9.675623103  |
| wavelet-HLH | glcm       | Idn                              | 0.870837058  |
| wavelet-HLH | glcm       | Idm                              | 0.246050332  |
| wavelet-HLH | glcm       | Correlation                      | -0.029214195 |
| wavelet-HLH | glcm       | Autocorrelation                  | 134.9749845  |
| wavelet-HLH | glcm       | SumEntropy                       | 4.091966911  |
| wavelet-HLH | glcm       | SumSquares                       | 11.66581462  |
| wavelet-HLH | glcm       | ClusterProminence                | 1903.876901  |
| wavelet-HLH | glcm       | Imc2                             | 0.872332844  |
| wavelet-HLH | glcm       | Imc1                             | -0.194207235 |
| wavelet-HLH | glcm       | DifferenceAverage                | 3.743336189  |
| wavelet-HLH | glcm       | Id                               | 0.335237296  |
| wavelet-HLH | glcm       | ClusterTendency                  | 22.64429777  |
| wavelet-HLH | firstorder | InterquartileRange               | 107.1236522  |
| wavelet-HLH | firstorder | Skewness                         | -0.035350773 |
| wavelet-HLH | firstorder | Uniformity                       | 0.08829932   |
| wavelet-HLH | firstorder | Median                           | 4.282480806  |
| wavelet-HLH | firstorder | Energy                           | 1602844.483  |
| wavelet-HLH | firstorder | RobustMeanAbsoluteDeviation      | 45.08077923  |
| wavelet-HLH | firstorder | MeanAbsoluteDeviation            | 67.49279193  |
| wavelet-HLH | firstorder | TotalEnergy                      | 43276801.04  |
| wavelet-HLH | firstorder | Maximum                          | 297.634035   |
| wavelet-HLH | firstorder | RootMeanSquared                  | 87.36471127  |
| wavelet-HLH | firstorder | 90Percentile                     | 113.0608064  |
| wavelet-HLH | firstorder | Minimum                          | -263.7094208 |
| wavelet-HLH | firstorder | Entropy                          | 3.761997558  |
| wavelet-HLH | firstorder | Range                            | 561.3434558  |
| wavelet-HLH | firstorder | Variance                         | 7628.555592  |
| wavelet-HLH | firstorder | 10Percentile                     | -105.7235689 |
| wavelet-HLH | firstorder | Kurtosis                         | 3.568419539  |
| wavelet-HLH | firstorder | Mean                             | 2.009274256  |
| wavelet-HLH | grlm       | ShortRunLowGrayLevelEmphasis     | 0.016340647  |
| wavelet-HLH | grlm       | GrayLevelVariance                | 12.58292152  |
| wavelet-HLH | grlm       | LowGrayLevelRunEmphasis          | 0.016764853  |
| wavelet-HLH | grlm       | GrayLevelNonUniformityNormalized | 0.085678856  |
| wavelet-HLH | grlm       | RunVariance                      | 0.077236409  |
| wavelet-HLH | grlm       | GrayLevelNonUniformity           | 16.82911461  |
| wavelet-HLH | grlm       | LongRunEmphasis                  | 1.222694147  |
| wavelet-HLH | grlm       | ShortRunHighGrayLevelEmphasis    | 140.2711908  |
| wavelet-HLH | grlm       | RunLengthNonUniformity           | 172.9415949  |
| wavelet-HLH | grlm       | ShortRunEmphasis                 | 0.951048831  |
| wavelet-HLH | grlm       | LongRunHighGrayLevelEmphasis     | 176.9631576  |
| wavelet-HLH | grlm       | RunPercentage                    | 0.935164835  |
| wavelet-HLH | grlm       | LongRunLowGrayLevelEmphasis      | 0.018696525  |
| wavelet-HLH | grlm       | RunEntropy                       | 4.084735606  |
| wavelet-HLH | grlm       | HighGrayLevelRunEmphasis         | 146.937515   |
| wavelet-HLH | grlm       | RunLengthNonUniformityNormalized | 0.879786336  |
| wavelet-HLH | glszm      | GrayLevelVariance                | 18.8264      |



|             |       |                                  |             |
|-------------|-------|----------------------------------|-------------|
| wavelet-HLH | glszm | ZoneVariance                     | 7.69        |
| wavelet-HLH | glszm | GrayLevelNonUniformityNormalized | 0.0672      |
| wavelet-HLH | glszm | SizeZoneNonUniformityNormalized  | 0.4468      |
| wavelet-HLH | glszm | SizeZoneNonUniformity            | 44.68       |
| wavelet-HLH | glszm | GrayLevelNonUniformity           | 6.72        |
| wavelet-HLH | glszm | LargeAreaEmphasis                | 12.1        |
| wavelet-HLH | glszm | SmallAreaHighGrayLevelEmphasis   | 107.6833024 |
| wavelet-HLH | glszm | ZonePercentage                   | 0.476190476 |
| wavelet-HLH | glszm | LargeAreaLowGrayLevelEmphasis    | 0.114057209 |
| wavelet-HLH | glszm | LargeAreaHighGrayLevelEmphasis   | 1697.72     |
| wavelet-HLH | glszm | HighGrayLevelZoneEmphasis        | 152.46      |
| wavelet-HLH | glszm | SmallAreaEmphasis                | 0.694520213 |
| wavelet-HLH | glszm | LowGrayLevelZoneEmphasis         | 0.024397395 |
| wavelet-HLH | glszm | ZoneEntropy                      | 5.254177321 |
| wavelet-HLH | glszm | SmallAreaLowGrayLevelEmphasis    | 0.021516693 |
| wavelet-HLH | ngtdm | Coarseness                       | 0.028705213 |
| wavelet-HLH | ngtdm | Complexity                       | 487.7063974 |
| wavelet-HLH | ngtdm | Strength                         | 3.689371639 |
| wavelet-HLH | ngtdm | Contrast                         | 0.161610089 |
| wavelet-HLH | ngtdm | Busyness                         | 0.136223454 |

| Image type | Feature Class | Feature Name                         |                                                                                                                                                                                                                                                                                                                                                                                                                   |
|------------|---------------|--------------------------------------|-------------------------------------------------------------------------------------------------------------------------------------------------------------------------------------------------------------------------------------------------------------------------------------------------------------------------------------------------------------------------------------------------------------------|
| general    | info          | BoundingBox                          | 5: RTSTRUCT: C99-DNU_segment_IGTV LEFT LOWER<br>(0, 0, 1, 12, 13, 12)                                                                                                                                                                                                                                                                                                                                             |
| general    | info          | EnabledImageTypes                    | {u'Original': {}, u'Wavelet': {}}                                                                                                                                                                                                                                                                                                                                                                                 |
|            |               |                                      | {'distances': [1], 'additionalInfo': True, 'force2D': False, 'interpolator': 'sitkBSpline', 'resampledPixelSpacing': [3.0], 'label': 1, 'normalizeScale': 1, 'normalize': False, 'force2Ddimension': 0, 'removeOutliers': None, 'minimumROISize': None, u'binWidth': 25.0, 'minimumROIDimensions': 1, u'correctMask': True, 'preCrop': False, u'symmetricalGLCM': True, 'resegmentRange': None, 'padDistance': 5} |
| general    | info          | GeneralSettings                      |                                                                                                                                                                                                                                                                                                                                                                                                                   |
| general    | info          | ImageHash                            | e262a1c16809a94e3f8653bb6abeb9a454c0328c                                                                                                                                                                                                                                                                                                                                                                          |
| general    | info          | ImageSpacing                         | (0.9765625000000002, 0.9765625000000002, 2.0)                                                                                                                                                                                                                                                                                                                                                                     |
| general    | info          | MaskHash                             | d1fac83645e9cd07a48486b9c19078da4fdb891d                                                                                                                                                                                                                                                                                                                                                                          |
| general    | info          | NumpyVersion                         | 1.13.1                                                                                                                                                                                                                                                                                                                                                                                                            |
| general    | info          | PyWaveletVersion                     | 0.5.2                                                                                                                                                                                                                                                                                                                                                                                                             |
| general    | info          | SimpleITKVersion                     | 1.1.0                                                                                                                                                                                                                                                                                                                                                                                                             |
| general    | info          | Version                              | 1.3.0.post102+g1b0eb74                                                                                                                                                                                                                                                                                                                                                                                            |
| general    | info          | VolumeNum                            | 1                                                                                                                                                                                                                                                                                                                                                                                                                 |
| general    | info          | VoxelNum                             | 745                                                                                                                                                                                                                                                                                                                                                                                                               |
| original   | shape         | Maximum3DDiameter                    | 42.10700654                                                                                                                                                                                                                                                                                                                                                                                                       |
| original   | shape         | Maximum2DDiameterSlice               | 40.24922359                                                                                                                                                                                                                                                                                                                                                                                                       |
| original   | shape         | Sphericity                           | 0.765569656                                                                                                                                                                                                                                                                                                                                                                                                       |
| original   | shape         | MinorAxis                            | 31.27071515                                                                                                                                                                                                                                                                                                                                                                                                       |
| original   | shape         | Elongation                           | 0.875084812                                                                                                                                                                                                                                                                                                                                                                                                       |
| original   | shape         | SurfaceVolumeRatio                   | 0.232269794                                                                                                                                                                                                                                                                                                                                                                                                       |
| original   | shape         | Volume                               | 20115                                                                                                                                                                                                                                                                                                                                                                                                             |
| original   | shape         | MajorAxis                            | 35.73449649                                                                                                                                                                                                                                                                                                                                                                                                       |
| original   | shape         | SurfaceArea                          | 4672.106901                                                                                                                                                                                                                                                                                                                                                                                                       |
| original   | shape         | Flatness                             | 0.752748719                                                                                                                                                                                                                                                                                                                                                                                                       |
| original   | shape         | LeastAxis                            | 26.89909646                                                                                                                                                                                                                                                                                                                                                                                                       |
| original   | shape         | Maximum2DDiameterColumn              | 40.80441153                                                                                                                                                                                                                                                                                                                                                                                                       |
| original   | shape         | Maximum2DDiameterRow                 | 36.61966685                                                                                                                                                                                                                                                                                                                                                                                                       |
| original   | gldm          | GrayLevelVariance                    | 120.305997                                                                                                                                                                                                                                                                                                                                                                                                        |
| original   | gldm          | HighGrayLevelEmphasis                | 771.5489933                                                                                                                                                                                                                                                                                                                                                                                                       |
| original   | gldm          | DependenceEntropy                    | 6.62428044                                                                                                                                                                                                                                                                                                                                                                                                        |
| original   | gldm          | DependenceNonUniformity              | 286.3557047                                                                                                                                                                                                                                                                                                                                                                                                       |
| original   | gldm          | GrayLevelNonUniformity               | 19.92080537                                                                                                                                                                                                                                                                                                                                                                                                       |
| original   | gldm          | SmallDependenceEmphasis              | 0.618056301                                                                                                                                                                                                                                                                                                                                                                                                       |
| original   | gldm          | SmallDependenceHighGrayLevelEmphasis | 404.0507878                                                                                                                                                                                                                                                                                                                                                                                                       |
| original   | gldm          | DependenceNonUniformityNormalized    | 0.384370073                                                                                                                                                                                                                                                                                                                                                                                                       |
| original   | gldm          | LargeDependenceEmphasis              | 3.773154362                                                                                                                                                                                                                                                                                                                                                                                                       |
| original   | gldm          | LargeDependenceLowGrayLevelEmphasis  | 0.026261042                                                                                                                                                                                                                                                                                                                                                                                                       |
| original   | gldm          | DependenceVariance                   | 0.844232242                                                                                                                                                                                                                                                                                                                                                                                                       |
| original   | gldm          | LargeDependenceHighGrayLevelEmphasis | 3816.491275                                                                                                                                                                                                                                                                                                                                                                                                       |
| original   | gldm          | SmallDependenceLowGrayLevelEmphasis  | 0.004529207                                                                                                                                                                                                                                                                                                                                                                                                       |
| original   | gldm          | LowGrayLevelEmphasis                 | 0.008138322                                                                                                                                                                                                                                                                                                                                                                                                       |
| original   | glcm          | JointAverage                         | 27.18301999                                                                                                                                                                                                                                                                                                                                                                                                       |
| original   | glcm          | SumAverage                           | 54.36603999                                                                                                                                                                                                                                                                                                                                                                                                       |
| original   | glcm          | JointEntropy                         | 9.382295584                                                                                                                                                                                                                                                                                                                                                                                                       |
| original   | glcm          | ClusterShade                         | -906.268337                                                                                                                                                                                                                                                                                                                                                                                                       |
| original   | glcm          | MaximumProbability                   | 0.005338594                                                                                                                                                                                                                                                                                                                                                                                                       |
| original   | glcm          | Idmn                                 | 0.936230491                                                                                                                                                                                                                                                                                                                                                                                                       |
| original   | glcm          | JointEnergy                          | 0.001729776                                                                                                                                                                                                                                                                                                                                                                                                       |
| original   | glcm          | Contrast                             | 157.8932734                                                                                                                                                                                                                                                                                                                                                                                                       |
| original   | glcm          | DifferenceEntropy                    | 4.660728349                                                                                                                                                                                                                                                                                                                                                                                                       |

|          |            |                                  |              |
|----------|------------|----------------------------------|--------------|
| original | glcm       | InverseVariance                  | 0.109057118  |
| original | glcm       | DifferenceVariance               | 60.84866903  |
| original | glcm       | Idn                              | 0.836514802  |
| original | glcm       | Idm                              | 0.103720465  |
| original | glcm       | Correlation                      | 0.330550795  |
| original | glcm       | Autocorrelation                  | 777.7819808  |
| original | glcm       | SumEntropy                       | 6.01007142   |
| original | glcm       | SumSquares                       | 117.7551456  |
| original | glcm       | ClusterProminence                | 222533.9164  |
| original | glcm       | Imc2                             | 0.952399773  |
| original | glcm       | Imc1                             | -0.22503475  |
| original | glcm       | DifferenceAverage                | 9.800649564  |
| original | glcm       | Id                               | 0.185091122  |
| original | glcm       | ClusterTendency                  | 313.1273092  |
| original | firstorder | InterquartileRange               | 464          |
| original | firstorder | Skewness                         | -0.049681532 |
| original | firstorder | Uniformity                       | 0.026739336  |
| original | firstorder | Median                           | -432         |
| original | firstorder | Energy                           | 190906958    |
| original | firstorder | RobustMeanAbsoluteDeviation      | 181.4338987  |
| original | firstorder | MeanAbsoluteDeviation            | 233.8633575  |
| original | firstorder | TotalEnergy                      | 5154487866   |
| original | firstorder | Maximum                          | 70           |
| original | firstorder | RootMeanSquared                  | 506.212357   |
| original | firstorder | 90Percentile                     | -50.4        |
| original | firstorder | Minimum                          | -1043        |
| original | firstorder | Entropy                          | 5.32141217   |
| original | firstorder | Range                            | 1113         |
| original | firstorder | Variance                         | 75127.01566  |
| original | firstorder | 10Percentile                     | -784.6       |
| original | firstorder | Kurtosis                         | 1.999167248  |
| original | firstorder | Mean                             | -425.5865772 |
| original | glrlm      | ShortRunLowGrayLevelEmphasis     | 0.00798757   |
| original | glrlm      | GrayLevelVariance                | 119.6852796  |
| original | glrlm      | LowGrayLevelRunEmphasis          | 0.00815002   |
| original | glrlm      | GrayLevelNonUniformityNormalized | 0.02673168   |
| original | glrlm      | RunVariance                      | 0.029254053  |
| original | glrlm      | GrayLevelNonUniformity           | 19.3703148   |
| original | glrlm      | LongRunEmphasis                  | 1.086455026  |
| original | glrlm      | ShortRunHighGrayLevelEmphasis    | 742.7241736  |
| original | glrlm      | RunLengthNonUniformity           | 686.3242374  |
| original | glrlm      | ShortRunEmphasis                 | 0.979451687  |
| original | glrlm      | LongRunHighGrayLevelEmphasis     | 854.201649   |
| original | glrlm      | RunPercentage                    | 0.9726381    |
| original | glrlm      | LongRunLowGrayLevelEmphasis      | 0.008805449  |
| original | glrlm      | RunEntropy                       | 5.457638476  |
| original | glrlm      | HighGrayLevelRunEmphasis         | 763.9915759  |
| original | glrlm      | RunLengthNonUniformityNormalized | 0.947073219  |
| original | glszm      | GrayLevelVariance                | 111.4519919  |
| original | glszm      | ZoneVariance                     | 1.058935778  |
| original | glszm      | GrayLevelNonUniformityNormalized | 0.027023214  |
| original | glszm      | SizeZoneNonUniformityNormalized  | 0.596541444  |
| original | glszm      | SizeZoneNonUniformity            | 309.6050096  |
| original | glszm      | GrayLevelNonUniformity           | 14.02504817  |
| original | glszm      | LargeAreaEmphasis                | 3.119460501  |
| original | glszm      | SmallAreaHighGrayLevelEmphasis   | 497.5537075  |
| original | glszm      | ZonePercentage                   | 0.696644295  |
| original | glszm      | LargeAreaLowGrayLevelEmphasis    | 0.020122026  |

|             |            |                                      |              |
|-------------|------------|--------------------------------------|--------------|
| original    | glszm      | LargeAreaHighGrayLevelEmphasis       | 3139.456647  |
| original    | glszm      | HighGrayLevelZoneEmphasis            | 667.9210019  |
| original    | glszm      | SmallAreaEmphasis                    | 0.800635389  |
| original    | glszm      | LowGrayLevelZoneEmphasis             | 0.008095397  |
| original    | glszm      | ZoneEntropy                          | 6.225768635  |
| original    | glszm      | SmallAreaLowGrayLevelEmphasis        | 0.005698034  |
| original    | ngtdm      | Coarseness                           | 0.00791479   |
| original    | ngtdm      | Complexity                           | 5086.222526  |
| original    | ngtdm      | Strength                             | 5.134527626  |
| original    | ngtdm      | Contrast                             | 0.844366919  |
| original    | ngtdm      | Busyness                             | 0.144891019  |
| wavelet-HHH | gldm       | GrayLevelVariance                    | 21.46005315  |
| wavelet-HHH | gldm       | HighGrayLevelEmphasis                | 328.6268456  |
| wavelet-HHH | gldm       | DependenceEntropy                    | 6.176262853  |
| wavelet-HHH | gldm       | DependenceNonUniformity              | 185.6201342  |
| wavelet-HHH | gldm       | GrayLevelNonUniformity               | 48.23221477  |
| wavelet-HHH | gldm       | SmallDependenceEmphasis              | 0.430983549  |
| wavelet-HHH | gldm       | SmallDependenceHighGrayLevelEmphasis | 147.1140417  |
| wavelet-HHH | gldm       | DependenceNonUniformityNormalized    | 0.249154543  |
| wavelet-HHH | gldm       | LargeDependenceEmphasis              | 7.252348993  |
| wavelet-HHH | gldm       | LargeDependenceLowGrayLevelEmphasis  | 0.03162078   |
| wavelet-HHH | gldm       | DependenceVariance                   | 1.778633395  |
| wavelet-HHH | gldm       | LargeDependenceHighGrayLevelEmphasis | 2251.120805  |
| wavelet-HHH | gldm       | SmallDependenceLowGrayLevelEmphasis  | 0.006063817  |
| wavelet-HHH | gldm       | LowGrayLevelEmphasis                 | 0.008278681  |
| wavelet-HHH | glcm       | JointAverage                         | 17.53903098  |
| wavelet-HHH | glcm       | SumAverage                           | 35.07806197  |
| wavelet-HHH | glcm       | JointEntropy                         | 8.005322174  |
| wavelet-HHH | glcm       | ClusterShade                         | -6.776899346 |
| wavelet-HHH | glcm       | MaximumProbability                   | 0.014586534  |
| wavelet-HHH | glcm       | Idmn                                 | 0.960606599  |
| wavelet-HHH | glcm       | JointEnergy                          | 0.005109108  |
| wavelet-HHH | glcm       | Contrast                             | 46.39818081  |
| wavelet-HHH | glcm       | DifferenceEntropy                    | 3.813186836  |
| wavelet-HHH | glcm       | InverseVariance                      | 0.188737491  |
| wavelet-HHH | glcm       | DifferenceVariance                   | 18.18548852  |
| wavelet-HHH | glcm       | Idn                                  | 0.869447583  |
| wavelet-HHH | glcm       | Idm                                  | 0.181730494  |
| wavelet-HHH | glcm       | Correlation                          | -0.039238163 |
| wavelet-HHH | glcm       | Autocorrelation                      | 306.7764567  |
| wavelet-HHH | glcm       | SumEntropy                           | 4.646239598  |
| wavelet-HHH | glcm       | SumSquares                           | 22.35722963  |
| wavelet-HHH | glcm       | ClusterProminence                    | 6967.859251  |
| wavelet-HHH | glcm       | Imc2                                 | 0.782780887  |
| wavelet-HHH | glcm       | Imc1                                 | -0.112813263 |
| wavelet-HHH | glcm       | DifferenceAverage                    | 5.25331262   |
| wavelet-HHH | glcm       | Id                                   | 0.273579268  |
| wavelet-HHH | glcm       | ClusterTendency                      | 43.0307377   |
| wavelet-HHH | firstorder | InterquartileRange                   | 142.7021341  |
| wavelet-HHH | firstorder | Skewness                             | -0.058032497 |
| wavelet-HHH | firstorder | Uniformity                           | 0.064741228  |
| wavelet-HHH | firstorder | Median                               | 2.546534637  |
| wavelet-HHH | firstorder | Energy                               | 9976823.411  |
| wavelet-HHH | firstorder | RobustMeanAbsoluteDeviation          | 59.6781191   |
| wavelet-HHH | firstorder | MeanAbsoluteDeviation                | 89.20642211  |
| wavelet-HHH | firstorder | TotalEnergy                          | 269374232.1  |
| wavelet-HHH | firstorder | Maximum                              | 367.7859074  |
| wavelet-HHH | firstorder | RootMeanSquared                      | 115.722553   |

|             |            |                                      |              |
|-------------|------------|--------------------------------------|--------------|
| wavelet-HHH | firstorder | 90Percentile                         | 150.6711451  |
| wavelet-HHH | firstorder | Minimum                              | -424.3727511 |
| wavelet-HHH | firstorder | Entropy                              | 4.210585555  |
| wavelet-HHH | firstorder | Range                                | 792.1586584  |
| wavelet-HHH | firstorder | Variance                             | 13391.44655  |
| wavelet-HHH | firstorder | 10Percentile                         | -139.9950438 |
| wavelet-HHH | firstorder | Kurtosis                             | 3.614682051  |
| wavelet-HHH | firstorder | Mean                                 | 0.512566773  |
| wavelet-HHH | glrlm      | ShortRunLowGrayLevelEmphasis         | 0.008372595  |
| wavelet-HHH | glrlm      | GrayLevelVariance                    | 22.04936441  |
| wavelet-HHH | glrlm      | LowGrayLevelRunEmphasis              | 0.008522899  |
| wavelet-HHH | glrlm      | GrayLevelNonUniformityNormalized     | 0.063554775  |
| wavelet-HHH | glrlm      | RunVariance                          | 0.056158405  |
| wavelet-HHH | glrlm      | GrayLevelNonUniformity               | 44.90911808  |
| wavelet-HHH | glrlm      | LongRunEmphasis                      | 1.168088251  |
| wavelet-HHH | glrlm      | ShortRunHighGrayLevelEmphasis        | 317.1907358  |
| wavelet-HHH | glrlm      | RunLengthNonUniformity               | 636.5143171  |
| wavelet-HHH | glrlm      | ShortRunEmphasis                     | 0.96041272   |
| wavelet-HHH | glrlm      | LongRunHighGrayLevelEmphasis         | 381.8139534  |
| wavelet-HHH | glrlm      | RunPercentage                        | 0.948477026  |
| wavelet-HHH | glrlm      | LongRunLowGrayLevelEmphasis          | 0.009159626  |
| wavelet-HHH | glrlm      | RunEntropy                           | 4.499694207  |
| wavelet-HHH | glrlm      | HighGrayLevelRunEmphasis             | 329.5524913  |
| wavelet-HHH | glrlm      | RunLengthNonUniformityNormalized     | 0.900612645  |
| wavelet-HHH | glszm      | GrayLevelVariance                    | 30.78167757  |
| wavelet-HHH | glszm      | ZoneVariance                         | 6.538935525  |
| wavelet-HHH | glszm      | GrayLevelNonUniformityNormalized     | 0.051696154  |
| wavelet-HHH | glszm      | SizeZoneNonUniformityNormalized      | 0.462738963  |
| wavelet-HHH | glszm      | SizeZoneNonUniformity                | 170.7506775  |
| wavelet-HHH | glszm      | GrayLevelNonUniformity               | 19.07588076  |
| wavelet-HHH | glszm      | LargeAreaEmphasis                    | 10.61517615  |
| wavelet-HHH | glszm      | SmallAreaHighGrayLevelEmphasis       | 243.772913   |
| wavelet-HHH | glszm      | ZonePercentage                       | 0.495302013  |
| wavelet-HHH | glszm      | LargeAreaLowGrayLevelEmphasis        | 0.047060365  |
| wavelet-HHH | glszm      | LargeAreaHighGrayLevelEmphasis       | 3353.840108  |
| wavelet-HHH | glszm      | HighGrayLevelZoneEmphasis            | 340.598916   |
| wavelet-HHH | glszm      | SmallAreaEmphasis                    | 0.706987027  |
| wavelet-HHH | glszm      | LowGrayLevelZoneEmphasis             | 0.012812732  |
| wavelet-HHH | glszm      | ZoneEntropy                          | 5.858257705  |
| wavelet-HHH | glszm      | SmallAreaLowGrayLevelEmphasis        | 0.011602655  |
| wavelet-HHH | ngtdm      | Coarseness                           | 0.008297858  |
| wavelet-HHH | ngtdm      | Complexity                           | 1225.548941  |
| wavelet-HHH | ngtdm      | Strength                             | 1.956564478  |
| wavelet-HHH | ngtdm      | Contrast                             | 0.199370337  |
| wavelet-HHH | ngtdm      | Busyness                             | 0.225345635  |
| wavelet-HLL | gldm       | GrayLevelVariance                    | 72.48339444  |
| wavelet-HLL | gldm       | HighGrayLevelEmphasis                | 1697.601342  |
| wavelet-HLL | gldm       | DependenceEntropy                    | 6.534201556  |
| wavelet-HLL | gldm       | DependenceNonUniformity              | 259.1798658  |
| wavelet-HLL | gldm       | GrayLevelNonUniformity               | 26.87651007  |
| wavelet-HLL | gldm       | SmallDependenceEmphasis              | 0.557216804  |
| wavelet-HLL | gldm       | SmallDependenceHighGrayLevelEmphasis | 962.7883001  |
| wavelet-HLL | gldm       | DependenceNonUniformityNormalized    | 0.347892437  |
| wavelet-HLL | gldm       | LargeDependenceEmphasis              | 4.175838926  |
| wavelet-HLL | gldm       | LargeDependenceLowGrayLevelEmphasis  | 0.004301696  |
| wavelet-HLL | gldm       | DependenceVariance                   | 0.867834782  |
| wavelet-HLL | gldm       | LargeDependenceHighGrayLevelEmphasis | 6896.855034  |
| wavelet-HLL | gldm       | SmallDependenceLowGrayLevelEmphasis  | 0.00174944   |

|             |            |                                  |              |
|-------------|------------|----------------------------------|--------------|
| wavelet-HLL | gldm       | LowGrayLevelEmphasis             | 0.002063295  |
| wavelet-HLL | glcm       | JointAverage                     | 40.13034395  |
| wavelet-HLL | glcm       | SumAverage                       | 80.2606879   |
| wavelet-HLL | glcm       | JointEntropy                     | 9.047325957  |
| wavelet-HLL | glcm       | ClusterShade                     | 371.156729   |
| wavelet-HLL | glcm       | MaximumProbability               | 0.007064277  |
| wavelet-HLL | glcm       | Idmn                             | 0.976292482  |
| wavelet-HLL | glcm       | JointEnergy                      | 0.002272763  |
| wavelet-HLL | glcm       | Contrast                         | 135.2342717  |
| wavelet-HLL | glcm       | DifferenceEntropy                | 4.478871136  |
| wavelet-HLL | glcm       | InverseVariance                  | 0.121763525  |
| wavelet-HLL | glcm       | DifferenceVariance               | 53.23226252  |
| wavelet-HLL | glcm       | Idn                              | 0.897732596  |
| wavelet-HLL | glcm       | Idm                              | 0.116084604  |
| wavelet-HLL | glcm       | Correlation                      | 0.113920805  |
| wavelet-HLL | glcm       | Autocorrelation                  | 1619.066415  |
| wavelet-HLL | glcm       | SumEntropy                       | 5.583281415  |
| wavelet-HLL | glcm       | SumSquares                       | 76.23103519  |
| wavelet-HLL | glcm       | ClusterProminence                | 117657.0677  |
| wavelet-HLL | glcm       | Imc2                             | 0.938163972  |
| wavelet-HLL | glcm       | Imc1                             | -0.210629567 |
| wavelet-HLL | glcm       | DifferenceAverage                | 8.832180273  |
| wavelet-HLL | glcm       | Id                               | 0.200223333  |
| wavelet-HLL | glcm       | ClusterTendency                  | 169.6898691  |
| wavelet-HLL | firstorder | InterquartileRange               | 288.3268519  |
| wavelet-HLL | firstorder | Skewness                         | 0.002652261  |
| wavelet-HLL | firstorder | Uniformity                       | 0.036075852  |
| wavelet-HLL | firstorder | Median                           | -31.06271404 |
| wavelet-HLL | firstorder | Energy                           | 34254515.28  |
| wavelet-HLL | firstorder | RobustMeanAbsoluteDeviation      | 116.3900694  |
| wavelet-HLL | firstorder | MeanAbsoluteDeviation            | 166.4539238  |
| wavelet-HLL | firstorder | TotalEnergy                      | 924871912.6  |
| wavelet-HLL | firstorder | Maximum                          | 752.2210277  |
| wavelet-HLL | firstorder | RootMeanSquared                  | 214.4276455  |
| wavelet-HLL | firstorder | 90Percentile                     | 209.7020122  |
| wavelet-HLL | firstorder | Minimum                          | -1019.189535 |
| wavelet-HLL | firstorder | Entropy                          | 5.026101422  |
| wavelet-HLL | firstorder | Range                            | 1771.410563  |
| wavelet-HLL | firstorder | Variance                         | 45101.68684  |
| wavelet-HLL | firstorder | 10Percentile                     | -277.3604278 |
| wavelet-HLL | firstorder | Kurtosis                         | 4.118113274  |
| wavelet-HLL | firstorder | Mean                             | -29.62310419 |
| wavelet-HLL | glrlm      | ShortRunLowGrayLevelEmphasis     | 0.002090674  |
| wavelet-HLL | glrlm      | GrayLevelVariance                | 73.2917411   |
| wavelet-HLL | glrlm      | LowGrayLevelRunEmphasis          | 0.002107664  |
| wavelet-HLL | glrlm      | GrayLevelNonUniformityNormalized | 0.03586604   |
| wavelet-HLL | glrlm      | RunVariance                      | 0.033577899  |
| wavelet-HLL | glrlm      | GrayLevelNonUniformity           | 25.87895381  |
| wavelet-HLL | glrlm      | LongRunEmphasis                  | 1.100384414  |
| wavelet-HLL | glrlm      | ShortRunHighGrayLevelEmphasis    | 1659.860388  |
| wavelet-HLL | glrlm      | RunLengthNonUniformity           | 677.8522716  |
| wavelet-HLL | glrlm      | ShortRunEmphasis                 | 0.976095792  |
| wavelet-HLL | glrlm      | LongRunHighGrayLevelEmphasis     | 1864.566449  |
| wavelet-HLL | glrlm      | RunPercentage                    | 0.968508002  |
| wavelet-HLL | glrlm      | LongRunLowGrayLevelEmphasis      | 0.00217859   |
| wavelet-HLL | glrlm      | RunEntropy                       | 5.199779488  |
| wavelet-HLL | glrlm      | HighGrayLevelRunEmphasis         | 1699.249845  |
| wavelet-HLL | glrlm      | RunLengthNonUniformityNormalized | 0.939039845  |

|             |       |                                      |              |
|-------------|-------|--------------------------------------|--------------|
| wavelet-HLL | glszm | GrayLevelVariance                    | 84.52221074  |
| wavelet-HLL | glszm | ZoneVariance                         | 1.145153166  |
| wavelet-HLL | glszm | GrayLevelNonUniformityNormalized     | 0.033459122  |
| wavelet-HLL | glszm | SizeZoneNonUniformityNormalized      | 0.519909842  |
| wavelet-HLL | glszm | SizeZoneNonUniformity                | 251.6363636  |
| wavelet-HLL | glszm | GrayLevelNonUniformity               | 16.19421488  |
| wavelet-HLL | glszm | LargeAreaEmphasis                    | 3.51446281   |
| wavelet-HLL | glszm | SmallAreaHighGrayLevelEmphasis       | 1300.539441  |
| wavelet-HLL | glszm | ZonePercentage                       | 0.64966443   |
| wavelet-HLL | glszm | LargeAreaLowGrayLevelEmphasis        | 0.004535753  |
| wavelet-HLL | glszm | LargeAreaHighGrayLevelEmphasis       | 5859.927686  |
| wavelet-HLL | glszm | HighGrayLevelZoneEmphasis            | 1719.254132  |
| wavelet-HLL | glszm | SmallAreaEmphasis                    | 0.749254478  |
| wavelet-HLL | glszm | LowGrayLevelZoneEmphasis             | 0.002796514  |
| wavelet-HLL | glszm | ZoneEntropy                          | 6.322038116  |
| wavelet-HLL | glszm | SmallAreaLowGrayLevelEmphasis        | 0.002617333  |
| wavelet-HLL | ngtdm | Coarseness                           | 0.008000476  |
| wavelet-HLL | ngtdm | Complexity                           | 7146.057585  |
| wavelet-HLL | ngtdm | Strength                             | 8.306243699  |
| wavelet-HLL | ngtdm | Contrast                             | 0.317320476  |
| wavelet-HLL | ngtdm | Busyness                             | 0.054764814  |
| wavelet-LHL | gldm  | GrayLevelVariance                    | 100.7884257  |
| wavelet-LHL | gldm  | HighGrayLevelEmphasis                | 1207.4       |
| wavelet-LHL | gldm  | DependenceEntropy                    | 6.605612021  |
| wavelet-LHL | gldm  | DependenceNonUniformity              | 297.5637584  |
| wavelet-LHL | gldm  | GrayLevelNonUniformity               | 22.27516779  |
| wavelet-LHL | gldm  | SmallDependenceEmphasis              | 0.617944072  |
| wavelet-LHL | gldm  | SmallDependenceHighGrayLevelEmphasis | 739.2250455  |
| wavelet-LHL | gldm  | DependenceNonUniformityNormalized    | 0.399414441  |
| wavelet-LHL | gldm  | LargeDependenceEmphasis              | 3.416107383  |
| wavelet-LHL | gldm  | LargeDependenceLowGrayLevelEmphasis  | 0.005571815  |
| wavelet-LHL | gldm  | DependenceVariance                   | 0.668078015  |
| wavelet-LHL | gldm  | LargeDependenceHighGrayLevelEmphasis | 4112.524832  |
| wavelet-LHL | gldm  | SmallDependenceLowGrayLevelEmphasis  | 0.002518679  |
| wavelet-LHL | gldm  | LowGrayLevelEmphasis                 | 0.002941867  |
| wavelet-LHL | glcm  | JointAverage                         | 33.1198587   |
| wavelet-LHL | glcm  | SumAverage                           | 66.23971741  |
| wavelet-LHL | glcm  | JointEntropy                         | 9.349376518  |
| wavelet-LHL | glcm  | ClusterShade                         | 37.72557853  |
| wavelet-LHL | glcm  | MaximumProbability                   | 0.006123646  |
| wavelet-LHL | glcm  | Idmn                                 | 0.964046897  |
| wavelet-LHL | glcm  | JointEnergy                          | 0.001810591  |
| wavelet-LHL | glcm  | Contrast                             | 196.7434303  |
| wavelet-LHL | glcm  | DifferenceEntropy                    | 4.726693321  |
| wavelet-LHL | glcm  | InverseVariance                      | 0.099945429  |
| wavelet-LHL | glcm  | DifferenceVariance                   | 76.04678977  |
| wavelet-LHL | glcm  | Idn                                  | 0.875819294  |
| wavelet-LHL | glcm  | Idm                                  | 0.095789682  |
| wavelet-LHL | glcm  | Correlation                          | 0.073100242  |
| wavelet-LHL | glcm  | Autocorrelation                      | 1104.884773  |
| wavelet-LHL | glcm  | SumEntropy                           | 5.786835442  |
| wavelet-LHL | glcm  | SumSquares                           | 106.3270466  |
| wavelet-LHL | glcm  | ClusterProminence                    | 195260.6605  |
| wavelet-LHL | glcm  | Imc2                                 | 0.963716618  |
| wavelet-LHL | glcm  | Imc1                                 | -0.248781845 |
| wavelet-LHL | glcm  | DifferenceAverage                    | 10.69000697  |
| wavelet-LHL | glcm  | Id                                   | 0.175689908  |
| wavelet-LHL | glcm  | ClusterTendency                      | 228.5647559  |

|             |            |                                  |              |
|-------------|------------|----------------------------------|--------------|
| wavelet-LHL | firstorder | InterquartileRange               | 325.8462207  |
| wavelet-LHL | firstorder | Skewness                         | -0.147711465 |
| wavelet-LHL | firstorder | Uniformity                       | 0.029899554  |
| wavelet-LHL | firstorder | Median                           | -29.11142277 |
| wavelet-LHL | firstorder | Energy                           | 47623506.21  |
| wavelet-LHL | firstorder | RobustMeanAbsoluteDeviation      | 138.1882874  |
| wavelet-LHL | firstorder | MeanAbsoluteDeviation            | 199.1048684  |
| wavelet-LHL | firstorder | TotalEnergy                      | 1285834668   |
| wavelet-LHL | firstorder | Maximum                          | 873.7564843  |
| wavelet-LHL | firstorder | RootMeanSquared                  | 252.832295   |
| wavelet-LHL | firstorder | 90Percentile                     | 274.232678   |
| wavelet-LHL | firstorder | Minimum                          | -837.5207163 |
| wavelet-LHL | firstorder | Entropy                          | 5.304394582  |
| wavelet-LHL | firstorder | Range                            | 1711.277201  |
| wavelet-LHL | firstorder | Variance                         | 62983.3634   |
| wavelet-LHL | firstorder | 10Percentile                     | -342.5260755 |
| wavelet-LHL | firstorder | Kurtosis                         | 3.178136377  |
| wavelet-LHL | firstorder | Mean                             | -30.67256112 |
| wavelet-LHL | glrlm      | ShortRunLowGrayLevelEmphasis     | 0.002968848  |
| wavelet-LHL | glrlm      | GrayLevelVariance                | 101.7672747  |
| wavelet-LHL | glrlm      | LowGrayLevelRunEmphasis          | 0.002989914  |
| wavelet-LHL | glrlm      | GrayLevelNonUniformityNormalized | 0.029696752  |
| wavelet-LHL | glrlm      | RunVariance                      | 0.026764506  |
| wavelet-LHL | glrlm      | GrayLevelNonUniformity           | 21.56404752  |
| wavelet-LHL | glrlm      | LongRunEmphasis                  | 1.079763679  |
| wavelet-LHL | glrlm      | ShortRunHighGrayLevelEmphasis    | 1184.117042  |
| wavelet-LHL | glrlm      | RunLengthNonUniformity           | 690.618112   |
| wavelet-LHL | glrlm      | ShortRunEmphasis                 | 0.980890277  |
| wavelet-LHL | glrlm      | LongRunHighGrayLevelEmphasis     | 1303.837722  |
| wavelet-LHL | glrlm      | RunPercentage                    | 0.974703149  |
| wavelet-LHL | glrlm      | LongRunLowGrayLevelEmphasis      | 0.003077539  |
| wavelet-LHL | glrlm      | RunEntropy                       | 5.44502853   |
| wavelet-LHL | glrlm      | HighGrayLevelRunEmphasis         | 1207.29415   |
| wavelet-LHL | glrlm      | RunLengthNonUniformityNormalized | 0.950818908  |
| wavelet-LHL | glszm      | GrayLevelVariance                | 115.6498323  |
| wavelet-LHL | glszm      | ZoneVariance                     | 0.779124319  |
| wavelet-LHL | glszm      | GrayLevelNonUniformityNormalized | 0.027237635  |
| wavelet-LHL | glszm      | SizeZoneNonUniformityNormalized  | 0.573804739  |
| wavelet-LHL | glszm      | SizeZoneNonUniformity            | 301.8212928  |
| wavelet-LHL | glszm      | GrayLevelNonUniformity           | 14.3269962   |
| wavelet-LHL | glszm      | LargeAreaEmphasis                | 2.785171103  |
| wavelet-LHL | glszm      | SmallAreaHighGrayLevelEmphasis   | 936.5555646  |
| wavelet-LHL | glszm      | ZonePercentage                   | 0.706040268  |
| wavelet-LHL | glszm      | LargeAreaLowGrayLevelEmphasis    | 0.005598562  |
| wavelet-LHL | glszm      | LargeAreaHighGrayLevelEmphasis   | 3350.511407  |
| wavelet-LHL | glszm      | HighGrayLevelZoneEmphasis        | 1201.515209  |
| wavelet-LHL | glszm      | SmallAreaEmphasis                | 0.786125604  |
| wavelet-LHL | glszm      | LowGrayLevelZoneEmphasis         | 0.003712518  |
| wavelet-LHL | glszm      | ZoneEntropy                      | 6.38430863   |
| wavelet-LHL | glszm      | SmallAreaLowGrayLevelEmphasis    | 0.003471013  |
| wavelet-LHL | ngtdm      | Coarseness                       | 0.007961013  |
| wavelet-LHL | ngtdm      | Complexity                       | 9981.632664  |
| wavelet-LHL | ngtdm      | Strength                         | 8.376949526  |
| wavelet-LHL | ngtdm      | Contrast                         | 0.462503212  |
| wavelet-LHL | ngtdm      | Busyness                         | 0.063422679  |
| wavelet-LHH | gldm       | GrayLevelVariance                | 44.72572587  |
| wavelet-LHH | gldm       | HighGrayLevelEmphasis            | 601.052349   |
| wavelet-LHH | gldm       | DependenceEntropy                | 6.291040022  |



|             |            |                                      |              |
|-------------|------------|--------------------------------------|--------------|
| wavelet-LHH | gldm       | DependenceNonUniformity              | 244.2697987  |
| wavelet-LHH | gldm       | GrayLevelNonUniformity               | 33.41610738  |
| wavelet-LHH | gldm       | SmallDependenceEmphasis              | 0.523488441  |
| wavelet-LHH | gldm       | SmallDependenceHighGrayLevelEmphasis | 317.8847983  |
| wavelet-LHH | gldm       | DependenceNonUniformityNormalized    | 0.327878924  |
| wavelet-LHH | gldm       | LargeDependenceEmphasis              | 4.49261745   |
| wavelet-LHH | gldm       | LargeDependenceLowGrayLevelEmphasis  | 0.01134281   |
| wavelet-LHH | gldm       | DependenceVariance                   | 0.895357867  |
| wavelet-LHH | gldm       | LargeDependenceHighGrayLevelEmphasis | 2680.512752  |
| wavelet-LHH | gldm       | SmallDependenceLowGrayLevelEmphasis  | 0.003026452  |
| wavelet-LHH | gldm       | LowGrayLevelEmphasis                 | 0.00409595   |
| wavelet-LHH | glcm       | JointAverage                         | 23.58953777  |
| wavelet-LHH | glcm       | SumAverage                           | 47.17907555  |
| wavelet-LHH | glcm       | JointEntropy                         | 8.805723933  |
| wavelet-LHH | glcm       | ClusterShade                         | -92.21116376 |
| wavelet-LHH | glcm       | MaximumProbability                   | 0.009064502  |
| wavelet-LHH | glcm       | Idmn                                 | 0.955434826  |
| wavelet-LHH | glcm       | JointEnergy                          | 0.00279364   |
| wavelet-LHH | glcm       | Contrast                             | 100.2256539  |
| wavelet-LHH | glcm       | DifferenceEntropy                    | 4.317766978  |
| wavelet-LHH | glcm       | InverseVariance                      | 0.124876775  |
| wavelet-LHH | glcm       | DifferenceVariance                   | 37.35267879  |
| wavelet-LHH | glcm       | Idn                                  | 0.860697226  |
| wavelet-LHH | glcm       | Idm                                  | 0.123948475  |
| wavelet-LHH | glcm       | Correlation                          | -0.012371562 |
| wavelet-LHH | glcm       | Autocorrelation                      | 555.95175    |
| wavelet-LHH | glcm       | SumEntropy                           | 5.216304645  |
| wavelet-LHH | glcm       | SumSquares                           | 49.5946004   |
| wavelet-LHH | glcm       | ClusterProminence                    | 34426.816    |
| wavelet-LHH | glcm       | Imc2                                 | 0.894744409  |
| wavelet-LHH | glcm       | Imc1                                 | -0.168820777 |
| wavelet-LHH | glcm       | DifferenceAverage                    | 7.799377147  |
| wavelet-LHH | glcm       | Id                                   | 0.21180116   |
| wavelet-LHH | glcm       | ClusterTendency                      | 98.15274767  |
| wavelet-LHH | firstorder | InterquartileRange                   | 205.3568206  |
| wavelet-LHH | firstorder | Skewness                             | -0.163220109 |
| wavelet-LHH | firstorder | Uniformity                           | 0.044853835  |
| wavelet-LHH | firstorder | Median                               | 10.13107109  |
| wavelet-LHH | firstorder | Energy                               | 20817398.87  |
| wavelet-LHH | firstorder | RobustMeanAbsoluteDeviation          | 87.97498274  |
| wavelet-LHH | firstorder | MeanAbsoluteDeviation                | 130.4160472  |
| wavelet-LHH | firstorder | TotalEnergy                          | 562069769.5  |
| wavelet-LHH | firstorder | Maximum                              | 521.53899    |
| wavelet-LHH | firstorder | RootMeanSquared                      | 167.1610519  |
| wavelet-LHH | firstorder | 90Percentile                         | 209.1391678  |
| wavelet-LHH | firstorder | Minimum                              | -565.913002  |
| wavelet-LHH | firstorder | Entropy                              | 4.734933152  |
| wavelet-LHH | firstorder | Range                                | 1087.451992  |
| wavelet-LHH | firstorder | Variance                             | 27936.16167  |
| wavelet-LHH | firstorder | 10Percentile                         | -222.4180675 |
| wavelet-LHH | firstorder | Kurtosis                             | 3.295627272  |
| wavelet-LHH | firstorder | Mean                                 | 2.57984601   |
| wavelet-LHH | glrlm      | ShortRunLowGrayLevelEmphasis         | 0.004109732  |
| wavelet-LHH | glrlm      | GrayLevelVariance                    | 45.4015178   |
| wavelet-LHH | glrlm      | LowGrayLevelRunEmphasis              | 0.004165943  |
| wavelet-LHH | glrlm      | GrayLevelNonUniformityNormalized     | 0.044334868  |
| wavelet-LHH | glrlm      | RunVariance                          | 0.036362854  |
| wavelet-LHH | glrlm      | GrayLevelNonUniformity               | 31.88982161  |

|             |       |                                      |             |
|-------------|-------|--------------------------------------|-------------|
| wavelet-LHH | glrlm | LongRunEmphasis                      | 1.109390053 |
| wavelet-LHH | glrlm | ShortRunHighGrayLevelEmphasis        | 585.6261154 |
| wavelet-LHH | glrlm | RunLengthNonUniformity               | 671.1378156 |
| wavelet-LHH | glrlm | ShortRunEmphasis                     | 0.973726146 |
| wavelet-LHH | glrlm | LongRunHighGrayLevelEmphasis         | 666.3182443 |
| wavelet-LHH | glrlm | RunPercentage                        | 0.965513681 |
| wavelet-LHH | glrlm | LongRunLowGrayLevelEmphasis          | 0.004400457 |
| wavelet-LHH | glrlm | RunEntropy                           | 4.933669157 |
| wavelet-LHH | glrlm | HighGrayLevelRunEmphasis             | 601.2697841 |
| wavelet-LHH | glrlm | RunLengthNonUniformityNormalized     | 0.932853783 |
| wavelet-LHH | glszm | GrayLevelVariance                    | 55.20924526 |
| wavelet-LHH | glszm | ZoneVariance                         | 1.633329308 |
| wavelet-LHH | glszm | GrayLevelNonUniformityNormalized     | 0.038782756 |
| wavelet-LHH | glszm | SizeZoneNonUniformityNormalized      | 0.494090086 |
| wavelet-LHH | glszm | SizeZoneNonUniformity                | 224.810989  |
| wavelet-LHH | glszm | GrayLevelNonUniformity               | 17.64615385 |
| wavelet-LHH | glszm | LargeAreaEmphasis                    | 4.314285714 |
| wavelet-LHH | glszm | SmallAreaHighGrayLevelEmphasis       | 445.3649483 |
| wavelet-LHH | glszm | ZonePercentage                       | 0.610738255 |
| wavelet-LHH | glszm | LargeAreaLowGrayLevelEmphasis        | 0.012061587 |
| wavelet-LHH | glszm | LargeAreaHighGrayLevelEmphasis       | 2593.393407 |
| wavelet-LHH | glszm | HighGrayLevelZoneEmphasis            | 604.7252747 |
| wavelet-LHH | glszm | SmallAreaEmphasis                    | 0.730738805 |
| wavelet-LHH | glszm | LowGrayLevelZoneEmphasis             | 0.00530878  |
| wavelet-LHH | glszm | ZoneEntropy                          | 6.150305379 |
| wavelet-LHH | glszm | SmallAreaLowGrayLevelEmphasis        | 0.004665306 |
| wavelet-LHH | ngtdm | Coarseness                           | 0.008226013 |
| wavelet-LHH | ngtdm | Complexity                           | 3315.276482 |
| wavelet-LHH | ngtdm | Strength                             | 3.691024996 |
| wavelet-LHH | ngtdm | Contrast                             | 0.308695084 |
| wavelet-LHH | ngtdm | Busyness                             | 0.123722502 |
| wavelet-LLH | gldm  | GrayLevelVariance                    | 98.26176118 |
| wavelet-LLH | gldm  | HighGrayLevelEmphasis                | 1108.051007 |
| wavelet-LLH | gldm  | DependenceEntropy                    | 6.662454977 |
| wavelet-LLH | gldm  | DependenceNonUniformity              | 278.9409396 |
| wavelet-LLH | gldm  | GrayLevelNonUniformity               | 22.38255034 |
| wavelet-LLH | gldm  | SmallDependenceEmphasis              | 0.596372483 |
| wavelet-LLH | gldm  | SmallDependenceHighGrayLevelEmphasis | 670.7019165 |
| wavelet-LLH | gldm  | DependenceNonUniformityNormalized    | 0.374417369 |
| wavelet-LLH | gldm  | LargeDependenceEmphasis              | 3.802684564 |
| wavelet-LLH | gldm  | LargeDependenceLowGrayLevelEmphasis  | 0.006662299 |
| wavelet-LLH | gldm  | DependenceVariance                   | 0.799791    |
| wavelet-LLH | gldm  | LargeDependenceHighGrayLevelEmphasis | 4040.757047 |
| wavelet-LLH | gldm  | SmallDependenceLowGrayLevelEmphasis  | 0.00255808  |
| wavelet-LLH | gldm  | LowGrayLevelEmphasis                 | 0.003097885 |
| wavelet-LLH | glcm  | JointAverage                         | 31.2573221  |
| wavelet-LLH | glcm  | SumAverage                           | 62.5146442  |
| wavelet-LLH | glcm  | JointEntropy                         | 9.281157006 |
| wavelet-LLH | glcm  | ClusterShade                         | 574.2131701 |
| wavelet-LLH | glcm  | MaximumProbability                   | 0.006461875 |
| wavelet-LLH | glcm  | Idmn                                 | 0.961582747 |
| wavelet-LLH | glcm  | JointEnergy                          | 0.001905611 |
| wavelet-LLH | glcm  | Contrast                             | 165.2592701 |
| wavelet-LLH | glcm  | DifferenceEntropy                    | 4.626006716 |
| wavelet-LLH | glcm  | InverseVariance                      | 0.114140256 |
| wavelet-LLH | glcm  | DifferenceVariance                   | 64.35038216 |
| wavelet-LLH | glcm  | Idn                                  | 0.871984597 |
| wavelet-LLH | glcm  | Idm                                  | 0.10706443  |

|             |            |                                  |              |
|-------------|------------|----------------------------------|--------------|
| wavelet-LLH | glcm       | Correlation                      | 0.157594287  |
| wavelet-LLH | glcm       | Autocorrelation                  | 992.9990711  |
| wavelet-LLH | glcm       | SumEntropy                       | 5.795809829  |
| wavelet-LLH | glcm       | SumSquares                       | 98.57674425  |
| wavelet-LLH | glcm       | ClusterProminence                | 171158.1881  |
| wavelet-LLH | glcm       | Imc2                             | 0.960857826  |
| wavelet-LLH | glcm       | Imc1                             | -0.243582665 |
| wavelet-LLH | glcm       | DifferenceAverage                | 9.810971739  |
| wavelet-LLH | glcm       | Id                               | 0.187947029  |
| wavelet-LLH | glcm       | ClusterTendency                  | 229.0477069  |
| wavelet-LLH | firstorder | InterquartileRange               | 333.5986201  |
| wavelet-LLH | firstorder | Skewness                         | 0.037847151  |
| wavelet-LLH | firstorder | Uniformity                       | 0.030043692  |
| wavelet-LLH | firstorder | Median                           | -28.9722785  |
| wavelet-LLH | firstorder | Energy                           | 46025218.41  |
| wavelet-LLH | firstorder | RobustMeanAbsoluteDeviation      | 136.7447323  |
| wavelet-LLH | firstorder | MeanAbsoluteDeviation            | 197.4885529  |
| wavelet-LLH | firstorder | TotalEnergy                      | 1242680897   |
| wavelet-LLH | firstorder | Maximum                          | 709.1926995  |
| wavelet-LLH | firstorder | RootMeanSquared                  | 248.5534483  |
| wavelet-LLH | firstorder | 90Percentile                     | 292.5785192  |
| wavelet-LLH | firstorder | Minimum                          | -783.8310482 |
| wavelet-LLH | firstorder | Entropy                          | 5.2936449    |
| wavelet-LLH | firstorder | Range                            | 1493.023748  |
| wavelet-LLH | firstorder | Variance                         | 61445.04814  |
| wavelet-LLH | firstorder | 10Percentile                     | -321.0545905 |
| wavelet-LLH | firstorder | Kurtosis                         | 2.996684294  |
| wavelet-LLH | firstorder | Mean                             | -18.26933296 |
| wavelet-LLH | glrlm      | ShortRunLowGrayLevelEmphasis     | 0.003122212  |
| wavelet-LLH | glrlm      | GrayLevelVariance                | 99.30512623  |
| wavelet-LLH | glrlm      | LowGrayLevelRunEmphasis          | 0.003150315  |
| wavelet-LLH | glrlm      | GrayLevelNonUniformityNormalized | 0.029839599  |
| wavelet-LLH | glrlm      | RunVariance                      | 0.029012552  |
| wavelet-LLH | glrlm      | GrayLevelNonUniformity           | 21.60345871  |
| wavelet-LLH | glrlm      | LongRunEmphasis                  | 1.088245011  |
| wavelet-LLH | glrlm      | ShortRunHighGrayLevelEmphasis    | 1086.512876  |
| wavelet-LLH | glrlm      | RunLengthNonUniformity           | 683.942799   |
| wavelet-LLH | glrlm      | ShortRunEmphasis                 | 0.978416615  |
| wavelet-LLH | glrlm      | LongRunHighGrayLevelEmphasis     | 1203.08451   |
| wavelet-LLH | glrlm      | RunPercentage                    | 0.971812081  |
| wavelet-LLH | glrlm      | LongRunLowGrayLevelEmphasis      | 0.003264554  |
| wavelet-LLH | glrlm      | RunEntropy                       | 5.449702734  |
| wavelet-LLH | glrlm      | HighGrayLevelRunEmphasis         | 1109.413314  |
| wavelet-LLH | glrlm      | RunLengthNonUniformityNormalized | 0.944452061  |
| wavelet-LLH | glszm      | GrayLevelVariance                | 113.5786851  |
| wavelet-LLH | glszm      | ZoneVariance                     | 1.115128797  |
| wavelet-LLH | glszm      | GrayLevelNonUniformityNormalized | 0.027474048  |
| wavelet-LLH | glszm      | SizeZoneNonUniformityNormalized  | 0.561245675  |
| wavelet-LLH | glszm      | SizeZoneNonUniformity            | 286.2352941  |
| wavelet-LLH | glszm      | GrayLevelNonUniformity           | 14.01176471  |
| wavelet-LLH | glszm      | LargeAreaEmphasis                | 3.249019608  |
| wavelet-LLH | glszm      | SmallAreaHighGrayLevelEmphasis   | 878.1813371  |
| wavelet-LLH | glszm      | ZonePercentage                   | 0.684563758  |
| wavelet-LLH | glszm      | LargeAreaLowGrayLevelEmphasis    | 0.006711001  |
| wavelet-LLH | glszm      | LargeAreaHighGrayLevelEmphasis   | 3464.062745  |
| wavelet-LLH | glszm      | HighGrayLevelZoneEmphasis        | 1124.070588  |
| wavelet-LLH | glszm      | SmallAreaEmphasis                | 0.777790305  |
| wavelet-LLH | glszm      | LowGrayLevelZoneEmphasis         | 0.003921569  |

|             |            |                                      |              |
|-------------|------------|--------------------------------------|--------------|
| wavelet-LLH | glszm      | ZoneEntropy                          | 6.420834556  |
| wavelet-LLH | glszm      | SmallAreaLowGrayLevelEmphasis        | 0.003611601  |
| wavelet-LLH | ngtdm      | Coarseness                           | 0.008742465  |
| wavelet-LLH | ngtdm      | Complexity                           | 8810.811316  |
| wavelet-LLH | ngtdm      | Strength                             | 8.657740958  |
| wavelet-LLH | ngtdm      | Contrast                             | 0.410058936  |
| wavelet-LLH | ngtdm      | Busyness                             | 0.062064821  |
| wavelet-LLL | gldm       | GrayLevelVariance                    | 597.8870429  |
| wavelet-LLL | gldm       | HighGrayLevelEmphasis                | 4186.138255  |
| wavelet-LLL | gldm       | DependenceEntropy                    | 7.228893058  |
| wavelet-LLL | gldm       | DependenceNonUniformity              | 402.6456376  |
| wavelet-LLL | gldm       | GrayLevelNonUniformity               | 9.053691275  |
| wavelet-LLL | gldm       | SmallDependenceEmphasis              | 0.758356823  |
| wavelet-LLL | gldm       | SmallDependenceHighGrayLevelEmphasis | 2911.371018  |
| wavelet-LLL | gldm       | DependenceNonUniformityNormalized    | 0.540463943  |
| wavelet-LLL | gldm       | LargeDependenceEmphasis              | 2.32885906   |
| wavelet-LLL | gldm       | LargeDependenceLowGrayLevelEmphasis  | 0.002469612  |
| wavelet-LLL | gldm       | DependenceVariance                   | 0.413700284  |
| wavelet-LLL | gldm       | LargeDependenceHighGrayLevelEmphasis | 11930.08188  |
| wavelet-LLL | gldm       | SmallDependenceLowGrayLevelEmphasis  | 0.001923098  |
| wavelet-LLL | gldm       | LowGrayLevelEmphasis                 | 0.002014954  |
| wavelet-LLL | glcm       | JointAverage                         | 64.76127446  |
| wavelet-LLL | glcm       | SumAverage                           | 129.5225489  |
| wavelet-LLL | glcm       | JointEntropy                         | 9.954030991  |
| wavelet-LLL | glcm       | ClusterShade                         | -1875.406949 |
| wavelet-LLL | glcm       | MaximumProbability                   | 0.003008567  |
| wavelet-LLL | glcm       | Idmn                                 | 0.963254726  |
| wavelet-LLL | glcm       | JointEnergy                          | 0.001067909  |
| wavelet-LLL | glcm       | Contrast                             | 497.143868   |
| wavelet-LLL | glcm       | DifferenceEntropy                    | 5.410558159  |
| wavelet-LLL | glcm       | InverseVariance                      | 0.060551968  |
| wavelet-LLL | glcm       | DifferenceVariance                   | 177.3123152  |
| wavelet-LLL | glcm       | Idn                                  | 0.871335888  |
| wavelet-LLL | glcm       | Idm                                  | 0.05779308   |
| wavelet-LLL | glcm       | Correlation                          | 0.565065881  |
| wavelet-LLL | glcm       | Autocorrelation                      | 4516.246135  |
| wavelet-LLL | glcm       | SumEntropy                           | 7.121001936  |
| wavelet-LLL | glcm       | SumSquares                           | 570.1962109  |
| wavelet-LLL | glcm       | ClusterProminence                    | 6698135.901  |
| wavelet-LLL | glcm       | Imc2                                 | 0.998509658  |
| wavelet-LLL | glcm       | Imc1                                 | -0.452538342 |
| wavelet-LLL | glcm       | DifferenceAverage                    | 17.59194153  |
| wavelet-LLL | glcm       | Id                                   | 0.122099763  |
| wavelet-LLL | glcm       | ClusterTendency                      | 1783.640976  |
| wavelet-LLL | firstorder | InterquartileRange                   | 999.9296159  |
| wavelet-LLL | firstorder | Skewness                             | 0.100710351  |
| wavelet-LLL | firstorder | Uniformity                           | 0.012152606  |
| wavelet-LLL | firstorder | Median                               | -1287.721694 |
| wavelet-LLL | firstorder | Energy                               | 1423550657   |
| wavelet-LLL | firstorder | RobustMeanAbsoluteDeviation          | 406.7090693  |
| wavelet-LLL | firstorder | MeanAbsoluteDeviation                | 522.8711173  |
| wavelet-LLL | firstorder | TotalEnergy                          | 38435867748  |
| wavelet-LLL | firstorder | Maximum                              | 14.59499595  |
| wavelet-LLL | firstorder | RootMeanSquared                      | 1382.319157  |
| wavelet-LLL | firstorder | 90Percentile                         | -364.4000029 |
| wavelet-LLL | firstorder | Minimum                              | -2723.821531 |
| wavelet-LLL | firstorder | Entropy                              | 6.479233968  |
| wavelet-LLL | firstorder | Range                                | 2738.416527  |

|             |            |                                      |              |
|-------------|------------|--------------------------------------|--------------|
| wavelet-LLL | firstorder | Variance                             | 373596.5936  |
| wavelet-LLL | firstorder | 10Percentile                         | -2001.268739 |
| wavelet-LLL | firstorder | Kurtosis                             | 2.006915773  |
| wavelet-LLL | firstorder | Mean                                 | -1239.842594 |
| wavelet-LLL | glrlm      | ShortRunLowGrayLevelEmphasis         | 0.002035774  |
| wavelet-LLL | glrlm      | GrayLevelVariance                    | 595.6787759  |
| wavelet-LLL | glrlm      | LowGrayLevelRunEmphasis              | 0.0020398    |
| wavelet-LLL | glrlm      | GrayLevelNonUniformityNormalized     | 0.012155081  |
| wavelet-LLL | glrlm      | RunVariance                          | 0.015180943  |
| wavelet-LLL | glrlm      | GrayLevelNonUniformity               | 8.921842953  |
| wavelet-LLL | glrlm      | LongRunEmphasis                      | 1.045438364  |
| wavelet-LLL | glrlm      | ShortRunHighGrayLevelEmphasis        | 4103.473897  |
| wavelet-LLL | glrlm      | RunLengthNonUniformity               | 712.652279   |
| wavelet-LLL | glrlm      | ShortRunEmphasis                     | 0.988873777  |
| wavelet-LLL | glrlm      | LongRunHighGrayLevelEmphasis         | 4420.053696  |
| wavelet-LLL | glrlm      | RunPercentage                        | 0.985234899  |
| wavelet-LLL | glrlm      | LongRunLowGrayLevelEmphasis          | 0.002056027  |
| wavelet-LLL | glrlm      | RunEntropy                           | 6.540353095  |
| wavelet-LLL | glrlm      | HighGrayLevelRunEmphasis             | 4165.197901  |
| wavelet-LLL | glrlm      | RunLengthNonUniformityNormalized     | 0.970878487  |
| wavelet-LLL | glszm      | GrayLevelVariance                    | 569.4383223  |
| wavelet-LLL | glszm      | ZoneVariance                         | 0.366170597  |
| wavelet-LLL | glszm      | GrayLevelNonUniformityNormalized     | 0.012377718  |
| wavelet-LLL | glszm      | SizeZoneNonUniformityNormalized      | 0.722051348  |
| wavelet-LLL | glszm      | SizeZoneNonUniformity                | 441.8954248  |
| wavelet-LLL | glszm      | GrayLevelNonUniformity               | 7.575163399  |
| wavelet-LLL | glszm      | LargeAreaEmphasis                    | 1.848039216  |
| wavelet-LLL | glszm      | SmallAreaHighGrayLevelEmphasis       | 3290.518824  |
| wavelet-LLL | glszm      | ZonePercentage                       | 0.82147651   |
| wavelet-LLL | glszm      | LargeAreaLowGrayLevelEmphasis        | 0.002659482  |
| wavelet-LLL | glszm      | LargeAreaHighGrayLevelEmphasis       | 8900.75      |
| wavelet-LLL | glszm      | HighGrayLevelZoneEmphasis            | 3915.455882  |
| wavelet-LLL | glszm      | SmallAreaEmphasis                    | 0.874485961  |
| wavelet-LLL | glszm      | LowGrayLevelZoneEmphasis             | 0.002372561  |
| wavelet-LLL | glszm      | ZoneEntropy                          | 6.988738195  |
| wavelet-LLL | glszm      | SmallAreaLowGrayLevelEmphasis        | 0.002322343  |
| wavelet-LLL | ngtdm      | Coarseness                           | 0.010575572  |
| wavelet-LLL | ngtdm      | Complexity                           | 43354.07422  |
| wavelet-LLL | ngtdm      | Strength                             | 38.97578296  |
| wavelet-LLL | ngtdm      | Contrast                             | 1.211935801  |
| wavelet-LLL | ngtdm      | Busyness                             | 0.021361282  |
| wavelet-HHL | gldm       | GrayLevelVariance                    | 34.03056439  |
| wavelet-HHL | gldm       | HighGrayLevelEmphasis                | 489.0080537  |
| wavelet-HHL | gldm       | DependenceEntropy                    | 6.229359184  |
| wavelet-HHL | gldm       | DependenceNonUniformity              | 212.642953   |
| wavelet-HHL | gldm       | GrayLevelNonUniformity               | 39.33825503  |
| wavelet-HHL | gldm       | SmallDependenceEmphasis              | 0.491754463  |
| wavelet-HHL | gldm       | SmallDependenceHighGrayLevelEmphasis | 255.9826949  |
| wavelet-HHL | gldm       | DependenceNonUniformityNormalized    | 0.285426783  |
| wavelet-HHL | gldm       | LargeDependenceEmphasis              | 5.582550336  |
| wavelet-HHL | gldm       | LargeDependenceLowGrayLevelEmphasis  | 0.016021711  |
| wavelet-HHL | gldm       | DependenceVariance                   | 1.248329355  |
| wavelet-HHL | gldm       | LargeDependenceHighGrayLevelEmphasis | 2612.406711  |
| wavelet-HHL | gldm       | SmallDependenceLowGrayLevelEmphasis  | 0.00316561   |
| wavelet-HHL | gldm       | LowGrayLevelEmphasis                 | 0.004538851  |
| wavelet-HHL | glcm       | JointAverage                         | 21.38880739  |
| wavelet-HHL | glcm       | SumAverage                           | 42.77761478  |
| wavelet-HHL | glcm       | JointEntropy                         | 8.458305906  |

|             |            |                                  |              |
|-------------|------------|----------------------------------|--------------|
| wavelet-HHL | glcm       | ClusterShade                     | 85.40737215  |
| wavelet-HHL | glcm       | MaximumProbability               | 0.010302046  |
| wavelet-HHL | glcm       | Idmn                             | 0.967353598  |
| wavelet-HHL | glcm       | JointEnergy                      | 0.003667222  |
| wavelet-HHL | glcm       | Contrast                         | 74.85308001  |
| wavelet-HHL | glcm       | DifferenceEntropy                | 4.109531119  |
| wavelet-HHL | glcm       | InverseVariance                  | 0.153398286  |
| wavelet-HHL | glcm       | DifferenceVariance               | 30.09987442  |
| wavelet-HHL | glcm       | Idn                              | 0.881576692  |
| wavelet-HHL | glcm       | Idm                              | 0.149475839  |
| wavelet-HHL | glcm       | Correlation                      | -0.0327055   |
| wavelet-HHL | glcm       | Autocorrelation                  | 456.2977763  |
| wavelet-HHL | glcm       | SumEntropy                       | 4.980379326  |
| wavelet-HHL | glcm       | SumSquares                       | 36.23075462  |
| wavelet-HHL | glcm       | ClusterProminence                | 19681.50351  |
| wavelet-HHL | glcm       | Imc2                             | 0.858731518  |
| wavelet-HHL | glcm       | Imc1                             | -0.147594965 |
| wavelet-HHL | glcm       | DifferenceAverage                | 6.584813247  |
| wavelet-HHL | glcm       | Id                               | 0.240200729  |
| wavelet-HHL | glcm       | ClusterTendency                  | 70.06993846  |
| wavelet-HHL | firstorder | InterquartileRange               | 174.486683   |
| wavelet-HHL | firstorder | Skewness                         | 0.26647365   |
| wavelet-HHL | firstorder | Uniformity                       | 0.052803027  |
| wavelet-HHL | firstorder | Median                           | -7.036698103 |
| wavelet-HHL | firstorder | Energy                           | 15815281.26  |
| wavelet-HHL | firstorder | RobustMeanAbsoluteDeviation      | 73.42350091  |
| wavelet-HHL | firstorder | MeanAbsoluteDeviation            | 111.6610238  |
| wavelet-HHL | firstorder | TotalEnergy                      | 427012594.1  |
| wavelet-HHL | firstorder | Maximum                          | 597.4892334  |
| wavelet-HHL | firstorder | RootMeanSquared                  | 145.7002589  |
| wavelet-HHL | firstorder | 90Percentile                     | 180.3254577  |
| wavelet-HHL | firstorder | Minimum                          | -507.3279116 |
| wavelet-HHL | firstorder | Entropy                          | 4.520579274  |
| wavelet-HHL | firstorder | Range                            | 1104.817145  |
| wavelet-HHL | firstorder | Variance                         | 21212.70699  |
| wavelet-HHL | firstorder | 10Percentile                     | -189.8270844 |
| wavelet-HHL | firstorder | Kurtosis                         | 3.945055613  |
| wavelet-HHL | firstorder | Mean                             | -3.982268975 |
| wavelet-HHL | glrlm      | ShortRunLowGrayLevelEmphasis     | 0.004543157  |
| wavelet-HHL | glrlm      | GrayLevelVariance                | 34.85687578  |
| wavelet-HHL | glrlm      | LowGrayLevelRunEmphasis          | 0.004624306  |
| wavelet-HHL | glrlm      | GrayLevelNonUniformityNormalized | 0.052005667  |
| wavelet-HHL | glrlm      | RunVariance                      | 0.046527719  |
| wavelet-HHL | glrlm      | GrayLevelNonUniformity           | 37.13187087  |
| wavelet-HHL | glrlm      | LongRunEmphasis                  | 1.135712735  |
| wavelet-HHL | glrlm      | ShortRunHighGrayLevelEmphasis    | 475.9174474  |
| wavelet-HHL | glrlm      | RunLengthNonUniformity           | 657.7975618  |
| wavelet-HHL | glrlm      | ShortRunEmphasis                 | 0.968801733  |
| wavelet-HHL | glrlm      | LongRunHighGrayLevelEmphasis     | 553.1780673  |
| wavelet-HHL | glrlm      | RunPercentage                    | 0.958389262  |
| wavelet-HHL | glrlm      | LongRunLowGrayLevelEmphasis      | 0.004971437  |
| wavelet-HHL | glrlm      | RunEntropy                       | 4.759732446  |
| wavelet-HHL | glrlm      | HighGrayLevelRunEmphasis         | 490.2138677  |
| wavelet-HHL | glrlm      | RunLengthNonUniformityNormalized | 0.921066203  |
| wavelet-HHL | glszm      | GrayLevelVariance                | 47.39081066  |
| wavelet-HHL | glszm      | ZoneVariance                     | 2.808361678  |
| wavelet-HHL | glszm      | GrayLevelNonUniformityNormalized | 0.042834467  |
| wavelet-HHL | glszm      | SizeZoneNonUniformityNormalized  | 0.505170068  |

|             |            |                                      |              |
|-------------|------------|--------------------------------------|--------------|
| wavelet-HHL | glszm      | SizeZoneNonUniformity                | 212.1714286  |
| wavelet-HHL | glszm      | GrayLevelNonUniformity               | 17.99047619  |
| wavelet-HHL | glszm      | LargeAreaEmphasis                    | 5.954761905  |
| wavelet-HHL | glszm      | SmallAreaHighGrayLevelEmphasis       | 392.861501   |
| wavelet-HHL | glszm      | ZonePercentage                       | 0.563758389  |
| wavelet-HHL | glszm      | LargeAreaLowGrayLevelEmphasis        | 0.018177897  |
| wavelet-HHL | glszm      | LargeAreaHighGrayLevelEmphasis       | 2820.411905  |
| wavelet-HHL | glszm      | HighGrayLevelZoneEmphasis            | 511.5880952  |
| wavelet-HHL | glszm      | SmallAreaEmphasis                    | 0.738378339  |
| wavelet-HHL | glszm      | LowGrayLevelZoneEmphasis             | 0.006010473  |
| wavelet-HHL | glszm      | ZoneEntropy                          | 6.041474407  |
| wavelet-HHL | glszm      | SmallAreaLowGrayLevelEmphasis        | 0.005243672  |
| wavelet-HHL | ngtdm      | Coarseness                           | 0.008055962  |
| wavelet-HHL | ngtdm      | Complexity                           | 2807.280215  |
| wavelet-HHL | ngtdm      | Strength                             | 3.762681633  |
| wavelet-HHL | ngtdm      | Contrast                             | 0.228178446  |
| wavelet-HHL | ngtdm      | Busyness                             | 0.139505764  |
| wavelet-HLH | gldm       | GrayLevelVariance                    | 31.7514094   |
| wavelet-HLH | gldm       | HighGrayLevelEmphasis                | 377.7114094  |
| wavelet-HLH | gldm       | DependenceEntropy                    | 6.188980521  |
| wavelet-HLH | gldm       | DependenceNonUniformity              | 216.1865772  |
| wavelet-HLH | gldm       | GrayLevelNonUniformity               | 40.72885906  |
| wavelet-HLH | gldm       | SmallDependenceEmphasis              | 0.495799008  |
| wavelet-HLH | gldm       | SmallDependenceHighGrayLevelEmphasis | 188.3367552  |
| wavelet-HLH | gldm       | DependenceNonUniformityNormalized    | 0.290183325  |
| wavelet-HLH | gldm       | LargeDependenceEmphasis              | 5.569127517  |
| wavelet-HLH | gldm       | LargeDependenceLowGrayLevelEmphasis  | 0.021943371  |
| wavelet-HLH | gldm       | DependenceVariance                   | 1.290615738  |
| wavelet-HLH | gldm       | LargeDependenceHighGrayLevelEmphasis | 2063         |
| wavelet-HLH | gldm       | SmallDependenceLowGrayLevelEmphasis  | 0.004480527  |
| wavelet-HLH | gldm       | LowGrayLevelEmphasis                 | 0.006421686  |
| wavelet-HLH | glcm       | JointAverage                         | 18.55773496  |
| wavelet-HLH | glcm       | SumAverage                           | 37.11546993  |
| wavelet-HLH | glcm       | JointEntropy                         | 8.40428387   |
| wavelet-HLH | glcm       | ClusterShade                         | -12.40069154 |
| wavelet-HLH | glcm       | MaximumProbability                   | 0.011652841  |
| wavelet-HLH | glcm       | Idmn                                 | 0.961038525  |
| wavelet-HLH | glcm       | JointEnergy                          | 0.003835322  |
| wavelet-HLH | glcm       | Contrast                             | 68.27239429  |
| wavelet-HLH | glcm       | DifferenceEntropy                    | 4.059880049  |
| wavelet-HLH | glcm       | InverseVariance                      | 0.159224727  |
| wavelet-HLH | glcm       | DifferenceVariance                   | 26.7475353   |
| wavelet-HLH | glcm       | Idn                                  | 0.870010559  |
| wavelet-HLH | glcm       | Idm                                  | 0.151313819  |
| wavelet-HLH | glcm       | Correlation                          | -0.020976018 |
| wavelet-HLH | glcm       | Autocorrelation                      | 343.6837179  |
| wavelet-HLH | glcm       | SumEntropy                           | 4.952612239  |
| wavelet-HLH | glcm       | SumSquares                           | 33.42607024  |
| wavelet-HLH | glcm       | ClusterProminence                    | 16019.23872  |
| wavelet-HLH | glcm       | Imc2                                 | 0.842864323  |
| wavelet-HLH | glcm       | Imc1                                 | -0.138308875 |
| wavelet-HLH | glcm       | DifferenceAverage                    | 6.367360301  |
| wavelet-HLH | glcm       | Id                                   | 0.241995686  |
| wavelet-HLH | glcm       | ClusterTendency                      | 65.43188668  |
| wavelet-HLH | firstorder | InterquartileRange                   | 169.7015255  |
| wavelet-HLH | firstorder | Skewness                             | 0.006071139  |
| wavelet-HLH | firstorder | Uniformity                           | 0.054669609  |
| wavelet-HLH | firstorder | Median                               | 6.837569449  |

|             |            |                                  |              |
|-------------|------------|----------------------------------|--------------|
| wavelet-HLH | firstorder | Energy                           | 14760356.12  |
| wavelet-HLH | firstorder | RobustMeanAbsoluteDeviation      | 71.22478984  |
| wavelet-HLH | firstorder | MeanAbsoluteDeviation            | 108.4108029  |
| wavelet-HLH | firstorder | TotalEnergy                      | 398529615.4  |
| wavelet-HLH | firstorder | Maximum                          | 500.176589   |
| wavelet-HLH | firstorder | RootMeanSquared                  | 140.7570906  |
| wavelet-HLH | firstorder | 90Percentile                     | 178.2408368  |
| wavelet-HLH | firstorder | Minimum                          | -432.1579467 |
| wavelet-HLH | firstorder | Entropy                          | 4.478585929  |
| wavelet-HLH | firstorder | Range                            | 932.3345357  |
| wavelet-HLH | firstorder | Variance                         | 19806.2031   |
| wavelet-HLH | firstorder | 10Percentile                     | -174.9215735 |
| wavelet-HLH | firstorder | Kurtosis                         | 3.61963724   |
| wavelet-HLH | firstorder | Mean                             | 2.521002541  |
| wavelet-HLH | glrlm      | ShortRunLowGrayLevelEmphasis     | 0.00643318   |
| wavelet-HLH | glrlm      | GrayLevelVariance                | 32.47297746  |
| wavelet-HLH | glrlm      | LowGrayLevelRunEmphasis          | 0.006544543  |
| wavelet-HLH | glrlm      | GrayLevelNonUniformityNormalized | 0.053838446  |
| wavelet-HLH | glrlm      | RunVariance                      | 0.045339003  |
| wavelet-HLH | glrlm      | GrayLevelNonUniformity           | 38.46162463  |
| wavelet-HLH | glrlm      | LongRunEmphasis                  | 1.133477967  |
| wavelet-HLH | glrlm      | ShortRunHighGrayLevelEmphasis    | 366.4469211  |
| wavelet-HLH | glrlm      | RunLengthNonUniformity           | 658.5597975  |
| wavelet-HLH | glrlm      | ShortRunEmphasis                 | 0.968989629  |
| wavelet-HLH | glrlm      | LongRunHighGrayLevelEmphasis     | 427.4320604  |
| wavelet-HLH | glrlm      | RunPercentage                    | 0.958905524  |
| wavelet-HLH | glrlm      | LongRunLowGrayLevelEmphasis      | 0.007018284  |
| wavelet-HLH | glrlm      | RunEntropy                       | 4.71595178   |
| wavelet-HLH | glrlm      | HighGrayLevelRunEmphasis         | 377.9892436  |
| wavelet-HLH | glrlm      | RunLengthNonUniformityNormalized | 0.921551171  |
| wavelet-HLH | glszm      | GrayLevelVariance                | 43.35573598  |
| wavelet-HLH | glszm      | ZoneVariance                     | 3.170191998  |
| wavelet-HLH | glszm      | GrayLevelNonUniformityNormalized | 0.044058655  |
| wavelet-HLH | glszm      | SizeZoneNonUniformityNormalized  | 0.508330465  |
| wavelet-HLH | glszm      | SizeZoneNonUniformity            | 214.0071259  |
| wavelet-HLH | glszm      | GrayLevelNonUniformity           | 18.54869359  |
| wavelet-HLH | glszm      | LargeAreaEmphasis                | 6.301662708  |
| wavelet-HLH | glszm      | SmallAreaHighGrayLevelEmphasis   | 280.9845122  |
| wavelet-HLH | glszm      | ZonePercentage                   | 0.565100671  |
| wavelet-HLH | glszm      | LargeAreaLowGrayLevelEmphasis    | 0.025665949  |
| wavelet-HLH | glszm      | LargeAreaHighGrayLevelEmphasis   | 2360.235154  |
| wavelet-HLH | glszm      | HighGrayLevelZoneEmphasis        | 379.263658   |
| wavelet-HLH | glszm      | SmallAreaEmphasis                | 0.740551595  |
| wavelet-HLH | glszm      | LowGrayLevelZoneEmphasis         | 0.008554677  |
| wavelet-HLH | glszm      | ZoneEntropy                      | 5.990910846  |
| wavelet-HLH | glszm      | SmallAreaLowGrayLevelEmphasis    | 0.007398044  |
| wavelet-HLH | ngtdm      | Coarseness                       | 0.008238153  |
| wavelet-HLH | ngtdm      | Complexity                       | 2266.290822  |
| wavelet-HLH | ngtdm      | Strength                         | 3.127972924  |
| wavelet-HLH | ngtdm      | Contrast                         | 0.226533923  |
| wavelet-HLH | ngtdm      | Busyness                         | 0.162997946  |



| Image type | Feature Class | Feature Name                         |                                                                                                                                                                                                                                                                                                                                                                                                                                                                                                                                                                                                     |
|------------|---------------|--------------------------------------|-----------------------------------------------------------------------------------------------------------------------------------------------------------------------------------------------------------------------------------------------------------------------------------------------------------------------------------------------------------------------------------------------------------------------------------------------------------------------------------------------------------------------------------------------------------------------------------------------------|
| general    | info          | BoundingBox                          | 4: RTSTRUCT: C99-DNu_segment_GTV<br>(0, 0, 1, 10, 10, 10)                                                                                                                                                                                                                                                                                                                                                                                                                                                                                                                                           |
| general    | info          | EnabledImageTypes                    | {u'Original': {}, u'Wavelet': {}}                                                                                                                                                                                                                                                                                                                                                                                                                                                                                                                                                                   |
|            |               |                                      | {'distances': [1], 'additionalInfo': True,<br>'force2D': False, 'interpolator': 'sitkBSpline',<br>'resampledPixelSpacing': [3.0], 'label': 1,<br>'normalizeScale': 1, 'normalize': False,<br>'force2Ddimension': 0, 'removeOutliers':<br>None, 'minimumROISize': None,<br>u'binWidth': 25.0,<br>'minimumROIDimensions': 1,<br>u'correctMask': True, 'preCrop': False,<br>u'symmetricalGLCM': True,<br>'resegmentRange': None, 'padDistance': 5}<br>92feba319139b5a5d9736c33c57ad7efd275<br>d5cc<br>(0.9765625000000002,<br>0.9765625000000002, 2.0)<br>5cfc521b1794931be3281555344829d6f904<br>cff7 |
| general    | info          | GeneralSettings                      |                                                                                                                                                                                                                                                                                                                                                                                                                                                                                                                                                                                                     |
| general    | info          | ImageHash                            | d5cc                                                                                                                                                                                                                                                                                                                                                                                                                                                                                                                                                                                                |
| general    | info          | ImageSpacing                         | (0.9765625000000002,<br>0.9765625000000002, 2.0)<br>5cfc521b1794931be3281555344829d6f904<br>cff7                                                                                                                                                                                                                                                                                                                                                                                                                                                                                                    |
| general    | info          | MaskHash                             | cff7                                                                                                                                                                                                                                                                                                                                                                                                                                                                                                                                                                                                |
| general    | info          | NumpyVersion                         | 1.13.1                                                                                                                                                                                                                                                                                                                                                                                                                                                                                                                                                                                              |
| general    | info          | PyWaveletVersion                     | 0.5.2                                                                                                                                                                                                                                                                                                                                                                                                                                                                                                                                                                                               |
| general    | info          | SimpleITKVersion                     | 1.1.0                                                                                                                                                                                                                                                                                                                                                                                                                                                                                                                                                                                               |
| general    | info          | Version                              | 1.3.0.post102+g1b0eb74                                                                                                                                                                                                                                                                                                                                                                                                                                                                                                                                                                              |
| general    | info          | VolumeNum                            | 1                                                                                                                                                                                                                                                                                                                                                                                                                                                                                                                                                                                                   |
| general    | info          | VoxelNum                             | 383                                                                                                                                                                                                                                                                                                                                                                                                                                                                                                                                                                                                 |
| original   | shape         | Maximum3DDiameter                    | 33.27160952                                                                                                                                                                                                                                                                                                                                                                                                                                                                                                                                                                                         |
| original   | shape         | Maximum2DDiameterSlice               | 27                                                                                                                                                                                                                                                                                                                                                                                                                                                                                                                                                                                                  |
| original   | shape         | Sphericity                           | 0.839350093                                                                                                                                                                                                                                                                                                                                                                                                                                                                                                                                                                                         |
| original   | shape         | MinorAxis                            | 23.34676671                                                                                                                                                                                                                                                                                                                                                                                                                                                                                                                                                                                         |
| original   | shape         | Elongation                           | 0.778284464                                                                                                                                                                                                                                                                                                                                                                                                                                                                                                                                                                                         |
| original   | shape         | SurfaceVolumeRatio                   | 0.264456027                                                                                                                                                                                                                                                                                                                                                                                                                                                                                                                                                                                         |
| original   | shape         | Volume                               | 10341                                                                                                                                                                                                                                                                                                                                                                                                                                                                                                                                                                                               |
| original   | shape         | MajorAxis                            | 29.99772937                                                                                                                                                                                                                                                                                                                                                                                                                                                                                                                                                                                         |
| original   | shape         | SurfaceArea                          | 2734.739773                                                                                                                                                                                                                                                                                                                                                                                                                                                                                                                                                                                         |
| original   | shape         | Flatness                             | 0.728591265                                                                                                                                                                                                                                                                                                                                                                                                                                                                                                                                                                                         |
| original   | shape         | LeastAxis                            | 21.85608359                                                                                                                                                                                                                                                                                                                                                                                                                                                                                                                                                                                         |
| original   | shape         | Maximum2DDiameterColumn              | 30                                                                                                                                                                                                                                                                                                                                                                                                                                                                                                                                                                                                  |
| original   | shape         | Maximum2DDiameterRow                 | 30.88689042                                                                                                                                                                                                                                                                                                                                                                                                                                                                                                                                                                                         |
| original   | gldm          | GrayLevelVariance                    | 96.35067387                                                                                                                                                                                                                                                                                                                                                                                                                                                                                                                                                                                         |
| original   | gldm          | HighGrayLevelEmphasis                | 962.9843342                                                                                                                                                                                                                                                                                                                                                                                                                                                                                                                                                                                         |
| original   | gldm          | DependenceEntropy                    | 6.479280795                                                                                                                                                                                                                                                                                                                                                                                                                                                                                                                                                                                         |
| original   | gldm          | DependenceNonUniformity              | 98.92167102                                                                                                                                                                                                                                                                                                                                                                                                                                                                                                                                                                                         |
| original   | gldm          | GrayLevelNonUniformity               | 17.37597911                                                                                                                                                                                                                                                                                                                                                                                                                                                                                                                                                                                         |
| original   | gldm          | SmallDependenceEmphasis              | 0.516220852                                                                                                                                                                                                                                                                                                                                                                                                                                                                                                                                                                                         |
| original   | gldm          | SmallDependenceHighGrayLevelEmphasis | 356.9896067                                                                                                                                                                                                                                                                                                                                                                                                                                                                                                                                                                                         |
| original   | gldm          | DependenceNonUniformityNormalized    | 0.258281125                                                                                                                                                                                                                                                                                                                                                                                                                                                                                                                                                                                         |
| original   | gldm          | LargeDependenceEmphasis              | 15.19321149                                                                                                                                                                                                                                                                                                                                                                                                                                                                                                                                                                                         |
| original   | gldm          | LargeDependenceLowGrayLevelEmphasis  | 0.015195106                                                                                                                                                                                                                                                                                                                                                                                                                                                                                                                                                                                         |
| original   | gldm          | DependenceVariance                   | 6.989399341                                                                                                                                                                                                                                                                                                                                                                                                                                                                                                                                                                                         |
| original   | gldm          | LargeDependenceHighGrayLevelEmphasis | 21953.02089                                                                                                                                                                                                                                                                                                                                                                                                                                                                                                                                                                                         |

|          |            |                                     |              |
|----------|------------|-------------------------------------|--------------|
| original | gldm       | SmallDependenceLowGrayLevelEmphasis | 0.004263368  |
| original | gldm       | LowGrayLevelEmphasis                | 0.00477943   |
| original | glcm       | JointAverage                        | 31.51763249  |
| original | glcm       | SumAverage                          | 63.03526498  |
| original | glcm       | JointEntropy                        | 7.835241082  |
| original | glcm       | ClusterShade                        | -2816.957045 |
| original | glcm       | MaximumProbability                  | 0.042530836  |
| original | glcm       | ldmn                                | 0.959859779  |
| original | glcm       | JointEnergy                         | 0.008241152  |
| original | glcm       | Contrast                            | 86.78854776  |
| original | glcm       | DifferenceEntropy                   | 4.137435585  |
| original | glcm       | InverseVariance                     | 0.204317832  |
| original | glcm       | DifferenceVariance                  | 41.52791046  |
| original | glcm       | ldn                                 | 0.879144406  |
| original | glcm       | ldm                                 | 0.215415041  |
| original | glcm       | Correlation                         | 0.473890753  |
| original | glcm       | Autocorrelation                     | 1033.030091  |
| original | glcm       | SumEntropy                          | 5.408064635  |
| original | glcm       | SumSquares                          | 82.93830618  |
| original | glcm       | ClusterProminence                   | 156148.1646  |
| original | glcm       | lmc2                                | 0.968335027  |
| original | glcm       | lmc1                                | -0.303233482 |
| original | glcm       | DifferenceAverage                   | 6.6613039    |
| original | glcm       | ld                                  | 0.290891584  |
| original | glcm       | ClusterTendency                     | 244.964677   |
| original | firstorder | InterquartileRange                  | 432.5        |
| original | firstorder | Skewness                            | -0.598191176 |
| original | firstorder | Uniformity                          | 0.045368092  |
| original | firstorder | Median                              | -175         |
| original | firstorder | Energy                              | 42726667     |
| original | firstorder | RobustMeanAbsoluteDeviation         | 167.3160323  |
| original | firstorder | MeanAbsoluteDeviation               | 211.2375979  |
| original | firstorder | TotalEnergy                         | 1153620009   |
| original | firstorder | Maximum                             | 103          |
| original | firstorder | RootMeanSquared                     | 334.0028103  |
| original | firstorder | 90Percentile                        | 34           |
| original | firstorder | Minimum                             | -936         |
| original | firstorder | Entropy                             | 4.853226677  |
| original | firstorder | Range                               | 1039         |
| original | firstorder | Variance                            | 60028.87728  |
| original | firstorder | 10Percentile                        | -603.6       |
| original | firstorder | Kurtosis                            | 2.242123677  |
| original | firstorder | Mean                                | -227         |
| original | glrlm      | ShortRunLowGrayLevelEmphasis        | 0.005041844  |
| original | glrlm      | GrayLevelVariance                   | 96.64550679  |
| original | glrlm      | LowGrayLevelRunEmphasis             | 0.005086116  |
| original | glrlm      | GrayLevelNonUniformityNormalized    | 0.03990722   |
| original | glrlm      | RunVariance                         | 0.09445664   |
| original | glrlm      | GrayLevelNonUniformity              | 14.19694292  |
| original | glrlm      | LongRunEmphasis                     | 1.256242388  |
| original | glrlm      | ShortRunHighGrayLevelEmphasis       | 855.5339351  |
| original | glrlm      | RunLengthNonUniformity              | 310.5539222  |

|             |       |                                      |              |
|-------------|-------|--------------------------------------|--------------|
| original    | glrlm | ShortRunEmphasis                     | 0.947937583  |
| original    | glrlm | LongRunHighGrayLevelEmphasis         | 1292.763415  |
| original    | glrlm | RunPercentage                        | 0.928298855  |
| original    | glrlm | LongRunLowGrayLevelEmphasis          | 0.005294761  |
| original    | glrlm | RunEntropy                           | 5.202745988  |
| original    | glrlm | HighGrayLevelRunEmphasis             | 928.1992393  |
| original    | glrlm | RunLengthNonUniformityNormalized     | 0.872977856  |
| original    | glszm | GrayLevelVariance                    | 87.77850453  |
| original    | glszm | ZoneVariance                         | 15.79269044  |
| original    | glszm | GrayLevelNonUniformityNormalized     | 0.032173119  |
| original    | glszm | SizeZoneNonUniformityNormalized      | 0.644630381  |
| original    | glszm | SizeZoneNonUniformity                | 139.8847926  |
| original    | glszm | GrayLevelNonUniformity               | 6.98156682   |
| original    | glszm | LargeAreaEmphasis                    | 18.9078341   |
| original    | glszm | SmallAreaHighGrayLevelEmphasis       | 539.7492534  |
| original    | glszm | ZonePercentage                       | 0.566579634  |
| original    | glszm | LargeAreaLowGrayLevelEmphasis        | 0.020176809  |
| original    | glszm | LargeAreaHighGrayLevelEmphasis       | 27742.14286  |
| original    | glszm | HighGrayLevelZoneEmphasis            | 701.5391705  |
| original    | glszm | SmallAreaEmphasis                    | 0.828471427  |
| original    | glszm | LowGrayLevelZoneEmphasis             | 0.007684289  |
| original    | glszm | ZoneEntropy                          | 5.798614981  |
| original    | glszm | SmallAreaLowGrayLevelEmphasis        | 0.007417118  |
| original    | ngtdm | Coarseness                           | 0.015192695  |
| original    | ngtdm | Complexity                           | 2876.318192  |
| original    | ngtdm | Strength                             | 11.08278377  |
| original    | ngtdm | Contrast                             | 0.622248126  |
| original    | ngtdm | Busyness                             | 0.052532014  |
| wavelet-HHH | gldm  | GrayLevelVariance                    | 5.766431021  |
| wavelet-HHH | gldm  | HighGrayLevelEmphasis                | 114.8407311  |
| wavelet-HHH | gldm  | DependenceEntropy                    | 5.660984456  |
| wavelet-HHH | gldm  | DependenceNonUniformity              | 59.54308094  |
| wavelet-HHH | gldm  | GrayLevelNonUniformity               | 49.44908616  |
| wavelet-HHH | gldm  | SmallDependenceEmphasis              | 0.283750579  |
| wavelet-HHH | gldm  | SmallDependenceHighGrayLevelEmphasis | 33.55135914  |
| wavelet-HHH | gldm  | DependenceNonUniformityNormalized    | 0.155464963  |
| wavelet-HHH | gldm  | LargeDependenceEmphasis              | 17.09921671  |
| wavelet-HHH | gldm  | LargeDependenceLowGrayLevelEmphasis  | 0.16393624   |
| wavelet-HHH | gldm  | DependenceVariance                   | 4.949532685  |
| wavelet-HHH | gldm  | LargeDependenceHighGrayLevelEmphasis | 1953.10705   |
| wavelet-HHH | gldm  | SmallDependenceLowGrayLevelEmphasis  | 0.006790401  |
| wavelet-HHH | gldm  | LowGrayLevelEmphasis                 | 0.013971329  |
| wavelet-HHH | glcm  | JointAverage                         | 10.46295952  |
| wavelet-HHH | glcm  | SumAverage                           | 20.92591903  |
| wavelet-HHH | glcm  | JointEntropy                         | 6.192632503  |
| wavelet-HHH | glcm  | ClusterShade                         | -5.298069955 |
| wavelet-HHH | glcm  | MaximumProbability                   | 0.053753255  |
| wavelet-HHH | glcm  | ldmn                                 | 0.967739444  |
| wavelet-HHH | glcm  | JointEnergy                          | 0.019967772  |
| wavelet-HHH | glcm  | Contrast                             | 11.76664201  |
| wavelet-HHH | glcm  | DifferenceEntropy                    | 2.88380452   |
| wavelet-HHH | glcm  | InverseVariance                      | 0.336568854  |

|             |            |                                  |              |
|-------------|------------|----------------------------------|--------------|
| wavelet-HHH | glcm       | DifferenceVariance               | 4.822189149  |
| wavelet-HHH | glcm       | Idn                              | 0.882805313  |
| wavelet-HHH | glcm       | Idm                              | 0.323386854  |
| wavelet-HHH | glcm       | Correlation                      | -0.028390147 |
| wavelet-HHH | glcm       | Autocorrelation                  | 109.3117471  |
| wavelet-HHH | glcm       | SumEntropy                       | 3.669867342  |
| wavelet-HHH | glcm       | SumSquares                       | 5.721041562  |
| wavelet-HHH | glcm       | ClusterProminence                | 486.8447125  |
| wavelet-HHH | glcm       | Imc2                             | 0.687081744  |
| wavelet-HHH | glcm       | Imc1                             | -0.099894547 |
| wavelet-HHH | glcm       | DifferenceAverage                | 2.605625481  |
| wavelet-HHH | glcm       | Id                               | 0.404078443  |
| wavelet-HHH | glcm       | ClusterTendency                  | 11.11752424  |
| wavelet-HHH | firstorder | InterquartileRange               | 67.85407595  |
| wavelet-HHH | firstorder | Skewness                         | -0.217921684 |
| wavelet-HHH | firstorder | Uniformity                       | 0.129109886  |
| wavelet-HHH | firstorder | Median                           | 3.595869644  |
| wavelet-HHH | firstorder | Energy                           | 1347115.061  |
| wavelet-HHH | firstorder | RobustMeanAbsoluteDeviation      | 29.7207068   |
| wavelet-HHH | firstorder | MeanAbsoluteDeviation            | 45.32147551  |
| wavelet-HHH | firstorder | TotalEnergy                      | 36372106.64  |
| wavelet-HHH | firstorder | Maximum                          | 188.7905106  |
| wavelet-HHH | firstorder | RootMeanSquared                  | 59.30659069  |
| wavelet-HHH | firstorder | 90Percentile                     | 71.70943954  |
| wavelet-HHH | firstorder | Minimum                          | -225.6332496 |
| wavelet-HHH | firstorder | Entropy                          | 3.264586548  |
| wavelet-HHH | firstorder | Range                            | 414.4237602  |
| wavelet-HHH | firstorder | Variance                         | 3515.220436  |
| wavelet-HHH | firstorder | 10Percentile                     | -77.26651944 |
| wavelet-HHH | firstorder | Kurtosis                         | 3.835006043  |
| wavelet-HHH | firstorder | Mean                             | -1.432222878 |
| wavelet-HHH | glrlm      | ShortRunLowGrayLevelEmphasis     | 0.013749603  |
| wavelet-HHH | glrlm      | GrayLevelVariance                | 6.146580231  |
| wavelet-HHH | glrlm      | LowGrayLevelRunEmphasis          | 0.014440133  |
| wavelet-HHH | glrlm      | GrayLevelNonUniformityNormalized | 0.122439209  |
| wavelet-HHH | glrlm      | RunVariance                      | 0.121135783  |
| wavelet-HHH | glrlm      | GrayLevelNonUniformity           | 42.41105618  |
| wavelet-HHH | glrlm      | LongRunEmphasis                  | 1.345297938  |
| wavelet-HHH | glrlm      | ShortRunHighGrayLevelEmphasis    | 106.7015715  |
| wavelet-HHH | glrlm      | RunLengthNonUniformity           | 287.3105333  |
| wavelet-HHH | glrlm      | ShortRunEmphasis                 | 0.927964938  |
| wavelet-HHH | glrlm      | LongRunHighGrayLevelEmphasis     | 154.2666768  |
| wavelet-HHH | glrlm      | RunPercentage                    | 0.904398474  |
| wavelet-HHH | glrlm      | LongRunLowGrayLevelEmphasis      | 0.017732093  |
| wavelet-HHH | glrlm      | RunEntropy                       | 3.757072423  |
| wavelet-HHH | glrlm      | HighGrayLevelRunEmphasis         | 114.9264613  |
| wavelet-HHH | glrlm      | RunLengthNonUniformityNormalized | 0.828765965  |
| wavelet-HHH | glszm      | GrayLevelVariance                | 12.80009739  |
| wavelet-HHH | glszm      | ZoneVariance                     | 95.58087818  |
| wavelet-HHH | glszm      | GrayLevelNonUniformityNormalized | 0.085463842  |
| wavelet-HHH | glszm      | SizeZoneNonUniformityNormalized  | 0.487054622  |
| wavelet-HHH | glszm      | SizeZoneNonUniformity            | 54.06306306  |

|             |       |                                      |              |
|-------------|-------|--------------------------------------|--------------|
| wavelet-HHH | glszm | GrayLevelNonUniformity               | 9.486486486  |
| wavelet-HHH | glszm | LargeAreaEmphasis                    | 107.4864865  |
| wavelet-HHH | glszm | SmallAreaHighGrayLevelEmphasis       | 86.95302033  |
| wavelet-HHH | glszm | ZonePercentage                       | 0.289817232  |
| wavelet-HHH | glszm | LargeAreaLowGrayLevelEmphasis        | 0.971427309  |
| wavelet-HHH | glszm | LargeAreaHighGrayLevelEmphasis       | 12537.24324  |
| wavelet-HHH | glszm | HighGrayLevelZoneEmphasis            | 117.1711712  |
| wavelet-HHH | glszm | SmallAreaEmphasis                    | 0.724419572  |
| wavelet-HHH | glszm | LowGrayLevelZoneEmphasis             | 0.024068499  |
| wavelet-HHH | glszm | ZoneEntropy                          | 4.888048917  |
| wavelet-HHH | glszm | SmallAreaLowGrayLevelEmphasis        | 0.020742152  |
| wavelet-HHH | ngtdm | Coarseness                           | 0.016681785  |
| wavelet-HHH | ngtdm | Complexity                           | 223.7427044  |
| wavelet-HHH | ngtdm | Strength                             | 1.424330984  |
| wavelet-HHH | ngtdm | Contrast                             | 0.081963128  |
| wavelet-HHH | ngtdm | Busyness                             | 0.28506548   |
| wavelet-HLL | gldm  | GrayLevelVariance                    | 47.83055307  |
| wavelet-HLL | gldm  | HighGrayLevelEmphasis                | 494.8825065  |
| wavelet-HLL | gldm  | DependenceEntropy                    | 6.416201809  |
| wavelet-HLL | gldm  | DependenceNonUniformity              | 102.2375979  |
| wavelet-HLL | gldm  | GrayLevelNonUniformity               | 16.35770235  |
| wavelet-HLL | gldm  | SmallDependenceEmphasis              | 0.470978962  |
| wavelet-HLL | gldm  | SmallDependenceHighGrayLevelEmphasis | 252.201166   |
| wavelet-HLL | gldm  | DependenceNonUniformityNormalized    | 0.266938898  |
| wavelet-HLL | gldm  | LargeDependenceEmphasis              | 7.866840731  |
| wavelet-HLL | gldm  | LargeDependenceLowGrayLevelEmphasis  | 0.024062612  |
| wavelet-HLL | gldm  | DependenceVariance                   | 2.551588735  |
| wavelet-HLL | gldm  | LargeDependenceHighGrayLevelEmphasis | 3867.373368  |
| wavelet-HLL | gldm  | SmallDependenceLowGrayLevelEmphasis  | 0.004970149  |
| wavelet-HLL | gldm  | LowGrayLevelEmphasis                 | 0.006686106  |
| wavelet-HLL | glcm  | JointAverage                         | 20.96263026  |
| wavelet-HLL | glcm  | SumAverage                           | 41.92526052  |
| wavelet-HLL | glcm  | JointEntropy                         | 8.151721725  |
| wavelet-HLL | glcm  | ClusterShade                         | -46.00690252 |
| wavelet-HLL | glcm  | MaximumProbability                   | 0.014632914  |
| wavelet-HLL | glcm  | Idmn                                 | 0.961369326  |
| wavelet-HLL | glcm  | JointEnergy                          | 0.004286534  |
| wavelet-HLL | glcm  | Contrast                             | 63.19014893  |
| wavelet-HLL | glcm  | DifferenceEntropy                    | 3.945924564  |
| wavelet-HLL | glcm  | InverseVariance                      | 0.167756354  |
| wavelet-HLL | glcm  | DifferenceVariance                   | 23.23117027  |
| wavelet-HLL | glcm  | Idn                                  | 0.871324485  |
| wavelet-HLL | glcm  | Idm                                  | 0.169318025  |
| wavelet-HLL | glcm  | Correlation                          | 0.234763887  |
| wavelet-HLL | glcm  | Autocorrelation                      | 449.7987134  |
| wavelet-HLL | glcm  | SumEntropy                           | 5.219370431  |
| wavelet-HLL | glcm  | SumSquares                           | 41.94536773  |
| wavelet-HLL | glcm  | ClusterProminence                    | 33131.03593  |
| wavelet-HLL | glcm  | Imc2                                 | 0.945891213  |
| wavelet-HLL | glcm  | Imc1                                 | -0.246924831 |
| wavelet-HLL | glcm  | DifferenceAverage                    | 6.136882733  |
| wavelet-HLL | glcm  | Id                                   | 0.25758053   |

|             |            |                                  |              |
|-------------|------------|----------------------------------|--------------|
| wavelet-HLL | glcm       | ClusterTendency                  | 104.591322   |
| wavelet-HLL | firstorder | InterquartileRange               | 232.3443078  |
| wavelet-HLL | firstorder | Skewness                         | -0.084169091 |
| wavelet-HLL | firstorder | Uniformity                       | 0.042709406  |
| wavelet-HLL | firstorder | Median                           | -54.13327058 |
| wavelet-HLL | firstorder | Energy                           | 12755560.67  |
| wavelet-HLL | firstorder | RobustMeanAbsoluteDeviation      | 96.23543335  |
| wavelet-HLL | firstorder | MeanAbsoluteDeviation            | 137.9873484  |
| wavelet-HLL | firstorder | TotalEnergy                      | 344400138    |
| wavelet-HLL | firstorder | Maximum                          | 361.7266677  |
| wavelet-HLL | firstorder | RootMeanSquared                  | 182.4947559  |
| wavelet-HLL | firstorder | 90Percentile                     | 171.782493   |
| wavelet-HLL | firstorder | Minimum                          | -568.6950422 |
| wavelet-HLL | firstorder | Entropy                          | 4.752089858  |
| wavelet-HLL | firstorder | Range                            | 930.4217099  |
| wavelet-HLL | firstorder | Variance                         | 29847.35402  |
| wavelet-HLL | firstorder | 10Percentile                     | -279.5096328 |
| wavelet-HLL | firstorder | Kurtosis                         | 2.785089546  |
| wavelet-HLL | firstorder | Mean                             | -58.79610467 |
| wavelet-HLL | glrlm      | ShortRunLowGrayLevelEmphasis     | 0.006783904  |
| wavelet-HLL | glrlm      | GrayLevelVariance                | 49.12377839  |
| wavelet-HLL | glrlm      | LowGrayLevelRunEmphasis          | 0.006892163  |
| wavelet-HLL | glrlm      | GrayLevelNonUniformityNormalized | 0.041756155  |
| wavelet-HLL | glrlm      | RunVariance                      | 0.058155463  |
| wavelet-HLL | glrlm      | GrayLevelNonUniformity           | 15.18916684  |
| wavelet-HLL | glrlm      | LongRunEmphasis                  | 1.168891044  |
| wavelet-HLL | glrlm      | ShortRunHighGrayLevelEmphasis    | 478.1129249  |
| wavelet-HLL | glrlm      | RunLengthNonUniformity           | 330.1940374  |
| wavelet-HLL | glrlm      | ShortRunEmphasis                 | 0.962345937  |
| wavelet-HLL | glrlm      | LongRunHighGrayLevelEmphasis     | 576.0621414  |
| wavelet-HLL | glrlm      | RunPercentage                    | 0.949789114  |
| wavelet-HLL | glrlm      | LongRunLowGrayLevelEmphasis      | 0.007367079  |
| wavelet-HLL | glrlm      | RunEntropy                       | 4.996167014  |
| wavelet-HLL | glrlm      | HighGrayLevelRunEmphasis         | 495.983079   |
| wavelet-HLL | glrlm      | RunLengthNonUniformityNormalized | 0.906646122  |
| wavelet-HLL | glszm      | GrayLevelVariance                | 64.23836451  |
| wavelet-HLL | glszm      | ZoneVariance                     | 4.895400746  |
| wavelet-HLL | glszm      | GrayLevelNonUniformityNormalized | 0.037293102  |
| wavelet-HLL | glszm      | SizeZoneNonUniformityNormalized  | 0.491128866  |
| wavelet-HLL | glszm      | SizeZoneNonUniformity            | 102.645933   |
| wavelet-HLL | glszm      | GrayLevelNonUniformity           | 7.794258373  |
| wavelet-HLL | glszm      | LargeAreaEmphasis                | 8.253588517  |
| wavelet-HLL | glszm      | SmallAreaHighGrayLevelEmphasis   | 402.4788504  |
| wavelet-HLL | glszm      | ZonePercentage                   | 0.545691906  |
| wavelet-HLL | glszm      | LargeAreaLowGrayLevelEmphasis    | 0.027816212  |
| wavelet-HLL | glszm      | LargeAreaHighGrayLevelEmphasis   | 4048.478469  |
| wavelet-HLL | glszm      | HighGrayLevelZoneEmphasis        | 524.5358852  |
| wavelet-HLL | glszm      | SmallAreaEmphasis                | 0.72811925   |
| wavelet-HLL | glszm      | LowGrayLevelZoneEmphasis         | 0.009673957  |
| wavelet-HLL | glszm      | ZoneEntropy                      | 5.966164026  |
| wavelet-HLL | glszm      | SmallAreaLowGrayLevelEmphasis    | 0.008639706  |
| wavelet-HLL | ngtdm      | Coarseness                       | 0.016665385  |

|             |            |                                      |              |
|-------------|------------|--------------------------------------|--------------|
| wavelet-HLL | ngtdm      | Complexity                           | 2284.011546  |
| wavelet-HLL | ngtdm      | Strength                             | 6.622759477  |
| wavelet-HLL | ngtdm      | Contrast                             | 0.350486119  |
| wavelet-HLL | ngtdm      | Busyness                             | 0.087872288  |
| wavelet-LHL | gldm       | GrayLevelVariance                    | 36.39701682  |
| wavelet-LHL | gldm       | HighGrayLevelEmphasis                | 293.9869452  |
| wavelet-LHL | gldm       | DependenceEntropy                    | 6.291058896  |
| wavelet-LHL | gldm       | DependenceNonUniformity              | 94.16449086  |
| wavelet-LHL | gldm       | GrayLevelNonUniformity               | 19.29765013  |
| wavelet-LHL | gldm       | SmallDependenceEmphasis              | 0.436406228  |
| wavelet-LHL | gldm       | SmallDependenceHighGrayLevelEmphasis | 134.7159401  |
| wavelet-LHL | gldm       | DependenceNonUniformityNormalized    | 0.245860289  |
| wavelet-LHL | gldm       | LargeDependenceEmphasis              | 9.412532637  |
| wavelet-LHL | gldm       | LargeDependenceLowGrayLevelEmphasis  | 0.049596164  |
| wavelet-LHL | gldm       | DependenceVariance                   | 3.169058348  |
| wavelet-LHL | gldm       | LargeDependenceHighGrayLevelEmphasis | 2648.624021  |
| wavelet-LHL | gldm       | SmallDependenceLowGrayLevelEmphasis  | 0.007518078  |
| wavelet-LHL | gldm       | LowGrayLevelEmphasis                 | 0.011022866  |
| wavelet-LHL | glcm       | JointAverage                         | 15.81851851  |
| wavelet-LHL | glcm       | SumAverage                           | 31.63703701  |
| wavelet-LHL | glcm       | JointEntropy                         | 7.939514884  |
| wavelet-LHL | glcm       | ClusterShade                         | 134.0780447  |
| wavelet-LHL | glcm       | MaximumProbability                   | 0.01871355   |
| wavelet-LHL | glcm       | ldmn                                 | 0.972537539  |
| wavelet-LHL | glcm       | JointEnergy                          | 0.005160577  |
| wavelet-LHL | glcm       | Contrast                             | 53.56163009  |
| wavelet-LHL | glcm       | DifferenceEntropy                    | 3.858428813  |
| wavelet-LHL | glcm       | InverseVariance                      | 0.177677357  |
| wavelet-LHL | glcm       | DifferenceVariance                   | 21.68191103  |
| wavelet-LHL | glcm       | ldn                                  | 0.891486369  |
| wavelet-LHL | glcm       | ldm                                  | 0.186539268  |
| wavelet-LHL | glcm       | Correlation                          | 0.167070664  |
| wavelet-LHL | glcm       | Autocorrelation                      | 255.5507389  |
| wavelet-LHL | glcm       | SumEntropy                           | 4.97771902   |
| wavelet-LHL | glcm       | SumSquares                           | 32.09416207  |
| wavelet-LHL | glcm       | ClusterProminence                    | 19363.84835  |
| wavelet-LHL | glcm       | lmc2                                 | 0.922062936  |
| wavelet-LHL | glcm       | lmc1                                 | -0.215778739 |
| wavelet-LHL | glcm       | DifferenceAverage                    | 5.544140919  |
| wavelet-LHL | glcm       | ld                                   | 0.276517202  |
| wavelet-LHL | glcm       | ClusterTendency                      | 74.81501821  |
| wavelet-LHL | firstorder | InterquartileRange                   | 192.7653021  |
| wavelet-LHL | firstorder | Skewness                             | 0.166906442  |
| wavelet-LHL | firstorder | Uniformity                           | 0.050385509  |
| wavelet-LHL | firstorder | Median                               | -31.95474877 |
| wavelet-LHL | firstorder | Energy                               | 9306240.597  |
| wavelet-LHL | firstorder | RobustMeanAbsoluteDeviation          | 82.6923674   |
| wavelet-LHL | firstorder | MeanAbsoluteDeviation                | 119.9498935  |
| wavelet-LHL | firstorder | TotalEnergy                          | 251268496.1  |
| wavelet-LHL | firstorder | Maximum                              | 617.4777078  |
| wavelet-LHL | firstorder | RootMeanSquared                      | 155.8790503  |
| wavelet-LHL | firstorder | 90Percentile                         | 152.9276997  |

|             |            |                                      |              |
|-------------|------------|--------------------------------------|--------------|
| wavelet-LHL | firstorder | Minimum                              | -421.6775041 |
| wavelet-LHL | firstorder | Entropy                              | 4.537202504  |
| wavelet-LHL | firstorder | Range                                | 1039.155212  |
| wavelet-LHL | firstorder | Variance                             | 22953.91851  |
| wavelet-LHL | firstorder | 10Percentile                         | -242.5417453 |
| wavelet-LHL | firstorder | Kurtosis                             | 3.345598954  |
| wavelet-LHL | firstorder | Mean                                 | -36.66551261 |
| wavelet-LHL | glrlm      | ShortRunLowGrayLevelEmphasis         | 0.011152023  |
| wavelet-LHL | glrlm      | GrayLevelVariance                    | 37.69586076  |
| wavelet-LHL | glrlm      | LowGrayLevelRunEmphasis              | 0.011381938  |
| wavelet-LHL | glrlm      | GrayLevelNonUniformityNormalized     | 0.048878033  |
| wavelet-LHL | glrlm      | RunVariance                          | 0.069022258  |
| wavelet-LHL | glrlm      | GrayLevelNonUniformity               | 17.64298756  |
| wavelet-LHL | glrlm      | LongRunEmphasis                      | 1.197049562  |
| wavelet-LHL | glrlm      | ShortRunHighGrayLevelEmphasis        | 282.9090879  |
| wavelet-LHL | glrlm      | RunLengthNonUniformity               | 322.979876   |
| wavelet-LHL | glrlm      | ShortRunEmphasis                     | 0.95702069   |
| wavelet-LHL | glrlm      | LongRunHighGrayLevelEmphasis         | 350.1809588  |
| wavelet-LHL | glrlm      | RunPercentage                        | 0.942357903  |
| wavelet-LHL | glrlm      | LongRunLowGrayLevelEmphasis          | 0.012387801  |
| wavelet-LHL | glrlm      | RunEntropy                           | 4.822720333  |
| wavelet-LHL | glrlm      | HighGrayLevelRunEmphasis             | 294.8707676  |
| wavelet-LHL | glrlm      | RunLengthNonUniformityNormalized     | 0.893957484  |
| wavelet-LHL | glszm      | GrayLevelVariance                    | 51.68126233  |
| wavelet-LHL | glszm      | ZoneVariance                         | 6.885890861  |
| wavelet-LHL | glszm      | GrayLevelNonUniformityNormalized     | 0.040631164  |
| wavelet-LHL | glszm      | SizeZoneNonUniformityNormalized      | 0.464930966  |
| wavelet-LHL | glszm      | SizeZoneNonUniformity                | 90.66153846  |
| wavelet-LHL | glszm      | GrayLevelNonUniformity               | 7.923076923  |
| wavelet-LHL | glszm      | LargeAreaEmphasis                    | 10.74358974  |
| wavelet-LHL | glszm      | SmallAreaHighGrayLevelEmphasis       | 221.5536023  |
| wavelet-LHL | glszm      | ZonePercentage                       | 0.509138381  |
| wavelet-LHL | glszm      | LargeAreaLowGrayLevelEmphasis        | 0.059997338  |
| wavelet-LHL | glszm      | LargeAreaHighGrayLevelEmphasis       | 3024.415385  |
| wavelet-LHL | glszm      | HighGrayLevelZoneEmphasis            | 305.225641   |
| wavelet-LHL | glszm      | SmallAreaEmphasis                    | 0.708394282  |
| wavelet-LHL | glszm      | LowGrayLevelZoneEmphasis             | 0.016027379  |
| wavelet-LHL | glszm      | ZoneEntropy                          | 5.890589133  |
| wavelet-LHL | glszm      | SmallAreaLowGrayLevelEmphasis        | 0.013759542  |
| wavelet-LHL | ngtdm      | Coarseness                           | 0.017052832  |
| wavelet-LHL | ngtdm      | Complexity                           | 1658.787547  |
| wavelet-LHL | ngtdm      | Strength                             | 5.501357155  |
| wavelet-LHL | ngtdm      | Contrast                             | 0.302932124  |
| wavelet-LHL | ngtdm      | Busyness                             | 0.118389189  |
| wavelet-LHH | gldm       | GrayLevelVariance                    | 13.73920335  |
| wavelet-LHH | gldm       | HighGrayLevelEmphasis                | 177.4856397  |
| wavelet-LHH | gldm       | DependenceEntropy                    | 5.939698396  |
| wavelet-LHH | gldm       | DependenceNonUniformity              | 75.6997389   |
| wavelet-LHH | gldm       | GrayLevelNonUniformity               | 34.59791123  |
| wavelet-LHH | gldm       | SmallDependenceEmphasis              | 0.384255026  |
| wavelet-LHH | gldm       | SmallDependenceHighGrayLevelEmphasis | 70.89805632  |
| wavelet-LHH | gldm       | DependenceNonUniformityNormalized    | 0.197649449  |



|             |            |                                      |              |
|-------------|------------|--------------------------------------|--------------|
| wavelet-LHH | gldm       | LargeDependenceEmphasis              | 12.83289817  |
| wavelet-LHH | gldm       | LargeDependenceLowGrayLevelEmphasis  | 0.093276403  |
| wavelet-LHH | gldm       | DependenceVariance                   | 4.35765463   |
| wavelet-LHH | gldm       | LargeDependenceHighGrayLevelEmphasis | 2014.462141  |
| wavelet-LHH | gldm       | SmallDependenceLowGrayLevelEmphasis  | 0.006676768  |
| wavelet-LHH | gldm       | LowGrayLevelEmphasis                 | 0.011137599  |
| wavelet-LHH | glcm       | JointAverage                         | 12.74006127  |
| wavelet-LHH | glcm       | SumAverage                           | 25.48012255  |
| wavelet-LHH | glcm       | JointEntropy                         | 7.0057945    |
| wavelet-LHH | glcm       | ClusterShade                         | 37.29225804  |
| wavelet-LHH | glcm       | MaximumProbability                   | 0.039066173  |
| wavelet-LHH | glcm       | ldmn                                 | 0.957855148  |
| wavelet-LHH | glcm       | JointEnergy                          | 0.011935392  |
| wavelet-LHH | glcm       | Contrast                             | 25.99302643  |
| wavelet-LHH | glcm       | DifferenceEntropy                    | 3.380447937  |
| wavelet-LHH | glcm       | InverseVariance                      | 0.267860395  |
| wavelet-LHH | glcm       | DifferenceVariance                   | 10.98960975  |
| wavelet-LHH | glcm       | ldn                                  | 0.869732591  |
| wavelet-LHH | glcm       | ldm                                  | 0.256533412  |
| wavelet-LHH | glcm       | Correlation                          | 0.002280376  |
| wavelet-LHH | glcm       | Autocorrelation                      | 162.3523087  |
| wavelet-LHH | glcm       | SumEntropy                           | 4.238824552  |
| wavelet-LHH | glcm       | SumSquares                           | 13.03290091  |
| wavelet-LHH | glcm       | ClusterProminence                    | 2571.597746  |
| wavelet-LHH | glcm       | lmc2                                 | 0.814978382  |
| wavelet-LHH | glcm       | lmc1                                 | -0.146263001 |
| wavelet-LHH | glcm       | DifferenceAverage                    | 3.820530986  |
| wavelet-LHH | glcm       | ld                                   | 0.341848838  |
| wavelet-LHH | glcm       | ClusterTendency                      | 26.1385772   |
| wavelet-LHH | firstorder | InterquartileRange                   | 106.6127336  |
| wavelet-LHH | firstorder | Skewness                             | 0.252659326  |
| wavelet-LHH | firstorder | Uniformity                           | 0.090333972  |
| wavelet-LHH | firstorder | Median                               | -7.126531482 |
| wavelet-LHH | firstorder | Energy                               | 3303898.315  |
| wavelet-LHH | firstorder | RobustMeanAbsoluteDeviation          | 44.32119923  |
| wavelet-LHH | firstorder | MeanAbsoluteDeviation                | 70.15658801  |
| wavelet-LHH | firstorder | TotalEnergy                          | 89205254.51  |
| wavelet-LHH | firstorder | Maximum                              | 269.3045495  |
| wavelet-LHH | firstorder | RootMeanSquared                      | 92.87823404  |
| wavelet-LHH | firstorder | 90Percentile                         | 133.6166895  |
| wavelet-LHH | firstorder | Minimum                              | -281.4819955 |
| wavelet-LHH | firstorder | Entropy                              | 3.830376559  |
| wavelet-LHH | firstorder | Range                                | 550.7865451  |
| wavelet-LHH | firstorder | Variance                             | 8577.079645  |
| wavelet-LHH | firstorder | 10Percentile                         | -88.83854476 |
| wavelet-LHH | firstorder | Kurtosis                             | 3.470839487  |
| wavelet-LHH | firstorder | Mean                                 | 7.020449678  |
| wavelet-LHH | glrlm      | ShortRunLowGrayLevelEmphasis         | 0.011077089  |
| wavelet-LHH | glrlm      | GrayLevelVariance                    | 14.46040578  |
| wavelet-LHH | glrlm      | LowGrayLevelRunEmphasis              | 0.011464544  |
| wavelet-LHH | glrlm      | GrayLevelNonUniformityNormalized     | 0.085363023  |
| wavelet-LHH | glrlm      | RunVariance                          | 0.09146406   |

|             |       |                                      |             |
|-------------|-------|--------------------------------------|-------------|
| wavelet-LHH | glrlm | GrayLevelNonUniformity               | 30.29759878 |
| wavelet-LHH | glrlm | LongRunEmphasis                      | 1.257844063 |
| wavelet-LHH | glrlm | ShortRunHighGrayLevelEmphasis        | 169.8807928 |
| wavelet-LHH | glrlm | RunLengthNonUniformity               | 307.4659543 |
| wavelet-LHH | glrlm | ShortRunEmphasis                     | 0.945004138 |
| wavelet-LHH | glrlm | LongRunHighGrayLevelEmphasis         | 220.0563845 |
| wavelet-LHH | glrlm | RunPercentage                        | 0.926491263 |
| wavelet-LHH | glrlm | LongRunLowGrayLevelEmphasis          | 0.013277798 |
| wavelet-LHH | glrlm | RunEntropy                           | 4.216201693 |
| wavelet-LHH | glrlm | HighGrayLevelRunEmphasis             | 178.8014876 |
| wavelet-LHH | glrlm | RunLengthNonUniformityNormalized     | 0.865928274 |
| wavelet-LHH | glszm | GrayLevelVariance                    | 22.80756657 |
| wavelet-LHH | glszm | ZoneVariance                         | 18.59379247 |
| wavelet-LHH | glszm | GrayLevelNonUniformityNormalized     | 0.058879706 |
| wavelet-LHH | glszm | SizeZoneNonUniformityNormalized      | 0.484591368 |
| wavelet-LHH | glszm | SizeZoneNonUniformity                | 79.95757576 |
| wavelet-LHH | glszm | GrayLevelNonUniformity               | 9.715151515 |
| wavelet-LHH | glszm | LargeAreaEmphasis                    | 23.98181818 |
| wavelet-LHH | glszm | SmallAreaHighGrayLevelEmphasis       | 133.4552287 |
| wavelet-LHH | glszm | ZonePercentage                       | 0.430809399 |
| wavelet-LHH | glszm | LargeAreaLowGrayLevelEmphasis        | 0.175736578 |
| wavelet-LHH | glszm | LargeAreaHighGrayLevelEmphasis       | 3710.357576 |
| wavelet-LHH | glszm | HighGrayLevelZoneEmphasis            | 189.1393939 |
| wavelet-LHH | glszm | SmallAreaEmphasis                    | 0.723033951 |
| wavelet-LHH | glszm | LowGrayLevelZoneEmphasis             | 0.016412895 |
| wavelet-LHH | glszm | ZoneEntropy                          | 5.39464487  |
| wavelet-LHH | glszm | SmallAreaLowGrayLevelEmphasis        | 0.014255346 |
| wavelet-LHH | ngtdm | Coarseness                           | 0.016881586 |
| wavelet-LHH | ngtdm | Complexity                           | 511.4553229 |
| wavelet-LHH | ngtdm | Strength                             | 2.209185302 |
| wavelet-LHH | ngtdm | Contrast                             | 0.170433189 |
| wavelet-LHH | ngtdm | Busyness                             | 0.206110811 |
| wavelet-LLH | gldm  | GrayLevelVariance                    | 33.63837779 |
| wavelet-LLH | gldm  | HighGrayLevelEmphasis                | 382.537859  |
| wavelet-LLH | gldm  | DependenceEntropy                    | 6.226406683 |
| wavelet-LLH | gldm  | DependenceNonUniformity              | 94.45169713 |
| wavelet-LLH | gldm  | GrayLevelNonUniformity               | 20.16971279 |
| wavelet-LLH | gldm  | SmallDependenceEmphasis              | 0.43218503  |
| wavelet-LLH | gldm  | SmallDependenceHighGrayLevelEmphasis | 183.0652009 |
| wavelet-LLH | gldm  | DependenceNonUniformityNormalized    | 0.246610175 |
| wavelet-LLH | gldm  | LargeDependenceEmphasis              | 7.234986945 |
| wavelet-LLH | gldm  | LargeDependenceLowGrayLevelEmphasis  | 0.045304044 |
| wavelet-LLH | gldm  | DependenceVariance                   | 1.749851727 |
| wavelet-LLH | gldm  | LargeDependenceHighGrayLevelEmphasis | 2587.56658  |
| wavelet-LLH | gldm  | SmallDependenceLowGrayLevelEmphasis  | 0.003343652 |
| wavelet-LLH | gldm  | LowGrayLevelEmphasis                 | 0.009267868 |
| wavelet-LLH | glcm  | JointAverage                         | 18.47111323 |
| wavelet-LLH | glcm  | SumAverage                           | 36.94222647 |
| wavelet-LLH | glcm  | JointEntropy                         | 7.827623145 |
| wavelet-LLH | glcm  | ClusterShade                         | 168.5781053 |
| wavelet-LLH | glcm  | MaximumProbability                   | 0.016232621 |
| wavelet-LLH | glcm  | ldmn                                 | 0.973141744 |

|             |            |                                  |              |
|-------------|------------|----------------------------------|--------------|
| wavelet-LLH | glcm       | JointEnergy                      | 0.005678118  |
| wavelet-LLH | glcm       | Contrast                         | 49.36584718  |
| wavelet-LLH | glcm       | DifferenceEntropy                | 3.743601849  |
| wavelet-LLH | glcm       | InverseVariance                  | 0.210306735  |
| wavelet-LLH | glcm       | DifferenceVariance               | 21.95390314  |
| wavelet-LLH | glcm       | Idn                              | 0.894874512  |
| wavelet-LLH | glcm       | Idm                              | 0.195420276  |
| wavelet-LLH | glcm       | Correlation                      | 0.157941806  |
| wavelet-LLH | glcm       | Autocorrelation                  | 345.8477983  |
| wavelet-LLH | glcm       | SumEntropy                       | 4.908386301  |
| wavelet-LLH | glcm       | SumSquares                       | 29.34182536  |
| wavelet-LLH | glcm       | ClusterProminence                | 17766.32304  |
| wavelet-LLH | glcm       | Imc2                             | 0.922633995  |
| wavelet-LLH | glcm       | Imc1                             | -0.219344642 |
| wavelet-LLH | glcm       | DifferenceAverage                | 5.131858997  |
| wavelet-LLH | glcm       | Id                               | 0.285659324  |
| wavelet-LLH | glcm       | ClusterTendency                  | 68.00145426  |
| wavelet-LLH | firstorder | InterquartileRange               | 171.9375926  |
| wavelet-LLH | firstorder | Skewness                         | 0.233604498  |
| wavelet-LLH | firstorder | Uniformity                       | 0.052662435  |
| wavelet-LLH | firstorder | Median                           | -42.83457871 |
| wavelet-LLH | firstorder | Energy                           | 8739182.149  |
| wavelet-LLH | firstorder | RobustMeanAbsoluteDeviation      | 75.5563364   |
| wavelet-LLH | firstorder | MeanAbsoluteDeviation            | 111.9387859  |
| wavelet-LLH | firstorder | TotalEnergy                      | 235957918    |
| wavelet-LLH | firstorder | Maximum                          | 476.436598   |
| wavelet-LLH | firstorder | RootMeanSquared                  | 151.0553142  |
| wavelet-LLH | firstorder | 90Percentile                     | 136.7164811  |
| wavelet-LLH | firstorder | Minimum                          | -479.0376452 |
| wavelet-LLH | firstorder | Entropy                          | 4.513105723  |
| wavelet-LLH | firstorder | Range                            | 955.4742432  |
| wavelet-LLH | firstorder | Variance                         | 20766.05485  |
| wavelet-LLH | firstorder | 10Percentile                     | -218.0729222 |
| wavelet-LLH | firstorder | Kurtosis                         | 3.498927231  |
| wavelet-LLH | firstorder | Mean                             | -45.29517762 |
| wavelet-LLH | glrlm      | ShortRunLowGrayLevelEmphasis     | 0.009076619  |
| wavelet-LLH | glrlm      | GrayLevelVariance                | 34.6795248   |
| wavelet-LLH | glrlm      | LowGrayLevelRunEmphasis          | 0.009371741  |
| wavelet-LLH | glrlm      | GrayLevelNonUniformityNormalized | 0.051414791  |
| wavelet-LLH | glrlm      | RunVariance                      | 0.05998246   |
| wavelet-LLH | glrlm      | GrayLevelNonUniformity           | 18.67759146  |
| wavelet-LLH | glrlm      | LongRunEmphasis                  | 1.172963457  |
| wavelet-LLH | glrlm      | ShortRunHighGrayLevelEmphasis    | 370.6724906  |
| wavelet-LLH | glrlm      | RunLengthNonUniformity           | 328.5392611  |
| wavelet-LLH | glrlm      | ShortRunEmphasis                 | 0.961413465  |
| wavelet-LLH | glrlm      | LongRunHighGrayLevelEmphasis     | 444.9952262  |
| wavelet-LLH | glrlm      | RunPercentage                    | 0.948383209  |
| wavelet-LLH | glrlm      | LongRunLowGrayLevelEmphasis      | 0.010610144  |
| wavelet-LLH | glrlm      | RunEntropy                       | 4.779165593  |
| wavelet-LLH | glrlm      | HighGrayLevelRunEmphasis         | 384.2448333  |
| wavelet-LLH | glrlm      | RunLengthNonUniformityNormalized | 0.903919169  |
| wavelet-LLH | glszm      | GrayLevelVariance                | 48.86005823  |

|             |       |                                      |              |
|-------------|-------|--------------------------------------|--------------|
| wavelet-LLH | glszm | ZoneVariance                         | 4.448658816  |
| wavelet-LLH | glszm | GrayLevelNonUniformityNormalized     | 0.040944111  |
| wavelet-LLH | glszm | SizeZoneNonUniformityNormalized      | 0.444974104  |
| wavelet-LLH | glszm | SizeZoneNonUniformity                | 87.65989848  |
| wavelet-LLH | glszm | GrayLevelNonUniformity               | 8.065989848  |
| wavelet-LLH | glszm | LargeAreaEmphasis                    | 8.228426396  |
| wavelet-LLH | glszm | SmallAreaHighGrayLevelEmphasis       | 304.8792435  |
| wavelet-LLH | glszm | ZonePercentage                       | 0.514360313  |
| wavelet-LLH | glszm | LargeAreaLowGrayLevelEmphasis        | 0.04798401   |
| wavelet-LLH | glszm | LargeAreaHighGrayLevelEmphasis       | 2985.025381  |
| wavelet-LLH | glszm | HighGrayLevelZoneEmphasis            | 415.6700508  |
| wavelet-LLH | glszm | SmallAreaEmphasis                    | 0.693530126  |
| wavelet-LLH | glszm | LowGrayLevelZoneEmphasis             | 0.009638066  |
| wavelet-LLH | glszm | ZoneEntropy                          | 6.008636497  |
| wavelet-LLH | glszm | SmallAreaLowGrayLevelEmphasis        | 0.00469312   |
| wavelet-LLH | ngtdm | Coarseness                           | 0.01833718   |
| wavelet-LLH | ngtdm | Complexity                           | 1697.139078  |
| wavelet-LLH | ngtdm | Strength                             | 6.453902332  |
| wavelet-LLH | ngtdm | Contrast                             | 0.230204794  |
| wavelet-LLH | ngtdm | Busyness                             | 0.086850598  |
| wavelet-LLL | gldm  | GrayLevelVariance                    | 629.1656089  |
| wavelet-LLL | gldm  | HighGrayLevelEmphasis                | 5329.467363  |
| wavelet-LLL | gldm  | DependenceEntropy                    | 6.988372713  |
| wavelet-LLL | gldm  | DependenceNonUniformity              | 185.1462141  |
| wavelet-LLL | gldm  | GrayLevelNonUniformity               | 5.851174935  |
| wavelet-LLL | gldm  | SmallDependenceEmphasis              | 0.718185319  |
| wavelet-LLL | gldm  | SmallDependenceHighGrayLevelEmphasis | 3243.657427  |
| wavelet-LLL | gldm  | DependenceNonUniformityNormalized    | 0.483410481  |
| wavelet-LLL | gldm  | LargeDependenceEmphasis              | 4.315926893  |
| wavelet-LLL | gldm  | LargeDependenceLowGrayLevelEmphasis  | 0.003580674  |
| wavelet-LLL | gldm  | DependenceVariance                   | 1.686956759  |
| wavelet-LLL | gldm  | LargeDependenceHighGrayLevelEmphasis | 34759.08616  |
| wavelet-LLL | gldm  | SmallDependenceLowGrayLevelEmphasis  | 0.00304751   |
| wavelet-LLL | gldm  | LowGrayLevelEmphasis                 | 0.003106154  |
| wavelet-LLL | glcm  | JointAverage                         | 74.40740235  |
| wavelet-LLL | glcm  | SumAverage                           | 148.8148047  |
| wavelet-LLL | glcm  | JointEntropy                         | 8.856732466  |
| wavelet-LLL | glcm  | ClusterShade                         | -39065.27488 |
| wavelet-LLL | glcm  | MaximumProbability                   | 0.011384428  |
| wavelet-LLL | glcm  | Idmn                                 | 0.962835537  |
| wavelet-LLL | glcm  | JointEnergy                          | 0.002416703  |
| wavelet-LLL | glcm  | Contrast                             | 463.6183607  |
| wavelet-LLL | glcm  | DifferenceEntropy                    | 5.25288102   |
| wavelet-LLL | glcm  | InverseVariance                      | 0.08504197   |
| wavelet-LLL | glcm  | DifferenceVariance                   | 187.0822279  |
| wavelet-LLL | glcm  | Idn                                  | 0.87584541   |
| wavelet-LLL | glcm  | Idm                                  | 0.08473227   |
| wavelet-LLL | glcm  | Correlation                          | 0.579819055  |
| wavelet-LLL | glcm  | Autocorrelation                      | 5862.232657  |
| wavelet-LLL | glcm  | SumEntropy                           | 6.678123018  |
| wavelet-LLL | glcm  | SumSquares                           | 556.3927072  |
| wavelet-LLL | glcm  | ClusterProminence                    | 7319626.447  |

|             |            |                                  |              |
|-------------|------------|----------------------------------|--------------|
| wavelet-LLL | glcm       | lmc2                             | 0.999300566  |
| wavelet-LLL | glcm       | lmc1                             | -0.541767466 |
| wavelet-LLL | glcm       | DifferenceAverage                | 16.3504778   |
| wavelet-LLL | glcm       | ld                               | 0.150692623  |
| wavelet-LLL | glcm       | ClusterTendency                  | 1761.952468  |
| wavelet-LLL | firstorder | InterquartileRange               | 1112.655838  |
| wavelet-LLL | firstorder | Skewness                         | -0.351002854 |
| wavelet-LLL | firstorder | Uniformity                       | 0.015277219  |
| wavelet-LLL | firstorder | Median                           | -637.9026481 |
| wavelet-LLL | firstorder | Energy                           | 324236308.2  |
| wavelet-LLL | firstorder | RobustMeanAbsoluteDeviation      | 424.5964339  |
| wavelet-LLL | firstorder | MeanAbsoluteDeviation            | 538.1143526  |
| wavelet-LLL | firstorder | TotalEnergy                      | 8754380322   |
| wavelet-LLL | firstorder | Maximum                          | 238.6988349  |
| wavelet-LLL | firstorder | RootMeanSquared                  | 920.0923841  |
| wavelet-LLL | firstorder | 90Percentile                     | 99.2661003   |
| wavelet-LLL | firstorder | Minimum                          | -2350.774437 |
| wavelet-LLL | firstorder | Entropy                          | 6.259512248  |
| wavelet-LLL | firstorder | Range                            | 2589.473271  |
| wavelet-LLL | firstorder | Variance                         | 392772.1962  |
| wavelet-LLL | firstorder | 10Percentile                     | -1539.210951 |
| wavelet-LLL | firstorder | Kurtosis                         | 2.085252785  |
| wavelet-LLL | firstorder | Mean                             | -673.6451582 |
| wavelet-LLL | glrlm      | ShortRunLowGrayLevelEmphasis     | 0.003175682  |
| wavelet-LLL | glrlm      | GrayLevelVariance                | 625.5786959  |
| wavelet-LLL | glrlm      | LowGrayLevelRunEmphasis          | 0.003178612  |
| wavelet-LLL | glrlm      | GrayLevelNonUniformityNormalized | 0.014860584  |
| wavelet-LLL | glrlm      | RunVariance                      | 0.028901317  |
| wavelet-LLL | glrlm      | GrayLevelNonUniformity           | 5.556454143  |
| wavelet-LLL | glrlm      | LongRunEmphasis                  | 1.079105584  |
| wavelet-LLL | glrlm      | ShortRunHighGrayLevelEmphasis    | 5118.758589  |
| wavelet-LLL | glrlm      | RunLengthNonUniformity           | 357.7948947  |
| wavelet-LLL | glrlm      | ShortRunEmphasis                 | 0.983019225  |
| wavelet-LLL | glrlm      | LongRunHighGrayLevelEmphasis     | 5912.716552  |
| wavelet-LLL | glrlm      | RunPercentage                    | 0.976099618  |
| wavelet-LLL | glrlm      | LongRunLowGrayLevelEmphasis      | 0.003192132  |
| wavelet-LLL | glrlm      | RunEntropy                       | 6.356105777  |
| wavelet-LLL | glrlm      | HighGrayLevelRunEmphasis         | 5257.634252  |
| wavelet-LLL | glrlm      | RunLengthNonUniformityNormalized | 0.956759663  |
| wavelet-LLL | glszm      | GrayLevelVariance                | 593.1431192  |
| wavelet-LLL | glszm      | ZoneVariance                     | 0.951175043  |
| wavelet-LLL | glszm      | GrayLevelNonUniformityNormalized | 0.013389112  |
| wavelet-LLL | glszm      | SizeZoneNonUniformityNormalized  | 0.709488708  |
| wavelet-LLL | glszm      | SizeZoneNonUniformity            | 212.1371237  |
| wavelet-LLL | glszm      | GrayLevelNonUniformity           | 4.003344482  |
| wavelet-LLL | glszm      | LargeAreaEmphasis                | 2.591973244  |
| wavelet-LLL | glszm      | SmallAreaHighGrayLevelEmphasis   | 3791.153501  |
| wavelet-LLL | glszm      | ZonePercentage                   | 0.780678851  |
| wavelet-LLL | glszm      | LargeAreaLowGrayLevelEmphasis    | 0.004178574  |
| wavelet-LLL | glszm      | LargeAreaHighGrayLevelEmphasis   | 18168.04013  |
| wavelet-LLL | glszm      | HighGrayLevelZoneEmphasis        | 4697.280936  |
| wavelet-LLL | glszm      | SmallAreaEmphasis                | 0.867071304  |

|             |            |                                      |              |
|-------------|------------|--------------------------------------|--------------|
| wavelet-LLL | glszm      | LowGrayLevelZoneEmphasis             | 0.003922614  |
| wavelet-LLL | glszm      | ZoneEntropy                          | 6.80075893   |
| wavelet-LLL | glszm      | SmallAreaLowGrayLevelEmphasis        | 0.003891454  |
| wavelet-LLL | ngtdm      | Coarseness                           | 0.018582396  |
| wavelet-LLL | ngtdm      | Complexity                           | 33532.47174  |
| wavelet-LLL | ngtdm      | Strength                             | 68.00575951  |
| wavelet-LLL | ngtdm      | Contrast                             | 1.556801145  |
| wavelet-LLL | ngtdm      | Busyness                             | 0.008999923  |
| wavelet-HHL | gldm       | GrayLevelVariance                    | 17.30365603  |
| wavelet-HHL | gldm       | HighGrayLevelEmphasis                | 368.156658   |
| wavelet-HHL | gldm       | DependenceEntropy                    | 6.040541326  |
| wavelet-HHL | gldm       | DependenceNonUniformity              | 76.94778068  |
| wavelet-HHL | gldm       | GrayLevelNonUniformity               | 31.60574413  |
| wavelet-HHL | gldm       | SmallDependenceEmphasis              | 0.416762102  |
| wavelet-HHL | gldm       | SmallDependenceHighGrayLevelEmphasis | 157.710626   |
| wavelet-HHL | gldm       | DependenceNonUniformityNormalized    | 0.200908044  |
| wavelet-HHL | gldm       | LargeDependenceEmphasis              | 13.66318538  |
| wavelet-HHL | gldm       | LargeDependenceLowGrayLevelEmphasis  | 0.0444387    |
| wavelet-HHL | gldm       | DependenceVariance                   | 5.004533401  |
| wavelet-HHL | gldm       | LargeDependenceHighGrayLevelEmphasis | 4726.955614  |
| wavelet-HHL | gldm       | SmallDependenceLowGrayLevelEmphasis  | 0.004470835  |
| wavelet-HHL | gldm       | LowGrayLevelEmphasis                 | 0.006212057  |
| wavelet-HHL | glcm       | JointAverage                         | 18.66837259  |
| wavelet-HHL | glcm       | SumAverage                           | 37.33674519  |
| wavelet-HHL | glcm       | JointEntropy                         | 7.096709348  |
| wavelet-HHL | glcm       | ClusterShade                         | -0.329141866 |
| wavelet-HHL | glcm       | MaximumProbability                   | 0.031444402  |
| wavelet-HHL | glcm       | ldmn                                 | 0.972059809  |
| wavelet-HHL | glcm       | JointEnergy                          | 0.01056269   |
| wavelet-HHL | glcm       | Contrast                             | 33.26684017  |
| wavelet-HHL | glcm       | DifferenceEntropy                    | 3.483232769  |
| wavelet-HHL | glcm       | InverseVariance                      | 0.249128001  |
| wavelet-HHL | glcm       | DifferenceVariance                   | 15.97612547  |
| wavelet-HHL | glcm       | ldn                                  | 0.896030189  |
| wavelet-HHL | glcm       | ldm                                  | 0.249217595  |
| wavelet-HHL | glcm       | Correlation                          | -0.016000155 |
| wavelet-HHL | glcm       | Autocorrelation                      | 348.1618949  |
| wavelet-HHL | glcm       | SumEntropy                           | 4.329587092  |
| wavelet-HHL | glcm       | SumSquares                           | 16.28008147  |
| wavelet-HHL | glcm       | ClusterProminence                    | 5464.12202   |
| wavelet-HHL | glcm       | lmc2                                 | 0.852710988  |
| wavelet-HHL | glcm       | lmc1                                 | -0.170281804 |
| wavelet-HHL | glcm       | DifferenceAverage                    | 4.096548576  |
| wavelet-HHL | glcm       | ld                                   | 0.336561934  |
| wavelet-HHL | glcm       | ClusterTendency                      | 31.8534857   |
| wavelet-HHL | firstorder | InterquartileRange                   | 107.4916215  |
| wavelet-HHL | firstorder | Skewness                             | -0.027505102 |
| wavelet-HHL | firstorder | Uniformity                           | 0.082521525  |
| wavelet-HHL | firstorder | Median                               | 1.081527419  |
| wavelet-HHL | firstorder | Energy                               | 4148808.665  |
| wavelet-HHL | firstorder | RobustMeanAbsoluteDeviation          | 46.92202199  |
| wavelet-HHL | firstorder | MeanAbsoluteDeviation                | 76.19027294  |

|             |            |                                  |              |
|-------------|------------|----------------------------------|--------------|
| wavelet-HHL | firstorder | TotalEnergy                      | 112017834    |
| wavelet-HHL | firstorder | Maximum                          | 327.0871994  |
| wavelet-HHL | firstorder | RootMeanSquared                  | 104.0788096  |
| wavelet-HHL | firstorder | 90Percentile                     | 129.6539125  |
| wavelet-HHL | firstorder | Minimum                          | -433.5068442 |
| wavelet-HHL | firstorder | Entropy                          | 3.960090691  |
| wavelet-HHL | firstorder | Range                            | 760.5940436  |
| wavelet-HHL | firstorder | Variance                         | 10797.07224  |
| wavelet-HHL | firstorder | 10Percentile                     | -104.3859171 |
| wavelet-HHL | firstorder | Kurtosis                         | 4.673149247  |
| wavelet-HHL | firstorder | Mean                             | 5.9435986    |
| wavelet-HHL | grlm       | ShortRunLowGrayLevelEmphasis     | 0.006307327  |
| wavelet-HHL | grlm       | GrayLevelVariance                | 18.30096863  |
| wavelet-HHL | grlm       | LowGrayLevelRunEmphasis          | 0.006473907  |
| wavelet-HHL | grlm       | GrayLevelNonUniformityNormalized | 0.078579923  |
| wavelet-HHL | grlm       | RunVariance                      | 0.092732753  |
| wavelet-HHL | grlm       | GrayLevelNonUniformity           | 27.85248339  |
| wavelet-HHL | grlm       | LongRunEmphasis                  | 1.262505917  |
| wavelet-HHL | grlm       | ShortRunHighGrayLevelEmphasis    | 349.6405734  |
| wavelet-HHL | grlm       | RunLengthNonUniformity           | 306.4440365  |
| wavelet-HHL | grlm       | ShortRunEmphasis                 | 0.944129683  |
| wavelet-HHL | grlm       | LongRunHighGrayLevelEmphasis     | 461.4255917  |
| wavelet-HHL | grlm       | RunPercentage                    | 0.925286202  |
| wavelet-HHL | grlm       | LongRunLowGrayLevelEmphasis      | 0.007261413  |
| wavelet-HHL | grlm       | RunEntropy                       | 4.351165914  |
| wavelet-HHL | grlm       | HighGrayLevelRunEmphasis         | 369.4442343  |
| wavelet-HHL | grlm       | RunLengthNonUniformityNormalized | 0.86406241   |
| wavelet-HHL | glszm      | GrayLevelVariance                | 31.10495537  |
| wavelet-HHL | glszm      | ZoneVariance                     | 23.83140111  |
| wavelet-HHL | glszm      | GrayLevelNonUniformityNormalized | 0.058240142  |
| wavelet-HHL | glszm      | SizeZoneNonUniformityNormalized  | 0.577511029  |
| wavelet-HHL | glszm      | SizeZoneNonUniformity            | 98.75438596  |
| wavelet-HHL | glszm      | GrayLevelNonUniformity           | 9.959064327  |
| wavelet-HHL | glszm      | LargeAreaEmphasis                | 28.84795322  |
| wavelet-HHL | glszm      | SmallAreaHighGrayLevelEmphasis   | 298.868343   |
| wavelet-HHL | glszm      | ZonePercentage                   | 0.446475196  |
| wavelet-HHL | glszm      | LargeAreaLowGrayLevelEmphasis    | 0.0948144    |
| wavelet-HHL | glszm      | LargeAreaHighGrayLevelEmphasis   | 9750.643275  |
| wavelet-HHL | glszm      | HighGrayLevelZoneEmphasis        | 378.8947368  |
| wavelet-HHL | glszm      | SmallAreaEmphasis                | 0.785182894  |
| wavelet-HHL | glszm      | LowGrayLevelZoneEmphasis         | 0.010233387  |
| wavelet-HHL | glszm      | ZoneEntropy                      | 5.327434993  |
| wavelet-HHL | glszm      | SmallAreaLowGrayLevelEmphasis    | 0.009571389  |
| wavelet-HHL | ngtdm      | Coarseness                       | 0.018492476  |
| wavelet-HHL | ngtdm      | Complexity                       | 956.2485781  |
| wavelet-HHL | ngtdm      | Strength                         | 4.304376573  |
| wavelet-HHL | ngtdm      | Contrast                         | 0.140183329  |
| wavelet-HHL | ngtdm      | Busyness                         | 0.087381342  |
| wavelet-HLH | gldm       | GrayLevelVariance                | 5.884094922  |
| wavelet-HLH | gldm       | HighGrayLevelEmphasis            | 64.04960836  |
| wavelet-HLH | gldm       | DependenceEntropy                | 5.704973539  |
| wavelet-HLH | gldm       | DependenceNonUniformity          | 59.52741514  |

|             |            |                                      |              |
|-------------|------------|--------------------------------------|--------------|
| wavelet-HLH | gldm       | GrayLevelNonUniformity               | 44.84856397  |
| wavelet-HLH | gldm       | SmallDependenceEmphasis              | 0.264833267  |
| wavelet-HLH | gldm       | SmallDependenceHighGrayLevelEmphasis | 20.01741772  |
| wavelet-HLH | gldm       | DependenceNonUniformityNormalized    | 0.15542406   |
| wavelet-HLH | gldm       | LargeDependenceEmphasis              | 16.27415144  |
| wavelet-HLH | gldm       | LargeDependenceLowGrayLevelEmphasis  | 0.354333591  |
| wavelet-HLH | gldm       | DependenceVariance                   | 4.124467411  |
| wavelet-HLH | gldm       | LargeDependenceHighGrayLevelEmphasis | 913.2663185  |
| wavelet-HLH | gldm       | SmallDependenceLowGrayLevelEmphasis  | 0.015577164  |
| wavelet-HLH | gldm       | LowGrayLevelEmphasis                 | 0.031744184  |
| wavelet-HLH | glcm       | JointAverage                         | 7.600946658  |
| wavelet-HLH | glcm       | SumAverage                           | 15.20189332  |
| wavelet-HLH | glcm       | JointEntropy                         | 6.24416465   |
| wavelet-HLH | glcm       | ClusterShade                         | 5.150941648  |
| wavelet-HLH | glcm       | MaximumProbability                   | 0.040797949  |
| wavelet-HLH | glcm       | ldmn                                 | 0.957795833  |
| wavelet-HLH | glcm       | JointEnergy                          | 0.017112001  |
| wavelet-HLH | glcm       | Contrast                             | 10.85848213  |
| wavelet-HLH | glcm       | DifferenceEntropy                    | 2.842011708  |
| wavelet-HLH | glcm       | InverseVariance                      | 0.317493246  |
| wavelet-HLH | glcm       | DifferenceVariance                   | 4.144824899  |
| wavelet-HLH | glcm       | ldn                                  | 0.864534603  |
| wavelet-HLH | glcm       | ldm                                  | 0.315760646  |
| wavelet-HLH | glcm       | Correlation                          | -0.007176979 |
| wavelet-HLH | glcm       | Autocorrelation                      | 57.72063479  |
| wavelet-HLH | glcm       | SumEntropy                           | 3.681186705  |
| wavelet-HLH | glcm       | SumSquares                           | 5.373842196  |
| wavelet-HLH | glcm       | ClusterProminence                    | 354.987328   |
| wavelet-HLH | glcm       | lmc2                                 | 0.610741868  |
| wavelet-HLH | glcm       | lmc1                                 | -0.073154676 |
| wavelet-HLH | glcm       | DifferenceAverage                    | 2.57044182   |
| wavelet-HLH | glcm       | ld                                   | 0.400462114  |
| wavelet-HLH | glcm       | ClusterTendency                      | 10.63688666  |
| wavelet-HLH | firstorder | InterquartileRange                   | 80.674366    |
| wavelet-HLH | firstorder | Skewness                             | 0.146107428  |
| wavelet-HLH | firstorder | Uniformity                           | 0.117098078  |
| wavelet-HLH | firstorder | Median                               | 0.531692878  |
| wavelet-HLH | firstorder | Energy                               | 1410262.546  |
| wavelet-HLH | firstorder | RobustMeanAbsoluteDeviation          | 33.6301653   |
| wavelet-HLH | firstorder | MeanAbsoluteDeviation                | 48.3220186   |
| wavelet-HLH | firstorder | TotalEnergy                          | 38077088.75  |
| wavelet-HLH | firstorder | Maximum                              | 190.5743336  |
| wavelet-HLH | firstorder | RootMeanSquared                      | 60.68070238  |
| wavelet-HLH | firstorder | 90Percentile                         | 79.42822378  |
| wavelet-HLH | firstorder | Minimum                              | -164.4439856 |
| wavelet-HLH | firstorder | Entropy                              | 3.302919134  |
| wavelet-HLH | firstorder | Range                                | 355.0183191  |
| wavelet-HLH | firstorder | Variance                             | 3675.052658  |
| wavelet-HLH | firstorder | 10Percentile                         | -74.2845524  |
| wavelet-HLH | firstorder | Kurtosis                             | 3.00507471   |
| wavelet-HLH | firstorder | Mean                                 | 2.663640892  |
| wavelet-HLH | gllrm      | ShortRunLowGrayLevelEmphasis         | 0.031311987  |



|             |       |                                  |             |
|-------------|-------|----------------------------------|-------------|
| wavelet-HLH | glrlm | GrayLevelVariance                | 6.223108004 |
| wavelet-HLH | glrlm | LowGrayLevelRunEmphasis          | 0.032847593 |
| wavelet-HLH | glrlm | GrayLevelNonUniformityNormalized | 0.113208095 |
| wavelet-HLH | glrlm | RunVariance                      | 0.120984224 |
| wavelet-HLH | glrlm | GrayLevelNonUniformity           | 39.21620687 |
| wavelet-HLH | glrlm | LongRunEmphasis                  | 1.345233836 |
| wavelet-HLH | glrlm | ShortRunHighGrayLevelEmphasis    | 60.60290448 |
| wavelet-HLH | glrlm | RunLengthNonUniformity           | 287.1794446 |
| wavelet-HLH | glrlm | ShortRunEmphasis                 | 0.928003129 |
| wavelet-HLH | glrlm | LongRunHighGrayLevelEmphasis     | 84.48932964 |
| wavelet-HLH | glrlm | RunPercentage                    | 0.904398474 |
| wavelet-HLH | glrlm | LongRunLowGrayLevelEmphasis      | 0.040235316 |
| wavelet-HLH | glrlm | RunEntropy                       | 3.783767958 |
| wavelet-HLH | glrlm | HighGrayLevelRunEmphasis         | 64.75437061 |
| wavelet-HLH | glrlm | RunLengthNonUniformityNormalized | 0.828534237 |
| wavelet-HLH | glszm | GrayLevelVariance                | 12.30889656 |
| wavelet-HLH | glszm | ZoneVariance                     | 65.80944365 |
| wavelet-HLH | glszm | GrayLevelNonUniformityNormalized | 0.089638919 |
| wavelet-HLH | glszm | SizeZoneNonUniformityNormalized  | 0.418230789 |
| wavelet-HLH | glszm | SizeZoneNonUniformity            | 45.58715596 |
| wavelet-HLH | glszm | GrayLevelNonUniformity           | 9.770642202 |
| wavelet-HLH | glszm | LargeAreaEmphasis                | 78.1559633  |
| wavelet-HLH | glszm | SmallAreaHighGrayLevelEmphasis   | 54.08580686 |
| wavelet-HLH | glszm | ZonePercentage                   | 0.2845953   |
| wavelet-HLH | glszm | LargeAreaLowGrayLevelEmphasis    | 1.634354904 |
| wavelet-HLH | glszm | LargeAreaHighGrayLevelEmphasis   | 4272.541284 |
| wavelet-HLH | glszm | HighGrayLevelZoneEmphasis        | 75.43119266 |
| wavelet-HLH | glszm | SmallAreaEmphasis                | 0.671597992 |
| wavelet-HLH | glszm | LowGrayLevelZoneEmphasis         | 0.057150599 |
| wavelet-HLH | glszm | ZoneEntropy                      | 5.018082138 |
| wavelet-HLH | glszm | SmallAreaLowGrayLevelEmphasis    | 0.048838327 |
| wavelet-HLH | ngtdm | Coarseness                       | 0.015659374 |
| wavelet-HLH | ngtdm | Complexity                       | 170.1744054 |
| wavelet-HLH | ngtdm | Strength                         | 0.983421424 |
| wavelet-HLH | ngtdm | Contrast                         | 0.110203956 |
| wavelet-HLH | ngtdm | Busyness                         | 0.563604794 |

| Image type | Feature Class | Feature Name                         |                                                                                                                                                                                                                                                                                                                                                                                                                                              |
|------------|---------------|--------------------------------------|----------------------------------------------------------------------------------------------------------------------------------------------------------------------------------------------------------------------------------------------------------------------------------------------------------------------------------------------------------------------------------------------------------------------------------------------|
| general    | info          | BoundingBox                          | 4: RTSTRUCT: C99-DNU_segment_RUL GTV<br>(0, 0, 1, 8, 8, 4)                                                                                                                                                                                                                                                                                                                                                                                   |
| general    | info          | EnabledImageTypes                    | {u'Original': {}, u'Wavelet': {}}                                                                                                                                                                                                                                                                                                                                                                                                            |
|            |               |                                      | {'distances': [1], 'additionalInfo': True,<br>'force2D': False, 'interpolator': 'sitkBSpline',<br>'resampledPixelSpacing': [3.0], 'label': 1,<br>'normalizeScale': 1, 'normalize': False,<br>'force2Ddimension': 0, 'removeOutliers':<br>None, 'minimumROISize': None, u'binWidth':<br>25.0, 'minimumROIDimensions': 1,<br>u'correctMask': True, 'preCrop': False,<br>u'symmetricalGLCM': True,<br>'resegmentRange': None, 'padDistance': 5} |
| general    | info          | GeneralSettings                      | 11d74446fca7dd494ac9097143277cd3bef2b0<br>f2                                                                                                                                                                                                                                                                                                                                                                                                 |
| general    | info          | ImageHash                            | (0.9765625000000002,<br>0.9765625000000002, 2.0)                                                                                                                                                                                                                                                                                                                                                                                             |
| general    | info          | ImageSpacing                         | 8add2e3aec4d7fb2d851ea015eb4644316fd5<br>885                                                                                                                                                                                                                                                                                                                                                                                                 |
| general    | info          | MaskHash                             | 1.13.1                                                                                                                                                                                                                                                                                                                                                                                                                                       |
| general    | info          | NumpyVersion                         | 0.5.2                                                                                                                                                                                                                                                                                                                                                                                                                                        |
| general    | info          | PyWaveletVersion                     | 1.1.0                                                                                                                                                                                                                                                                                                                                                                                                                                        |
| general    | info          | SimpleITKVersion                     | 1.3.0.post102+g1b0eb74                                                                                                                                                                                                                                                                                                                                                                                                                       |
| general    | info          | Version                              |                                                                                                                                                                                                                                                                                                                                                                                                                                              |
| general    | info          | VolumeNum                            | 1                                                                                                                                                                                                                                                                                                                                                                                                                                            |
| general    | info          | VoxelNum                             | 108                                                                                                                                                                                                                                                                                                                                                                                                                                          |
| original   | shape         | Maximum3DDiameter                    | 24.18677324                                                                                                                                                                                                                                                                                                                                                                                                                                  |
| original   | shape         | Maximum2DDiameterSlice               | 24.18677324                                                                                                                                                                                                                                                                                                                                                                                                                                  |
| original   | shape         | Sphericity                           | 0.805724557                                                                                                                                                                                                                                                                                                                                                                                                                                  |
| original   | shape         | MinorAxis                            | 18.85452012                                                                                                                                                                                                                                                                                                                                                                                                                                  |
| original   | shape         | Elongation                           | 0.879326704                                                                                                                                                                                                                                                                                                                                                                                                                                  |
| original   | shape         | SurfaceVolumeRatio                   | 0.420115158                                                                                                                                                                                                                                                                                                                                                                                                                                  |
| original   | shape         | Volume                               | 2916                                                                                                                                                                                                                                                                                                                                                                                                                                         |
| original   | shape         | MajorAxis                            | 21.4419965                                                                                                                                                                                                                                                                                                                                                                                                                                   |
| original   | shape         | SurfaceArea                          | 1225.0558                                                                                                                                                                                                                                                                                                                                                                                                                                    |
| original   | shape         | Flatness                             | 0.506309523                                                                                                                                                                                                                                                                                                                                                                                                                                  |
| original   | shape         | LeastAxis                            | 10.85628703                                                                                                                                                                                                                                                                                                                                                                                                                                  |
| original   | shape         | Maximum2DDiameterColumn              | 21.21320344                                                                                                                                                                                                                                                                                                                                                                                                                                  |
| original   | shape         | Maximum2DDiameterRow                 | 21.84032967                                                                                                                                                                                                                                                                                                                                                                                                                                  |
| original   | gldm          | GrayLevelVariance                    | 47.15046296                                                                                                                                                                                                                                                                                                                                                                                                                                  |
| original   | gldm          | HighGrayLevelEmphasis                | 227.1574074                                                                                                                                                                                                                                                                                                                                                                                                                                  |
| original   | gldm          | DependenceEntropy                    | 5.403837474                                                                                                                                                                                                                                                                                                                                                                                                                                  |
| original   | gldm          | DependenceNonUniformity              | 45.44444444                                                                                                                                                                                                                                                                                                                                                                                                                                  |
| original   | gldm          | GrayLevelNonUniformity               | 5.314814815                                                                                                                                                                                                                                                                                                                                                                                                                                  |
| original   | gldm          | SmallDependenceEmphasis              | 0.652584877                                                                                                                                                                                                                                                                                                                                                                                                                                  |
| original   | gldm          | SmallDependenceHighGrayLevelEmphasis | 158.9236754                                                                                                                                                                                                                                                                                                                                                                                                                                  |
| original   | gldm          | DependenceNonUniformityNormalized    | 0.420781893                                                                                                                                                                                                                                                                                                                                                                                                                                  |
| original   | gldm          | LargeDependenceEmphasis              | 3.111111111                                                                                                                                                                                                                                                                                                                                                                                                                                  |
| original   | gldm          | LargeDependenceLowGrayLevelEmphasis  | 0.042071975                                                                                                                                                                                                                                                                                                                                                                                                                                  |
| original   | gldm          | DependenceVariance                   | 0.574759945                                                                                                                                                                                                                                                                                                                                                                                                                                  |
| original   | gldm          | LargeDependenceHighGrayLevelEmphasis | 631.8425926                                                                                                                                                                                                                                                                                                                                                                                                                                  |

|          |            |                                     |              |
|----------|------------|-------------------------------------|--------------|
| original | gldm       | SmallDependenceLowGrayLevelEmphasis | 0.02359765   |
| original | gldm       | LowGrayLevelEmphasis                | 0.026113219  |
| original | glcm       | JointAverage                        | 14.70621157  |
| original | glcm       | SumAverage                          | 29.41242314  |
| original | glcm       | JointEntropy                        | 6.65747825   |
| original | glcm       | ClusterShade                        | 355.6410821  |
| original | glcm       | MaximumProbability                  | 0.026176385  |
| original | glcm       | Idmn                                | 0.940569046  |
| original | glcm       | JointEnergy                         | 0.010871506  |
| original | glcm       | Contrast                            | 78.14909683  |
| original | glcm       | DifferenceEntropy                   | 3.888728682  |
| original | glcm       | InverseVariance                     | 0.153150446  |
| original | glcm       | DifferenceVariance                  | 29.54562628  |
| original | glcm       | Idn                                 | 0.841058997  |
| original | glcm       | Idm                                 | 0.133816074  |
| original | glcm       | Correlation                         | 0.098740729  |
| original | glcm       | Autocorrelation                     | 220.79793    |
| original | glcm       | SumEntropy                          | 4.688476401  |
| original | glcm       | SumSquares                          | 43.32961664  |
| original | glcm       | ClusterProminence                   | 26090.04132  |
| original | glcm       | Imc2                                | 0.993371551  |
| original | glcm       | Imc1                                | -0.493809344 |
| original | glcm       | DifferenceAverage                   | 6.914112356  |
| original | glcm       | Id                                  | 0.223934011  |
| original | glcm       | ClusterTendency                     | 95.16936972  |
| original | firstorder | InterquartileRange                  | 199.5        |
| original | firstorder | Skewness                            | 0.649277997  |
| original | firstorder | Uniformity                          | 0.049211248  |
| original | firstorder | Median                              | -528         |
| original | firstorder | Energy                              | 30441681     |
| original | firstorder | RobustMeanAbsoluteDeviation         | 92.66428855  |
| original | firstorder | MeanAbsoluteDeviation               | 134.1815844  |
| original | firstorder | TotalEnergy                         | 821925387    |
| original | firstorder | Maximum                             | -6           |
| original | firstorder | RootMeanSquared                     | 530.9118728  |
| original | firstorder | 90Percentile                        | -264.8       |
| original | firstorder | Minimum                             | -816         |
| original | firstorder | Entropy                             | 4.571197806  |
| original | firstorder | Range                               | 810          |
| original | firstorder | Variance                            | 29333.24923  |
| original | firstorder | 10Percentile                        | -706         |
| original | firstorder | Kurtosis                            | 3.049486223  |
| original | firstorder | Mean                                | -502.5277778 |
| original | glrlm      | ShortRunLowGrayLevelEmphasis        | 0.026419853  |
| original | glrlm      | GrayLevelVariance                   | 47.84040685  |
| original | glrlm      | LowGrayLevelRunEmphasis             | 0.026551628  |
| original | glrlm      | GrayLevelNonUniformityNormalized    | 0.048693937  |
| original | glrlm      | RunVariance                         | 0.022764876  |
| original | glrlm      | GrayLevelNonUniformity              | 5.139760908  |
| original | glrlm      | LongRunEmphasis                     | 1.070551458  |
| original | glrlm      | ShortRunHighGrayLevelEmphasis       | 224.5638726  |
| original | glrlm      | RunLengthNonUniformity              | 100.7720127  |
| original | glrlm      | ShortRunEmphasis                    | 0.982362135  |

|             |       |                                      |              |
|-------------|-------|--------------------------------------|--------------|
| original    | glrlm | LongRunHighGrayLevelEmphasis         | 241.5687946  |
| original    | glrlm | RunPercentage                        | 0.977207977  |
| original    | glrlm | LongRunLowGrayLevelEmphasis          | 0.027078726  |
| original    | glrlm | RunEntropy                           | 4.664539512  |
| original    | glrlm | HighGrayLevelRunEmphasis             | 227.964857   |
| original    | glrlm | RunLengthNonUniformityNormalized     | 0.954470249  |
| original    | glszm | GrayLevelVariance                    | 57.88655664  |
| original    | glszm | ZoneVariance                         | 0.612081397  |
| original    | glszm | GrayLevelNonUniformityNormalized     | 0.042781606  |
| original    | glszm | SizeZoneNonUniformityNormalized      | 0.618330396  |
| original    | glszm | SizeZoneNonUniformity                | 48.84810127  |
| original    | glszm | GrayLevelNonUniformity               | 3.379746835  |
| original    | glszm | LargeAreaEmphasis                    | 2.481012658  |
| original    | glszm | SmallAreaHighGrayLevelEmphasis       | 201.0047433  |
| original    | glszm | ZonePercentage                       | 0.731481481  |
| original    | glszm | LargeAreaLowGrayLevelEmphasis        | 0.043397424  |
| original    | glszm | LargeAreaHighGrayLevelEmphasis       | 533.9113924  |
| original    | glszm | HighGrayLevelZoneEmphasis            | 237.5822785  |
| original    | glszm | SmallAreaEmphasis                    | 0.813533755  |
| original    | glszm | LowGrayLevelZoneEmphasis             | 0.033078772  |
| original    | glszm | ZoneEntropy                          | 5.25449147   |
| original    | glszm | SmallAreaLowGrayLevelEmphasis        | 0.031730151  |
| original    | ngtdm | Coarseness                           | 0.047075928  |
| original    | ngtdm | Complexity                           | 1787.913795  |
| original    | ngtdm | Strength                             | 15.86148198  |
| original    | ngtdm | Contrast                             | 0.537988497  |
| original    | ngtdm | Busyness                             | 0.069667967  |
| wavelet-HHH | gldm  | GrayLevelVariance                    | 30.88571674  |
| wavelet-HHH | gldm  | HighGrayLevelEmphasis                | 331.0092593  |
| wavelet-HHH | gldm  | DependenceEntropy                    | 5.197683192  |
| wavelet-HHH | gldm  | DependenceNonUniformity              | 38.59259259  |
| wavelet-HHH | gldm  | GrayLevelNonUniformity               | 7.092592593  |
| wavelet-HHH | gldm  | SmallDependenceEmphasis              | 0.568207305  |
| wavelet-HHH | gldm  | SmallDependenceHighGrayLevelEmphasis | 183.0807382  |
| wavelet-HHH | gldm  | DependenceNonUniformityNormalized    | 0.35733882   |
| wavelet-HHH | gldm  | LargeDependenceEmphasis              | 3.925925926  |
| wavelet-HHH | gldm  | LargeDependenceLowGrayLevelEmphasis  | 0.02929863   |
| wavelet-HHH | gldm  | DependenceVariance                   | 0.765432099  |
| wavelet-HHH | gldm  | LargeDependenceHighGrayLevelEmphasis | 1318.546296  |
| wavelet-HHH | gldm  | SmallDependenceLowGrayLevelEmphasis  | 0.01798821   |
| wavelet-HHH | gldm  | LowGrayLevelEmphasis                 | 0.019480921  |
| wavelet-HHH | glcm  | JointAverage                         | 17.47769937  |
| wavelet-HHH | glcm  | SumAverage                           | 34.95539873  |
| wavelet-HHH | glcm  | JointEntropy                         | 6.550390625  |
| wavelet-HHH | glcm  | ClusterShade                         | -289.6964348 |
| wavelet-HHH | glcm  | MaximumProbability                   | 0.02668882   |
| wavelet-HHH | glcm  | Idmn                                 | 0.934935808  |
| wavelet-HHH | glcm  | JointEnergy                          | 0.011908158  |
| wavelet-HHH | glcm  | Contrast                             | 64.35598553  |
| wavelet-HHH | glcm  | DifferenceEntropy                    | 3.716438975  |
| wavelet-HHH | glcm  | InverseVariance                      | 0.161553622  |
| wavelet-HHH | glcm  | DifferenceVariance                   | 25.5480148   |
| wavelet-HHH | glcm  | Idn                                  | 0.836031259  |

|             |            |                                  |              |
|-------------|------------|----------------------------------|--------------|
| wavelet-HHH | glcm       | Idm                              | 0.147695935  |
| wavelet-HHH | glcm       | Correlation                      | -0.037688107 |
| wavelet-HHH | glcm       | Autocorrelation                  | 304.3489141  |
| wavelet-HHH | glcm       | SumEntropy                       | 4.426274678  |
| wavelet-HHH | glcm       | SumSquares                       | 31.02574113  |
| wavelet-HHH | glcm       | ClusterProminence                | 13893.64854  |
| wavelet-HHH | glcm       | Imc2                             | 0.987486994  |
| wavelet-HHH | glcm       | Imc1                             | -0.445336695 |
| wavelet-HHH | glcm       | DifferenceAverage                | 6.156812454  |
| wavelet-HHH | glcm       | Id                               | 0.241665679  |
| wavelet-HHH | glcm       | ClusterTendency                  | 59.74697901  |
| wavelet-HHH | firstorder | InterquartileRange               | 135.3754609  |
| wavelet-HHH | firstorder | Skewness                         | -0.839531348 |
| wavelet-HHH | firstorder | Uniformity                       | 0.065672154  |
| wavelet-HHH | firstorder | Median                           | 5.445777029  |
| wavelet-HHH | firstorder | Energy                           | 2075450.972  |
| wavelet-HHH | firstorder | RobustMeanAbsoluteDeviation      | 64.19258121  |
| wavelet-HHH | firstorder | MeanAbsoluteDeviation            | 102.9773188  |
| wavelet-HHH | firstorder | TotalEnergy                      | 56037176.24  |
| wavelet-HHH | firstorder | Maximum                          | 259.3367368  |
| wavelet-HHH | firstorder | RootMeanSquared                  | 138.6258945  |
| wavelet-HHH | firstorder | 90Percentile                     | 151.4555611  |
| wavelet-HHH | firstorder | Minimum                          | -401.9561848 |
| wavelet-HHH | firstorder | Entropy                          | 4.236815407  |
| wavelet-HHH | firstorder | Range                            | 661.2929215  |
| wavelet-HHH | firstorder | Variance                         | 19191.42175  |
| wavelet-HHH | firstorder | 10Percentile                     | -193.2543972 |
| wavelet-HHH | firstorder | Kurtosis                         | 3.750270495  |
| wavelet-HHH | firstorder | Mean                             | -5.07118138  |
| wavelet-HHH | glrlm      | ShortRunLowGrayLevelEmphasis     | 0.019916518  |
| wavelet-HHH | glrlm      | GrayLevelVariance                | 31.56538303  |
| wavelet-HHH | glrlm      | LowGrayLevelRunEmphasis          | 0.019989023  |
| wavelet-HHH | glrlm      | GrayLevelNonUniformityNormalized | 0.064784595  |
| wavelet-HHH | glrlm      | RunVariance                      | 0.037438422  |
| wavelet-HHH | glrlm      | GrayLevelNonUniformity           | 6.789981164  |
| wavelet-HHH | glrlm      | LongRunEmphasis                  | 1.102385525  |
| wavelet-HHH | glrlm      | ShortRunHighGrayLevelEmphasis    | 323.4432109  |
| wavelet-HHH | glrlm      | RunLengthNonUniformity           | 99.31398169  |
| wavelet-HHH | glrlm      | ShortRunEmphasis                 | 0.978643274  |
| wavelet-HHH | glrlm      | LongRunHighGrayLevelEmphasis     | 365.4083769  |
| wavelet-HHH | glrlm      | RunPercentage                    | 0.97008547   |
| wavelet-HHH | glrlm      | LongRunLowGrayLevelEmphasis      | 0.020336442  |
| wavelet-HHH | glrlm      | RunEntropy                       | 4.361978396  |
| wavelet-HHH | glrlm      | HighGrayLevelRunEmphasis         | 330.733047   |
| wavelet-HHH | glrlm      | RunLengthNonUniformityNormalized | 0.946789327  |
| wavelet-HHH | glszm      | GrayLevelVariance                | 41.4449514   |
| wavelet-HHH | glszm      | ZoneVariance                     | 1.094624083  |
| wavelet-HHH | glszm      | GrayLevelNonUniformityNormalized | 0.054949415  |
| wavelet-HHH | glszm      | SizeZoneNonUniformityNormalized  | 0.532235668  |
| wavelet-HHH | glszm      | SizeZoneNonUniformity            | 37.78873239  |
| wavelet-HHH | glszm      | GrayLevelNonUniformity           | 3.901408451  |
| wavelet-HHH | glszm      | LargeAreaEmphasis                | 3.408450704  |
| wavelet-HHH | glszm      | SmallAreaHighGrayLevelEmphasis   | 241.8292553  |

|             |            |                                      |              |
|-------------|------------|--------------------------------------|--------------|
| wavelet-HHH | glszm      | ZonePercentage                       | 0.657407407  |
| wavelet-HHH | glszm      | LargeAreaLowGrayLevelEmphasis        | 0.036071873  |
| wavelet-HHH | glszm      | LargeAreaHighGrayLevelEmphasis       | 1126.042254  |
| wavelet-HHH | glszm      | HighGrayLevelZoneEmphasis            | 325.6760563  |
| wavelet-HHH | glszm      | SmallAreaEmphasis                    | 0.757599645  |
| wavelet-HHH | glszm      | LowGrayLevelZoneEmphasis             | 0.027846077  |
| wavelet-HHH | glszm      | ZoneEntropy                          | 5.161874366  |
| wavelet-HHH | glszm      | SmallAreaLowGrayLevelEmphasis        | 0.026990528  |
| wavelet-HHH | ngtdm      | Coarseness                           | 0.050713792  |
| wavelet-HHH | ngtdm      | Complexity                           | 1226.042596  |
| wavelet-HHH | ngtdm      | Strength                             | 11.48983744  |
| wavelet-HHH | ngtdm      | Contrast                             | 0.387505683  |
| wavelet-HHH | ngtdm      | Busyness                             | 0.039046538  |
| wavelet-HLL | gldm       | GrayLevelVariance                    | 86.78626543  |
| wavelet-HLL | gldm       | HighGrayLevelEmphasis                | 832.3796296  |
| wavelet-HLL | gldm       | DependenceEntropy                    | 5.756976044  |
| wavelet-HLL | gldm       | DependenceNonUniformity              | 39.07407407  |
| wavelet-HLL | gldm       | GrayLevelNonUniformity               | 4.111111111  |
| wavelet-HLL | gldm       | SmallDependenceEmphasis              | 0.576195988  |
| wavelet-HLL | gldm       | SmallDependenceHighGrayLevelEmphasis | 414.5467464  |
| wavelet-HLL | gldm       | DependenceNonUniformityNormalized    | 0.361796982  |
| wavelet-HLL | gldm       | LargeDependenceEmphasis              | 3.833333333  |
| wavelet-HLL | gldm       | LargeDependenceLowGrayLevelEmphasis  | 0.079750108  |
| wavelet-HLL | gldm       | DependenceVariance                   | 0.738340192  |
| wavelet-HLL | gldm       | LargeDependenceHighGrayLevelEmphasis | 3793.787037  |
| wavelet-HLL | gldm       | SmallDependenceLowGrayLevelEmphasis  | 0.006779501  |
| wavelet-HLL | gldm       | LowGrayLevelEmphasis                 | 0.021130897  |
| wavelet-HLL | glcm       | JointAverage                         | 27.2626055   |
| wavelet-HLL | glcm       | SumAverage                           | 54.525211    |
| wavelet-HLL | glcm       | JointEntropy                         | 6.756345836  |
| wavelet-HLL | glcm       | ClusterShade                         | -1270.356173 |
| wavelet-HLL | glcm       | MaximumProbability                   | 0.021148397  |
| wavelet-HLL | glcm       | ldmn                                 | 0.944052262  |
| wavelet-HLL | glcm       | JointEnergy                          | 0.009832025  |
| wavelet-HLL | glcm       | Contrast                             | 125.482999   |
| wavelet-HLL | glcm       | DifferenceEntropy                    | 4.044854068  |
| wavelet-HLL | glcm       | InverseVariance                      | 0.153579157  |
| wavelet-HLL | glcm       | DifferenceVariance                   | 54.20567272  |
| wavelet-HLL | glcm       | ldn                                  | 0.853323187  |
| wavelet-HLL | glcm       | ldm                                  | 0.140653536  |
| wavelet-HLL | glcm       | Correlation                          | 0.200902598  |
| wavelet-HLL | glcm       | Autocorrelation                      | 759.5393956  |
| wavelet-HLL | glcm       | SumEntropy                           | 4.971298142  |
| wavelet-HLL | glcm       | SumSquares                           | 78.93230278  |
| wavelet-HLL | glcm       | ClusterProminence                    | 112565.4933  |
| wavelet-HLL | glcm       | lmc2                                 | 0.997762987  |
| wavelet-HLL | glcm       | lmc1                                 | -0.575877807 |
| wavelet-HLL | glcm       | DifferenceAverage                    | 8.189317574  |
| wavelet-HLL | glcm       | ld                                   | 0.223663247  |
| wavelet-HLL | glcm       | ClusterTendency                      | 190.2462121  |
| wavelet-HLL | firstorder | InterquartileRange                   | 300.1924268  |
| wavelet-HLL | firstorder | Skewness                             | -0.830739324 |
| wavelet-HLL | firstorder | Uniformity                           | 0.038065844  |

|             |            |                                  |              |
|-------------|------------|----------------------------------|--------------|
| wavelet-HLL | firstorder | Median                           | 19.81347538  |
| wavelet-HLL | firstorder | Energy                           | 5983893.314  |
| wavelet-HLL | firstorder | RobustMeanAbsoluteDeviation      | 126.8977312  |
| wavelet-HLL | firstorder | MeanAbsoluteDeviation            | 186.1879831  |
| wavelet-HLL | firstorder | TotalEnergy                      | 161565119.5  |
| wavelet-HLL | firstorder | Maximum                          | 328.3418901  |
| wavelet-HLL | firstorder | RootMeanSquared                  | 235.3856826  |
| wavelet-HLL | firstorder | 90Percentile                     | 247.1766429  |
| wavelet-HLL | firstorder | Minimum                          | -692.2047207 |
| wavelet-HLL | firstorder | Entropy                          | 4.902079032  |
| wavelet-HLL | firstorder | Range                            | 1020.546611  |
| wavelet-HLL | firstorder | Variance                         | 54507.31487  |
| wavelet-HLL | firstorder | 10Percentile                     | -376.5254512 |
| wavelet-HLL | firstorder | Kurtosis                         | 3.182376125  |
| wavelet-HLL | firstorder | Mean                             | -29.98507462 |
| wavelet-HLL | grlm       | ShortRunLowGrayLevelEmphasis     | 0.02037534   |
| wavelet-HLL | grlm       | GrayLevelVariance                | 87.23390053  |
| wavelet-HLL | grlm       | LowGrayLevelRunEmphasis          | 0.020974853  |
| wavelet-HLL | grlm       | GrayLevelNonUniformityNormalized | 0.037883275  |
| wavelet-HLL | grlm       | RunVariance                      | 0.035174027  |
| wavelet-HLL | grlm       | GrayLevelNonUniformity           | 3.972143408  |
| wavelet-HLL | grlm       | LongRunEmphasis                  | 1.097814383  |
| wavelet-HLL | grlm       | ShortRunHighGrayLevelEmphasis    | 805.0018881  |
| wavelet-HLL | grlm       | RunLengthNonUniformity           | 99.36657711  |
| wavelet-HLL | grlm       | ShortRunEmphasis                 | 0.97890744   |
| wavelet-HLL | grlm       | LongRunHighGrayLevelEmphasis     | 926.4399884  |
| wavelet-HLL | grlm       | RunPercentage                    | 0.970797721  |
| wavelet-HLL | grlm       | LongRunLowGrayLevelEmphasis      | 0.023389534  |
| wavelet-HLL | grlm       | RunEntropy                       | 4.990222858  |
| wavelet-HLL | grlm       | HighGrayLevelRunEmphasis         | 826.5842846  |
| wavelet-HLL | grlm       | RunLengthNonUniformityNormalized | 0.946945662  |
| wavelet-HLL | glszm      | GrayLevelVariance                | 92.99305556  |
| wavelet-HLL | glszm      | ZoneVariance                     | 0.833333333  |
| wavelet-HLL | glszm      | GrayLevelNonUniformityNormalized | 0.035108025  |
| wavelet-HLL | glszm      | SizeZoneNonUniformityNormalized  | 0.533950617  |
| wavelet-HLL | glszm      | SizeZoneNonUniformity            | 38.44444444  |
| wavelet-HLL | glszm      | GrayLevelNonUniformity           | 2.527777778  |
| wavelet-HLL | glszm      | LargeAreaEmphasis                | 3.083333333  |
| wavelet-HLL | glszm      | SmallAreaHighGrayLevelEmphasis   | 518.5260417  |
| wavelet-HLL | glszm      | ZonePercentage                   | 0.666666667  |
| wavelet-HLL | glszm      | LargeAreaLowGrayLevelEmphasis    | 0.061187261  |
| wavelet-HLL | glszm      | LargeAreaHighGrayLevelEmphasis   | 2890.041667  |
| wavelet-HLL | glszm      | HighGrayLevelZoneEmphasis        | 747.5        |
| wavelet-HLL | glszm      | SmallAreaEmphasis                | 0.758946759  |
| wavelet-HLL | glszm      | LowGrayLevelZoneEmphasis         | 0.017263897  |
| wavelet-HLL | glszm      | ZoneEntropy                      | 5.489097918  |
| wavelet-HLL | glszm      | SmallAreaLowGrayLevelEmphasis    | 0.006582877  |
| wavelet-HLL | ngtdm      | Coarseness                       | 0.053721435  |
| wavelet-HLL | ngtdm      | Complexity                       | 2937.740358  |
| wavelet-HLL | ngtdm      | Strength                         | 28.19577266  |
| wavelet-HLL | ngtdm      | Contrast                         | 0.755915707  |
| wavelet-HLL | ngtdm      | Busyness                         | 0.019984996  |
| wavelet-LHL | gldm       | GrayLevelVariance                | 29.60459534  |

|             |            |                                      |              |
|-------------|------------|--------------------------------------|--------------|
| wavelet-LHL | gldm       | HighGrayLevelEmphasis                | 245.2592593  |
| wavelet-LHL | gldm       | DependenceEntropy                    | 5.303867738  |
| wavelet-LHL | gldm       | DependenceNonUniformity              | 32.18518519  |
| wavelet-LHL | gldm       | GrayLevelNonUniformity               | 6.833333333  |
| wavelet-LHL | gldm       | SmallDependenceEmphasis              | 0.527651749  |
| wavelet-LHL | gldm       | SmallDependenceHighGrayLevelEmphasis | 136.2878704  |
| wavelet-LHL | gldm       | DependenceNonUniformityNormalized    | 0.298010974  |
| wavelet-LHL | gldm       | LargeDependenceEmphasis              | 5.481481481  |
| wavelet-LHL | gldm       | LargeDependenceLowGrayLevelEmphasis  | 0.052039356  |
| wavelet-LHL | gldm       | DependenceVariance                   | 1.331961591  |
| wavelet-LHL | gldm       | LargeDependenceHighGrayLevelEmphasis | 1353.759259  |
| wavelet-LHL | gldm       | SmallDependenceLowGrayLevelEmphasis  | 0.024810801  |
| wavelet-LHL | gldm       | LowGrayLevelEmphasis                 | 0.02804593   |
| wavelet-LHL | glcm       | JointAverage                         | 14.48135102  |
| wavelet-LHL | glcm       | SumAverage                           | 28.96270204  |
| wavelet-LHL | glcm       | JointEntropy                         | 6.516253317  |
| wavelet-LHL | glcm       | ClusterShade                         | -135.9886187 |
| wavelet-LHL | glcm       | MaximumProbability                   | 0.033878918  |
| wavelet-LHL | glcm       | ldmn                                 | 0.941093371  |
| wavelet-LHL | glcm       | JointEnergy                          | 0.012341498  |
| wavelet-LHL | glcm       | Contrast                             | 56.422569    |
| wavelet-LHL | glcm       | DifferenceEntropy                    | 3.722722409  |
| wavelet-LHL | glcm       | InverseVariance                      | 0.174863879  |
| wavelet-LHL | glcm       | DifferenceVariance                   | 22.41683032  |
| wavelet-LHL | glcm       | ldn                                  | 0.844231506  |
| wavelet-LHL | glcm       | ldm                                  | 0.175940233  |
| wavelet-LHL | glcm       | Correlation                          | -0.001828624 |
| wavelet-LHL | glcm       | Autocorrelation                      | 209.7394102  |
| wavelet-LHL | glcm       | SumEntropy                           | 4.458465845  |
| wavelet-LHL | glcm       | SumSquares                           | 28.23251115  |
| wavelet-LHL | glcm       | ClusterProminence                    | 10957.08325  |
| wavelet-LHL | glcm       | lmc2                                 | 0.985436781  |
| wavelet-LHL | glcm       | lmc1                                 | -0.433189015 |
| wavelet-LHL | glcm       | DifferenceAverage                    | 5.769776669  |
| wavelet-LHL | glcm       | ld                                   | 0.265681146  |
| wavelet-LHL | glcm       | ClusterTendency                      | 56.50747561  |
| wavelet-LHL | firstorder | InterquartileRange                   | 166.541338   |
| wavelet-LHL | firstorder | Skewness                             | -0.316078308 |
| wavelet-LHL | firstorder | Uniformity                           | 0.063271605  |
| wavelet-LHL | firstorder | Median                               | -33.75123629 |
| wavelet-LHL | firstorder | Energy                               | 2249095.837  |
| wavelet-LHL | firstorder | RobustMeanAbsoluteDeviation          | 67.45728658  |
| wavelet-LHL | firstorder | MeanAbsoluteDeviation                | 105.1172057  |
| wavelet-LHL | firstorder | TotalEnergy                          | 60725587.6   |
| wavelet-LHL | firstorder | Maximum                              | 295.9062397  |
| wavelet-LHL | firstorder | RootMeanSquared                      | 144.3085633  |
| wavelet-LHL | firstorder | 90Percentile                         | 89.2353182   |
| wavelet-LHL | firstorder | Minimum                              | -393.4976701 |
| wavelet-LHL | firstorder | Entropy                              | 4.24375376   |
| wavelet-LHL | firstorder | Range                                | 689.4039098  |
| wavelet-LHL | firstorder | Variance                             | 18737.17069  |
| wavelet-LHL | firstorder | 10Percentile                         | -234.4430595 |
| wavelet-LHL | firstorder | Kurtosis                             | 3.279029358  |



|             |            |                                      |             |
|-------------|------------|--------------------------------------|-------------|
| wavelet-LHL | firstorder | Mean                                 | -45.6923491 |
| wavelet-LHL | glrlm      | ShortRunLowGrayLevelEmphasis         | 0.028807352 |
| wavelet-LHL | glrlm      | GrayLevelVariance                    | 30.37799495 |
| wavelet-LHL | glrlm      | LowGrayLevelRunEmphasis              | 0.02898022  |
| wavelet-LHL | glrlm      | GrayLevelNonUniformityNormalized     | 0.062484048 |
| wavelet-LHL | glrlm      | RunVariance                          | 0.04741959  |
| wavelet-LHL | glrlm      | GrayLevelNonUniformity               | 6.479608867 |
| wavelet-LHL | glrlm      | LongRunEmphasis                      | 1.134031261 |
| wavelet-LHL | glrlm      | ShortRunHighGrayLevelEmphasis        | 238.3749182 |
| wavelet-LHL | glrlm      | RunLengthNonUniformity               | 96.18984325 |
| wavelet-LHL | glrlm      | ShortRunEmphasis                     | 0.970757568 |
| wavelet-LHL | glrlm      | LongRunHighGrayLevelEmphasis         | 277.5576638 |
| wavelet-LHL | glrlm      | RunPercentage                        | 0.96011396  |
| wavelet-LHL | glrlm      | LongRunLowGrayLevelEmphasis          | 0.02976144  |
| wavelet-LHL | glrlm      | RunEntropy                           | 4.398117024 |
| wavelet-LHL | glrlm      | HighGrayLevelRunEmphasis             | 245.4553644 |
| wavelet-LHL | glrlm      | RunLengthNonUniformityNormalized     | 0.926810709 |
| wavelet-LHL | glszm      | GrayLevelVariance                    | 41.58764648 |
| wavelet-LHL | glszm      | ZoneVariance                         | 2.46484375  |
| wavelet-LHL | glszm      | GrayLevelNonUniformityNormalized     | 0.052734375 |
| wavelet-LHL | glszm      | SizeZoneNonUniformityNormalized      | 0.559570313 |
| wavelet-LHL | glszm      | SizeZoneNonUniformity                | 35.8125     |
| wavelet-LHL | glszm      | GrayLevelNonUniformity               | 3.375       |
| wavelet-LHL | glszm      | LargeAreaEmphasis                    | 5.3125      |
| wavelet-LHL | glszm      | SmallAreaHighGrayLevelEmphasis       | 203.638303  |
| wavelet-LHL | glszm      | ZonePercentage                       | 0.592592593 |
| wavelet-LHL | glszm      | LargeAreaLowGrayLevelEmphasis        | 0.066792637 |
| wavelet-LHL | glszm      | LargeAreaHighGrayLevelEmphasis       | 1257.90625  |
| wavelet-LHL | glszm      | HighGrayLevelZoneEmphasis            | 254.109375  |
| wavelet-LHL | glszm      | SmallAreaEmphasis                    | 0.773515625 |
| wavelet-LHL | glszm      | LowGrayLevelZoneEmphasis             | 0.042937265 |
| wavelet-LHL | glszm      | ZoneEntropy                          | 5.042434179 |
| wavelet-LHL | glszm      | SmallAreaLowGrayLevelEmphasis        | 0.041015621 |
| wavelet-LHL | ngtdm      | Coarseness                           | 0.044950483 |
| wavelet-LHL | ngtdm      | Complexity                           | 1064.951528 |
| wavelet-LHL | ngtdm      | Strength                             | 9.286308094 |
| wavelet-LHL | ngtdm      | Contrast                             | 0.434903898 |
| wavelet-LHL | ngtdm      | Busyness                             | 0.060820267 |
| wavelet-LHH | gldm       | GrayLevelVariance                    | 28.41246571 |
| wavelet-LHH | gldm       | HighGrayLevelEmphasis                | 236.787037  |
| wavelet-LHH | gldm       | DependenceEntropy                    | 5.151567914 |
| wavelet-LHH | gldm       | DependenceNonUniformity              | 39.05555556 |
| wavelet-LHH | gldm       | GrayLevelNonUniformity               | 6.722222222 |
| wavelet-LHH | gldm       | SmallDependenceEmphasis              | 0.603171296 |
| wavelet-LHH | gldm       | SmallDependenceHighGrayLevelEmphasis | 163.3668673 |
| wavelet-LHH | gldm       | DependenceNonUniformityNormalized    | 0.361625514 |
| wavelet-LHH | gldm       | LargeDependenceEmphasis              | 4.222222222 |
| wavelet-LHH | gldm       | LargeDependenceLowGrayLevelEmphasis  | 0.03816091  |
| wavelet-LHH | gldm       | DependenceVariance                   | 0.995541838 |
| wavelet-LHH | gldm       | LargeDependenceHighGrayLevelEmphasis | 830.787037  |
| wavelet-LHH | gldm       | SmallDependenceLowGrayLevelEmphasis  | 0.013807864 |
| wavelet-LHH | gldm       | LowGrayLevelEmphasis                 | 0.016521486 |
| wavelet-LHH | glcm       | JointAverage                         | 14.55335681 |

|             |            |                                  |              |
|-------------|------------|----------------------------------|--------------|
| wavelet-LHH | glcm       | SumAverage                       | 29.10671361  |
| wavelet-LHH | glcm       | JointEntropy                     | 6.536671466  |
| wavelet-LHH | glcm       | ClusterShade                     | 152.8596989  |
| wavelet-LHH | glcm       | MaximumProbability               | 0.024468411  |
| wavelet-LHH | glcm       | Idmn                             | 0.951395101  |
| wavelet-LHH | glcm       | JointEnergy                      | 0.011774602  |
| wavelet-LHH | glcm       | Contrast                         | 61.91516995  |
| wavelet-LHH | glcm       | DifferenceEntropy                | 3.778994439  |
| wavelet-LHH | glcm       | InverseVariance                  | 0.155634216  |
| wavelet-LHH | glcm       | DifferenceVariance               | 22.91679982  |
| wavelet-LHH | glcm       | Idn                              | 0.853952712  |
| wavelet-LHH | glcm       | Idm                              | 0.149218578  |
| wavelet-LHH | glcm       | Correlation                      | -0.049183083 |
| wavelet-LHH | glcm       | Autocorrelation                  | 210.5078739  |
| wavelet-LHH | glcm       | SumEntropy                       | 4.445999416  |
| wavelet-LHH | glcm       | SumSquares                       | 29.64934417  |
| wavelet-LHH | glcm       | ClusterProminence                | 10423.88951  |
| wavelet-LHH | glcm       | Imc2                             | 0.985651648  |
| wavelet-LHH | glcm       | Imc1                             | -0.430986748 |
| wavelet-LHH | glcm       | DifferenceAverage                | 6.184862167  |
| wavelet-LHH | glcm       | Id                               | 0.241336511  |
| wavelet-LHH | glcm       | ClusterTendency                  | 56.68220672  |
| wavelet-LHH | firstorder | InterquartileRange               | 184.2536154  |
| wavelet-LHH | firstorder | Skewness                         | 0.44202462   |
| wavelet-LHH | firstorder | Uniformity                       | 0.062242798  |
| wavelet-LHH | firstorder | Median                           | -17.67923385 |
| wavelet-LHH | firstorder | Energy                           | 1933172.585  |
| wavelet-LHH | firstorder | RobustMeanAbsoluteDeviation      | 76.14499278  |
| wavelet-LHH | firstorder | MeanAbsoluteDeviation            | 107.0172276  |
| wavelet-LHH | firstorder | TotalEnergy                      | 52195659.79  |
| wavelet-LHH | firstorder | Maximum                          | 468.2353464  |
| wavelet-LHH | firstorder | RootMeanSquared                  | 133.7899329  |
| wavelet-LHH | firstorder | 90Percentile                     | 192.6846704  |
| wavelet-LHH | firstorder | Minimum                          | -347.8061576 |
| wavelet-LHH | firstorder | Entropy                          | 4.205779407  |
| wavelet-LHH | firstorder | Range                            | 816.041504   |
| wavelet-LHH | firstorder | Variance                         | 17896.5454   |
| wavelet-LHH | firstorder | 10Percentile                     | -151.1434939 |
| wavelet-LHH | firstorder | Kurtosis                         | 3.458156741  |
| wavelet-LHH | firstorder | Mean                             | -1.789066468 |
| wavelet-LHH | grlm       | ShortRunLowGrayLevelEmphasis     | 0.016668796  |
| wavelet-LHH | grlm       | GrayLevelVariance                | 28.92742106  |
| wavelet-LHH | grlm       | LowGrayLevelRunEmphasis          | 0.016830761  |
| wavelet-LHH | grlm       | GrayLevelNonUniformityNormalized | 0.061353739  |
| wavelet-LHH | grlm       | RunVariance                      | 0.030574943  |
| wavelet-LHH | grlm       | GrayLevelNonUniformity           | 6.423742308  |
| wavelet-LHH | grlm       | LongRunEmphasis                  | 1.095371956  |
| wavelet-LHH | grlm       | ShortRunHighGrayLevelEmphasis    | 234.0678339  |
| wavelet-LHH | grlm       | RunLengthNonUniformity           | 98.32831931  |
| wavelet-LHH | grlm       | ShortRunEmphasis                 | 0.976157011  |
| wavelet-LHH | grlm       | LongRunHighGrayLevelEmphasis     | 256.0252998  |
| wavelet-LHH | grlm       | RunPercentage                    | 0.969373219  |
| wavelet-LHH | grlm       | LongRunLowGrayLevelEmphasis      | 0.017478621  |

|             |       |                                      |             |
|-------------|-------|--------------------------------------|-------------|
| wavelet-LHH | grlm  | RunEntropy                           | 4.343319938 |
| wavelet-LHH | grlm  | HighGrayLevelRunEmphasis             | 238.4593271 |
| wavelet-LHH | grlm  | RunLengthNonUniformityNormalized     | 0.938850114 |
| wavelet-LHH | glszm | GrayLevelVariance                    | 35.78626543 |
| wavelet-LHH | glszm | ZoneVariance                         | 1.388888889 |
| wavelet-LHH | glszm | GrayLevelNonUniformityNormalized     | 0.057484568 |
| wavelet-LHH | glszm | SizeZoneNonUniformityNormalized      | 0.61882716  |
| wavelet-LHH | glszm | SizeZoneNonUniformity                | 44.55555556 |
| wavelet-LHH | glszm | GrayLevelNonUniformity               | 4.138888889 |
| wavelet-LHH | glszm | LargeAreaEmphasis                    | 3.638888889 |
| wavelet-LHH | glszm | SmallAreaHighGrayLevelEmphasis       | 228.5662506 |
| wavelet-LHH | glszm | ZonePercentage                       | 0.666666667 |
| wavelet-LHH | glszm | LargeAreaLowGrayLevelEmphasis        | 0.03974623  |
| wavelet-LHH | glszm | LargeAreaHighGrayLevelEmphasis       | 734.9027778 |
| wavelet-LHH | glszm | HighGrayLevelZoneEmphasis            | 264.9722222 |
| wavelet-LHH | glszm | SmallAreaEmphasis                    | 0.811217089 |
| wavelet-LHH | glszm | LowGrayLevelZoneEmphasis             | 0.021294259 |
| wavelet-LHH | glszm | ZoneEntropy                          | 4.800075134 |
| wavelet-LHH | glszm | SmallAreaLowGrayLevelEmphasis        | 0.02004197  |
| wavelet-LHH | ngtdm | Coarseness                           | 0.040630983 |
| wavelet-LHH | ngtdm | Complexity                           | 985.6320576 |
| wavelet-LHH | ngtdm | Strength                             | 8.23836778  |
| wavelet-LHH | ngtdm | Contrast                             | 0.510294921 |
| wavelet-LHH | ngtdm | Busyness                             | 0.099463779 |
| wavelet-LLH | gldm  | GrayLevelVariance                    | 42.07098765 |
| wavelet-LLH | gldm  | HighGrayLevelEmphasis                | 388.4444444 |
| wavelet-LLH | gldm  | DependenceEntropy                    | 5.402912794 |
| wavelet-LLH | gldm  | DependenceNonUniformity              | 41.42592593 |
| wavelet-LLH | gldm  | GrayLevelNonUniformity               | 5.796296296 |
| wavelet-LLH | gldm  | SmallDependenceEmphasis              | 0.606610082 |
| wavelet-LLH | gldm  | SmallDependenceHighGrayLevelEmphasis | 234.1395319 |
| wavelet-LLH | gldm  | DependenceNonUniformityNormalized    | 0.383573388 |
| wavelet-LLH | gldm  | LargeDependenceEmphasis              | 3.481481481 |
| wavelet-LLH | gldm  | LargeDependenceLowGrayLevelEmphasis  | 0.026995855 |
| wavelet-LLH | gldm  | DependenceVariance                   | 0.641632373 |
| wavelet-LLH | gldm  | LargeDependenceHighGrayLevelEmphasis | 1399.185185 |
| wavelet-LLH | gldm  | SmallDependenceLowGrayLevelEmphasis  | 0.012296103 |
| wavelet-LLH | gldm  | LowGrayLevelEmphasis                 | 0.014440652 |
| wavelet-LLH | glcm  | JointAverage                         | 17.94128741 |
| wavelet-LLH | glcm  | SumAverage                           | 35.88257481 |
| wavelet-LLH | glcm  | JointEntropy                         | 6.668618272 |
| wavelet-LLH | glcm  | ClusterShade                         | 101.1578406 |
| wavelet-LLH | glcm  | MaximumProbability                   | 0.023202544 |
| wavelet-LLH | glcm  | ldmn                                 | 0.942126569 |
| wavelet-LLH | glcm  | JointEnergy                          | 0.010608246 |
| wavelet-LLH | glcm  | Contrast                             | 78.56236556 |
| wavelet-LLH | glcm  | DifferenceEntropy                    | 3.860803453 |
| wavelet-LLH | glcm  | InverseVariance                      | 0.130185363 |
| wavelet-LLH | glcm  | DifferenceVariance                   | 24.81965946 |
| wavelet-LLH | glcm  | ldn                                  | 0.838258534 |
| wavelet-LLH | glcm  | ldm                                  | 0.126153866 |
| wavelet-LLH | glcm  | Correlation                          | 0.138643661 |
| wavelet-LLH | glcm  | Autocorrelation                      | 328.4459916 |

|             |            |                                  |              |
|-------------|------------|----------------------------------|--------------|
| wavelet-LLH | glcm       | SumEntropy                       | 4.731519184  |
| wavelet-LLH | glcm       | SumSquares                       | 45.77692727  |
| wavelet-LLH | glcm       | ClusterProminence                | 34233.96009  |
| wavelet-LLH | glcm       | Imc2                             | 0.994118589  |
| wavelet-LLH | glcm       | Imc1                             | -0.50508095  |
| wavelet-LLH | glcm       | DifferenceAverage                | 7.167921049  |
| wavelet-LLH | glcm       | Id                               | 0.215022933  |
| wavelet-LLH | glcm       | ClusterTendency                  | 104.5453435  |
| wavelet-LLH | firstorder | InterquartileRange               | 204.3290552  |
| wavelet-LLH | firstorder | Skewness                         | -0.126156915 |
| wavelet-LLH | firstorder | Uniformity                       | 0.05366941   |
| wavelet-LLH | firstorder | Median                           | -13.13080217 |
| wavelet-LLH | firstorder | Energy                           | 2891439.205  |
| wavelet-LLH | firstorder | RobustMeanAbsoluteDeviation      | 85.1678498   |
| wavelet-LLH | firstorder | MeanAbsoluteDeviation            | 126.0925326  |
| wavelet-LLH | firstorder | TotalEnergy                      | 78068858.52  |
| wavelet-LLH | firstorder | Maximum                          | 371.2662019  |
| wavelet-LLH | firstorder | RootMeanSquared                  | 163.6233028  |
| wavelet-LLH | firstorder | 90Percentile                     | 189.6068086  |
| wavelet-LLH | firstorder | Minimum                          | -472.4845521 |
| wavelet-LLH | firstorder | Entropy                          | 4.47585975   |
| wavelet-LLH | firstorder | Range                            | 843.750754   |
| wavelet-LLH | firstorder | Variance                         | 26282.21188  |
| wavelet-LLH | firstorder | 10Percentile                     | -230.9346357 |
| wavelet-LLH | firstorder | Kurtosis                         | 2.977123507  |
| wavelet-LLH | firstorder | Mean                             | -22.14437503 |
| wavelet-LLH | glrlm      | ShortRunLowGrayLevelEmphasis     | 0.014588803  |
| wavelet-LLH | glrlm      | GrayLevelVariance                | 42.12300249  |
| wavelet-LLH | glrlm      | LowGrayLevelRunEmphasis          | 0.014693909  |
| wavelet-LLH | glrlm      | GrayLevelNonUniformityNormalized | 0.05328338   |
| wavelet-LLH | glrlm      | RunVariance                      | 0.029302389  |
| wavelet-LLH | glrlm      | GrayLevelNonUniformity           | 5.604058741  |
| wavelet-LLH | glrlm      | LongRunEmphasis                  | 1.085320522  |
| wavelet-LLH | glrlm      | ShortRunHighGrayLevelEmphasis    | 380.1669974  |
| wavelet-LLH | glrlm      | RunLengthNonUniformity           | 99.96308754  |
| wavelet-LLH | glrlm      | ShortRunEmphasis                 | 0.980337936  |
| wavelet-LLH | glrlm      | LongRunHighGrayLevelEmphasis     | 422.5520459  |
| wavelet-LLH | glrlm      | RunPercentage                    | 0.973646724  |
| wavelet-LLH | glrlm      | LongRunLowGrayLevelEmphasis      | 0.015129839  |
| wavelet-LLH | glrlm      | RunEntropy                       | 4.56609105   |
| wavelet-LLH | glrlm      | HighGrayLevelRunEmphasis         | 388.0485351  |
| wavelet-LLH | glrlm      | RunLengthNonUniformityNormalized | 0.950003297  |
| wavelet-LLH | glszm      | GrayLevelVariance                | 43.07306667  |
| wavelet-LLH | glszm      | ZoneVariance                     | 0.619733333  |
| wavelet-LLH | glszm      | GrayLevelNonUniformityNormalized | 0.048888889  |
| wavelet-LLH | glszm      | SizeZoneNonUniformityNormalized  | 0.570844444  |
| wavelet-LLH | glszm      | SizeZoneNonUniformity            | 42.81333333  |
| wavelet-LLH | glszm      | GrayLevelNonUniformity           | 3.666666667  |
| wavelet-LLH | glszm      | LargeAreaEmphasis                | 2.693333333  |
| wavelet-LLH | glszm      | SmallAreaHighGrayLevelEmphasis   | 301.2063889  |
| wavelet-LLH | glszm      | ZonePercentage                   | 0.694444444  |
| wavelet-LLH | glszm      | LargeAreaLowGrayLevelEmphasis    | 0.02773803   |
| wavelet-LLH | glszm      | LargeAreaHighGrayLevelEmphasis   | 1050.346667  |

|             |            |                                      |              |
|-------------|------------|--------------------------------------|--------------|
| wavelet-LLH | glszm      | HighGrayLevelZoneEmphasis            | 387.5466667  |
| wavelet-LLH | glszm      | SmallAreaEmphasis                    | 0.77712963   |
| wavelet-LLH | glszm      | LowGrayLevelZoneEmphasis             | 0.018351244  |
| wavelet-LLH | glszm      | ZoneEntropy                          | 5.112170611  |
| wavelet-LLH | glszm      | SmallAreaLowGrayLevelEmphasis        | 0.017128035  |
| wavelet-LLH | ngtdm      | Coarseness                           | 0.046072034  |
| wavelet-LLH | ngtdm      | Complexity                           | 1469.325987  |
| wavelet-LLH | ngtdm      | Strength                             | 12.90915593  |
| wavelet-LLH | ngtdm      | Contrast                             | 0.533623103  |
| wavelet-LLH | ngtdm      | Busyness                             | 0.049350637  |
| wavelet-LLL | gldm       | GrayLevelVariance                    | 169.9811385  |
| wavelet-LLL | gldm       | HighGrayLevelEmphasis                | 1327.240741  |
| wavelet-LLL | gldm       | DependenceEntropy                    | 5.807992479  |
| wavelet-LLL | gldm       | DependenceNonUniformity              | 46.11111111  |
| wavelet-LLL | gldm       | GrayLevelNonUniformity               | 3.148148148  |
| wavelet-LLL | gldm       | SmallDependenceEmphasis              | 0.655156893  |
| wavelet-LLL | gldm       | SmallDependenceHighGrayLevelEmphasis | 801.1242284  |
| wavelet-LLL | gldm       | DependenceNonUniformityNormalized    | 0.426954733  |
| wavelet-LLL | gldm       | LargeDependenceEmphasis              | 3.018518519  |
| wavelet-LLL | gldm       | LargeDependenceLowGrayLevelEmphasis  | 0.012730396  |
| wavelet-LLL | gldm       | DependenceVariance                   | 0.540809328  |
| wavelet-LLL | gldm       | LargeDependenceHighGrayLevelEmphasis | 4234.962963  |
| wavelet-LLL | gldm       | SmallDependenceLowGrayLevelEmphasis  | 0.01037053   |
| wavelet-LLL | gldm       | LowGrayLevelEmphasis                 | 0.010717569  |
| wavelet-LLL | glcm       | JointAverage                         | 37.49006598  |
| wavelet-LLL | glcm       | SumAverage                           | 74.98013197  |
| wavelet-LLL | glcm       | JointEntropy                         | 6.828881544  |
| wavelet-LLL | glcm       | ClusterShade                         | -160.668952  |
| wavelet-LLL | glcm       | MaximumProbability                   | 0.019081543  |
| wavelet-LLL | glcm       | Idmn                                 | 0.956909522  |
| wavelet-LLL | glcm       | JointEnergy                          | 0.009267811  |
| wavelet-LLL | glcm       | Contrast                             | 205.6322793  |
| wavelet-LLL | glcm       | DifferenceEntropy                    | 4.390472871  |
| wavelet-LLL | glcm       | InverseVariance                      | 0.081311766  |
| wavelet-LLL | glcm       | DifferenceVariance                   | 64.484652    |
| wavelet-LLL | glcm       | Idn                                  | 0.858410545  |
| wavelet-LLL | glcm       | Idm                                  | 0.088062687  |
| wavelet-LLL | glcm       | Correlation                          | 0.30456815   |
| wavelet-LLL | glcm       | Autocorrelation                      | 1454.288076  |
| wavelet-LLL | glcm       | SumEntropy                           | 5.235827574  |
| wavelet-LLL | glcm       | SumSquares                           | 149.8626648  |
| wavelet-LLL | glcm       | ClusterProminence                    | 405822.6466  |
| wavelet-LLL | glcm       | Imc2                                 | 0.99948648   |
| wavelet-LLL | glcm       | Imc1                                 | -0.6737606   |
| wavelet-LLL | glcm       | DifferenceAverage                    | 11.58372415  |
| wavelet-LLL | glcm       | Id                                   | 0.16211002   |
| wavelet-LLL | glcm       | ClusterTendency                      | 393.8183799  |
| wavelet-LLL | firstorder | InterquartileRange                   | 488.068099   |
| wavelet-LLL | firstorder | Skewness                             | 0.059614167  |
| wavelet-LLL | firstorder | Uniformity                           | 0.02914952   |
| wavelet-LLL | firstorder | Median                               | -1456.071233 |
| wavelet-LLL | firstorder | Energy                               | 242365769.3  |
| wavelet-LLL | firstorder | RobustMeanAbsoluteDeviation          | 194.0672947  |

|             |            |                                  |              |
|-------------|------------|----------------------------------|--------------|
| wavelet-LLL | firstorder | MeanAbsoluteDeviation            | 265.595534   |
| wavelet-LLL | firstorder | TotalEnergy                      | 6543875771   |
| wavelet-LLL | firstorder | Maximum                          | -675.0156335 |
| wavelet-LLL | firstorder | RootMeanSquared                  | 1498.041219  |
| wavelet-LLL | firstorder | 90Percentile                     | -1040.046905 |
| wavelet-LLL | firstorder | Minimum                          | -2289.098079 |
| wavelet-LLL | firstorder | Entropy                          | 5.324836836  |
| wavelet-LLL | firstorder | Range                            | 1614.082445  |
| wavelet-LLL | firstorder | Variance                         | 106697.6046  |
| wavelet-LLL | firstorder | 10Percentile                     | -1901.219594 |
| wavelet-LLL | firstorder | Kurtosis                         | 2.501954256  |
| wavelet-LLL | firstorder | Mean                             | -1461.995174 |
| wavelet-LLL | grlm       | ShortRunLowGrayLevelEmphasis     | 0.010923534  |
| wavelet-LLL | grlm       | GrayLevelVariance                | 171.201227   |
| wavelet-LLL | grlm       | LowGrayLevelRunEmphasis          | 0.010940867  |
| wavelet-LLL | grlm       | GrayLevelNonUniformityNormalized | 0.028813872  |
| wavelet-LLL | grlm       | RunVariance                      | 0.022029297  |
| wavelet-LLL | grlm       | GrayLevelNonUniformity           | 3.043578539  |
| wavelet-LLL | grlm       | LongRunEmphasis                  | 1.068973098  |
| wavelet-LLL | grlm       | ShortRunHighGrayLevelEmphasis    | 1298.510539  |
| wavelet-LLL | grlm       | RunLengthNonUniformity           | 101.0429862  |
| wavelet-LLL | grlm       | ShortRunEmphasis                 | 0.982756725  |
| wavelet-LLL | grlm       | LongRunHighGrayLevelEmphasis     | 1425.463761  |
| wavelet-LLL | grlm       | RunPercentage                    | 0.977920228  |
| wavelet-LLL | grlm       | LongRunLowGrayLevelEmphasis      | 0.011010197  |
| wavelet-LLL | grlm       | RunEntropy                       | 5.388833283  |
| wavelet-LLL | grlm       | HighGrayLevelRunEmphasis         | 1323.901184  |
| wavelet-LLL | grlm       | RunLengthNonUniformityNormalized | 0.955941407  |
| wavelet-LLL | glszm      | GrayLevelVariance                | 184.7623438  |
| wavelet-LLL | glszm      | ZoneVariance                     | 0.6025       |
| wavelet-LLL | glszm      | GrayLevelNonUniformityNormalized | 0.0259375    |
| wavelet-LLL | glszm      | SizeZoneNonUniformityNormalized  | 0.611875     |
| wavelet-LLL | glszm      | SizeZoneNonUniformity            | 48.95        |
| wavelet-LLL | glszm      | GrayLevelNonUniformity           | 2.075        |
| wavelet-LLL | glszm      | LargeAreaEmphasis                | 2.425        |
| wavelet-LLL | glszm      | SmallAreaHighGrayLevelEmphasis   | 969.7128472  |
| wavelet-LLL | glszm      | ZonePercentage                   | 0.740740741  |
| wavelet-LLL | glszm      | LargeAreaLowGrayLevelEmphasis    | 0.015573752  |
| wavelet-LLL | glszm      | LargeAreaHighGrayLevelEmphasis   | 3268.225     |
| wavelet-LLL | glszm      | HighGrayLevelZoneEmphasis        | 1272.9375    |
| wavelet-LLL | glszm      | SmallAreaEmphasis                | 0.810416667  |
| wavelet-LLL | glszm      | LowGrayLevelZoneEmphasis         | 0.014108873  |
| wavelet-LLL | glszm      | ZoneEntropy                      | 5.703055907  |
| wavelet-LLL | glszm      | SmallAreaLowGrayLevelEmphasis    | 0.013920689  |
| wavelet-LLL | ngtdm      | Coarseness                       | 0.051226312  |
| wavelet-LLL | ngtdm      | Complexity                       | 6774.394676  |
| wavelet-LLL | ngtdm      | Strength                         | 50.33696091  |
| wavelet-LLL | ngtdm      | Contrast                         | 1.078655167  |
| wavelet-LLL | ngtdm      | Busyness                         | 0.014994961  |
| wavelet-HHL | gldm       | GrayLevelVariance                | 33.47839506  |
| wavelet-HHL | gldm       | HighGrayLevelEmphasis            | 309.4074074  |
| wavelet-HHL | gldm       | DependenceEntropy                | 5.517399164  |
| wavelet-HHL | gldm       | DependenceNonUniformity          | 39.16666667  |

|             |            |                                      |              |
|-------------|------------|--------------------------------------|--------------|
| wavelet-HHL | gldm       | GrayLevelNonUniformity               | 6.444444444  |
| wavelet-HHL | gldm       | SmallDependenceEmphasis              | 0.588121063  |
| wavelet-HHL | gldm       | SmallDependenceHighGrayLevelEmphasis | 189.4477066  |
| wavelet-HHL | gldm       | DependenceNonUniformityNormalized    | 0.362654321  |
| wavelet-HHL | gldm       | LargeDependenceEmphasis              | 4.833333333  |
| wavelet-HHL | gldm       | LargeDependenceLowGrayLevelEmphasis  | 0.033584995  |
| wavelet-HHL | gldm       | DependenceVariance                   | 1.403978052  |
| wavelet-HHL | gldm       | LargeDependenceHighGrayLevelEmphasis | 1223.240741  |
| wavelet-HHL | gldm       | SmallDependenceLowGrayLevelEmphasis  | 0.012798616  |
| wavelet-HHL | gldm       | LowGrayLevelEmphasis                 | 0.014655606  |
| wavelet-HHL | glcm       | JointAverage                         | 16.66330404  |
| wavelet-HHL | glcm       | SumAverage                           | 33.32660807  |
| wavelet-HHL | glcm       | JointEntropy                         | 6.563307272  |
| wavelet-HHL | glcm       | ClusterShade                         | 155.7084813  |
| wavelet-HHL | glcm       | MaximumProbability                   | 0.031462059  |
| wavelet-HHL | glcm       | Idmn                                 | 0.951071176  |
| wavelet-HHL | glcm       | JointEnergy                          | 0.011880861  |
| wavelet-HHL | glcm       | Contrast                             | 71.3208551   |
| wavelet-HHL | glcm       | DifferenceEntropy                    | 3.81053218   |
| wavelet-HHL | glcm       | InverseVariance                      | 0.152828364  |
| wavelet-HHL | glcm       | DifferenceVariance                   | 27.87735414  |
| wavelet-HHL | glcm       | Idn                                  | 0.856097374  |
| wavelet-HHL | glcm       | Idm                                  | 0.148056104  |
| wavelet-HHL | glcm       | Correlation                          | -0.029506672 |
| wavelet-HHL | glcm       | Autocorrelation                      | 276.7106884  |
| wavelet-HHL | glcm       | SumEntropy                           | 4.455783262  |
| wavelet-HHL | glcm       | SumSquares                           | 34.67219061  |
| wavelet-HHL | glcm       | ClusterProminence                    | 16981.46111  |
| wavelet-HHL | glcm       | Imc2                                 | 0.990980492  |
| wavelet-HHL | glcm       | Imc1                                 | -0.47553996  |
| wavelet-HHL | glcm       | DifferenceAverage                    | 6.497656199  |
| wavelet-HHL | glcm       | Id                                   | 0.239120837  |
| wavelet-HHL | glcm       | ClusterTendency                      | 67.36790735  |
| wavelet-HHL | firstorder | InterquartileRange                   | 155.455983   |
| wavelet-HHL | firstorder | Skewness                             | 0.426768872  |
| wavelet-HHL | firstorder | Uniformity                           | 0.059670782  |
| wavelet-HHL | firstorder | Median                               | -11.69049201 |
| wavelet-HHL | firstorder | Energy                               | 2249923.252  |
| wavelet-HHL | firstorder | RobustMeanAbsoluteDeviation          | 71.96989374  |
| wavelet-HHL | firstorder | MeanAbsoluteDeviation                | 110.3764512  |
| wavelet-HHL | firstorder | TotalEnergy                          | 60747927.81  |
| wavelet-HHL | firstorder | Maximum                              | 459.1958461  |
| wavelet-HHL | firstorder | RootMeanSquared                      | 144.3351056  |
| wavelet-HHL | firstorder | 90Percentile                         | 201.0308059  |
| wavelet-HHL | firstorder | Minimum                              | -378.4188353 |
| wavelet-HHL | firstorder | Entropy                              | 4.369139496  |
| wavelet-HHL | firstorder | Range                                | 837.6146814  |
| wavelet-HHL | firstorder | Variance                             | 20824.04402  |
| wavelet-HHL | firstorder | 10Percentile                         | -168.0643731 |
| wavelet-HHL | firstorder | Kurtosis                             | 3.540177496  |
| wavelet-HHL | firstorder | Mean                                 | 2.928939285  |
| wavelet-HHL | glrlm      | ShortRunLowGrayLevelEmphasis         | 0.014878737  |
| wavelet-HHL | glrlm      | GrayLevelVariance                    | 34.08105491  |

|             |       |                                      |             |
|-------------|-------|--------------------------------------|-------------|
| wavelet-HHL | glrlm | LowGrayLevelRunEmphasis              | 0.014997252 |
| wavelet-HHL | glrlm | GrayLevelNonUniformityNormalized     | 0.058218823 |
| wavelet-HHL | glrlm | RunVariance                          | 0.035601602 |
| wavelet-HHL | glrlm | GrayLevelNonUniformity               | 6.0839398   |
| wavelet-HHL | glrlm | LongRunEmphasis                      | 1.106539899 |
| wavelet-HHL | glrlm | ShortRunHighGrayLevelEmphasis        | 304.6161349 |
| wavelet-HHL | glrlm | RunLengthNonUniformity               | 98.04096806 |
| wavelet-HHL | glrlm | ShortRunEmphasis                     | 0.97501666  |
| wavelet-HHL | glrlm | LongRunHighGrayLevelEmphasis         | 338.5616394 |
| wavelet-HHL | glrlm | RunPercentage                        | 0.967236467 |
| wavelet-HHL | glrlm | LongRunLowGrayLevelEmphasis          | 0.015505562 |
| wavelet-HHL | glrlm | RunEntropy                           | 4.50199379  |
| wavelet-HHL | glrlm | HighGrayLevelRunEmphasis             | 311.1451169 |
| wavelet-HHL | glrlm | RunLengthNonUniformityNormalized     | 0.937413588 |
| wavelet-HHL | glszm | GrayLevelVariance                    | 41.41666667 |
| wavelet-HHL | glszm | ZoneVariance                         | 1.861111111 |
| wavelet-HHL | glszm | GrayLevelNonUniformityNormalized     | 0.049768519 |
| wavelet-HHL | glszm | SizeZoneNonUniformityNormalized      | 0.586033951 |
| wavelet-HHL | glszm | SizeZoneNonUniformity                | 42.19444444 |
| wavelet-HHL | glszm | GrayLevelNonUniformity               | 3.583333333 |
| wavelet-HHL | glszm | LargeAreaEmphasis                    | 4.111111111 |
| wavelet-HHL | glszm | SmallAreaHighGrayLevelEmphasis       | 256.0514298 |
| wavelet-HHL | glszm | ZonePercentage                       | 0.666666667 |
| wavelet-HHL | glszm | LargeAreaLowGrayLevelEmphasis        | 0.034971537 |
| wavelet-HHL | glszm | LargeAreaHighGrayLevelEmphasis       | 1063.722222 |
| wavelet-HHL | glszm | HighGrayLevelZoneEmphasis            | 324.7777778 |
| wavelet-HHL | glszm | SmallAreaEmphasis                    | 0.790715545 |
| wavelet-HHL | glszm | LowGrayLevelZoneEmphasis             | 0.019700674 |
| wavelet-HHL | glszm | ZoneEntropy                          | 5.206257252 |
| wavelet-HHL | glszm | SmallAreaLowGrayLevelEmphasis        | 0.018800856 |
| wavelet-HHL | ngtdm | Coarseness                           | 0.047546553 |
| wavelet-HHL | ngtdm | Complexity                           | 1376.286357 |
| wavelet-HHL | ngtdm | Strength                             | 12.01990866 |
| wavelet-HHL | ngtdm | Contrast                             | 0.412972601 |
| wavelet-HHL | ngtdm | Busyness                             | 0.053350668 |
| wavelet-HLH | gldm  | GrayLevelVariance                    | 42.69718793 |
| wavelet-HLH | gldm  | HighGrayLevelEmphasis                | 258.3518519 |
| wavelet-HLH | gldm  | DependenceEntropy                    | 5.465458049 |
| wavelet-HLH | gldm  | DependenceNonUniformity              | 37.77777778 |
| wavelet-HLH | gldm  | GrayLevelNonUniformity               | 5.888888889 |
| wavelet-HLH | gldm  | SmallDependenceEmphasis              | 0.573302469 |
| wavelet-HLH | gldm  | SmallDependenceHighGrayLevelEmphasis | 160.2632459 |
| wavelet-HLH | gldm  | DependenceNonUniformityNormalized    | 0.349794239 |
| wavelet-HLH | gldm  | LargeDependenceEmphasis              | 4.111111111 |
| wavelet-HLH | gldm  | LargeDependenceLowGrayLevelEmphasis  | 0.054231739 |
| wavelet-HLH | gldm  | DependenceVariance                   | 0.817558299 |
| wavelet-HLH | gldm  | LargeDependenceHighGrayLevelEmphasis | 940.0555556 |
| wavelet-HLH | gldm  | SmallDependenceLowGrayLevelEmphasis  | 0.015588881 |
| wavelet-HLH | gldm  | LowGrayLevelEmphasis                 | 0.020492068 |
| wavelet-HLH | glcm  | JointAverage                         | 14.62060845 |
| wavelet-HLH | glcm  | SumAverage                           | 29.2412169  |
| wavelet-HLH | glcm  | JointEntropy                         | 6.633031113 |
| wavelet-HLH | glcm  | ClusterShade                         | 233.7000129 |



|             |            |                                  |              |
|-------------|------------|----------------------------------|--------------|
| wavelet-HLH | glcm       | MaximumProbability               | 0.025488595  |
| wavelet-HLH | glcm       | Idmn                             | 0.949272983  |
| wavelet-HLH | glcm       | JointEnergy                      | 0.011013977  |
| wavelet-HLH | glcm       | Contrast                         | 86.34089909  |
| wavelet-HLH | glcm       | DifferenceEntropy                | 3.975954229  |
| wavelet-HLH | glcm       | InverseVariance                  | 0.126054901  |
| wavelet-HLH | glcm       | DifferenceVariance               | 31.15414303  |
| wavelet-HLH | glcm       | Idn                              | 0.850877968  |
| wavelet-HLH | glcm       | Idm                              | 0.13111574   |
| wavelet-HLH | glcm       | Correlation                      | -0.033301362 |
| wavelet-HLH | glcm       | Autocorrelation                  | 212.4076908  |
| wavelet-HLH | glcm       | SumEntropy                       | 4.624508802  |
| wavelet-HLH | glcm       | SumSquares                       | 41.7662124   |
| wavelet-HLH | glcm       | ClusterProminence                | 23533.43856  |
| wavelet-HLH | glcm       | Imc2                             | 0.992569373  |
| wavelet-HLH | glcm       | Imc1                             | -0.490806836 |
| wavelet-HLH | glcm       | DifferenceAverage                | 7.308635975  |
| wavelet-HLH | glcm       | Id                               | 0.220107452  |
| wavelet-HLH | glcm       | ClusterTendency                  | 80.72395051  |
| wavelet-HLH | firstorder | InterquartileRange               | 218.2607168  |
| wavelet-HLH | firstorder | Skewness                         | 0.517525833  |
| wavelet-HLH | firstorder | Uniformity                       | 0.054526749  |
| wavelet-HLH | firstorder | Median                           | 11.11416607  |
| wavelet-HLH | firstorder | Energy                           | 2850671.672  |
| wavelet-HLH | firstorder | RobustMeanAbsoluteDeviation      | 83.72733491  |
| wavelet-HLH | firstorder | MeanAbsoluteDeviation            | 125.2139391  |
| wavelet-HLH | firstorder | TotalEnergy                      | 76968135.14  |
| wavelet-HLH | firstorder | Maximum                          | 589.8484952  |
| wavelet-HLH | firstorder | RootMeanSquared                  | 162.4657135  |
| wavelet-HLH | firstorder | 90Percentile                     | 176.4377069  |
| wavelet-HLH | firstorder | Minimum                          | -332.7244381 |
| wavelet-HLH | firstorder | Entropy                          | 4.42227324   |
| wavelet-HLH | firstorder | Range                            | 922.5729334  |
| wavelet-HLH | firstorder | Variance                         | 26381.32818  |
| wavelet-HLH | firstorder | 10Percentile                     | -202.2965333 |
| wavelet-HLH | firstorder | Kurtosis                         | 3.882104792  |
| wavelet-HLH | firstorder | Mean                             | 3.71212824   |
| wavelet-HLH | glrlm      | ShortRunLowGrayLevelEmphasis     | 0.020525897  |
| wavelet-HLH | glrlm      | GrayLevelVariance                | 43.10714145  |
| wavelet-HLH | glrlm      | LowGrayLevelRunEmphasis          | 0.020800085  |
| wavelet-HLH | glrlm      | GrayLevelNonUniformityNormalized | 0.054368639  |
| wavelet-HLH | glrlm      | RunVariance                      | 0.031252812  |
| wavelet-HLH | glrlm      | GrayLevelNonUniformity           | 5.688066385  |
| wavelet-HLH | glrlm      | LongRunEmphasis                  | 1.098613676  |
| wavelet-HLH | glrlm      | ShortRunHighGrayLevelEmphasis    | 254.034104   |
| wavelet-HLH | glrlm      | RunLengthNonUniformity           | 98.17710777  |
| wavelet-HLH | glrlm      | ShortRunEmphasis                 | 0.975346581  |
| wavelet-HLH | glrlm      | LongRunHighGrayLevelEmphasis     | 281.4842964  |
| wavelet-HLH | glrlm      | RunPercentage                    | 0.968660969  |
| wavelet-HLH | glrlm      | LongRunLowGrayLevelEmphasis      | 0.021896834  |
| wavelet-HLH | glrlm      | RunEntropy                       | 4.53366278   |
| wavelet-HLH | glrlm      | HighGrayLevelRunEmphasis         | 259.5241425  |
| wavelet-HLH | glrlm      | RunLengthNonUniformityNormalized | 0.937494375  |

|             |       |                                  |             |
|-------------|-------|----------------------------------|-------------|
| wavelet-HLH | glszm | GrayLevelVariance                | 48.9581535  |
| wavelet-HLH | glszm | ZoneVariance                     | 0.742728467 |
| wavelet-HLH | glszm | GrayLevelNonUniformityNormalized | 0.050478514 |
| wavelet-HLH | glszm | SizeZoneNonUniformityNormalized  | 0.539876149 |
| wavelet-HLH | glszm | SizeZoneNonUniformity            | 39.4109589  |
| wavelet-HLH | glszm | GrayLevelNonUniformity           | 3.684931507 |
| wavelet-HLH | glszm | LargeAreaEmphasis                | 2.931506849 |
| wavelet-HLH | glszm | SmallAreaHighGrayLevelEmphasis   | 217.3845129 |
| wavelet-HLH | glszm | ZonePercentage                   | 0.675925926 |
| wavelet-HLH | glszm | LargeAreaLowGrayLevelEmphasis    | 0.045250931 |
| wavelet-HLH | glszm | LargeAreaHighGrayLevelEmphasis   | 708.4109589 |
| wavelet-HLH | glszm | HighGrayLevelZoneEmphasis        | 273.1369863 |
| wavelet-HLH | glszm | SmallAreaEmphasis                | 0.762557078 |
| wavelet-HLH | glszm | LowGrayLevelZoneEmphasis         | 0.024968515 |
| wavelet-HLH | glszm | ZoneEntropy                      | 5.282443313 |
| wavelet-HLH | glszm | SmallAreaLowGrayLevelEmphasis    | 0.022083191 |
| wavelet-HLH | ngtdm | Coarseness                       | 0.039875911 |
| wavelet-HLH | ngtdm | Complexity                       | 1773.517043 |
| wavelet-HLH | ngtdm | Strength                         | 12.13134553 |
| wavelet-HLH | ngtdm | Contrast                         | 0.614580166 |
| wavelet-HLH | ngtdm | Busyness                         | 0.068783068 |

| Image type | Feature Class | Feature Name                         |                                                                                                                                                                                                                                                                                                                                                                                                                   |
|------------|---------------|--------------------------------------|-------------------------------------------------------------------------------------------------------------------------------------------------------------------------------------------------------------------------------------------------------------------------------------------------------------------------------------------------------------------------------------------------------------------|
| general    | info          | BoundingBox                          | 11: RTSTRUCT: C99-DNU_segment_ITVp RLL<br>(0, 0, 1, 6, 6, 14)                                                                                                                                                                                                                                                                                                                                                     |
| general    | info          | EnabledImageTypes                    | {u'Original': {}, u'Wavelet': {}}                                                                                                                                                                                                                                                                                                                                                                                 |
|            |               |                                      | {'distances': [1], 'additionalInfo': True, 'force2D': False, 'interpolator': 'sitkBSpline', 'resampledPixelSpacing': [3.0], 'label': 1, 'normalizeScale': 1, 'normalize': False, 'force2Ddimension': 0, 'removeOutliers': None, 'minimumROISize': None, u'binWidth': 25.0, 'minimumROIDimensions': 1, u'correctMask': True, 'preCrop': False, u'symmetricalGLCM': True, 'resegmentRange': None, 'padDistance': 5} |
| general    | info          | GeneralSettings                      |                                                                                                                                                                                                                                                                                                                                                                                                                   |
| general    | info          | ImageHash                            | df67948ff51d1c9dfdf52362da6b02592924fb0d                                                                                                                                                                                                                                                                                                                                                                          |
| general    | info          | ImageSpacing                         | (0.9765625000000002, 0.9765625000000002, 2.0)                                                                                                                                                                                                                                                                                                                                                                     |
| general    | info          | MaskHash                             | cf35b0cd870305e050716ba8f6768dc01624dff4                                                                                                                                                                                                                                                                                                                                                                          |
| general    | info          | NumpyVersion                         | 1.13.1                                                                                                                                                                                                                                                                                                                                                                                                            |
| general    | info          | PyWaveletVersion                     | 0.5.2                                                                                                                                                                                                                                                                                                                                                                                                             |
| general    | info          | SimpleITKVersion                     | 1.1.0                                                                                                                                                                                                                                                                                                                                                                                                             |
| general    | info          | Version                              | 1.3.0.post102+g1b0eb74                                                                                                                                                                                                                                                                                                                                                                                            |
| general    | info          | VolumeNum                            | 1                                                                                                                                                                                                                                                                                                                                                                                                                 |
| general    | info          | VoxelNum                             | 219                                                                                                                                                                                                                                                                                                                                                                                                               |
| original   | shape         | Maximum3DDiameter                    | 40.13726448                                                                                                                                                                                                                                                                                                                                                                                                       |
| original   | shape         | Maximum2DDiameterSlice               | 16.15549442                                                                                                                                                                                                                                                                                                                                                                                                       |
| original   | shape         | Sphericity                           | 0.756013893                                                                                                                                                                                                                                                                                                                                                                                                       |
| original   | shape         | MinorAxis                            | 15.31584871                                                                                                                                                                                                                                                                                                                                                                                                       |
| original   | shape         | Elongation                           | 0.352393167                                                                                                                                                                                                                                                                                                                                                                                                       |
| original   | shape         | SurfaceVolumeRatio                   | 0.35374072                                                                                                                                                                                                                                                                                                                                                                                                        |
| original   | shape         | Volume                               | 5913                                                                                                                                                                                                                                                                                                                                                                                                              |
| original   | shape         | MajorAxis                            | 43.46238839                                                                                                                                                                                                                                                                                                                                                                                                       |
| original   | shape         | SurfaceArea                          | 2091.668876                                                                                                                                                                                                                                                                                                                                                                                                       |
| original   | shape         | Flatness                             | 0.300921319                                                                                                                                                                                                                                                                                                                                                                                                       |
| original   | shape         | LeastAxis                            | 13.07875925                                                                                                                                                                                                                                                                                                                                                                                                       |
| original   | shape         | Maximum2DDiameterColumn              | 40.02499219                                                                                                                                                                                                                                                                                                                                                                                                       |
| original   | shape         | Maximum2DDiameterRow                 | 40.02499219                                                                                                                                                                                                                                                                                                                                                                                                       |
| original   | gldm          | GrayLevelVariance                    | 11.69541919                                                                                                                                                                                                                                                                                                                                                                                                       |
| original   | gldm          | HighGrayLevelEmphasis                | 197.3515982                                                                                                                                                                                                                                                                                                                                                                                                       |
| original   | gldm          | DependenceEntropy                    | 5.672337935                                                                                                                                                                                                                                                                                                                                                                                                       |
| original   | gldm          | DependenceNonUniformity              | 33.32876712                                                                                                                                                                                                                                                                                                                                                                                                       |
| original   | gldm          | GrayLevelNonUniformity               | 21.87671233                                                                                                                                                                                                                                                                                                                                                                                                       |
| original   | gldm          | SmallDependenceEmphasis              | 0.278709802                                                                                                                                                                                                                                                                                                                                                                                                       |
| original   | gldm          | SmallDependenceHighGrayLevelEmphasis | 40.3399949                                                                                                                                                                                                                                                                                                                                                                                                        |
| original   | gldm          | DependenceNonUniformityNormalized    | 0.152186151                                                                                                                                                                                                                                                                                                                                                                                                       |
| original   | gldm          | LargeDependenceEmphasis              | 16.8173516                                                                                                                                                                                                                                                                                                                                                                                                        |
| original   | gldm          | LargeDependenceLowGrayLevelEmphasis  | 0.082358849                                                                                                                                                                                                                                                                                                                                                                                                       |
| original   | gldm          | DependenceVariance                   | 4.615249891                                                                                                                                                                                                                                                                                                                                                                                                       |
| original   | gldm          | LargeDependenceHighGrayLevelEmphasis | 4033.205479                                                                                                                                                                                                                                                                                                                                                                                                       |
| original   | gldm          | SmallDependenceLowGrayLevelEmphasis  | 0.007782615                                                                                                                                                                                                                                                                                                                                                                                                       |
| original   | gldm          | LowGrayLevelEmphasis                 | 0.011796912                                                                                                                                                                                                                                                                                                                                                                                                       |
| original   | glcm          | JointAverage                         | 14.3234171                                                                                                                                                                                                                                                                                                                                                                                                        |
| original   | glcm          | SumAverage                           | 28.64683419                                                                                                                                                                                                                                                                                                                                                                                                       |

|          |            |                                  |              |
|----------|------------|----------------------------------|--------------|
| original | glcm       | JointEntropy                     | 6.285063171  |
| original | glcm       | ClusterShade                     | -99.45041692 |
| original | glcm       | MaximumProbability               | 0.049963376  |
| original | glcm       | Idmn                             | 0.963824455  |
| original | glcm       | JointEnergy                      | 0.017700775  |
| original | glcm       | Contrast                         | 15.26715841  |
| original | glcm       | DifferenceEntropy                | 3.008104917  |
| original | glcm       | InverseVariance                  | 0.319113156  |
| original | glcm       | DifferenceVariance               | 7.069978605  |
| original | glcm       | Idn                              | 0.881726417  |
| original | glcm       | Idm                              | 0.3297096    |
| original | glcm       | Correlation                      | 0.234460061  |
| original | glcm       | Autocorrelation                  | 207.5558271  |
| original | glcm       | SumEntropy                       | 4.087487592  |
| original | glcm       | SumSquares                       | 10.01452469  |
| original | glcm       | ClusterProminence                | 1977.582853  |
| original | glcm       | Imc2                             | 0.829677395  |
| original | glcm       | Imc1                             | -0.171698269 |
| original | glcm       | DifferenceAverage                | 2.834598218  |
| original | glcm       | Id                               | 0.407673447  |
| original | glcm       | ClusterTendency                  | 24.79094036  |
| original | firstorder | InterquartileRange               | 102          |
| original | firstorder | Skewness                         | -0.897335235 |
| original | firstorder | Uniformity                       | 0.099893664  |
| original | firstorder | Median                           | -47          |
| original | firstorder | Energy                           | 2754914      |
| original | firstorder | RobustMeanAbsoluteDeviation      | 48.13068182  |
| original | firstorder | MeanAbsoluteDeviation            | 68.31654886  |
| original | firstorder | TotalEnergy                      | 74382678     |
| original | firstorder | Maximum                          | 72           |
| original | firstorder | RootMeanSquared                  | 112.1584414  |
| original | firstorder | 90Percentile                     | 17           |
| original | firstorder | Minimum                          | -376         |
| original | firstorder | Entropy                          | 3.581499903  |
| original | firstorder | Range                            | 448          |
| original | firstorder | Variance                         | 7277.814266  |
| original | firstorder | 10Percentile                     | -202.4       |
| original | firstorder | Kurtosis                         | 3.294602862  |
| original | firstorder | Mean                             | -72.81278539 |
| original | glrlm      | ShortRunLowGrayLevelEmphasis     | 0.012190909  |
| original | glrlm      | GrayLevelVariance                | 12.15116807  |
| original | glrlm      | LowGrayLevelRunEmphasis          | 0.012544897  |
| original | glrlm      | GrayLevelNonUniformityNormalized | 0.095073685  |
| original | glrlm      | RunVariance                      | 0.118191451  |
| original | glrlm      | GrayLevelNonUniformity           | 18.82545072  |
| original | glrlm      | LongRunEmphasis                  | 1.344227576  |
| original | glrlm      | ShortRunHighGrayLevelEmphasis    | 176.2304443  |
| original | glrlm      | RunLengthNonUniformity           | 163.9073314  |
| original | glrlm      | ShortRunEmphasis                 | 0.926868437  |
| original | glrlm      | LongRunHighGrayLevelEmphasis     | 274.5339048  |
| original | glrlm      | RunPercentage                    | 0.904109589  |
| original | glrlm      | LongRunLowGrayLevelEmphasis      | 0.01418504   |
| original | glrlm      | RunEntropy                       | 4.025701949  |
| original | glrlm      | HighGrayLevelRunEmphasis         | 193.3300964  |
| original | glrlm      | RunLengthNonUniformityNormalized | 0.826738666  |

|             |       |                                      |              |
|-------------|-------|--------------------------------------|--------------|
| original    | glszm | GrayLevelVariance                    | 14.57684369  |
| original    | glszm | ZoneVariance                         | 26.08219178  |
| original    | glszm | GrayLevelNonUniformityNormalized     | 0.085006568  |
| original    | glszm | SizeZoneNonUniformityNormalized      | 0.376618503  |
| original    | glszm | SizeZoneNonUniformity                | 27.49315068  |
| original    | glszm | GrayLevelNonUniformity               | 6.205479452  |
| original    | glszm | LargeAreaEmphasis                    | 35.08219178  |
| original    | glszm | SmallAreaHighGrayLevelEmphasis       | 80.4980896   |
| original    | glszm | ZonePercentage                       | 0.333333333  |
| original    | glszm | LargeAreaLowGrayLevelEmphasis        | 0.170431204  |
| original    | glszm | LargeAreaHighGrayLevelEmphasis       | 8571.09589   |
| original    | glszm | HighGrayLevelZoneEmphasis            | 142.9178082  |
| original    | glszm | SmallAreaEmphasis                    | 0.629752882  |
| original    | glszm | LowGrayLevelZoneEmphasis             | 0.024905457  |
| original    | glszm | ZoneEntropy                          | 4.876258594  |
| original    | glszm | SmallAreaLowGrayLevelEmphasis        | 0.022012207  |
| original    | ngtdm | Coarseness                           | 0.031996862  |
| original    | ngtdm | Complexity                           | 203.6877739  |
| original    | ngtdm | Strength                             | 3.00349847   |
| original    | ngtdm | Contrast                             | 0.202822328  |
| original    | ngtdm | Busyness                             | 0.141565754  |
| wavelet-HHH | gldm  | GrayLevelVariance                    | 2.770417631  |
| wavelet-HHH | gldm  | HighGrayLevelEmphasis                | 58.84931507  |
| wavelet-HHH | gldm  | DependenceEntropy                    | 5.301928675  |
| wavelet-HHH | gldm  | DependenceNonUniformity              | 27.72146119  |
| wavelet-HHH | gldm  | GrayLevelNonUniformity               | 41.34703196  |
| wavelet-HHH | gldm  | SmallDependenceEmphasis              | 0.190273529  |
| wavelet-HHH | gldm  | SmallDependenceHighGrayLevelEmphasis | 12.97750832  |
| wavelet-HHH | gldm  | DependenceNonUniformityNormalized    | 0.126582015  |
| wavelet-HHH | gldm  | LargeDependenceEmphasis              | 25.03652968  |
| wavelet-HHH | gldm  | LargeDependenceLowGrayLevelEmphasis  | 0.463741534  |
| wavelet-HHH | gldm  | DependenceVariance                   | 6.337816142  |
| wavelet-HHH | gldm  | LargeDependenceHighGrayLevelEmphasis | 1463.525114  |
| wavelet-HHH | gldm  | SmallDependenceLowGrayLevelEmphasis  | 0.009462271  |
| wavelet-HHH | gldm  | LowGrayLevelEmphasis                 | 0.025602349  |
| wavelet-HHH | glcm  | JointAverage                         | 7.494033243  |
| wavelet-HHH | glcm  | SumAverage                           | 14.98806649  |
| wavelet-HHH | glcm  | JointEntropy                         | 5.069286648  |
| wavelet-HHH | glcm  | ClusterShade                         | -0.518666175 |
| wavelet-HHH | glcm  | MaximumProbability                   | 0.088573471  |
| wavelet-HHH | glcm  | Idmn                                 | 0.975885167  |
| wavelet-HHH | glcm  | JointEnergy                          | 0.041183926  |
| wavelet-HHH | glcm  | Contrast                             | 5.189995203  |
| wavelet-HHH | glcm  | DifferenceEntropy                    | 2.351331836  |
| wavelet-HHH | glcm  | InverseVariance                      | 0.411832525  |
| wavelet-HHH | glcm  | DifferenceVariance                   | 2.180265324  |
| wavelet-HHH | glcm  | Idn                                  | 0.898031691  |
| wavelet-HHH | glcm  | Idm                                  | 0.427397501  |
| wavelet-HHH | glcm  | Correlation                          | -0.022370706 |
| wavelet-HHH | glcm  | Autocorrelation                      | 56.10673325  |
| wavelet-HHH | glcm  | SumEntropy                           | 3.078367748  |
| wavelet-HHH | glcm  | SumSquares                           | 2.540298884  |
| wavelet-HHH | glcm  | ClusterProminence                    | 106.7023153  |
| wavelet-HHH | glcm  | Imc2                                 | 0.64196815   |
| wavelet-HHH | glcm  | Imc1                                 | -0.102147263 |

|             |            |                                  |              |
|-------------|------------|----------------------------------|--------------|
| wavelet-HHH | glcm       | DifferenceAverage                | 1.718304835  |
| wavelet-HHH | glcm       | Id                               | 0.491779319  |
| wavelet-HHH | glcm       | ClusterTendency                  | 4.971200333  |
| wavelet-HHH | firstorder | InterquartileRange               | 47.80228909  |
| wavelet-HHH | firstorder | Skewness                         | -0.061891999 |
| wavelet-HHH | firstorder | Uniformity                       | 0.188799233  |
| wavelet-HHH | firstorder | Median                           | 1.497335065  |
| wavelet-HHH | firstorder | Energy                           | 360806.8663  |
| wavelet-HHH | firstorder | RobustMeanAbsoluteDeviation      | 19.7705291   |
| wavelet-HHH | firstorder | MeanAbsoluteDeviation            | 30.47912561  |
| wavelet-HHH | firstorder | TotalEnergy                      | 9741785.389  |
| wavelet-HHH | firstorder | Maximum                          | 155.5669052  |
| wavelet-HHH | firstorder | RootMeanSquared                  | 40.58965308  |
| wavelet-HHH | firstorder | 90Percentile                     | 43.9379285   |
| wavelet-HHH | firstorder | Minimum                          | -154.4465919 |
| wavelet-HHH | firstorder | Entropy                          | 2.708728163  |
| wavelet-HHH | firstorder | Range                            | 310.0134971  |
| wavelet-HHH | firstorder | Variance                         | 1647.506138  |
| wavelet-HHH | firstorder | 10Percentile                     | -47.91396316 |
| wavelet-HHH | firstorder | Kurtosis                         | 4.723284612  |
| wavelet-HHH | firstorder | Mean                             | 0.117468683  |
| wavelet-HHH | glrlm      | ShortRunLowGrayLevelEmphasis     | 0.024755688  |
| wavelet-HHH | glrlm      | GrayLevelVariance                | 3.024238514  |
| wavelet-HHH | glrlm      | LowGrayLevelRunEmphasis          | 0.026593471  |
| wavelet-HHH | glrlm      | GrayLevelNonUniformityNormalized | 0.179472366  |
| wavelet-HHH | glrlm      | RunVariance                      | 0.173747578  |
| wavelet-HHH | glrlm      | GrayLevelNonUniformity           | 34.28692187  |
| wavelet-HHH | glrlm      | LongRunEmphasis                  | 1.492975981  |
| wavelet-HHH | glrlm      | ShortRunHighGrayLevelEmphasis    | 53.45362165  |
| wavelet-HHH | glrlm      | RunLengthNonUniformity           | 148.9369756  |
| wavelet-HHH | glrlm      | ShortRunEmphasis                 | 0.903007716  |
| wavelet-HHH | glrlm      | LongRunHighGrayLevelEmphasis     | 87.39310021  |
| wavelet-HHH | glrlm      | RunPercentage                    | 0.872146119  |
| wavelet-HHH | glrlm      | LongRunLowGrayLevelEmphasis      | 0.03589333   |
| wavelet-HHH | glrlm      | RunEntropy                       | 3.317362784  |
| wavelet-HHH | glrlm      | HighGrayLevelRunEmphasis         | 59.04165681  |
| wavelet-HHH | glrlm      | RunLengthNonUniformityNormalized | 0.778361159  |
| wavelet-HHH | glszm      | GrayLevelVariance                | 9.304601899  |
| wavelet-HHH | glszm      | ZoneVariance                     | 168.128561   |
| wavelet-HHH | glszm      | GrayLevelNonUniformityNormalized | 0.11468225   |
| wavelet-HHH | glszm      | SizeZoneNonUniformityNormalized  | 0.474068663  |
| wavelet-HHH | glszm      | SizeZoneNonUniformity            | 17.54054054  |
| wavelet-HHH | glszm      | GrayLevelNonUniformity           | 4.243243243  |
| wavelet-HHH | glszm      | LargeAreaEmphasis                | 203.1621622  |
| wavelet-HHH | glszm      | SmallAreaHighGrayLevelEmphasis   | 53.57260245  |
| wavelet-HHH | glszm      | ZonePercentage                   | 0.168949772  |
| wavelet-HHH | glszm      | LargeAreaLowGrayLevelEmphasis    | 3.742569217  |
| wavelet-HHH | glszm      | LargeAreaHighGrayLevelEmphasis   | 11774.10811  |
| wavelet-HHH | glszm      | HighGrayLevelZoneEmphasis        | 69.89189189  |
| wavelet-HHH | glszm      | SmallAreaEmphasis                | 0.706397386  |
| wavelet-HHH | glszm      | LowGrayLevelZoneEmphasis         | 0.054103524  |
| wavelet-HHH | glszm      | ZoneEntropy                      | 4.208924987  |
| wavelet-HHH | glszm      | SmallAreaLowGrayLevelEmphasis    | 0.046973857  |
| wavelet-HHH | ngtdm      | Coarseness                       | 0.028107315  |
| wavelet-HHH | ngtdm      | Complexity                       | 78.45489985  |

|             |            |                                      |              |
|-------------|------------|--------------------------------------|--------------|
| wavelet-HHH | ngtdm      | Strength                             | 1.392439184  |
| wavelet-HHH | ngtdm      | Contrast                             | 0.055128484  |
| wavelet-HHH | ngtdm      | Busyness                             | 0.329202546  |
| wavelet-HLL | gldm       | GrayLevelVariance                    | 3.865682534  |
| wavelet-HLL | gldm       | HighGrayLevelEmphasis                | 86.76712329  |
| wavelet-HLL | gldm       | DependenceEntropy                    | 5.288087653  |
| wavelet-HLL | gldm       | DependenceNonUniformity              | 33.0456621   |
| wavelet-HLL | gldm       | GrayLevelNonUniformity               | 34.17808219  |
| wavelet-HLL | gldm       | SmallDependenceEmphasis              | 0.236189701  |
| wavelet-HLL | gldm       | SmallDependenceHighGrayLevelEmphasis | 19.53804255  |
| wavelet-HLL | gldm       | DependenceNonUniformityNormalized    | 0.150893434  |
| wavelet-HLL | gldm       | LargeDependenceEmphasis              | 18.43378995  |
| wavelet-HLL | gldm       | LargeDependenceLowGrayLevelEmphasis  | 0.228180704  |
| wavelet-HLL | gldm       | DependenceVariance                   | 4.922291028  |
| wavelet-HLL | gldm       | LargeDependenceHighGrayLevelEmphasis | 1615.260274  |
| wavelet-HLL | gldm       | SmallDependenceLowGrayLevelEmphasis  | 0.009253344  |
| wavelet-HLL | gldm       | LowGrayLevelEmphasis                 | 0.018849467  |
| wavelet-HLL | glcm       | JointAverage                         | 9.175594613  |
| wavelet-HLL | glcm       | SumAverage                           | 18.35118923  |
| wavelet-HLL | glcm       | JointEntropy                         | 5.43404815   |
| wavelet-HLL | glcm       | ClusterShade                         | -5.833013264 |
| wavelet-HLL | glcm       | MaximumProbability                   | 0.067496561  |
| wavelet-HLL | glcm       | Idmn                                 | 0.967561146  |
| wavelet-HLL | glcm       | JointEnergy                          | 0.031997983  |
| wavelet-HLL | glcm       | Contrast                             | 7.215461352  |
| wavelet-HLL | glcm       | DifferenceEntropy                    | 2.51756971   |
| wavelet-HLL | glcm       | InverseVariance                      | 0.388169192  |
| wavelet-HLL | glcm       | DifferenceVariance                   | 2.924733991  |
| wavelet-HLL | glcm       | Idn                                  | 0.882488986  |
| wavelet-HLL | glcm       | Idm                                  | 0.378763843  |
| wavelet-HLL | glcm       | Correlation                          | -0.027576174 |
| wavelet-HLL | glcm       | Autocorrelation                      | 84.12116576  |
| wavelet-HLL | glcm       | SumEntropy                           | 3.300457079  |
| wavelet-HLL | glcm       | SumSquares                           | 3.533602399  |
| wavelet-HLL | glcm       | ClusterProminence                    | 207.7109168  |
| wavelet-HLL | glcm       | Imc2                                 | 0.715033829  |
| wavelet-HLL | glcm       | Imc1                                 | -0.127013961 |
| wavelet-HLL | glcm       | DifferenceAverage                    | 2.034149464  |
| wavelet-HLL | glcm       | Id                                   | 0.451404492  |
| wavelet-HLL | glcm       | ClusterTendency                      | 6.918948244  |
| wavelet-HLL | firstorder | InterquartileRange                   | 56.83353007  |
| wavelet-HLL | firstorder | Skewness                             | -0.516952987 |
| wavelet-HLL | firstorder | Uniformity                           | 0.156064302  |
| wavelet-HLL | firstorder | Median                               | -6.810096345 |
| wavelet-HLL | firstorder | Energy                               | 551447.086   |
| wavelet-HLL | firstorder | RobustMeanAbsoluteDeviation          | 24.54402844  |
| wavelet-HLL | firstorder | MeanAbsoluteDeviation                | 37.45009528  |
| wavelet-HLL | firstorder | TotalEnergy                          | 14889071.32  |
| wavelet-HLL | firstorder | Maximum                              | 119.7802768  |
| wavelet-HLL | firstorder | RootMeanSquared                      | 50.17990857  |
| wavelet-HLL | firstorder | 90Percentile                         | 47.02154807  |
| wavelet-HLL | firstorder | Minimum                              | -216.0199944 |
| wavelet-HLL | firstorder | Entropy                              | 2.962746721  |
| wavelet-HLL | firstorder | Range                                | 335.8002712  |
| wavelet-HLL | firstorder | Variance                             | 2413.323989  |

|             |            |                                      |              |
|-------------|------------|--------------------------------------|--------------|
| wavelet-HLL | firstorder | 10Percentile                         | -69.10273775 |
| wavelet-HLL | firstorder | Kurtosis                             | 4.357227866  |
| wavelet-HLL | firstorder | Mean                                 | -10.23226437 |
| wavelet-HLL | glrlm      | ShortRunLowGrayLevelEmphasis         | 0.01864494   |
| wavelet-HLL | glrlm      | GrayLevelVariance                    | 4.152124214  |
| wavelet-HLL | glrlm      | LowGrayLevelRunEmphasis              | 0.019611328  |
| wavelet-HLL | glrlm      | GrayLevelNonUniformityNormalized     | 0.149173454  |
| wavelet-HLL | glrlm      | RunVariance                          | 0.130688337  |
| wavelet-HLL | glrlm      | GrayLevelNonUniformity               | 29.30706879  |
| wavelet-HLL | glrlm      | LongRunEmphasis                      | 1.377081901  |
| wavelet-HLL | glrlm      | ShortRunHighGrayLevelEmphasis        | 79.86683497  |
| wavelet-HLL | glrlm      | RunLengthNonUniformity               | 160.3913577  |
| wavelet-HLL | glrlm      | ShortRunEmphasis                     | 0.921308018  |
| wavelet-HLL | glrlm      | LongRunHighGrayLevelEmphasis         | 119.5859209  |
| wavelet-HLL | glrlm      | RunPercentage                        | 0.897084651  |
| wavelet-HLL | glrlm      | LongRunLowGrayLevelEmphasis          | 0.024236524  |
| wavelet-HLL | glrlm      | RunEntropy                           | 3.467459066  |
| wavelet-HLL | glrlm      | HighGrayLevelRunEmphasis             | 86.72330068  |
| wavelet-HLL | glrlm      | RunLengthNonUniformityNormalized     | 0.814973369  |
| wavelet-HLL | glszm      | GrayLevelVariance                    | 9.647891659  |
| wavelet-HLL | glszm      | ZoneVariance                         | 60.27331487  |
| wavelet-HLL | glszm      | GrayLevelNonUniformityNormalized     | 0.106802093  |
| wavelet-HLL | glszm      | SizeZoneNonUniformityNormalized      | 0.35426285   |
| wavelet-HLL | glszm      | SizeZoneNonUniformity                | 20.19298246  |
| wavelet-HLL | glszm      | GrayLevelNonUniformity               | 6.087719298  |
| wavelet-HLL | glszm      | LargeAreaEmphasis                    | 75.03508772  |
| wavelet-HLL | glszm      | SmallAreaHighGrayLevelEmphasis       | 48.33750142  |
| wavelet-HLL | glszm      | ZonePercentage                       | 0.260273973  |
| wavelet-HLL | glszm      | LargeAreaLowGrayLevelEmphasis        | 0.920066398  |
| wavelet-HLL | glszm      | LargeAreaHighGrayLevelEmphasis       | 6547.719298  |
| wavelet-HLL | glszm      | HighGrayLevelZoneEmphasis            | 85.36842105  |
| wavelet-HLL | glszm      | SmallAreaEmphasis                    | 0.610211752  |
| wavelet-HLL | glszm      | LowGrayLevelZoneEmphasis             | 0.036895689  |
| wavelet-HLL | glszm      | ZoneEntropy                          | 4.684048901  |
| wavelet-HLL | glszm      | SmallAreaLowGrayLevelEmphasis        | 0.031747333  |
| wavelet-HLL | ngtdm      | Coarseness                           | 0.026766138  |
| wavelet-HLL | ngtdm      | Complexity                           | 109.1814133  |
| wavelet-HLL | ngtdm      | Strength                             | 1.514001602  |
| wavelet-HLL | ngtdm      | Contrast                             | 0.078723518  |
| wavelet-HLL | ngtdm      | Busyness                             | 0.279401031  |
| wavelet-LHL | gldm       | GrayLevelVariance                    | 90.1897792   |
| wavelet-LHL | gldm       | HighGrayLevelEmphasis                | 4221.333333  |
| wavelet-LHL | gldm       | DependenceEntropy                    | 5.859825946  |
| wavelet-LHL | gldm       | DependenceNonUniformity              | 45.16438356  |
| wavelet-LHL | gldm       | GrayLevelNonUniformity               | 16.10502283  |
| wavelet-LHL | gldm       | SmallDependenceEmphasis              | 0.399435981  |
| wavelet-LHL | gldm       | SmallDependenceHighGrayLevelEmphasis | 1578.437204  |
| wavelet-LHL | gldm       | DependenceNonUniformityNormalized    | 0.206230062  |
| wavelet-LHL | gldm       | LargeDependenceEmphasis              | 10.9543379   |
| wavelet-LHL | gldm       | LargeDependenceLowGrayLevelEmphasis  | 0.007126652  |
| wavelet-LHL | gldm       | DependenceVariance                   | 3.372990555  |
| wavelet-LHL | gldm       | LargeDependenceHighGrayLevelEmphasis | 48537.23288  |
| wavelet-LHL | gldm       | SmallDependenceLowGrayLevelEmphasis  | 0.00472269   |
| wavelet-LHL | gldm       | LowGrayLevelEmphasis                 | 0.004864962  |
| wavelet-LHL | glcm       | JointAverage                         | 65.13918101  |



|             |            |                                  |              |
|-------------|------------|----------------------------------|--------------|
| wavelet-LHL | glcm       | SumAverage                       | 130.278362   |
| wavelet-LHL | glcm       | JointEntropy                     | 6.779592623  |
| wavelet-LHL | glcm       | ClusterShade                     | -5272.783488 |
| wavelet-LHL | glcm       | MaximumProbability               | 0.043882885  |
| wavelet-LHL | glcm       | Idmn                             | 0.986205884  |
| wavelet-LHL | glcm       | JointEnergy                      | 0.012704501  |
| wavelet-LHL | glcm       | Contrast                         | 140.4595666  |
| wavelet-LHL | glcm       | DifferenceEntropy                | 3.752355388  |
| wavelet-LHL | glcm       | InverseVariance                  | 0.237330238  |
| wavelet-LHL | glcm       | DifferenceVariance               | 94.18997864  |
| wavelet-LHL | glcm       | Idn                              | 0.940372311  |
| wavelet-LHL | glcm       | Idm                              | 0.237077078  |
| wavelet-LHL | glcm       | Correlation                      | -0.064094258 |
| wavelet-LHL | glcm       | Autocorrelation                  | 4243.919719  |
| wavelet-LHL | glcm       | SumEntropy                       | 4.616347361  |
| wavelet-LHL | glcm       | SumSquares                       | 70.76321421  |
| wavelet-LHL | glcm       | ClusterProminence                | 466795.3081  |
| wavelet-LHL | glcm       | Imc2                             | 0.970913047  |
| wavelet-LHL | glcm       | Imc1                             | -0.356496798 |
| wavelet-LHL | glcm       | DifferenceAverage                | 6.459329292  |
| wavelet-LHL | glcm       | Id                               | 0.316048285  |
| wavelet-LHL | glcm       | ClusterTendency                  | 142.5932902  |
| wavelet-LHL | firstorder | InterquartileRange               | 144.5570649  |
| wavelet-LHL | firstorder | Skewness                         | -3.063684756 |
| wavelet-LHL | firstorder | Uniformity                       | 0.073538917  |
| wavelet-LHL | firstorder | Median                           | -56.19118477 |
| wavelet-LHL | firstorder | Energy                           | 14752048.16  |
| wavelet-LHL | firstorder | RobustMeanAbsoluteDeviation      | 64.19578394  |
| wavelet-LHL | firstorder | MeanAbsoluteDeviation            | 136.5228182  |
| wavelet-LHL | firstorder | TotalEnergy                      | 398305300.3  |
| wavelet-LHL | firstorder | Maximum                          | 530.288741   |
| wavelet-LHL | firstorder | RootMeanSquared                  | 259.5398823  |
| wavelet-LHL | firstorder | 90Percentile                     | 50.8496649   |
| wavelet-LHL | firstorder | Minimum                          | -1685.686782 |
| wavelet-LHL | firstorder | Entropy                          | 4.315206669  |
| wavelet-LHL | firstorder | Range                            | 2215.975523  |
| wavelet-LHL | firstorder | Variance                         | 56077.32423  |
| wavelet-LHL | firstorder | 10Percentile                     | -314.1078604 |
| wavelet-LHL | firstorder | Kurtosis                         | 18.92535174  |
| wavelet-LHL | firstorder | Mean                             | -106.2244146 |
| wavelet-LHL | glrlm      | ShortRunLowGrayLevelEmphasis     | 0.005203546  |
| wavelet-LHL | glrlm      | GrayLevelVariance                | 95.45690031  |
| wavelet-LHL | glrlm      | LowGrayLevelRunEmphasis          | 0.005215054  |
| wavelet-LHL | glrlm      | GrayLevelNonUniformityNormalized | 0.06811151   |
| wavelet-LHL | glrlm      | RunVariance                      | 0.093354003  |
| wavelet-LHL | glrlm      | GrayLevelNonUniformity           | 13.92703337  |
| wavelet-LHL | glrlm      | LongRunEmphasis                  | 1.254025845  |
| wavelet-LHL | glrlm      | ShortRunHighGrayLevelEmphasis    | 3984.479088  |
| wavelet-LHL | glrlm      | RunLengthNonUniformity           | 180.6250783  |
| wavelet-LHL | glrlm      | ShortRunEmphasis                 | 0.950201761  |
| wavelet-LHL | glrlm      | LongRunHighGrayLevelEmphasis     | 5331.055312  |
| wavelet-LHL | glrlm      | RunPercentage                    | 0.93256059   |
| wavelet-LHL | glrlm      | LongRunLowGrayLevelEmphasis      | 0.005273584  |
| wavelet-LHL | glrlm      | RunEntropy                       | 4.648342783  |
| wavelet-LHL | glrlm      | HighGrayLevelRunEmphasis         | 4205.368349  |

|             |       |                                      |              |
|-------------|-------|--------------------------------------|--------------|
| wavelet-LHL | glrlm | RunLengthNonUniformityNormalized     | 0.880753132  |
| wavelet-LHL | glszm | GrayLevelVariance                    | 160.0954808  |
| wavelet-LHL | glszm | ZoneVariance                         | 10.53602588  |
| wavelet-LHL | glszm | GrayLevelNonUniformityNormalized     | 0.042446819  |
| wavelet-LHL | glszm | SizeZoneNonUniformityNormalized      | 0.471620429  |
| wavelet-LHL | glszm | SizeZoneNonUniformity                | 47.63366337  |
| wavelet-LHL | glszm | GrayLevelNonUniformity               | 4.287128713  |
| wavelet-LHL | glszm | LargeAreaEmphasis                    | 15.23762376  |
| wavelet-LHL | glszm | SmallAreaHighGrayLevelEmphasis       | 2758.206081  |
| wavelet-LHL | glszm | ZonePercentage                       | 0.461187215  |
| wavelet-LHL | glszm | LargeAreaLowGrayLevelEmphasis        | 0.013489253  |
| wavelet-LHL | glszm | LargeAreaHighGrayLevelEmphasis       | 67645.68317  |
| wavelet-LHL | glszm | HighGrayLevelZoneEmphasis            | 3996.732673  |
| wavelet-LHL | glszm | SmallAreaEmphasis                    | 0.71349478   |
| wavelet-LHL | glszm | LowGrayLevelZoneEmphasis             | 0.010275395  |
| wavelet-LHL | glszm | ZoneEntropy                          | 5.554251523  |
| wavelet-LHL | glszm | SmallAreaLowGrayLevelEmphasis        | 0.010203122  |
| wavelet-LHL | ngtdm | Coarseness                           | 0.026656544  |
| wavelet-LHL | ngtdm | Complexity                           | 4251.16143   |
| wavelet-LHL | ngtdm | Strength                             | 32.98392927  |
| wavelet-LHL | ngtdm | Contrast                             | 0.691703307  |
| wavelet-LHL | ngtdm | Busyness                             | 0.012728316  |
| wavelet-LHH | gldm  | GrayLevelVariance                    | 6.802902358  |
| wavelet-LHH | gldm  | HighGrayLevelEmphasis                | 150.1461187  |
| wavelet-LHH | gldm  | DependenceEntropy                    | 5.473141026  |
| wavelet-LHH | gldm  | DependenceNonUniformity              | 35.75799087  |
| wavelet-LHH | gldm  | GrayLevelNonUniformity               | 28.76255708  |
| wavelet-LHH | gldm  | SmallDependenceEmphasis              | 0.271747289  |
| wavelet-LHH | gldm  | SmallDependenceHighGrayLevelEmphasis | 42.03604159  |
| wavelet-LHH | gldm  | DependenceNonUniformityNormalized    | 0.163278497  |
| wavelet-LHH | gldm  | LargeDependenceEmphasis              | 15.15525114  |
| wavelet-LHH | gldm  | LargeDependenceLowGrayLevelEmphasis  | 0.116825662  |
| wavelet-LHH | gldm  | DependenceVariance                   | 3.706761744  |
| wavelet-LHH | gldm  | LargeDependenceHighGrayLevelEmphasis | 2216.684932  |
| wavelet-LHH | gldm  | SmallDependenceLowGrayLevelEmphasis  | 0.008046913  |
| wavelet-LHH | gldm  | LowGrayLevelEmphasis                 | 0.013656109  |
| wavelet-LHH | glcm  | JointAverage                         | 12.15119259  |
| wavelet-LHH | glcm  | SumAverage                           | 24.30238518  |
| wavelet-LHH | glcm  | JointEntropy                         | 5.877492332  |
| wavelet-LHH | glcm  | ClusterShade                         | -28.01433226 |
| wavelet-LHH | glcm  | MaximumProbability                   | 0.05451921   |
| wavelet-LHH | glcm  | Idmn                                 | 0.971268496  |
| wavelet-LHH | glcm  | JointEnergy                          | 0.023705262  |
| wavelet-LHH | glcm  | Contrast                             | 13.59058509  |
| wavelet-LHH | glcm  | DifferenceEntropy                    | 2.827383034  |
| wavelet-LHH | glcm  | InverseVariance                      | 0.342046241  |
| wavelet-LHH | glcm  | DifferenceVariance                   | 6.586878744  |
| wavelet-LHH | glcm  | Idn                                  | 0.89408261   |
| wavelet-LHH | glcm  | Idm                                  | 0.336416869  |
| wavelet-LHH | glcm  | Correlation                          | -0.041343402 |
| wavelet-LHH | glcm  | Autocorrelation                      | 147.4358815  |
| wavelet-LHH | glcm  | SumEntropy                           | 3.64313701   |
| wavelet-LHH | glcm  | SumSquares                           | 6.569706221  |
| wavelet-LHH | glcm  | ClusterProminence                    | 993.6458969  |
| wavelet-LHH | glcm  | Imc2                                 | 0.819451007  |

|             |            |                                  |              |
|-------------|------------|----------------------------------|--------------|
| wavelet-LHH | glcm       | Imc1                             | -0.17714107  |
| wavelet-LHH | glcm       | DifferenceAverage                | 2.615526383  |
| wavelet-LHH | glcm       | Id                               | 0.414775861  |
| wavelet-LHH | glcm       | ClusterTendency                  | 12.6882398   |
| wavelet-LHH | firstorder | InterquartileRange               | 69.20655074  |
| wavelet-LHH | firstorder | Skewness                         | -0.431024056 |
| wavelet-LHH | firstorder | Uniformity                       | 0.131335877  |
| wavelet-LHH | firstorder | Median                           | -12.90763215 |
| wavelet-LHH | firstorder | Energy                           | 958001.1338  |
| wavelet-LHH | firstorder | RobustMeanAbsoluteDeviation      | 29.24918441  |
| wavelet-LHH | firstorder | MeanAbsoluteDeviation            | 47.04306698  |
| wavelet-LHH | firstorder | TotalEnergy                      | 25866030.61  |
| wavelet-LHH | firstorder | Maximum                          | 188.601719   |
| wavelet-LHH | firstorder | RootMeanSquared                  | 66.13950711  |
| wavelet-LHH | firstorder | 90Percentile                     | 61.91446273  |
| wavelet-LHH | firstorder | Minimum                          | -279.9944139 |
| wavelet-LHH | firstorder | Entropy                          | 3.261933548  |
| wavelet-LHH | firstorder | Range                            | 468.5961329  |
| wavelet-LHH | firstorder | Variance                         | 4226.083775  |
| wavelet-LHH | firstorder | 10Percentile                     | -86.05764138 |
| wavelet-LHH | firstorder | Kurtosis                         | 5.48374803   |
| wavelet-LHH | firstorder | Mean                             | -12.17992718 |
| wavelet-LHH | glrlm      | ShortRunLowGrayLevelEmphasis     | 0.013790148  |
| wavelet-LHH | glrlm      | GrayLevelVariance                | 7.256465416  |
| wavelet-LHH | glrlm      | LowGrayLevelRunEmphasis          | 0.014303565  |
| wavelet-LHH | glrlm      | GrayLevelNonUniformityNormalized | 0.12570881   |
| wavelet-LHH | glrlm      | RunVariance                      | 0.11946105   |
| wavelet-LHH | glrlm      | GrayLevelNonUniformity           | 25.01911038  |
| wavelet-LHH | glrlm      | LongRunEmphasis                  | 1.339448066  |
| wavelet-LHH | glrlm      | ShortRunHighGrayLevelEmphasis    | 140.2414088  |
| wavelet-LHH | glrlm      | RunLengthNonUniformity           | 166.8312228  |
| wavelet-LHH | glrlm      | ShortRunEmphasis                 | 0.930766784  |
| wavelet-LHH | glrlm      | LongRunHighGrayLevelEmphasis     | 200.3859365  |
| wavelet-LHH | glrlm      | RunPercentage                    | 0.908324552  |
| wavelet-LHH | glrlm      | LongRunLowGrayLevelEmphasis      | 0.016805872  |
| wavelet-LHH | glrlm      | RunEntropy                       | 3.724056186  |
| wavelet-LHH | glrlm      | HighGrayLevelRunEmphasis         | 150.4369555  |
| wavelet-LHH | glrlm      | RunLengthNonUniformityNormalized | 0.836234637  |
| wavelet-LHH | glszm      | GrayLevelVariance                | 15.41804408  |
| wavelet-LHH | glszm      | ZoneVariance                     | 45.33815427  |
| wavelet-LHH | glszm      | GrayLevelNonUniformityNormalized | 0.090449954  |
| wavelet-LHH | glszm      | SizeZoneNonUniformityNormalized  | 0.396235078  |
| wavelet-LHH | glszm      | SizeZoneNonUniformity            | 26.15151515  |
| wavelet-LHH | glszm      | GrayLevelNonUniformity           | 5.96969697   |
| wavelet-LHH | glszm      | LargeAreaEmphasis                | 56.34848485  |
| wavelet-LHH | glszm      | SmallAreaHighGrayLevelEmphasis   | 101.8204102  |
| wavelet-LHH | glszm      | ZonePercentage                   | 0.301369863  |
| wavelet-LHH | glszm      | LargeAreaLowGrayLevelEmphasis    | 0.44113009   |
| wavelet-LHH | glszm      | LargeAreaHighGrayLevelEmphasis   | 7837.363636  |
| wavelet-LHH | glszm      | HighGrayLevelZoneEmphasis        | 154.0151515  |
| wavelet-LHH | glszm      | SmallAreaEmphasis                | 0.650886545  |
| wavelet-LHH | glszm      | LowGrayLevelZoneEmphasis         | 0.027768549  |
| wavelet-LHH | glszm      | ZoneEntropy                      | 4.8604704    |
| wavelet-LHH | glszm      | SmallAreaLowGrayLevelEmphasis    | 0.024639241  |
| wavelet-LHH | ngtdm      | Coarseness                       | 0.027637176  |

|             |            |                                      |              |
|-------------|------------|--------------------------------------|--------------|
| wavelet-LHH | ngtdm      | Complexity                           | 239.5754783  |
| wavelet-LHH | ngtdm      | Strength                             | 3.08961357   |
| wavelet-LHH | ngtdm      | Contrast                             | 0.09679732   |
| wavelet-LHH | ngtdm      | Busyness                             | 0.150180223  |
| wavelet-LLH | gldm       | GrayLevelVariance                    | 43.77510894  |
| wavelet-LLH | gldm       | HighGrayLevelEmphasis                | 183.7488584  |
| wavelet-LLH | gldm       | DependenceEntropy                    | 5.985522166  |
| wavelet-LLH | gldm       | DependenceNonUniformity              | 44.8630137   |
| wavelet-LLH | gldm       | GrayLevelNonUniformity               | 16.44292237  |
| wavelet-LLH | gldm       | SmallDependenceEmphasis              | 0.357490864  |
| wavelet-LLH | gldm       | SmallDependenceHighGrayLevelEmphasis | 97.22011124  |
| wavelet-LLH | gldm       | DependenceNonUniformityNormalized    | 0.204853944  |
| wavelet-LLH | gldm       | LargeDependenceEmphasis              | 10.82648402  |
| wavelet-LLH | gldm       | LargeDependenceLowGrayLevelEmphasis  | 0.137851208  |
| wavelet-LLH | gldm       | DependenceVariance                   | 2.99159734   |
| wavelet-LLH | gldm       | LargeDependenceHighGrayLevelEmphasis | 1255.420091  |
| wavelet-LLH | gldm       | SmallDependenceLowGrayLevelEmphasis  | 0.009476202  |
| wavelet-LLH | gldm       | LowGrayLevelEmphasis                 | 0.017815661  |
| wavelet-LLH | glcm       | JointAverage                         | 11.18626336  |
| wavelet-LLH | glcm       | SumAverage                           | 22.37252671  |
| wavelet-LLH | glcm       | JointEntropy                         | 6.719774797  |
| wavelet-LLH | glcm       | ClusterShade                         | 1707.209565  |
| wavelet-LLH | glcm       | MaximumProbability                   | 0.032353434  |
| wavelet-LLH | glcm       | Idmn                                 | 0.969321552  |
| wavelet-LLH | glcm       | JointEnergy                          | 0.012443457  |
| wavelet-LLH | glcm       | Contrast                             | 59.70910409  |
| wavelet-LLH | glcm       | DifferenceEntropy                    | 3.455910442  |
| wavelet-LLH | glcm       | InverseVariance                      | 0.258727788  |
| wavelet-LLH | glcm       | DifferenceVariance                   | 34.11461921  |
| wavelet-LLH | glcm       | Idn                                  | 0.903891254  |
| wavelet-LLH | glcm       | Idm                                  | 0.253588094  |
| wavelet-LLH | glcm       | Correlation                          | 0.16074211   |
| wavelet-LLH | glcm       | Autocorrelation                      | 133.144635   |
| wavelet-LLH | glcm       | SumEntropy                           | 4.488115803  |
| wavelet-LLH | glcm       | SumSquares                           | 37.80714358  |
| wavelet-LLH | glcm       | ClusterProminence                    | 64994.85801  |
| wavelet-LLH | glcm       | Imc2                                 | 0.952517082  |
| wavelet-LLH | glcm       | Imc1                                 | -0.309949551 |
| wavelet-LLH | glcm       | DifferenceAverage                    | 4.787695487  |
| wavelet-LLH | glcm       | Id                                   | 0.33775886   |
| wavelet-LLH | glcm       | ClusterTendency                      | 91.51947024  |
| wavelet-LLH | firstorder | InterquartileRange                   | 130.1261544  |
| wavelet-LLH | firstorder | Skewness                             | 1.839180483  |
| wavelet-LLH | firstorder | Uniformity                           | 0.075081837  |
| wavelet-LLH | firstorder | Median                               | -31.46888023 |
| wavelet-LLH | firstorder | Energy                               | 5988383.872  |
| wavelet-LLH | firstorder | RobustMeanAbsoluteDeviation          | 57.93448207  |
| wavelet-LLH | firstorder | MeanAbsoluteDeviation                | 113.2643773  |
| wavelet-LLH | firstorder | TotalEnergy                          | 161686364.5  |
| wavelet-LLH | firstorder | Maximum                              | 677.6236698  |
| wavelet-LLH | firstorder | RootMeanSquared                      | 165.3608738  |
| wavelet-LLH | firstorder | 90Percentile                         | 241.7847248  |
| wavelet-LLH | firstorder | Minimum                              | -250.5477395 |
| wavelet-LLH | firstorder | Entropy                              | 4.152419114  |
| wavelet-LLH | firstorder | Range                                | 928.1714093  |

|             |            |                                      |              |
|-------------|------------|--------------------------------------|--------------|
| wavelet-LLH | firstorder | Variance                             | 27279.02666  |
| wavelet-LLH | firstorder | 10Percentile                         | -135.4044205 |
| wavelet-LLH | firstorder | Kurtosis                             | 6.357560259  |
| wavelet-LLH | firstorder | Mean                                 | 8.074151946  |
| wavelet-LLH | glrlm      | ShortRunLowGrayLevelEmphasis         | 0.017576539  |
| wavelet-LLH | glrlm      | GrayLevelVariance                    | 45.95246204  |
| wavelet-LLH | glrlm      | LowGrayLevelRunEmphasis              | 0.018222239  |
| wavelet-LLH | glrlm      | GrayLevelNonUniformityNormalized     | 0.072502055  |
| wavelet-LLH | glrlm      | RunVariance                          | 0.094901338  |
| wavelet-LLH | glrlm      | GrayLevelNonUniformity               | 14.79974178  |
| wavelet-LLH | glrlm      | LongRunEmphasis                      | 1.265923981  |
| wavelet-LLH | glrlm      | ShortRunHighGrayLevelEmphasis        | 182.8338047  |
| wavelet-LLH | glrlm      | RunLengthNonUniformity               | 180.1059381  |
| wavelet-LLH | glrlm      | ShortRunEmphasis                     | 0.948487598  |
| wavelet-LLH | glrlm      | LongRunHighGrayLevelEmphasis         | 219.4139864  |
| wavelet-LLH | glrlm      | RunPercentage                        | 0.930804355  |
| wavelet-LLH | glrlm      | LongRunLowGrayLevelEmphasis          | 0.021626458  |
| wavelet-LLH | glrlm      | RunEntropy                           | 4.474637774  |
| wavelet-LLH | glrlm      | HighGrayLevelRunEmphasis             | 189.0429362  |
| wavelet-LLH | glrlm      | RunLengthNonUniformityNormalized     | 0.87849217   |
| wavelet-LLH | glszm      | GrayLevelVariance                    | 73.23630602  |
| wavelet-LLH | glszm      | ZoneVariance                         | 7.774219104  |
| wavelet-LLH | glszm      | GrayLevelNonUniformityNormalized     | 0.051833409  |
| wavelet-LLH | glszm      | SizeZoneNonUniformityNormalized      | 0.390448167  |
| wavelet-LLH | glszm      | SizeZoneNonUniformity                | 36.70212766  |
| wavelet-LLH | glszm      | GrayLevelNonUniformity               | 4.872340426  |
| wavelet-LLH | glszm      | LargeAreaEmphasis                    | 13.20212766  |
| wavelet-LLH | glszm      | SmallAreaHighGrayLevelEmphasis       | 198.9766289  |
| wavelet-LLH | glszm      | ZonePercentage                       | 0.429223744  |
| wavelet-LLH | glszm      | LargeAreaLowGrayLevelEmphasis        | 0.16597458   |
| wavelet-LLH | glszm      | LargeAreaHighGrayLevelEmphasis       | 1623.117021  |
| wavelet-LLH | glszm      | HighGrayLevelZoneEmphasis            | 258.6595745  |
| wavelet-LLH | glszm      | SmallAreaEmphasis                    | 0.644757064  |
| wavelet-LLH | glszm      | LowGrayLevelZoneEmphasis             | 0.024418592  |
| wavelet-LLH | glszm      | ZoneEntropy                          | 5.739384698  |
| wavelet-LLH | glszm      | SmallAreaLowGrayLevelEmphasis        | 0.019573381  |
| wavelet-LLH | ngtdm      | Coarseness                           | 0.026989055  |
| wavelet-LLH | ngtdm      | Complexity                           | 1855.564986  |
| wavelet-LLH | ngtdm      | Strength                             | 17.69063965  |
| wavelet-LLH | ngtdm      | Contrast                             | 0.29904935   |
| wavelet-LLH | ngtdm      | Busyness                             | 0.101232601  |
| wavelet-LLL | gldm       | GrayLevelVariance                    | 121.7679781  |
| wavelet-LLL | gldm       | HighGrayLevelEmphasis                | 1108.703196  |
| wavelet-LLL | gldm       | DependenceEntropy                    | 6.177905227  |
| wavelet-LLL | gldm       | DependenceNonUniformity              | 75.79452055  |
| wavelet-LLL | gldm       | GrayLevelNonUniformity               | 7.484018265  |
| wavelet-LLL | gldm       | SmallDependenceEmphasis              | 0.571982496  |
| wavelet-LLL | gldm       | SmallDependenceHighGrayLevelEmphasis | 538.6668176  |
| wavelet-LLL | gldm       | DependenceNonUniformityNormalized    | 0.346093701  |
| wavelet-LLL | gldm       | LargeDependenceEmphasis              | 4.726027397  |
| wavelet-LLL | gldm       | LargeDependenceLowGrayLevelEmphasis  | 0.018560243  |
| wavelet-LLL | gldm       | DependenceVariance                   | 1.203978232  |
| wavelet-LLL | gldm       | LargeDependenceHighGrayLevelEmphasis | 6680.502283  |
| wavelet-LLL | gldm       | SmallDependenceLowGrayLevelEmphasis  | 0.006698038  |
| wavelet-LLL | gldm       | LowGrayLevelEmphasis                 | 0.008812936  |

|             |            |                                  |              |
|-------------|------------|----------------------------------|--------------|
| wavelet-LLL | glcm       | JointAverage                     | 33.4057249   |
| wavelet-LLL | glcm       | SumAverage                       | 66.8114498   |
| wavelet-LLL | glcm       | JointEntropy                     | 7.673149544  |
| wavelet-LLL | glcm       | ClusterShade                     | -2692.886395 |
| wavelet-LLL | glcm       | MaximumProbability               | 0.015809133  |
| wavelet-LLL | glcm       | Idmn                             | 0.973559912  |
| wavelet-LLL | glcm       | JointEnergy                      | 0.005554512  |
| wavelet-LLL | glcm       | Contrast                         | 119.2797682  |
| wavelet-LLL | glcm       | DifferenceEntropy                | 4.230072921  |
| wavelet-LLL | glcm       | InverseVariance                  | 0.155726272  |
| wavelet-LLL | glcm       | DifferenceVariance               | 49.87527165  |
| wavelet-LLL | glcm       | Idn                              | 0.895577436  |
| wavelet-LLL | glcm       | Idm                              | 0.145584082  |
| wavelet-LLL | glcm       | Correlation                      | 0.393487153  |
| wavelet-LLL | glcm       | Autocorrelation                  | 1155.910341  |
| wavelet-LLL | glcm       | SumEntropy                       | 5.532845202  |
| wavelet-LLL | glcm       | SumSquares                       | 99.44230945  |
| wavelet-LLL | glcm       | ClusterProminence                | 253129.6238  |
| wavelet-LLL | glcm       | Imc2                             | 0.993473008  |
| wavelet-LLL | glcm       | Imc1                             | -0.443185195 |
| wavelet-LLL | glcm       | DifferenceAverage                | 8.128449496  |
| wavelet-LLL | glcm       | Id                               | 0.22820956   |
| wavelet-LLL | glcm       | ClusterTendency                  | 278.4894696  |
| wavelet-LLL | firstorder | InterquartileRange               | 383.5263615  |
| wavelet-LLL | firstorder | Skewness                         | -0.480409093 |
| wavelet-LLL | firstorder | Uniformity                       | 0.034173599  |
| wavelet-LLL | firstorder | Median                           | -176.6804362 |
| wavelet-LLL | firstorder | Energy                           | 27989260.77  |
| wavelet-LLL | firstorder | RobustMeanAbsoluteDeviation      | 159.6673196  |
| wavelet-LLL | firstorder | MeanAbsoluteDeviation            | 223.0840845  |
| wavelet-LLL | firstorder | TotalEnergy                      | 755710040.8  |
| wavelet-LLL | firstorder | Maximum                          | 594.8182236  |
| wavelet-LLL | firstorder | RootMeanSquared                  | 357.4980331  |
| wavelet-LLL | firstorder | 90Percentile                     | 48.52743279  |
| wavelet-LLL | firstorder | Minimum                          | -991.9556113 |
| wavelet-LLL | firstorder | Entropy                          | 5.145130974  |
| wavelet-LLL | firstorder | Range                            | 1586.773835  |
| wavelet-LLL | firstorder | Variance                         | 76335.97464  |
| wavelet-LLL | firstorder | 10Percentile                     | -621.3794269 |
| wavelet-LLL | firstorder | Kurtosis                         | 3.070468925  |
| wavelet-LLL | firstorder | Mean                             | -226.8675143 |
| wavelet-LLL | glrlm      | ShortRunLowGrayLevelEmphasis     | 0.008916679  |
| wavelet-LLL | glrlm      | GrayLevelVariance                | 122.9448896  |
| wavelet-LLL | glrlm      | LowGrayLevelRunEmphasis          | 0.009005393  |
| wavelet-LLL | glrlm      | GrayLevelNonUniformityNormalized | 0.03344101   |
| wavelet-LLL | glrlm      | RunVariance                      | 0.037403052  |
| wavelet-LLL | glrlm      | GrayLevelNonUniformity           | 7.077830364  |
| wavelet-LLL | glrlm      | LongRunEmphasis                  | 1.109908766  |
| wavelet-LLL | glrlm      | ShortRunHighGrayLevelEmphasis    | 1061.217138  |
| wavelet-LLL | glrlm      | RunLengthNonUniformity           | 198.1856578  |
| wavelet-LLL | glrlm      | ShortRunEmphasis                 | 0.974629198  |
| wavelet-LLL | glrlm      | LongRunHighGrayLevelEmphasis     | 1255.136176  |
| wavelet-LLL | glrlm      | RunPercentage                    | 0.966280295  |
| wavelet-LLL | glrlm      | LongRunLowGrayLevelEmphasis      | 0.009365658  |
| wavelet-LLL | glrlm      | RunEntropy                       | 5.292669765  |

|             |       |                                      |              |
|-------------|-------|--------------------------------------|--------------|
| wavelet-LLL | glrlm | HighGrayLevelRunEmphasis             | 1097.324257  |
| wavelet-LLL | glrlm | RunLengthNonUniformityNormalizd      | 0.935804949  |
| wavelet-LLL | glszm | GrayLevelVariance                    | 135.0131422  |
| wavelet-LLL | glszm | ZoneVariance                         | 2.135538584  |
| wavelet-LLL | glszm | GrayLevelNonUniformityNormalized     | 0.029160881  |
| wavelet-LLL | glszm | SizeZoneNonUniformityNormalized      | 0.565959135  |
| wavelet-LLL | glszm | SizeZoneNonUniformity                | 80.36619718  |
| wavelet-LLL | glszm | GrayLevelNonUniformity               | 4.14084507   |
| wavelet-LLL | glszm | LargeAreaEmphasis                    | 4.514084507  |
| wavelet-LLL | glszm | SmallAreaHighGrayLevelEmphasis       | 700.010804   |
| wavelet-LLL | glszm | ZonePercentage                       | 0.648401826  |
| wavelet-LLL | glszm | LargeAreaLowGrayLevelEmphasis        | 0.019244058  |
| wavelet-LLL | glszm | LargeAreaHighGrayLevelEmphasis       | 6368.802817  |
| wavelet-LLL | glszm | HighGrayLevelZoneEmphasis            | 965.0211268  |
| wavelet-LLL | glszm | SmallAreaEmphasis                    | 0.780573161  |
| wavelet-LLL | glszm | LowGrayLevelZoneEmphasis             | 0.011346427  |
| wavelet-LLL | glszm | ZoneEntropy                          | 5.939271264  |
| wavelet-LLL | glszm | SmallAreaLowGrayLevelEmphasis        | 0.009790273  |
| wavelet-LLL | ngtdm | Coarseness                           | 0.032674755  |
| wavelet-LLL | ngtdm | Complexity                           | 4914.941723  |
| wavelet-LLL | ngtdm | Strength                             | 28.82514747  |
| wavelet-LLL | ngtdm | Contrast                             | 0.607273526  |
| wavelet-LLL | ngtdm | Busyness                             | 0.019871275  |
| wavelet-HHL | gldm  | GrayLevelVariance                    | 5.8479181    |
| wavelet-HHL | gldm  | HighGrayLevelEmphasis                | 138.4657534  |
| wavelet-HHL | gldm  | DependenceEntropy                    | 5.476482578  |
| wavelet-HHL | gldm  | DependenceNonUniformity              | 29.14611872  |
| wavelet-HHL | gldm  | GrayLevelNonUniformity               | 34.75342466  |
| wavelet-HHL | gldm  | SmallDependenceEmphasis              | 0.249812026  |
| wavelet-HHL | gldm  | SmallDependenceHighGrayLevelEmphasis | 37.33832809  |
| wavelet-HHL | gldm  | DependenceNonUniformityNormalized    | 0.1330873    |
| wavelet-HHL | gldm  | LargeDependenceEmphasis              | 22.00456621  |
| wavelet-HHL | gldm  | LargeDependenceLowGrayLevelEmphasis  | 0.173741336  |
| wavelet-HHL | gldm  | DependenceVariance                   | 6.475928358  |
| wavelet-HHL | gldm  | LargeDependenceHighGrayLevelEmphasis | 2956.721461  |
| wavelet-HHL | gldm  | SmallDependenceLowGrayLevelEmphasis  | 0.007214661  |
| wavelet-HHL | gldm  | LowGrayLevelEmphasis                 | 0.013192109  |
| wavelet-HHL | glcm  | JointAverage                         | 11.50498054  |
| wavelet-HHL | glcm  | SumAverage                           | 23.00996108  |
| wavelet-HHL | glcm  | JointEntropy                         | 5.386719923  |
| wavelet-HHL | glcm  | ClusterShade                         | 9.409450668  |
| wavelet-HHL | glcm  | MaximumProbability                   | 0.079098278  |
| wavelet-HHL | glcm  | Idmn                                 | 0.984393387  |
| wavelet-HHL | glcm  | JointEnergy                          | 0.035118696  |
| wavelet-HHL | glcm  | Contrast                             | 10.19878195  |
| wavelet-HHL | glcm  | DifferenceEntropy                    | 2.631625379  |
| wavelet-HHL | glcm  | InverseVariance                      | 0.390055524  |
| wavelet-HHL | glcm  | DifferenceVariance                   | 5.445730267  |
| wavelet-HHL | glcm  | Idn                                  | 0.923652877  |
| wavelet-HHL | glcm  | Idm                                  | 0.395317344  |
| wavelet-HHL | glcm  | Correlation                          | -0.044707702 |
| wavelet-HHL | glcm  | Autocorrelation                      | 132.1827039  |
| wavelet-HHL | glcm  | SumEntropy                           | 3.341905249  |
| wavelet-HHL | glcm  | SumSquares                           | 4.915747879  |
| wavelet-HHL | glcm  | ClusterProminence                    | 833.373857   |

|             |            |                                  |              |
|-------------|------------|----------------------------------|--------------|
| wavelet-HHL | glcm       | Imc2                             | 0.796007599  |
| wavelet-HHL | glcm       | Imc1                             | -0.172860697 |
| wavelet-HHL | glcm       | DifferenceAverage                | 2.158557942  |
| wavelet-HHL | glcm       | Id                               | 0.46285918   |
| wavelet-HHL | glcm       | ClusterTendency                  | 9.464209567  |
| wavelet-HHL | firstorder | InterquartileRange               | 57.50025319  |
| wavelet-HHL | firstorder | Skewness                         | 0.347427784  |
| wavelet-HHL | firstorder | Uniformity                       | 0.158691437  |
| wavelet-HHL | firstorder | Median                           | 0.909364549  |
| wavelet-HHL | firstorder | Energy                           | 793013.0248  |
| wavelet-HHL | firstorder | RobustMeanAbsoluteDeviation      | 23.55128627  |
| wavelet-HHL | firstorder | MeanAbsoluteDeviation            | 40.65555665  |
| wavelet-HHL | firstorder | TotalEnergy                      | 21411351.67  |
| wavelet-HHL | firstorder | Maximum                          | 310.5092795  |
| wavelet-HHL | firstorder | RootMeanSquared                  | 60.17527765  |
| wavelet-HHL | firstorder | 90Percentile                     | 60.32327203  |
| wavelet-HHL | firstorder | Minimum                          | -251.7009232 |
| wavelet-HHL | firstorder | Entropy                          | 3.075178551  |
| wavelet-HHL | firstorder | Range                            | 562.2102027  |
| wavelet-HHL | firstorder | Variance                         | 3620.873235  |
| wavelet-HHL | firstorder | 10Percentile                     | -64.095261   |
| wavelet-HHL | firstorder | Kurtosis                         | 8.371050424  |
| wavelet-HHL | firstorder | Mean                             | 0.436812176  |
| wavelet-HHL | glrlm      | ShortRunLowGrayLevelEmphasis     | 0.013220564  |
| wavelet-HHL | glrlm      | GrayLevelVariance                | 6.451202115  |
| wavelet-HHL | glrlm      | LowGrayLevelRunEmphasis          | 0.013891603  |
| wavelet-HHL | glrlm      | GrayLevelNonUniformityNormalized | 0.14760798   |
| wavelet-HHL | glrlm      | RunVariance                      | 0.146625222  |
| wavelet-HHL | glrlm      | GrayLevelNonUniformity           | 28.67508181  |
| wavelet-HHL | glrlm      | LongRunEmphasis                  | 1.420838451  |
| wavelet-HHL | glrlm      | ShortRunHighGrayLevelEmphasis    | 127.4118243  |
| wavelet-HHL | glrlm      | RunLengthNonUniformity           | 155.4877917  |
| wavelet-HHL | glrlm      | ShortRunEmphasis                 | 0.913619939  |
| wavelet-HHL | glrlm      | LongRunHighGrayLevelEmphasis     | 195.4912225  |
| wavelet-HHL | glrlm      | RunPercentage                    | 0.88689849   |
| wavelet-HHL | glrlm      | LongRunLowGrayLevelEmphasis      | 0.017143034  |
| wavelet-HHL | glrlm      | RunEntropy                       | 3.642007169  |
| wavelet-HHL | glrlm      | HighGrayLevelRunEmphasis         | 139.0074588  |
| wavelet-HHL | glrlm      | RunLengthNonUniformityNormalized | 0.799344465  |
| wavelet-HHL | glszm      | GrayLevelVariance                | 16.68305556  |
| wavelet-HHL | glszm      | ZoneVariance                     | 55.09416667  |
| wavelet-HHL | glszm      | GrayLevelNonUniformityNormalized | 0.089444444  |
| wavelet-HHL | glszm      | SizeZoneNonUniformityNormalized  | 0.406666667  |
| wavelet-HHL | glszm      | SizeZoneNonUniformity            | 24.4         |
| wavelet-HHL | glszm      | GrayLevelNonUniformity           | 5.366666667  |
| wavelet-HHL | glszm      | LargeAreaEmphasis                | 68.41666667  |
| wavelet-HHL | glszm      | SmallAreaHighGrayLevelEmphasis   | 102.0967497  |
| wavelet-HHL | glszm      | ZonePercentage                   | 0.273972603  |
| wavelet-HHL | glszm      | LargeAreaLowGrayLevelEmphasis    | 0.540412072  |
| wavelet-HHL | glszm      | LargeAreaHighGrayLevelEmphasis   | 9241.433333  |
| wavelet-HHL | glszm      | HighGrayLevelZoneEmphasis        | 149.3166667  |
| wavelet-HHL | glszm      | SmallAreaEmphasis                | 0.657164168  |
| wavelet-HHL | glszm      | LowGrayLevelZoneEmphasis         | 0.027185362  |
| wavelet-HHL | glszm      | ZoneEntropy                      | 4.837907837  |
| wavelet-HHL | glszm      | SmallAreaLowGrayLevelEmphasis    | 0.024206292  |



|             |            |                                      |              |
|-------------|------------|--------------------------------------|--------------|
| wavelet-HHL | ngtdm      | Coarseness                           | 0.030126106  |
| wavelet-HHL | ngtdm      | Complexity                           | 267.499143   |
| wavelet-HHL | ngtdm      | Strength                             | 4.260020997  |
| wavelet-HHL | ngtdm      | Contrast                             | 0.059199851  |
| wavelet-HHL | ngtdm      | Busyness                             | 0.112641666  |
| wavelet-HLH | gldm       | GrayLevelVariance                    | 2.942557495  |
| wavelet-HLH | gldm       | HighGrayLevelEmphasis                | 33.62100457  |
| wavelet-HLH | gldm       | DependenceEntropy                    | 5.240920557  |
| wavelet-HLH | gldm       | DependenceNonUniformity              | 27.38356164  |
| wavelet-HLH | gldm       | GrayLevelNonUniformity               | 39.75799087  |
| wavelet-HLH | gldm       | SmallDependenceEmphasis              | 0.182375743  |
| wavelet-HLH | gldm       | SmallDependenceHighGrayLevelEmphasis | 6.738218784  |
| wavelet-HLH | gldm       | DependenceNonUniformityNormalized    | 0.125039094  |
| wavelet-HLH | gldm       | LargeDependenceEmphasis              | 24.96347032  |
| wavelet-HLH | gldm       | LargeDependenceLowGrayLevelEmphasis  | 0.965111033  |
| wavelet-HLH | gldm       | DependenceVariance                   | 6.185692542  |
| wavelet-HLH | gldm       | LargeDependenceHighGrayLevelEmphasis | 790.5159817  |
| wavelet-HLH | gldm       | SmallDependenceLowGrayLevelEmphasis  | 0.014731071  |
| wavelet-HLH | gldm       | LowGrayLevelEmphasis                 | 0.060579869  |
| wavelet-HLH | glcm       | JointAverage                         | 5.504508887  |
| wavelet-HLH | glcm       | SumAverage                           | 11.00901777  |
| wavelet-HLH | glcm       | JointEntropy                         | 5.155990108  |
| wavelet-HLH | glcm       | ClusterShade                         | -0.26960186  |
| wavelet-HLH | glcm       | MaximumProbability                   | 0.094798262  |
| wavelet-HLH | glcm       | Idmn                                 | 0.958590156  |
| wavelet-HLH | glcm       | JointEnergy                          | 0.03991349   |
| wavelet-HLH | glcm       | Contrast                             | 5.818496308  |
| wavelet-HLH | glcm       | DifferenceEntropy                    | 2.428597256  |
| wavelet-HLH | glcm       | InverseVariance                      | 0.391963628  |
| wavelet-HLH | glcm       | DifferenceVariance                   | 2.442496742  |
| wavelet-HLH | glcm       | Idn                                  | 0.870533003  |
| wavelet-HLH | glcm       | Idm                                  | 0.419653798  |
| wavelet-HLH | glcm       | Correlation                          | -0.034218555 |
| wavelet-HLH | glcm       | Autocorrelation                      | 30.19910447  |
| wavelet-HLH | glcm       | SumEntropy                           | 3.150859757  |
| wavelet-HLH | glcm       | SumSquares                           | 2.806949135  |
| wavelet-HLH | glcm       | ClusterProminence                    | 107.6309682  |
| wavelet-HLH | glcm       | Imc2                                 | 0.654203399  |
| wavelet-HLH | glcm       | Imc1                                 | -0.106006744 |
| wavelet-HLH | glcm       | DifferenceAverage                    | 1.812433657  |
| wavelet-HLH | glcm       | Id                                   | 0.486017055  |
| wavelet-HLH | glcm       | ClusterTendency                      | 5.409300233  |
| wavelet-HLH | firstorder | InterquartileRange                   | 48.81430619  |
| wavelet-HLH | firstorder | Skewness                             | -0.073441523 |
| wavelet-HLH | firstorder | Uniformity                           | 0.181543337  |
| wavelet-HLH | firstorder | Median                               | 5.974657662  |
| wavelet-HLH | firstorder | Energy                               | 396770.7223  |
| wavelet-HLH | firstorder | RobustMeanAbsoluteDeviation          | 21.73205309  |
| wavelet-HLH | firstorder | MeanAbsoluteDeviation                | 32.86407132  |
| wavelet-HLH | firstorder | TotalEnergy                          | 10712809.5   |
| wavelet-HLH | firstorder | Maximum                              | 127.9070053  |
| wavelet-HLH | firstorder | RootMeanSquared                      | 42.56452112  |
| wavelet-HLH | firstorder | 90Percentile                         | 52.16743241  |
| wavelet-HLH | firstorder | Minimum                              | -124.645338  |
| wavelet-HLH | firstorder | Entropy                              | 2.75929453   |

|             |            |                                  |              |
|-------------|------------|----------------------------------|--------------|
| wavelet-HLH | firstorder | Range                            | 252.5523433  |
| wavelet-HLH | firstorder | Variance                         | 1809.132337  |
| wavelet-HLH | firstorder | 10Percentile                     | -53.97029619 |
| wavelet-HLH | firstorder | Kurtosis                         | 3.584530676  |
| wavelet-HLH | firstorder | Mean                             | 1.614348444  |
| wavelet-HLH | glrlm      | ShortRunLowGrayLevelEmphasis     | 0.058919426  |
| wavelet-HLH | glrlm      | GrayLevelVariance                | 3.18590917   |
| wavelet-HLH | glrlm      | LowGrayLevelRunEmphasis          | 0.063264918  |
| wavelet-HLH | glrlm      | GrayLevelNonUniformityNormalized | 0.170193342  |
| wavelet-HLH | glrlm      | RunVariance                      | 0.165894851  |
| wavelet-HLH | glrlm      | GrayLevelNonUniformity           | 32.49887014  |
| wavelet-HLH | glrlm      | LongRunEmphasis                  | 1.486868218  |
| wavelet-HLH | glrlm      | ShortRunHighGrayLevelEmphasis    | 30.67585329  |
| wavelet-HLH | glrlm      | RunLengthNonUniformity           | 147.8843936  |
| wavelet-HLH | glrlm      | ShortRunEmphasis                 | 0.90049023   |
| wavelet-HLH | glrlm      | LongRunHighGrayLevelEmphasis     | 49.46039158  |
| wavelet-HLH | glrlm      | RunPercentage                    | 0.871794872  |
| wavelet-HLH | glrlm      | LongRunLowGrayLevelEmphasis      | 0.083567569  |
| wavelet-HLH | glrlm      | RunEntropy                       | 3.375423866  |
| wavelet-HLH | glrlm      | HighGrayLevelRunEmphasis         | 33.85779523  |
| wavelet-HLH | glrlm      | RunLengthNonUniformityNormalized | 0.772816617  |
| wavelet-HLH | glszm      | GrayLevelVariance                | 6.578231293  |
| wavelet-HLH | glszm      | ZoneVariance                     | 132.0731293  |
| wavelet-HLH | glszm      | GrayLevelNonUniformityNormalized | 0.124716553  |
| wavelet-HLH | glszm      | SizeZoneNonUniformityNormalized  | 0.323129252  |
| wavelet-HLH | glszm      | SizeZoneNonUniformity            | 13.57142857  |
| wavelet-HLH | glszm      | GrayLevelNonUniformity           | 5.238095238  |
| wavelet-HLH | glszm      | LargeAreaEmphasis                | 159.2619048  |
| wavelet-HLH | glszm      | SmallAreaHighGrayLevelEmphasis   | 22.58116768  |
| wavelet-HLH | glszm      | ZonePercentage                   | 0.191780822  |
| wavelet-HLH | glszm      | LargeAreaLowGrayLevelEmphasis    | 5.42975259   |
| wavelet-HLH | glszm      | LargeAreaHighGrayLevelEmphasis   | 5280.214286  |
| wavelet-HLH | glszm      | HighGrayLevelZoneEmphasis        | 37.61904762  |
| wavelet-HLH | glszm      | SmallAreaEmphasis                | 0.578352705  |
| wavelet-HLH | glszm      | LowGrayLevelZoneEmphasis         | 0.103023288  |
| wavelet-HLH | glszm      | ZoneEntropy                      | 4.403989446  |
| wavelet-HLH | glszm      | SmallAreaLowGrayLevelEmphasis    | 0.048361431  |
| wavelet-HLH | ngtdm      | Coarseness                       | 0.027391489  |
| wavelet-HLH | ngtdm      | Complexity                       | 65.40084856  |
| wavelet-HLH | ngtdm      | Strength                         | 0.937299825  |
| wavelet-HLH | ngtdm      | Contrast                         | 0.075433011  |
| wavelet-HLH | ngtdm      | Busyness                         | 0.540361195  |

| Image type | Feature Class | Feature Name                         |                                                                                                                                                                                                                                                                                                                                                                                                                                              |
|------------|---------------|--------------------------------------|----------------------------------------------------------------------------------------------------------------------------------------------------------------------------------------------------------------------------------------------------------------------------------------------------------------------------------------------------------------------------------------------------------------------------------------------|
| general    | info          | BoundingBox                          | 11: RTSTRUCT: C99-DNU_segment_ITV LLL<br>(0, 1, 1, 7, 7, 5)                                                                                                                                                                                                                                                                                                                                                                                  |
| general    | info          | EnabledImageTypes                    | {u'Original': {}, u'Wavelet': {}}                                                                                                                                                                                                                                                                                                                                                                                                            |
|            |               |                                      | {'distances': [1], 'additionalInfo': True,<br>'force2D': False, 'interpolator': 'sitkBSpline',<br>'resampledPixelSpacing': [3.0], 'label': 1,<br>'normalizeScale': 1, 'normalize': False,<br>'force2Ddimension': 0, 'removeOutliers':<br>None, 'minimumROISize': None, u'binWidth':<br>25.0, 'minimumROIDimensions': 1,<br>u'correctMask': True, 'preCrop': False,<br>u'symmetricalGLCM': True,<br>'resegmentRange': None, 'padDistance': 5} |
| general    | info          | GeneralSettings                      | 820cf1b0ebcde051b80ab7bd37f54451116a3                                                                                                                                                                                                                                                                                                                                                                                                        |
| general    | info          | ImageHash                            | cfa                                                                                                                                                                                                                                                                                                                                                                                                                                          |
| general    | info          | ImageSpacing                         | (0.9765625000000002,<br>0.9765625000000002, 2.0)                                                                                                                                                                                                                                                                                                                                                                                             |
| general    | info          | MaskHash                             | 6688eac8574a2e734d3d16a17182aea1faad7                                                                                                                                                                                                                                                                                                                                                                                                        |
| general    | info          | NumpyVersion                         | cf8                                                                                                                                                                                                                                                                                                                                                                                                                                          |
| general    | info          | PyWaveletVersion                     | 1.13.1                                                                                                                                                                                                                                                                                                                                                                                                                                       |
| general    | info          | SimpleITKVersion                     | 0.5.2                                                                                                                                                                                                                                                                                                                                                                                                                                        |
| general    | info          | Version                              | 1.1.0                                                                                                                                                                                                                                                                                                                                                                                                                                        |
| general    | info          | VolumeNum                            | 1.3.0.post102+g1b0eb74                                                                                                                                                                                                                                                                                                                                                                                                                       |
| general    | info          | VoxelNum                             | 1                                                                                                                                                                                                                                                                                                                                                                                                                                            |
| original   | shape         | Maximum3DDiameter                    | 108                                                                                                                                                                                                                                                                                                                                                                                                                                          |
| original   | shape         | Maximum2DDiameterSlice               | 22.44994432                                                                                                                                                                                                                                                                                                                                                                                                                                  |
| original   | shape         | Sphericity                           | 20.1246118                                                                                                                                                                                                                                                                                                                                                                                                                                   |
| original   | shape         | MinorAxis                            | 0.881798369                                                                                                                                                                                                                                                                                                                                                                                                                                  |
| original   | shape         | Elongation                           | 16.15068387                                                                                                                                                                                                                                                                                                                                                                                                                                  |
| original   | shape         | SurfaceVolumeRatio                   | 0.820449784                                                                                                                                                                                                                                                                                                                                                                                                                                  |
| original   | shape         | Volume                               | 0.383871315                                                                                                                                                                                                                                                                                                                                                                                                                                  |
| original   | shape         | MajorAxis                            | 2916                                                                                                                                                                                                                                                                                                                                                                                                                                         |
| original   | shape         | SurfaceArea                          | 19.68515831                                                                                                                                                                                                                                                                                                                                                                                                                                  |
| original   | shape         | Flatness                             | 1119.368753                                                                                                                                                                                                                                                                                                                                                                                                                                  |
| original   | shape         | LeastAxis                            | 0.670513334                                                                                                                                                                                                                                                                                                                                                                                                                                  |
| original   | shape         | Maximum2DDiameterColumn              | 13.19916112                                                                                                                                                                                                                                                                                                                                                                                                                                  |
| original   | shape         | Maximum2DDiameterRow                 | 18                                                                                                                                                                                                                                                                                                                                                                                                                                           |
| original   | gldm          | GrayLevelVariance                    | 21.63330765                                                                                                                                                                                                                                                                                                                                                                                                                                  |
| original   | gldm          | HighGrayLevelEmphasis                | 81.71879287                                                                                                                                                                                                                                                                                                                                                                                                                                  |
| original   | gldm          | DependenceEntropy                    | 750.037037                                                                                                                                                                                                                                                                                                                                                                                                                                   |
| original   | gldm          | DependenceNonUniformity              | 5.629434956                                                                                                                                                                                                                                                                                                                                                                                                                                  |
| original   | gldm          | GrayLevelNonUniformity               | 30.44444444                                                                                                                                                                                                                                                                                                                                                                                                                                  |
| original   | gldm          | SmallDependenceEmphasis              | 6.611111111                                                                                                                                                                                                                                                                                                                                                                                                                                  |
| original   | gldm          | SmallDependenceHighGrayLevelEmphasis | 0.537815614                                                                                                                                                                                                                                                                                                                                                                                                                                  |
| original   | gldm          | DependenceNonUniformityNormalized    | 294.7568754                                                                                                                                                                                                                                                                                                                                                                                                                                  |
| original   | gldm          | LargeDependenceEmphasis              | 0.281893004                                                                                                                                                                                                                                                                                                                                                                                                                                  |
| original   | gldm          | LargeDependenceLowGrayLevelEmphasis  | 12                                                                                                                                                                                                                                                                                                                                                                                                                                           |
| original   | gldm          | DependenceVariance                   | 0.022887647                                                                                                                                                                                                                                                                                                                                                                                                                                  |
| original   | gldm          | LargeDependenceHighGrayLevelEmphasis | 4.888888889                                                                                                                                                                                                                                                                                                                                                                                                                                  |
|            |               |                                      | 13238.57407                                                                                                                                                                                                                                                                                                                                                                                                                                  |

|          |            |                                     |              |
|----------|------------|-------------------------------------|--------------|
| original | gldm       | SmallDependenceLowGrayLevelEmphasis | 0.011975768  |
| original | gldm       | LowGrayLevelEmphasis                | 0.012571114  |
| original | glcm       | JointAverage                        | 27.96679941  |
| original | glcm       | SumAverage                          | 55.93359882  |
| original | glcm       | JointEntropy                        | 6.345550738  |
| original | glcm       | ClusterShade                        | -1750.648301 |
| original | glcm       | MaximumProbability                  | 0.050464276  |
| original | glcm       | Idmn                                | 0.930318639  |
| original | glcm       | JointEnergy                         | 0.015769056  |
| original | glcm       | Contrast                            | 116.2242794  |
| original | glcm       | DifferenceEntropy                   | 4.045646516  |
| original | glcm       | InverseVariance                     | 0.198535256  |
| original | glcm       | DifferenceVariance                  | 55.79303059  |
| original | glcm       | Idn                                 | 0.844894381  |
| original | glcm       | Idm                                 | 0.215463865  |
| original | glcm       | Correlation                         | 0.158389493  |
| original | glcm       | Autocorrelation                     | 793.038339   |
| original | glcm       | SumEntropy                          | 4.684556418  |
| original | glcm       | SumSquares                          | 68.96696317  |
| original | glcm       | ClusterProminence                   | 76002.91334  |
| original | glcm       | Imc2                                | 0.987918495  |
| original | glcm       | Imc1                                | -0.457183857 |
| original | glcm       | DifferenceAverage                   | 7.733197164  |
| original | glcm       | Id                                  | 0.284814056  |
| original | glcm       | ClusterTendency                     | 159.6435733  |
| original | firstorder | InterquartileRange                  | 366          |
| original | firstorder | Skewness                            | -0.772493775 |
| original | firstorder | Uniformity                          | 0.061213992  |
| original | firstorder | Median                              | -100         |
| original | firstorder | Energy                              | 9465300      |
| original | firstorder | RobustMeanAbsoluteDeviation         | 153.1179016  |
| original | firstorder | MeanAbsoluteDeviation               | 195.4128944  |
| original | firstorder | TotalEnergy                         | 255563100    |
| original | firstorder | Maximum                             | 67           |
| original | firstorder | RootMeanSquared                     | 296.0433527  |
| original | firstorder | 90Percentile                        | 29.6         |
| original | firstorder | Minimum                             | -801         |
| original | firstorder | Entropy                             | 4.452841682  |
| original | firstorder | Range                               | 868          |
| original | firstorder | Variance                            | 50763.44307  |
| original | firstorder | 10Percentile                        | -525.6       |
| original | firstorder | Kurtosis                            | 2.496036864  |
| original | firstorder | Mean                                | -192.037037  |
| original | glrlm      | ShortRunLowGrayLevelEmphasis        | 0.013318423  |
| original | glrlm      | GrayLevelVariance                   | 82.57514469  |
| original | glrlm      | LowGrayLevelRunEmphasis             | 0.01336842   |
| original | glrlm      | GrayLevelNonUniformityNormalized    | 0.055689765  |
| original | glrlm      | RunVariance                         | 0.075973171  |
| original | glrlm      | GrayLevelNonUniformity              | 5.632571637  |
| original | glrlm      | LongRunEmphasis                     | 1.219550187  |
| original | glrlm      | ShortRunHighGrayLevelEmphasis       | 673.9683035  |
| original | glrlm      | RunLengthNonUniformity              | 89.29152927  |
| original | glrlm      | ShortRunEmphasis                    | 0.951944656  |

|             |       |                                      |             |
|-------------|-------|--------------------------------------|-------------|
| original    | glrlm | LongRunHighGrayLevelEmphasis         | 966.673071  |
| original    | glrlm | RunPercentage                        | 0.935897436 |
| original    | glrlm | LongRunLowGrayLevelEmphasis          | 0.013592927 |
| original    | glrlm | RunEntropy                           | 4.747093148 |
| original    | glrlm | HighGrayLevelRunEmphasis             | 726.3601672 |
| original    | glrlm | RunLengthNonUniformityNormalized     | 0.882472321 |
| original    | glszm | GrayLevelVariance                    | 81.96484375 |
| original    | glszm | ZoneVariance                         | 4.52734375  |
| original    | glszm | GrayLevelNonUniformityNormalized     | 0.038574219 |
| original    | glszm | SizeZoneNonUniformityNormalized      | 0.671386719 |
| original    | glszm | SizeZoneNonUniformity                | 42.96875    |
| original    | glszm | GrayLevelNonUniformity               | 2.46875     |
| original    | glszm | LargeAreaEmphasis                    | 7.375       |
| original    | glszm | SmallAreaHighGrayLevelEmphasis       | 442.9841305 |
| original    | glszm | ZonePercentage                       | 0.592592593 |
| original    | glszm | LargeAreaLowGrayLevelEmphasis        | 0.026709725 |
| original    | glszm | LargeAreaHighGrayLevelEmphasis       | 7582.90625  |
| original    | glszm | HighGrayLevelZoneEmphasis            | 568.71875   |
| original    | glszm | SmallAreaEmphasis                    | 0.840258264 |
| original    | glszm | LowGrayLevelZoneEmphasis             | 0.020383148 |
| original    | glszm | ZoneEntropy                          | 5.159774414 |
| original    | glszm | SmallAreaLowGrayLevelEmphasis        | 0.020093228 |
| original    | ngtdm | Coarseness                           | 0.027992519 |
| original    | ngtdm | Complexity                           | 2667.800315 |
| original    | ngtdm | Strength                             | 17.09700721 |
| original    | ngtdm | Contrast                             | 1.219507793 |
| original    | ngtdm | Busyness                             | 0.040340586 |
| wavelet-HHH | gldm  | GrayLevelVariance                    | 22.33024691 |
| wavelet-HHH | gldm  | HighGrayLevelEmphasis                | 298.2592593 |
| wavelet-HHH | gldm  | DependenceEntropy                    | 5.405363373 |
| wavelet-HHH | gldm  | DependenceNonUniformity              | 33.01851852 |
| wavelet-HHH | gldm  | GrayLevelNonUniformity               | 7.259259259 |
| wavelet-HHH | gldm  | SmallDependenceEmphasis              | 0.486027442 |
| wavelet-HHH | gldm  | SmallDependenceHighGrayLevelEmphasis | 144.1959399 |
| wavelet-HHH | gldm  | DependenceNonUniformityNormalized    | 0.305727023 |
| wavelet-HHH | gldm  | LargeDependenceEmphasis              | 5.592592593 |
| wavelet-HHH | gldm  | LargeDependenceLowGrayLevelEmphasis  | 0.031215176 |
| wavelet-HHH | gldm  | DependenceVariance                   | 1.367283951 |
| wavelet-HHH | gldm  | LargeDependenceHighGrayLevelEmphasis | 1740.037037 |
| wavelet-HHH | gldm  | SmallDependenceLowGrayLevelEmphasis  | 0.012636155 |
| wavelet-HHH | gldm  | LowGrayLevelEmphasis                 | 0.014694506 |
| wavelet-HHH | glcm  | JointAverage                         | 16.4848446  |
| wavelet-HHH | glcm  | SumAverage                           | 32.9696892  |
| wavelet-HHH | glcm  | JointEntropy                         | 6.503740938 |
| wavelet-HHH | glcm  | ClusterShade                         | -57.5350488 |
| wavelet-HHH | glcm  | MaximumProbability                   | 0.031590348 |
| wavelet-HHH | glcm  | Idmn                                 | 0.955978845 |
| wavelet-HHH | glcm  | JointEnergy                          | 0.012475715 |
| wavelet-HHH | glcm  | Contrast                             | 43.64331905 |
| wavelet-HHH | glcm  | DifferenceEntropy                    | 3.571737112 |
| wavelet-HHH | glcm  | InverseVariance                      | 0.189939032 |
| wavelet-HHH | glcm  | DifferenceVariance                   | 17.12334938 |
| wavelet-HHH | glcm  | Idn                                  | 0.862238028 |

|             |            |                                  |              |
|-------------|------------|----------------------------------|--------------|
| wavelet-HHH | glcm       | Idm                              | 0.181279008  |
| wavelet-HHH | glcm       | Correlation                      | -0.027715223 |
| wavelet-HHH | glcm       | Autocorrelation                  | 271.2137406  |
| wavelet-HHH | glcm       | SumEntropy                       | 4.260461331  |
| wavelet-HHH | glcm       | SumSquares                       | 21.26579039  |
| wavelet-HHH | glcm       | ClusterProminence                | 6845.734509  |
| wavelet-HHH | glcm       | Imc2                             | 0.976170902  |
| wavelet-HHH | glcm       | Imc1                             | -0.383297952 |
| wavelet-HHH | glcm       | DifferenceAverage                | 5.087689332  |
| wavelet-HHH | glcm       | Id                               | 0.274900236  |
| wavelet-HHH | glcm       | ClusterTendency                  | 41.41984252  |
| wavelet-HHH | firstorder | InterquartileRange               | 153.1862648  |
| wavelet-HHH | firstorder | Skewness                         | -0.382133102 |
| wavelet-HHH | firstorder | Uniformity                       | 0.067215364  |
| wavelet-HHH | firstorder | Median                           | 8.195818109  |
| wavelet-HHH | firstorder | Energy                           | 1500026.466  |
| wavelet-HHH | firstorder | RobustMeanAbsoluteDeviation      | 63.49450897  |
| wavelet-HHH | firstorder | MeanAbsoluteDeviation            | 92.08444283  |
| wavelet-HHH | firstorder | TotalEnergy                      | 40500714.58  |
| wavelet-HHH | firstorder | Maximum                          | 303.2806768  |
| wavelet-HHH | firstorder | RootMeanSquared                  | 117.8521699  |
| wavelet-HHH | firstorder | 90Percentile                     | 128.3701114  |
| wavelet-HHH | firstorder | Minimum                          | -397.6128636 |
| wavelet-HHH | firstorder | Entropy                          | 4.11458322   |
| wavelet-HHH | firstorder | Range                            | 700.8935404  |
| wavelet-HHH | firstorder | Variance                         | 13884.62211  |
| wavelet-HHH | firstorder | 10Percentile                     | -138.8643557 |
| wavelet-HHH | firstorder | Kurtosis                         | 3.882909882  |
| wavelet-HHH | firstorder | Mean                             | 2.124107954  |
| wavelet-HHH | glrlm      | ShortRunLowGrayLevelEmphasis     | 0.015045516  |
| wavelet-HHH | glrlm      | GrayLevelVariance                | 22.8793637   |
| wavelet-HHH | glrlm      | LowGrayLevelRunEmphasis          | 0.015164766  |
| wavelet-HHH | glrlm      | GrayLevelNonUniformityNormalized | 0.066352172  |
| wavelet-HHH | glrlm      | RunVariance                      | 0.043492998  |
| wavelet-HHH | glrlm      | GrayLevelNonUniformity           | 6.876378634  |
| wavelet-HHH | glrlm      | LongRunEmphasis                  | 1.132418309  |
| wavelet-HHH | glrlm      | ShortRunHighGrayLevelEmphasis    | 288.2836347  |
| wavelet-HHH | glrlm      | RunLengthNonUniformity           | 95.62622702  |
| wavelet-HHH | glrlm      | ShortRunEmphasis                 | 0.968613805  |
| wavelet-HHH | glrlm      | LongRunHighGrayLevelEmphasis     | 338.5024587  |
| wavelet-HHH | glrlm      | RunPercentage                    | 0.959401709  |
| wavelet-HHH | glrlm      | LongRunLowGrayLevelEmphasis      | 0.015664654  |
| wavelet-HHH | glrlm      | RunEntropy                       | 4.28167792   |
| wavelet-HHH | glrlm      | HighGrayLevelRunEmphasis         | 297.9022147  |
| wavelet-HHH | glrlm      | RunLengthNonUniformityNormalized | 0.921589289  |
| wavelet-HHH | glszm      | GrayLevelVariance                | 30.93860562  |
| wavelet-HHH | glszm      | ZoneVariance                     | 2.094693028  |
| wavelet-HHH | glszm      | GrayLevelNonUniformityNormalized | 0.059833507  |
| wavelet-HHH | glszm      | SizeZoneNonUniformityNormalized  | 0.46566077   |
| wavelet-HHH | glszm      | SizeZoneNonUniformity            | 28.87096774  |
| wavelet-HHH | glszm      | GrayLevelNonUniformity           | 3.709677419  |
| wavelet-HHH | glszm      | LargeAreaEmphasis                | 5.129032258  |
| wavelet-HHH | glszm      | SmallAreaHighGrayLevelEmphasis   | 210.1371098  |

|             |            |                                      |              |
|-------------|------------|--------------------------------------|--------------|
| wavelet-HHH | glszm      | ZonePercentage                       | 0.574074074  |
| wavelet-HHH | glszm      | LargeAreaLowGrayLevelEmphasis        | 0.038515658  |
| wavelet-HHH | glszm      | LargeAreaHighGrayLevelEmphasis       | 1525.677419  |
| wavelet-HHH | glszm      | HighGrayLevelZoneEmphasis            | 298.4193548  |
| wavelet-HHH | glszm      | SmallAreaEmphasis                    | 0.707431538  |
| wavelet-HHH | glszm      | LowGrayLevelZoneEmphasis             | 0.022646264  |
| wavelet-HHH | glszm      | ZoneEntropy                          | 5.073080335  |
| wavelet-HHH | glszm      | SmallAreaLowGrayLevelEmphasis        | 0.021433099  |
| wavelet-HHH | ngtdm      | Coarseness                           | 0.045263671  |
| wavelet-HHH | ngtdm      | Complexity                           | 894.7789269  |
| wavelet-HHH | ngtdm      | Strength                             | 9.20867061   |
| wavelet-HHH | ngtdm      | Contrast                             | 0.314593974  |
| wavelet-HHH | ngtdm      | Busyness                             | 0.057756087  |
| wavelet-HLL | gldm       | GrayLevelVariance                    | 104.2663752  |
| wavelet-HLL | gldm       | HighGrayLevelEmphasis                | 547.212963   |
| wavelet-HLL | gldm       | DependenceEntropy                    | 5.760590484  |
| wavelet-HLL | gldm       | DependenceNonUniformity              | 36.01851852  |
| wavelet-HLL | gldm       | GrayLevelNonUniformity               | 4.592592593  |
| wavelet-HLL | gldm       | SmallDependenceEmphasis              | 0.546489198  |
| wavelet-HLL | gldm       | SmallDependenceHighGrayLevelEmphasis | 380.820409   |
| wavelet-HLL | gldm       | DependenceNonUniformityNormalized    | 0.333504801  |
| wavelet-HLL | gldm       | LargeDependenceEmphasis              | 4.777777778  |
| wavelet-HLL | gldm       | LargeDependenceLowGrayLevelEmphasis  | 0.031670512  |
| wavelet-HLL | gldm       | DependenceVariance                   | 0.99691358   |
| wavelet-HLL | gldm       | LargeDependenceHighGrayLevelEmphasis | 1798.990741  |
| wavelet-HLL | gldm       | SmallDependenceLowGrayLevelEmphasis  | 0.013419937  |
| wavelet-HLL | gldm       | LowGrayLevelEmphasis                 | 0.015315843  |
| wavelet-HLL | glcm       | JointAverage                         | 20.07764754  |
| wavelet-HLL | glcm       | SumAverage                           | 40.15529507  |
| wavelet-HLL | glcm       | JointEntropy                         | 6.819221654  |
| wavelet-HLL | glcm       | ClusterShade                         | 2964.889545  |
| wavelet-HLL | glcm       | MaximumProbability                   | 0.02300524   |
| wavelet-HLL | glcm       | Idmn                                 | 0.950947316  |
| wavelet-HLL | glcm       | JointEnergy                          | 0.009519708  |
| wavelet-HLL | glcm       | Contrast                             | 155.2023476  |
| wavelet-HLL | glcm       | DifferenceEntropy                    | 4.106096091  |
| wavelet-HLL | glcm       | InverseVariance                      | 0.12845326   |
| wavelet-HLL | glcm       | DifferenceVariance                   | 72.07143305  |
| wavelet-HLL | glcm       | Idn                                  | 0.867332104  |
| wavelet-HLL | glcm       | Idm                                  | 0.139341637  |
| wavelet-HLL | glcm       | Correlation                          | 0.116644513  |
| wavelet-HLL | glcm       | Autocorrelation                      | 416.7878969  |
| wavelet-HLL | glcm       | SumEntropy                           | 5.002821277  |
| wavelet-HLL | glcm       | SumSquares                           | 91.02896343  |
| wavelet-HLL | glcm       | ClusterProminence                    | 186032.1242  |
| wavelet-HLL | glcm       | Imc2                                 | 0.997799456  |
| wavelet-HLL | glcm       | Imc1                                 | -0.571363221 |
| wavelet-HLL | glcm       | DifferenceAverage                    | 8.745867505  |
| wavelet-HLL | glcm       | Id                                   | 0.22503072   |
| wavelet-HLL | glcm       | ClusterTendency                      | 208.9135061  |
| wavelet-HLL | firstorder | InterquartileRange                   | 291.056665   |
| wavelet-HLL | firstorder | Skewness                             | 0.902275338  |
| wavelet-HLL | firstorder | Uniformity                           | 0.042524005  |

|             |            |                                  |              |
|-------------|------------|----------------------------------|--------------|
| wavelet-HLL | firstorder | Median                           | -178.1653489 |
| wavelet-HLL | firstorder | Energy                           | 8403556.435  |
| wavelet-HLL | firstorder | RobustMeanAbsoluteDeviation      | 135.4231268  |
| wavelet-HLL | firstorder | MeanAbsoluteDeviation            | 200.5198089  |
| wavelet-HLL | firstorder | TotalEnergy                      | 226896023.7  |
| wavelet-HLL | firstorder | Maximum                          | 623.6447993  |
| wavelet-HLL | firstorder | RootMeanSquared                  | 278.9457075  |
| wavelet-HLL | firstorder | 90Percentile                     | 267.827858   |
| wavelet-HLL | firstorder | Minimum                          | -601.028402  |
| wavelet-HLL | firstorder | Entropy                          | 4.891624684  |
| wavelet-HLL | firstorder | Range                            | 1224.673201  |
| wavelet-HLL | firstorder | Variance                         | 65348.23346  |
| wavelet-HLL | firstorder | 10Percentile                     | -351.9853041 |
| wavelet-HLL | firstorder | Kurtosis                         | 3.269401672  |
| wavelet-HLL | firstorder | Mean                             | -111.6354526 |
| wavelet-HLL | glrlm      | ShortRunLowGrayLevelEmphasis     | 0.015614783  |
| wavelet-HLL | glrlm      | GrayLevelVariance                | 106.3521388  |
| wavelet-HLL | glrlm      | LowGrayLevelRunEmphasis          | 0.015737963  |
| wavelet-HLL | glrlm      | GrayLevelNonUniformityNormalized | 0.041683396  |
| wavelet-HLL | glrlm      | RunVariance                      | 0.036196321  |
| wavelet-HLL | glrlm      | GrayLevelNonUniformity           | 4.339779918  |
| wavelet-HLL | glrlm      | LongRunEmphasis                  | 1.114853386  |
| wavelet-HLL | glrlm      | ShortRunHighGrayLevelEmphasis    | 545.2058645  |
| wavelet-HLL | glrlm      | RunLengthNonUniformity           | 96.65405918  |
| wavelet-HLL | glrlm      | ShortRunEmphasis                 | 0.971286653  |
| wavelet-HLL | glrlm      | LongRunHighGrayLevelEmphasis     | 594.3991196  |
| wavelet-HLL | glrlm      | RunPercentage                    | 0.963675214  |
| wavelet-HLL | glrlm      | LongRunLowGrayLevelEmphasis      | 0.01623068   |
| wavelet-HLL | glrlm      | RunEntropy                       | 5.032932834  |
| wavelet-HLL | glrlm      | HighGrayLevelRunEmphasis         | 555.0445155  |
| wavelet-HLL | glrlm      | RunLengthNonUniformityNormalized | 0.927607358  |
| wavelet-HLL | glszm      | GrayLevelVariance                | 133.475607   |
| wavelet-HLL | glszm      | ZoneVariance                     | 1.640454444  |
| wavelet-HLL | glszm      | GrayLevelNonUniformityNormalized | 0.032746714  |
| wavelet-HLL | glszm      | SizeZoneNonUniformityNormalized  | 0.577634217  |
| wavelet-HLL | glszm      | SizeZoneNonUniformity            | 38.70149254  |
| wavelet-HLL | glszm      | GrayLevelNonUniformity           | 2.194029851  |
| wavelet-HLL | glszm      | LargeAreaEmphasis                | 4.23880597   |
| wavelet-HLL | glszm      | SmallAreaHighGrayLevelEmphasis   | 572.6841177  |
| wavelet-HLL | glszm      | ZonePercentage                   | 0.62037037   |
| wavelet-HLL | glszm      | LargeAreaLowGrayLevelEmphasis    | 0.035316317  |
| wavelet-HLL | glszm      | LargeAreaHighGrayLevelEmphasis   | 1791.597015  |
| wavelet-HLL | glszm      | HighGrayLevelZoneEmphasis        | 660.4179104  |
| wavelet-HLL | glszm      | SmallAreaEmphasis                | 0.777868735  |
| wavelet-HLL | glszm      | LowGrayLevelZoneEmphasis         | 0.022137575  |
| wavelet-HLL | glszm      | ZoneEntropy                      | 5.487658034  |
| wavelet-HLL | glszm      | SmallAreaLowGrayLevelEmphasis    | 0.021217727  |
| wavelet-HLL | ngtdm      | Coarseness                       | 0.045075149  |
| wavelet-HLL | ngtdm      | Complexity                       | 4476.587934  |
| wavelet-HLL | ngtdm      | Strength                         | 33.14602109  |
| wavelet-HLL | ngtdm      | Contrast                         | 0.884761285  |
| wavelet-HLL | ngtdm      | Busyness                         | 0.035946811  |
| wavelet-LHL | gldm       | GrayLevelVariance                | 51.08256173  |



|             |            |                                      |              |
|-------------|------------|--------------------------------------|--------------|
| wavelet-LHL | gldm       | HighGrayLevelEmphasis                | 333.5092593  |
| wavelet-LHL | gldm       | DependenceEntropy                    | 5.513784724  |
| wavelet-LHL | gldm       | DependenceNonUniformity              | 46.66666667  |
| wavelet-LHL | gldm       | GrayLevelNonUniformity               | 4.537037037  |
| wavelet-LHL | gldm       | SmallDependenceEmphasis              | 0.651234568  |
| wavelet-LHL | gldm       | SmallDependenceHighGrayLevelEmphasis | 221.2345679  |
| wavelet-LHL | gldm       | DependenceNonUniformityNormalized    | 0.432098765  |
| wavelet-LHL | gldm       | LargeDependenceEmphasis              | 2.888888889  |
| wavelet-LHL | gldm       | LargeDependenceLowGrayLevelEmphasis  | 0.029007948  |
| wavelet-LHL | gldm       | DependenceVariance                   | 0.469135802  |
| wavelet-LHL | gldm       | LargeDependenceHighGrayLevelEmphasis | 943.8425926  |
| wavelet-LHL | gldm       | SmallDependenceLowGrayLevelEmphasis  | 0.014853942  |
| wavelet-LHL | gldm       | LowGrayLevelEmphasis                 | 0.017054393  |
| wavelet-LHL | glcm       | JointAverage                         | 16.21086004  |
| wavelet-LHL | glcm       | SumAverage                           | 32.42172007  |
| wavelet-LHL | glcm       | JointEntropy                         | 6.870290769  |
| wavelet-LHL | glcm       | ClusterShade                         | 137.273631   |
| wavelet-LHL | glcm       | MaximumProbability                   | 0.018263625  |
| wavelet-LHL | glcm       | Idmn                                 | 0.932656477  |
| wavelet-LHL | glcm       | JointEnergy                          | 0.008998355  |
| wavelet-LHL | glcm       | Contrast                             | 72.78066121  |
| wavelet-LHL | glcm       | DifferenceEntropy                    | 3.863853561  |
| wavelet-LHL | glcm       | InverseVariance                      | 0.142428869  |
| wavelet-LHL | glcm       | DifferenceVariance                   | 23.17145919  |
| wavelet-LHL | glcm       | Idn                                  | 0.82663227   |
| wavelet-LHL | glcm       | Idm                                  | 0.122154727  |
| wavelet-LHL | glcm       | Correlation                          | 0.206820514  |
| wavelet-LHL | glcm       | Autocorrelation                      | 272.4798331  |
| wavelet-LHL | glcm       | SumEntropy                           | 4.827897298  |
| wavelet-LHL | glcm       | SumSquares                           | 45.9790172   |
| wavelet-LHL | glcm       | ClusterProminence                    | 28829.28609  |
| wavelet-LHL | glcm       | Imc2                                 | 0.995727553  |
| wavelet-LHL | glcm       | Imc1                                 | -0.517782447 |
| wavelet-LHL | glcm       | DifferenceAverage                    | 6.913934363  |
| wavelet-LHL | glcm       | Id                                   | 0.213095251  |
| wavelet-LHL | glcm       | ClusterTendency                      | 111.1354076  |
| wavelet-LHL | firstorder | InterquartileRange                   | 285.1760299  |
| wavelet-LHL | firstorder | Skewness                             | -0.033538258 |
| wavelet-LHL | firstorder | Uniformity                           | 0.042009602  |
| wavelet-LHL | firstorder | Median                               | -39.80885794 |
| wavelet-LHL | firstorder | Energy                               | 3625890.354  |
| wavelet-LHL | firstorder | RobustMeanAbsoluteDeviation          | 122.1269065  |
| wavelet-LHL | firstorder | MeanAbsoluteDeviation                | 154.7474562  |
| wavelet-LHL | firstorder | TotalEnergy                          | 97899039.57  |
| wavelet-LHL | firstorder | Maximum                              | 294.5734247  |
| wavelet-LHL | firstorder | RootMeanSquared                      | 183.229525   |
| wavelet-LHL | firstorder | 90Percentile                         | 194.1463769  |
| wavelet-LHL | firstorder | Minimum                              | -440.1334847 |
| wavelet-LHL | firstorder | Entropy                              | 4.683083805  |
| wavelet-LHL | firstorder | Range                                | 734.7069094  |
| wavelet-LHL | firstorder | Variance                             | 31771.54174  |
| wavelet-LHL | firstorder | 10Percentile                         | -271.0873082 |
| wavelet-LHL | firstorder | Kurtosis                             | 1.965632303  |

|             |            |                                      |              |
|-------------|------------|--------------------------------------|--------------|
| wavelet-LHL | firstorder | Mean                                 | -42.44428227 |
| wavelet-LHL | glrlm      | ShortRunLowGrayLevelEmphasis         | 0.017186634  |
| wavelet-LHL | glrlm      | GrayLevelVariance                    | 51.25907605  |
| wavelet-LHL | glrlm      | LowGrayLevelRunEmphasis              | 0.017292424  |
| wavelet-LHL | glrlm      | GrayLevelNonUniformityNormalized     | 0.041885035  |
| wavelet-LHL | glrlm      | RunVariance                          | 0.021322289  |
| wavelet-LHL | glrlm      | GrayLevelNonUniformity               | 4.427334252  |
| wavelet-LHL | glrlm      | LongRunEmphasis                      | 1.066683947  |
| wavelet-LHL | glrlm      | ShortRunHighGrayLevelEmphasis        | 328.3823776  |
| wavelet-LHL | glrlm      | RunLengthNonUniformity               | 101.2627827  |
| wavelet-LHL | glrlm      | ShortRunEmphasis                     | 0.983329013  |
| wavelet-LHL | glrlm      | LongRunHighGrayLevelEmphasis         | 355.2540626  |
| wavelet-LHL | glrlm      | RunPercentage                        | 0.978632479  |
| wavelet-LHL | glrlm      | LongRunLowGrayLevelEmphasis          | 0.017715585  |
| wavelet-LHL | glrlm      | RunEntropy                           | 4.754443017  |
| wavelet-LHL | glrlm      | HighGrayLevelRunEmphasis             | 333.7567146  |
| wavelet-LHL | glrlm      | RunLengthNonUniformityNormalized     | 0.957355421  |
| wavelet-LHL | glszm      | GrayLevelVariance                    | 53.63114885  |
| wavelet-LHL | glszm      | ZoneVariance                         | 0.561448486  |
| wavelet-LHL | glszm      | GrayLevelNonUniformityNormalized     | 0.040217914  |
| wavelet-LHL | glszm      | SizeZoneNonUniformityNormalized      | 0.604230091  |
| wavelet-LHL | glszm      | SizeZoneNonUniformity                | 47.73417722  |
| wavelet-LHL | glszm      | GrayLevelNonUniformity               | 3.17721519   |
| wavelet-LHL | glszm      | LargeAreaEmphasis                    | 2.430379747  |
| wavelet-LHL | glszm      | SmallAreaHighGrayLevelEmphasis       | 273.9125035  |
| wavelet-LHL | glszm      | ZonePercentage                       | 0.731481481  |
| wavelet-LHL | glszm      | LargeAreaLowGrayLevelEmphasis        | 0.030978581  |
| wavelet-LHL | glszm      | LargeAreaHighGrayLevelEmphasis       | 783.1012658  |
| wavelet-LHL | glszm      | HighGrayLevelZoneEmphasis            | 337.0632911  |
| wavelet-LHL | glszm      | SmallAreaEmphasis                    | 0.804655415  |
| wavelet-LHL | glszm      | LowGrayLevelZoneEmphasis             | 0.020958226  |
| wavelet-LHL | glszm      | ZoneEntropy                          | 5.309738659  |
| wavelet-LHL | glszm      | SmallAreaLowGrayLevelEmphasis        | 0.019770537  |
| wavelet-LHL | ngtdm      | Coarseness                           | 0.048113889  |
| wavelet-LHL | ngtdm      | Complexity                           | 1528.685448  |
| wavelet-LHL | ngtdm      | Strength                             | 13.33479867  |
| wavelet-LHL | ngtdm      | Contrast                             | 0.622181265  |
| wavelet-LHL | ngtdm      | Busyness                             | 0.059051722  |
| wavelet-LHH | gldm       | GrayLevelVariance                    | 38.06678669  |
| wavelet-LHH | gldm       | HighGrayLevelEmphasis                | 226.6203704  |
| wavelet-LHH | gldm       | DependenceEntropy                    | 5.34490666   |
| wavelet-LHH | gldm       | DependenceNonUniformity              | 40.22222222  |
| wavelet-LHH | gldm       | GrayLevelNonUniformity               | 6.314814815  |
| wavelet-LHH | gldm       | SmallDependenceEmphasis              | 0.609151235  |
| wavelet-LHH | gldm       | SmallDependenceHighGrayLevelEmphasis | 150.6512963  |
| wavelet-LHH | gldm       | DependenceNonUniformityNormalized    | 0.372427984  |
| wavelet-LHH | gldm       | LargeDependenceEmphasis              | 4.055555556  |
| wavelet-LHH | gldm       | LargeDependenceLowGrayLevelEmphasis  | 0.048261613  |
| wavelet-LHH | gldm       | DependenceVariance                   | 0.960562414  |
| wavelet-LHH | gldm       | LargeDependenceHighGrayLevelEmphasis | 766.3981481  |
| wavelet-LHH | gldm       | SmallDependenceLowGrayLevelEmphasis  | 0.020531201  |
| wavelet-LHH | gldm       | LowGrayLevelEmphasis                 | 0.023843624  |
| wavelet-LHH | glcm       | JointAverage                         | 13.76493005  |

|             |            |                                  |              |
|-------------|------------|----------------------------------|--------------|
| wavelet-LHH | glcm       | SumAverage                       | 27.5298601   |
| wavelet-LHH | glcm       | JointEntropy                     | 6.664401421  |
| wavelet-LHH | glcm       | ClusterShade                     | 271.7202784  |
| wavelet-LHH | glcm       | MaximumProbability               | 0.027088858  |
| wavelet-LHH | glcm       | Idmn                             | 0.949949585  |
| wavelet-LHH | glcm       | JointEnergy                      | 0.011025447  |
| wavelet-LHH | glcm       | Contrast                         | 64.44564825  |
| wavelet-LHH | glcm       | DifferenceEntropy                | 3.77092619   |
| wavelet-LHH | glcm       | InverseVariance                  | 0.153001006  |
| wavelet-LHH | glcm       | DifferenceVariance               | 22.44733886  |
| wavelet-LHH | glcm       | Idn                              | 0.851679047  |
| wavelet-LHH | glcm       | Idm                              | 0.141102124  |
| wavelet-LHH | glcm       | Correlation                      | 0.028473274  |
| wavelet-LHH | glcm       | Autocorrelation                  | 190.8367833  |
| wavelet-LHH | glcm       | SumEntropy                       | 4.553025503  |
| wavelet-LHH | glcm       | SumSquares                       | 33.55096651  |
| wavelet-LHH | glcm       | ClusterProminence                | 17715.35315  |
| wavelet-LHH | glcm       | Imc2                             | 0.989612481  |
| wavelet-LHH | glcm       | Imc1                             | -0.454270753 |
| wavelet-LHH | glcm       | DifferenceAverage                | 6.303299599  |
| wavelet-LHH | glcm       | Id                               | 0.234006184  |
| wavelet-LHH | glcm       | ClusterTendency                  | 69.7582178   |
| wavelet-LHH | firstorder | InterquartileRange               | 195.7605149  |
| wavelet-LHH | firstorder | Skewness                         | 0.531781068  |
| wavelet-LHH | firstorder | Uniformity                       | 0.058470508  |
| wavelet-LHH | firstorder | Median                           | -0.469691246 |
| wavelet-LHH | firstorder | Energy                           | 2579277.738  |
| wavelet-LHH | firstorder | RobustMeanAbsoluteDeviation      | 82.21876454  |
| wavelet-LHH | firstorder | MeanAbsoluteDeviation            | 121.7908676  |
| wavelet-LHH | firstorder | TotalEnergy                      | 69640498.92  |
| wavelet-LHH | firstorder | Maximum                          | 492.1086184  |
| wavelet-LHH | firstorder | RootMeanSquared                  | 154.5386724  |
| wavelet-LHH | firstorder | 90Percentile                     | 191.3391107  |
| wavelet-LHH | firstorder | Minimum                          | -308.1565776 |
| wavelet-LHH | firstorder | Entropy                          | 4.42353119   |
| wavelet-LHH | firstorder | Range                            | 800.265196   |
| wavelet-LHH | firstorder | Variance                         | 23847.40358  |
| wavelet-LHH | firstorder | 10Percentile                     | -160.4676118 |
| wavelet-LHH | firstorder | Kurtosis                         | 3.300241525  |
| wavelet-LHH | firstorder | Mean                             | 5.898957219  |
| wavelet-LHH | glrlm      | ShortRunLowGrayLevelEmphasis     | 0.024141074  |
| wavelet-LHH | glrlm      | GrayLevelVariance                | 38.66230999  |
| wavelet-LHH | glrlm      | LowGrayLevelRunEmphasis          | 0.024323885  |
| wavelet-LHH | glrlm      | GrayLevelNonUniformityNormalized | 0.057199233  |
| wavelet-LHH | glrlm      | RunVariance                      | 0.030672189  |
| wavelet-LHH | glrlm      | GrayLevelNonUniformity           | 5.998881076  |
| wavelet-LHH | glrlm      | LongRunEmphasis                  | 1.093469321  |
| wavelet-LHH | glrlm      | ShortRunHighGrayLevelEmphasis    | 223.7581508  |
| wavelet-LHH | glrlm      | RunLengthNonUniformity           | 98.95899051  |
| wavelet-LHH | glrlm      | ShortRunEmphasis                 | 0.977504813  |
| wavelet-LHH | glrlm      | LongRunHighGrayLevelEmphasis     | 244.9792064  |
| wavelet-LHH | glrlm      | RunPercentage                    | 0.970797721  |
| wavelet-LHH | glrlm      | LongRunLowGrayLevelEmphasis      | 0.025090016  |

|             |       |                                      |             |
|-------------|-------|--------------------------------------|-------------|
| wavelet-LHH | glrlm | RunEntropy                           | 4.546640546 |
| wavelet-LHH | glrlm | HighGrayLevelRunEmphasis             | 227.9325904 |
| wavelet-LHH | glrlm | RunLengthNonUniformityNormalized     | 0.942932686 |
| wavelet-LHH | glszm | GrayLevelVariance                    | 46.17092768 |
| wavelet-LHH | glszm | ZoneVariance                         | 1.437545654 |
| wavelet-LHH | glszm | GrayLevelNonUniformityNormalized     | 0.048210373 |
| wavelet-LHH | glszm | SizeZoneNonUniformityNormalized      | 0.601168736 |
| wavelet-LHH | glszm | SizeZoneNonUniformity                | 44.48648649 |
| wavelet-LHH | glszm | GrayLevelNonUniformity               | 3.567567568 |
| wavelet-LHH | glszm | LargeAreaEmphasis                    | 3.567567568 |
| wavelet-LHH | glszm | SmallAreaHighGrayLevelEmphasis       | 203.4784889 |
| wavelet-LHH | glszm | ZonePercentage                       | 0.685185185 |
| wavelet-LHH | glszm | LargeAreaLowGrayLevelEmphasis        | 0.052728096 |
| wavelet-LHH | glszm | LargeAreaHighGrayLevelEmphasis       | 654.472973  |
| wavelet-LHH | glszm | HighGrayLevelZoneEmphasis            | 245.972973  |
| wavelet-LHH | glszm | SmallAreaEmphasis                    | 0.803188605 |
| wavelet-LHH | glszm | LowGrayLevelZoneEmphasis             | 0.030926701 |
| wavelet-LHH | glszm | ZoneEntropy                          | 5.1535214   |
| wavelet-LHH | glszm | SmallAreaLowGrayLevelEmphasis        | 0.029211779 |
| wavelet-LHH | ngtdm | Coarseness                           | 0.044503102 |
| wavelet-LHH | ngtdm | Complexity                           | 1561.321051 |
| wavelet-LHH | ngtdm | Strength                             | 12.63329782 |
| wavelet-LHH | ngtdm | Contrast                             | 0.463969569 |
| wavelet-LHH | ngtdm | Busyness                             | 0.06405863  |
| wavelet-LLH | gldm  | GrayLevelVariance                    | 109.0154321 |
| wavelet-LLH | gldm  | HighGrayLevelEmphasis                | 753.6111111 |
| wavelet-LLH | gldm  | DependenceEntropy                    | 5.684065831 |
| wavelet-LLH | gldm  | DependenceNonUniformity              | 44.40740741 |
| wavelet-LLH | gldm  | GrayLevelNonUniformity               | 4.240740741 |
| wavelet-LLH | gldm  | SmallDependenceEmphasis              | 0.649112654 |
| wavelet-LLH | gldm  | SmallDependenceHighGrayLevelEmphasis | 478.2022248 |
| wavelet-LLH | gldm  | DependenceNonUniformityNormalized    | 0.411179698 |
| wavelet-LLH | gldm  | LargeDependenceEmphasis              | 3.333333333 |
| wavelet-LLH | gldm  | LargeDependenceLowGrayLevelEmphasis  | 0.018038073 |
| wavelet-LLH | gldm  | DependenceVariance                   | 0.677640604 |
| wavelet-LLH | gldm  | LargeDependenceHighGrayLevelEmphasis | 2419.574074 |
| wavelet-LLH | gldm  | SmallDependenceLowGrayLevelEmphasis  | 0.011136713 |
| wavelet-LLH | gldm  | LowGrayLevelEmphasis                 | 0.012128719 |
| wavelet-LLH | glcm  | JointAverage                         | 24.80891306 |
| wavelet-LLH | glcm  | SumAverage                           | 49.61782611 |
| wavelet-LLH | glcm  | JointEntropy                         | 6.848264597 |
| wavelet-LLH | glcm  | ClusterShade                         | 2321.648345 |
| wavelet-LLH | glcm  | MaximumProbability                   | 0.022987731 |
| wavelet-LLH | glcm  | Idmn                                 | 0.954238089 |
| wavelet-LLH | glcm  | JointEnergy                          | 0.009305652 |
| wavelet-LLH | glcm  | Contrast                             | 118.2308133 |
| wavelet-LLH | glcm  | DifferenceEntropy                    | 4.092360915 |
| wavelet-LLH | glcm  | InverseVariance                      | 0.114948155 |
| wavelet-LLH | glcm  | DifferenceVariance                   | 43.66286371 |
| wavelet-LLH | glcm  | Idn                                  | 0.860133049 |
| wavelet-LLH | glcm  | Idm                                  | 0.112077962 |
| wavelet-LLH | glcm  | Correlation                          | 0.372116127 |
| wavelet-LLH | glcm  | Autocorrelation                      | 651.2503346 |

|             |            |                                  |              |
|-------------|------------|----------------------------------|--------------|
| wavelet-LLH | glcm       | SumEntropy                       | 5.056834908  |
| wavelet-LLH | glcm       | SumSquares                       | 94.77108072  |
| wavelet-LLH | glcm       | ClusterProminence                | 177408.6605  |
| wavelet-LLH | glcm       | Imc2                             | 0.998095592  |
| wavelet-LLH | glcm       | Imc1                             | -0.579860796 |
| wavelet-LLH | glcm       | DifferenceAverage                | 8.40396355   |
| wavelet-LLH | glcm       | Id                               | 0.200157077  |
| wavelet-LLH | glcm       | ClusterTendency                  | 260.8535095  |
| wavelet-LLH | firstorder | InterquartileRange               | 389.177991   |
| wavelet-LLH | firstorder | Skewness                         | 0.28857691   |
| wavelet-LLH | firstorder | Uniformity                       | 0.039266118  |
| wavelet-LLH | firstorder | Median                           | -115.6995127 |
| wavelet-LLH | firstorder | Energy                           | 7701862.5    |
| wavelet-LLH | firstorder | RobustMeanAbsoluteDeviation      | 161.5336242  |
| wavelet-LLH | firstorder | MeanAbsoluteDeviation            | 219.0248711  |
| wavelet-LLH | firstorder | TotalEnergy                      | 207950287.5  |
| wavelet-LLH | firstorder | Maximum                          | 477.0718024  |
| wavelet-LLH | firstorder | RootMeanSquared                  | 267.0459542  |
| wavelet-LLH | firstorder | 90Percentile                     | 338.0870213  |
| wavelet-LLH | firstorder | Minimum                          | -652.9188297 |
| wavelet-LLH | firstorder | Entropy                          | 4.899241009  |
| wavelet-LLH | firstorder | Range                            | 1129.990632  |
| wavelet-LLH | firstorder | Variance                         | 68571.59919  |
| wavelet-LLH | firstorder | 10Percentile                     | -350.3750027 |
| wavelet-LLH | firstorder | Kurtosis                         | 2.300262982  |
| wavelet-LLH | firstorder | Mean                             | -52.36356058 |
| wavelet-LLH | glrlm      | ShortRunLowGrayLevelEmphasis     | 0.012321746  |
| wavelet-LLH | glrlm      | GrayLevelVariance                | 109.7109334  |
| wavelet-LLH | glrlm      | LowGrayLevelRunEmphasis          | 0.01236817   |
| wavelet-LLH | glrlm      | GrayLevelNonUniformityNormalized | 0.038796048  |
| wavelet-LLH | glrlm      | RunVariance                      | 0.031735602  |
| wavelet-LLH | glrlm      | GrayLevelNonUniformity           | 4.088730853  |
| wavelet-LLH | glrlm      | LongRunEmphasis                  | 1.083228123  |
| wavelet-LLH | glrlm      | ShortRunHighGrayLevelEmphasis    | 741.1878954  |
| wavelet-LLH | glrlm      | RunLengthNonUniformity           | 100.908057   |
| wavelet-LLH | glrlm      | ShortRunEmphasis                 | 0.983000238  |
| wavelet-LLH | glrlm      | LongRunHighGrayLevelEmphasis     | 815.6870478  |
| wavelet-LLH | glrlm      | RunPercentage                    | 0.975783476  |
| wavelet-LLH | glrlm      | LongRunLowGrayLevelEmphasis      | 0.012579841  |
| wavelet-LLH | glrlm      | RunEntropy                       | 4.975553454  |
| wavelet-LLH | glrlm      | HighGrayLevelRunEmphasis         | 753.8941896  |
| wavelet-LLH | glrlm      | RunLengthNonUniformityNormalized | 0.956947613  |
| wavelet-LLH | glszm      | GrayLevelVariance                | 117.5792242  |
| wavelet-LLH | glszm      | ZoneVariance                     | 0.775147929  |
| wavelet-LLH | glszm      | GrayLevelNonUniformityNormalized | 0.033859303  |
| wavelet-LLH | glszm      | SizeZoneNonUniformityNormalized  | 0.630834977  |
| wavelet-LLH | glszm      | SizeZoneNonUniformity            | 49.20512821  |
| wavelet-LLH | glszm      | GrayLevelNonUniformity           | 2.641025641  |
| wavelet-LLH | glszm      | LargeAreaEmphasis                | 2.692307692  |
| wavelet-LLH | glszm      | SmallAreaHighGrayLevelEmphasis   | 598.3318376  |
| wavelet-LLH | glszm      | ZonePercentage                   | 0.722222222  |
| wavelet-LLH | glszm      | LargeAreaLowGrayLevelEmphasis    | 0.019890724  |
| wavelet-LLH | glszm      | LargeAreaHighGrayLevelEmphasis   | 1986.410256  |

|             |            |                                      |              |
|-------------|------------|--------------------------------------|--------------|
| wavelet-LLH | glszm      | HighGrayLevelZoneEmphasis            | 747.7179487  |
| wavelet-LLH | glszm      | SmallAreaEmphasis                    | 0.821004274  |
| wavelet-LLH | glszm      | LowGrayLevelZoneEmphasis             | 0.015761801  |
| wavelet-LLH | glszm      | ZoneEntropy                          | 5.45810318   |
| wavelet-LLH | glszm      | SmallAreaLowGrayLevelEmphasis        | 0.015201643  |
| wavelet-LLH | ngtdm      | Coarseness                           | 0.049829885  |
| wavelet-LLH | ngtdm      | Complexity                           | 3340.227221  |
| wavelet-LLH | ngtdm      | Strength                             | 29.3441976   |
| wavelet-LLH | ngtdm      | Contrast                             | 1.023346056  |
| wavelet-LLH | ngtdm      | Busyness                             | 0.028125799  |
| wavelet-LLL | gldm       | GrayLevelVariance                    | 489.7252229  |
| wavelet-LLL | gldm       | HighGrayLevelEmphasis                | 2545.675926  |
| wavelet-LLL | gldm       | DependenceEntropy                    | 6.016235303  |
| wavelet-LLL | gldm       | DependenceNonUniformity              | 66.16666667  |
| wavelet-LLL | gldm       | GrayLevelNonUniformity               | 2.166666667  |
| wavelet-LLL | gldm       | SmallDependenceEmphasis              | 0.808641975  |
| wavelet-LLL | gldm       | SmallDependenceHighGrayLevelEmphasis | 1884.049383  |
| wavelet-LLL | gldm       | DependenceNonUniformityNormalized    | 0.612654321  |
| wavelet-LLL | gldm       | LargeDependenceEmphasis              | 1.888888889  |
| wavelet-LLL | gldm       | LargeDependenceLowGrayLevelEmphasis  | 0.02108391   |
| wavelet-LLL | gldm       | DependenceVariance                   | 0.25617284   |
| wavelet-LLL | gldm       | LargeDependenceHighGrayLevelEmphasis | 5962.675926  |
| wavelet-LLL | gldm       | SmallDependenceLowGrayLevelEmphasis  | 0.020094189  |
| wavelet-LLL | gldm       | LowGrayLevelEmphasis                 | 0.020288177  |
| wavelet-LLL | glcm       | JointAverage                         | 52.08848599  |
| wavelet-LLL | glcm       | SumAverage                           | 104.176972   |
| wavelet-LLL | glcm       | JointEntropy                         | 7.029243723  |
| wavelet-LLL | glcm       | ClusterShade                         | -9572.577422 |
| wavelet-LLL | glcm       | MaximumProbability                   | 0.013879555  |
| wavelet-LLL | glcm       | Idmn                                 | 0.920833965  |
| wavelet-LLL | glcm       | JointEnergy                          | 0.007799299  |
| wavelet-LLL | glcm       | Contrast                             | 690.9835268  |
| wavelet-LLL | glcm       | DifferenceEntropy                    | 4.986192165  |
| wavelet-LLL | glcm       | InverseVariance                      | 0.048249875  |
| wavelet-LLL | glcm       | DifferenceVariance                   | 234.8749423  |
| wavelet-LLL | glcm       | Idn                                  | 0.815413844  |
| wavelet-LLL | glcm       | Idm                                  | 0.048182295  |
| wavelet-LLL | glcm       | Correlation                          | 0.273775871  |
| wavelet-LLL | glcm       | Autocorrelation                      | 2842.26378   |
| wavelet-LLL | glcm       | SumEntropy                           | 5.581624489  |
| wavelet-LLL | glcm       | SumSquares                           | 473.8571355  |
| wavelet-LLL | glcm       | ClusterProminence                    | 3300354.533  |
| wavelet-LLL | glcm       | Imc2                                 | 0.999916934  |
| wavelet-LLL | glcm       | Imc1                                 | -0.766751811 |
| wavelet-LLL | glcm       | DifferenceAverage                    | 21.15277462  |
| wavelet-LLL | glcm       | Id                                   | 0.106382524  |
| wavelet-LLL | glcm       | ClusterTendency                      | 1204.445015  |
| wavelet-LLL | firstorder | InterquartileRange                   | 885.4584205  |
| wavelet-LLL | firstorder | Skewness                             | 0.030518355  |
| wavelet-LLL | firstorder | Uniformity                           | 0.020061728  |
| wavelet-LLL | firstorder | Median                               | -721.1454345 |
| wavelet-LLL | firstorder | Energy                               | 82662238.28  |
| wavelet-LLL | firstorder | RobustMeanAbsoluteDeviation          | 373.8271466  |

|             |            |                                  |              |
|-------------|------------|----------------------------------|--------------|
| wavelet-LLL | firstorder | MeanAbsoluteDeviation            | 477.1030321  |
| wavelet-LLL | firstorder | TotalEnergy                      | 2231880433   |
| wavelet-LLL | firstorder | Maximum                          | 294.0856171  |
| wavelet-LLL | firstorder | RootMeanSquared                  | 874.8663299  |
| wavelet-LLL | firstorder | 90Percentile                     | 132.9159222  |
| wavelet-LLL | firstorder | Minimum                          | -1781.152152 |
| wavelet-LLL | firstorder | Entropy                          | 5.82068516   |
| wavelet-LLL | firstorder | Range                            | 2075.237769  |
| wavelet-LLL | firstorder | Variance                         | 305196.3138  |
| wavelet-LLL | firstorder | 10Percentile                     | -1404.758476 |
| wavelet-LLL | firstorder | Kurtosis                         | 1.956548118  |
| wavelet-LLL | firstorder | Mean                             | -678.3765778 |
| wavelet-LLL | glrlm      | ShortRunLowGrayLevelEmphasis     | 0.020491545  |
| wavelet-LLL | glrlm      | GrayLevelVariance                | 487.9744016  |
| wavelet-LLL | glrlm      | LowGrayLevelRunEmphasis          | 0.020499218  |
| wavelet-LLL | glrlm      | GrayLevelNonUniformityNormalized | 0.020015825  |
| wavelet-LLL | glrlm      | RunVariance                      | 0.010678564  |
| wavelet-LLL | glrlm      | GrayLevelNonUniformity           | 2.138668297  |
| wavelet-LLL | glrlm      | LongRunEmphasis                  | 1.032719388  |
| wavelet-LLL | glrlm      | ShortRunHighGrayLevelEmphasis    | 2503.045279  |
| wavelet-LLL | glrlm      | RunLengthNonUniformity           | 104.5865652  |
| wavelet-LLL | glrlm      | ShortRunEmphasis                 | 0.991820153  |
| wavelet-LLL | glrlm      | LongRunHighGrayLevelEmphasis     | 2653.891635  |
| wavelet-LLL | glrlm      | RunPercentage                    | 0.989316239  |
| wavelet-LLL | glrlm      | LongRunLowGrayLevelEmphasis      | 0.020529911  |
| wavelet-LLL | glrlm      | RunEntropy                       | 5.838094045  |
| wavelet-LLL | glrlm      | HighGrayLevelRunEmphasis         | 2533.21455   |
| wavelet-LLL | glrlm      | RunLengthNonUniformityNormalized | 0.978642872  |
| wavelet-LLL | glszm      | GrayLevelVariance                | 470.0947261  |
| wavelet-LLL | glszm      | ZoneVariance                     | 0.148030783  |
| wavelet-LLL | glszm      | GrayLevelNonUniformityNormalized | 0.019239475  |
| wavelet-LLL | glszm      | SizeZoneNonUniformityNormalized  | 0.758940697  |
| wavelet-LLL | glszm      | SizeZoneNonUniformity            | 71.34042553  |
| wavelet-LLL | glszm      | GrayLevelNonUniformity           | 1.808510638  |
| wavelet-LLL | glszm      | LargeAreaEmphasis                | 1.468085106  |
| wavelet-LLL | glszm      | SmallAreaHighGrayLevelEmphasis   | 2052.712175  |
| wavelet-LLL | glszm      | ZonePercentage                   | 0.87037037   |
| wavelet-LLL | glszm      | LargeAreaLowGrayLevelEmphasis    | 0.02361116   |
| wavelet-LLL | glszm      | LargeAreaHighGrayLevelEmphasis   | 4100.670213  |
| wavelet-LLL | glszm      | HighGrayLevelZoneEmphasis        | 2403.287234  |
| wavelet-LLL | glszm      | SmallAreaEmphasis                | 0.894799054  |
| wavelet-LLL | glszm      | LowGrayLevelZoneEmphasis         | 0.023160855  |
| wavelet-LLL | glszm      | ZoneEntropy                      | 6.011827681  |
| wavelet-LLL | glszm      | SmallAreaLowGrayLevelEmphasis    | 0.023050173  |
| wavelet-LLL | ngtdm      | Coarseness                       | 0.029994138  |
| wavelet-LLL | ngtdm      | Complexity                       | 30298.25977  |
| wavelet-LLL | ngtdm      | Strength                         | 79.76586594  |
| wavelet-LLL | ngtdm      | Contrast                         | 3.603856083  |
| wavelet-LLL | ngtdm      | Busyness                         | 0.015229212  |
| wavelet-HHL | gldm       | GrayLevelVariance                | 22.46262003  |
| wavelet-HHL | gldm       | HighGrayLevelEmphasis            | 217.9444444  |
| wavelet-HHL | gldm       | DependenceEntropy                | 5.255689326  |
| wavelet-HHL | gldm       | DependenceNonUniformity          | 34.75925926  |

|             |            |                                      |              |
|-------------|------------|--------------------------------------|--------------|
| wavelet-HHL | gldm       | GrayLevelNonUniformity               | 7.12962963   |
| wavelet-HHL | gldm       | SmallDependenceEmphasis              | 0.572755837  |
| wavelet-HHL | gldm       | SmallDependenceHighGrayLevelEmphasis | 130.7547996  |
| wavelet-HHL | gldm       | DependenceNonUniformityNormalized    | 0.321844993  |
| wavelet-HHL | gldm       | LargeDependenceEmphasis              | 6.148148148  |
| wavelet-HHL | gldm       | LargeDependenceLowGrayLevelEmphasis  | 0.046437909  |
| wavelet-HHL | gldm       | DependenceVariance                   | 1.846364883  |
| wavelet-HHL | gldm       | LargeDependenceHighGrayLevelEmphasis | 1392.740741  |
| wavelet-HHL | gldm       | SmallDependenceLowGrayLevelEmphasis  | 0.01435663   |
| wavelet-HHL | gldm       | LowGrayLevelEmphasis                 | 0.017112479  |
| wavelet-HHL | glcm       | JointAverage                         | 13.93341558  |
| wavelet-HHL | glcm       | SumAverage                           | 27.86683117  |
| wavelet-HHL | glcm       | JointEntropy                         | 6.537726464  |
| wavelet-HHL | glcm       | ClusterShade                         | -23.08526723 |
| wavelet-HHL | glcm       | MaximumProbability                   | 0.0303986    |
| wavelet-HHL | glcm       | Idmn                                 | 0.941403916  |
| wavelet-HHL | glcm       | JointEnergy                          | 0.012163751  |
| wavelet-HHL | glcm       | Contrast                             | 43.85521277  |
| wavelet-HHL | glcm       | DifferenceEntropy                    | 3.584143478  |
| wavelet-HHL | glcm       | InverseVariance                      | 0.181264912  |
| wavelet-HHL | glcm       | DifferenceVariance                   | 15.66746018  |
| wavelet-HHL | glcm       | Idn                                  | 0.84108496   |
| wavelet-HHL | glcm       | Idm                                  | 0.176729477  |
| wavelet-HHL | glcm       | Correlation                          | -0.041174262 |
| wavelet-HHL | glcm       | Autocorrelation                      | 193.2034369  |
| wavelet-HHL | glcm       | SumEntropy                           | 4.32302579   |
| wavelet-HHL | glcm       | SumSquares                           | 20.9225015   |
| wavelet-HHL | glcm       | ClusterProminence                    | 4732.096806  |
| wavelet-HHL | glcm       | Imc2                                 | 0.975150854  |
| wavelet-HHL | glcm       | Imc1                                 | -0.378526554 |
| wavelet-HHL | glcm       | DifferenceAverage                    | 5.218573478  |
| wavelet-HHL | glcm       | Id                                   | 0.269857959  |
| wavelet-HHL | glcm       | ClusterTendency                      | 39.83479323  |
| wavelet-HHL | firstorder | InterquartileRange                   | 162.6824149  |
| wavelet-HHL | firstorder | Skewness                             | -0.117947612 |
| wavelet-HHL | firstorder | Uniformity                           | 0.066015089  |
| wavelet-HHL | firstorder | Median                               | 13.52887559  |
| wavelet-HHL | firstorder | Energy                               | 1525774.184  |
| wavelet-HHL | firstorder | RobustMeanAbsoluteDeviation          | 70.85847054  |
| wavelet-HHL | firstorder | MeanAbsoluteDeviation                | 97.18259684  |
| wavelet-HHL | firstorder | TotalEnergy                          | 41195902.98  |
| wavelet-HHL | firstorder | Maximum                              | 282.7848763  |
| wavelet-HHL | firstorder | RootMeanSquared                      | 118.8593233  |
| wavelet-HHL | firstorder | 90Percentile                         | 153.0290958  |
| wavelet-HHL | firstorder | Minimum                              | -319.2236449 |
| wavelet-HHL | firstorder | Entropy                              | 4.117113473  |
| wavelet-HHL | firstorder | Range                                | 602.0085212  |
| wavelet-HHL | firstorder | Variance                             | 14004.05338  |
| wavelet-HHL | firstorder | 10Percentile                         | -150.3032768 |
| wavelet-HHL | firstorder | Kurtosis                             | 2.726517662  |
| wavelet-HHL | firstorder | Mean                                 | 11.11239689  |
| wavelet-HHL | glrlm      | ShortRunLowGrayLevelEmphasis         | 0.017395475  |
| wavelet-HHL | glrlm      | GrayLevelVariance                    | 22.95181587  |



|             |       |                                      |              |
|-------------|-------|--------------------------------------|--------------|
| wavelet-HHL | glrlm | LowGrayLevelRunEmphasis              | 0.01759293   |
| wavelet-HHL | glrlm | GrayLevelNonUniformityNormalized     | 0.06439922   |
| wavelet-HHL | glrlm | RunVariance                          | 0.041183789  |
| wavelet-HHL | glrlm | GrayLevelNonUniformity               | 6.669272291  |
| wavelet-HHL | glrlm | LongRunEmphasis                      | 1.130382716  |
| wavelet-HHL | glrlm | ShortRunHighGrayLevelEmphasis        | 210.8918456  |
| wavelet-HHL | glrlm | RunLengthNonUniformity               | 95.07986324  |
| wavelet-HHL | glrlm | ShortRunEmphasis                     | 0.967404321  |
| wavelet-HHL | glrlm | LongRunHighGrayLevelEmphasis         | 246.301835   |
| wavelet-HHL | glrlm | RunPercentage                        | 0.958689459  |
| wavelet-HHL | glrlm | LongRunLowGrayLevelEmphasis          | 0.018382749  |
| wavelet-HHL | glrlm | RunEntropy                           | 4.309231588  |
| wavelet-HHL | glrlm | HighGrayLevelRunEmphasis             | 217.9738435  |
| wavelet-HHL | glrlm | RunLengthNonUniformityNormalized     | 0.917632423  |
| wavelet-HHL | glszm | GrayLevelVariance                    | 29.30968858  |
| wavelet-HHL | glszm | ZoneVariance                         | 2.565743945  |
| wavelet-HHL | glszm | GrayLevelNonUniformityNormalized     | 0.0566609    |
| wavelet-HHL | glszm | SizeZoneNonUniformityNormalized      | 0.641435986  |
| wavelet-HHL | glszm | SizeZoneNonUniformity                | 43.61764706  |
| wavelet-HHL | glszm | GrayLevelNonUniformity               | 3.852941176  |
| wavelet-HHL | glszm | LargeAreaEmphasis                    | 5.088235294  |
| wavelet-HHL | glszm | SmallAreaHighGrayLevelEmphasis       | 190.1041204  |
| wavelet-HHL | glszm | ZonePercentage                       | 0.62962963   |
| wavelet-HHL | glszm | LargeAreaLowGrayLevelEmphasis        | 0.044884237  |
| wavelet-HHL | glszm | LargeAreaHighGrayLevelEmphasis       | 1215.470588  |
| wavelet-HHL | glszm | HighGrayLevelZoneEmphasis            | 222.0294118  |
| wavelet-HHL | glszm | SmallAreaEmphasis                    | 0.822809445  |
| wavelet-HHL | glszm | LowGrayLevelZoneEmphasis             | 0.023516999  |
| wavelet-HHL | glszm | ZoneEntropy                          | 4.850125113  |
| wavelet-HHL | glszm | SmallAreaLowGrayLevelEmphasis        | 0.022249669  |
| wavelet-HHL | ngtdm | Coarseness                           | 0.041589529  |
| wavelet-HHL | ngtdm | Complexity                           | 755.1901129  |
| wavelet-HHL | ngtdm | Strength                             | 6.653484529  |
| wavelet-HHL | ngtdm | Contrast                             | 0.398785432  |
| wavelet-HHL | ngtdm | Busyness                             | 0.094718686  |
| wavelet-HLH | gldm  | GrayLevelVariance                    | 29.32407407  |
| wavelet-HLH | gldm  | HighGrayLevelEmphasis                | 211.5740741  |
| wavelet-HLH | gldm  | DependenceEntropy                    | 5.408376595  |
| wavelet-HLH | gldm  | DependenceNonUniformity              | 34.92592593  |
| wavelet-HLH | gldm  | GrayLevelNonUniformity               | 6.62962963   |
| wavelet-HLH | gldm  | SmallDependenceEmphasis              | 0.561715535  |
| wavelet-HLH | gldm  | SmallDependenceHighGrayLevelEmphasis | 118.019856   |
| wavelet-HLH | gldm  | DependenceNonUniformityNormalized    | 0.323388203  |
| wavelet-HLH | gldm  | LargeDependenceEmphasis              | 5.074074074  |
| wavelet-HLH | gldm  | LargeDependenceLowGrayLevelEmphasis  | 0.047912821  |
| wavelet-HLH | gldm  | DependenceVariance                   | 1.293209877  |
| wavelet-HLH | gldm  | LargeDependenceHighGrayLevelEmphasis | 1014.314815  |
| wavelet-HLH | gldm  | SmallDependenceLowGrayLevelEmphasis  | 0.022192845  |
| wavelet-HLH | gldm  | LowGrayLevelEmphasis                 | 0.024660833  |
| wavelet-HLH | glcm  | JointAverage                         | 13.62501401  |
| wavelet-HLH | glcm  | SumAverage                           | 27.25002802  |
| wavelet-HLH | glcm  | JointEntropy                         | 6.622088705  |
| wavelet-HLH | glcm  | ClusterShade                         | -86.36407979 |

|             |            |                                  |              |
|-------------|------------|----------------------------------|--------------|
| wavelet-HLH | glcm       | MaximumProbability               | 0.025671812  |
| wavelet-HLH | glcm       | Idmn                             | 0.936272863  |
| wavelet-HLH | glcm       | JointEnergy                      | 0.011181905  |
| wavelet-HLH | glcm       | Contrast                         | 58.69230549  |
| wavelet-HLH | glcm       | DifferenceEntropy                | 3.717812382  |
| wavelet-HLH | glcm       | InverseVariance                  | 0.182818171  |
| wavelet-HLH | glcm       | DifferenceVariance               | 24.42041846  |
| wavelet-HLH | glcm       | Idn                              | 0.840852855  |
| wavelet-HLH | glcm       | Idm                              | 0.171057282  |
| wavelet-HLH | glcm       | Correlation                      | -0.040500438 |
| wavelet-HLH | glcm       | Autocorrelation                  | 184.6729175  |
| wavelet-HLH | glcm       | SumEntropy                       | 4.426804921  |
| wavelet-HLH | glcm       | SumSquares                       | 28.28447226  |
| wavelet-HLH | glcm       | ClusterProminence                | 10201.34073  |
| wavelet-HLH | glcm       | Imc2                             | 0.988173597  |
| wavelet-HLH | glcm       | Imc1                             | -0.443215132 |
| wavelet-HLH | glcm       | DifferenceAverage                | 5.773996006  |
| wavelet-HLH | glcm       | Id                               | 0.262638824  |
| wavelet-HLH | glcm       | ClusterTendency                  | 54.44558354  |
| wavelet-HLH | firstorder | InterquartileRange               | 167.8033465  |
| wavelet-HLH | firstorder | Skewness                         | -0.143463378 |
| wavelet-HLH | firstorder | Uniformity                       | 0.06138546   |
| wavelet-HLH | firstorder | Median                           | 7.905251013  |
| wavelet-HLH | firstorder | Energy                           | 1970843.837  |
| wavelet-HLH | firstorder | RobustMeanAbsoluteDeviation      | 71.04483163  |
| wavelet-HLH | firstorder | MeanAbsoluteDeviation            | 105.4691019  |
| wavelet-HLH | firstorder | TotalEnergy                      | 53212783.59  |
| wavelet-HLH | firstorder | Maximum                          | 342.5037039  |
| wavelet-HLH | firstorder | RootMeanSquared                  | 135.087209   |
| wavelet-HLH | firstorder | 90Percentile                     | 174.8134435  |
| wavelet-HLH | firstorder | Minimum                          | -302.4061039 |
| wavelet-HLH | firstorder | Entropy                          | 4.307131477  |
| wavelet-HLH | firstorder | Range                            | 644.9098078  |
| wavelet-HLH | firstorder | Variance                         | 18248.17382  |
| wavelet-HLH | firstorder | 10Percentile                     | -209.2636311 |
| wavelet-HLH | firstorder | Kurtosis                         | 2.782231649  |
| wavelet-HLH | firstorder | Mean                             | -0.616625362 |
| wavelet-HLH | glrlm      | ShortRunLowGrayLevelEmphasis     | 0.025225718  |
| wavelet-HLH | glrlm      | GrayLevelVariance                | 30.16676234  |
| wavelet-HLH | glrlm      | LowGrayLevelRunEmphasis          | 0.025383518  |
| wavelet-HLH | glrlm      | GrayLevelNonUniformityNormalized | 0.060002762  |
| wavelet-HLH | glrlm      | RunVariance                      | 0.039236624  |
| wavelet-HLH | glrlm      | GrayLevelNonUniformity           | 6.245679791  |
| wavelet-HLH | glrlm      | LongRunEmphasis                  | 1.117411776  |
| wavelet-HLH | glrlm      | ShortRunHighGrayLevelEmphasis    | 206.3016752  |
| wavelet-HLH | glrlm      | RunLengthNonUniformity           | 96.88339817  |
| wavelet-HLH | glrlm      | ShortRunEmphasis                 | 0.972323101  |
| wavelet-HLH | glrlm      | LongRunHighGrayLevelEmphasis     | 235.5754224  |
| wavelet-HLH | glrlm      | RunPercentage                    | 0.963675214  |
| wavelet-HLH | glrlm      | LongRunLowGrayLevelEmphasis      | 0.026054388  |
| wavelet-HLH | glrlm      | RunEntropy                       | 4.473217404  |
| wavelet-HLH | glrlm      | HighGrayLevelRunEmphasis         | 211.9298234  |
| wavelet-HLH | glrlm      | RunLengthNonUniformityNormalized | 0.930131912  |

|             |       |                                  |             |
|-------------|-------|----------------------------------|-------------|
| wavelet-HLH | glszm | GrayLevelVariance                | 41.47988754 |
| wavelet-HLH | glszm | ZoneVariance                     | 2.212802768 |
| wavelet-HLH | glszm | GrayLevelNonUniformityNormalized | 0.047145329 |
| wavelet-HLH | glszm | SizeZoneNonUniformityNormalized  | 0.58650519  |
| wavelet-HLH | glszm | SizeZoneNonUniformity            | 39.88235294 |
| wavelet-HLH | glszm | GrayLevelNonUniformity           | 3.205882353 |
| wavelet-HLH | glszm | LargeAreaEmphasis                | 4.735294118 |
| wavelet-HLH | glszm | SmallAreaHighGrayLevelEmphasis   | 165.0256786 |
| wavelet-HLH | glszm | ZonePercentage                   | 0.62962963  |
| wavelet-HLH | glszm | LargeAreaLowGrayLevelEmphasis    | 0.056487274 |
| wavelet-HLH | glszm | LargeAreaHighGrayLevelEmphasis   | 957.3235294 |
| wavelet-HLH | glszm | HighGrayLevelZoneEmphasis        | 212.3970588 |
| wavelet-HLH | glszm | SmallAreaEmphasis                | 0.792690745 |
| wavelet-HLH | glszm | LowGrayLevelZoneEmphasis         | 0.035888083 |
| wavelet-HLH | glszm | ZoneEntropy                      | 5.138502179 |
| wavelet-HLH | glszm | SmallAreaLowGrayLevelEmphasis    | 0.034713774 |
| wavelet-HLH | ngtdm | Coarseness                       | 0.049901485 |
| wavelet-HLH | ngtdm | Complexity                       | 1088.294126 |
| wavelet-HLH | ngtdm | Strength                         | 9.305354131 |
| wavelet-HLH | ngtdm | Contrast                         | 0.404180619 |
| wavelet-HLH | ngtdm | Busyness                         | 0.059152297 |

| Image type | Feature Class | Feature Name                         |                                                                                                                                                                                                                                                                                                                                                                                                                   |
|------------|---------------|--------------------------------------|-------------------------------------------------------------------------------------------------------------------------------------------------------------------------------------------------------------------------------------------------------------------------------------------------------------------------------------------------------------------------------------------------------------------|
| general    | info          | BoundingBox                          | 502: RTSTRUCT: C99-DNU_segment_ITVp<br>(0, 0, 1, 5, 5, 4)                                                                                                                                                                                                                                                                                                                                                         |
| general    | info          | EnabledImageTypes                    | {u'Original': {}, u'Wavelet': {}}                                                                                                                                                                                                                                                                                                                                                                                 |
|            |               |                                      | {'distances': [1], 'additionalInfo': True, 'force2D': False, 'interpolator': 'sitkBSpline', 'resampledPixelSpacing': [3.0], 'label': 1, 'normalizeScale': 1, 'normalize': False, 'force2Ddimension': 0, 'removeOutliers': None, 'minimumROISize': None, u'binWidth': 25.0, 'minimumROIDimensions': 1, u'correctMask': True, 'preCrop': False, u'symmetricalGLCM': True, 'resegmentRange': None, 'padDistance': 5} |
| general    | info          | GeneralSettings                      |                                                                                                                                                                                                                                                                                                                                                                                                                   |
| general    | info          | ImageHash                            | 642adbafa5d7080cbe199e9b94065faf49b83188<br>(0.9765625000000002, 0.9765625000000002, 2.0)                                                                                                                                                                                                                                                                                                                         |
| general    | info          | ImageSpacing                         |                                                                                                                                                                                                                                                                                                                                                                                                                   |
| general    | info          | MaskHash                             | b0ac6997fd95c65a05c261b1da5b0086d2209f4b                                                                                                                                                                                                                                                                                                                                                                          |
| general    | info          | NumpyVersion                         | 1.13.1                                                                                                                                                                                                                                                                                                                                                                                                            |
| general    | info          | PyWaveletVersion                     | 0.5.2                                                                                                                                                                                                                                                                                                                                                                                                             |
| general    | info          | SimpleITKVersion                     | 1.1.0                                                                                                                                                                                                                                                                                                                                                                                                             |
| general    | info          | Version                              | 1.3.0.post102+g1b0eb74                                                                                                                                                                                                                                                                                                                                                                                            |
| general    | info          | VolumeNum                            | 1                                                                                                                                                                                                                                                                                                                                                                                                                 |
| general    | info          | VoxelNum                             | 45                                                                                                                                                                                                                                                                                                                                                                                                                |
| original   | shape         | Maximum3DDiameter                    | 14.69693846                                                                                                                                                                                                                                                                                                                                                                                                       |
| original   | shape         | Maximum2DDiameterSlice               | 13.41640786                                                                                                                                                                                                                                                                                                                                                                                                       |
| original   | shape         | Sphericity                           | 0.917871287                                                                                                                                                                                                                                                                                                                                                                                                       |
| original   | shape         | MinorAxis                            | 12.21353278                                                                                                                                                                                                                                                                                                                                                                                                       |
| original   | shape         | Elongation                           | 0.862970258                                                                                                                                                                                                                                                                                                                                                                                                       |
| original   | shape         | SurfaceVolumeRatio                   | 0.493753569                                                                                                                                                                                                                                                                                                                                                                                                       |
| original   | shape         | Volume                               | 1215                                                                                                                                                                                                                                                                                                                                                                                                              |
| original   | shape         | MajorAxis                            | 14.15290117                                                                                                                                                                                                                                                                                                                                                                                                       |
| original   | shape         | SurfaceArea                          | 599.9105857                                                                                                                                                                                                                                                                                                                                                                                                       |
| original   | shape         | Flatness                             | 0.717848766                                                                                                                                                                                                                                                                                                                                                                                                       |
| original   | shape         | LeastAxis                            | 10.15964265                                                                                                                                                                                                                                                                                                                                                                                                       |
| original   | shape         | Maximum2DDiameterColumn              | 13.41640786                                                                                                                                                                                                                                                                                                                                                                                                       |
| original   | shape         | Maximum2DDiameterRow                 | 13.41640786                                                                                                                                                                                                                                                                                                                                                                                                       |
| original   | gldm          | GrayLevelVariance                    | 83.10617284                                                                                                                                                                                                                                                                                                                                                                                                       |
| original   | gldm          | HighGrayLevelEmphasis                | 346.2666667                                                                                                                                                                                                                                                                                                                                                                                                       |
| original   | gldm          | DependenceEntropy                    | 4.691853096                                                                                                                                                                                                                                                                                                                                                                                                       |
| original   | gldm          | DependenceNonUniformity              | 20.73333333                                                                                                                                                                                                                                                                                                                                                                                                       |
| original   | gldm          | GrayLevelNonUniformity               | 2.511111111                                                                                                                                                                                                                                                                                                                                                                                                       |
| original   | gldm          | SmallDependenceEmphasis              | 0.627160494                                                                                                                                                                                                                                                                                                                                                                                                       |
| original   | gldm          | SmallDependenceHighGrayLevelEmphasis | 185.9506173                                                                                                                                                                                                                                                                                                                                                                                                       |
| original   | gldm          | DependenceNonUniformityNormalized    | 0.460740741                                                                                                                                                                                                                                                                                                                                                                                                       |
| original   | gldm          | LargeDependenceEmphasis              | 2.688888889                                                                                                                                                                                                                                                                                                                                                                                                       |
| original   | gldm          | LargeDependenceLowGrayLevelEmphasis  | 0.04911702                                                                                                                                                                                                                                                                                                                                                                                                        |
| original   | gldm          | DependenceVariance                   | 0.337777778                                                                                                                                                                                                                                                                                                                                                                                                       |
| original   | gldm          | LargeDependenceHighGrayLevelEmphasis | 1090.444444                                                                                                                                                                                                                                                                                                                                                                                                       |
| original   | gldm          | SmallDependenceLowGrayLevelEmphasis  | 0.032077263                                                                                                                                                                                                                                                                                                                                                                                                       |
| original   | gldm          | LowGrayLevelEmphasis                 | 0.035220794                                                                                                                                                                                                                                                                                                                                                                                                       |
| original   | glcm          | JointAverage                         | 18.22490759                                                                                                                                                                                                                                                                                                                                                                                                       |
| original   | glcm          | SumAverage                           | 36.44981518                                                                                                                                                                                                                                                                                                                                                                                                       |

|          |            |                                  |              |
|----------|------------|----------------------------------|--------------|
| original | glcm       | JointEntropy                     | 5.434539186  |
| original | glcm       | ClusterShade                     | 20.16485518  |
| original | glcm       | MaximumProbability               | 0.036309585  |
| original | glcm       | Idmn                             | 0.883873979  |
| original | glcm       | JointEnergy                      | 0.023880008  |
| original | glcm       | Contrast                         | 161.5622026  |
| original | glcm       | DifferenceEntropy                | 3.761629745  |
| original | glcm       | InverseVariance                  | 0.087842704  |
| original | glcm       | DifferenceVariance               | 52.56489626  |
| original | glcm       | Idn                              | 0.778435994  |
| original | glcm       | Idm                              | 0.094263469  |
| original | glcm       | Correlation                      | 0.06726969   |
| original | glcm       | Autocorrelation                  | 337.8114928  |
| original | glcm       | SumEntropy                       | 4.140964115  |
| original | glcm       | SumSquares                       | 86.18594788  |
| original | glcm       | ClusterProminence                | 73346.15672  |
| original | glcm       | Imc2                             | 0.998705723  |
| original | glcm       | Imc1                             | -0.717784456 |
| original | glcm       | DifferenceAverage                | 10.31041339  |
| original | glcm       | Id                               | 0.173409334  |
| original | glcm       | ClusterTendency                  | 183.181589   |
| original | firstorder | InterquartileRange               | 379          |
| original | firstorder | Skewness                         | 0.214635759  |
| original | firstorder | Uniformity                       | 0.055802469  |
| original | firstorder | Median                           | -426         |
| original | firstorder | Energy                           | 8908500      |
| original | firstorder | RobustMeanAbsoluteDeviation      | 155.2489796  |
| original | firstorder | MeanAbsoluteDeviation            | 198.8197531  |
| original | firstorder | TotalEnergy                      | 240529500    |
| original | firstorder | Maximum                          | 16           |
| original | firstorder | RootMeanSquared                  | 444.9344521  |
| original | firstorder | 90Percentile                     | -51          |
| original | firstorder | Minimum                          | -752         |
| original | firstorder | Entropy                          | 4.385754485  |
| original | firstorder | Range                            | 768          |
| original | firstorder | Variance                         | 51872.83951  |
| original | firstorder | 10Percentile                     | -648         |
| original | firstorder | Kurtosis                         | 1.789727895  |
| original | firstorder | Mean                             | -382.2222222 |
| original | glrlm      | ShortRunLowGrayLevelEmphasis     | 0.035661591  |
| original | glrlm      | GrayLevelVariance                | 82.71106578  |
| original | glrlm      | LowGrayLevelRunEmphasis          | 0.035795573  |
| original | glrlm      | GrayLevelNonUniformityNormalized | 0.055659489  |
| original | glrlm      | RunVariance                      | 0.020467449  |
| original | glrlm      | GrayLevelNonUniformity           | 2.453878163  |
| original | glrlm      | LongRunEmphasis                  | 1.064174198  |
| original | glrlm      | ShortRunHighGrayLevelEmphasis    | 337.2551126  |
| original | glrlm      | RunLengthNonUniformity           | 42.30984132  |
| original | glrlm      | ShortRunEmphasis                 | 0.983956451  |
| original | glrlm      | LongRunHighGrayLevelEmphasis     | 372.4380039  |
| original | glrlm      | RunPercentage                    | 0.979487179  |
| original | glrlm      | LongRunLowGrayLevelEmphasis      | 0.036331502  |
| original | glrlm      | RunEntropy                       | 4.419141571  |
| original | glrlm      | HighGrayLevelRunEmphasis         | 344.2916909  |
| original | glrlm      | RunLengthNonUniformityNormalized | 0.959065101  |

|             |       |                                      |              |
|-------------|-------|--------------------------------------|--------------|
| original    | glszm | GrayLevelVariance                    | 76.60238751  |
| original    | glszm | ZoneVariance                         | 0.35261708   |
| original    | glszm | GrayLevelNonUniformityNormalized     | 0.052341598  |
| original    | glszm | SizeZoneNonUniformityNormalized      | 0.548209366  |
| original    | glszm | SizeZoneNonUniformity                | 18.09090909  |
| original    | glszm | GrayLevelNonUniformity               | 1.727272727  |
| original    | glszm | LargeAreaEmphasis                    | 2.212121212  |
| original    | glszm | SmallAreaHighGrayLevelEmphasis       | 213.9175084  |
| original    | glszm | ZonePercentage                       | 0.733333333  |
| original    | glszm | LargeAreaLowGrayLevelEmphasis        | 0.054885681  |
| original    | glszm | LargeAreaHighGrayLevelEmphasis       | 852.5454545  |
| original    | glszm | HighGrayLevelZoneEmphasis            | 313.5757576  |
| original    | glszm | SmallAreaEmphasis                    | 0.764309764  |
| original    | glszm | LowGrayLevelZoneEmphasis             | 0.045005337  |
| original    | glszm | ZoneEntropy                          | 4.620151695  |
| original    | glszm | SmallAreaLowGrayLevelEmphasis        | 0.042985967  |
| original    | ngtdm | Coarseness                           | 0.046998219  |
| original    | ngtdm | Complexity                           | 2403.830544  |
| original    | ngtdm | Strength                             | 23.0477821   |
| original    | ngtdm | Contrast                             | 2.272176804  |
| original    | ngtdm | Busyness                             | 0.073449147  |
| wavelet-HHH | gldm  | GrayLevelVariance                    | 8.158024691  |
| wavelet-HHH | gldm  | HighGrayLevelEmphasis                | 63.57777778  |
| wavelet-HHH | gldm  | DependenceEntropy                    | 4.119087818  |
| wavelet-HHH | gldm  | DependenceNonUniformity              | 15           |
| wavelet-HHH | gldm  | GrayLevelNonUniformity               | 5.222222222  |
| wavelet-HHH | gldm  | SmallDependenceEmphasis              | 0.482561728  |
| wavelet-HHH | gldm  | SmallDependenceHighGrayLevelEmphasis | 31.78117284  |
| wavelet-HHH | gldm  | DependenceNonUniformityNormalized    | 0.333333333  |
| wavelet-HHH | gldm  | LargeDependenceEmphasis              | 4.511111111  |
| wavelet-HHH | gldm  | LargeDependenceLowGrayLevelEmphasis  | 0.144375273  |
| wavelet-HHH | gldm  | DependenceVariance                   | 0.773333333  |
| wavelet-HHH | gldm  | LargeDependenceHighGrayLevelEmphasis | 254.2888889  |
| wavelet-HHH | gldm  | SmallDependenceLowGrayLevelEmphasis  | 0.057734756  |
| wavelet-HHH | gldm  | LowGrayLevelEmphasis                 | 0.068374567  |
| wavelet-HHH | glcm  | JointAverage                         | 7.517344992  |
| wavelet-HHH | glcm  | SumAverage                           | 15.03468998  |
| wavelet-HHH | glcm  | JointEntropy                         | 4.985865198  |
| wavelet-HHH | glcm  | ClusterShade                         | 1.903978492  |
| wavelet-HHH | glcm  | MaximumProbability                   | 0.063419068  |
| wavelet-HHH | glcm  | Idmn                                 | 0.945808181  |
| wavelet-HHH | glcm  | JointEnergy                          | 0.035313074  |
| wavelet-HHH | glcm  | Contrast                             | 14.41756483  |
| wavelet-HHH | glcm  | DifferenceEntropy                    | 2.626098385  |
| wavelet-HHH | glcm  | InverseVariance                      | 0.324227057  |
| wavelet-HHH | glcm  | DifferenceVariance                   | 4.781837577  |
| wavelet-HHH | glcm  | Idn                                  | 0.845023584  |
| wavelet-HHH | glcm  | Idm                                  | 0.258350676  |
| wavelet-HHH | glcm  | Correlation                          | -0.005570471 |
| wavelet-HHH | glcm  | Autocorrelation                      | 56.34578353  |
| wavelet-HHH | glcm  | SumEntropy                           | 3.226097203  |
| wavelet-HHH | glcm  | SumSquares                           | 7.015858781  |
| wavelet-HHH | glcm  | ClusterProminence                    | 614.7205582  |
| wavelet-HHH | glcm  | Imc2                                 | 0.975433944  |
| wavelet-HHH | glcm  | Imc1                                 | -0.469718025 |

|             |            |                                  |              |
|-------------|------------|----------------------------------|--------------|
| wavelet-HHH | glcm       | DifferenceAverage                | 3.015888772  |
| wavelet-HHH | glcm       | Id                               | 0.34832803   |
| wavelet-HHH | glcm       | ClusterTendency                  | 13.64587029  |
| wavelet-HHH | firstorder | InterquartileRange               | 80.11389782  |
| wavelet-HHH | firstorder | Skewness                         | -0.002822205 |
| wavelet-HHH | firstorder | Uniformity                       | 0.116049383  |
| wavelet-HHH | firstorder | Median                           | 3.01298646   |
| wavelet-HHH | firstorder | Energy                           | 225184.225   |
| wavelet-HHH | firstorder | RobustMeanAbsoluteDeviation      | 35.6863122   |
| wavelet-HHH | firstorder | MeanAbsoluteDeviation            | 55.28562515  |
| wavelet-HHH | firstorder | TotalEnergy                      | 6079974.075  |
| wavelet-HHH | firstorder | Maximum                          | 176.0404188  |
| wavelet-HHH | firstorder | RootMeanSquared                  | 70.73962036  |
| wavelet-HHH | firstorder | 90Percentile                     | 76.01611698  |
| wavelet-HHH | firstorder | Minimum                          | -170.4602046 |
| wavelet-HHH | firstorder | Entropy                          | 3.351352676  |
| wavelet-HHH | firstorder | Range                            | 346.5006234  |
| wavelet-HHH | firstorder | Variance                         | 4993.265243  |
| wavelet-HHH | firstorder | 10Percentile                     | -94.69255171 |
| wavelet-HHH | firstorder | Kurtosis                         | 3.226442913  |
| wavelet-HHH | firstorder | Mean                             | -3.290690751 |
| wavelet-HHH | glrlm      | ShortRunLowGrayLevelEmphasis     | 0.06963225   |
| wavelet-HHH | glrlm      | GrayLevelVariance                | 8.379065887  |
| wavelet-HHH | glrlm      | LowGrayLevelRunEmphasis          | 0.070219736  |
| wavelet-HHH | glrlm      | GrayLevelNonUniformityNormalized | 0.11504078   |
| wavelet-HHH | glrlm      | RunVariance                      | 0.039291826  |
| wavelet-HHH | glrlm      | GrayLevelNonUniformity           | 4.993132619  |
| wavelet-HHH | glrlm      | LongRunEmphasis                  | 1.12094276   |
| wavelet-HHH | glrlm      | ShortRunHighGrayLevelEmphasis    | 62.19569585  |
| wavelet-HHH | glrlm      | RunLengthNonUniformity           | 40.55886441  |
| wavelet-HHH | glrlm      | ShortRunEmphasis                 | 0.971848946  |
| wavelet-HHH | glrlm      | LongRunHighGrayLevelEmphasis     | 70.6614897   |
| wavelet-HHH | glrlm      | RunPercentage                    | 0.964102564  |
| wavelet-HHH | glrlm      | LongRunLowGrayLevelEmphasis      | 0.072801306  |
| wavelet-HHH | glrlm      | RunEntropy                       | 3.478640916  |
| wavelet-HHH | glrlm      | HighGrayLevelRunEmphasis         | 63.8288171   |
| wavelet-HHH | glrlm      | RunLengthNonUniformityNormalized | 0.931849698  |
| wavelet-HHH | glszm      | GrayLevelVariance                | 11.79698217  |
| wavelet-HHH | glszm      | ZoneVariance                     | 1.407407407  |
| wavelet-HHH | glszm      | GrayLevelNonUniformityNormalized | 0.102880658  |
| wavelet-HHH | glszm      | SizeZoneNonUniformityNormalized  | 0.465020576  |
| wavelet-HHH | glszm      | SizeZoneNonUniformity            | 12.55555556  |
| wavelet-HHH | glszm      | GrayLevelNonUniformity           | 2.777777778  |
| wavelet-HHH | glszm      | LargeAreaEmphasis                | 4.185185185  |
| wavelet-HHH | glszm      | SmallAreaHighGrayLevelEmphasis   | 44.95559671  |
| wavelet-HHH | glszm      | ZonePercentage                   | 0.6          |
| wavelet-HHH | glszm      | LargeAreaLowGrayLevelEmphasis    | 0.16940774   |
| wavelet-HHH | glszm      | LargeAreaHighGrayLevelEmphasis   | 236.8518519  |
| wavelet-HHH | glszm      | HighGrayLevelZoneEmphasis        | 66.66666667  |
| wavelet-HHH | glszm      | SmallAreaEmphasis                | 0.678436214  |
| wavelet-HHH | glszm      | LowGrayLevelZoneEmphasis         | 0.099963966  |
| wavelet-HHH | glszm      | ZoneEntropy                      | 4.032303243  |
| wavelet-HHH | glszm      | SmallAreaLowGrayLevelEmphasis    | 0.093667103  |
| wavelet-HHH | ngtdm      | Coarseness                       | 0.116035098  |
| wavelet-HHH | ngtdm      | Complexity                       | 151.3778477  |

|             |            |                                      |              |
|-------------|------------|--------------------------------------|--------------|
| wavelet-HHH | ngtdm      | Strength                             | 5.962200691  |
| wavelet-HHH | ngtdm      | Contrast                             | 0.247981602  |
| wavelet-HHH | ngtdm      | Busyness                             | 0.10347217   |
| wavelet-HLL | gldm       | GrayLevelVariance                    | 79.81432099  |
| wavelet-HLL | gldm       | HighGrayLevelEmphasis                | 392.71111111 |
| wavelet-HLL | gldm       | DependenceEntropy                    | 4.763966707  |
| wavelet-HLL | gldm       | DependenceNonUniformity              | 20.42222222  |
| wavelet-HLL | gldm       | GrayLevelNonUniformity               | 2.333333333  |
| wavelet-HLL | gldm       | SmallDependenceEmphasis              | 0.65632716   |
| wavelet-HLL | gldm       | SmallDependenceHighGrayLevelEmphasis | 230.7222222  |
| wavelet-HLL | gldm       | DependenceNonUniformityNormalized    | 0.45382716   |
| wavelet-HLL | gldm       | LargeDependenceEmphasis              | 2.822222222  |
| wavelet-HLL | gldm       | LargeDependenceLowGrayLevelEmphasis  | 0.043962099  |
| wavelet-HLL | gldm       | DependenceVariance                   | 0.471111111  |
| wavelet-HLL | gldm       | LargeDependenceHighGrayLevelEmphasis | 1298.444444  |
| wavelet-HLL | gldm       | SmallDependenceLowGrayLevelEmphasis  | 0.034967225  |
| wavelet-HLL | gldm       | LowGrayLevelEmphasis                 | 0.036610807  |
| wavelet-HLL | glcm       | JointAverage                         | 17.9948908   |
| wavelet-HLL | glcm       | SumAverage                           | 35.98978161  |
| wavelet-HLL | glcm       | JointEntropy                         | 5.386718162  |
| wavelet-HLL | glcm       | ClusterShade                         | 447.3275094  |
| wavelet-HLL | glcm       | MaximumProbability                   | 0.03807984   |
| wavelet-HLL | glcm       | Idmn                                 | 0.942179916  |
| wavelet-HLL | glcm       | JointEnergy                          | 0.024698479  |
| wavelet-HLL | glcm       | Contrast                             | 91.92714836  |
| wavelet-HLL | glcm       | DifferenceEntropy                    | 3.317788653  |
| wavelet-HLL | glcm       | InverseVariance                      | 0.171715378  |
| wavelet-HLL | glcm       | DifferenceVariance                   | 25.16583714  |
| wavelet-HLL | glcm       | Idn                                  | 0.843841161  |
| wavelet-HLL | glcm       | Idm                                  | 0.137913433  |
| wavelet-HLL | glcm       | Correlation                          | 0.313659712  |
| wavelet-HLL | glcm       | Autocorrelation                      | 348.1352549  |
| wavelet-HLL | glcm       | SumEntropy                           | 4.033376366  |
| wavelet-HLL | glcm       | SumSquares                           | 69.17513294  |
| wavelet-HLL | glcm       | ClusterProminence                    | 94370.56771  |
| wavelet-HLL | glcm       | Imc2                                 | 0.998500979  |
| wavelet-HLL | glcm       | Imc1                                 | -0.707011135 |
| wavelet-HLL | glcm       | DifferenceAverage                    | 7.576874921  |
| wavelet-HLL | glcm       | Id                                   | 0.220782978  |
| wavelet-HLL | glcm       | ClusterTendency                      | 184.7733834  |
| wavelet-HLL | firstorder | InterquartileRange                   | 325.7820695  |
| wavelet-HLL | firstorder | Skewness                             | 0.153542452  |
| wavelet-HLL | firstorder | Uniformity                           | 0.051851852  |
| wavelet-HLL | firstorder | Median                               | 22.53977182  |
| wavelet-HLL | firstorder | Energy                               | 2257379.047  |
| wavelet-HLL | firstorder | RobustMeanAbsoluteDeviation          | 115.0132027  |
| wavelet-HLL | firstorder | MeanAbsoluteDeviation                | 175.9119773  |
| wavelet-HLL | firstorder | TotalEnergy                          | 60949234.27  |
| wavelet-HLL | firstorder | Maximum                              | 465.4523869  |
| wavelet-HLL | firstorder | RootMeanSquared                      | 223.9731654  |
| wavelet-HLL | firstorder | 90Percentile                         | 265.3172587  |
| wavelet-HLL | firstorder | Minimum                              | -446.5018306 |
| wavelet-HLL | firstorder | Entropy                              | 4.446974207  |
| wavelet-HLL | firstorder | Range                                | 911.9542175  |
| wavelet-HLL | firstorder | Variance                             | 49729.94992  |



|             |            |                                      |              |
|-------------|------------|--------------------------------------|--------------|
| wavelet-HLL | firstorder | 10Percentile                         | -308.0722534 |
| wavelet-HLL | firstorder | Kurtosis                             | 2.676298045  |
| wavelet-HLL | firstorder | Mean                                 | -20.83336041 |
| wavelet-HLL | glrlm      | ShortRunLowGrayLevelEmphasis         | 0.037231492  |
| wavelet-HLL | glrlm      | GrayLevelVariance                    | 80.207752    |
| wavelet-HLL | glrlm      | LowGrayLevelRunEmphasis              | 0.037301123  |
| wavelet-HLL | glrlm      | GrayLevelNonUniformityNormalized     | 0.051388759  |
| wavelet-HLL | glrlm      | RunVariance                          | 0.020467449  |
| wavelet-HLL | glrlm      | GrayLevelNonUniformity               | 2.265552277  |
| wavelet-HLL | glrlm      | LongRunEmphasis                      | 1.064174198  |
| wavelet-HLL | glrlm      | ShortRunHighGrayLevelEmphasis        | 382.8375841  |
| wavelet-HLL | glrlm      | RunLengthNonUniformity               | 42.30984132  |
| wavelet-HLL | glrlm      | ShortRunEmphasis                     | 0.983956451  |
| wavelet-HLL | glrlm      | LongRunHighGrayLevelEmphasis         | 421.9965138  |
| wavelet-HLL | glrlm      | RunPercentage                        | 0.979487179  |
| wavelet-HLL | glrlm      | LongRunLowGrayLevelEmphasis          | 0.037579646  |
| wavelet-HLL | glrlm      | RunEntropy                           | 4.494760079  |
| wavelet-HLL | glrlm      | HighGrayLevelRunEmphasis             | 390.66937    |
| wavelet-HLL | glrlm      | RunLengthNonUniformityNormalized     | 0.959065101  |
| wavelet-HLL | glszm      | GrayLevelVariance                    | 85.07698962  |
| wavelet-HLL | glszm      | ZoneVariance                         | 0.39532872   |
| wavelet-HLL | glszm      | GrayLevelNonUniformityNormalized     | 0.046712803  |
| wavelet-HLL | glszm      | SizeZoneNonUniformityNormalized      | 0.596885813  |
| wavelet-HLL | glszm      | SizeZoneNonUniformity                | 20.29411765  |
| wavelet-HLL | glszm      | GrayLevelNonUniformity               | 1.588235294  |
| wavelet-HLL | glszm      | LargeAreaEmphasis                    | 2.147058824  |
| wavelet-HLL | glszm      | SmallAreaHighGrayLevelEmphasis       | 271.4191176  |
| wavelet-HLL | glszm      | ZonePercentage                       | 0.755555556  |
| wavelet-HLL | glszm      | LargeAreaLowGrayLevelEmphasis        | 0.051732739  |
| wavelet-HLL | glszm      | LargeAreaHighGrayLevelEmphasis       | 930.6470588  |
| wavelet-HLL | glszm      | HighGrayLevelZoneEmphasis            | 365.1470588  |
| wavelet-HLL | glszm      | SmallAreaEmphasis                    | 0.795955882  |
| wavelet-HLL | glszm      | LowGrayLevelZoneEmphasis             | 0.046970037  |
| wavelet-HLL | glszm      | ZoneEntropy                          | 4.712319091  |
| wavelet-HLL | glszm      | SmallAreaLowGrayLevelEmphasis        | 0.045922974  |
| wavelet-HLL | ngtdm      | Coarseness                           | 0.091186654  |
| wavelet-HLL | ngtdm      | Complexity                           | 1719.114163  |
| wavelet-HLL | ngtdm      | Strength                             | 39.95442121  |
| wavelet-HLL | ngtdm      | Contrast                             | 1.398791195  |
| wavelet-HLL | ngtdm      | Busyness                             | 0.027138873  |
| wavelet-LHL | gldm       | GrayLevelVariance                    | 179.2069136  |
| wavelet-LHL | gldm       | HighGrayLevelEmphasis                | 927.5333333  |
| wavelet-LHL | gldm       | DependenceEntropy                    | 4.802529763  |
| wavelet-LHL | gldm       | DependenceNonUniformity              | 16.91111111  |
| wavelet-LHL | gldm       | GrayLevelNonUniformity               | 2.288888889  |
| wavelet-LHL | gldm       | SmallDependenceEmphasis              | 0.613888889  |
| wavelet-LHL | gldm       | SmallDependenceHighGrayLevelEmphasis | 567.0296296  |
| wavelet-LHL | gldm       | DependenceNonUniformityNormalized    | 0.375802469  |
| wavelet-LHL | gldm       | LargeDependenceEmphasis              | 3.933333333  |
| wavelet-LHL | gldm       | LargeDependenceLowGrayLevelEmphasis  | 0.036232932  |
| wavelet-LHL | gldm       | DependenceVariance                   | 0.851358025  |
| wavelet-LHL | gldm       | LargeDependenceHighGrayLevelEmphasis | 3655.4       |
| wavelet-LHL | gldm       | SmallDependenceLowGrayLevelEmphasis  | 0.027281624  |
| wavelet-LHL | gldm       | LowGrayLevelEmphasis                 | 0.028468179  |
| wavelet-LHL | glcm       | JointAverage                         | 27.75315304  |

|             |            |                                  |              |
|-------------|------------|----------------------------------|--------------|
| wavelet-LHL | glcm       | SumAverage                       | 55.50630608  |
| wavelet-LHL | glcm       | JointEntropy                     | 5.395913499  |
| wavelet-LHL | glcm       | ClusterShade                     | -3210.369461 |
| wavelet-LHL | glcm       | MaximumProbability               | 0.039355452  |
| wavelet-LHL | glcm       | Idmn                             | 0.92328694   |
| wavelet-LHL | glcm       | JointEnergy                      | 0.024656817  |
| wavelet-LHL | glcm       | Contrast                         | 226.3910868  |
| wavelet-LHL | glcm       | DifferenceEntropy                | 3.709527624  |
| wavelet-LHL | glcm       | InverseVariance                  | 0.13520854   |
| wavelet-LHL | glcm       | DifferenceVariance               | 80.63202526  |
| wavelet-LHL | glcm       | Idn                              | 0.831240684  |
| wavelet-LHL | glcm       | Idm                              | 0.134519407  |
| wavelet-LHL | glcm       | Correlation                      | 0.337233139  |
| wavelet-LHL | glcm       | Autocorrelation                  | 832.0823143  |
| wavelet-LHL | glcm       | SumEntropy                       | 4.173605394  |
| wavelet-LHL | glcm       | SumSquares                       | 173.0343647  |
| wavelet-LHL | glcm       | ClusterProminence                | 489400.9803  |
| wavelet-LHL | glcm       | Imc2                             | 0.999319746  |
| wavelet-LHL | glcm       | Imc1                             | -0.770292118 |
| wavelet-LHL | glcm       | DifferenceAverage                | 11.24499442  |
| wavelet-LHL | glcm       | Id                               | 0.205585524  |
| wavelet-LHL | glcm       | ClusterTendency                  | 465.7463718  |
| wavelet-LHL | firstorder | InterquartileRange               | 543.9933359  |
| wavelet-LHL | firstorder | Skewness                         | -0.386535011 |
| wavelet-LHL | firstorder | Uniformity                       | 0.050864198  |
| wavelet-LHL | firstorder | Median                           | 89.75112292  |
| wavelet-LHL | firstorder | Energy                           | 5067402.359  |
| wavelet-LHL | firstorder | RobustMeanAbsoluteDeviation      | 223.08081    |
| wavelet-LHL | firstorder | MeanAbsoluteDeviation            | 291.3763096  |
| wavelet-LHL | firstorder | TotalEnergy                      | 136819863.7  |
| wavelet-LHL | firstorder | Maximum                          | 491.5211792  |
| wavelet-LHL | firstorder | RootMeanSquared                  | 335.5725575  |
| wavelet-LHL | firstorder | 90Percentile                     | 385.9066872  |
| wavelet-LHL | firstorder | Minimum                          | -682.6771497 |
| wavelet-LHL | firstorder | Entropy                          | 4.56131303   |
| wavelet-LHL | firstorder | Range                            | 1174.198329  |
| wavelet-LHL | firstorder | Variance                         | 111677.5667  |
| wavelet-LHL | firstorder | 10Percentile                     | -517.6632996 |
| wavelet-LHL | firstorder | Kurtosis                         | 1.905389555  |
| wavelet-LHL | firstorder | Mean                             | -30.51843129 |
| wavelet-LHL | glrlm      | ShortRunLowGrayLevelEmphasis     | 0.029188761  |
| wavelet-LHL | glrlm      | GrayLevelVariance                | 181.3998464  |
| wavelet-LHL | glrlm      | LowGrayLevelRunEmphasis          | 0.029252758  |
| wavelet-LHL | glrlm      | GrayLevelNonUniformityNormalized | 0.049601376  |
| wavelet-LHL | glrlm      | RunVariance                      | 0.028960749  |
| wavelet-LHL | glrlm      | GrayLevelNonUniformity           | 2.167444505  |
| wavelet-LHL | glrlm      | LongRunEmphasis                  | 1.091671658  |
| wavelet-LHL | glrlm      | ShortRunHighGrayLevelEmphasis    | 906.0869187  |
| wavelet-LHL | glrlm      | RunLengthNonUniformity           | 41.2116882   |
| wavelet-LHL | glrlm      | ShortRunEmphasis                 | 0.977082086  |
| wavelet-LHL | glrlm      | LongRunHighGrayLevelEmphasis     | 1012.778177  |
| wavelet-LHL | glrlm      | RunPercentage                    | 0.970940171  |
| wavelet-LHL | glrlm      | LongRunLowGrayLevelEmphasis      | 0.029508747  |
| wavelet-LHL | glrlm      | RunEntropy                       | 4.643866864  |
| wavelet-LHL | glrlm      | HighGrayLevelRunEmphasis         | 927.4251705  |

|             |       |                                      |              |
|-------------|-------|--------------------------------------|--------------|
| wavelet-LHL | glrlm | RunLengthNonUniformityNormalized     | 0.942078502  |
| wavelet-LHL | glszm | GrayLevelVariance                    | 207.125      |
| wavelet-LHL | glszm | ZoneVariance                         | 0.741210938  |
| wavelet-LHL | glszm | GrayLevelNonUniformityNormalized     | 0.041015625  |
| wavelet-LHL | glszm | SizeZoneNonUniformityNormalized      | 0.591796875  |
| wavelet-LHL | glszm | SizeZoneNonUniformity                | 18.9375      |
| wavelet-LHL | glszm | GrayLevelNonUniformity               | 1.3125       |
| wavelet-LHL | glszm | LargeAreaEmphasis                    | 2.71875      |
| wavelet-LHL | glszm | SmallAreaHighGrayLevelEmphasis       | 733.6871875  |
| wavelet-LHL | glszm | ZonePercentage                       | 0.711111111  |
| wavelet-LHL | glszm | LargeAreaLowGrayLevelEmphasis        | 0.043235751  |
| wavelet-LHL | glszm | LargeAreaHighGrayLevelEmphasis       | 2578.21875   |
| wavelet-LHL | glszm | HighGrayLevelZoneEmphasis            | 922.6875     |
| wavelet-LHL | glszm | SmallAreaEmphasis                    | 0.797256944  |
| wavelet-LHL | glszm | LowGrayLevelZoneEmphasis             | 0.038840098  |
| wavelet-LHL | glszm | ZoneEntropy                          | 4.851409766  |
| wavelet-LHL | glszm | SmallAreaLowGrayLevelEmphasis        | 0.038150441  |
| wavelet-LHL | ngtdm | Coarseness                           | 0.069819008  |
| wavelet-LHL | ngtdm | Complexity                           | 3902.96708   |
| wavelet-LHL | ngtdm | Strength                             | 68.20332125  |
| wavelet-LHL | ngtdm | Contrast                             | 3.474764237  |
| wavelet-LHL | ngtdm | Busyness                             | 0.021612354  |
| wavelet-LHH | gldm  | GrayLevelVariance                    | 14.40987654  |
| wavelet-LHH | gldm  | HighGrayLevelEmphasis                | 80.2         |
| wavelet-LHH | gldm  | DependenceEntropy                    | 4.463749485  |
| wavelet-LHH | gldm  | DependenceNonUniformity              | 14.15555556  |
| wavelet-LHH | gldm  | GrayLevelNonUniformity               | 4.022222222  |
| wavelet-LHH | gldm  | SmallDependenceEmphasis              | 0.477395062  |
| wavelet-LHH | gldm  | SmallDependenceHighGrayLevelEmphasis | 37.15161728  |
| wavelet-LHH | gldm  | DependenceNonUniformityNormalized    | 0.314567901  |
| wavelet-LHH | gldm  | LargeDependenceEmphasis              | 5.177777778  |
| wavelet-LHH | gldm  | LargeDependenceLowGrayLevelEmphasis  | 0.136149194  |
| wavelet-LHH | gldm  | DependenceVariance                   | 1.088395062  |
| wavelet-LHH | gldm  | LargeDependenceHighGrayLevelEmphasis | 413.0444444  |
| wavelet-LHH | gldm  | SmallDependenceLowGrayLevelEmphasis  | 0.040611582  |
| wavelet-LHH | gldm  | LowGrayLevelEmphasis                 | 0.052872111  |
| wavelet-LHH | glcm  | JointAverage                         | 7.909034983  |
| wavelet-LHH | glcm  | SumAverage                           | 15.81806997  |
| wavelet-LHH | glcm  | JointEntropy                         | 5.156071404  |
| wavelet-LHH | glcm  | ClusterShade                         | 33.37620278  |
| wavelet-LHH | glcm  | MaximumProbability                   | 0.054025934  |
| wavelet-LHH | glcm  | Idmn                                 | 0.939773695  |
| wavelet-LHH | glcm  | JointEnergy                          | 0.030686181  |
| wavelet-LHH | glcm  | Contrast                             | 26.2513886   |
| wavelet-LHH | glcm  | DifferenceEntropy                    | 2.921317592  |
| wavelet-LHH | glcm  | InverseVariance                      | 0.245844386  |
| wavelet-LHH | glcm  | DifferenceVariance                   | 9.344941975  |
| wavelet-LHH | glcm  | Idn                                  | 0.840550818  |
| wavelet-LHH | glcm  | Idm                                  | 0.222860049  |
| wavelet-LHH | glcm  | Correlation                          | -0.073946149 |
| wavelet-LHH | glcm  | Autocorrelation                      | 61.80876926  |
| wavelet-LHH | glcm  | SumEntropy                           | 3.47716489   |
| wavelet-LHH | glcm  | SumSquares                           | 12.32902216  |
| wavelet-LHH | glcm  | ClusterProminence                    | 1830.407281  |
| wavelet-LHH | glcm  | Imc2                                 | 0.988570303  |

|             |            |                                  |              |
|-------------|------------|----------------------------------|--------------|
| wavelet-LHH | glcm       | Imc1                             | -0.554093105 |
| wavelet-LHH | glcm       | DifferenceAverage                | 4.002733207  |
| wavelet-LHH | glcm       | Id                               | 0.314396485  |
| wavelet-LHH | glcm       | ClusterTendency                  | 23.06470006  |
| wavelet-LHH | firstorder | InterquartileRange               | 136.0983992  |
| wavelet-LHH | firstorder | Skewness                         | 0.444081639  |
| wavelet-LHH | firstorder | Uniformity                       | 0.089382716  |
| wavelet-LHH | firstorder | Median                           | -27.13207427 |
| wavelet-LHH | firstorder | Energy                           | 394492.2215  |
| wavelet-LHH | firstorder | RobustMeanAbsoluteDeviation      | 53.5486816   |
| wavelet-LHH | firstorder | MeanAbsoluteDeviation            | 76.18482888  |
| wavelet-LHH | firstorder | TotalEnergy                      | 10651289.98  |
| wavelet-LHH | firstorder | Maximum                          | 251.1586874  |
| wavelet-LHH | firstorder | RootMeanSquared                  | 93.62955628  |
| wavelet-LHH | firstorder | 90Percentile                     | 109.2799862  |
| wavelet-LHH | firstorder | Minimum                          | -186.774129  |
| wavelet-LHH | firstorder | Entropy                          | 3.68331803   |
| wavelet-LHH | firstorder | Range                            | 437.9328164  |
| wavelet-LHH | firstorder | Variance                         | 8658.114452  |
| wavelet-LHH | firstorder | 10Percentile                     | -125.4573268 |
| wavelet-LHH | firstorder | Kurtosis                         | 2.90395307   |
| wavelet-LHH | firstorder | Mean                             | -10.41054071 |
| wavelet-LHH | glrlm      | ShortRunLowGrayLevelEmphasis     | 0.053536605  |
| wavelet-LHH | glrlm      | GrayLevelVariance                | 14.62214563  |
| wavelet-LHH | glrlm      | LowGrayLevelRunEmphasis          | 0.054195488  |
| wavelet-LHH | glrlm      | GrayLevelNonUniformityNormalized | 0.088201828  |
| wavelet-LHH | glrlm      | RunVariance                      | 0.039138057  |
| wavelet-LHH | glrlm      | GrayLevelNonUniformity           | 3.812702707  |
| wavelet-LHH | glrlm      | LongRunEmphasis                  | 1.124936606  |
| wavelet-LHH | glrlm      | ShortRunHighGrayLevelEmphasis    | 77.52814595  |
| wavelet-LHH | glrlm      | RunLengthNonUniformity           | 39.90194434  |
| wavelet-LHH | glrlm      | ShortRunEmphasis                 | 0.968765848  |
| wavelet-LHH | glrlm      | LongRunHighGrayLevelEmphasis     | 90.41063021  |
| wavelet-LHH | glrlm      | RunPercentage                    | 0.960683761  |
| wavelet-LHH | glrlm      | LongRunLowGrayLevelEmphasis      | 0.056831019  |
| wavelet-LHH | glrlm      | RunEntropy                       | 3.800881856  |
| wavelet-LHH | glrlm      | HighGrayLevelRunEmphasis         | 80.1046428   |
| wavelet-LHH | glrlm      | RunLengthNonUniformityNormalized | 0.921723887  |
| wavelet-LHH | glszm      | GrayLevelVariance                | 17.58024691  |
| wavelet-LHH | glszm      | ZoneVariance                     | 1.185185185  |
| wavelet-LHH | glszm      | GrayLevelNonUniformityNormalized | 0.0781893    |
| wavelet-LHH | glszm      | SizeZoneNonUniformityNormalized  | 0.432098765  |
| wavelet-LHH | glszm      | SizeZoneNonUniformity            | 11.66666667  |
| wavelet-LHH | glszm      | GrayLevelNonUniformity           | 2.111111111  |
| wavelet-LHH | glszm      | LargeAreaEmphasis                | 3.962962963  |
| wavelet-LHH | glszm      | SmallAreaHighGrayLevelEmphasis   | 52.47942387  |
| wavelet-LHH | glszm      | ZonePercentage                   | 0.6          |
| wavelet-LHH | glszm      | LargeAreaLowGrayLevelEmphasis    | 0.135618061  |
| wavelet-LHH | glszm      | LargeAreaHighGrayLevelEmphasis   | 303.8888889  |
| wavelet-LHH | glszm      | HighGrayLevelZoneEmphasis        | 79.81481481  |
| wavelet-LHH | glszm      | SmallAreaEmphasis                | 0.670781893  |
| wavelet-LHH | glszm      | LowGrayLevelZoneEmphasis         | 0.073033774  |
| wavelet-LHH | glszm      | ZoneEntropy                      | 4.282484261  |
| wavelet-LHH | glszm      | SmallAreaLowGrayLevelEmphasis    | 0.064493208  |
| wavelet-LHH | ngtdm      | Coarseness                       | 0.095808375  |

|             |            |                                      |              |
|-------------|------------|--------------------------------------|--------------|
| wavelet-LHH | ngtdm      | Complexity                           | 297.4969328  |
| wavelet-LHH | ngtdm      | Strength                             | 7.667871473  |
| wavelet-LHH | ngtdm      | Contrast                             | 0.461538545  |
| wavelet-LHH | ngtdm      | Busyness                             | 0.117657199  |
| wavelet-LLH | gldm       | GrayLevelVariance                    | 61.89333333  |
| wavelet-LLH | gldm       | HighGrayLevelEmphasis                | 273.1111111  |
| wavelet-LLH | gldm       | DependenceEntropy                    | 4.791635874  |
| wavelet-LLH | gldm       | DependenceNonUniformity              | 14.77777778  |
| wavelet-LLH | gldm       | GrayLevelNonUniformity               | 2.644444444  |
| wavelet-LLH | gldm       | SmallDependenceEmphasis              | 0.513888889  |
| wavelet-LLH | gldm       | SmallDependenceHighGrayLevelEmphasis | 179.3447531  |
| wavelet-LLH | gldm       | DependenceNonUniformityNormalized    | 0.328395062  |
| wavelet-LLH | gldm       | LargeDependenceEmphasis              | 4.333333333  |
| wavelet-LLH | gldm       | LargeDependenceLowGrayLevelEmphasis  | 0.071871031  |
| wavelet-LLH | gldm       | DependenceVariance                   | 0.765432099  |
| wavelet-LLH | gldm       | LargeDependenceHighGrayLevelEmphasis | 961.4666667  |
| wavelet-LLH | gldm       | SmallDependenceLowGrayLevelEmphasis  | 0.03172859   |
| wavelet-LLH | gldm       | LowGrayLevelEmphasis                 | 0.037659044  |
| wavelet-LLH | glcm       | JointAverage                         | 13.84583868  |
| wavelet-LLH | glcm       | SumAverage                           | 27.69167735  |
| wavelet-LLH | glcm       | JointEntropy                         | 5.326845993  |
| wavelet-LLH | glcm       | ClusterShade                         | 1028.823828  |
| wavelet-LLH | glcm       | MaximumProbability                   | 0.048906088  |
| wavelet-LLH | glcm       | Idmn                                 | 0.941209462  |
| wavelet-LLH | glcm       | JointEnergy                          | 0.026278939  |
| wavelet-LLH | glcm       | Contrast                             | 82.6178923   |
| wavelet-LLH | glcm       | DifferenceEntropy                    | 3.489884142  |
| wavelet-LLH | glcm       | InverseVariance                      | 0.131247592  |
| wavelet-LLH | glcm       | DifferenceVariance                   | 29.75760271  |
| wavelet-LLH | glcm       | Idn                                  | 0.843336262  |
| wavelet-LLH | glcm       | Idm                                  | 0.147035607  |
| wavelet-LLH | glcm       | Correlation                          | 0.256599564  |
| wavelet-LLH | glcm       | Autocorrelation                      | 207.4389541  |
| wavelet-LLH | glcm       | SumEntropy                           | 4.046973055  |
| wavelet-LLH | glcm       | SumSquares                           | 56.66512442  |
| wavelet-LLH | glcm       | ClusterProminence                    | 60218.06717  |
| wavelet-LLH | glcm       | Imc2                                 | 0.997922797  |
| wavelet-LLH | glcm       | Imc1                                 | -0.683523432 |
| wavelet-LLH | glcm       | DifferenceAverage                    | 7.030934464  |
| wavelet-LLH | glcm       | Id                                   | 0.235606485  |
| wavelet-LLH | glcm       | ClusterTendency                      | 144.0426054  |
| wavelet-LLH | firstorder | InterquartileRange                   | 267.7835107  |
| wavelet-LLH | firstorder | Skewness                             | 0.549171226  |
| wavelet-LLH | firstorder | Uniformity                           | 0.058765432  |
| wavelet-LLH | firstorder | Median                               | -17.35750501 |
| wavelet-LLH | firstorder | Energy                               | 1734357.187  |
| wavelet-LLH | firstorder | RobustMeanAbsoluteDeviation          | 107.9778643  |
| wavelet-LLH | firstorder | MeanAbsoluteDeviation                | 156.6482169  |
| wavelet-LLH | firstorder | TotalEnergy                          | 46827644.04  |
| wavelet-LLH | firstorder | Maximum                              | 452.3343716  |
| wavelet-LLH | firstorder | RootMeanSquared                      | 196.3193083  |
| wavelet-LLH | firstorder | 90Percentile                         | 232.2318757  |
| wavelet-LLH | firstorder | Minimum                              | -352.5377665 |
| wavelet-LLH | firstorder | Entropy                              | 4.294646363  |
| wavelet-LLH | firstorder | Range                                | 804.8721381  |

|             |            |                                      |              |
|-------------|------------|--------------------------------------|--------------|
| wavelet-LLH | firstorder | Variance                             | 37966.92288  |
| wavelet-LLH | firstorder | 10Percentile                         | -249.6564601 |
| wavelet-LLH | firstorder | Kurtosis                             | 2.748354271  |
| wavelet-LLH | firstorder | Mean                                 | -23.96555719 |
| wavelet-LLH | glrlm      | ShortRunLowGrayLevelEmphasis         | 0.038356156  |
| wavelet-LLH | glrlm      | GrayLevelVariance                    | 63.00350232  |
| wavelet-LLH | glrlm      | LowGrayLevelRunEmphasis              | 0.038632805  |
| wavelet-LLH | glrlm      | GrayLevelNonUniformityNormalized     | 0.0580017    |
| wavelet-LLH | glrlm      | RunVariance                          | 0.037829106  |
| wavelet-LLH | glrlm      | GrayLevelNonUniformity               | 2.521974537  |
| wavelet-LLH | glrlm      | LongRunEmphasis                      | 1.113350022  |
| wavelet-LLH | glrlm      | ShortRunHighGrayLevelEmphasis        | 270.241197   |
| wavelet-LLH | glrlm      | RunLengthNonUniformity               | 40.70050066  |
| wavelet-LLH | glrlm      | ShortRunEmphasis                     | 0.973799247  |
| wavelet-LLH | glrlm      | LongRunHighGrayLevelEmphasis         | 298.0072315  |
| wavelet-LLH | glrlm      | RunPercentage                        | 0.965811966  |
| wavelet-LLH | glrlm      | LongRunLowGrayLevelEmphasis          | 0.039913826  |
| wavelet-LLH | glrlm      | RunEntropy                           | 4.375080753  |
| wavelet-LLH | glrlm      | HighGrayLevelRunEmphasis             | 275.7106432  |
| wavelet-LLH | glrlm      | RunLengthNonUniformityNormalized     | 0.934726404  |
| wavelet-LLH | glszm      | GrayLevelVariance                    | 79.45280612  |
| wavelet-LLH | glszm      | ZoneVariance                         | 0.952806122  |
| wavelet-LLH | glszm      | GrayLevelNonUniformityNormalized     | 0.048469388  |
| wavelet-LLH | glszm      | SizeZoneNonUniformityNormalized      | 0.466836735  |
| wavelet-LLH | glszm      | SizeZoneNonUniformity                | 13.07142857  |
| wavelet-LLH | glszm      | GrayLevelNonUniformity               | 1.357142857  |
| wavelet-LLH | glszm      | LargeAreaEmphasis                    | 3.535714286  |
| wavelet-LLH | glszm      | SmallAreaHighGrayLevelEmphasis       | 267.3065476  |
| wavelet-LLH | glszm      | ZonePercentage                       | 0.622222222  |
| wavelet-LLH | glszm      | LargeAreaLowGrayLevelEmphasis        | 0.080384325  |
| wavelet-LLH | glszm      | LargeAreaHighGrayLevelEmphasis       | 815.5714286  |
| wavelet-LLH | glszm      | HighGrayLevelZoneEmphasis            | 323.0357143  |
| wavelet-LLH | glszm      | SmallAreaEmphasis                    | 0.704801587  |
| wavelet-LLH | glszm      | LowGrayLevelZoneEmphasis             | 0.053347018  |
| wavelet-LLH | glszm      | ZoneEntropy                          | 4.664497779  |
| wavelet-LLH | glszm      | SmallAreaLowGrayLevelEmphasis        | 0.049389476  |
| wavelet-LLH | ngtdm      | Coarseness                           | 0.087818387  |
| wavelet-LLH | ngtdm      | Complexity                           | 1383.205809  |
| wavelet-LLH | ngtdm      | Strength                             | 31.07169493  |
| wavelet-LLH | ngtdm      | Contrast                             | 1.251552176  |
| wavelet-LLH | ngtdm      | Busyness                             | 0.05371291   |
| wavelet-LLL | gldm       | GrayLevelVariance                    | 333.5377778  |
| wavelet-LLL | gldm       | HighGrayLevelEmphasis                | 1069.755556  |
| wavelet-LLL | gldm       | DependenceEntropy                    | 5.002964207  |
| wavelet-LLL | gldm       | DependenceNonUniformity              | 23.4         |
| wavelet-LLL | gldm       | GrayLevelNonUniformity               | 1.977777778  |
| wavelet-LLL | gldm       | SmallDependenceEmphasis              | 0.740740741  |
| wavelet-LLL | gldm       | SmallDependenceHighGrayLevelEmphasis | 737.7234568  |
| wavelet-LLL | gldm       | DependenceNonUniformityNormalized    | 0.52         |
| wavelet-LLL | gldm       | LargeDependenceEmphasis              | 2.333333333  |
| wavelet-LLL | gldm       | LargeDependenceLowGrayLevelEmphasis  | 0.076850872  |
| wavelet-LLL | gldm       | DependenceVariance                   | 0.373333333  |
| wavelet-LLL | gldm       | LargeDependenceHighGrayLevelEmphasis | 2707.711111  |
| wavelet-LLL | gldm       | SmallDependenceLowGrayLevelEmphasis  | 0.032807589  |
| wavelet-LLL | gldm       | LowGrayLevelEmphasis                 | 0.041559526  |

|             |            |                                  |              |
|-------------|------------|----------------------------------|--------------|
| wavelet-LLL | glcm       | JointAverage                     | 32.07494257  |
| wavelet-LLL | glcm       | SumAverage                       | 64.14988514  |
| wavelet-LLL | glcm       | JointEntropy                     | 5.437646168  |
| wavelet-LLL | glcm       | ClusterShade                     | 420.1552953  |
| wavelet-LLL | glcm       | MaximumProbability               | 0.039319002  |
| wavelet-LLL | glcm       | Idmn                             | 0.894989873  |
| wavelet-LLL | glcm       | JointEnergy                      | 0.023817085  |
| wavelet-LLL | glcm       | Contrast                         | 613.2562196  |
| wavelet-LLL | glcm       | DifferenceEntropy                | 4.042694702  |
| wavelet-LLL | glcm       | InverseVariance                  | 0.069862056  |
| wavelet-LLL | glcm       | DifferenceVariance               | 194.5614517  |
| wavelet-LLL | glcm       | Idn                              | 0.788375679  |
| wavelet-LLL | glcm       | Idm                              | 0.070071446  |
| wavelet-LLL | glcm       | Correlation                      | 0.155082694  |
| wavelet-LLL | glcm       | Autocorrelation                  | 1084.464939  |
| wavelet-LLL | glcm       | SumEntropy                       | 4.289363638  |
| wavelet-LLL | glcm       | SumSquares                       | 361.1384947  |
| wavelet-LLL | glcm       | ClusterProminence                | 1513796.43   |
| wavelet-LLL | glcm       | Imc2                             | 0.999522137  |
| wavelet-LLL | glcm       | Imc1                             | -0.786438074 |
| wavelet-LLL | glcm       | DifferenceAverage                | 20.20146309  |
| wavelet-LLL | glcm       | Id                               | 0.122834292  |
| wavelet-LLL | glcm       | ClusterTendency                  | 831.2977592  |
| wavelet-LLL | firstorder | InterquartileRange               | 635.7983043  |
| wavelet-LLL | firstorder | Skewness                         | 0.424428501  |
| wavelet-LLL | firstorder | Uniformity                       | 0.043950617  |
| wavelet-LLL | firstorder | Median                           | -1220.315058 |
| wavelet-LLL | firstorder | Energy                           | 75076740.91  |
| wavelet-LLL | firstorder | RobustMeanAbsoluteDeviation      | 282.441122   |
| wavelet-LLL | firstorder | MeanAbsoluteDeviation            | 380.6671534  |
| wavelet-LLL | firstorder | TotalEnergy                      | 2027072005   |
| wavelet-LLL | firstorder | Maximum                          | -209.7458023 |
| wavelet-LLL | firstorder | RootMeanSquared                  | 1291.654761  |
| wavelet-LLL | firstorder | 90Percentile                     | -490.4110667 |
| wavelet-LLL | firstorder | Minimum                          | -1859.303001 |
| wavelet-LLL | firstorder | Entropy                          | 4.719522263  |
| wavelet-LLL | firstorder | Range                            | 1649.557199  |
| wavelet-LLL | firstorder | Variance                         | 209460.883   |
| wavelet-LLL | firstorder | 10Percentile                     | -1790.869536 |
| wavelet-LLL | firstorder | Kurtosis                         | 2.163650394  |
| wavelet-LLL | firstorder | Mean                             | -1207.853939 |
| wavelet-LLL | glrlm      | ShortRunLowGrayLevelEmphasis     | 0.041392097  |
| wavelet-LLL | glrlm      | GrayLevelVariance                | 334.311818   |
| wavelet-LLL | glrlm      | LowGrayLevelRunEmphasis          | 0.041745547  |
| wavelet-LLL | glrlm      | GrayLevelNonUniformityNormalized | 0.043394752  |
| wavelet-LLL | glrlm      | RunVariance                      | 0.015371039  |
| wavelet-LLL | glrlm      | GrayLevelNonUniformity           | 1.922986574  |
| wavelet-LLL | glrlm      | LongRunEmphasis                  | 1.047446739  |
| wavelet-LLL | glrlm      | ShortRunHighGrayLevelEmphasis    | 1052.216165  |
| wavelet-LLL | glrlm      | RunLengthNonUniformity           | 42.96186372  |
| wavelet-LLL | glrlm      | ShortRunEmphasis                 | 0.988138315  |
| wavelet-LLL | glrlm      | LongRunHighGrayLevelEmphasis     | 1126.055154  |
| wavelet-LLL | glrlm      | RunPercentage                    | 0.984615385  |
| wavelet-LLL | glrlm      | LongRunLowGrayLevelEmphasis      | 0.043159348  |
| wavelet-LLL | glrlm      | RunEntropy                       | 4.756379487  |

|             |       |                                      |              |
|-------------|-------|--------------------------------------|--------------|
| wavelet-LLL | glrlm | HighGrayLevelRunEmphasis             | 1066.983963  |
| wavelet-LLL | glrlm | RunLengthNonUniformityNormalized     | 0.969257923  |
| wavelet-LLL | glszm | GrayLevelVariance                    | 346.1080247  |
| wavelet-LLL | glszm | ZoneVariance                         | 0.409722222  |
| wavelet-LLL | glszm | GrayLevelNonUniformityNormalized     | 0.037037037  |
| wavelet-LLL | glszm | SizeZoneNonUniformityNormalized      | 0.708333333  |
| wavelet-LLL | glszm | SizeZoneNonUniformity                | 25.5         |
| wavelet-LLL | glszm | GrayLevelNonUniformity               | 1.333333333  |
| wavelet-LLL | glszm | LargeAreaEmphasis                    | 1.972222222  |
| wavelet-LLL | glszm | SmallAreaHighGrayLevelEmphasis       | 846.6736111  |
| wavelet-LLL | glszm | ZonePercentage                       | 0.8          |
| wavelet-LLL | glszm | LargeAreaLowGrayLevelEmphasis        | 0.066814737  |
| wavelet-LLL | glszm | LargeAreaHighGrayLevelEmphasis       | 2192.75      |
| wavelet-LLL | glszm | HighGrayLevelZoneEmphasis            | 1025         |
| wavelet-LLL | glszm | SmallAreaEmphasis                    | 0.865933642  |
| wavelet-LLL | glszm | LowGrayLevelZoneEmphasis             | 0.044623631  |
| wavelet-LLL | glszm | ZoneEntropy                          | 4.947702779  |
| wavelet-LLL | glszm | SmallAreaLowGrayLevelEmphasis        | 0.03918049   |
| wavelet-LLL | ngtdm | Coarseness                           | 0.044377632  |
| wavelet-LLL | ngtdm | Complexity                           | 10039.35714  |
| wavelet-LLL | ngtdm | Strength                             | 70.58219689  |
| wavelet-LLL | ngtdm | Contrast                             | 10.39381648  |
| wavelet-LLL | ngtdm | Busyness                             | 0.029475738  |
| wavelet-HHL | gldm  | GrayLevelVariance                    | 12.23506173  |
| wavelet-HHL | gldm  | HighGrayLevelEmphasis                | 108.7111111  |
| wavelet-HHL | gldm  | DependenceEntropy                    | 4.341310041  |
| wavelet-HHL | gldm  | DependenceNonUniformity              | 13.08888889  |
| wavelet-HHL | gldm  | GrayLevelNonUniformity               | 4.244444444  |
| wavelet-HHL | gldm  | SmallDependenceEmphasis              | 0.482216049  |
| wavelet-HHL | gldm  | SmallDependenceHighGrayLevelEmphasis | 53.93101235  |
| wavelet-HHL | gldm  | DependenceNonUniformityNormalized    | 0.290864198  |
| wavelet-HHL | gldm  | LargeDependenceEmphasis              | 5.355555556  |
| wavelet-HHL | gldm  | LargeDependenceLowGrayLevelEmphasis  | 0.235699771  |
| wavelet-HHL | gldm  | DependenceVariance                   | 1.084444444  |
| wavelet-HHL | gldm  | LargeDependenceHighGrayLevelEmphasis | 563.8666667  |
| wavelet-HHL | gldm  | SmallDependenceLowGrayLevelEmphasis  | 0.0193317    |
| wavelet-HHL | gldm  | LowGrayLevelEmphasis                 | 0.057616193  |
| wavelet-HHL | glcm  | JointAverage                         | 9.991043285  |
| wavelet-HHL | glcm  | SumAverage                           | 19.98208657  |
| wavelet-HHL | glcm  | JointEntropy                         | 5.094904316  |
| wavelet-HHL | glcm  | ClusterShade                         | -23.32119487 |
| wavelet-HHL | glcm  | MaximumProbability                   | 0.058139985  |
| wavelet-HHL | glcm  | Idmn                                 | 0.931371366  |
| wavelet-HHL | glcm  | JointEnergy                          | 0.032438755  |
| wavelet-HHL | glcm  | Contrast                             | 21.93187563  |
| wavelet-HHL | glcm  | DifferenceEntropy                    | 2.836891495  |
| wavelet-HHL | glcm  | InverseVariance                      | 0.213700217  |
| wavelet-HHL | glcm  | DifferenceVariance                   | 7.311588779  |
| wavelet-HHL | glcm  | Idn                                  | 0.826305295  |
| wavelet-HHL | glcm  | Idm                                  | 0.214513633  |
| wavelet-HHL | glcm  | Correlation                          | 0.001200315  |
| wavelet-HHL | glcm  | Autocorrelation                      | 100.2772448  |
| wavelet-HHL | glcm  | SumEntropy                           | 3.553829712  |
| wavelet-HHL | glcm  | SumSquares                           | 11.28324732  |
| wavelet-HHL | glcm  | ClusterProminence                    | 1559.321261  |



|             |            |                                  |              |
|-------------|------------|----------------------------------|--------------|
| wavelet-HHL | glcm       | Imc2                             | 0.986599132  |
| wavelet-HHL | glcm       | Imc1                             | -0.535009706 |
| wavelet-HHL | glcm       | DifferenceAverage                | 3.722219374  |
| wavelet-HHL | glcm       | Id                               | 0.314939348  |
| wavelet-HHL | glcm       | ClusterTendency                  | 23.20111365  |
| wavelet-HHL | firstorder | InterquartileRange               | 132.8731622  |
| wavelet-HHL | firstorder | Skewness                         | -0.556134472 |
| wavelet-HHL | firstorder | Uniformity                       | 0.094320988  |
| wavelet-HHL | firstorder | Median                           | 12.07839806  |
| wavelet-HHL | firstorder | Energy                           | 349343.1303  |
| wavelet-HHL | firstorder | RobustMeanAbsoluteDeviation      | 47.09744845  |
| wavelet-HHL | firstorder | MeanAbsoluteDeviation            | 69.53619871  |
| wavelet-HHL | firstorder | TotalEnergy                      | 9432264.518  |
| wavelet-HHL | firstorder | Maximum                          | 166.7158201  |
| wavelet-HHL | firstorder | RootMeanSquared                  | 88.1089137   |
| wavelet-HHL | firstorder | 90Percentile                     | 110.9630722  |
| wavelet-HHL | firstorder | Minimum                          | -212.2875159 |
| wavelet-HHL | firstorder | Entropy                          | 3.583179421  |
| wavelet-HHL | firstorder | Range                            | 379.003336   |
| wavelet-HHL | firstorder | Variance                         | 7696.793443  |
| wavelet-HHL | firstorder | 10Percentile                     | -103.5114093 |
| wavelet-HHL | firstorder | Kurtosis                         | 2.978096254  |
| wavelet-HHL | firstorder | Mean                             | 8.147835958  |
| wavelet-HHL | glrlm      | ShortRunLowGrayLevelEmphasis     | 0.055986653  |
| wavelet-HHL | glrlm      | GrayLevelVariance                | 12.44596923  |
| wavelet-HHL | glrlm      | LowGrayLevelRunEmphasis          | 0.057748406  |
| wavelet-HHL | glrlm      | GrayLevelNonUniformityNormalized | 0.092764872  |
| wavelet-HHL | glrlm      | RunVariance                      | 0.056182509  |
| wavelet-HHL | glrlm      | GrayLevelNonUniformity           | 4.00525517   |
| wavelet-HHL | glrlm      | LongRunEmphasis                  | 1.148141513  |
| wavelet-HHL | glrlm      | ShortRunHighGrayLevelEmphasis    | 105.7299349  |
| wavelet-HHL | glrlm      | RunLengthNonUniformity           | 40.09738711  |
| wavelet-HHL | glrlm      | ShortRunEmphasis                 | 0.970546961  |
| wavelet-HHL | glrlm      | LongRunHighGrayLevelEmphasis     | 123.9628417  |
| wavelet-HHL | glrlm      | RunPercentage                    | 0.958974359  |
| wavelet-HHL | glrlm      | LongRunLowGrayLevelEmphasis      | 0.065209402  |
| wavelet-HHL | glrlm      | RunEntropy                       | 3.720208364  |
| wavelet-HHL | glrlm      | HighGrayLevelRunEmphasis         | 108.8955044  |
| wavelet-HHL | glrlm      | RunLengthNonUniformityNormalized | 0.927332487  |
| wavelet-HHL | glszm      | GrayLevelVariance                | 15.0591716   |
| wavelet-HHL | glszm      | ZoneVariance                     | 1.658284024  |
| wavelet-HHL | glszm      | GrayLevelNonUniformityNormalized | 0.082840237  |
| wavelet-HHL | glszm      | SizeZoneNonUniformityNormalized  | 0.479289941  |
| wavelet-HHL | glszm      | SizeZoneNonUniformity            | 12.46153846  |
| wavelet-HHL | glszm      | GrayLevelNonUniformity           | 2.153846154  |
| wavelet-HHL | glszm      | LargeAreaEmphasis                | 4.653846154  |
| wavelet-HHL | glszm      | SmallAreaHighGrayLevelEmphasis   | 79.76042735  |
| wavelet-HHL | glszm      | ZonePercentage                   | 0.577777778  |
| wavelet-HHL | glszm      | LargeAreaLowGrayLevelEmphasis    | 0.20519256   |
| wavelet-HHL | glszm      | LargeAreaHighGrayLevelEmphasis   | 517.5384615  |
| wavelet-HHL | glszm      | HighGrayLevelZoneEmphasis        | 109          |
| wavelet-HHL | glszm      | SmallAreaEmphasis                | 0.710811966  |
| wavelet-HHL | glszm      | LowGrayLevelZoneEmphasis         | 0.054247287  |
| wavelet-HHL | glszm      | ZoneEntropy                      | 4.132944045  |
| wavelet-HHL | glszm      | SmallAreaLowGrayLevelEmphasis    | 0.022716218  |

|             |            |                                      |              |
|-------------|------------|--------------------------------------|--------------|
| wavelet-HHL | ngtdm      | Coarseness                           | 0.108224325  |
| wavelet-HHL | ngtdm      | Complexity                           | 208.1461888  |
| wavelet-HHL | ngtdm      | Strength                             | 6.932579604  |
| wavelet-HHL | ngtdm      | Contrast                             | 0.371964709  |
| wavelet-HHL | ngtdm      | Busyness                             | 0.085485816  |
| wavelet-HLH | gldm       | GrayLevelVariance                    | 8.017777778  |
| wavelet-HLH | gldm       | HighGrayLevelEmphasis                | 57.955555556 |
| wavelet-HLH | gldm       | DependenceEntropy                    | 4.58618893   |
| wavelet-HLH | gldm       | DependenceNonUniformity              | 11.133333333 |
| wavelet-HLH | gldm       | GrayLevelNonUniformity               | 5.4          |
| wavelet-HLH | gldm       | SmallDependenceEmphasis              | 0.401895062  |
| wavelet-HLH | gldm       | SmallDependenceHighGrayLevelEmphasis | 30.01967901  |
| wavelet-HLH | gldm       | DependenceNonUniformityNormalized    | 0.247407407  |
| wavelet-HLH | gldm       | LargeDependenceEmphasis              | 7.177777778  |
| wavelet-HLH | gldm       | LargeDependenceLowGrayLevelEmphasis  | 0.231197816  |
| wavelet-HLH | gldm       | DependenceVariance                   | 1.523950617  |
| wavelet-HLH | gldm       | LargeDependenceHighGrayLevelEmphasis | 359.3777778  |
| wavelet-HLH | gldm       | SmallDependenceLowGrayLevelEmphasis  | 0.032397751  |
| wavelet-HLH | gldm       | LowGrayLevelEmphasis                 | 0.053706005  |
| wavelet-HLH | glcm       | JointAverage                         | 7.098516926  |
| wavelet-HLH | glcm       | SumAverage                           | 14.19703385  |
| wavelet-HLH | glcm       | JointEntropy                         | 5.023501218  |
| wavelet-HLH | glcm       | ClusterShade                         | 17.39371678  |
| wavelet-HLH | glcm       | MaximumProbability                   | 0.068284232  |
| wavelet-HLH | glcm       | Idmn                                 | 0.930491048  |
| wavelet-HLH | glcm       | JointEnergy                          | 0.034456797  |
| wavelet-HLH | glcm       | Contrast                             | 16.37780619  |
| wavelet-HLH | glcm       | DifferenceEntropy                    | 2.850585683  |
| wavelet-HLH | glcm       | InverseVariance                      | 0.216584747  |
| wavelet-HLH | glcm       | DifferenceVariance                   | 5.405355274  |
| wavelet-HLH | glcm       | Idn                                  | 0.825164324  |
| wavelet-HLH | glcm       | Idm                                  | 0.247973211  |
| wavelet-HLH | glcm       | Correlation                          | 0.000516732  |
| wavelet-HLH | glcm       | Autocorrelation                      | 50.48216428  |
| wavelet-HLH | glcm       | SumEntropy                           | 3.444552677  |
| wavelet-HLH | glcm       | SumSquares                           | 8.249854971  |
| wavelet-HLH | glcm       | ClusterProminence                    | 796.0516601  |
| wavelet-HLH | glcm       | Imc2                                 | 0.966099562  |
| wavelet-HLH | glcm       | Imc1                                 | -0.434144497 |
| wavelet-HLH | glcm       | DifferenceAverage                    | 3.272260189  |
| wavelet-HLH | glcm       | Id                                   | 0.346494466  |
| wavelet-HLH | glcm       | ClusterTendency                      | 16.62161369  |
| wavelet-HLH | firstorder | InterquartileRange                   | 83.7698416   |
| wavelet-HLH | firstorder | Skewness                             | 0.24034703   |
| wavelet-HLH | firstorder | Uniformity                           | 0.12         |
| wavelet-HLH | firstorder | Median                               | -10.29730626 |
| wavelet-HLH | firstorder | Energy                               | 232983.6405  |
| wavelet-HLH | firstorder | RobustMeanAbsoluteDeviation          | 35.73972157  |
| wavelet-HLH | firstorder | MeanAbsoluteDeviation                | 54.93968171  |
| wavelet-HLH | firstorder | TotalEnergy                          | 6290558.294  |
| wavelet-HLH | firstorder | Maximum                              | 165.8041768  |
| wavelet-HLH | firstorder | RootMeanSquared                      | 71.95425098  |
| wavelet-HLH | firstorder | 90Percentile                         | 78.03451854  |
| wavelet-HLH | firstorder | Minimum                              | -172.4798069 |
| wavelet-HLH | firstorder | Entropy                              | 3.297874075  |

|             |            |                                  |              |
|-------------|------------|----------------------------------|--------------|
| wavelet-HLH | firstorder | Range                            | 338.2839838  |
| wavelet-HLH | firstorder | Variance                         | 5068.331764  |
| wavelet-HLH | firstorder | 10Percentile                     | -104.2915496 |
| wavelet-HLH | firstorder | Kurtosis                         | 2.996057895  |
| wavelet-HLH | firstorder | Mean                             | -10.44425533 |
| wavelet-HLH | glrlm      | ShortRunLowGrayLevelEmphasis     | 0.053676456  |
| wavelet-HLH | glrlm      | GrayLevelVariance                | 8.283294237  |
| wavelet-HLH | glrlm      | LowGrayLevelRunEmphasis          | 0.054993032  |
| wavelet-HLH | glrlm      | GrayLevelNonUniformityNormalized | 0.117161944  |
| wavelet-HLH | glrlm      | RunVariance                      | 0.052686958  |
| wavelet-HLH | glrlm      | GrayLevelNonUniformity           | 4.994876677  |
| wavelet-HLH | glrlm      | LongRunEmphasis                  | 1.169950937  |
| wavelet-HLH | glrlm      | ShortRunHighGrayLevelEmphasis    | 56.49459021  |
| wavelet-HLH | glrlm      | RunLengthNonUniformity           | 38.17545118  |
| wavelet-HLH | glrlm      | ShortRunEmphasis                 | 0.957512266  |
| wavelet-HLH | glrlm      | LongRunHighGrayLevelEmphasis     | 66.6606595   |
| wavelet-HLH | glrlm      | RunPercentage                    | 0.947008547  |
| wavelet-HLH | glrlm      | LongRunLowGrayLevelEmphasis      | 0.060259336  |
| wavelet-HLH | glrlm      | RunEntropy                       | 3.524036333  |
| wavelet-HLH | glrlm      | HighGrayLevelRunEmphasis         | 58.52780406  |
| wavelet-HLH | glrlm      | RunLengthNonUniformityNormalized | 0.894626084  |
| wavelet-HLH | glszm      | GrayLevelVariance                | 12.20408163  |
| wavelet-HLH | glszm      | ZoneVariance                     | 3.836734694  |
| wavelet-HLH | glszm      | GrayLevelNonUniformityNormalized | 0.088435374  |
| wavelet-HLH | glszm      | SizeZoneNonUniformityNormalized  | 0.424036281  |
| wavelet-HLH | glszm      | SizeZoneNonUniformity            | 8.904761905  |
| wavelet-HLH | glszm      | GrayLevelNonUniformity           | 1.857142857  |
| wavelet-HLH | glszm      | LargeAreaEmphasis                | 8.428571429  |
| wavelet-HLH | glszm      | SmallAreaHighGrayLevelEmphasis   | 55.91669366  |
| wavelet-HLH | glszm      | ZonePercentage                   | 0.466666667  |
| wavelet-HLH | glszm      | LargeAreaLowGrayLevelEmphasis    | 0.296462792  |
| wavelet-HLH | glszm      | LargeAreaHighGrayLevelEmphasis   | 418.6666667  |
| wavelet-HLH | glszm      | HighGrayLevelZoneEmphasis        | 71.71428571  |
| wavelet-HLH | glszm      | SmallAreaEmphasis                | 0.668610301  |
| wavelet-HLH | glszm      | LowGrayLevelZoneEmphasis         | 0.075794398  |
| wavelet-HLH | glszm      | ZoneEntropy                      | 4.106603137  |
| wavelet-HLH | glszm      | SmallAreaLowGrayLevelEmphasis    | 0.061700264  |
| wavelet-HLH | ngtdm      | Coarseness                       | 0.100603097  |
| wavelet-HLH | ngtdm      | Complexity                       | 158.7619489  |
| wavelet-HLH | ngtdm      | Strength                         | 5.692229588  |
| wavelet-HLH | ngtdm      | Contrast                         | 0.247751038  |
| wavelet-HLH | ngtdm      | Busyness                         | 0.129128848  |

|            |               |                                      |                                                                                                                                                                                                                                                                                                                                                                                                                   |
|------------|---------------|--------------------------------------|-------------------------------------------------------------------------------------------------------------------------------------------------------------------------------------------------------------------------------------------------------------------------------------------------------------------------------------------------------------------------------------------------------------------|
| Image type | Feature Class | Feature Name                         | 11: RTSTRUCT: C99-DNU_segment_GTV RLL                                                                                                                                                                                                                                                                                                                                                                             |
| general    | info          | BoundingBox                          | (1, 0, 1, 5, 7, 5)                                                                                                                                                                                                                                                                                                                                                                                                |
| general    | info          | EnabledImageTypes                    | {u'Original': {}, u'Wavelet': {}}                                                                                                                                                                                                                                                                                                                                                                                 |
|            |               |                                      | {'distances': [1], 'additionalInfo': True, 'force2D': False, 'interpolator': 'sitkBSpline', 'resampledPixelSpacing': [3.0], 'label': 1, 'normalizeScale': 1, 'normalize': False, 'force2Ddimension': 0, 'removeOutliers': None, 'minimumROISize': None, u'binWidth': 25.0, 'minimumROIDimensions': 1, u'correctMask': True, 'preCrop': False, u'symmetricalGLCM': True, 'resegmentRange': None, 'padDistance': 5} |
| general    | info          | GeneralSettings                      |                                                                                                                                                                                                                                                                                                                                                                                                                   |
| general    | info          | ImageHash                            | 3a081fbf94e08190510786c9b43559c48a9791fb                                                                                                                                                                                                                                                                                                                                                                          |
| general    | info          | ImageSpacing                         | (1.26953125, 1.26953125, 2.0)                                                                                                                                                                                                                                                                                                                                                                                     |
| general    | info          | MaskHash                             | f677c81c0826f6b15ba759d23aba66b368686682                                                                                                                                                                                                                                                                                                                                                                          |
| general    | info          | NumpyVersion                         | 1.13.1                                                                                                                                                                                                                                                                                                                                                                                                            |
| general    | info          | PyWaveletVersion                     | 0.5.2                                                                                                                                                                                                                                                                                                                                                                                                             |
| general    | info          | SimpleITKVersion                     | 1.1.0                                                                                                                                                                                                                                                                                                                                                                                                             |
| general    | info          | Version                              | 1.3.0.post102+g1b0eb74                                                                                                                                                                                                                                                                                                                                                                                            |
| general    | info          | VolumeNum                            | 1                                                                                                                                                                                                                                                                                                                                                                                                                 |
| general    | info          | VoxelNum                             | 110                                                                                                                                                                                                                                                                                                                                                                                                               |
| original   | shape         | Maximum3DDiameter                    | 20.34698995                                                                                                                                                                                                                                                                                                                                                                                                       |
| original   | shape         | Maximum2DDiameterSlice               | 17.49285568                                                                                                                                                                                                                                                                                                                                                                                                       |
| original   | shape         | Sphericity                           | 0.916448828                                                                                                                                                                                                                                                                                                                                                                                                       |
| original   | shape         | MinorAxis                            | 15.65513004                                                                                                                                                                                                                                                                                                                                                                                                       |
| original   | shape         | Elongation                           | 0.815104627                                                                                                                                                                                                                                                                                                                                                                                                       |
| original   | shape         | SurfaceVolumeRatio                   | 0.367105103                                                                                                                                                                                                                                                                                                                                                                                                       |
| original   | shape         | Volume                               | 2970                                                                                                                                                                                                                                                                                                                                                                                                              |
| original   | shape         | MajorAxis                            | 19.20628287                                                                                                                                                                                                                                                                                                                                                                                                       |
| original   | shape         | SurfaceArea                          | 1090.302156                                                                                                                                                                                                                                                                                                                                                                                                       |
| original   | shape         | Flatness                             | 0.719001573                                                                                                                                                                                                                                                                                                                                                                                                       |
| original   | shape         | LeastAxis                            | 13.8093476                                                                                                                                                                                                                                                                                                                                                                                                        |
| original   | shape         | Maximum2DDiameterColumn              | 16.97056275                                                                                                                                                                                                                                                                                                                                                                                                       |
| original   | shape         | Maximum2DDiameterRow                 | 20.1246118                                                                                                                                                                                                                                                                                                                                                                                                        |
| original   | gldm          | GrayLevelVariance                    | 59.9292562                                                                                                                                                                                                                                                                                                                                                                                                        |
| original   | gldm          | HighGrayLevelEmphasis                | 782.0727273                                                                                                                                                                                                                                                                                                                                                                                                       |
| original   | gldm          | DependenceEntropy                    | 5.361241537                                                                                                                                                                                                                                                                                                                                                                                                       |
| original   | gldm          | DependenceNonUniformity              | 25.85454545                                                                                                                                                                                                                                                                                                                                                                                                       |
| original   | gldm          | GrayLevelNonUniformity               | 8.963636364                                                                                                                                                                                                                                                                                                                                                                                                       |
| original   | gldm          | SmallDependenceEmphasis              | 0.474290908                                                                                                                                                                                                                                                                                                                                                                                                       |
| original   | gldm          | SmallDependenceHighGrayLevelEmphasis | 268.2191194                                                                                                                                                                                                                                                                                                                                                                                                       |
| original   | gldm          | DependenceNonUniformityNormalized    | 0.235041322                                                                                                                                                                                                                                                                                                                                                                                                       |
| original   | gldm          | LargeDependenceEmphasis              | 12.78181818                                                                                                                                                                                                                                                                                                                                                                                                       |
| original   | gldm          | LargeDependenceLowGrayLevelEmphasis  | 0.023270861                                                                                                                                                                                                                                                                                                                                                                                                       |
| original   | gldm          | DependenceVariance                   | 4.736859504                                                                                                                                                                                                                                                                                                                                                                                                       |
| original   | gldm          | LargeDependenceHighGrayLevelEmphasis | 13065.2                                                                                                                                                                                                                                                                                                                                                                                                           |
| original   | gldm          | SmallDependenceLowGrayLevelEmphasis  | 0.011148598                                                                                                                                                                                                                                                                                                                                                                                                       |
| original   | gldm          | LowGrayLevelEmphasis                 | 0.011731831                                                                                                                                                                                                                                                                                                                                                                                                       |
| original   | glcm          | JointAverage                         | 28.50064765                                                                                                                                                                                                                                                                                                                                                                                                       |
| original   | glcm          | SumAverage                           | 57.0012953                                                                                                                                                                                                                                                                                                                                                                                                        |
| original   | glcm          | JointEntropy                         | 6.062832543                                                                                                                                                                                                                                                                                                                                                                                                       |
| original   | glcm          | ClusterShade                         | -1723.770545                                                                                                                                                                                                                                                                                                                                                                                                      |
| original   | glcm          | MaximumProbability                   | 0.059639838                                                                                                                                                                                                                                                                                                                                                                                                       |
| original   | glcm          | ldmn                                 | 0.953387623                                                                                                                                                                                                                                                                                                                                                                                                       |
| original   | glcm          | JointEnergy                          | 0.020588645                                                                                                                                                                                                                                                                                                                                                                                                       |

|          |            |                                  |              |
|----------|------------|----------------------------------|--------------|
| original | glcm       | Contrast                         | 72.41923794  |
| original | glcm       | DifferenceEntropy                | 3.653319024  |
| original | glcm       | InverseVariance                  | 0.273041486  |
| original | glcm       | DifferenceVariance               | 40.4989274   |
| original | glcm       | Idn                              | 0.879100821  |
| original | glcm       | Idm                              | 0.264901232  |
| original | glcm       | Correlation                      | 0.200756714  |
| original | glcm       | Autocorrelation                  | 821.6542029  |
| original | glcm       | SumEntropy                       | 4.318739521  |
| original | glcm       | SumSquares                       | 45.52948578  |
| original | glcm       | ClusterProminence                | 61309.63283  |
| original | glcm       | Imc2                             | 0.970847411  |
| original | glcm       | Imc1                             | -0.383068838 |
| original | glcm       | DifferenceAverage                | 5.633352438  |
| original | glcm       | Id                               | 0.335159222  |
| original | glcm       | ClusterTendency                  | 109.6987052  |
| original | firstorder | InterquartileRange               | 217.25       |
| original | firstorder | Skewness                         | -1.386387329 |
| original | firstorder | Uniformity                       | 0.081487603  |
| original | firstorder | Median                           | -53.5        |
| original | firstorder | Energy                           | 6360220      |
| original | firstorder | RobustMeanAbsoluteDeviation      | 103.3306401  |
| original | firstorder | MeanAbsoluteDeviation            | 154.6981818  |
| original | firstorder | TotalEnergy                      | 171725940    |
| original | firstorder | Maximum                          | 72           |
| original | firstorder | RootMeanSquared                  | 240.4582746  |
| original | firstorder | 90Percentile                     | 23           |
| original | firstorder | Minimum                          | -781         |
| original | firstorder | Entropy                          | 4.136812194  |
| original | firstorder | Range                            | 853          |
| original | firstorder | Variance                         | 37826.22182  |
| original | firstorder | 10Percentile                     | -426.2       |
| original | firstorder | Kurtosis                         | 4.111826286  |
| original | firstorder | Mean                             | -141.4       |
| original | glrlm      | ShortRunLowGrayLevelEmphasis     | 0.012500793  |
| original | glrlm      | GrayLevelVariance                | 61.93737655  |
| original | glrlm      | LowGrayLevelRunEmphasis          | 0.012555209  |
| original | glrlm      | GrayLevelNonUniformityNormalized | 0.073983114  |
| original | glrlm      | RunVariance                      | 0.083856581  |
| original | glrlm      | GrayLevelNonUniformity           | 7.570768607  |
| original | glrlm      | LongRunEmphasis                  | 1.244343396  |
| original | glrlm      | ShortRunHighGrayLevelEmphasis    | 708.9192913  |
| original | glrlm      | RunLengthNonUniformity           | 89.1074329   |
| original | glrlm      | ShortRunEmphasis                 | 0.946603158  |
| original | glrlm      | LongRunHighGrayLevelEmphasis     | 1013.713811  |
| original | glrlm      | RunPercentage                    | 0.929370629  |
| original | glrlm      | LongRunLowGrayLevelEmphasis      | 0.012802737  |
| original | glrlm      | RunEntropy                       | 4.471504661  |
| original | glrlm      | HighGrayLevelRunEmphasis         | 763.5295444  |
| original | glrlm      | RunLengthNonUniformityNormalized | 0.870436018  |
| original | glszm      | GrayLevelVariance                | 68.89158163  |
| original | glszm      | ZoneVariance                     | 10.49872449  |
| original | glszm      | GrayLevelNonUniformityNormalized | 0.051658163  |
| original | glszm      | SizeZoneNonUniformityNormalized  | 0.65880102   |
| original | glszm      | SizeZoneNonUniformity            | 36.89285714  |
| original | glszm      | GrayLevelNonUniformity           | 2.892857143  |

|             |            |                                      |              |
|-------------|------------|--------------------------------------|--------------|
| original    | glszm      | LargeAreaEmphasis                    | 14.35714286  |
| original    | glszm      | SmallAreaHighGrayLevelEmphasis       | 436.7283236  |
| original    | glszm      | ZonePercentage                       | 0.509090909  |
| original    | glszm      | LargeAreaLowGrayLevelEmphasis        | 0.035119499  |
| original    | glszm      | LargeAreaHighGrayLevelEmphasis       | 14451.78571  |
| original    | glszm      | HighGrayLevelZoneEmphasis            | 576.75       |
| original    | glszm      | SmallAreaEmphasis                    | 0.833101623  |
| original    | glszm      | LowGrayLevelZoneEmphasis             | 0.022009056  |
| original    | glszm      | ZoneEntropy                          | 4.857010619  |
| original    | glszm      | SmallAreaLowGrayLevelEmphasis        | 0.021776125  |
| original    | ngtdm      | Coarseness                           | 0.034304122  |
| original    | ngtdm      | Complexity                           | 1865.399869  |
| original    | ngtdm      | Strength                             | 21.54000184  |
| original    | ngtdm      | Contrast                             | 0.705465351  |
| original    | ngtdm      | Busyness                             | 0.028647855  |
| wavelet-HHH | gldm       | GrayLevelVariance                    | 14.58545455  |
| wavelet-HHH | gldm       | HighGrayLevelEmphasis                | 149.1454545  |
| wavelet-HHH | gldm       | DependenceEntropy                    | 5.332292928  |
| wavelet-HHH | gldm       | DependenceNonUniformity              | 26.65454545  |
| wavelet-HHH | gldm       | GrayLevelNonUniformity               | 9.672727273  |
| wavelet-HHH | gldm       | SmallDependenceEmphasis              | 0.450566842  |
| wavelet-HHH | gldm       | SmallDependenceHighGrayLevelEmphasis | 77.35631463  |
| wavelet-HHH | gldm       | DependenceNonUniformityNormalized    | 0.24231405   |
| wavelet-HHH | gldm       | LargeDependenceEmphasis              | 8.163636364  |
| wavelet-HHH | gldm       | LargeDependenceLowGrayLevelEmphasis  | 0.079443313  |
| wavelet-HHH | gldm       | DependenceVariance                   | 2.316033058  |
| wavelet-HHH | gldm       | LargeDependenceHighGrayLevelEmphasis | 1119.018182  |
| wavelet-HHH | gldm       | SmallDependenceLowGrayLevelEmphasis  | 0.015835417  |
| wavelet-HHH | gldm       | LowGrayLevelEmphasis                 | 0.021009     |
| wavelet-HHH | glcm       | JointAverage                         | 11.54390132  |
| wavelet-HHH | glcm       | SumAverage                           | 23.08780264  |
| wavelet-HHH | glcm       | JointEntropy                         | 6.255708139  |
| wavelet-HHH | glcm       | ClusterShade                         | -1.080958065 |
| wavelet-HHH | glcm       | MaximumProbability                   | 0.03894739   |
| wavelet-HHH | glcm       | Idmn                                 | 0.956163544  |
| wavelet-HHH | glcm       | JointEnergy                          | 0.015661065  |
| wavelet-HHH | glcm       | Contrast                             | 27.33314932  |
| wavelet-HHH | glcm       | DifferenceEntropy                    | 3.295092338  |
| wavelet-HHH | glcm       | InverseVariance                      | 0.252356527  |
| wavelet-HHH | glcm       | DifferenceVariance                   | 11.38590047  |
| wavelet-HHH | glcm       | Idn                                  | 0.865772199  |
| wavelet-HHH | glcm       | Idm                                  | 0.236628799  |
| wavelet-HHH | glcm       | Correlation                          | -0.036323595 |
| wavelet-HHH | glcm       | Autocorrelation                      | 132.6776952  |
| wavelet-HHH | glcm       | SumEntropy                           | 3.998237732  |
| wavelet-HHH | glcm       | SumSquares                           | 13.06985862  |
| wavelet-HHH | glcm       | ClusterProminence                    | 2291.778979  |
| wavelet-HHH | glcm       | Imc2                                 | 0.958072185  |
| wavelet-HHH | glcm       | Imc1                                 | -0.335676302 |
| wavelet-HHH | glcm       | DifferenceAverage                    | 3.947021677  |
| wavelet-HHH | glcm       | Id                                   | 0.326418045  |
| wavelet-HHH | glcm       | ClusterTendency                      | 24.94628517  |
| wavelet-HHH | firstorder | InterquartileRange                   | 103.5797128  |
| wavelet-HHH | firstorder | Skewness                             | 0.077791002  |
| wavelet-HHH | firstorder | Uniformity                           | 0.087933884  |
| wavelet-HHH | firstorder | Median                               | 0.023507155  |

|             |            |                                  |              |
|-------------|------------|----------------------------------|--------------|
| wavelet-HHH | firstorder | Energy                           | 1019416.594  |
| wavelet-HHH | firstorder | RobustMeanAbsoluteDeviation      | 45.26666926  |
| wavelet-HHH | firstorder | MeanAbsoluteDeviation            | 72.08507233  |
| wavelet-HHH | firstorder | TotalEnergy                      | 27524248.04  |
| wavelet-HHH | firstorder | Maximum                          | 297.1305783  |
| wavelet-HHH | firstorder | RootMeanSquared                  | 96.26745859  |
| wavelet-HHH | firstorder | 90Percentile                     | 111.2527884  |
| wavelet-HHH | firstorder | Minimum                          | -259.2300021 |
| wavelet-HHH | firstorder | Entropy                          | 3.839552118  |
| wavelet-HHH | firstorder | Range                            | 556.3605805  |
| wavelet-HHH | firstorder | Variance                         | 9258.85464   |
| wavelet-HHH | firstorder | 10Percentile                     | -115.374511  |
| wavelet-HHH | firstorder | Kurtosis                         | 3.809082077  |
| wavelet-HHH | firstorder | Mean                             | 2.927275655  |
| wavelet-HHH | grlm       | ShortRunLowGrayLevelEmphasis     | 0.021366044  |
| wavelet-HHH | grlm       | GrayLevelVariance                | 15.24524376  |
| wavelet-HHH | grlm       | LowGrayLevelRunEmphasis          | 0.021729862  |
| wavelet-HHH | grlm       | GrayLevelNonUniformityNormalized | 0.085276212  |
| wavelet-HHH | grlm       | RunVariance                      | 0.058761084  |
| wavelet-HHH | grlm       | GrayLevelNonUniformity           | 8.870916525  |
| wavelet-HHH | grlm       | LongRunEmphasis                  | 1.178479333  |
| wavelet-HHH | grlm       | ShortRunHighGrayLevelEmphasis    | 144.46085    |
| wavelet-HHH | grlm       | RunLengthNonUniformity           | 93.1520392   |
| wavelet-HHH | grlm       | ShortRunEmphasis                 | 0.957853937  |
| wavelet-HHH | grlm       | LongRunHighGrayLevelEmphasis     | 173.9092859  |
| wavelet-HHH | grlm       | RunPercentage                    | 0.945454545  |
| wavelet-HHH | grlm       | LongRunLowGrayLevelEmphasis      | 0.023254705  |
| wavelet-HHH | grlm       | RunEntropy                       | 4.101579903  |
| wavelet-HHH | grlm       | HighGrayLevelRunEmphasis         | 150.0637776  |
| wavelet-HHH | grlm       | RunLengthNonUniformityNormalized | 0.89514485   |
| wavelet-HHH | glszm      | GrayLevelVariance                | 24.66709184  |
| wavelet-HHH | glszm      | ZoneVariance                     | 4.891581633  |
| wavelet-HHH | glszm      | GrayLevelNonUniformityNormalized | 0.066326531  |
| wavelet-HHH | glszm      | SizeZoneNonUniformityNormalized  | 0.510204082  |
| wavelet-HHH | glszm      | SizeZoneNonUniformity            | 28.57142857  |
| wavelet-HHH | glszm      | GrayLevelNonUniformity           | 3.714285714  |
| wavelet-HHH | glszm      | LargeAreaEmphasis                | 8.75         |
| wavelet-HHH | glszm      | SmallAreaHighGrayLevelEmphasis   | 133.1297199  |
| wavelet-HHH | glszm      | ZonePercentage                   | 0.509090909  |
| wavelet-HHH | glszm      | LargeAreaLowGrayLevelEmphasis    | 0.095790245  |
| wavelet-HHH | glszm      | LargeAreaHighGrayLevelEmphasis   | 1211.785714  |
| wavelet-HHH | glszm      | HighGrayLevelZoneEmphasis        | 166.1071429  |
| wavelet-HHH | glszm      | SmallAreaEmphasis                | 0.740836636  |
| wavelet-HHH | glszm      | LowGrayLevelZoneEmphasis         | 0.032556676  |
| wavelet-HHH | glszm      | ZoneEntropy                      | 4.840587681  |
| wavelet-HHH | glszm      | SmallAreaLowGrayLevelEmphasis    | 0.029691938  |
| wavelet-HHH | ngtdm      | Coarseness                       | 0.058938716  |
| wavelet-HHH | ngtdm      | Complexity                       | 479.82203    |
| wavelet-HHH | ngtdm      | Strength                         | 6.852646364  |
| wavelet-HHH | ngtdm      | Contrast                         | 0.210347951  |
| wavelet-HHH | ngtdm      | Busyness                         | 0.06858538   |
| wavelet-HLL | gldm       | GrayLevelVariance                | 60.55247934  |
| wavelet-HLL | gldm       | HighGrayLevelEmphasis            | 257.8272727  |
| wavelet-HLL | gldm       | DependenceEntropy                | 5.660594145  |
| wavelet-HLL | gldm       | DependenceNonUniformity          | 28.29090909  |
| wavelet-HLL | gldm       | GrayLevelNonUniformity           | 6.018181818  |

|             |            |                                      |              |
|-------------|------------|--------------------------------------|--------------|
| wavelet-HLL | gldm       | SmallDependenceEmphasis              | 0.46099732   |
| wavelet-HLL | gldm       | SmallDependenceHighGrayLevelEmphasis | 155.5793962  |
| wavelet-HLL | gldm       | DependenceNonUniformityNormalized    | 0.257190083  |
| wavelet-HLL | gldm       | LargeDependenceEmphasis              | 7.472727273  |
| wavelet-HLL | gldm       | LargeDependenceLowGrayLevelEmphasis  | 0.154853185  |
| wavelet-HLL | gldm       | DependenceVariance                   | 1.971570248  |
| wavelet-HLL | gldm       | LargeDependenceHighGrayLevelEmphasis | 1250.409091  |
| wavelet-HLL | gldm       | SmallDependenceLowGrayLevelEmphasis  | 0.010497068  |
| wavelet-HLL | gldm       | LowGrayLevelEmphasis                 | 0.030072692  |
| wavelet-HLL | glcm       | JointAverage                         | 13.61456008  |
| wavelet-HLL | glcm       | SumAverage                           | 27.22912016  |
| wavelet-HLL | glcm       | JointEntropy                         | 6.686958822  |
| wavelet-HLL | glcm       | ClusterShade                         | 1817.340078  |
| wavelet-HLL | glcm       | MaximumProbability                   | 0.02721413   |
| wavelet-HLL | glcm       | Idmn                                 | 0.953106127  |
| wavelet-HLL | glcm       | JointEnergy                          | 0.010828807  |
| wavelet-HLL | glcm       | Contrast                             | 80.4589059   |
| wavelet-HLL | glcm       | DifferenceEntropy                    | 3.792459761  |
| wavelet-HLL | glcm       | InverseVariance                      | 0.175260521  |
| wavelet-HLL | glcm       | DifferenceVariance                   | 38.17385858  |
| wavelet-HLL | glcm       | Idn                                  | 0.869150017  |
| wavelet-HLL | glcm       | Idm                                  | 0.187510012  |
| wavelet-HLL | glcm       | Correlation                          | 0.209559764  |
| wavelet-HLL | glcm       | Autocorrelation                      | 196.6226246  |
| wavelet-HLL | glcm       | SumEntropy                           | 4.730775138  |
| wavelet-HLL | glcm       | SumSquares                           | 51.48340032  |
| wavelet-HLL | glcm       | ClusterProminence                    | 80184.9359   |
| wavelet-HLL | glcm       | Imc2                                 | 0.989882265  |
| wavelet-HLL | glcm       | Imc1                                 | -0.453539842 |
| wavelet-HLL | glcm       | DifferenceAverage                    | 6.336618493  |
| wavelet-HLL | glcm       | Id                                   | 0.274537597  |
| wavelet-HLL | glcm       | ClusterTendency                      | 125.4746954  |
| wavelet-HLL | firstorder | InterquartileRange                   | 244.5204602  |
| wavelet-HLL | firstorder | Skewness                             | 1.155191866  |
| wavelet-HLL | firstorder | Uniformity                           | 0.054710744  |
| wavelet-HLL | firstorder | Median                               | -77.29850124 |
| wavelet-HLL | firstorder | Energy                               | 4254072.377  |
| wavelet-HLL | firstorder | RobustMeanAbsoluteDeviation          | 92.57931314  |
| wavelet-HLL | firstorder | MeanAbsoluteDeviation                | 146.862023   |
| wavelet-HLL | firstorder | TotalEnergy                          | 114859954.2  |
| wavelet-HLL | firstorder | Maximum                              | 536.7129949  |
| wavelet-HLL | firstorder | RootMeanSquared                      | 196.6554989  |
| wavelet-HLL | firstorder | 90Percentile                         | 204.5055218  |
| wavelet-HLL | firstorder | Minimum                              | -361.4296498 |
| wavelet-HLL | firstorder | Entropy                              | 4.441263214  |
| wavelet-HLL | firstorder | Range                                | 898.1426448  |
| wavelet-HLL | firstorder | Variance                             | 37362.83226  |
| wavelet-HLL | firstorder | 10Percentile                         | -222.4682333 |
| wavelet-HLL | firstorder | Kurtosis                             | 4.193381229  |
| wavelet-HLL | firstorder | Mean                                 | -36.20156054 |
| wavelet-HLL | glrlm      | ShortRunLowGrayLevelEmphasis         | 0.029357105  |
| wavelet-HLL | glrlm      | GrayLevelVariance                    | 61.88511583  |
| wavelet-HLL | glrlm      | LowGrayLevelRunEmphasis              | 0.0303711    |
| wavelet-HLL | glrlm      | GrayLevelNonUniformityNormalized     | 0.053719169  |
| wavelet-HLL | glrlm      | RunVariance                          | 0.054572932  |
| wavelet-HLL | glrlm      | GrayLevelNonUniformity               | 5.603016026  |



|             |       |                                      |             |
|-------------|-------|--------------------------------------|-------------|
| wavelet-HLL | glrlm | LongRunEmphasis                      | 1.169773331 |
| wavelet-HLL | glrlm | ShortRunHighGrayLevelEmphasis        | 255.8491847 |
| wavelet-HLL | glrlm | RunLengthNonUniformity               | 93.9588997  |
| wavelet-HLL | glrlm | ShortRunEmphasis                     | 0.959318937 |
| wavelet-HLL | glrlm | LongRunHighGrayLevelEmphasis         | 291.0884646 |
| wavelet-HLL | glrlm | RunPercentage                        | 0.948251748 |
| wavelet-HLL | glrlm | LongRunLowGrayLevelEmphasis          | 0.034534253 |
| wavelet-HLL | glrlm | RunEntropy                           | 4.644982388 |
| wavelet-HLL | glrlm | HighGrayLevelRunEmphasis             | 262.7920094 |
| wavelet-HLL | glrlm | RunLengthNonUniformityNormalized     | 0.899291229 |
| wavelet-HLL | glszm | GrayLevelVariance                    | 74.34333333 |
| wavelet-HLL | glszm | ZoneVariance                         | 2.505555556 |
| wavelet-HLL | glszm | GrayLevelNonUniformityNormalized     | 0.047222222 |
| wavelet-HLL | glszm | SizeZoneNonUniformityNormalized      | 0.49        |
| wavelet-HLL | glszm | SizeZoneNonUniformity                | 29.4        |
| wavelet-HLL | glszm | GrayLevelNonUniformity               | 2.833333333 |
| wavelet-HLL | glszm | LargeAreaEmphasis                    | 5.866666667 |
| wavelet-HLL | glszm | SmallAreaHighGrayLevelEmphasis       | 259.3620854 |
| wavelet-HLL | glszm | ZonePercentage                       | 0.545454545 |
| wavelet-HLL | glszm | LargeAreaLowGrayLevelEmphasis        | 0.130934054 |
| wavelet-HLL | glszm | LargeAreaHighGrayLevelEmphasis       | 1094.883333 |
| wavelet-HLL | glszm | HighGrayLevelZoneEmphasis            | 320.8333333 |
| wavelet-HLL | glszm | SmallAreaEmphasis                    | 0.723557613 |
| wavelet-HLL | glszm | LowGrayLevelZoneEmphasis             | 0.029319204 |
| wavelet-HLL | glszm | ZoneEntropy                          | 5.202479554 |
| wavelet-HLL | glszm | SmallAreaLowGrayLevelEmphasis        | 0.013781774 |
| wavelet-HLL | ngtdm | Coarseness                           | 0.045334553 |
| wavelet-HLL | ngtdm | Complexity                           | 1836.773752 |
| wavelet-HLL | ngtdm | Strength                             | 18.58327621 |
| wavelet-HLL | ngtdm | Contrast                             | 0.705478727 |
| wavelet-HLL | ngtdm | Busyness                             | 0.071255882 |
| wavelet-LHL | gldm  | GrayLevelVariance                    | 116.271405  |
| wavelet-LHL | gldm  | HighGrayLevelEmphasis                | 656.2       |
| wavelet-LHL | gldm  | DependenceEntropy                    | 5.587866872 |
| wavelet-LHL | gldm  | DependenceNonUniformity              | 51.65454545 |
| wavelet-LHL | gldm  | GrayLevelNonUniformity               | 4.363636364 |
| wavelet-LHL | gldm  | SmallDependenceEmphasis              | 0.69730303  |
| wavelet-LHL | gldm  | SmallDependenceHighGrayLevelEmphasis | 487.6495051 |
| wavelet-LHL | gldm  | DependenceNonUniformityNormalized    | 0.469586777 |
| wavelet-LHL | gldm  | LargeDependenceEmphasis              | 3.290909091 |
| wavelet-LHL | gldm  | LargeDependenceLowGrayLevelEmphasis  | 0.021691129 |
| wavelet-LHL | gldm  | DependenceVariance                   | 0.845950413 |
| wavelet-LHL | gldm  | LargeDependenceHighGrayLevelEmphasis | 1916.018182 |
| wavelet-LHL | gldm  | SmallDependenceLowGrayLevelEmphasis  | 0.015788215 |
| wavelet-LHL | gldm  | LowGrayLevelEmphasis                 | 0.01655653  |
| wavelet-LHL | glcm  | JointAverage                         | 22.49659911 |
| wavelet-LHL | glcm  | SumAverage                           | 44.99319821 |
| wavelet-LHL | glcm  | JointEntropy                         | 6.854449591 |
| wavelet-LHL | glcm  | ClusterShade                         | 5270.453309 |
| wavelet-LHL | glcm  | MaximumProbability                   | 0.022121187 |
| wavelet-LHL | glcm  | ldmn                                 | 0.966558064 |
| wavelet-LHL | glcm  | JointEnergy                          | 0.009350957 |
| wavelet-LHL | glcm  | Contrast                             | 143.6824555 |
| wavelet-LHL | glcm  | DifferenceEntropy                    | 4.14653526  |
| wavelet-LHL | glcm  | InverseVariance                      | 0.132180369 |
| wavelet-LHL | glcm  | DifferenceVariance                   | 60.61614017 |

|             |            |                                  |              |
|-------------|------------|----------------------------------|--------------|
| wavelet-LHL | glcm       | Idn                              | 0.884008071  |
| wavelet-LHL | glcm       | Idm                              | 0.115704611  |
| wavelet-LHL | glcm       | Correlation                      | 0.292031969  |
| wavelet-LHL | glcm       | Autocorrelation                  | 535.2962705  |
| wavelet-LHL | glcm       | SumEntropy                       | 4.993945904  |
| wavelet-LHL | glcm       | SumSquares                       | 100.9688349  |
| wavelet-LHL | glcm       | ClusterProminence                | 371190.1825  |
| wavelet-LHL | glcm       | Imc2                             | 0.997850719  |
| wavelet-LHL | glcm       | Imc1                             | -0.571462012 |
| wavelet-LHL | glcm       | DifferenceAverage                | 8.817577105  |
| wavelet-LHL | glcm       | Id                               | 0.202084036  |
| wavelet-LHL | glcm       | ClusterTendency                  | 260.1928839  |
| wavelet-LHL | firstorder | InterquartileRange               | 272.5663317  |
| wavelet-LHL | firstorder | Skewness                         | 0.94874831   |
| wavelet-LHL | firstorder | Uniformity                       | 0.039669421  |
| wavelet-LHL | firstorder | Median                           | -79.31286197 |
| wavelet-LHL | firstorder | Energy                           | 8065697.426  |
| wavelet-LHL | firstorder | RobustMeanAbsoluteDeviation      | 123.8001572  |
| wavelet-LHL | firstorder | MeanAbsoluteDeviation            | 199.0023033  |
| wavelet-LHL | firstorder | TotalEnergy                      | 217773830.5  |
| wavelet-LHL | firstorder | Maximum                          | 905.9182736  |
| wavelet-LHL | firstorder | RootMeanSquared                  | 270.7850108  |
| wavelet-LHL | firstorder | 90Percentile                     | 352.1680592  |
| wavelet-LHL | firstorder | Minimum                          | -597.9567209 |
| wavelet-LHL | firstorder | Entropy                          | 4.932674828  |
| wavelet-LHL | firstorder | Range                            | 1503.874995  |
| wavelet-LHL | firstorder | Variance                         | 72341.65723  |
| wavelet-LHL | firstorder | 10Percentile                     | -302.1897972 |
| wavelet-LHL | firstorder | Kurtosis                         | 4.506583826  |
| wavelet-LHL | firstorder | Mean                             | -31.35067511 |
| wavelet-LHL | glrlm      | ShortRunLowGrayLevelEmphasis     | 0.016835583  |
| wavelet-LHL | glrlm      | GrayLevelVariance                | 118.0107671  |
| wavelet-LHL | glrlm      | LowGrayLevelRunEmphasis          | 0.016873087  |
| wavelet-LHL | glrlm      | GrayLevelNonUniformityNormalized | 0.038978628  |
| wavelet-LHL | glrlm      | RunVariance                      | 0.024573555  |
| wavelet-LHL | glrlm      | GrayLevelNonUniformity           | 4.195344516  |
| wavelet-LHL | glrlm      | LongRunEmphasis                  | 1.06982508   |
| wavelet-LHL | glrlm      | ShortRunHighGrayLevelEmphasis    | 649.6918451  |
| wavelet-LHL | glrlm      | RunLengthNonUniformity           | 103.2605939  |
| wavelet-LHL | glrlm      | ShortRunEmphasis                 | 0.984164052  |
| wavelet-LHL | glrlm      | LongRunHighGrayLevelEmphasis     | 696.7342264  |
| wavelet-LHL | glrlm      | RunPercentage                    | 0.978321678  |
| wavelet-LHL | glrlm      | LongRunLowGrayLevelEmphasis      | 0.017037801  |
| wavelet-LHL | glrlm      | RunEntropy                       | 5.0168815    |
| wavelet-LHL | glrlm      | HighGrayLevelRunEmphasis         | 658.5286717  |
| wavelet-LHL | glrlm      | RunLengthNonUniformityNormalied  | 0.95931195   |
| wavelet-LHL | glszm      | GrayLevelVariance                | 136.8608997  |
| wavelet-LHL | glszm      | ZoneVariance                     | 0.607612457  |
| wavelet-LHL | glszm      | GrayLevelNonUniformityNormalized | 0.034740484  |
| wavelet-LHL | glszm      | SizeZoneNonUniformityNormalized  | 0.667543253  |
| wavelet-LHL | glszm      | SizeZoneNonUniformity            | 56.74117647  |
| wavelet-LHL | glszm      | GrayLevelNonUniformity           | 2.952941176  |
| wavelet-LHL | glszm      | LargeAreaEmphasis                | 2.282352941  |
| wavelet-LHL | glszm      | SmallAreaHighGrayLevelEmphasis   | 598.6336601  |
| wavelet-LHL | glszm      | ZonePercentage                   | 0.772727273  |
| wavelet-LHL | glszm      | LargeAreaLowGrayLevelEmphasis    | 0.023716972  |

|             |            |                                      |              |
|-------------|------------|--------------------------------------|--------------|
| wavelet-LHL | glszm      | LargeAreaHighGrayLevelEmphasis       | 1372.635294  |
| wavelet-LHL | glszm      | HighGrayLevelZoneEmphasis            | 687.7294118  |
| wavelet-LHL | glszm      | SmallAreaEmphasis                    | 0.843281046  |
| wavelet-LHL | glszm      | LowGrayLevelZoneEmphasis             | 0.020692964  |
| wavelet-LHL | glszm      | ZoneEntropy                          | 5.429576671  |
| wavelet-LHL | glszm      | SmallAreaLowGrayLevelEmphasis        | 0.020275534  |
| wavelet-LHL | ngtdm      | Coarseness                           | 0.050353845  |
| wavelet-LHL | ngtdm      | Complexity                           | 4356.09057   |
| wavelet-LHL | ngtdm      | Strength                             | 39.51487587  |
| wavelet-LHL | ngtdm      | Contrast                             | 0.965305054  |
| wavelet-LHL | ngtdm      | Busyness                             | 0.028636938  |
| wavelet-LHH | gldm       | GrayLevelVariance                    | 32.76561983  |
| wavelet-LHH | gldm       | HighGrayLevelEmphasis                | 419.7818182  |
| wavelet-LHH | gldm       | DependenceEntropy                    | 5.534464118  |
| wavelet-LHH | gldm       | DependenceNonUniformity              | 31.03636364  |
| wavelet-LHH | gldm       | GrayLevelNonUniformity               | 7.145454545  |
| wavelet-LHH | gldm       | SmallDependenceEmphasis              | 0.510834364  |
| wavelet-LHH | gldm       | SmallDependenceHighGrayLevelEmphasis | 231.1868701  |
| wavelet-LHH | gldm       | DependenceNonUniformityNormalized    | 0.28214876   |
| wavelet-LHH | gldm       | LargeDependenceEmphasis              | 6.981818182  |
| wavelet-LHH | gldm       | LargeDependenceLowGrayLevelEmphasis  | 0.032449999  |
| wavelet-LHH | gldm       | DependenceVariance                   | 2.141818182  |
| wavelet-LHH | gldm       | LargeDependenceHighGrayLevelEmphasis | 2566.890909  |
| wavelet-LHH | gldm       | SmallDependenceLowGrayLevelEmphasis  | 0.013067519  |
| wavelet-LHH | gldm       | LowGrayLevelEmphasis                 | 0.014567316  |
| wavelet-LHH | glcm       | JointAverage                         | 19.68993802  |
| wavelet-LHH | glcm       | SumAverage                           | 39.37987603  |
| wavelet-LHH | glcm       | JointEntropy                         | 6.564892261  |
| wavelet-LHH | glcm       | ClusterShade                         | -51.57098346 |
| wavelet-LHH | glcm       | MaximumProbability                   | 0.036612727  |
| wavelet-LHH | glcm       | ldmn                                 | 0.952841964  |
| wavelet-LHH | glcm       | JointEnergy                          | 0.012358015  |
| wavelet-LHH | glcm       | Contrast                             | 57.90709858  |
| wavelet-LHH | glcm       | DifferenceEntropy                    | 3.728783858  |
| wavelet-LHH | glcm       | InverseVariance                      | 0.192728457  |
| wavelet-LHH | glcm       | DifferenceVariance                   | 24.45861183  |
| wavelet-LHH | glcm       | ldn                                  | 0.861812875  |
| wavelet-LHH | glcm       | ldm                                  | 0.188078723  |
| wavelet-LHH | glcm       | Correlation                          | -0.028698671 |
| wavelet-LHH | glcm       | Autocorrelation                      | 386.8260329  |
| wavelet-LHH | glcm       | SumEntropy                           | 4.420717488  |
| wavelet-LHH | glcm       | SumSquares                           | 28.07436077  |
| wavelet-LHH | glcm       | ClusterProminence                    | 12425.59349  |
| wavelet-LHH | glcm       | lmc2                                 | 0.981501777  |
| wavelet-LHH | glcm       | lmc1                                 | -0.404330412 |
| wavelet-LHH | glcm       | DifferenceAverage                    | 5.712502894  |
| wavelet-LHH | glcm       | ld                                   | 0.274784747  |
| wavelet-LHH | glcm       | ClusterTendency                      | 54.39034449  |
| wavelet-LHH | firstorder | InterquartileRange                   | 152.4870077  |
| wavelet-LHH | firstorder | Skewness                             | -0.300615281 |
| wavelet-LHH | firstorder | Uniformity                           | 0.064958678  |
| wavelet-LHH | firstorder | Median                               | -4.418919448 |
| wavelet-LHH | firstorder | Energy                               | 2238356.326  |
| wavelet-LHH | firstorder | RobustMeanAbsoluteDeviation          | 63.74632433  |
| wavelet-LHH | firstorder | MeanAbsoluteDeviation                | 103.9374529  |
| wavelet-LHH | firstorder | TotalEnergy                          | 60435620.81  |

|             |            |                                      |              |
|-------------|------------|--------------------------------------|--------------|
| wavelet-LHH | firstorder | Maximum                              | 311.5921287  |
| wavelet-LHH | firstorder | RootMeanSquared                      | 142.6488481  |
| wavelet-LHH | firstorder | 90Percentile                         | 190.0157717  |
| wavelet-LHH | firstorder | Minimum                              | -466.9636306 |
| wavelet-LHH | firstorder | Entropy                              | 4.257682055  |
| wavelet-LHH | firstorder | Range                                | 778.5557593  |
| wavelet-LHH | firstorder | Variance                             | 20331.7572   |
| wavelet-LHH | firstorder | 10Percentile                         | -143.789586  |
| wavelet-LHH | firstorder | Kurtosis                             | 4.060100206  |
| wavelet-LHH | firstorder | Mean                                 | 4.115419259  |
| wavelet-LHH | grlm       | ShortRunLowGrayLevelEmphasis         | 0.015029448  |
| wavelet-LHH | grlm       | GrayLevelVariance                    | 33.88754497  |
| wavelet-LHH | grlm       | LowGrayLevelRunEmphasis              | 0.015131795  |
| wavelet-LHH | grlm       | GrayLevelNonUniformityNormalized     | 0.062537932  |
| wavelet-LHH | grlm       | RunVariance                          | 0.053459379  |
| wavelet-LHH | grlm       | GrayLevelNonUniformity               | 6.563170466  |
| wavelet-LHH | grlm       | LongRunEmphasis                      | 1.154005098  |
| wavelet-LHH | grlm       | ShortRunHighGrayLevelEmphasis        | 409.450192   |
| wavelet-LHH | grlm       | RunLengthNonUniformity               | 95.9981516   |
| wavelet-LHH | grlm       | ShortRunEmphasis                     | 0.965657763  |
| wavelet-LHH | grlm       | LongRunHighGrayLevelEmphasis         | 478.6053823  |
| wavelet-LHH | grlm       | RunPercentage                        | 0.953846154  |
| wavelet-LHH | grlm       | LongRunLowGrayLevelEmphasis          | 0.015598567  |
| wavelet-LHH | grlm       | RunEntropy                           | 4.464235191  |
| wavelet-LHH | grlm       | HighGrayLevelRunEmphasis             | 422.2655954  |
| wavelet-LHH | grlm       | RunLengthNonUniformityNormalized     | 0.914253987  |
| wavelet-LHH | glszm      | GrayLevelVariance                    | 47.77676997  |
| wavelet-LHH | glszm      | ZoneVariance                         | 3.586293777  |
| wavelet-LHH | glszm      | GrayLevelNonUniformityNormalized     | 0.049634669  |
| wavelet-LHH | glszm      | SizeZoneNonUniformityNormalized      | 0.560594608  |
| wavelet-LHH | glszm      | SizeZoneNonUniformity                | 35.31746032  |
| wavelet-LHH | glszm      | GrayLevelNonUniformity               | 3.126984127  |
| wavelet-LHH | glszm      | LargeAreaEmphasis                    | 6.634920635  |
| wavelet-LHH | glszm      | SmallAreaHighGrayLevelEmphasis       | 357.3154938  |
| wavelet-LHH | glszm      | ZonePercentage                       | 0.572727273  |
| wavelet-LHH | glszm      | LargeAreaLowGrayLevelEmphasis        | 0.039632585  |
| wavelet-LHH | glszm      | LargeAreaHighGrayLevelEmphasis       | 2516.539683  |
| wavelet-LHH | glszm      | HighGrayLevelZoneEmphasis            | 449.047619   |
| wavelet-LHH | glszm      | SmallAreaEmphasis                    | 0.774549027  |
| wavelet-LHH | glszm      | LowGrayLevelZoneEmphasis             | 0.023184075  |
| wavelet-LHH | glszm      | ZoneEntropy                          | 5.135699765  |
| wavelet-LHH | glszm      | SmallAreaLowGrayLevelEmphasis        | 0.022451193  |
| wavelet-LHH | ngtdm      | Coarseness                           | 0.050514626  |
| wavelet-LHH | ngtdm      | Complexity                           | 1230.39406   |
| wavelet-LHH | ngtdm      | Strength                             | 11.50721556  |
| wavelet-LHH | ngtdm      | Contrast                             | 0.452730814  |
| wavelet-LHH | ngtdm      | Busyness                             | 0.04195413   |
| wavelet-LLH | gldm       | GrayLevelVariance                    | 60.56198347  |
| wavelet-LLH | gldm       | HighGrayLevelEmphasis                | 249          |
| wavelet-LLH | gldm       | DependenceEntropy                    | 5.494551759  |
| wavelet-LLH | gldm       | DependenceNonUniformity              | 39.4         |
| wavelet-LLH | gldm       | GrayLevelNonUniformity               | 5.418181818  |
| wavelet-LLH | gldm       | SmallDependenceEmphasis              | 0.53655303   |
| wavelet-LLH | gldm       | SmallDependenceHighGrayLevelEmphasis | 160.5825758  |
| wavelet-LLH | gldm       | DependenceNonUniformityNormalized    | 0.358181818  |
| wavelet-LLH | gldm       | LargeDependenceEmphasis              | 4.054545455  |

|             |            |                                      |              |
|-------------|------------|--------------------------------------|--------------|
| wavelet-LLH | gldm       | LargeDependenceLowGrayLevelEmphasis  | 0.090384709  |
| wavelet-LLH | gldm       | DependenceVariance                   | 0.748760331  |
| wavelet-LLH | gldm       | LargeDependenceHighGrayLevelEmphasis | 772.7454545  |
| wavelet-LLH | gldm       | SmallDependenceLowGrayLevelEmphasis  | 0.037534027  |
| wavelet-LLH | gldm       | LowGrayLevelEmphasis                 | 0.045868464  |
| wavelet-LLH | glcm       | JointAverage                         | 13.47949087  |
| wavelet-LLH | glcm       | SumAverage                           | 26.95898173  |
| wavelet-LLH | glcm       | JointEntropy                         | 6.809877151  |
| wavelet-LLH | glcm       | ClusterShade                         | 1209.2845    |
| wavelet-LLH | glcm       | MaximumProbability                   | 0.023566804  |
| wavelet-LLH | glcm       | ldmn                                 | 0.955551927  |
| wavelet-LLH | glcm       | JointEnergy                          | 0.009654293  |
| wavelet-LLH | glcm       | Contrast                             | 85.13715822  |
| wavelet-LLH | glcm       | DifferenceEntropy                    | 3.932138542  |
| wavelet-LLH | glcm       | InverseVariance                      | 0.156625851  |
| wavelet-LLH | glcm       | DifferenceVariance                   | 35.75342627  |
| wavelet-LLH | glcm       | ldn                                  | 0.864573598  |
| wavelet-LLH | glcm       | ldm                                  | 0.145282181  |
| wavelet-LLH | glcm       | Correlation                          | 0.152082367  |
| wavelet-LLH | glcm       | Autocorrelation                      | 189.7240324  |
| wavelet-LLH | glcm       | SumEntropy                           | 4.792318498  |
| wavelet-LLH | glcm       | SumSquares                           | 50.52169609  |
| wavelet-LLH | glcm       | ClusterProminence                    | 64565.4398   |
| wavelet-LLH | glcm       | lmc2                                 | 0.992774025  |
| wavelet-LLH | glcm       | lmc1                                 | -0.476288787 |
| wavelet-LLH | glcm       | DifferenceAverage                    | 6.940370384  |
| wavelet-LLH | glcm       | ld                                   | 0.234017396  |
| wavelet-LLH | glcm       | ClusterTendency                      | 116.9496261  |
| wavelet-LLH | firstorder | InterquartileRange                   | 218.1778009  |
| wavelet-LLH | firstorder | Skewness                             | 0.928901975  |
| wavelet-LLH | firstorder | Uniformity                           | 0.049256198  |
| wavelet-LLH | firstorder | Median                               | -112.110237  |
| wavelet-LLH | firstorder | Energy                               | 4690710.721  |
| wavelet-LLH | firstorder | RobustMeanAbsoluteDeviation          | 95.60447501  |
| wavelet-LLH | firstorder | MeanAbsoluteDeviation                | 148.3220158  |
| wavelet-LLH | firstorder | TotalEnergy                          | 126649189.5  |
| wavelet-LLH | firstorder | Maximum                              | 595.221916   |
| wavelet-LLH | firstorder | RootMeanSquared                      | 206.5013916  |
| wavelet-LLH | firstorder | 90Percentile                         | 155.3113638  |
| wavelet-LLH | firstorder | Minimum                              | -386.2400596 |
| wavelet-LLH | firstorder | Entropy                              | 4.574955336  |
| wavelet-LLH | firstorder | Range                                | 981.4619756  |
| wavelet-LLH | firstorder | Variance                             | 37676.1217   |
| wavelet-LLH | firstorder | 10Percentile                         | -298.5852312 |
| wavelet-LLH | firstorder | Kurtosis                             | 4.104505521  |
| wavelet-LLH | firstorder | Mean                                 | -70.47483977 |
| wavelet-LLH | glrlm      | ShortRunLowGrayLevelEmphasis         | 0.046457264  |
| wavelet-LLH | glrlm      | GrayLevelVariance                    | 61.60678923  |
| wavelet-LLH | glrlm      | LowGrayLevelRunEmphasis              | 0.046849814  |
| wavelet-LLH | glrlm      | GrayLevelNonUniformityNormalized     | 0.048556069  |
| wavelet-LLH | glrlm      | RunVariance                          | 0.032895794  |
| wavelet-LLH | glrlm      | GrayLevelNonUniformity               | 5.173632037  |
| wavelet-LLH | glrlm      | LongRunEmphasis                      | 1.100204683  |
| wavelet-LLH | glrlm      | ShortRunHighGrayLevelEmphasis        | 246.9099051  |
| wavelet-LLH | glrlm      | RunLengthNonUniformity               | 100.0522147  |
| wavelet-LLH | glrlm      | ShortRunEmphasis                     | 0.975786771  |

|             |       |                                      |             |
|-------------|-------|--------------------------------------|-------------|
| wavelet-LLH | glrlm | LongRunHighGrayLevelEmphasis         | 269.2355776 |
| wavelet-LLH | glrlm | RunPercentage                        | 0.968531469 |
| wavelet-LLH | glrlm | LongRunLowGrayLevelEmphasis          | 0.048443289 |
| wavelet-LLH | glrlm | RunEntropy                           | 4.697864146 |
| wavelet-LLH | glrlm | HighGrayLevelRunEmphasis             | 251.2785087 |
| wavelet-LLH | glrlm | RunLengthNonUniformityNormalized     | 0.938422768 |
| wavelet-LLH | glszm | GrayLevelVariance                    | 78.36588952 |
| wavelet-LLH | glszm | ZoneVariance                         | 1.400546104 |
| wavelet-LLH | glszm | GrayLevelNonUniformityNormalized     | 0.041797942 |
| wavelet-LLH | glszm | SizeZoneNonUniformityNormalized      | 0.496324302 |
| wavelet-LLH | glszm | SizeZoneNonUniformity                | 34.24637681 |
| wavelet-LLH | glszm | GrayLevelNonUniformity               | 2.884057971 |
| wavelet-LLH | glszm | LargeAreaEmphasis                    | 3.942028986 |
| wavelet-LLH | glszm | SmallAreaHighGrayLevelEmphasis       | 232.2450765 |
| wavelet-LLH | glszm | ZonePercentage                       | 0.627272727 |
| wavelet-LLH | glszm | LargeAreaLowGrayLevelEmphasis        | 0.103895355 |
| wavelet-LLH | glszm | LargeAreaHighGrayLevelEmphasis       | 761.3913043 |
| wavelet-LLH | glszm | HighGrayLevelZoneEmphasis            | 288.4057971 |
| wavelet-LLH | glszm | SmallAreaEmphasis                    | 0.729747383 |
| wavelet-LLH | glszm | LowGrayLevelZoneEmphasis             | 0.06332453  |
| wavelet-LLH | glszm | ZoneEntropy                          | 5.329184783 |
| wavelet-LLH | glszm | SmallAreaLowGrayLevelEmphasis        | 0.057592258 |
| wavelet-LLH | ngtdm | Coarseness                           | 0.046716709 |
| wavelet-LLH | ngtdm | Complexity                           | 2085.798828 |
| wavelet-LLH | ngtdm | Strength                             | 19.01857476 |
| wavelet-LLH | ngtdm | Contrast                             | 0.727487201 |
| wavelet-LLH | ngtdm | Busyness                             | 0.071136493 |
| wavelet-LLL | gldm  | GrayLevelVariance                    | 374.6595868 |
| wavelet-LLL | gldm  | HighGrayLevelEmphasis                | 3895.463636 |
| wavelet-LLL | gldm  | DependenceEntropy                    | 5.883232554 |
| wavelet-LLL | gldm  | DependenceNonUniformity              | 52.83636364 |
| wavelet-LLL | gldm  | GrayLevelNonUniformity               | 2.781818182 |
| wavelet-LLL | gldm  | SmallDependenceEmphasis              | 0.718704545 |
| wavelet-LLL | gldm  | SmallDependenceHighGrayLevelEmphasis | 2544.463932 |
| wavelet-LLL | gldm  | DependenceNonUniformityNormalized    | 0.480330579 |
| wavelet-LLL | gldm  | LargeDependenceEmphasis              | 3.345454545 |
| wavelet-LLL | gldm  | LargeDependenceLowGrayLevelEmphasis  | 0.01044493  |
| wavelet-LLL | gldm  | DependenceVariance                   | 0.900495868 |
| wavelet-LLL | gldm  | LargeDependenceHighGrayLevelEmphasis | 17341.35455 |
| wavelet-LLL | gldm  | SmallDependenceLowGrayLevelEmphasis  | 0.009852751 |
| wavelet-LLL | gldm  | LowGrayLevelEmphasis                 | 0.009932723 |
| wavelet-LLL | glcm  | JointAverage                         | 64.1923217  |
| wavelet-LLL | glcm  | SumAverage                           | 128.3846434 |
| wavelet-LLL | glcm  | JointEntropy                         | 6.980552225 |
| wavelet-LLL | glcm  | ClusterShade                         | -20107.0889 |
| wavelet-LLL | glcm  | MaximumProbability                   | 0.016062779 |
| wavelet-LLL | glcm  | ldmn                                 | 0.94805303  |
| wavelet-LLL | glcm  | JointEnergy                          | 0.008265977 |
| wavelet-LLL | glcm  | Contrast                             | 444.917756  |
| wavelet-LLL | glcm  | DifferenceEntropy                    | 4.810766186 |
| wavelet-LLL | glcm  | InverseVariance                      | 0.089760756 |
| wavelet-LLL | glcm  | DifferenceVariance                   | 177.3661114 |
| wavelet-LLL | glcm  | ldn                                  | 0.853435416 |
| wavelet-LLL | glcm  | ldm                                  | 0.088111068 |
| wavelet-LLL | glcm  | Correlation                          | 0.320813379 |
| wavelet-LLL | glcm  | Autocorrelation                      | 4225.471364 |

|             |            |                                  |              |
|-------------|------------|----------------------------------|--------------|
| wavelet-LLL | glcm       | SumEntropy                       | 5.499003821  |
| wavelet-LLL | glcm       | SumSquares                       | 326.8521403  |
| wavelet-LLL | glcm       | ClusterProminence                | 2442246.446  |
| wavelet-LLL | glcm       | Imc2                             | 0.999620406  |
| wavelet-LLL | glcm       | Imc1                             | -0.680898128 |
| wavelet-LLL | glcm       | DifferenceAverage                | 16.21104137  |
| wavelet-LLL | glcm       | Id                               | 0.151396715  |
| wavelet-LLL | glcm       | ClusterTendency                  | 862.4908053  |
| wavelet-LLL | firstorder | InterquartileRange               | 756.8999137  |
| wavelet-LLL | firstorder | Skewness                         | -0.698986892 |
| wavelet-LLL | firstorder | Uniformity                       | 0.025289256  |
| wavelet-LLL | firstorder | Median                           | -416.5325411 |
| wavelet-LLL | firstorder | Energy                           | 51102202.2   |
| wavelet-LLL | firstorder | RobustMeanAbsoluteDeviation      | 287.3746433  |
| wavelet-LLL | firstorder | MeanAbsoluteDeviation            | 391.5737549  |
| wavelet-LLL | firstorder | TotalEnergy                      | 1379759459   |
| wavelet-LLL | firstorder | Maximum                          | 170.4098527  |
| wavelet-LLL | firstorder | RootMeanSquared                  | 681.5904009  |
| wavelet-LLL | firstorder | 90Percentile                     | 111.2191727  |
| wavelet-LLL | firstorder | Minimum                          | -1935.407199 |
| wavelet-LLL | firstorder | Entropy                          | 5.472148182  |
| wavelet-LLL | firstorder | Range                            | 2105.817052  |
| wavelet-LLL | firstorder | Variance                         | 234801.6674  |
| wavelet-LLL | firstorder | 10Percentile                     | -1176.774897 |
| wavelet-LLL | firstorder | Kurtosis                         | 3.039670673  |
| wavelet-LLL | firstorder | Mean                             | -479.336841  |
| wavelet-LLL | glrlm      | ShortRunLowGrayLevelEmphasis     | 0.010146095  |
| wavelet-LLL | glrlm      | GrayLevelVariance                | 373.9825271  |
| wavelet-LLL | glrlm      | LowGrayLevelRunEmphasis          | 0.010150186  |
| wavelet-LLL | glrlm      | GrayLevelNonUniformityNormalized | 0.024941518  |
| wavelet-LLL | glrlm      | RunVariance                      | 0.021643189  |
| wavelet-LLL | glrlm      | GrayLevelNonUniformity           | 2.684425912  |
| wavelet-LLL | glrlm      | LongRunEmphasis                  | 1.06732819   |
| wavelet-LLL | glrlm      | ShortRunHighGrayLevelEmphasis    | 3772.0291    |
| wavelet-LLL | glrlm      | RunLengthNonUniformity           | 103.0143237  |
| wavelet-LLL | glrlm      | ShortRunEmphasis                 | 0.983167953  |
| wavelet-LLL | glrlm      | LongRunHighGrayLevelEmphasis     | 4223.870618  |
| wavelet-LLL | glrlm      | RunPercentage                    | 0.978321678  |
| wavelet-LLL | glrlm      | LongRunLowGrayLevelEmphasis      | 0.010166549  |
| wavelet-LLL | glrlm      | RunEntropy                       | 5.539575882  |
| wavelet-LLL | glrlm      | HighGrayLevelRunEmphasis         | 3862.397403  |
| wavelet-LLL | glrlm      | RunLengthNonUniformityNormalized | 0.956713621  |
| wavelet-LLL | glszm      | GrayLevelVariance                | 370.2932666  |
| wavelet-LLL | glszm      | ZoneVariance                     | 0.550027042  |
| wavelet-LLL | glszm      | GrayLevelNonUniformityNormalized | 0.023796647  |
| wavelet-LLL | glszm      | SizeZoneNonUniformityNormalized  | 0.711465657  |
| wavelet-LLL | glszm      | SizeZoneNonUniformity            | 61.18604651  |
| wavelet-LLL | glszm      | GrayLevelNonUniformity           | 2.046511628  |
| wavelet-LLL | glszm      | LargeAreaEmphasis                | 2.186046512  |
| wavelet-LLL | glszm      | SmallAreaHighGrayLevelEmphasis   | 3011.624399  |
| wavelet-LLL | glszm      | ZonePercentage                   | 0.781818182  |
| wavelet-LLL | glszm      | LargeAreaLowGrayLevelEmphasis    | 0.012908727  |
| wavelet-LLL | glszm      | LargeAreaHighGrayLevelEmphasis   | 10079.31395  |
| wavelet-LLL | glszm      | HighGrayLevelZoneEmphasis        | 3580.965116  |
| wavelet-LLL | glszm      | SmallAreaEmphasis                | 0.86625969   |
| wavelet-LLL | glszm      | LowGrayLevelZoneEmphasis         | 0.012630047  |

|             |            |                                      |              |
|-------------|------------|--------------------------------------|--------------|
| wavelet-LLL | glszm      | ZoneEntropy                          | 5.713657632  |
| wavelet-LLL | glszm      | SmallAreaLowGrayLevelEmphasis        | 0.012586471  |
| wavelet-LLL | ngtdm      | Coarseness                           | 0.036807343  |
| wavelet-LLL | ngtdm      | Complexity                           | 15921.42252  |
| wavelet-LLL | ngtdm      | Strength                             | 69.2519305   |
| wavelet-LLL | ngtdm      | Contrast                             | 3.301016623  |
| wavelet-LLL | ngtdm      | Busyness                             | 0.01096404   |
| wavelet-HHL | gldm       | GrayLevelVariance                    | 14.07966942  |
| wavelet-HHL | gldm       | HighGrayLevelEmphasis                | 102.7818182  |
| wavelet-HHL | gldm       | DependenceEntropy                    | 5.326313237  |
| wavelet-HHL | gldm       | DependenceNonUniformity              | 23.09090909  |
| wavelet-HHL | gldm       | GrayLevelNonUniformity               | 10.16363636  |
| wavelet-HHL | gldm       | SmallDependenceEmphasis              | 0.35142843   |
| wavelet-HHL | gldm       | SmallDependenceHighGrayLevelEmphasis | 44.71367013  |
| wavelet-HHL | gldm       | DependenceNonUniformityNormalized    | 0.209917355  |
| wavelet-HHL | gldm       | LargeDependenceEmphasis              | 9.909090909  |
| wavelet-HHL | gldm       | LargeDependenceLowGrayLevelEmphasis  | 0.155508986  |
| wavelet-HHL | gldm       | DependenceVariance                   | 2.371570248  |
| wavelet-HHL | gldm       | LargeDependenceHighGrayLevelEmphasis | 838.5818182  |
| wavelet-HHL | gldm       | SmallDependenceLowGrayLevelEmphasis  | 0.02017564   |
| wavelet-HHL | gldm       | LowGrayLevelEmphasis                 | 0.029955886  |
| wavelet-HHL | glcm       | JointAverage                         | 9.423213761  |
| wavelet-HHL | glcm       | SumAverage                           | 18.84642752  |
| wavelet-HHL | glcm       | JointEntropy                         | 6.200760381  |
| wavelet-HHL | glcm       | ClusterShade                         | 79.13514691  |
| wavelet-HHL | glcm       | MaximumProbability                   | 0.044968965  |
| wavelet-HHL | glcm       | ldmn                                 | 0.965628406  |
| wavelet-HHL | glcm       | JointEnergy                          | 0.016675158  |
| wavelet-HHL | glcm       | Contrast                             | 24.83406814  |
| wavelet-HHL | glcm       | DifferenceEntropy                    | 3.250891043  |
| wavelet-HHL | glcm       | InverseVariance                      | 0.263995468  |
| wavelet-HHL | glcm       | DifferenceVariance                   | 10.9180784   |
| wavelet-HHL | glcm       | ldn                                  | 0.881558461  |
| wavelet-HHL | glcm       | ldm                                  | 0.261208156  |
| wavelet-HHL | glcm       | Correlation                          | 0.003717178  |
| wavelet-HHL | glcm       | Autocorrelation                      | 88.87363657  |
| wavelet-HHL | glcm       | SumEntropy                           | 4.007868773  |
| wavelet-HHL | glcm       | SumSquares                           | 12.47798534  |
| wavelet-HHL | glcm       | ClusterProminence                    | 2723.414798  |
| wavelet-HHL | glcm       | lmc2                                 | 0.950387422  |
| wavelet-HHL | glcm       | lmc1                                 | -0.320088843 |
| wavelet-HHL | glcm       | DifferenceAverage                    | 3.696912252  |
| wavelet-HHL | glcm       | ld                                   | 0.347664774  |
| wavelet-HHL | glcm       | ClusterTendency                      | 25.07787323  |
| wavelet-HHL | firstorder | InterquartileRange                   | 91.0329612   |
| wavelet-HHL | firstorder | Skewness                             | 0.891036832  |
| wavelet-HHL | firstorder | Uniformity                           | 0.092396694  |
| wavelet-HHL | firstorder | Median                               | -9.05181226  |
| wavelet-HHL | firstorder | Energy                               | 931133.6915  |
| wavelet-HHL | firstorder | RobustMeanAbsoluteDeviation          | 40.72746213  |
| wavelet-HHL | firstorder | MeanAbsoluteDeviation                | 66.58572628  |
| wavelet-HHL | firstorder | TotalEnergy                          | 25140609.67  |
| wavelet-HHL | firstorder | Maximum                              | 378.143802   |
| wavelet-HHL | firstorder | RootMeanSquared                      | 92.00462891  |
| wavelet-HHL | firstorder | 90Percentile                         | 113.1699822  |
| wavelet-HHL | firstorder | Minimum                              | -200.5537255 |



|             |            |                                      |              |
|-------------|------------|--------------------------------------|--------------|
| wavelet-HHL | firstorder | Entropy                              | 3.771912507  |
| wavelet-HHL | firstorder | Range                                | 578.6975275  |
| wavelet-HHL | firstorder | Variance                             | 8460.033616  |
| wavelet-HHL | firstorder | 10Percentile                         | -105.1494842 |
| wavelet-HHL | firstorder | Kurtosis                             | 5.294152003  |
| wavelet-HHL | firstorder | Mean                                 | -2.195022728 |
| wavelet-HHL | glrlm      | ShortRunLowGrayLevelEmphasis         | 0.030371369  |
| wavelet-HHL | glrlm      | GrayLevelVariance                    | 14.81713709  |
| wavelet-HHL | glrlm      | LowGrayLevelRunEmphasis              | 0.031087597  |
| wavelet-HHL | glrlm      | GrayLevelNonUniformityNormalized     | 0.088888513  |
| wavelet-HHL | glrlm      | RunVariance                          | 0.07872842   |
| wavelet-HHL | glrlm      | GrayLevelNonUniformity               | 9.120280864  |
| wavelet-HHL | glrlm      | LongRunEmphasis                      | 1.229771959  |
| wavelet-HHL | glrlm      | ShortRunHighGrayLevelEmphasis        | 99.65455693  |
| wavelet-HHL | glrlm      | RunLengthNonUniformity               | 90.03511212  |
| wavelet-HHL | glrlm      | ShortRunEmphasis                     | 0.949264084  |
| wavelet-HHL | glrlm      | LongRunHighGrayLevelEmphasis         | 123.5478462  |
| wavelet-HHL | glrlm      | RunPercentage                        | 0.932867133  |
| wavelet-HHL | glrlm      | LongRunLowGrayLevelEmphasis          | 0.03442765   |
| wavelet-HHL | glrlm      | RunEntropy                           | 4.086029101  |
| wavelet-HHL | glrlm      | HighGrayLevelRunEmphasis             | 104.0347915  |
| wavelet-HHL | glrlm      | RunLengthNonUniformityNormalized     | 0.876416173  |
| wavelet-HHL | glszm      | GrayLevelVariance                    | 28.3634397   |
| wavelet-HHL | glszm      | ZoneVariance                         | 11.73499189  |
| wavelet-HHL | glszm      | GrayLevelNonUniformityNormalized     | 0.061114116  |
| wavelet-HHL | glszm      | SizeZoneNonUniformityNormalized      | 0.454840454  |
| wavelet-HHL | glszm      | SizeZoneNonUniformity                | 19.55813953  |
| wavelet-HHL | glszm      | GrayLevelNonUniformity               | 2.627906977  |
| wavelet-HHL | glszm      | LargeAreaEmphasis                    | 18.27906977  |
| wavelet-HHL | glszm      | SmallAreaHighGrayLevelEmphasis       | 96.09792313  |
| wavelet-HHL | glszm      | ZonePercentage                       | 0.390909091  |
| wavelet-HHL | glszm      | LargeAreaLowGrayLevelEmphasis        | 0.28430927   |
| wavelet-HHL | glszm      | LargeAreaHighGrayLevelEmphasis       | 1602.418605  |
| wavelet-HHL | glszm      | HighGrayLevelZoneEmphasis            | 126.5116279  |
| wavelet-HHL | glszm      | SmallAreaEmphasis                    | 0.69358083   |
| wavelet-HHL | glszm      | LowGrayLevelZoneEmphasis             | 0.053572042  |
| wavelet-HHL | glszm      | ZoneEntropy                          | 4.804058069  |
| wavelet-HHL | glszm      | SmallAreaLowGrayLevelEmphasis        | 0.048215233  |
| wavelet-HHL | ngtdm      | Coarseness                           | 0.058760382  |
| wavelet-HHL | ngtdm      | Complexity                           | 434.7650979  |
| wavelet-HHL | ngtdm      | Strength                             | 7.377067832  |
| wavelet-HHL | ngtdm      | Contrast                             | 0.2087824    |
| wavelet-HHL | ngtdm      | Busyness                             | 0.094565045  |
| wavelet-HLH | gldm       | GrayLevelVariance                    | 31.32595041  |
| wavelet-HLH | gldm       | HighGrayLevelEmphasis                | 421.9272727  |
| wavelet-HLH | gldm       | DependenceEntropy                    | 5.485283122  |
| wavelet-HLH | gldm       | DependenceNonUniformity              | 36.87272727  |
| wavelet-HLH | gldm       | GrayLevelNonUniformity               | 6.8          |
| wavelet-HLH | gldm       | SmallDependenceEmphasis              | 0.571386364  |
| wavelet-HLH | gldm       | SmallDependenceHighGrayLevelEmphasis | 240.7054066  |
| wavelet-HLH | gldm       | DependenceNonUniformityNormalized    | 0.335206612  |
| wavelet-HLH | gldm       | LargeDependenceEmphasis              | 4.545454545  |
| wavelet-HLH | gldm       | LargeDependenceLowGrayLevelEmphasis  | 0.023496049  |
| wavelet-HLH | gldm       | DependenceVariance                   | 1.038347107  |
| wavelet-HLH | gldm       | LargeDependenceHighGrayLevelEmphasis | 1770.054545  |
| wavelet-HLH | gldm       | SmallDependenceLowGrayLevelEmphasis  | 0.012132441  |

|             |            |                                  |              |
|-------------|------------|----------------------------------|--------------|
| wavelet-HLH | gldm       | LowGrayLevelEmphasis             | 0.013274647  |
| wavelet-HLH | glcm       | JointAverage                     | 19.69465383  |
| wavelet-HLH | glcm       | SumAverage                       | 39.38930766  |
| wavelet-HLH | glcm       | JointEntropy                     | 6.595345915  |
| wavelet-HLH | glcm       | ClusterShade                     | -135.3300267 |
| wavelet-HLH | glcm       | MaximumProbability               | 0.026214296  |
| wavelet-HLH | glcm       | ldmn                             | 0.955553344  |
| wavelet-HLH | glcm       | JointEnergy                      | 0.01153308   |
| wavelet-HLH | glcm       | Contrast                         | 67.80836499  |
| wavelet-HLH | glcm       | DifferenceEntropy                | 3.70343143   |
| wavelet-HLH | glcm       | InverseVariance                  | 0.199710945  |
| wavelet-HLH | glcm       | DifferenceVariance               | 30.76730083  |
| wavelet-HLH | glcm       | ldn                              | 0.869170954  |
| wavelet-HLH | glcm       | ldm                              | 0.173018639  |
| wavelet-HLH | glcm       | Correlation                      | -0.012611572 |
| wavelet-HLH | glcm       | Autocorrelation                  | 387.4793945  |
| wavelet-HLH | glcm       | SumEntropy                       | 4.403164177  |
| wavelet-HLH | glcm       | SumSquares                       | 33.41841719  |
| wavelet-HLH | glcm       | ClusterProminence                | 22463.46896  |
| wavelet-HLH | glcm       | lmc2                             | 0.988274926  |
| wavelet-HLH | glcm       | lmc1                             | -0.446716279 |
| wavelet-HLH | glcm       | DifferenceAverage                | 5.923095126  |
| wavelet-HLH | glcm       | ld                               | 0.262922673  |
| wavelet-HLH | glcm       | ClusterTendency                  | 65.86530378  |
| wavelet-HLH | firstorder | InterquartileRange               | 160.9341865  |
| wavelet-HLH | firstorder | Skewness                         | -0.292581163 |
| wavelet-HLH | firstorder | Uniformity                       | 0.061818182  |
| wavelet-HLH | firstorder | Median                           | 0.675727493  |
| wavelet-HLH | firstorder | Energy                           | 2151836.371  |
| wavelet-HLH | firstorder | RobustMeanAbsoluteDeviation      | 66.74099756  |
| wavelet-HLH | firstorder | MeanAbsoluteDeviation            | 104.3116951  |
| wavelet-HLH | firstorder | TotalEnergy                      | 58099582.02  |
| wavelet-HLH | firstorder | Maximum                          | 385.6975544  |
| wavelet-HLH | firstorder | RootMeanSquared                  | 139.8647519  |
| wavelet-HLH | firstorder | 90Percentile                     | 155.2837132  |
| wavelet-HLH | firstorder | Minimum                          | -469.2969141 |
| wavelet-HLH | firstorder | Entropy                          | 4.259249052  |
| wavelet-HLH | firstorder | Range                            | 854.9944685  |
| wavelet-HLH | firstorder | Variance                         | 19522.8546   |
| wavelet-HLH | firstorder | 10Percentile                     | -127.84268   |
| wavelet-HLH | firstorder | Kurtosis                         | 4.469626538  |
| wavelet-HLH | firstorder | Mean                             | 6.268510666  |
| wavelet-HLH | glrlm      | ShortRunLowGrayLevelEmphasis     | 0.013575863  |
| wavelet-HLH | glrlm      | GrayLevelVariance                | 32.03001274  |
| wavelet-HLH | glrlm      | LowGrayLevelRunEmphasis          | 0.013645149  |
| wavelet-HLH | glrlm      | GrayLevelNonUniformityNormalized | 0.061277408  |
| wavelet-HLH | glrlm      | RunVariance                      | 0.039451453  |
| wavelet-HLH | glrlm      | GrayLevelNonUniformity           | 6.514887833  |
| wavelet-HLH | glrlm      | LongRunEmphasis                  | 1.112148156  |
| wavelet-HLH | glrlm      | ShortRunHighGrayLevelEmphasis    | 413.060785   |
| wavelet-HLH | glrlm      | RunLengthNonUniformity           | 99.82948457  |
| wavelet-HLH | glrlm      | ShortRunEmphasis                 | 0.975298619  |
| wavelet-HLH | glrlm      | LongRunHighGrayLevelEmphasis     | 467.0824968  |
| wavelet-HLH | glrlm      | RunPercentage                    | 0.966433566  |
| wavelet-HLH | glrlm      | LongRunLowGrayLevelEmphasis      | 0.013959341  |
| wavelet-HLH | glrlm      | RunEntropy                       | 4.386111082  |

|             |       |                                  |             |
|-------------|-------|----------------------------------|-------------|
| wavelet-HLH | glrlm | HighGrayLevelRunEmphasis         | 422.8660928 |
| wavelet-HLH | glrlm | RunLengthNonUniformityNormalized | 0.938051623 |
| wavelet-HLH | glszm | GrayLevelVariance                | 41.71196191 |
| wavelet-HLH | glszm | ZoneVariance                     | 1.402499504 |
| wavelet-HLH | glszm | GrayLevelNonUniformityNormalized | 0.052965681 |
| wavelet-HLH | glszm | SizeZoneNonUniformityNormalized  | 0.577464789 |
| wavelet-HLH | glszm | SizeZoneNonUniformity            | 41          |
| wavelet-HLH | glszm | GrayLevelNonUniformity           | 3.76056338  |
| wavelet-HLH | glszm | LargeAreaEmphasis                | 3.802816901 |
| wavelet-HLH | glszm | SmallAreaHighGrayLevelEmphasis   | 329.8418662 |
| wavelet-HLH | glszm | ZonePercentage                   | 0.645454545 |
| wavelet-HLH | glszm | LargeAreaLowGrayLevelEmphasis    | 0.027181201 |
| wavelet-HLH | glszm | LargeAreaHighGrayLevelEmphasis   | 1489.464789 |
| wavelet-HLH | glszm | HighGrayLevelZoneEmphasis        | 428.8591549 |
| wavelet-HLH | glszm | SmallAreaEmphasis                | 0.786533646 |
| wavelet-HLH | glszm | LowGrayLevelZoneEmphasis         | 0.019068305 |
| wavelet-HLH | glszm | ZoneEntropy                      | 5.106942894 |
| wavelet-HLH | glszm | SmallAreaLowGrayLevelEmphasis    | 0.018541186 |
| wavelet-HLH | ngtdm | Coarseness                       | 0.046703869 |
| wavelet-HLH | ngtdm | Complexity                       | 1260.352561 |
| wavelet-HLH | ngtdm | Strength                         | 12.02039362 |
| wavelet-HLH | ngtdm | Contrast                         | 0.429577911 |
| wavelet-HLH | ngtdm | Busyness                         | 0.04607687  |

| Image type | Feature Class | Feature Name                         |                                                                                                                                                                                                                                                                                                                                                                                                                                              |
|------------|---------------|--------------------------------------|----------------------------------------------------------------------------------------------------------------------------------------------------------------------------------------------------------------------------------------------------------------------------------------------------------------------------------------------------------------------------------------------------------------------------------------------|
| general    | info          | BoundingBox                          | 3: RTSTRUCT: C99-DNU_segment_GTV_T9<br>(0, 1, 1, 11, 7, 11)                                                                                                                                                                                                                                                                                                                                                                                  |
| general    | info          | EnabledImageTypes                    | {'Original': {}, u'Wavelet': {}}                                                                                                                                                                                                                                                                                                                                                                                                             |
|            |               |                                      | {'distances': [1], 'additionalInfo': True,<br>'force2D': False, 'interpolator': 'sitkBSpline',<br>'resampledPixelSpacing': [3.0], 'label': 1,<br>'normalizeScale': 1, 'normalize': False,<br>'force2Ddimension': 0, 'removeOutliers': None,<br>'minimumROISize': None, u'binWidth': 25.0,<br>'minimumROIDimensions': 1, u'correctMask':<br>True, 'preCrop': False, u'symmetricalGLCM':<br>True, 'resegmentRange': None, 'padDistance':<br>5} |
| general    | info          | GeneralSettings                      | f704d6044e19d5f7eda935496a80564c2d20cf2<br>b                                                                                                                                                                                                                                                                                                                                                                                                 |
| general    | info          | ImageHash                            | (0.9765624999999998, 0.9765624999999998,<br>1.9999999999999999)                                                                                                                                                                                                                                                                                                                                                                              |
| general    | info          | ImageSpacing                         | 5d6ceebf00269009033aaa5a787ff207d67f1e6<br>9                                                                                                                                                                                                                                                                                                                                                                                                 |
| general    | info          | MaskHash                             |                                                                                                                                                                                                                                                                                                                                                                                                                                              |
| general    | info          | NumpyVersion                         | 1.13.1                                                                                                                                                                                                                                                                                                                                                                                                                                       |
| general    | info          | PyWaveletVersion                     | 0.5.2                                                                                                                                                                                                                                                                                                                                                                                                                                        |
| general    | info          | SimpleITKVersion                     | 1.1.0                                                                                                                                                                                                                                                                                                                                                                                                                                        |
| general    | info          | Version                              | 1.3.0.post102+g1b0eb74                                                                                                                                                                                                                                                                                                                                                                                                                       |
| general    | info          | VolumeNum                            | 1                                                                                                                                                                                                                                                                                                                                                                                                                                            |
| general    | info          | VoxelNum                             | 242                                                                                                                                                                                                                                                                                                                                                                                                                                          |
| original   | shape         | Maximum3DDiameter                    | 36.12478374                                                                                                                                                                                                                                                                                                                                                                                                                                  |
| original   | shape         | Maximum2DDiameterSlice               | 30.59411708                                                                                                                                                                                                                                                                                                                                                                                                                                  |
| original   | shape         | Sphericity                           | 0.650484259                                                                                                                                                                                                                                                                                                                                                                                                                                  |
| original   | shape         | MinorAxis                            | 23.98294987                                                                                                                                                                                                                                                                                                                                                                                                                                  |
| original   | shape         | Elongation                           | 0.657773085                                                                                                                                                                                                                                                                                                                                                                                                                                  |
| original   | shape         | SurfaceVolumeRatio                   | 0.397668285                                                                                                                                                                                                                                                                                                                                                                                                                                  |
| original   | shape         | Volume                               | 6534                                                                                                                                                                                                                                                                                                                                                                                                                                         |
| original   | shape         | MajorAxis                            | 36.46082581                                                                                                                                                                                                                                                                                                                                                                                                                                  |
| original   | shape         | SurfaceArea                          | 2598.364575                                                                                                                                                                                                                                                                                                                                                                                                                                  |
| original   | shape         | Flatness                             | 0.467987664                                                                                                                                                                                                                                                                                                                                                                                                                                  |
| original   | shape         | LeastAxis                            | 17.06321671                                                                                                                                                                                                                                                                                                                                                                                                                                  |
| original   | shape         | Maximum2DDiameterColumn              | 34.98571137                                                                                                                                                                                                                                                                                                                                                                                                                                  |
| original   | shape         | Maximum2DDiameterRow                 | 32.31098884                                                                                                                                                                                                                                                                                                                                                                                                                                  |
| original   | gldm          | GrayLevelVariance                    | 87.66942149                                                                                                                                                                                                                                                                                                                                                                                                                                  |
| original   | gldm          | HighGrayLevelEmphasis                | 487.6694215                                                                                                                                                                                                                                                                                                                                                                                                                                  |
| original   | gldm          | DependenceEntropy                    | 6.121594038                                                                                                                                                                                                                                                                                                                                                                                                                                  |
| original   | gldm          | DependenceNonUniformity              | 89.36363636                                                                                                                                                                                                                                                                                                                                                                                                                                  |
| original   | gldm          | GrayLevelNonUniformity               | 8.280991736                                                                                                                                                                                                                                                                                                                                                                                                                                  |
| original   | gldm          | SmallDependenceEmphasis              | 0.57443067                                                                                                                                                                                                                                                                                                                                                                                                                                   |
| original   | gldm          | SmallDependenceHighGrayLevelEmphasis | 273.1549885                                                                                                                                                                                                                                                                                                                                                                                                                                  |
| original   | gldm          | DependenceNonUniformityNormalized    | 0.369271225                                                                                                                                                                                                                                                                                                                                                                                                                                  |
| original   | gldm          | LargeDependenceEmphasis              | 3.669421488                                                                                                                                                                                                                                                                                                                                                                                                                                  |
| original   | gldm          | LargeDependenceLowGrayLevelEmphasis  | 0.053732814                                                                                                                                                                                                                                                                                                                                                                                                                                  |
| original   | gldm          | DependenceVariance                   | 0.657332149                                                                                                                                                                                                                                                                                                                                                                                                                                  |
| original   | gldm          | LargeDependenceHighGrayLevelEmphasis | 1945.958678                                                                                                                                                                                                                                                                                                                                                                                                                                  |
| original   | gldm          | SmallDependenceLowGrayLevelEmphasis  | 0.011407452                                                                                                                                                                                                                                                                                                                                                                                                                                  |

|          |            |                                  |              |
|----------|------------|----------------------------------|--------------|
| original | gldm       | LowGrayLevelEmphasis             | 0.018796996  |
| original | glcm       | JointAverage                     | 20.98956277  |
| original | glcm       | SumAverage                       | 41.97912555  |
| original | glcm       | JointEntropy                     | 7.83063399   |
| original | glcm       | ClusterShade                     | -1362.677498 |
| original | glcm       | MaximumProbability               | 0.013186912  |
| original | glcm       | ldmn                             | 0.932007282  |
| original | glcm       | JointEnergy                      | 0.004803818  |
| original | glcm       | Contrast                         | 128.456335   |
| original | glcm       | DifferenceEntropy                | 4.38696607   |
| original | glcm       | InverseVariance                  | 0.133536824  |
| original | glcm       | DifferenceVariance               | 50.16653063  |
| original | glcm       | ldn                              | 0.834352423  |
| original | glcm       | ldm                              | 0.127451233  |
| original | glcm       | Correlation                      | 0.198138715  |
| original | glcm       | Autocorrelation                  | 456.5389697  |
| original | glcm       | SumEntropy                       | 5.387701976  |
| original | glcm       | SumSquares                       | 80.12970498  |
| original | glcm       | ClusterProminence                | 108190.9788  |
| original | glcm       | lmc2                             | 0.990940192  |
| original | glcm       | lmc1                             | -0.410627121 |
| original | glcm       | DifferenceAverage                | 8.720412437  |
| original | glcm       | ld                               | 0.209478019  |
| original | glcm       | ClusterTendency                  | 192.0624849  |
| original | firstorder | InterquartileRange               | 381.5        |
| original | firstorder | Skewness                         | -0.361733567 |
| original | firstorder | Uniformity                       | 0.034218974  |
| original | firstorder | Median                           | 436.5        |
| original | firstorder | Energy                           | 49528583     |
| original | firstorder | RobustMeanAbsoluteDeviation      | 152.2858615  |
| original | firstorder | MeanAbsoluteDeviation            | 199.3631583  |
| original | firstorder | TotalEnergy                      | 1337271741   |
| original | firstorder | Maximum                          | 852          |
| original | firstorder | RootMeanSquared                  | 452.3975753  |
| original | firstorder | 90Percentile                     | 662.6        |
| original | firstorder | Minimum                          | -76          |
| original | firstorder | Entropy                          | 5.013166884  |
| original | firstorder | Range                            | 928          |
| original | firstorder | Variance                         | 54801.79969  |
| original | firstorder | 10Percentile                     | 11           |
| original | firstorder | Kurtosis                         | 2.06825824   |
| original | firstorder | Mean                             | 387.1198347  |
| original | glrlm      | ShortRunLowGrayLevelEmphasis     | 0.018599568  |
| original | glrlm      | GrayLevelVariance                | 87.83626036  |
| original | glrlm      | LowGrayLevelRunEmphasis          | 0.018909739  |
| original | glrlm      | GrayLevelNonUniformityNormalized | 0.034092732  |
| original | glrlm      | RunVariance                      | 0.030941021  |
| original | glrlm      | GrayLevelNonUniformity           | 8.017013636  |
| original | glrlm      | LongRunEmphasis                  | 1.090690262  |
| original | glrlm      | ShortRunHighGrayLevelEmphasis    | 474.8936909  |
| original | glrlm      | RunLengthNonUniformity           | 222.3630848  |
| original | glrlm      | ShortRunEmphasis                 | 0.978649975  |
| original | glrlm      | LongRunHighGrayLevelEmphasis     | 533.1838924  |

|             |       |                                      |             |
|-------------|-------|--------------------------------------|-------------|
| original    | glrlm | RunPercentage                        | 0.971710108 |
| original    | glrlm | LongRunLowGrayLevelEmphasis          | 0.02031008  |
| original    | glrlm | RunEntropy                           | 5.129966565 |
| original    | glrlm | HighGrayLevelRunEmphasis             | 486.4668393 |
| original    | glrlm | RunLengthNonUniformityNormalized     | 0.94525734  |
| original    | glszm | GrayLevelVariance                    | 88.86464646 |
| original    | glszm | ZoneVariance                         | 0.733737374 |
| original    | glszm | GrayLevelNonUniformityNormalized     | 0.032800735 |
| original    | glszm | SizeZoneNonUniformityNormalized      | 0.520440771 |
| original    | glszm | SizeZoneNonUniformity                | 85.87272727 |
| original    | glszm | GrayLevelNonUniformity               | 5.412121212 |
| original    | glszm | LargeAreaEmphasis                    | 2.884848485 |
| original    | glszm | SmallAreaHighGrayLevelEmphasis       | 354.7356988 |
| original    | glszm | ZonePercentage                       | 0.681818182 |
| original    | glszm | LargeAreaLowGrayLevelEmphasis        | 0.046659572 |
| original    | glszm | LargeAreaHighGrayLevelEmphasis       | 1519.939394 |
| original    | glszm | HighGrayLevelZoneEmphasis            | 475.6424242 |
| original    | glszm | SmallAreaEmphasis                    | 0.747756682 |
| original    | glszm | LowGrayLevelZoneEmphasis             | 0.019791488 |
| original    | glszm | ZoneEntropy                          | 5.937348694 |
| original    | glszm | SmallAreaLowGrayLevelEmphasis        | 0.014854248 |
| original    | ngtdm | Coarseness                           | 0.02063193  |
| original    | ngtdm | Complexity                           | 3614.468362 |
| original    | ngtdm | Strength                             | 9.924696307 |
| original    | ngtdm | Contrast                             | 0.825310496 |
| original    | ngtdm | Busyness                             | 0.069447424 |
| wavelet-HHH | gldm  | GrayLevelVariance                    | 10.10197391 |
| wavelet-HHH | gldm  | HighGrayLevelEmphasis                | 222.8760331 |
| wavelet-HHH | gldm  | DependenceEntropy                    | 5.701012918 |
| wavelet-HHH | gldm  | DependenceNonUniformity              | 45.91735537 |
| wavelet-HHH | gldm  | GrayLevelNonUniformity               | 24.54545455 |
| wavelet-HHH | gldm  | SmallDependenceEmphasis              | 0.343847464 |
| wavelet-HHH | gldm  | SmallDependenceHighGrayLevelEmphasis | 81.26958289 |
| wavelet-HHH | gldm  | DependenceNonUniformityNormalized    | 0.189741138 |
| wavelet-HHH | gldm  | LargeDependenceEmphasis              | 12.27272727 |
| wavelet-HHH | gldm  | LargeDependenceLowGrayLevelEmphasis  | 0.064545896 |
| wavelet-HHH | gldm  | DependenceVariance                   | 3.567789085 |
| wavelet-HHH | gldm  | LargeDependenceHighGrayLevelEmphasis | 2642.438017 |
| wavelet-HHH | gldm  | SmallDependenceLowGrayLevelEmphasis  | 0.006088236 |
| wavelet-HHH | gldm  | LowGrayLevelEmphasis                 | 0.009484429 |
| wavelet-HHH | glcm  | JointAverage                         | 14.52737728 |
| wavelet-HHH | glcm  | SumAverage                           | 29.05475455 |
| wavelet-HHH | glcm  | JointEntropy                         | 6.462061352 |
| wavelet-HHH | glcm  | ClusterShade                         | 3.290422374 |
| wavelet-HHH | glcm  | MaximumProbability                   | 0.045682502 |
| wavelet-HHH | glcm  | ldmn                                 | 0.969245173 |
| wavelet-HHH | glcm  | JointEnergy                          | 0.015711438 |
| wavelet-HHH | glcm  | Contrast                             | 20.24280684 |
| wavelet-HHH | glcm  | DifferenceEntropy                    | 3.170445272 |
| wavelet-HHH | glcm  | InverseVariance                      | 0.285453527 |
| wavelet-HHH | glcm  | DifferenceVariance                   | 9.061539274 |
| wavelet-HHH | glcm  | ldn                                  | 0.888578866 |
| wavelet-HHH | glcm  | ldm                                  | 0.289695806 |

|             |            |                                  |              |
|-------------|------------|----------------------------------|--------------|
| wavelet-HHH | glcm       | Correlation                      | -0.035122708 |
| wavelet-HHH | glcm       | Autocorrelation                  | 210.6554264  |
| wavelet-HHH | glcm       | SumEntropy                       | 3.940997106  |
| wavelet-HHH | glcm       | SumSquares                       | 9.727284423  |
| wavelet-HHH | glcm       | ClusterProminence                | 1598.556995  |
| wavelet-HHH | glcm       | Imc2                             | 0.860776916  |
| wavelet-HHH | glcm       | Imc1                             | -0.19150889  |
| wavelet-HHH | glcm       | DifferenceAverage                | 3.306532582  |
| wavelet-HHH | glcm       | Id                               | 0.373074625  |
| wavelet-HHH | glcm       | ClusterTendency                  | 18.66633085  |
| wavelet-HHH | firstorder | InterquartileRange               | 84.28697621  |
| wavelet-HHH | firstorder | Skewness                         | 0.038496219  |
| wavelet-HHH | firstorder | Uniformity                       | 0.101427498  |
| wavelet-HHH | firstorder | Median                           | -0.576210215 |
| wavelet-HHH | firstorder | Energy                           | 1528415.918  |
| wavelet-HHH | firstorder | RobustMeanAbsoluteDeviation      | 37.09376961  |
| wavelet-HHH | firstorder | MeanAbsoluteDeviation            | 59.01329775  |
| wavelet-HHH | firstorder | TotalEnergy                      | 41267229.77  |
| wavelet-HHH | firstorder | Maximum                          | 244.3471176  |
| wavelet-HHH | firstorder | RootMeanSquared                  | 79.47180792  |
| wavelet-HHH | firstorder | 90Percentile                     | 104.6312772  |
| wavelet-HHH | firstorder | Minimum                          | -348.4063433 |
| wavelet-HHH | firstorder | Entropy                          | 3.602906714  |
| wavelet-HHH | firstorder | Range                            | 592.7534609  |
| wavelet-HHH | firstorder | Variance                         | 6311.81164   |
| wavelet-HHH | firstorder | 10Percentile                     | -91.75744936 |
| wavelet-HHH | firstorder | Kurtosis                         | 4.583129237  |
| wavelet-HHH | firstorder | Mean                             | 1.989123872  |
| wavelet-HHH | glrlm      | ShortRunLowGrayLevelEmphasis     | 0.009570806  |
| wavelet-HHH | glrlm      | GrayLevelVariance                | 10.65548613  |
| wavelet-HHH | glrlm      | LowGrayLevelRunEmphasis          | 0.009851364  |
| wavelet-HHH | glrlm      | GrayLevelNonUniformityNormalized | 0.097107572  |
| wavelet-HHH | glrlm      | RunVariance                      | 0.092617143  |
| wavelet-HHH | glrlm      | GrayLevelNonUniformity           | 21.74173164  |
| wavelet-HHH | glrlm      | LongRunEmphasis                  | 1.263604906  |
| wavelet-HHH | glrlm      | ShortRunHighGrayLevelEmphasis    | 211.5160124  |
| wavelet-HHH | glrlm      | RunLengthNonUniformity           | 193.5325881  |
| wavelet-HHH | glrlm      | ShortRunEmphasis                 | 0.943891889  |
| wavelet-HHH | glrlm      | LongRunHighGrayLevelEmphasis     | 279.997296   |
| wavelet-HHH | glrlm      | RunPercentage                    | 0.924984107  |
| wavelet-HHH | glrlm      | LongRunLowGrayLevelEmphasis      | 0.011167865  |
| wavelet-HHH | glrlm      | RunEntropy                       | 3.982936115  |
| wavelet-HHH | glrlm      | HighGrayLevelRunEmphasis         | 223.5701225  |
| wavelet-HHH | glrlm      | RunLengthNonUniformityNormalized | 0.8637456    |
| wavelet-HHH | glszm      | GrayLevelVariance                | 18.32541233  |
| wavelet-HHH | glszm      | ZoneVariance                     | 22.27039931  |
| wavelet-HHH | glszm      | GrayLevelNonUniformityNormalized | 0.072048611  |
| wavelet-HHH | glszm      | SizeZoneNonUniformityNormalized  | 0.427083333  |
| wavelet-HHH | glszm      | SizeZoneNonUniformity            | 41           |
| wavelet-HHH | glszm      | GrayLevelNonUniformity           | 6.916666667  |
| wavelet-HHH | glszm      | LargeAreaEmphasis                | 28.625       |
| wavelet-HHH | glszm      | SmallAreaHighGrayLevelEmphasis   | 164.0560879  |
| wavelet-HHH | glszm      | ZonePercentage                   | 0.396694215  |

|             |            |                                      |              |
|-------------|------------|--------------------------------------|--------------|
| wavelet-HHH | glszm      | LargeAreaLowGrayLevelEmphasis        | 0.151945287  |
| wavelet-HHH | glszm      | LargeAreaHighGrayLevelEmphasis       | 6026.979167  |
| wavelet-HHH | glszm      | HighGrayLevelZoneEmphasis            | 237.4270833  |
| wavelet-HHH | glszm      | SmallAreaEmphasis                    | 0.676819511  |
| wavelet-HHH | glszm      | LowGrayLevelZoneEmphasis             | 0.016057478  |
| wavelet-HHH | glszm      | ZoneEntropy                          | 5.173671423  |
| wavelet-HHH | glszm      | SmallAreaLowGrayLevelEmphasis        | 0.014313897  |
| wavelet-HHH | ngtdm      | Coarseness                           | 0.027488211  |
| wavelet-HHH | ngtdm      | Complexity                           | 323.5636768  |
| wavelet-HHH | ngtdm      | Strength                             | 2.661099716  |
| wavelet-HHH | ngtdm      | Contrast                             | 0.166297117  |
| wavelet-HHH | ngtdm      | Busyness                             | 0.141996356  |
| wavelet-HLL | gldm       | GrayLevelVariance                    | 34.82222867  |
| wavelet-HLL | gldm       | HighGrayLevelEmphasis                | 268.9628099  |
| wavelet-HLL | gldm       | DependenceEntropy                    | 5.922941687  |
| wavelet-HLL | gldm       | DependenceNonUniformity              | 66.37190083  |
| wavelet-HLL | gldm       | GrayLevelNonUniformity               | 13.75206612  |
| wavelet-HLL | gldm       | SmallDependenceEmphasis              | 0.46769682   |
| wavelet-HLL | gldm       | SmallDependenceHighGrayLevelEmphasis | 144.5136026  |
| wavelet-HLL | gldm       | DependenceNonUniformityNormalized    | 0.274264053  |
| wavelet-HLL | gldm       | LargeDependenceEmphasis              | 6.371900826  |
| wavelet-HLL | gldm       | LargeDependenceLowGrayLevelEmphasis  | 0.069434844  |
| wavelet-HLL | gldm       | DependenceVariance                   | 1.575438836  |
| wavelet-HLL | gldm       | LargeDependenceHighGrayLevelEmphasis | 1479.028926  |
| wavelet-HLL | gldm       | SmallDependenceLowGrayLevelEmphasis  | 0.007644594  |
| wavelet-HLL | gldm       | LowGrayLevelEmphasis                 | 0.016746394  |
| wavelet-HLL | glcm       | JointAverage                         | 15.18502947  |
| wavelet-HLL | glcm       | SumAverage                           | 30.37005893  |
| wavelet-HLL | glcm       | JointEntropy                         | 7.340872833  |
| wavelet-HLL | glcm       | ClusterShade                         | 477.6342937  |
| wavelet-HLL | glcm       | MaximumProbability                   | 0.021854607  |
| wavelet-HLL | glcm       | Idmn                                 | 0.978858403  |
| wavelet-HLL | glcm       | JointEnergy                          | 0.00741383   |
| wavelet-HLL | glcm       | Contrast                             | 43.42685866  |
| wavelet-HLL | glcm       | DifferenceEntropy                    | 3.609012085  |
| wavelet-HLL | glcm       | InverseVariance                      | 0.222814925  |
| wavelet-HLL | glcm       | DifferenceVariance                   | 19.43547077  |
| wavelet-HLL | glcm       | Idn                                  | 0.906677795  |
| wavelet-HLL | glcm       | Idm                                  | 0.208168436  |
| wavelet-HLL | glcm       | Correlation                          | 0.271892314  |
| wavelet-HLL | glcm       | Autocorrelation                      | 238.90796    |
| wavelet-HLL | glcm       | SumEntropy                           | 4.823030788  |
| wavelet-HLL | glcm       | SumSquares                           | 29.95784633  |
| wavelet-HLL | glcm       | ClusterProminence                    | 30453.06161  |
| wavelet-HLL | glcm       | Imc2                                 | 0.959619782  |
| wavelet-HLL | glcm       | Imc1                                 | -0.298247844 |
| wavelet-HLL | glcm       | DifferenceAverage                    | 4.796938502  |
| wavelet-HLL | glcm       | Id                                   | 0.298684643  |
| wavelet-HLL | glcm       | ClusterTendency                      | 76.40452666  |
| wavelet-HLL | firstorder | InterquartileRange                   | 169.0446595  |
| wavelet-HLL | firstorder | Skewness                             | 0.88051861   |
| wavelet-HLL | firstorder | Uniformity                           | 0.056826719  |
| wavelet-HLL | firstorder | Median                               | -44.86344239 |



|             |            |                                  |             |
|-------------|------------|----------------------------------|-------------|
| wavelet-HLL | firstorder | Energy                           | 5462991.523 |
| wavelet-HLL | firstorder | RobustMeanAbsoluteDeviation      | 72.41087562 |
| wavelet-HLL | firstorder | MeanAbsoluteDeviation            | 110.4072247 |
| wavelet-HLL | firstorder | TotalEnergy                      | 147500771.1 |
| wavelet-HLL | firstorder | Maximum                          | 655.4647488 |
| wavelet-HLL | firstorder | RootMeanSquared                  | 150.2476127 |
| wavelet-HLL | firstorder | 90Percentile                     | 145.2572604 |
| wavelet-HLL | firstorder | Minimum                          | -394.65713  |
| wavelet-HLL | firstorder | Entropy                          | 4.39613828  |
| wavelet-HLL | firstorder | Range                            | 1050.121879 |
| wavelet-HLL | firstorder | Variance                         | 21671.00747 |
| wavelet-HLL | firstorder | 10Percentile                     | -195.573439 |
| wavelet-HLL | firstorder | Kurtosis                         | 5.71688784  |
| wavelet-HLL | firstorder | Mean                             | -30.0555763 |
| wavelet-HLL | grlm       | ShortRunLowGrayLevelEmphasis     | 0.016490454 |
| wavelet-HLL | grlm       | GrayLevelVariance                | 35.87498802 |
| wavelet-HLL | grlm       | LowGrayLevelRunEmphasis          | 0.01694346  |
| wavelet-HLL | grlm       | GrayLevelNonUniformityNormalized | 0.055584243 |
| wavelet-HLL | grlm       | RunVariance                      | 0.052526482 |
| wavelet-HLL | grlm       | GrayLevelNonUniformity           | 12.83807218 |
| wavelet-HLL | grlm       | LongRunEmphasis                  | 1.152563443 |
| wavelet-HLL | grlm       | ShortRunHighGrayLevelEmphasis    | 263.0460666 |
| wavelet-HLL | grlm       | RunLengthNonUniformity           | 211.1676854 |
| wavelet-HLL | grlm       | ShortRunEmphasis                 | 0.965548379 |
| wavelet-HLL | grlm       | LongRunHighGrayLevelEmphasis     | 306.0273215 |
| wavelet-HLL | grlm       | RunPercentage                    | 0.954227591 |
| wavelet-HLL | grlm       | LongRunLowGrayLevelEmphasis      | 0.018821507 |
| wavelet-HLL | grlm       | RunEntropy                       | 4.62468639  |
| wavelet-HLL | grlm       | HighGrayLevelRunEmphasis         | 270.8916041 |
| wavelet-HLL | grlm       | RunLengthNonUniformityNormalized | 0.913691874 |
| wavelet-HLL | glszm      | GrayLevelVariance                | 50.95362718 |
| wavelet-HLL | glszm      | ZoneVariance                     | 3.76010101  |
| wavelet-HLL | glszm      | GrayLevelNonUniformityNormalized | 0.045454545 |
| wavelet-HLL | glszm      | SizeZoneNonUniformityNormalized  | 0.47761708  |
| wavelet-HLL | glszm      | SizeZoneNonUniformity            | 63.04545455 |
| wavelet-HLL | glszm      | GrayLevelNonUniformity           | 6           |
| wavelet-HLL | glszm      | LargeAreaEmphasis                | 7.121212121 |
| wavelet-HLL | glszm      | SmallAreaHighGrayLevelEmphasis   | 230.6521698 |
| wavelet-HLL | glszm      | ZonePercentage                   | 0.545454545 |
| wavelet-HLL | glszm      | LargeAreaLowGrayLevelEmphasis    | 0.073184536 |
| wavelet-HLL | glszm      | LargeAreaHighGrayLevelEmphasis   | 1667.204545 |
| wavelet-HLL | glszm      | HighGrayLevelZoneEmphasis        | 297.3484848 |
| wavelet-HLL | glszm      | SmallAreaEmphasis                | 0.716800178 |
| wavelet-HLL | glszm      | LowGrayLevelZoneEmphasis         | 0.018689218 |
| wavelet-HLL | glszm      | ZoneEntropy                      | 5.561207522 |
| wavelet-HLL | glszm      | SmallAreaLowGrayLevelEmphasis    | 0.011360789 |
| wavelet-HLL | ngtdm      | Coarseness                       | 0.032071514 |
| wavelet-HLL | ngtdm      | Complexity                       | 1270.416047 |
| wavelet-HLL | ngtdm      | Strength                         | 12.16865752 |
| wavelet-HLL | ngtdm      | Contrast                         | 0.257263808 |
| wavelet-HLL | ngtdm      | Busyness                         | 0.074252001 |
| wavelet-LHL | gldm       | GrayLevelVariance                | 138.7094632 |
| wavelet-LHL | gldm       | HighGrayLevelEmphasis            | 1127.318182 |

|             |            |                                      |              |
|-------------|------------|--------------------------------------|--------------|
| wavelet-LHL | gldm       | DependenceEntropy                    | 6.314940407  |
| wavelet-LHL | gldm       | DependenceNonUniformity              | 104.9421488  |
| wavelet-LHL | gldm       | GrayLevelNonUniformity               | 7.115702479  |
| wavelet-LHL | gldm       | SmallDependenceEmphasis              | 0.669515611  |
| wavelet-LHL | gldm       | SmallDependenceHighGrayLevelEmphasis | 780.7391563  |
| wavelet-LHL | gldm       | DependenceNonUniformityNormalized    | 0.433645243  |
| wavelet-LHL | gldm       | LargeDependenceEmphasis              | 3.289256198  |
| wavelet-LHL | gldm       | LargeDependenceLowGrayLevelEmphasis  | 0.010916782  |
| wavelet-LHL | gldm       | DependenceVariance                   | 0.745099378  |
| wavelet-LHL | gldm       | LargeDependenceHighGrayLevelEmphasis | 3343.896694  |
| wavelet-LHL | gldm       | SmallDependenceLowGrayLevelEmphasis  | 0.006647467  |
| wavelet-LHL | gldm       | LowGrayLevelEmphasis                 | 0.007185633  |
| wavelet-LHL | glcm       | JointAverage                         | 31.5141467   |
| wavelet-LHL | glcm       | SumAverage                           | 63.0282934   |
| wavelet-LHL | glcm       | JointEntropy                         | 7.954344909  |
| wavelet-LHL | glcm       | ClusterShade                         | -103.7731558 |
| wavelet-LHL | glcm       | MaximumProbability                   | 0.012004625  |
| wavelet-LHL | glcm       | ldmn                                 | 0.944879694  |
| wavelet-LHL | glcm       | JointEnergy                          | 0.004348809  |
| wavelet-LHL | glcm       | Contrast                             | 253.2992985  |
| wavelet-LHL | glcm       | DifferenceEntropy                    | 4.723967027  |
| wavelet-LHL | glcm       | InverseVariance                      | 0.102339021  |
| wavelet-LHL | glcm       | DifferenceVariance                   | 100.8967079  |
| wavelet-LHL | glcm       | ldn                                  | 0.851320065  |
| wavelet-LHL | glcm       | ldm                                  | 0.099752431  |
| wavelet-LHL | glcm       | Correlation                          | 0.160856934  |
| wavelet-LHL | glcm       | Autocorrelation                      | 1017.365252  |
| wavelet-LHL | glcm       | SumEntropy                           | 5.750608954  |
| wavelet-LHL | glcm       | SumSquares                           | 150.8021512  |
| wavelet-LHL | glcm       | ClusterProminence                    | 318739.2867  |
| wavelet-LHL | glcm       | lmc2                                 | 0.997815567  |
| wavelet-LHL | glcm       | lmc1                                 | -0.511920281 |
| wavelet-LHL | glcm       | DifferenceAverage                    | 11.95268388  |
| wavelet-LHL | glcm       | ld                                   | 0.174602185  |
| wavelet-LHL | glcm       | ClusterTendency                      | 349.9093062  |
| wavelet-LHL | firstorder | InterquartileRange                   | 428.912118   |
| wavelet-LHL | firstorder | Skewness                             | -0.040471239 |
| wavelet-LHL | firstorder | Uniformity                           | 0.029403729  |
| wavelet-LHL | firstorder | Median                               | -3.503292958 |
| wavelet-LHL | firstorder | Energy                               | 21070429.89  |
| wavelet-LHL | firstorder | RobustMeanAbsoluteDeviation          | 179.8487075  |
| wavelet-LHL | firstorder | MeanAbsoluteDeviation                | 245.3949626  |
| wavelet-LHL | firstorder | TotalEnergy                          | 568901607    |
| wavelet-LHL | firstorder | Maximum                              | 716.734068   |
| wavelet-LHL | firstorder | RootMeanSquared                      | 295.0726895  |
| wavelet-LHL | firstorder | 90Percentile                         | 347.8194638  |
| wavelet-LHL | firstorder | Minimum                              | -783.1332724 |
| wavelet-LHL | firstorder | Entropy                              | 5.344516079  |
| wavelet-LHL | firstorder | Range                                | 1499.86734   |
| wavelet-LHL | firstorder | Variance                             | 86377.064    |
| wavelet-LHL | firstorder | 10Percentile                         | -422.1743357 |
| wavelet-LHL | firstorder | Kurtosis                             | 2.478951577  |
| wavelet-LHL | firstorder | Mean                                 | -26.28360892 |

|             |       |                                      |             |
|-------------|-------|--------------------------------------|-------------|
| wavelet-LHL | grlm  | ShortRunLowGrayLevelEmphasis         | 0.007289085 |
| wavelet-LHL | grlm  | GrayLevelVariance                    | 139.3995125 |
| wavelet-LHL | grlm  | LowGrayLevelRunEmphasis              | 0.007317452 |
| wavelet-LHL | grlm  | GrayLevelNonUniformityNormalized     | 0.029070826 |
| wavelet-LHL | grlm  | RunVariance                          | 0.023502969 |
| wavelet-LHL | grlm  | GrayLevelNonUniformity               | 6.874752764 |
| wavelet-LHL | grlm  | LongRunEmphasis                      | 1.07169045  |
| wavelet-LHL | grlm  | ShortRunHighGrayLevelEmphasis        | 1112.185708 |
| wavelet-LHL | grlm  | RunLengthNonUniformity               | 225.9101946 |
| wavelet-LHL | grlm  | ShortRunEmphasis                     | 0.98244109  |
| wavelet-LHL | grlm  | LongRunHighGrayLevelEmphasis         | 1202.279644 |
| wavelet-LHL | grlm  | RunPercentage                        | 0.977113795 |
| wavelet-LHL | grlm  | LongRunLowGrayLevelEmphasis          | 0.007433669 |
| wavelet-LHL | grlm  | RunEntropy                           | 5.445510484 |
| wavelet-LHL | grlm  | HighGrayLevelRunEmphasis             | 1130.050576 |
| wavelet-LHL | grlm  | RunLengthNonUniformityNormalized     | 0.954907911 |
| wavelet-LHL | glszm | GrayLevelVariance                    | 149.3030556 |
| wavelet-LHL | glszm | ZoneVariance                         | 0.692469136 |
| wavelet-LHL | glszm | GrayLevelNonUniformityNormalized     | 0.026049383 |
| wavelet-LHL | glszm | SizeZoneNonUniformityNormalized      | 0.642037037 |
| wavelet-LHL | glszm | SizeZoneNonUniformity                | 115.5666667 |
| wavelet-LHL | glszm | GrayLevelNonUniformity               | 4.688888889 |
| wavelet-LHL | glszm | LargeAreaEmphasis                    | 2.5         |
| wavelet-LHL | glszm | SmallAreaHighGrayLevelEmphasis       | 973.6172936 |
| wavelet-LHL | glszm | ZonePercentage                       | 0.743801653 |
| wavelet-LHL | glszm | LargeAreaLowGrayLevelEmphasis        | 0.011531814 |
| wavelet-LHL | glszm | LargeAreaHighGrayLevelEmphasis       | 2613.172222 |
| wavelet-LHL | glszm | HighGrayLevelZoneEmphasis            | 1159.483333 |
| wavelet-LHL | glszm | SmallAreaEmphasis                    | 0.827980324 |
| wavelet-LHL | glszm | LowGrayLevelZoneEmphasis             | 0.009104096 |
| wavelet-LHL | glszm | ZoneEntropy                          | 6.110739486 |
| wavelet-LHL | glszm | SmallAreaLowGrayLevelEmphasis        | 0.008820102 |
| wavelet-LHL | ngtdm | Coarseness                           | 0.020209025 |
| wavelet-LHL | ngtdm | Complexity                           | 9180.140021 |
| wavelet-LHL | ngtdm | Strength                             | 20.61378895 |
| wavelet-LHL | ngtdm | Contrast                             | 0.847291246 |
| wavelet-LHL | ngtdm | Busyness                             | 0.032528326 |
| wavelet-LHH | gldm  | GrayLevelVariance                    | 51.22081825 |
| wavelet-LHH | gldm  | HighGrayLevelEmphasis                | 708.8677686 |
| wavelet-LHH | gldm  | DependenceEntropy                    | 5.87686905  |
| wavelet-LHH | gldm  | DependenceNonUniformity              | 93.73553719 |
| wavelet-LHH | gldm  | GrayLevelNonUniformity               | 10.96694215 |
| wavelet-LHH | gldm  | SmallDependenceEmphasis              | 0.631967401 |
| wavelet-LHH | gldm  | SmallDependenceHighGrayLevelEmphasis | 455.4301297 |
| wavelet-LHH | gldm  | DependenceNonUniformityNormalized    | 0.387336931 |
| wavelet-LHH | gldm  | LargeDependenceEmphasis              | 4.033057851 |
| wavelet-LHH | gldm  | LargeDependenceLowGrayLevelEmphasis  | 0.011990317 |
| wavelet-LHH | gldm  | DependenceVariance                   | 1.020968513 |
| wavelet-LHH | gldm  | LargeDependenceHighGrayLevelEmphasis | 2695.85124  |
| wavelet-LHH | gldm  | SmallDependenceLowGrayLevelEmphasis  | 0.005547485 |
| wavelet-LHH | gldm  | LowGrayLevelEmphasis                 | 0.006301124 |
| wavelet-LHH | glcm  | JointAverage                         | 25.60366658 |
| wavelet-LHH | glcm  | SumAverage                           | 51.20733316 |

|             |            |                                  |              |
|-------------|------------|----------------------------------|--------------|
| wavelet-LHH | glcm       | JointEntropy                     | 7.62839358   |
| wavelet-LHH | glcm       | ClusterShade                     | 18.71410845  |
| wavelet-LHH | glcm       | MaximumProbability               | 0.016457749  |
| wavelet-LHH | glcm       | Idmn                             | 0.966346174  |
| wavelet-LHH | glcm       | JointEnergy                      | 0.005761317  |
| wavelet-LHH | glcm       | Contrast                         | 102.3004818  |
| wavelet-LHH | glcm       | DifferenceEntropy                | 4.128616472  |
| wavelet-LHH | glcm       | InverseVariance                  | 0.148410017  |
| wavelet-LHH | glcm       | DifferenceVariance               | 42.55088758  |
| wavelet-LHH | glcm       | Idn                              | 0.881516258  |
| wavelet-LHH | glcm       | Idm                              | 0.138402139  |
| wavelet-LHH | glcm       | Correlation                      | -0.028847071 |
| wavelet-LHH | glcm       | Autocorrelation                  | 654.0878086  |
| wavelet-LHH | glcm       | SumEntropy                       | 4.912555861  |
| wavelet-LHH | glcm       | SumSquares                       | 49.68080845  |
| wavelet-LHH | glcm       | ClusterProminence                | 48457.39033  |
| wavelet-LHH | glcm       | Imc2                             | 0.983425012  |
| wavelet-LHH | glcm       | Imc1                             | -0.368994525 |
| wavelet-LHH | glcm       | DifferenceAverage                | 7.520303247  |
| wavelet-LHH | glcm       | Id                               | 0.225345297  |
| wavelet-LHH | glcm       | ClusterTendency                  | 96.42275199  |
| wavelet-LHH | firstorder | InterquartileRange               | 202.7791744  |
| wavelet-LHH | firstorder | Skewness                         | 0.007410039  |
| wavelet-LHH | firstorder | Uniformity                       | 0.045317943  |
| wavelet-LHH | firstorder | Median                           | 8.653072689  |
| wavelet-LHH | firstorder | Energy                           | 7680304.632  |
| wavelet-LHH | firstorder | RobustMeanAbsoluteDeviation      | 89.75899766  |
| wavelet-LHH | firstorder | MeanAbsoluteDeviation            | 135.9782967  |
| wavelet-LHH | firstorder | TotalEnergy                      | 207368225.1  |
| wavelet-LHH | firstorder | Maximum                          | 631.0895985  |
| wavelet-LHH | firstorder | RootMeanSquared                  | 178.1482416  |
| wavelet-LHH | firstorder | 90Percentile                     | 205.4111466  |
| wavelet-LHH | firstorder | Minimum                          | -608.4332665 |
| wavelet-LHH | firstorder | Entropy                          | 4.704009667  |
| wavelet-LHH | firstorder | Range                            | 1239.522865  |
| wavelet-LHH | firstorder | Variance                         | 31724.76988  |
| wavelet-LHH | firstorder | 10Percentile                     | -222.0659823 |
| wavelet-LHH | firstorder | Kurtosis                         | 4.343602045  |
| wavelet-LHH | firstorder | Mean                             | 3.467869171  |
| wavelet-LHH | grlm       | ShortRunLowGrayLevelEmphasis     | 0.006387757  |
| wavelet-LHH | grlm       | GrayLevelVariance                | 52.0647885   |
| wavelet-LHH | grlm       | LowGrayLevelRunEmphasis          | 0.006429212  |
| wavelet-LHH | grlm       | GrayLevelNonUniformityNormalized | 0.044825696  |
| wavelet-LHH | grlm       | RunVariance                      | 0.030224616  |
| wavelet-LHH | grlm       | GrayLevelNonUniformity           | 10.54117844  |
| wavelet-LHH | grlm       | LongRunEmphasis                  | 1.090088071  |
| wavelet-LHH | grlm       | ShortRunHighGrayLevelEmphasis    | 695.623385   |
| wavelet-LHH | grlm       | RunLengthNonUniformity           | 222.3949731  |
| wavelet-LHH | grlm       | ShortRunEmphasis                 | 0.978580269  |
| wavelet-LHH | grlm       | LongRunHighGrayLevelEmphasis     | 769.9169093  |
| wavelet-LHH | grlm       | RunPercentage                    | 0.971710108  |
| wavelet-LHH | grlm       | LongRunLowGrayLevelEmphasis      | 0.006604251  |
| wavelet-LHH | grlm       | RunEntropy                       | 4.840144765  |

|             |       |                                      |              |
|-------------|-------|--------------------------------------|--------------|
| wavelet-LHH | grlm  | HighGrayLevelRunEmphasis             | 710.0529771  |
| wavelet-LHH | grlm  | RunLengthNonUniformityNormalized     | 0.945287261  |
| wavelet-LHH | glszm | GrayLevelVariance                    | 62.83319161  |
| wavelet-LHH | glszm | ZoneVariance                         | 1.627409297  |
| wavelet-LHH | glszm | GrayLevelNonUniformityNormalized     | 0.04180839   |
| wavelet-LHH | glszm | SizeZoneNonUniformityNormalized      | 0.642502834  |
| wavelet-LHH | glszm | SizeZoneNonUniformity                | 107.9404762  |
| wavelet-LHH | glszm | GrayLevelNonUniformity               | 7.023809524  |
| wavelet-LHH | glszm | LargeAreaEmphasis                    | 3.702380952  |
| wavelet-LHH | glszm | SmallAreaHighGrayLevelEmphasis       | 597.3452735  |
| wavelet-LHH | glszm | ZonePercentage                       | 0.694214876  |
| wavelet-LHH | glszm | LargeAreaLowGrayLevelEmphasis        | 0.013234488  |
| wavelet-LHH | glszm | LargeAreaHighGrayLevelEmphasis       | 2451.892857  |
| wavelet-LHH | glszm | HighGrayLevelZoneEmphasis            | 721          |
| wavelet-LHH | glszm | SmallAreaEmphasis                    | 0.827218537  |
| wavelet-LHH | glszm | LowGrayLevelZoneEmphasis             | 0.008207505  |
| wavelet-LHH | glszm | ZoneEntropy                          | 5.476337289  |
| wavelet-LHH | glszm | SmallAreaLowGrayLevelEmphasis        | 0.007820857  |
| wavelet-LHH | ngtdm | Coarseness                           | 0.022303119  |
| wavelet-LHH | ngtdm | Complexity                           | 3290.290835  |
| wavelet-LHH | ngtdm | Strength                             | 10.92739136  |
| wavelet-LHH | ngtdm | Contrast                             | 0.443770808  |
| wavelet-LHH | ngtdm | Busyness                             | 0.048715497  |
| wavelet-LLH | gldm  | GrayLevelVariance                    | 76.92008743  |
| wavelet-LLH | gldm  | HighGrayLevelEmphasis                | 564.1983471  |
| wavelet-LLH | gldm  | DependenceEntropy                    | 6.267831913  |
| wavelet-LLH | gldm  | DependenceNonUniformity              | 77.3553719   |
| wavelet-LLH | gldm  | GrayLevelNonUniformity               | 9.79338843   |
| wavelet-LLH | gldm  | SmallDependenceEmphasis              | 0.557649149  |
| wavelet-LLH | gldm  | SmallDependenceHighGrayLevelEmphasis | 338.8593553  |
| wavelet-LLH | gldm  | DependenceNonUniformityNormalized    | 0.319650297  |
| wavelet-LLH | gldm  | LargeDependenceEmphasis              | 5.545454545  |
| wavelet-LLH | gldm  | LargeDependenceLowGrayLevelEmphasis  | 0.022348705  |
| wavelet-LLH | gldm  | DependenceVariance                   | 1.578444095  |
| wavelet-LLH | gldm  | LargeDependenceHighGrayLevelEmphasis | 2911.92562   |
| wavelet-LLH | gldm  | SmallDependenceLowGrayLevelEmphasis  | 0.008721749  |
| wavelet-LLH | gldm  | LowGrayLevelEmphasis                 | 0.010087989  |
| wavelet-LLH | glcm  | JointAverage                         | 21.71881796  |
| wavelet-LLH | glcm  | SumAverage                           | 43.43763591  |
| wavelet-LLH | glcm  | JointEntropy                         | 7.636952192  |
| wavelet-LLH | glcm  | ClusterShade                         | -45.04676395 |
| wavelet-LLH | glcm  | MaximumProbability                   | 0.015861429  |
| wavelet-LLH | glcm  | ldmn                                 | 0.96378652   |
| wavelet-LLH | glcm  | JointEnergy                          | 0.00572279   |
| wavelet-LLH | glcm  | Contrast                             | 118.2833995  |
| wavelet-LLH | glcm  | DifferenceEntropy                    | 4.258147727  |
| wavelet-LLH | glcm  | InverseVariance                      | 0.149262586  |
| wavelet-LLH | glcm  | DifferenceVariance                   | 49.7964731   |
| wavelet-LLH | glcm  | ldn                                  | 0.879161302  |
| wavelet-LLH | glcm  | ldm                                  | 0.152128378  |
| wavelet-LLH | glcm  | Correlation                          | 0.163130755  |
| wavelet-LLH | glcm  | Autocorrelation                      | 483.6370982  |
| wavelet-LLH | glcm  | SumEntropy                           | 5.272615468  |

|             |            |                                  |              |
|-------------|------------|----------------------------------|--------------|
| wavelet-LLH | glcm       | SumSquares                       | 71.04853185  |
| wavelet-LLH | glcm       | ClusterProminence                | 100157.201   |
| wavelet-LLH | glcm       | Imc2                             | 0.990233444  |
| wavelet-LLH | glcm       | Imc1                             | -0.41186947  |
| wavelet-LLH | glcm       | DifferenceAverage                | 8.046486661  |
| wavelet-LLH | glcm       | Id                               | 0.233368516  |
| wavelet-LLH | glcm       | ClusterTendency                  | 165.9107279  |
| wavelet-LLH | firstorder | InterquartileRange               | 322.7507555  |
| wavelet-LLH | firstorder | Skewness                         | 0.247413381  |
| wavelet-LLH | firstorder | Uniformity                       | 0.040468547  |
| wavelet-LLH | firstorder | Median                           | -18.61286189 |
| wavelet-LLH | firstorder | Energy                           | 11908123.72  |
| wavelet-LLH | firstorder | RobustMeanAbsoluteDeviation      | 117.202428   |
| wavelet-LLH | firstorder | MeanAbsoluteDeviation            | 170.3523385  |
| wavelet-LLH | firstorder | TotalEnergy                      | 321519340.4  |
| wavelet-LLH | firstorder | Maximum                          | 731.8179541  |
| wavelet-LLH | firstorder | RootMeanSquared                  | 221.8267856  |
| wavelet-LLH | firstorder | 90Percentile                     | 188.8471062  |
| wavelet-LLH | firstorder | Minimum                          | -556.3371849 |
| wavelet-LLH | firstorder | Entropy                          | 4.910121968  |
| wavelet-LLH | firstorder | Range                            | 1288.155139  |
| wavelet-LLH | firstorder | Variance                         | 47907.73398  |
| wavelet-LLH | firstorder | 10Percentile                     | -302.1413996 |
| wavelet-LLH | firstorder | Kurtosis                         | 3.512512792  |
| wavelet-LLH | firstorder | Mean                             | -36.04703632 |
| wavelet-LLH | grlm       | ShortRunLowGrayLevelEmphasis     | 0.010295225  |
| wavelet-LLH | grlm       | GrayLevelVariance                | 78.64735526  |
| wavelet-LLH | grlm       | LowGrayLevelRunEmphasis          | 0.010376857  |
| wavelet-LLH | grlm       | GrayLevelNonUniformityNormalized | 0.039757995  |
| wavelet-LLH | grlm       | RunVariance                      | 0.041391489  |
| wavelet-LLH | grlm       | GrayLevelNonUniformity           | 9.25529011   |
| wavelet-LLH | grlm       | LongRunEmphasis                  | 1.123096197  |
| wavelet-LLH | grlm       | ShortRunHighGrayLevelEmphasis    | 551.0736218  |
| wavelet-LLH | grlm       | RunLengthNonUniformity           | 215.8301159  |
| wavelet-LLH | grlm       | ShortRunEmphasis                 | 0.971083346  |
| wavelet-LLH | grlm       | LongRunHighGrayLevelEmphasis     | 629.3883238  |
| wavelet-LLH | grlm       | RunPercentage                    | 0.961856325  |
| wavelet-LLH | grlm       | LongRunLowGrayLevelEmphasis      | 0.010730533  |
| wavelet-LLH | grlm       | RunEntropy                       | 5.092984145  |
| wavelet-LLH | grlm       | HighGrayLevelRunEmphasis         | 566.1007911  |
| wavelet-LLH | grlm       | RunLengthNonUniformityNormalized | 0.926783855  |
| wavelet-LLH | glszm      | GrayLevelVariance                | 99.64406852  |
| wavelet-LLH | glszm      | ZoneVariance                     | 1.942671622  |
| wavelet-LLH | glszm      | GrayLevelNonUniformityNormalized | 0.033961297  |
| wavelet-LLH | glszm      | SizeZoneNonUniformityNormalized  | 0.568371139  |
| wavelet-LLH | glszm      | SizeZoneNonUniformity            | 86.96078431  |
| wavelet-LLH | glszm      | GrayLevelNonUniformity           | 5.196078431  |
| wavelet-LLH | glszm      | LargeAreaEmphasis                | 4.444444444  |
| wavelet-LLH | glszm      | SmallAreaHighGrayLevelEmphasis   | 486.5614953  |
| wavelet-LLH | glszm      | ZonePercentage                   | 0.632231405  |
| wavelet-LLH | glszm      | LargeAreaLowGrayLevelEmphasis    | 0.023500538  |
| wavelet-LLH | glszm      | LargeAreaHighGrayLevelEmphasis   | 2381.751634  |
| wavelet-LLH | glszm      | HighGrayLevelZoneEmphasis        | 595.2156863  |

|             |            |                                      |              |
|-------------|------------|--------------------------------------|--------------|
| wavelet-LLH | glszm      | SmallAreaEmphasis                    | 0.781222715  |
| wavelet-LLH | glszm      | LowGrayLevelZoneEmphasis             | 0.014201429  |
| wavelet-LLH | glszm      | ZoneEntropy                          | 5.9082578    |
| wavelet-LLH | glszm      | SmallAreaLowGrayLevelEmphasis        | 0.013461849  |
| wavelet-LLH | ngtdm      | Coarseness                           | 0.021899803  |
| wavelet-LLH | ngtdm      | Complexity                           | 4706.787707  |
| wavelet-LLH | ngtdm      | Strength                             | 15.60523955  |
| wavelet-LLH | ngtdm      | Contrast                             | 0.493180052  |
| wavelet-LLH | ngtdm      | Busyness                             | 0.045814723  |
| wavelet-LLL | gldm       | GrayLevelVariance                    | 354.2899563  |
| wavelet-LLL | gldm       | HighGrayLevelEmphasis                | 2443.384298  |
| wavelet-LLL | gldm       | DependenceEntropy                    | 6.472311018  |
| wavelet-LLL | gldm       | DependenceNonUniformity              | 116.5702479  |
| wavelet-LLL | gldm       | GrayLevelNonUniformity               | 5.008264463  |
| wavelet-LLL | gldm       | SmallDependenceEmphasis              | 0.710571625  |
| wavelet-LLL | gldm       | SmallDependenceHighGrayLevelEmphasis | 1659.219697  |
| wavelet-LLL | gldm       | DependenceNonUniformityNormalized    | 0.481695239  |
| wavelet-LLL | gldm       | LargeDependenceEmphasis              | 2.636363636  |
| wavelet-LLL | gldm       | LargeDependenceLowGrayLevelEmphasis  | 0.007        |
| wavelet-LLL | gldm       | DependenceVariance                   | 0.472303804  |
| wavelet-LLL | gldm       | LargeDependenceHighGrayLevelEmphasis | 7446.764463  |
| wavelet-LLL | gldm       | SmallDependenceLowGrayLevelEmphasis  | 0.005619133  |
| wavelet-LLL | gldm       | LowGrayLevelEmphasis                 | 0.005862324  |
| wavelet-LLL | glcm       | JointAverage                         | 48.29544572  |
| wavelet-LLL | glcm       | SumAverage                           | 96.59089144  |
| wavelet-LLL | glcm       | JointEntropy                         | 8.055026231  |
| wavelet-LLL | glcm       | ClusterShade                         | -8987.887505 |
| wavelet-LLL | glcm       | MaximumProbability                   | 0.009615911  |
| wavelet-LLL | glcm       | ldmn                                 | 0.95227406   |
| wavelet-LLL | glcm       | JointEnergy                          | 0.003938831  |
| wavelet-LLL | glcm       | Contrast                             | 425.6990736  |
| wavelet-LLL | glcm       | DifferenceEntropy                    | 5.10010795   |
| wavelet-LLL | glcm       | InverseVariance                      | 0.055931592  |
| wavelet-LLL | glcm       | DifferenceVariance                   | 146.2216385  |
| wavelet-LLL | glcm       | ldn                                  | 0.85476814   |
| wavelet-LLL | glcm       | ldm                                  | 0.065674402  |
| wavelet-LLL | glcm       | Correlation                          | 0.363345094  |
| wavelet-LLL | glcm       | Autocorrelation                      | 2452.578892  |
| wavelet-LLL | glcm       | SumEntropy                           | 6.148797109  |
| wavelet-LLL | glcm       | SumSquares                           | 332.4836431  |
| wavelet-LLL | glcm       | ClusterProminence                    | 2365763.675  |
| wavelet-LLL | glcm       | lmc2                                 | 0.999329456  |
| wavelet-LLL | glcm       | lmc1                                 | -0.584617718 |
| wavelet-LLL | glcm       | DifferenceAverage                    | 16.34149874  |
| wavelet-LLL | glcm       | ld                                   | 0.132054016  |
| wavelet-LLL | glcm       | ClusterTendency                      | 904.2354986  |
| wavelet-LLL | firstorder | InterquartileRange                   | 642.289664   |
| wavelet-LLL | firstorder | Skewness                             | -0.26643609  |
| wavelet-LLL | firstorder | Uniformity                           | 0.020695308  |
| wavelet-LLL | firstorder | Median                               | 1076.661142  |
| wavelet-LLL | firstorder | Energy                               | 322964584.7  |
| wavelet-LLL | firstorder | RobustMeanAbsoluteDeviation          | 273.3107679  |
| wavelet-LLL | firstorder | MeanAbsoluteDeviation                | 382.0769687  |

|             |            |                                  |              |
|-------------|------------|----------------------------------|--------------|
| wavelet-LLL | firstorder | TotalEnergy                      | 8720043788   |
| wavelet-LLL | firstorder | Maximum                          | 2123.166482  |
| wavelet-LLL | firstorder | RootMeanSquared                  | 1155.233483  |
| wavelet-LLL | firstorder | 90Percentile                     | 1610.438185  |
| wavelet-LLL | firstorder | Minimum                          | -67.08234373 |
| wavelet-LLL | firstorder | Entropy                          | 5.804284132  |
| wavelet-LLL | firstorder | Range                            | 2190.248826  |
| wavelet-LLL | firstorder | Variance                         | 221394.2841  |
| wavelet-LLL | firstorder | 10Percentile                     | 338.7232753  |
| wavelet-LLL | firstorder | Kurtosis                         | 2.416931387  |
| wavelet-LLL | firstorder | Mean                             | 1055.068773  |
| wavelet-LLL | grlm       | ShortRunLowGrayLevelEmphasis     | 0.005946615  |
| wavelet-LLL | grlm       | GrayLevelVariance                | 354.894987   |
| wavelet-LLL | grlm       | LowGrayLevelRunEmphasis          | 0.005957106  |
| wavelet-LLL | grlm       | GrayLevelNonUniformityNormalized | 0.020576184  |
| wavelet-LLL | grlm       | RunVariance                      | 0.018106579  |
| wavelet-LLL | grlm       | GrayLevelNonUniformity           | 4.889331518  |
| wavelet-LLL | grlm       | LongRunEmphasis                  | 1.055661526  |
| wavelet-LLL | grlm       | ShortRunHighGrayLevelEmphasis    | 2394.277715  |
| wavelet-LLL | grlm       | RunLengthNonUniformity           | 229.0569826  |
| wavelet-LLL | grlm       | ShortRunEmphasis                 | 0.986084619  |
| wavelet-LLL | grlm       | LongRunHighGrayLevelEmphasis     | 2596.650748  |
| wavelet-LLL | grlm       | RunPercentage                    | 0.981881755  |
| wavelet-LLL | grlm       | LongRunLowGrayLevelEmphasis      | 0.005999067  |
| wavelet-LLL | grlm       | RunEntropy                       | 5.868124794  |
| wavelet-LLL | grlm       | HighGrayLevelRunEmphasis         | 2434.752322  |
| wavelet-LLL | grlm       | RunLengthNonUniformityNormalized | 0.963786842  |
| wavelet-LLL | glszm      | GrayLevelVariance                | 367.1505167  |
| wavelet-LLL | glszm      | ZoneVariance                     | 0.384199995  |
| wavelet-LLL | glszm      | GrayLevelNonUniformityNormalized | 0.019051013  |
| wavelet-LLL | glszm      | SizeZoneNonUniformityNormalized  | 0.665853458  |
| wavelet-LLL | glszm      | SizeZoneNonUniformity            | 127.1780105  |
| wavelet-LLL | glszm      | GrayLevelNonUniformity           | 3.638743455  |
| wavelet-LLL | glszm      | LargeAreaEmphasis                | 1.989528796  |
| wavelet-LLL | glszm      | SmallAreaHighGrayLevelEmphasis   | 1951.754543  |
| wavelet-LLL | glszm      | ZonePercentage                   | 0.789256198  |
| wavelet-LLL | glszm      | LargeAreaLowGrayLevelEmphasis    | 0.007910068  |
| wavelet-LLL | glszm      | LargeAreaHighGrayLevelEmphasis   | 5332.675393  |
| wavelet-LLL | glszm      | HighGrayLevelZoneEmphasis        | 2347.633508  |
| wavelet-LLL | glszm      | SmallAreaEmphasis                | 0.843359511  |
| wavelet-LLL | glszm      | LowGrayLevelZoneEmphasis         | 0.007215173  |
| wavelet-LLL | glszm      | ZoneEntropy                      | 6.359200771  |
| wavelet-LLL | glszm      | SmallAreaLowGrayLevelEmphasis    | 0.007070021  |
| wavelet-LLL | ngtdm      | Coarseness                       | 0.021238385  |
| wavelet-LLL | ngtdm      | Complexity                       | 20915.81375  |
| wavelet-LLL | ngtdm      | Strength                         | 44.20985234  |
| wavelet-LLL | ngtdm      | Contrast                         | 1.74239451   |
| wavelet-LLL | ngtdm      | Busyness                         | 0.01747049   |
| wavelet-HHL | gldm       | GrayLevelVariance                | 18.89495253  |
| wavelet-HHL | gldm       | HighGrayLevelEmphasis            | 297.8677686  |
| wavelet-HHL | gldm       | DependenceEntropy                | 5.843473299  |
| wavelet-HHL | gldm       | DependenceNonUniformity          | 49.40495868  |
| wavelet-HHL | gldm       | GrayLevelNonUniformity           | 21.4214876   |



|             |            |                                      |              |
|-------------|------------|--------------------------------------|--------------|
| wavelet-HHL | gldm       | SmallDependenceEmphasis              | 0.39898115   |
| wavelet-HHL | gldm       | SmallDependenceHighGrayLevelEmphasis | 122.9071353  |
| wavelet-HHL | gldm       | DependenceNonUniformityNormalized    | 0.204152722  |
| wavelet-HHL | gldm       | LargeDependenceEmphasis              | 10.19008264  |
| wavelet-HHL | gldm       | LargeDependenceLowGrayLevelEmphasis  | 0.04412097   |
| wavelet-HHL | gldm       | DependenceVariance                   | 2.797076702  |
| wavelet-HHL | gldm       | LargeDependenceHighGrayLevelEmphasis | 2810.595041  |
| wavelet-HHL | gldm       | SmallDependenceLowGrayLevelEmphasis  | 0.006323314  |
| wavelet-HHL | gldm       | LowGrayLevelEmphasis                 | 0.00862598   |
| wavelet-HHL | glcm       | JointAverage                         | 16.82114966  |
| wavelet-HHL | glcm       | SumAverage                           | 33.64229933  |
| wavelet-HHL | glcm       | JointEntropy                         | 6.866237958  |
| wavelet-HHL | glcm       | ClusterShade                         | 76.71679631  |
| wavelet-HHL | glcm       | MaximumProbability                   | 0.039004423  |
| wavelet-HHL | glcm       | Idmn                                 | 0.972291275  |
| wavelet-HHL | glcm       | JointEnergy                          | 0.011690195  |
| wavelet-HHL | glcm       | Contrast                             | 35.84103535  |
| wavelet-HHL | glcm       | DifferenceEntropy                    | 3.579447914  |
| wavelet-HHL | glcm       | InverseVariance                      | 0.221039648  |
| wavelet-HHL | glcm       | DifferenceVariance                   | 15.76002732  |
| wavelet-HHL | glcm       | Idn                                  | 0.893226334  |
| wavelet-HHL | glcm       | Idm                                  | 0.238827772  |
| wavelet-HHL | glcm       | Correlation                          | -0.008892444 |
| wavelet-HHL | glcm       | Autocorrelation                      | 282.746004   |
| wavelet-HHL | glcm       | SumEntropy                           | 4.357962121  |
| wavelet-HHL | glcm       | SumSquares                           | 17.70414246  |
| wavelet-HHL | glcm       | ClusterProminence                    | 5152.154629  |
| wavelet-HHL | glcm       | Imc2                                 | 0.917841233  |
| wavelet-HHL | glcm       | Imc1                                 | -0.23874069  |
| wavelet-HHL | glcm       | DifferenceAverage                    | 4.437249367  |
| wavelet-HHL | glcm       | Id                                   | 0.325431017  |
| wavelet-HHL | glcm       | ClusterTendency                      | 34.97553448  |
| wavelet-HHL | firstorder | InterquartileRange                   | 109.474137   |
| wavelet-HHL | firstorder | Skewness                             | 0.40730617   |
| wavelet-HHL | firstorder | Uniformity                           | 0.088518544  |
| wavelet-HHL | firstorder | Median                               | -8.122860226 |
| wavelet-HHL | firstorder | Energy                               | 2843651.96   |
| wavelet-HHL | firstorder | RobustMeanAbsoluteDeviation          | 47.13261816  |
| wavelet-HHL | firstorder | MeanAbsoluteDeviation                | 78.78673151  |
| wavelet-HHL | firstorder | TotalEnergy                          | 76778602.91  |
| wavelet-HHL | firstorder | Maximum                              | 447.0712696  |
| wavelet-HHL | firstorder | RootMeanSquared                      | 108.4003133  |
| wavelet-HHL | firstorder | 90Percentile                         | 142.7077614  |
| wavelet-HHL | firstorder | Minimum                              | -384.618205  |
| wavelet-HHL | firstorder | Entropy                              | 3.945506307  |
| wavelet-HHL | firstorder | Range                                | 831.6894746  |
| wavelet-HHL | firstorder | Variance                             | 11726.86425  |
| wavelet-HHL | firstorder | 10Percentile                         | -111.3352048 |
| wavelet-HHL | firstorder | Kurtosis                             | 4.884104125  |
| wavelet-HHL | firstorder | Mean                                 | 4.874800904  |
| wavelet-HHL | grlm       | ShortRunLowGrayLevelEmphasis         | 0.008774742  |
| wavelet-HHL | grlm       | GrayLevelVariance                    | 19.84165213  |
| wavelet-HHL | grlm       | LowGrayLevelRunEmphasis              | 0.008967024  |

|             |       |                                      |              |
|-------------|-------|--------------------------------------|--------------|
| wavelet-HHL | glrlm | GrayLevelNonUniformityNormalized     | 0.084533883  |
| wavelet-HHL | glrlm | RunVariance                          | 0.079038201  |
| wavelet-HHL | glrlm | GrayLevelNonUniformity               | 19.11503664  |
| wavelet-HHL | glrlm | LongRunEmphasis                      | 1.228205238  |
| wavelet-HHL | glrlm | ShortRunHighGrayLevelEmphasis        | 285.3901008  |
| wavelet-HHL | glrlm | RunLengthNonUniformity               | 198.6669693  |
| wavelet-HHL | glrlm | ShortRunEmphasis                     | 0.950238336  |
| wavelet-HHL | glrlm | LongRunHighGrayLevelEmphasis         | 362.5864564  |
| wavelet-HHL | glrlm | RunPercentage                        | 0.933884298  |
| wavelet-HHL | glrlm | LongRunLowGrayLevelEmphasis          | 0.009847816  |
| wavelet-HHL | glrlm | RunEntropy                           | 4.285840085  |
| wavelet-HHL | glrlm | HighGrayLevelRunEmphasis             | 299.2788175  |
| wavelet-HHL | glrlm | RunLengthNonUniformityNormalized     | 0.878106279  |
| wavelet-HHL | glszm | GrayLevelVariance                    | 32.6892562   |
| wavelet-HHL | glszm | ZoneVariance                         | 10.46909091  |
| wavelet-HHL | glszm | GrayLevelNonUniformityNormalized     | 0.053553719  |
| wavelet-HHL | glszm | SizeZoneNonUniformityNormalized      | 0.49322314   |
| wavelet-HHL | glszm | SizeZoneNonUniformity                | 54.25454545  |
| wavelet-HHL | glszm | GrayLevelNonUniformity               | 5.890909091  |
| wavelet-HHL | glszm | LargeAreaEmphasis                    | 15.30909091  |
| wavelet-HHL | glszm | SmallAreaHighGrayLevelEmphasis       | 224.034386   |
| wavelet-HHL | glszm | ZonePercentage                       | 0.454545455  |
| wavelet-HHL | glszm | LargeAreaLowGrayLevelEmphasis        | 0.070689124  |
| wavelet-HHL | glszm | LargeAreaHighGrayLevelEmphasis       | 4097.236364  |
| wavelet-HHL | glszm | HighGrayLevelZoneEmphasis            | 312.4909091  |
| wavelet-HHL | glszm | SmallAreaEmphasis                    | 0.727721651  |
| wavelet-HHL | glszm | LowGrayLevelZoneEmphasis             | 0.014371337  |
| wavelet-HHL | glszm | ZoneEntropy                          | 5.416460027  |
| wavelet-HHL | glszm | SmallAreaLowGrayLevelEmphasis        | 0.013351432  |
| wavelet-HHL | ngtdm | Coarseness                           | 0.024794244  |
| wavelet-HHL | ngtdm | Complexity                           | 943.1745206  |
| wavelet-HHL | ngtdm | Strength                             | 5.964789207  |
| wavelet-HHL | ngtdm | Contrast                             | 0.177794284  |
| wavelet-HHL | ngtdm | Busyness                             | 0.078529944  |
| wavelet-HLH | gldm  | GrayLevelVariance                    | 8.162232771  |
| wavelet-HLH | gldm  | HighGrayLevelEmphasis                | 120.8553719  |
| wavelet-HLH | gldm  | DependenceEntropy                    | 5.414097414  |
| wavelet-HLH | gldm  | DependenceNonUniformity              | 54.85950413  |
| wavelet-HLH | gldm  | GrayLevelNonUniformity               | 26.04132231  |
| wavelet-HLH | gldm  | SmallDependenceEmphasis              | 0.346444565  |
| wavelet-HLH | gldm  | SmallDependenceHighGrayLevelEmphasis | 43.6515749   |
| wavelet-HLH | gldm  | DependenceNonUniformityNormalized    | 0.226692166  |
| wavelet-HLH | gldm  | LargeDependenceEmphasis              | 9.884297521  |
| wavelet-HLH | gldm  | LargeDependenceLowGrayLevelEmphasis  | 0.097397253  |
| wavelet-HLH | gldm  | DependenceVariance                   | 2.625503722  |
| wavelet-HLH | gldm  | LargeDependenceHighGrayLevelEmphasis | 1176.954545  |
| wavelet-HLH | gldm  | SmallDependenceLowGrayLevelEmphasis  | 0.009518171  |
| wavelet-HLH | gldm  | LowGrayLevelEmphasis                 | 0.016208618  |
| wavelet-HLH | glcm  | JointAverage                         | 10.60942777  |
| wavelet-HLH | glcm  | SumAverage                           | 21.21885555  |
| wavelet-HLH | glcm  | JointEntropy                         | 6.367095735  |
| wavelet-HLH | glcm  | ClusterShade                         | -5.178722579 |
| wavelet-HLH | glcm  | MaximumProbability                   | 0.044758449  |

|             |            |                                  |              |
|-------------|------------|----------------------------------|--------------|
| wavelet-HLH | glcm       | Idmn                             | 0.967931864  |
| wavelet-HLH | glcm       | JointEnergy                      | 0.016151933  |
| wavelet-HLH | glcm       | Contrast                         | 15.8874139   |
| wavelet-HLH | glcm       | DifferenceEntropy                | 3.053837541  |
| wavelet-HLH | glcm       | InverseVariance                  | 0.298590697  |
| wavelet-HLH | glcm       | DifferenceVariance               | 6.418131903  |
| wavelet-HLH | glcm       | Idn                              | 0.881943049  |
| wavelet-HLH | glcm       | Idm                              | 0.281400094  |
| wavelet-HLH | glcm       | Correlation                      | -0.020367395 |
| wavelet-HLH | glcm       | Autocorrelation                  | 112.4100538  |
| wavelet-HLH | glcm       | SumEntropy                       | 3.869559975  |
| wavelet-HLH | glcm       | SumSquares                       | 7.788144194  |
| wavelet-HLH | glcm       | ClusterProminence                | 900.5792903  |
| wavelet-HLH | glcm       | Imc2                             | 0.805832659  |
| wavelet-HLH | glcm       | Imc1                             | -0.15374494  |
| wavelet-HLH | glcm       | DifferenceAverage                | 3.054953121  |
| wavelet-HLH | glcm       | Id                               | 0.36842369   |
| wavelet-HLH | glcm       | ClusterTendency                  | 15.26516287  |
| wavelet-HLH | firstorder | InterquartileRange               | 81.91817019  |
| wavelet-HLH | firstorder | Skewness                         | -0.121482135 |
| wavelet-HLH | firstorder | Uniformity                       | 0.10760877   |
| wavelet-HLH | firstorder | Median                           | 7.995711151  |
| wavelet-HLH | firstorder | Energy                           | 1209147.739  |
| wavelet-HLH | firstorder | RobustMeanAbsoluteDeviation      | 35.54544069  |
| wavelet-HLH | firstorder | MeanAbsoluteDeviation            | 54.2338237   |
| wavelet-HLH | firstorder | TotalEnergy                      | 32646988.96  |
| wavelet-HLH | firstorder | Maximum                          | 257.9546445  |
| wavelet-HLH | firstorder | RootMeanSquared                  | 70.68577128  |
| wavelet-HLH | firstorder | 90Percentile                     | 90.52880915  |
| wavelet-HLH | firstorder | Minimum                          | -225.3613377 |
| wavelet-HLH | firstorder | Entropy                          | 3.483722536  |
| wavelet-HLH | firstorder | Range                            | 483.3159822  |
| wavelet-HLH | firstorder | Variance                         | 4985.004453  |
| wavelet-HLH | firstorder | 10Percentile                     | -88.55649906 |
| wavelet-HLH | firstorder | Kurtosis                         | 3.623491138  |
| wavelet-HLH | firstorder | Mean                             | 3.387301117  |
| wavelet-HLH | grlm       | ShortRunLowGrayLevelEmphasis     | 0.016200731  |
| wavelet-HLH | grlm       | GrayLevelVariance                | 8.530657831  |
| wavelet-HLH | grlm       | LowGrayLevelRunEmphasis          | 0.016677361  |
| wavelet-HLH | grlm       | GrayLevelNonUniformityNormalized | 0.103754765  |
| wavelet-HLH | grlm       | RunVariance                      | 0.075021383  |
| wavelet-HLH | grlm       | GrayLevelNonUniformity           | 23.47615035  |
| wavelet-HLH | grlm       | LongRunEmphasis                  | 1.221360903  |
| wavelet-HLH | grlm       | ShortRunHighGrayLevelEmphasis    | 115.1651133  |
| wavelet-HLH | grlm       | RunLengthNonUniformity           | 198.9987678  |
| wavelet-HLH | grlm       | ShortRunEmphasis                 | 0.950396469  |
| wavelet-HLH | grlm       | LongRunHighGrayLevelEmphasis     | 147.249156   |
| wavelet-HLH | grlm       | RunPercentage                    | 0.934837889  |
| wavelet-HLH | grlm       | LongRunLowGrayLevelEmphasis      | 0.018779941  |
| wavelet-HLH | grlm       | RunEntropy                       | 3.817347419  |
| wavelet-HLH | grlm       | HighGrayLevelRunEmphasis         | 121.0308187  |
| wavelet-HLH | grlm       | RunLengthNonUniformityNormalized | 0.878636017  |
| wavelet-HLH | glszm      | GrayLevelVariance                | 14.57774471  |

|             |       |                                  |             |
|-------------|-------|----------------------------------|-------------|
| wavelet-HLH | glszm | ZoneVariance                     | 18.97162291 |
| wavelet-HLH | glszm | GrayLevelNonUniformityNormalized | 0.080880009 |
| wavelet-HLH | glszm | SizeZoneNonUniformityNormalized  | 0.380805612 |
| wavelet-HLH | glszm | SizeZoneNonUniformity            | 36.93814433 |
| wavelet-HLH | glszm | GrayLevelNonUniformity           | 7.845360825 |
| wavelet-HLH | glszm | LargeAreaEmphasis                | 25.19587629 |
| wavelet-HLH | glszm | SmallAreaHighGrayLevelEmphasis   | 81.44710872 |
| wavelet-HLH | glszm | ZonePercentage                   | 0.400826446 |
| wavelet-HLH | glszm | LargeAreaLowGrayLevelEmphasis    | 0.234373509 |
| wavelet-HLH | glszm | LargeAreaHighGrayLevelEmphasis   | 3068.298969 |
| wavelet-HLH | glszm | HighGrayLevelZoneEmphasis        | 123.8556701 |
| wavelet-HLH | glszm | SmallAreaEmphasis                | 0.635084839 |
| wavelet-HLH | glszm | LowGrayLevelZoneEmphasis         | 0.025671815 |
| wavelet-HLH | glszm | ZoneEntropy                      | 5.180688585 |
| wavelet-HLH | glszm | SmallAreaLowGrayLevelEmphasis    | 0.021322191 |
| wavelet-HLH | ngtdm | Coarseness                       | 0.025310236 |
| wavelet-HLH | ngtdm | Complexity                       | 269.6247004 |
| wavelet-HLH | ngtdm | Strength                         | 2.224359043 |
| wavelet-HLH | ngtdm | Contrast                         | 0.139308909 |
| wavelet-HLH | ngtdm | Busyness                         | 0.208817787 |

| Image type | Feature Class | Feature Name                         |                                                                                                                                                                                                                                                                                                                                                                                                                                           |
|------------|---------------|--------------------------------------|-------------------------------------------------------------------------------------------------------------------------------------------------------------------------------------------------------------------------------------------------------------------------------------------------------------------------------------------------------------------------------------------------------------------------------------------|
| general    | info          | BoundingBox                          | 11: RTSTRUCT: C99-DNU-B_1_segment_ITV-RUL<br>(1, 1, 1, 14, 12, 9)                                                                                                                                                                                                                                                                                                                                                                         |
| general    | info          | EnabledImageTypes                    | {u'Original': {}, u'Wavelet': {}}                                                                                                                                                                                                                                                                                                                                                                                                         |
|            |               |                                      | {'distances': [1], 'additionalInfo': True, 'force2D':<br>False, 'interpolator': 'sitkBSpline',<br>'resampledPixelSpacing': [3.0], 'label': 1,<br>'normalizeScale': 1, 'normalize': False,<br>'force2Ddimension': 0, 'removeOutliers': None,<br>'minimumROISize': None, u'binWidth': 25.0,<br>'minimumROIDimensions': 1, u'correctMask':<br>True, 'preCrop': False, u'symmetricalGLCM':<br>True, 'resegmentRange': None, 'padDistance': 5} |
| general    | info          | GeneralSettings                      |                                                                                                                                                                                                                                                                                                                                                                                                                                           |
| general    | info          | ImageHash                            | e65113bd6793fcf11f5b95888366fdf387e0c3a3<br>(0.9765625000000002, 0.9765625000000002,<br>2.0)                                                                                                                                                                                                                                                                                                                                              |
| general    | info          | ImageSpacing                         |                                                                                                                                                                                                                                                                                                                                                                                                                                           |
| general    | info          | MaskHash                             | 399efe7a869f8195ecbc3bc4331bd5c42068416d                                                                                                                                                                                                                                                                                                                                                                                                  |
| general    | info          | NumpyVersion                         | 1.13.1                                                                                                                                                                                                                                                                                                                                                                                                                                    |
| general    | info          | PyWaveletVersion                     | 0.5.2                                                                                                                                                                                                                                                                                                                                                                                                                                     |
| general    | info          | SimpleITKVersion                     | 1.1.0                                                                                                                                                                                                                                                                                                                                                                                                                                     |
| general    | info          | Version                              | 1.3.0.post102+g1b0eb74                                                                                                                                                                                                                                                                                                                                                                                                                    |
| general    | info          | VolumeNum                            | 1                                                                                                                                                                                                                                                                                                                                                                                                                                         |
| general    | info          | VoxelNum                             | 285                                                                                                                                                                                                                                                                                                                                                                                                                                       |
| original   | shape         | Maximum3DDiameter                    | 48.18713521                                                                                                                                                                                                                                                                                                                                                                                                                               |
| original   | shape         | Maximum2DDiameterSlice               | 34.20526275                                                                                                                                                                                                                                                                                                                                                                                                                               |
| original   | shape         | Sphericity                           | 0.670166998                                                                                                                                                                                                                                                                                                                                                                                                                               |
| original   | shape         | MinorAxis                            | 21.12011631                                                                                                                                                                                                                                                                                                                                                                                                                               |
| original   | shape         | Elongation                           | 0.477725185                                                                                                                                                                                                                                                                                                                                                                                                                               |
| original   | shape         | SurfaceVolumeRatio                   | 0.365509115                                                                                                                                                                                                                                                                                                                                                                                                                               |
| original   | shape         | Volume                               | 7695                                                                                                                                                                                                                                                                                                                                                                                                                                      |
| original   | shape         | MajorAxis                            | 44.20976114                                                                                                                                                                                                                                                                                                                                                                                                                               |
| original   | shape         | SurfaceArea                          | 2812.592643                                                                                                                                                                                                                                                                                                                                                                                                                               |
| original   | shape         | Flatness                             | 0.361618712                                                                                                                                                                                                                                                                                                                                                                                                                               |
| original   | shape         | LeastAxis                            | 15.98707687                                                                                                                                                                                                                                                                                                                                                                                                                               |
| original   | shape         | Maximum2DDiameterColumn              | 37.94733192                                                                                                                                                                                                                                                                                                                                                                                                                               |
| original   | shape         | Maximum2DDiameterRow                 | 27.16615541                                                                                                                                                                                                                                                                                                                                                                                                                               |
| original   | gldm          | GrayLevelVariance                    | 66.92360726                                                                                                                                                                                                                                                                                                                                                                                                                               |
| original   | gldm          | HighGrayLevelEmphasis                | 384.6385965                                                                                                                                                                                                                                                                                                                                                                                                                               |
| original   | gldm          | DependenceEntropy                    | 6.160858561                                                                                                                                                                                                                                                                                                                                                                                                                               |
| original   | gldm          | DependenceNonUniformity              | 95.20350877                                                                                                                                                                                                                                                                                                                                                                                                                               |
| original   | gldm          | GrayLevelNonUniformity               | 10.25614035                                                                                                                                                                                                                                                                                                                                                                                                                               |
| original   | gldm          | SmallDependenceEmphasis              | 0.573828127                                                                                                                                                                                                                                                                                                                                                                                                                               |
| original   | gldm          | SmallDependenceHighGrayLevelEmphasis | 192.5659566                                                                                                                                                                                                                                                                                                                                                                                                                               |
| original   | gldm          | DependenceNonUniformityNormalized    | 0.334047399                                                                                                                                                                                                                                                                                                                                                                                                                               |
| original   | gldm          | LargeDependenceEmphasis              | 5.4                                                                                                                                                                                                                                                                                                                                                                                                                                       |
| original   | gldm          | LargeDependenceLowGrayLevelEmphasis  | 0.052213157                                                                                                                                                                                                                                                                                                                                                                                                                               |
| original   | gldm          | DependenceVariance                   | 1.607756233                                                                                                                                                                                                                                                                                                                                                                                                                               |
| original   | gldm          | LargeDependenceHighGrayLevelEmphasis | 3118.45614                                                                                                                                                                                                                                                                                                                                                                                                                                |
| original   | gldm          | SmallDependenceLowGrayLevelEmphasis  | 0.024079845                                                                                                                                                                                                                                                                                                                                                                                                                               |
| original   | gldm          | LowGrayLevelEmphasis                 | 0.028597083                                                                                                                                                                                                                                                                                                                                                                                                                               |
| original   | glcm          | JointAverage                         | 19.37451922                                                                                                                                                                                                                                                                                                                                                                                                                               |

|          |            |                                  |              |
|----------|------------|----------------------------------|--------------|
| original | glcm       | SumAverage                       | 38.74903844  |
| original | glcm       | JointEntropy                     | 8.010715874  |
| original | glcm       | ClusterShade                     | -427.5825814 |
| original | glcm       | MaximumProbability               | 0.013253403  |
| original | glcm       | Idmn                             | 0.931418848  |
| original | glcm       | JointEnergy                      | 0.004352648  |
| original | glcm       | Contrast                         | 84.99715634  |
| original | glcm       | DifferenceEntropy                | 4.161007392  |
| original | glcm       | InverseVariance                  | 0.139720413  |
| original | glcm       | DifferenceVariance               | 29.48408129  |
| original | glcm       | Idn                              | 0.829184448  |
| original | glcm       | Idm                              | 0.140597978  |
| original | glcm       | Correlation                      | 0.322185046  |
| original | glcm       | Autocorrelation                  | 395.2069702  |
| original | glcm       | SumEntropy                       | 5.413877863  |
| original | glcm       | SumSquares                       | 62.24742063  |
| original | glcm       | ClusterProminence                | 64455.39293  |
| original | glcm       | Imc2                             | 0.979736661  |
| original | glcm       | Imc1                             | -0.33563435  |
| original | glcm       | DifferenceAverage                | 7.325794673  |
| original | glcm       | Id                               | 0.226053546  |
| original | glcm       | ClusterTendency                  | 163.9925262  |
| original | firstorder | InterquartileRange               | 350          |
| original | firstorder | Skewness                         | -0.11114576  |
| original | firstorder | Uniformity                       | 0.035986457  |
| original | firstorder | Median                           | -306         |
| original | firstorder | Energy                           | 40584082     |
| original | firstorder | RobustMeanAbsoluteDeviation      | 136.1508926  |
| original | firstorder | MeanAbsoluteDeviation            | 174.9500769  |
| original | firstorder | TotalEnergy                      | 1095770214   |
| original | firstorder | Maximum                          | 39           |
| original | firstorder | RootMeanSquared                  | 377.3596265  |
| original | firstorder | 90Percentile                     | -33.6        |
| original | firstorder | Minimum                          | -743         |
| original | firstorder | Entropy                          | 4.875271191  |
| original | firstorder | Range                            | 782          |
| original | firstorder | Variance                         | 41922.41022  |
| original | firstorder | 10Percentile                     | -582         |
| original | firstorder | Kurtosis                         | 1.989002593  |
| original | firstorder | Mean                             | -316.9824561 |
| original | glrlm      | ShortRunLowGrayLevelEmphasis     | 0.029202431  |
| original | glrlm      | GrayLevelVariance                | 66.40938505  |
| original | glrlm      | LowGrayLevelRunEmphasis          | 0.029408091  |
| original | glrlm      | GrayLevelNonUniformityNormalized | 0.035975924  |
| original | glrlm      | RunVariance                      | 0.041488708  |
| original | glrlm      | GrayLevelNonUniformity           | 9.879572216  |
| original | glrlm      | LongRunEmphasis                  | 1.119451236  |
| original | glrlm      | ShortRunHighGrayLevelEmphasis    | 363.8957599  |
| original | glrlm      | RunLengthNonUniformity           | 255.989205   |
| original | glrlm      | ShortRunEmphasis                 | 0.972991124  |
| original | glrlm      | LongRunHighGrayLevelEmphasis     | 444.5199521  |
| original | glrlm      | RunPercentage                    | 0.963562753  |
| original | glrlm      | LongRunLowGrayLevelEmphasis      | 0.030255071  |
| original | glrlm      | RunEntropy                       | 5.026023168  |
| original | glrlm      | HighGrayLevelRunEmphasis         | 378.4498401  |

|             |       |                                      |              |
|-------------|-------|--------------------------------------|--------------|
| original    | glrlm | RunLengthNonUniformityNormalized     | 0.931720465  |
| original    | glszm | GrayLevelVariance                    | 64.73418892  |
| original    | glszm | ZoneVariance                         | 1.711325009  |
| original    | glszm | GrayLevelNonUniformityNormalized     | 0.036709446  |
| original    | glszm | SizeZoneNonUniformityNormalized      | 0.577465603  |
| original    | glszm | SizeZoneNonUniformity                | 107.4086022  |
| original    | glszm | GrayLevelNonUniformity               | 6.827956989  |
| original    | glszm | LargeAreaEmphasis                    | 4.059139785  |
| original    | glszm | SmallAreaHighGrayLevelEmphasis       | 258.719697   |
| original    | glszm | ZonePercentage                       | 0.652631579  |
| original    | glszm | LargeAreaLowGrayLevelEmphasis        | 0.056222888  |
| original    | glszm | LargeAreaHighGrayLevelEmphasis       | 2130.225806  |
| original    | glszm | HighGrayLevelZoneEmphasis            | 333.6236559  |
| original    | glszm | SmallAreaEmphasis                    | 0.787914717  |
| original    | glszm | LowGrayLevelZoneEmphasis             | 0.038972691  |
| original    | glszm | ZoneEntropy                          | 5.681925565  |
| original    | glszm | SmallAreaLowGrayLevelEmphasis        | 0.035790611  |
| original    | ngtdm | Coarseness                           | 0.019819568  |
| original    | ngtdm | Complexity                           | 1893.992043  |
| original    | ngtdm | Strength                             | 6.581884746  |
| original    | ngtdm | Contrast                             | 0.708598667  |
| original    | ngtdm | Busyness                             | 0.118715147  |
| wavelet-HHH | gldm  | GrayLevelVariance                    | 3.751726685  |
| wavelet-HHH | gldm  | HighGrayLevelEmphasis                | 59.92280702  |
| wavelet-HHH | gldm  | DependenceEntropy                    | 5.339686826  |
| wavelet-HHH | gldm  | DependenceNonUniformity              | 48.12982456  |
| wavelet-HHH | gldm  | GrayLevelNonUniformity               | 42.73333333  |
| wavelet-HHH | gldm  | SmallDependenceEmphasis              | 0.230785382  |
| wavelet-HHH | gldm  | SmallDependenceHighGrayLevelEmphasis | 15.51706349  |
| wavelet-HHH | gldm  | DependenceNonUniformityNormalized    | 0.168876577  |
| wavelet-HHH | gldm  | LargeDependenceEmphasis              | 14.74736842  |
| wavelet-HHH | gldm  | LargeDependenceLowGrayLevelEmphasis  | 0.305423622  |
| wavelet-HHH | gldm  | DependenceVariance                   | 3.187368421  |
| wavelet-HHH | gldm  | LargeDependenceHighGrayLevelEmphasis | 846.4421053  |
| wavelet-HHH | gldm  | SmallDependenceLowGrayLevelEmphasis  | 0.008959699  |
| wavelet-HHH | gldm  | LowGrayLevelEmphasis                 | 0.025542398  |
| wavelet-HHH | glcm  | JointAverage                         | 7.513996365  |
| wavelet-HHH | glcm  | SumAverage                           | 15.02799273  |
| wavelet-HHH | glcm  | JointEntropy                         | 5.698127116  |
| wavelet-HHH | glcm  | ClusterShade                         | 1.441205345  |
| wavelet-HHH | glcm  | MaximumProbability                   | 0.055189059  |
| wavelet-HHH | glcm  | Idmn                                 | 0.95813446   |
| wavelet-HHH | glcm  | JointEnergy                          | 0.024130182  |
| wavelet-HHH | glcm  | Contrast                             | 7.982929259  |
| wavelet-HHH | glcm  | DifferenceEntropy                    | 2.642130832  |
| wavelet-HHH | glcm  | InverseVariance                      | 0.345570768  |
| wavelet-HHH | glcm  | DifferenceVariance                   | 2.927851129  |
| wavelet-HHH | glcm  | Idn                                  | 0.86385332   |
| wavelet-HHH | glcm  | Idm                                  | 0.344532595  |
| wavelet-HHH | glcm  | Correlation                          | -0.046927356 |
| wavelet-HHH | glcm  | Autocorrelation                      | 56.28830546  |
| wavelet-HHH | glcm  | SumEntropy                           | 3.391202292  |
| wavelet-HHH | glcm  | SumSquares                           | 3.819187638  |
| wavelet-HHH | glcm  | ClusterProminence                    | 156.6436855  |
| wavelet-HHH | glcm  | Imc2                                 | 0.610333509  |

|             |            |                                  |              |
|-------------|------------|----------------------------------|--------------|
| wavelet-HHH | glcm       | Imc1                             | -0.079876785 |
| wavelet-HHH | glcm       | DifferenceAverage                | 2.231871331  |
| wavelet-HHH | glcm       | Id                               | 0.425580407  |
| wavelet-HHH | glcm       | ClusterTendency                  | 7.293821293  |
| wavelet-HHH | firstorder | InterquartileRange               | 59.5657757   |
| wavelet-HHH | firstorder | Skewness                         | 0.043504184  |
| wavelet-HHH | firstorder | Uniformity                       | 0.14994152   |
| wavelet-HHH | firstorder | Median                           | 0.783785521  |
| wavelet-HHH | firstorder | Energy                           | 642447.0457  |
| wavelet-HHH | firstorder | RobustMeanAbsoluteDeviation      | 25.05931977  |
| wavelet-HHH | firstorder | MeanAbsoluteDeviation            | 37.1229389   |
| wavelet-HHH | firstorder | TotalEnergy                      | 17346070.23  |
| wavelet-HHH | firstorder | Maximum                          | 129.4494087  |
| wavelet-HHH | firstorder | RootMeanSquared                  | 47.47841784  |
| wavelet-HHH | firstorder | 90Percentile                     | 60.37577838  |
| wavelet-HHH | firstorder | Minimum                          | -153.9748087 |
| wavelet-HHH | firstorder | Entropy                          | 2.957467035  |
| wavelet-HHH | firstorder | Range                            | 283.4242174  |
| wavelet-HHH | firstorder | Variance                         | 2254.162913  |
| wavelet-HHH | firstorder | 10Percentile                     | -62.48988125 |
| wavelet-HHH | firstorder | Kurtosis                         | 3.027822763  |
| wavelet-HHH | firstorder | Mean                             | -0.192994304 |
| wavelet-HHH | glrlm      | ShortRunLowGrayLevelEmphasis     | 0.024527353  |
| wavelet-HHH | glrlm      | GrayLevelVariance                | 3.913989969  |
| wavelet-HHH | glrlm      | LowGrayLevelRunEmphasis          | 0.02603721   |
| wavelet-HHH | glrlm      | GrayLevelNonUniformityNormalized | 0.145571914  |
| wavelet-HHH | glrlm      | RunVariance                      | 0.105103915  |
| wavelet-HHH | glrlm      | GrayLevelNonUniformity           | 37.65727617  |
| wavelet-HHH | glrlm      | LongRunEmphasis                  | 1.321140168  |
| wavelet-HHH | glrlm      | ShortRunHighGrayLevelEmphasis    | 55.9816016   |
| wavelet-HHH | glrlm      | RunLengthNonUniformity           | 214.0147713  |
| wavelet-HHH | glrlm      | ShortRunEmphasis                 | 0.9271559    |
| wavelet-HHH | glrlm      | LongRunHighGrayLevelEmphasis     | 78.61114183  |
| wavelet-HHH | glrlm      | RunPercentage                    | 0.907692308  |
| wavelet-HHH | glrlm      | LongRunLowGrayLevelEmphasis      | 0.03268095   |
| wavelet-HHH | glrlm      | RunEntropy                       | 3.423770046  |
| wavelet-HHH | glrlm      | HighGrayLevelRunEmphasis         | 60.17369907  |
| wavelet-HHH | glrlm      | RunLengthNonUniformityNormalized | 0.826352085  |
| wavelet-HHH | glszm      | GrayLevelVariance                | 7.05315097   |
| wavelet-HHH | glszm      | ZoneVariance                     | 40.42434211  |
| wavelet-HHH | glszm      | GrayLevelNonUniformityNormalized | 0.108033241  |
| wavelet-HHH | glszm      | SizeZoneNonUniformityNormalized  | 0.278739612  |
| wavelet-HHH | glszm      | SizeZoneNonUniformity            | 21.18421053  |
| wavelet-HHH | glszm      | GrayLevelNonUniformity           | 8.210526316  |
| wavelet-HHH | glszm      | LargeAreaEmphasis                | 54.48684211  |
| wavelet-HHH | glszm      | SmallAreaHighGrayLevelEmphasis   | 39.61455398  |
| wavelet-HHH | glszm      | ZonePercentage                   | 0.266666667  |
| wavelet-HHH | glszm      | LargeAreaLowGrayLevelEmphasis    | 1.041879365  |
| wavelet-HHH | glszm      | LargeAreaHighGrayLevelEmphasis   | 3182.921053  |
| wavelet-HHH | glszm      | HighGrayLevelZoneEmphasis        | 66.30263158  |
| wavelet-HHH | glszm      | SmallAreaEmphasis                | 0.542042958  |
| wavelet-HHH | glszm      | LowGrayLevelZoneEmphasis         | 0.037226856  |
| wavelet-HHH | glszm      | ZoneEntropy                      | 5.159387304  |
| wavelet-HHH | glszm      | SmallAreaLowGrayLevelEmphasis    | 0.026135132  |
| wavelet-HHH | ngtdm      | Coarseness                       | 0.020619757  |



|             |            |                                      |              |
|-------------|------------|--------------------------------------|--------------|
| wavelet-HHH | ngtdm      | Complexity                           | 96.27116132  |
| wavelet-HHH | ngtdm      | Strength                             | 0.850652715  |
| wavelet-HHH | ngtdm      | Contrast                             | 0.093793545  |
| wavelet-HHH | ngtdm      | Busyness                             | 0.535475563  |
| wavelet-HLL | gldm       | GrayLevelVariance                    | 66.58676516  |
| wavelet-HLL | gldm       | HighGrayLevelEmphasis                | 396.9333333  |
| wavelet-HLL | gldm       | DependenceEntropy                    | 6.202334193  |
| wavelet-HLL | gldm       | DependenceNonUniformity              | 102.8596491  |
| wavelet-HLL | gldm       | GrayLevelNonUniformity               | 10.4877193   |
| wavelet-HLL | gldm       | SmallDependenceEmphasis              | 0.583876218  |
| wavelet-HLL | gldm       | SmallDependenceHighGrayLevelEmphasis | 244.899501   |
| wavelet-HLL | gldm       | DependenceNonUniformityNormalized    | 0.36091105   |
| wavelet-HLL | gldm       | LargeDependenceEmphasis              | 3.98245614   |
| wavelet-HLL | gldm       | LargeDependenceLowGrayLevelEmphasis  | 0.056838422  |
| wavelet-HLL | gldm       | DependenceVariance                   | 0.842720837  |
| wavelet-HLL | gldm       | LargeDependenceHighGrayLevelEmphasis | 1653.445614  |
| wavelet-HLL | gldm       | SmallDependenceLowGrayLevelEmphasis  | 0.009907378  |
| wavelet-HLL | gldm       | LowGrayLevelEmphasis                 | 0.016981814  |
| wavelet-HLL | glcm       | JointAverage                         | 18.34166083  |
| wavelet-HLL | glcm       | SumAverage                           | 36.68332166  |
| wavelet-HLL | glcm       | JointEntropy                         | 8.027407585  |
| wavelet-HLL | glcm       | ClusterShade                         | 26.62837367  |
| wavelet-HLL | glcm       | MaximumProbability                   | 0.011928198  |
| wavelet-HLL | glcm       | Idmn                                 | 0.953466006  |
| wavelet-HLL | glcm       | JointEnergy                          | 0.004270643  |
| wavelet-HLL | glcm       | Contrast                             | 103.6140842  |
| wavelet-HLL | glcm       | DifferenceEntropy                    | 4.133533677  |
| wavelet-HLL | glcm       | InverseVariance                      | 0.138075268  |
| wavelet-HLL | glcm       | DifferenceVariance                   | 39.41292016  |
| wavelet-HLL | glcm       | Idn                                  | 0.861490758  |
| wavelet-HLL | glcm       | Idm                                  | 0.13099661   |
| wavelet-HLL | glcm       | Correlation                          | 0.266308805  |
| wavelet-HLL | glcm       | Autocorrelation                      | 355.6955933  |
| wavelet-HLL | glcm       | SumEntropy                           | 5.432448012  |
| wavelet-HLL | glcm       | SumSquares                           | 71.03654969  |
| wavelet-HLL | glcm       | ClusterProminence                    | 97081.80282  |
| wavelet-HLL | glcm       | Imc2                                 | 0.988710008  |
| wavelet-HLL | glcm       | Imc1                                 | -0.384762362 |
| wavelet-HLL | glcm       | DifferenceAverage                    | 7.670164454  |
| wavelet-HLL | glcm       | Id                                   | 0.218998536  |
| wavelet-HLL | glcm       | ClusterTendency                      | 180.5321146  |
| wavelet-HLL | firstorder | InterquartileRange                   | 273.1591492  |
| wavelet-HLL | firstorder | Skewness                             | 0.143592617  |
| wavelet-HLL | firstorder | Uniformity                           | 0.036799015  |
| wavelet-HLL | firstorder | Median                               | -28.50764189 |
| wavelet-HLL | firstorder | Energy                               | 12191003.12  |
| wavelet-HLL | firstorder | RobustMeanAbsoluteDeviation          | 114.5801189  |
| wavelet-HLL | firstorder | MeanAbsoluteDeviation                | 163.3260591  |
| wavelet-HLL | firstorder | TotalEnergy                          | 329157084.2  |
| wavelet-HLL | firstorder | Maximum                              | 587.1795205  |
| wavelet-HLL | firstorder | RootMeanSquared                      | 206.8222656  |
| wavelet-HLL | firstorder | 90Percentile                         | 208.0332893  |
| wavelet-HLL | firstorder | Minimum                              | -464.3567435 |
| wavelet-HLL | firstorder | Entropy                              | 4.945208891  |
| wavelet-HLL | firstorder | Range                                | 1051.536264  |

|             |            |                                      |              |
|-------------|------------|--------------------------------------|--------------|
| wavelet-HLL | firstorder | Variance                             | 41671.78734  |
| wavelet-HLL | firstorder | 10Percentile                         | -302.595624  |
| wavelet-HLL | firstorder | Kurtosis                             | 2.972550189  |
| wavelet-HLL | firstorder | Mean                                 | -33.22141166 |
| wavelet-HLL | glrlm      | ShortRunLowGrayLevelEmphasis         | 0.016689933  |
| wavelet-HLL | glrlm      | GrayLevelVariance                    | 67.07784929  |
| wavelet-HLL | glrlm      | LowGrayLevelRunEmphasis              | 0.017039752  |
| wavelet-HLL | glrlm      | GrayLevelNonUniformityNormalized     | 0.036654567  |
| wavelet-HLL | glrlm      | RunVariance                          | 0.031375684  |
| wavelet-HLL | glrlm      | GrayLevelNonUniformity               | 10.13705227  |
| wavelet-HLL | glrlm      | LongRunEmphasis                      | 1.095217025  |
| wavelet-HLL | glrlm      | ShortRunHighGrayLevelEmphasis        | 387.8649709  |
| wavelet-HLL | glrlm      | RunLengthNonUniformity               | 260.7691755  |
| wavelet-HLL | glrlm      | ShortRunEmphasis                     | 0.977193449  |
| wavelet-HLL | glrlm      | LongRunHighGrayLevelEmphasis         | 434.5774263  |
| wavelet-HLL | glrlm      | RunPercentage                        | 0.970310391  |
| wavelet-HLL | glrlm      | LongRunLowGrayLevelEmphasis          | 0.018463334  |
| wavelet-HLL | glrlm      | RunEntropy                           | 5.077215447  |
| wavelet-HLL | glrlm      | HighGrayLevelRunEmphasis             | 396.9461962  |
| wavelet-HLL | glrlm      | RunLengthNonUniformityNormalized     | 0.942112154  |
| wavelet-HLL | glszm      | GrayLevelVariance                    | 74.50442696  |
| wavelet-HLL | glszm      | ZoneVariance                         | 0.982922617  |
| wavelet-HLL | glszm      | GrayLevelNonUniformityNormalized     | 0.035223815  |
| wavelet-HLL | glszm      | SizeZoneNonUniformityNormalized      | 0.552040788  |
| wavelet-HLL | glszm      | SizeZoneNonUniformity                | 105.4397906  |
| wavelet-HLL | glszm      | GrayLevelNonUniformity               | 6.727748691  |
| wavelet-HLL | glszm      | LargeAreaEmphasis                    | 3.209424084  |
| wavelet-HLL | glszm      | SmallAreaHighGrayLevelEmphasis       | 332.2326571  |
| wavelet-HLL | glszm      | ZonePercentage                       | 0.670175439  |
| wavelet-HLL | glszm      | LargeAreaLowGrayLevelEmphasis        | 0.052600587  |
| wavelet-HLL | glszm      | LargeAreaHighGrayLevelEmphasis       | 1258.209424  |
| wavelet-HLL | glszm      | HighGrayLevelZoneEmphasis            | 411.8324607  |
| wavelet-HLL | glszm      | SmallAreaEmphasis                    | 0.771192465  |
| wavelet-HLL | glszm      | LowGrayLevelZoneEmphasis             | 0.016935041  |
| wavelet-HLL | glszm      | ZoneEntropy                          | 5.939110188  |
| wavelet-HLL | glszm      | SmallAreaLowGrayLevelEmphasis        | 0.012859255  |
| wavelet-HLL | ngtdm      | Coarseness                           | 0.024253518  |
| wavelet-HLL | ngtdm      | Complexity                           | 3088.742912  |
| wavelet-HLL | ngtdm      | Strength                             | 12.77266745  |
| wavelet-HLL | ngtdm      | Contrast                             | 0.420214311  |
| wavelet-HLL | ngtdm      | Busyness                             | 0.063117011  |
| wavelet-LHL | gldm       | GrayLevelVariance                    | 28.37998153  |
| wavelet-LHL | gldm       | HighGrayLevelEmphasis                | 266.8385965  |
| wavelet-LHL | gldm       | DependenceEntropy                    | 5.910777758  |
| wavelet-LHL | gldm       | DependenceNonUniformity              | 85.66666667  |
| wavelet-LHL | gldm       | GrayLevelNonUniformity               | 15.40701754  |
| wavelet-LHL | gldm       | SmallDependenceEmphasis              | 0.506006823  |
| wavelet-LHL | gldm       | SmallDependenceHighGrayLevelEmphasis | 141.7112817  |
| wavelet-LHL | gldm       | DependenceNonUniformityNormalized    | 0.300584795  |
| wavelet-LHL | gldm       | LargeDependenceEmphasis              | 5.070175439  |
| wavelet-LHL | gldm       | LargeDependenceLowGrayLevelEmphasis  | 0.035161177  |
| wavelet-LHL | gldm       | DependenceVariance                   | 1.056128039  |
| wavelet-LHL | gldm       | LargeDependenceHighGrayLevelEmphasis | 1286.214035  |
| wavelet-LHL | gldm       | SmallDependenceLowGrayLevelEmphasis  | 0.008609521  |
| wavelet-LHL | gldm       | LowGrayLevelEmphasis                 | 0.011846821  |

|             |            |                                  |              |
|-------------|------------|----------------------------------|--------------|
| wavelet-LHL | glcm       | JointAverage                     | 15.13647702  |
| wavelet-LHL | glcm       | SumAverage                       | 30.27295405  |
| wavelet-LHL | glcm       | JointEntropy                     | 7.586929534  |
| wavelet-LHL | glcm       | ClusterShade                     | 128.9509535  |
| wavelet-LHL | glcm       | MaximumProbability               | 0.015596387  |
| wavelet-LHL | glcm       | Idmn                             | 0.956510166  |
| wavelet-LHL | glcm       | JointEnergy                      | 0.006083709  |
| wavelet-LHL | glcm       | Contrast                         | 43.54036373  |
| wavelet-LHL | glcm       | DifferenceEntropy                | 3.623983755  |
| wavelet-LHL | glcm       | InverseVariance                  | 0.214273217  |
| wavelet-LHL | glcm       | DifferenceVariance               | 17.33191227  |
| wavelet-LHL | glcm       | Idn                              | 0.865655314  |
| wavelet-LHL | glcm       | Idm                              | 0.188549779  |
| wavelet-LHL | glcm       | Correlation                      | 0.245976323  |
| wavelet-LHL | glcm       | Autocorrelation                  | 236.4772581  |
| wavelet-LHL | glcm       | SumEntropy                       | 4.887622097  |
| wavelet-LHL | glcm       | SumSquares                       | 29.06886365  |
| wavelet-LHL | glcm       | ClusterProminence                | 15837.52189  |
| wavelet-LHL | glcm       | Imc2                             | 0.955074342  |
| wavelet-LHL | glcm       | Imc1                             | -0.279780387 |
| wavelet-LHL | glcm       | DifferenceAverage                | 4.97579272   |
| wavelet-LHL | glcm       | Id                               | 0.28068255   |
| wavelet-LHL | glcm       | ClusterTendency                  | 72.73509089  |
| wavelet-LHL | firstorder | InterquartileRange               | 182.6294714  |
| wavelet-LHL | firstorder | Skewness                         | -0.066583428 |
| wavelet-LHL | firstorder | Uniformity                       | 0.054059711  |
| wavelet-LHL | firstorder | Median                           | -25.12281992 |
| wavelet-LHL | firstorder | Energy                           | 5253737.478  |
| wavelet-LHL | firstorder | RobustMeanAbsoluteDeviation      | 75.67247825  |
| wavelet-LHL | firstorder | MeanAbsoluteDeviation            | 107.5778347  |
| wavelet-LHL | firstorder | TotalEnergy                      | 141850911.9  |
| wavelet-LHL | firstorder | Maximum                          | 320.758313   |
| wavelet-LHL | firstorder | RootMeanSquared                  | 135.772481   |
| wavelet-LHL | firstorder | 90Percentile                     | 152.5243307  |
| wavelet-LHL | firstorder | Minimum                          | -383.7523664 |
| wavelet-LHL | firstorder | Entropy                          | 4.407865603  |
| wavelet-LHL | firstorder | Range                            | 704.5106794  |
| wavelet-LHL | firstorder | Variance                         | 17765.47032  |
| wavelet-LHL | firstorder | 10Percentile                     | -195.7163477 |
| wavelet-LHL | firstorder | Kurtosis                         | 2.695787738  |
| wavelet-LHL | firstorder | Mean                             | -25.85916212 |
| wavelet-LHL | glrlm      | ShortRunLowGrayLevelEmphasis     | 0.011904091  |
| wavelet-LHL | glrlm      | GrayLevelVariance                | 28.81550924  |
| wavelet-LHL | glrlm      | LowGrayLevelRunEmphasis          | 0.012081658  |
| wavelet-LHL | glrlm      | GrayLevelNonUniformityNormalized | 0.053654716  |
| wavelet-LHL | glrlm      | RunVariance                      | 0.041901897  |
| wavelet-LHL | glrlm      | GrayLevelNonUniformity           | 14.70165683  |
| wavelet-LHL | glrlm      | LongRunEmphasis                  | 1.124283012  |
| wavelet-LHL | glrlm      | ShortRunHighGrayLevelEmphasis    | 260.139367   |
| wavelet-LHL | glrlm      | RunLengthNonUniformity           | 253.7781553  |
| wavelet-LHL | glrlm      | ShortRunEmphasis                 | 0.970810205  |
| wavelet-LHL | glrlm      | LongRunHighGrayLevelEmphasis     | 298.8694415  |
| wavelet-LHL | glrlm      | RunPercentage                    | 0.961403509  |
| wavelet-LHL | glrlm      | LongRunLowGrayLevelEmphasis      | 0.012823689  |
| wavelet-LHL | glrlm      | RunEntropy                       | 4.601863962  |

|             |       |                                      |              |
|-------------|-------|--------------------------------------|--------------|
| wavelet-LHL | glrlm | HighGrayLevelRunEmphasis             | 267.4467105  |
| wavelet-LHL | glrlm | RunLengthNonUniformityNormalized     | 0.925928979  |
| wavelet-LHL | glszm | GrayLevelVariance                    | 35.338162    |
| wavelet-LHL | glszm | ZoneVariance                         | 1.752232063  |
| wavelet-LHL | glszm | GrayLevelNonUniformityNormalized     | 0.04872889   |
| wavelet-LHL | glszm | SizeZoneNonUniformityNormalized      | 0.500089641  |
| wavelet-LHL | glszm | SizeZoneNonUniformity                | 83.51497006  |
| wavelet-LHL | glszm | GrayLevelNonUniformity               | 8.137724551  |
| wavelet-LHL | glszm | LargeAreaEmphasis                    | 4.664670659  |
| wavelet-LHL | glszm | SmallAreaHighGrayLevelEmphasis       | 209.6778654  |
| wavelet-LHL | glszm | ZonePercentage                       | 0.585964912  |
| wavelet-LHL | glszm | LargeAreaLowGrayLevelEmphasis        | 0.037297008  |
| wavelet-LHL | glszm | LargeAreaHighGrayLevelEmphasis       | 1163.383234  |
| wavelet-LHL | glszm | HighGrayLevelZoneEmphasis            | 279.2215569  |
| wavelet-LHL | glszm | SmallAreaEmphasis                    | 0.733862174  |
| wavelet-LHL | glszm | LowGrayLevelZoneEmphasis             | 0.015751653  |
| wavelet-LHL | glszm | ZoneEntropy                          | 5.603045699  |
| wavelet-LHL | glszm | SmallAreaLowGrayLevelEmphasis        | 0.013804181  |
| wavelet-LHL | ngtdm | Coarseness                           | 0.022928954  |
| wavelet-LHL | ngtdm | Complexity                           | 1121.416969  |
| wavelet-LHL | ngtdm | Strength                             | 5.576477541  |
| wavelet-LHL | ngtdm | Contrast                             | 0.251465245  |
| wavelet-LHL | ngtdm | Busyness                             | 0.103257287  |
| wavelet-LHH | gldm  | GrayLevelVariance                    | 9.243139428  |
| wavelet-LHH | gldm  | HighGrayLevelEmphasis                | 98.39649123  |
| wavelet-LHH | gldm  | DependenceEntropy                    | 5.549070508  |
| wavelet-LHH | gldm  | DependenceNonUniformity              | 58.13684211  |
| wavelet-LHH | gldm  | GrayLevelNonUniformity               | 29.42105263  |
| wavelet-LHH | gldm  | SmallDependenceEmphasis              | 0.371072976  |
| wavelet-LHH | gldm  | SmallDependenceHighGrayLevelEmphasis | 40.15067575  |
| wavelet-LHH | gldm  | DependenceNonUniformityNormalized    | 0.20398892   |
| wavelet-LHH | gldm  | LargeDependenceEmphasis              | 12.2         |
| wavelet-LHH | gldm  | LargeDependenceLowGrayLevelEmphasis  | 0.177956309  |
| wavelet-LHH | gldm  | DependenceVariance                   | 4.062493075  |
| wavelet-LHH | gldm  | LargeDependenceHighGrayLevelEmphasis | 1104.207018  |
| wavelet-LHH | gldm  | SmallDependenceLowGrayLevelEmphasis  | 0.010516571  |
| wavelet-LHH | gldm  | LowGrayLevelEmphasis                 | 0.022575183  |
| wavelet-LHH | glcm  | JointAverage                         | 9.470332357  |
| wavelet-LHH | glcm  | SumAverage                           | 18.94066471  |
| wavelet-LHH | glcm  | JointEntropy                         | 6.656303625  |
| wavelet-LHH | glcm  | ClusterShade                         | -0.38811868  |
| wavelet-LHH | glcm  | MaximumProbability                   | 0.04712928   |
| wavelet-LHH | glcm  | Idmn                                 | 0.952244018  |
| wavelet-LHH | glcm  | JointEnergy                          | 0.014162305  |
| wavelet-LHH | glcm  | Contrast                             | 20.439459    |
| wavelet-LHH | glcm  | DifferenceEntropy                    | 3.209052635  |
| wavelet-LHH | glcm  | InverseVariance                      | 0.274191097  |
| wavelet-LHH | glcm  | DifferenceVariance                   | 8.246491137  |
| wavelet-LHH | glcm  | Idn                                  | 0.860294053  |
| wavelet-LHH | glcm  | Idm                                  | 0.270566125  |
| wavelet-LHH | glcm  | Correlation                          | -0.016562806 |
| wavelet-LHH | glcm  | Autocorrelation                      | 89.49452551  |
| wavelet-LHH | glcm  | SumEntropy                           | 4.044805788  |
| wavelet-LHH | glcm  | SumSquares                           | 10.02299412  |
| wavelet-LHH | glcm  | ClusterProminence                    | 1414.241401  |

|             |            |                                  |              |
|-------------|------------|----------------------------------|--------------|
| wavelet-LHH | glcm       | Imc2                             | 0.832043573  |
| wavelet-LHH | glcm       | Imc1                             | -0.165086354 |
| wavelet-LHH | glcm       | DifferenceAverage                | 3.427448394  |
| wavelet-LHH | glcm       | Id                               | 0.357014913  |
| wavelet-LHH | glcm       | ClusterTendency                  | 19.65251749  |
| wavelet-LHH | firstorder | InterquartileRange               | 80.81561198  |
| wavelet-LHH | firstorder | Skewness                         | 0.078645914  |
| wavelet-LHH | firstorder | Uniformity                       | 0.103231764  |
| wavelet-LHH | firstorder | Median                           | -2.9316811   |
| wavelet-LHH | firstorder | Energy                           | 1631463.62   |
| wavelet-LHH | firstorder | RobustMeanAbsoluteDeviation      | 36.93678973  |
| wavelet-LHH | firstorder | MeanAbsoluteDeviation            | 57.32254665  |
| wavelet-LHH | firstorder | TotalEnergy                      | 44049517.74  |
| wavelet-LHH | firstorder | Maximum                          | 236.2282851  |
| wavelet-LHH | firstorder | RootMeanSquared                  | 75.6599878   |
| wavelet-LHH | firstorder | 90Percentile                     | 98.98303918  |
| wavelet-LHH | firstorder | Minimum                          | -208.8349773 |
| wavelet-LHH | firstorder | Entropy                          | 3.592067965  |
| wavelet-LHH | firstorder | Range                            | 445.0632624  |
| wavelet-LHH | firstorder | Variance                         | 5720.696456  |
| wavelet-LHH | firstorder | 10Percentile                     | -96.30569335 |
| wavelet-LHH | firstorder | Kurtosis                         | 3.323714213  |
| wavelet-LHH | firstorder | Mean                             | -1.933209393 |
| wavelet-LHH | glrlm      | ShortRunLowGrayLevelEmphasis     | 0.022242073  |
| wavelet-LHH | glrlm      | GrayLevelVariance                | 9.67600934   |
| wavelet-LHH | glrlm      | LowGrayLevelRunEmphasis          | 0.023107946  |
| wavelet-LHH | glrlm      | GrayLevelNonUniformityNormalized | 0.098100685  |
| wavelet-LHH | glrlm      | RunVariance                      | 0.086075831  |
| wavelet-LHH | glrlm      | GrayLevelNonUniformity           | 25.97280725  |
| wavelet-LHH | glrlm      | LongRunEmphasis                  | 1.248439802  |
| wavelet-LHH | glrlm      | ShortRunHighGrayLevelEmphasis    | 93.99005943  |
| wavelet-LHH | glrlm      | RunLengthNonUniformity           | 230.3646874  |
| wavelet-LHH | glrlm      | ShortRunEmphasis                 | 0.946013606  |
| wavelet-LHH | glrlm      | LongRunHighGrayLevelEmphasis     | 121.6037408  |
| wavelet-LHH | glrlm      | RunPercentage                    | 0.928744939  |
| wavelet-LHH | glrlm      | LongRunLowGrayLevelEmphasis      | 0.026949653  |
| wavelet-LHH | glrlm      | RunEntropy                       | 3.952840986  |
| wavelet-LHH | glrlm      | HighGrayLevelRunEmphasis         | 98.93684565  |
| wavelet-LHH | glrlm      | RunLengthNonUniformityNormalized | 0.868952603  |
| wavelet-LHH | glszm      | GrayLevelVariance                | 14.697856    |
| wavelet-LHH | glszm      | ZoneVariance                     | 12.3456      |
| wavelet-LHH | glszm      | GrayLevelNonUniformityNormalized | 0.079424     |
| wavelet-LHH | glszm      | SizeZoneNonUniformityNormalized  | 0.4272       |
| wavelet-LHH | glszm      | SizeZoneNonUniformity            | 53.4         |
| wavelet-LHH | glszm      | GrayLevelNonUniformity           | 9.928        |
| wavelet-LHH | glszm      | LargeAreaEmphasis                | 17.544       |
| wavelet-LHH | glszm      | SmallAreaHighGrayLevelEmphasis   | 75.57814339  |
| wavelet-LHH | glszm      | ZonePercentage                   | 0.438596491  |
| wavelet-LHH | glszm      | LargeAreaLowGrayLevelEmphasis    | 0.240028519  |
| wavelet-LHH | glszm      | LargeAreaHighGrayLevelEmphasis   | 1633.56      |
| wavelet-LHH | glszm      | HighGrayLevelZoneEmphasis        | 105.176      |
| wavelet-LHH | glszm      | SmallAreaEmphasis                | 0.677760611  |
| wavelet-LHH | glszm      | LowGrayLevelZoneEmphasis         | 0.029220015  |
| wavelet-LHH | glszm      | ZoneEntropy                      | 5.102282031  |
| wavelet-LHH | glszm      | SmallAreaLowGrayLevelEmphasis    | 0.020467912  |

|             |            |                                      |              |
|-------------|------------|--------------------------------------|--------------|
| wavelet-LHH | ngtdm      | Coarseness                           | 0.023928624  |
| wavelet-LHH | ngtdm      | Complexity                           | 283.451124   |
| wavelet-LHH | ngtdm      | Strength                             | 1.962644721  |
| wavelet-LHH | ngtdm      | Contrast                             | 0.144521281  |
| wavelet-LHH | ngtdm      | Busyness                             | 0.241052852  |
| wavelet-LLH | gldm       | GrayLevelVariance                    | 45.09675592  |
| wavelet-LLH | gldm       | HighGrayLevelEmphasis                | 772.0140351  |
| wavelet-LLH | gldm       | DependenceEntropy                    | 5.953313856  |
| wavelet-LLH | gldm       | DependenceNonUniformity              | 96.34035088  |
| wavelet-LLH | gldm       | GrayLevelNonUniformity               | 13.49824561  |
| wavelet-LLH | gldm       | SmallDependenceEmphasis              | 0.533109162  |
| wavelet-LLH | gldm       | SmallDependenceHighGrayLevelEmphasis | 427.5588567  |
| wavelet-LLH | gldm       | DependenceNonUniformityNormalized    | 0.338036319  |
| wavelet-LLH | gldm       | LargeDependenceEmphasis              | 4.333333333  |
| wavelet-LLH | gldm       | LargeDependenceLowGrayLevelEmphasis  | 0.012340904  |
| wavelet-LLH | gldm       | DependenceVariance                   | 0.861975993  |
| wavelet-LLH | gldm       | LargeDependenceHighGrayLevelEmphasis | 3127.003509  |
| wavelet-LLH | gldm       | SmallDependenceLowGrayLevelEmphasis  | 0.004541735  |
| wavelet-LLH | gldm       | LowGrayLevelEmphasis                 | 0.005610045  |
| wavelet-LLH | glcm       | JointAverage                         | 26.67191576  |
| wavelet-LLH | glcm       | SumAverage                           | 53.34383151  |
| wavelet-LLH | glcm       | JointEntropy                         | 7.770199942  |
| wavelet-LLH | glcm       | ClusterShade                         | -233.4436327 |
| wavelet-LLH | glcm       | MaximumProbability                   | 0.014042865  |
| wavelet-LLH | glcm       | Idmn                                 | 0.965558988  |
| wavelet-LLH | glcm       | JointEnergy                          | 0.005330908  |
| wavelet-LLH | glcm       | Contrast                             | 74.0860365   |
| wavelet-LLH | glcm       | DifferenceEntropy                    | 3.966985322  |
| wavelet-LLH | glcm       | InverseVariance                      | 0.156436582  |
| wavelet-LLH | glcm       | DifferenceVariance                   | 29.36249582  |
| wavelet-LLH | glcm       | Idn                                  | 0.878230743  |
| wavelet-LLH | glcm       | Idm                                  | 0.147276592  |
| wavelet-LLH | glcm       | Correlation                          | 0.114890649  |
| wavelet-LLH | glcm       | Autocorrelation                      | 716.7516241  |
| wavelet-LLH | glcm       | SumEntropy                           | 5.040760552  |
| wavelet-LLH | glcm       | SumSquares                           | 42.38414185  |
| wavelet-LLH | glcm       | ClusterProminence                    | 35196.87115  |
| wavelet-LLH | glcm       | Imc2                                 | 0.97016921   |
| wavelet-LLH | glcm       | Imc1                                 | -0.312701507 |
| wavelet-LLH | glcm       | DifferenceAverage                    | 6.510311134  |
| wavelet-LLH | glcm       | Id                                   | 0.238281888  |
| wavelet-LLH | glcm       | ClusterTendency                      | 95.45053088  |
| wavelet-LLH | firstorder | InterquartileRange                   | 232.0559317  |
| wavelet-LLH | firstorder | Skewness                             | -0.559773212 |
| wavelet-LLH | firstorder | Uniformity                           | 0.047362265  |
| wavelet-LLH | firstorder | Median                               | -14.97380405 |
| wavelet-LLH | firstorder | Energy                               | 8115403.694  |
| wavelet-LLH | firstorder | RobustMeanAbsoluteDeviation          | 88.22683209  |
| wavelet-LLH | firstorder | MeanAbsoluteDeviation                | 129.8230202  |
| wavelet-LLH | firstorder | TotalEnergy                          | 219115899.7  |
| wavelet-LLH | firstorder | Maximum                              | 381.3607272  |
| wavelet-LLH | firstorder | RootMeanSquared                      | 168.7456686  |
| wavelet-LLH | firstorder | 90Percentile                         | 175.0807467  |
| wavelet-LLH | firstorder | Minimum                              | -669.2314008 |
| wavelet-LLH | firstorder | Entropy                              | 4.646273683  |

|             |            |                                      |              |
|-------------|------------|--------------------------------------|--------------|
| wavelet-LLH | firstorder | Range                                | 1050.592128  |
| wavelet-LLH | firstorder | Variance                             | 28279.66221  |
| wavelet-LLH | firstorder | 10Percentile                         | -211.4003213 |
| wavelet-LLH | firstorder | Kurtosis                             | 3.967095986  |
| wavelet-LLH | firstorder | Mean                                 | -13.97993101 |
| wavelet-LLH | glrlm      | ShortRunLowGrayLevelEmphasis         | 0.00567633   |
| wavelet-LLH | glrlm      | GrayLevelVariance                    | 45.59336099  |
| wavelet-LLH | glrlm      | LowGrayLevelRunEmphasis              | 0.005730848  |
| wavelet-LLH | glrlm      | GrayLevelNonUniformityNormalized     | 0.04705889   |
| wavelet-LLH | glrlm      | RunVariance                          | 0.035988841  |
| wavelet-LLH | glrlm      | GrayLevelNonUniformity               | 12.96648255  |
| wavelet-LLH | glrlm      | LongRunEmphasis                      | 1.107306089  |
| wavelet-LLH | glrlm      | ShortRunHighGrayLevelEmphasis        | 755.8010163  |
| wavelet-LLH | glrlm      | RunLengthNonUniformity               | 258.1516201  |
| wavelet-LLH | glrlm      | ShortRunEmphasis                     | 0.974781613  |
| wavelet-LLH | glrlm      | LongRunHighGrayLevelEmphasis         | 851.3426416  |
| wavelet-LLH | glrlm      | RunPercentage                        | 0.966801619  |
| wavelet-LLH | glrlm      | LongRunLowGrayLevelEmphasis          | 0.005958502  |
| wavelet-LLH | glrlm      | RunEntropy                           | 4.801782669  |
| wavelet-LLH | glrlm      | HighGrayLevelRunEmphasis             | 773.8476667  |
| wavelet-LLH | glrlm      | RunLengthNonUniformityNormalized     | 0.936147108  |
| wavelet-LLH | glszm      | GrayLevelVariance                    | 52.69042789  |
| wavelet-LLH | glszm      | ZoneVariance                         | 1.381167879  |
| wavelet-LLH | glszm      | GrayLevelNonUniformityNormalized     | 0.044287007  |
| wavelet-LLH | glszm      | SizeZoneNonUniformityNormalized      | 0.495646203  |
| wavelet-LLH | glszm      | SizeZoneNonUniformity                | 88.72067039  |
| wavelet-LLH | glszm      | GrayLevelNonUniformity               | 7.927374302  |
| wavelet-LLH | glszm      | LargeAreaEmphasis                    | 3.916201117  |
| wavelet-LLH | glszm      | SmallAreaHighGrayLevelEmphasis       | 591.8115864  |
| wavelet-LLH | glszm      | ZonePercentage                       | 0.628070175  |
| wavelet-LLH | glszm      | LargeAreaLowGrayLevelEmphasis        | 0.013361297  |
| wavelet-LLH | glszm      | LargeAreaHighGrayLevelEmphasis       | 2860.335196  |
| wavelet-LLH | glszm      | HighGrayLevelZoneEmphasis            | 796.547486   |
| wavelet-LLH | glszm      | SmallAreaEmphasis                    | 0.73057025   |
| wavelet-LLH | glszm      | LowGrayLevelZoneEmphasis             | 0.007640958  |
| wavelet-LLH | glszm      | ZoneEntropy                          | 5.749003432  |
| wavelet-LLH | glszm      | SmallAreaLowGrayLevelEmphasis        | 0.006959894  |
| wavelet-LLH | ngtdm      | Coarseness                           | 0.021355888  |
| wavelet-LLH | ngtdm      | Complexity                           | 2237.846707  |
| wavelet-LLH | ngtdm      | Strength                             | 8.724039771  |
| wavelet-LLH | ngtdm      | Contrast                             | 0.353888587  |
| wavelet-LLH | ngtdm      | Busyness                             | 0.050738598  |
| wavelet-LLL | gldm       | GrayLevelVariance                    | 369.7403016  |
| wavelet-LLL | gldm       | HighGrayLevelEmphasis                | 2248.126316  |
| wavelet-LLL | gldm       | DependenceEntropy                    | 6.493174822  |
| wavelet-LLL | gldm       | DependenceNonUniformity              | 173.7859649  |
| wavelet-LLL | gldm       | GrayLevelNonUniformity               | 4.915789474  |
| wavelet-LLL | gldm       | SmallDependenceEmphasis              | 0.80662768   |
| wavelet-LLL | gldm       | SmallDependenceHighGrayLevelEmphasis | 1618.887524  |
| wavelet-LLL | gldm       | DependenceNonUniformityNormalized    | 0.609775315  |
| wavelet-LLL | gldm       | LargeDependenceEmphasis              | 1.898245614  |
| wavelet-LLL | gldm       | LargeDependenceLowGrayLevelEmphasis  | 0.006823953  |
| wavelet-LLL | gldm       | DependenceVariance                   | 0.25804863   |
| wavelet-LLL | gldm       | LargeDependenceHighGrayLevelEmphasis | 5112.512281  |
| wavelet-LLL | gldm       | SmallDependenceLowGrayLevelEmphasis  | 0.006093561  |

|             |            |                                  |              |
|-------------|------------|----------------------------------|--------------|
| wavelet-LLL | gldm       | LowGrayLevelEmphasis             | 0.006228722  |
| wavelet-LLL | glcm       | JointAverage                     | 47.31158591  |
| wavelet-LLL | glcm       | SumAverage                       | 94.62317182  |
| wavelet-LLL | glcm       | JointEntropy                     | 8.38493142   |
| wavelet-LLL | glcm       | ClusterShade                     | 1637.986156  |
| wavelet-LLL | glcm       | MaximumProbability               | 0.006722081  |
| wavelet-LLL | glcm       | Idmn                             | 0.953887346  |
| wavelet-LLL | glcm       | JointEnergy                      | 0.003113054  |
| wavelet-LLL | glcm       | Contrast                         | 361.4249863  |
| wavelet-LLL | glcm       | DifferenceEntropy                | 5.015720547  |
| wavelet-LLL | glcm       | InverseVariance                  | 0.064199432  |
| wavelet-LLL | glcm       | DifferenceVariance               | 114.0669963  |
| wavelet-LLL | glcm       | Idn                              | 0.85487105   |
| wavelet-LLL | glcm       | Idm                              | 0.058390315  |
| wavelet-LLL | glcm       | Correlation                      | 0.487989676  |
| wavelet-LLL | glcm       | Autocorrelation                  | 2406.291563  |
| wavelet-LLL | glcm       | SumEntropy                       | 6.393090926  |
| wavelet-LLL | glcm       | SumSquares                       | 347.9420573  |
| wavelet-LLL | glcm       | ClusterProminence                | 2501994.759  |
| wavelet-LLL | glcm       | Imc2                             | 0.999548302  |
| wavelet-LLL | glcm       | Imc1                             | -0.593345973 |
| wavelet-LLL | glcm       | DifferenceAverage                | 15.29047522  |
| wavelet-LLL | glcm       | Id                               | 0.127204072  |
| wavelet-LLL | glcm       | ClusterTendency                  | 1030.343243  |
| wavelet-LLL | firstorder | InterquartileRange               | 684.4624862  |
| wavelet-LLL | firstorder | Skewness                         | 0.12713916   |
| wavelet-LLL | firstorder | Uniformity                       | 0.017248384  |
| wavelet-LLL | firstorder | Median                           | -952.8497841 |
| wavelet-LLL | firstorder | Energy                           | 311499333.4  |
| wavelet-LLL | firstorder | RobustMeanAbsoluteDeviation      | 292.2934177  |
| wavelet-LLL | firstorder | MeanAbsoluteDeviation            | 395.6140697  |
| wavelet-LLL | firstorder | TotalEnergy                      | 8410482002   |
| wavelet-LLL | firstorder | Maximum                          | 56.21531538  |
| wavelet-LLL | firstorder | RootMeanSquared                  | 1045.456894  |
| wavelet-LLL | firstorder | 90Percentile                     | -223.3856374 |
| wavelet-LLL | firstorder | Minimum                          | -1997.106101 |
| wavelet-LLL | firstorder | Entropy                          | 6.040680746  |
| wavelet-LLL | firstorder | Range                            | 2053.321416  |
| wavelet-LLL | firstorder | Variance                         | 231016.8375  |
| wavelet-LLL | firstorder | 10Percentile                     | -1523.014538 |
| wavelet-LLL | firstorder | Kurtosis                         | 2.235902001  |
| wavelet-LLL | firstorder | Mean                             | -928.4197756 |
| wavelet-LLL | glrlm      | ShortRunLowGrayLevelEmphasis     | 0.00628396   |
| wavelet-LLL | glrlm      | GrayLevelVariance                | 369.425701   |
| wavelet-LLL | glrlm      | LowGrayLevelRunEmphasis          | 0.006289543  |
| wavelet-LLL | glrlm      | GrayLevelNonUniformityNormalized | 0.017237264  |
| wavelet-LLL | glrlm      | RunVariance                      | 0.010793439  |
| wavelet-LLL | glrlm      | GrayLevelNonUniformity           | 4.859558122  |
| wavelet-LLL | glrlm      | LongRunEmphasis                  | 1.032879852  |
| wavelet-LLL | glrlm      | ShortRunHighGrayLevelEmphasis    | 2211.12221   |
| wavelet-LLL | glrlm      | RunLengthNonUniformity           | 275.8625565  |
| wavelet-LLL | glrlm      | ShortRunEmphasis                 | 0.991780037  |
| wavelet-LLL | glrlm      | LongRunHighGrayLevelEmphasis     | 2343.215338  |
| wavelet-LLL | glrlm      | RunPercentage                    | 0.989203779  |
| wavelet-LLL | glrlm      | LongRunLowGrayLevelEmphasis      | 0.006311878  |



|             |       |                                      |              |
|-------------|-------|--------------------------------------|--------------|
| wavelet-LLL | glrlm | RunEntropy                           | 6.075279725  |
| wavelet-LLL | glrlm | HighGrayLevelRunEmphasis             | 2237.540835  |
| wavelet-LLL | glrlm | RunLengthNonUniformityNormalized     | 0.978413122  |
| wavelet-LLL | glszm | GrayLevelVariance                    | 359.4165123  |
| wavelet-LLL | glszm | ZoneVariance                         | 0.162566179  |
| wavelet-LLL | glszm | GrayLevelNonUniformityNormalized     | 0.017259749  |
| wavelet-LLL | glszm | SizeZoneNonUniformityNormalized      | 0.758658559  |
| wavelet-LLL | glszm | SizeZoneNonUniformity                | 187.388664   |
| wavelet-LLL | glszm | GrayLevelNonUniformity               | 4.263157895  |
| wavelet-LLL | glszm | LargeAreaEmphasis                    | 1.493927126  |
| wavelet-LLL | glszm | SmallAreaHighGrayLevelEmphasis       | 1746.030589  |
| wavelet-LLL | glszm | ZonePercentage                       | 0.866666667  |
| wavelet-LLL | glszm | LargeAreaLowGrayLevelEmphasis        | 0.007409685  |
| wavelet-LLL | glszm | LargeAreaHighGrayLevelEmphasis       | 3721.838057  |
| wavelet-LLL | glszm | HighGrayLevelZoneEmphasis            | 2088.898785  |
| wavelet-LLL | glszm | SmallAreaEmphasis                    | 0.894511921  |
| wavelet-LLL | glszm | LowGrayLevelZoneEmphasis             | 0.007081432  |
| wavelet-LLL | glszm | ZoneEntropy                          | 6.369182771  |
| wavelet-LLL | glszm | SmallAreaLowGrayLevelEmphasis        | 0.007005807  |
| wavelet-LLL | ngtdm | Coarseness                           | 0.023307596  |
| wavelet-LLL | ngtdm | Complexity                           | 21864.09242  |
| wavelet-LLL | ngtdm | Strength                             | 51.51057859  |
| wavelet-LLL | ngtdm | Contrast                             | 1.189356282  |
| wavelet-LLL | ngtdm | Busyness                             | 0.015718872  |
| wavelet-HHL | gldm  | GrayLevelVariance                    | 5.414022776  |
| wavelet-HHL | gldm  | HighGrayLevelEmphasis                | 62.1122807   |
| wavelet-HHL | gldm  | DependenceEntropy                    | 5.374824616  |
| wavelet-HHL | gldm  | DependenceNonUniformity              | 46.65614035  |
| wavelet-HHL | gldm  | GrayLevelNonUniformity               | 36.97192982  |
| wavelet-HHL | gldm  | SmallDependenceEmphasis              | 0.265345478  |
| wavelet-HHL | gldm  | SmallDependenceHighGrayLevelEmphasis | 17.62440774  |
| wavelet-HHL | gldm  | DependenceNonUniformityNormalized    | 0.163705756  |
| wavelet-HHL | gldm  | LargeDependenceEmphasis              | 14.60701754  |
| wavelet-HHL | gldm  | LargeDependenceLowGrayLevelEmphasis  | 0.295830097  |
| wavelet-HHL | gldm  | DependenceVariance                   | 3.425620191  |
| wavelet-HHL | gldm  | LargeDependenceHighGrayLevelEmphasis | 860.9192982  |
| wavelet-HHL | gldm  | SmallDependenceLowGrayLevelEmphasis  | 0.013222087  |
| wavelet-HHL | gldm  | LowGrayLevelEmphasis                 | 0.029540894  |
| wavelet-HHL | glcm  | JointAverage                         | 7.552644758  |
| wavelet-HHL | glcm  | SumAverage                           | 15.10528952  |
| wavelet-HHL | glcm  | JointEntropy                         | 5.989764239  |
| wavelet-HHL | glcm  | ClusterShade                         | -0.318262284 |
| wavelet-HHL | glcm  | MaximumProbability                   | 0.055139337  |
| wavelet-HHL | glcm  | Idmn                                 | 0.95675209   |
| wavelet-HHL | glcm  | JointEnergy                          | 0.021387061  |
| wavelet-HHL | glcm  | Contrast                             | 9.76616641   |
| wavelet-HHL | glcm  | DifferenceEntropy                    | 2.774115609  |
| wavelet-HHL | glcm  | InverseVariance                      | 0.334756252  |
| wavelet-HHL | glcm  | DifferenceVariance                   | 3.828035478  |
| wavelet-HHL | glcm  | Idn                                  | 0.864081959  |
| wavelet-HHL | glcm  | Idm                                  | 0.334422723  |
| wavelet-HHL | glcm  | Correlation                          | 0.010668547  |
| wavelet-HHL | glcm  | Autocorrelation                      | 57.10605263  |
| wavelet-HHL | glcm  | SumEntropy                           | 3.613466505  |
| wavelet-HHL | glcm  | SumSquares                           | 4.943181996  |

|             |            |                                  |              |
|-------------|------------|----------------------------------|--------------|
| wavelet-HHL | glcm       | ClusterProminence                | 316.1936066  |
| wavelet-HHL | glcm       | Imc2                             | 0.68973068   |
| wavelet-HHL | glcm       | Imc1                             | -0.103367701 |
| wavelet-HHL | glcm       | DifferenceAverage                | 2.41796581   |
| wavelet-HHL | glcm       | Id                               | 0.415726795  |
| wavelet-HHL | glcm       | ClusterTendency                  | 10.00656158  |
| wavelet-HHL | firstorder | InterquartileRange               | 71.90877427  |
| wavelet-HHL | firstorder | Skewness                         | 0.084535505  |
| wavelet-HHL | firstorder | Uniformity                       | 0.12972607   |
| wavelet-HHL | firstorder | Median                           | -1.724580135 |
| wavelet-HHL | firstorder | Energy                           | 954285.1377  |
| wavelet-HHL | firstorder | RobustMeanAbsoluteDeviation      | 30.44362679  |
| wavelet-HHL | firstorder | MeanAbsoluteDeviation            | 45.20712242  |
| wavelet-HHL | firstorder | TotalEnergy                      | 25765698.72  |
| wavelet-HHL | firstorder | Maximum                          | 160.8234464  |
| wavelet-HHL | firstorder | RootMeanSquared                  | 57.86509228  |
| wavelet-HHL | firstorder | 90Percentile                     | 74.80403514  |
| wavelet-HHL | firstorder | Minimum                          | -153.1352332 |
| wavelet-HHL | firstorder | Entropy                          | 3.226286451  |
| wavelet-HHL | firstorder | Range                            | 313.9586796  |
| wavelet-HHL | firstorder | Variance                         | 3347.960248  |
| wavelet-HHL | firstorder | 10Percentile                     | -75.89017513 |
| wavelet-HHL | firstorder | Kurtosis                         | 3.00192207   |
| wavelet-HHL | firstorder | Mean                             | 0.639262181  |
| wavelet-HHL | glrlm      | ShortRunLowGrayLevelEmphasis     | 0.029031469  |
| wavelet-HHL | glrlm      | GrayLevelVariance                | 5.71925764   |
| wavelet-HHL | glrlm      | LowGrayLevelRunEmphasis          | 0.030457433  |
| wavelet-HHL | glrlm      | GrayLevelNonUniformityNormalized | 0.123686651  |
| wavelet-HHL | glrlm      | RunVariance                      | 0.103511293  |
| wavelet-HHL | glrlm      | GrayLevelNonUniformity           | 32.0722713   |
| wavelet-HHL | glrlm      | LongRunEmphasis                  | 1.312754421  |
| wavelet-HHL | glrlm      | ShortRunHighGrayLevelEmphasis    | 58.15723134  |
| wavelet-HHL | glrlm      | RunLengthNonUniformity           | 215.8353309  |
| wavelet-HHL | glrlm      | ShortRunEmphasis                 | 0.929791635  |
| wavelet-HHL | glrlm      | LongRunHighGrayLevelEmphasis     | 80.92726084  |
| wavelet-HHL | glrlm      | RunPercentage                    | 0.909851552  |
| wavelet-HHL | glrlm      | LongRunLowGrayLevelEmphasis      | 0.036818079  |
| wavelet-HHL | glrlm      | RunEntropy                       | 3.682517208  |
| wavelet-HHL | glrlm      | HighGrayLevelRunEmphasis         | 62.36318772  |
| wavelet-HHL | glrlm      | RunLengthNonUniformityNormalized | 0.831818195  |
| wavelet-HHL | glszm      | GrayLevelVariance                | 11.15121882  |
| wavelet-HHL | glszm      | ZoneVariance                     | 69.28613946  |
| wavelet-HHL | glszm      | GrayLevelNonUniformityNormalized | 0.108843537  |
| wavelet-HHL | glszm      | SizeZoneNonUniformityNormalized  | 0.387188209  |
| wavelet-HHL | glszm      | SizeZoneNonUniformity            | 32.52380952  |
| wavelet-HHL | glszm      | GrayLevelNonUniformity           | 9.142857143  |
| wavelet-HHL | glszm      | LargeAreaEmphasis                | 80.79761905  |
| wavelet-HHL | glszm      | SmallAreaHighGrayLevelEmphasis   | 44.42300888  |
| wavelet-HHL | glszm      | ZonePercentage                   | 0.294736842  |
| wavelet-HHL | glszm      | LargeAreaLowGrayLevelEmphasis    | 1.636365398  |
| wavelet-HHL | glszm      | LargeAreaHighGrayLevelEmphasis   | 4368.97619   |
| wavelet-HHL | glszm      | HighGrayLevelZoneEmphasis        | 68.29761905  |
| wavelet-HHL | glszm      | SmallAreaEmphasis                | 0.64401499   |
| wavelet-HHL | glszm      | LowGrayLevelZoneEmphasis         | 0.048493496  |
| wavelet-HHL | glszm      | ZoneEntropy                      | 4.738661215  |

|             |            |                                      |              |
|-------------|------------|--------------------------------------|--------------|
| wavelet-HHL | glszm      | SmallAreaLowGrayLevelEmphasis        | 0.038463656  |
| wavelet-HHL | ngtdm      | Coarseness                           | 0.023308332  |
| wavelet-HHL | ngtdm      | Complexity                           | 132.9611734  |
| wavelet-HHL | ngtdm      | Strength                             | 1.164343836  |
| wavelet-HHL | ngtdm      | Contrast                             | 0.108759586  |
| wavelet-HHL | ngtdm      | Busyness                             | 0.401055726  |
| wavelet-HLH | gldm       | GrayLevelVariance                    | 20.82248076  |
| wavelet-HLH | gldm       | HighGrayLevelEmphasis                | 254.5368421  |
| wavelet-HLH | gldm       | DependenceEntropy                    | 5.95307161   |
| wavelet-HLH | gldm       | DependenceNonUniformity              | 70.54385965  |
| wavelet-HLH | gldm       | GrayLevelNonUniformity               | 20.29824561  |
| wavelet-HLH | gldm       | SmallDependenceEmphasis              | 0.455417438  |
| wavelet-HLH | gldm       | SmallDependenceHighGrayLevelEmphasis | 122.5308705  |
| wavelet-HLH | gldm       | DependenceNonUniformityNormalized    | 0.247522315  |
| wavelet-HLH | gldm       | LargeDependenceEmphasis              | 8.29122807   |
| wavelet-HLH | gldm       | LargeDependenceLowGrayLevelEmphasis  | 0.04222517   |
| wavelet-HLH | gldm       | DependenceVariance                   | 2.514373653  |
| wavelet-HLH | gldm       | LargeDependenceHighGrayLevelEmphasis | 2142.207018  |
| wavelet-HLH | gldm       | SmallDependenceLowGrayLevelEmphasis  | 0.008069648  |
| wavelet-HLH | gldm       | LowGrayLevelEmphasis                 | 0.010842398  |
| wavelet-HLH | glcm       | JointAverage                         | 15.21608868  |
| wavelet-HLH | glcm       | SumAverage                           | 30.43217737  |
| wavelet-HLH | glcm       | JointEntropy                         | 7.25295522   |
| wavelet-HLH | glcm       | ClusterShade                         | -33.96039735 |
| wavelet-HLH | glcm       | MaximumProbability                   | 0.029222834  |
| wavelet-HLH | glcm       | Idmn                                 | 0.965202237  |
| wavelet-HLH | glcm       | JointEnergy                          | 0.00841722   |
| wavelet-HLH | glcm       | Contrast                             | 41.14914448  |
| wavelet-HLH | glcm       | DifferenceEntropy                    | 3.64940944   |
| wavelet-HLH | glcm       | InverseVariance                      | 0.215830917  |
| wavelet-HLH | glcm       | DifferenceVariance                   | 17.14789167  |
| wavelet-HLH | glcm       | Idn                                  | 0.879943777  |
| wavelet-HLH | glcm       | Idm                                  | 0.210778762  |
| wavelet-HLH | glcm       | Correlation                          | -0.009449932 |
| wavelet-HLH | glcm       | Autocorrelation                      | 231.2699017  |
| wavelet-HLH | glcm       | SumEntropy                           | 4.460414821  |
| wavelet-HLH | glcm       | SumSquares                           | 20.31188758  |
| wavelet-HLH | glcm       | ClusterProminence                    | 6905.901839  |
| wavelet-HLH | glcm       | Imc2                                 | 0.922763493  |
| wavelet-HLH | glcm       | Imc1                                 | -0.23710943  |
| wavelet-HLH | glcm       | DifferenceAverage                    | 4.795313816  |
| wavelet-HLH | glcm       | Id                                   | 0.299738144  |
| wavelet-HLH | glcm       | ClusterTendency                      | 40.09840584  |
| wavelet-HLH | firstorder | InterquartileRange                   | 137.3748175  |
| wavelet-HLH | firstorder | Skewness                             | -0.012016879 |
| wavelet-HLH | firstorder | Uniformity                           | 0.071221914  |
| wavelet-HLH | firstorder | Median                               | 0.296960006  |
| wavelet-HLH | firstorder | Energy                               | 3701226.675  |
| wavelet-HLH | firstorder | RobustMeanAbsoluteDeviation          | 55.95900397  |
| wavelet-HLH | firstorder | MeanAbsoluteDeviation                | 86.23354259  |
| wavelet-HLH | firstorder | TotalEnergy                          | 99933120.24  |
| wavelet-HLH | firstorder | Maximum                              | 403.2767336  |
| wavelet-HLH | firstorder | RootMeanSquared                      | 113.9594676  |
| wavelet-HLH | firstorder | 90Percentile                         | 134.2884436  |
| wavelet-HLH | firstorder | Minimum                              | -365.1235121 |

|             |            |                                  |              |
|-------------|------------|----------------------------------|--------------|
| wavelet-HLH | firstorder | Entropy                          | 4.135552628  |
| wavelet-HLH | firstorder | Range                            | 768.4002457  |
| wavelet-HLH | firstorder | Variance                         | 12957.40203  |
| wavelet-HLH | firstorder | 10Percentile                     | -146.4146171 |
| wavelet-HLH | firstorder | Kurtosis                         | 3.816593781  |
| wavelet-HLH | firstorder | Mean                             | -5.41832383  |
| wavelet-HLH | glrlm      | ShortRunLowGrayLevelEmphasis     | 0.011017334  |
| wavelet-HLH | glrlm      | GrayLevelVariance                | 21.62315583  |
| wavelet-HLH | glrlm      | LowGrayLevelRunEmphasis          | 0.011206632  |
| wavelet-HLH | glrlm      | GrayLevelNonUniformityNormalized | 0.069139925  |
| wavelet-HLH | glrlm      | RunVariance                      | 0.064252968  |
| wavelet-HLH | glrlm      | GrayLevelNonUniformity           | 18.65080071  |
| wavelet-HLH | glrlm      | LongRunEmphasis                  | 1.185797549  |
| wavelet-HLH | glrlm      | ShortRunHighGrayLevelEmphasis    | 244.3866397  |
| wavelet-HLH | glrlm      | RunLengthNonUniformity           | 243.2305175  |
| wavelet-HLH | glrlm      | ShortRunEmphasis                 | 0.959386834  |
| wavelet-HLH | glrlm      | LongRunHighGrayLevelEmphasis     | 301.8080599  |
| wavelet-HLH | glrlm      | RunPercentage                    | 0.946018893  |
| wavelet-HLH | glrlm      | LongRunLowGrayLevelEmphasis      | 0.012052207  |
| wavelet-HLH | glrlm      | RunEntropy                       | 4.411501867  |
| wavelet-HLH | glrlm      | HighGrayLevelRunEmphasis         | 254.6190226  |
| wavelet-HLH | glrlm      | RunLengthNonUniformityNormalized | 0.900410202  |
| wavelet-HLH | glszm      | GrayLevelVariance                | 31.894239    |
| wavelet-HLH | glszm      | ZoneVariance                     | 4.965542093  |
| wavelet-HLH | glszm      | GrayLevelNonUniformityNormalized | 0.052475114  |
| wavelet-HLH | glszm      | SizeZoneNonUniformityNormalized  | 0.495428134  |
| wavelet-HLH | glszm      | SizeZoneNonUniformity            | 73.81879195  |
| wavelet-HLH | glszm      | GrayLevelNonUniformity           | 7.818791946  |
| wavelet-HLH | glszm      | LargeAreaEmphasis                | 8.624161074  |
| wavelet-HLH | glszm      | SmallAreaHighGrayLevelEmphasis   | 202.0415007  |
| wavelet-HLH | glszm      | ZonePercentage                   | 0.522807018  |
| wavelet-HLH | glszm      | LargeAreaLowGrayLevelEmphasis    | 0.049263078  |
| wavelet-HLH | glszm      | LargeAreaHighGrayLevelEmphasis   | 2232.114094  |
| wavelet-HLH | glszm      | HighGrayLevelZoneEmphasis        | 263.7919463  |
| wavelet-HLH | glszm      | SmallAreaEmphasis                | 0.72982688   |
| wavelet-HLH | glszm      | LowGrayLevelZoneEmphasis         | 0.016221063  |
| wavelet-HLH | glszm      | ZoneEntropy                      | 5.565518796  |
| wavelet-HLH | glszm      | SmallAreaLowGrayLevelEmphasis    | 0.014646756  |
| wavelet-HLH | ngtdm      | Coarseness                       | 0.022346515  |
| wavelet-HLH | ngtdm      | Complexity                       | 1080.234428  |
| wavelet-HLH | ngtdm      | Strength                         | 5.182415542  |
| wavelet-HLH | ngtdm      | Contrast                         | 0.194862901  |
| wavelet-HLH | ngtdm      | Busyness                         | 0.094999376  |

| Image type | Feature Class | Feature Name                         |                                                                                                                                                                                                                                                                                                                                                                                                                   |
|------------|---------------|--------------------------------------|-------------------------------------------------------------------------------------------------------------------------------------------------------------------------------------------------------------------------------------------------------------------------------------------------------------------------------------------------------------------------------------------------------------------|
| general    | info          | BoundingBox                          | 502: RTSTRUCT: C99-DNU_segment_GTV_LUL<br>(0, 0, 1, 8, 7, 6)                                                                                                                                                                                                                                                                                                                                                      |
| general    | info          | EnabledImageTypes                    | {u'Original': {}, u'Wavelet': {}}                                                                                                                                                                                                                                                                                                                                                                                 |
|            |               |                                      | {'distances': [1], 'additionalInfo': True, 'force2D': False, 'interpolator': 'sitkBSpline', 'resampledPixelSpacing': [3.0], 'label': 1, 'normalizeScale': 1, 'normalize': False, 'force2Ddimension': 0, 'removeOutliers': None, 'minimumROISize': None, u'binWidth': 25.0, 'minimumROIDimensions': 1, u'correctMask': True, 'preCrop': False, u'symmetricalGLCM': True, 'resegmentRange': None, 'padDistance': 5} |
| general    | info          | GeneralSettings                      |                                                                                                                                                                                                                                                                                                                                                                                                                   |
| general    | info          | ImageHash                            | 56506f19380279cec30721b0943a23e0ddfc8dfa<br>(0.9765625000000002, 0.9765625000000002, 2.0)                                                                                                                                                                                                                                                                                                                         |
| general    | info          | ImageSpacing                         |                                                                                                                                                                                                                                                                                                                                                                                                                   |
| general    | info          | MaskHash                             | d25f3cd83a126bf6f0628f61cda64ef3f9ef1c4c                                                                                                                                                                                                                                                                                                                                                                          |
| general    | info          | NumpyVersion                         | 1.13.1                                                                                                                                                                                                                                                                                                                                                                                                            |
| general    | info          | PyWaveletVersion                     | 0.5.2                                                                                                                                                                                                                                                                                                                                                                                                             |
| general    | info          | SimpleITKVersion                     | 1.1.0                                                                                                                                                                                                                                                                                                                                                                                                             |
| general    | info          | Version                              | 1.3.0.post102+g1b0eb74                                                                                                                                                                                                                                                                                                                                                                                            |
| general    | info          | VolumeNum                            | 1                                                                                                                                                                                                                                                                                                                                                                                                                 |
| general    | info          | VoxelNum                             | 139                                                                                                                                                                                                                                                                                                                                                                                                               |
| original   | shape         | Maximum3DDiameter                    | 22.04540769                                                                                                                                                                                                                                                                                                                                                                                                       |
| original   | shape         | Maximum2DDiameterSlice               | 20.1246118                                                                                                                                                                                                                                                                                                                                                                                                        |
| original   | shape         | Sphericity                           | 0.870004181                                                                                                                                                                                                                                                                                                                                                                                                       |
| original   | shape         | MinorAxis                            | 17.94730634                                                                                                                                                                                                                                                                                                                                                                                                       |
| original   | shape         | Elongation                           | 0.896398011                                                                                                                                                                                                                                                                                                                                                                                                       |
| original   | shape         | SurfaceVolumeRatio                   | 0.357687088                                                                                                                                                                                                                                                                                                                                                                                                       |
| original   | shape         | Volume                               | 3753                                                                                                                                                                                                                                                                                                                                                                                                              |
| original   | shape         | MajorAxis                            | 20.02158208                                                                                                                                                                                                                                                                                                                                                                                                       |
| original   | shape         | SurfaceArea                          | 1342.399642                                                                                                                                                                                                                                                                                                                                                                                                       |
| original   | shape         | Flatness                             | 0.754797767                                                                                                                                                                                                                                                                                                                                                                                                       |
| original   | shape         | LeastAxis                            | 15.11224544                                                                                                                                                                                                                                                                                                                                                                                                       |
| original   | shape         | Maximum2DDiameterColumn              | 19.20937271                                                                                                                                                                                                                                                                                                                                                                                                       |
| original   | shape         | Maximum2DDiameterRow                 | 18.97366596                                                                                                                                                                                                                                                                                                                                                                                                       |
| original   | gldm          | GrayLevelVariance                    | 68.6307127                                                                                                                                                                                                                                                                                                                                                                                                        |
| original   | gldm          | HighGrayLevelEmphasis                | 591.6906475                                                                                                                                                                                                                                                                                                                                                                                                       |
| original   | gldm          | DependenceEntropy                    | 5.622161443                                                                                                                                                                                                                                                                                                                                                                                                       |
| original   | gldm          | DependenceNonUniformity              | 46.20863309                                                                                                                                                                                                                                                                                                                                                                                                       |
| original   | gldm          | GrayLevelNonUniformity               | 7.273381295                                                                                                                                                                                                                                                                                                                                                                                                       |
| original   | gldm          | SmallDependenceEmphasis              | 0.59388715                                                                                                                                                                                                                                                                                                                                                                                                        |
| original   | gldm          | SmallDependenceHighGrayLevelEmphasis | 261.9389633                                                                                                                                                                                                                                                                                                                                                                                                       |
| original   | gldm          | DependenceNonUniformityNormalized    | 0.332436209                                                                                                                                                                                                                                                                                                                                                                                                       |
| original   | gldm          | LargeDependenceEmphasis              | 11.79136691                                                                                                                                                                                                                                                                                                                                                                                                       |
| original   | gldm          | LargeDependenceLowGrayLevelEmphasis  | 0.024194533                                                                                                                                                                                                                                                                                                                                                                                                       |
| original   | gldm          | DependenceVariance                   | 5.702189328                                                                                                                                                                                                                                                                                                                                                                                                       |
| original   | gldm          | LargeDependenceHighGrayLevelEmphasis | 11206.97122                                                                                                                                                                                                                                                                                                                                                                                                       |
| original   | gldm          | SmallDependenceLowGrayLevelEmphasis  | 0.011507858                                                                                                                                                                                                                                                                                                                                                                                                       |
| original   | gldm          | LowGrayLevelEmphasis                 | 0.012200866                                                                                                                                                                                                                                                                                                                                                                                                       |
| original   | glcm          | JointAverage                         | 24.81735347                                                                                                                                                                                                                                                                                                                                                                                                       |
| original   | glcm          | SumAverage                           | 49.63470695                                                                                                                                                                                                                                                                                                                                                                                                       |
| original   | glcm          | JointEntropy                         | 6.742173297                                                                                                                                                                                                                                                                                                                                                                                                       |

|          |            |                                  |              |
|----------|------------|----------------------------------|--------------|
| original | glcm       | ClusterShade                     | -978.5442388 |
| original | glcm       | MaximumProbability               | 0.05066662   |
| original | glcm       | Idmn                             | 0.934705247  |
| original | glcm       | JointEnergy                      | 0.012752145  |
| original | glcm       | Contrast                         | 93.50943944  |
| original | glcm       | DifferenceEntropy                | 4.106394905  |
| original | glcm       | InverseVariance                  | 0.167928538  |
| original | glcm       | DifferenceVariance               | 40.44155382  |
| original | glcm       | Idn                              | 0.842588786  |
| original | glcm       | Idm                              | 0.185825259  |
| original | glcm       | Correlation                      | 0.23889078   |
| original | glcm       | Autocorrelation                  | 631.1821992  |
| original | glcm       | SumEntropy                       | 4.883458019  |
| original | glcm       | SumSquares                       | 61.85345152  |
| original | glcm       | ClusterProminence                | 54341.68924  |
| original | glcm       | Imc2                             | 0.988372483  |
| original | glcm       | Imc1                             | -0.43835587  |
| original | glcm       | DifferenceAverage                | 7.240499558  |
| original | glcm       | Id                               | 0.264149516  |
| original | glcm       | ClusterTendency                  | 153.9043667  |
| original | firstorder | InterquartileRange               | 353          |
| original | firstorder | Skewness                         | -0.460913951 |
| original | firstorder | Uniformity                       | 0.053568656  |
| original | firstorder | Median                           | -173         |
| original | firstorder | Energy                           | 12436572     |
| original | firstorder | RobustMeanAbsoluteDeviation      | 149.3520408  |
| original | firstorder | MeanAbsoluteDeviation            | 182.5525594  |
| original | firstorder | TotalEnergy                      | 335787444    |
| original | firstorder | Maximum                          | 50           |
| original | firstorder | RootMeanSquared                  | 299.1182726  |
| original | firstorder | 90Percentile                     | 24           |
| original | firstorder | Minimum                          | -766         |
| original | firstorder | Entropy                          | 4.528111152  |
| original | firstorder | Range                            | 816          |
| original | firstorder | Variance                         | 42766.00114  |
| original | firstorder | 10Percentile                     | -484.4       |
| original | firstorder | Kurtosis                         | 2.139035965  |
| original | firstorder | Mean                             | -216.1151079 |
| original | glrlm      | ShortRunLowGrayLevelEmphasis     | 0.01280578   |
| original | glrlm      | GrayLevelVariance                | 67.98024375  |
| original | glrlm      | LowGrayLevelRunEmphasis          | 0.012859617  |
| original | glrlm      | GrayLevelNonUniformityNormalized | 0.047994821  |
| original | glrlm      | RunVariance                      | 0.071853572  |
| original | glrlm      | GrayLevelNonUniformity           | 6.298149574  |
| original | glrlm      | LongRunEmphasis                  | 1.19665256   |
| original | glrlm      | ShortRunHighGrayLevelEmphasis    | 533.1829762  |
| original | glrlm      | RunLengthNonUniformity           | 117.8854216  |
| original | glrlm      | ShortRunEmphasis                 | 0.958926986  |
| original | glrlm      | LongRunHighGrayLevelEmphasis     | 756.1961937  |
| original | glrlm      | RunPercentage                    | 0.94355285   |
| original | glrlm      | LongRunLowGrayLevelEmphasis      | 0.013106257  |
| original | glrlm      | RunEntropy                       | 4.801854395  |
| original | glrlm      | HighGrayLevelRunEmphasis         | 571.0892778  |
| original | glrlm      | RunLengthNonUniformityNormalized | 0.8982664    |
| original | glszm      | GrayLevelVariance                | 59.55102041  |

|             |       |                                      |              |
|-------------|-------|--------------------------------------|--------------|
| original    | glszm | ZoneVariance                         | 4.271223282  |
| original    | glszm | GrayLevelNonUniformityNormalized     | 0.041420118  |
| original    | glszm | SizeZoneNonUniformityNormalized      | 0.677092139  |
| original    | glszm | SizeZoneNonUniformity                | 61.61538462  |
| original    | glszm | GrayLevelNonUniformity               | 3.769230769  |
| original    | glszm | LargeAreaEmphasis                    | 6.604395604  |
| original    | glszm | SmallAreaHighGrayLevelEmphasis       | 358.3435003  |
| original    | glszm | ZonePercentage                       | 0.654676259  |
| original    | glszm | LargeAreaLowGrayLevelEmphasis        | 0.024229575  |
| original    | glszm | LargeAreaHighGrayLevelEmphasis       | 5952.450549  |
| original    | glszm | HighGrayLevelZoneEmphasis            | 453.8571429  |
| original    | glszm | SmallAreaEmphasis                    | 0.847336559  |
| original    | glszm | LowGrayLevelZoneEmphasis             | 0.017812493  |
| original    | glszm | ZoneEntropy                          | 5.225725514  |
| original    | glszm | SmallAreaLowGrayLevelEmphasis        | 0.017450459  |
| original    | ngtdm | Coarseness                           | 0.030042399  |
| original    | ngtdm | Complexity                           | 2149.631067  |
| original    | ngtdm | Strength                             | 13.81179231  |
| original    | ngtdm | Contrast                             | 0.816503748  |
| original    | ngtdm | Busyness                             | 0.043378908  |
| wavelet-HHH | gldm  | GrayLevelVariance                    | 13.57724755  |
| wavelet-HHH | gldm  | HighGrayLevelEmphasis                | 198.6546763  |
| wavelet-HHH | gldm  | DependenceEntropy                    | 5.57319861   |
| wavelet-HHH | gldm  | DependenceNonUniformity              | 28.55395683  |
| wavelet-HHH | gldm  | GrayLevelNonUniformity               | 12.49640288  |
| wavelet-HHH | gldm  | SmallDependenceEmphasis              | 0.384703054  |
| wavelet-HHH | gldm  | SmallDependenceHighGrayLevelEmphasis | 81.23109431  |
| wavelet-HHH | gldm  | DependenceNonUniformityNormalized    | 0.20542415   |
| wavelet-HHH | gldm  | LargeDependenceEmphasis              | 9.978417266  |
| wavelet-HHH | gldm  | LargeDependenceLowGrayLevelEmphasis  | 0.070364061  |
| wavelet-HHH | gldm  | DependenceVariance                   | 2.622224523  |
| wavelet-HHH | gldm  | LargeDependenceHighGrayLevelEmphasis | 1768.582734  |
| wavelet-HHH | gldm  | SmallDependenceLowGrayLevelEmphasis  | 0.010839343  |
| wavelet-HHH | gldm  | LowGrayLevelEmphasis                 | 0.014493721  |
| wavelet-HHH | glcm  | JointAverage                         | 13.55340034  |
| wavelet-HHH | glcm  | SumAverage                           | 27.10680067  |
| wavelet-HHH | glcm  | JointEntropy                         | 6.440952788  |
| wavelet-HHH | glcm  | ClusterShade                         | -22.38090679 |
| wavelet-HHH | glcm  | MaximumProbability                   | 0.04046747   |
| wavelet-HHH | glcm  | Idmn                                 | 0.956769173  |
| wavelet-HHH | glcm  | JointEnergy                          | 0.014177883  |
| wavelet-HHH | glcm  | Contrast                             | 26.67498106  |
| wavelet-HHH | glcm  | DifferenceEntropy                    | 3.353471491  |
| wavelet-HHH | glcm  | InverseVariance                      | 0.235046989  |
| wavelet-HHH | glcm  | DifferenceVariance                   | 11.09132895  |
| wavelet-HHH | glcm  | Idn                                  | 0.866164214  |
| wavelet-HHH | glcm  | Idm                                  | 0.242530365  |
| wavelet-HHH | glcm  | Correlation                          | -0.042181815 |
| wavelet-HHH | glcm  | Autocorrelation                      | 183.1800423  |
| wavelet-HHH | glcm  | SumEntropy                           | 4.079983543  |
| wavelet-HHH | glcm  | SumSquares                           | 12.81106056  |
| wavelet-HHH | glcm  | ClusterProminence                    | 2262.478727  |
| wavelet-HHH | glcm  | Imc2                                 | 0.928077585  |
| wavelet-HHH | glcm  | Imc1                                 | -0.268025092 |
| wavelet-HHH | glcm  | DifferenceAverage                    | 3.924737204  |

|             |            |                                  |              |
|-------------|------------|----------------------------------|--------------|
| wavelet-HHH | glcm       | Id                               | 0.332620016  |
| wavelet-HHH | glcm       | ClusterTendency                  | 24.56926119  |
| wavelet-HHH | firstorder | InterquartileRange               | 118.8039488  |
| wavelet-HHH | firstorder | Skewness                         | -0.308456916 |
| wavelet-HHH | firstorder | Uniformity                       | 0.089902179  |
| wavelet-HHH | firstorder | Median                           | 7.995267163  |
| wavelet-HHH | firstorder | Energy                           | 1198217.506  |
| wavelet-HHH | firstorder | RobustMeanAbsoluteDeviation      | 46.90875385  |
| wavelet-HHH | firstorder | MeanAbsoluteDeviation            | 71.59932453  |
| wavelet-HHH | firstorder | TotalEnergy                      | 32351872.65  |
| wavelet-HHH | firstorder | Maximum                          | 240.765582   |
| wavelet-HHH | firstorder | RootMeanSquared                  | 92.8454082   |
| wavelet-HHH | firstorder | 90Percentile                     | 121.7597063  |
| wavelet-HHH | firstorder | Minimum                          | -319.0299667 |
| wavelet-HHH | firstorder | Entropy                          | 3.772231241  |
| wavelet-HHH | firstorder | Range                            | 559.7955487  |
| wavelet-HHH | firstorder | Variance                         | 8617.407666  |
| wavelet-HHH | firstorder | 10Percentile                     | -106.9747467 |
| wavelet-HHH | firstorder | Kurtosis                         | 3.700094243  |
| wavelet-HHH | firstorder | Mean                             | 1.691791264  |
| wavelet-HHH | glrlm      | ShortRunLowGrayLevelEmphasis     | 0.014787697  |
| wavelet-HHH | glrlm      | GrayLevelVariance                | 14.21817609  |
| wavelet-HHH | glrlm      | LowGrayLevelRunEmphasis          | 0.015092102  |
| wavelet-HHH | glrlm      | GrayLevelNonUniformityNormalized | 0.086992715  |
| wavelet-HHH | glrlm      | RunVariance                      | 0.078780959  |
| wavelet-HHH | glrlm      | GrayLevelNonUniformity           | 11.29955573  |
| wavelet-HHH | glrlm      | LongRunEmphasis                  | 1.227207999  |
| wavelet-HHH | glrlm      | ShortRunHighGrayLevelEmphasis    | 190.8325424  |
| wavelet-HHH | glrlm      | RunLengthNonUniformity           | 114.0928202  |
| wavelet-HHH | glrlm      | ShortRunEmphasis                 | 0.950011434  |
| wavelet-HHH | glrlm      | LongRunHighGrayLevelEmphasis     | 240.8176537  |
| wavelet-HHH | glrlm      | RunPercentage                    | 0.934144992  |
| wavelet-HHH | glrlm      | LongRunLowGrayLevelEmphasis      | 0.016479885  |
| wavelet-HHH | glrlm      | RunEntropy                       | 4.081772411  |
| wavelet-HHH | glrlm      | HighGrayLevelRunEmphasis         | 199.9215325  |
| wavelet-HHH | glrlm      | RunLengthNonUniformityNormalized | 0.877576849  |
| wavelet-HHH | glszm      | GrayLevelVariance                | 24.12201021  |
| wavelet-HHH | glszm      | ZoneVariance                     | 7.479709755  |
| wavelet-HHH | glszm      | GrayLevelNonUniformityNormalized | 0.064230046  |
| wavelet-HHH | glszm      | SizeZoneNonUniformityNormalized  | 0.457135179  |
| wavelet-HHH | glszm      | SizeZoneNonUniformity            | 27.8852459   |
| wavelet-HHH | glszm      | GrayLevelNonUniformity           | 3.918032787  |
| wavelet-HHH | glszm      | LargeAreaEmphasis                | 12.67213115  |
| wavelet-HHH | glszm      | SmallAreaHighGrayLevelEmphasis   | 150.0104307  |
| wavelet-HHH | glszm      | ZonePercentage                   | 0.438848921  |
| wavelet-HHH | glszm      | LargeAreaLowGrayLevelEmphasis    | 0.093748016  |
| wavelet-HHH | glszm      | LargeAreaHighGrayLevelEmphasis   | 2368.04918   |
| wavelet-HHH | glszm      | HighGrayLevelZoneEmphasis        | 211.0491803  |
| wavelet-HHH | glszm      | SmallAreaEmphasis                | 0.701349186  |
| wavelet-HHH | glszm      | LowGrayLevelZoneEmphasis         | 0.025435491  |
| wavelet-HHH | glszm      | ZoneEntropy                      | 5.080338928  |
| wavelet-HHH | glszm      | SmallAreaLowGrayLevelEmphasis    | 0.023677964  |
| wavelet-HHH | ngtdm      | Coarseness                       | 0.039153364  |
| wavelet-HHH | ngtdm      | Complexity                       | 473.9074441  |
| wavelet-HHH | ngtdm      | Strength                         | 4.98351925   |



|             |            |                                      |              |
|-------------|------------|--------------------------------------|--------------|
| wavelet-HHH | ngtdm      | Contrast                             | 0.21704954   |
| wavelet-HHH | ngtdm      | Busyness                             | 0.093439542  |
| wavelet-HLL | gldm       | GrayLevelVariance                    | 61.36245536  |
| wavelet-HLL | gldm       | HighGrayLevelEmphasis                | 320.8273381  |
| wavelet-HLL | gldm       | DependenceEntropy                    | 5.851472976  |
| wavelet-HLL | gldm       | DependenceNonUniformity              | 45.30215827  |
| wavelet-HLL | gldm       | GrayLevelNonUniformity               | 6.611510791  |
| wavelet-HLL | gldm       | SmallDependenceEmphasis              | 0.556078576  |
| wavelet-HLL | gldm       | SmallDependenceHighGrayLevelEmphasis | 195.3329868  |
| wavelet-HLL | gldm       | DependenceNonUniformityNormalized    | 0.325914808  |
| wavelet-HLL | gldm       | LargeDependenceEmphasis              | 5.431654676  |
| wavelet-HLL | gldm       | LargeDependenceLowGrayLevelEmphasis  | 0.046157062  |
| wavelet-HLL | gldm       | DependenceVariance                   | 1.574245639  |
| wavelet-HLL | gldm       | LargeDependenceHighGrayLevelEmphasis | 1360.453237  |
| wavelet-HLL | gldm       | SmallDependenceLowGrayLevelEmphasis  | 0.013248403  |
| wavelet-HLL | gldm       | LowGrayLevelEmphasis                 | 0.016287765  |
| wavelet-HLL | glcm       | JointAverage                         | 15.5334962   |
| wavelet-HLL | glcm       | SumAverage                           | 31.0669924   |
| wavelet-HLL | glcm       | JointEntropy                         | 7.050682937  |
| wavelet-HLL | glcm       | ClusterShade                         | 1442.808569  |
| wavelet-HLL | glcm       | MaximumProbability                   | 0.024295099  |
| wavelet-HLL | glcm       | Idmn                                 | 0.958716973  |
| wavelet-HLL | glcm       | JointEnergy                          | 0.008531976  |
| wavelet-HLL | glcm       | Contrast                             | 61.38641656  |
| wavelet-HLL | glcm       | DifferenceEntropy                    | 3.8127049    |
| wavelet-HLL | glcm       | InverseVariance                      | 0.179246177  |
| wavelet-HLL | glcm       | DifferenceVariance                   | 23.65595757  |
| wavelet-HLL | glcm       | Idn                                  | 0.867398003  |
| wavelet-HLL | glcm       | Idm                                  | 0.164699812  |
| wavelet-HLL | glcm       | Correlation                          | 0.431851672  |
| wavelet-HLL | glcm       | Autocorrelation                      | 266.4252939  |
| wavelet-HLL | glcm       | SumEntropy                           | 5.060013679  |
| wavelet-HLL | glcm       | SumSquares                           | 55.627812    |
| wavelet-HLL | glcm       | ClusterProminence                    | 73096.58896  |
| wavelet-HLL | glcm       | Imc2                                 | 0.991927639  |
| wavelet-HLL | glcm       | Imc1                                 | -0.45487092  |
| wavelet-HLL | glcm       | DifferenceAverage                    | 6.03638716   |
| wavelet-HLL | glcm       | Id                                   | 0.253853982  |
| wavelet-HLL | glcm       | ClusterTendency                      | 161.1248314  |
| wavelet-HLL | firstorder | InterquartileRange                   | 316.8487539  |
| wavelet-HLL | firstorder | Skewness                             | 0.510296566  |
| wavelet-HLL | firstorder | Uniformity                           | 0.047564826  |
| wavelet-HLL | firstorder | Median                               | -71.49733479 |
| wavelet-HLL | firstorder | Energy                               | 5550852.756  |
| wavelet-HLL | firstorder | RobustMeanAbsoluteDeviation          | 118.2675375  |
| wavelet-HLL | firstorder | MeanAbsoluteDeviation                | 162.1392625  |
| wavelet-HLL | firstorder | TotalEnergy                          | 149873024.4  |
| wavelet-HLL | firstorder | Maximum                              | 457.6282812  |
| wavelet-HLL | firstorder | RootMeanSquared                      | 199.8354135  |
| wavelet-HLL | firstorder | 90Percentile                         | 249.302902   |
| wavelet-HLL | firstorder | Minimum                              | -411.0795453 |
| wavelet-HLL | firstorder | Entropy                              | 4.668668506  |
| wavelet-HLL | firstorder | Range                                | 868.7078265  |
| wavelet-HLL | firstorder | Variance                             | 38761.62087  |
| wavelet-HLL | firstorder | 10Percentile                         | -259.4207336 |

|             |            |                                      |              |
|-------------|------------|--------------------------------------|--------------|
| wavelet-HLL | firstorder | Kurtosis                             | 2.393037255  |
| wavelet-HLL | firstorder | Mean                                 | -34.24283308 |
| wavelet-HLL | glrlm      | ShortRunLowGrayLevelEmphasis         | 0.016473502  |
| wavelet-HLL | glrlm      | GrayLevelVariance                    | 62.33967586  |
| wavelet-HLL | glrlm      | LowGrayLevelRunEmphasis              | 0.016658526  |
| wavelet-HLL | glrlm      | GrayLevelNonUniformityNormalized     | 0.046186446  |
| wavelet-HLL | glrlm      | RunVariance                          | 0.041653369  |
| wavelet-HLL | glrlm      | GrayLevelNonUniformity               | 6.182079018  |
| wavelet-HLL | glrlm      | LongRunEmphasis                      | 1.121610949  |
| wavelet-HLL | glrlm      | ShortRunHighGrayLevelEmphasis        | 316.1351725  |
| wavelet-HLL | glrlm      | RunLengthNonUniformity               | 124.5850906  |
| wavelet-HLL | glrlm      | ShortRunEmphasis                     | 0.972203072  |
| wavelet-HLL | glrlm      | LongRunHighGrayLevelEmphasis         | 353.7244609  |
| wavelet-HLL | glrlm      | RunPercentage                        | 0.96292197   |
| wavelet-HLL | glrlm      | LongRunLowGrayLevelEmphasis          | 0.017493156  |
| wavelet-HLL | glrlm      | RunEntropy                           | 4.823864904  |
| wavelet-HLL | glrlm      | HighGrayLevelRunEmphasis             | 323.4089792  |
| wavelet-HLL | glrlm      | RunLengthNonUniformityNormalized     | 0.930029548  |
| wavelet-HLL | glszm      | GrayLevelVariance                    | 73.80358988  |
| wavelet-HLL | glszm      | ZoneVariance                         | 2.107308884  |
| wavelet-HLL | glszm      | GrayLevelNonUniformityNormalized     | 0.039256198  |
| wavelet-HLL | glszm      | SizeZoneNonUniformityNormalized      | 0.556818182  |
| wavelet-HLL | glszm      | SizeZoneNonUniformity                | 49           |
| wavelet-HLL | glszm      | GrayLevelNonUniformity               | 3.454545455  |
| wavelet-HLL | glszm      | LargeAreaEmphasis                    | 4.602272727  |
| wavelet-HLL | glszm      | SmallAreaHighGrayLevelEmphasis       | 278.9238889  |
| wavelet-HLL | glszm      | ZonePercentage                       | 0.633093525  |
| wavelet-HLL | glszm      | LargeAreaLowGrayLevelEmphasis        | 0.046655572  |
| wavelet-HLL | glszm      | LargeAreaHighGrayLevelEmphasis       | 1154.056818  |
| wavelet-HLL | glszm      | HighGrayLevelZoneEmphasis            | 352.4659091  |
| wavelet-HLL | glszm      | SmallAreaEmphasis                    | 0.773933081  |
| wavelet-HLL | glszm      | LowGrayLevelZoneEmphasis             | 0.021706597  |
| wavelet-HLL | glszm      | ZoneEntropy                          | 5.440695931  |
| wavelet-HLL | glszm      | SmallAreaLowGrayLevelEmphasis        | 0.020173853  |
| wavelet-HLL | ngtdm      | Coarseness                           | 0.046019621  |
| wavelet-HLL | ngtdm      | Complexity                           | 1762.254856  |
| wavelet-HLL | ngtdm      | Strength                             | 19.33878788  |
| wavelet-HLL | ngtdm      | Contrast                             | 0.478692962  |
| wavelet-HLL | ngtdm      | Busyness                             | 0.051908483  |
| wavelet-LHL | gldm       | GrayLevelVariance                    | 84.62170695  |
| wavelet-LHL | gldm       | HighGrayLevelEmphasis                | 810.1294964  |
| wavelet-LHL | gldm       | DependenceEntropy                    | 5.737736491  |
| wavelet-LHL | gldm       | DependenceNonUniformity              | 60.68345324  |
| wavelet-LHL | gldm       | GrayLevelNonUniformity               | 5.489208633  |
| wavelet-LHL | gldm       | SmallDependenceEmphasis              | 0.684466427  |
| wavelet-LHL | gldm       | SmallDependenceHighGrayLevelEmphasis | 603.5635931  |
| wavelet-LHL | gldm       | DependenceNonUniformityNormalized    | 0.436571606  |
| wavelet-LHL | gldm       | LargeDependenceEmphasis              | 3.935251799  |
| wavelet-LHL | gldm       | LargeDependenceLowGrayLevelEmphasis  | 0.015638919  |
| wavelet-LHL | gldm       | DependenceVariance                   | 1.125407588  |
| wavelet-LHL | gldm       | LargeDependenceHighGrayLevelEmphasis | 2485.827338  |
| wavelet-LHL | gldm       | SmallDependenceLowGrayLevelEmphasis  | 0.008537589  |
| wavelet-LHL | gldm       | LowGrayLevelEmphasis                 | 0.009202339  |
| wavelet-LHL | glcm       | JointAverage                         | 26.31484114  |
| wavelet-LHL | glcm       | SumAverage                           | 52.62968227  |

|             |            |                                  |              |
|-------------|------------|----------------------------------|--------------|
| wavelet-LHL | glcm       | JointEntropy                     | 7.192084013  |
| wavelet-LHL | glcm       | ClusterShade                     | 1828.648644  |
| wavelet-LHL | glcm       | MaximumProbability               | 0.018574555  |
| wavelet-LHL | glcm       | Idmn                             | 0.964620938  |
| wavelet-LHL | glcm       | JointEnergy                      | 0.007400427  |
| wavelet-LHL | glcm       | Contrast                         | 111.7318927  |
| wavelet-LHL | glcm       | DifferenceEntropy                | 4.167441458  |
| wavelet-LHL | glcm       | InverseVariance                  | 0.134896338  |
| wavelet-LHL | glcm       | DifferenceVariance               | 41.24690632  |
| wavelet-LHL | glcm       | Idn                              | 0.876343947  |
| wavelet-LHL | glcm       | Idm                              | 0.122958347  |
| wavelet-LHL | glcm       | Correlation                      | 0.266233534  |
| wavelet-LHL | glcm       | Autocorrelation                  | 714.3764562  |
| wavelet-LHL | glcm       | SumEntropy                       | 5.171419673  |
| wavelet-LHL | glcm       | SumSquares                       | 77.66107851  |
| wavelet-LHL | glcm       | ClusterProminence                | 140209.594   |
| wavelet-LHL | glcm       | Imc2                             | 0.995692345  |
| wavelet-LHL | glcm       | Imc1                             | -0.499171958 |
| wavelet-LHL | glcm       | DifferenceAverage                | 8.148939347  |
| wavelet-LHL | glcm       | Id                               | 0.209136811  |
| wavelet-LHL | glcm       | ClusterTendency                  | 198.9124214  |
| wavelet-LHL | firstorder | InterquartileRange               | 293.1778961  |
| wavelet-LHL | firstorder | Skewness                         | 0.407179435  |
| wavelet-LHL | firstorder | Uniformity                       | 0.03949071   |
| wavelet-LHL | firstorder | Median                           | -43.4805139  |
| wavelet-LHL | firstorder | Energy                           | 7335793.802  |
| wavelet-LHL | firstorder | RobustMeanAbsoluteDeviation      | 120.3796016  |
| wavelet-LHL | firstorder | MeanAbsoluteDeviation            | 179.5351859  |
| wavelet-LHL | firstorder | TotalEnergy                      | 198066432.6  |
| wavelet-LHL | firstorder | Maximum                          | 627.184419   |
| wavelet-LHL | firstorder | RootMeanSquared                  | 229.7291775  |
| wavelet-LHL | firstorder | 90Percentile                     | 291.3486844  |
| wavelet-LHL | firstorder | Minimum                          | -654.4678538 |
| wavelet-LHL | firstorder | Entropy                          | 4.922637964  |
| wavelet-LHL | firstorder | Range                            | 1281.652273  |
| wavelet-LHL | firstorder | Variance                         | 52572.78529  |
| wavelet-LHL | firstorder | 10Percentile                     | -237.4358067 |
| wavelet-LHL | firstorder | Kurtosis                         | 3.338994981  |
| wavelet-LHL | firstorder | Mean                             | -14.2376151  |
| wavelet-LHL | glrlm      | ShortRunLowGrayLevelEmphasis     | 0.00935138   |
| wavelet-LHL | glrlm      | GrayLevelVariance                | 85.73920245  |
| wavelet-LHL | glrlm      | LowGrayLevelRunEmphasis          | 0.009392879  |
| wavelet-LHL | glrlm      | GrayLevelNonUniformityNormalized | 0.038854226  |
| wavelet-LHL | glrlm      | RunVariance                      | 0.028282657  |
| wavelet-LHL | glrlm      | GrayLevelNonUniformity           | 5.261254545  |
| wavelet-LHL | glrlm      | LongRunEmphasis                  | 1.083243833  |
| wavelet-LHL | glrlm      | ShortRunHighGrayLevelEmphasis    | 803.6727937  |
| wavelet-LHL | glrlm      | RunLengthNonUniformity           | 128.6955473  |
| wavelet-LHL | glrlm      | ShortRunEmphasis                 | 0.980474379  |
| wavelet-LHL | glrlm      | LongRunHighGrayLevelEmphasis     | 865.5907837  |
| wavelet-LHL | glrlm      | RunPercentage                    | 0.973990039  |
| wavelet-LHL | glrlm      | LongRunLowGrayLevelEmphasis      | 0.009571836  |
| wavelet-LHL | glrlm      | RunEntropy                       | 5.032178412  |
| wavelet-LHL | glrlm      | HighGrayLevelRunEmphasis         | 815.6443648  |
| wavelet-LHL | glrlm      | RunLengthNonUniformityNormalized | 0.95011376   |

|             |       |                                      |              |
|-------------|-------|--------------------------------------|--------------|
| wavelet-LHL | glszm | GrayLevelVariance                    | 98.03174603  |
| wavelet-LHL | glszm | ZoneVariance                         | 0.828480726  |
| wavelet-LHL | glszm | GrayLevelNonUniformityNormalized     | 0.034195011  |
| wavelet-LHL | glszm | SizeZoneNonUniformityNormalized      | 0.685623583  |
| wavelet-LHL | glszm | SizeZoneNonUniformity                | 71.99047619  |
| wavelet-LHL | glszm | GrayLevelNonUniformity               | 3.59047619   |
| wavelet-LHL | glszm | LargeAreaEmphasis                    | 2.580952381  |
| wavelet-LHL | glszm | SmallAreaHighGrayLevelEmphasis       | 761.5880952  |
| wavelet-LHL | glszm | ZonePercentage                       | 0.755395683  |
| wavelet-LHL | glszm | LargeAreaLowGrayLevelEmphasis        | 0.014884558  |
| wavelet-LHL | glszm | LargeAreaHighGrayLevelEmphasis       | 1806.07619   |
| wavelet-LHL | glszm | HighGrayLevelZoneEmphasis            | 863.4761905  |
| wavelet-LHL | glszm | SmallAreaEmphasis                    | 0.852906004  |
| wavelet-LHL | glszm | LowGrayLevelZoneEmphasis             | 0.011503579  |
| wavelet-LHL | glszm | ZoneEntropy                          | 5.493169333  |
| wavelet-LHL | glszm | SmallAreaLowGrayLevelEmphasis        | 0.011192012  |
| wavelet-LHL | ngtdm | Coarseness                           | 0.038001018  |
| wavelet-LHL | ngtdm | Complexity                           | 3679.603268  |
| wavelet-LHL | ngtdm | Strength                             | 24.48731826  |
| wavelet-LHL | ngtdm | Contrast                             | 0.66892904   |
| wavelet-LHL | ngtdm | Busyness                             | 0.032458353  |
| wavelet-LHH | gldm  | GrayLevelVariance                    | 27.55923606  |
| wavelet-LHH | gldm  | HighGrayLevelEmphasis                | 209.5179856  |
| wavelet-LHH | gldm  | DependenceEntropy                    | 5.60513071   |
| wavelet-LHH | gldm  | DependenceNonUniformity              | 39.58992806  |
| wavelet-LHH | gldm  | GrayLevelNonUniformity               | 8.841726619  |
| wavelet-LHH | gldm  | SmallDependenceEmphasis              | 0.50198479   |
| wavelet-LHH | gldm  | SmallDependenceHighGrayLevelEmphasis | 115.461031   |
| wavelet-LHH | gldm  | DependenceNonUniformityNormalized    | 0.284819626  |
| wavelet-LHH | gldm  | LargeDependenceEmphasis              | 7.014388489  |
| wavelet-LHH | gldm  | LargeDependenceLowGrayLevelEmphasis  | 0.060021046  |
| wavelet-LHH | gldm  | DependenceVariance                   | 2.136328347  |
| wavelet-LHH | gldm  | LargeDependenceHighGrayLevelEmphasis | 1270.035971  |
| wavelet-LHH | gldm  | SmallDependenceLowGrayLevelEmphasis  | 0.016202337  |
| wavelet-LHH | gldm  | LowGrayLevelEmphasis                 | 0.019634576  |
| wavelet-LHH | glcm  | JointAverage                         | 13.5719321   |
| wavelet-LHH | glcm  | SumAverage                           | 27.1438642   |
| wavelet-LHH | glcm  | JointEntropy                         | 6.858969846  |
| wavelet-LHH | glcm  | ClusterShade                         | 114.125692   |
| wavelet-LHH | glcm  | MaximumProbability                   | 0.024598342  |
| wavelet-LHH | glcm  | Idmn                                 | 0.955495696  |
| wavelet-LHH | glcm  | JointEnergy                          | 0.009864422  |
| wavelet-LHH | glcm  | Contrast                             | 54.21807151  |
| wavelet-LHH | glcm  | DifferenceEntropy                    | 3.733309925  |
| wavelet-LHH | glcm  | InverseVariance                      | 0.184744419  |
| wavelet-LHH | glcm  | DifferenceVariance                   | 22.10062803  |
| wavelet-LHH | glcm  | Idn                                  | 0.863897078  |
| wavelet-LHH | glcm  | Idm                                  | 0.183454239  |
| wavelet-LHH | glcm  | Correlation                          | -0.032475534 |
| wavelet-LHH | glcm  | Autocorrelation                      | 183.3455529  |
| wavelet-LHH | glcm  | SumEntropy                           | 4.511915553  |
| wavelet-LHH | glcm  | SumSquares                           | 26.23932895  |
| wavelet-LHH | glcm  | ClusterProminence                    | 9879.755907  |
| wavelet-LHH | glcm  | Imc2                                 | 0.974046774  |
| wavelet-LHH | glcm  | Imc1                                 | -0.358479759 |

|             |            |                                  |              |
|-------------|------------|----------------------------------|--------------|
| wavelet-LHH | glcm       | DifferenceAverage                | 5.575019506  |
| wavelet-LHH | glcm       | Id                               | 0.272632339  |
| wavelet-LHH | glcm       | ClusterTendency                  | 50.73924431  |
| wavelet-LHH | firstorder | InterquartileRange               | 140.758373   |
| wavelet-LHH | firstorder | Skewness                         | 0.494208548  |
| wavelet-LHH | firstorder | Uniformity                       | 0.063609544  |
| wavelet-LHH | firstorder | Median                           | -5.499026234 |
| wavelet-LHH | firstorder | Energy                           | 2414069.625  |
| wavelet-LHH | firstorder | RobustMeanAbsoluteDeviation      | 63.18112304  |
| wavelet-LHH | firstorder | MeanAbsoluteDeviation            | 98.50380901  |
| wavelet-LHH | firstorder | TotalEnergy                      | 65179879.86  |
| wavelet-LHH | firstorder | Maximum                          | 474.5818351  |
| wavelet-LHH | firstorder | RootMeanSquared                  | 131.7854596  |
| wavelet-LHH | firstorder | 90Percentile                     | 149.2065766  |
| wavelet-LHH | firstorder | Minimum                          | -318.2064006 |
| wavelet-LHH | firstorder | Entropy                          | 4.232444071  |
| wavelet-LHH | firstorder | Range                            | 792.7882358  |
| wavelet-LHH | firstorder | Variance                         | 17367.40722  |
| wavelet-LHH | firstorder | 10Percentile                     | -156.7813233 |
| wavelet-LHH | firstorder | Kurtosis                         | 4.297188576  |
| wavelet-LHH | firstorder | Mean                             | 0.012344199  |
| wavelet-LHH | glrlm      | ShortRunLowGrayLevelEmphasis     | 0.020038322  |
| wavelet-LHH | glrlm      | GrayLevelVariance                | 28.5256882   |
| wavelet-LHH | glrlm      | LowGrayLevelRunEmphasis          | 0.02026675   |
| wavelet-LHH | glrlm      | GrayLevelNonUniformityNormalized | 0.062290966  |
| wavelet-LHH | glrlm      | RunVariance                      | 0.059325474  |
| wavelet-LHH | glrlm      | GrayLevelNonUniformity           | 8.257634861  |
| wavelet-LHH | glrlm      | LongRunEmphasis                  | 1.161255374  |
| wavelet-LHH | glrlm      | ShortRunHighGrayLevelEmphasis    | 204.7975514  |
| wavelet-LHH | glrlm      | RunLengthNonUniformity           | 121.5544821  |
| wavelet-LHH | glrlm      | ShortRunEmphasis                 | 0.966343954  |
| wavelet-LHH | glrlm      | LongRunHighGrayLevelEmphasis     | 240.0521386  |
| wavelet-LHH | glrlm      | RunPercentage                    | 0.953514112  |
| wavelet-LHH | glrlm      | LongRunLowGrayLevelEmphasis      | 0.021370553  |
| wavelet-LHH | glrlm      | RunEntropy                       | 4.43963535   |
| wavelet-LHH | glrlm      | HighGrayLevelRunEmphasis         | 210.9269463  |
| wavelet-LHH | glrlm      | RunLengthNonUniformityNormalized | 0.916244673  |
| wavelet-LHH | glszm      | GrayLevelVariance                | 41.24146771  |
| wavelet-LHH | glszm      | ZoneVariance                     | 3.245954174  |
| wavelet-LHH | glszm      | GrayLevelNonUniformityNormalized | 0.052074988  |
| wavelet-LHH | glszm      | SizeZoneNonUniformityNormalized  | 0.530523954  |
| wavelet-LHH | glszm      | SizeZoneNonUniformity            | 41.91139241  |
| wavelet-LHH | glszm      | GrayLevelNonUniformity           | 4.113924051  |
| wavelet-LHH | glszm      | LargeAreaEmphasis                | 6.341772152  |
| wavelet-LHH | glszm      | SmallAreaHighGrayLevelEmphasis   | 178.486931   |
| wavelet-LHH | glszm      | ZonePercentage                   | 0.568345324  |
| wavelet-LHH | glszm      | LargeAreaLowGrayLevelEmphasis    | 0.064515481  |
| wavelet-LHH | glszm      | LargeAreaHighGrayLevelEmphasis   | 1188.21519   |
| wavelet-LHH | glszm      | HighGrayLevelZoneEmphasis        | 227.443038   |
| wavelet-LHH | glszm      | SmallAreaEmphasis                | 0.755021761  |
| wavelet-LHH | glszm      | LowGrayLevelZoneEmphasis         | 0.029300242  |
| wavelet-LHH | glszm      | ZoneEntropy                      | 5.13125935   |
| wavelet-LHH | glszm      | SmallAreaLowGrayLevelEmphasis    | 0.027612288  |
| wavelet-LHH | ngtdm      | Coarseness                       | 0.042037664  |
| wavelet-LHH | ngtdm      | Complexity                       | 1118.427546  |

|             |            |                                      |              |
|-------------|------------|--------------------------------------|--------------|
| wavelet-LHH | ngtdm      | Strength                             | 9.300162281  |
| wavelet-LHH | ngtdm      | Contrast                             | 0.349743681  |
| wavelet-LHH | ngtdm      | Busyness                             | 0.072249238  |
| wavelet-LLH | gldm       | GrayLevelVariance                    | 40.53537602  |
| wavelet-LLH | gldm       | HighGrayLevelEmphasis                | 294.4676259  |
| wavelet-LLH | gldm       | DependenceEntropy                    | 5.583894203  |
| wavelet-LLH | gldm       | DependenceNonUniformity              | 55.44604317  |
| wavelet-LLH | gldm       | GrayLevelNonUniformity               | 6.81294964   |
| wavelet-LLH | gldm       | SmallDependenceEmphasis              | 0.645809353  |
| wavelet-LLH | gldm       | SmallDependenceHighGrayLevelEmphasis | 206.9063689  |
| wavelet-LLH | gldm       | DependenceNonUniformityNormalized    | 0.398892397  |
| wavelet-LLH | gldm       | LargeDependenceEmphasis              | 3.848920863  |
| wavelet-LLH | gldm       | LargeDependenceLowGrayLevelEmphasis  | 0.032522815  |
| wavelet-LLH | gldm       | DependenceVariance                   | 0.9417732    |
| wavelet-LLH | gldm       | LargeDependenceHighGrayLevelEmphasis | 926.0359712  |
| wavelet-LLH | gldm       | SmallDependenceLowGrayLevelEmphasis  | 0.012758561  |
| wavelet-LLH | gldm       | LowGrayLevelEmphasis                 | 0.015176334  |
| wavelet-LLH | glcm       | JointAverage                         | 15.52990868  |
| wavelet-LLH | glcm       | SumAverage                           | 31.05981735  |
| wavelet-LLH | glcm       | JointEntropy                         | 7.077165654  |
| wavelet-LLH | glcm       | ClusterShade                         | 271.4938214  |
| wavelet-LLH | glcm       | MaximumProbability                   | 0.021045336  |
| wavelet-LLH | glcm       | Idmn                                 | 0.948220448  |
| wavelet-LLH | glcm       | JointEnergy                          | 0.008254592  |
| wavelet-LLH | glcm       | Contrast                             | 62.7991904   |
| wavelet-LLH | glcm       | DifferenceEntropy                    | 3.833828529  |
| wavelet-LLH | glcm       | InverseVariance                      | 0.163287647  |
| wavelet-LLH | glcm       | DifferenceVariance                   | 22.7553858   |
| wavelet-LLH | glcm       | Idn                                  | 0.849296351  |
| wavelet-LLH | glcm       | Idm                                  | 0.142224054  |
| wavelet-LLH | glcm       | Correlation                          | 0.147721386  |
| wavelet-LLH | glcm       | Autocorrelation                      | 246.9851191  |
| wavelet-LLH | glcm       | SumEntropy                           | 4.803309492  |
| wavelet-LLH | glcm       | SumSquares                           | 37.15040549  |
| wavelet-LLH | glcm       | ClusterProminence                    | 24018.62756  |
| wavelet-LLH | glcm       | Imc2                                 | 0.988648579  |
| wavelet-LLH | glcm       | Imc1                                 | -0.425583965 |
| wavelet-LLH | glcm       | DifferenceAverage                    | 6.234541527  |
| wavelet-LLH | glcm       | Id                                   | 0.234528596  |
| wavelet-LLH | glcm       | ClusterTendency                      | 85.80243158  |
| wavelet-LLH | firstorder | InterquartileRange                   | 204.5731135  |
| wavelet-LLH | firstorder | Skewness                             | 0.226409706  |
| wavelet-LLH | firstorder | Uniformity                           | 0.049014026  |
| wavelet-LLH | firstorder | Median                               | -62.69186869 |
| wavelet-LLH | firstorder | Energy                               | 3724061.226  |
| wavelet-LLH | firstorder | RobustMeanAbsoluteDeviation          | 90.94953446  |
| wavelet-LLH | firstorder | MeanAbsoluteDeviation                | 129.2077661  |
| wavelet-LLH | firstorder | TotalEnergy                          | 100549653.1  |
| wavelet-LLH | firstorder | Maximum                              | 359.1560923  |
| wavelet-LLH | firstorder | RootMeanSquared                      | 163.6820313  |
| wavelet-LLH | firstorder | 90Percentile                         | 172.7537353  |
| wavelet-LLH | firstorder | Minimum                              | -406.38519   |
| wavelet-LLH | firstorder | Entropy                              | 4.592167234  |
| wavelet-LLH | firstorder | Range                                | 765.5412823  |
| wavelet-LLH | firstorder | Variance                             | 25204.59825  |

|             |            |                                      |              |
|-------------|------------|--------------------------------------|--------------|
| wavelet-LLH | firstorder | 10Percentile                         | -231.7908983 |
| wavelet-LLH | firstorder | Kurtosis                             | 2.70071891   |
| wavelet-LLH | firstorder | Mean                                 | -39.83979331 |
| wavelet-LLH | glrlm      | ShortRunLowGrayLevelEmphasis         | 0.015293666  |
| wavelet-LLH | glrlm      | GrayLevelVariance                    | 41.22902085  |
| wavelet-LLH | glrlm      | LowGrayLevelRunEmphasis              | 0.015424173  |
| wavelet-LLH | glrlm      | GrayLevelNonUniformityNormalized     | 0.048265837  |
| wavelet-LLH | glrlm      | RunVariance                          | 0.028226596  |
| wavelet-LLH | glrlm      | GrayLevelNonUniformity               | 6.527682904  |
| wavelet-LLH | glrlm      | LongRunEmphasis                      | 1.085072339  |
| wavelet-LLH | glrlm      | ShortRunHighGrayLevelEmphasis        | 291.4599856  |
| wavelet-LLH | glrlm      | RunLengthNonUniformity               | 128.075203   |
| wavelet-LLH | glrlm      | ShortRunEmphasis                     | 0.979365027  |
| wavelet-LLH | glrlm      | LongRunHighGrayLevelEmphasis         | 315.8186864  |
| wavelet-LLH | glrlm      | RunPercentage                        | 0.972883232  |
| wavelet-LLH | glrlm      | LongRunLowGrayLevelEmphasis          | 0.015961189  |
| wavelet-LLH | glrlm      | RunEntropy                           | 4.712950981  |
| wavelet-LLH | glrlm      | HighGrayLevelRunEmphasis             | 296.246129   |
| wavelet-LLH | glrlm      | RunLengthNonUniformityNormalized     | 0.946889637  |
| wavelet-LLH | glszm      | GrayLevelVariance                    | 49.44352617  |
| wavelet-LLH | glszm      | ZoneVariance                         | 1.230690746  |
| wavelet-LLH | glszm      | GrayLevelNonUniformityNormalized     | 0.042342618  |
| wavelet-LLH | glszm      | SizeZoneNonUniformityNormalized      | 0.653504744  |
| wavelet-LLH | glszm      | SizeZoneNonUniformity                | 64.6969697   |
| wavelet-LLH | glszm      | GrayLevelNonUniformity               | 4.191919192  |
| wavelet-LLH | glszm      | LargeAreaEmphasis                    | 3.202020202  |
| wavelet-LLH | glszm      | SmallAreaHighGrayLevelEmphasis       | 271.982033   |
| wavelet-LLH | glszm      | ZonePercentage                       | 0.712230216  |
| wavelet-LLH | glszm      | LargeAreaLowGrayLevelEmphasis        | 0.031998015  |
| wavelet-LLH | glszm      | LargeAreaHighGrayLevelEmphasis       | 799.2424242  |
| wavelet-LLH | glszm      | HighGrayLevelZoneEmphasis            | 317.2121212  |
| wavelet-LLH | glszm      | SmallAreaEmphasis                    | 0.834171491  |
| wavelet-LLH | glszm      | LowGrayLevelZoneEmphasis             | 0.018644447  |
| wavelet-LLH | glszm      | ZoneEntropy                          | 5.357764989  |
| wavelet-LLH | glszm      | SmallAreaLowGrayLevelEmphasis        | 0.017400397  |
| wavelet-LLH | ngtdm      | Coarseness                           | 0.0447769    |
| wavelet-LLH | ngtdm      | Complexity                           | 1511.508838  |
| wavelet-LLH | ngtdm      | Strength                             | 12.42429285  |
| wavelet-LLH | ngtdm      | Contrast                             | 0.383688028  |
| wavelet-LLH | ngtdm      | Busyness                             | 0.055724119  |
| wavelet-LLL | gldm       | GrayLevelVariance                    | 393.3218777  |
| wavelet-LLL | gldm       | HighGrayLevelEmphasis                | 2238.611511  |
| wavelet-LLL | gldm       | DependenceEntropy                    | 6.033810947  |
| wavelet-LLL | gldm       | DependenceNonUniformity              | 75.77697842  |
| wavelet-LLL | gldm       | GrayLevelNonUniformity               | 2.726618705  |
| wavelet-LLL | gldm       | SmallDependenceEmphasis              | 0.763389289  |
| wavelet-LLL | gldm       | SmallDependenceHighGrayLevelEmphasis | 1544.923261  |
| wavelet-LLL | gldm       | DependenceNonUniformityNormalized    | 0.545158118  |
| wavelet-LLL | gldm       | LargeDependenceEmphasis              | 2.26618705   |
| wavelet-LLL | gldm       | LargeDependenceLowGrayLevelEmphasis  | 0.009927323  |
| wavelet-LLL | gldm       | DependenceVariance                   | 0.378034263  |
| wavelet-LLL | gldm       | LargeDependenceHighGrayLevelEmphasis | 6491.446043  |
| wavelet-LLL | gldm       | SmallDependenceLowGrayLevelEmphasis  | 0.008130277  |
| wavelet-LLL | gldm       | LowGrayLevelEmphasis                 | 0.008470201  |
| wavelet-LLL | glcm       | JointAverage                         | 48.67487258  |

|             |            |                                  |              |
|-------------|------------|----------------------------------|--------------|
| wavelet-LLL | glcm       | SumAverage                       | 97.34974516  |
| wavelet-LLL | glcm       | JointEntropy                     | 7.425164939  |
| wavelet-LLL | glcm       | ClusterShade                     | -1322.658753 |
| wavelet-LLL | glcm       | MaximumProbability               | 0.011209192  |
| wavelet-LLL | glcm       | Idmn                             | 0.936463995  |
| wavelet-LLL | glcm       | JointEnergy                      | 0.005948415  |
| wavelet-LLL | glcm       | Contrast                         | 466.8719554  |
| wavelet-LLL | glcm       | DifferenceEntropy                | 4.969865737  |
| wavelet-LLL | glcm       | InverseVariance                  | 0.056392178  |
| wavelet-LLL | glcm       | DifferenceVariance               | 146.940305   |
| wavelet-LLL | glcm       | Idn                              | 0.831369775  |
| wavelet-LLL | glcm       | Idm                              | 0.058056569  |
| wavelet-LLL | glcm       | Correlation                      | 0.380183118  |
| wavelet-LLL | glcm       | Autocorrelation                  | 2517.681615  |
| wavelet-LLL | glcm       | SumEntropy                       | 5.896989154  |
| wavelet-LLL | glcm       | SumSquares                       | 380.3456533  |
| wavelet-LLL | glcm       | ClusterProminence                | 2312811.052  |
| wavelet-LLL | glcm       | Imc2                             | 0.999819547  |
| wavelet-LLL | glcm       | Imc1                             | -0.697657453 |
| wavelet-LLL | glcm       | DifferenceAverage                | 17.56092167  |
| wavelet-LLL | glcm       | Id                               | 0.120530054  |
| wavelet-LLL | glcm       | ClusterTendency                  | 1054.510658  |
| wavelet-LLL | firstorder | InterquartileRange               | 778.0407519  |
| wavelet-LLL | firstorder | Skewness                         | 0.132670183  |
| wavelet-LLL | firstorder | Uniformity                       | 0.019615962  |
| wavelet-LLL | firstorder | Median                           | -692.8060958 |
| wavelet-LLL | firstorder | Energy                           | 99987221.59  |
| wavelet-LLL | firstorder | RobustMeanAbsoluteDeviation      | 330.0690545  |
| wavelet-LLL | firstorder | MeanAbsoluteDeviation            | 423.8517822  |
| wavelet-LLL | firstorder | TotalEnergy                      | 2699654983   |
| wavelet-LLL | firstorder | Maximum                          | 206.3070261  |
| wavelet-LLL | firstorder | RootMeanSquared                  | 848.1347354  |
| wavelet-LLL | firstorder | 90Percentile                     | 57.60829707  |
| wavelet-LLL | firstorder | Minimum                          | -1740.123131 |
| wavelet-LLL | firstorder | Entropy                          | 5.813457058  |
| wavelet-LLL | firstorder | Range                            | 1946.430158  |
| wavelet-LLL | firstorder | Variance                         | 244915.1051  |
| wavelet-LLL | firstorder | 10Percentile                     | -1297.995982 |
| wavelet-LLL | firstorder | Kurtosis                         | 1.971022195  |
| wavelet-LLL | firstorder | Mean                             | -688.7796631 |
| wavelet-LLL | glrlm      | ShortRunLowGrayLevelEmphasis     | 0.008562465  |
| wavelet-LLL | glrlm      | GrayLevelVariance                | 389.4655641  |
| wavelet-LLL | glrlm      | LowGrayLevelRunEmphasis          | 0.008576435  |
| wavelet-LLL | glrlm      | GrayLevelNonUniformityNormalized | 0.019632515  |
| wavelet-LLL | glrlm      | RunVariance                      | 0.01437798   |
| wavelet-LLL | glrlm      | GrayLevelNonUniformity           | 2.689670968  |
| wavelet-LLL | glrlm      | LongRunEmphasis                  | 1.044223175  |
| wavelet-LLL | glrlm      | ShortRunHighGrayLevelEmphasis    | 2189.16085   |
| wavelet-LLL | glrlm      | RunLengthNonUniformity           | 133.0980143  |
| wavelet-LLL | glrlm      | ShortRunEmphasis                 | 0.988944206  |
| wavelet-LLL | glrlm      | LongRunHighGrayLevelEmphasis     | 2365.839773  |
| wavelet-LLL | glrlm      | RunPercentage                    | 0.985611511  |
| wavelet-LLL | glrlm      | LongRunLowGrayLevelEmphasis      | 0.008632313  |
| wavelet-LLL | glrlm      | RunEntropy                       | 5.838991665  |
| wavelet-LLL | glrlm      | HighGrayLevelRunEmphasis         | 2224.496635  |



|             |       |                                      |              |
|-------------|-------|--------------------------------------|--------------|
| wavelet-LLL | glrlm | RunLengthNonUniformityNormalized     | 0.971244041  |
| wavelet-LLL | glszm | GrayLevelVariance                    | 345.9473098  |
| wavelet-LLL | glszm | ZoneVariance                         | 0.227928062  |
| wavelet-LLL | glszm | GrayLevelNonUniformityNormalized     | 0.020065398  |
| wavelet-LLL | glszm | SizeZoneNonUniformityNormalized      | 0.7171522    |
| wavelet-LLL | glszm | SizeZoneNonUniformity                | 83.18965517  |
| wavelet-LLL | glszm | GrayLevelNonUniformity               | 2.327586207  |
| wavelet-LLL | glszm | LargeAreaEmphasis                    | 1.663793103  |
| wavelet-LLL | glszm | SmallAreaHighGrayLevelEmphasis       | 1740.860153  |
| wavelet-LLL | glszm | ZonePercentage                       | 0.834532374  |
| wavelet-LLL | glszm | LargeAreaLowGrayLevelEmphasis        | 0.010733294  |
| wavelet-LLL | glszm | LargeAreaHighGrayLevelEmphasis       | 4131.008621  |
| wavelet-LLL | glszm | HighGrayLevelZoneEmphasis            | 2096.215517  |
| wavelet-LLL | glszm | SmallAreaEmphasis                    | 0.8723659    |
| wavelet-LLL | glszm | LowGrayLevelZoneEmphasis             | 0.00987295   |
| wavelet-LLL | glszm | ZoneEntropy                          | 5.973770435  |
| wavelet-LLL | glszm | SmallAreaLowGrayLevelEmphasis        | 0.009674688  |
| wavelet-LLL | ngtdm | Coarseness                           | 0.033170648  |
| wavelet-LLL | ngtdm | Complexity                           | 20082.14556  |
| wavelet-LLL | ngtdm | Strength                             | 63.95470051  |
| wavelet-LLL | ngtdm | Contrast                             | 2.340363358  |
| wavelet-LLL | ngtdm | Busyness                             | 0.015316203  |
| wavelet-HHL | gldm  | GrayLevelVariance                    | 20.56084054  |
| wavelet-HHL | gldm  | HighGrayLevelEmphasis                | 204.8561151  |
| wavelet-HHL | gldm  | DependenceEntropy                    | 5.579995727  |
| wavelet-HHL | gldm  | DependenceNonUniformity              | 38.00719424  |
| wavelet-HHL | gldm  | GrayLevelNonUniformity               | 9.949640288  |
| wavelet-HHL | gldm  | SmallDependenceEmphasis              | 0.45675786   |
| wavelet-HHL | gldm  | SmallDependenceHighGrayLevelEmphasis | 94.17415505  |
| wavelet-HHL | gldm  | DependenceNonUniformityNormalized    | 0.273433052  |
| wavelet-HHL | gldm  | LargeDependenceEmphasis              | 7.73381295   |
| wavelet-HHL | gldm  | LargeDependenceLowGrayLevelEmphasis  | 0.109270948  |
| wavelet-HHL | gldm  | DependenceVariance                   | 2.400703897  |
| wavelet-HHL | gldm  | LargeDependenceHighGrayLevelEmphasis | 1518.640288  |
| wavelet-HHL | gldm  | SmallDependenceLowGrayLevelEmphasis  | 0.009790809  |
| wavelet-HHL | gldm  | LowGrayLevelEmphasis                 | 0.024718479  |
| wavelet-HHL | glcm  | JointAverage                         | 13.54841391  |
| wavelet-HHL | glcm  | SumAverage                           | 27.09682782  |
| wavelet-HHL | glcm  | JointEntropy                         | 6.698718853  |
| wavelet-HHL | glcm  | ClusterShade                         | -54.58393918 |
| wavelet-HHL | glcm  | MaximumProbability                   | 0.032148718  |
| wavelet-HHL | glcm  | Idmn                                 | 0.944580556  |
| wavelet-HHL | glcm  | JointEnergy                          | 0.011464655  |
| wavelet-HHL | glcm  | Contrast                             | 38.98639258  |
| wavelet-HHL | glcm  | DifferenceEntropy                    | 3.552655879  |
| wavelet-HHL | glcm  | InverseVariance                      | 0.217212569  |
| wavelet-HHL | glcm  | DifferenceVariance                   | 15.84347492  |
| wavelet-HHL | glcm  | Idn                                  | 0.850019434  |
| wavelet-HHL | glcm  | Idm                                  | 0.207397246  |
| wavelet-HHL | glcm  | Correlation                          | -0.031325889 |
| wavelet-HHL | glcm  | Autocorrelation                      | 182.9105007  |
| wavelet-HHL | glcm  | SumEntropy                           | 4.308383073  |
| wavelet-HHL | glcm  | SumSquares                           | 18.81220592  |
| wavelet-HHL | glcm  | ClusterProminence                    | 4721.329793  |
| wavelet-HHL | glcm  | Imc2                                 | 0.961521266  |

|             |            |                                  |              |
|-------------|------------|----------------------------------|--------------|
| wavelet-HHL | glcm       | Imc1                             | -0.324829549 |
| wavelet-HHL | glcm       | DifferenceAverage                | 4.73627589   |
| wavelet-HHL | glcm       | Id                               | 0.297382431  |
| wavelet-HHL | glcm       | ClusterTendency                  | 36.26243109  |
| wavelet-HHL | firstorder | InterquartileRange               | 140.3900628  |
| wavelet-HHL | firstorder | Skewness                         | -0.295718294 |
| wavelet-HHL | firstorder | Uniformity                       | 0.071580146  |
| wavelet-HHL | firstorder | Median                           | 2.127199373  |
| wavelet-HHL | firstorder | Energy                           | 1783835.55   |
| wavelet-HHL | firstorder | RobustMeanAbsoluteDeviation      | 56.3972431   |
| wavelet-HHL | firstorder | MeanAbsoluteDeviation            | 86.44505292  |
| wavelet-HHL | firstorder | TotalEnergy                      | 48163559.84  |
| wavelet-HHL | firstorder | Maximum                          | 256.3135943  |
| wavelet-HHL | firstorder | RootMeanSquared                  | 113.2843735  |
| wavelet-HHL | firstorder | 90Percentile                     | 147.3534176  |
| wavelet-HHL | firstorder | Minimum                          | -317.3435704 |
| wavelet-HHL | firstorder | Entropy                          | 4.099367214  |
| wavelet-HHL | firstorder | Range                            | 573.6571647  |
| wavelet-HHL | firstorder | Variance                         | 12831.42966  |
| wavelet-HHL | firstorder | 10Percentile                     | -130.2872541 |
| wavelet-HHL | firstorder | Kurtosis                         | 3.264561327  |
| wavelet-HHL | firstorder | Mean                             | 1.385503146  |
| wavelet-HHL | glrlm      | ShortRunLowGrayLevelEmphasis     | 0.024341032  |
| wavelet-HHL | glrlm      | GrayLevelVariance                | 21.18208476  |
| wavelet-HHL | glrlm      | LowGrayLevelRunEmphasis          | 0.025065966  |
| wavelet-HHL | glrlm      | GrayLevelNonUniformityNormalized | 0.069404534  |
| wavelet-HHL | glrlm      | RunVariance                      | 0.053708402  |
| wavelet-HHL | glrlm      | GrayLevelNonUniformity           | 9.161669333  |
| wavelet-HHL | glrlm      | LongRunEmphasis                  | 1.163925603  |
| wavelet-HHL | glrlm      | ShortRunHighGrayLevelEmphasis    | 197.5963164  |
| wavelet-HHL | glrlm      | RunLengthNonUniformity           | 119.2273172  |
| wavelet-HHL | glrlm      | ShortRunEmphasis                 | 0.961002454  |
| wavelet-HHL | glrlm      | LongRunHighGrayLevelEmphasis     | 237.6116721  |
| wavelet-HHL | glrlm      | RunPercentage                    | 0.949640288  |
| wavelet-HHL | glrlm      | LongRunLowGrayLevelEmphasis      | 0.028004843  |
| wavelet-HHL | glrlm      | RunEntropy                       | 4.336114854  |
| wavelet-HHL | glrlm      | HighGrayLevelRunEmphasis         | 205.2717479  |
| wavelet-HHL | glrlm      | RunLengthNonUniformityNormalized | 0.902563075  |
| wavelet-HHL | glszm      | GrayLevelVariance                | 27.23359757  |
| wavelet-HHL | glszm      | ZoneVariance                     | 2.910102884  |
| wavelet-HHL | glszm      | GrayLevelNonUniformityNormalized | 0.056839265  |
| wavelet-HHL | glszm      | SizeZoneNonUniformityNormalized  | 0.447124304  |
| wavelet-HHL | glszm      | SizeZoneNonUniformity            | 34.42857143  |
| wavelet-HHL | glszm      | GrayLevelNonUniformity           | 4.376623377  |
| wavelet-HHL | glszm      | LargeAreaEmphasis                | 6.168831169  |
| wavelet-HHL | glszm      | SmallAreaHighGrayLevelEmphasis   | 142.089228   |
| wavelet-HHL | glszm      | ZonePercentage                   | 0.553956835  |
| wavelet-HHL | glszm      | LargeAreaLowGrayLevelEmphasis    | 0.097143563  |
| wavelet-HHL | glszm      | LargeAreaHighGrayLevelEmphasis   | 1224.766234  |
| wavelet-HHL | glszm      | HighGrayLevelZoneEmphasis        | 207.9090909  |
| wavelet-HHL | glszm      | SmallAreaEmphasis                | 0.690758478  |
| wavelet-HHL | glszm      | LowGrayLevelZoneEmphasis         | 0.025785302  |
| wavelet-HHL | glszm      | ZoneEntropy                      | 5.237121443  |
| wavelet-HHL | glszm      | SmallAreaLowGrayLevelEmphasis    | 0.013339339  |
| wavelet-HHL | ngtdm      | Coarseness                       | 0.042780471  |

|             |            |                                      |              |
|-------------|------------|--------------------------------------|--------------|
| wavelet-HHL | ngtdm      | Complexity                           | 766.2850782  |
| wavelet-HHL | ngtdm      | Strength                             | 6.515640628  |
| wavelet-HHL | ngtdm      | Contrast                             | 0.27493135   |
| wavelet-HHL | ngtdm      | Busyness                             | 0.070434556  |
| wavelet-HLH | gldm       | GrayLevelVariance                    | 21.44920035  |
| wavelet-HLH | gldm       | HighGrayLevelEmphasis                | 234.5251799  |
| wavelet-HLH | gldm       | DependenceEntropy                    | 5.496357937  |
| wavelet-HLH | gldm       | DependenceNonUniformity              | 42.42446043  |
| wavelet-HLH | gldm       | GrayLevelNonUniformity               | 9.690647482  |
| wavelet-HLH | gldm       | SmallDependenceEmphasis              | 0.47251199   |
| wavelet-HLH | gldm       | SmallDependenceHighGrayLevelEmphasis | 100.0940927  |
| wavelet-HLH | gldm       | DependenceNonUniformityNormalized    | 0.305211946  |
| wavelet-HLH | gldm       | LargeDependenceEmphasis              | 5.618705036  |
| wavelet-HLH | gldm       | LargeDependenceLowGrayLevelEmphasis  | 0.038066455  |
| wavelet-HLH | gldm       | DependenceVariance                   | 1.295895658  |
| wavelet-HLH | gldm       | LargeDependenceHighGrayLevelEmphasis | 1413.359712  |
| wavelet-HLH | gldm       | SmallDependenceLowGrayLevelEmphasis  | 0.01413622   |
| wavelet-HLH | gldm       | LowGrayLevelEmphasis                 | 0.01673819   |
| wavelet-HLH | glcm       | JointAverage                         | 14.65971838  |
| wavelet-HLH | glcm       | SumAverage                           | 29.31943676  |
| wavelet-HLH | glcm       | JointEntropy                         | 6.79126655   |
| wavelet-HLH | glcm       | ClusterShade                         | -59.23664723 |
| wavelet-HLH | glcm       | MaximumProbability                   | 0.025499024  |
| wavelet-HLH | glcm       | Idmn                                 | 0.953742046  |
| wavelet-HLH | glcm       | JointEnergy                          | 0.010331373  |
| wavelet-HLH | glcm       | Contrast                             | 45.54622258  |
| wavelet-HLH | glcm       | DifferenceEntropy                    | 3.659023156  |
| wavelet-HLH | glcm       | InverseVariance                      | 0.18240524   |
| wavelet-HLH | glcm       | DifferenceVariance                   | 17.03740419  |
| wavelet-HLH | glcm       | Idn                                  | 0.858438978  |
| wavelet-HLH | glcm       | Idm                                  | 0.177123167  |
| wavelet-HLH | glcm       | Correlation                          | -0.038514568 |
| wavelet-HLH | glcm       | Autocorrelation                      | 214.0396022  |
| wavelet-HLH | glcm       | SumEntropy                           | 4.403856721  |
| wavelet-HLH | glcm       | SumSquares                           | 21.89097274  |
| wavelet-HLH | glcm       | ClusterProminence                    | 6146.031907  |
| wavelet-HLH | glcm       | Imc2                                 | 0.96131554   |
| wavelet-HLH | glcm       | Imc1                                 | -0.320623047 |
| wavelet-HLH | glcm       | DifferenceAverage                    | 5.248861987  |
| wavelet-HLH | glcm       | Id                                   | 0.270284994  |
| wavelet-HLH | glcm       | ClusterTendency                      | 42.01766839  |
| wavelet-HLH | firstorder | InterquartileRange                   | 158.0928037  |
| wavelet-HLH | firstorder | Skewness                             | -0.17175611  |
| wavelet-HLH | firstorder | Uniformity                           | 0.069716888  |
| wavelet-HLH | firstorder | Median                               | 3.509490703  |
| wavelet-HLH | firstorder | Energy                               | 1864447.206  |
| wavelet-HLH | firstorder | RobustMeanAbsoluteDeviation          | 66.64011876  |
| wavelet-HLH | firstorder | MeanAbsoluteDeviation                | 92.99046751  |
| wavelet-HLH | firstorder | TotalEnergy                          | 50340074.57  |
| wavelet-HLH | firstorder | Maximum                              | 351.6022318  |
| wavelet-HLH | firstorder | RootMeanSquared                      | 115.8157556  |
| wavelet-HLH | firstorder | 90Percentile                         | 147.3233538  |
| wavelet-HLH | firstorder | Minimum                              | -340.5875701 |
| wavelet-HLH | firstorder | Entropy                              | 4.051964161  |
| wavelet-HLH | firstorder | Range                                | 692.1898019  |

|             |            |                                  |              |
|-------------|------------|----------------------------------|--------------|
| wavelet-HLH | firstorder | Variance                         | 13410.59451  |
| wavelet-HLH | firstorder | 10Percentile                     | -134.7318019 |
| wavelet-HLH | firstorder | Kurtosis                         | 3.269164651  |
| wavelet-HLH | firstorder | Mean                             | 1.641566283  |
| wavelet-HLH | glrlm      | ShortRunLowGrayLevelEmphasis     | 0.017112574  |
| wavelet-HLH | glrlm      | GrayLevelVariance                | 21.86482426  |
| wavelet-HLH | glrlm      | LowGrayLevelRunEmphasis          | 0.017259821  |
| wavelet-HLH | glrlm      | GrayLevelNonUniformityNormalized | 0.069196257  |
| wavelet-HLH | glrlm      | RunVariance                      | 0.047203411  |
| wavelet-HLH | glrlm      | GrayLevelNonUniformity           | 9.219207129  |
| wavelet-HLH | glrlm      | LongRunEmphasis                  | 1.136111838  |
| wavelet-HLH | glrlm      | ShortRunHighGrayLevelEmphasis    | 225.7801919  |
| wavelet-HLH | glrlm      | RunLengthNonUniformity           | 122.9154094  |
| wavelet-HLH | glrlm      | ShortRunEmphasis                 | 0.969190721  |
| wavelet-HLH | glrlm      | LongRunHighGrayLevelEmphasis     | 268.5387763  |
| wavelet-HLH | glrlm      | RunPercentage                    | 0.958494743  |
| wavelet-HLH | glrlm      | LongRunLowGrayLevelEmphasis      | 0.017898645  |
| wavelet-HLH | glrlm      | RunEntropy                       | 4.229200436  |
| wavelet-HLH | glrlm      | HighGrayLevelRunEmphasis         | 233.6109319  |
| wavelet-HLH | glrlm      | RunLengthNonUniformityNormalized | 0.922339662  |
| wavelet-HLH | glszm      | GrayLevelVariance                | 27.26758711  |
| wavelet-HLH | glszm      | ZoneVariance                     | 1.862754767  |
| wavelet-HLH | glszm      | GrayLevelNonUniformityNormalized | 0.063445102  |
| wavelet-HLH | glszm      | SizeZoneNonUniformityNormalized  | 0.440828402  |
| wavelet-HLH | glszm      | SizeZoneNonUniformity            | 34.38461538  |
| wavelet-HLH | glszm      | GrayLevelNonUniformity           | 4.948717949  |
| wavelet-HLH | glszm      | LargeAreaEmphasis                | 5.038461538  |
| wavelet-HLH | glszm      | SmallAreaHighGrayLevelEmphasis   | 138.5956088  |
| wavelet-HLH | glszm      | ZonePercentage                   | 0.561151079  |
| wavelet-HLH | glszm      | LargeAreaLowGrayLevelEmphasis    | 0.044632543  |
| wavelet-HLH | glszm      | LargeAreaHighGrayLevelEmphasis   | 1260.730769  |
| wavelet-HLH | glszm      | HighGrayLevelZoneEmphasis        | 216.1538462  |
| wavelet-HLH | glszm      | SmallAreaEmphasis                | 0.688803201  |
| wavelet-HLH | glszm      | LowGrayLevelZoneEmphasis         | 0.026080467  |
| wavelet-HLH | glszm      | ZoneEntropy                      | 5.256162797  |
| wavelet-HLH | glszm      | SmallAreaLowGrayLevelEmphasis    | 0.024438334  |
| wavelet-HLH | ngtdm      | Coarseness                       | 0.034422025  |
| wavelet-HLH | ngtdm      | Complexity                       | 772.3612481  |
| wavelet-HLH | ngtdm      | Strength                         | 5.85213285   |
| wavelet-HLH | ngtdm      | Contrast                         | 0.364357035  |
| wavelet-HLH | ngtdm      | Busyness                         | 0.099652344  |

|            |               |                                      |                                                                                                                                                                                                                                                                                                                                                                                                                   |
|------------|---------------|--------------------------------------|-------------------------------------------------------------------------------------------------------------------------------------------------------------------------------------------------------------------------------------------------------------------------------------------------------------------------------------------------------------------------------------------------------------------|
| Image type | Feature Class | Feature Name                         | 502: RTSTRUCT: C99-DNU_segment_GTVp_RUL                                                                                                                                                                                                                                                                                                                                                                           |
| general    | info          | BoundingBox                          | (1, 0, 1, 5, 6, 4)                                                                                                                                                                                                                                                                                                                                                                                                |
| general    | info          | EnabledImageTypes                    | {u'Original': {}, u'Wavelet': {}}                                                                                                                                                                                                                                                                                                                                                                                 |
|            |               |                                      | {'distances': [1], 'additionalInfo': True, 'force2D': False, 'interpolator': 'sitkBSpline', 'resampledPixelSpacing': [3.0], 'label': 1, 'normalizeScale': 1, 'normalize': False, 'force2Ddimension': 0, 'removeOutliers': None, 'minimumROISize': None, u'binWidth': 25.0, 'minimumROIDimensions': 1, u'correctMask': True, 'preCrop': False, u'symmetricalGLCM': True, 'resegmentRange': None, 'padDistance': 5} |
| general    | info          | GeneralSettings                      | 865f4fff9208af09a0a146636c02c83a725d85a8                                                                                                                                                                                                                                                                                                                                                                          |
| general    | info          | ImageHash                            |                                                                                                                                                                                                                                                                                                                                                                                                                   |
| general    | info          | ImageSpacing                         | (0.9765625000000002, 0.9765625000000002, 2.0)                                                                                                                                                                                                                                                                                                                                                                     |
| general    | info          | MaskHash                             | 8b6f86499f2b37e5c2cda4ea1ed85c80f9a28d3a                                                                                                                                                                                                                                                                                                                                                                          |
| general    | info          | NumpyVersion                         | 1.13.1                                                                                                                                                                                                                                                                                                                                                                                                            |
| general    | info          | PyWaveletVersion                     | 0.5.2                                                                                                                                                                                                                                                                                                                                                                                                             |
| general    | info          | SimpleITKVersion                     | 1.1.0                                                                                                                                                                                                                                                                                                                                                                                                             |
| general    | info          | Version                              | 1.3.0.post102+g1b0eb74                                                                                                                                                                                                                                                                                                                                                                                            |
| general    | info          | VolumeNum                            | 1                                                                                                                                                                                                                                                                                                                                                                                                                 |
| general    | info          | VoxelNum                             | 63                                                                                                                                                                                                                                                                                                                                                                                                                |
| original   | shape         | Maximum3DDiameter                    | 18                                                                                                                                                                                                                                                                                                                                                                                                                |
| original   | shape         | Maximum2DDiameterSlice               | 15                                                                                                                                                                                                                                                                                                                                                                                                                |
| original   | shape         | Sphericity                           | 0.899432551                                                                                                                                                                                                                                                                                                                                                                                                       |
| original   | shape         | MinorAxis                            | 12.84316708                                                                                                                                                                                                                                                                                                                                                                                                       |
| original   | shape         | Elongation                           | 0.814706374                                                                                                                                                                                                                                                                                                                                                                                                       |
| original   | shape         | SurfaceVolumeRatio                   | 0.450416286                                                                                                                                                                                                                                                                                                                                                                                                       |
| original   | shape         | Volume                               | 1701                                                                                                                                                                                                                                                                                                                                                                                                              |
| original   | shape         | MajorAxis                            | 15.76416669                                                                                                                                                                                                                                                                                                                                                                                                       |
| original   | shape         | SurfaceArea                          | 766.1581033                                                                                                                                                                                                                                                                                                                                                                                                       |
| original   | shape         | Flatness                             | 0.772747855                                                                                                                                                                                                                                                                                                                                                                                                       |
| original   | shape         | LeastAxis                            | 12.18172599                                                                                                                                                                                                                                                                                                                                                                                                       |
| original   | shape         | Maximum2DDiameterColumn              | 15                                                                                                                                                                                                                                                                                                                                                                                                                |
| original   | shape         | Maximum2DDiameterRow                 | 13.41640786                                                                                                                                                                                                                                                                                                                                                                                                       |
| original   | gldm          | GrayLevelVariance                    | 76.33308138                                                                                                                                                                                                                                                                                                                                                                                                       |
| original   | gldm          | HighGrayLevelEmphasis                | 476.968254                                                                                                                                                                                                                                                                                                                                                                                                        |
| original   | gldm          | DependenceEntropy                    | 4.875945352                                                                                                                                                                                                                                                                                                                                                                                                       |
| original   | gldm          | DependenceNonUniformity              | 26.74603175                                                                                                                                                                                                                                                                                                                                                                                                       |
| original   | gldm          | GrayLevelNonUniformity               | 2.936507937                                                                                                                                                                                                                                                                                                                                                                                                       |
| original   | gldm          | SmallDependenceEmphasis              | 0.670943563                                                                                                                                                                                                                                                                                                                                                                                                       |
| original   | gldm          | SmallDependenceHighGrayLevelEmphasis | 259.7465608                                                                                                                                                                                                                                                                                                                                                                                                       |
| original   | gldm          | DependenceNonUniformityNormalized    | 0.424540186                                                                                                                                                                                                                                                                                                                                                                                                       |
| original   | gldm          | LargeDependenceEmphasis              | 4.555555556                                                                                                                                                                                                                                                                                                                                                                                                       |
| original   | gldm          | LargeDependenceLowGrayLevelEmphasis  | 0.031541208                                                                                                                                                                                                                                                                                                                                                                                                       |
| original   | gldm          | DependenceVariance                   | 1.451247166                                                                                                                                                                                                                                                                                                                                                                                                       |
| original   | gldm          | LargeDependenceHighGrayLevelEmphasis | 3281.920635                                                                                                                                                                                                                                                                                                                                                                                                       |
| original   | gldm          | SmallDependenceLowGrayLevelEmphasis  | 0.020268254                                                                                                                                                                                                                                                                                                                                                                                                       |
| original   | gldm          | LowGrayLevelEmphasis                 | 0.021433441                                                                                                                                                                                                                                                                                                                                                                                                       |
| original   | glcm          | JointAverage                         | 22.15959586                                                                                                                                                                                                                                                                                                                                                                                                       |
| original   | glcm          | SumAverage                           | 44.31919171                                                                                                                                                                                                                                                                                                                                                                                                       |
| original   | glcm          | JointEntropy                         | 5.911916588                                                                                                                                                                                                                                                                                                                                                                                                       |
| original   | glcm          | ClusterShade                         | -554.1411611                                                                                                                                                                                                                                                                                                                                                                                                      |

|          |            |                                  |              |
|----------|------------|----------------------------------|--------------|
| original | glcm       | MaximumProbability               | 0.031163934  |
| original | glcm       | Idmn                             | 0.903768177  |
| original | glcm       | JointEnergy                      | 0.017487563  |
| original | glcm       | Contrast                         | 142.1366756  |
| original | glcm       | DifferenceEntropy                | 3.926792204  |
| original | glcm       | InverseVariance                  | 0.122944174  |
| original | glcm       | DifferenceVariance               | 46.23137556  |
| original | glcm       | Idn                              | 0.800111881  |
| original | glcm       | Idm                              | 0.122626781  |
| original | glcm       | Correlation                      | 0.055853908  |
| original | glcm       | Autocorrelation                  | 495.3521278  |
| original | glcm       | SumEntropy                       | 4.484437008  |
| original | glcm       | SumSquares                       | 74.84154815  |
| original | glcm       | ClusterProminence                | 61219.60992  |
| original | glcm       | Imc2                             | 0.998089345  |
| original | glcm       | Imc1                             | -0.64372656  |
| original | glcm       | DifferenceAverage                | 9.58310381   |
| original | glcm       | Id                               | 0.19838695   |
| original | glcm       | ClusterTendency                  | 157.229517   |
| original | firstorder | InterquartileRange               | 381          |
| original | firstorder | Skewness                         | -0.126828055 |
| original | firstorder | Uniformity                       | 0.046611237  |
| original | firstorder | Median                           | -263         |
| original | firstorder | Energy                           | 6535661      |
| original | firstorder | RobustMeanAbsoluteDeviation      | 149.6101624  |
| original | firstorder | MeanAbsoluteDeviation            | 188.6606198  |
| original | firstorder | TotalEnergy                      | 176462847    |
| original | firstorder | Maximum                          | 103          |
| original | firstorder | RootMeanSquared                  | 322.0879551  |
| original | firstorder | 90Percentile                     | 36.8         |
| original | firstorder | Minimum                          | -711         |
| original | firstorder | Entropy                          | 4.59642725   |
| original | firstorder | Range                            | 814          |
| original | firstorder | Variance                         | 47511.44419  |
| original | firstorder | 10Percentile                     | -523         |
| original | firstorder | Kurtosis                         | 1.88939294   |
| original | firstorder | Mean                             | -237.1269841 |
| original | glrlm      | ShortRunLowGrayLevelEmphasis     | 0.021926661  |
| original | glrlm      | GrayLevelVariance                | 75.43408179  |
| original | glrlm      | LowGrayLevelRunEmphasis          | 0.022003167  |
| original | glrlm      | GrayLevelNonUniformityNormalized | 0.045580145  |
| original | glrlm      | RunVariance                      | 0.029109116  |
| original | glrlm      | GrayLevelNonUniformity           | 2.789106724  |
| original | glrlm      | LongRunEmphasis                  | 1.094021345  |
| original | glrlm      | ShortRunHighGrayLevelEmphasis    | 451.6762159  |
| original | glrlm      | RunLengthNonUniformity           | 57.71812726  |
| original | glrlm      | ShortRunEmphasis                 | 0.976494664  |
| original | glrlm      | LongRunHighGrayLevelEmphasis     | 537.9057237  |
| original | glrlm      | RunPercentage                    | 0.970695971  |
| original | glrlm      | LongRunLowGrayLevelEmphasis      | 0.022309189  |
| original | glrlm      | RunEntropy                       | 4.690680378  |
| original | glrlm      | HighGrayLevelRunEmphasis         | 468.9221175  |
| original | glrlm      | RunLengthNonUniformityNormalized | 0.941781768  |
| original | glszm      | GrayLevelVariance                | 67.68764147  |
| original | glszm      | ZoneVariance                     | 0.777727478  |

|             |       |                                      |              |
|-------------|-------|--------------------------------------|--------------|
| original    | glszm | GrayLevelNonUniformityNormalized     | 0.043005885  |
| original    | glszm | SizeZoneNonUniformityNormalized      | 0.672249887  |
| original    | glszm | SizeZoneNonUniformity                | 31.59574468  |
| original    | glszm | GrayLevelNonUniformity               | 2.021276596  |
| original    | glszm | LargeAreaEmphasis                    | 2.574468085  |
| original    | glszm | SmallAreaHighGrayLevelEmphasis       | 313.3095981  |
| original    | glszm | ZonePercentage                       | 0.746031746  |
| original    | glszm | LargeAreaLowGrayLevelEmphasis        | 0.032264556  |
| original    | glszm | LargeAreaHighGrayLevelEmphasis       | 1583.085106  |
| original    | glszm | HighGrayLevelZoneEmphasis            | 406.4042553  |
| original    | glszm | SmallAreaEmphasis                    | 0.844491726  |
| original    | glszm | LowGrayLevelZoneEmphasis             | 0.027569749  |
| original    | glszm | ZoneEntropy                          | 4.809492043  |
| original    | glszm | SmallAreaLowGrayLevelEmphasis        | 0.026996168  |
| original    | ngtdm | Coarseness                           | 0.047790728  |
| original    | ngtdm | Complexity                           | 2550.905395  |
| original    | ngtdm | Strength                             | 19.83043694  |
| original    | ngtdm | Contrast                             | 1.467427198  |
| original    | ngtdm | Busyness                             | 0.045154735  |
| wavelet-HHH | gldm  | GrayLevelVariance                    | 10.53061224  |
| wavelet-HHH | gldm  | HighGrayLevelEmphasis                | 99.42857143  |
| wavelet-HHH | gldm  | DependenceEntropy                    | 4.677023623  |
| wavelet-HHH | gldm  | DependenceNonUniformity              | 17.57142857  |
| wavelet-HHH | gldm  | GrayLevelNonUniformity               | 6.492063492  |
| wavelet-HHH | gldm  | SmallDependenceEmphasis              | 0.447588183  |
| wavelet-HHH | gldm  | SmallDependenceHighGrayLevelEmphasis | 42.17615961  |
| wavelet-HHH | gldm  | DependenceNonUniformityNormalized    | 0.278911565  |
| wavelet-HHH | gldm  | LargeDependenceEmphasis              | 5.73015873   |
| wavelet-HHH | gldm  | LargeDependenceLowGrayLevelEmphasis  | 0.095680729  |
| wavelet-HHH | gldm  | DependenceVariance                   | 1.138321995  |
| wavelet-HHH | gldm  | LargeDependenceHighGrayLevelEmphasis | 565.968254   |
| wavelet-HHH | gldm  | SmallDependenceLowGrayLevelEmphasis  | 0.024952558  |
| wavelet-HHH | gldm  | LowGrayLevelEmphasis                 | 0.033386331  |
| wavelet-HHH | glcm  | JointAverage                         | 9.439107811  |
| wavelet-HHH | glcm  | SumAverage                           | 18.87821562  |
| wavelet-HHH | glcm  | JointEntropy                         | 5.596149832  |
| wavelet-HHH | glcm  | ClusterShade                         | -17.81023586 |
| wavelet-HHH | glcm  | MaximumProbability                   | 0.046201062  |
| wavelet-HHH | glcm  | ldmn                                 | 0.927717888  |
| wavelet-HHH | glcm  | JointEnergy                          | 0.022961591  |
| wavelet-HHH | glcm  | Contrast                             | 22.77769117  |
| wavelet-HHH | glcm  | DifferenceEntropy                    | 3.086057691  |
| wavelet-HHH | glcm  | InverseVariance                      | 0.231197397  |
| wavelet-HHH | glcm  | DifferenceVariance                   | 7.966752798  |
| wavelet-HHH | glcm  | ldn                                  | 0.823203735  |
| wavelet-HHH | glcm  | ldm                                  | 0.220359005  |
| wavelet-HHH | glcm  | Correlation                          | -0.044322884 |
| wavelet-HHH | glcm  | Autocorrelation                      | 88.66259764  |
| wavelet-HHH | glcm  | SumEntropy                           | 3.711445899  |
| wavelet-HHH | glcm  | SumSquares                           | 10.92654727  |
| wavelet-HHH | glcm  | ClusterProminence                    | 1279.481801  |
| wavelet-HHH | glcm  | lmc2                                 | 0.966202679  |
| wavelet-HHH | glcm  | lmc1                                 | -0.39688083  |
| wavelet-HHH | glcm  | DifferenceAverage                    | 3.81364353   |
| wavelet-HHH | glcm  | ld                                   | 0.315784973  |

|             |            |                                  |              |
|-------------|------------|----------------------------------|--------------|
| wavelet-HHH | glcm       | ClusterTendency                  | 20.92849793  |
| wavelet-HHH | firstorder | InterquartileRange               | 111.2367759  |
| wavelet-HHH | firstorder | Skewness                         | -0.210767316 |
| wavelet-HHH | firstorder | Uniformity                       | 0.103048627  |
| wavelet-HHH | firstorder | Median                           | -5.835692177 |
| wavelet-HHH | firstorder | Energy                           | 426675.5983  |
| wavelet-HHH | firstorder | RobustMeanAbsoluteDeviation      | 42.40243483  |
| wavelet-HHH | firstorder | MeanAbsoluteDeviation            | 64.77471002  |
| wavelet-HHH | firstorder | TotalEnergy                      | 11520241.15  |
| wavelet-HHH | firstorder | Maximum                          | 174.9208109  |
| wavelet-HHH | firstorder | RootMeanSquared                  | 82.29598134  |
| wavelet-HHH | firstorder | 90Percentile                     | 104.5190666  |
| wavelet-HHH | firstorder | Minimum                          | -214.5076378 |
| wavelet-HHH | firstorder | Entropy                          | 3.532692705  |
| wavelet-HHH | firstorder | Range                            | 389.4284488  |
| wavelet-HHH | firstorder | Variance                         | 6767.579326  |
| wavelet-HHH | firstorder | 10Percentile                     | -116.7552392 |
| wavelet-HHH | firstorder | Kurtosis                         | 2.840237554  |
| wavelet-HHH | firstorder | Mean                             | -2.247046588 |
| wavelet-HHH | glrlm      | ShortRunLowGrayLevelEmphasis     | 0.033808077  |
| wavelet-HHH | glrlm      | GrayLevelVariance                | 10.78810182  |
| wavelet-HHH | glrlm      | LowGrayLevelRunEmphasis          | 0.034294847  |
| wavelet-HHH | glrlm      | GrayLevelNonUniformityNormalized | 0.100954558  |
| wavelet-HHH | glrlm      | RunVariance                      | 0.043766363  |
| wavelet-HHH | glrlm      | GrayLevelNonUniformity           | 6.081103312  |
| wavelet-HHH | glrlm      | LongRunEmphasis                  | 1.139956235  |
| wavelet-HHH | glrlm      | ShortRunHighGrayLevelEmphasis    | 95.86646718  |
| wavelet-HHH | glrlm      | RunLengthNonUniformity           | 55.03200803  |
| wavelet-HHH | glrlm      | ShortRunEmphasis                 | 0.965010941  |
| wavelet-HHH | glrlm      | LongRunHighGrayLevelEmphasis     | 113.4392967  |
| wavelet-HHH | glrlm      | RunPercentage                    | 0.956043956  |
| wavelet-HHH | glrlm      | LongRunLowGrayLevelEmphasis      | 0.036241924  |
| wavelet-HHH | glrlm      | RunEntropy                       | 3.71815838   |
| wavelet-HHH | glrlm      | HighGrayLevelRunEmphasis         | 99.38103307  |
| wavelet-HHH | glrlm      | RunLengthNonUniformityNormalized | 0.912467274  |
| wavelet-HHH | glszm      | GrayLevelVariance                | 14.71366782  |
| wavelet-HHH | glszm      | ZoneVariance                     | 3.360726644  |
| wavelet-HHH | glszm      | GrayLevelNonUniformityNormalized | 0.089965398  |
| wavelet-HHH | glszm      | SizeZoneNonUniformityNormalized  | 0.446366782  |
| wavelet-HHH | glszm      | SizeZoneNonUniformity            | 15.17647059  |
| wavelet-HHH | glszm      | GrayLevelNonUniformity           | 3.058823529  |
| wavelet-HHH | glszm      | LargeAreaEmphasis                | 6.794117647  |
| wavelet-HHH | glszm      | SmallAreaHighGrayLevelEmphasis   | 63.18472155  |
| wavelet-HHH | glszm      | ZonePercentage                   | 0.53968254   |
| wavelet-HHH | glszm      | LargeAreaLowGrayLevelEmphasis    | 0.125728141  |
| wavelet-HHH | glszm      | LargeAreaHighGrayLevelEmphasis   | 630.5882353  |
| wavelet-HHH | glszm      | HighGrayLevelZoneEmphasis        | 98.38235294  |
| wavelet-HHH | glszm      | SmallAreaEmphasis                | 0.68549634   |
| wavelet-HHH | glszm      | LowGrayLevelZoneEmphasis         | 0.049438051  |
| wavelet-HHH | glszm      | ZoneEntropy                      | 4.359377915  |
| wavelet-HHH | glszm      | SmallAreaLowGrayLevelEmphasis    | 0.043919628  |
| wavelet-HHH | ngtdm      | Coarseness                       | 0.077418174  |
| wavelet-HHH | ngtdm      | Complexity                       | 229.6572407  |
| wavelet-HHH | ngtdm      | Strength                         | 5.225343329  |
| wavelet-HHH | ngtdm      | Contrast                         | 0.278193942  |



|             |            |                                      |              |
|-------------|------------|--------------------------------------|--------------|
| wavelet-HHH | ngtdm      | Busyness                             | 0.100912997  |
| wavelet-HLL | gldm       | GrayLevelVariance                    | 135.3716301  |
| wavelet-HLL | gldm       | HighGrayLevelEmphasis                | 453.6825397  |
| wavelet-HLL | gldm       | DependenceEntropy                    | 4.988951947  |
| wavelet-HLL | gldm       | DependenceNonUniformity              | 30.3968254   |
| wavelet-HLL | gldm       | GrayLevelNonUniformity               | 2.777777778  |
| wavelet-HLL | gldm       | SmallDependenceEmphasis              | 0.712191358  |
| wavelet-HLL | gldm       | SmallDependenceHighGrayLevelEmphasis | 314.707231   |
| wavelet-HLL | gldm       | DependenceNonUniformityNormalized    | 0.482489292  |
| wavelet-HLL | gldm       | LargeDependenceEmphasis              | 2.682539683  |
| wavelet-HLL | gldm       | LargeDependenceLowGrayLevelEmphasis  | 0.09147105   |
| wavelet-HLL | gldm       | DependenceVariance                   | 0.503401361  |
| wavelet-HLL | gldm       | LargeDependenceHighGrayLevelEmphasis | 1108.031746  |
| wavelet-HLL | gldm       | SmallDependenceLowGrayLevelEmphasis  | 0.043436616  |
| wavelet-HLL | gldm       | LowGrayLevelEmphasis                 | 0.048951709  |
| wavelet-HLL | glcm       | JointAverage                         | 16.47516204  |
| wavelet-HLL | glcm       | SumAverage                           | 32.95032408  |
| wavelet-HLL | glcm       | JointEntropy                         | 5.937992106  |
| wavelet-HLL | glcm       | ClusterShade                         | 4143.419692  |
| wavelet-HLL | glcm       | MaximumProbability                   | 0.030991906  |
| wavelet-HLL | glcm       | Idmn                                 | 0.936049867  |
| wavelet-HLL | glcm       | JointEnergy                          | 0.017064451  |
| wavelet-HLL | glcm       | Contrast                             | 141.913005   |
| wavelet-HLL | glcm       | DifferenceEntropy                    | 3.869348247  |
| wavelet-HLL | glcm       | InverseVariance                      | 0.130149763  |
| wavelet-HLL | glcm       | DifferenceVariance                   | 44.68006528  |
| wavelet-HLL | glcm       | Idn                                  | 0.834805827  |
| wavelet-HLL | glcm       | Idm                                  | 0.109974442  |
| wavelet-HLL | glcm       | Correlation                          | 0.427757441  |
| wavelet-HLL | glcm       | Autocorrelation                      | 329.7464307  |
| wavelet-HLL | glcm       | SumEntropy                           | 4.513152025  |
| wavelet-HLL | glcm       | SumSquares                           | 128.9704107  |
| wavelet-HLL | glcm       | ClusterProminence                    | 336315.7923  |
| wavelet-HLL | glcm       | Imc2                                 | 0.998619872  |
| wavelet-HLL | glcm       | Imc1                                 | -0.669640653 |
| wavelet-HLL | glcm       | DifferenceAverage                    | 9.433041461  |
| wavelet-HLL | glcm       | Id                                   | 0.189035242  |
| wavelet-HLL | glcm       | ClusterTendency                      | 373.9686376  |
| wavelet-HLL | firstorder | InterquartileRange                   | 450.50684    |
| wavelet-HLL | firstorder | Skewness                             | 0.520039455  |
| wavelet-HLL | firstorder | Uniformity                           | 0.044091711  |
| wavelet-HLL | firstorder | Median                               | -143.1591556 |
| wavelet-HLL | firstorder | Energy                               | 5618779.371  |
| wavelet-HLL | firstorder | RobustMeanAbsoluteDeviation          | 173.891852   |
| wavelet-HLL | firstorder | MeanAbsoluteDeviation                | 242.2014465  |
| wavelet-HLL | firstorder | TotalEnergy                          | 151707043    |
| wavelet-HLL | firstorder | Maximum                              | 573.5288922  |
| wavelet-HLL | firstorder | RootMeanSquared                      | 298.6418828  |
| wavelet-HLL | firstorder | 90Percentile                         | 386.8902691  |
| wavelet-HLL | firstorder | Minimum                              | -492.5726445 |
| wavelet-HLL | firstorder | Entropy                              | 4.676102646  |
| wavelet-HLL | firstorder | Range                                | 1066.101537  |
| wavelet-HLL | firstorder | Variance                             | 84683.59795  |
| wavelet-HLL | firstorder | 10Percentile                         | -413.5500321 |
| wavelet-HLL | firstorder | Kurtosis                             | 2.331666212  |

|             |            |                                      |              |
|-------------|------------|--------------------------------------|--------------|
| wavelet-HLL | firstorder | Mean                                 | -67.10719923 |
| wavelet-HLL | glrlm      | ShortRunLowGrayLevelEmphasis         | 0.049133885  |
| wavelet-HLL | glrlm      | GrayLevelVariance                    | 134.9872059  |
| wavelet-HLL | glrlm      | LowGrayLevelRunEmphasis              | 0.049452303  |
| wavelet-HLL | glrlm      | GrayLevelNonUniformityNormalized     | 0.043962148  |
| wavelet-HLL | glrlm      | RunVariance                          | 0.018291855  |
| wavelet-HLL | glrlm      | GrayLevelNonUniformity               | 2.718573811  |
| wavelet-HLL | glrlm      | LongRunEmphasis                      | 1.056697718  |
| wavelet-HLL | glrlm      | ShortRunHighGrayLevelEmphasis        | 447.9928661  |
| wavelet-HLL | glrlm      | RunLengthNonUniformity               | 59.61207338  |
| wavelet-HLL | glrlm      | ShortRunEmphasis                     | 0.985825571  |
| wavelet-HLL | glrlm      | LongRunHighGrayLevelEmphasis         | 478.5584271  |
| wavelet-HLL | glrlm      | RunPercentage                        | 0.981684982  |
| wavelet-HLL | glrlm      | LongRunLowGrayLevelEmphasis          | 0.050725973  |
| wavelet-HLL | glrlm      | RunEntropy                           | 4.711744064  |
| wavelet-HLL | glrlm      | HighGrayLevelRunEmphasis             | 454.1059783  |
| wavelet-HLL | glrlm      | RunLengthNonUniformityNormalized     | 0.963416291  |
| wavelet-HLL | glszm      | GrayLevelVariance                    | 128.72       |
| wavelet-HLL | glszm      | ZoneVariance                         | 0.3524       |
| wavelet-HLL | glszm      | GrayLevelNonUniformityNormalized     | 0.044        |
| wavelet-HLL | glszm      | SizeZoneNonUniformityNormalized      | 0.6664       |
| wavelet-HLL | glszm      | SizeZoneNonUniformity                | 33.32        |
| wavelet-HLL | glszm      | GrayLevelNonUniformity               | 2.2          |
| wavelet-HLL | glszm      | LargeAreaEmphasis                    | 1.94         |
| wavelet-HLL | glszm      | SmallAreaHighGrayLevelEmphasis       | 369.34       |
| wavelet-HLL | glszm      | ZonePercentage                       | 0.793650794  |
| wavelet-HLL | glszm      | LargeAreaLowGrayLevelEmphasis        | 0.080279907  |
| wavelet-HLL | glszm      | LargeAreaHighGrayLevelEmphasis       | 829.04       |
| wavelet-HLL | glszm      | HighGrayLevelZoneEmphasis            | 452.72       |
| wavelet-HLL | glszm      | SmallAreaEmphasis                    | 0.843472222  |
| wavelet-HLL | glszm      | LowGrayLevelZoneEmphasis             | 0.056174129  |
| wavelet-HLL | glszm      | ZoneEntropy                          | 4.85366069   |
| wavelet-HLL | glszm      | SmallAreaLowGrayLevelEmphasis        | 0.053713699  |
| wavelet-HLL | ngtdm      | Coarseness                           | 0.075674798  |
| wavelet-HLL | ngtdm      | Complexity                           | 2580.211956  |
| wavelet-HLL | ngtdm      | Strength                             | 46.45857672  |
| wavelet-HLL | ngtdm      | Contrast                             | 1.863518922  |
| wavelet-HLL | ngtdm      | Busyness                             | 0.032843209  |
| wavelet-LHL | gldm       | GrayLevelVariance                    | 127.8342152  |
| wavelet-LHL | gldm       | HighGrayLevelEmphasis                | 943.2539683  |
| wavelet-LHL | gldm       | DependenceEntropy                    | 5.223156511  |
| wavelet-LHL | gldm       | DependenceNonUniformity              | 32.07936508  |
| wavelet-LHL | gldm       | GrayLevelNonUniformity               | 2.587301587  |
| wavelet-LHL | gldm       | SmallDependenceEmphasis              | 0.700176367  |
| wavelet-LHL | gldm       | SmallDependenceHighGrayLevelEmphasis | 694.0555556  |
| wavelet-LHL | gldm       | DependenceNonUniformityNormalized    | 0.509196271  |
| wavelet-LHL | gldm       | LargeDependenceEmphasis              | 2.26984127   |
| wavelet-LHL | gldm       | LargeDependenceLowGrayLevelEmphasis  | 0.020187297  |
| wavelet-LHL | gldm       | DependenceVariance                   | 0.274124465  |
| wavelet-LHL | gldm       | LargeDependenceHighGrayLevelEmphasis | 2003.539683  |
| wavelet-LHL | gldm       | SmallDependenceLowGrayLevelEmphasis  | 0.01708869   |
| wavelet-LHL | gldm       | LowGrayLevelEmphasis                 | 0.017692735  |
| wavelet-LHL | glcm       | JointAverage                         | 27.50237668  |
| wavelet-LHL | glcm       | SumAverage                           | 55.00475336  |
| wavelet-LHL | glcm       | JointEntropy                         | 6.034807428  |

|             |            |                                  |              |
|-------------|------------|----------------------------------|--------------|
| wavelet-LHL | glcm       | ClusterShade                     | 3325.308308  |
| wavelet-LHL | glcm       | MaximumProbability               | 0.027386443  |
| wavelet-LHL | glcm       | Idmn                             | 0.937313272  |
| wavelet-LHL | glcm       | JointEnergy                      | 0.015689082  |
| wavelet-LHL | glcm       | Contrast                         | 223.8200174  |
| wavelet-LHL | glcm       | DifferenceEntropy                | 4.11638172   |
| wavelet-LHL | glcm       | InverseVariance                  | 0.093084474  |
| wavelet-LHL | glcm       | DifferenceVariance               | 79.47582491  |
| wavelet-LHL | glcm       | Idn                              | 0.837785159  |
| wavelet-LHL | glcm       | Idm                              | 0.085821765  |
| wavelet-LHL | glcm       | Correlation                      | 0.123067267  |
| wavelet-LHL | glcm       | Autocorrelation                  | 774.1090155  |
| wavelet-LHL | glcm       | SumEntropy                       | 4.60269813   |
| wavelet-LHL | glcm       | SumSquares                       | 129.4352256  |
| wavelet-LHL | glcm       | ClusterProminence                | 276581.9814  |
| wavelet-LHL | glcm       | Imc2                             | 0.999339139  |
| wavelet-LHL | glcm       | Imc1                             | -0.713847804 |
| wavelet-LHL | glcm       | DifferenceAverage                | 11.64493465  |
| wavelet-LHL | glcm       | Id                               | 0.162742093  |
| wavelet-LHL | glcm       | ClusterTendency                  | 293.920885   |
| wavelet-LHL | firstorder | InterquartileRange               | 396.9788529  |
| wavelet-LHL | firstorder | Skewness                         | 0.38880193   |
| wavelet-LHL | firstorder | Uniformity                       | 0.041068279  |
| wavelet-LHL | firstorder | Median                           | -70.88033767 |
| wavelet-LHL | firstorder | Energy                           | 5195448.229  |
| wavelet-LHL | firstorder | RobustMeanAbsoluteDeviation      | 151.2982806  |
| wavelet-LHL | firstorder | MeanAbsoluteDeviation            | 225.2684762  |
| wavelet-LHL | firstorder | TotalEnergy                      | 140277102.2  |
| wavelet-LHL | firstorder | Maximum                          | 593.2526325  |
| wavelet-LHL | firstorder | RootMeanSquared                  | 287.1714335  |
| wavelet-LHL | firstorder | 90Percentile                     | 294.1079114  |
| wavelet-LHL | firstorder | Minimum                          | -746.5495357 |
| wavelet-LHL | firstorder | Entropy                          | 4.845784487  |
| wavelet-LHL | firstorder | Range                            | 1339.802168  |
| wavelet-LHL | firstorder | Variance                         | 79912.87211  |
| wavelet-LHL | firstorder | 10Percentile                     | -369.3468092 |
| wavelet-LHL | firstorder | Kurtosis                         | 2.916123378  |
| wavelet-LHL | firstorder | Mean                             | -50.54265614 |
| wavelet-LHL | glrlm      | ShortRunLowGrayLevelEmphasis     | 0.01792914   |
| wavelet-LHL | glrlm      | GrayLevelVariance                | 128.1503142  |
| wavelet-LHL | glrlm      | LowGrayLevelRunEmphasis          | 0.017953984  |
| wavelet-LHL | glrlm      | GrayLevelNonUniformityNormalized | 0.040825833  |
| wavelet-LHL | glrlm      | RunVariance                      | 0.015821125  |
| wavelet-LHL | glrlm      | GrayLevelNonUniformity           | 2.531756864  |
| wavelet-LHL | glrlm      | LongRunEmphasis                  | 1.049914645  |
| wavelet-LHL | glrlm      | ShortRunHighGrayLevelEmphasis    | 934.757853   |
| wavelet-LHL | glrlm      | RunLengthNonUniformity           | 60.0964151   |
| wavelet-LHL | glrlm      | ShortRunEmphasis                 | 0.987521339  |
| wavelet-LHL | glrlm      | LongRunHighGrayLevelEmphasis     | 986.593948   |
| wavelet-LHL | glrlm      | RunPercentage                    | 0.984126984  |
| wavelet-LHL | glrlm      | LongRunLowGrayLevelEmphasis      | 0.018053362  |
| wavelet-LHL | glrlm      | RunEntropy                       | 4.878879508  |
| wavelet-LHL | glrlm      | HighGrayLevelRunEmphasis         | 945.125072   |
| wavelet-LHL | glrlm      | RunLengthNonUniformityNormalized | 0.96835775   |
| wavelet-LHL | glszm      | GrayLevelVariance                | 133.1584     |

|             |       |                                      |              |
|-------------|-------|--------------------------------------|--------------|
| wavelet-LHL | glszm | ZoneVariance                         | 0.2324       |
| wavelet-LHL | glszm | GrayLevelNonUniformityNormalized     | 0.0368       |
| wavelet-LHL | glszm | SizeZoneNonUniformityNormalized      | 0.6264       |
| wavelet-LHL | glszm | SizeZoneNonUniformity                | 31.32        |
| wavelet-LHL | glszm | GrayLevelNonUniformity               | 1.84         |
| wavelet-LHL | glszm | LargeAreaEmphasis                    | 1.82         |
| wavelet-LHL | glszm | SmallAreaHighGrayLevelEmphasis       | 820.345      |
| wavelet-LHL | glszm | ZonePercentage                       | 0.793650794  |
| wavelet-LHL | glszm | LargeAreaLowGrayLevelEmphasis        | 0.023370191  |
| wavelet-LHL | glszm | LargeAreaHighGrayLevelEmphasis       | 1657.82      |
| wavelet-LHL | glszm | HighGrayLevelZoneEmphasis            | 971.84       |
| wavelet-LHL | glszm | SmallAreaEmphasis                    | 0.817222222  |
| wavelet-LHL | glszm | LowGrayLevelZoneEmphasis             | 0.021776395  |
| wavelet-LHL | glszm | ZoneEntropy                          | 5.25366069   |
| wavelet-LHL | glszm | SmallAreaLowGrayLevelEmphasis        | 0.021402637  |
| wavelet-LHL | ngtdm | Coarseness                           | 0.056441217  |
| wavelet-LHL | ngtdm | Complexity                           | 4624.660035  |
| wavelet-LHL | ngtdm | Strength                             | 41.18300254  |
| wavelet-LHL | ngtdm | Contrast                             | 1.805278373  |
| wavelet-LHL | ngtdm | Busyness                             | 0.026592785  |
| wavelet-LHH | gldm  | GrayLevelVariance                    | 40.19551524  |
| wavelet-LHH | gldm  | HighGrayLevelEmphasis                | 322.2222222  |
| wavelet-LHH | gldm  | DependenceEntropy                    | 4.925459884  |
| wavelet-LHH | gldm  | DependenceNonUniformity              | 29.12698413  |
| wavelet-LHH | gldm  | GrayLevelNonUniformity               | 3.412698413  |
| wavelet-LHH | gldm  | SmallDependenceEmphasis              | 0.668981481  |
| wavelet-LHH | gldm  | SmallDependenceHighGrayLevelEmphasis | 213.4329806  |
| wavelet-LHH | gldm  | DependenceNonUniformityNormalized    | 0.462333081  |
| wavelet-LHH | gldm  | LargeDependenceEmphasis              | 2.714285714  |
| wavelet-LHH | gldm  | LargeDependenceLowGrayLevelEmphasis  | 0.029958392  |
| wavelet-LHH | gldm  | DependenceVariance                   | 0.440413202  |
| wavelet-LHH | gldm  | LargeDependenceHighGrayLevelEmphasis | 840.7301587  |
| wavelet-LHH | gldm  | SmallDependenceLowGrayLevelEmphasis  | 0.020793577  |
| wavelet-LHH | gldm  | LowGrayLevelEmphasis                 | 0.022155889  |
| wavelet-LHH | glcm  | JointAverage                         | 17.02444224  |
| wavelet-LHH | glcm  | SumAverage                           | 34.04888448  |
| wavelet-LHH | glcm  | JointEntropy                         | 5.959107912  |
| wavelet-LHH | glcm  | ClusterShade                         | 3.33926906   |
| wavelet-LHH | glcm  | MaximumProbability                   | 0.029911009  |
| wavelet-LHH | glcm  | Idmn                                 | 0.921692787  |
| wavelet-LHH | glcm  | JointEnergy                          | 0.016860183  |
| wavelet-LHH | glcm  | Contrast                             | 88.71905048  |
| wavelet-LHH | glcm  | DifferenceEntropy                    | 3.748816748  |
| wavelet-LHH | glcm  | InverseVariance                      | 0.139290099  |
| wavelet-LHH | glcm  | DifferenceVariance                   | 30.71228474  |
| wavelet-LHH | glcm  | Idn                                  | 0.817581858  |
| wavelet-LHH | glcm  | Idm                                  | 0.11917595   |
| wavelet-LHH | glcm  | Correlation                          | -0.028078144 |
| wavelet-LHH | glcm  | Autocorrelation                      | 288.761312   |
| wavelet-LHH | glcm  | SumEntropy                           | 4.303938201  |
| wavelet-LHH | glcm  | SumSquares                           | 43.08427779  |
| wavelet-LHH | glcm  | ClusterProminence                    | 18725.61208  |
| wavelet-LHH | glcm  | Imc2                                 | 0.99790895   |
| wavelet-LHH | glcm  | Imc1                                 | -0.636247411 |
| wavelet-LHH | glcm  | DifferenceAverage                    | 7.478959706  |

|             |            |                                  |              |
|-------------|------------|----------------------------------|--------------|
| wavelet-LHH | glcm       | Id                               | 0.208233926  |
| wavelet-LHH | glcm       | ClusterTendency                  | 83.61806069  |
| wavelet-LHH | firstorder | InterquartileRange               | 203.028079   |
| wavelet-LHH | firstorder | Skewness                         | -0.044071194 |
| wavelet-LHH | firstorder | Uniformity                       | 0.054169816  |
| wavelet-LHH | firstorder | Median                           | 5.212556309  |
| wavelet-LHH | firstorder | Energy                           | 1556441.703  |
| wavelet-LHH | firstorder | RobustMeanAbsoluteDeviation      | 84.07838618  |
| wavelet-LHH | firstorder | MeanAbsoluteDeviation            | 125.9998951  |
| wavelet-LHH | firstorder | TotalEnergy                      | 42023925.99  |
| wavelet-LHH | firstorder | Maximum                          | 325.4581488  |
| wavelet-LHH | firstorder | RootMeanSquared                  | 157.1795911  |
| wavelet-LHH | firstorder | 90Percentile                     | 211.8321048  |
| wavelet-LHH | firstorder | Minimum                          | -376.9978574 |
| wavelet-LHH | firstorder | Entropy                          | 4.435447734  |
| wavelet-LHH | firstorder | Range                            | 702.4560061  |
| wavelet-LHH | firstorder | Variance                         | 24666.35432  |
| wavelet-LHH | firstorder | 10Percentile                     | -190.287595  |
| wavelet-LHH | firstorder | Kurtosis                         | 2.666128068  |
| wavelet-LHH | firstorder | Mean                             | 6.250563292  |
| wavelet-LHH | glrlm      | ShortRunLowGrayLevelEmphasis     | 0.022449541  |
| wavelet-LHH | glrlm      | GrayLevelVariance                | 40.4909659   |
| wavelet-LHH | glrlm      | LowGrayLevelRunEmphasis          | 0.022515313  |
| wavelet-LHH | glrlm      | GrayLevelNonUniformityNormalized | 0.053631383  |
| wavelet-LHH | glrlm      | RunVariance                      | 0.019510548  |
| wavelet-LHH | glrlm      | GrayLevelNonUniformity           | 3.312884436  |
| wavelet-LHH | glrlm      | LongRunEmphasis                  | 1.060541838  |
| wavelet-LHH | glrlm      | ShortRunHighGrayLevelEmphasis    | 317.6085188  |
| wavelet-LHH | glrlm      | RunLengthNonUniformity           | 59.38891104  |
| wavelet-LHH | glrlm      | ShortRunEmphasis                 | 0.984864541  |
| wavelet-LHH | glrlm      | LongRunHighGrayLevelEmphasis     | 341.4292587  |
| wavelet-LHH | glrlm      | RunPercentage                    | 0.98046398   |
| wavelet-LHH | glrlm      | LongRunLowGrayLevelEmphasis      | 0.022778401  |
| wavelet-LHH | glrlm      | RunEntropy                       | 4.498005703  |
| wavelet-LHH | glrlm      | HighGrayLevelRunEmphasis         | 322.3726667  |
| wavelet-LHH | glrlm      | RunLengthNonUniformityNormalized | 0.960978903  |
| wavelet-LHH | glszm      | GrayLevelVariance                | 44.77604167  |
| wavelet-LHH | glszm      | ZoneVariance                     | 0.381510417  |
| wavelet-LHH | glszm      | GrayLevelNonUniformityNormalized | 0.048611111  |
| wavelet-LHH | glszm      | SizeZoneNonUniformityNormalized  | 0.606770833  |
| wavelet-LHH | glszm      | SizeZoneNonUniformity            | 29.125       |
| wavelet-LHH | glszm      | GrayLevelNonUniformity           | 2.333333333  |
| wavelet-LHH | glszm      | LargeAreaEmphasis                | 2.104166667  |
| wavelet-LHH | glszm      | SmallAreaHighGrayLevelEmphasis   | 255.5266204  |
| wavelet-LHH | glszm      | ZonePercentage                   | 0.761904762  |
| wavelet-LHH | glszm      | LargeAreaLowGrayLevelEmphasis    | 0.03264216   |
| wavelet-LHH | glszm      | LargeAreaHighGrayLevelEmphasis   | 666.4583333  |
| wavelet-LHH | glszm      | HighGrayLevelZoneEmphasis        | 321.1666667  |
| wavelet-LHH | glszm      | SmallAreaEmphasis                | 0.805700231  |
| wavelet-LHH | glszm      | LowGrayLevelZoneEmphasis         | 0.027771737  |
| wavelet-LHH | glszm      | ZoneEntropy                      | 4.845175521  |
| wavelet-LHH | glszm      | SmallAreaLowGrayLevelEmphasis    | 0.027004791  |
| wavelet-LHH | ngtdm      | Coarseness                       | 0.07355921   |
| wavelet-LHH | ngtdm      | Complexity                       | 1354.601902  |
| wavelet-LHH | ngtdm      | Strength                         | 16.90302338  |

|             |            |                                      |              |
|-------------|------------|--------------------------------------|--------------|
| wavelet-LHH | ngtdm      | Contrast                             | 0.651036742  |
| wavelet-LHH | ngtdm      | Busyness                             | 0.039931598  |
| wavelet-LLH | gldm       | GrayLevelVariance                    | 88.56739733  |
| wavelet-LLH | gldm       | HighGrayLevelEmphasis                | 532.2380952  |
| wavelet-LLH | gldm       | DependenceEntropy                    | 5.20339282   |
| wavelet-LLH | gldm       | DependenceNonUniformity              | 25.98412698  |
| wavelet-LLH | gldm       | GrayLevelNonUniformity               | 2.777777778  |
| wavelet-LLH | gldm       | SmallDependenceEmphasis              | 0.634920635  |
| wavelet-LLH | gldm       | SmallDependenceHighGrayLevelEmphasis | 351.14903    |
| wavelet-LLH | gldm       | DependenceNonUniformityNormalized    | 0.41244646   |
| wavelet-LLH | gldm       | LargeDependenceEmphasis              | 3.095238095  |
| wavelet-LLH | gldm       | LargeDependenceLowGrayLevelEmphasis  | 0.029394369  |
| wavelet-LLH | gldm       | DependenceVariance                   | 0.525069287  |
| wavelet-LLH | gldm       | LargeDependenceHighGrayLevelEmphasis | 1588.587302  |
| wavelet-LLH | gldm       | SmallDependenceLowGrayLevelEmphasis  | 0.021189108  |
| wavelet-LLH | gldm       | LowGrayLevelEmphasis                 | 0.022544279  |
| wavelet-LLH | glcm       | JointAverage                         | 20.27520636  |
| wavelet-LLH | glcm       | SumAverage                           | 40.55041271  |
| wavelet-LLH | glcm       | JointEntropy                         | 5.962802146  |
| wavelet-LLH | glcm       | ClusterShade                         | 905.6608851  |
| wavelet-LLH | glcm       | MaximumProbability                   | 0.030204289  |
| wavelet-LLH | glcm       | Idmn                                 | 0.926844162  |
| wavelet-LLH | glcm       | JointEnergy                          | 0.016904788  |
| wavelet-LLH | glcm       | Contrast                             | 137.0579171  |
| wavelet-LLH | glcm       | DifferenceEntropy                    | 3.797102434  |
| wavelet-LLH | glcm       | InverseVariance                      | 0.118999698  |
| wavelet-LLH | glcm       | DifferenceVariance                   | 52.31883756  |
| wavelet-LLH | glcm       | Idn                                  | 0.829716028  |
| wavelet-LLH | glcm       | Idm                                  | 0.119709939  |
| wavelet-LLH | glcm       | Correlation                          | 0.263366242  |
| wavelet-LLH | glcm       | Autocorrelation                      | 436.5326905  |
| wavelet-LLH | glcm       | SumEntropy                           | 4.601476248  |
| wavelet-LLH | glcm       | SumSquares                           | 93.77692828  |
| wavelet-LLH | glcm       | ClusterProminence                    | 134351.9009  |
| wavelet-LLH | glcm       | Imc2                                 | 0.99904045   |
| wavelet-LLH | glcm       | Imc1                                 | -0.696250315 |
| wavelet-LLH | glcm       | DifferenceAverage                    | 8.868355705  |
| wavelet-LLH | glcm       | Id                                   | 0.204477322  |
| wavelet-LLH | glcm       | ClusterTendency                      | 238.049796   |
| wavelet-LLH | firstorder | InterquartileRange                   | 356.1599411  |
| wavelet-LLH | firstorder | Skewness                             | -0.084277755 |
| wavelet-LLH | firstorder | Uniformity                           | 0.044091711  |
| wavelet-LLH | firstorder | Median                               | -59.43696288 |
| wavelet-LLH | firstorder | Energy                               | 3736833.696  |
| wavelet-LLH | firstorder | RobustMeanAbsoluteDeviation          | 140.6478656  |
| wavelet-LLH | firstorder | MeanAbsoluteDeviation                | 194.0676647  |
| wavelet-LLH | firstorder | TotalEnergy                          | 100894509.8  |
| wavelet-LLH | firstorder | Maximum                              | 369.0670796  |
| wavelet-LLH | firstorder | RootMeanSquared                      | 243.5463417  |
| wavelet-LLH | firstorder | 90Percentile                         | 242.9436439  |
| wavelet-LLH | firstorder | Minimum                              | -570.918381  |
| wavelet-LLH | firstorder | Entropy                              | 4.661504479  |
| wavelet-LLH | firstorder | Range                                | 939.9854606  |
| wavelet-LLH | firstorder | Variance                             | 55687.2661   |
| wavelet-LLH | firstorder | 10Percentile                         | -386.8515    |

|             |            |                                      |              |
|-------------|------------|--------------------------------------|--------------|
| wavelet-LLH | firstorder | Kurtosis                             | 2.177513661  |
| wavelet-LLH | firstorder | Mean                                 | -60.22918294 |
| wavelet-LLH | glrlm      | ShortRunLowGrayLevelEmphasis         | 0.022950608  |
| wavelet-LLH | glrlm      | GrayLevelVariance                    | 89.56252552  |
| wavelet-LLH | glrlm      | LowGrayLevelRunEmphasis              | 0.023014086  |
| wavelet-LLH | glrlm      | GrayLevelNonUniformityNormalized     | 0.043774189  |
| wavelet-LLH | glrlm      | RunVariance                          | 0.02309523   |
| wavelet-LLH | glrlm      | GrayLevelNonUniformity               | 2.694591456  |
| wavelet-LLH | glrlm      | LongRunEmphasis                      | 1.073780802  |
| wavelet-LLH | glrlm      | ShortRunHighGrayLevelEmphasis        | 523.6444554  |
| wavelet-LLH | glrlm      | RunLengthNonUniformity               | 58.79110136  |
| wavelet-LLH | glrlm      | ShortRunEmphasis                     | 0.9815548    |
| wavelet-LLH | glrlm      | LongRunHighGrayLevelEmphasis         | 570.1086504  |
| wavelet-LLH | glrlm      | RunPercentage                        | 0.976800977  |
| wavelet-LLH | glrlm      | LongRunLowGrayLevelEmphasis          | 0.023268     |
| wavelet-LLH | glrlm      | RunEntropy                           | 4.725942114  |
| wavelet-LLH | glrlm      | HighGrayLevelRunEmphasis             | 532.9372944  |
| wavelet-LLH | glrlm      | RunLengthNonUniformityNormalized     | 0.95380954   |
| wavelet-LLH | glszm      | GrayLevelVariance                    | 104.1995062  |
| wavelet-LLH | glszm      | ZoneVariance                         | 0.64         |
| wavelet-LLH | glszm      | GrayLevelNonUniformityNormalized     | 0.040987654  |
| wavelet-LLH | glszm      | SizeZoneNonUniformityNormalized      | 0.595061728  |
| wavelet-LLH | glszm      | SizeZoneNonUniformity                | 26.77777778  |
| wavelet-LLH | glszm      | GrayLevelNonUniformity               | 1.844444444  |
| wavelet-LLH | glszm      | LargeAreaEmphasis                    | 2.6          |
| wavelet-LLH | glszm      | SmallAreaHighGrayLevelEmphasis       | 447.1280864  |
| wavelet-LLH | glszm      | ZonePercentage                       | 0.714285714  |
| wavelet-LLH | glszm      | LargeAreaLowGrayLevelEmphasis        | 0.035220431  |
| wavelet-LLH | glszm      | LargeAreaHighGrayLevelEmphasis       | 1373.888889  |
| wavelet-LLH | glszm      | HighGrayLevelZoneEmphasis            | 544.2666667  |
| wavelet-LLH | glszm      | SmallAreaEmphasis                    | 0.799074074  |
| wavelet-LLH | glszm      | LowGrayLevelZoneEmphasis             | 0.030159638  |
| wavelet-LLH | glszm      | ZoneEntropy                          | 5.047408652  |
| wavelet-LLH | glszm      | SmallAreaLowGrayLevelEmphasis        | 0.029333095  |
| wavelet-LLH | ngtdm      | Coarseness                           | 0.073810194  |
| wavelet-LLH | ngtdm      | Complexity                           | 2305.552794  |
| wavelet-LLH | ngtdm      | Strength                             | 32.14984696  |
| wavelet-LLH | ngtdm      | Contrast                             | 1.27504455   |
| wavelet-LLH | ngtdm      | Busyness                             | 0.02689164   |
| wavelet-LLL | gldm       | GrayLevelVariance                    | 486.6293777  |
| wavelet-LLL | gldm       | HighGrayLevelEmphasis                | 2043.746032  |
| wavelet-LLL | gldm       | DependenceEntropy                    | 5.357921987  |
| wavelet-LLL | gldm       | DependenceNonUniformity              | 53.6031746   |
| wavelet-LLL | gldm       | GrayLevelNonUniformity               | 1.698412698  |
| wavelet-LLL | gldm       | SmallDependenceEmphasis              | 0.933862434  |
| wavelet-LLL | gldm       | SmallDependenceHighGrayLevelEmphasis | 1808.656085  |
| wavelet-LLL | gldm       | DependenceNonUniformityNormalized    | 0.850844041  |
| wavelet-LLL | gldm       | LargeDependenceEmphasis              | 1.476190476  |
| wavelet-LLL | gldm       | LargeDependenceLowGrayLevelEmphasis  | 0.025666385  |
| wavelet-LLL | gldm       | DependenceVariance                   | 0.206097254  |
| wavelet-LLL | gldm       | LargeDependenceHighGrayLevelEmphasis | 4111.936508  |
| wavelet-LLL | gldm       | SmallDependenceLowGrayLevelEmphasis  | 0.025289337  |
| wavelet-LLL | gldm       | LowGrayLevelEmphasis                 | 0.025356803  |
| wavelet-LLL | glcm       | JointAverage                         | 46.4191287   |
| wavelet-LLL | glcm       | SumAverage                           | 92.8382574   |

|             |            |                                  |              |
|-------------|------------|----------------------------------|--------------|
| wavelet-LLL | glcm       | JointEntropy                     | 6.088362039  |
| wavelet-LLL | glcm       | ClusterShade                     | 2697.770862  |
| wavelet-LLL | glcm       | MaximumProbability               | 0.023104367  |
| wavelet-LLL | glcm       | Idmn                             | 0.902398242  |
| wavelet-LLL | glcm       | JointEnergy                      | 0.014989188  |
| wavelet-LLL | glcm       | Contrast                         | 908.7973834  |
| wavelet-LLL | glcm       | DifferenceEntropy                | 4.437430409  |
| wavelet-LLL | glcm       | InverseVariance                  | 0.037936291  |
| wavelet-LLL | glcm       | DifferenceVariance               | 278.7206023  |
| wavelet-LLL | glcm       | Idn                              | 0.795291179  |
| wavelet-LLL | glcm       | Idm                              | 0.034037228  |
| wavelet-LLL | glcm       | Correlation                      | 0.140086483  |
| wavelet-LLL | glcm       | Autocorrelation                  | 2223.593919  |
| wavelet-LLL | glcm       | SumEntropy                       | 4.871484443  |
| wavelet-LLL | glcm       | SumSquares                       | 520.022252   |
| wavelet-LLL | glcm       | ClusterProminence                | 3243006.604  |
| wavelet-LLL | glcm       | Imc2                             | 0.999904423  |
| wavelet-LLL | glcm       | Imc1                             | -0.828864565 |
| wavelet-LLL | glcm       | DifferenceAverage                | 24.49244975  |
| wavelet-LLL | glcm       | Id                               | 0.088605446  |
| wavelet-LLL | glcm       | ClusterTendency                  | 1171.291624  |
| wavelet-LLL | firstorder | InterquartileRange               | 783.5796793  |
| wavelet-LLL | firstorder | Skewness                         | 0.362216764  |
| wavelet-LLL | firstorder | Uniformity                       | 0.026958932  |
| wavelet-LLL | firstorder | Median                           | -935.7855398 |
| wavelet-LLL | firstorder | Energy                           | 64728504.57  |
| wavelet-LLL | firstorder | RobustMeanAbsoluteDeviation      | 324.0269238  |
| wavelet-LLL | firstorder | MeanAbsoluteDeviation            | 456.2052349  |
| wavelet-LLL | firstorder | TotalEnergy                      | 1747669623   |
| wavelet-LLL | firstorder | Maximum                          | 295.8623223  |
| wavelet-LLL | firstorder | RootMeanSquared                  | 1013.625464  |
| wavelet-LLL | firstorder | 90Percentile                     | -15.55164379 |
| wavelet-LLL | firstorder | Minimum                          | -1807.807023 |
| wavelet-LLL | firstorder | Entropy                          | 5.357921987  |
| wavelet-LLL | firstorder | Range                            | 2103.669345  |
| wavelet-LLL | firstorder | Variance                         | 304590.6171  |
| wavelet-LLL | firstorder | 10Percentile                     | -1489.083463 |
| wavelet-LLL | firstorder | Kurtosis                         | 2.262940357  |
| wavelet-LLL | firstorder | Mean                             | -850.2034835 |
| wavelet-LLL | glrlm      | ShortRunLowGrayLevelEmphasis     | 0.025475993  |
| wavelet-LLL | glrlm      | GrayLevelVariance                | 484.312434   |
| wavelet-LLL | glrlm      | LowGrayLevelRunEmphasis          | 0.025478843  |
| wavelet-LLL | glrlm      | GrayLevelNonUniformityNormalized | 0.02686847   |
| wavelet-LLL | glrlm      | RunVariance                      | 0.004882734  |
| wavelet-LLL | glrlm      | GrayLevelNonUniformity           | 1.684509039  |
| wavelet-LLL | glrlm      | LongRunEmphasis                  | 1.014888337  |
| wavelet-LLL | glrlm      | ShortRunHighGrayLevelEmphasis    | 2018.308977  |
| wavelet-LLL | glrlm      | RunLengthNonUniformity           | 62.08684864  |
| wavelet-LLL | glrlm      | ShortRunEmphasis                 | 0.996277916  |
| wavelet-LLL | glrlm      | LongRunHighGrayLevelEmphasis     | 2094.551223  |
| wavelet-LLL | glrlm      | RunPercentage                    | 0.995115995  |
| wavelet-LLL | glrlm      | LongRunLowGrayLevelEmphasis      | 0.025490244  |
| wavelet-LLL | glrlm      | RunEntropy                       | 5.367925082  |
| wavelet-LLL | glrlm      | HighGrayLevelRunEmphasis         | 2033.557426  |
| wavelet-LLL | glrlm      | RunLengthNonUniformityNormalized | 0.990234531  |



|             |       |                                      |              |
|-------------|-------|--------------------------------------|--------------|
| wavelet-LLL | glszm | GrayLevelVariance                    | 466.5222222  |
| wavelet-LLL | glszm | ZoneVariance                         | 0.080833333  |
| wavelet-LLL | glszm | GrayLevelNonUniformityNormalized     | 0.026666667  |
| wavelet-LLL | glszm | SizeZoneNonUniformityNormalized      | 0.935        |
| wavelet-LLL | glszm | SizeZoneNonUniformity                | 56.1         |
| wavelet-LLL | glszm | GrayLevelNonUniformity               | 1.6          |
| wavelet-LLL | glszm | LargeAreaEmphasis                    | 1.183333333  |
| wavelet-LLL | glszm | SmallAreaHighGrayLevelEmphasis       | 1877.685185  |
| wavelet-LLL | glszm | ZonePercentage                       | 0.952380952  |
| wavelet-LLL | glszm | LargeAreaLowGrayLevelEmphasis        | 0.026726742  |
| wavelet-LLL | glszm | LargeAreaHighGrayLevelEmphasis       | 2692.166667  |
| wavelet-LLL | glszm | HighGrayLevelZoneEmphasis            | 1961.633333  |
| wavelet-LLL | glszm | SmallAreaEmphasis                    | 0.972685185  |
| wavelet-LLL | glszm | LowGrayLevelZoneEmphasis             | 0.026576722  |
| wavelet-LLL | glszm | ZoneEntropy                          | 5.369146221  |
| wavelet-LLL | glszm | SmallAreaLowGrayLevelEmphasis        | 0.026542692  |
| wavelet-LLL | ngtdm | Coarseness                           | 0.034537611  |
| wavelet-LLL | ngtdm | Complexity                           | 23480.09624  |
| wavelet-LLL | ngtdm | Strength                             | 85.69189586  |
| wavelet-LLL | ngtdm | Contrast                             | 8.101119044  |
| wavelet-LLL | ngtdm | Busyness                             | 0.023783488  |
| wavelet-HHL | gldm  | GrayLevelVariance                    | 25.13378685  |
| wavelet-HHL | gldm  | HighGrayLevelEmphasis                | 295.031746   |
| wavelet-HHL | gldm  | DependenceEntropy                    | 4.88951286   |
| wavelet-HHL | gldm  | DependenceNonUniformity              | 20.04761905  |
| wavelet-HHL | gldm  | GrayLevelNonUniformity               | 4.650793651  |
| wavelet-HHL | gldm  | SmallDependenceEmphasis              | 0.508708113  |
| wavelet-HHL | gldm  | SmallDependenceHighGrayLevelEmphasis | 160.9521605  |
| wavelet-HHL | gldm  | DependenceNonUniformityNormalized    | 0.318216175  |
| wavelet-HHL | gldm  | LargeDependenceEmphasis              | 4.841269841  |
| wavelet-HHL | gldm  | LargeDependenceLowGrayLevelEmphasis  | 0.036054034  |
| wavelet-HHL | gldm  | DependenceVariance                   | 1.029478458  |
| wavelet-HHL | gldm  | LargeDependenceHighGrayLevelEmphasis | 1411.063492  |
| wavelet-HHL | gldm  | SmallDependenceLowGrayLevelEmphasis  | 0.018215293  |
| wavelet-HHL | gldm  | LowGrayLevelEmphasis                 | 0.020552661  |
| wavelet-HHL | glcm  | JointAverage                         | 16.52602019  |
| wavelet-HHL | glcm  | SumAverage                           | 33.05204039  |
| wavelet-HHL | glcm  | JointEntropy                         | 5.82266732   |
| wavelet-HHL | glcm  | ClusterShade                         | -5.184873948 |
| wavelet-HHL | glcm  | MaximumProbability                   | 0.03213056   |
| wavelet-HHL | glcm  | Idmn                                 | 0.953945748  |
| wavelet-HHL | glcm  | JointEnergy                          | 0.018902074  |
| wavelet-HHL | glcm  | Contrast                             | 55.75092328  |
| wavelet-HHL | glcm  | DifferenceEntropy                    | 3.486361849  |
| wavelet-HHL | glcm  | InverseVariance                      | 0.180182997  |
| wavelet-HHL | glcm  | DifferenceVariance                   | 22.27245398  |
| wavelet-HHL | glcm  | Idn                                  | 0.86121527   |
| wavelet-HHL | glcm  | Idm                                  | 0.175483426  |
| wavelet-HHL | glcm  | Correlation                          | 0.048208531  |
| wavelet-HHL | glcm  | Autocorrelation                      | 274.8345986  |
| wavelet-HHL | glcm  | SumEntropy                           | 4.089715475  |
| wavelet-HHL | glcm  | SumSquares                           | 29.47173466  |
| wavelet-HHL | glcm  | ClusterProminence                    | 12473.86227  |
| wavelet-HHL | glcm  | Imc2                                 | 0.992066575  |
| wavelet-HHL | glcm  | Imc1                                 | -0.534961488 |

|             |            |                                  |              |
|-------------|------------|----------------------------------|--------------|
| wavelet-HHL | glcm       | DifferenceAverage                | 5.698963595  |
| wavelet-HHL | glcm       | Id                               | 0.26575699   |
| wavelet-HHL | glcm       | ClusterTendency                  | 62.13601534  |
| wavelet-HHL | firstorder | InterquartileRange               | 150.5862237  |
| wavelet-HHL | firstorder | Skewness                         | -0.157722492 |
| wavelet-HHL | firstorder | Uniformity                       | 0.073822121  |
| wavelet-HHL | firstorder | Median                           | 10.72821103  |
| wavelet-HHL | firstorder | Energy                           | 990023.6209  |
| wavelet-HHL | firstorder | RobustMeanAbsoluteDeviation      | 62.44740269  |
| wavelet-HHL | firstorder | MeanAbsoluteDeviation            | 96.50965172  |
| wavelet-HHL | firstorder | TotalEnergy                      | 26730637.76  |
| wavelet-HHL | firstorder | Maximum                          | 377.6460654  |
| wavelet-HHL | firstorder | RootMeanSquared                  | 125.3581296  |
| wavelet-HHL | firstorder | 90Percentile                     | 122.8892327  |
| wavelet-HHL | firstorder | Minimum                          | -390.8759323 |
| wavelet-HHL | firstorder | Entropy                          | 3.959924069  |
| wavelet-HHL | firstorder | Range                            | 768.5219977  |
| wavelet-HHL | firstorder | Variance                         | 15703.52731  |
| wavelet-HHL | firstorder | 10Percentile                     | -181.9240836 |
| wavelet-HHL | firstorder | Kurtosis                         | 4.135016567  |
| wavelet-HHL | firstorder | Mean                             | -3.336665678 |
| wavelet-HHL | glrlm      | ShortRunLowGrayLevelEmphasis     | 0.021055508  |
| wavelet-HHL | glrlm      | GrayLevelVariance                | 25.74687071  |
| wavelet-HHL | glrlm      | LowGrayLevelRunEmphasis          | 0.021178992  |
| wavelet-HHL | glrlm      | GrayLevelNonUniformityNormalized | 0.073010462  |
| wavelet-HHL | glrlm      | RunVariance                      | 0.03651081   |
| wavelet-HHL | glrlm      | GrayLevelNonUniformity           | 4.43200511   |
| wavelet-HHL | glrlm      | LongRunEmphasis                  | 1.115455943  |
| wavelet-HHL | glrlm      | ShortRunHighGrayLevelEmphasis    | 287.1921762  |
| wavelet-HHL | glrlm      | RunLengthNonUniformity           | 56.31068807  |
| wavelet-HHL | glrlm      | ShortRunEmphasis                 | 0.971136014  |
| wavelet-HHL | glrlm      | LongRunHighGrayLevelEmphasis     | 328.322089   |
| wavelet-HHL | glrlm      | RunPercentage                    | 0.963369963  |
| wavelet-HHL | glrlm      | LongRunLowGrayLevelEmphasis      | 0.021672927  |
| wavelet-HHL | glrlm      | RunEntropy                       | 4.089885987  |
| wavelet-HHL | glrlm      | HighGrayLevelRunEmphasis         | 295.4181588  |
| wavelet-HHL | glrlm      | RunLengthNonUniformityNormalized | 0.92697838   |
| wavelet-HHL | glszm      | GrayLevelVariance                | 34.7700831   |
| wavelet-HHL | glszm      | ZoneVariance                     | 1.593490305  |
| wavelet-HHL | glszm      | GrayLevelNonUniformityNormalized | 0.069252078  |
| wavelet-HHL | glszm      | SizeZoneNonUniformityNormalized  | 0.48199446   |
| wavelet-HHL | glszm      | SizeZoneNonUniformity            | 18.31578947  |
| wavelet-HHL | glszm      | GrayLevelNonUniformity           | 2.631578947  |
| wavelet-HHL | glszm      | LargeAreaEmphasis                | 4.342105263  |
| wavelet-HHL | glszm      | SmallAreaHighGrayLevelEmphasis   | 233.0739302  |
| wavelet-HHL | glszm      | ZonePercentage                   | 0.603174603  |
| wavelet-HHL | glszm      | LargeAreaLowGrayLevelEmphasis    | 0.044454976  |
| wavelet-HHL | glszm      | LargeAreaHighGrayLevelEmphasis   | 1280.552632  |
| wavelet-HHL | glszm      | HighGrayLevelZoneEmphasis        | 304.4210526  |
| wavelet-HHL | glszm      | SmallAreaEmphasis                | 0.719608694  |
| wavelet-HHL | glszm      | LowGrayLevelZoneEmphasis         | 0.031124213  |
| wavelet-HHL | glszm      | ZoneEntropy                      | 4.523986066  |
| wavelet-HHL | glszm      | SmallAreaLowGrayLevelEmphasis    | 0.029596716  |
| wavelet-HHL | ngtdm      | Coarseness                       | 0.074657245  |
| wavelet-HHL | ngtdm      | Complexity                       | 615.8002964  |

|             |            |                                      |              |
|-------------|------------|--------------------------------------|--------------|
| wavelet-HHL | ngtdm      | Strength                             | 12.34608142  |
| wavelet-HHL | ngtdm      | Contrast                             | 0.55228939   |
| wavelet-HHL | ngtdm      | Busyness                             | 0.054938573  |
| wavelet-HLH | gldm       | GrayLevelVariance                    | 19.73444192  |
| wavelet-HLH | gldm       | HighGrayLevelEmphasis                | 134.1904762  |
| wavelet-HLH | gldm       | DependenceEntropy                    | 4.838003138  |
| wavelet-HLH | gldm       | DependenceNonUniformity              | 19.25396825  |
| wavelet-HLH | gldm       | GrayLevelNonUniformity               | 5            |
| wavelet-HLH | gldm       | SmallDependenceEmphasis              | 0.505458554  |
| wavelet-HLH | gldm       | SmallDependenceHighGrayLevelEmphasis | 62.09291887  |
| wavelet-HLH | gldm       | DependenceNonUniformityNormalized    | 0.305618544  |
| wavelet-HLH | gldm       | LargeDependenceEmphasis              | 5.253968254  |
| wavelet-HLH | gldm       | LargeDependenceLowGrayLevelEmphasis  | 0.090340043  |
| wavelet-HLH | gldm       | DependenceVariance                   | 1.190224238  |
| wavelet-HLH | gldm       | LargeDependenceHighGrayLevelEmphasis | 663.1111111  |
| wavelet-HLH | gldm       | SmallDependenceLowGrayLevelEmphasis  | 0.029527415  |
| wavelet-HLH | gldm       | LowGrayLevelEmphasis                 | 0.036799189  |
| wavelet-HLH | glcm       | JointAverage                         | 10.52666728  |
| wavelet-HLH | glcm       | SumAverage                           | 21.05333457  |
| wavelet-HLH | glcm       | JointEntropy                         | 5.746213444  |
| wavelet-HLH | glcm       | ClusterShade                         | -30.42210228 |
| wavelet-HLH | glcm       | MaximumProbability                   | 0.039222011  |
| wavelet-HLH | glcm       | Idmn                                 | 0.910305363  |
| wavelet-HLH | glcm       | JointEnergy                          | 0.020388211  |
| wavelet-HLH | glcm       | Contrast                             | 42.56143947  |
| wavelet-HLH | glcm       | DifferenceEntropy                    | 3.428638833  |
| wavelet-HLH | glcm       | InverseVariance                      | 0.198127676  |
| wavelet-HLH | glcm       | DifferenceVariance                   | 15.74256066  |
| wavelet-HLH | glcm       | Idn                                  | 0.809014367  |
| wavelet-HLH | glcm       | Idm                                  | 0.190437894  |
| wavelet-HLH | glcm       | Correlation                          | -0.00961269  |
| wavelet-HLH | glcm       | Autocorrelation                      | 110.7934653  |
| wavelet-HLH | glcm       | SumEntropy                           | 4.020095152  |
| wavelet-HLH | glcm       | SumSquares                           | 21.24052387  |
| wavelet-HLH | glcm       | ClusterProminence                    | 5157.280935  |
| wavelet-HLH | glcm       | Imc2                                 | 0.987453468  |
| wavelet-HLH | glcm       | Imc1                                 | -0.493055337 |
| wavelet-HLH | glcm       | DifferenceAverage                    | 5.097989659  |
| wavelet-HLH | glcm       | Id                                   | 0.280537037  |
| wavelet-HLH | glcm       | ClusterTendency                      | 42.40065601  |
| wavelet-HLH | firstorder | InterquartileRange                   | 142.1399314  |
| wavelet-HLH | firstorder | Skewness                             | -0.136094914 |
| wavelet-HLH | firstorder | Uniformity                           | 0.079365079  |
| wavelet-HLH | firstorder | Median                               | 12.06292467  |
| wavelet-HLH | firstorder | Energy                               | 792339.6987  |
| wavelet-HLH | firstorder | RobustMeanAbsoluteDeviation          | 59.26383795  |
| wavelet-HLH | firstorder | MeanAbsoluteDeviation                | 88.50402106  |
| wavelet-HLH | firstorder | TotalEnergy                          | 21393171.86  |
| wavelet-HLH | firstorder | Maximum                              | 219.2380599  |
| wavelet-HLH | firstorder | RootMeanSquared                      | 112.1464249  |
| wavelet-HLH | firstorder | 90Percentile                         | 167.729175   |
| wavelet-HLH | firstorder | Minimum                              | -227.537623  |
| wavelet-HLH | firstorder | Entropy                              | 3.862067527  |
| wavelet-HLH | firstorder | Range                                | 446.7756828  |
| wavelet-HLH | firstorder | Variance                             | 12558.74872  |

|             |            |                                  |              |
|-------------|------------|----------------------------------|--------------|
| wavelet-HLH | firstorder | 10Percentile                     | -158.2301833 |
| wavelet-HLH | firstorder | Kurtosis                         | 2.402770567  |
| wavelet-HLH | firstorder | Mean                             | 4.251104722  |
| wavelet-HLH | glrlm      | ShortRunLowGrayLevelEmphasis     | 0.037347111  |
| wavelet-HLH | glrlm      | GrayLevelVariance                | 20.06984465  |
| wavelet-HLH | glrlm      | LowGrayLevelRunEmphasis          | 0.037758102  |
| wavelet-HLH | glrlm      | GrayLevelNonUniformityNormalized | 0.077941042  |
| wavelet-HLH | glrlm      | RunVariance                      | 0.038972526  |
| wavelet-HLH | glrlm      | GrayLevelNonUniformity           | 4.718785041  |
| wavelet-HLH | glrlm      | LongRunEmphasis                  | 1.122847917  |
| wavelet-HLH | glrlm      | ShortRunHighGrayLevelEmphasis    | 130.2447383  |
| wavelet-HLH | glrlm      | RunLengthNonUniformity           | 55.8519202   |
| wavelet-HLH | glrlm      | ShortRunEmphasis                 | 0.969288021  |
| wavelet-HLH | glrlm      | LongRunHighGrayLevelEmphasis     | 150.4749055  |
| wavelet-HLH | glrlm      | RunPercentage                    | 0.960927961  |
| wavelet-HLH | glrlm      | LongRunLowGrayLevelEmphasis      | 0.039402067  |
| wavelet-HLH | glrlm      | RunEntropy                       | 4.017627797  |
| wavelet-HLH | glrlm      | HighGrayLevelRunEmphasis         | 134.2907718  |
| wavelet-HLH | glrlm      | RunLengthNonUniformityNormalized | 0.922054948  |
| wavelet-HLH | glszm      | GrayLevelVariance                | 23.86997809  |
| wavelet-HLH | glszm      | ZoneVariance                     | 2.208911614  |
| wavelet-HLH | glszm      | GrayLevelNonUniformityNormalized | 0.069393718  |
| wavelet-HLH | glszm      | SizeZoneNonUniformityNormalized  | 0.507669832  |
| wavelet-HLH | glszm      | SizeZoneNonUniformity            | 18.78378378  |
| wavelet-HLH | glszm      | GrayLevelNonUniformity           | 2.567567568  |
| wavelet-HLH | glszm      | LargeAreaEmphasis                | 5.108108108  |
| wavelet-HLH | glszm      | SmallAreaHighGrayLevelEmphasis   | 87.24865416  |
| wavelet-HLH | glszm      | ZonePercentage                   | 0.587301587  |
| wavelet-HLH | glszm      | LargeAreaLowGrayLevelEmphasis    | 0.107144237  |
| wavelet-HLH | glszm      | LargeAreaHighGrayLevelEmphasis   | 617.5675676  |
| wavelet-HLH | glszm      | HighGrayLevelZoneEmphasis        | 133.2702703  |
| wavelet-HLH | glszm      | SmallAreaEmphasis                | 0.734916958  |
| wavelet-HLH | glszm      | LowGrayLevelZoneEmphasis         | 0.052511704  |
| wavelet-HLH | glszm      | ZoneEntropy                      | 4.553651676  |
| wavelet-HLH | glszm      | SmallAreaLowGrayLevelEmphasis    | 0.048285945  |
| wavelet-HLH | ngtdm      | Coarseness                       | 0.069027812  |
| wavelet-HLH | ngtdm      | Complexity                       | 483.9962821  |
| wavelet-HLH | ngtdm      | Strength                         | 7.534635996  |
| wavelet-HLH | ngtdm      | Contrast                         | 0.478875436  |
| wavelet-HLH | ngtdm      | Busyness                         | 0.080454478  |

| Image type | Feature Class | Feature Name                         |                                                                                                                                                                                                                                                                                                                                                                                                                   |
|------------|---------------|--------------------------------------|-------------------------------------------------------------------------------------------------------------------------------------------------------------------------------------------------------------------------------------------------------------------------------------------------------------------------------------------------------------------------------------------------------------------|
| general    | info          | BoundingBox                          | 3: RTSTRUCT: C99-DNU_segment_ITV-RUL<br>(0, 0, 1, 4, 5, 4)                                                                                                                                                                                                                                                                                                                                                        |
| general    | info          | EnabledImageTypes                    | {u'Original': {}, u'Wavelet': {}}                                                                                                                                                                                                                                                                                                                                                                                 |
|            |               |                                      | {'distances': [1], 'additionalInfo': True, 'force2D': False, 'interpolator': 'sitkBSpline', 'resampledPixelSpacing': [3.0], 'label': 1, 'normalizeScale': 1, 'normalize': False, 'force2Ddimension': 0, 'removeOutliers': None, 'minimumROISize': None, u'binWidth': 25.0, 'minimumROIDimensions': 1, u'correctMask': True, 'preCrop': False, u'symmetricalGLCM': True, 'resegmentRange': None, 'padDistance': 5} |
| general    | info          | GeneralSettings                      |                                                                                                                                                                                                                                                                                                                                                                                                                   |
| general    | info          | ImageHash                            | 238e8e078a6b269bd13474f72c26df1f9eb8f449<br>(0.9765625000000002, 0.9765625000000002,                                                                                                                                                                                                                                                                                                                              |
| general    | info          | ImageSpacing                         | 2.0)<br>8dc0712b47997a65fb206e06706dd79573dc73c                                                                                                                                                                                                                                                                                                                                                                   |
| general    | info          | MaskHash                             | 7                                                                                                                                                                                                                                                                                                                                                                                                                 |
| general    | info          | NumpyVersion                         | 1.13.1                                                                                                                                                                                                                                                                                                                                                                                                            |
| general    | info          | PyWaveletVersion                     | 0.5.2                                                                                                                                                                                                                                                                                                                                                                                                             |
| general    | info          | SimpleITKVersion                     | 1.1.0                                                                                                                                                                                                                                                                                                                                                                                                             |
| general    | info          | Version                              | 1.3.0.post102+g1b0eb74                                                                                                                                                                                                                                                                                                                                                                                            |
| general    | info          | VolumeNum                            | 1                                                                                                                                                                                                                                                                                                                                                                                                                 |
| general    | info          | VoxelNum                             | 35                                                                                                                                                                                                                                                                                                                                                                                                                |
| original   | shape         | Maximum3DDiameter                    | 14.07124728                                                                                                                                                                                                                                                                                                                                                                                                       |
| original   | shape         | Maximum2DDiameterSlice               | 12.36931688                                                                                                                                                                                                                                                                                                                                                                                                       |
| original   | shape         | Sphericity                           | 0.873709674                                                                                                                                                                                                                                                                                                                                                                                                       |
| original   | shape         | MinorAxis                            | 11.275846                                                                                                                                                                                                                                                                                                                                                                                                         |
| original   | shape         | Elongation                           | 0.82654471                                                                                                                                                                                                                                                                                                                                                                                                        |
| original   | shape         | SurfaceVolumeRatio                   | 0.564035419                                                                                                                                                                                                                                                                                                                                                                                                       |
| original   | shape         | Volume                               | 945                                                                                                                                                                                                                                                                                                                                                                                                               |
| original   | shape         | MajorAxis                            | 13.6421489                                                                                                                                                                                                                                                                                                                                                                                                        |
| original   | shape         | SurfaceArea                          | 533.0134714                                                                                                                                                                                                                                                                                                                                                                                                       |
| original   | shape         | Flatness                             | 0.707806996                                                                                                                                                                                                                                                                                                                                                                                                       |
| original   | shape         | LeastAxis                            | 9.656008437                                                                                                                                                                                                                                                                                                                                                                                                       |
| original   | shape         | Maximum2DDiameterColumn              | 10.81665383                                                                                                                                                                                                                                                                                                                                                                                                       |
| original   | shape         | Maximum2DDiameterRow                 | 13.41640786                                                                                                                                                                                                                                                                                                                                                                                                       |
| original   | gldm          | GrayLevelVariance                    | 103.5477551                                                                                                                                                                                                                                                                                                                                                                                                       |
| original   | gldm          | HighGrayLevelEmphasis                | 400.3714286                                                                                                                                                                                                                                                                                                                                                                                                       |
| original   | gldm          | DependenceEntropy                    | 4.536286231                                                                                                                                                                                                                                                                                                                                                                                                       |
| original   | gldm          | DependenceNonUniformity              | 17.97142857                                                                                                                                                                                                                                                                                                                                                                                                       |
| original   | gldm          | GrayLevelNonUniformity               | 1.857142857                                                                                                                                                                                                                                                                                                                                                                                                       |
| original   | gldm          | SmallDependenceEmphasis              | 0.717460317                                                                                                                                                                                                                                                                                                                                                                                                       |
| original   | gldm          | SmallDependenceHighGrayLevelEmphasis | 259.531746                                                                                                                                                                                                                                                                                                                                                                                                        |
| original   | gldm          | DependenceNonUniformityNormalized    | 0.513469388                                                                                                                                                                                                                                                                                                                                                                                                       |
| original   | gldm          | LargeDependenceEmphasis              | 2.257142857                                                                                                                                                                                                                                                                                                                                                                                                       |
| original   | gldm          | LargeDependenceLowGrayLevelEmphasis  | 0.05117022                                                                                                                                                                                                                                                                                                                                                                                                        |
| original   | gldm          | DependenceVariance                   | 0.297142857                                                                                                                                                                                                                                                                                                                                                                                                       |
| original   | gldm          | LargeDependenceHighGrayLevelEmphasis | 976.4285714                                                                                                                                                                                                                                                                                                                                                                                                       |
| original   | gldm          | SmallDependenceLowGrayLevelEmphasis  | 0.043997753                                                                                                                                                                                                                                                                                                                                                                                                       |
| original   | gldm          | LowGrayLevelEmphasis                 | 0.045178278                                                                                                                                                                                                                                                                                                                                                                                                       |
| original   | glcm          | JointAverage                         | 20.29840556                                                                                                                                                                                                                                                                                                                                                                                                       |

|          |            |                                  |              |
|----------|------------|----------------------------------|--------------|
| original | glcm       | SumAverage                       | 40.59681111  |
| original | glcm       | JointEntropy                     | 4.893555421  |
| original | glcm       | ClusterShade                     | -449.0538434 |
| original | glcm       | MaximumProbability               | 0.050098649  |
| original | glcm       | Idmn                             | 0.891693837  |
| original | glcm       | JointEnergy                      | 0.034869217  |
| original | glcm       | Contrast                         | 173.6295547  |
| original | glcm       | DifferenceEntropy                | 3.482767232  |
| original | glcm       | InverseVariance                  | 0.09502363   |
| original | glcm       | DifferenceVariance               | 53.28293022  |
| original | glcm       | Idn                              | 0.784484567  |
| original | glcm       | Idm                              | 0.092687632  |
| original | glcm       | Correlation                      | 0.150578887  |
| original | glcm       | Autocorrelation                  | 427.303602   |
| original | glcm       | SumEntropy                       | 3.761645139  |
| original | glcm       | SumSquares                       | 101.3765226  |
| original | glcm       | ClusterProminence                | 112969.1549  |
| original | glcm       | Imc2                             | 0.999098736  |
| original | glcm       | Imc1                             | -0.789115773 |
| original | glcm       | DifferenceAverage                | 10.79129939  |
| original | glcm       | Id                               | 0.168399629  |
| original | glcm       | ClusterTendency                  | 231.8765355  |
| original | firstorder | InterquartileRange               | 438          |
| original | firstorder | Skewness                         | 0.270573424  |
| original | firstorder | Uniformity                       | 0.053061224  |
| original | firstorder | Median                           | -456         |
| original | firstorder | Energy                           | 8817494      |
| original | firstorder | RobustMeanAbsoluteDeviation      | 169.4019204  |
| original | firstorder | MeanAbsoluteDeviation            | 218.5485714  |
| original | firstorder | TotalEnergy                      | 238072338    |
| original | firstorder | Maximum                          | 12           |
| original | firstorder | RootMeanSquared                  | 501.9246955  |
| original | firstorder | 90Percentile                     | -76.6        |
| original | firstorder | Minimum                          | -840         |
| original | firstorder | Entropy                          | 4.378864088  |
| original | firstorder | Range                            | 852          |
| original | firstorder | Variance                         | 64612.56     |
| original | firstorder | 10Percentile                     | -702.8       |
| original | firstorder | Kurtosis                         | 1.824848113  |
| original | firstorder | Mean                             | -432.8       |
| original | glrlm      | ShortRunLowGrayLevelEmphasis     | 0.045774344  |
| original | glrlm      | GrayLevelVariance                | 103.7413837  |
| original | glrlm      | LowGrayLevelRunEmphasis          | 0.045828182  |
| original | glrlm      | GrayLevelNonUniformityNormalized | 0.052959696  |
| original | glrlm      | RunVariance                      | 0.015358964  |
| original | glrlm      | GrayLevelNonUniformity           | 1.825174825  |
| original | glrlm      | LongRunEmphasis                  | 1.047922666  |
| original | glrlm      | ShortRunHighGrayLevelEmphasis    | 393.4042541  |
| original | glrlm      | RunLengthNonUniformity           | 33.42588784  |
| original | glrlm      | ShortRunEmphasis                 | 0.988019334  |
| original | glrlm      | LongRunHighGrayLevelEmphasis     | 422.038818   |
| original | glrlm      | RunPercentage                    | 0.984615385  |
| original | glrlm      | LongRunLowGrayLevelEmphasis      | 0.046043533  |
| original | glrlm      | RunEntropy                       | 4.395097779  |

|             |       |                                      |              |
|-------------|-------|--------------------------------------|--------------|
| original    | glrlm | HighGrayLevelRunEmphasis             | 399.1311669  |
| original    | glrlm | RunLengthNonUniformityNormalized     | 0.969282072  |
| original    | glszm | GrayLevelVariance                    | 107.0306122  |
| original    | glszm | ZoneVariance                         | 0.258928571  |
| original    | glszm | GrayLevelNonUniformityNormalized     | 0.051020408  |
| original    | glszm | SizeZoneNonUniformityNormalized      | 0.650510204  |
| original    | glszm | SizeZoneNonUniformity                | 18.21428571  |
| original    | glszm | GrayLevelNonUniformity               | 1.428571429  |
| original    | glszm | LargeAreaEmphasis                    | 1.821428571  |
| original    | glszm | SmallAreaHighGrayLevelEmphasis       | 294.7093254  |
| original    | glszm | ZonePercentage                       | 0.8          |
| original    | glszm | LargeAreaLowGrayLevelEmphasis        | 0.05944568   |
| original    | glszm | LargeAreaHighGrayLevelEmphasis       | 745.25       |
| original    | glszm | HighGrayLevelZoneEmphasis            | 381.6428571  |
| original    | glszm | SmallAreaEmphasis                    | 0.834325397  |
| original    | glszm | LowGrayLevelZoneEmphasis             | 0.055343574  |
| original    | glszm | ZoneEntropy                          | 4.494680368  |
| original    | glszm | SmallAreaLowGrayLevelEmphasis        | 0.054714872  |
| original    | ngtdm | Coarseness                           | 0.073146291  |
| original    | ngtdm | Complexity                           | 2432.519362  |
| original    | ngtdm | Strength                             | 37.32757588  |
| original    | ngtdm | Contrast                             | 3.162262576  |
| original    | ngtdm | Busyness                             | 0.043626291  |
| wavelet-HHH | gldm  | GrayLevelVariance                    | 2.053877551  |
| wavelet-HHH | gldm  | HighGrayLevelEmphasis                | 20.91428571  |
| wavelet-HHH | gldm  | DependenceEntropy                    | 4.204582218  |
| wavelet-HHH | gldm  | DependenceNonUniformity              | 6.942857143  |
| wavelet-HHH | gldm  | GrayLevelNonUniformity               | 6.828571429  |
| wavelet-HHH | gldm  | SmallDependenceEmphasis              | 0.352488095  |
| wavelet-HHH | gldm  | SmallDependenceHighGrayLevelEmphasis | 7.307670635  |
| wavelet-HHH | gldm  | DependenceNonUniformityNormalized    | 0.198367347  |
| wavelet-HHH | gldm  | LargeDependenceEmphasis              | 13.68571429  |
| wavelet-HHH | gldm  | LargeDependenceLowGrayLevelEmphasis  | 0.790078879  |
| wavelet-HHH | gldm  | DependenceVariance                   | 3.627755102  |
| wavelet-HHH | gldm  | LargeDependenceHighGrayLevelEmphasis | 290.3428571  |
| wavelet-HHH | gldm  | SmallDependenceLowGrayLevelEmphasis  | 0.059168134  |
| wavelet-HHH | gldm  | LowGrayLevelEmphasis                 | 0.096967768  |
| wavelet-HHH | glcm  | JointAverage                         | 4.486809307  |
| wavelet-HHH | glcm  | SumAverage                           | 8.973618614  |
| wavelet-HHH | glcm  | JointEntropy                         | 4.00529255   |
| wavelet-HHH | glcm  | ClusterShade                         | -1.275476642 |
| wavelet-HHH | glcm  | MaximumProbability                   | 0.135200647  |
| wavelet-HHH | glcm  | ldmn                                 | 0.937126756  |
| wavelet-HHH | glcm  | JointEnergy                          | 0.07305041   |
| wavelet-HHH | glcm  | Contrast                             | 3.688641695  |
| wavelet-HHH | glcm  | DifferenceEntropy                    | 1.897059119  |
| wavelet-HHH | glcm  | InverseVariance                      | 0.466517572  |
| wavelet-HHH | glcm  | DifferenceVariance                   | 1.373443035  |
| wavelet-HHH | glcm  | ldn                                  | 0.837372721  |
| wavelet-HHH | glcm  | ldm                                  | 0.446009932  |
| wavelet-HHH | glcm  | Correlation                          | -0.059974305 |
| wavelet-HHH | glcm  | Autocorrelation                      | 20.05496798  |
| wavelet-HHH | glcm  | SumEntropy                           | 2.526278212  |
| wavelet-HHH | glcm  | SumSquares                           | 1.737738363  |

|             |            |                                  |              |
|-------------|------------|----------------------------------|--------------|
| wavelet-HHH | glcm       | ClusterProminence                | 29.51204514  |
| wavelet-HHH | glcm       | Imc2                             | 0.867413815  |
| wavelet-HHH | glcm       | Imc1                             | -0.305328475 |
| wavelet-HHH | glcm       | DifferenceAverage                | 1.511890114  |
| wavelet-HHH | glcm       | Id                               | 0.504256849  |
| wavelet-HHH | glcm       | ClusterTendency                  | 3.262311758  |
| wavelet-HHH | firstorder | InterquartileRange               | 46.76723386  |
| wavelet-HHH | firstorder | Skewness                         | -0.072724721 |
| wavelet-HHH | firstorder | Uniformity                       | 0.195102041  |
| wavelet-HHH | firstorder | Median                           | -2.340322939 |
| wavelet-HHH | firstorder | Energy                           | 44823.41271  |
| wavelet-HHH | firstorder | RobustMeanAbsoluteDeviation      | 20.36161275  |
| wavelet-HHH | firstorder | MeanAbsoluteDeviation            | 29.3672158   |
| wavelet-HHH | firstorder | TotalEnergy                      | 1210232.143  |
| wavelet-HHH | firstorder | Maximum                          | 66.37209858  |
| wavelet-HHH | firstorder | RootMeanSquared                  | 35.78643506  |
| wavelet-HHH | firstorder | 90Percentile                     | 36.79828697  |
| wavelet-HHH | firstorder | Minimum                          | -89.84014109 |
| wavelet-HHH | firstorder | Entropy                          | 2.509552032  |
| wavelet-HHH | firstorder | Range                            | 156.2122397  |
| wavelet-HHH | firstorder | Variance                         | 1258.278884  |
| wavelet-HHH | firstorder | 10Percentile                     | -41.27220708 |
| wavelet-HHH | firstorder | Kurtosis                         | 2.800117677  |
| wavelet-HHH | firstorder | Mean                             | -4.731812645 |
| wavelet-HHH | glrlm      | ShortRunLowGrayLevelEmphasis     | 0.096981274  |
| wavelet-HHH | glrlm      | GrayLevelVariance                | 2.169700494  |
| wavelet-HHH | glrlm      | LowGrayLevelRunEmphasis          | 0.100763489  |
| wavelet-HHH | glrlm      | GrayLevelNonUniformityNormalized | 0.190901107  |
| wavelet-HHH | glrlm      | RunVariance                      | 0.092421928  |
| wavelet-HHH | glrlm      | GrayLevelNonUniformity           | 6.126377204  |
| wavelet-HHH | glrlm      | LongRunEmphasis                  | 1.290333721  |
| wavelet-HHH | glrlm      | ShortRunHighGrayLevelEmphasis    | 19.4905824   |
| wavelet-HHH | glrlm      | RunLengthNonUniformity           | 27.10436803  |
| wavelet-HHH | glrlm      | ShortRunEmphasis                 | 0.933114575  |
| wavelet-HHH | glrlm      | LongRunHighGrayLevelEmphasis     | 27.00906658  |
| wavelet-HHH | glrlm      | RunPercentage                    | 0.916483516  |
| wavelet-HHH | glrlm      | LongRunLowGrayLevelEmphasis      | 0.117060439  |
| wavelet-HHH | glrlm      | RunEntropy                       | 2.856207364  |
| wavelet-HHH | glrlm      | HighGrayLevelRunEmphasis         | 20.90083194  |
| wavelet-HHH | glrlm      | RunLengthNonUniformityNormalized | 0.841822811  |
| wavelet-HHH | glszm      | GrayLevelVariance                | 3.693877551  |
| wavelet-HHH | glszm      | ZoneVariance                     | 6.678571429  |
| wavelet-HHH | glszm      | GrayLevelNonUniformityNormalized | 0.183673469  |
| wavelet-HHH | glszm      | SizeZoneNonUniformityNormalized  | 0.530612245  |
| wavelet-HHH | glszm      | SizeZoneNonUniformity            | 7.428571429  |
| wavelet-HHH | glszm      | GrayLevelNonUniformity           | 2.571428571  |
| wavelet-HHH | glszm      | LargeAreaEmphasis                | 12.92857143  |
| wavelet-HHH | glszm      | SmallAreaHighGrayLevelEmphasis   | 14.94608376  |
| wavelet-HHH | glszm      | ZonePercentage                   | 0.4          |
| wavelet-HHH | glszm      | LargeAreaLowGrayLevelEmphasis    | 0.818173388  |
| wavelet-HHH | glszm      | LargeAreaHighGrayLevelEmphasis   | 272.5714286  |
| wavelet-HHH | glszm      | HighGrayLevelZoneEmphasis        | 20.85714286  |
| wavelet-HHH | glszm      | SmallAreaEmphasis                | 0.723946703  |
| wavelet-HHH | glszm      | LowGrayLevelZoneEmphasis         | 0.15507815   |



|             |            |                                      |              |
|-------------|------------|--------------------------------------|--------------|
| wavelet-HHH | glszm      | ZoneEntropy                          | 3.039148672  |
| wavelet-HHH | glszm      | SmallAreaLowGrayLevelEmphasis        | 0.138403936  |
| wavelet-HHH | ngtdm      | Coarseness                           | 0.137064656  |
| wavelet-HHH | ngtdm      | Complexity                           | 22.0902173   |
| wavelet-HHH | ngtdm      | Strength                             | 1.916875372  |
| wavelet-HHH | ngtdm      | Contrast                             | 0.125952582  |
| wavelet-HHH | ngtdm      | Busyness                             | 0.303992787  |
| wavelet-HLL | gldm       | GrayLevelVariance                    | 103.8742857  |
| wavelet-HLL | gldm       | HighGrayLevelEmphasis                | 623.7142857  |
| wavelet-HLL | gldm       | DependenceEntropy                    | 4.378864088  |
| wavelet-HLL | gldm       | DependenceNonUniformity              | 16.25714286  |
| wavelet-HLL | gldm       | GrayLevelNonUniformity               | 1.971428571  |
| wavelet-HLL | gldm       | SmallDependenceEmphasis              | 0.693650794  |
| wavelet-HLL | gldm       | SmallDependenceHighGrayLevelEmphasis | 340.2555556  |
| wavelet-HLL | gldm       | DependenceNonUniformityNormalized    | 0.464489796  |
| wavelet-HLL | gldm       | LargeDependenceEmphasis              | 3.114285714  |
| wavelet-HLL | gldm       | LargeDependenceLowGrayLevelEmphasis  | 0.037098412  |
| wavelet-HLL | gldm       | DependenceVariance                   | 0.644897959  |
| wavelet-HLL | gldm       | LargeDependenceHighGrayLevelEmphasis | 2617.485714  |
| wavelet-HLL | gldm       | SmallDependenceLowGrayLevelEmphasis  | 0.034116987  |
| wavelet-HLL | gldm       | LowGrayLevelEmphasis                 | 0.034500238  |
| wavelet-HLL | glcm       | JointAverage                         | 22.89932355  |
| wavelet-HLL | glcm       | SumAverage                           | 45.7986471   |
| wavelet-HLL | glcm       | JointEntropy                         | 4.854113038  |
| wavelet-HLL | glcm       | ClusterShade                         | -921.9291433 |
| wavelet-HLL | glcm       | MaximumProbability                   | 0.054638943  |
| wavelet-HLL | glcm       | Idmn                                 | 0.920368938  |
| wavelet-HLL | glcm       | JointEnergy                          | 0.036073426  |
| wavelet-HLL | glcm       | Contrast                             | 133.3698131  |
| wavelet-HLL | glcm       | DifferenceEntropy                    | 3.261680922  |
| wavelet-HLL | glcm       | InverseVariance                      | 0.127415141  |
| wavelet-HLL | glcm       | DifferenceVariance                   | 32.48562492  |
| wavelet-HLL | glcm       | Idn                                  | 0.815610674  |
| wavelet-HLL | glcm       | Idm                                  | 0.117430424  |
| wavelet-HLL | glcm       | Correlation                          | 0.341617382  |
| wavelet-HLL | glcm       | Autocorrelation                      | 563.7391658  |
| wavelet-HLL | glcm       | SumEntropy                           | 3.703364621  |
| wavelet-HLL | glcm       | SumSquares                           | 104.0210319  |
| wavelet-HLL | glcm       | ClusterProminence                    | 148181.0372  |
| wavelet-HLL | glcm       | Imc2                                 | 0.99868639   |
| wavelet-HLL | glcm       | Imc1                                 | -0.769805986 |
| wavelet-HLL | glcm       | DifferenceAverage                    | 9.314808181  |
| wavelet-HLL | glcm       | Id                                   | 0.1948683    |
| wavelet-HLL | glcm       | ClusterTendency                      | 282.7143143  |
| wavelet-HLL | firstorder | InterquartileRange                   | 382.7159913  |
| wavelet-HLL | firstorder | Skewness                             | -0.529839721 |
| wavelet-HLL | firstorder | Uniformity                           | 0.056326531  |
| wavelet-HLL | firstorder | Median                               | -0.611200853 |
| wavelet-HLL | firstorder | Energy                               | 2346087.833  |
| wavelet-HLL | firstorder | RobustMeanAbsoluteDeviation          | 148.3078169  |
| wavelet-HLL | firstorder | MeanAbsoluteDeviation                | 209.8122529  |
| wavelet-HLL | firstorder | TotalEnergy                          | 63344371.49  |
| wavelet-HLL | firstorder | Maximum                              | 302.9870718  |
| wavelet-HLL | firstorder | RootMeanSquared                      | 258.9036132  |

|             |            |                                      |              |
|-------------|------------|--------------------------------------|--------------|
| wavelet-HLL | firstorder | 90Percentile                         | 268.9147609  |
| wavelet-HLL | firstorder | Minimum                              | -578.9342289 |
| wavelet-HLL | firstorder | Entropy                              | 4.300153017  |
| wavelet-HLL | firstorder | Range                                | 881.9213006  |
| wavelet-HLL | firstorder | Variance                             | 65297.13017  |
| wavelet-HLL | firstorder | 10Percentile                         | -428.0859448 |
| wavelet-HLL | firstorder | Kurtosis                             | 2.191720157  |
| wavelet-HLL | firstorder | Mean                                 | -41.64073448 |
| wavelet-HLL | glrlm      | ShortRunLowGrayLevelEmphasis         | 0.035264648  |
| wavelet-HLL | glrlm      | GrayLevelVariance                    | 104.2121396  |
| wavelet-HLL | glrlm      | LowGrayLevelRunEmphasis              | 0.035286541  |
| wavelet-HLL | glrlm      | GrayLevelNonUniformityNormalized     | 0.055755647  |
| wavelet-HLL | glrlm      | RunVariance                          | 0.021807904  |
| wavelet-HLL | glrlm      | GrayLevelNonUniformity               | 1.909465993  |
| wavelet-HLL | glrlm      | LongRunEmphasis                      | 1.07091201   |
| wavelet-HLL | glrlm      | ShortRunHighGrayLevelEmphasis        | 599.6913512  |
| wavelet-HLL | glrlm      | RunLengthNonUniformity               | 32.80845972  |
| wavelet-HLL | glrlm      | ShortRunEmphasis                     | 0.982271997  |
| wavelet-HLL | glrlm      | LongRunHighGrayLevelEmphasis         | 682.7610922  |
| wavelet-HLL | glrlm      | RunPercentage                        | 0.978021978  |
| wavelet-HLL | glrlm      | LongRunLowGrayLevelEmphasis          | 0.035374113  |
| wavelet-HLL | glrlm      | RunEntropy                           | 4.346824001  |
| wavelet-HLL | glrlm      | HighGrayLevelRunEmphasis             | 616.3052994  |
| wavelet-HLL | glrlm      | RunLengthNonUniformityNormalized     | 0.956384192  |
| wavelet-HLL | glszm      | GrayLevelVariance                    | 105.122085   |
| wavelet-HLL | glszm      | ZoneVariance                         | 0.430727023  |
| wavelet-HLL | glszm      | GrayLevelNonUniformityNormalized     | 0.053497942  |
| wavelet-HLL | glszm      | SizeZoneNonUniformityNormalized      | 0.68175583   |
| wavelet-HLL | glszm      | SizeZoneNonUniformity                | 18.40740741  |
| wavelet-HLL | glszm      | GrayLevelNonUniformity               | 1.444444444  |
| wavelet-HLL | glszm      | LargeAreaEmphasis                    | 2.111111111  |
| wavelet-HLL | glszm      | SmallAreaHighGrayLevelEmphasis       | 390.877572   |
| wavelet-HLL | glszm      | ZonePercentage                       | 0.771428571  |
| wavelet-HLL | glszm      | LargeAreaLowGrayLevelEmphasis        | 0.045702161  |
| wavelet-HLL | glszm      | LargeAreaHighGrayLevelEmphasis       | 1588.444444  |
| wavelet-HLL | glszm      | HighGrayLevelZoneEmphasis            | 530.7037037  |
| wavelet-HLL | glszm      | SmallAreaEmphasis                    | 0.845679012  |
| wavelet-HLL | glszm      | LowGrayLevelZoneEmphasis             | 0.044357633  |
| wavelet-HLL | glszm      | ZoneEntropy                          | 4.356558335  |
| wavelet-HLL | glszm      | SmallAreaLowGrayLevelEmphasis        | 0.044160299  |
| wavelet-HLL | ngtdm      | Coarseness                           | 0.115096935  |
| wavelet-HLL | ngtdm      | Complexity                           | 1532.015417  |
| wavelet-HLL | ngtdm      | Strength                             | 57.97920918  |
| wavelet-HLL | ngtdm      | Contrast                             | 2.280418327  |
| wavelet-HLL | ngtdm      | Busyness                             | 0.018488053  |
| wavelet-LHL | gldm       | GrayLevelVariance                    | 80.57632653  |
| wavelet-LHL | gldm       | HighGrayLevelEmphasis                | 391.3428571  |
| wavelet-LHL | gldm       | DependenceEntropy                    | 4.45757516   |
| wavelet-LHL | gldm       | DependenceNonUniformity              | 18.54285714  |
| wavelet-LHL | gldm       | GrayLevelNonUniformity               | 1.742857143  |
| wavelet-LHL | gldm       | SmallDependenceEmphasis              | 0.752380952  |
| wavelet-LHL | gldm       | SmallDependenceHighGrayLevelEmphasis | 302.2095238  |
| wavelet-LHL | gldm       | DependenceNonUniformityNormalized    | 0.529795918  |
| wavelet-LHL | gldm       | LargeDependenceEmphasis              | 2.371428571  |

|             |            |                                      |              |
|-------------|------------|--------------------------------------|--------------|
| wavelet-LHL | gldm       | LargeDependenceLowGrayLevelEmphasis  | 0.050871676  |
| wavelet-LHL | gldm       | DependenceVariance                   | 0.411428571  |
| wavelet-LHL | gldm       | LargeDependenceHighGrayLevelEmphasis | 772.2571429  |
| wavelet-LHL | gldm       | SmallDependenceLowGrayLevelEmphasis  | 0.033279065  |
| wavelet-LHL | gldm       | LowGrayLevelEmphasis                 | 0.035607111  |
| wavelet-LHL | glcm       | JointAverage                         | 17.01589894  |
| wavelet-LHL | glcm       | SumAverage                           | 34.03179788  |
| wavelet-LHL | glcm       | JointEntropy                         | 4.849452156  |
| wavelet-LHL | glcm       | ClusterShade                         | 1011.543692  |
| wavelet-LHL | glcm       | MaximumProbability                   | 0.052378387  |
| wavelet-LHL | glcm       | ldmn                                 | 0.936829161  |
| wavelet-LHL | glcm       | JointEnergy                          | 0.036161493  |
| wavelet-LHL | glcm       | Contrast                             | 89.60838524  |
| wavelet-LHL | glcm       | DifferenceEntropy                    | 3.154070515  |
| wavelet-LHL | glcm       | InverseVariance                      | 0.144825266  |
| wavelet-LHL | glcm       | DifferenceVariance                   | 29.01985391  |
| wavelet-LHL | glcm       | ldn                                  | 0.836810253  |
| wavelet-LHL | glcm       | ldm                                  | 0.123024329  |
| wavelet-LHL | glcm       | Correlation                          | 0.446731357  |
| wavelet-LHL | glcm       | Autocorrelation                      | 328.1631638  |
| wavelet-LHL | glcm       | SumEntropy                           | 3.70014814   |
| wavelet-LHL | glcm       | SumSquares                           | 82.96228568  |
| wavelet-LHL | glcm       | ClusterProminence                    | 123087.0088  |
| wavelet-LHL | glcm       | lmc2                                 | 0.999188308  |
| wavelet-LHL | glcm       | lmc1                                 | -0.803794706 |
| wavelet-LHL | glcm       | DifferenceAverage                    | 7.380161059  |
| wavelet-LHL | glcm       | ld                                   | 0.212642332  |
| wavelet-LHL | glcm       | ClusterTendency                      | 242.2407575  |
| wavelet-LHL | firstorder | InterquartileRange                   | 314.8139617  |
| wavelet-LHL | firstorder | Skewness                             | 0.185728774  |
| wavelet-LHL | firstorder | Uniformity                           | 0.049795918  |
| wavelet-LHL | firstorder | Median                               | -6.512358271 |
| wavelet-LHL | firstorder | Energy                               | 1819566.019  |
| wavelet-LHL | firstorder | RobustMeanAbsoluteDeviation          | 143.2242317  |
| wavelet-LHL | firstorder | MeanAbsoluteDeviation                | 190.9818025  |
| wavelet-LHL | firstorder | TotalEnergy                          | 49128282.51  |
| wavelet-LHL | firstorder | Maximum                              | 388.7192676  |
| wavelet-LHL | firstorder | RootMeanSquared                      | 228.0078958  |
| wavelet-LHL | firstorder | 90Percentile                         | 308.9315483  |
| wavelet-LHL | firstorder | Minimum                              | -446.897996  |
| wavelet-LHL | firstorder | Entropy                              | 4.45757516   |
| wavelet-LHL | firstorder | Range                                | 835.6172636  |
| wavelet-LHL | firstorder | Variance                             | 51562.06714  |
| wavelet-LHL | firstorder | 10Percentile                         | -292.1331729 |
| wavelet-LHL | firstorder | Kurtosis                             | 2.016194513  |
| wavelet-LHL | firstorder | Mean                                 | -20.62846076 |
| wavelet-LHL | glrlm      | ShortRunLowGrayLevelEmphasis         | 0.035885346  |
| wavelet-LHL | glrlm      | GrayLevelVariance                    | 80.31385925  |
| wavelet-LHL | glrlm      | LowGrayLevelRunEmphasis              | 0.036011965  |
| wavelet-LHL | glrlm      | GrayLevelNonUniformityNormalized     | 0.049584594  |
| wavelet-LHL | glrlm      | RunVariance                          | 0.015346621  |
| wavelet-LHL | glrlm      | GrayLevelNonUniformity               | 1.708891109  |
| wavelet-LHL | glrlm      | LongRunEmphasis                      | 1.048334019  |
| wavelet-LHL | glrlm      | ShortRunHighGrayLevelEmphasis        | 388.9082329  |

|             |       |                                      |             |
|-------------|-------|--------------------------------------|-------------|
| wavelet-LHL | glrlm | RunLengthNonUniformity               | 33.43548608 |
| wavelet-LHL | glrlm | ShortRunEmphasis                     | 0.987916495 |
| wavelet-LHL | glrlm | LongRunHighGrayLevelEmphasis         | 407.6361227 |
| wavelet-LHL | glrlm | RunPercentage                        | 0.984615385 |
| wavelet-LHL | glrlm | LongRunLowGrayLevelEmphasis          | 0.036518438 |
| wavelet-LHL | glrlm | RunEntropy                           | 4.475152289 |
| wavelet-LHL | glrlm | HighGrayLevelRunEmphasis             | 392.6538109 |
| wavelet-LHL | glrlm | RunLengthNonUniformityNormalized     | 0.969306758 |
| wavelet-LHL | glszm | GrayLevelVariance                    | 77.34363853 |
| wavelet-LHL | glszm | ZoneVariance                         | 0.233055886 |
| wavelet-LHL | glszm | GrayLevelNonUniformityNormalized     | 0.048751486 |
| wavelet-LHL | glszm | SizeZoneNonUniformityNormalized      | 0.705112961 |
| wavelet-LHL | glszm | SizeZoneNonUniformity                | 20.44827586 |
| wavelet-LHL | glszm | GrayLevelNonUniformity               | 1.413793103 |
| wavelet-LHL | glszm | LargeAreaEmphasis                    | 1.689655172 |
| wavelet-LHL | glszm | SmallAreaHighGrayLevelEmphasis       | 347.2969349 |
| wavelet-LHL | glszm | ZonePercentage                       | 0.828571429 |
| wavelet-LHL | glszm | LargeAreaLowGrayLevelEmphasis        | 0.04803743  |
| wavelet-LHL | glszm | LargeAreaHighGrayLevelEmphasis       | 621.137931  |
| wavelet-LHL | glszm | HighGrayLevelZoneEmphasis            | 400.1034483 |
| wavelet-LHL | glszm | SmallAreaEmphasis                    | 0.865900383 |
| wavelet-LHL | glszm | LowGrayLevelZoneEmphasis             | 0.040981227 |
| wavelet-LHL | glszm | ZoneEntropy                          | 4.487122805 |
| wavelet-LHL | glszm | SmallAreaLowGrayLevelEmphasis        | 0.039815835 |
| wavelet-LHL | ngtdm | Coarseness                           | 0.142945402 |
| wavelet-LHL | ngtdm | Complexity                           | 1242.235178 |
| wavelet-LHL | ngtdm | Strength                             | 57.7055248  |
| wavelet-LHL | ngtdm | Contrast                             | 1.180240875 |
| wavelet-LHL | ngtdm | Busyness                             | 0.029450172 |
| wavelet-LHH | gldm  | GrayLevelVariance                    | 12.85387755 |
| wavelet-LHH | gldm  | HighGrayLevelEmphasis                | 199.3714286 |
| wavelet-LHH | gldm  | DependenceEntropy                    | 4.079143374 |
| wavelet-LHH | gldm  | DependenceNonUniformity              | 12.6        |
| wavelet-LHH | gldm  | GrayLevelNonUniformity               | 4.028571429 |
| wavelet-LHH | gldm  | SmallDependenceEmphasis              | 0.54484127  |
| wavelet-LHH | gldm  | SmallDependenceHighGrayLevelEmphasis | 112.2031746 |
| wavelet-LHH | gldm  | DependenceNonUniformityNormalized    | 0.36        |
| wavelet-LHH | gldm  | LargeDependenceEmphasis              | 3.971428571 |
| wavelet-LHH | gldm  | LargeDependenceLowGrayLevelEmphasis  | 0.055348198 |
| wavelet-LHH | gldm  | DependenceVariance                   | 0.731428571 |
| wavelet-LHH | gldm  | LargeDependenceHighGrayLevelEmphasis | 702.7428571 |
| wavelet-LHH | gldm  | SmallDependenceLowGrayLevelEmphasis  | 0.031520116 |
| wavelet-LHH | gldm  | LowGrayLevelEmphasis                 | 0.034293669 |
| wavelet-LHH | glcm  | JointAverage                         | 13.39419831 |
| wavelet-LHH | glcm  | SumAverage                           | 26.78839663 |
| wavelet-LHH | glcm  | JointEntropy                         | 4.592943823 |
| wavelet-LHH | glcm  | ClusterShade                         | -60.2179925 |
| wavelet-LHH | glcm  | MaximumProbability                   | 0.07502308  |
| wavelet-LHH | glcm  | ldmn                                 | 0.955158577 |
| wavelet-LHH | glcm  | JointEnergy                          | 0.045218687 |
| wavelet-LHH | glcm  | Contrast                             | 23.97987875 |
| wavelet-LHH | glcm  | DifferenceEntropy                    | 2.747133081 |
| wavelet-LHH | glcm  | InverseVariance                      | 0.277116544 |
| wavelet-LHH | glcm  | DifferenceVariance                   | 9.815536246 |

|             |            |                                  |              |
|-------------|------------|----------------------------------|--------------|
| wavelet-LHH | glcm       | Idn                              | 0.862985731  |
| wavelet-LHH | glcm       | Idm                              | 0.233282702  |
| wavelet-LHH | glcm       | Correlation                      | -0.005126687 |
| wavelet-LHH | glcm       | Autocorrelation                  | 179.5785634  |
| wavelet-LHH | glcm       | SumEntropy                       | 3.235110955  |
| wavelet-LHH | glcm       | SumSquares                       | 12.01458574  |
| wavelet-LHH | glcm       | ClusterProminence                | 2191.707943  |
| wavelet-LHH | glcm       | Imc2                             | 0.986098887  |
| wavelet-LHH | glcm       | Imc1                             | -0.572396776 |
| wavelet-LHH | glcm       | DifferenceAverage                | 3.688032223  |
| wavelet-LHH | glcm       | Id                               | 0.325103441  |
| wavelet-LHH | glcm       | ClusterTendency                  | 24.0784642   |
| wavelet-LHH | firstorder | InterquartileRange               | 102.6584311  |
| wavelet-LHH | firstorder | Skewness                         | -1.078001823 |
| wavelet-LHH | firstorder | Uniformity                       | 0.115102041  |
| wavelet-LHH | firstorder | Median                           | 3.840195234  |
| wavelet-LHH | firstorder | Energy                           | 273369.7259  |
| wavelet-LHH | firstorder | RobustMeanAbsoluteDeviation      | 45.821738    |
| wavelet-LHH | firstorder | MeanAbsoluteDeviation            | 67.07426072  |
| wavelet-LHH | firstorder | TotalEnergy                      | 7380982.598  |
| wavelet-LHH | firstorder | Maximum                          | 188.0453823  |
| wavelet-LHH | firstorder | RootMeanSquared                  | 88.37739301  |
| wavelet-LHH | firstorder | 90Percentile                     | 86.47963624  |
| wavelet-LHH | firstorder | Minimum                          | -306.2083479 |
| wavelet-LHH | firstorder | Entropy                          | 3.293887847  |
| wavelet-LHH | firstorder | Range                            | 494.2537303  |
| wavelet-LHH | firstorder | Variance                         | 7790.968545  |
| wavelet-LHH | firstorder | 10Percentile                     | -92.51732864 |
| wavelet-LHH | firstorder | Kurtosis                         | 5.486405709  |
| wavelet-LHH | firstorder | Mean                             | 4.426629703  |
| wavelet-LHH | glrlm      | ShortRunLowGrayLevelEmphasis     | 0.035018377  |
| wavelet-LHH | glrlm      | GrayLevelVariance                | 13.00266069  |
| wavelet-LHH | glrlm      | LowGrayLevelRunEmphasis          | 0.035179358  |
| wavelet-LHH | glrlm      | GrayLevelNonUniformityNormalized | 0.11473167   |
| wavelet-LHH | glrlm      | RunVariance                      | 0.030705585  |
| wavelet-LHH | glrlm      | GrayLevelNonUniformity           | 3.892096139  |
| wavelet-LHH | glrlm      | LongRunEmphasis                  | 1.096256684  |
| wavelet-LHH | glrlm      | ShortRunHighGrayLevelEmphasis    | 195.7646021  |
| wavelet-LHH | glrlm      | RunLengthNonUniformity           | 31.86137392  |
| wavelet-LHH | glrlm      | ShortRunEmphasis                 | 0.975935829  |
| wavelet-LHH | glrlm      | LongRunHighGrayLevelEmphasis     | 217.2012536  |
| wavelet-LHH | glrlm      | RunPercentage                    | 0.969230769  |
| wavelet-LHH | glrlm      | LongRunLowGrayLevelEmphasis      | 0.035823285  |
| wavelet-LHH | glrlm      | RunEntropy                       | 3.397487306  |
| wavelet-LHH | glrlm      | HighGrayLevelRunEmphasis         | 200.0519324  |
| wavelet-LHH | glrlm      | RunLengthNonUniformityNormalized | 0.938588831  |
| wavelet-LHH | glszm      | GrayLevelVariance                | 15.86389414  |
| wavelet-LHH | glszm      | ZoneVariance                     | 0.771266541  |
| wavelet-LHH | glszm      | GrayLevelNonUniformityNormalized | 0.103969754  |
| wavelet-LHH | glszm      | SizeZoneNonUniformityNormalized  | 0.50094518   |
| wavelet-LHH | glszm      | SizeZoneNonUniformity            | 11.52173913  |
| wavelet-LHH | glszm      | GrayLevelNonUniformity           | 2.391304348  |
| wavelet-LHH | glszm      | LargeAreaEmphasis                | 3.086956522  |
| wavelet-LHH | glszm      | SmallAreaHighGrayLevelEmphasis   | 148.7826087  |

|             |            |                                      |              |
|-------------|------------|--------------------------------------|--------------|
| wavelet-LHH | glszm      | ZonePercentage                       | 0.657142857  |
| wavelet-LHH | glszm      | LargeAreaLowGrayLevelEmphasis        | 0.062209149  |
| wavelet-LHH | glszm      | LargeAreaHighGrayLevelEmphasis       | 596.173913   |
| wavelet-LHH | glszm      | HighGrayLevelZoneEmphasis            | 203.4347826  |
| wavelet-LHH | glszm      | SmallAreaEmphasis                    | 0.722826087  |
| wavelet-LHH | glszm      | LowGrayLevelZoneEmphasis             | 0.048988311  |
| wavelet-LHH | glszm      | ZoneEntropy                          | 3.96900163   |
| wavelet-LHH | glszm      | SmallAreaLowGrayLevelEmphasis        | 0.047383594  |
| wavelet-LHH | ngtdm      | Coarseness                           | 0.119754632  |
| wavelet-LHH | ngtdm      | Complexity                           | 189.0608881  |
| wavelet-LHH | ngtdm      | Strength                             | 10.70557516  |
| wavelet-LHH | ngtdm      | Contrast                             | 0.494881541  |
| wavelet-LHH | ngtdm      | Busyness                             | 0.061972916  |
| wavelet-LLH | gldm       | GrayLevelVariance                    | 132.884898   |
| wavelet-LLH | gldm       | HighGrayLevelEmphasis                | 766.4857143  |
| wavelet-LLH | gldm       | DependenceEntropy                    | 4.514718017  |
| wavelet-LLH | gldm       | DependenceNonUniformity              | 27.91428571  |
| wavelet-LLH | gldm       | GrayLevelNonUniformity               | 1.685714286  |
| wavelet-LLH | gldm       | SmallDependenceEmphasis              | 0.914285714  |
| wavelet-LLH | gldm       | SmallDependenceHighGrayLevelEmphasis | 711.8857143  |
| wavelet-LLH | gldm       | DependenceNonUniformityNormalized    | 0.79755102   |
| wavelet-LLH | gldm       | LargeDependenceEmphasis              | 1.342857143  |
| wavelet-LLH | gldm       | LargeDependenceLowGrayLevelEmphasis  | 0.038814274  |
| wavelet-LLH | gldm       | DependenceVariance                   | 0.10122449   |
| wavelet-LLH | gldm       | LargeDependenceHighGrayLevelEmphasis | 984.8857143  |
| wavelet-LLH | gldm       | SmallDependenceLowGrayLevelEmphasis  | 0.034266169  |
| wavelet-LLH | gldm       | LowGrayLevelEmphasis                 | 0.03517579   |
| wavelet-LLH | glcm       | JointAverage                         | 26.19899703  |
| wavelet-LLH | glcm       | SumAverage                           | 52.39799406  |
| wavelet-LLH | glcm       | JointEntropy                         | 4.885331459  |
| wavelet-LLH | glcm       | ClusterShade                         | -3800.13219  |
| wavelet-LLH | glcm       | MaximumProbability                   | 0.043568641  |
| wavelet-LLH | glcm       | Idmn                                 | 0.891603262  |
| wavelet-LLH | glcm       | JointEnergy                          | 0.034946946  |
| wavelet-LLH | glcm       | Contrast                             | 241.9559831  |
| wavelet-LLH | glcm       | DifferenceEntropy                    | 3.294075799  |
| wavelet-LLH | glcm       | InverseVariance                      | 0.146563228  |
| wavelet-LLH | glcm       | DifferenceVariance                   | 78.06443298  |
| wavelet-LLH | glcm       | Idn                                  | 0.800945801  |
| wavelet-LLH | glcm       | Idm                                  | 0.096778762  |
| wavelet-LLH | glcm       | Correlation                          | 0.141788623  |
| wavelet-LLH | glcm       | Autocorrelation                      | 710.5241729  |
| wavelet-LLH | glcm       | SumEntropy                           | 3.631777062  |
| wavelet-LLH | glcm       | SumSquares                           | 144.6641184  |
| wavelet-LLH | glcm       | ClusterProminence                    | 273671.0199  |
| wavelet-LLH | glcm       | Imc2                                 | 0.999397822  |
| wavelet-LLH | glcm       | Imc1                                 | -0.820378079 |
| wavelet-LLH | glcm       | DifferenceAverage                    | 11.73684638  |
| wavelet-LLH | glcm       | Id                                   | 0.173849302  |
| wavelet-LLH | glcm       | ClusterTendency                      | 336.7004907  |
| wavelet-LLH | firstorder | InterquartileRange                   | 473.4577397  |
| wavelet-LLH | firstorder | Skewness                             | -0.65429091  |
| wavelet-LLH | firstorder | Uniformity                           | 0.048163265  |
| wavelet-LLH | firstorder | Median                               | 119.2560783  |

|             |            |                                  |              |
|-------------|------------|----------------------------------|--------------|
| wavelet-LLH | firstorder | Energy                           | 2899148.866  |
| wavelet-LLH | firstorder | RobustMeanAbsoluteDeviation      | 197.9094626  |
| wavelet-LLH | firstorder | MeanAbsoluteDeviation            | 254.4887094  |
| wavelet-LLH | firstorder | TotalEnergy                      | 78277019.38  |
| wavelet-LLH | firstorder | Maximum                          | 362.5551489  |
| wavelet-LLH | firstorder | RootMeanSquared                  | 287.8069227  |
| wavelet-LLH | firstorder | 90Percentile                     | 277.6206171  |
| wavelet-LLH | firstorder | Minimum                          | -617.2931817 |
| wavelet-LLH | firstorder | Entropy                          | 4.514718017  |
| wavelet-LLH | firstorder | Range                            | 979.8483306  |
| wavelet-LLH | firstorder | Variance                         | 82746.87348  |
| wavelet-LLH | firstorder | 10Percentile                     | -448.9215775 |
| wavelet-LLH | firstorder | Kurtosis                         | 2.026399692  |
| wavelet-LLH | firstorder | Mean                             | -9.270990281 |
| wavelet-LLH | glrlm      | ShortRunLowGrayLevelEmphasis     | 0.035250923  |
| wavelet-LLH | glrlm      | GrayLevelVariance                | 132.4921721  |
| wavelet-LLH | glrlm      | LowGrayLevelRunEmphasis          | 0.035286938  |
| wavelet-LLH | glrlm      | GrayLevelNonUniformityNormalized | 0.048206287  |
| wavelet-LLH | glrlm      | RunVariance                      | 0.004391802  |
| wavelet-LLH | glrlm      | GrayLevelNonUniformity           | 1.679767292  |
| wavelet-LLH | glrlm      | LongRunEmphasis                  | 1.013574661  |
| wavelet-LLH | glrlm      | ShortRunHighGrayLevelEmphasis    | 764.9098578  |
| wavelet-LLH | glrlm      | RunLengthNonUniformity           | 34.54751131  |
| wavelet-LLH | glrlm      | ShortRunEmphasis                 | 0.996606335  |
| wavelet-LLH | glrlm      | LongRunHighGrayLevelEmphasis     | 775.7186813  |
| wavelet-LLH | glrlm      | RunPercentage                    | 0.995604396  |
| wavelet-LLH | glrlm      | LongRunLowGrayLevelEmphasis      | 0.035430995  |
| wavelet-LLH | glrlm      | RunEntropy                       | 4.51455308   |
| wavelet-LLH | glrlm      | HighGrayLevelRunEmphasis         | 767.0716225  |
| wavelet-LLH | glrlm      | RunLengthNonUniformityNormalized | 0.991216396  |
| wavelet-LLH | glszm      | GrayLevelVariance                | 127.9412305  |
| wavelet-LLH | glszm      | ZoneVariance                     | 0.056932966  |
| wavelet-LLH | glszm      | GrayLevelNonUniformityNormalized | 0.048668503  |
| wavelet-LLH | glszm      | SizeZoneNonUniformityNormalized  | 0.886134068  |
| wavelet-LLH | glszm      | SizeZoneNonUniformity            | 29.24242424  |
| wavelet-LLH | glszm      | GrayLevelNonUniformity           | 1.606060606  |
| wavelet-LLH | glszm      | LargeAreaEmphasis                | 1.181818182  |
| wavelet-LLH | glszm      | SmallAreaHighGrayLevelEmphasis   | 745.3787879  |
| wavelet-LLH | glszm      | ZonePercentage                   | 0.942857143  |
| wavelet-LLH | glszm      | LargeAreaLowGrayLevelEmphasis    | 0.038593989  |
| wavelet-LLH | glszm      | LargeAreaHighGrayLevelEmphasis   | 890.1515152  |
| wavelet-LLH | glszm      | HighGrayLevelZoneEmphasis        | 774.3333333  |
| wavelet-LLH | glszm      | SmallAreaEmphasis                | 0.954545455  |
| wavelet-LLH | glszm      | LowGrayLevelZoneEmphasis         | 0.03666449   |
| wavelet-LLH | glszm      | ZoneEntropy                      | 4.513794877  |
| wavelet-LLH | glszm      | SmallAreaLowGrayLevelEmphasis    | 0.036182115  |
| wavelet-LLH | ngtdm      | Coarseness                       | 0.076686389  |
| wavelet-LLH | ngtdm      | Complexity                       | 3090.671583  |
| wavelet-LLH | ngtdm      | Strength                         | 50.08408734  |
| wavelet-LLH | ngtdm      | Contrast                         | 3.585427756  |
| wavelet-LLH | ngtdm      | Busyness                         | 0.024543145  |
| wavelet-LLL | gldm       | GrayLevelVariance                | 468.7053061  |
| wavelet-LLL | gldm       | HighGrayLevelEmphasis            | 1932.314286  |
| wavelet-LLL | gldm       | DependenceEntropy                | 4.786425874  |

|             |            |                                      |              |
|-------------|------------|--------------------------------------|--------------|
| wavelet-LLL | gldm       | DependenceNonUniformity              | 27.91428571  |
| wavelet-LLL | gldm       | GrayLevelNonUniformity               | 1.457142857  |
| wavelet-LLL | gldm       | SmallDependenceEmphasis              | 0.914285714  |
| wavelet-LLL | gldm       | SmallDependenceHighGrayLevelEmphasis | 1880.457143  |
| wavelet-LLL | gldm       | DependenceNonUniformityNormalized    | 0.79755102   |
| wavelet-LLL | gldm       | LargeDependenceEmphasis              | 1.342857143  |
| wavelet-LLL | gldm       | LargeDependenceLowGrayLevelEmphasis  | 0.032908536  |
| wavelet-LLL | gldm       | DependenceVariance                   | 0.10122449   |
| wavelet-LLL | gldm       | LargeDependenceHighGrayLevelEmphasis | 2139.742857  |
| wavelet-LLL | gldm       | SmallDependenceLowGrayLevelEmphasis  | 0.030940807  |
| wavelet-LLL | gldm       | LowGrayLevelEmphasis                 | 0.031334353  |
| wavelet-LLL | glcm       | JointAverage                         | 44.98156305  |
| wavelet-LLL | glcm       | SumAverage                           | 89.9631261   |
| wavelet-LLL | glcm       | JointEntropy                         | 4.930993691  |
| wavelet-LLL | glcm       | ClusterShade                         | -5179.511079 |
| wavelet-LLL | glcm       | MaximumProbability                   | 0.038797096  |
| wavelet-LLL | glcm       | Idmn                                 | 0.913669328  |
| wavelet-LLL | glcm       | JointEnergy                          | 0.03355393   |
| wavelet-LLL | glcm       | Contrast                             | 789.1583832  |
| wavelet-LLL | glcm       | DifferenceEntropy                    | 3.700136968  |
| wavelet-LLL | glcm       | InverseVariance                      | 0.03790827   |
| wavelet-LLL | glcm       | DifferenceVariance                   | 232.9222895  |
| wavelet-LLL | glcm       | Idn                                  | 0.803858432  |
| wavelet-LLL | glcm       | Idm                                  | 0.032667511  |
| wavelet-LLL | glcm       | Correlation                          | 0.176529044  |
| wavelet-LLL | glcm       | Autocorrelation                      | 2105.997638  |
| wavelet-LLL | glcm       | SumEntropy                           | 3.825063605  |
| wavelet-LLL | glcm       | SumSquares                           | 472.7731538  |
| wavelet-LLL | glcm       | ClusterProminence                    | 2778240.56   |
| wavelet-LLL | glcm       | Imc2                                 | 0.999826395  |
| wavelet-LLL | glcm       | Imc1                                 | -0.896526168 |
| wavelet-LLL | glcm       | DifferenceAverage                    | 23.16188136  |
| wavelet-LLL | glcm       | Id                                   | 0.087820682  |
| wavelet-LLL | glcm       | ClusterTendency                      | 1101.934232  |
| wavelet-LLL | firstorder | InterquartileRange                   | 836.3382213  |
| wavelet-LLL | firstorder | Skewness                             | 0.29879863   |
| wavelet-LLL | firstorder | Uniformity                           | 0.041632653  |
| wavelet-LLL | firstorder | Median                               | -1424.127935 |
| wavelet-LLL | firstorder | Energy                               | 76849086.16  |
| wavelet-LLL | firstorder | RobustMeanAbsoluteDeviation          | 327.0906557  |
| wavelet-LLL | firstorder | MeanAbsoluteDeviation                | 450.2071015  |
| wavelet-LLL | firstorder | TotalEnergy                          | 2074925326   |
| wavelet-LLL | firstorder | Maximum                              | -175.210354  |
| wavelet-LLL | firstorder | RootMeanSquared                      | 1481.785469  |
| wavelet-LLL | firstorder | 90Percentile                         | -670.9241842 |
| wavelet-LLL | firstorder | Minimum                              | -2305.630822 |
| wavelet-LLL | firstorder | Entropy                              | 4.707714803  |
| wavelet-LLL | firstorder | Range                                | 2130.420468  |
| wavelet-LLL | firstorder | Variance                             | 292061.8235  |
| wavelet-LLL | firstorder | 10Percentile                         | -2056.375262 |
| wavelet-LLL | firstorder | Kurtosis                             | 2.229015642  |
| wavelet-LLL | firstorder | Mean                                 | -1379.719664 |
| wavelet-LLL | glrlm      | ShortRunLowGrayLevelEmphasis         | 0.03143978   |
| wavelet-LLL | glrlm      | GrayLevelVariance                    | 469.0314528  |



|             |       |                                      |             |
|-------------|-------|--------------------------------------|-------------|
| wavelet-LLL | glrlm | LowGrayLevelRunEmphasis              | 0.031455362 |
| wavelet-LLL | glrlm | GrayLevelNonUniformityNormalized     | 0.04148262  |
| wavelet-LLL | glrlm | RunVariance                          | 0.004391802 |
| wavelet-LLL | glrlm | GrayLevelNonUniformity               | 1.445636716 |
| wavelet-LLL | glrlm | LongRunEmphasis                      | 1.013574661 |
| wavelet-LLL | glrlm | ShortRunHighGrayLevelEmphasis        | 1936.267065 |
| wavelet-LLL | glrlm | RunLengthNonUniformity               | 34.54751131 |
| wavelet-LLL | glrlm | ShortRunEmphasis                     | 0.996606335 |
| wavelet-LLL | glrlm | LongRunHighGrayLevelEmphasis         | 1946.532902 |
| wavelet-LLL | glrlm | RunPercentage                        | 0.995604396 |
| wavelet-LLL | glrlm | LongRunLowGrayLevelEmphasis          | 0.031517688 |
| wavelet-LLL | glrlm | RunEntropy                           | 4.714655932 |
| wavelet-LLL | glrlm | HighGrayLevelRunEmphasis             | 1938.320233 |
| wavelet-LLL | glrlm | RunLengthNonUniformityNormalized     | 0.991216396 |
| wavelet-LLL | glszm | GrayLevelVariance                    | 472.7897153 |
| wavelet-LLL | glszm | ZoneVariance                         | 0.056932966 |
| wavelet-LLL | glszm | GrayLevelNonUniformityNormalized     | 0.039485767 |
| wavelet-LLL | glszm | SizeZoneNonUniformityNormalized      | 0.886134068 |
| wavelet-LLL | glszm | SizeZoneNonUniformity                | 29.24242424 |
| wavelet-LLL | glszm | GrayLevelNonUniformity               | 1.303030303 |
| wavelet-LLL | glszm | LargeAreaEmphasis                    | 1.181818182 |
| wavelet-LLL | glszm | SmallAreaHighGrayLevelEmphasis       | 1985.257576 |
| wavelet-LLL | glszm | ZonePercentage                       | 0.942857143 |
| wavelet-LLL | glszm | LargeAreaLowGrayLevelEmphasis        | 0.033789934 |
| wavelet-LLL | glszm | LargeAreaHighGrayLevelEmphasis       | 2122.757576 |
| wavelet-LLL | glszm | HighGrayLevelZoneEmphasis            | 2012.757576 |
| wavelet-LLL | glszm | SmallAreaEmphasis                    | 0.954545455 |
| wavelet-LLL | glszm | LowGrayLevelZoneEmphasis             | 0.03295514  |
| wavelet-LLL | glszm | ZoneEntropy                          | 4.801969877 |
| wavelet-LLL | glszm | SmallAreaLowGrayLevelEmphasis        | 0.032746441 |
| wavelet-LLL | ngtdm | Coarseness                           | 0.043472852 |
| wavelet-LLL | ngtdm | Complexity                           | 13190.82664 |
| wavelet-LLL | ngtdm | Strength                             | 99.33890412 |
| wavelet-LLL | ngtdm | Contrast                             | 19.49839151 |
| wavelet-LLL | ngtdm | Busyness                             | 0.037463944 |
| wavelet-HHL | gldm  | GrayLevelVariance                    | 12.07836735 |
| wavelet-HHL | gldm  | HighGrayLevelEmphasis                | 49.11428571 |
| wavelet-HHL | gldm  | DependenceEntropy                    | 4.164299088 |
| wavelet-HHL | gldm  | DependenceNonUniformity              | 9.971428571 |
| wavelet-HHL | gldm  | GrayLevelNonUniformity               | 3.571428571 |
| wavelet-HHL | gldm  | SmallDependenceEmphasis              | 0.467460317 |
| wavelet-HHL | gldm  | SmallDependenceHighGrayLevelEmphasis | 34.29186508 |
| wavelet-HHL | gldm  | DependenceNonUniformityNormalized    | 0.284897959 |
| wavelet-HHL | gldm  | LargeDependenceEmphasis              | 5.685714286 |
| wavelet-HHL | gldm  | LargeDependenceLowGrayLevelEmphasis  | 0.63122039  |
| wavelet-HHL | gldm  | DependenceVariance                   | 1.093877551 |
| wavelet-HHL | gldm  | LargeDependenceHighGrayLevelEmphasis | 167.1142857 |
| wavelet-HHL | gldm  | SmallDependenceLowGrayLevelEmphasis  | 0.033466329 |
| wavelet-HHL | gldm  | LowGrayLevelEmphasis                 | 0.114904694 |
| wavelet-HHL | glcm  | JointAverage                         | 6.071612435 |
| wavelet-HHL | glcm  | SumAverage                           | 12.14322487 |
| wavelet-HHL | glcm  | JointEntropy                         | 4.6342216   |
| wavelet-HHL | glcm  | ClusterShade                         | 41.13217132 |
| wavelet-HHL | glcm  | MaximumProbability                   | 0.069363961 |

|             |            |                                  |              |
|-------------|------------|----------------------------------|--------------|
| wavelet-HHL | glcm       | Idmn                             | 0.900928586  |
| wavelet-HHL | glcm       | JointEnergy                      | 0.043655379  |
| wavelet-HHL | glcm       | Contrast                         | 26.16771728  |
| wavelet-HHL | glcm       | DifferenceEntropy                | 2.699006712  |
| wavelet-HHL | glcm       | InverseVariance                  | 0.218991252  |
| wavelet-HHL | glcm       | DifferenceVariance               | 7.408522988  |
| wavelet-HHL | glcm       | Idn                              | 0.801020078  |
| wavelet-HHL | glcm       | Idm                              | 0.231622046  |
| wavelet-HHL | glcm       | Correlation                      | -0.024860229 |
| wavelet-HHL | glcm       | Autocorrelation                  | 36.40158452  |
| wavelet-HHL | glcm       | SumEntropy                       | 3.188967132  |
| wavelet-HHL | glcm       | SumSquares                       | 12.49794016  |
| wavelet-HHL | glcm       | ClusterProminence                | 1635.488591  |
| wavelet-HHL | glcm       | Imc2                             | 0.992249647  |
| wavelet-HHL | glcm       | Imc1                             | -0.635779358 |
| wavelet-HHL | glcm       | DifferenceAverage                | 3.987501591  |
| wavelet-HHL | glcm       | Id                               | 0.324270263  |
| wavelet-HHL | glcm       | ClusterTendency                  | 23.82404335  |
| wavelet-HHL | firstorder | InterquartileRange               | 112.4398842  |
| wavelet-HHL | firstorder | Skewness                         | 0.535537317  |
| wavelet-HHL | firstorder | Uniformity                       | 0.102040816  |
| wavelet-HHL | firstorder | Median                           | -3.957621768 |
| wavelet-HHL | firstorder | Energy                           | 268014.7496  |
| wavelet-HHL | firstorder | RobustMeanAbsoluteDeviation      | 50.73380342  |
| wavelet-HHL | firstorder | MeanAbsoluteDeviation            | 72.11921831  |
| wavelet-HHL | firstorder | TotalEnergy                      | 7236398.238  |
| wavelet-HHL | firstorder | Maximum                          | 203.6614502  |
| wavelet-HHL | firstorder | RootMeanSquared                  | 87.50750981  |
| wavelet-HHL | firstorder | 90Percentile                     | 133.2469618  |
| wavelet-HHL | firstorder | Minimum                          | -119.4187245 |
| wavelet-HHL | firstorder | Entropy                          | 3.475731503  |
| wavelet-HHL | firstorder | Range                            | 323.0801748  |
| wavelet-HHL | firstorder | Variance                         | 7442.07748   |
| wavelet-HHL | firstorder | 10Percentile                     | -84.78762946 |
| wavelet-HHL | firstorder | Kurtosis                         | 2.494136292  |
| wavelet-HHL | firstorder | Mean                             | 14.67946842  |
| wavelet-HHL | glrlm      | ShortRunLowGrayLevelEmphasis     | 0.1099564    |
| wavelet-HHL | glrlm      | GrayLevelVariance                | 12.30269462  |
| wavelet-HHL | glrlm      | LowGrayLevelRunEmphasis          | 0.11446916   |
| wavelet-HHL | glrlm      | GrayLevelNonUniformityNormalized | 0.100376621  |
| wavelet-HHL | glrlm      | RunVariance                      | 0.043248114  |
| wavelet-HHL | glrlm      | GrayLevelNonUniformity           | 3.359431939  |
| wavelet-HHL | glrlm      | LongRunEmphasis                  | 1.145724585  |
| wavelet-HHL | glrlm      | ShortRunHighGrayLevelEmphasis    | 49.25192599  |
| wavelet-HHL | glrlm      | RunLengthNonUniformity           | 30.70793262  |
| wavelet-HHL | glrlm      | ShortRunEmphasis                 | 0.963568854  |
| wavelet-HHL | glrlm      | LongRunHighGrayLevelEmphasis     | 54.06923889  |
| wavelet-HHL | glrlm      | RunPercentage                    | 0.956043956  |
| wavelet-HHL | glrlm      | LongRunLowGrayLevelEmphasis      | 0.132520202  |
| wavelet-HHL | glrlm      | RunEntropy                       | 3.619644146  |
| wavelet-HHL | glrlm      | HighGrayLevelRunEmphasis         | 50.21538857  |
| wavelet-HHL | glrlm      | RunLengthNonUniformityNormalized | 0.913503771  |
| wavelet-HHL | glszm      | GrayLevelVariance                | 14.06        |
| wavelet-HHL | glszm      | ZoneVariance                     | 1.5875       |

|             |       |                                      |             |
|-------------|-------|--------------------------------------|-------------|
| wavelet-HHL | glszm | GrayLevelNonUniformityNormalized     | 0.09        |
| wavelet-HHL | glszm | SizeZoneNonUniformityNormalized      | 0.465       |
| wavelet-HHL | glszm | SizeZoneNonUniformity                | 9.3         |
| wavelet-HHL | glszm | GrayLevelNonUniformity               | 1.8         |
| wavelet-HHL | glszm | LargeAreaEmphasis                    | 4.65        |
| wavelet-HHL | glszm | SmallAreaHighGrayLevelEmphasis       | 56.66394444 |
| wavelet-HHL | glszm | ZonePercentage                       | 0.571428571 |
| wavelet-HHL | glszm | LargeAreaLowGrayLevelEmphasis        | 0.496643221 |
| wavelet-HHL | glszm | LargeAreaHighGrayLevelEmphasis       | 155.95      |
| wavelet-HHL | glszm | HighGrayLevelZoneEmphasis            | 65.9        |
| wavelet-HHL | glszm | SmallAreaEmphasis                    | 0.702611111 |
| wavelet-HHL | glszm | LowGrayLevelZoneEmphasis             | 0.09757362  |
| wavelet-HHL | glszm | ZoneEntropy                          | 3.88418372  |
| wavelet-HHL | glszm | SmallAreaLowGrayLevelEmphasis        | 0.038658895 |
| wavelet-HHL | ngtdm | Coarseness                           | 0.108175727 |
| wavelet-HHL | ngtdm | Complexity                           | 210.9316304 |
| wavelet-HHL | ngtdm | Strength                             | 6.879690563 |
| wavelet-HHL | ngtdm | Contrast                             | 0.485593579 |
| wavelet-HHL | ngtdm | Busyness                             | 0.19443968  |
| wavelet-HLH | gldm  | GrayLevelVariance                    | 8.82122449  |
| wavelet-HLH | gldm  | HighGrayLevelEmphasis                | 64.85714286 |
| wavelet-HLH | gldm  | DependenceEntropy                    | 4.286146588 |
| wavelet-HLH | gldm  | DependenceNonUniformity              | 10.48571429 |
| wavelet-HLH | gldm  | GrayLevelNonUniformity               | 4.314285714 |
| wavelet-HLH | gldm  | SmallDependenceEmphasis              | 0.503968254 |
| wavelet-HLH | gldm  | SmallDependenceHighGrayLevelEmphasis | 38.79047619 |
| wavelet-HLH | gldm  | DependenceNonUniformityNormalized    | 0.299591837 |
| wavelet-HLH | gldm  | LargeDependenceEmphasis              | 6.428571429 |
| wavelet-HLH | gldm  | LargeDependenceLowGrayLevelEmphasis  | 0.18957805  |
| wavelet-HLH | gldm  | DependenceVariance                   | 1.588571429 |
| wavelet-HLH | gldm  | LargeDependenceHighGrayLevelEmphasis | 359.8857143 |
| wavelet-HLH | gldm  | SmallDependenceLowGrayLevelEmphasis  | 0.044707876 |
| wavelet-HLH | gldm  | LowGrayLevelEmphasis                 | 0.057595381 |
| wavelet-HLH | glcm  | JointAverage                         | 7.466076158 |
| wavelet-HLH | glcm  | SumAverage                           | 14.93215232 |
| wavelet-HLH | glcm  | JointEntropy                         | 4.519784623 |
| wavelet-HLH | glcm  | ClusterShade                         | 13.22528463 |
| wavelet-HLH | glcm  | MaximumProbability                   | 0.090046484 |
| wavelet-HLH | glcm  | Idmn                                 | 0.939177532 |
| wavelet-HLH | glcm  | JointEnergy                          | 0.049236665 |
| wavelet-HLH | glcm  | Contrast                             | 13.90998868 |
| wavelet-HLH | glcm  | DifferenceEntropy                    | 2.597294302 |
| wavelet-HLH | glcm  | InverseVariance                      | 0.268586909 |
| wavelet-HLH | glcm  | DifferenceVariance                   | 4.309648586 |
| wavelet-HLH | glcm  | Idn                                  | 0.835881769 |
| wavelet-HLH | glcm  | Idm                                  | 0.266572259 |
| wavelet-HLH | glcm  | Correlation                          | 0.032201852 |
| wavelet-HLH | glcm  | Autocorrelation                      | 56.61489202 |
| wavelet-HLH | glcm  | SumEntropy                           | 3.091645177 |
| wavelet-HLH | glcm  | SumSquares                           | 7.375637795 |
| wavelet-HLH | glcm  | ClusterProminence                    | 734.2004933 |
| wavelet-HLH | glcm  | Imc2                                 | 0.977938452 |
| wavelet-HLH | glcm  | Imc1                                 | -0.52627319 |
| wavelet-HLH | glcm  | DifferenceAverage                    | 3.015920679 |

|             |            |                                  |              |
|-------------|------------|----------------------------------|--------------|
| wavelet-HLH | glcm       | Id                               | 0.359490255  |
| wavelet-HLH | glcm       | ClusterTendency                  | 15.5925625   |
| wavelet-HLH | firstorder | InterquartileRange               | 84.17655585  |
| wavelet-HLH | firstorder | Skewness                         | 0.278531541  |
| wavelet-HLH | firstorder | Uniformity                       | 0.123265306  |
| wavelet-HLH | firstorder | Median                           | 0.749414932  |
| wavelet-HLH | firstorder | Energy                           | 196963.1413  |
| wavelet-HLH | firstorder | RobustMeanAbsoluteDeviation      | 38.45826227  |
| wavelet-HLH | firstorder | MeanAbsoluteDeviation            | 59.4767245   |
| wavelet-HLH | firstorder | TotalEnergy                      | 5318004.814  |
| wavelet-HLH | firstorder | Maximum                          | 174.784112   |
| wavelet-HLH | firstorder | RootMeanSquared                  | 75.01678693  |
| wavelet-HLH | firstorder | 90Percentile                     | 96.95534013  |
| wavelet-HLH | firstorder | Minimum                          | -153.3077171 |
| wavelet-HLH | firstorder | Entropy                          | 3.257117662  |
| wavelet-HLH | firstorder | Range                            | 328.0918291  |
| wavelet-HLH | firstorder | Variance                         | 5627.203034  |
| wavelet-HLH | firstorder | 10Percentile                     | -92.87758844 |
| wavelet-HLH | firstorder | Kurtosis                         | 2.838055822  |
| wavelet-HLH | firstorder | Mean                             | -0.561504865 |
| wavelet-HLH | glrlm      | ShortRunLowGrayLevelEmphasis     | 0.058303106  |
| wavelet-HLH | glrlm      | GrayLevelVariance                | 9.088395761  |
| wavelet-HLH | glrlm      | LowGrayLevelRunEmphasis          | 0.059213222  |
| wavelet-HLH | glrlm      | GrayLevelNonUniformityNormalized | 0.120161424  |
| wavelet-HLH | glrlm      | RunVariance                      | 0.050461371  |
| wavelet-HLH | glrlm      | GrayLevelNonUniformity           | 4.015002202  |
| wavelet-HLH | glrlm      | LongRunEmphasis                  | 1.153684709  |
| wavelet-HLH | glrlm      | ShortRunHighGrayLevelEmphasis    | 63.47597952  |
| wavelet-HLH | glrlm      | RunLengthNonUniformity           | 30.54013349  |
| wavelet-HLH | glrlm      | ShortRunEmphasis                 | 0.964168825  |
| wavelet-HLH | glrlm      | LongRunHighGrayLevelEmphasis     | 73.74188051  |
| wavelet-HLH | glrlm      | RunPercentage                    | 0.953846154  |
| wavelet-HLH | glrlm      | LongRunLowGrayLevelEmphasis      | 0.063015561  |
| wavelet-HLH | glrlm      | RunEntropy                       | 3.430397065  |
| wavelet-HLH | glrlm      | HighGrayLevelRunEmphasis         | 65.39655158  |
| wavelet-HLH | glrlm      | RunLengthNonUniformityNormalized | 0.912639454  |
| wavelet-HLH | glszm      | GrayLevelVariance                | 12.8275      |
| wavelet-HLH | glszm      | ZoneVariance                     | 2.3875       |
| wavelet-HLH | glszm      | GrayLevelNonUniformityNormalized | 0.095        |
| wavelet-HLH | glszm      | SizeZoneNonUniformityNormalized  | 0.585        |
| wavelet-HLH | glszm      | SizeZoneNonUniformity            | 11.7         |
| wavelet-HLH | glszm      | GrayLevelNonUniformity           | 1.9          |
| wavelet-HLH | glszm      | LargeAreaEmphasis                | 5.45         |
| wavelet-HLH | glszm      | SmallAreaHighGrayLevelEmphasis   | 62.59583333  |
| wavelet-HLH | glszm      | ZonePercentage                   | 0.571428571  |
| wavelet-HLH | glszm      | LargeAreaLowGrayLevelEmphasis    | 0.189686899  |
| wavelet-HLH | glszm      | LargeAreaHighGrayLevelEmphasis   | 303.2        |
| wavelet-HLH | glszm      | HighGrayLevelZoneEmphasis        | 74.45        |
| wavelet-HLH | glszm      | SmallAreaEmphasis                | 0.776388889  |
| wavelet-HLH | glszm      | LowGrayLevelZoneEmphasis         | 0.081670813  |
| wavelet-HLH | glszm      | ZoneEntropy                      | 3.921928095  |
| wavelet-HLH | glszm      | SmallAreaLowGrayLevelEmphasis    | 0.075573428  |
| wavelet-HLH | ngtdm      | Coarseness                       | 0.145966051  |
| wavelet-HLH | ngtdm      | Complexity                       | 121.6813103  |

|             |       |          |             |
|-------------|-------|----------|-------------|
| wavelet-HLH | ngtdm | Strength | 8.465815954 |
| wavelet-HLH | ngtdm | Contrast | 0.271443618 |
| wavelet-HLH | ngtdm | Busyness | 0.091380253 |

| Image type | Feature Class | Feature Name                         | Value                                                                                                                                                                                                                                                                                                                                                                                                                                                                                |
|------------|---------------|--------------------------------------|--------------------------------------------------------------------------------------------------------------------------------------------------------------------------------------------------------------------------------------------------------------------------------------------------------------------------------------------------------------------------------------------------------------------------------------------------------------------------------------|
| general    | info          | BoundingBox                          | 2: RTSTRUCT: C99-Dnu-B_segment_ITV<br>(1, 0, 3, 15, 13, 14)                                                                                                                                                                                                                                                                                                                                                                                                                          |
| general    | info          | EnabledImageTypes                    | {u'Original': {}, u'Wavelet': {}}                                                                                                                                                                                                                                                                                                                                                                                                                                                    |
|            |               |                                      | {'distances': [1], 'additionalInfo': True,<br>'force2D': False, 'interpolator': 'sitkBSpline',<br>'resampledPixelSpacing': [3.0], 'label': 1,<br>'normalizeScale': 1, 'normalize': False,<br>'force2Ddimension': 0, 'removeOutliers':<br>None, 'minimumROISize': None, u'binWidth':<br>25.0, 'minimumROIDimensions': 1,<br>u'correctMask': True, 'preCrop': False,<br>u'symmetricalGLCM': True,<br>'resegmentRange': None, 'padDistance': 5}<br>1d096944131e4e1a0c9a38bc8ad9d42d5202 |
| general    | info          | GeneralSettings                      | ee5c                                                                                                                                                                                                                                                                                                                                                                                                                                                                                 |
| general    | info          | ImageHash                            | (0.9765625000000002,<br>0.9765625000000002, 2.0)                                                                                                                                                                                                                                                                                                                                                                                                                                     |
| general    | info          | ImageSpacing                         | a7426d3f791e249534fae605229875e87312c                                                                                                                                                                                                                                                                                                                                                                                                                                                |
| general    | info          | MaskHash                             | 255                                                                                                                                                                                                                                                                                                                                                                                                                                                                                  |
| general    | info          | NumpyVersion                         | 1.13.1                                                                                                                                                                                                                                                                                                                                                                                                                                                                               |
| general    | info          | PyWaveletVersion                     | 0.5.2                                                                                                                                                                                                                                                                                                                                                                                                                                                                                |
| general    | info          | SimpleITKVersion                     | 1.1.0                                                                                                                                                                                                                                                                                                                                                                                                                                                                                |
| general    | info          | Version                              | 1.3.0.post102+g1b0eb74                                                                                                                                                                                                                                                                                                                                                                                                                                                               |
| general    | info          | VolumeNum                            | 1                                                                                                                                                                                                                                                                                                                                                                                                                                                                                    |
| general    | info          | VoxelNum                             | 688                                                                                                                                                                                                                                                                                                                                                                                                                                                                                  |
| original   | shape         | Maximum3DDiameter                    | 50.28916384                                                                                                                                                                                                                                                                                                                                                                                                                                                                          |
| original   | shape         | Maximum2DDiameterSlice               | 44.59820624                                                                                                                                                                                                                                                                                                                                                                                                                                                                          |
| original   | shape         | Sphericity                           | 0.699592721                                                                                                                                                                                                                                                                                                                                                                                                                                                                          |
| original   | shape         | MinorAxis                            | 34.04193959                                                                                                                                                                                                                                                                                                                                                                                                                                                                          |
| original   | shape         | Elongation                           | 0.86312351                                                                                                                                                                                                                                                                                                                                                                                                                                                                           |
| original   | shape         | SurfaceVolumeRatio                   | 0.261008574                                                                                                                                                                                                                                                                                                                                                                                                                                                                          |
| original   | shape         | Volume                               | 18576                                                                                                                                                                                                                                                                                                                                                                                                                                                                                |
| original   | shape         | MajorAxis                            | 39.44040362                                                                                                                                                                                                                                                                                                                                                                                                                                                                          |
| original   | shape         | SurfaceArea                          | 4848.495279                                                                                                                                                                                                                                                                                                                                                                                                                                                                          |
| original   | shape         | Flatness                             | 0.681583351                                                                                                                                                                                                                                                                                                                                                                                                                                                                          |
| original   | shape         | LeastAxis                            | 26.88192246                                                                                                                                                                                                                                                                                                                                                                                                                                                                          |
| original   | shape         | Maximum2DDiameterColumn              | 40.80441153                                                                                                                                                                                                                                                                                                                                                                                                                                                                          |
| original   | shape         | Maximum2DDiameterRow                 | 45.79301257                                                                                                                                                                                                                                                                                                                                                                                                                                                                          |
| original   | gldm          | GrayLevelVariance                    | 165.1370483                                                                                                                                                                                                                                                                                                                                                                                                                                                                          |
| original   | gldm          | HighGrayLevelEmphasis                | 1242.178779                                                                                                                                                                                                                                                                                                                                                                                                                                                                          |
| original   | gldm          | DependenceEntropy                    | 6.659780213                                                                                                                                                                                                                                                                                                                                                                                                                                                                          |
| original   | gldm          | DependenceNonUniformity              | 149.2877907                                                                                                                                                                                                                                                                                                                                                                                                                                                                          |
| original   | gldm          | GrayLevelNonUniformity               | 56.60755814                                                                                                                                                                                                                                                                                                                                                                                                                                                                          |
| original   | gldm          | SmallDependenceEmphasis              | 0.474978518                                                                                                                                                                                                                                                                                                                                                                                                                                                                          |
| original   | gldm          | SmallDependenceHighGrayLevelEmphasis | 389.7137091                                                                                                                                                                                                                                                                                                                                                                                                                                                                          |
| original   | gldm          | DependenceNonUniformityNormalized    | 0.216988068                                                                                                                                                                                                                                                                                                                                                                                                                                                                          |
| original   | gldm          | LargeDependenceEmphasis              | 32.48546512                                                                                                                                                                                                                                                                                                                                                                                                                                                                          |
| original   | gldm          | LargeDependenceLowGrayLevelEmphasis  | 0.038954679                                                                                                                                                                                                                                                                                                                                                                                                                                                                          |
| original   | gldm          | DependenceVariance                   | 16.57835316                                                                                                                                                                                                                                                                                                                                                                                                                                                                          |
| original   | gldm          | LargeDependenceHighGrayLevelEmphasis | 58501.29506                                                                                                                                                                                                                                                                                                                                                                                                                                                                          |

|          |            |                                     |              |
|----------|------------|-------------------------------------|--------------|
| original | gldm       | SmallDependenceLowGrayLevelEmphasis | 0.007197101  |
| original | gldm       | LowGrayLevelEmphasis                | 0.010194441  |
| original | glcm       | JointAverage                        | 34.72490243  |
| original | glcm       | SumAverage                          | 69.44980487  |
| original | glcm       | JointEntropy                        | 7.504284724  |
| original | glcm       | ClusterShade                        | -7771.291707 |
| original | glcm       | MaximumProbability                  | 0.094534925  |
| original | glcm       | ldmn                                | 0.929981757  |
| original | glcm       | JointEnergy                         | 0.020507693  |
| original | glcm       | Contrast                            | 200.5254135  |
| original | glcm       | DifferenceEntropy                   | 4.381129951  |
| original | glcm       | InverseVariance                     | 0.244485317  |
| original | glcm       | DifferenceVariance                  | 115.0786914  |
| original | glcm       | ldn                                 | 0.861089505  |
| original | glcm       | ldm                                 | 0.286987469  |
| original | glcm       | Correlation                         | 0.307836365  |
| original | glcm       | Autocorrelation                     | 1250.609985  |
| original | glcm       | SumEntropy                          | 5.303332192  |
| original | glcm       | SumSquares                          | 144.8670955  |
| original | glcm       | ClusterProminence                   | 450671.8274  |
| original | glcm       | lmc2                                | 0.939383121  |
| original | glcm       | lmc1                                | -0.251629067 |
| original | glcm       | DifferenceAverage                   | 9.174433722  |
| original | glcm       | ld                                  | 0.338842814  |
| original | glcm       | ClusterTendency                     | 378.9429686  |
| original | firstorder | InterquartileRange                  | 479.75       |
| original | firstorder | Skewness                            | -0.970513925 |
| original | firstorder | Uniformity                          | 0.082278428  |
| original | firstorder | Median                              | -31.5        |
| original | firstorder | Energy                              | 103590872    |
| original | firstorder | RobustMeanAbsoluteDeviation         | 212.6137295  |
| original | firstorder | MeanAbsoluteDeviation               | 275.2077643  |
| original | firstorder | TotalEnergy                         | 2796953544   |
| original | firstorder | Maximum                             | 104          |
| original | firstorder | RootMeanSquared                     | 388.0310914  |
| original | firstorder | 90Percentile                        | 49           |
| original | firstorder | Minimum                             | -1020        |
| original | firstorder | Entropy                             | 4.586612813  |
| original | firstorder | Range                               | 1124         |
| original | firstorder | Variance                            | 103239.1135  |
| original | firstorder | 10Percentile                        | -762.6       |
| original | firstorder | Kurtosis                            | 2.493420593  |
| original | firstorder | Mean                                | -217.5523256 |
| original | glrlm      | ShortRunLowGrayLevelEmphasis        | 0.01111478   |
| original | glrlm      | GrayLevelVariance                   | 171.349303   |
| original | glrlm      | LowGrayLevelRunEmphasis             | 0.011283356  |
| original | glrlm      | GrayLevelNonUniformityNormalized    | 0.061551526  |
| original | glrlm      | RunVariance                         | 0.19766371   |
| original | glrlm      | GrayLevelNonUniformity              | 37.51311884  |
| original | glrlm      | LongRunEmphasis                     | 1.475904704  |
| original | glrlm      | ShortRunHighGrayLevelEmphasis       | 1036.756742  |
| original | glrlm      | RunLengthNonUniformity              | 499.8483276  |

|             |       |                                      |             |
|-------------|-------|--------------------------------------|-------------|
| original    | glrlm | ShortRunEmphasis                     | 0.923008297 |
| original    | glrlm | LongRunHighGrayLevelEmphasis         | 2022.963071 |
| original    | glrlm | RunPercentage                        | 0.885062612 |
| original    | glrlm | LongRunLowGrayLevelEmphasis          | 0.012049574 |
| original    | glrlm | RunEntropy                           | 5.225062914 |
| original    | glrlm | HighGrayLevelRunEmphasis             | 1172.440629 |
| original    | glrlm | RunLengthNonUniformityNormalized     | 0.82045303  |
| original    | glszm | GrayLevelVariance                    | 159.3437981 |
| original    | glszm | ZoneVariance                         | 84.6255942  |
| original    | glszm | GrayLevelNonUniformityNormalized     | 0.025700215 |
| original    | glszm | SizeZoneNonUniformityNormalized      | 0.730275982 |
| original    | glszm | SizeZoneNonUniformity                | 249.754386  |
| original    | glszm | GrayLevelNonUniformity               | 8.789473684 |
| original    | glszm | LargeAreaEmphasis                    | 88.67251462 |
| original    | glszm | SmallAreaHighGrayLevelEmphasis       | 675.5192492 |
| original    | glszm | ZonePercentage                       | 0.497093023 |
| original    | glszm | LargeAreaLowGrayLevelEmphasis        | 0.075384201 |
| original    | glszm | LargeAreaHighGrayLevelEmphasis       | 161398.6871 |
| original    | glszm | HighGrayLevelZoneEmphasis            | 802.9005848 |
| original    | glszm | SmallAreaEmphasis                    | 0.877021337 |
| original    | glszm | LowGrayLevelZoneEmphasis             | 0.01627145  |
| original    | glszm | ZoneEntropy                          | 5.975339245 |
| original    | glszm | SmallAreaLowGrayLevelEmphasis        | 0.01354055  |
| original    | ngtdm | Coarseness                           | 0.003654249 |
| original    | ngtdm | Complexity                           | 7188.973889 |
| original    | ngtdm | Strength                             | 7.552206742 |
| original    | ngtdm | Contrast                             | 1.20974721  |
| original    | ngtdm | Busyness                             | 0.128455928 |
| wavelet-HHH | gldm  | GrayLevelVariance                    | 22.95641014 |
| wavelet-HHH | gldm  | HighGrayLevelEmphasis                | 441.0043605 |
| wavelet-HHH | gldm  | DependenceEntropy                    | 6.206621174 |
| wavelet-HHH | gldm  | DependenceNonUniformity              | 158.3953488 |
| wavelet-HHH | gldm  | GrayLevelNonUniformity               | 48.86627907 |
| wavelet-HHH | gldm  | SmallDependenceEmphasis              | 0.444377109 |
| wavelet-HHH | gldm  | SmallDependenceHighGrayLevelEmphasis | 202.8364574 |
| wavelet-HHH | gldm  | DependenceNonUniformityNormalized    | 0.230225798 |
| wavelet-HHH | gldm  | LargeDependenceEmphasis              | 10.76453488 |
| wavelet-HHH | gldm  | LargeDependenceLowGrayLevelEmphasis  | 0.028096705 |
| wavelet-HHH | gldm  | DependenceVariance                   | 3.858639805 |
| wavelet-HHH | gldm  | LargeDependenceHighGrayLevelEmphasis | 4622.443314 |
| wavelet-HHH | gldm  | SmallDependenceLowGrayLevelEmphasis  | 0.003032203 |
| wavelet-HHH | gldm  | LowGrayLevelEmphasis                 | 0.004455463 |
| wavelet-HHH | glcm  | JointAverage                         | 20.43436251 |
| wavelet-HHH | glcm  | SumAverage                           | 40.86872501 |
| wavelet-HHH | glcm  | JointEntropy                         | 7.689528828 |
| wavelet-HHH | glcm  | ClusterShade                         | 15.61238113 |
| wavelet-HHH | glcm  | MaximumProbability                   | 0.029039705 |
| wavelet-HHH | glcm  | ldmn                                 | 0.979948562 |
| wavelet-HHH | glcm  | JointEnergy                          | 0.007582828 |
| wavelet-HHH | glcm  | Contrast                             | 42.85325181 |
| wavelet-HHH | glcm  | DifferenceEntropy                    | 3.7237518   |
| wavelet-HHH | glcm  | InverseVariance                      | 0.228305738 |



|             |            |                                  |              |
|-------------|------------|----------------------------------|--------------|
| wavelet-HHH | glcm       | DifferenceVariance               | 20.02372575  |
| wavelet-HHH | glcm       | Idn                              | 0.909298199  |
| wavelet-HHH | glcm       | Idm                              | 0.220129192  |
| wavelet-HHH | glcm       | Correlation                      | -0.03728522  |
| wavelet-HHH | glcm       | Autocorrelation                  | 416.7494577  |
| wavelet-HHH | glcm       | SumEntropy                       | 4.557036536  |
| wavelet-HHH | glcm       | SumSquares                       | 20.61039079  |
| wavelet-HHH | glcm       | ClusterProminence                | 7901.94063   |
| wavelet-HHH | glcm       | Imc2                             | 0.80486553   |
| wavelet-HHH | glcm       | Imc1                             | -0.127396849 |
| wavelet-HHH | glcm       | DifferenceAverage                | 4.752324129  |
| wavelet-HHH | glcm       | Id                               | 0.307606032  |
| wavelet-HHH | glcm       | ClusterTendency                  | 39.58831133  |
| wavelet-HHH | firstorder | InterquartileRange               | 120.698204   |
| wavelet-HHH | firstorder | Skewness                         | 0.17317451   |
| wavelet-HHH | firstorder | Uniformity                       | 0.071026568  |
| wavelet-HHH | firstorder | Median                           | 0.618667368  |
| wavelet-HHH | firstorder | Energy                           | 9756527.574  |
| wavelet-HHH | firstorder | RobustMeanAbsoluteDeviation      | 52.87116595  |
| wavelet-HHH | firstorder | MeanAbsoluteDeviation            | 86.08480275  |
| wavelet-HHH | firstorder | TotalEnergy                      | 263426244.5  |
| wavelet-HHH | firstorder | Maximum                          | 577.1334812  |
| wavelet-HHH | firstorder | RootMeanSquared                  | 119.0840014  |
| wavelet-HHH | firstorder | 90Percentile                     | 135.6444107  |
| wavelet-HHH | firstorder | Minimum                          | -479.9298527 |
| wavelet-HHH | firstorder | Entropy                          | 4.202792289  |
| wavelet-HHH | firstorder | Range                            | 1057.063334  |
| wavelet-HHH | firstorder | Variance                         | 14178.02556  |
| wavelet-HHH | firstorder | 10Percentile                     | -143.2588623 |
| wavelet-HHH | firstorder | Kurtosis                         | 5.13456101   |
| wavelet-HHH | firstorder | Mean                             | -1.724478444 |
| wavelet-HHH | glrlm      | ShortRunLowGrayLevelEmphasis     | 0.004474134  |
| wavelet-HHH | glrlm      | GrayLevelVariance                | 24.13191255  |
| wavelet-HHH | glrlm      | LowGrayLevelRunEmphasis          | 0.00458818   |
| wavelet-HHH | glrlm      | GrayLevelNonUniformityNormalized | 0.067485936  |
| wavelet-HHH | glrlm      | RunVariance                      | 0.07762119   |
| wavelet-HHH | glrlm      | GrayLevelNonUniformity           | 43.5252346   |
| wavelet-HHH | glrlm      | LongRunEmphasis                  | 1.215984117  |
| wavelet-HHH | glrlm      | ShortRunHighGrayLevelEmphasis    | 422.1968698  |
| wavelet-HHH | glrlm      | RunLengthNonUniformity           | 571.8668491  |
| wavelet-HHH | glrlm      | ShortRunEmphasis                 | 0.954071954  |
| wavelet-HHH | glrlm      | LongRunHighGrayLevelEmphasis     | 534.3730076  |
| wavelet-HHH | glrlm      | RunPercentage                    | 0.937388193  |
| wavelet-HHH | glrlm      | LongRunLowGrayLevelEmphasis      | 0.005120056  |
| wavelet-HHH | glrlm      | RunEntropy                       | 4.556268949  |
| wavelet-HHH | glrlm      | HighGrayLevelRunEmphasis         | 441.8574547  |
| wavelet-HHH | glrlm      | RunLengthNonUniformityNormalized | 0.886576736  |
| wavelet-HHH | glszm      | GrayLevelVariance                | 39.65781619  |
| wavelet-HHH | glszm      | ZoneVariance                     | 29.96966074  |
| wavelet-HHH | glszm      | GrayLevelNonUniformityNormalized | 0.047562545  |
| wavelet-HHH | glszm      | SizeZoneNonUniformityNormalized  | 0.557817106  |
| wavelet-HHH | glszm      | SizeZoneNonUniformity            | 184.6374622  |

|             |       |                                      |              |
|-------------|-------|--------------------------------------|--------------|
| wavelet-HHH | glszm | GrayLevelNonUniformity               | 15.74320242  |
| wavelet-HHH | glszm | LargeAreaEmphasis                    | 34.29003021  |
| wavelet-HHH | glszm | SmallAreaHighGrayLevelEmphasis       | 357.4156062  |
| wavelet-HHH | glszm | ZonePercentage                       | 0.481104651  |
| wavelet-HHH | glszm | LargeAreaLowGrayLevelEmphasis        | 0.085433886  |
| wavelet-HHH | glszm | LargeAreaHighGrayLevelEmphasis       | 14711.08459  |
| wavelet-HHH | glszm | HighGrayLevelZoneEmphasis            | 453.5528701  |
| wavelet-HHH | glszm | SmallAreaEmphasis                    | 0.774398695  |
| wavelet-HHH | glszm | LowGrayLevelZoneEmphasis             | 0.006543449  |
| wavelet-HHH | glszm | ZoneEntropy                          | 5.739886651  |
| wavelet-HHH | glszm | SmallAreaLowGrayLevelEmphasis        | 0.005911951  |
| wavelet-HHH | ngtdm | Coarseness                           | 0.01019009   |
| wavelet-HHH | ngtdm | Complexity                           | 1935.894621  |
| wavelet-HHH | ngtdm | Strength                             | 4.037421682  |
| wavelet-HHH | ngtdm | Contrast                             | 0.133954926  |
| wavelet-HHH | ngtdm | Busyness                             | 0.106301542  |
| wavelet-HLL | gldm  | GrayLevelVariance                    | 89.60829967  |
| wavelet-HLL | gldm  | HighGrayLevelEmphasis                | 1165.696221  |
| wavelet-HLL | gldm  | DependenceEntropy                    | 6.732762642  |
| wavelet-HLL | gldm  | DependenceNonUniformity              | 218.7296512  |
| wavelet-HLL | gldm  | GrayLevelNonUniformity               | 23.59593023  |
| wavelet-HLL | gldm  | SmallDependenceEmphasis              | 0.547529657  |
| wavelet-HLL | gldm  | SmallDependenceHighGrayLevelEmphasis | 636.1253224  |
| wavelet-HLL | gldm  | DependenceNonUniformityNormalized    | 0.317921005  |
| wavelet-HLL | gldm  | LargeDependenceEmphasis              | 7.212209302  |
| wavelet-HLL | gldm  | LargeDependenceLowGrayLevelEmphasis  | 0.008964148  |
| wavelet-HLL | gldm  | DependenceVariance                   | 2.770407991  |
| wavelet-HLL | gldm  | LargeDependenceHighGrayLevelEmphasis | 8553.75436   |
| wavelet-HLL | gldm  | SmallDependenceLowGrayLevelEmphasis  | 0.00238463   |
| wavelet-HLL | gldm  | LowGrayLevelEmphasis                 | 0.002931125  |
| wavelet-HLL | glcm  | JointAverage                         | 32.40308435  |
| wavelet-HLL | glcm  | SumAverage                           | 64.8061687   |
| wavelet-HLL | glcm  | JointEntropy                         | 8.881690168  |
| wavelet-HLL | glcm  | ClusterShade                         | -547.2447622 |
| wavelet-HLL | glcm  | MaximumProbability                   | 0.018090279  |
| wavelet-HLL | glcm  | ldmn                                 | 0.966567558  |
| wavelet-HLL | glcm  | JointEnergy                          | 0.00301932   |
| wavelet-HLL | glcm  | Contrast                             | 127.2423908  |
| wavelet-HLL | glcm  | DifferenceEntropy                    | 4.40371927   |
| wavelet-HLL | glcm  | InverseVariance                      | 0.158746337  |
| wavelet-HLL | glcm  | DifferenceVariance                   | 59.70860485  |
| wavelet-HLL | glcm  | ldn                                  | 0.887266365  |
| wavelet-HLL | glcm  | ldm                                  | 0.152924515  |
| wavelet-HLL | glcm  | Correlation                          | 0.209246749  |
| wavelet-HLL | glcm  | Autocorrelation                      | 1068.102779  |
| wavelet-HLL | glcm  | SumEntropy                           | 5.664199266  |
| wavelet-HLL | glcm  | SumSquares                           | 81.71884363  |
| wavelet-HLL | glcm  | ClusterProminence                    | 144837.5155  |
| wavelet-HLL | glcm  | lmc2                                 | 0.963056252  |
| wavelet-HLL | glcm  | lmc1                                 | -0.258509453 |
| wavelet-HLL | glcm  | DifferenceAverage                    | 8.056440105  |
| wavelet-HLL | glcm  | ld                                   | 0.23564152   |

|             |            |                                  |              |
|-------------|------------|----------------------------------|--------------|
| wavelet-HLL | glcm       | ClusterTendency                  | 199.6329837  |
| wavelet-HLL | firstorder | InterquartileRange               | 285.6655496  |
| wavelet-HLL | firstorder | Skewness                         | -0.262819608 |
| wavelet-HLL | firstorder | Uniformity                       | 0.03429641   |
| wavelet-HLL | firstorder | Median                           | -26.18652819 |
| wavelet-HLL | firstorder | Energy                           | 39766737.69  |
| wavelet-HLL | firstorder | RobustMeanAbsoluteDeviation      | 121.0781227  |
| wavelet-HLL | firstorder | MeanAbsoluteDeviation            | 182.5793777  |
| wavelet-HLL | firstorder | TotalEnergy                      | 1073701918   |
| wavelet-HLL | firstorder | Maximum                          | 553.5307785  |
| wavelet-HLL | firstorder | RootMeanSquared                  | 240.4173264  |
| wavelet-HLL | firstorder | 90Percentile                     | 256.6845998  |
| wavelet-HLL | firstorder | Minimum                          | -832.3926514 |
| wavelet-HLL | firstorder | Entropy                          | 5.178235877  |
| wavelet-HLL | firstorder | Range                            | 1385.92343   |
| wavelet-HLL | firstorder | Variance                         | 55972.22999  |
| wavelet-HLL | firstorder | 10Percentile                     | -343.4260794 |
| wavelet-HLL | firstorder | Kurtosis                         | 3.170600452  |
| wavelet-HLL | firstorder | Mean                             | -42.75816688 |
| wavelet-HLL | glrlm      | ShortRunLowGrayLevelEmphasis     | 0.002980621  |
| wavelet-HLL | glrlm      | GrayLevelVariance                | 91.81876061  |
| wavelet-HLL | glrlm      | LowGrayLevelRunEmphasis          | 0.00301445   |
| wavelet-HLL | glrlm      | GrayLevelNonUniformityNormalized | 0.033104346  |
| wavelet-HLL | glrlm      | RunVariance                      | 0.050261299  |
| wavelet-HLL | glrlm      | GrayLevelNonUniformity           | 21.80779499  |
| wavelet-HLL | glrlm      | LongRunEmphasis                  | 1.141828634  |
| wavelet-HLL | glrlm      | ShortRunHighGrayLevelEmphasis    | 1128.330653  |
| wavelet-HLL | glrlm      | RunLengthNonUniformity           | 607.0461423  |
| wavelet-HLL | glrlm      | ShortRunEmphasis                 | 0.968739102  |
| wavelet-HLL | glrlm      | LongRunHighGrayLevelEmphasis     | 1332.393648  |
| wavelet-HLL | glrlm      | RunPercentage                    | 0.95740161   |
| wavelet-HLL | glrlm      | LongRunLowGrayLevelEmphasis      | 0.003163984  |
| wavelet-HLL | glrlm      | RunEntropy                       | 5.402778578  |
| wavelet-HLL | glrlm      | HighGrayLevelRunEmphasis         | 1165.130519  |
| wavelet-HLL | glrlm      | RunLengthNonUniformityNormalized | 0.921297229  |
| wavelet-HLL | glszm      | GrayLevelVariance                | 113.0811006  |
| wavelet-HLL | glszm      | ZoneVariance                     | 6.186103143  |
| wavelet-HLL | glszm      | GrayLevelNonUniformityNormalized | 0.027538132  |
| wavelet-HLL | glszm      | SizeZoneNonUniformityNormalized  | 0.565861712  |
| wavelet-HLL | glszm      | SizeZoneNonUniformity            | 241.6229508  |
| wavelet-HLL | glszm      | GrayLevelNonUniformity           | 11.7587822   |
| wavelet-HLL | glszm      | LargeAreaEmphasis                | 8.782201405  |
| wavelet-HLL | glszm      | SmallAreaHighGrayLevelEmphasis   | 906.5602853  |
| wavelet-HLL | glszm      | ZonePercentage                   | 0.620639535  |
| wavelet-HLL | glszm      | LargeAreaLowGrayLevelEmphasis    | 0.011239526  |
| wavelet-HLL | glszm      | LargeAreaHighGrayLevelEmphasis   | 10355.0281   |
| wavelet-HLL | glszm      | HighGrayLevelZoneEmphasis        | 1163.782201  |
| wavelet-HLL | glszm      | SmallAreaEmphasis                | 0.780544391  |
| wavelet-HLL | glszm      | LowGrayLevelZoneEmphasis         | 0.004018995  |
| wavelet-HLL | glszm      | ZoneEntropy                      | 6.338160304  |
| wavelet-HLL | glszm      | SmallAreaLowGrayLevelEmphasis    | 0.003713428  |
| wavelet-HLL | ngtdm      | Coarseness                       | 0.010844496  |

|             |            |                                      |              |
|-------------|------------|--------------------------------------|--------------|
| wavelet-HLL | ngtdm      | Complexity                           | 5769.136086  |
| wavelet-HLL | ngtdm      | Strength                             | 8.609393416  |
| wavelet-HLL | ngtdm      | Contrast                             | 0.387442349  |
| wavelet-HLL | ngtdm      | Busyness                             | 0.052875562  |
| wavelet-LHL | gldm       | GrayLevelVariance                    | 141.9944227  |
| wavelet-LHL | gldm       | HighGrayLevelEmphasis                | 1724.831395  |
| wavelet-LHL | gldm       | DependenceEntropy                    | 6.814849561  |
| wavelet-LHL | gldm       | DependenceNonUniformity              | 262.2761628  |
| wavelet-LHL | gldm       | GrayLevelNonUniformity               | 21.05813953  |
| wavelet-LHL | gldm       | SmallDependenceEmphasis              | 0.631869268  |
| wavelet-LHL | gldm       | SmallDependenceHighGrayLevelEmphasis | 1123.702455  |
| wavelet-LHL | gldm       | DependenceNonUniformityNormalized    | 0.381215353  |
| wavelet-LHL | gldm       | LargeDependenceEmphasis              | 5.75872093   |
| wavelet-LHL | gldm       | LargeDependenceLowGrayLevelEmphasis  | 0.008781003  |
| wavelet-LHL | gldm       | DependenceVariance                   | 2.188378853  |
| wavelet-LHL | gldm       | LargeDependenceHighGrayLevelEmphasis | 9759.607558  |
| wavelet-LHL | gldm       | SmallDependenceLowGrayLevelEmphasis  | 0.005480158  |
| wavelet-LHL | gldm       | LowGrayLevelEmphasis                 | 0.005747524  |
| wavelet-LHL | glcm       | JointAverage                         | 39.82821663  |
| wavelet-LHL | glcm       | SumAverage                           | 79.65643325  |
| wavelet-LHL | glcm       | JointEntropy                         | 9.027676434  |
| wavelet-LHL | glcm       | ClusterShade                         | 2217.944823  |
| wavelet-LHL | glcm       | MaximumProbability                   | 0.013738818  |
| wavelet-LHL | glcm       | Idmn                                 | 0.975143566  |
| wavelet-LHL | glcm       | JointEnergy                          | 0.0026797    |
| wavelet-LHL | glcm       | Contrast                             | 230.4413753  |
| wavelet-LHL | glcm       | DifferenceEntropy                    | 4.745197759  |
| wavelet-LHL | glcm       | InverseVariance                      | 0.140417709  |
| wavelet-LHL | glcm       | DifferenceVariance                   | 115.7704303  |
| wavelet-LHL | glcm       | Idn                                  | 0.904739693  |
| wavelet-LHL | glcm       | Idm                                  | 0.130955642  |
| wavelet-LHL | glcm       | Correlation                          | 0.117466129  |
| wavelet-LHL | glcm       | Autocorrelation                      | 1603.365017  |
| wavelet-LHL | glcm       | SumEntropy                           | 5.847386423  |
| wavelet-LHL | glcm       | SumSquares                           | 132.2593879  |
| wavelet-LHL | glcm       | ClusterProminence                    | 476372.7915  |
| wavelet-LHL | glcm       | Imc2                                 | 0.98111265   |
| wavelet-LHL | glcm       | Imc1                                 | -0.30913184  |
| wavelet-LHL | glcm       | DifferenceAverage                    | 10.49090099  |
| wavelet-LHL | glcm       | Id                                   | 0.208967038  |
| wavelet-LHL | glcm       | ClusterTendency                      | 298.5961765  |
| wavelet-LHL | firstorder | InterquartileRange                   | 293.0515419  |
| wavelet-LHL | firstorder | Skewness                             | 0.23734304   |
| wavelet-LHL | firstorder | Uniformity                           | 0.030607761  |
| wavelet-LHL | firstorder | Median                               | -26.98051922 |
| wavelet-LHL | firstorder | Energy                               | 62241606.78  |
| wavelet-LHL | firstorder | RobustMeanAbsoluteDeviation          | 135.1904459  |
| wavelet-LHL | firstorder | MeanAbsoluteDeviation                | 218.0864985  |
| wavelet-LHL | firstorder | TotalEnergy                          | 1680523383   |
| wavelet-LHL | firstorder | Maximum                              | 1216.559916  |
| wavelet-LHL | firstorder | RootMeanSquared                      | 300.7780772  |
| wavelet-LHL | firstorder | 90Percentile                         | 306.5403253  |

|             |            |                                      |              |
|-------------|------------|--------------------------------------|--------------|
| wavelet-LHL | firstorder | Minimum                              | -1017.035666 |
| wavelet-LHL | firstorder | Entropy                              | 5.43780966   |
| wavelet-LHL | firstorder | Range                                | 2233.595582  |
| wavelet-LHL | firstorder | Variance                             | 88655.92976  |
| wavelet-LHL | firstorder | 10Percentile                         | -409.5932289 |
| wavelet-LHL | firstorder | Kurtosis                             | 4.489853013  |
| wavelet-LHL | firstorder | Mean                                 | -42.56197777 |
| wavelet-LHL | glrlm      | ShortRunLowGrayLevelEmphasis         | 0.005911226  |
| wavelet-LHL | glrlm      | GrayLevelVariance                    | 145.8187803  |
| wavelet-LHL | glrlm      | LowGrayLevelRunEmphasis              | 0.00592787   |
| wavelet-LHL | glrlm      | GrayLevelNonUniformityNormalized     | 0.029410127  |
| wavelet-LHL | glrlm      | RunVariance                          | 0.041604278  |
| wavelet-LHL | glrlm      | GrayLevelNonUniformity               | 19.54334401  |
| wavelet-LHL | glrlm      | LongRunEmphasis                      | 1.114089582  |
| wavelet-LHL | glrlm      | ShortRunHighGrayLevelEmphasis        | 1686.27587   |
| wavelet-LHL | glrlm      | RunLengthNonUniformity               | 623.207696   |
| wavelet-LHL | glrlm      | ShortRunEmphasis                     | 0.975433936  |
| wavelet-LHL | glrlm      | LongRunHighGrayLevelEmphasis         | 1916.401771  |
| wavelet-LHL | glrlm      | RunPercentage                        | 0.96578712   |
| wavelet-LHL | glrlm      | LongRunLowGrayLevelEmphasis          | 0.00600447   |
| wavelet-LHL | glrlm      | RunEntropy                           | 5.630633342  |
| wavelet-LHL | glrlm      | HighGrayLevelRunEmphasis             | 1727.117458  |
| wavelet-LHL | glrlm      | RunLengthNonUniformityNormalized     | 0.937718179  |
| wavelet-LHL | glszm      | GrayLevelVariance                    | 186.8594334  |
| wavelet-LHL | glszm      | ZoneVariance                         | 4.015153691  |
| wavelet-LHL | glszm      | GrayLevelNonUniformityNormalized     | 0.023125539  |
| wavelet-LHL | glszm      | SizeZoneNonUniformityNormalized      | 0.672050057  |
| wavelet-LHL | glszm      | SizeZoneNonUniformity                | 317.2076271  |
| wavelet-LHL | glszm      | GrayLevelNonUniformity               | 10.91525424  |
| wavelet-LHL | glszm      | LargeAreaEmphasis                    | 6.139830508  |
| wavelet-LHL | glszm      | SmallAreaHighGrayLevelEmphasis       | 1515.689299  |
| wavelet-LHL | glszm      | ZonePercentage                       | 0.686046512  |
| wavelet-LHL | glszm      | LargeAreaLowGrayLevelEmphasis        | 0.011210679  |
| wavelet-LHL | glszm      | LargeAreaHighGrayLevelEmphasis       | 10563.41949  |
| wavelet-LHL | glszm      | HighGrayLevelZoneEmphasis            | 1763.555085  |
| wavelet-LHL | glszm      | SmallAreaEmphasis                    | 0.845148903  |
| wavelet-LHL | glszm      | LowGrayLevelZoneEmphasis             | 0.008055703  |
| wavelet-LHL | glszm      | ZoneEntropy                          | 6.435990297  |
| wavelet-LHL | glszm      | SmallAreaLowGrayLevelEmphasis        | 0.00793092   |
| wavelet-LHL | ngtdm      | Coarseness                           | 0.010911921  |
| wavelet-LHL | ngtdm      | Complexity                           | 15462.33745  |
| wavelet-LHL | ngtdm      | Strength                             | 17.27344513  |
| wavelet-LHL | ngtdm      | Contrast                             | 0.440148988  |
| wavelet-LHL | ngtdm      | Busyness                             | 0.029332437  |
| wavelet-LHH | gldm       | GrayLevelVariance                    | 59.85275825  |
| wavelet-LHH | gldm       | HighGrayLevelEmphasis                | 1059.44186   |
| wavelet-LHH | gldm       | DependenceEntropy                    | 6.404701498  |
| wavelet-LHH | gldm       | DependenceNonUniformity              | 198.4331395  |
| wavelet-LHH | gldm       | GrayLevelNonUniformity               | 32.77325581  |
| wavelet-LHH | gldm       | SmallDependenceEmphasis              | 0.525247565  |
| wavelet-LHH | gldm       | SmallDependenceHighGrayLevelEmphasis | 601.5946386  |
| wavelet-LHH | gldm       | DependenceNonUniformityNormalized    | 0.288420261  |

|             |            |                                      |              |
|-------------|------------|--------------------------------------|--------------|
| wavelet-LHH | gldm       | LargeDependenceEmphasis              | 6.965116279  |
| wavelet-LHH | gldm       | LargeDependenceLowGrayLevelEmphasis  | 0.00931343   |
| wavelet-LHH | gldm       | DependenceVariance                   | 2.19901805   |
| wavelet-LHH | gldm       | LargeDependenceHighGrayLevelEmphasis | 6843.921512  |
| wavelet-LHH | gldm       | SmallDependenceLowGrayLevelEmphasis  | 0.002254471  |
| wavelet-LHH | gldm       | LowGrayLevelEmphasis                 | 0.002813671  |
| wavelet-LHH | glcm       | JointAverage                         | 31.55303179  |
| wavelet-LHH | glcm       | SumAverage                           | 63.10606359  |
| wavelet-LHH | glcm       | JointEntropy                         | 8.444834618  |
| wavelet-LHH | glcm       | ClusterShade                         | 126.6298118  |
| wavelet-LHH | glcm       | MaximumProbability                   | 0.019074644  |
| wavelet-LHH | glcm       | ldmn                                 | 0.979586717  |
| wavelet-LHH | glcm       | JointEnergy                          | 0.004314229  |
| wavelet-LHH | glcm       | Contrast                             | 105.5593936  |
| wavelet-LHH | glcm       | DifferenceEntropy                    | 4.279128868  |
| wavelet-LHH | glcm       | InverseVariance                      | 0.177295508  |
| wavelet-LHH | glcm       | DifferenceVariance                   | 51.7131544   |
| wavelet-LHH | glcm       | ldn                                  | 0.910910135  |
| wavelet-LHH | glcm       | ldm                                  | 0.167527215  |
| wavelet-LHH | glcm       | Correlation                          | 0.001005133  |
| wavelet-LHH | glcm       | Autocorrelation                      | 995.7097494  |
| wavelet-LHH | glcm       | SumEntropy                           | 5.170260695  |
| wavelet-LHH | glcm       | SumSquares                           | 52.88713573  |
| wavelet-LHH | glcm       | ClusterProminence                    | 66363.52679  |
| wavelet-LHH | glcm       | Imc2                                 | 0.925737082  |
| wavelet-LHH | glcm       | Imc1                                 | -0.206870151 |
| wavelet-LHH | glcm       | DifferenceAverage                    | 7.255056762  |
| wavelet-LHH | glcm       | ld                                   | 0.251132485  |
| wavelet-LHH | glcm       | ClusterTendency                      | 105.9891494  |
| wavelet-LHH | firstorder | InterquartileRange                   | 180.6859106  |
| wavelet-LHH | firstorder | Skewness                             | 0.155448954  |
| wavelet-LHH | firstorder | Uniformity                           | 0.047635546  |
| wavelet-LHH | firstorder | Median                               | -5.247357554 |
| wavelet-LHH | firstorder | Energy                               | 25770202.53  |
| wavelet-LHH | firstorder | RobustMeanAbsoluteDeviation          | 80.57998324  |
| wavelet-LHH | firstorder | MeanAbsoluteDeviation                | 136.8110336  |
| wavelet-LHH | firstorder | TotalEnergy                          | 695795468.2  |
| wavelet-LHH | firstorder | Maximum                              | 907.4676395  |
| wavelet-LHH | firstorder | RootMeanSquared                      | 193.5373083  |
| wavelet-LHH | firstorder | 90Percentile                         | 230.723806   |
| wavelet-LHH | firstorder | Minimum                              | -772.5918958 |
| wavelet-LHH | firstorder | Entropy                              | 4.81332802   |
| wavelet-LHH | firstorder | Range                                | 1680.059535  |
| wavelet-LHH | firstorder | Variance                             | 37446.69402  |
| wavelet-LHH | firstorder | 10Percentile                         | -218.6208859 |
| wavelet-LHH | firstorder | Kurtosis                             | 5.244701343  |
| wavelet-LHH | firstorder | Mean                                 | 3.161597153  |
| wavelet-LHH | glrlm      | ShortRunLowGrayLevelEmphasis         | 0.002856931  |
| wavelet-LHH | glrlm      | GrayLevelVariance                    | 61.93056063  |
| wavelet-LHH | glrlm      | LowGrayLevelRunEmphasis              | 0.002894768  |
| wavelet-LHH | glrlm      | GrayLevelNonUniformityNormalized     | 0.045748604  |
| wavelet-LHH | glrlm      | RunVariance                          | 0.054644811  |

|             |       |                                      |             |
|-------------|-------|--------------------------------------|-------------|
| wavelet-LHH | glrlm | GrayLevelNonUniformity               | 30.04728528 |
| wavelet-LHH | glrlm | LongRunEmphasis                      | 1.152959327 |
| wavelet-LHH | glrlm | ShortRunHighGrayLevelEmphasis        | 1031.33231  |
| wavelet-LHH | glrlm | RunLengthNonUniformity               | 601.4039257 |
| wavelet-LHH | glrlm | ShortRunEmphasis                     | 0.966400162 |
| wavelet-LHH | glrlm | LongRunHighGrayLevelEmphasis         | 1211.908457 |
| wavelet-LHH | glrlm | RunPercentage                        | 0.954494633 |
| wavelet-LHH | glrlm | LongRunLowGrayLevelEmphasis          | 0.003065332 |
| wavelet-LHH | glrlm | RunEntropy                           | 5.073721177 |
| wavelet-LHH | glrlm | HighGrayLevelRunEmphasis             | 1063.837109 |
| wavelet-LHH | glrlm | RunLengthNonUniformityNormalized     | 0.915502256 |
| wavelet-LHH | glszm | GrayLevelVariance                    | 87.46173076 |
| wavelet-LHH | glszm | ZoneVariance                         | 12.50928007 |
| wavelet-LHH | glszm | GrayLevelNonUniformityNormalized     | 0.034026919 |
| wavelet-LHH | glszm | SizeZoneNonUniformityNormalized      | 0.592586046 |
| wavelet-LHH | glszm | SizeZoneNonUniformity                | 235.8492462 |
| wavelet-LHH | glszm | GrayLevelNonUniformity               | 13.54271357 |
| wavelet-LHH | glszm | LargeAreaEmphasis                    | 15.49748744 |
| wavelet-LHH | glszm | SmallAreaHighGrayLevelEmphasis       | 934.1804735 |
| wavelet-LHH | glszm | ZonePercentage                       | 0.578488372 |
| wavelet-LHH | glszm | LargeAreaLowGrayLevelEmphasis        | 0.019303865 |
| wavelet-LHH | glszm | LargeAreaHighGrayLevelEmphasis       | 15177.63819 |
| wavelet-LHH | glszm | HighGrayLevelZoneEmphasis            | 1128.577889 |
| wavelet-LHH | glszm | SmallAreaEmphasis                    | 0.797530072 |
| wavelet-LHH | glszm | LowGrayLevelZoneEmphasis             | 0.004025166 |
| wavelet-LHH | glszm | ZoneEntropy                          | 6.068238024 |
| wavelet-LHH | glszm | SmallAreaLowGrayLevelEmphasis        | 0.003762281 |
| wavelet-LHH | ngtdm | Coarseness                           | 0.010438203 |
| wavelet-LHH | ngtdm | Complexity                           | 5878.041734 |
| wavelet-LHH | ngtdm | Strength                             | 8.396151829 |
| wavelet-LHH | ngtdm | Contrast                             | 0.262772743 |
| wavelet-LHH | ngtdm | Busyness                             | 0.049724134 |
| wavelet-LLH | gldm  | GrayLevelVariance                    | 139.7643912 |
| wavelet-LLH | gldm  | HighGrayLevelEmphasis                | 2720.936047 |
| wavelet-LLH | gldm  | DependenceEntropy                    | 6.844033012 |
| wavelet-LLH | gldm  | DependenceNonUniformity              | 243.5901163 |
| wavelet-LLH | gldm  | GrayLevelNonUniformity               | 21.10755814 |
| wavelet-LLH | gldm  | SmallDependenceEmphasis              | 0.605038747 |
| wavelet-LLH | gldm  | SmallDependenceHighGrayLevelEmphasis | 1658.645493 |
| wavelet-LLH | gldm  | DependenceNonUniformityNormalized    | 0.354055402 |
| wavelet-LLH | gldm  | LargeDependenceEmphasis              | 5.098837209 |
| wavelet-LLH | gldm  | LargeDependenceLowGrayLevelEmphasis  | 0.003859152 |
| wavelet-LLH | gldm  | DependenceVariance                   | 1.495462074 |
| wavelet-LLH | gldm  | LargeDependenceHighGrayLevelEmphasis | 13936.125   |
| wavelet-LLH | gldm  | SmallDependenceLowGrayLevelEmphasis  | 0.002127905 |
| wavelet-LLH | gldm  | LowGrayLevelEmphasis                 | 0.002287633 |
| wavelet-LLH | glcm  | JointAverage                         | 50.8294092  |
| wavelet-LLH | glcm  | SumAverage                           | 101.6588184 |
| wavelet-LLH | glcm  | JointEntropy                         | 9.067416464 |
| wavelet-LLH | glcm  | ClusterShade                         | 714.4870104 |
| wavelet-LLH | glcm  | MaximumProbability                   | 0.010973052 |
| wavelet-LLH | glcm  | ldmn                                 | 0.978472555 |

|             |            |                                  |              |
|-------------|------------|----------------------------------|--------------|
| wavelet-LLH | glcm       | JointEnergy                      | 0.00246499   |
| wavelet-LLH | glcm       | Contrast                         | 214.8747359  |
| wavelet-LLH | glcm       | DifferenceEntropy                | 4.720546343  |
| wavelet-LLH | glcm       | InverseVariance                  | 0.132635701  |
| wavelet-LLH | glcm       | DifferenceVariance               | 105.5797828  |
| wavelet-LLH | glcm       | Idn                              | 0.909500698  |
| wavelet-LLH | glcm       | Idm                              | 0.127129954  |
| wavelet-LLH | glcm       | Correlation                      | 0.133957297  |
| wavelet-LLH | glcm       | Autocorrelation                  | 2601.523223  |
| wavelet-LLH | glcm       | SumEntropy                       | 5.850752069  |
| wavelet-LLH | glcm       | SumSquares                       | 125.3013617  |
| wavelet-LLH | glcm       | ClusterProminence                | 409240.3738  |
| wavelet-LLH | glcm       | Imc2                             | 0.977445443  |
| wavelet-LLH | glcm       | Imc1                             | -0.293964722 |
| wavelet-LLH | glcm       | DifferenceAverage                | 10.24993366  |
| wavelet-LLH | glcm       | Id                               | 0.206498285  |
| wavelet-LLH | glcm       | ClusterTendency                  | 286.3307109  |
| wavelet-LLH | firstorder | InterquartileRange               | 294.0494826  |
| wavelet-LLH | firstorder | Skewness                         | 0.049198306  |
| wavelet-LLH | firstorder | Uniformity                       | 0.03067959   |
| wavelet-LLH | firstorder | Median                           | -31.95347876 |
| wavelet-LLH | firstorder | Energy                           | 61270285.44  |
| wavelet-LLH | firstorder | RobustMeanAbsoluteDeviation      | 128.8357071  |
| wavelet-LLH | firstorder | MeanAbsoluteDeviation            | 212.4208445  |
| wavelet-LLH | firstorder | TotalEnergy                      | 1654297707   |
| wavelet-LLH | firstorder | Maximum                          | 1028.306903  |
| wavelet-LLH | firstorder | RootMeanSquared                  | 298.4219286  |
| wavelet-LLH | firstorder | 90Percentile                     | 283.0095648  |
| wavelet-LLH | firstorder | Minimum                          | -1293.384378 |
| wavelet-LLH | firstorder | Entropy                          | 5.408447765  |
| wavelet-LLH | firstorder | Range                            | 2321.691281  |
| wavelet-LLH | firstorder | Variance                         | 87277.39196  |
| wavelet-LLH | firstorder | 10Percentile                     | -387.1273936 |
| wavelet-LLH | firstorder | Kurtosis                         | 4.935686822  |
| wavelet-LLH | firstorder | Mean                             | -42.16936666 |
| wavelet-LLH | glrlm      | ShortRunLowGrayLevelEmphasis     | 0.002345813  |
| wavelet-LLH | glrlm      | GrayLevelVariance                | 143.4194453  |
| wavelet-LLH | glrlm      | LowGrayLevelRunEmphasis          | 0.002355916  |
| wavelet-LLH | glrlm      | GrayLevelNonUniformityNormalized | 0.029882327  |
| wavelet-LLH | glrlm      | RunVariance                      | 0.039422903  |
| wavelet-LLH | glrlm      | GrayLevelNonUniformity           | 19.85234425  |
| wavelet-LLH | glrlm      | LongRunEmphasis                  | 1.112984449  |
| wavelet-LLH | glrlm      | ShortRunHighGrayLevelEmphasis    | 2651.785636  |
| wavelet-LLH | glrlm      | RunLengthNonUniformity           | 621.2392761  |
| wavelet-LLH | glrlm      | ShortRunEmphasis                 | 0.974378665  |
| wavelet-LLH | glrlm      | LongRunHighGrayLevelEmphasis     | 3029.299607  |
| wavelet-LLH | glrlm      | RunPercentage                    | 0.965451699  |
| wavelet-LLH | glrlm      | LongRunLowGrayLevelEmphasis      | 0.002399898  |
| wavelet-LLH | glrlm      | RunEntropy                       | 5.600052574  |
| wavelet-LLH | glrlm      | HighGrayLevelRunEmphasis         | 2721.06325   |
| wavelet-LLH | glrlm      | RunLengthNonUniformityNormalized | 0.934919554  |
| wavelet-LLH | glszm      | GrayLevelVariance                | 187.6343287  |



|             |       |                                      |              |
|-------------|-------|--------------------------------------|--------------|
| wavelet-LLH | glszm | ZoneVariance                         | 3.043027136  |
| wavelet-LLH | glszm | GrayLevelNonUniformityNormalized     | 0.023870211  |
| wavelet-LLH | glszm | SizeZoneNonUniformityNormalized      | 0.644087507  |
| wavelet-LLH | glszm | SizeZoneNonUniformity                | 295.6361656  |
| wavelet-LLH | glszm | GrayLevelNonUniformity               | 10.95642702  |
| wavelet-LLH | glszm | LargeAreaEmphasis                    | 5.289760349  |
| wavelet-LLH | glszm | SmallAreaHighGrayLevelEmphasis       | 2274.323653  |
| wavelet-LLH | glszm | ZonePercentage                       | 0.667151163  |
| wavelet-LLH | glszm | LargeAreaLowGrayLevelEmphasis        | 0.004848316  |
| wavelet-LLH | glszm | LargeAreaHighGrayLevelEmphasis       | 14475.878    |
| wavelet-LLH | glszm | HighGrayLevelZoneEmphasis            | 2730.298475  |
| wavelet-LLH | glszm | SmallAreaEmphasis                    | 0.827827535  |
| wavelet-LLH | glszm | LowGrayLevelZoneEmphasis             | 0.003230499  |
| wavelet-LLH | glszm | ZoneEntropy                          | 6.450267903  |
| wavelet-LLH | glszm | SmallAreaLowGrayLevelEmphasis        | 0.003157128  |
| wavelet-LLH | ngtdm | Coarseness                           | 0.010125148  |
| wavelet-LLH | ngtdm | Complexity                           | 15861.49462  |
| wavelet-LLH | ngtdm | Strength                             | 17.60789545  |
| wavelet-LLH | ngtdm | Contrast                             | 0.432354785  |
| wavelet-LLH | ngtdm | Busyness                             | 0.024255629  |
| wavelet-LLL | gldm  | GrayLevelVariance                    | 813.2438797  |
| wavelet-LLL | gldm  | HighGrayLevelEmphasis                | 5513.263081  |
| wavelet-LLL | gldm  | DependenceEntropy                    | 7.320737082  |
| wavelet-LLL | gldm  | DependenceNonUniformity              | 341.6976744  |
| wavelet-LLL | gldm  | GrayLevelNonUniformity               | 9.488372093  |
| wavelet-LLL | gldm  | SmallDependenceEmphasis              | 0.732235068  |
| wavelet-LLL | gldm  | SmallDependenceHighGrayLevelEmphasis | 3403.824456  |
| wavelet-LLL | gldm  | DependenceNonUniformityNormalized    | 0.496653597  |
| wavelet-LLL | gldm  | LargeDependenceEmphasis              | 3.845930233  |
| wavelet-LLL | gldm  | LargeDependenceLowGrayLevelEmphasis  | 0.003323177  |
| wavelet-LLL | gldm  | DependenceVariance                   | 1.280345795  |
| wavelet-LLL | gldm  | LargeDependenceHighGrayLevelEmphasis | 31091.71948  |
| wavelet-LLL | gldm  | SmallDependenceLowGrayLevelEmphasis  | 0.002784187  |
| wavelet-LLL | gldm  | LowGrayLevelEmphasis                 | 0.002854917  |
| wavelet-LLL | glcm  | JointAverage                         | 73.59266163  |
| wavelet-LLL | glcm  | SumAverage                           | 147.1853233  |
| wavelet-LLL | glcm  | JointEntropy                         | 9.592210303  |
| wavelet-LLL | glcm  | ClusterShade                         | -61863.34041 |
| wavelet-LLL | glcm  | MaximumProbability                   | 0.007961585  |
| wavelet-LLL | glcm  | ldmn                                 | 0.963234432  |
| wavelet-LLL | glcm  | JointEnergy                          | 0.001541344  |
| wavelet-LLL | glcm  | Contrast                             | 694.8736185  |
| wavelet-LLL | glcm  | DifferenceEntropy                    | 5.556734363  |
| wavelet-LLL | glcm  | InverseVariance                      | 0.090469267  |
| wavelet-LLL | glcm  | DifferenceVariance                   | 302.2778322  |
| wavelet-LLL | glcm  | ldn                                  | 0.88011872   |
| wavelet-LLL | glcm  | ldm                                  | 0.086526128  |
| wavelet-LLL | glcm  | Correlation                          | 0.524938583  |
| wavelet-LLL | glcm  | Autocorrelation                      | 5798.867526  |
| wavelet-LLL | glcm  | SumEntropy                           | 6.978389247  |
| wavelet-LLL | glcm  | SumSquares                           | 729.1128031  |
| wavelet-LLL | glcm  | ClusterProminence                    | 11649761.24  |

|             |            |                                  |              |
|-------------|------------|----------------------------------|--------------|
| wavelet-LLL | glcm       | lmc2                             | 0.998715851  |
| wavelet-LLL | glcm       | lmc1                             | -0.474615037 |
| wavelet-LLL | glcm       | DifferenceAverage                | 19.48567837  |
| wavelet-LLL | glcm       | ld                               | 0.148218969  |
| wavelet-LLL | glcm       | ClusterTendency                  | 2221.577594  |
| wavelet-LLL | firstorder | InterquartileRange               | 1235.655174  |
| wavelet-LLL | firstorder | Skewness                         | -0.467658894 |
| wavelet-LLL | firstorder | Uniformity                       | 0.013791239  |
| wavelet-LLL | firstorder | Median                           | -550.5167871 |
| wavelet-LLL | firstorder | Energy                           | 638591195.4  |
| wavelet-LLL | firstorder | RobustMeanAbsoluteDeviation      | 491.6736575  |
| wavelet-LLL | firstorder | MeanAbsoluteDeviation            | 614.9668677  |
| wavelet-LLL | firstorder | TotalEnergy                      | 17241962276  |
| wavelet-LLL | firstorder | Maximum                          | 853.0418305  |
| wavelet-LLL | firstorder | RootMeanSquared                  | 963.423519   |
| wavelet-LLL | firstorder | 90Percentile                     | 150.7951918  |
| wavelet-LLL | firstorder | Minimum                          | -2338.867749 |
| wavelet-LLL | firstorder | Entropy                          | 6.447156024  |
| wavelet-LLL | firstorder | Range                            | 3191.90958   |
| wavelet-LLL | firstorder | Variance                         | 507832.8574  |
| wavelet-LLL | firstorder | 10Percentile                     | -1703.893047 |
| wavelet-LLL | firstorder | Kurtosis                         | 2.053137249  |
| wavelet-LLL | firstorder | Mean                             | -648.345602  |
| wavelet-LLL | glrlm      | ShortRunLowGrayLevelEmphasis     | 0.002914485  |
| wavelet-LLL | glrlm      | GrayLevelVariance                | 812.2207715  |
| wavelet-LLL | glrlm      | LowGrayLevelRunEmphasis          | 0.002917943  |
| wavelet-LLL | glrlm      | GrayLevelNonUniformityNormalized | 0.013362887  |
| wavelet-LLL | glrlm      | RunVariance                      | 0.026106431  |
| wavelet-LLL | glrlm      | GrayLevelNonUniformity           | 8.981332131  |
| wavelet-LLL | glrlm      | LongRunEmphasis                  | 1.074181165  |
| wavelet-LLL | glrlm      | ShortRunHighGrayLevelEmphasis    | 5296.041352  |
| wavelet-LLL | glrlm      | RunLengthNonUniformity           | 642.9073886  |
| wavelet-LLL | glrlm      | ShortRunEmphasis                 | 0.983109338  |
| wavelet-LLL | glrlm      | LongRunHighGrayLevelEmphasis     | 6081.804861  |
| wavelet-LLL | glrlm      | RunPercentage                    | 0.976855993  |
| wavelet-LLL | glrlm      | LongRunLowGrayLevelEmphasis      | 0.002932444  |
| wavelet-LLL | glrlm      | RunEntropy                       | 6.562309569  |
| wavelet-LLL | glrlm      | HighGrayLevelRunEmphasis         | 5440.054342  |
| wavelet-LLL | glrlm      | RunLengthNonUniformityNormalized | 0.95651992   |
| wavelet-LLL | glszm      | GrayLevelVariance                | 774.5045804  |
| wavelet-LLL | glszm      | ZoneVariance                     | 1.654576342  |
| wavelet-LLL | glszm      | GrayLevelNonUniformityNormalized | 0.011600895  |
| wavelet-LLL | glszm      | SizeZoneNonUniformityNormalized  | 0.77044343   |
| wavelet-LLL | glszm      | SizeZoneNonUniformity            | 409.1054614  |
| wavelet-LLL | glszm      | GrayLevelNonUniformity           | 6.16007533   |
| wavelet-LLL | glszm      | LargeAreaEmphasis                | 3.333333333  |
| wavelet-LLL | glszm      | SmallAreaHighGrayLevelEmphasis   | 4015.131947  |
| wavelet-LLL | glszm      | ZonePercentage                   | 0.771802326  |
| wavelet-LLL | glszm      | LargeAreaLowGrayLevelEmphasis    | 0.003984214  |
| wavelet-LLL | glszm      | LargeAreaHighGrayLevelEmphasis   | 26126.25424  |
| wavelet-LLL | glszm      | HighGrayLevelZoneEmphasis        | 4703.032015  |
| wavelet-LLL | glszm      | SmallAreaEmphasis                | 0.896857813  |

|             |            |                                      |              |
|-------------|------------|--------------------------------------|--------------|
| wavelet-LLL | glszm      | LowGrayLevelZoneEmphasis             | 0.00363107   |
| wavelet-LLL | glszm      | ZoneEntropy                          | 7.005930477  |
| wavelet-LLL | glszm      | SmallAreaLowGrayLevelEmphasis        | 0.003592662  |
| wavelet-LLL | ngtdm      | Coarseness                           | 0.009897309  |
| wavelet-LLL | ngtdm      | Complexity                           | 59978.8186   |
| wavelet-LLL | ngtdm      | Strength                             | 48.42167828  |
| wavelet-LLL | ngtdm      | Contrast                             | 1.765971575  |
| wavelet-LLL | ngtdm      | Busyness                             | 0.012488443  |
| wavelet-HHL | gldm       | GrayLevelVariance                    | 42.63060269  |
| wavelet-HHL | gldm       | HighGrayLevelEmphasis                | 758.9709302  |
| wavelet-HHL | gldm       | DependenceEntropy                    | 6.501432194  |
| wavelet-HHL | gldm       | DependenceNonUniformity              | 169.0261628  |
| wavelet-HHL | gldm       | GrayLevelNonUniformity               | 36.95348837  |
| wavelet-HHL | gldm       | SmallDependenceEmphasis              | 0.455748768  |
| wavelet-HHL | gldm       | SmallDependenceHighGrayLevelEmphasis | 347.1130399  |
| wavelet-HHL | gldm       | DependenceNonUniformityNormalized    | 0.245677562  |
| wavelet-HHL | gldm       | LargeDependenceEmphasis              | 9.281976744  |
| wavelet-HHL | gldm       | LargeDependenceLowGrayLevelEmphasis  | 0.01560574   |
| wavelet-HHL | gldm       | DependenceVariance                   | 3.118881828  |
| wavelet-HHL | gldm       | LargeDependenceHighGrayLevelEmphasis | 6606.276163  |
| wavelet-HHL | gldm       | SmallDependenceLowGrayLevelEmphasis  | 0.002415306  |
| wavelet-HHL | gldm       | LowGrayLevelEmphasis                 | 0.003230089  |
| wavelet-HHL | glcm       | JointAverage                         | 26.79812262  |
| wavelet-HHL | glcm       | SumAverage                           | 53.59624524  |
| wavelet-HHL | glcm       | JointEntropy                         | 8.240095466  |
| wavelet-HHL | glcm       | ClusterShade                         | 191.7654564  |
| wavelet-HHL | glcm       | MaximumProbability                   | 0.019494959  |
| wavelet-HHL | glcm       | ldmn                                 | 0.968070464  |
| wavelet-HHL | glcm       | JointEnergy                          | 0.005101804  |
| wavelet-HHL | glcm       | Contrast                             | 81.79678034  |
| wavelet-HHL | glcm       | DifferenceEntropy                    | 4.126389088  |
| wavelet-HHL | glcm       | InverseVariance                      | 0.194577813  |
| wavelet-HHL | glcm       | DifferenceVariance                   | 39.36762859  |
| wavelet-HHL | glcm       | ldn                                  | 0.890446689  |
| wavelet-HHL | glcm       | ldm                                  | 0.192688363  |
| wavelet-HHL | glcm       | Correlation                          | -0.029731644 |
| wavelet-HHL | glcm       | Autocorrelation                      | 717.0756104  |
| wavelet-HHL | glcm       | SumEntropy                           | 4.970120184  |
| wavelet-HHL | glcm       | SumSquares                           | 39.80915183  |
| wavelet-HHL | glcm       | ClusterProminence                    | 28843.9975   |
| wavelet-HHL | glcm       | lmc2                                 | 0.899017728  |
| wavelet-HHL | glcm       | lmc1                                 | -0.183092705 |
| wavelet-HHL | glcm       | DifferenceAverage                    | 6.431619094  |
| wavelet-HHL | glcm       | ld                                   | 0.275675423  |
| wavelet-HHL | glcm       | ClusterTendency                      | 77.43982697  |
| wavelet-HHL | firstorder | InterquartileRange                   | 162.0632824  |
| wavelet-HHL | firstorder | Skewness                             | 0.101766871  |
| wavelet-HHL | firstorder | Uniformity                           | 0.053711466  |
| wavelet-HHL | firstorder | Median                               | -2.109107525 |
| wavelet-HHL | firstorder | Energy                               | 18342109.93  |
| wavelet-HHL | firstorder | RobustMeanAbsoluteDeviation          | 70.75709956  |
| wavelet-HHL | firstorder | MeanAbsoluteDeviation                | 118.4808324  |

|             |            |                                  |              |
|-------------|------------|----------------------------------|--------------|
| wavelet-HHL | firstorder | TotalEnergy                      | 495236968.1  |
| wavelet-HHL | firstorder | Maximum                          | 519.1388679  |
| wavelet-HHL | firstorder | RootMeanSquared                  | 163.2790357  |
| wavelet-HHL | firstorder | 90Percentile                     | 204.0423845  |
| wavelet-HHL | firstorder | Minimum                          | -632.0131387 |
| wavelet-HHL | firstorder | Entropy                          | 4.620493688  |
| wavelet-HHL | firstorder | Range                            | 1151.152007  |
| wavelet-HHL | firstorder | Variance                         | 26617.15722  |
| wavelet-HHL | firstorder | 10Percentile                     | -182.0074158 |
| wavelet-HHL | firstorder | Kurtosis                         | 4.091233163  |
| wavelet-HHL | firstorder | Mean                             | 6.548762216  |
| wavelet-HHL | glrlm      | ShortRunLowGrayLevelEmphasis     | 0.003272418  |
| wavelet-HHL | glrlm      | GrayLevelVariance                | 44.36053424  |
| wavelet-HHL | glrlm      | LowGrayLevelRunEmphasis          | 0.003335266  |
| wavelet-HHL | glrlm      | GrayLevelNonUniformityNormalized | 0.051348696  |
| wavelet-HHL | glrlm      | RunVariance                      | 0.070380932  |
| wavelet-HHL | glrlm      | GrayLevelNonUniformity           | 33.31268721  |
| wavelet-HHL | glrlm      | LongRunEmphasis                  | 1.19559918   |
| wavelet-HHL | glrlm      | ShortRunHighGrayLevelEmphasis    | 730.7115414  |
| wavelet-HHL | glrlm      | RunLengthNonUniformity           | 581.4428249  |
| wavelet-HHL | glrlm      | ShortRunEmphasis                 | 0.958091729  |
| wavelet-HHL | glrlm      | LongRunHighGrayLevelEmphasis     | 902.4075792  |
| wavelet-HHL | glrlm      | RunPercentage                    | 0.942978533  |
| wavelet-HHL | glrlm      | LongRunLowGrayLevelEmphasis      | 0.003627623  |
| wavelet-HHL | glrlm      | RunEntropy                       | 4.936347405  |
| wavelet-HHL | glrlm      | HighGrayLevelRunEmphasis         | 761.0948472  |
| wavelet-HHL | glrlm      | RunLengthNonUniformityNormalized | 0.895942767  |
| wavelet-HHL | glszm      | GrayLevelVariance                | 65.94902639  |
| wavelet-HHL | glszm      | ZoneVariance                     | 18.64228375  |
| wavelet-HHL | glszm      | GrayLevelNonUniformityNormalized | 0.037150672  |
| wavelet-HHL | glszm      | SizeZoneNonUniformityNormalized  | 0.531302506  |
| wavelet-HHL | glszm      | SizeZoneNonUniformity            | 186.4871795  |
| wavelet-HHL | glszm      | GrayLevelNonUniformity           | 13.03988604  |
| wavelet-HHL | glszm      | LargeAreaEmphasis                | 22.48433048  |
| wavelet-HHL | glszm      | SmallAreaHighGrayLevelEmphasis   | 573.1968347  |
| wavelet-HHL | glszm      | ZonePercentage                   | 0.510174419  |
| wavelet-HHL | glszm      | LargeAreaLowGrayLevelEmphasis    | 0.037243798  |
| wavelet-HHL | glszm      | LargeAreaHighGrayLevelEmphasis   | 15367.7037   |
| wavelet-HHL | glszm      | HighGrayLevelZoneEmphasis        | 774.9344729  |
| wavelet-HHL | glszm      | SmallAreaEmphasis                | 0.756009823  |
| wavelet-HHL | glszm      | LowGrayLevelZoneEmphasis         | 0.004896778  |
| wavelet-HHL | glszm      | ZoneEntropy                      | 6.035387442  |
| wavelet-HHL | glszm      | SmallAreaLowGrayLevelEmphasis    | 0.004529853  |
| wavelet-HHL | ngtdm      | Coarseness                       | 0.010095415  |
| wavelet-HHL | ngtdm      | Complexity                       | 3133.168995  |
| wavelet-HHL | ngtdm      | Strength                         | 4.579226835  |
| wavelet-HHL | ngtdm      | Contrast                         | 0.259302692  |
| wavelet-HHL | ngtdm      | Busyness                         | 0.080589932  |
| wavelet-HLH | gldm       | GrayLevelVariance                | 33.42313413  |
| wavelet-HLH | gldm       | HighGrayLevelEmphasis            | 504.2122093  |
| wavelet-HLH | gldm       | DependenceEntropy                | 6.36513909   |
| wavelet-HLH | gldm       | DependenceNonUniformity          | 167.1133721  |

|             |            |                                      |              |
|-------------|------------|--------------------------------------|--------------|
| wavelet-HLH | gldm       | GrayLevelNonUniformity               | 41.6627907   |
| wavelet-HLH | gldm       | SmallDependenceEmphasis              | 0.466273419  |
| wavelet-HLH | gldm       | SmallDependenceHighGrayLevelEmphasis | 250.4180394  |
| wavelet-HLH | gldm       | DependenceNonUniformityNormalized    | 0.242897343  |
| wavelet-HLH | gldm       | LargeDependenceEmphasis              | 10.34593023  |
| wavelet-HLH | gldm       | LargeDependenceLowGrayLevelEmphasis  | 0.026303563  |
| wavelet-HLH | gldm       | DependenceVariance                   | 3.801852353  |
| wavelet-HLH | gldm       | LargeDependenceHighGrayLevelEmphasis | 4785.005814  |
| wavelet-HLH | gldm       | SmallDependenceLowGrayLevelEmphasis  | 0.003488374  |
| wavelet-HLH | gldm       | LowGrayLevelEmphasis                 | 0.00480066   |
| wavelet-HLH | glcm       | JointAverage                         | 21.72844304  |
| wavelet-HLH | glcm       | SumAverage                           | 43.45688608  |
| wavelet-HLH | glcm       | JointEntropy                         | 7.990613855  |
| wavelet-HLH | glcm       | ClusterShade                         | 36.62919175  |
| wavelet-HLH | glcm       | MaximumProbability                   | 0.021434003  |
| wavelet-HLH | glcm       | Idmn                                 | 0.97375523   |
| wavelet-HLH | glcm       | JointEnergy                          | 0.006077257  |
| wavelet-HLH | glcm       | Contrast                             | 60.87751838  |
| wavelet-HLH | glcm       | DifferenceEntropy                    | 3.930821015  |
| wavelet-HLH | glcm       | InverseVariance                      | 0.206881222  |
| wavelet-HLH | glcm       | DifferenceVariance                   | 29.27101155  |
| wavelet-HLH | glcm       | Idn                                  | 0.898990855  |
| wavelet-HLH | glcm       | Idm                                  | 0.203936451  |
| wavelet-HLH | glcm       | Correlation                          | -0.013655844 |
| wavelet-HLH | glcm       | Autocorrelation                      | 471.6904925  |
| wavelet-HLH | glcm       | SumEntropy                           | 4.811160576  |
| wavelet-HLH | glcm       | SumSquares                           | 29.98929046  |
| wavelet-HLH | glcm       | ClusterProminence                    | 18088.37043  |
| wavelet-HLH | glcm       | Imc2                                 | 0.86606405   |
| wavelet-HLH | glcm       | Imc1                                 | -0.160737554 |
| wavelet-HLH | glcm       | DifferenceAverage                    | 5.560862487  |
| wavelet-HLH | glcm       | Id                                   | 0.289903376  |
| wavelet-HLH | glcm       | ClusterTendency                      | 59.07964347  |
| wavelet-HLH | firstorder | InterquartileRange                   | 145.7991438  |
| wavelet-HLH | firstorder | Skewness                             | 0.073244215  |
| wavelet-HLH | firstorder | Uniformity                           | 0.060556382  |
| wavelet-HLH | firstorder | Median                               | 0.47423188   |
| wavelet-HLH | firstorder | Energy                               | 14520103.33  |
| wavelet-HLH | firstorder | RobustMeanAbsoluteDeviation          | 62.51266467  |
| wavelet-HLH | firstorder | MeanAbsoluteDeviation                | 104.2456245  |
| wavelet-HLH | firstorder | TotalEnergy                          | 392042789.9  |
| wavelet-HLH | firstorder | Maximum                              | 577.1614622  |
| wavelet-HLH | firstorder | RootMeanSquared                      | 145.2749164  |
| wavelet-HLH | firstorder | 90Percentile                         | 176.6247856  |
| wavelet-HLH | firstorder | Minimum                              | -506.5502279 |
| wavelet-HLH | firstorder | Entropy                              | 4.444517625  |
| wavelet-HLH | firstorder | Range                                | 1083.71169   |
| wavelet-HLH | firstorder | Variance                             | 21084.88296  |
| wavelet-HLH | firstorder | 10Percentile                         | -164.7128295 |
| wavelet-HLH | firstorder | Kurtosis                             | 4.651506618  |
| wavelet-HLH | firstorder | Mean                                 | 4.463001888  |
| wavelet-HLH | glrlm      | ShortRunLowGrayLevelEmphasis         | 0.004854493  |

|             |       |                                  |             |
|-------------|-------|----------------------------------|-------------|
| wavelet-HLH | glrlm | GrayLevelVariance                | 35.07923601 |
| wavelet-HLH | glrlm | LowGrayLevelRunEmphasis          | 0.004958064 |
| wavelet-HLH | glrlm | GrayLevelNonUniformityNormalized | 0.05760049  |
| wavelet-HLH | glrlm | RunVariance                      | 0.073497184 |
| wavelet-HLH | glrlm | GrayLevelNonUniformity           | 37.25624045 |
| wavelet-HLH | glrlm | LongRunEmphasis                  | 1.205955613 |
| wavelet-HLH | glrlm | ShortRunHighGrayLevelEmphasis    | 486.0178354 |
| wavelet-HLH | glrlm | RunLengthNonUniformity           | 576.6539372 |
| wavelet-HLH | glrlm | ShortRunEmphasis                 | 0.955904579 |
| wavelet-HLH | glrlm | LongRunHighGrayLevelEmphasis     | 602.3503876 |
| wavelet-HLH | glrlm | RunPercentage                    | 0.940071556 |
| wavelet-HLH | glrlm | LongRunLowGrayLevelEmphasis      | 0.005439567 |
| wavelet-HLH | glrlm | RunEntropy                       | 4.78173554  |
| wavelet-HLH | glrlm | HighGrayLevelRunEmphasis         | 506.6509088 |
| wavelet-HLH | glrlm | RunLengthNonUniformityNormalized | 0.891157526 |
| wavelet-HLH | glszm | GrayLevelVariance                | 54.9252926  |
| wavelet-HLH | glszm | ZoneVariance                     | 16.42432851 |
| wavelet-HLH | glszm | GrayLevelNonUniformityNormalized | 0.040761754 |
| wavelet-HLH | glszm | SizeZoneNonUniformityNormalized  | 0.556437215 |
| wavelet-HLH | glszm | SizeZoneNonUniformity            | 197.5352113 |
| wavelet-HLH | glszm | GrayLevelNonUniformity           | 14.47042254 |
| wavelet-HLH | glszm | LargeAreaEmphasis                | 20.18028169 |
| wavelet-HLH | glszm | SmallAreaHighGrayLevelEmphasis   | 422.3289841 |
| wavelet-HLH | glszm | ZonePercentage                   | 0.515988372 |
| wavelet-HLH | glszm | LargeAreaLowGrayLevelEmphasis    | 0.05129116  |
| wavelet-HLH | glszm | LargeAreaHighGrayLevelEmphasis   | 9098.090141 |
| wavelet-HLH | glszm | HighGrayLevelZoneEmphasis        | 532.1323944 |
| wavelet-HLH | glszm | SmallAreaEmphasis                | 0.773295228 |
| wavelet-HLH | glszm | LowGrayLevelZoneEmphasis         | 0.007059332 |
| wavelet-HLH | glszm | ZoneEntropy                      | 5.89341006  |
| wavelet-HLH | glszm | SmallAreaLowGrayLevelEmphasis    | 0.006430898 |
| wavelet-HLH | ngtdm | Coarseness                       | 0.010423797 |
| wavelet-HLH | ngtdm | Complexity                       | 2809.607661 |
| wavelet-HLH | ngtdm | Strength                         | 5.00231429  |
| wavelet-HLH | ngtdm | Contrast                         | 0.174393409 |
| wavelet-HLH | ngtdm | Busyness                         | 0.087386695 |

| Image type | Feature Class | Feature Name                         |                                                                                                                                                                                                                                                                                                                                                                                                                   |
|------------|---------------|--------------------------------------|-------------------------------------------------------------------------------------------------------------------------------------------------------------------------------------------------------------------------------------------------------------------------------------------------------------------------------------------------------------------------------------------------------------------|
| general    | info          | BoundingBox                          | 3: RTSTRUCT: C99-DNU_segment_RUL GTV<br>(0, 1, 1, 4, 4, 4)                                                                                                                                                                                                                                                                                                                                                        |
| general    | info          | EnabledImageTypes                    | {u'Original': {}, u'Wavelet': {}}                                                                                                                                                                                                                                                                                                                                                                                 |
|            |               |                                      | {'distances': [1], 'additionalInfo': True, 'force2D': False, 'interpolator': 'sitkBSpline', 'resampledPixelSpacing': [3.0], 'label': 1, 'normalizeScale': 1, 'normalize': False, 'force2Ddimension': 0, 'removeOutliers': None, 'minimumROISize': None, u'binWidth': 25.0, 'minimumROIDimensions': 1, u'correctMask': True, 'preCrop': False, u'symmetricalGLCM': True, 'resegmentRange': None, 'padDistance': 5} |
| general    | info          | GeneralSettings                      |                                                                                                                                                                                                                                                                                                                                                                                                                   |
| general    | info          | ImageHash                            | b95bbe59cf23c56c380ff660fdc7505d715a6071<br>(0.9765625000000002, 0.9765625000000002,                                                                                                                                                                                                                                                                                                                              |
| general    | info          | ImageSpacing                         | 2.0)                                                                                                                                                                                                                                                                                                                                                                                                              |
| general    | info          | MaskHash                             | 9fbeeb14750e84851604cfb767679f29630d9eff                                                                                                                                                                                                                                                                                                                                                                          |
| general    | info          | NumpyVersion                         | 1.13.1                                                                                                                                                                                                                                                                                                                                                                                                            |
| general    | info          | PyWaveletVersion                     | 0.5.2                                                                                                                                                                                                                                                                                                                                                                                                             |
| general    | info          | SimpleITKVersion                     | 1.1.0                                                                                                                                                                                                                                                                                                                                                                                                             |
| general    | info          | Version                              | 1.3.0.post102+g1b0eb74                                                                                                                                                                                                                                                                                                                                                                                            |
| general    | info          | VolumeNum                            | 1                                                                                                                                                                                                                                                                                                                                                                                                                 |
| general    | info          | VoxelNum                             | 42                                                                                                                                                                                                                                                                                                                                                                                                                |
| original   | shape         | Maximum3DDiameter                    | 13.07669683                                                                                                                                                                                                                                                                                                                                                                                                       |
| original   | shape         | Maximum2DDiameterSlice               | 10.81665383                                                                                                                                                                                                                                                                                                                                                                                                       |
| original   | shape         | Sphericity                           | 0.944357774                                                                                                                                                                                                                                                                                                                                                                                                       |
| original   | shape         | MinorAxis                            | 12.15805051                                                                                                                                                                                                                                                                                                                                                                                                       |
| original   | shape         | Elongation                           | 0.914761319                                                                                                                                                                                                                                                                                                                                                                                                       |
| original   | shape         | SurfaceVolumeRatio                   | 0.491069785                                                                                                                                                                                                                                                                                                                                                                                                       |
| original   | shape         | Volume                               | 1134                                                                                                                                                                                                                                                                                                                                                                                                              |
| original   | shape         | MajorAxis                            | 13.2909539                                                                                                                                                                                                                                                                                                                                                                                                        |
| original   | shape         | SurfaceArea                          | 556.873136                                                                                                                                                                                                                                                                                                                                                                                                        |
| original   | shape         | Flatness                             | 0.73821467                                                                                                                                                                                                                                                                                                                                                                                                        |
| original   | shape         | LeastAxis                            | 9.811577149                                                                                                                                                                                                                                                                                                                                                                                                       |
| original   | shape         | Maximum2DDiameterColumn              | 12.72792206                                                                                                                                                                                                                                                                                                                                                                                                       |
| original   | shape         | Maximum2DDiameterRow                 | 12.72792206                                                                                                                                                                                                                                                                                                                                                                                                       |
| original   | gldm          | GrayLevelVariance                    | 71.91609977                                                                                                                                                                                                                                                                                                                                                                                                       |
| original   | gldm          | HighGrayLevelEmphasis                | 245.9047619                                                                                                                                                                                                                                                                                                                                                                                                       |
| original   | gldm          | DependenceEntropy                    | 4.820888851                                                                                                                                                                                                                                                                                                                                                                                                       |
| original   | gldm          | DependenceNonUniformity              | 26.76190476                                                                                                                                                                                                                                                                                                                                                                                                       |
| original   | gldm          | GrayLevelNonUniformity               | 2.142857143                                                                                                                                                                                                                                                                                                                                                                                                       |
| original   | gldm          | SmallDependenceEmphasis              | 0.821428571                                                                                                                                                                                                                                                                                                                                                                                                       |
| original   | gldm          | SmallDependenceHighGrayLevelEmphasis | 233.547619                                                                                                                                                                                                                                                                                                                                                                                                        |
| original   | gldm          | DependenceNonUniformityNormalized    | 0.637188209                                                                                                                                                                                                                                                                                                                                                                                                       |
| original   | gldm          | LargeDependenceEmphasis              | 1.714285714                                                                                                                                                                                                                                                                                                                                                                                                       |
| original   | gldm          | LargeDependenceLowGrayLevelEmphasis  | 0.064097231                                                                                                                                                                                                                                                                                                                                                                                                       |
| original   | gldm          | DependenceVariance                   | 0.181405896                                                                                                                                                                                                                                                                                                                                                                                                       |
| original   | gldm          | LargeDependenceHighGrayLevelEmphasis | 295.3333333                                                                                                                                                                                                                                                                                                                                                                                                       |
| original   | gldm          | SmallDependenceLowGrayLevelEmphasis  | 0.037990992                                                                                                                                                                                                                                                                                                                                                                                                       |
| original   | gldm          | LowGrayLevelEmphasis                 | 0.043212239                                                                                                                                                                                                                                                                                                                                                                                                       |

|          |            |                                  |              |
|----------|------------|----------------------------------|--------------|
| original | glcm       | JointAverage                     | 15.0472715   |
| original | glcm       | SumAverage                       | 30.094543    |
| original | glcm       | JointEntropy                     | 5.319491261  |
| original | glcm       | ClusterShade                     | 473.3636944  |
| original | glcm       | MaximumProbability               | 0.036649262  |
| original | glcm       | Idmn                             | 0.90554542   |
| original | glcm       | JointEnergy                      | 0.026129262  |
| original | glcm       | Contrast                         | 121.2981257  |
| original | glcm       | DifferenceEntropy                | 3.563574493  |
| original | glcm       | InverseVariance                  | 0.116802863  |
| original | glcm       | DifferenceVariance               | 34.9832248   |
| original | glcm       | Idn                              | 0.79535656   |
| original | glcm       | Idm                              | 0.09439937   |
| original | glcm       | Correlation                      | 0.171965992  |
| original | glcm       | Autocorrelation                  | 239.6106206  |
| original | glcm       | SumEntropy                       | 4.032508437  |
| original | glcm       | SumSquares                       | 73.42271533  |
| original | glcm       | ClusterProminence                | 66716.03399  |
| original | glcm       | Imc2                             | 0.999564695  |
| original | glcm       | Imc1                             | -0.805080681 |
| original | glcm       | DifferenceAverage                | 9.115300811  |
| original | glcm       | Id                               | 0.176135482  |
| original | glcm       | ClusterTendency                  | 172.3927356  |
| original | firstorder | InterquartileRange               | 316.5        |
| original | firstorder | Skewness                         | 0.66382111   |
| original | firstorder | Uniformity                       | 0.051020408  |
| original | firstorder | Median                           | -612         |
| original | firstorder | Energy                           | 15070081     |
| original | firstorder | RobustMeanAbsoluteDeviation      | 127.3632813  |
| original | firstorder | MeanAbsoluteDeviation            | 176.9195011  |
| original | firstorder | TotalEnergy                      | 406892187    |
| original | firstorder | Maximum                          | -99          |
| original | firstorder | RootMeanSquared                  | 599.0087248  |
| original | firstorder | 90Percentile                     | -240.2       |
| original | firstorder | Minimum                          | -851         |
| original | firstorder | Entropy                          | 4.499227542  |
| original | firstorder | Range                            | 752          |
| original | firstorder | Variance                         | 44597.81916  |
| original | firstorder | 10Percentile                     | -786.8       |
| original | firstorder | Kurtosis                         | 2.366050028  |
| original | firstorder | Mean                             | -560.547619  |
| original | glrlm      | ShortRunLowGrayLevelEmphasis     | 0.043135993  |
| original | glrlm      | GrayLevelVariance                | 72.17869953  |
| original | glrlm      | LowGrayLevelRunEmphasis          | 0.043345874  |
| original | glrlm      | GrayLevelNonUniformityNormalized | 0.050736881  |
| original | glrlm      | RunVariance                      | 0.009138105  |
| original | glrlm      | GrayLevelNonUniformity           | 2.111766282  |
| original | glrlm      | LongRunEmphasis                  | 1.028705441  |
| original | glrlm      | ShortRunHighGrayLevelEmphasis    | 247.0962287  |
| original | glrlm      | RunLengthNonUniformity           | 40.88067542  |
| original | glrlm      | ShortRunEmphasis                 | 0.99282364   |
| original | glrlm      | LongRunHighGrayLevelEmphasis     | 249.5850889  |
| original | glrlm      | RunPercentage                    | 0.990842491  |
| original | glrlm      | LongRunLowGrayLevelEmphasis      | 0.044185397  |



|             |       |                                      |              |
|-------------|-------|--------------------------------------|--------------|
| original    | glrlm | RunEntropy                           | 4.522108318  |
| original    | glrlm | HighGrayLevelRunEmphasis             | 247.5940007  |
| original    | glrlm | RunLengthNonUniformityNormalized     | 0.981723791  |
| original    | glszm | GrayLevelVariance                    | 75.29437546  |
| original    | glszm | ZoneVariance                         | 0.11687363   |
| original    | glszm | GrayLevelNonUniformityNormalized     | 0.046018992  |
| original    | glszm | SizeZoneNonUniformityNormalized      | 0.766252739  |
| original    | glszm | SizeZoneNonUniformity                | 28.35135135  |
| original    | glszm | GrayLevelNonUniformity               | 1.702702703  |
| original    | glszm | LargeAreaEmphasis                    | 1.405405405  |
| original    | glszm | SmallAreaHighGrayLevelEmphasis       | 262.7702703  |
| original    | glszm | ZonePercentage                       | 0.880952381  |
| original    | glszm | LargeAreaLowGrayLevelEmphasis        | 0.05695416   |
| original    | glszm | LargeAreaHighGrayLevelEmphasis       | 297.8378378  |
| original    | glszm | HighGrayLevelZoneEmphasis            | 269.7837838  |
| original    | glszm | SmallAreaEmphasis                    | 0.898648649  |
| original    | glszm | LowGrayLevelZoneEmphasis             | 0.045100517  |
| original    | glszm | ZoneEntropy                          | 4.831074987  |
| original    | glszm | SmallAreaLowGrayLevelEmphasis        | 0.042137106  |
| original    | ngtdm | Coarseness                           | 0.073659008  |
| original    | ngtdm | Complexity                           | 2089.501123  |
| original    | ngtdm | Strength                             | 31.3693065   |
| original    | ngtdm | Contrast                             | 1.41002399   |
| original    | ngtdm | Busyness                             | 0.076188539  |
| wavelet-HHH | gldm  | GrayLevelVariance                    | 1.725623583  |
| wavelet-HHH | gldm  | HighGrayLevelEmphasis                | 21.76190476  |
| wavelet-HHH | gldm  | DependenceEntropy                    | 4.302449863  |
| wavelet-HHH | gldm  | DependenceNonUniformity              | 7.80952381   |
| wavelet-HHH | gldm  | GrayLevelNonUniformity               | 9.904761905  |
| wavelet-HHH | gldm  | SmallDependenceEmphasis              | 0.233949661  |
| wavelet-HHH | gldm  | SmallDependenceHighGrayLevelEmphasis | 5.165760717  |
| wavelet-HHH | gldm  | DependenceNonUniformityNormalized    | 0.185941043  |
| wavelet-HHH | gldm  | LargeDependenceEmphasis              | 13.9047619   |
| wavelet-HHH | gldm  | LargeDependenceLowGrayLevelEmphasis  | 0.845642884  |
| wavelet-HHH | gldm  | DependenceVariance                   | 3.108843537  |
| wavelet-HHH | gldm  | LargeDependenceHighGrayLevelEmphasis | 267          |
| wavelet-HHH | gldm  | SmallDependenceLowGrayLevelEmphasis  | 0.038614712  |
| wavelet-HHH | gldm  | LowGrayLevelEmphasis                 | 0.083021677  |
| wavelet-HHH | glcm  | JointAverage                         | 4.469861582  |
| wavelet-HHH | glcm  | SumAverage                           | 8.939723164  |
| wavelet-HHH | glcm  | JointEntropy                         | 4.211024519  |
| wavelet-HHH | glcm  | ClusterShade                         | -1.192130355 |
| wavelet-HHH | glcm  | MaximumProbability                   | 0.127794658  |
| wavelet-HHH | glcm  | ldmn                                 | 0.923337699  |
| wavelet-HHH | glcm  | JointEnergy                          | 0.066428419  |
| wavelet-HHH | glcm  | Contrast                             | 4.611044211  |
| wavelet-HHH | glcm  | DifferenceEntropy                    | 2.043525536  |
| wavelet-HHH | glcm  | InverseVariance                      | 0.414457866  |
| wavelet-HHH | glcm  | DifferenceVariance                   | 1.598014039  |
| wavelet-HHH | glcm  | ldn                                  | 0.819965728  |
| wavelet-HHH | glcm  | ldm                                  | 0.405817468  |
| wavelet-HHH | glcm  | Correlation                          | -0.049885543 |
| wavelet-HHH | glcm  | Autocorrelation                      | 19.88502866  |
| wavelet-HHH | glcm  | SumEntropy                           | 2.684962035  |

|             |            |                                  |              |
|-------------|------------|----------------------------------|--------------|
| wavelet-HHH | glcm       | SumSquares                       | 2.202561065  |
| wavelet-HHH | glcm       | ClusterProminence                | 51.87014399  |
| wavelet-HHH | glcm       | Imc2                             | 0.864448626  |
| wavelet-HHH | glcm       | Imc1                             | -0.306957885 |
| wavelet-HHH | glcm       | DifferenceAverage                | 1.716022915  |
| wavelet-HHH | glcm       | Id                               | 0.47517634   |
| wavelet-HHH | glcm       | ClusterTendency                  | 4.199200049  |
| wavelet-HHH | firstorder | InterquartileRange               | 37.00632936  |
| wavelet-HHH | firstorder | Skewness                         | 0.015796301  |
| wavelet-HHH | firstorder | Uniformity                       | 0.235827664  |
| wavelet-HHH | firstorder | Median                           | -5.510520666 |
| wavelet-HHH | firstorder | Energy                           | 44278.26972  |
| wavelet-HHH | firstorder | RobustMeanAbsoluteDeviation      | 15.1642361   |
| wavelet-HHH | firstorder | MeanAbsoluteDeviation            | 24.99646755  |
| wavelet-HHH | firstorder | TotalEnergy                      | 1195513.283  |
| wavelet-HHH | firstorder | Maximum                          | 70.08417579  |
| wavelet-HHH | firstorder | RootMeanSquared                  | 32.46913176  |
| wavelet-HHH | firstorder | 90Percentile                     | 46.58325999  |
| wavelet-HHH | firstorder | Minimum                          | -88.4433181  |
| wavelet-HHH | firstorder | Entropy                          | 2.340725     |
| wavelet-HHH | firstorder | Range                            | 158.5274939  |
| wavelet-HHH | firstorder | Variance                         | 1054.207068  |
| wavelet-HHH | firstorder | 10Percentile                     | -35.55297546 |
| wavelet-HHH | firstorder | Kurtosis                         | 3.371011664  |
| wavelet-HHH | firstorder | Mean                             | -0.193517045 |
| wavelet-HHH | glrlm      | ShortRunLowGrayLevelEmphasis     | 0.081286984  |
| wavelet-HHH | glrlm      | GrayLevelVariance                | 1.807556963  |
| wavelet-HHH | glrlm      | LowGrayLevelRunEmphasis          | 0.08547913   |
| wavelet-HHH | glrlm      | GrayLevelNonUniformityNormalized | 0.227230196  |
| wavelet-HHH | glrlm      | RunVariance                      | 0.098241321  |
| wavelet-HHH | glrlm      | GrayLevelNonUniformity           | 8.712494977  |
| wavelet-HHH | glrlm      | LongRunEmphasis                  | 1.311868785  |
| wavelet-HHH | glrlm      | ShortRunHighGrayLevelEmphasis    | 20.52874398  |
| wavelet-HHH | glrlm      | RunLengthNonUniformity           | 32.26109983  |
| wavelet-HHH | glrlm      | ShortRunEmphasis                 | 0.928860771  |
| wavelet-HHH | glrlm      | LongRunHighGrayLevelEmphasis     | 28.27351755  |
| wavelet-HHH | glrlm      | RunPercentage                    | 0.912087912  |
| wavelet-HHH | glrlm      | LongRunLowGrayLevelEmphasis      | 0.10357601   |
| wavelet-HHH | glrlm      | RunEntropy                       | 2.707957236  |
| wavelet-HHH | glrlm      | HighGrayLevelRunEmphasis         | 21.9309215   |
| wavelet-HHH | glrlm      | RunLengthNonUniformityNormalized | 0.836880449  |
| wavelet-HHH | glszm      | GrayLevelVariance                | 2.852071006  |
| wavelet-HHH | glszm      | ZoneVariance                     | 6.023668639  |
| wavelet-HHH | glszm      | GrayLevelNonUniformityNormalized | 0.171597633  |
| wavelet-HHH | glszm      | SizeZoneNonUniformityNormalized  | 0.25443787   |
| wavelet-HHH | glszm      | SizeZoneNonUniformity            | 3.307692308  |
| wavelet-HHH | glszm      | GrayLevelNonUniformity           | 2.230769231  |
| wavelet-HHH | glszm      | LargeAreaEmphasis                | 16.46153846  |
| wavelet-HHH | glszm      | SmallAreaHighGrayLevelEmphasis   | 9.213378443  |
| wavelet-HHH | glszm      | ZonePercentage                   | 0.30952381   |
| wavelet-HHH | glszm      | LargeAreaLowGrayLevelEmphasis    | 1.030609192  |
| wavelet-HHH | glszm      | LargeAreaHighGrayLevelEmphasis   | 337.0769231  |
| wavelet-HHH | glszm      | HighGrayLevelZoneEmphasis        | 22.07692308  |
| wavelet-HHH | glszm      | SmallAreaEmphasis                | 0.442723172  |

|             |            |                                      |              |
|-------------|------------|--------------------------------------|--------------|
| wavelet-HHH | glszm      | LowGrayLevelZoneEmphasis             | 0.140074132  |
| wavelet-HHH | glszm      | ZoneEntropy                          | 3.546593564  |
| wavelet-HHH | glszm      | SmallAreaLowGrayLevelEmphasis        | 0.107278197  |
| wavelet-HHH | ngtdm      | Coarseness                           | 0.132693026  |
| wavelet-HHH | ngtdm      | Complexity                           | 20.40199518  |
| wavelet-HHH | ngtdm      | Strength                             | 1.769467303  |
| wavelet-HHH | ngtdm      | Contrast                             | 0.092141164  |
| wavelet-HHH | ngtdm      | Busyness                             | 0.270068281  |
| wavelet-HLL | gldm       | GrayLevelVariance                    | 70.89569161  |
| wavelet-HLL | gldm       | HighGrayLevelEmphasis                | 474.7142857  |
| wavelet-HLL | gldm       | DependenceEntropy                    | 4.546846589  |
| wavelet-HLL | gldm       | DependenceNonUniformity              | 13.19047619  |
| wavelet-HLL | gldm       | GrayLevelNonUniformity               | 2.80952381   |
| wavelet-HLL | gldm       | SmallDependenceEmphasis              | 0.529265873  |
| wavelet-HLL | gldm       | SmallDependenceHighGrayLevelEmphasis | 193.5709325  |
| wavelet-HLL | gldm       | DependenceNonUniformityNormalized    | 0.314058957  |
| wavelet-HLL | gldm       | LargeDependenceEmphasis              | 4.857142857  |
| wavelet-HLL | gldm       | LargeDependenceLowGrayLevelEmphasis  | 0.081458245  |
| wavelet-HLL | gldm       | DependenceVariance                   | 1.045351474  |
| wavelet-HLL | gldm       | LargeDependenceHighGrayLevelEmphasis | 3041.857143  |
| wavelet-HLL | gldm       | SmallDependenceLowGrayLevelEmphasis  | 0.029765363  |
| wavelet-HLL | gldm       | LowGrayLevelEmphasis                 | 0.039466073  |
| wavelet-HLL | glcm       | JointAverage                         | 20.52214638  |
| wavelet-HLL | glcm       | SumAverage                           | 41.04429276  |
| wavelet-HLL | glcm       | JointEntropy                         | 5.129290381  |
| wavelet-HLL | glcm       | ClusterShade                         | -1142.461733 |
| wavelet-HLL | glcm       | MaximumProbability                   | 0.051953095  |
| wavelet-HLL | glcm       | Idmn                                 | 0.944645665  |
| wavelet-HLL | glcm       | JointEnergy                          | 0.030846067  |
| wavelet-HLL | glcm       | Contrast                             | 66.42976223  |
| wavelet-HLL | glcm       | DifferenceEntropy                    | 3.225897505  |
| wavelet-HLL | glcm       | InverseVariance                      | 0.19304285   |
| wavelet-HLL | glcm       | DifferenceVariance                   | 20.37392793  |
| wavelet-HLL | glcm       | Idn                                  | 0.848476092  |
| wavelet-HLL | glcm       | Idm                                  | 0.180050152  |
| wavelet-HLL | glcm       | Correlation                          | 0.473998871  |
| wavelet-HLL | glcm       | Autocorrelation                      | 455.8079144  |
| wavelet-HLL | glcm       | SumEntropy                           | 3.898632584  |
| wavelet-HLL | glcm       | SumSquares                           | 67.14037164  |
| wavelet-HLL | glcm       | ClusterProminence                    | 89610.50116  |
| wavelet-HLL | glcm       | Imc2                                 | 0.997499128  |
| wavelet-HLL | glcm       | Imc1                                 | -0.693482141 |
| wavelet-HLL | glcm       | DifferenceAverage                    | 6.345175227  |
| wavelet-HLL | glcm       | Id                                   | 0.260886708  |
| wavelet-HLL | glcm       | ClusterTendency                      | 202.1317243  |
| wavelet-HLL | firstorder | InterquartileRange                   | 259.6379082  |
| wavelet-HLL | firstorder | Skewness                             | -0.727040828 |
| wavelet-HLL | firstorder | Uniformity                           | 0.066893424  |
| wavelet-HLL | firstorder | Median                               | 4.774272904  |
| wavelet-HLL | firstorder | Energy                               | 1864496.785  |
| wavelet-HLL | firstorder | RobustMeanAbsoluteDeviation          | 113.612342   |
| wavelet-HLL | firstorder | MeanAbsoluteDeviation                | 166.2080459  |
| wavelet-HLL | firstorder | TotalEnergy                          | 50341413.19  |
| wavelet-HLL | firstorder | Maximum                              | 276.8004479  |

|             |            |                                      |              |
|-------------|------------|--------------------------------------|--------------|
| wavelet-HLL | firstorder | RootMeanSquared                      | 210.6959435  |
| wavelet-HLL | firstorder | 90Percentile                         | 227.3116629  |
| wavelet-HLL | firstorder | Minimum                              | -490.6901872 |
| wavelet-HLL | firstorder | Entropy                              | 4.13686371   |
| wavelet-HLL | firstorder | Range                                | 767.490635   |
| wavelet-HLL | firstorder | Variance                             | 44289.41989  |
| wavelet-HLL | firstorder | 10Percentile                         | -292.4952571 |
| wavelet-HLL | firstorder | Kurtosis                             | 2.660079395  |
| wavelet-HLL | firstorder | Mean                                 | -10.16664638 |
| wavelet-HLL | glrlm      | ShortRunLowGrayLevelEmphasis         | 0.040017748  |
| wavelet-HLL | glrlm      | GrayLevelVariance                    | 71.03071398  |
| wavelet-HLL | glrlm      | LowGrayLevelRunEmphasis              | 0.040445673  |
| wavelet-HLL | glrlm      | GrayLevelNonUniformityNormalized     | 0.065345245  |
| wavelet-HLL | glrlm      | RunVariance                          | 0.036404434  |
| wavelet-HLL | glrlm      | GrayLevelNonUniformity               | 2.645520787  |
| wavelet-HLL | glrlm      | LongRunEmphasis                      | 1.117835413  |
| wavelet-HLL | glrlm      | ShortRunHighGrayLevelEmphasis        | 449.5594557  |
| wavelet-HLL | glrlm      | RunLengthNonUniformity               | 37.60708388  |
| wavelet-HLL | glrlm      | ShortRunEmphasis                     | 0.970541147  |
| wavelet-HLL | glrlm      | LongRunHighGrayLevelEmphasis         | 543.4184872  |
| wavelet-HLL | glrlm      | RunPercentage                        | 0.963369963  |
| wavelet-HLL | glrlm      | LongRunLowGrayLevelEmphasis          | 0.042157372  |
| wavelet-HLL | glrlm      | RunEntropy                           | 4.246625656  |
| wavelet-HLL | glrlm      | HighGrayLevelRunEmphasis             | 468.331262   |
| wavelet-HLL | glrlm      | RunLengthNonUniformityNormalized     | 0.927191131  |
| wavelet-HLL | glszm      | GrayLevelVariance                    | 72.51851852  |
| wavelet-HLL | glszm      | ZoneVariance                         | 0.987654321  |
| wavelet-HLL | glszm      | GrayLevelNonUniformityNormalized     | 0.053497942  |
| wavelet-HLL | glszm      | SizeZoneNonUniformityNormalized      | 0.497942387  |
| wavelet-HLL | glszm      | SizeZoneNonUniformity                | 13.44444444  |
| wavelet-HLL | glszm      | GrayLevelNonUniformity               | 1.444444444  |
| wavelet-HLL | glszm      | LargeAreaEmphasis                    | 3.407407407  |
| wavelet-HLL | glszm      | SmallAreaHighGrayLevelEmphasis       | 251.3290535  |
| wavelet-HLL | glszm      | ZonePercentage                       | 0.642857143  |
| wavelet-HLL | glszm      | LargeAreaLowGrayLevelEmphasis        | 0.083363665  |
| wavelet-HLL | glszm      | LargeAreaHighGrayLevelEmphasis       | 1820.814815  |
| wavelet-HLL | glszm      | HighGrayLevelZoneEmphasis            | 408.6296296  |
| wavelet-HLL | glszm      | SmallAreaEmphasis                    | 0.730133745  |
| wavelet-HLL | glszm      | LowGrayLevelZoneEmphasis             | 0.05118874   |
| wavelet-HLL | glszm      | ZoneEntropy                          | 4.53266528   |
| wavelet-HLL | glszm      | SmallAreaLowGrayLevelEmphasis        | 0.043826765  |
| wavelet-HLL | ngtdm      | Coarseness                           | 0.139205192  |
| wavelet-HLL | ngtdm      | Complexity                           | 804.9503816  |
| wavelet-HLL | ngtdm      | Strength                             | 51.50790262  |
| wavelet-HLL | ngtdm      | Contrast                             | 1.031507986  |
| wavelet-HLL | ngtdm      | Busyness                             | 0.017134989  |
| wavelet-LHL | gldm       | GrayLevelVariance                    | 62.53514739  |
| wavelet-LHL | gldm       | HighGrayLevelEmphasis                | 272.0952381  |
| wavelet-LHL | gldm       | DependenceEntropy                    | 4.755296292  |
| wavelet-LHL | gldm       | DependenceNonUniformity              | 16.9047619   |
| wavelet-LHL | gldm       | GrayLevelNonUniformity               | 2.285714286  |
| wavelet-LHL | gldm       | SmallDependenceEmphasis              | 0.572751323  |
| wavelet-LHL | gldm       | SmallDependenceHighGrayLevelEmphasis | 153.707672   |
| wavelet-LHL | gldm       | DependenceNonUniformityNormalized    | 0.402494331  |

|             |            |                                      |              |
|-------------|------------|--------------------------------------|--------------|
| wavelet-LHL | gldm       | LargeDependenceEmphasis              | 3.238095238  |
| wavelet-LHL | gldm       | LargeDependenceLowGrayLevelEmphasis  | 0.057777519  |
| wavelet-LHL | gldm       | DependenceVariance                   | 0.46031746   |
| wavelet-LHL | gldm       | LargeDependenceHighGrayLevelEmphasis | 836.3333333  |
| wavelet-LHL | gldm       | SmallDependenceLowGrayLevelEmphasis  | 0.037325719  |
| wavelet-LHL | gldm       | LowGrayLevelEmphasis                 | 0.040755269  |
| wavelet-LHL | glcm       | JointAverage                         | 13.73222146  |
| wavelet-LHL | glcm       | SumAverage                           | 27.46444291  |
| wavelet-LHL | glcm       | JointEntropy                         | 5.229935265  |
| wavelet-LHL | glcm       | ClusterShade                         | 1356.312268  |
| wavelet-LHL | glcm       | MaximumProbability                   | 0.042786732  |
| wavelet-LHL | glcm       | Idmn                                 | 0.909056659  |
| wavelet-LHL | glcm       | JointEnergy                          | 0.028115927  |
| wavelet-LHL | glcm       | Contrast                             | 105.7551711  |
| wavelet-LHL | glcm       | DifferenceEntropy                    | 3.296031883  |
| wavelet-LHL | glcm       | InverseVariance                      | 0.118406433  |
| wavelet-LHL | glcm       | DifferenceVariance                   | 28.28981704  |
| wavelet-LHL | glcm       | Idn                                  | 0.805578765  |
| wavelet-LHL | glcm       | Idm                                  | 0.118713898  |
| wavelet-LHL | glcm       | Correlation                          | 0.236770596  |
| wavelet-LHL | glcm       | Autocorrelation                      | 204.735303   |
| wavelet-LHL | glcm       | SumEntropy                           | 3.833033829  |
| wavelet-LHL | glcm       | SumSquares                           | 68.59432534  |
| wavelet-LHL | glcm       | ClusterProminence                    | 72844.46255  |
| wavelet-LHL | glcm       | Imc2                                 | 0.999243978  |
| wavelet-LHL | glcm       | Imc1                                 | -0.770935008 |
| wavelet-LHL | glcm       | DifferenceAverage                    | 8.169348926  |
| wavelet-LHL | glcm       | Id                                   | 0.205235824  |
| wavelet-LHL | glcm       | ClusterTendency                      | 168.6221303  |
| wavelet-LHL | firstorder | InterquartileRange                   | 246.748834   |
| wavelet-LHL | firstorder | Skewness                             | 0.330215857  |
| wavelet-LHL | firstorder | Uniformity                           | 0.054421769  |
| wavelet-LHL | firstorder | Median                               | -17.94011049 |
| wavelet-LHL | firstorder | Energy                               | 1658242.374  |
| wavelet-LHL | firstorder | RobustMeanAbsoluteDeviation          | 115.7449084  |
| wavelet-LHL | firstorder | MeanAbsoluteDeviation                | 164.1624838  |
| wavelet-LHL | firstorder | TotalEnergy                          | 44772544.1   |
| wavelet-LHL | firstorder | Maximum                              | 375.733863   |
| wavelet-LHL | firstorder | RootMeanSquared                      | 198.7006827  |
| wavelet-LHL | firstorder | 90Percentile                         | 294.1513766  |
| wavelet-LHL | firstorder | Minimum                              | -337.6373352 |
| wavelet-LHL | firstorder | Entropy                              | 4.350068911  |
| wavelet-LHL | firstorder | Range                                | 713.3711982  |
| wavelet-LHL | firstorder | Variance                             | 39481.9588   |
| wavelet-LHL | firstorder | 10Percentile                         | -241.4328707 |
| wavelet-LHL | firstorder | Kurtosis                             | 2.135704768  |
| wavelet-LHL | firstorder | Mean                                 | -0.049908329 |
| wavelet-LHL | glrlm      | ShortRunLowGrayLevelEmphasis         | 0.041537663  |
| wavelet-LHL | glrlm      | GrayLevelVariance                    | 63.25185603  |
| wavelet-LHL | glrlm      | LowGrayLevelRunEmphasis              | 0.041697308  |
| wavelet-LHL | glrlm      | GrayLevelNonUniformityNormalized     | 0.054251698  |
| wavelet-LHL | glrlm      | RunVariance                          | 0.029430969  |
| wavelet-LHL | glrlm      | GrayLevelNonUniformity               | 2.220584108  |
| wavelet-LHL | glrlm      | LongRunEmphasis                      | 1.089908064  |

|             |       |                                      |             |
|-------------|-------|--------------------------------------|-------------|
| wavelet-LHL | glrlm | ShortRunHighGrayLevelEmphasis        | 266.996956  |
| wavelet-LHL | glrlm | RunLengthNonUniformity               | 39.12033638 |
| wavelet-LHL | glrlm | ShortRunEmphasis                     | 0.979832986 |
| wavelet-LHL | glrlm | LongRunHighGrayLevelEmphasis         | 295.535782  |
| wavelet-LHL | glrlm | RunPercentage                        | 0.974358974 |
| wavelet-LHL | glrlm | LongRunLowGrayLevelEmphasis          | 0.042390562 |
| wavelet-LHL | glrlm | RunEntropy                           | 4.389874117 |
| wavelet-LHL | glrlm | HighGrayLevelRunEmphasis             | 272.3924089 |
| wavelet-LHL | glrlm | RunLengthNonUniformityNormalized     | 0.952263533 |
| wavelet-LHL | glszm | GrayLevelVariance                    | 72.64684899 |
| wavelet-LHL | glszm | ZoneVariance                         | 0.454221165 |
| wavelet-LHL | glszm | GrayLevelNonUniformityNormalized     | 0.048751486 |
| wavelet-LHL | glszm | SizeZoneNonUniformityNormalized      | 0.498216409 |
| wavelet-LHL | glszm | SizeZoneNonUniformity                | 14.44827586 |
| wavelet-LHL | glszm | GrayLevelNonUniformity               | 1.413793103 |
| wavelet-LHL | glszm | LargeAreaEmphasis                    | 2.551724138 |
| wavelet-LHL | glszm | SmallAreaHighGrayLevelEmphasis       | 194.591954  |
| wavelet-LHL | glszm | ZonePercentage                       | 0.69047619  |
| wavelet-LHL | glszm | LargeAreaLowGrayLevelEmphasis        | 0.067622469 |
| wavelet-LHL | glszm | LargeAreaHighGrayLevelEmphasis       | 665.3103448 |
| wavelet-LHL | glszm | HighGrayLevelZoneEmphasis            | 274.4827586 |
| wavelet-LHL | glszm | SmallAreaEmphasis                    | 0.727011494 |
| wavelet-LHL | glszm | LowGrayLevelZoneEmphasis             | 0.055450874 |
| wavelet-LHL | glszm | ZoneEntropy                          | 4.720049961 |
| wavelet-LHL | glszm | SmallAreaLowGrayLevelEmphasis        | 0.053213309 |
| wavelet-LHL | ngtdm | Coarseness                           | 0.091936835 |
| wavelet-LHL | ngtdm | Complexity                           | 1336.940789 |
| wavelet-LHL | ngtdm | Strength                             | 29.14951092 |
| wavelet-LHL | ngtdm | Contrast                             | 1.301157805 |
| wavelet-LHL | ngtdm | Busyness                             | 0.043458466 |
| wavelet-LHH | gldm  | GrayLevelVariance                    | 8.868480726 |
| wavelet-LHH | gldm  | HighGrayLevelEmphasis                | 47.19047619 |
| wavelet-LHH | gldm  | DependenceEntropy                    | 4.576492125 |
| wavelet-LHH | gldm  | DependenceNonUniformity              | 9.523809524 |
| wavelet-LHH | gldm  | GrayLevelNonUniformity               | 4.619047619 |
| wavelet-LHH | gldm  | SmallDependenceEmphasis              | 0.367109788 |
| wavelet-LHH | gldm  | SmallDependenceHighGrayLevelEmphasis | 24.89412037 |
| wavelet-LHH | gldm  | DependenceNonUniformityNormalized    | 0.22675737  |
| wavelet-LHH | gldm  | LargeDependenceEmphasis              | 7.904761905 |
| wavelet-LHH | gldm  | LargeDependenceLowGrayLevelEmphasis  | 0.385208854 |
| wavelet-LHH | gldm  | DependenceVariance                   | 1.535147392 |
| wavelet-LHH | gldm  | LargeDependenceHighGrayLevelEmphasis | 281.7142857 |
| wavelet-LHH | gldm  | SmallDependenceLowGrayLevelEmphasis  | 0.044415607 |
| wavelet-LHH | gldm  | LowGrayLevelEmphasis                 | 0.072653627 |
| wavelet-LHH | glcm  | JointAverage                         | 6.339469914 |
| wavelet-LHH | glcm  | SumAverage                           | 12.67893983 |
| wavelet-LHH | glcm  | JointEntropy                         | 4.901042185 |
| wavelet-LHH | glcm  | ClusterShade                         | 27.75292429 |
| wavelet-LHH | glcm  | MaximumProbability                   | 0.076492145 |
| wavelet-LHH | glcm  | ldmn                                 | 0.915315866 |
| wavelet-LHH | glcm  | JointEnergy                          | 0.038293842 |
| wavelet-LHH | glcm  | Contrast                             | 18.26569513 |
| wavelet-LHH | glcm  | DifferenceEntropy                    | 2.76091094  |
| wavelet-LHH | glcm  | InverseVariance                      | 0.245694527 |

|             |            |                                  |              |
|-------------|------------|----------------------------------|--------------|
| wavelet-LHH | glcm       | DifferenceVariance               | 6.292860281  |
| wavelet-LHH | glcm       | Idn                              | 0.813150052  |
| wavelet-LHH | glcm       | Idm                              | 0.262230553  |
| wavelet-LHH | glcm       | Correlation                      | -0.007693109 |
| wavelet-LHH | glcm       | Autocorrelation                  | 40.06579819  |
| wavelet-LHH | glcm       | SumEntropy                       | 3.298061154  |
| wavelet-LHH | glcm       | SumSquares                       | 8.942901786  |
| wavelet-LHH | glcm       | ClusterProminence                | 821.1822074  |
| wavelet-LHH | glcm       | Imc2                             | 0.983664686  |
| wavelet-LHH | glcm       | Imc1                             | -0.529313721 |
| wavelet-LHH | glcm       | DifferenceAverage                | 3.371090846  |
| wavelet-LHH | glcm       | Id                               | 0.353114042  |
| wavelet-LHH | glcm       | ClusterTendency                  | 17.50591202  |
| wavelet-LHH | firstorder | InterquartileRange               | 104.8883889  |
| wavelet-LHH | firstorder | Skewness                         | 0.463908224  |
| wavelet-LHH | firstorder | Uniformity                       | 0.109977324  |
| wavelet-LHH | firstorder | Median                           | -14.76951845 |
| wavelet-LHH | firstorder | Energy                           | 223982.4089  |
| wavelet-LHH | firstorder | RobustMeanAbsoluteDeviation      | 41.01843778  |
| wavelet-LHH | firstorder | MeanAbsoluteDeviation            | 59.59318571  |
| wavelet-LHH | firstorder | TotalEnergy                      | 6047525.041  |
| wavelet-LHH | firstorder | Maximum                          | 151.94909    |
| wavelet-LHH | firstorder | RootMeanSquared                  | 73.02680671  |
| wavelet-LHH | firstorder | 90Percentile                     | 105.86323    |
| wavelet-LHH | firstorder | Minimum                          | -128.6559477 |
| wavelet-LHH | firstorder | Entropy                          | 3.391554926  |
| wavelet-LHH | firstorder | Range                            | 280.6050377  |
| wavelet-LHH | firstorder | Variance                         | 5258.563169  |
| wavelet-LHH | firstorder | 10Percentile                     | -89.89845374 |
| wavelet-LHH | firstorder | Kurtosis                         | 2.446872975  |
| wavelet-LHH | firstorder | Mean                             | -8.622721721 |
| wavelet-LHH | glrlm      | ShortRunLowGrayLevelEmphasis     | 0.072211833  |
| wavelet-LHH | glrlm      | GrayLevelVariance                | 9.201943398  |
| wavelet-LHH | glrlm      | LowGrayLevelRunEmphasis          | 0.074410905  |
| wavelet-LHH | glrlm      | GrayLevelNonUniformityNormalized | 0.107310249  |
| wavelet-LHH | glrlm      | RunVariance                      | 0.057790574  |
| wavelet-LHH | glrlm      | GrayLevelNonUniformity           | 4.249650203  |
| wavelet-LHH | glrlm      | LongRunEmphasis                  | 1.193632715  |
| wavelet-LHH | glrlm      | ShortRunHighGrayLevelEmphasis    | 46.38911334  |
| wavelet-LHH | glrlm      | RunLengthNonUniformity           | 35.11402371  |
| wavelet-LHH | glrlm      | ShortRunEmphasis                 | 0.951591821  |
| wavelet-LHH | glrlm      | LongRunHighGrayLevelEmphasis     | 54.63319089  |
| wavelet-LHH | glrlm      | RunPercentage                    | 0.941391941  |
| wavelet-LHH | glrlm      | LongRunLowGrayLevelEmphasis      | 0.083207192  |
| wavelet-LHH | glrlm      | RunEntropy                       | 3.599364596  |
| wavelet-LHH | glrlm      | HighGrayLevelRunEmphasis         | 48.03792885  |
| wavelet-LHH | glrlm      | RunLengthNonUniformityNormalized | 0.884418852  |
| wavelet-LHH | glszm      | GrayLevelVariance                | 14.42105263  |
| wavelet-LHH | glszm      | ZoneVariance                     | 3.218836565  |
| wavelet-LHH | glszm      | GrayLevelNonUniformityNormalized | 0.091412742  |
| wavelet-LHH | glszm      | SizeZoneNonUniformityNormalized  | 0.385041551  |
| wavelet-LHH | glszm      | SizeZoneNonUniformity            | 7.315789474  |
| wavelet-LHH | glszm      | GrayLevelNonUniformity           | 1.736842105  |
| wavelet-LHH | glszm      | LargeAreaEmphasis                | 8.105263158  |

|             |            |                                      |              |
|-------------|------------|--------------------------------------|--------------|
| wavelet-LHH | glszm      | SmallAreaHighGrayLevelEmphasis       | 48.70258056  |
| wavelet-LHH | glszm      | ZonePercentage                       | 0.452380952  |
| wavelet-LHH | glszm      | LargeAreaLowGrayLevelEmphasis        | 0.448763799  |
| wavelet-LHH | glszm      | LargeAreaHighGrayLevelEmphasis       | 281.1578947  |
| wavelet-LHH | glszm      | HighGrayLevelZoneEmphasis            | 63.42105263  |
| wavelet-LHH | glszm      | SmallAreaEmphasis                    | 0.63028464   |
| wavelet-LHH | glszm      | LowGrayLevelZoneEmphasis             | 0.104951565  |
| wavelet-LHH | glszm      | ZoneEntropy                          | 3.892407119  |
| wavelet-LHH | glszm      | SmallAreaLowGrayLevelEmphasis        | 0.090034189  |
| wavelet-LHH | ngtdm      | Coarseness                           | 0.104492739  |
| wavelet-LHH | ngtdm      | Complexity                           | 157.9619647  |
| wavelet-LHH | ngtdm      | Strength                             | 5.837226494  |
| wavelet-LHH | ngtdm      | Contrast                             | 0.283648042  |
| wavelet-LHH | ngtdm      | Busyness                             | 0.163657087  |
| wavelet-LLH | gldm       | GrayLevelVariance                    | 102.3718821  |
| wavelet-LLH | gldm       | HighGrayLevelEmphasis                | 732.1428571  |
| wavelet-LLH | gldm       | DependenceEntropy                    | 4.784941827  |
| wavelet-LLH | gldm       | DependenceNonUniformity              | 22.14285714  |
| wavelet-LLH | gldm       | GrayLevelNonUniformity               | 2.047619048  |
| wavelet-LLH | gldm       | SmallDependenceEmphasis              | 0.751322751  |
| wavelet-LLH | gldm       | SmallDependenceHighGrayLevelEmphasis | 526.5674603  |
| wavelet-LLH | gldm       | DependenceNonUniformityNormalized    | 0.527210884  |
| wavelet-LLH | gldm       | LargeDependenceEmphasis              | 2.523809524  |
| wavelet-LLH | gldm       | LargeDependenceLowGrayLevelEmphasis  | 0.029639753  |
| wavelet-LLH | gldm       | DependenceVariance                   | 0.482993197  |
| wavelet-LLH | gldm       | LargeDependenceHighGrayLevelEmphasis | 2050         |
| wavelet-LLH | gldm       | SmallDependenceLowGrayLevelEmphasis  | 0.026999835  |
| wavelet-LLH | gldm       | LowGrayLevelEmphasis                 | 0.027414719  |
| wavelet-LLH | glcm       | JointAverage                         | 25.02582266  |
| wavelet-LLH | glcm       | SumAverage                           | 50.05164533  |
| wavelet-LLH | glcm       | JointEntropy                         | 5.272811415  |
| wavelet-LLH | glcm       | ClusterShade                         | -74.08000361 |
| wavelet-LLH | glcm       | MaximumProbability                   | 0.042784704  |
| wavelet-LLH | glcm       | Idmn                                 | 0.951193174  |
| wavelet-LLH | glcm       | JointEnergy                          | 0.027046246  |
| wavelet-LLH | glcm       | Contrast                             | 114.8797523  |
| wavelet-LLH | glcm       | DifferenceEntropy                    | 3.381485907  |
| wavelet-LLH | glcm       | InverseVariance                      | 0.113158933  |
| wavelet-LLH | glcm       | DifferenceVariance                   | 22.40860027  |
| wavelet-LLH | glcm       | Idn                                  | 0.846352376  |
| wavelet-LLH | glcm       | Idm                                  | 0.09660343   |
| wavelet-LLH | glcm       | Correlation                          | 0.423266525  |
| wavelet-LLH | glcm       | Autocorrelation                      | 669.6267301  |
| wavelet-LLH | glcm       | SumEntropy                           | 4.00692649   |
| wavelet-LLH | glcm       | SumSquares                           | 100.0940699  |
| wavelet-LLH | glcm       | ClusterProminence                    | 188080.9168  |
| wavelet-LLH | glcm       | Imc2                                 | 0.999353518  |
| wavelet-LLH | glcm       | Imc1                                 | -0.777639323 |
| wavelet-LLH | glcm       | DifferenceAverage                    | 8.963380649  |
| wavelet-LLH | glcm       | Id                                   | 0.178491335  |
| wavelet-LLH | glcm       | ClusterTendency                      | 285.4965275  |
| wavelet-LLH | firstorder | InterquartileRange                   | 381.2161769  |
| wavelet-LLH | firstorder | Skewness                             | -0.208168783 |
| wavelet-LLH | firstorder | Uniformity                           | 0.048752834  |



|             |            |                                  |              |
|-------------|------------|----------------------------------|--------------|
| wavelet-LLH | firstorder | Median                           | 55.12752586  |
| wavelet-LLH | firstorder | Energy                           | 2676664.117  |
| wavelet-LLH | firstorder | RobustMeanAbsoluteDeviation      | 154.0590715  |
| wavelet-LLH | firstorder | MeanAbsoluteDeviation            | 213.3809871  |
| wavelet-LLH | firstorder | TotalEnergy                      | 72269931.16  |
| wavelet-LLH | firstorder | Maximum                          | 545.4966459  |
| wavelet-LLH | firstorder | RootMeanSquared                  | 252.4482086  |
| wavelet-LLH | firstorder | 90Percentile                     | 330.4485943  |
| wavelet-LLH | firstorder | Minimum                          | -589.4914569 |
| wavelet-LLH | firstorder | Entropy                          | 4.558518613  |
| wavelet-LLH | firstorder | Range                            | 1134.988103  |
| wavelet-LLH | firstorder | Variance                         | 63526.06132  |
| wavelet-LLH | firstorder | 10Percentile                     | -271.9824783 |
| wavelet-LLH | firstorder | Kurtosis                         | 2.526029773  |
| wavelet-LLH | firstorder | Mean                             | 14.28414141  |
| wavelet-LLH | glrlm      | ShortRunLowGrayLevelEmphasis     | 0.027874216  |
| wavelet-LLH | glrlm      | GrayLevelVariance                | 103.4525414  |
| wavelet-LLH | glrlm      | LowGrayLevelRunEmphasis          | 0.027894322  |
| wavelet-LLH | glrlm      | GrayLevelNonUniformityNormalized | 0.048090294  |
| wavelet-LLH | glrlm      | RunVariance                      | 0.020441523  |
| wavelet-LLH | glrlm      | GrayLevelNonUniformity           | 1.989027368  |
| wavelet-LLH | glrlm      | LongRunEmphasis                  | 1.059902022  |
| wavelet-LLH | glrlm      | ShortRunHighGrayLevelEmphasis    | 719.3700749  |
| wavelet-LLH | glrlm      | RunLengthNonUniformity           | 40.18580363  |
| wavelet-LLH | glrlm      | ShortRunEmphasis                 | 0.987398664  |
| wavelet-LLH | glrlm      | LongRunHighGrayLevelEmphasis     | 781.0210221  |
| wavelet-LLH | glrlm      | RunPercentage                    | 0.983516484  |
| wavelet-LLH | glrlm      | LongRunLowGrayLevelEmphasis      | 0.0279853    |
| wavelet-LLH | glrlm      | RunEntropy                       | 4.599312715  |
| wavelet-LLH | glrlm      | HighGrayLevelRunEmphasis         | 729.9908626  |
| wavelet-LLH | glrlm      | RunLengthNonUniformityNormalized | 0.970156839  |
| wavelet-LLH | glszm      | GrayLevelVariance                | 115.6306228  |
| wavelet-LLH | glszm      | ZoneVariance                     | 0.415224913  |
| wavelet-LLH | glszm      | GrayLevelNonUniformityNormalized | 0.043252595  |
| wavelet-LLH | glszm      | SizeZoneNonUniformityNormalized  | 0.737024221  |
| wavelet-LLH | glszm      | SizeZoneNonUniformity            | 25.05882353  |
| wavelet-LLH | glszm      | GrayLevelNonUniformity           | 1.470588235  |
| wavelet-LLH | glszm      | LargeAreaEmphasis                | 1.941176471  |
| wavelet-LLH | glszm      | SmallAreaHighGrayLevelEmphasis   | 611.4199346  |
| wavelet-LLH | glszm      | ZonePercentage                   | 0.80952381   |
| wavelet-LLH | glszm      | LargeAreaLowGrayLevelEmphasis    | 0.034872726  |
| wavelet-LLH | glszm      | LargeAreaHighGrayLevelEmphasis   | 1514.058824  |
| wavelet-LLH | glszm      | HighGrayLevelZoneEmphasis        | 707.2647059  |
| wavelet-LLH | glszm      | SmallAreaEmphasis                | 0.880106209  |
| wavelet-LLH | glszm      | LowGrayLevelZoneEmphasis         | 0.033490143  |
| wavelet-LLH | glszm      | ZoneEntropy                      | 4.771142621  |
| wavelet-LLH | glszm      | SmallAreaLowGrayLevelEmphasis    | 0.033270415  |
| wavelet-LLH | ngtdm      | Coarseness                       | 0.10836105   |
| wavelet-LLH | ngtdm      | Complexity                       | 1960.683629  |
| wavelet-LLH | ngtdm      | Strength                         | 61.42929812  |
| wavelet-LLH | ngtdm      | Contrast                         | 1.421096237  |
| wavelet-LLH | ngtdm      | Busyness                         | 0.019025778  |
| wavelet-LLL | gldm       | GrayLevelVariance                | 323.4875283  |
| wavelet-LLL | gldm       | HighGrayLevelEmphasis            | 958.047619   |

|             |            |                                      |              |
|-------------|------------|--------------------------------------|--------------|
| wavelet-LLL | gldm       | DependenceEntropy                    | 4.766968315  |
| wavelet-LLL | gldm       | DependenceNonUniformity              | 28.28571429  |
| wavelet-LLL | gldm       | GrayLevelNonUniformity               | 1.80952381   |
| wavelet-LLL | gldm       | SmallDependenceEmphasis              | 0.843915344  |
| wavelet-LLL | gldm       | SmallDependenceHighGrayLevelEmphasis | 834.9484127  |
| wavelet-LLL | gldm       | DependenceNonUniformityNormalized    | 0.673469388  |
| wavelet-LLL | gldm       | LargeDependenceEmphasis              | 2.047619048  |
| wavelet-LLL | gldm       | LargeDependenceLowGrayLevelEmphasis  | 0.040811946  |
| wavelet-LLL | gldm       | DependenceVariance                   | 0.394557823  |
| wavelet-LLL | gldm       | LargeDependenceHighGrayLevelEmphasis | 1673.619048  |
| wavelet-LLL | gldm       | SmallDependenceLowGrayLevelEmphasis  | 0.037051847  |
| wavelet-LLL | gldm       | LowGrayLevelEmphasis                 | 0.037466013  |
| wavelet-LLL | glcm       | JointAverage                         | 29.63836866  |
| wavelet-LLL | glcm       | SumAverage                           | 59.27673731  |
| wavelet-LLL | glcm       | JointEntropy                         | 5.331001552  |
| wavelet-LLL | glcm       | ClusterShade                         | 2701.607508  |
| wavelet-LLL | glcm       | MaximumProbability                   | 0.036196385  |
| wavelet-LLL | glcm       | Idmn                                 | 0.903795298  |
| wavelet-LLL | glcm       | JointEnergy                          | 0.025609455  |
| wavelet-LLL | glcm       | Contrast                             | 524.3190794  |
| wavelet-LLL | glcm       | DifferenceEntropy                    | 3.957779503  |
| wavelet-LLL | glcm       | InverseVariance                      | 0.060580939  |
| wavelet-LLL | glcm       | DifferenceVariance                   | 150.3313171  |
| wavelet-LLL | glcm       | Idn                                  | 0.794509466  |
| wavelet-LLL | glcm       | Idm                                  | 0.056999004  |
| wavelet-LLL | glcm       | Correlation                          | 0.232059899  |
| wavelet-LLL | glcm       | Autocorrelation                      | 960.2332311  |
| wavelet-LLL | glcm       | SumEntropy                           | 4.224246097  |
| wavelet-LLL | glcm       | SumSquares                           | 341.7321199  |
| wavelet-LLL | glcm       | ClusterProminence                    | 1432711.392  |
| wavelet-LLL | glcm       | Imc2                                 | 0.999776723  |
| wavelet-LLL | glcm       | Imc1                                 | -0.844057861 |
| wavelet-LLL | glcm       | DifferenceAverage                    | 18.9433259   |
| wavelet-LLL | glcm       | Id                                   | 0.115188626  |
| wavelet-LLL | glcm       | ClusterTendency                      | 842.6094003  |
| wavelet-LLL | firstorder | InterquartileRange                   | 782.7993437  |
| wavelet-LLL | firstorder | Skewness                             | 0.437208125  |
| wavelet-LLL | firstorder | Uniformity                           | 0.0430839    |
| wavelet-LLL | firstorder | Median                               | -1784.184237 |
| wavelet-LLL | firstorder | Energy                               | 127533134.7  |
| wavelet-LLL | firstorder | RobustMeanAbsoluteDeviation          | 309.2336048  |
| wavelet-LLL | firstorder | MeanAbsoluteDeviation                | 397.4358188  |
| wavelet-LLL | firstorder | TotalEnergy                          | 3443394637   |
| wavelet-LLL | firstorder | Maximum                              | -669.5559434 |
| wavelet-LLL | firstorder | RootMeanSquared                      | 1742.556515  |
| wavelet-LLL | firstorder | 90Percentile                         | -1086.245463 |
| wavelet-LLL | firstorder | Minimum                              | -2292.082486 |
| wavelet-LLL | firstorder | Entropy                              | 4.701375756  |
| wavelet-LLL | firstorder | Range                                | 1622.526543  |
| wavelet-LLL | firstorder | Variance                             | 203543.5575  |
| wavelet-LLL | firstorder | 10Percentile                         | -2211.007892 |
| wavelet-LLL | firstorder | Kurtosis                             | 2.021714169  |
| wavelet-LLL | firstorder | Mean                                 | -1683.139819 |
| wavelet-LLL | glrlm      | ShortRunLowGrayLevelEmphasis         | 0.037831315  |

|             |       |                                      |             |
|-------------|-------|--------------------------------------|-------------|
| wavelet-LLL | glrlm | GrayLevelVariance                    | 325.6977316 |
| wavelet-LLL | glrlm | LowGrayLevelRunEmphasis              | 0.037857016 |
| wavelet-LLL | glrlm | GrayLevelNonUniformityNormalized     | 0.042778327 |
| wavelet-LLL | glrlm | RunVariance                          | 0.010975495 |
| wavelet-LLL | glrlm | GrayLevelNonUniformity               | 1.777155365 |
| wavelet-LLL | glrlm | LongRunEmphasis                      | 1.034052533 |
| wavelet-LLL | glrlm | ShortRunHighGrayLevelEmphasis        | 954.7127937 |
| wavelet-LLL | glrlm | RunLengthNonUniformity               | 40.64577861 |
| wavelet-LLL | glrlm | ShortRunEmphasis                     | 0.991486867 |
| wavelet-LLL | glrlm | LongRunHighGrayLevelEmphasis         | 985.161668  |
| wavelet-LLL | glrlm | RunPercentage                        | 0.989010989 |
| wavelet-LLL | glrlm | LongRunLowGrayLevelEmphasis          | 0.03795982  |
| wavelet-LLL | glrlm | RunEntropy                           | 4.726095496 |
| wavelet-LLL | glrlm | HighGrayLevelRunEmphasis             | 960.8025686 |
| wavelet-LLL | glrlm | RunLengthNonUniformityNormalized     | 0.978049009 |
| wavelet-LLL | glszm | GrayLevelVariance                    | 350.0803506 |
| wavelet-LLL | glszm | ZoneVariance                         | 0.224981738 |
| wavelet-LLL | glszm | GrayLevelNonUniformityNormalized     | 0.041636231 |
| wavelet-LLL | glszm | SizeZoneNonUniformityNormalized      | 0.84806428  |
| wavelet-LLL | glszm | SizeZoneNonUniformity                | 31.37837838 |
| wavelet-LLL | glszm | GrayLevelNonUniformity               | 1.540540541 |
| wavelet-LLL | glszm | LargeAreaEmphasis                    | 1.513513514 |
| wavelet-LLL | glszm | SmallAreaHighGrayLevelEmphasis       | 921.4804805 |
| wavelet-LLL | glszm | ZonePercentage                       | 0.880952381 |
| wavelet-LLL | glszm | LargeAreaLowGrayLevelEmphasis        | 0.043542923 |
| wavelet-LLL | glszm | LargeAreaHighGrayLevelEmphasis       | 1402.486486 |
| wavelet-LLL | glszm | HighGrayLevelZoneEmphasis            | 976.4324324 |
| wavelet-LLL | glszm | SmallAreaEmphasis                    | 0.931681682 |
| wavelet-LLL | glszm | LowGrayLevelZoneEmphasis             | 0.042177683 |
| wavelet-LLL | glszm | ZoneEntropy                          | 4.736216203 |
| wavelet-LLL | glszm | SmallAreaLowGrayLevelEmphasis        | 0.042009331 |
| wavelet-LLL | ngtdm | Coarseness                           | 0.044692289 |
| wavelet-LLL | ngtdm | Complexity                           | 9107.814964 |
| wavelet-LLL | ngtdm | Strength                             | 76.38151207 |
| wavelet-LLL | ngtdm | Contrast                             | 9.969524054 |
| wavelet-LLL | ngtdm | Busyness                             | 0.042833155 |
| wavelet-HHL | gldm  | GrayLevelVariance                    | 5.283446712 |
| wavelet-HHL | gldm  | HighGrayLevelEmphasis                | 34.23809524 |
| wavelet-HHL | gldm  | DependenceEntropy                    | 4.474952542 |
| wavelet-HHL | gldm  | DependenceNonUniformity              | 8.761904762 |
| wavelet-HHL | gldm  | GrayLevelNonUniformity               | 5.952380952 |
| wavelet-HHL | gldm  | SmallDependenceEmphasis              | 0.280390212 |
| wavelet-HHL | gldm  | SmallDependenceHighGrayLevelEmphasis | 10.27621032 |
| wavelet-HHL | gldm  | DependenceNonUniformityNormalized    | 0.20861678  |
| wavelet-HHL | gldm  | LargeDependenceEmphasis              | 9.952380952 |
| wavelet-HHL | gldm  | LargeDependenceLowGrayLevelEmphasis  | 0.565605581 |
| wavelet-HHL | gldm  | DependenceVariance                   | 1.789115646 |
| wavelet-HHL | gldm  | LargeDependenceHighGrayLevelEmphasis | 291.0952381 |
| wavelet-HHL | gldm  | SmallDependenceLowGrayLevelEmphasis  | 0.063351477 |
| wavelet-HHL | gldm  | LowGrayLevelEmphasis                 | 0.102202668 |
| wavelet-HHL | glcm  | JointAverage                         | 5.424981701 |
| wavelet-HHL | glcm  | SumAverage                           | 10.8499634  |
| wavelet-HHL | glcm  | JointEntropy                         | 4.63501912  |
| wavelet-HHL | glcm  | ClusterShade                         | 4.405888069 |

|             |            |                                  |              |
|-------------|------------|----------------------------------|--------------|
| wavelet-HHL | glcm       | MaximumProbability               | 0.079569853  |
| wavelet-HHL | glcm       | Idmn                             | 0.933435297  |
| wavelet-HHL | glcm       | JointEnergy                      | 0.045244809  |
| wavelet-HHL | glcm       | Contrast                         | 10.18501652  |
| wavelet-HHL | glcm       | DifferenceEntropy                | 2.471386361  |
| wavelet-HHL | glcm       | InverseVariance                  | 0.356182532  |
| wavelet-HHL | glcm       | DifferenceVariance               | 3.964792767  |
| wavelet-HHL | glcm       | Idn                              | 0.837512142  |
| wavelet-HHL | glcm       | Idm                              | 0.34488626   |
| wavelet-HHL | glcm       | Correlation                      | -0.066154885 |
| wavelet-HHL | glcm       | Autocorrelation                  | 29.0289215   |
| wavelet-HHL | glcm       | SumEntropy                       | 3.015527511  |
| wavelet-HHL | glcm       | SumSquares                       | 4.680685657  |
| wavelet-HHL | glcm       | ClusterProminence                | 251.5130734  |
| wavelet-HHL | glcm       | Imc2                             | 0.946512888  |
| wavelet-HHL | glcm       | Imc1                             | -0.411681732 |
| wavelet-HHL | glcm       | DifferenceAverage                | 2.416166692  |
| wavelet-HHL | glcm       | Id                               | 0.421670882  |
| wavelet-HHL | glcm       | ClusterTendency                  | 8.537726108  |
| wavelet-HHL | firstorder | InterquartileRange               | 71.47477029  |
| wavelet-HHL | firstorder | Skewness                         | 0.270283272  |
| wavelet-HHL | firstorder | Uniformity                       | 0.141723356  |
| wavelet-HHL | firstorder | Median                           | -6.132305792 |
| wavelet-HHL | firstorder | Energy                           | 141506.4599  |
| wavelet-HHL | firstorder | RobustMeanAbsoluteDeviation      | 27.01439492  |
| wavelet-HHL | firstorder | MeanAbsoluteDeviation            | 44.77495541  |
| wavelet-HHL | firstorder | TotalEnergy                      | 3820674.418  |
| wavelet-HHL | firstorder | Maximum                          | 131.288632   |
| wavelet-HHL | firstorder | RootMeanSquared                  | 58.04482257  |
| wavelet-HHL | firstorder | 90Percentile                     | 65.1519612   |
| wavelet-HHL | firstorder | Minimum                          | -123.7233071 |
| wavelet-HHL | firstorder | Entropy                          | 3.063973377  |
| wavelet-HHL | firstorder | Range                            | 255.0119391  |
| wavelet-HHL | firstorder | Variance                         | 3341.440718  |
| wavelet-HHL | firstorder | 10Percentile                     | -86.38198579 |
| wavelet-HHL | firstorder | Kurtosis                         | 3.083201261  |
| wavelet-HHL | firstorder | Mean                             | -5.268843206 |
| wavelet-HHL | glrlm      | ShortRunLowGrayLevelEmphasis     | 0.102827313  |
| wavelet-HHL | glrlm      | GrayLevelVariance                | 5.507853999  |
| wavelet-HHL | glrlm      | LowGrayLevelRunEmphasis          | 0.105987112  |
| wavelet-HHL | glrlm      | GrayLevelNonUniformityNormalized | 0.138411291  |
| wavelet-HHL | glrlm      | RunVariance                      | 0.070671436  |
| wavelet-HHL | glrlm      | GrayLevelNonUniformity           | 5.398873621  |
| wavelet-HHL | glrlm      | LongRunEmphasis                  | 1.234754388  |
| wavelet-HHL | glrlm      | ShortRunHighGrayLevelEmphasis    | 32.80801246  |
| wavelet-HHL | glrlm      | RunLengthNonUniformity           | 33.57312288  |
| wavelet-HHL | glrlm      | ShortRunEmphasis                 | 0.941311403  |
| wavelet-HHL | glrlm      | LongRunHighGrayLevelEmphasis     | 41.61357778  |
| wavelet-HHL | glrlm      | RunPercentage                    | 0.928571429  |
| wavelet-HHL | glrlm      | LongRunLowGrayLevelEmphasis      | 0.118626307  |
| wavelet-HHL | glrlm      | RunEntropy                       | 3.354270883  |
| wavelet-HHL | glrlm      | HighGrayLevelRunEmphasis         | 34.56912552  |
| wavelet-HHL | glrlm      | RunLengthNonUniformityNormalized | 0.858657129  |
| wavelet-HHL | glszm      | GrayLevelVariance                | 9.795555556  |

|             |       |                                      |              |
|-------------|-------|--------------------------------------|--------------|
| wavelet-HHL | glszm | ZoneVariance                         | 5.626666667  |
| wavelet-HHL | glszm | GrayLevelNonUniformityNormalized     | 0.102222222  |
| wavelet-HHL | glszm | SizeZoneNonUniformityNormalized      | 0.28         |
| wavelet-HHL | glszm | SizeZoneNonUniformity                | 4.2          |
| wavelet-HHL | glszm | GrayLevelNonUniformity               | 1.533333333  |
| wavelet-HHL | glszm | LargeAreaEmphasis                    | 13.46666667  |
| wavelet-HHL | glszm | SmallAreaHighGrayLevelEmphasis       | 19.13161385  |
| wavelet-HHL | glszm | ZonePercentage                       | 0.357142857  |
| wavelet-HHL | glszm | LargeAreaLowGrayLevelEmphasis        | 0.772609837  |
| wavelet-HHL | glszm | LargeAreaHighGrayLevelEmphasis       | 415.6        |
| wavelet-HHL | glszm | HighGrayLevelZoneEmphasis            | 37.53333333  |
| wavelet-HHL | glszm | SmallAreaEmphasis                    | 0.530994803  |
| wavelet-HHL | glszm | LowGrayLevelZoneEmphasis             | 0.193220665  |
| wavelet-HHL | glszm | ZoneEntropy                          | 3.773557262  |
| wavelet-HHL | glszm | SmallAreaLowGrayLevelEmphasis        | 0.165939604  |
| wavelet-HHL | ngtdm | Coarseness                           | 0.136714423  |
| wavelet-HHL | ngtdm | Complexity                           | 81.45958878  |
| wavelet-HHL | ngtdm | Strength                             | 4.404918529  |
| wavelet-HHL | ngtdm | Contrast                             | 0.178964444  |
| wavelet-HHL | ngtdm | Busyness                             | 0.143288117  |
| wavelet-HLH | gldm  | GrayLevelVariance                    | 8.092970522  |
| wavelet-HLH | gldm  | HighGrayLevelEmphasis                | 78.33333333  |
| wavelet-HLH | gldm  | DependenceEntropy                    | 4.403989446  |
| wavelet-HLH | gldm  | DependenceNonUniformity              | 10.9047619   |
| wavelet-HLH | gldm  | GrayLevelNonUniformity               | 5.19047619   |
| wavelet-HLH | gldm  | SmallDependenceEmphasis              | 0.38504795   |
| wavelet-HLH | gldm  | SmallDependenceHighGrayLevelEmphasis | 27.54321594  |
| wavelet-HLH | gldm  | DependenceNonUniformityNormalized    | 0.259637188  |
| wavelet-HLH | gldm  | LargeDependenceEmphasis              | 9.380952381  |
| wavelet-HLH | gldm  | LargeDependenceLowGrayLevelEmphasis  | 0.159391316  |
| wavelet-HLH | gldm  | DependenceVariance                   | 2.768707483  |
| wavelet-HLH | gldm  | LargeDependenceHighGrayLevelEmphasis | 765.6666667  |
| wavelet-HLH | gldm  | SmallDependenceLowGrayLevelEmphasis  | 0.033271183  |
| wavelet-HLH | gldm  | LowGrayLevelEmphasis                 | 0.043767419  |
| wavelet-HLH | glcm  | JointAverage                         | 8.507588523  |
| wavelet-HLH | glcm  | SumAverage                           | 17.01517705  |
| wavelet-HLH | glcm  | JointEntropy                         | 4.843446544  |
| wavelet-HLH | glcm  | ClusterShade                         | -14.70934127 |
| wavelet-HLH | glcm  | MaximumProbability                   | 0.075150104  |
| wavelet-HLH | glcm  | Idmn                                 | 0.953117665  |
| wavelet-HLH | glcm  | JointEnergy                          | 0.039301435  |
| wavelet-HLH | glcm  | Contrast                             | 12.20525102  |
| wavelet-HLH | glcm  | DifferenceEntropy                    | 2.553714328  |
| wavelet-HLH | glcm  | InverseVariance                      | 0.348674856  |
| wavelet-HLH | glcm  | DifferenceVariance                   | 4.752470884  |
| wavelet-HLH | glcm  | Idn                                  | 0.860317873  |
| wavelet-HLH | glcm  | Idm                                  | 0.31448791   |
| wavelet-HLH | glcm  | Correlation                          | 0.066931457  |
| wavelet-HLH | glcm  | Autocorrelation                      | 73.14129952  |
| wavelet-HLH | glcm  | SumEntropy                           | 3.373601499  |
| wavelet-HLH | glcm  | SumSquares                           | 6.771927183  |
| wavelet-HLH | glcm  | ClusterProminence                    | 758.6774827  |
| wavelet-HLH | glcm  | Imc2                                 | 0.964965535  |
| wavelet-HLH | glcm  | Imc1                                 | -0.44469567  |

|             |            |                                  |              |
|-------------|------------|----------------------------------|--------------|
| wavelet-HLH | glcm       | DifferenceAverage                | 2.690322379  |
| wavelet-HLH | glcm       | Id                               | 0.394239256  |
| wavelet-HLH | glcm       | ClusterTendency                  | 14.88245771  |
| wavelet-HLH | firstorder | InterquartileRange               | 71.81783454  |
| wavelet-HLH | firstorder | Skewness                         | -0.174465399 |
| wavelet-HLH | firstorder | Uniformity                       | 0.123582766  |
| wavelet-HLH | firstorder | Median                           | 3.780994058  |
| wavelet-HLH | firstorder | Energy                           | 204883.6162  |
| wavelet-HLH | firstorder | RobustMeanAbsoluteDeviation      | 31.52981515  |
| wavelet-HLH | firstorder | MeanAbsoluteDeviation            | 52.81062976  |
| wavelet-HLH | firstorder | TotalEnergy                      | 5531857.639  |
| wavelet-HLH | firstorder | Maximum                          | 165.2726008  |
| wavelet-HLH | firstorder | RootMeanSquared                  | 69.84397855  |
| wavelet-HLH | firstorder | 90Percentile                     | 63.70944944  |
| wavelet-HLH | firstorder | Minimum                          | -188.2697636 |
| wavelet-HLH | firstorder | Entropy                          | 3.26849934   |
| wavelet-HLH | firstorder | Range                            | 353.5423644  |
| wavelet-HLH | firstorder | Variance                         | 4862.332597  |
| wavelet-HLH | firstorder | 10Percentile                     | -101.7825146 |
| wavelet-HLH | firstorder | Kurtosis                         | 3.607990632  |
| wavelet-HLH | firstorder | Mean                             | -3.981047872 |
| wavelet-HLH | glrlm      | ShortRunLowGrayLevelEmphasis     | 0.044948043  |
| wavelet-HLH | glrlm      | GrayLevelVariance                | 8.390731198  |
| wavelet-HLH | glrlm      | LowGrayLevelRunEmphasis          | 0.045669378  |
| wavelet-HLH | glrlm      | GrayLevelNonUniformityNormalized | 0.118468509  |
| wavelet-HLH | glrlm      | RunVariance                      | 0.063989863  |
| wavelet-HLH | glrlm      | GrayLevelNonUniformity           | 4.676210248  |
| wavelet-HLH | glrlm      | LongRunEmphasis                  | 1.201883974  |
| wavelet-HLH | glrlm      | ShortRunHighGrayLevelEmphasis    | 74.07437907  |
| wavelet-HLH | glrlm      | RunLengthNonUniformity           | 34.94796956  |
| wavelet-HLH | glrlm      | ShortRunEmphasis                 | 0.951839009  |
| wavelet-HLH | glrlm      | LongRunHighGrayLevelEmphasis     | 94.71835886  |
| wavelet-HLH | glrlm      | RunPercentage                    | 0.93956044   |
| wavelet-HLH | glrlm      | LongRunLowGrayLevelEmphasis      | 0.04866879   |
| wavelet-HLH | glrlm      | RunEntropy                       | 3.507627062  |
| wavelet-HLH | glrlm      | HighGrayLevelRunEmphasis         | 78.05348688  |
| wavelet-HLH | glrlm      | RunLengthNonUniformityNormalized | 0.883145745  |
| wavelet-HLH | glszm      | GrayLevelVariance                | 11.59        |
| wavelet-HLH | glszm      | ZoneVariance                     | 3.99         |
| wavelet-HLH | glszm      | GrayLevelNonUniformityNormalized | 0.105        |
| wavelet-HLH | glszm      | SizeZoneNonUniformityNormalized  | 0.4          |
| wavelet-HLH | glszm      | SizeZoneNonUniformity            | 8            |
| wavelet-HLH | glszm      | GrayLevelNonUniformity           | 2.1          |
| wavelet-HLH | glszm      | LargeAreaEmphasis                | 8.4          |
| wavelet-HLH | glszm      | SmallAreaHighGrayLevelEmphasis   | 43.52951389  |
| wavelet-HLH | glszm      | ZonePercentage                   | 0.476190476  |
| wavelet-HLH | glszm      | LargeAreaLowGrayLevelEmphasis    | 0.178246813  |
| wavelet-HLH | glszm      | LargeAreaHighGrayLevelEmphasis   | 687          |
| wavelet-HLH | glszm      | HighGrayLevelZoneEmphasis        | 74           |
| wavelet-HLH | glszm      | SmallAreaEmphasis                | 0.630131173  |
| wavelet-HLH | glszm      | LowGrayLevelZoneEmphasis         | 0.074089138  |
| wavelet-HLH | glszm      | ZoneEntropy                      | 3.921928095  |
| wavelet-HLH | glszm      | SmallAreaLowGrayLevelEmphasis    | 0.066544522  |
| wavelet-HLH | ngtdm      | Coarseness                       | 0.150105267  |

|             |       |            |             |
|-------------|-------|------------|-------------|
| wavelet-HLH | ngtdm | Complexity | 109.0991824 |
| wavelet-HLH | ngtdm | Strength   | 6.982649274 |
| wavelet-HLH | ngtdm | Contrast   | 0.238882352 |
| wavelet-HLH | ngtdm | Busyness   | 0.073170408 |

| Image type | Feature Class | Feature Name                         |                                                                                                                                                                                                                                                                                                                                                                                                                   |
|------------|---------------|--------------------------------------|-------------------------------------------------------------------------------------------------------------------------------------------------------------------------------------------------------------------------------------------------------------------------------------------------------------------------------------------------------------------------------------------------------------------|
| general    | info          | BoundingBox                          | 3: RTSTRUCT: C99-DNU-A_segment_GTV LUL<br>(0, 0, 1, 5, 5, 3)                                                                                                                                                                                                                                                                                                                                                      |
| general    | info          | EnabledImageTypes                    | {u'Original': {}, u'Wavelet': {}}                                                                                                                                                                                                                                                                                                                                                                                 |
|            |               |                                      | {'distances': [1], 'additionalInfo': True, 'force2D': False, 'interpolator': 'sitkBSpline', 'resampledPixelSpacing': [3.0], 'label': 1, 'normalizeScale': 1, 'normalize': False, 'force2Ddimension': 0, 'removeOutliers': None, 'minimumROISize': None, u'binWidth': 25.0, 'minimumROIDimensions': 1, u'correctMask': True, 'preCrop': False, u'symmetricalGLCM': True, 'resegmentRange': None, 'padDistance': 5} |
| general    | info          | GeneralSettings                      |                                                                                                                                                                                                                                                                                                                                                                                                                   |
| general    | info          | ImageHash                            | 525b135c269d171cc15012c9eca7023d55d92887                                                                                                                                                                                                                                                                                                                                                                          |
| general    | info          | ImageSpacing                         | (0.9375, 0.9375, 2.0)                                                                                                                                                                                                                                                                                                                                                                                             |
| general    | info          | MaskHash                             | 743209826dbc4da7c3f50119046ff4983a2f0eac                                                                                                                                                                                                                                                                                                                                                                          |
| general    | info          | NumpyVersion                         | 1.13.1                                                                                                                                                                                                                                                                                                                                                                                                            |
| general    | info          | PyWaveletVersion                     | 0.5.2                                                                                                                                                                                                                                                                                                                                                                                                             |
| general    | info          | SimpleITKVersion                     | 1.1.0                                                                                                                                                                                                                                                                                                                                                                                                             |
| general    | info          | Version                              | 1.3.0.post102+g1b0eb74                                                                                                                                                                                                                                                                                                                                                                                            |
| general    | info          | VolumeNum                            | 1                                                                                                                                                                                                                                                                                                                                                                                                                 |
| general    | info          | VoxelNum                             | 37                                                                                                                                                                                                                                                                                                                                                                                                                |
| original   | shape         | Maximum3DDiameter                    | 15.29705854                                                                                                                                                                                                                                                                                                                                                                                                       |
| original   | shape         | Maximum2DDiameterSlice               | 13.41640786                                                                                                                                                                                                                                                                                                                                                                                                       |
| original   | shape         | Sphericity                           | 0.880314135                                                                                                                                                                                                                                                                                                                                                                                                       |
| original   | shape         | MinorAxis                            | 13.16705797                                                                                                                                                                                                                                                                                                                                                                                                       |
| original   | shape         | Elongation                           | 0.86650253                                                                                                                                                                                                                                                                                                                                                                                                        |
| original   | shape         | SurfaceVolumeRatio                   | 0.549529848                                                                                                                                                                                                                                                                                                                                                                                                       |
| original   | shape         | Volume                               | 999                                                                                                                                                                                                                                                                                                                                                                                                               |
| original   | shape         | MajorAxis                            | 15.19563707                                                                                                                                                                                                                                                                                                                                                                                                       |
| original   | shape         | SurfaceArea                          | 548.9803181                                                                                                                                                                                                                                                                                                                                                                                                       |
| original   | shape         | Flatness                             | 0.459025789                                                                                                                                                                                                                                                                                                                                                                                                       |
| original   | shape         | LeastAxis                            | 6.975189297                                                                                                                                                                                                                                                                                                                                                                                                       |
| original   | shape         | Maximum2DDiameterColumn              | 13.41640786                                                                                                                                                                                                                                                                                                                                                                                                       |
| original   | shape         | Maximum2DDiameterRow                 | 13.41640786                                                                                                                                                                                                                                                                                                                                                                                                       |
| original   | gldm          | GrayLevelVariance                    | 89.10591673                                                                                                                                                                                                                                                                                                                                                                                                       |
| original   | gldm          | HighGrayLevelEmphasis                | 392.0540541                                                                                                                                                                                                                                                                                                                                                                                                       |
| original   | gldm          | DependenceEntropy                    | 4.594456406                                                                                                                                                                                                                                                                                                                                                                                                       |
| original   | gldm          | DependenceNonUniformity              | 24.45945946                                                                                                                                                                                                                                                                                                                                                                                                       |
| original   | gldm          | GrayLevelNonUniformity               | 1.756756757                                                                                                                                                                                                                                                                                                                                                                                                       |
| original   | gldm          | SmallDependenceEmphasis              | 0.837837838                                                                                                                                                                                                                                                                                                                                                                                                       |
| original   | gldm          | SmallDependenceHighGrayLevelEmphasis | 332.2972973                                                                                                                                                                                                                                                                                                                                                                                                       |
| original   | gldm          | DependenceNonUniformityNormalized    | 0.661066472                                                                                                                                                                                                                                                                                                                                                                                                       |
| original   | gldm          | LargeDependenceEmphasis              | 1.648648649                                                                                                                                                                                                                                                                                                                                                                                                       |
| original   | gldm          | LargeDependenceLowGrayLevelEmphasis  | 0.0466436                                                                                                                                                                                                                                                                                                                                                                                                         |
| original   | gldm          | DependenceVariance                   | 0.169466764                                                                                                                                                                                                                                                                                                                                                                                                       |
| original   | gldm          | LargeDependenceHighGrayLevelEmphasis | 631.0810811                                                                                                                                                                                                                                                                                                                                                                                                       |
| original   | gldm          | SmallDependenceLowGrayLevelEmphasis  | 0.034608807                                                                                                                                                                                                                                                                                                                                                                                                       |
| original   | gldm          | LowGrayLevelEmphasis                 | 0.037015766                                                                                                                                                                                                                                                                                                                                                                                                       |
| original   | glcm          | JointAverage                         | 19.73113814                                                                                                                                                                                                                                                                                                                                                                                                       |
| original   | glcm          | SumAverage                           | 39.46227628                                                                                                                                                                                                                                                                                                                                                                                                       |



|          |            |                                  |              |
|----------|------------|----------------------------------|--------------|
| original | glcm       | JointEntropy                     | 4.924174793  |
| original | glcm       | ClusterShade                     | -440.4319037 |
| original | glcm       | MaximumProbability               | 0.046532801  |
| original | glcm       | Idmn                             | 0.880088171  |
| original | glcm       | JointEnergy                      | 0.036017823  |
| original | glcm       | Contrast                         | 197.151978   |
| original | glcm       | DifferenceEntropy                | 3.479337987  |
| original | glcm       | InverseVariance                  | 0.091016954  |
| original | glcm       | DifferenceVariance               | 59.05593789  |
| original | glcm       | Idn                              | 0.772483447  |
| original | glcm       | Idm                              | 0.071087495  |
| original | glcm       | Correlation                      | -0.045415534 |
| original | glcm       | Autocorrelation                  | 386.3203841  |
| original | glcm       | SumEntropy                       | 3.679270697  |
| original | glcm       | SumSquares                       | 94.0089715   |
| original | glcm       | ClusterProminence                | 87964.80329  |
| original | glcm       | Imc2                             | 0.999535688  |
| original | glcm       | Imc1                             | -0.842945504 |
| original | glcm       | DifferenceAverage                | 11.58144954  |
| original | glcm       | Id                               | 0.14737739   |
| original | glcm       | ClusterTendency                  | 178.8839081  |
| original | firstorder | InterquartileRange               | 399          |
| original | firstorder | Skewness                         | 0.135084802  |
| original | firstorder | Uniformity                       | 0.047479912  |
| original | firstorder | Median                           | -410         |
| original | firstorder | Energy                           | 8055267      |
| original | firstorder | RobustMeanAbsoluteDeviation      | 151.4268728  |
| original | firstorder | MeanAbsoluteDeviation            | 198.3403944  |
| original | firstorder | TotalEnergy                      | 217492209    |
| original | firstorder | Maximum                          | 26           |
| original | firstorder | RootMeanSquared                  | 466.5939551  |
| original | firstorder | 90Percentile                     | -46.4        |
| original | firstorder | Minimum                          | -811         |
| original | firstorder | Entropy                          | 4.519999987  |
| original | firstorder | Range                            | 837          |
| original | firstorder | Variance                         | 55779.80862  |
| original | firstorder | 10Percentile                     | -705.8       |
| original | firstorder | Kurtosis                         | 1.906600822  |
| original | firstorder | Mean                             | -402.4054054 |
| original | glrlm      | ShortRunLowGrayLevelEmphasis     | 0.037112827  |
| original | glrlm      | GrayLevelVariance                | 88.87386046  |
| original | glrlm      | LowGrayLevelRunEmphasis          | 0.037210692  |
| original | glrlm      | GrayLevelNonUniformityNormalized | 0.047459455  |
| original | glrlm      | RunVariance                      | 0.008288854  |
| original | glrlm      | GrayLevelNonUniformity           | 1.741431541  |
| original | glrlm      | LongRunEmphasis                  | 1.026373626  |
| original | glrlm      | ShortRunHighGrayLevelEmphasis    | 389.8314523  |
| original | glrlm      | RunLengthNonUniformity           | 36.11208791  |
| original | glrlm      | ShortRunEmphasis                 | 0.993406593  |
| original | glrlm      | LongRunHighGrayLevelEmphasis     | 401.979804   |
| original | glrlm      | RunPercentage                    | 0.991683992  |
| original | glrlm      | LongRunLowGrayLevelEmphasis      | 0.037602153  |
| original | glrlm      | RunEntropy                       | 4.525242074  |
| original | glrlm      | HighGrayLevelRunEmphasis         | 392.2611227  |
| original | glrlm      | RunLengthNonUniformityNormalized | 0.983422292  |

|             |       |                                      |              |
|-------------|-------|--------------------------------------|--------------|
| original    | glszm | GrayLevelVariance                    | 86.00183655  |
| original    | glszm | ZoneVariance                         | 0.106519743  |
| original    | glszm | GrayLevelNonUniformityNormalized     | 0.046831956  |
| original    | glszm | SizeZoneNonUniformityNormalized      | 0.786960514  |
| original    | glszm | SizeZoneNonUniformity                | 25.96969697  |
| original    | glszm | GrayLevelNonUniformity               | 1.545454545  |
| original    | glszm | LargeAreaEmphasis                    | 1.363636364  |
| original    | glszm | SmallAreaHighGrayLevelEmphasis       | 361.4090909  |
| original    | glszm | ZonePercentage                       | 0.891891892  |
| original    | glszm | LargeAreaLowGrayLevelEmphasis        | 0.045100807  |
| original    | glszm | LargeAreaHighGrayLevelEmphasis       | 528.9090909  |
| original    | glszm | HighGrayLevelZoneEmphasis            | 394.9090909  |
| original    | glszm | SmallAreaEmphasis                    | 0.909090909  |
| original    | glszm | LowGrayLevelZoneEmphasis             | 0.039703384  |
| original    | glszm | ZoneEntropy                          | 4.597276316  |
| original    | glszm | SmallAreaLowGrayLevelEmphasis        | 0.038354029  |
| original    | ngtdm | Coarseness                           | 0.06724255   |
| original    | ngtdm | Complexity                           | 2842.334894  |
| original    | ngtdm | Strength                             | 29.50717956  |
| original    | ngtdm | Contrast                             | 2.553370895  |
| original    | ngtdm | Busyness                             | 0.052047562  |
| wavelet-HHH | gldm  | GrayLevelVariance                    | 14.12710007  |
| wavelet-HHH | gldm  | HighGrayLevelEmphasis                | 193.1081081  |
| wavelet-HHH | gldm  | DependenceEntropy                    | 4.270132082  |
| wavelet-HHH | gldm  | DependenceNonUniformity              | 11.86486486  |
| wavelet-HHH | gldm  | GrayLevelNonUniformity               | 4.297297297  |
| wavelet-HHH | gldm  | SmallDependenceEmphasis              | 0.470908408  |
| wavelet-HHH | gldm  | SmallDependenceHighGrayLevelEmphasis | 100.0760135  |
| wavelet-HHH | gldm  | DependenceNonUniformityNormalized    | 0.320672023  |
| wavelet-HHH | gldm  | LargeDependenceEmphasis              | 4.621621622  |
| wavelet-HHH | gldm  | LargeDependenceLowGrayLevelEmphasis  | 0.057778426  |
| wavelet-HHH | gldm  | DependenceVariance                   | 0.72899927   |
| wavelet-HHH | gldm  | LargeDependenceHighGrayLevelEmphasis | 795.5405405  |
| wavelet-HHH | gldm  | SmallDependenceLowGrayLevelEmphasis  | 0.029746509  |
| wavelet-HHH | gldm  | LowGrayLevelEmphasis                 | 0.033163264  |
| wavelet-HHH | glcm  | JointAverage                         | 13.55762681  |
| wavelet-HHH | glcm  | SumAverage                           | 27.11525363  |
| wavelet-HHH | glcm  | JointEntropy                         | 4.554720842  |
| wavelet-HHH | glcm  | ClusterShade                         | -8.007795321 |
| wavelet-HHH | glcm  | MaximumProbability                   | 0.089128501  |
| wavelet-HHH | glcm  | Idmn                                 | 0.962697711  |
| wavelet-HHH | glcm  | JointEnergy                          | 0.050062406  |
| wavelet-HHH | glcm  | Contrast                             | 20.67708929  |
| wavelet-HHH | glcm  | DifferenceEntropy                    | 2.608209827  |
| wavelet-HHH | glcm  | InverseVariance                      | 0.239821454  |
| wavelet-HHH | glcm  | DifferenceVariance                   | 7.205386074  |
| wavelet-HHH | glcm  | Idn                                  | 0.871260934  |
| wavelet-HHH | glcm  | Idm                                  | 0.243848086  |
| wavelet-HHH | glcm  | Correlation                          | -0.106429154 |
| wavelet-HHH | glcm  | Autocorrelation                      | 183.1917966  |
| wavelet-HHH | glcm  | SumEntropy                           | 3.022137024  |
| wavelet-HHH | glcm  | SumSquares                           | 9.569469086  |
| wavelet-HHH | glcm  | ClusterProminence                    | 1201.253689  |
| wavelet-HHH | glcm  | Imc2                                 | 0.981620729  |
| wavelet-HHH | glcm  | Imc1                                 | -0.550339467 |

|             |            |                                  |              |
|-------------|------------|----------------------------------|--------------|
| wavelet-HHH | glcm       | DifferenceAverage                | 3.534947395  |
| wavelet-HHH | glcm       | Id                               | 0.337737212  |
| wavelet-HHH | glcm       | ClusterTendency                  | 17.60078705  |
| wavelet-HHH | firstorder | InterquartileRange               | 102.6843246  |
| wavelet-HHH | firstorder | Skewness                         | -0.68652119  |
| wavelet-HHH | firstorder | Uniformity                       | 0.11614317   |
| wavelet-HHH | firstorder | Median                           | 6.402888221  |
| wavelet-HHH | firstorder | Energy                           | 322758.6561  |
| wavelet-HHH | firstorder | RobustMeanAbsoluteDeviation      | 43.59596729  |
| wavelet-HHH | firstorder | MeanAbsoluteDeviation            | 68.99572422  |
| wavelet-HHH | firstorder | TotalEnergy                      | 8714483.715  |
| wavelet-HHH | firstorder | Maximum                          | 204.0486551  |
| wavelet-HHH | firstorder | RootMeanSquared                  | 93.39810984  |
| wavelet-HHH | firstorder | 90Percentile                     | 105.014925   |
| wavelet-HHH | firstorder | Minimum                          | -322.2620546 |
| wavelet-HHH | firstorder | Entropy                          | 3.418516541  |
| wavelet-HHH | firstorder | Range                            | 526.3107097  |
| wavelet-HHH | firstorder | Variance                         | 8714.065456  |
| wavelet-HHH | firstorder | 10Percentile                     | -85.83109045 |
| wavelet-HHH | firstorder | Kurtosis                         | 5.232481489  |
| wavelet-HHH | firstorder | Mean                             | -3.023485793 |
| wavelet-HHH | glrlm      | ShortRunLowGrayLevelEmphasis     | 0.034034373  |
| wavelet-HHH | glrlm      | GrayLevelVariance                | 14.46898611  |
| wavelet-HHH | glrlm      | LowGrayLevelRunEmphasis          | 0.034229627  |
| wavelet-HHH | glrlm      | GrayLevelNonUniformityNormalized | 0.114110684  |
| wavelet-HHH | glrlm      | RunVariance                      | 0.041802899  |
| wavelet-HHH | glrlm      | GrayLevelNonUniformity           | 4.067319467  |
| wavelet-HHH | glrlm      | LongRunEmphasis                  | 1.125441225  |
| wavelet-HHH | glrlm      | ShortRunHighGrayLevelEmphasis    | 189.2487811  |
| wavelet-HHH | glrlm      | RunLengthNonUniformity           | 33.16803197  |
| wavelet-HHH | glrlm      | ShortRunEmphasis                 | 0.971229696  |
| wavelet-HHH | glrlm      | LongRunHighGrayLevelEmphasis     | 215.5936238  |
| wavelet-HHH | glrlm      | RunPercentage                    | 0.962577963  |
| wavelet-HHH | glrlm      | LongRunLowGrayLevelEmphasis      | 0.03505669   |
| wavelet-HHH | glrlm      | RunEntropy                       | 3.548782617  |
| wavelet-HHH | glrlm      | HighGrayLevelRunEmphasis         | 194.0515492  |
| wavelet-HHH | glrlm      | RunLengthNonUniformityNormalized | 0.92910876   |
| wavelet-HHH | glszm      | GrayLevelVariance                | 21.00680272  |
| wavelet-HHH | glszm      | ZoneVariance                     | 1.324263039  |
| wavelet-HHH | glszm      | GrayLevelNonUniformityNormalized | 0.083900227  |
| wavelet-HHH | glszm      | SizeZoneNonUniformityNormalized  | 0.428571429  |
| wavelet-HHH | glszm      | SizeZoneNonUniformity            | 9            |
| wavelet-HHH | glszm      | GrayLevelNonUniformity           | 1.761904762  |
| wavelet-HHH | glszm      | LargeAreaEmphasis                | 4.428571429  |
| wavelet-HHH | glszm      | SmallAreaHighGrayLevelEmphasis   | 147.7000661  |
| wavelet-HHH | glszm      | ZonePercentage                   | 0.567567568  |
| wavelet-HHH | glszm      | LargeAreaLowGrayLevelEmphasis    | 0.074971301  |
| wavelet-HHH | glszm      | LargeAreaHighGrayLevelEmphasis   | 820.5238095  |
| wavelet-HHH | glszm      | HighGrayLevelZoneEmphasis        | 205.1904762  |
| wavelet-HHH | glszm      | SmallAreaEmphasis                | 0.675515873  |
| wavelet-HHH | glszm      | LowGrayLevelZoneEmphasis         | 0.053580197  |
| wavelet-HHH | glszm      | ZoneEntropy                      | 4.201841232  |
| wavelet-HHH | glszm      | SmallAreaLowGrayLevelEmphasis    | 0.051483269  |
| wavelet-HHH | ngtdm      | Coarseness                       | 0.100110672  |
| wavelet-HHH | ngtdm      | Complexity                       | 291.2330809  |

|             |            |                                      |              |
|-------------|------------|--------------------------------------|--------------|
| wavelet-HHH | ngtdm      | Strength                             | 10.56022766  |
| wavelet-HHH | ngtdm      | Contrast                             | 0.480710037  |
| wavelet-HHH | ngtdm      | Busyness                             | 0.066833809  |
| wavelet-HLL | gldm       | GrayLevelVariance                    | 124.9306063  |
| wavelet-HLL | gldm       | HighGrayLevelEmphasis                | 873.027027   |
| wavelet-HLL | gldm       | DependenceEntropy                    | 4.722966879  |
| wavelet-HLL | gldm       | DependenceNonUniformity              | 29.86486486  |
| wavelet-HLL | gldm       | GrayLevelNonUniformity               | 1.702702703  |
| wavelet-HLL | gldm       | SmallDependenceEmphasis              | 0.918918919  |
| wavelet-HLL | gldm       | SmallDependenceHighGrayLevelEmphasis | 822.7162162  |
| wavelet-HLL | gldm       | DependenceNonUniformityNormalized    | 0.80715851   |
| wavelet-HLL | gldm       | LargeDependenceEmphasis              | 1.324324324  |
| wavelet-HLL | gldm       | LargeDependenceLowGrayLevelEmphasis  | 0.030592649  |
| wavelet-HLL | gldm       | DependenceVariance                   | 0.096420745  |
| wavelet-HLL | gldm       | LargeDependenceHighGrayLevelEmphasis | 1074.27027   |
| wavelet-HLL | gldm       | SmallDependenceLowGrayLevelEmphasis  | 0.029844867  |
| wavelet-HLL | gldm       | LowGrayLevelEmphasis                 | 0.029994423  |
| wavelet-HLL | glcm       | JointAverage                         | 27.37480073  |
| wavelet-HLL | glcm       | SumAverage                           | 54.74960147  |
| wavelet-HLL | glcm       | JointEntropy                         | 4.931912164  |
| wavelet-HLL | glcm       | ClusterShade                         | -995.0772117 |
| wavelet-HLL | glcm       | MaximumProbability                   | 0.041543403  |
| wavelet-HLL | glcm       | Idmn                                 | 0.909874519  |
| wavelet-HLL | glcm       | JointEnergy                          | 0.035636872  |
| wavelet-HLL | glcm       | Contrast                             | 229.5069536  |
| wavelet-HLL | glcm       | DifferenceEntropy                    | 3.343969588  |
| wavelet-HLL | glcm       | InverseVariance                      | 0.068055437  |
| wavelet-HLL | glcm       | DifferenceVariance                   | 35.27415275  |
| wavelet-HLL | glcm       | Idn                                  | 0.794418367  |
| wavelet-HLL | glcm       | Idm                                  | 0.050904981  |
| wavelet-HLL | glcm       | Correlation                          | 0.155910634  |
| wavelet-HLL | glcm       | Autocorrelation                      | 767.0395145  |
| wavelet-HLL | glcm       | SumEntropy                           | 3.71930941   |
| wavelet-HLL | glcm       | SumSquares                           | 131.117313   |
| wavelet-HLL | glcm       | ClusterProminence                    | 216742.7201  |
| wavelet-HLL | glcm       | Imc2                                 | 0.999587999  |
| wavelet-HLL | glcm       | Imc1                                 | -0.844022477 |
| wavelet-HLL | glcm       | DifferenceAverage                    | 12.94322665  |
| wavelet-HLL | glcm       | Id                                   | 0.124549628  |
| wavelet-HLL | glcm       | ClusterTendency                      | 294.9622983  |
| wavelet-HLL | firstorder | InterquartileRange                   | 344.1570597  |
| wavelet-HLL | firstorder | Skewness                             | -0.270786426 |
| wavelet-HLL | firstorder | Uniformity                           | 0.046018992  |
| wavelet-HLL | firstorder | Median                               | -35.6110544  |
| wavelet-HLL | firstorder | Energy                               | 2981494.748  |
| wavelet-HLL | firstorder | RobustMeanAbsoluteDeviation          | 145.9829146  |
| wavelet-HLL | firstorder | MeanAbsoluteDeviation                | 218.1956508  |
| wavelet-HLL | firstorder | TotalEnergy                          | 80500358.19  |
| wavelet-HLL | firstorder | Maximum                              | 420.5486304  |
| wavelet-HLL | firstorder | RootMeanSquared                      | 283.8678198  |
| wavelet-HLL | firstorder | 90Percentile                         | 330.1534579  |
| wavelet-HLL | firstorder | Minimum                              | -706.157451  |
| wavelet-HLL | firstorder | Entropy                              | 4.614858771  |
| wavelet-HLL | firstorder | Range                                | 1126.706081  |
| wavelet-HLL | firstorder | Variance                             | 77856.53363  |

|             |            |                                      |              |
|-------------|------------|--------------------------------------|--------------|
| wavelet-HLL | firstorder | 10Percentile                         | -434.3378682 |
| wavelet-HLL | firstorder | Kurtosis                             | 2.602140742  |
| wavelet-HLL | firstorder | Mean                                 | -52.19583799 |
| wavelet-HLL | glrlm      | ShortRunLowGrayLevelEmphasis         | 0.03010881   |
| wavelet-HLL | glrlm      | GrayLevelVariance                    | 125.3398459  |
| wavelet-HLL | glrlm      | LowGrayLevelRunEmphasis              | 0.030114722  |
| wavelet-HLL | glrlm      | GrayLevelNonUniformityNormalized     | 0.045824237  |
| wavelet-HLL | glrlm      | RunVariance                          | 0.004154796  |
| wavelet-HLL | glrlm      | GrayLevelNonUniformity               | 1.688611689  |
| wavelet-HLL | glrlm      | LongRunEmphasis                      | 1.012820513  |
| wavelet-HLL | glrlm      | ShortRunHighGrayLevelEmphasis        | 872.1174203  |
| wavelet-HLL | glrlm      | RunLengthNonUniformity               | 36.54700855  |
| wavelet-HLL | glrlm      | ShortRunEmphasis                     | 0.996794872  |
| wavelet-HLL | glrlm      | LongRunHighGrayLevelEmphasis         | 882.0613306  |
| wavelet-HLL | glrlm      | RunPercentage                        | 0.995841996  |
| wavelet-HLL | glrlm      | LongRunLowGrayLevelEmphasis          | 0.03013837   |
| wavelet-HLL | glrlm      | RunEntropy                           | 4.623330499  |
| wavelet-HLL | glrlm      | HighGrayLevelRunEmphasis             | 874.1062024  |
| wavelet-HLL | glrlm      | RunLengthNonUniformityNormalized     | 0.991690408  |
| wavelet-HLL | glszm      | GrayLevelVariance                    | 130.4212245  |
| wavelet-HLL | glszm      | ZoneVariance                         | 0.053877551  |
| wavelet-HLL | glszm      | GrayLevelNonUniformityNormalized     | 0.043265306  |
| wavelet-HLL | glszm      | SizeZoneNonUniformityNormalized      | 0.892244898  |
| wavelet-HLL | glszm      | SizeZoneNonUniformity                | 31.22857143  |
| wavelet-HLL | glszm      | GrayLevelNonUniformity               | 1.514285714  |
| wavelet-HLL | glszm      | LargeAreaEmphasis                    | 1.171428571  |
| wavelet-HLL | glszm      | SmallAreaHighGrayLevelEmphasis       | 860.8642857  |
| wavelet-HLL | glszm      | ZonePercentage                       | 0.945945946  |
| wavelet-HLL | glszm      | LargeAreaLowGrayLevelEmphasis        | 0.031919194  |
| wavelet-HLL | glszm      | LargeAreaHighGrayLevelEmphasis       | 993.8285714  |
| wavelet-HLL | glszm      | HighGrayLevelZoneEmphasis            | 887.4571429  |
| wavelet-HLL | glszm      | SmallAreaEmphasis                    | 0.957142857  |
| wavelet-HLL | glszm      | LowGrayLevelZoneEmphasis             | 0.031602988  |
| wavelet-HLL | glszm      | ZoneEntropy                          | 4.729283017  |
| wavelet-HLL | glszm      | SmallAreaLowGrayLevelEmphasis        | 0.031523937  |
| wavelet-HLL | ngtdm      | Coarseness                           | 0.105327005  |
| wavelet-HLL | ngtdm      | Complexity                           | 2990.963717  |
| wavelet-HLL | ngtdm      | Strength                             | 57.56054837  |
| wavelet-HLL | ngtdm      | Contrast                             | 2.507976668  |
| wavelet-HLL | ngtdm      | Busyness                             | 0.017277539  |
| wavelet-LHL | gldm       | GrayLevelVariance                    | 157.8407597  |
| wavelet-LHL | gldm       | HighGrayLevelEmphasis                | 850.8108108  |
| wavelet-LHL | gldm       | DependenceEntropy                    | 4.722966879  |
| wavelet-LHL | gldm       | DependenceNonUniformity              | 24.45945946  |
| wavelet-LHL | gldm       | GrayLevelNonUniformity               | 1.810810811  |
| wavelet-LHL | gldm       | SmallDependenceEmphasis              | 0.837837838  |
| wavelet-LHL | gldm       | SmallDependenceHighGrayLevelEmphasis | 708.5135135  |
| wavelet-LHL | gldm       | DependenceNonUniformityNormalized    | 0.661066472  |
| wavelet-LHL | gldm       | LargeDependenceEmphasis              | 1.648648649  |
| wavelet-LHL | gldm       | LargeDependenceLowGrayLevelEmphasis  | 0.031926872  |
| wavelet-LHL | gldm       | DependenceVariance                   | 0.169466764  |
| wavelet-LHL | gldm       | LargeDependenceHighGrayLevelEmphasis | 1420         |
| wavelet-LHL | gldm       | SmallDependenceLowGrayLevelEmphasis  | 0.030255525  |
| wavelet-LHL | gldm       | LowGrayLevelEmphasis                 | 0.030589794  |
| wavelet-LHL | glcm       | JointAverage                         | 27.0058669   |

|             |            |                                  |              |
|-------------|------------|----------------------------------|--------------|
| wavelet-LHL | glcm       | SumAverage                       | 54.01173381  |
| wavelet-LHL | glcm       | JointEntropy                     | 4.926183668  |
| wavelet-LHL | glcm       | ClusterShade                     | -266.535354  |
| wavelet-LHL | glcm       | MaximumProbability               | 0.04389383   |
| wavelet-LHL | glcm       | Idmn                             | 0.887517802  |
| wavelet-LHL | glcm       | JointEnergy                      | 0.035913421  |
| wavelet-LHL | glcm       | Contrast                         | 405.8635922  |
| wavelet-LHL | glcm       | DifferenceEntropy                | 3.527477598  |
| wavelet-LHL | glcm       | InverseVariance                  | 0.067449216  |
| wavelet-LHL | glcm       | DifferenceVariance               | 111.804176   |
| wavelet-LHL | glcm       | Idn                              | 0.783476702  |
| wavelet-LHL | glcm       | Idm                              | 0.05572148   |
| wavelet-LHL | glcm       | Correlation                      | -0.002059387 |
| wavelet-LHL | glcm       | Autocorrelation                  | 726.311275   |
| wavelet-LHL | glcm       | SumEntropy                       | 3.73462449   |
| wavelet-LHL | glcm       | SumSquares                       | 199.7382931  |
| wavelet-LHL | glcm       | ClusterProminence                | 368231.3467  |
| wavelet-LHL | glcm       | Imc2                             | 0.999657519  |
| wavelet-LHL | glcm       | Imc1                             | -0.859851851 |
| wavelet-LHL | glcm       | DifferenceAverage                | 16.05645112  |
| wavelet-LHL | glcm       | Id                               | 0.122176017  |
| wavelet-LHL | glcm       | ClusterTendency                  | 393.0895804  |
| wavelet-LHL | firstorder | InterquartileRange               | 456.6132621  |
| wavelet-LHL | firstorder | Skewness                         | -0.007663335 |
| wavelet-LHL | firstorder | Uniformity                       | 0.048940833  |
| wavelet-LHL | firstorder | Median                           | -58.84267853 |
| wavelet-LHL | firstorder | Energy                           | 3686708.575  |
| wavelet-LHL | firstorder | RobustMeanAbsoluteDeviation      | 188.1455558  |
| wavelet-LHL | firstorder | MeanAbsoluteDeviation            | 261.2195966  |
| wavelet-LHL | firstorder | TotalEnergy                      | 99541131.52  |
| wavelet-LHL | firstorder | Maximum                          | 582.1536367  |
| wavelet-LHL | firstorder | RootMeanSquared                  | 315.6592661  |
| wavelet-LHL | firstorder | 90Percentile                     | 356.0626447  |
| wavelet-LHL | firstorder | Minimum                          | -672.8750838 |
| wavelet-LHL | firstorder | Entropy                          | 4.540402352  |
| wavelet-LHL | firstorder | Range                            | 1255.028721  |
| wavelet-LHL | firstorder | Variance                         | 98655.68596  |
| wavelet-LHL | firstorder | 10Percentile                     | -476.0900507 |
| wavelet-LHL | firstorder | Kurtosis                         | 2.244817645  |
| wavelet-LHL | firstorder | Mean                             | -31.38608498 |
| wavelet-LHL | glrlm      | ShortRunLowGrayLevelEmphasis     | 0.030827003  |
| wavelet-LHL | glrlm      | GrayLevelVariance                | 158.3701248  |
| wavelet-LHL | glrlm      | LowGrayLevelRunEmphasis          | 0.030840594  |
| wavelet-LHL | glrlm      | GrayLevelNonUniformityNormalized | 0.048695618  |
| wavelet-LHL | glrlm      | RunVariance                      | 0.008288854  |
| wavelet-LHL | glrlm      | GrayLevelNonUniformity           | 1.787169587  |
| wavelet-LHL | glrlm      | LongRunEmphasis                  | 1.026373626  |
| wavelet-LHL | glrlm      | ShortRunHighGrayLevelEmphasis    | 844.7904663  |
| wavelet-LHL | glrlm      | RunLengthNonUniformity           | 36.11208791  |
| wavelet-LHL | glrlm      | ShortRunEmphasis                 | 0.993406593  |
| wavelet-LHL | glrlm      | LongRunHighGrayLevelEmphasis     | 873.7190377  |
| wavelet-LHL | glrlm      | RunPercentage                    | 0.991683992  |
| wavelet-LHL | glrlm      | LongRunLowGrayLevelEmphasis      | 0.030894959  |
| wavelet-LHL | glrlm      | RunEntropy                       | 4.554615009  |
| wavelet-LHL | glrlm      | HighGrayLevelRunEmphasis         | 850.5761806  |

|             |       |                                      |              |
|-------------|-------|--------------------------------------|--------------|
| wavelet-LHL | glrlm | RunLengthNonUniformityNormalized     | 0.983422292  |
| wavelet-LHL | glszm | GrayLevelVariance                    | 165.2580349  |
| wavelet-LHL | glszm | ZoneVariance                         | 0.106519743  |
| wavelet-LHL | glszm | GrayLevelNonUniformityNormalized     | 0.044995409  |
| wavelet-LHL | glszm | SizeZoneNonUniformityNormalized      | 0.786960514  |
| wavelet-LHL | glszm | SizeZoneNonUniformity                | 25.96969697  |
| wavelet-LHL | glszm | GrayLevelNonUniformity               | 1.484848485  |
| wavelet-LHL | glszm | LargeAreaEmphasis                    | 1.363636364  |
| wavelet-LHL | glszm | SmallAreaHighGrayLevelEmphasis       | 767.8030303  |
| wavelet-LHL | glszm | ZonePercentage                       | 0.891891892  |
| wavelet-LHL | glszm | LargeAreaLowGrayLevelEmphasis        | 0.034797364  |
| wavelet-LHL | glszm | LargeAreaHighGrayLevelEmphasis       | 1166.666667  |
| wavelet-LHL | glszm | HighGrayLevelZoneEmphasis            | 847.5757576  |
| wavelet-LHL | glszm | SmallAreaEmphasis                    | 0.909090909  |
| wavelet-LHL | glszm | LowGrayLevelZoneEmphasis             | 0.03404779   |
| wavelet-LHL | glszm | ZoneEntropy                          | 4.741363816  |
| wavelet-LHL | glszm | SmallAreaLowGrayLevelEmphasis        | 0.033860396  |
| wavelet-LHL | ngtdm | Coarseness                           | 0.054150525  |
| wavelet-LHL | ngtdm | Complexity                           | 4992.060045  |
| wavelet-LHL | ngtdm | Strength                             | 45.42697947  |
| wavelet-LHL | ngtdm | Contrast                             | 5.185795059  |
| wavelet-LHL | ngtdm | Busyness                             | 0.032780682  |
| wavelet-LHH | gldm  | GrayLevelVariance                    | 26.17092768  |
| wavelet-LHH | gldm  | HighGrayLevelEmphasis                | 123.4864865  |
| wavelet-LHH | gldm  | DependenceEntropy                    | 4.391489514  |
| wavelet-LHH | gldm  | DependenceNonUniformity              | 20.83783784  |
| wavelet-LHH | gldm  | GrayLevelNonUniformity               | 3.054054054  |
| wavelet-LHH | gldm  | SmallDependenceEmphasis              | 0.777214715  |
| wavelet-LHH | gldm  | SmallDependenceHighGrayLevelEmphasis | 111.4934309  |
| wavelet-LHH | gldm  | DependenceNonUniformityNormalized    | 0.563184806  |
| wavelet-LHH | gldm  | LargeDependenceEmphasis              | 2.675675676  |
| wavelet-LHH | gldm  | LargeDependenceLowGrayLevelEmphasis  | 0.126962237  |
| wavelet-LHH | gldm  | DependenceVariance                   | 0.623813002  |
| wavelet-LHH | gldm  | LargeDependenceHighGrayLevelEmphasis | 200.0810811  |
| wavelet-LHH | gldm  | SmallDependenceLowGrayLevelEmphasis  | 0.069252965  |
| wavelet-LHH | gldm  | LowGrayLevelEmphasis                 | 0.075239264  |
| wavelet-LHH | glcm  | JointAverage                         | 9.652285459  |
| wavelet-LHH | glcm  | SumAverage                           | 19.30457092  |
| wavelet-LHH | glcm  | JointEntropy                         | 4.811487561  |
| wavelet-LHH | glcm  | ClusterShade                         | 61.22346381  |
| wavelet-LHH | glcm  | MaximumProbability                   | 0.062114477  |
| wavelet-LHH | glcm  | Idmn                                 | 0.900332702  |
| wavelet-LHH | glcm  | JointEnergy                          | 0.039568667  |
| wavelet-LHH | glcm  | Contrast                             | 56.16578397  |
| wavelet-LHH | glcm  | DifferenceEntropy                    | 2.918343777  |
| wavelet-LHH | glcm  | InverseVariance                      | 0.138299983  |
| wavelet-LHH | glcm  | DifferenceVariance                   | 15.68142122  |
| wavelet-LHH | glcm  | Idn                                  | 0.78897649   |
| wavelet-LHH | glcm  | Idm                                  | 0.127030928  |
| wavelet-LHH | glcm  | Correlation                          | -0.084423944 |
| wavelet-LHH | glcm  | Autocorrelation                      | 91.32911107  |
| wavelet-LHH | glcm  | SumEntropy                           | 3.45470766   |
| wavelet-LHH | glcm  | SumSquares                           | 25.84413337  |
| wavelet-LHH | glcm  | ClusterProminence                    | 6051.28676   |
| wavelet-LHH | glcm  | Imc2                                 | 0.995538402  |

|             |            |                                  |              |
|-------------|------------|----------------------------------|--------------|
| wavelet-LHH | glcm       | Imc1                             | -0.672618731 |
| wavelet-LHH | glcm       | DifferenceAverage                | 6.2182653    |
| wavelet-LHH | glcm       | Id                               | 0.221969568  |
| wavelet-LHH | glcm       | ClusterTendency                  | 47.21074952  |
| wavelet-LHH | firstorder | InterquartileRange               | 191.2852128  |
| wavelet-LHH | firstorder | Skewness                         | 0.343467768  |
| wavelet-LHH | firstorder | Uniformity                       | 0.082542001  |
| wavelet-LHH | firstorder | Median                           | 2.311493306  |
| wavelet-LHH | firstorder | Energy                           | 611642.5632  |
| wavelet-LHH | firstorder | RobustMeanAbsoluteDeviation      | 74.22886175  |
| wavelet-LHH | firstorder | MeanAbsoluteDeviation            | 105.0531165  |
| wavelet-LHH | firstorder | TotalEnergy                      | 16514349.21  |
| wavelet-LHH | firstorder | Maximum                          | 278.4845834  |
| wavelet-LHH | firstorder | RootMeanSquared                  | 128.5724702  |
| wavelet-LHH | firstorder | 90Percentile                     | 178.7385026  |
| wavelet-LHH | firstorder | Minimum                          | -219.7788565 |
| wavelet-LHH | firstorder | Entropy                          | 3.830546609  |
| wavelet-LHH | firstorder | Range                            | 498.2634399  |
| wavelet-LHH | firstorder | Variance                         | 16467.78269  |
| wavelet-LHH | firstorder | 10Percentile                     | -122.0917318 |
| wavelet-LHH | firstorder | Kurtosis                         | 2.402605079  |
| wavelet-LHH | firstorder | Mean                             | 7.943386985  |
| wavelet-LHH | glrlm      | ShortRunLowGrayLevelEmphasis     | 0.075648174  |
| wavelet-LHH | glrlm      | GrayLevelVariance                | 26.35245163  |
| wavelet-LHH | glrlm      | LowGrayLevelRunEmphasis          | 0.076028067  |
| wavelet-LHH | glrlm      | GrayLevelNonUniformityNormalized | 0.080861392  |
| wavelet-LHH | glrlm      | RunVariance                      | 0.016608814  |
| wavelet-LHH | glrlm      | GrayLevelNonUniformity           | 2.943140943  |
| wavelet-LHH | glrlm      | LongRunEmphasis                  | 1.051648352  |
| wavelet-LHH | glrlm      | ShortRunHighGrayLevelEmphasis    | 124.1444956  |
| wavelet-LHH | glrlm      | RunLengthNonUniformity           | 35.1970696   |
| wavelet-LHH | glrlm      | ShortRunEmphasis                 | 0.987087912  |
| wavelet-LHH | glrlm      | LongRunHighGrayLevelEmphasis     | 127.2901     |
| wavelet-LHH | glrlm      | RunPercentage                    | 0.983367983  |
| wavelet-LHH | glrlm      | LongRunLowGrayLevelEmphasis      | 0.077547641  |
| wavelet-LHH | glrlm      | RunEntropy                       | 3.901915328  |
| wavelet-LHH | glrlm      | HighGrayLevelRunEmphasis         | 124.7736165  |
| wavelet-LHH | glrlm      | RunLengthNonUniformityNormalized | 0.966782371  |
| wavelet-LHH | glszm      | GrayLevelVariance                | 28.51222222  |
| wavelet-LHH | glszm      | ZoneVariance                     | 0.645555556  |
| wavelet-LHH | glszm      | GrayLevelNonUniformityNormalized | 0.068888889  |
| wavelet-LHH | glszm      | SizeZoneNonUniformityNormalized  | 0.813333333  |
| wavelet-LHH | glszm      | SizeZoneNonUniformity            | 24.4         |
| wavelet-LHH | glszm      | GrayLevelNonUniformity           | 2.066666667  |
| wavelet-LHH | glszm      | LargeAreaEmphasis                | 2.166666667  |
| wavelet-LHH | glszm      | SmallAreaHighGrayLevelEmphasis   | 134.8037037  |
| wavelet-LHH | glszm      | ZonePercentage                   | 0.810810811  |
| wavelet-LHH | glszm      | LargeAreaLowGrayLevelEmphasis    | 0.122503426  |
| wavelet-LHH | glszm      | LargeAreaHighGrayLevelEmphasis   | 193.2333333  |
| wavelet-LHH | glszm      | HighGrayLevelZoneEmphasis        | 140.1666667  |
| wavelet-LHH | glszm      | SmallAreaEmphasis                | 0.91337037   |
| wavelet-LHH | glszm      | LowGrayLevelZoneEmphasis         | 0.086274259  |
| wavelet-LHH | glszm      | ZoneEntropy                      | 4.189898095  |
| wavelet-LHH | glszm      | SmallAreaLowGrayLevelEmphasis    | 0.084307338  |
| wavelet-LHH | ngtdm      | Coarseness                       | 0.076202036  |



|             |            |                                      |              |
|-------------|------------|--------------------------------------|--------------|
| wavelet-LHH | ngtdm      | Complexity                           | 628.8977318  |
| wavelet-LHH | ngtdm      | Strength                             | 12.69542212  |
| wavelet-LHH | ngtdm      | Contrast                             | 0.888513094  |
| wavelet-LHH | ngtdm      | Busyness                             | 0.132664298  |
| wavelet-LLH | gldm       | GrayLevelVariance                    | 416.8224982  |
| wavelet-LLH | gldm       | HighGrayLevelEmphasis                | 3263.189189  |
| wavelet-LLH | gldm       | DependenceEntropy                    | 4.722966879  |
| wavelet-LLH | gldm       | DependenceNonUniformity              | 19.59459459  |
| wavelet-LLH | gldm       | GrayLevelNonUniformity               | 1.594594595  |
| wavelet-LLH | gldm       | SmallDependenceEmphasis              | 0.716216216  |
| wavelet-LLH | gldm       | SmallDependenceHighGrayLevelEmphasis | 2099.027027  |
| wavelet-LLH | gldm       | DependenceNonUniformityNormalized    | 0.529583638  |
| wavelet-LLH | gldm       | LargeDependenceEmphasis              | 2.135135135  |
| wavelet-LLH | gldm       | LargeDependenceLowGrayLevelEmphasis  | 0.028274106  |
| wavelet-LLH | gldm       | DependenceVariance                   | 0.235208181  |
| wavelet-LLH | gldm       | LargeDependenceHighGrayLevelEmphasis | 7919.837838  |
| wavelet-LLH | gldm       | SmallDependenceLowGrayLevelEmphasis  | 0.02789032   |
| wavelet-LLH | gldm       | LowGrayLevelEmphasis                 | 0.027967077  |
| wavelet-LLH | glcm       | JointAverage                         | 57.54584173  |
| wavelet-LLH | glcm       | SumAverage                           | 115.0916835  |
| wavelet-LLH | glcm       | JointEntropy                         | 4.920376729  |
| wavelet-LLH | glcm       | ClusterShade                         | -7425.802903 |
| wavelet-LLH | glcm       | MaximumProbability                   | 0.049612238  |
| wavelet-LLH | glcm       | Idmn                                 | 0.933129607  |
| wavelet-LLH | glcm       | JointEnergy                          | 0.036149783  |
| wavelet-LLH | glcm       | Contrast                             | 624.5936156  |
| wavelet-LLH | glcm       | DifferenceEntropy                    | 3.44452824   |
| wavelet-LLH | glcm       | InverseVariance                      | 0.088122045  |
| wavelet-LLH | glcm       | DifferenceVariance                   | 267.1722227  |
| wavelet-LLH | glcm       | Idn                                  | 0.851937396  |
| wavelet-LLH | glcm       | Idm                                  | 0.087068907  |
| wavelet-LLH | glcm       | Correlation                          | -0.066982178 |
| wavelet-LLH | glcm       | Autocorrelation                      | 3288.757162  |
| wavelet-LLH | glcm       | SumEntropy                           | 3.692628872  |
| wavelet-LLH | glcm       | SumSquares                           | 284.961836   |
| wavelet-LLH | glcm       | ClusterProminence                    | 1366121.099  |
| wavelet-LLH | glcm       | Imc2                                 | 0.999459127  |
| wavelet-LLH | glcm       | Imc1                                 | -0.826454265 |
| wavelet-LLH | glcm       | DifferenceAverage                    | 16.80259834  |
| wavelet-LLH | glcm       | Id                                   | 0.15986084   |
| wavelet-LLH | glcm       | ClusterTendency                      | 515.2537283  |
| wavelet-LLH | firstorder | InterquartileRange                   | 449.1548787  |
| wavelet-LLH | firstorder | Skewness                             | -0.831275922 |
| wavelet-LLH | firstorder | Uniformity                           | 0.043097151  |
| wavelet-LLH | firstorder | Median                               | -33.17241607 |
| wavelet-LLH | firstorder | Energy                               | 10050192.04  |
| wavelet-LLH | firstorder | RobustMeanAbsoluteDeviation          | 236.9047852  |
| wavelet-LLH | firstorder | MeanAbsoluteDeviation                | 383.443621   |
| wavelet-LLH | firstorder | TotalEnergy                          | 271355185.1  |
| wavelet-LLH | firstorder | Maximum                              | 583.3740835  |
| wavelet-LLH | firstorder | RootMeanSquared                      | 521.1782918  |
| wavelet-LLH | firstorder | 90Percentile                         | 510.3032135  |
| wavelet-LLH | firstorder | Minimum                              | -1421.092393 |
| wavelet-LLH | firstorder | Entropy                              | 4.64851046   |
| wavelet-LLH | firstorder | Range                                | 2004.466477  |

|             |            |                                      |              |
|-------------|------------|--------------------------------------|--------------|
| wavelet-LLH | firstorder | Variance                             | 261071.1565  |
| wavelet-LLH | firstorder | 10Percentile                         | -877.9817992 |
| wavelet-LLH | firstorder | Kurtosis                             | 3.195636482  |
| wavelet-LLH | firstorder | Mean                                 | -102.7407189 |
| wavelet-LLH | glrlm      | ShortRunLowGrayLevelEmphasis         | 0.028399701  |
| wavelet-LLH | glrlm      | GrayLevelVariance                    | 419.7374531  |
| wavelet-LLH | glrlm      | LowGrayLevelRunEmphasis              | 0.02840288   |
| wavelet-LLH | glrlm      | GrayLevelNonUniformityNormalized     | 0.043009203  |
| wavelet-LLH | glrlm      | RunVariance                          | 0.01442602   |
| wavelet-LLH | glrlm      | GrayLevelNonUniformity               | 1.568208068  |
| wavelet-LLH | glrlm      | LongRunEmphasis                      | 1.047202797  |
| wavelet-LLH | glrlm      | ShortRunHighGrayLevelEmphasis        | 3200.832706  |
| wavelet-LLH | glrlm      | RunLengthNonUniformity               | 35.47202797  |
| wavelet-LLH | glrlm      | ShortRunEmphasis                     | 0.988199301  |
| wavelet-LLH | glrlm      | LongRunHighGrayLevelEmphasis         | 3444.476354  |
| wavelet-LLH | glrlm      | RunPercentage                        | 0.985446985  |
| wavelet-LLH | glrlm      | LongRunLowGrayLevelEmphasis          | 0.028415596  |
| wavelet-LLH | glrlm      | RunEntropy                           | 4.655220683  |
| wavelet-LLH | glrlm      | HighGrayLevelRunEmphasis             | 3249.561436  |
| wavelet-LLH | glrlm      | RunLengthNonUniformityNormalized     | 0.97114796   |
| wavelet-LLH | glszm      | GrayLevelVariance                    | 459.5955556  |
| wavelet-LLH | glszm      | ZoneVariance                         | 0.178888889  |
| wavelet-LLH | glszm      | GrayLevelNonUniformityNormalized     | 0.04         |
| wavelet-LLH | glszm      | SizeZoneNonUniformityNormalized      | 0.642222222  |
| wavelet-LLH | glszm      | SizeZoneNonUniformity                | 19.26666667  |
| wavelet-LLH | glszm      | GrayLevelNonUniformity               | 1.2          |
| wavelet-LLH | glszm      | LargeAreaEmphasis                    | 1.7          |
| wavelet-LLH | glszm      | SmallAreaHighGrayLevelEmphasis       | 2349.5       |
| wavelet-LLH | glszm      | ZonePercentage                       | 0.810810811  |
| wavelet-LLH | glszm      | LargeAreaLowGrayLevelEmphasis        | 0.034618952  |
| wavelet-LLH | glszm      | LargeAreaHighGrayLevelEmphasis       | 5939         |
| wavelet-LLH | glszm      | HighGrayLevelZoneEmphasis            | 3067.4       |
| wavelet-LLH | glszm      | SmallAreaEmphasis                    | 0.825        |
| wavelet-LLH | glszm      | LowGrayLevelZoneEmphasis             | 0.034429617  |
| wavelet-LLH | glszm      | ZoneEntropy                          | 4.773557262  |
| wavelet-LLH | glszm      | SmallAreaLowGrayLevelEmphasis        | 0.034382283  |
| wavelet-LLH | ngtdm      | Coarseness                           | 0.045801859  |
| wavelet-LLH | ngtdm      | Complexity                           | 13080.5226   |
| wavelet-LLH | ngtdm      | Strength                             | 84.24709468  |
| wavelet-LLH | ngtdm      | Contrast                             | 18.81624933  |
| wavelet-LLH | ngtdm      | Busyness                             | 0.0200553    |
| wavelet-LLL | gldm       | GrayLevelVariance                    | 214.8327246  |
| wavelet-LLL | gldm       | HighGrayLevelEmphasis                | 1160.810811  |
| wavelet-LLL | gldm       | DependenceEntropy                    | 4.831074987  |
| wavelet-LLL | gldm       | DependenceNonUniformity              | 26.94594595  |
| wavelet-LLL | gldm       | GrayLevelNonUniformity               | 1.378378378  |
| wavelet-LLL | gldm       | SmallDependenceEmphasis              | 0.878378378  |
| wavelet-LLL | gldm       | SmallDependenceHighGrayLevelEmphasis | 1015.067568  |
| wavelet-LLL | gldm       | DependenceNonUniformityNormalized    | 0.728268809  |
| wavelet-LLL | gldm       | LargeDependenceEmphasis              | 1.486486486  |
| wavelet-LLL | gldm       | LargeDependenceLowGrayLevelEmphasis  | 0.030575592  |
| wavelet-LLL | gldm       | DependenceVariance                   | 0.135865595  |
| wavelet-LLL | gldm       | LargeDependenceHighGrayLevelEmphasis | 1743.783784  |
| wavelet-LLL | gldm       | SmallDependenceLowGrayLevelEmphasis  | 0.029431794  |
| wavelet-LLL | gldm       | LowGrayLevelEmphasis                 | 0.029660553  |

|             |            |                                  |              |
|-------------|------------|----------------------------------|--------------|
| wavelet-LLL | glcm       | JointAverage                     | 33.4814355   |
| wavelet-LLL | glcm       | SumAverage                       | 66.962871    |
| wavelet-LLL | glcm       | JointEntropy                     | 4.958694101  |
| wavelet-LLL | glcm       | ClusterShade                     | -1799.982692 |
| wavelet-LLL | glcm       | MaximumProbability               | 0.041009394  |
| wavelet-LLL | glcm       | Idmn                             | 0.919903243  |
| wavelet-LLL | glcm       | JointEnergy                      | 0.03513821   |
| wavelet-LLL | glcm       | Contrast                         | 433.5432457  |
| wavelet-LLL | glcm       | DifferenceEntropy                | 3.682110635  |
| wavelet-LLL | glcm       | InverseVariance                  | 0.050808746  |
| wavelet-LLL | glcm       | DifferenceVariance               | 145.9139159  |
| wavelet-LLL | glcm       | Idn                              | 0.813209476  |
| wavelet-LLL | glcm       | Idm                              | 0.046685283  |
| wavelet-LLL | glcm       | Correlation                      | 0.040157412  |
| wavelet-LLL | glcm       | Autocorrelation                  | 1133.715423  |
| wavelet-LLL | glcm       | SumEntropy                       | 3.908436056  |
| wavelet-LLL | glcm       | SumSquares                       | 226.2313673  |
| wavelet-LLL | glcm       | ClusterProminence                | 590639.0142  |
| wavelet-LLL | glcm       | Imc2                             | 0.999799705  |
| wavelet-LLL | glcm       | Imc1                             | -0.890945113 |
| wavelet-LLL | glcm       | DifferenceAverage                | 16.82415257  |
| wavelet-LLL | glcm       | Id                               | 0.114005364  |
| wavelet-LLL | glcm       | ClusterTendency                  | 471.3822233  |
| wavelet-LLL | firstorder | InterquartileRange               | 455.1350158  |
| wavelet-LLL | firstorder | Skewness                         | 0.109468148  |
| wavelet-LLL | firstorder | Uniformity                       | 0.03725347   |
| wavelet-LLL | firstorder | Median                           | -1137.971137 |
| wavelet-LLL | firstorder | Energy                           | 55485268.82  |
| wavelet-LLL | firstorder | RobustMeanAbsoluteDeviation      | 212.7567733  |
| wavelet-LLL | firstorder | MeanAbsoluteDeviation            | 299.8523635  |
| wavelet-LLL | firstorder | TotalEnergy                      | 1498102258   |
| wavelet-LLL | firstorder | Maximum                          | -290.7839299 |
| wavelet-LLL | firstorder | RootMeanSquared                  | 1224.582321  |
| wavelet-LLL | firstorder | 90Percentile                     | -783.9819129 |
| wavelet-LLL | firstorder | Minimum                          | -1914.887492 |
| wavelet-LLL | firstorder | Entropy                          | 4.831074987  |
| wavelet-LLL | firstorder | Range                            | 1624.103563  |
| wavelet-LLL | firstorder | Variance                         | 132950.2751  |
| wavelet-LLL | firstorder | 10Percentile                     | -1639.829141 |
| wavelet-LLL | firstorder | Kurtosis                         | 2.673648852  |
| wavelet-LLL | firstorder | Mean                             | -1169.038744 |
| wavelet-LLL | glrlm      | ShortRunLowGrayLevelEmphasis     | 0.029829585  |
| wavelet-LLL | glrlm      | GrayLevelVariance                | 215.1862008  |
| wavelet-LLL | glrlm      | LowGrayLevelRunEmphasis          | 0.029838628  |
| wavelet-LLL | glrlm      | GrayLevelNonUniformityNormalized | 0.037203524  |
| wavelet-LLL | glrlm      | RunVariance                      | 0.006232194  |
| wavelet-LLL | glrlm      | GrayLevelNonUniformity           | 1.367983368  |
| wavelet-LLL | glrlm      | LongRunEmphasis                  | 1.019230769  |
| wavelet-LLL | glrlm      | ShortRunHighGrayLevelEmphasis    | 1154.809064  |
| wavelet-LLL | glrlm      | RunLengthNonUniformity           | 36.32051282  |
| wavelet-LLL | glrlm      | ShortRunEmphasis                 | 0.995192308  |
| wavelet-LLL | glrlm      | LongRunHighGrayLevelEmphasis     | 1183.615154  |
| wavelet-LLL | glrlm      | RunPercentage                    | 0.993762994  |
| wavelet-LLL | glrlm      | LongRunLowGrayLevelEmphasis      | 0.029874799  |
| wavelet-LLL | glrlm      | RunEntropy                       | 4.832348067  |

|             |       |                                      |              |
|-------------|-------|--------------------------------------|--------------|
| wavelet-LLL | glrlm | HighGrayLevelRunEmphasis             | 1160.570282  |
| wavelet-LLL | glrlm | RunLengthNonUniformityNormalized     | 0.987535613  |
| wavelet-LLL | glszm | GrayLevelVariance                    | 220.0596886  |
| wavelet-LLL | glszm | ZoneVariance                         | 0.080449827  |
| wavelet-LLL | glszm | GrayLevelNonUniformityNormalized     | 0.03633218   |
| wavelet-LLL | glszm | SizeZoneNonUniformityNormalized      | 0.839100346  |
| wavelet-LLL | glszm | SizeZoneNonUniformity                | 28.52941176  |
| wavelet-LLL | glszm | GrayLevelNonUniformity               | 1.235294118  |
| wavelet-LLL | glszm | LargeAreaEmphasis                    | 1.264705882  |
| wavelet-LLL | glszm | SmallAreaHighGrayLevelEmphasis       | 1078.198529  |
| wavelet-LLL | glszm | ZonePercentage                       | 0.918918919  |
| wavelet-LLL | glszm | LargeAreaLowGrayLevelEmphasis        | 0.032609587  |
| wavelet-LLL | glszm | LargeAreaHighGrayLevelEmphasis       | 1474.705882  |
| wavelet-LLL | glszm | HighGrayLevelZoneEmphasis            | 1157.5       |
| wavelet-LLL | glszm | SmallAreaEmphasis                    | 0.933823529  |
| wavelet-LLL | glszm | LowGrayLevelZoneEmphasis             | 0.032111698  |
| wavelet-LLL | glszm | ZoneEntropy                          | 4.852168724  |
| wavelet-LLL | glszm | SmallAreaLowGrayLevelEmphasis        | 0.031987226  |
| wavelet-LLL | ngtdm | Coarseness                           | 0.067318295  |
| wavelet-LLL | ngtdm | Complexity                           | 7029.703067  |
| wavelet-LLL | ngtdm | Strength                             | 63.00348155  |
| wavelet-LLL | ngtdm | Contrast                             | 5.777574301  |
| wavelet-LLL | ngtdm | Busyness                             | 0.02378517   |
| wavelet-HHL | gldm  | GrayLevelVariance                    | 16.35792549  |
| wavelet-HHL | gldm  | HighGrayLevelEmphasis                | 106.3513514  |
| wavelet-HHL | gldm  | DependenceEntropy                    | 4.391489514  |
| wavelet-HHL | gldm  | DependenceNonUniformity              | 17.10810811  |
| wavelet-HHL | gldm  | GrayLevelNonUniformity               | 3.378378378  |
| wavelet-HHL | gldm  | SmallDependenceEmphasis              | 0.705660661  |
| wavelet-HHL | gldm  | SmallDependenceHighGrayLevelEmphasis | 88.53238739  |
| wavelet-HHL | gldm  | DependenceNonUniformityNormalized    | 0.4623813    |
| wavelet-HHL | gldm  | LargeDependenceEmphasis              | 3.810810811  |
| wavelet-HHL | gldm  | LargeDependenceLowGrayLevelEmphasis  | 0.099347643  |
| wavelet-HHL | gldm  | DependenceVariance                   | 1.092768444  |
| wavelet-HHL | gldm  | LargeDependenceHighGrayLevelEmphasis | 289.7567568  |
| wavelet-HHL | gldm  | SmallDependenceLowGrayLevelEmphasis  | 0.038782399  |
| wavelet-HHL | gldm  | LowGrayLevelEmphasis                 | 0.044869125  |
| wavelet-HHL | glcm  | JointAverage                         | 9.482204865  |
| wavelet-HHL | glcm  | SumAverage                           | 18.96440973  |
| wavelet-HHL | glcm  | JointEntropy                         | 4.75626229   |
| wavelet-HHL | glcm  | ClusterShade                         | 11.8027627   |
| wavelet-HHL | glcm  | MaximumProbability                   | 0.063322206  |
| wavelet-HHL | glcm  | Idmn                                 | 0.912395887  |
| wavelet-HHL | glcm  | JointEnergy                          | 0.0412171    |
| wavelet-HHL | glcm  | Contrast                             | 40.10345487  |
| wavelet-HHL | glcm  | DifferenceEntropy                    | 2.878260221  |
| wavelet-HHL | glcm  | InverseVariance                      | 0.209836795  |
| wavelet-HHL | glcm  | DifferenceVariance                   | 12.32690589  |
| wavelet-HHL | glcm  | Idn                                  | 0.806021423  |
| wavelet-HHL | glcm  | Idm                                  | 0.169700392  |
| wavelet-HHL | glcm  | Correlation                          | -0.043295573 |
| wavelet-HHL | glcm  | Autocorrelation                      | 89.33163303  |
| wavelet-HHL | glcm  | SumEntropy                           | 3.260513133  |
| wavelet-HHL | glcm  | SumSquares                           | 19.01643296  |
| wavelet-HHL | glcm  | ClusterProminence                    | 3569.38465   |

|             |            |                                  |              |
|-------------|------------|----------------------------------|--------------|
| wavelet-HHL | glcm       | Imc2                             | 0.996055081  |
| wavelet-HHL | glcm       | Imc1                             | -0.698328293 |
| wavelet-HHL | glcm       | DifferenceAverage                | 5.10629499   |
| wavelet-HHL | glcm       | Id                               | 0.261617749  |
| wavelet-HHL | glcm       | ClusterTendency                  | 35.96227699  |
| wavelet-HHL | firstorder | InterquartileRange               | 143.152841   |
| wavelet-HHL | firstorder | Skewness                         | 0.263408276  |
| wavelet-HHL | firstorder | Uniformity                       | 0.091307524  |
| wavelet-HHL | firstorder | Median                           | -43.09377854 |
| wavelet-HHL | firstorder | Energy                           | 410053.4296  |
| wavelet-HHL | firstorder | RobustMeanAbsoluteDeviation      | 55.80358776  |
| wavelet-HHL | firstorder | MeanAbsoluteDeviation            | 81.9404176   |
| wavelet-HHL | firstorder | TotalEnergy                      | 11071442.6   |
| wavelet-HHL | firstorder | Maximum                          | 201.8758687  |
| wavelet-HHL | firstorder | RootMeanSquared                  | 105.2735728  |
| wavelet-HHL | firstorder | 90Percentile                     | 119.3111048  |
| wavelet-HHL | firstorder | Minimum                          | -249.8554256 |
| wavelet-HHL | firstorder | Entropy                          | 3.752260205  |
| wavelet-HHL | firstorder | Range                            | 451.7312943  |
| wavelet-HHL | firstorder | Variance                         | 10322.91492  |
| wavelet-HHL | firstorder | 10Percentile                     | -146.2344519 |
| wavelet-HHL | firstorder | Kurtosis                         | 2.60462211   |
| wavelet-HHL | firstorder | Mean                             | -27.56102689 |
| wavelet-HHL | glrlm      | ShortRunLowGrayLevelEmphasis     | 0.045119969  |
| wavelet-HHL | glrlm      | GrayLevelVariance                | 16.62757452  |
| wavelet-HHL | glrlm      | LowGrayLevelRunEmphasis          | 0.045517479  |
| wavelet-HHL | glrlm      | GrayLevelNonUniformityNormalized | 0.088901226  |
| wavelet-HHL | glrlm      | RunVariance                      | 0.024864292  |
| wavelet-HHL | glrlm      | GrayLevelNonUniformity           | 3.20923768   |
| wavelet-HHL | glrlm      | LongRunEmphasis                  | 1.078786899  |
| wavelet-HHL | glrlm      | ShortRunHighGrayLevelEmphasis    | 106.252257   |
| wavelet-HHL | glrlm      | RunLengthNonUniformity           | 34.32802557  |
| wavelet-HHL | glrlm      | ShortRunEmphasis                 | 0.980303275  |
| wavelet-HHL | glrlm      | LongRunHighGrayLevelEmphasis     | 112.4496686  |
| wavelet-HHL | glrlm      | RunPercentage                    | 0.975051975  |
| wavelet-HHL | glrlm      | LongRunLowGrayLevelEmphasis      | 0.047107517  |
| wavelet-HHL | glrlm      | RunEntropy                       | 3.850477965  |
| wavelet-HHL | glrlm      | HighGrayLevelRunEmphasis         | 107.4917393  |
| wavelet-HHL | glrlm      | RunLengthNonUniformityNormalized | 0.950271416  |
| wavelet-HHL | glszm      | GrayLevelVariance                | 19.53443878  |
| wavelet-HHL | glszm      | ZoneVariance                     | 1.003826531  |
| wavelet-HHL | glszm      | GrayLevelNonUniformityNormalized | 0.073979592  |
| wavelet-HHL | glszm      | SizeZoneNonUniformityNormalized  | 0.742346939  |
| wavelet-HHL | glszm      | SizeZoneNonUniformity            | 20.78571429  |
| wavelet-HHL | glszm      | GrayLevelNonUniformity           | 2.071428571  |
| wavelet-HHL | glszm      | LargeAreaEmphasis                | 2.75         |
| wavelet-HHL | glszm      | SmallAreaHighGrayLevelEmphasis   | 113.6170635  |
| wavelet-HHL | glszm      | ZonePercentage                   | 0.756756757  |
| wavelet-HHL | glszm      | LargeAreaLowGrayLevelEmphasis    | 0.083664083  |
| wavelet-HHL | glszm      | LargeAreaHighGrayLevelEmphasis   | 240.75       |
| wavelet-HHL | glszm      | HighGrayLevelZoneEmphasis        | 120.25       |
| wavelet-HHL | glszm      | SmallAreaEmphasis                | 0.879960317  |
| wavelet-HHL | glszm      | LowGrayLevelZoneEmphasis         | 0.052942717  |
| wavelet-HHL | glszm      | ZoneEntropy                      | 4.182005815  |
| wavelet-HHL | glszm      | SmallAreaLowGrayLevelEmphasis    | 0.050279032  |

|             |            |                                      |              |
|-------------|------------|--------------------------------------|--------------|
| wavelet-HHL | ngtdm      | Coarseness                           | 0.131474427  |
| wavelet-HHL | ngtdm      | Complexity                           | 360.8577631  |
| wavelet-HHL | ngtdm      | Strength                             | 11.66317279  |
| wavelet-HHL | ngtdm      | Contrast                             | 0.403905503  |
| wavelet-HHL | ngtdm      | Busyness                             | 0.058924529  |
| wavelet-HLH | gldm       | GrayLevelVariance                    | 143.7048941  |
| wavelet-HLH | gldm       | HighGrayLevelEmphasis                | 521.3243243  |
| wavelet-HLH | gldm       | DependenceEntropy                    | 4.411891879  |
| wavelet-HLH | gldm       | DependenceNonUniformity              | 15.91891892  |
| wavelet-HLH | gldm       | GrayLevelNonUniformity               | 2.513513514  |
| wavelet-HLH | gldm       | SmallDependenceEmphasis              | 0.603603604  |
| wavelet-HLH | gldm       | SmallDependenceHighGrayLevelEmphasis | 411.5900901  |
| wavelet-HLH | gldm       | DependenceNonUniformityNormalized    | 0.430241052  |
| wavelet-HLH | gldm       | LargeDependenceEmphasis              | 2.945945946  |
| wavelet-HLH | gldm       | LargeDependenceLowGrayLevelEmphasis  | 0.226148479  |
| wavelet-HLH | gldm       | DependenceVariance                   | 0.403214025  |
| wavelet-HLH | gldm       | LargeDependenceHighGrayLevelEmphasis | 1090.351351  |
| wavelet-HLH | gldm       | SmallDependenceLowGrayLevelEmphasis  | 0.015787809  |
| wavelet-HLH | gldm       | LowGrayLevelEmphasis                 | 0.057660297  |
| wavelet-HLH | glcm       | JointAverage                         | 18.09663596  |
| wavelet-HLH | glcm       | SumAverage                           | 36.19327192  |
| wavelet-HLH | glcm       | JointEntropy                         | 4.844779633  |
| wavelet-HLH | glcm       | ClusterShade                         | 4268.834155  |
| wavelet-HLH | glcm       | MaximumProbability                   | 0.053781143  |
| wavelet-HLH | glcm       | Idmn                                 | 0.969730442  |
| wavelet-HLH | glcm       | JointEnergy                          | 0.03810165   |
| wavelet-HLH | glcm       | Contrast                             | 170.3189069  |
| wavelet-HLH | glcm       | DifferenceEntropy                    | 3.124554701  |
| wavelet-HLH | glcm       | InverseVariance                      | 0.179070133  |
| wavelet-HLH | glcm       | DifferenceVariance                   | 100.5960141  |
| wavelet-HLH | glcm       | Idn                                  | 0.903274045  |
| wavelet-HLH | glcm       | Idm                                  | 0.153433717  |
| wavelet-HLH | glcm       | Correlation                          | -0.109759486 |
| wavelet-HLH | glcm       | Autocorrelation                      | 326.2052615  |
| wavelet-HLH | glcm       | SumEntropy                           | 3.408243367  |
| wavelet-HLH | glcm       | SumSquares                           | 83.06817583  |
| wavelet-HLH | glcm       | ClusterProminence                    | 326351.4249  |
| wavelet-HLH | glcm       | Imc2                                 | 0.998009589  |
| wavelet-HLH | glcm       | Imc1                                 | -0.739630556 |
| wavelet-HLH | glcm       | DifferenceAverage                    | 7.921812969  |
| wavelet-HLH | glcm       | Id                                   | 0.240926236  |
| wavelet-HLH | glcm       | ClusterTendency                      | 161.9537965  |
| wavelet-HLH | firstorder | InterquartileRange                   | 167.6458962  |
| wavelet-HLH | firstorder | Skewness                             | 2.139273875  |
| wavelet-HLH | firstorder | Uniformity                           | 0.067932798  |
| wavelet-HLH | firstorder | Median                               | 17.42683478  |
| wavelet-HLH | firstorder | Energy                               | 3394052.156  |
| wavelet-HLH | firstorder | RobustMeanAbsoluteDeviation          | 74.70273447  |
| wavelet-HLH | firstorder | MeanAbsoluteDeviation                | 175.2986804  |
| wavelet-HLH | firstorder | TotalEnergy                          | 91639408.2   |
| wavelet-HLH | firstorder | Maximum                              | 1164.034999  |
| wavelet-HLH | firstorder | RootMeanSquared                      | 302.8714898  |
| wavelet-HLH | firstorder | 90Percentile                         | 172.232053   |
| wavelet-HLH | firstorder | Minimum                              | -416.6172575 |
| wavelet-HLH | firstorder | Entropy                              | 4.098117812  |

|             |            |                                  |             |
|-------------|------------|----------------------------------|-------------|
| wavelet-HLH | firstorder | Range                            | 1580.652256 |
| wavelet-HLH | firstorder | Variance                         | 89470.44266 |
| wavelet-HLH | firstorder | 10Percentile                     | -150.749319 |
| wavelet-HLH | firstorder | Kurtosis                         | 8.297571308 |
| wavelet-HLH | firstorder | Mean                             | 47.54678415 |
| wavelet-HLH | glrlm      | ShortRunLowGrayLevelEmphasis     | 0.054959657 |
| wavelet-HLH | glrlm      | GrayLevelVariance                | 146.112357  |
| wavelet-HLH | glrlm      | LowGrayLevelRunEmphasis          | 0.056716538 |
| wavelet-HLH | glrlm      | GrayLevelNonUniformityNormalized | 0.067360871 |
| wavelet-HLH | glrlm      | RunVariance                      | 0.022763886 |
| wavelet-HLH | glrlm      | GrayLevelNonUniformity           | 2.435849877 |
| wavelet-HLH | glrlm      | LongRunEmphasis                  | 1.072775264 |
| wavelet-HLH | glrlm      | ShortRunHighGrayLevelEmphasis    | 521.8835997 |
| wavelet-HLH | glrlm      | RunLengthNonUniformity           | 34.56435395 |
| wavelet-HLH | glrlm      | ShortRunEmphasis                 | 0.981806184 |
| wavelet-HLH | glrlm      | LongRunHighGrayLevelEmphasis     | 547.7848063 |
| wavelet-HLH | glrlm      | RunPercentage                    | 0.977130977 |
| wavelet-HLH | glrlm      | LongRunLowGrayLevelEmphasis      | 0.06374406  |
| wavelet-HLH | glrlm      | RunEntropy                       | 4.14319822  |
| wavelet-HLH | glrlm      | HighGrayLevelRunEmphasis         | 527.063841  |
| wavelet-HLH | glrlm      | RunLengthNonUniformityNormalized | 0.954472228 |
| wavelet-HLH | glszm      | GrayLevelVariance                | 177.9286694 |
| wavelet-HLH | glszm      | ZoneVariance                     | 0.307270233 |
| wavelet-HLH | glszm      | GrayLevelNonUniformityNormalized | 0.061728395 |
| wavelet-HLH | glszm      | SizeZoneNonUniformityNormalized  | 0.533607682 |
| wavelet-HLH | glszm      | SizeZoneNonUniformity            | 14.40740741 |
| wavelet-HLH | glszm      | GrayLevelNonUniformity           | 1.666666667 |
| wavelet-HLH | glszm      | LargeAreaEmphasis                | 2.185185185 |
| wavelet-HLH | glszm      | SmallAreaHighGrayLevelEmphasis   | 541.9393004 |
| wavelet-HLH | glszm      | ZonePercentage                   | 0.72972973  |
| wavelet-HLH | glszm      | LargeAreaLowGrayLevelEmphasis    | 0.155774509 |
| wavelet-HLH | glszm      | LargeAreaHighGrayLevelEmphasis   | 947.5925926 |
| wavelet-HLH | glszm      | HighGrayLevelZoneEmphasis        | 611.1851852 |
| wavelet-HLH | glszm      | SmallAreaEmphasis                | 0.744855967 |
| wavelet-HLH | glszm      | LowGrayLevelZoneEmphasis         | 0.040739285 |
| wavelet-HLH | glszm      | ZoneEntropy                      | 4.430632409 |
| wavelet-HLH | glszm      | SmallAreaLowGrayLevelEmphasis    | 0.012094475 |
| wavelet-HLH | ngtdm      | Coarseness                       | 0.081177617 |
| wavelet-HLH | ngtdm      | Complexity                       | 2909.9883   |
| wavelet-HLH | ngtdm      | Strength                         | 57.58135841 |
| wavelet-HLH | ngtdm      | Contrast                         | 5.404939762 |
| wavelet-HLH | ngtdm      | Busyness                         | 0.045533533 |

| Image type | Feature Class | Feature Name                         |                                                                                                                                                                                                                                                                                                                                                                                                                                              |
|------------|---------------|--------------------------------------|----------------------------------------------------------------------------------------------------------------------------------------------------------------------------------------------------------------------------------------------------------------------------------------------------------------------------------------------------------------------------------------------------------------------------------------------|
| general    | info          | BoundingBox                          | 7: RTSTRUCT: C99_DNU_segment_Tumor<br>(0, 0, 1, 25, 24, 20)                                                                                                                                                                                                                                                                                                                                                                                  |
| general    | info          | EnabledImageTypes                    | {u'Original': {}, u'Wavelet': {}}                                                                                                                                                                                                                                                                                                                                                                                                            |
|            |               |                                      | {'distances': [1], 'additionalInfo': True,<br>'force2D': False, 'interpolator': 'sitkBSpline',<br>'resampledPixelSpacing': [3.0], 'label': 1,<br>'normalizeScale': 1, 'normalize': False,<br>'force2Ddimension': 0, 'removeOutliers':<br>None, 'minimumROISize': None, u'binWidth':<br>25.0, 'minimumROIDimensions': 1,<br>u'correctMask': True, 'preCrop': False,<br>u'symmetricalGLCM': True,<br>'resegmentRange': None, 'padDistance': 5} |
| general    | info          | GeneralSettings                      | 4dc4e8a678c240e442e6879347266657b859<br>bbb0                                                                                                                                                                                                                                                                                                                                                                                                 |
| general    | info          | ImageHash                            |                                                                                                                                                                                                                                                                                                                                                                                                                                              |
| general    | info          | ImageSpacing                         | (0.9765624999999998,<br>0.9765624999999998, 1.9999999999999999)<br>44577aaf0a2507e783147c287d2522b15605<br>6df6                                                                                                                                                                                                                                                                                                                              |
| general    | info          | MaskHash                             |                                                                                                                                                                                                                                                                                                                                                                                                                                              |
| general    | info          | NumpyVersion                         | 1.13.1                                                                                                                                                                                                                                                                                                                                                                                                                                       |
| general    | info          | PyWaveletVersion                     | 0.5.2                                                                                                                                                                                                                                                                                                                                                                                                                                        |
| general    | info          | SimpleITKVersion                     | 1.1.0                                                                                                                                                                                                                                                                                                                                                                                                                                        |
| general    | info          | Version                              | 1.3.0.post102+g1b0eb74                                                                                                                                                                                                                                                                                                                                                                                                                       |
| general    | info          | VolumeNum                            | 1                                                                                                                                                                                                                                                                                                                                                                                                                                            |
| general    | info          | VoxelNum                             | 4698                                                                                                                                                                                                                                                                                                                                                                                                                                         |
| original   | shape         | Maximum3DDiameter                    | 86.1684397                                                                                                                                                                                                                                                                                                                                                                                                                                   |
| original   | shape         | Maximum2DDiameterSlice               | 76.4852927                                                                                                                                                                                                                                                                                                                                                                                                                                   |
| original   | shape         | Sphericity                           | 0.802412988                                                                                                                                                                                                                                                                                                                                                                                                                                  |
| original   | shape         | MinorAxis                            | 52.52326729                                                                                                                                                                                                                                                                                                                                                                                                                                  |
| original   | shape         | Elongation                           | 0.727645538                                                                                                                                                                                                                                                                                                                                                                                                                                  |
| original   | shape         | SurfaceVolumeRatio                   | 0.11994825                                                                                                                                                                                                                                                                                                                                                                                                                                   |
| original   | shape         | Volume                               | 126846                                                                                                                                                                                                                                                                                                                                                                                                                                       |
| original   | shape         | MajorAxis                            | 72.18249069                                                                                                                                                                                                                                                                                                                                                                                                                                  |
| original   | shape         | SurfaceArea                          | 15214.95572                                                                                                                                                                                                                                                                                                                                                                                                                                  |
| original   | shape         | Flatness                             | 0.657468495                                                                                                                                                                                                                                                                                                                                                                                                                                  |
| original   | shape         | LeastAxis                            | 47.4577135                                                                                                                                                                                                                                                                                                                                                                                                                                   |
| original   | shape         | Maximum2DDiameterColumn              | 67.08203932                                                                                                                                                                                                                                                                                                                                                                                                                                  |
| original   | shape         | Maximum2DDiameterRow                 | 70.29224708                                                                                                                                                                                                                                                                                                                                                                                                                                  |
| original   | gldm          | GrayLevelVariance                    | 178.0301662                                                                                                                                                                                                                                                                                                                                                                                                                                  |
| original   | gldm          | HighGrayLevelEmphasis                | 1324.727544                                                                                                                                                                                                                                                                                                                                                                                                                                  |
| original   | gldm          | DependenceEntropy                    | 7.036291477                                                                                                                                                                                                                                                                                                                                                                                                                                  |
| original   | gldm          | DependenceNonUniformity              | 419.0791826                                                                                                                                                                                                                                                                                                                                                                                                                                  |
| original   | gldm          | GrayLevelNonUniformity               | 731.2005109                                                                                                                                                                                                                                                                                                                                                                                                                                  |
| original   | gldm          | SmallDependenceEmphasis              | 0.27680686                                                                                                                                                                                                                                                                                                                                                                                                                                   |
| original   | gldm          | SmallDependenceHighGrayLevelEmphasis | 222.2744472                                                                                                                                                                                                                                                                                                                                                                                                                                  |
| original   | gldm          | DependenceNonUniformityNormalized    | 0.089203743                                                                                                                                                                                                                                                                                                                                                                                                                                  |
| original   | gldm          | LargeDependenceEmphasis              | 113.49255                                                                                                                                                                                                                                                                                                                                                                                                                                    |
| original   | gldm          | LargeDependenceLowGrayLevelEmphasis  | 0.222898849                                                                                                                                                                                                                                                                                                                                                                                                                                  |
| original   | gldm          | DependenceVariance                   | 48.45302866                                                                                                                                                                                                                                                                                                                                                                                                                                  |



|          |            |                                      |              |
|----------|------------|--------------------------------------|--------------|
| original | gldm       | LargeDependenceHighGrayLevelEmphasis | 196679.6701  |
| original | gldm       | SmallDependenceLowGrayLevelEmphasis  | 0.004525609  |
| original | gldm       | LowGrayLevelEmphasis                 | 0.0120954    |
| original | glcm       | JointAverage                         | 35.60937297  |
| original | glcm       | SumAverage                           | 71.21874594  |
| original | glcm       | JointEntropy                         | 6.688864932  |
| original | glcm       | ClusterShade                         | -15739.61989 |
| original | glcm       | MaximumProbability                   | 0.215482855  |
| original | glcm       | ldmn                                 | 0.98306387   |
| original | glcm       | JointEnergy                          | 0.066313033  |
| original | glcm       | Contrast                             | 113.2663353  |
| original | glcm       | DifferenceEntropy                    | 3.505971116  |
| original | glcm       | InverseVariance                      | 0.311062219  |
| original | glcm       | DifferenceVariance                   | 81.78916823  |
| original | glcm       | ldn                                  | 0.942187681  |
| original | glcm       | ldm                                  | 0.470958637  |
| original | glcm       | Correlation                          | 0.599502177  |
| original | glcm       | Autocorrelation                      | 1354.333521  |
| original | glcm       | SumEntropy                           | 4.707259872  |
| original | glcm       | SumSquares                           | 142.831991   |
| original | glcm       | ClusterProminence                    | 950198.8142  |
| original | glcm       | lmc2                                 | 0.83045137   |
| original | glcm       | lmc1                                 | -0.166036434 |
| original | glcm       | DifferenceAverage                    | 5.554139677  |
| original | glcm       | ld                                   | 0.506034699  |
| original | glcm       | ClusterTendency                      | 458.0616287  |
| original | firstorder | InterquartileRange                   | 341.5        |
| original | firstorder | Skewness                             | -1.280414712 |
| original | firstorder | Uniformity                           | 0.155640807  |
| original | firstorder | Median                               | -4           |
| original | firstorder | Energy                               | 694883622    |
| original | firstorder | RobustMeanAbsoluteDeviation          | 186.9796975  |
| original | firstorder | MeanAbsoluteDeviation                | 273.5375631  |
| original | firstorder | TotalEnergy                          | 18761857794  |
| original | firstorder | Maximum                              | 878          |
| original | firstorder | RootMeanSquared                      | 384.5913673  |
| original | firstorder | 90Percentile                         | 27           |
| original | firstorder | Minimum                              | -1012        |
| original | firstorder | Entropy                              | 3.950904826  |
| original | firstorder | Range                                | 1890         |
| original | firstorder | Variance                             | 111196.7623  |
| original | firstorder | 10Percentile                         | -832         |
| original | firstorder | Kurtosis                             | 3.240799689  |
| original | firstorder | Mean                                 | -191.608344  |
| original | glrlm      | ShortRunLowGrayLevelEmphasis         | 0.014330086  |
| original | glrlm      | GrayLevelVariance                    | 205.4624622  |
| original | glrlm      | LowGrayLevelRunEmphasis              | 0.015218192  |
| original | glrlm      | GrayLevelNonUniformityNormalized     | 0.084854362  |
| original | glrlm      | RunVariance                          | 0.993845051  |
| original | glrlm      | GrayLevelNonUniformity               | 290.7521026  |
| original | glrlm      | LongRunEmphasis                      | 2.885805093  |
| original | glrlm      | ShortRunHighGrayLevelEmphasis        | 917.5128033  |
| original | glrlm      | RunLengthNonUniformity               | 2271.320459  |

|             |       |                                      |             |
|-------------|-------|--------------------------------------|-------------|
| original    | glrlm | ShortRunEmphasis                     | 0.839253346 |
| original    | glrlm | LongRunHighGrayLevelEmphasis         | 4427.996261 |
| original    | glrlm | RunPercentage                        | 0.728280447 |
| original    | glrlm | LongRunLowGrayLevelEmphasis          | 0.020330196 |
| original    | glrlm | RunEntropy                           | 5.407386765 |
| original    | glrlm | HighGrayLevelRunEmphasis             | 1184.755005 |
| original    | glrlm | RunLengthNonUniformityNormalized     | 0.663140178 |
| original    | glszm | GrayLevelVariance                    | 190.7109555 |
| original    | glszm | ZoneVariance                         | 2241.503098 |
| original    | glszm | GrayLevelNonUniformityNormalized     | 0.024273455 |
| original    | glszm | SizeZoneNonUniformityNormalized      | 0.626656234 |
| original    | glszm | SizeZoneNonUniformity                | 878.5720399 |
| original    | glszm | GrayLevelNonUniformity               | 34.03138374 |
| original    | glszm | LargeAreaEmphasis                    | 2252.731812 |
| original    | glszm | SmallAreaHighGrayLevelEmphasis       | 631.4337558 |
| original    | glszm | ZonePercentage                       | 0.298424862 |
| original    | glszm | LargeAreaLowGrayLevelEmphasis        | 1.561491132 |
| original    | glszm | LargeAreaHighGrayLevelEmphasis       | 3948505.153 |
| original    | glszm | HighGrayLevelZoneEmphasis            | 762.2346648 |
| original    | glszm | SmallAreaEmphasis                    | 0.81863106  |
| original    | glszm | LowGrayLevelZoneEmphasis             | 0.018786011 |
| original    | glszm | ZoneEntropy                          | 6.490865536 |
| original    | glszm | SmallAreaLowGrayLevelEmphasis        | 0.012413931 |
| original    | ngtdm | Coarseness                           | 0.000735893 |
| original    | ngtdm | Complexity                           | 10595.80385 |
| original    | ngtdm | Strength                             | 3.615994507 |
| original    | ngtdm | Contrast                             | 0.388751879 |
| original    | ngtdm | Busyness                             | 0.365035885 |
| wavelet-HHH | gldm  | GrayLevelVariance                    | 7.875090276 |
| wavelet-HHH | gldm  | HighGrayLevelEmphasis                | 279.247765  |
| wavelet-HHH | gldm  | DependenceEntropy                    | 6.247285041 |
| wavelet-HHH | gldm  | DependenceNonUniformity              | 394.1281396 |
| wavelet-HHH | gldm  | GrayLevelNonUniformity               | 831.3639847 |
| wavelet-HHH | gldm  | SmallDependenceEmphasis              | 0.196198084 |
| wavelet-HHH | gldm  | SmallDependenceHighGrayLevelEmphasis | 56.89897855 |
| wavelet-HHH | gldm  | DependenceNonUniformityNormalized    | 0.08389275  |
| wavelet-HHH | gldm  | LargeDependenceEmphasis              | 70.94848872 |
| wavelet-HHH | gldm  | LargeDependenceLowGrayLevelEmphasis  | 0.264175771 |
| wavelet-HHH | gldm  | DependenceVariance                   | 24.69806668 |
| wavelet-HHH | gldm  | LargeDependenceHighGrayLevelEmphasis | 19301.82205 |
| wavelet-HHH | gldm  | SmallDependenceLowGrayLevelEmphasis  | 0.001553661 |
| wavelet-HHH | gldm  | LowGrayLevelEmphasis                 | 0.00467067  |
| wavelet-HHH | glcm  | JointAverage                         | 16.4816208  |
| wavelet-HHH | glcm  | SumAverage                           | 32.9632416  |
| wavelet-HHH | glcm  | JointEntropy                         | 5.889860659 |
| wavelet-HHH | glcm  | ClusterShade                         | -3.54529676 |
| wavelet-HHH | glcm  | MaximumProbability                   | 0.126932328 |
| wavelet-HHH | glcm  | ldmn                                 | 0.989070152 |
| wavelet-HHH | glcm  | JointEnergy                          | 0.056074048 |
| wavelet-HHH | glcm  | Contrast                             | 14.56945377 |
| wavelet-HHH | glcm  | DifferenceEntropy                    | 2.867013345 |
| wavelet-HHH | glcm  | InverseVariance                      | 0.373197912 |
| wavelet-HHH | glcm  | DifferenceVariance                   | 8.98079047  |

|             |            |                                  |              |
|-------------|------------|----------------------------------|--------------|
| wavelet-HHH | glcm       | Idn                              | 0.942400061  |
| wavelet-HHH | glcm       | Idm                              | 0.455193289  |
| wavelet-HHH | glcm       | Correlation                      | -0.027518534 |
| wavelet-HHH | glcm       | Autocorrelation                  | 271.4457375  |
| wavelet-HHH | glcm       | SumEntropy                       | 3.58442157   |
| wavelet-HHH | glcm       | SumSquares                       | 7.086494699  |
| wavelet-HHH | glcm       | ClusterProminence                | 1568.242583  |
| wavelet-HHH | glcm       | Imc2                             | 0.615453847  |
| wavelet-HHH | glcm       | Imc1                             | -0.079270972 |
| wavelet-HHH | glcm       | DifferenceAverage                | 2.347283196  |
| wavelet-HHH | glcm       | Id                               | 0.507504643  |
| wavelet-HHH | glcm       | ClusterTendency                  | 13.77652503  |
| wavelet-HHH | firstorder | InterquartileRange               | 37.4934186   |
| wavelet-HHH | firstorder | Skewness                         | -0.116252512 |
| wavelet-HHH | firstorder | Uniformity                       | 0.176961257  |
| wavelet-HHH | firstorder | Median                           | -0.051041827 |
| wavelet-HHH | firstorder | Energy                           | 22900980.45  |
| wavelet-HHH | firstorder | RobustMeanAbsoluteDeviation      | 19.70339672  |
| wavelet-HHH | firstorder | MeanAbsoluteDeviation            | 42.70361999  |
| wavelet-HHH | firstorder | TotalEnergy                      | 618326472.2  |
| wavelet-HHH | firstorder | Maximum                          | 468.4457846  |
| wavelet-HHH | firstorder | RootMeanSquared                  | 69.81850285  |
| wavelet-HHH | firstorder | 90Percentile                     | 69.64862404  |
| wavelet-HHH | firstorder | Minimum                          | -397.6850149 |
| wavelet-HHH | firstorder | Entropy                          | 3.185454674  |
| wavelet-HHH | firstorder | Range                            | 866.1307994  |
| wavelet-HHH | firstorder | Variance                         | 4874.297467  |
| wavelet-HHH | firstorder | 10Percentile                     | -74.19422485 |
| wavelet-HHH | firstorder | Kurtosis                         | 7.483152313  |
| wavelet-HHH | firstorder | Mean                             | -0.570853523 |
| wavelet-HHH | glrlm      | ShortRunLowGrayLevelEmphasis     | 0.004375142  |
| wavelet-HHH | glrlm      | GrayLevelVariance                | 9.814983016  |
| wavelet-HHH | glrlm      | LowGrayLevelRunEmphasis          | 0.004940404  |
| wavelet-HHH | glrlm      | GrayLevelNonUniformityNormalzied | 0.136714661  |
| wavelet-HHH | glrlm      | RunVariance                      | 0.544461566  |
| wavelet-HHH | glrlm      | GrayLevelNonUniformity           | 499.4989372  |
| wavelet-HHH | glrlm      | LongRunEmphasis                  | 2.206975458  |
| wavelet-HHH | glrlm      | ShortRunHighGrayLevelEmphasis    | 239.6667015  |
| wavelet-HHH | glrlm      | RunLengthNonUniformity           | 2474.626294  |
| wavelet-HHH | glrlm      | ShortRunEmphasis                 | 0.849184872  |
| wavelet-HHH | glrlm      | LongRunHighGrayLevelEmphasis     | 609.8205997  |
| wavelet-HHH | glrlm      | RunPercentage                    | 0.776893604  |
| wavelet-HHH | glrlm      | LongRunLowGrayLevelEmphasis      | 0.009442159  |
| wavelet-HHH | glrlm      | RunEntropy                       | 4.299989651  |
| wavelet-HHH | glrlm      | HighGrayLevelRunEmphasis         | 281.0036302  |
| wavelet-HHH | glrlm      | RunLengthNonUniformityNormalized | 0.677487124  |
| wavelet-HHH | glszm      | GrayLevelVariance                | 25.56453454  |
| wavelet-HHH | glszm      | ZoneVariance                     | 3281.29628   |
| wavelet-HHH | glszm      | GrayLevelNonUniformityNormalized | 0.060302578  |
| wavelet-HHH | glszm      | SizeZoneNonUniformityNormalized  | 0.44680498   |
| wavelet-HHH | glszm      | SizeZoneNonUniformity            | 441.4433198  |
| wavelet-HHH | glszm      | GrayLevelNonUniformity           | 59.57894737  |
| wavelet-HHH | glszm      | LargeAreaEmphasis                | 3303.906883  |

|             |            |                                      |              |
|-------------|------------|--------------------------------------|--------------|
| wavelet-HHH | glszm      | SmallAreaHighGrayLevelEmphasis       | 203.3282586  |
| wavelet-HHH | glszm      | ZonePercentage                       | 0.210302256  |
| wavelet-HHH | glszm      | LargeAreaLowGrayLevelEmphasis        | 12.19884875  |
| wavelet-HHH | glszm      | LargeAreaHighGrayLevelEmphasis       | 898804.5526  |
| wavelet-HHH | glszm      | HighGrayLevelZoneEmphasis            | 290.3512146  |
| wavelet-HHH | glszm      | SmallAreaEmphasis                    | 0.695040369  |
| wavelet-HHH | glszm      | LowGrayLevelZoneEmphasis             | 0.00780705   |
| wavelet-HHH | glszm      | ZoneEntropy                          | 5.914106832  |
| wavelet-HHH | glszm      | SmallAreaLowGrayLevelEmphasis        | 0.006379916  |
| wavelet-HHH | ngtdm      | Coarseness                           | 1.64E-03     |
| wavelet-HHH | ngtdm      | Complexity                           | 781.1897933  |
| wavelet-HHH | ngtdm      | Strength                             | 0.656354135  |
| wavelet-HHH | ngtdm      | Contrast                             | 0.031775795  |
| wavelet-HHH | ngtdm      | Busyness                             | 0.768960897  |
| wavelet-HLL | gldm       | GrayLevelVariance                    | 46.9360068   |
| wavelet-HLL | gldm       | HighGrayLevelEmphasis                | 1846.497871  |
| wavelet-HLL | gldm       | DependenceEntropy                    | 7.178338361  |
| wavelet-HLL | gldm       | DependenceNonUniformity              | 611.9778629  |
| wavelet-HLL | gldm       | GrayLevelNonUniformity               | 423.308642   |
| wavelet-HLL | gldm       | SmallDependenceEmphasis              | 0.305172558  |
| wavelet-HLL | gldm       | SmallDependenceHighGrayLevelEmphasis | 570.5544156  |
| wavelet-HLL | gldm       | DependenceNonUniformityNormalized    | 0.130263487  |
| wavelet-HLL | gldm       | LargeDependenceEmphasis              | 57.51809281  |
| wavelet-HLL | gldm       | LargeDependenceLowGrayLevelEmphasis  | 0.030989883  |
| wavelet-HLL | gldm       | DependenceVariance                   | 27.11570896  |
| wavelet-HLL | gldm       | LargeDependenceHighGrayLevelEmphasis | 108581.9121  |
| wavelet-HLL | gldm       | SmallDependenceLowGrayLevelEmphasis  | 0.000428595  |
| wavelet-HLL | gldm       | LowGrayLevelEmphasis                 | 0.000835246  |
| wavelet-HLL | glcm       | JointAverage                         | 42.41529774  |
| wavelet-HLL | glcm       | SumAverage                           | 84.83059549  |
| wavelet-HLL | glcm       | JointEntropy                         | 7.86244418   |
| wavelet-HLL | glcm       | ClusterShade                         | 15.333422    |
| wavelet-HLL | glcm       | MaximumProbability                   | 0.092632941  |
| wavelet-HLL | glcm       | Idmn                                 | 0.989132369  |
| wavelet-HLL | glcm       | JointEnergy                          | 0.027566555  |
| wavelet-HLL | glcm       | Contrast                             | 56.31464186  |
| wavelet-HLL | glcm       | DifferenceEntropy                    | 3.684867379  |
| wavelet-HLL | glcm       | InverseVariance                      | 0.280524533  |
| wavelet-HLL | glcm       | DifferenceVariance                   | 34.34451255  |
| wavelet-HLL | glcm       | Idn                                  | 0.942730463  |
| wavelet-HLL | glcm       | Idm                                  | 0.350097619  |
| wavelet-HLL | glcm       | Correlation                          | 0.330656454  |
| wavelet-HLL | glcm       | Autocorrelation                      | 1813.560712  |
| wavelet-HLL | glcm       | SumEntropy                           | 4.972368194  |
| wavelet-HLL | glcm       | SumSquares                           | 42.65809642  |
| wavelet-HLL | glcm       | ClusterProminence                    | 70093.63219  |
| wavelet-HLL | glcm       | Imc2                                 | 0.834682879  |
| wavelet-HLL | glcm       | Imc1                                 | -0.147340975 |
| wavelet-HLL | glcm       | DifferenceAverage                    | 4.601770052  |
| wavelet-HLL | glcm       | Id                                   | 0.410857203  |
| wavelet-HLL | glcm       | ClusterTendency                      | 114.3177438  |
| wavelet-HLL | firstorder | InterquartileRange                   | 122.9433607  |
| wavelet-HLL | firstorder | Skewness                             | -0.146924371 |

|             |            |                                  |              |
|-------------|------------|----------------------------------|--------------|
| wavelet-HLL | firstorder | Uniformity                       | 0.090104011  |
| wavelet-HLL | firstorder | Median                           | -5.480106918 |
| wavelet-HLL | firstorder | Energy                           | 140992927    |
| wavelet-HLL | firstorder | RobustMeanAbsoluteDeviation      | 64.09421664  |
| wavelet-HLL | firstorder | MeanAbsoluteDeviation            | 116.839729   |
| wavelet-HLL | firstorder | TotalEnergy                      | 3806809029   |
| wavelet-HLL | firstorder | Maximum                          | 626.540058   |
| wavelet-HLL | firstorder | RootMeanSquared                  | 173.2375994  |
| wavelet-HLL | firstorder | 90Percentile                     | 175.8995233  |
| wavelet-HLL | firstorder | Minimum                          | -1054.760761 |
| wavelet-HLL | firstorder | Entropy                          | 4.39634981   |
| wavelet-HLL | firstorder | Range                            | 1681.300819  |
| wavelet-HLL | firstorder | Variance                         | 29290.66635  |
| wavelet-HLL | firstorder | 10Percentile                     | -246.2205258 |
| wavelet-HLL | firstorder | Kurtosis                         | 5.096236738  |
| wavelet-HLL | firstorder | Mean                             | -26.84398443 |
| wavelet-HLL | grlm       | ShortRunLowGrayLevelEmphasis     | 0.000837273  |
| wavelet-HLL | grlm       | GrayLevelVariance                | 54.87513555  |
| wavelet-HLL | grlm       | LowGrayLevelRunEmphasis          | 0.000897031  |
| wavelet-HLL | grlm       | GrayLevelNonUniformityNormalized | 0.062485991  |
| wavelet-HLL | grlm       | RunVariance                      | 0.469237243  |
| wavelet-HLL | grlm       | GrayLevelNonUniformity           | 243.6545236  |
| wavelet-HLL | grlm       | LongRunEmphasis                  | 1.944498595  |
| wavelet-HLL | grlm       | ShortRunHighGrayLevelEmphasis    | 1637.50088   |
| wavelet-HLL | grlm       | RunLengthNonUniformity           | 2946.354739  |
| wavelet-HLL | grlm       | ShortRunEmphasis                 | 0.89169626   |
| wavelet-HLL | grlm       | LongRunHighGrayLevelEmphasis     | 3616.723948  |
| wavelet-HLL | grlm       | RunPercentage                    | 0.826390936  |
| wavelet-HLL | grlm       | LongRunLowGrayLevelEmphasis      | 0.001407456  |
| wavelet-HLL | grlm       | RunEntropy                       | 5.309799974  |
| wavelet-HLL | grlm       | HighGrayLevelRunEmphasis         | 1840.108632  |
| wavelet-HLL | grlm       | RunLengthNonUniformityNormalized | 0.757786176  |
| wavelet-HLL | glszm      | GrayLevelVariance                | 88.56436605  |
| wavelet-HLL | glszm      | ZoneVariance                     | 854.3818441  |
| wavelet-HLL | glszm      | GrayLevelNonUniformityNormalized | 0.030671924  |
| wavelet-HLL | glszm      | SizeZoneNonUniformityNormalized  | 0.462353603  |
| wavelet-HLL | glszm      | SizeZoneNonUniformity            | 761.9587379  |
| wavelet-HLL | glszm      | GrayLevelNonUniformity           | 50.5473301   |
| wavelet-HLL | glszm      | LargeAreaEmphasis                | 862.5084951  |
| wavelet-HLL | glszm      | SmallAreaHighGrayLevelEmphasis   | 1338.232524  |
| wavelet-HLL | glszm      | ZonePercentage                   | 0.350787569  |
| wavelet-HLL | glszm      | LargeAreaLowGrayLevelEmphasis    | 0.456917061  |
| wavelet-HLL | glszm      | LargeAreaHighGrayLevelEmphasis   | 1632882.845  |
| wavelet-HLL | glszm      | HighGrayLevelZoneEmphasis        | 1860.831311  |
| wavelet-HLL | glszm      | SmallAreaEmphasis                | 0.706864296  |
| wavelet-HLL | glszm      | LowGrayLevelZoneEmphasis         | 0.001310356  |
| wavelet-HLL | glszm      | ZoneEntropy                      | 6.778303019  |
| wavelet-HLL | glszm      | SmallAreaLowGrayLevelEmphasis    | 0.001117097  |
| wavelet-HLL | ngtdm      | Coarseness                       | 0.001558657  |
| wavelet-HLL | ngtdm      | Complexity                       | 5329.763973  |
| wavelet-HLL | ngtdm      | Strength                         | 2.881530391  |
| wavelet-HLL | ngtdm      | Contrast                         | 0.090432146  |
| wavelet-HLL | ngtdm      | Busyness                         | 0.177794599  |

|             |            |                                      |              |
|-------------|------------|--------------------------------------|--------------|
| wavelet-LHL | gldm       | GrayLevelVariance                    | 62.30351874  |
| wavelet-LHL | gldm       | HighGrayLevelEmphasis                | 1473.011069  |
| wavelet-LHL | gldm       | DependenceEntropy                    | 7.136688435  |
| wavelet-LHL | gldm       | DependenceNonUniformity              | 671.9297573  |
| wavelet-LHL | gldm       | GrayLevelNonUniformity               | 430.7220094  |
| wavelet-LHL | gldm       | SmallDependenceEmphasis              | 0.351775078  |
| wavelet-LHL | gldm       | SmallDependenceHighGrayLevelEmphasis | 522.192861   |
| wavelet-LHL | gldm       | DependenceNonUniformityNormalized    | 0.14302464   |
| wavelet-LHL | gldm       | LargeDependenceEmphasis              | 53.45806726  |
| wavelet-LHL | gldm       | LargeDependenceLowGrayLevelEmphasis  | 0.037017419  |
| wavelet-LHL | gldm       | DependenceVariance                   | 25.55142819  |
| wavelet-LHL | gldm       | LargeDependenceHighGrayLevelEmphasis | 79410.58961  |
| wavelet-LHL | gldm       | SmallDependenceLowGrayLevelEmphasis  | 0.00099077   |
| wavelet-LHL | gldm       | LowGrayLevelEmphasis                 | 0.001470237  |
| wavelet-LHL | glcm       | JointAverage                         | 37.51597713  |
| wavelet-LHL | glcm       | SumAverage                           | 75.03195426  |
| wavelet-LHL | glcm       | JointEntropy                         | 7.975671917  |
| wavelet-LHL | glcm       | ClusterShade                         | -316.0025737 |
| wavelet-LHL | glcm       | MaximumProbability                   | 0.094120918  |
| wavelet-LHL | glcm       | ldmn                                 | 0.984382204  |
| wavelet-LHL | glcm       | JointEnergy                          | 0.027647461  |
| wavelet-LHL | glcm       | Contrast                             | 87.58015757  |
| wavelet-LHL | glcm       | DifferenceEntropy                    | 3.877466746  |
| wavelet-LHL | glcm       | InverseVariance                      | 0.27869846   |
| wavelet-LHL | glcm       | DifferenceVariance                   | 56.21785963  |
| wavelet-LHL | glcm       | ldn                                  | 0.934952306  |
| wavelet-LHL | glcm       | ldm                                  | 0.339108408  |
| wavelet-LHL | glcm       | Correlation                          | 0.200396467  |
| wavelet-LHL | glcm       | Autocorrelation                      | 1419.031214  |
| wavelet-LHL | glcm       | SumEntropy                           | 4.988140354  |
| wavelet-LHL | glcm       | SumSquares                           | 55.36967218  |
| wavelet-LHL | glcm       | ClusterProminence                    | 116687.61    |
| wavelet-LHL | glcm       | lmc2                                 | 0.852868909  |
| wavelet-LHL | glcm       | lmc1                                 | -0.154550081 |
| wavelet-LHL | glcm       | DifferenceAverage                    | 5.494285064  |
| wavelet-LHL | glcm       | ld                                   | 0.397733196  |
| wavelet-LHL | glcm       | ClusterTendency                      | 133.8985311  |
| wavelet-LHL | firstorder | InterquartileRange                   | 113.9561248  |
| wavelet-LHL | firstorder | Skewness                             | -0.262713831 |
| wavelet-LHL | firstorder | Uniformity                           | 0.091681994  |
| wavelet-LHL | firstorder | Median                               | -3.414887742 |
| wavelet-LHL | firstorder | Energy                               | 185214391.9  |
| wavelet-LHL | firstorder | RobustMeanAbsoluteDeviation          | 62.14935196  |
| wavelet-LHL | firstorder | MeanAbsoluteDeviation                | 127.0091958  |
| wavelet-LHL | firstorder | TotalEnergy                          | 5000788582   |
| wavelet-LHL | firstorder | Maximum                              | 799.0676849  |
| wavelet-LHL | firstorder | RootMeanSquared                      | 198.5550141  |
| wavelet-LHL | firstorder | 90Percentile                         | 193.5548485  |
| wavelet-LHL | firstorder | Minimum                              | -945.7575643 |
| wavelet-LHL | firstorder | Entropy                              | 4.49439159   |
| wavelet-LHL | firstorder | Range                                | 1744.825249  |
| wavelet-LHL | firstorder | Variance                             | 38869.73932  |
| wavelet-LHL | firstorder | 10Percentile                         | -259.1776787 |

|             |            |                                      |              |
|-------------|------------|--------------------------------------|--------------|
| wavelet-LHL | firstorder | Kurtosis                             | 5.822197532  |
| wavelet-LHL | firstorder | Mean                                 | -23.54473012 |
| wavelet-LHL | glrlm      | ShortRunLowGrayLevelEmphasis         | 0.001552843  |
| wavelet-LHL | glrlm      | GrayLevelVariance                    | 73.27921392  |
| wavelet-LHL | glrlm      | LowGrayLevelRunEmphasis              | 0.001625577  |
| wavelet-LHL | glrlm      | GrayLevelNonUniformityNormalized     | 0.063412558  |
| wavelet-LHL | glrlm      | RunVariance                          | 0.388328313  |
| wavelet-LHL | glrlm      | GrayLevelNonUniformity               | 249.6022125  |
| wavelet-LHL | glrlm      | LongRunEmphasis                      | 1.828704948  |
| wavelet-LHL | glrlm      | ShortRunHighGrayLevelEmphasis        | 1317.2284    |
| wavelet-LHL | glrlm      | RunLengthNonUniformity               | 3008.092109  |
| wavelet-LHL | glrlm      | ShortRunEmphasis                     | 0.895608819  |
| wavelet-LHL | glrlm      | LongRunHighGrayLevelEmphasis         | 2699.909892  |
| wavelet-LHL | glrlm      | RunPercentage                        | 0.835281789  |
| wavelet-LHL | glrlm      | LongRunLowGrayLevelEmphasis          | 0.00219375   |
| wavelet-LHL | glrlm      | RunEntropy                           | 5.398140943  |
| wavelet-LHL | glrlm      | HighGrayLevelRunEmphasis             | 1471.543063  |
| wavelet-LHL | glrlm      | RunLengthNonUniformityNormalized     | 0.765542145  |
| wavelet-LHL | glszm      | GrayLevelVariance                    | 127.6753569  |
| wavelet-LHL | glszm      | ZoneVariance                         | 818.2429243  |
| wavelet-LHL | glszm      | GrayLevelNonUniformityNormalized     | 0.026276171  |
| wavelet-LHL | glszm      | SizeZoneNonUniformityNormalized      | 0.549496446  |
| wavelet-LHL | glszm      | SizeZoneNonUniformity                | 1016.018929  |
| wavelet-LHL | glszm      | GrayLevelNonUniformity               | 48.58464035  |
| wavelet-LHL | glszm      | LargeAreaEmphasis                    | 824.6987561  |
| wavelet-LHL | glszm      | SmallAreaHighGrayLevelEmphasis       | 1146.799358  |
| wavelet-LHL | glszm      | ZonePercentage                       | 0.393571733  |
| wavelet-LHL | glszm      | LargeAreaLowGrayLevelEmphasis        | 0.557357587  |
| wavelet-LHL | glszm      | LargeAreaHighGrayLevelEmphasis       | 1226008.501  |
| wavelet-LHL | glszm      | HighGrayLevelZoneEmphasis            | 1482.186047  |
| wavelet-LHL | glszm      | SmallAreaEmphasis                    | 0.76972716   |
| wavelet-LHL | glszm      | LowGrayLevelZoneEmphasis             | 0.00261501   |
| wavelet-LHL | glszm      | ZoneEntropy                          | 6.740833786  |
| wavelet-LHL | glszm      | SmallAreaLowGrayLevelEmphasis        | 0.002416425  |
| wavelet-LHL | ngtdm      | Coarseness                           | 0.001537991  |
| wavelet-LHL | ngtdm      | Complexity                           | 8395.11866   |
| wavelet-LHL | ngtdm      | Strength                             | 3.304353061  |
| wavelet-LHL | ngtdm      | Contrast                             | 0.110466294  |
| wavelet-LHL | ngtdm      | Busyness                             | 0.168455214  |
| wavelet-LHH | gldm       | GrayLevelVariance                    | 20.55196105  |
| wavelet-LHH | gldm       | HighGrayLevelEmphasis                | 888.1666667  |
| wavelet-LHH | gldm       | DependenceEntropy                    | 6.628244256  |
| wavelet-LHH | gldm       | DependenceNonUniformity              | 468.8761175  |
| wavelet-LHH | gldm       | GrayLevelNonUniformity               | 635.2916135  |
| wavelet-LHH | gldm       | SmallDependenceEmphasis              | 0.253467041  |
| wavelet-LHH | gldm       | SmallDependenceHighGrayLevelEmphasis | 233.5072009  |
| wavelet-LHH | gldm       | DependenceNonUniformityNormalized    | 0.099803346  |
| wavelet-LHH | gldm       | LargeDependenceEmphasis              | 59.1890166   |
| wavelet-LHH | gldm       | LargeDependenceLowGrayLevelEmphasis  | 0.068994682  |
| wavelet-LHH | gldm       | DependenceVariance                   | 23.56097547  |
| wavelet-LHH | gldm       | LargeDependenceHighGrayLevelEmphasis | 51319.54896  |
| wavelet-LHH | gldm       | SmallDependenceLowGrayLevelEmphasis  | 0.00069348   |
| wavelet-LHH | gldm       | LowGrayLevelEmphasis                 | 0.001575505  |

|             |            |                                  |              |
|-------------|------------|----------------------------------|--------------|
| wavelet-LHH | glcm       | JointAverage                     | 29.476927    |
| wavelet-LHH | glcm       | SumAverage                       | 58.95385399  |
| wavelet-LHH | glcm       | JointEntropy                     | 6.75303416   |
| wavelet-LHH | glcm       | ClusterShade                     | 1.546405292  |
| wavelet-LHH | glcm       | MaximumProbability               | 0.109257281  |
| wavelet-LHH | glcm       | Idmn                             | 0.991041081  |
| wavelet-LHH | glcm       | JointEnergy                      | 0.038895138  |
| wavelet-LHH | glcm       | Contrast                         | 36.85753489  |
| wavelet-LHH | glcm       | DifferenceEntropy                | 3.308266807  |
| wavelet-LHH | glcm       | InverseVariance                  | 0.336967416  |
| wavelet-LHH | glcm       | DifferenceVariance               | 24.61373252  |
| wavelet-LHH | glcm       | Idn                              | 0.951023363  |
| wavelet-LHH | glcm       | Idm                              | 0.400910777  |
| wavelet-LHH | glcm       | Correlation                      | -0.008565653 |
| wavelet-LHH | glcm       | Autocorrelation                  | 868.7835211  |
| wavelet-LHH | glcm       | SumEntropy                       | 4.108981225  |
| wavelet-LHH | glcm       | SumSquares                       | 18.3227978   |
| wavelet-LHH | glcm       | ClusterProminence                | 16262.48481  |
| wavelet-LHH | glcm       | Imc2                             | 0.730975967  |
| wavelet-LHH | glcm       | Imc1                             | -0.109347717 |
| wavelet-LHH | glcm       | DifferenceAverage                | 3.462111024  |
| wavelet-LHH | glcm       | Id                               | 0.457893258  |
| wavelet-LHH | glcm       | ClusterTendency                  | 36.43365632  |
| wavelet-LHH | firstorder | InterquartileRange               | 54.23149705  |
| wavelet-LHH | firstorder | Skewness                         | 0.158143671  |
| wavelet-LHH | firstorder | Uniformity                       | 0.135225971  |
| wavelet-LHH | firstorder | Median                           | -1.54079164  |
| wavelet-LHH | firstorder | Energy                           | 60289103.04  |
| wavelet-LHH | firstorder | RobustMeanAbsoluteDeviation      | 28.46704748  |
| wavelet-LHH | firstorder | MeanAbsoluteDeviation            | 65.37979031  |
| wavelet-LHH | firstorder | TotalEnergy                      | 1627805782   |
| wavelet-LHH | firstorder | Maximum                          | 788.0309055  |
| wavelet-LHH | firstorder | RootMeanSquared                  | 113.282521   |
| wavelet-LHH | firstorder | 90Percentile                     | 104.3453089  |
| wavelet-LHH | firstorder | Minimum                          | -714.6204321 |
| wavelet-LHH | firstorder | Entropy                          | 3.712092944  |
| wavelet-LHH | firstorder | Range                            | 1502.651338  |
| wavelet-LHH | firstorder | Variance                         | 12832.0364   |
| wavelet-LHH | firstorder | 10Percentile                     | -104.0907407 |
| wavelet-LHH | firstorder | Kurtosis                         | 10.62610383  |
| wavelet-LHH | firstorder | Mean                             | -0.945068257 |
| wavelet-LHH | glrlm      | ShortRunLowGrayLevelEmphasis     | 0.001525258  |
| wavelet-LHH | glrlm      | GrayLevelVariance                | 24.95781539  |
| wavelet-LHH | glrlm      | LowGrayLevelRunEmphasis          | 0.001673688  |
| wavelet-LHH | glrlm      | GrayLevelNonUniformityNormalized | 0.103029378  |
| wavelet-LHH | glrlm      | RunVariance                      | 0.442563803  |
| wavelet-LHH | glrlm      | GrayLevelNonUniformity           | 392.230321   |
| wavelet-LHH | glrlm      | LongRunEmphasis                  | 1.97841765   |
| wavelet-LHH | glrlm      | ShortRunHighGrayLevelEmphasis    | 782.0560316  |
| wavelet-LHH | glrlm      | RunLengthNonUniformity           | 2740.677295  |
| wavelet-LHH | glrlm      | ShortRunEmphasis                 | 0.872657609  |
| wavelet-LHH | glrlm      | LongRunHighGrayLevelEmphasis     | 1741.805357  |
| wavelet-LHH | glrlm      | RunPercentage                    | 0.808887579  |



|             |       |                                      |             |
|-------------|-------|--------------------------------------|-------------|
| wavelet-LHH | grlm  | LongRunLowGrayLevelEmphasis          | 0.002810501 |
| wavelet-LHH | grlm  | RunEntropy                           | 4.713827735 |
| wavelet-LHH | grlm  | HighGrayLevelRunEmphasis             | 892.8266031 |
| wavelet-LHH | grlm  | RunLengthNonUniformityNormalized     | 0.720350766 |
| wavelet-LHH | glszm | GrayLevelVariance                    | 60.28572862 |
| wavelet-LHH | glszm | ZoneVariance                         | 1830.873286 |
| wavelet-LHH | glszm | GrayLevelNonUniformityNormalized     | 0.04303227  |
| wavelet-LHH | glszm | SizeZoneNonUniformityNormalized      | 0.499383451 |
| wavelet-LHH | glszm | SizeZoneNonUniformity                | 644.2046512 |
| wavelet-LHH | glszm | GrayLevelNonUniformity               | 55.51162791 |
| wavelet-LHH | glszm | LargeAreaEmphasis                    | 1844.136434 |
| wavelet-LHH | glszm | SmallAreaHighGrayLevelEmphasis       | 681.738387  |
| wavelet-LHH | glszm | ZonePercentage                       | 0.27458493  |
| wavelet-LHH | glszm | LargeAreaLowGrayLevelEmphasis        | 2.134225563 |
| wavelet-LHH | glszm | LargeAreaHighGrayLevelEmphasis       | 1596871.593 |
| wavelet-LHH | glszm | HighGrayLevelZoneEmphasis            | 923.5976744 |
| wavelet-LHH | glszm | SmallAreaEmphasis                    | 0.73459226  |
| wavelet-LHH | glszm | LowGrayLevelZoneEmphasis             | 0.002630118 |
| wavelet-LHH | glszm | ZoneEntropy                          | 6.323300884 |
| wavelet-LHH | glszm | SmallAreaLowGrayLevelEmphasis        | 0.002297244 |
| wavelet-LHH | ngtdm | Coarseness                           | 0.001784249 |
| wavelet-LHH | ngtdm | Complexity                           | 3876.996194 |
| wavelet-LHH | ngtdm | Strength                             | 2.668945031 |
| wavelet-LHH | ngtdm | Contrast                             | 0.0355112   |
| wavelet-LHH | ngtdm | Busyness                             | 0.204460633 |
| wavelet-LLH | gldm  | GrayLevelVariance                    | 50.78562746 |
| wavelet-LLH | gldm  | HighGrayLevelEmphasis                | 2089.52533  |
| wavelet-LLH | gldm  | DependenceEntropy                    | 7.048055888 |
| wavelet-LLH | gldm  | DependenceNonUniformity              | 590.1179225 |
| wavelet-LLH | gldm  | GrayLevelNonUniformity               | 475.4171988 |
| wavelet-LLH | gldm  | SmallDependenceEmphasis              | 0.319084311 |
| wavelet-LLH | gldm  | SmallDependenceHighGrayLevelEmphasis | 691.6995247 |
| wavelet-LLH | gldm  | DependenceNonUniformityNormalized    | 0.125610456 |
| wavelet-LLH | gldm  | LargeDependenceEmphasis              | 54.2899106  |
| wavelet-LLH | gldm  | LargeDependenceLowGrayLevelEmphasis  | 0.026582926 |
| wavelet-LLH | gldm  | DependenceVariance                   | 24.76833688 |
| wavelet-LLH | gldm  | LargeDependenceHighGrayLevelEmphasis | 112619.3035 |
| wavelet-LLH | gldm  | SmallDependenceLowGrayLevelEmphasis  | 0.000437367 |
| wavelet-LLH | gldm  | LowGrayLevelEmphasis                 | 0.000784024 |
| wavelet-LLH | glcm  | JointAverage                         | 45.01842841 |
| wavelet-LLH | glcm  | SumAverage                           | 90.03685682 |
| wavelet-LLH | glcm  | JointEntropy                         | 7.697753885 |
| wavelet-LLH | glcm  | ClusterShade                         | 502.3832711 |
| wavelet-LLH | glcm  | MaximumProbability                   | 0.097975505 |
| wavelet-LLH | glcm  | ldmn                                 | 0.99178896  |
| wavelet-LLH | glcm  | JointEnergy                          | 0.029568245 |
| wavelet-LLH | glcm  | Contrast                             | 74.13227131 |
| wavelet-LLH | glcm  | DifferenceEntropy                    | 3.73067968  |
| wavelet-LLH | glcm  | InverseVariance                      | 0.293864736 |
| wavelet-LLH | glcm  | DifferenceVariance                   | 49.16798531 |
| wavelet-LLH | glcm  | ldn                                  | 0.953200873 |
| wavelet-LLH | glcm  | ldm                                  | 0.354538256 |
| wavelet-LLH | glcm  | Correlation                          | 0.191727623 |

|             |            |                                  |              |
|-------------|------------|----------------------------------|--------------|
| wavelet-LLH | glcm       | Autocorrelation                  | 2035.648886  |
| wavelet-LLH | glcm       | SumEntropy                       | 4.819621153  |
| wavelet-LLH | glcm       | SumSquares                       | 46.05263647  |
| wavelet-LLH | glcm       | ClusterProminence                | 114012.7705  |
| wavelet-LLH | glcm       | Imc2                             | 0.835288229  |
| wavelet-LLH | glcm       | Imc1                             | -0.147958724 |
| wavelet-LLH | glcm       | DifferenceAverage                | 4.908265382  |
| wavelet-LLH | glcm       | Id                               | 0.413694868  |
| wavelet-LLH | glcm       | ClusterTendency                  | 110.0782746  |
| wavelet-LLH | firstorder | InterquartileRange               | 88.4061709   |
| wavelet-LLH | firstorder | Skewness                         | 0.227079637  |
| wavelet-LLH | firstorder | Uniformity                       | 0.101195657  |
| wavelet-LLH | firstorder | Median                           | -2.659327765 |
| wavelet-LLH | firstorder | Energy                           | 149146107.8  |
| wavelet-LLH | firstorder | RobustMeanAbsoluteDeviation      | 47.66112768  |
| wavelet-LLH | firstorder | MeanAbsoluteDeviation            | 106.2305799  |
| wavelet-LLH | firstorder | TotalEnergy                      | 4026944911   |
| wavelet-LLH | firstorder | Maximum                          | 1126.144272  |
| wavelet-LLH | firstorder | RootMeanSquared                  | 178.176103   |
| wavelet-LLH | firstorder | 90Percentile                     | 168.2697782  |
| wavelet-LLH | firstorder | Minimum                          | -1117.470666 |
| wavelet-LLH | firstorder | Entropy                          | 4.306875898  |
| wavelet-LLH | firstorder | Range                            | 2243.614938  |
| wavelet-LLH | firstorder | Variance                         | 31668.49075  |
| wavelet-LLH | firstorder | 10Percentile                     | -193.7026408 |
| wavelet-LLH | firstorder | Kurtosis                         | 8.452075551  |
| wavelet-LLH | firstorder | Mean                             | -8.844937851 |
| wavelet-LLH | glrlm      | ShortRunLowGrayLevelEmphasis     | 0.000791166  |
| wavelet-LLH | glrlm      | GrayLevelVariance                | 60.13652367  |
| wavelet-LLH | glrlm      | LowGrayLevelRunEmphasis          | 0.00084515   |
| wavelet-LLH | glrlm      | GrayLevelNonUniformityNormalized | 0.072476567  |
| wavelet-LLH | glrlm      | RunVariance                      | 0.408571178  |
| wavelet-LLH | glrlm      | GrayLevelNonUniformity           | 283.307877   |
| wavelet-LLH | glrlm      | LongRunEmphasis                  | 1.8707756    |
| wavelet-LLH | glrlm      | ShortRunHighGrayLevelEmphasis    | 1868.888558  |
| wavelet-LLH | glrlm      | RunLengthNonUniformity           | 2949.83144   |
| wavelet-LLH | glrlm      | ShortRunEmphasis                 | 0.890601226  |
| wavelet-LLH | glrlm      | LongRunHighGrayLevelEmphasis     | 3896.663472  |
| wavelet-LLH | glrlm      | RunPercentage                    | 0.829485542  |
| wavelet-LLH | glrlm      | LongRunLowGrayLevelEmphasis      | 0.001269807  |
| wavelet-LLH | glrlm      | RunEntropy                       | 5.234836893  |
| wavelet-LLH | glrlm      | HighGrayLevelRunEmphasis         | 2094.400764  |
| wavelet-LLH | glrlm      | RunLengthNonUniformityNormalized | 0.755552868  |
| wavelet-LLH | glszm      | GrayLevelVariance                | 113.7336548  |
| wavelet-LLH | glszm      | ZoneVariance                     | 979.317546   |
| wavelet-LLH | glszm      | GrayLevelNonUniformityNormalized | 0.029719856  |
| wavelet-LLH | glszm      | SizeZoneNonUniformityNormalized  | 0.529023462  |
| wavelet-LLH | glszm      | SizeZoneNonUniformity            | 883.9982047  |
| wavelet-LLH | glszm      | GrayLevelNonUniformity           | 49.66187911  |
| wavelet-LLH | glszm      | LargeAreaEmphasis                | 987.2220227  |
| wavelet-LLH | glszm      | SmallAreaHighGrayLevelEmphasis   | 1655.972693  |
| wavelet-LLH | glszm      | ZonePercentage                   | 0.355683269  |
| wavelet-LLH | glszm      | LargeAreaLowGrayLevelEmphasis    | 0.477671515  |

|             |            |                                      |              |
|-------------|------------|--------------------------------------|--------------|
| wavelet-LLH | glszm      | LargeAreaHighGrayLevelEmphasis       | 2045460.705  |
| wavelet-LLH | glszm      | HighGrayLevelZoneEmphasis            | 2161.255536  |
| wavelet-LLH | glszm      | SmallAreaEmphasis                    | 0.755567651  |
| wavelet-LLH | glszm      | LowGrayLevelZoneEmphasis             | 0.001289145  |
| wavelet-LLH | glszm      | ZoneEntropy                          | 6.699733797  |
| wavelet-LLH | glszm      | SmallAreaLowGrayLevelEmphasis        | 0.001153799  |
| wavelet-LLH | ngtdm      | Coarseness                           | 0.001594732  |
| wavelet-LLH | ngtdm      | Complexity                           | 9388.252178  |
| wavelet-LLH | ngtdm      | Strength                             | 5.036290597  |
| wavelet-LLH | ngtdm      | Contrast                             | 0.066618124  |
| wavelet-LLH | ngtdm      | Busyness                             | 0.117156111  |
| wavelet-LLL | gldm       | GrayLevelVariance                    | 1166.800227  |
| wavelet-LLL | gldm       | HighGrayLevelEmphasis                | 10371.07471  |
| wavelet-LLL | gldm       | DependenceEntropy                    | 8.141861951  |
| wavelet-LLL | gldm       | DependenceNonUniformity              | 992.2383993  |
| wavelet-LLL | gldm       | GrayLevelNonUniformity               | 201.6879523  |
| wavelet-LLL | gldm       | SmallDependenceEmphasis              | 0.471047501  |
| wavelet-LLL | gldm       | SmallDependenceHighGrayLevelEmphasis | 3427.195317  |
| wavelet-LLL | gldm       | DependenceNonUniformityNormalized    | 0.211204427  |
| wavelet-LLL | gldm       | LargeDependenceEmphasis              | 46.96636867  |
| wavelet-LLL | gldm       | LargeDependenceLowGrayLevelEmphasis  | 0.010359035  |
| wavelet-LLL | gldm       | DependenceVariance                   | 25.49740739  |
| wavelet-LLL | gldm       | LargeDependenceHighGrayLevelEmphasis | 654409.9053  |
| wavelet-LLL | gldm       | SmallDependenceLowGrayLevelEmphasis  | 0.001056343  |
| wavelet-LLL | gldm       | LowGrayLevelEmphasis                 | 0.001870302  |
| wavelet-LLL | glcm       | JointAverage                         | 100.5556864  |
| wavelet-LLL | glcm       | SumAverage                           | 201.1113727  |
| wavelet-LLL | glcm       | JointEntropy                         | 9.49933811   |
| wavelet-LLL | glcm       | ClusterShade                         | -265553.357  |
| wavelet-LLL | glcm       | MaximumProbability                   | 0.048118009  |
| wavelet-LLL | glcm       | Idmn                                 | 0.98271874   |
| wavelet-LLL | glcm       | JointEnergy                          | 0.010051473  |
| wavelet-LLL | glcm       | Contrast                             | 532.7955257  |
| wavelet-LLL | glcm       | DifferenceEntropy                    | 4.85861631   |
| wavelet-LLL | glcm       | InverseVariance                      | 0.227531401  |
| wavelet-LLL | glcm       | DifferenceVariance                   | 340.2018761  |
| wavelet-LLL | glcm       | Idn                                  | 0.932897806  |
| wavelet-LLL | glcm       | Idm                                  | 0.28227949   |
| wavelet-LLL | glcm       | Correlation                          | 0.712442936  |
| wavelet-LLL | glcm       | Autocorrelation                      | 10784.69268  |
| wavelet-LLL | glcm       | SumEntropy                           | 6.522147848  |
| wavelet-LLL | glcm       | SumSquares                           | 938.7651778  |
| wavelet-LLL | glcm       | ClusterProminence                    | 43143125.69  |
| wavelet-LLL | glcm       | Imc2                                 | 0.979895306  |
| wavelet-LLL | glcm       | Imc1                                 | -0.293802213 |
| wavelet-LLL | glcm       | DifferenceAverage                    | 13.66433046  |
| wavelet-LLL | glcm       | Id                                   | 0.33042532   |
| wavelet-LLL | glcm       | ClusterTendency                      | 3222.265186  |
| wavelet-LLL | firstorder | InterquartileRange                   | 1095.93707   |
| wavelet-LLL | firstorder | Skewness                             | -1.169976785 |
| wavelet-LLL | firstorder | Uniformity                           | 0.042930599  |
| wavelet-LLL | firstorder | Median                               | -20.76101136 |
| wavelet-LLL | firstorder | Energy                               | 4792332302   |

|             |            |                                  |              |
|-------------|------------|----------------------------------|--------------|
| wavelet-LLL | firstorder | RobustMeanAbsoluteDeviation      | 510.8336148  |
| wavelet-LLL | firstorder | MeanAbsoluteDeviation            | 710.5301929  |
| wavelet-LLL | firstorder | TotalEnergy                      | 1.29393E+11  |
| wavelet-LLL | firstorder | Maximum                          | 1249.575096  |
| wavelet-LLL | firstorder | RootMeanSquared                  | 1009.989726  |
| wavelet-LLL | firstorder | 90Percentile                     | 94.63780427  |
| wavelet-LLL | firstorder | Minimum                          | -2908.899116 |
| wavelet-LLL | firstorder | Entropy                          | 5.864958921  |
| wavelet-LLL | firstorder | Range                            | 4158.474212  |
| wavelet-LLL | firstorder | Variance                         | 729449.5834  |
| wavelet-LLL | firstorder | 10Percentile                     | -2005.660737 |
| wavelet-LLL | firstorder | Kurtosis                         | 3.114330676  |
| wavelet-LLL | firstorder | Mean                             | -539.1007916 |
| wavelet-LLL | grlm       | ShortRunLowGrayLevelEmphasis     | 0.002048472  |
| wavelet-LLL | grlm       | GrayLevelVariance                | 1250.449897  |
| wavelet-LLL | grlm       | LowGrayLevelRunEmphasis          | 0.002100676  |
| wavelet-LLL | grlm       | GrayLevelNonUniformityNormalized | 0.029066996  |
| wavelet-LLL | grlm       | RunVariance                      | 0.321272309  |
| wavelet-LLL | grlm       | GrayLevelNonUniformity           | 117.6609727  |
| wavelet-LLL | grlm       | LongRunEmphasis                  | 1.675329338  |
| wavelet-LLL | grlm       | ShortRunHighGrayLevelEmphasis    | 8622.761145  |
| wavelet-LLL | grlm       | RunLengthNonUniformity           | 3252.77215   |
| wavelet-LLL | grlm       | ShortRunEmphasis                 | 0.914524172  |
| wavelet-LLL | grlm       | LongRunHighGrayLevelEmphasis     | 19196.70558  |
| wavelet-LLL | grlm       | RunPercentage                    | 0.860251498  |
| wavelet-LLL | grlm       | LongRunLowGrayLevelEmphasis      | 0.002343848  |
| wavelet-LLL | grlm       | RunEntropy                       | 6.67924528   |
| wavelet-LLL | grlm       | HighGrayLevelRunEmphasis         | 9801.161457  |
| wavelet-LLL | grlm       | RunLengthNonUniformityNormalized | 0.804337579  |
| wavelet-LLL | glszm      | GrayLevelVariance                | 1301.403637  |
| wavelet-LLL | glszm      | ZoneVariance                     | 295.6692026  |
| wavelet-LLL | glszm      | GrayLevelNonUniformityNormalized | 0.008926501  |
| wavelet-LLL | glszm      | SizeZoneNonUniformityNormalized  | 0.737543475  |
| wavelet-LLL | glszm      | SizeZoneNonUniformity            | 1711.100862  |
| wavelet-LLL | glszm      | GrayLevelNonUniformity           | 20.70948276  |
| wavelet-LLL | glszm      | LargeAreaEmphasis                | 299.7698276  |
| wavelet-LLL | glszm      | SmallAreaHighGrayLevelEmphasis   | 6073.601409  |
| wavelet-LLL | glszm      | ZonePercentage                   | 0.49382716   |
| wavelet-LLL | glszm      | LargeAreaLowGrayLevelEmphasis    | 0.028538141  |
| wavelet-LLL | glszm      | LargeAreaHighGrayLevelEmphasis   | 4212944.803  |
| wavelet-LLL | glszm      | HighGrayLevelZoneEmphasis        | 7278.626293  |
| wavelet-LLL | glszm      | SmallAreaEmphasis                | 0.880443728  |
| wavelet-LLL | glszm      | LowGrayLevelZoneEmphasis         | 0.002547876  |
| wavelet-LLL | glszm      | ZoneEntropy                      | 7.630026027  |
| wavelet-LLL | glszm      | SmallAreaLowGrayLevelEmphasis    | 0.001898047  |
| wavelet-LLL | ngtdm      | Coarseness                       | 0.001577966  |
| wavelet-LLL | ngtdm      | Complexity                       | 94916.65307  |
| wavelet-LLL | ngtdm      | Strength                         | 27.13595842  |
| wavelet-LLL | ngtdm      | Contrast                         | 0.834774966  |
| wavelet-LLL | ngtdm      | Busyness                         | 0.027435269  |
| wavelet-HHL | gldm       | GrayLevelVariance                | 16.11629307  |
| wavelet-HHL | gldm       | HighGrayLevelEmphasis            | 358.1536824  |
| wavelet-HHL | gldm       | DependenceEntropy                | 6.624954201  |

|             |            |                                      |              |
|-------------|------------|--------------------------------------|--------------|
| wavelet-HHL | gldm       | DependenceNonUniformity              | 463.9463602  |
| wavelet-HHL | gldm       | GrayLevelNonUniformity               | 626.6734781  |
| wavelet-HHL | gldm       | SmallDependenceEmphasis              | 0.242945846  |
| wavelet-HHL | gldm       | SmallDependenceHighGrayLevelEmphasis | 94.81283593  |
| wavelet-HHL | gldm       | DependenceNonUniformityNormalized    | 0.098754015  |
| wavelet-HHL | gldm       | LargeDependenceEmphasis              | 60.44870158  |
| wavelet-HHL | gldm       | LargeDependenceLowGrayLevelEmphasis  | 0.181722485  |
| wavelet-HHL | gldm       | DependenceVariance                   | 23.90001107  |
| wavelet-HHL | gldm       | LargeDependenceHighGrayLevelEmphasis | 20525.50702  |
| wavelet-HHL | gldm       | SmallDependenceLowGrayLevelEmphasis  | 0.001537611  |
| wavelet-HHL | gldm       | LowGrayLevelEmphasis                 | 0.003992755  |
| wavelet-HHL | glcm       | JointAverage                         | 18.57069275  |
| wavelet-HHL | glcm       | SumAverage                           | 37.1413855   |
| wavelet-HHL | glcm       | JointEntropy                         | 6.726680114  |
| wavelet-HHL | glcm       | ClusterShade                         | 48.26092175  |
| wavelet-HHL | glcm       | MaximumProbability                   | 0.111358669  |
| wavelet-HHL | glcm       | Idmn                                 | 0.98556241   |
| wavelet-HHL | glcm       | JointEnergy                          | 0.039101263  |
| wavelet-HHL | glcm       | Contrast                             | 28.38582806  |
| wavelet-HHL | glcm       | DifferenceEntropy                    | 3.23895315   |
| wavelet-HHL | glcm       | InverseVariance                      | 0.339257461  |
| wavelet-HHL | glcm       | DifferenceVariance                   | 17.75333565  |
| wavelet-HHL | glcm       | Idn                                  | 0.935527859  |
| wavelet-HHL | glcm       | Idm                                  | 0.404985216  |
| wavelet-HHL | glcm       | Correlation                          | 0.011608492  |
| wavelet-HHL | glcm       | Autocorrelation                      | 345.1306287  |
| wavelet-HHL | glcm       | SumEntropy                           | 4.081533639  |
| wavelet-HHL | glcm       | SumSquares                           | 14.45238211  |
| wavelet-HHL | glcm       | ClusterProminence                    | 6576.149645  |
| wavelet-HHL | glcm       | Imc2                                 | 0.702966476  |
| wavelet-HHL | glcm       | Imc1                                 | -0.098787543 |
| wavelet-HHL | glcm       | DifferenceAverage                    | 3.228887633  |
| wavelet-HHL | glcm       | Id                                   | 0.461823697  |
| wavelet-HHL | glcm       | ClusterTendency                      | 29.42370036  |
| wavelet-HHL | firstorder | InterquartileRange                   | 55.16639203  |
| wavelet-HHL | firstorder | Skewness                             | 0.276990745  |
| wavelet-HHL | firstorder | Uniformity                           | 0.133391545  |
| wavelet-HHL | firstorder | Median                               | -2.085110239 |
| wavelet-HHL | firstorder | Energy                               | 47117025.58  |
| wavelet-HHL | firstorder | RobustMeanAbsoluteDeviation          | 29.3317874   |
| wavelet-HHL | firstorder | MeanAbsoluteDeviation                | 62.54234978  |
| wavelet-HHL | firstorder | TotalEnergy                          | 1272159691   |
| wavelet-HHL | firstorder | Maximum                              | 589.0694817  |
| wavelet-HHL | firstorder | RootMeanSquared                      | 100.1457278  |
| wavelet-HHL | firstorder | 90Percentile                         | 115.8058877  |
| wavelet-HHL | firstorder | Minimum                              | -434.5557982 |
| wavelet-HHL | firstorder | Entropy                              | 3.676047139  |
| wavelet-HHL | firstorder | Range                                | 1023.62528   |
| wavelet-HHL | firstorder | Variance                             | 10029.15656  |
| wavelet-HHL | firstorder | 10Percentile                         | -105.2541726 |
| wavelet-HHL | firstorder | Kurtosis                             | 6.306445213  |
| wavelet-HHL | firstorder | Mean                                 | -0.101132795 |
| wavelet-HHL | glrlm      | ShortRunLowGrayLevelEmphasis         | 0.003832753  |

|             |       |                                      |             |
|-------------|-------|--------------------------------------|-------------|
| wavelet-HHL | glrlm | GrayLevelVariance                    | 19.43026957 |
| wavelet-HHL | glrlm | LowGrayLevelRunEmphasis              | 0.004222833 |
| wavelet-HHL | glrlm | GrayLevelNonUniformityNormalized     | 0.101177882 |
| wavelet-HHL | glrlm | RunVariance                          | 0.473754063 |
| wavelet-HHL | glrlm | GrayLevelNonUniformity               | 383.9248541 |
| wavelet-HHL | glrlm | LongRunEmphasis                      | 2.022700121 |
| wavelet-HHL | glrlm | ShortRunHighGrayLevelEmphasis        | 319.2337719 |
| wavelet-HHL | glrlm | RunLengthNonUniformity               | 2739.632817 |
| wavelet-HHL | glrlm | ShortRunEmphasis                     | 0.873371764 |
| wavelet-HHL | glrlm | LongRunHighGrayLevelEmphasis         | 710.248904  |
| wavelet-HHL | glrlm | RunPercentage                        | 0.805940335 |
| wavelet-HHL | glrlm | LongRunLowGrayLevelEmphasis          | 0.007316043 |
| wavelet-HHL | glrlm | RunEntropy                           | 4.674851502 |
| wavelet-HHL | glrlm | HighGrayLevelRunEmphasis             | 362.4372951 |
| wavelet-HHL | glrlm | RunLengthNonUniformityNormalized     | 0.722336526 |
| wavelet-HHL | glszm | GrayLevelVariance                    | 42.36460935 |
| wavelet-HHL | glszm | ZoneVariance                         | 1837.281496 |
| wavelet-HHL | glszm | GrayLevelNonUniformityNormalized     | 0.045590386 |
| wavelet-HHL | glszm | SizeZoneNonUniformityNormalized      | 0.471786919 |
| wavelet-HHL | glszm | SizeZoneNonUniformity                | 590.2054357 |
| wavelet-HHL | glszm | GrayLevelNonUniformity               | 57.03357314 |
| wavelet-HHL | glszm | LargeAreaEmphasis                    | 1851.384492 |
| wavelet-HHL | glszm | SmallAreaHighGrayLevelEmphasis       | 283.9260247 |
| wavelet-HHL | glszm | ZonePercentage                       | 0.266283525 |
| wavelet-HHL | glszm | LargeAreaLowGrayLevelEmphasis        | 5.51645672  |
| wavelet-HHL | glszm | LargeAreaHighGrayLevelEmphasis       | 624535.96   |
| wavelet-HHL | glszm | HighGrayLevelZoneEmphasis            | 394.1894484 |
| wavelet-HHL | glszm | SmallAreaEmphasis                    | 0.714178736 |
| wavelet-HHL | glszm | LowGrayLevelZoneEmphasis             | 0.006182124 |
| wavelet-HHL | glszm | ZoneEntropy                          | 6.20458113  |
| wavelet-HHL | glszm | SmallAreaLowGrayLevelEmphasis        | 0.005069516 |
| wavelet-HHL | ngtdm | Coarseness                           | 0.001756496 |
| wavelet-HHL | ngtdm | Complexity                           | 1732.150702 |
| wavelet-HHL | ngtdm | Strength                             | 1.028047015 |
| wavelet-HHL | ngtdm | Contrast                             | 0.05326666  |
| wavelet-HHL | ngtdm | Busyness                             | 0.514485141 |
| wavelet-HLH | gldm  | GrayLevelVariance                    | 10.20133618 |
| wavelet-HLH | gldm  | HighGrayLevelEmphasis                | 353.3260962 |
| wavelet-HLH | gldm  | DependenceEntropy                    | 6.429576149 |
| wavelet-HLH | gldm  | DependenceNonUniformity              | 410.7650064 |
| wavelet-HLH | gldm  | GrayLevelNonUniformity               | 745.4618987 |
| wavelet-HLH | gldm  | SmallDependenceEmphasis              | 0.206335365 |
| wavelet-HLH | gldm  | SmallDependenceHighGrayLevelEmphasis | 78.41210939 |
| wavelet-HLH | gldm  | DependenceNonUniformityNormalized    | 0.087434016 |
| wavelet-HLH | gldm  | LargeDependenceEmphasis              | 65.08173691 |
| wavelet-HLH | gldm  | LargeDependenceLowGrayLevelEmphasis  | 0.193610862 |
| wavelet-HLH | gldm  | DependenceVariance                   | 23.77553377 |
| wavelet-HLH | gldm  | LargeDependenceHighGrayLevelEmphasis | 22176.05321 |
| wavelet-HLH | gldm  | SmallDependenceLowGrayLevelEmphasis  | 0.001206729 |
| wavelet-HLH | gldm  | LowGrayLevelEmphasis                 | 0.003671583 |
| wavelet-HLH | glcm  | JointAverage                         | 18.51885379 |
| wavelet-HLH | glcm  | SumAverage                           | 37.03770758 |
| wavelet-HLH | glcm  | JointEntropy                         | 6.247773616 |

|             |            |                                  |              |
|-------------|------------|----------------------------------|--------------|
| wavelet-HLH | glcm       | ClusterShade                     | -3.522462419 |
| wavelet-HLH | glcm       | MaximumProbability               | 0.119041801  |
| wavelet-HLH | glcm       | Idmn                             | 0.989220895  |
| wavelet-HLH | glcm       | JointEnergy                      | 0.04582696   |
| wavelet-HLH | glcm       | Contrast                         | 18.96054348  |
| wavelet-HLH | glcm       | DifferenceEntropy                | 3.000845735  |
| wavelet-HLH | glcm       | InverseVariance                  | 0.361100092  |
| wavelet-HLH | glcm       | DifferenceVariance               | 11.96948157  |
| wavelet-HLH | glcm       | Idn                              | 0.943694396  |
| wavelet-HLH | glcm       | Idm                              | 0.433470523  |
| wavelet-HLH | glcm       | Correlation                      | 0.009333968  |
| wavelet-HLH | glcm       | Autocorrelation                  | 343.0413852  |
| wavelet-HLH | glcm       | SumEntropy                       | 3.807538463  |
| wavelet-HLH | glcm       | SumSquares                       | 9.573558085  |
| wavelet-HLH | glcm       | ClusterProminence                | 3386.265233  |
| wavelet-HLH | glcm       | Imc2                             | 0.646531968  |
| wavelet-HLH | glcm       | Imc1                             | -0.084622982 |
| wavelet-HLH | glcm       | DifferenceAverage                | 2.625549491  |
| wavelet-HLH | glcm       | Id                               | 0.488863656  |
| wavelet-HLH | glcm       | ClusterTendency                  | 19.33368886  |
| wavelet-HLH | firstorder | InterquartileRange               | 45.72101111  |
| wavelet-HLH | firstorder | Skewness                         | 0.016025263  |
| wavelet-HLH | firstorder | Uniformity                       | 0.158676437  |
| wavelet-HLH | firstorder | Median                           | -0.645670971 |
| wavelet-HLH | firstorder | Energy                           | 29634797.22  |
| wavelet-HLH | firstorder | RobustMeanAbsoluteDeviation      | 22.77613863  |
| wavelet-HLH | firstorder | MeanAbsoluteDeviation            | 48.33076993  |
| wavelet-HLH | firstorder | TotalEnergy                      | 800139524.9  |
| wavelet-HLH | firstorder | Maximum                          | 539.7477807  |
| wavelet-HLH | firstorder | RootMeanSquared                  | 79.42266831  |
| wavelet-HLH | firstorder | 90Percentile                     | 81.54714719  |
| wavelet-HLH | firstorder | Minimum                          | -425.5692443 |
| wavelet-HLH | firstorder | Entropy                          | 3.352113047  |
| wavelet-HLH | firstorder | Range                            | 965.317025   |
| wavelet-HLH | firstorder | Variance                         | 6307.450783  |
| wavelet-HLH | firstorder | 10Percentile                     | -75.84332568 |
| wavelet-HLH | firstorder | Kurtosis                         | 8.406499153  |
| wavelet-HLH | firstorder | Mean                             | 0.71376394   |
| wavelet-HLH | grlm       | ShortRunLowGrayLevelEmphasis     | 0.003431949  |
| wavelet-HLH | grlm       | GrayLevelVariance                | 12.52067193  |
| wavelet-HLH | grlm       | LowGrayLevelRunEmphasis          | 0.003853044  |
| wavelet-HLH | grlm       | GrayLevelNonUniformityNormalized | 0.124197934  |
| wavelet-HLH | grlm       | RunVariance                      | 0.488315398  |
| wavelet-HLH | grlm       | GrayLevelNonUniformity           | 462.4216979  |
| wavelet-HLH | grlm       | LongRunEmphasis                  | 2.094102368  |
| wavelet-HLH | grlm       | ShortRunHighGrayLevelEmphasis    | 308.2297499  |
| wavelet-HLH | grlm       | RunLengthNonUniformity           | 2594.750231  |
| wavelet-HLH | grlm       | ShortRunEmphasis                 | 0.859714701  |
| wavelet-HLH | grlm       | LongRunHighGrayLevelEmphasis     | 729.9950492  |
| wavelet-HLH | grlm       | RunPercentage                    | 0.791269607  |
| wavelet-HLH | grlm       | LongRunLowGrayLevelEmphasis      | 0.007114687  |
| wavelet-HLH | grlm       | RunEntropy                       | 4.4067826    |
| wavelet-HLH | grlm       | HighGrayLevelRunEmphasis         | 356.3184632  |

|             |       |                                  |             |
|-------------|-------|----------------------------------|-------------|
| wavelet-HLH | g1rlm | RunLengthNonUniformityNormalized | 0.696858597 |
| wavelet-HLH | glszm | GrayLevelVariance                | 33.19795256 |
| wavelet-HLH | glszm | ZoneVariance                     | 2671.858546 |
| wavelet-HLH | glszm | GrayLevelNonUniformityNormalized | 0.05419323  |
| wavelet-HLH | glszm | SizeZoneNonUniformityNormalized  | 0.459128526 |
| wavelet-HLH | glszm | SizeZoneNonUniformity            | 474.2797677 |
| wavelet-HLH | glszm | GrayLevelNonUniformity           | 55.98160697 |
| wavelet-HLH | glszm | LargeAreaEmphasis                | 2692.54211  |
| wavelet-HLH | glszm | SmallAreaHighGrayLevelEmphasis   | 273.9253406 |
| wavelet-HLH | glszm | ZonePercentage                   | 0.2198808   |
| wavelet-HLH | glszm | LargeAreaLowGrayLevelEmphasis    | 7.931078385 |
| wavelet-HLH | glszm | LargeAreaHighGrayLevelEmphasis   | 917650.4511 |
| wavelet-HLH | glszm | HighGrayLevelZoneEmphasis        | 379.8857696 |
| wavelet-HLH | glszm | SmallAreaEmphasis                | 0.704653975 |
| wavelet-HLH | glszm | LowGrayLevelZoneEmphasis         | 0.005811155 |
| wavelet-HLH | glszm | ZoneEntropy                      | 6.091913959 |
| wavelet-HLH | glszm | SmallAreaLowGrayLevelEmphasis    | 0.004703386 |
| wavelet-HLH | ngtdm | Coarseness                       | 0.001682305 |
| wavelet-HLH | ngtdm | Complexity                       | 1196.763664 |
| wavelet-HLH | ngtdm | Strength                         | 1.006732173 |
| wavelet-HLH | ngtdm | Contrast                         | 0.031049065 |
| wavelet-HLH | ngtdm | Busyness                         | 0.550298428 |



| Image type | Feature Class | Feature Name                         |                                                                                                                                                                                                                                                                                                                                                                                                                   |
|------------|---------------|--------------------------------------|-------------------------------------------------------------------------------------------------------------------------------------------------------------------------------------------------------------------------------------------------------------------------------------------------------------------------------------------------------------------------------------------------------------------|
| general    | info          | BoundingBox                          | 9: RTSTRUCT: C99-DNU_segment_GTV/ITV Left Lun<br>(0, 0, 1, 8, 10, 8)                                                                                                                                                                                                                                                                                                                                              |
| general    | info          | EnabledImageTypes                    | {u'Original': {}, u'Wavelet': {}}                                                                                                                                                                                                                                                                                                                                                                                 |
|            |               |                                      | {'distances': [1], 'additionalInfo': True, 'force2D': False, 'interpolator': 'sitkBSpline', 'resampledPixelSpacing': [3.0], 'label': 1, 'normalizeScale': 1, 'normalize': False, 'force2Ddimension': 0, 'removeOutliers': None, 'minimumROISize': None, u'binWidth': 25.0, 'minimumROIDimensions': 1, u'correctMask': True, 'preCrop': False, u'symmetricalGLCM': True, 'resegmentRange': None, 'padDistance': 5} |
| general    | info          | GeneralSettings                      |                                                                                                                                                                                                                                                                                                                                                                                                                   |
| general    | info          | ImageHash                            | f1059adcd825097f815b994a024245d90eb323c3<br>(0.9765624999999998, 0.9765624999999998,<br>1.9999999999999999)                                                                                                                                                                                                                                                                                                       |
| general    | info          | ImageSpacing                         |                                                                                                                                                                                                                                                                                                                                                                                                                   |
| general    | info          | MaskHash                             | 5ab5a502df9926f285aed950da104f1e523cbb58                                                                                                                                                                                                                                                                                                                                                                          |
| general    | info          | NumpyVersion                         | 1.13.1                                                                                                                                                                                                                                                                                                                                                                                                            |
| general    | info          | PyWaveletVersion                     | 0.5.2                                                                                                                                                                                                                                                                                                                                                                                                             |
| general    | info          | SimpleITKVersion                     | 1.1.0                                                                                                                                                                                                                                                                                                                                                                                                             |
| general    | info          | Version                              | 1.3.0.post102+g1b0eb74                                                                                                                                                                                                                                                                                                                                                                                            |
| general    | info          | VolumeNum                            | 1                                                                                                                                                                                                                                                                                                                                                                                                                 |
| general    | info          | VoxelNum                             | 324                                                                                                                                                                                                                                                                                                                                                                                                               |
| original   | shape         | Maximum3DDiameter                    | 32.31098884                                                                                                                                                                                                                                                                                                                                                                                                       |
| original   | shape         | Maximum2DDiameterSlice               | 27.65863337                                                                                                                                                                                                                                                                                                                                                                                                       |
| original   | shape         | Sphericity                           | 0.828473762                                                                                                                                                                                                                                                                                                                                                                                                       |
| original   | shape         | MinorAxis                            | 22.94784445                                                                                                                                                                                                                                                                                                                                                                                                       |
| original   | shape         | Elongation                           | 0.81174244                                                                                                                                                                                                                                                                                                                                                                                                        |
| original   | shape         | SurfaceVolumeRatio                   | 0.283292955                                                                                                                                                                                                                                                                                                                                                                                                       |
| original   | shape         | Volume                               | 8748                                                                                                                                                                                                                                                                                                                                                                                                              |
| original   | shape         | MajorAxis                            | 28.26985916                                                                                                                                                                                                                                                                                                                                                                                                       |
| original   | shape         | SurfaceArea                          | 2478.246768                                                                                                                                                                                                                                                                                                                                                                                                       |
| original   | shape         | Flatness                             | 0.692919896                                                                                                                                                                                                                                                                                                                                                                                                       |
| original   | shape         | LeastAxis                            | 19.58874787                                                                                                                                                                                                                                                                                                                                                                                                       |
| original   | shape         | Maximum2DDiameterColumn              | 23.43074903                                                                                                                                                                                                                                                                                                                                                                                                       |
| original   | shape         | Maximum2DDiameterRow                 | 30                                                                                                                                                                                                                                                                                                                                                                                                                |
| original   | gldm          | GrayLevelVariance                    | 185.4966754                                                                                                                                                                                                                                                                                                                                                                                                       |
| original   | gldm          | HighGrayLevelEmphasis                | 1374.682099                                                                                                                                                                                                                                                                                                                                                                                                       |
| original   | gldm          | DependenceEntropy                    | 6.571536752                                                                                                                                                                                                                                                                                                                                                                                                       |
| original   | gldm          | DependenceNonUniformity              | 78.16049383                                                                                                                                                                                                                                                                                                                                                                                                       |
| original   | gldm          | GrayLevelNonUniformity               | 19.5                                                                                                                                                                                                                                                                                                                                                                                                              |
| original   | gldm          | SmallDependenceEmphasis              | 0.491118921                                                                                                                                                                                                                                                                                                                                                                                                       |
| original   | gldm          | SmallDependenceHighGrayLevelEmphasis | 614.2032283                                                                                                                                                                                                                                                                                                                                                                                                       |
| original   | gldm          | DependenceNonUniformityNormalized    | 0.241236092                                                                                                                                                                                                                                                                                                                                                                                                       |
| original   | gldm          | LargeDependenceEmphasis              | 14.17283951                                                                                                                                                                                                                                                                                                                                                                                                       |
| original   | gldm          | LargeDependenceLowGrayLevelEmphasis  | 0.12000018                                                                                                                                                                                                                                                                                                                                                                                                        |
| original   | gldm          | DependenceVariance                   | 6.180003048                                                                                                                                                                                                                                                                                                                                                                                                       |
| original   | gldm          | LargeDependenceHighGrayLevelEmphasis | 22785.04012                                                                                                                                                                                                                                                                                                                                                                                                       |
| original   | gldm          | SmallDependenceLowGrayLevelEmphasis  | 0.009822394                                                                                                                                                                                                                                                                                                                                                                                                       |
| original   | gldm          | LowGrayLevelEmphasis                 | 0.014855004                                                                                                                                                                                                                                                                                                                                                                                                       |
| original   | glcm          | JointAverage                         | 33.33994621                                                                                                                                                                                                                                                                                                                                                                                                       |
| original   | glcm          | SumAverage                           | 66.67989242                                                                                                                                                                                                                                                                                                                                                                                                       |
| original   | glcm          | JointEntropy                         | 7.840748315                                                                                                                                                                                                                                                                                                                                                                                                       |
| original   | glcm          | ClusterShade                         | -9985.984881                                                                                                                                                                                                                                                                                                                                                                                                      |
| original   | glcm          | MaximumProbability                   | 0.038422111                                                                                                                                                                                                                                                                                                                                                                                                       |
| original   | glcm          | Idmn                                 | 0.957004605                                                                                                                                                                                                                                                                                                                                                                                                       |
| original   | glcm          | JointEnergy                          | 0.007961067                                                                                                                                                                                                                                                                                                                                                                                                       |
| original   | glcm          | Contrast                             | 216.5173942                                                                                                                                                                                                                                                                                                                                                                                                       |

|          |            |                                  |              |
|----------|------------|----------------------------------|--------------|
| original | glcm       | DifferenceEntropy                | 4.623362468  |
| original | glcm       | InverseVariance                  | 0.164631354  |
| original | glcm       | DifferenceVariance               | 108.1854492  |
| original | glcm       | Idn                              | 0.878891272  |
| original | glcm       | Idm                              | 0.192168365  |
| original | glcm       | Correlation                      | 0.459742892  |
| original | glcm       | Autocorrelation                  | 1202.957306  |
| original | glcm       | SumEntropy                       | 5.819254562  |
| original | glcm       | SumSquares                       | 199.5129292  |
| original | glcm       | ClusterProminence                | 1002485.827  |
| original | glcm       | Imc2                             | 0.992419695  |
| original | glcm       | Imc1                             | -0.422098314 |
| original | glcm       | DifferenceAverage                | 10.24515702  |
| original | glcm       | Id                               | 0.259433995  |
| original | glcm       | ClusterTendency                  | 581.5343225  |
| original | firstorder | InterquartileRange               | 291.25       |
| original | firstorder | Skewness                         | -0.785171749 |
| original | firstorder | Uniformity                       | 0.060185185  |
| original | firstorder | Median                           | -29.5        |
| original | firstorder | Energy                           | 44820380     |
| original | firstorder | RobustMeanAbsoluteDeviation      | 160.5565771  |
| original | firstorder | MeanAbsoluteDeviation            | 260.9720317  |
| original | firstorder | TotalEnergy                      | 1210150260   |
| original | firstorder | Maximum                          | 623          |
| original | firstorder | RootMeanSquared                  | 371.9334701  |
| original | firstorder | 90Percentile                     | 76.1         |
| original | firstorder | Minimum                          | -997         |
| original | firstorder | Entropy                          | 4.905493456  |
| original | firstorder | Range                            | 1620         |
| original | firstorder | Variance                         | 115554.0077  |
| original | firstorder | 10Percentile                     | -729.5       |
| original | firstorder | Kurtosis                         | 3.342626942  |
| original | firstorder | Mean                             | -150.9320988 |
| original | glrlm      | ShortRunLowGrayLevelEmphasis     | 0.014674587  |
| original | glrlm      | GrayLevelVariance                | 191.4805453  |
| original | glrlm      | LowGrayLevelRunEmphasis          | 0.0152347    |
| original | glrlm      | GrayLevelNonUniformityNormalized | 0.052861643  |
| original | glrlm      | RunVariance                      | 0.094147852  |
| original | glrlm      | GrayLevelNonUniformity           | 15.93753457  |
| original | glrlm      | LongRunEmphasis                  | 1.252948416  |
| original | glrlm      | ShortRunHighGrayLevelEmphasis    | 1280.769471  |
| original | glrlm      | RunLengthNonUniformity           | 264.3147826  |
| original | glrlm      | ShortRunEmphasis                 | 0.949372916  |
| original | glrlm      | LongRunHighGrayLevelEmphasis     | 1760.595345  |
| original | glrlm      | RunPercentage                    | 0.929724596  |
| original | glrlm      | LongRunLowGrayLevelEmphasis      | 0.017504864  |
| original | glrlm      | RunEntropy                       | 5.293100007  |
| original | glrlm      | HighGrayLevelRunEmphasis         | 1359.574683  |
| original | glrlm      | RunLengthNonUniformityNormalized | 0.876688388  |
| original | glszm      | GrayLevelVariance                | 235.606405   |
| original | glszm      | ZoneVariance                     | 16.08832645  |
| original | glszm      | GrayLevelNonUniformityNormalized | 0.026407541  |
| original | glszm      | SizeZoneNonUniformityNormalized  | 0.613636364  |
| original | glszm      | SizeZoneNonUniformity            | 108          |
| original | glszm      | GrayLevelNonUniformity           | 4.647727273  |
| original | glszm      | LargeAreaEmphasis                | 19.47727273  |
| original | glszm      | SmallAreaHighGrayLevelEmphasis   | 994.0160764  |
| original | glszm      | ZonePercentage                   | 0.543209877  |

|             |            |                                      |              |
|-------------|------------|--------------------------------------|--------------|
| original    | glszm      | LargeAreaLowGrayLevelEmphasis        | 0.069197659  |
| original    | glszm      | LargeAreaHighGrayLevelEmphasis       | 32182.46023  |
| original    | glszm      | HighGrayLevelZoneEmphasis            | 1250.897727  |
| original    | glszm      | SmallAreaEmphasis                    | 0.808781692  |
| original    | glszm      | LowGrayLevelZoneEmphasis             | 0.019827242  |
| original    | glszm      | ZoneEntropy                          | 6.202059568  |
| original    | glszm      | SmallAreaLowGrayLevelEmphasis        | 0.017480023  |
| original    | ngtdm      | Coarseness                           | 0.013135283  |
| original    | ngtdm      | Complexity                           | 9976.523907  |
| original    | ngtdm      | Strength                             | 31.08516302  |
| original    | ngtdm      | Contrast                             | 0.688721625  |
| original    | ngtdm      | Busyness                             | 0.02745322   |
| wavelet-HHH | gldm       | GrayLevelVariance                    | 13.73551097  |
| wavelet-HHH | gldm       | HighGrayLevelEmphasis                | 252.5524691  |
| wavelet-HHH | gldm       | DependenceEntropy                    | 5.835897879  |
| wavelet-HHH | gldm       | DependenceNonUniformity              | 53.89506173  |
| wavelet-HHH | gldm       | GrayLevelNonUniformity               | 32.51851852  |
| wavelet-HHH | gldm       | SmallDependenceEmphasis              | 0.328504428  |
| wavelet-HHH | gldm       | SmallDependenceHighGrayLevelEmphasis | 90.18280522  |
| wavelet-HHH | gldm       | DependenceNonUniformityNormalized    | 0.166342783  |
| wavelet-HHH | gldm       | LargeDependenceEmphasis              | 14.54320988  |
| wavelet-HHH | gldm       | LargeDependenceLowGrayLevelEmphasis  | 0.070083148  |
| wavelet-HHH | gldm       | DependenceVariance                   | 4.200236244  |
| wavelet-HHH | gldm       | LargeDependenceHighGrayLevelEmphasis | 3452.570988  |
| wavelet-HHH | gldm       | SmallDependenceLowGrayLevelEmphasis  | 0.006396864  |
| wavelet-HHH | gldm       | LowGrayLevelEmphasis                 | 0.009554682  |
| wavelet-HHH | glcm       | JointAverage                         | 15.47522988  |
| wavelet-HHH | glcm       | SumAverage                           | 30.95045976  |
| wavelet-HHH | glcm       | JointEntropy                         | 6.807032842  |
| wavelet-HHH | glcm       | ClusterShade                         | 5.30251015   |
| wavelet-HHH | glcm       | MaximumProbability                   | 0.042245024  |
| wavelet-HHH | glcm       | ldmn                                 | 0.973240595  |
| wavelet-HHH | glcm       | JointEnergy                          | 0.013459943  |
| wavelet-HHH | glcm       | Contrast                             | 30.23678717  |
| wavelet-HHH | glcm       | DifferenceEntropy                    | 3.404035901  |
| wavelet-HHH | glcm       | InverseVariance                      | 0.268357615  |
| wavelet-HHH | glcm       | DifferenceVariance                   | 15.59718957  |
| wavelet-HHH | glcm       | ldn                                  | 0.900213138  |
| wavelet-HHH | glcm       | ldm                                  | 0.275209798  |
| wavelet-HHH | glcm       | Correlation                          | -0.039913811 |
| wavelet-HHH | glcm       | Autocorrelation                      | 238.9125621  |
| wavelet-HHH | glcm       | SumEntropy                           | 4.158128869  |
| wavelet-HHH | glcm       | SumSquares                           | 14.54696518  |
| wavelet-HHH | glcm       | ClusterProminence                    | 5281.282758  |
| wavelet-HHH | glcm       | lmc2                                 | 0.857805264  |
| wavelet-HHH | glcm       | lmc1                                 | -0.17905042  |
| wavelet-HHH | glcm       | DifferenceAverage                    | 3.809433774  |
| wavelet-HHH | glcm       | ld                                   | 0.358820526  |
| wavelet-HHH | glcm       | ClusterTendency                      | 27.95107355  |
| wavelet-HHH | firstorder | InterquartileRange                   | 86.14125064  |
| wavelet-HHH | firstorder | Skewness                             | -0.00136046  |
| wavelet-HHH | firstorder | Uniformity                           | 0.100365798  |
| wavelet-HHH | firstorder | Median                               | -0.522185681 |
| wavelet-HHH | firstorder | Energy                               | 2754685.594  |
| wavelet-HHH | firstorder | RobustMeanAbsoluteDeviation          | 36.73151567  |
| wavelet-HHH | firstorder | MeanAbsoluteDeviation                | 63.70960409  |
| wavelet-HHH | firstorder | TotalEnergy                          | 74376511.03  |
| wavelet-HHH | firstorder | Maximum                              | 378.6259717  |

|             |            |                                      |              |
|-------------|------------|--------------------------------------|--------------|
| wavelet-HHH | firstorder | RootMeanSquared                      | 92.20691964  |
| wavelet-HHH | firstorder | 90Percentile                         | 98.42069556  |
| wavelet-HHH | firstorder | Minimum                              | -350.1401229 |
| wavelet-HHH | firstorder | Entropy                              | 3.719795512  |
| wavelet-HHH | firstorder | Range                                | 728.7660946  |
| wavelet-HHH | firstorder | Variance                             | 8499.826943  |
| wavelet-HHH | firstorder | 10Percentile                         | -97.80464423 |
| wavelet-HHH | firstorder | Kurtosis                             | 6.175840976  |
| wavelet-HHH | firstorder | Mean                                 | -1.512972717 |
| wavelet-HHH | glrlm      | ShortRunLowGrayLevelEmphasis         | 0.009739487  |
| wavelet-HHH | glrlm      | GrayLevelVariance                    | 14.64867737  |
| wavelet-HHH | glrlm      | LowGrayLevelRunEmphasis              | 0.010024951  |
| wavelet-HHH | glrlm      | GrayLevelNonUniformityNormalized     | 0.094805603  |
| wavelet-HHH | glrlm      | RunVariance                          | 0.111014461  |
| wavelet-HHH | glrlm      | GrayLevelNonUniformity               | 28.10379877  |
| wavelet-HHH | glrlm      | LongRunEmphasis                      | 1.307560426  |
| wavelet-HHH | glrlm      | ShortRunHighGrayLevelEmphasis        | 238.8581407  |
| wavelet-HHH | glrlm      | RunLengthNonUniformity               | 251.8991323  |
| wavelet-HHH | glrlm      | ShortRunEmphasis                     | 0.937238049  |
| wavelet-HHH | glrlm      | LongRunHighGrayLevelEmphasis         | 327.1271835  |
| wavelet-HHH | glrlm      | RunPercentage                        | 0.914767331  |
| wavelet-HHH | glrlm      | LongRunLowGrayLevelEmphasis          | 0.011416178  |
| wavelet-HHH | glrlm      | RunEntropy                           | 4.154954048  |
| wavelet-HHH | glrlm      | HighGrayLevelRunEmphasis             | 253.8560648  |
| wavelet-HHH | glrlm      | RunLengthNonUniformityNormalized     | 0.84925605   |
| wavelet-HHH | glszm      | GrayLevelVariance                    | 28.69760702  |
| wavelet-HHH | glszm      | ZoneVariance                         | 45.56064209  |
| wavelet-HHH | glszm      | GrayLevelNonUniformityNormalized     | 0.067776457  |
| wavelet-HHH | glszm      | SizeZoneNonUniformityNormalized      | 0.480529132  |
| wavelet-HHH | glszm      | SizeZoneNonUniformity                | 55.74137931  |
| wavelet-HHH | glszm      | GrayLevelNonUniformity               | 7.862068966  |
| wavelet-HHH | glszm      | LargeAreaEmphasis                    | 53.36206897  |
| wavelet-HHH | glszm      | SmallAreaHighGrayLevelEmphasis       | 202.3575516  |
| wavelet-HHH | glszm      | ZonePercentage                       | 0.358024691  |
| wavelet-HHH | glszm      | LargeAreaLowGrayLevelEmphasis        | 0.240256051  |
| wavelet-HHH | glszm      | LargeAreaHighGrayLevelEmphasis       | 12956.4569   |
| wavelet-HHH | glszm      | HighGrayLevelZoneEmphasis            | 269.75       |
| wavelet-HHH | glszm      | SmallAreaEmphasis                    | 0.719414587  |
| wavelet-HHH | glszm      | LowGrayLevelZoneEmphasis             | 0.018478465  |
| wavelet-HHH | glszm      | ZoneEntropy                          | 5.231415832  |
| wavelet-HHH | glszm      | SmallAreaLowGrayLevelEmphasis        | 0.016924446  |
| wavelet-HHH | ngtdm      | Coarseness                           | 0.021723862  |
| wavelet-HHH | ngtdm      | Complexity                           | 741.5150415  |
| wavelet-HHH | ngtdm      | Strength                             | 4.759810169  |
| wavelet-HHH | ngtdm      | Contrast                             | 0.124902827  |
| wavelet-HHH | ngtdm      | Busyness                             | 0.095851384  |
| wavelet-HLL | gldm       | GrayLevelVariance                    | 79.01039285  |
| wavelet-HLL | gldm       | HighGrayLevelEmphasis                | 777.5030864  |
| wavelet-HLL | gldm       | DependenceEntropy                    | 6.377525056  |
| wavelet-HLL | gldm       | DependenceNonUniformity              | 89.75925926  |
| wavelet-HLL | gldm       | GrayLevelNonUniformity               | 15.58024691  |
| wavelet-HLL | gldm       | SmallDependenceEmphasis              | 0.480875362  |
| wavelet-HLL | gldm       | SmallDependenceHighGrayLevelEmphasis | 408.2472706  |
| wavelet-HLL | gldm       | DependenceNonUniformityNormalized    | 0.277034751  |
| wavelet-HLL | gldm       | LargeDependenceEmphasis              | 7.382716049  |
| wavelet-HLL | gldm       | LargeDependenceLowGrayLevelEmphasis  | 0.015513515  |
| wavelet-HLL | gldm       | DependenceVariance                   | 2.361796982  |
| wavelet-HLL | gldm       | LargeDependenceHighGrayLevelEmphasis | 5338.645062  |

|             |            |                                     |              |
|-------------|------------|-------------------------------------|--------------|
| wavelet-HLL | gldm       | SmallDependenceLowGrayLevelEmphasis | 0.004264971  |
| wavelet-HLL | gldm       | LowGrayLevelEmphasis                | 0.005230232  |
| wavelet-HLL | glcm       | JointAverage                        | 26.40928501  |
| wavelet-HLL | glcm       | SumAverage                          | 52.81857002  |
| wavelet-HLL | glcm       | JointEntropy                        | 8.068780113  |
| wavelet-HLL | glcm       | ClusterShade                        | 2156.797946  |
| wavelet-HLL | glcm       | MaximumProbability                  | 0.018094679  |
| wavelet-HLL | glcm       | ldmn                                | 0.968982999  |
| wavelet-HLL | glcm       | JointEnergy                         | 0.004766493  |
| wavelet-HLL | glcm       | Contrast                            | 130.1044977  |
| wavelet-HLL | glcm       | DifferenceEntropy                   | 4.338080688  |
| wavelet-HLL | glcm       | InverseVariance                     | 0.156610616  |
| wavelet-HLL | glcm       | DifferenceVariance                  | 62.7011503   |
| wavelet-HLL | glcm       | ldn                                 | 0.892776374  |
| wavelet-HLL | glcm       | ldm                                 | 0.161316922  |
| wavelet-HLL | glcm       | Correlation                         | 0.247328622  |
| wavelet-HLL | glcm       | Autocorrelation                     | 719.0239182  |
| wavelet-HLL | glcm       | SumEntropy                          | 5.500804487  |
| wavelet-HLL | glcm       | SumSquares                          | 86.58695049  |
| wavelet-HLL | glcm       | ClusterProminence                   | 190612.2082  |
| wavelet-HLL | glcm       | lmc2                                | 0.986068203  |
| wavelet-HLL | glcm       | lmc1                                | -0.364740277 |
| wavelet-HLL | glcm       | DifferenceAverage                   | 8.02571597   |
| wavelet-HLL | glcm       | ld                                  | 0.244066222  |
| wavelet-HLL | glcm       | ClusterTendency                     | 216.2433043  |
| wavelet-HLL | firstorder | InterquartileRange                  | 161.1079033  |
| wavelet-HLL | firstorder | Skewness                            | 0.744801744  |
| wavelet-HLL | firstorder | Uniformity                          | 0.048087182  |
| wavelet-HLL | firstorder | Median                              | -17.19240913 |
| wavelet-HLL | firstorder | Energy                              | 16073262.12  |
| wavelet-HLL | firstorder | RobustMeanAbsoluteDeviation         | 85.90893009  |
| wavelet-HLL | firstorder | MeanAbsoluteDeviation               | 154.9334188  |
| wavelet-HLL | firstorder | TotalEnergy                         | 433978077.4  |
| wavelet-HLL | firstorder | Maximum                             | 848.0056457  |
| wavelet-HLL | firstorder | RootMeanSquared                     | 222.7304059  |
| wavelet-HLL | firstorder | 90Percentile                        | 305.7362734  |
| wavelet-HLL | firstorder | Minimum                             | -642.7045959 |
| wavelet-HLL | firstorder | Entropy                             | 4.861144999  |
| wavelet-HLL | firstorder | Range                               | 1490.710242  |
| wavelet-HLL | firstorder | Variance                            | 49607.2008   |
| wavelet-HLL | firstorder | 10Percentile                        | -269.350898  |
| wavelet-HLL | firstorder | Kurtosis                            | 4.559237868  |
| wavelet-HLL | firstorder | Mean                                | -1.277857135 |
| wavelet-HLL | glrlm      | ShortRunLowGrayLevelEmphasis        | 0.005348825  |
| wavelet-HLL | glrlm      | GrayLevelVariance                   | 81.35568481  |
| wavelet-HLL | glrlm      | LowGrayLevelRunEmphasis             | 0.005407818  |
| wavelet-HLL | glrlm      | GrayLevelNonUniformityNormalized    | 0.046389779  |
| wavelet-HLL | glrlm      | RunVariance                         | 0.058137701  |
| wavelet-HLL | glrlm      | GrayLevelNonUniformity              | 14.31568037  |
| wavelet-HLL | glrlm      | LongRunEmphasis                     | 1.161567058  |
| wavelet-HLL | glrlm      | ShortRunHighGrayLevelEmphasis       | 755.3666616  |
| wavelet-HLL | glrlm      | RunLengthNonUniformity              | 281.8127462  |
| wavelet-HLL | glrlm      | ShortRunEmphasis                    | 0.965215358  |
| wavelet-HLL | glrlm      | LongRunHighGrayLevelEmphasis        | 895.7371124  |
| wavelet-HLL | glrlm      | RunPercentage                       | 0.952279202  |
| wavelet-HLL | glrlm      | LongRunLowGrayLevelEmphasis         | 0.00568341   |
| wavelet-HLL | glrlm      | RunEntropy                          | 5.099540382  |
| wavelet-HLL | glrlm      | HighGrayLevelRunEmphasis            | 780.5208019  |

|             |       |                                      |              |
|-------------|-------|--------------------------------------|--------------|
| wavelet-HLL | glrlm | RunLengthNonUniformityNormalized     | 0.913047147  |
| wavelet-HLL | glszm | GrayLevelVariance                    | 112.5507196  |
| wavelet-HLL | glszm | ZoneVariance                         | 4.102512309  |
| wavelet-HLL | glszm | GrayLevelNonUniformityNormalized     | 0.032382275  |
| wavelet-HLL | glszm | SizeZoneNonUniformityNormalized      | 0.50284055   |
| wavelet-HLL | glszm | SizeZoneNonUniformity                | 89.50561798  |
| wavelet-HLL | glszm | GrayLevelNonUniformity               | 5.764044944  |
| wavelet-HLL | glszm | LargeAreaEmphasis                    | 7.415730337  |
| wavelet-HLL | glszm | SmallAreaHighGrayLevelEmphasis       | 647.8603079  |
| wavelet-HLL | glszm | ZonePercentage                       | 0.549382716  |
| wavelet-HLL | glszm | LargeAreaLowGrayLevelEmphasis        | 0.018471797  |
| wavelet-HLL | glszm | LargeAreaHighGrayLevelEmphasis       | 5313.162921  |
| wavelet-HLL | glszm | HighGrayLevelZoneEmphasis            | 834.5898876  |
| wavelet-HLL | glszm | SmallAreaEmphasis                    | 0.736889111  |
| wavelet-HLL | glszm | LowGrayLevelZoneEmphasis             | 0.008042207  |
| wavelet-HLL | glszm | ZoneEntropy                          | 6.09407178   |
| wavelet-HLL | glszm | SmallAreaLowGrayLevelEmphasis        | 0.007490809  |
| wavelet-HLL | ngtdm | Coarseness                           | 0.021308646  |
| wavelet-HLL | ngtdm | Complexity                           | 4838.824843  |
| wavelet-HLL | ngtdm | Strength                             | 19.26990107  |
| wavelet-HLL | ngtdm | Contrast                             | 0.336707329  |
| wavelet-HLL | ngtdm | Busyness                             | 0.033276496  |
| wavelet-LHL | gldm  | GrayLevelVariance                    | 147.0895062  |
| wavelet-LHL | gldm  | HighGrayLevelEmphasis                | 1104.648148  |
| wavelet-LHL | gldm  | DependenceEntropy                    | 6.486321812  |
| wavelet-LHL | gldm  | DependenceNonUniformity              | 120.9567901  |
| wavelet-LHL | gldm  | GrayLevelNonUniformity               | 10.64814815  |
| wavelet-LHL | gldm  | SmallDependenceEmphasis              | 0.601868544  |
| wavelet-LHL | gldm  | SmallDependenceHighGrayLevelEmphasis | 663.9647123  |
| wavelet-LHL | gldm  | DependenceNonUniformityNormalized    | 0.373323426  |
| wavelet-LHL | gldm  | LargeDependenceEmphasis              | 4.12962963   |
| wavelet-LHL | gldm  | LargeDependenceLowGrayLevelEmphasis  | 0.010284012  |
| wavelet-LHL | gldm  | DependenceVariance                   | 1.012879134  |
| wavelet-LHL | gldm  | LargeDependenceHighGrayLevelEmphasis | 4367.950617  |
| wavelet-LHL | gldm  | SmallDependenceLowGrayLevelEmphasis  | 0.005697165  |
| wavelet-LHL | gldm  | LowGrayLevelEmphasis                 | 0.006265768  |
| wavelet-LHL | glcm  | JointAverage                         | 31.58978057  |
| wavelet-LHL | glcm  | SumAverage                           | 63.17956115  |
| wavelet-LHL | glcm  | JointEntropy                         | 8.391103896  |
| wavelet-LHL | glcm  | ClusterShade                         | 4170.379006  |
| wavelet-LHL | glcm  | MaximumProbability                   | 0.014462857  |
| wavelet-LHL | glcm  | ldmn                                 | 0.962479129  |
| wavelet-LHL | glcm  | JointEnergy                          | 0.003531167  |
| wavelet-LHL | glcm  | Contrast                             | 247.7411574  |
| wavelet-LHL | glcm  | DifferenceEntropy                    | 4.701835734  |
| wavelet-LHL | glcm  | InverseVariance                      | 0.122668361  |
| wavelet-LHL | glcm  | DifferenceVariance                   | 116.2428959  |
| wavelet-LHL | glcm  | ldn                                  | 0.882668349  |
| wavelet-LHL | glcm  | ldm                                  | 0.115673706  |
| wavelet-LHL | glcm  | Correlation                          | 0.208660228  |
| wavelet-LHL | glcm  | Autocorrelation                      | 1030.035021  |
| wavelet-LHL | glcm  | SumEntropy                           | 5.840513283  |
| wavelet-LHL | glcm  | SumSquares                           | 155.9484372  |
| wavelet-LHL | glcm  | ClusterProminence                    | 566913.726   |
| wavelet-LHL | glcm  | lmc2                                 | 0.995533146  |
| wavelet-LHL | glcm  | lmc1                                 | -0.440037866 |
| wavelet-LHL | glcm  | DifferenceAverage                    | 11.06307531  |
| wavelet-LHL | glcm  | ld                                   | 0.19440322   |

|             |            |                                  |              |
|-------------|------------|----------------------------------|--------------|
| wavelet-LHL | glcm       | ClusterTendency                  | 376.0525913  |
| wavelet-LHL | firstorder | InterquartileRange               | 340.4662443  |
| wavelet-LHL | firstorder | Skewness                         | 0.459552285  |
| wavelet-LHL | firstorder | Uniformity                       | 0.032864655  |
| wavelet-LHL | firstorder | Median                           | -11.1571158  |
| wavelet-LHL | firstorder | Energy                           | 29706452.47  |
| wavelet-LHL | firstorder | RobustMeanAbsoluteDeviation      | 135.9114588  |
| wavelet-LHL | firstorder | MeanAbsoluteDeviation            | 223.5349634  |
| wavelet-LHL | firstorder | TotalEnergy                      | 802074216.8  |
| wavelet-LHL | firstorder | Maximum                          | 1077.838499  |
| wavelet-LHL | firstorder | RootMeanSquared                  | 302.7979222  |
| wavelet-LHL | firstorder | 90Percentile                     | 414.0552     |
| wavelet-LHL | firstorder | Minimum                          | -729.8141771 |
| wavelet-LHL | firstorder | Entropy                          | 5.357578874  |
| wavelet-LHL | firstorder | Range                            | 1807.652676  |
| wavelet-LHL | firstorder | Variance                         | 91557.98441  |
| wavelet-LHL | firstorder | 10Percentile                     | -363.3690972 |
| wavelet-LHL | firstorder | Kurtosis                         | 3.590777011  |
| wavelet-LHL | firstorder | Mean                             | 11.34007505  |
| wavelet-LHL | glrlm      | ShortRunLowGrayLevelEmphasis     | 0.006387004  |
| wavelet-LHL | glrlm      | GrayLevelVariance                | 149.0873299  |
| wavelet-LHL | glrlm      | LowGrayLevelRunEmphasis          | 0.006416269  |
| wavelet-LHL | glrlm      | GrayLevelNonUniformityNormalized | 0.031863222  |
| wavelet-LHL | glrlm      | RunVariance                      | 0.032395496  |
| wavelet-LHL | glrlm      | GrayLevelNonUniformity           | 10.02131783  |
| wavelet-LHL | glrlm      | LongRunEmphasis                  | 1.09467719   |
| wavelet-LHL | glrlm      | ShortRunHighGrayLevelEmphasis    | 1081.794249  |
| wavelet-LHL | glrlm      | RunLengthNonUniformity           | 296.8932041  |
| wavelet-LHL | glrlm      | ShortRunEmphasis                 | 0.978002652  |
| wavelet-LHL | glrlm      | LongRunHighGrayLevelEmphasis     | 1206.323198  |
| wavelet-LHL | glrlm      | RunPercentage                    | 0.970560304  |
| wavelet-LHL | glrlm      | LongRunLowGrayLevelEmphasis      | 0.006543881  |
| wavelet-LHL | glrlm      | RunEntropy                       | 5.50043977   |
| wavelet-LHL | glrlm      | HighGrayLevelRunEmphasis         | 1105.63691   |
| wavelet-LHL | glrlm      | RunLengthNonUniformityNormalized | 0.943785383  |
| wavelet-LHL | glszm      | GrayLevelVariance                | 170.8945763  |
| wavelet-LHL | glszm      | ZoneVariance                     | 2.176450114  |
| wavelet-LHL | glszm      | GrayLevelNonUniformityNormalized | 0.025572777  |
| wavelet-LHL | glszm      | SizeZoneNonUniformityNormalized  | 0.582645728  |
| wavelet-LHL | glszm      | SizeZoneNonUniformity            | 128.7647059  |
| wavelet-LHL | glszm      | GrayLevelNonUniformity           | 5.65158371   |
| wavelet-LHL | glszm      | LargeAreaEmphasis                | 4.325791855  |
| wavelet-LHL | glszm      | SmallAreaHighGrayLevelEmphasis   | 869.858503   |
| wavelet-LHL | glszm      | ZonePercentage                   | 0.682098765  |
| wavelet-LHL | glszm      | LargeAreaLowGrayLevelEmphasis    | 0.012644973  |
| wavelet-LHL | glszm      | LargeAreaHighGrayLevelEmphasis   | 4463.99095   |
| wavelet-LHL | glszm      | HighGrayLevelZoneEmphasis        | 1106.257919  |
| wavelet-LHL | glszm      | SmallAreaEmphasis                | 0.791677979  |
| wavelet-LHL | glszm      | LowGrayLevelZoneEmphasis         | 0.008540271  |
| wavelet-LHL | glszm      | ZoneEntropy                      | 6.275579669  |
| wavelet-LHL | glszm      | SmallAreaLowGrayLevelEmphasis    | 0.008219602  |
| wavelet-LHL | ngtdm      | Coarseness                       | 0.020926513  |
| wavelet-LHL | ngtdm      | Complexity                       | 10680.22738  |
| wavelet-LHL | ngtdm      | Strength                         | 24.25374759  |
| wavelet-LHL | ngtdm      | Contrast                         | 0.628819058  |
| wavelet-LHL | ngtdm      | Busyness                         | 0.026658915  |
| wavelet-LHH | gldm       | GrayLevelVariance                | 49.31575789  |
| wavelet-LHH | gldm       | HighGrayLevelEmphasis            | 762.8981481  |

|             |            |                                      |              |
|-------------|------------|--------------------------------------|--------------|
| wavelet-LHH | gldm       | DependenceEntropy                    | 6.023253573  |
| wavelet-LHH | gldm       | DependenceNonUniformity              | 89.24074074  |
| wavelet-LHH | gldm       | GrayLevelNonUniformity               | 19.53703704  |
| wavelet-LHH | gldm       | SmallDependenceEmphasis              | 0.505013612  |
| wavelet-LHH | gldm       | SmallDependenceHighGrayLevelEmphasis | 436.2983427  |
| wavelet-LHH | gldm       | DependenceNonUniformityNormalized    | 0.275434385  |
| wavelet-LHH | gldm       | LargeDependenceEmphasis              | 6.783950617  |
| wavelet-LHH | gldm       | LargeDependenceLowGrayLevelEmphasis  | 0.014201047  |
| wavelet-LHH | gldm       | DependenceVariance                   | 1.927640604  |
| wavelet-LHH | gldm       | LargeDependenceHighGrayLevelEmphasis | 4688.533951  |
| wavelet-LHH | gldm       | SmallDependenceLowGrayLevelEmphasis  | 0.004121975  |
| wavelet-LHH | gldm       | LowGrayLevelEmphasis                 | 0.004969357  |
| wavelet-LHH | glcm       | JointAverage                         | 26.56983718  |
| wavelet-LHH | glcm       | SumAverage                           | 53.13967437  |
| wavelet-LHH | glcm       | JointEntropy                         | 7.767275547  |
| wavelet-LHH | glcm       | ClusterShade                         | 549.1111856  |
| wavelet-LHH | glcm       | MaximumProbability                   | 0.022034008  |
| wavelet-LHH | glcm       | Idmn                                 | 0.97600002   |
| wavelet-LHH | glcm       | JointEnergy                          | 0.006133203  |
| wavelet-LHH | glcm       | Contrast                             | 100.3134302  |
| wavelet-LHH | glcm       | DifferenceEntropy                    | 4.161306553  |
| wavelet-LHH | glcm       | InverseVariance                      | 0.178901723  |
| wavelet-LHH | glcm       | DifferenceVariance                   | 51.00071929  |
| wavelet-LHH | glcm       | Idn                                  | 0.904742261  |
| wavelet-LHH | glcm       | Idm                                  | 0.172170086  |
| wavelet-LHH | glcm       | Correlation                          | -0.016087865 |
| wavelet-LHH | glcm       | Autocorrelation                      | 705.3336575  |
| wavelet-LHH | glcm       | SumEntropy                           | 4.975825146  |
| wavelet-LHH | glcm       | SumSquares                           | 49.52564368  |
| wavelet-LHH | glcm       | ClusterProminence                    | 68646.92958  |
| wavelet-LHH | glcm       | Imc2                                 | 0.961511625  |
| wavelet-LHH | glcm       | Imc1                                 | -0.286675079 |
| wavelet-LHH | glcm       | DifferenceAverage                    | 6.960169575  |
| wavelet-LHH | glcm       | Id                                   | 0.257138451  |
| wavelet-LHH | glcm       | ClusterTendency                      | 97.7891445   |
| wavelet-LHH | firstorder | InterquartileRange                   | 145.620803   |
| wavelet-LHH | firstorder | Skewness                             | 0.584272375  |
| wavelet-LHH | firstorder | Uniformity                           | 0.060299497  |
| wavelet-LHH | firstorder | Median                               | -3.597443214 |
| wavelet-LHH | firstorder | Energy                               | 10034645.62  |
| wavelet-LHH | firstorder | RobustMeanAbsoluteDeviation          | 65.1871417   |
| wavelet-LHH | firstorder | MeanAbsoluteDeviation                | 118.3223722  |
| wavelet-LHH | firstorder | TotalEnergy                          | 270935431.8  |
| wavelet-LHH | firstorder | Maximum                              | 846.6142801  |
| wavelet-LHH | firstorder | RootMeanSquared                      | 175.9861599  |
| wavelet-LHH | firstorder | 90Percentile                         | 214.9643312  |
| wavelet-LHH | firstorder | Minimum                              | -649.7104158 |
| wavelet-LHH | firstorder | Entropy                              | 4.515407915  |
| wavelet-LHH | firstorder | Range                                | 1496.324696  |
| wavelet-LHH | firstorder | Variance                             | 30949.39894  |
| wavelet-LHH | firstorder | 10Percentile                         | -179.4827218 |
| wavelet-LHH | firstorder | Kurtosis                             | 6.629526224  |
| wavelet-LHH | firstorder | Mean                                 | 4.661493739  |
| wavelet-LHH | glrlm      | ShortRunLowGrayLevelEmphasis         | 0.005073527  |
| wavelet-LHH | glrlm      | GrayLevelVariance                    | 51.10489159  |
| wavelet-LHH | glrlm      | LowGrayLevelRunEmphasis              | 0.005131295  |
| wavelet-LHH | glrlm      | GrayLevelNonUniformityNormalized     | 0.058019333  |
| wavelet-LHH | glrlm      | RunVariance                          | 0.051190899  |



|             |       |                                      |             |
|-------------|-------|--------------------------------------|-------------|
| wavelet-LHH | glrlm | GrayLevelNonUniformity               | 17.9287822  |
| wavelet-LHH | glrlm | LongRunEmphasis                      | 1.150988502 |
| wavelet-LHH | glrlm | ShortRunHighGrayLevelEmphasis        | 743.794567  |
| wavelet-LHH | glrlm | RunLengthNonUniformity               | 281.7045791 |
| wavelet-LHH | glrlm | ShortRunEmphasis                     | 0.964910579 |
| wavelet-LHH | glrlm | LongRunHighGrayLevelEmphasis         | 868.6775737 |
| wavelet-LHH | glrlm | RunPercentage                        | 0.953703704 |
| wavelet-LHH | glrlm | LongRunLowGrayLevelEmphasis          | 0.005378539 |
| wavelet-LHH | glrlm | RunEntropy                           | 4.769389348 |
| wavelet-LHH | glrlm | HighGrayLevelRunEmphasis             | 767.3522819 |
| wavelet-LHH | glrlm | RunLengthNonUniformityNormalized     | 0.911490991 |
| wavelet-LHH | glszm | GrayLevelVariance                    | 76.23454717 |
| wavelet-LHH | glszm | ZoneVariance                         | 5.56918287  |
| wavelet-LHH | glszm | GrayLevelNonUniformityNormalized     | 0.041665395 |
| wavelet-LHH | glszm | SizeZoneNonUniformityNormalized      | 0.569610207 |
| wavelet-LHH | glszm | SizeZoneNonUniformity                | 103.0994475 |
| wavelet-LHH | glszm | GrayLevelNonUniformity               | 7.541436464 |
| wavelet-LHH | glszm | LargeAreaEmphasis                    | 8.773480663 |
| wavelet-LHH | glszm | SmallAreaHighGrayLevelEmphasis       | 700.2720702 |
| wavelet-LHH | glszm | ZonePercentage                       | 0.558641975 |
| wavelet-LHH | glszm | LargeAreaLowGrayLevelEmphasis        | 0.019605059 |
| wavelet-LHH | glszm | LargeAreaHighGrayLevelEmphasis       | 6139.033149 |
| wavelet-LHH | glszm | HighGrayLevelZoneEmphasis            | 839.3370166 |
| wavelet-LHH | glszm | SmallAreaEmphasis                    | 0.781141254 |
| wavelet-LHH | glszm | LowGrayLevelZoneEmphasis             | 0.007572301 |
| wavelet-LHH | glszm | ZoneEntropy                          | 5.744812036 |
| wavelet-LHH | glszm | SmallAreaLowGrayLevelEmphasis        | 0.007164751 |
| wavelet-LHH | ngtdm | Coarseness                           | 0.021492714 |
| wavelet-LHH | ngtdm | Complexity                           | 3530.141805 |
| wavelet-LHH | ngtdm | Strength                             | 12.66272183 |
| wavelet-LHH | ngtdm | Contrast                             | 0.296622563 |
| wavelet-LHH | ngtdm | Busyness                             | 0.036385323 |
| wavelet-LLH | gldm  | GrayLevelVariance                    | 333.2895424 |
| wavelet-LLH | gldm  | HighGrayLevelEmphasis                | 5716.953704 |
| wavelet-LLH | gldm  | DependenceEntropy                    | 6.623358891 |
| wavelet-LLH | gldm  | DependenceNonUniformity              | 123.5308642 |
| wavelet-LLH | gldm  | GrayLevelNonUniformity               | 9.734567901 |
| wavelet-LLH | gldm  | SmallDependenceEmphasis              | 0.626234568 |
| wavelet-LLH | gldm  | SmallDependenceHighGrayLevelEmphasis | 3601.177906 |
| wavelet-LLH | gldm  | DependenceNonUniformityNormalized    | 0.381268099 |
| wavelet-LLH | gldm  | LargeDependenceEmphasis              | 4.166666667 |
| wavelet-LLH | gldm  | LargeDependenceLowGrayLevelEmphasis  | 0.003963189 |
| wavelet-LLH | gldm  | DependenceVariance                   | 1.071673525 |
| wavelet-LLH | gldm  | LargeDependenceHighGrayLevelEmphasis | 23162.15741 |
| wavelet-LLH | gldm  | SmallDependenceLowGrayLevelEmphasis  | 0.003271409 |
| wavelet-LLH | gldm  | LowGrayLevelEmphasis                 | 0.003345376 |
| wavelet-LLH | glcm  | JointAverage                         | 72.38303502 |
| wavelet-LLH | glcm  | SumAverage                           | 144.76607   |
| wavelet-LLH | glcm  | JointEntropy                         | 8.44420892  |
| wavelet-LLH | glcm  | ClusterShade                         | -10548.3719 |
| wavelet-LLH | glcm  | MaximumProbability                   | 0.013762481 |
| wavelet-LLH | glcm  | Idmn                                 | 0.970435438 |
| wavelet-LLH | glcm  | JointEnergy                          | 0.003334911 |
| wavelet-LLH | glcm  | Contrast                             | 601.9091097 |
| wavelet-LLH | glcm  | DifferenceEntropy                    | 5.077834851 |
| wavelet-LLH | glcm  | InverseVariance                      | 0.112144041 |
| wavelet-LLH | glcm  | DifferenceVariance                   | 332.8314911 |
| wavelet-LLH | glcm  | Idn                                  | 0.903094076 |

|             |            |                                  |              |
|-------------|------------|----------------------------------|--------------|
| wavelet-LLH | glcm       | Idm                              | 0.109188712  |
| wavelet-LLH | glcm       | Correlation                      | 0.047687801  |
| wavelet-LLH | glcm       | Autocorrelation                  | 5258.613155  |
| wavelet-LLH | glcm       | SumEntropy                       | 6.009221955  |
| wavelet-LLH | glcm       | SumSquares                       | 320.2149047  |
| wavelet-LLH | glcm       | ClusterProminence                | 2636262.745  |
| wavelet-LLH | glcm       | Imc2                             | 0.998198287  |
| wavelet-LLH | glcm       | Imc1                             | -0.500550445 |
| wavelet-LLH | glcm       | DifferenceAverage                | 15.89507388  |
| wavelet-LLH | glcm       | Id                               | 0.180733021  |
| wavelet-LLH | glcm       | ClusterTendency                  | 678.9505091  |
| wavelet-LLH | firstorder | InterquartileRange               | 315.9310026  |
| wavelet-LLH | firstorder | Skewness                         | -0.275890425 |
| wavelet-LLH | firstorder | Uniformity                       | 0.030044963  |
| wavelet-LLH | firstorder | Median                           | -21.49115454 |
| wavelet-LLH | firstorder | Energy                           | 67832322.23  |
| wavelet-LLH | firstorder | RobustMeanAbsoluteDeviation      | 146.0235665  |
| wavelet-LLH | firstorder | MeanAbsoluteDeviation            | 298.360666   |
| wavelet-LLH | firstorder | TotalEnergy                      | 1831472700   |
| wavelet-LLH | firstorder | Maximum                          | 1391.542257  |
| wavelet-LLH | firstorder | RootMeanSquared                  | 457.5576676  |
| wavelet-LLH | firstorder | 90Percentile                     | 463.3241355  |
| wavelet-LLH | firstorder | Minimum                          | -1849.901037 |
| wavelet-LLH | firstorder | Entropy                          | 5.627369088  |
| wavelet-LLH | firstorder | Range                            | 3241.443293  |
| wavelet-LLH | firstorder | Variance                         | 208568.3529  |
| wavelet-LLH | firstorder | 10Percentile                     | -488.5356326 |
| wavelet-LLH | firstorder | Kurtosis                         | 5.142331477  |
| wavelet-LLH | firstorder | Mean                             | -28.11879006 |
| wavelet-LLH | glrlm      | ShortRunLowGrayLevelEmphasis     | 0.003436292  |
| wavelet-LLH | glrlm      | GrayLevelVariance                | 340.6873874  |
| wavelet-LLH | glrlm      | LowGrayLevelRunEmphasis          | 0.003440693  |
| wavelet-LLH | glrlm      | GrayLevelNonUniformityNormalized | 0.02901003   |
| wavelet-LLH | glrlm      | RunVariance                      | 0.03015642   |
| wavelet-LLH | glrlm      | GrayLevelNonUniformity           | 9.126126249  |
| wavelet-LLH | glrlm      | LongRunEmphasis                  | 1.091805647  |
| wavelet-LLH | glrlm      | ShortRunHighGrayLevelEmphasis    | 5596.846064  |
| wavelet-LLH | glrlm      | RunLengthNonUniformity           | 296.5692305  |
| wavelet-LLH | glrlm      | ShortRunEmphasis                 | 0.977603612  |
| wavelet-LLH | glrlm      | LongRunHighGrayLevelEmphasis     | 6232.214867  |
| wavelet-LLH | glrlm      | RunPercentage                    | 0.970797721  |
| wavelet-LLH | glrlm      | LongRunLowGrayLevelEmphasis      | 0.003458712  |
| wavelet-LLH | glrlm      | RunEntropy                       | 5.778724853  |
| wavelet-LLH | glrlm      | HighGrayLevelRunEmphasis         | 5721.553646  |
| wavelet-LLH | glrlm      | RunLengthNonUniformityNormalized | 0.94253806   |
| wavelet-LLH | glszm      | GrayLevelVariance                | 429.1626851  |
| wavelet-LLH | glszm      | ZoneVariance                     | 1.0729104    |
| wavelet-LLH | glszm      | GrayLevelNonUniformityNormalized | 0.021211357  |
| wavelet-LLH | glszm      | SizeZoneNonUniformityNormalized  | 0.620369113  |
| wavelet-LLH | glszm      | SizeZoneNonUniformity            | 140.8237885  |
| wavelet-LLH | glszm      | GrayLevelNonUniformity           | 4.814977974  |
| wavelet-LLH | glszm      | LargeAreaEmphasis                | 3.110132159  |
| wavelet-LLH | glszm      | SmallAreaHighGrayLevelEmphasis   | 4689.826175  |
| wavelet-LLH | glszm      | ZonePercentage                   | 0.700617284  |
| wavelet-LLH | glszm      | LargeAreaLowGrayLevelEmphasis    | 0.005103539  |
| wavelet-LLH | glszm      | LargeAreaHighGrayLevelEmphasis   | 17457.28194  |
| wavelet-LLH | glszm      | HighGrayLevelZoneEmphasis        | 5760.735683  |
| wavelet-LLH | glszm      | SmallAreaEmphasis                | 0.814643226  |

|             |            |                                      |              |
|-------------|------------|--------------------------------------|--------------|
| wavelet-LLH | glszm      | LowGrayLevelZoneEmphasis             | 0.00468998   |
| wavelet-LLH | glszm      | ZoneEntropy                          | 6.573100142  |
| wavelet-LLH | glszm      | SmallAreaLowGrayLevelEmphasis        | 0.004653258  |
| wavelet-LLH | ngtdm      | Coarseness                           | 0.018773243  |
| wavelet-LLH | ngtdm      | Complexity                           | 35297.78658  |
| wavelet-LLH | ngtdm      | Strength                             | 53.9605448   |
| wavelet-LLH | ngtdm      | Contrast                             | 1.162208733  |
| wavelet-LLH | ngtdm      | Busyness                             | 0.00794937   |
| wavelet-LLL | gldm       | GrayLevelVariance                    | 917.8688462  |
| wavelet-LLL | gldm       | HighGrayLevelEmphasis                | 11410.2037   |
| wavelet-LLL | gldm       | DependenceEntropy                    | 6.861076238  |
| wavelet-LLL | gldm       | DependenceNonUniformity              | 172.5987654  |
| wavelet-LLL | gldm       | GrayLevelNonUniformity               | 5.827160494  |
| wavelet-LLL | gldm       | SmallDependenceEmphasis              | 0.75654321   |
| wavelet-LLL | gldm       | SmallDependenceHighGrayLevelEmphasis | 8202.792332  |
| wavelet-LLL | gldm       | DependenceNonUniformityNormalized    | 0.532712239  |
| wavelet-LLL | gldm       | LargeDependenceEmphasis              | 2.685185185  |
| wavelet-LLL | gldm       | LargeDependenceLowGrayLevelEmphasis  | 0.003541178  |
| wavelet-LLL | gldm       | DependenceVariance                   | 0.616559976  |
| wavelet-LLL | gldm       | LargeDependenceHighGrayLevelEmphasis | 34106.49383  |
| wavelet-LLL | gldm       | SmallDependenceLowGrayLevelEmphasis  | 0.003237644  |
| wavelet-LLL | gldm       | LowGrayLevelEmphasis                 | 0.003272061  |
| wavelet-LLL | glcm       | JointAverage                         | 99.84610951  |
| wavelet-LLL | glcm       | SumAverage                           | 199.692219   |
| wavelet-LLL | glcm       | JointEntropy                         | 8.68444809   |
| wavelet-LLL | glcm       | ClusterShade                         | -148337.2172 |
| wavelet-LLL | glcm       | MaximumProbability                   | 0.010396981  |
| wavelet-LLL | glcm       | Idmn                                 | 0.972612991  |
| wavelet-LLL | glcm       | JointEnergy                          | 0.002628939  |
| wavelet-LLL | glcm       | Contrast                             | 843.8871104  |
| wavelet-LLL | glcm       | DifferenceEntropy                    | 5.543176817  |
| wavelet-LLL | glcm       | InverseVariance                      | 0.073585703  |
| wavelet-LLL | glcm       | DifferenceVariance                   | 360.5591278  |
| wavelet-LLL | glcm       | Idn                                  | 0.894320657  |
| wavelet-LLL | glcm       | Idm                                  | 0.068544316  |
| wavelet-LLL | glcm       | Correlation                          | 0.579718182  |
| wavelet-LLL | glcm       | Autocorrelation                      | 10546.56798  |
| wavelet-LLL | glcm       | SumEntropy                           | 6.770749264  |
| wavelet-LLL | glcm       | SumSquares                           | 998.2298541  |
| wavelet-LLL | glcm       | ClusterProminence                    | 29567117.34  |
| wavelet-LLL | glcm       | Imc2                                 | 0.999796646  |
| wavelet-LLL | glcm       | Imc1                                 | -0.620869914 |
| wavelet-LLL | glcm       | DifferenceAverage                    | 21.55138863  |
| wavelet-LLL | glcm       | Id                                   | 0.128618622  |
| wavelet-LLL | glcm       | ClusterTendency                      | 3149.032306  |
| wavelet-LLL | firstorder | InterquartileRange                   | 968.6177679  |
| wavelet-LLL | firstorder | Skewness                             | -1.040199233 |
| wavelet-LLL | firstorder | Uniformity                           | 0.017985063  |
| wavelet-LLL | firstorder | Median                               | -173.1626398 |
| wavelet-LLL | firstorder | Energy                               | 251848722.3  |
| wavelet-LLL | firstorder | RobustMeanAbsoluteDeviation          | 411.3022029  |
| wavelet-LLL | firstorder | MeanAbsoluteDeviation                | 607.9913338  |
| wavelet-LLL | firstorder | TotalEnergy                          | 6799915502   |
| wavelet-LLL | firstorder | Maximum                              | 1157.795535  |
| wavelet-LLL | firstorder | RootMeanSquared                      | 881.6523529  |
| wavelet-LLL | firstorder | 90Percentile                         | 214.982701   |
| wavelet-LLL | firstorder | Minimum                              | -2984.213336 |
| wavelet-LLL | firstorder | Entropy                              | 6.268350098  |

|             |            |                                      |              |
|-------------|------------|--------------------------------------|--------------|
| wavelet-LLL | firstorder | Range                                | 4142.008871  |
| wavelet-LLL | firstorder | Variance                             | 572806.6537  |
| wavelet-LLL | firstorder | 10Percentile                         | -1664.397079 |
| wavelet-LLL | firstorder | Kurtosis                             | 3.49439817   |
| wavelet-LLL | firstorder | Mean                                 | -452.2214254 |
| wavelet-LLL | glrlm      | ShortRunLowGrayLevelEmphasis         | 0.003323858  |
| wavelet-LLL | glrlm      | GrayLevelVariance                    | 919.9607713  |
| wavelet-LLL | glrlm      | LowGrayLevelRunEmphasis              | 0.00332583   |
| wavelet-LLL | glrlm      | GrayLevelNonUniformityNormalized     | 0.017529402  |
| wavelet-LLL | glrlm      | RunVariance                          | 0.017823043  |
| wavelet-LLL | glrlm      | GrayLevelNonUniformity               | 5.58503291   |
| wavelet-LLL | glrlm      | LongRunEmphasis                      | 1.05270897   |
| wavelet-LLL | glrlm      | ShortRunHighGrayLevelEmphasis        | 11209.05912  |
| wavelet-LLL | glrlm      | RunLengthNonUniformity               | 308.1506937  |
| wavelet-LLL | glrlm      | ShortRunEmphasis                     | 0.98736543   |
| wavelet-LLL | glrlm      | LongRunHighGrayLevelEmphasis         | 12081.49056  |
| wavelet-LLL | glrlm      | RunPercentage                        | 0.9831434    |
| wavelet-LLL | glrlm      | LongRunLowGrayLevelEmphasis          | 0.00333386   |
| wavelet-LLL | glrlm      | RunEntropy                           | 6.343454772  |
| wavelet-LLL | glrlm      | HighGrayLevelRunEmphasis             | 11377.02875  |
| wavelet-LLL | glrlm      | RunLengthNonUniformityNormalized     | 0.967209862  |
| wavelet-LLL | glszm      | GrayLevelVariance                    | 948.0642218  |
| wavelet-LLL | glszm      | ZoneVariance                         | 0.493801653  |
| wavelet-LLL | glszm      | GrayLevelNonUniformityNormalized     | 0.014520202  |
| wavelet-LLL | glszm      | SizeZoneNonUniformityNormalized      | 0.738894628  |
| wavelet-LLL | glszm      | SizeZoneNonUniformity                | 195.0681818  |
| wavelet-LLL | glszm      | GrayLevelNonUniformity               | 3.833333333  |
| wavelet-LLL | glszm      | LargeAreaEmphasis                    | 2            |
| wavelet-LLL | glszm      | SmallAreaHighGrayLevelEmphasis       | 9472.349547  |
| wavelet-LLL | glszm      | ZonePercentage                       | 0.814814815  |
| wavelet-LLL | glszm      | LargeAreaLowGrayLevelEmphasis        | 0.004136011  |
| wavelet-LLL | glszm      | LargeAreaHighGrayLevelEmphasis       | 24466.31818  |
| wavelet-LLL | glszm      | HighGrayLevelZoneEmphasis            | 11007.24242  |
| wavelet-LLL | glszm      | SmallAreaEmphasis                    | 0.882646748  |
| wavelet-LLL | glszm      | LowGrayLevelZoneEmphasis             | 0.003981851  |
| wavelet-LLL | glszm      | ZoneEntropy                          | 6.773133041  |
| wavelet-LLL | glszm      | SmallAreaLowGrayLevelEmphasis        | 0.003967092  |
| wavelet-LLL | ngtdm      | Coarseness                           | 0.019683455  |
| wavelet-LLL | ngtdm      | Complexity                           | 62810.26598  |
| wavelet-LLL | ngtdm      | Strength                             | 148.6895684  |
| wavelet-LLL | ngtdm      | Contrast                             | 1.767919061  |
| wavelet-LLL | ngtdm      | Busyness                             | 0.004168104  |
| wavelet-HHL | gldm       | GrayLevelVariance                    | 15.44623533  |
| wavelet-HHL | gldm       | HighGrayLevelEmphasis                | 223.1975309  |
| wavelet-HHL | gldm       | DependenceEntropy                    | 5.964639153  |
| wavelet-HHL | gldm       | DependenceNonUniformity              | 61.32098765  |
| wavelet-HHL | gldm       | GrayLevelNonUniformity               | 29.02469136  |
| wavelet-HHL | gldm       | SmallDependenceEmphasis              | 0.372936198  |
| wavelet-HHL | gldm       | SmallDependenceHighGrayLevelEmphasis | 87.62855491  |
| wavelet-HHL | gldm       | DependenceNonUniformityNormalized    | 0.189262308  |
| wavelet-HHL | gldm       | LargeDependenceEmphasis              | 14.25308642  |
| wavelet-HHL | gldm       | LargeDependenceLowGrayLevelEmphasis  | 0.100242226  |
| wavelet-HHL | gldm       | DependenceVariance                   | 5.029492455  |
| wavelet-HHL | gldm       | LargeDependenceHighGrayLevelEmphasis | 2906.907407  |
| wavelet-HHL | gldm       | SmallDependenceLowGrayLevelEmphasis  | 0.004716249  |
| wavelet-HHL | gldm       | LowGrayLevelEmphasis                 | 0.012738132  |
| wavelet-HHL | glcm       | JointAverage                         | 14.41327424  |
| wavelet-HHL | glcm       | SumAverage                           | 28.82654848  |

|             |            |                                  |              |
|-------------|------------|----------------------------------|--------------|
| wavelet-HHL | glcm       | JointEntropy                     | 7.110852631  |
| wavelet-HHL | glcm       | ClusterShade                     | -7.950913661 |
| wavelet-HHL | glcm       | MaximumProbability               | 0.047170746  |
| wavelet-HHL | glcm       | Idmn                             | 0.969230728  |
| wavelet-HHL | glcm       | JointEnergy                      | 0.011281978  |
| wavelet-HHL | glcm       | Contrast                         | 31.70777054  |
| wavelet-HHL | glcm       | DifferenceEntropy                | 3.487291427  |
| wavelet-HHL | glcm       | InverseVariance                  | 0.251486176  |
| wavelet-HHL | glcm       | DifferenceVariance               | 14.72735224  |
| wavelet-HHL | glcm       | Idn                              | 0.890182966  |
| wavelet-HHL | glcm       | Idm                              | 0.256282008  |
| wavelet-HHL | glcm       | Correlation                      | 0.028397546  |
| wavelet-HHL | glcm       | Autocorrelation                  | 208.1524951  |
| wavelet-HHL | glcm       | SumEntropy                       | 4.38215541   |
| wavelet-HHL | glcm       | SumSquares                       | 16.2607969   |
| wavelet-HHL | glcm       | ClusterProminence                | 4952.937069  |
| wavelet-HHL | glcm       | Imc2                             | 0.882354552  |
| wavelet-HHL | glcm       | Imc1                             | -0.192626198 |
| wavelet-HHL | glcm       | DifferenceAverage                | 4.083845602  |
| wavelet-HHL | glcm       | Id                               | 0.341178727  |
| wavelet-HHL | glcm       | ClusterTendency                  | 33.33541707  |
| wavelet-HHL | firstorder | InterquartileRange               | 97.27460443  |
| wavelet-HHL | firstorder | Skewness                         | -0.004187898 |
| wavelet-HHL | firstorder | Uniformity                       | 0.089582381  |
| wavelet-HHL | firstorder | Median                           | -3.798021501 |
| wavelet-HHL | firstorder | Energy                           | 3059505.973  |
| wavelet-HHL | firstorder | RobustMeanAbsoluteDeviation      | 41.79782706  |
| wavelet-HHL | firstorder | MeanAbsoluteDeviation            | 69.81814883  |
| wavelet-HHL | firstorder | TotalEnergy                      | 82606661.26  |
| wavelet-HHL | firstorder | Maximum                          | 385.5146349  |
| wavelet-HHL | firstorder | RootMeanSquared                  | 97.17468636  |
| wavelet-HHL | firstorder | 90Percentile                     | 114.8968368  |
| wavelet-HHL | firstorder | Minimum                          | -336.5069334 |
| wavelet-HHL | firstorder | Entropy                          | 3.891753109  |
| wavelet-HHL | firstorder | Range                            | 722.0215683  |
| wavelet-HHL | firstorder | Variance                         | 9440.739905  |
| wavelet-HHL | firstorder | 10Percentile                     | -110.6814874 |
| wavelet-HHL | firstorder | Kurtosis                         | 4.608756314  |
| wavelet-HHL | firstorder | Mean                             | -1.476402145 |
| wavelet-HHL | glrlm      | ShortRunLowGrayLevelEmphasis     | 0.012590706  |
| wavelet-HHL | glrlm      | GrayLevelVariance                | 16.3489094   |
| wavelet-HHL | glrlm      | LowGrayLevelRunEmphasis          | 0.013102357  |
| wavelet-HHL | glrlm      | GrayLevelNonUniformityNormalized | 0.083774817  |
| wavelet-HHL | glrlm      | RunVariance                      | 0.102355203  |
| wavelet-HHL | glrlm      | GrayLevelNonUniformity           | 25.02627138  |
| wavelet-HHL | glrlm      | LongRunEmphasis                  | 1.28180458   |
| wavelet-HHL | glrlm      | ShortRunHighGrayLevelEmphasis    | 212.4794557  |
| wavelet-HHL | glrlm      | RunLengthNonUniformity           | 257.1648121  |
| wavelet-HHL | glrlm      | ShortRunEmphasis                 | 0.942310859  |
| wavelet-HHL | glrlm      | LongRunHighGrayLevelEmphasis     | 282.8091763  |
| wavelet-HHL | glrlm      | RunPercentage                    | 0.921652422  |
| wavelet-HHL | glrlm      | LongRunLowGrayLevelEmphasis      | 0.015411569  |
| wavelet-HHL | glrlm      | RunEntropy                       | 4.29571909   |
| wavelet-HHL | glrlm      | HighGrayLevelRunEmphasis         | 224.5220929  |
| wavelet-HHL | glrlm      | RunLengthNonUniformityNormalized | 0.860378143  |
| wavelet-HHL | glszm      | GrayLevelVariance                | 26.88213668  |
| wavelet-HHL | glszm      | ZoneVariance                     | 27.50086505  |
| wavelet-HHL | glszm      | GrayLevelNonUniformityNormalized | 0.058282872  |

|             |            |                                      |              |
|-------------|------------|--------------------------------------|--------------|
| wavelet-HHL | glszm      | SizeZoneNonUniformityNormalized      | 0.478265571  |
| wavelet-HHL | glszm      | SizeZoneNonUniformity                | 65.04411765  |
| wavelet-HHL | glszm      | GrayLevelNonUniformity               | 7.926470588  |
| wavelet-HHL | glszm      | LargeAreaEmphasis                    | 33.17647059  |
| wavelet-HHL | glszm      | SmallAreaHighGrayLevelEmphasis       | 171.2796732  |
| wavelet-HHL | glszm      | ZonePercentage                       | 0.419753086  |
| wavelet-HHL | glszm      | LargeAreaLowGrayLevelEmphasis        | 0.204209241  |
| wavelet-HHL | glszm      | LargeAreaHighGrayLevelEmphasis       | 6634.735294  |
| wavelet-HHL | glszm      | HighGrayLevelZoneEmphasis            | 236.7058824  |
| wavelet-HHL | glszm      | SmallAreaEmphasis                    | 0.718793025  |
| wavelet-HHL | glszm      | LowGrayLevelZoneEmphasis             | 0.015610358  |
| wavelet-HHL | glszm      | ZoneEntropy                          | 5.453615927  |
| wavelet-HHL | glszm      | SmallAreaLowGrayLevelEmphasis        | 0.008447192  |
| wavelet-HHL | ngtdm      | Coarseness                           | 0.021535133  |
| wavelet-HHL | ngtdm      | Complexity                           | 755.14006    |
| wavelet-HHL | ngtdm      | Strength                             | 4.207460129  |
| wavelet-HHL | ngtdm      | Contrast                             | 0.137686902  |
| wavelet-HHL | ngtdm      | Busyness                             | 0.104897108  |
| wavelet-HLH | gldm       | GrayLevelVariance                    | 44.612902    |
| wavelet-HLH | gldm       | HighGrayLevelEmphasis                | 510.5864198  |
| wavelet-HLH | gldm       | DependenceEntropy                    | 6.110067714  |
| wavelet-HLH | gldm       | DependenceNonUniformity              | 81.85185185  |
| wavelet-HLH | gldm       | GrayLevelNonUniformity               | 21.32098765  |
| wavelet-HLH | gldm       | SmallDependenceEmphasis              | 0.475413408  |
| wavelet-HLH | gldm       | SmallDependenceHighGrayLevelEmphasis | 267.2604012  |
| wavelet-HLH | gldm       | DependenceNonUniformityNormalized    | 0.252629172  |
| wavelet-HLH | gldm       | LargeDependenceEmphasis              | 8.672839506  |
| wavelet-HLH | gldm       | LargeDependenceLowGrayLevelEmphasis  | 0.024478038  |
| wavelet-HLH | gldm       | DependenceVariance                   | 2.847469898  |
| wavelet-HLH | gldm       | LargeDependenceHighGrayLevelEmphasis | 4026.703704  |
| wavelet-HLH | gldm       | SmallDependenceLowGrayLevelEmphasis  | 0.00538243   |
| wavelet-HLH | gldm       | LowGrayLevelEmphasis                 | 0.006695016  |
| wavelet-HLH | glcm       | JointAverage                         | 21.6936217   |
| wavelet-HLH | glcm       | SumAverage                           | 43.38724341  |
| wavelet-HLH | glcm       | JointEntropy                         | 7.678008203  |
| wavelet-HLH | glcm       | ClusterShade                         | 623.4882339  |
| wavelet-HLH | glcm       | MaximumProbability                   | 0.030393407  |
| wavelet-HLH | glcm       | Idmn                                 | 0.977856047  |
| wavelet-HLH | glcm       | JointEnergy                          | 0.006921643  |
| wavelet-HLH | glcm       | Contrast                             | 92.74762614  |
| wavelet-HLH | glcm       | DifferenceEntropy                    | 4.078915849  |
| wavelet-HLH | glcm       | InverseVariance                      | 0.190221429  |
| wavelet-HLH | glcm       | DifferenceVariance                   | 48.68932889  |
| wavelet-HLH | glcm       | Idn                                  | 0.909636021  |
| wavelet-HLH | glcm       | Idm                                  | 0.188344537  |
| wavelet-HLH | glcm       | Correlation                          | -0.017978134 |
| wavelet-HLH | glcm       | Autocorrelation                      | 470.2262313  |
| wavelet-HLH | glcm       | SumEntropy                           | 4.917883707  |
| wavelet-HLH | glcm       | SumSquares                           | 45.97516706  |
| wavelet-HLH | glcm       | ClusterProminence                    | 63637.5513   |
| wavelet-HLH | glcm       | Imc2                                 | 0.954629323  |
| wavelet-HLH | glcm       | Imc1                                 | -0.273452129 |
| wavelet-HLH | glcm       | DifferenceAverage                    | 6.573151062  |
| wavelet-HLH | glcm       | Id                                   | 0.272583432  |
| wavelet-HLH | glcm       | ClusterTendency                      | 91.15304209  |
| wavelet-HLH | firstorder | InterquartileRange                   | 135.8823141  |
| wavelet-HLH | firstorder | Skewness                             | 1.068862674  |
| wavelet-HLH | firstorder | Uniformity                           | 0.065805517  |

|             |            |                                  |              |
|-------------|------------|----------------------------------|--------------|
| wavelet-HLH | firstorder | Median                           | -6.511149945 |
| wavelet-HLH | firstorder | Energy                           | 8995787.577  |
| wavelet-HLH | firstorder | RobustMeanAbsoluteDeviation      | 60.02441621  |
| wavelet-HLH | firstorder | MeanAbsoluteDeviation            | 110.2016928  |
| wavelet-HLH | firstorder | TotalEnergy                      | 242886264.6  |
| wavelet-HLH | firstorder | Maximum                          | 960.7901698  |
| wavelet-HLH | firstorder | RootMeanSquared                  | 166.6276582  |
| wavelet-HLH | firstorder | 90Percentile                     | 178.0860677  |
| wavelet-HLH | firstorder | Minimum                          | -516.882979  |
| wavelet-HLH | firstorder | Entropy                          | 4.413567045  |
| wavelet-HLH | firstorder | Range                            | 1477.673149  |
| wavelet-HLH | firstorder | Variance                         | 27760.97047  |
| wavelet-HLH | firstorder | 10Percentile                     | -169.2645117 |
| wavelet-HLH | firstorder | Kurtosis                         | 9.306002268  |
| wavelet-HLH | firstorder | Mean                             | 1.950897419  |
| wavelet-HLH | glrlm      | ShortRunLowGrayLevelEmphasis     | 0.006848069  |
| wavelet-HLH | glrlm      | GrayLevelVariance                | 46.76714943  |
| wavelet-HLH | glrlm      | LowGrayLevelRunEmphasis          | 0.006945189  |
| wavelet-HLH | glrlm      | GrayLevelNonUniformityNormalized | 0.062074747  |
| wavelet-HLH | glrlm      | RunVariance                      | 0.06536868   |
| wavelet-HLH | glrlm      | GrayLevelNonUniformity           | 19.02679773  |
| wavelet-HLH | glrlm      | LongRunEmphasis                  | 1.185151567  |
| wavelet-HLH | glrlm      | ShortRunHighGrayLevelEmphasis    | 494.7315261  |
| wavelet-HLH | glrlm      | RunLengthNonUniformity           | 275.6230505  |
| wavelet-HLH | glrlm      | ShortRunEmphasis                 | 0.959278009  |
| wavelet-HLH | glrlm      | LongRunHighGrayLevelEmphasis     | 598.6237082  |
| wavelet-HLH | glrlm      | RunPercentage                    | 0.945631529  |
| wavelet-HLH | glrlm      | LongRunLowGrayLevelEmphasis      | 0.007384505  |
| wavelet-HLH | glrlm      | RunEntropy                       | 4.709643493  |
| wavelet-HLH | glrlm      | HighGrayLevelRunEmphasis         | 513.5004706  |
| wavelet-HLH | glrlm      | RunLengthNonUniformityNormalized | 0.898881082  |
| wavelet-HLH | glszm      | GrayLevelVariance                | 74.33310213  |
| wavelet-HLH | glszm      | ZoneVariance                     | 8.854538248  |
| wavelet-HLH | glszm      | GrayLevelNonUniformityNormalized | 0.041088651  |
| wavelet-HLH | glszm      | SizeZoneNonUniformityNormalized  | 0.533557934  |
| wavelet-HLH | glszm      | SizeZoneNonUniformity            | 92.83908046  |
| wavelet-HLH | glszm      | GrayLevelNonUniformity           | 7.149425287  |
| wavelet-HLH | glszm      | LargeAreaEmphasis                | 12.32183908  |
| wavelet-HLH | glszm      | SmallAreaHighGrayLevelEmphasis   | 438.3388701  |
| wavelet-HLH | glszm      | ZonePercentage                   | 0.537037037  |
| wavelet-HLH | glszm      | LargeAreaLowGrayLevelEmphasis    | 0.036538171  |
| wavelet-HLH | glszm      | LargeAreaHighGrayLevelEmphasis   | 5643.931034  |
| wavelet-HLH | glszm      | HighGrayLevelZoneEmphasis        | 552.5344828  |
| wavelet-HLH | glszm      | SmallAreaEmphasis                | 0.757849219  |
| wavelet-HLH | glszm      | LowGrayLevelZoneEmphasis         | 0.010353524  |
| wavelet-HLH | glszm      | ZoneEntropy                      | 5.839214583  |
| wavelet-HLH | glszm      | SmallAreaLowGrayLevelEmphasis    | 0.009693685  |
| wavelet-HLH | ngtdm      | Coarseness                       | 0.022097347  |
| wavelet-HLH | ngtdm      | Complexity                       | 2607.647552  |
| wavelet-HLH | ngtdm      | Strength                         | 11.39497455  |
| wavelet-HLH | ngtdm      | Contrast                         | 0.32288717   |
| wavelet-HLH | ngtdm      | Busyness                         | 0.051622329  |

| Image type | Feature Class | Feature Name                         | Value                                                                                                                                                                                                                                                                                                                                                                                                             |
|------------|---------------|--------------------------------------|-------------------------------------------------------------------------------------------------------------------------------------------------------------------------------------------------------------------------------------------------------------------------------------------------------------------------------------------------------------------------------------------------------------------|
| general    | info          | BoundingBox                          | 15: RTSTRUCT: C99-DNU_segment_Tumor(4D)<br>(0, 0, 2, 8, 7, 8)                                                                                                                                                                                                                                                                                                                                                     |
| general    | info          | EnabledImageTypes                    | {u'Original': {}, u'Wavelet': {}}                                                                                                                                                                                                                                                                                                                                                                                 |
|            |               |                                      | {'distances': [1], 'additionalInfo': True, 'force2D': False, 'interpolator': 'sitkBSpline', 'resampledPixelSpacing': [3.0], 'label': 1, 'normalizeScale': 1, 'normalize': False, 'force2Ddimension': 0, 'removeOutliers': None, 'minimumROISize': None, u'binWidth': 25.0, 'minimumROIDimensions': 1, u'correctMask': True, 'preCrop': False, u'symmetricalGLCM': True, 'resegmentRange': None, 'padDistance': 5} |
| general    | info          | GeneralSettings                      |                                                                                                                                                                                                                                                                                                                                                                                                                   |
| general    | info          | ImageHash                            | c3cb87f6b106b5033f8e97f85cc4a4f252836c72                                                                                                                                                                                                                                                                                                                                                                          |
| general    | info          | ImageSpacing                         | (0.9765625, 0.9765625, 1.9999999999999999)                                                                                                                                                                                                                                                                                                                                                                        |
| general    | info          | MaskHash                             | fa20b17072dee1e33ce49f6d12dcda21474d0328                                                                                                                                                                                                                                                                                                                                                                          |
| general    | info          | NumpyVersion                         | 1.13.1                                                                                                                                                                                                                                                                                                                                                                                                            |
| general    | info          | PyWaveletVersion                     | 0.5.2                                                                                                                                                                                                                                                                                                                                                                                                             |
| general    | info          | SimpleITKVersion                     | 1.1.0                                                                                                                                                                                                                                                                                                                                                                                                             |
| general    | info          | Version                              | 1.3.0.post102+g1b0eb74                                                                                                                                                                                                                                                                                                                                                                                            |
| general    | info          | VolumeNum                            | 1                                                                                                                                                                                                                                                                                                                                                                                                                 |
| general    | info          | VoxelNum                             | 222                                                                                                                                                                                                                                                                                                                                                                                                               |
| original   | shape         | Maximum3DDiameter                    | 25.98076211                                                                                                                                                                                                                                                                                                                                                                                                       |
| original   | shape         | Maximum2DDiameterSlice               | 21.84032967                                                                                                                                                                                                                                                                                                                                                                                                       |
| original   | shape         | Sphericity                           | 0.874322917                                                                                                                                                                                                                                                                                                                                                                                                       |
| original   | shape         | MinorAxis                            | 20.92364996                                                                                                                                                                                                                                                                                                                                                                                                       |
| original   | shape         | Elongation                           | 0.926712664                                                                                                                                                                                                                                                                                                                                                                                                       |
| original   | shape         | SurfaceVolumeRatio                   | 0.304490221                                                                                                                                                                                                                                                                                                                                                                                                       |
| original   | shape         | Volume                               | 5994                                                                                                                                                                                                                                                                                                                                                                                                              |
| original   | shape         | MajorAxis                            | 22.57835764                                                                                                                                                                                                                                                                                                                                                                                                       |
| original   | shape         | SurfaceArea                          | 1825.114386                                                                                                                                                                                                                                                                                                                                                                                                       |
| original   | shape         | Flatness                             | 0.833187148                                                                                                                                                                                                                                                                                                                                                                                                       |
| original   | shape         | LeastAxis                            | 18.8119974                                                                                                                                                                                                                                                                                                                                                                                                        |
| original   | shape         | Maximum2DDiameterColumn              | 25.8069758                                                                                                                                                                                                                                                                                                                                                                                                        |
| original   | shape         | Maximum2DDiameterRow                 | 24.18677324                                                                                                                                                                                                                                                                                                                                                                                                       |
| original   | gldm          | GrayLevelVariance                    | 98.78242432                                                                                                                                                                                                                                                                                                                                                                                                       |
| original   | gldm          | HighGrayLevelEmphasis                | 753.6351351                                                                                                                                                                                                                                                                                                                                                                                                       |
| original   | gldm          | DependenceEntropy                    | 6.415468108                                                                                                                                                                                                                                                                                                                                                                                                       |
| original   | gldm          | DependenceNonUniformity              | 47.78378378                                                                                                                                                                                                                                                                                                                                                                                                       |
| original   | gldm          | GrayLevelNonUniformity               | 9.342342342                                                                                                                                                                                                                                                                                                                                                                                                       |
| original   | gldm          | SmallDependenceEmphasis              | 0.42435885                                                                                                                                                                                                                                                                                                                                                                                                        |
| original   | gldm          | SmallDependenceHighGrayLevelEmphasis | 230.167591                                                                                                                                                                                                                                                                                                                                                                                                        |
| original   | gldm          | DependenceNonUniformityNormalized    | 0.215242269                                                                                                                                                                                                                                                                                                                                                                                                       |
| original   | gldm          | LargeDependenceEmphasis              | 12.67567568                                                                                                                                                                                                                                                                                                                                                                                                       |
| original   | gldm          | LargeDependenceLowGrayLevelEmphasis  | 0.042044056                                                                                                                                                                                                                                                                                                                                                                                                       |
| original   | gldm          | DependenceVariance                   | 4.724291859                                                                                                                                                                                                                                                                                                                                                                                                       |
| original   | gldm          | LargeDependenceHighGrayLevelEmphasis | 14207.01351                                                                                                                                                                                                                                                                                                                                                                                                       |
| original   | gldm          | SmallDependenceLowGrayLevelEmphasis  | 0.007545765                                                                                                                                                                                                                                                                                                                                                                                                       |
| original   | gldm          | LowGrayLevelEmphasis                 | 0.011433816                                                                                                                                                                                                                                                                                                                                                                                                       |
| original   | glcm          | JointAverage                         | 26.99622884                                                                                                                                                                                                                                                                                                                                                                                                       |
| original   | glcm          | SumAverage                           | 53.99245768                                                                                                                                                                                                                                                                                                                                                                                                       |
| original   | glcm          | JointEntropy                         | 7.439898857                                                                                                                                                                                                                                                                                                                                                                                                       |
| original   | glcm          | ClusterShade                         | -3437.567762                                                                                                                                                                                                                                                                                                                                                                                                      |
| original   | glcm          | MaximumProbability                   | 0.037782821                                                                                                                                                                                                                                                                                                                                                                                                       |
| original   | glcm          | ldmn                                 | 0.97520037                                                                                                                                                                                                                                                                                                                                                                                                        |
| original   | glcm          | JointEnergy                          | 0.008020887                                                                                                                                                                                                                                                                                                                                                                                                       |



|          |            |                                  |              |
|----------|------------|----------------------------------|--------------|
| original | glcm       | Contrast                         | 45.3193906   |
| original | glcm       | DifferenceEntropy                | 3.703007686  |
| original | glcm       | InverseVariance                  | 0.207679563  |
| original | glcm       | DifferenceVariance               | 18.43511239  |
| original | glcm       | Idn                              | 0.897475945  |
| original | glcm       | Idm                              | 0.222242052  |
| original | glcm       | Correlation                      | 0.727207965  |
| original | glcm       | Autocorrelation                  | 790.3860205  |
| original | glcm       | SumEntropy                       | 5.452435374  |
| original | glcm       | SumSquares                       | 84.08762508  |
| original | glcm       | ClusterProminence                | 221756.2277  |
| original | glcm       | Imc2                             | 0.992878392  |
| original | glcm       | Imc1                             | -0.44695808  |
| original | glcm       | DifferenceAverage                | 5.074250793  |
| original | glcm       | Id                               | 0.306233358  |
| original | glcm       | ClusterTendency                  | 291.0311097  |
| original | firstorder | InterquartileRange               | 422          |
| original | firstorder | Skewness                         | -0.599940858 |
| original | firstorder | Uniformity                       | 0.042123204  |
| original | firstorder | Median                           | -146.5       |
| original | firstorder | Energy                           | 22396285     |
| original | firstorder | RobustMeanAbsoluteDeviation      | 167.805656   |
| original | firstorder | MeanAbsoluteDeviation            | 213.4726889  |
| original | firstorder | TotalEnergy                      | 604699695    |
| original | firstorder | Maximum                          | 175          |
| original | firstorder | RootMeanSquared                  | 317.6226797  |
| original | firstorder | 90Percentile                     | 68.9         |
| original | firstorder | Minimum                          | -804         |
| original | firstorder | Entropy                          | 4.907365383  |
| original | firstorder | Range                            | 979          |
| original | firstorder | Variance                         | 61753.26769  |
| original | firstorder | 10Percentile                     | -548.3       |
| original | firstorder | Kurtosis                         | 2.251906822  |
| original | firstorder | Mean                             | -197.8153153 |
| original | glrlm      | ShortRunLowGrayLevelEmphasis     | 0.011753957  |
| original | glrlm      | GrayLevelVariance                | 98.90628055  |
| original | glrlm      | LowGrayLevelRunEmphasis          | 0.011989869  |
| original | glrlm      | GrayLevelNonUniformityNormalized | 0.038754927  |
| original | glrlm      | RunVariance                      | 0.099138436  |
| original | glrlm      | GrayLevelNonUniformity           | 8.013949263  |
| original | glrlm      | LongRunEmphasis                  | 1.260675359  |
| original | glrlm      | ShortRunHighGrayLevelEmphasis    | 676.6350705  |
| original | glrlm      | RunLengthNonUniformity           | 181.4054412  |
| original | glrlm      | ShortRunEmphasis                 | 0.949121224  |
| original | glrlm      | LongRunHighGrayLevelEmphasis     | 1008.958159  |
| original | glrlm      | RunPercentage                    | 0.93000693   |
| original | glrlm      | LongRunLowGrayLevelEmphasis      | 0.012989253  |
| original | glrlm      | RunEntropy                       | 5.208233813  |
| original | glrlm      | HighGrayLevelRunEmphasis         | 729.9758971  |
| original | glrlm      | RunLengthNonUniformityNormalized | 0.876708075  |
| original | glszm      | GrayLevelVariance                | 94.53386488  |
| original | glszm      | ZoneVariance                     | 9.274691358  |
| original | glszm      | GrayLevelNonUniformityNormalized | 0.032578875  |
| original | glszm      | SizeZoneNonUniformityNormalized  | 0.50154321   |
| original | glszm      | SizeZoneNonUniformity            | 54.16666667  |
| original | glszm      | GrayLevelNonUniformity           | 3.518518519  |

|             |            |                                      |              |
|-------------|------------|--------------------------------------|--------------|
| original    | glszm      | LargeAreaEmphasis                    | 13.5         |
| original    | glszm      | SmallAreaHighGrayLevelEmphasis       | 365.3972166  |
| original    | glszm      | ZonePercentage                       | 0.486486486  |
| original    | glszm      | LargeAreaLowGrayLevelEmphasis        | 0.046009755  |
| original    | glszm      | LargeAreaHighGrayLevelEmphasis       | 14578.89815  |
| original    | glszm      | HighGrayLevelZoneEmphasis            | 549.25       |
| original    | glszm      | SmallAreaEmphasis                    | 0.735262036  |
| original    | glszm      | LowGrayLevelZoneEmphasis             | 0.017638771  |
| original    | glszm      | ZoneEntropy                          | 5.81277078   |
| original    | glszm      | SmallAreaLowGrayLevelEmphasis        | 0.014457064  |
| original    | ngtdm      | Coarseness                           | 0.04793935   |
| original    | ngtdm      | Complexity                           | 1795.950707  |
| original    | ngtdm      | Strength                             | 30.79255371  |
| original    | ngtdm      | Contrast                             | 0.382087061  |
| original    | ngtdm      | Busyness                             | 0.018290602  |
| wavelet-HHH | gldm       | GrayLevelVariance                    | 1.177420664  |
| wavelet-HHH | gldm       | HighGrayLevelEmphasis                | 31.18018018  |
| wavelet-HHH | gldm       | DependenceEntropy                    | 5.061630627  |
| wavelet-HHH | gldm       | DependenceNonUniformity              | 18.54054054  |
| wavelet-HHH | gldm       | GrayLevelNonUniformity               | 63.8018018   |
| wavelet-HHH | gldm       | SmallDependenceEmphasis              | 0.137887194  |
| wavelet-HHH | gldm       | SmallDependenceHighGrayLevelEmphasis | 4.68941791   |
| wavelet-HHH | gldm       | DependenceNonUniformityNormalized    | 0.083515948  |
| wavelet-HHH | gldm       | LargeDependenceEmphasis              | 52.42342342  |
| wavelet-HHH | gldm       | LargeDependenceLowGrayLevelEmphasis  | 1.791562546  |
| wavelet-HHH | gldm       | DependenceVariance                   | 11.96923951  |
| wavelet-HHH | gldm       | LargeDependenceHighGrayLevelEmphasis | 1609.711712  |
| wavelet-HHH | gldm       | SmallDependenceLowGrayLevelEmphasis  | 0.011613937  |
| wavelet-HHH | gldm       | LowGrayLevelEmphasis                 | 0.042148591  |
| wavelet-HHH | glcm       | JointAverage                         | 5.486782318  |
| wavelet-HHH | glcm       | SumAverage                           | 10.97356464  |
| wavelet-HHH | glcm       | JointEntropy                         | 4.00570409   |
| wavelet-HHH | glcm       | ClusterShade                         | -0.245903856 |
| wavelet-HHH | glcm       | MaximumProbability                   | 0.160713594  |
| wavelet-HHH | glcm       | Idmn                                 | 0.97450311   |
| wavelet-HHH | glcm       | JointEnergy                          | 0.092125189  |
| wavelet-HHH | glcm       | Contrast                             | 2.284160235  |
| wavelet-HHH | glcm       | DifferenceEntropy                    | 1.885033555  |
| wavelet-HHH | glcm       | InverseVariance                      | 0.486209168  |
| wavelet-HHH | glcm       | DifferenceVariance                   | 1.048249994  |
| wavelet-HHH | glcm       | Idn                                  | 0.899004674  |
| wavelet-HHH | glcm       | Idm                                  | 0.555773966  |
| wavelet-HHH | glcm       | Correlation                          | -0.031827392 |
| wavelet-HHH | glcm       | Autocorrelation                      | 30.07233106  |
| wavelet-HHH | glcm       | SumEntropy                           | 2.532490545  |
| wavelet-HHH | glcm       | SumSquares                           | 1.109357301  |
| wavelet-HHH | glcm       | ClusterProminence                    | 17.10377356  |
| wavelet-HHH | glcm       | Imc2                                 | 0.476944175  |
| wavelet-HHH | glcm       | Imc1                                 | -0.064556007 |
| wavelet-HHH | glcm       | DifferenceAverage                    | 1.106218555  |
| wavelet-HHH | glcm       | Id                                   | 0.593175238  |
| wavelet-HHH | glcm       | ClusterTendency                      | 2.153268968  |
| wavelet-HHH | firstorder | InterquartileRange                   | 28.21414791  |
| wavelet-HHH | firstorder | Skewness                             | -0.178513894 |
| wavelet-HHH | firstorder | Uniformity                           | 0.287395504  |
| wavelet-HHH | firstorder | Median                               | -0.311042725 |

|             |            |                                  |              |
|-------------|------------|----------------------------------|--------------|
| wavelet-HHH | firstorder | Energy                           | 140474.9829  |
| wavelet-HHH | firstorder | RobustMeanAbsoluteDeviation      | 11.83191053  |
| wavelet-HHH | firstorder | MeanAbsoluteDeviation            | 18.64157779  |
| wavelet-HHH | firstorder | TotalEnergy                      | 3792824.537  |
| wavelet-HHH | firstorder | Maximum                          | 86.18951228  |
| wavelet-HHH | firstorder | RootMeanSquared                  | 25.15492383  |
| wavelet-HHH | firstorder | 90Percentile                     | 29.4295541   |
| wavelet-HHH | firstorder | Minimum                          | -107.1060294 |
| wavelet-HHH | firstorder | Entropy                          | 2.114209632  |
| wavelet-HHH | firstorder | Range                            | 193.2955417  |
| wavelet-HHH | firstorder | Variance                         | 632.5775375  |
| wavelet-HHH | firstorder | 10Percentile                     | -28.867702   |
| wavelet-HHH | firstorder | Kurtosis                         | 4.980662758  |
| wavelet-HHH | firstorder | Mean                             | -0.438925389 |
| wavelet-HHH | grlm       | ShortRunLowGrayLevelEmphasis     | 0.038580389  |
| wavelet-HHH | grlm       | GrayLevelVariance                | 1.380378831  |
| wavelet-HHH | grlm       | LowGrayLevelRunEmphasis          | 0.044208423  |
| wavelet-HHH | grlm       | GrayLevelNonUniformityNormalized | 0.260485959  |
| wavelet-HHH | grlm       | RunVariance                      | 0.319308443  |
| wavelet-HHH | grlm       | GrayLevelNonUniformity           | 45.95500988  |
| wavelet-HHH | grlm       | LongRunEmphasis                  | 1.922898972  |
| wavelet-HHH | grlm       | ShortRunHighGrayLevelEmphasis    | 26.25684782  |
| wavelet-HHH | grlm       | RunLengthNonUniformity           | 116.470818   |
| wavelet-HHH | grlm       | ShortRunEmphasis                 | 0.836414383  |
| wavelet-HHH | grlm       | LongRunHighGrayLevelEmphasis     | 59.59031563  |
| wavelet-HHH | grlm       | RunPercentage                    | 0.793832294  |
| wavelet-HHH | grlm       | LongRunLowGrayLevelEmphasis      | 0.075902007  |
| wavelet-HHH | grlm       | RunEntropy                       | 3.065701199  |
| wavelet-HHH | grlm       | HighGrayLevelRunEmphasis         | 31.29710922  |
| wavelet-HHH | grlm       | RunLengthNonUniformityNormalized | 0.657414947  |
| wavelet-HHH | glszm      | GrayLevelVariance                | 4.888888889  |
| wavelet-HHH | glszm      | ZoneVariance                     | 391.5066667  |
| wavelet-HHH | glszm      | GrayLevelNonUniformityNormalized | 0.18         |
| wavelet-HHH | glszm      | SizeZoneNonUniformityNormalized  | 0.504444444  |
| wavelet-HHH | glszm      | SizeZoneNonUniformity            | 15.13333333  |
| wavelet-HHH | glszm      | GrayLevelNonUniformity           | 5.4          |
| wavelet-HHH | glszm      | LargeAreaEmphasis                | 446.2666667  |
| wavelet-HHH | glszm      | SmallAreaHighGrayLevelEmphasis   | 26.04856048  |
| wavelet-HHH | glszm      | ZonePercentage                   | 0.135135135  |
| wavelet-HHH | glszm      | LargeAreaLowGrayLevelEmphasis    | 15.24318302  |
| wavelet-HHH | glszm      | LargeAreaHighGrayLevelEmphasis   | 13654.6      |
| wavelet-HHH | glszm      | HighGrayLevelZoneEmphasis        | 33.33333333  |
| wavelet-HHH | glszm      | SmallAreaEmphasis                | 0.725183509  |
| wavelet-HHH | glszm      | LowGrayLevelZoneEmphasis         | 0.086779394  |
| wavelet-HHH | glszm      | ZoneEntropy                      | 3.574418314  |
| wavelet-HHH | glszm      | SmallAreaLowGrayLevelEmphasis    | 0.073960976  |
| wavelet-HHH | ngtdm      | Coarseness                       | 0.026017622  |
| wavelet-HHH | ngtdm      | Complexity                       | 29.35523324  |
| wavelet-HHH | ngtdm      | Strength                         | 0.743623485  |
| wavelet-HHH | ngtdm      | Contrast                         | 0.028785953  |
| wavelet-HHH | ngtdm      | Busyness                         | 0.609477026  |
| wavelet-HLL | gldm       | GrayLevelVariance                | 13.07426345  |
| wavelet-HLL | gldm       | HighGrayLevelEmphasis            | 102.045045   |
| wavelet-HLL | gldm       | DependenceEntropy                | 5.841814183  |
| wavelet-HLL | gldm       | DependenceNonUniformity          | 35.90990991  |
| wavelet-HLL | gldm       | GrayLevelNonUniformity           | 17.78378378  |

|             |            |                                      |              |
|-------------|------------|--------------------------------------|--------------|
| wavelet-HLL | gldm       | SmallDependenceEmphasis              | 0.213460849  |
| wavelet-HLL | gldm       | SmallDependenceHighGrayLevelEmphasis | 24.48917668  |
| wavelet-HLL | gldm       | DependenceNonUniformityNormalized    | 0.161756351  |
| wavelet-HLL | gldm       | LargeDependenceEmphasis              | 16.53153153  |
| wavelet-HLL | gldm       | LargeDependenceLowGrayLevelEmphasis  | 0.379693803  |
| wavelet-HLL | gldm       | DependenceVariance                   | 3.610421232  |
| wavelet-HLL | gldm       | LargeDependenceHighGrayLevelEmphasis | 1608.45045   |
| wavelet-HLL | gldm       | SmallDependenceLowGrayLevelEmphasis  | 0.006633766  |
| wavelet-HLL | gldm       | LowGrayLevelEmphasis                 | 0.029313566  |
| wavelet-HLL | glcm       | JointAverage                         | 9.05626698   |
| wavelet-HLL | glcm       | SumAverage                           | 18.11253396  |
| wavelet-HLL | glcm       | JointEntropy                         | 6.564810477  |
| wavelet-HLL | glcm       | ClusterShade                         | 34.88091428  |
| wavelet-HLL | glcm       | MaximumProbability                   | 0.033309027  |
| wavelet-HLL | glcm       | Idmn                                 | 0.967994053  |
| wavelet-HLL | glcm       | JointEnergy                          | 0.012979407  |
| wavelet-HLL | glcm       | Contrast                             | 11.71215593  |
| wavelet-HLL | glcm       | DifferenceEntropy                    | 2.805356044  |
| wavelet-HLL | glcm       | InverseVariance                      | 0.320857245  |
| wavelet-HLL | glcm       | DifferenceVariance                   | 4.548167859  |
| wavelet-HLL | glcm       | Idn                                  | 0.883524872  |
| wavelet-HLL | glcm       | Idm                                  | 0.326352656  |
| wavelet-HLL | glcm       | Correlation                          | 0.518948697  |
| wavelet-HLL | glcm       | Autocorrelation                      | 88.36315767  |
| wavelet-HLL | glcm       | SumEntropy                           | 4.44890672   |
| wavelet-HLL | glcm       | SumSquares                           | 12.19500043  |
| wavelet-HLL | glcm       | ClusterProminence                    | 3170.750203  |
| wavelet-HLL | glcm       | Imc2                                 | 0.885217137  |
| wavelet-HLL | glcm       | Imc1                                 | -0.220165751 |
| wavelet-HLL | glcm       | DifferenceAverage                    | 2.589372077  |
| wavelet-HLL | glcm       | Id                                   | 0.408361154  |
| wavelet-HLL | glcm       | ClusterTendency                      | 37.0678458   |
| wavelet-HLL | firstorder | InterquartileRange                   | 142.2961679  |
| wavelet-HLL | firstorder | Skewness                             | 0.002563812  |
| wavelet-HLL | firstorder | Uniformity                           | 0.080107134  |
| wavelet-HLL | firstorder | Median                               | -2.764589281 |
| wavelet-HLL | firstorder | Energy                               | 1822197.332  |
| wavelet-HLL | firstorder | RobustMeanAbsoluteDeviation          | 60.24665553  |
| wavelet-HLL | firstorder | MeanAbsoluteDeviation                | 77.59431648  |
| wavelet-HLL | firstorder | TotalEnergy                          | 49199327.95  |
| wavelet-HLL | firstorder | Maximum                              | 210.5216503  |
| wavelet-HLL | firstorder | RootMeanSquared                      | 90.59854352  |
| wavelet-HLL | firstorder | 90Percentile                         | 118.3208846  |
| wavelet-HLL | firstorder | Minimum                              | -221.7732082 |
| wavelet-HLL | firstorder | Entropy                              | 3.762434174  |
| wavelet-HLL | firstorder | Range                                | 432.2948585  |
| wavelet-HLL | firstorder | Variance                             | 8202.60386   |
| wavelet-HLL | firstorder | 10Percentile                         | -118.0333729 |
| wavelet-HLL | firstorder | Kurtosis                             | 2.124551553  |
| wavelet-HLL | firstorder | Mean                                 | -2.343550229 |
| wavelet-HLL | glrlm      | ShortRunLowGrayLevelEmphasis         | 0.027889242  |
| wavelet-HLL | glrlm      | GrayLevelVariance                    | 13.02750702  |
| wavelet-HLL | glrlm      | LowGrayLevelRunEmphasis              | 0.029851593  |
| wavelet-HLL | glrlm      | GrayLevelNonUniformityNormalized     | 0.079295866  |
| wavelet-HLL | glrlm      | RunVariance                          | 0.123458588  |
| wavelet-HLL | glrlm      | GrayLevelNonUniformity               | 15.84719695  |

|             |       |                                      |             |
|-------------|-------|--------------------------------------|-------------|
| wavelet-HLL | glrlm | LongRunEmphasis                      | 1.368514799 |
| wavelet-HLL | glrlm | ShortRunHighGrayLevelEmphasis        | 95.20829436 |
| wavelet-HLL | glrlm | RunLengthNonUniformity               | 164.3290647 |
| wavelet-HLL | glrlm | ShortRunEmphasis                     | 0.921814929 |
| wavelet-HLL | glrlm | LongRunHighGrayLevelEmphasis         | 138.2590004 |
| wavelet-HLL | glrlm | RunPercentage                        | 0.9002079   |
| wavelet-HLL | glrlm | LongRunLowGrayLevelEmphasis          | 0.038770209 |
| wavelet-HLL | glrlm | RunEntropy                           | 4.189384711 |
| wavelet-HLL | glrlm | HighGrayLevelRunEmphasis             | 102.719354  |
| wavelet-HLL | glrlm | RunLengthNonUniformityNormalized     | 0.818384037 |
| wavelet-HLL | glszm | GrayLevelVariance                    | 14.76968557 |
| wavelet-HLL | glszm | ZoneVariance                         | 18.78796023 |
| wavelet-HLL | glszm | GrayLevelNonUniformityNormalized     | 0.081429723 |
| wavelet-HLL | glszm | SizeZoneNonUniformityNormalized      | 0.236764311 |
| wavelet-HLL | glszm | SizeZoneNonUniformity                | 14.44262295 |
| wavelet-HLL | glszm | GrayLevelNonUniformity               | 4.967213115 |
| wavelet-HLL | glszm | LargeAreaEmphasis                    | 32.03278689 |
| wavelet-HLL | glszm | SmallAreaHighGrayLevelEmphasis       | 59.83303498 |
| wavelet-HLL | glszm | ZonePercentage                       | 0.274774775 |
| wavelet-HLL | glszm | LargeAreaLowGrayLevelEmphasis        | 0.779631999 |
| wavelet-HLL | glszm | LargeAreaHighGrayLevelEmphasis       | 2717.442623 |
| wavelet-HLL | glszm | HighGrayLevelZoneEmphasis            | 117.4098361 |
| wavelet-HLL | glszm | SmallAreaEmphasis                    | 0.490761405 |
| wavelet-HLL | glszm | LowGrayLevelZoneEmphasis             | 0.036253361 |
| wavelet-HLL | glszm | ZoneEntropy                          | 5.191074789 |
| wavelet-HLL | glszm | SmallAreaLowGrayLevelEmphasis        | 0.014071789 |
| wavelet-HLL | ngtdm | Coarseness                           | 0.036436583 |
| wavelet-HLL | ngtdm | Complexity                           | 209.4770593 |
| wavelet-HLL | ngtdm | Strength                             | 3.966560947 |
| wavelet-HLL | ngtdm | Contrast                             | 0.139724408 |
| wavelet-HLL | ngtdm | Busyness                             | 0.184808837 |
| wavelet-LHL | gldm  | GrayLevelVariance                    | 38.96771772 |
| wavelet-LHL | gldm  | HighGrayLevelEmphasis                | 406.3288288 |
| wavelet-LHL | gldm  | DependenceEntropy                    | 6.092116344 |
| wavelet-LHL | gldm  | DependenceNonUniformity              | 44.34234234 |
| wavelet-LHL | gldm  | GrayLevelNonUniformity               | 15.14414414 |
| wavelet-LHL | gldm  | SmallDependenceEmphasis              | 0.387160968 |
| wavelet-LHL | gldm  | SmallDependenceHighGrayLevelEmphasis | 181.0276627 |
| wavelet-LHL | gldm  | DependenceNonUniformityNormalized    | 0.199740281 |
| wavelet-LHL | gldm  | LargeDependenceEmphasis              | 11.69369369 |
| wavelet-LHL | gldm  | LargeDependenceLowGrayLevelEmphasis  | 0.043363862 |
| wavelet-LHL | gldm  | DependenceVariance                   | 3.691421151 |
| wavelet-LHL | gldm  | LargeDependenceHighGrayLevelEmphasis | 4165.463964 |
| wavelet-LHL | gldm  | SmallDependenceLowGrayLevelEmphasis  | 0.006082472 |
| wavelet-LHL | gldm  | LowGrayLevelEmphasis                 | 0.008404514 |
| wavelet-LHL | glcm  | JointAverage                         | 18.91560091 |
| wavelet-LHL | glcm  | SumAverage                           | 37.83120181 |
| wavelet-LHL | glcm  | JointEntropy                         | 7.113020946 |
| wavelet-LHL | glcm  | ClusterShade                         | 1091.07432  |
| wavelet-LHL | glcm  | MaximumProbability                   | 0.028956708 |
| wavelet-LHL | glcm  | ldmn                                 | 0.977064584 |
| wavelet-LHL | glcm  | JointEnergy                          | 0.00949382  |
| wavelet-LHL | glcm  | Contrast                             | 45.19519936 |
| wavelet-LHL | glcm  | DifferenceEntropy                    | 3.610210389 |
| wavelet-LHL | glcm  | InverseVariance                      | 0.233981168 |
| wavelet-LHL | glcm  | DifferenceVariance                   | 21.62323101 |

|             |            |                                  |              |
|-------------|------------|----------------------------------|--------------|
| wavelet-LHL | glcm       | Idn                              | 0.907109425  |
| wavelet-LHL | glcm       | Idm                              | 0.238341021  |
| wavelet-LHL | glcm       | Correlation                      | 0.318795822  |
| wavelet-LHL | glcm       | Autocorrelation                  | 369.6833567  |
| wavelet-LHL | glcm       | SumEntropy                       | 4.781178278  |
| wavelet-LHL | glcm       | SumSquares                       | 34.44348713  |
| wavelet-LHL | glcm       | ClusterProminence                | 51295.4187   |
| wavelet-LHL | glcm       | Imc2                             | 0.963775914  |
| wavelet-LHL | glcm       | Imc1                             | -0.316776367 |
| wavelet-LHL | glcm       | DifferenceAverage                | 4.725550765  |
| wavelet-LHL | glcm       | Id                               | 0.323593079  |
| wavelet-LHL | glcm       | ClusterTendency                  | 92.57874916  |
| wavelet-LHL | firstorder | InterquartileRange               | 125.4847156  |
| wavelet-LHL | firstorder | Skewness                         | 0.964340419  |
| wavelet-LHL | firstorder | Uniformity                       | 0.068216866  |
| wavelet-LHL | firstorder | Median                           | -20.59212745 |
| wavelet-LHL | firstorder | Energy                           | 5489614.944  |
| wavelet-LHL | firstorder | RobustMeanAbsoluteDeviation      | 57.51270296  |
| wavelet-LHL | firstorder | MeanAbsoluteDeviation            | 106.8407261  |
| wavelet-LHL | firstorder | TotalEnergy                      | 148219603.5  |
| wavelet-LHL | firstorder | Maximum                          | 571.9096872  |
| wavelet-LHL | firstorder | RootMeanSquared                  | 157.251376   |
| wavelet-LHL | firstorder | 90Percentile                     | 202.578672   |
| wavelet-LHL | firstorder | Minimum                          | -452.9873202 |
| wavelet-LHL | firstorder | Entropy                          | 4.326594087  |
| wavelet-LHL | firstorder | Range                            | 1024.897007  |
| wavelet-LHL | firstorder | Variance                         | 24652.01017  |
| wavelet-LHL | firstorder | 10Percentile                     | -168.172711  |
| wavelet-LHL | firstorder | Kurtosis                         | 5.450647355  |
| wavelet-LHL | firstorder | Mean                             | -8.716941566 |
| wavelet-LHL | glrlm      | ShortRunLowGrayLevelEmphasis     | 0.008599744  |
| wavelet-LHL | glrlm      | GrayLevelVariance                | 40.5517056   |
| wavelet-LHL | glrlm      | LowGrayLevelRunEmphasis          | 0.008784988  |
| wavelet-LHL | glrlm      | GrayLevelNonUniformityNormalized | 0.064694809  |
| wavelet-LHL | glrlm      | RunVariance                      | 0.08804203   |
| wavelet-LHL | glrlm      | GrayLevelNonUniformity           | 13.35791392  |
| wavelet-LHL | glrlm      | LongRunEmphasis                  | 1.248940397  |
| wavelet-LHL | glrlm      | ShortRunHighGrayLevelEmphasis    | 390.9838575  |
| wavelet-LHL | glrlm      | RunLengthNonUniformity           | 180.2366402  |
| wavelet-LHL | glrlm      | ShortRunEmphasis                 | 0.946986306  |
| wavelet-LHL | glrlm      | LongRunHighGrayLevelEmphasis     | 498.8583419  |
| wavelet-LHL | glrlm      | RunPercentage                    | 0.92966043   |
| wavelet-LHL | glrlm      | LongRunLowGrayLevelEmphasis      | 0.009635709  |
| wavelet-LHL | glrlm      | RunEntropy                       | 4.662786073  |
| wavelet-LHL | glrlm      | HighGrayLevelRunEmphasis         | 410.0432601  |
| wavelet-LHL | glrlm      | RunLengthNonUniformityNormalied  | 0.871630031  |
| wavelet-LHL | glszm      | GrayLevelVariance                | 58.9043107   |
| wavelet-LHL | glszm      | ZoneVariance                     | 11.95002082  |
| wavelet-LHL | glszm      | GrayLevelNonUniformityNormalized | 0.042898792  |
| wavelet-LHL | glszm      | SizeZoneNonUniformityNormalized  | 0.475426905  |
| wavelet-LHL | glszm      | SizeZoneNonUniformity            | 46.59183673  |
| wavelet-LHL | glszm      | GrayLevelNonUniformity           | 4.204081633  |
| wavelet-LHL | glszm      | LargeAreaEmphasis                | 17.08163265  |
| wavelet-LHL | glszm      | SmallAreaHighGrayLevelEmphasis   | 352.6961647  |
| wavelet-LHL | glszm      | ZonePercentage                   | 0.441441441  |
| wavelet-LHL | glszm      | LargeAreaLowGrayLevelEmphasis    | 0.067528937  |

|             |            |                                      |              |
|-------------|------------|--------------------------------------|--------------|
| wavelet-LHL | glszm      | LargeAreaHighGrayLevelEmphasis       | 5854.214286  |
| wavelet-LHL | glszm      | HighGrayLevelZoneEmphasis            | 469.1734694  |
| wavelet-LHL | glszm      | SmallAreaEmphasis                    | 0.716127439  |
| wavelet-LHL | glszm      | LowGrayLevelZoneEmphasis             | 0.014374707  |
| wavelet-LHL | glszm      | ZoneEntropy                          | 5.518526967  |
| wavelet-LHL | glszm      | SmallAreaLowGrayLevelEmphasis        | 0.013114272  |
| wavelet-LHL | ngtdm      | Coarseness                           | 0.031598439  |
| wavelet-LHL | ngtdm      | Complexity                           | 1448.240866  |
| wavelet-LHL | ngtdm      | Strength                             | 13.54608869  |
| wavelet-LHL | ngtdm      | Contrast                             | 0.241695457  |
| wavelet-LHL | ngtdm      | Busyness                             | 0.047601927  |
| wavelet-LHH | gldm       | GrayLevelVariance                    | 7.793685577  |
| wavelet-LHH | gldm       | HighGrayLevelEmphasis                | 119.6576577  |
| wavelet-LHH | gldm       | DependenceEntropy                    | 5.566816964  |
| wavelet-LHH | gldm       | DependenceNonUniformity              | 29.43243243  |
| wavelet-LHH | gldm       | GrayLevelNonUniformity               | 30.81981982  |
| wavelet-LHH | gldm       | SmallDependenceEmphasis              | 0.270796813  |
| wavelet-LHH | gldm       | SmallDependenceHighGrayLevelEmphasis | 36.093039    |
| wavelet-LHH | gldm       | DependenceNonUniformityNormalized    | 0.132578524  |
| wavelet-LHH | gldm       | LargeDependenceEmphasis              | 23.28828829  |
| wavelet-LHH | gldm       | LargeDependenceLowGrayLevelEmphasis  | 0.265333142  |
| wavelet-LHH | gldm       | DependenceVariance                   | 7.503774044  |
| wavelet-LHH | gldm       | LargeDependenceHighGrayLevelEmphasis | 2519.36036   |
| wavelet-LHH | gldm       | SmallDependenceLowGrayLevelEmphasis  | 0.006298174  |
| wavelet-LHH | gldm       | LowGrayLevelEmphasis                 | 0.020475422  |
| wavelet-LHH | glcm       | JointAverage                         | 10.58120129  |
| wavelet-LHH | glcm       | SumAverage                           | 21.16240257  |
| wavelet-LHH | glcm       | JointEntropy                         | 5.864586533  |
| wavelet-LHH | glcm       | ClusterShade                         | -2.711743915 |
| wavelet-LHH | glcm       | MaximumProbability                   | 0.080668539  |
| wavelet-LHH | glcm       | ldmn                                 | 0.964169733  |
| wavelet-LHH | glcm       | JointEnergy                          | 0.028112266  |
| wavelet-LHH | glcm       | Contrast                             | 15.81931333  |
| wavelet-LHH | glcm       | DifferenceEntropy                    | 2.930455714  |
| wavelet-LHH | glcm       | InverseVariance                      | 0.360900874  |
| wavelet-LHH | glcm       | DifferenceVariance                   | 8.312574115  |
| wavelet-LHH | glcm       | ldn                                  | 0.889111044  |
| wavelet-LHH | glcm       | ldm                                  | 0.364835119  |
| wavelet-LHH | glcm       | Correlation                          | -0.043915489 |
| wavelet-LHH | glcm       | Autocorrelation                      | 111.6886582  |
| wavelet-LHH | glcm       | SumEntropy                           | 3.690142187  |
| wavelet-LHH | glcm       | SumSquares                           | 7.633302157  |
| wavelet-LHH | glcm       | ClusterProminence                    | 1257.327149  |
| wavelet-LHH | glcm       | lmc2                                 | 0.850671865  |
| wavelet-LHH | glcm       | lmc1                                 | -0.200727135 |
| wavelet-LHH | glcm       | DifferenceAverage                    | 2.692331696  |
| wavelet-LHH | glcm       | ld                                   | 0.433973493  |
| wavelet-LHH | glcm       | ClusterTendency                      | 14.7138953   |
| wavelet-LHH | firstorder | InterquartileRange                   | 63.91506847  |
| wavelet-LHH | firstorder | Skewness                             | -0.033061995 |
| wavelet-LHH | firstorder | Uniformity                           | 0.138828017  |
| wavelet-LHH | firstorder | Median                               | -4.321356407 |
| wavelet-LHH | firstorder | Energy                               | 1062384.039  |
| wavelet-LHH | firstorder | RobustMeanAbsoluteDeviation          | 27.37355061  |
| wavelet-LHH | firstorder | MeanAbsoluteDeviation                | 48.68002098  |
| wavelet-LHH | firstorder | TotalEnergy                          | 28684369.04  |

|             |            |                                      |              |
|-------------|------------|--------------------------------------|--------------|
| wavelet-LHH | firstorder | Maximum                              | 207.7075668  |
| wavelet-LHH | firstorder | RootMeanSquared                      | 69.17740735  |
| wavelet-LHH | firstorder | 90Percentile                         | 84.5340895   |
| wavelet-LHH | firstorder | Minimum                              | -238.1630429 |
| wavelet-LHH | firstorder | Entropy                              | 3.308957012  |
| wavelet-LHH | firstorder | Range                                | 445.8706097  |
| wavelet-LHH | firstorder | Variance                             | 4782.907552  |
| wavelet-LHH | firstorder | 10Percentile                         | -64.7685217  |
| wavelet-LHH | firstorder | Kurtosis                             | 4.821369406  |
| wavelet-LHH | firstorder | Mean                                 | 1.614352917  |
| wavelet-LHH | grlm       | ShortRunLowGrayLevelEmphasis         | 0.020211292  |
| wavelet-LHH | grlm       | GrayLevelVariance                    | 8.525190812  |
| wavelet-LHH | grlm       | LowGrayLevelRunEmphasis              | 0.021400835  |
| wavelet-LHH | grlm       | GrayLevelNonUniformityNormalized     | 0.126130304  |
| wavelet-LHH | grlm       | RunVariance                          | 0.184728247  |
| wavelet-LHH | grlm       | GrayLevelNonUniformity               | 24.81688869  |
| wavelet-LHH | grlm       | LongRunEmphasis                      | 1.471362669  |
| wavelet-LHH | grlm       | ShortRunHighGrayLevelEmphasis        | 111.8059342  |
| wavelet-LHH | grlm       | RunLengthNonUniformity               | 158.8726563  |
| wavelet-LHH | grlm       | ShortRunEmphasis                     | 0.916413498  |
| wavelet-LHH | grlm       | LongRunHighGrayLevelEmphasis         | 172.3494721  |
| wavelet-LHH | grlm       | RunPercentage                        | 0.885654886  |
| wavelet-LHH | grlm       | LongRunLowGrayLevelEmphasis          | 0.027469051  |
| wavelet-LHH | grlm       | RunEntropy                           | 3.868222494  |
| wavelet-LHH | grlm       | HighGrayLevelRunEmphasis             | 121.00188    |
| wavelet-LHH | grlm       | RunLengthNonUniformityNormalized     | 0.805561075  |
| wavelet-LHH | glszm      | GrayLevelVariance                    | 17.31120517  |
| wavelet-LHH | glszm      | ZoneVariance                         | 60.96146135  |
| wavelet-LHH | glszm      | GrayLevelNonUniformityNormalized     | 0.082646469  |
| wavelet-LHH | glszm      | SizeZoneNonUniformityNormalized      | 0.436400089  |
| wavelet-LHH | glszm      | SizeZoneNonUniformity                | 29.23880597  |
| wavelet-LHH | glszm      | GrayLevelNonUniformity               | 5.537313433  |
| wavelet-LHH | glszm      | LargeAreaEmphasis                    | 71.94029851  |
| wavelet-LHH | glszm      | SmallAreaHighGrayLevelEmphasis       | 93.03964891  |
| wavelet-LHH | glszm      | ZonePercentage                       | 0.301801802  |
| wavelet-LHH | glszm      | LargeAreaLowGrayLevelEmphasis        | 0.768031374  |
| wavelet-LHH | glszm      | LargeAreaHighGrayLevelEmphasis       | 7604.537313  |
| wavelet-LHH | glszm      | HighGrayLevelZoneEmphasis            | 134.4029851  |
| wavelet-LHH | glszm      | SmallAreaEmphasis                    | 0.684443694  |
| wavelet-LHH | glszm      | LowGrayLevelZoneEmphasis             | 0.029671294  |
| wavelet-LHH | glszm      | ZoneEntropy                          | 4.814860923  |
| wavelet-LHH | glszm      | SmallAreaLowGrayLevelEmphasis        | 0.015049545  |
| wavelet-LHH | ngtdm      | Coarseness                           | 0.032616423  |
| wavelet-LHH | ngtdm      | Complexity                           | 240.7715747  |
| wavelet-LHH | ngtdm      | Strength                             | 2.868470626  |
| wavelet-LHH | ngtdm      | Contrast                             | 0.102877277  |
| wavelet-LHH | ngtdm      | Busyness                             | 0.134790617  |
| wavelet-LLH | gldm       | GrayLevelVariance                    | 14.75523496  |
| wavelet-LLH | gldm       | HighGrayLevelEmphasis                | 175.0855856  |
| wavelet-LLH | gldm       | DependenceEntropy                    | 5.945924568  |
| wavelet-LLH | gldm       | DependenceNonUniformity              | 32.76576577  |
| wavelet-LLH | gldm       | GrayLevelNonUniformity               | 20.99099099  |
| wavelet-LLH | gldm       | SmallDependenceEmphasis              | 0.265167051  |
| wavelet-LLH | gldm       | SmallDependenceHighGrayLevelEmphasis | 50.75034889  |
| wavelet-LLH | gldm       | DependenceNonUniformityNormalized    | 0.147593539  |
| wavelet-LLH | gldm       | LargeDependenceEmphasis              | 20.1981982   |



|             |            |                                      |              |
|-------------|------------|--------------------------------------|--------------|
| wavelet-LLH | gldm       | LargeDependenceLowGrayLevelEmphasis  | 0.151727399  |
| wavelet-LLH | gldm       | DependenceVariance                   | 6.220030842  |
| wavelet-LLH | gldm       | LargeDependenceHighGrayLevelEmphasis | 3382.382883  |
| wavelet-LLH | gldm       | SmallDependenceLowGrayLevelEmphasis  | 0.007731957  |
| wavelet-LLH | gldm       | LowGrayLevelEmphasis                 | 0.014353759  |
| wavelet-LLH | glcm       | JointAverage                         | 12.55831291  |
| wavelet-LLH | glcm       | SumAverage                           | 25.11662582  |
| wavelet-LLH | glcm       | JointEntropy                         | 6.510946605  |
| wavelet-LLH | glcm       | ClusterShade                         | 56.87326271  |
| wavelet-LLH | glcm       | MaximumProbability                   | 0.054036847  |
| wavelet-LLH | glcm       | ldmn                                 | 0.964595907  |
| wavelet-LLH | glcm       | JointEnergy                          | 0.016090271  |
| wavelet-LLH | glcm       | Contrast                             | 25.25117164  |
| wavelet-LLH | glcm       | DifferenceEntropy                    | 3.197725228  |
| wavelet-LLH | glcm       | InverseVariance                      | 0.293134107  |
| wavelet-LLH | glcm       | DifferenceVariance                   | 13.09003897  |
| wavelet-LLH | glcm       | ldn                                  | 0.89039446   |
| wavelet-LLH | glcm       | ldm                                  | 0.318854464  |
| wavelet-LLH | glcm       | Correlation                          | 0.094744884  |
| wavelet-LLH | glcm       | Autocorrelation                      | 159.366995   |
| wavelet-LLH | glcm       | SumEntropy                           | 4.228979029  |
| wavelet-LLH | glcm       | SumSquares                           | 14.2753544   |
| wavelet-LLH | glcm       | ClusterProminence                    | 4997.655953  |
| wavelet-LLH | glcm       | lmc2                                 | 0.921416115  |
| wavelet-LLH | glcm       | lmc1                                 | -0.26036386  |
| wavelet-LLH | glcm       | DifferenceAverage                    | 3.364063451  |
| wavelet-LLH | glcm       | ld                                   | 0.396935534  |
| wavelet-LLH | glcm       | ClusterTendency                      | 31.85024595  |
| wavelet-LLH | firstorder | InterquartileRange                   | 97.29180255  |
| wavelet-LLH | firstorder | Skewness                             | 0.010810447  |
| wavelet-LLH | firstorder | Uniformity                           | 0.094554013  |
| wavelet-LLH | firstorder | Median                               | -39.23817446 |
| wavelet-LLH | firstorder | Energy                               | 2487782.524  |
| wavelet-LLH | firstorder | RobustMeanAbsoluteDeviation          | 41.47144449  |
| wavelet-LLH | firstorder | MeanAbsoluteDeviation                | 69.75304332  |
| wavelet-LLH | firstorder | TotalEnergy                          | 67170128.14  |
| wavelet-LLH | firstorder | Maximum                              | 236.1900649  |
| wavelet-LLH | firstorder | RootMeanSquared                      | 105.8594709  |
| wavelet-LLH | firstorder | 90Percentile                         | 61.83908919  |
| wavelet-LLH | firstorder | Minimum                              | -333.1357615 |
| wavelet-LLH | firstorder | Entropy                              | 3.807142336  |
| wavelet-LLH | firstorder | Range                                | 569.3258264  |
| wavelet-LLH | firstorder | Variance                             | 9094.480178  |
| wavelet-LLH | firstorder | 10Percentile                         | -147.6823456 |
| wavelet-LLH | firstorder | Kurtosis                             | 3.979232354  |
| wavelet-LLH | firstorder | Mean                                 | -45.9537529  |
| wavelet-LLH | glrlm      | ShortRunLowGrayLevelEmphasis         | 0.014559897  |
| wavelet-LLH | glrlm      | GrayLevelVariance                    | 15.71288492  |
| wavelet-LLH | glrlm      | LowGrayLevelRunEmphasis              | 0.015155367  |
| wavelet-LLH | glrlm      | GrayLevelNonUniformityNormalized     | 0.088260144  |
| wavelet-LLH | glrlm      | RunVariance                          | 0.150041929  |
| wavelet-LLH | glrlm      | GrayLevelNonUniformity               | 17.53534198  |
| wavelet-LLH | glrlm      | LongRunEmphasis                      | 1.407250449  |
| wavelet-LLH | glrlm      | ShortRunHighGrayLevelEmphasis        | 163.0952462  |
| wavelet-LLH | glrlm      | RunLengthNonUniformity               | 163.1944343  |
| wavelet-LLH | glrlm      | ShortRunEmphasis                     | 0.922636132  |

|             |       |                                      |              |
|-------------|-------|--------------------------------------|--------------|
| wavelet-LLH | glrlm | LongRunHighGrayLevelEmphasis         | 244.3544589  |
| wavelet-LLH | glrlm | RunPercentage                        | 0.894663895  |
| wavelet-LLH | glrlm | LongRunLowGrayLevelEmphasis          | 0.01826381   |
| wavelet-LLH | glrlm | RunEntropy                           | 4.291474135  |
| wavelet-LLH | glrlm | HighGrayLevelRunEmphasis             | 176.0102917  |
| wavelet-LLH | glrlm | RunLengthNonUniformityNormalized     | 0.819352259  |
| wavelet-LLH | glszm | GrayLevelVariance                    | 26.68155376  |
| wavelet-LLH | glszm | ZoneVariance                         | 27.92981798  |
| wavelet-LLH | glszm | GrayLevelNonUniformityNormalized     | 0.055732783  |
| wavelet-LLH | glszm | SizeZoneNonUniformityNormalized      | 0.340589229  |
| wavelet-LLH | glszm | SizeZoneNonUniformity                | 24.8630137   |
| wavelet-LLH | glszm | GrayLevelNonUniformity               | 4.068493151  |
| wavelet-LLH | glszm | LargeAreaEmphasis                    | 37.17808219  |
| wavelet-LLH | glszm | SmallAreaHighGrayLevelEmphasis       | 118.0572311  |
| wavelet-LLH | glszm | ZonePercentage                       | 0.328828829  |
| wavelet-LLH | glszm | LargeAreaLowGrayLevelEmphasis        | 0.259171278  |
| wavelet-LLH | glszm | LargeAreaHighGrayLevelEmphasis       | 6538.561644  |
| wavelet-LLH | glszm | HighGrayLevelZoneEmphasis            | 187.5890411  |
| wavelet-LLH | glszm | SmallAreaEmphasis                    | 0.594282376  |
| wavelet-LLH | glszm | LowGrayLevelZoneEmphasis             | 0.026299269  |
| wavelet-LLH | glszm | ZoneEntropy                          | 5.364281237  |
| wavelet-LLH | glszm | SmallAreaLowGrayLevelEmphasis        | 0.021185851  |
| wavelet-LLH | ngtdm | Coarseness                           | 0.033612618  |
| wavelet-LLH | ngtdm | Complexity                           | 467.8201905  |
| wavelet-LLH | ngtdm | Strength                             | 5.154834131  |
| wavelet-LLH | ngtdm | Contrast                             | 0.140283728  |
| wavelet-LLH | ngtdm | Busyness                             | 0.090863178  |
| wavelet-LLL | gldm  | GrayLevelVariance                    | 770.8091064  |
| wavelet-LLL | gldm  | HighGrayLevelEmphasis                | 5424.261261  |
| wavelet-LLL | gldm  | DependenceEntropy                    | 6.741201733  |
| wavelet-LLL | gldm  | DependenceNonUniformity              | 96.48648649  |
| wavelet-LLL | gldm  | GrayLevelNonUniformity               | 4.027027027  |
| wavelet-LLL | gldm  | SmallDependenceEmphasis              | 0.679825999  |
| wavelet-LLL | gldm  | SmallDependenceHighGrayLevelEmphasis | 3346.621815  |
| wavelet-LLL | gldm  | DependenceNonUniformityNormalized    | 0.434623813  |
| wavelet-LLL | gldm  | LargeDependenceEmphasis              | 4.099099099  |
| wavelet-LLL | gldm  | LargeDependenceLowGrayLevelEmphasis  | 0.012175477  |
| wavelet-LLL | gldm  | DependenceVariance                   | 1.260936612  |
| wavelet-LLL | gldm  | LargeDependenceHighGrayLevelEmphasis | 30141.38739  |
| wavelet-LLL | gldm  | SmallDependenceLowGrayLevelEmphasis  | 0.006145075  |
| wavelet-LLL | gldm  | LowGrayLevelEmphasis                 | 0.007032788  |
| wavelet-LLL | glcm  | JointAverage                         | 72.08494572  |
| wavelet-LLL | glcm  | SumAverage                           | 144.1698914  |
| wavelet-LLL | glcm  | JointEntropy                         | 8.047324936  |
| wavelet-LLL | glcm  | ClusterShade                         | -70038.31412 |
| wavelet-LLL | glcm  | MaximumProbability                   | 0.013660497  |
| wavelet-LLL | glcm  | Idmn                                 | 0.975891891  |
| wavelet-LLL | glcm  | JointEnergy                          | 0.004105493  |
| wavelet-LLL | glcm  | Contrast                             | 296.961272   |
| wavelet-LLL | glcm  | DifferenceEntropy                    | 4.807376866  |
| wavelet-LLL | glcm  | InverseVariance                      | 0.092555203  |
| wavelet-LLL | glcm  | DifferenceVariance                   | 110.2876353  |
| wavelet-LLL | glcm  | Idn                                  | 0.896433634  |
| wavelet-LLL | glcm  | Idm                                  | 0.095029013  |
| wavelet-LLL | glcm  | Correlation                          | 0.773075045  |
| wavelet-LLL | glcm  | Autocorrelation                      | 5710.649284  |

|             |            |                                  |              |
|-------------|------------|----------------------------------|--------------|
| wavelet-LLL | glcm       | SumEntropy                       | 6.367001355  |
| wavelet-LLL | glcm       | SumSquares                       | 661.6414942  |
| wavelet-LLL | glcm       | ClusterProminence                | 13668938.22  |
| wavelet-LLL | glcm       | Imc2                             | 0.999771984  |
| wavelet-LLL | glcm       | Imc1                             | -0.647048651 |
| wavelet-LLL | glcm       | DifferenceAverage                | 13.29550187  |
| wavelet-LLL | glcm       | Id                               | 0.167189115  |
| wavelet-LLL | glcm       | ClusterTendency                  | 2349.604705  |
| wavelet-LLL | firstorder | InterquartileRange               | 1231.423927  |
| wavelet-LLL | firstorder | Skewness                         | -0.505845738 |
| wavelet-LLL | firstorder | Uniformity                       | 0.018139761  |
| wavelet-LLL | firstorder | Median                           | -477.7361601 |
| wavelet-LLL | firstorder | Energy                           | 181960488.7  |
| wavelet-LLL | firstorder | RobustMeanAbsoluteDeviation      | 472.9783028  |
| wavelet-LLL | firstorder | MeanAbsoluteDeviation            | 597.7968556  |
| wavelet-LLL | firstorder | TotalEnergy                      | 4912933195   |
| wavelet-LLL | firstorder | Maximum                          | 399.9480934  |
| wavelet-LLL | firstorder | RootMeanSquared                  | 905.340732   |
| wavelet-LLL | firstorder | 90Percentile                     | 213.4165551  |
| wavelet-LLL | firstorder | Minimum                          | -2264.264984 |
| wavelet-LLL | firstorder | Entropy                          | 6.063576018  |
| wavelet-LLL | firstorder | Range                            | 2664.213078  |
| wavelet-LLL | firstorder | Variance                         | 481339.4997  |
| wavelet-LLL | firstorder | 10Percentile                     | -1555.845198 |
| wavelet-LLL | firstorder | Kurtosis                         | 2.184222459  |
| wavelet-LLL | firstorder | Mean                             | -581.6376375 |
| wavelet-LLL | glrlm      | ShortRunLowGrayLevelEmphasis     | 0.007121746  |
| wavelet-LLL | glrlm      | GrayLevelVariance                | 763.9646011  |
| wavelet-LLL | glrlm      | LowGrayLevelRunEmphasis          | 0.007167188  |
| wavelet-LLL | glrlm      | GrayLevelNonUniformityNormalized | 0.017570246  |
| wavelet-LLL | glrlm      | RunVariance                      | 0.029296688  |
| wavelet-LLL | glrlm      | GrayLevelNonUniformity           | 3.799464041  |
| wavelet-LLL | glrlm      | LongRunEmphasis                  | 1.086381279  |
| wavelet-LLL | glrlm      | ShortRunHighGrayLevelEmphasis    | 5223.722219  |
| wavelet-LLL | glrlm      | RunLengthNonUniformity           | 205.4382754  |
| wavelet-LLL | glrlm      | ShortRunEmphasis                 | 0.979913761  |
| wavelet-LLL | glrlm      | LongRunHighGrayLevelEmphasis     | 6005.902093  |
| wavelet-LLL | glrlm      | RunPercentage                    | 0.973665974  |
| wavelet-LLL | glrlm      | LongRunLowGrayLevelEmphasis      | 0.007350648  |
| wavelet-LLL | glrlm      | RunEntropy                       | 6.159912388  |
| wavelet-LLL | glrlm      | HighGrayLevelRunEmphasis         | 5371.208525  |
| wavelet-LLL | glrlm      | RunLengthNonUniformityNormalized | 0.949260471  |
| wavelet-LLL | glszm      | GrayLevelVariance                | 686.1804689  |
| wavelet-LLL | glszm      | ZoneVariance                     | 1.030773697  |
| wavelet-LLL | glszm      | GrayLevelNonUniformityNormalized | 0.015314269  |
| wavelet-LLL | glszm      | SizeZoneNonUniformityNormalized  | 0.677819713  |
| wavelet-LLL | glszm      | SizeZoneNonUniformity            | 112.5180723  |
| wavelet-LLL | glszm      | GrayLevelNonUniformity           | 2.542168675  |
| wavelet-LLL | glszm      | LargeAreaEmphasis                | 2.819277108  |
| wavelet-LLL | glszm      | SmallAreaHighGrayLevelEmphasis   | 4124.909696  |
| wavelet-LLL | glszm      | ZonePercentage                   | 0.747747748  |
| wavelet-LLL | glszm      | LargeAreaLowGrayLevelEmphasis    | 0.012225268  |
| wavelet-LLL | glszm      | LargeAreaHighGrayLevelEmphasis   | 19207.71084  |
| wavelet-LLL | glszm      | HighGrayLevelZoneEmphasis        | 4989.066265  |
| wavelet-LLL | glszm      | SmallAreaEmphasis                | 0.848859554  |
| wavelet-LLL | glszm      | LowGrayLevelZoneEmphasis         | 0.008444507  |

|             |            |                                      |              |
|-------------|------------|--------------------------------------|--------------|
| wavelet-LLL | glszm      | ZoneEntropy                          | 6.502786494  |
| wavelet-LLL | glszm      | SmallAreaLowGrayLevelEmphasis        | 0.007982094  |
| wavelet-LLL | ngtdm      | Coarseness                           | 0.039826961  |
| wavelet-LLL | ngtdm      | Complexity                           | 21506.01486  |
| wavelet-LLL | ngtdm      | Strength                             | 173.3865233  |
| wavelet-LLL | ngtdm      | Contrast                             | 1.644248877  |
| wavelet-LLL | ngtdm      | Busyness                             | 0.004521081  |
| wavelet-HHL | gldm       | GrayLevelVariance                    | 3.175898872  |
| wavelet-HHL | gldm       | HighGrayLevelEmphasis                | 46.01351351  |
| wavelet-HHL | gldm       | DependenceEntropy                    | 5.599921217  |
| wavelet-HHL | gldm       | DependenceNonUniformity              | 22.51351351  |
| wavelet-HHL | gldm       | GrayLevelNonUniformity               | 41.89189189  |
| wavelet-HHL | gldm       | SmallDependenceEmphasis              | 0.171768078  |
| wavelet-HHL | gldm       | SmallDependenceHighGrayLevelEmphasis | 9.105472153  |
| wavelet-HHL | gldm       | DependenceNonUniformityNormalized    | 0.101412223  |
| wavelet-HHL | gldm       | LargeDependenceEmphasis              | 36.99099099  |
| wavelet-HHL | gldm       | LargeDependenceLowGrayLevelEmphasis  | 0.973048016  |
| wavelet-HHL | gldm       | DependenceVariance                   | 10.99017937  |
| wavelet-HHL | gldm       | LargeDependenceHighGrayLevelEmphasis | 1635.274775  |
| wavelet-HHL | gldm       | SmallDependenceLowGrayLevelEmphasis  | 0.01027895   |
| wavelet-HHL | gldm       | LowGrayLevelEmphasis                 | 0.042784691  |
| wavelet-HHL | glcm       | JointAverage                         | 6.560387236  |
| wavelet-HHL | glcm       | SumAverage                           | 13.12077447  |
| wavelet-HHL | glcm       | JointEntropy                         | 5.133988822  |
| wavelet-HHL | glcm       | ClusterShade                         | -4.716599156 |
| wavelet-HHL | glcm       | MaximumProbability                   | 0.10367637   |
| wavelet-HHL | glcm       | ldmn                                 | 0.963220256  |
| wavelet-HHL | glcm       | JointEnergy                          | 0.043758259  |
| wavelet-HHL | glcm       | Contrast                             | 5.094600879  |
| wavelet-HHL | glcm       | DifferenceEntropy                    | 2.350269921  |
| wavelet-HHL | glcm       | InverseVariance                      | 0.402488936  |
| wavelet-HHL | glcm       | DifferenceVariance                   | 2.220257365  |
| wavelet-HHL | glcm       | ldn                                  | 0.879195493  |
| wavelet-HHL | glcm       | ldm                                  | 0.447712297  |
| wavelet-HHL | glcm       | Correlation                          | 0.087425124  |
| wavelet-HHL | glcm       | Autocorrelation                      | 43.34047153  |
| wavelet-HHL | glcm       | SumEntropy                           | 3.234530168  |
| wavelet-HHL | glcm       | SumSquares                           | 2.847197048  |
| wavelet-HHL | glcm       | ClusterProminence                    | 179.7547852  |
| wavelet-HHL | glcm       | lmc2                                 | 0.646234799  |
| wavelet-HHL | glcm       | lmc1                                 | -0.105748205 |
| wavelet-HHL | glcm       | DifferenceAverage                    | 1.67357537   |
| wavelet-HHL | glcm       | ld                                   | 0.508802961  |
| wavelet-HHL | glcm       | ClusterTendency                      | 6.294187314  |
| wavelet-HHL | firstorder | InterquartileRange                   | 41.29840525  |
| wavelet-HHL | firstorder | Skewness                             | -0.195845793 |
| wavelet-HHL | firstorder | Uniformity                           | 0.188702216  |
| wavelet-HHL | firstorder | Median                               | 0.422274179  |
| wavelet-HHL | firstorder | Energy                               | 419287.856   |
| wavelet-HHL | firstorder | RobustMeanAbsoluteDeviation          | 18.13591288  |
| wavelet-HHL | firstorder | MeanAbsoluteDeviation                | 31.10902541  |
| wavelet-HHL | firstorder | TotalEnergy                          | 11320772.11  |
| wavelet-HHL | firstorder | Maximum                              | 114.2581477  |
| wavelet-HHL | firstorder | RootMeanSquared                      | 43.45899258  |
| wavelet-HHL | firstorder | 90Percentile                         | 57.77919694  |
| wavelet-HHL | firstorder | Minimum                              | -146.8283797 |

|             |            |                                      |              |
|-------------|------------|--------------------------------------|--------------|
| wavelet-HHL | firstorder | Entropy                              | 2.775182729  |
| wavelet-HHL | firstorder | Range                                | 261.0865275  |
| wavelet-HHL | firstorder | Variance                             | 1887.162807  |
| wavelet-HHL | firstorder | 10Percentile                         | -44.28561685 |
| wavelet-HHL | firstorder | Kurtosis                             | 4.430371208  |
| wavelet-HHL | firstorder | Mean                                 | 1.233380968  |
| wavelet-HHL | glrlm      | ShortRunLowGrayLevelEmphasis         | 0.041611464  |
| wavelet-HHL | glrlm      | GrayLevelVariance                    | 3.56883719   |
| wavelet-HHL | glrlm      | LowGrayLevelRunEmphasis              | 0.045280344  |
| wavelet-HHL | glrlm      | GrayLevelNonUniformityNormalized     | 0.171070888  |
| wavelet-HHL | glrlm      | RunVariance                          | 0.254562791  |
| wavelet-HHL | glrlm      | GrayLevelNonUniformity               | 32.02942131  |
| wavelet-HHL | glrlm      | LongRunEmphasis                      | 1.679982139  |
| wavelet-HHL | glrlm      | ShortRunHighGrayLevelEmphasis        | 41.34935913  |
| wavelet-HHL | glrlm      | RunLengthNonUniformity               | 139.0686871  |
| wavelet-HHL | glrlm      | ShortRunEmphasis                     | 0.882510579  |
| wavelet-HHL | glrlm      | LongRunHighGrayLevelEmphasis         | 76.36410914  |
| wavelet-HHL | glrlm      | RunPercentage                        | 0.842342342  |
| wavelet-HHL | glrlm      | LongRunLowGrayLevelEmphasis          | 0.064793384  |
| wavelet-HHL | glrlm      | RunEntropy                           | 3.506369122  |
| wavelet-HHL | glrlm      | HighGrayLevelRunEmphasis             | 46.45101573  |
| wavelet-HHL | glrlm      | RunLengthNonUniformityNormalized     | 0.740031203  |
| wavelet-HHL | glszm      | GrayLevelVariance                    | 8.151111111  |
| wavelet-HHL | glszm      | ZoneVariance                         | 133.2622222  |
| wavelet-HHL | glszm      | GrayLevelNonUniformityNormalized     | 0.109135802  |
| wavelet-HHL | glszm      | SizeZoneNonUniformityNormalized      | 0.302716049  |
| wavelet-HHL | glszm      | SizeZoneNonUniformity                | 13.62222222  |
| wavelet-HHL | glszm      | GrayLevelNonUniformity               | 4.911111111  |
| wavelet-HHL | glszm      | LargeAreaEmphasis                    | 157.6        |
| wavelet-HHL | glszm      | SmallAreaHighGrayLevelEmphasis       | 31.27921547  |
| wavelet-HHL | glszm      | ZonePercentage                       | 0.202702703  |
| wavelet-HHL | glszm      | LargeAreaLowGrayLevelEmphasis        | 3.951975762  |
| wavelet-HHL | glszm      | LargeAreaHighGrayLevelEmphasis       | 6954.022222  |
| wavelet-HHL | glszm      | HighGrayLevelZoneEmphasis            | 53.48888889  |
| wavelet-HHL | glszm      | SmallAreaEmphasis                    | 0.558889869  |
| wavelet-HHL | glszm      | LowGrayLevelZoneEmphasis             | 0.064596038  |
| wavelet-HHL | glszm      | ZoneEntropy                          | 4.597082818  |
| wavelet-HHL | glszm      | SmallAreaLowGrayLevelEmphasis        | 0.031969184  |
| wavelet-HHL | ngtdm      | Coarseness                           | 0.031548658  |
| wavelet-HHL | ngtdm      | Complexity                           | 55.42619791  |
| wavelet-HHL | ngtdm      | Strength                             | 1.077440222  |
| wavelet-HHL | ngtdm      | Contrast                             | 0.071555651  |
| wavelet-HHL | ngtdm      | Busyness                             | 0.401000083  |
| wavelet-HLH | gldm       | GrayLevelVariance                    | 2.047094392  |
| wavelet-HLH | gldm       | HighGrayLevelEmphasis                | 45.83333333  |
| wavelet-HLH | gldm       | DependenceEntropy                    | 5.271698289  |
| wavelet-HLH | gldm       | DependenceNonUniformity              | 20.01801802  |
| wavelet-HLH | gldm       | GrayLevelNonUniformity               | 51.61261261  |
| wavelet-HLH | gldm       | SmallDependenceEmphasis              | 0.16529223   |
| wavelet-HLH | gldm       | SmallDependenceHighGrayLevelEmphasis | 9.449525076  |
| wavelet-HLH | gldm       | DependenceNonUniformityNormalized    | 0.090171252  |
| wavelet-HLH | gldm       | LargeDependenceEmphasis              | 45.99099099  |
| wavelet-HLH | gldm       | LargeDependenceLowGrayLevelEmphasis  | 1.090616992  |
| wavelet-HLH | gldm       | DependenceVariance                   | 12.74693613  |
| wavelet-HLH | gldm       | LargeDependenceHighGrayLevelEmphasis | 2037.382883  |
| wavelet-HLH | gldm       | SmallDependenceLowGrayLevelEmphasis  | 0.009437076  |

|             |            |                                  |              |
|-------------|------------|----------------------------------|--------------|
| wavelet-HLH | gldm       | LowGrayLevelEmphasis             | 0.03058336   |
| wavelet-HLH | glcm       | JointAverage                     | 6.615126762  |
| wavelet-HLH | glcm       | SumAverage                       | 13.23025352  |
| wavelet-HLH | glcm       | JointEntropy                     | 4.571034056  |
| wavelet-HLH | glcm       | ClusterShade                     | 2.202388765  |
| wavelet-HLH | glcm       | MaximumProbability               | 0.149850122  |
| wavelet-HLH | glcm       | ldmn                             | 0.978522896  |
| wavelet-HLH | glcm       | JointEnergy                      | 0.068400539  |
| wavelet-HLH | glcm       | Contrast                         | 4.024232519  |
| wavelet-HLH | glcm       | DifferenceEntropy                | 2.178877981  |
| wavelet-HLH | glcm       | InverseVariance                  | 0.447234393  |
| wavelet-HLH | glcm       | DifferenceVariance               | 1.944949993  |
| wavelet-HLH | glcm       | ldn                              | 0.909399521  |
| wavelet-HLH | glcm       | ldm                              | 0.504343207  |
| wavelet-HLH | glcm       | Correlation                      | 0.001831784  |
| wavelet-HLH | glcm       | Autocorrelation                  | 43.75885458  |
| wavelet-HLH | glcm       | SumEntropy                       | 2.88555425   |
| wavelet-HLH | glcm       | SumSquares                       | 2.010592661  |
| wavelet-HLH | glcm       | ClusterProminence                | 84.34595278  |
| wavelet-HLH | glcm       | lmc2                             | 0.63117009   |
| wavelet-HLH | glcm       | lmc1                             | -0.110578873 |
| wavelet-HLH | glcm       | DifferenceAverage                | 1.418074687  |
| wavelet-HLH | glcm       | ld                               | 0.552108034  |
| wavelet-HLH | glcm       | ClusterTendency                  | 4.018138123  |
| wavelet-HLH | firstorder | InterquartileRange               | 32.26287043  |
| wavelet-HLH | firstorder | Skewness                         | 0.216639184  |
| wavelet-HLH | firstorder | Uniformity                       | 0.232489246  |
| wavelet-HLH | firstorder | Median                           | 2.722666107  |
| wavelet-HLH | firstorder | Energy                           | 266739.3475  |
| wavelet-HLH | firstorder | RobustMeanAbsoluteDeviation      | 14.45131631  |
| wavelet-HLH | firstorder | MeanAbsoluteDeviation            | 24.30940338  |
| wavelet-HLH | firstorder | TotalEnergy                      | 7201962.383  |
| wavelet-HLH | firstorder | Maximum                          | 160.6539643  |
| wavelet-HLH | firstorder | RootMeanSquared                  | 34.66307246  |
| wavelet-HLH | firstorder | 90Percentile                     | 41.42155377  |
| wavelet-HLH | firstorder | Minimum                          | -131.5843607 |
| wavelet-HLH | firstorder | Entropy                          | 2.455236704  |
| wavelet-HLH | firstorder | Range                            | 292.238325   |
| wavelet-HLH | firstorder | Variance                         | 1189.716866  |
| wavelet-HLH | firstorder | 10Percentile                     | -35.83257431 |
| wavelet-HLH | firstorder | Kurtosis                         | 5.909801813  |
| wavelet-HLH | firstorder | Mean                             | 3.436819208  |
| wavelet-HLH | glrlm      | ShortRunLowGrayLevelEmphasis     | 0.028582253  |
| wavelet-HLH | glrlm      | GrayLevelVariance                | 2.382151981  |
| wavelet-HLH | glrlm      | LowGrayLevelRunEmphasis          | 0.032033159  |
| wavelet-HLH | glrlm      | GrayLevelNonUniformityNormalized | 0.208315192  |
| wavelet-HLH | glrlm      | RunVariance                      | 0.305626903  |
| wavelet-HLH | glrlm      | GrayLevelNonUniformity           | 37.83073297  |
| wavelet-HLH | glrlm      | LongRunEmphasis                  | 1.82936582   |
| wavelet-HLH | glrlm      | ShortRunHighGrayLevelEmphasis    | 40.115658    |
| wavelet-HLH | glrlm      | RunLengthNonUniformity           | 127.170286   |
| wavelet-HLH | glrlm      | ShortRunEmphasis                 | 0.858350996  |
| wavelet-HLH | glrlm      | LongRunHighGrayLevelEmphasis     | 82.49827408  |
| wavelet-HLH | glrlm      | RunPercentage                    | 0.816701317  |
| wavelet-HLH | glrlm      | LongRunLowGrayLevelEmphasis      | 0.052172913  |
| wavelet-HLH | glrlm      | RunEntropy                       | 3.297563641  |

|             |       |                                  |              |
|-------------|-------|----------------------------------|--------------|
| wavelet-HLH | glrlm | HighGrayLevelRunEmphasis         | 46.32137738  |
| wavelet-HLH | glrlm | RunLengthNonUniformityNormalized | 0.696225658  |
| wavelet-HLH | glszm | GrayLevelVariance                | 6.967784352  |
| wavelet-HLH | glszm | ZoneVariance                     | 213.6489152  |
| wavelet-HLH | glszm | GrayLevelNonUniformityNormalized | 0.130834977  |
| wavelet-HLH | glszm | SizeZoneNonUniformityNormalized  | 0.418803419  |
| wavelet-HLH | glszm | SizeZoneNonUniformity            | 16.333333333 |
| wavelet-HLH | glszm | GrayLevelNonUniformity           | 5.102564103  |
| wavelet-HLH | glszm | LargeAreaEmphasis                | 246.0512821  |
| wavelet-HLH | glszm | SmallAreaHighGrayLevelEmphasis   | 40.86801903  |
| wavelet-HLH | glszm | ZonePercentage                   | 0.175675676  |
| wavelet-HLH | glszm | LargeAreaLowGrayLevelEmphasis    | 5.957184659  |
| wavelet-HLH | glszm | LargeAreaHighGrayLevelEmphasis   | 10662.4359   |
| wavelet-HLH | glszm | HighGrayLevelZoneEmphasis        | 58.51282051  |
| wavelet-HLH | glszm | SmallAreaEmphasis                | 0.651670462  |
| wavelet-HLH | glszm | LowGrayLevelZoneEmphasis         | 0.054785856  |
| wavelet-HLH | glszm | ZoneEntropy                      | 4.278114718  |
| wavelet-HLH | glszm | SmallAreaLowGrayLevelEmphasis    | 0.046104168  |
| wavelet-HLH | ngtdm | Coarseness                       | 0.027687124  |
| wavelet-HLH | ngtdm | Complexity                       | 57.26159193  |
| wavelet-HLH | ngtdm | Strength                         | 1.285404798  |
| wavelet-HLH | ngtdm | Contrast                         | 0.040728686  |
| wavelet-HLH | ngtdm | Busyness                         | 0.394905816  |

| Image type | Feature Class | Feature Name                         |                                                                                                                                                                                                                                                                                                                                                                                                                   |
|------------|---------------|--------------------------------------|-------------------------------------------------------------------------------------------------------------------------------------------------------------------------------------------------------------------------------------------------------------------------------------------------------------------------------------------------------------------------------------------------------------------|
| general    | info          | BoundingBox                          | 10: RTSTRUCT: C99-DNU_segment_Tumor<br>(0, 1, 1, 6, 7, 5)                                                                                                                                                                                                                                                                                                                                                         |
| general    | info          | EnabledImageTypes                    | {u'Original': {}, u'Wavelet': {}}                                                                                                                                                                                                                                                                                                                                                                                 |
|            |               |                                      | {'distances': [1], 'additionalInfo': True, 'force2D': False, 'interpolator': 'sitkBSpline', 'resampledPixelSpacing': [3.0], 'label': 1, 'normalizeScale': 1, 'normalize': False, 'force2Ddimension': 0, 'removeOutliers': None, 'minimumROISize': None, u'binWidth': 25.0, 'minimumROIDimensions': 1, u'correctMask': True, 'preCrop': False, u'symmetricalGLCM': True, 'resegmentRange': None, 'padDistance': 5} |
| general    | info          | GeneralSettings                      |                                                                                                                                                                                                                                                                                                                                                                                                                   |
| general    | info          | ImageHash                            | a70adbc7365e0a4e72f44c25f62bf144db3258dc                                                                                                                                                                                                                                                                                                                                                                          |
| general    | info          | ImageSpacing                         | (0.9765625000000002, 0.9765625000000002, 2.0)                                                                                                                                                                                                                                                                                                                                                                     |
| general    | info          | MaskHash                             | 15bb1094c84bdffc91d44168820c2ae5f398452b                                                                                                                                                                                                                                                                                                                                                                          |
| general    | info          | NumpyVersion                         | 1.13.1                                                                                                                                                                                                                                                                                                                                                                                                            |
| general    | info          | PyWaveletVersion                     | 0.5.2                                                                                                                                                                                                                                                                                                                                                                                                             |
| general    | info          | SimpleITKVersion                     | 1.1.0                                                                                                                                                                                                                                                                                                                                                                                                             |
| general    | info          | Version                              | 1.3.0.post102+g1b0eb74                                                                                                                                                                                                                                                                                                                                                                                            |
| general    | info          | VolumeNum                            | 1                                                                                                                                                                                                                                                                                                                                                                                                                 |
| general    | info          | VoxelNum                             | 60                                                                                                                                                                                                                                                                                                                                                                                                                |
| original   | shape         | Maximum3DDiameter                    | 24.73863375                                                                                                                                                                                                                                                                                                                                                                                                       |
| original   | shape         | Maximum2DDiameterSlice               | 15.29705854                                                                                                                                                                                                                                                                                                                                                                                                       |
| original   | shape         | Sphericity                           | 0.804880811                                                                                                                                                                                                                                                                                                                                                                                                       |
| original   | shape         | MinorAxis                            | 12.8521947                                                                                                                                                                                                                                                                                                                                                                                                        |
| original   | shape         | Elongation                           | 0.58710221                                                                                                                                                                                                                                                                                                                                                                                                        |
| original   | shape         | SurfaceVolumeRatio                   | 0.511580772                                                                                                                                                                                                                                                                                                                                                                                                       |
| original   | shape         | Volume                               | 1620                                                                                                                                                                                                                                                                                                                                                                                                              |
| original   | shape         | MajorAxis                            | 21.89089818                                                                                                                                                                                                                                                                                                                                                                                                       |
| original   | shape         | SurfaceArea                          | 828.76085                                                                                                                                                                                                                                                                                                                                                                                                         |
| original   | shape         | Flatness                             | 0.422271343                                                                                                                                                                                                                                                                                                                                                                                                       |
| original   | shape         | LeastAxis                            | 9.243898979                                                                                                                                                                                                                                                                                                                                                                                                       |
| original   | shape         | Maximum2DDiameterColumn              | 15                                                                                                                                                                                                                                                                                                                                                                                                                |
| original   | shape         | Maximum2DDiameterRow                 | 17.49285568                                                                                                                                                                                                                                                                                                                                                                                                       |
| original   | gldm          | GrayLevelVariance                    | 315.6497222                                                                                                                                                                                                                                                                                                                                                                                                       |
| original   | gldm          | HighGrayLevelEmphasis                | 822.65                                                                                                                                                                                                                                                                                                                                                                                                            |
| original   | gldm          | DependenceEntropy                    | 5.156564762                                                                                                                                                                                                                                                                                                                                                                                                       |
| original   | gldm          | DependenceNonUniformity              | 36.76666667                                                                                                                                                                                                                                                                                                                                                                                                       |
| original   | gldm          | GrayLevelNonUniformity               | 2.533333333                                                                                                                                                                                                                                                                                                                                                                                                       |
| original   | gldm          | SmallDependenceEmphasis              | 0.803356481                                                                                                                                                                                                                                                                                                                                                                                                       |
| original   | gldm          | SmallDependenceHighGrayLevelEmphasis | 637.0978009                                                                                                                                                                                                                                                                                                                                                                                                       |
| original   | gldm          | DependenceNonUniformityNormalized    | 0.612777778                                                                                                                                                                                                                                                                                                                                                                                                       |
| original   | gldm          | LargeDependenceEmphasis              | 2.566666667                                                                                                                                                                                                                                                                                                                                                                                                       |
| original   | gldm          | LargeDependenceLowGrayLevelEmphasis  | 0.081600354                                                                                                                                                                                                                                                                                                                                                                                                       |
| original   | gldm          | DependenceVariance                   | 0.606666667                                                                                                                                                                                                                                                                                                                                                                                                       |
| original   | gldm          | LargeDependenceHighGrayLevelEmphasis | 2422.416667                                                                                                                                                                                                                                                                                                                                                                                                       |
| original   | gldm          | SmallDependenceLowGrayLevelEmphasis  | 0.036920109                                                                                                                                                                                                                                                                                                                                                                                                       |
| original   | gldm          | LowGrayLevelEmphasis                 | 0.044439172                                                                                                                                                                                                                                                                                                                                                                                                       |
| original   | glcm          | JointAverage                         | 25.24458555                                                                                                                                                                                                                                                                                                                                                                                                       |
| original   | glcm          | SumAverage                           | 50.4891711                                                                                                                                                                                                                                                                                                                                                                                                        |



|          |            |                                  |              |
|----------|------------|----------------------------------|--------------|
| original | glcm       | JointEntropy                     | 5.796134582  |
| original | glcm       | ClusterShade                     | 4129.994632  |
| original | glcm       | MaximumProbability               | 0.033117147  |
| original | glcm       | Idmn                             | 0.906571994  |
| original | glcm       | JointEnergy                      | 0.018981632  |
| original | glcm       | Contrast                         | 600.9406925  |
| original | glcm       | DifferenceEntropy                | 4.345036272  |
| original | glcm       | InverseVariance                  | 0.075878718  |
| original | glcm       | DifferenceVariance               | 212.5114     |
| original | glcm       | Idn                              | 0.806396878  |
| original | glcm       | Idm                              | 0.073633434  |
| original | glcm       | Correlation                      | 0.08427991   |
| original | glcm       | Autocorrelation                  | 660.9896334  |
| original | glcm       | SumEntropy                       | 4.614879324  |
| original | glcm       | SumSquares                       | 322.944709   |
| original | glcm       | ClusterProminence                | 1054130.905  |
| original | glcm       | Imc2                             | 0.999623638  |
| original | glcm       | Imc1                             | -0.769438221 |
| original | glcm       | DifferenceAverage                | 19.17537792  |
| original | glcm       | Id                               | 0.13294796   |
| original | glcm       | ClusterTendency                  | 690.8381436  |
| original | firstorder | InterquartileRange               | 786          |
| original | firstorder | Skewness                         | 0.69397403   |
| original | firstorder | Uniformity                       | 0.042222222  |
| original | firstorder | Median                           | -578.5       |
| original | firstorder | Energy                           | 25358766     |
| original | firstorder | RobustMeanAbsoluteDeviation      | 292.4826389  |
| original | firstorder | MeanAbsoluteDeviation            | 375.4944444  |
| original | firstorder | TotalEnergy                      | 684686682    |
| original | firstorder | Maximum                          | 706          |
| original | firstorder | RootMeanSquared                  | 650.1123749  |
| original | firstorder | 90Percentile                     | 114.9        |
| original | firstorder | Minimum                          | -1024        |
| original | firstorder | Entropy                          | 4.874954813  |
| original | firstorder | Range                            | 1730         |
| original | firstorder | Variance                         | 196609.2456  |
| original | firstorder | 10Percentile                     | -957.3       |
| original | firstorder | Kurtosis                         | 2.411044079  |
| original | firstorder | Mean                             | -475.4333333 |
| original | glrlm      | ShortRunLowGrayLevelEmphasis     | 0.044354834  |
| original | glrlm      | GrayLevelVariance                | 315.2951056  |
| original | glrlm      | LowGrayLevelRunEmphasis          | 0.044693277  |
| original | glrlm      | GrayLevelNonUniformityNormalized | 0.041499603  |
| original | glrlm      | RunVariance                      | 0.015366022  |
| original | glrlm      | GrayLevelNonUniformity           | 2.452100444  |
| original | glrlm      | LongRunEmphasis                  | 1.047617583  |
| original | glrlm      | ShortRunHighGrayLevelEmphasis    | 807.6786123  |
| original | glrlm      | RunLengthNonUniformity           | 57.2893187   |
| original | glrlm      | ShortRunEmphasis                 | 0.988095604  |
| original | glrlm      | LongRunHighGrayLevelEmphasis     | 867.7405892  |
| original | glrlm      | RunPercentage                    | 0.984615385  |
| original | glrlm      | LongRunLowGrayLevelEmphasis      | 0.046047048  |
| original | glrlm      | RunEntropy                       | 4.926756758  |
| original | glrlm      | HighGrayLevelRunEmphasis         | 819.6910077  |
| original | glrlm      | RunLengthNonUniformityNormalized | 0.969267956  |

|             |       |                                      |              |
|-------------|-------|--------------------------------------|--------------|
| original    | glszm | GrayLevelVariance                    | 314.2106882  |
| original    | glszm | ZoneVariance                         | 0.341407151  |
| original    | glszm | GrayLevelNonUniformityNormalized     | 0.035755479  |
| original    | glszm | SizeZoneNonUniformityNormalized      | 0.816993464  |
| original    | glszm | SizeZoneNonUniformity                | 41.66666667  |
| original    | glszm | GrayLevelNonUniformity               | 1.823529412  |
| original    | glszm | LargeAreaEmphasis                    | 1.725490196  |
| original    | glszm | SmallAreaHighGrayLevelEmphasis       | 729.7376089  |
| original    | glszm | ZonePercentage                       | 0.85         |
| original    | glszm | LargeAreaLowGrayLevelEmphasis        | 0.067079699  |
| original    | glszm | LargeAreaHighGrayLevelEmphasis       | 1447.392157  |
| original    | glszm | HighGrayLevelZoneEmphasis            | 805.1372549  |
| original    | glszm | SmallAreaEmphasis                    | 0.917347495  |
| original    | glszm | LowGrayLevelZoneEmphasis             | 0.046103431  |
| original    | glszm | ZoneEntropy                          | 5.093802303  |
| original    | glszm | SmallAreaLowGrayLevelEmphasis        | 0.042007851  |
| original    | ngtdm | Coarseness                           | 0.027879114  |
| original    | ngtdm | Complexity                           | 12826.28612  |
| original    | ngtdm | Strength                             | 58.31439952  |
| original    | ngtdm | Contrast                             | 7.274612489  |
| original    | ngtdm | Busyness                             | 0.058737683  |
| wavelet-HHH | gldm  | GrayLevelVariance                    | 59.98305556  |
| wavelet-HHH | gldm  | HighGrayLevelEmphasis                | 433.1166667  |
| wavelet-HHH | gldm  | DependenceEntropy                    | 5.048394346  |
| wavelet-HHH | gldm  | DependenceNonUniformity              | 27.4         |
| wavelet-HHH | gldm  | GrayLevelNonUniformity               | 3.533333333  |
| wavelet-HHH | gldm  | SmallDependenceEmphasis              | 0.693171296  |
| wavelet-HHH | gldm  | SmallDependenceHighGrayLevelEmphasis | 280.0587963  |
| wavelet-HHH | gldm  | DependenceNonUniformityNormalized    | 0.456666667  |
| wavelet-HHH | gldm  | LargeDependenceEmphasis              | 2.933333333  |
| wavelet-HHH | gldm  | LargeDependenceLowGrayLevelEmphasis  | 0.034079523  |
| wavelet-HHH | gldm  | DependenceVariance                   | 0.582222222  |
| wavelet-HHH | gldm  | LargeDependenceHighGrayLevelEmphasis | 1261.95      |
| wavelet-HHH | gldm  | SmallDependenceLowGrayLevelEmphasis  | 0.023693843  |
| wavelet-HHH | gldm  | LowGrayLevelEmphasis                 | 0.024848622  |
| wavelet-HHH | glcm  | JointAverage                         | 19.23013541  |
| wavelet-HHH | glcm  | SumAverage                           | 38.46027082  |
| wavelet-HHH | glcm  | JointEntropy                         | 5.716394353  |
| wavelet-HHH | glcm  | ClusterShade                         | -257.6316111 |
| wavelet-HHH | glcm  | MaximumProbability                   | 0.04065085   |
| wavelet-HHH | glcm  | Idmn                                 | 0.903004011  |
| wavelet-HHH | glcm  | JointEnergy                          | 0.020356242  |
| wavelet-HHH | glcm  | Contrast                             | 144.1991405  |
| wavelet-HHH | glcm  | DifferenceEntropy                    | 3.893172613  |
| wavelet-HHH | glcm  | InverseVariance                      | 0.099699973  |
| wavelet-HHH | glcm  | DifferenceVariance                   | 43.02189811  |
| wavelet-HHH | glcm  | Idn                                  | 0.795501346  |
| wavelet-HHH | glcm  | Idm                                  | 0.10335829   |
| wavelet-HHH | glcm  | Correlation                          | -0.042929043 |
| wavelet-HHH | glcm  | Autocorrelation                      | 367.2996005  |
| wavelet-HHH | glcm  | SumEntropy                           | 4.279500213  |
| wavelet-HHH | glcm  | SumSquares                           | 69.25174198  |
| wavelet-HHH | glcm  | ClusterProminence                    | 46375.96555  |
| wavelet-HHH | glcm  | Imc2                                 | 0.998102175  |
| wavelet-HHH | glcm  | Imc1                                 | -0.659440296 |

|             |            |                                  |              |
|-------------|------------|----------------------------------|--------------|
| wavelet-HHH | glcm       | DifferenceAverage                | 9.772809242  |
| wavelet-HHH | glcm       | Id                               | 0.181732556  |
| wavelet-HHH | glcm       | ClusterTendency                  | 132.8078274  |
| wavelet-HHH | firstorder | InterquartileRange               | 288.9668201  |
| wavelet-HHH | firstorder | Skewness                         | -0.206091219 |
| wavelet-HHH | firstorder | Uniformity                       | 0.058888889  |
| wavelet-HHH | firstorder | Median                           | 14.53870149  |
| wavelet-HHH | firstorder | Energy                           | 2268919.061  |
| wavelet-HHH | firstorder | RobustMeanAbsoluteDeviation      | 118.5505481  |
| wavelet-HHH | firstorder | MeanAbsoluteDeviation            | 160.2260448  |
| wavelet-HHH | firstorder | TotalEnergy                      | 61260814.64  |
| wavelet-HHH | firstorder | Maximum                          | 359.4888491  |
| wavelet-HHH | firstorder | RootMeanSquared                  | 194.4616098  |
| wavelet-HHH | firstorder | 90Percentile                     | 221.3242662  |
| wavelet-HHH | firstorder | Minimum                          | -472.7450038 |
| wavelet-HHH | firstorder | Entropy                          | 4.41064997   |
| wavelet-HHH | firstorder | Range                            | 832.233853   |
| wavelet-HHH | firstorder | Variance                         | 37801.94784  |
| wavelet-HHH | firstorder | 10Percentile                     | -242.7383943 |
| wavelet-HHH | firstorder | Kurtosis                         | 2.448126482  |
| wavelet-HHH | firstorder | Mean                             | -3.65647879  |
| wavelet-HHH | glrlm      | ShortRunLowGrayLevelEmphasis     | 0.025220225  |
| wavelet-HHH | glrlm      | GrayLevelVariance                | 60.03841585  |
| wavelet-HHH | glrlm      | LowGrayLevelRunEmphasis          | 0.025281808  |
| wavelet-HHH | glrlm      | GrayLevelNonUniformityNormalized | 0.057743773  |
| wavelet-HHH | glrlm      | RunVariance                      | 0.023184572  |
| wavelet-HHH | glrlm      | GrayLevelNonUniformity           | 3.394035103  |
| wavelet-HHH | glrlm      | LongRunEmphasis                  | 1.066238856  |
| wavelet-HHH | glrlm      | ShortRunHighGrayLevelEmphasis    | 425.5112623  |
| wavelet-HHH | glrlm      | RunLengthNonUniformity           | 56.5253977   |
| wavelet-HHH | glrlm      | ShortRunEmphasis                 | 0.984939761  |
| wavelet-HHH | glrlm      | LongRunHighGrayLevelEmphasis     | 461.8299633  |
| wavelet-HHH | glrlm      | RunPercentage                    | 0.979487179  |
| wavelet-HHH | glrlm      | LongRunLowGrayLevelEmphasis      | 0.025588117  |
| wavelet-HHH | glrlm      | RunEntropy                       | 4.490010821  |
| wavelet-HHH | glrlm      | HighGrayLevelRunEmphasis         | 432.6550445  |
| wavelet-HHH | glrlm      | RunLengthNonUniformityNormalized | 0.96144391   |
| wavelet-HHH | glszm      | GrayLevelVariance                | 60.60680529  |
| wavelet-HHH | glszm      | ZoneVariance                     | 0.559546314  |
| wavelet-HHH | glszm      | GrayLevelNonUniformityNormalized | 0.047258979  |
| wavelet-HHH | glszm      | SizeZoneNonUniformityNormalized  | 0.666351607  |
| wavelet-HHH | glszm      | SizeZoneNonUniformity            | 30.65217391  |
| wavelet-HHH | glszm      | GrayLevelNonUniformity           | 2.173913043  |
| wavelet-HHH | glszm      | LargeAreaEmphasis                | 2.260869565  |
| wavelet-HHH | glszm      | SmallAreaHighGrayLevelEmphasis   | 333.1008454  |
| wavelet-HHH | glszm      | ZonePercentage                   | 0.766666667  |
| wavelet-HHH | glszm      | LargeAreaLowGrayLevelEmphasis    | 0.037683811  |
| wavelet-HHH | glszm      | LargeAreaHighGrayLevelEmphasis   | 938.0652174  |
| wavelet-HHH | glszm      | HighGrayLevelZoneEmphasis        | 419.9565217  |
| wavelet-HHH | glszm      | SmallAreaEmphasis                | 0.842657005  |
| wavelet-HHH | glszm      | LowGrayLevelZoneEmphasis         | 0.031148135  |
| wavelet-HHH | glszm      | ZoneEntropy                      | 4.958344565  |
| wavelet-HHH | glszm      | SmallAreaLowGrayLevelEmphasis    | 0.030686338  |
| wavelet-HHH | ngtdm      | Coarseness                       | 0.045394637  |
| wavelet-HHH | ngtdm      | Complexity                       | 2319.811428  |

|             |            |                                      |              |
|-------------|------------|--------------------------------------|--------------|
| wavelet-HHH | ngtdm      | Strength                             | 18.56264129  |
| wavelet-HHH | ngtdm      | Contrast                             | 1.177839614  |
| wavelet-HHH | ngtdm      | Busyness                             | 0.04490223   |
| wavelet-HLL | gldm       | GrayLevelVariance                    | 179.8388889  |
| wavelet-HLL | gldm       | HighGrayLevelEmphasis                | 2101.2       |
| wavelet-HLL | gldm       | DependenceEntropy                    | 5.181727679  |
| wavelet-HLL | gldm       | DependenceNonUniformity              | 33.8         |
| wavelet-HLL | gldm       | GrayLevelNonUniformity               | 2.333333333  |
| wavelet-HLL | gldm       | SmallDependenceEmphasis              | 0.777430556  |
| wavelet-HLL | gldm       | SmallDependenceHighGrayLevelEmphasis | 1562.130208  |
| wavelet-HLL | gldm       | DependenceNonUniformityNormalized    | 0.563333333  |
| wavelet-HLL | gldm       | LargeDependenceEmphasis              | 2.3          |
| wavelet-HLL | gldm       | LargeDependenceLowGrayLevelEmphasis  | 0.01810811   |
| wavelet-HLL | gldm       | DependenceVariance                   | 0.432222222  |
| wavelet-HLL | gldm       | LargeDependenceHighGrayLevelEmphasis | 5223         |
| wavelet-HLL | gldm       | SmallDependenceLowGrayLevelEmphasis  | 0.017378676  |
| wavelet-HLL | gldm       | LowGrayLevelEmphasis                 | 0.017489276  |
| wavelet-HLL | glcm       | JointAverage                         | 44.53137729  |
| wavelet-HLL | glcm       | SumAverage                           | 89.06275458  |
| wavelet-HLL | glcm       | JointEntropy                         | 5.812296372  |
| wavelet-HLL | glcm       | ClusterShade                         | -8547.7646   |
| wavelet-HLL | glcm       | MaximumProbability                   | 0.031570813  |
| wavelet-HLL | glcm       | Idmn                                 | 0.938887445  |
| wavelet-HLL | glcm       | JointEnergy                          | 0.01861818   |
| wavelet-HLL | glcm       | Contrast                             | 390.6821485  |
| wavelet-HLL | glcm       | DifferenceEntropy                    | 4.161289952  |
| wavelet-HLL | glcm       | InverseVariance                      | 0.087163292  |
| wavelet-HLL | glcm       | DifferenceVariance                   | 149.5926164  |
| wavelet-HLL | glcm       | Idn                                  | 0.843461729  |
| wavelet-HLL | glcm       | Idm                                  | 0.08238767   |
| wavelet-HLL | glcm       | Correlation                          | 0.124458299  |
| wavelet-HLL | glcm       | Autocorrelation                      | 2008.920064  |
| wavelet-HLL | glcm       | SumEntropy                           | 4.579061512  |
| wavelet-HLL | glcm       | SumSquares                           | 220.8770173  |
| wavelet-HLL | glcm       | ClusterProminence                    | 820609.9151  |
| wavelet-HLL | glcm       | Imc2                                 | 0.999665401  |
| wavelet-HLL | glcm       | Imc1                                 | -0.778047794 |
| wavelet-HLL | glcm       | DifferenceAverage                    | 14.85651695  |
| wavelet-HLL | glcm       | Id                                   | 0.150982754  |
| wavelet-HLL | glcm       | ClusterTendency                      | 492.8259209  |
| wavelet-HLL | firstorder | InterquartileRange                   | 411.055468   |
| wavelet-HLL | firstorder | Skewness                             | -0.888789227 |
| wavelet-HLL | firstorder | Uniformity                           | 0.038888889  |
| wavelet-HLL | firstorder | Median                               | 75.75923996  |
| wavelet-HLL | firstorder | Energy                               | 6701533.592  |
| wavelet-HLL | firstorder | RobustMeanAbsoluteDeviation          | 167.0828631  |
| wavelet-HLL | firstorder | MeanAbsoluteDeviation                | 256.0358042  |
| wavelet-HLL | firstorder | TotalEnergy                          | 180941407    |
| wavelet-HLL | firstorder | Maximum                              | 675.5838135  |
| wavelet-HLL | firstorder | RootMeanSquared                      | 334.2038697  |
| wavelet-HLL | firstorder | 90Percentile                         | 362.4919708  |
| wavelet-HLL | firstorder | Minimum                              | -1050.64545  |
| wavelet-HLL | firstorder | Entropy                              | 4.883822629  |
| wavelet-HLL | firstorder | Range                                | 1726.229263  |
| wavelet-HLL | firstorder | Variance                             | 111608.6274  |

|             |            |                                      |              |
|-------------|------------|--------------------------------------|--------------|
| wavelet-HLL | firstorder | 10Percentile                         | -416.4064052 |
| wavelet-HLL | firstorder | Kurtosis                             | 3.937506034  |
| wavelet-HLL | firstorder | Mean                                 | 9.143257568  |
| wavelet-HLL | glrlm      | ShortRunLowGrayLevelEmphasis         | 0.017733248  |
| wavelet-HLL | glrlm      | GrayLevelVariance                    | 181.0886406  |
| wavelet-HLL | glrlm      | LowGrayLevelRunEmphasis              | 0.017738579  |
| wavelet-HLL | glrlm      | GrayLevelNonUniformityNormalized     | 0.038557432  |
| wavelet-HLL | glrlm      | RunVariance                          | 0.014077102  |
| wavelet-HLL | glrlm      | GrayLevelNonUniformity               | 2.281109531  |
| wavelet-HLL | glrlm      | LongRunEmphasis                      | 1.043983086  |
| wavelet-HLL | glrlm      | ShortRunHighGrayLevelEmphasis        | 2070.148888  |
| wavelet-HLL | glrlm      | RunLengthNonUniformity               | 57.52855422  |
| wavelet-HLL | glrlm      | ShortRunEmphasis                     | 0.989004228  |
| wavelet-HLL | glrlm      | LongRunHighGrayLevelEmphasis         | 2202.699315  |
| wavelet-HLL | glrlm      | RunPercentage                        | 0.985897436  |
| wavelet-HLL | glrlm      | LongRunLowGrayLevelEmphasis          | 0.017759904  |
| wavelet-HLL | glrlm      | RunEntropy                           | 4.917859333  |
| wavelet-HLL | glrlm      | HighGrayLevelRunEmphasis             | 2096.658973  |
| wavelet-HLL | glrlm      | RunLengthNonUniformityNormalized     | 0.971845796  |
| wavelet-HLL | glszm      | GrayLevelVariance                    | 194.65       |
| wavelet-HLL | glszm      | ZoneVariance                         | 0.32         |
| wavelet-HLL | glszm      | GrayLevelNonUniformityNormalized     | 0.0368       |
| wavelet-HLL | glszm      | SizeZoneNonUniformityNormalized      | 0.7504       |
| wavelet-HLL | glszm      | SizeZoneNonUniformity                | 37.52        |
| wavelet-HLL | glszm      | GrayLevelNonUniformity               | 1.84         |
| wavelet-HLL | glszm      | LargeAreaEmphasis                    | 1.76         |
| wavelet-HLL | glszm      | SmallAreaHighGrayLevelEmphasis       | 1765.233472  |
| wavelet-HLL | glszm      | ZonePercentage                       | 0.833333333  |
| wavelet-HLL | glszm      | LargeAreaLowGrayLevelEmphasis        | 0.021249517  |
| wavelet-HLL | glszm      | LargeAreaHighGrayLevelEmphasis       | 3880.28      |
| wavelet-HLL | glszm      | HighGrayLevelZoneEmphasis            | 2035.06      |
| wavelet-HLL | glszm      | SmallAreaEmphasis                    | 0.888472222  |
| wavelet-HLL | glszm      | LowGrayLevelZoneEmphasis             | 0.020889713  |
| wavelet-HLL | glszm      | ZoneEntropy                          | 5.05366069   |
| wavelet-HLL | glszm      | SmallAreaLowGrayLevelEmphasis        | 0.020832572  |
| wavelet-HLL | ngtdm      | Coarseness                           | 0.056813061  |
| wavelet-HLL | ngtdm      | Complexity                           | 6111.536152  |
| wavelet-HLL | ngtdm      | Strength                             | 57.82909284  |
| wavelet-HLL | ngtdm      | Contrast                             | 2.772451962  |
| wavelet-HLL | ngtdm      | Busyness                             | 0.014694112  |
| wavelet-LHL | gldm       | GrayLevelVariance                    | 94.79888889  |
| wavelet-LHL | gldm       | HighGrayLevelEmphasis                | 493.4666667  |
| wavelet-LHL | gldm       | DependenceEntropy                    | 5.115061012  |
| wavelet-LHL | gldm       | DependenceNonUniformity              | 25.03333333  |
| wavelet-LHL | gldm       | GrayLevelNonUniformity               | 3            |
| wavelet-LHL | gldm       | SmallDependenceEmphasis              | 0.632986111  |
| wavelet-LHL | gldm       | SmallDependenceHighGrayLevelEmphasis | 332.8898148  |
| wavelet-LHL | gldm       | DependenceNonUniformityNormalized    | 0.417222222  |
| wavelet-LHL | gldm       | LargeDependenceEmphasis              | 3.1          |
| wavelet-LHL | gldm       | LargeDependenceLowGrayLevelEmphasis  | 0.052616437  |
| wavelet-LHL | gldm       | DependenceVariance                   | 0.54         |
| wavelet-LHL | gldm       | LargeDependenceHighGrayLevelEmphasis | 1336.033333  |
| wavelet-LHL | gldm       | SmallDependenceLowGrayLevelEmphasis  | 0.042520452  |
| wavelet-LHL | gldm       | LowGrayLevelEmphasis                 | 0.04397819   |
| wavelet-LHL | glcm       | JointAverage                         | 18.52877596  |

|             |            |                                  |              |
|-------------|------------|----------------------------------|--------------|
| wavelet-LHL | glcm       | SumAverage                       | 37.05755192  |
| wavelet-LHL | glcm       | JointEntropy                     | 5.772677031  |
| wavelet-LHL | glcm       | ClusterShade                     | 1447.064289  |
| wavelet-LHL | glcm       | MaximumProbability               | 0.037657745  |
| wavelet-LHL | glcm       | Idmn                             | 0.928430792  |
| wavelet-LHL | glcm       | JointEnergy                      | 0.019391184  |
| wavelet-LHL | glcm       | Contrast                         | 154.0654865  |
| wavelet-LHL | glcm       | DifferenceEntropy                | 3.875152084  |
| wavelet-LHL | glcm       | InverseVariance                  | 0.07746816   |
| wavelet-LHL | glcm       | DifferenceVariance               | 47.57411141  |
| wavelet-LHL | glcm       | Idn                              | 0.822685278  |
| wavelet-LHL | glcm       | Idm                              | 0.094846307  |
| wavelet-LHL | glcm       | Correlation                      | 0.21126504   |
| wavelet-LHL | glcm       | Autocorrelation                  | 363.4707844  |
| wavelet-LHL | glcm       | SumEntropy                       | 4.461907366  |
| wavelet-LHL | glcm       | SumSquares                       | 96.69370545  |
| wavelet-LHL | glcm       | ClusterProminence                | 149580.8128  |
| wavelet-LHL | glcm       | Imc2                             | 0.998661223  |
| wavelet-LHL | glcm       | Imc1                             | -0.684688954 |
| wavelet-LHL | glcm       | DifferenceAverage                | 10.00176215  |
| wavelet-LHL | glcm       | Id                               | 0.176922984  |
| wavelet-LHL | glcm       | ClusterTendency                  | 232.7093354  |
| wavelet-LHL | firstorder | InterquartileRange               | 330.1883382  |
| wavelet-LHL | firstorder | Skewness                         | 0.050529282  |
| wavelet-LHL | firstorder | Uniformity                       | 0.05         |
| wavelet-LHL | firstorder | Median                           | -84.99782464 |
| wavelet-LHL | firstorder | Energy                           | 4018650.406  |
| wavelet-LHL | firstorder | RobustMeanAbsoluteDeviation      | 136.7830458  |
| wavelet-LHL | firstorder | MeanAbsoluteDeviation            | 195.5673325  |
| wavelet-LHL | firstorder | TotalEnergy                      | 108503561    |
| wavelet-LHL | firstorder | Maximum                          | 474.6046718  |
| wavelet-LHL | firstorder | RootMeanSquared                  | 258.800129   |
| wavelet-LHL | firstorder | 90Percentile                     | 238.8642074  |
| wavelet-LHL | firstorder | Minimum                          | -568.3721948 |
| wavelet-LHL | firstorder | Entropy                          | 4.525326379  |
| wavelet-LHL | firstorder | Range                            | 1042.976867  |
| wavelet-LHL | firstorder | Variance                         | 59421.81164  |
| wavelet-LHL | firstorder | 10Percentile                     | -375.1937731 |
| wavelet-LHL | firstorder | Kurtosis                         | 2.546420474  |
| wavelet-LHL | firstorder | Mean                             | -86.92350156 |
| wavelet-LHL | glrlm      | ShortRunLowGrayLevelEmphasis     | 0.044864581  |
| wavelet-LHL | glrlm      | GrayLevelVariance                | 96.06783268  |
| wavelet-LHL | glrlm      | LowGrayLevelRunEmphasis          | 0.044938307  |
| wavelet-LHL | glrlm      | GrayLevelNonUniformityNormalized | 0.049427932  |
| wavelet-LHL | glrlm      | RunVariance                      | 0.023024192  |
| wavelet-LHL | glrlm      | GrayLevelNonUniformity           | 2.898143253  |
| wavelet-LHL | glrlm      | LongRunEmphasis                  | 1.072200632  |
| wavelet-LHL | glrlm      | ShortRunHighGrayLevelEmphasis    | 487.9384107  |
| wavelet-LHL | glrlm      | RunLengthNonUniformity           | 55.96494834  |
| wavelet-LHL | glrlm      | ShortRunEmphasis                 | 0.981949842  |
| wavelet-LHL | glrlm      | LongRunHighGrayLevelEmphasis     | 525.233677   |
| wavelet-LHL | glrlm      | RunPercentage                    | 0.976923077  |
| wavelet-LHL | glrlm      | LongRunLowGrayLevelEmphasis      | 0.045233211  |
| wavelet-LHL | glrlm      | RunEntropy                       | 4.586830224  |
| wavelet-LHL | glrlm      | HighGrayLevelRunEmphasis         | 495.397464   |

|             |       |                                      |             |
|-------------|-------|--------------------------------------|-------------|
| wavelet-LHL | glrlm | RunLengthNonUniformityNormalized     | 0.953951616 |
| wavelet-LHL | glszm | GrayLevelVariance                    | 114.9691725 |
| wavelet-LHL | glszm | ZoneVariance                         | 0.657652785 |
| wavelet-LHL | glszm | GrayLevelNonUniformityNormalized     | 0.042725798 |
| wavelet-LHL | glszm | SizeZoneNonUniformityNormalized      | 0.585722012 |
| wavelet-LHL | glszm | SizeZoneNonUniformity                | 25.18604651 |
| wavelet-LHL | glszm | GrayLevelNonUniformity               | 1.837209302 |
| wavelet-LHL | glszm | LargeAreaEmphasis                    | 2.604651163 |
| wavelet-LHL | glszm | SmallAreaHighGrayLevelEmphasis       | 427.1059432 |
| wavelet-LHL | glszm | ZonePercentage                       | 0.716666667 |
| wavelet-LHL | glszm | LargeAreaLowGrayLevelEmphasis        | 0.066477911 |
| wavelet-LHL | glszm | LargeAreaHighGrayLevelEmphasis       | 1151.488372 |
| wavelet-LHL | glszm | HighGrayLevelZoneEmphasis            | 524.3255814 |
| wavelet-LHL | glszm | SmallAreaEmphasis                    | 0.793565891 |
| wavelet-LHL | glszm | LowGrayLevelZoneEmphasis             | 0.059717033 |
| wavelet-LHL | glszm | ZoneEntropy                          | 4.99010458  |
| wavelet-LHL | glszm | SmallAreaLowGrayLevelEmphasis        | 0.058941809 |
| wavelet-LHL | ngtdm | Coarseness                           | 0.062916439 |
| wavelet-LHL | ngtdm | Complexity                           | 2643.512755 |
| wavelet-LHL | ngtdm | Strength                             | 33.12768733 |
| wavelet-LHL | ngtdm | Contrast                             | 1.770092461 |
| wavelet-LHL | ngtdm | Busyness                             | 0.037669689 |
| wavelet-LHH | gldm  | GrayLevelVariance                    | 43.08305556 |
| wavelet-LHH | gldm  | HighGrayLevelEmphasis                | 207.35      |
| wavelet-LHH | gldm  | DependenceEntropy                    | 4.802479554 |
| wavelet-LHH | gldm  | DependenceNonUniformity              | 28.63333333 |
| wavelet-LHH | gldm  | GrayLevelNonUniformity               | 3.566666667 |
| wavelet-LHH | gldm  | SmallDependenceEmphasis              | 0.700925926 |
| wavelet-LHH | gldm  | SmallDependenceHighGrayLevelEmphasis | 169.3185185 |
| wavelet-LHH | gldm  | DependenceNonUniformityNormalized    | 0.477222222 |
| wavelet-LHH | gldm  | LargeDependenceEmphasis              | 2.566666667 |
| wavelet-LHH | gldm  | LargeDependenceLowGrayLevelEmphasis  | 0.179200262 |
| wavelet-LHH | gldm  | DependenceVariance                   | 0.415555556 |
| wavelet-LHH | gldm  | LargeDependenceHighGrayLevelEmphasis | 438.8833333 |
| wavelet-LHH | gldm  | SmallDependenceLowGrayLevelEmphasis  | 0.031886526 |
| wavelet-LHH | gldm  | LowGrayLevelEmphasis                 | 0.060696302 |
| wavelet-LHH | glcm  | JointAverage                         | 12.85607737 |
| wavelet-LHH | glcm  | SumAverage                           | 25.71215473 |
| wavelet-LHH | glcm  | JointEntropy                         | 5.768171808 |
| wavelet-LHH | glcm  | ClusterShade                         | 296.7085442 |
| wavelet-LHH | glcm  | MaximumProbability                   | 0.033498709 |
| wavelet-LHH | glcm  | Idmn                                 | 0.910578758 |
| wavelet-LHH | glcm  | JointEnergy                          | 0.019221031 |
| wavelet-LHH | glcm  | Contrast                             | 90.90788011 |
| wavelet-LHH | glcm  | DifferenceEntropy                    | 3.678751535 |
| wavelet-LHH | glcm  | InverseVariance                      | 0.133878216 |
| wavelet-LHH | glcm  | DifferenceVariance                   | 29.36316124 |
| wavelet-LHH | glcm  | Idn                                  | 0.805314712 |
| wavelet-LHH | glcm  | Idm                                  | 0.119322756 |
| wavelet-LHH | glcm  | Correlation                          | -0.01440765 |
| wavelet-LHH | glcm  | Autocorrelation                      | 164.6995657 |
| wavelet-LHH | glcm  | SumEntropy                           | 4.170037764 |
| wavelet-LHH | glcm  | SumSquares                           | 44.78705953 |
| wavelet-LHH | glcm  | ClusterProminence                    | 23243.56633 |
| wavelet-LHH | glcm  | Imc2                                 | 0.99704153  |

|             |            |                                  |              |
|-------------|------------|----------------------------------|--------------|
| wavelet-LHH | glcm       | Imc1                             | -0.625294066 |
| wavelet-LHH | glcm       | DifferenceAverage                | 7.602698105  |
| wavelet-LHH | glcm       | Id                               | 0.207208244  |
| wavelet-LHH | glcm       | ClusterTendency                  | 88.240358    |
| wavelet-LHH | firstorder | InterquartileRange               | 222.0105103  |
| wavelet-LHH | firstorder | Skewness                         | 0.406770914  |
| wavelet-LHH | firstorder | Uniformity                       | 0.059444444  |
| wavelet-LHH | firstorder | Median                           | -0.667134991 |
| wavelet-LHH | firstorder | Energy                           | 1657397.581  |
| wavelet-LHH | firstorder | RobustMeanAbsoluteDeviation      | 89.60618688  |
| wavelet-LHH | firstorder | MeanAbsoluteDeviation            | 130.6243226  |
| wavelet-LHH | firstorder | TotalEnergy                      | 44749734.7   |
| wavelet-LHH | firstorder | Maximum                          | 397.4956646  |
| wavelet-LHH | firstorder | RootMeanSquared                  | 166.2025662  |
| wavelet-LHH | firstorder | 90Percentile                     | 265.1432828  |
| wavelet-LHH | firstorder | Minimum                          | -297.7435483 |
| wavelet-LHH | firstorder | Entropy                          | 4.24371643   |
| wavelet-LHH | firstorder | Range                            | 695.239213   |
| wavelet-LHH | firstorder | Variance                         | 27545.51193  |
| wavelet-LHH | firstorder | 10Percentile                     | -180.9813447 |
| wavelet-LHH | firstorder | Kurtosis                         | 2.732060599  |
| wavelet-LHH | firstorder | Mean                             | 8.819358879  |
| wavelet-LHH | glrlm      | ShortRunLowGrayLevelEmphasis     | 0.059067531  |
| wavelet-LHH | glrlm      | GrayLevelVariance                | 43.32222946  |
| wavelet-LHH | glrlm      | LowGrayLevelRunEmphasis          | 0.060248693  |
| wavelet-LHH | glrlm      | GrayLevelNonUniformityNormalized | 0.059214906  |
| wavelet-LHH | glrlm      | RunVariance                      | 0.017922151  |
| wavelet-LHH | glrlm      | GrayLevelNonUniformity           | 3.489497741  |
| wavelet-LHH | glrlm      | LongRunEmphasis                  | 1.055717115  |
| wavelet-LHH | glrlm      | ShortRunHighGrayLevelEmphasis    | 206.6619402  |
| wavelet-LHH | glrlm      | RunLengthNonUniformity           | 56.84406922  |
| wavelet-LHH | glrlm      | ShortRunEmphasis                 | 0.986070721  |
| wavelet-LHH | glrlm      | LongRunHighGrayLevelEmphasis     | 216.3884568  |
| wavelet-LHH | glrlm      | RunPercentage                    | 0.982051282  |
| wavelet-LHH | glrlm      | LongRunLowGrayLevelEmphasis      | 0.064973342  |
| wavelet-LHH | glrlm      | RunEntropy                       | 4.295967368  |
| wavelet-LHH | glrlm      | HighGrayLevelRunEmphasis         | 208.6072435  |
| wavelet-LHH | glrlm      | RunLengthNonUniformityNormalized | 0.964155698  |
| wavelet-LHH | glszm      | GrayLevelVariance                | 46.07876867  |
| wavelet-LHH | glszm      | ZoneVariance                     | 0.327750113  |
| wavelet-LHH | glszm      | GrayLevelNonUniformityNormalized | 0.056586691  |
| wavelet-LHH | glszm      | SizeZoneNonUniformityNormalized  | 0.645993662  |
| wavelet-LHH | glszm      | SizeZoneNonUniformity            | 30.36170213  |
| wavelet-LHH | glszm      | GrayLevelNonUniformity           | 2.659574468  |
| wavelet-LHH | glszm      | LargeAreaEmphasis                | 1.957446809  |
| wavelet-LHH | glszm      | SmallAreaHighGrayLevelEmphasis   | 208.9816785  |
| wavelet-LHH | glszm      | ZonePercentage                   | 0.783333333  |
| wavelet-LHH | glszm      | LargeAreaLowGrayLevelEmphasis    | 0.1287205    |
| wavelet-LHH | glszm      | LargeAreaHighGrayLevelEmphasis   | 356.7446809  |
| wavelet-LHH | glszm      | HighGrayLevelZoneEmphasis        | 229.1914894  |
| wavelet-LHH | glszm      | SmallAreaEmphasis                | 0.831560284  |
| wavelet-LHH | glszm      | LowGrayLevelZoneEmphasis         | 0.052657246  |
| wavelet-LHH | glszm      | ZoneEntropy                      | 4.713955341  |
| wavelet-LHH | glszm      | SmallAreaLowGrayLevelEmphasis    | 0.034519805  |
| wavelet-LHH | ngtdm      | Coarseness                       | 0.061817268  |



|             |            |                                      |              |
|-------------|------------|--------------------------------------|--------------|
| wavelet-LHH | ngtdm      | Complexity                           | 1229.972169  |
| wavelet-LHH | ngtdm      | Strength                             | 13.30052981  |
| wavelet-LHH | ngtdm      | Contrast                             | 1.028955771  |
| wavelet-LHH | ngtdm      | Busyness                             | 0.078211328  |
| wavelet-LLH | gldm       | GrayLevelVariance                    | 426.1163889  |
| wavelet-LLH | gldm       | HighGrayLevelEmphasis                | 3541.616667  |
| wavelet-LLH | gldm       | DependenceEntropy                    | 5.294309137  |
| wavelet-LLH | gldm       | DependenceNonUniformity              | 40.8         |
| wavelet-LLH | gldm       | GrayLevelNonUniformity               | 1.833333333  |
| wavelet-LLH | gldm       | SmallDependenceEmphasis              | 0.85         |
| wavelet-LLH | gldm       | SmallDependenceHighGrayLevelEmphasis | 2945.491667  |
| wavelet-LLH | gldm       | DependenceNonUniformityNormalized    | 0.68         |
| wavelet-LLH | gldm       | LargeDependenceEmphasis              | 1.6          |
| wavelet-LLH | gldm       | LargeDependenceLowGrayLevelEmphasis  | 0.017923095  |
| wavelet-LLH | gldm       | DependenceVariance                   | 0.16         |
| wavelet-LLH | gldm       | LargeDependenceHighGrayLevelEmphasis | 5926.116667  |
| wavelet-LLH | gldm       | SmallDependenceLowGrayLevelEmphasis  | 0.017504397  |
| wavelet-LLH | gldm       | LowGrayLevelEmphasis                 | 0.017588136  |
| wavelet-LLH | glcm       | JointAverage                         | 55.55315862  |
| wavelet-LLH | glcm       | SumAverage                           | 111.1063172  |
| wavelet-LLH | glcm       | JointEntropy                         | 5.836102307  |
| wavelet-LLH | glcm       | ClusterShade                         | -6473.161697 |
| wavelet-LLH | glcm       | MaximumProbability                   | 0.027066733  |
| wavelet-LLH | glcm       | Idmn                                 | 0.92963439   |
| wavelet-LLH | glcm       | JointEnergy                          | 0.018227903  |
| wavelet-LLH | glcm       | Contrast                             | 793.4678547  |
| wavelet-LLH | glcm       | DifferenceEntropy                    | 4.359030232  |
| wavelet-LLH | glcm       | InverseVariance                      | 0.051800128  |
| wavelet-LLH | glcm       | DifferenceVariance                   | 282.9408429  |
| wavelet-LLH | glcm       | Idn                                  | 0.830125515  |
| wavelet-LLH | glcm       | Idm                                  | 0.046582124  |
| wavelet-LLH | glcm       | Correlation                          | 0.068501966  |
| wavelet-LLH | glcm       | Autocorrelation                      | 3132.958205  |
| wavelet-LLH | glcm       | SumEntropy                           | 4.649306369  |
| wavelet-LLH | glcm       | SumSquares                           | 442.1713903  |
| wavelet-LLH | glcm       | ClusterProminence                    | 2598345.962  |
| wavelet-LLH | glcm       | Imc2                                 | 0.999879057  |
| wavelet-LLH | glcm       | Imc1                                 | -0.835717106 |
| wavelet-LLH | glcm       | DifferenceAverage                    | 21.65821615  |
| wavelet-LLH | glcm       | Id                                   | 0.105793912  |
| wavelet-LLH | glcm       | ClusterTendency                      | 975.2177064  |
| wavelet-LLH | firstorder | InterquartileRange                   | 634.7666806  |
| wavelet-LLH | firstorder | Skewness                             | -0.490390857 |
| wavelet-LLH | firstorder | Uniformity                           | 0.030555556  |
| wavelet-LLH | firstorder | Median                               | 56.43036495  |
| wavelet-LLH | firstorder | Energy                               | 16324533.82  |
| wavelet-LLH | firstorder | RobustMeanAbsoluteDeviation          | 297.5268635  |
| wavelet-LLH | firstorder | MeanAbsoluteDeviation                | 417.6840463  |
| wavelet-LLH | firstorder | TotalEnergy                          | 440762413.1  |
| wavelet-LLH | firstorder | Maximum                              | 882.6873604  |
| wavelet-LLH | firstorder | RootMeanSquared                      | 521.6086307  |
| wavelet-LLH | firstorder | 90Percentile                         | 540.5420055  |
| wavelet-LLH | firstorder | Minimum                              | -1444.854471 |
| wavelet-LLH | firstorder | Entropy                              | 5.181727679  |
| wavelet-LLH | firstorder | Range                                | 2327.541831  |

|             |            |                                      |              |
|-------------|------------|--------------------------------------|--------------|
| wavelet-LLH | firstorder | Variance                             | 267561.3498  |
| wavelet-LLH | firstorder | 10Percentile                         | -775.8732986 |
| wavelet-LLH | firstorder | Kurtosis                             | 2.823644565  |
| wavelet-LLH | firstorder | Mean                                 | -67.18789918 |
| wavelet-LLH | glrlm      | ShortRunLowGrayLevelEmphasis         | 0.017725991  |
| wavelet-LLH | glrlm      | GrayLevelVariance                    | 424.9556502  |
| wavelet-LLH | glrlm      | LowGrayLevelRunEmphasis              | 0.01772945   |
| wavelet-LLH | glrlm      | GrayLevelNonUniformityNormalized     | 0.030482376  |
| wavelet-LLH | glrlm      | RunVariance                          | 0.007638962  |
| wavelet-LLH | glrlm      | GrayLevelNonUniformity               | 1.815262139  |
| wavelet-LLH | glrlm      | LongRunEmphasis                      | 1.024890364  |
| wavelet-LLH | glrlm      | ShortRunHighGrayLevelEmphasis        | 3512.853874  |
| wavelet-LLH | glrlm      | RunLengthNonUniformity               | 58.68792225  |
| wavelet-LLH | glrlm      | ShortRunEmphasis                     | 0.993777409  |
| wavelet-LLH | glrlm      | LongRunHighGrayLevelEmphasis         | 3637.454235  |
| wavelet-LLH | glrlm      | RunPercentage                        | 0.992307692  |
| wavelet-LLH | glrlm      | LongRunLowGrayLevelEmphasis          | 0.017743285  |
| wavelet-LLH | glrlm      | RunEntropy                           | 5.190230709  |
| wavelet-LLH | glrlm      | HighGrayLevelRunEmphasis             | 3537.773946  |
| wavelet-LLH | glrlm      | RunLengthNonUniformityNormalized     | 0.984722076  |
| wavelet-LLH | glszm      | GrayLevelVariance                    | 411.2496571  |
| wavelet-LLH | glszm      | ZoneVariance                         | 0.098765432  |
| wavelet-LLH | glszm      | GrayLevelNonUniformityNormalized     | 0.029492455  |
| wavelet-LLH | glszm      | SizeZoneNonUniformityNormalized      | 0.802469136  |
| wavelet-LLH | glszm      | SizeZoneNonUniformity                | 43.33333333  |
| wavelet-LLH | glszm      | GrayLevelNonUniformity               | 1.592592593  |
| wavelet-LLH | glszm      | LargeAreaEmphasis                    | 1.333333333  |
| wavelet-LLH | glszm      | SmallAreaHighGrayLevelEmphasis       | 3162.375     |
| wavelet-LLH | glszm      | ZonePercentage                       | 0.9          |
| wavelet-LLH | glszm      | LargeAreaLowGrayLevelEmphasis        | 0.019666432  |
| wavelet-LLH | glszm      | LargeAreaHighGrayLevelEmphasis       | 4818.277778  |
| wavelet-LLH | glszm      | HighGrayLevelZoneEmphasis            | 3493.555556  |
| wavelet-LLH | glszm      | SmallAreaEmphasis                    | 0.916666667  |
| wavelet-LLH | glszm      | LowGrayLevelZoneEmphasis             | 0.019480344  |
| wavelet-LLH | glszm      | ZoneEntropy                          | 5.29646366   |
| wavelet-LLH | glszm      | SmallAreaLowGrayLevelEmphasis        | 0.019433822  |
| wavelet-LLH | ngtdm      | Coarseness                           | 0.044246738  |
| wavelet-LLH | ngtdm      | Complexity                           | 17046.63459  |
| wavelet-LLH | ngtdm      | Strength                             | 90.22021569  |
| wavelet-LLH | ngtdm      | Contrast                             | 7.518885139  |
| wavelet-LLH | ngtdm      | Busyness                             | 0.01428515   |
| wavelet-LLL | gldm       | GrayLevelVariance                    | 814.4941667  |
| wavelet-LLL | gldm       | HighGrayLevelEmphasis                | 2826.016667  |
| wavelet-LLL | gldm       | DependenceEntropy                    | 5.548394346  |
| wavelet-LLL | gldm       | DependenceNonUniformity              | 49.2         |
| wavelet-LLL | gldm       | GrayLevelNonUniformity               | 1.533333333  |
| wavelet-LLL | gldm       | SmallDependenceEmphasis              | 0.925        |
| wavelet-LLL | gldm       | SmallDependenceHighGrayLevelEmphasis | 2735.666667  |
| wavelet-LLL | gldm       | DependenceNonUniformityNormalized    | 0.82         |
| wavelet-LLL | gldm       | LargeDependenceEmphasis              | 1.3          |
| wavelet-LLL | gldm       | LargeDependenceLowGrayLevelEmphasis  | 0.021671288  |
| wavelet-LLL | gldm       | DependenceVariance                   | 0.09         |
| wavelet-LLL | gldm       | LargeDependenceHighGrayLevelEmphasis | 3187.416667  |
| wavelet-LLL | gldm       | SmallDependenceLowGrayLevelEmphasis  | 0.021189494  |
| wavelet-LLL | gldm       | LowGrayLevelEmphasis                 | 0.021285853  |

|             |            |                                  |              |
|-------------|------------|----------------------------------|--------------|
| wavelet-LLL | glcm       | JointAverage                     | 51.11402779  |
| wavelet-LLL | glcm       | SumAverage                       | 102.2280556  |
| wavelet-LLL | glcm       | JointEntropy                     | 5.865795495  |
| wavelet-LLL | glcm       | ClusterShade                     | 23207.16963  |
| wavelet-LLL | glcm       | MaximumProbability               | 0.021655176  |
| wavelet-LLL | glcm       | Idmn                             | 0.912063932  |
| wavelet-LLL | glcm       | JointEnergy                      | 0.017661808  |
| wavelet-LLL | glcm       | Contrast                         | 1395.49459   |
| wavelet-LLL | glcm       | DifferenceEntropy                | 4.510070585  |
| wavelet-LLL | glcm       | InverseVariance                  | 0.029562599  |
| wavelet-LLL | glcm       | DifferenceVariance               | 415.9935179  |
| wavelet-LLL | glcm       | Idn                              | 0.805014644  |
| wavelet-LLL | glcm       | Idm                              | 0.025433066  |
| wavelet-LLL | glcm       | Correlation                      | 0.240709956  |
| wavelet-LLL | glcm       | Autocorrelation                  | 2810.745435  |
| wavelet-LLL | glcm       | SumEntropy                       | 4.747217517  |
| wavelet-LLL | glcm       | SumSquares                       | 893.8436415  |
| wavelet-LLL | glcm       | ClusterProminence                | 10706019.34  |
| wavelet-LLL | glcm       | Imc2                             | 0.999940606  |
| wavelet-LLL | glcm       | Imc1                             | -0.873933256 |
| wavelet-LLL | glcm       | DifferenceAverage                | 30.23393013  |
| wavelet-LLL | glcm       | Id                               | 0.073149473  |
| wavelet-LLL | glcm       | ClusterTendency                  | 2179.879976  |
| wavelet-LLL | firstorder | InterquartileRange               | 1075.311374  |
| wavelet-LLL | firstorder | Skewness                         | 0.572146026  |
| wavelet-LLL | firstorder | Uniformity                       | 0.025555556  |
| wavelet-LLL | firstorder | Median                           | -1602.884109 |
| wavelet-LLL | firstorder | Energy                           | 155369442.7  |
| wavelet-LLL | firstorder | RobustMeanAbsoluteDeviation      | 451.6997817  |
| wavelet-LLL | firstorder | MeanAbsoluteDeviation            | 600.0622514  |
| wavelet-LLL | firstorder | TotalEnergy                      | 4194974952   |
| wavelet-LLL | firstorder | Maximum                          | 228.273253   |
| wavelet-LLL | firstorder | RootMeanSquared                  | 1609.189458  |
| wavelet-LLL | firstorder | 90Percentile                     | -363.3988027 |
| wavelet-LLL | firstorder | Minimum                          | -2540.517178 |
| wavelet-LLL | firstorder | Entropy                          | 5.456564762  |
| wavelet-LLL | firstorder | Range                            | 2768.790431  |
| wavelet-LLL | firstorder | Variance                         | 510226.3644  |
| wavelet-LLL | firstorder | 10Percentile                     | -2178.302594 |
| wavelet-LLL | firstorder | Kurtosis                         | 2.329480468  |
| wavelet-LLL | firstorder | Mean                             | -1441.965446 |
| wavelet-LLL | glrlm      | ShortRunLowGrayLevelEmphasis     | 0.021361174  |
| wavelet-LLL | glrlm      | GrayLevelVariance                | 816.5707879  |
| wavelet-LLL | glrlm      | LowGrayLevelRunEmphasis          | 0.021364985  |
| wavelet-LLL | glrlm      | GrayLevelNonUniformityNormalized | 0.025467246  |
| wavelet-LLL | glrlm      | RunVariance                      | 0.003842737  |
| wavelet-LLL | glrlm      | GrayLevelNonUniformity           | 1.522270677  |
| wavelet-LLL | glrlm      | LongRunEmphasis                  | 1.011868903  |
| wavelet-LLL | glrlm      | ShortRunHighGrayLevelEmphasis    | 2828.837985  |
| wavelet-LLL | glrlm      | RunLengthNonUniformity           | 59.32090995  |
| wavelet-LLL | glrlm      | ShortRunEmphasis                 | 0.997032774  |
| wavelet-LLL | glrlm      | LongRunHighGrayLevelEmphasis     | 2846.750671  |
| wavelet-LLL | glrlm      | RunPercentage                    | 0.996153846  |
| wavelet-LLL | glrlm      | LongRunLowGrayLevelEmphasis      | 0.021380228  |
| wavelet-LLL | glrlm      | RunEntropy                       | 5.464313733  |

|             |       |                                      |              |
|-------------|-------|--------------------------------------|--------------|
| wavelet-LLL | glrlm | HighGrayLevelRunEmphasis             | 2832.420523  |
| wavelet-LLL | glrlm | RunLengthNonUniformityNormalized     | 0.992314527  |
| wavelet-LLL | glszm | GrayLevelVariance                    | 841.8990459  |
| wavelet-LLL | glszm | ZoneVariance                         | 0.049861496  |
| wavelet-LLL | glszm | GrayLevelNonUniformityNormalized     | 0.024315174  |
| wavelet-LLL | glszm | SizeZoneNonUniformityNormalized      | 0.900277008  |
| wavelet-LLL | glszm | SizeZoneNonUniformity                | 51.31578947  |
| wavelet-LLL | glszm | GrayLevelNonUniformity               | 1.385964912  |
| wavelet-LLL | glszm | LargeAreaEmphasis                    | 1.157894737  |
| wavelet-LLL | glszm | SmallAreaHighGrayLevelEmphasis       | 2863.798246  |
| wavelet-LLL | glszm | ZonePercentage                       | 0.95         |
| wavelet-LLL | glszm | LargeAreaLowGrayLevelEmphasis        | 0.022541401  |
| wavelet-LLL | glszm | LargeAreaHighGrayLevelEmphasis       | 3101.561404  |
| wavelet-LLL | glszm | HighGrayLevelZoneEmphasis            | 2911.350877  |
| wavelet-LLL | glszm | SmallAreaEmphasis                    | 0.960526316  |
| wavelet-LLL | glszm | LowGrayLevelZoneEmphasis             | 0.022338541  |
| wavelet-LLL | glszm | ZoneEntropy                          | 5.560788698  |
| wavelet-LLL | glszm | SmallAreaLowGrayLevelEmphasis        | 0.022287825  |
| wavelet-LLL | ngtdm | Coarseness                           | 0.034926679  |
| wavelet-LLL | ngtdm | Complexity                           | 36091.95121  |
| wavelet-LLL | ngtdm | Strength                             | 144.6619222  |
| wavelet-LLL | ngtdm | Contrast                             | 13.97025299  |
| wavelet-LLL | ngtdm | Busyness                             | 0.020119984  |
| wavelet-HHL | gldm  | GrayLevelVariance                    | 63.86972222  |
| wavelet-HHL | gldm  | HighGrayLevelEmphasis                | 323.6166667  |
| wavelet-HHL | gldm  | DependenceEntropy                    | 4.981727679  |
| wavelet-HHL | gldm  | DependenceNonUniformity              | 27.9         |
| wavelet-HHL | gldm  | GrayLevelNonUniformity               | 3.266666667  |
| wavelet-HHL | gldm  | SmallDependenceEmphasis              | 0.655555556  |
| wavelet-HHL | gldm  | SmallDependenceHighGrayLevelEmphasis | 247.0509259  |
| wavelet-HHL | gldm  | DependenceNonUniformityNormalized    | 0.465        |
| wavelet-HHL | gldm  | LargeDependenceEmphasis              | 2.6          |
| wavelet-HHL | gldm  | LargeDependenceLowGrayLevelEmphasis  | 0.061477924  |
| wavelet-HHL | gldm  | DependenceVariance                   | 0.35         |
| wavelet-HHL | gldm  | LargeDependenceHighGrayLevelEmphasis | 671.5833333  |
| wavelet-HHL | gldm  | SmallDependenceLowGrayLevelEmphasis  | 0.039258671  |
| wavelet-HHL | gldm  | LowGrayLevelEmphasis                 | 0.043283073  |
| wavelet-HHL | glcm  | JointAverage                         | 16.47539801  |
| wavelet-HHL | glcm  | SumAverage                           | 32.95079602  |
| wavelet-HHL | glcm  | JointEntropy                         | 5.751684107  |
| wavelet-HHL | glcm  | ClusterShade                         | 484.4321951  |
| wavelet-HHL | glcm  | MaximumProbability                   | 0.035921634  |
| wavelet-HHL | glcm  | Idmn                                 | 0.928416701  |
| wavelet-HHL | glcm  | JointEnergy                          | 0.019673067  |
| wavelet-HHL | glcm  | Contrast                             | 136.9425462  |
| wavelet-HHL | glcm  | DifferenceEntropy                    | 3.765084041  |
| wavelet-HHL | glcm  | InverseVariance                      | 0.115774586  |
| wavelet-HHL | glcm  | DifferenceVariance                   | 49.37715852  |
| wavelet-HHL | glcm  | Idn                                  | 0.826748053  |
| wavelet-HHL | glcm  | Idm                                  | 0.110557773  |
| wavelet-HHL | glcm  | Correlation                          | -0.025621758 |
| wavelet-HHL | glcm  | Autocorrelation                      | 271.2049787  |
| wavelet-HHL | glcm  | SumEntropy                           | 4.271814768  |
| wavelet-HHL | glcm  | SumSquares                           | 68.05451539  |
| wavelet-HHL | glcm  | ClusterProminence                    | 56229.38344  |

|             |            |                                  |              |
|-------------|------------|----------------------------------|--------------|
| wavelet-HHL | glcm       | Imc2                             | 0.998407367  |
| wavelet-HHL | glcm       | Imc1                             | -0.673260279 |
| wavelet-HHL | glcm       | DifferenceAverage                | 9.148529344  |
| wavelet-HHL | glcm       | Id                               | 0.192905516  |
| wavelet-HHL | glcm       | ClusterTendency                  | 135.2755154  |
| wavelet-HHL | firstorder | InterquartileRange               | 265.7352263  |
| wavelet-HHL | firstorder | Skewness                         | 0.299044399  |
| wavelet-HHL | firstorder | Uniformity                       | 0.054444444  |
| wavelet-HHL | firstorder | Median                           | 2.563085224  |
| wavelet-HHL | firstorder | Energy                           | 2381260.765  |
| wavelet-HHL | firstorder | RobustMeanAbsoluteDeviation      | 105.8520106  |
| wavelet-HHL | firstorder | MeanAbsoluteDeviation            | 154.0318734  |
| wavelet-HHL | firstorder | TotalEnergy                      | 64294040.64  |
| wavelet-HHL | firstorder | Maximum                          | 574.7795814  |
| wavelet-HHL | firstorder | RootMeanSquared                  | 199.2176684  |
| wavelet-HHL | firstorder | 90Percentile                     | 204.5797632  |
| wavelet-HHL | firstorder | Minimum                          | -392.0908715 |
| wavelet-HHL | firstorder | Entropy                          | 4.410383097  |
| wavelet-HHL | firstorder | Range                            | 966.870453   |
| wavelet-HHL | firstorder | Variance                         | 39638.52855  |
| wavelet-HHL | firstorder | 10Percentile                     | -279.6895526 |
| wavelet-HHL | firstorder | Kurtosis                         | 3.139816716  |
| wavelet-HHL | firstorder | Mean                             | -7.010767681 |
| wavelet-HHL | glrlm      | ShortRunLowGrayLevelEmphasis     | 0.043744102  |
| wavelet-HHL | glrlm      | GrayLevelVariance                | 64.31141352  |
| wavelet-HHL | glrlm      | LowGrayLevelRunEmphasis          | 0.043916143  |
| wavelet-HHL | glrlm      | GrayLevelNonUniformityNormalized | 0.054095576  |
| wavelet-HHL | glrlm      | RunVariance                      | 0.019195929  |
| wavelet-HHL | glrlm      | GrayLevelNonUniformity           | 3.183994322  |
| wavelet-HHL | glrlm      | LongRunEmphasis                  | 1.059778036  |
| wavelet-HHL | glrlm      | ShortRunHighGrayLevelEmphasis    | 322.42005    |
| wavelet-HHL | glrlm      | RunLengthNonUniformity           | 56.62189068  |
| wavelet-HHL | glrlm      | ShortRunEmphasis                 | 0.985055491  |
| wavelet-HHL | glrlm      | LongRunHighGrayLevelEmphasis     | 338.8022063  |
| wavelet-HHL | glrlm      | RunPercentage                    | 0.980769231  |
| wavelet-HHL | glrlm      | LongRunLowGrayLevelEmphasis      | 0.044604309  |
| wavelet-HHL | glrlm      | RunEntropy                       | 4.465132489  |
| wavelet-HHL | glrlm      | HighGrayLevelRunEmphasis         | 325.6964812  |
| wavelet-HHL | glrlm      | RunLengthNonUniformityNormalized | 0.961608142  |
| wavelet-HHL | glszm      | GrayLevelVariance                | 70.84246914  |
| wavelet-HHL | glszm      | ZoneVariance                     | 0.355555556  |
| wavelet-HHL | glszm      | GrayLevelNonUniformityNormalized | 0.047901235  |
| wavelet-HHL | glszm      | SizeZoneNonUniformityNormalized  | 0.582222222  |
| wavelet-HHL | glszm      | SizeZoneNonUniformity            | 26.2         |
| wavelet-HHL | glszm      | GrayLevelNonUniformity           | 2.155555556  |
| wavelet-HHL | glszm      | LargeAreaEmphasis                | 2.133333333  |
| wavelet-HHL | glszm      | SmallAreaHighGrayLevelEmphasis   | 311.1123457  |
| wavelet-HHL | glszm      | ZonePercentage                   | 0.75         |
| wavelet-HHL | glszm      | LargeAreaLowGrayLevelEmphasis    | 0.066636263  |
| wavelet-HHL | glszm      | LargeAreaHighGrayLevelEmphasis   | 602.8222222  |
| wavelet-HHL | glszm      | HighGrayLevelZoneEmphasis        | 358.3333333  |
| wavelet-HHL | glszm      | SmallAreaEmphasis                | 0.790740741  |
| wavelet-HHL | glszm      | LowGrayLevelZoneEmphasis         | 0.053877188  |
| wavelet-HHL | glszm      | ZoneEntropy                      | 4.924969207  |
| wavelet-HHL | glszm      | SmallAreaLowGrayLevelEmphasis    | 0.051386501  |

|             |            |                                      |              |
|-------------|------------|--------------------------------------|--------------|
| wavelet-HHL | ngtdm      | Coarseness                           | 0.058277649  |
| wavelet-HHL | ngtdm      | Complexity                           | 1949.116576  |
| wavelet-HHL | ngtdm      | Strength                             | 20.58526243  |
| wavelet-HHL | ngtdm      | Contrast                             | 1.325130883  |
| wavelet-HHL | ngtdm      | Busyness                             | 0.053533394  |
| wavelet-HLH | gldm       | GrayLevelVariance                    | 230.7141667  |
| wavelet-HLH | gldm       | HighGrayLevelEmphasis                | 1188.616667  |
| wavelet-HLH | gldm       | DependenceEntropy                    | 5.202479554  |
| wavelet-HLH | gldm       | DependenceNonUniformity              | 41.7         |
| wavelet-HLH | gldm       | GrayLevelNonUniformity               | 2.2          |
| wavelet-HLH | gldm       | SmallDependenceEmphasis              | 0.860185185  |
| wavelet-HLH | gldm       | SmallDependenceHighGrayLevelEmphasis | 1069.607407  |
| wavelet-HLH | gldm       | DependenceNonUniformityNormalized    | 0.695        |
| wavelet-HLH | gldm       | LargeDependenceEmphasis              | 1.633333333  |
| wavelet-HLH | gldm       | LargeDependenceLowGrayLevelEmphasis  | 0.01980816   |
| wavelet-HLH | gldm       | DependenceVariance                   | 0.193333333  |
| wavelet-HLH | gldm       | LargeDependenceHighGrayLevelEmphasis | 1710.95      |
| wavelet-HLH | gldm       | SmallDependenceLowGrayLevelEmphasis  | 0.018778032  |
| wavelet-HLH | gldm       | LowGrayLevelEmphasis                 | 0.018960354  |
| wavelet-HLH | glcm       | JointAverage                         | 31.42324631  |
| wavelet-HLH | glcm       | SumAverage                           | 62.84649262  |
| wavelet-HLH | glcm       | JointEntropy                         | 5.844122431  |
| wavelet-HLH | glcm       | ClusterShade                         | 5213.893335  |
| wavelet-HLH | glcm       | MaximumProbability                   | 0.026185405  |
| wavelet-HLH | glcm       | Idmn                                 | 0.935235261  |
| wavelet-HLH | glcm       | JointEnergy                          | 0.018094326  |
| wavelet-HLH | glcm       | Contrast                             | 511.9785715  |
| wavelet-HLH | glcm       | DifferenceEntropy                    | 4.249979355  |
| wavelet-HLH | glcm       | InverseVariance                      | 0.053937314  |
| wavelet-HLH | glcm       | DifferenceVariance                   | 181.1827973  |
| wavelet-HLH | glcm       | Idn                                  | 0.835726479  |
| wavelet-HLH | glcm       | Idm                                  | 0.050940966  |
| wavelet-HLH | glcm       | Correlation                          | -0.053269994 |
| wavelet-HLH | glcm       | Autocorrelation                      | 981.9911672  |
| wavelet-HLH | glcm       | SumEntropy                           | 4.485236909  |
| wavelet-HLH | glcm       | SumSquares                           | 248.9394349  |
| wavelet-HLH | glcm       | ClusterProminence                    | 758147.4392  |
| wavelet-HLH | glcm       | Imc2                                 | 0.999816397  |
| wavelet-HLH | glcm       | Imc1                                 | -0.810372258 |
| wavelet-HLH | glcm       | DifferenceAverage                    | 17.56463189  |
| wavelet-HLH | glcm       | Id                                   | 0.118940434  |
| wavelet-HLH | glcm       | ClusterTendency                      | 483.7791682  |
| wavelet-HLH | firstorder | InterquartileRange                   | 495.9360372  |
| wavelet-HLH | firstorder | Skewness                             | 0.806885384  |
| wavelet-HLH | firstorder | Uniformity                           | 0.036666667  |
| wavelet-HLH | firstorder | Median                               | -49.29247815 |
| wavelet-HLH | firstorder | Energy                               | 8732105.282  |
| wavelet-HLH | firstorder | RobustMeanAbsoluteDeviation          | 202.3944271  |
| wavelet-HLH | firstorder | MeanAbsoluteDeviation                | 297.9770323  |
| wavelet-HLH | firstorder | TotalEnergy                          | 235766842.6  |
| wavelet-HLH | firstorder | Maximum                              | 1254.197919  |
| wavelet-HLH | firstorder | RootMeanSquared                      | 381.4906133  |
| wavelet-HLH | firstorder | 90Percentile                         | 506.1579766  |
| wavelet-HLH | firstorder | Minimum                              | -717.2957899 |
| wavelet-HLH | firstorder | Entropy                              | 5.021567004  |

|             |            |                                  |              |
|-------------|------------|----------------------------------|--------------|
| wavelet-HLH | firstorder | Range                            | 1971.493709  |
| wavelet-HLH | firstorder | Variance                         | 144340.5338  |
| wavelet-HLH | firstorder | 10Percentile                     | -350.4198311 |
| wavelet-HLH | firstorder | Kurtosis                         | 3.788470052  |
| wavelet-HLH | firstorder | Mean                             | 34.56232372  |
| wavelet-HLH | glrlm      | ShortRunLowGrayLevelEmphasis     | 0.019091287  |
| wavelet-HLH | glrlm      | GrayLevelVariance                | 232.2921521  |
| wavelet-HLH | glrlm      | LowGrayLevelRunEmphasis          | 0.019099104  |
| wavelet-HLH | glrlm      | GrayLevelNonUniformityNormalized | 0.036535401  |
| wavelet-HLH | glrlm      | RunVariance                      | 0.007687786  |
| wavelet-HLH | glrlm      | GrayLevelNonUniformity           | 2.175363036  |
| wavelet-HLH | glrlm      | LongRunEmphasis                  | 1.023602931  |
| wavelet-HLH | glrlm      | ShortRunHighGrayLevelEmphasis    | 1186.470544  |
| wavelet-HLH | glrlm      | RunLengthNonUniformity           | 58.63642494  |
| wavelet-HLH | glrlm      | ShortRunEmphasis                 | 0.994099267  |
| wavelet-HLH | glrlm      | LongRunHighGrayLevelEmphasis     | 1211.108548  |
| wavelet-HLH | glrlm      | RunPercentage                    | 0.992307692  |
| wavelet-HLH | glrlm      | LongRunLowGrayLevelEmphasis      | 0.019130373  |
| wavelet-HLH | glrlm      | RunEntropy                       | 5.035963519  |
| wavelet-HLH | glrlm      | HighGrayLevelRunEmphasis         | 1191.398145  |
| wavelet-HLH | glrlm      | RunLengthNonUniformityNormalized | 0.984624429  |
| wavelet-HLH | glszm      | GrayLevelVariance                | 252.9876543  |
| wavelet-HLH | glszm      | ZoneVariance                     | 0.135802469  |
| wavelet-HLH | glszm      | GrayLevelNonUniformityNormalized | 0.034979424  |
| wavelet-HLH | glszm      | SizeZoneNonUniformityNormalized  | 0.829218107  |
| wavelet-HLH | glszm      | SizeZoneNonUniformity            | 44.77777778  |
| wavelet-HLH | glszm      | GrayLevelNonUniformity           | 1.888888889  |
| wavelet-HLH | glszm      | LargeAreaEmphasis                | 1.37037037   |
| wavelet-HLH | glszm      | SmallAreaHighGrayLevelEmphasis   | 1165.235082  |
| wavelet-HLH | glszm      | ZonePercentage                   | 0.9          |
| wavelet-HLH | glszm      | LargeAreaLowGrayLevelEmphasis    | 0.021420568  |
| wavelet-HLH | glszm      | LargeAreaHighGrayLevelEmphasis   | 1529.574074  |
| wavelet-HLH | glszm      | HighGrayLevelZoneEmphasis        | 1227.814815  |
| wavelet-HLH | glszm      | SmallAreaEmphasis                | 0.927983539  |
| wavelet-HLH | glszm      | LowGrayLevelZoneEmphasis         | 0.020919935  |
| wavelet-HLH | glszm      | ZoneEntropy                      | 5.157393752  |
| wavelet-HLH | glszm      | SmallAreaLowGrayLevelEmphasis    | 0.020827699  |
| wavelet-HLH | ngtdm      | Coarseness                       | 0.045467227  |
| wavelet-HLH | ngtdm      | Complexity                       | 10646.15021  |
| wavelet-HLH | ngtdm      | Strength                         | 57.70368743  |
| wavelet-HLH | ngtdm      | Contrast                         | 3.986149017  |
| wavelet-HLH | ngtdm      | Busyness                         | 0.02770357   |

| Image type | Feature Class | Feature Name                         | Value                                                                                                                                                                                                                                                                                                                                                                                                             |
|------------|---------------|--------------------------------------|-------------------------------------------------------------------------------------------------------------------------------------------------------------------------------------------------------------------------------------------------------------------------------------------------------------------------------------------------------------------------------------------------------------------|
| general    | info          | BoundingBox                          | 16: RTSTRUCT: C99-DNU_B_segment_Tumor<br>(1, 1, 1, 5, 8, 6)                                                                                                                                                                                                                                                                                                                                                       |
| general    | info          | EnabledImageTypes                    | {u'Original': {}, u'Wavelet': {}}                                                                                                                                                                                                                                                                                                                                                                                 |
|            |               |                                      | {'distances': [1], 'additionalInfo': True, 'force2D': False, 'interpolator': 'sitkBSpline', 'resampledPixelSpacing': [3.0], 'label': 1, 'normalizeScale': 1, 'normalize': False, 'force2Ddimension': 0, 'removeOutliers': None, 'minimumROISize': None, u'binWidth': 25.0, 'minimumROIDimensions': 1, u'correctMask': True, 'preCrop': False, u'symmetricalGLCM': True, 'resegmentRange': None, 'padDistance': 5} |
| general    | info          | GeneralSettings                      | 8ee41fdaecc9482d953734bd399d19c868ee569e                                                                                                                                                                                                                                                                                                                                                                          |
| general    | info          | ImageHash                            | (0.9765625000000002, 0.9765625000000002, 2.0)                                                                                                                                                                                                                                                                                                                                                                     |
| general    | info          | ImageSpacing                         |                                                                                                                                                                                                                                                                                                                                                                                                                   |
| general    | info          | MaskHash                             | 5e666ca43e0f316bc2a2dcace68d277e9cbbb681                                                                                                                                                                                                                                                                                                                                                                          |
| general    | info          | NumpyVersion                         | 1.13.1                                                                                                                                                                                                                                                                                                                                                                                                            |
| general    | info          | PyWaveletVersion                     | 0.5.2                                                                                                                                                                                                                                                                                                                                                                                                             |
| general    | info          | SimpleITKVersion                     | 1.1.0                                                                                                                                                                                                                                                                                                                                                                                                             |
| general    | info          | Version                              | 1.3.0.post102+g1b0eb74                                                                                                                                                                                                                                                                                                                                                                                            |
| general    | info          | VolumeNum                            | 1                                                                                                                                                                                                                                                                                                                                                                                                                 |
| general    | info          | VoxelNum                             | 99                                                                                                                                                                                                                                                                                                                                                                                                                |
| original   | shape         | Maximum3DDiameter                    | 26.4952826                                                                                                                                                                                                                                                                                                                                                                                                        |
| original   | shape         | Maximum2DDiameterSlice               | 16.97056275                                                                                                                                                                                                                                                                                                                                                                                                       |
| original   | shape         | Sphericity                           | 0.802388048                                                                                                                                                                                                                                                                                                                                                                                                       |
| original   | shape         | MinorAxis                            | 15.63024906                                                                                                                                                                                                                                                                                                                                                                                                       |
| original   | shape         | Elongation                           | 0.609399113                                                                                                                                                                                                                                                                                                                                                                                                       |
| original   | shape         | SurfaceVolumeRatio                   | 0.434276858                                                                                                                                                                                                                                                                                                                                                                                                       |
| original   | shape         | Volume                               | 2673                                                                                                                                                                                                                                                                                                                                                                                                              |
| original   | shape         | MajorAxis                            | 25.64862455                                                                                                                                                                                                                                                                                                                                                                                                       |
| original   | shape         | SurfaceArea                          | 1160.822042                                                                                                                                                                                                                                                                                                                                                                                                       |
| original   | shape         | Flatness                             | 0.386163754                                                                                                                                                                                                                                                                                                                                                                                                       |
| original   | shape         | LeastAxis                            | 9.904569144                                                                                                                                                                                                                                                                                                                                                                                                       |
| original   | shape         | Maximum2DDiameterColumn              | 16.15549442                                                                                                                                                                                                                                                                                                                                                                                                       |
| original   | shape         | Maximum2DDiameterRow                 | 25.8069758                                                                                                                                                                                                                                                                                                                                                                                                        |
| original   | gldm          | GrayLevelVariance                    | 150.426079                                                                                                                                                                                                                                                                                                                                                                                                        |
| original   | gldm          | HighGrayLevelEmphasis                | 866.3939394                                                                                                                                                                                                                                                                                                                                                                                                       |
| original   | gldm          | DependenceEntropy                    | 5.622803686                                                                                                                                                                                                                                                                                                                                                                                                       |
| original   | gldm          | DependenceNonUniformity              | 48.83838384                                                                                                                                                                                                                                                                                                                                                                                                       |
| original   | gldm          | GrayLevelNonUniformity               | 3.888888889                                                                                                                                                                                                                                                                                                                                                                                                       |
| original   | gldm          | SmallDependenceEmphasis              | 0.727502806                                                                                                                                                                                                                                                                                                                                                                                                       |
| original   | gldm          | SmallDependenceHighGrayLevelEmphasis | 563.473931                                                                                                                                                                                                                                                                                                                                                                                                        |
| original   | gldm          | DependenceNonUniformityNormalized    | 0.493317008                                                                                                                                                                                                                                                                                                                                                                                                       |
| original   | gldm          | LargeDependenceEmphasis              | 4.050505051                                                                                                                                                                                                                                                                                                                                                                                                       |
| original   | gldm          | LargeDependenceLowGrayLevelEmphasis  | 0.020303989                                                                                                                                                                                                                                                                                                                                                                                                       |
| original   | gldm          | DependenceVariance                   | 1.405774921                                                                                                                                                                                                                                                                                                                                                                                                       |
| original   | gldm          | LargeDependenceHighGrayLevelEmphasis | 4616.878788                                                                                                                                                                                                                                                                                                                                                                                                       |
| original   | gldm          | SmallDependenceLowGrayLevelEmphasis  | 0.015764239                                                                                                                                                                                                                                                                                                                                                                                                       |
| original   | gldm          | LowGrayLevelEmphasis                 | 0.016366762                                                                                                                                                                                                                                                                                                                                                                                                       |
| original   | glcm          | JointAverage                         | 29.33855051                                                                                                                                                                                                                                                                                                                                                                                                       |



|          |            |                                  |              |
|----------|------------|----------------------------------|--------------|
| original | glcm       | SumAverage                       | 58.67710102  |
| original | glcm       | JointEntropy                     | 6.597148813  |
| original | glcm       | ClusterShade                     | -2405.584576 |
| original | glcm       | MaximumProbability               | 0.027408226  |
| original | glcm       | Idmn                             | 0.944838185  |
| original | glcm       | JointEnergy                      | 0.01120329   |
| original | glcm       | Contrast                         | 242.5218306  |
| original | glcm       | DifferenceEntropy                | 4.342963063  |
| original | glcm       | InverseVariance                  | 0.128541789  |
| original | glcm       | DifferenceVariance               | 104.1540996  |
| original | glcm       | Idn                              | 0.854483198  |
| original | glcm       | Idm                              | 0.120223844  |
| original | glcm       | Correlation                      | 0.11999913   |
| original | glcm       | Autocorrelation                  | 878.8299179  |
| original | glcm       | SumEntropy                       | 5.052429204  |
| original | glcm       | SumSquares                       | 139.0540516  |
| original | glcm       | ClusterProminence                | 310915.2618  |
| original | glcm       | Imc2                             | 0.998654164  |
| original | glcm       | Imc1                             | -0.621617569 |
| original | glcm       | DifferenceAverage                | 11.55144204  |
| original | glcm       | Id                               | 0.193180874  |
| original | glcm       | ClusterTendency                  | 313.6943757  |
| original | firstorder | InterquartileRange               | 453          |
| original | firstorder | Skewness                         | -0.262264386 |
| original | firstorder | Uniformity                       | 0.039281706  |
| original | firstorder | Median                           | -156         |
| original | firstorder | Energy                           | 14025431     |
| original | firstorder | RobustMeanAbsoluteDeviation      | 187.3581157  |
| original | firstorder | MeanAbsoluteDeviation            | 251.0921335  |
| original | firstorder | TotalEnergy                      | 378686637    |
| original | firstorder | Maximum                          | 606          |
| original | firstorder | RootMeanSquared                  | 376.3921096  |
| original | firstorder | 90Percentile                     | 59.2         |
| original | firstorder | Minimum                          | -875         |
| original | firstorder | Entropy                          | 4.990609934  |
| original | firstorder | Range                            | 1481         |
| original | firstorder | Variance                         | 93648.06081  |
| original | firstorder | 10Percentile                     | -700.8       |
| original | firstorder | Kurtosis                         | 2.614118928  |
| original | firstorder | Mean                             | -219.1414141 |
| original | glrlm      | ShortRunLowGrayLevelEmphasis     | 0.016702833  |
| original | glrlm      | GrayLevelVariance                | 151.7401869  |
| original | glrlm      | LowGrayLevelRunEmphasis          | 0.01673271   |
| original | glrlm      | GrayLevelNonUniformityNormalized | 0.038009004  |
| original | glrlm      | RunVariance                      | 0.024062801  |
| original | glrlm      | GrayLevelNonUniformity           | 3.672714402  |
| original | glrlm      | LongRunEmphasis                  | 1.07437946   |
| original | glrlm      | ShortRunHighGrayLevelEmphasis    | 836.3579648  |
| original | glrlm      | RunLengthNonUniformity           | 91.98596743  |
| original | glrlm      | ShortRunEmphasis                 | 0.981405135  |
| original | glrlm      | LongRunHighGrayLevelEmphasis     | 946.7507055  |
| original | glrlm      | RunPercentage                    | 0.975912976  |
| original | glrlm      | LongRunLowGrayLevelEmphasis      | 0.016852218  |
| original | glrlm      | RunEntropy                       | 5.09620068   |
| original | glrlm      | HighGrayLevelRunEmphasis         | 858.436513   |

|             |       |                                      |              |
|-------------|-------|--------------------------------------|--------------|
| original    | glrlm | RunLengthNonUniformityNormalized     | 0.951874398  |
| original    | glszm | GrayLevelVariance                    | 161.9421433  |
| original    | glszm | ZoneVariance                         | 0.658284024  |
| original    | glszm | GrayLevelNonUniformityNormalized     | 0.032215648  |
| original    | glszm | SizeZoneNonUniformityNormalized      | 0.72748192   |
| original    | glszm | SizeZoneNonUniformity                | 56.74358974  |
| original    | glszm | GrayLevelNonUniformity               | 2.512820513  |
| original    | glszm | LargeAreaEmphasis                    | 2.269230769  |
| original    | glszm | SmallAreaHighGrayLevelEmphasis       | 664.8968519  |
| original    | glszm | ZonePercentage                       | 0.787878788  |
| original    | glszm | LargeAreaLowGrayLevelEmphasis        | 0.022226226  |
| original    | glszm | LargeAreaHighGrayLevelEmphasis       | 2298.320513  |
| original    | glszm | HighGrayLevelZoneEmphasis            | 795.9487179  |
| original    | glszm | SmallAreaEmphasis                    | 0.875512821  |
| original    | glszm | LowGrayLevelZoneEmphasis             | 0.020230475  |
| original    | glszm | ZoneEntropy                          | 5.437466764  |
| original    | glszm | SmallAreaLowGrayLevelEmphasis        | 0.01988754   |
| original    | ngtdm | Coarseness                           | 0.045394094  |
| original    | ngtdm | Complexity                           | 5866.883644  |
| original    | ngtdm | Strength                             | 36.72264162  |
| original    | ngtdm | Contrast                             | 1.536949873  |
| original    | ngtdm | Busyness                             | 0.019783563  |
| wavelet-HHH | gldm  | GrayLevelVariance                    | 42.69605142  |
| wavelet-HHH | gldm  | HighGrayLevelEmphasis                | 319.4646465  |
| wavelet-HHH | gldm  | DependenceEntropy                    | 5.356234398  |
| wavelet-HHH | gldm  | DependenceNonUniformity              | 43.88888889  |
| wavelet-HHH | gldm  | GrayLevelNonUniformity               | 4.737373737  |
| wavelet-HHH | gldm  | SmallDependenceEmphasis              | 0.660634119  |
| wavelet-HHH | gldm  | SmallDependenceHighGrayLevelEmphasis | 228.4287318  |
| wavelet-HHH | gldm  | DependenceNonUniformityNormalized    | 0.44332211   |
| wavelet-HHH | gldm  | LargeDependenceEmphasis              | 2.898989899  |
| wavelet-HHH | gldm  | LargeDependenceLowGrayLevelEmphasis  | 0.030264713  |
| wavelet-HHH | gldm  | DependenceVariance                   | 0.510560147  |
| wavelet-HHH | gldm  | LargeDependenceHighGrayLevelEmphasis | 837.7272727  |
| wavelet-HHH | gldm  | SmallDependenceLowGrayLevelEmphasis  | 0.018022565  |
| wavelet-HHH | gldm  | LowGrayLevelEmphasis                 | 0.019970394  |
| wavelet-HHH | glcm  | JointAverage                         | 16.54534394  |
| wavelet-HHH | glcm  | SumAverage                           | 33.09068788  |
| wavelet-HHH | glcm  | JointEntropy                         | 6.606591975  |
| wavelet-HHH | glcm  | ClusterShade                         | -60.27930501 |
| wavelet-HHH | glcm  | MaximumProbability                   | 0.023076749  |
| wavelet-HHH | glcm  | Idmn                                 | 0.925969317  |
| wavelet-HHH | glcm  | JointEnergy                          | 0.010968068  |
| wavelet-HHH | glcm  | Contrast                             | 87.10449837  |
| wavelet-HHH | glcm  | DifferenceEntropy                    | 3.904287732  |
| wavelet-HHH | glcm  | InverseVariance                      | 0.121407655  |
| wavelet-HHH | glcm  | DifferenceVariance                   | 26.54754229  |
| wavelet-HHH | glcm  | Idn                                  | 0.819839033  |
| wavelet-HHH | glcm  | Idm                                  | 0.114854629  |
| wavelet-HHH | glcm  | Correlation                          | -0.046849229 |
| wavelet-HHH | glcm  | Autocorrelation                      | 271.9861082  |
| wavelet-HHH | glcm  | SumEntropy                           | 4.610641583  |
| wavelet-HHH | glcm  | SumSquares                           | 41.6887344   |
| wavelet-HHH | glcm  | ClusterProminence                    | 17469.36596  |
| wavelet-HHH | glcm  | Imc2                                 | 0.995061098  |

|             |            |                                  |              |
|-------------|------------|----------------------------------|--------------|
| wavelet-HHH | glcm       | Imc1                             | -0.523180658 |
| wavelet-HHH | glcm       | DifferenceAverage                | 7.534050567  |
| wavelet-HHH | glcm       | Id                               | 0.204910864  |
| wavelet-HHH | glcm       | ClusterTendency                  | 79.65043923  |
| wavelet-HHH | firstorder | InterquartileRange               | 224.329929   |
| wavelet-HHH | firstorder | Skewness                         | -0.161407594 |
| wavelet-HHH | firstorder | Uniformity                       | 0.04785226   |
| wavelet-HHH | firstorder | Median                           | 3.963701704  |
| wavelet-HHH | firstorder | Energy                           | 2625745.701  |
| wavelet-HHH | firstorder | RobustMeanAbsoluteDeviation      | 92.71242242  |
| wavelet-HHH | firstorder | MeanAbsoluteDeviation            | 131.3419986  |
| wavelet-HHH | firstorder | TotalEnergy                      | 70895133.93  |
| wavelet-HHH | firstorder | Maximum                          | 359.0765791  |
| wavelet-HHH | firstorder | RootMeanSquared                  | 162.8578639  |
| wavelet-HHH | firstorder | 90Percentile                     | 219.7136175  |
| wavelet-HHH | firstorder | Minimum                          | -380.9262747 |
| wavelet-HHH | firstorder | Entropy                          | 4.548677107  |
| wavelet-HHH | firstorder | Range                            | 740.0028538  |
| wavelet-HHH | firstorder | Variance                         | 26513.02052  |
| wavelet-HHH | firstorder | 10Percentile                     | -219.7370182 |
| wavelet-HHH | firstorder | Kurtosis                         | 2.590551361  |
| wavelet-HHH | firstorder | Mean                             | 3.108589994  |
| wavelet-HHH | glrlm      | ShortRunLowGrayLevelEmphasis     | 0.020192347  |
| wavelet-HHH | glrlm      | GrayLevelVariance                | 43.08367999  |
| wavelet-HHH | glrlm      | LowGrayLevelRunEmphasis          | 0.020282702  |
| wavelet-HHH | glrlm      | GrayLevelNonUniformityNormalized | 0.047708497  |
| wavelet-HHH | glrlm      | RunVariance                      | 0.02095306   |
| wavelet-HHH | glrlm      | GrayLevelNonUniformity           | 4.624177964  |
| wavelet-HHH | glrlm      | LongRunEmphasis                  | 1.065013344  |
| wavelet-HHH | glrlm      | ShortRunHighGrayLevelEmphasis    | 316.0821883  |
| wavelet-HHH | glrlm      | RunLengthNonUniformity           | 92.90626535  |
| wavelet-HHH | glrlm      | ShortRunEmphasis                 | 0.983746664  |
| wavelet-HHH | glrlm      | LongRunHighGrayLevelEmphasis     | 338.1656451  |
| wavelet-HHH | glrlm      | RunPercentage                    | 0.979020979  |
| wavelet-HHH | glrlm      | LongRunLowGrayLevelEmphasis      | 0.020644119  |
| wavelet-HHH | glrlm      | RunEntropy                       | 4.619159648  |
| wavelet-HHH | glrlm      | HighGrayLevelRunEmphasis         | 320.4988797  |
| wavelet-HHH | glrlm      | RunLengthNonUniformityNormalized | 0.958093881  |
| wavelet-HHH | glszm      | GrayLevelVariance                | 48.13221329  |
| wavelet-HHH | glszm      | ZoneVariance                     | 0.439919649  |
| wavelet-HHH | glszm      | GrayLevelNonUniformityNormalized | 0.045288532  |
| wavelet-HHH | glszm      | SizeZoneNonUniformityNormalized  | 0.603725347  |
| wavelet-HHH | glszm      | SizeZoneNonUniformity            | 44.67567568  |
| wavelet-HHH | glszm      | GrayLevelNonUniformity           | 3.351351351  |
| wavelet-HHH | glszm      | LargeAreaEmphasis                | 2.22972973   |
| wavelet-HHH | glszm      | SmallAreaHighGrayLevelEmphasis   | 284.1865616  |
| wavelet-HHH | glszm      | ZonePercentage                   | 0.747474747  |
| wavelet-HHH | glszm      | LargeAreaLowGrayLevelEmphasis    | 0.031639406  |
| wavelet-HHH | glszm      | LargeAreaHighGrayLevelEmphasis   | 676.2567568  |
| wavelet-HHH | glszm      | HighGrayLevelZoneEmphasis        | 335.2972973  |
| wavelet-HHH | glszm      | SmallAreaEmphasis                | 0.805649399  |
| wavelet-HHH | glszm      | LowGrayLevelZoneEmphasis         | 0.02479501   |
| wavelet-HHH | glszm      | ZoneEntropy                      | 5.154870933  |
| wavelet-HHH | glszm      | SmallAreaLowGrayLevelEmphasis    | 0.023655295  |
| wavelet-HHH | ngtdm      | Coarseness                       | 0.046947412  |

|             |            |                                      |              |
|-------------|------------|--------------------------------------|--------------|
| wavelet-HHH | ngtdm      | Complexity                           | 1678.419397  |
| wavelet-HHH | ngtdm      | Strength                             | 11.76616792  |
| wavelet-HHH | ngtdm      | Contrast                             | 0.636337189  |
| wavelet-HHH | ngtdm      | Busyness                             | 0.058709907  |
| wavelet-HLL | gldm       | GrayLevelVariance                    | 148.107336   |
| wavelet-HLL | gldm       | HighGrayLevelEmphasis                | 968.7272727  |
| wavelet-HLL | gldm       | DependenceEntropy                    | 5.591033514  |
| wavelet-HLL | gldm       | DependenceNonUniformity              | 46.15151515  |
| wavelet-HLL | gldm       | GrayLevelNonUniformity               | 3            |
| wavelet-HLL | gldm       | SmallDependenceEmphasis              | 0.685746352  |
| wavelet-HLL | gldm       | SmallDependenceHighGrayLevelEmphasis | 634.4938272  |
| wavelet-HLL | gldm       | DependenceNonUniformityNormalized    | 0.466176921  |
| wavelet-HLL | gldm       | LargeDependenceEmphasis              | 2.616161616  |
| wavelet-HLL | gldm       | LargeDependenceLowGrayLevelEmphasis  | 0.017269479  |
| wavelet-HLL | gldm       | DependenceVariance                   | 0.411386593  |
| wavelet-HLL | gldm       | LargeDependenceHighGrayLevelEmphasis | 2726.222222  |
| wavelet-HLL | gldm       | SmallDependenceLowGrayLevelEmphasis  | 0.013527409  |
| wavelet-HLL | gldm       | LowGrayLevelEmphasis                 | 0.014170671  |
| wavelet-HLL | glcm       | JointAverage                         | 28.13678437  |
| wavelet-HLL | glcm       | SumAverage                           | 56.27356874  |
| wavelet-HLL | glcm       | JointEntropy                         | 6.696017053  |
| wavelet-HLL | glcm       | ClusterShade                         | -204.0655848 |
| wavelet-HLL | glcm       | MaximumProbability                   | 0.018469844  |
| wavelet-HLL | glcm       | Idmn                                 | 0.927730517  |
| wavelet-HLL | glcm       | JointEnergy                          | 0.010133459  |
| wavelet-HLL | glcm       | Contrast                             | 216.09303    |
| wavelet-HLL | glcm       | DifferenceEntropy                    | 4.291157288  |
| wavelet-HLL | glcm       | InverseVariance                      | 0.095496911  |
| wavelet-HLL | glcm       | DifferenceVariance                   | 67.99851039  |
| wavelet-HLL | glcm       | Idn                                  | 0.827577569  |
| wavelet-HLL | glcm       | Idm                                  | 0.091558779  |
| wavelet-HLL | glcm       | Correlation                          | 0.259302051  |
| wavelet-HLL | glcm       | Autocorrelation                      | 828.3070256  |
| wavelet-HLL | glcm       | SumEntropy                           | 5.139071094  |
| wavelet-HLL | glcm       | SumSquares                           | 143.9483074  |
| wavelet-HLL | glcm       | ClusterProminence                    | 280351.1149  |
| wavelet-HLL | glcm       | Imc2                                 | 0.999542749  |
| wavelet-HLL | glcm       | Imc1                                 | -0.694795624 |
| wavelet-HLL | glcm       | DifferenceAverage                    | 11.46467348  |
| wavelet-HLL | glcm       | Id                                   | 0.168883998  |
| wavelet-HLL | glcm       | ClusterTendency                      | 359.7001998  |
| wavelet-HLL | firstorder | InterquartileRange                   | 523.5405897  |
| wavelet-HLL | firstorder | Skewness                             | -0.19812744  |
| wavelet-HLL | firstorder | Uniformity                           | 0.03030303   |
| wavelet-HLL | firstorder | Median                               | -64.99480659 |
| wavelet-HLL | firstorder | Energy                               | 9699335.611  |
| wavelet-HLL | firstorder | RobustMeanAbsoluteDeviation          | 206.4903397  |
| wavelet-HLL | firstorder | MeanAbsoluteDeviation                | 262.7871434  |
| wavelet-HLL | firstorder | TotalEnergy                          | 261882061.5  |
| wavelet-HLL | firstorder | Maximum                              | 441.7338557  |
| wavelet-HLL | firstorder | RootMeanSquared                      | 313.0065287  |
| wavelet-HLL | firstorder | 90Percentile                         | 318.2085209  |
| wavelet-HLL | firstorder | Minimum                              | -750.5737667 |
| wavelet-HLL | firstorder | Entropy                              | 5.216089923  |
| wavelet-HLL | firstorder | Range                                | 1192.307622  |

|             |            |                                      |              |
|-------------|------------|--------------------------------------|--------------|
| wavelet-HLL | firstorder | Variance                             | 92914.25026  |
| wavelet-HLL | firstorder | 10Percentile                         | -454.4114268 |
| wavelet-HLL | firstorder | Kurtosis                             | 2.007848112  |
| wavelet-HLL | firstorder | Mean                                 | -71.1254998  |
| wavelet-HLL | glrlm      | ShortRunLowGrayLevelEmphasis         | 0.014376664  |
| wavelet-HLL | glrlm      | GrayLevelVariance                    | 148.5488256  |
| wavelet-HLL | glrlm      | LowGrayLevelRunEmphasis              | 0.014404992  |
| wavelet-HLL | glrlm      | GrayLevelNonUniformityNormalized     | 0.030218721  |
| wavelet-HLL | glrlm      | RunVariance                          | 0.018627892  |
| wavelet-HLL | glrlm      | GrayLevelNonUniformity               | 2.935981255  |
| wavelet-HLL | glrlm      | LongRunEmphasis                      | 1.057603112  |
| wavelet-HLL | glrlm      | ShortRunHighGrayLevelEmphasis        | 951.0517263  |
| wavelet-HLL | glrlm      | RunLengthNonUniformity               | 93.57103617  |
| wavelet-HLL | glrlm      | ShortRunEmphasis                     | 0.985599222  |
| wavelet-HLL | glrlm      | LongRunHighGrayLevelEmphasis         | 1028.786259  |
| wavelet-HLL | glrlm      | RunPercentage                        | 0.981351981  |
| wavelet-HLL | glrlm      | LongRunLowGrayLevelEmphasis          | 0.014518305  |
| wavelet-HLL | glrlm      | RunEntropy                           | 5.261431967  |
| wavelet-HLL | glrlm      | HighGrayLevelRunEmphasis             | 966.5986327  |
| wavelet-HLL | glrlm      | RunLengthNonUniformityNormalized     | 0.962744216  |
| wavelet-HLL | glszm      | GrayLevelVariance                    | 156.4415584  |
| wavelet-HLL | glszm      | ZoneVariance                         | 0.307977737  |
| wavelet-HLL | glszm      | GrayLevelNonUniformityNormalized     | 0.029178614  |
| wavelet-HLL | glszm      | SizeZoneNonUniformityNormalized      | 0.622870636  |
| wavelet-HLL | glszm      | SizeZoneNonUniformity                | 47.96103896  |
| wavelet-HLL | glszm      | GrayLevelNonUniformity               | 2.246753247  |
| wavelet-HLL | glszm      | LargeAreaEmphasis                    | 1.961038961  |
| wavelet-HLL | glszm      | SmallAreaHighGrayLevelEmphasis       | 748.1190476  |
| wavelet-HLL | glszm      | ZonePercentage                       | 0.777777778  |
| wavelet-HLL | glszm      | LargeAreaLowGrayLevelEmphasis        | 0.019495957  |
| wavelet-HLL | glszm      | LargeAreaHighGrayLevelEmphasis       | 1975.012987  |
| wavelet-HLL | glszm      | HighGrayLevelZoneEmphasis            | 940.4415584  |
| wavelet-HLL | glszm      | SmallAreaEmphasis                    | 0.817460317  |
| wavelet-HLL | glszm      | LowGrayLevelZoneEmphasis             | 0.017648491  |
| wavelet-HLL | glszm      | ZoneEntropy                          | 5.532639463  |
| wavelet-HLL | glszm      | SmallAreaLowGrayLevelEmphasis        | 0.017261422  |
| wavelet-HLL | ngtdm      | Coarseness                           | 0.04969368   |
| wavelet-HLL | ngtdm      | Complexity                           | 5536.214119  |
| wavelet-HLL | ngtdm      | Strength                             | 39.81846128  |
| wavelet-HLL | ngtdm      | Contrast                             | 1.195302708  |
| wavelet-HLL | ngtdm      | Busyness                             | 0.019084618  |
| wavelet-LHL | gldm       | GrayLevelVariance                    | 81.64554637  |
| wavelet-LHL | gldm       | HighGrayLevelEmphasis                | 943.8686869  |
| wavelet-LHL | gldm       | DependenceEntropy                    | 5.533100812  |
| wavelet-LHL | gldm       | DependenceNonUniformity              | 38.17171717  |
| wavelet-LHL | gldm       | GrayLevelNonUniformity               | 4.131313131  |
| wavelet-LHL | gldm       | SmallDependenceEmphasis              | 0.617213805  |
| wavelet-LHL | gldm       | SmallDependenceHighGrayLevelEmphasis | 639.4501964  |
| wavelet-LHL | gldm       | DependenceNonUniformityNormalized    | 0.385572901  |
| wavelet-LHL | gldm       | LargeDependenceEmphasis              | 3.545454545  |
| wavelet-LHL | gldm       | LargeDependenceLowGrayLevelEmphasis  | 0.015687139  |
| wavelet-LHL | gldm       | DependenceVariance                   | 0.699928579  |
| wavelet-LHL | gldm       | LargeDependenceHighGrayLevelEmphasis | 2881.343434  |
| wavelet-LHL | gldm       | SmallDependenceLowGrayLevelEmphasis  | 0.010946561  |
| wavelet-LHL | gldm       | LowGrayLevelEmphasis                 | 0.011599459  |

|             |            |                                  |              |
|-------------|------------|----------------------------------|--------------|
| wavelet-LHL | glcm       | JointAverage                     | 28.72570077  |
| wavelet-LHL | glcm       | SumAverage                       | 57.45140155  |
| wavelet-LHL | glcm       | JointEntropy                     | 6.616020208  |
| wavelet-LHL | glcm       | ClusterShade                     | 768.3058902  |
| wavelet-LHL | glcm       | MaximumProbability               | 0.021333109  |
| wavelet-LHL | glcm       | Idmn                             | 0.954460163  |
| wavelet-LHL | glcm       | JointEnergy                      | 0.010947923  |
| wavelet-LHL | glcm       | Contrast                         | 146.2107511  |
| wavelet-LHL | glcm       | DifferenceEntropy                | 4.099879137  |
| wavelet-LHL | glcm       | InverseVariance                  | 0.14620896   |
| wavelet-LHL | glcm       | DifferenceVariance               | 56.87483536  |
| wavelet-LHL | glcm       | Idn                              | 0.865796048  |
| wavelet-LHL | glcm       | Idm                              | 0.131908088  |
| wavelet-LHL | glcm       | Correlation                      | 0.158280245  |
| wavelet-LHL | glcm       | Autocorrelation                  | 838.1854478  |
| wavelet-LHL | glcm       | SumEntropy                       | 4.901268924  |
| wavelet-LHL | glcm       | SumSquares                       | 85.83935573  |
| wavelet-LHL | glcm       | ClusterProminence                | 137009.8968  |
| wavelet-LHL | glcm       | Imc2                             | 0.99845625   |
| wavelet-LHL | glcm       | Imc1                             | -0.620839821 |
| wavelet-LHL | glcm       | DifferenceAverage                | 8.994734423  |
| wavelet-LHL | glcm       | Id                               | 0.212211909  |
| wavelet-LHL | glcm       | ClusterTendency                  | 197.1466718  |
| wavelet-LHL | firstorder | InterquartileRange               | 277.7851018  |
| wavelet-LHL | firstorder | Skewness                         | 0.155315007  |
| wavelet-LHL | firstorder | Uniformity                       | 0.041730436  |
| wavelet-LHL | firstorder | Median                           | -145.5285739 |
| wavelet-LHL | firstorder | Energy                           | 6623583.026  |
| wavelet-LHL | firstorder | RobustMeanAbsoluteDeviation      | 111.7516696  |
| wavelet-LHL | firstorder | MeanAbsoluteDeviation            | 171.5286331  |
| wavelet-LHL | firstorder | TotalEnergy                      | 178836741.7  |
| wavelet-LHL | firstorder | Maximum                          | 440.6515827  |
| wavelet-LHL | firstorder | RootMeanSquared                  | 258.6597747  |
| wavelet-LHL | firstorder | 90Percentile                     | 150.1670047  |
| wavelet-LHL | firstorder | Minimum                          | -827.6953619 |
| wavelet-LHL | firstorder | Entropy                          | 4.83434049   |
| wavelet-LHL | firstorder | Range                            | 1268.346945  |
| wavelet-LHL | firstorder | Variance                         | 50508.09855  |
| wavelet-LHL | firstorder | 10Percentile                     | -381.4434595 |
| wavelet-LHL | firstorder | Kurtosis                         | 3.456229264  |
| wavelet-LHL | firstorder | Mean                             | -128.0499141 |
| wavelet-LHL | glrlm      | ShortRunLowGrayLevelEmphasis     | 0.011838492  |
| wavelet-LHL | glrlm      | GrayLevelVariance                | 82.62048772  |
| wavelet-LHL | glrlm      | LowGrayLevelRunEmphasis          | 0.011872266  |
| wavelet-LHL | glrlm      | GrayLevelNonUniformityNormalized | 0.041146747  |
| wavelet-LHL | glrlm      | RunVariance                      | 0.026374734  |
| wavelet-LHL | glrlm      | GrayLevelNonUniformity           | 3.966084127  |
| wavelet-LHL | glrlm      | LongRunEmphasis                  | 1.082203302  |
| wavelet-LHL | glrlm      | ShortRunHighGrayLevelEmphasis    | 932.6726671  |
| wavelet-LHL | glrlm      | RunLengthNonUniformity           | 91.34849485  |
| wavelet-LHL | glrlm      | ShortRunEmphasis                 | 0.979449175  |
| wavelet-LHL | glrlm      | LongRunHighGrayLevelEmphasis     | 1012.08494   |
| wavelet-LHL | glrlm      | RunPercentage                    | 0.973581974  |
| wavelet-LHL | glrlm      | LongRunLowGrayLevelEmphasis      | 0.012007359  |
| wavelet-LHL | glrlm      | RunEntropy                       | 4.927843116  |

|             |       |                                      |              |
|-------------|-------|--------------------------------------|--------------|
| wavelet-LHL | glrlm | HighGrayLevelRunEmphasis             | 948.5551217  |
| wavelet-LHL | glrlm | RunLengthNonUniformityNormalized     | 0.947250531  |
| wavelet-LHL | glszm | GrayLevelVariance                    | 93.73387755  |
| wavelet-LHL | glszm | ZoneVariance                         | 0.785510204  |
| wavelet-LHL | glszm | GrayLevelNonUniformityNormalized     | 0.035510204  |
| wavelet-LHL | glszm | SizeZoneNonUniformityNormalized      | 0.584081633  |
| wavelet-LHL | glszm | SizeZoneNonUniformity                | 40.88571429  |
| wavelet-LHL | glszm | GrayLevelNonUniformity               | 2.485714286  |
| wavelet-LHL | glszm | LargeAreaEmphasis                    | 2.785714286  |
| wavelet-LHL | glszm | SmallAreaHighGrayLevelEmphasis       | 839.3958333  |
| wavelet-LHL | glszm | ZonePercentage                       | 0.707070707  |
| wavelet-LHL | glszm | LargeAreaLowGrayLevelEmphasis        | 0.018535083  |
| wavelet-LHL | glszm | LargeAreaHighGrayLevelEmphasis       | 2390.214286  |
| wavelet-LHL | glszm | HighGrayLevelZoneEmphasis            | 1009.228571  |
| wavelet-LHL | glszm | SmallAreaEmphasis                    | 0.79265873   |
| wavelet-LHL | glszm | LowGrayLevelZoneEmphasis             | 0.01571317   |
| wavelet-LHL | glszm | ZoneEntropy                          | 5.422000517  |
| wavelet-LHL | glszm | SmallAreaLowGrayLevelEmphasis        | 0.015342663  |
| wavelet-LHL | ngtdm | Coarseness                           | 0.056030875  |
| wavelet-LHL | ngtdm | Complexity                           | 2949.75307   |
| wavelet-LHL | ngtdm | Strength                             | 27.51690679  |
| wavelet-LHL | ngtdm | Contrast                             | 0.800491128  |
| wavelet-LHL | ngtdm | Busyness                             | 0.02336158   |
| wavelet-LHH | gldm  | GrayLevelVariance                    | 29.78104275  |
| wavelet-LHH | gldm  | HighGrayLevelEmphasis                | 182.1414141  |
| wavelet-LHH | gldm  | DependenceEntropy                    | 5.228666817  |
| wavelet-LHH | gldm  | DependenceNonUniformity              | 39.4040404   |
| wavelet-LHH | gldm  | GrayLevelNonUniformity               | 5.98989899   |
| wavelet-LHH | gldm  | SmallDependenceEmphasis              | 0.62191358   |
| wavelet-LHH | gldm  | SmallDependenceHighGrayLevelEmphasis | 125.1820988  |
| wavelet-LHH | gldm  | DependenceNonUniformityNormalized    | 0.39802061   |
| wavelet-LHH | gldm  | LargeDependenceEmphasis              | 3.323232323  |
| wavelet-LHH | gldm  | LargeDependenceLowGrayLevelEmphasis  | 0.05072414   |
| wavelet-LHH | gldm  | DependenceVariance                   | 0.612386491  |
| wavelet-LHH | gldm  | LargeDependenceHighGrayLevelEmphasis | 511.5555556  |
| wavelet-LHH | gldm  | SmallDependenceLowGrayLevelEmphasis  | 0.018041661  |
| wavelet-LHH | gldm  | LowGrayLevelEmphasis                 | 0.022779123  |
| wavelet-LHH | glcm  | JointAverage                         | 12.51474469  |
| wavelet-LHH | glcm  | SumAverage                           | 25.02948937  |
| wavelet-LHH | glcm  | JointEntropy                         | 6.490563549  |
| wavelet-LHH | glcm  | ClusterShade                         | 259.6084517  |
| wavelet-LHH | glcm  | MaximumProbability                   | 0.022920661  |
| wavelet-LHH | glcm  | Idmn                                 | 0.943387851  |
| wavelet-LHH | glcm  | JointEnergy                          | 0.012112669  |
| wavelet-LHH | glcm  | Contrast                             | 69.56352217  |
| wavelet-LHH | glcm  | DifferenceEntropy                    | 3.793656823  |
| wavelet-LHH | glcm  | InverseVariance                      | 0.146788012  |
| wavelet-LHH | glcm  | DifferenceVariance                   | 24.15328235  |
| wavelet-LHH | glcm  | Idn                                  | 0.842969115  |
| wavelet-LHH | glcm  | Idm                                  | 0.134177907  |
| wavelet-LHH | glcm  | Correlation                          | -0.023845552 |
| wavelet-LHH | glcm  | Autocorrelation                      | 155.8038689  |
| wavelet-LHH | glcm  | SumEntropy                           | 4.438482558  |
| wavelet-LHH | glcm  | SumSquares                           | 33.96008121  |
| wavelet-LHH | glcm  | ClusterProminence                    | 15533.25917  |

|             |            |                                  |              |
|-------------|------------|----------------------------------|--------------|
| wavelet-LHH | glcm       | Imc2                             | 0.990413968  |
| wavelet-LHH | glcm       | Imc1                             | -0.478699253 |
| wavelet-LHH | glcm       | DifferenceAverage                | 6.568875609  |
| wavelet-LHH | glcm       | Id                               | 0.226910933  |
| wavelet-LHH | glcm       | ClusterTendency                  | 66.27680268  |
| wavelet-LHH | firstorder | InterquartileRange               | 150.0101886  |
| wavelet-LHH | firstorder | Skewness                         | 0.568552325  |
| wavelet-LHH | firstorder | Uniformity                       | 0.06050403   |
| wavelet-LHH | firstorder | Median                           | -7.459750291 |
| wavelet-LHH | firstorder | Energy                           | 1823290.949  |
| wavelet-LHH | firstorder | RobustMeanAbsoluteDeviation      | 73.57270779  |
| wavelet-LHH | firstorder | MeanAbsoluteDeviation            | 106.0228143  |
| wavelet-LHH | firstorder | TotalEnergy                      | 49228855.63  |
| wavelet-LHH | firstorder | Maximum                          | 497.0749039  |
| wavelet-LHH | firstorder | RootMeanSquared                  | 135.7095439  |
| wavelet-LHH | firstorder | 90Percentile                     | 178.1289662  |
| wavelet-LHH | firstorder | Minimum                          | -296.9991187 |
| wavelet-LHH | firstorder | Entropy                          | 4.230233142  |
| wavelet-LHH | firstorder | Range                            | 794.0740226  |
| wavelet-LHH | firstorder | Variance                         | 18397.91699  |
| wavelet-LHH | firstorder | 10Percentile                     | -179.6203419 |
| wavelet-LHH | firstorder | Kurtosis                         | 3.815130106  |
| wavelet-LHH | firstorder | Mean                             | -4.377591441 |
| wavelet-LHH | glrlm      | ShortRunLowGrayLevelEmphasis     | 0.022816078  |
| wavelet-LHH | glrlm      | GrayLevelVariance                | 30.1667195   |
| wavelet-LHH | glrlm      | LowGrayLevelRunEmphasis          | 0.023052145  |
| wavelet-LHH | glrlm      | GrayLevelNonUniformityNormalized | 0.060109399  |
| wavelet-LHH | glrlm      | RunVariance                      | 0.024816733  |
| wavelet-LHH | glrlm      | GrayLevelNonUniformity           | 5.802980137  |
| wavelet-LHH | glrlm      | LongRunEmphasis                  | 1.077409961  |
| wavelet-LHH | glrlm      | ShortRunHighGrayLevelEmphasis    | 180.2646741  |
| wavelet-LHH | glrlm      | RunLengthNonUniformity           | 91.80136515  |
| wavelet-LHH | glrlm      | ShortRunEmphasis                 | 0.98064751   |
| wavelet-LHH | glrlm      | LongRunHighGrayLevelEmphasis     | 194.3573741  |
| wavelet-LHH | glrlm      | RunPercentage                    | 0.975135975  |
| wavelet-LHH | glrlm      | LongRunLowGrayLevelEmphasis      | 0.023996411  |
| wavelet-LHH | glrlm      | RunEntropy                       | 4.333208474  |
| wavelet-LHH | glrlm      | HighGrayLevelRunEmphasis         | 183.0832141  |
| wavelet-LHH | glrlm      | RunLengthNonUniformityNormalized | 0.950366534  |
| wavelet-LHH | glszm      | GrayLevelVariance                | 34.87839714  |
| wavelet-LHH | glszm      | ZoneVariance                     | 0.605038683  |
| wavelet-LHH | glszm      | GrayLevelNonUniformityNormalized | 0.055346161  |
| wavelet-LHH | glszm      | SizeZoneNonUniformityNormalized  | 0.573497322  |
| wavelet-LHH | glszm      | SizeZoneNonUniformity            | 40.71830986  |
| wavelet-LHH | glszm      | GrayLevelNonUniformity           | 3.929577465  |
| wavelet-LHH | glszm      | LargeAreaEmphasis                | 2.549295775  |
| wavelet-LHH | glszm      | SmallAreaHighGrayLevelEmphasis   | 162.5511894  |
| wavelet-LHH | glszm      | ZonePercentage                   | 0.717171717  |
| wavelet-LHH | glszm      | LargeAreaLowGrayLevelEmphasis    | 0.047969511  |
| wavelet-LHH | glszm      | LargeAreaHighGrayLevelEmphasis   | 404          |
| wavelet-LHH | glszm      | HighGrayLevelZoneEmphasis        | 196.6338028  |
| wavelet-LHH | glszm      | SmallAreaEmphasis                | 0.785872457  |
| wavelet-LHH | glszm      | LowGrayLevelZoneEmphasis         | 0.026687751  |
| wavelet-LHH | glszm      | ZoneEntropy                      | 5.066735106  |
| wavelet-LHH | glszm      | SmallAreaLowGrayLevelEmphasis    | 0.024045343  |



|             |            |                                      |              |
|-------------|------------|--------------------------------------|--------------|
| wavelet-LHH | ngtdm      | Coarseness                           | 0.046358852  |
| wavelet-LHH | ngtdm      | Complexity                           | 1015.624937  |
| wavelet-LHH | ngtdm      | Strength                             | 9.099708813  |
| wavelet-LHH | ngtdm      | Contrast                             | 0.542066467  |
| wavelet-LHH | ngtdm      | Busyness                             | 0.107919673  |
| wavelet-LLH | gldm       | GrayLevelVariance                    | 481.046832   |
| wavelet-LLH | gldm       | HighGrayLevelEmphasis                | 4542.212121  |
| wavelet-LLH | gldm       | DependenceEntropy                    | 5.891785408  |
| wavelet-LLH | gldm       | DependenceNonUniformity              | 48.05050505  |
| wavelet-LLH | gldm       | GrayLevelNonUniformity               | 2.636363636  |
| wavelet-LLH | gldm       | SmallDependenceEmphasis              | 0.718434343  |
| wavelet-LLH | gldm       | SmallDependenceHighGrayLevelEmphasis | 3423.976431  |
| wavelet-LLH | gldm       | DependenceNonUniformityNormalized    | 0.485358637  |
| wavelet-LLH | gldm       | LargeDependenceEmphasis              | 2.757575758  |
| wavelet-LLH | gldm       | LargeDependenceLowGrayLevelEmphasis  | 0.011148519  |
| wavelet-LLH | gldm       | DependenceVariance                   | 0.552800735  |
| wavelet-LLH | gldm       | LargeDependenceHighGrayLevelEmphasis | 11530.27273  |
| wavelet-LLH | gldm       | SmallDependenceLowGrayLevelEmphasis  | 0.010545234  |
| wavelet-LLH | gldm       | LowGrayLevelEmphasis                 | 0.010633725  |
| wavelet-LLH | glcm       | JointAverage                         | 66.07377087  |
| wavelet-LLH | glcm       | SumAverage                           | 132.1475417  |
| wavelet-LLH | glcm       | JointEntropy                         | 6.710778589  |
| wavelet-LLH | glcm       | ClusterShade                         | -5988.704931 |
| wavelet-LLH | glcm       | MaximumProbability                   | 0.019698605  |
| wavelet-LLH | glcm       | Idmn                                 | 0.942155513  |
| wavelet-LLH | glcm       | JointEnergy                          | 0.01003496   |
| wavelet-LLH | glcm       | Contrast                             | 958.2486613  |
| wavelet-LLH | glcm       | DifferenceEntropy                    | 4.585317608  |
| wavelet-LLH | glcm       | InverseVariance                      | 0.095661262  |
| wavelet-LLH | glcm       | DifferenceVariance                   | 484.459606   |
| wavelet-LLH | glcm       | Idn                                  | 0.868585861  |
| wavelet-LLH | glcm       | Idm                                  | 0.08968519   |
| wavelet-LLH | glcm       | Correlation                          | -0.137439885 |
| wavelet-LLH | glcm       | Autocorrelation                      | 4314.36383   |
| wavelet-LLH | glcm       | SumEntropy                           | 5.064852731  |
| wavelet-LLH | glcm       | SumSquares                           | 427.0384327  |
| wavelet-LLH | glcm       | ClusterProminence                    | 3686596.037  |
| wavelet-LLH | glcm       | Imc2                                 | 0.999743941  |
| wavelet-LLH | glcm       | Imc1                                 | -0.723899727 |
| wavelet-LLH | glcm       | DifferenceAverage                    | 20.01520467  |
| wavelet-LLH | glcm       | Id                                   | 0.157843167  |
| wavelet-LLH | glcm       | ClusterTendency                      | 749.9050696  |
| wavelet-LLH | firstorder | InterquartileRange                   | 403.9551842  |
| wavelet-LLH | firstorder | Skewness                             | -0.333605106 |
| wavelet-LLH | firstorder | Uniformity                           | 0.026629936  |
| wavelet-LLH | firstorder | Median                               | -137.9492381 |
| wavelet-LLH | firstorder | Energy                               | 31900431.76  |
| wavelet-LLH | firstorder | RobustMeanAbsoluteDeviation          | 218.0616052  |
| wavelet-LLH | firstorder | MeanAbsoluteDeviation                | 384.601144   |
| wavelet-LLH | firstorder | TotalEnergy                          | 861311657.6  |
| wavelet-LLH | firstorder | Maximum                              | 1019.634471  |
| wavelet-LLH | firstorder | RootMeanSquared                      | 567.6500537  |
| wavelet-LLH | firstorder | 90Percentile                         | 692.2916149  |
| wavelet-LLH | firstorder | Minimum                              | -1719.426754 |
| wavelet-LLH | firstorder | Entropy                              | 5.486341312  |

|             |            |                                      |              |
|-------------|------------|--------------------------------------|--------------|
| wavelet-LLH | firstorder | Range                                | 2739.061225  |
| wavelet-LLH | firstorder | Variance                             | 301378.8197  |
| wavelet-LLH | firstorder | 10Percentile                         | -996.2657972 |
| wavelet-LLH | firstorder | Kurtosis                             | 3.554816387  |
| wavelet-LLH | firstorder | Mean                                 | -144.3875473 |
| wavelet-LLH | glrlm      | ShortRunLowGrayLevelEmphasis         | 0.010828358  |
| wavelet-LLH | glrlm      | GrayLevelVariance                    | 488.606226   |
| wavelet-LLH | glrlm      | LowGrayLevelRunEmphasis              | 0.010832464  |
| wavelet-LLH | glrlm      | GrayLevelNonUniformityNormalized     | 0.026235274  |
| wavelet-LLH | glrlm      | RunVariance                          | 0.023536878  |
| wavelet-LLH | glrlm      | GrayLevelNonUniformity               | 2.549280484  |
| wavelet-LLH | glrlm      | LongRunEmphasis                      | 1.0626102    |
| wavelet-LLH | glrlm      | ShortRunHighGrayLevelEmphasis        | 4500.675866  |
| wavelet-LLH | glrlm      | RunLengthNonUniformity               | 93.85567748  |
| wavelet-LLH | glrlm      | ShortRunEmphasis                     | 0.986649005  |
| wavelet-LLH | glrlm      | LongRunHighGrayLevelEmphasis         | 4805.266564  |
| wavelet-LLH | glrlm      | RunPercentage                        | 0.981351981  |
| wavelet-LLH | glrlm      | LongRunLowGrayLevelEmphasis          | 0.010850877  |
| wavelet-LLH | glrlm      | RunEntropy                           | 5.544058522  |
| wavelet-LLH | glrlm      | HighGrayLevelRunEmphasis             | 4553.080094  |
| wavelet-LLH | glrlm      | RunLengthNonUniformityNormalized     | 0.965706131  |
| wavelet-LLH | glszm      | GrayLevelVariance                    | 583.7523011  |
| wavelet-LLH | glszm      | ZoneVariance                         | 0.427514793  |
| wavelet-LLH | glszm      | GrayLevelNonUniformityNormalized     | 0.022024984  |
| wavelet-LLH | glszm      | SizeZoneNonUniformityNormalized      | 0.68869165   |
| wavelet-LLH | glszm      | SizeZoneNonUniformity                | 53.71794872  |
| wavelet-LLH | glszm      | GrayLevelNonUniformity               | 1.717948718  |
| wavelet-LLH | glszm      | LargeAreaEmphasis                    | 2.038461538  |
| wavelet-LLH | glszm      | SmallAreaHighGrayLevelEmphasis       | 4118.060897  |
| wavelet-LLH | glszm      | ZonePercentage                       | 0.787878788  |
| wavelet-LLH | glszm      | LargeAreaLowGrayLevelEmphasis        | 0.013718038  |
| wavelet-LLH | glszm      | LargeAreaHighGrayLevelEmphasis       | 8883.269231  |
| wavelet-LLH | glszm      | HighGrayLevelZoneEmphasis            | 4687.961538  |
| wavelet-LLH | glszm      | SmallAreaEmphasis                    | 0.855235043  |
| wavelet-LLH | glszm      | LowGrayLevelZoneEmphasis             | 0.01341422   |
| wavelet-LLH | glszm      | ZoneEntropy                          | 5.846111674  |
| wavelet-LLH | glszm      | SmallAreaLowGrayLevelEmphasis        | 0.013366487  |
| wavelet-LLH | ngtdm      | Coarseness                           | 0.033612617  |
| wavelet-LLH | ngtdm      | Complexity                           | 32098.14878  |
| wavelet-LLH | ngtdm      | Strength                             | 79.36130569  |
| wavelet-LLH | ngtdm      | Contrast                             | 5.742219333  |
| wavelet-LLH | ngtdm      | Busyness                             | 0.010680514  |
| wavelet-LLL | gldm       | GrayLevelVariance                    | 618.2928273  |
| wavelet-LLL | gldm       | HighGrayLevelEmphasis                | 2563.191919  |
| wavelet-LLL | gldm       | DependenceEntropy                    | 5.934862807  |
| wavelet-LLL | gldm       | DependenceNonUniformity              | 54.71717172  |
| wavelet-LLL | gldm       | GrayLevelNonUniformity               | 2.232323232  |
| wavelet-LLL | gldm       | SmallDependenceEmphasis              | 0.760942761  |
| wavelet-LLL | gldm       | SmallDependenceHighGrayLevelEmphasis | 1958.464646  |
| wavelet-LLL | gldm       | DependenceNonUniformityNormalized    | 0.552698704  |
| wavelet-LLL | gldm       | LargeDependenceEmphasis              | 2.090909091  |
| wavelet-LLL | gldm       | LargeDependenceLowGrayLevelEmphasis  | 0.021179132  |
| wavelet-LLL | gldm       | DependenceVariance                   | 0.286093256  |
| wavelet-LLL | gldm       | LargeDependenceHighGrayLevelEmphasis | 5419.676768  |
| wavelet-LLL | gldm       | SmallDependenceLowGrayLevelEmphasis  | 0.016725048  |

|             |            |                                  |              |
|-------------|------------|----------------------------------|--------------|
| wavelet-LLL | gldm       | LowGrayLevelEmphasis             | 0.017607574  |
| wavelet-LLL | glcm       | JointAverage                     | 49.73761955  |
| wavelet-LLL | glcm       | SumAverage                       | 99.47523909  |
| wavelet-LLL | glcm       | JointEntropy                     | 6.742334512  |
| wavelet-LLL | glcm       | ClusterShade                     | -6341.922756 |
| wavelet-LLL | glcm       | MaximumProbability               | 0.017715697  |
| wavelet-LLL | glcm       | Idmn                             | 0.911643114  |
| wavelet-LLL | glcm       | JointEnergy                      | 0.009743847  |
| wavelet-LLL | glcm       | Contrast                         | 865.4352648  |
| wavelet-LLL | glcm       | DifferenceEntropy                | 4.873223272  |
| wavelet-LLL | glcm       | InverseVariance                  | 0.036750996  |
| wavelet-LLL | glcm       | DifferenceVariance               | 248.000715   |
| wavelet-LLL | glcm       | Idn                              | 0.80388546   |
| wavelet-LLL | glcm       | Idm                              | 0.046383565  |
| wavelet-LLL | glcm       | Correlation                      | 0.275165608  |
| wavelet-LLL | glcm       | Autocorrelation                  | 2635.211237  |
| wavelet-LLL | glcm       | SumEntropy                       | 5.428365582  |
| wavelet-LLL | glcm       | SumSquares                       | 592.3710578  |
| wavelet-LLL | glcm       | ClusterProminence                | 4972396.689  |
| wavelet-LLL | glcm       | Imc2                             | 0.999897909  |
| wavelet-LLL | glcm       | Imc1                             | -0.776310244 |
| wavelet-LLL | glcm       | DifferenceAverage                | 23.89274562  |
| wavelet-LLL | glcm       | Id                               | 0.099143721  |
| wavelet-LLL | glcm       | ClusterTendency                  | 1504.048966  |
| wavelet-LLL | firstorder | InterquartileRange               | 980.4610068  |
| wavelet-LLL | firstorder | Skewness                         | 0.112262815  |
| wavelet-LLL | firstorder | Uniformity                       | 0.02254872   |
| wavelet-LLL | firstorder | Median                           | -709.9931383 |
| wavelet-LLL | firstorder | Energy                           | 81511277.36  |
| wavelet-LLL | firstorder | RobustMeanAbsoluteDeviation      | 411.409617   |
| wavelet-LLL | firstorder | MeanAbsoluteDeviation            | 529.9300081  |
| wavelet-LLL | firstorder | TotalEnergy                      | 2200804489   |
| wavelet-LLL | firstorder | Maximum                          | 443.6527859  |
| wavelet-LLL | firstorder | RootMeanSquared                  | 907.3842824  |
| wavelet-LLL | firstorder | 90Percentile                     | 255.0332238  |
| wavelet-LLL | firstorder | Minimum                          | -1746.680186 |
| wavelet-LLL | firstorder | Entropy                          | 5.682401004  |
| wavelet-LLL | firstorder | Range                            | 2190.332972  |
| wavelet-LLL | firstorder | Variance                         | 386188.076   |
| wavelet-LLL | firstorder | 10Percentile                     | -1500.663    |
| wavelet-LLL | firstorder | Kurtosis                         | 1.923490012  |
| wavelet-LLL | firstorder | Mean                             | -661.1793705 |
| wavelet-LLL | glrlm      | ShortRunLowGrayLevelEmphasis     | 0.017764782  |
| wavelet-LLL | glrlm      | GrayLevelVariance                | 618.2913403  |
| wavelet-LLL | glrlm      | LowGrayLevelRunEmphasis          | 0.017799834  |
| wavelet-LLL | glrlm      | GrayLevelNonUniformityNormalized | 0.022331912  |
| wavelet-LLL | glrlm      | RunVariance                      | 0.013197386  |
| wavelet-LLL | glrlm      | GrayLevelNonUniformity           | 2.181967856  |
| wavelet-LLL | glrlm      | LongRunEmphasis                  | 1.040720297  |
| wavelet-LLL | glrlm      | ShortRunHighGrayLevelEmphasis    | 2536.644992  |
| wavelet-LLL | glrlm      | RunLengthNonUniformity           | 95.14907808  |
| wavelet-LLL | glrlm      | ShortRunEmphasis                 | 0.989819926  |
| wavelet-LLL | glrlm      | LongRunHighGrayLevelEmphasis     | 2668.084077  |
| wavelet-LLL | glrlm      | RunPercentage                    | 0.986790987  |
| wavelet-LLL | glrlm      | LongRunLowGrayLevelEmphasis      | 0.017940041  |

|             |       |                                      |              |
|-------------|-------|--------------------------------------|--------------|
| wavelet-LLL | glrlm | RunEntropy                           | 5.716360349  |
| wavelet-LLL | glrlm | HighGrayLevelRunEmphasis             | 2562.932809  |
| wavelet-LLL | glrlm | RunLengthNonUniformityNormalized     | 0.973605227  |
| wavelet-LLL | glszm | GrayLevelVariance                    | 614.7339236  |
| wavelet-LLL | glszm | ZoneVariance                         | 0.179706779  |
| wavelet-LLL | glszm | GrayLevelNonUniformityNormalized     | 0.019596458  |
| wavelet-LLL | glszm | SizeZoneNonUniformityNormalized      | 0.699811293  |
| wavelet-LLL | glszm | SizeZoneNonUniformity                | 58.08433735  |
| wavelet-LLL | glszm | GrayLevelNonUniformity               | 1.626506024  |
| wavelet-LLL | glszm | LargeAreaEmphasis                    | 1.602409639  |
| wavelet-LLL | glszm | SmallAreaHighGrayLevelEmphasis       | 2224.481928  |
| wavelet-LLL | glszm | ZonePercentage                       | 0.838383838  |
| wavelet-LLL | glszm | LargeAreaLowGrayLevelEmphasis        | 0.022414406  |
| wavelet-LLL | glszm | LargeAreaHighGrayLevelEmphasis       | 4114.722892  |
| wavelet-LLL | glszm | HighGrayLevelZoneEmphasis            | 2567.73494   |
| wavelet-LLL | glszm | SmallAreaEmphasis                    | 0.862784471  |
| wavelet-LLL | glszm | LowGrayLevelZoneEmphasis             | 0.020299213  |
| wavelet-LLL | glszm | ZoneEntropy                          | 5.989497263  |
| wavelet-LLL | glszm | SmallAreaLowGrayLevelEmphasis        | 0.019774536  |
| wavelet-LLL | ngtdm | Coarseness                           | 0.029010832  |
| wavelet-LLL | ngtdm | Complexity                           | 32589.43888  |
| wavelet-LLL | ngtdm | Strength                             | 99.64534189  |
| wavelet-LLL | ngtdm | Contrast                             | 5.475823143  |
| wavelet-LLL | ngtdm | Busyness                             | 0.016454754  |
| wavelet-HHL | gldm  | GrayLevelVariance                    | 79.86368738  |
| wavelet-HHL | gldm  | HighGrayLevelEmphasis                | 690.3030303  |
| wavelet-HHL | gldm  | DependenceEntropy                    | 5.380379443  |
| wavelet-HHL | gldm  | DependenceNonUniformity              | 41.86868687  |
| wavelet-HHL | gldm  | GrayLevelNonUniformity               | 4.171717172  |
| wavelet-HHL | gldm  | SmallDependenceEmphasis              | 0.653198653  |
| wavelet-HHL | gldm  | SmallDependenceHighGrayLevelEmphasis | 482.7631874  |
| wavelet-HHL | gldm  | DependenceNonUniformityNormalized    | 0.422916029  |
| wavelet-HHL | gldm  | LargeDependenceEmphasis              | 3.060606061  |
| wavelet-HHL | gldm  | LargeDependenceLowGrayLevelEmphasis  | 0.01691012   |
| wavelet-HHL | gldm  | DependenceVariance                   | 0.545658606  |
| wavelet-HHL | gldm  | LargeDependenceHighGrayLevelEmphasis | 1950.585859  |
| wavelet-HHL | gldm  | SmallDependenceLowGrayLevelEmphasis  | 0.011984011  |
| wavelet-HHL | gldm  | LowGrayLevelEmphasis                 | 0.012731899  |
| wavelet-HHL | glcm  | JointAverage                         | 25.11804444  |
| wavelet-HHL | glcm  | SumAverage                           | 50.23608888  |
| wavelet-HHL | glcm  | JointEntropy                         | 6.569593252  |
| wavelet-HHL | glcm  | ClusterShade                         | 511.6622838  |
| wavelet-HHL | glcm  | MaximumProbability                   | 0.02245027   |
| wavelet-HHL | glcm  | Idmn                                 | 0.946070745  |
| wavelet-HHL | glcm  | JointEnergy                          | 0.011356946  |
| wavelet-HHL | glcm  | Contrast                             | 152.7397285  |
| wavelet-HHL | glcm  | DifferenceEntropy                    | 4.085628939  |
| wavelet-HHL | glcm  | InverseVariance                      | 0.107539682  |
| wavelet-HHL | glcm  | DifferenceVariance                   | 56.29898273  |
| wavelet-HHL | glcm  | Idn                                  | 0.850879713  |
| wavelet-HHL | glcm  | Idm                                  | 0.105986941  |
| wavelet-HHL | glcm  | Correlation                          | -0.023145712 |
| wavelet-HHL | glcm  | Autocorrelation                      | 630.9658409  |
| wavelet-HHL | glcm  | SumEntropy                           | 4.699362564  |
| wavelet-HHL | glcm  | SumSquares                           | 75.97070434  |

|             |            |                                  |              |
|-------------|------------|----------------------------------|--------------|
| wavelet-HHL | glcm       | ClusterProminence                | 93590.39822  |
| wavelet-HHL | glcm       | Imc2                             | 0.997893626  |
| wavelet-HHL | glcm       | Imc1                             | -0.590740835 |
| wavelet-HHL | glcm       | DifferenceAverage                | 9.378536085  |
| wavelet-HHL | glcm       | Id                               | 0.19078703   |
| wavelet-HHL | glcm       | ClusterTendency                  | 151.1430889  |
| wavelet-HHL | firstorder | InterquartileRange               | 289.6833536  |
| wavelet-HHL | firstorder | Skewness                         | 0.297891945  |
| wavelet-HHL | firstorder | Uniformity                       | 0.042138557  |
| wavelet-HHL | firstorder | Median                           | -9.70551159  |
| wavelet-HHL | firstorder | Energy                           | 5000437.672  |
| wavelet-HHL | firstorder | RobustMeanAbsoluteDeviation      | 123.7281006  |
| wavelet-HHL | firstorder | MeanAbsoluteDeviation            | 177.1814969  |
| wavelet-HHL | firstorder | TotalEnergy                      | 135011817.1  |
| wavelet-HHL | firstorder | Maximum                          | 613.7195534  |
| wavelet-HHL | firstorder | RootMeanSquared                  | 224.7431232  |
| wavelet-HHL | firstorder | 90Percentile                     | 314.4399422  |
| wavelet-HHL | firstorder | Minimum                          | -551.2401029 |
| wavelet-HHL | firstorder | Entropy                          | 4.790021141  |
| wavelet-HHL | firstorder | Range                            | 1164.959656  |
| wavelet-HHL | firstorder | Variance                         | 49597.29292  |
| wavelet-HHL | firstorder | 10Percentile                     | -231.0293773 |
| wavelet-HHL | firstorder | Kurtosis                         | 3.080897703  |
| wavelet-HHL | firstorder | Mean                             | 30.20229312  |
| wavelet-HHL | glrlm      | ShortRunLowGrayLevelEmphasis     | 0.012944642  |
| wavelet-HHL | glrlm      | GrayLevelVariance                | 81.02653539  |
| wavelet-HHL | glrlm      | LowGrayLevelRunEmphasis          | 0.012980386  |
| wavelet-HHL | glrlm      | GrayLevelNonUniformityNormalized | 0.041730008  |
| wavelet-HHL | glrlm      | RunVariance                      | 0.024122051  |
| wavelet-HHL | glrlm      | GrayLevelNonUniformity           | 4.038460084  |
| wavelet-HHL | glrlm      | LongRunEmphasis                  | 1.071542827  |
| wavelet-HHL | glrlm      | ShortRunHighGrayLevelEmphasis    | 682.1532154  |
| wavelet-HHL | glrlm      | RunLengthNonUniformity           | 92.6003691   |
| wavelet-HHL | glrlm      | ShortRunEmphasis                 | 0.983013978  |
| wavelet-HHL | glrlm      | LongRunHighGrayLevelEmphasis     | 736.4738937  |
| wavelet-HHL | glrlm      | RunPercentage                    | 0.977466977  |
| wavelet-HHL | glrlm      | LongRunLowGrayLevelEmphasis      | 0.013126668  |
| wavelet-HHL | glrlm      | RunEntropy                       | 4.864661149  |
| wavelet-HHL | glrlm      | HighGrayLevelRunEmphasis         | 692.2335454  |
| wavelet-HHL | glrlm      | RunLengthNonUniformityNormalized | 0.956460778  |
| wavelet-HHL | glszm      | GrayLevelVariance                | 97.88580247  |
| wavelet-HHL | glszm      | ZoneVariance                     | 0.651041667  |
| wavelet-HHL | glszm      | GrayLevelNonUniformityNormalized | 0.037037037  |
| wavelet-HHL | glszm      | SizeZoneNonUniformityNormalized  | 0.624614198  |
| wavelet-HHL | glszm      | SizeZoneNonUniformity            | 44.97222222  |
| wavelet-HHL | glszm      | GrayLevelNonUniformity           | 2.666666667  |
| wavelet-HHL | glszm      | LargeAreaEmphasis                | 2.541666667  |
| wavelet-HHL | glszm      | SmallAreaHighGrayLevelEmphasis   | 612.8762539  |
| wavelet-HHL | glszm      | ZonePercentage                   | 0.727272727  |
| wavelet-HHL | glszm      | LargeAreaLowGrayLevelEmphasis    | 0.019851807  |
| wavelet-HHL | glszm      | LargeAreaHighGrayLevelEmphasis   | 1665.388889  |
| wavelet-HHL | glszm      | HighGrayLevelZoneEmphasis        | 720.1111111  |
| wavelet-HHL | glszm      | SmallAreaEmphasis                | 0.816238426  |
| wavelet-HHL | glszm      | LowGrayLevelZoneEmphasis         | 0.016722145  |
| wavelet-HHL | glszm      | ZoneEntropy                      | 5.223550481  |

|             |            |                                      |              |
|-------------|------------|--------------------------------------|--------------|
| wavelet-HHL | glszm      | SmallAreaLowGrayLevelEmphasis        | 0.016305001  |
| wavelet-HHL | ngtdm      | Coarseness                           | 0.043736486  |
| wavelet-HHL | ngtdm      | Complexity                           | 3315.261825  |
| wavelet-HHL | ngtdm      | Strength                             | 19.74000074  |
| wavelet-HHL | ngtdm      | Contrast                             | 1.076042174  |
| wavelet-HHL | ngtdm      | Busyness                             | 0.037902819  |
| wavelet-HLH | gldm       | GrayLevelVariance                    | 51.67084991  |
| wavelet-HLH | gldm       | HighGrayLevelEmphasis                | 406.5555556  |
| wavelet-HLH | gldm       | DependenceEntropy                    | 5.22739715   |
| wavelet-HLH | gldm       | DependenceNonUniformity              | 46.33333333  |
| wavelet-HLH | gldm       | GrayLevelNonUniformity               | 4.818181818  |
| wavelet-HLH | gldm       | SmallDependenceEmphasis              | 0.691130752  |
| wavelet-HLH | gldm       | SmallDependenceHighGrayLevelEmphasis | 274.4752385  |
| wavelet-HLH | gldm       | DependenceNonUniformityNormalized    | 0.468013468  |
| wavelet-HLH | gldm       | LargeDependenceEmphasis              | 2.95959596   |
| wavelet-HLH | gldm       | LargeDependenceLowGrayLevelEmphasis  | 0.022602429  |
| wavelet-HLH | gldm       | DependenceVariance                   | 0.633200694  |
| wavelet-HLH | gldm       | LargeDependenceHighGrayLevelEmphasis | 1145.121212  |
| wavelet-HLH | gldm       | SmallDependenceLowGrayLevelEmphasis  | 0.013910011  |
| wavelet-HLH | gldm       | LowGrayLevelEmphasis                 | 0.015088047  |
| wavelet-HLH | glcm       | JointAverage                         | 18.52879522  |
| wavelet-HLH | glcm       | SumAverage                           | 37.05759044  |
| wavelet-HLH | glcm       | JointEntropy                         | 6.578974483  |
| wavelet-HLH | glcm       | ClusterShade                         | 61.27047537  |
| wavelet-HLH | glcm       | MaximumProbability                   | 0.024337472  |
| wavelet-HLH | glcm       | Idmn                                 | 0.934065161  |
| wavelet-HLH | glcm       | JointEnergy                          | 0.011220709  |
| wavelet-HLH | glcm       | Contrast                             | 109.9975733  |
| wavelet-HLH | glcm       | DifferenceEntropy                    | 4.000519271  |
| wavelet-HLH | glcm       | InverseVariance                      | 0.120794229  |
| wavelet-HLH | glcm       | DifferenceVariance                   | 38.34773206  |
| wavelet-HLH | glcm       | Idn                                  | 0.831092379  |
| wavelet-HLH | glcm       | Idm                                  | 0.108190429  |
| wavelet-HLH | glcm       | Correlation                          | -0.036873137 |
| wavelet-HLH | glcm       | Autocorrelation                      | 341.4825868  |
| wavelet-HLH | glcm       | SumEntropy                           | 4.676542315  |
| wavelet-HLH | glcm       | SumSquares                           | 53.11022283  |
| wavelet-HLH | glcm       | ClusterProminence                    | 33355.41511  |
| wavelet-HLH | glcm       | Imc2                                 | 0.996297495  |
| wavelet-HLH | glcm       | Imc1                                 | -0.547551067 |
| wavelet-HLH | glcm       | DifferenceAverage                    | 8.325879781  |
| wavelet-HLH | glcm       | Id                                   | 0.194931789  |
| wavelet-HLH | glcm       | ClusterTendency                      | 102.4433181  |
| wavelet-HLH | firstorder | InterquartileRange                   | 248.6053265  |
| wavelet-HLH | firstorder | Skewness                             | 0.156257867  |
| wavelet-HLH | firstorder | Uniformity                           | 0.048668503  |
| wavelet-HLH | firstorder | Median                               | 35.28418705  |
| wavelet-HLH | firstorder | Energy                               | 3330846.389  |
| wavelet-HLH | firstorder | RobustMeanAbsoluteDeviation          | 102.7057545  |
| wavelet-HLH | firstorder | MeanAbsoluteDeviation                | 145.4385518  |
| wavelet-HLH | firstorder | TotalEnergy                          | 89932852.49  |
| wavelet-HLH | firstorder | Maximum                              | 479.5494232  |
| wavelet-HLH | firstorder | RootMeanSquared                      | 183.4254972  |
| wavelet-HLH | firstorder | 90Percentile                         | 278.0910007  |
| wavelet-HLH | firstorder | Minimum                              | -423.4871531 |

|             |            |                                  |              |
|-------------|------------|----------------------------------|--------------|
| wavelet-HLH | firstorder | Entropy                          | 4.584552046  |
| wavelet-HLH | firstorder | Range                            | 903.0365763  |
| wavelet-HLH | firstorder | Variance                         | 32523.03206  |
| wavelet-HLH | firstorder | 10Percentile                     | -182.5808343 |
| wavelet-HLH | firstorder | Kurtosis                         | 2.677575307  |
| wavelet-HLH | firstorder | Mean                             | 33.49449148  |
| wavelet-HLH | glrlm      | ShortRunLowGrayLevelEmphasis     | 0.015266455  |
| wavelet-HLH | glrlm      | GrayLevelVariance                | 52.039436    |
| wavelet-HLH | glrlm      | LowGrayLevelRunEmphasis          | 0.015326241  |
| wavelet-HLH | glrlm      | GrayLevelNonUniformityNormalized | 0.048064124  |
| wavelet-HLH | glrlm      | RunVariance                      | 0.020145962  |
| wavelet-HLH | glrlm      | GrayLevelNonUniformity           | 4.662790355  |
| wavelet-HLH | glrlm      | LongRunEmphasis                  | 1.0632107    |
| wavelet-HLH | glrlm      | ShortRunHighGrayLevelEmphasis    | 400.2890623  |
| wavelet-HLH | glrlm      | RunLengthNonUniformity           | 93.17190622  |
| wavelet-HLH | glrlm      | ShortRunEmphasis                 | 0.984197325  |
| wavelet-HLH | glrlm      | LongRunHighGrayLevelEmphasis     | 432.0734488  |
| wavelet-HLH | glrlm      | RunPercentage                    | 0.97979798   |
| wavelet-HLH | glrlm      | LongRunLowGrayLevelEmphasis      | 0.015565384  |
| wavelet-HLH | glrlm      | RunEntropy                       | 4.661878931  |
| wavelet-HLH | glrlm      | HighGrayLevelRunEmphasis         | 406.6459396  |
| wavelet-HLH | glrlm      | RunLengthNonUniformityNormalized | 0.959708076  |
| wavelet-HLH | glszm      | GrayLevelVariance                | 56.32271468  |
| wavelet-HLH | glszm      | ZoneVariance                     | 0.500519391  |
| wavelet-HLH | glszm      | GrayLevelNonUniformityNormalized | 0.043628809  |
| wavelet-HLH | glszm      | SizeZoneNonUniformityNormalized  | 0.649238227  |
| wavelet-HLH | glszm      | SizeZoneNonUniformity            | 49.34210526  |
| wavelet-HLH | glszm      | GrayLevelNonUniformity           | 3.315789474  |
| wavelet-HLH | glszm      | LargeAreaEmphasis                | 2.197368421  |
| wavelet-HLH | glszm      | SmallAreaHighGrayLevelEmphasis   | 327.8665936  |
| wavelet-HLH | glszm      | ZonePercentage                   | 0.767676768  |
| wavelet-HLH | glszm      | LargeAreaLowGrayLevelEmphasis    | 0.022878055  |
| wavelet-HLH | glszm      | LargeAreaHighGrayLevelEmphasis   | 887.8815789  |
| wavelet-HLH | glszm      | HighGrayLevelZoneEmphasis        | 401.5        |
| wavelet-HLH | glszm      | SmallAreaEmphasis                | 0.833220029  |
| wavelet-HLH | glszm      | LowGrayLevelZoneEmphasis         | 0.018527914  |
| wavelet-HLH | glszm      | ZoneEntropy                      | 5.073135244  |
| wavelet-HLH | glszm      | SmallAreaLowGrayLevelEmphasis    | 0.017873013  |
| wavelet-HLH | ngtdm      | Coarseness                       | 0.043115007  |
| wavelet-HLH | ngtdm      | Complexity                       | 2012.605488  |
| wavelet-HLH | ngtdm      | Strength                         | 13.21399492  |
| wavelet-HLH | ngtdm      | Contrast                         | 0.771261601  |
| wavelet-HLH | ngtdm      | Busyness                         | 0.054334695  |

| Image type | Feature Class | Feature Name                         |                                                                                                                                                                                                                                                                                                                                                                                                                                              |
|------------|---------------|--------------------------------------|----------------------------------------------------------------------------------------------------------------------------------------------------------------------------------------------------------------------------------------------------------------------------------------------------------------------------------------------------------------------------------------------------------------------------------------------|
| general    | info          | BoundingBox                          | 11: RTSTRUCT: C99-DNU_segment_Tumor<br>(0, 0, 1, 9, 6, 7)                                                                                                                                                                                                                                                                                                                                                                                    |
| general    | info          | EnabledImageTypes                    | {u'Original': {}, u'Wavelet': {}}                                                                                                                                                                                                                                                                                                                                                                                                            |
|            |               |                                      | {'distances': [1], 'additionalInfo': True,<br>'force2D': False, 'interpolator': 'sitkBSpline',<br>'resampledPixelSpacing': [3.0], 'label': 1,<br>'normalizeScale': 1, 'normalize': False,<br>'force2Ddimension': 0, 'removeOutliers':<br>None, 'minimumROISize': None, u'binWidth':<br>25.0, 'minimumROIDimensions': 1,<br>u'correctMask': True, 'preCrop': False,<br>u'symmetricalGLCM': True,<br>'resegmentRange': None, 'padDistance': 5} |
| general    | info          | GeneralSettings                      | d1448d1054ef3f5958caa29f0aec3fa175e10e<br>06                                                                                                                                                                                                                                                                                                                                                                                                 |
| general    | info          | ImageHash                            | (0.9765625000000002,<br>0.9765625000000002, 2.0)                                                                                                                                                                                                                                                                                                                                                                                             |
| general    | info          | ImageSpacing                         | 5428d4eb24a2ef46135486e49994c85f4ad1c<br>773                                                                                                                                                                                                                                                                                                                                                                                                 |
| general    | info          | MaskHash                             | 1.13.1                                                                                                                                                                                                                                                                                                                                                                                                                                       |
| general    | info          | NumpyVersion                         | 0.5.2                                                                                                                                                                                                                                                                                                                                                                                                                                        |
| general    | info          | PyWaveletVersion                     | 1.1.0                                                                                                                                                                                                                                                                                                                                                                                                                                        |
| general    | info          | SimpleITKVersion                     | 1.3.0.post102+g1b0eb74                                                                                                                                                                                                                                                                                                                                                                                                                       |
| general    | info          | Version                              |                                                                                                                                                                                                                                                                                                                                                                                                                                              |
| general    | info          | VolumeNum                            | 1                                                                                                                                                                                                                                                                                                                                                                                                                                            |
| general    | info          | VoxelNum                             | 150                                                                                                                                                                                                                                                                                                                                                                                                                                          |
| original   | shape         | Maximum3DDiameter                    | 27                                                                                                                                                                                                                                                                                                                                                                                                                                           |
| original   | shape         | Maximum2DDiameterSlice               | 21.21320344                                                                                                                                                                                                                                                                                                                                                                                                                                  |
| original   | shape         | Sphericity                           | 0.838176628                                                                                                                                                                                                                                                                                                                                                                                                                                  |
| original   | shape         | MinorAxis                            | 15.87696363                                                                                                                                                                                                                                                                                                                                                                                                                                  |
| original   | shape         | Elongation                           | 0.626386244                                                                                                                                                                                                                                                                                                                                                                                                                                  |
| original   | shape         | SurfaceVolumeRatio                   | 0.361962493                                                                                                                                                                                                                                                                                                                                                                                                                                  |
| original   | shape         | Volume                               | 4050                                                                                                                                                                                                                                                                                                                                                                                                                                         |
| original   | shape         | MajorAxis                            | 25.34692257                                                                                                                                                                                                                                                                                                                                                                                                                                  |
| original   | shape         | SurfaceArea                          | 1465.948095                                                                                                                                                                                                                                                                                                                                                                                                                                  |
| original   | shape         | Flatness                             | 0.582919168                                                                                                                                                                                                                                                                                                                                                                                                                                  |
| original   | shape         | LeastAxis                            | 14.77520701                                                                                                                                                                                                                                                                                                                                                                                                                                  |
| original   | shape         | Maximum2DDiameterColumn              | 26.83281573                                                                                                                                                                                                                                                                                                                                                                                                                                  |
| original   | shape         | Maximum2DDiameterRow                 | 20.1246118                                                                                                                                                                                                                                                                                                                                                                                                                                   |
| original   | gldm          | GrayLevelVariance                    | 116.0924889                                                                                                                                                                                                                                                                                                                                                                                                                                  |
| original   | gldm          | HighGrayLevelEmphasis                | 641.1133333                                                                                                                                                                                                                                                                                                                                                                                                                                  |
| original   | gldm          | DependenceEntropy                    | 5.765071067                                                                                                                                                                                                                                                                                                                                                                                                                                  |
| original   | gldm          | DependenceNonUniformity              | 48.37333333                                                                                                                                                                                                                                                                                                                                                                                                                                  |
| original   | gldm          | GrayLevelNonUniformity               | 7.2                                                                                                                                                                                                                                                                                                                                                                                                                                          |
| original   | gldm          | SmallDependenceEmphasis              | 0.581936608                                                                                                                                                                                                                                                                                                                                                                                                                                  |
| original   | gldm          | SmallDependenceHighGrayLevelEmphasis | 233.8262815                                                                                                                                                                                                                                                                                                                                                                                                                                  |
| original   | gldm          | DependenceNonUniformityNormalized    | 0.322488889                                                                                                                                                                                                                                                                                                                                                                                                                                  |
| original   | gldm          | LargeDependenceEmphasis              | 9.32                                                                                                                                                                                                                                                                                                                                                                                                                                         |
| original   | gldm          | LargeDependenceLowGrayLevelEmphasis  | 0.037529055                                                                                                                                                                                                                                                                                                                                                                                                                                  |
| original   | gldm          | DependenceVariance                   | 3.9376                                                                                                                                                                                                                                                                                                                                                                                                                                       |
| original   | gldm          | LargeDependenceHighGrayLevelEmphasis | 10222.92667                                                                                                                                                                                                                                                                                                                                                                                                                                  |



|          |            |                                     |              |
|----------|------------|-------------------------------------|--------------|
| original | gldm       | SmallDependenceLowGrayLevelEmphasis | 0.015094516  |
| original | gldm       | LowGrayLevelEmphasis                | 0.018466266  |
| original | glcm       | JointAverage                        | 25.49598556  |
| original | glcm       | SumAverage                          | 50.99197113  |
| original | glcm       | JointEntropy                        | 6.901877295  |
| original | glcm       | ClusterShade                        | -2609.839479 |
| original | glcm       | MaximumProbability                  | 0.044544394  |
| original | glcm       | Idmn                                | 0.902941158  |
| original | glcm       | JointEnergy                         | 0.011237481  |
| original | glcm       | Contrast                            | 171.5436168  |
| original | glcm       | DifferenceEntropy                   | 4.38353599   |
| original | glcm       | InverseVariance                     | 0.163276232  |
| original | glcm       | DifferenceVariance                  | 74.77633397  |
| original | glcm       | Idn                                 | 0.813522949  |
| original | glcm       | Idm                                 | 0.171310376  |
| original | glcm       | Correlation                         | 0.170241989  |
| original | glcm       | Autocorrelation                     | 667.6836284  |
| original | glcm       | SumEntropy                          | 5.127303344  |
| original | glcm       | SumSquares                          | 103.307913   |
| original | glcm       | ClusterProminence                   | 158811.4548  |
| original | glcm       | Imc2                                | 0.991343586  |
| original | glcm       | Imc1                                | -0.455941056 |
| original | glcm       | DifferenceAverage                   | 9.74229526   |
| original | glcm       | Id                                  | 0.239876815  |
| original | glcm       | ClusterTendency                     | 241.6880351  |
| original | firstorder | InterquartileRange                  | 492.75       |
| original | firstorder | Skewness                            | -0.44388371  |
| original | firstorder | Uniformity                          | 0.048        |
| original | firstorder | Median                              | -185.5       |
| original | firstorder | Energy                              | 21457803     |
| original | firstorder | RobustMeanAbsoluteDeviation         | 200.2843322  |
| original | firstorder | MeanAbsoluteDeviation               | 239.3032     |
| original | firstorder | TotalEnergy                         | 579360681    |
| original | firstorder | Maximum                             | 60           |
| original | firstorder | RootMeanSquared                     | 378.2221834  |
| original | firstorder | 90Percentile                        | 33           |
| original | firstorder | Minimum                             | -805         |
| original | firstorder | Entropy                             | 4.763949425  |
| original | firstorder | Range                               | 865          |
| original | firstorder | Variance                            | 72717.44396  |
| original | firstorder | 10Percentile                        | -686.2       |
| original | firstorder | Kurtosis                            | 1.799043769  |
| original | firstorder | Mean                                | -265.2066667 |
| original | gllm       | ShortRunLowGrayLevelEmphasis        | 0.019094118  |
| original | gllm       | GrayLevelVariance                   | 115.2479218  |
| original | gllm       | LowGrayLevelRunEmphasis             | 0.019251573  |
| original | gllm       | GrayLevelNonUniformityNormalized    | 0.04368768   |
| original | gllm       | RunVariance                         | 0.054984902  |
| original | gllm       | GrayLevelNonUniformity              | 6.225202342  |
| original | gllm       | LongRunEmphasis                     | 1.166381085  |
| original | gllm       | ShortRunHighGrayLevelEmphasis       | 573.7533079  |
| original | gllm       | RunLengthNonUniformity              | 128.5921295  |
| original | gllm       | ShortRunEmphasis                    | 0.96087334   |

|             |       |                                      |              |
|-------------|-------|--------------------------------------|--------------|
| original    | glrlm | LongRunHighGrayLevelEmphasis         | 799.2908514  |
| original    | glrlm | RunPercentage                        | 0.949230769  |
| original    | glrlm | LongRunLowGrayLevelEmphasis          | 0.019889827  |
| original    | glrlm | RunEntropy                           | 4.994971061  |
| original    | glrlm | HighGrayLevelRunEmphasis             | 616.5426661  |
| original    | glrlm | RunLengthNonUniformityNormalized     | 0.902348211  |
| original    | glszm | GrayLevelVariance                    | 96.02295674  |
| original    | glszm | ZoneVariance                         | 4.598363269  |
| original    | glszm | GrayLevelNonUniformityNormalized     | 0.033266022  |
| original    | glszm | SizeZoneNonUniformityNormalized      | 0.652247848  |
| original    | glszm | SizeZoneNonUniformity                | 63.26804124  |
| original    | glszm | GrayLevelNonUniformity               | 3.226804124  |
| original    | glszm | LargeAreaEmphasis                    | 6.989690722  |
| original    | glszm | SmallAreaHighGrayLevelEmphasis       | 305.8606872  |
| original    | glszm | ZonePercentage                       | 0.646666667  |
| original    | glszm | LargeAreaLowGrayLevelEmphasis        | 0.039360444  |
| original    | glszm | LargeAreaHighGrayLevelEmphasis       | 7296.381443  |
| original    | glszm | HighGrayLevelZoneEmphasis            | 437.7010309  |
| original    | glszm | SmallAreaEmphasis                    | 0.833838525  |
| original    | glszm | LowGrayLevelZoneEmphasis             | 0.024979429  |
| original    | glszm | ZoneEntropy                          | 5.44992444   |
| original    | glszm | SmallAreaLowGrayLevelEmphasis        | 0.022508314  |
| original    | ngtdm | Coarseness                           | 0.018975175  |
| original    | ngtdm | Complexity                           | 4319.069974  |
| original    | ngtdm | Strength                             | 14.50942542  |
| original    | ngtdm | Contrast                             | 1.550614164  |
| original    | ngtdm | Busyness                             | 0.056405124  |
| wavelet-HHH | gldm  | GrayLevelVariance                    | 10.75222222  |
| wavelet-HHH | gldm  | HighGrayLevelEmphasis                | 85.28666667  |
| wavelet-HHH | gldm  | DependenceEntropy                    | 5.155485945  |
| wavelet-HHH | gldm  | DependenceNonUniformity              | 39.57333333  |
| wavelet-HHH | gldm  | GrayLevelNonUniformity               | 13.86666667  |
| wavelet-HHH | gldm  | SmallDependenceEmphasis              | 0.464606425  |
| wavelet-HHH | gldm  | SmallDependenceHighGrayLevelEmphasis | 35.58794777  |
| wavelet-HHH | gldm  | DependenceNonUniformityNormalized    | 0.263822222  |
| wavelet-HHH | gldm  | LargeDependenceEmphasis              | 6.506666667  |
| wavelet-HHH | gldm  | LargeDependenceLowGrayLevelEmphasis  | 0.133925977  |
| wavelet-HHH | gldm  | DependenceVariance                   | 1.548622222  |
| wavelet-HHH | gldm  | LargeDependenceHighGrayLevelEmphasis | 574.98       |
| wavelet-HHH | gldm  | SmallDependenceLowGrayLevelEmphasis  | 0.04262138   |
| wavelet-HHH | gldm  | LowGrayLevelEmphasis                 | 0.052149079  |
| wavelet-HHH | glcm  | JointAverage                         | 8.542772345  |
| wavelet-HHH | glcm  | SumAverage                           | 17.08554469  |
| wavelet-HHH | glcm  | JointEntropy                         | 6.482787004  |
| wavelet-HHH | glcm  | ClusterShade                         | -15.21110469 |
| wavelet-HHH | glcm  | MaximumProbability                   | 0.032015143  |
| wavelet-HHH | glcm  | Idmn                                 | 0.928907767  |
| wavelet-HHH | glcm  | JointEnergy                          | 0.013446624  |
| wavelet-HHH | glcm  | Contrast                             | 22.54594988  |
| wavelet-HHH | glcm  | DifferenceEntropy                    | 3.233388182  |
| wavelet-HHH | glcm  | InverseVariance                      | 0.247027034  |
| wavelet-HHH | glcm  | DifferenceVariance                   | 8.192244342  |
| wavelet-HHH | glcm  | Idn                                  | 0.825558773  |

|             |            |                                  |              |
|-------------|------------|----------------------------------|--------------|
| wavelet-HHH | glcm       | Idm                              | 0.222725751  |
| wavelet-HHH | glcm       | Correlation                      | -0.042246796 |
| wavelet-HHH | glcm       | Autocorrelation                  | 72.53832767  |
| wavelet-HHH | glcm       | SumEntropy                       | 3.97724548   |
| wavelet-HHH | glcm       | SumSquares                       | 10.82679283  |
| wavelet-HHH | glcm       | ClusterProminence                | 1325.895583  |
| wavelet-HHH | glcm       | Imc2                             | 0.896280835  |
| wavelet-HHH | glcm       | Imc1                             | -0.225131015 |
| wavelet-HHH | glcm       | DifferenceAverage                | 3.761576249  |
| wavelet-HHH | glcm       | Id                               | 0.317223421  |
| wavelet-HHH | glcm       | ClusterTendency                  | 20.76122146  |
| wavelet-HHH | firstorder | InterquartileRange               | 93.09348955  |
| wavelet-HHH | firstorder | Skewness                         | -0.258308227 |
| wavelet-HHH | firstorder | Uniformity                       | 0.092444444  |
| wavelet-HHH | firstorder | Median                           | 4.689432436  |
| wavelet-HHH | firstorder | Energy                           | 996359.9937  |
| wavelet-HHH | firstorder | RobustMeanAbsoluteDeviation      | 42.85691436  |
| wavelet-HHH | firstorder | MeanAbsoluteDeviation            | 63.65572925  |
| wavelet-HHH | firstorder | TotalEnergy                      | 26901719.83  |
| wavelet-HHH | firstorder | Maximum                          | 197.3406346  |
| wavelet-HHH | firstorder | RootMeanSquared                  | 81.50091998  |
| wavelet-HHH | firstorder | 90Percentile                     | 100.6835545  |
| wavelet-HHH | firstorder | Minimum                          | -198.329252  |
| wavelet-HHH | firstorder | Entropy                          | 3.662822942  |
| wavelet-HHH | firstorder | Range                            | 395.6698866  |
| wavelet-HHH | firstorder | Variance                         | 6629.932744  |
| wavelet-HHH | firstorder | 10Percentile                     | -108.48495   |
| wavelet-HHH | firstorder | Kurtosis                         | 2.933504973  |
| wavelet-HHH | firstorder | Mean                             | 3.530894223  |
| wavelet-HHH | glrlm      | ShortRunLowGrayLevelEmphasis     | 0.053383249  |
| wavelet-HHH | glrlm      | GrayLevelVariance                | 11.05155773  |
| wavelet-HHH | glrlm      | LowGrayLevelRunEmphasis          | 0.053955389  |
| wavelet-HHH | glrlm      | GrayLevelNonUniformityNormalized | 0.090212726  |
| wavelet-HHH | glrlm      | RunVariance                      | 0.053550318  |
| wavelet-HHH | glrlm      | GrayLevelNonUniformity           | 12.89433056  |
| wavelet-HHH | glrlm      | LongRunEmphasis                  | 1.155973192  |
| wavelet-HHH | glrlm      | ShortRunHighGrayLevelEmphasis    | 81.88958306  |
| wavelet-HHH | glrlm      | RunLengthNonUniformity           | 130.3315708  |
| wavelet-HHH | glrlm      | ShortRunEmphasis                 | 0.964636034  |
| wavelet-HHH | glrlm      | LongRunHighGrayLevelEmphasis     | 99.17089758  |
| wavelet-HHH | glrlm      | RunPercentage                    | 0.952820513  |
| wavelet-HHH | glrlm      | LongRunLowGrayLevelEmphasis      | 0.056399747  |
| wavelet-HHH | glrlm      | RunEntropy                       | 3.895840103  |
| wavelet-HHH | glrlm      | HighGrayLevelRunEmphasis         | 85.0500068   |
| wavelet-HHH | glrlm      | RunLengthNonUniformityNormalized | 0.911424569  |
| wavelet-HHH | glszm      | GrayLevelVariance                | 15.64317867  |
| wavelet-HHH | glszm      | ZoneVariance                     | 6.736149584  |
| wavelet-HHH | glszm      | GrayLevelNonUniformityNormalized | 0.076523546  |
| wavelet-HHH | glszm      | SizeZoneNonUniformityNormalized  | 0.545360111  |
| wavelet-HHH | glszm      | SizeZoneNonUniformity            | 41.44736842  |
| wavelet-HHH | glszm      | GrayLevelNonUniformity           | 5.815789474  |
| wavelet-HHH | glszm      | LargeAreaEmphasis                | 10.63157895  |
| wavelet-HHH | glszm      | SmallAreaHighGrayLevelEmphasis   | 55.44285537  |

|             |            |                                      |              |
|-------------|------------|--------------------------------------|--------------|
| wavelet-HHH | glszm      | ZonePercentage                       | 0.506666667  |
| wavelet-HHH | glszm      | LargeAreaLowGrayLevelEmphasis        | 0.223449601  |
| wavelet-HHH | glszm      | LargeAreaHighGrayLevelEmphasis       | 909.0394737  |
| wavelet-HHH | glszm      | HighGrayLevelZoneEmphasis            | 79.01315789  |
| wavelet-HHH | glszm      | SmallAreaEmphasis                    | 0.764747689  |
| wavelet-HHH | glszm      | LowGrayLevelZoneEmphasis             | 0.086947923  |
| wavelet-HHH | glszm      | ZoneEntropy                          | 4.702426041  |
| wavelet-HHH | glszm      | SmallAreaLowGrayLevelEmphasis        | 0.081347303  |
| wavelet-HHH | ngtdm      | Coarseness                           | 0.037838888  |
| wavelet-HHH | ngtdm      | Complexity                           | 242.8783905  |
| wavelet-HHH | ngtdm      | Strength                             | 2.486407124  |
| wavelet-HHH | ngtdm      | Contrast                             | 0.246164142  |
| wavelet-HHH | ngtdm      | Busyness                             | 0.206102511  |
| wavelet-HLL | gldm       | GrayLevelVariance                    | 70.75115556  |
| wavelet-HLL | gldm       | HighGrayLevelEmphasis                | 482.3        |
| wavelet-HLL | gldm       | DependenceEntropy                    | 5.790899754  |
| wavelet-HLL | gldm       | DependenceNonUniformity              | 54.16        |
| wavelet-HLL | gldm       | GrayLevelNonUniformity               | 5.813333333  |
| wavelet-HLL | gldm       | SmallDependenceEmphasis              | 0.588425926  |
| wavelet-HLL | gldm       | SmallDependenceHighGrayLevelEmphasis | 295.8316204  |
| wavelet-HLL | gldm       | DependenceNonUniformityNormalized    | 0.361066667  |
| wavelet-HLL | gldm       | LargeDependenceEmphasis              | 3.866666667  |
| wavelet-HLL | gldm       | LargeDependenceLowGrayLevelEmphasis  | 0.024160246  |
| wavelet-HLL | gldm       | DependenceVariance                   | 0.769066667  |
| wavelet-HLL | gldm       | LargeDependenceHighGrayLevelEmphasis | 1682.446667  |
| wavelet-HLL | gldm       | SmallDependenceLowGrayLevelEmphasis  | 0.012166988  |
| wavelet-HLL | gldm       | LowGrayLevelEmphasis                 | 0.01363776   |
| wavelet-HLL | glcm       | JointAverage                         | 19.34786054  |
| wavelet-HLL | glcm       | SumAverage                           | 38.69572107  |
| wavelet-HLL | glcm       | JointEntropy                         | 7.303520542  |
| wavelet-HLL | glcm       | ClusterShade                         | 1062.624705  |
| wavelet-HLL | glcm       | MaximumProbability                   | 0.015876645  |
| wavelet-HLL | glcm       | ldmn                                 | 0.942196465  |
| wavelet-HLL | glcm       | JointEnergy                          | 0.006809303  |
| wavelet-HLL | glcm       | Contrast                             | 110.4322432  |
| wavelet-HLL | glcm       | DifferenceEntropy                    | 4.156543426  |
| wavelet-HLL | glcm       | InverseVariance                      | 0.115244779  |
| wavelet-HLL | glcm       | DifferenceVariance                   | 37.5104669   |
| wavelet-HLL | glcm       | ldn                                  | 0.842065597  |
| wavelet-HLL | glcm       | ldm                                  | 0.117112542  |
| wavelet-HLL | glcm       | Correlation                          | 0.169552621  |
| wavelet-HLL | glcm       | Autocorrelation                      | 386.2186214  |
| wavelet-HLL | glcm       | SumEntropy                           | 5.125770119  |
| wavelet-HLL | glcm       | SumSquares                           | 67.07765262  |
| wavelet-HLL | glcm       | ClusterProminence                    | 80208.52147  |
| wavelet-HLL | glcm       | lmc2                                 | 0.994486628  |
| wavelet-HLL | glcm       | lmc1                                 | -0.474344614 |
| wavelet-HLL | glcm       | DifferenceAverage                    | 8.28166361   |
| wavelet-HLL | glcm       | ld                                   | 0.203182296  |
| wavelet-HLL | glcm       | ClusterTendency                      | 157.8783672  |
| wavelet-HLL | firstorder | InterquartileRange                   | 312.1099276  |
| wavelet-HLL | firstorder | Skewness                             | 0.143524687  |
| wavelet-HLL | firstorder | Uniformity                           | 0.038755556  |

|             |            |                                  |              |
|-------------|------------|----------------------------------|--------------|
| wavelet-HLL | firstorder | Median                           | -59.37276412 |
| wavelet-HLL | firstorder | Energy                           | 7088908.09   |
| wavelet-HLL | firstorder | RobustMeanAbsoluteDeviation      | 120.5973456  |
| wavelet-HLL | firstorder | MeanAbsoluteDeviation            | 169.370029   |
| wavelet-HLL | firstorder | TotalEnergy                      | 191400518.4  |
| wavelet-HLL | firstorder | Maximum                          | 437.2539325  |
| wavelet-HLL | firstorder | RootMeanSquared                  | 217.3922429  |
| wavelet-HLL | firstorder | 90Percentile                     | 211.3483056  |
| wavelet-HLL | firstorder | Minimum                          | -542.3639256 |
| wavelet-HLL | firstorder | Entropy                          | 4.881156524  |
| wavelet-HLL | firstorder | Range                            | 979.6178581  |
| wavelet-HLL | firstorder | Variance                         | 44133.5096   |
| wavelet-HLL | firstorder | 10Percentile                     | -314.7035275 |
| wavelet-HLL | firstorder | Kurtosis                         | 2.599480022  |
| wavelet-HLL | firstorder | Mean                             | -55.90954898 |
| wavelet-HLL | grlm       | ShortRunLowGrayLevelEmphasis     | 0.013862249  |
| wavelet-HLL | grlm       | GrayLevelVariance                | 71.49155411  |
| wavelet-HLL | grlm       | LowGrayLevelRunEmphasis          | 0.013942807  |
| wavelet-HLL | grlm       | GrayLevelNonUniformityNormalized | 0.038424027  |
| wavelet-HLL | grlm       | RunVariance                      | 0.031306776  |
| wavelet-HLL | grlm       | GrayLevelNonUniformity           | 5.595126822  |
| wavelet-HLL | grlm       | LongRunEmphasis                  | 1.093482122  |
| wavelet-HLL | grlm       | ShortRunHighGrayLevelEmphasis    | 474.1433758  |
| wavelet-HLL | grlm       | RunLengthNonUniformity           | 137.4865936  |
| wavelet-HLL | grlm       | ShortRunEmphasis                 | 0.977817069  |
| wavelet-HLL | grlm       | LongRunHighGrayLevelEmphasis     | 524.439959   |
| wavelet-HLL | grlm       | RunPercentage                    | 0.970769231  |
| wavelet-HLL | grlm       | LongRunLowGrayLevelEmphasis      | 0.014280235  |
| wavelet-HLL | grlm       | RunEntropy                       | 4.99346209   |
| wavelet-HLL | grlm       | HighGrayLevelRunEmphasis         | 483.7580056  |
| wavelet-HLL | grlm       | RunLengthNonUniformityNormalized | 0.943571051  |
| wavelet-HLL | glszm      | GrayLevelVariance                | 81.2491      |
| wavelet-HLL | glszm      | ZoneVariance                     | 1.33         |
| wavelet-HLL | glszm      | GrayLevelNonUniformityNormalized | 0.0376       |
| wavelet-HLL | glszm      | SizeZoneNonUniformityNormalized  | 0.5744       |
| wavelet-HLL | glszm      | SizeZoneNonUniformity            | 57.44        |
| wavelet-HLL | glszm      | GrayLevelNonUniformity           | 3.76         |
| wavelet-HLL | glszm      | LargeAreaEmphasis                | 3.58         |
| wavelet-HLL | glszm      | SmallAreaHighGrayLevelEmphasis   | 398.8139592  |
| wavelet-HLL | glszm      | ZonePercentage                   | 0.666666667  |
| wavelet-HLL | glszm      | LargeAreaLowGrayLevelEmphasis    | 0.029009321  |
| wavelet-HLL | glszm      | LargeAreaHighGrayLevelEmphasis   | 1502.11      |
| wavelet-HLL | glszm      | HighGrayLevelZoneEmphasis        | 502.73       |
| wavelet-HLL | glszm      | SmallAreaEmphasis                | 0.786176998  |
| wavelet-HLL | glszm      | LowGrayLevelZoneEmphasis         | 0.01861963   |
| wavelet-HLL | glszm      | ZoneEntropy                      | 5.500818565  |
| wavelet-HLL | glszm      | SmallAreaLowGrayLevelEmphasis    | 0.017896607  |
| wavelet-HLL | ngtdm      | Coarseness                       | 0.035910454  |
| wavelet-HLL | ngtdm      | Complexity                       | 3106.651665  |
| wavelet-HLL | ngtdm      | Strength                         | 17.06180483  |
| wavelet-HLL | ngtdm      | Contrast                         | 0.619796385  |
| wavelet-HLL | ngtdm      | Busyness                         | 0.044365034  |
| wavelet-HLL | gldm       | GrayLevelVariance                | 130.6824889  |

|             |            |                                      |              |
|-------------|------------|--------------------------------------|--------------|
| wavelet-LHL | gldm       | HighGrayLevelEmphasis                | 1076.04      |
| wavelet-LHL | gldm       | DependenceEntropy                    | 5.798534734  |
| wavelet-LHL | gldm       | DependenceNonUniformity              | 58.38666667  |
| wavelet-LHL | gldm       | GrayLevelNonUniformity               | 4.586666667  |
| wavelet-LHL | gldm       | SmallDependenceEmphasis              | 0.618877778  |
| wavelet-LHL | gldm       | SmallDependenceHighGrayLevelEmphasis | 645.7116315  |
| wavelet-LHL | gldm       | DependenceNonUniformityNormalized    | 0.389244444  |
| wavelet-LHL | gldm       | LargeDependenceEmphasis              | 3.52         |
| wavelet-LHL | gldm       | LargeDependenceLowGrayLevelEmphasis  | 0.012038218  |
| wavelet-LHL | gldm       | DependenceVariance                   | 0.6976       |
| wavelet-LHL | gldm       | LargeDependenceHighGrayLevelEmphasis | 4189.426667  |
| wavelet-LHL | gldm       | SmallDependenceLowGrayLevelEmphasis  | 0.007895655  |
| wavelet-LHL | gldm       | LowGrayLevelEmphasis                 | 0.008501693  |
| wavelet-LHL | glcm       | JointAverage                         | 30.22501729  |
| wavelet-LHL | glcm       | SumAverage                           | 60.45003458  |
| wavelet-LHL | glcm       | JointEntropy                         | 7.345462821  |
| wavelet-LHL | glcm       | ClusterShade                         | 1486.457273  |
| wavelet-LHL | glcm       | MaximumProbability                   | 0.016402258  |
| wavelet-LHL | glcm       | ldmn                                 | 0.941618221  |
| wavelet-LHL | glcm       | JointEnergy                          | 0.006586438  |
| wavelet-LHL | glcm       | Contrast                             | 196.3057902  |
| wavelet-LHL | glcm       | DifferenceEntropy                    | 4.378093831  |
| wavelet-LHL | glcm       | InverseVariance                      | 0.124701284  |
| wavelet-LHL | glcm       | DifferenceVariance                   | 77.40183139  |
| wavelet-LHL | glcm       | ldn                                  | 0.851593919  |
| wavelet-LHL | glcm       | ldm                                  | 0.116710104  |
| wavelet-LHL | glcm       | Correlation                          | 0.282617341  |
| wavelet-LHL | glcm       | Autocorrelation                      | 952.6542811  |
| wavelet-LHL | glcm       | SumEntropy                           | 5.422213173  |
| wavelet-LHL | glcm       | SumSquares                           | 137.1614249  |
| wavelet-LHL | glcm       | ClusterProminence                    | 253284.6844  |
| wavelet-LHL | glcm       | lmc2                                 | 0.998237212  |
| wavelet-LHL | glcm       | lmc1                                 | -0.557729785 |
| wavelet-LHL | glcm       | DifferenceAverage                    | 10.3076958   |
| wavelet-LHL | glcm       | ld                                   | 0.196850243  |
| wavelet-LHL | glcm       | ClusterTendency                      | 352.3399095  |
| wavelet-LHL | firstorder | InterquartileRange                   | 481.0168294  |
| wavelet-LHL | firstorder | Skewness                             | -0.147165491 |
| wavelet-LHL | firstorder | Uniformity                           | 0.030577778  |
| wavelet-LHL | firstorder | Median                               | -81.99498935 |
| wavelet-LHL | firstorder | Energy                               | 12583559.09  |
| wavelet-LHL | firstorder | RobustMeanAbsoluteDeviation          | 198.7410922  |
| wavelet-LHL | firstorder | MeanAbsoluteDeviation                | 248.3841502  |
| wavelet-LHL | firstorder | TotalEnergy                          | 339756095.4  |
| wavelet-LHL | firstorder | Maximum                              | 482.5178925  |
| wavelet-LHL | firstorder | RootMeanSquared                      | 289.6383848  |
| wavelet-LHL | firstorder | 90Percentile                         | 310.6615645  |
| wavelet-LHL | firstorder | Minimum                              | -785.7244801 |
| wavelet-LHL | firstorder | Entropy                              | 5.156989695  |
| wavelet-LHL | firstorder | Range                                | 1268.242373  |
| wavelet-LHL | firstorder | Variance                             | 81861.8289   |
| wavelet-LHL | firstorder | 10Percentile                         | -406.1436788 |
| wavelet-LHL | firstorder | Kurtosis                             | 1.993088021  |

|             |            |                                      |              |
|-------------|------------|--------------------------------------|--------------|
| wavelet-LHL | firstorder | Mean                                 | -45.03959408 |
| wavelet-LHL | glrlm      | ShortRunLowGrayLevelEmphasis         | 0.008664686  |
| wavelet-LHL | glrlm      | GrayLevelVariance                    | 131.0349651  |
| wavelet-LHL | glrlm      | LowGrayLevelRunEmphasis              | 0.008693958  |
| wavelet-LHL | glrlm      | GrayLevelNonUniformityNormalized     | 0.030393576  |
| wavelet-LHL | glrlm      | RunVariance                          | 0.027180184  |
| wavelet-LHL | glrlm      | GrayLevelNonUniformity               | 4.440207643  |
| wavelet-LHL | glrlm      | LongRunEmphasis                      | 1.083262409  |
| wavelet-LHL | glrlm      | ShortRunHighGrayLevelEmphasis        | 1048.440748  |
| wavelet-LHL | glrlm      | RunLengthNonUniformity               | 138.725142   |
| wavelet-LHL | glrlm      | ShortRunEmphasis                     | 0.979794898  |
| wavelet-LHL | glrlm      | LongRunHighGrayLevelEmphasis         | 1171.161359  |
| wavelet-LHL | glrlm      | RunPercentage                        | 0.973846154  |
| wavelet-LHL | glrlm      | LongRunLowGrayLevelEmphasis          | 0.008819494  |
| wavelet-LHL | glrlm      | RunEntropy                           | 5.247801982  |
| wavelet-LHL | glrlm      | HighGrayLevelRunEmphasis             | 1072.843722  |
| wavelet-LHL | glrlm      | RunLengthNonUniformityNormalized     | 0.948724404  |
| wavelet-LHL | glszm      | GrayLevelVariance                    | 135.6091136  |
| wavelet-LHL | glszm      | ZoneVariance                         | 0.808828765  |
| wavelet-LHL | glszm      | GrayLevelNonUniformityNormalized     | 0.03008188   |
| wavelet-LHL | glszm      | SizeZoneNonUniformityNormalized      | 0.585617658  |
| wavelet-LHL | glszm      | SizeZoneNonUniformity                | 62.0754717   |
| wavelet-LHL | glszm      | GrayLevelNonUniformity               | 3.188679245  |
| wavelet-LHL | glszm      | LargeAreaEmphasis                    | 2.811320755  |
| wavelet-LHL | glszm      | SmallAreaHighGrayLevelEmphasis       | 827.0670569  |
| wavelet-LHL | glszm      | ZonePercentage                       | 0.706666667  |
| wavelet-LHL | glszm      | LargeAreaLowGrayLevelEmphasis        | 0.014003772  |
| wavelet-LHL | glszm      | LargeAreaHighGrayLevelEmphasis       | 3260.867925  |
| wavelet-LHL | glszm      | HighGrayLevelZoneEmphasis            | 1049.245283  |
| wavelet-LHL | glszm      | SmallAreaEmphasis                    | 0.793022719  |
| wavelet-LHL | glszm      | LowGrayLevelZoneEmphasis             | 0.01137118   |
| wavelet-LHL | glszm      | ZoneEntropy                          | 5.591095045  |
| wavelet-LHL | glszm      | SmallAreaLowGrayLevelEmphasis        | 0.011024877  |
| wavelet-LHL | ngtdm      | Coarseness                           | 0.031347583  |
| wavelet-LHL | ngtdm      | Complexity                           | 5298.975107  |
| wavelet-LHL | ngtdm      | Strength                             | 22.31908527  |
| wavelet-LHL | ngtdm      | Contrast                             | 1.211809201  |
| wavelet-LHL | ngtdm      | Busyness                             | 0.034156539  |
| wavelet-LHH | gldm       | GrayLevelVariance                    | 29.19222222  |
| wavelet-LHH | gldm       | HighGrayLevelEmphasis                | 406.8466667  |
| wavelet-LHH | gldm       | DependenceEntropy                    | 5.603399885  |
| wavelet-LHH | gldm       | DependenceNonUniformity              | 48.22666667  |
| wavelet-LHH | gldm       | GrayLevelNonUniformity               | 9.24         |
| wavelet-LHH | gldm       | SmallDependenceEmphasis              | 0.532131481  |
| wavelet-LHH | gldm       | SmallDependenceHighGrayLevelEmphasis | 223.3831148  |
| wavelet-LHH | gldm       | DependenceNonUniformityNormalized    | 0.321511111  |
| wavelet-LHH | gldm       | LargeDependenceEmphasis              | 4.826666667  |
| wavelet-LHH | gldm       | LargeDependenceLowGrayLevelEmphasis  | 0.021812263  |
| wavelet-LHH | gldm       | DependenceVariance                   | 1.088888889  |
| wavelet-LHH | gldm       | LargeDependenceHighGrayLevelEmphasis | 1861.553333  |
| wavelet-LHH | gldm       | SmallDependenceLowGrayLevelEmphasis  | 0.008551276  |
| wavelet-LHH | gldm       | LowGrayLevelEmphasis                 | 0.010040987  |
| wavelet-LHH | glcm       | JointAverage                         | 19.56625252  |

|             |            |                                  |              |
|-------------|------------|----------------------------------|--------------|
| wavelet-LHH | glcm       | SumAverage                       | 39.13250503  |
| wavelet-LHH | glcm       | JointEntropy                     | 6.956720478  |
| wavelet-LHH | glcm       | ClusterShade                     | 85.39638537  |
| wavelet-LHH | glcm       | MaximumProbability               | 0.023319857  |
| wavelet-LHH | glcm       | Idmn                             | 0.964877165  |
| wavelet-LHH | glcm       | JointEnergy                      | 0.009193271  |
| wavelet-LHH | glcm       | Contrast                         | 54.24930495  |
| wavelet-LHH | glcm       | DifferenceEntropy                | 3.76141172   |
| wavelet-LHH | glcm       | InverseVariance                  | 0.166053698  |
| wavelet-LHH | glcm       | DifferenceVariance               | 20.54531306  |
| wavelet-LHH | glcm       | Idn                              | 0.874938561  |
| wavelet-LHH | glcm       | Idm                              | 0.159432315  |
| wavelet-LHH | glcm       | Correlation                      | -0.031788498 |
| wavelet-LHH | glcm       | Autocorrelation                  | 381.985068   |
| wavelet-LHH | glcm       | SumEntropy                       | 4.51835461   |
| wavelet-LHH | glcm       | SumSquares                       | 26.25111095  |
| wavelet-LHH | glcm       | ClusterProminence                | 9061.775927  |
| wavelet-LHH | glcm       | Imc2                             | 0.968419079  |
| wavelet-LHH | glcm       | Imc1                             | -0.336707413 |
| wavelet-LHH | glcm       | DifferenceAverage                | 5.737118697  |
| wavelet-LHH | glcm       | Id                               | 0.253337596  |
| wavelet-LHH | glcm       | ClusterTendency                  | 50.75513884  |
| wavelet-LHH | firstorder | InterquartileRange               | 179.3585338  |
| wavelet-LHH | firstorder | Skewness                         | 0.072794105  |
| wavelet-LHH | firstorder | Uniformity                       | 0.0616       |
| wavelet-LHH | firstorder | Median                           | -12.79474155 |
| wavelet-LHH | firstorder | Energy                           | 2769475.932  |
| wavelet-LHH | firstorder | RobustMeanAbsoluteDeviation      | 73.58170008  |
| wavelet-LHH | firstorder | MeanAbsoluteDeviation            | 106.5572572  |
| wavelet-LHH | firstorder | TotalEnergy                      | 74775850.18  |
| wavelet-LHH | firstorder | Maximum                          | 448.6144325  |
| wavelet-LHH | firstorder | RootMeanSquared                  | 135.8792585  |
| wavelet-LHH | firstorder | 90Percentile                     | 162.5987887  |
| wavelet-LHH | firstorder | Minimum                          | -474.5352574 |
| wavelet-LHH | firstorder | Entropy                          | 4.26905276   |
| wavelet-LHH | firstorder | Range                            | 923.1496899  |
| wavelet-LHH | firstorder | Variance                         | 18461.55526  |
| wavelet-LHH | firstorder | 10Percentile                     | -172.1847272 |
| wavelet-LHH | firstorder | Kurtosis                         | 3.84268661   |
| wavelet-LHH | firstorder | Mean                             | -1.271856262 |
| wavelet-LHH | grlm       | ShortRunLowGrayLevelEmphasis     | 0.010212845  |
| wavelet-LHH | grlm       | GrayLevelVariance                | 29.66360016  |
| wavelet-LHH | grlm       | LowGrayLevelRunEmphasis          | 0.010300463  |
| wavelet-LHH | grlm       | GrayLevelNonUniformityNormalized | 0.060894639  |
| wavelet-LHH | grlm       | RunVariance                      | 0.035818576  |
| wavelet-LHH | grlm       | GrayLevelNonUniformity           | 8.806382595  |
| wavelet-LHH | grlm       | LongRunEmphasis                  | 1.112429475  |
| wavelet-LHH | grlm       | ShortRunHighGrayLevelEmphasis    | 396.833498   |
| wavelet-LHH | grlm       | RunLengthNonUniformity           | 134.3198706  |
| wavelet-LHH | grlm       | ShortRunEmphasis                 | 0.971892631  |
| wavelet-LHH | grlm       | LongRunHighGrayLevelEmphasis     | 450.9628288  |
| wavelet-LHH | grlm       | RunPercentage                    | 0.964102564  |
| wavelet-LHH | grlm       | LongRunLowGrayLevelEmphasis      | 0.010650937  |



|             |       |                                      |             |
|-------------|-------|--------------------------------------|-------------|
| wavelet-LHH | grlm  | RunEntropy                           | 4.432366431 |
| wavelet-LHH | grlm  | HighGrayLevelRunEmphasis             | 407.6593642 |
| wavelet-LHH | grlm  | RunLengthNonUniformityNormalized     | 0.928362847 |
| wavelet-LHH | glszm | GrayLevelVariance                    | 35.17400856 |
| wavelet-LHH | glszm | ZoneVariance                         | 1.635102324 |
| wavelet-LHH | glszm | GrayLevelNonUniformityNormalized     | 0.055382125 |
| wavelet-LHH | glszm | SizeZoneNonUniformityNormalized      | 0.508613713 |
| wavelet-LHH | glszm | SizeZoneNonUniformity                | 47.30107527 |
| wavelet-LHH | glszm | GrayLevelNonUniformity               | 5.150537634 |
| wavelet-LHH | glszm | LargeAreaEmphasis                    | 4.23655914  |
| wavelet-LHH | glszm | SmallAreaHighGrayLevelEmphasis       | 312.1020131 |
| wavelet-LHH | glszm | ZonePercentage                       | 0.62        |
| wavelet-LHH | glszm | LargeAreaLowGrayLevelEmphasis        | 0.024327079 |
| wavelet-LHH | glszm | LargeAreaHighGrayLevelEmphasis       | 1646.16129  |
| wavelet-LHH | glszm | HighGrayLevelZoneEmphasis            | 414.3763441 |
| wavelet-LHH | glszm | SmallAreaEmphasis                    | 0.74103644  |
| wavelet-LHH | glszm | LowGrayLevelZoneEmphasis             | 0.014267864 |
| wavelet-LHH | glszm | ZoneEntropy                          | 5.322926592 |
| wavelet-LHH | glszm | SmallAreaLowGrayLevelEmphasis        | 0.013421932 |
| wavelet-LHH | ngtdm | Coarseness                           | 0.032532823 |
| wavelet-LHH | ngtdm | Complexity                           | 1232.404655 |
| wavelet-LHH | ngtdm | Strength                             | 8.202860327 |
| wavelet-LHH | ngtdm | Contrast                             | 0.398274478 |
| wavelet-LHH | ngtdm | Busyness                             | 0.067914686 |
| wavelet-LLH | gldm  | GrayLevelVariance                    | 115.9264    |
| wavelet-LLH | gldm  | HighGrayLevelEmphasis                | 665.36      |
| wavelet-LLH | gldm  | DependenceEntropy                    | 5.841137131 |
| wavelet-LLH | gldm  | DependenceNonUniformity              | 63.17333333 |
| wavelet-LLH | gldm  | GrayLevelNonUniformity               | 4.906666667 |
| wavelet-LLH | gldm  | SmallDependenceEmphasis              | 0.661157407 |
| wavelet-LLH | gldm  | SmallDependenceHighGrayLevelEmphasis | 488.4278241 |
| wavelet-LLH | gldm  | DependenceNonUniformityNormalized    | 0.421155556 |
| wavelet-LLH | gldm  | LargeDependenceEmphasis              | 3.293333333 |
| wavelet-LLH | gldm  | LargeDependenceLowGrayLevelEmphasis  | 0.020577737 |
| wavelet-LLH | gldm  | DependenceVariance                   | 0.690488889 |
| wavelet-LLH | gldm  | LargeDependenceHighGrayLevelEmphasis | 1817.693333 |
| wavelet-LLH | gldm  | SmallDependenceLowGrayLevelEmphasis  | 0.011704278 |
| wavelet-LLH | gldm  | LowGrayLevelEmphasis                 | 0.012936852 |
| wavelet-LLH | glcm  | JointAverage                         | 22.83243953 |
| wavelet-LLH | glcm  | SumAverage                           | 45.66487907 |
| wavelet-LLH | glcm  | JointEntropy                         | 7.374318883 |
| wavelet-LLH | glcm  | ClusterShade                         | 2378.659326 |
| wavelet-LLH | glcm  | MaximumProbability                   | 0.013927461 |
| wavelet-LLH | glcm  | ldmn                                 | 0.947550661 |
| wavelet-LLH | glcm  | JointEnergy                          | 0.006379796 |
| wavelet-LLH | glcm  | Contrast                             | 183.1583878 |
| wavelet-LLH | glcm  | DifferenceEntropy                    | 4.404127042 |
| wavelet-LLH | glcm  | InverseVariance                      | 0.102464357 |
| wavelet-LLH | glcm  | DifferenceVariance                   | 65.06065288 |
| wavelet-LLH | glcm  | ldn                                  | 0.851175461 |
| wavelet-LLH | glcm  | ldm                                  | 0.100415836 |
| wavelet-LLH | glcm  | Correlation                          | 0.168870356 |
| wavelet-LLH | glcm  | Autocorrelation                      | 539.2583635 |

|             |            |                                  |              |
|-------------|------------|----------------------------------|--------------|
| wavelet-LLH | glcm       | SumEntropy                       | 5.276688254  |
| wavelet-LLH | glcm       | SumSquares                       | 109.3800114  |
| wavelet-LLH | glcm       | ClusterProminence                | 238703.6164  |
| wavelet-LLH | glcm       | Imc2                             | 0.997795134  |
| wavelet-LLH | glcm       | Imc1                             | -0.541512113 |
| wavelet-LLH | glcm       | DifferenceAverage                | 10.45191415  |
| wavelet-LLH | glcm       | Id                               | 0.179832465  |
| wavelet-LLH | glcm       | ClusterTendency                  | 254.361658   |
| wavelet-LLH | firstorder | InterquartileRange               | 390.0546299  |
| wavelet-LLH | firstorder | Skewness                         | 0.387859028  |
| wavelet-LLH | firstorder | Uniformity                       | 0.032711111  |
| wavelet-LLH | firstorder | Median                           | -89.96017087 |
| wavelet-LLH | firstorder | Energy                           | 11290103.82  |
| wavelet-LLH | firstorder | RobustMeanAbsoluteDeviation      | 160.0048801  |
| wavelet-LLH | firstorder | MeanAbsoluteDeviation            | 220.2816604  |
| wavelet-LLH | firstorder | TotalEnergy                      | 304832803.1  |
| wavelet-LLH | firstorder | Maximum                          | 707.3233694  |
| wavelet-LLH | firstorder | RootMeanSquared                  | 274.3489726  |
| wavelet-LLH | firstorder | 90Percentile                     | 337.0680571  |
| wavelet-LLH | firstorder | Minimum                          | -624.6565683 |
| wavelet-LLH | firstorder | Entropy                          | 5.133330528  |
| wavelet-LLH | firstorder | Range                            | 1331.979938  |
| wavelet-LLH | firstorder | Variance                         | 72592.43786  |
| wavelet-LLH | firstorder | 10Percentile                     | -389.7006874 |
| wavelet-LLH | firstorder | Kurtosis                         | 2.68909952   |
| wavelet-LLH | firstorder | Mean                             | -51.71963769 |
| wavelet-LLH | glrlm      | ShortRunLowGrayLevelEmphasis     | 0.013108771  |
| wavelet-LLH | glrlm      | GrayLevelVariance                | 116.8731022  |
| wavelet-LLH | glrlm      | LowGrayLevelRunEmphasis          | 0.013168506  |
| wavelet-LLH | glrlm      | GrayLevelNonUniformityNormalized | 0.032417068  |
| wavelet-LLH | glrlm      | RunVariance                      | 0.025693647  |
| wavelet-LLH | glrlm      | GrayLevelNonUniformity           | 4.747844834  |
| wavelet-LLH | glrlm      | LongRunEmphasis                  | 1.075338895  |
| wavelet-LLH | glrlm      | ShortRunHighGrayLevelEmphasis    | 659.901108   |
| wavelet-LLH | glrlm      | RunLengthNonUniformity           | 139.9099579  |
| wavelet-LLH | glrlm      | ShortRunEmphasis                 | 0.982352361  |
| wavelet-LLH | glrlm      | LongRunHighGrayLevelEmphasis     | 707.0631781  |
| wavelet-LLH | glrlm      | RunPercentage                    | 0.976410256  |
| wavelet-LLH | glrlm      | LongRunLowGrayLevelEmphasis      | 0.013431264  |
| wavelet-LLH | glrlm      | RunEntropy                       | 5.219406137  |
| wavelet-LLH | glrlm      | HighGrayLevelRunEmphasis         | 669.1112998  |
| wavelet-LLH | glrlm      | RunLengthNonUniformityNormalized | 0.9548449    |
| wavelet-LLH | glszm      | GrayLevelVariance                | 128.6215405  |
| wavelet-LLH | glszm      | ZoneVariance                     | 0.714390066  |
| wavelet-LLH | glszm      | GrayLevelNonUniformityNormalized | 0.030598166  |
| wavelet-LLH | glszm      | SizeZoneNonUniformityNormalized  | 0.637529421  |
| wavelet-LLH | glszm      | SizeZoneNonUniformity            | 70.76576577  |
| wavelet-LLH | glszm      | GrayLevelNonUniformity           | 3.396396396  |
| wavelet-LLH | glszm      | LargeAreaEmphasis                | 2.540540541  |
| wavelet-LLH | glszm      | SmallAreaHighGrayLevelEmphasis   | 625.8249249  |
| wavelet-LLH | glszm      | ZonePercentage                   | 0.74         |
| wavelet-LLH | glszm      | LargeAreaLowGrayLevelEmphasis    | 0.021375085  |
| wavelet-LLH | glszm      | LargeAreaHighGrayLevelEmphasis   | 1456.036036  |

|             |            |                                      |              |
|-------------|------------|--------------------------------------|--------------|
| wavelet-LLH | glszm      | HighGrayLevelZoneEmphasis            | 721.1711712  |
| wavelet-LLH | glszm      | SmallAreaEmphasis                    | 0.825795796  |
| wavelet-LLH | glszm      | LowGrayLevelZoneEmphasis             | 0.016229524  |
| wavelet-LLH | glszm      | ZoneEntropy                          | 5.698713984  |
| wavelet-LLH | glszm      | SmallAreaLowGrayLevelEmphasis        | 0.015560011  |
| wavelet-LLH | ngtdm      | Coarseness                           | 0.034417391  |
| wavelet-LLH | ngtdm      | Complexity                           | 5540.922869  |
| wavelet-LLH | ngtdm      | Strength                             | 24.33941996  |
| wavelet-LLH | ngtdm      | Contrast                             | 0.955827754  |
| wavelet-LLH | ngtdm      | Busyness                             | 0.03926645   |
| wavelet-LLL | gldm       | GrayLevelVariance                    | 592.3788889  |
| wavelet-LLL | gldm       | HighGrayLevelEmphasis                | 2686.966667  |
| wavelet-LLL | gldm       | DependenceEntropy                    | 6.219996607  |
| wavelet-LLL | gldm       | DependenceNonUniformity              | 100.4133333  |
| wavelet-LLL | gldm       | GrayLevelNonUniformity               | 2.693333333  |
| wavelet-LLL | gldm       | SmallDependenceEmphasis              | 0.844074074  |
| wavelet-LLL | gldm       | SmallDependenceHighGrayLevelEmphasis | 2080.540741  |
| wavelet-LLL | gldm       | DependenceNonUniformityNormalized    | 0.669422222  |
| wavelet-LLL | gldm       | LargeDependenceEmphasis              | 1.653333333  |
| wavelet-LLL | gldm       | LargeDependenceLowGrayLevelEmphasis  | 0.010759005  |
| wavelet-LLL | gldm       | DependenceVariance                   | 0.181155556  |
| wavelet-LLL | gldm       | LargeDependenceHighGrayLevelEmphasis | 5302.3       |
| wavelet-LLL | gldm       | SmallDependenceLowGrayLevelEmphasis  | 0.009633176  |
| wavelet-LLL | gldm       | LowGrayLevelEmphasis                 | 0.009857416  |
| wavelet-LLL | glcm       | JointAverage                         | 53.04817999  |
| wavelet-LLL | glcm       | SumAverage                           | 106.09636    |
| wavelet-LLL | glcm       | JointEntropy                         | 7.550434452  |
| wavelet-LLL | glcm       | ClusterShade                         | -7457.695187 |
| wavelet-LLL | glcm       | MaximumProbability                   | 0.010382724  |
| wavelet-LLL | glcm       | Idmn                                 | 0.922417374  |
| wavelet-LLL | glcm       | JointEnergy                          | 0.005435001  |
| wavelet-LLL | glcm       | Contrast                             | 798.950636   |
| wavelet-LLL | glcm       | DifferenceEntropy                    | 5.255795443  |
| wavelet-LLL | glcm       | InverseVariance                      | 0.043725601  |
| wavelet-LLL | glcm       | DifferenceVariance                   | 246.5530197  |
| wavelet-LLL | glcm       | Idn                                  | 0.815249098  |
| wavelet-LLL | glcm       | Idm                                  | 0.041087301  |
| wavelet-LLL | glcm       | Correlation                          | 0.317358617  |
| wavelet-LLL | glcm       | Autocorrelation                      | 2996.95585   |
| wavelet-LLL | glcm       | SumEntropy                           | 6.022997917  |
| wavelet-LLL | glcm       | SumSquares                           | 581.3290498  |
| wavelet-LLL | glcm       | ClusterProminence                    | 5198879.454  |
| wavelet-LLL | glcm       | Imc2                                 | 0.999867576  |
| wavelet-LLL | glcm       | Imc1                                 | -0.707431463 |
| wavelet-LLL | glcm       | DifferenceAverage                    | 23.03635584  |
| wavelet-LLL | glcm       | Id                                   | 0.096446364  |
| wavelet-LLL | glcm       | ClusterTendency                      | 1526.365563  |
| wavelet-LLL | firstorder | InterquartileRange                   | 998.6334     |
| wavelet-LLL | firstorder | Skewness                             | 0.150245887  |
| wavelet-LLL | firstorder | Uniformity                           | 0.017955556  |
| wavelet-LLL | firstorder | Median                               | -822.0919506 |
| wavelet-LLL | firstorder | Energy                               | 162198470.3  |
| wavelet-LLL | firstorder | RobustMeanAbsoluteDeviation          | 409.2484338  |

|             |            |                                  |              |
|-------------|------------|----------------------------------|--------------|
| wavelet-LLL | firstorder | MeanAbsoluteDeviation            | 522.1791385  |
| wavelet-LLL | firstorder | TotalEnergy                      | 4379358697   |
| wavelet-LLL | firstorder | Maximum                          | 317.2817925  |
| wavelet-LLL | firstorder | RootMeanSquared                  | 1039.866883  |
| wavelet-LLL | firstorder | 90Percentile                     | 3.385748608  |
| wavelet-LLL | firstorder | Minimum                          | -1965.107996 |
| wavelet-LLL | firstorder | Entropy                          | 5.955005901  |
| wavelet-LLL | firstorder | Range                            | 2282.389788  |
| wavelet-LLL | firstorder | Variance                         | 369912.3154  |
| wavelet-LLL | firstorder | 10Percentile                     | -1592.968896 |
| wavelet-LLL | firstorder | Kurtosis                         | 1.943043666  |
| wavelet-LLL | firstorder | Mean                             | -843.4517293 |
| wavelet-LLL | grlm       | ShortRunLowGrayLevelEmphasis     | 0.009919089  |
| wavelet-LLL | grlm       | GrayLevelVariance                | 590.154447   |
| wavelet-LLL | grlm       | LowGrayLevelRunEmphasis          | 0.009927851  |
| wavelet-LLL | grlm       | GrayLevelNonUniformityNormalized | 0.0179539    |
| wavelet-LLL | grlm       | RunVariance                      | 0.008202903  |
| wavelet-LLL | grlm       | GrayLevelNonUniformity           | 2.670992234  |
| wavelet-LLL | grlm       | LongRunEmphasis                  | 1.024991165  |
| wavelet-LLL | grlm       | ShortRunHighGrayLevelEmphasis    | 2651.719635  |
| wavelet-LLL | grlm       | RunLengthNonUniformity           | 146.3452704  |
| wavelet-LLL | grlm       | ShortRunEmphasis                 | 0.993752209  |
| wavelet-LLL | grlm       | LongRunHighGrayLevelEmphasis     | 2775.21358   |
| wavelet-LLL | grlm       | RunPercentage                    | 0.991794872  |
| wavelet-LLL | grlm       | LongRunLowGrayLevelEmphasis      | 0.009962895  |
| wavelet-LLL | grlm       | RunEntropy                       | 5.971268464  |
| wavelet-LLL | grlm       | HighGrayLevelRunEmphasis         | 2676.418424  |
| wavelet-LLL | grlm       | RunLengthNonUniformityNormalized | 0.983594194  |
| wavelet-LLL | glszm      | GrayLevelVariance                | 559.5166518  |
| wavelet-LLL | glszm      | ZoneVariance                     | 0.120071285  |
| wavelet-LLL | glszm      | GrayLevelNonUniformityNormalized | 0.017821341  |
| wavelet-LLL | glszm      | SizeZoneNonUniformityNormalized  | 0.799621297  |
| wavelet-LLL | glszm      | SizeZoneNonUniformity            | 107.1492537  |
| wavelet-LLL | glszm      | GrayLevelNonUniformity           | 2.388059701  |
| wavelet-LLL | glszm      | LargeAreaEmphasis                | 1.373134328  |
| wavelet-LLL | glszm      | SmallAreaHighGrayLevelEmphasis   | 2210.959784  |
| wavelet-LLL | glszm      | ZonePercentage                   | 0.893333333  |
| wavelet-LLL | glszm      | LargeAreaLowGrayLevelEmphasis    | 0.011372389  |
| wavelet-LLL | glszm      | LargeAreaHighGrayLevelEmphasis   | 4047.350746  |
| wavelet-LLL | glszm      | HighGrayLevelZoneEmphasis        | 2535.783582  |
| wavelet-LLL | glszm      | SmallAreaEmphasis                | 0.915008292  |
| wavelet-LLL | glszm      | LowGrayLevelZoneEmphasis         | 0.010866603  |
| wavelet-LLL | glszm      | ZoneEntropy                      | 6.160691336  |
| wavelet-LLL | glszm      | SmallAreaLowGrayLevelEmphasis    | 0.010741452  |
| wavelet-LLL | ngtdm      | Coarseness                       | 0.025571703  |
| wavelet-LLL | ngtdm      | Complexity                       | 37728.88414  |
| wavelet-LLL | ngtdm      | Strength                         | 77.68481911  |
| wavelet-LLL | ngtdm      | Contrast                         | 3.686496993  |
| wavelet-LLL | ngtdm      | Busyness                         | 0.014614374  |
| wavelet-HHL | gldm       | GrayLevelVariance                | 10.34333333  |
| wavelet-HHL | gldm       | HighGrayLevelEmphasis            | 100.5933333  |
| wavelet-HHL | gldm       | DependenceEntropy                | 5.330150818  |
| wavelet-HHL | gldm       | DependenceNonUniformity          | 36.16        |

|             |            |                                      |              |
|-------------|------------|--------------------------------------|--------------|
| wavelet-HHL | gldm       | GrayLevelNonUniformity               | 13.4         |
| wavelet-HHL | gldm       | SmallDependenceEmphasis              | 0.447239645  |
| wavelet-HHL | gldm       | SmallDependenceHighGrayLevelEmphasis | 52.10530737  |
| wavelet-HHL | gldm       | DependenceNonUniformityNormalized    | 0.241066667  |
| wavelet-HHL | gldm       | LargeDependenceEmphasis              | 7.866666667  |
| wavelet-HHL | gldm       | LargeDependenceLowGrayLevelEmphasis  | 0.159292099  |
| wavelet-HHL | gldm       | DependenceVariance                   | 2.106666667  |
| wavelet-HHL | gldm       | LargeDependenceHighGrayLevelEmphasis | 712.7533333  |
| wavelet-HHL | gldm       | SmallDependenceLowGrayLevelEmphasis  | 0.01109884   |
| wavelet-HHL | gldm       | LowGrayLevelEmphasis                 | 0.029067737  |
| wavelet-HHL | glcm       | JointAverage                         | 9.618138659  |
| wavelet-HHL | glcm       | SumAverage                           | 19.23627732  |
| wavelet-HHL | glcm       | JointEntropy                         | 6.436472917  |
| wavelet-HHL | glcm       | ClusterShade                         | -15.70206891 |
| wavelet-HHL | glcm       | MaximumProbability                   | 0.031598491  |
| wavelet-HHL | glcm       | Idmn                                 | 0.939617902  |
| wavelet-HHL | glcm       | JointEnergy                          | 0.013657299  |
| wavelet-HHL | glcm       | Contrast                             | 20.92300513  |
| wavelet-HHL | glcm       | DifferenceEntropy                    | 3.201525914  |
| wavelet-HHL | glcm       | InverseVariance                      | 0.249550378  |
| wavelet-HHL | glcm       | DifferenceVariance                   | 7.614512638  |
| wavelet-HHL | glcm       | Idn                                  | 0.83824208   |
| wavelet-HHL | glcm       | Idm                                  | 0.232932138  |
| wavelet-HHL | glcm       | Correlation                          | -0.005729928 |
| wavelet-HHL | glcm       | Autocorrelation                      | 92.46993768  |
| wavelet-HHL | glcm       | SumEntropy                           | 4.009192319  |
| wavelet-HHL | glcm       | SumSquares                           | 10.40394315  |
| wavelet-HHL | glcm       | ClusterProminence                    | 1393.982909  |
| wavelet-HHL | glcm       | Imc2                                 | 0.900121673  |
| wavelet-HHL | glcm       | Imc1                                 | -0.230261638 |
| wavelet-HHL | glcm       | DifferenceAverage                    | 3.622393851  |
| wavelet-HHL | glcm       | Id                                   | 0.326743596  |
| wavelet-HHL | glcm       | ClusterTendency                      | 20.69276748  |
| wavelet-HHL | firstorder | InterquartileRange                   | 116.2854893  |
| wavelet-HHL | firstorder | Skewness                             | 0.04093656   |
| wavelet-HHL | firstorder | Uniformity                           | 0.089333333  |
| wavelet-HHL | firstorder | Median                               | -5.566997623 |
| wavelet-HHL | firstorder | Energy                               | 957510.8705  |
| wavelet-HHL | firstorder | RobustMeanAbsoluteDeviation          | 47.08506055  |
| wavelet-HHL | firstorder | MeanAbsoluteDeviation                | 65.07232817  |
| wavelet-HHL | firstorder | TotalEnergy                          | 25852793.5   |
| wavelet-HHL | firstorder | Maximum                              | 192.9708385  |
| wavelet-HHL | firstorder | RootMeanSquared                      | 79.89621896  |
| wavelet-HHL | firstorder | 90Percentile                         | 107.8880931  |
| wavelet-HHL | firstorder | Minimum                              | -220.2024926 |
| wavelet-HHL | firstorder | Entropy                              | 3.660964071  |
| wavelet-HHL | firstorder | Range                                | 413.1733311  |
| wavelet-HHL | firstorder | Variance                             | 6383.138192  |
| wavelet-HHL | firstorder | 10Percentile                         | -97.16323078 |
| wavelet-HHL | firstorder | Kurtosis                             | 2.720205817  |
| wavelet-HHL | firstorder | Mean                                 | -0.517311972 |
| wavelet-HHL | glrlm      | ShortRunLowGrayLevelEmphasis         | 0.028443512  |
| wavelet-HHL | glrlm      | GrayLevelVariance                    | 10.66242792  |

|             |       |                                      |             |
|-------------|-------|--------------------------------------|-------------|
| wavelet-HHL | glrlm | LowGrayLevelRunEmphasis              | 0.02941077  |
| wavelet-HHL | glrlm | GrayLevelNonUniformityNormalized     | 0.087632532 |
| wavelet-HHL | glrlm | RunVariance                          | 0.059176858 |
| wavelet-HHL | glrlm | GrayLevelNonUniformity               | 12.43767889 |
| wavelet-HHL | glrlm | LongRunEmphasis                      | 1.177179117 |
| wavelet-HHL | glrlm | ShortRunHighGrayLevelEmphasis        | 97.64274705 |
| wavelet-HHL | glrlm | RunLengthNonUniformity               | 127.383271  |
| wavelet-HHL | glrlm | ShortRunEmphasis                     | 0.958793052 |
| wavelet-HHL | glrlm | LongRunHighGrayLevelEmphasis         | 116.9194134 |
| wavelet-HHL | glrlm | RunPercentage                        | 0.946153846 |
| wavelet-HHL | glrlm | LongRunLowGrayLevelEmphasis          | 0.03344436  |
| wavelet-HHL | glrlm | RunEntropy                           | 3.922561108 |
| wavelet-HHL | glrlm | HighGrayLevelRunEmphasis             | 101.2929878 |
| wavelet-HHL | glrlm | RunLengthNonUniformityNormalized     | 0.89713929  |
| wavelet-HHL | glszm | GrayLevelVariance                    | 15.04462222 |
| wavelet-HHL | glszm | ZoneVariance                         | 8.373333333 |
| wavelet-HHL | glszm | GrayLevelNonUniformityNormalized     | 0.082311111 |
| wavelet-HHL | glszm | SizeZoneNonUniformityNormalized      | 0.525688889 |
| wavelet-HHL | glszm | SizeZoneNonUniformity                | 39.42666667 |
| wavelet-HHL | glszm | GrayLevelNonUniformity               | 6.173333333 |
| wavelet-HHL | glszm | LargeAreaEmphasis                    | 12.37333333 |
| wavelet-HHL | glszm | SmallAreaHighGrayLevelEmphasis       | 91.50391276 |
| wavelet-HHL | glszm | ZonePercentage                       | 0.5         |
| wavelet-HHL | glszm | LargeAreaLowGrayLevelEmphasis        | 0.209272994 |
| wavelet-HHL | glszm | LargeAreaHighGrayLevelEmphasis       | 1141.213333 |
| wavelet-HHL | glszm | HighGrayLevelZoneEmphasis            | 113.1866667 |
| wavelet-HHL | glszm | SmallAreaEmphasis                    | 0.750746091 |
| wavelet-HHL | glszm | LowGrayLevelZoneEmphasis             | 0.030793764 |
| wavelet-HHL | glszm | ZoneEntropy                          | 4.725551112 |
| wavelet-HHL | glszm | SmallAreaLowGrayLevelEmphasis        | 0.016732869 |
| wavelet-HHL | ngtdm | Coarseness                           | 0.036856118 |
| wavelet-HHL | ngtdm | Complexity                           | 246.1014868 |
| wavelet-HHL | ngtdm | Strength                             | 2.613372494 |
| wavelet-HHL | ngtdm | Contrast                             | 0.229332421 |
| wavelet-HHL | ngtdm | Busyness                             | 0.230275015 |
| wavelet-HLH | gldm  | GrayLevelVariance                    | 21.46026667 |
| wavelet-HLH | gldm  | HighGrayLevelEmphasis                | 192.5466667 |
| wavelet-HLH | gldm  | DependenceEntropy                    | 5.496687152 |
| wavelet-HLH | gldm  | DependenceNonUniformity              | 43.37333333 |
| wavelet-HLH | gldm  | GrayLevelNonUniformity               | 10.25333333 |
| wavelet-HLH | gldm  | SmallDependenceEmphasis              | 0.510494331 |
| wavelet-HLH | gldm  | SmallDependenceHighGrayLevelEmphasis | 99.76985518 |
| wavelet-HLH | gldm  | DependenceNonUniformityNormalized    | 0.289155556 |
| wavelet-HLH | gldm  | LargeDependenceEmphasis              | 6.04        |
| wavelet-HLH | gldm  | LargeDependenceLowGrayLevelEmphasis  | 0.052828614 |
| wavelet-HLH | gldm  | DependenceVariance                   | 1.601955556 |
| wavelet-HLH | gldm  | LargeDependenceHighGrayLevelEmphasis | 1069.253333 |
| wavelet-HLH | gldm  | SmallDependenceLowGrayLevelEmphasis  | 0.011492854 |
| wavelet-HLH | gldm  | LowGrayLevelEmphasis                 | 0.015234851 |
| wavelet-HLH | glcm  | JointAverage                         | 13.08932251 |
| wavelet-HLH | glcm  | SumAverage                           | 26.17864503 |
| wavelet-HLH | glcm  | JointEntropy                         | 6.839526447 |
| wavelet-HLH | glcm  | ClusterShade                         | 88.27295375 |

|             |            |                                  |              |
|-------------|------------|----------------------------------|--------------|
| wavelet-HLH | glcm       | MaximumProbability               | 0.024412948  |
| wavelet-HLH | glcm       | Idmn                             | 0.945691604  |
| wavelet-HLH | glcm       | JointEnergy                      | 0.010035332  |
| wavelet-HLH | glcm       | Contrast                         | 43.43456975  |
| wavelet-HLH | glcm       | DifferenceEntropy                | 3.64756916   |
| wavelet-HLH | glcm       | InverseVariance                  | 0.168733721  |
| wavelet-HLH | glcm       | DifferenceVariance               | 15.65749819  |
| wavelet-HLH | glcm       | Idn                              | 0.8458652    |
| wavelet-HLH | glcm       | Idm                              | 0.171421201  |
| wavelet-HLH | glcm       | Correlation                      | -0.041494108 |
| wavelet-HLH | glcm       | Autocorrelation                  | 170.5846222  |
| wavelet-HLH | glcm       | SumEntropy                       | 4.393346098  |
| wavelet-HLH | glcm       | SumSquares                       | 20.90793482  |
| wavelet-HLH | glcm       | ClusterProminence                | 5393.211424  |
| wavelet-HLH | glcm       | Imc2                             | 0.95557333   |
| wavelet-HLH | glcm       | Imc1                             | -0.305833896 |
| wavelet-HLH | glcm       | DifferenceAverage                | 5.207918324  |
| wavelet-HLH | glcm       | Id                               | 0.267108963  |
| wavelet-HLH | glcm       | ClusterTendency                  | 40.19716954  |
| wavelet-HLH | firstorder | InterquartileRange               | 159.3250191  |
| wavelet-HLH | firstorder | Skewness                         | 0.390856327  |
| wavelet-HLH | firstorder | Uniformity                       | 0.068355556  |
| wavelet-HLH | firstorder | Median                           | 11.20945887  |
| wavelet-HLH | firstorder | Energy                           | 2041109.582  |
| wavelet-HLH | firstorder | RobustMeanAbsoluteDeviation      | 64.13203278  |
| wavelet-HLH | firstorder | MeanAbsoluteDeviation            | 92.1469088   |
| wavelet-HLH | firstorder | TotalEnergy                      | 55109958.72  |
| wavelet-HLH | firstorder | Maximum                          | 342.2988006  |
| wavelet-HLH | firstorder | RootMeanSquared                  | 116.6507489  |
| wavelet-HLH | firstorder | 90Percentile                     | 158.1499967  |
| wavelet-HLH | firstorder | Minimum                          | -277.3353521 |
| wavelet-HLH | firstorder | Entropy                          | 4.089020258  |
| wavelet-HLH | firstorder | Range                            | 619.6341527  |
| wavelet-HLH | firstorder | Variance                         | 13381.95063  |
| wavelet-HLH | firstorder | 10Percentile                     | -127.3192282 |
| wavelet-HLH | firstorder | Kurtosis                         | 2.908994798  |
| wavelet-HLH | firstorder | Mean                             | 15.01487873  |
| wavelet-HLH | grlm       | ShortRunLowGrayLevelEmphasis     | 0.015332523  |
| wavelet-HLH | grlm       | GrayLevelVariance                | 21.87905822  |
| wavelet-HLH | grlm       | LowGrayLevelRunEmphasis          | 0.015577965  |
| wavelet-HLH | grlm       | GrayLevelNonUniformityNormalized | 0.067250325  |
| wavelet-HLH | grlm       | RunVariance                      | 0.04684098   |
| wavelet-HLH | grlm       | GrayLevelNonUniformity           | 9.658019763  |
| wavelet-HLH | grlm       | LongRunEmphasis                  | 1.138794114  |
| wavelet-HLH | grlm       | ShortRunHighGrayLevelEmphasis    | 187.3700909  |
| wavelet-HLH | grlm       | RunLengthNonUniformity           | 132.010822   |
| wavelet-HLH | grlm       | ShortRunEmphasis                 | 0.967753014  |
| wavelet-HLH | grlm       | LongRunHighGrayLevelEmphasis     | 217.9974233  |
| wavelet-HLH | grlm       | RunPercentage                    | 0.957435897  |
| wavelet-HLH | grlm       | LongRunLowGrayLevelEmphasis      | 0.016625501  |
| wavelet-HLH | grlm       | RunEntropy                       | 4.286012651  |
| wavelet-HLH | grlm       | HighGrayLevelRunEmphasis         | 193.1487669  |
| wavelet-HLH | grlm       | RunLengthNonUniformityNormalized | 0.918694929  |

|             |       |                                  |             |
|-------------|-------|----------------------------------|-------------|
| wavelet-HLH | glszm | GrayLevelVariance                | 27.12177169 |
| wavelet-HLH | glszm | ZoneVariance                     | 2.639979339 |
| wavelet-HLH | glszm | GrayLevelNonUniformityNormalized | 0.06017562  |
| wavelet-HLH | glszm | SizeZoneNonUniformityNormalized  | 0.52427686  |
| wavelet-HLH | glszm | SizeZoneNonUniformity            | 46.13636364 |
| wavelet-HLH | glszm | GrayLevelNonUniformity           | 5.295454545 |
| wavelet-HLH | glszm | LargeAreaEmphasis                | 5.545454545 |
| wavelet-HLH | glszm | SmallAreaHighGrayLevelEmphasis   | 146.9499974 |
| wavelet-HLH | glszm | ZonePercentage                   | 0.586666667 |
| wavelet-HLH | glszm | LargeAreaLowGrayLevelEmphasis    | 0.05254178  |
| wavelet-HLH | glszm | LargeAreaHighGrayLevelEmphasis   | 1016.340909 |
| wavelet-HLH | glszm | HighGrayLevelZoneEmphasis        | 197.6022727 |
| wavelet-HLH | glszm | SmallAreaEmphasis                | 0.751932438 |
| wavelet-HLH | glszm | LowGrayLevelZoneEmphasis         | 0.020634843 |
| wavelet-HLH | glszm | ZoneEntropy                      | 5.142314257 |
| wavelet-HLH | glszm | SmallAreaLowGrayLevelEmphasis    | 0.01868267  |
| wavelet-HLH | ngtdm | Coarseness                       | 0.034490746 |
| wavelet-HLH | ngtdm | Complexity                       | 726.5286976 |
| wavelet-HLH | ngtdm | Strength                         | 5.208054058 |
| wavelet-HLH | ngtdm | Contrast                         | 0.359888039 |
| wavelet-HLH | ngtdm | Busyness                         | 0.130224957 |



| Image type | Feature Class | Feature Name                         |                                                                                                                                                                                                                                                                                                                                                                                                                                           |
|------------|---------------|--------------------------------------|-------------------------------------------------------------------------------------------------------------------------------------------------------------------------------------------------------------------------------------------------------------------------------------------------------------------------------------------------------------------------------------------------------------------------------------------|
| general    | info          | BoundingBox                          | 18: RTSTRUCT: C99-DNU_segment_Tumo_RUL<br>(1, 0, 1, 8, 11, 3)                                                                                                                                                                                                                                                                                                                                                                             |
| general    | info          | EnabledImageTypes                    | {u'Original': {}, u'Wavelet': {}}                                                                                                                                                                                                                                                                                                                                                                                                         |
|            |               |                                      | {'distances': [1], 'additionalInfo': True, 'force2D':<br>False, 'interpolator': 'sitkBSpline',<br>'resampledPixelSpacing': [3.0], 'label': 1,<br>'normalizeScale': 1, 'normalize': False,<br>'force2Ddimension': 0, 'removeOutliers': None,<br>'minimumROISize': None, u'binWidth': 25.0,<br>'minimumROIDimensions': 1, u'correctMask':<br>True, 'preCrop': False, u'symmetricalGLCM': True,<br>'resegmentRange': None, 'padDistance': 5} |
| general    | info          | GeneralSettings                      |                                                                                                                                                                                                                                                                                                                                                                                                                                           |
| general    | info          | ImageHash                            | 1005effc4c41e5b03ca8944b795fe7c464f2fe6c<br>(0.9765624999999998, 0.9765624999999998,<br>1.9999999999999999)                                                                                                                                                                                                                                                                                                                               |
| general    | info          | ImageSpacing                         |                                                                                                                                                                                                                                                                                                                                                                                                                                           |
| general    | info          | MaskHash                             | 40c8f073805f24a244bec4bc0448c1896a5c73ad                                                                                                                                                                                                                                                                                                                                                                                                  |
| general    | info          | NumpyVersion                         | 1.13.1                                                                                                                                                                                                                                                                                                                                                                                                                                    |
| general    | info          | PyWaveletVersion                     | 0.5.2                                                                                                                                                                                                                                                                                                                                                                                                                                     |
| general    | info          | SimpleITKVersion                     | 1.1.0                                                                                                                                                                                                                                                                                                                                                                                                                                     |
| general    | info          | Version                              | 1.3.0.post102+g1b0eb74                                                                                                                                                                                                                                                                                                                                                                                                                    |
| general    | info          | VolumeNum                            | 1                                                                                                                                                                                                                                                                                                                                                                                                                                         |
| general    | info          | VoxelNum                             | 162                                                                                                                                                                                                                                                                                                                                                                                                                                       |
| original   | shape         | Maximum3DDiameter                    | 33.67491648                                                                                                                                                                                                                                                                                                                                                                                                                               |
| original   | shape         | Maximum2DDiameterSlice               | 33.54101966                                                                                                                                                                                                                                                                                                                                                                                                                               |
| original   | shape         | Sphericity                           | 0.738667979                                                                                                                                                                                                                                                                                                                                                                                                                               |
| original   | shape         | MinorAxis                            | 20.5442125                                                                                                                                                                                                                                                                                                                                                                                                                                |
| original   | shape         | Elongation                           | 0.63343432                                                                                                                                                                                                                                                                                                                                                                                                                                |
| original   | shape         | SurfaceVolumeRatio                   | 0.400321202                                                                                                                                                                                                                                                                                                                                                                                                                               |
| original   | shape         | Volume                               | 4374                                                                                                                                                                                                                                                                                                                                                                                                                                      |
| original   | shape         | MajorAxis                            | 32.43305872                                                                                                                                                                                                                                                                                                                                                                                                                               |
| original   | shape         | SurfaceArea                          | 1751.004938                                                                                                                                                                                                                                                                                                                                                                                                                               |
| original   | shape         | Flatness                             | 0.300004299                                                                                                                                                                                                                                                                                                                                                                                                                               |
| original   | shape         | LeastAxis                            | 9.730057047                                                                                                                                                                                                                                                                                                                                                                                                                               |
| original   | shape         | Maximum2DDiameterColumn              | 21.84032967                                                                                                                                                                                                                                                                                                                                                                                                                               |
| original   | shape         | Maximum2DDiameterRow                 | 27.65863337                                                                                                                                                                                                                                                                                                                                                                                                                               |
| original   | gldm          | GrayLevelVariance                    | 80.39719555                                                                                                                                                                                                                                                                                                                                                                                                                               |
| original   | gldm          | HighGrayLevelEmphasis                | 191.2962963                                                                                                                                                                                                                                                                                                                                                                                                                               |
| original   | gldm          | DependenceEntropy                    | 5.580289318                                                                                                                                                                                                                                                                                                                                                                                                                               |
| original   | gldm          | DependenceNonUniformity              | 45.90123457                                                                                                                                                                                                                                                                                                                                                                                                                               |
| original   | gldm          | GrayLevelNonUniformity               | 12.33333333                                                                                                                                                                                                                                                                                                                                                                                                                               |
| original   | gldm          | SmallDependenceEmphasis              | 0.508620813                                                                                                                                                                                                                                                                                                                                                                                                                               |
| original   | gldm          | SmallDependenceHighGrayLevelEmphasis | 157.087018                                                                                                                                                                                                                                                                                                                                                                                                                                |
| original   | gldm          | DependenceNonUniformityNormalized    | 0.283340954                                                                                                                                                                                                                                                                                                                                                                                                                               |
| original   | gldm          | LargeDependenceEmphasis              | 6.728395062                                                                                                                                                                                                                                                                                                                                                                                                                               |
| original   | gldm          | LargeDependenceLowGrayLevelEmphasis  | 0.598171448                                                                                                                                                                                                                                                                                                                                                                                                                               |
| original   | gldm          | DependenceVariance                   | 2.007163542                                                                                                                                                                                                                                                                                                                                                                                                                               |
| original   | gldm          | LargeDependenceHighGrayLevelEmphasis | 383.8271605                                                                                                                                                                                                                                                                                                                                                                                                                               |
| original   | gldm          | SmallDependenceLowGrayLevelEmphasis  | 0.014446356                                                                                                                                                                                                                                                                                                                                                                                                                               |
| original   | gldm          | LowGrayLevelEmphasis                 | 0.056702709                                                                                                                                                                                                                                                                                                                                                                                                                               |
| original   | glcm          | JointAverage                         | 11.77121367                                                                                                                                                                                                                                                                                                                                                                                                                               |
| original   | glcm          | SumAverage                           | 23.54242734                                                                                                                                                                                                                                                                                                                                                                                                                               |

|          |            |                                  |              |
|----------|------------|----------------------------------|--------------|
| original | glcm       | JointEntropy                     | 6.979275388  |
| original | glcm       | ClusterShade                     | 3564.13441   |
| original | glcm       | MaximumProbability               | 0.040213448  |
| original | glcm       | Idmn                             | 0.939431741  |
| original | glcm       | JointEnergy                      | 0.01006735   |
| original | glcm       | Contrast                         | 120.5866215  |
| original | glcm       | DifferenceEntropy                | 4.170411828  |
| original | glcm       | InverseVariance                  | 0.173861958  |
| original | glcm       | DifferenceVariance               | 54.59524025  |
| original | glcm       | Idn                              | 0.850877092  |
| original | glcm       | Idm                              | 0.174854154  |
| original | glcm       | Correlation                      | 0.357178729  |
| original | glcm       | Autocorrelation                  | 171.9181171  |
| original | glcm       | SumEntropy                       | 5.17288971   |
| original | glcm       | SumSquares                       | 93.385822    |
| original | glcm       | ClusterProminence                | 191552.3233  |
| original | glcm       | Imc2                             | 0.991186221  |
| original | glcm       | Imc1                             | -0.459444724 |
| original | glcm       | DifferenceAverage                | 8.030834932  |
| original | glcm       | Id                               | 0.251874892  |
| original | glcm       | ClusterTendency                  | 252.9566665  |
| original | firstorder | InterquartileRange               | 320.5        |
| original | firstorder | Skewness                         | 1.289371194  |
| original | firstorder | Uniformity                       | 0.076131687  |
| original | firstorder | Median                           | -763.5       |
| original | firstorder | Energy                           | 81968408     |
| original | firstorder | RobustMeanAbsoluteDeviation      | 126.7786865  |
| original | firstorder | MeanAbsoluteDeviation            | 182.2130773  |
| original | firstorder | TotalEnergy                      | 2213147016   |
| original | firstorder | Maximum                          | 65           |
| original | firstorder | RootMeanSquared                  | 711.3211842  |
| original | firstorder | 90Percentile                     | -352.5       |
| original | firstorder | Minimum                          | -905         |
| original | firstorder | Entropy                          | 4.340812044  |
| original | firstorder | Range                            | 970          |
| original | firstorder | Variance                         | 50002.75995  |
| original | firstorder | 10Percentile                     | -867.9       |
| original | firstorder | Kurtosis                         | 3.949116309  |
| original | firstorder | Mean                             | -675.2592593 |
| original | glrlm      | ShortRunLowGrayLevelEmphasis     | 0.051995441  |
| original | glrlm      | GrayLevelVariance                | 81.85798146  |
| original | glrlm      | LowGrayLevelRunEmphasis          | 0.05508125   |
| original | glrlm      | GrayLevelNonUniformityNormalized | 0.071591716  |
| original | glrlm      | RunVariance                      | 0.051125715  |
| original | glrlm      | GrayLevelNonUniformity           | 11.08448948  |
| original | glrlm      | LongRunEmphasis                  | 1.149781734  |
| original | glrlm      | ShortRunHighGrayLevelEmphasis    | 196.6223482  |
| original | glrlm      | RunLengthNonUniformity           | 141.5704581  |
| original | glrlm      | ShortRunEmphasis                 | 0.965736659  |
| original | glrlm      | LongRunHighGrayLevelEmphasis     | 204.9084341  |
| original | glrlm      | RunPercentage                    | 0.954890788  |
| original | glrlm      | LongRunLowGrayLevelEmphasis      | 0.068726456  |
| original | glrlm      | RunEntropy                       | 4.573033489  |
| original | glrlm      | HighGrayLevelRunEmphasis         | 198.2534203  |
| original | glrlm      | RunLengthNonUniformityNormalized | 0.914241658  |

|             |       |                                      |              |
|-------------|-------|--------------------------------------|--------------|
| original    | glszm | GrayLevelVariance                    | 93.98271468  |
| original    | glszm | ZoneVariance                         | 3.344709141  |
| original    | glszm | GrayLevelNonUniformityNormalized     | 0.044875346  |
| original    | glszm | SizeZoneNonUniformityNormalized      | 0.532188366  |
| original    | glszm | SizeZoneNonUniformity                | 50.55789474  |
| original    | glszm | GrayLevelNonUniformity               | 4.263157895  |
| original    | glszm | LargeAreaEmphasis                    | 6.252631579  |
| original    | glszm | SmallAreaHighGrayLevelEmphasis       | 258.2773077  |
| original    | glszm | ZonePercentage                       | 0.586419753  |
| original    | glszm | LargeAreaLowGrayLevelEmphasis        | 0.518888288  |
| original    | glszm | LargeAreaHighGrayLevelEmphasis       | 458.8421053  |
| original    | glszm | HighGrayLevelZoneEmphasis            | 283.8421053  |
| original    | glszm | SmallAreaEmphasis                    | 0.756591374  |
| original    | glszm | LowGrayLevelZoneEmphasis             | 0.036747106  |
| original    | glszm | ZoneEntropy                          | 5.482925282  |
| original    | glszm | SmallAreaLowGrayLevelEmphasis        | 0.016053807  |
| original    | ngtdm | Coarseness                           | 0.01831664   |
| original    | ngtdm | Complexity                           | 3311.690187  |
| original    | ngtdm | Strength                             | 23.06237141  |
| original    | ngtdm | Contrast                             | 0.699512127  |
| original    | ngtdm | Busyness                             | 0.234749354  |
| wavelet-HHH | gldm  | GrayLevelVariance                    | 11.46578266  |
| wavelet-HHH | gldm  | HighGrayLevelEmphasis                | 195.8888889  |
| wavelet-HHH | gldm  | DependenceEntropy                    | 5.355217408  |
| wavelet-HHH | gldm  | DependenceNonUniformity              | 39.38271605  |
| wavelet-HHH | gldm  | GrayLevelNonUniformity               | 15.08641975  |
| wavelet-HHH | gldm  | SmallDependenceEmphasis              | 0.382033608  |
| wavelet-HHH | gldm  | SmallDependenceHighGrayLevelEmphasis | 78.05765089  |
| wavelet-HHH | gldm  | DependenceNonUniformityNormalized    | 0.243103185  |
| wavelet-HHH | gldm  | LargeDependenceEmphasis              | 7.308641975  |
| wavelet-HHH | gldm  | LargeDependenceLowGrayLevelEmphasis  | 0.052296738  |
| wavelet-HHH | gldm  | DependenceVariance                   | 1.453436976  |
| wavelet-HHH | gldm  | LargeDependenceHighGrayLevelEmphasis | 1387.493827  |
| wavelet-HHH | gldm  | SmallDependenceLowGrayLevelEmphasis  | 0.009016838  |
| wavelet-HHH | gldm  | LowGrayLevelEmphasis                 | 0.013107661  |
| wavelet-HHH | glcm  | JointAverage                         | 13.60623731  |
| wavelet-HHH | glcm  | SumAverage                           | 27.21247461  |
| wavelet-HHH | glcm  | JointEntropy                         | 6.503403525  |
| wavelet-HHH | glcm  | ClusterShade                         | -28.38598752 |
| wavelet-HHH | glcm  | MaximumProbability                   | 0.033768645  |
| wavelet-HHH | glcm  | Idmn                                 | 0.958243283  |
| wavelet-HHH | glcm  | JointEnergy                          | 0.013101299  |
| wavelet-HHH | glcm  | Contrast                             | 23.12873098  |
| wavelet-HHH | glcm  | DifferenceEntropy                    | 3.264563313  |
| wavelet-HHH | glcm  | InverseVariance                      | 0.237871127  |
| wavelet-HHH | glcm  | DifferenceVariance                   | 8.685844845  |
| wavelet-HHH | glcm  | Idn                                  | 0.864735204  |
| wavelet-HHH | glcm  | Idm                                  | 0.235021903  |
| wavelet-HHH | glcm  | Correlation                          | -0.020616123 |
| wavelet-HHH | glcm  | Autocorrelation                      | 184.9086855  |
| wavelet-HHH | glcm  | SumEntropy                           | 4.056995639  |
| wavelet-HHH | glcm  | SumSquares                           | 11.33996515  |
| wavelet-HHH | glcm  | ClusterProminence                    | 1677.655758  |
| wavelet-HHH | glcm  | Imc2                                 | 0.896858048  |
| wavelet-HHH | glcm  | Imc1                                 | -0.225977045 |

|             |            |                                  |             |
|-------------|------------|----------------------------------|-------------|
| wavelet-HHH | glcm       | DifferenceAverage                | 3.757527565 |
| wavelet-HHH | glcm       | Id                               | 0.327851006 |
| wavelet-HHH | glcm       | ClusterTendency                  | 22.23112961 |
| wavelet-HHH | firstorder | InterquartileRange               | 103.037198  |
| wavelet-HHH | firstorder | Skewness                         | -0.54127584 |
| wavelet-HHH | firstorder | Uniformity                       | 0.093126048 |
| wavelet-HHH | firstorder | Median                           | 8.062463265 |
| wavelet-HHH | firstorder | Energy                           | 1162810.351 |
| wavelet-HHH | firstorder | RobustMeanAbsoluteDeviation      | 43.29891987 |
| wavelet-HHH | firstorder | MeanAbsoluteDeviation            | 65.27162819 |
| wavelet-HHH | firstorder | TotalEnergy                      | 31395879.49 |
| wavelet-HHH | firstorder | Maximum                          | 203.4103787 |
| wavelet-HHH | firstorder | RootMeanSquared                  | 84.72214395 |
| wavelet-HHH | firstorder | 90Percentile                     | 97.62441397 |
| wavelet-HHH | firstorder | Minimum                          | -318.833379 |
| wavelet-HHH | firstorder | Entropy                          | 3.665800825 |
| wavelet-HHH | firstorder | Range                            | 522.2437577 |
| wavelet-HHH | firstorder | Variance                         | 7175.791536 |
| wavelet-HHH | firstorder | 10Percentile                     | -113.970134 |
| wavelet-HHH | firstorder | Kurtosis                         | 3.826353942 |
| wavelet-HHH | firstorder | Mean                             | 1.431830832 |
| wavelet-HHH | glrlm      | ShortRunLowGrayLevelEmphasis     | 0.013230051 |
| wavelet-HHH | glrlm      | GrayLevelVariance                | 11.76897204 |
| wavelet-HHH | glrlm      | LowGrayLevelRunEmphasis          | 0.013501772 |
| wavelet-HHH | glrlm      | GrayLevelNonUniformityNormalized | 0.091766247 |
| wavelet-HHH | glrlm      | RunVariance                      | 0.059305576 |
| wavelet-HHH | glrlm      | GrayLevelNonUniformity           | 14.05496072 |
| wavelet-HHH | glrlm      | LongRunEmphasis                  | 1.180679437 |
| wavelet-HHH | glrlm      | ShortRunHighGrayLevelEmphasis    | 188.2779044 |
| wavelet-HHH | glrlm      | RunLengthNonUniformity           | 137.3875519 |
| wavelet-HHH | glrlm      | ShortRunEmphasis                 | 0.957629408 |
| wavelet-HHH | glrlm      | LongRunHighGrayLevelEmphasis     | 230.4592762 |
| wavelet-HHH | glrlm      | RunPercentage                    | 0.945394112 |
| wavelet-HHH | glrlm      | LongRunLowGrayLevelEmphasis      | 0.014648695 |
| wavelet-HHH | glrlm      | RunEntropy                       | 3.926714991 |
| wavelet-HHH | glrlm      | HighGrayLevelRunEmphasis         | 196.2871447 |
| wavelet-HHH | glrlm      | RunLengthNonUniformityNormalized | 0.895702667 |
| wavelet-HHH | glszm      | GrayLevelVariance                | 17.4992284  |
| wavelet-HHH | glszm      | ZoneVariance                     | 7.465277778 |
| wavelet-HHH | glszm      | GrayLevelNonUniformityNormalized | 0.077160494 |
| wavelet-HHH | glszm      | SizeZoneNonUniformityNormalized  | 0.409722222 |
| wavelet-HHH | glszm      | SizeZoneNonUniformity            | 29.5        |
| wavelet-HHH | glszm      | GrayLevelNonUniformity           | 5.555555556 |
| wavelet-HHH | glszm      | LargeAreaEmphasis                | 12.52777778 |
| wavelet-HHH | glszm      | SmallAreaHighGrayLevelEmphasis   | 137.2467073 |
| wavelet-HHH | glszm      | ZonePercentage                   | 0.444444444 |
| wavelet-HHH | glszm      | LargeAreaLowGrayLevelEmphasis    | 0.086151302 |
| wavelet-HHH | glszm      | LargeAreaHighGrayLevelEmphasis   | 2479.472222 |
| wavelet-HHH | glszm      | HighGrayLevelZoneEmphasis        | 200.5       |
| wavelet-HHH | glszm      | SmallAreaEmphasis                | 0.662849949 |
| wavelet-HHH | glszm      | LowGrayLevelZoneEmphasis         | 0.021535483 |
| wavelet-HHH | glszm      | ZoneEntropy                      | 5.078211683 |
| wavelet-HHH | glszm      | SmallAreaLowGrayLevelEmphasis    | 0.018981454 |
| wavelet-HHH | ngtdm      | Coarseness                       | 0.034220666 |
| wavelet-HHH | ngtdm      | Complexity                       | 365.6275021 |

|             |            |                                      |              |
|-------------|------------|--------------------------------------|--------------|
| wavelet-HHH | ngtdm      | Strength                             | 3.76485935   |
| wavelet-HHH | ngtdm      | Contrast                             | 0.207005356  |
| wavelet-HHH | ngtdm      | Busyness                             | 0.120703251  |
| wavelet-HLL | gldm       | GrayLevelVariance                    | 74.05746075  |
| wavelet-HLL | gldm       | HighGrayLevelEmphasis                | 785.8271605  |
| wavelet-HLL | gldm       | DependenceEntropy                    | 5.928636253  |
| wavelet-HLL | gldm       | DependenceNonUniformity              | 58.16049383  |
| wavelet-HLL | gldm       | GrayLevelNonUniformity               | 7.061728395  |
| wavelet-HLL | gldm       | SmallDependenceEmphasis              | 0.587985254  |
| wavelet-HLL | gldm       | SmallDependenceHighGrayLevelEmphasis | 442.8389438  |
| wavelet-HLL | gldm       | DependenceNonUniformityNormalized    | 0.359015394  |
| wavelet-HLL | gldm       | LargeDependenceEmphasis              | 4.012345679  |
| wavelet-HLL | gldm       | LargeDependenceLowGrayLevelEmphasis  | 0.015059099  |
| wavelet-HLL | gldm       | DependenceVariance                   | 0.851851852  |
| wavelet-HLL | gldm       | LargeDependenceHighGrayLevelEmphasis | 3478.481481  |
| wavelet-HLL | gldm       | SmallDependenceLowGrayLevelEmphasis  | 0.010332279  |
| wavelet-HLL | gldm       | LowGrayLevelEmphasis                 | 0.010964784  |
| wavelet-HLL | glcm       | JointAverage                         | 26.45233622  |
| wavelet-HLL | glcm       | SumAverage                           | 52.90467243  |
| wavelet-HLL | glcm       | JointEntropy                         | 7.263699533  |
| wavelet-HLL | glcm       | ClusterShade                         | -774.1813189 |
| wavelet-HLL | glcm       | MaximumProbability                   | 0.015867018  |
| wavelet-HLL | glcm       | Idmn                                 | 0.952228833  |
| wavelet-HLL | glcm       | JointEnergy                          | 0.007031553  |
| wavelet-HLL | glcm       | Contrast                             | 135.0463512  |
| wavelet-HLL | glcm       | DifferenceEntropy                    | 4.26258058   |
| wavelet-HLL | glcm       | InverseVariance                      | 0.119694231  |
| wavelet-HLL | glcm       | DifferenceVariance                   | 51.62630212  |
| wavelet-HLL | glcm       | Idn                                  | 0.859685338  |
| wavelet-HLL | glcm       | Idm                                  | 0.123387     |
| wavelet-HLL | glcm       | Correlation                          | 0.115954093  |
| wavelet-HLL | glcm       | Autocorrelation                      | 710.475493   |
| wavelet-HLL | glcm       | SumEntropy                           | 5.202241341  |
| wavelet-HLL | glcm       | SumSquares                           | 78.11654501  |
| wavelet-HLL | glcm       | ClusterProminence                    | 113554.7356  |
| wavelet-HLL | glcm       | Imc2                                 | 0.995452073  |
| wavelet-HLL | glcm       | Imc1                                 | -0.490536632 |
| wavelet-HLL | glcm       | DifferenceAverage                    | 8.863726075  |
| wavelet-HLL | glcm       | Id                                   | 0.206874868  |
| wavelet-HLL | glcm       | ClusterTendency                      | 177.4198289  |
| wavelet-HLL | firstorder | InterquartileRange                   | 220.7807819  |
| wavelet-HLL | firstorder | Skewness                             | -0.531312065 |
| wavelet-HLL | firstorder | Uniformity                           | 0.043590916  |
| wavelet-HLL | firstorder | Median                               | 19.09627562  |
| wavelet-HLL | firstorder | Energy                               | 7506170.76   |
| wavelet-HLL | firstorder | RobustMeanAbsoluteDeviation          | 101.0327754  |
| wavelet-HLL | firstorder | MeanAbsoluteDeviation                | 160.8864607  |
| wavelet-HLL | firstorder | TotalEnergy                          | 202666610.5  |
| wavelet-HLL | firstorder | Maximum                              | 556.4938152  |
| wavelet-HLL | firstorder | RootMeanSquared                      | 215.254239   |
| wavelet-HLL | firstorder | 90Percentile                         | 266.5191624  |
| wavelet-HLL | firstorder | Minimum                              | -628.6384317 |
| wavelet-HLL | firstorder | Entropy                              | 4.822981919  |
| wavelet-HLL | firstorder | Range                                | 1185.132247  |
| wavelet-HLL | firstorder | Variance                             | 46317.82986  |

|             |            |                                      |              |
|-------------|------------|--------------------------------------|--------------|
| wavelet-HLL | firstorder | 10Percentile                         | -263.2610526 |
| wavelet-HLL | firstorder | Kurtosis                             | 3.77316038   |
| wavelet-HLL | firstorder | Mean                                 | 4.069097364  |
| wavelet-HLL | glrlm      | ShortRunLowGrayLevelEmphasis         | 0.011229726  |
| wavelet-HLL | glrlm      | GrayLevelVariance                    | 75.14682617  |
| wavelet-HLL | glrlm      | LowGrayLevelRunEmphasis              | 0.011261127  |
| wavelet-HLL | glrlm      | GrayLevelNonUniformityNormalized     | 0.043057401  |
| wavelet-HLL | glrlm      | RunVariance                          | 0.033845677  |
| wavelet-HLL | glrlm      | GrayLevelNonUniformity               | 6.76651024   |
| wavelet-HLL | glrlm      | LongRunEmphasis                      | 1.097228266  |
| wavelet-HLL | glrlm      | ShortRunHighGrayLevelEmphasis        | 764.1926762  |
| wavelet-HLL | glrlm      | RunLengthNonUniformity               | 148.3829561  |
| wavelet-HLL | glrlm      | ShortRunEmphasis                     | 0.977906188  |
| wavelet-HLL | glrlm      | LongRunHighGrayLevelEmphasis         | 867.3922255  |
| wavelet-HLL | glrlm      | RunPercentage                        | 0.97008547   |
| wavelet-HLL | glrlm      | LongRunLowGrayLevelEmphasis          | 0.011400863  |
| wavelet-HLL | glrlm      | RunEntropy                           | 4.95202976   |
| wavelet-HLL | glrlm      | HighGrayLevelRunEmphasis             | 783.3497796  |
| wavelet-HLL | glrlm      | RunLengthNonUniformityNormalized     | 0.943791432  |
| wavelet-HLL | glszm      | GrayLevelVariance                    | 89.83975207  |
| wavelet-HLL | glszm      | ZoneVariance                         | 0.885619835  |
| wavelet-HLL | glszm      | GrayLevelNonUniformityNormalized     | 0.036859504  |
| wavelet-HLL | glszm      | SizeZoneNonUniformityNormalized      | 0.558347107  |
| wavelet-HLL | glszm      | SizeZoneNonUniformity                | 61.41818182  |
| wavelet-HLL | glszm      | GrayLevelNonUniformity               | 4.054545455  |
| wavelet-HLL | glszm      | LargeAreaEmphasis                    | 3.054545455  |
| wavelet-HLL | glszm      | SmallAreaHighGrayLevelEmphasis       | 577.4621959  |
| wavelet-HLL | glszm      | ZonePercentage                       | 0.679012346  |
| wavelet-HLL | glszm      | LargeAreaLowGrayLevelEmphasis        | 0.0182599    |
| wavelet-HLL | glszm      | LargeAreaHighGrayLevelEmphasis       | 2611.436364  |
| wavelet-HLL | glszm      | HighGrayLevelZoneEmphasis            | 757.8272727  |
| wavelet-HLL | glszm      | SmallAreaEmphasis                    | 0.774364822  |
| wavelet-HLL | glszm      | LowGrayLevelZoneEmphasis             | 0.015442523  |
| wavelet-HLL | glszm      | ZoneEntropy                          | 5.7767825    |
| wavelet-HLL | glszm      | SmallAreaLowGrayLevelEmphasis        | 0.01507054   |
| wavelet-HLL | ngtdm      | Coarseness                           | 0.038160739  |
| wavelet-HLL | ngtdm      | Complexity                           | 3437.791315  |
| wavelet-HLL | ngtdm      | Strength                             | 23.92993294  |
| wavelet-HLL | ngtdm      | Contrast                             | 0.494014956  |
| wavelet-HLL | ngtdm      | Busyness                             | 0.02312352   |
| wavelet-LHL | gldm       | GrayLevelVariance                    | 65.29660113  |
| wavelet-LHL | gldm       | HighGrayLevelEmphasis                | 755.4938272  |
| wavelet-LHL | gldm       | DependenceEntropy                    | 5.870390938  |
| wavelet-LHL | gldm       | DependenceNonUniformity              | 61.08641975  |
| wavelet-LHL | gldm       | GrayLevelNonUniformity               | 7.037037037  |
| wavelet-LHL | gldm       | SmallDependenceEmphasis              | 0.569819959  |
| wavelet-LHL | gldm       | SmallDependenceHighGrayLevelEmphasis | 397.3616358  |
| wavelet-LHL | gldm       | DependenceNonUniformityNormalized    | 0.377076665  |
| wavelet-LHL | gldm       | LargeDependenceEmphasis              | 3.62962963   |
| wavelet-LHL | gldm       | LargeDependenceLowGrayLevelEmphasis  | 0.061559185  |
| wavelet-LHL | gldm       | DependenceVariance                   | 0.64228014   |
| wavelet-LHL | gldm       | LargeDependenceHighGrayLevelEmphasis | 2986.08642   |
| wavelet-LHL | gldm       | SmallDependenceLowGrayLevelEmphasis  | 0.011187208  |
| wavelet-LHL | gldm       | LowGrayLevelEmphasis                 | 0.02104642   |
| wavelet-LHL | glcm       | JointAverage                         | 26.12446637  |

|             |            |                                  |              |
|-------------|------------|----------------------------------|--------------|
| wavelet-LHL | glcm       | SumAverage                       | 52.24893274  |
| wavelet-LHL | glcm       | JointEntropy                     | 7.192731156  |
| wavelet-LHL | glcm       | ClusterShade                     | -886.0807458 |
| wavelet-LHL | glcm       | MaximumProbability               | 0.018041954  |
| wavelet-LHL | glcm       | Idmn                             | 0.953422114  |
| wavelet-LHL | glcm       | JointEnergy                      | 0.007585574  |
| wavelet-LHL | glcm       | Contrast                         | 128.8189496  |
| wavelet-LHL | glcm       | DifferenceEntropy                | 4.153412258  |
| wavelet-LHL | glcm       | InverseVariance                  | 0.148680111  |
| wavelet-LHL | glcm       | DifferenceVariance               | 58.84304852  |
| wavelet-LHL | glcm       | Idn                              | 0.866874896  |
| wavelet-LHL | glcm       | Idm                              | 0.137405714  |
| wavelet-LHL | glcm       | Correlation                      | 0.040237998  |
| wavelet-LHL | glcm       | Autocorrelation                  | 685.0886398  |
| wavelet-LHL | glcm       | SumEntropy                       | 5.005715194  |
| wavelet-LHL | glcm       | SumSquares                       | 66.98545283  |
| wavelet-LHL | glcm       | ClusterProminence                | 79067.33004  |
| wavelet-LHL | glcm       | Imc2                             | 0.995220463  |
| wavelet-LHL | glcm       | Imc1                             | -0.498257844 |
| wavelet-LHL | glcm       | DifferenceAverage                | 8.148024102  |
| wavelet-LHL | glcm       | Id                               | 0.223119881  |
| wavelet-LHL | glcm       | ClusterTendency                  | 139.1228617  |
| wavelet-LHL | firstorder | InterquartileRange               | 226.3670872  |
| wavelet-LHL | firstorder | Skewness                         | -0.684074578 |
| wavelet-LHL | firstorder | Uniformity                       | 0.0434385    |
| wavelet-LHL | firstorder | Median                           | 19.70612177  |
| wavelet-LHL | firstorder | Energy                           | 6563572.221  |
| wavelet-LHL | firstorder | RobustMeanAbsoluteDeviation      | 97.82020962  |
| wavelet-LHL | firstorder | MeanAbsoluteDeviation            | 152.8216739  |
| wavelet-LHL | firstorder | TotalEnergy                      | 177216450    |
| wavelet-LHL | firstorder | Maximum                          | 512.9439167  |
| wavelet-LHL | firstorder | RootMeanSquared                  | 201.2855631  |
| wavelet-LHL | firstorder | 90Percentile                     | 230.9925     |
| wavelet-LHL | firstorder | Minimum                          | -632.8796208 |
| wavelet-LHL | firstorder | Entropy                          | 4.781109647  |
| wavelet-LHL | firstorder | Range                            | 1145.823538  |
| wavelet-LHL | firstorder | Variance                         | 40477.00644  |
| wavelet-LHL | firstorder | 10Percentile                     | -291.9723465 |
| wavelet-LHL | firstorder | Kurtosis                         | 3.884818464  |
| wavelet-LHL | firstorder | Mean                             | -6.234698622 |
| wavelet-LHL | glrlm      | ShortRunLowGrayLevelEmphasis     | 0.020726241  |
| wavelet-LHL | glrlm      | GrayLevelVariance                | 65.98250385  |
| wavelet-LHL | glrlm      | LowGrayLevelRunEmphasis          | 0.021127226  |
| wavelet-LHL | glrlm      | GrayLevelNonUniformityNormalized | 0.042904156  |
| wavelet-LHL | glrlm      | RunVariance                      | 0.030932482  |
| wavelet-LHL | glrlm      | GrayLevelNonUniformity           | 6.755674503  |
| wavelet-LHL | glrlm      | LongRunEmphasis                  | 1.090904835  |
| wavelet-LHL | glrlm      | ShortRunHighGrayLevelEmphasis    | 735.3661453  |
| wavelet-LHL | glrlm      | RunLengthNonUniformity           | 149.1989675  |
| wavelet-LHL | glrlm      | ShortRunEmphasis                 | 0.978940083  |
| wavelet-LHL | glrlm      | LongRunHighGrayLevelEmphasis     | 830.1717569  |
| wavelet-LHL | glrlm      | RunPercentage                    | 0.971984805  |
| wavelet-LHL | glrlm      | LongRunLowGrayLevelEmphasis      | 0.022737966  |
| wavelet-LHL | glrlm      | RunEntropy                       | 4.905246865  |
| wavelet-LHL | glrlm      | HighGrayLevelRunEmphasis         | 752.9313288  |

|             |       |                                      |              |
|-------------|-------|--------------------------------------|--------------|
| wavelet-LHL | glrlm | RunLengthNonUniformityNormalized     | 0.946709292  |
| wavelet-LHL | glszm | GrayLevelVariance                    | 74.17719008  |
| wavelet-LHL | glszm | ZoneVariance                         | 0.612892562  |
| wavelet-LHL | glszm | GrayLevelNonUniformityNormalized     | 0.037024793  |
| wavelet-LHL | glszm | SizeZoneNonUniformityNormalized      | 0.506446281  |
| wavelet-LHL | glszm | SizeZoneNonUniformity                | 55.70909091  |
| wavelet-LHL | glszm | GrayLevelNonUniformity               | 4.072727273  |
| wavelet-LHL | glszm | LargeAreaEmphasis                    | 2.781818182  |
| wavelet-LHL | glszm | SmallAreaHighGrayLevelEmphasis       | 499.1176288  |
| wavelet-LHL | glszm | ZonePercentage                       | 0.679012346  |
| wavelet-LHL | glszm | LargeAreaLowGrayLevelEmphasis        | 0.050885935  |
| wavelet-LHL | glszm | LargeAreaHighGrayLevelEmphasis       | 2240.363636  |
| wavelet-LHL | glszm | HighGrayLevelZoneEmphasis            | 714.7272727  |
| wavelet-LHL | glszm | SmallAreaEmphasis                    | 0.737042929  |
| wavelet-LHL | glszm | LowGrayLevelZoneEmphasis             | 0.021258204  |
| wavelet-LHL | glszm | ZoneEntropy                          | 5.766371164  |
| wavelet-LHL | glszm | SmallAreaLowGrayLevelEmphasis        | 0.01406113   |
| wavelet-LHL | ngtdm | Coarseness                           | 0.035244684  |
| wavelet-LHL | ngtdm | Complexity                           | 3127.080933  |
| wavelet-LHL | ngtdm | Strength                             | 14.72003794  |
| wavelet-LHL | ngtdm | Contrast                             | 0.619943879  |
| wavelet-LHL | ngtdm | Busyness                             | 0.031299797  |
| wavelet-LHH | gldm  | GrayLevelVariance                    | 29.35409998  |
| wavelet-LHH | gldm  | HighGrayLevelEmphasis                | 180.4012346  |
| wavelet-LHH | gldm  | DependenceEntropy                    | 5.383810615  |
| wavelet-LHH | gldm  | DependenceNonUniformity              | 62.0617284   |
| wavelet-LHH | gldm  | GrayLevelNonUniformity               | 9.444444444  |
| wavelet-LHH | gldm  | SmallDependenceEmphasis              | 0.618355624  |
| wavelet-LHH | gldm  | SmallDependenceHighGrayLevelEmphasis | 114.7709191  |
| wavelet-LHH | gldm  | DependenceNonUniformityNormalized    | 0.383097089  |
| wavelet-LHH | gldm  | LargeDependenceEmphasis              | 3.641975309  |
| wavelet-LHH | gldm  | LargeDependenceLowGrayLevelEmphasis  | 0.051011544  |
| wavelet-LHH | gldm  | DependenceVariance                   | 0.739368999  |
| wavelet-LHH | gldm  | LargeDependenceHighGrayLevelEmphasis | 625.7962963  |
| wavelet-LHH | gldm  | SmallDependenceLowGrayLevelEmphasis  | 0.024234458  |
| wavelet-LHH | gldm  | LowGrayLevelEmphasis                 | 0.027947121  |
| wavelet-LHH | glcm  | JointAverage                         | 12.35031742  |
| wavelet-LHH | glcm  | SumAverage                           | 24.70063484  |
| wavelet-LHH | glcm  | JointEntropy                         | 7.037994477  |
| wavelet-LHH | glcm  | ClusterShade                         | 111.9742502  |
| wavelet-LHH | glcm  | MaximumProbability                   | 0.023507739  |
| wavelet-LHH | glcm  | Idmn                                 | 0.938302004  |
| wavelet-LHH | glcm  | JointEnergy                          | 0.008647171  |
| wavelet-LHH | glcm  | Contrast                             | 62.84392165  |
| wavelet-LHH | glcm  | DifferenceEntropy                    | 3.84376971   |
| wavelet-LHH | glcm  | InverseVariance                      | 0.169630826  |
| wavelet-LHH | glcm  | DifferenceVariance                   | 22.1534567   |
| wavelet-LHH | glcm  | Idn                                  | 0.837210034  |
| wavelet-LHH | glcm  | Idm                                  | 0.149032998  |
| wavelet-LHH | glcm  | Correlation                          | -0.025022009 |
| wavelet-LHH | glcm  | Autocorrelation                      | 151.6965643  |
| wavelet-LHH | glcm  | SumEntropy                           | 4.626168053  |
| wavelet-LHH | glcm  | SumSquares                           | 30.58508533  |
| wavelet-LHH | glcm  | ClusterProminence                    | 10696.7127   |
| wavelet-LHH | glcm  | Imc2                                 | 0.97912843   |



|             |            |                                  |              |
|-------------|------------|----------------------------------|--------------|
| wavelet-LHH | glcm       | Imc1                             | -0.378238953 |
| wavelet-LHH | glcm       | DifferenceAverage                | 6.244518269  |
| wavelet-LHH | glcm       | Id                               | 0.239096796  |
| wavelet-LHH | glcm       | ClusterTendency                  | 59.49641966  |
| wavelet-LHH | firstorder | InterquartileRange               | 193.8170849  |
| wavelet-LHH | firstorder | Skewness                         | 0.323714127  |
| wavelet-LHH | firstorder | Uniformity                       | 0.05829904   |
| wavelet-LHH | firstorder | Median                           | 0.813262469  |
| wavelet-LHH | firstorder | Energy                           | 3003011.443  |
| wavelet-LHH | firstorder | RobustMeanAbsoluteDeviation      | 74.41667473  |
| wavelet-LHH | firstorder | MeanAbsoluteDeviation            | 107.608113   |
| wavelet-LHH | firstorder | TotalEnergy                      | 81081308.96  |
| wavelet-LHH | firstorder | Maximum                          | 421.9888827  |
| wavelet-LHH | firstorder | RootMeanSquared                  | 136.1510473  |
| wavelet-LHH | firstorder | 90Percentile                     | 160.5650655  |
| wavelet-LHH | firstorder | Minimum                          | -297.9466074 |
| wavelet-LHH | firstorder | Entropy                          | 4.346608562  |
| wavelet-LHH | firstorder | Range                            | 719.9354901  |
| wavelet-LHH | firstorder | Variance                         | 18504.06545  |
| wavelet-LHH | firstorder | 10Percentile                     | -174.8106268 |
| wavelet-LHH | firstorder | Kurtosis                         | 3.049332007  |
| wavelet-LHH | firstorder | Mean                             | -5.74823622  |
| wavelet-LHH | glrlm      | ShortRunLowGrayLevelEmphasis     | 0.028291708  |
| wavelet-LHH | glrlm      | GrayLevelVariance                | 29.82592729  |
| wavelet-LHH | glrlm      | LowGrayLevelRunEmphasis          | 0.028475483  |
| wavelet-LHH | glrlm      | GrayLevelNonUniformityNormalized | 0.057577819  |
| wavelet-LHH | glrlm      | RunVariance                      | 0.030003214  |
| wavelet-LHH | glrlm      | GrayLevelNonUniformity           | 9.07573737   |
| wavelet-LHH | glrlm      | LongRunEmphasis                  | 1.087043244  |
| wavelet-LHH | glrlm      | ShortRunHighGrayLevelEmphasis    | 177.2546813  |
| wavelet-LHH | glrlm      | RunLengthNonUniformity           | 149.5636067  |
| wavelet-LHH | glrlm      | ShortRunEmphasis                 | 0.979893768  |
| wavelet-LHH | glrlm      | LongRunHighGrayLevelEmphasis     | 195.3932232  |
| wavelet-LHH | glrlm      | RunPercentage                    | 0.972934473  |
| wavelet-LHH | glrlm      | LongRunLowGrayLevelEmphasis      | 0.029263655  |
| wavelet-LHH | glrlm      | RunEntropy                       | 4.467923531  |
| wavelet-LHH | glrlm      | HighGrayLevelRunEmphasis         | 180.6967735  |
| wavelet-LHH | glrlm      | RunLengthNonUniformityNormalized | 0.948578873  |
| wavelet-LHH | glszm      | GrayLevelVariance                | 36.54930606  |
| wavelet-LHH | glszm      | ZoneVariance                     | 1.005113221  |
| wavelet-LHH | glszm      | GrayLevelNonUniformityNormalized | 0.051538025  |
| wavelet-LHH | glszm      | SizeZoneNonUniformityNormalized  | 0.617401185  |
| wavelet-LHH | glszm      | SizeZoneNonUniformity            | 68.53153153  |
| wavelet-LHH | glszm      | GrayLevelNonUniformity           | 5.720720721  |
| wavelet-LHH | glszm      | LargeAreaEmphasis                | 3.135135135  |
| wavelet-LHH | glszm      | SmallAreaHighGrayLevelEmphasis   | 151.1585611  |
| wavelet-LHH | glszm      | ZonePercentage                   | 0.685185185  |
| wavelet-LHH | glszm      | LargeAreaLowGrayLevelEmphasis    | 0.054700366  |
| wavelet-LHH | glszm      | LargeAreaHighGrayLevelEmphasis   | 556.963964   |
| wavelet-LHH | glszm      | HighGrayLevelZoneEmphasis        | 183.8108108  |
| wavelet-LHH | glszm      | SmallAreaEmphasis                | 0.809827327  |
| wavelet-LHH | glszm      | LowGrayLevelZoneEmphasis         | 0.036528467  |
| wavelet-LHH | glszm      | ZoneEntropy                      | 5.078571358  |
| wavelet-LHH | glszm      | SmallAreaLowGrayLevelEmphasis    | 0.034470504  |
| wavelet-LHH | ngtdm      | Coarseness                       | 0.032177829  |

|             |            |                                      |              |
|-------------|------------|--------------------------------------|--------------|
| wavelet-LHH | ngtdm      | Complexity                           | 1255.25932   |
| wavelet-LHH | ngtdm      | Strength                             | 7.111548171  |
| wavelet-LHH | ngtdm      | Contrast                             | 0.381418842  |
| wavelet-LHH | ngtdm      | Busyness                             | 0.105377647  |
| wavelet-LLH | gldm       | GrayLevelVariance                    | 73.09327846  |
| wavelet-LLH | gldm       | HighGrayLevelEmphasis                | 728.0740741  |
| wavelet-LLH | gldm       | DependenceEntropy                    | 5.749701932  |
| wavelet-LLH | gldm       | DependenceNonUniformity              | 64.20987654  |
| wavelet-LLH | gldm       | GrayLevelNonUniformity               | 6.703703704  |
| wavelet-LLH | gldm       | SmallDependenceEmphasis              | 0.613340192  |
| wavelet-LLH | gldm       | SmallDependenceHighGrayLevelEmphasis | 445.3160151  |
| wavelet-LLH | gldm       | DependenceNonUniformityNormalized    | 0.396357263  |
| wavelet-LLH | gldm       | LargeDependenceEmphasis              | 3.345679012  |
| wavelet-LLH | gldm       | LargeDependenceLowGrayLevelEmphasis  | 0.015474496  |
| wavelet-LLH | gldm       | DependenceVariance                   | 0.608901082  |
| wavelet-LLH | gldm       | LargeDependenceHighGrayLevelEmphasis | 2515.419753  |
| wavelet-LLH | gldm       | SmallDependenceLowGrayLevelEmphasis  | 0.009910796  |
| wavelet-LLH | gldm       | LowGrayLevelEmphasis                 | 0.010789089  |
| wavelet-LLH | glcm       | JointAverage                         | 24.69103749  |
| wavelet-LLH | glcm       | SumAverage                           | 49.38207498  |
| wavelet-LLH | glcm       | JointEntropy                         | 7.303050384  |
| wavelet-LLH | glcm       | ClusterShade                         | -1283.115644 |
| wavelet-LLH | glcm       | MaximumProbability                   | 0.013118808  |
| wavelet-LLH | glcm       | Idmn                                 | 0.934382679  |
| wavelet-LLH | glcm       | JointEnergy                          | 0.006813623  |
| wavelet-LLH | glcm       | Contrast                             | 149.2572966  |
| wavelet-LLH | glcm       | DifferenceEntropy                    | 4.318102609  |
| wavelet-LLH | glcm       | InverseVariance                      | 0.11210614   |
| wavelet-LLH | glcm       | DifferenceVariance                   | 52.61616685  |
| wavelet-LLH | glcm       | Idn                                  | 0.834850835  |
| wavelet-LLH | glcm       | Idm                                  | 0.111541991  |
| wavelet-LLH | glcm       | Correlation                          | 0.112842848  |
| wavelet-LLH | glcm       | Autocorrelation                      | 619.2525762  |
| wavelet-LLH | glcm       | SumEntropy                           | 5.204731372  |
| wavelet-LLH | glcm       | SumSquares                           | 84.17745379  |
| wavelet-LLH | glcm       | ClusterProminence                    | 106833.1306  |
| wavelet-LLH | glcm       | Imc2                                 | 0.995596166  |
| wavelet-LLH | glcm       | Imc1                                 | -0.504734489 |
| wavelet-LLH | glcm       | DifferenceAverage                    | 9.505538792  |
| wavelet-LLH | glcm       | Id                                   | 0.192695946  |
| wavelet-LLH | glcm       | ClusterTendency                      | 187.4525185  |
| wavelet-LLH | firstorder | InterquartileRange                   | 303.873957   |
| wavelet-LLH | firstorder | Skewness                             | -0.651027682 |
| wavelet-LLH | firstorder | Uniformity                           | 0.041380887  |
| wavelet-LLH | firstorder | Median                               | 23.27475838  |
| wavelet-LLH | firstorder | Energy                               | 7430475.357  |
| wavelet-LLH | firstorder | RobustMeanAbsoluteDeviation          | 122.4440551  |
| wavelet-LLH | firstorder | MeanAbsoluteDeviation                | 174.3297778  |
| wavelet-LLH | firstorder | TotalEnergy                          | 200622834.6  |
| wavelet-LLH | firstorder | Maximum                              | 402.1019272  |
| wavelet-LLH | firstorder | RootMeanSquared                      | 214.1661314  |
| wavelet-LLH | firstorder | 90Percentile                         | 224.3808897  |
| wavelet-LLH | firstorder | Minimum                              | -627.8581262 |
| wavelet-LLH | firstorder | Entropy                              | 4.806400521  |
| wavelet-LLH | firstorder | Range                                | 1029.960053  |

|             |            |                                      |              |
|-------------|------------|--------------------------------------|--------------|
| wavelet-LLH | firstorder | Variance                             | 45338.80226  |
| wavelet-LLH | firstorder | 10Percentile                         | -325.071932  |
| wavelet-LLH | firstorder | Kurtosis                             | 2.96892481   |
| wavelet-LLH | firstorder | Mean                                 | -22.98542087 |
| wavelet-LLH | glrlm      | ShortRunLowGrayLevelEmphasis         | 0.010973731  |
| wavelet-LLH | glrlm      | GrayLevelVariance                    | 73.54040108  |
| wavelet-LLH | glrlm      | LowGrayLevelRunEmphasis              | 0.011014817  |
| wavelet-LLH | glrlm      | GrayLevelNonUniformityNormalized     | 0.041260108  |
| wavelet-LLH | glrlm      | RunVariance                          | 0.025131507  |
| wavelet-LLH | glrlm      | GrayLevelNonUniformity               | 6.515788164  |
| wavelet-LLH | glrlm      | LongRunEmphasis                      | 1.077998213  |
| wavelet-LLH | glrlm      | ShortRunHighGrayLevelEmphasis        | 712.8159383  |
| wavelet-LLH | glrlm      | RunLengthNonUniformity               | 150.0391917  |
| wavelet-LLH | glrlm      | ShortRunEmphasis                     | 0.980500447  |
| wavelet-LLH | glrlm      | LongRunHighGrayLevelEmphasis         | 786.0751414  |
| wavelet-LLH | glrlm      | RunPercentage                        | 0.974833808  |
| wavelet-LLH | glrlm      | LongRunLowGrayLevelEmphasis          | 0.011179163  |
| wavelet-LLH | glrlm      | RunEntropy                           | 4.91036803   |
| wavelet-LLH | glrlm      | HighGrayLevelRunEmphasis             | 727.4677789  |
| wavelet-LLH | glrlm      | RunLengthNonUniformityNormalized     | 0.949736986  |
| wavelet-LLH | glszm      | GrayLevelVariance                    | 79.57402278  |
| wavelet-LLH | glszm      | ZoneVariance                         | 0.734995383  |
| wavelet-LLH | glszm      | GrayLevelNonUniformityNormalized     | 0.040320098  |
| wavelet-LLH | glszm      | SizeZoneNonUniformityNormalized      | 0.567251462  |
| wavelet-LLH | glszm      | SizeZoneNonUniformity                | 64.66666667  |
| wavelet-LLH | glszm      | GrayLevelNonUniformity               | 4.596491228  |
| wavelet-LLH | glszm      | LargeAreaEmphasis                    | 2.754385965  |
| wavelet-LLH | glszm      | SmallAreaHighGrayLevelEmphasis       | 567.9029094  |
| wavelet-LLH | glszm      | ZonePercentage                       | 0.703703704  |
| wavelet-LLH | glszm      | LargeAreaLowGrayLevelEmphasis        | 0.018047663  |
| wavelet-LLH | glszm      | LargeAreaHighGrayLevelEmphasis       | 2004.912281  |
| wavelet-LLH | glszm      | HighGrayLevelZoneEmphasis            | 724.9122807  |
| wavelet-LLH | glszm      | SmallAreaEmphasis                    | 0.781661793  |
| wavelet-LLH | glszm      | LowGrayLevelZoneEmphasis             | 0.014408626  |
| wavelet-LLH | glszm      | ZoneEntropy                          | 5.563869922  |
| wavelet-LLH | glszm      | SmallAreaLowGrayLevelEmphasis        | 0.013874911  |
| wavelet-LLH | ngtdm      | Coarseness                           | 0.027745491  |
| wavelet-LLH | ngtdm      | Complexity                           | 3566.237434  |
| wavelet-LLH | ngtdm      | Strength                             | 15.29560657  |
| wavelet-LLH | ngtdm      | Contrast                             | 0.739130559  |
| wavelet-LLH | ngtdm      | Busyness                             | 0.039402274  |
| wavelet-LLL | gldm       | GrayLevelVariance                    | 349.5655007  |
| wavelet-LLL | gldm       | HighGrayLevelEmphasis                | 937.1790123  |
| wavelet-LLL | gldm       | DependenceEntropy                    | 6.060636735  |
| wavelet-LLL | gldm       | DependenceNonUniformity              | 78.55555556  |
| wavelet-LLL | gldm       | GrayLevelNonUniformity               | 4.098765432  |
| wavelet-LLL | gldm       | SmallDependenceEmphasis              | 0.715569273  |
| wavelet-LLL | gldm       | SmallDependenceHighGrayLevelEmphasis | 736.1829218  |
| wavelet-LLL | gldm       | DependenceNonUniformityNormalized    | 0.484910837  |
| wavelet-LLL | gldm       | LargeDependenceEmphasis              | 3.061728395  |
| wavelet-LLL | gldm       | LargeDependenceLowGrayLevelEmphasis  | 0.321204075  |
| wavelet-LLL | gldm       | DependenceVariance                   | 0.755829904  |
| wavelet-LLL | gldm       | LargeDependenceHighGrayLevelEmphasis | 1862.993827  |
| wavelet-LLL | gldm       | SmallDependenceLowGrayLevelEmphasis  | 0.013321778  |
| wavelet-LLL | gldm       | LowGrayLevelEmphasis                 | 0.038009713  |

|             |            |                                  |              |
|-------------|------------|----------------------------------|--------------|
| wavelet-LLL | glcm       | JointAverage                     | 27.47022648  |
| wavelet-LLL | glcm       | SumAverage                       | 54.94045297  |
| wavelet-LLL | glcm       | JointEntropy                     | 7.442922984  |
| wavelet-LLL | glcm       | ClusterShade                     | 34548.29769  |
| wavelet-LLL | glcm       | MaximumProbability               | 0.01398182   |
| wavelet-LLL | glcm       | Idmn                             | 0.961659536  |
| wavelet-LLL | glcm       | JointEnergy                      | 0.006087931  |
| wavelet-LLL | glcm       | Contrast                         | 350.748915   |
| wavelet-LLL | glcm       | DifferenceEntropy                | 4.755200356  |
| wavelet-LLL | glcm       | InverseVariance                  | 0.090422646  |
| wavelet-LLL | glcm       | DifferenceVariance               | 143.6281623  |
| wavelet-LLL | glcm       | Idn                              | 0.87414541   |
| wavelet-LLL | glcm       | Idm                              | 0.089244293  |
| wavelet-LLL | glcm       | Correlation                      | 0.564261163  |
| wavelet-LLL | glcm       | Autocorrelation                  | 980.9742278  |
| wavelet-LLL | glcm       | SumEntropy                       | 5.887151375  |
| wavelet-LLL | glcm       | SumSquares                       | 400.0276598  |
| wavelet-LLL | glcm       | ClusterProminence                | 4575015.117  |
| wavelet-LLL | glcm       | Imc2                             | 0.999579407  |
| wavelet-LLL | glcm       | Imc1                             | -0.652550374 |
| wavelet-LLL | glcm       | DifferenceAverage                | 14.10978407  |
| wavelet-LLL | glcm       | Id                               | 0.159177154  |
| wavelet-LLL | glcm       | ClusterTendency                  | 1249.361724  |
| wavelet-LLL | firstorder | InterquartileRange               | 606.1725372  |
| wavelet-LLL | firstorder | Skewness                         | 1.071854935  |
| wavelet-LLL | firstorder | Uniformity                       | 0.025301021  |
| wavelet-LLL | firstorder | Median                           | -2028.505201 |
| wavelet-LLL | firstorder | Energy                           | 639791315.8  |
| wavelet-LLL | firstorder | RobustMeanAbsoluteDeviation      | 256.7276312  |
| wavelet-LLL | firstorder | MeanAbsoluteDeviation            | 370.5564455  |
| wavelet-LLL | firstorder | TotalEnergy                      | 17274365526  |
| wavelet-LLL | firstorder | Maximum                          | -308.0614507 |
| wavelet-LLL | firstorder | RootMeanSquared                  | 1987.291904  |
| wavelet-LLL | firstorder | 90Percentile                     | -1238.843663 |
| wavelet-LLL | firstorder | Minimum                          | -2524.700556 |
| wavelet-LLL | firstorder | Entropy                          | 5.531067075  |
| wavelet-LLL | firstorder | Range                            | 2216.639105  |
| wavelet-LLL | firstorder | Variance                         | 218244.3504  |
| wavelet-LLL | firstorder | 10Percentile                     | -2424.521876 |
| wavelet-LLL | firstorder | Kurtosis                         | 3.766637332  |
| wavelet-LLL | firstorder | Mean                             | -1931.601605 |
| wavelet-LLL | glrlm      | ShortRunLowGrayLevelEmphasis     | 0.034698839  |
| wavelet-LLL | glrlm      | GrayLevelVariance                | 349.4545877  |
| wavelet-LLL | glrlm      | LowGrayLevelRunEmphasis          | 0.036450602  |
| wavelet-LLL | glrlm      | GrayLevelNonUniformityNormalized | 0.025049743  |
| wavelet-LLL | glrlm      | RunVariance                      | 0.019929544  |
| wavelet-LLL | glrlm      | GrayLevelNonUniformity           | 3.977261105  |
| wavelet-LLL | glrlm      | LongRunEmphasis                  | 1.061292808  |
| wavelet-LLL | glrlm      | ShortRunHighGrayLevelEmphasis    | 936.3906349  |
| wavelet-LLL | glrlm      | RunLengthNonUniformity           | 152.4657771  |
| wavelet-LLL | glrlm      | ShortRunEmphasis                 | 0.984676798  |
| wavelet-LLL | glrlm      | LongRunHighGrayLevelEmphasis     | 979.1102534  |
| wavelet-LLL | glrlm      | RunPercentage                    | 0.98005698   |
| wavelet-LLL | glrlm      | LongRunLowGrayLevelEmphasis      | 0.043457657  |
| wavelet-LLL | glrlm      | RunEntropy                       | 5.600278959  |

|             |       |                                      |              |
|-------------|-------|--------------------------------------|--------------|
| wavelet-LLL | glrlm | HighGrayLevelRunEmphasis             | 944.9345586  |
| wavelet-LLL | glrlm | RunLengthNonUniformityNormalized     | 0.960140911  |
| wavelet-LLL | glszm | GrayLevelVariance                    | 350.5384091  |
| wavelet-LLL | glszm | ZoneVariance                         | 0.451608903  |
| wavelet-LLL | glszm | GrayLevelNonUniformityNormalized     | 0.023622047  |
| wavelet-LLL | glszm | SizeZoneNonUniformityNormalized      | 0.685907372  |
| wavelet-LLL | glszm | SizeZoneNonUniformity                | 87.11023622  |
| wavelet-LLL | glszm | GrayLevelNonUniformity               | 3            |
| wavelet-LLL | glszm | LargeAreaEmphasis                    | 2.078740157  |
| wavelet-LLL | glszm | SmallAreaHighGrayLevelEmphasis       | 895.1240179  |
| wavelet-LLL | glszm | ZonePercentage                       | 0.783950617  |
| wavelet-LLL | glszm | LargeAreaLowGrayLevelEmphasis        | 0.140687636  |
| wavelet-LLL | glszm | LargeAreaHighGrayLevelEmphasis       | 1610.433071  |
| wavelet-LLL | glszm | HighGrayLevelZoneEmphasis            | 1014.716535  |
| wavelet-LLL | glszm | SmallAreaEmphasis                    | 0.853388014  |
| wavelet-LLL | glszm | LowGrayLevelZoneEmphasis             | 0.022552709  |
| wavelet-LLL | glszm | ZoneEntropy                          | 5.936535797  |
| wavelet-LLL | glszm | SmallAreaLowGrayLevelEmphasis        | 0.012176558  |
| wavelet-LLL | ngtdm | Coarseness                           | 0.034547532  |
| wavelet-LLL | ngtdm | Complexity                           | 13063.78706  |
| wavelet-LLL | ngtdm | Strength                             | 81.70164571  |
| wavelet-LLL | ngtdm | Contrast                             | 1.690117476  |
| wavelet-LLL | ngtdm | Busyness                             | 0.030429538  |
| wavelet-HHL | gldm  | GrayLevelVariance                    | 18.21189605  |
| wavelet-HHL | gldm  | HighGrayLevelEmphasis                | 170.4753086  |
| wavelet-HHL | gldm  | DependenceEntropy                    | 5.447672383  |
| wavelet-HHL | gldm  | DependenceNonUniformity              | 45.49382716  |
| wavelet-HHL | gldm  | GrayLevelNonUniformity               | 12.67901235  |
| wavelet-HHL | gldm  | SmallDependenceEmphasis              | 0.462170782  |
| wavelet-HHL | gldm  | SmallDependenceHighGrayLevelEmphasis | 90.73767147  |
| wavelet-HHL | gldm  | DependenceNonUniformityNormalized    | 0.280826094  |
| wavelet-HHL | gldm  | LargeDependenceEmphasis              | 5.555555556  |
| wavelet-HHL | gldm  | LargeDependenceLowGrayLevelEmphasis  | 0.052305271  |
| wavelet-HHL | gldm  | DependenceVariance                   | 1.098765432  |
| wavelet-HHL | gldm  | LargeDependenceHighGrayLevelEmphasis | 844.2283951  |
| wavelet-HHL | gldm  | SmallDependenceLowGrayLevelEmphasis  | 0.011478887  |
| wavelet-HHL | gldm  | LowGrayLevelEmphasis                 | 0.016120675  |
| wavelet-HHL | glcm  | JointAverage                         | 12.46440222  |
| wavelet-HHL | glcm  | SumAverage                           | 24.92880444  |
| wavelet-HHL | glcm  | JointEntropy                         | 6.800760902  |
| wavelet-HHL | glcm  | ClusterShade                         | 59.46663862  |
| wavelet-HHL | glcm  | MaximumProbability                   | 0.031048032  |
| wavelet-HHL | glcm  | Idmn                                 | 0.94581973   |
| wavelet-HHL | glcm  | JointEnergy                          | 0.010726198  |
| wavelet-HHL | glcm  | Contrast                             | 40.61329262  |
| wavelet-HHL | glcm  | DifferenceEntropy                    | 3.583625815  |
| wavelet-HHL | glcm  | InverseVariance                      | 0.210694858  |
| wavelet-HHL | glcm  | DifferenceVariance                   | 15.96090731  |
| wavelet-HHL | glcm  | Idn                                  | 0.850080024  |
| wavelet-HHL | glcm  | Idm                                  | 0.195165768  |
| wavelet-HHL | glcm  | Correlation                          | -0.014881444 |
| wavelet-HHL | glcm  | Autocorrelation                      | 155.1040111  |
| wavelet-HHL | glcm  | SumEntropy                           | 4.384193374  |
| wavelet-HHL | glcm  | SumSquares                           | 20.04504421  |
| wavelet-HHL | glcm  | ClusterProminence                    | 5629.385479  |

|             |            |                                  |              |
|-------------|------------|----------------------------------|--------------|
| wavelet-HHL | glcm       | Imc2                             | 0.961727842  |
| wavelet-HHL | glcm       | Imc1                             | -0.327416679 |
| wavelet-HHL | glcm       | DifferenceAverage                | 4.900745167  |
| wavelet-HHL | glcm       | Id                               | 0.2862183    |
| wavelet-HHL | glcm       | ClusterTendency                  | 39.56688423  |
| wavelet-HHL | firstorder | InterquartileRange               | 113.5435935  |
| wavelet-HHL | firstorder | Skewness                         | 0.356345345  |
| wavelet-HHL | firstorder | Uniformity                       | 0.078265508  |
| wavelet-HHL | firstorder | Median                           | -14.31520974 |
| wavelet-HHL | firstorder | Energy                           | 1811920.958  |
| wavelet-HHL | firstorder | RobustMeanAbsoluteDeviation      | 50.01431574  |
| wavelet-HHL | firstorder | MeanAbsoluteDeviation            | 80.0194696   |
| wavelet-HHL | firstorder | TotalEnergy                      | 48921865.88  |
| wavelet-HHL | firstorder | Maximum                          | 310.2187826  |
| wavelet-HHL | firstorder | RootMeanSquared                  | 105.7577291  |
| wavelet-HHL | firstorder | 90Percentile                     | 132.915908   |
| wavelet-HHL | firstorder | Minimum                          | -299.4696073 |
| wavelet-HHL | firstorder | Entropy                          | 3.998922962  |
| wavelet-HHL | firstorder | Range                            | 609.6883899  |
| wavelet-HHL | firstorder | Variance                         | 11162.4082   |
| wavelet-HHL | firstorder | 10Percentile                     | -134.3038916 |
| wavelet-HHL | firstorder | Kurtosis                         | 3.488526512  |
| wavelet-HHL | firstorder | Mean                             | -4.721131104 |
| wavelet-HHL | glrlm      | ShortRunLowGrayLevelEmphasis     | 0.016211367  |
| wavelet-HHL | glrlm      | GrayLevelVariance                | 18.77954859  |
| wavelet-HHL | glrlm      | LowGrayLevelRunEmphasis          | 0.016482465  |
| wavelet-HHL | glrlm      | GrayLevelNonUniformityNormalized | 0.076609252  |
| wavelet-HHL | glrlm      | RunVariance                      | 0.046734403  |
| wavelet-HHL | glrlm      | GrayLevelNonUniformity           | 11.88768896  |
| wavelet-HHL | glrlm      | LongRunEmphasis                  | 1.140937165  |
| wavelet-HHL | glrlm      | ShortRunHighGrayLevelEmphasis    | 166.6456948  |
| wavelet-HHL | glrlm      | RunLengthNonUniformity           | 142.5731019  |
| wavelet-HHL | glrlm      | ShortRunEmphasis                 | 0.967128588  |
| wavelet-HHL | glrlm      | LongRunHighGrayLevelEmphasis     | 192.3975686  |
| wavelet-HHL | glrlm      | RunPercentage                    | 0.957264957  |
| wavelet-HHL | glrlm      | LongRunLowGrayLevelEmphasis      | 0.017628088  |
| wavelet-HHL | glrlm      | RunEntropy                       | 4.203236437  |
| wavelet-HHL | glrlm      | HighGrayLevelRunEmphasis         | 171.4990018  |
| wavelet-HHL | glrlm      | RunLengthNonUniformityNormalized | 0.91798173   |
| wavelet-HHL | glszm      | GrayLevelVariance                | 28.30387105  |
| wavelet-HHL | glszm      | ZoneVariance                     | 3.084423306  |
| wavelet-HHL | glszm      | GrayLevelNonUniformityNormalized | 0.056150086  |
| wavelet-HHL | glszm      | SizeZoneNonUniformityNormalized  | 0.472849782  |
| wavelet-HHL | glszm      | SizeZoneNonUniformity            | 41.13793103  |
| wavelet-HHL | glszm      | GrayLevelNonUniformity           | 4.885057471  |
| wavelet-HHL | glszm      | LargeAreaEmphasis                | 6.551724138  |
| wavelet-HHL | glszm      | SmallAreaHighGrayLevelEmphasis   | 147.2972941  |
| wavelet-HHL | glszm      | ZonePercentage                   | 0.537037037  |
| wavelet-HHL | glszm      | LargeAreaLowGrayLevelEmphasis    | 0.066526778  |
| wavelet-HHL | glszm      | LargeAreaHighGrayLevelEmphasis   | 992.3793103  |
| wavelet-HHL | glszm      | HighGrayLevelZoneEmphasis        | 190.7931034  |
| wavelet-HHL | glszm      | SmallAreaEmphasis                | 0.712159864  |
| wavelet-HHL | glszm      | LowGrayLevelZoneEmphasis         | 0.02277048   |
| wavelet-HHL | glszm      | ZoneEntropy                      | 5.32054418   |
| wavelet-HHL | glszm      | SmallAreaLowGrayLevelEmphasis    | 0.020041824  |

|             |            |                                      |              |
|-------------|------------|--------------------------------------|--------------|
| wavelet-HHL | ngtdm      | Coarseness                           | 0.034916286  |
| wavelet-HHL | ngtdm      | Complexity                           | 682.1372841  |
| wavelet-HHL | ngtdm      | Strength                             | 5.473730979  |
| wavelet-HHL | ngtdm      | Contrast                             | 0.249320445  |
| wavelet-HHL | ngtdm      | Busyness                             | 0.1089431    |
| wavelet-HLH | gldm       | GrayLevelVariance                    | 20.39525225  |
| wavelet-HLH | gldm       | HighGrayLevelEmphasis                | 155.5        |
| wavelet-HLH | gldm       | DependenceEntropy                    | 5.448806448  |
| wavelet-HLH | gldm       | DependenceNonUniformity              | 45.51851852  |
| wavelet-HLH | gldm       | GrayLevelNonUniformity               | 11.75308642  |
| wavelet-HLH | gldm       | SmallDependenceEmphasis              | 0.472478514  |
| wavelet-HLH | gldm       | SmallDependenceHighGrayLevelEmphasis | 81.63758923  |
| wavelet-HLH | gldm       | DependenceNonUniformityNormalized    | 0.280978509  |
| wavelet-HLH | gldm       | LargeDependenceEmphasis              | 5.975308642  |
| wavelet-HLH | gldm       | LargeDependenceLowGrayLevelEmphasis  | 0.071823458  |
| wavelet-HLH | gldm       | DependenceVariance                   | 1.413656455  |
| wavelet-HLH | gldm       | LargeDependenceHighGrayLevelEmphasis | 817.3148148  |
| wavelet-HLH | gldm       | SmallDependenceLowGrayLevelEmphasis  | 0.013159468  |
| wavelet-HLH | gldm       | LowGrayLevelEmphasis                 | 0.019069202  |
| wavelet-HLH | glcm       | JointAverage                         | 11.51177813  |
| wavelet-HLH | glcm       | SumAverage                           | 23.02355625  |
| wavelet-HLH | glcm       | JointEntropy                         | 6.825330273  |
| wavelet-HLH | glcm       | ClusterShade                         | 161.5376552  |
| wavelet-HLH | glcm       | MaximumProbability                   | 0.026053125  |
| wavelet-HLH | glcm       | Idmn                                 | 0.950450957  |
| wavelet-HLH | glcm       | JointEnergy                          | 0.010334336  |
| wavelet-HLH | glcm       | Contrast                             | 42.62964878  |
| wavelet-HLH | glcm       | DifferenceEntropy                    | 3.637896814  |
| wavelet-HLH | glcm       | InverseVariance                      | 0.181723729  |
| wavelet-HLH | glcm       | DifferenceVariance                   | 16.31829233  |
| wavelet-HLH | glcm       | Idn                                  | 0.854742843  |
| wavelet-HLH | glcm       | Idm                                  | 0.185854372  |
| wavelet-HLH | glcm       | Correlation                          | -0.004976874 |
| wavelet-HLH | glcm       | Autocorrelation                      | 132.3825117  |
| wavelet-HLH | glcm       | SumEntropy                           | 4.415671387  |
| wavelet-HLH | glcm       | SumSquares                           | 21.17393518  |
| wavelet-HLH | glcm       | ClusterProminence                    | 6619.426593  |
| wavelet-HLH | glcm       | Imc2                                 | 0.95713008   |
| wavelet-HLH | glcm       | Imc1                                 | -0.314376106 |
| wavelet-HLH | glcm       | DifferenceAverage                    | 5.060546443  |
| wavelet-HLH | glcm       | Id                                   | 0.279606535  |
| wavelet-HLH | glcm       | ClusterTendency                      | 42.06609193  |
| wavelet-HLH | firstorder | InterquartileRange                   | 144.0033956  |
| wavelet-HLH | firstorder | Skewness                             | 0.557757703  |
| wavelet-HLH | firstorder | Uniformity                           | 0.072549916  |
| wavelet-HLH | firstorder | Median                               | -9.266665505 |
| wavelet-HLH | firstorder | Energy                               | 2049972.518  |
| wavelet-HLH | firstorder | RobustMeanAbsoluteDeviation          | 59.19155702  |
| wavelet-HLH | firstorder | MeanAbsoluteDeviation                | 88.33021283  |
| wavelet-HLH | firstorder | TotalEnergy                          | 55349257.99  |
| wavelet-HLH | firstorder | Maximum                              | 378.327413   |
| wavelet-HLH | firstorder | RootMeanSquared                      | 112.4906723  |
| wavelet-HLH | firstorder | 90Percentile                         | 151.1342522  |
| wavelet-HLH | firstorder | Minimum                              | -264.0188213 |
| wavelet-HLH | firstorder | Entropy                              | 4.050661888  |

|             |            |                                  |              |
|-------------|------------|----------------------------------|--------------|
| wavelet-HLH | firstorder | Range                            | 642.3462343  |
| wavelet-HLH | firstorder | Variance                         | 12648.71984  |
| wavelet-HLH | firstorder | 10Percentile                     | -125.8593027 |
| wavelet-HLH | firstorder | Kurtosis                         | 3.517583997  |
| wavelet-HLH | firstorder | Mean                             | 2.330559549  |
| wavelet-HLH | glrlm      | ShortRunLowGrayLevelEmphasis     | 0.019107382  |
| wavelet-HLH | glrlm      | GrayLevelVariance                | 20.75341532  |
| wavelet-HLH | glrlm      | LowGrayLevelRunEmphasis          | 0.019457818  |
| wavelet-HLH | glrlm      | GrayLevelNonUniformityNormalized | 0.071425218  |
| wavelet-HLH | glrlm      | RunVariance                      | 0.048553483  |
| wavelet-HLH | glrlm      | GrayLevelNonUniformity           | 11.06610269  |
| wavelet-HLH | glrlm      | LongRunEmphasis                  | 1.144060532  |
| wavelet-HLH | glrlm      | ShortRunHighGrayLevelEmphasis    | 151.6877927  |
| wavelet-HLH | glrlm      | RunLengthNonUniformity           | 142.2615274  |
| wavelet-HLH | glrlm      | ShortRunEmphasis                 | 0.966800689  |
| wavelet-HLH | glrlm      | LongRunHighGrayLevelEmphasis     | 175.8308531  |
| wavelet-HLH | glrlm      | RunPercentage                    | 0.95631529   |
| wavelet-HLH | glrlm      | LongRunLowGrayLevelEmphasis      | 0.021010242  |
| wavelet-HLH | glrlm      | RunEntropy                       | 4.253629108  |
| wavelet-HLH | glrlm      | HighGrayLevelRunEmphasis         | 156.3398404  |
| wavelet-HLH | glrlm      | RunLengthNonUniformityNormalized | 0.917211084  |
| wavelet-HLH | glszm      | GrayLevelVariance                | 26.60623659  |
| wavelet-HLH | glszm      | ZoneVariance                     | 3.293523545  |
| wavelet-HLH | glszm      | GrayLevelNonUniformityNormalized | 0.059967176  |
| wavelet-HLH | glszm      | SizeZoneNonUniformityNormalized  | 0.47733872   |
| wavelet-HLH | glszm      | SizeZoneNonUniformity            | 42.48314607  |
| wavelet-HLH | glszm      | GrayLevelNonUniformity           | 5.337078652  |
| wavelet-HLH | glszm      | LargeAreaEmphasis                | 6.606741573  |
| wavelet-HLH | glszm      | SmallAreaHighGrayLevelEmphasis   | 129.4284445  |
| wavelet-HLH | glszm      | ZonePercentage                   | 0.549382716  |
| wavelet-HLH | glszm      | LargeAreaLowGrayLevelEmphasis    | 0.085320087  |
| wavelet-HLH | glszm      | LargeAreaHighGrayLevelEmphasis   | 859.5617978  |
| wavelet-HLH | glszm      | HighGrayLevelZoneEmphasis        | 171.1460674  |
| wavelet-HLH | glszm      | SmallAreaEmphasis                | 0.717942404  |
| wavelet-HLH | glszm      | LowGrayLevelZoneEmphasis         | 0.025743054  |
| wavelet-HLH | glszm      | ZoneEntropy                      | 5.133037297  |
| wavelet-HLH | glszm      | SmallAreaLowGrayLevelEmphasis    | 0.022297274  |
| wavelet-HLH | ngtdm      | Coarseness                       | 0.032739748  |
| wavelet-HLH | ngtdm      | Complexity                       | 772.0898282  |
| wavelet-HLH | ngtdm      | Strength                         | 6.005218395  |
| wavelet-HLH | ngtdm      | Contrast                         | 0.291877945  |
| wavelet-HLH | ngtdm      | Busyness                         | 0.131263631  |



| Image type | Feature Class | Feature Name                         | Value                                                                                                                                                                                                                                                                                                                                                                                                             |
|------------|---------------|--------------------------------------|-------------------------------------------------------------------------------------------------------------------------------------------------------------------------------------------------------------------------------------------------------------------------------------------------------------------------------------------------------------------------------------------------------------------|
| general    | info          | BoundingBox                          | 502: RTSTRUCT: C99-DNU-B_segment_GTV_LUL<br>(1, 1, 1, 5, 4, 4)                                                                                                                                                                                                                                                                                                                                                    |
| general    | info          | EnabledImageTypes                    | {u'Original': {}, u'Wavelet': {}}                                                                                                                                                                                                                                                                                                                                                                                 |
|            |               |                                      | {'distances': [1], 'additionalInfo': True, 'force2D': False, 'interpolator': 'sitkBSpline', 'resampledPixelSpacing': [3.0], 'label': 1, 'normalizeScale': 1, 'normalize': False, 'force2Ddimension': 0, 'removeOutliers': None, 'minimumROISize': None, u'binWidth': 25.0, 'minimumROIDimensions': 1, u'correctMask': True, 'preCrop': False, u'symmetricalGLCM': True, 'resegmentRange': None, 'padDistance': 5} |
| general    | info          | GeneralSettings                      |                                                                                                                                                                                                                                                                                                                                                                                                                   |
| general    | info          | ImageHash                            | 015efed8b51513c66fc89e5583601747fdadb5b8                                                                                                                                                                                                                                                                                                                                                                          |
| general    | info          | ImageSpacing                         | (0.9765625000000002, 0.9765625000000002, 2.0)                                                                                                                                                                                                                                                                                                                                                                     |
| general    | info          | MaskHash                             | 2d7b63455b617b3590b90d064732ff2307c4697a                                                                                                                                                                                                                                                                                                                                                                          |
| general    | info          | NumpyVersion                         | 1.13.1                                                                                                                                                                                                                                                                                                                                                                                                            |
| general    | info          | PyWaveletVersion                     | 0.5.2                                                                                                                                                                                                                                                                                                                                                                                                             |
| general    | info          | SimpleITKVersion                     | 1.1.0                                                                                                                                                                                                                                                                                                                                                                                                             |
| general    | info          | Version                              | 1.3.0.post102+g1b0eb74                                                                                                                                                                                                                                                                                                                                                                                            |
| general    | info          | VolumeNum                            | 1                                                                                                                                                                                                                                                                                                                                                                                                                 |
| general    | info          | VoxelNum                             | 41                                                                                                                                                                                                                                                                                                                                                                                                                |
| original   | shape         | Maximum3DDiameter                    | 14.07124728                                                                                                                                                                                                                                                                                                                                                                                                       |
| original   | shape         | Maximum2DDiameterSlice               | 13.41640786                                                                                                                                                                                                                                                                                                                                                                                                       |
| original   | shape         | Sphericity                           | 0.918035594                                                                                                                                                                                                                                                                                                                                                                                                       |
| original   | shape         | MinorAxis                            | 12.65529725                                                                                                                                                                                                                                                                                                                                                                                                       |
| original   | shape         | Elongation                           | 0.834694871                                                                                                                                                                                                                                                                                                                                                                                                       |
| original   | shape         | SurfaceVolumeRatio                   | 0.509223844                                                                                                                                                                                                                                                                                                                                                                                                       |
| original   | shape         | Volume                               | 1107                                                                                                                                                                                                                                                                                                                                                                                                              |
| original   | shape         | MajorAxis                            | 15.161585                                                                                                                                                                                                                                                                                                                                                                                                         |
| original   | shape         | SurfaceArea                          | 563.7107954                                                                                                                                                                                                                                                                                                                                                                                                       |
| original   | shape         | Flatness                             | 0.522620821                                                                                                                                                                                                                                                                                                                                                                                                       |
| original   | shape         | LeastAxis                            | 7.923760009                                                                                                                                                                                                                                                                                                                                                                                                       |
| original   | shape         | Maximum2DDiameterColumn              | 13.41640786                                                                                                                                                                                                                                                                                                                                                                                                       |
| original   | shape         | Maximum2DDiameterRow                 | 12.72792206                                                                                                                                                                                                                                                                                                                                                                                                       |
| original   | gldm          | GrayLevelVariance                    | 104.8197501                                                                                                                                                                                                                                                                                                                                                                                                       |
| original   | gldm          | HighGrayLevelEmphasis                | 1010.682927                                                                                                                                                                                                                                                                                                                                                                                                       |
| original   | gldm          | DependenceEntropy                    | 4.73536237                                                                                                                                                                                                                                                                                                                                                                                                        |
| original   | gldm          | DependenceNonUniformity              | 11.53658537                                                                                                                                                                                                                                                                                                                                                                                                       |
| original   | gldm          | GrayLevelNonUniformity               | 3.390243902                                                                                                                                                                                                                                                                                                                                                                                                       |
| original   | gldm          | SmallDependenceEmphasis              | 0.534799928                                                                                                                                                                                                                                                                                                                                                                                                       |
| original   | gldm          | SmallDependenceHighGrayLevelEmphasis | 378.1443889                                                                                                                                                                                                                                                                                                                                                                                                       |
| original   | gldm          | DependenceNonUniformityNormalized    | 0.281380131                                                                                                                                                                                                                                                                                                                                                                                                       |
| original   | gldm          | LargeDependenceEmphasis              | 8.56097561                                                                                                                                                                                                                                                                                                                                                                                                        |
| original   | gldm          | LargeDependenceLowGrayLevelEmphasis  | 0.031706614                                                                                                                                                                                                                                                                                                                                                                                                       |
| original   | gldm          | DependenceVariance                   | 2.963712076                                                                                                                                                                                                                                                                                                                                                                                                       |
| original   | gldm          | LargeDependenceHighGrayLevelEmphasis | 11739.5122                                                                                                                                                                                                                                                                                                                                                                                                        |
| original   | gldm          | SmallDependenceLowGrayLevelEmphasis  | 0.025933025                                                                                                                                                                                                                                                                                                                                                                                                       |
| original   | gldm          | LowGrayLevelEmphasis                 | 0.026294716                                                                                                                                                                                                                                                                                                                                                                                                       |
| original   | glcm          | JointAverage                         | 32.1407377                                                                                                                                                                                                                                                                                                                                                                                                        |
| original   | glcm          | SumAverage                           | 64.28147539                                                                                                                                                                                                                                                                                                                                                                                                       |
| original   | glcm          | JointEntropy                         | 4.980000424                                                                                                                                                                                                                                                                                                                                                                                                       |
| original   | glcm          | ClusterShade                         | -2245.780116                                                                                                                                                                                                                                                                                                                                                                                                      |
| original   | glcm          | MaximumProbability                   | 0.074664991                                                                                                                                                                                                                                                                                                                                                                                                       |
| original   | glcm          | Idmn                                 | 0.925656329                                                                                                                                                                                                                                                                                                                                                                                                       |

|          |            |                                  |              |
|----------|------------|----------------------------------|--------------|
| original | glcm       | JointEnergy                      | 0.035431487  |
| original | glcm       | Contrast                         | 159.3779479  |
| original | glcm       | DifferenceEntropy                | 3.492897282  |
| original | glcm       | InverseVariance                  | 0.201823018  |
| original | glcm       | DifferenceVariance               | 79.59333847  |
| original | glcm       | Idn                              | 0.844017229  |
| original | glcm       | Idm                              | 0.222393727  |
| original | glcm       | Correlation                      | 0.001386699  |
| original | glcm       | Autocorrelation                  | 1034.67078   |
| original | glcm       | SumEntropy                       | 3.790980801  |
| original | glcm       | SumSquares                       | 81.09145341  |
| original | glcm       | ClusterProminence                | 100296.9942  |
| original | glcm       | Imc2                             | 0.994403255  |
| original | glcm       | Imc1                             | -0.627171618 |
| original | glcm       | DifferenceAverage                | 8.814710876  |
| original | glcm       | Id                               | 0.28586223   |
| original | glcm       | ClusterTendency                  | 164.9878657  |
| original | firstorder | InterquartileRange               | 319          |
| original | firstorder | Skewness                         | -1.151651948 |
| original | firstorder | Uniformity                       | 0.082688876  |
| original | firstorder | Median                           | -59          |
| original | firstorder | Energy                           | 3724624      |
| original | firstorder | RobustMeanAbsoluteDeviation      | 155.3957759  |
| original | firstorder | MeanAbsoluteDeviation            | 210.92326    |
| original | firstorder | TotalEnergy                      | 100564848    |
| original | firstorder | Maximum                          | 87           |
| original | firstorder | RootMeanSquared                  | 301.4041934  |
| original | firstorder | 90Percentile                     | 59           |
| original | firstorder | Minimum                          | -892         |
| original | firstorder | Entropy                          | 3.987288359  |
| original | firstorder | Range                            | 979          |
| original | firstorder | Variance                         | 64821.28971  |
| original | firstorder | 10Percentile                     | -601         |
| original | firstorder | Kurtosis                         | 3.345461754  |
| original | firstorder | Mean                             | -161.3170732 |
| original | glrlm      | ShortRunLowGrayLevelEmphasis     | 0.027706891  |
| original | glrlm      | GrayLevelVariance                | 107.1580017  |
| original | glrlm      | LowGrayLevelRunEmphasis          | 0.027737019  |
| original | glrlm      | GrayLevelNonUniformityNormalized | 0.076902157  |
| original | glrlm      | RunVariance                      | 0.056449589  |
| original | glrlm      | GrayLevelNonUniformity           | 2.990392401  |
| original | glrlm      | LongRunEmphasis                  | 1.173548393  |
| original | glrlm      | ShortRunHighGrayLevelEmphasis    | 931.1687072  |
| original | glrlm      | RunLengthNonUniformity           | 34.96018028  |
| original | glrlm      | ShortRunEmphasis                 | 0.958987071  |
| original | glrlm      | LongRunHighGrayLevelEmphasis     | 1232.084506  |
| original | glrlm      | RunPercentage                    | 0.947467167  |
| original | glrlm      | LongRunLowGrayLevelEmphasis      | 0.027864107  |
| original | glrlm      | RunEntropy                       | 4.212219414  |
| original | glrlm      | HighGrayLevelRunEmphasis         | 988.609227   |
| original | glrlm      | RunLengthNonUniformityNormalized | 0.898496834  |
| original | glszm      | GrayLevelVariance                | 116.6624     |
| original | glszm      | ZoneVariance                     | 2.3104       |
| original | glszm      | GrayLevelNonUniformityNormalized | 0.0528       |
| original | glszm      | SizeZoneNonUniformityNormalized  | 0.5968       |
| original | glszm      | SizeZoneNonUniformity            | 14.92        |

|             |            |                                      |              |
|-------------|------------|--------------------------------------|--------------|
| original    | glszm      | GrayLevelNonUniformity               | 1.32         |
| original    | glszm      | LargeAreaEmphasis                    | 5            |
| original    | glszm      | SmallAreaHighGrayLevelEmphasis       | 514.9098866  |
| original    | glszm      | ZonePercentage                       | 0.609756098  |
| original    | glszm      | LargeAreaLowGrayLevelEmphasis        | 0.045568317  |
| original    | glszm      | LargeAreaHighGrayLevelEmphasis       | 6361.76      |
| original    | glszm      | HighGrayLevelZoneEmphasis            | 780.24       |
| original    | glszm      | SmallAreaEmphasis                    | 0.796371882  |
| original    | glszm      | LowGrayLevelZoneEmphasis             | 0.042634839  |
| original    | glszm      | ZoneEntropy                          | 4.56385619   |
| original    | glszm      | SmallAreaLowGrayLevelEmphasis        | 0.042463219  |
| original    | ngtdm      | Coarseness                           | 0.04825919   |
| original    | ngtdm      | Complexity                           | 2512.624656  |
| original    | ngtdm      | Strength                             | 31.09763481  |
| original    | ngtdm      | Contrast                             | 3.950022564  |
| original    | ngtdm      | Busyness                             | 0.030337777  |
| wavelet-HHH | gldm       | GrayLevelVariance                    | 12.19631172  |
| wavelet-HHH | gldm       | HighGrayLevelEmphasis                | 80.56097561  |
| wavelet-HHH | gldm       | DependenceEntropy                    | 4.393898956  |
| wavelet-HHH | gldm       | DependenceNonUniformity              | 14.51219512  |
| wavelet-HHH | gldm       | GrayLevelNonUniformity               | 4.073170732  |
| wavelet-HHH | gldm       | SmallDependenceEmphasis              | 0.456131436  |
| wavelet-HHH | gldm       | SmallDependenceHighGrayLevelEmphasis | 42.89295393  |
| wavelet-HHH | gldm       | DependenceNonUniformityNormalized    | 0.353955979  |
| wavelet-HHH | gldm       | LargeDependenceEmphasis              | 4.317073171  |
| wavelet-HHH | gldm       | LargeDependenceLowGrayLevelEmphasis  | 0.118488439  |
| wavelet-HHH | gldm       | DependenceVariance                   | 0.604402142  |
| wavelet-HHH | gldm       | LargeDependenceHighGrayLevelEmphasis | 307.4390244  |
| wavelet-HHH | gldm       | SmallDependenceLowGrayLevelEmphasis  | 0.040985674  |
| wavelet-HHH | gldm       | LowGrayLevelEmphasis                 | 0.052838305  |
| wavelet-HHH | glcm       | JointAverage                         | 8.240027624  |
| wavelet-HHH | glcm       | SumAverage                           | 16.48005525  |
| wavelet-HHH | glcm       | JointEntropy                         | 4.965075423  |
| wavelet-HHH | glcm       | ClusterShade                         | 6.637367652  |
| wavelet-HHH | glcm       | MaximumProbability                   | 0.063229759  |
| wavelet-HHH | glcm       | ldmn                                 | 0.933016203  |
| wavelet-HHH | glcm       | JointEnergy                          | 0.035306743  |
| wavelet-HHH | glcm       | Contrast                             | 23.57499515  |
| wavelet-HHH | glcm       | DifferenceEntropy                    | 2.811887518  |
| wavelet-HHH | glcm       | InverseVariance                      | 0.232051453  |
| wavelet-HHH | glcm       | DifferenceVariance                   | 8.02967976   |
| wavelet-HHH | glcm       | ldn                                  | 0.828642571  |
| wavelet-HHH | glcm       | ldm                                  | 0.212644598  |
| wavelet-HHH | glcm       | Correlation                          | -0.042480272 |
| wavelet-HHH | glcm       | Autocorrelation                      | 67.52247431  |
| wavelet-HHH | glcm       | SumEntropy                           | 3.37208429   |
| wavelet-HHH | glcm       | SumSquares                           | 11.31827634  |
| wavelet-HHH | glcm       | ClusterProminence                    | 1300.884495  |
| wavelet-HHH | glcm       | lmc2                                 | 0.986912012  |
| wavelet-HHH | glcm       | lmc1                                 | -0.553841667 |
| wavelet-HHH | glcm       | DifferenceAverage                    | 3.882818261  |
| wavelet-HHH | glcm       | ld                                   | 0.308795686  |
| wavelet-HHH | glcm       | ClusterTendency                      | 21.69811022  |
| wavelet-HHH | firstorder | InterquartileRange                   | 101.2560038  |
| wavelet-HHH | firstorder | Skewness                             | -0.013726061 |
| wavelet-HHH | firstorder | Uniformity                           | 0.099345628  |

|             |            |                                  |              |
|-------------|------------|----------------------------------|--------------|
| wavelet-HHH | firstorder | Median                           | -9.979035229 |
| wavelet-HHH | firstorder | Energy                           | 325687.2764  |
| wavelet-HHH | firstorder | RobustMeanAbsoluteDeviation      | 49.44858086  |
| wavelet-HHH | firstorder | MeanAbsoluteDeviation            | 69.97840582  |
| wavelet-HHH | firstorder | TotalEnergy                      | 8793556.462  |
| wavelet-HHH | firstorder | Maximum                          | 207.2218283  |
| wavelet-HHH | firstorder | RootMeanSquared                  | 89.12683157  |
| wavelet-HHH | firstorder | 90Percentile                     | 101.4378787  |
| wavelet-HHH | firstorder | Minimum                          | -197.9645551 |
| wavelet-HHH | firstorder | Entropy                          | 3.536307262  |
| wavelet-HHH | firstorder | Range                            | 405.1863833  |
| wavelet-HHH | firstorder | Variance                         | 7906.343444  |
| wavelet-HHH | firstorder | 10Percentile                     | -122.5513466 |
| wavelet-HHH | firstorder | Kurtosis                         | 2.763528984  |
| wavelet-HHH | firstorder | Mean                             | -6.103168199 |
| wavelet-HHH | glrlm      | ShortRunLowGrayLevelEmphasis     | 0.053478949  |
| wavelet-HHH | glrlm      | GrayLevelVariance                | 12.47376907  |
| wavelet-HHH | glrlm      | LowGrayLevelRunEmphasis          | 0.054061362  |
| wavelet-HHH | glrlm      | GrayLevelNonUniformityNormalized | 0.098159524  |
| wavelet-HHH | glrlm      | RunVariance                      | 0.03550022   |
| wavelet-HHH | glrlm      | GrayLevelNonUniformity           | 3.882474624  |
| wavelet-HHH | glrlm      | LongRunEmphasis                  | 1.11353161   |
| wavelet-HHH | glrlm      | ShortRunHighGrayLevelEmphasis    | 79.04859667  |
| wavelet-HHH | glrlm      | RunLengthNonUniformity           | 36.79550503  |
| wavelet-HHH | glrlm      | ShortRunEmphasis                 | 0.971617097  |
| wavelet-HHH | glrlm      | LongRunHighGrayLevelEmphasis     | 88.82242102  |
| wavelet-HHH | glrlm      | RunPercentage                    | 0.96435272   |
| wavelet-HHH | glrlm      | LongRunLowGrayLevelEmphasis      | 0.05639101   |
| wavelet-HHH | glrlm      | RunEntropy                       | 3.657710244  |
| wavelet-HHH | glrlm      | HighGrayLevelRunEmphasis         | 81.00336154  |
| wavelet-HHH | glrlm      | RunLengthNonUniformityNormalized | 0.928999561  |
| wavelet-HHH | glszm      | GrayLevelVariance                | 17.72778828  |
| wavelet-HHH | glszm      | ZoneVariance                     | 1.213610586  |
| wavelet-HHH | glszm      | GrayLevelNonUniformityNormalized | 0.077504726  |
| wavelet-HHH | glszm      | SizeZoneNonUniformityNormalized  | 0.387523629  |
| wavelet-HHH | glszm      | SizeZoneNonUniformity            | 8.913043478  |
| wavelet-HHH | glszm      | GrayLevelNonUniformity           | 1.782608696  |
| wavelet-HHH | glszm      | LargeAreaEmphasis                | 4.391304348  |
| wavelet-HHH | glszm      | SmallAreaHighGrayLevelEmphasis   | 64.25049517  |
| wavelet-HHH | glszm      | ZonePercentage                   | 0.56097561   |
| wavelet-HHH | glszm      | LargeAreaLowGrayLevelEmphasis    | 0.143794268  |
| wavelet-HHH | glszm      | LargeAreaHighGrayLevelEmphasis   | 319.6086957  |
| wavelet-HHH | glszm      | HighGrayLevelZoneEmphasis        | 89.60869565  |
| wavelet-HHH | glszm      | SmallAreaEmphasis                | 0.638514493  |
| wavelet-HHH | glszm      | LowGrayLevelZoneEmphasis         | 0.077909325  |
| wavelet-HHH | glszm      | ZoneEntropy                      | 4.262692391  |
| wavelet-HHH | glszm      | SmallAreaLowGrayLevelEmphasis    | 0.069339126  |
| wavelet-HHH | ngtdm      | Coarseness                       | 0.12228303   |
| wavelet-HHH | ngtdm      | Complexity                       | 225.2814527  |
| wavelet-HHH | ngtdm      | Strength                         | 8.266094014  |
| wavelet-HHH | ngtdm      | Contrast                         | 0.383229998  |
| wavelet-HHH | ngtdm      | Busyness                         | 0.092365767  |
| wavelet-HLL | gldm       | GrayLevelVariance                | 188.8352171  |
| wavelet-HLL | gldm       | HighGrayLevelEmphasis            | 495.5121951  |
| wavelet-HLL | gldm       | DependenceEntropy                | 4.820966639  |
| wavelet-HLL | gldm       | DependenceNonUniformity          | 21.34146341  |

|             |            |                                      |              |
|-------------|------------|--------------------------------------|--------------|
| wavelet-HLL | gldm       | GrayLevelNonUniformity               | 1.87804878   |
| wavelet-HLL | gldm       | SmallDependenceEmphasis              | 0.74745935   |
| wavelet-HLL | gldm       | SmallDependenceHighGrayLevelEmphasis | 387.395664   |
| wavelet-HLL | gldm       | DependenceNonUniformityNormalized    | 0.520523498  |
| wavelet-HLL | gldm       | LargeDependenceEmphasis              | 2.609756098  |
| wavelet-HLL | gldm       | LargeDependenceLowGrayLevelEmphasis  | 0.068679773  |
| wavelet-HLL | gldm       | DependenceVariance                   | 0.538964902  |
| wavelet-HLL | gldm       | LargeDependenceHighGrayLevelEmphasis | 963.3170732  |
| wavelet-HLL | gldm       | SmallDependenceLowGrayLevelEmphasis  | 0.039884329  |
| wavelet-HLL | gldm       | LowGrayLevelEmphasis                 | 0.043506214  |
| wavelet-HLL | glcm       | JointAverage                         | 16.21059255  |
| wavelet-HLL | glcm       | SumAverage                           | 32.4211851   |
| wavelet-HLL | glcm       | JointEntropy                         | 5.219381526  |
| wavelet-HLL | glcm       | ClusterShade                         | 9469.860396  |
| wavelet-HLL | glcm       | MaximumProbability                   | 0.040536616  |
| wavelet-HLL | glcm       | Idmn                                 | 0.921045369  |
| wavelet-HLL | glcm       | JointEnergy                          | 0.028221799  |
| wavelet-HLL | glcm       | Contrast                             | 264.2034205  |
| wavelet-HLL | glcm       | DifferenceEntropy                    | 3.638109775  |
| wavelet-HLL | glcm       | InverseVariance                      | 0.094398523  |
| wavelet-HLL | glcm       | DifferenceVariance                   | 103.7035711  |
| wavelet-HLL | glcm       | Idn                                  | 0.828582323  |
| wavelet-HLL | glcm       | Idm                                  | 0.098127774  |
| wavelet-HLL | glcm       | Correlation                          | 0.206673348  |
| wavelet-HLL | glcm       | Autocorrelation                      | 304.171679   |
| wavelet-HLL | glcm       | SumEntropy                           | 3.940769098  |
| wavelet-HLL | glcm       | SumSquares                           | 172.6377743  |
| wavelet-HLL | glcm       | ClusterProminence                    | 652429.5404  |
| wavelet-HLL | glcm       | Imc2                                 | 0.999597058  |
| wavelet-HLL | glcm       | Imc1                                 | -0.81689027  |
| wavelet-HLL | glcm       | DifferenceAverage                    | 11.99381134  |
| wavelet-HLL | glcm       | Id                                   | 0.177622137  |
| wavelet-HLL | glcm       | ClusterTendency                      | 426.3476766  |
| wavelet-HLL | firstorder | InterquartileRange                   | 407.5413203  |
| wavelet-HLL | firstorder | Skewness                             | 1.055779528  |
| wavelet-HLL | firstorder | Uniformity                           | 0.045806068  |
| wavelet-HLL | firstorder | Median                               | -51.42566787 |
| wavelet-HLL | firstorder | Energy                               | 4908390.679  |
| wavelet-HLL | firstorder | RobustMeanAbsoluteDeviation          | 195.5224225  |
| wavelet-HLL | firstorder | MeanAbsoluteDeviation                | 275.6942938  |
| wavelet-HLL | firstorder | TotalEnergy                          | 132526548.3  |
| wavelet-HLL | firstorder | Maximum                              | 872.6853934  |
| wavelet-HLL | firstorder | RootMeanSquared                      | 346.0012223  |
| wavelet-HLL | firstorder | 90Percentile                         | 673.8790421  |
| wavelet-HLL | firstorder | Minimum                              | -365.5198458 |
| wavelet-HLL | firstorder | Entropy                              | 4.607432797  |
| wavelet-HLL | firstorder | Range                                | 1238.205239  |
| wavelet-HLL | firstorder | Variance                             | 117119.8169  |
| wavelet-HLL | firstorder | 10Percentile                         | -252.9390873 |
| wavelet-HLL | firstorder | Kurtosis                             | 3.050943533  |
| wavelet-HLL | firstorder | Mean                                 | 50.96105273  |
| wavelet-HLL | glrlm      | ShortRunLowGrayLevelEmphasis         | 0.043805263  |
| wavelet-HLL | glrlm      | GrayLevelVariance                    | 188.6013449  |
| wavelet-HLL | glrlm      | LowGrayLevelRunEmphasis              | 0.044005326  |
| wavelet-HLL | glrlm      | GrayLevelNonUniformityNormalized     | 0.045123638  |
| wavelet-HLL | glrlm      | RunVariance                          | 0.016852431  |

|             |       |                                      |             |
|-------------|-------|--------------------------------------|-------------|
| wavelet-HLL | glrlm | GrayLevelNonUniformity               | 1.819343821 |
| wavelet-HLL | glrlm | LongRunEmphasis                      | 1.052810651 |
| wavelet-HLL | glrlm | ShortRunHighGrayLevelEmphasis        | 493.6248605 |
| wavelet-HLL | glrlm | RunLengthNonUniformity               | 38.98195266 |
| wavelet-HLL | glrlm | ShortRunEmphasis                     | 0.986797337 |
| wavelet-HLL | glrlm | LongRunHighGrayLevelEmphasis         | 516.3608072 |
| wavelet-HLL | glrlm | RunPercentage                        | 0.983114447 |
| wavelet-HLL | glrlm | LongRunLowGrayLevelEmphasis          | 0.044805579 |
| wavelet-HLL | glrlm | RunEntropy                           | 4.646459556 |
| wavelet-HLL | glrlm | HighGrayLevelRunEmphasis             | 498.1720498 |
| wavelet-HLL | glrlm | RunLengthNonUniformityNormalized     | 0.966295137 |
| wavelet-HLL | glszm | GrayLevelVariance                    | 182.6134068 |
| wavelet-HLL | glszm | ZoneVariance                         | 0.426078972 |
| wavelet-HLL | glszm | GrayLevelNonUniformityNormalized     | 0.041322314 |
| wavelet-HLL | glszm | SizeZoneNonUniformityNormalized      | 0.730027548 |
| wavelet-HLL | glszm | SizeZoneNonUniformity                | 24.09090909 |
| wavelet-HLL | glszm | GrayLevelNonUniformity               | 1.363636364 |
| wavelet-HLL | glszm | LargeAreaEmphasis                    | 1.96969697  |
| wavelet-HLL | glszm | SmallAreaHighGrayLevelEmphasis       | 459.0151515 |
| wavelet-HLL | glszm | ZonePercentage                       | 0.804878049 |
| wavelet-HLL | glszm | LargeAreaLowGrayLevelEmphasis        | 0.065916579 |
| wavelet-HLL | glszm | LargeAreaHighGrayLevelEmphasis       | 812.1212121 |
| wavelet-HLL | glszm | HighGrayLevelZoneEmphasis            | 524.3030303 |
| wavelet-HLL | glszm | SmallAreaEmphasis                    | 0.876473064 |
| wavelet-HLL | glszm | LowGrayLevelZoneEmphasis             | 0.050383678 |
| wavelet-HLL | glszm | ZoneEntropy                          | 4.680757756 |
| wavelet-HLL | glszm | SmallAreaLowGrayLevelEmphasis        | 0.048767407 |
| wavelet-HLL | ngtdm | Coarseness                           | 0.075368335 |
| wavelet-HLL | ngtdm | Complexity                           | 4223.204578 |
| wavelet-HLL | ngtdm | Strength                             | 63.33936478 |
| wavelet-HLL | ngtdm | Contrast                             | 4.22734694  |
| wavelet-HLL | ngtdm | Busyness                             | 0.032380657 |
| wavelet-LHL | gldm  | GrayLevelVariance                    | 270.4009518 |
| wavelet-LHL | gldm  | HighGrayLevelEmphasis                | 1439.707317 |
| wavelet-LHL | gldm  | DependenceEntropy                    | 4.930484322 |
| wavelet-LHL | gldm  | DependenceNonUniformity              | 23.53658537 |
| wavelet-LHL | gldm  | GrayLevelNonUniformity               | 1.682926829 |
| wavelet-LHL | gldm  | SmallDependenceEmphasis              | 0.775067751 |
| wavelet-LHL | gldm  | SmallDependenceHighGrayLevelEmphasis | 1232.093496 |
| wavelet-LHL | gldm  | DependenceNonUniformityNormalized    | 0.574063058 |
| wavelet-LHL | gldm  | LargeDependenceEmphasis              | 2.658536585 |
| wavelet-LHL | gldm  | LargeDependenceLowGrayLevelEmphasis  | 0.030207199 |
| wavelet-LHL | gldm  | DependenceVariance                   | 0.58774539  |
| wavelet-LHL | gldm  | LargeDependenceHighGrayLevelEmphasis | 2689.02439  |
| wavelet-LHL | gldm  | SmallDependenceLowGrayLevelEmphasis  | 0.025407029 |
| wavelet-LHL | gldm  | LowGrayLevelEmphasis                 | 0.025925316 |
| wavelet-LHL | glcm  | JointAverage                         | 32.85922073 |
| wavelet-LHL | glcm  | SumAverage                           | 65.71844145 |
| wavelet-LHL | glcm  | JointEntropy                         | 5.206580804 |
| wavelet-LHL | glcm  | ClusterShade                         | 5004.339652 |
| wavelet-LHL | glcm  | MaximumProbability                   | 0.046242449 |
| wavelet-LHL | glcm  | ldmn                                 | 0.90763079  |
| wavelet-LHL | glcm  | JointEnergy                          | 0.02890722  |
| wavelet-LHL | glcm  | Contrast                             | 538.5368851 |
| wavelet-LHL | glcm  | DifferenceEntropy                    | 3.87206287  |
| wavelet-LHL | glcm  | InverseVariance                      | 0.056213595 |

|             |            |                                  |              |
|-------------|------------|----------------------------------|--------------|
| wavelet-LHL | glcm       | DifferenceVariance               | 173.9571685  |
| wavelet-LHL | glcm       | Idn                              | 0.804869797  |
| wavelet-LHL | glcm       | Idm                              | 0.076455048  |
| wavelet-LHL | glcm       | Correlation                      | 0.01858169   |
| wavelet-LHL | glcm       | Autocorrelation                  | 1084.381419  |
| wavelet-LHL | glcm       | SumEntropy                       | 3.98123563   |
| wavelet-LHL | glcm       | SumSquares                       | 272.9722585  |
| wavelet-LHL | glcm       | ClusterProminence                | 795903.8076  |
| wavelet-LHL | glcm       | Imc2                             | 0.999652183  |
| wavelet-LHL | glcm       | Imc1                             | -0.827980141 |
| wavelet-LHL | glcm       | DifferenceAverage                | 18.38153908  |
| wavelet-LHL | glcm       | Id                               | 0.135837882  |
| wavelet-LHL | glcm       | ClusterTendency                  | 553.3521489  |
| wavelet-LHL | firstorder | InterquartileRange               | 555.189764   |
| wavelet-LHL | firstorder | Skewness                         | 0.344877425  |
| wavelet-LHL | firstorder | Uniformity                       | 0.041046996  |
| wavelet-LHL | firstorder | Median                           | -226.9591535 |
| wavelet-LHL | firstorder | Energy                           | 7628666.951  |
| wavelet-LHL | firstorder | RobustMeanAbsoluteDeviation      | 265.9950269  |
| wavelet-LHL | firstorder | MeanAbsoluteDeviation            | 346.5993536  |
| wavelet-LHL | firstorder | TotalEnergy                      | 205974007.7  |
| wavelet-LHL | firstorder | Maximum                          | 687.4701622  |
| wavelet-LHL | firstorder | RootMeanSquared                  | 431.3525792  |
| wavelet-LHL | firstorder | 90Percentile                     | 466.9530897  |
| wavelet-LHL | firstorder | Minimum                          | -950.209971  |
| wavelet-LHL | firstorder | Entropy                          | 4.796099565  |
| wavelet-LHL | firstorder | Range                            | 1637.680133  |
| wavelet-LHL | firstorder | Variance                         | 168682.5373  |
| wavelet-LHL | firstorder | 10Percentile                     | -634.5556482 |
| wavelet-LHL | firstorder | Kurtosis                         | 2.197563352  |
| wavelet-LHL | firstorder | Mean                             | -131.8427482 |
| wavelet-LHL | grlm       | ShortRunLowGrayLevelEmphasis     | 0.026302808  |
| wavelet-LHL | grlm       | GrayLevelVariance                | 271.4999961  |
| wavelet-LHL | grlm       | LowGrayLevelRunEmphasis          | 0.02633552   |
| wavelet-LHL | grlm       | GrayLevelNonUniformityNormalized | 0.040297116  |
| wavelet-LHL | grlm       | RunVariance                      | 0.016859954  |
| wavelet-LHL | grlm       | GrayLevelNonUniformity           | 1.624861692  |
| wavelet-LHL | grlm       | LongRunEmphasis                  | 1.052514793  |
| wavelet-LHL | grlm       | ShortRunHighGrayLevelEmphasis    | 1440.126947  |
| wavelet-LHL | grlm       | RunLengthNonUniformity           | 38.97386588  |
| wavelet-LHL | grlm       | ShortRunEmphasis                 | 0.986871302  |
| wavelet-LHL | grlm       | LongRunHighGrayLevelEmphasis     | 1493.231977  |
| wavelet-LHL | grlm       | RunPercentage                    | 0.983114447  |
| wavelet-LHL | grlm       | LongRunLowGrayLevelEmphasis      | 0.02646637   |
| wavelet-LHL | grlm       | RunEntropy                       | 4.844703886  |
| wavelet-LHL | grlm       | HighGrayLevelRunEmphasis         | 1450.747953  |
| wavelet-LHL | grlm       | RunLengthNonUniformityNormalized | 0.966280092  |
| wavelet-LHL | glszm      | GrayLevelVariance                | 282.3365052  |
| wavelet-LHL | glszm      | ZoneVariance                     | 0.339965398  |
| wavelet-LHL | glszm      | GrayLevelNonUniformityNormalized | 0.034602076  |
| wavelet-LHL | glszm      | SizeZoneNonUniformityNormalized  | 0.787197232  |
| wavelet-LHL | glszm      | SizeZoneNonUniformity            | 26.76470588  |
| wavelet-LHL | glszm      | GrayLevelNonUniformity           | 1.176470588  |
| wavelet-LHL | glszm      | LargeAreaEmphasis                | 1.794117647  |
| wavelet-LHL | glszm      | SmallAreaHighGrayLevelEmphasis   | 1449.471405  |
| wavelet-LHL | glszm      | ZonePercentage                   | 0.829268293  |

|             |            |                                      |              |
|-------------|------------|--------------------------------------|--------------|
| wavelet-LHL | glszm      | LargeAreaLowGrayLevelEmphasis        | 0.032686633  |
| wavelet-LHL | glszm      | LargeAreaHighGrayLevelEmphasis       | 2196.411765  |
| wavelet-LHL | glszm      | HighGrayLevelZoneEmphasis            | 1555.147059  |
| wavelet-LHL | glszm      | SmallAreaEmphasis                    | 0.899509804  |
| wavelet-LHL | glszm      | LowGrayLevelZoneEmphasis             | 0.030784807  |
| wavelet-LHL | glszm      | ZoneEntropy                          | 4.969815782  |
| wavelet-LHL | glszm      | SmallAreaLowGrayLevelEmphasis        | 0.03056913   |
| wavelet-LHL | ngtdm      | Coarseness                           | 0.045348459  |
| wavelet-LHL | ngtdm      | Complexity                           | 9742.567392  |
| wavelet-LHL | ngtdm      | Strength                             | 63.51350577  |
| wavelet-LHL | ngtdm      | Contrast                             | 7.70792434   |
| wavelet-LHL | ngtdm      | Busyness                             | 0.034837782  |
| wavelet-LHH | gldm       | GrayLevelVariance                    | 99.50624628  |
| wavelet-LHH | gldm       | HighGrayLevelEmphasis                | 566.4878049  |
| wavelet-LHH | gldm       | DependenceEntropy                    | 4.686581883  |
| wavelet-LHH | gldm       | DependenceNonUniformity              | 22.65853659  |
| wavelet-LHH | gldm       | GrayLevelNonUniformity               | 1.926829268  |
| wavelet-LHH | gldm       | SmallDependenceEmphasis              | 0.758807588  |
| wavelet-LHH | gldm       | SmallDependenceHighGrayLevelEmphasis | 431.8604336  |
| wavelet-LHH | gldm       | DependenceNonUniformityNormalized    | 0.552647234  |
| wavelet-LHH | gldm       | LargeDependenceEmphasis              | 2.073170732  |
| wavelet-LHH | gldm       | LargeDependenceLowGrayLevelEmphasis  | 0.031781116  |
| wavelet-LHH | gldm       | DependenceVariance                   | 0.273646639  |
| wavelet-LHH | gldm       | LargeDependenceHighGrayLevelEmphasis | 1216         |
| wavelet-LHH | gldm       | SmallDependenceLowGrayLevelEmphasis  | 0.027312315  |
| wavelet-LHH | gldm       | LowGrayLevelEmphasis                 | 0.028184903  |
| wavelet-LHH | glcm       | JointAverage                         | 22.02368565  |
| wavelet-LHH | glcm       | SumAverage                           | 44.04737129  |
| wavelet-LHH | glcm       | JointEntropy                         | 5.209823189  |
| wavelet-LHH | glcm       | ClusterShade                         | 825.4749843  |
| wavelet-LHH | glcm       | MaximumProbability                   | 0.043476658  |
| wavelet-LHH | glcm       | ldmn                                 | 0.92555389   |
| wavelet-LHH | glcm       | JointEnergy                          | 0.028681156  |
| wavelet-LHH | glcm       | Contrast                             | 207.115206   |
| wavelet-LHH | glcm       | DifferenceEntropy                    | 3.614108319  |
| wavelet-LHH | glcm       | InverseVariance                      | 0.081947584  |
| wavelet-LHH | glcm       | DifferenceVariance                   | 71.18904979  |
| wavelet-LHH | glcm       | ldn                                  | 0.821463045  |
| wavelet-LHH | glcm       | ldm                                  | 0.081332753  |
| wavelet-LHH | glcm       | Correlation                          | -0.092462449 |
| wavelet-LHH | glcm       | Autocorrelation                      | 478.3594     |
| wavelet-LHH | glcm       | SumEntropy                           | 3.927461621  |
| wavelet-LHH | glcm       | SumSquares                           | 95.48572917  |
| wavelet-LHH | glcm       | ClusterProminence                    | 100050.8163  |
| wavelet-LHH | glcm       | lmc2                                 | 0.999451503  |
| wavelet-LHH | glcm       | lmc1                                 | -0.794959842 |
| wavelet-LHH | glcm       | DifferenceAverage                    | 11.38776121  |
| wavelet-LHH | glcm       | ld                                   | 0.159402761  |
| wavelet-LHH | glcm       | ClusterTendency                      | 174.8277106  |
| wavelet-LHH | firstorder | InterquartileRange                   | 283.7240911  |
| wavelet-LHH | firstorder | Skewness                             | 0.516733953  |
| wavelet-LHH | firstorder | Uniformity                           | 0.046995836  |
| wavelet-LHH | firstorder | Median                               | -26.50548072 |
| wavelet-LHH | firstorder | Energy                               | 2517387.17   |
| wavelet-LHH | firstorder | RobustMeanAbsoluteDeviation          | 133.267776   |
| wavelet-LHH | firstorder | MeanAbsoluteDeviation                | 195.908921   |



|             |            |                                      |              |
|-------------|------------|--------------------------------------|--------------|
| wavelet-LHH | firstorder | TotalEnergy                          | 67969453.59  |
| wavelet-LHH | firstorder | Maximum                              | 640.050284   |
| wavelet-LHH | firstorder | RootMeanSquared                      | 247.7896024  |
| wavelet-LHH | firstorder | 90Percentile                         | 288.3108159  |
| wavelet-LHH | firstorder | Minimum                              | -500.3424428 |
| wavelet-LHH | firstorder | Entropy                              | 4.552197126  |
| wavelet-LHH | firstorder | Range                                | 1140.392727  |
| wavelet-LHH | firstorder | Variance                             | 61389.91303  |
| wavelet-LHH | firstorder | 10Percentile                         | -281.3012544 |
| wavelet-LHH | firstorder | Kurtosis                             | 3.063351855  |
| wavelet-LHH | firstorder | Mean                                 | 3.126347357  |
| wavelet-LHH | glrlm      | ShortRunLowGrayLevelEmphasis         | 0.028487251  |
| wavelet-LHH | glrlm      | GrayLevelVariance                    | 99.87244587  |
| wavelet-LHH | glrlm      | LowGrayLevelRunEmphasis              | 0.028522661  |
| wavelet-LHH | glrlm      | GrayLevelNonUniformityNormalized     | 0.046967409  |
| wavelet-LHH | glrlm      | RunVariance                          | 0.013109954  |
| wavelet-LHH | glrlm      | GrayLevelNonUniformity               | 1.900435368  |
| wavelet-LHH | glrlm      | LongRunEmphasis                      | 1.040976331  |
| wavelet-LHH | glrlm      | ShortRunHighGrayLevelEmphasis        | 560.2391423  |
| wavelet-LHH | glrlm      | RunLengthNonUniformity               | 39.42771203  |
| wavelet-LHH | glrlm      | ShortRunEmphasis                     | 0.989755917  |
| wavelet-LHH | glrlm      | LongRunHighGrayLevelEmphasis         | 590.2095565  |
| wavelet-LHH | glrlm      | RunPercentage                        | 0.986866792  |
| wavelet-LHH | glrlm      | LongRunLowGrayLevelEmphasis          | 0.028664302  |
| wavelet-LHH | glrlm      | RunEntropy                           | 4.565358915  |
| wavelet-LHH | glrlm      | HighGrayLevelRunEmphasis             | 566.2332251  |
| wavelet-LHH | glrlm      | RunLengthNonUniformityNormalized     | 0.973780092  |
| wavelet-LHH | glszm      | GrayLevelVariance                    | 105.4126298  |
| wavelet-LHH | glszm      | ZoneVariance                         | 0.222318339  |
| wavelet-LHH | glszm      | GrayLevelNonUniformityNormalized     | 0.046712803  |
| wavelet-LHH | glszm      | SizeZoneNonUniformityNormalized      | 0.700692042  |
| wavelet-LHH | glszm      | SizeZoneNonUniformity                | 23.82352941  |
| wavelet-LHH | glszm      | GrayLevelNonUniformity               | 1.588235294  |
| wavelet-LHH | glszm      | LargeAreaEmphasis                    | 1.676470588  |
| wavelet-LHH | glszm      | SmallAreaHighGrayLevelEmphasis       | 490.6478758  |
| wavelet-LHH | glszm      | ZonePercentage                       | 0.829268293  |
| wavelet-LHH | glszm      | LargeAreaLowGrayLevelEmphasis        | 0.035471511  |
| wavelet-LHH | glszm      | LargeAreaHighGrayLevelEmphasis       | 984.3529412  |
| wavelet-LHH | glszm      | HighGrayLevelZoneEmphasis            | 562.6176471  |
| wavelet-LHH | glszm      | SmallAreaEmphasis                    | 0.863562092  |
| wavelet-LHH | glszm      | LowGrayLevelZoneEmphasis             | 0.033274483  |
| wavelet-LHH | glszm      | ZoneEntropy                          | 4.631292988  |
| wavelet-LHH | glszm      | SmallAreaLowGrayLevelEmphasis        | 0.03275714   |
| wavelet-LHH | ngtdm      | Coarseness                           | 0.07003184   |
| wavelet-LHH | ngtdm      | Complexity                           | 3252.408925  |
| wavelet-LHH | ngtdm      | Strength                             | 34.07938666  |
| wavelet-LHH | ngtdm      | Contrast                             | 2.635439619  |
| wavelet-LHH | ngtdm      | Busyness                             | 0.037128868  |
| wavelet-LLH | gldm       | GrayLevelVariance                    | 237.8108269  |
| wavelet-LLH | gldm       | HighGrayLevelEmphasis                | 1107.341463  |
| wavelet-LLH | gldm       | DependenceEntropy                    | 4.967308102  |
| wavelet-LLH | gldm       | DependenceNonUniformity              | 23.3902439   |
| wavelet-LLH | gldm       | GrayLevelNonUniformity               | 1.731707317  |
| wavelet-LLH | gldm       | SmallDependenceEmphasis              | 0.784044715  |
| wavelet-LLH | gldm       | SmallDependenceHighGrayLevelEmphasis | 1040.202744  |
| wavelet-LLH | gldm       | DependenceNonUniformityNormalized    | 0.570493754  |

|             |            |                                      |              |
|-------------|------------|--------------------------------------|--------------|
| wavelet-LLH | gldm       | LargeDependenceEmphasis              | 2.463414634  |
| wavelet-LLH | gldm       | LargeDependenceLowGrayLevelEmphasis  | 0.032664511  |
| wavelet-LLH | gldm       | DependenceVariance                   | 0.530636526  |
| wavelet-LLH | gldm       | LargeDependenceHighGrayLevelEmphasis | 1534.219512  |
| wavelet-LLH | gldm       | SmallDependenceLowGrayLevelEmphasis  | 0.026499266  |
| wavelet-LLH | gldm       | LowGrayLevelEmphasis                 | 0.027246538  |
| wavelet-LLH | glcm       | JointAverage                         | 28.45830637  |
| wavelet-LLH | glcm       | SumAverage                           | 56.91661274  |
| wavelet-LLH | glcm       | JointEntropy                         | 5.20467193   |
| wavelet-LLH | glcm       | ClusterShade                         | 10935.44996  |
| wavelet-LLH | glcm       | MaximumProbability                   | 0.046774899  |
| wavelet-LLH | glcm       | ldmn                                 | 0.944932881  |
| wavelet-LLH | glcm       | JointEnergy                          | 0.028784927  |
| wavelet-LLH | glcm       | Contrast                             | 282.1206882  |
| wavelet-LLH | glcm       | DifferenceEntropy                    | 3.604080316  |
| wavelet-LLH | glcm       | InverseVariance                      | 0.095856766  |
| wavelet-LLH | glcm       | DifferenceVariance                   | 114.2313463  |
| wavelet-LLH | glcm       | ldn                                  | 0.85504226   |
| wavelet-LLH | glcm       | ldm                                  | 0.09330203   |
| wavelet-LLH | glcm       | Correlation                          | 0.335154544  |
| wavelet-LLH | glcm       | Autocorrelation                      | 891.1986241  |
| wavelet-LLH | glcm       | SumEntropy                           | 4.027865119  |
| wavelet-LLH | glcm       | SumSquares                           | 220.226893   |
| wavelet-LLH | glcm       | ClusterProminence                    | 903173.0049  |
| wavelet-LLH | glcm       | lmc2                                 | 0.999565484  |
| wavelet-LLH | glcm       | lmc1                                 | -0.813942072 |
| wavelet-LLH | glcm       | DifferenceAverage                    | 12.45836276  |
| wavelet-LLH | glcm       | ld                                   | 0.17156775   |
| wavelet-LLH | glcm       | ClusterTendency                      | 598.7868837  |
| wavelet-LLH | firstorder | InterquartileRange                   | 660.3048498  |
| wavelet-LLH | firstorder | Skewness                             | 0.487401252  |
| wavelet-LLH | firstorder | Uniformity                           | 0.042236764  |
| wavelet-LLH | firstorder | Median                               | -144.3182122 |
| wavelet-LLH | firstorder | Energy                               | 6132039.955  |
| wavelet-LLH | firstorder | RobustMeanAbsoluteDeviation          | 248.6308279  |
| wavelet-LLH | firstorder | MeanAbsoluteDeviation                | 326.1357084  |
| wavelet-LLH | firstorder | TotalEnergy                          | 165565078.8  |
| wavelet-LLH | firstorder | Maximum                              | 872.0129286  |
| wavelet-LLH | firstorder | RootMeanSquared                      | 386.7324012  |
| wavelet-LLH | firstorder | 90Percentile                         | 555.4380834  |
| wavelet-LLH | firstorder | Minimum                              | -736.9010849 |
| wavelet-LLH | firstorder | Entropy                              | 4.753774261  |
| wavelet-LLH | firstorder | Range                                | 1608.914014  |
| wavelet-LLH | firstorder | Variance                             | 149003.3232  |
| wavelet-LLH | firstorder | 10Percentile                         | -386.1047793 |
| wavelet-LLH | firstorder | Kurtosis                             | 2.303872675  |
| wavelet-LLH | firstorder | Mean                                 | -23.63529055 |
| wavelet-LLH | glrlm      | ShortRunLowGrayLevelEmphasis         | 0.027575129  |
| wavelet-LLH | glrlm      | GrayLevelVariance                    | 238.9499067  |
| wavelet-LLH | glrlm      | LowGrayLevelRunEmphasis              | 0.027617498  |
| wavelet-LLH | glrlm      | GrayLevelNonUniformityNormalized     | 0.041399116  |
| wavelet-LLH | glrlm      | RunVariance                          | 0.014968437  |
| wavelet-LLH | glrlm      | GrayLevelNonUniformity               | 1.672741187  |
| wavelet-LLH | glrlm      | LongRunEmphasis                      | 1.047064777  |
| wavelet-LLH | glrlm      | ShortRunHighGrayLevelEmphasis        | 1116.478273  |
| wavelet-LLH | glrlm      | RunLengthNonUniformity               | 39.20951417  |

|             |       |                                      |              |
|-------------|-------|--------------------------------------|--------------|
| wavelet-LLH | glrlm | ShortRunEmphasis                     | 0.988233806  |
| wavelet-LLH | glrlm | LongRunHighGrayLevelEmphasis         | 1134.125667  |
| wavelet-LLH | glrlm | RunPercentage                        | 0.984990619  |
| wavelet-LLH | glrlm | LongRunLowGrayLevelEmphasis          | 0.02778697   |
| wavelet-LLH | glrlm | RunEntropy                           | 4.795593045  |
| wavelet-LLH | glrlm | HighGrayLevelRunEmphasis             | 1120.007752  |
| wavelet-LLH | glrlm | RunLengthNonUniformityNormalized     | 0.970063126  |
| wavelet-LLH | glszm | GrayLevelVariance                    | 249.3814879  |
| wavelet-LLH | glszm | ZoneVariance                         | 0.398788927  |
| wavelet-LLH | glszm | GrayLevelNonUniformityNormalized     | 0.03633218   |
| wavelet-LLH | glszm | SizeZoneNonUniformityNormalized      | 0.783737024  |
| wavelet-LLH | glszm | SizeZoneNonUniformity                | 26.64705882  |
| wavelet-LLH | glszm | GrayLevelNonUniformity               | 1.235294118  |
| wavelet-LLH | glszm | LargeAreaEmphasis                    | 1.852941176  |
| wavelet-LLH | glszm | SmallAreaHighGrayLevelEmphasis       | 1240.244485  |
| wavelet-LLH | glszm | ZonePercentage                       | 0.829268293  |
| wavelet-LLH | glszm | LargeAreaLowGrayLevelEmphasis        | 0.035210002  |
| wavelet-LLH | glszm | LargeAreaHighGrayLevelEmphasis       | 1528.617647  |
| wavelet-LLH | glszm | HighGrayLevelZoneEmphasis            | 1271.5       |
| wavelet-LLH | glszm | SmallAreaEmphasis                    | 0.902165033  |
| wavelet-LLH | glszm | LowGrayLevelZoneEmphasis             | 0.032138028  |
| wavelet-LLH | glszm | ZoneEntropy                          | 4.852168724  |
| wavelet-LLH | glszm | SmallAreaLowGrayLevelEmphasis        | 0.031811785  |
| wavelet-LLH | ngtdm | Coarseness                           | 0.065184523  |
| wavelet-LLH | ngtdm | Complexity                           | 5981.038679  |
| wavelet-LLH | ngtdm | Strength                             | 79.32552888  |
| wavelet-LLH | ngtdm | Contrast                             | 5.181913941  |
| wavelet-LLH | ngtdm | Busyness                             | 0.033531488  |
| wavelet-LLL | gldm  | GrayLevelVariance                    | 570.0440214  |
| wavelet-LLL | gldm  | HighGrayLevelEmphasis                | 2954.341463  |
| wavelet-LLL | gldm  | DependenceEntropy                    | 5.064869078  |
| wavelet-LLL | gldm  | DependenceNonUniformity              | 30.75609756  |
| wavelet-LLL | gldm  | GrayLevelNonUniformity               | 1.292682927  |
| wavelet-LLL | gldm  | SmallDependenceEmphasis              | 0.890243902  |
| wavelet-LLL | gldm  | SmallDependenceHighGrayLevelEmphasis | 2425.134146  |
| wavelet-LLL | gldm  | DependenceNonUniformityNormalized    | 0.750148721  |
| wavelet-LLL | gldm  | LargeDependenceEmphasis              | 1.43902439   |
| wavelet-LLL | gldm  | LargeDependenceLowGrayLevelEmphasis  | 0.031890395  |
| wavelet-LLL | gldm  | DependenceVariance                   | 0.12492564   |
| wavelet-LLL | gldm  | LargeDependenceHighGrayLevelEmphasis | 5071.170732  |
| wavelet-LLL | gldm  | SmallDependenceLowGrayLevelEmphasis  | 0.031727971  |
| wavelet-LLL | gldm  | LowGrayLevelEmphasis                 | 0.031760456  |
| wavelet-LLL | glcm  | JointAverage                         | 55.14052125  |
| wavelet-LLL | glcm  | SumAverage                           | 110.2810425  |
| wavelet-LLL | glcm  | JointEntropy                         | 5.269250254  |
| wavelet-LLL | glcm  | ClusterShade                         | -15029.96822 |
| wavelet-LLL | glcm  | MaximumProbability                   | 0.030978192  |
| wavelet-LLL | glcm  | ldmn                                 | 0.918539684  |
| wavelet-LLL | glcm  | JointEnergy                          | 0.027146481  |
| wavelet-LLL | glcm  | Contrast                             | 900.38865    |
| wavelet-LLL | glcm  | DifferenceEntropy                    | 4.027653991  |
| wavelet-LLL | glcm  | InverseVariance                      | 0.049746404  |
| wavelet-LLL | glcm  | DifferenceVariance                   | 273.3520864  |
| wavelet-LLL | glcm  | ldn                                  | 0.80988429   |
| wavelet-LLL | glcm  | ldm                                  | 0.044724256  |
| wavelet-LLL | glcm  | Correlation                          | 0.161303631  |

|             |            |                                  |              |
|-------------|------------|----------------------------------|--------------|
| wavelet-LLL | glcm       | Autocorrelation                  | 3133.454833  |
| wavelet-LLL | glcm       | SumEntropy                       | 4.16440332   |
| wavelet-LLL | glcm       | SumSquares                       | 540.643215   |
| wavelet-LLL | glcm       | ClusterProminence                | 3951153.107  |
| wavelet-LLL | glcm       | Imc2                             | 0.999902732  |
| wavelet-LLL | glcm       | Imc1                             | -0.899706873 |
| wavelet-LLL | glcm       | DifferenceAverage                | 24.61610626  |
| wavelet-LLL | glcm       | Id                               | 0.095300439  |
| wavelet-LLL | glcm       | ClusterTendency                  | 1262.18421   |
| wavelet-LLL | firstorder | InterquartileRange               | 968.7480925  |
| wavelet-LLL | firstorder | Skewness                         | -0.058805363 |
| wavelet-LLL | firstorder | Uniformity                       | 0.031528852  |
| wavelet-LLL | firstorder | Median                           | -790.278416  |
| wavelet-LLL | firstorder | Energy                           | 32809761.41  |
| wavelet-LLL | firstorder | RobustMeanAbsoluteDeviation      | 387.7287074  |
| wavelet-LLL | firstorder | MeanAbsoluteDeviation            | 507.0203205  |
| wavelet-LLL | firstorder | TotalEnergy                      | 885863558.2  |
| wavelet-LLL | firstorder | Maximum                          | 483.3332869  |
| wavelet-LLL | firstorder | RootMeanSquared                  | 894.5602737  |
| wavelet-LLL | firstorder | 90Percentile                     | 193.1187326  |
| wavelet-LLL | firstorder | Minimum                          | -1850.608142 |
| wavelet-LLL | firstorder | Entropy                          | 5.064869078  |
| wavelet-LLL | firstorder | Range                            | 2333.941429  |
| wavelet-LLL | firstorder | Variance                         | 354684.5017  |
| wavelet-LLL | firstorder | 10Percentile                     | -1384.403734 |
| wavelet-LLL | firstorder | Kurtosis                         | 2.209105982  |
| wavelet-LLL | firstorder | Mean                             | -667.4980012 |
| wavelet-LLL | glrlm      | ShortRunLowGrayLevelEmphasis     | 0.031943769  |
| wavelet-LLL | glrlm      | GrayLevelVariance                | 569.4514106  |
| wavelet-LLL | glrlm      | LowGrayLevelRunEmphasis          | 0.031945077  |
| wavelet-LLL | glrlm      | GrayLevelNonUniformityNormalized | 0.031459084  |
| wavelet-LLL | glrlm      | RunVariance                      | 0.005617477  |
| wavelet-LLL | glrlm      | GrayLevelNonUniformity           | 1.282664646  |
| wavelet-LLL | glrlm      | LongRunEmphasis                  | 1.01760355   |
| wavelet-LLL | glrlm      | ShortRunHighGrayLevelEmphasis    | 2922.372054  |
| wavelet-LLL | glrlm      | RunLengthNonUniformity           | 40.32731755  |
| wavelet-LLL | glrlm      | ShortRunEmphasis                 | 0.995599112  |
| wavelet-LLL | glrlm      | LongRunHighGrayLevelEmphasis     | 3028.025716  |
| wavelet-LLL | glrlm      | RunPercentage                    | 0.994371482  |
| wavelet-LLL | glrlm      | LongRunLowGrayLevelEmphasis      | 0.03195031   |
| wavelet-LLL | glrlm      | RunEntropy                       | 5.066597074  |
| wavelet-LLL | glrlm      | HighGrayLevelRunEmphasis         | 2943.502787  |
| wavelet-LLL | glrlm      | RunLengthNonUniformityNormalized | 0.988765046  |
| wavelet-LLL | glszm      | GrayLevelVariance                | 560.6599723  |
| wavelet-LLL | glszm      | ZoneVariance                     | 0.072714681  |
| wavelet-LLL | glszm      | GrayLevelNonUniformityNormalized | 0.030470914  |
| wavelet-LLL | glszm      | SizeZoneNonUniformityNormalized  | 0.854570637  |
| wavelet-LLL | glszm      | SizeZoneNonUniformity            | 32.47368421  |
| wavelet-LLL | glszm      | GrayLevelNonUniformity           | 1.157894737  |
| wavelet-LLL | glszm      | LargeAreaEmphasis                | 1.236842105  |
| wavelet-LLL | glszm      | SmallAreaHighGrayLevelEmphasis   | 2521.427632  |
| wavelet-LLL | glszm      | ZonePercentage                   | 0.926829268  |
| wavelet-LLL | glszm      | LargeAreaLowGrayLevelEmphasis    | 0.034314593  |
| wavelet-LLL | glszm      | LargeAreaHighGrayLevelEmphasis   | 3948.894737  |
| wavelet-LLL | glszm      | HighGrayLevelZoneEmphasis        | 2806.921053  |
| wavelet-LLL | glszm      | SmallAreaEmphasis                | 0.940789474  |

|             |            |                                      |              |
|-------------|------------|--------------------------------------|--------------|
| wavelet-LLL | glszm      | LowGrayLevelZoneEmphasis             | 0.034244494  |
| wavelet-LLL | glszm      | ZoneEntropy                          | 5.090032777  |
| wavelet-LLL | glszm      | SmallAreaLowGrayLevelEmphasis        | 0.034226969  |
| wavelet-LLL | ngtdm      | Coarseness                           | 0.044795258  |
| wavelet-LLL | ngtdm      | Complexity                           | 19134.48213  |
| wavelet-LLL | ngtdm      | Strength                             | 116.0770043  |
| wavelet-LLL | ngtdm      | Contrast                             | 16.28010521  |
| wavelet-LLL | ngtdm      | Busyness                             | 0.020312371  |
| wavelet-HHL | gldm       | GrayLevelVariance                    | 48.41165973  |
| wavelet-HHL | gldm       | HighGrayLevelEmphasis                | 476.195122   |
| wavelet-HHL | gldm       | DependenceEntropy                    | 4.528283712  |
| wavelet-HHL | gldm       | DependenceNonUniformity              | 20.31707317  |
| wavelet-HHL | gldm       | GrayLevelNonUniformity               | 2.512195122  |
| wavelet-HHL | gldm       | SmallDependenceEmphasis              | 0.685636856  |
| wavelet-HHL | gldm       | SmallDependenceHighGrayLevelEmphasis | 322.8170732  |
| wavelet-HHL | gldm       | DependenceNonUniformityNormalized    | 0.49553837   |
| wavelet-HHL | gldm       | LargeDependenceEmphasis              | 2.365853659  |
| wavelet-HHL | gldm       | LargeDependenceLowGrayLevelEmphasis  | 0.031015819  |
| wavelet-HHL | gldm       | DependenceVariance                   | 0.295062463  |
| wavelet-HHL | gldm       | LargeDependenceHighGrayLevelEmphasis | 1137.512195  |
| wavelet-HHL | gldm       | SmallDependenceLowGrayLevelEmphasis  | 0.027193919  |
| wavelet-HHL | gldm       | LowGrayLevelEmphasis                 | 0.027909138  |
| wavelet-HHL | glcm       | JointAverage                         | 20.4511752   |
| wavelet-HHL | glcm       | SumAverage                           | 40.9023504   |
| wavelet-HHL | glcm       | JointEntropy                         | 5.129212657  |
| wavelet-HHL | glcm       | ClusterShade                         | 35.03425068  |
| wavelet-HHL | glcm       | MaximumProbability                   | 0.051912743  |
| wavelet-HHL | glcm       | Idmn                                 | 0.949082097  |
| wavelet-HHL | glcm       | JointEnergy                          | 0.030972914  |
| wavelet-HHL | glcm       | Contrast                             | 86.23012937  |
| wavelet-HHL | glcm       | DifferenceEntropy                    | 3.222872975  |
| wavelet-HHL | glcm       | InverseVariance                      | 0.151457473  |
| wavelet-HHL | glcm       | DifferenceVariance                   | 36.3490495   |
| wavelet-HHL | glcm       | Idn                                  | 0.855735507  |
| wavelet-HHL | glcm       | Idm                                  | 0.128677138  |
| wavelet-HHL | glcm       | Correlation                          | -0.048710809 |
| wavelet-HHL | glcm       | Autocorrelation                      | 417.3775157  |
| wavelet-HHL | glcm       | SumEntropy                           | 3.66034539   |
| wavelet-HHL | glcm       | SumSquares                           | 41.16203607  |
| wavelet-HHL | glcm       | ClusterProminence                    | 27461.05662  |
| wavelet-HHL | glcm       | Imc2                                 | 0.99852009   |
| wavelet-HHL | glcm       | Imc1                                 | -0.736256552 |
| wavelet-HHL | glcm       | DifferenceAverage                    | 6.958141009  |
| wavelet-HHL | glcm       | Id                                   | 0.221708809  |
| wavelet-HHL | glcm       | ClusterTendency                      | 78.41801492  |
| wavelet-HHL | firstorder | InterquartileRange                   | 195.7972149  |
| wavelet-HHL | firstorder | Skewness                             | -0.174961467 |
| wavelet-HHL | firstorder | Uniformity                           | 0.061273052  |
| wavelet-HHL | firstorder | Median                               | 27.49356828  |
| wavelet-HHL | firstorder | Energy                               | 1232391.413  |
| wavelet-HHL | firstorder | RobustMeanAbsoluteDeviation          | 78.19276696  |
| wavelet-HHL | firstorder | MeanAbsoluteDeviation                | 125.9863928  |
| wavelet-HHL | firstorder | TotalEnergy                          | 33274568.16  |
| wavelet-HHL | firstorder | Maximum                              | 430.0717365  |
| wavelet-HHL | firstorder | RootMeanSquared                      | 173.373375   |
| wavelet-HHL | firstorder | 90Percentile                         | 213.5214864  |

|             |            |                                      |              |
|-------------|------------|--------------------------------------|--------------|
| wavelet-HHL | firstorder | Minimum                              | -451.7293395 |
| wavelet-HHL | firstorder | Entropy                              | 4.208297969  |
| wavelet-HHL | firstorder | Range                                | 881.801076   |
| wavelet-HHL | firstorder | Variance                             | 29322.75287  |
| wavelet-HHL | firstorder | 10Percentile                         | -130.9979959 |
| wavelet-HHL | firstorder | Kurtosis                             | 4.016373441  |
| wavelet-HHL | firstorder | Mean                                 | 27.12147273  |
| wavelet-HHL | grlm       | ShortRunLowGrayLevelEmphasis         | 0.028330454  |
| wavelet-HHL | grlm       | GrayLevelVariance                    | 49.0351697   |
| wavelet-HHL | grlm       | LowGrayLevelRunEmphasis              | 0.028360447  |
| wavelet-HHL | grlm       | GrayLevelNonUniformityNormalized     | 0.060838349  |
| wavelet-HHL | grlm       | RunVariance                          | 0.016852431  |
| wavelet-HHL | grlm       | GrayLevelNonUniformity               | 2.45272045   |
| wavelet-HHL | grlm       | LongRunEmphasis                      | 1.052810651  |
| wavelet-HHL | grlm       | ShortRunHighGrayLevelEmphasis        | 469.5969666  |
| wavelet-HHL | grlm       | RunLengthNonUniformity               | 38.98195266  |
| wavelet-HHL | grlm       | ShortRunEmphasis                     | 0.986797337  |
| wavelet-HHL | grlm       | LongRunHighGrayLevelEmphasis         | 501.6988526  |
| wavelet-HHL | grlm       | RunPercentage                        | 0.983114447  |
| wavelet-HHL | grlm       | LongRunLowGrayLevelEmphasis          | 0.02848042   |
| wavelet-HHL | grlm       | RunEntropy                           | 4.245511338  |
| wavelet-HHL | grlm       | HighGrayLevelRunEmphasis             | 476.0173438  |
| wavelet-HHL | grlm       | RunLengthNonUniformityNormalized     | 0.966295137  |
| wavelet-HHL | glszm      | GrayLevelVariance                    | 58.359375    |
| wavelet-HHL | glszm      | ZoneVariance                         | 0.264648438  |
| wavelet-HHL | glszm      | GrayLevelNonUniformityNormalized     | 0.0546875    |
| wavelet-HHL | glszm      | SizeZoneNonUniformityNormalized      | 0.611328125  |
| wavelet-HHL | glszm      | SizeZoneNonUniformity                | 19.5625      |
| wavelet-HHL | glszm      | GrayLevelNonUniformity               | 1.75         |
| wavelet-HHL | glszm      | LargeAreaEmphasis                    | 1.90625      |
| wavelet-HHL | glszm      | SmallAreaHighGrayLevelEmphasis       | 379.453125   |
| wavelet-HHL | glszm      | ZonePercentage                       | 0.780487805  |
| wavelet-HHL | glszm      | LargeAreaLowGrayLevelEmphasis        | 0.037179877  |
| wavelet-HHL | glszm      | LargeAreaHighGrayLevelEmphasis       | 910.9375     |
| wavelet-HHL | glszm      | HighGrayLevelZoneEmphasis            | 473.5        |
| wavelet-HHL | glszm      | SmallAreaEmphasis                    | 0.808159722  |
| wavelet-HHL | glszm      | LowGrayLevelZoneEmphasis             | 0.035118798  |
| wavelet-HHL | glszm      | ZoneEntropy                          | 4.5625       |
| wavelet-HHL | glszm      | SmallAreaLowGrayLevelEmphasis        | 0.034682263  |
| wavelet-HHL | ngtdm      | Coarseness                           | 0.11049661   |
| wavelet-HHL | ngtdm      | Complexity                           | 1103.798304  |
| wavelet-HHL | ngtdm      | Strength                             | 27.31753621  |
| wavelet-HHL | ngtdm      | Contrast                             | 1.120318948  |
| wavelet-HHL | ngtdm      | Busyness                             | 0.033332025  |
| wavelet-HLH | gldm       | GrayLevelVariance                    | 18.743605    |
| wavelet-HLH | gldm       | HighGrayLevelEmphasis                | 169.8536585  |
| wavelet-HLH | gldm       | DependenceEntropy                    | 4.393898956  |
| wavelet-HLH | gldm       | DependenceNonUniformity              | 17.43902439  |
| wavelet-HLH | gldm       | GrayLevelNonUniformity               | 3.487804878  |
| wavelet-HLH | gldm       | SmallDependenceEmphasis              | 0.635968835  |
| wavelet-HLH | gldm       | SmallDependenceHighGrayLevelEmphasis | 118.6494648  |
| wavelet-HLH | gldm       | DependenceNonUniformityNormalized    | 0.425342058  |
| wavelet-HLH | gldm       | LargeDependenceEmphasis              | 3.43902439   |
| wavelet-HLH | gldm       | LargeDependenceLowGrayLevelEmphasis  | 0.056862554  |
| wavelet-HLH | gldm       | DependenceVariance                   | 0.768590125  |
| wavelet-HLH | gldm       | LargeDependenceHighGrayLevelEmphasis | 540.7804878  |

|             |            |                                     |              |
|-------------|------------|-------------------------------------|--------------|
| wavelet-HLH | gldm       | SmallDependenceLowGrayLevelEmphasis | 0.030156063  |
| wavelet-HLH | gldm       | LowGrayLevelEmphasis                | 0.034334167  |
| wavelet-HLH | glcm       | JointAverage                        | 12.76711659  |
| wavelet-HLH | glcm       | SumAverage                          | 25.53423319  |
| wavelet-HLH | glcm       | JointEntropy                        | 5.069725237  |
| wavelet-HLH | glcm       | ClusterShade                        | -83.97147954 |
| wavelet-HLH | glcm       | MaximumProbability                  | 0.056846494  |
| wavelet-HLH | glcm       | ldmn                                | 0.933814555  |
| wavelet-HLH | glcm       | JointEnergy                         | 0.032308751  |
| wavelet-HLH | glcm       | Contrast                            | 35.75931965  |
| wavelet-HLH | glcm       | DifferenceEntropy                   | 3.110271092  |
| wavelet-HLH | glcm       | InverseVariance                     | 0.181548211  |
| wavelet-HLH | glcm       | DifferenceVariance                  | 12.30500194  |
| wavelet-HLH | glcm       | ldn                                 | 0.827814546  |
| wavelet-HLH | glcm       | ldm                                 | 0.161882602  |
| wavelet-HLH | glcm       | Correlation                         | -0.072139651 |
| wavelet-HLH | glcm       | Autocorrelation                     | 162.1281497  |
| wavelet-HLH | glcm       | SumEntropy                          | 3.56011133   |
| wavelet-HLH | glcm       | SumSquares                          | 16.8239491   |
| wavelet-HLH | glcm       | ClusterProminence                   | 3167.842167  |
| wavelet-HLH | glcm       | lmc2                                | 0.992442369  |
| wavelet-HLH | glcm       | lmc1                                | -0.593910692 |
| wavelet-HLH | glcm       | DifferenceAverage                   | 4.803630378  |
| wavelet-HLH | glcm       | ld                                  | 0.262557138  |
| wavelet-HLH | glcm       | ClusterTendency                     | 31.53647675  |
| wavelet-HLH | firstorder | InterquartileRange                  | 126.0570462  |
| wavelet-HLH | firstorder | Skewness                            | -0.401685214 |
| wavelet-HLH | firstorder | Uniformity                          | 0.085068412  |
| wavelet-HLH | firstorder | Median                              | 9.638193137  |
| wavelet-HLH | firstorder | Energy                              | 482565.9774  |
| wavelet-HLH | firstorder | RobustMeanAbsoluteDeviation         | 60.3762204   |
| wavelet-HLH | firstorder | MeanAbsoluteDeviation               | 86.99432668  |
| wavelet-HLH | firstorder | TotalEnergy                         | 13029281.39  |
| wavelet-HLH | firstorder | Maximum                             | 215.1190832  |
| wavelet-HLH | firstorder | RootMeanSquared                     | 108.4891787  |
| wavelet-HLH | firstorder | 90Percentile                        | 135.7031628  |
| wavelet-HLH | firstorder | Minimum                             | -297.589695  |
| wavelet-HLH | firstorder | Entropy                             | 3.750861688  |
| wavelet-HLH | firstorder | Range                               | 512.7087782  |
| wavelet-HLH | firstorder | Variance                            | 11736.51818  |
| wavelet-HLH | firstorder | 10Percentile                        | -133.7138876 |
| wavelet-HLH | firstorder | Kurtosis                            | 3.016056756  |
| wavelet-HLH | firstorder | Mean                                | -5.777863492 |
| wavelet-HLH | glrlm      | ShortRunLowGrayLevelEmphasis        | 0.034756263  |
| wavelet-HLH | glrlm      | GrayLevelVariance                   | 18.9855648   |
| wavelet-HLH | glrlm      | LowGrayLevelRunEmphasis             | 0.034949035  |
| wavelet-HLH | glrlm      | GrayLevelNonUniformityNormalized    | 0.084053063  |
| wavelet-HLH | glrlm      | RunVariance                         | 0.024344908  |
| wavelet-HLH | glrlm      | GrayLevelNonUniformity              | 3.36311156   |
| wavelet-HLH | glrlm      | LongRunEmphasis                     | 1.076183432  |
| wavelet-HLH | glrlm      | ShortRunHighGrayLevelEmphasis       | 167.6095083  |
| wavelet-HLH | glrlm      | RunLengthNonUniformity              | 38.08234714  |
| wavelet-HLH | glrlm      | ShortRunEmphasis                    | 0.980954142  |
| wavelet-HLH | glrlm      | LongRunHighGrayLevelEmphasis        | 181.6612835  |
| wavelet-HLH | glrlm      | RunPercentage                       | 0.975609756  |
| wavelet-HLH | glrlm      | LongRunLowGrayLevelEmphasis         | 0.035720124  |

|             |       |                                  |             |
|-------------|-------|----------------------------------|-------------|
| wavelet-HLH | glrlm | RunEntropy                       | 3.830545608 |
| wavelet-HLH | glrlm | HighGrayLevelRunEmphasis         | 170.4198634 |
| wavelet-HLH | glrlm | RunLengthNonUniformityNormalized | 0.951310183 |
| wavelet-HLH | glszm | GrayLevelVariance                | 21.64555556 |
| wavelet-HLH | glszm | ZoneVariance                     | 0.632222222 |
| wavelet-HLH | glszm | GrayLevelNonUniformityNormalized | 0.077777778 |
| wavelet-HLH | glszm | SizeZoneNonUniformityNormalized  | 0.593333333 |
| wavelet-HLH | glszm | SizeZoneNonUniformity            | 17.8        |
| wavelet-HLH | glszm | GrayLevelNonUniformity           | 2.333333333 |
| wavelet-HLH | glszm | LargeAreaEmphasis                | 2.5         |
| wavelet-HLH | glszm | SmallAreaHighGrayLevelEmphasis   | 151.6336667 |
| wavelet-HLH | glszm | ZonePercentage                   | 0.731707317 |
| wavelet-HLH | glszm | LargeAreaLowGrayLevelEmphasis    | 0.057317786 |
| wavelet-HLH | glszm | LargeAreaHighGrayLevelEmphasis   | 404.8666667 |
| wavelet-HLH | glszm | HighGrayLevelZoneEmphasis        | 179.5666667 |
| wavelet-HLH | glszm | SmallAreaEmphasis                | 0.793       |
| wavelet-HLH | glszm | LowGrayLevelZoneEmphasis         | 0.042909581 |
| wavelet-HLH | glszm | ZoneEntropy                      | 4.189898095 |
| wavelet-HLH | glszm | SmallAreaLowGrayLevelEmphasis    | 0.040301612 |
| wavelet-HLH | ngtdm | Coarseness                       | 0.102300266 |
| wavelet-HLH | ngtdm | Complexity                       | 392.5448407 |
| wavelet-HLH | ngtdm | Strength                         | 10.66362606 |
| wavelet-HLH | ngtdm | Contrast                         | 0.568233425 |
| wavelet-HLH | ngtdm | Busyness                         | 0.063818626 |



| Image type | Feature Class | Feature Name                         | Value                                                                                                                                                                                                                                                                                                                                                                                                             |
|------------|---------------|--------------------------------------|-------------------------------------------------------------------------------------------------------------------------------------------------------------------------------------------------------------------------------------------------------------------------------------------------------------------------------------------------------------------------------------------------------------------|
| general    | info          | BoundingBox                          | 502: RTSTRUCT: C99-DNU-C_segment_GTV_RUL<br>(0, 1, 1, 5, 6, 4)                                                                                                                                                                                                                                                                                                                                                    |
| general    | info          | EnabledImageTypes                    | {u'Original': {}, u'Wavelet': {}}                                                                                                                                                                                                                                                                                                                                                                                 |
|            |               |                                      | {'distances': [1], 'additionalInfo': True, 'force2D': False, 'interpolator': 'sitkBSpline', 'resampledPixelSpacing': [3.0], 'label': 1, 'normalizeScale': 1, 'normalize': False, 'force2Ddimension': 0, 'removeOutliers': None, 'minimumROISize': None, u'binWidth': 25.0, 'minimumROIDimensions': 1, u'correctMask': True, 'preCrop': False, u'symmetricalGLCM': True, 'resegmentRange': None, 'padDistance': 5} |
| general    | info          | GeneralSettings                      |                                                                                                                                                                                                                                                                                                                                                                                                                   |
| general    | info          | ImageHash                            | 015efed8b51513c66fc89e5583601747dfddb5b8                                                                                                                                                                                                                                                                                                                                                                          |
| general    | info          | ImageSpacing                         | (0.9765625000000002, 0.9765625000000002, 2.0)                                                                                                                                                                                                                                                                                                                                                                     |
| general    | info          | MaskHash                             | aa2277787191d2f95504335c214af856b5765141                                                                                                                                                                                                                                                                                                                                                                          |
| general    | info          | NumpyVersion                         | 1.13.1                                                                                                                                                                                                                                                                                                                                                                                                            |
| general    | info          | PyWaveletVersion                     | 0.5.2                                                                                                                                                                                                                                                                                                                                                                                                             |
| general    | info          | SimpleITKVersion                     | 1.1.0                                                                                                                                                                                                                                                                                                                                                                                                             |
| general    | info          | Version                              | 1.3.0.post102+g1b0eb74                                                                                                                                                                                                                                                                                                                                                                                            |
| general    | info          | VolumeNum                            | 1                                                                                                                                                                                                                                                                                                                                                                                                                 |
| general    | info          | VoxelNum                             | 56                                                                                                                                                                                                                                                                                                                                                                                                                |
| original   | shape         | Maximum3DDiameter                    | 17.74823935                                                                                                                                                                                                                                                                                                                                                                                                       |
| original   | shape         | Maximum2DDiameterSlice               | 16.15549442                                                                                                                                                                                                                                                                                                                                                                                                       |
| original   | shape         | Sphericity                           | 0.852878098                                                                                                                                                                                                                                                                                                                                                                                                       |
| original   | shape         | MinorAxis                            | 13.3785307                                                                                                                                                                                                                                                                                                                                                                                                        |
| original   | shape         | Elongation                           | 0.724121095                                                                                                                                                                                                                                                                                                                                                                                                       |
| original   | shape         | SurfaceVolumeRatio                   | 0.494022314                                                                                                                                                                                                                                                                                                                                                                                                       |
| original   | shape         | Volume                               | 1512                                                                                                                                                                                                                                                                                                                                                                                                              |
| original   | shape         | MajorAxis                            | 18.47554339                                                                                                                                                                                                                                                                                                                                                                                                       |
| original   | shape         | SurfaceArea                          | 746.9617388                                                                                                                                                                                                                                                                                                                                                                                                       |
| original   | shape         | Flatness                             | 0.497831386                                                                                                                                                                                                                                                                                                                                                                                                       |
| original   | shape         | LeastAxis                            | 9.19770538                                                                                                                                                                                                                                                                                                                                                                                                        |
| original   | shape         | Maximum2DDiameterColumn              | 12.72792206                                                                                                                                                                                                                                                                                                                                                                                                       |
| original   | shape         | Maximum2DDiameterRow                 | 16.15549442                                                                                                                                                                                                                                                                                                                                                                                                       |
| original   | gldm          | GrayLevelVariance                    | 89.91039541                                                                                                                                                                                                                                                                                                                                                                                                       |
| original   | gldm          | HighGrayLevelEmphasis                | 931.9464286                                                                                                                                                                                                                                                                                                                                                                                                       |
| original   | gldm          | DependenceEntropy                    | 5.030394654                                                                                                                                                                                                                                                                                                                                                                                                       |
| original   | gldm          | DependenceNonUniformity              | 20.39285714                                                                                                                                                                                                                                                                                                                                                                                                       |
| original   | gldm          | GrayLevelNonUniformity               | 3.214285714                                                                                                                                                                                                                                                                                                                                                                                                       |
| original   | gldm          | SmallDependenceEmphasis              | 0.603144841                                                                                                                                                                                                                                                                                                                                                                                                       |
| original   | gldm          | SmallDependenceHighGrayLevelEmphasis | 425.4594444                                                                                                                                                                                                                                                                                                                                                                                                       |
| original   | gldm          | DependenceNonUniformityNormalized    | 0.364158163                                                                                                                                                                                                                                                                                                                                                                                                       |
| original   | gldm          | LargeDependenceEmphasis              | 4.142857143                                                                                                                                                                                                                                                                                                                                                                                                       |
| original   | gldm          | LargeDependenceLowGrayLevelEmphasis  | 0.022426005                                                                                                                                                                                                                                                                                                                                                                                                       |
| original   | gldm          | DependenceVariance                   | 0.954081633                                                                                                                                                                                                                                                                                                                                                                                                       |
| original   | gldm          | LargeDependenceHighGrayLevelEmphasis | 5016.517857                                                                                                                                                                                                                                                                                                                                                                                                       |
| original   | gldm          | SmallDependenceLowGrayLevelEmphasis  | 0.019642326                                                                                                                                                                                                                                                                                                                                                                                                       |
| original   | gldm          | LowGrayLevelEmphasis                 | 0.019962846                                                                                                                                                                                                                                                                                                                                                                                                       |
| original   | glcm          | JointAverage                         | 30.41422938                                                                                                                                                                                                                                                                                                                                                                                                       |
| original   | glcm          | SumAverage                           | 60.82845876                                                                                                                                                                                                                                                                                                                                                                                                       |
| original   | glcm          | JointEntropy                         | 5.628032429                                                                                                                                                                                                                                                                                                                                                                                                       |
| original   | glcm          | ClusterShade                         | -1309.178871                                                                                                                                                                                                                                                                                                                                                                                                      |
| original   | glcm          | MaximumProbability                   | 0.041252994                                                                                                                                                                                                                                                                                                                                                                                                       |
| original   | glcm          | Idmn                                 | 0.925267973                                                                                                                                                                                                                                                                                                                                                                                                       |
| original   | glcm          | JointEnergy                          | 0.021443982                                                                                                                                                                                                                                                                                                                                                                                                       |
| original   | glcm          | Contrast                             | 146.6376131                                                                                                                                                                                                                                                                                                                                                                                                       |
| original   | glcm          | DifferenceEntropy                    | 3.81252095                                                                                                                                                                                                                                                                                                                                                                                                        |
| original   | glcm          | InverseVariance                      | 0.174890945                                                                                                                                                                                                                                                                                                                                                                                                       |

|          |            |                                  |              |
|----------|------------|----------------------------------|--------------|
| original | glcm       | DifferenceVariance               | 66.24471389  |
| original | glcm       | Idn                              | 0.835131099  |
| original | glcm       | Idm                              | 0.159028007  |
| original | glcm       | Correlation                      | -0.039720546 |
| original | glcm       | Autocorrelation                  | 923.4280891  |
| original | glcm       | SumEntropy                       | 4.171732679  |
| original | glcm       | SumSquares                       | 70.98521381  |
| original | glcm       | ClusterProminence                | 59886.6892   |
| original | glcm       | Imc2                             | 0.996680348  |
| original | glcm       | Imc1                             | -0.628288949 |
| original | glcm       | DifferenceAverage                | 8.925478437  |
| original | glcm       | Id                               | 0.233798923  |
| original | glcm       | ClusterTendency                  | 137.3032422  |
| original | firstorder | InterquartileRange               | 358.5        |
| original | firstorder | Skewness                         | -1.033853177 |
| original | firstorder | Uniformity                       | 0.057397959  |
| original | firstorder | Median                           | -83.5        |
| original | firstorder | Energy                           | 4651775      |
| original | firstorder | RobustMeanAbsoluteDeviation      | 138.7975207  |
| original | firstorder | MeanAbsoluteDeviation            | 194.6007653  |
| original | firstorder | TotalEnergy                      | 125597925    |
| original | firstorder | Maximum                          | 97           |
| original | firstorder | RootMeanSquared                  | 288.2141751  |
| original | firstorder | 90Percentile                     | 58.5         |
| original | firstorder | Minimum                          | -855         |
| original | firstorder | Entropy                          | 4.361038521  |
| original | firstorder | Range                            | 952          |
| original | firstorder | Variance                         | 56480.94356  |
| original | firstorder | 10Percentile                     | -536         |
| original | firstorder | Kurtosis                         | 3.161541362  |
| original | firstorder | Mean                             | -163.0535714 |
| original | glrlm      | ShortRunLowGrayLevelEmphasis     | 0.020553038  |
| original | glrlm      | GrayLevelVariance                | 90.98435473  |
| original | glrlm      | LowGrayLevelRunEmphasis          | 0.020571153  |
| original | glrlm      | GrayLevelNonUniformityNormalized | 0.056141421  |
| original | glrlm      | RunVariance                      | 0.033086557  |
| original | glrlm      | GrayLevelNonUniformity           | 3.050557286  |
| original | glrlm      | LongRunEmphasis                  | 1.098143994  |
| original | glrlm      | ShortRunHighGrayLevelEmphasis    | 890.8654611  |
| original | glrlm      | RunLengthNonUniformity           | 51.21926928  |
| original | glrlm      | ShortRunEmphasis                 | 0.977107657  |
| original | glrlm      | LongRunHighGrayLevelEmphasis     | 1047.432042  |
| original | glrlm      | RunPercentage                    | 0.96978022   |
| original | glrlm      | LongRunLowGrayLevelEmphasis      | 0.020648686  |
| original | glrlm      | RunEntropy                       | 4.463932696  |
| original | glrlm      | HighGrayLevelRunEmphasis         | 920.4746352  |
| original | glrlm      | RunLengthNonUniformityNormalized | 0.942190564  |
| original | glszm      | GrayLevelVariance                | 96.03360117  |
| original | glszm      | ZoneVariance                     | 1.330898466  |
| original | glszm      | GrayLevelNonUniformityNormalized | 0.047479912  |
| original | glszm      | SizeZoneNonUniformityNormalized  | 0.628926224  |
| original | glszm      | SizeZoneNonUniformity            | 23.27027027  |
| original | glszm      | GrayLevelNonUniformity           | 1.756756757  |
| original | glszm      | LargeAreaEmphasis                | 3.621621622  |
| original | glszm      | SmallAreaHighGrayLevelEmphasis   | 515.4100976  |
| original | glszm      | ZonePercentage                   | 0.660714286  |
| original | glszm      | LargeAreaLowGrayLevelEmphasis    | 0.031845825  |
| original | glszm      | LargeAreaHighGrayLevelEmphasis   | 4180.405405  |

|             |            |                                      |              |
|-------------|------------|--------------------------------------|--------------|
| original    | glszm      | HighGrayLevelZoneEmphasis            | 746.972973   |
| original    | glszm      | SmallAreaEmphasis                    | 0.812875375  |
| original    | glszm      | LowGrayLevelZoneEmphasis             | 0.029806025  |
| original    | glszm      | ZoneEntropy                          | 4.756618568  |
| original    | glszm      | SmallAreaLowGrayLevelEmphasis        | 0.029648582  |
| original    | ngtdm      | Coarseness                           | 0.046252019  |
| original    | ngtdm      | Complexity                           | 2704.334171  |
| original    | ngtdm      | Strength                             | 26.10066962  |
| original    | ngtdm      | Contrast                             | 2.255061866  |
| original    | ngtdm      | Busyness                             | 0.029798138  |
| wavelet-HHH | gldm       | GrayLevelVariance                    | 25.39253827  |
| wavelet-HHH | gldm       | HighGrayLevelEmphasis                | 227.9464286  |
| wavelet-HHH | gldm       | DependenceEntropy                    | 4.775668538  |
| wavelet-HHH | gldm       | DependenceNonUniformity              | 22.25        |
| wavelet-HHH | gldm       | GrayLevelNonUniformity               | 4.214285714  |
| wavelet-HHH | gldm       | SmallDependenceEmphasis              | 0.616071429  |
| wavelet-HHH | gldm       | SmallDependenceHighGrayLevelEmphasis | 146.9166667  |
| wavelet-HHH | gldm       | DependenceNonUniformityNormalized    | 0.397321429  |
| wavelet-HHH | gldm       | LargeDependenceEmphasis              | 3.25         |
| wavelet-HHH | gldm       | LargeDependenceLowGrayLevelEmphasis  | 0.040198128  |
| wavelet-HHH | gldm       | DependenceVariance                   | 0.551020408  |
| wavelet-HHH | gldm       | LargeDependenceHighGrayLevelEmphasis | 705.1607143  |
| wavelet-HHH | gldm       | SmallDependenceLowGrayLevelEmphasis  | 0.023726233  |
| wavelet-HHH | gldm       | LowGrayLevelEmphasis                 | 0.026324036  |
| wavelet-HHH | glcm       | JointAverage                         | 14.2068383   |
| wavelet-HHH | glcm       | SumAverage                           | 28.4136766   |
| wavelet-HHH | glcm       | JointEntropy                         | 5.530607591  |
| wavelet-HHH | glcm       | ClusterShade                         | -50.51574838 |
| wavelet-HHH | glcm       | MaximumProbability                   | 0.044320007  |
| wavelet-HHH | glcm       | Idmn                                 | 0.919822497  |
| wavelet-HHH | glcm       | JointEnergy                          | 0.023545062  |
| wavelet-HHH | glcm       | Contrast                             | 58.30960399  |
| wavelet-HHH | glcm       | DifferenceEntropy                    | 3.416521983  |
| wavelet-HHH | glcm       | InverseVariance                      | 0.160385816  |
| wavelet-HHH | glcm       | DifferenceVariance                   | 19.89863235  |
| wavelet-HHH | glcm       | Idn                                  | 0.814973003  |
| wavelet-HHH | glcm       | Idm                                  | 0.146512325  |
| wavelet-HHH | glcm       | Correlation                          | -0.071038567 |
| wavelet-HHH | glcm       | Autocorrelation                      | 200.0469025  |
| wavelet-HHH | glcm       | SumEntropy                           | 3.813288917  |
| wavelet-HHH | glcm       | SumSquares                           | 27.3149758   |
| wavelet-HHH | glcm       | ClusterProminence                    | 7137.777145  |
| wavelet-HHH | glcm       | Imc2                                 | 0.995865056  |
| wavelet-HHH | glcm       | Imc1                                 | -0.61278553  |
| wavelet-HHH | glcm       | DifferenceAverage                    | 6.085563834  |
| wavelet-HHH | glcm       | Id                                   | 0.239134777  |
| wavelet-HHH | glcm       | ClusterTendency                      | 50.95029922  |
| wavelet-HHH | firstorder | InterquartileRange                   | 171.5119096  |
| wavelet-HHH | firstorder | Skewness                             | -0.273999586 |
| wavelet-HHH | firstorder | Uniformity                           | 0.075255102  |
| wavelet-HHH | firstorder | Median                               | -0.521113729 |
| wavelet-HHH | firstorder | Energy                               | 893352.7243  |
| wavelet-HHH | firstorder | RobustMeanAbsoluteDeviation          | 71.04564951  |
| wavelet-HHH | firstorder | MeanAbsoluteDeviation                | 102.3509606  |
| wavelet-HHH | firstorder | TotalEnergy                          | 24120523.56  |
| wavelet-HHH | firstorder | Maximum                              | 245.11335    |
| wavelet-HHH | firstorder | RootMeanSquared                      | 126.3041061  |
| wavelet-HHH | firstorder | 90Percentile                         | 151.5086618  |

|             |            |                                      |              |
|-------------|------------|--------------------------------------|--------------|
| wavelet-HHH | firstorder | Minimum                              | -328.4788114 |
| wavelet-HHH | firstorder | Entropy                              | 4.009706877  |
| wavelet-HHH | firstorder | Range                                | 573.5921615  |
| wavelet-HHH | firstorder | Variance                             | 15903.33689  |
| wavelet-HHH | firstorder | 10Percentile                         | -179.5536104 |
| wavelet-HHH | firstorder | Kurtosis                             | 2.700478174  |
| wavelet-HHH | firstorder | Mean                                 | -7.027825365 |
| wavelet-HHH | glrlm      | ShortRunLowGrayLevelEmphasis         | 0.026716096  |
| wavelet-HHH | glrlm      | GrayLevelVariance                    | 25.75301042  |
| wavelet-HHH | glrlm      | LowGrayLevelRunEmphasis              | 0.026839851  |
| wavelet-HHH | glrlm      | GrayLevelNonUniformityNormalized     | 0.07457286   |
| wavelet-HHH | glrlm      | RunVariance                          | 0.024663123  |
| wavelet-HHH | glrlm      | GrayLevelNonUniformity               | 4.073449923  |
| wavelet-HHH | glrlm      | LongRunEmphasis                      | 1.077589335  |
| wavelet-HHH | glrlm      | ShortRunHighGrayLevelEmphasis        | 224.2435327  |
| wavelet-HHH | glrlm      | RunLengthNonUniformity               | 51.9735916   |
| wavelet-HHH | glrlm      | ShortRunEmphasis                     | 0.980602666  |
| wavelet-HHH | glrlm      | LongRunHighGrayLevelEmphasis         | 244.811318   |
| wavelet-HHH | glrlm      | RunPercentage                        | 0.975274725  |
| wavelet-HHH | glrlm      | LongRunLowGrayLevelEmphasis          | 0.027334871  |
| wavelet-HHH | glrlm      | RunEntropy                           | 4.091474918  |
| wavelet-HHH | glrlm      | HighGrayLevelRunEmphasis             | 228.3570898  |
| wavelet-HHH | glrlm      | RunLengthNonUniformityNormalized     | 0.950673753  |
| wavelet-HHH | glszm      | GrayLevelVariance                    | 31.37015122  |
| wavelet-HHH | glszm      | ZoneVariance                         | 0.758711374  |
| wavelet-HHH | glszm      | GrayLevelNonUniformityNormalized     | 0.063773833  |
| wavelet-HHH | glszm      | SizeZoneNonUniformityNormalized      | 0.580539119  |
| wavelet-HHH | glszm      | SizeZoneNonUniformity                | 22.64102564  |
| wavelet-HHH | glszm      | GrayLevelNonUniformity               | 2.487179487  |
| wavelet-HHH | glszm      | LargeAreaEmphasis                    | 2.820512821  |
| wavelet-HHH | glszm      | SmallAreaHighGrayLevelEmphasis       | 190.075755   |
| wavelet-HHH | glszm      | ZonePercentage                       | 0.696428571  |
| wavelet-HHH | glszm      | LargeAreaLowGrayLevelEmphasis        | 0.046064927  |
| wavelet-HHH | glszm      | LargeAreaHighGrayLevelEmphasis       | 617.5128205  |
| wavelet-HHH | glszm      | HighGrayLevelZoneEmphasis            | 234.6153846  |
| wavelet-HHH | glszm      | SmallAreaEmphasis                    | 0.788062678  |
| wavelet-HHH | glszm      | LowGrayLevelZoneEmphasis             | 0.034984221  |
| wavelet-HHH | glszm      | ZoneEntropy                          | 4.611949334  |
| wavelet-HHH | glszm      | SmallAreaLowGrayLevelEmphasis        | 0.033432533  |
| wavelet-HHH | ngtdm      | Coarseness                           | 0.068653344  |
| wavelet-HHH | ngtdm      | Complexity                           | 710.7968147  |
| wavelet-HHH | ngtdm      | Strength                             | 10.62084379  |
| wavelet-HHH | ngtdm      | Contrast                             | 0.590258054  |
| wavelet-HHH | ngtdm      | Busyness                             | 0.057161334  |
| wavelet-HLL | gldm       | GrayLevelVariance                    | 151.7806122  |
| wavelet-HLL | gldm       | HighGrayLevelEmphasis                | 748.5357143  |
| wavelet-HLL | gldm       | DependenceEntropy                    | 5.030394654  |
| wavelet-HLL | gldm       | DependenceNonUniformity              | 26.60714286  |
| wavelet-HLL | gldm       | GrayLevelNonUniformity               | 2.5          |
| wavelet-HLL | gldm       | SmallDependenceEmphasis              | 0.702073413  |
| wavelet-HLL | gldm       | SmallDependenceHighGrayLevelEmphasis | 513.1954365  |
| wavelet-HLL | gldm       | DependenceNonUniformityNormalized    | 0.475127551  |
| wavelet-HLL | gldm       | LargeDependenceEmphasis              | 3.392857143  |
| wavelet-HLL | gldm       | LargeDependenceLowGrayLevelEmphasis  | 0.029222268  |
| wavelet-HLL | gldm       | DependenceVariance                   | 0.923469388  |
| wavelet-HLL | gldm       | LargeDependenceHighGrayLevelEmphasis | 2170.357143  |
| wavelet-HLL | gldm       | SmallDependenceLowGrayLevelEmphasis  | 0.023084084  |
| wavelet-HLL | gldm       | LowGrayLevelEmphasis                 | 0.023711145  |

|             |            |                                  |              |
|-------------|------------|----------------------------------|--------------|
| wavelet-HLL | glcm       | JointAverage                     | 23.51135962  |
| wavelet-HLL | glcm       | SumAverage                       | 47.02271925  |
| wavelet-HLL | glcm       | JointEntropy                     | 5.678755103  |
| wavelet-HLL | glcm       | ClusterShade                     | 2939.054275  |
| wavelet-HLL | glcm       | MaximumProbability               | 0.038982321  |
| wavelet-HLL | glcm       | Idmn                             | 0.928594933  |
| wavelet-HLL | glcm       | JointEnergy                      | 0.020780679  |
| wavelet-HLL | glcm       | Contrast                         | 219.2364006  |
| wavelet-HLL | glcm       | DifferenceEntropy                | 3.923709445  |
| wavelet-HLL | glcm       | InverseVariance                  | 0.102121228  |
| wavelet-HLL | glcm       | DifferenceVariance               | 73.5512395   |
| wavelet-HLL | glcm       | Idn                              | 0.826120174  |
| wavelet-HLL | glcm       | Idm                              | 0.101920552  |
| wavelet-HLL | glcm       | Correlation                      | 0.188561119  |
| wavelet-HLL | glcm       | Autocorrelation                  | 581.3847749  |
| wavelet-HLL | glcm       | SumEntropy                       | 4.404947484  |
| wavelet-HLL | glcm       | SumSquares                       | 137.7697622  |
| wavelet-HLL | glcm       | ClusterProminence                | 304406.5923  |
| wavelet-HLL | glcm       | Imc2                             | 0.999305553  |
| wavelet-HLL | glcm       | Imc1                             | -0.738012664 |
| wavelet-HLL | glcm       | DifferenceAverage                | 11.72993085  |
| wavelet-HLL | glcm       | Id                               | 0.173318919  |
| wavelet-HLL | glcm       | ClusterTendency                  | 331.8426482  |
| wavelet-HLL | firstorder | InterquartileRange               | 392.6072335  |
| wavelet-HLL | firstorder | Skewness                         | 0.362460207  |
| wavelet-HLL | firstorder | Uniformity                       | 0.044642857  |
| wavelet-HLL | firstorder | Median                           | -159.9490795 |
| wavelet-HLL | firstorder | Energy                           | 5617830.182  |
| wavelet-HLL | firstorder | RobustMeanAbsoluteDeviation      | 179.6111582  |
| wavelet-HLL | firstorder | MeanAbsoluteDeviation            | 252.901357   |
| wavelet-HLL | firstorder | TotalEnergy                      | 151681414.9  |
| wavelet-HLL | firstorder | Maximum                          | 571.7206515  |
| wavelet-HLL | firstorder | RootMeanSquared                  | 316.7307944  |
| wavelet-HLL | firstorder | 90Percentile                     | 399.3578556  |
| wavelet-HLL | firstorder | Minimum                          | -660.560713  |
| wavelet-HLL | firstorder | Entropy                          | 4.726474118  |
| wavelet-HLL | firstorder | Range                            | 1232.281364  |
| wavelet-HLL | firstorder | Variance                         | 94552.1269   |
| wavelet-HLL | firstorder | 10Percentile                     | -425.303259  |
| wavelet-HLL | firstorder | Kurtosis                         | 2.392584884  |
| wavelet-HLL | firstorder | Mean                             | -75.93595462 |
| wavelet-HLL | glrlm      | ShortRunLowGrayLevelEmphasis     | 0.024169459  |
| wavelet-HLL | glrlm      | GrayLevelVariance                | 153.1908876  |
| wavelet-HLL | glrlm      | LowGrayLevelRunEmphasis          | 0.024207989  |
| wavelet-HLL | glrlm      | GrayLevelNonUniformityNormalized | 0.04352127   |
| wavelet-HLL | glrlm      | RunVariance                      | 0.021910658  |
| wavelet-HLL | glrlm      | GrayLevelNonUniformity           | 2.384889947  |
| wavelet-HLL | glrlm      | LongRunEmphasis                  | 1.069361923  |
| wavelet-HLL | glrlm      | ShortRunHighGrayLevelEmphasis    | 738.5063891  |
| wavelet-HLL | glrlm      | RunLengthNonUniformity           | 52.43566565  |
| wavelet-HLL | glrlm      | ShortRunEmphasis                 | 0.982659519  |
| wavelet-HLL | glrlm      | LongRunHighGrayLevelEmphasis     | 797.0834266  |
| wavelet-HLL | glrlm      | RunPercentage                    | 0.978021978  |
| wavelet-HLL | glrlm      | LongRunLowGrayLevelEmphasis      | 0.024362108  |
| wavelet-HLL | glrlm      | RunEntropy                       | 4.787896197  |
| wavelet-HLL | glrlm      | HighGrayLevelRunEmphasis         | 750.2217966  |
| wavelet-HLL | glrlm      | RunLengthNonUniformityNormalized | 0.956178683  |
| wavelet-HLL | glszm      | GrayLevelVariance                | 163.5552686  |

|             |            |                                      |              |
|-------------|------------|--------------------------------------|--------------|
| wavelet-HLL | glszm      | ZoneVariance                         | 0.47107438   |
| wavelet-HLL | glszm      | GrayLevelNonUniformityNormalized     | 0.03822314   |
| wavelet-HLL | glszm      | SizeZoneNonUniformityNormalized      | 0.666322314  |
| wavelet-HLL | glszm      | SizeZoneNonUniformity                | 29.31818182  |
| wavelet-HLL | glszm      | GrayLevelNonUniformity               | 1.681818182  |
| wavelet-HLL | glszm      | LargeAreaEmphasis                    | 2.090909091  |
| wavelet-HLL | glszm      | SmallAreaHighGrayLevelEmphasis       | 607.8238636  |
| wavelet-HLL | glszm      | ZonePercentage                       | 0.785714286  |
| wavelet-HLL | glszm      | LargeAreaLowGrayLevelEmphasis        | 0.032023449  |
| wavelet-HLL | glszm      | LargeAreaHighGrayLevelEmphasis       | 1477.090909  |
| wavelet-HLL | glszm      | HighGrayLevelZoneEmphasis            | 745.0227273  |
| wavelet-HLL | glszm      | SmallAreaEmphasis                    | 0.841818182  |
| wavelet-HLL | glszm      | LowGrayLevelZoneEmphasis             | 0.029595917  |
| wavelet-HLL | glszm      | ZoneEntropy                          | 4.970573096  |
| wavelet-HLL | glszm      | SmallAreaLowGrayLevelEmphasis        | 0.029275397  |
| wavelet-HLL | ngtdm      | Coarseness                           | 0.060657249  |
| wavelet-HLL | ngtdm      | Complexity                           | 4300.522026  |
| wavelet-HLL | ngtdm      | Strength                             | 49.11418012  |
| wavelet-HLL | ngtdm      | Contrast                             | 2.507664241  |
| wavelet-HLL | ngtdm      | Busyness                             | 0.03071667   |
| wavelet-LHL | gldm       | GrayLevelVariance                    | 136.75       |
| wavelet-LHL | gldm       | HighGrayLevelEmphasis                | 599          |
| wavelet-LHL | gldm       | DependenceEntropy                    | 4.945485949  |
| wavelet-LHL | gldm       | DependenceNonUniformity              | 29.28571429  |
| wavelet-LHL | gldm       | GrayLevelNonUniformity               | 2.428571429  |
| wavelet-LHL | gldm       | SmallDependenceEmphasis              | 0.705357143  |
| wavelet-LHL | gldm       | SmallDependenceHighGrayLevelEmphasis | 420.0982143  |
| wavelet-LHL | gldm       | DependenceNonUniformityNormalized    | 0.522959184  |
| wavelet-LHL | gldm       | LargeDependenceEmphasis              | 2.178571429  |
| wavelet-LHL | gldm       | LargeDependenceLowGrayLevelEmphasis  | 0.044806006  |
| wavelet-LHL | gldm       | DependenceVariance                   | 0.238520408  |
| wavelet-LHL | gldm       | LargeDependenceHighGrayLevelEmphasis | 1314.607143  |
| wavelet-LHL | gldm       | SmallDependenceLowGrayLevelEmphasis  | 0.023172088  |
| wavelet-LHL | gldm       | LowGrayLevelEmphasis                 | 0.027498872  |
| wavelet-LHL | glcm       | JointAverage                         | 20.38383869  |
| wavelet-LHL | glcm       | SumAverage                           | 40.76767737  |
| wavelet-LHL | glcm       | JointEntropy                         | 5.70958156   |
| wavelet-LHL | glcm       | ClusterShade                         | 3818.520613  |
| wavelet-LHL | glcm       | MaximumProbability                   | 0.033579338  |
| wavelet-LHL | glcm       | Idmn                                 | 0.929915442  |
| wavelet-LHL | glcm       | JointEnergy                          | 0.020021785  |
| wavelet-LHL | glcm       | Contrast                             | 208.8395161  |
| wavelet-LHL | glcm       | DifferenceEntropy                    | 3.910450163  |
| wavelet-LHL | glcm       | InverseVariance                      | 0.095864761  |
| wavelet-LHL | glcm       | DifferenceVariance                   | 66.89258408  |
| wavelet-LHL | glcm       | Idn                                  | 0.828700436  |
| wavelet-LHL | glcm       | Idm                                  | 0.0903113    |
| wavelet-LHL | glcm       | Correlation                          | 0.167196469  |
| wavelet-LHL | glcm       | Autocorrelation                      | 435.9790006  |
| wavelet-LHL | glcm       | SumEntropy                           | 4.329819572  |
| wavelet-LHL | glcm       | SumSquares                           | 124.5651434  |
| wavelet-LHL | glcm       | ClusterProminence                    | 318111.6853  |
| wavelet-LHL | glcm       | Imc2                                 | 0.999334179  |
| wavelet-LHL | glcm       | Imc1                                 | -0.745612739 |
| wavelet-LHL | glcm       | DifferenceAverage                    | 11.32260932  |
| wavelet-LHL | glcm       | Id                                   | 0.167594063  |
| wavelet-LHL | glcm       | ClusterTendency                      | 289.4210575  |
| wavelet-LHL | firstorder | InterquartileRange                   | 298.4324883  |

|             |            |                                  |              |
|-------------|------------|----------------------------------|--------------|
| wavelet-LHL | firstorder | Skewness                         | 0.579980652  |
| wavelet-LHL | firstorder | Uniformity                       | 0.043367347  |
| wavelet-LHL | firstorder | Median                           | -83.84704861 |
| wavelet-LHL | firstorder | Energy                           | 4896330.402  |
| wavelet-LHL | firstorder | RobustMeanAbsoluteDeviation      | 148.3856209  |
| wavelet-LHL | firstorder | MeanAbsoluteDeviation            | 228.577987   |
| wavelet-LHL | firstorder | TotalEnergy                      | 132200920.8  |
| wavelet-LHL | firstorder | Maximum                          | 643.4829173  |
| wavelet-LHL | firstorder | RootMeanSquared                  | 295.693205   |
| wavelet-LHL | firstorder | 90Percentile                     | 400.3392118  |
| wavelet-LHL | firstorder | Minimum                          | -564.5185564 |
| wavelet-LHL | firstorder | Entropy                          | 4.684250404  |
| wavelet-LHL | firstorder | Range                            | 1208.001474  |
| wavelet-LHL | firstorder | Variance                         | 84957.00729  |
| wavelet-LHL | firstorder | 10Percentile                     | -399.4855111 |
| wavelet-LHL | firstorder | Kurtosis                         | 2.893619152  |
| wavelet-LHL | firstorder | Mean                             | -49.77413153 |
| wavelet-LHL | glrlm      | ShortRunLowGrayLevelEmphasis     | 0.027531306  |
| wavelet-LHL | glrlm      | GrayLevelVariance                | 136.254448   |
| wavelet-LHL | glrlm      | LowGrayLevelRunEmphasis          | 0.027701194  |
| wavelet-LHL | glrlm      | GrayLevelNonUniformityNormalized | 0.043351235  |
| wavelet-LHL | glrlm      | RunVariance                      | 0.015090194  |
| wavelet-LHL | glrlm      | GrayLevelNonUniformity           | 2.391160342  |
| wavelet-LHL | glrlm      | LongRunEmphasis                  | 1.046784243  |
| wavelet-LHL | glrlm      | ShortRunHighGrayLevelEmphasis    | 591.771789   |
| wavelet-LHL | glrlm      | RunLengthNonUniformity           | 53.51584251  |
| wavelet-LHL | glrlm      | ShortRunEmphasis                 | 0.988303939  |
| wavelet-LHL | glrlm      | LongRunHighGrayLevelEmphasis     | 627.2777851  |
| wavelet-LHL | glrlm      | RunPercentage                    | 0.98489011   |
| wavelet-LHL | glrlm      | LongRunLowGrayLevelEmphasis      | 0.028380742  |
| wavelet-LHL | glrlm      | RunEntropy                       | 4.70531998   |
| wavelet-LHL | glrlm      | HighGrayLevelRunEmphasis         | 598.8729882  |
| wavelet-LHL | glrlm      | RunLengthNonUniformityNormalized | 0.969819612  |
| wavelet-LHL | glszm      | GrayLevelVariance                | 129.4795062  |
| wavelet-LHL | glszm      | ZoneVariance                     | 0.184691358  |
| wavelet-LHL | glszm      | GrayLevelNonUniformityNormalized | 0.041975309  |
| wavelet-LHL | glszm      | SizeZoneNonUniformityNormalized  | 0.630617284  |
| wavelet-LHL | glszm      | SizeZoneNonUniformity            | 28.37777778  |
| wavelet-LHL | glszm      | GrayLevelNonUniformity           | 1.888888889  |
| wavelet-LHL | glszm      | LargeAreaEmphasis                | 1.733333333  |
| wavelet-LHL | glszm      | SmallAreaHighGrayLevelEmphasis   | 485.6833333  |
| wavelet-LHL | glszm      | ZonePercentage                   | 0.803571429  |
| wavelet-LHL | glszm      | LargeAreaLowGrayLevelEmphasis    | 0.041400074  |
| wavelet-LHL | glszm      | LargeAreaHighGrayLevelEmphasis   | 1042.266667  |
| wavelet-LHL | glszm      | HighGrayLevelZoneEmphasis        | 597          |
| wavelet-LHL | glszm      | SmallAreaEmphasis                | 0.816666667  |
| wavelet-LHL | glszm      | LowGrayLevelZoneEmphasis         | 0.03063119   |
| wavelet-LHL | glszm      | ZoneEntropy                      | 4.952638374  |
| wavelet-LHL | glszm      | SmallAreaLowGrayLevelEmphasis    | 0.027938969  |
| wavelet-LHL | ngtdm      | Coarseness                       | 0.056410425  |
| wavelet-LHL | ngtdm      | Complexity                       | 4098.269199  |
| wavelet-LHL | ngtdm      | Strength                         | 38.25681917  |
| wavelet-LHL | ngtdm      | Contrast                         | 2.761705054  |
| wavelet-LHL | ngtdm      | Busyness                         | 0.038483653  |
| wavelet-LHH | gldm       | GrayLevelVariance                | 66.67059949  |
| wavelet-LHH | gldm       | HighGrayLevelEmphasis            | 483.2678571  |
| wavelet-LHH | gldm       | DependenceEntropy                | 4.909771663  |
| wavelet-LHH | gldm       | DependenceNonUniformity          | 25.32142857  |

|             |            |                                      |              |
|-------------|------------|--------------------------------------|--------------|
| wavelet-LHH | gldm       | GrayLevelNonUniformity               | 3.178571429  |
| wavelet-LHH | gldm       | SmallDependenceEmphasis              | 0.687127976  |
| wavelet-LHH | gldm       | SmallDependenceHighGrayLevelEmphasis | 338.359747   |
| wavelet-LHH | gldm       | DependenceNonUniformityNormalized    | 0.452168367  |
| wavelet-LHH | gldm       | LargeDependenceEmphasis              | 2.928571429  |
| wavelet-LHH | gldm       | LargeDependenceLowGrayLevelEmphasis  | 0.032392999  |
| wavelet-LHH | gldm       | DependenceVariance                   | 0.570153061  |
| wavelet-LHH | gldm       | LargeDependenceHighGrayLevelEmphasis | 1374.589286  |
| wavelet-LHH | gldm       | SmallDependenceLowGrayLevelEmphasis  | 0.026510055  |
| wavelet-LHH | gldm       | LowGrayLevelEmphasis                 | 0.027382728  |
| wavelet-LHH | glcm       | JointAverage                         | 20.65544481  |
| wavelet-LHH | glcm       | SumAverage                           | 41.31088963  |
| wavelet-LHH | glcm       | JointEntropy                         | 5.640964139  |
| wavelet-LHH | glcm       | ClusterShade                         | -338.1566782 |
| wavelet-LHH | glcm       | MaximumProbability                   | 0.037266283  |
| wavelet-LHH | glcm       | Idmn                                 | 0.921315747  |
| wavelet-LHH | glcm       | JointEnergy                          | 0.021175786  |
| wavelet-LHH | glcm       | Contrast                             | 120.6636995  |
| wavelet-LHH | glcm       | DifferenceEntropy                    | 3.794034003  |
| wavelet-LHH | glcm       | InverseVariance                      | 0.08595002   |
| wavelet-LHH | glcm       | DifferenceVariance                   | 38.82776338  |
| wavelet-LHH | glcm       | Idn                                  | 0.814220153  |
| wavelet-LHH | glcm       | Idm                                  | 0.099964681  |
| wavelet-LHH | glcm       | Correlation                          | -0.056278611 |
| wavelet-LHH | glcm       | Autocorrelation                      | 423.6908632  |
| wavelet-LHH | glcm       | SumEntropy                           | 4.116319996  |
| wavelet-LHH | glcm       | SumSquares                           | 57.0096392   |
| wavelet-LHH | glcm       | ClusterProminence                    | 37886.14676  |
| wavelet-LHH | glcm       | Imc2                                 | 0.998007392  |
| wavelet-LHH | glcm       | Imc1                                 | -0.665310139 |
| wavelet-LHH | glcm       | DifferenceAverage                    | 8.854970121  |
| wavelet-LHH | glcm       | Id                                   | 0.186782862  |
| wavelet-LHH | glcm       | ClusterTendency                      | 107.3748573  |
| wavelet-LHH | firstorder | InterquartileRange                   | 291.6598985  |
| wavelet-LHH | firstorder | Skewness                             | -0.265793041 |
| wavelet-LHH | firstorder | Uniformity                           | 0.056760204  |
| wavelet-LHH | firstorder | Median                               | 32.88951535  |
| wavelet-LHH | firstorder | Energy                               | 2359333.342  |
| wavelet-LHH | firstorder | RobustMeanAbsoluteDeviation          | 117.7411797  |
| wavelet-LHH | firstorder | MeanAbsoluteDeviation                | 165.9471122  |
| wavelet-LHH | firstorder | TotalEnergy                          | 63702000.23  |
| wavelet-LHH | firstorder | Maximum                              | 382.968791   |
| wavelet-LHH | firstorder | RootMeanSquared                      | 205.2582581  |
| wavelet-LHH | firstorder | 90Percentile                         | 296.0829817  |
| wavelet-LHH | firstorder | Minimum                              | -460.3183519 |
| wavelet-LHH | firstorder | Entropy                              | 4.340587681  |
| wavelet-LHH | firstorder | Range                                | 843.2871429  |
| wavelet-LHH | firstorder | Variance                             | 41574.44313  |
| wavelet-LHH | firstorder | 10Percentile                         | -213.0274517 |
| wavelet-LHH | firstorder | Kurtosis                             | 2.562093285  |
| wavelet-LHH | firstorder | Mean                                 | 23.59045141  |
| wavelet-LHH | glrlm      | ShortRunLowGrayLevelEmphasis         | 0.027866431  |
| wavelet-LHH | glrlm      | GrayLevelVariance                    | 67.5979718   |
| wavelet-LHH | glrlm      | LowGrayLevelRunEmphasis              | 0.02790901   |
| wavelet-LHH | glrlm      | GrayLevelNonUniformityNormalized     | 0.056480574  |
| wavelet-LHH | glrlm      | RunVariance                          | 0.020577162  |
| wavelet-LHH | glrlm      | GrayLevelNonUniformity               | 3.097571157  |
| wavelet-LHH | glrlm      | LongRunEmphasis                      | 1.06387826   |



|             |       |                                      |              |
|-------------|-------|--------------------------------------|--------------|
| wavelet-LHH | glrlm | ShortRunHighGrayLevelEmphasis        | 476.2741378  |
| wavelet-LHH | glrlm | RunLengthNonUniformity               | 52.61555761  |
| wavelet-LHH | glrlm | ShortRunEmphasis                     | 0.984030435  |
| wavelet-LHH | glrlm | LongRunHighGrayLevelEmphasis         | 513.3109006  |
| wavelet-LHH | glrlm | RunPercentage                        | 0.979395604  |
| wavelet-LHH | glrlm | LongRunLowGrayLevelEmphasis          | 0.028079326  |
| wavelet-LHH | glrlm | RunEntropy                           | 4.396258872  |
| wavelet-LHH | glrlm | HighGrayLevelRunEmphasis             | 483.6814904  |
| wavelet-LHH | glrlm | RunLengthNonUniformityNormalized     | 0.958845676  |
| wavelet-LHH | glszm | GrayLevelVariance                    | 79.09572742  |
| wavelet-LHH | glszm | ZoneVariance                         | 0.443482964  |
| wavelet-LHH | glszm | GrayLevelNonUniformityNormalized     | 0.053542455  |
| wavelet-LHH | glszm | SizeZoneNonUniformityNormalized      | 0.647376961  |
| wavelet-LHH | glszm | SizeZoneNonUniformity                | 27.8372093   |
| wavelet-LHH | glszm | GrayLevelNonUniformity               | 2.302325581  |
| wavelet-LHH | glszm | LargeAreaEmphasis                    | 2.139534884  |
| wavelet-LHH | glszm | SmallAreaHighGrayLevelEmphasis       | 410.6222545  |
| wavelet-LHH | glszm | ZonePercentage                       | 0.767857143  |
| wavelet-LHH | glszm | LargeAreaLowGrayLevelEmphasis        | 0.037797641  |
| wavelet-LHH | glszm | LargeAreaHighGrayLevelEmphasis       | 1027.139535  |
| wavelet-LHH | glszm | HighGrayLevelZoneEmphasis            | 487.5116279  |
| wavelet-LHH | glszm | SmallAreaEmphasis                    | 0.832202842  |
| wavelet-LHH | glszm | LowGrayLevelZoneEmphasis             | 0.034841264  |
| wavelet-LHH | glszm | ZoneEntropy                          | 4.739990917  |
| wavelet-LHH | glszm | SmallAreaLowGrayLevelEmphasis        | 0.034350531  |
| wavelet-LHH | ngtdm | Coarseness                           | 0.050723176  |
| wavelet-LHH | ngtdm | Complexity                           | 2203.437266  |
| wavelet-LHH | ngtdm | Strength                             | 19.38377007  |
| wavelet-LHH | ngtdm | Contrast                             | 1.729338071  |
| wavelet-LHH | ngtdm | Busyness                             | 0.047411828  |
| wavelet-LLH | gldm  | GrayLevelVariance                    | 259.872449   |
| wavelet-LLH | gldm  | HighGrayLevelEmphasis                | 1510         |
| wavelet-LLH | gldm  | DependenceEntropy                    | 5.079589074  |
| wavelet-LLH | gldm  | DependenceNonUniformity              | 37.14285714  |
| wavelet-LLH | gldm  | GrayLevelNonUniformity               | 1.964285714  |
| wavelet-LLH | gldm  | SmallDependenceEmphasis              | 0.839285714  |
| wavelet-LLH | gldm  | SmallDependenceHighGrayLevelEmphasis | 1256.178571  |
| wavelet-LLH | gldm  | DependenceNonUniformityNormalized    | 0.663265306  |
| wavelet-LLH | gldm  | LargeDependenceEmphasis              | 1.642857143  |
| wavelet-LLH | gldm  | LargeDependenceLowGrayLevelEmphasis  | 0.021158472  |
| wavelet-LLH | gldm  | DependenceVariance                   | 0.168367347  |
| wavelet-LLH | gldm  | LargeDependenceHighGrayLevelEmphasis | 2525.285714  |
| wavelet-LLH | gldm  | SmallDependenceLowGrayLevelEmphasis  | 0.019609064  |
| wavelet-LLH | gldm  | LowGrayLevelEmphasis                 | 0.019918946  |
| wavelet-LLH | glcm  | JointAverage                         | 33.4364942   |
| wavelet-LLH | glcm  | SumAverage                           | 66.87298839  |
| wavelet-LLH | glcm  | JointEntropy                         | 5.756141842  |
| wavelet-LLH | glcm  | ClusterShade                         | 3315.793251  |
| wavelet-LLH | glcm  | MaximumProbability                   | 0.024844791  |
| wavelet-LLH | glcm  | Idmn                                 | 0.897320807  |
| wavelet-LLH | glcm  | JointEnergy                          | 0.019147745  |
| wavelet-LLH | glcm  | Contrast                             | 679.013766   |
| wavelet-LLH | glcm  | DifferenceEntropy                    | 4.247843042  |
| wavelet-LLH | glcm  | InverseVariance                      | 0.051504874  |
| wavelet-LLH | glcm  | DifferenceVariance                   | 201.5124953  |
| wavelet-LLH | glcm  | Idn                                  | 0.793267824  |
| wavelet-LLH | glcm  | Idm                                  | 0.046866818  |
| wavelet-LLH | glcm  | Correlation                          | -0.090449007 |

|             |            |                                  |              |
|-------------|------------|----------------------------------|--------------|
| wavelet-LLH | glcm       | Autocorrelation                  | 1085.129334  |
| wavelet-LLH | glcm       | SumEntropy                       | 4.528519826  |
| wavelet-LLH | glcm       | SumSquares                       | 303.6204574  |
| wavelet-LLH | glcm       | ClusterProminence                | 948788.6624  |
| wavelet-LLH | glcm       | Imc2                             | 0.999767917  |
| wavelet-LLH | glcm       | Imc1                             | -0.804041159 |
| wavelet-LLH | glcm       | DifferenceAverage                | 20.70599703  |
| wavelet-LLH | glcm       | Id                               | 0.105981242  |
| wavelet-LLH | glcm       | ClusterTendency                  | 535.4680636  |
| wavelet-LLH | firstorder | InterquartileRange               | 542.2223477  |
| wavelet-LLH | firstorder | Skewness                         | 0.091365943  |
| wavelet-LLH | firstorder | Uniformity                       | 0.035076531  |
| wavelet-LLH | firstorder | Median                           | 43.46756115  |
| wavelet-LLH | firstorder | Energy                           | 9140421.413  |
| wavelet-LLH | firstorder | RobustMeanAbsoluteDeviation      | 228.3965211  |
| wavelet-LLH | firstorder | MeanAbsoluteDeviation            | 329.7655931  |
| wavelet-LLH | firstorder | TotalEnergy                      | 246791378.1  |
| wavelet-LLH | firstorder | Maximum                          | 839.1616137  |
| wavelet-LLH | firstorder | RootMeanSquared                  | 404.0071917  |
| wavelet-LLH | firstorder | 90Percentile                     | 489.8878094  |
| wavelet-LLH | firstorder | Minimum                          | -878.6690876 |
| wavelet-LLH | firstorder | Entropy                          | 5.008160502  |
| wavelet-LLH | firstorder | Range                            | 1717.830701  |
| wavelet-LLH | firstorder | Variance                         | 162352.9276  |
| wavelet-LLH | firstorder | 10Percentile                     | -562.9488591 |
| wavelet-LLH | firstorder | Kurtosis                         | 2.556512065  |
| wavelet-LLH | firstorder | Mean                             | -29.47682678 |
| wavelet-LLH | glrlm      | ShortRunLowGrayLevelEmphasis     | 0.020063804  |
| wavelet-LLH | glrlm      | GrayLevelVariance                | 258.995327   |
| wavelet-LLH | glrlm      | LowGrayLevelRunEmphasis          | 0.020076114  |
| wavelet-LLH | glrlm      | GrayLevelNonUniformityNormalized | 0.035097879  |
| wavelet-LLH | glrlm      | RunVariance                      | 0.008208338  |
| wavelet-LLH | glrlm      | GrayLevelNonUniformity           | 1.949342965  |
| wavelet-LLH | glrlm      | LongRunEmphasis                  | 1.026143088  |
| wavelet-LLH | glrlm      | ShortRunHighGrayLevelEmphasis    | 1498.702461  |
| wavelet-LLH | glrlm      | RunLengthNonUniformity           | 54.6683163   |
| wavelet-LLH | glrlm      | ShortRunEmphasis                 | 0.993464228  |
| wavelet-LLH | glrlm      | LongRunHighGrayLevelEmphasis     | 1551.108661  |
| wavelet-LLH | glrlm      | RunPercentage                    | 0.991758242  |
| wavelet-LLH | glrlm      | LongRunLowGrayLevelEmphasis      | 0.020125352  |
| wavelet-LLH | glrlm      | RunEntropy                       | 5.012318408  |
| wavelet-LLH | glrlm      | HighGrayLevelRunEmphasis         | 1509.183701  |
| wavelet-LLH | glrlm      | RunLengthNonUniformityNormalized | 0.983583324  |
| wavelet-LLH | glszm      | GrayLevelVariance                | 248.52       |
| wavelet-LLH | glszm      | ZoneVariance                     | 0.1056       |
| wavelet-LLH | glszm      | GrayLevelNonUniformityNormalized | 0.0352       |
| wavelet-LLH | glszm      | SizeZoneNonUniformityNormalized  | 0.7888       |
| wavelet-LLH | glszm      | SizeZoneNonUniformity            | 39.44        |
| wavelet-LLH | glszm      | GrayLevelNonUniformity           | 1.76         |
| wavelet-LLH | glszm      | LargeAreaEmphasis                | 1.36         |
| wavelet-LLH | glszm      | SmallAreaHighGrayLevelEmphasis   | 1359.54      |
| wavelet-LLH | glszm      | ZonePercentage                   | 0.892857143  |
| wavelet-LLH | glszm      | LargeAreaLowGrayLevelEmphasis    | 0.022771976  |
| wavelet-LLH | glszm      | LargeAreaHighGrayLevelEmphasis   | 2070.24      |
| wavelet-LLH | glszm      | HighGrayLevelZoneEmphasis        | 1501.68      |
| wavelet-LLH | glszm      | SmallAreaEmphasis                | 0.91         |
| wavelet-LLH | glszm      | LowGrayLevelZoneEmphasis         | 0.022077841  |
| wavelet-LLH | glszm      | ZoneEntropy                      | 5.06875844   |

|             |            |                                      |              |
|-------------|------------|--------------------------------------|--------------|
| wavelet-LLH | glszm      | SmallAreaLowGrayLevelEmphasis        | 0.021904308  |
| wavelet-LLH | ngtdm      | Coarseness                           | 0.04105032   |
| wavelet-LLH | ngtdm      | Complexity                           | 11683.23056  |
| wavelet-LLH | ngtdm      | Strength                             | 52.95647822  |
| wavelet-LLH | ngtdm      | Contrast                             | 5.581140736  |
| wavelet-LLH | ngtdm      | Busyness                             | 0.025025304  |
| wavelet-LLL | gldm       | GrayLevelVariance                    | 406.8364158  |
| wavelet-LLL | gldm       | HighGrayLevelEmphasis                | 3013.303571  |
| wavelet-LLL | gldm       | DependenceEntropy                    | 5.374057377  |
| wavelet-LLL | gldm       | DependenceNonUniformity              | 48.57142857  |
| wavelet-LLL | gldm       | GrayLevelNonUniformity               | 1.571428571  |
| wavelet-LLL | gldm       | SmallDependenceEmphasis              | 0.946428571  |
| wavelet-LLL | gldm       | SmallDependenceHighGrayLevelEmphasis | 2821.598214  |
| wavelet-LLL | gldm       | DependenceNonUniformityNormalized    | 0.867346939  |
| wavelet-LLL | gldm       | LargeDependenceEmphasis              | 1.214285714  |
| wavelet-LLL | gldm       | LargeDependenceLowGrayLevelEmphasis  | 0.018576712  |
| wavelet-LLL | gldm       | DependenceVariance                   | 0.066326531  |
| wavelet-LLL | gldm       | LargeDependenceHighGrayLevelEmphasis | 3780.125     |
| wavelet-LLL | gldm       | SmallDependenceLowGrayLevelEmphasis  | 0.018472583  |
| wavelet-LLL | gldm       | LowGrayLevelEmphasis                 | 0.018493409  |
| wavelet-LLL | glcm       | JointAverage                         | 57.68110183  |
| wavelet-LLL | glcm       | SumAverage                           | 115.3622037  |
| wavelet-LLL | glcm       | JointEntropy                         | 5.764005582  |
| wavelet-LLL | glcm       | ClusterShade                         | -7501.399023 |
| wavelet-LLL | glcm       | MaximumProbability                   | 0.024086762  |
| wavelet-LLL | glcm       | Idmn                                 | 0.925504162  |
| wavelet-LLL | glcm       | JointEnergy                          | 0.019117648  |
| wavelet-LLL | glcm       | Contrast                             | 677.6489186  |
| wavelet-LLL | glcm       | DifferenceEntropy                    | 4.31373518   |
| wavelet-LLL | glcm       | InverseVariance                      | 0.049325945  |
| wavelet-LLL | glcm       | DifferenceVariance                   | 210.1724462  |
| wavelet-LLL | glcm       | Idn                                  | 0.817496786  |
| wavelet-LLL | glcm       | Idm                                  | 0.036352969  |
| wavelet-LLL | glcm       | Correlation                          | 0.086305469  |
| wavelet-LLL | glcm       | Autocorrelation                      | 3365.735071  |
| wavelet-LLL | glcm       | SumEntropy                           | 4.580179387  |
| wavelet-LLL | glcm       | SumSquares                           | 373.4301273  |
| wavelet-LLL | glcm       | ClusterProminence                    | 1724899.772  |
| wavelet-LLL | glcm       | Imc2                                 | 0.999912958  |
| wavelet-LLL | glcm       | Imc1                                 | -0.860998674 |
| wavelet-LLL | glcm       | DifferenceAverage                    | 21.35050332  |
| wavelet-LLL | glcm       | Id                                   | 0.094239357  |
| wavelet-LLL | glcm       | ClusterTendency                      | 816.0715907  |
| wavelet-LLL | firstorder | InterquartileRange                   | 747.8781946  |
| wavelet-LLL | firstorder | Skewness                             | -0.164026252 |
| wavelet-LLL | firstorder | Uniformity                           | 0.028061224  |
| wavelet-LLL | firstorder | Median                               | -744.5132515 |
| wavelet-LLL | firstorder | Energy                               | 42416547.92  |
| wavelet-LLL | firstorder | RobustMeanAbsoluteDeviation          | 324.2838216  |
| wavelet-LLL | firstorder | MeanAbsoluteDeviation                | 425.4296494  |
| wavelet-LLL | firstorder | TotalEnergy                          | 1145246794   |
| wavelet-LLL | firstorder | Maximum                              | 175.1130892  |
| wavelet-LLL | firstorder | RootMeanSquared                      | 870.3093448  |
| wavelet-LLL | firstorder | 90Percentile                         | -80.19643926 |
| wavelet-LLL | firstorder | Minimum                              | -1951.697531 |
| wavelet-LLL | firstorder | Entropy                              | 5.324862958  |
| wavelet-LLL | firstorder | Range                                | 2126.81062   |
| wavelet-LLL | firstorder | Variance                             | 251390.8675  |

|             |            |                                      |              |
|-------------|------------|--------------------------------------|--------------|
| wavelet-LLL | firstorder | 10Percentile                         | -1368.108986 |
| wavelet-LLL | firstorder | Kurtosis                             | 2.212424695  |
| wavelet-LLL | firstorder | Mean                                 | -711.3701485 |
| wavelet-LLL | glrlm      | ShortRunLowGrayLevelEmphasis         | 0.018543236  |
| wavelet-LLL | glrlm      | GrayLevelVariance                    | 407.0806799  |
| wavelet-LLL | glrlm      | LowGrayLevelRunEmphasis              | 0.018544051  |
| wavelet-LLL | glrlm      | GrayLevelNonUniformityNormalized     | 0.028016205  |
| wavelet-LLL | glrlm      | RunVariance                          | 0.002746345  |
| wavelet-LLL | glrlm      | GrayLevelNonUniformity               | 1.564635365  |
| wavelet-LLL | glrlm      | LongRunEmphasis                      | 1.008391608  |
| wavelet-LLL | glrlm      | ShortRunHighGrayLevelEmphasis        | 3004.21526   |
| wavelet-LLL | glrlm      | RunLengthNonUniformity               | 55.54405594  |
| wavelet-LLL | glrlm      | ShortRunEmphasis                     | 0.997902098  |
| wavelet-LLL | glrlm      | LongRunHighGrayLevelEmphasis         | 3041.751973  |
| wavelet-LLL | glrlm      | RunPercentage                        | 0.997252747  |
| wavelet-LLL | glrlm      | LongRunLowGrayLevelEmphasis          | 0.018547313  |
| wavelet-LLL | glrlm      | RunEntropy                           | 5.328961462  |
| wavelet-LLL | glrlm      | HighGrayLevelRunEmphasis             | 3011.722602  |
| wavelet-LLL | glrlm      | RunLengthNonUniformityNormalized     | 0.994507311  |
| wavelet-LLL | glszm      | GrayLevelVariance                    | 410.2249657  |
| wavelet-LLL | glszm      | ZoneVariance                         | 0.035665295  |
| wavelet-LLL | glszm      | GrayLevelNonUniformityNormalized     | 0.027434842  |
| wavelet-LLL | glszm      | SizeZoneNonUniformityNormalized      | 0.92866941   |
| wavelet-LLL | glszm      | SizeZoneNonUniformity                | 50.14814815  |
| wavelet-LLL | glszm      | GrayLevelNonUniformity               | 1.481481481  |
| wavelet-LLL | glszm      | LargeAreaEmphasis                    | 1.111111111  |
| wavelet-LLL | glszm      | SmallAreaHighGrayLevelEmphasis       | 2892.967593  |
| wavelet-LLL | glszm      | ZonePercentage                       | 0.964285714  |
| wavelet-LLL | glszm      | LargeAreaLowGrayLevelEmphasis        | 0.019207146  |
| wavelet-LLL | glszm      | LargeAreaHighGrayLevelEmphasis       | 3389.981481  |
| wavelet-LLL | glszm      | HighGrayLevelZoneEmphasis            | 2992.37037   |
| wavelet-LLL | glszm      | SmallAreaEmphasis                    | 0.972222222  |
| wavelet-LLL | glszm      | LowGrayLevelZoneEmphasis             | 0.019163952  |
| wavelet-LLL | glszm      | ZoneEntropy                          | 5.379615974  |
| wavelet-LLL | glszm      | SmallAreaLowGrayLevelEmphasis        | 0.019153153  |
| wavelet-LLL | ngtdm      | Coarseness                           | 0.04427817   |
| wavelet-LLL | ngtdm      | Complexity                           | 18748.00233  |
| wavelet-LLL | ngtdm      | Strength                             | 87.4409506   |
| wavelet-LLL | ngtdm      | Contrast                             | 6.735781394  |
| wavelet-LLL | ngtdm      | Busyness                             | 0.014818179  |
| wavelet-HHL | gldm       | GrayLevelVariance                    | 79.11096939  |
| wavelet-HHL | gldm       | HighGrayLevelEmphasis                | 555.2857143  |
| wavelet-HHL | gldm       | DependenceEntropy                    | 5.003434386  |
| wavelet-HHL | gldm       | DependenceNonUniformity              | 31.21428571  |
| wavelet-HHL | gldm       | GrayLevelNonUniformity               | 2.714285714  |
| wavelet-HHL | gldm       | SmallDependenceEmphasis              | 0.766493056  |
| wavelet-HHL | gldm       | SmallDependenceHighGrayLevelEmphasis | 405.7912946  |
| wavelet-HHL | gldm       | DependenceNonUniformityNormalized    | 0.557397959  |
| wavelet-HHL | gldm       | LargeDependenceEmphasis              | 2.214285714  |
| wavelet-HHL | gldm       | LargeDependenceLowGrayLevelEmphasis  | 0.026920055  |
| wavelet-HHL | gldm       | DependenceVariance                   | 0.37244898   |
| wavelet-HHL | gldm       | LargeDependenceHighGrayLevelEmphasis | 1357.571429  |
| wavelet-HHL | gldm       | SmallDependenceLowGrayLevelEmphasis  | 0.022002936  |
| wavelet-HHL | gldm       | LowGrayLevelEmphasis                 | 0.022909471  |
| wavelet-HHL | glcm       | JointAverage                         | 21.78059943  |
| wavelet-HHL | glcm       | SumAverage                           | 43.56119886  |
| wavelet-HHL | glcm       | JointEntropy                         | 5.661090127  |
| wavelet-HHL | glcm       | ClusterShade                         | -416.313484  |

|             |            |                                  |              |
|-------------|------------|----------------------------------|--------------|
| wavelet-HHL | glcm       | MaximumProbability               | 0.037199683  |
| wavelet-HHL | glcm       | Idmn                             | 0.904878005  |
| wavelet-HHL | glcm       | JointEnergy                      | 0.021029877  |
| wavelet-HHL | glcm       | Contrast                         | 187.5115391  |
| wavelet-HHL | glcm       | DifferenceEntropy                | 3.883135278  |
| wavelet-HHL | glcm       | InverseVariance                  | 0.107460952  |
| wavelet-HHL | glcm       | DifferenceVariance               | 61.45264729  |
| wavelet-HHL | glcm       | Idn                              | 0.80226596   |
| wavelet-HHL | glcm       | Idm                              | 0.098784802  |
| wavelet-HHL | glcm       | Correlation                      | -0.0442859   |
| wavelet-HHL | glcm       | Autocorrelation                  | 471.2893703  |
| wavelet-HHL | glcm       | SumEntropy                       | 4.26796345   |
| wavelet-HHL | glcm       | SumSquares                       | 90.4889978   |
| wavelet-HHL | glcm       | ClusterProminence                | 81524.01664  |
| wavelet-HHL | glcm       | Imc2                             | 0.999308767  |
| wavelet-HHL | glcm       | Imc1                             | -0.747399288 |
| wavelet-HHL | glcm       | DifferenceAverage                | 10.88534508  |
| wavelet-HHL | glcm       | Id                               | 0.175091193  |
| wavelet-HHL | glcm       | ClusterTendency                  | 174.4444521  |
| wavelet-HHL | firstorder | InterquartileRange               | 276.5070638  |
| wavelet-HHL | firstorder | Skewness                         | -0.302906333 |
| wavelet-HHL | firstorder | Uniformity                       | 0.048469388  |
| wavelet-HHL | firstorder | Median                           | 38.836022    |
| wavelet-HHL | firstorder | Energy                           | 2755904.85   |
| wavelet-HHL | firstorder | RobustMeanAbsoluteDeviation      | 127.6665251  |
| wavelet-HHL | firstorder | MeanAbsoluteDeviation            | 182.1983574  |
| wavelet-HHL | firstorder | TotalEnergy                      | 74409430.95  |
| wavelet-HHL | firstorder | Maximum                          | 436.8453297  |
| wavelet-HHL | firstorder | RootMeanSquared                  | 221.8391007  |
| wavelet-HHL | firstorder | 90Percentile                     | 307.5672103  |
| wavelet-HHL | firstorder | Minimum                          | -503.1369608 |
| wavelet-HHL | firstorder | Entropy                          | 4.625554753  |
| wavelet-HHL | firstorder | Range                            | 939.9822905  |
| wavelet-HHL | firstorder | Variance                         | 49135.30184  |
| wavelet-HHL | firstorder | 10Percentile                     | -320.3421198 |
| wavelet-HHL | firstorder | Kurtosis                         | 2.494473776  |
| wavelet-HHL | firstorder | Mean                             | 8.791175382  |
| wavelet-HHL | glrlm      | ShortRunLowGrayLevelEmphasis     | 0.023144943  |
| wavelet-HHL | glrlm      | GrayLevelVariance                | 79.32137756  |
| wavelet-HHL | glrlm      | LowGrayLevelRunEmphasis          | 0.023182872  |
| wavelet-HHL | glrlm      | GrayLevelNonUniformityNormalized | 0.047887977  |
| wavelet-HHL | glrlm      | RunVariance                      | 0.013723142  |
| wavelet-HHL | glrlm      | GrayLevelNonUniformity           | 2.645288045  |
| wavelet-HHL | glrlm      | LongRunEmphasis                  | 1.042424242  |
| wavelet-HHL | glrlm      | ShortRunHighGrayLevelEmphasis    | 547.0276335  |
| wavelet-HHL | glrlm      | RunLengthNonUniformity           | 53.73768454  |
| wavelet-HHL | glrlm      | ShortRunEmphasis                 | 0.989393939  |
| wavelet-HHL | glrlm      | LongRunHighGrayLevelEmphasis     | 581.5503608  |
| wavelet-HHL | glrlm      | RunPercentage                    | 0.986263736  |
| wavelet-HHL | glrlm      | LongRunLowGrayLevelEmphasis      | 0.023334587  |
| wavelet-HHL | glrlm      | RunEntropy                       | 4.662834029  |
| wavelet-HHL | glrlm      | HighGrayLevelRunEmphasis         | 553.9321789  |
| wavelet-HHL | glrlm      | RunLengthNonUniformityNormalized | 0.972553716  |
| wavelet-HHL | glszm      | GrayLevelVariance                | 82.32325142  |
| wavelet-HHL | glszm      | ZoneVariance                     | 0.43100189   |
| wavelet-HHL | glszm      | GrayLevelNonUniformityNormalized | 0.041587902  |
| wavelet-HHL | glszm      | SizeZoneNonUniformityNormalized  | 0.736294896  |
| wavelet-HHL | glszm      | SizeZoneNonUniformity            | 33.86956522  |

|             |            |                                      |              |
|-------------|------------|--------------------------------------|--------------|
| wavelet-HHL | glszm      | GrayLevelNonUniformity               | 1.913043478  |
| wavelet-HHL | glszm      | LargeAreaEmphasis                    | 1.913043478  |
| wavelet-HHL | glszm      | SmallAreaHighGrayLevelEmphasis       | 460.4382609  |
| wavelet-HHL | glszm      | ZonePercentage                       | 0.821428571  |
| wavelet-HHL | glszm      | LargeAreaLowGrayLevelEmphasis        | 0.029795599  |
| wavelet-HHL | glszm      | LargeAreaHighGrayLevelEmphasis       | 1149.478261  |
| wavelet-HHL | glszm      | HighGrayLevelZoneEmphasis            | 534.3478261  |
| wavelet-HHL | glszm      | SmallAreaEmphasis                    | 0.881304348  |
| wavelet-HHL | glszm      | LowGrayLevelZoneEmphasis             | 0.02711581   |
| wavelet-HHL | glszm      | ZoneEntropy                          | 4.909112771  |
| wavelet-HHL | glszm      | SmallAreaLowGrayLevelEmphasis        | 0.026596158  |
| wavelet-HHL | ngtdm      | Coarseness                           | 0.054762621  |
| wavelet-HHL | ngtdm      | Complexity                           | 3049.884775  |
| wavelet-HHL | ngtdm      | Strength                             | 24.96459533  |
| wavelet-HHL | ngtdm      | Contrast                             | 1.533550036  |
| wavelet-HHL | ngtdm      | Busyness                             | 0.033278942  |
| wavelet-HLH | gldm       | GrayLevelVariance                    | 65.86607143  |
| wavelet-HLH | gldm       | HighGrayLevelEmphasis                | 398.9285714  |
| wavelet-HLH | gldm       | DependenceEntropy                    | 4.81610894   |
| wavelet-HLH | gldm       | DependenceNonUniformity              | 30.17857143  |
| wavelet-HLH | gldm       | GrayLevelNonUniformity               | 2.857142857  |
| wavelet-HLH | gldm       | SmallDependenceEmphasis              | 0.759920635  |
| wavelet-HLH | gldm       | SmallDependenceHighGrayLevelEmphasis | 307.7777778  |
| wavelet-HLH | gldm       | DependenceNonUniformityNormalized    | 0.538903061  |
| wavelet-HLH | gldm       | LargeDependenceEmphasis              | 2.357142857  |
| wavelet-HLH | gldm       | LargeDependenceLowGrayLevelEmphasis  | 0.048432235  |
| wavelet-HLH | gldm       | DependenceVariance                   | 0.417091837  |
| wavelet-HLH | gldm       | LargeDependenceHighGrayLevelEmphasis | 939.6428571  |
| wavelet-HLH | gldm       | SmallDependenceLowGrayLevelEmphasis  | 0.039912794  |
| wavelet-HLH | gldm       | LowGrayLevelEmphasis                 | 0.041351948  |
| wavelet-HLH | glcm       | JointAverage                         | 18.28921202  |
| wavelet-HLH | glcm       | SumAverage                           | 36.57842404  |
| wavelet-HLH | glcm       | JointEntropy                         | 5.65475477   |
| wavelet-HLH | glcm       | ClusterShade                         | -185.5941874 |
| wavelet-HLH | glcm       | MaximumProbability                   | 0.037215891  |
| wavelet-HLH | glcm       | Idmn                                 | 0.904369046  |
| wavelet-HLH | glcm       | JointEnergy                          | 0.021081818  |
| wavelet-HLH | glcm       | Contrast                             | 142.5227608  |
| wavelet-HLH | glcm       | DifferenceEntropy                    | 3.740701751  |
| wavelet-HLH | glcm       | InverseVariance                      | 0.10115732   |
| wavelet-HLH | glcm       | DifferenceVariance                   | 46.07679532  |
| wavelet-HLH | glcm       | Idn                                  | 0.798041997  |
| wavelet-HLH | glcm       | Idm                                  | 0.093123934  |
| wavelet-HLH | glcm       | Correlation                          | -0.067846111 |
| wavelet-HLH | glcm       | Autocorrelation                      | 330.7912948  |
| wavelet-HLH | glcm       | SumEntropy                           | 4.1344071    |
| wavelet-HLH | glcm       | SumSquares                           | 66.7117596   |
| wavelet-HLH | glcm       | ClusterProminence                    | 43618.00452  |
| wavelet-HLH | glcm       | Imc2                                 | 0.998628364  |
| wavelet-HLH | glcm       | Imc1                                 | -0.69142443  |
| wavelet-HLH | glcm       | DifferenceAverage                    | 9.647567073  |
| wavelet-HLH | glcm       | Id                                   | 0.175709626  |
| wavelet-HLH | glcm       | ClusterTendency                      | 124.3242776  |
| wavelet-HLH | firstorder | InterquartileRange                   | 284.9222476  |
| wavelet-HLH | firstorder | Skewness                             | -0.223181968 |
| wavelet-HLH | firstorder | Uniformity                           | 0.051020408  |
| wavelet-HLH | firstorder | Median                               | 26.26107321  |
| wavelet-HLH | firstorder | Energy                               | 2315818.209  |

|             |            |                                  |              |
|-------------|------------|----------------------------------|--------------|
| wavelet-HLH | firstorder | RobustMeanAbsoluteDeviation      | 122.5544368  |
| wavelet-HLH | firstorder | MeanAbsoluteDeviation            | 166.9966332  |
| wavelet-HLH | firstorder | TotalEnergy                      | 62527091.64  |
| wavelet-HLH | firstorder | Maximum                          | 409.7185569  |
| wavelet-HLH | firstorder | RootMeanSquared                  | 203.356575   |
| wavelet-HLH | firstorder | 90Percentile                     | 291.7733913  |
| wavelet-HLH | firstorder | Minimum                          | -422.8943127 |
| wavelet-HLH | firstorder | Entropy                          | 4.445485949  |
| wavelet-HLH | firstorder | Range                            | 832.6128696  |
| wavelet-HLH | firstorder | Variance                         | 41012.80715  |
| wavelet-HLH | firstorder | 10Percentile                     | -267.4914417 |
| wavelet-HLH | firstorder | Kurtosis                         | 2.272825618  |
| wavelet-HLH | firstorder | Mean                             | 18.46860686  |
| wavelet-HLH | glrlm      | ShortRunLowGrayLevelEmphasis     | 0.041849665  |
| wavelet-HLH | glrlm      | GrayLevelVariance                | 66.08410559  |
| wavelet-HLH | glrlm      | LowGrayLevelRunEmphasis          | 0.04191365   |
| wavelet-HLH | glrlm      | GrayLevelNonUniformityNormalized | 0.050827149  |
| wavelet-HLH | glrlm      | RunVariance                      | 0.015087333  |
| wavelet-HLH | glrlm      | GrayLevelNonUniformity           | 2.803615811  |
| wavelet-HLH | glrlm      | LongRunEmphasis                  | 1.046939643  |
| wavelet-HLH | glrlm      | ShortRunHighGrayLevelEmphasis    | 394.3926813  |
| wavelet-HLH | glrlm      | RunLengthNonUniformity           | 53.52164411  |
| wavelet-HLH | glrlm      | ShortRunEmphasis                 | 0.988265089  |
| wavelet-HLH | glrlm      | LongRunHighGrayLevelEmphasis     | 417.4878493  |
| wavelet-HLH | glrlm      | RunPercentage                    | 0.98489011   |
| wavelet-HLH | glrlm      | LongRunLowGrayLevelEmphasis      | 0.042169589  |
| wavelet-HLH | glrlm      | RunEntropy                       | 4.479831813  |
| wavelet-HLH | glrlm      | HighGrayLevelRunEmphasis         | 399.0117149  |
| wavelet-HLH | glrlm      | RunLengthNonUniformityNormalized | 0.969825333  |
| wavelet-HLH | glszm      | GrayLevelVariance                | 69.49333333  |
| wavelet-HLH | glszm      | ZoneVariance                     | 0.495802469  |
| wavelet-HLH | glszm      | GrayLevelNonUniformityNormalized | 0.050864198  |
| wavelet-HLH | glszm      | SizeZoneNonUniformityNormalized  | 0.758024691  |
| wavelet-HLH | glszm      | SizeZoneNonUniformity            | 34.11111111  |
| wavelet-HLH | glszm      | GrayLevelNonUniformity           | 2.288888889  |
| wavelet-HLH | glszm      | LargeAreaEmphasis                | 2.044444444  |
| wavelet-HLH | glszm      | SmallAreaHighGrayLevelEmphasis   | 360.5791667  |
| wavelet-HLH | glszm      | ZonePercentage                   | 0.803571429  |
| wavelet-HLH | glszm      | LargeAreaLowGrayLevelEmphasis    | 0.055231526  |
| wavelet-HLH | glszm      | LargeAreaHighGrayLevelEmphasis   | 819.6        |
| wavelet-HLH | glszm      | HighGrayLevelZoneEmphasis        | 400.7333333  |
| wavelet-HLH | glszm      | SmallAreaEmphasis                | 0.888580247  |
| wavelet-HLH | glszm      | LowGrayLevelZoneEmphasis         | 0.05011524   |
| wavelet-HLH | glszm      | ZoneEntropy                      | 4.613858096  |
| wavelet-HLH | glszm      | SmallAreaLowGrayLevelEmphasis    | 0.049348368  |
| wavelet-HLH | ngtdm      | Coarseness                       | 0.052770283  |
| wavelet-HLH | ngtdm      | Complexity                       | 2139.605199  |
| wavelet-HLH | ngtdm      | Strength                         | 17.34446205  |
| wavelet-HLH | ngtdm      | Contrast                         | 1.565220705  |
| wavelet-HLH | ngtdm      | Busyness                         | 0.051315441  |

| Image type | Feature Class | Feature Name                         |                                                                                                                                                                                                                                                                                                                                                                                                                                                 |
|------------|---------------|--------------------------------------|-------------------------------------------------------------------------------------------------------------------------------------------------------------------------------------------------------------------------------------------------------------------------------------------------------------------------------------------------------------------------------------------------------------------------------------------------|
| general    | info          | BoundingBox                          | 4: RTSTRUCT: C99-DNU_A_segment_GTV<br>(0, 0, 1, 4, 4, 4)                                                                                                                                                                                                                                                                                                                                                                                        |
| general    | info          | EnabledImageTypes                    | {u'Original': {}, u'Wavelet': {}}                                                                                                                                                                                                                                                                                                                                                                                                               |
|            |               |                                      | {'distances': [1], 'additionalInfo': True,<br>'force2D': False, 'interpolator': 'sitkBSpline',<br>'resampledPixelSpacing': [3.0], 'label': 1,<br>'normalizeScale': 1, 'normalize': False,<br>'force2Ddimension': 0, 'removeOutliers':<br>None, 'minimumROISize': None,<br>u'binWidth': 25.0,<br>'minimumROIDimensions': 1,<br>u'correctMask': True, 'preCrop': False,<br>u'symmetricalGLCM': True,<br>'resegmentRange': None, 'padDistance': 5} |
| general    | info          | GeneralSettings                      | 8271c3443f4243f442e032f7691c3c9d86219                                                                                                                                                                                                                                                                                                                                                                                                           |
| general    | info          | ImageHash                            | 1a5                                                                                                                                                                                                                                                                                                                                                                                                                                             |
| general    | info          | ImageSpacing                         | (0.9765624999999998,<br>0.9765624999999998, 1.9999999999999999)<br>15d31cbc84f2b4061aa8d6ff810d2de6b251                                                                                                                                                                                                                                                                                                                                         |
| general    | info          | MaskHash                             | 23c8                                                                                                                                                                                                                                                                                                                                                                                                                                            |
| general    | info          | NumpyVersion                         | 1.13.1                                                                                                                                                                                                                                                                                                                                                                                                                                          |
| general    | info          | PyWaveletVersion                     | 0.5.2                                                                                                                                                                                                                                                                                                                                                                                                                                           |
| general    | info          | SimpleITKVersion                     | 1.1.0                                                                                                                                                                                                                                                                                                                                                                                                                                           |
| general    | info          | Version                              | 1.3.0.post102+g1b0eb74                                                                                                                                                                                                                                                                                                                                                                                                                          |
| general    | info          | VolumeNum                            | 1                                                                                                                                                                                                                                                                                                                                                                                                                                               |
| general    | info          | VoxelNum                             | 31                                                                                                                                                                                                                                                                                                                                                                                                                                              |
| original   | shape         | Maximum3DDiameter                    | 12.36931688                                                                                                                                                                                                                                                                                                                                                                                                                                     |
| original   | shape         | Maximum2DDiameterSlice               | 9.486832981                                                                                                                                                                                                                                                                                                                                                                                                                                     |
| original   | shape         | Sphericity                           | 0.977850094                                                                                                                                                                                                                                                                                                                                                                                                                                     |
| original   | shape         | MinorAxis                            | 10.0740242                                                                                                                                                                                                                                                                                                                                                                                                                                      |
| original   | shape         | Elongation                           | 0.84093741                                                                                                                                                                                                                                                                                                                                                                                                                                      |
| original   | shape         | SurfaceVolumeRatio                   | 0.524771237                                                                                                                                                                                                                                                                                                                                                                                                                                     |
| original   | shape         | Volume                               | 837                                                                                                                                                                                                                                                                                                                                                                                                                                             |
| original   | shape         | MajorAxis                            | 11.97951724                                                                                                                                                                                                                                                                                                                                                                                                                                     |
| original   | shape         | SurfaceArea                          | 439.2335257                                                                                                                                                                                                                                                                                                                                                                                                                                     |
| original   | shape         | Flatness                             | 0.784219943                                                                                                                                                                                                                                                                                                                                                                                                                                     |
| original   | shape         | LeastAxis                            | 9.394576335                                                                                                                                                                                                                                                                                                                                                                                                                                     |
| original   | shape         | Maximum2DDiameterColumn              | 10.81665383                                                                                                                                                                                                                                                                                                                                                                                                                                     |
| original   | shape         | Maximum2DDiameterRow                 | 10.81665383                                                                                                                                                                                                                                                                                                                                                                                                                                     |
| original   | gldm          | GrayLevelVariance                    | 64.64308012                                                                                                                                                                                                                                                                                                                                                                                                                                     |
| original   | gldm          | HighGrayLevelEmphasis                | 297.4516129                                                                                                                                                                                                                                                                                                                                                                                                                                     |
| original   | gldm          | DependenceEntropy                    | 4.026619294                                                                                                                                                                                                                                                                                                                                                                                                                                     |
| original   | gldm          | DependenceNonUniformity              | 11.12903226                                                                                                                                                                                                                                                                                                                                                                                                                                     |
| original   | gldm          | GrayLevelNonUniformity               | 2.096774194                                                                                                                                                                                                                                                                                                                                                                                                                                     |
| original   | gldm          | SmallDependenceEmphasis              | 0.599462366                                                                                                                                                                                                                                                                                                                                                                                                                                     |
| original   | gldm          | SmallDependenceHighGrayLevelEmphasis | 146.7983871                                                                                                                                                                                                                                                                                                                                                                                                                                     |
| original   | gldm          | DependenceNonUniformityNormalized    | 0.359001041                                                                                                                                                                                                                                                                                                                                                                                                                                     |
| original   | gldm          | LargeDependenceEmphasis              | 4.483870968                                                                                                                                                                                                                                                                                                                                                                                                                                     |
| original   | gldm          | LargeDependenceLowGrayLevelEmphasis  | 0.335207464                                                                                                                                                                                                                                                                                                                                                                                                                                     |



|          |            |                                      |              |
|----------|------------|--------------------------------------|--------------|
| original | gldm       | DependenceVariance                   | 1.10301769   |
| original | gldm       | LargeDependenceHighGrayLevelEmphasis | 1946.677419  |
| original | gldm       | SmallDependenceLowGrayLevelEmphasis  | 0.02583685   |
| original | gldm       | LowGrayLevelEmphasis                 | 0.086980958  |
| original | glcm       | JointAverage                         | 17.08046512  |
| original | glcm       | SumAverage                           | 34.16093023  |
| original | glcm       | JointEntropy                         | 4.667695947  |
| original | glcm       | ClusterShade                         | -697.5091876 |
| original | glcm       | MaximumProbability                   | 0.07634213   |
| original | glcm       | ldmn                                 | 0.871027817  |
| original | glcm       | JointEnergy                          | 0.041822683  |
| original | glcm       | Contrast                             | 124.1590061  |
| original | glcm       | DifferenceEntropy                    | 3.312004552  |
| original | glcm       | InverseVariance                      | 0.124657987  |
| original | glcm       | DifferenceVariance                   | 42.35539701  |
| original | glcm       | ldn                                  | 0.774926591  |
| original | glcm       | ldm                                  | 0.142273732  |
| original | glcm       | Correlation                          | -0.005885834 |
| original | glcm       | Autocorrelation                      | 292.0895083  |
| original | glcm       | SumEntropy                           | 3.503975503  |
| original | glcm       | SumSquares                           | 62.07722148  |
| original | glcm       | ClusterProminence                    | 40610.36012  |
| original | glcm       | lmc2                                 | 0.998003388  |
| original | glcm       | lmc1                                 | -0.755429318 |
| original | glcm       | DifferenceAverage                    | 8.794148564  |
| original | glcm       | ld                                   | 0.219859268  |
| original | glcm       | ClusterTendency                      | 124.1498799  |
| original | firstorder | InterquartileRange                   | 352.5        |
| original | firstorder | Skewness                             | -0.360783827 |
| original | firstorder | Uniformity                           | 0.067637877  |
| original | firstorder | Median                               | -189         |
| original | firstorder | Energy                               | 2930367      |
| original | firstorder | RobustMeanAbsoluteDeviation          | 144.0352     |
| original | firstorder | MeanAbsoluteDeviation                | 175.7169615  |
| original | firstorder | TotalEnergy                          | 79119909     |
| original | firstorder | Maximum                              | 43           |
| original | firstorder | RootMeanSquared                      | 307.4540091  |
| original | firstorder | 90Percentile                         | 17           |
| original | firstorder | Minimum                              | -592         |
| original | firstorder | Entropy                              | 4.026619294  |
| original | firstorder | Range                                | 635          |
| original | firstorder | Variance                             | 41286.12695  |
| original | firstorder | 10Percentile                         | -558         |
| original | firstorder | Kurtosis                             | 1.862784868  |
| original | firstorder | Mean                                 | -230.7419355 |
| original | glrlm      | ShortRunLowGrayLevelEmphasis         | 0.083889765  |
| original | glrlm      | GrayLevelVariance                    | 63.96057068  |
| original | glrlm      | LowGrayLevelRunEmphasis              | 0.086511295  |
| original | glrlm      | GrayLevelNonUniformityNormalized     | 0.066525581  |
| original | glrlm      | RunVariance                          | 0.032031673  |
| original | glrlm      | GrayLevelNonUniformity               | 1.996515461  |
| original | glrlm      | LongRunEmphasis                      | 1.104357711  |

|             |       |                                      |              |
|-------------|-------|--------------------------------------|--------------|
| original    | glrlm | ShortRunHighGrayLevelEmphasis        | 281.2624408  |
| original    | glrlm | RunLengthNonUniformity               | 28.15672603  |
| original    | glrlm | ShortRunEmphasis                     | 0.973910572  |
| original    | glrlm | LongRunHighGrayLevelEmphasis         | 338.1259307  |
| original    | glrlm | RunPercentage                        | 0.967741935  |
| original    | glrlm | LongRunLowGrayLevelEmphasis          | 0.096997417  |
| original    | glrlm | RunEntropy                           | 4.068866401  |
| original    | glrlm | HighGrayLevelRunEmphasis             | 292.6351388  |
| original    | glrlm | RunLengthNonUniformityNormalized     | 0.935936654  |
| original    | glszm | GrayLevelVariance                    | 55.12603306  |
| original    | glszm | ZoneVariance                         | 0.605371901  |
| original    | glszm | GrayLevelNonUniformityNormalized     | 0.061983471  |
| original    | glszm | SizeZoneNonUniformityNormalized      | 0.566115702  |
| original    | glszm | SizeZoneNonUniformity                | 12.45454545  |
| original    | glszm | GrayLevelNonUniformity               | 1.363636364  |
| original    | glszm | LargeAreaEmphasis                    | 2.590909091  |
| original    | glszm | SmallAreaHighGrayLevelEmphasis       | 187.1732955  |
| original    | glszm | ZonePercentage                       | 0.709677419  |
| original    | glszm | LargeAreaLowGrayLevelEmphasis        | 0.238292913  |
| original    | glszm | LargeAreaHighGrayLevelEmphasis       | 937.0454545  |
| original    | glszm | HighGrayLevelZoneEmphasis            | 260.1363636  |
| original    | glszm | SmallAreaEmphasis                    | 0.780618687  |
| original    | glszm | LowGrayLevelZoneEmphasis             | 0.065058133  |
| original    | glszm | ZoneEntropy                          | 4.095795255  |
| original    | glszm | SmallAreaLowGrayLevelEmphasis        | 0.022109863  |
| original    | ngtdm | Coarseness                           | 0.06904568   |
| original    | ngtdm | Complexity                           | 1377.781071  |
| original    | ngtdm | Strength                             | 20.85873109  |
| original    | ngtdm | Contrast                             | 2.936350303  |
| original    | ngtdm | Busyness                             | 0.057783542  |
| wavelet-HHH | gldm  | GrayLevelVariance                    | 5.791883455  |
| wavelet-HHH | gldm  | HighGrayLevelEmphasis                | 60.83870968  |
| wavelet-HHH | gldm  | DependenceEntropy                    | 3.848884617  |
| wavelet-HHH | gldm  | DependenceNonUniformity              | 10.16129032  |
| wavelet-HHH | gldm  | GrayLevelNonUniformity               | 3.967741935  |
| wavelet-HHH | gldm  | SmallDependenceEmphasis              | 0.308360215  |
| wavelet-HHH | gldm  | SmallDependenceHighGrayLevelEmphasis | 16.60327061  |
| wavelet-HHH | gldm  | DependenceNonUniformityNormalized    | 0.327783559  |
| wavelet-HHH | gldm  | LargeDependenceEmphasis              | 7.580645161  |
| wavelet-HHH | gldm  | LargeDependenceLowGrayLevelEmphasis  | 0.178878284  |
| wavelet-HHH | gldm  | DependenceVariance                   | 1.086368366  |
| wavelet-HHH | gldm  | LargeDependenceHighGrayLevelEmphasis | 470.1290323  |
| wavelet-HHH | gldm  | SmallDependenceLowGrayLevelEmphasis  | 0.04261664   |
| wavelet-HHH | gldm  | LowGrayLevelEmphasis                 | 0.055567962  |
| wavelet-HHH | glcm  | JointAverage                         | 7.391771698  |
| wavelet-HHH | glcm  | SumAverage                           | 14.7835434   |
| wavelet-HHH | glcm  | JointEntropy                         | 4.51289551   |
| wavelet-HHH | glcm  | ClusterShade                         | -18.04429065 |
| wavelet-HHH | glcm  | MaximumProbability                   | 0.072074248  |
| wavelet-HHH | glcm  | ldmn                                 | 0.919087465  |
| wavelet-HHH | glcm  | JointEnergy                          | 0.046944588  |
| wavelet-HHH | glcm  | Contrast                             | 12.4572087   |

|             |            |                                  |              |
|-------------|------------|----------------------------------|--------------|
| wavelet-HHH | glcm       | DifferenceEntropy                | 2.543807785  |
| wavelet-HHH | glcm       | InverseVariance                  | 0.333623233  |
| wavelet-HHH | glcm       | DifferenceVariance               | 4.464383249  |
| wavelet-HHH | glcm       | Idn                              | 0.819775272  |
| wavelet-HHH | glcm       | Idm                              | 0.312358572  |
| wavelet-HHH | glcm       | Correlation                      | -0.015389171 |
| wavelet-HHH | glcm       | Autocorrelation                  | 54.45327168  |
| wavelet-HHH | glcm       | SumEntropy                       | 3.013953917  |
| wavelet-HHH | glcm       | SumSquares                       | 6.010326486  |
| wavelet-HHH | glcm       | ClusterProminence                | 383.8314233  |
| wavelet-HHH | glcm       | Imc2                             | 0.978819177  |
| wavelet-HHH | glcm       | Imc1                             | -0.536879055 |
| wavelet-HHH | glcm       | DifferenceAverage                | 2.742958408  |
| wavelet-HHH | glcm       | Id                               | 0.392841949  |
| wavelet-HHH | glcm       | ClusterTendency                  | 11.58409724  |
| wavelet-HHH | firstorder | InterquartileRange               | 86.05355653  |
| wavelet-HHH | firstorder | Skewness                         | -0.570912337 |
| wavelet-HHH | firstorder | Uniformity                       | 0.127991675  |
| wavelet-HHH | firstorder | Median                           | 6.880909974  |
| wavelet-HHH | firstorder | Energy                           | 112078.9105  |
| wavelet-HHH | firstorder | RobustMeanAbsoluteDeviation      | 38.03520331  |
| wavelet-HHH | firstorder | MeanAbsoluteDeviation            | 50.23200709  |
| wavelet-HHH | firstorder | TotalEnergy                      | 3026130.584  |
| wavelet-HHH | firstorder | Maximum                          | 87.73281506  |
| wavelet-HHH | firstorder | RootMeanSquared                  | 60.12860157  |
| wavelet-HHH | firstorder | 90Percentile                     | 70.57950467  |
| wavelet-HHH | firstorder | Minimum                          | -154.9329496 |
| wavelet-HHH | firstorder | Entropy                          | 3.10924633   |
| wavelet-HHH | firstorder | Range                            | 242.6657647  |
| wavelet-HHH | firstorder | Variance                         | 3614.750608  |
| wavelet-HHH | firstorder | 10Percentile                     | -82.23876734 |
| wavelet-HHH | firstorder | Kurtosis                         | 2.687844581  |
| wavelet-HHH | firstorder | Mean                             | -0.835534804 |
| wavelet-HHH | glrlm      | ShortRunLowGrayLevelEmphasis     | 0.057055305  |
| wavelet-HHH | glrlm      | GrayLevelVariance                | 6.004074076  |
| wavelet-HHH | glrlm      | LowGrayLevelRunEmphasis          | 0.05796761   |
| wavelet-HHH | glrlm      | GrayLevelNonUniformityNormalized | 0.126572176  |
| wavelet-HHH | glrlm      | RunVariance                      | 0.058924002  |
| wavelet-HHH | glrlm      | GrayLevelNonUniformity           | 3.690359614  |
| wavelet-HHH | glrlm      | LongRunEmphasis                  | 1.195223359  |
| wavelet-HHH | glrlm      | ShortRunHighGrayLevelEmphasis    | 57.62446115  |
| wavelet-HHH | glrlm      | RunLengthNonUniformity           | 25.80384686  |
| wavelet-HHH | glrlm      | ShortRunEmphasis                 | 0.95119416   |
| wavelet-HHH | glrlm      | LongRunHighGrayLevelEmphasis     | 72.99580604  |
| wavelet-HHH | glrlm      | RunPercentage                    | 0.94044665   |
| wavelet-HHH | glrlm      | LongRunLowGrayLevelEmphasis      | 0.061616829  |
| wavelet-HHH | glrlm      | RunEntropy                       | 3.314346392  |
| wavelet-HHH | glrlm      | HighGrayLevelRunEmphasis         | 60.69873013  |
| wavelet-HHH | glrlm      | RunLengthNonUniformityNormalized | 0.882151996  |
| wavelet-HHH | glszm      | GrayLevelVariance                | 9.909722222  |
| wavelet-HHH | glszm      | ZoneVariance                     | 3.243055556  |
| wavelet-HHH | glszm      | GrayLevelNonUniformityNormalized | 0.111111111  |

|             |       |                                      |             |
|-------------|-------|--------------------------------------|-------------|
| wavelet-HHH | glszm | SizeZoneNonUniformityNormalized      | 0.375       |
| wavelet-HHH | glszm | SizeZoneNonUniformity                | 4.5         |
| wavelet-HHH | glszm | GrayLevelNonUniformity               | 1.333333333 |
| wavelet-HHH | glszm | LargeAreaEmphasis                    | 9.916666667 |
| wavelet-HHH | glszm | SmallAreaHighGrayLevelEmphasis       | 25.57787037 |
| wavelet-HHH | glszm | ZonePercentage                       | 0.387096774 |
| wavelet-HHH | glszm | LargeAreaLowGrayLevelEmphasis        | 0.270002077 |
| wavelet-HHH | glszm | LargeAreaHighGrayLevelEmphasis       | 654.1666667 |
| wavelet-HHH | glszm | HighGrayLevelZoneEmphasis            | 53.25       |
| wavelet-HHH | glszm | SmallAreaEmphasis                    | 0.543425926 |
| wavelet-HHH | glszm | LowGrayLevelZoneEmphasis             | 0.114899721 |
| wavelet-HHH | glszm | ZoneEntropy                          | 3.251629167 |
| wavelet-HHH | glszm | SmallAreaLowGrayLevelEmphasis        | 0.105628129 |
| wavelet-HHH | ngtdm | Coarseness                           | 0.147622018 |
| wavelet-HHH | ngtdm | Complexity                           | 78.58228726 |
| wavelet-HHH | ngtdm | Strength                             | 5.037571627 |
| wavelet-HHH | ngtdm | Contrast                             | 0.264908807 |
| wavelet-HHH | ngtdm | Busyness                             | 0.109830426 |
| wavelet-HLL | gldm  | GrayLevelVariance                    | 159.9791883 |
| wavelet-HLL | gldm  | HighGrayLevelEmphasis                | 535.8387097 |
| wavelet-HLL | gldm  | DependenceEntropy                    | 4.502583407 |
| wavelet-HLL | gldm  | DependenceNonUniformity              | 19.12903226 |
| wavelet-HLL | gldm  | GrayLevelNonUniformity               | 1.580645161 |
| wavelet-HLL | gldm  | SmallDependenceEmphasis              | 0.806451613 |
| wavelet-HLL | gldm  | SmallDependenceHighGrayLevelEmphasis | 462.8709677 |
| wavelet-HLL | gldm  | DependenceNonUniformityNormalized    | 0.617065557 |
| wavelet-HLL | gldm  | LargeDependenceEmphasis              | 1.774193548 |
| wavelet-HLL | gldm  | LargeDependenceLowGrayLevelEmphasis  | 0.110315934 |
| wavelet-HLL | gldm  | DependenceVariance                   | 0.191467222 |
| wavelet-HLL | gldm  | LargeDependenceHighGrayLevelEmphasis | 827.7096774 |
| wavelet-HLL | gldm  | SmallDependenceLowGrayLevelEmphasis  | 0.044185035 |
| wavelet-HLL | gldm  | LowGrayLevelEmphasis                 | 0.057411215 |
| wavelet-HLL | glcm  | JointAverage                         | 18.64705123 |
| wavelet-HLL | glcm  | SumAverage                           | 37.29410246 |
| wavelet-HLL | glcm  | JointEntropy                         | 4.814924646 |
| wavelet-HLL | glcm  | ClusterShade                         | 2787.983472 |
| wavelet-HLL | glcm  | MaximumProbability                   | 0.049199973 |
| wavelet-HLL | glcm  | Idmn                                 | 0.932629985 |
| wavelet-HLL | glcm  | JointEnergy                          | 0.036623345 |
| wavelet-HLL | glcm  | Contrast                             | 147.3408733 |
| wavelet-HLL | glcm  | DifferenceEntropy                    | 3.159967661 |
| wavelet-HLL | glcm  | InverseVariance                      | 0.081705653 |
| wavelet-HLL | glcm  | DifferenceVariance                   | 29.06390018 |
| wavelet-HLL | glcm  | Idn                                  | 0.824243815 |
| wavelet-HLL | glcm  | Idm                                  | 0.077608053 |
| wavelet-HLL | glcm  | Correlation                          | 0.443167952 |
| wavelet-HLL | glcm  | Autocorrelation                      | 413.9700617 |
| wavelet-HLL | glcm  | SumEntropy                           | 3.728002526 |
| wavelet-HLL | glcm  | SumSquares                           | 139.330074  |
| wavelet-HLL | glcm  | ClusterProminence                    | 350207.8617 |
| wavelet-HLL | glcm  | Imc2                                 | 0.999558111 |
| wavelet-HLL | glcm  | Imc1                                 | -0.8513913  |

|             |            |                                  |              |
|-------------|------------|----------------------------------|--------------|
| wavelet-HLL | glcm       | DifferenceAverage                | 10.00465247  |
| wavelet-HLL | glcm       | Id                               | 0.161214247  |
| wavelet-HLL | glcm       | ClusterTendency                  | 409.9794226  |
| wavelet-HLL | firstorder | InterquartileRange               | 531.3995136  |
| wavelet-HLL | firstorder | Skewness                         | 0.298292229  |
| wavelet-HLL | firstorder | Uniformity                       | 0.050988554  |
| wavelet-HLL | firstorder | Median                           | -168.9121527 |
| wavelet-HLL | firstorder | Energy                           | 3607301.264  |
| wavelet-HLL | firstorder | RobustMeanAbsoluteDeviation      | 217.1203004  |
| wavelet-HLL | firstorder | MeanAbsoluteDeviation            | 269.0396472  |
| wavelet-HLL | firstorder | TotalEnergy                      | 97397134.12  |
| wavelet-HLL | firstorder | Maximum                          | 459.2490517  |
| wavelet-HLL | firstorder | RootMeanSquared                  | 341.1224954  |
| wavelet-HLL | firstorder | 90Percentile                     | 338.0566625  |
| wavelet-HLL | firstorder | Minimum                          | -578.9009197 |
| wavelet-HLL | firstorder | Entropy                          | 4.413716068  |
| wavelet-HLL | firstorder | Range                            | 1038.149971  |
| wavelet-HLL | firstorder | Variance                         | 100019.8982  |
| wavelet-HLL | firstorder | 10Percentile                     | -546.2429575 |
| wavelet-HLL | firstorder | Kurtosis                         | 1.863712567  |
| wavelet-HLL | firstorder | Mean                             | -127.8462306 |
| wavelet-HLL | glrlm      | ShortRunLowGrayLevelEmphasis     | 0.056773517  |
| wavelet-HLL | glrlm      | GrayLevelVariance                | 159.599609   |
| wavelet-HLL | glrlm      | LowGrayLevelRunEmphasis          | 0.057299173  |
| wavelet-HLL | glrlm      | GrayLevelNonUniformityNormalized | 0.050855323  |
| wavelet-HLL | glrlm      | RunVariance                      | 0.00991453   |
| wavelet-HLL | glrlm      | GrayLevelNonUniformity           | 1.560959471  |
| wavelet-HLL | glrlm      | LongRunEmphasis                  | 1.030769231  |
| wavelet-HLL | glrlm      | ShortRunHighGrayLevelEmphasis    | 534.5678246  |
| wavelet-HLL | glrlm      | RunLengthNonUniformity           | 30.0974359   |
| wavelet-HLL | glrlm      | ShortRunEmphasis                 | 0.992307692  |
| wavelet-HLL | glrlm      | LongRunHighGrayLevelEmphasis     | 549.0678246  |
| wavelet-HLL | glrlm      | RunPercentage                    | 0.990074442  |
| wavelet-HLL | glrlm      | LongRunLowGrayLevelEmphasis      | 0.059401797  |
| wavelet-HLL | glrlm      | RunEntropy                       | 4.421193711  |
| wavelet-HLL | glrlm      | HighGrayLevelRunEmphasis         | 537.4678246  |
| wavelet-HLL | glrlm      | RunLengthNonUniformityNormalized | 0.98017094   |
| wavelet-HLL | glszm      | GrayLevelVariance                | 154.9135802  |
| wavelet-HLL | glszm      | ZoneVariance                     | 0.126200274  |
| wavelet-HLL | glszm      | GrayLevelNonUniformityNormalized | 0.048010974  |
| wavelet-HLL | glszm      | SizeZoneNonUniformityNormalized  | 0.747599451  |
| wavelet-HLL | glszm      | SizeZoneNonUniformity            | 20.18518519  |
| wavelet-HLL | glszm      | GrayLevelNonUniformity           | 1.296296296  |
| wavelet-HLL | glszm      | LargeAreaEmphasis                | 1.444444444  |
| wavelet-HLL | glszm      | SmallAreaHighGrayLevelEmphasis   | 517.4814815  |
| wavelet-HLL | glszm      | ZonePercentage                   | 0.870967742  |
| wavelet-HLL | glszm      | LargeAreaLowGrayLevelEmphasis    | 0.086164065  |
| wavelet-HLL | glszm      | LargeAreaHighGrayLevelEmphasis   | 726.9259259  |
| wavelet-HLL | glszm      | HighGrayLevelZoneEmphasis        | 559.3703704  |
| wavelet-HLL | glszm      | SmallAreaEmphasis                | 0.888888889  |
| wavelet-HLL | glszm      | LowGrayLevelZoneEmphasis         | 0.055792837  |
| wavelet-HLL | glszm      | ZoneEntropy                      | 4.53266528   |

|             |            |                                      |              |
|-------------|------------|--------------------------------------|--------------|
| wavelet-HLL | glszm      | SmallAreaLowGrayLevelEmphasis        | 0.04820003   |
| wavelet-HLL | ngtdm      | Coarseness                           | 0.115451704  |
| wavelet-HLL | ngtdm      | Complexity                           | 2222.188837  |
| wavelet-HLL | ngtdm      | Strength                             | 86.92320834  |
| wavelet-HLL | ngtdm      | Contrast                             | 3.506977737  |
| wavelet-HLL | ngtdm      | Busyness                             | 0.023512307  |
| wavelet-LHL | gldm       | GrayLevelVariance                    | 165.9833507  |
| wavelet-LHL | gldm       | HighGrayLevelEmphasis                | 426.1290323  |
| wavelet-LHL | gldm       | DependenceEntropy                    | 4.155651552  |
| wavelet-LHL | gldm       | DependenceNonUniformity              | 12.29032258  |
| wavelet-LHL | gldm       | GrayLevelNonUniformity               | 2.225806452  |
| wavelet-LHL | gldm       | SmallDependenceEmphasis              | 0.614695341  |
| wavelet-LHL | gldm       | SmallDependenceHighGrayLevelEmphasis | 286.3942652  |
| wavelet-LHL | gldm       | DependenceNonUniformityNormalized    | 0.396462019  |
| wavelet-LHL | gldm       | LargeDependenceEmphasis              | 3.258064516  |
| wavelet-LHL | gldm       | LargeDependenceLowGrayLevelEmphasis  | 0.182928387  |
| wavelet-LHL | gldm       | DependenceVariance                   | 0.551508845  |
| wavelet-LHL | gldm       | LargeDependenceHighGrayLevelEmphasis | 999.5483871  |
| wavelet-LHL | gldm       | SmallDependenceLowGrayLevelEmphasis  | 0.054548368  |
| wavelet-LHL | gldm       | LowGrayLevelEmphasis                 | 0.068934293  |
| wavelet-LHL | glcm       | JointAverage                         | 15.57260806  |
| wavelet-LHL | glcm       | SumAverage                           | 31.14521612  |
| wavelet-LHL | glcm       | JointEntropy                         | 4.742096428  |
| wavelet-LHL | glcm       | ClusterShade                         | 4552.766953  |
| wavelet-LHL | glcm       | MaximumProbability                   | 0.057255927  |
| wavelet-LHL | glcm       | Idmn                                 | 0.898290017  |
| wavelet-LHL | glcm       | JointEnergy                          | 0.038906318  |
| wavelet-LHL | glcm       | Contrast                             | 252.9503173  |
| wavelet-LHL | glcm       | DifferenceEntropy                    | 3.319807185  |
| wavelet-LHL | glcm       | InverseVariance                      | 0.094213598  |
| wavelet-LHL | glcm       | DifferenceVariance                   | 74.79838566  |
| wavelet-LHL | glcm       | Idn                                  | 0.801562197  |
| wavelet-LHL | glcm       | Idm                                  | 0.106197455  |
| wavelet-LHL | glcm       | Correlation                          | 0.214604426  |
| wavelet-LHL | glcm       | Autocorrelation                      | 280.315797   |
| wavelet-LHL | glcm       | SumEntropy                           | 3.607960387  |
| wavelet-LHL | glcm       | SumSquares                           | 163.9335382  |
| wavelet-LHL | glcm       | ClusterProminence                    | 367602.07    |
| wavelet-LHL | glcm       | Imc2                                 | 0.998356966  |
| wavelet-LHL | glcm       | Imc1                                 | -0.757670496 |
| wavelet-LHL | glcm       | DifferenceAverage                    | 12.30876108  |
| wavelet-LHL | glcm       | Id                                   | 0.180040916  |
| wavelet-LHL | glcm       | ClusterTendency                      | 402.7838354  |
| wavelet-LHL | firstorder | InterquartileRange                   | 565.2772158  |
| wavelet-LHL | firstorder | Skewness                             | 0.54756507   |
| wavelet-LHL | firstorder | Uniformity                           | 0.071800208  |
| wavelet-LHL | firstorder | Median                               | -156.8643144 |
| wavelet-LHL | firstorder | Energy                               | 3287606.776  |
| wavelet-LHL | firstorder | RobustMeanAbsoluteDeviation          | 240.9276544  |
| wavelet-LHL | firstorder | MeanAbsoluteDeviation                | 288.7576962  |
| wavelet-LHL | firstorder | TotalEnergy                          | 88765382.94  |
| wavelet-LHL | firstorder | Maximum                              | 627.9821873  |

|             |            |                                  |              |
|-------------|------------|----------------------------------|--------------|
| wavelet-LHL | firstorder | RootMeanSquared                  | 325.6560017  |
| wavelet-LHL | firstorder | 90Percentile                     | 393.2033248  |
| wavelet-LHL | firstorder | Minimum                          | -421.2367889 |
| wavelet-LHL | firstorder | Entropy                          | 3.977916875  |
| wavelet-LHL | firstorder | Range                            | 1049.218976  |
| wavelet-LHL | firstorder | Variance                         | 104984.1405  |
| wavelet-LHL | firstorder | 10Percentile                     | -374.3366458 |
| wavelet-LHL | firstorder | Kurtosis                         | 1.951489442  |
| wavelet-LHL | firstorder | Mean                             | -32.67554044 |
| wavelet-LHL | glrlm      | ShortRunLowGrayLevelEmphasis     | 0.068719843  |
| wavelet-LHL | glrlm      | GrayLevelVariance                | 166.1326912  |
| wavelet-LHL | glrlm      | LowGrayLevelRunEmphasis          | 0.069587343  |
| wavelet-LHL | glrlm      | GrayLevelNonUniformityNormalized | 0.071211241  |
| wavelet-LHL | glrlm      | RunVariance                      | 0.029789273  |
| wavelet-LHL | glrlm      | GrayLevelNonUniformity           | 2.154598493  |
| wavelet-LHL | glrlm      | LongRunEmphasis                  | 1.087825776  |
| wavelet-LHL | glrlm      | ShortRunHighGrayLevelEmphasis    | 423.4223455  |
| wavelet-LHL | glrlm      | RunLengthNonUniformity           | 28.99720573  |
| wavelet-LHL | glrlm      | ShortRunEmphasis                 | 0.9809908    |
| wavelet-LHL | glrlm      | LongRunHighGrayLevelEmphasis     | 454.5188151  |
| wavelet-LHL | glrlm      | RunPercentage                    | 0.975186104  |
| wavelet-LHL | glrlm      | LongRunLowGrayLevelEmphasis      | 0.073528903  |
| wavelet-LHL | glrlm      | RunEntropy                       | 4.014007532  |
| wavelet-LHL | glrlm      | HighGrayLevelRunEmphasis         | 429.5826945  |
| wavelet-LHL | glrlm      | RunLengthNonUniformityNormalized | 0.955787775  |
| wavelet-LHL | glszm      | GrayLevelVariance                | 169.3801653  |
| wavelet-LHL | glszm      | ZoneVariance                     | 0.51446281   |
| wavelet-LHL | glszm      | GrayLevelNonUniformityNormalized | 0.061983471  |
| wavelet-LHL | glszm      | SizeZoneNonUniformityNormalized  | 0.566115702  |
| wavelet-LHL | glszm      | SizeZoneNonUniformity            | 12.45454545  |
| wavelet-LHL | glszm      | GrayLevelNonUniformity           | 1.363636364  |
| wavelet-LHL | glszm      | LargeAreaEmphasis                | 2.5          |
| wavelet-LHL | glszm      | SmallAreaHighGrayLevelEmphasis   | 370.4873737  |
| wavelet-LHL | glszm      | ZonePercentage                   | 0.709677419  |
| wavelet-LHL | glszm      | LargeAreaLowGrayLevelEmphasis    | 0.144237457  |
| wavelet-LHL | glszm      | LargeAreaHighGrayLevelEmphasis   | 873.4545455  |
| wavelet-LHL | glszm      | HighGrayLevelZoneEmphasis        | 467.7272727  |
| wavelet-LHL | glszm      | SmallAreaEmphasis                | 0.776515152  |
| wavelet-LHL | glszm      | LowGrayLevelZoneEmphasis         | 0.081379631  |
| wavelet-LHL | glszm      | ZoneEntropy                      | 4.095795255  |
| wavelet-LHL | glszm      | SmallAreaLowGrayLevelEmphasis    | 0.074327764  |
| wavelet-LHL | ngtdm      | Coarseness                       | 0.061421372  |
| wavelet-LHL | ngtdm      | Complexity                       | 2482.647471  |
| wavelet-LHL | ngtdm      | Strength                         | 51.38402311  |
| wavelet-LHL | ngtdm      | Contrast                         | 8.450903605  |
| wavelet-LHL | ngtdm      | Busyness                         | 0.060256724  |
| wavelet-LHH | gldm       | GrayLevelVariance                | 17.27575442  |
| wavelet-LHH | gldm       | HighGrayLevelEmphasis            | 171.516129   |
| wavelet-LHH | gldm       | DependenceEntropy                | 4.026619294  |
| wavelet-LHH | gldm       | DependenceNonUniformity          | 11.77419355  |
| wavelet-LHH | gldm       | GrayLevelNonUniformity           | 2.612903226  |
| wavelet-LHH | gldm       | SmallDependenceEmphasis          | 0.517921147  |

|             |            |                                      |              |
|-------------|------------|--------------------------------------|--------------|
| wavelet-LHH | gldm       | SmallDependenceHighGrayLevelEmphasis | 85.80824373  |
| wavelet-LHH | gldm       | DependenceNonUniformityNormalized    | 0.379812695  |
| wavelet-LHH | gldm       | LargeDependenceEmphasis              | 3.64516129   |
| wavelet-LHH | gldm       | LargeDependenceLowGrayLevelEmphasis  | 0.059975465  |
| wavelet-LHH | gldm       | DependenceVariance                   | 0.497398543  |
| wavelet-LHH | gldm       | LargeDependenceHighGrayLevelEmphasis | 628.6129032  |
| wavelet-LHH | gldm       | SmallDependenceLowGrayLevelEmphasis  | 0.039273132  |
| wavelet-LHH | gldm       | LowGrayLevelEmphasis                 | 0.042500264  |
| wavelet-LHH | glcm       | JointAverage                         | 12.52503038  |
| wavelet-LHH | glcm       | SumAverage                           | 25.05006077  |
| wavelet-LHH | glcm       | JointEntropy                         | 4.655855813  |
| wavelet-LHH | glcm       | ClusterShade                         | -116.3034994 |
| wavelet-LHH | glcm       | MaximumProbability                   | 0.070399607  |
| wavelet-LHH | glcm       | ldmn                                 | 0.926362832  |
| wavelet-LHH | glcm       | JointEnergy                          | 0.042494012  |
| wavelet-LHH | glcm       | Contrast                             | 33.26509786  |
| wavelet-LHH | glcm       | DifferenceEntropy                    | 2.806305363  |
| wavelet-LHH | glcm       | InverseVariance                      | 0.205451844  |
| wavelet-LHH | glcm       | DifferenceVariance                   | 11.58287684  |
| wavelet-LHH | glcm       | ldn                                  | 0.822645844  |
| wavelet-LHH | glcm       | ldm                                  | 0.189305501  |
| wavelet-LHH | glcm       | Correlation                          | -0.113182981 |
| wavelet-LHH | glcm       | Autocorrelation                      | 155.4244774  |
| wavelet-LHH | glcm       | SumEntropy                           | 3.023741931  |
| wavelet-LHH | glcm       | SumSquares                           | 14.91724789  |
| wavelet-LHH | glcm       | ClusterProminence                    | 2824.548698  |
| wavelet-LHH | glcm       | lmc2                                 | 0.99566638   |
| wavelet-LHH | glcm       | lmc1                                 | -0.682943764 |
| wavelet-LHH | glcm       | DifferenceAverage                    | 4.566028034  |
| wavelet-LHH | glcm       | ld                                   | 0.284799645  |
| wavelet-LHH | glcm       | ClusterTendency                      | 26.40389372  |
| wavelet-LHH | firstorder | InterquartileRange                   | 122.472774   |
| wavelet-LHH | firstorder | Skewness                             | -0.838858299 |
| wavelet-LHH | firstorder | Uniformity                           | 0.084287201  |
| wavelet-LHH | firstorder | Median                               | 33.2302953   |
| wavelet-LHH | firstorder | Energy                               | 359131.7977  |
| wavelet-LHH | firstorder | RobustMeanAbsoluteDeviation          | 50.75695947  |
| wavelet-LHH | firstorder | MeanAbsoluteDeviation                | 78.59013781  |
| wavelet-LHH | firstorder | TotalEnergy                          | 9696558.537  |
| wavelet-LHH | firstorder | Maximum                              | 187.0007735  |
| wavelet-LHH | firstorder | RootMeanSquared                      | 107.633158   |
| wavelet-LHH | firstorder | 90Percentile                         | 155.0131053  |
| wavelet-LHH | firstorder | Minimum                              | -270.9398936 |
| wavelet-LHH | firstorder | Entropy                              | 3.732444601  |
| wavelet-LHH | firstorder | Range                                | 457.940667   |
| wavelet-LHH | firstorder | Variance                             | 11028.30188  |
| wavelet-LHH | firstorder | 10Percentile                         | -87.87727553 |
| wavelet-LHH | firstorder | Kurtosis                             | 3.813617792  |
| wavelet-LHH | firstorder | Mean                                 | 23.59226185  |
| wavelet-LHH | glrlm      | ShortRunLowGrayLevelEmphasis         | 0.043484486  |
| wavelet-LHH | glrlm      | GrayLevelVariance                    | 17.62565656  |
| wavelet-LHH | glrlm      | LowGrayLevelRunEmphasis              | 0.043642791  |



|             |       |                                      |             |
|-------------|-------|--------------------------------------|-------------|
| wavelet-LHH | glrlm | GrayLevelNonUniformityNormalized     | 0.083982376 |
| wavelet-LHH | glrlm | RunVariance                          | 0.029612135 |
| wavelet-LHH | glrlm | GrayLevelNonUniformity               | 2.52627869  |
| wavelet-LHH | glrlm | LongRunEmphasis                      | 1.095547556 |
| wavelet-LHH | glrlm | ShortRunHighGrayLevelEmphasis        | 167.21987   |
| wavelet-LHH | glrlm | RunLengthNonUniformity               | 28.35926487 |
| wavelet-LHH | glrlm | ShortRunEmphasis                     | 0.976113111 |
| wavelet-LHH | glrlm | LongRunHighGrayLevelEmphasis         | 188.1318158 |
| wavelet-LHH | glrlm | RunPercentage                        | 0.970223325 |
| wavelet-LHH | glrlm | LongRunLowGrayLevelEmphasis          | 0.044276008 |
| wavelet-LHH | glrlm | RunEntropy                           | 3.784451619 |
| wavelet-LHH | glrlm | HighGrayLevelRunEmphasis             | 171.4022591 |
| wavelet-LHH | glrlm | RunLengthNonUniformityNormalized     | 0.94077573  |
| wavelet-LHH | glszm | GrayLevelVariance                    | 23.0475     |
| wavelet-LHH | glszm | ZoneVariance                         | 0.5475      |
| wavelet-LHH | glszm | GrayLevelNonUniformityNormalized     | 0.075       |
| wavelet-LHH | glszm | SizeZoneNonUniformityNormalized      | 0.445       |
| wavelet-LHH | glszm | SizeZoneNonUniformity                | 8.9         |
| wavelet-LHH | glszm | GrayLevelNonUniformity               | 1.5         |
| wavelet-LHH | glszm | LargeAreaEmphasis                    | 2.95        |
| wavelet-LHH | glszm | SmallAreaHighGrayLevelEmphasis       | 110.6027778 |
| wavelet-LHH | glszm | ZonePercentage                       | 0.64516129  |
| wavelet-LHH | glszm | LargeAreaLowGrayLevelEmphasis        | 0.074944433 |
| wavelet-LHH | glszm | LargeAreaHighGrayLevelEmphasis       | 511.95      |
| wavelet-LHH | glszm | HighGrayLevelZoneEmphasis            | 168.25      |
| wavelet-LHH | glszm | SmallAreaEmphasis                    | 0.679166667 |
| wavelet-LHH | glszm | LowGrayLevelZoneEmphasis             | 0.062239081 |
| wavelet-LHH | glszm | ZoneEntropy                          | 4.021928095 |
| wavelet-LHH | glszm | SmallAreaLowGrayLevelEmphasis        | 0.060060723 |
| wavelet-LHH | ngtdm | Coarseness                           | 0.155532556 |
| wavelet-LHH | ngtdm | Complexity                           | 320.1016964 |
| wavelet-LHH | ngtdm | Strength                             | 12.48765306 |
| wavelet-LHH | ngtdm | Contrast                             | 0.564969558 |
| wavelet-LHH | ngtdm | Busyness                             | 0.047501235 |
| wavelet-LLH | gldm  | GrayLevelVariance                    | 159.8938606 |
| wavelet-LLH | gldm  | HighGrayLevelEmphasis                | 480.4193548 |
| wavelet-LLH | gldm  | DependenceEntropy                    | 4.631615665 |
| wavelet-LLH | gldm  | DependenceNonUniformity              | 19.77419355 |
| wavelet-LLH | gldm  | GrayLevelNonUniformity               | 1.451612903 |
| wavelet-LLH | gldm  | SmallDependenceEmphasis              | 0.826164875 |
| wavelet-LLH | gldm  | SmallDependenceHighGrayLevelEmphasis | 457.0896057 |
| wavelet-LLH | gldm  | DependenceNonUniformityNormalized    | 0.637877211 |
| wavelet-LLH | gldm  | LargeDependenceEmphasis              | 1.838709677 |
| wavelet-LLH | gldm  | LargeDependenceLowGrayLevelEmphasis  | 0.060192876 |
| wavelet-LLH | gldm  | DependenceVariance                   | 0.255983351 |
| wavelet-LLH | gldm  | LargeDependenceHighGrayLevelEmphasis | 601.8387097 |
| wavelet-LLH | gldm  | SmallDependenceLowGrayLevelEmphasis  | 0.050558635 |
| wavelet-LLH | gldm  | LowGrayLevelEmphasis                 | 0.052339188 |
| wavelet-LLH | glcm  | JointAverage                         | 17.3844592  |
| wavelet-LLH | glcm  | SumAverage                           | 34.7689184  |
| wavelet-LLH | glcm  | JointEntropy                         | 4.812201981 |
| wavelet-LLH | glcm  | ClusterShade                         | 5384.840593 |

|             |            |                                  |              |
|-------------|------------|----------------------------------|--------------|
| wavelet-LLH | glcm       | MaximumProbability               | 0.044589646  |
| wavelet-LLH | glcm       | Idmn                             | 0.919280588  |
| wavelet-LLH | glcm       | JointEnergy                      | 0.036456126  |
| wavelet-LLH | glcm       | Contrast                         | 224.5229346  |
| wavelet-LLH | glcm       | DifferenceEntropy                | 3.32589559   |
| wavelet-LLH | glcm       | InverseVariance                  | 0.086227809  |
| wavelet-LLH | glcm       | DifferenceVariance               | 64.37092587  |
| wavelet-LLH | glcm       | Idn                              | 0.815780574  |
| wavelet-LLH | glcm       | Idm                              | 0.074353456  |
| wavelet-LLH | glcm       | Correlation                      | 0.284657042  |
| wavelet-LLH | glcm       | Autocorrelation                  | 346.0714759  |
| wavelet-LLH | glcm       | SumEntropy                       | 3.729761395  |
| wavelet-LLH | glcm       | SumSquares                       | 155.7404359  |
| wavelet-LLH | glcm       | ClusterProminence                | 429516.9827  |
| wavelet-LLH | glcm       | Imc2                             | 0.99954945   |
| wavelet-LLH | glcm       | Imc1                             | -0.847971734 |
| wavelet-LLH | glcm       | DifferenceAverage                | 11.89149359  |
| wavelet-LLH | glcm       | Id                               | 0.152614013  |
| wavelet-LLH | glcm       | ClusterTendency                  | 398.4388089  |
| wavelet-LLH | firstorder | InterquartileRange               | 452.6246423  |
| wavelet-LLH | firstorder | Skewness                         | 0.799641988  |
| wavelet-LLH | firstorder | Uniformity                       | 0.046826223  |
| wavelet-LLH | firstorder | Median                           | -102.1611891 |
| wavelet-LLH | firstorder | Energy                           | 3139058.588  |
| wavelet-LLH | firstorder | RobustMeanAbsoluteDeviation      | 182.7300354  |
| wavelet-LLH | firstorder | MeanAbsoluteDeviation            | 253.7132526  |
| wavelet-LLH | firstorder | TotalEnergy                      | 84754581.88  |
| wavelet-LLH | firstorder | Maximum                          | 687.025543   |
| wavelet-LLH | firstorder | RootMeanSquared                  | 318.2136931  |
| wavelet-LLH | firstorder | 90Percentile                     | 531.4495774  |
| wavelet-LLH | firstorder | Minimum                          | -455.6126033 |
| wavelet-LLH | firstorder | Entropy                          | 4.542748326  |
| wavelet-LLH | firstorder | Range                            | 1142.638146  |
| wavelet-LLH | firstorder | Variance                         | 99735.36539  |
| wavelet-LLH | firstorder | 10Percentile                     | -386.4451995 |
| wavelet-LLH | firstorder | Kurtosis                         | 2.793386646  |
| wavelet-LLH | firstorder | Mean                             | -39.04598657 |
| wavelet-LLH | glrlm      | ShortRunLowGrayLevelEmphasis     | 0.052706372  |
| wavelet-LLH | glrlm      | GrayLevelVariance                | 161.0106008  |
| wavelet-LLH | glrlm      | LowGrayLevelRunEmphasis          | 0.052783037  |
| wavelet-LLH | glrlm      | GrayLevelNonUniformityNormalized | 0.04642496   |
| wavelet-LLH | glrlm      | RunVariance                      | 0.00989644   |
| wavelet-LLH | glrlm      | GrayLevelNonUniformity           | 1.425201791  |
| wavelet-LLH | glrlm      | LongRunEmphasis                  | 1.031299735  |
| wavelet-LLH | glrlm      | ShortRunHighGrayLevelEmphasis    | 482.8835886  |
| wavelet-LLH | glrlm      | RunLengthNonUniformity           | 30.10839965  |
| wavelet-LLH | glrlm      | ShortRunEmphasis                 | 0.992175066  |
| wavelet-LLH | glrlm      | LongRunHighGrayLevelEmphasis     | 488.3438008  |
| wavelet-LLH | glrlm      | RunPercentage                    | 0.990074442  |
| wavelet-LLH | glrlm      | LongRunLowGrayLevelEmphasis      | 0.053089694  |
| wavelet-LLH | glrlm      | RunEntropy                       | 4.558770727  |
| wavelet-LLH | glrlm      | HighGrayLevelRunEmphasis         | 483.975631   |

|             |       |                                      |              |
|-------------|-------|--------------------------------------|--------------|
| wavelet-LLH | glrlm | RunLengthNonUniformityNormalized     | 0.98020712   |
| wavelet-LLH | glszm | GrayLevelVariance                    | 175.3854595  |
| wavelet-LLH | glszm | ZoneVariance                         | 0.200274348  |
| wavelet-LLH | glszm | GrayLevelNonUniformityNormalized     | 0.042524005  |
| wavelet-LLH | glszm | SizeZoneNonUniformityNormalized      | 0.796982167  |
| wavelet-LLH | glszm | SizeZoneNonUniformity                | 21.51851852  |
| wavelet-LLH | glszm | GrayLevelNonUniformity               | 1.148148148  |
| wavelet-LLH | glszm | LargeAreaEmphasis                    | 1.518518519  |
| wavelet-LLH | glszm | SmallAreaHighGrayLevelEmphasis       | 519.6028807  |
| wavelet-LLH | glszm | ZonePercentage                       | 0.870967742  |
| wavelet-LLH | glszm | LargeAreaLowGrayLevelEmphasis        | 0.063350827  |
| wavelet-LLH | glszm | LargeAreaHighGrayLevelEmphasis       | 607.7407407  |
| wavelet-LLH | glszm | HighGrayLevelZoneEmphasis            | 530.7777778  |
| wavelet-LLH | glszm | SmallAreaEmphasis                    | 0.911522634  |
| wavelet-LLH | glszm | LowGrayLevelZoneEmphasis             | 0.058653264  |
| wavelet-LLH | glszm | ZoneEntropy                          | 4.606739354  |
| wavelet-LLH | glszm | SmallAreaLowGrayLevelEmphasis        | 0.057688833  |
| wavelet-LLH | ngtdm | Coarseness                           | 0.118205879  |
| wavelet-LLH | ngtdm | Complexity                           | 2975.850259  |
| wavelet-LLH | ngtdm | Strength                             | 84.69323323  |
| wavelet-LLH | ngtdm | Contrast                             | 3.521795032  |
| wavelet-LLH | ngtdm | Busyness                             | 0.023465846  |
| wavelet-LLL | gldm  | GrayLevelVariance                    | 324.5515088  |
| wavelet-LLL | gldm  | HighGrayLevelEmphasis                | 967.4193548  |
| wavelet-LLL | gldm  | DependenceEntropy                    | 4.567099536  |
| wavelet-LLL | gldm  | DependenceNonUniformity              | 17.4516129   |
| wavelet-LLL | gldm  | GrayLevelNonUniformity               | 1.516129032  |
| wavelet-LLL | gldm  | SmallDependenceEmphasis              | 0.758064516  |
| wavelet-LLL | gldm  | SmallDependenceHighGrayLevelEmphasis | 638.9193548  |
| wavelet-LLL | gldm  | DependenceNonUniformityNormalized    | 0.562955255  |
| wavelet-LLL | gldm  | LargeDependenceEmphasis              | 1.967741935  |
| wavelet-LLL | gldm  | LargeDependenceLowGrayLevelEmphasis  | 0.057063297  |
| wavelet-LLL | gldm  | DependenceVariance                   | 0.218522373  |
| wavelet-LLL | gldm  | LargeDependenceHighGrayLevelEmphasis | 2281.419355  |
| wavelet-LLL | gldm  | SmallDependenceLowGrayLevelEmphasis  | 0.036094083  |
| wavelet-LLL | gldm  | LowGrayLevelEmphasis                 | 0.040287926  |
| wavelet-LLL | glcm  | JointAverage                         | 30.44489789  |
| wavelet-LLL | glcm  | SumAverage                           | 60.88979578  |
| wavelet-LLL | glcm  | JointEntropy                         | 4.820457709  |
| wavelet-LLL | glcm  | ClusterShade                         | 2725.26673   |
| wavelet-LLL | glcm  | MaximumProbability                   | 0.048457733  |
| wavelet-LLL | glcm  | ldmn                                 | 0.862567825  |
| wavelet-LLL | glcm  | JointEnergy                          | 0.036410262  |
| wavelet-LLL | glcm  | Contrast                             | 793.6093558  |
| wavelet-LLL | glcm  | DifferenceEntropy                    | 3.6494503    |
| wavelet-LLL | glcm  | InverseVariance                      | 0.060994643  |
| wavelet-LLL | glcm  | DifferenceVariance                   | 253.1526879  |
| wavelet-LLL | glcm  | ldn                                  | 0.762361031  |
| wavelet-LLL | glcm  | ldm                                  | 0.062206854  |
| wavelet-LLL | glcm  | Correlation                          | -0.047999009 |
| wavelet-LLL | glcm  | Autocorrelation                      | 910.80173    |
| wavelet-LLL | glcm  | SumEntropy                           | 3.781383895  |

|             |            |                                  |              |
|-------------|------------|----------------------------------|--------------|
| wavelet-LLL | glcm       | SumSquares                       | 378.6936475  |
| wavelet-LLL | glcm       | ClusterProminence                | 1175082.194  |
| wavelet-LLL | glcm       | Imc2                             | 0.999558303  |
| wavelet-LLL | glcm       | Imc1                             | -0.847714642 |
| wavelet-LLL | glcm       | DifferenceAverage                | 22.89079121  |
| wavelet-LLL | glcm       | Id                               | 0.113600143  |
| wavelet-LLL | glcm       | ClusterTendency                  | 721.1652341  |
| wavelet-LLL | firstorder | InterquartileRange               | 671.4471095  |
| wavelet-LLL | firstorder | Skewness                         | 0.677908461  |
| wavelet-LLL | firstorder | Uniformity                       | 0.048907388  |
| wavelet-LLL | firstorder | Median                           | -1090.910466 |
| wavelet-LLL | firstorder | Energy                           | 31546353.65  |
| wavelet-LLL | firstorder | RobustMeanAbsoluteDeviation      | 295.1356448  |
| wavelet-LLL | firstorder | MeanAbsoluteDeviation            | 384.9124995  |
| wavelet-LLL | firstorder | TotalEnergy                      | 851751548.4  |
| wavelet-LLL | firstorder | Maximum                          | 60.99772819  |
| wavelet-LLL | firstorder | RootMeanSquared                  | 1008.773667  |
| wavelet-LLL | firstorder | 90Percentile                     | -341.0884844 |
| wavelet-LLL | firstorder | Minimum                          | -1502.608257 |
| wavelet-LLL | firstorder | Entropy                          | 4.478232197  |
| wavelet-LLL | firstorder | Range                            | 1563.605985  |
| wavelet-LLL | firstorder | Variance                         | 201884.3379  |
| wavelet-LLL | firstorder | 10Percentile                     | -1374.032296 |
| wavelet-LLL | firstorder | Kurtosis                         | 2.288692689  |
| wavelet-LLL | firstorder | Mean                             | -903.1832446 |
| wavelet-LLL | glrlm      | ShortRunLowGrayLevelEmphasis     | 0.040415522  |
| wavelet-LLL | glrlm      | GrayLevelVariance                | 321.152467   |
| wavelet-LLL | glrlm      | LowGrayLevelRunEmphasis          | 0.0405822    |
| wavelet-LLL | glrlm      | GrayLevelNonUniformityNormalized | 0.048729333  |
| wavelet-LLL | glrlm      | RunVariance                      | 0.012393162  |
| wavelet-LLL | glrlm      | GrayLevelNonUniformity           | 1.49197684   |
| wavelet-LLL | glrlm      | LongRunEmphasis                  | 1.038461538  |
| wavelet-LLL | glrlm      | ShortRunHighGrayLevelEmphasis    | 949.3587055  |
| wavelet-LLL | glrlm      | RunLengthNonUniformity           | 29.87179487  |
| wavelet-LLL | glrlm      | ShortRunEmphasis                 | 0.990384615  |
| wavelet-LLL | glrlm      | LongRunHighGrayLevelEmphasis     | 1014.637552  |
| wavelet-LLL | glrlm      | RunPercentage                    | 0.987593052  |
| wavelet-LLL | glrlm      | LongRunLowGrayLevelEmphasis      | 0.041248914  |
| wavelet-LLL | glrlm      | RunEntropy                       | 4.486640427  |
| wavelet-LLL | glrlm      | HighGrayLevelRunEmphasis         | 962.4144748  |
| wavelet-LLL | glrlm      | RunLengthNonUniformityNormalized | 0.975213675  |
| wavelet-LLL | glszm      | GrayLevelVariance                | 276.9245562  |
| wavelet-LLL | glszm      | ZoneVariance                     | 0.155325444  |
| wavelet-LLL | glszm      | GrayLevelNonUniformityNormalized | 0.044378698  |
| wavelet-LLL | glszm      | SizeZoneNonUniformityNormalized  | 0.689349112  |
| wavelet-LLL | glszm      | SizeZoneNonUniformity            | 17.92307692  |
| wavelet-LLL | glszm      | GrayLevelNonUniformity           | 1.153846154  |
| wavelet-LLL | glszm      | LargeAreaEmphasis                | 1.576923077  |
| wavelet-LLL | glszm      | SmallAreaHighGrayLevelEmphasis   | 696.5096154  |
| wavelet-LLL | glszm      | ZonePercentage                   | 0.838709677  |
| wavelet-LLL | glszm      | LargeAreaLowGrayLevelEmphasis    | 0.054702739  |
| wavelet-LLL | glszm      | LargeAreaHighGrayLevelEmphasis   | 1675.692308  |

|             |            |                                      |              |
|-------------|------------|--------------------------------------|--------------|
| wavelet-LLL | glszm      | HighGrayLevelZoneEmphasis            | 892.3461538  |
| wavelet-LLL | glszm      | SmallAreaEmphasis                    | 0.855769231  |
| wavelet-LLL | glszm      | LowGrayLevelZoneEmphasis             | 0.044702037  |
| wavelet-LLL | glszm      | ZoneEntropy                          | 4.623516641  |
| wavelet-LLL | glszm      | SmallAreaLowGrayLevelEmphasis        | 0.042201861  |
| wavelet-LLL | ngtdm      | Coarseness                           | 0.03722723   |
| wavelet-LLL | ngtdm      | Complexity                           | 9758.825983  |
| wavelet-LLL | ngtdm      | Strength                             | 56.31672174  |
| wavelet-LLL | ngtdm      | Contrast                             | 20.01203922  |
| wavelet-LLL | ngtdm      | Busyness                             | 0.051124987  |
| wavelet-HHL | gldm       | GrayLevelVariance                    | 15.0301769   |
| wavelet-HHL | gldm       | HighGrayLevelEmphasis                | 100.7419355  |
| wavelet-HHL | gldm       | DependenceEntropy                    | 4.002268084  |
| wavelet-HHL | gldm       | DependenceNonUniformity              | 11.90322581  |
| wavelet-HHL | gldm       | GrayLevelNonUniformity               | 2.935483871  |
| wavelet-HHL | gldm       | SmallDependenceEmphasis              | 0.61155914   |
| wavelet-HHL | gldm       | SmallDependenceHighGrayLevelEmphasis | 61.57930108  |
| wavelet-HHL | gldm       | DependenceNonUniformityNormalized    | 0.383975026  |
| wavelet-HHL | gldm       | LargeDependenceEmphasis              | 3.709677419  |
| wavelet-HHL | gldm       | LargeDependenceLowGrayLevelEmphasis  | 0.0824801    |
| wavelet-HHL | gldm       | DependenceVariance                   | 0.786680541  |
| wavelet-HHL | gldm       | LargeDependenceHighGrayLevelEmphasis | 397.2580645  |
| wavelet-HHL | gldm       | SmallDependenceLowGrayLevelEmphasis  | 0.045987992  |
| wavelet-HHL | gldm       | LowGrayLevelEmphasis                 | 0.051375812  |
| wavelet-HHL | glcm       | JointAverage                         | 9.116455483  |
| wavelet-HHL | glcm       | SumAverage                           | 18.23291097  |
| wavelet-HHL | glcm       | JointEntropy                         | 4.655025284  |
| wavelet-HHL | glcm       | ClusterShade                         | 9.340104802  |
| wavelet-HHL | glcm       | MaximumProbability                   | 0.076290098  |
| wavelet-HHL | glcm       | Idmn                                 | 0.918498574  |
| wavelet-HHL | glcm       | JointEnergy                          | 0.04330662   |
| wavelet-HHL | glcm       | Contrast                             | 33.06133642  |
| wavelet-HHL | glcm       | DifferenceEntropy                    | 2.751681726  |
| wavelet-HHL | glcm       | InverseVariance                      | 0.222910935  |
| wavelet-HHL | glcm       | DifferenceVariance                   | 10.91778275  |
| wavelet-HHL | glcm       | Idn                                  | 0.814248044  |
| wavelet-HHL | glcm       | Idm                                  | 0.193547086  |
| wavelet-HHL | glcm       | Correlation                          | -0.059048478 |
| wavelet-HHL | glcm       | Autocorrelation                      | 82.33874787  |
| wavelet-HHL | glcm       | SumEntropy                           | 3.334132713  |
| wavelet-HHL | glcm       | SumSquares                           | 15.64312466  |
| wavelet-HHL | glcm       | ClusterProminence                    | 2368.495612  |
| wavelet-HHL | glcm       | Imc2                                 | 0.995008432  |
| wavelet-HHL | glcm       | Imc1                                 | -0.668424355 |
| wavelet-HHL | glcm       | DifferenceAverage                    | 4.59230717   |
| wavelet-HHL | glcm       | Id                                   | 0.28539879   |
| wavelet-HHL | glcm       | ClusterTendency                      | 29.51116223  |
| wavelet-HHL | firstorder | InterquartileRange                   | 111.4086231  |
| wavelet-HHL | firstorder | Skewness                             | 0.082171057  |
| wavelet-HHL | firstorder | Uniformity                           | 0.094693028  |
| wavelet-HHL | firstorder | Median                               | 2.186985377  |
| wavelet-HHL | firstorder | Energy                               | 295276.1702  |

|             |            |                                  |              |
|-------------|------------|----------------------------------|--------------|
| wavelet-HHL | firstorder | RobustMeanAbsoluteDeviation      | 52.89878136  |
| wavelet-HHL | firstorder | MeanAbsoluteDeviation            | 76.3340608   |
| wavelet-HHL | firstorder | TotalEnergy                      | 7972456.597  |
| wavelet-HHL | firstorder | Maximum                          | 210.5404474  |
| wavelet-HHL | firstorder | RootMeanSquared                  | 97.59629988  |
| wavelet-HHL | firstorder | 90Percentile                     | 120.0812151  |
| wavelet-HHL | firstorder | Minimum                          | -206.3499227 |
| wavelet-HHL | firstorder | Entropy                          | 3.640355796  |
| wavelet-HHL | firstorder | Range                            | 416.8903701  |
| wavelet-HHL | firstorder | Variance                         | 9491.317859  |
| wavelet-HHL | firstorder | 10Percentile                     | -129.5002722 |
| wavelet-HHL | firstorder | Kurtosis                         | 2.699093515  |
| wavelet-HHL | firstorder | Mean                             | -5.806883073 |
| wavelet-HHL | grlm       | ShortRunLowGrayLevelEmphasis     | 0.052242288  |
| wavelet-HHL | grlm       | GrayLevelVariance                | 15.31672896  |
| wavelet-HHL | grlm       | LowGrayLevelRunEmphasis          | 0.052515746  |
| wavelet-HHL | grlm       | GrayLevelNonUniformityNormalized | 0.09334566   |
| wavelet-HHL | grlm       | RunVariance                      | 0.027133503  |
| wavelet-HHL | grlm       | GrayLevelNonUniformity           | 2.816466811  |
| wavelet-HHL | grlm       | LongRunEmphasis                  | 1.087855248  |
| wavelet-HHL | grlm       | ShortRunHighGrayLevelEmphasis    | 98.2663867   |
| wavelet-HHL | grlm       | RunLengthNonUniformity           | 28.5849059   |
| wavelet-HHL | grlm       | ShortRunEmphasis                 | 0.978036188  |
| wavelet-HHL | grlm       | LongRunHighGrayLevelEmphasis     | 109.8930682  |
| wavelet-HHL | grlm       | RunPercentage                    | 0.972704715  |
| wavelet-HHL | grlm       | LongRunLowGrayLevelEmphasis      | 0.053609578  |
| wavelet-HHL | grlm       | RunEntropy                       | 3.697476478  |
| wavelet-HHL | grlm       | HighGrayLevelRunEmphasis         | 100.591723   |
| wavelet-HHL | grlm       | RunLengthNonUniformityNormalized | 0.945732995  |
| wavelet-HHL | glszm      | GrayLevelVariance                | 18.81818182  |
| wavelet-HHL | glszm      | ZoneVariance                     | 0.787190083  |
| wavelet-HHL | glszm      | GrayLevelNonUniformityNormalized | 0.082644628  |
| wavelet-HHL | glszm      | SizeZoneNonUniformityNormalized  | 0.582644628  |
| wavelet-HHL | glszm      | SizeZoneNonUniformity            | 12.81818182  |
| wavelet-HHL | glszm      | GrayLevelNonUniformity           | 1.818181818  |
| wavelet-HHL | glszm      | LargeAreaEmphasis                | 2.772727273  |
| wavelet-HHL | glszm      | SmallAreaHighGrayLevelEmphasis   | 79.43590909  |
| wavelet-HHL | glszm      | ZonePercentage                   | 0.709677419  |
| wavelet-HHL | glszm      | LargeAreaLowGrayLevelEmphasis    | 0.087754094  |
| wavelet-HHL | glszm      | LargeAreaHighGrayLevelEmphasis   | 292.2272727  |
| wavelet-HHL | glszm      | HighGrayLevelZoneEmphasis        | 99.81818182  |
| wavelet-HHL | glszm      | SmallAreaEmphasis                | 0.785909091  |
| wavelet-HHL | glszm      | LowGrayLevelZoneEmphasis         | 0.066966681  |
| wavelet-HHL | glszm      | ZoneEntropy                      | 3.970573096  |
| wavelet-HHL | glszm      | SmallAreaLowGrayLevelEmphasis    | 0.063663141  |
| wavelet-HHL | ngtdm      | Coarseness                       | 0.134360101  |
| wavelet-HHL | ngtdm      | Complexity                       | 303.2978293  |
| wavelet-HHL | ngtdm      | Strength                         | 11.66146777  |
| wavelet-HHL | ngtdm      | Contrast                         | 0.479402061  |
| wavelet-HHL | ngtdm      | Busyness                         | 0.065546379  |
| wavelet-HLH | gldm       | GrayLevelVariance                | 29.15296566  |
| wavelet-HLH | gldm       | HighGrayLevelEmphasis            | 185          |

|             |            |                                      |              |
|-------------|------------|--------------------------------------|--------------|
| wavelet-HLH | gldm       | DependenceEntropy                    | 4.106949133  |
| wavelet-HLH | gldm       | DependenceNonUniformity              | 11.64516129  |
| wavelet-HLH | gldm       | GrayLevelNonUniformity               | 2.806451613  |
| wavelet-HLH | gldm       | SmallDependenceEmphasis              | 0.586021505  |
| wavelet-HLH | gldm       | SmallDependenceHighGrayLevelEmphasis | 114.8763441  |
| wavelet-HLH | gldm       | DependenceNonUniformityNormalized    | 0.375650364  |
| wavelet-HLH | gldm       | LargeDependenceEmphasis              | 3.516129032  |
| wavelet-HLH | gldm       | LargeDependenceLowGrayLevelEmphasis  | 0.08726228   |
| wavelet-HLH | gldm       | DependenceVariance                   | 0.593132154  |
| wavelet-HLH | gldm       | LargeDependenceHighGrayLevelEmphasis | 705.0645161  |
| wavelet-HLH | gldm       | SmallDependenceLowGrayLevelEmphasis  | 0.039285015  |
| wavelet-HLH | gldm       | LowGrayLevelEmphasis                 | 0.048203296  |
| wavelet-HLH | glcm       | JointAverage                         | 12.61886148  |
| wavelet-HLH | glcm       | SumAverage                           | 25.23772296  |
| wavelet-HLH | glcm       | JointEntropy                         | 4.697457902  |
| wavelet-HLH | glcm       | ClusterShade                         | -258.6293934 |
| wavelet-HLH | glcm       | MaximumProbability                   | 0.062844662  |
| wavelet-HLH | glcm       | ldmn                                 | 0.885235416  |
| wavelet-HLH | glcm       | JointEnergy                          | 0.040266503  |
| wavelet-HLH | glcm       | Contrast                             | 68.87283396  |
| wavelet-HLH | glcm       | DifferenceEntropy                    | 2.971829143  |
| wavelet-HLH | glcm       | InverseVariance                      | 0.16122837   |
| wavelet-HLH | glcm       | DifferenceVariance                   | 18.94428891  |
| wavelet-HLH | glcm       | ldn                                  | 0.78353126   |
| wavelet-HLH | glcm       | ldm                                  | 0.149553315  |
| wavelet-HLH | glcm       | Correlation                          | -0.017862532 |
| wavelet-HLH | glcm       | Autocorrelation                      | 159.4089155  |
| wavelet-HLH | glcm       | SumEntropy                           | 3.364349524  |
| wavelet-HLH | glcm       | SumSquares                           | 34.33389769  |
| wavelet-HLH | glcm       | ClusterProminence                    | 12182.47468  |
| wavelet-HLH | glcm       | lmc2                                 | 0.996806868  |
| wavelet-HLH | glcm       | lmc1                                 | -0.709008838 |
| wavelet-HLH | glcm       | DifferenceAverage                    | 6.632591009  |
| wavelet-HLH | glcm       | ld                                   | 0.23644397   |
| wavelet-HLH | glcm       | ClusterTendency                      | 68.4627568   |
| wavelet-HLH | firstorder | InterquartileRange                   | 212.2536729  |
| wavelet-HLH | firstorder | Skewness                             | -0.560911567 |
| wavelet-HLH | firstorder | Uniformity                           | 0.090530697  |
| wavelet-HLH | firstorder | Median                               | 32.30076679  |
| wavelet-HLH | firstorder | Energy                               | 565170.5916  |
| wavelet-HLH | firstorder | RobustMeanAbsoluteDeviation          | 81.90452091  |
| wavelet-HLH | firstorder | MeanAbsoluteDeviation                | 110.7609739  |
| wavelet-HLH | firstorder | TotalEnergy                          | 15259605.97  |
| wavelet-HLH | firstorder | Maximum                              | 210.2970091  |
| wavelet-HLH | firstorder | RootMeanSquared                      | 135.0233662  |
| wavelet-HLH | firstorder | 90Percentile                         | 157.2359496  |
| wavelet-HLH | firstorder | Minimum                              | -291.0425197 |
| wavelet-HLH | firstorder | Entropy                              | 3.735666068  |
| wavelet-HLH | firstorder | Range                                | 501.3395288  |
| wavelet-HLH | firstorder | Variance                             | 18230.08619  |
| wavelet-HLH | firstorder | 10Percentile                         | -215.8494996 |
| wavelet-HLH | firstorder | Kurtosis                             | 2.277655214  |

|             |            |                                  |              |
|-------------|------------|----------------------------------|--------------|
| wavelet-HLH | firstorder | Mean                             | -1.105991614 |
| wavelet-HLH | glrlm      | ShortRunLowGrayLevelEmphasis     | 0.048699666  |
| wavelet-HLH | glrlm      | GrayLevelVariance                | 29.18664874  |
| wavelet-HLH | glrlm      | LowGrayLevelRunEmphasis          | 0.049099612  |
| wavelet-HLH | glrlm      | GrayLevelNonUniformityNormalized | 0.089406811  |
| wavelet-HLH | glrlm      | RunVariance                      | 0.032475462  |
| wavelet-HLH | glrlm      | GrayLevelNonUniformity           | 2.69781664   |
| wavelet-HLH | glrlm      | LongRunEmphasis                  | 1.095177045  |
| wavelet-HLH | glrlm      | ShortRunHighGrayLevelEmphasis    | 180.8603022  |
| wavelet-HLH | glrlm      | RunLengthNonUniformity           | 28.74354904  |
| wavelet-HLH | glrlm      | ShortRunEmphasis                 | 0.979258242  |
| wavelet-HLH | glrlm      | LongRunHighGrayLevelEmphasis     | 203.0349817  |
| wavelet-HLH | glrlm      | RunPercentage                    | 0.972704715  |
| wavelet-HLH | glrlm      | LongRunLowGrayLevelEmphasis      | 0.050761692  |
| wavelet-HLH | glrlm      | RunEntropy                       | 3.795267424  |
| wavelet-HLH | glrlm      | HighGrayLevelRunEmphasis         | 184.8166056  |
| wavelet-HLH | glrlm      | RunLengthNonUniformityNormalized | 0.950355199  |
| wavelet-HLH | glszm      | GrayLevelVariance                | 30.81632653  |
| wavelet-HLH | glszm      | ZoneVariance                     | 0.916099773  |
| wavelet-HLH | glszm      | GrayLevelNonUniformityNormalized | 0.074829932  |
| wavelet-HLH | glszm      | SizeZoneNonUniformityNormalized  | 0.551020408  |
| wavelet-HLH | glszm      | SizeZoneNonUniformity            | 11.57142857  |
| wavelet-HLH | glszm      | GrayLevelNonUniformity           | 1.571428571  |
| wavelet-HLH | glszm      | LargeAreaEmphasis                | 3.095238095  |
| wavelet-HLH | glszm      | SmallAreaHighGrayLevelEmphasis   | 155.2238624  |
| wavelet-HLH | glszm      | ZonePercentage                   | 0.677419355  |
| wavelet-HLH | glszm      | LargeAreaLowGrayLevelEmphasis    | 0.092542473  |
| wavelet-HLH | glszm      | LargeAreaHighGrayLevelEmphasis   | 587.952381   |
| wavelet-HLH | glszm      | HighGrayLevelZoneEmphasis        | 188.8571429  |
| wavelet-HLH | glszm      | SmallAreaEmphasis                | 0.769100529  |
| wavelet-HLH | glszm      | LowGrayLevelZoneEmphasis         | 0.062054269  |
| wavelet-HLH | glszm      | ZoneEntropy                      | 4.070656113  |
| wavelet-HLH | glszm      | SmallAreaLowGrayLevelEmphasis    | 0.055803273  |
| wavelet-HLH | ngtdm      | Coarseness                       | 0.09578666   |
| wavelet-HLH | ngtdm      | Complexity                       | 589.2142799  |
| wavelet-HLH | ngtdm      | Strength                         | 14.14396052  |
| wavelet-HLH | ngtdm      | Contrast                         | 1.150224511  |
| wavelet-HLH | ngtdm      | Busyness                         | 0.054909379  |



| Image type | Feature Class | Feature Name                         |                                                                                                                                                                                                                                                                                                                                                                                                                   |
|------------|---------------|--------------------------------------|-------------------------------------------------------------------------------------------------------------------------------------------------------------------------------------------------------------------------------------------------------------------------------------------------------------------------------------------------------------------------------------------------------------------|
| general    | info          | BoundingBox                          | 6: RTSTRUCT: C99-DNU-B_segment_Tumor<br>(1, 1, 1, 5, 5, 11)                                                                                                                                                                                                                                                                                                                                                       |
| general    | info          | EnabledImageTypes                    | {u'Original': {}, u'Wavelet': {}}                                                                                                                                                                                                                                                                                                                                                                                 |
|            |               |                                      | {'distances': [1], 'additionalInfo': True, 'force2D': False, 'interpolator': 'sitkBSpline', 'resampledPixelSpacing': [3.0], 'label': 1, 'normalizeScale': 1, 'normalize': False, 'force2Ddimension': 0, 'removeOutliers': None, 'minimumROISize': None, u'binWidth': 25.0, 'minimumROIDimensions': 1, u'correctMask': True, 'preCrop': False, u'symmetricalGLCM': True, 'resegmentRange': None, 'padDistance': 5} |
| general    | info          | GeneralSettings                      |                                                                                                                                                                                                                                                                                                                                                                                                                   |
| general    | info          | ImageHash                            | 806fdff7992952eadb2e8a089d392f5911c63ac3                                                                                                                                                                                                                                                                                                                                                                          |
| general    | info          | ImageSpacing                         | (0.9765625000000002, 0.9765625000000002, 2.0)                                                                                                                                                                                                                                                                                                                                                                     |
| general    | info          | MaskHash                             | a4a86a089c7af356219d0d76f1ace0bfd180f26d                                                                                                                                                                                                                                                                                                                                                                          |
| general    | info          | NumpyVersion                         | 1.13.1                                                                                                                                                                                                                                                                                                                                                                                                            |
| general    | info          | PyWaveletVersion                     | 0.5.2                                                                                                                                                                                                                                                                                                                                                                                                             |
| general    | info          | SimpleITKVersion                     | 1.1.0                                                                                                                                                                                                                                                                                                                                                                                                             |
| general    | info          | Version                              | 1.3.0.post102+g1b0eb74                                                                                                                                                                                                                                                                                                                                                                                            |
| general    | info          | VolumeNum                            | 1                                                                                                                                                                                                                                                                                                                                                                                                                 |
| general    | info          | VoxelNum                             | 153                                                                                                                                                                                                                                                                                                                                                                                                               |
| original   | shape         | Maximum3DDiameter                    | 31.89043744                                                                                                                                                                                                                                                                                                                                                                                                       |
| original   | shape         | Maximum2DDiameterSlice               | 13.41640786                                                                                                                                                                                                                                                                                                                                                                                                       |
| original   | shape         | Sphericity                           | 0.810667907                                                                                                                                                                                                                                                                                                                                                                                                       |
| original   | shape         | MinorAxis                            | 13.66612072                                                                                                                                                                                                                                                                                                                                                                                                       |
| original   | shape         | Elongation                           | 0.385648049                                                                                                                                                                                                                                                                                                                                                                                                       |
| original   | shape         | SurfaceVolumeRatio                   | 0.371782901                                                                                                                                                                                                                                                                                                                                                                                                       |
| original   | shape         | Volume                               | 4131                                                                                                                                                                                                                                                                                                                                                                                                              |
| original   | shape         | MajorAxis                            | 35.43676868                                                                                                                                                                                                                                                                                                                                                                                                       |
| original   | shape         | SurfaceArea                          | 1535.835166                                                                                                                                                                                                                                                                                                                                                                                                       |
| original   | shape         | Flatness                             | 0.34003259                                                                                                                                                                                                                                                                                                                                                                                                        |
| original   | shape         | LeastAxis                            | 12.04965624                                                                                                                                                                                                                                                                                                                                                                                                       |
| original   | shape         | Maximum2DDiameterColumn              | 31.32091953                                                                                                                                                                                                                                                                                                                                                                                                       |
| original   | shape         | Maximum2DDiameterRow                 | 31.32091953                                                                                                                                                                                                                                                                                                                                                                                                       |
| original   | gldm          | GrayLevelVariance                    | 182.5344098                                                                                                                                                                                                                                                                                                                                                                                                       |
| original   | gldm          | HighGrayLevelEmphasis                | 639.3202614                                                                                                                                                                                                                                                                                                                                                                                                       |
| original   | gldm          | DependenceEntropy                    | 6.107795872                                                                                                                                                                                                                                                                                                                                                                                                       |
| original   | gldm          | DependenceNonUniformity              | 46.16339869                                                                                                                                                                                                                                                                                                                                                                                                       |
| original   | gldm          | GrayLevelNonUniformity               | 5.888888889                                                                                                                                                                                                                                                                                                                                                                                                       |
| original   | gldm          | SmallDependenceEmphasis              | 0.538400508                                                                                                                                                                                                                                                                                                                                                                                                       |
| original   | gldm          | SmallDependenceHighGrayLevelEmphasis | 292.4435802                                                                                                                                                                                                                                                                                                                                                                                                       |
| original   | gldm          | DependenceNonUniformityNormalized    | 0.30172156                                                                                                                                                                                                                                                                                                                                                                                                        |
| original   | gldm          | LargeDependenceEmphasis              | 5.758169935                                                                                                                                                                                                                                                                                                                                                                                                       |
| original   | gldm          | LargeDependenceLowGrayLevelEmphasis  | 0.136851054                                                                                                                                                                                                                                                                                                                                                                                                       |
| original   | gldm          | DependenceVariance                   | 1.519415609                                                                                                                                                                                                                                                                                                                                                                                                       |
| original   | gldm          | LargeDependenceHighGrayLevelEmphasis | 4832.823529                                                                                                                                                                                                                                                                                                                                                                                                       |
| original   | gldm          | SmallDependenceLowGrayLevelEmphasis  | 0.008611593                                                                                                                                                                                                                                                                                                                                                                                                       |
| original   | gldm          | LowGrayLevelEmphasis                 | 0.025697518                                                                                                                                                                                                                                                                                                                                                                                                       |
| original   | glcm          | JointAverage                         | 21.78451889                                                                                                                                                                                                                                                                                                                                                                                                       |
| original   | glcm          | SumAverage                           | 43.56903778                                                                                                                                                                                                                                                                                                                                                                                                       |

|          |            |                                  |              |
|----------|------------|----------------------------------|--------------|
| original | glcm       | JointEntropy                     | 7.274284868  |
| original | glcm       | ClusterShade                     | 1500.395991  |
| original | glcm       | MaximumProbability               | 0.020823799  |
| original | glcm       | Idmn                             | 0.918054565  |
| original | glcm       | JointEnergy                      | 0.007225596  |
| original | glcm       | Contrast                         | 190.6189224  |
| original | glcm       | DifferenceEntropy                | 4.457510531  |
| original | glcm       | InverseVariance                  | 0.148544068  |
| original | glcm       | DifferenceVariance               | 84.86569955  |
| original | glcm       | Idn                              | 0.828993131  |
| original | glcm       | Idm                              | 0.152968644  |
| original | glcm       | Correlation                      | 0.489859475  |
| original | glcm       | Autocorrelation                  | 566.5059416  |
| original | glcm       | SumEntropy                       | 5.561271982  |
| original | glcm       | SumSquares                       | 187.1414089  |
| original | glcm       | ClusterProminence                | 531973.2072  |
| original | glcm       | Imc2                             | 0.997661797  |
| original | glcm       | Imc1                             | -0.541962907 |
| original | glcm       | DifferenceAverage                | 10.14175071  |
| original | glcm       | Id                               | 0.2263644    |
| original | glcm       | ClusterTendency                  | 557.9467132  |
| original | firstorder | InterquartileRange               | 699          |
| original | firstorder | Skewness                         | 0.134009156  |
| original | firstorder | Uniformity                       | 0.038831219  |
| original | firstorder | Median                           | -497         |
| original | firstorder | Energy                           | 45783973     |
| original | firstorder | RobustMeanAbsoluteDeviation      | 265.2322929  |
| original | firstorder | MeanAbsoluteDeviation            | 305.9807766  |
| original | firstorder | TotalEnergy                      | 1236167271   |
| original | firstorder | Maximum                          | 75           |
| original | firstorder | RootMeanSquared                  | 547.0298471  |
| original | firstorder | 90Percentile                     | 24.8         |
| original | firstorder | Minimum                          | -949         |
| original | firstorder | Entropy                          | 4.967597829  |
| original | firstorder | Range                            | 1024         |
| original | firstorder | Variance                         | 113964.8605  |
| original | firstorder | 10Percentile                     | -836.6       |
| original | firstorder | Kurtosis                         | 1.466243272  |
| original | firstorder | Mean                             | -430.4379085 |
| original | glrlm      | ShortRunLowGrayLevelEmphasis     | 0.024715392  |
| original | glrlm      | GrayLevelVariance                | 179.0606127  |
| original | glrlm      | LowGrayLevelRunEmphasis          | 0.0256009    |
| original | glrlm      | GrayLevelNonUniformityNormalized | 0.03734344   |
| original | glrlm      | RunVariance                      | 0.041691879  |
| original | glrlm      | GrayLevelNonUniformity           | 5.482511125  |
| original | glrlm      | LongRunEmphasis                  | 1.129768623  |
| original | glrlm      | ShortRunHighGrayLevelEmphasis    | 604.5882368  |
| original | glrlm      | RunLengthNonUniformity           | 135.0803398  |
| original | glrlm      | ShortRunEmphasis                 | 0.968172737  |
| original | glrlm      | LongRunHighGrayLevelEmphasis     | 737.805698   |
| original | glrlm      | RunPercentage                    | 0.959276018  |
| original | glrlm      | LongRunLowGrayLevelEmphasis      | 0.029241316  |
| original | glrlm      | RunEntropy                       | 5.167536415  |
| original | glrlm      | HighGrayLevelRunEmphasis         | 631.2194312  |
| original | glrlm      | RunLengthNonUniformityNormalized | 0.91962612   |

|             |       |                                      |              |
|-------------|-------|--------------------------------------|--------------|
| original    | glszm | GrayLevelVariance                    | 135.0685255  |
| original    | glszm | ZoneVariance                         | 2.440808129  |
| original    | glszm | GrayLevelNonUniformityNormalized     | 0.029773157  |
| original    | glszm | SizeZoneNonUniformityNormalized      | 0.580340265  |
| original    | glszm | SizeZoneNonUniformity                | 53.39130435  |
| original    | glszm | GrayLevelNonUniformity               | 2.739130435  |
| original    | glszm | LargeAreaEmphasis                    | 5.206521739  |
| original    | glszm | SmallAreaHighGrayLevelEmphasis       | 412.5799932  |
| original    | glszm | ZonePercentage                       | 0.60130719   |
| original    | glszm | LargeAreaLowGrayLevelEmphasis        | 0.115825975  |
| original    | glszm | LargeAreaHighGrayLevelEmphasis       | 4245.76087   |
| original    | glszm | HighGrayLevelZoneEmphasis            | 551.7608696  |
| original    | glszm | SmallAreaEmphasis                    | 0.786748004  |
| original    | glszm | LowGrayLevelZoneEmphasis             | 0.021302884  |
| original    | glszm | ZoneEntropy                          | 5.690635973  |
| original    | glszm | SmallAreaLowGrayLevelEmphasis        | 0.009892259  |
| original    | ngtdm | Coarseness                           | 0.024650856  |
| original    | ngtdm | Complexity                           | 5365.037771  |
| original    | ngtdm | Strength                             | 24.71493872  |
| original    | ngtdm | Contrast                             | 1.563512542  |
| original    | ngtdm | Busyness                             | 0.04630193   |
| wavelet-HHH | gldm  | GrayLevelVariance                    | 14.26177966  |
| wavelet-HHH | gldm  | HighGrayLevelEmphasis                | 147.3398693  |
| wavelet-HHH | gldm  | DependenceEntropy                    | 5.368179798  |
| wavelet-HHH | gldm  | DependenceNonUniformity              | 38.16339869  |
| wavelet-HHH | gldm  | GrayLevelNonUniformity               | 12.75163399  |
| wavelet-HHH | gldm  | SmallDependenceEmphasis              | 0.417232152  |
| wavelet-HHH | gldm  | SmallDependenceHighGrayLevelEmphasis | 67.90658486  |
| wavelet-HHH | gldm  | DependenceNonUniformityNormalized    | 0.249433978  |
| wavelet-HHH | gldm  | LargeDependenceEmphasis              | 7.326797386  |
| wavelet-HHH | gldm  | LargeDependenceLowGrayLevelEmphasis  | 0.079740571  |
| wavelet-HHH | gldm  | DependenceVariance                   | 1.759665086  |
| wavelet-HHH | gldm  | LargeDependenceHighGrayLevelEmphasis | 952.9869281  |
| wavelet-HHH | gldm  | SmallDependenceLowGrayLevelEmphasis  | 0.014162859  |
| wavelet-HHH | gldm  | LowGrayLevelEmphasis                 | 0.02002345   |
| wavelet-HHH | glcm  | JointAverage                         | 11.54078748  |
| wavelet-HHH | glcm  | SumAverage                           | 23.08157496  |
| wavelet-HHH | glcm  | JointEntropy                         | 6.56833523   |
| wavelet-HHH | glcm  | ClusterShade                         | -14.73859011 |
| wavelet-HHH | glcm  | MaximumProbability                   | 0.033054077  |
| wavelet-HHH | glcm  | Idmn                                 | 0.950544685  |
| wavelet-HHH | glcm  | JointEnergy                          | 0.01264787   |
| wavelet-HHH | glcm  | Contrast                             | 28.24603578  |
| wavelet-HHH | glcm  | DifferenceEntropy                    | 3.374225547  |
| wavelet-HHH | glcm  | InverseVariance                      | 0.227567924  |
| wavelet-HHH | glcm  | DifferenceVariance                   | 10.82593218  |
| wavelet-HHH | glcm  | Idn                                  | 0.854509933  |
| wavelet-HHH | glcm  | Idm                                  | 0.219876361  |
| wavelet-HHH | glcm  | Correlation                          | -0.033878752 |
| wavelet-HHH | glcm  | Autocorrelation                      | 132.7118658  |
| wavelet-HHH | glcm  | SumEntropy                           | 4.122172     |
| wavelet-HHH | glcm  | SumSquares                           | 13.6409877   |
| wavelet-HHH | glcm  | ClusterProminence                    | 2421.425484  |
| wavelet-HHH | glcm  | Imc2                                 | 0.926348303  |
| wavelet-HHH | glcm  | Imc1                                 | -0.260907367 |

|             |            |                                  |              |
|-------------|------------|----------------------------------|--------------|
| wavelet-HHH | glcm       | DifferenceAverage                | 4.127537487  |
| wavelet-HHH | glcm       | Id                               | 0.312351796  |
| wavelet-HHH | glcm       | ClusterTendency                  | 26.31791503  |
| wavelet-HHH | firstorder | InterquartileRange               | 116.6514389  |
| wavelet-HHH | firstorder | Skewness                         | -0.012618724 |
| wavelet-HHH | firstorder | Uniformity                       | 0.083344013  |
| wavelet-HHH | firstorder | Median                           | 0.732695476  |
| wavelet-HHH | firstorder | Energy                           | 1360452.318  |
| wavelet-HHH | firstorder | RobustMeanAbsoluteDeviation      | 49.44454719  |
| wavelet-HHH | firstorder | MeanAbsoluteDeviation            | 74.17859044  |
| wavelet-HHH | firstorder | TotalEnergy                      | 36732212.59  |
| wavelet-HHH | firstorder | Maximum                          | 265.4049904  |
| wavelet-HHH | firstorder | RootMeanSquared                  | 94.29658115  |
| wavelet-HHH | firstorder | 90Percentile                     | 122.428753   |
| wavelet-HHH | firstorder | Minimum                          | -252.2887864 |
| wavelet-HHH | firstorder | Entropy                          | 3.830463418  |
| wavelet-HHH | firstorder | Range                            | 517.6937768  |
| wavelet-HHH | firstorder | Variance                         | 8891.055735  |
| wavelet-HHH | firstorder | 10Percentile                     | -121.0274351 |
| wavelet-HHH | firstorder | Kurtosis                         | 3.181185795  |
| wavelet-HHH | firstorder | Mean                             | 0.888527782  |
| wavelet-HHH | glrlm      | ShortRunLowGrayLevelEmphasis     | 0.02021849   |
| wavelet-HHH | glrlm      | GrayLevelVariance                | 14.68679886  |
| wavelet-HHH | glrlm      | LowGrayLevelRunEmphasis          | 0.020603119  |
| wavelet-HHH | glrlm      | GrayLevelNonUniformityNormalized | 0.081447928  |
| wavelet-HHH | glrlm      | RunVariance                      | 0.056345897  |
| wavelet-HHH | glrlm      | GrayLevelNonUniformity           | 11.81021977  |
| wavelet-HHH | glrlm      | LongRunEmphasis                  | 1.170666285  |
| wavelet-HHH | glrlm      | ShortRunHighGrayLevelEmphasis    | 142.8527617  |
| wavelet-HHH | glrlm      | RunLengthNonUniformity           | 130.488533   |
| wavelet-HHH | glrlm      | ShortRunEmphasis                 | 0.959703965  |
| wavelet-HHH | glrlm      | LongRunHighGrayLevelEmphasis     | 170.5635906  |
| wavelet-HHH | glrlm      | RunPercentage                    | 0.947712418  |
| wavelet-HHH | glrlm      | LongRunLowGrayLevelEmphasis      | 0.022240481  |
| wavelet-HHH | glrlm      | RunEntropy                       | 4.08829836   |
| wavelet-HHH | glrlm      | HighGrayLevelRunEmphasis         | 148.2027902  |
| wavelet-HHH | glrlm      | RunLengthNonUniformityNormalized | 0.899415846  |
| wavelet-HHH | glszm      | GrayLevelVariance                | 20.98802496  |
| wavelet-HHH | glszm      | ZoneVariance                     | 4.610220948  |
| wavelet-HHH | glszm      | GrayLevelNonUniformityNormalized | 0.064260415  |
| wavelet-HHH | glszm      | SizeZoneNonUniformityNormalized  | 0.426210153  |
| wavelet-HHH | glszm      | SizeZoneNonUniformity            | 32.81818182  |
| wavelet-HHH | glszm      | GrayLevelNonUniformity           | 4.948051948  |
| wavelet-HHH | glszm      | LargeAreaEmphasis                | 8.558441558  |
| wavelet-HHH | glszm      | SmallAreaHighGrayLevelEmphasis   | 113.7109901  |
| wavelet-HHH | glszm      | ZonePercentage                   | 0.503267974  |
| wavelet-HHH | glszm      | LargeAreaLowGrayLevelEmphasis    | 0.104542646  |
| wavelet-HHH | glszm      | LargeAreaHighGrayLevelEmphasis   | 1064.168831  |
| wavelet-HHH | glszm      | HighGrayLevelZoneEmphasis        | 160.3506494  |
| wavelet-HHH | glszm      | SmallAreaEmphasis                | 0.67513617   |
| wavelet-HHH | glszm      | LowGrayLevelZoneEmphasis         | 0.030110693  |
| wavelet-HHH | glszm      | ZoneEntropy                      | 5.097447579  |
| wavelet-HHH | glszm      | SmallAreaLowGrayLevelEmphasis    | 0.026543858  |
| wavelet-HHH | ngtdm      | Coarseness                       | 0.034814301  |
| wavelet-HHH | ngtdm      | Complexity                       | 435.2498384  |

|             |            |                                      |              |
|-------------|------------|--------------------------------------|--------------|
| wavelet-HHH | ngtdm      | Strength                             | 3.874519948  |
| wavelet-HHH | ngtdm      | Contrast                             | 0.26403866   |
| wavelet-HHH | ngtdm      | Busyness                             | 0.145232837  |
| wavelet-HLL | gldm       | GrayLevelVariance                    | 153.2724166  |
| wavelet-HLL | gldm       | HighGrayLevelEmphasis                | 664.0915033  |
| wavelet-HLL | gldm       | DependenceEntropy                    | 6.008638496  |
| wavelet-HLL | gldm       | DependenceNonUniformity              | 69.95424837  |
| wavelet-HLL | gldm       | GrayLevelNonUniformity               | 4.54248366   |
| wavelet-HLL | gldm       | SmallDependenceEmphasis              | 0.689497095  |
| wavelet-HLL | gldm       | SmallDependenceHighGrayLevelEmphasis | 500.7646605  |
| wavelet-HLL | gldm       | DependenceNonUniformityNormalized    | 0.45721731   |
| wavelet-HLL | gldm       | LargeDependenceEmphasis              | 2.869281046  |
| wavelet-HLL | gldm       | LargeDependenceLowGrayLevelEmphasis  | 0.028409599  |
| wavelet-HLL | gldm       | DependenceVariance                   | 0.550130292  |
| wavelet-HLL | gldm       | LargeDependenceHighGrayLevelEmphasis | 1504.823529  |
| wavelet-HLL | gldm       | SmallDependenceLowGrayLevelEmphasis  | 0.011776858  |
| wavelet-HLL | gldm       | LowGrayLevelEmphasis                 | 0.013858209  |
| wavelet-HLL | glcm       | JointAverage                         | 22.04601217  |
| wavelet-HLL | glcm       | SumAverage                           | 44.09202434  |
| wavelet-HLL | glcm       | JointEntropy                         | 7.415323047  |
| wavelet-HLL | glcm       | ClusterShade                         | 5522.920589  |
| wavelet-HLL | glcm       | MaximumProbability                   | 0.013119167  |
| wavelet-HLL | glcm       | Idmn                                 | 0.96100014   |
| wavelet-HLL | glcm       | JointEnergy                          | 0.006163248  |
| wavelet-HLL | glcm       | Contrast                             | 153.5340484  |
| wavelet-HLL | glcm       | DifferenceEntropy                    | 4.324799917  |
| wavelet-HLL | glcm       | InverseVariance                      | 0.117806013  |
| wavelet-HLL | glcm       | DifferenceVariance                   | 52.90575447  |
| wavelet-HLL | glcm       | Idn                                  | 0.870398639  |
| wavelet-HLL | glcm       | Idm                                  | 0.10561313   |
| wavelet-HLL | glcm       | Correlation                          | 0.459421137  |
| wavelet-HLL | glcm       | Autocorrelation                      | 553.919757   |
| wavelet-HLL | glcm       | SumEntropy                           | 5.56595251   |
| wavelet-HLL | glcm       | SumSquares                           | 144.6152705  |
| wavelet-HLL | glcm       | ClusterProminence                    | 612262.0296  |
| wavelet-HLL | glcm       | Imc2                                 | 0.998707217  |
| wavelet-HLL | glcm       | Imc1                                 | -0.577824162 |
| wavelet-HLL | glcm       | DifferenceAverage                    | 9.599015862  |
| wavelet-HLL | glcm       | Id                                   | 0.1879839    |
| wavelet-HLL | glcm       | ClusterTendency                      | 424.9270335  |
| wavelet-HLL | firstorder | InterquartileRange                   | 439.8720624  |
| wavelet-HLL | firstorder | Skewness                             | 0.632120743  |
| wavelet-HLL | firstorder | Uniformity                           | 0.029689436  |
| wavelet-HLL | firstorder | Median                               | 23.88917466  |
| wavelet-HLL | firstorder | Energy                               | 14993771.56  |
| wavelet-HLL | firstorder | RobustMeanAbsoluteDeviation          | 174.6591728  |
| wavelet-HLL | firstorder | MeanAbsoluteDeviation                | 246.9660114  |
| wavelet-HLL | firstorder | TotalEnergy                          | 404831832.1  |
| wavelet-HLL | firstorder | Maximum                              | 955.9977873  |
| wavelet-HLL | firstorder | RootMeanSquared                      | 313.0471321  |
| wavelet-HLL | firstorder | 90Percentile                         | 414.7117486  |
| wavelet-HLL | firstorder | Minimum                              | -476.9603363 |
| wavelet-HLL | firstorder | Entropy                              | 5.254179147  |
| wavelet-HLL | firstorder | Range                                | 1432.958124  |
| wavelet-HLL | firstorder | Variance                             | 95252.2171   |

|             |            |                                      |              |
|-------------|------------|--------------------------------------|--------------|
| wavelet-HLL | firstorder | 10Percentile                         | -333.5758066 |
| wavelet-HLL | firstorder | Kurtosis                             | 3.130020676  |
| wavelet-HLL | firstorder | Mean                                 | 52.40505539  |
| wavelet-HLL | glrlm      | ShortRunLowGrayLevelEmphasis         | 0.01388085   |
| wavelet-HLL | glrlm      | GrayLevelVariance                    | 153.6347011  |
| wavelet-HLL | glrlm      | LowGrayLevelRunEmphasis              | 0.013994331  |
| wavelet-HLL | glrlm      | GrayLevelNonUniformityNormalized     | 0.029532966  |
| wavelet-HLL | glrlm      | RunVariance                          | 0.020083768  |
| wavelet-HLL | glrlm      | GrayLevelNonUniformity               | 4.428104784  |
| wavelet-HLL | glrlm      | LongRunEmphasis                      | 1.062222349  |
| wavelet-HLL | glrlm      | ShortRunHighGrayLevelEmphasis        | 660.3155102  |
| wavelet-HLL | glrlm      | RunLengthNonUniformity               | 143.9620642  |
| wavelet-HLL | glrlm      | ShortRunEmphasis                     | 0.984444413  |
| wavelet-HLL | glrlm      | LongRunHighGrayLevelEmphasis         | 697.922162   |
| wavelet-HLL | glrlm      | RunPercentage                        | 0.979889392  |
| wavelet-HLL | glrlm      | LongRunLowGrayLevelEmphasis          | 0.014448255  |
| wavelet-HLL | glrlm      | RunEntropy                           | 5.327939605  |
| wavelet-HLL | glrlm      | HighGrayLevelRunEmphasis             | 667.8368406  |
| wavelet-HLL | glrlm      | RunLengthNonUniformityNormalized     | 0.959832464  |
| wavelet-HLL | glszm      | GrayLevelVariance                    | 159.1042443  |
| wavelet-HLL | glszm      | ZoneVariance                         | 0.503616042  |
| wavelet-HLL | glszm      | GrayLevelNonUniformityNormalized     | 0.027686464  |
| wavelet-HLL | glszm      | SizeZoneNonUniformityNormalized      | 0.652713858  |
| wavelet-HLL | glszm      | SizeZoneNonUniformity                | 76.36752137  |
| wavelet-HLL | glszm      | GrayLevelNonUniformity               | 3.239316239  |
| wavelet-HLL | glszm      | LargeAreaEmphasis                    | 2.213675214  |
| wavelet-HLL | glszm      | SmallAreaHighGrayLevelEmphasis       | 618.487925   |
| wavelet-HLL | glszm      | ZonePercentage                       | 0.764705882  |
| wavelet-HLL | glszm      | LargeAreaLowGrayLevelEmphasis        | 0.025028788  |
| wavelet-HLL | glszm      | LargeAreaHighGrayLevelEmphasis       | 1266.08547   |
| wavelet-HLL | glszm      | HighGrayLevelZoneEmphasis            | 712.3589744  |
| wavelet-HLL | glszm      | SmallAreaEmphasis                    | 0.835218424  |
| wavelet-HLL | glszm      | LowGrayLevelZoneEmphasis             | 0.016018039  |
| wavelet-HLL | glszm      | ZoneEntropy                          | 5.814391429  |
| wavelet-HLL | glszm      | SmallAreaLowGrayLevelEmphasis        | 0.014989443  |
| wavelet-HLL | ngtdm      | Coarseness                           | 0.037861377  |
| wavelet-HLL | ngtdm      | Complexity                           | 5871.0089    |
| wavelet-HLL | ngtdm      | Strength                             | 39.61394906  |
| wavelet-HLL | ngtdm      | Contrast                             | 0.934894455  |
| wavelet-HLL | ngtdm      | Busyness                             | 0.033935652  |
| wavelet-LHL | gldm       | GrayLevelVariance                    | 116.4821223  |
| wavelet-LHL | gldm       | HighGrayLevelEmphasis                | 794.5228758  |
| wavelet-LHL | gldm       | DependenceEntropy                    | 6.045622546  |
| wavelet-LHL | gldm       | DependenceNonUniformity              | 66.85620915  |
| wavelet-LHL | gldm       | GrayLevelNonUniformity               | 4.712418301  |
| wavelet-LHL | gldm       | SmallDependenceEmphasis              | 0.643643791  |
| wavelet-LHL | gldm       | SmallDependenceHighGrayLevelEmphasis | 540.2437073  |
| wavelet-LHL | gldm       | DependenceNonUniformityNormalized    | 0.436968687  |
| wavelet-LHL | gldm       | LargeDependenceEmphasis              | 3.039215686  |
| wavelet-LHL | gldm       | LargeDependenceLowGrayLevelEmphasis  | 0.061601775  |
| wavelet-LHL | gldm       | DependenceVariance                   | 0.558075954  |
| wavelet-LHL | gldm       | LargeDependenceHighGrayLevelEmphasis | 2079.803922  |
| wavelet-LHL | gldm       | SmallDependenceLowGrayLevelEmphasis  | 0.006323031  |
| wavelet-LHL | gldm       | LowGrayLevelEmphasis                 | 0.017063399  |
| wavelet-LHL | glcm       | JointAverage                         | 25.27453891  |

|             |            |                                  |              |
|-------------|------------|----------------------------------|--------------|
| wavelet-LHL | glcm       | SumAverage                       | 50.54907782  |
| wavelet-LHL | glcm       | JointEntropy                     | 7.384516308  |
| wavelet-LHL | glcm       | ClusterShade                     | -493.6951174 |
| wavelet-LHL | glcm       | MaximumProbability               | 0.014285772  |
| wavelet-LHL | glcm       | Idmn                             | 0.946663825  |
| wavelet-LHL | glcm       | JointEnergy                      | 0.006311229  |
| wavelet-LHL | glcm       | Contrast                         | 168.0050272  |
| wavelet-LHL | glcm       | DifferenceEntropy                | 4.318663646  |
| wavelet-LHL | glcm       | InverseVariance                  | 0.120003643  |
| wavelet-LHL | glcm       | DifferenceVariance               | 69.1335149   |
| wavelet-LHL | glcm       | Idn                              | 0.855369095  |
| wavelet-LHL | glcm       | Idm                              | 0.109926848  |
| wavelet-LHL | glcm       | Correlation                      | 0.309046666  |
| wavelet-LHL | glcm       | Autocorrelation                  | 675.7434666  |
| wavelet-LHL | glcm       | SumEntropy                       | 5.474197031  |
| wavelet-LHL | glcm       | SumSquares                       | 120.8499648  |
| wavelet-LHL | glcm       | ClusterProminence                | 279600.422   |
| wavelet-LHL | glcm       | Imc2                             | 0.99859937   |
| wavelet-LHL | glcm       | Imc1                             | -0.571754111 |
| wavelet-LHL | glcm       | DifferenceAverage                | 9.53217304   |
| wavelet-LHL | glcm       | Id                               | 0.193969209  |
| wavelet-LHL | glcm       | ClusterTendency                  | 315.3948322  |
| wavelet-LHL | firstorder | InterquartileRange               | 343.5124953  |
| wavelet-LHL | firstorder | Skewness                         | -0.101367012 |
| wavelet-LHL | firstorder | Uniformity                       | 0.03080012   |
| wavelet-LHL | firstorder | Median                           | 16.84382131  |
| wavelet-LHL | firstorder | Energy                           | 11190016.13  |
| wavelet-LHL | firstorder | RobustMeanAbsoluteDeviation      | 149.3291167  |
| wavelet-LHL | firstorder | MeanAbsoluteDeviation            | 216.2608601  |
| wavelet-LHL | firstorder | TotalEnergy                      | 302130435.6  |
| wavelet-LHL | firstorder | Maximum                          | 614.2766812  |
| wavelet-LHL | firstorder | RootMeanSquared                  | 270.439199   |
| wavelet-LHL | firstorder | 90Percentile                     | 355.2170423  |
| wavelet-LHL | firstorder | Minimum                          | -620.8004187 |
| wavelet-LHL | firstorder | Entropy                          | 5.189350874  |
| wavelet-LHL | firstorder | Range                            | 1235.0771    |
| wavelet-LHL | firstorder | Variance                         | 72958.59758  |
| wavelet-LHL | firstorder | 10Percentile                     | -349.0263761 |
| wavelet-LHL | firstorder | Kurtosis                         | 2.620397775  |
| wavelet-LHL | firstorder | Mean                             | 13.37021948  |
| wavelet-LHL | glrlm      | ShortRunLowGrayLevelEmphasis     | 0.016445168  |
| wavelet-LHL | glrlm      | GrayLevelVariance                | 117.0671259  |
| wavelet-LHL | glrlm      | LowGrayLevelRunEmphasis          | 0.016876324  |
| wavelet-LHL | glrlm      | GrayLevelNonUniformityNormalized | 0.030705838  |
| wavelet-LHL | glrlm      | RunVariance                      | 0.023123933  |
| wavelet-LHL | glrlm      | GrayLevelNonUniformity           | 4.594091284  |
| wavelet-LHL | glrlm      | LongRunEmphasis                  | 1.069390399  |
| wavelet-LHL | glrlm      | ShortRunHighGrayLevelEmphasis    | 786.1409689  |
| wavelet-LHL | glrlm      | RunLengthNonUniformity           | 143.1978207  |
| wavelet-LHL | glrlm      | ShortRunEmphasis                 | 0.983222201  |
| wavelet-LHL | glrlm      | LongRunHighGrayLevelEmphasis     | 843.4538356  |
| wavelet-LHL | glrlm      | RunPercentage                    | 0.977878331  |
| wavelet-LHL | glrlm      | LongRunLowGrayLevelEmphasis      | 0.018606648  |
| wavelet-LHL | glrlm      | RunEntropy                       | 5.26005514   |
| wavelet-LHL | glrlm      | HighGrayLevelRunEmphasis         | 797.421206   |

|             |       |                                      |              |
|-------------|-------|--------------------------------------|--------------|
| wavelet-LHL | glrlm | RunLengthNonUniformityNormalized     | 0.956788032  |
| wavelet-LHL | glszm | GrayLevelVariance                    | 124.484375   |
| wavelet-LHL | glszm | ZoneVariance                         | 0.589205995  |
| wavelet-LHL | glszm | GrayLevelNonUniformityNormalized     | 0.02997449   |
| wavelet-LHL | glszm | SizeZoneNonUniformityNormalized      | 0.589445153  |
| wavelet-LHL | glszm | SizeZoneNonUniformity                | 66.01785714  |
| wavelet-LHL | glszm | GrayLevelNonUniformity               | 3.357142857  |
| wavelet-LHL | glszm | LargeAreaEmphasis                    | 2.455357143  |
| wavelet-LHL | glszm | SmallAreaHighGrayLevelEmphasis       | 678.046937   |
| wavelet-LHL | glszm | ZonePercentage                       | 0.732026144  |
| wavelet-LHL | glszm | LargeAreaLowGrayLevelEmphasis        | 0.043982583  |
| wavelet-LHL | glszm | LargeAreaHighGrayLevelEmphasis       | 1748.875     |
| wavelet-LHL | glszm | HighGrayLevelZoneEmphasis            | 833.375      |
| wavelet-LHL | glszm | SmallAreaEmphasis                    | 0.795510913  |
| wavelet-LHL | glszm | LowGrayLevelZoneEmphasis             | 0.013426024  |
| wavelet-LHL | glszm | ZoneEntropy                          | 5.8305684    |
| wavelet-LHL | glszm | SmallAreaLowGrayLevelEmphasis        | 0.006186894  |
| wavelet-LHL | ngtdm | Coarseness                           | 0.041562724  |
| wavelet-LHL | ngtdm | Complexity                           | 4543.493802  |
| wavelet-LHL | ngtdm | Strength                             | 27.26062531  |
| wavelet-LHL | ngtdm | Contrast                             | 0.806815815  |
| wavelet-LHL | ngtdm | Busyness                             | 0.028535419  |
| wavelet-LHH | gldm  | GrayLevelVariance                    | 20.81618181  |
| wavelet-LHH | gldm  | HighGrayLevelEmphasis                | 205.6339869  |
| wavelet-LHH | gldm  | DependenceEntropy                    | 5.523905945  |
| wavelet-LHH | gldm  | DependenceNonUniformity              | 38.50326797  |
| wavelet-LHH | gldm  | GrayLevelNonUniformity               | 11.2745098   |
| wavelet-LHH | gldm  | SmallDependenceEmphasis              | 0.448582859  |
| wavelet-LHH | gldm  | SmallDependenceHighGrayLevelEmphasis | 97.45681009  |
| wavelet-LHH | gldm  | DependenceNonUniformityNormalized    | 0.251655346  |
| wavelet-LHH | gldm  | LargeDependenceEmphasis              | 7.758169935  |
| wavelet-LHH | gldm  | LargeDependenceLowGrayLevelEmphasis  | 0.054409372  |
| wavelet-LHH | gldm  | DependenceVariance                   | 2.191037635  |
| wavelet-LHH | gldm  | LargeDependenceHighGrayLevelEmphasis | 1531.921569  |
| wavelet-LHH | gldm  | SmallDependenceLowGrayLevelEmphasis  | 0.013334569  |
| wavelet-LHH | gldm  | LowGrayLevelEmphasis                 | 0.016701581  |
| wavelet-LHH | glcm  | JointAverage                         | 13.62100333  |
| wavelet-LHH | glcm  | SumAverage                           | 27.24200665  |
| wavelet-LHH | glcm  | JointEntropy                         | 6.742600595  |
| wavelet-LHH | glcm  | ClusterShade                         | 65.1319356   |
| wavelet-LHH | glcm  | MaximumProbability                   | 0.035965116  |
| wavelet-LHH | glcm  | Idmn                                 | 0.954292102  |
| wavelet-LHH | glcm  | JointEnergy                          | 0.011680423  |
| wavelet-LHH | glcm  | Contrast                             | 44.00999621  |
| wavelet-LHH | glcm  | DifferenceEntropy                    | 3.566682572  |
| wavelet-LHH | glcm  | InverseVariance                      | 0.248729712  |
| wavelet-LHH | glcm  | DifferenceVariance                   | 20.94522145  |
| wavelet-LHH | glcm  | Idn                                  | 0.869489001  |
| wavelet-LHH | glcm  | Idm                                  | 0.228674261  |
| wavelet-LHH | glcm  | Correlation                          | -0.039251184 |
| wavelet-LHH | glcm  | Autocorrelation                      | 184.9110907  |
| wavelet-LHH | glcm  | SumEntropy                           | 4.30440184   |
| wavelet-LHH | glcm  | SumSquares                           | 21.36755439  |
| wavelet-LHH | glcm  | ClusterProminence                    | 8120.369925  |
| wavelet-LHH | glcm  | Imc2                                 | 0.966772347  |



|             |            |                                  |              |
|-------------|------------|----------------------------------|--------------|
| wavelet-LHH | glcm       | Imc1                             | -0.340521383 |
| wavelet-LHH | glcm       | DifferenceAverage                | 4.752057795  |
| wavelet-LHH | glcm       | Id                               | 0.313359439  |
| wavelet-LHH | glcm       | ClusterTendency                  | 41.46022134  |
| wavelet-LHH | firstorder | InterquartileRange               | 125.8273607  |
| wavelet-LHH | firstorder | Skewness                         | 0.235958376  |
| wavelet-LHH | firstorder | Uniformity                       | 0.073689607  |
| wavelet-LHH | firstorder | Median                           | 1.139234873  |
| wavelet-LHH | firstorder | Energy                           | 2026772.019  |
| wavelet-LHH | firstorder | RobustMeanAbsoluteDeviation      | 51.67705565  |
| wavelet-LHH | firstorder | MeanAbsoluteDeviation            | 84.60087819  |
| wavelet-LHH | firstorder | TotalEnergy                      | 54722844.51  |
| wavelet-LHH | firstorder | Maximum                          | 374.174678   |
| wavelet-LHH | firstorder | RootMeanSquared                  | 115.0950735  |
| wavelet-LHH | firstorder | 90Percentile                     | 143.0562704  |
| wavelet-LHH | firstorder | Minimum                          | -311.759494  |
| wavelet-LHH | firstorder | Entropy                          | 4.079067867  |
| wavelet-LHH | firstorder | Range                            | 685.934172   |
| wavelet-LHH | firstorder | Variance                         | 13244.87937  |
| wavelet-LHH | firstorder | 10Percentile                     | -142.0340087 |
| wavelet-LHH | firstorder | Kurtosis                         | 4.194377749  |
| wavelet-LHH | firstorder | Mean                             | 1.413001645  |
| wavelet-LHH | glrlm      | ShortRunLowGrayLevelEmphasis     | 0.017084562  |
| wavelet-LHH | glrlm      | GrayLevelVariance                | 21.65267235  |
| wavelet-LHH | glrlm      | LowGrayLevelRunEmphasis          | 0.017307553  |
| wavelet-LHH | glrlm      | GrayLevelNonUniformityNormalized | 0.071207629  |
| wavelet-LHH | glrlm      | RunVariance                      | 0.063929013  |
| wavelet-LHH | glrlm      | GrayLevelNonUniformity           | 10.32725185  |
| wavelet-LHH | glrlm      | LongRunEmphasis                  | 1.17838211   |
| wavelet-LHH | glrlm      | ShortRunHighGrayLevelEmphasis    | 198.6819634  |
| wavelet-LHH | glrlm      | RunLengthNonUniformity           | 131.2598089  |
| wavelet-LHH | glrlm      | ShortRunEmphasis                 | 0.961710979  |
| wavelet-LHH | glrlm      | LongRunHighGrayLevelEmphasis     | 241.0506728  |
| wavelet-LHH | glrlm      | RunPercentage                    | 0.947712418  |
| wavelet-LHH | glrlm      | LongRunLowGrayLevelEmphasis      | 0.018333882  |
| wavelet-LHH | glrlm      | RunEntropy                       | 4.340878174  |
| wavelet-LHH | glrlm      | HighGrayLevelRunEmphasis         | 206.1867904  |
| wavelet-LHH | glrlm      | RunLengthNonUniformityNormalized | 0.904780894  |
| wavelet-LHH | glszm      | GrayLevelVariance                | 34.22364648  |
| wavelet-LHH | glszm      | ZoneVariance                     | 6.53229887   |
| wavelet-LHH | glszm      | GrayLevelNonUniformityNormalized | 0.054140665  |
| wavelet-LHH | glszm      | SizeZoneNonUniformityNormalized  | 0.508180132  |
| wavelet-LHH | glszm      | SizeZoneNonUniformity            | 39.12987013  |
| wavelet-LHH | glszm      | GrayLevelNonUniformity           | 4.168831169  |
| wavelet-LHH | glszm      | LargeAreaEmphasis                | 10.48051948  |
| wavelet-LHH | glszm      | SmallAreaHighGrayLevelEmphasis   | 164.2720948  |
| wavelet-LHH | glszm      | ZonePercentage                   | 0.503267974  |
| wavelet-LHH | glszm      | LargeAreaLowGrayLevelEmphasis    | 0.079890144  |
| wavelet-LHH | glszm      | LargeAreaHighGrayLevelEmphasis   | 2062.415584  |
| wavelet-LHH | glszm      | HighGrayLevelZoneEmphasis        | 217          |
| wavelet-LHH | glszm      | SmallAreaEmphasis                | 0.739203478  |
| wavelet-LHH | glszm      | LowGrayLevelZoneEmphasis         | 0.027234338  |
| wavelet-LHH | glszm      | ZoneEntropy                      | 5.174072703  |
| wavelet-LHH | glszm      | SmallAreaLowGrayLevelEmphasis    | 0.025508887  |
| wavelet-LHH | ngtdm      | Coarseness                       | 0.045527889  |

|             |            |                                      |              |
|-------------|------------|--------------------------------------|--------------|
| wavelet-LHH | ngtdm      | Complexity                           | 814.9770103  |
| wavelet-LHH | ngtdm      | Strength                             | 7.779659255  |
| wavelet-LHH | ngtdm      | Contrast                             | 0.238254701  |
| wavelet-LHH | ngtdm      | Busyness                             | 0.062833325  |
| wavelet-LLH | gldm       | GrayLevelVariance                    | 104.924089   |
| wavelet-LLH | gldm       | HighGrayLevelEmphasis                | 674.6666667  |
| wavelet-LLH | gldm       | DependenceEntropy                    | 6.000500506  |
| wavelet-LLH | gldm       | DependenceNonUniformity              | 56.4379085   |
| wavelet-LLH | gldm       | GrayLevelNonUniformity               | 5.104575163  |
| wavelet-LLH | gldm       | SmallDependenceEmphasis              | 0.597790487  |
| wavelet-LLH | gldm       | SmallDependenceHighGrayLevelEmphasis | 427.9770243  |
| wavelet-LLH | gldm       | DependenceNonUniformityNormalized    | 0.368875219  |
| wavelet-LLH | gldm       | LargeDependenceEmphasis              | 4.777777778  |
| wavelet-LLH | gldm       | LargeDependenceLowGrayLevelEmphasis  | 0.02194432   |
| wavelet-LLH | gldm       | DependenceVariance                   | 1.404673416  |
| wavelet-LLH | gldm       | LargeDependenceHighGrayLevelEmphasis | 3192.457516  |
| wavelet-LLH | gldm       | SmallDependenceLowGrayLevelEmphasis  | 0.009490721  |
| wavelet-LLH | gldm       | LowGrayLevelEmphasis                 | 0.011197989  |
| wavelet-LLH | glcm       | JointAverage                         | 23.64088808  |
| wavelet-LLH | glcm       | SumAverage                           | 47.28177616  |
| wavelet-LLH | glcm       | JointEntropy                         | 7.31006518   |
| wavelet-LLH | glcm       | ClusterShade                         | 328.6107012  |
| wavelet-LLH | glcm       | MaximumProbability                   | 0.018824351  |
| wavelet-LLH | glcm       | Idmn                                 | 0.957399824  |
| wavelet-LLH | glcm       | JointEnergy                          | 0.006844046  |
| wavelet-LLH | glcm       | Contrast                             | 137.395649   |
| wavelet-LLH | glcm       | DifferenceEntropy                    | 4.278410137  |
| wavelet-LLH | glcm       | InverseVariance                      | 0.133737045  |
| wavelet-LLH | glcm       | DifferenceVariance                   | 53.11173988  |
| wavelet-LLH | glcm       | Idn                                  | 0.867544504  |
| wavelet-LLH | glcm       | Idm                                  | 0.132378713  |
| wavelet-LLH | glcm       | Correlation                          | 0.359073127  |
| wavelet-LLH | glcm       | Autocorrelation                      | 597.2101541  |
| wavelet-LLH | glcm       | SumEntropy                           | 5.408681794  |
| wavelet-LLH | glcm       | SumSquares                           | 106.9954054  |
| wavelet-LLH | glcm       | ClusterProminence                    | 233853.1952  |
| wavelet-LLH | glcm       | Imc2                                 | 0.998542304  |
| wavelet-LLH | glcm       | Imc1                                 | -0.574382306 |
| wavelet-LLH | glcm       | DifferenceAverage                    | 8.932646076  |
| wavelet-LLH | glcm       | Id                                   | 0.212811455  |
| wavelet-LLH | glcm       | ClusterTendency                      | 290.5859725  |
| wavelet-LLH | firstorder | InterquartileRange                   | 374.7796946  |
| wavelet-LLH | firstorder | Skewness                             | 0.051912438  |
| wavelet-LLH | firstorder | Uniformity                           | 0.033363236  |
| wavelet-LLH | firstorder | Median                               | -53.0768088  |
| wavelet-LLH | firstorder | Energy                               | 10585860.2   |
| wavelet-LLH | firstorder | RobustMeanAbsoluteDeviation          | 142.3539038  |
| wavelet-LLH | firstorder | MeanAbsoluteDeviation                | 203.1708041  |
| wavelet-LLH | firstorder | TotalEnergy                          | 285818225.4  |
| wavelet-LLH | firstorder | Maximum                              | 673.5121227  |
| wavelet-LLH | firstorder | RootMeanSquared                      | 263.0373144  |
| wavelet-LLH | firstorder | 90Percentile                         | 251.0168128  |
| wavelet-LLH | firstorder | Minimum                              | -629.9800592 |
| wavelet-LLH | firstorder | Entropy                              | 5.128317375  |
| wavelet-LLH | firstorder | Range                                | 1303.492182  |

|             |            |                                      |              |
|-------------|------------|--------------------------------------|--------------|
| wavelet-LLH | firstorder | Variance                             | 64904.65367  |
| wavelet-LLH | firstorder | 10Percentile                         | -428.2426174 |
| wavelet-LLH | firstorder | Kurtosis                             | 2.686470339  |
| wavelet-LLH | firstorder | Mean                                 | -65.45208234 |
| wavelet-LLH | glrlm      | ShortRunLowGrayLevelEmphasis         | 0.011374459  |
| wavelet-LLH | glrlm      | GrayLevelVariance                    | 106.6263411  |
| wavelet-LLH | glrlm      | LowGrayLevelRunEmphasis              | 0.011459354  |
| wavelet-LLH | glrlm      | GrayLevelNonUniformityNormalized     | 0.032681077  |
| wavelet-LLH | glrlm      | RunVariance                          | 0.033151568  |
| wavelet-LLH | glrlm      | GrayLevelNonUniformity               | 4.840586151  |
| wavelet-LLH | glrlm      | LongRunEmphasis                      | 1.101600086  |
| wavelet-LLH | glrlm      | ShortRunHighGrayLevelEmphasis        | 659.6190853  |
| wavelet-LLH | glrlm      | RunLengthNonUniformity               | 138.7831672  |
| wavelet-LLH | glrlm      | ShortRunEmphasis                     | 0.975177479  |
| wavelet-LLH | glrlm      | LongRunHighGrayLevelEmphasis         | 741.0664503  |
| wavelet-LLH | glrlm      | RunPercentage                        | 0.967823027  |
| wavelet-LLH | glrlm      | LongRunLowGrayLevelEmphasis          | 0.0118033    |
| wavelet-LLH | glrlm      | RunEntropy                           | 5.24976642   |
| wavelet-LLH | glrlm      | HighGrayLevelRunEmphasis             | 675.6641601  |
| wavelet-LLH | glrlm      | RunLengthNonUniformityNormalized     | 0.936731083  |
| wavelet-LLH | glszm      | GrayLevelVariance                    | 122.0758277  |
| wavelet-LLH | glszm      | ZoneVariance                         | 1.048163265  |
| wavelet-LLH | glszm      | GrayLevelNonUniformityNormalized     | 0.029478458  |
| wavelet-LLH | glszm      | SizeZoneNonUniformityNormalized      | 0.575873016  |
| wavelet-LLH | glszm      | SizeZoneNonUniformity                | 60.46666667  |
| wavelet-LLH | glszm      | GrayLevelNonUniformity               | 3.095238095  |
| wavelet-LLH | glszm      | LargeAreaEmphasis                    | 3.171428571  |
| wavelet-LLH | glszm      | SmallAreaHighGrayLevelEmphasis       | 572.9029127  |
| wavelet-LLH | glszm      | ZonePercentage                       | 0.68627451   |
| wavelet-LLH | glszm      | LargeAreaLowGrayLevelEmphasis        | 0.021762293  |
| wavelet-LLH | glszm      | LargeAreaHighGrayLevelEmphasis       | 2088.47619   |
| wavelet-LLH | glszm      | HighGrayLevelZoneEmphasis            | 698.9904762  |
| wavelet-LLH | glszm      | SmallAreaEmphasis                    | 0.785896825  |
| wavelet-LLH | glszm      | LowGrayLevelZoneEmphasis             | 0.014456201  |
| wavelet-LLH | glszm      | ZoneEntropy                          | 5.794918613  |
| wavelet-LLH | glszm      | SmallAreaLowGrayLevelEmphasis        | 0.013408212  |
| wavelet-LLH | ngtdm      | Coarseness                           | 0.047330085  |
| wavelet-LLH | ngtdm      | Complexity                           | 3810.847078  |
| wavelet-LLH | ngtdm      | Strength                             | 30.69883787  |
| wavelet-LLH | ngtdm      | Contrast                             | 0.605394149  |
| wavelet-LLH | ngtdm      | Busyness                             | 0.024410368  |
| wavelet-LLL | gldm       | GrayLevelVariance                    | 1118.482122  |
| wavelet-LLL | gldm       | HighGrayLevelEmphasis                | 3791.980392  |
| wavelet-LLL | gldm       | DependenceEntropy                    | 6.482686372  |
| wavelet-LLL | gldm       | DependenceNonUniformity              | 90.03267974  |
| wavelet-LLL | gldm       | GrayLevelNonUniformity               | 2.267973856  |
| wavelet-LLL | gldm       | SmallDependenceEmphasis              | 0.794798475  |
| wavelet-LLL | gldm       | SmallDependenceHighGrayLevelEmphasis | 2733.041984  |
| wavelet-LLL | gldm       | DependenceNonUniformityNormalized    | 0.588448887  |
| wavelet-LLL | gldm       | LargeDependenceEmphasis              | 2.215686275  |
| wavelet-LLL | gldm       | LargeDependenceLowGrayLevelEmphasis  | 0.031864385  |
| wavelet-LLL | gldm       | DependenceVariance                   | 0.420436584  |
| wavelet-LLL | gldm       | LargeDependenceHighGrayLevelEmphasis | 10750.97386  |
| wavelet-LLL | gldm       | SmallDependenceLowGrayLevelEmphasis  | 0.01689061   |
| wavelet-LLL | gldm       | LowGrayLevelEmphasis                 | 0.019785356  |

|             |            |                                  |              |
|-------------|------------|----------------------------------|--------------|
| wavelet-LLL | glcm       | JointAverage                     | 52.78055551  |
| wavelet-LLL | glcm       | SumAverage                       | 105.561111   |
| wavelet-LLL | glcm       | JointEntropy                     | 7.524753971  |
| wavelet-LLL | glcm       | ClusterShade                     | 61185.64226  |
| wavelet-LLL | glcm       | MaximumProbability               | 0.010765946  |
| wavelet-LLL | glcm       | Idmn                             | 0.943652825  |
| wavelet-LLL | glcm       | JointEnergy                      | 0.005565652  |
| wavelet-LLL | glcm       | Contrast                         | 876.7714298  |
| wavelet-LLL | glcm       | DifferenceEntropy                | 5.236896868  |
| wavelet-LLL | glcm       | InverseVariance                  | 0.071309656  |
| wavelet-LLL | glcm       | DifferenceVariance               | 331.3669801  |
| wavelet-LLL | glcm       | Idn                              | 0.848845942  |
| wavelet-LLL | glcm       | Idm                              | 0.063326816  |
| wavelet-LLL | glcm       | Correlation                      | 0.604219366  |
| wavelet-LLL | glcm       | Autocorrelation                  | 3462.945314  |
| wavelet-LLL | glcm       | SumEntropy                       | 6.159433052  |
| wavelet-LLL | glcm       | SumSquares                       | 1114.779592  |
| wavelet-LLL | glcm       | ClusterProminence                | 25887196.46  |
| wavelet-LLL | glcm       | Imc2                             | 0.999967217  |
| wavelet-LLL | glcm       | Imc1                             | -0.782688293 |
| wavelet-LLL | glcm       | DifferenceAverage                | 22.68071219  |
| wavelet-LLL | glcm       | Id                               | 0.119111567  |
| wavelet-LLL | glcm       | ClusterTendency                  | 3582.346939  |
| wavelet-LLL | firstorder | InterquartileRange               | 1452.996669  |
| wavelet-LLL | firstorder | Skewness                         | 0.402709383  |
| wavelet-LLL | firstorder | Uniformity                       | 0.014823359  |
| wavelet-LLL | firstorder | Median                           | -1401.646094 |
| wavelet-LLL | firstorder | Energy                           | 353490737.6  |
| wavelet-LLL | firstorder | RobustMeanAbsoluteDeviation      | 559.1121122  |
| wavelet-LLL | firstorder | MeanAbsoluteDeviation            | 715.3790107  |
| wavelet-LLL | firstorder | TotalEnergy                      | 9544249914   |
| wavelet-LLL | firstorder | Maximum                          | 283.093425   |
| wavelet-LLL | firstorder | RootMeanSquared                  | 1519.999006  |
| wavelet-LLL | firstorder | 90Percentile                     | 100.2270127  |
| wavelet-LLL | firstorder | Minimum                          | -2533.786126 |
| wavelet-LLL | firstorder | Entropy                          | 6.243932614  |
| wavelet-LLL | firstorder | Range                            | 2816.879551  |
| wavelet-LLL | firstorder | Variance                         | 698351.2367  |
| wavelet-LLL | firstorder | 10Percentile                     | -2264.867203 |
| wavelet-LLL | firstorder | Kurtosis                         | 1.912005189  |
| wavelet-LLL | firstorder | Mean                             | -1269.663633 |
| wavelet-LLL | glrlm      | ShortRunLowGrayLevelEmphasis     | 0.019776854  |
| wavelet-LLL | glrlm      | GrayLevelVariance                | 1108.941639  |
| wavelet-LLL | glrlm      | LowGrayLevelRunEmphasis          | 0.019893174  |
| wavelet-LLL | glrlm      | GrayLevelNonUniformityNormalized | 0.014750616  |
| wavelet-LLL | glrlm      | RunVariance                      | 0.014097027  |
| wavelet-LLL | glrlm      | GrayLevelNonUniformity           | 2.227400224  |
| wavelet-LLL | glrlm      | LongRunEmphasis                  | 1.041117594  |
| wavelet-LLL | glrlm      | ShortRunHighGrayLevelEmphasis    | 3714.745735  |
| wavelet-LLL | glrlm      | RunLengthNonUniformity           | 147.2332305  |
| wavelet-LLL | glrlm      | ShortRunEmphasis                 | 0.990294226  |
| wavelet-LLL | glrlm      | LongRunHighGrayLevelEmphasis     | 3989.223887  |
| wavelet-LLL | glrlm      | RunPercentage                    | 0.986928105  |
| wavelet-LLL | glrlm      | LongRunLowGrayLevelEmphasis      | 0.020366391  |
| wavelet-LLL | glrlm      | RunEntropy                       | 6.270528822  |

|             |       |                                      |              |
|-------------|-------|--------------------------------------|--------------|
| wavelet-LLL | glrlm | HighGrayLevelRunEmphasis             | 3769.508743  |
| wavelet-LLL | glrlm | RunLengthNonUniformityNormalized     | 0.974841152  |
| wavelet-LLL | glszm | GrayLevelVariance                    | 1008.884556  |
| wavelet-LLL | glszm | ZoneVariance                         | 0.268698225  |
| wavelet-LLL | glszm | GrayLevelNonUniformityNormalized     | 0.01443787   |
| wavelet-LLL | glszm | SizeZoneNonUniformityNormalized      | 0.766035503  |
| wavelet-LLL | glszm | SizeZoneNonUniformity                | 99.58461538  |
| wavelet-LLL | glszm | GrayLevelNonUniformity               | 1.876923077  |
| wavelet-LLL | glszm | LargeAreaEmphasis                    | 1.653846154  |
| wavelet-LLL | glszm | SmallAreaHighGrayLevelEmphasis       | 3030.293857  |
| wavelet-LLL | glszm | ZonePercentage                       | 0.849673203  |
| wavelet-LLL | glszm | LargeAreaLowGrayLevelEmphasis        | 0.028049618  |
| wavelet-LLL | glszm | LargeAreaHighGrayLevelEmphasis       | 6998.530769  |
| wavelet-LLL | glszm | HighGrayLevelZoneEmphasis            | 3548.269231  |
| wavelet-LLL | glszm | SmallAreaEmphasis                    | 0.896901709  |
| wavelet-LLL | glszm | LowGrayLevelZoneEmphasis             | 0.020992934  |
| wavelet-LLL | glszm | ZoneEntropy                          | 6.387526851  |
| wavelet-LLL | glszm | SmallAreaLowGrayLevelEmphasis        | 0.019313422  |
| wavelet-LLL | ngtdm | Coarseness                           | 0.03460055   |
| wavelet-LLL | ngtdm | Complexity                           | 48530.67097  |
| wavelet-LLL | ngtdm | Strength                             | 192.0524604  |
| wavelet-LLL | ngtdm | Contrast                             | 3.942930401  |
| wavelet-LLL | ngtdm | Busyness                             | 0.007637837  |
| wavelet-HHL | gldm  | GrayLevelVariance                    | 28.01777094  |
| wavelet-HHL | gldm  | HighGrayLevelEmphasis                | 255.7712418  |
| wavelet-HHL | gldm  | DependenceEntropy                    | 5.468094546  |
| wavelet-HHL | gldm  | DependenceNonUniformity              | 51.53594771  |
| wavelet-HHL | gldm  | GrayLevelNonUniformity               | 8.960784314  |
| wavelet-HHL | gldm  | SmallDependenceEmphasis              | 0.521379811  |
| wavelet-HHL | gldm  | SmallDependenceHighGrayLevelEmphasis | 122.6936583  |
| wavelet-HHL | gldm  | DependenceNonUniformityNormalized    | 0.33683626   |
| wavelet-HHL | gldm  | LargeDependenceEmphasis              | 4.581699346  |
| wavelet-HHL | gldm  | LargeDependenceLowGrayLevelEmphasis  | 0.038604905  |
| wavelet-HHL | gldm  | DependenceVariance                   | 0.964244521  |
| wavelet-HHL | gldm  | LargeDependenceHighGrayLevelEmphasis | 1252.111111  |
| wavelet-HHL | gldm  | SmallDependenceLowGrayLevelEmphasis  | 0.019963901  |
| wavelet-HHL | gldm  | LowGrayLevelEmphasis                 | 0.02226886   |
| wavelet-HHL | glcm  | JointAverage                         | 15.24521388  |
| wavelet-HHL | glcm  | SumAverage                           | 30.49042775  |
| wavelet-HHL | glcm  | JointEntropy                         | 6.974511579  |
| wavelet-HHL | glcm  | ClusterShade                         | -167.6561619 |
| wavelet-HHL | glcm  | MaximumProbability                   | 0.021302451  |
| wavelet-HHL | glcm  | Idmn                                 | 0.938778614  |
| wavelet-HHL | glcm  | JointEnergy                          | 0.008977898  |
| wavelet-HHL | glcm  | Contrast                             | 54.91371455  |
| wavelet-HHL | glcm  | DifferenceEntropy                    | 3.754413343  |
| wavelet-HHL | glcm  | InverseVariance                      | 0.171140032  |
| wavelet-HHL | glcm  | DifferenceVariance                   | 20.50991578  |
| wavelet-HHL | glcm  | Idn                                  | 0.838566974  |
| wavelet-HHL | glcm  | Idm                                  | 0.159991859  |
| wavelet-HHL | glcm  | Correlation                          | -0.003043698 |
| wavelet-HHL | glcm  | Autocorrelation                      | 232.4202579  |
| wavelet-HHL | glcm  | SumEntropy                           | 4.565365425  |
| wavelet-HHL | glcm  | SumSquares                           | 27.44781143  |
| wavelet-HHL | glcm  | ClusterProminence                    | 10943.81175  |

|             |            |                                  |              |
|-------------|------------|----------------------------------|--------------|
| wavelet-HHL | glcm       | Imc2                             | 0.977993804  |
| wavelet-HHL | glcm       | Imc1                             | -0.372051558 |
| wavelet-HHL | glcm       | DifferenceAverage                | 5.773864042  |
| wavelet-HHL | glcm       | Id                               | 0.252448244  |
| wavelet-HHL | glcm       | ClusterTendency                  | 54.87753115  |
| wavelet-HHL | firstorder | InterquartileRange               | 170.8564672  |
| wavelet-HHL | firstorder | Skewness                         | -0.35188571  |
| wavelet-HHL | firstorder | Uniformity                       | 0.058567218  |
| wavelet-HHL | firstorder | Median                           | -5.150267578 |
| wavelet-HHL | firstorder | Energy                           | 2658588.529  |
| wavelet-HHL | firstorder | RobustMeanAbsoluteDeviation      | 74.13379995  |
| wavelet-HHL | firstorder | MeanAbsoluteDeviation            | 106.4596206  |
| wavelet-HHL | firstorder | TotalEnergy                      | 71781890.27  |
| wavelet-HHL | firstorder | Maximum                          | 292.9285529  |
| wavelet-HHL | firstorder | RootMeanSquared                  | 131.819557   |
| wavelet-HHL | firstorder | 90Percentile                     | 138.0477435  |
| wavelet-HHL | firstorder | Minimum                          | -357.0054941 |
| wavelet-HHL | firstorder | Entropy                          | 4.332802407  |
| wavelet-HHL | firstorder | Range                            | 649.934047   |
| wavelet-HHL | firstorder | Variance                         | 17275.18313  |
| wavelet-HHL | firstorder | 10Percentile                     | -186.9020549 |
| wavelet-HHL | firstorder | Kurtosis                         | 2.946593311  |
| wavelet-HHL | firstorder | Mean                             | -10.06044139 |
| wavelet-HHL | glrlm      | ShortRunLowGrayLevelEmphasis     | 0.022782431  |
| wavelet-HHL | glrlm      | GrayLevelVariance                | 28.47844068  |
| wavelet-HHL | glrlm      | LowGrayLevelRunEmphasis          | 0.022906916  |
| wavelet-HHL | glrlm      | GrayLevelNonUniformityNormalized | 0.057792858  |
| wavelet-HHL | glrlm      | RunVariance                      | 0.036756389  |
| wavelet-HHL | glrlm      | GrayLevelNonUniformity           | 8.536454393  |
| wavelet-HHL | glrlm      | LongRunEmphasis                  | 1.110787782  |
| wavelet-HHL | glrlm      | ShortRunHighGrayLevelEmphasis    | 247.616038   |
| wavelet-HHL | glrlm      | RunLengthNonUniformity           | 137.7960686  |
| wavelet-HHL | glrlm      | ShortRunEmphasis                 | 0.973494405  |
| wavelet-HHL | glrlm      | LongRunHighGrayLevelEmphasis     | 285.9844095  |
| wavelet-HHL | glrlm      | RunPercentage                    | 0.965309201  |
| wavelet-HHL | glrlm      | LongRunLowGrayLevelEmphasis      | 0.023418053  |
| wavelet-HHL | glrlm      | RunEntropy                       | 4.492398926  |
| wavelet-HHL | glrlm      | HighGrayLevelRunEmphasis         | 254.9456502  |
| wavelet-HHL | glrlm      | RunLengthNonUniformityNormalized | 0.932537961  |
| wavelet-HHL | glszm      | GrayLevelVariance                | 35.11087987  |
| wavelet-HHL | glszm      | ZoneVariance                     | 1.927852931  |
| wavelet-HHL | glszm      | GrayLevelNonUniformityNormalized | 0.050526072  |
| wavelet-HHL | glszm      | SizeZoneNonUniformityNormalized  | 0.491501908  |
| wavelet-HHL | glszm      | SizeZoneNonUniformity            | 45.70967742  |
| wavelet-HHL | glszm      | GrayLevelNonUniformity           | 4.698924731  |
| wavelet-HHL | glszm      | LargeAreaEmphasis                | 4.634408602  |
| wavelet-HHL | glszm      | SmallAreaHighGrayLevelEmphasis   | 165.2108736  |
| wavelet-HHL | glszm      | ZonePercentage                   | 0.607843137  |
| wavelet-HHL | glszm      | LargeAreaLowGrayLevelEmphasis    | 0.048441697  |
| wavelet-HHL | glszm      | LargeAreaHighGrayLevelEmphasis   | 1339.602151  |
| wavelet-HHL | glszm      | HighGrayLevelZoneEmphasis        | 238.0967742  |
| wavelet-HHL | glszm      | SmallAreaEmphasis                | 0.727502246  |
| wavelet-HHL | glszm      | LowGrayLevelZoneEmphasis         | 0.033646936  |
| wavelet-HHL | glszm      | ZoneEntropy                      | 5.352023026  |
| wavelet-HHL | glszm      | SmallAreaLowGrayLevelEmphasis    | 0.032223732  |

|             |            |                                      |              |
|-------------|------------|--------------------------------------|--------------|
| wavelet-HHL | ngtdm      | Coarseness                           | 0.032655084  |
| wavelet-HHL | ngtdm      | Complexity                           | 1168.633127  |
| wavelet-HHL | ngtdm      | Strength                             | 7.183984136  |
| wavelet-HHL | ngtdm      | Contrast                             | 0.352457113  |
| wavelet-HHL | ngtdm      | Busyness                             | 0.075902908  |
| wavelet-HLH | gldm       | GrayLevelVariance                    | 22.72467854  |
| wavelet-HLH | gldm       | HighGrayLevelEmphasis                | 207.5424837  |
| wavelet-HLH | gldm       | DependenceEntropy                    | 5.490336372  |
| wavelet-HLH | gldm       | DependenceNonUniformity              | 50.54248366  |
| wavelet-HLH | gldm       | GrayLevelNonUniformity               | 9.836601307  |
| wavelet-HLH | gldm       | SmallDependenceEmphasis              | 0.499546115  |
| wavelet-HLH | gldm       | SmallDependenceHighGrayLevelEmphasis | 112.8490378  |
| wavelet-HLH | gldm       | DependenceNonUniformityNormalized    | 0.33034303   |
| wavelet-HLH | gldm       | LargeDependenceEmphasis              | 4.633986928  |
| wavelet-HLH | gldm       | LargeDependenceLowGrayLevelEmphasis  | 0.04253048   |
| wavelet-HLH | gldm       | DependenceVariance                   | 0.916399675  |
| wavelet-HLH | gldm       | LargeDependenceHighGrayLevelEmphasis | 894.7712418  |
| wavelet-HLH | gldm       | SmallDependenceLowGrayLevelEmphasis  | 0.01042942   |
| wavelet-HLH | gldm       | LowGrayLevelEmphasis                 | 0.014738641  |
| wavelet-HLH | glcm       | JointAverage                         | 13.62534252  |
| wavelet-HLH | glcm       | SumAverage                           | 27.25068505  |
| wavelet-HLH | glcm       | JointEntropy                         | 6.928036339  |
| wavelet-HLH | glcm       | ClusterShade                         | 45.39704255  |
| wavelet-HLH | glcm       | MaximumProbability                   | 0.023275692  |
| wavelet-HLH | glcm       | Idmn                                 | 0.945893798  |
| wavelet-HLH | glcm       | JointEnergy                          | 0.0093631    |
| wavelet-HLH | glcm       | Contrast                             | 49.92560107  |
| wavelet-HLH | glcm       | DifferenceEntropy                    | 3.702157129  |
| wavelet-HLH | glcm       | InverseVariance                      | 0.165115846  |
| wavelet-HLH | glcm       | DifferenceVariance                   | 17.01251783  |
| wavelet-HLH | glcm       | Idn                                  | 0.845210338  |
| wavelet-HLH | glcm       | Idm                                  | 0.160258163  |
| wavelet-HLH | glcm       | Correlation                          | 0.004110766  |
| wavelet-HLH | glcm       | Autocorrelation                      | 185.7811096  |
| wavelet-HLH | glcm       | SumEntropy                           | 4.497882448  |
| wavelet-HLH | glcm       | SumSquares                           | 25.08635768  |
| wavelet-HLH | glcm       | ClusterProminence                    | 7905.419825  |
| wavelet-HLH | glcm       | Imc2                                 | 0.967933795  |
| wavelet-HLH | glcm       | Imc1                                 | -0.338838579 |
| wavelet-HLH | glcm       | DifferenceAverage                    | 5.621767985  |
| wavelet-HLH | glcm       | Id                                   | 0.253759829  |
| wavelet-HLH | glcm       | ClusterTendency                      | 50.41982964  |
| wavelet-HLH | firstorder | InterquartileRange                   | 161.5865332  |
| wavelet-HLH | firstorder | Skewness                             | 0.224231874  |
| wavelet-HLH | firstorder | Uniformity                           | 0.064291512  |
| wavelet-HLH | firstorder | Median                               | -10.54114965 |
| wavelet-HLH | firstorder | Energy                               | 2194163.527  |
| wavelet-HLH | firstorder | RobustMeanAbsoluteDeviation          | 68.33474488  |
| wavelet-HLH | firstorder | MeanAbsoluteDeviation                | 96.74126989  |
| wavelet-HLH | firstorder | TotalEnergy                          | 59242415.23  |
| wavelet-HLH | firstorder | Maximum                              | 358.2065757  |
| wavelet-HLH | firstorder | RootMeanSquared                      | 119.7536558  |
| wavelet-HLH | firstorder | 90Percentile                         | 156.8996058  |
| wavelet-HLH | firstorder | Minimum                              | -304.2092028 |
| wavelet-HLH | firstorder | Entropy                              | 4.153024778  |

|             |            |                                  |              |
|-------------|------------|----------------------------------|--------------|
| wavelet-HLH | firstorder | Range                            | 662.4157785  |
| wavelet-HLH | firstorder | Variance                         | 14334.87296  |
| wavelet-HLH | firstorder | 10Percentile                     | -155.1487307 |
| wavelet-HLH | firstorder | Kurtosis                         | 2.805302178  |
| wavelet-HLH | firstorder | Mean                             | 2.462748459  |
| wavelet-HLH | glrlm      | ShortRunLowGrayLevelEmphasis     | 0.014769092  |
| wavelet-HLH | glrlm      | GrayLevelVariance                | 22.96960618  |
| wavelet-HLH | glrlm      | LowGrayLevelRunEmphasis          | 0.014992597  |
| wavelet-HLH | glrlm      | GrayLevelNonUniformityNormalized | 0.063724389  |
| wavelet-HLH | glrlm      | RunVariance                      | 0.037690945  |
| wavelet-HLH | glrlm      | GrayLevelNonUniformity           | 9.402623618  |
| wavelet-HLH | glrlm      | LongRunEmphasis                  | 1.115338088  |
| wavelet-HLH | glrlm      | ShortRunHighGrayLevelEmphasis    | 202.93978    |
| wavelet-HLH | glrlm      | RunLengthNonUniformity           | 137.493815   |
| wavelet-HLH | glrlm      | ShortRunEmphasis                 | 0.972353995  |
| wavelet-HLH | glrlm      | LongRunHighGrayLevelEmphasis     | 230.3235144  |
| wavelet-HLH | glrlm      | RunPercentage                    | 0.96430367   |
| wavelet-HLH | glrlm      | LongRunLowGrayLevelEmphasis      | 0.015909362  |
| wavelet-HLH | glrlm      | RunEntropy                       | 4.316603559  |
| wavelet-HLH | glrlm      | HighGrayLevelRunEmphasis         | 208.1728643  |
| wavelet-HLH | glrlm      | RunLengthNonUniformityNormalized | 0.930663194  |
| wavelet-HLH | glszm      | GrayLevelVariance                | 26.19863568  |
| wavelet-HLH | glszm      | ZoneVariance                     | 1.024627125  |
| wavelet-HLH | glszm      | GrayLevelNonUniformityNormalized | 0.058619494  |
| wavelet-HLH | glszm      | SizeZoneNonUniformityNormalized  | 0.444328824  |
| wavelet-HLH | glszm      | SizeZoneNonUniformity            | 41.32258065  |
| wavelet-HLH | glszm      | GrayLevelNonUniformity           | 5.451612903  |
| wavelet-HLH | glszm      | LargeAreaEmphasis                | 3.731182796  |
| wavelet-HLH | glszm      | SmallAreaHighGrayLevelEmphasis   | 161.3775717  |
| wavelet-HLH | glszm      | ZonePercentage                   | 0.607843137  |
| wavelet-HLH | glszm      | LargeAreaLowGrayLevelEmphasis    | 0.04051423   |
| wavelet-HLH | glszm      | LargeAreaHighGrayLevelEmphasis   | 727.4193548  |
| wavelet-HLH | glszm      | HighGrayLevelZoneEmphasis        | 220.0967742  |
| wavelet-HLH | glszm      | SmallAreaEmphasis                | 0.689124851  |
| wavelet-HLH | glszm      | LowGrayLevelZoneEmphasis         | 0.018830426  |
| wavelet-HLH | glszm      | ZoneEntropy                      | 5.315357332  |
| wavelet-HLH | glszm      | SmallAreaLowGrayLevelEmphasis    | 0.015967191  |
| wavelet-HLH | ngtdm      | Coarseness                       | 0.032182985  |
| wavelet-HLH | ngtdm      | Complexity                       | 823.8798266  |
| wavelet-HLH | ngtdm      | Strength                         | 5.578888549  |
| wavelet-HLH | ngtdm      | Contrast                         | 0.357838571  |
| wavelet-HLH | ngtdm      | Busyness                         | 0.127263757  |



| Image type | Feature Class | Feature Name                         |                                                                                                                                                                                                                                                                                                                                                                                                                                              |
|------------|---------------|--------------------------------------|----------------------------------------------------------------------------------------------------------------------------------------------------------------------------------------------------------------------------------------------------------------------------------------------------------------------------------------------------------------------------------------------------------------------------------------------|
| general    | info          | BoundingBox                          | 4: RTSTRUCT: C99-DNU_segment_Tumor<br>(1, 0, 1, 11, 14, 10)                                                                                                                                                                                                                                                                                                                                                                                  |
| general    | info          | EnabledImageTypes                    | {u'Original': {}, u'Wavelet': {}}                                                                                                                                                                                                                                                                                                                                                                                                            |
|            |               |                                      | {'distances': [1], 'additionalInfo': True,<br>'force2D': False, 'interpolator': 'sitkBSpline',<br>'resampledPixelSpacing': [3.0], 'label': 1,<br>'normalizeScale': 1, 'normalize': False,<br>'force2Ddimension': 0, 'removeOutliers':<br>None, 'minimumROISize': None, u'binWidth':<br>25.0, 'minimumROIDimensions': 1,<br>u'correctMask': True, 'preCrop': False,<br>u'symmetricalGLCM': True,<br>'resegmentRange': None, 'padDistance': 5} |
| general    | info          | GeneralSettings                      | b7a378fc3d06c837214a9525dfa26c82f9f43f<br>06                                                                                                                                                                                                                                                                                                                                                                                                 |
| general    | info          | ImageHash                            | (0.9765625000000002,<br>0.9765625000000002, 2.0)                                                                                                                                                                                                                                                                                                                                                                                             |
| general    | info          | ImageSpacing                         | 300b75b70f60528b11b6bba660f4c8f075f61f<br>c2                                                                                                                                                                                                                                                                                                                                                                                                 |
| general    | info          | MaskHash                             | 1.13.1                                                                                                                                                                                                                                                                                                                                                                                                                                       |
| general    | info          | NumpyVersion                         | 0.5.2                                                                                                                                                                                                                                                                                                                                                                                                                                        |
| general    | info          | PyWaveletVersion                     | 1.1.0                                                                                                                                                                                                                                                                                                                                                                                                                                        |
| general    | info          | SimpleITKVersion                     | 1.3.0.post102+g1b0eb74                                                                                                                                                                                                                                                                                                                                                                                                                       |
| general    | info          | Version                              |                                                                                                                                                                                                                                                                                                                                                                                                                                              |
| general    | info          | VolumeNum                            | 1                                                                                                                                                                                                                                                                                                                                                                                                                                            |
| general    | info          | VoxelNum                             | 608                                                                                                                                                                                                                                                                                                                                                                                                                                          |
| original   | shape         | Maximum3DDiameter                    | 45.49725266                                                                                                                                                                                                                                                                                                                                                                                                                                  |
| original   | shape         | Maximum2DDiameterSlice               | 39.11521443                                                                                                                                                                                                                                                                                                                                                                                                                                  |
| original   | shape         | Sphericity                           | 0.723607921                                                                                                                                                                                                                                                                                                                                                                                                                                  |
| original   | shape         | MinorAxis                            | 30.57655978                                                                                                                                                                                                                                                                                                                                                                                                                                  |
| original   | shape         | Elongation                           | 0.743702191                                                                                                                                                                                                                                                                                                                                                                                                                                  |
| original   | shape         | SurfaceVolumeRatio                   | 0.262961215                                                                                                                                                                                                                                                                                                                                                                                                                                  |
| original   | shape         | Volume                               | 16416                                                                                                                                                                                                                                                                                                                                                                                                                                        |
| original   | shape         | MajorAxis                            | 41.11398374                                                                                                                                                                                                                                                                                                                                                                                                                                  |
| original   | shape         | SurfaceArea                          | 4316.771303                                                                                                                                                                                                                                                                                                                                                                                                                                  |
| original   | shape         | Flatness                             | 0.505998057                                                                                                                                                                                                                                                                                                                                                                                                                                  |
| original   | shape         | LeastAxis                            | 20.80359589                                                                                                                                                                                                                                                                                                                                                                                                                                  |
| original   | shape         | Maximum2DDiameterColumn              | 38.18376618                                                                                                                                                                                                                                                                                                                                                                                                                                  |
| original   | shape         | Maximum2DDiameterRow                 | 36.49657518                                                                                                                                                                                                                                                                                                                                                                                                                                  |
| original   | gldm          | GrayLevelVariance                    | 279.8006839                                                                                                                                                                                                                                                                                                                                                                                                                                  |
| original   | gldm          | HighGrayLevelEmphasis                | 738.9440789                                                                                                                                                                                                                                                                                                                                                                                                                                  |
| original   | gldm          | DependenceEntropy                    | 7.018263682                                                                                                                                                                                                                                                                                                                                                                                                                                  |
| original   | gldm          | DependenceNonUniformity              | 137.2434211                                                                                                                                                                                                                                                                                                                                                                                                                                  |
| original   | gldm          | GrayLevelNonUniformity               | 20.89802632                                                                                                                                                                                                                                                                                                                                                                                                                                  |
| original   | gldm          | SmallDependenceEmphasis              | 0.460972799                                                                                                                                                                                                                                                                                                                                                                                                                                  |
| original   | gldm          | SmallDependenceHighGrayLevelEmphasis | 476.83438                                                                                                                                                                                                                                                                                                                                                                                                                                    |
| original   | gldm          | DependenceNonUniformityNormalized    | 0.225729311                                                                                                                                                                                                                                                                                                                                                                                                                                  |
| original   | gldm          | LargeDependenceEmphasis              | 11.54934211                                                                                                                                                                                                                                                                                                                                                                                                                                  |
| original   | gldm          | LargeDependenceLowGrayLevelEmphasis  | 0.359053116                                                                                                                                                                                                                                                                                                                                                                                                                                  |
| original   | gldm          | DependenceVariance                   | 4.166681094                                                                                                                                                                                                                                                                                                                                                                                                                                  |
| original   | gldm          | LargeDependenceHighGrayLevelEmphasis | 5145.881579                                                                                                                                                                                                                                                                                                                                                                                                                                  |
| original   | gldm          | SmallDependenceLowGrayLevelEmphasis  | 0.007659933                                                                                                                                                                                                                                                                                                                                                                                                                                  |

|          |            |                                  |              |
|----------|------------|----------------------------------|--------------|
| original | gldm       | LowGrayLevelEmphasis             | 0.021292634  |
| original | glcm       | JointAverage                     | 21.06298511  |
| original | glcm       | SumAverage                       | 42.12597023  |
| original | glcm       | JointEntropy                     | 8.649921539  |
| original | glcm       | ClusterShade                     | 16159.66936  |
| original | glcm       | MaximumProbability               | 0.018475767  |
| original | glcm       | ldmn                             | 0.970762061  |
| original | glcm       | JointEnergy                      | 0.003745201  |
| original | glcm       | Contrast                         | 162.3353589  |
| original | glcm       | DifferenceEntropy                | 4.386229382  |
| original | glcm       | InverseVariance                  | 0.205606041  |
| original | glcm       | DifferenceVariance               | 84.13862708  |
| original | glcm       | ldn                              | 0.902883023  |
| original | glcm       | ldm                              | 0.207848286  |
| original | glcm       | Correlation                      | 0.68566094   |
| original | glcm       | Autocorrelation                  | 622.9016092  |
| original | glcm       | SumEntropy                       | 6.218364683  |
| original | glcm       | SumSquares                       | 260.3891997  |
| original | glcm       | ClusterProminence                | 1784345.84   |
| original | glcm       | lmc2                             | 0.990026112  |
| original | glcm       | lmc1                             | -0.373491619 |
| original | glcm       | DifferenceAverage                | 8.421203777  |
| original | glcm       | ld                               | 0.279937645  |
| original | glcm       | ClusterTendency                  | 879.2214397  |
| original | firstorder | InterquartileRange               | 695.25       |
| original | firstorder | Skewness                         | 0.706041073  |
| original | firstorder | Uniformity                       | 0.034371754  |
| original | firstorder | Median                           | -551.5       |
| original | firstorder | Energy                           | 192604324    |
| original | firstorder | RobustMeanAbsoluteDeviation      | 295.8851452  |
| original | firstorder | MeanAbsoluteDeviation            | 369.6168845  |
| original | firstorder | TotalEnergy                      | 5200316748   |
| original | firstorder | Maximum                          | 801          |
| original | firstorder | RootMeanSquared                  | 562.8351691  |
| original | firstorder | 90Percentile                     | 183.7        |
| original | firstorder | Minimum                          | -893         |
| original | firstorder | Entropy                          | 5.342703649  |
| original | firstorder | Range                            | 1694         |
| original | firstorder | Variance                         | 174490.6831  |
| original | firstorder | 10Percentile                     | -804         |
| original | firstorder | Kurtosis                         | 2.443402303  |
| original | firstorder | Mean                             | -377.2171053 |
| original | glrlm      | ShortRunLowGrayLevelEmphasis     | 0.019342239  |
| original | glrlm      | GrayLevelVariance                | 282.9178705  |
| original | glrlm      | LowGrayLevelRunEmphasis          | 0.020733519  |
| original | glrlm      | GrayLevelNonUniformityNormalized | 0.032484732  |
| original | glrlm      | RunVariance                      | 0.081336842  |
| original | glrlm      | GrayLevelNonUniformity           | 18.4512974   |
| original | glrlm      | LongRunEmphasis                  | 1.229358359  |
| original | glrlm      | ShortRunHighGrayLevelEmphasis    | 739.0229244  |
| original | glrlm      | RunLengthNonUniformity           | 499.7815908  |
| original | glrlm      | ShortRunEmphasis                 | 0.950882223  |
| original | glrlm      | LongRunHighGrayLevelEmphasis     | 858.5200469  |

|             |       |                                      |             |
|-------------|-------|--------------------------------------|-------------|
| original    | glrlm | RunPercentage                        | 0.93395749  |
| original    | glrlm | LongRunLowGrayLevelEmphasis          | 0.02762731  |
| original    | glrlm | RunEntropy                           | 5.677101582 |
| original    | glrlm | HighGrayLevelRunEmphasis             | 760.64956   |
| original    | glrlm | RunLengthNonUniformityNormalized     | 0.879460558 |
| original    | glszm | GrayLevelVariance                    | 297.0637253 |
| original    | glszm | ZoneVariance                         | 10.43075963 |
| original    | glszm | GrayLevelNonUniformityNormalized     | 0.021165453 |
| original    | glszm | SizeZoneNonUniformityNormalized      | 0.584828304 |
| original    | glszm | SizeZoneNonUniformity                | 181.2967742 |
| original    | glszm | GrayLevelNonUniformity               | 6.561290323 |
| original    | glszm | LargeAreaEmphasis                    | 14.27741935 |
| original    | glszm | SmallAreaHighGrayLevelEmphasis       | 874.3807295 |
| original    | glszm | ZonePercentage                       | 0.509868421 |
| original    | glszm | LargeAreaLowGrayLevelEmphasis        | 0.454557914 |
| original    | glszm | LargeAreaHighGrayLevelEmphasis       | 6513.354839 |
| original    | glszm | HighGrayLevelZoneEmphasis            | 1007.716129 |
| original    | glszm | SmallAreaEmphasis                    | 0.789717521 |
| original    | glszm | LowGrayLevelZoneEmphasis             | 0.017177219 |
| original    | glszm | ZoneEntropy                          | 6.566373612 |
| original    | glszm | SmallAreaLowGrayLevelEmphasis        | 0.012597577 |
| original    | ngtdm | Coarseness                           | 0.011468802 |
| original    | ngtdm | Complexity                           | 9764.636501 |
| original    | ngtdm | Strength                             | 32.59418525 |
| original    | ngtdm | Contrast                             | 0.69351617  |
| original    | ngtdm | Busyness                             | 0.076915713 |
| wavelet-HHH | gldm  | GrayLevelVariance                    | 25.60407018 |
| wavelet-HHH | gldm  | HighGrayLevelEmphasis                | 369.1332237 |
| wavelet-HHH | gldm  | DependenceEntropy                    | 6.175378777 |
| wavelet-HHH | gldm  | DependenceNonUniformity              | 151.8125    |
| wavelet-HHH | gldm  | GrayLevelNonUniformity               | 39.61842105 |
| wavelet-HHH | gldm  | SmallDependenceEmphasis              | 0.452568461 |
| wavelet-HHH | gldm  | SmallDependenceHighGrayLevelEmphasis | 172.4219911 |
| wavelet-HHH | gldm  | DependenceNonUniformityNormalized    | 0.249691612 |
| wavelet-HHH | gldm  | LargeDependenceEmphasis              | 7.523026316 |
| wavelet-HHH | gldm  | LargeDependenceLowGrayLevelEmphasis  | 0.027995073 |
| wavelet-HHH | gldm  | DependenceVariance                   | 2.037569252 |
| wavelet-HHH | gldm  | LargeDependenceHighGrayLevelEmphasis | 2727.666118 |
| wavelet-HHH | gldm  | SmallDependenceLowGrayLevelEmphasis  | 0.005667113 |
| wavelet-HHH | gldm  | LowGrayLevelEmphasis                 | 0.007578687 |
| wavelet-HHH | glcm  | JointAverage                         | 18.49689893 |
| wavelet-HHH | glcm  | SumAverage                           | 36.99379787 |
| wavelet-HHH | glcm  | JointEntropy                         | 7.9175464   |
| wavelet-HHH | glcm  | ClusterShade                         | -41.6165645 |
| wavelet-HHH | glcm  | MaximumProbability                   | 0.017388217 |
| wavelet-HHH | glcm  | ldmn                                 | 0.961847958 |
| wavelet-HHH | glcm  | JointEnergy                          | 0.005920578 |
| wavelet-HHH | glcm  | Contrast                             | 54.74364811 |
| wavelet-HHH | glcm  | DifferenceEntropy                    | 3.868701952 |
| wavelet-HHH | glcm  | InverseVariance                      | 0.205382052 |
| wavelet-HHH | glcm  | DifferenceVariance                   | 23.96625525 |
| wavelet-HHH | glcm  | ldn                                  | 0.876970919 |
| wavelet-HHH | glcm  | ldm                                  | 0.19330769  |

|             |            |                                  |              |
|-------------|------------|----------------------------------|--------------|
| wavelet-HHH | glcm       | Correlation                      | -0.043055914 |
| wavelet-HHH | glcm       | Autocorrelation                  | 340.9726312  |
| wavelet-HHH | glcm       | SumEntropy                       | 4.689430912  |
| wavelet-HHH | glcm       | SumSquares                       | 26.20864625  |
| wavelet-HHH | glcm       | ClusterProminence                | 10981.8095   |
| wavelet-HHH | glcm       | Imc2                             | 0.858036323  |
| wavelet-HHH | glcm       | Imc1                             | -0.15753057  |
| wavelet-HHH | glcm       | DifferenceAverage                | 5.44581659   |
| wavelet-HHH | glcm       | Id                               | 0.28182003   |
| wavelet-HHH | glcm       | ClusterTendency                  | 50.09093691  |
| wavelet-HHH | firstorder | InterquartileRange               | 136.1799155  |
| wavelet-HHH | firstorder | Skewness                         | -0.169719293 |
| wavelet-HHH | firstorder | Uniformity                       | 0.065161877  |
| wavelet-HHH | firstorder | Median                           | 4.877290186  |
| wavelet-HHH | firstorder | Energy                           | 9742489.517  |
| wavelet-HHH | firstorder | RobustMeanAbsoluteDeviation      | 58.27638005  |
| wavelet-HHH | firstorder | MeanAbsoluteDeviation            | 93.96634796  |
| wavelet-HHH | firstorder | TotalEnergy                      | 263047217    |
| wavelet-HHH | firstorder | Maximum                          | 421.6247853  |
| wavelet-HHH | firstorder | RootMeanSquared                  | 126.5852734  |
| wavelet-HHH | firstorder | 90Percentile                     | 152.2991691  |
| wavelet-HHH | firstorder | Minimum                          | -429.5079093 |
| wavelet-HHH | firstorder | Entropy                          | 4.283695737  |
| wavelet-HHH | firstorder | Range                            | 851.1326946  |
| wavelet-HHH | firstorder | Variance                         | 16022.99511  |
| wavelet-HHH | firstorder | 10Percentile                     | -156.1602004 |
| wavelet-HHH | firstorder | Kurtosis                         | 3.948482568  |
| wavelet-HHH | firstorder | Mean                             | 0.914514557  |
| wavelet-HHH | glrlm      | ShortRunLowGrayLevelEmphasis     | 0.007688362  |
| wavelet-HHH | glrlm      | GrayLevelVariance                | 26.48011904  |
| wavelet-HHH | glrlm      | LowGrayLevelRunEmphasis          | 0.00781453   |
| wavelet-HHH | glrlm      | GrayLevelNonUniformityNormalized | 0.063361145  |
| wavelet-HHH | glrlm      | RunVariance                      | 0.062287575  |
| wavelet-HHH | glrlm      | GrayLevelNonUniformity           | 36.53892357  |
| wavelet-HHH | glrlm      | LongRunEmphasis                  | 1.174895739  |
| wavelet-HHH | glrlm      | ShortRunHighGrayLevelEmphasis    | 355.8195865  |
| wavelet-HHH | glrlm      | RunLengthNonUniformity           | 521.5129007  |
| wavelet-HHH | glrlm      | ShortRunEmphasis                 | 0.961640372  |
| wavelet-HHH | glrlm      | LongRunHighGrayLevelEmphasis     | 432.5180658  |
| wavelet-HHH | glrlm      | RunPercentage                    | 0.948380567  |
| wavelet-HHH | glrlm      | LongRunLowGrayLevelEmphasis      | 0.00838171   |
| wavelet-HHH | glrlm      | RunEntropy                       | 4.572326997  |
| wavelet-HHH | glrlm      | HighGrayLevelRunEmphasis         | 369.641554   |
| wavelet-HHH | glrlm      | RunLengthNonUniformityNormalized | 0.904100861  |
| wavelet-HHH | glszm      | GrayLevelVariance                | 39.4412487   |
| wavelet-HHH | glszm      | ZoneVariance                     | 7.469469303  |
| wavelet-HHH | glszm      | GrayLevelNonUniformityNormalized | 0.046181061  |
| wavelet-HHH | glszm      | SizeZoneNonUniformityNormalized  | 0.507450572  |
| wavelet-HHH | glszm      | SizeZoneNonUniformity            | 157.3096774  |
| wavelet-HHH | glszm      | GrayLevelNonUniformity           | 14.31612903  |
| wavelet-HHH | glszm      | LargeAreaEmphasis                | 11.31612903  |
| wavelet-HHH | glszm      | SmallAreaHighGrayLevelEmphasis   | 284.4584392  |
| wavelet-HHH | glszm      | ZonePercentage                   | 0.509868421  |

|             |            |                                      |              |
|-------------|------------|--------------------------------------|--------------|
| wavelet-HHH | glszm      | LargeAreaLowGrayLevelEmphasis        | 0.042695199  |
| wavelet-HHH | glszm      | LargeAreaHighGrayLevelEmphasis       | 4100.545161  |
| wavelet-HHH | glszm      | HighGrayLevelZoneEmphasis            | 378.2387097  |
| wavelet-HHH | glszm      | SmallAreaEmphasis                    | 0.740045549  |
| wavelet-HHH | glszm      | LowGrayLevelZoneEmphasis             | 0.011633174  |
| wavelet-HHH | glszm      | ZoneEntropy                          | 5.838421538  |
| wavelet-HHH | glszm      | SmallAreaLowGrayLevelEmphasis        | 0.010591379  |
| wavelet-HHH | ngtdm      | Coarseness                           | 0.011166648  |
| wavelet-HHH | ngtdm      | Complexity                           | 1581.907524  |
| wavelet-HHH | ngtdm      | Strength                             | 3.12771928   |
| wavelet-HHH | ngtdm      | Contrast                             | 0.205626639  |
| wavelet-HHH | ngtdm      | Busyness                             | 0.133599283  |
| wavelet-HLL | gldm       | GrayLevelVariance                    | 63.01063669  |
| wavelet-HLL | gldm       | HighGrayLevelEmphasis                | 2424.523026  |
| wavelet-HLL | gldm       | DependenceEntropy                    | 6.507513362  |
| wavelet-HLL | gldm       | DependenceNonUniformity              | 143.2401316  |
| wavelet-HLL | gldm       | GrayLevelNonUniformity               | 32.78289474  |
| wavelet-HLL | gldm       | SmallDependenceEmphasis              | 0.430260447  |
| wavelet-HLL | gldm       | SmallDependenceHighGrayLevelEmphasis | 981.593633   |
| wavelet-HLL | gldm       | DependenceNonUniformityNormalized    | 0.235592322  |
| wavelet-HLL | gldm       | LargeDependenceEmphasis              | 8.049342105  |
| wavelet-HLL | gldm       | LargeDependenceLowGrayLevelEmphasis  | 0.005417103  |
| wavelet-HLL | gldm       | DependenceVariance                   | 2.123961219  |
| wavelet-HLL | gldm       | LargeDependenceHighGrayLevelEmphasis | 20650.11184  |
| wavelet-HLL | gldm       | SmallDependenceLowGrayLevelEmphasis  | 0.002331991  |
| wavelet-HLL | gldm       | LowGrayLevelEmphasis                 | 0.00257823   |
| wavelet-HLL | glcm       | JointAverage                         | 48.92143433  |
| wavelet-HLL | glcm       | SumAverage                           | 97.84286865  |
| wavelet-HLL | glcm       | JointEntropy                         | 8.166140757  |
| wavelet-HLL | glcm       | ClusterShade                         | -3974.075978 |
| wavelet-HLL | glcm       | MaximumProbability                   | 0.014311248  |
| wavelet-HLL | glcm       | Idmn                                 | 0.9835771    |
| wavelet-HLL | glcm       | JointEnergy                          | 0.004730138  |
| wavelet-HLL | glcm       | Contrast                             | 73.10494991  |
| wavelet-HLL | glcm       | DifferenceEntropy                    | 3.945339205  |
| wavelet-HLL | glcm       | InverseVariance                      | 0.200932552  |
| wavelet-HLL | glcm       | DifferenceVariance                   | 36.9487366   |
| wavelet-HLL | glcm       | Idn                                  | 0.921190205  |
| wavelet-HLL | glcm       | Idm                                  | 0.194602935  |
| wavelet-HLL | glcm       | Correlation                          | 0.339368891  |
| wavelet-HLL | glcm       | Autocorrelation                      | 2413.462156  |
| wavelet-HLL | glcm       | SumEntropy                           | 5.192645951  |
| wavelet-HLL | glcm       | SumSquares                           | 56.6582069   |
| wavelet-HLL | glcm       | ClusterProminence                    | 248876.8006  |
| wavelet-HLL | glcm       | Imc2                                 | 0.921957261  |
| wavelet-HLL | glcm       | Imc1                                 | -0.210366197 |
| wavelet-HLL | glcm       | DifferenceAverage                    | 5.862582268  |
| wavelet-HLL | glcm       | Id                                   | 0.282071803  |
| wavelet-HLL | glcm       | ClusterTendency                      | 153.5278777  |
| wavelet-HLL | firstorder | InterquartileRange                   | 178.7979383  |
| wavelet-HLL | firstorder | Skewness                             | -2.221536414 |
| wavelet-HLL | firstorder | Uniformity                           | 0.053919235  |
| wavelet-HLL | firstorder | Median                               | -11.35775803 |

|             |            |                                  |              |
|-------------|------------|----------------------------------|--------------|
| wavelet-HLL | firstorder | Energy                           | 25312305.24  |
| wavelet-HLL | firstorder | RobustMeanAbsoluteDeviation      | 76.41339541  |
| wavelet-HLL | firstorder | MeanAbsoluteDeviation            | 133.3058455  |
| wavelet-HLL | firstorder | TotalEnergy                      | 683432241.5  |
| wavelet-HLL | firstorder | Maximum                          | 315.3082735  |
| wavelet-HLL | firstorder | RootMeanSquared                  | 204.0394104  |
| wavelet-HLL | firstorder | 90Percentile                     | 128.3375447  |
| wavelet-HLL | firstorder | Minimum                          | -1234.466337 |
| wavelet-HLL | firstorder | Entropy                          | 4.601187169  |
| wavelet-HLL | firstorder | Range                            | 1549.774611  |
| wavelet-HLL | firstorder | Variance                         | 39324.34705  |
| wavelet-HLL | firstorder | 10Percentile                     | -260.5827309 |
| wavelet-HLL | firstorder | Kurtosis                         | 10.89170714  |
| wavelet-HLL | firstorder | Mean                             | -48.03887939 |
| wavelet-HLL | grlm       | ShortRunLowGrayLevelEmphasis     | 0.002688134  |
| wavelet-HLL | grlm       | GrayLevelVariance                | 65.22413739  |
| wavelet-HLL | grlm       | LowGrayLevelRunEmphasis          | 0.002705516  |
| wavelet-HLL | grlm       | GrayLevelNonUniformityNormalized | 0.052516432  |
| wavelet-HLL | grlm       | RunVariance                      | 0.062173863  |
| wavelet-HLL | grlm       | GrayLevelNonUniformity           | 30.17170538  |
| wavelet-HLL | grlm       | LongRunEmphasis                  | 1.18355114   |
| wavelet-HLL | grlm       | ShortRunHighGrayLevelEmphasis    | 2308.316539  |
| wavelet-HLL | grlm       | RunLengthNonUniformity           | 514.9333885  |
| wavelet-HLL | grlm       | ShortRunEmphasis                 | 0.958010066  |
| wavelet-HLL | grlm       | LongRunHighGrayLevelEmphasis     | 2888.639456  |
| wavelet-HLL | grlm       | RunPercentage                    | 0.944838057  |
| wavelet-HLL | grlm       | LongRunLowGrayLevelEmphasis      | 0.002780884  |
| wavelet-HLL | grlm       | RunEntropy                       | 4.904720465  |
| wavelet-HLL | grlm       | HighGrayLevelRunEmphasis         | 2415.966836  |
| wavelet-HLL | grlm       | RunLengthNonUniformityNormalized | 0.895730757  |
| wavelet-HLL | glszm      | GrayLevelVariance                | 94.17542942  |
| wavelet-HLL | glszm      | ZoneVariance                     | 6.785434979  |
| wavelet-HLL | glszm      | GrayLevelNonUniformityNormalized | 0.040399089  |
| wavelet-HLL | glszm      | SizeZoneNonUniformityNormalized  | 0.471206527  |
| wavelet-HLL | glszm      | SizeZoneNonUniformity            | 142.7755776  |
| wavelet-HLL | glszm      | GrayLevelNonUniformity           | 12.24092409  |
| wavelet-HLL | glszm      | LargeAreaEmphasis                | 10.81188119  |
| wavelet-HLL | glszm      | SmallAreaHighGrayLevelEmphasis   | 1592.796439  |
| wavelet-HLL | glszm      | ZonePercentage                   | 0.498355263  |
| wavelet-HLL | glszm      | LargeAreaLowGrayLevelEmphasis    | 0.008612071  |
| wavelet-HLL | glszm      | LargeAreaHighGrayLevelEmphasis   | 28005.20792  |
| wavelet-HLL | glszm      | HighGrayLevelZoneEmphasis        | 2298.214521  |
| wavelet-HLL | glszm      | SmallAreaEmphasis                | 0.712850098  |
| wavelet-HLL | glszm      | LowGrayLevelZoneEmphasis         | 0.004748214  |
| wavelet-HLL | glszm      | ZoneEntropy                      | 6.220777     |
| wavelet-HLL | glszm      | SmallAreaLowGrayLevelEmphasis    | 0.004612329  |
| wavelet-HLL | ngtdm      | Coarseness                       | 0.011293202  |
| wavelet-HLL | ngtdm      | Complexity                       | 4824.748621  |
| wavelet-HLL | ngtdm      | Strength                         | 18.41132061  |
| wavelet-HLL | ngtdm      | Contrast                         | 0.224075056  |
| wavelet-HLL | ngtdm      | Busyness                         | 0.028622215  |
| wavelet-LHL | gldm       | GrayLevelVariance                | 53.90568462  |
| wavelet-LHL | gldm       | HighGrayLevelEmphasis            | 1621.570724  |

|             |            |                                      |              |
|-------------|------------|--------------------------------------|--------------|
| wavelet-LHL | gldm       | DependenceEntropy                    | 6.510571415  |
| wavelet-LHL | gldm       | DependenceNonUniformity              | 162.4835526  |
| wavelet-LHL | gldm       | GrayLevelNonUniformity               | 28.63815789  |
| wavelet-LHL | gldm       | SmallDependenceEmphasis              | 0.450783022  |
| wavelet-LHL | gldm       | SmallDependenceHighGrayLevelEmphasis | 702.6982014  |
| wavelet-LHL | gldm       | DependenceNonUniformityNormalized    | 0.267242685  |
| wavelet-LHL | gldm       | LargeDependenceEmphasis              | 6.391447368  |
| wavelet-LHL | gldm       | LargeDependenceLowGrayLevelEmphasis  | 0.006211236  |
| wavelet-LHL | gldm       | DependenceVariance                   | 1.490467019  |
| wavelet-LHL | gldm       | LargeDependenceHighGrayLevelEmphasis | 10711.90954  |
| wavelet-LHL | gldm       | SmallDependenceLowGrayLevelEmphasis  | 0.002459592  |
| wavelet-LHL | gldm       | LowGrayLevelEmphasis                 | 0.002818228  |
| wavelet-LHL | glcm       | JointAverage                         | 39.91004351  |
| wavelet-LHL | glcm       | SumAverage                           | 79.82008703  |
| wavelet-LHL | glcm       | JointEntropy                         | 8.455045293  |
| wavelet-LHL | glcm       | ClusterShade                         | -693.013381  |
| wavelet-LHL | glcm       | MaximumProbability                   | 0.015559226  |
| wavelet-LHL | glcm       | ldmn                                 | 0.981412057  |
| wavelet-LHL | glcm       | JointEnergy                          | 0.003817459  |
| wavelet-LHL | glcm       | Contrast                             | 70.24793929  |
| wavelet-LHL | glcm       | DifferenceEntropy                    | 4.029678212  |
| wavelet-LHL | glcm       | InverseVariance                      | 0.175069809  |
| wavelet-LHL | glcm       | DifferenceVariance                   | 30.34841097  |
| wavelet-LHL | glcm       | ldn                                  | 0.911165977  |
| wavelet-LHL | glcm       | ldm                                  | 0.170315959  |
| wavelet-LHL | glcm       | Correlation                          | 0.263507913  |
| wavelet-LHL | glcm       | Autocorrelation                      | 1605.466842  |
| wavelet-LHL | glcm       | SumEntropy                           | 5.317835822  |
| wavelet-LHL | glcm       | SumSquares                           | 47.75504357  |
| wavelet-LHL | glcm       | ClusterProminence                    | 64954.26627  |
| wavelet-LHL | glcm       | lmc2                                 | 0.9264952    |
| wavelet-LHL | glcm       | lmc1                                 | -0.208938556 |
| wavelet-LHL | glcm       | DifferenceAverage                    | 6.188276436  |
| wavelet-LHL | glcm       | ld                                   | 0.259452316  |
| wavelet-LHL | glcm       | ClusterTendency                      | 120.772235   |
| wavelet-LHL | firstorder | InterquartileRange                   | 199.8049091  |
| wavelet-LHL | firstorder | Skewness                             | -0.965958538 |
| wavelet-LHL | firstorder | Uniformity                           | 0.047102233  |
| wavelet-LHL | firstorder | Median                               | -1.374935866 |
| wavelet-LHL | firstorder | Energy                               | 20725682.72  |
| wavelet-LHL | firstorder | RobustMeanAbsoluteDeviation          | 84.85199279  |
| wavelet-LHL | firstorder | MeanAbsoluteDeviation                | 134.3828842  |
| wavelet-LHL | firstorder | TotalEnergy                          | 559593433.5  |
| wavelet-LHL | firstorder | Maximum                              | 461.9634445  |
| wavelet-LHL | firstorder | RootMeanSquared                      | 184.6301545  |
| wavelet-LHL | firstorder | 90Percentile                         | 195.0623286  |
| wavelet-LHL | firstorder | Minimum                              | -978.3133433 |
| wavelet-LHL | firstorder | Entropy                              | 4.751102182  |
| wavelet-LHL | firstorder | Range                                | 1440.276788  |
| wavelet-LHL | firstorder | Variance                             | 33595.98078  |
| wavelet-LHL | firstorder | 10Percentile                         | -238.4057015 |
| wavelet-LHL | firstorder | Kurtosis                             | 6.173941878  |
| wavelet-LHL | firstorder | Mean                                 | -22.1881312  |

|             |       |                                      |             |
|-------------|-------|--------------------------------------|-------------|
| wavelet-LHL | grlm  | ShortRunLowGrayLevelEmphasis         | 0.0029026   |
| wavelet-LHL | grlm  | GrayLevelVariance                    | 55.25375676 |
| wavelet-LHL | grlm  | LowGrayLevelRunEmphasis              | 0.00292544  |
| wavelet-LHL | grlm  | GrayLevelNonUniformityNormalized     | 0.046050014 |
| wavelet-LHL | grlm  | RunVariance                          | 0.050539001 |
| wavelet-LHL | grlm  | GrayLevelNonUniformity               | 26.69217792 |
| wavelet-LHL | grlm  | LongRunEmphasis                      | 1.151574242 |
| wavelet-LHL | grlm  | ShortRunHighGrayLevelEmphasis        | 1558.68342  |
| wavelet-LHL | grlm  | RunLengthNonUniformity               | 527.8445738 |
| wavelet-LHL | grlm  | ShortRunEmphasis                     | 0.96433045  |
| wavelet-LHL | grlm  | LongRunHighGrayLevelEmphasis         | 1873.632918 |
| wavelet-LHL | grlm  | RunPercentage                        | 0.953314777 |
| wavelet-LHL | grlm  | LongRunLowGrayLevelEmphasis          | 0.003022059 |
| wavelet-LHL | grlm  | RunEntropy                           | 5.002301454 |
| wavelet-LHL | grlm  | HighGrayLevelRunEmphasis             | 1618.621429 |
| wavelet-LHL | grlm  | RunLengthNonUniformityNormalized     | 0.910310478 |
| wavelet-LHL | glszm | GrayLevelVariance                    | 75.7860053  |
| wavelet-LHL | glszm | ZoneVariance                         | 5.69036035  |
| wavelet-LHL | glszm | GrayLevelNonUniformityNormalized     | 0.037320517 |
| wavelet-LHL | glszm | SizeZoneNonUniformityNormalized      | 0.463727701 |
| wavelet-LHL | glszm | SizeZoneNonUniformity                | 147.4654088 |
| wavelet-LHL | glszm | GrayLevelNonUniformity               | 11.86792453 |
| wavelet-LHL | glszm | LargeAreaEmphasis                    | 9.34591195  |
| wavelet-LHL | glszm | SmallAreaHighGrayLevelEmphasis       | 1087.22174  |
| wavelet-LHL | glszm | ZonePercentage                       | 0.523026316 |
| wavelet-LHL | glszm | LargeAreaLowGrayLevelEmphasis        | 0.009925512 |
| wavelet-LHL | glszm | LargeAreaHighGrayLevelEmphasis       | 15714.74528 |
| wavelet-LHL | glszm | HighGrayLevelZoneEmphasis            | 1569.924528 |
| wavelet-LHL | glszm | SmallAreaEmphasis                    | 0.707851256 |
| wavelet-LHL | glszm | LowGrayLevelZoneEmphasis             | 0.00479979  |
| wavelet-LHL | glszm | ZoneEntropy                          | 6.314514777 |
| wavelet-LHL | glszm | SmallAreaLowGrayLevelEmphasis        | 0.004600753 |
| wavelet-LHL | ngtdm | Coarseness                           | 0.011721105 |
| wavelet-LHL | ngtdm | Complexity                           | 4011.946398 |
| wavelet-LHL | ngtdm | Strength                             | 10.68208979 |
| wavelet-LHL | ngtdm | Contrast                             | 0.223945969 |
| wavelet-LHL | ngtdm | Busyness                             | 0.039783537 |
| wavelet-LHH | gldm  | GrayLevelVariance                    | 84.80582367 |
| wavelet-LHH | gldm  | HighGrayLevelEmphasis                | 1283.013158 |
| wavelet-LHH | gldm  | DependenceEntropy                    | 6.550801344 |
| wavelet-LHH | gldm  | DependenceNonUniformity              | 207.2171053 |
| wavelet-LHH | gldm  | GrayLevelNonUniformity               | 25.05592105 |
| wavelet-LHH | gldm  | SmallDependenceEmphasis              | 0.579915908 |
| wavelet-LHH | gldm  | SmallDependenceHighGrayLevelEmphasis | 773.6220794 |
| wavelet-LHH | gldm  | DependenceNonUniformityNormalized    | 0.340817607 |
| wavelet-LHH | gldm  | LargeDependenceEmphasis              | 4.825657895 |
| wavelet-LHH | gldm  | LargeDependenceLowGrayLevelEmphasis  | 0.006673784 |
| wavelet-LHH | gldm  | DependenceVariance                   | 1.27292893  |
| wavelet-LHH | gldm  | LargeDependenceHighGrayLevelEmphasis | 5872.266447 |
| wavelet-LHH | gldm  | SmallDependenceLowGrayLevelEmphasis  | 0.002805996 |
| wavelet-LHH | gldm  | LowGrayLevelEmphasis                 | 0.003202808 |
| wavelet-LHH | glcm  | JointAverage                         | 34.65227781 |
| wavelet-LHH | glcm  | SumAverage                           | 69.30455562 |



|             |            |                                  |              |
|-------------|------------|----------------------------------|--------------|
| wavelet-LHH | glcm       | JointEntropy                     | 8.747437373  |
| wavelet-LHH | glcm       | ClusterShade                     | 564.3492708  |
| wavelet-LHH | glcm       | MaximumProbability               | 0.011302713  |
| wavelet-LHH | glcm       | Idmn                             | 0.969304625  |
| wavelet-LHH | glcm       | JointEnergy                      | 0.003009836  |
| wavelet-LHH | glcm       | Contrast                         | 176.8583186  |
| wavelet-LHH | glcm       | DifferenceEntropy                | 4.567459785  |
| wavelet-LHH | glcm       | InverseVariance                  | 0.13192583   |
| wavelet-LHH | glcm       | DifferenceVariance               | 81.94876244  |
| wavelet-LHH | glcm       | Idn                              | 0.891738169  |
| wavelet-LHH | glcm       | Idm                              | 0.127835956  |
| wavelet-LHH | glcm       | Correlation                      | -0.024312938 |
| wavelet-LHH | glcm       | Autocorrelation                  | 1198.538602  |
| wavelet-LHH | glcm       | SumEntropy                       | 5.423864533  |
| wavelet-LHH | glcm       | SumSquares                       | 86.18475835  |
| wavelet-LHH | glcm       | ClusterProminence                | 158648.3096  |
| wavelet-LHH | glcm       | Imc2                             | 0.968855064  |
| wavelet-LHH | glcm       | Imc1                             | -0.276979952 |
| wavelet-LHH | glcm       | DifferenceAverage                | 9.42498664   |
| wavelet-LHH | glcm       | Id                               | 0.209986334  |
| wavelet-LHH | glcm       | ClusterTendency                  | 167.8807148  |
| wavelet-LHH | firstorder | InterquartileRange               | 208.15023    |
| wavelet-LHH | firstorder | Skewness                         | 0.239433272  |
| wavelet-LHH | firstorder | Uniformity                       | 0.041210396  |
| wavelet-LHH | firstorder | Median                           | -3.140698898 |
| wavelet-LHH | firstorder | Energy                           | 32159836.94  |
| wavelet-LHH | firstorder | RobustMeanAbsoluteDeviation      | 95.88337487  |
| wavelet-LHH | firstorder | MeanAbsoluteDeviation            | 162.7139124  |
| wavelet-LHH | firstorder | TotalEnergy                      | 868315597.5  |
| wavelet-LHH | firstorder | Maximum                          | 895.0782311  |
| wavelet-LHH | firstorder | RootMeanSquared                  | 229.987975   |
| wavelet-LHH | firstorder | 90Percentile                     | 277.4381464  |
| wavelet-LHH | firstorder | Minimum                          | -840.4860603 |
| wavelet-LHH | firstorder | Entropy                          | 5.056333248  |
| wavelet-LHH | firstorder | Range                            | 1735.564291  |
| wavelet-LHH | firstorder | Variance                         | 52882.98755  |
| wavelet-LHH | firstorder | 10Percentile                     | -253.2334246 |
| wavelet-LHH | firstorder | Kurtosis                         | 4.873376596  |
| wavelet-LHH | firstorder | Mean                             | 3.388378272  |
| wavelet-LHH | grlm       | ShortRunLowGrayLevelEmphasis     | 0.003260282  |
| wavelet-LHH | grlm       | GrayLevelVariance                | 86.76279969  |
| wavelet-LHH | grlm       | LowGrayLevelRunEmphasis          | 0.003283525  |
| wavelet-LHH | grlm       | GrayLevelNonUniformityNormalized | 0.040293071  |
| wavelet-LHH | grlm       | RunVariance                      | 0.038452314  |
| wavelet-LHH | grlm       | GrayLevelNonUniformity           | 23.66366717  |
| wavelet-LHH | grlm       | LongRunEmphasis                  | 1.110718274  |
| wavelet-LHH | grlm       | ShortRunHighGrayLevelEmphasis    | 1255.3384    |
| wavelet-LHH | grlm       | RunLengthNonUniformity           | 549.7787508  |
| wavelet-LHH | grlm       | ShortRunEmphasis                 | 0.97474372   |
| wavelet-LHH | grlm       | LongRunHighGrayLevelEmphasis     | 1418.852319  |
| wavelet-LHH | grlm       | RunPercentage                    | 0.965966599  |
| wavelet-LHH | grlm       | LongRunLowGrayLevelEmphasis      | 0.003385996  |
| wavelet-LHH | grlm       | RunEntropy                       | 5.252090436  |

|             |       |                                      |              |
|-------------|-------|--------------------------------------|--------------|
| wavelet-LHH | grlm  | HighGrayLevelRunEmphasis             | 1285.818671  |
| wavelet-LHH | grlm  | RunLengthNonUniformityNormalized     | 0.935798699  |
| wavelet-LHH | glszm | GrayLevelVariance                    | 113.2162823  |
| wavelet-LHH | glszm | ZoneVariance                         | 3.482623021  |
| wavelet-LHH | glszm | GrayLevelNonUniformityNormalized     | 0.03181794   |
| wavelet-LHH | glszm | SizeZoneNonUniformityNormalized      | 0.609190669  |
| wavelet-LHH | glszm | SizeZoneNonUniformity                | 236.3659794  |
| wavelet-LHH | glszm | GrayLevelNonUniformity               | 12.34536082  |
| wavelet-LHH | glszm | LargeAreaEmphasis                    | 5.93814433   |
| wavelet-LHH | glszm | SmallAreaHighGrayLevelEmphasis       | 1090.025916  |
| wavelet-LHH | glszm | ZonePercentage                       | 0.638157895  |
| wavelet-LHH | glszm | LargeAreaLowGrayLevelEmphasis        | 0.008810565  |
| wavelet-LHH | glszm | LargeAreaHighGrayLevelEmphasis       | 7312.871134  |
| wavelet-LHH | glszm | HighGrayLevelZoneEmphasis            | 1328.134021  |
| wavelet-LHH | glszm | SmallAreaEmphasis                    | 0.807407436  |
| wavelet-LHH | glszm | LowGrayLevelZoneEmphasis             | 0.004486002  |
| wavelet-LHH | glszm | ZoneEntropy                          | 6.227458337  |
| wavelet-LHH | glszm | SmallAreaLowGrayLevelEmphasis        | 0.004298386  |
| wavelet-LHH | ngtdm | Coarseness                           | 0.011354588  |
| wavelet-LHH | ngtdm | Complexity                           | 9676.723243  |
| wavelet-LHH | ngtdm | Strength                             | 12.18233484  |
| wavelet-LHH | ngtdm | Contrast                             | 0.329691296  |
| wavelet-LHH | ngtdm | Busyness                             | 0.036151141  |
| wavelet-LLH | gldm  | GrayLevelVariance                    | 169.4434703  |
| wavelet-LLH | gldm  | HighGrayLevelEmphasis                | 3712.629934  |
| wavelet-LLH | gldm  | DependenceEntropy                    | 6.908161002  |
| wavelet-LLH | gldm  | DependenceNonUniformity              | 220.1644737  |
| wavelet-LLH | gldm  | GrayLevelNonUniformity               | 15.80921053  |
| wavelet-LLH | gldm  | SmallDependenceEmphasis              | 0.585932346  |
| wavelet-LLH | gldm  | SmallDependenceHighGrayLevelEmphasis | 2181.6288    |
| wavelet-LLH | gldm  | DependenceNonUniformityNormalized    | 0.362112621  |
| wavelet-LLH | gldm  | LargeDependenceEmphasis              | 4.246710526  |
| wavelet-LLH | gldm  | LargeDependenceLowGrayLevelEmphasis  | 0.002989048  |
| wavelet-LLH | gldm  | DependenceVariance                   | 1.020905471  |
| wavelet-LLH | gldm  | LargeDependenceHighGrayLevelEmphasis | 15631.85362  |
| wavelet-LLH | gldm  | SmallDependenceLowGrayLevelEmphasis  | 0.001877202  |
| wavelet-LLH | gldm  | LowGrayLevelEmphasis                 | 0.00200821   |
| wavelet-LLH | glcm  | JointAverage                         | 59.75855651  |
| wavelet-LLH | glcm  | SumAverage                           | 119.517113   |
| wavelet-LLH | glcm  | JointEntropy                         | 9.204284317  |
| wavelet-LLH | glcm  | ClusterShade                         | -4239.835688 |
| wavelet-LLH | glcm  | MaximumProbability                   | 0.007745371  |
| wavelet-LLH | glcm  | ldmn                                 | 0.976637247  |
| wavelet-LLH | glcm  | JointEnergy                          | 0.001982059  |
| wavelet-LLH | glcm  | Contrast                             | 227.5363199  |
| wavelet-LLH | glcm  | DifferenceEntropy                    | 4.753582979  |
| wavelet-LLH | glcm  | InverseVariance                      | 0.107088723  |
| wavelet-LLH | glcm  | DifferenceVariance                   | 98.36862827  |
| wavelet-LLH | glcm  | ldn                                  | 0.902507612  |
| wavelet-LLH | glcm  | ldm                                  | 0.108132168  |
| wavelet-LLH | glcm  | Correlation                          | 0.278925575  |
| wavelet-LLH | glcm  | Autocorrelation                      | 3615.173089  |
| wavelet-LLH | glcm  | SumEntropy                           | 6.086501548  |

|             |            |                                  |              |
|-------------|------------|----------------------------------|--------------|
| wavelet-LLH | glcm       | SumSquares                       | 157.8441283  |
| wavelet-LLH | glcm       | ClusterProminence                | 723746.6784  |
| wavelet-LLH | glcm       | Imc2                             | 0.988037943  |
| wavelet-LLH | glcm       | Imc1                             | -0.339566386 |
| wavelet-LLH | glcm       | DifferenceAverage                | 10.93859711  |
| wavelet-LLH | glcm       | Id                               | 0.186963827  |
| wavelet-LLH | glcm       | ClusterTendency                  | 403.8401931  |
| wavelet-LLH | firstorder | InterquartileRange               | 357.880195   |
| wavelet-LLH | firstorder | Skewness                         | -0.682607588 |
| wavelet-LLH | firstorder | Uniformity                       | 0.026001991  |
| wavelet-LLH | firstorder | Median                           | -28.57077081 |
| wavelet-LLH | firstorder | Energy                           | 65630039.19  |
| wavelet-LLH | firstorder | RobustMeanAbsoluteDeviation      | 152.8259961  |
| wavelet-LLH | firstorder | MeanAbsoluteDeviation            | 241.712048   |
| wavelet-LLH | firstorder | TotalEnergy                      | 1772011058   |
| wavelet-LLH | firstorder | Maximum                          | 786.0040781  |
| wavelet-LLH | firstorder | RootMeanSquared                  | 328.5485404  |
| wavelet-LLH | firstorder | 90Percentile                     | 335.2870403  |
| wavelet-LLH | firstorder | Minimum                          | -1503.284851 |
| wavelet-LLH | firstorder | Entropy                          | 5.583144261  |
| wavelet-LLH | firstorder | Range                            | 2289.288929  |
| wavelet-LLH | firstorder | Variance                         | 105487.1257  |
| wavelet-LLH | firstorder | 10Percentile                     | -444.9640791 |
| wavelet-LLH | firstorder | Kurtosis                         | 4.372778832  |
| wavelet-LLH | firstorder | Mean                             | -49.56831373 |
| wavelet-LLH | grlm       | ShortRunLowGrayLevelEmphasis     | 0.002055311  |
| wavelet-LLH | grlm       | GrayLevelVariance                | 171.9937189  |
| wavelet-LLH | grlm       | LowGrayLevelRunEmphasis          | 0.002062358  |
| wavelet-LLH | grlm       | GrayLevelNonUniformityNormalized | 0.02563004   |
| wavelet-LLH | grlm       | RunVariance                      | 0.03451439   |
| wavelet-LLH | grlm       | GrayLevelNonUniformity           | 15.10600316  |
| wavelet-LLH | grlm       | LongRunEmphasis                  | 1.09950507   |
| wavelet-LLH | grlm       | ShortRunHighGrayLevelEmphasis    | 3629.965862  |
| wavelet-LLH | grlm       | RunLengthNonUniformity           | 555.5698012  |
| wavelet-LLH | grlm       | ShortRunEmphasis                 | 0.977251965  |
| wavelet-LLH | grlm       | LongRunHighGrayLevelEmphasis     | 4080.286892  |
| wavelet-LLH | grlm       | RunPercentage                    | 0.969382591  |
| wavelet-LLH | grlm       | LongRunLowGrayLevelEmphasis      | 0.00209288   |
| wavelet-LLH | grlm       | RunEntropy                       | 5.737301527  |
| wavelet-LLH | grlm       | HighGrayLevelRunEmphasis         | 3713.621214  |
| wavelet-LLH | grlm       | RunLengthNonUniformityNormalized | 0.942164667  |
| wavelet-LLH | glszm      | GrayLevelVariance                | 202.656401   |
| wavelet-LLH | glszm      | ZoneVariance                     | 1.074098751  |
| wavelet-LLH | glszm      | GrayLevelNonUniformityNormalized | 0.022831648  |
| wavelet-LLH | glszm      | SizeZoneNonUniformityNormalized  | 0.555455086  |
| wavelet-LLH | glszm      | SizeZoneNonUniformity            | 227.7365854  |
| wavelet-LLH | glszm      | GrayLevelNonUniformity           | 9.36097561   |
| wavelet-LLH | glszm      | LargeAreaEmphasis                | 3.273170732  |
| wavelet-LLH | glszm      | SmallAreaHighGrayLevelEmphasis   | 2878.071944  |
| wavelet-LLH | glszm      | ZonePercentage                   | 0.674342105  |
| wavelet-LLH | glszm      | LargeAreaLowGrayLevelEmphasis    | 0.003510944  |
| wavelet-LLH | glszm      | LargeAreaHighGrayLevelEmphasis   | 12119.35854  |
| wavelet-LLH | glszm      | HighGrayLevelZoneEmphasis        | 3713.363415  |

|             |            |                                      |              |
|-------------|------------|--------------------------------------|--------------|
| wavelet-LLH | glszm      | SmallAreaEmphasis                    | 0.773910189  |
| wavelet-LLH | glszm      | LowGrayLevelZoneEmphasis             | 0.002827875  |
| wavelet-LLH | glszm      | ZoneEntropy                          | 6.667102682  |
| wavelet-LLH | glszm      | SmallAreaLowGrayLevelEmphasis        | 0.002753886  |
| wavelet-LLH | ngtdm      | Coarseness                           | 0.011898552  |
| wavelet-LLH | ngtdm      | Complexity                           | 15786.01085  |
| wavelet-LLH | ngtdm      | Strength                             | 21.4472701   |
| wavelet-LLH | ngtdm      | Contrast                             | 0.507175694  |
| wavelet-LLH | ngtdm      | Busyness                             | 0.018458563  |
| wavelet-LLL | gldm       | GrayLevelVariance                    | 1999.680507  |
| wavelet-LLL | gldm       | HighGrayLevelEmphasis                | 5667.297697  |
| wavelet-LLL | gldm       | DependenceEntropy                    | 7.682637774  |
| wavelet-LLL | gldm       | DependenceNonUniformity              | 258.3190789  |
| wavelet-LLL | gldm       | GrayLevelNonUniformity               | 6.430921053  |
| wavelet-LLL | gldm       | SmallDependenceEmphasis              | 0.660602613  |
| wavelet-LLL | gldm       | SmallDependenceHighGrayLevelEmphasis | 4401.882201  |
| wavelet-LLL | gldm       | DependenceNonUniformityNormalized    | 0.424866906  |
| wavelet-LLL | gldm       | LargeDependenceEmphasis              | 3.345394737  |
| wavelet-LLL | gldm       | LargeDependenceLowGrayLevelEmphasis  | 0.031528641  |
| wavelet-LLL | gldm       | DependenceVariance                   | 0.747359765  |
| wavelet-LLL | gldm       | LargeDependenceHighGrayLevelEmphasis | 12397.33059  |
| wavelet-LLL | gldm       | SmallDependenceLowGrayLevelEmphasis  | 0.002190001  |
| wavelet-LLL | gldm       | LowGrayLevelEmphasis                 | 0.006331658  |
| wavelet-LLL | glcm       | JointAverage                         | 59.41729505  |
| wavelet-LLL | glcm       | SumAverage                           | 118.8345901  |
| wavelet-LLL | glcm       | JointEntropy                         | 9.59116304   |
| wavelet-LLL | glcm       | ClusterShade                         | 240327.3386  |
| wavelet-LLL | glcm       | MaximumProbability                   | 0.004630728  |
| wavelet-LLL | glcm       | ldmn                                 | 0.972447114  |
| wavelet-LLL | glcm       | JointEnergy                          | 0.001389832  |
| wavelet-LLL | glcm       | Contrast                             | 779.5386588  |
| wavelet-LLL | glcm       | DifferenceEntropy                    | 5.434315563  |
| wavelet-LLL | glcm       | InverseVariance                      | 0.086705849  |
| wavelet-LLL | glcm       | DifferenceVariance                   | 315.6502546  |
| wavelet-LLL | glcm       | ldn                                  | 0.899061458  |
| wavelet-LLL | glcm       | ldm                                  | 0.085222584  |
| wavelet-LLL | glcm       | Correlation                          | 0.782016804  |
| wavelet-LLL | glcm       | Autocorrelation                      | 4956.12017   |
| wavelet-LLL | glcm       | SumEntropy                           | 7.471425413  |
| wavelet-LLL | glcm       | SumSquares                           | 1815.237281  |
| wavelet-LLL | glcm       | ClusterProminence                    | 82117117.48  |
| wavelet-LLL | glcm       | lmc2                                 | 0.999850502  |
| wavelet-LLL | glcm       | lmc1                                 | -0.595136889 |
| wavelet-LLL | glcm       | DifferenceAverage                    | 19.66286374  |
| wavelet-LLL | glcm       | ld                                   | 0.14916126   |
| wavelet-LLL | glcm       | ClusterTendency                      | 6481.410464  |
| wavelet-LLL | firstorder | InterquartileRange                   | 1957.30151   |
| wavelet-LLL | firstorder | Skewness                             | 0.462742513  |
| wavelet-LLL | firstorder | Uniformity                           | 0.010577173  |
| wavelet-LLL | firstorder | Median                               | -1353.725791 |
| wavelet-LLL | firstorder | Energy                               | 1428800846   |
| wavelet-LLL | firstorder | RobustMeanAbsoluteDeviation          | 820.1008327  |
| wavelet-LLL | firstorder | MeanAbsoluteDeviation                | 998.5712513  |

|             |            |                                  |              |
|-------------|------------|----------------------------------|--------------|
| wavelet-LLL | firstorder | TotalEnergy                      | 38577622832  |
| wavelet-LLL | firstorder | Maximum                          | 1384.470878  |
| wavelet-LLL | firstorder | RootMeanSquared                  | 1532.971425  |
| wavelet-LLL | firstorder | 90Percentile                     | 611.8381809  |
| wavelet-LLL | firstorder | Minimum                          | -2546.822212 |
| wavelet-LLL | firstorder | Entropy                          | 6.851943218  |
| wavelet-LLL | firstorder | Range                            | 3931.293089  |
| wavelet-LLL | firstorder | Variance                         | 1249772.616  |
| wavelet-LLL | firstorder | 10Percentile                     | -2283.098446 |
| wavelet-LLL | firstorder | Kurtosis                         | 1.834603183  |
| wavelet-LLL | firstorder | Mean                             | -1048.917906 |
| wavelet-LLL | grlm       | ShortRunLowGrayLevelEmphasis     | 0.006006367  |
| wavelet-LLL | grlm       | GrayLevelVariance                | 1998.691921  |
| wavelet-LLL | grlm       | LowGrayLevelRunEmphasis          | 0.006210542  |
| wavelet-LLL | grlm       | GrayLevelNonUniformityNormalized | 0.010438813  |
| wavelet-LLL | grlm       | RunVariance                      | 0.024562773  |
| wavelet-LLL | grlm       | GrayLevelNonUniformity           | 6.197867738  |
| wavelet-LLL | grlm       | LongRunEmphasis                  | 1.073713196  |
| wavelet-LLL | grlm       | ShortRunHighGrayLevelEmphasis    | 5668.443787  |
| wavelet-LLL | grlm       | RunLengthNonUniformity           | 566.4580913  |
| wavelet-LLL | grlm       | ShortRunEmphasis                 | 0.982156863  |
| wavelet-LLL | grlm       | LongRunHighGrayLevelEmphasis     | 5966.208677  |
| wavelet-LLL | grlm       | RunPercentage                    | 0.976467611  |
| wavelet-LLL | grlm       | LongRunLowGrayLevelEmphasis      | 0.007039437  |
| wavelet-LLL | grlm       | RunEntropy                       | 6.952817274  |
| wavelet-LLL | grlm       | HighGrayLevelRunEmphasis         | 5725.991164  |
| wavelet-LLL | grlm       | RunLengthNonUniformityNormalized | 0.953913972  |
| wavelet-LLL | glszm      | GrayLevelVariance                | 1964.435556  |
| wavelet-LLL | glszm      | ZoneVariance                     | 0.756720988  |
| wavelet-LLL | glszm      | GrayLevelNonUniformityNormalized | 0.009264198  |
| wavelet-LLL | glszm      | SizeZoneNonUniformityNormalized  | 0.631061728  |
| wavelet-LLL | glszm      | SizeZoneNonUniformity            | 283.9777778  |
| wavelet-LLL | glszm      | GrayLevelNonUniformity           | 4.168888889  |
| wavelet-LLL | glszm      | LargeAreaEmphasis                | 2.582222222  |
| wavelet-LLL | glszm      | SmallAreaHighGrayLevelEmphasis   | 5670.291783  |
| wavelet-LLL | glszm      | ZonePercentage                   | 0.740131579  |
| wavelet-LLL | glszm      | LargeAreaLowGrayLevelEmphasis    | 0.021377098  |
| wavelet-LLL | glszm      | LargeAreaHighGrayLevelEmphasis   | 11202.54444  |
| wavelet-LLL | glszm      | HighGrayLevelZoneEmphasis        | 6408.88      |
| wavelet-LLL | glszm      | SmallAreaEmphasis                | 0.82229933   |
| wavelet-LLL | glszm      | LowGrayLevelZoneEmphasis         | 0.004481989  |
| wavelet-LLL | glszm      | ZoneEntropy                      | 7.541003547  |
| wavelet-LLL | glszm      | SmallAreaLowGrayLevelEmphasis    | 0.002104282  |
| wavelet-LLL | ngtdm      | Coarseness                       | 0.017822607  |
| wavelet-LLL | ngtdm      | Complexity                       | 90236.62802  |
| wavelet-LLL | ngtdm      | Strength                         | 220.3275031  |
| wavelet-LLL | ngtdm      | Contrast                         | 1.726039011  |
| wavelet-LLL | ngtdm      | Busyness                         | 0.008266604  |
| wavelet-HHL | gldm       | GrayLevelVariance                | 14.76384771  |
| wavelet-HHL | gldm       | HighGrayLevelEmphasis            | 226.4950658  |
| wavelet-HHL | gldm       | DependenceEntropy                | 5.976416075  |
| wavelet-HHL | gldm       | DependenceNonUniformity          | 123.3190789  |
| wavelet-HHL | gldm       | GrayLevelNonUniformity           | 52.02960526  |

|             |            |                                      |              |
|-------------|------------|--------------------------------------|--------------|
| wavelet-HHL | gldm       | SmallDependenceEmphasis              | 0.381292518  |
| wavelet-HHL | gldm       | SmallDependenceHighGrayLevelEmphasis | 95.48261549  |
| wavelet-HHL | gldm       | DependenceNonUniformityNormalized    | 0.202827432  |
| wavelet-HHL | gldm       | LargeDependenceEmphasis              | 10.45394737  |
| wavelet-HHL | gldm       | LargeDependenceLowGrayLevelEmphasis  | 0.05784671   |
| wavelet-HHL | gldm       | DependenceVariance                   | 2.909528653  |
| wavelet-HHL | gldm       | LargeDependenceHighGrayLevelEmphasis | 2167.485197  |
| wavelet-HHL | gldm       | SmallDependenceLowGrayLevelEmphasis  | 0.004514679  |
| wavelet-HHL | gldm       | LowGrayLevelEmphasis                 | 0.008011094  |
| wavelet-HHL | glcm       | JointAverage                         | 14.57102125  |
| wavelet-HHL | glcm       | SumAverage                           | 29.14204249  |
| wavelet-HHL | glcm       | JointEntropy                         | 7.312198324  |
| wavelet-HHL | glcm       | ClusterShade                         | 43.06281636  |
| wavelet-HHL | glcm       | MaximumProbability                   | 0.025413247  |
| wavelet-HHL | glcm       | Idmn                                 | 0.974133574  |
| wavelet-HHL | glcm       | JointEnergy                          | 0.009022156  |
| wavelet-HHL | glcm       | Contrast                             | 30.24952297  |
| wavelet-HHL | glcm       | DifferenceEntropy                    | 3.464939038  |
| wavelet-HHL | glcm       | InverseVariance                      | 0.249280904  |
| wavelet-HHL | glcm       | DifferenceVariance                   | 13.80140027  |
| wavelet-HHL | glcm       | Idn                                  | 0.896903593  |
| wavelet-HHL | glcm       | Idm                                  | 0.239224028  |
| wavelet-HHL | glcm       | Correlation                          | -0.014957856 |
| wavelet-HHL | glcm       | Autocorrelation                      | 212.057914   |
| wavelet-HHL | glcm       | SumEntropy                           | 4.331787349  |
| wavelet-HHL | glcm       | SumSquares                           | 14.86700621  |
| wavelet-HHL | glcm       | ClusterProminence                    | 4622.738147  |
| wavelet-HHL | glcm       | Imc2                                 | 0.778842589  |
| wavelet-HHL | glcm       | Imc1                                 | -0.120827023 |
| wavelet-HHL | glcm       | DifferenceAverage                    | 4.012896153  |
| wavelet-HHL | glcm       | Id                                   | 0.328744512  |
| wavelet-HHL | glcm       | ClusterTendency                      | 29.21850185  |
| wavelet-HHL | firstorder | InterquartileRange                   | 102.838627   |
| wavelet-HHL | firstorder | Skewness                             | 0.36184902   |
| wavelet-HHL | firstorder | Uniformity                           | 0.085575009  |
| wavelet-HHL | firstorder | Median                               | -1.355319843 |
| wavelet-HHL | firstorder | Energy                               | 5529719.811  |
| wavelet-HHL | firstorder | RobustMeanAbsoluteDeviation          | 43.61013353  |
| wavelet-HHL | firstorder | MeanAbsoluteDeviation                | 69.84387887  |
| wavelet-HHL | firstorder | TotalEnergy                          | 149302434.9  |
| wavelet-HHL | firstorder | Maximum                              | 437.1823779  |
| wavelet-HHL | firstorder | RootMeanSquared                      | 95.36736287  |
| wavelet-HHL | firstorder | 90Percentile                         | 107.440596   |
| wavelet-HHL | firstorder | Minimum                              | -332.4393195 |
| wavelet-HHL | firstorder | Entropy                              | 3.898787849  |
| wavelet-HHL | firstorder | Range                                | 769.6216974  |
| wavelet-HHL | firstorder | Variance                             | 9094.062987  |
| wavelet-HHL | firstorder | 10Percentile                         | -113.6059845 |
| wavelet-HHL | firstorder | Kurtosis                             | 5.072196601  |
| wavelet-HHL | firstorder | Mean                                 | 0.933227661  |
| wavelet-HHL | glrlm      | ShortRunLowGrayLevelEmphasis         | 0.007931787  |
| wavelet-HHL | glrlm      | GrayLevelVariance                    | 15.48773927  |
| wavelet-HHL | glrlm      | LowGrayLevelRunEmphasis              | 0.008201984  |

|             |       |                                      |             |
|-------------|-------|--------------------------------------|-------------|
| wavelet-HHL | grlm  | GrayLevelNonUniformityNormalized     | 0.082540778 |
| wavelet-HHL | grlm  | RunVariance                          | 0.080441127 |
| wavelet-HHL | grlm  | GrayLevelNonUniformity               | 46.81627095 |
| wavelet-HHL | grlm  | LongRunEmphasis                      | 1.230454351 |
| wavelet-HHL | grlm  | ShortRunHighGrayLevelEmphasis        | 217.3388461 |
| wavelet-HHL | grlm  | RunLengthNonUniformity               | 497.3541576 |
| wavelet-HHL | grlm  | ShortRunEmphasis                     | 0.94976255  |
| wavelet-HHL | grlm  | LongRunHighGrayLevelEmphasis         | 275.6939082 |
| wavelet-HHL | grlm  | RunPercentage                        | 0.932818826 |
| wavelet-HHL | grlm  | LongRunLowGrayLevelEmphasis          | 0.009438044 |
| wavelet-HHL | grlm  | RunEntropy                           | 4.272429308 |
| wavelet-HHL | grlm  | HighGrayLevelRunEmphasis             | 227.820818  |
| wavelet-HHL | grlm  | RunLengthNonUniformityNormalized     | 0.876577356 |
| wavelet-HHL | glszm | GrayLevelVariance                    | 26.44774953 |
| wavelet-HHL | glszm | ZoneVariance                         | 28.23718527 |
| wavelet-HHL | glszm | GrayLevelNonUniformityNormalized     | 0.057508563 |
| wavelet-HHL | glszm | SizeZoneNonUniformityNormalized      | 0.482302746 |
| wavelet-HHL | glszm | SizeZoneNonUniformity                | 124.4341085 |
| wavelet-HHL | glszm | GrayLevelNonUniformity               | 14.8372093  |
| wavelet-HHL | glszm | LargeAreaEmphasis                    | 33.79069767 |
| wavelet-HHL | glszm | SmallAreaHighGrayLevelEmphasis       | 186.8494566 |
| wavelet-HHL | glszm | ZonePercentage                       | 0.424342105 |
| wavelet-HHL | glszm | LargeAreaLowGrayLevelEmphasis        | 0.18160412  |
| wavelet-HHL | glszm | LargeAreaHighGrayLevelEmphasis       | 6819.189922 |
| wavelet-HHL | glszm | HighGrayLevelZoneEmphasis            | 247.5116279 |
| wavelet-HHL | glszm | SmallAreaEmphasis                    | 0.721620377 |
| wavelet-HHL | glszm | LowGrayLevelZoneEmphasis             | 0.011431217 |
| wavelet-HHL | glszm | ZoneEntropy                          | 5.645918805 |
| wavelet-HHL | glszm | SmallAreaLowGrayLevelEmphasis        | 0.009601516 |
| wavelet-HHL | ngtdm | Coarseness                           | 0.011041168 |
| wavelet-HHL | ngtdm | Complexity                           | 995.1541192 |
| wavelet-HHL | ngtdm | Strength                             | 2.982155161 |
| wavelet-HHL | ngtdm | Contrast                             | 0.105928135 |
| wavelet-HHL | ngtdm | Busyness                             | 0.173296316 |
| wavelet-HLH | gldm  | GrayLevelVariance                    | 54.65687489 |
| wavelet-HLH | gldm  | HighGrayLevelEmphasis                | 761.5345395 |
| wavelet-HLH | gldm  | DependenceEntropy                    | 6.361532659 |
| wavelet-HLH | gldm  | DependenceNonUniformity              | 185.8092105 |
| wavelet-HLH | gldm  | GrayLevelNonUniformity               | 28.75328947 |
| wavelet-HLH | gldm  | SmallDependenceEmphasis              | 0.506606817 |
| wavelet-HLH | gldm  | SmallDependenceHighGrayLevelEmphasis | 412.2237098 |
| wavelet-HLH | gldm  | DependenceNonUniformityNormalized    | 0.305607254 |
| wavelet-HLH | gldm  | LargeDependenceEmphasis              | 5.394736842 |
| wavelet-HLH | gldm  | LargeDependenceLowGrayLevelEmphasis  | 0.010788281 |
| wavelet-HLH | gldm  | DependenceVariance                   | 1.288781163 |
| wavelet-HLH | gldm  | LargeDependenceHighGrayLevelEmphasis | 3783.488487 |
| wavelet-HLH | gldm  | SmallDependenceLowGrayLevelEmphasis  | 0.002934642 |
| wavelet-HLH | gldm  | LowGrayLevelEmphasis                 | 0.003748957 |
| wavelet-HLH | glcm  | JointAverage                         | 26.66243736 |
| wavelet-HLH | glcm  | SumAverage                           | 53.32487472 |
| wavelet-HLH | glcm  | JointEntropy                         | 8.561603314 |
| wavelet-HLH | glcm  | ClusterShade                         | 509.8011291 |
| wavelet-HLH | glcm  | MaximumProbability                   | 0.012985947 |

|             |            |                                  |              |
|-------------|------------|----------------------------------|--------------|
| wavelet-HLH | glcm       | Idmn                             | 0.965222698  |
| wavelet-HLH | glcm       | JointEnergy                      | 0.003446743  |
| wavelet-HLH | glcm       | Contrast                         | 120.3028361  |
| wavelet-HLH | glcm       | DifferenceEntropy                | 4.335167338  |
| wavelet-HLH | glcm       | InverseVariance                  | 0.152872072  |
| wavelet-HLH | glcm       | DifferenceVariance               | 55.16681476  |
| wavelet-HLH | glcm       | Idn                              | 0.884710889  |
| wavelet-HLH | glcm       | Idm                              | 0.147001164  |
| wavelet-HLH | glcm       | Correlation                      | -0.011975672 |
| wavelet-HLH | glcm       | Autocorrelation                  | 710.4139994  |
| wavelet-HLH | glcm       | SumEntropy                       | 5.239382962  |
| wavelet-HLH | glcm       | SumSquares                       | 59.67489202  |
| wavelet-HLH | glcm       | ClusterProminence                | 71169.09263  |
| wavelet-HLH | glcm       | Imc2                             | 0.946365162  |
| wavelet-HLH | glcm       | Imc1                             | -0.235006565 |
| wavelet-HLH | glcm       | DifferenceAverage                | 7.836244046  |
| wavelet-HLH | glcm       | Id                               | 0.232713091  |
| wavelet-HLH | glcm       | ClusterTendency                  | 118.3967319  |
| wavelet-HLH | firstorder | InterquartileRange               | 189.7847397  |
| wavelet-HLH | firstorder | Skewness                         | 0.426946729  |
| wavelet-HLH | firstorder | Uniformity                       | 0.047291595  |
| wavelet-HLH | firstorder | Median                           | -8.121210092 |
| wavelet-HLH | firstorder | Energy                           | 20694149.97  |
| wavelet-HLH | firstorder | RobustMeanAbsoluteDeviation      | 80.7771296   |
| wavelet-HLH | firstorder | MeanAbsoluteDeviation            | 133.593092   |
| wavelet-HLH | firstorder | TotalEnergy                      | 558742049.2  |
| wavelet-HLH | firstorder | Maximum                          | 678.4228089  |
| wavelet-HLH | firstorder | RootMeanSquared                  | 184.4896498  |
| wavelet-HLH | firstorder | 90Percentile                     | 247.0800687  |
| wavelet-HLH | firstorder | Minimum                          | -640.5886515 |
| wavelet-HLH | firstorder | Entropy                          | 4.78382742   |
| wavelet-HLH | firstorder | Range                            | 1319.01146   |
| wavelet-HLH | firstorder | Variance                         | 34031.79105  |
| wavelet-HLH | firstorder | 10Percentile                     | -199.1366987 |
| wavelet-HLH | firstorder | Kurtosis                         | 4.51258943   |
| wavelet-HLH | firstorder | Mean                             | 2.154024401  |
| wavelet-HLH | grlm       | ShortRunLowGrayLevelEmphasis     | 0.003790044  |
| wavelet-HLH | grlm       | GrayLevelVariance                | 56.13653384  |
| wavelet-HLH | grlm       | LowGrayLevelRunEmphasis          | 0.00383726   |
| wavelet-HLH | grlm       | GrayLevelNonUniformityNormalized | 0.046223278  |
| wavelet-HLH | grlm       | RunVariance                      | 0.047982032  |
| wavelet-HLH | grlm       | GrayLevelNonUniformity           | 26.99994757  |
| wavelet-HLH | grlm       | LongRunEmphasis                  | 1.133035505  |
| wavelet-HLH | grlm       | ShortRunHighGrayLevelEmphasis    | 743.9140184  |
| wavelet-HLH | grlm       | RunLengthNonUniformity           | 541.4253868  |
| wavelet-HLH | grlm       | ShortRunEmphasis                 | 0.970860991  |
| wavelet-HLH | grlm       | LongRunHighGrayLevelEmphasis     | 856.3897078  |
| wavelet-HLH | grlm       | RunPercentage                    | 0.960526316  |
| wavelet-HLH | grlm       | LongRunLowGrayLevelEmphasis      | 0.004052547  |
| wavelet-HLH | grlm       | RunEntropy                       | 5.005491735  |
| wavelet-HLH | grlm       | HighGrayLevelRunEmphasis         | 764.2739792  |
| wavelet-HLH | grlm       | RunLengthNonUniformityNormalized | 0.926536198  |
| wavelet-HLH | glszm      | GrayLevelVariance                | 77.28906713  |



|             |       |                                  |             |
|-------------|-------|----------------------------------|-------------|
| wavelet-HLH | glszm | ZoneVariance                     | 3.367092163 |
| wavelet-HLH | glszm | GrayLevelNonUniformityNormalized | 0.035688649 |
| wavelet-HLH | glszm | SizeZoneNonUniformityNormalized  | 0.502013046 |
| wavelet-HLH | glszm | SizeZoneNonUniformity            | 179.7206704 |
| wavelet-HLH | glszm | GrayLevelNonUniformity           | 12.77653631 |
| wavelet-HLH | glszm | LargeAreaEmphasis                | 6.251396648 |
| wavelet-HLH | glszm | SmallAreaHighGrayLevelEmphasis   | 609.9603288 |
| wavelet-HLH | glszm | ZonePercentage                   | 0.588815789 |
| wavelet-HLH | glszm | LargeAreaLowGrayLevelEmphasis    | 0.013405982 |
| wavelet-HLH | glszm | LargeAreaHighGrayLevelEmphasis   | 4449.634078 |
| wavelet-HLH | glszm | HighGrayLevelZoneEmphasis        | 801.7709497 |
| wavelet-HLH | glszm | SmallAreaEmphasis                | 0.734935213 |
| wavelet-HLH | glszm | LowGrayLevelZoneEmphasis         | 0.005226345 |
| wavelet-HLH | glszm | ZoneEntropy                      | 6.197901276 |
| wavelet-HLH | glszm | SmallAreaLowGrayLevelEmphasis    | 0.004775853 |
| wavelet-HLH | ngtdm | Coarseness                       | 0.011220291 |
| wavelet-HLH | ngtdm | Complexity                       | 4996.127104 |
| wavelet-HLH | ngtdm | Strength                         | 7.659511908 |
| wavelet-HLH | ngtdm | Contrast                         | 0.267216594 |
| wavelet-HLH | ngtdm | Busyness                         | 0.061184203 |

| Image type | Feature Class | Feature Name                         |                                                                                                                                                                                                                                                                                                                                                                                                                   |
|------------|---------------|--------------------------------------|-------------------------------------------------------------------------------------------------------------------------------------------------------------------------------------------------------------------------------------------------------------------------------------------------------------------------------------------------------------------------------------------------------------------|
| general    | info          | BoundingBox                          | 15: RTSTRUCT: C99-DNU_segment_GTV<br>(0, 0, 1, 8, 12, 8)                                                                                                                                                                                                                                                                                                                                                          |
| general    | info          | EnabledImageTypes                    | {u'Original': {}, u'Wavelet': {}}                                                                                                                                                                                                                                                                                                                                                                                 |
|            |               |                                      | {'distances': [1], 'additionalInfo': True, 'force2D': False, 'interpolator': 'sitkBSpline', 'resampledPixelSpacing': [3.0], 'label': 1, 'normalizeScale': 1, 'normalize': False, 'force2Ddimension': 0, 'removeOutliers': None, 'minimumROISize': None, u'binWidth': 25.0, 'minimumROIDimensions': 1, u'correctMask': True, 'preCrop': False, u'symmetricalGLCM': True, 'resegmentRange': None, 'padDistance': 5} |
| general    | info          | GeneralSettings                      | b426943befeb5b5a84b874a88d41cb9cab8c3                                                                                                                                                                                                                                                                                                                                                                             |
| general    | info          | ImageHash                            | b21                                                                                                                                                                                                                                                                                                                                                                                                               |
| general    | info          | ImageSpacing                         | (0.9765625000000002, 0.9765625000000002, 2.0)                                                                                                                                                                                                                                                                                                                                                                     |
| general    | info          | MaskHash                             | 183f23771a4e74b763ffc425d4069d0bd9bfd                                                                                                                                                                                                                                                                                                                                                                             |
| general    | info          | NumpyVersion                         | b50                                                                                                                                                                                                                                                                                                                                                                                                               |
| general    | info          | PyWaveletVersion                     | 1.13.1                                                                                                                                                                                                                                                                                                                                                                                                            |
| general    | info          | SimpleITKVersion                     | 0.5.2                                                                                                                                                                                                                                                                                                                                                                                                             |
| general    | info          | Version                              | 1.1.0                                                                                                                                                                                                                                                                                                                                                                                                             |
| general    | info          | VolumeNum                            | 1.3.0.post102+g1b0eb74                                                                                                                                                                                                                                                                                                                                                                                            |
| general    | info          | VoxelNum                             | 1                                                                                                                                                                                                                                                                                                                                                                                                                 |
| original   | shape         | Maximum3DDiameter                    | 203                                                                                                                                                                                                                                                                                                                                                                                                               |
| original   | shape         | Maximum2DDiameterSlice               | 35.62302626                                                                                                                                                                                                                                                                                                                                                                                                       |
| original   | shape         | Sphericity                           | 20.1246118                                                                                                                                                                                                                                                                                                                                                                                                        |
| original   | shape         | MinorAxis                            | 0.758097294                                                                                                                                                                                                                                                                                                                                                                                                       |
| original   | shape         | Elongation                           | 17.0924606                                                                                                                                                                                                                                                                                                                                                                                                        |
| original   | shape         | SurfaceVolumeRatio                   | 0.454403868                                                                                                                                                                                                                                                                                                                                                                                                       |
| original   | shape         | Volume                               | 0.361803344                                                                                                                                                                                                                                                                                                                                                                                                       |
| original   | shape         | MajorAxis                            | 5481                                                                                                                                                                                                                                                                                                                                                                                                              |
| original   | shape         | SurfaceArea                          | 37.61513003                                                                                                                                                                                                                                                                                                                                                                                                       |
| original   | shape         | Flatness                             | 1983.044131                                                                                                                                                                                                                                                                                                                                                                                                       |
| original   | shape         | LeastAxis                            | 0.367265136                                                                                                                                                                                                                                                                                                                                                                                                       |
| original   | shape         | Maximum2DDiameterColumn              | 13.81472585                                                                                                                                                                                                                                                                                                                                                                                                       |
| original   | shape         | Maximum2DDiameterRow                 | 23.43074903                                                                                                                                                                                                                                                                                                                                                                                                       |
| original   | gldm          | GrayLevelVariance                    | 33.54101966                                                                                                                                                                                                                                                                                                                                                                                                       |
| original   | gldm          | HighGrayLevelEmphasis                | 108.4491252                                                                                                                                                                                                                                                                                                                                                                                                       |
| original   | gldm          | DependenceEntropy                    | 1147.955665                                                                                                                                                                                                                                                                                                                                                                                                       |
| original   | gldm          | DependenceNonUniformity              | 5.776042849                                                                                                                                                                                                                                                                                                                                                                                                       |
| original   | gldm          | GrayLevelNonUniformity               | 42.32019704                                                                                                                                                                                                                                                                                                                                                                                                       |
| original   | gldm          | SmallDependenceEmphasis              | 23.73891626                                                                                                                                                                                                                                                                                                                                                                                                       |
| original   | gldm          | SmallDependenceHighGrayLevelEmphasis | 0.460435025                                                                                                                                                                                                                                                                                                                                                                                                       |
| original   | gldm          | DependenceNonUniformityNormalized    | 374.0892425                                                                                                                                                                                                                                                                                                                                                                                                       |
| original   | gldm          | LargeDependenceEmphasis              | 0.208473877                                                                                                                                                                                                                                                                                                                                                                                                       |
| original   | gldm          | LargeDependenceLowGrayLevelEmphasis  | 26.22167488                                                                                                                                                                                                                                                                                                                                                                                                       |
| original   | gldm          | DependenceVariance                   | 0.032592454                                                                                                                                                                                                                                                                                                                                                                                                       |
| original   | gldm          | LargeDependenceHighGrayLevelEmphasis | 11.72171128                                                                                                                                                                                                                                                                                                                                                                                                       |
| original   | gldm          | SmallDependenceLowGrayLevelEmphasis  | 37894.18227                                                                                                                                                                                                                                                                                                                                                                                                       |
| original   | gldm          |                                      | 0.014744548                                                                                                                                                                                                                                                                                                                                                                                                       |

|          |            |                                  |              |
|----------|------------|----------------------------------|--------------|
| original | gldm       | LowGrayLevelEmphasis             | 0.01515095   |
| original | glcm       | JointAverage                     | 33.84390512  |
| original | glcm       | SumAverage                       | 67.68781025  |
| original | glcm       | JointEntropy                     | 6.084917322  |
| original | glcm       | ClusterShade                     | -4760.885962 |
| original | glcm       | MaximumProbability               | 0.111872445  |
| original | glcm       | Idmn                             | 0.942269811  |
| original | glcm       | JointEnergy                      | 0.032824975  |
| original | glcm       | Contrast                         | 135.4620997  |
| original | glcm       | DifferenceEntropy                | 3.829502341  |
| original | glcm       | InverseVariance                  | 0.289989624  |
| original | glcm       | DifferenceVariance               | 86.69475301  |
| original | glcm       | Idn                              | 0.881952313  |
| original | glcm       | Idm                              | 0.323604223  |
| original | glcm       | Correlation                      | 0.183717708  |
| original | glcm       | Autocorrelation                  | 1160.391168  |
| original | glcm       | SumEntropy                       | 4.454699568  |
| original | glcm       | SumSquares                       | 82.69720848  |
| original | glcm       | ClusterProminence                | 217204.8676  |
| original | glcm       | Imc2                             | 0.95672869   |
| original | glcm       | Imc1                             | -0.338513145 |
| original | glcm       | DifferenceAverage                | 6.90948356   |
| original | glcm       | Id                               | 0.379392409  |
| original | glcm       | ClusterTendency                  | 195.3267342  |
| original | firstorder | InterquartileRange               | 178.5        |
| original | firstorder | Skewness                         | -1.664302051 |
| original | firstorder | Uniformity                       | 0.116940474  |
| original | firstorder | Median                           | 27           |
| original | firstorder | Energy                           | 16107043     |
| original | firstorder | RobustMeanAbsoluteDeviation      | 113.7109679  |
| original | firstorder | MeanAbsoluteDeviation            | 198.8669465  |
| original | firstorder | TotalEnergy                      | 434890161    |
| original | firstorder | Maximum                          | 120          |
| original | firstorder | RootMeanSquared                  | 281.6825153  |
| original | firstorder | 90Percentile                     | 68.8         |
| original | firstorder | Minimum                          | -894         |
| original | firstorder | Entropy                          | 4.023371256  |
| original | firstorder | Range                            | 1014         |
| original | firstorder | Variance                         | 67796.73139  |
| original | firstorder | 10Percentile                     | -557         |
| original | firstorder | Kurtosis                         | 4.557006615  |
| original | firstorder | Mean                             | -107.4630542 |
| original | glrlm      | ShortRunLowGrayLevelEmphasis     | 0.016862244  |
| original | glrlm      | GrayLevelVariance                | 116.5826553  |
| original | glrlm      | LowGrayLevelRunEmphasis          | 0.016917404  |
| original | glrlm      | GrayLevelNonUniformityNormalized | 0.094017983  |
| original | glrlm      | RunVariance                      | 0.162062353  |
| original | glrlm      | GrayLevelNonUniformity           | 17.05882906  |
| original | glrlm      | LongRunEmphasis                  | 1.422817817  |
| original | glrlm      | ShortRunHighGrayLevelEmphasis    | 996.1536083  |
| original | glrlm      | RunLengthNonUniformity           | 147.9588588  |
| original | glrlm      | ShortRunEmphasis                 | 0.921637137  |
| original | glrlm      | LongRunHighGrayLevelEmphasis     | 1725.644187  |

|             |       |                                      |              |
|-------------|-------|--------------------------------------|--------------|
| original    | glrlm | RunPercentage                        | 0.892004547  |
| original    | glrlm | LongRunLowGrayLevelEmphasis          | 0.017213405  |
| original    | glrlm | RunEntropy                           | 4.609679774  |
| original    | glrlm | HighGrayLevelRunEmphasis             | 1110.300584  |
| original    | glrlm | RunLengthNonUniformityNormalized     | 0.816032361  |
| original    | glszm | GrayLevelVariance                    | 144.7628866  |
| original    | glszm | ZoneVariance                         | 38.86767988  |
| original    | glszm | GrayLevelNonUniformityNormalized     | 0.040280582  |
| original    | glszm | SizeZoneNonUniformityNormalized      | 0.755978319  |
| original    | glszm | SizeZoneNonUniformity                | 73.32989691  |
| original    | glszm | GrayLevelNonUniformity               | 3.907216495  |
| original    | glszm | LargeAreaEmphasis                    | 43.24742268  |
| original    | glszm | SmallAreaHighGrayLevelEmphasis       | 677.4668485  |
| original    | glszm | ZonePercentage                       | 0.477832512  |
| original    | glszm | LargeAreaLowGrayLevelEmphasis        | 0.059845431  |
| original    | glszm | LargeAreaHighGrayLevelEmphasis       | 62817.76289  |
| original    | glszm | HighGrayLevelZoneEmphasis            | 820.7628866  |
| original    | glszm | SmallAreaEmphasis                    | 0.88717806   |
| original    | glszm | LowGrayLevelZoneEmphasis             | 0.030909991  |
| original    | glszm | ZoneEntropy                          | 5.289266616  |
| original    | glszm | SmallAreaLowGrayLevelEmphasis        | 0.030791406  |
| original    | ngtdm | Coarseness                           | 0.013034471  |
| original    | ngtdm | Complexity                           | 4350.29975   |
| original    | ngtdm | Strength                             | 23.48034391  |
| original    | ngtdm | Contrast                             | 0.93194454   |
| original    | ngtdm | Busyness                             | 0.0408758    |
| wavelet-HHH | gldm  | GrayLevelVariance                    | 21.47797811  |
| wavelet-HHH | gldm  | HighGrayLevelEmphasis                | 235.0985222  |
| wavelet-HHH | gldm  | DependenceEntropy                    | 5.692203514  |
| wavelet-HHH | gldm  | DependenceNonUniformity              | 55.97536946  |
| wavelet-HHH | gldm  | GrayLevelNonUniformity               | 13.75862069  |
| wavelet-HHH | gldm  | SmallDependenceEmphasis              | 0.426256158  |
| wavelet-HHH | gldm  | SmallDependenceHighGrayLevelEmphasis | 102.0708005  |
| wavelet-HHH | gldm  | DependenceNonUniformityNormalized    | 0.275740736  |
| wavelet-HHH | gldm  | LargeDependenceEmphasis              | 6.083743842  |
| wavelet-HHH | gldm  | LargeDependenceLowGrayLevelEmphasis  | 0.040979097  |
| wavelet-HHH | gldm  | DependenceVariance                   | 1.235070009  |
| wavelet-HHH | gldm  | LargeDependenceHighGrayLevelEmphasis | 1385.827586  |
| wavelet-HHH | gldm  | SmallDependenceLowGrayLevelEmphasis  | 0.009045036  |
| wavelet-HHH | gldm  | LowGrayLevelEmphasis                 | 0.012547605  |
| wavelet-HHH | glcm  | JointAverage                         | 14.52393611  |
| wavelet-HHH | glcm  | SumAverage                           | 29.04787222  |
| wavelet-HHH | glcm  | JointEntropy                         | 7.120827756  |
| wavelet-HHH | glcm  | ClusterShade                         | -16.88157041 |
| wavelet-HHH | glcm  | MaximumProbability                   | 0.021373818  |
| wavelet-HHH | glcm  | Idmn                                 | 0.951074342  |
| wavelet-HHH | glcm  | JointEnergy                          | 0.008404257  |
| wavelet-HHH | glcm  | Contrast                             | 41.47791913  |
| wavelet-HHH | glcm  | DifferenceEntropy                    | 3.672823625  |
| wavelet-HHH | glcm  | InverseVariance                      | 0.178271953  |
| wavelet-HHH | glcm  | DifferenceVariance                   | 15.3364379   |
| wavelet-HHH | glcm  | Idn                                  | 0.853544081  |
| wavelet-HHH | glcm  | Idm                                  | 0.181971965  |

|             |            |                                  |              |
|-------------|------------|----------------------------------|--------------|
| wavelet-HHH | glcm       | Correlation                      | -0.033815091 |
| wavelet-HHH | glcm       | Autocorrelation                  | 210.2284181  |
| wavelet-HHH | glcm       | SumEntropy                       | 4.475709067  |
| wavelet-HHH | glcm       | SumSquares                       | 20.01028083  |
| wavelet-HHH | glcm       | ClusterProminence                | 4622.605378  |
| wavelet-HHH | glcm       | Imc2                             | 0.936473458  |
| wavelet-HHH | glcm       | Imc1                             | -0.260185673 |
| wavelet-HHH | glcm       | DifferenceAverage                | 5.076589618  |
| wavelet-HHH | glcm       | Id                               | 0.275736672  |
| wavelet-HHH | glcm       | ClusterTendency                  | 38.56320421  |
| wavelet-HHH | firstorder | InterquartileRange               | 147.1629708  |
| wavelet-HHH | firstorder | Skewness                         | -0.091772603 |
| wavelet-HHH | firstorder | Uniformity                       | 0.067776457  |
| wavelet-HHH | firstorder | Median                           | 7.394933042  |
| wavelet-HHH | firstorder | Energy                           | 2757804.353  |
| wavelet-HHH | firstorder | RobustMeanAbsoluteDeviation      | 60.13011339  |
| wavelet-HHH | firstorder | MeanAbsoluteDeviation            | 90.18331014  |
| wavelet-HHH | firstorder | TotalEnergy                      | 74460717.54  |
| wavelet-HHH | firstorder | Maximum                          | 307.9237576  |
| wavelet-HHH | firstorder | RootMeanSquared                  | 116.5557511  |
| wavelet-HHH | firstorder | 90Percentile                     | 141.2214077  |
| wavelet-HHH | firstorder | Minimum                          | -348.4995044 |
| wavelet-HHH | firstorder | Entropy                          | 4.144973002  |
| wavelet-HHH | firstorder | Range                            | 656.423262   |
| wavelet-HHH | firstorder | Variance                         | 13574.98642  |
| wavelet-HHH | firstorder | 10Percentile                     | -144.0519038 |
| wavelet-HHH | firstorder | Kurtosis                         | 3.163823574  |
| wavelet-HHH | firstorder | Mean                             | 3.202609023  |
| wavelet-HHH | glrlm      | ShortRunLowGrayLevelEmphasis     | 0.012673163  |
| wavelet-HHH | glrlm      | GrayLevelVariance                | 22.00382886  |
| wavelet-HHH | glrlm      | LowGrayLevelRunEmphasis          | 0.012877295  |
| wavelet-HHH | glrlm      | GrayLevelNonUniformityNormalized | 0.066615398  |
| wavelet-HHH | glrlm      | RunVariance                      | 0.050078862  |
| wavelet-HHH | glrlm      | GrayLevelNonUniformity           | 12.89762057  |
| wavelet-HHH | glrlm      | LongRunEmphasis                  | 1.150199438  |
| wavelet-HHH | glrlm      | ShortRunHighGrayLevelEmphasis    | 227.3433533  |
| wavelet-HHH | glrlm      | RunLengthNonUniformity           | 176.5210131  |
| wavelet-HHH | glrlm      | ShortRunEmphasis                 | 0.964671799  |
| wavelet-HHH | glrlm      | LongRunHighGrayLevelEmphasis     | 269.6453852  |
| wavelet-HHH | glrlm      | RunPercentage                    | 0.953770368  |
| wavelet-HHH | glrlm      | LongRunLowGrayLevelEmphasis      | 0.013746303  |
| wavelet-HHH | glrlm      | RunEntropy                       | 4.369849924  |
| wavelet-HHH | glrlm      | HighGrayLevelRunEmphasis         | 235.4306237  |
| wavelet-HHH | glrlm      | RunLengthNonUniformityNormalized | 0.911259406  |
| wavelet-HHH | glszm      | GrayLevelVariance                | 31.8084      |
| wavelet-HHH | glszm      | ZoneVariance                     | 4.8291       |
| wavelet-HHH | glszm      | GrayLevelNonUniformityNormalized | 0.0518       |
| wavelet-HHH | glszm      | SizeZoneNonUniformityNormalized  | 0.4288       |
| wavelet-HHH | glszm      | SizeZoneNonUniformity            | 42.88        |
| wavelet-HHH | glszm      | GrayLevelNonUniformity           | 5.18         |
| wavelet-HHH | glszm      | LargeAreaEmphasis                | 8.95         |
| wavelet-HHH | glszm      | SmallAreaHighGrayLevelEmphasis   | 164.2918922  |
| wavelet-HHH | glszm      | ZonePercentage                   | 0.492610837  |

|             |            |                                      |              |
|-------------|------------|--------------------------------------|--------------|
| wavelet-HHH | glszm      | LargeAreaLowGrayLevelEmphasis        | 0.060828955  |
| wavelet-HHH | glszm      | LargeAreaHighGrayLevelEmphasis       | 2043.69      |
| wavelet-HHH | glszm      | HighGrayLevelZoneEmphasis            | 240.9        |
| wavelet-HHH | glszm      | SmallAreaEmphasis                    | 0.679351254  |
| wavelet-HHH | glszm      | LowGrayLevelZoneEmphasis             | 0.0194227    |
| wavelet-HHH | glszm      | ZoneEntropy                          | 5.550273725  |
| wavelet-HHH | glszm      | SmallAreaLowGrayLevelEmphasis        | 0.017211285  |
| wavelet-HHH | ngtdm      | Coarseness                           | 0.028689873  |
| wavelet-HHH | ngtdm      | Complexity                           | 886.6734048  |
| wavelet-HHH | ngtdm      | Strength                             | 4.960165229  |
| wavelet-HHH | ngtdm      | Contrast                             | 0.272082723  |
| wavelet-HHH | ngtdm      | Busyness                             | 0.098822171  |
| wavelet-HLL | gldm       | GrayLevelVariance                    | 108.2377151  |
| wavelet-HLL | gldm       | HighGrayLevelEmphasis                | 628.8866995  |
| wavelet-HLL | gldm       | DependenceEntropy                    | 6.066731179  |
| wavelet-HLL | gldm       | DependenceNonUniformity              | 73.86699507  |
| wavelet-HLL | gldm       | GrayLevelNonUniformity               | 8.093596059  |
| wavelet-HLL | gldm       | SmallDependenceEmphasis              | 0.601736369  |
| wavelet-HLL | gldm       | SmallDependenceHighGrayLevelEmphasis | 401.5137095  |
| wavelet-HLL | gldm       | DependenceNonUniformityNormalized    | 0.363876823  |
| wavelet-HLL | gldm       | LargeDependenceEmphasis              | 4.901477833  |
| wavelet-HLL | gldm       | LargeDependenceLowGrayLevelEmphasis  | 0.019797871  |
| wavelet-HLL | gldm       | DependenceVariance                   | 1.452498241  |
| wavelet-HLL | gldm       | LargeDependenceHighGrayLevelEmphasis | 2599.960591  |
| wavelet-HLL | gldm       | SmallDependenceLowGrayLevelEmphasis  | 0.008310772  |
| wavelet-HLL | gldm       | LowGrayLevelEmphasis                 | 0.009472646  |
| wavelet-HLL | glcm       | JointAverage                         | 21.69300268  |
| wavelet-HLL | glcm       | SumAverage                           | 43.38600537  |
| wavelet-HLL | glcm       | JointEntropy                         | 7.593978337  |
| wavelet-HLL | glcm       | ClusterShade                         | 3693.947961  |
| wavelet-HLL | glcm       | MaximumProbability                   | 0.018407112  |
| wavelet-HLL | glcm       | Idmn                                 | 0.962758709  |
| wavelet-HLL | glcm       | JointEnergy                          | 0.005798035  |
| wavelet-HLL | glcm       | Contrast                             | 151.6858453  |
| wavelet-HLL | glcm       | DifferenceEntropy                    | 4.373260043  |
| wavelet-HLL | glcm       | InverseVariance                      | 0.125115737  |
| wavelet-HLL | glcm       | DifferenceVariance                   | 65.04289838  |
| wavelet-HLL | glcm       | Idn                                  | 0.878267584  |
| wavelet-HLL | glcm       | Idm                                  | 0.127405565  |
| wavelet-HLL | glcm       | Correlation                          | 0.145126865  |
| wavelet-HLL | glcm       | Autocorrelation                      | 486.0352397  |
| wavelet-HLL | glcm       | SumEntropy                           | 5.276649034  |
| wavelet-HLL | glcm       | SumSquares                           | 91.17641973  |
| wavelet-HLL | glcm       | ClusterProminence                    | 257156.1667  |
| wavelet-HLL | glcm       | Imc2                                 | 0.992938735  |
| wavelet-HLL | glcm       | Imc1                                 | -0.440288489 |
| wavelet-HLL | glcm       | DifferenceAverage                    | 9.058560554  |
| wavelet-HLL | glcm       | Id                                   | 0.210359564  |
| wavelet-HLL | glcm       | ClusterTendency                      | 213.0198336  |
| wavelet-HLL | firstorder | InterquartileRange                   | 231.2063472  |
| wavelet-HLL | firstorder | Skewness                             | 1.120187541  |
| wavelet-HLL | firstorder | Uniformity                           | 0.039869931  |
| wavelet-HLL | firstorder | Median                               | -115.7540322 |

|             |            |                                  |              |
|-------------|------------|----------------------------------|--------------|
| wavelet-HLL | firstorder | Energy                           | 14650567.67  |
| wavelet-HLL | firstorder | RobustMeanAbsoluteDeviation      | 115.6558781  |
| wavelet-HLL | firstorder | MeanAbsoluteDeviation            | 191.6657859  |
| wavelet-HLL | firstorder | TotalEnergy                      | 395565327.2  |
| wavelet-HLL | firstorder | Maximum                          | 846.965631   |
| wavelet-HLL | firstorder | RootMeanSquared                  | 268.6452756  |
| wavelet-HLL | firstorder | 90Percentile                     | 306.2767391  |
| wavelet-HLL | firstorder | Minimum                          | -612.5796612 |
| wavelet-HLL | firstorder | Entropy                          | 4.981857333  |
| wavelet-HLL | firstorder | Range                            | 1459.545292  |
| wavelet-HLL | firstorder | Variance                         | 67791.61367  |
| wavelet-HLL | firstorder | 10Percentile                     | -339.062416  |
| wavelet-HLL | firstorder | Kurtosis                         | 4.583717431  |
| wavelet-HLL | firstorder | Mean                             | -66.17152283 |
| wavelet-HLL | glrlm      | ShortRunLowGrayLevelEmphasis     | 0.009634854  |
| wavelet-HLL | glrlm      | GrayLevelVariance                | 110.0305526  |
| wavelet-HLL | glrlm      | LowGrayLevelRunEmphasis          | 0.009704512  |
| wavelet-HLL | glrlm      | GrayLevelNonUniformityNormalized | 0.038966433  |
| wavelet-HLL | glrlm      | RunVariance                      | 0.035320218  |
| wavelet-HLL | glrlm      | GrayLevelNonUniformity           | 7.648896474  |
| wavelet-HLL | glrlm      | LongRunEmphasis                  | 1.105908775  |
| wavelet-HLL | glrlm      | ShortRunHighGrayLevelEmphasis    | 618.9291603  |
| wavelet-HLL | glrlm      | RunLengthNonUniformity           | 183.9077114  |
| wavelet-HLL | glrlm      | ShortRunEmphasis                 | 0.974882879  |
| wavelet-HLL | glrlm      | LongRunHighGrayLevelEmphasis     | 688.7453627  |
| wavelet-HLL | glrlm      | RunPercentage                    | 0.967032967  |
| wavelet-HLL | glrlm      | LongRunLowGrayLevelEmphasis      | 0.009993718  |
| wavelet-HLL | glrlm      | RunEntropy                       | 5.129637352  |
| wavelet-HLL | glrlm      | HighGrayLevelRunEmphasis         | 632.2323907  |
| wavelet-HLL | glrlm      | RunLengthNonUniformityNormalized | 0.936200338  |
| wavelet-HLL | glszm      | GrayLevelVariance                | 125.7616047  |
| wavelet-HLL | glszm      | ZoneVariance                     | 1.437565637  |
| wavelet-HLL | glszm      | GrayLevelNonUniformityNormalized | 0.033606385  |
| wavelet-HLL | glszm      | SizeZoneNonUniformityNormalized  | 0.593782819  |
| wavelet-HLL | glszm      | SizeZoneNonUniformity            | 81.94202899  |
| wavelet-HLL | glszm      | GrayLevelNonUniformity           | 4.637681159  |
| wavelet-HLL | glszm      | LargeAreaEmphasis                | 3.601449275  |
| wavelet-HLL | glszm      | SmallAreaHighGrayLevelEmphasis   | 539.291245   |
| wavelet-HLL | glszm      | ZonePercentage                   | 0.679802956  |
| wavelet-HLL | glszm      | LargeAreaLowGrayLevelEmphasis    | 0.019735704  |
| wavelet-HLL | glszm      | LargeAreaHighGrayLevelEmphasis   | 1968.028986  |
| wavelet-HLL | glszm      | HighGrayLevelZoneEmphasis        | 663.4637681  |
| wavelet-HLL | glszm      | SmallAreaEmphasis                | 0.798697166  |
| wavelet-HLL | glszm      | LowGrayLevelZoneEmphasis         | 0.012574746  |
| wavelet-HLL | glszm      | ZoneEntropy                      | 5.81046153   |
| wavelet-HLL | glszm      | SmallAreaLowGrayLevelEmphasis    | 0.011959304  |
| wavelet-HLL | ngtdm      | Coarseness                       | 0.026550446  |
| wavelet-HLL | ngtdm      | Complexity                       | 5888.767503  |
| wavelet-HLL | ngtdm      | Strength                         | 24.00070735  |
| wavelet-HLL | ngtdm      | Contrast                         | 0.73613917   |
| wavelet-HLL | ngtdm      | Busyness                         | 0.042735103  |
| wavelet-LHL | gldm       | GrayLevelVariance                | 112.6253974  |
| wavelet-LHL | gldm       | HighGrayLevelEmphasis            | 1960.35468   |

|             |            |                                      |              |
|-------------|------------|--------------------------------------|--------------|
| wavelet-LHL | gldm       | DependenceEntropy                    | 6.267002223  |
| wavelet-LHL | gldm       | DependenceNonUniformity              | 72.14285714  |
| wavelet-LHL | gldm       | GrayLevelNonUniformity               | 7.600985222  |
| wavelet-LHL | gldm       | SmallDependenceEmphasis              | 0.586997001  |
| wavelet-LHL | gldm       | SmallDependenceHighGrayLevelEmphasis | 1151.599321  |
| wavelet-LHL | gldm       | DependenceNonUniformityNormalized    | 0.355383533  |
| wavelet-LHL | gldm       | LargeDependenceEmphasis              | 5.019704433  |
| wavelet-LHL | gldm       | LargeDependenceLowGrayLevelEmphasis  | 0.007755936  |
| wavelet-LHL | gldm       | DependenceVariance                   | 1.497148681  |
| wavelet-LHL | gldm       | LargeDependenceHighGrayLevelEmphasis | 9981.270936  |
| wavelet-LHL | gldm       | SmallDependenceLowGrayLevelEmphasis  | 0.005375581  |
| wavelet-LHL | gldm       | LowGrayLevelEmphasis                 | 0.005612974  |
| wavelet-LHL | glcm       | JointAverage                         | 42.93244267  |
| wavelet-LHL | glcm       | SumAverage                           | 85.86488535  |
| wavelet-LHL | glcm       | JointEntropy                         | 7.590446935  |
| wavelet-LHL | glcm       | ClusterShade                         | -275.0773274 |
| wavelet-LHL | glcm       | MaximumProbability                   | 0.019871208  |
| wavelet-LHL | glcm       | Idmn                                 | 0.972580896  |
| wavelet-LHL | glcm       | JointEnergy                          | 0.005969337  |
| wavelet-LHL | glcm       | Contrast                             | 153.8121461  |
| wavelet-LHL | glcm       | DifferenceEntropy                    | 4.386449198  |
| wavelet-LHL | glcm       | InverseVariance                      | 0.143532702  |
| wavelet-LHL | glcm       | DifferenceVariance                   | 72.91084101  |
| wavelet-LHL | glcm       | Idn                                  | 0.897372687  |
| wavelet-LHL | glcm       | Idm                                  | 0.139651508  |
| wavelet-LHL | glcm       | Correlation                          | 0.219531099  |
| wavelet-LHL | glcm       | Autocorrelation                      | 1864.662731  |
| wavelet-LHL | glcm       | SumEntropy                           | 5.367686237  |
| wavelet-LHL | glcm       | SumSquares                           | 98.27151683  |
| wavelet-LHL | glcm       | ClusterProminence                    | 242370.6956  |
| wavelet-LHL | glcm       | Imc2                                 | 0.996009354  |
| wavelet-LHL | glcm       | Imc1                                 | -0.486266512 |
| wavelet-LHL | glcm       | DifferenceAverage                    | 8.829093089  |
| wavelet-LHL | glcm       | Id                                   | 0.222325122  |
| wavelet-LHL | glcm       | ClusterTendency                      | 239.2739213  |
| wavelet-LHL | firstorder | InterquartileRange                   | 252.5628496  |
| wavelet-LHL | firstorder | Skewness                             | -0.375120918 |
| wavelet-LHL | firstorder | Uniformity                           | 0.037443277  |
| wavelet-LHL | firstorder | Median                               | -46.58134408 |
| wavelet-LHL | firstorder | Energy                               | 15102033.13  |
| wavelet-LHL | firstorder | RobustMeanAbsoluteDeviation          | 112.4833334  |
| wavelet-LHL | firstorder | MeanAbsoluteDeviation                | 191.9009575  |
| wavelet-LHL | firstorder | TotalEnergy                          | 407754894.6  |
| wavelet-LHL | firstorder | Maximum                              | 617.6100272  |
| wavelet-LHL | firstorder | RootMeanSquared                      | 272.7530969  |
| wavelet-LHL | firstorder | 90Percentile                         | 266.608968   |
| wavelet-LHL | firstorder | Minimum                              | -1115.960041 |
| wavelet-LHL | firstorder | Entropy                              | 5.141198505  |
| wavelet-LHL | firstorder | Range                                | 1733.570069  |
| wavelet-LHL | firstorder | Variance                             | 70539.05148  |
| wavelet-LHL | firstorder | 10Percentile                         | -399.7606302 |
| wavelet-LHL | firstorder | Kurtosis                             | 4.289771745  |
| wavelet-LHL | firstorder | Mean                                 | -62.09026014 |



|             |       |                                      |             |
|-------------|-------|--------------------------------------|-------------|
| wavelet-LHL | glrlm | ShortRunLowGrayLevelEmphasis         | 0.005777148 |
| wavelet-LHL | glrlm | GrayLevelVariance                    | 115.3493882 |
| wavelet-LHL | glrlm | LowGrayLevelRunEmphasis              | 0.005790725 |
| wavelet-LHL | glrlm | GrayLevelNonUniformityNormalized     | 0.036250134 |
| wavelet-LHL | glrlm | RunVariance                          | 0.038439461 |
| wavelet-LHL | glrlm | GrayLevelNonUniformity               | 7.111800079 |
| wavelet-LHL | glrlm | LongRunEmphasis                      | 1.110142917 |
| wavelet-LHL | glrlm | ShortRunHighGrayLevelEmphasis        | 1910.601956 |
| wavelet-LHL | glrlm | RunLengthNonUniformity               | 183.8340704 |
| wavelet-LHL | glrlm | ShortRunEmphasis                     | 0.975119448 |
| wavelet-LHL | glrlm | LongRunHighGrayLevelEmphasis         | 2176.565122 |
| wavelet-LHL | glrlm | RunPercentage                        | 0.966275104 |
| wavelet-LHL | glrlm | LongRunLowGrayLevelEmphasis          | 0.005852017 |
| wavelet-LHL | glrlm | RunEntropy                           | 5.295039354 |
| wavelet-LHL | glrlm | HighGrayLevelRunEmphasis             | 1959.902768 |
| wavelet-LHL | glrlm | RunLengthNonUniformityNormalized     | 0.93684904  |
| wavelet-LHL | glszm | GrayLevelVariance                    | 148.2731121 |
| wavelet-LHL | glszm | ZoneVariance                         | 1.891568278 |
| wavelet-LHL | glszm | GrayLevelNonUniformityNormalized     | 0.028068612 |
| wavelet-LHL | glszm | SizeZoneNonUniformityNormalized      | 0.58465137  |
| wavelet-LHL | glszm | SizeZoneNonUniformity                | 78.34328358 |
| wavelet-LHL | glszm | GrayLevelNonUniformity               | 3.76119403  |
| wavelet-LHL | glszm | LargeAreaEmphasis                    | 4.186567164 |
| wavelet-LHL | glszm | SmallAreaHighGrayLevelEmphasis       | 1556.921386 |
| wavelet-LHL | glszm | ZonePercentage                       | 0.660098522 |
| wavelet-LHL | glszm | LargeAreaLowGrayLevelEmphasis        | 0.009920668 |
| wavelet-LHL | glszm | LargeAreaHighGrayLevelEmphasis       | 8279        |
| wavelet-LHL | glszm | HighGrayLevelZoneEmphasis            | 1961.507463 |
| wavelet-LHL | glszm | SmallAreaEmphasis                    | 0.792827015 |
| wavelet-LHL | glszm | LowGrayLevelZoneEmphasis             | 0.008210961 |
| wavelet-LHL | glszm | ZoneEntropy                          | 5.999909926 |
| wavelet-LHL | glszm | SmallAreaLowGrayLevelEmphasis        | 0.008086817 |
| wavelet-LHL | ngtdm | Coarseness                           | 0.033714642 |
| wavelet-LHL | ngtdm | Complexity                           | 6593.224238 |
| wavelet-LHL | ngtdm | Strength                             | 30.1732777  |
| wavelet-LHL | ngtdm | Contrast                             | 0.569720441 |
| wavelet-LHL | ngtdm | Busyness                             | 0.01335404  |
| wavelet-LHH | gldm  | GrayLevelVariance                    | 32.39127375 |
| wavelet-LHH | gldm  | HighGrayLevelEmphasis                | 220.4729064 |
| wavelet-LHH | gldm  | DependenceEntropy                    | 5.912621757 |
| wavelet-LHH | gldm  | DependenceNonUniformity              | 53.34482759 |
| wavelet-LHH | gldm  | GrayLevelNonUniformity               | 12.20197044 |
| wavelet-LHH | gldm  | SmallDependenceEmphasis              | 0.47015626  |
| wavelet-LHH | gldm  | SmallDependenceHighGrayLevelEmphasis | 120.9022385 |
| wavelet-LHH | gldm  | DependenceNonUniformityNormalized    | 0.262782402 |
| wavelet-LHH | gldm  | LargeDependenceEmphasis              | 7.482758621 |
| wavelet-LHH | gldm  | LargeDependenceLowGrayLevelEmphasis  | 0.071133035 |
| wavelet-LHH | gldm  | DependenceVariance                   | 2.235725206 |
| wavelet-LHH | gldm  | LargeDependenceHighGrayLevelEmphasis | 1390.019704 |
| wavelet-LHH | gldm  | SmallDependenceLowGrayLevelEmphasis  | 0.015731109 |
| wavelet-LHH | gldm  | LowGrayLevelEmphasis                 | 0.021276677 |
| wavelet-LHH | glcm  | JointAverage                         | 13.64163293 |
| wavelet-LHH | glcm  | SumAverage                           | 27.28326585 |

|             |            |                                  |              |
|-------------|------------|----------------------------------|--------------|
| wavelet-LHH | glcm       | JointEntropy                     | 7.219797245  |
| wavelet-LHH | glcm       | ClusterShade                     | 153.974839   |
| wavelet-LHH | glcm       | MaximumProbability               | 0.02651236   |
| wavelet-LHH | glcm       | Idmn                             | 0.944669975  |
| wavelet-LHH | glcm       | JointEnergy                      | 0.00815956   |
| wavelet-LHH | glcm       | Contrast                         | 65.17184194  |
| wavelet-LHH | glcm       | DifferenceEntropy                | 3.950364066  |
| wavelet-LHH | glcm       | InverseVariance                  | 0.17406947   |
| wavelet-LHH | glcm       | DifferenceVariance               | 27.64389799  |
| wavelet-LHH | glcm       | Idn                              | 0.851595133  |
| wavelet-LHH | glcm       | Idm                              | 0.182409173  |
| wavelet-LHH | glcm       | Correlation                      | -0.017338952 |
| wavelet-LHH | glcm       | Autocorrelation                  | 185.5211962  |
| wavelet-LHH | glcm       | SumEntropy                       | 4.711672104  |
| wavelet-LHH | glcm       | SumSquares                       | 31.99319616  |
| wavelet-LHH | glcm       | ClusterProminence                | 14468.2577   |
| wavelet-LHH | glcm       | Imc2                             | 0.966769661  |
| wavelet-LHH | glcm       | Imc1                             | -0.320173015 |
| wavelet-LHH | glcm       | DifferenceAverage                | 6.067074635  |
| wavelet-LHH | glcm       | Id                               | 0.269189134  |
| wavelet-LHH | glcm       | ClusterTendency                  | 62.80094271  |
| wavelet-LHH | firstorder | InterquartileRange               | 151.8620317  |
| wavelet-LHH | firstorder | Skewness                         | 0.518137665  |
| wavelet-LHH | firstorder | Uniformity                       | 0.060108229  |
| wavelet-LHH | firstorder | Median                           | -7.876812257 |
| wavelet-LHH | firstorder | Energy                           | 4076168.167  |
| wavelet-LHH | firstorder | RobustMeanAbsoluteDeviation      | 67.08655966  |
| wavelet-LHH | firstorder | MeanAbsoluteDeviation            | 106.9385111  |
| wavelet-LHH | firstorder | TotalEnergy                      | 110056540.5  |
| wavelet-LHH | firstorder | Maximum                          | 434.1868685  |
| wavelet-LHH | firstorder | RootMeanSquared                  | 141.7026681  |
| wavelet-LHH | firstorder | 90Percentile                     | 180.4305503  |
| wavelet-LHH | firstorder | Minimum                          | -306.4643618 |
| wavelet-LHH | firstorder | Entropy                          | 4.348917598  |
| wavelet-LHH | firstorder | Range                            | 740.6512303  |
| wavelet-LHH | firstorder | Variance                         | 20050.52596  |
| wavelet-LHH | firstorder | 10Percentile                     | -158.7369753 |
| wavelet-LHH | firstorder | Kurtosis                         | 3.654362852  |
| wavelet-LHH | firstorder | Mean                             | 5.396312056  |
| wavelet-LHH | glrlm      | ShortRunLowGrayLevelEmphasis     | 0.021612919  |
| wavelet-LHH | glrlm      | GrayLevelVariance                | 33.45739242  |
| wavelet-LHH | glrlm      | LowGrayLevelRunEmphasis          | 0.021939523  |
| wavelet-LHH | glrlm      | GrayLevelNonUniformityNormalized | 0.058160937  |
| wavelet-LHH | glrlm      | RunVariance                      | 0.058280732  |
| wavelet-LHH | glrlm      | GrayLevelNonUniformity           | 11.22329313  |
| wavelet-LHH | glrlm      | LongRunEmphasis                  | 1.166322518  |
| wavelet-LHH | glrlm      | ShortRunHighGrayLevelEmphasis    | 215.6092286  |
| wavelet-LHH | glrlm      | RunLengthNonUniformity           | 175.2449194  |
| wavelet-LHH | glrlm      | ShortRunEmphasis                 | 0.963110321  |
| wavelet-LHH | glrlm      | LongRunHighGrayLevelEmphasis     | 253.2118438  |
| wavelet-LHH | glrlm      | RunPercentage                    | 0.950359985  |
| wavelet-LHH | glrlm      | LongRunLowGrayLevelEmphasis      | 0.023352148  |
| wavelet-LHH | glrlm      | RunEntropy                       | 4.584228161  |

|             |       |                                      |             |
|-------------|-------|--------------------------------------|-------------|
| wavelet-LHH | glrlm | HighGrayLevelRunEmphasis             | 222.3617606 |
| wavelet-LHH | glrlm | RunLengthNonUniformityNormalized     | 0.907922258 |
| wavelet-LHH | glszm | GrayLevelVariance                    | 47.37131344 |
| wavelet-LHH | glszm | ZoneVariance                         | 6.920696159 |
| wavelet-LHH | glszm | GrayLevelNonUniformityNormalized     | 0.047496571 |
| wavelet-LHH | glszm | SizeZoneNonUniformityNormalized      | 0.513203018 |
| wavelet-LHH | glszm | SizeZoneNonUniformity                | 55.42592593 |
| wavelet-LHH | glszm | GrayLevelNonUniformity               | 5.12962963  |
| wavelet-LHH | glszm | LargeAreaEmphasis                    | 10.4537037  |
| wavelet-LHH | glszm | SmallAreaHighGrayLevelEmphasis       | 200.4915349 |
| wavelet-LHH | glszm | ZonePercentage                       | 0.532019704 |
| wavelet-LHH | glszm | LargeAreaLowGrayLevelEmphasis        | 0.099174416 |
| wavelet-LHH | glszm | LargeAreaHighGrayLevelEmphasis       | 1909.259259 |
| wavelet-LHH | glszm | HighGrayLevelZoneEmphasis            | 249.3796296 |
| wavelet-LHH | glszm | SmallAreaEmphasis                    | 0.744012632 |
| wavelet-LHH | glszm | LowGrayLevelZoneEmphasis             | 0.031553976 |
| wavelet-LHH | glszm | ZoneEntropy                          | 5.510409465 |
| wavelet-LHH | glszm | SmallAreaLowGrayLevelEmphasis        | 0.02793757  |
| wavelet-LHH | ngtdm | Coarseness                           | 0.028415748 |
| wavelet-LHH | ngtdm | Complexity                           | 1437.151298 |
| wavelet-LHH | ngtdm | Strength                             | 6.890601521 |
| wavelet-LHH | ngtdm | Contrast                             | 0.358593281 |
| wavelet-LHH | ngtdm | Busyness                             | 0.09243732  |
| wavelet-LLH | gldm  | GrayLevelVariance                    | 200.3604552 |
| wavelet-LLH | gldm  | HighGrayLevelEmphasis                | 1239.866995 |
| wavelet-LLH | gldm  | DependenceEntropy                    | 6.388500373 |
| wavelet-LLH | gldm  | DependenceNonUniformity              | 79.01970443 |
| wavelet-LLH | gldm  | GrayLevelNonUniformity               | 6.18226601  |
| wavelet-LLH | gldm  | SmallDependenceEmphasis              | 0.63858986  |
| wavelet-LLH | gldm  | SmallDependenceHighGrayLevelEmphasis | 800.6876631 |
| wavelet-LLH | gldm  | DependenceNonUniformityNormalized    | 0.389259628 |
| wavelet-LLH | gldm  | LargeDependenceEmphasis              | 4.458128079 |
| wavelet-LLH | gldm  | LargeDependenceLowGrayLevelEmphasis  | 0.0176142   |
| wavelet-LLH | gldm  | DependenceVariance                   | 1.295687835 |
| wavelet-LLH | gldm  | LargeDependenceHighGrayLevelEmphasis | 5301.463054 |
| wavelet-LLH | gldm  | SmallDependenceLowGrayLevelEmphasis  | 0.012952421 |
| wavelet-LLH | gldm  | LowGrayLevelEmphasis                 | 0.013489523 |
| wavelet-LLH | glcm  | JointAverage                         | 30.74424071 |
| wavelet-LLH | glcm  | SumAverage                           | 61.48848142 |
| wavelet-LLH | glcm  | JointEntropy                         | 7.732396521 |
| wavelet-LLH | glcm  | ClusterShade                         | 5204.139597 |
| wavelet-LLH | glcm  | MaximumProbability                   | 0.016228576 |
| wavelet-LLH | glcm  | Idmn                                 | 0.956326935 |
| wavelet-LLH | glcm  | JointEnergy                          | 0.005170391 |
| wavelet-LLH | glcm  | Contrast                             | 343.8219067 |
| wavelet-LLH | glcm  | DifferenceEntropy                    | 4.708778256 |
| wavelet-LLH | glcm  | InverseVariance                      | 0.106431232 |
| wavelet-LLH | glcm  | DifferenceVariance                   | 174.1226094 |
| wavelet-LLH | glcm  | Idn                                  | 0.877780153 |
| wavelet-LLH | glcm  | Idm                                  | 0.112534494 |
| wavelet-LLH | glcm  | Correlation                          | 0.069292334 |
| wavelet-LLH | glcm  | Autocorrelation                      | 962.8420279 |
| wavelet-LLH | glcm  | SumEntropy                           | 5.610548941 |

|             |            |                                  |              |
|-------------|------------|----------------------------------|--------------|
| wavelet-LLH | glcm       | SumSquares                       | 189.2617592  |
| wavelet-LLH | glcm       | ClusterProminence                | 796385.7438  |
| wavelet-LLH | glcm       | Imc2                             | 0.998458608  |
| wavelet-LLH | glcm       | Imc1                             | -0.547936803 |
| wavelet-LLH | glcm       | DifferenceAverage                | 12.49692936  |
| wavelet-LLH | glcm       | Id                               | 0.189536095  |
| wavelet-LLH | glcm       | ClusterTendency                  | 413.2251301  |
| wavelet-LLH | firstorder | InterquartileRange               | 337.3301808  |
| wavelet-LLH | firstorder | Skewness                         | 0.592791872  |
| wavelet-LLH | firstorder | Uniformity                       | 0.030454512  |
| wavelet-LLH | firstorder | Median                           | -44.2237623  |
| wavelet-LLH | firstorder | Energy                           | 25688401.31  |
| wavelet-LLH | firstorder | RobustMeanAbsoluteDeviation      | 156.5604338  |
| wavelet-LLH | firstorder | MeanAbsoluteDeviation            | 259.7802481  |
| wavelet-LLH | firstorder | TotalEnergy                      | 693586835.3  |
| wavelet-LLH | firstorder | Maximum                          | 1104.476211  |
| wavelet-LLH | firstorder | RootMeanSquared                  | 355.7300224  |
| wavelet-LLH | firstorder | 90Percentile                     | 477.9499455  |
| wavelet-LLH | firstorder | Minimum                          | -824.2437196 |
| wavelet-LLH | firstorder | Entropy                          | 5.420778468  |
| wavelet-LLH | firstorder | Range                            | 1928.719931  |
| wavelet-LLH | firstorder | Variance                         | 125507.7387  |
| wavelet-LLH | firstorder | 10Percentile                     | -443.6318158 |
| wavelet-LLH | firstorder | Kurtosis                         | 3.628458429  |
| wavelet-LLH | firstorder | Mean                             | -32.18866407 |
| wavelet-LLH | glrlm      | ShortRunLowGrayLevelEmphasis     | 0.013839934  |
| wavelet-LLH | glrlm      | GrayLevelVariance                | 203.6159573  |
| wavelet-LLH | glrlm      | LowGrayLevelRunEmphasis          | 0.013869529  |
| wavelet-LLH | glrlm      | GrayLevelNonUniformityNormalized | 0.029591917  |
| wavelet-LLH | glrlm      | RunVariance                      | 0.032227088  |
| wavelet-LLH | glrlm      | GrayLevelNonUniformity           | 5.828833607  |
| wavelet-LLH | glrlm      | LongRunEmphasis                  | 1.095837832  |
| wavelet-LLH | glrlm      | ShortRunHighGrayLevelEmphasis    | 1214.07218   |
| wavelet-LLH | glrlm      | RunLengthNonUniformity           | 185.693518   |
| wavelet-LLH | glrlm      | ShortRunEmphasis                 | 0.977346567  |
| wavelet-LLH | glrlm      | LongRunHighGrayLevelEmphasis     | 1355.526237  |
| wavelet-LLH | glrlm      | RunPercentage                    | 0.970064418  |
| wavelet-LLH | glrlm      | LongRunLowGrayLevelEmphasis      | 0.01399281   |
| wavelet-LLH | glrlm      | RunEntropy                       | 5.55181542   |
| wavelet-LLH | glrlm      | HighGrayLevelRunEmphasis         | 1241.247744  |
| wavelet-LLH | glrlm      | RunLengthNonUniformityNormalized | 0.942418254  |
| wavelet-LLH | glszm      | GrayLevelVariance                | 238.159674   |
| wavelet-LLH | glszm      | ZoneVariance                     | 1.186294367  |
| wavelet-LLH | glszm      | GrayLevelNonUniformityNormalized | 0.023726852  |
| wavelet-LLH | glszm      | SizeZoneNonUniformityNormalized  | 0.647280093  |
| wavelet-LLH | glszm      | SizeZoneNonUniformity            | 93.20833333  |
| wavelet-LLH | glszm      | GrayLevelNonUniformity           | 3.416666667  |
| wavelet-LLH | glszm      | LargeAreaEmphasis                | 3.173611111  |
| wavelet-LLH | glszm      | SmallAreaHighGrayLevelEmphasis   | 1046.506504  |
| wavelet-LLH | glszm      | ZonePercentage                   | 0.709359606  |
| wavelet-LLH | glszm      | LargeAreaLowGrayLevelEmphasis    | 0.021162142  |
| wavelet-LLH | glszm      | LargeAreaHighGrayLevelEmphasis   | 3721.118056  |
| wavelet-LLH | glszm      | HighGrayLevelZoneEmphasis        | 1261.715278  |

|             |            |                                      |              |
|-------------|------------|--------------------------------------|--------------|
| wavelet-LLH | glszm      | SmallAreaEmphasis                    | 0.830214908  |
| wavelet-LLH | glszm      | LowGrayLevelZoneEmphasis             | 0.01843447   |
| wavelet-LLH | glszm      | ZoneEntropy                          | 6.167122029  |
| wavelet-LLH | glszm      | SmallAreaLowGrayLevelEmphasis        | 0.018145693  |
| wavelet-LLH | ngtdm      | Coarseness                           | 0.029747608  |
| wavelet-LLH | ngtdm      | Complexity                           | 13892.00094  |
| wavelet-LLH | ngtdm      | Strength                             | 38.6829611   |
| wavelet-LLH | ngtdm      | Contrast                             | 1.047283372  |
| wavelet-LLH | ngtdm      | Busyness                             | 0.017999119  |
| wavelet-LLL | gldm       | GrayLevelVariance                    | 640.074013   |
| wavelet-LLL | gldm       | HighGrayLevelEmphasis                | 7260.261084  |
| wavelet-LLL | gldm       | DependenceEntropy                    | 6.538399188  |
| wavelet-LLL | gldm       | DependenceNonUniformity              | 106.4384236  |
| wavelet-LLL | gldm       | GrayLevelNonUniformity               | 4.280788177  |
| wavelet-LLL | gldm       | SmallDependenceEmphasis              | 0.752487301  |
| wavelet-LLL | gldm       | SmallDependenceHighGrayLevelEmphasis | 4813.319869  |
| wavelet-LLL | gldm       | DependenceNonUniformityNormalized    | 0.52432721   |
| wavelet-LLL | gldm       | LargeDependenceEmphasis              | 3.709359606  |
| wavelet-LLL | gldm       | LargeDependenceLowGrayLevelEmphasis  | 0.005640741  |
| wavelet-LLL | gldm       | DependenceVariance                   | 1.270838894  |
| wavelet-LLL | gldm       | LargeDependenceHighGrayLevelEmphasis | 35378.12315  |
| wavelet-LLL | gldm       | SmallDependenceLowGrayLevelEmphasis  | 0.005338366  |
| wavelet-LLL | gldm       | LowGrayLevelEmphasis                 | 0.005366442  |
| wavelet-LLL | glcm       | JointAverage                         | 86.30591459  |
| wavelet-LLL | glcm       | SumAverage                           | 172.6118292  |
| wavelet-LLL | glcm       | JointEntropy                         | 7.843960234  |
| wavelet-LLL | glcm       | ClusterShade                         | -59038.55408 |
| wavelet-LLL | glcm       | MaximumProbability                   | 0.014874711  |
| wavelet-LLL | glcm       | Idmn                                 | 0.95332229   |
| wavelet-LLL | glcm       | JointEnergy                          | 0.004656526  |
| wavelet-LLL | glcm       | Contrast                             | 706.1190604  |
| wavelet-LLL | glcm       | DifferenceEntropy                    | 5.275267997  |
| wavelet-LLL | glcm       | InverseVariance                      | 0.076535439  |
| wavelet-LLL | glcm       | DifferenceVariance                   | 298.30454    |
| wavelet-LLL | glcm       | Idn                                  | 0.865116161  |
| wavelet-LLL | glcm       | Idm                                  | 0.079813159  |
| wavelet-LLL | glcm       | Correlation                          | 0.333150753  |
| wavelet-LLL | glcm       | Autocorrelation                      | 7618.29564   |
| wavelet-LLL | glcm       | SumEntropy                           | 6.036959726  |
| wavelet-LLL | glcm       | SumSquares                           | 522.476137   |
| wavelet-LLL | glcm       | ClusterProminence                    | 7567938.569  |
| wavelet-LLL | glcm       | Imc2                                 | 0.999593831  |
| wavelet-LLL | glcm       | Imc1                                 | -0.625520335 |
| wavelet-LLL | glcm       | DifferenceAverage                    | 19.72449887  |
| wavelet-LLL | glcm       | Id                                   | 0.140944816  |
| wavelet-LLL | glcm       | ClusterTendency                      | 1383.785488  |
| wavelet-LLL | firstorder | InterquartileRange                   | 885.4754843  |
| wavelet-LLL | firstorder | Skewness                             | -1.045063282 |
| wavelet-LLL | firstorder | Uniformity                           | 0.021087626  |
| wavelet-LLL | firstorder | Median                               | -194.3016581 |
| wavelet-LLL | firstorder | Energy                               | 110204292.2  |
| wavelet-LLL | firstorder | RobustMeanAbsoluteDeviation          | 361.8149571  |
| wavelet-LLL | firstorder | MeanAbsoluteDeviation                | 512.5536363  |

|             |            |                                  |              |
|-------------|------------|----------------------------------|--------------|
| wavelet-LLL | firstorder | TotalEnergy                      | 2975515889   |
| wavelet-LLL | firstorder | Maximum                          | 409.4114122  |
| wavelet-LLL | firstorder | RootMeanSquared                  | 736.802746   |
| wavelet-LLL | firstorder | 90Percentile                     | 244.9808798  |
| wavelet-LLL | firstorder | Minimum                          | -2385.693364 |
| wavelet-LLL | firstorder | Entropy                          | 5.929803588  |
| wavelet-LLL | firstorder | Range                            | 2795.104776  |
| wavelet-LLL | firstorder | Variance                         | 399445.6313  |
| wavelet-LLL | firstorder | 10Percentile                     | -1275.480554 |
| wavelet-LLL | firstorder | Kurtosis                         | 3.453760272  |
| wavelet-LLL | firstorder | Mean                             | -378.7250391 |
| wavelet-LLL | glrlm      | ShortRunLowGrayLevelEmphasis     | 0.005481929  |
| wavelet-LLL | glrlm      | GrayLevelVariance                | 643.225621   |
| wavelet-LLL | glrlm      | LowGrayLevelRunEmphasis          | 0.00548362   |
| wavelet-LLL | glrlm      | GrayLevelNonUniformityNormalized | 0.020340887  |
| wavelet-LLL | glrlm      | RunVariance                      | 0.023926411  |
| wavelet-LLL | glrlm      | GrayLevelNonUniformity           | 4.040914985  |
| wavelet-LLL | glrlm      | LongRunEmphasis                  | 1.069171312  |
| wavelet-LLL | glrlm      | ShortRunHighGrayLevelEmphasis    | 7031.339356  |
| wavelet-LLL | glrlm      | RunLengthNonUniformity           | 190.5413516  |
| wavelet-LLL | glrlm      | ShortRunEmphasis                 | 0.984013309  |
| wavelet-LLL | glrlm      | LongRunHighGrayLevelEmphasis     | 7900.655977  |
| wavelet-LLL | glrlm      | RunPercentage                    | 0.978400909  |
| wavelet-LLL | glrlm      | LongRunLowGrayLevelEmphasis      | 0.005490909  |
| wavelet-LLL | glrlm      | RunEntropy                       | 6.019278851  |
| wavelet-LLL | glrlm      | HighGrayLevelRunEmphasis         | 7194.580205  |
| wavelet-LLL | glrlm      | RunLengthNonUniformityNormalized | 0.958995164  |
| wavelet-LLL | glszm      | GrayLevelVariance                | 658.4139994  |
| wavelet-LLL | glszm      | ZoneVariance                     | 1.028539857  |
| wavelet-LLL | glszm      | GrayLevelNonUniformityNormalized | 0.0173754    |
| wavelet-LLL | glszm      | SizeZoneNonUniformityNormalized  | 0.776101204  |
| wavelet-LLL | glszm      | SizeZoneNonUniformity            | 125.7283951  |
| wavelet-LLL | glszm      | GrayLevelNonUniformity           | 2.814814815  |
| wavelet-LLL | glszm      | LargeAreaEmphasis                | 2.598765432  |
| wavelet-LLL | glszm      | SmallAreaHighGrayLevelEmphasis   | 5615.594699  |
| wavelet-LLL | glszm      | ZonePercentage                   | 0.798029557  |
| wavelet-LLL | glszm      | LargeAreaLowGrayLevelEmphasis    | 0.006858947  |
| wavelet-LLL | glszm      | LargeAreaHighGrayLevelEmphasis   | 23168.40123  |
| wavelet-LLL | glszm      | HighGrayLevelZoneEmphasis        | 6557.981481  |
| wavelet-LLL | glszm      | SmallAreaEmphasis                | 0.900075021  |
| wavelet-LLL | glszm      | LowGrayLevelZoneEmphasis         | 0.006696798  |
| wavelet-LLL | glszm      | ZoneEntropy                      | 6.299704982  |
| wavelet-LLL | glszm      | SmallAreaLowGrayLevelEmphasis    | 0.006684395  |
| wavelet-LLL | ngtdm      | Coarseness                       | 0.022077379  |
| wavelet-LLL | ngtdm      | Complexity                       | 41392.20291  |
| wavelet-LLL | ngtdm      | Strength                         | 96.700552    |
| wavelet-LLL | ngtdm      | Contrast                         | 2.836062887  |
| wavelet-LLL | ngtdm      | Busyness                         | 0.006742082  |
| wavelet-HHL | gldm       | GrayLevelVariance                | 36.28056978  |
| wavelet-HHL | gldm       | HighGrayLevelEmphasis            | 435.6896552  |
| wavelet-HHL | gldm       | DependenceEntropy                | 5.92951255   |
| wavelet-HHL | gldm       | DependenceNonUniformity          | 55.71921182  |
| wavelet-HHL | gldm       | GrayLevelNonUniformity           | 11.69950739  |

|             |            |                                      |              |
|-------------|------------|--------------------------------------|--------------|
| wavelet-HHL | gldm       | SmallDependenceEmphasis              | 0.501370374  |
| wavelet-HHL | gldm       | SmallDependenceHighGrayLevelEmphasis | 242.606413   |
| wavelet-HHL | gldm       | DependenceNonUniformityNormalized    | 0.274478876  |
| wavelet-HHL | gldm       | LargeDependenceEmphasis              | 6.625615764  |
| wavelet-HHL | gldm       | LargeDependenceLowGrayLevelEmphasis  | 0.025869322  |
| wavelet-HHL | gldm       | DependenceVariance                   | 1.820233444  |
| wavelet-HHL | gldm       | LargeDependenceHighGrayLevelEmphasis | 2442.133005  |
| wavelet-HHL | gldm       | SmallDependenceLowGrayLevelEmphasis  | 0.006763364  |
| wavelet-HHL | gldm       | LowGrayLevelEmphasis                 | 0.00831308   |
| wavelet-HHL | glcm       | JointAverage                         | 19.99996914  |
| wavelet-HHL | glcm       | SumAverage                           | 39.99993829  |
| wavelet-HHL | glcm       | JointEntropy                         | 7.273379822  |
| wavelet-HHL | glcm       | ClusterShade                         | 275.420827   |
| wavelet-HHL | glcm       | MaximumProbability                   | 0.025072726  |
| wavelet-HHL | glcm       | Idmn                                 | 0.961342278  |
| wavelet-HHL | glcm       | JointEnergy                          | 0.007802364  |
| wavelet-HHL | glcm       | Contrast                             | 71.57115285  |
| wavelet-HHL | glcm       | DifferenceEntropy                    | 3.987558178  |
| wavelet-HHL | glcm       | InverseVariance                      | 0.169079186  |
| wavelet-HHL | glcm       | DifferenceVariance                   | 29.57190266  |
| wavelet-HHL | glcm       | Idn                                  | 0.873753655  |
| wavelet-HHL | glcm       | Idm                                  | 0.173827572  |
| wavelet-HHL | glcm       | Correlation                          | -0.019201846 |
| wavelet-HHL | glcm       | Autocorrelation                      | 399.4247828  |
| wavelet-HHL | glcm       | SumEntropy                           | 4.745912815  |
| wavelet-HHL | glcm       | SumSquares                           | 35.15426147  |
| wavelet-HHL | glcm       | ClusterProminence                    | 19050.40211  |
| wavelet-HHL | glcm       | Imc2                                 | 0.972216555  |
| wavelet-HHL | glcm       | Imc1                                 | -0.33602987  |
| wavelet-HHL | glcm       | DifferenceAverage                    | 6.369014432  |
| wavelet-HHL | glcm       | Id                                   | 0.260112033  |
| wavelet-HHL | glcm       | ClusterTendency                      | 69.04589302  |
| wavelet-HHL | firstorder | InterquartileRange                   | 168.1359199  |
| wavelet-HHL | firstorder | Skewness                             | 0.356191645  |
| wavelet-HHL | firstorder | Uniformity                           | 0.057633041  |
| wavelet-HHL | firstorder | Median                               | -5.990553638 |
| wavelet-HHL | firstorder | Energy                               | 4626160.754  |
| wavelet-HHL | firstorder | RobustMeanAbsoluteDeviation          | 75.79119382  |
| wavelet-HHL | firstorder | MeanAbsoluteDeviation                | 115.8947624  |
| wavelet-HHL | firstorder | TotalEnergy                          | 124906340.4  |
| wavelet-HHL | firstorder | Maximum                              | 511.9276159  |
| wavelet-HHL | firstorder | RootMeanSquared                      | 150.9601578  |
| wavelet-HHL | firstorder | 90Percentile                         | 205.0298374  |
| wavelet-HHL | firstorder | Minimum                              | -450.7329522 |
| wavelet-HHL | firstorder | Entropy                              | 4.442443776  |
| wavelet-HHL | firstorder | Range                                | 962.660568   |
| wavelet-HHL | firstorder | Variance                             | 22623.28154  |
| wavelet-HHL | firstorder | 10Percentile                         | -154.1528108 |
| wavelet-HHL | firstorder | Kurtosis                             | 3.707131614  |
| wavelet-HHL | firstorder | Mean                                 | 12.87197295  |
| wavelet-HHL | glrlm      | ShortRunLowGrayLevelEmphasis         | 0.008455949  |
| wavelet-HHL | glrlm      | GrayLevelVariance                    | 37.31993645  |
| wavelet-HHL | glrlm      | LowGrayLevelRunEmphasis              | 0.008563984  |

|             |       |                                      |             |
|-------------|-------|--------------------------------------|-------------|
| wavelet-HHL | glrlm | GrayLevelNonUniformityNormalized     | 0.055857488 |
| wavelet-HHL | glrlm | RunVariance                          | 0.050546599 |
| wavelet-HHL | glrlm | GrayLevelNonUniformity               | 10.81966751 |
| wavelet-HHL | glrlm | LongRunEmphasis                      | 1.149570539 |
| wavelet-HHL | glrlm | ShortRunHighGrayLevelEmphasis        | 426.1203014 |
| wavelet-HHL | glrlm | RunLengthNonUniformity               | 176.8166027 |
| wavelet-HHL | glrlm | ShortRunEmphasis                     | 0.965293281 |
| wavelet-HHL | glrlm | LongRunHighGrayLevelEmphasis         | 493.7872749 |
| wavelet-HHL | glrlm | RunPercentage                        | 0.954149299 |
| wavelet-HHL | glrlm | LongRunLowGrayLevelEmphasis          | 0.009029482 |
| wavelet-HHL | glrlm | RunEntropy                           | 4.669486461 |
| wavelet-HHL | glrlm | HighGrayLevelRunEmphasis             | 438.9558675 |
| wavelet-HHL | glrlm | RunLengthNonUniformityNormalized     | 0.912590737 |
| wavelet-HHL | glszm | GrayLevelVariance                    | 50.66728224 |
| wavelet-HHL | glszm | ZoneVariance                         | 4.364188981 |
| wavelet-HHL | glszm | GrayLevelNonUniformityNormalized     | 0.045552478 |
| wavelet-HHL | glszm | SizeZoneNonUniformityNormalized      | 0.55355494  |
| wavelet-HHL | glszm | SizeZoneNonUniformity                | 63.10526316 |
| wavelet-HHL | glszm | GrayLevelNonUniformity               | 5.192982456 |
| wavelet-HHL | glszm | LargeAreaEmphasis                    | 7.535087719 |
| wavelet-HHL | glszm | SmallAreaHighGrayLevelEmphasis       | 383.28002   |
| wavelet-HHL | glszm | ZonePercentage                       | 0.561576355 |
| wavelet-HHL | glszm | LargeAreaLowGrayLevelEmphasis        | 0.03339894  |
| wavelet-HHL | glszm | LargeAreaHighGrayLevelEmphasis       | 2696.008772 |
| wavelet-HHL | glszm | HighGrayLevelZoneEmphasis            | 482.1403509 |
| wavelet-HHL | glszm | SmallAreaEmphasis                    | 0.770663293 |
| wavelet-HHL | glszm | LowGrayLevelZoneEmphasis             | 0.012360348 |
| wavelet-HHL | glszm | ZoneEntropy                          | 5.474705036 |
| wavelet-HHL | glszm | SmallAreaLowGrayLevelEmphasis        | 0.011663487 |
| wavelet-HHL | ngtdm | Coarseness                           | 0.025615918 |
| wavelet-HHL | ngtdm | Complexity                           | 1849.543987 |
| wavelet-HHL | ngtdm | Strength                             | 8.33403655  |
| wavelet-HHL | ngtdm | Contrast                             | 0.381205271 |
| wavelet-HHL | ngtdm | Busyness                             | 0.067394292 |
| wavelet-HLH | gldm  | GrayLevelVariance                    | 35.29403771 |
| wavelet-HLH | gldm  | HighGrayLevelEmphasis                | 588.3546798 |
| wavelet-HLH | gldm  | DependenceEntropy                    | 5.768399406 |
| wavelet-HLH | gldm  | DependenceNonUniformity              | 59.30541872 |
| wavelet-HLH | gldm  | GrayLevelNonUniformity               | 11.26600985 |
| wavelet-HLH | gldm  | SmallDependenceEmphasis              | 0.507449371 |
| wavelet-HLH | gldm  | SmallDependenceHighGrayLevelEmphasis | 285.0413643 |
| wavelet-HLH | gldm  | DependenceNonUniformityNormalized    | 0.29214492  |
| wavelet-HLH | gldm  | LargeDependenceEmphasis              | 5.600985222 |
| wavelet-HLH | gldm  | LargeDependenceLowGrayLevelEmphasis  | 0.015677776 |
| wavelet-HLH | gldm  | DependenceVariance                   | 1.34072654  |
| wavelet-HLH | gldm  | LargeDependenceHighGrayLevelEmphasis | 3414.660099 |
| wavelet-HLH | gldm  | SmallDependenceLowGrayLevelEmphasis  | 0.006300436 |
| wavelet-HLH | gldm  | LowGrayLevelEmphasis                 | 0.007243448 |
| wavelet-HLH | glcm  | JointAverage                         | 23.71345585 |
| wavelet-HLH | glcm  | SumAverage                           | 47.4269117  |
| wavelet-HLH | glcm  | JointEntropy                         | 7.331414945 |
| wavelet-HLH | glcm  | ClusterShade                         | 25.22947516 |
| wavelet-HLH | glcm  | MaximumProbability                   | 0.020206081 |



|             |            |                                  |              |
|-------------|------------|----------------------------------|--------------|
| wavelet-HLH | glcm       | Idmn                             | 0.968307955  |
| wavelet-HLH | glcm       | JointEnergy                      | 0.007220705  |
| wavelet-HLH | glcm       | Contrast                         | 66.62653063  |
| wavelet-HLH | glcm       | DifferenceEntropy                | 3.927890751  |
| wavelet-HLH | glcm       | InverseVariance                  | 0.16496952   |
| wavelet-HLH | glcm       | DifferenceVariance               | 27.31332245  |
| wavelet-HLH | glcm       | Idn                              | 0.88318683   |
| wavelet-HLH | glcm       | Idm                              | 0.163637518  |
| wavelet-HLH | glcm       | Correlation                      | -0.016985326 |
| wavelet-HLH | glcm       | Autocorrelation                  | 561.5864669  |
| wavelet-HLH | glcm       | SumEntropy                       | 4.70849763   |
| wavelet-HLH | glcm       | SumSquares                       | 32.53393308  |
| wavelet-HLH | glcm       | ClusterProminence                | 16862.89695  |
| wavelet-HLH | glcm       | Imc2                             | 0.966918343  |
| wavelet-HLH | glcm       | Imc1                             | -0.316130344 |
| wavelet-HLH | glcm       | DifferenceAverage                | 6.191835139  |
| wavelet-HLH | glcm       | Id                               | 0.253246969  |
| wavelet-HLH | glcm       | ClusterTendency                  | 63.5092017   |
| wavelet-HLH | firstorder | InterquartileRange               | 187.4467987  |
| wavelet-HLH | firstorder | Skewness                         | 0.003246555  |
| wavelet-HLH | firstorder | Uniformity                       | 0.055497585  |
| wavelet-HLH | firstorder | Median                           | -0.362603677 |
| wavelet-HLH | firstorder | Energy                           | 4485399.358  |
| wavelet-HLH | firstorder | RobustMeanAbsoluteDeviation      | 74.51683753  |
| wavelet-HLH | firstorder | MeanAbsoluteDeviation            | 112.3786119  |
| wavelet-HLH | firstorder | TotalEnergy                      | 121105782.7  |
| wavelet-HLH | firstorder | Maximum                          | 485.3928743  |
| wavelet-HLH | firstorder | RootMeanSquared                  | 148.6457646  |
| wavelet-HLH | firstorder | 90Percentile                     | 178.4507062  |
| wavelet-HLH | firstorder | Minimum                          | -570.8375222 |
| wavelet-HLH | firstorder | Entropy                          | 4.402078761  |
| wavelet-HLH | firstorder | Range                            | 1056.230396  |
| wavelet-HLH | firstorder | Variance                         | 22095.10899  |
| wavelet-HLH | firstorder | 10Percentile                     | -158.7658125 |
| wavelet-HLH | firstorder | Kurtosis                         | 4.534809854  |
| wavelet-HLH | firstorder | Mean                             | 0.674051383  |
| wavelet-HLH | glrlm      | ShortRunLowGrayLevelEmphasis     | 0.007419192  |
| wavelet-HLH | glrlm      | GrayLevelVariance                | 35.92017262  |
| wavelet-HLH | glrlm      | LowGrayLevelRunEmphasis          | 0.007476778  |
| wavelet-HLH | glrlm      | GrayLevelNonUniformityNormalized | 0.054788535  |
| wavelet-HLH | glrlm      | RunVariance                      | 0.044796929  |
| wavelet-HLH | glrlm      | GrayLevelNonUniformity           | 10.66730292  |
| wavelet-HLH | glrlm      | LongRunEmphasis                  | 1.1338194    |
| wavelet-HLH | glrlm      | ShortRunHighGrayLevelEmphasis    | 567.5667565  |
| wavelet-HLH | glrlm      | RunLengthNonUniformity           | 179.6585291  |
| wavelet-HLH | glrlm      | ShortRunEmphasis                 | 0.968785976  |
| wavelet-HLH | glrlm      | LongRunHighGrayLevelEmphasis     | 669.4514843  |
| wavelet-HLH | glrlm      | RunPercentage                    | 0.959075407  |
| wavelet-HLH | glrlm      | LongRunLowGrayLevelEmphasis      | 0.007724872  |
| wavelet-HLH | glrlm      | RunEntropy                       | 4.594033515  |
| wavelet-HLH | glrlm      | HighGrayLevelRunEmphasis         | 587.0225963  |
| wavelet-HLH | glrlm      | RunLengthNonUniformityNormalized | 0.921784363  |
| wavelet-HLH | glszm      | GrayLevelVariance                | 44.61129704  |

|             |       |                                  |             |
|-------------|-------|----------------------------------|-------------|
| wavelet-HLH | glszm | ZoneVariance                     | 1.953964893 |
| wavelet-HLH | glszm | GrayLevelNonUniformityNormalized | 0.04924527  |
| wavelet-HLH | glszm | SizeZoneNonUniformityNormalized  | 0.503995629 |
| wavelet-HLH | glszm | SizeZoneNonUniformity            | 60.98347107 |
| wavelet-HLH | glszm | GrayLevelNonUniformity           | 5.958677686 |
| wavelet-HLH | glszm | LargeAreaEmphasis                | 4.768595041 |
| wavelet-HLH | glszm | SmallAreaHighGrayLevelEmphasis   | 409.7458095 |
| wavelet-HLH | glszm | ZonePercentage                   | 0.596059113 |
| wavelet-HLH | glszm | LargeAreaLowGrayLevelEmphasis    | 0.017968    |
| wavelet-HLH | glszm | LargeAreaHighGrayLevelEmphasis   | 2792        |
| wavelet-HLH | glszm | HighGrayLevelZoneEmphasis        | 572.8512397 |
| wavelet-HLH | glszm | SmallAreaEmphasis                | 0.737759788 |
| wavelet-HLH | glszm | LowGrayLevelZoneEmphasis         | 0.010869369 |
| wavelet-HLH | glszm | ZoneEntropy                      | 5.461888498 |
| wavelet-HLH | glszm | SmallAreaLowGrayLevelEmphasis    | 0.01034677  |
| wavelet-HLH | ngtdm | Coarseness                       | 0.026687718 |
| wavelet-HLH | ngtdm | Complexity                       | 1715.984039 |
| wavelet-HLH | ngtdm | Strength                         | 8.269293637 |
| wavelet-HLH | ngtdm | Contrast                         | 0.414819727 |
| wavelet-HLH | ngtdm | Busyness                         | 0.061835392 |

|            |               |                                      |                                                                                                                                                                                                                                                                                                                                                                                                                   |
|------------|---------------|--------------------------------------|-------------------------------------------------------------------------------------------------------------------------------------------------------------------------------------------------------------------------------------------------------------------------------------------------------------------------------------------------------------------------------------------------------------------|
| Image type | Feature Class | Feature Name                         | 4: RTSTRUCT: C99-DNU_segment_GTV                                                                                                                                                                                                                                                                                                                                                                                  |
| general    | info          | BoundingBox                          | (1, 0, 1, 15, 16, 11)                                                                                                                                                                                                                                                                                                                                                                                             |
| general    | info          | EnabledImageTypes                    | {u'Original': {}, u'Wavelet': {}}                                                                                                                                                                                                                                                                                                                                                                                 |
|            |               |                                      | {'distances': [1], 'additionalInfo': True, 'force2D': False, 'interpolator': 'sitkBSpline', 'resampledPixelSpacing': [3.0], 'label': 1, 'normalizeScale': 1, 'normalize': False, 'force2Ddimension': 0, 'removeOutliers': None, 'minimumROISize': None, u'binWidth': 25.0, 'minimumROIDimensions': 1, u'correctMask': True, 'preCrop': False, u'symmetricalGLCM': True, 'resegmentRange': None, 'padDistance': 5} |
| general    | info          | GeneralSettings                      | daf68cccd6baca1d4c05bdf9797f002ad9f11                                                                                                                                                                                                                                                                                                                                                                             |
| general    | info          | ImageHash                            | eff                                                                                                                                                                                                                                                                                                                                                                                                               |
| general    | info          | ImageSpacing                         | (0.9765624999999998, 0.9765624999999998, 1.9999999999999999)                                                                                                                                                                                                                                                                                                                                                      |
| general    | info          | MaskHash                             | d1f94cca491146124ca756858f6a91388be7                                                                                                                                                                                                                                                                                                                                                                              |
| general    | info          | NumpyVersion                         | b17d                                                                                                                                                                                                                                                                                                                                                                                                              |
| general    | info          | PyWaveletVersion                     | 1.13.1                                                                                                                                                                                                                                                                                                                                                                                                            |
| general    | info          | SimpleITKVersion                     | 0.5.2                                                                                                                                                                                                                                                                                                                                                                                                             |
| general    | info          | Version                              | 1.1.0                                                                                                                                                                                                                                                                                                                                                                                                             |
| general    | info          | VolumeNum                            | 1.3.0.post102+g1b0eb74                                                                                                                                                                                                                                                                                                                                                                                            |
| general    | info          | VoxelNum                             | 1                                                                                                                                                                                                                                                                                                                                                                                                                 |
| original   | shape         | Maximum3DDiameter                    | 618                                                                                                                                                                                                                                                                                                                                                                                                               |
| original   | shape         | Maximum2DDiameterSlice               | 46.7653718                                                                                                                                                                                                                                                                                                                                                                                                        |
| original   | shape         | Sphericity                           | 42.95346319                                                                                                                                                                                                                                                                                                                                                                                                       |
| original   | shape         | MinorAxis                            | 0.682991214                                                                                                                                                                                                                                                                                                                                                                                                       |
| original   | shape         | Elongation                           | 34.82900856                                                                                                                                                                                                                                                                                                                                                                                                       |
| original   | shape         | SurfaceVolumeRatio                   | 0.845002843                                                                                                                                                                                                                                                                                                                                                                                                       |
| original   | shape         | Volume                               | 0.277088346                                                                                                                                                                                                                                                                                                                                                                                                       |
| original   | shape         | MajorAxis                            | 16686                                                                                                                                                                                                                                                                                                                                                                                                             |
| original   | shape         | SurfaceArea                          | 41.21762292                                                                                                                                                                                                                                                                                                                                                                                                       |
| original   | shape         | Flatness                             | 4623.496147                                                                                                                                                                                                                                                                                                                                                                                                       |
| original   | shape         | LeastAxis                            | 0.493595914                                                                                                                                                                                                                                                                                                                                                                                                       |
| original   | shape         | Maximum2DDiameterColumn              | 20.34485026                                                                                                                                                                                                                                                                                                                                                                                                       |
| original   | shape         | Maximum2DDiameterRow                 | 45.69463864                                                                                                                                                                                                                                                                                                                                                                                                       |
| original   | gldm          | GrayLevelVariance                    | 45.89117562                                                                                                                                                                                                                                                                                                                                                                                                       |
| original   | gldm          | HighGrayLevelEmphasis                | 149.2433285                                                                                                                                                                                                                                                                                                                                                                                                       |
| original   | gldm          | DependenceEntropy                    | 553.9822006                                                                                                                                                                                                                                                                                                                                                                                                       |
| original   | gldm          | DependenceNonUniformity              | 6.717421458                                                                                                                                                                                                                                                                                                                                                                                                       |
| original   | gldm          | GrayLevelNonUniformity               | 223.1812298                                                                                                                                                                                                                                                                                                                                                                                                       |
| original   | gldm          | SmallDependenceEmphasis              | 16.23300971                                                                                                                                                                                                                                                                                                                                                                                                       |
| original   | gldm          | SmallDependenceHighGrayLevelEmphasis | 0.603170296                                                                                                                                                                                                                                                                                                                                                                                                       |
| original   | gldm          | DependenceNonUniformityNormalized    | 314.8657066                                                                                                                                                                                                                                                                                                                                                                                                       |
| original   | gldm          | LargeDependenceEmphasis              | 0.361134676                                                                                                                                                                                                                                                                                                                                                                                                       |
| original   | gldm          | LargeDependenceLowGrayLevelEmphasis  | 5.715210356                                                                                                                                                                                                                                                                                                                                                                                                       |
| original   | gldm          | DependenceVariance                   | 0.506556964                                                                                                                                                                                                                                                                                                                                                                                                       |
|            |               |                                      | 2.094133911                                                                                                                                                                                                                                                                                                                                                                                                       |

|          |            |                                      |              |
|----------|------------|--------------------------------------|--------------|
| original | gldm       | LargeDependenceHighGrayLevelEmphasis | 2849.713592  |
| original | gldm       | SmallDependenceLowGrayLevelEmphasis  | 0.008826752  |
| original | gldm       | LowGrayLevelEmphasis                 | 0.022271501  |
| original | glcm       | JointAverage                         | 21.12075378  |
| original | glcm       | SumAverage                           | 42.24150756  |
| original | glcm       | JointEntropy                         | 9.196211624  |
| original | glcm       | ClusterShade                         | 2344.350905  |
| original | glcm       | MaximumProbability                   | 0.009964534  |
| original | glcm       | ldmn                                 | 0.929783762  |
| original | glcm       | JointEnergy                          | 0.001982959  |
| original | glcm       | Contrast                             | 168.7779722  |
| original | glcm       | DifferenceEntropy                    | 4.692847919  |
| original | glcm       | InverseVariance                      | 0.11145838   |
| original | glcm       | DifferenceVariance                   | 66.01628386  |
| original | glcm       | ldn                                  | 0.831173271  |
| original | glcm       | ldm                                  | 0.116643463  |
| original | glcm       | Correlation                          | 0.477128549  |
| original | glcm       | Autocorrelation                      | 522.6695749  |
| original | glcm       | SumEntropy                           | 6.212649685  |
| original | glcm       | SumSquares                           | 160.8315436  |
| original | glcm       | ClusterProminence                    | 465290.0112  |
| original | glcm       | lmc2                                 | 0.975289498  |
| original | glcm       | lmc1                                 | -0.282689286 |
| original | glcm       | DifferenceAverage                    | 10.05966059  |
| original | glcm       | ld                                   | 0.195043619  |
| original | glcm       | ClusterTendency                      | 474.5482022  |
| original | firstorder | InterquartileRange                   | 489.25       |
| original | firstorder | Skewness                             | 0.368711192  |
| original | firstorder | Uniformity                           | 0.026267006  |
| original | firstorder | Median                               | -587.5       |
| original | firstorder | Energy                               | 234446271    |
| original | firstorder | RobustMeanAbsoluteDeviation          | 205.9107683  |
| original | firstorder | MeanAbsoluteDeviation                | 261.665347   |
| original | firstorder | TotalEnergy                          | 6330049317   |
| original | firstorder | Maximum                              | 56           |
| original | firstorder | RootMeanSquared                      | 615.9244256  |
| original | firstorder | 90Percentile                         | -53.9        |
| original | firstorder | Minimum                              | -1011        |
| original | firstorder | Entropy                              | 5.344417484  |
| original | firstorder | Range                                | 1067         |
| original | firstorder | Variance                             | 93184.64372  |
| original | firstorder | 10Percentile                         | -906         |
| original | firstorder | Kurtosis                             | 1.959042416  |
| original | firstorder | Mean                                 | -534.9563107 |
| original | glrlm      | ShortRunLowGrayLevelEmphasis         | 0.01924244   |
| original | glrlm      | GrayLevelVariance                    | 146.3137713  |
| original | glrlm      | LowGrayLevelRunEmphasis              | 0.020792295  |
| original | glrlm      | GrayLevelNonUniformityNormalized     | 0.026182824  |
| original | glrlm      | RunVariance                          | 0.038049946  |
| original | glrlm      | GrayLevelNonUniformity               | 15.61942956  |
| original | glrlm      | LongRunEmphasis                      | 1.111709192  |
| original | glrlm      | ShortRunHighGrayLevelEmphasis        | 537.8747802  |

|             |       |                                      |              |
|-------------|-------|--------------------------------------|--------------|
| original    | glrlm | RunLengthNonUniformity               | 556.9456893  |
| original    | glrlm | ShortRunEmphasis                     | 0.973883784  |
| original    | glrlm | LongRunHighGrayLevelEmphasis         | 616.4539482  |
| original    | glrlm | RunPercentage                        | 0.965272591  |
| original    | glrlm | LongRunLowGrayLevelEmphasis          | 0.028230379  |
| original    | glrlm | RunEntropy                           | 5.503384024  |
| original    | glrlm | HighGrayLevelRunEmphasis             | 553.196115   |
| original    | glrlm | RunLengthNonUniformityNormalized     | 0.933406484  |
| original    | glszm | GrayLevelVariance                    | 126.69266    |
| original    | glszm | ZoneVariance                         | 1.352609843  |
| original    | glszm | GrayLevelNonUniformityNormalized     | 0.026693505  |
| original    | glszm | SizeZoneNonUniformityNormalized      | 0.587449062  |
| original    | glszm | SizeZoneNonUniformity                | 250.8407494  |
| original    | glszm | GrayLevelNonUniformity               | 11.39812646  |
| original    | glszm | LargeAreaEmphasis                    | 3.447306792  |
| original    | glszm | SmallAreaHighGrayLevelEmphasis       | 408.5163272  |
| original    | glszm | ZonePercentage                       | 0.690938511  |
| original    | glszm | LargeAreaLowGrayLevelEmphasis        | 0.194846138  |
| original    | glszm | LargeAreaHighGrayLevelEmphasis       | 1908.133489  |
| original    | glszm | HighGrayLevelZoneEmphasis            | 525.7564403  |
| original    | glszm | SmallAreaEmphasis                    | 0.795021107  |
| original    | glszm | LowGrayLevelZoneEmphasis             | 0.015859631  |
| original    | glszm | ZoneEntropy                          | 6.239385058  |
| original    | glszm | SmallAreaLowGrayLevelEmphasis        | 0.011062077  |
| original    | ngtdm | Coarseness                           | 0.008844284  |
| original    | ngtdm | Complexity                           | 5058.757153  |
| original    | ngtdm | Strength                             | 6.455291763  |
| original    | ngtdm | Contrast                             | 1.100267263  |
| original    | ngtdm | Busyness                             | 0.218532092  |
| wavelet-HHH | gldm  | GrayLevelVariance                    | 15.43665494  |
| wavelet-HHH | gldm  | HighGrayLevelEmphasis                | 254.684466   |
| wavelet-HHH | gldm  | DependenceEntropy                    | 5.972615526  |
| wavelet-HHH | gldm  | DependenceNonUniformity              | 145.8381877  |
| wavelet-HHH | gldm  | GrayLevelNonUniformity               | 47.75728155  |
| wavelet-HHH | gldm  | SmallDependenceEmphasis              | 0.406489127  |
| wavelet-HHH | gldm  | SmallDependenceHighGrayLevelEmphasis | 105.4014185  |
| wavelet-HHH | gldm  | DependenceNonUniformityNormalized    | 0.235984122  |
| wavelet-HHH | gldm  | LargeDependenceEmphasis              | 8.190938511  |
| wavelet-HHH | gldm  | LargeDependenceLowGrayLevelEmphasis  | 0.039826493  |
| wavelet-HHH | gldm  | DependenceVariance                   | 2.125637561  |
| wavelet-HHH | gldm  | LargeDependenceHighGrayLevelEmphasis | 1996.720065  |
| wavelet-HHH | gldm  | SmallDependenceLowGrayLevelEmphasis  | 0.004408112  |
| wavelet-HHH | gldm  | LowGrayLevelEmphasis                 | 0.007213739  |
| wavelet-HHH | glcm  | JointAverage                         | 15.47057339  |
| wavelet-HHH | glcm  | SumAverage                           | 30.94114677  |
| wavelet-HHH | glcm  | JointEntropy                         | 7.5483179    |
| wavelet-HHH | glcm  | ClusterShade                         | -22.48930913 |
| wavelet-HHH | glcm  | MaximumProbability                   | 0.019857487  |
| wavelet-HHH | glcm  | ldmn                                 | 0.958054337  |
| wavelet-HHH | glcm  | JointEnergy                          | 0.007165304  |
| wavelet-HHH | glcm  | Contrast                             | 32.94135967  |
| wavelet-HHH | glcm  | DifferenceEntropy                    | 3.584707086  |

|             |            |                                  |              |
|-------------|------------|----------------------------------|--------------|
| wavelet-HHH | glcm       | InverseVariance                  | 0.217391703  |
| wavelet-HHH | glcm       | DifferenceVariance               | 13.33462277  |
| wavelet-HHH | glcm       | Idn                              | 0.866295089  |
| wavelet-HHH | glcm       | Idm                              | 0.209515044  |
| wavelet-HHH | glcm       | Correlation                      | -0.031187805 |
| wavelet-HHH | glcm       | Autocorrelation                  | 238.8611488  |
| wavelet-HHH | glcm       | SumEntropy                       | 4.427709995  |
| wavelet-HHH | glcm       | SumSquares                       | 15.99208224  |
| wavelet-HHH | glcm       | ClusterProminence                | 3598.492726  |
| wavelet-HHH | glcm       | Imc2                             | 0.75975922   |
| wavelet-HHH | glcm       | Imc1                             | -0.108686188 |
| wavelet-HHH | glcm       | DifferenceAverage                | 4.406236195  |
| wavelet-HHH | glcm       | Id                               | 0.302451658  |
| wavelet-HHH | glcm       | ClusterTendency                  | 31.02696929  |
| wavelet-HHH | firstorder | InterquartileRange               | 120.7016963  |
| wavelet-HHH | firstorder | Skewness                         | -0.152297501 |
| wavelet-HHH | firstorder | Uniformity                       | 0.077277155  |
| wavelet-HHH | firstorder | Median                           | -0.457799512 |
| wavelet-HHH | firstorder | Energy                           | 5923873.986  |
| wavelet-HHH | firstorder | RobustMeanAbsoluteDeviation      | 49.51182276  |
| wavelet-HHH | firstorder | MeanAbsoluteDeviation            | 75.24867846  |
| wavelet-HHH | firstorder | TotalEnergy                      | 159944597.6  |
| wavelet-HHH | firstorder | Maximum                          | 273.1246897  |
| wavelet-HHH | firstorder | RootMeanSquared                  | 97.90585586  |
| wavelet-HHH | firstorder | 90Percentile                     | 119.0436892  |
| wavelet-HHH | firstorder | Minimum                          | -356.6103914 |
| wavelet-HHH | firstorder | Entropy                          | 3.970705322  |
| wavelet-HHH | firstorder | Range                            | 629.7350811  |
| wavelet-HHH | firstorder | Variance                         | 9585.167933  |
| wavelet-HHH | firstorder | 10Percentile                     | -123.3613175 |
| wavelet-HHH | firstorder | Kurtosis                         | 3.468969725  |
| wavelet-HHH | firstorder | Mean                             | -0.623441088 |
| wavelet-HHH | glrlm      | ShortRunLowGrayLevelEmphasis     | 0.007174062  |
| wavelet-HHH | glrlm      | GrayLevelVariance                | 15.97622312  |
| wavelet-HHH | glrlm      | LowGrayLevelRunEmphasis          | 0.007370672  |
| wavelet-HHH | glrlm      | GrayLevelNonUniformityNormalized | 0.075435771  |
| wavelet-HHH | glrlm      | RunVariance                      | 0.062954007  |
| wavelet-HHH | glrlm      | GrayLevelNonUniformity           | 44.00208118  |
| wavelet-HHH | glrlm      | LongRunEmphasis                  | 1.186352028  |
| wavelet-HHH | glrlm      | ShortRunHighGrayLevelEmphasis    | 244.6549198  |
| wavelet-HHH | glrlm      | RunLengthNonUniformity           | 521.2088758  |
| wavelet-HHH | glrlm      | ShortRunEmphasis                 | 0.957190749  |
| wavelet-HHH | glrlm      | LongRunHighGrayLevelEmphasis     | 300.9929622  |
| wavelet-HHH | glrlm      | RunPercentage                    | 0.943739109  |
| wavelet-HHH | glrlm      | LongRunLowGrayLevelEmphasis      | 0.008225544  |
| wavelet-HHH | glrlm      | RunEntropy                       | 4.288184907  |
| wavelet-HHH | glrlm      | HighGrayLevelRunEmphasis         | 255.2025897  |
| wavelet-HHH | glrlm      | RunLengthNonUniformityNormalized | 0.893369063  |
| wavelet-HHH | glszm      | GrayLevelVariance                | 24.36197231  |
| wavelet-HHH | glszm      | ZoneVariance                     | 13.74715629  |
| wavelet-HHH | glszm      | GrayLevelNonUniformityNormalized | 0.058147811  |
| wavelet-HHH | glszm      | SizeZoneNonUniformityNormalized  | 0.459251583  |

|             |       |                                      |              |
|-------------|-------|--------------------------------------|--------------|
| wavelet-HHH | glszm | SizeZoneNonUniformity                | 129.9681979  |
| wavelet-HHH | glszm | GrayLevelNonUniformity               | 16.45583039  |
| wavelet-HHH | glszm | LargeAreaEmphasis                    | 18.51590106  |
| wavelet-HHH | glszm | SmallAreaHighGrayLevelEmphasis       | 183.2370676  |
| wavelet-HHH | glszm | ZonePercentage                       | 0.457928803  |
| wavelet-HHH | glszm | LargeAreaLowGrayLevelEmphasis        | 0.085671175  |
| wavelet-HHH | glszm | LargeAreaHighGrayLevelEmphasis       | 4587.600707  |
| wavelet-HHH | glszm | HighGrayLevelZoneEmphasis            | 259.3286219  |
| wavelet-HHH | glszm | SmallAreaEmphasis                    | 0.70454643   |
| wavelet-HHH | glszm | LowGrayLevelZoneEmphasis             | 0.010266548  |
| wavelet-HHH | glszm | ZoneEntropy                          | 5.698946554  |
| wavelet-HHH | glszm | SmallAreaLowGrayLevelEmphasis        | 0.008748019  |
| wavelet-HHH | ngtdm | Coarseness                           | 0.010365652  |
| wavelet-HHH | ngtdm | Complexity                           | 764.8641512  |
| wavelet-HHH | ngtdm | Strength                             | 1.817197973  |
| wavelet-HHH | ngtdm | Contrast                             | 0.161986917  |
| wavelet-HHH | ngtdm | Busyness                             | 0.228951883  |
| wavelet-HLL | gldm  | GrayLevelVariance                    | 61.14022685  |
| wavelet-HLL | gldm  | HighGrayLevelEmphasis                | 921.394822   |
| wavelet-HLL | gldm  | DependenceEntropy                    | 6.485780552  |
| wavelet-HLL | gldm  | DependenceNonUniformity              | 194.7184466  |
| wavelet-HLL | gldm  | GrayLevelNonUniformity               | 23.98381877  |
| wavelet-HLL | gldm  | SmallDependenceEmphasis              | 0.524151834  |
| wavelet-HLL | gldm  | SmallDependenceHighGrayLevelEmphasis | 477.4182025  |
| wavelet-HLL | gldm  | DependenceNonUniformityNormalized    | 0.315078393  |
| wavelet-HLL | gldm  | LargeDependenceEmphasis              | 4.757281553  |
| wavelet-HLL | gldm  | LargeDependenceLowGrayLevelEmphasis  | 0.008546696  |
| wavelet-HLL | gldm  | DependenceVariance                   | 0.999455389  |
| wavelet-HLL | gldm  | LargeDependenceHighGrayLevelEmphasis | 4434.297735  |
| wavelet-HLL | gldm  | SmallDependenceLowGrayLevelEmphasis  | 0.002511572  |
| wavelet-HLL | gldm  | LowGrayLevelEmphasis                 | 0.00322499   |
| wavelet-HLL | glcm  | JointAverage                         | 29.26085516  |
| wavelet-HLL | glcm  | SumAverage                           | 58.52171032  |
| wavelet-HLL | glcm  | JointEntropy                         | 8.820708958  |
| wavelet-HLL | glcm  | ClusterShade                         | -888.1656885 |
| wavelet-HLL | glcm  | MaximumProbability                   | 0.008663713  |
| wavelet-HLL | glcm  | ldmn                                 | 0.964925922  |
| wavelet-HLL | glcm  | JointEnergy                          | 0.002680393  |
| wavelet-HLL | glcm  | Contrast                             | 99.48354466  |
| wavelet-HLL | glcm  | DifferenceEntropy                    | 4.289084397  |
| wavelet-HLL | glcm  | InverseVariance                      | 0.143326073  |
| wavelet-HLL | glcm  | DifferenceVariance                   | 39.43636406  |
| wavelet-HLL | glcm  | ldn                                  | 0.878319975  |
| wavelet-HLL | glcm  | ldm                                  | 0.13775501   |
| wavelet-HLL | glcm  | Correlation                          | 0.236713819  |
| wavelet-HLL | glcm  | Autocorrelation                      | 871.2337176  |
| wavelet-HLL | glcm  | SumEntropy                           | 5.535656854  |
| wavelet-HLL | glcm  | SumSquares                           | 64.75907481  |
| wavelet-HLL | glcm  | ClusterProminence                    | 74426.36615  |
| wavelet-HLL | glcm  | lmc2                                 | 0.939214884  |
| wavelet-HLL | glcm  | lmc1                                 | -0.217124464 |
| wavelet-HLL | glcm  | DifferenceAverage                    | 7.577925711  |

|             |            |                                  |              |
|-------------|------------|----------------------------------|--------------|
| wavelet-HLL | glcm       | Id                               | 0.22471104   |
| wavelet-HLL | glcm       | ClusterTendency                  | 159.5527546  |
| wavelet-HLL | firstorder | InterquartileRange               | 274.7575744  |
| wavelet-HLL | firstorder | Skewness                         | -0.472249165 |
| wavelet-HLL | firstorder | Uniformity                       | 0.038808768  |
| wavelet-HLL | firstorder | Median                           | 0.612499247  |
| wavelet-HLL | firstorder | Energy                           | 24181759.42  |
| wavelet-HLL | firstorder | RobustMeanAbsoluteDeviation      | 110.7945492  |
| wavelet-HLL | firstorder | MeanAbsoluteDeviation            | 157.3365504  |
| wavelet-HLL | firstorder | TotalEnergy                      | 652907504.4  |
| wavelet-HLL | firstorder | Maximum                          | 494.7744725  |
| wavelet-HLL | firstorder | RootMeanSquared                  | 197.8106684  |
| wavelet-HLL | firstorder | 90Percentile                     | 196.427347   |
| wavelet-HLL | firstorder | Minimum                          | -737.7988779 |
| wavelet-HLL | firstorder | Entropy                          | 4.914914586  |
| wavelet-HLL | firstorder | Range                            | 1232.57335   |
| wavelet-HLL | firstorder | Variance                         | 38253.21299  |
| wavelet-HLL | firstorder | 10Percentile                     | -305.9295925 |
| wavelet-HLL | firstorder | Kurtosis                         | 2.884135074  |
| wavelet-HLL | firstorder | Mean                             | -29.5947218  |
| wavelet-HLL | glrlm      | ShortRunLowGrayLevelEmphasis     | 0.003252491  |
| wavelet-HLL | glrlm      | GrayLevelVariance                | 61.7095296   |
| wavelet-HLL | glrlm      | LowGrayLevelRunEmphasis          | 0.003292087  |
| wavelet-HLL | glrlm      | GrayLevelNonUniformityNormalized | 0.038514555  |
| wavelet-HLL | glrlm      | RunVariance                      | 0.039414592  |
| wavelet-HLL | glrlm      | GrayLevelNonUniformity           | 22.94385856  |
| wavelet-HLL | glrlm      | LongRunEmphasis                  | 1.116504627  |
| wavelet-HLL | glrlm      | ShortRunHighGrayLevelEmphasis    | 895.3079461  |
| wavelet-HLL | glrlm      | RunLengthNonUniformity           | 554.7843738  |
| wavelet-HLL | glrlm      | ShortRunEmphasis                 | 0.972762839  |
| wavelet-HLL | glrlm      | LongRunHighGrayLevelEmphasis     | 1029.842202  |
| wavelet-HLL | glrlm      | RunPercentage                    | 0.963903411  |
| wavelet-HLL | glrlm      | LongRunLowGrayLevelEmphasis      | 0.003459722  |
| wavelet-HLL | glrlm      | RunEntropy                       | 5.110007183  |
| wavelet-HLL | glrlm      | HighGrayLevelRunEmphasis         | 920.8327997  |
| wavelet-HLL | glrlm      | RunLengthNonUniformityNormalized | 0.930899052  |
| wavelet-HLL | glszm      | GrayLevelVariance                | 69.22782817  |
| wavelet-HLL | glszm      | ZoneVariance                     | 1.803224994  |
| wavelet-HLL | glszm      | GrayLevelNonUniformityNormalized | 0.035441337  |
| wavelet-HLL | glszm      | SizeZoneNonUniformityNormalized  | 0.507460597  |
| wavelet-HLL | glszm      | SizeZoneNonUniformity            | 191.8201058  |
| wavelet-HLL | glszm      | GrayLevelNonUniformity           | 13.3968254   |
| wavelet-HLL | glszm      | LargeAreaEmphasis                | 4.476190476  |
| wavelet-HLL | glszm      | SmallAreaHighGrayLevelEmphasis   | 673.1308753  |
| wavelet-HLL | glszm      | ZonePercentage                   | 0.611650485  |
| wavelet-HLL | glszm      | LargeAreaLowGrayLevelEmphasis    | 0.009180909  |
| wavelet-HLL | glszm      | LargeAreaHighGrayLevelEmphasis   | 4142.613757  |
| wavelet-HLL | glszm      | HighGrayLevelZoneEmphasis        | 915.2989418  |
| wavelet-HLL | glszm      | SmallAreaEmphasis                | 0.740266732  |
| wavelet-HLL | glszm      | LowGrayLevelZoneEmphasis         | 0.004336835  |
| wavelet-HLL | glszm      | ZoneEntropy                      | 6.184692107  |
| wavelet-HLL | glszm      | SmallAreaLowGrayLevelEmphasis    | 0.003926929  |



|             |            |                                      |              |
|-------------|------------|--------------------------------------|--------------|
| wavelet-HLL | ngtdm      | Coarseness                           | 0.010278071  |
| wavelet-HLL | ngtdm      | Complexity                           | 3702.731252  |
| wavelet-HLL | ngtdm      | Strength                             | 6.071799674  |
| wavelet-HLL | ngtdm      | Contrast                             | 0.349022103  |
| wavelet-HLL | ngtdm      | Busyness                             | 0.074962495  |
| wavelet-LHL | gldm       | GrayLevelVariance                    | 132.6402347  |
| wavelet-LHL | gldm       | HighGrayLevelEmphasis                | 3653.276699  |
| wavelet-LHL | gldm       | DependenceEntropy                    | 6.712802037  |
| wavelet-LHL | gldm       | DependenceNonUniformity              | 231.0809061  |
| wavelet-LHL | gldm       | GrayLevelNonUniformity               | 17.87378641  |
| wavelet-LHL | gldm       | SmallDependenceEmphasis              | 0.596219435  |
| wavelet-LHL | gldm       | SmallDependenceHighGrayLevelEmphasis | 2176.493248  |
| wavelet-LHL | gldm       | DependenceNonUniformityNormalized    | 0.373917324  |
| wavelet-LHL | gldm       | LargeDependenceEmphasis              | 3.692556634  |
| wavelet-LHL | gldm       | LargeDependenceLowGrayLevelEmphasis  | 0.002957158  |
| wavelet-LHL | gldm       | DependenceVariance                   | 0.728364806  |
| wavelet-LHL | gldm       | LargeDependenceHighGrayLevelEmphasis | 13420.16019  |
| wavelet-LHL | gldm       | SmallDependenceLowGrayLevelEmphasis  | 0.002018515  |
| wavelet-LHL | gldm       | LowGrayLevelEmphasis                 | 0.002143945  |
| wavelet-LHL | glcm       | JointAverage                         | 59.49763969  |
| wavelet-LHL | glcm       | SumAverage                           | 118.9952794  |
| wavelet-LHL | glcm       | JointEntropy                         | 9.103380048  |
| wavelet-LHL | glcm       | ClusterShade                         | -2825.045499 |
| wavelet-LHL | glcm       | MaximumProbability                   | 0.006847362  |
| wavelet-LHL | glcm       | ldmn                                 | 0.979339632  |
| wavelet-LHL | glcm       | JointEnergy                          | 0.002118817  |
| wavelet-LHL | glcm       | Contrast                             | 185.5548017  |
| wavelet-LHL | glcm       | DifferenceEntropy                    | 4.601341103  |
| wavelet-LHL | glcm       | InverseVariance                      | 0.116898976  |
| wavelet-LHL | glcm       | DifferenceVariance                   | 82.77928486  |
| wavelet-LHL | glcm       | ldn                                  | 0.907185818  |
| wavelet-LHL | glcm       | ldm                                  | 0.110854928  |
| wavelet-LHL | glcm       | Correlation                          | 0.172974849  |
| wavelet-LHL | glcm       | Autocorrelation                      | 3561.186235  |
| wavelet-LHL | glcm       | SumEntropy                           | 5.834416347  |
| wavelet-LHL | glcm       | SumSquares                           | 113.9810188  |
| wavelet-LHL | glcm       | ClusterProminence                    | 433897.2223  |
| wavelet-LHL | glcm       | lmc2                                 | 0.975495587  |
| wavelet-LHL | glcm       | lmc1                                 | -0.287596658 |
| wavelet-LHL | glcm       | DifferenceAverage                    | 9.858576809  |
| wavelet-LHL | glcm       | ld                                   | 0.192706938  |
| wavelet-LHL | glcm       | ClusterTendency                      | 270.3692736  |
| wavelet-LHL | firstorder | InterquartileRange                   | 348.5615395  |
| wavelet-LHL | firstorder | Skewness                             | -0.917311003 |
| wavelet-LHL | firstorder | Uniformity                           | 0.028921984  |
| wavelet-LHL | firstorder | Median                               | 22.69673435  |
| wavelet-LHL | firstorder | Energy                               | 51306018.34  |
| wavelet-LHL | firstorder | RobustMeanAbsoluteDeviation          | 139.5522498  |
| wavelet-LHL | firstorder | MeanAbsoluteDeviation                | 214.8330074  |
| wavelet-LHL | firstorder | TotalEnergy                          | 1385262495   |
| wavelet-LHL | firstorder | Maximum                              | 735.2293581  |
| wavelet-LHL | firstorder | RootMeanSquared                      | 288.1309549  |

|             |            |                                      |              |
|-------------|------------|--------------------------------------|--------------|
| wavelet-LHL | firstorder | 90Percentile                         | 321.2252222  |
| wavelet-LHL | firstorder | Minimum                              | -1461.186148 |
| wavelet-LHL | firstorder | Entropy                              | 5.398026534  |
| wavelet-LHL | firstorder | Range                                | 2196.415506  |
| wavelet-LHL | firstorder | Variance                             | 83007.3371   |
| wavelet-LHL | firstorder | 10Percentile                         | -334.132146  |
| wavelet-LHL | firstorder | Kurtosis                             | 5.847165959  |
| wavelet-LHL | firstorder | Mean                                 | -3.479949742 |
| wavelet-LHL | glrlm      | ShortRunLowGrayLevelEmphasis         | 0.002190255  |
| wavelet-LHL | glrlm      | GrayLevelVariance                    | 134.5803241  |
| wavelet-LHL | glrlm      | LowGrayLevelRunEmphasis              | 0.002196663  |
| wavelet-LHL | glrlm      | GrayLevelNonUniformityNormalized     | 0.028670522  |
| wavelet-LHL | glrlm      | RunVariance                          | 0.029531279  |
| wavelet-LHL | glrlm      | GrayLevelNonUniformity               | 17.22661214  |
| wavelet-LHL | glrlm      | LongRunEmphasis                      | 1.087820513  |
| wavelet-LHL | glrlm      | ShortRunHighGrayLevelEmphasis        | 3577.566809  |
| wavelet-LHL | glrlm      | RunLengthNonUniformity               | 568.6333825  |
| wavelet-LHL | glrlm      | ShortRunEmphasis                     | 0.979049773  |
| wavelet-LHL | glrlm      | LongRunHighGrayLevelEmphasis         | 3974.04098   |
| wavelet-LHL | glrlm      | RunPercentage                        | 0.972242967  |
| wavelet-LHL | glrlm      | LongRunLowGrayLevelEmphasis          | 0.002223415  |
| wavelet-LHL | glrlm      | RunEntropy                           | 5.545805936  |
| wavelet-LHL | glrlm      | HighGrayLevelRunEmphasis             | 3653.63584   |
| wavelet-LHL | glrlm      | RunLengthNonUniformityNormalized     | 0.946176785  |
| wavelet-LHL | glszm      | GrayLevelVariance                    | 161.030174   |
| wavelet-LHL | glszm      | ZoneVariance                         | 0.853679392  |
| wavelet-LHL | glszm      | GrayLevelNonUniformityNormalized     | 0.025814709  |
| wavelet-LHL | glszm      | SizeZoneNonUniformityNormalized      | 0.558506447  |
| wavelet-LHL | glszm      | SizeZoneNonUniformity                | 236.248227   |
| wavelet-LHL | glszm      | GrayLevelNonUniformity               | 10.91962175  |
| wavelet-LHL | glszm      | LargeAreaEmphasis                    | 2.988179669  |
| wavelet-LHL | glszm      | SmallAreaHighGrayLevelEmphasis       | 2830.289198  |
| wavelet-LHL | glszm      | ZonePercentage                       | 0.684466019  |
| wavelet-LHL | glszm      | LargeAreaLowGrayLevelEmphasis        | 0.003590374  |
| wavelet-LHL | glszm      | LargeAreaHighGrayLevelEmphasis       | 10881.79905  |
| wavelet-LHL | glszm      | HighGrayLevelZoneEmphasis            | 3652.359338  |
| wavelet-LHL | glszm      | SmallAreaEmphasis                    | 0.775978421  |
| wavelet-LHL | glszm      | LowGrayLevelZoneEmphasis             | 0.002990629  |
| wavelet-LHL | glszm      | ZoneEntropy                          | 6.516611277  |
| wavelet-LHL | glszm      | SmallAreaLowGrayLevelEmphasis        | 0.002919432  |
| wavelet-LHL | ngtdm      | Coarseness                           | 0.010576375  |
| wavelet-LHL | ngtdm      | Complexity                           | 13611.38167  |
| wavelet-LHL | ngtdm      | Strength                             | 17.81416942  |
| wavelet-LHL | ngtdm      | Contrast                             | 0.480313579  |
| wavelet-LHL | ngtdm      | Busyness                             | 0.022841821  |
| wavelet-LHH | gldm       | GrayLevelVariance                    | 40.08937118  |
| wavelet-LHH | gldm       | HighGrayLevelEmphasis                | 548.3802589  |
| wavelet-LHH | gldm       | DependenceEntropy                    | 6.173657652  |
| wavelet-LHH | gldm       | DependenceNonUniformity              | 208.6569579  |
| wavelet-LHH | gldm       | GrayLevelNonUniformity               | 29.44660194  |
| wavelet-LHH | gldm       | SmallDependenceEmphasis              | 0.564083064  |
| wavelet-LHH | gldm       | SmallDependenceHighGrayLevelEmphasis | 316.668163   |

|             |            |                                      |              |
|-------------|------------|--------------------------------------|--------------|
| wavelet-LHH | gldm       | DependenceNonUniformityNormalized    | 0.337632618  |
| wavelet-LHH | gldm       | LargeDependenceEmphasis              | 4.621359223  |
| wavelet-LHH | gldm       | LargeDependenceLowGrayLevelEmphasis  | 0.012321775  |
| wavelet-LHH | gldm       | DependenceVariance                   | 1.110283721  |
| wavelet-LHH | gldm       | LargeDependenceHighGrayLevelEmphasis | 2492.726537  |
| wavelet-LHH | gldm       | SmallDependenceLowGrayLevelEmphasis  | 0.003525706  |
| wavelet-LHH | gldm       | LowGrayLevelEmphasis                 | 0.004513591  |
| wavelet-LHH | glcm       | JointAverage                         | 22.5615603   |
| wavelet-LHH | glcm       | SumAverage                           | 45.1231206   |
| wavelet-LHH | glcm       | JointEntropy                         | 8.45576259   |
| wavelet-LHH | glcm       | ClusterShade                         | 4.087847409  |
| wavelet-LHH | glcm       | MaximumProbability                   | 0.011098957  |
| wavelet-LHH | glcm       | ldmn                                 | 0.964910817  |
| wavelet-LHH | glcm       | JointEnergy                          | 0.003528769  |
| wavelet-LHH | glcm       | Contrast                             | 80.11840355  |
| wavelet-LHH | glcm       | DifferenceEntropy                    | 4.171598874  |
| wavelet-LHH | glcm       | InverseVariance                      | 0.143877056  |
| wavelet-LHH | glcm       | DifferenceVariance                   | 30.68740053  |
| wavelet-LHH | glcm       | ldn                                  | 0.875354876  |
| wavelet-LHH | glcm       | ldm                                  | 0.136185601  |
| wavelet-LHH | glcm       | Correlation                          | -0.029627512 |
| wavelet-LHH | glcm       | Autocorrelation                      | 507.8777407  |
| wavelet-LHH | glcm       | SumEntropy                           | 5.033382878  |
| wavelet-LHH | glcm       | SumSquares                           | 38.9115032   |
| wavelet-LHH | glcm       | ClusterProminence                    | 20778.71944  |
| wavelet-LHH | glcm       | lmc2                                 | 0.889509722  |
| wavelet-LHH | glcm       | lmc1                                 | -0.170677587 |
| wavelet-LHH | glcm       | DifferenceAverage                    | 6.956210766  |
| wavelet-LHH | glcm       | ld                                   | 0.226287027  |
| wavelet-LHH | glcm       | ClusterTendency                      | 75.52760927  |
| wavelet-LHH | firstorder | InterquartileRange                   | 201.1400435  |
| wavelet-LHH | firstorder | Skewness                             | 0.06674169   |
| wavelet-LHH | firstorder | Uniformity                           | 0.047648223  |
| wavelet-LHH | firstorder | Median                               | -4.371297863 |
| wavelet-LHH | firstorder | Energy                               | 15446337.26  |
| wavelet-LHH | firstorder | RobustMeanAbsoluteDeviation          | 84.78548196  |
| wavelet-LHH | firstorder | MeanAbsoluteDeviation                | 123.7589922  |
| wavelet-LHH | firstorder | TotalEnergy                          | 417051106    |
| wavelet-LHH | firstorder | Maximum                              | 566.6905616  |
| wavelet-LHH | firstorder | RootMeanSquared                      | 158.0951398  |
| wavelet-LHH | firstorder | 90Percentile                         | 203.2781189  |
| wavelet-LHH | firstorder | Minimum                              | -533.153676  |
| wavelet-LHH | firstorder | Entropy                              | 4.646825261  |
| wavelet-LHH | firstorder | Range                                | 1099.844238  |
| wavelet-LHH | firstorder | Variance                             | 24993.30172  |
| wavelet-LHH | firstorder | 10Percentile                         | -189.4302029 |
| wavelet-LHH | firstorder | Kurtosis                             | 3.34284757   |
| wavelet-LHH | firstorder | Mean                                 | 0.878359104  |
| wavelet-LHH | glrlm      | ShortRunLowGrayLevelEmphasis         | 0.004539647  |
| wavelet-LHH | glrlm      | GrayLevelVariance                    | 40.85333979  |
| wavelet-LHH | glrlm      | LowGrayLevelRunEmphasis              | 0.004594131  |
| wavelet-LHH | glrlm      | GrayLevelNonUniformityNormalied      | 0.046986415  |

|             |       |                                      |              |
|-------------|-------|--------------------------------------|--------------|
| wavelet-LHH | glrlm | RunVariance                          | 0.038455484  |
| wavelet-LHH | glrlm | GrayLevelNonUniformity               | 28.06211956  |
| wavelet-LHH | glrlm | LongRunEmphasis                      | 1.109496615  |
| wavelet-LHH | glrlm | ShortRunHighGrayLevelEmphasis        | 535.4707123  |
| wavelet-LHH | glrlm | RunLengthNonUniformity               | 559.6180199  |
| wavelet-LHH | glrlm | ShortRunEmphasis                     | 0.975213267  |
| wavelet-LHH | glrlm | LongRunHighGrayLevelEmphasis         | 607.0175226  |
| wavelet-LHH | glrlm | RunPercentage                        | 0.96639283   |
| wavelet-LHH | glrlm | LongRunLowGrayLevelEmphasis          | 0.004835846  |
| wavelet-LHH | glrlm | RunEntropy                           | 4.834637106  |
| wavelet-LHH | glrlm | HighGrayLevelRunEmphasis             | 548.8469298  |
| wavelet-LHH | glrlm | RunLengthNonUniformityNormalized     | 0.936858295  |
| wavelet-LHH | glszm | GrayLevelVariance                    | 52.09497583  |
| wavelet-LHH | glszm | ZoneVariance                         | 2.243509658  |
| wavelet-LHH | glszm | GrayLevelNonUniformityNormalized     | 0.041149652  |
| wavelet-LHH | glszm | SizeZoneNonUniformityNormalized      | 0.568160857  |
| wavelet-LHH | glszm | SizeZoneNonUniformity                | 222.1508951  |
| wavelet-LHH | glszm | GrayLevelNonUniformity               | 16.08951407  |
| wavelet-LHH | glszm | LargeAreaEmphasis                    | 4.74168798   |
| wavelet-LHH | glszm | SmallAreaHighGrayLevelEmphasis       | 441.7039576  |
| wavelet-LHH | glszm | ZonePercentage                       | 0.632686084  |
| wavelet-LHH | glszm | LargeAreaLowGrayLevelEmphasis        | 0.013858037  |
| wavelet-LHH | glszm | LargeAreaHighGrayLevelEmphasis       | 2520.723785  |
| wavelet-LHH | glszm | HighGrayLevelZoneEmphasis            | 556.5626598  |
| wavelet-LHH | glszm | SmallAreaEmphasis                    | 0.781838055  |
| wavelet-LHH | glszm | LowGrayLevelZoneEmphasis             | 0.005844198  |
| wavelet-LHH | glszm | ZoneEntropy                          | 5.877271396  |
| wavelet-LHH | glszm | SmallAreaLowGrayLevelEmphasis        | 0.00532586   |
| wavelet-LHH | ngtdm | Coarseness                           | 0.009481522  |
| wavelet-LHH | ngtdm | Complexity                           | 3126.336638  |
| wavelet-LHH | ngtdm | Strength                             | 4.275606155  |
| wavelet-LHH | ngtdm | Contrast                             | 0.281442218  |
| wavelet-LHH | ngtdm | Busyness                             | 0.115645884  |
| wavelet-LLH | gldm  | GrayLevelVariance                    | 129.5475775  |
| wavelet-LLH | gldm  | HighGrayLevelEmphasis                | 1531.432039  |
| wavelet-LLH | gldm  | DependenceEntropy                    | 6.57907917   |
| wavelet-LLH | gldm  | DependenceNonUniformity              | 271.0614887  |
| wavelet-LLH | gldm  | GrayLevelNonUniformity               | 16.79288026  |
| wavelet-LLH | gldm  | SmallDependenceEmphasis              | 0.672855538  |
| wavelet-LLH | gldm  | SmallDependenceHighGrayLevelEmphasis | 1029.297173  |
| wavelet-LLH | gldm  | DependenceNonUniformityNormalized    | 0.438610823  |
| wavelet-LLH | gldm  | LargeDependenceEmphasis              | 3.045307443  |
| wavelet-LLH | gldm  | LargeDependenceLowGrayLevelEmphasis  | 0.004566065  |
| wavelet-LLH | gldm  | DependenceVariance                   | 0.602004587  |
| wavelet-LLH | gldm  | LargeDependenceHighGrayLevelEmphasis | 4734.639159  |
| wavelet-LLH | gldm  | SmallDependenceLowGrayLevelEmphasis  | 0.002634655  |
| wavelet-LLH | gldm  | LowGrayLevelEmphasis                 | 0.002919009  |
| wavelet-LLH | glcm  | JointAverage                         | 37.11158932  |
| wavelet-LLH | glcm  | SumAverage                           | 74.22317864  |
| wavelet-LLH | glcm  | JointEntropy                         | 9.22560996   |
| wavelet-LLH | glcm  | ClusterShade                         | -2423.189392 |
| wavelet-LLH | glcm  | MaximumProbability                   | 0.006098112  |

|             |            |                                  |              |
|-------------|------------|----------------------------------|--------------|
| wavelet-LLH | glcm       | Idmn                             | 0.950548657  |
| wavelet-LLH | glcm       | JointEnergy                      | 0.001908861  |
| wavelet-LLH | glcm       | Contrast                         | 258.8183238  |
| wavelet-LLH | glcm       | DifferenceEntropy                | 4.891970396  |
| wavelet-LLH | glcm       | InverseVariance                  | 0.096120668  |
| wavelet-LLH | glcm       | DifferenceVariance               | 104.2057682  |
| wavelet-LLH | glcm       | Idn                              | 0.858961958  |
| wavelet-LLH | glcm       | Idm                              | 0.089802534  |
| wavelet-LLH | glcm       | Correlation                      | 0.028812191  |
| wavelet-LLH | glcm       | Autocorrelation                  | 1381.754619  |
| wavelet-LLH | glcm       | SumEntropy                       | 5.864092665  |
| wavelet-LLH | glcm       | SumSquares                       | 133.8814527  |
| wavelet-LLH | glcm       | ClusterProminence                | 256280.0866  |
| wavelet-LLH | glcm       | Imc2                             | 0.981569975  |
| wavelet-LLH | glcm       | Imc1                             | -0.305640374 |
| wavelet-LLH | glcm       | DifferenceAverage                | 12.09010041  |
| wavelet-LLH | glcm       | Id                               | 0.166951182  |
| wavelet-LLH | glcm       | ClusterTendency                  | 276.7074872  |
| wavelet-LLH | firstorder | InterquartileRange               | 354.6331509  |
| wavelet-LLH | firstorder | Skewness                         | -0.553833565 |
| wavelet-LLH | firstorder | Uniformity                       | 0.027172945  |
| wavelet-LLH | firstorder | Median                           | 13.16092037  |
| wavelet-LLH | firstorder | Energy                           | 50409386.78  |
| wavelet-LLH | firstorder | RobustMeanAbsoluteDeviation      | 153.7065286  |
| wavelet-LLH | firstorder | MeanAbsoluteDeviation            | 225.1589935  |
| wavelet-LLH | firstorder | TotalEnergy                      | 1361053443   |
| wavelet-LLH | firstorder | Maximum                          | 684.5834303  |
| wavelet-LLH | firstorder | RootMeanSquared                  | 285.6021481  |
| wavelet-LLH | firstorder | 90Percentile                     | 307.0836461  |
| wavelet-LLH | firstorder | Minimum                          | -930.4534468 |
| wavelet-LLH | firstorder | Entropy                          | 5.433561644  |
| wavelet-LLH | firstorder | Range                            | 1615.036877  |
| wavelet-LLH | firstorder | Variance                         | 80875.65722  |
| wavelet-LLH | firstorder | 10Percentile                     | -410.6486045 |
| wavelet-LLH | firstorder | Kurtosis                         | 3.033472169  |
| wavelet-LLH | firstorder | Mean                             | -26.32355992 |
| wavelet-LLH | glrlm      | ShortRunLowGrayLevelEmphasis     | 0.002951739  |
| wavelet-LLH | glrlm      | GrayLevelVariance                | 131.0241459  |
| wavelet-LLH | glrlm      | LowGrayLevelRunEmphasis          | 0.002965388  |
| wavelet-LLH | glrlm      | GrayLevelNonUniformityNormalized | 0.026952779  |
| wavelet-LLH | glrlm      | RunVariance                      | 0.02240806   |
| wavelet-LLH | glrlm      | GrayLevelNonUniformity           | 16.29651754  |
| wavelet-LLH | glrlm      | LongRunEmphasis                  | 1.067414946  |
| wavelet-LLH | glrlm      | ShortRunHighGrayLevelEmphasis    | 1505.404561  |
| wavelet-LLH | glrlm      | RunLengthNonUniformity           | 578.9639538  |
| wavelet-LLH | glrlm      | ShortRunEmphasis                 | 0.983571972  |
| wavelet-LLH | glrlm      | LongRunHighGrayLevelEmphasis     | 1635.280809  |
| wavelet-LLH | glrlm      | RunPercentage                    | 0.978342046  |
| wavelet-LLH | glrlm      | LongRunLowGrayLevelEmphasis      | 0.003021466  |
| wavelet-LLH | glrlm      | RunEntropy                       | 5.552760978  |
| wavelet-LLH | glrlm      | HighGrayLevelRunEmphasis         | 1530.985363  |
| wavelet-LLH | glrlm      | RunLengthNonUniformityNormalized | 0.95742658   |

|             |       |                                      |             |
|-------------|-------|--------------------------------------|-------------|
| wavelet-LLH | glszm | GrayLevelVariance                    | 151.6086842 |
| wavelet-LLH | glszm | ZoneVariance                         | 0.634901895 |
| wavelet-LLH | glszm | GrayLevelNonUniformityNormalized     | 0.024502914 |
| wavelet-LLH | glszm | SizeZoneNonUniformityNormalized      | 0.641573434 |
| wavelet-LLH | glszm | SizeZoneNonUniformity                | 296.4069264 |
| wavelet-LLH | glszm | GrayLevelNonUniformity               | 11.32034632 |
| wavelet-LLH | glszm | LargeAreaEmphasis                    | 2.424242424 |
| wavelet-LLH | glszm | SmallAreaHighGrayLevelEmphasis       | 1267.540479 |
| wavelet-LLH | glszm | ZonePercentage                       | 0.747572816 |
| wavelet-LLH | glszm | LargeAreaLowGrayLevelEmphasis        | 0.004758418 |
| wavelet-LLH | glszm | LargeAreaHighGrayLevelEmphasis       | 3739.945887 |
| wavelet-LLH | glszm | HighGrayLevelZoneEmphasis            | 1529.593074 |
| wavelet-LLH | glszm | SmallAreaEmphasis                    | 0.828263269 |
| wavelet-LLH | glszm | LowGrayLevelZoneEmphasis             | 0.003618637 |
| wavelet-LLH | glszm | ZoneEntropy                          | 6.362391347 |
| wavelet-LLH | glszm | SmallAreaLowGrayLevelEmphasis        | 0.003461691 |
| wavelet-LLH | ngtdm | Coarseness                           | 0.009298347 |
| wavelet-LLH | ngtdm | Complexity                           | 11590.60136 |
| wavelet-LLH | ngtdm | Strength                             | 9.569298411 |
| wavelet-LLH | ngtdm | Contrast                             | 0.667091024 |
| wavelet-LLH | ngtdm | Busyness                             | 0.047983458 |
| wavelet-LLL | gldm  | GrayLevelVariance                    | 792.8834454 |
| wavelet-LLL | gldm  | HighGrayLevelEmphasis                | 3783.982201 |
| wavelet-LLL | gldm  | DependenceEntropy                    | 7.222678972 |
| wavelet-LLL | gldm  | DependenceNonUniformity              | 377.6472492 |
| wavelet-LLL | gldm  | GrayLevelNonUniformity               | 7.32038835  |
| wavelet-LLL | gldm  | SmallDependenceEmphasis              | 0.808308612 |
| wavelet-LLL | gldm  | SmallDependenceHighGrayLevelEmphasis | 3139.831322 |
| wavelet-LLL | gldm  | DependenceNonUniformityNormalized    | 0.611079691 |
| wavelet-LLL | gldm  | LargeDependenceEmphasis              | 1.928802589 |
| wavelet-LLL | gldm  | LargeDependenceLowGrayLevelEmphasis  | 0.005647654 |
| wavelet-LLL | gldm  | DependenceVariance                   | 0.27811816  |
| wavelet-LLL | gldm  | LargeDependenceHighGrayLevelEmphasis | 6514.839806 |
| wavelet-LLL | gldm  | SmallDependenceLowGrayLevelEmphasis  | 0.003129357 |
| wavelet-LLL | gldm  | LowGrayLevelEmphasis                 | 0.003461066 |
| wavelet-LLL | glcm  | JointAverage                         | 57.51340688 |
| wavelet-LLL | glcm  | SumAverage                           | 115.0268138 |
| wavelet-LLL | glcm  | JointEntropy                         | 9.655727329 |
| wavelet-LLL | glcm  | ClusterShade                         | 41529.5665  |
| wavelet-LLL | glcm  | MaximumProbability                   | 0.003761173 |
| wavelet-LLL | glcm  | Idmn                                 | 0.965972464 |
| wavelet-LLL | glcm  | JointEnergy                          | 0.001298217 |
| wavelet-LLL | glcm  | Contrast                             | 570.8791879 |
| wavelet-LLL | glcm  | DifferenceEntropy                    | 5.477458701 |
| wavelet-LLL | glcm  | InverseVariance                      | 0.057058663 |
| wavelet-LLL | glcm  | DifferenceVariance                   | 201.844173  |
| wavelet-LLL | glcm  | Idn                                  | 0.875326454 |
| wavelet-LLL | glcm  | Idm                                  | 0.051301298 |
| wavelet-LLL | glcm  | Correlation                          | 0.671681282 |
| wavelet-LLL | glcm  | Autocorrelation                      | 3887.489226 |
| wavelet-LLL | glcm  | SumEntropy                           | 7.275770453 |
| wavelet-LLL | glcm  | SumSquares                           | 864.1377635 |

|             |            |                                  |              |
|-------------|------------|----------------------------------|--------------|
| wavelet-LLL | glcm       | ClusterProminence                | 18424295.21  |
| wavelet-LLL | glcm       | lmc2                             | 0.999625851  |
| wavelet-LLL | glcm       | lmc1                             | -0.544403209 |
| wavelet-LLL | glcm       | DifferenceAverage                | 18.90210102  |
| wavelet-LLL | glcm       | ld                               | 0.113454146  |
| wavelet-LLL | glcm       | ClusterTendency                  | 2885.671866  |
| wavelet-LLL | firstorder | InterquartileRange               | 1060.086692  |
| wavelet-LLL | firstorder | Skewness                         | 0.443129883  |
| wavelet-LLL | firstorder | Uniformity                       | 0.011845289  |
| wavelet-LLL | firstorder | Median                           | -1668.194114 |
| wavelet-LLL | firstorder | Energy                           | 1782465007   |
| wavelet-LLL | firstorder | RobustMeanAbsoluteDeviation      | 437.7000856  |
| wavelet-LLL | firstorder | MeanAbsoluteDeviation            | 589.3965303  |
| wavelet-LLL | firstorder | TotalEnergy                      | 48126555178  |
| wavelet-LLL | firstorder | Maximum                          | 156.4529054  |
| wavelet-LLL | firstorder | RootMeanSquared                  | 1698.30727   |
| wavelet-LLL | firstorder | 90Percentile                     | -507.6408704 |
| wavelet-LLL | firstorder | Minimum                          | -2886.131899 |
| wavelet-LLL | firstorder | Entropy                          | 6.603716775  |
| wavelet-LLL | firstorder | Range                            | 3042.584804  |
| wavelet-LLL | firstorder | Variance                         | 495696.4242  |
| wavelet-LLL | firstorder | 10Percentile                     | -2382.371724 |
| wavelet-LLL | firstorder | Kurtosis                         | 2.370132857  |
| wavelet-LLL | firstorder | Mean                             | -1545.493824 |
| wavelet-LLL | glrlm      | ShortRunLowGrayLevelEmphasis     | 0.003459321  |
| wavelet-LLL | glrlm      | GrayLevelVariance                | 792.0161861  |
| wavelet-LLL | glrlm      | LowGrayLevelRunEmphasis          | 0.003476509  |
| wavelet-LLL | glrlm      | GrayLevelNonUniformityNormalized | 0.011825387  |
| wavelet-LLL | glrlm      | RunVariance                      | 0.011203573  |
| wavelet-LLL | glrlm      | GrayLevelNonUniformity           | 7.228058572  |
| wavelet-LLL | glrlm      | LongRunEmphasis                  | 1.033567442  |
| wavelet-LLL | glrlm      | ShortRunHighGrayLevelEmphasis    | 3765.553824  |
| wavelet-LLL | glrlm      | RunLengthNonUniformity           | 598.0273357  |
| wavelet-LLL | glrlm      | ShortRunEmphasis                 | 0.991748484  |
| wavelet-LLL | glrlm      | LongRunHighGrayLevelEmphasis     | 3895.554589  |
| wavelet-LLL | glrlm      | RunPercentage                    | 0.989046552  |
| wavelet-LLL | glrlm      | LongRunLowGrayLevelEmphasis      | 0.003545669  |
| wavelet-LLL | glrlm      | RunEntropy                       | 6.647384974  |
| wavelet-LLL | glrlm      | HighGrayLevelRunEmphasis         | 3791.400271  |
| wavelet-LLL | glrlm      | RunLengthNonUniformityNormalized | 0.978340761  |
| wavelet-LLL | glszm      | GrayLevelVariance                | 780.7045687  |
| wavelet-LLL | glszm      | ZoneVariance                     | 0.188738796  |
| wavelet-LLL | glszm      | GrayLevelNonUniformityNormalized | 0.011621709  |
| wavelet-LLL | glszm      | SizeZoneNonUniformityNormalized  | 0.766913549  |
| wavelet-LLL | glszm      | SizeZoneNonUniformity            | 409.5318352  |
| wavelet-LLL | glszm      | GrayLevelNonUniformity           | 6.205992509  |
| wavelet-LLL | glszm      | LargeAreaEmphasis                | 1.528089888  |
| wavelet-LLL | glszm      | SmallAreaHighGrayLevelEmphasis   | 3508.623609  |
| wavelet-LLL | glszm      | ZonePercentage                   | 0.86407767   |
| wavelet-LLL | glszm      | LargeAreaLowGrayLevelEmphasis    | 0.004907378  |
| wavelet-LLL | glszm      | LargeAreaHighGrayLevelEmphasis   | 5449.698502  |
| wavelet-LLL | glszm      | HighGrayLevelZoneEmphasis        | 3871.981273  |

|             |            |                                      |              |
|-------------|------------|--------------------------------------|--------------|
| wavelet-LLL | glszm      | SmallAreaEmphasis                    | 0.898213171  |
| wavelet-LLL | glszm      | LowGrayLevelZoneEmphasis             | 0.003708346  |
| wavelet-LLL | glszm      | ZoneEntropy                          | 7.041268761  |
| wavelet-LLL | glszm      | SmallAreaLowGrayLevelEmphasis        | 0.00355955   |
| wavelet-LLL | ngtdm      | Coarseness                           | 0.013507909  |
| wavelet-LLL | ngtdm      | Complexity                           | 58096.78965  |
| wavelet-LLL | ngtdm      | Strength                             | 74.30454365  |
| wavelet-LLL | ngtdm      | Contrast                             | 1.208192     |
| wavelet-LLL | ngtdm      | Busyness                             | 0.015884696  |
| wavelet-HHL | gldm       | GrayLevelVariance                    | 21.73077628  |
| wavelet-HHL | gldm       | HighGrayLevelEmphasis                | 266.1116505  |
| wavelet-HHL | gldm       | DependenceEntropy                    | 6.158889818  |
| wavelet-HHL | gldm       | DependenceNonUniformity              | 139.02589    |
| wavelet-HHL | gldm       | GrayLevelNonUniformity               | 41.33656958  |
| wavelet-HHL | gldm       | SmallDependenceEmphasis              | 0.417609511  |
| wavelet-HHL | gldm       | SmallDependenceHighGrayLevelEmphasis | 125.0462561  |
| wavelet-HHL | gldm       | DependenceNonUniformityNormalized    | 0.224960987  |
| wavelet-HHL | gldm       | LargeDependenceEmphasis              | 9.025889968  |
| wavelet-HHL | gldm       | LargeDependenceLowGrayLevelEmphasis  | 0.046201497  |
| wavelet-HHL | gldm       | DependenceVariance                   | 2.571988144  |
| wavelet-HHL | gldm       | LargeDependenceHighGrayLevelEmphasis | 2145.205502  |
| wavelet-HHL | gldm       | SmallDependenceLowGrayLevelEmphasis  | 0.005097931  |
| wavelet-HHL | gldm       | LowGrayLevelEmphasis                 | 0.008060334  |
| wavelet-HHL | glcm       | JointAverage                         | 15.61679907  |
| wavelet-HHL | glcm       | SumAverage                           | 31.23359814  |
| wavelet-HHL | glcm       | JointEntropy                         | 7.776379992  |
| wavelet-HHL | glcm       | ClusterShade                         | 48.79010061  |
| wavelet-HHL | glcm       | MaximumProbability                   | 0.019582319  |
| wavelet-HHL | glcm       | ldmn                                 | 0.964831339  |
| wavelet-HHL | glcm       | JointEnergy                          | 0.006248281  |
| wavelet-HHL | glcm       | Contrast                             | 41.33643005  |
| wavelet-HHL | glcm       | DifferenceEntropy                    | 3.723473246  |
| wavelet-HHL | glcm       | InverseVariance                      | 0.199108729  |
| wavelet-HHL | glcm       | DifferenceVariance                   | 17.35410684  |
| wavelet-HHL | glcm       | ldn                                  | 0.878500906  |
| wavelet-HHL | glcm       | ldm                                  | 0.203178552  |
| wavelet-HHL | glcm       | Correlation                          | -0.005469092 |
| wavelet-HHL | glcm       | Autocorrelation                      | 243.7516496  |
| wavelet-HHL | glcm       | SumEntropy                           | 4.602060141  |
| wavelet-HHL | glcm       | SumSquares                           | 20.52913706  |
| wavelet-HHL | glcm       | ClusterProminence                    | 6553.16687   |
| wavelet-HHL | glcm       | lmc2                                 | 0.820138446  |
| wavelet-HHL | glcm       | lmc1                                 | -0.135122291 |
| wavelet-HHL | glcm       | DifferenceAverage                    | 4.849754491  |
| wavelet-HHL | glcm       | ld                                   | 0.294732914  |
| wavelet-HHL | glcm       | ClusterTendency                      | 40.78011817  |
| wavelet-HHL | firstorder | InterquartileRange                   | 133.4280842  |
| wavelet-HHL | firstorder | Skewness                             | 0.209131618  |
| wavelet-HHL | firstorder | Uniformity                           | 0.066887653  |
| wavelet-HHL | firstorder | Median                               | -2.455297683 |
| wavelet-HHL | firstorder | Energy                               | 8366192.416  |
| wavelet-HHL | firstorder | RobustMeanAbsoluteDeviation          | 57.33015105  |



|             |            |                                  |              |
|-------------|------------|----------------------------------|--------------|
| wavelet-HHL | firstorder | MeanAbsoluteDeviation            | 88.49997658  |
| wavelet-HHL | firstorder | TotalEnergy                      | 225887195.2  |
| wavelet-HHL | firstorder | Maximum                          | 405.345755   |
| wavelet-HHL | firstorder | RootMeanSquared                  | 116.3508839  |
| wavelet-HHL | firstorder | 90Percentile                     | 150.2966159  |
| wavelet-HHL | firstorder | Minimum                          | -369.9781336 |
| wavelet-HHL | firstorder | Entropy                          | 4.213894742  |
| wavelet-HHL | firstorder | Range                            | 775.3238886  |
| wavelet-HHL | firstorder | Variance                         | 13525.15862  |
| wavelet-HHL | firstorder | 10Percentile                     | -132.17187   |
| wavelet-HHL | firstorder | Kurtosis                         | 3.712187234  |
| wavelet-HHL | firstorder | Mean                             | 3.51703906   |
| wavelet-HHL | grlm       | ShortRunLowGrayLevelEmphasis     | 0.00804899   |
| wavelet-HHL | grlm       | GrayLevelVariance                | 22.64833298  |
| wavelet-HHL | grlm       | LowGrayLevelRunEmphasis          | 0.008262682  |
| wavelet-HHL | grlm       | GrayLevelNonUniformityNormalized | 0.064738879  |
| wavelet-HHL | grlm       | RunVariance                      | 0.070925852  |
| wavelet-HHL | grlm       | GrayLevelNonUniformity           | 37.63964741  |
| wavelet-HHL | grlm       | LongRunEmphasis                  | 1.201438348  |
| wavelet-HHL | grlm       | ShortRunHighGrayLevelEmphasis    | 257.5041302  |
| wavelet-HHL | grlm       | RunLengthNonUniformity           | 518.5564336  |
| wavelet-HHL | grlm       | ShortRunEmphasis                 | 0.956209678  |
| wavelet-HHL | grlm       | LongRunHighGrayLevelEmphasis     | 315.6799349  |
| wavelet-HHL | grlm       | RunPercentage                    | 0.940751805  |
| wavelet-HHL | grlm       | LongRunLowGrayLevelEmphasis      | 0.009238172  |
| wavelet-HHL | grlm       | RunEntropy                       | 4.544388235  |
| wavelet-HHL | grlm       | HighGrayLevelRunEmphasis         | 267.920381   |
| wavelet-HHL | grlm       | RunLengthNonUniformityNormalized | 0.891643154  |
| wavelet-HHL | glszm      | GrayLevelVariance                | 36.74429067  |
| wavelet-HHL | glszm      | ZoneVariance                     | 16.19790699  |
| wavelet-HHL | glszm      | GrayLevelNonUniformityNormalized | 0.04738618   |
| wavelet-HHL | glszm      | SizeZoneNonUniformityNormalized  | 0.509535919  |
| wavelet-HHL | glszm      | SizeZoneNonUniformity            | 145.7272727  |
| wavelet-HHL | glszm      | GrayLevelNonUniformity           | 13.55244755  |
| wavelet-HHL | glszm      | LargeAreaEmphasis                | 20.86713287  |
| wavelet-HHL | glszm      | SmallAreaHighGrayLevelEmphasis   | 230.7205551  |
| wavelet-HHL | glszm      | ZonePercentage                   | 0.462783172  |
| wavelet-HHL | glszm      | LargeAreaLowGrayLevelEmphasis    | 0.100203568  |
| wavelet-HHL | glszm      | LargeAreaHighGrayLevelEmphasis   | 5091.234266  |
| wavelet-HHL | glszm      | HighGrayLevelZoneEmphasis        | 294.7622378  |
| wavelet-HHL | glszm      | SmallAreaEmphasis                | 0.741284403  |
| wavelet-HHL | glszm      | LowGrayLevelZoneEmphasis         | 0.011680051  |
| wavelet-HHL | glszm      | ZoneEntropy                      | 5.778995922  |
| wavelet-HHL | glszm      | SmallAreaLowGrayLevelEmphasis    | 0.010166696  |
| wavelet-HHL | ngtdm      | Coarseness                       | 0.010748485  |
| wavelet-HHL | ngtdm      | Complexity                       | 1339.786642  |
| wavelet-HHL | ngtdm      | Strength                         | 2.876661294  |
| wavelet-HHL | ngtdm      | Contrast                         | 0.169253366  |
| wavelet-HHL | ngtdm      | Busyness                         | 0.171877549  |
| wavelet-HHL | gldm       | GrayLevelVariance                | 30.13557671  |
| wavelet-HHL | gldm       | HighGrayLevelEmphasis            | 490.9255663  |
| wavelet-HHL | gldm       | DependenceEntropy                | 6.20921879   |

|             |            |                                      |              |
|-------------|------------|--------------------------------------|--------------|
| wavelet-HLH | gldm       | DependenceNonUniformity              | 166.2394822  |
| wavelet-HLH | gldm       | GrayLevelNonUniformity               | 34.69579288  |
| wavelet-HLH | gldm       | SmallDependenceEmphasis              | 0.480132232  |
| wavelet-HLH | gldm       | SmallDependenceHighGrayLevelEmphasis | 254.6295422  |
| wavelet-HLH | gldm       | DependenceNonUniformityNormalized    | 0.268995926  |
| wavelet-HLH | gldm       | LargeDependenceEmphasis              | 6.44012945   |
| wavelet-HLH | gldm       | LargeDependenceLowGrayLevelEmphasis  | 0.018081249  |
| wavelet-HLH | gldm       | DependenceVariance                   | 1.611514333  |
| wavelet-HLH | gldm       | LargeDependenceHighGrayLevelEmphasis | 2894.184466  |
| wavelet-HLH | gldm       | SmallDependenceLowGrayLevelEmphasis  | 0.003094072  |
| wavelet-HLH | gldm       | LowGrayLevelEmphasis                 | 0.004423123  |
| wavelet-HLH | glcm       | JointAverage                         | 21.43321261  |
| wavelet-HLH | glcm       | SumAverage                           | 42.86642522  |
| wavelet-HLH | glcm       | JointEntropy                         | 8.163533291  |
| wavelet-HLH | glcm       | ClusterShade                         | 83.87598294  |
| wavelet-HLH | glcm       | MaximumProbability                   | 0.013658093  |
| wavelet-HLH | glcm       | Idmn                                 | 0.969147853  |
| wavelet-HLH | glcm       | JointEnergy                          | 0.004534454  |
| wavelet-HLH | glcm       | Contrast                             | 61.53882587  |
| wavelet-HLH | glcm       | DifferenceEntropy                    | 3.975843072  |
| wavelet-HLH | glcm       | InverseVariance                      | 0.176232662  |
| wavelet-HLH | glcm       | DifferenceVariance                   | 25.78988142  |
| wavelet-HLH | glcm       | Idn                                  | 0.885700128  |
| wavelet-HLH | glcm       | Idm                                  | 0.171242522  |
| wavelet-HLH | glcm       | Correlation                          | -0.015316184 |
| wavelet-HLH | glcm       | Autocorrelation                      | 458.9301673  |
| wavelet-HLH | glcm       | SumEntropy                           | 4.856535789  |
| wavelet-HLH | glcm       | SumSquares                           | 30.28850613  |
| wavelet-HLH | glcm       | ClusterProminence                    | 14495.33565  |
| wavelet-HLH | glcm       | Imc2                                 | 0.865336033  |
| wavelet-HLH | glcm       | Imc1                                 | -0.156591215 |
| wavelet-HLH | glcm       | DifferenceAverage                    | 5.909471526  |
| wavelet-HLH | glcm       | Id                                   | 0.261478619  |
| wavelet-HLH | glcm       | ClusterTendency                      | 59.61519867  |
| wavelet-HLH | firstorder | InterquartileRange                   | 167.6680728  |
| wavelet-HLH | firstorder | Skewness                             | 0.274454641  |
| wavelet-HLH | firstorder | Uniformity                           | 0.05614206   |
| wavelet-HLH | firstorder | Median                               | -4.954640983 |
| wavelet-HLH | firstorder | Energy                               | 11655316.88  |
| wavelet-HLH | firstorder | RobustMeanAbsoluteDeviation          | 69.60324648  |
| wavelet-HLH | firstorder | MeanAbsoluteDeviation                | 104.8874368  |
| wavelet-HLH | firstorder | TotalEnergy                          | 314693555.9  |
| wavelet-HLH | firstorder | Maximum                              | 523.7800262  |
| wavelet-HLH | firstorder | RootMeanSquared                      | 137.3307542  |
| wavelet-HLH | firstorder | 90Percentile                         | 164.6300413  |
| wavelet-HLH | firstorder | Minimum                              | -502.2419699 |
| wavelet-HLH | firstorder | Entropy                              | 4.424744475  |
| wavelet-HLH | firstorder | Range                                | 1026.021996  |
| wavelet-HLH | firstorder | Variance                             | 18858.74793  |
| wavelet-HLH | firstorder | 10Percentile                         | -160.9171749 |
| wavelet-HLH | firstorder | Kurtosis                             | 3.951541037  |
| wavelet-HLH | firstorder | Mean                                 | -0.994046599 |

|             |       |                                  |             |
|-------------|-------|----------------------------------|-------------|
| wavelet-HLH | glrlm | ShortRunLowGrayLevelEmphasis     | 0.004426577 |
| wavelet-HLH | glrlm | GrayLevelVariance                | 31.00683338 |
| wavelet-HLH | glrlm | LowGrayLevelRunEmphasis          | 0.00451505  |
| wavelet-HLH | glrlm | GrayLevelNonUniformityNormalized | 0.055110262 |
| wavelet-HLH | glrlm | RunVariance                      | 0.050361602 |
| wavelet-HLH | glrlm | GrayLevelNonUniformity           | 32.49106463 |
| wavelet-HLH | glrlm | LongRunEmphasis                  | 1.150177823 |
| wavelet-HLH | glrlm | ShortRunHighGrayLevelEmphasis    | 477.3470088 |
| wavelet-HLH | glrlm | RunLengthNonUniformity           | 537.9465697 |
| wavelet-HLH | glrlm | ShortRunEmphasis                 | 0.964933751 |
| wavelet-HLH | glrlm | LongRunHighGrayLevelEmphasis     | 559.8616625 |
| wavelet-HLH | glrlm | RunPercentage                    | 0.953945731 |
| wavelet-HLH | glrlm | LongRunLowGrayLevelEmphasis      | 0.004895942 |
| wavelet-HLH | glrlm | RunEntropy                       | 4.684282892 |
| wavelet-HLH | glrlm | HighGrayLevelRunEmphasis         | 493.085559  |
| wavelet-HLH | glrlm | RunLengthNonUniformityNormalized | 0.911980276 |
| wavelet-HLH | glszm | GrayLevelVariance                | 43.50797416 |
| wavelet-HLH | glszm | ZoneVariance                     | 4.295998039 |
| wavelet-HLH | glszm | GrayLevelNonUniformityNormalized | 0.045236511 |
| wavelet-HLH | glszm | SizeZoneNonUniformityNormalized  | 0.515037989 |
| wavelet-HLH | glszm | SizeZoneNonUniformity            | 174.0828402 |
| wavelet-HLH | glszm | GrayLevelNonUniformity           | 15.28994083 |
| wavelet-HLH | glszm | LargeAreaEmphasis                | 7.639053254 |
| wavelet-HLH | glszm | SmallAreaHighGrayLevelEmphasis   | 404.2798636 |
| wavelet-HLH | glszm | ZonePercentage                   | 0.546925566 |
| wavelet-HLH | glszm | LargeAreaLowGrayLevelEmphasis    | 0.022546834 |
| wavelet-HLH | glszm | LargeAreaHighGrayLevelEmphasis   | 3427.278107 |
| wavelet-HLH | glszm | HighGrayLevelZoneEmphasis        | 524.7781065 |
| wavelet-HLH | glszm | SmallAreaEmphasis                | 0.744711342 |
| wavelet-HLH | glszm | LowGrayLevelZoneEmphasis         | 0.005970589 |
| wavelet-HLH | glszm | ZoneEntropy                      | 5.897797412 |
| wavelet-HLH | glszm | SmallAreaLowGrayLevelEmphasis    | 0.005313211 |
| wavelet-HLH | ngtdm | Coarseness                       | 0.010201623 |
| wavelet-HLH | ngtdm | Complexity                       | 2032.958252 |
| wavelet-HLH | ngtdm | Strength                         | 3.70758156  |
| wavelet-HLH | ngtdm | Contrast                         | 0.231590331 |
| wavelet-HLH | ngtdm | Busyness                         | 0.128761318 |

| Image type | Feature Class | Feature Name                         |                                                                                                                                                                                                                                                                                                                                                                                                                   |
|------------|---------------|--------------------------------------|-------------------------------------------------------------------------------------------------------------------------------------------------------------------------------------------------------------------------------------------------------------------------------------------------------------------------------------------------------------------------------------------------------------------|
| general    | info          | BoundingBox                          | 20: RTSTRUCT: C99-DNU_A_segment_tumor_right<br>(0, 0, 1, 10, 8, 8)                                                                                                                                                                                                                                                                                                                                                |
| general    | info          | EnabledImageTypes                    | {u'Original': {}, u'Wavelet': {}}                                                                                                                                                                                                                                                                                                                                                                                 |
|            |               |                                      | {'distances': [1], 'additionalInfo': True, 'force2D': False, 'interpolator': 'sitkBSpline', 'resampledPixelSpacing': [3.0], 'label': 1, 'normalizeScale': 1, 'normalize': False, 'force2Ddimension': 0, 'removeOutliers': None, 'minimumROISize': None, u'binWidth': 25.0, 'minimumROIDimensions': 1, u'correctMask': True, 'preCrop': False, u'symmetricalGLCM': True, 'resegmentRange': None, 'padDistance': 5} |
| general    | info          | GeneralSettings                      |                                                                                                                                                                                                                                                                                                                                                                                                                   |
| general    | info          | ImageHash                            | ba62d046cf972dcb5c72ea93a8987cb4b787d8f4<br>(0.9765624999999998, 0.9765624999999998, 1.9999999999999999)                                                                                                                                                                                                                                                                                                          |
| general    | info          | ImageSpacing                         |                                                                                                                                                                                                                                                                                                                                                                                                                   |
| general    | info          | MaskHash                             | 002b2ff6b132e1e8283fe50279a493728cff7610                                                                                                                                                                                                                                                                                                                                                                          |
| general    | info          | NumpyVersion                         | 1.13.1                                                                                                                                                                                                                                                                                                                                                                                                            |
| general    | info          | PyWaveletVersion                     | 0.5.2                                                                                                                                                                                                                                                                                                                                                                                                             |
| general    | info          | SimpleITKVersion                     | 1.1.0                                                                                                                                                                                                                                                                                                                                                                                                             |
| general    | info          | Version                              | 1.3.0.post102+g1b0eb74                                                                                                                                                                                                                                                                                                                                                                                            |
| general    | info          | VolumeNum                            | 1                                                                                                                                                                                                                                                                                                                                                                                                                 |
| general    | info          | VoxelNum                             | 234                                                                                                                                                                                                                                                                                                                                                                                                               |
| original   | shape         | Maximum3DDiameter                    | 32.17141588                                                                                                                                                                                                                                                                                                                                                                                                       |
| original   | shape         | Maximum2DDiameterSlice               | 25.63201124                                                                                                                                                                                                                                                                                                                                                                                                       |
| original   | shape         | Sphericity                           | 0.774886873                                                                                                                                                                                                                                                                                                                                                                                                       |
| original   | shape         | MinorAxis                            | 22.44292553                                                                                                                                                                                                                                                                                                                                                                                                       |
| original   | shape         | Elongation                           | 0.827262541                                                                                                                                                                                                                                                                                                                                                                                                       |
| original   | shape         | SurfaceVolumeRatio                   | 0.337587181                                                                                                                                                                                                                                                                                                                                                                                                       |
| original   | shape         | Volume                               | 6318                                                                                                                                                                                                                                                                                                                                                                                                              |
| original   | shape         | MajorAxis                            | 27.12914512                                                                                                                                                                                                                                                                                                                                                                                                       |
| original   | shape         | SurfaceArea                          | 2132.87581                                                                                                                                                                                                                                                                                                                                                                                                        |
| original   | shape         | Flatness                             | 0.624367808                                                                                                                                                                                                                                                                                                                                                                                                       |
| original   | shape         | LeastAxis                            | 16.93856487                                                                                                                                                                                                                                                                                                                                                                                                       |
| original   | shape         | Maximum2DDiameterColumn              | 29.69848481                                                                                                                                                                                                                                                                                                                                                                                                       |
| original   | shape         | Maximum2DDiameterRow                 | 25.8069758                                                                                                                                                                                                                                                                                                                                                                                                        |
| original   | gldm          | GrayLevelVariance                    | 114.2646651                                                                                                                                                                                                                                                                                                                                                                                                       |
| original   | gldm          | HighGrayLevelEmphasis                | 434.8888889                                                                                                                                                                                                                                                                                                                                                                                                       |
| original   | gldm          | DependenceEntropy                    | 6.161923938                                                                                                                                                                                                                                                                                                                                                                                                       |
| original   | gldm          | DependenceNonUniformity              | 73.85470085                                                                                                                                                                                                                                                                                                                                                                                                       |
| original   | gldm          | GrayLevelNonUniformity               | 10.06837607                                                                                                                                                                                                                                                                                                                                                                                                       |
| original   | gldm          | SmallDependenceEmphasis              | 0.570987898                                                                                                                                                                                                                                                                                                                                                                                                       |
| original   | gldm          | SmallDependenceHighGrayLevelEmphasis | 177.3957782                                                                                                                                                                                                                                                                                                                                                                                                       |
| original   | gldm          | DependenceNonUniformityNormalized    | 0.31561838                                                                                                                                                                                                                                                                                                                                                                                                        |
| original   | gldm          | LargeDependenceEmphasis              | 9.743589744                                                                                                                                                                                                                                                                                                                                                                                                       |
| original   | gldm          | LargeDependenceLowGrayLevelEmphasis  | 0.062451392                                                                                                                                                                                                                                                                                                                                                                                                       |
| original   | gldm          | DependenceVariance                   | 4.299145299                                                                                                                                                                                                                                                                                                                                                                                                       |
| original   | gldm          | LargeDependenceHighGrayLevelEmphasis | 8491.709402                                                                                                                                                                                                                                                                                                                                                                                                       |
| original   | gldm          | SmallDependenceLowGrayLevelEmphasis  | 0.014204446                                                                                                                                                                                                                                                                                                                                                                                                       |
| original   | gldm          | LowGrayLevelEmphasis                 | 0.019383495                                                                                                                                                                                                                                                                                                                                                                                                       |
| original   | glcm          | JointAverage                         | 19.99799956                                                                                                                                                                                                                                                                                                                                                                                                       |
| original   | glcm          | SumAverage                           | 39.99599913                                                                                                                                                                                                                                                                                                                                                                                                       |
| original   | glcm          | JointEntropy                         | 7.531249867                                                                                                                                                                                                                                                                                                                                                                                                       |
| original   | glcm          | ClusterShade                         | -477.679949                                                                                                                                                                                                                                                                                                                                                                                                       |
| original   | glcm          | MaximumProbability                   | 0.035913321                                                                                                                                                                                                                                                                                                                                                                                                       |
| original   | glcm          | Idmn                                 | 0.913083696                                                                                                                                                                                                                                                                                                                                                                                                       |
| original   | glcm          | JointEnergy                          | 0.007704245                                                                                                                                                                                                                                                                                                                                                                                                       |
| original   | glcm          | Contrast                             | 132.5187536                                                                                                                                                                                                                                                                                                                                                                                                       |

|          |            |                                  |              |
|----------|------------|----------------------------------|--------------|
| original | glcm       | DifferenceEntropy                | 4.306257447  |
| original | glcm       | InverseVariance                  | 0.18271198   |
| original | glcm       | DifferenceVariance               | 55.31915536  |
| original | glcm       | Idn                              | 0.823296396  |
| original | glcm       | Idm                              | 0.180988912  |
| original | glcm       | Correlation                      | 0.428345001  |
| original | glcm       | Autocorrelation                  | 450.7150989  |
| original | glcm       | SumEntropy                       | 5.496838043  |
| original | glcm       | SumSquares                       | 116.6684579  |
| original | glcm       | ClusterProminence                | 194678.7057  |
| original | glcm       | Imc2                             | 0.986325601  |
| original | glcm       | Imc1                             | -0.388887983 |
| original | glcm       | DifferenceAverage                | 8.545546075  |
| original | glcm       | Id                               | 0.252137351  |
| original | glcm       | ClusterTendency                  | 334.1550778  |
| original | firstorder | InterquartileRange               | 551.25       |
| original | firstorder | Skewness                         | 0.176502752  |
| original | firstorder | Uniformity                       | 0.043027248  |
| original | firstorder | Median                           | -407         |
| original | firstorder | Energy                           | 43810781     |
| original | firstorder | RobustMeanAbsoluteDeviation      | 208.0025464  |
| original | firstorder | MeanAbsoluteDeviation            | 239.636533   |
| original | firstorder | TotalEnergy                      | 1182891087   |
| original | firstorder | Maximum                          | 70           |
| original | firstorder | RootMeanSquared                  | 432.6956896  |
| original | firstorder | 90Percentile                     | 27           |
| original | firstorder | Minimum                          | -757         |
| original | firstorder | Entropy                          | 4.787945197  |
| original | firstorder | Range                            | 827          |
| original | firstorder | Variance                         | 71454.04326  |
| original | firstorder | 10Percentile                     | -670.6       |
| original | firstorder | Kurtosis                         | 1.523361338  |
| original | firstorder | Mean                             | -340.2521368 |
| original | glrlm      | ShortRunLowGrayLevelEmphasis     | 0.019731189  |
| original | glrlm      | GrayLevelVariance                | 110.40323    |
| original | glrlm      | LowGrayLevelRunEmphasis          | 0.020018955  |
| original | glrlm      | GrayLevelNonUniformityNormalized | 0.040543301  |
| original | glrlm      | RunVariance                      | 0.064031739  |
| original | glrlm      | GrayLevelNonUniformity           | 9.00487348   |
| original | glrlm      | LongRunEmphasis                  | 1.177563791  |
| original | glrlm      | ShortRunHighGrayLevelEmphasis    | 384.6197425  |
| original | glrlm      | RunLengthNonUniformity           | 201.4325486  |
| original | glrlm      | ShortRunEmphasis                 | 0.962293029  |
| original | glrlm      | LongRunHighGrayLevelEmphasis     | 557.74995    |
| original | glrlm      | RunPercentage                    | 0.948717949  |
| original | glrlm      | LongRunLowGrayLevelEmphasis      | 0.021447436  |
| original | glrlm      | RunEntropy                       | 5.012512918  |
| original | glrlm      | HighGrayLevelRunEmphasis         | 414.707182   |
| original | glrlm      | RunLengthNonUniformityNormalized | 0.906374903  |
| original | glszm      | GrayLevelVariance                | 82.95703981  |
| original | glszm      | ZoneVariance                     | 5.189371804  |
| original | glszm      | GrayLevelNonUniformityNormalized | 0.036705625  |
| original | glszm      | SizeZoneNonUniformityNormalized  | 0.631848064  |
| original | glszm      | SizeZoneNonUniformity            | 93.51351351  |
| original | glszm      | GrayLevelNonUniformity           | 5.432432432  |
| original | glszm      | LargeAreaEmphasis                | 7.689189189  |
| original | glszm      | SmallAreaHighGrayLevelEmphasis   | 245.993705   |
| original | glszm      | ZonePercentage                   | 0.632478632  |

|             |            |                                      |              |
|-------------|------------|--------------------------------------|--------------|
| original    | glszm      | LargeAreaLowGrayLevelEmphasis        | 0.059143371  |
| original    | glszm      | LargeAreaHighGrayLevelEmphasis       | 6401.959459  |
| original    | glszm      | HighGrayLevelZoneEmphasis            | 314.6959459  |
| original    | glszm      | SmallAreaEmphasis                    | 0.820827703  |
| original    | glszm      | LowGrayLevelZoneEmphasis             | 0.023804581  |
| original    | glszm      | ZoneEntropy                          | 5.536235951  |
| original    | glszm      | SmallAreaLowGrayLevelEmphasis        | 0.021101979  |
| original    | ngtdm      | Coarseness                           | 0.015352029  |
| original    | ngtdm      | Complexity                           | 3171.749981  |
| original    | ngtdm      | Strength                             | 10.05830782  |
| original    | ngtdm      | Contrast                             | 1.239765295  |
| original    | ngtdm      | Busyness                             | 0.114314852  |
| wavelet-HHH | gldm       | GrayLevelVariance                    | 11.9508547   |
| wavelet-HHH | gldm       | HighGrayLevelEmphasis                | 252.2008547  |
| wavelet-HHH | gldm       | DependenceEntropy                    | 5.737483847  |
| wavelet-HHH | gldm       | DependenceNonUniformity              | 41.77777778  |
| wavelet-HHH | gldm       | GrayLevelNonUniformity               | 24.32478632  |
| wavelet-HHH | gldm       | SmallDependenceEmphasis              | 0.34272467   |
| wavelet-HHH | gldm       | SmallDependenceHighGrayLevelEmphasis | 85.10125335  |
| wavelet-HHH | gldm       | DependenceNonUniformityNormalized    | 0.178537512  |
| wavelet-HHH | gldm       | LargeDependenceEmphasis              | 15           |
| wavelet-HHH | gldm       | LargeDependenceLowGrayLevelEmphasis  | 0.069592751  |
| wavelet-HHH | gldm       | DependenceVariance                   | 5.053254438  |
| wavelet-HHH | gldm       | LargeDependenceHighGrayLevelEmphasis | 3655.081197  |
| wavelet-HHH | gldm       | SmallDependenceLowGrayLevelEmphasis  | 0.006973703  |
| wavelet-HHH | gldm       | LowGrayLevelEmphasis                 | 0.009832261  |
| wavelet-HHH | glcm       | JointAverage                         | 15.50373309  |
| wavelet-HHH | glcm       | SumAverage                           | 31.00746618  |
| wavelet-HHH | glcm       | JointEntropy                         | 6.44428212   |
| wavelet-HHH | glcm       | ClusterShade                         | -31.92731179 |
| wavelet-HHH | glcm       | MaximumProbability                   | 0.046838769  |
| wavelet-HHH | glcm       | Idmn                                 | 0.97042089   |
| wavelet-HHH | glcm       | JointEnergy                          | 0.016290528  |
| wavelet-HHH | glcm       | Contrast                             | 23.55299034  |
| wavelet-HHH | glcm       | DifferenceEntropy                    | 3.213575627  |
| wavelet-HHH | glcm       | InverseVariance                      | 0.278745671  |
| wavelet-HHH | glcm       | DifferenceVariance                   | 11.5643165   |
| wavelet-HHH | glcm       | Idn                                  | 0.893801186  |
| wavelet-HHH | glcm       | Idm                                  | 0.287758588  |
| wavelet-HHH | glcm       | Correlation                          | -0.045819801 |
| wavelet-HHH | glcm       | Autocorrelation                      | 239.7845775  |
| wavelet-HHH | glcm       | SumEntropy                           | 3.95834832   |
| wavelet-HHH | glcm       | SumSquares                           | 11.19403497  |
| wavelet-HHH | glcm       | ClusterProminence                    | 2668.749126  |
| wavelet-HHH | glcm       | Imc2                                 | 0.876179078  |
| wavelet-HHH | glcm       | Imc1                                 | -0.20537053  |
| wavelet-HHH | glcm       | DifferenceAverage                    | 3.42380992   |
| wavelet-HHH | glcm       | Id                                   | 0.372035499  |
| wavelet-HHH | glcm       | ClusterTendency                      | 21.22314952  |
| wavelet-HHH | firstorder | InterquartileRange                   | 79.89667125  |
| wavelet-HHH | firstorder | Skewness                             | -0.55391643  |
| wavelet-HHH | firstorder | Uniformity                           | 0.103952078  |
| wavelet-HHH | firstorder | Median                               | 3.681743271  |
| wavelet-HHH | firstorder | Energy                               | 1700365.755  |
| wavelet-HHH | firstorder | RobustMeanAbsoluteDeviation          | 34.85117776  |
| wavelet-HHH | firstorder | MeanAbsoluteDeviation                | 59.7357097   |
| wavelet-HHH | firstorder | TotalEnergy                          | 45909875.39  |
| wavelet-HHH | firstorder | Maximum                              | 252.7422361  |

|             |            |                                      |              |
|-------------|------------|--------------------------------------|--------------|
| wavelet-HHH | firstorder | RootMeanSquared                      | 85.2438873   |
| wavelet-HHH | firstorder | 90Percentile                         | 101.1308339  |
| wavelet-HHH | firstorder | Minimum                              | -354.1770516 |
| wavelet-HHH | firstorder | Entropy                              | 3.649583138  |
| wavelet-HHH | firstorder | Range                                | 606.9192877  |
| wavelet-HHH | firstorder | Variance                             | 7266.326318  |
| wavelet-HHH | firstorder | 10Percentile                         | -96.60922772 |
| wavelet-HHH | firstorder | Kurtosis                             | 5.639771542  |
| wavelet-HHH | firstorder | Mean                                 | 0.440458143  |
| wavelet-HHH | glrlm      | ShortRunLowGrayLevelEmphasis         | 0.010071576  |
| wavelet-HHH | glrlm      | GrayLevelVariance                    | 12.71801291  |
| wavelet-HHH | glrlm      | LowGrayLevelRunEmphasis              | 0.010337398  |
| wavelet-HHH | glrlm      | GrayLevelNonUniformityNormalized     | 0.098491078  |
| wavelet-HHH | glrlm      | RunVariance                          | 0.104440885  |
| wavelet-HHH | glrlm      | GrayLevelNonUniformity               | 21.14275851  |
| wavelet-HHH | glrlm      | LongRunEmphasis                      | 1.295084215  |
| wavelet-HHH | glrlm      | ShortRunHighGrayLevelEmphasis        | 237.1374335  |
| wavelet-HHH | glrlm      | RunLengthNonUniformity               | 182.7052341  |
| wavelet-HHH | glrlm      | ShortRunEmphasis                     | 0.937938916  |
| wavelet-HHH | glrlm      | LongRunHighGrayLevelEmphasis         | 325.6671612  |
| wavelet-HHH | glrlm      | RunPercentage                        | 0.917159763  |
| wavelet-HHH | glrlm      | LongRunLowGrayLevelEmphasis          | 0.011597216  |
| wavelet-HHH | glrlm      | RunEntropy                           | 4.068384522  |
| wavelet-HHH | glrlm      | HighGrayLevelRunEmphasis             | 252.5648739  |
| wavelet-HHH | glrlm      | RunLengthNonUniformityNormalized     | 0.850516396  |
| wavelet-HHH | glszm      | GrayLevelVariance                    | 23.63939968  |
| wavelet-HHH | glszm      | ZoneVariance                         | 29.94537588  |
| wavelet-HHH | glszm      | GrayLevelNonUniformityNormalized     | 0.065711195  |
| wavelet-HHH | glszm      | SizeZoneNonUniformityNormalized      | 0.49540292   |
| wavelet-HHH | glszm      | SizeZoneNonUniformity                | 42.60465116  |
| wavelet-HHH | glszm      | GrayLevelNonUniformity               | 5.651162791  |
| wavelet-HHH | glszm      | LargeAreaEmphasis                    | 37.34883721  |
| wavelet-HHH | glszm      | SmallAreaHighGrayLevelEmphasis       | 178.6685308  |
| wavelet-HHH | glszm      | ZonePercentage                       | 0.367521368  |
| wavelet-HHH | glszm      | LargeAreaLowGrayLevelEmphasis        | 0.169185319  |
| wavelet-HHH | glszm      | LargeAreaHighGrayLevelEmphasis       | 9318.616279  |
| wavelet-HHH | glszm      | HighGrayLevelZoneEmphasis            | 248.2906977  |
| wavelet-HHH | glszm      | SmallAreaEmphasis                    | 0.729746019  |
| wavelet-HHH | glszm      | LowGrayLevelZoneEmphasis             | 0.019399292  |
| wavelet-HHH | glszm      | ZoneEntropy                          | 5.167673697  |
| wavelet-HHH | glszm      | SmallAreaLowGrayLevelEmphasis        | 0.018089564  |
| wavelet-HHH | ngtdm      | Coarseness                           | 0.028931264  |
| wavelet-HHH | ngtdm      | Complexity                           | 508.3575486  |
| wavelet-HHH | ngtdm      | Strength                             | 4.420837049  |
| wavelet-HHH | ngtdm      | Contrast                             | 0.13567206   |
| wavelet-HHH | ngtdm      | Busyness                             | 0.085054116  |
| wavelet-HLL | gldm       | GrayLevelVariance                    | 73.8489298   |
| wavelet-HLL | gldm       | HighGrayLevelEmphasis                | 552.5982906  |
| wavelet-HLL | gldm       | DependenceEntropy                    | 6.168128718  |
| wavelet-HLL | gldm       | DependenceNonUniformity              | 87.75213675  |
| wavelet-HLL | gldm       | GrayLevelNonUniformity               | 8.393162393  |
| wavelet-HLL | gldm       | SmallDependenceEmphasis              | 0.611431624  |
| wavelet-HLL | gldm       | SmallDependenceHighGrayLevelEmphasis | 365.9147721  |
| wavelet-HLL | gldm       | DependenceNonUniformityNormalized    | 0.375009131  |
| wavelet-HLL | gldm       | LargeDependenceEmphasis              | 4.128205128  |
| wavelet-HLL | gldm       | LargeDependenceLowGrayLevelEmphasis  | 0.018064256  |
| wavelet-HLL | gldm       | DependenceVariance                   | 1.028197823  |
| wavelet-HLL | gldm       | LargeDependenceHighGrayLevelEmphasis | 1936.675214  |

|             |            |                                     |              |
|-------------|------------|-------------------------------------|--------------|
| wavelet-HLL | gldm       | SmallDependenceLowGrayLevelEmphasis | 0.007218356  |
| wavelet-HLL | gldm       | LowGrayLevelEmphasis                | 0.008408915  |
| wavelet-HLL | glcm       | JointAverage                        | 21.22103996  |
| wavelet-HLL | glcm       | SumAverage                          | 42.44207993  |
| wavelet-HLL | glcm       | JointEntropy                        | 7.851097409  |
| wavelet-HLL | glcm       | ClusterShade                        | 618.09461    |
| wavelet-HLL | glcm       | MaximumProbability                  | 0.013757269  |
| wavelet-HLL | glcm       | Idmn                                | 0.952531505  |
| wavelet-HLL | glcm       | JointEnergy                         | 0.004810187  |
| wavelet-HLL | glcm       | Contrast                            | 117.4120276  |
| wavelet-HLL | glcm       | DifferenceEntropy                   | 4.297496885  |
| wavelet-HLL | glcm       | InverseVariance                     | 0.118876955  |
| wavelet-HLL | glcm       | DifferenceVariance                  | 43.154219    |
| wavelet-HLL | glcm       | Idn                                 | 0.857362352  |
| wavelet-HLL | glcm       | Idm                                 | 0.117107059  |
| wavelet-HLL | glcm       | Correlation                         | 0.15173082   |
| wavelet-HLL | glcm       | Autocorrelation                     | 461.6534636  |
| wavelet-HLL | glcm       | SumEntropy                          | 5.33193804   |
| wavelet-HLL | glcm       | SumSquares                          | 69.92380695  |
| wavelet-HLL | glcm       | ClusterProminence                   | 76235.94491  |
| wavelet-HLL | glcm       | Imc2                                | 0.988738403  |
| wavelet-HLL | glcm       | Imc1                                | -0.390836938 |
| wavelet-HLL | glcm       | DifferenceAverage                   | 8.416923412  |
| wavelet-HLL | glcm       | Id                                  | 0.203069007  |
| wavelet-HLL | glcm       | ClusterTendency                     | 162.2832002  |
| wavelet-HLL | firstorder | InterquartileRange                  | 313.3856508  |
| wavelet-HLL | firstorder | Skewness                            | 0.259751618  |
| wavelet-HLL | firstorder | Uniformity                          | 0.035868215  |
| wavelet-HLL | firstorder | Median                              | -52.21615765 |
| wavelet-HLL | firstorder | Energy                              | 11207422.38  |
| wavelet-HLL | firstorder | RobustMeanAbsoluteDeviation         | 127.4019002  |
| wavelet-HLL | firstorder | MeanAbsoluteDeviation               | 175.8584287  |
| wavelet-HLL | firstorder | TotalEnergy                         | 302600404.2  |
| wavelet-HLL | firstorder | Maximum                             | 559.6747569  |
| wavelet-HLL | firstorder | RootMeanSquared                     | 218.8491888  |
| wavelet-HLL | firstorder | 90Percentile                        | 286.8032216  |
| wavelet-HLL | firstorder | Minimum                             | -573.1758574 |
| wavelet-HLL | firstorder | Entropy                             | 4.972230056  |
| wavelet-HLL | firstorder | Range                               | 1132.850614  |
| wavelet-HLL | firstorder | Variance                            | 46268.51356  |
| wavelet-HLL | firstorder | 10Percentile                        | -305.4516636 |
| wavelet-HLL | firstorder | Kurtosis                            | 2.566437376  |
| wavelet-HLL | firstorder | Mean                                | -40.32931773 |
| wavelet-HLL | glrlm      | ShortRunLowGrayLevelEmphasis        | 0.008504363  |
| wavelet-HLL | glrlm      | GrayLevelVariance                   | 74.88698739  |
| wavelet-HLL | glrlm      | LowGrayLevelRunEmphasis             | 0.008572019  |
| wavelet-HLL | glrlm      | GrayLevelNonUniformityNormalized    | 0.035539332  |
| wavelet-HLL | glrlm      | RunVariance                         | 0.034829874  |
| wavelet-HLL | glrlm      | GrayLevelNonUniformity              | 8.073520781  |
| wavelet-HLL | glrlm      | LongRunEmphasis                     | 1.09778897   |
| wavelet-HLL | glrlm      | ShortRunHighGrayLevelEmphasis       | 545.8237192  |
| wavelet-HLL | glrlm      | RunLengthNonUniformity              | 215.0133437  |
| wavelet-HLL | glrlm      | ShortRunEmphasis                    | 0.978523236  |
| wavelet-HLL | glrlm      | LongRunHighGrayLevelEmphasis        | 600.9361962  |
| wavelet-HLL | glrlm      | RunPercentage                       | 0.970742932  |
| wavelet-HLL | glrlm      | LongRunLowGrayLevelEmphasis         | 0.008869724  |
| wavelet-HLL | glrlm      | RunEntropy                          | 5.097178175  |
| wavelet-HLL | glrlm      | HighGrayLevelRunEmphasis            | 555.5212494  |



|             |       |                                      |              |
|-------------|-------|--------------------------------------|--------------|
| wavelet-HLL | glrlm | RunLengthNonUniformityNormalized     | 0.945737044  |
| wavelet-HLL | glszm | GrayLevelVariance                    | 86.89317542  |
| wavelet-HLL | glszm | ZoneVariance                         | 1.104972802  |
| wavelet-HLL | glszm | GrayLevelNonUniformityNormalized     | 0.032753366  |
| wavelet-HLL | glszm | SizeZoneNonUniformityNormalized      | 0.597237761  |
| wavelet-HLL | glszm | SizeZoneNonUniformity                | 96.1552795   |
| wavelet-HLL | glszm | GrayLevelNonUniformity               | 5.273291925  |
| wavelet-HLL | glszm | LargeAreaEmphasis                    | 3.217391304  |
| wavelet-HLL | glszm | SmallAreaHighGrayLevelEmphasis       | 488.5686599  |
| wavelet-HLL | glszm | ZonePercentage                       | 0.688034188  |
| wavelet-HLL | glszm | LargeAreaLowGrayLevelEmphasis        | 0.017951286  |
| wavelet-HLL | glszm | LargeAreaHighGrayLevelEmphasis       | 1562.521739  |
| wavelet-HLL | glszm | HighGrayLevelZoneEmphasis            | 590.7701863  |
| wavelet-HLL | glszm | SmallAreaEmphasis                    | 0.800542184  |
| wavelet-HLL | glszm | LowGrayLevelZoneEmphasis             | 0.010800668  |
| wavelet-HLL | glszm | ZoneEntropy                          | 5.806510845  |
| wavelet-HLL | glszm | SmallAreaLowGrayLevelEmphasis        | 0.010216616  |
| wavelet-HLL | ngtdm | Coarseness                           | 0.022921542  |
| wavelet-HLL | ngtdm | Complexity                           | 3622.845898  |
| wavelet-HLL | ngtdm | Strength                             | 11.64203527  |
| wavelet-HLL | ngtdm | Contrast                             | 0.619443594  |
| wavelet-HLL | ngtdm | Busyness                             | 0.067532397  |
| wavelet-LHL | gldm  | GrayLevelVariance                    | 59.88823143  |
| wavelet-LHL | gldm  | HighGrayLevelEmphasis                | 530.4444444  |
| wavelet-LHL | gldm  | DependenceEntropy                    | 6.069990096  |
| wavelet-LHL | gldm  | DependenceNonUniformity              | 77.76068376  |
| wavelet-LHL | gldm  | GrayLevelNonUniformity               | 9.675213675  |
| wavelet-LHL | gldm  | SmallDependenceEmphasis              | 0.538977848  |
| wavelet-LHL | gldm  | SmallDependenceHighGrayLevelEmphasis | 271.956566   |
| wavelet-LHL | gldm  | DependenceNonUniformityNormalized    | 0.332310614  |
| wavelet-LHL | gldm  | LargeDependenceEmphasis              | 4.846153846  |
| wavelet-LHL | gldm  | LargeDependenceLowGrayLevelEmphasis  | 0.029485652  |
| wavelet-LHL | gldm  | DependenceVariance                   | 1.180729053  |
| wavelet-LHL | gldm  | LargeDependenceHighGrayLevelEmphasis | 2497.504274  |
| wavelet-LHL | gldm  | SmallDependenceLowGrayLevelEmphasis  | 0.009788719  |
| wavelet-LHL | gldm  | LowGrayLevelEmphasis                 | 0.012563551  |
| wavelet-LHL | glcm  | JointAverage                         | 21.75979748  |
| wavelet-LHL | glcm  | SumAverage                           | 43.51959497  |
| wavelet-LHL | glcm  | JointEntropy                         | 7.760092494  |
| wavelet-LHL | glcm  | ClusterShade                         | -552.6253637 |
| wavelet-LHL | glcm  | MaximumProbability                   | 0.014893975  |
| wavelet-LHL | glcm  | ldmn                                 | 0.955897745  |
| wavelet-LHL | glcm  | JointEnergy                          | 0.005217668  |
| wavelet-LHL | glcm  | Contrast                             | 78.82646829  |
| wavelet-LHL | glcm  | DifferenceEntropy                    | 4.019563467  |
| wavelet-LHL | glcm  | InverseVariance                      | 0.165854536  |
| wavelet-LHL | glcm  | DifferenceVariance                   | 29.75309308  |
| wavelet-LHL | glcm  | ldn                                  | 0.863899476  |
| wavelet-LHL | glcm  | ldm                                  | 0.152753856  |
| wavelet-LHL | glcm  | Correlation                          | 0.295694995  |
| wavelet-LHL | glcm  | Autocorrelation                      | 489.3404143  |
| wavelet-LHL | glcm  | SumEntropy                           | 5.250180621  |
| wavelet-LHL | glcm  | SumSquares                           | 55.1281441   |
| wavelet-LHL | glcm  | ClusterProminence                    | 53666.90167  |
| wavelet-LHL | glcm  | lmc2                                 | 0.983655069  |
| wavelet-LHL | glcm  | lmc1                                 | -0.363530846 |
| wavelet-LHL | glcm  | DifferenceAverage                    | 6.775888576  |
| wavelet-LHL | glcm  | ld                                   | 0.23956086   |

|             |            |                                  |              |
|-------------|------------|----------------------------------|--------------|
| wavelet-LHL | glcm       | ClusterTendency                  | 141.6861081  |
| wavelet-LHL | firstorder | InterquartileRange               | 279.1117162  |
| wavelet-LHL | firstorder | Skewness                         | -0.47756453  |
| wavelet-LHL | firstorder | Uniformity                       | 0.041347067  |
| wavelet-LHL | firstorder | Median                           | 15.73082991  |
| wavelet-LHL | firstorder | Energy                           | 8850111.806  |
| wavelet-LHL | firstorder | RobustMeanAbsoluteDeviation      | 112.2522491  |
| wavelet-LHL | firstorder | MeanAbsoluteDeviation            | 158.481048   |
| wavelet-LHL | firstorder | TotalEnergy                      | 238953018.8  |
| wavelet-LHL | firstorder | Maximum                          | 412.0442972  |
| wavelet-LHL | firstorder | RootMeanSquared                  | 194.4761955  |
| wavelet-LHL | firstorder | 90Percentile                     | 217.0062357  |
| wavelet-LHL | firstorder | Minimum                          | -528.1569257 |
| wavelet-LHL | firstorder | Entropy                          | 4.806328475  |
| wavelet-LHL | firstorder | Range                            | 940.201223   |
| wavelet-LHL | firstorder | Variance                         | 37414.63126  |
| wavelet-LHL | firstorder | 10Percentile                     | -267.1453079 |
| wavelet-LHL | firstorder | Kurtosis                         | 2.799730815  |
| wavelet-LHL | firstorder | Mean                             | -20.15835715 |
| wavelet-LHL | glrlm      | ShortRunLowGrayLevelEmphasis     | 0.012712136  |
| wavelet-LHL | glrlm      | GrayLevelVariance                | 60.63492031  |
| wavelet-LHL | glrlm      | LowGrayLevelRunEmphasis          | 0.012844572  |
| wavelet-LHL | glrlm      | GrayLevelNonUniformityNormalized | 0.041019596  |
| wavelet-LHL | glrlm      | RunVariance                      | 0.04064396   |
| wavelet-LHL | glrlm      | GrayLevelNonUniformity           | 9.261740666  |
| wavelet-LHL | glrlm      | LongRunEmphasis                  | 1.115808974  |
| wavelet-LHL | glrlm      | ShortRunHighGrayLevelEmphasis    | 516.1945285  |
| wavelet-LHL | glrlm      | RunLengthNonUniformity           | 210.9825228  |
| wavelet-LHL | glrlm      | ShortRunEmphasis                 | 0.973949533  |
| wavelet-LHL | glrlm      | LongRunHighGrayLevelEmphasis     | 592.8923345  |
| wavelet-LHL | glrlm      | RunPercentage                    | 0.964825773  |
| wavelet-LHL | glrlm      | LongRunLowGrayLevelEmphasis      | 0.013397852  |
| wavelet-LHL | glrlm      | RunEntropy                       | 4.958712031  |
| wavelet-LHL | glrlm      | HighGrayLevelRunEmphasis         | 530.1335179  |
| wavelet-LHL | glrlm      | RunLengthNonUniformityNormalized | 0.934034821  |
| wavelet-LHL | glszm      | GrayLevelVariance                | 72.17978395  |
| wavelet-LHL | glszm      | ZoneVariance                     | 2.081597222  |
| wavelet-LHL | glszm      | GrayLevelNonUniformityNormalized | 0.038676698  |
| wavelet-LHL | glszm      | SizeZoneNonUniformityNormalized  | 0.531828704  |
| wavelet-LHL | glszm      | SizeZoneNonUniformity            | 76.58333333  |
| wavelet-LHL | glszm      | GrayLevelNonUniformity           | 5.569444444  |
| wavelet-LHL | glszm      | LargeAreaEmphasis                | 4.722222222  |
| wavelet-LHL | glszm      | SmallAreaHighGrayLevelEmphasis   | 374.2719907  |
| wavelet-LHL | glszm      | ZonePercentage                   | 0.615384615  |
| wavelet-LHL | glszm      | LargeAreaLowGrayLevelEmphasis    | 0.031750587  |
| wavelet-LHL | glszm      | LargeAreaHighGrayLevelEmphasis   | 2507.708333  |
| wavelet-LHL | glszm      | HighGrayLevelZoneEmphasis        | 514.3472222  |
| wavelet-LHL | glszm      | SmallAreaEmphasis                | 0.756027574  |
| wavelet-LHL | glszm      | LowGrayLevelZoneEmphasis         | 0.017108434  |
| wavelet-LHL | glszm      | ZoneEntropy                      | 5.712372422  |
| wavelet-LHL | glszm      | SmallAreaLowGrayLevelEmphasis    | 0.015171381  |
| wavelet-LHL | ngtdm      | Coarseness                       | 0.026692147  |
| wavelet-LHL | ngtdm      | Complexity                       | 2421.128255  |
| wavelet-LHL | ngtdm      | Strength                         | 11.37293319  |
| wavelet-LHL | ngtdm      | Contrast                         | 0.465784531  |
| wavelet-LHL | ngtdm      | Busyness                         | 0.049618652  |
| wavelet-LHH | gldm       | GrayLevelVariance                | 25.89911608  |
| wavelet-LHH | gldm       | HighGrayLevelEmphasis            | 526.2051282  |

|             |            |                                      |              |
|-------------|------------|--------------------------------------|--------------|
| wavelet-LHH | gldm       | DependenceEntropy                    | 5.815226808  |
| wavelet-LHH | gldm       | DependenceNonUniformity              | 59.53846154  |
| wavelet-LHH | gldm       | GrayLevelNonUniformity               | 16.65811966  |
| wavelet-LHH | gldm       | SmallDependenceEmphasis              | 0.480246544  |
| wavelet-LHH | gldm       | SmallDependenceHighGrayLevelEmphasis | 256.2947832  |
| wavelet-LHH | gldm       | DependenceNonUniformityNormalized    | 0.25443787   |
| wavelet-LHH | gldm       | LargeDependenceEmphasis              | 8.256410256  |
| wavelet-LHH | gldm       | LargeDependenceLowGrayLevelEmphasis  | 0.021277506  |
| wavelet-LHH | gldm       | DependenceVariance                   | 2.610709329  |
| wavelet-LHH | gldm       | LargeDependenceHighGrayLevelEmphasis | 4252.760684  |
| wavelet-LHH | gldm       | SmallDependenceLowGrayLevelEmphasis  | 0.005695358  |
| wavelet-LHH | gldm       | LowGrayLevelEmphasis                 | 0.00675474   |
| wavelet-LHH | glcm       | JointAverage                         | 22.45218262  |
| wavelet-LHH | glcm       | SumAverage                           | 44.90436524  |
| wavelet-LHH | glcm       | JointEntropy                         | 7.068823096  |
| wavelet-LHH | glcm       | ClusterShade                         | -21.20422116 |
| wavelet-LHH | glcm       | MaximumProbability                   | 0.030557869  |
| wavelet-LHH | glcm       | Idmn                                 | 0.973023316  |
| wavelet-LHH | glcm       | JointEnergy                          | 0.009776038  |
| wavelet-LHH | glcm       | Contrast                             | 47.86837756  |
| wavelet-LHH | glcm       | DifferenceEntropy                    | 3.641362747  |
| wavelet-LHH | glcm       | InverseVariance                      | 0.226450285  |
| wavelet-LHH | glcm       | DifferenceVariance                   | 23.13159021  |
| wavelet-LHH | glcm       | Idn                                  | 0.898071567  |
| wavelet-LHH | glcm       | Idm                                  | 0.214098884  |
| wavelet-LHH | glcm       | Correlation                          | -0.02734855  |
| wavelet-LHH | glcm       | Autocorrelation                      | 503.2877801  |
| wavelet-LHH | glcm       | SumEntropy                           | 4.437480881  |
| wavelet-LHH | glcm       | SumSquares                           | 23.11305717  |
| wavelet-LHH | glcm       | ClusterProminence                    | 12084.01198  |
| wavelet-LHH | glcm       | Imc2                                 | 0.939927796  |
| wavelet-LHH | glcm       | Imc1                                 | -0.265680945 |
| wavelet-LHH | glcm       | DifferenceAverage                    | 4.882111726  |
| wavelet-LHH | glcm       | Id                                   | 0.303067071  |
| wavelet-LHH | glcm       | ClusterTendency                      | 44.58385111  |
| wavelet-LHH | firstorder | InterquartileRange                   | 124.6738911  |
| wavelet-LHH | firstorder | Skewness                             | -0.144232273 |
| wavelet-LHH | firstorder | Uniformity                           | 0.071188546  |
| wavelet-LHH | firstorder | Median                               | 1.686895361  |
| wavelet-LHH | firstorder | Energy                               | 3754515.774  |
| wavelet-LHH | firstorder | RobustMeanAbsoluteDeviation          | 53.8274525   |
| wavelet-LHH | firstorder | MeanAbsoluteDeviation                | 90.23637508  |
| wavelet-LHH | firstorder | TotalEnergy                          | 101371925.9  |
| wavelet-LHH | firstorder | Maximum                              | 414.5687893  |
| wavelet-LHH | firstorder | RootMeanSquared                      | 126.6686197  |
| wavelet-LHH | firstorder | 90Percentile                         | 132.0534898  |
| wavelet-LHH | firstorder | Minimum                              | -545.9841287 |
| wavelet-LHH | firstorder | Entropy                              | 4.194987541  |
| wavelet-LHH | firstorder | Range                                | 960.552918   |
| wavelet-LHH | firstorder | Variance                             | 16034.63486  |
| wavelet-LHH | firstorder | 10Percentile                         | -145.9888645 |
| wavelet-LHH | firstorder | Kurtosis                             | 5.386776653  |
| wavelet-LHH | firstorder | Mean                                 | -3.210038813 |
| wavelet-LHH | glrlm      | ShortRunLowGrayLevelEmphasis         | 0.006946741  |
| wavelet-LHH | glrlm      | GrayLevelVariance                    | 27.09586915  |
| wavelet-LHH | glrlm      | LowGrayLevelRunEmphasis              | 0.007022144  |
| wavelet-LHH | glrlm      | GrayLevelNonUniformityNormalized     | 0.068026503  |
| wavelet-LHH | glrlm      | RunVariance                          | 0.071766868  |

|             |       |                                      |             |
|-------------|-------|--------------------------------------|-------------|
| wavelet-LHH | glrlm | GrayLevelNonUniformity               | 15.08068131 |
| wavelet-LHH | glrlm | LongRunEmphasis                      | 1.188557305 |
| wavelet-LHH | glrlm | ShortRunHighGrayLevelEmphasis        | 507.6902218 |
| wavelet-LHH | glrlm | RunLengthNonUniformity               | 201.4071309 |
| wavelet-LHH | glrlm | ShortRunEmphasis                     | 0.962747587 |
| wavelet-LHH | glrlm | LongRunHighGrayLevelEmphasis         | 623.7201717 |
| wavelet-LHH | glrlm | RunPercentage                        | 0.947074293 |
| wavelet-LHH | glrlm | LongRunLowGrayLevelEmphasis          | 0.007402465 |
| wavelet-LHH | glrlm | RunEntropy                           | 4.466397284 |
| wavelet-LHH | glrlm | HighGrayLevelRunEmphasis             | 526.8800315 |
| wavelet-LHH | glrlm | RunLengthNonUniformityNormalized     | 0.908029742 |
| wavelet-LHH | glszm | GrayLevelVariance                    | 44.09298576 |
| wavelet-LHH | glszm | ZoneVariance                         | 8.550658425 |
| wavelet-LHH | glszm | GrayLevelNonUniformityNormalized     | 0.04877721  |
| wavelet-LHH | glszm | SizeZoneNonUniformityNormalized      | 0.583579683 |
| wavelet-LHH | glszm | SizeZoneNonUniformity                | 71.19672131 |
| wavelet-LHH | glszm | GrayLevelNonUniformity               | 5.950819672 |
| wavelet-LHH | glszm | LargeAreaEmphasis                    | 12.2295082  |
| wavelet-LHH | glszm | SmallAreaHighGrayLevelEmphasis       | 421.7407954 |
| wavelet-LHH | glszm | ZonePercentage                       | 0.521367521 |
| wavelet-LHH | glszm | LargeAreaLowGrayLevelEmphasis        | 0.033256355 |
| wavelet-LHH | glszm | LargeAreaHighGrayLevelEmphasis       | 6339.42623  |
| wavelet-LHH | glszm | HighGrayLevelZoneEmphasis            | 534.6065574 |
| wavelet-LHH | glszm | SmallAreaEmphasis                    | 0.788207712 |
| wavelet-LHH | glszm | LowGrayLevelZoneEmphasis             | 0.011091168 |
| wavelet-LHH | glszm | ZoneEntropy                          | 5.386926766 |
| wavelet-LHH | glszm | SmallAreaLowGrayLevelEmphasis        | 0.010652276 |
| wavelet-LHH | ngtdm | Coarseness                           | 0.030046516 |
| wavelet-LHH | ngtdm | Complexity                           | 1452.762544 |
| wavelet-LHH | ngtdm | Strength                             | 8.618520814 |
| wavelet-LHH | ngtdm | Contrast                             | 0.211289928 |
| wavelet-LHH | ngtdm | Busyness                             | 0.042397568 |
| wavelet-LLH | gldm  | GrayLevelVariance                    | 50.69165023 |
| wavelet-LLH | gldm  | HighGrayLevelEmphasis                | 657.8717949 |
| wavelet-LLH | gldm  | DependenceEntropy                    | 6.10933203  |
| wavelet-LLH | gldm  | DependenceNonUniformity              | 63.88034188 |
| wavelet-LLH | gldm  | GrayLevelNonUniformity               | 10.97435897 |
| wavelet-LLH | gldm  | SmallDependenceEmphasis              | 0.480582192 |
| wavelet-LLH | gldm  | SmallDependenceHighGrayLevelEmphasis | 326.8138546 |
| wavelet-LLH | gldm  | DependenceNonUniformityNormalized    | 0.272992914 |
| wavelet-LLH | gldm  | LargeDependenceEmphasis              | 6.615384615 |
| wavelet-LLH | gldm  | LargeDependenceLowGrayLevelEmphasis  | 0.016903756 |
| wavelet-LLH | gldm  | DependenceVariance                   | 1.790415662 |
| wavelet-LLH | gldm  | LargeDependenceHighGrayLevelEmphasis | 4147.145299 |
| wavelet-LLH | gldm  | SmallDependenceLowGrayLevelEmphasis  | 0.005525668 |
| wavelet-LLH | gldm  | LowGrayLevelEmphasis                 | 0.006534002 |
| wavelet-LLH | glcm  | JointAverage                         | 24.6357019  |
| wavelet-LLH | glcm  | SumAverage                           | 49.2714038  |
| wavelet-LLH | glcm  | JointEntropy                         | 7.627030238 |
| wavelet-LLH | glcm  | ClusterShade                         | 333.1760987 |
| wavelet-LLH | glcm  | MaximumProbability                   | 0.018848194 |
| wavelet-LLH | glcm  | Idmn                                 | 0.964306353 |
| wavelet-LLH | glcm  | JointEnergy                          | 0.005919537 |
| wavelet-LLH | glcm  | Contrast                             | 80.06873455 |
| wavelet-LLH | glcm  | DifferenceEntropy                    | 4.029056476 |
| wavelet-LLH | glcm  | InverseVariance                      | 0.165949824 |
| wavelet-LLH | glcm  | DifferenceVariance                   | 34.44071611 |
| wavelet-LLH | glcm  | Idn                                  | 0.880238627 |

|             |            |                                  |              |
|-------------|------------|----------------------------------|--------------|
| wavelet-LLH | glcm       | Idm                              | 0.169530795  |
| wavelet-LLH | glcm       | Correlation                      | 0.191065366  |
| wavelet-LLH | glcm       | Autocorrelation                  | 616.676277   |
| wavelet-LLH | glcm       | SumEntropy                       | 5.128934993  |
| wavelet-LLH | glcm       | SumSquares                       | 49.78725691  |
| wavelet-LLH | glcm       | ClusterProminence                | 49806.83147  |
| wavelet-LLH | glcm       | Imc2                             | 0.981974933  |
| wavelet-LLH | glcm       | Imc1                             | -0.360532675 |
| wavelet-LLH | glcm       | DifferenceAverage                | 6.610536351  |
| wavelet-LLH | glcm       | Id                               | 0.256178786  |
| wavelet-LLH | glcm       | ClusterTendency                  | 119.0802931  |
| wavelet-LLH | firstorder | InterquartileRange               | 199.0302582  |
| wavelet-LLH | firstorder | Skewness                         | 0.010987105  |
| wavelet-LLH | firstorder | Uniformity                       | 0.04689897   |
| wavelet-LLH | firstorder | Median                           | -46.66569301 |
| wavelet-LLH | firstorder | Energy                           | 7869503.066  |
| wavelet-LLH | firstorder | RobustMeanAbsoluteDeviation      | 87.01343978  |
| wavelet-LLH | firstorder | MeanAbsoluteDeviation            | 135.0341939  |
| wavelet-LLH | firstorder | TotalEnergy                      | 212476582.8  |
| wavelet-LLH | firstorder | Maximum                          | 434.865131   |
| wavelet-LLH | firstorder | RootMeanSquared                  | 183.3858091  |
| wavelet-LLH | firstorder | 90Percentile                     | 164.1290606  |
| wavelet-LLH | firstorder | Minimum                          | -638.9201059 |
| wavelet-LLH | firstorder | Entropy                          | 4.693229714  |
| wavelet-LLH | firstorder | Range                            | 1073.785237  |
| wavelet-LLH | firstorder | Variance                         | 31414.55636  |
| wavelet-LLH | firstorder | 10Percentile                     | -279.6312915 |
| wavelet-LLH | firstorder | Kurtosis                         | 3.484185027  |
| wavelet-LLH | firstorder | Mean                             | -47.07227019 |
| wavelet-LLH | glrlm      | ShortRunLowGrayLevelEmphasis     | 0.006693024  |
| wavelet-LLH | glrlm      | GrayLevelVariance                | 51.92383687  |
| wavelet-LLH | glrlm      | LowGrayLevelRunEmphasis          | 0.006759455  |
| wavelet-LLH | glrlm      | GrayLevelNonUniformityNormalized | 0.045856667  |
| wavelet-LLH | glrlm      | RunVariance                      | 0.04937058   |
| wavelet-LLH | glrlm      | GrayLevelNonUniformity           | 10.23799921  |
| wavelet-LLH | glrlm      | LongRunEmphasis                  | 1.14878101   |
| wavelet-LLH | glrlm      | ShortRunHighGrayLevelEmphasis    | 636.8664301  |
| wavelet-LLH | glrlm      | RunLengthNonUniformity           | 203.4614788  |
| wavelet-LLH | glrlm      | ShortRunEmphasis                 | 0.964740503  |
| wavelet-LLH | glrlm      | LongRunHighGrayLevelEmphasis     | 752.9680133  |
| wavelet-LLH | glrlm      | RunPercentage                    | 0.953977646  |
| wavelet-LLH | glrlm      | LongRunLowGrayLevelEmphasis      | 0.007038425  |
| wavelet-LLH | glrlm      | RunEntropy                       | 4.911406219  |
| wavelet-LLH | glrlm      | HighGrayLevelRunEmphasis         | 659.1597927  |
| wavelet-LLH | glrlm      | RunLengthNonUniformityNormalized | 0.911131026  |
| wavelet-LLH | glszm      | GrayLevelVariance                | 69.56913933  |
| wavelet-LLH | glszm      | ZoneVariance                     | 3.160421887  |
| wavelet-LLH | glszm      | GrayLevelNonUniformityNormalized | 0.037119049  |
| wavelet-LLH | glszm      | SizeZoneNonUniformityNormalized  | 0.4945516    |
| wavelet-LLH | glszm      | SizeZoneNonUniformity            | 64.78625954  |
| wavelet-LLH | glszm      | GrayLevelNonUniformity           | 4.86259542   |
| wavelet-LLH | glszm      | LargeAreaEmphasis                | 6.351145038  |
| wavelet-LLH | glszm      | SmallAreaHighGrayLevelEmphasis   | 503.073465   |
| wavelet-LLH | glszm      | ZonePercentage                   | 0.55982906   |
| wavelet-LLH | glszm      | LargeAreaLowGrayLevelEmphasis    | 0.019717834  |
| wavelet-LLH | glszm      | LargeAreaHighGrayLevelEmphasis   | 4047.129771  |
| wavelet-LLH | glszm      | HighGrayLevelZoneEmphasis        | 674.5038168  |
| wavelet-LLH | glszm      | SmallAreaEmphasis                | 0.730810583  |

|             |            |                                      |              |
|-------------|------------|--------------------------------------|--------------|
| wavelet-LLH | glszm      | LowGrayLevelZoneEmphasis             | 0.010179556  |
| wavelet-LLH | glszm      | ZoneEntropy                          | 5.822411865  |
| wavelet-LLH | glszm      | SmallAreaLowGrayLevelEmphasis        | 0.009619535  |
| wavelet-LLH | ngtdm      | Coarseness                           | 0.026304183  |
| wavelet-LLH | ngtdm      | Complexity                           | 2380.656078  |
| wavelet-LLH | ngtdm      | Strength                             | 11.00423884  |
| wavelet-LLH | ngtdm      | Contrast                             | 0.385422087  |
| wavelet-LLH | ngtdm      | Busyness                             | 0.04469954   |
| wavelet-LLL | gldm       | GrayLevelVariance                    | 587.9536854  |
| wavelet-LLL | gldm       | HighGrayLevelEmphasis                | 2264.051282  |
| wavelet-LLL | gldm       | DependenceEntropy                    | 6.613662237  |
| wavelet-LLL | gldm       | DependenceNonUniformity              | 127.3675214  |
| wavelet-LLL | gldm       | GrayLevelNonUniformity               | 3.743589744  |
| wavelet-LLL | gldm       | SmallDependenceEmphasis              | 0.760921178  |
| wavelet-LLL | gldm       | SmallDependenceHighGrayLevelEmphasis | 1690.054606  |
| wavelet-LLL | gldm       | DependenceNonUniformityNormalized    | 0.544305647  |
| wavelet-LLL | gldm       | LargeDependenceEmphasis              | 2.222222222  |
| wavelet-LLL | gldm       | LargeDependenceLowGrayLevelEmphasis  | 0.04434395   |
| wavelet-LLL | gldm       | DependenceVariance                   | 0.352107532  |
| wavelet-LLL | gldm       | LargeDependenceHighGrayLevelEmphasis | 5317.264957  |
| wavelet-LLL | gldm       | SmallDependenceLowGrayLevelEmphasis  | 0.004550116  |
| wavelet-LLL | gldm       | LowGrayLevelEmphasis                 | 0.011990183  |
| wavelet-LLL | glcm       | JointAverage                         | 46.51010587  |
| wavelet-LLL | glcm       | SumAverage                           | 93.02021174  |
| wavelet-LLL | glcm       | JointEntropy                         | 8.199525173  |
| wavelet-LLL | glcm       | ClusterShade                         | 11655.68256  |
| wavelet-LLL | glcm       | MaximumProbability                   | 0.00666833   |
| wavelet-LLL | glcm       | Idmn                                 | 0.942465231  |
| wavelet-LLL | glcm       | JointEnergy                          | 0.003493731  |
| wavelet-LLL | glcm       | Contrast                             | 586.1246901  |
| wavelet-LLL | glcm       | DifferenceEntropy                    | 5.261824361  |
| wavelet-LLL | glcm       | InverseVariance                      | 0.062413584  |
| wavelet-LLL | glcm       | DifferenceVariance                   | 194.47481    |
| wavelet-LLL | glcm       | Idn                                  | 0.842485617  |
| wavelet-LLL | glcm       | Idm                                  | 0.059968527  |
| wavelet-LLL | glcm       | Correlation                          | 0.536349098  |
| wavelet-LLL | glcm       | Autocorrelation                      | 2504.242219  |
| wavelet-LLL | glcm       | SumEntropy                           | 6.500570432  |
| wavelet-LLL | glcm       | SumSquares                           | 631.8982146  |
| wavelet-LLL | glcm       | ClusterProminence                    | 7827333.186  |
| wavelet-LLL | glcm       | Imc2                                 | 0.999864036  |
| wavelet-LLL | glcm       | Imc1                                 | -0.669106964 |
| wavelet-LLL | glcm       | DifferenceAverage                    | 19.17656396  |
| wavelet-LLL | glcm       | Id                                   | 0.120464195  |
| wavelet-LLL | glcm       | ClusterTendency                      | 1941.468168  |
| wavelet-LLL | firstorder | InterquartileRange                   | 980.112943   |
| wavelet-LLL | firstorder | Skewness                             | 0.394593317  |
| wavelet-LLL | firstorder | Uniformity                           | 0.015998247  |
| wavelet-LLL | firstorder | Median                               | -1085.352892 |
| wavelet-LLL | firstorder | Energy                               | 315491968.3  |
| wavelet-LLL | firstorder | RobustMeanAbsoluteDeviation          | 389.2482684  |
| wavelet-LLL | firstorder | MeanAbsoluteDeviation                | 513.3607529  |
| wavelet-LLL | firstorder | TotalEnergy                          | 8518283145   |
| wavelet-LLL | firstorder | Maximum                              | 302.5502677  |
| wavelet-LLL | firstorder | RootMeanSquared                      | 1161.144382  |
| wavelet-LLL | firstorder | 90Percentile                         | -101.8951257 |
| wavelet-LLL | firstorder | Minimum                              | -1989.214982 |
| wavelet-LLL | firstorder | Entropy                              | 6.157746413  |

|             |            |                                      |              |
|-------------|------------|--------------------------------------|--------------|
| wavelet-LLL | firstorder | Range                                | 2291.765249  |
| wavelet-LLL | firstorder | Variance                             | 368245.9039  |
| wavelet-LLL | firstorder | 10Percentile                         | -1736.947942 |
| wavelet-LLL | firstorder | Kurtosis                             | 2.126736872  |
| wavelet-LLL | firstorder | Mean                                 | -989.9547318 |
| wavelet-LLL | glrlm      | ShortRunLowGrayLevelEmphasis         | 0.011445515  |
| wavelet-LLL | glrlm      | GrayLevelVariance                    | 585.0740118  |
| wavelet-LLL | glrlm      | LowGrayLevelRunEmphasis              | 0.011753111  |
| wavelet-LLL | glrlm      | GrayLevelNonUniformityNormalized     | 0.015991755  |
| wavelet-LLL | glrlm      | RunVariance                          | 0.014128347  |
| wavelet-LLL | glrlm      | GrayLevelNonUniformity               | 3.689196312  |
| wavelet-LLL | glrlm      | LongRunEmphasis                      | 1.043299454  |
| wavelet-LLL | glrlm      | ShortRunHighGrayLevelEmphasis        | 2234.607088  |
| wavelet-LLL | glrlm      | RunLengthNonUniformity               | 224.2162534  |
| wavelet-LLL | glrlm      | ShortRunEmphasis                     | 0.989175136  |
| wavelet-LLL | glrlm      | LongRunHighGrayLevelEmphasis         | 2367.72478   |
| wavelet-LLL | glrlm      | RunPercentage                        | 0.985864563  |
| wavelet-LLL | glrlm      | LongRunLowGrayLevelEmphasis          | 0.012983495  |
| wavelet-LLL | glrlm      | RunEntropy                           | 6.193559787  |
| wavelet-LLL | glrlm      | HighGrayLevelRunEmphasis             | 2261.230626  |
| wavelet-LLL | glrlm      | RunLengthNonUniformityNormalized     | 0.971743305  |
| wavelet-LLL | glszm      | GrayLevelVariance                    | 554.9739877  |
| wavelet-LLL | glszm      | ZoneVariance                         | 0.256456584  |
| wavelet-LLL | glszm      | GrayLevelNonUniformityNormalized     | 0.015942183  |
| wavelet-LLL | glszm      | SizeZoneNonUniformityNormalized      | 0.714900627  |
| wavelet-LLL | glszm      | SizeZoneNonUniformity                | 138.6907216  |
| wavelet-LLL | glszm      | GrayLevelNonUniformity               | 3.092783505  |
| wavelet-LLL | glszm      | LargeAreaEmphasis                    | 1.711340206  |
| wavelet-LLL | glszm      | SmallAreaHighGrayLevelEmphasis       | 1930.278207  |
| wavelet-LLL | glszm      | ZonePercentage                       | 0.829059829  |
| wavelet-LLL | glszm      | LargeAreaLowGrayLevelEmphasis        | 0.027145207  |
| wavelet-LLL | glszm      | LargeAreaHighGrayLevelEmphasis       | 3985.350515  |
| wavelet-LLL | glszm      | HighGrayLevelZoneEmphasis            | 2234.706186  |
| wavelet-LLL | glszm      | SmallAreaEmphasis                    | 0.871026632  |
| wavelet-LLL | glszm      | LowGrayLevelZoneEmphasis             | 0.008403912  |
| wavelet-LLL | glszm      | ZoneEntropy                          | 6.477213263  |
| wavelet-LLL | glszm      | SmallAreaLowGrayLevelEmphasis        | 0.004032382  |
| wavelet-LLL | ngtdm      | Coarseness                           | 0.025021915  |
| wavelet-LLL | ngtdm      | Complexity                           | 32760.63931  |
| wavelet-LLL | ngtdm      | Strength                             | 84.66519978  |
| wavelet-LLL | ngtdm      | Contrast                             | 1.83743279   |
| wavelet-LLL | ngtdm      | Busyness                             | 0.016200667  |
| wavelet-HHL | gldm       | GrayLevelVariance                    | 29.69064577  |
| wavelet-HHL | gldm       | HighGrayLevelEmphasis                | 208.9529915  |
| wavelet-HHL | gldm       | DependenceEntropy                    | 5.838150055  |
| wavelet-HHL | gldm       | DependenceNonUniformity              | 68.12820513  |
| wavelet-HHL | gldm       | GrayLevelNonUniformity               | 14.44444444  |
| wavelet-HHL | gldm       | SmallDependenceEmphasis              | 0.510693257  |
| wavelet-HHL | gldm       | SmallDependenceHighGrayLevelEmphasis | 126.6225867  |
| wavelet-HHL | gldm       | DependenceNonUniformityNormalized    | 0.291146176  |
| wavelet-HHL | gldm       | LargeDependenceEmphasis              | 5.735042735  |
| wavelet-HHL | gldm       | LargeDependenceLowGrayLevelEmphasis  | 0.058237016  |
| wavelet-HHL | gldm       | DependenceVariance                   | 1.421433268  |
| wavelet-HHL | gldm       | LargeDependenceHighGrayLevelEmphasis | 967.7051282  |
| wavelet-HHL | gldm       | SmallDependenceLowGrayLevelEmphasis  | 0.016067412  |
| wavelet-HHL | gldm       | LowGrayLevelEmphasis                 | 0.020558798  |
| wavelet-HHL | glcm       | JointAverage                         | 13.41325355  |
| wavelet-HHL | glcm       | SumAverage                           | 26.8265071   |

|             |            |                                  |              |
|-------------|------------|----------------------------------|--------------|
| wavelet-HHL | glcm       | JointEntropy                     | 7.377003207  |
| wavelet-HHL | glcm       | ClusterShade                     | 118.1091075  |
| wavelet-HHL | glcm       | MaximumProbability               | 0.019983454  |
| wavelet-HHL | glcm       | Idmn                             | 0.95320255   |
| wavelet-HHL | glcm       | JointEnergy                      | 0.007259427  |
| wavelet-HHL | glcm       | Contrast                         | 56.80885898  |
| wavelet-HHL | glcm       | DifferenceEntropy                | 3.8226111    |
| wavelet-HHL | glcm       | InverseVariance                  | 0.18571406   |
| wavelet-HHL | glcm       | DifferenceVariance               | 22.55512497  |
| wavelet-HHL | glcm       | Idn                              | 0.861202787  |
| wavelet-HHL | glcm       | Idm                              | 0.175210093  |
| wavelet-HHL | glcm       | Correlation                      | 0.002370523  |
| wavelet-HHL | glcm       | Autocorrelation                  | 180.0321074  |
| wavelet-HHL | glcm       | SumEntropy                       | 4.689683784  |
| wavelet-HHL | glcm       | SumSquares                       | 28.50243951  |
| wavelet-HHL | glcm       | ClusterProminence                | 11369.41395  |
| wavelet-HHL | glcm       | Imc2                             | 0.956463264  |
| wavelet-HHL | glcm       | Imc1                             | -0.289028043 |
| wavelet-HHL | glcm       | DifferenceAverage                | 5.717753841  |
| wavelet-HHL | glcm       | Id                               | 0.265401153  |
| wavelet-HHL | glcm       | ClusterTendency                  | 57.20089907  |
| wavelet-HHL | firstorder | InterquartileRange               | 155.417377   |
| wavelet-HHL | firstorder | Skewness                         | 0.542593435  |
| wavelet-HHL | firstorder | Uniformity                       | 0.061728395  |
| wavelet-HHL | firstorder | Median                           | -16.6727796  |
| wavelet-HHL | firstorder | Energy                           | 4362444.114  |
| wavelet-HHL | firstorder | RobustMeanAbsoluteDeviation      | 65.97371217  |
| wavelet-HHL | firstorder | MeanAbsoluteDeviation            | 103.5898671  |
| wavelet-HHL | firstorder | TotalEnergy                      | 117785991.1  |
| wavelet-HHL | firstorder | Maximum                          | 467.3930616  |
| wavelet-HHL | firstorder | RootMeanSquared                  | 136.5390917  |
| wavelet-HHL | firstorder | 90Percentile                     | 186.7653419  |
| wavelet-HHL | firstorder | Minimum                          | -310.2082178 |
| wavelet-HHL | firstorder | Entropy                          | 4.351076815  |
| wavelet-HHL | firstorder | Range                            | 777.6012794  |
| wavelet-HHL | firstorder | Variance                         | 18635.67495  |
| wavelet-HHL | firstorder | 10Percentile                     | -159.9114746 |
| wavelet-HHL | firstorder | Kurtosis                         | 3.615229169  |
| wavelet-HHL | firstorder | Mean                             | -2.692324193 |
| wavelet-HHL | glrlm      | ShortRunLowGrayLevelEmphasis     | 0.020819472  |
| wavelet-HHL | glrlm      | GrayLevelVariance                | 30.5566123   |
| wavelet-HHL | glrlm      | LowGrayLevelRunEmphasis          | 0.021087493  |
| wavelet-HHL | glrlm      | GrayLevelNonUniformityNormalized | 0.060057038  |
| wavelet-HHL | glrlm      | RunVariance                      | 0.044764229  |
| wavelet-HHL | glrlm      | GrayLevelNonUniformity           | 13.47282002  |
| wavelet-HHL | glrlm      | LongRunEmphasis                  | 1.133959413  |
| wavelet-HHL | glrlm      | ShortRunHighGrayLevelEmphasis    | 205.8635343  |
| wavelet-HHL | glrlm      | RunLengthNonUniformity           | 206.5520668  |
| wavelet-HHL | glrlm      | ShortRunEmphasis                 | 0.968434114  |
| wavelet-HHL | glrlm      | LongRunHighGrayLevelEmphasis     | 232.780495   |
| wavelet-HHL | glrlm      | RunPercentage                    | 0.958579882  |
| wavelet-HHL | glrlm      | LongRunLowGrayLevelEmphasis      | 0.022204442  |
| wavelet-HHL | glrlm      | RunEntropy                       | 4.571611798  |
| wavelet-HHL | glrlm      | HighGrayLevelRunEmphasis         | 210.9768589  |
| wavelet-HHL | glrlm      | RunLengthNonUniformityNormalized | 0.92034804   |
| wavelet-HHL | glszm      | GrayLevelVariance                | 42.49821583  |
| wavelet-HHL | glszm      | ZoneVariance                     | 3.716046713  |
| wavelet-HHL | glszm      | GrayLevelNonUniformityNormalized | 0.046064014  |



|             |            |                                      |              |
|-------------|------------|--------------------------------------|--------------|
| wavelet-HHL | glszm      | SizeZoneNonUniformityNormalized      | 0.539143599  |
| wavelet-HHL | glszm      | SizeZoneNonUniformity                | 73.32352941  |
| wavelet-HHL | glszm      | GrayLevelNonUniformity               | 6.264705882  |
| wavelet-HHL | glszm      | LargeAreaEmphasis                    | 6.676470588  |
| wavelet-HHL | glszm      | SmallAreaHighGrayLevelEmphasis       | 197.8224718  |
| wavelet-HHL | glszm      | ZonePercentage                       | 0.581196581  |
| wavelet-HHL | glszm      | LargeAreaLowGrayLevelEmphasis        | 0.072561612  |
| wavelet-HHL | glszm      | LargeAreaHighGrayLevelEmphasis       | 1128.992647  |
| wavelet-HHL | glszm      | HighGrayLevelZoneEmphasis            | 241.1838235  |
| wavelet-HHL | glszm      | SmallAreaEmphasis                    | 0.762160502  |
| wavelet-HHL | glszm      | LowGrayLevelZoneEmphasis             | 0.02903747   |
| wavelet-HHL | glszm      | ZoneEntropy                          | 5.551550827  |
| wavelet-HHL | glszm      | SmallAreaLowGrayLevelEmphasis        | 0.026525435  |
| wavelet-HHL | ngtdm      | Coarseness                           | 0.025584498  |
| wavelet-HHL | ngtdm      | Complexity                           | 1431.207294  |
| wavelet-HHL | ngtdm      | Strength                             | 6.837848866  |
| wavelet-HHL | ngtdm      | Contrast                             | 0.290822547  |
| wavelet-HHL | ngtdm      | Busyness                             | 0.101998031  |
| wavelet-HLH | gldm       | GrayLevelVariance                    | 22.83665717  |
| wavelet-HLH | gldm       | HighGrayLevelEmphasis                | 577.7008547  |
| wavelet-HLH | gldm       | DependenceEntropy                    | 5.827114359  |
| wavelet-HLH | gldm       | DependenceNonUniformity              | 51.64102564  |
| wavelet-HLH | gldm       | GrayLevelNonUniformity               | 18.99145299  |
| wavelet-HLH | gldm       | SmallDependenceEmphasis              | 0.395352214  |
| wavelet-HLH | gldm       | SmallDependenceHighGrayLevelEmphasis | 227.6793947  |
| wavelet-HLH | gldm       | DependenceNonUniformityNormalized    | 0.220688144  |
| wavelet-HLH | gldm       | LargeDependenceEmphasis              | 10.61538462  |
| wavelet-HLH | gldm       | LargeDependenceLowGrayLevelEmphasis  | 0.023640007  |
| wavelet-HLH | gldm       | DependenceVariance                   | 3.274526992  |
| wavelet-HLH | gldm       | LargeDependenceHighGrayLevelEmphasis | 6075.512821  |
| wavelet-HLH | gldm       | SmallDependenceLowGrayLevelEmphasis  | 0.005253214  |
| wavelet-HLH | gldm       | LowGrayLevelEmphasis                 | 0.006373106  |
| wavelet-HLH | glcm       | JointAverage                         | 23.61508634  |
| wavelet-HLH | glcm       | SumAverage                           | 47.23017267  |
| wavelet-HLH | glcm       | JointEntropy                         | 6.885396811  |
| wavelet-HLH | glcm       | ClusterShade                         | -69.35163729 |
| wavelet-HLH | glcm       | MaximumProbability                   | 0.039310065  |
| wavelet-HLH | glcm       | Idmn                                 | 0.974906981  |
| wavelet-HLH | glcm       | JointEnergy                          | 0.012135963  |
| wavelet-HLH | glcm       | Contrast                             | 42.1011355   |
| wavelet-HLH | glcm       | DifferenceEntropy                    | 3.57383689   |
| wavelet-HLH | glcm       | InverseVariance                      | 0.244162543  |
| wavelet-HLH | glcm       | DifferenceVariance                   | 21.21224605  |
| wavelet-HLH | glcm       | Idn                                  | 0.903337527  |
| wavelet-HLH | glcm       | Idm                                  | 0.243171039  |
| wavelet-HLH | glcm       | Correlation                          | -0.007013536 |
| wavelet-HLH | glcm       | Autocorrelation                      | 557.3711394  |
| wavelet-HLH | glcm       | SumEntropy                           | 4.36484945   |
| wavelet-HLH | glcm       | SumSquares                           | 20.74205746  |
| wavelet-HLH | glcm       | ClusterProminence                    | 11377.06914  |
| wavelet-HLH | glcm       | Imc2                                 | 0.929637768  |
| wavelet-HLH | glcm       | Imc1                                 | -0.255810042 |
| wavelet-HLH | glcm       | DifferenceAverage                    | 4.495212249  |
| wavelet-HLH | glcm       | Id                                   | 0.328782966  |
| wavelet-HLH | glcm       | ClusterTendency                      | 40.86709436  |
| wavelet-HLH | firstorder | InterquartileRange                   | 109.8256677  |
| wavelet-HLH | firstorder | Skewness                             | -0.281641875 |
| wavelet-HLH | firstorder | Uniformity                           | 0.081160056  |

|             |            |                                  |              |
|-------------|------------|----------------------------------|--------------|
| wavelet-HLH | firstorder | Median                           | -2.488134727 |
| wavelet-HLH | firstorder | Energy                           | 3295499.437  |
| wavelet-HLH | firstorder | RobustMeanAbsoluteDeviation      | 48.33194323  |
| wavelet-HLH | firstorder | MeanAbsoluteDeviation            | 82.84978145  |
| wavelet-HLH | firstorder | TotalEnergy                      | 88978484.79  |
| wavelet-HLH | firstorder | Maximum                          | 370.5857604  |
| wavelet-HLH | firstorder | RootMeanSquared                  | 118.6732107  |
| wavelet-HLH | firstorder | 90Percentile                     | 147.3717081  |
| wavelet-HLH | firstorder | Minimum                          | -555.2990456 |
| wavelet-HLH | firstorder | Entropy                          | 4.048090373  |
| wavelet-HLH | firstorder | Range                            | 925.884806   |
| wavelet-HLH | firstorder | Variance                         | 14079.75557  |
| wavelet-HLH | firstorder | 10Percentile                     | -130.4203198 |
| wavelet-HLH | firstorder | Kurtosis                         | 5.924274689  |
| wavelet-HLH | firstorder | Mean                             | 1.890861363  |
| wavelet-HLH | glrlm      | ShortRunLowGrayLevelEmphasis     | 0.006606314  |
| wavelet-HLH | glrlm      | GrayLevelVariance                | 24.04552928  |
| wavelet-HLH | glrlm      | LowGrayLevelRunEmphasis          | 0.006695986  |
| wavelet-HLH | glrlm      | GrayLevelNonUniformityNormalized | 0.076677345  |
| wavelet-HLH | glrlm      | RunVariance                      | 0.078820045  |
| wavelet-HLH | glrlm      | GrayLevelNonUniformity           | 16.76479718  |
| wavelet-HLH | glrlm      | LongRunEmphasis                  | 1.225778972  |
| wavelet-HLH | glrlm      | ShortRunHighGrayLevelEmphasis    | 549.5416417  |
| wavelet-HLH | glrlm      | RunLengthNonUniformity           | 192.2658123  |
| wavelet-HLH | glrlm      | ShortRunEmphasis                 | 0.9506853    |
| wavelet-HLH | glrlm      | LongRunHighGrayLevelEmphasis     | 707.9866061  |
| wavelet-HLH | glrlm      | RunPercentage                    | 0.93425378   |
| wavelet-HLH | glrlm      | LongRunLowGrayLevelEmphasis      | 0.00710328   |
| wavelet-HLH | glrlm      | RunEntropy                       | 4.383565114  |
| wavelet-HLH | glrlm      | HighGrayLevelRunEmphasis         | 577.8593436  |
| wavelet-HLH | glrlm      | RunLengthNonUniformityNormalized | 0.878912261  |
| wavelet-HLH | glszm      | GrayLevelVariance                | 40.2492284   |
| wavelet-HLH | glszm      | ZoneVariance                     | 12.71296296  |
| wavelet-HLH | glszm      | GrayLevelNonUniformityNormalized | 0.051954733  |
| wavelet-HLH | glszm      | SizeZoneNonUniformityNormalized  | 0.453703704  |
| wavelet-HLH | glszm      | SizeZoneNonUniformity            | 49           |
| wavelet-HLH | glszm      | GrayLevelNonUniformity           | 5.611111111  |
| wavelet-HLH | glszm      | LargeAreaEmphasis                | 17.40740741  |
| wavelet-HLH | glszm      | SmallAreaHighGrayLevelEmphasis   | 400.4141863  |
| wavelet-HLH | glszm      | ZonePercentage                   | 0.461538462  |
| wavelet-HLH | glszm      | LargeAreaLowGrayLevelEmphasis    | 0.041008329  |
| wavelet-HLH | glszm      | LargeAreaHighGrayLevelEmphasis   | 9919.62963   |
| wavelet-HLH | glszm      | HighGrayLevelZoneEmphasis        | 578.2314815  |
| wavelet-HLH | glszm      | SmallAreaEmphasis                | 0.695860699  |
| wavelet-HLH | glszm      | LowGrayLevelZoneEmphasis         | 0.01166887   |
| wavelet-HLH | glszm      | ZoneEntropy                      | 5.481138544  |
| wavelet-HLH | glszm      | SmallAreaLowGrayLevelEmphasis    | 0.011077629  |
| wavelet-HLH | ngtdm      | Coarseness                       | 0.029947686  |
| wavelet-HLH | ngtdm      | Complexity                       | 1070.09102   |
| wavelet-HLH | ngtdm      | Strength                         | 7.358362273  |
| wavelet-HLH | ngtdm      | Contrast                         | 0.226860011  |
| wavelet-HLH | ngtdm      | Busyness                         | 0.047740703  |

| Image type | Feature Class | Feature Name                         | Value                                                                                                                                                                                                                                                                                                                                                                                                             |
|------------|---------------|--------------------------------------|-------------------------------------------------------------------------------------------------------------------------------------------------------------------------------------------------------------------------------------------------------------------------------------------------------------------------------------------------------------------------------------------------------------------|
| general    | info          | BoundingBox                          | 3: RTSTRUCT: C99-DNU_A_segment_GTV 2<br>(1, 0, 1, 6, 9, 8)                                                                                                                                                                                                                                                                                                                                                        |
| general    | info          | EnabledImageTypes                    | {u'Original': {}, u'Wavelet': {}}                                                                                                                                                                                                                                                                                                                                                                                 |
|            |               |                                      | {'distances': [1], 'additionalInfo': True, 'force2D': False, 'interpolator': 'sitkBSpline', 'resampledPixelSpacing': [3.0], 'label': 1, 'normalizeScale': 1, 'normalize': False, 'force2Ddimension': 0, 'removeOutliers': None, 'minimumROISize': None, u'binWidth': 25.0, 'minimumROIDimensions': 1, u'correctMask': True, 'preCrop': False, u'symmetricalGLCM': True, 'resegmentRange': None, 'padDistance': 5} |
| general    | info          | GeneralSettings                      |                                                                                                                                                                                                                                                                                                                                                                                                                   |
| general    | info          | ImageHash                            | 1aed7435b4888a53c40371afc2ecb3c32a085d2f                                                                                                                                                                                                                                                                                                                                                                          |
| general    | info          | ImageSpacing                         | (0.9765625000000002, 0.9765625000000002, 2.0)                                                                                                                                                                                                                                                                                                                                                                     |
| general    | info          | MaskHash                             | 584ac1c45938c751fd6c30bb06159872626010f9                                                                                                                                                                                                                                                                                                                                                                          |
| general    | info          | NumpyVersion                         | 1.13.1                                                                                                                                                                                                                                                                                                                                                                                                            |
| general    | info          | PyWaveletVersion                     | 0.5.2                                                                                                                                                                                                                                                                                                                                                                                                             |
| general    | info          | SimpleITKVersion                     | 1.1.0                                                                                                                                                                                                                                                                                                                                                                                                             |
| general    | info          | Version                              | 1.3.0.post102+g1b0eb74                                                                                                                                                                                                                                                                                                                                                                                            |
| general    | info          | VolumeNum                            | 1                                                                                                                                                                                                                                                                                                                                                                                                                 |
| general    | info          | VoxelNum                             | 208                                                                                                                                                                                                                                                                                                                                                                                                               |
| original   | shape         | Maximum3DDiameter                    | 28.3019434                                                                                                                                                                                                                                                                                                                                                                                                        |
| original   | shape         | Maximum2DDiameterSlice               | 25.63201124                                                                                                                                                                                                                                                                                                                                                                                                       |
| original   | shape         | Sphericity                           | 0.837116378                                                                                                                                                                                                                                                                                                                                                                                                       |
| original   | shape         | MinorAxis                            | 21.47687584                                                                                                                                                                                                                                                                                                                                                                                                       |
| original   | shape         | Elongation                           | 0.830147722                                                                                                                                                                                                                                                                                                                                                                                                       |
| original   | shape         | SurfaceVolumeRatio                   | 0.325004409                                                                                                                                                                                                                                                                                                                                                                                                       |
| original   | shape         | Volume                               | 5616                                                                                                                                                                                                                                                                                                                                                                                                              |
| original   | shape         | MajorAxis                            | 25.87114951                                                                                                                                                                                                                                                                                                                                                                                                       |
| original   | shape         | SurfaceArea                          | 1825.22476                                                                                                                                                                                                                                                                                                                                                                                                        |
| original   | shape         | Flatness                             | 0.580279751                                                                                                                                                                                                                                                                                                                                                                                                       |
| original   | shape         | LeastAxis                            | 15.01250419                                                                                                                                                                                                                                                                                                                                                                                                       |
| original   | shape         | Maximum2DDiameterColumn              | 22.84731932                                                                                                                                                                                                                                                                                                                                                                                                       |
| original   | shape         | Maximum2DDiameterRow                 | 27.65863337                                                                                                                                                                                                                                                                                                                                                                                                       |
| original   | gldm          | GrayLevelVariance                    | 40.09982896                                                                                                                                                                                                                                                                                                                                                                                                       |
| original   | gldm          | HighGrayLevelEmphasis                | 482.5144231                                                                                                                                                                                                                                                                                                                                                                                                       |
| original   | gldm          | DependenceEntropy                    | 5.933374428                                                                                                                                                                                                                                                                                                                                                                                                       |
| original   | gldm          | DependenceNonUniformity              | 30.21153846                                                                                                                                                                                                                                                                                                                                                                                                       |
| original   | gldm          | GrayLevelNonUniformity               | 25.51923077                                                                                                                                                                                                                                                                                                                                                                                                       |
| original   | gldm          | SmallDependenceEmphasis              | 0.351567988                                                                                                                                                                                                                                                                                                                                                                                                       |
| original   | gldm          | SmallDependenceHighGrayLevelEmphasis | 111.6162256                                                                                                                                                                                                                                                                                                                                                                                                       |
| original   | gldm          | DependenceNonUniformityNormalized    | 0.145247781                                                                                                                                                                                                                                                                                                                                                                                                       |
| original   | gldm          | LargeDependenceEmphasis              | 37.81730769                                                                                                                                                                                                                                                                                                                                                                                                       |
| original   | gldm          | LargeDependenceLowGrayLevelEmphasis  | 0.079398522                                                                                                                                                                                                                                                                                                                                                                                                       |
| original   | gldm          | DependenceVariance                   | 17.99768861                                                                                                                                                                                                                                                                                                                                                                                                       |
| original   | gldm          | LargeDependenceHighGrayLevelEmphasis | 23220.34135                                                                                                                                                                                                                                                                                                                                                                                                       |
| original   | gldm          | SmallDependenceLowGrayLevelEmphasis  | 0.009064822                                                                                                                                                                                                                                                                                                                                                                                                       |
| original   | gldm          | LowGrayLevelEmphasis                 | 0.012075127                                                                                                                                                                                                                                                                                                                                                                                                       |
| original   | glcm          | JointAverage                         | 22.0027579                                                                                                                                                                                                                                                                                                                                                                                                        |
| original   | glcm          | SumAverage                           | 44.0055158                                                                                                                                                                                                                                                                                                                                                                                                        |
| original   | glcm          | JointEntropy                         | 6.032070287                                                                                                                                                                                                                                                                                                                                                                                                       |
| original   | glcm          | ClusterShade                         | -1231.957408                                                                                                                                                                                                                                                                                                                                                                                                      |
| original   | glcm          | MaximumProbability                   | 0.135093713                                                                                                                                                                                                                                                                                                                                                                                                       |
| original   | glcm          | Idmn                                 | 0.954125756                                                                                                                                                                                                                                                                                                                                                                                                       |

|          |            |                                  |              |
|----------|------------|----------------------------------|--------------|
| original | glcm       | JointEnergy                      | 0.034049619  |
| original | glcm       | Contrast                         | 46.49914701  |
| original | glcm       | DifferenceEntropy                | 3.459328062  |
| original | glcm       | InverseVariance                  | 0.293650976  |
| original | glcm       | DifferenceVariance               | 27.99430095  |
| original | glcm       | Idn                              | 0.887499692  |
| original | glcm       | Idm                              | 0.358304818  |
| original | glcm       | Correlation                      | 0.27415355   |
| original | glcm       | Autocorrelation                  | 493.8318127  |
| original | glcm       | SumEntropy                       | 4.307505202  |
| original | glcm       | SumSquares                       | 32.90081187  |
| original | glcm       | ClusterProminence                | 37291.75866  |
| original | glcm       | Imc2                             | 0.925029942  |
| original | glcm       | Imc1                             | -0.281136461 |
| original | glcm       | DifferenceAverage                | 4.25520398   |
| original | glcm       | Id                               | 0.42004274   |
| original | glcm       | ClusterTendency                  | 85.10410045  |
| original | firstorder | InterquartileRange               | 169.75       |
| original | firstorder | Skewness                         | -1.490363702 |
| original | firstorder | Uniformity                       | 0.122688609  |
| original | firstorder | Median                           | 17           |
| original | firstorder | Energy                           | 5992986      |
| original | firstorder | RobustMeanAbsoluteDeviation      | 79.02961243  |
| original | firstorder | MeanAbsoluteDeviation            | 124.9522929  |
| original | firstorder | TotalEnergy                      | 161810622    |
| original | firstorder | Maximum                          | 108          |
| original | firstorder | RootMeanSquared                  | 169.7422537  |
| original | firstorder | 90Percentile                     | 57.3         |
| original | firstorder | Minimum                          | -564         |
| original | firstorder | Entropy                          | 3.800177996  |
| original | firstorder | Range                            | 672          |
| original | firstorder | Variance                         | 25001.74482  |
| original | firstorder | 10Percentile                     | -293.6       |
| original | firstorder | Kurtosis                         | 4.244942533  |
| original | firstorder | Mean                             | -61.73076923 |
| original | glrlm      | ShortRunLowGrayLevelEmphasis     | 0.013322526  |
| original | glrlm      | GrayLevelVariance                | 43.44891001  |
| original | glrlm      | LowGrayLevelRunEmphasis          | 0.013563481  |
| original | glrlm      | GrayLevelNonUniformityNormalized | 0.095348242  |
| original | glrlm      | RunVariance                      | 0.227740216  |
| original | glrlm      | GrayLevelNonUniformity           | 17.21715857  |
| original | glrlm      | LongRunEmphasis                  | 1.560280328  |
| original | glrlm      | ShortRunHighGrayLevelEmphasis    | 407.8339461  |
| original | glrlm      | RunLengthNonUniformity           | 142.3083301  |
| original | glrlm      | ShortRunEmphasis                 | 0.907533687  |
| original | glrlm      | LongRunHighGrayLevelEmphasis     | 804.8880582  |
| original | glrlm      | RunPercentage                    | 0.867233728  |
| original | glrlm      | LongRunLowGrayLevelEmphasis      | 0.01483256   |
| original | glrlm      | RunEntropy                       | 4.465469984  |
| original | glrlm      | HighGrayLevelRunEmphasis         | 463.4769206  |
| original | glrlm      | RunLengthNonUniformityNormalized | 0.788074968  |
| original | glszm      | GrayLevelVariance                | 54.0475      |
| original | glszm      | ZoneVariance                     | 49.265       |
| original | glszm      | GrayLevelNonUniformityNormalized | 0.0484375    |
| original | glszm      | SizeZoneNonUniformityNormalized  | 0.571875     |
| original | glszm      | SizeZoneNonUniformity            | 45.75        |

|             |            |                                      |              |
|-------------|------------|--------------------------------------|--------------|
| original    | glszm      | GrayLevelNonUniformity               | 3.875        |
| original    | glszm      | LargeAreaEmphasis                    | 56.025       |
| original    | glszm      | SmallAreaHighGrayLevelEmphasis       | 221.3864431  |
| original    | glszm      | ZonePercentage                       | 0.384615385  |
| original    | glszm      | LargeAreaLowGrayLevelEmphasis        | 0.124879854  |
| original    | glszm      | LargeAreaHighGrayLevelEmphasis       | 34184.0625   |
| original    | glszm      | HighGrayLevelZoneEmphasis            | 324.65       |
| original    | glszm      | SmallAreaEmphasis                    | 0.781265744  |
| original    | glszm      | LowGrayLevelZoneEmphasis             | 0.025363901  |
| original    | glszm      | ZoneEntropy                          | 5.166882745  |
| original    | glszm      | SmallAreaLowGrayLevelEmphasis        | 0.022500165  |
| original    | ngtdm      | Coarseness                           | 0.019455317  |
| original    | ngtdm      | Complexity                           | 1113.60645   |
| original    | ngtdm      | Strength                             | 11.94321305  |
| original    | ngtdm      | Contrast                             | 0.354020814  |
| original    | ngtdm      | Busyness                             | 0.060654962  |
| wavelet-HHH | gldm       | GrayLevelVariance                    | 6.644138314  |
| wavelet-HHH | gldm       | HighGrayLevelEmphasis                | 66.55769231  |
| wavelet-HHH | gldm       | DependenceEntropy                    | 5.563031693  |
| wavelet-HHH | gldm       | DependenceNonUniformity              | 32.57692308  |
| wavelet-HHH | gldm       | GrayLevelNonUniformity               | 26.02884615  |
| wavelet-HHH | gldm       | SmallDependenceEmphasis              | 0.308870893  |
| wavelet-HHH | gldm       | SmallDependenceHighGrayLevelEmphasis | 22.79989637  |
| wavelet-HHH | gldm       | DependenceNonUniformityNormalized    | 0.156619822  |
| wavelet-HHH | gldm       | LargeDependenceEmphasis              | 17.72115385  |
| wavelet-HHH | gldm       | LargeDependenceLowGrayLevelEmphasis  | 0.360284512  |
| wavelet-HHH | gldm       | DependenceVariance                   | 5.538369083  |
| wavelet-HHH | gldm       | LargeDependenceHighGrayLevelEmphasis | 1030.807692  |
| wavelet-HHH | gldm       | SmallDependenceLowGrayLevelEmphasis  | 0.016734545  |
| wavelet-HHH | gldm       | LowGrayLevelEmphasis                 | 0.032769134  |
| wavelet-HHH | glcm       | JointAverage                         | 7.653387112  |
| wavelet-HHH | glcm       | SumAverage                           | 15.30677422  |
| wavelet-HHH | glcm       | JointEntropy                         | 6.0481745    |
| wavelet-HHH | glcm       | ClusterShade                         | 7.493592789  |
| wavelet-HHH | glcm       | MaximumProbability                   | 0.063531281  |
| wavelet-HHH | glcm       | ldmn                                 | 0.953516048  |
| wavelet-HHH | glcm       | JointEnergy                          | 0.022223885  |
| wavelet-HHH | glcm       | Contrast                             | 12.46306017  |
| wavelet-HHH | glcm       | DifferenceEntropy                    | 2.914268959  |
| wavelet-HHH | glcm       | InverseVariance                      | 0.317421442  |
| wavelet-HHH | glcm       | DifferenceVariance                   | 5.310514176  |
| wavelet-HHH | glcm       | ldn                                  | 0.863153397  |
| wavelet-HHH | glcm       | ldm                                  | 0.326731891  |
| wavelet-HHH | glcm       | Correlation                          | -0.029179653 |
| wavelet-HHH | glcm       | Autocorrelation                      | 58.38799431  |
| wavelet-HHH | glcm       | SumEntropy                           | 3.648229006  |
| wavelet-HHH | glcm       | SumSquares                           | 6.041206623  |
| wavelet-HHH | glcm       | ClusterProminence                    | 565.0080914  |
| wavelet-HHH | glcm       | lmc2                                 | 0.78418557   |
| wavelet-HHH | glcm       | lmc1                                 | -0.147469917 |
| wavelet-HHH | glcm       | DifferenceAverage                    | 2.648004601  |
| wavelet-HHH | glcm       | ld                                   | 0.408099401  |
| wavelet-HHH | glcm       | ClusterTendency                      | 11.70176632  |
| wavelet-HHH | firstorder | InterquartileRange                   | 72.70266084  |
| wavelet-HHH | firstorder | Skewness                             | 0.162017923  |
| wavelet-HHH | firstorder | Uniformity                           | 0.125138683  |

|             |            |                                  |              |
|-------------|------------|----------------------------------|--------------|
| wavelet-HHH | firstorder | Median                           | 5.180304643  |
| wavelet-HHH | firstorder | Energy                           | 856861.6168  |
| wavelet-HHH | firstorder | RobustMeanAbsoluteDeviation      | 31.27137267  |
| wavelet-HHH | firstorder | MeanAbsoluteDeviation            | 48.5495215   |
| wavelet-HHH | firstorder | TotalEnergy                      | 23135263.65  |
| wavelet-HHH | firstorder | Maximum                          | 183.8217886  |
| wavelet-HHH | firstorder | RootMeanSquared                  | 64.18354154  |
| wavelet-HHH | firstorder | 90Percentile                     | 92.37014475  |
| wavelet-HHH | firstorder | Minimum                          | -173.1935348 |
| wavelet-HHH | firstorder | Entropy                          | 3.336219577  |
| wavelet-HHH | firstorder | Range                            | 357.0153234  |
| wavelet-HHH | firstorder | Variance                         | 4078.634241  |
| wavelet-HHH | firstorder | 10Percentile                     | -68.87861948 |
| wavelet-HHH | firstorder | Kurtosis                         | 3.243697257  |
| wavelet-HHH | firstorder | Mean                             | 6.394744948  |
| wavelet-HHH | grlm       | ShortRunLowGrayLevelEmphasis     | 0.032598206  |
| wavelet-HHH | grlm       | GrayLevelVariance                | 7.110568183  |
| wavelet-HHH | grlm       | LowGrayLevelRunEmphasis          | 0.034068036  |
| wavelet-HHH | grlm       | GrayLevelNonUniformityNormalized | 0.116323789  |
| wavelet-HHH | grlm       | RunVariance                      | 0.122759047  |
| wavelet-HHH | grlm       | GrayLevelNonUniformity           | 21.88341844  |
| wavelet-HHH | grlm       | LongRunEmphasis                  | 1.347525819  |
| wavelet-HHH | grlm       | ShortRunHighGrayLevelEmphasis    | 63.02513847  |
| wavelet-HHH | grlm       | RunLengthNonUniformity           | 156.2425324  |
| wavelet-HHH | grlm       | ShortRunEmphasis                 | 0.928574929  |
| wavelet-HHH | grlm       | LongRunHighGrayLevelEmphasis     | 88.01519234  |
| wavelet-HHH | grlm       | RunPercentage                    | 0.904215976  |
| wavelet-HHH | grlm       | LongRunLowGrayLevelEmphasis      | 0.041211966  |
| wavelet-HHH | grlm       | RunEntropy                       | 3.803045867  |
| wavelet-HHH | grlm       | HighGrayLevelRunEmphasis         | 67.28984322  |
| wavelet-HHH | grlm       | RunLengthNonUniformityNormalized | 0.830200637  |
| wavelet-HHH | glszm      | GrayLevelVariance                | 12.82965763  |
| wavelet-HHH | glszm      | ZoneVariance                     | 41.08674648  |
| wavelet-HHH | glszm      | GrayLevelNonUniformityNormalized | 0.082965763  |
| wavelet-HHH | glszm      | SizeZoneNonUniformityNormalized  | 0.484141987  |
| wavelet-HHH | glszm      | SizeZoneNonUniformity            | 33.4057971   |
| wavelet-HHH | glszm      | GrayLevelNonUniformity           | 5.724637681  |
| wavelet-HHH | glszm      | LargeAreaEmphasis                | 50.17391304  |
| wavelet-HHH | glszm      | SmallAreaHighGrayLevelEmphasis   | 54.34623637  |
| wavelet-HHH | glszm      | ZonePercentage                   | 0.331730769  |
| wavelet-HHH | glszm      | LargeAreaLowGrayLevelEmphasis    | 0.992261105  |
| wavelet-HHH | glszm      | LargeAreaHighGrayLevelEmphasis   | 2886.521739  |
| wavelet-HHH | glszm      | HighGrayLevelZoneEmphasis        | 74.30434783  |
| wavelet-HHH | glszm      | SmallAreaEmphasis                | 0.719007858  |
| wavelet-HHH | glszm      | LowGrayLevelZoneEmphasis         | 0.053968538  |
| wavelet-HHH | glszm      | ZoneEntropy                      | 4.687435871  |
| wavelet-HHH | glszm      | SmallAreaLowGrayLevelEmphasis    | 0.044723133  |
| wavelet-HHH | ngtdm      | Coarseness                       | 0.031072217  |
| wavelet-HHH | ngtdm      | Complexity                       | 167.4946323  |
| wavelet-HHH | ngtdm      | Strength                         | 1.7575654    |
| wavelet-HHH | ngtdm      | Contrast                         | 0.131782182  |
| wavelet-HHH | ngtdm      | Busyness                         | 0.273943488  |
| wavelet-HLL | gldm       | GrayLevelVariance                | 104.4015348  |
| wavelet-HLL | gldm       | HighGrayLevelEmphasis            | 496.3653846  |
| wavelet-HLL | gldm       | DependenceEntropy                | 6.198281443  |
| wavelet-HLL | gldm       | DependenceNonUniformity          | 55.94230769  |

|             |            |                                      |              |
|-------------|------------|--------------------------------------|--------------|
| wavelet-HLL | gldm       | GrayLevelNonUniformity               | 9.769230769  |
| wavelet-HLL | gldm       | SmallDependenceEmphasis              | 0.451943109  |
| wavelet-HLL | gldm       | SmallDependenceHighGrayLevelEmphasis | 309.6454647  |
| wavelet-HLL | gldm       | DependenceNonUniformityNormalized    | 0.268953402  |
| wavelet-HLL | gldm       | LargeDependenceEmphasis              | 6.278846154  |
| wavelet-HLL | gldm       | LargeDependenceLowGrayLevelEmphasis  | 0.03546011   |
| wavelet-HLL | gldm       | DependenceVariance                   | 1.430380917  |
| wavelet-HLL | gldm       | LargeDependenceHighGrayLevelEmphasis | 2304.759615  |
| wavelet-HLL | gldm       | SmallDependenceLowGrayLevelEmphasis  | 0.008216887  |
| wavelet-HLL | gldm       | LowGrayLevelEmphasis                 | 0.011557673  |
| wavelet-HLL | glcm       | JointAverage                         | 18.80594321  |
| wavelet-HLL | glcm       | SumAverage                           | 37.61188641  |
| wavelet-HLL | glcm       | JointEntropy                         | 7.407318482  |
| wavelet-HLL | glcm       | ClusterShade                         | 5914.761154  |
| wavelet-HLL | glcm       | MaximumProbability                   | 0.019419715  |
| wavelet-HLL | glcm       | Idmn                                 | 0.971864244  |
| wavelet-HLL | glcm       | JointEnergy                          | 0.007041108  |
| wavelet-HLL | glcm       | Contrast                             | 103.2832526  |
| wavelet-HLL | glcm       | DifferenceEntropy                    | 3.966716993  |
| wavelet-HLL | glcm       | InverseVariance                      | 0.202430995  |
| wavelet-HLL | glcm       | DifferenceVariance                   | 51.90186973  |
| wavelet-HLL | glcm       | Idn                                  | 0.902322606  |
| wavelet-HLL | glcm       | Idm                                  | 0.187311829  |
| wavelet-HLL | glcm       | Correlation                          | 0.382460993  |
| wavelet-HLL | glcm       | Autocorrelation                      | 392.2653702  |
| wavelet-HLL | glcm       | SumEntropy                           | 5.099523246  |
| wavelet-HLL | glcm       | SumSquares                           | 89.9475762   |
| wavelet-HLL | glcm       | ClusterProminence                    | 350023.3063  |
| wavelet-HLL | glcm       | Imc2                                 | 0.992275942  |
| wavelet-HLL | glcm       | Imc1                                 | -0.445910384 |
| wavelet-HLL | glcm       | DifferenceAverage                    | 6.815279954  |
| wavelet-HLL | glcm       | Id                                   | 0.27195975   |
| wavelet-HLL | glcm       | ClusterTendency                      | 256.5070522  |
| wavelet-HLL | firstorder | InterquartileRange                   | 186.9403444  |
| wavelet-HLL | firstorder | Skewness                             | 1.307931293  |
| wavelet-HLL | firstorder | Uniformity                           | 0.046967456  |
| wavelet-HLL | firstorder | Median                               | -52.75260713 |
| wavelet-HLL | firstorder | Energy                               | 13632881.74  |
| wavelet-HLL | firstorder | RobustMeanAbsoluteDeviation          | 102.5187632  |
| wavelet-HLL | firstorder | MeanAbsoluteDeviation                | 184.4627607  |
| wavelet-HLL | firstorder | TotalEnergy                          | 368087807    |
| wavelet-HLL | firstorder | Maximum                              | 906.1440382  |
| wavelet-HLL | firstorder | RootMeanSquared                      | 256.0130869  |
| wavelet-HLL | firstorder | 90Percentile                         | 377.9834524  |
| wavelet-HLL | firstorder | Minimum                              | -458.0319642 |
| wavelet-HLL | firstorder | Entropy                              | 4.833344751  |
| wavelet-HLL | firstorder | Range                                | 1364.176002  |
| wavelet-HLL | firstorder | Variance                             | 65489.54522  |
| wavelet-HLL | firstorder | 10Percentile                         | -230.1895119 |
| wavelet-HLL | firstorder | Kurtosis                             | 4.509745113  |
| wavelet-HLL | firstorder | Mean                                 | 7.29077922   |
| wavelet-HLL | glrlm      | ShortRunLowGrayLevelEmphasis         | 0.011703116  |
| wavelet-HLL | glrlm      | GrayLevelVariance                    | 107.6210738  |
| wavelet-HLL | glrlm      | LowGrayLevelRunEmphasis              | 0.011878477  |
| wavelet-HLL | glrlm      | GrayLevelNonUniformityNormalized     | 0.046063474  |
| wavelet-HLL | glrlm      | RunVariance                          | 0.05969906   |

|             |       |                                      |             |
|-------------|-------|--------------------------------------|-------------|
| wavelet-HLL | glrlm | GrayLevelNonUniformity               | 9.13886258  |
| wavelet-HLL | glrlm | LongRunEmphasis                      | 1.16295533  |
| wavelet-HLL | glrlm | ShortRunHighGrayLevelEmphasis        | 492.258871  |
| wavelet-HLL | glrlm | RunLengthNonUniformity               | 182.2646397 |
| wavelet-HLL | glrlm | ShortRunEmphasis                     | 0.9663057   |
| wavelet-HLL | glrlm | LongRunHighGrayLevelEmphasis         | 558.6708473 |
| wavelet-HLL | glrlm | RunPercentage                        | 0.953772189 |
| wavelet-HLL | glrlm | LongRunLowGrayLevelEmphasis          | 0.012699922 |
| wavelet-HLL | glrlm | RunEntropy                           | 5.035513522 |
| wavelet-HLL | glrlm | HighGrayLevelRunEmphasis             | 504.0297965 |
| wavelet-HLL | glrlm | RunLengthNonUniformityNormalized     | 0.917001724 |
| wavelet-HLL | glszm | GrayLevelVariance                    | 151.151706  |
| wavelet-HLL | glszm | ZoneVariance                         | 3.533163265 |
| wavelet-HLL | glszm | GrayLevelNonUniformityNormalized     | 0.035235969 |
| wavelet-HLL | glszm | SizeZoneNonUniformityNormalized      | 0.459024235 |
| wavelet-HLL | glszm | SizeZoneNonUniformity                | 51.41071429 |
| wavelet-HLL | glszm | GrayLevelNonUniformity               | 3.946428571 |
| wavelet-HLL | glszm | LargeAreaEmphasis                    | 6.982142857 |
| wavelet-HLL | glszm | SmallAreaHighGrayLevelEmphasis       | 530.1732407 |
| wavelet-HLL | glszm | ZonePercentage                       | 0.538461538 |
| wavelet-HLL | glszm | LargeAreaLowGrayLevelEmphasis        | 0.043375477 |
| wavelet-HLL | glszm | LargeAreaHighGrayLevelEmphasis       | 2534.589286 |
| wavelet-HLL | glszm | HighGrayLevelZoneEmphasis            | 635.5446429 |
| wavelet-HLL | glszm | SmallAreaEmphasis                    | 0.69929006  |
| wavelet-HLL | glszm | LowGrayLevelZoneEmphasis             | 0.016649018 |
| wavelet-HLL | glszm | ZoneEntropy                          | 6.052859445 |
| wavelet-HLL | glszm | SmallAreaLowGrayLevelEmphasis        | 0.014305703 |
| wavelet-HLL | ngtdm | Coarseness                           | 0.038675742 |
| wavelet-HLL | ngtdm | Complexity                           | 3965.247714 |
| wavelet-HLL | ngtdm | Strength                             | 34.65734012 |
| wavelet-HLL | ngtdm | Contrast                             | 0.474060657 |
| wavelet-HLL | ngtdm | Busyness                             | 0.030865749 |
| wavelet-LHL | gldm  | GrayLevelVariance                    | 67.37978458 |
| wavelet-LHL | gldm  | HighGrayLevelEmphasis                | 356.2163462 |
| wavelet-LHL | gldm  | DependenceEntropy                    | 6.078462075 |
| wavelet-LHL | gldm  | DependenceNonUniformity              | 52.48076923 |
| wavelet-LHL | gldm  | GrayLevelNonUniformity               | 11.08653846 |
| wavelet-LHL | gldm  | SmallDependenceEmphasis              | 0.459737936 |
| wavelet-LHL | gldm  | SmallDependenceHighGrayLevelEmphasis | 210.4222469 |
| wavelet-LHL | gldm  | DependenceNonUniformityNormalized    | 0.252311391 |
| wavelet-LHL | gldm  | LargeDependenceEmphasis              | 9.038461538 |
| wavelet-LHL | gldm  | LargeDependenceLowGrayLevelEmphasis  | 0.059584447 |
| wavelet-LHL | gldm  | DependenceVariance                   | 3.120469675 |
| wavelet-LHL | gldm  | LargeDependenceHighGrayLevelEmphasis | 2395.591346 |
| wavelet-LHL | gldm  | SmallDependenceLowGrayLevelEmphasis  | 0.007982863 |
| wavelet-LHL | gldm  | LowGrayLevelEmphasis                 | 0.011734607 |
| wavelet-LHL | glcm  | JointAverage                         | 16.12479394 |
| wavelet-LHL | glcm  | SumAverage                           | 32.24958789 |
| wavelet-LHL | glcm  | JointEntropy                         | 7.324339236 |
| wavelet-LHL | glcm  | ClusterShade                         | 2728.91908  |
| wavelet-LHL | glcm  | MaximumProbability                   | 0.026778608 |
| wavelet-LHL | glcm  | ldmn                                 | 0.968927947 |
| wavelet-LHL | glcm  | JointEnergy                          | 0.007777678 |
| wavelet-LHL | glcm  | Contrast                             | 92.46783851 |
| wavelet-LHL | glcm  | DifferenceEntropy                    | 3.988343888 |
| wavelet-LHL | glcm  | InverseVariance                      | 0.199289068 |



|             |            |                                  |              |
|-------------|------------|----------------------------------|--------------|
| wavelet-LHL | glcm       | DifferenceVariance               | 46.75726702  |
| wavelet-LHL | glcm       | Idn                              | 0.89619328   |
| wavelet-LHL | glcm       | Idm                              | 0.198654813  |
| wavelet-LHL | glcm       | Correlation                      | 0.173265879  |
| wavelet-LHL | glcm       | Autocorrelation                  | 270.9840374  |
| wavelet-LHL | glcm       | SumEntropy                       | 4.885684597  |
| wavelet-LHL | glcm       | SumSquares                       | 57.13486732  |
| wavelet-LHL | glcm       | ClusterProminence                | 150999.681   |
| wavelet-LHL | glcm       | Imc2                             | 0.981823347  |
| wavelet-LHL | glcm       | Imc1                             | -0.37295428  |
| wavelet-LHL | glcm       | DifferenceAverage                | 6.521621269  |
| wavelet-LHL | glcm       | Id                               | 0.281698412  |
| wavelet-LHL | glcm       | ClusterTendency                  | 136.0716308  |
| wavelet-LHL | firstorder | InterquartileRange               | 169.4141992  |
| wavelet-LHL | firstorder | Skewness                         | 1.428399311  |
| wavelet-LHL | firstorder | Uniformity                       | 0.053300666  |
| wavelet-LHL | firstorder | Median                           | -17.55496481 |
| wavelet-LHL | firstorder | Energy                           | 8809012.147  |
| wavelet-LHL | firstorder | RobustMeanAbsoluteDeviation      | 80.7572797   |
| wavelet-LHL | firstorder | MeanAbsoluteDeviation            | 143.1784481  |
| wavelet-LHL | firstorder | TotalEnergy                      | 237843328    |
| wavelet-LHL | firstorder | Maximum                          | 836.0426382  |
| wavelet-LHL | firstorder | RootMeanSquared                  | 205.7936344  |
| wavelet-LHL | firstorder | 90Percentile                     | 273.3133132  |
| wavelet-LHL | firstorder | Minimum                          | -378.8256278 |
| wavelet-LHL | firstorder | Entropy                          | 4.627415884  |
| wavelet-LHL | firstorder | Range                            | 1214.868266  |
| wavelet-LHL | firstorder | Variance                         | 42203.46168  |
| wavelet-LHL | firstorder | 10Percentile                     | -201.001593  |
| wavelet-LHL | firstorder | Kurtosis                         | 5.870145537  |
| wavelet-LHL | firstorder | Mean                             | 12.14735618  |
| wavelet-LHL | glrlm      | ShortRunLowGrayLevelEmphasis     | 0.011764606  |
| wavelet-LHL | glrlm      | GrayLevelVariance                | 69.88297647  |
| wavelet-LHL | glrlm      | LowGrayLevelRunEmphasis          | 0.012037853  |
| wavelet-LHL | glrlm      | GrayLevelNonUniformityNormalized | 0.051070666  |
| wavelet-LHL | glrlm      | RunVariance                      | 0.066737415  |
| wavelet-LHL | glrlm      | GrayLevelNonUniformity           | 10.03836345  |
| wavelet-LHL | glrlm      | LongRunEmphasis                  | 1.188468924  |
| wavelet-LHL | glrlm      | ShortRunHighGrayLevelEmphasis    | 351.7587057  |
| wavelet-LHL | glrlm      | RunLengthNonUniformity           | 176.9079613  |
| wavelet-LHL | glrlm      | ShortRunEmphasis                 | 0.959309211  |
| wavelet-LHL | glrlm      | LongRunHighGrayLevelEmphasis     | 409.8254159  |
| wavelet-LHL | glrlm      | RunPercentage                    | 0.94489645   |
| wavelet-LHL | glrlm      | LongRunLowGrayLevelEmphasis      | 0.013261526  |
| wavelet-LHL | glrlm      | RunEntropy                       | 4.889247126  |
| wavelet-LHL | glrlm      | HighGrayLevelRunEmphasis         | 362.1976951  |
| wavelet-LHL | glrlm      | RunLengthNonUniformityNormalized | 0.899358177  |
| wavelet-LHL | glszm      | GrayLevelVariance                | 99.9433299   |
| wavelet-LHL | glszm      | ZoneVariance                     | 5.772290809  |
| wavelet-LHL | glszm      | GrayLevelNonUniformityNormalized | 0.037208505  |
| wavelet-LHL | glszm      | SizeZoneNonUniformityNormalized  | 0.511831276  |
| wavelet-LHL | glszm      | SizeZoneNonUniformity            | 55.27777778  |
| wavelet-LHL | glszm      | GrayLevelNonUniformity           | 4.018518519  |
| wavelet-LHL | glszm      | LargeAreaEmphasis                | 9.481481481  |
| wavelet-LHL | glszm      | SmallAreaHighGrayLevelEmphasis   | 364.7453778  |
| wavelet-LHL | glszm      | ZonePercentage                   | 0.519230769  |

|             |            |                                      |              |
|-------------|------------|--------------------------------------|--------------|
| wavelet-LHL | glszm      | LargeAreaLowGrayLevelEmphasis        | 0.064574843  |
| wavelet-LHL | glszm      | LargeAreaHighGrayLevelEmphasis       | 2473.657407  |
| wavelet-LHL | glszm      | HighGrayLevelZoneEmphasis            | 445.9722222  |
| wavelet-LHL | glszm      | SmallAreaEmphasis                    | 0.742814562  |
| wavelet-LHL | glszm      | LowGrayLevelZoneEmphasis             | 0.016438289  |
| wavelet-LHL | glszm      | ZoneEntropy                          | 5.715251623  |
| wavelet-LHL | glszm      | SmallAreaLowGrayLevelEmphasis        | 0.014441353  |
| wavelet-LHL | ngtdm      | Coarseness                           | 0.030198078  |
| wavelet-LHL | ngtdm      | Complexity                           | 3172.928302  |
| wavelet-LHL | ngtdm      | Strength                             | 19.54173267  |
| wavelet-LHL | ngtdm      | Contrast                             | 0.478985504  |
| wavelet-LHL | ngtdm      | Busyness                             | 0.056957376  |
| wavelet-LHH | gldm       | GrayLevelVariance                    | 23.52071006  |
| wavelet-LHH | gldm       | HighGrayLevelEmphasis                | 257.8461538  |
| wavelet-LHH | gldm       | DependenceEntropy                    | 5.86321657   |
| wavelet-LHH | gldm       | DependenceNonUniformity              | 48.22115385  |
| wavelet-LHH | gldm       | GrayLevelNonUniformity               | 16.18269231  |
| wavelet-LHH | gldm       | SmallDependenceEmphasis              | 0.430572908  |
| wavelet-LHH | gldm       | SmallDependenceHighGrayLevelEmphasis | 117.7160664  |
| wavelet-LHH | gldm       | DependenceNonUniformityNormalized    | 0.23183247   |
| wavelet-LHH | gldm       | LargeDependenceEmphasis              | 9.932692308  |
| wavelet-LHH | gldm       | LargeDependenceLowGrayLevelEmphasis  | 0.087163944  |
| wavelet-LHH | gldm       | DependenceVariance                   | 3.292159763  |
| wavelet-LHH | gldm       | LargeDependenceHighGrayLevelEmphasis | 2355.817308  |
| wavelet-LHH | gldm       | SmallDependenceLowGrayLevelEmphasis  | 0.00762879   |
| wavelet-LHH | gldm       | LowGrayLevelEmphasis                 | 0.017632775  |
| wavelet-LHH | glcm       | JointAverage                         | 15.31629233  |
| wavelet-LHH | glcm       | SumAverage                           | 30.63258465  |
| wavelet-LHH | glcm       | JointEntropy                         | 6.953435227  |
| wavelet-LHH | glcm       | ClusterShade                         | -122.8768046 |
| wavelet-LHH | glcm       | MaximumProbability                   | 0.040344283  |
| wavelet-LHH | glcm       | ldmn                                 | 0.955974821  |
| wavelet-LHH | glcm       | JointEnergy                          | 0.011211307  |
| wavelet-LHH | glcm       | Contrast                             | 44.67057725  |
| wavelet-LHH | glcm       | DifferenceEntropy                    | 3.647927086  |
| wavelet-LHH | glcm       | InverseVariance                      | 0.22760527   |
| wavelet-LHH | glcm       | DifferenceVariance                   | 20.48578453  |
| wavelet-LHH | glcm       | ldn                                  | 0.870955667  |
| wavelet-LHH | glcm       | ldm                                  | 0.224269998  |
| wavelet-LHH | glcm       | Correlation                          | -0.008434118 |
| wavelet-LHH | glcm       | Autocorrelation                      | 234.3764013  |
| wavelet-LHH | glcm       | SumEntropy                           | 4.449539359  |
| wavelet-LHH | glcm       | SumSquares                           | 22.08545599  |
| wavelet-LHH | glcm       | ClusterProminence                    | 8520.339789  |
| wavelet-LHH | glcm       | lmc2                                 | 0.948781249  |
| wavelet-LHH | glcm       | lmc1                                 | -0.285445824 |
| wavelet-LHH | glcm       | DifferenceAverage                    | 4.833183814  |
| wavelet-LHH | glcm       | ld                                   | 0.310821986  |
| wavelet-LHH | glcm       | ClusterTendency                      | 43.67124671  |
| wavelet-LHH | firstorder | InterquartileRange                   | 118.8906834  |
| wavelet-LHH | firstorder | Skewness                             | -0.211173701 |
| wavelet-LHH | firstorder | Uniformity                           | 0.077801405  |
| wavelet-LHH | firstorder | Median                               | -4.651809989 |
| wavelet-LHH | firstorder | Energy                               | 3049749.269  |
| wavelet-LHH | firstorder | RobustMeanAbsoluteDeviation          | 50.26669984  |
| wavelet-LHH | firstorder | MeanAbsoluteDeviation                | 86.61855051  |

|             |            |                                      |              |
|-------------|------------|--------------------------------------|--------------|
| wavelet-LHH | firstorder | TotalEnergy                          | 82343230.26  |
| wavelet-LHH | firstorder | Maximum                              | 342.6791299  |
| wavelet-LHH | firstorder | RootMeanSquared                      | 121.0878033  |
| wavelet-LHH | firstorder | 90Percentile                         | 145.353494   |
| wavelet-LHH | firstorder | Minimum                              | -372.3920593 |
| wavelet-LHH | firstorder | Entropy                              | 4.133489869  |
| wavelet-LHH | firstorder | Range                                | 715.0711892  |
| wavelet-LHH | firstorder | Variance                             | 14640.10288  |
| wavelet-LHH | firstorder | 10Percentile                         | -141.6622447 |
| wavelet-LHH | firstorder | Kurtosis                             | 4.047389222  |
| wavelet-LHH | firstorder | Mean                                 | -4.706720659 |
| wavelet-LHH | grlm       | ShortRunLowGrayLevelEmphasis         | 0.017543658  |
| wavelet-LHH | grlm       | GrayLevelVariance                    | 24.61893944  |
| wavelet-LHH | grlm       | LowGrayLevelRunEmphasis              | 0.018063122  |
| wavelet-LHH | grlm       | GrayLevelNonUniformityNormalized     | 0.073248444  |
| wavelet-LHH | grlm       | RunVariance                          | 0.073789386  |
| wavelet-LHH | grlm       | GrayLevelNonUniformity               | 14.31388095  |
| wavelet-LHH | grlm       | LongRunEmphasis                      | 1.208865627  |
| wavelet-LHH | grlm       | ShortRunHighGrayLevelEmphasis        | 248.3462487  |
| wavelet-LHH | grlm       | RunLengthNonUniformity               | 174.1447459  |
| wavelet-LHH | grlm       | ShortRunEmphasis                     | 0.955286702  |
| wavelet-LHH | grlm       | LongRunHighGrayLevelEmphasis         | 308.7792928  |
| wavelet-LHH | grlm       | RunPercentage                        | 0.939349112  |
| wavelet-LHH | grlm       | LongRunLowGrayLevelEmphasis          | 0.020278867  |
| wavelet-LHH | grlm       | RunEntropy                           | 4.43892696   |
| wavelet-LHH | grlm       | HighGrayLevelRunEmphasis             | 259.0837485  |
| wavelet-LHH | grlm       | RunLengthNonUniformityNormalized     | 0.890428279  |
| wavelet-LHH | glszm      | GrayLevelVariance                    | 37.81977566  |
| wavelet-LHH | glszm      | ZoneVariance                         | 11.47535112  |
| wavelet-LHH | glszm      | GrayLevelNonUniformityNormalized     | 0.0506174    |
| wavelet-LHH | glszm      | SizeZoneNonUniformityNormalized      | 0.487604864  |
| wavelet-LHH | glszm      | SizeZoneNonUniformity                | 50.22330097  |
| wavelet-LHH | glszm      | GrayLevelNonUniformity               | 5.213592233  |
| wavelet-LHH | glszm      | LargeAreaEmphasis                    | 15.55339806  |
| wavelet-LHH | glszm      | SmallAreaHighGrayLevelEmphasis       | 200.314398   |
| wavelet-LHH | glszm      | ZonePercentage                       | 0.495192308  |
| wavelet-LHH | glszm      | LargeAreaLowGrayLevelEmphasis        | 0.115065079  |
| wavelet-LHH | glszm      | LargeAreaHighGrayLevelEmphasis       | 3685.165049  |
| wavelet-LHH | glszm      | HighGrayLevelZoneEmphasis            | 270.4563107  |
| wavelet-LHH | glszm      | SmallAreaEmphasis                    | 0.725218339  |
| wavelet-LHH | glszm      | LowGrayLevelZoneEmphasis             | 0.021047123  |
| wavelet-LHH | glszm      | ZoneEntropy                          | 5.516563697  |
| wavelet-LHH | glszm      | SmallAreaLowGrayLevelEmphasis        | 0.012265879  |
| wavelet-LHH | ngtdm      | Coarseness                           | 0.032907952  |
| wavelet-LHH | ngtdm      | Complexity                           | 1112.624644  |
| wavelet-LHH | ngtdm      | Strength                             | 7.1431161    |
| wavelet-LHH | ngtdm      | Contrast                             | 0.211713509  |
| wavelet-LHH | ngtdm      | Busyness                             | 0.059565938  |
| wavelet-LLH | gldm       | GrayLevelVariance                    | 101.5541559  |
| wavelet-LLH | gldm       | HighGrayLevelEmphasis                | 459.0913462  |
| wavelet-LLH | gldm       | DependenceEntropy                    | 5.966844108  |
| wavelet-LLH | gldm       | DependenceNonUniformity              | 60.76923077  |
| wavelet-LLH | gldm       | GrayLevelNonUniformity               | 11.46153846  |
| wavelet-LLH | gldm       | SmallDependenceEmphasis              | 0.515632972  |
| wavelet-LLH | gldm       | SmallDependenceHighGrayLevelEmphasis | 288.1652553  |
| wavelet-LLH | gldm       | DependenceNonUniformityNormalized    | 0.292159763  |

|             |            |                                      |              |
|-------------|------------|--------------------------------------|--------------|
| wavelet-LLH | gldm       | LargeDependenceEmphasis              | 6.798076923  |
| wavelet-LLH | gldm       | LargeDependenceLowGrayLevelEmphasis  | 0.034285722  |
| wavelet-LLH | gldm       | DependenceVariance                   | 2.117511095  |
| wavelet-LLH | gldm       | LargeDependenceHighGrayLevelEmphasis | 2326.639423  |
| wavelet-LLH | gldm       | SmallDependenceLowGrayLevelEmphasis  | 0.008720292  |
| wavelet-LLH | gldm       | LowGrayLevelEmphasis                 | 0.010893342  |
| wavelet-LLH | glcm       | JointAverage                         | 18.04753479  |
| wavelet-LLH | glcm       | SumAverage                           | 36.09506957  |
| wavelet-LLH | glcm       | JointEntropy                         | 7.432496587  |
| wavelet-LLH | glcm       | ClusterShade                         | 5478.502212  |
| wavelet-LLH | glcm       | MaximumProbability                   | 0.024500733  |
| wavelet-LLH | glcm       | ldmn                                 | 0.961327046  |
| wavelet-LLH | glcm       | JointEnergy                          | 0.007085808  |
| wavelet-LLH | glcm       | Contrast                             | 131.8491376  |
| wavelet-LLH | glcm       | DifferenceEntropy                    | 4.162370159  |
| wavelet-LLH | glcm       | InverseVariance                      | 0.154273269  |
| wavelet-LLH | glcm       | DifferenceVariance                   | 60.46624275  |
| wavelet-LLH | glcm       | ldn                                  | 0.881867838  |
| wavelet-LLH | glcm       | ldm                                  | 0.157448545  |
| wavelet-LLH | glcm       | Correlation                          | 0.220876038  |
| wavelet-LLH | glcm       | Autocorrelation                      | 346.940538   |
| wavelet-LLH | glcm       | SumEntropy                           | 5.097810828  |
| wavelet-LLH | glcm       | SumSquares                           | 87.07094976  |
| wavelet-LLH | glcm       | ClusterProminence                    | 332196.8973  |
| wavelet-LLH | glcm       | lmc2                                 | 0.983978062  |
| wavelet-LLH | glcm       | lmc1                                 | -0.378907196 |
| wavelet-LLH | glcm       | DifferenceAverage                    | 8.01709265   |
| wavelet-LLH | glcm       | ld                                   | 0.241160537  |
| wavelet-LLH | glcm       | ClusterTendency                      | 216.4346615  |
| wavelet-LLH | firstorder | InterquartileRange                   | 189.7956511  |
| wavelet-LLH | firstorder | Skewness                             | 1.658712423  |
| wavelet-LLH | firstorder | Uniformity                           | 0.05510355   |
| wavelet-LLH | firstorder | Median                               | -17.09226256 |
| wavelet-LLH | firstorder | Energy                               | 13424270.23  |
| wavelet-LLH | firstorder | RobustMeanAbsoluteDeviation          | 85.51850513  |
| wavelet-LLH | firstorder | MeanAbsoluteDeviation                | 172.5840059  |
| wavelet-LLH | firstorder | TotalEnergy                          | 362455296.3  |
| wavelet-LLH | firstorder | Maximum                              | 890.3168997  |
| wavelet-LLH | firstorder | RootMeanSquared                      | 254.0467688  |
| wavelet-LLH | firstorder | 90Percentile                         | 314.6707781  |
| wavelet-LLH | firstorder | Minimum                              | -403.924559  |
| wavelet-LLH | firstorder | Entropy                              | 4.63696564   |
| wavelet-LLH | firstorder | Range                                | 1294.241459  |
| wavelet-LLH | firstorder | Variance                             | 63293.14023  |
| wavelet-LLH | firstorder | 10Percentile                         | -191.1914145 |
| wavelet-LLH | firstorder | Kurtosis                             | 5.756849     |
| wavelet-LLH | firstorder | Mean                                 | 35.30751331  |
| wavelet-LLH | glrlm      | ShortRunLowGrayLevelEmphasis         | 0.011068334  |
| wavelet-LLH | glrlm      | GrayLevelVariance                    | 104.4497452  |
| wavelet-LLH | glrlm      | LowGrayLevelRunEmphasis              | 0.011211012  |
| wavelet-LLH | glrlm      | GrayLevelNonUniformityNormalized     | 0.052578773  |
| wavelet-LLH | glrlm      | RunVariance                          | 0.05250938   |
| wavelet-LLH | glrlm      | GrayLevelNonUniformity               | 10.45324408  |
| wavelet-LLH | glrlm      | LongRunEmphasis                      | 1.151259333  |
| wavelet-LLH | glrlm      | ShortRunHighGrayLevelEmphasis        | 453.6273845  |
| wavelet-LLH | glrlm      | RunLengthNonUniformity               | 182.5288467  |

|             |       |                                      |              |
|-------------|-------|--------------------------------------|--------------|
| wavelet-LLH | glrlm | ShortRunEmphasis                     | 0.966639448  |
| wavelet-LLH | glrlm | LongRunHighGrayLevelEmphasis         | 515.3499361  |
| wavelet-LLH | glrlm | RunPercentage                        | 0.955251479  |
| wavelet-LLH | glrlm | LongRunLowGrayLevelEmphasis          | 0.011848378  |
| wavelet-LLH | glrlm | RunEntropy                           | 4.859189737  |
| wavelet-LLH | glrlm | HighGrayLevelRunEmphasis             | 464.9698488  |
| wavelet-LLH | glrlm | RunLengthNonUniformityNormalized     | 0.917269029  |
| wavelet-LLH | glszm | GrayLevelVariance                    | 133.9382643  |
| wavelet-LLH | glszm | ZoneVariance                         | 2.554960672  |
| wavelet-LLH | glszm | GrayLevelNonUniformityNormalized     | 0.037609888  |
| wavelet-LLH | glszm | SizeZoneNonUniformityNormalized      | 0.528455285  |
| wavelet-LLH | glszm | SizeZoneNonUniformity                | 65           |
| wavelet-LLH | glszm | GrayLevelNonUniformity               | 4.62601626   |
| wavelet-LLH | glszm | LargeAreaEmphasis                    | 5.414634146  |
| wavelet-LLH | glszm | SmallAreaHighGrayLevelEmphasis       | 442.0125729  |
| wavelet-LLH | glszm | ZonePercentage                       | 0.591346154  |
| wavelet-LLH | glszm | LargeAreaLowGrayLevelEmphasis        | 0.03331453   |
| wavelet-LLH | glszm | LargeAreaHighGrayLevelEmphasis       | 2024.056911  |
| wavelet-LLH | glszm | HighGrayLevelZoneEmphasis            | 529.398374   |
| wavelet-LLH | glszm | SmallAreaEmphasis                    | 0.754573714  |
| wavelet-LLH | glszm | LowGrayLevelZoneEmphasis             | 0.015400707  |
| wavelet-LLH | glszm | ZoneEntropy                          | 5.771073022  |
| wavelet-LLH | glszm | SmallAreaLowGrayLevelEmphasis        | 0.014224211  |
| wavelet-LLH | ngtdm | Coarseness                           | 0.024102157  |
| wavelet-LLH | ngtdm | Complexity                           | 4381.407567  |
| wavelet-LLH | ngtdm | Strength                             | 23.61288227  |
| wavelet-LLH | ngtdm | Contrast                             | 0.791847828  |
| wavelet-LLH | ngtdm | Busyness                             | 0.060681871  |
| wavelet-LLL | gldm  | GrayLevelVariance                    | 324.7181722  |
| wavelet-LLL | gldm  | HighGrayLevelEmphasis                | 3096.639423  |
| wavelet-LLL | gldm  | DependenceEntropy                    | 6.425250009  |
| wavelet-LLL | gldm  | DependenceNonUniformity              | 73.79807692  |
| wavelet-LLL | gldm  | GrayLevelNonUniformity               | 6.192307692  |
| wavelet-LLL | gldm  | SmallDependenceEmphasis              | 0.591498397  |
| wavelet-LLL | gldm  | SmallDependenceHighGrayLevelEmphasis | 1458.911553  |
| wavelet-LLL | gldm  | DependenceNonUniformityNormalized    | 0.354798447  |
| wavelet-LLL | gldm  | LargeDependenceEmphasis              | 4.461538462  |
| wavelet-LLL | gldm  | LargeDependenceLowGrayLevelEmphasis  | 0.00737367   |
| wavelet-LLL | gldm  | DependenceVariance                   | 1.123890533  |
| wavelet-LLL | gldm  | LargeDependenceHighGrayLevelEmphasis | 17874.02404  |
| wavelet-LLL | gldm  | SmallDependenceLowGrayLevelEmphasis  | 0.005422793  |
| wavelet-LLL | gldm  | LowGrayLevelEmphasis                 | 0.005723931  |
| wavelet-LLL | glcm  | JointAverage                         | 56.08981881  |
| wavelet-LLL | glcm  | SumAverage                           | 112.1796376  |
| wavelet-LLL | glcm  | JointEntropy                         | 7.726697509  |
| wavelet-LLL | glcm  | ClusterShade                         | -22361.26328 |
| wavelet-LLL | glcm  | MaximumProbability                   | 0.016016473  |
| wavelet-LLL | glcm  | ldmn                                 | 0.956209931  |
| wavelet-LLL | glcm  | JointEnergy                          | 0.005417266  |
| wavelet-LLL | glcm  | Contrast                             | 301.5544918  |
| wavelet-LLL | glcm  | DifferenceEntropy                    | 4.739053628  |
| wavelet-LLL | glcm  | InverseVariance                      | 0.135572134  |
| wavelet-LLL | glcm  | DifferenceVariance                   | 144.2017421  |
| wavelet-LLL | glcm  | ldn                                  | 0.875699058  |
| wavelet-LLL | glcm  | ldm                                  | 0.128743124  |
| wavelet-LLL | glcm  | Correlation                          | 0.432862949  |

|             |            |                                  |              |
|-------------|------------|----------------------------------|--------------|
| wavelet-LLL | glcm       | Autocorrelation                  | 3267.328473  |
| wavelet-LLL | glcm       | SumEntropy                       | 5.78134259   |
| wavelet-LLL | glcm       | SumSquares                       | 271.4336375  |
| wavelet-LLL | glcm       | ClusterProminence                | 2037566.986  |
| wavelet-LLL | glcm       | Imc2                             | 0.998515317  |
| wavelet-LLL | glcm       | Imc1                             | -0.548742196 |
| wavelet-LLL | glcm       | DifferenceAverage                | 12.27017117  |
| wavelet-LLL | glcm       | Id                               | 0.202260059  |
| wavelet-LLL | glcm       | ClusterTendency                  | 784.1800583  |
| wavelet-LLL | firstorder | InterquartileRange               | 673.4706024  |
| wavelet-LLL | firstorder | Skewness                         | -0.870675386 |
| wavelet-LLL | firstorder | Uniformity                       | 0.02977071   |
| wavelet-LLL | firstorder | Median                           | -89.2574876  |
| wavelet-LLL | firstorder | Energy                           | 54739696.79  |
| wavelet-LLL | firstorder | RobustMeanAbsoluteDeviation      | 288.6353506  |
| wavelet-LLL | firstorder | MeanAbsoluteDeviation            | 381.2302317  |
| wavelet-LLL | firstorder | TotalEnergy                      | 1477971813   |
| wavelet-LLL | firstorder | Maximum                          | 334.9809715  |
| wavelet-LLL | firstorder | RootMeanSquared                  | 513.0025528  |
| wavelet-LLL | firstorder | 90Percentile                     | 184.410444   |
| wavelet-LLL | firstorder | Minimum                          | -1549.941591 |
| wavelet-LLL | firstorder | Entropy                          | 5.514544502  |
| wavelet-LLL | firstorder | Range                            | 1884.922563  |
| wavelet-LLL | firstorder | Variance                         | 202912.8246  |
| wavelet-LLL | firstorder | 10Percentile                     | -979.5607699 |
| wavelet-LLL | firstorder | Kurtosis                         | 2.674294441  |
| wavelet-LLL | firstorder | Mean                             | -245.4766681 |
| wavelet-LLL | glrlm      | ShortRunLowGrayLevelEmphasis     | 0.005880903  |
| wavelet-LLL | glrlm      | GrayLevelVariance                | 326.3673526  |
| wavelet-LLL | glrlm      | LowGrayLevelRunEmphasis          | 0.005894909  |
| wavelet-LLL | glrlm      | GrayLevelNonUniformityNormalized | 0.028795593  |
| wavelet-LLL | glrlm      | RunVariance                      | 0.033339082  |
| wavelet-LLL | glrlm      | GrayLevelNonUniformity           | 5.80013382   |
| wavelet-LLL | glrlm      | LongRunEmphasis                  | 1.1010804    |
| wavelet-LLL | glrlm      | ShortRunHighGrayLevelEmphasis    | 2959.809975  |
| wavelet-LLL | glrlm      | RunLengthNonUniformity           | 188.9513727  |
| wavelet-LLL | glrlm      | ShortRunEmphasis                 | 0.975624875  |
| wavelet-LLL | glrlm      | LongRunHighGrayLevelEmphasis     | 3483.683312  |
| wavelet-LLL | glrlm      | RunPercentage                    | 0.968195266  |
| wavelet-LLL | glrlm      | LongRunLowGrayLevelEmphasis      | 0.005951661  |
| wavelet-LLL | glrlm      | RunEntropy                       | 5.656111613  |
| wavelet-LLL | glrlm      | HighGrayLevelRunEmphasis         | 3061.075625  |
| wavelet-LLL | glrlm      | RunLengthNonUniformityNormalized | 0.937775155  |
| wavelet-LLL | glszm      | GrayLevelVariance                | 323.8913101  |
| wavelet-LLL | glszm      | ZoneVariance                     | 1.548937077  |
| wavelet-LLL | glszm      | GrayLevelNonUniformityNormalized | 0.020938782  |
| wavelet-LLL | glszm      | SizeZoneNonUniformityNormalized  | 0.595183547  |
| wavelet-LLL | glszm      | SizeZoneNonUniformity            | 81.54014599  |
| wavelet-LLL | glszm      | GrayLevelNonUniformity           | 2.868613139  |
| wavelet-LLL | glszm      | LargeAreaEmphasis                | 3.854014599  |
| wavelet-LLL | glszm      | SmallAreaHighGrayLevelEmphasis   | 1821.717271  |
| wavelet-LLL | glszm      | ZonePercentage                   | 0.658653846  |
| wavelet-LLL | glszm      | LargeAreaLowGrayLevelEmphasis    | 0.009672938  |
| wavelet-LLL | glszm      | LargeAreaHighGrayLevelEmphasis   | 14813.0438   |
| wavelet-LLL | glszm      | HighGrayLevelZoneEmphasis        | 2588.817518  |
| wavelet-LLL | glszm      | SmallAreaEmphasis                | 0.797887267  |

|             |            |                                      |              |
|-------------|------------|--------------------------------------|--------------|
| wavelet-LLL | glszm      | LowGrayLevelZoneEmphasis             | 0.00835607   |
| wavelet-LLL | glszm      | ZoneEntropy                          | 6.203372046  |
| wavelet-LLL | glszm      | SmallAreaLowGrayLevelEmphasis        | 0.008156018  |
| wavelet-LLL | ngtdm      | Coarseness                           | 0.024608256  |
| wavelet-LLL | ngtdm      | Complexity                           | 14917.03371  |
| wavelet-LLL | ngtdm      | Strength                             | 57.34405107  |
| wavelet-LLL | ngtdm      | Contrast                             | 1.391193201  |
| wavelet-LLL | ngtdm      | Busyness                             | 0.010558196  |
| wavelet-HHL | gldm       | GrayLevelVariance                    | 9.956337833  |
| wavelet-HHL | gldm       | HighGrayLevelEmphasis                | 118.6971154  |
| wavelet-HHL | gldm       | DependenceEntropy                    | 5.602752456  |
| wavelet-HHL | gldm       | DependenceNonUniformity              | 39.36538462  |
| wavelet-HHL | gldm       | GrayLevelNonUniformity               | 20.48076923  |
| wavelet-HHL | gldm       | SmallDependenceEmphasis              | 0.326223939  |
| wavelet-HHL | gldm       | SmallDependenceHighGrayLevelEmphasis | 42.23170882  |
| wavelet-HHL | gldm       | DependenceNonUniformityNormalized    | 0.189256657  |
| wavelet-HHL | gldm       | LargeDependenceEmphasis              | 12.46153846  |
| wavelet-HHL | gldm       | LargeDependenceLowGrayLevelEmphasis  | 0.135961813  |
| wavelet-HHL | gldm       | DependenceVariance                   | 3.519138314  |
| wavelet-HHL | gldm       | LargeDependenceHighGrayLevelEmphasis | 1377.293269  |
| wavelet-HHL | gldm       | SmallDependenceLowGrayLevelEmphasis  | 0.012210598  |
| wavelet-HHL | gldm       | LowGrayLevelEmphasis                 | 0.019886293  |
| wavelet-HHL | glcm       | JointAverage                         | 10.51970588  |
| wavelet-HHL | glcm       | SumAverage                           | 21.03941175  |
| wavelet-HHL | glcm       | JointEntropy                         | 6.504119224  |
| wavelet-HHL | glcm       | ClusterShade                         | -11.70389355 |
| wavelet-HHL | glcm       | MaximumProbability                   | 0.038264022  |
| wavelet-HHL | glcm       | ldmn                                 | 0.954155193  |
| wavelet-HHL | glcm       | JointEnergy                          | 0.014664014  |
| wavelet-HHL | glcm       | Contrast                             | 19.49679305  |
| wavelet-HHL | glcm       | DifferenceEntropy                    | 3.183940991  |
| wavelet-HHL | glcm       | InverseVariance                      | 0.274641083  |
| wavelet-HHL | glcm       | DifferenceVariance                   | 8.013223823  |
| wavelet-HHL | glcm       | ldn                                  | 0.863132239  |
| wavelet-HHL | glcm       | ldm                                  | 0.274655711  |
| wavelet-HHL | glcm       | Correlation                          | -0.026334798 |
| wavelet-HHL | glcm       | Autocorrelation                      | 110.4407679  |
| wavelet-HHL | glcm       | SumEntropy                           | 3.968548618  |
| wavelet-HHL | glcm       | SumSquares                           | 9.511255956  |
| wavelet-HHL | glcm       | ClusterProminence                    | 1204.418341  |
| wavelet-HHL | glcm       | lmc2                                 | 0.863743935  |
| wavelet-HHL | glcm       | lmc1                                 | -0.192615924 |
| wavelet-HHL | glcm       | DifferenceAverage                    | 3.342035871  |
| wavelet-HHL | glcm       | ld                                   | 0.361541675  |
| wavelet-HHL | glcm       | ClusterTendency                      | 18.54823078  |
| wavelet-HHL | firstorder | InterquartileRange                   | 91.08903103  |
| wavelet-HHL | firstorder | Skewness                             | -0.243016094 |
| wavelet-HHL | firstorder | Uniformity                           | 0.098465237  |
| wavelet-HHL | firstorder | Median                               | -4.696496636 |
| wavelet-HHL | firstorder | Energy                               | 1303248.682  |
| wavelet-HHL | firstorder | RobustMeanAbsoluteDeviation          | 40.30701179  |
| wavelet-HHL | firstorder | MeanAbsoluteDeviation                | 60.98474304  |
| wavelet-HHL | firstorder | TotalEnergy                          | 35187714.41  |
| wavelet-HHL | firstorder | Maximum                              | 202.5174045  |
| wavelet-HHL | firstorder | RootMeanSquared                      | 79.15566096  |
| wavelet-HHL | firstorder | 90Percentile                         | 95.39653422  |

|             |            |                                      |              |
|-------------|------------|--------------------------------------|--------------|
| wavelet-HHL | firstorder | Minimum                              | -242.9845564 |
| wavelet-HHL | firstorder | Entropy                              | 3.641193046  |
| wavelet-HHL | firstorder | Range                                | 445.5019609  |
| wavelet-HHL | firstorder | Variance                             | 6262.631372  |
| wavelet-HHL | firstorder | 10Percentile                         | -96.12138246 |
| wavelet-HHL | firstorder | Kurtosis                             | 3.327789804  |
| wavelet-HHL | firstorder | Mean                                 | -1.72837773  |
| wavelet-HHL | gllm       | ShortRunLowGrayLevelEmphasis         | 0.020067449  |
| wavelet-HHL | gllm       | GrayLevelVariance                    | 10.49820057  |
| wavelet-HHL | gllm       | LowGrayLevelRunEmphasis              | 0.020669236  |
| wavelet-HHL | gllm       | GrayLevelNonUniformityNormalized     | 0.094246618  |
| wavelet-HHL | gllm       | RunVariance                          | 0.093799542  |
| wavelet-HHL | gllm       | GrayLevelNonUniformity               | 18.10399931  |
| wavelet-HHL | gllm       | LongRunEmphasis                      | 1.268707742  |
| wavelet-HHL | gllm       | ShortRunHighGrayLevelEmphasis        | 112.8970954  |
| wavelet-HHL | gllm       | RunLengthNonUniformity               | 165.5385436  |
| wavelet-HHL | gllm       | ShortRunEmphasis                     | 0.942591037  |
| wavelet-HHL | gllm       | LongRunHighGrayLevelEmphasis         | 149.0988043  |
| wavelet-HHL | gllm       | RunPercentage                        | 0.923446746  |
| wavelet-HHL | gllm       | LongRunLowGrayLevelEmphasis          | 0.023502246  |
| wavelet-HHL | gllm       | RunEntropy                           | 4.019985374  |
| wavelet-HHL | gllm       | HighGrayLevelRunEmphasis             | 119.3182444  |
| wavelet-HHL | gllm       | RunLengthNonUniformityNormalized     | 0.860941904  |
| wavelet-HHL | glszm      | GrayLevelVariance                    | 18.31234375  |
| wavelet-HHL | glszm      | ZoneVariance                         | 20.515       |
| wavelet-HHL | glszm      | GrayLevelNonUniformityNormalized     | 0.0746875    |
| wavelet-HHL | glszm      | SizeZoneNonUniformityNormalized      | 0.40125      |
| wavelet-HHL | glszm      | SizeZoneNonUniformity                | 32.1         |
| wavelet-HHL | glszm      | GrayLevelNonUniformity               | 5.975        |
| wavelet-HHL | glszm      | LargeAreaEmphasis                    | 27.275       |
| wavelet-HHL | glszm      | SmallAreaHighGrayLevelEmphasis       | 86.15384851  |
| wavelet-HHL | glszm      | ZonePercentage                       | 0.384615385  |
| wavelet-HHL | glszm      | LargeAreaLowGrayLevelEmphasis        | 0.290364686  |
| wavelet-HHL | glszm      | LargeAreaHighGrayLevelEmphasis       | 3029.6375    |
| wavelet-HHL | glszm      | HighGrayLevelZoneEmphasis            | 126.2125     |
| wavelet-HHL | glszm      | SmallAreaEmphasis                    | 0.647690405  |
| wavelet-HHL | glszm      | LowGrayLevelZoneEmphasis             | 0.034234431  |
| wavelet-HHL | glszm      | ZoneEntropy                          | 5.019667977  |
| wavelet-HHL | glszm      | SmallAreaLowGrayLevelEmphasis        | 0.029321968  |
| wavelet-HHL | ngtdm      | Coarseness                           | 0.029575981  |
| wavelet-HHL | ngtdm      | Complexity                           | 337.8743648  |
| wavelet-HHL | ngtdm      | Strength                             | 2.886411004  |
| wavelet-HHL | ngtdm      | Contrast                             | 0.147923349  |
| wavelet-HHL | ngtdm      | Busyness                             | 0.159588221  |
| wavelet-HLH | gldm       | GrayLevelVariance                    | 10.470576    |
| wavelet-HLH | gldm       | HighGrayLevelEmphasis                | 140.4086538  |
| wavelet-HLH | gldm       | DependenceEntropy                    | 5.720272202  |
| wavelet-HLH | gldm       | DependenceNonUniformity              | 39.07692308  |
| wavelet-HLH | gldm       | GrayLevelNonUniformity               | 21.58653846  |
| wavelet-HLH | gldm       | SmallDependenceEmphasis              | 0.372125547  |
| wavelet-HLH | gldm       | SmallDependenceHighGrayLevelEmphasis | 50.76241241  |
| wavelet-HLH | gldm       | DependenceNonUniformityNormalized    | 0.187869822  |
| wavelet-HLH | gldm       | LargeDependenceEmphasis              | 14.33653846  |
| wavelet-HLH | gldm       | LargeDependenceLowGrayLevelEmphasis  | 0.122407357  |
| wavelet-HLH | gldm       | DependenceVariance                   | 5.045765533  |
| wavelet-HLH | gldm       | LargeDependenceHighGrayLevelEmphasis | 1949.120192  |



|             |            |                                     |              |
|-------------|------------|-------------------------------------|--------------|
| wavelet-HLH | gldm       | SmallDependenceLowGrayLevelEmphasis | 0.012328904  |
| wavelet-HLH | gldm       | LowGrayLevelEmphasis                | 0.01758629   |
| wavelet-HLH | glcm       | JointAverage                        | 11.42627053  |
| wavelet-HLH | glcm       | SumAverage                          | 22.85254106  |
| wavelet-HLH | glcm       | JointEntropy                        | 6.469756802  |
| wavelet-HLH | glcm       | ClusterShade                        | -31.60810143 |
| wavelet-HLH | glcm       | MaximumProbability                  | 0.04841831   |
| wavelet-HLH | glcm       | ldmn                                | 0.963832701  |
| wavelet-HLH | glcm       | JointEnergy                         | 0.015548485  |
| wavelet-HLH | glcm       | Contrast                            | 20.19783163  |
| wavelet-HLH | glcm       | DifferenceEntropy                   | 3.193122482  |
| wavelet-HLH | glcm       | InverseVariance                     | 0.266805305  |
| wavelet-HLH | glcm       | DifferenceVariance                  | 8.705841079  |
| wavelet-HLH | glcm       | ldn                                 | 0.878142131  |
| wavelet-HLH | glcm       | ldm                                 | 0.273684627  |
| wavelet-HLH | glcm       | Correlation                         | -0.033710828 |
| wavelet-HLH | glcm       | Autocorrelation                     | 130.2710452  |
| wavelet-HLH | glcm       | SumEntropy                          | 3.974901922  |
| wavelet-HLH | glcm       | SumSquares                          | 9.80942161   |
| wavelet-HLH | glcm       | ClusterProminence                   | 1468.49813   |
| wavelet-HLH | glcm       | lmc2                                | 0.85719474   |
| wavelet-HLH | glcm       | lmc1                                | -0.188500427 |
| wavelet-HLH | glcm       | DifferenceAverage                   | 3.36019358   |
| wavelet-HLH | glcm       | ld                                  | 0.361853214  |
| wavelet-HLH | glcm       | ClusterTendency                     | 19.03985481  |
| wavelet-HLH | firstorder | InterquartileRange                  | 91.7050622   |
| wavelet-HLH | firstorder | Skewness                            | -0.288271677 |
| wavelet-HLH | firstorder | Uniformity                          | 0.103781435  |
| wavelet-HLH | firstorder | Median                              | -1.59239139  |
| wavelet-HLH | firstorder | Energy                              | 1376770.565  |
| wavelet-HLH | firstorder | RobustMeanAbsoluteDeviation         | 36.95901537  |
| wavelet-HLH | firstorder | MeanAbsoluteDeviation               | 59.95457496  |
| wavelet-HLH | firstorder | TotalEnergy                         | 37172805.27  |
| wavelet-HLH | firstorder | Maximum                             | 267.681435   |
| wavelet-HLH | firstorder | RootMeanSquared                     | 81.35778547  |
| wavelet-HLH | firstorder | 90Percentile                        | 89.30613316  |
| wavelet-HLH | firstorder | Minimum                             | -251.1396541 |
| wavelet-HLH | firstorder | Entropy                             | 3.625658768  |
| wavelet-HLH | firstorder | Range                               | 518.8210891  |
| wavelet-HLH | firstorder | Variance                            | 6615.27897   |
| wavelet-HLH | firstorder | 10Percentile                        | -99.48414152 |
| wavelet-HLH | firstorder | Kurtosis                            | 4.075128121  |
| wavelet-HLH | firstorder | Mean                                | -1.951995636 |
| wavelet-HLH | grlm       | ShortRunLowGrayLevelEmphasis        | 0.017949112  |
| wavelet-HLH | grlm       | GrayLevelVariance                   | 11.12774866  |
| wavelet-HLH | grlm       | LowGrayLevelRunEmphasis             | 0.018413867  |
| wavelet-HLH | grlm       | GrayLevelNonUniformityNormalized    | 0.097883694  |
| wavelet-HLH | grlm       | RunVariance                         | 0.101767828  |
| wavelet-HLH | grlm       | GrayLevelNonUniformity              | 18.76173487  |
| wavelet-HLH | grlm       | LongRunEmphasis                     | 1.281236118  |
| wavelet-HLH | grlm       | ShortRunHighGrayLevelEmphasis       | 132.3997093  |
| wavelet-HLH | grlm       | RunLengthNonUniformity              | 164.5945674  |
| wavelet-HLH | grlm       | ShortRunEmphasis                    | 0.941741304  |
| wavelet-HLH | grlm       | LongRunHighGrayLevelEmphasis        | 179.597046   |
| wavelet-HLH | grlm       | RunPercentage                       | 0.921227811  |
| wavelet-HLH | grlm       | LongRunLowGrayLevelEmphasis         | 0.020638364  |

|             |       |                                  |             |
|-------------|-------|----------------------------------|-------------|
| wavelet-HLH | glrlm | RunEntropy                       | 4.021405706 |
| wavelet-HLH | glrlm | HighGrayLevelRunEmphasis         | 140.5265066 |
| wavelet-HLH | glrlm | RunLengthNonUniformityNormalized | 0.858616937 |
| wavelet-HLH | glszm | GrayLevelVariance                | 19.43712818 |
| wavelet-HLH | glszm | ZoneVariance                     | 20.68523526 |
| wavelet-HLH | glszm | GrayLevelNonUniformityNormalized | 0.069497025 |
| wavelet-HLH | glszm | SizeZoneNonUniformityNormalized  | 0.483775014 |
| wavelet-HLH | glszm | SizeZoneNonUniformity            | 41.60465116 |
| wavelet-HLH | glszm | GrayLevelNonUniformity           | 5.976744186 |
| wavelet-HLH | glszm | LargeAreaEmphasis                | 26.53488372 |
| wavelet-HLH | glszm | SmallAreaHighGrayLevelEmphasis   | 96.97508232 |
| wavelet-HLH | glszm | ZonePercentage                   | 0.413461538 |
| wavelet-HLH | glszm | LargeAreaLowGrayLevelEmphasis    | 0.2230769   |
| wavelet-HLH | glszm | LargeAreaHighGrayLevelEmphasis   | 3700.965116 |
| wavelet-HLH | glszm | HighGrayLevelZoneEmphasis        | 137.6395349 |
| wavelet-HLH | glszm | SmallAreaEmphasis                | 0.720651069 |
| wavelet-HLH | glszm | LowGrayLevelZoneEmphasis         | 0.030998212 |
| wavelet-HLH | glszm | ZoneEntropy                      | 5.186390447 |
| wavelet-HLH | glszm | SmallAreaLowGrayLevelEmphasis    | 0.028241402 |
| wavelet-HLH | ngtdm | Coarseness                       | 0.030517932 |
| wavelet-HLH | ngtdm | Complexity                       | 380.2333544 |
| wavelet-HLH | ngtdm | Strength                         | 3.530355445 |
| wavelet-HLH | ngtdm | Contrast                         | 0.139435039 |
| wavelet-HLH | ngtdm | Busyness                         | 0.126043292 |

| Image type | Feature Class | Feature Name                         |                                                                                                                                                                                                                                                                                                                                                                                                                   |
|------------|---------------|--------------------------------------|-------------------------------------------------------------------------------------------------------------------------------------------------------------------------------------------------------------------------------------------------------------------------------------------------------------------------------------------------------------------------------------------------------------------|
| general    | info          | BoundingBox                          | 5: RTSTRUCT: C99-DNU_segment_Lung GTV-ITV<br>(0, 0, 3, 16, 13, 12)                                                                                                                                                                                                                                                                                                                                                |
| general    | info          | EnabledImageTypes                    | {u'Original': {}, u'Wavelet': {}}                                                                                                                                                                                                                                                                                                                                                                                 |
|            |               |                                      | {'distances': [1], 'additionalInfo': True, 'force2D': False, 'interpolator': 'sitkBSpline', 'resampledPixelSpacing': [3.0], 'label': 1, 'normalizeScale': 1, 'normalize': False, 'force2Ddimension': 0, 'removeOutliers': None, 'minimumROISize': None, u'binWidth': 25.0, 'minimumROIDimensions': 1, u'correctMask': True, 'preCrop': False, u'symmetricalGLCM': True, 'resegmentRange': None, 'padDistance': 5} |
| general    | info          | GeneralSettings                      |                                                                                                                                                                                                                                                                                                                                                                                                                   |
| general    | info          | ImageHash                            | 3b474d06b821004f7ee30424eac5f84406f8588f<br>(0.9765624999999998, 0.9765624999999998, 1.9999999999999999)                                                                                                                                                                                                                                                                                                          |
| general    | info          | ImageSpacing                         |                                                                                                                                                                                                                                                                                                                                                                                                                   |
| general    | info          | MaskHash                             | 1b7f803188b651472c8cc5ee09d83221d9660903                                                                                                                                                                                                                                                                                                                                                                          |
| general    | info          | NumpyVersion                         | 1.13.1                                                                                                                                                                                                                                                                                                                                                                                                            |
| general    | info          | PyWaveletVersion                     | 0.5.2                                                                                                                                                                                                                                                                                                                                                                                                             |
| general    | info          | SimpleITKVersion                     | 1.1.0                                                                                                                                                                                                                                                                                                                                                                                                             |
| general    | info          | Version                              | 1.3.0.post102+g1b0eb74                                                                                                                                                                                                                                                                                                                                                                                            |
| general    | info          | VolumeNum                            | 1                                                                                                                                                                                                                                                                                                                                                                                                                 |
| general    | info          | VoxelNum                             | 1037                                                                                                                                                                                                                                                                                                                                                                                                              |
| original   | shape         | Maximum3DDiameter                    | 45.79301257                                                                                                                                                                                                                                                                                                                                                                                                       |
| original   | shape         | Maximum2DDiameterSlice               | 45.09988914                                                                                                                                                                                                                                                                                                                                                                                                       |
| original   | shape         | Sphericity                           | 0.816798013                                                                                                                                                                                                                                                                                                                                                                                                       |
| original   | shape         | MinorAxis                            | 34.23081403                                                                                                                                                                                                                                                                                                                                                                                                       |
| original   | shape         | Elongation                           | 0.833343249                                                                                                                                                                                                                                                                                                                                                                                                       |
| original   | shape         | SurfaceVolumeRatio                   | 0.194979347                                                                                                                                                                                                                                                                                                                                                                                                       |
| original   | shape         | Volume                               | 27999                                                                                                                                                                                                                                                                                                                                                                                                             |
| original   | shape         | MajorAxis                            | 41.07648806                                                                                                                                                                                                                                                                                                                                                                                                       |
| original   | shape         | SurfaceArea                          | 5459.22674                                                                                                                                                                                                                                                                                                                                                                                                        |
| original   | shape         | Flatness                             | 0.729145714                                                                                                                                                                                                                                                                                                                                                                                                       |
| original   | shape         | LeastAxis                            | 29.9507452                                                                                                                                                                                                                                                                                                                                                                                                        |
| original   | shape         | Maximum2DDiameterColumn              | 44.59820624                                                                                                                                                                                                                                                                                                                                                                                                       |
| original   | shape         | Maximum2DDiameterRow                 | 39.11521443                                                                                                                                                                                                                                                                                                                                                                                                       |
| original   | gldm          | GrayLevelVariance                    | 106.1167599                                                                                                                                                                                                                                                                                                                                                                                                       |
| original   | gldm          | HighGrayLevelEmphasis                | 1055.612343                                                                                                                                                                                                                                                                                                                                                                                                       |
| original   | gldm          | DependenceEntropy                    | 6.780529022                                                                                                                                                                                                                                                                                                                                                                                                       |
| original   | gldm          | DependenceNonUniformity              | 159.0096432                                                                                                                                                                                                                                                                                                                                                                                                       |
| original   | gldm          | GrayLevelNonUniformity               | 86.66248795                                                                                                                                                                                                                                                                                                                                                                                                       |
| original   | gldm          | SmallDependenceEmphasis              | 0.379038934                                                                                                                                                                                                                                                                                                                                                                                                       |
| original   | gldm          | SmallDependenceHighGrayLevelEmphasis | 250.3003646                                                                                                                                                                                                                                                                                                                                                                                                       |
| original   | gldm          | DependenceNonUniformityNormalized    | 0.153336204                                                                                                                                                                                                                                                                                                                                                                                                       |
| original   | gldm          | LargeDependenceEmphasis              | 46.29026037                                                                                                                                                                                                                                                                                                                                                                                                       |
| original   | gldm          | LargeDependenceLowGrayLevelEmphasis  | 0.037158019                                                                                                                                                                                                                                                                                                                                                                                                       |
| original   | gldm          | DependenceVariance                   | 22.79067185                                                                                                                                                                                                                                                                                                                                                                                                       |
| original   | gldm          | LargeDependenceHighGrayLevelEmphasis | 68939.41948                                                                                                                                                                                                                                                                                                                                                                                                       |
| original   | gldm          | SmallDependenceLowGrayLevelEmphasis  | 0.003069063                                                                                                                                                                                                                                                                                                                                                                                                       |
| original   | gldm          | LowGrayLevelEmphasis                 | 0.004058677                                                                                                                                                                                                                                                                                                                                                                                                       |
| original   | glcm          | JointAverage                         | 32.59289363                                                                                                                                                                                                                                                                                                                                                                                                       |
| original   | glcm          | SumAverage                           | 65.18578726                                                                                                                                                                                                                                                                                                                                                                                                       |
| original   | glcm          | JointEntropy                         | 7.48284716                                                                                                                                                                                                                                                                                                                                                                                                        |
| original   | glcm          | ClusterShade                         | -4694.108902                                                                                                                                                                                                                                                                                                                                                                                                      |
| original   | glcm          | MaximumProbability                   | 0.113026611                                                                                                                                                                                                                                                                                                                                                                                                       |
| original   | glcm          | Idmn                                 | 0.956710685                                                                                                                                                                                                                                                                                                                                                                                                       |
| original   | glcm          | JointEnergy                          | 0.024260463                                                                                                                                                                                                                                                                                                                                                                                                       |
| original   | glcm          | Contrast                             | 91.71625734                                                                                                                                                                                                                                                                                                                                                                                                       |
| original   | glcm          | DifferenceEntropy                    | 3.948070553                                                                                                                                                                                                                                                                                                                                                                                                       |

|          |            |                                  |              |
|----------|------------|----------------------------------|--------------|
| original | glcm       | InverseVariance                  | 0.270595854  |
| original | glcm       | DifferenceVariance               | 55.44926381  |
| original | glcm       | Idn                              | 0.891144261  |
| original | glcm       | Idm                              | 0.330300584  |
| original | glcm       | Correlation                      | 0.459419486  |
| original | glcm       | Autocorrelation                  | 1101.509755  |
| original | glcm       | SumEntropy                       | 5.115999849  |
| original | glcm       | SumSquares                       | 85.03006312  |
| original | glcm       | ClusterProminence                | 221136.2495  |
| original | glcm       | Imc2                             | 0.897523263  |
| original | glcm       | Imc1                             | -0.19972916  |
| original | glcm       | DifferenceAverage                | 5.981280958  |
| original | glcm       | Id                               | 0.387084809  |
| original | glcm       | ClusterTendency                  | 248.4039952  |
| original | firstorder | InterquartileRange               | 375          |
| original | firstorder | Skewness                         | -1.055997194 |
| original | firstorder | Uniformity                       | 0.083570384  |
| original | firstorder | Median                           | -34          |
| original | firstorder | Energy                           | 97913057     |
| original | firstorder | RobustMeanAbsoluteDeviation      | 162.578415   |
| original | firstorder | MeanAbsoluteDeviation            | 216.9635967  |
| original | firstorder | TotalEnergy                      | 2643652539   |
| original | firstorder | Maximum                          | 89           |
| original | firstorder | RootMeanSquared                  | 307.2776175  |
| original | firstorder | 90Percentile                     | 49           |
| original | firstorder | Minimum                          | -909         |
| original | firstorder | Entropy                          | 4.447777491  |
| original | firstorder | Range                            | 998          |
| original | firstorder | Variance                         | 66346.64483  |
| original | firstorder | 10Percentile                     | -601         |
| original | firstorder | Kurtosis                         | 2.831372367  |
| original | firstorder | Mean                             | -167.5496625 |
| original | glrlm      | ShortRunLowGrayLevelEmphasis     | 0.004519818  |
| original | glrlm      | GrayLevelVariance                | 111.2344492  |
| original | glrlm      | LowGrayLevelRunEmphasis          | 0.004609019  |
| original | glrlm      | GrayLevelNonUniformityNormalized | 0.058700939  |
| original | glrlm      | RunVariance                      | 0.298297079  |
| original | glrlm      | GrayLevelNonUniformity           | 51.92270709  |
| original | glrlm      | LongRunEmphasis                  | 1.679143152  |
| original | glrlm      | ShortRunHighGrayLevelEmphasis    | 846.3891143  |
| original | glrlm      | RunLengthNonUniformity           | 689.9262799  |
| original | glrlm      | ShortRunEmphasis                 | 0.903225989  |
| original | glrlm      | LongRunHighGrayLevelEmphasis     | 1983.341439  |
| original | glrlm      | RunPercentage                    | 0.852013946  |
| original | glrlm      | LongRunLowGrayLevelEmphasis      | 0.005209587  |
| original | glrlm      | RunEntropy                       | 5.214237508  |
| original | glrlm      | HighGrayLevelRunEmphasis         | 985.5878209  |
| original | glrlm      | RunLengthNonUniformityNormalized | 0.780164605  |
| original | glszm      | GrayLevelVariance                | 100.7478442  |
| original | glszm      | ZoneVariance                     | 164.947115   |
| original | glszm      | GrayLevelNonUniformityNormalized | 0.030161757  |
| original | glszm      | SizeZoneNonUniformityNormalized  | 0.606739803  |
| original | glszm      | SizeZoneNonUniformity            | 260.2913753  |
| original | glszm      | GrayLevelNonUniformity           | 12.93939394  |
| original | glszm      | LargeAreaEmphasis                | 170.7902098  |
| original | glszm      | SmallAreaHighGrayLevelEmphasis   | 494.0149376  |
| original | glszm      | ZonePercentage                   | 0.413693346  |
| original | glszm      | LargeAreaLowGrayLevelEmphasis    | 0.124741203  |

|             |            |                                      |              |
|-------------|------------|--------------------------------------|--------------|
| original    | glszm      | LargeAreaHighGrayLevelEmphasis       | 255730.0932  |
| original    | glszm      | HighGrayLevelZoneEmphasis            | 654.4778555  |
| original    | glszm      | SmallAreaEmphasis                    | 0.806703496  |
| original    | glszm      | LowGrayLevelZoneEmphasis             | 0.007765952  |
| original    | glszm      | ZoneEntropy                          | 6.006732031  |
| original    | glszm      | SmallAreaLowGrayLevelEmphasis        | 0.007076328  |
| original    | ngtdm      | Coarseness                           | 0.004235886  |
| original    | ngtdm      | Complexity                           | 3155.632502  |
| original    | ngtdm      | Strength                             | 5.391014673  |
| original    | ngtdm      | Contrast                             | 0.637747416  |
| original    | ngtdm      | Busyness                             | 0.139054988  |
| wavelet-HHH | gldm       | GrayLevelVariance                    | 4.047496255  |
| wavelet-HHH | gldm       | HighGrayLevelEmphasis                | 93.46576663  |
| wavelet-HHH | gldm       | DependenceEntropy                    | 5.919180575  |
| wavelet-HHH | gldm       | DependenceNonUniformity              | 90.59884282  |
| wavelet-HHH | gldm       | GrayLevelNonUniformity               | 186.6528447  |
| wavelet-HHH | gldm       | SmallDependenceEmphasis              | 0.16766842   |
| wavelet-HHH | gldm       | SmallDependenceHighGrayLevelEmphasis | 16.82817715  |
| wavelet-HHH | gldm       | DependenceNonUniformityNormalized    | 0.08736629   |
| wavelet-HHH | gldm       | LargeDependenceEmphasis              | 49.75988428  |
| wavelet-HHH | gldm       | LargeDependenceLowGrayLevelEmphasis  | 0.567213417  |
| wavelet-HHH | gldm       | DependenceVariance                   | 15.91374496  |
| wavelet-HHH | gldm       | LargeDependenceHighGrayLevelEmphasis | 4521.564127  |
| wavelet-HHH | gldm       | SmallDependenceLowGrayLevelEmphasis  | 0.004619082  |
| wavelet-HHH | gldm       | LowGrayLevelEmphasis                 | 0.014750853  |
| wavelet-HHH | glcm       | JointAverage                         | 9.47777625   |
| wavelet-HHH | glcm       | SumAverage                           | 18.9555525   |
| wavelet-HHH | glcm       | JointEntropy                         | 5.472217457  |
| wavelet-HHH | glcm       | ClusterShade                         | 0.95801732   |
| wavelet-HHH | glcm       | MaximumProbability                   | 0.102226663  |
| wavelet-HHH | glcm       | Idmn                                 | 0.982843923  |
| wavelet-HHH | glcm       | JointEnergy                          | 0.045118839  |
| wavelet-HHH | glcm       | Contrast                             | 7.591825543  |
| wavelet-HHH | glcm       | DifferenceEntropy                    | 2.589934519  |
| wavelet-HHH | glcm       | InverseVariance                      | 0.392711635  |
| wavelet-HHH | glcm       | DifferenceVariance                   | 3.985705516  |
| wavelet-HHH | glcm       | Idn                                  | 0.920647324  |
| wavelet-HHH | glcm       | Idm                                  | 0.446557912  |
| wavelet-HHH | glcm       | Correlation                          | -0.028841798 |
| wavelet-HHH | glcm       | Autocorrelation                      | 89.7190619   |
| wavelet-HHH | glcm       | SumEntropy                           | 3.302101885  |
| wavelet-HHH | glcm       | SumSquares                           | 3.686437362  |
| wavelet-HHH | glcm       | ClusterProminence                    | 328.7476609  |
| wavelet-HHH | glcm       | Imc2                                 | 0.562316566  |
| wavelet-HHH | glcm       | Imc1                                 | -0.069232896 |
| wavelet-HHH | glcm       | DifferenceAverage                    | 1.883457463  |
| wavelet-HHH | glcm       | Id                                   | 0.505516379  |
| wavelet-HHH | glcm       | ClusterTendency                      | 7.153923906  |
| wavelet-HHH | firstorder | InterquartileRange                   | 44.16995406  |
| wavelet-HHH | firstorder | Skewness                             | 0.078158814  |
| wavelet-HHH | firstorder | Uniformity                           | 0.1799931    |
| wavelet-HHH | firstorder | Median                               | 0.131511724  |
| wavelet-HHH | firstorder | Energy                               | 2567839.522  |
| wavelet-HHH | firstorder | RobustMeanAbsoluteDeviation          | 19.23948792  |
| wavelet-HHH | firstorder | MeanAbsoluteDeviation                | 34.06257653  |
| wavelet-HHH | firstorder | TotalEnergy                          | 69331667.1   |
| wavelet-HHH | firstorder | Maximum                              | 259.9210187  |
| wavelet-HHH | firstorder | RootMeanSquared                      | 49.76162582  |

|             |            |                                      |              |
|-------------|------------|--------------------------------------|--------------|
| wavelet-HHH | firstorder | 90Percentile                         | 52.6560375   |
| wavelet-HHH | firstorder | Minimum                              | -200.5902341 |
| wavelet-HHH | firstorder | Entropy                              | 2.922559532  |
| wavelet-HHH | firstorder | Range                                | 460.5112528  |
| wavelet-HHH | firstorder | Variance                             | 2475.025753  |
| wavelet-HHH | firstorder | 10Percentile                         | -58.44619364 |
| wavelet-HHH | firstorder | Kurtosis                             | 5.988287854  |
| wavelet-HHH | firstorder | Mean                                 | -1.092543717 |
| wavelet-HHH | glrlm      | ShortRunLowGrayLevelEmphasis         | 0.013916198  |
| wavelet-HHH | glrlm      | GrayLevelVariance                    | 4.74040894   |
| wavelet-HHH | glrlm      | LowGrayLevelRunEmphasis              | 0.015487855  |
| wavelet-HHH | glrlm      | GrayLevelNonUniformityNormalized     | 0.155982812  |
| wavelet-HHH | glrlm      | RunVariance                          | 0.328061708  |
| wavelet-HHH | glrlm      | GrayLevelNonUniformity               | 131.8098668  |
| wavelet-HHH | glrlm      | LongRunEmphasis                      | 1.839265844  |
| wavelet-HHH | glrlm      | ShortRunHighGrayLevelEmphasis        | 81.5407694   |
| wavelet-HHH | glrlm      | RunLengthNonUniformity               | 595.9847289  |
| wavelet-HHH | glrlm      | ShortRunEmphasis                     | 0.86452179   |
| wavelet-HHH | glrlm      | LongRunHighGrayLevelEmphasis         | 170.4530517  |
| wavelet-HHH | glrlm      | RunPercentage                        | 0.814702173  |
| wavelet-HHH | glrlm      | LongRunLowGrayLevelEmphasis          | 0.025122264  |
| wavelet-HHH | glrlm      | RunEntropy                           | 3.819933153  |
| wavelet-HHH | glrlm      | HighGrayLevelRunEmphasis             | 93.94863715  |
| wavelet-HHH | glrlm      | RunLengthNonUniformityNormalized     | 0.70438653   |
| wavelet-HHH | glszm      | GrayLevelVariance                    | 13.94625306  |
| wavelet-HHH | glszm      | ZoneVariance                         | 862.8459102  |
| wavelet-HHH | glszm      | GrayLevelNonUniformityNormalized     | 0.092179592  |
| wavelet-HHH | glszm      | SizeZoneNonUniformityNormalized      | 0.397616327  |
| wavelet-HHH | glszm      | SizeZoneNonUniformity                | 69.58285714  |
| wavelet-HHH | glszm      | GrayLevelNonUniformity               | 16.13142857  |
| wavelet-HHH | glszm      | LargeAreaEmphasis                    | 897.96       |
| wavelet-HHH | glszm      | SmallAreaHighGrayLevelEmphasis       | 68.28548653  |
| wavelet-HHH | glszm      | ZonePercentage                       | 0.168756027  |
| wavelet-HHH | glszm      | LargeAreaLowGrayLevelEmphasis        | 10.02423864  |
| wavelet-HHH | glszm      | LargeAreaHighGrayLevelEmphasis       | 81983.06286  |
| wavelet-HHH | glszm      | HighGrayLevelZoneEmphasis            | 101.6628571  |
| wavelet-HHH | glszm      | SmallAreaEmphasis                    | 0.655572382  |
| wavelet-HHH | glszm      | LowGrayLevelZoneEmphasis             | 0.027823501  |
| wavelet-HHH | glszm      | ZoneEntropy                          | 5.360552888  |
| wavelet-HHH | glszm      | SmallAreaLowGrayLevelEmphasis        | 0.022823201  |
| wavelet-HHH | ngtdm      | Coarseness                           | 0.006631637  |
| wavelet-HHH | ngtdm      | Complexity                           | 232.0694229  |
| wavelet-HHH | ngtdm      | Strength                             | 0.887376865  |
| wavelet-HHH | ngtdm      | Contrast                             | 0.035532175  |
| wavelet-HHH | ngtdm      | Busyness                             | 0.59030446   |
| wavelet-HLL | gldm       | GrayLevelVariance                    | 51.61996301  |
| wavelet-HLL | gldm       | HighGrayLevelEmphasis                | 333.4194793  |
| wavelet-HLL | gldm       | DependenceEntropy                    | 6.810245861  |
| wavelet-HLL | gldm       | DependenceNonUniformity              | 147.7425265  |
| wavelet-HLL | gldm       | GrayLevelNonUniformity               | 75.74059788  |
| wavelet-HLL | gldm       | SmallDependenceEmphasis              | 0.286441762  |
| wavelet-HLL | gldm       | SmallDependenceHighGrayLevelEmphasis | 128.3464051  |
| wavelet-HLL | gldm       | DependenceNonUniformityNormalized    | 0.142471096  |
| wavelet-HLL | gldm       | LargeDependenceEmphasis              | 21.25265188  |
| wavelet-HLL | gldm       | LargeDependenceLowGrayLevelEmphasis  | 0.092813354  |
| wavelet-HLL | gldm       | DependenceVariance                   | 7.188343722  |
| wavelet-HLL | gldm       | LargeDependenceHighGrayLevelEmphasis | 5958.619094  |
| wavelet-HLL | gldm       | SmallDependenceLowGrayLevelEmphasis  | 0.005177603  |

|             |            |                                  |              |
|-------------|------------|----------------------------------|--------------|
| wavelet-HLL | gldm       | LowGrayLevelEmphasis             | 0.009148395  |
| wavelet-HLL | glcm       | JointAverage                     | 16.5031742   |
| wavelet-HLL | glcm       | SumAverage                       | 33.00634839  |
| wavelet-HLL | glcm       | JointEntropy                     | 7.533781542  |
| wavelet-HLL | glcm       | ClusterShade                     | 3643.282566  |
| wavelet-HLL | glcm       | MaximumProbability               | 0.036386778  |
| wavelet-HLL | glcm       | Idmn                             | 0.989358611  |
| wavelet-HLL | glcm       | JointEnergy                      | 0.009549437  |
| wavelet-HLL | glcm       | Contrast                         | 39.28313727  |
| wavelet-HLL | glcm       | DifferenceEntropy                | 3.385461693  |
| wavelet-HLL | glcm       | InverseVariance                  | 0.290085229  |
| wavelet-HLL | glcm       | DifferenceVariance               | 23.63991134  |
| wavelet-HLL | glcm       | Idn                              | 0.942000344  |
| wavelet-HLL | glcm       | Idm                              | 0.297944217  |
| wavelet-HLL | glcm       | Correlation                      | 0.468777207  |
| wavelet-HLL | glcm       | Autocorrelation                  | 291.3628509  |
| wavelet-HLL | glcm       | SumEntropy                       | 4.782903962  |
| wavelet-HLL | glcm       | SumSquares                       | 38.64008859  |
| wavelet-HLL | glcm       | ClusterProminence                | 242277.1072  |
| wavelet-HLL | glcm       | Imc2                             | 0.835255927  |
| wavelet-HLL | glcm       | Imc1                             | -0.15627963  |
| wavelet-HLL | glcm       | DifferenceAverage                | 3.833839585  |
| wavelet-HLL | glcm       | Id                               | 0.377137605  |
| wavelet-HLL | glcm       | ClusterTendency                  | 115.2772171  |
| wavelet-HLL | firstorder | InterquartileRange               | 119.9225017  |
| wavelet-HLL | firstorder | Skewness                         | 2.866604807  |
| wavelet-HLL | firstorder | Uniformity                       | 0.073038185  |
| wavelet-HLL | firstorder | Median                           | -27.60548097 |
| wavelet-HLL | firstorder | Energy                           | 33720298.06  |
| wavelet-HLL | firstorder | RobustMeanAbsoluteDeviation      | 51.77638583  |
| wavelet-HLL | firstorder | MeanAbsoluteDeviation            | 102.3568331  |
| wavelet-HLL | firstorder | TotalEnergy                      | 910448047.6  |
| wavelet-HLL | firstorder | Maximum                          | 975.3168657  |
| wavelet-HLL | firstorder | RootMeanSquared                  | 180.3251592  |
| wavelet-HLL | firstorder | 90Percentile                     | 105.6468634  |
| wavelet-HLL | firstorder | Minimum                          | -423.6882012 |
| wavelet-HLL | firstorder | Entropy                          | 4.243150181  |
| wavelet-HLL | firstorder | Range                            | 1399.005067  |
| wavelet-HLL | firstorder | Variance                         | 32212.5516   |
| wavelet-HLL | firstorder | 10Percentile                     | -172.5452015 |
| wavelet-HLL | firstorder | Kurtosis                         | 15.8114356   |
| wavelet-HLL | firstorder | Mean                             | -17.45312089 |
| wavelet-HLL | glrlm      | ShortRunLowGrayLevelEmphasis     | 0.009327443  |
| wavelet-HLL | glrlm      | GrayLevelVariance                | 56.34187352  |
| wavelet-HLL | glrlm      | LowGrayLevelRunEmphasis          | 0.009693216  |
| wavelet-HLL | glrlm      | GrayLevelNonUniformityNormalized | 0.06787404   |
| wavelet-HLL | glrlm      | RunVariance                      | 0.151229998  |
| wavelet-HLL | glrlm      | GrayLevelNonUniformity           | 62.95211593  |
| wavelet-HLL | glrlm      | LongRunEmphasis                  | 1.405715625  |
| wavelet-HLL | glrlm      | ShortRunHighGrayLevelEmphasis    | 318.3976714  |
| wavelet-HLL | glrlm      | RunLengthNonUniformity           | 759.1469674  |
| wavelet-HLL | glrlm      | ShortRunEmphasis                 | 0.922300956  |
| wavelet-HLL | glrlm      | LongRunHighGrayLevelEmphasis     | 452.845724   |
| wavelet-HLL | glrlm      | RunPercentage                    | 0.894221497  |
| wavelet-HLL | glrlm      | LongRunLowGrayLevelEmphasis      | 0.011517921  |
| wavelet-HLL | glrlm      | RunEntropy                       | 4.795990618  |
| wavelet-HLL | glrlm      | HighGrayLevelRunEmphasis         | 340.0099431  |
| wavelet-HLL | glrlm      | RunLengthNonUniformityNormalized | 0.817376627  |

|             |       |                                      |              |
|-------------|-------|--------------------------------------|--------------|
| wavelet-HLL | glszm | GrayLevelVariance                    | 119.5464565  |
| wavelet-HLL | glszm | ZoneVariance                         | 97.51489731  |
| wavelet-HLL | glszm | GrayLevelNonUniformityNormalized     | 0.041416838  |
| wavelet-HLL | glszm | SizeZoneNonUniformityNormalized      | 0.440711006  |
| wavelet-HLL | glszm | SizeZoneNonUniformity                | 144.993921   |
| wavelet-HLL | glszm | GrayLevelNonUniformity               | 13.62613982  |
| wavelet-HLL | glszm | LargeAreaEmphasis                    | 107.449848   |
| wavelet-HLL | glszm | SmallAreaHighGrayLevelEmphasis       | 340.8294795  |
| wavelet-HLL | glszm | ZonePercentage                       | 0.317261331  |
| wavelet-HLL | glszm | LargeAreaLowGrayLevelEmphasis        | 0.422231099  |
| wavelet-HLL | glszm | LargeAreaHighGrayLevelEmphasis       | 29967.8541   |
| wavelet-HLL | glszm | HighGrayLevelZoneEmphasis            | 446.5075988  |
| wavelet-HLL | glszm | SmallAreaEmphasis                    | 0.690077965  |
| wavelet-HLL | glszm | LowGrayLevelZoneEmphasis             | 0.01767415   |
| wavelet-HLL | glszm | ZoneEntropy                          | 6.259773111  |
| wavelet-HLL | glszm | SmallAreaLowGrayLevelEmphasis        | 0.014892109  |
| wavelet-HLL | ngtdm | Coarseness                           | 0.007945443  |
| wavelet-HLL | ngtdm | Complexity                           | 2796.963013  |
| wavelet-HLL | ngtdm | Strength                             | 13.37598419  |
| wavelet-HLL | ngtdm | Contrast                             | 0.16235322   |
| wavelet-HLL | ngtdm | Busyness                             | 0.139914526  |
| wavelet-LHL | gldm  | GrayLevelVariance                    | 48.94020378  |
| wavelet-LHL | gldm  | HighGrayLevelEmphasis                | 846.0086789  |
| wavelet-LHL | gldm  | DependenceEntropy                    | 6.920675275  |
| wavelet-LHL | gldm  | DependenceNonUniformity              | 198.024108   |
| wavelet-LHL | gldm  | GrayLevelNonUniformity               | 56.31533269  |
| wavelet-LHL | gldm  | SmallDependenceEmphasis              | 0.388052494  |
| wavelet-LHL | gldm  | SmallDependenceHighGrayLevelEmphasis | 345.6624457  |
| wavelet-LHL | gldm  | DependenceNonUniformityNormalized    | 0.190958638  |
| wavelet-LHL | gldm  | LargeDependenceEmphasis              | 18.62777242  |
| wavelet-LHL | gldm  | LargeDependenceLowGrayLevelEmphasis  | 0.024194963  |
| wavelet-LHL | gldm  | DependenceVariance                   | 8.123172604  |
| wavelet-LHL | gldm  | LargeDependenceHighGrayLevelEmphasis | 15953.05207  |
| wavelet-LHL | gldm  | SmallDependenceLowGrayLevelEmphasis  | 0.001854495  |
| wavelet-LHL | gldm  | LowGrayLevelEmphasis                 | 0.002712761  |
| wavelet-LHL | glcm  | JointAverage                         | 28.01769371  |
| wavelet-LHL | glcm  | SumAverage                           | 56.03538742  |
| wavelet-LHL | glcm  | JointEntropy                         | 8.31576111   |
| wavelet-LHL | glcm  | ClusterShade                         | 483.336546   |
| wavelet-LHL | glcm  | MaximumProbability                   | 0.038427415  |
| wavelet-LHL | glcm  | Idmn                                 | 0.981027268  |
| wavelet-LHL | glcm  | JointEnergy                          | 0.006959992  |
| wavelet-LHL | glcm  | Contrast                             | 64.59968961  |
| wavelet-LHL | glcm  | DifferenceEntropy                    | 3.918290578  |
| wavelet-LHL | glcm  | InverseVariance                      | 0.227151161  |
| wavelet-LHL | glcm  | DifferenceVariance                   | 33.78860536  |
| wavelet-LHL | glcm  | Idn                                  | 0.917617227  |
| wavelet-LHL | glcm  | Idm                                  | 0.238817719  |
| wavelet-LHL | glcm  | Correlation                          | 0.272058943  |
| wavelet-LHL | glcm  | Autocorrelation                      | 797.4506478  |
| wavelet-LHL | glcm  | SumEntropy                           | 5.219939832  |
| wavelet-LHL | glcm  | SumSquares                           | 44.75638499  |
| wavelet-LHL | glcm  | ClusterProminence                    | 66874.27355  |
| wavelet-LHL | glcm  | Imc2                                 | 0.898238417  |
| wavelet-LHL | glcm  | Imc1                                 | -0.184785111 |
| wavelet-LHL | glcm  | DifferenceAverage                    | 5.430497857  |
| wavelet-LHL | glcm  | Id                                   | 0.318721656  |
| wavelet-LHL | glcm  | ClusterTendency                      | 114.4258504  |



|             |            |                                  |              |
|-------------|------------|----------------------------------|--------------|
| wavelet-LHL | firstorder | InterquartileRange               | 166.3298867  |
| wavelet-LHL | firstorder | Skewness                         | 0.273655026  |
| wavelet-LHL | firstorder | Uniformity                       | 0.05430601   |
| wavelet-LHL | firstorder | Median                           | -24.30911993 |
| wavelet-LHL | firstorder | Energy                           | 32675600.32  |
| wavelet-LHL | firstorder | RobustMeanAbsoluteDeviation      | 77.26767612  |
| wavelet-LHL | firstorder | MeanAbsoluteDeviation            | 126.374267   |
| wavelet-LHL | firstorder | TotalEnergy                      | 882241208.6  |
| wavelet-LHL | firstorder | Maximum                          | 636.2771548  |
| wavelet-LHL | firstorder | RootMeanSquared                  | 177.5098305  |
| wavelet-LHL | firstorder | 90Percentile                     | 182.2267518  |
| wavelet-LHL | firstorder | Minimum                          | -715.4761    |
| wavelet-LHL | firstorder | Entropy                          | 4.688847124  |
| wavelet-LHL | firstorder | Range                            | 1351.753255  |
| wavelet-LHL | firstorder | Variance                         | 30508.18686  |
| wavelet-LHL | firstorder | 10Percentile                     | -233.2312791 |
| wavelet-LHL | firstorder | Kurtosis                         | 4.448512978  |
| wavelet-LHL | firstorder | Mean                             | -31.64732346 |
| wavelet-LHL | glrlm      | ShortRunLowGrayLevelEmphasis     | 0.002769404  |
| wavelet-LHL | glrlm      | GrayLevelVariance                | 52.2040235   |
| wavelet-LHL | glrlm      | LowGrayLevelRunEmphasis          | 0.002847913  |
| wavelet-LHL | glrlm      | GrayLevelNonUniformityNormalized | 0.048928635  |
| wavelet-LHL | glrlm      | RunVariance                      | 0.136268927  |
| wavelet-LHL | glrlm      | GrayLevelNonUniformity           | 46.38979711  |
| wavelet-LHL | glrlm      | LongRunEmphasis                  | 1.336376858  |
| wavelet-LHL | glrlm      | ShortRunHighGrayLevelEmphasis    | 796.9700298  |
| wavelet-LHL | glrlm      | RunLengthNonUniformity           | 812.2542724  |
| wavelet-LHL | glrlm      | ShortRunEmphasis                 | 0.940162045  |
| wavelet-LHL | glrlm      | LongRunHighGrayLevelEmphasis     | 1130.14154   |
| wavelet-LHL | glrlm      | RunPercentage                    | 0.913804614  |
| wavelet-LHL | glrlm      | LongRunLowGrayLevelEmphasis      | 0.00327644   |
| wavelet-LHL | glrlm      | RunEntropy                       | 5.142837596  |
| wavelet-LHL | glrlm      | HighGrayLevelRunEmphasis         | 846.7812893  |
| wavelet-LHL | glrlm      | RunLengthNonUniformityNormalized | 0.856374303  |
| wavelet-LHL | glszm      | GrayLevelVariance                | 82.43957756  |
| wavelet-LHL | glszm      | ZoneVariance                     | 49.83933037  |
| wavelet-LHL | glszm      | GrayLevelNonUniformityNormalized | 0.032615805  |
| wavelet-LHL | glszm      | SizeZoneNonUniformityNormalized  | 0.492151431  |
| wavelet-LHL | glszm      | SizeZoneNonUniformity            | 224.4210526  |
| wavelet-LHL | glszm      | GrayLevelNonUniformity           | 14.87280702  |
| wavelet-LHL | glszm      | LargeAreaEmphasis                | 55.01096491  |
| wavelet-LHL | glszm      | SmallAreaHighGrayLevelEmphasis   | 663.2814734  |
| wavelet-LHL | glszm      | ZonePercentage                   | 0.43972999   |
| wavelet-LHL | glszm      | LargeAreaLowGrayLevelEmphasis    | 0.068221364  |
| wavelet-LHL | glszm      | LargeAreaHighGrayLevelEmphasis   | 47509.44079  |
| wavelet-LHL | glszm      | HighGrayLevelZoneEmphasis        | 886.4605263  |
| wavelet-LHL | glszm      | SmallAreaEmphasis                | 0.729260597  |
| wavelet-LHL | glszm      | LowGrayLevelZoneEmphasis         | 0.004403365  |
| wavelet-LHL | glszm      | ZoneEntropy                      | 6.443396926  |
| wavelet-LHL | glszm      | SmallAreaLowGrayLevelEmphasis    | 0.003988915  |
| wavelet-LHL | ngtdm      | Coarseness                       | 0.007723644  |
| wavelet-LHL | ngtdm      | Complexity                       | 3926.975462  |
| wavelet-LHL | ngtdm      | Strength                         | 6.825235138  |
| wavelet-LHL | ngtdm      | Contrast                         | 0.15458091   |
| wavelet-LHL | ngtdm      | Busyness                         | 0.074900584  |
| wavelet-LHH | gldm       | GrayLevelVariance                | 14.96481859  |
| wavelet-LHH | gldm       | HighGrayLevelEmphasis            | 441.8235294  |
| wavelet-LHH | gldm       | DependenceEntropy                | 6.464315457  |

|             |            |                                      |              |
|-------------|------------|--------------------------------------|--------------|
| wavelet-LHH | gldm       | DependenceNonUniformity              | 141.2160077  |
| wavelet-LHH | gldm       | GrayLevelNonUniformity               | 101.6345227  |
| wavelet-LHH | gldm       | SmallDependenceEmphasis              | 0.296397051  |
| wavelet-LHH | gldm       | SmallDependenceHighGrayLevelEmphasis | 136.6380581  |
| wavelet-LHH | gldm       | DependenceNonUniformityNormalized    | 0.136177442  |
| wavelet-LHH | gldm       | LargeDependenceEmphasis              | 27.79459981  |
| wavelet-LHH | gldm       | LargeDependenceLowGrayLevelEmphasis  | 0.069574463  |
| wavelet-LHH | gldm       | DependenceVariance                   | 10.84752304  |
| wavelet-LHH | gldm       | LargeDependenceHighGrayLevelEmphasis | 11540.39441  |
| wavelet-LHH | gldm       | SmallDependenceLowGrayLevelEmphasis  | 0.00194807   |
| wavelet-LHH | gldm       | LowGrayLevelEmphasis                 | 0.003692494  |
| wavelet-LHH | glcm       | JointAverage                         | 20.61248904  |
| wavelet-LHH | glcm       | SumAverage                           | 41.22497808  |
| wavelet-LHH | glcm       | JointEntropy                         | 7.055706348  |
| wavelet-LHH | glcm       | ClusterShade                         | 3.026863086  |
| wavelet-LHH | glcm       | MaximumProbability                   | 0.05874029   |
| wavelet-LHH | glcm       | ldmn                                 | 0.983887368  |
| wavelet-LHH | glcm       | JointEnergy                          | 0.015456315  |
| wavelet-LHH | glcm       | Contrast                             | 25.61059686  |
| wavelet-LHH | glcm       | DifferenceEntropy                    | 3.341894959  |
| wavelet-LHH | glcm       | InverseVariance                      | 0.297793972  |
| wavelet-LHH | glcm       | DifferenceVariance                   | 13.45132957  |
| wavelet-LHH | glcm       | ldn                                  | 0.923204774  |
| wavelet-LHH | glcm       | ldm                                  | 0.31795155   |
| wavelet-LHH | glcm       | Correlation                          | 0.017863704  |
| wavelet-LHH | glcm       | Autocorrelation                      | 425.1424589  |
| wavelet-LHH | glcm       | SumEntropy                           | 4.247839022  |
| wavelet-LHH | glcm       | SumSquares                           | 13.06895895  |
| wavelet-LHH | glcm       | ClusterProminence                    | 4430.500031  |
| wavelet-LHH | glcm       | lmc2                                 | 0.713456176  |
| wavelet-LHH | glcm       | lmc1                                 | -0.100031099 |
| wavelet-LHH | glcm       | DifferenceAverage                    | 3.447163508  |
| wavelet-LHH | glcm       | ld                                   | 0.393593615  |
| wavelet-LHH | glcm       | ClusterTendency                      | 26.66523895  |
| wavelet-LHH | firstorder | InterquartileRange                   | 86.31535705  |
| wavelet-LHH | firstorder | Skewness                             | -0.124219304 |
| wavelet-LHH | firstorder | Uniformity                           | 0.098008219  |
| wavelet-LHH | firstorder | Median                               | -0.000726444 |
| wavelet-LHH | firstorder | Energy                               | 9644990.521  |
| wavelet-LHH | firstorder | RobustMeanAbsoluteDeviation          | 38.48060519  |
| wavelet-LHH | firstorder | MeanAbsoluteDeviation                | 66.71208898  |
| wavelet-LHH | firstorder | TotalEnergy                          | 260414744.1  |
| wavelet-LHH | firstorder | Maximum                              | 427.4229767  |
| wavelet-LHH | firstorder | RootMeanSquared                      | 96.4409599   |
| wavelet-LHH | firstorder | 90Percentile                         | 116.5937141  |
| wavelet-LHH | firstorder | Minimum                              | -492.7867981 |
| wavelet-LHH | firstorder | Entropy                              | 3.830182965  |
| wavelet-LHH | firstorder | Range                                | 920.2097748  |
| wavelet-LHH | firstorder | Variance                             | 9280.896977  |
| wavelet-LHH | firstorder | 10Percentile                         | -99.18697283 |
| wavelet-LHH | firstorder | Kurtosis                             | 5.869966218  |
| wavelet-LHH | firstorder | Mean                                 | 4.467859692  |
| wavelet-LHH | glrlm      | ShortRunLowGrayLevelEmphasis         | 0.003650523  |
| wavelet-LHH | glrlm      | GrayLevelVariance                    | 16.53540365  |
| wavelet-LHH | glrlm      | LowGrayLevelRunEmphasis              | 0.003861532  |
| wavelet-LHH | glrlm      | GrayLevelNonUniformityNormalized     | 0.087409418  |
| wavelet-LHH | glrlm      | RunVariance                          | 0.188271558  |
| wavelet-LHH | glrlm      | GrayLevelNonUniformity               | 79.81355622  |

|             |       |                                      |             |
|-------------|-------|--------------------------------------|-------------|
| wavelet-LHH | glrlm | LongRunEmphasis                      | 1.483915256 |
| wavelet-LHH | glrlm | ShortRunHighGrayLevelEmphasis        | 408.6569713 |
| wavelet-LHH | glrlm | RunLengthNonUniformity               | 732.6587535 |
| wavelet-LHH | glrlm | ShortRunEmphasis                     | 0.914416355 |
| wavelet-LHH | glrlm | LongRunHighGrayLevelEmphasis         | 647.5235512 |
| wavelet-LHH | glrlm | RunPercentage                        | 0.880127587 |
| wavelet-LHH | glrlm | LongRunLowGrayLevelEmphasis          | 0.005053039 |
| wavelet-LHH | glrlm | RunEntropy                           | 4.451543789 |
| wavelet-LHH | glrlm | HighGrayLevelRunEmphasis             | 444.7791189 |
| wavelet-LHH | glrlm | RunLengthNonUniformityNormalized     | 0.801499599 |
| wavelet-LHH | glszm | GrayLevelVariance                    | 33.57629762 |
| wavelet-LHH | glszm | ZoneVariance                         | 161.1849053 |
| wavelet-LHH | glszm | GrayLevelNonUniformityNormalized     | 0.053865003 |
| wavelet-LHH | glszm | SizeZoneNonUniformityNormalized      | 0.47202495  |
| wavelet-LHH | glszm | SizeZoneNonUniformity                | 158.1283582 |
| wavelet-LHH | glszm | GrayLevelNonUniformity               | 18.04477612 |
| wavelet-LHH | glszm | LargeAreaEmphasis                    | 170.7671642 |
| wavelet-LHH | glszm | SmallAreaHighGrayLevelEmphasis       | 331.1634331 |
| wavelet-LHH | glszm | ZonePercentage                       | 0.323047252 |
| wavelet-LHH | glszm | LargeAreaLowGrayLevelEmphasis        | 0.419579499 |
| wavelet-LHH | glszm | LargeAreaHighGrayLevelEmphasis       | 70720.11642 |
| wavelet-LHH | glszm | HighGrayLevelZoneEmphasis            | 462.7462687 |
| wavelet-LHH | glszm | SmallAreaEmphasis                    | 0.71354876  |
| wavelet-LHH | glszm | LowGrayLevelZoneEmphasis             | 0.006269252 |
| wavelet-LHH | glszm | ZoneEntropy                          | 5.904340558 |
| wavelet-LHH | glszm | SmallAreaLowGrayLevelEmphasis        | 0.005520446 |
| wavelet-LHH | ngtdm | Coarseness                           | 0.007365405 |
| wavelet-LHH | ngtdm | Complexity                           | 1223.264651 |
| wavelet-LHH | ngtdm | Strength                             | 2.650595749 |
| wavelet-LHH | ngtdm | Contrast                             | 0.076391349 |
| wavelet-LHH | ngtdm | Busyness                             | 0.145265182 |
| wavelet-LLH | gldm  | GrayLevelVariance                    | 74.33976058 |
| wavelet-LLH | gldm  | HighGrayLevelEmphasis                | 1086.340405 |
| wavelet-LLH | gldm  | DependenceEntropy                    | 6.997862875 |
| wavelet-LLH | gldm  | DependenceNonUniformity              | 236.4136933 |
| wavelet-LLH | gldm  | GrayLevelNonUniformity               | 46.47155256 |
| wavelet-LLH | gldm  | SmallDependenceEmphasis              | 0.440189286 |
| wavelet-LLH | gldm  | SmallDependenceHighGrayLevelEmphasis | 510.9875944 |
| wavelet-LLH | gldm  | DependenceNonUniformityNormalized    | 0.227978489 |
| wavelet-LLH | gldm  | LargeDependenceEmphasis              | 17.31243973 |
| wavelet-LLH | gldm  | LargeDependenceLowGrayLevelEmphasis  | 0.018560017 |
| wavelet-LLH | gldm  | DependenceVariance                   | 8.450766202 |
| wavelet-LLH | gldm  | LargeDependenceHighGrayLevelEmphasis | 18986.51784 |
| wavelet-LLH | gldm  | SmallDependenceLowGrayLevelEmphasis  | 0.001971311 |
| wavelet-LLH | gldm  | LowGrayLevelEmphasis                 | 0.002693274 |
| wavelet-LLH | glcm  | JointAverage                         | 32.03337708 |
| wavelet-LLH | glcm  | SumAverage                           | 64.06675415 |
| wavelet-LLH | glcm  | JointEntropy                         | 8.644815978 |
| wavelet-LLH | glcm  | ClusterShade                         | 166.8557326 |
| wavelet-LLH | glcm  | MaximumProbability                   | 0.03133871  |
| wavelet-LLH | glcm  | ldmn                                 | 0.988156889 |
| wavelet-LLH | glcm  | JointEnergy                          | 0.005442183 |
| wavelet-LLH | glcm  | Contrast                             | 88.38197868 |
| wavelet-LLH | glcm  | DifferenceEntropy                    | 4.1063638   |
| wavelet-LLH | glcm  | InverseVariance                      | 0.204610562 |
| wavelet-LLH | glcm  | DifferenceVariance                   | 45.52044859 |
| wavelet-LLH | glcm  | ldn                                  | 0.933770613 |
| wavelet-LLH | glcm  | ldm                                  | 0.21381154  |

|             |            |                                  |              |
|-------------|------------|----------------------------------|--------------|
| wavelet-LLH | glcm       | Correlation                      | 0.289355877  |
| wavelet-LLH | glcm       | Autocorrelation                  | 1045.095699  |
| wavelet-LLH | glcm       | SumEntropy                       | 5.50133464   |
| wavelet-LLH | glcm       | SumSquares                       | 63.11863038  |
| wavelet-LLH | glcm       | ClusterProminence                | 130461.6663  |
| wavelet-LLH | glcm       | Imc2                             | 0.918855754  |
| wavelet-LLH | glcm       | Imc1                             | -0.201774442 |
| wavelet-LLH | glcm       | DifferenceAverage                | 6.354021295  |
| wavelet-LLH | glcm       | Id                               | 0.293806077  |
| wavelet-LLH | glcm       | ClusterTendency                  | 164.0925429  |
| wavelet-LLH | firstorder | InterquartileRange               | 212.3758834  |
| wavelet-LLH | firstorder | Skewness                         | 0.349574567  |
| wavelet-LLH | firstorder | Uniformity                       | 0.044813455  |
| wavelet-LLH | firstorder | Median                           | -35.35658174 |
| wavelet-LLH | firstorder | Energy                           | 49999825.8   |
| wavelet-LLH | firstorder | RobustMeanAbsoluteDeviation      | 94.19044485  |
| wavelet-LLH | firstorder | MeanAbsoluteDeviation            | 154.2919229  |
| wavelet-LLH | firstorder | TotalEnergy                      | 1349995297   |
| wavelet-LLH | firstorder | Maximum                          | 1232.896682  |
| wavelet-LLH | firstorder | RootMeanSquared                  | 219.581055   |
| wavelet-LLH | firstorder | 90Percentile                     | 221.3678138  |
| wavelet-LLH | firstorder | Minimum                          | -814.9204936 |
| wavelet-LLH | firstorder | Entropy                          | 4.963020529  |
| wavelet-LLH | firstorder | Range                            | 2047.817175  |
| wavelet-LLH | firstorder | Variance                         | 46431.86801  |
| wavelet-LLH | firstorder | 10Percentile                     | -283.3080604 |
| wavelet-LLH | firstorder | Kurtosis                         | 5.592758534  |
| wavelet-LLH | firstorder | Mean                             | -42.23708945 |
| wavelet-LLH | glrlm      | ShortRunLowGrayLevelEmphasis     | 0.002768394  |
| wavelet-LLH | glrlm      | GrayLevelVariance                | 78.72735944  |
| wavelet-LLH | glrlm      | LowGrayLevelRunEmphasis          | 0.002826801  |
| wavelet-LLH | glrlm      | GrayLevelNonUniformityNormalized | 0.040374304  |
| wavelet-LLH | glrlm      | RunVariance                      | 0.115304365  |
| wavelet-LLH | glrlm      | GrayLevelNonUniformity           | 38.69801225  |
| wavelet-LLH | glrlm      | LongRunEmphasis                  | 1.288988217  |
| wavelet-LLH | glrlm      | ShortRunHighGrayLevelEmphasis    | 1032.195216  |
| wavelet-LLH | glrlm      | RunLengthNonUniformity           | 837.4469057  |
| wavelet-LLH | glrlm      | ShortRunEmphasis                 | 0.947516658  |
| wavelet-LLH | glrlm      | LongRunHighGrayLevelEmphasis     | 1397.948086  |
| wavelet-LLH | glrlm      | RunPercentage                    | 0.923967065  |
| wavelet-LLH | glrlm      | LongRunLowGrayLevelEmphasis      | 0.003133864  |
| wavelet-LLH | glrlm      | RunEntropy                       | 5.364231307  |
| wavelet-LLH | glrlm      | HighGrayLevelRunEmphasis         | 1087.883099  |
| wavelet-LLH | glrlm      | RunLengthNonUniformityNormalized | 0.873200654  |
| wavelet-LLH | glszm      | GrayLevelVariance                | 114.3987833  |
| wavelet-LLH | glszm      | ZoneVariance                     | 30.48650518  |
| wavelet-LLH | glszm      | GrayLevelNonUniformityNormalized | 0.029534024  |
| wavelet-LLH | glszm      | SizeZoneNonUniformityNormalized  | 0.512914201  |
| wavelet-LLH | glszm      | SizeZoneNonUniformity            | 266.7153846  |
| wavelet-LLH | glszm      | GrayLevelNonUniformity           | 15.35769231  |
| wavelet-LLH | glszm      | LargeAreaEmphasis                | 34.46346154  |
| wavelet-LLH | glszm      | SmallAreaHighGrayLevelEmphasis   | 886.5123939  |
| wavelet-LLH | glszm      | ZonePercentage                   | 0.50144648   |
| wavelet-LLH | glszm      | LargeAreaLowGrayLevelEmphasis    | 0.035577354  |
| wavelet-LLH | glszm      | LargeAreaHighGrayLevelEmphasis   | 38046.38654  |
| wavelet-LLH | glszm      | HighGrayLevelZoneEmphasis        | 1146.167308  |
| wavelet-LLH | glszm      | SmallAreaEmphasis                | 0.743930508  |
| wavelet-LLH | glszm      | LowGrayLevelZoneEmphasis         | 0.004144587  |

|             |            |                                      |              |
|-------------|------------|--------------------------------------|--------------|
| wavelet-LLH | glszm      | ZoneEntropy                          | 6.5392781    |
| wavelet-LLH | glszm      | SmallAreaLowGrayLevelEmphasis        | 0.003738141  |
| wavelet-LLH | ngtdm      | Coarseness                           | 0.007841847  |
| wavelet-LLH | ngtdm      | Complexity                           | 7165.322364  |
| wavelet-LLH | ngtdm      | Strength                             | 11.14953414  |
| wavelet-LLH | ngtdm      | Contrast                             | 0.18786226   |
| wavelet-LLH | ngtdm      | Busyness                             | 0.052884529  |
| wavelet-LLL | gldm       | GrayLevelVariance                    | 701.4766782  |
| wavelet-LLL | gldm       | HighGrayLevelEmphasis                | 6237.152363  |
| wavelet-LLL | gldm       | DependenceEntropy                    | 7.488399265  |
| wavelet-LLL | gldm       | DependenceNonUniformity              | 376.7917068  |
| wavelet-LLL | gldm       | GrayLevelNonUniformity               | 20.66634523  |
| wavelet-LLL | gldm       | SmallDependenceEmphasis              | 0.621460861  |
| wavelet-LLL | gldm       | SmallDependenceHighGrayLevelEmphasis | 3150.138873  |
| wavelet-LLL | gldm       | DependenceNonUniformityNormalized    | 0.363347837  |
| wavelet-LLL | gldm       | LargeDependenceEmphasis              | 8.255544841  |
| wavelet-LLL | gldm       | LargeDependenceLowGrayLevelEmphasis  | 0.00266101   |
| wavelet-LLL | gldm       | DependenceVariance                   | 3.758854867  |
| wavelet-LLL | gldm       | LargeDependenceHighGrayLevelEmphasis | 74388.44648  |
| wavelet-LLL | gldm       | SmallDependenceLowGrayLevelEmphasis  | 0.001658496  |
| wavelet-LLL | gldm       | LowGrayLevelEmphasis                 | 0.001735258  |
| wavelet-LLL | glcm       | JointAverage                         | 79.35506384  |
| wavelet-LLL | glcm       | SumAverage                           | 158.7101277  |
| wavelet-LLL | glcm       | JointEntropy                         | 9.690658085  |
| wavelet-LLL | glcm       | ClusterShade                         | -69197.65094 |
| wavelet-LLL | glcm       | MaximumProbability                   | 0.013000371  |
| wavelet-LLL | glcm       | Idmn                                 | 0.964950626  |
| wavelet-LLL | glcm       | JointEnergy                          | 0.002096696  |
| wavelet-LLL | glcm       | Contrast                             | 489.2154825  |
| wavelet-LLL | glcm       | DifferenceEntropy                    | 5.28312118   |
| wavelet-LLL | glcm       | InverseVariance                      | 0.132670995  |
| wavelet-LLL | glcm       | DifferenceVariance                   | 245.2393126  |
| wavelet-LLL | glcm       | Idn                                  | 0.889163894  |
| wavelet-LLL | glcm       | Idm                                  | 0.13166753   |
| wavelet-LLL | glcm       | Correlation                          | 0.577261504  |
| wavelet-LLL | glcm       | Autocorrelation                      | 6633.406839  |
| wavelet-LLL | glcm       | SumEntropy                           | 6.780258531  |
| wavelet-LLL | glcm       | SumSquares                           | 580.4014054  |
| wavelet-LLL | glcm       | ClusterProminence                    | 9314603.97   |
| wavelet-LLL | glcm       | Imc2                                 | 0.993372636  |
| wavelet-LLL | glcm       | Imc1                                 | -0.365909252 |
| wavelet-LLL | glcm       | DifferenceAverage                    | 15.46174757  |
| wavelet-LLL | glcm       | Id                                   | 0.196572223  |
| wavelet-LLL | glcm       | ClusterTendency                      | 1832.390139  |
| wavelet-LLL | firstorder | InterquartileRange                   | 1105.62537   |
| wavelet-LLL | firstorder | Skewness                             | -0.705012773 |
| wavelet-LLL | firstorder | Uniformity                           | 0.019928973  |
| wavelet-LLL | firstorder | Median                               | -280.9738464 |
| wavelet-LLL | firstorder | Energy                               | 716562903.5  |
| wavelet-LLL | firstorder | RobustMeanAbsoluteDeviation          | 453.6635303  |
| wavelet-LLL | firstorder | MeanAbsoluteDeviation                | 571.1283984  |
| wavelet-LLL | firstorder | TotalEnergy                          | 19347198395  |
| wavelet-LLL | firstorder | Maximum                              | 391.9503997  |
| wavelet-LLL | firstorder | RootMeanSquared                      | 831.2617215  |
| wavelet-LLL | firstorder | 90Percentile                         | 163.4068909  |
| wavelet-LLL | firstorder | Minimum                              | -2338.063447 |
| wavelet-LLL | firstorder | Entropy                              | 6.148431296  |
| wavelet-LLL | firstorder | Range                                | 2730.013846  |

|             |            |                                      |              |
|-------------|------------|--------------------------------------|--------------|
| wavelet-LLL | firstorder | Variance                             | 438913.8218  |
| wavelet-LLL | firstorder | 10Percentile                         | -1553.884847 |
| wavelet-LLL | firstorder | Kurtosis                             | 2.237379691  |
| wavelet-LLL | firstorder | Mean                                 | -502.0779102 |
| wavelet-LLL | glrlm      | ShortRunLowGrayLevelEmphasis         | 0.001801929  |
| wavelet-LLL | glrlm      | GrayLevelVariance                    | 704.3338131  |
| wavelet-LLL | glrlm      | LowGrayLevelRunEmphasis              | 0.001806767  |
| wavelet-LLL | glrlm      | GrayLevelNonUniformityNormalized     | 0.018307458  |
| wavelet-LLL | glrlm      | RunVariance                          | 0.05346495   |
| wavelet-LLL | glrlm      | GrayLevelNonUniformity               | 18.1708918   |
| wavelet-LLL | glrlm      | LongRunEmphasis                      | 1.146008978  |
| wavelet-LLL | glrlm      | ShortRunHighGrayLevelEmphasis        | 5835.294091  |
| wavelet-LLL | glrlm      | RunLengthNonUniformity               | 915.0983912  |
| wavelet-LLL | glrlm      | ShortRunEmphasis                     | 0.968984734  |
| wavelet-LLL | glrlm      | LongRunHighGrayLevelEmphasis         | 7432.937882  |
| wavelet-LLL | glrlm      | RunPercentage                        | 0.956902307  |
| wavelet-LLL | glrlm      | LongRunLowGrayLevelEmphasis          | 0.001828611  |
| wavelet-LLL | glrlm      | RunEntropy                           | 6.389095591  |
| wavelet-LLL | glrlm      | HighGrayLevelRunEmphasis             | 6112.475941  |
| wavelet-LLL | glrlm      | RunLengthNonUniformityNormalized     | 0.921999165  |
| wavelet-LLL | glszm      | GrayLevelVariance                    | 682.1157039  |
| wavelet-LLL | glszm      | ZoneVariance                         | 5.00738356   |
| wavelet-LLL | glszm      | GrayLevelNonUniformityNormalized     | 0.012282605  |
| wavelet-LLL | glszm      | SizeZoneNonUniformityNormalized      | 0.690240403  |
| wavelet-LLL | glszm      | SizeZoneNonUniformity                | 481.097561   |
| wavelet-LLL | glszm      | GrayLevelNonUniformity               | 8.56097561   |
| wavelet-LLL | glszm      | LargeAreaEmphasis                    | 7.220946915  |
| wavelet-LLL | glszm      | SmallAreaHighGrayLevelEmphasis       | 4163.34657   |
| wavelet-LLL | glszm      | ZonePercentage                       | 0.672131148  |
| wavelet-LLL | glszm      | LargeAreaLowGrayLevelEmphasis        | 0.003261072  |
| wavelet-LLL | glszm      | LargeAreaHighGrayLevelEmphasis       | 64101.76614  |
| wavelet-LLL | glszm      | HighGrayLevelZoneEmphasis            | 5147.691535  |
| wavelet-LLL | glszm      | SmallAreaEmphasis                    | 0.855081518  |
| wavelet-LLL | glszm      | LowGrayLevelZoneEmphasis             | 0.002491787  |
| wavelet-LLL | glszm      | ZoneEntropy                          | 7.102033849  |
| wavelet-LLL | glszm      | SmallAreaLowGrayLevelEmphasis        | 0.002450877  |
| wavelet-LLL | ngtdm      | Coarseness                           | 0.006687982  |
| wavelet-LLL | ngtdm      | Complexity                           | 43641.68032  |
| wavelet-LLL | ngtdm      | Strength                             | 36.59953725  |
| wavelet-LLL | ngtdm      | Contrast                             | 1.369396342  |
| wavelet-LLL | ngtdm      | Busyness                             | 0.016386071  |
| wavelet-HHL | gldm       | GrayLevelVariance                    | 8.049495568  |
| wavelet-HHL | gldm       | HighGrayLevelEmphasis                | 284.4040501  |
| wavelet-HHL | gldm       | DependenceEntropy                    | 6.231522742  |
| wavelet-HHL | gldm       | DependenceNonUniformity              | 96.0144648   |
| wavelet-HHL | gldm       | GrayLevelNonUniformity               | 159.0867888  |
| wavelet-HHL | gldm       | SmallDependenceEmphasis              | 0.197470533  |
| wavelet-HHL | gldm       | SmallDependenceHighGrayLevelEmphasis | 61.8951105   |
| wavelet-HHL | gldm       | DependenceNonUniformityNormalized    | 0.092588684  |
| wavelet-HHL | gldm       | LargeDependenceEmphasis              | 43.09257473  |
| wavelet-HHL | gldm       | LargeDependenceLowGrayLevelEmphasis  | 0.163994783  |
| wavelet-HHL | gldm       | DependenceVariance                   | 13.83668118  |
| wavelet-HHL | gldm       | LargeDependenceHighGrayLevelEmphasis | 11595.3703   |
| wavelet-HHL | gldm       | SmallDependenceLowGrayLevelEmphasis  | 0.002002546  |
| wavelet-HHL | gldm       | LowGrayLevelEmphasis                 | 0.005089359  |
| wavelet-HHL | glcm       | JointAverage                         | 16.63026526  |
| wavelet-HHL | glcm       | SumAverage                           | 33.26053052  |
| wavelet-HHL | glcm       | JointEntropy                         | 5.938896122  |

|             |            |                                  |              |
|-------------|------------|----------------------------------|--------------|
| wavelet-HHL | glcm       | ClusterShade                     | 31.28060504  |
| wavelet-HHL | glcm       | MaximumProbability               | 0.088906128  |
| wavelet-HHL | glcm       | Idmn                             | 0.988631075  |
| wavelet-HHL | glcm       | JointEnergy                      | 0.034594758  |
| wavelet-HHL | glcm       | Contrast                         | 13.79523031  |
| wavelet-HHL | glcm       | DifferenceEntropy                | 2.821679862  |
| wavelet-HHL | glcm       | InverseVariance                  | 0.38287919   |
| wavelet-HHL | glcm       | DifferenceVariance               | 8.280790433  |
| wavelet-HHL | glcm       | Idn                              | 0.939527708  |
| wavelet-HHL | glcm       | Idm                              | 0.421358623  |
| wavelet-HHL | glcm       | Correlation                      | 0.012660978  |
| wavelet-HHL | glcm       | Autocorrelation                  | 276.7313059  |
| wavelet-HHL | glcm       | SumEntropy                       | 3.659463648  |
| wavelet-HHL | glcm       | SumSquares                       | 7.060588033  |
| wavelet-HHL | glcm       | ClusterProminence                | 2137.420326  |
| wavelet-HHL | glcm       | Imc2                             | 0.68317615   |
| wavelet-HHL | glcm       | Imc1                             | -0.103078955 |
| wavelet-HHL | glcm       | DifferenceAverage                | 2.32169363   |
| wavelet-HHL | glcm       | Id                               | 0.48145895   |
| wavelet-HHL | glcm       | ClusterTendency                  | 14.44712183  |
| wavelet-HHL | firstorder | InterquartileRange               | 54.59014989  |
| wavelet-HHL | firstorder | Skewness                         | 0.216835819  |
| wavelet-HHL | firstorder | Uniformity                       | 0.153410597  |
| wavelet-HHL | firstorder | Median                           | -0.72274703  |
| wavelet-HHL | firstorder | Energy                           | 5182260.214  |
| wavelet-HHL | firstorder | RobustMeanAbsoluteDeviation      | 23.19375614  |
| wavelet-HHL | firstorder | MeanAbsoluteDeviation            | 44.74912001  |
| wavelet-HHL | firstorder | TotalEnergy                      | 139921025.8  |
| wavelet-HHL | firstorder | Maximum                          | 406.973909   |
| wavelet-HHL | firstorder | RootMeanSquared                  | 70.69199367  |
| wavelet-HHL | firstorder | 90Percentile                     | 74.7410638   |
| wavelet-HHL | firstorder | Minimum                          | -375.6797739 |
| wavelet-HHL | firstorder | Entropy                          | 3.239522963  |
| wavelet-HHL | firstorder | Range                            | 782.6536829  |
| wavelet-HHL | firstorder | Variance                         | 4987.659886  |
| wavelet-HHL | firstorder | 10Percentile                     | -56.69600422 |
| wavelet-HHL | firstorder | Kurtosis                         | 8.755886337  |
| wavelet-HHL | firstorder | Mean                             | 3.11417457   |
| wavelet-HHL | glrlm      | ShortRunLowGrayLevelEmphasis     | 0.004886543  |
| wavelet-HHL | glrlm      | GrayLevelVariance                | 9.349197546  |
| wavelet-HHL | glrlm      | LowGrayLevelRunEmphasis          | 0.005354922  |
| wavelet-HHL | glrlm      | GrayLevelNonUniformityNormalized | 0.134763107  |
| wavelet-HHL | glrlm      | RunVariance                      | 0.296723635  |
| wavelet-HHL | glrlm      | GrayLevelNonUniformity           | 116.0783201  |
| wavelet-HHL | glrlm      | LongRunEmphasis                  | 1.752631726  |
| wavelet-HHL | glrlm      | ShortRunHighGrayLevelEmphasis    | 253.971638   |
| wavelet-HHL | glrlm      | RunLengthNonUniformity           | 627.3363437  |
| wavelet-HHL | glrlm      | ShortRunEmphasis                 | 0.876938492  |
| wavelet-HHL | glrlm      | LongRunHighGrayLevelEmphasis     | 490.3459877  |
| wavelet-HHL | glrlm      | RunPercentage                    | 0.83042801   |
| wavelet-HHL | glrlm      | LongRunLowGrayLevelEmphasis      | 0.008210392  |
| wavelet-HHL | glrlm      | RunEntropy                       | 4.087869701  |
| wavelet-HHL | glrlm      | HighGrayLevelRunEmphasis         | 287.3102164  |
| wavelet-HHL | glrlm      | RunLengthNonUniformityNormalized | 0.727291674  |
| wavelet-HHL | glszm      | GrayLevelVariance                | 26.77959184  |
| wavelet-HHL | glszm      | ZoneVariance                     | 590.1723583  |
| wavelet-HHL | glszm      | GrayLevelNonUniformityNormalized | 0.068027211  |
| wavelet-HHL | glszm      | SizeZoneNonUniformityNormalized  | 0.45478458   |

|             |            |                                      |              |
|-------------|------------|--------------------------------------|--------------|
| wavelet-HHL | glszm      | SizeZoneNonUniformity                | 95.5047619   |
| wavelet-HHL | glszm      | GrayLevelNonUniformity               | 14.28571429  |
| wavelet-HHL | glszm      | LargeAreaEmphasis                    | 614.5571429  |
| wavelet-HHL | glszm      | SmallAreaHighGrayLevelEmphasis       | 225.0925143  |
| wavelet-HHL | glszm      | ZonePercentage                       | 0.202507232  |
| wavelet-HHL | glszm      | LargeAreaLowGrayLevelEmphasis        | 2.319130253  |
| wavelet-HHL | glszm      | LargeAreaHighGrayLevelEmphasis       | 164604.9381  |
| wavelet-HHL | glszm      | HighGrayLevelZoneEmphasis            | 320.6571429  |
| wavelet-HHL | glszm      | SmallAreaEmphasis                    | 0.700654025  |
| wavelet-HHL | glszm      | LowGrayLevelZoneEmphasis             | 0.010069887  |
| wavelet-HHL | glszm      | ZoneEntropy                          | 5.625506921  |
| wavelet-HHL | glszm      | SmallAreaLowGrayLevelEmphasis        | 0.008820984  |
| wavelet-HHL | ngtdm      | Coarseness                           | 0.007181743  |
| wavelet-HHL | ngtdm      | Complexity                           | 601.2609769  |
| wavelet-HHL | ngtdm      | Strength                             | 2.332121081  |
| wavelet-HHL | ngtdm      | Contrast                             | 0.038753578  |
| wavelet-HHL | ngtdm      | Busyness                             | 0.200757341  |
| wavelet-HLH | gldm       | GrayLevelVariance                    | 6.1011039    |
| wavelet-HLH | gldm       | HighGrayLevelEmphasis                | 161.8572806  |
| wavelet-HLH | gldm       | DependenceEntropy                    | 6.19964721   |
| wavelet-HLH | gldm       | DependenceNonUniformity              | 109.0250723  |
| wavelet-HLH | gldm       | GrayLevelNonUniformity               | 146.270974   |
| wavelet-HLH | gldm       | SmallDependenceEmphasis              | 0.209428593  |
| wavelet-HLH | gldm       | SmallDependenceHighGrayLevelEmphasis | 34.08985543  |
| wavelet-HLH | gldm       | DependenceNonUniformityNormalized    | 0.105135075  |
| wavelet-HLH | gldm       | LargeDependenceEmphasis              | 37.31436837  |
| wavelet-HLH | gldm       | LargeDependenceLowGrayLevelEmphasis  | 0.25189232   |
| wavelet-HLH | gldm       | DependenceVariance                   | 13.02287308  |
| wavelet-HLH | gldm       | LargeDependenceHighGrayLevelEmphasis | 5760.235294  |
| wavelet-HLH | gldm       | SmallDependenceLowGrayLevelEmphasis  | 0.00420345   |
| wavelet-HLH | gldm       | LowGrayLevelEmphasis                 | 0.009647797  |
| wavelet-HLH | glcm       | JointAverage                         | 12.49101378  |
| wavelet-HLH | glcm       | SumAverage                           | 24.98202756  |
| wavelet-HLH | glcm       | JointEntropy                         | 6.149282742  |
| wavelet-HLH | glcm       | ClusterShade                         | -9.935246264 |
| wavelet-HLH | glcm       | MaximumProbability                   | 0.083413228  |
| wavelet-HLH | glcm       | Idmn                                 | 0.977444057  |
| wavelet-HLH | glcm       | JointEnergy                          | 0.026745615  |
| wavelet-HLH | glcm       | Contrast                             | 11.0979597   |
| wavelet-HLH | glcm       | DifferenceEntropy                    | 2.848776887  |
| wavelet-HLH | glcm       | InverseVariance                      | 0.357793665  |
| wavelet-HLH | glcm       | DifferenceVariance                   | 5.496453366  |
| wavelet-HLH | glcm       | Idn                                  | 0.907520385  |
| wavelet-HLH | glcm       | Idm                                  | 0.38726311   |
| wavelet-HLH | glcm       | Correlation                          | 0.005594398  |
| wavelet-HLH | glcm       | Autocorrelation                      | 156.0630532  |
| wavelet-HLH | glcm       | SumEntropy                           | 3.683352697  |
| wavelet-HLH | glcm       | SumSquares                           | 5.584766832  |
| wavelet-HLH | glcm       | ClusterProminence                    | 648.6539732  |
| wavelet-HLH | glcm       | Imc2                                 | 0.567267118  |
| wavelet-HLH | glcm       | Imc1                                 | -0.064505714 |
| wavelet-HLH | glcm       | DifferenceAverage                    | 2.348633715  |
| wavelet-HLH | glcm       | Id                                   | 0.455664243  |
| wavelet-HLH | glcm       | ClusterTendency                      | 11.24110763  |
| wavelet-HLH | firstorder | InterquartileRange                   | 60.14761425  |
| wavelet-HLH | firstorder | Skewness                             | -0.528128502 |
| wavelet-HLH | firstorder | Uniformity                           | 0.141052048  |
| wavelet-HLH | firstorder | Median                               | -0.322145592 |



|             |            |                                  |              |
|-------------|------------|----------------------------------|--------------|
| wavelet-HLH | firstorder | Energy                           | 3897109.054  |
| wavelet-HLH | firstorder | RobustMeanAbsoluteDeviation      | 25.80349811  |
| wavelet-HLH | firstorder | MeanAbsoluteDeviation            | 43.51299745  |
| wavelet-HLH | firstorder | TotalEnergy                      | 105221944.5  |
| wavelet-HLH | firstorder | Maximum                          | 220.8565725  |
| wavelet-HLH | firstorder | RootMeanSquared                  | 61.30302443  |
| wavelet-HLH | firstorder | 90Percentile                     | 70.78154367  |
| wavelet-HLH | firstorder | Minimum                          | -278.8213479 |
| wavelet-HLH | firstorder | Entropy                          | 3.238560561  |
| wavelet-HLH | firstorder | Range                            | 499.6779204  |
| wavelet-HLH | firstorder | Variance                         | 3758.040635  |
| wavelet-HLH | firstorder | 10Percentile                     | -67.62105602 |
| wavelet-HLH | firstorder | Kurtosis                         | 5.293711584  |
| wavelet-HLH | firstorder | Mean                             | 0.142019433  |
| wavelet-HLH | glrlm      | ShortRunLowGrayLevelEmphasis     | 0.009448925  |
| wavelet-HLH | glrlm      | GrayLevelVariance                | 6.876035848  |
| wavelet-HLH | glrlm      | LowGrayLevelRunEmphasis          | 0.010178892  |
| wavelet-HLH | glrlm      | GrayLevelNonUniformityNormalized | 0.126363279  |
| wavelet-HLH | glrlm      | RunVariance                      | 0.253178864  |
| wavelet-HLH | glrlm      | GrayLevelNonUniformity           | 111.2746195  |
| wavelet-HLH | glrlm      | LongRunEmphasis                  | 1.646373461  |
| wavelet-HLH | glrlm      | ShortRunHighGrayLevelEmphasis    | 145.3703344  |
| wavelet-HLH | glrlm      | RunLengthNonUniformity           | 665.0517144  |
| wavelet-HLH | glrlm      | ShortRunEmphasis                 | 0.890865651  |
| wavelet-HLH | glrlm      | LongRunHighGrayLevelEmphasis     | 263.6454961  |
| wavelet-HLH | glrlm      | RunPercentage                    | 0.84889845   |
| wavelet-HLH | glrlm      | LongRunLowGrayLevelEmphasis      | 0.014505725  |
| wavelet-HLH | glrlm      | RunEntropy                       | 3.988607793  |
| wavelet-HLH | glrlm      | HighGrayLevelRunEmphasis         | 162.6776409  |
| wavelet-HLH | glrlm      | RunLengthNonUniformityNormalized | 0.754154303  |
| wavelet-HLH | glszm      | GrayLevelVariance                | 17.04669563  |
| wavelet-HLH | glszm      | ZoneVariance                     | 456.5993104  |
| wavelet-HLH | glszm      | GrayLevelNonUniformityNormalized | 0.081114477  |
| wavelet-HLH | glszm      | SizeZoneNonUniformityNormalized  | 0.437141263  |
| wavelet-HLH | glszm      | SizeZoneNonUniformity            | 97.91964286  |
| wavelet-HLH | glszm      | GrayLevelNonUniformity           | 18.16964286  |
| wavelet-HLH | glszm      | LargeAreaEmphasis                | 478.03125    |
| wavelet-HLH | glszm      | SmallAreaHighGrayLevelEmphasis   | 110.8834758  |
| wavelet-HLH | glszm      | ZonePercentage                   | 0.216007715  |
| wavelet-HLH | glszm      | LargeAreaLowGrayLevelEmphasis    | 3.148343672  |
| wavelet-HLH | glszm      | LargeAreaHighGrayLevelEmphasis   | 73896.65179  |
| wavelet-HLH | glszm      | HighGrayLevelZoneEmphasis        | 166.78125    |
| wavelet-HLH | glszm      | SmallAreaEmphasis                | 0.686940085  |
| wavelet-HLH | glszm      | LowGrayLevelZoneEmphasis         | 0.019878011  |
| wavelet-HLH | glszm      | ZoneEntropy                      | 5.379312223  |
| wavelet-HLH | glszm      | SmallAreaLowGrayLevelEmphasis    | 0.017390211  |
| wavelet-HLH | ngtdm      | Coarseness                       | 0.006961882  |
| wavelet-HLH | ngtdm      | Complexity                       | 293.2101969  |
| wavelet-HLH | ngtdm      | Strength                         | 0.893746938  |
| wavelet-HLH | ngtdm      | Contrast                         | 0.057388717  |
| wavelet-HLH | ngtdm      | Busyness                         | 0.43302589   |

| Image type | Feature Class | Feature Name                         |                                                                                                                                                                                                                                                                                                                                                                                                                                                 |
|------------|---------------|--------------------------------------|-------------------------------------------------------------------------------------------------------------------------------------------------------------------------------------------------------------------------------------------------------------------------------------------------------------------------------------------------------------------------------------------------------------------------------------------------|
| general    | info          | BoundingBox                          | 3: RTSTRUCT: C99-DNU_segment_ITV1<br>(1, 0, 1, 7, 5, 5)                                                                                                                                                                                                                                                                                                                                                                                         |
| general    | info          | EnabledImageTypes                    | {u'Original': {}, u'Wavelet': {}}                                                                                                                                                                                                                                                                                                                                                                                                               |
|            |               |                                      | {'distances': [1], 'additionalInfo': True,<br>'force2D': False, 'interpolator': 'sitkBSpline',<br>'resampledPixelSpacing': [3.0], 'label': 1,<br>'normalizeScale': 1, 'normalize': False,<br>'force2Ddimension': 0, 'removeOutliers':<br>None, 'minimumROISize': None,<br>u'binWidth': 25.0,<br>'minimumROIDimensions': 1,<br>u'correctMask': True, 'preCrop': False,<br>u'symmetricalGLCM': True,<br>'resegmentRange': None, 'padDistance': 5} |
| general    | info          | GeneralSettings                      | a224cf1e3f4bd599a48a569c1e6e9070b943<br>7c49                                                                                                                                                                                                                                                                                                                                                                                                    |
| general    | info          | ImageHash                            | (1.26953125, 1.26953125,<br>1.9999999999999999)                                                                                                                                                                                                                                                                                                                                                                                                 |
| general    | info          | ImageSpacing                         | 8c036fade1bed66a2b12189a3699e8d6b33f<br>af2e                                                                                                                                                                                                                                                                                                                                                                                                    |
| general    | info          | MaskHash                             | af2e                                                                                                                                                                                                                                                                                                                                                                                                                                            |
| general    | info          | NumpyVersion                         | 1.13.1                                                                                                                                                                                                                                                                                                                                                                                                                                          |
| general    | info          | PyWaveletVersion                     | 0.5.2                                                                                                                                                                                                                                                                                                                                                                                                                                           |
| general    | info          | SimpleITKVersion                     | 1.1.0                                                                                                                                                                                                                                                                                                                                                                                                                                           |
| general    | info          | Version                              | 1.3.0.post102+g1b0eb74                                                                                                                                                                                                                                                                                                                                                                                                                          |
| general    | info          | VolumeNum                            | 1                                                                                                                                                                                                                                                                                                                                                                                                                                               |
| general    | info          | VoxelNum                             | 92                                                                                                                                                                                                                                                                                                                                                                                                                                              |
| original   | shape         | Maximum3DDiameter                    | 20.1246118                                                                                                                                                                                                                                                                                                                                                                                                                                      |
| original   | shape         | Maximum2DDiameterSlice               | 18.97366596                                                                                                                                                                                                                                                                                                                                                                                                                                     |
| original   | shape         | Sphericity                           | 0.882089                                                                                                                                                                                                                                                                                                                                                                                                                                        |
| original   | shape         | MinorAxis                            | 14.56743683                                                                                                                                                                                                                                                                                                                                                                                                                                     |
| original   | shape         | Elongation                           | 0.779060184                                                                                                                                                                                                                                                                                                                                                                                                                                     |
| original   | shape         | SurfaceVolumeRatio                   | 0.404813065                                                                                                                                                                                                                                                                                                                                                                                                                                     |
| original   | shape         | Volume                               | 2484                                                                                                                                                                                                                                                                                                                                                                                                                                            |
| original   | shape         | MajorAxis                            | 18.69873101                                                                                                                                                                                                                                                                                                                                                                                                                                     |
| original   | shape         | SurfaceArea                          | 1005.555654                                                                                                                                                                                                                                                                                                                                                                                                                                     |
| original   | shape         | Flatness                             | 0.715008518                                                                                                                                                                                                                                                                                                                                                                                                                                     |
| original   | shape         | LeastAxis                            | 13.36975196                                                                                                                                                                                                                                                                                                                                                                                                                                     |
| original   | shape         | Maximum2DDiameterColumn              | 18.24828759                                                                                                                                                                                                                                                                                                                                                                                                                                     |
| original   | shape         | Maximum2DDiameterRow                 | 15                                                                                                                                                                                                                                                                                                                                                                                                                                              |
| original   | gldm          | GrayLevelVariance                    | 90.80954631                                                                                                                                                                                                                                                                                                                                                                                                                                     |
| original   | gldm          | HighGrayLevelEmphasis                | 540.0652174                                                                                                                                                                                                                                                                                                                                                                                                                                     |
| original   | gldm          | DependenceEntropy                    | 5.672859103                                                                                                                                                                                                                                                                                                                                                                                                                                     |
| original   | gldm          | DependenceNonUniformity              | 24.08695652                                                                                                                                                                                                                                                                                                                                                                                                                                     |
| original   | gldm          | GrayLevelNonUniformity               | 5.565217391                                                                                                                                                                                                                                                                                                                                                                                                                                     |
| original   | gldm          | SmallDependenceEmphasis              | 0.445303089                                                                                                                                                                                                                                                                                                                                                                                                                                     |
| original   | gldm          | SmallDependenceHighGrayLevelEmphasis | 190.2324725                                                                                                                                                                                                                                                                                                                                                                                                                                     |
| original   | gldm          | DependenceNonUniformityNormalized    | 0.261814745                                                                                                                                                                                                                                                                                                                                                                                                                                     |
| original   | gldm          | LargeDependenceEmphasis              | 12.34782609                                                                                                                                                                                                                                                                                                                                                                                                                                     |
| original   | gldm          | LargeDependenceLowGrayLevelEmphasis  | 0.043827558                                                                                                                                                                                                                                                                                                                                                                                                                                     |
| original   | gldm          | DependenceVariance                   | 5.198015123                                                                                                                                                                                                                                                                                                                                                                                                                                     |
| original   | gldm          | LargeDependenceHighGrayLevelEmphasis | 9879.652174                                                                                                                                                                                                                                                                                                                                                                                                                                     |

|          |            |                                     |              |
|----------|------------|-------------------------------------|--------------|
| original | gldm       | SmallDependenceLowGrayLevelEmphasis | 0.020240045  |
| original | gldm       | LowGrayLevelEmphasis                | 0.022732332  |
| original | glcm       | JointAverage                        | 22.9884594   |
| original | glcm       | SumAverage                          | 45.97691881  |
| original | glcm       | JointEntropy                        | 6.195748328  |
| original | glcm       | ClusterShade                        | -2089.738015 |
| original | glcm       | MaximumProbability                  | 0.064664985  |
| original | glcm       | ldmn                                | 0.947646748  |
| original | glcm       | JointEnergy                         | 0.01747851   |
| original | glcm       | Contrast                            | 108.2026398  |
| original | glcm       | DifferenceEntropy                   | 3.980622703  |
| original | glcm       | InverseVariance                     | 0.145936116  |
| original | glcm       | DifferenceVariance                  | 43.57485486  |
| original | glcm       | ldn                                 | 0.857540085  |
| original | glcm       | ldm                                 | 0.193141781  |
| original | glcm       | Correlation                         | 0.319155999  |
| original | glcm       | Autocorrelation                     | 554.4758607  |
| original | glcm       | SumEntropy                          | 4.798696239  |
| original | glcm       | SumSquares                          | 79.9181459   |
| original | glcm       | ClusterProminence                   | 129894.5252  |
| original | glcm       | lmc2                                | 0.995176934  |
| original | glcm       | lmc1                                | -0.547152494 |
| original | glcm       | DifferenceAverage                   | 7.838996202  |
| original | glcm       | ld                                  | 0.267703276  |
| original | glcm       | ClusterTendency                     | 211.4699438  |
| original | firstorder | InterquartileRange                  | 406.25       |
| original | firstorder | Skewness                            | -0.35118023  |
| original | firstorder | Uniformity                          | 0.060491493  |
| original | firstorder | Median                              | -167.5       |
| original | firstorder | Energy                              | 9195102      |
| original | firstorder | RobustMeanAbsoluteDeviation         | 158.6223521  |
| original | firstorder | MeanAbsoluteDeviation               | 202.9045369  |
| original | firstorder | TotalEnergy                         | 248267754    |
| original | firstorder | Maximum                             | 311          |
| original | firstorder | RootMeanSquared                     | 316.1435764  |
| original | firstorder | 90Percentile                        | 16           |
| original | firstorder | Minimum                             | -723         |
| original | firstorder | Entropy                             | 4.548974902  |
| original | firstorder | Range                               | 1034         |
| original | firstorder | Variance                            | 56293.01749  |
| original | firstorder | 10Percentile                        | -539         |
| original | firstorder | Kurtosis                            | 2.27982899   |
| original | firstorder | Mean                                | -208.9347826 |
| original | glrlm      | ShortRunLowGrayLevelEmphasis        | 0.023999189  |
| original | glrlm      | GrayLevelVariance                   | 92.00457343  |
| original | glrlm      | LowGrayLevelRunEmphasis             | 0.024135793  |
| original | glrlm      | GrayLevelNonUniformityNormalized    | 0.053627321  |
| original | glrlm      | RunVariance                         | 0.078402716  |
| original | glrlm      | GrayLevelNonUniformity              | 4.622176767  |
| original | glrlm      | LongRunEmphasis                     | 1.224629066  |
| original | glrlm      | ShortRunHighGrayLevelEmphasis       | 489.3301853  |
| original | glrlm      | RunLengthNonUniformity              | 76.1293208   |

|             |       |                                      |             |
|-------------|-------|--------------------------------------|-------------|
| original    | glrlm | ShortRunEmphasis                     | 0.951451637 |
| original    | glrlm | LongRunHighGrayLevelEmphasis         | 695.8522639 |
| original    | glrlm | RunPercentage                        | 0.935618729 |
| original    | glrlm | LongRunLowGrayLevelEmphasis          | 0.024717089 |
| original    | glrlm | RunEntropy                           | 4.815371443 |
| original    | glrlm | HighGrayLevelRunEmphasis             | 525.2953849 |
| original    | glrlm | RunLengthNonUniformityNormalized     | 0.882485106 |
| original    | glszm | GrayLevelVariance                    | 102.4131612 |
| original    | glszm | ZoneVariance                         | 4.719700125 |
| original    | glszm | GrayLevelNonUniformityNormalized     | 0.035401916 |
| original    | glszm | SizeZoneNonUniformityNormalized      | 0.465222824 |
| original    | glszm | SizeZoneNonUniformity                | 22.79591837 |
| original    | glszm | GrayLevelNonUniformity               | 1.734693878 |
| original    | glszm | LargeAreaEmphasis                    | 8.244897959 |
| original    | glszm | SmallAreaHighGrayLevelEmphasis       | 283.4398866 |
| original    | glszm | ZonePercentage                       | 0.532608696 |
| original    | glszm | LargeAreaLowGrayLevelEmphasis        | 0.055798567 |
| original    | glszm | LargeAreaHighGrayLevelEmphasis       | 6015.755102 |
| original    | glszm | HighGrayLevelZoneEmphasis            | 444.2857143 |
| original    | glszm | SmallAreaEmphasis                    | 0.699960317 |
| original    | glszm | LowGrayLevelZoneEmphasis             | 0.039218304 |
| original    | glszm | ZoneEntropy                          | 5.451444538 |
| original    | glszm | SmallAreaLowGrayLevelEmphasis        | 0.037245802 |
| original    | ngtdm | Coarseness                           | 0.034866681 |
| original    | ngtdm | Complexity                           | 2936.46918  |
| original    | ngtdm | Strength                             | 26.3339656  |
| original    | ngtdm | Contrast                             | 1.023170191 |
| original    | ngtdm | Busyness                             | 0.034863673 |
| wavelet-HHH | gldm  | GrayLevelVariance                    | 11.90170132 |
| wavelet-HHH | gldm  | HighGrayLevelEmphasis                | 102.5652174 |
| wavelet-HHH | gldm  | DependenceEntropy                    | 5.000593109 |
| wavelet-HHH | gldm  | DependenceNonUniformity              | 23.32608696 |
| wavelet-HHH | gldm  | GrayLevelNonUniformity               | 8.086956522 |
| wavelet-HHH | gldm  | SmallDependenceEmphasis              | 0.425066425 |
| wavelet-HHH | gldm  | SmallDependenceHighGrayLevelEmphasis | 41.85798913 |
| wavelet-HHH | gldm  | DependenceNonUniformityNormalized    | 0.253544423 |
| wavelet-HHH | gldm  | LargeDependenceEmphasis              | 7.02173913  |
| wavelet-HHH | gldm  | LargeDependenceLowGrayLevelEmphasis  | 0.120867525 |
| wavelet-HHH | gldm  | DependenceVariance                   | 1.611058601 |
| wavelet-HHH | gldm  | LargeDependenceHighGrayLevelEmphasis | 690.1086957 |
| wavelet-HHH | gldm  | SmallDependenceLowGrayLevelEmphasis  | 0.040616766 |
| wavelet-HHH | gldm  | LowGrayLevelEmphasis                 | 0.047681745 |
| wavelet-HHH | glcm  | JointAverage                         | 9.483441431 |
| wavelet-HHH | glcm  | SumAverage                           | 18.96688286 |
| wavelet-HHH | glcm  | JointEntropy                         | 6.011219773 |
| wavelet-HHH | glcm  | ClusterShade                         | 2.625070861 |
| wavelet-HHH | glcm  | MaximumProbability                   | 0.043330604 |
| wavelet-HHH | glcm  | ldmn                                 | 0.9369031   |
| wavelet-HHH | glcm  | JointEnergy                          | 0.018120421 |
| wavelet-HHH | glcm  | Contrast                             | 22.17023988 |
| wavelet-HHH | glcm  | DifferenceEntropy                    | 3.156654471 |
| wavelet-HHH | glcm  | InverseVariance                      | 0.249122049 |

|             |            |                                  |              |
|-------------|------------|----------------------------------|--------------|
| wavelet-HHH | glcm       | DifferenceVariance               | 8.363965723  |
| wavelet-HHH | glcm       | Idn                              | 0.836871447  |
| wavelet-HHH | glcm       | Idm                              | 0.23521738   |
| wavelet-HHH | glcm       | Correlation                      | -0.023534577 |
| wavelet-HHH | glcm       | Autocorrelation                  | 89.65270414  |
| wavelet-HHH | glcm       | SumEntropy                       | 3.868453661  |
| wavelet-HHH | glcm       | SumSquares                       | 10.78990769  |
| wavelet-HHH | glcm       | ClusterProminence                | 1325.392214  |
| wavelet-HHH | glcm       | Imc2                             | 0.947117165  |
| wavelet-HHH | glcm       | Imc1                             | -0.321409459 |
| wavelet-HHH | glcm       | DifferenceAverage                | 3.685699702  |
| wavelet-HHH | glcm       | Id                               | 0.328127491  |
| wavelet-HHH | glcm       | ClusterTendency                  | 20.9893909   |
| wavelet-HHH | firstorder | InterquartileRange               | 112.3049699  |
| wavelet-HHH | firstorder | Skewness                         | -0.167032151 |
| wavelet-HHH | firstorder | Uniformity                       | 0.087901701  |
| wavelet-HHH | firstorder | Median                           | 0.837904206  |
| wavelet-HHH | firstorder | Energy                           | 686077.3344  |
| wavelet-HHH | firstorder | RobustMeanAbsoluteDeviation      | 46.04184569  |
| wavelet-HHH | firstorder | MeanAbsoluteDeviation            | 68.85075829  |
| wavelet-HHH | firstorder | TotalEnergy                      | 18524088.03  |
| wavelet-HHH | firstorder | Maximum                          | 199.0473655  |
| wavelet-HHH | firstorder | RootMeanSquared                  | 86.35602081  |
| wavelet-HHH | firstorder | 90Percentile                     | 108.0505767  |
| wavelet-HHH | firstorder | Minimum                          | -221.9729394 |
| wavelet-HHH | firstorder | Entropy                          | 3.662020322  |
| wavelet-HHH | firstorder | Range                            | 421.0203049  |
| wavelet-HHH | firstorder | Variance                         | 7456.785828  |
| wavelet-HHH | firstorder | 10Percentile                     | -95.22341527 |
| wavelet-HHH | firstorder | Kurtosis                         | 3.123836618  |
| wavelet-HHH | firstorder | Mean                             | 0.759277665  |
| wavelet-HHH | glrlm      | ShortRunLowGrayLevelEmphasis     | 0.049147736  |
| wavelet-HHH | glrlm      | GrayLevelVariance                | 12.28465912  |
| wavelet-HHH | glrlm      | LowGrayLevelRunEmphasis          | 0.049606405  |
| wavelet-HHH | glrlm      | GrayLevelNonUniformityNormalized | 0.086739767  |
| wavelet-HHH | glrlm      | RunVariance                      | 0.059751012  |
| wavelet-HHH | glrlm      | GrayLevelNonUniformity           | 7.573869984  |
| wavelet-HHH | glrlm      | LongRunEmphasis                  | 1.171559064  |
| wavelet-HHH | glrlm      | ShortRunHighGrayLevelEmphasis    | 98.85818496  |
| wavelet-HHH | glrlm      | RunLengthNonUniformity           | 79.13984904  |
| wavelet-HHH | glrlm      | ShortRunEmphasis                 | 0.962091664  |
| wavelet-HHH | glrlm      | LongRunHighGrayLevelEmphasis     | 119.8761462  |
| wavelet-HHH | glrlm      | RunPercentage                    | 0.948996656  |
| wavelet-HHH | glrlm      | LongRunLowGrayLevelEmphasis      | 0.051702971  |
| wavelet-HHH | glrlm      | RunEntropy                       | 3.863894131  |
| wavelet-HHH | glrlm      | HighGrayLevelRunEmphasis         | 102.6787856  |
| wavelet-HHH | glrlm      | RunLengthNonUniformityNormalized | 0.905759858  |
| wavelet-HHH | glszm      | GrayLevelVariance                | 18.17249527  |
| wavelet-HHH | glszm      | ZoneVariance                     | 4.217391304  |
| wavelet-HHH | glszm      | GrayLevelNonUniformityNormalized | 0.081285444  |
| wavelet-HHH | glszm      | SizeZoneNonUniformityNormalized  | 0.442344045  |
| wavelet-HHH | glszm      | SizeZoneNonUniformity            | 20.34782609  |

|             |       |                                      |              |
|-------------|-------|--------------------------------------|--------------|
| wavelet-HHH | glszm | GrayLevelNonUniformity               | 3.739130435  |
| wavelet-HHH | glszm | LargeAreaEmphasis                    | 8.217391304  |
| wavelet-HHH | glszm | SmallAreaHighGrayLevelEmphasis       | 66.31176932  |
| wavelet-HHH | glszm | ZonePercentage                       | 0.5          |
| wavelet-HHH | glszm | LargeAreaLowGrayLevelEmphasis        | 0.171184876  |
| wavelet-HHH | glszm | LargeAreaHighGrayLevelEmphasis       | 795.7391304  |
| wavelet-HHH | glszm | HighGrayLevelZoneEmphasis            | 101.9347826  |
| wavelet-HHH | glszm | SmallAreaEmphasis                    | 0.689647913  |
| wavelet-HHH | glszm | LowGrayLevelZoneEmphasis             | 0.083172633  |
| wavelet-HHH | glszm | ZoneEntropy                          | 4.499226837  |
| wavelet-HHH | glszm | SmallAreaLowGrayLevelEmphasis        | 0.079243112  |
| wavelet-HHH | ngtdm | Coarseness                           | 0.054737386  |
| wavelet-HHH | ngtdm | Complexity                           | 246.0957644  |
| wavelet-HHH | ngtdm | Strength                             | 3.749701042  |
| wavelet-HHH | ngtdm | Contrast                             | 0.331261324  |
| wavelet-HHH | ngtdm | Busyness                             | 0.177819778  |
| wavelet-HLL | gldm  | GrayLevelVariance                    | 50.77504726  |
| wavelet-HLL | gldm  | HighGrayLevelEmphasis                | 336.826087   |
| wavelet-HLL | gldm  | DependenceEntropy                    | 5.36563451   |
| wavelet-HLL | gldm  | DependenceNonUniformity              | 34.39130435  |
| wavelet-HLL | gldm  | GrayLevelNonUniformity               | 4.413043478  |
| wavelet-HLL | gldm  | SmallDependenceEmphasis              | 0.591108092  |
| wavelet-HLL | gldm  | SmallDependenceHighGrayLevelEmphasis | 207.8375604  |
| wavelet-HLL | gldm  | DependenceNonUniformityNormalized    | 0.373818526  |
| wavelet-HLL | gldm  | LargeDependenceEmphasis              | 3.630434783  |
| wavelet-HLL | gldm  | LargeDependenceLowGrayLevelEmphasis  | 0.032563681  |
| wavelet-HLL | gldm  | DependenceVariance                   | 0.68100189   |
| wavelet-HLL | gldm  | LargeDependenceHighGrayLevelEmphasis | 1257.804348  |
| wavelet-HLL | gldm  | SmallDependenceLowGrayLevelEmphasis  | 0.01615405   |
| wavelet-HLL | gldm  | LowGrayLevelEmphasis                 | 0.018727192  |
| wavelet-HLL | glcm  | JointAverage                         | 17.06657644  |
| wavelet-HLL | glcm  | SumAverage                           | 34.13315288  |
| wavelet-HLL | glcm  | JointEntropy                         | 6.509545018  |
| wavelet-HLL | glcm  | ClusterShade                         | 235.4759186  |
| wavelet-HLL | glcm  | MaximumProbability                   | 0.02710939   |
| wavelet-HLL | glcm  | Idmn                                 | 0.945248388  |
| wavelet-HLL | glcm  | JointEnergy                          | 0.011878169  |
| wavelet-HLL | glcm  | Contrast                             | 75.00293239  |
| wavelet-HLL | glcm  | DifferenceEntropy                    | 3.759907229  |
| wavelet-HLL | glcm  | InverseVariance                      | 0.154681525  |
| wavelet-HLL | glcm  | DifferenceVariance                   | 26.15102463  |
| wavelet-HLL | glcm  | Idn                                  | 0.847960748  |
| wavelet-HLL | glcm  | Idm                                  | 0.139917196  |
| wavelet-HLL | glcm  | Correlation                          | 0.243868924  |
| wavelet-HLL | glcm  | Autocorrelation                      | 303.5580974  |
| wavelet-HLL | glcm  | SumEntropy                           | 4.721128212  |
| wavelet-HLL | glcm  | SumSquares                           | 49.73642915  |
| wavelet-HLL | glcm  | ClusterProminence                    | 36553.21526  |
| wavelet-HLL | glcm  | Imc2                                 | 0.996527524  |
| wavelet-HLL | glcm  | Imc1                                 | -0.555081647 |
| wavelet-HLL | glcm  | DifferenceAverage                    | 6.747304403  |
| wavelet-HLL | glcm  | Id                                   | 0.230579792  |

|             |            |                                  |              |
|-------------|------------|----------------------------------|--------------|
| wavelet-HLL | glcm       | ClusterTendency                  | 123.9427842  |
| wavelet-HLL | firstorder | InterquartileRange               | 296.7903722  |
| wavelet-HLL | firstorder | Skewness                         | 0.010095335  |
| wavelet-HLL | firstorder | Uniformity                       | 0.047967864  |
| wavelet-HLL | firstorder | Median                           | -62.67465228 |
| wavelet-HLL | firstorder | Energy                           | 3299430.398  |
| wavelet-HLL | firstorder | RobustMeanAbsoluteDeviation      | 113.1148496  |
| wavelet-HLL | firstorder | MeanAbsoluteDeviation            | 151.3291717  |
| wavelet-HLL | firstorder | TotalEnergy                      | 89084620.74  |
| wavelet-HLL | firstorder | Maximum                          | 351.4553183  |
| wavelet-HLL | firstorder | RootMeanSquared                  | 189.3762759  |
| wavelet-HLL | firstorder | 90Percentile                     | 156.9230361  |
| wavelet-HLL | firstorder | Minimum                          | -464.6936915 |
| wavelet-HLL | firstorder | Entropy                          | 4.569347761  |
| wavelet-HLL | firstorder | Range                            | 816.1490097  |
| wavelet-HLL | firstorder | Variance                         | 31763.68784  |
| wavelet-HLL | firstorder | 10Percentile                     | -264.9992961 |
| wavelet-HLL | firstorder | Kurtosis                         | 2.232722442  |
| wavelet-HLL | firstorder | Mean                             | -64.02879077 |
| wavelet-HLL | glrlm      | ShortRunLowGrayLevelEmphasis     | 0.018988249  |
| wavelet-HLL | glrlm      | GrayLevelVariance                | 51.14864221  |
| wavelet-HLL | glrlm      | LowGrayLevelRunEmphasis          | 0.019108551  |
| wavelet-HLL | glrlm      | GrayLevelNonUniformityNormalized | 0.047588506  |
| wavelet-HLL | glrlm      | RunVariance                      | 0.031068336  |
| wavelet-HLL | glrlm      | GrayLevelNonUniformity           | 4.259055871  |
| wavelet-HLL | glrlm      | LongRunEmphasis                  | 1.091299788  |
| wavelet-HLL | glrlm      | ShortRunHighGrayLevelEmphasis    | 330.0155309  |
| wavelet-HLL | glrlm      | RunLengthNonUniformity           | 84.92641602  |
| wavelet-HLL | glrlm      | ShortRunEmphasis                 | 0.979188622  |
| wavelet-HLL | glrlm      | LongRunHighGrayLevelEmphasis     | 367.5600842  |
| wavelet-HLL | glrlm      | RunPercentage                    | 0.972408027  |
| wavelet-HLL | glrlm      | LongRunLowGrayLevelEmphasis      | 0.019619988  |
| wavelet-HLL | glrlm      | RunEntropy                       | 4.658924882  |
| wavelet-HLL | glrlm      | HighGrayLevelRunEmphasis         | 336.9128282  |
| wavelet-HLL | glrlm      | RunLengthNonUniformityNormalized | 0.947940038  |
| wavelet-HLL | glszm      | GrayLevelVariance                | 56.49609375  |
| wavelet-HLL | glszm      | ZoneVariance                     | 0.58984375   |
| wavelet-HLL | glszm      | GrayLevelNonUniformityNormalized | 0.043945313  |
| wavelet-HLL | glszm      | SizeZoneNonUniformityNormalized  | 0.536621094  |
| wavelet-HLL | glszm      | SizeZoneNonUniformity            | 34.34375     |
| wavelet-HLL | glszm      | GrayLevelNonUniformity           | 2.8125       |
| wavelet-HLL | glszm      | LargeAreaEmphasis                | 2.65625      |
| wavelet-HLL | glszm      | SmallAreaHighGrayLevelEmphasis   | 271.6267361  |
| wavelet-HLL | glszm      | ZonePercentage                   | 0.695652174  |
| wavelet-HLL | glszm      | LargeAreaLowGrayLevelEmphasis    | 0.033333858  |
| wavelet-HLL | glszm      | LargeAreaHighGrayLevelEmphasis   | 907.3125     |
| wavelet-HLL | glszm      | HighGrayLevelZoneEmphasis        | 343.375      |
| wavelet-HLL | glszm      | SmallAreaEmphasis                | 0.760633681  |
| wavelet-HLL | glszm      | LowGrayLevelZoneEmphasis         | 0.024290373  |
| wavelet-HLL | glszm      | ZoneEntropy                      | 5.245864648  |
| wavelet-HLL | glszm      | SmallAreaLowGrayLevelEmphasis    | 0.022642127  |
| wavelet-HLL | ngtdm      | Coarseness                       | 0.055581041  |

|             |            |                                      |              |
|-------------|------------|--------------------------------------|--------------|
| wavelet-HLL | ngtdm      | Complexity                           | 1513.385518  |
| wavelet-HLL | ngtdm      | Strength                             | 17.97421939  |
| wavelet-HLL | ngtdm      | Contrast                             | 0.566866442  |
| wavelet-HLL | ngtdm      | Busyness                             | 0.043145675  |
| wavelet-LHL | gldm       | GrayLevelVariance                    | 151.8908318  |
| wavelet-LHL | gldm       | HighGrayLevelEmphasis                | 826.7608696  |
| wavelet-LHL | gldm       | DependenceEntropy                    | 5.686392934  |
| wavelet-LHL | gldm       | DependenceNonUniformity              | 43.30434783  |
| wavelet-LHL | gldm       | GrayLevelNonUniformity               | 2.956521739  |
| wavelet-LHL | gldm       | SmallDependenceEmphasis              | 0.694444444  |
| wavelet-LHL | gldm       | SmallDependenceHighGrayLevelEmphasis | 575.4051932  |
| wavelet-LHL | gldm       | DependenceNonUniformityNormalized    | 0.470699433  |
| wavelet-LHL | gldm       | LargeDependenceEmphasis              | 2.608695652  |
| wavelet-LHL | gldm       | LargeDependenceLowGrayLevelEmphasis  | 0.018277035  |
| wavelet-LHL | gldm       | DependenceVariance                   | 0.423440454  |
| wavelet-LHL | gldm       | LargeDependenceHighGrayLevelEmphasis | 2097.73913   |
| wavelet-LHL | gldm       | SmallDependenceLowGrayLevelEmphasis  | 0.013123539  |
| wavelet-LHL | gldm       | LowGrayLevelEmphasis                 | 0.013971016  |
| wavelet-LHL | glcm       | JointAverage                         | 25.78751893  |
| wavelet-LHL | glcm       | SumAverage                           | 51.57503787  |
| wavelet-LHL | glcm       | JointEntropy                         | 6.654481256  |
| wavelet-LHL | glcm       | ClusterShade                         | 3411.576984  |
| wavelet-LHL | glcm       | MaximumProbability                   | 0.018381518  |
| wavelet-LHL | glcm       | ldmn                                 | 0.956606243  |
| wavelet-LHL | glcm       | JointEnergy                          | 0.010321588  |
| wavelet-LHL | glcm       | Contrast                             | 137.3716809  |
| wavelet-LHL | glcm       | DifferenceEntropy                    | 4.028096216  |
| wavelet-LHL | glcm       | InverseVariance                      | 0.112981668  |
| wavelet-LHL | glcm       | DifferenceVariance                   | 41.36750262  |
| wavelet-LHL | glcm       | ldn                                  | 0.860025232  |
| wavelet-LHL | glcm       | ldm                                  | 0.099801015  |
| wavelet-LHL | glcm       | Correlation                          | 0.498465085  |
| wavelet-LHL | glcm       | Autocorrelation                      | 738.0654879  |
| wavelet-LHL | glcm       | SumEntropy                           | 5.156040321  |
| wavelet-LHL | glcm       | SumSquares                           | 141.2513625  |
| wavelet-LHL | glcm       | ClusterProminence                    | 401524.8711  |
| wavelet-LHL | glcm       | lmc2                                 | 0.99945645   |
| wavelet-LHL | glcm       | lmc1                                 | -0.683369518 |
| wavelet-LHL | glcm       | DifferenceAverage                    | 9.366300691  |
| wavelet-LHL | glcm       | ld                                   | 0.182466994  |
| wavelet-LHL | glcm       | ClusterTendency                      | 427.633769   |
| wavelet-LHL | firstorder | InterquartileRange                   | 506.1169199  |
| wavelet-LHL | firstorder | Skewness                             | 0.328732247  |
| wavelet-LHL | firstorder | Uniformity                           | 0.032136106  |
| wavelet-LHL | firstorder | Median                               | -32.07418015 |
| wavelet-LHL | firstorder | Energy                               | 8757862.911  |
| wavelet-LHL | firstorder | RobustMeanAbsoluteDeviation          | 195.4402134  |
| wavelet-LHL | firstorder | MeanAbsoluteDeviation                | 263.2295315  |
| wavelet-LHL | firstorder | TotalEnergy                          | 236462298.6  |
| wavelet-LHL | firstorder | Maximum                              | 690.2182644  |
| wavelet-LHL | firstorder | RootMeanSquared                      | 308.5355119  |
| wavelet-LHL | firstorder | 90Percentile                         | 463.7853321  |



|             |            |                                      |              |
|-------------|------------|--------------------------------------|--------------|
| wavelet-LHL | firstorder | Minimum                              | -621.1183263 |
| wavelet-LHL | firstorder | Entropy                              | 5.152767022  |
| wavelet-LHL | firstorder | Range                                | 1311.336591  |
| wavelet-LHL | firstorder | Variance                             | 95093.10775  |
| wavelet-LHL | firstorder | 10Percentile                         | -369.1445681 |
| wavelet-LHL | firstorder | Kurtosis                             | 2.244648125  |
| wavelet-LHL | firstorder | Mean                                 | 10.05257778  |
| wavelet-LHL | glrlm      | ShortRunLowGrayLevelEmphasis         | 0.014147331  |
| wavelet-LHL | glrlm      | GrayLevelVariance                    | 152.3453544  |
| wavelet-LHL | glrlm      | LowGrayLevelRunEmphasis              | 0.014186252  |
| wavelet-LHL | glrlm      | GrayLevelNonUniformityNormalized     | 0.031939031  |
| wavelet-LHL | glrlm      | RunVariance                          | 0.01835769   |
| wavelet-LHL | glrlm      | GrayLevelNonUniformity               | 2.884574249  |
| wavelet-LHL | glrlm      | LongRunEmphasis                      | 1.05736082   |
| wavelet-LHL | glrlm      | ShortRunHighGrayLevelEmphasis        | 815.623896   |
| wavelet-LHL | glrlm      | RunLengthNonUniformity               | 87.05659181  |
| wavelet-LHL | glrlm      | ShortRunEmphasis                     | 0.985659795  |
| wavelet-LHL | glrlm      | LongRunHighGrayLevelEmphasis         | 873.3628973  |
| wavelet-LHL | glrlm      | RunPercentage                        | 0.981605351  |
| wavelet-LHL | glrlm      | LongRunLowGrayLevelEmphasis          | 0.014341934  |
| wavelet-LHL | glrlm      | RunEntropy                           | 5.204524538  |
| wavelet-LHL | glrlm      | HighGrayLevelRunEmphasis             | 827.1716963  |
| wavelet-LHL | glrlm      | RunLengthNonUniformityNormalized     | 0.963284621  |
| wavelet-LHL | glszm      | GrayLevelVariance                    | 159.0013886  |
| wavelet-LHL | glszm      | ZoneVariance                         | 0.405475104  |
| wavelet-LHL | glszm      | GrayLevelNonUniformityNormalized     | 0.029160881  |
| wavelet-LHL | glszm      | SizeZoneNonUniformityNormalized      | 0.645308471  |
| wavelet-LHL | glszm      | SizeZoneNonUniformity                | 45.81690141  |
| wavelet-LHL | glszm      | GrayLevelNonUniformity               | 2.070422535  |
| wavelet-LHL | glszm      | LargeAreaEmphasis                    | 2.084507042  |
| wavelet-LHL | glszm      | SmallAreaHighGrayLevelEmphasis       | 693.5688576  |
| wavelet-LHL | glszm      | ZonePercentage                       | 0.77173913   |
| wavelet-LHL | glszm      | LargeAreaLowGrayLevelEmphasis        | 0.020324504  |
| wavelet-LHL | glszm      | LargeAreaHighGrayLevelEmphasis       | 1625.239437  |
| wavelet-LHL | glszm      | HighGrayLevelZoneEmphasis            | 840.8732394  |
| wavelet-LHL | glszm      | SmallAreaEmphasis                    | 0.831083725  |
| wavelet-LHL | glszm      | LowGrayLevelZoneEmphasis             | 0.017273248  |
| wavelet-LHL | glszm      | ZoneEntropy                          | 5.582639197  |
| wavelet-LHL | glszm      | SmallAreaLowGrayLevelEmphasis        | 0.016803837  |
| wavelet-LHL | ngtdm      | Coarseness                           | 0.067157839  |
| wavelet-LHL | ngtdm      | Complexity                           | 4226.771871  |
| wavelet-LHL | ngtdm      | Strength                             | 56.8488152   |
| wavelet-LHL | ngtdm      | Contrast                             | 0.97468308   |
| wavelet-LHL | ngtdm      | Busyness                             | 0.018549357  |
| wavelet-LHH | gldm       | GrayLevelVariance                    | 32.8774811   |
| wavelet-LHH | gldm       | HighGrayLevelEmphasis                | 244.7065217  |
| wavelet-LHH | gldm       | DependenceEntropy                    | 5.18488244   |
| wavelet-LHH | gldm       | DependenceNonUniformity              | 33.69565217  |
| wavelet-LHH | gldm       | GrayLevelNonUniformity               | 5.260869565  |
| wavelet-LHH | gldm       | SmallDependenceEmphasis              | 0.588088768  |
| wavelet-LHH | gldm       | SmallDependenceHighGrayLevelEmphasis | 136.7660779  |
| wavelet-LHH | gldm       | DependenceNonUniformityNormalized    | 0.366257089  |

|             |            |                                      |              |
|-------------|------------|--------------------------------------|--------------|
| wavelet-LHH | gldm       | LargeDependenceEmphasis              | 3.739130435  |
| wavelet-LHH | gldm       | LargeDependenceLowGrayLevelEmphasis  | 0.107721556  |
| wavelet-LHH | gldm       | DependenceVariance                   | 0.714555766  |
| wavelet-LHH | gldm       | LargeDependenceHighGrayLevelEmphasis | 965.3586957  |
| wavelet-LHH | gldm       | SmallDependenceLowGrayLevelEmphasis  | 0.012569294  |
| wavelet-LHH | gldm       | LowGrayLevelEmphasis                 | 0.030587441  |
| wavelet-LHH | glcm       | JointAverage                         | 14.67471384  |
| wavelet-LHH | glcm       | SumAverage                           | 29.34942767  |
| wavelet-LHH | glcm       | JointEntropy                         | 6.466095401  |
| wavelet-LHH | glcm       | ClusterShade                         | -100.9988902 |
| wavelet-LHH | glcm       | MaximumProbability                   | 0.02581501   |
| wavelet-LHH | glcm       | Idmn                                 | 0.945688182  |
| wavelet-LHH | glcm       | JointEnergy                          | 0.012239014  |
| wavelet-LHH | glcm       | Contrast                             | 61.86739678  |
| wavelet-LHH | glcm       | DifferenceEntropy                    | 3.787841666  |
| wavelet-LHH | glcm       | InverseVariance                      | 0.153959528  |
| wavelet-LHH | glcm       | DifferenceVariance                   | 22.23260756  |
| wavelet-LHH | glcm       | Idn                                  | 0.846005111  |
| wavelet-LHH | glcm       | Idm                                  | 0.143760742  |
| wavelet-LHH | glcm       | Correlation                          | -0.008752635 |
| wavelet-LHH | glcm       | Autocorrelation                      | 215.1710102  |
| wavelet-LHH | glcm       | SumEntropy                           | 4.455969254  |
| wavelet-LHH | glcm       | SumSquares                           | 30.73282169  |
| wavelet-LHH | glcm       | ClusterProminence                    | 12487.22231  |
| wavelet-LHH | glcm       | Imc2                                 | 0.989486472  |
| wavelet-LHH | glcm       | Imc1                                 | -0.462644581 |
| wavelet-LHH | glcm       | DifferenceAverage                    | 6.205360244  |
| wavelet-LHH | glcm       | Id                                   | 0.236975985  |
| wavelet-LHH | glcm       | ClusterTendency                      | 61.06388997  |
| wavelet-LHH | firstorder | InterquartileRange                   | 182.7985862  |
| wavelet-LHH | firstorder | Skewness                             | -0.124020255 |
| wavelet-LHH | firstorder | Uniformity                           | 0.057183365  |
| wavelet-LHH | firstorder | Median                               | 10.54840947  |
| wavelet-LHH | firstorder | Energy                               | 1848091.198  |
| wavelet-LHH | firstorder | RobustMeanAbsoluteDeviation          | 76.75736845  |
| wavelet-LHH | firstorder | MeanAbsoluteDeviation                | 112.0353037  |
| wavelet-LHH | firstorder | TotalEnergy                          | 49898462.34  |
| wavelet-LHH | firstorder | Maximum                              | 402.2202563  |
| wavelet-LHH | firstorder | RootMeanSquared                      | 141.7319576  |
| wavelet-LHH | firstorder | 90Percentile                         | 172.1769478  |
| wavelet-LHH | firstorder | Minimum                              | -332.837802  |
| wavelet-LHH | firstorder | Entropy                              | 4.307819496  |
| wavelet-LHH | firstorder | Range                                | 735.0580583  |
| wavelet-LHH | firstorder | Variance                             | 20086.15978  |
| wavelet-LHH | firstorder | 10Percentile                         | -200.8175929 |
| wavelet-LHH | firstorder | Kurtosis                             | 2.932041817  |
| wavelet-LHH | firstorder | Mean                                 | 1.337167133  |
| wavelet-LHH | glrlm      | ShortRunLowGrayLevelEmphasis         | 0.02975307   |
| wavelet-LHH | glrlm      | GrayLevelVariance                    | 33.29489321  |
| wavelet-LHH | glrlm      | LowGrayLevelRunEmphasis              | 0.030495666  |
| wavelet-LHH | glrlm      | GrayLevelNonUniformityNormalized     | 0.056740937  |
| wavelet-LHH | glrlm      | RunVariance                          | 0.028393757  |

|             |       |                                      |             |
|-------------|-------|--------------------------------------|-------------|
| wavelet-LHH | glrlm | GrayLevelNonUniformity               | 5.071758104 |
| wavelet-LHH | glrlm | LongRunEmphasis                      | 1.088109902 |
| wavelet-LHH | glrlm | ShortRunHighGrayLevelEmphasis        | 238.372465  |
| wavelet-LHH | glrlm | RunLengthNonUniformity               | 84.32715092 |
| wavelet-LHH | glrlm | ShortRunEmphasis                     | 0.977972524 |
| wavelet-LHH | glrlm | LongRunHighGrayLevelEmphasis         | 267.3462064 |
| wavelet-LHH | glrlm | RunPercentage                        | 0.971571906 |
| wavelet-LHH | glrlm | LongRunLowGrayLevelEmphasis          | 0.033466048 |
| wavelet-LHH | glrlm | RunEntropy                           | 4.420541413 |
| wavelet-LHH | glrlm | HighGrayLevelRunEmphasis             | 244.1672132 |
| wavelet-LHH | glrlm | RunLengthNonUniformityNormalized     | 0.943212485 |
| wavelet-LHH | glszm | GrayLevelVariance                    | 39.62669095 |
| wavelet-LHH | glszm | ZoneVariance                         | 0.991675338 |
| wavelet-LHH | glszm | GrayLevelNonUniformityNormalized     | 0.050988554 |
| wavelet-LHH | glszm | SizeZoneNonUniformityNormalized      | 0.561914672 |
| wavelet-LHH | glszm | SizeZoneNonUniformity                | 34.83870968 |
| wavelet-LHH | glszm | GrayLevelNonUniformity               | 3.161290323 |
| wavelet-LHH | glszm | LargeAreaEmphasis                    | 3.193548387 |
| wavelet-LHH | glszm | SmallAreaHighGrayLevelEmphasis       | 177.9902733 |
| wavelet-LHH | glszm | ZonePercentage                       | 0.673913043 |
| wavelet-LHH | glszm | LargeAreaLowGrayLevelEmphasis        | 0.085406164 |
| wavelet-LHH | glszm | LargeAreaHighGrayLevelEmphasis       | 796.8548387 |
| wavelet-LHH | glszm | HighGrayLevelZoneEmphasis            | 236.983871  |
| wavelet-LHH | glszm | SmallAreaEmphasis                    | 0.776689068 |
| wavelet-LHH | glszm | LowGrayLevelZoneEmphasis             | 0.027204474 |
| wavelet-LHH | glszm | ZoneEntropy                          | 5.010174939 |
| wavelet-LHH | glszm | SmallAreaLowGrayLevelEmphasis        | 0.014227816 |
| wavelet-LHH | ngtdm | Coarseness                           | 0.052194647 |
| wavelet-LHH | ngtdm | Complexity                           | 1075.432347 |
| wavelet-LHH | ngtdm | Strength                             | 9.958259101 |
| wavelet-LHH | ngtdm | Contrast                             | 0.570792719 |
| wavelet-LHH | ngtdm | Busyness                             | 0.062767355 |
| wavelet-LLH | gldm  | GrayLevelVariance                    | 69.62996219 |
| wavelet-LLH | gldm  | HighGrayLevelEmphasis                | 468.7608696 |
| wavelet-LLH | gldm  | DependenceEntropy                    | 5.479658695 |
| wavelet-LLH | gldm  | DependenceNonUniformity              | 44.17391304 |
| wavelet-LLH | gldm  | GrayLevelNonUniformity               | 4           |
| wavelet-LLH | gldm  | SmallDependenceEmphasis              | 0.713807367 |
| wavelet-LLH | gldm  | SmallDependenceHighGrayLevelEmphasis | 339.2542633 |
| wavelet-LLH | gldm  | DependenceNonUniformityNormalized    | 0.480151229 |
| wavelet-LLH | gldm  | LargeDependenceEmphasis              | 3.043478261 |
| wavelet-LLH | gldm  | LargeDependenceLowGrayLevelEmphasis  | 0.023180246 |
| wavelet-LLH | gldm  | DependenceVariance                   | 0.72778828  |
| wavelet-LLH | gldm  | LargeDependenceHighGrayLevelEmphasis | 1324.586957 |
| wavelet-LLH | gldm  | SmallDependenceLowGrayLevelEmphasis  | 0.015825853 |
| wavelet-LLH | gldm  | LowGrayLevelEmphasis                 | 0.016792286 |
| wavelet-LLH | glcm  | JointAverage                         | 19.49260233 |
| wavelet-LLH | glcm  | SumAverage                           | 38.98520466 |
| wavelet-LLH | glcm  | JointEntropy                         | 6.598639174 |
| wavelet-LLH | glcm  | ClusterShade                         | 83.39709443 |
| wavelet-LLH | glcm  | MaximumProbability                   | 0.021837545 |
| wavelet-LLH | glcm  | ldmn                                 | 0.943697959 |

|             |            |                                  |              |
|-------------|------------|----------------------------------|--------------|
| wavelet-LLH | glcm       | JointEnergy                      | 0.010860205  |
| wavelet-LLH | glcm       | Contrast                         | 112.9776264  |
| wavelet-LLH | glcm       | DifferenceEntropy                | 4.024625839  |
| wavelet-LLH | glcm       | InverseVariance                  | 0.109233179  |
| wavelet-LLH | glcm       | DifferenceVariance               | 38.91295281  |
| wavelet-LLH | glcm       | Idn                              | 0.842995351  |
| wavelet-LLH | glcm       | Idm                              | 0.103757555  |
| wavelet-LLH | glcm       | Correlation                      | 0.057853002  |
| wavelet-LLH | glcm       | Autocorrelation                  | 384.2572591  |
| wavelet-LLH | glcm       | SumEntropy                       | 4.75173938   |
| wavelet-LLH | glcm       | SumSquares                       | 60.73362804  |
| wavelet-LLH | glcm       | ClusterProminence                | 48723.14681  |
| wavelet-LLH | glcm       | Imc2                             | 0.997452871  |
| wavelet-LLH | glcm       | Imc1                             | -0.57495312  |
| wavelet-LLH | glcm       | DifferenceAverage                | 8.40160916   |
| wavelet-LLH | glcm       | Id                               | 0.192229112  |
| wavelet-LLH | glcm       | ClusterTendency                  | 129.9568858  |
| wavelet-LLH | firstorder | InterquartileRange               | 282.6532628  |
| wavelet-LLH | firstorder | Skewness                         | 0.037270373  |
| wavelet-LLH | firstorder | Uniformity                       | 0.043478261  |
| wavelet-LLH | firstorder | Median                           | -19.54786906 |
| wavelet-LLH | firstorder | Energy                           | 4050403.597  |
| wavelet-LLH | firstorder | RobustMeanAbsoluteDeviation      | 122.2867977  |
| wavelet-LLH | firstorder | MeanAbsoluteDeviation            | 171.7230624  |
| wavelet-LLH | firstorder | TotalEnergy                      | 109360897.1  |
| wavelet-LLH | firstorder | Maximum                          | 516.3959397  |
| wavelet-LLH | firstorder | RootMeanSquared                  | 209.8240359  |
| wavelet-LLH | firstorder | 90Percentile                     | 244.8901827  |
| wavelet-LLH | firstorder | Minimum                          | -480.2912723 |
| wavelet-LLH | firstorder | Entropy                          | 4.755709141  |
| wavelet-LLH | firstorder | Range                            | 996.687212   |
| wavelet-LLH | firstorder | Variance                         | 43856.43436  |
| wavelet-LLH | firstorder | 10Percentile                     | -291.6149928 |
| wavelet-LLH | firstorder | Kurtosis                         | 2.578402943  |
| wavelet-LLH | firstorder | Mean                             | -13.02657654 |
| wavelet-LLH | glrlm      | ShortRunLowGrayLevelEmphasis     | 0.017022461  |
| wavelet-LLH | glrlm      | GrayLevelVariance                | 70.52126813  |
| wavelet-LLH | glrlm      | LowGrayLevelRunEmphasis          | 0.017072133  |
| wavelet-LLH | glrlm      | GrayLevelNonUniformityNormalized | 0.042749454  |
| wavelet-LLH | glrlm      | RunVariance                      | 0.020051159  |
| wavelet-LLH | glrlm      | GrayLevelNonUniformity           | 3.854236093  |
| wavelet-LLH | glrlm      | LongRunEmphasis                  | 1.061827829  |
| wavelet-LLH | glrlm      | ShortRunHighGrayLevelEmphasis    | 462.750112   |
| wavelet-LLH | glrlm      | RunLengthNonUniformity           | 86.56133763  |
| wavelet-LLH | glrlm      | ShortRunEmphasis                 | 0.984543043  |
| wavelet-LLH | glrlm      | LongRunHighGrayLevelEmphasis     | 496.3320689  |
| wavelet-LLH | glrlm      | RunPercentage                    | 0.97993311   |
| wavelet-LLH | glrlm      | LongRunLowGrayLevelEmphasis      | 0.017270822  |
| wavelet-LLH | glrlm      | RunEntropy                       | 4.836637399  |
| wavelet-LLH | glrlm      | HighGrayLevelRunEmphasis         | 469.4665034  |
| wavelet-LLH | glrlm      | RunLengthNonUniformityNormalized | 0.959897683  |
| wavelet-LLH | glszm      | GrayLevelVariance                | 81.5580242   |

|             |       |                                      |              |
|-------------|-------|--------------------------------------|--------------|
| wavelet-LLH | glszm | ZoneVariance                         | 0.771672287  |
| wavelet-LLH | glszm | GrayLevelNonUniformityNormalized     | 0.037492561  |
| wavelet-LLH | glszm | SizeZoneNonUniformityNormalized      | 0.704423725  |
| wavelet-LLH | glszm | SizeZoneNonUniformity                | 50.01408451  |
| wavelet-LLH | glszm | GrayLevelNonUniformity               | 2.661971831  |
| wavelet-LLH | glszm | LargeAreaEmphasis                    | 2.450704225  |
| wavelet-LLH | glszm | SmallAreaHighGrayLevelEmphasis       | 410.6702038  |
| wavelet-LLH | glszm | ZonePercentage                       | 0.77173913   |
| wavelet-LLH | glszm | LargeAreaLowGrayLevelEmphasis        | 0.025222744  |
| wavelet-LLH | glszm | LargeAreaHighGrayLevelEmphasis       | 1090.507042  |
| wavelet-LLH | glszm | HighGrayLevelZoneEmphasis            | 474.2676056  |
| wavelet-LLH | glszm | SmallAreaEmphasis                    | 0.863452541  |
| wavelet-LLH | glszm | LowGrayLevelZoneEmphasis             | 0.020804209  |
| wavelet-LLH | glszm | ZoneEntropy                          | 5.286589197  |
| wavelet-LLH | glszm | SmallAreaLowGrayLevelEmphasis        | 0.020304785  |
| wavelet-LLH | ngtdm | Coarseness                           | 0.046489454  |
| wavelet-LLH | ngtdm | Complexity                           | 2919.710367  |
| wavelet-LLH | ngtdm | Strength                             | 19.80151752  |
| wavelet-LLH | ngtdm | Contrast                             | 0.874626397  |
| wavelet-LLH | ngtdm | Busyness                             | 0.040971914  |
| wavelet-LLL | gldm  | GrayLevelVariance                    | 500.1403592  |
| wavelet-LLL | gldm  | HighGrayLevelEmphasis                | 2719.369565  |
| wavelet-LLL | gldm  | DependenceEntropy                    | 5.868511277  |
| wavelet-LLL | gldm  | DependenceNonUniformity              | 62.34782609  |
| wavelet-LLL | gldm  | GrayLevelNonUniformity               | 1.956521739  |
| wavelet-LLL | gldm  | SmallDependenceEmphasis              | 0.850241546  |
| wavelet-LLL | gldm  | SmallDependenceHighGrayLevelEmphasis | 2046.586353  |
| wavelet-LLL | gldm  | DependenceNonUniformityNormalized    | 0.677693762  |
| wavelet-LLL | gldm  | LargeDependenceEmphasis              | 1.695652174  |
| wavelet-LLL | gldm  | LargeDependenceLowGrayLevelEmphasis  | 0.015268008  |
| wavelet-LLL | gldm  | DependenceVariance                   | 0.213610586  |
| wavelet-LLL | gldm  | LargeDependenceHighGrayLevelEmphasis | 5877.217391  |
| wavelet-LLL | gldm  | SmallDependenceLowGrayLevelEmphasis  | 0.014942606  |
| wavelet-LLL | gldm  | LowGrayLevelEmphasis                 | 0.015003685  |
| wavelet-LLL | glcm  | JointAverage                         | 52.43878083  |
| wavelet-LLL | glcm  | SumAverage                           | 104.8775617  |
| wavelet-LLL | glcm  | JointEntropy                         | 6.742677566  |
| wavelet-LLL | glcm  | ClusterShade                         | -17908.92085 |
| wavelet-LLL | glcm  | MaximumProbability                   | 0.015429011  |
| wavelet-LLL | glcm  | Idmn                                 | 0.936053538  |
| wavelet-LLL | glcm  | JointEnergy                          | 0.009522222  |
| wavelet-LLL | glcm  | Contrast                             | 609.2868944  |
| wavelet-LLL | glcm  | DifferenceEntropy                    | 4.835449461  |
| wavelet-LLL | glcm  | InverseVariance                      | 0.054168728  |
| wavelet-LLL | glcm  | DifferenceVariance                   | 181.9059988  |
| wavelet-LLL | glcm  | Idn                                  | 0.829950574  |
| wavelet-LLL | glcm  | Idm                                  | 0.047978066  |
| wavelet-LLL | glcm  | Correlation                          | 0.375211279  |
| wavelet-LLL | glcm  | Autocorrelation                      | 2937.029765  |
| wavelet-LLL | glcm  | SumEntropy                           | 5.411655184  |
| wavelet-LLL | glcm  | SumSquares                           | 490.6317072  |
| wavelet-LLL | glcm  | ClusterProminence                    | 4291511.761  |

|             |            |                                  |              |
|-------------|------------|----------------------------------|--------------|
| wavelet-LLL | glcm       | Imc2                             | 0.999926318  |
| wavelet-LLL | glcm       | Imc1                             | -0.792874014 |
| wavelet-LLL | glcm       | DifferenceAverage                | 20.16531192  |
| wavelet-LLL | glcm       | Id                               | 0.105640303  |
| wavelet-LLL | glcm       | ClusterTendency                  | 1353.239934  |
| wavelet-LLL | firstorder | InterquartileRange               | 1037.397437  |
| wavelet-LLL | firstorder | Skewness                         | -0.080835405 |
| wavelet-LLL | firstorder | Uniformity                       | 0.021266541  |
| wavelet-LLL | firstorder | Median                           | -698.6703037 |
| wavelet-LLL | firstorder | Energy                           | 75199153.31  |
| wavelet-LLL | firstorder | RobustMeanAbsoluteDeviation      | 365.9669431  |
| wavelet-LLL | firstorder | MeanAbsoluteDeviation            | 477.7859601  |
| wavelet-LLL | firstorder | TotalEnergy                      | 2030377139   |
| wavelet-LLL | firstorder | Maximum                          | 366.6537819  |
| wavelet-LLL | firstorder | RootMeanSquared                  | 904.0918654  |
| wavelet-LLL | firstorder | 90Percentile                     | -18.35075879 |
| wavelet-LLL | firstorder | Minimum                          | -1850.741587 |
| wavelet-LLL | firstorder | Entropy                          | 5.755853364  |
| wavelet-LLL | firstorder | Range                            | 2217.395369  |
| wavelet-LLL | firstorder | Variance                         | 313224.0857  |
| wavelet-LLL | firstorder | 10Percentile                     | -1422.207472 |
| wavelet-LLL | firstorder | Kurtosis                         | 2.006404086  |
| wavelet-LLL | firstorder | Mean                             | -710.0408548 |
| wavelet-LLL | glrlm      | ShortRunLowGrayLevelEmphasis     | 0.015125527  |
| wavelet-LLL | glrlm      | GrayLevelVariance                | 498.7699495  |
| wavelet-LLL | glrlm      | LowGrayLevelRunEmphasis          | 0.015128026  |
| wavelet-LLL | glrlm      | GrayLevelNonUniformityNormalized | 0.021104855  |
| wavelet-LLL | glrlm      | RunVariance                      | 0.008358323  |
| wavelet-LLL | glrlm      | GrayLevelNonUniformity           | 1.92553281   |
| wavelet-LLL | glrlm      | LongRunEmphasis                  | 1.025528318  |
| wavelet-LLL | glrlm      | ShortRunHighGrayLevelEmphasis    | 2675.212867  |
| wavelet-LLL | glrlm      | RunLengthNonUniformity           | 89.71958298  |
| wavelet-LLL | glrlm      | ShortRunEmphasis                 | 0.993617921  |
| wavelet-LLL | glrlm      | LongRunHighGrayLevelEmphasis     | 2819.420742  |
| wavelet-LLL | glrlm      | RunPercentage                    | 0.991638796  |
| wavelet-LLL | glrlm      | LongRunLowGrayLevelEmphasis      | 0.015138023  |
| wavelet-LLL | glrlm      | RunEntropy                       | 5.774637618  |
| wavelet-LLL | glrlm      | HighGrayLevelRunEmphasis         | 2704.054442  |
| wavelet-LLL | glrlm      | RunLengthNonUniformityNormalized | 0.983283355  |
| wavelet-LLL | glszm      | GrayLevelVariance                | 476.9750149  |
| wavelet-LLL | glszm      | ZoneVariance                     | 0.155859607  |
| wavelet-LLL | glszm      | GrayLevelNonUniformityNormalized | 0.019631172  |
| wavelet-LLL | glszm      | SizeZoneNonUniformityNormalized  | 0.820345033  |
| wavelet-LLL | glszm      | SizeZoneNonUniformity            | 67.26829268  |
| wavelet-LLL | glszm      | GrayLevelNonUniformity           | 1.609756098  |
| wavelet-LLL | glszm      | LargeAreaEmphasis                | 1.414634146  |
| wavelet-LLL | glszm      | SmallAreaHighGrayLevelEmphasis   | 2158.365176  |
| wavelet-LLL | glszm      | ZonePercentage                   | 0.891304348  |
| wavelet-LLL | glszm      | LargeAreaLowGrayLevelEmphasis    | 0.016938989  |
| wavelet-LLL | glszm      | LargeAreaHighGrayLevelEmphasis   | 4389.073171  |
| wavelet-LLL | glszm      | HighGrayLevelZoneEmphasis        | 2499.780488  |
| wavelet-LLL | glszm      | SmallAreaEmphasis                | 0.923441734  |

|             |            |                                      |              |
|-------------|------------|--------------------------------------|--------------|
| wavelet-LLL | glszm      | LowGrayLevelZoneEmphasis             | 0.01678566   |
| wavelet-LLL | glszm      | ZoneEntropy                          | 5.866519535  |
| wavelet-LLL | glszm      | SmallAreaLowGrayLevelEmphasis        | 0.01675294   |
| wavelet-LLL | ngtdm      | Coarseness                           | 0.038772679  |
| wavelet-LLL | ngtdm      | Complexity                           | 25094.8022   |
| wavelet-LLL | ngtdm      | Strength                             | 104.6917651  |
| wavelet-LLL | ngtdm      | Contrast                             | 3.609879762  |
| wavelet-LLL | ngtdm      | Busyness                             | 0.011497707  |
| wavelet-HHL | gldm       | GrayLevelVariance                    | 11.04820416  |
| wavelet-HHL | gldm       | HighGrayLevelEmphasis                | 89.7173913   |
| wavelet-HHL | gldm       | DependenceEntropy                    | 5.178013587  |
| wavelet-HHL | gldm       | DependenceNonUniformity              | 21.52173913  |
| wavelet-HHL | gldm       | GrayLevelNonUniformity               | 8.413043478  |
| wavelet-HHL | gldm       | SmallDependenceEmphasis              | 0.395863342  |
| wavelet-HHL | gldm       | SmallDependenceHighGrayLevelEmphasis | 36.82682694  |
| wavelet-HHL | gldm       | DependenceNonUniformityNormalized    | 0.233931947  |
| wavelet-HHL | gldm       | LargeDependenceEmphasis              | 8            |
| wavelet-HHL | gldm       | LargeDependenceLowGrayLevelEmphasis  | 0.159149257  |
| wavelet-HHL | gldm       | DependenceVariance                   | 1.858223062  |
| wavelet-HHL | gldm       | LargeDependenceHighGrayLevelEmphasis | 661.4782609  |
| wavelet-HHL | gldm       | SmallDependenceLowGrayLevelEmphasis  | 0.033804178  |
| wavelet-HHL | gldm       | LowGrayLevelEmphasis                 | 0.043758972  |
| wavelet-HHL | glcm       | JointAverage                         | 8.663464769  |
| wavelet-HHL | glcm       | SumAverage                           | 17.32692954  |
| wavelet-HHL | glcm       | JointEntropy                         | 6.0284118    |
| wavelet-HHL | glcm       | ClusterShade                         | -4.270262919 |
| wavelet-HHL | glcm       | MaximumProbability                   | 0.038973496  |
| wavelet-HHL | glcm       | Idmn                                 | 0.940506565  |
| wavelet-HHL | glcm       | JointEnergy                          | 0.017524672  |
| wavelet-HHL | glcm       | Contrast                             | 20.44539803  |
| wavelet-HHL | glcm       | DifferenceEntropy                    | 3.083625906  |
| wavelet-HHL | glcm       | InverseVariance                      | 0.249729092  |
| wavelet-HHL | glcm       | DifferenceVariance                   | 7.091354254  |
| wavelet-HHL | glcm       | Idn                                  | 0.838988143  |
| wavelet-HHL | glcm       | Idm                                  | 0.240980551  |
| wavelet-HHL | glcm       | Correlation                          | 0.032199064  |
| wavelet-HHL | glcm       | Autocorrelation                      | 75.4942726   |
| wavelet-HHL | glcm       | SumEntropy                           | 3.904786666  |
| wavelet-HHL | glcm       | SumSquares                           | 10.64411277  |
| wavelet-HHL | glcm       | ClusterProminence                    | 1501.42005   |
| wavelet-HHL | glcm       | Imc2                                 | 0.946133374  |
| wavelet-HHL | glcm       | Imc1                                 | -0.318402338 |
| wavelet-HHL | glcm       | DifferenceAverage                    | 3.596065162  |
| wavelet-HHL | glcm       | Id                                   | 0.33269187   |
| wavelet-HHL | glcm       | ClusterTendency                      | 22.13105305  |
| wavelet-HHL | firstorder | InterquartileRange                   | 98.59968167  |
| wavelet-HHL | firstorder | Skewness                             | -0.073092388 |
| wavelet-HHL | firstorder | Uniformity                           | 0.091446125  |
| wavelet-HHL | firstorder | Median                               | 15.93078921  |
| wavelet-HHL | firstorder | Energy                               | 630265.5692  |
| wavelet-HHL | firstorder | RobustMeanAbsoluteDeviation          | 44.43638916  |
| wavelet-HHL | firstorder | MeanAbsoluteDeviation                | 65.7796274   |

|             |            |                                  |              |
|-------------|------------|----------------------------------|--------------|
| wavelet-HHL | firstorder | TotalEnergy                      | 17017170.37  |
| wavelet-HHL | firstorder | Maximum                          | 208.5983636  |
| wavelet-HHL | firstorder | RootMeanSquared                  | 82.76903231  |
| wavelet-HHL | firstorder | 90Percentile                     | 107.8840998  |
| wavelet-HHL | firstorder | Minimum                          | -180.5882733 |
| wavelet-HHL | firstorder | Entropy                          | 3.652343816  |
| wavelet-HHL | firstorder | Range                            | 389.186637   |
| wavelet-HHL | firstorder | Variance                         | 6753.475874  |
| wavelet-HHL | firstorder | 10Percentile                     | -102.5416216 |
| wavelet-HHL | firstorder | Kurtosis                         | 2.869712368  |
| wavelet-HHL | firstorder | Mean                             | 9.860873975  |
| wavelet-HHL | glrlm      | ShortRunLowGrayLevelEmphasis     | 0.044683053  |
| wavelet-HHL | glrlm      | GrayLevelVariance                | 11.41335789  |
| wavelet-HHL | glrlm      | LowGrayLevelRunEmphasis          | 0.045421615  |
| wavelet-HHL | glrlm      | GrayLevelNonUniformityNormalized | 0.089682039  |
| wavelet-HHL | glrlm      | RunVariance                      | 0.061764251  |
| wavelet-HHL | glrlm      | GrayLevelNonUniformity           | 7.783901149  |
| wavelet-HHL | glrlm      | LongRunEmphasis                  | 1.18884123   |
| wavelet-HHL | glrlm      | ShortRunHighGrayLevelEmphasis    | 86.31630104  |
| wavelet-HHL | glrlm      | RunLengthNonUniformity           | 77.50076193  |
| wavelet-HHL | glrlm      | ShortRunEmphasis                 | 0.955737196  |
| wavelet-HHL | glrlm      | LongRunHighGrayLevelEmphasis     | 105.910045   |
| wavelet-HHL | glrlm      | RunPercentage                    | 0.943143813  |
| wavelet-HHL | glrlm      | LongRunLowGrayLevelEmphasis      | 0.048537974  |
| wavelet-HHL | glrlm      | RunEntropy                       | 3.898502685  |
| wavelet-HHL | glrlm      | HighGrayLevelRunEmphasis         | 90.05584408  |
| wavelet-HHL | glrlm      | RunLengthNonUniformityNormalized | 0.891653292  |
| wavelet-HHL | glszm      | GrayLevelVariance                | 17.07179752  |
| wavelet-HHL | glszm      | ZoneVariance                     | 3.400826446  |
| wavelet-HHL | glszm      | GrayLevelNonUniformityNormalized | 0.075413223  |
| wavelet-HHL | glszm      | SizeZoneNonUniformityNormalized  | 0.422520661  |
| wavelet-HHL | glszm      | SizeZoneNonUniformity            | 18.59090909  |
| wavelet-HHL | glszm      | GrayLevelNonUniformity           | 3.318181818  |
| wavelet-HHL | glszm      | LargeAreaEmphasis                | 7.772727273  |
| wavelet-HHL | glszm      | SmallAreaHighGrayLevelEmphasis   | 61.88777427  |
| wavelet-HHL | glszm      | ZonePercentage                   | 0.47826087   |
| wavelet-HHL | glszm      | LargeAreaLowGrayLevelEmphasis    | 0.186560389  |
| wavelet-HHL | glszm      | LargeAreaHighGrayLevelEmphasis   | 658.5        |
| wavelet-HHL | glszm      | HighGrayLevelZoneEmphasis        | 92.84090909  |
| wavelet-HHL | glszm      | SmallAreaEmphasis                | 0.661740495  |
| wavelet-HHL | glszm      | LowGrayLevelZoneEmphasis         | 0.073297167  |
| wavelet-HHL | glszm      | ZoneEntropy                      | 4.587510528  |
| wavelet-HHL | glszm      | SmallAreaLowGrayLevelEmphasis    | 0.067994187  |
| wavelet-HHL | ngtdm      | Coarseness                       | 0.06247483   |
| wavelet-HHL | ngtdm      | Complexity                       | 241.4451204  |
| wavelet-HHL | ngtdm      | Strength                         | 4.69844733   |
| wavelet-HHL | ngtdm      | Contrast                         | 0.234553175  |
| wavelet-HHL | ngtdm      | Busyness                         | 0.130827386  |
| wavelet-HLH | gldm       | GrayLevelVariance                | 21.6969518   |
| wavelet-HLH | gldm       | HighGrayLevelEmphasis            | 243.7717391  |
| wavelet-HLH | gldm       | DependenceEntropy                | 5.057324424  |
| wavelet-HLH | gldm       | DependenceNonUniformity          | 26.7826087   |



|             |            |                                      |              |
|-------------|------------|--------------------------------------|--------------|
| wavelet-HLH | gldm       | GrayLevelNonUniformity               | 6.630434783  |
| wavelet-HLH | gldm       | SmallDependenceEmphasis              | 0.455202295  |
| wavelet-HLH | gldm       | SmallDependenceHighGrayLevelEmphasis | 116.952814   |
| wavelet-HLH | gldm       | DependenceNonUniformityNormalized    | 0.291115312  |
| wavelet-HLH | gldm       | LargeDependenceEmphasis              | 5.391304348  |
| wavelet-HLH | gldm       | LargeDependenceLowGrayLevelEmphasis  | 0.038764189  |
| wavelet-HLH | gldm       | DependenceVariance                   | 1.035916824  |
| wavelet-HLH | gldm       | LargeDependenceHighGrayLevelEmphasis | 1255.336957  |
| wavelet-HLH | gldm       | SmallDependenceLowGrayLevelEmphasis  | 0.013840757  |
| wavelet-HLH | gldm       | LowGrayLevelEmphasis                 | 0.016766329  |
| wavelet-HLH | glcm       | JointAverage                         | 14.83328265  |
| wavelet-HLH | glcm       | SumAverage                           | 29.6665653   |
| wavelet-HLH | glcm       | JointEntropy                         | 6.230157892  |
| wavelet-HLH | glcm       | ClusterShade                         | 12.57177697  |
| wavelet-HLH | glcm       | MaximumProbability                   | 0.031820952  |
| wavelet-HLH | glcm       | Idmn                                 | 0.95811758   |
| wavelet-HLH | glcm       | JointEnergy                          | 0.014948986  |
| wavelet-HLH | glcm       | Contrast                             | 41.18548965  |
| wavelet-HLH | glcm       | DifferenceEntropy                    | 3.455455322  |
| wavelet-HLH | glcm       | InverseVariance                      | 0.189923553  |
| wavelet-HLH | glcm       | DifferenceVariance                   | 16.21693096  |
| wavelet-HLH | glcm       | Idn                                  | 0.865944956  |
| wavelet-HLH | glcm       | Idm                                  | 0.186679061  |
| wavelet-HLH | glcm       | Correlation                          | -0.031168919 |
| wavelet-HLH | glcm       | Autocorrelation                      | 219.4519554  |
| wavelet-HLH | glcm       | SumEntropy                           | 4.147766876  |
| wavelet-HLH | glcm       | SumSquares                           | 19.97489379  |
| wavelet-HLH | glcm       | ClusterProminence                    | 6394.976288  |
| wavelet-HLH | glcm       | Imc2                                 | 0.977331663  |
| wavelet-HLH | glcm       | Imc1                                 | -0.401175428 |
| wavelet-HLH | glcm       | DifferenceAverage                    | 4.925776905  |
| wavelet-HLH | glcm       | Id                                   | 0.281336251  |
| wavelet-HLH | glcm       | ClusterTendency                      | 38.71408553  |
| wavelet-HLH | firstorder | InterquartileRange                   | 139.8439314  |
| wavelet-HLH | firstorder | Skewness                             | 0.223833644  |
| wavelet-HLH | firstorder | Uniformity                           | 0.072069943  |
| wavelet-HLH | firstorder | Median                               | 9.725322882  |
| wavelet-HLH | firstorder | Energy                               | 1257568.319  |
| wavelet-HLH | firstorder | RobustMeanAbsoluteDeviation          | 58.07998145  |
| wavelet-HLH | firstorder | MeanAbsoluteDeviation                | 88.92989172  |
| wavelet-HLH | firstorder | TotalEnergy                          | 33954344.61  |
| wavelet-HLH | firstorder | Maximum                              | 364.0065846  |
| wavelet-HLH | firstorder | RootMeanSquared                      | 116.9154432  |
| wavelet-HLH | firstorder | 90Percentile                         | 125.0194668  |
| wavelet-HLH | firstorder | Minimum                              | -344.2407131 |
| wavelet-HLH | firstorder | Entropy                              | 3.972297524  |
| wavelet-HLH | firstorder | Range                                | 708.2472977  |
| wavelet-HLH | firstorder | Variance                             | 13576.36125  |
| wavelet-HLH | firstorder | 10Percentile                         | -136.6075576 |
| wavelet-HLH | firstorder | Kurtosis                             | 4.114871926  |
| wavelet-HLH | firstorder | Mean                                 | 9.636368863  |
| wavelet-HLH | glrlm      | ShortRunLowGrayLevelEmphasis         | 0.017122629  |

|             |       |                                  |             |
|-------------|-------|----------------------------------|-------------|
| wavelet-HLH | glrlm | GrayLevelVariance                | 22.31251469 |
| wavelet-HLH | glrlm | LowGrayLevelRunEmphasis          | 0.017282661 |
| wavelet-HLH | glrlm | GrayLevelNonUniformityNormalized | 0.071279287 |
| wavelet-HLH | glrlm | RunVariance                      | 0.048735517 |
| wavelet-HLH | glrlm | GrayLevelNonUniformity           | 6.283754631 |
| wavelet-HLH | glrlm | LongRunEmphasis                  | 1.139953919 |
| wavelet-HLH | glrlm | ShortRunHighGrayLevelEmphasis    | 237.061125  |
| wavelet-HLH | glrlm | RunLengthNonUniformity           | 81.45344334 |
| wavelet-HLH | glrlm | ShortRunEmphasis                 | 0.968952862 |
| wavelet-HLH | glrlm | LongRunHighGrayLevelEmphasis     | 276.8217965 |
| wavelet-HLH | glrlm | RunPercentage                    | 0.95819398  |
| wavelet-HLH | glrlm | LongRunLowGrayLevelEmphasis      | 0.017992685 |
| wavelet-HLH | glrlm | RunEntropy                       | 4.136503374 |
| wavelet-HLH | glrlm | HighGrayLevelRunEmphasis         | 244.2730933 |
| wavelet-HLH | glrlm | RunLengthNonUniformityNormalized | 0.922890275 |
| wavelet-HLH | glszm | GrayLevelVariance                | 32.8676     |
| wavelet-HLH | glszm | ZoneVariance                     | 3.1344      |
| wavelet-HLH | glszm | GrayLevelNonUniformityNormalized | 0.0672      |
| wavelet-HLH | glszm | SizeZoneNonUniformityNormalized  | 0.456       |
| wavelet-HLH | glszm | SizeZoneNonUniformity            | 22.8        |
| wavelet-HLH | glszm | GrayLevelNonUniformity           | 3.36        |
| wavelet-HLH | glszm | LargeAreaEmphasis                | 6.52        |
| wavelet-HLH | glszm | SmallAreaHighGrayLevelEmphasis   | 181.1688465 |
| wavelet-HLH | glszm | ZonePercentage                   | 0.543478261 |
| wavelet-HLH | glszm | LargeAreaLowGrayLevelEmphasis    | 0.053233828 |
| wavelet-HLH | glszm | LargeAreaHighGrayLevelEmphasis   | 1535.5      |
| wavelet-HLH | glszm | HighGrayLevelZoneEmphasis        | 252.5       |
| wavelet-HLH | glszm | SmallAreaEmphasis                | 0.691566358 |
| wavelet-HLH | glszm | LowGrayLevelZoneEmphasis         | 0.026496112 |
| wavelet-HLH | glszm | ZoneEntropy                      | 4.82346519  |
| wavelet-HLH | glszm | SmallAreaLowGrayLevelEmphasis    | 0.024669038 |
| wavelet-HLH | ngtdm | Coarseness                       | 0.05336843  |
| wavelet-HLH | ngtdm | Complexity                       | 640.8778987 |
| wavelet-HLH | ngtdm | Strength                         | 8.025982267 |
| wavelet-HLH | ngtdm | Contrast                         | 0.425135108 |
| wavelet-HLH | ngtdm | Busyness                         | 0.077351951 |

| Image type | Feature Class | Feature Name                         |                                                                                                                                                                                                                                                                                                                                                                                                                                              |
|------------|---------------|--------------------------------------|----------------------------------------------------------------------------------------------------------------------------------------------------------------------------------------------------------------------------------------------------------------------------------------------------------------------------------------------------------------------------------------------------------------------------------------------|
| general    | info          | BoundingBox                          | 5: RTSTRUCT: C99-DNU_segment_LLL ITV<br>(0, 1, 1, 6, 9, 13)                                                                                                                                                                                                                                                                                                                                                                                  |
| general    | info          | EnabledImageTypes                    | {u'Original': {}, u'Wavelet': {}}                                                                                                                                                                                                                                                                                                                                                                                                            |
|            |               |                                      | {'distances': [1], 'additionalInfo': True,<br>'force2D': False, 'interpolator': 'sitkBSpline',<br>'resampledPixelSpacing': [3.0], 'label': 1,<br>'normalizeScale': 1, 'normalize': False,<br>'force2Ddimension': 0, 'removeOutliers': None,<br>'minimumROISize': None, u'binWidth': 25.0,<br>'minimumROIDimensions': 1, u'correctMask':<br>True, 'preCrop': False, u'symmetricalGLCM':<br>True, 'resegmentRange': None, 'padDistance':<br>5} |
| general    | info          | GeneralSettings                      | 7e565a2e2f0fc4d51ac9e268eb6ca28c52b0bcb                                                                                                                                                                                                                                                                                                                                                                                                      |
| general    | info          | ImageHash                            | 3                                                                                                                                                                                                                                                                                                                                                                                                                                            |
| general    | info          | ImageSpacing                         | (0.9765624999999998, 0.9765624999999998,<br>1.9999999999999999)                                                                                                                                                                                                                                                                                                                                                                              |
| general    | info          | MaskHash                             | 7f0c26c423662efb531fb7603f24310d0da8e97f                                                                                                                                                                                                                                                                                                                                                                                                     |
| general    | info          | NumpyVersion                         | 1.13.1                                                                                                                                                                                                                                                                                                                                                                                                                                       |
| general    | info          | PyWaveletVersion                     | 0.5.2                                                                                                                                                                                                                                                                                                                                                                                                                                        |
| general    | info          | SimpleITKVersion                     | 1.1.0                                                                                                                                                                                                                                                                                                                                                                                                                                        |
| general    | info          | Version                              | 1.3.0.post102+g1b0eb74                                                                                                                                                                                                                                                                                                                                                                                                                       |
| general    | info          | VolumeNum                            | 1                                                                                                                                                                                                                                                                                                                                                                                                                                            |
| general    | info          | VoxelNum                             | 98                                                                                                                                                                                                                                                                                                                                                                                                                                           |
| original   | shape         | Maximum3DDiameter                    | 43.37049688                                                                                                                                                                                                                                                                                                                                                                                                                                  |
| original   | shape         | Maximum2DDiameterSlice               | 13.41640786                                                                                                                                                                                                                                                                                                                                                                                                                                  |
| original   | shape         | Sphericity                           | 0.665133837                                                                                                                                                                                                                                                                                                                                                                                                                                  |
| original   | shape         | MinorAxis                            | 15.80058606                                                                                                                                                                                                                                                                                                                                                                                                                                  |
| original   | shape         | Elongation                           | 0.363470211                                                                                                                                                                                                                                                                                                                                                                                                                                  |
| original   | shape         | SurfaceVolumeRatio                   | 0.525668317                                                                                                                                                                                                                                                                                                                                                                                                                                  |
| original   | shape         | Volume                               | 2646                                                                                                                                                                                                                                                                                                                                                                                                                                         |
| original   | shape         | MajorAxis                            | 43.47147465                                                                                                                                                                                                                                                                                                                                                                                                                                  |
| original   | shape         | SurfaceArea                          | 1390.918367                                                                                                                                                                                                                                                                                                                                                                                                                                  |
| original   | shape         | Flatness                             | 0.202690997                                                                                                                                                                                                                                                                                                                                                                                                                                  |
| original   | shape         | LeastAxis                            | 8.811276527                                                                                                                                                                                                                                                                                                                                                                                                                                  |
| original   | shape         | Maximum2DDiameterColumn              | 21.21320344                                                                                                                                                                                                                                                                                                                                                                                                                                  |
| original   | shape         | Maximum2DDiameterRow                 | 41.67733197                                                                                                                                                                                                                                                                                                                                                                                                                                  |
| original   | gldm          | GrayLevelVariance                    | 94.84600167                                                                                                                                                                                                                                                                                                                                                                                                                                  |
| original   | gldm          | HighGrayLevelEmphasis                | 772.4387755                                                                                                                                                                                                                                                                                                                                                                                                                                  |
| original   | gldm          | DependenceEntropy                    | 5.442323589                                                                                                                                                                                                                                                                                                                                                                                                                                  |
| original   | gldm          | DependenceNonUniformity              | 33.93877551                                                                                                                                                                                                                                                                                                                                                                                                                                  |
| original   | gldm          | GrayLevelNonUniformity               | 4.93877551                                                                                                                                                                                                                                                                                                                                                                                                                                   |
| original   | gldm          | SmallDependenceEmphasis              | 0.598371512                                                                                                                                                                                                                                                                                                                                                                                                                                  |
| original   | gldm          | SmallDependenceHighGrayLevelEmphasis | 338.9784278                                                                                                                                                                                                                                                                                                                                                                                                                                  |
| original   | gldm          | DependenceNonUniformityNormalized    | 0.346314036                                                                                                                                                                                                                                                                                                                                                                                                                                  |
| original   | gldm          | LargeDependenceEmphasis              | 5.408163265                                                                                                                                                                                                                                                                                                                                                                                                                                  |
| original   | gldm          | LargeDependenceLowGrayLevelEmphasis  | 0.017959761                                                                                                                                                                                                                                                                                                                                                                                                                                  |
| original   | gldm          | DependenceVariance                   | 1.649312786                                                                                                                                                                                                                                                                                                                                                                                                                                  |
| original   | gldm          | LargeDependenceHighGrayLevelEmphasis | 6080.255102                                                                                                                                                                                                                                                                                                                                                                                                                                  |
| original   | gldm          | SmallDependenceLowGrayLevelEmphasis  | 0.013092469                                                                                                                                                                                                                                                                                                                                                                                                                                  |

|          |            |                                  |              |
|----------|------------|----------------------------------|--------------|
| original | gldm       | LowGrayLevelEmphasis             | 0.013625681  |
| original | glcm       | JointAverage                     | 27.83353532  |
| original | glcm       | SumAverage                       | 55.66707065  |
| original | glcm       | JointEntropy                     | 6.19578104   |
| original | glcm       | ClusterShade                     | -1813.236652 |
| original | glcm       | MaximumProbability               | 0.037646626  |
| original | glcm       | Idmn                             | 0.913843184  |
| original | glcm       | JointEnergy                      | 0.01561764   |
| original | glcm       | Contrast                         | 172.6939996  |
| original | glcm       | DifferenceEntropy                | 4.121457718  |
| original | glcm       | InverseVariance                  | 0.164110561  |
| original | glcm       | DifferenceVariance               | 74.07412148  |
| original | glcm       | Idn                              | 0.823490774  |
| original | glcm       | Idm                              | 0.163634067  |
| original | glcm       | Correlation                      | 0.060822903  |
| original | glcm       | Autocorrelation                  | 780.0335516  |
| original | glcm       | SumEntropy                       | 4.633000092  |
| original | glcm       | SumSquares                       | 91.45646687  |
| original | glcm       | ClusterProminence                | 102777.3634  |
| original | glcm       | Imc2                             | 0.995059124  |
| original | glcm       | Imc1                             | -0.549833099 |
| original | glcm       | DifferenceAverage                | 9.771187574  |
| original | glcm       | Id                               | 0.234015357  |
| original | glcm       | ClusterTendency                  | 193.1318679  |
| original | firstorder | InterquartileRange               | 388.5        |
| original | firstorder | Skewness                         | -0.623292031 |
| original | firstorder | Uniformity                       | 0.050395668  |
| original | firstorder | Median                           | -109         |
| original | firstorder | Energy                           | 10217246     |
| original | firstorder | RobustMeanAbsoluteDeviation      | 172.2879684  |
| original | firstorder | MeanAbsoluteDeviation            | 214.364848   |
| original | firstorder | TotalEnergy                      | 275865642    |
| original | firstorder | Maximum                          | 104          |
| original | firstorder | RootMeanSquared                  | 322.8894737  |
| original | firstorder | 90Percentile                     | 40.9         |
| original | firstorder | Minimum                          | -827         |
| original | firstorder | Entropy                          | 4.583834912  |
| original | firstorder | Range                            | 931          |
| original | firstorder | Variance                         | 59114.37151  |
| original | firstorder | 10Percentile                     | -553.8       |
| original | firstorder | Kurtosis                         | 2.225716815  |
| original | firstorder | Mean                             | -212.4693878 |
| original | glrlm      | ShortRunLowGrayLevelEmphasis     | 0.014072466  |
| original | glrlm      | GrayLevelVariance                | 94.95274725  |
| original | glrlm      | LowGrayLevelRunEmphasis          | 0.01410249   |
| original | glrlm      | GrayLevelNonUniformityNormalized | 0.048657871  |
| original | glrlm      | RunVariance                      | 0.041093899  |
| original | glrlm      | GrayLevelNonUniformity           | 4.59898581   |
| original | glrlm      | LongRunEmphasis                  | 1.119250821  |
| original | glrlm      | ShortRunHighGrayLevelEmphasis    | 726.444317   |
| original | glrlm      | RunLengthNonUniformity           | 88.13449934  |
| original | glrlm      | ShortRunEmphasis                 | 0.973025862  |
| original | glrlm      | LongRunHighGrayLevelEmphasis     | 897.0830225  |

|             |       |                                      |             |
|-------------|-------|--------------------------------------|-------------|
| original    | glrlm | RunPercentage                        | 0.96389325  |
| original    | glrlm | LongRunLowGrayLevelEmphasis          | 0.014231189 |
| original    | glrlm | RunEntropy                           | 4.735139076 |
| original    | glrlm | HighGrayLevelRunEmphasis             | 757.5735713 |
| original    | glrlm | RunLengthNonUniformityNormalized     | 0.932122295 |
| original    | glszm | GrayLevelVariance                    | 85.79272461 |
| original    | glszm | ZoneVariance                         | 2.436523438 |
| original    | glszm | GrayLevelNonUniformityNormalized     | 0.04296875  |
| original    | glszm | SizeZoneNonUniformityNormalized      | 0.65234375  |
| original    | glszm | SizeZoneNonUniformity                | 41.75       |
| original    | glszm | GrayLevelNonUniformity               | 2.75        |
| original    | glszm | LargeAreaEmphasis                    | 4.78125     |
| original    | glszm | SmallAreaHighGrayLevelEmphasis       | 431.3695121 |
| original    | glszm | ZonePercentage                       | 0.653061224 |
| original    | glszm | LargeAreaLowGrayLevelEmphasis        | 0.023846852 |
| original    | glszm | LargeAreaHighGrayLevelEmphasis       | 5193.265625 |
| original    | glszm | HighGrayLevelZoneEmphasis            | 585.734375  |
| original    | glszm | SmallAreaEmphasis                    | 0.831631679 |
| original    | glszm | LowGrayLevelZoneEmphasis             | 0.020224513 |
| original    | glszm | ZoneEntropy                          | 5.033214016 |
| original    | glszm | SmallAreaLowGrayLevelEmphasis        | 0.01992569  |
| original    | ngtdm | Coarseness                           | 0.031000589 |
| original    | ngtdm | Complexity                           | 3407.5985   |
| original    | ngtdm | Strength                             | 19.03051448 |
| original    | ngtdm | Contrast                             | 1.517616586 |
| original    | ngtdm | Busyness                             | 0.036105238 |
| wavelet-HHH | gldm  | GrayLevelVariance                    | 26.14493961 |
| wavelet-HHH | gldm  | HighGrayLevelEmphasis                | 440.1428571 |
| wavelet-HHH | gldm  | DependenceEntropy                    | 5.101214753 |
| wavelet-HHH | gldm  | DependenceNonUniformity              | 36.12244898 |
| wavelet-HHH | gldm  | GrayLevelNonUniformity               | 6.836734694 |
| wavelet-HHH | gldm  | SmallDependenceEmphasis              | 0.595167234 |
| wavelet-HHH | gldm  | SmallDependenceHighGrayLevelEmphasis | 265.6551162 |
| wavelet-HHH | gldm  | DependenceNonUniformityNormalized    | 0.368596418 |
| wavelet-HHH | gldm  | LargeDependenceEmphasis              | 3.734693878 |
| wavelet-HHH | gldm  | LargeDependenceLowGrayLevelEmphasis  | 0.019742515 |
| wavelet-HHH | gldm  | DependenceVariance                   | 0.725531029 |
| wavelet-HHH | gldm  | LargeDependenceHighGrayLevelEmphasis | 1677.653061 |
| wavelet-HHH | gldm  | SmallDependenceLowGrayLevelEmphasis  | 0.011880861 |
| wavelet-HHH | gldm  | LowGrayLevelEmphasis                 | 0.012945748 |
| wavelet-HHH | glcm  | JointAverage                         | 20.4321788  |
| wavelet-HHH | glcm  | SumAverage                           | 40.8643576  |
| wavelet-HHH | glcm  | JointEntropy                         | 6.191467086 |
| wavelet-HHH | glcm  | ClusterShade                         | 83.21686321 |
| wavelet-HHH | glcm  | MaximumProbability                   | 0.038233633 |
| wavelet-HHH | glcm  | ldmn                                 | 0.963066681 |
| wavelet-HHH | glcm  | JointEnergy                          | 0.01537027  |
| wavelet-HHH | glcm  | Contrast                             | 50.69017203 |
| wavelet-HHH | glcm  | DifferenceEntropy                    | 3.550002655 |
| wavelet-HHH | glcm  | InverseVariance                      | 0.154608854 |
| wavelet-HHH | glcm  | DifferenceVariance                   | 17.73559551 |
| wavelet-HHH | glcm  | ldn                                  | 0.869257892 |
| wavelet-HHH | glcm  | ldm                                  | 0.15608107  |

|             |            |                                  |              |
|-------------|------------|----------------------------------|--------------|
| wavelet-HHH | glcm       | Correlation                      | -0.023732387 |
| wavelet-HHH | glcm       | Autocorrelation                  | 416.7856101  |
| wavelet-HHH | glcm       | SumEntropy                       | 4.250321671  |
| wavelet-HHH | glcm       | SumSquares                       | 24.59272569  |
| wavelet-HHH | glcm       | ClusterProminence                | 7044.476049  |
| wavelet-HHH | glcm       | Imc2                             | 0.985500778  |
| wavelet-HHH | glcm       | Imc1                             | -0.451475588 |
| wavelet-HHH | glcm       | DifferenceAverage                | 5.678824508  |
| wavelet-HHH | glcm       | Id                               | 0.250790633  |
| wavelet-HHH | glcm       | ClusterTendency                  | 47.68073074  |
| wavelet-HHH | firstorder | InterquartileRange               | 145.1686025  |
| wavelet-HHH | firstorder | Skewness                         | 0.050576797  |
| wavelet-HHH | firstorder | Uniformity                       | 0.069762599  |
| wavelet-HHH | firstorder | Median                           | -9.230690273 |
| wavelet-HHH | firstorder | Energy                           | 1571830.756  |
| wavelet-HHH | firstorder | RobustMeanAbsoluteDeviation      | 62.83423342  |
| wavelet-HHH | firstorder | MeanAbsoluteDeviation            | 94.84092311  |
| wavelet-HHH | firstorder | TotalEnergy                      | 42439430.42  |
| wavelet-HHH | firstorder | Maximum                          | 355.1437511  |
| wavelet-HHH | firstorder | RootMeanSquared                  | 126.6455264  |
| wavelet-HHH | firstorder | 90Percentile                     | 152.5571733  |
| wavelet-HHH | firstorder | Minimum                          | -478.2795494 |
| wavelet-HHH | firstorder | Entropy                          | 4.099408566  |
| wavelet-HHH | firstorder | Range                            | 833.4233006  |
| wavelet-HHH | firstorder | Variance                         | 16028.091    |
| wavelet-HHH | firstorder | 10Percentile                     | -142.3634128 |
| wavelet-HHH | firstorder | Kurtosis                         | 4.61071743   |
| wavelet-HHH | firstorder | Mean                             | -3.316375834 |
| wavelet-HHH | glrlm      | ShortRunLowGrayLevelEmphasis     | 0.013197388  |
| wavelet-HHH | glrlm      | GrayLevelVariance                | 26.52386101  |
| wavelet-HHH | glrlm      | LowGrayLevelRunEmphasis          | 0.013252907  |
| wavelet-HHH | glrlm      | GrayLevelNonUniformityNormalized | 0.069181333  |
| wavelet-HHH | glrlm      | RunVariance                      | 0.029834829  |
| wavelet-HHH | glrlm      | GrayLevelNonUniformity           | 6.588323873  |
| wavelet-HHH | glrlm      | LongRunEmphasis                  | 1.090182952  |
| wavelet-HHH | glrlm      | ShortRunHighGrayLevelEmphasis    | 430.5312306  |
| wavelet-HHH | glrlm      | RunLengthNonUniformity           | 90.07798668  |
| wavelet-HHH | glrlm      | ShortRunEmphasis                 | 0.978363518  |
| wavelet-HHH | glrlm      | LongRunHighGrayLevelEmphasis     | 480.5752159  |
| wavelet-HHH | glrlm      | RunPercentage                    | 0.971742543  |
| wavelet-HHH | glrlm      | LongRunLowGrayLevelEmphasis      | 0.013479972  |
| wavelet-HHH | glrlm      | RunEntropy                       | 4.209647204  |
| wavelet-HHH | glrlm      | HighGrayLevelRunEmphasis         | 440.0097494  |
| wavelet-HHH | glrlm      | RunLengthNonUniformityNormalized | 0.945083624  |
| wavelet-HHH | glszm      | GrayLevelVariance                | 31.87525061  |
| wavelet-HHH | glszm      | ZoneVariance                     | 0.756070394  |
| wavelet-HHH | glszm      | GrayLevelNonUniformityNormalized | 0.065270662  |
| wavelet-HHH | glszm      | SizeZoneNonUniformityNormalized  | 0.562040544  |
| wavelet-HHH | glszm      | SizeZoneNonUniformity            | 37.65671642  |
| wavelet-HHH | glszm      | GrayLevelNonUniformity           | 4.373134328  |
| wavelet-HHH | glszm      | LargeAreaEmphasis                | 2.895522388  |
| wavelet-HHH | glszm      | SmallAreaHighGrayLevelEmphasis   | 348.7575663  |
| wavelet-HHH | glszm      | ZonePercentage                   | 0.683673469  |

|             |            |                                      |              |
|-------------|------------|--------------------------------------|--------------|
| wavelet-HHH | glszm      | LargeAreaLowGrayLevelEmphasis        | 0.022486851  |
| wavelet-HHH | glszm      | LargeAreaHighGrayLevelEmphasis       | 1302.268657  |
| wavelet-HHH | glszm      | HighGrayLevelZoneEmphasis            | 440.880597   |
| wavelet-HHH | glszm      | SmallAreaEmphasis                    | 0.77694859   |
| wavelet-HHH | glszm      | LowGrayLevelZoneEmphasis             | 0.017735096  |
| wavelet-HHH | glszm      | ZoneEntropy                          | 4.813609385  |
| wavelet-HHH | glszm      | SmallAreaLowGrayLevelEmphasis        | 0.017125197  |
| wavelet-HHH | ngtdm      | Coarseness                           | 0.052072406  |
| wavelet-HHH | ngtdm      | Complexity                           | 936.0036706  |
| wavelet-HHH | ngtdm      | Strength                             | 10.37205032  |
| wavelet-HHH | ngtdm      | Contrast                             | 0.429226239  |
| wavelet-HHH | ngtdm      | Busyness                             | 0.049143379  |
| wavelet-HLL | gldm       | GrayLevelVariance                    | 27.24323199  |
| wavelet-HLL | gldm       | HighGrayLevelEmphasis                | 195.1836735  |
| wavelet-HLL | gldm       | DependenceEntropy                    | 5.232220625  |
| wavelet-HLL | gldm       | DependenceNonUniformity              | 38.97959184  |
| wavelet-HLL | gldm       | GrayLevelNonUniformity               | 5.979591837  |
| wavelet-HLL | gldm       | SmallDependenceEmphasis              | 0.617825964  |
| wavelet-HLL | gldm       | SmallDependenceHighGrayLevelEmphasis | 120.582585   |
| wavelet-HLL | gldm       | DependenceNonUniformityNormalized    | 0.397750937  |
| wavelet-HLL | gldm       | LargeDependenceEmphasis              | 3.897959184  |
| wavelet-HLL | gldm       | LargeDependenceLowGrayLevelEmphasis  | 0.047597346  |
| wavelet-HLL | gldm       | DependenceVariance                   | 0.959183673  |
| wavelet-HLL | gldm       | LargeDependenceHighGrayLevelEmphasis | 696.6122449  |
| wavelet-HLL | gldm       | SmallDependenceLowGrayLevelEmphasis  | 0.019271406  |
| wavelet-HLL | gldm       | LowGrayLevelEmphasis                 | 0.022769852  |
| wavelet-HLL | glcm       | JointAverage                         | 12.58496916  |
| wavelet-HLL | glcm       | SumAverage                           | 25.16993831  |
| wavelet-HLL | glcm       | JointEntropy                         | 6.173512364  |
| wavelet-HLL | glcm       | ClusterShade                         | 72.15748699  |
| wavelet-HLL | glcm       | MaximumProbability                   | 0.03604895   |
| wavelet-HLL | glcm       | Idmn                                 | 0.939816263  |
| wavelet-HLL | glcm       | JointEnergy                          | 0.015676657  |
| wavelet-HLL | glcm       | Contrast                             | 48.59245645  |
| wavelet-HLL | glcm       | DifferenceEntropy                    | 3.571373704  |
| wavelet-HLL | glcm       | InverseVariance                      | 0.148843932  |
| wavelet-HLL | glcm       | DifferenceVariance                   | 16.58639728  |
| wavelet-HLL | glcm       | Idn                                  | 0.836866716  |
| wavelet-HLL | glcm       | Idm                                  | 0.154314811  |
| wavelet-HLL | glcm       | Correlation                          | 0.078099559  |
| wavelet-HLL | glcm       | Autocorrelation                      | 160.5215828  |
| wavelet-HLL | glcm       | SumEntropy                           | 4.321055194  |
| wavelet-HLL | glcm       | SumSquares                           | 26.34471917  |
| wavelet-HLL | glcm       | ClusterProminence                    | 9456.158294  |
| wavelet-HLL | glcm       | Imc2                                 | 0.990920063  |
| wavelet-HLL | glcm       | Imc1                                 | -0.509045623 |
| wavelet-HLL | glcm       | DifferenceAverage                    | 5.571118152  |
| wavelet-HLL | glcm       | Id                                   | 0.251316059  |
| wavelet-HLL | glcm       | ClusterTendency                      | 56.78642023  |
| wavelet-HLL | firstorder | InterquartileRange                   | 173.8868226  |
| wavelet-HLL | firstorder | Skewness                             | 0.007016338  |
| wavelet-HLL | firstorder | Uniformity                           | 0.061016243  |
| wavelet-HLL | firstorder | Median                               | -67.59704912 |

|             |            |                                  |              |
|-------------|------------|----------------------------------|--------------|
| wavelet-HLL | firstorder | Energy                           | 2048405.653  |
| wavelet-HLL | firstorder | RobustMeanAbsoluteDeviation      | 73.17324645  |
| wavelet-HLL | firstorder | MeanAbsoluteDeviation            | 104.178542   |
| wavelet-HLL | firstorder | TotalEnergy                      | 55306952.63  |
| wavelet-HLL | firstorder | Maximum                          | 260.4571276  |
| wavelet-HLL | firstorder | RootMeanSquared                  | 144.5755806  |
| wavelet-HLL | firstorder | 90Percentile                     | 96.22306437  |
| wavelet-HLL | firstorder | Minimum                          | -352.5762377 |
| wavelet-HLL | firstorder | Entropy                          | 4.226657642  |
| wavelet-HLL | firstorder | Range                            | 613.0333653  |
| wavelet-HLL | firstorder | Variance                         | 16949.4104   |
| wavelet-HLL | firstorder | 10Percentile                     | -248.3724936 |
| wavelet-HLL | firstorder | Kurtosis                         | 2.691555682  |
| wavelet-HLL | firstorder | Mean                             | -62.87040716 |
| wavelet-HLL | grlm       | ShortRunLowGrayLevelEmphasis     | 0.022994803  |
| wavelet-HLL | grlm       | GrayLevelVariance                | 27.5544893   |
| wavelet-HLL | grlm       | LowGrayLevelRunEmphasis          | 0.023164441  |
| wavelet-HLL | grlm       | GrayLevelNonUniformityNormalized | 0.059913897  |
| wavelet-HLL | grlm       | RunVariance                      | 0.029087979  |
| wavelet-HLL | grlm       | GrayLevelNonUniformity           | 5.710508252  |
| wavelet-HLL | grlm       | LongRunEmphasis                  | 1.086994856  |
| wavelet-HLL | grlm       | ShortRunHighGrayLevelEmphasis    | 191.6943302  |
| wavelet-HLL | grlm       | RunLengthNonUniformity           | 90.24804221  |
| wavelet-HLL | grlm       | ShortRunEmphasis                 | 0.979170319  |
| wavelet-HLL | grlm       | LongRunHighGrayLevelEmphasis     | 211.1252151  |
| wavelet-HLL | grlm       | RunPercentage                    | 0.972527473  |
| wavelet-HLL | grlm       | LongRunLowGrayLevelEmphasis      | 0.023990038  |
| wavelet-HLL | grlm       | RunEntropy                       | 4.33774944   |
| wavelet-HLL | grlm       | HighGrayLevelRunEmphasis         | 195.5621265  |
| wavelet-HLL | grlm       | RunLengthNonUniformityNormalized | 0.946573368  |
| wavelet-HLL | glszm      | GrayLevelVariance                | 30.65910523  |
| wavelet-HLL | glszm      | ZoneVariance                     | 1.171182525  |
| wavelet-HLL | glszm      | GrayLevelNonUniformityNormalized | 0.055240496  |
| wavelet-HLL | glszm      | SizeZoneNonUniformityNormalized  | 0.585381222  |
| wavelet-HLL | glszm      | SizeZoneNonUniformity            | 40.39130435  |
| wavelet-HLL | glszm      | GrayLevelNonUniformity           | 3.811594203  |
| wavelet-HLL | glszm      | LargeAreaEmphasis                | 3.188405797  |
| wavelet-HLL | glszm      | SmallAreaHighGrayLevelEmphasis   | 154.2516103  |
| wavelet-HLL | glszm      | ZonePercentage                   | 0.704081633  |
| wavelet-HLL | glszm      | LargeAreaLowGrayLevelEmphasis    | 0.047409347  |
| wavelet-HLL | glszm      | LargeAreaHighGrayLevelEmphasis   | 574.1449275  |
| wavelet-HLL | glszm      | HighGrayLevelZoneEmphasis        | 197.4057971  |
| wavelet-HLL | glszm      | SmallAreaEmphasis                | 0.792852031  |
| wavelet-HLL | glszm      | LowGrayLevelZoneEmphasis         | 0.028449027  |
| wavelet-HLL | glszm      | ZoneEntropy                      | 4.97991137   |
| wavelet-HLL | glszm      | SmallAreaLowGrayLevelEmphasis    | 0.026540184  |
| wavelet-HLL | ngtdm      | Coarseness                       | 0.056558728  |
| wavelet-HLL | ngtdm      | Complexity                       | 693.5729259  |
| wavelet-HLL | ngtdm      | Strength                         | 8.495212952  |
| wavelet-HLL | ngtdm      | Contrast                         | 0.453519178  |
| wavelet-HLL | ngtdm      | Busyness                         | 0.079657605  |
| wavelet-LHL | gldm       | GrayLevelVariance                | 214.2286547  |
| wavelet-LHL | gldm       | HighGrayLevelEmphasis            | 1856.959184  |



|             |            |                                      |              |
|-------------|------------|--------------------------------------|--------------|
| wavelet-LHL | gldm       | DependenceEntropy                    | 5.530376553  |
| wavelet-LHL | gldm       | DependenceNonUniformity              | 67.46938776  |
| wavelet-LHL | gldm       | GrayLevelNonUniformity               | 2.959183673  |
| wavelet-LHL | gldm       | SmallDependenceEmphasis              | 0.856575964  |
| wavelet-LHL | gldm       | SmallDependenceHighGrayLevelEmphasis | 1667.05102   |
| wavelet-LHL | gldm       | DependenceNonUniformityNormalized    | 0.68846314   |
| wavelet-LHL | gldm       | LargeDependenceEmphasis              | 1.755102041  |
| wavelet-LHL | gldm       | LargeDependenceLowGrayLevelEmphasis  | 0.013113643  |
| wavelet-LHL | gldm       | DependenceVariance                   | 0.255726781  |
| wavelet-LHL | gldm       | LargeDependenceHighGrayLevelEmphasis | 2820.265306  |
| wavelet-LHL | gldm       | SmallDependenceLowGrayLevelEmphasis  | 0.01211256   |
| wavelet-LHL | gldm       | LowGrayLevelEmphasis                 | 0.012271514  |
| wavelet-LHL | glcm       | JointAverage                         | 41.19937442  |
| wavelet-LHL | glcm       | SumAverage                           | 82.39874884  |
| wavelet-LHL | glcm       | JointEntropy                         | 6.456571664  |
| wavelet-LHL | glcm       | ClusterShade                         | -2771.951621 |
| wavelet-LHL | glcm       | MaximumProbability                   | 0.022928901  |
| wavelet-LHL | glcm       | ldmn                                 | 0.935748853  |
| wavelet-LHL | glcm       | JointEnergy                          | 0.012160994  |
| wavelet-LHL | glcm       | Contrast                             | 381.2629024  |
| wavelet-LHL | glcm       | DifferenceEntropy                    | 4.392736473  |
| wavelet-LHL | glcm       | InverseVariance                      | 0.080360282  |
| wavelet-LHL | glcm       | DifferenceVariance                   | 120.8459168  |
| wavelet-LHL | glcm       | ldn                                  | 0.835330378  |
| wavelet-LHL | glcm       | ldm                                  | 0.064421047  |
| wavelet-LHL | glcm       | Correlation                          | 0.047392702  |
| wavelet-LHL | glcm       | Autocorrelation                      | 1707.552691  |
| wavelet-LHL | glcm       | SumEntropy                           | 4.891527546  |
| wavelet-LHL | glcm       | SumSquares                           | 199.812184   |
| wavelet-LHL | glcm       | ClusterProminence                    | 486144.3284  |
| wavelet-LHL | glcm       | lmc2                                 | 0.999585248  |
| wavelet-LHL | glcm       | lmc1                                 | -0.717693727 |
| wavelet-LHL | glcm       | DifferenceAverage                    | 15.34339427  |
| wavelet-LHL | glcm       | ld                                   | 0.132891306  |
| wavelet-LHL | glcm       | ClusterTendency                      | 417.9858336  |
| wavelet-LHL | firstorder | InterquartileRange                   | 572.4879633  |
| wavelet-LHL | firstorder | Skewness                             | -0.333041251 |
| wavelet-LHL | firstorder | Uniformity                           | 0.030195752  |
| wavelet-LHL | firstorder | Median                               | 91.03314321  |
| wavelet-LHL | firstorder | Energy                               | 13394530.64  |
| wavelet-LHL | firstorder | RobustMeanAbsoluteDeviation          | 224.405458   |
| wavelet-LHL | firstorder | MeanAbsoluteDeviation                | 303.0402377  |
| wavelet-LHL | firstorder | TotalEnergy                          | 361652327.4  |
| wavelet-LHL | firstorder | Maximum                              | 783.5056732  |
| wavelet-LHL | firstorder | RootMeanSquared                      | 369.701074   |
| wavelet-LHL | firstorder | 90Percentile                         | 511.4141004  |
| wavelet-LHL | firstorder | Minimum                              | -940.5009469 |
| wavelet-LHL | firstorder | Entropy                              | 5.244925855  |
| wavelet-LHL | firstorder | Range                                | 1724.00662   |
| wavelet-LHL | firstorder | Variance                             | 134124.2439  |
| wavelet-LHL | firstorder | 10Percentile                         | -408.7369195 |
| wavelet-LHL | firstorder | Kurtosis                             | 2.579219453  |
| wavelet-LHL | firstorder | Mean                                 | 50.54344918  |

|             |       |                                      |             |
|-------------|-------|--------------------------------------|-------------|
| wavelet-LHL | grlm  | ShortRunLowGrayLevelEmphasis         | 0.012362969 |
| wavelet-LHL | grlm  | GrayLevelVariance                    | 214.7052779 |
| wavelet-LHL | grlm  | LowGrayLevelRunEmphasis              | 0.012370358 |
| wavelet-LHL | grlm  | GrayLevelNonUniformityNormalized     | 0.029986136 |
| wavelet-LHL | grlm  | RunVariance                          | 0.008626925 |
| wavelet-LHL | grlm  | GrayLevelNonUniformity               | 2.913673352 |
| wavelet-LHL | grlm  | LongRunEmphasis                      | 1.026572545 |
| wavelet-LHL | grlm  | ShortRunHighGrayLevelEmphasis        | 1853.323652 |
| wavelet-LHL | grlm  | RunLengthNonUniformity               | 95.50530368 |
| wavelet-LHL | grlm  | ShortRunEmphasis                     | 0.993356864 |
| wavelet-LHL | grlm  | LongRunHighGrayLevelEmphasis         | 1896.359884 |
| wavelet-LHL | grlm  | RunPercentage                        | 0.991365777 |
| wavelet-LHL | grlm  | LongRunLowGrayLevelEmphasis          | 0.012399912 |
| wavelet-LHL | grlm  | RunEntropy                           | 5.272672856 |
| wavelet-LHL | grlm  | HighGrayLevelRunEmphasis             | 1861.930899 |
| wavelet-LHL | grlm  | RunLengthNonUniformityNormalized     | 0.982746151 |
| wavelet-LHL | glszm | GrayLevelVariance                    | 220.4065083 |
| wavelet-LHL | glszm | ZoneVariance                         | 0.146177686 |
| wavelet-LHL | glszm | GrayLevelNonUniformityNormalized     | 0.027892562 |
| wavelet-LHL | glszm | SizeZoneNonUniformityNormalized      | 0.83161157  |
| wavelet-LHL | glszm | SizeZoneNonUniformity                | 73.18181818 |
| wavelet-LHL | glszm | GrayLevelNonUniformity               | 2.454545455 |
| wavelet-LHL | glszm | LargeAreaEmphasis                    | 1.386363636 |
| wavelet-LHL | glszm | SmallAreaHighGrayLevelEmphasis       | 1820.414773 |
| wavelet-LHL | glszm | ZonePercentage                       | 0.897959184 |
| wavelet-LHL | glszm | LargeAreaLowGrayLevelEmphasis        | 0.013954013 |
| wavelet-LHL | glszm | LargeAreaHighGrayLevelEmphasis       | 2443.909091 |
| wavelet-LHL | glszm | HighGrayLevelZoneEmphasis            | 1914.477273 |
| wavelet-LHL | glszm | SmallAreaEmphasis                    | 0.928661616 |
| wavelet-LHL | glszm | LowGrayLevelZoneEmphasis             | 0.01354252  |
| wavelet-LHL | glszm | ZoneEntropy                          | 5.510456903 |
| wavelet-LHL | glszm | SmallAreaLowGrayLevelEmphasis        | 0.013462447 |
| wavelet-LHL | ngtdm | Coarseness                           | 0.034781968 |
| wavelet-LHL | ngtdm | Complexity                           | 10531.13858 |
| wavelet-LHL | ngtdm | Strength                             | 40.69631908 |
| wavelet-LHL | ngtdm | Contrast                             | 2.479761561 |
| wavelet-LHL | ngtdm | Busyness                             | 0.021925109 |
| wavelet-LHH | gldm  | GrayLevelVariance                    | 127.6785714 |
| wavelet-LHH | gldm  | HighGrayLevelEmphasis                | 939.9285714 |
| wavelet-LHH | gldm  | DependenceEntropy                    | 5.470434686 |
| wavelet-LHH | gldm  | DependenceNonUniformity              | 52.95918367 |
| wavelet-LHH | gldm  | GrayLevelNonUniformity               | 3.551020408 |
| wavelet-LHH | gldm  | SmallDependenceEmphasis              | 0.755668934 |
| wavelet-LHH | gldm  | SmallDependenceHighGrayLevelEmphasis | 739.6235828 |
| wavelet-LHH | gldm  | DependenceNonUniformityNormalized    | 0.540399833 |
| wavelet-LHH | gldm  | LargeDependenceEmphasis              | 2.204081633 |
| wavelet-LHH | gldm  | LargeDependenceLowGrayLevelEmphasis  | 0.015998224 |
| wavelet-LHH | gldm  | DependenceVariance                   | 0.334443982 |
| wavelet-LHH | gldm  | LargeDependenceHighGrayLevelEmphasis | 1902.826531 |
| wavelet-LHH | gldm  | SmallDependenceLowGrayLevelEmphasis  | 0.012746851 |
| wavelet-LHH | gldm  | LowGrayLevelEmphasis                 | 0.013263599 |
| wavelet-LHH | glcm  | JointAverage                         | 28.36719104 |
| wavelet-LHH | glcm  | SumAverage                           | 56.73438207 |

|             |            |                                  |              |
|-------------|------------|----------------------------------|--------------|
| wavelet-LHH | glcm       | JointEntropy                     | 6.414176565  |
| wavelet-LHH | glcm       | ClusterShade                     | -656.1936412 |
| wavelet-LHH | glcm       | MaximumProbability               | 0.022005793  |
| wavelet-LHH | glcm       | Idmn                             | 0.947676746  |
| wavelet-LHH | glcm       | JointEnergy                      | 0.012497608  |
| wavelet-LHH | glcm       | Contrast                         | 252.2067892  |
| wavelet-LHH | glcm       | DifferenceEntropy                | 4.229213773  |
| wavelet-LHH | glcm       | InverseVariance                  | 0.076057169  |
| wavelet-LHH | glcm       | DifferenceVariance               | 84.50608495  |
| wavelet-LHH | glcm       | Idn                              | 0.848723811  |
| wavelet-LHH | glcm       | Idm                              | 0.075695464  |
| wavelet-LHH | glcm       | Correlation                      | -0.014365709 |
| wavelet-LHH | glcm       | Autocorrelation                  | 803.7317925  |
| wavelet-LHH | glcm       | SumEntropy                       | 4.810857804  |
| wavelet-LHH | glcm       | SumSquares                       | 124.3947355  |
| wavelet-LHH | glcm       | ClusterProminence                | 166908.6666  |
| wavelet-LHH | glcm       | Imc2                             | 0.999150368  |
| wavelet-LHH | glcm       | Imc1                             | -0.671265267 |
| wavelet-LHH | glcm       | DifferenceAverage                | 12.52627985  |
| wavelet-LHH | glcm       | Id                               | 0.151124168  |
| wavelet-LHH | glcm       | ClusterTendency                  | 245.3721528  |
| wavelet-LHH | firstorder | InterquartileRange               | 428.7799841  |
| wavelet-LHH | firstorder | Skewness                         | 0.181981113  |
| wavelet-LHH | firstorder | Uniformity                       | 0.036234902  |
| wavelet-LHH | firstorder | Median                           | -21.34901741 |
| wavelet-LHH | firstorder | Energy                           | 7885775.813  |
| wavelet-LHH | firstorder | RobustMeanAbsoluteDeviation      | 169.7341795  |
| wavelet-LHH | firstorder | MeanAbsoluteDeviation            | 231.5166458  |
| wavelet-LHH | firstorder | TotalEnergy                      | 212915946.9  |
| wavelet-LHH | firstorder | Maximum                          | 854.9539547  |
| wavelet-LHH | firstorder | RootMeanSquared                  | 283.6672349  |
| wavelet-LHH | firstorder | 90Percentile                     | 309.4597575  |
| wavelet-LHH | firstorder | Minimum                          | -716.3756305 |
| wavelet-LHH | firstorder | Entropy                          | 4.99216157   |
| wavelet-LHH | firstorder | Range                            | 1571.329585  |
| wavelet-LHH | firstorder | Variance                         | 79816.67535  |
| wavelet-LHH | firstorder | 10Percentile                     | -354.1529886 |
| wavelet-LHH | firstorder | Kurtosis                         | 2.923736939  |
| wavelet-LHH | firstorder | Mean                             | -25.50342684 |
| wavelet-LHH | grlm       | ShortRunLowGrayLevelEmphasis     | 0.013400228  |
| wavelet-LHH | grlm       | GrayLevelVariance                | 127.8335869  |
| wavelet-LHH | grlm       | LowGrayLevelRunEmphasis          | 0.013424338  |
| wavelet-LHH | grlm       | GrayLevelNonUniformityNormalized | 0.036134491  |
| wavelet-LHH | grlm       | RunVariance                      | 0.014115067  |
| wavelet-LHH | grlm       | GrayLevelNonUniformity           | 3.491231713  |
| wavelet-LHH | grlm       | LongRunEmphasis                  | 1.0436272    |
| wavelet-LHH | grlm       | ShortRunHighGrayLevelEmphasis    | 933.0385602  |
| wavelet-LHH | grlm       | RunLengthNonUniformity           | 93.92723351  |
| wavelet-LHH | grlm       | ShortRunEmphasis                 | 0.9890932    |
| wavelet-LHH | grlm       | LongRunHighGrayLevelEmphasis     | 977.0931929  |
| wavelet-LHH | grlm       | RunPercentage                    | 0.985871272  |
| wavelet-LHH | grlm       | LongRunLowGrayLevelEmphasis      | 0.013520776  |
| wavelet-LHH | grlm       | RunEntropy                       | 5.033433921  |

|             |       |                                      |             |
|-------------|-------|--------------------------------------|-------------|
| wavelet-LHH | grlm  | HighGrayLevelRunEmphasis             | 941.8494868 |
| wavelet-LHH | grlm  | RunLengthNonUniformityNormalized     | 0.971769867 |
| wavelet-LHH | glszm | GrayLevelVariance                    | 130.8992532 |
| wavelet-LHH | glszm | ZoneVariance                         | 0.239902454 |
| wavelet-LHH | glszm | GrayLevelNonUniformityNormalized     | 0.034293553 |
| wavelet-LHH | glszm | SizeZoneNonUniformityNormalized      | 0.704008535 |
| wavelet-LHH | glszm | SizeZoneNonUniformity                | 57.02469136 |
| wavelet-LHH | glszm | GrayLevelNonUniformity               | 2.777777778 |
| wavelet-LHH | glszm | LargeAreaEmphasis                    | 1.703703704 |
| wavelet-LHH | glszm | SmallAreaHighGrayLevelEmphasis       | 851.4458162 |
| wavelet-LHH | glszm | ZonePercentage                       | 0.826530612 |
| wavelet-LHH | glszm | LargeAreaLowGrayLevelEmphasis        | 0.017063277 |
| wavelet-LHH | glszm | LargeAreaHighGrayLevelEmphasis       | 1567.54321  |
| wavelet-LHH | glszm | HighGrayLevelZoneEmphasis            | 960.4814815 |
| wavelet-LHH | glszm | SmallAreaEmphasis                    | 0.865226337 |
| wavelet-LHH | glszm | LowGrayLevelZoneEmphasis             | 0.015611342 |
| wavelet-LHH | glszm | ZoneEntropy                          | 5.384491015 |
| wavelet-LHH | glszm | SmallAreaLowGrayLevelEmphasis        | 0.015328363 |
| wavelet-LHH | ngtdm | Coarseness                           | 0.035596649 |
| wavelet-LHH | ngtdm | Complexity                           | 6087.509986 |
| wavelet-LHH | ngtdm | Strength                             | 28.10876578 |
| wavelet-LHH | ngtdm | Contrast                             | 1.624728735 |
| wavelet-LHH | ngtdm | Busyness                             | 0.03533289  |
| wavelet-LLH | gldm  | GrayLevelVariance                    | 240.9325281 |
| wavelet-LLH | gldm  | HighGrayLevelEmphasis                | 1525.204082 |
| wavelet-LLH | gldm  | DependenceEntropy                    | 5.791963002 |
| wavelet-LLH | gldm  | DependenceNonUniformity              | 56.95918367 |
| wavelet-LLH | gldm  | GrayLevelNonUniformity               | 2.87755102  |
| wavelet-LLH | gldm  | SmallDependenceEmphasis              | 0.790603741 |
| wavelet-LLH | gldm  | SmallDependenceHighGrayLevelEmphasis | 1287.213719 |
| wavelet-LLH | gldm  | DependenceNonUniformityNormalized    | 0.58121616  |
| wavelet-LLH | gldm  | LargeDependenceEmphasis              | 2.224489796 |
| wavelet-LLH | gldm  | LargeDependenceLowGrayLevelEmphasis  | 0.013500075 |
| wavelet-LLH | gldm  | DependenceVariance                   | 0.410245731 |
| wavelet-LLH | gldm  | LargeDependenceHighGrayLevelEmphasis | 3023.265306 |
| wavelet-LLH | gldm  | SmallDependenceLowGrayLevelEmphasis  | 0.011534944 |
| wavelet-LLH | gldm  | LowGrayLevelEmphasis                 | 0.011872625 |
| wavelet-LLH | glcm  | JointAverage                         | 34.52513668 |
| wavelet-LLH | glcm  | SumAverage                           | 69.05027337 |
| wavelet-LLH | glcm  | JointEntropy                         | 6.463638924 |
| wavelet-LLH | glcm  | ClusterShade                         | 2317.416015 |
| wavelet-LLH | glcm  | MaximumProbability                   | 0.02312062  |
| wavelet-LLH | glcm  | ldmn                                 | 0.935999399 |
| wavelet-LLH | glcm  | JointEnergy                          | 0.011985412 |
| wavelet-LLH | glcm  | Contrast                             | 413.5407663 |
| wavelet-LLH | glcm  | DifferenceEntropy                    | 4.489137457 |
| wavelet-LLH | glcm  | InverseVariance                      | 0.060018455 |
| wavelet-LLH | glcm  | DifferenceVariance                   | 153.2981257 |
| wavelet-LLH | glcm  | ldn                                  | 0.837154277 |
| wavelet-LLH | glcm  | ldm                                  | 0.068643701 |
| wavelet-LLH | glcm  | Correlation                          | 0.085136515 |
| wavelet-LLH | glcm  | Autocorrelation                      | 1217.282649 |
| wavelet-LLH | glcm  | SumEntropy                           | 5.036569744 |

|             |            |                                  |              |
|-------------|------------|----------------------------------|--------------|
| wavelet-LLH | glcm       | SumSquares                       | 231.0002622  |
| wavelet-LLH | glcm       | ClusterProminence                | 708378.1919  |
| wavelet-LLH | glcm       | Imc2                             | 0.999787619  |
| wavelet-LLH | glcm       | Imc1                             | -0.754191373 |
| wavelet-LLH | glcm       | DifferenceAverage                | 15.67277766  |
| wavelet-LLH | glcm       | Id                               | 0.137835121  |
| wavelet-LLH | glcm       | ClusterTendency                  | 510.4602826  |
| wavelet-LLH | firstorder | InterquartileRange               | 534.8722151  |
| wavelet-LLH | firstorder | Skewness                         | 0.209567755  |
| wavelet-LLH | firstorder | Uniformity                       | 0.029362766  |
| wavelet-LLH | firstorder | Median                           | -17.74442271 |
| wavelet-LLH | firstorder | Energy                           | 14771960.49  |
| wavelet-LLH | firstorder | RobustMeanAbsoluteDeviation      | 223.7313728  |
| wavelet-LLH | firstorder | MeanAbsoluteDeviation            | 313.1735172  |
| wavelet-LLH | firstorder | TotalEnergy                      | 398842933.3  |
| wavelet-LLH | firstorder | Maximum                          | 878.4285213  |
| wavelet-LLH | firstorder | RootMeanSquared                  | 388.2451426  |
| wavelet-LLH | firstorder | 90Percentile                     | 538.219765   |
| wavelet-LLH | firstorder | Minimum                          | -899.6217029 |
| wavelet-LLH | firstorder | Entropy                          | 5.373396166  |
| wavelet-LLH | firstorder | Range                            | 1778.050224  |
| wavelet-LLH | firstorder | Variance                         | 150458.7366  |
| wavelet-LLH | firstorder | 10Percentile                     | -484.6348457 |
| wavelet-LLH | firstorder | Kurtosis                         | 2.465897092  |
| wavelet-LLH | firstorder | Mean                             | -16.59982313 |
| wavelet-LLH | grlm       | ShortRunLowGrayLevelEmphasis     | 0.012000351  |
| wavelet-LLH | grlm       | GrayLevelVariance                | 242.8715864  |
| wavelet-LLH | grlm       | LowGrayLevelRunEmphasis          | 0.012015054  |
| wavelet-LLH | grlm       | GrayLevelNonUniformityNormalized | 0.029059741  |
| wavelet-LLH | grlm       | RunVariance                      | 0.013336127  |
| wavelet-LLH | grlm       | GrayLevelNonUniformity           | 2.810086584  |
| wavelet-LLH | grlm       | LongRunEmphasis                  | 1.040942861  |
| wavelet-LLH | grlm       | ShortRunHighGrayLevelEmphasis    | 1517.553457  |
| wavelet-LLH | grlm       | RunLengthNonUniformity           | 94.13647203  |
| wavelet-LLH | grlm       | ShortRunEmphasis                 | 0.989764285  |
| wavelet-LLH | grlm       | LongRunHighGrayLevelEmphasis     | 1578.552095  |
| wavelet-LLH | grlm       | RunPercentage                    | 0.986656201  |
| wavelet-LLH | grlm       | LongRunLowGrayLevelEmphasis      | 0.012073867  |
| wavelet-LLH | grlm       | RunEntropy                       | 5.416186346  |
| wavelet-LLH | grlm       | HighGrayLevelRunEmphasis         | 1529.753184  |
| wavelet-LLH | grlm       | RunLengthNonUniformityNormalized | 0.973327746  |
| wavelet-LLH | glszm      | GrayLevelVariance                | 264.3178981  |
| wavelet-LLH | glszm      | ZoneVariance                     | 0.268544056  |
| wavelet-LLH | glszm      | GrayLevelNonUniformityNormalized | 0.026564088  |
| wavelet-LLH | glszm      | SizeZoneNonUniformityNormalized  | 0.762519959  |
| wavelet-LLH | glszm      | SizeZoneNonUniformity            | 63.28915663  |
| wavelet-LLH | glszm      | GrayLevelNonUniformity           | 2.204819277  |
| wavelet-LLH | glszm      | LargeAreaEmphasis                | 1.662650602  |
| wavelet-LLH | glszm      | SmallAreaHighGrayLevelEmphasis   | 1477.257697  |
| wavelet-LLH | glszm      | ZonePercentage                   | 0.846938776  |
| wavelet-LLH | glszm      | LargeAreaLowGrayLevelEmphasis    | 0.014661675  |
| wavelet-LLH | glszm      | LargeAreaHighGrayLevelEmphasis   | 2384.289157  |
| wavelet-LLH | glszm      | HighGrayLevelZoneEmphasis        | 1591.73494   |

|             |            |                                      |              |
|-------------|------------|--------------------------------------|--------------|
| wavelet-LLH | glszm      | SmallAreaEmphasis                    | 0.894996653  |
| wavelet-LLH | glszm      | LowGrayLevelZoneEmphasis             | 0.013740804  |
| wavelet-LLH | glszm      | ZoneEntropy                          | 5.701855058  |
| wavelet-LLH | glszm      | SmallAreaLowGrayLevelEmphasis        | 0.013554878  |
| wavelet-LLH | ngtdm      | Coarseness                           | 0.038278566  |
| wavelet-LLH | ngtdm      | Complexity                           | 12969.6054   |
| wavelet-LLH | ngtdm      | Strength                             | 51.55115661  |
| wavelet-LLH | ngtdm      | Contrast                             | 2.191346186  |
| wavelet-LLH | ngtdm      | Busyness                             | 0.019645331  |
| wavelet-LLL | gldm       | GrayLevelVariance                    | 373.4132653  |
| wavelet-LLL | gldm       | HighGrayLevelEmphasis                | 1664.27551   |
| wavelet-LLL | gldm       | DependenceEntropy                    | 5.780276808  |
| wavelet-LLL | gldm       | DependenceNonUniformity              | 80.04081633  |
| wavelet-LLL | gldm       | GrayLevelNonUniformity               | 2.183673469  |
| wavelet-LLL | gldm       | SmallDependenceEmphasis              | 0.923469388  |
| wavelet-LLL | gldm       | SmallDependenceHighGrayLevelEmphasis | 1479.836735  |
| wavelet-LLL | gldm       | DependenceNonUniformityNormalized    | 0.816743024  |
| wavelet-LLL | gldm       | LargeDependenceEmphasis              | 1.306122449  |
| wavelet-LLL | gldm       | LargeDependenceLowGrayLevelEmphasis  | 0.01587229   |
| wavelet-LLL | gldm       | DependenceVariance                   | 0.091628488  |
| wavelet-LLL | gldm       | LargeDependenceHighGrayLevelEmphasis | 2402.030612  |
| wavelet-LLL | gldm       | SmallDependenceLowGrayLevelEmphasis  | 0.015424477  |
| wavelet-LLL | gldm       | LowGrayLevelEmphasis                 | 0.015514039  |
| wavelet-LLL | glcm       | JointAverage                         | 40.5176927   |
| wavelet-LLL | glcm       | SumAverage                           | 81.03538541  |
| wavelet-LLL | glcm       | JointEntropy                         | 6.488245583  |
| wavelet-LLL | glcm       | ClusterShade                         | -3866.727355 |
| wavelet-LLL | glcm       | MaximumProbability                   | 0.019154657  |
| wavelet-LLL | glcm       | ldmn                                 | 0.909382788  |
| wavelet-LLL | glcm       | JointEnergy                          | 0.011850376  |
| wavelet-LLL | glcm       | Contrast                             | 641.3294401  |
| wavelet-LLL | glcm       | DifferenceEntropy                    | 4.601275803  |
| wavelet-LLL | glcm       | InverseVariance                      | 0.052030776  |
| wavelet-LLL | glcm       | DifferenceVariance                   | 210.6115318  |
| wavelet-LLL | glcm       | ldn                                  | 0.80416521   |
| wavelet-LLL | glcm       | ldm                                  | 0.043224384  |
| wavelet-LLL | glcm       | Correlation                          | 0.158809061  |
| wavelet-LLL | glcm       | Autocorrelation                      | 1704.170788  |
| wavelet-LLL | glcm       | SumEntropy                           | 5.105053253  |
| wavelet-LLL | glcm       | SumSquares                           | 380.7887319  |
| wavelet-LLL | glcm       | ClusterProminence                    | 1888471.874  |
| wavelet-LLL | glcm       | lmc2                                 | 0.999898149  |
| wavelet-LLL | glcm       | lmc1                                 | -0.794717898 |
| wavelet-LLL | glcm       | DifferenceAverage                    | 20.24266408  |
| wavelet-LLL | glcm       | ld                                   | 0.103931489  |
| wavelet-LLL | glcm       | ClusterTendency                      | 881.8254876  |
| wavelet-LLL | firstorder | InterquartileRange                   | 706.0568827  |
| wavelet-LLL | firstorder | Skewness                             | 0.181358612  |
| wavelet-LLL | firstorder | Uniformity                           | 0.022282382  |
| wavelet-LLL | firstorder | Median                               | -727.9065609 |
| wavelet-LLL | firstorder | Energy                               | 72899247.26  |
| wavelet-LLL | firstorder | RobustMeanAbsoluteDeviation          | 298.0730056  |
| wavelet-LLL | firstorder | MeanAbsoluteDeviation                | 400.1267031  |

|             |            |                                  |              |
|-------------|------------|----------------------------------|--------------|
| wavelet-LLL | firstorder | TotalEnergy                      | 1968279676   |
| wavelet-LLL | firstorder | Maximum                          | 240.018657   |
| wavelet-LLL | firstorder | RootMeanSquared                  | 862.4789099  |
| wavelet-LLL | firstorder | 90Percentile                     | 19.75160161  |
| wavelet-LLL | firstorder | Minimum                          | -1575.899585 |
| wavelet-LLL | firstorder | Entropy                          | 5.655127191  |
| wavelet-LLL | firstorder | Range                            | 1815.918242  |
| wavelet-LLL | firstorder | Variance                         | 232413.1225  |
| wavelet-LLL | firstorder | 10Percentile                     | -1352.672806 |
| wavelet-LLL | firstorder | Kurtosis                         | 2.120787559  |
| wavelet-LLL | firstorder | Mean                             | -715.1620428 |
| wavelet-LLL | grlm       | ShortRunLowGrayLevelEmphasis     | 0.015567647  |
| wavelet-LLL | grlm       | GrayLevelVariance                | 372.7376636  |
| wavelet-LLL | grlm       | LowGrayLevelRunEmphasis          | 0.015571146  |
| wavelet-LLL | grlm       | GrayLevelNonUniformityNormalized | 0.022255356  |
| wavelet-LLL | grlm       | RunVariance                      | 0.003923715  |
| wavelet-LLL | grlm       | GrayLevelNonUniformity           | 2.172476425  |
| wavelet-LLL | grlm       | LongRunEmphasis                  | 1.011944885  |
| wavelet-LLL | grlm       | ShortRunHighGrayLevelEmphasis    | 1654.103144  |
| wavelet-LLL | grlm       | RunLengthNonUniformity           | 96.85732223  |
| wavelet-LLL | grlm       | ShortRunEmphasis                 | 0.997013779  |
| wavelet-LLL | grlm       | LongRunHighGrayLevelEmphasis     | 1690.100771  |
| wavelet-LLL | grlm       | RunPercentage                    | 0.996075353  |
| wavelet-LLL | grlm       | LongRunLowGrayLevelEmphasis      | 0.01558514   |
| wavelet-LLL | grlm       | RunEntropy                       | 5.663315693  |
| wavelet-LLL | grlm       | HighGrayLevelRunEmphasis         | 1661.30267   |
| wavelet-LLL | grlm       | RunLengthNonUniformityNormalized | 0.99215257   |
| wavelet-LLL | glszm      | GrayLevelVariance                | 364.3144872  |
| wavelet-LLL | glszm      | ZoneVariance                     | 0.050872933  |
| wavelet-LLL | glszm      | GrayLevelNonUniformityNormalized | 0.021852237  |
| wavelet-LLL | glszm      | SizeZoneNonUniformityNormalized  | 0.898254133  |
| wavelet-LLL | glszm      | SizeZoneNonUniformity            | 83.53763441  |
| wavelet-LLL | glszm      | GrayLevelNonUniformity           | 2.032258065  |
| wavelet-LLL | glszm      | LargeAreaEmphasis                | 1.161290323  |
| wavelet-LLL | glszm      | SmallAreaHighGrayLevelEmphasis   | 1527.005376  |
| wavelet-LLL | glszm      | ZonePercentage                   | 0.948979592  |
| wavelet-LLL | glszm      | LargeAreaLowGrayLevelEmphasis    | 0.016473965  |
| wavelet-LLL | glszm      | LargeAreaHighGrayLevelEmphasis   | 2012.892473  |
| wavelet-LLL | glszm      | HighGrayLevelZoneEmphasis        | 1624.182796  |
| wavelet-LLL | glszm      | SmallAreaEmphasis                | 0.959677419  |
| wavelet-LLL | glszm      | LowGrayLevelZoneEmphasis         | 0.016285209  |
| wavelet-LLL | glszm      | ZoneEntropy                      | 5.767390666  |
| wavelet-LLL | glszm      | SmallAreaLowGrayLevelEmphasis    | 0.01623802   |
| wavelet-LLL | ngtdm      | Coarseness                       | 0.036383273  |
| wavelet-LLL | ngtdm      | Complexity                       | 20819.25841  |
| wavelet-LLL | ngtdm      | Strength                         | 73.3043443   |
| wavelet-LLL | ngtdm      | Contrast                         | 3.006522836  |
| wavelet-LLL | ngtdm      | Busyness                         | 0.016691943  |
| wavelet-HHL | gldm       | GrayLevelVariance                | 20.06122449  |
| wavelet-HHL | gldm       | HighGrayLevelEmphasis            | 131.8163265  |
| wavelet-HHL | gldm       | DependenceEntropy                | 5.051704457  |
| wavelet-HHL | gldm       | DependenceNonUniformity          | 34.91836735  |
| wavelet-HHL | gldm       | GrayLevelNonUniformity           | 7.040816327  |

|             |            |                                      |              |
|-------------|------------|--------------------------------------|--------------|
| wavelet-HHL | gldm       | SmallDependenceEmphasis              | 0.56547619   |
| wavelet-HHL | gldm       | SmallDependenceHighGrayLevelEmphasis | 84.5103458   |
| wavelet-HHL | gldm       | DependenceNonUniformityNormalized    | 0.356309871  |
| wavelet-HHL | gldm       | LargeDependenceEmphasis              | 3.87755102   |
| wavelet-HHL | gldm       | LargeDependenceLowGrayLevelEmphasis  | 0.081705749  |
| wavelet-HHL | gldm       | DependenceVariance                   | 0.725114536  |
| wavelet-HHL | gldm       | LargeDependenceHighGrayLevelEmphasis | 418.877551   |
| wavelet-HHL | gldm       | SmallDependenceLowGrayLevelEmphasis  | 0.030181942  |
| wavelet-HHL | gldm       | LowGrayLevelEmphasis                 | 0.037198134  |
| wavelet-HHL | glcm       | JointAverage                         | 10.70013186  |
| wavelet-HHL | glcm       | SumAverage                           | 21.40026372  |
| wavelet-HHL | glcm       | JointEntropy                         | 6.148148338  |
| wavelet-HHL | glcm       | ClusterShade                         | 25.32199955  |
| wavelet-HHL | glcm       | MaximumProbability                   | 0.033563645  |
| wavelet-HHL | glcm       | ldmn                                 | 0.92556124   |
| wavelet-HHL | glcm       | JointEnergy                          | 0.015615584  |
| wavelet-HHL | glcm       | Contrast                             | 40.37315484  |
| wavelet-HHL | glcm       | DifferenceEntropy                    | 3.452463151  |
| wavelet-HHL | glcm       | InverseVariance                      | 0.183085801  |
| wavelet-HHL | glcm       | DifferenceVariance                   | 13.61890821  |
| wavelet-HHL | glcm       | ldn                                  | 0.819411644  |
| wavelet-HHL | glcm       | ldm                                  | 0.170816153  |
| wavelet-HHL | glcm       | Correlation                          | 0.016692654  |
| wavelet-HHL | glcm       | Autocorrelation                      | 115.2779613  |
| wavelet-HHL | glcm       | SumEntropy                           | 4.20106028   |
| wavelet-HHL | glcm       | SumSquares                           | 20.88995592  |
| wavelet-HHL | glcm       | ClusterProminence                    | 4991.415542  |
| wavelet-HHL | glcm       | lmc2                                 | 0.987116146  |
| wavelet-HHL | glcm       | lmc1                                 | -0.469235833 |
| wavelet-HHL | glcm       | DifferenceAverage                    | 5.122743164  |
| wavelet-HHL | glcm       | ld                                   | 0.264765585  |
| wavelet-HHL | glcm       | ClusterTendency                      | 43.18666884  |
| wavelet-HHL | firstorder | InterquartileRange                   | 136.6856292  |
| wavelet-HHL | firstorder | Skewness                             | 0.296458061  |
| wavelet-HHL | firstorder | Uniformity                           | 0.071845065  |
| wavelet-HHL | firstorder | Median                               | -11.93983946 |
| wavelet-HHL | firstorder | Energy                               | 1222838.764  |
| wavelet-HHL | firstorder | RobustMeanAbsoluteDeviation          | 61.07638479  |
| wavelet-HHL | firstorder | MeanAbsoluteDeviation                | 89.35412947  |
| wavelet-HHL | firstorder | TotalEnergy                          | 33016646.62  |
| wavelet-HHL | firstorder | Maximum                              | 271.2503554  |
| wavelet-HHL | firstorder | RootMeanSquared                      | 111.7047294  |
| wavelet-HHL | firstorder | 90Percentile                         | 167.3146537  |
| wavelet-HHL | firstorder | Minimum                              | -228.173239  |
| wavelet-HHL | firstorder | Entropy                              | 4.01365726   |
| wavelet-HHL | firstorder | Range                                | 499.4235944  |
| wavelet-HHL | firstorder | Variance                             | 12475.65448  |
| wavelet-HHL | firstorder | 10Percentile                         | -128.3247108 |
| wavelet-HHL | firstorder | Kurtosis                             | 2.672066131  |
| wavelet-HHL | firstorder | Mean                                 | 1.513965963  |
| wavelet-HHL | glrlm      | ShortRunLowGrayLevelEmphasis         | 0.037500507  |
| wavelet-HHL | glrlm      | GrayLevelVariance                    | 20.34597769  |
| wavelet-HHL | glrlm      | LowGrayLevelRunEmphasis              | 0.037866543  |



|             |       |                                      |              |
|-------------|-------|--------------------------------------|--------------|
| wavelet-HHL | grlm  | GrayLevelNonUniformityNormalized     | 0.070953182  |
| wavelet-HHL | grlm  | RunVariance                          | 0.029763488  |
| wavelet-HHL | grlm  | GrayLevelNonUniformity               | 6.747308434  |
| wavelet-HHL | grlm  | LongRunEmphasis                      | 1.09326721   |
| wavelet-HHL | grlm  | ShortRunHighGrayLevelEmphasis        | 130.3057538  |
| wavelet-HHL | grlm  | RunLengthNonUniformity               | 89.47807308  |
| wavelet-HHL | grlm  | ShortRunEmphasis                     | 0.976683198  |
| wavelet-HHL | grlm  | LongRunHighGrayLevelEmphasis         | 142.3242246  |
| wavelet-HHL | grlm  | RunPercentage                        | 0.970172684  |
| wavelet-HHL | grlm  | LongRunLowGrayLevelEmphasis          | 0.039330684  |
| wavelet-HHL | grlm  | RunEntropy                           | 4.141473075  |
| wavelet-HHL | grlm  | HighGrayLevelRunEmphasis             | 132.709448   |
| wavelet-HHL | grlm  | RunLengthNonUniformityNormalized     | 0.940473024  |
| wavelet-HHL | glszm | GrayLevelVariance                    | 23.87878788  |
| wavelet-HHL | glszm | ZoneVariance                         | 0.704315886  |
| wavelet-HHL | glszm | GrayLevelNonUniformityNormalized     | 0.061983471  |
| wavelet-HHL | glszm | SizeZoneNonUniformityNormalized      | 0.515610652  |
| wavelet-HHL | glszm | SizeZoneNonUniformity                | 34.03030303  |
| wavelet-HHL | glszm | GrayLevelNonUniformity               | 4.090909091  |
| wavelet-HHL | glszm | LargeAreaEmphasis                    | 2.909090909  |
| wavelet-HHL | glszm | SmallAreaHighGrayLevelEmphasis       | 115.1155303  |
| wavelet-HHL | glszm | ZonePercentage                       | 0.673469388  |
| wavelet-HHL | glszm | LargeAreaLowGrayLevelEmphasis        | 0.078297009  |
| wavelet-HHL | glszm | LargeAreaHighGrayLevelEmphasis       | 331.6969697  |
| wavelet-HHL | glszm | HighGrayLevelZoneEmphasis            | 144.8787879  |
| wavelet-HHL | glszm | SmallAreaEmphasis                    | 0.743686869  |
| wavelet-HHL | glszm | LowGrayLevelZoneEmphasis             | 0.04738578   |
| wavelet-HHL | glszm | ZoneEntropy                          | 4.898201082  |
| wavelet-HHL | glszm | SmallAreaLowGrayLevelEmphasis        | 0.043194594  |
| wavelet-HHL | ngtdm | Coarseness                           | 0.052800592  |
| wavelet-HHL | ngtdm | Complexity                           | 516.7650689  |
| wavelet-HHL | ngtdm | Strength                             | 6.40682533   |
| wavelet-HHL | ngtdm | Contrast                             | 0.37050462   |
| wavelet-HHL | ngtdm | Busyness                             | 0.116614714  |
| wavelet-HLH | gldm  | GrayLevelVariance                    | 27.7468763   |
| wavelet-HLH | gldm  | HighGrayLevelEmphasis                | 293.9693878  |
| wavelet-HLH | gldm  | DependenceEntropy                    | 5.106907616  |
| wavelet-HLH | gldm  | DependenceNonUniformity              | 33.04081633  |
| wavelet-HLH | gldm  | GrayLevelNonUniformity               | 6.979591837  |
| wavelet-HLH | gldm  | SmallDependenceEmphasis              | 0.587783447  |
| wavelet-HLH | gldm  | SmallDependenceHighGrayLevelEmphasis | 168.3892602  |
| wavelet-HLH | gldm  | DependenceNonUniformityNormalized    | 0.337151187  |
| wavelet-HLH | gldm  | LargeDependenceEmphasis              | 5.551020408  |
| wavelet-HLH | gldm  | LargeDependenceLowGrayLevelEmphasis  | 0.036405292  |
| wavelet-HLH | gldm  | DependenceVariance                   | 1.551020408  |
| wavelet-HLH | gldm  | LargeDependenceHighGrayLevelEmphasis | 1765.744898  |
| wavelet-HLH | gldm  | SmallDependenceLowGrayLevelEmphasis  | 0.016173268  |
| wavelet-HLH | gldm  | LowGrayLevelEmphasis                 | 0.018028909  |
| wavelet-HLH | glcm  | JointAverage                         | 16.63650085  |
| wavelet-HLH | glcm  | SumAverage                           | 33.2730017   |
| wavelet-HLH | glcm  | JointEntropy                         | 6.056083397  |
| wavelet-HLH | glcm  | ClusterShade                         | -224.9255522 |
| wavelet-HLH | glcm  | MaximumProbability                   | 0.038700647  |

|             |            |                                  |              |
|-------------|------------|----------------------------------|--------------|
| wavelet-HLH | glcm       | Idmn                             | 0.962933045  |
| wavelet-HLH | glcm       | JointEnergy                      | 0.017018842  |
| wavelet-HLH | glcm       | Contrast                         | 46.98368315  |
| wavelet-HLH | glcm       | DifferenceEntropy                | 3.499096498  |
| wavelet-HLH | glcm       | InverseVariance                  | 0.193258979  |
| wavelet-HLH | glcm       | DifferenceVariance               | 19.06818353  |
| wavelet-HLH | glcm       | Idn                              | 0.874192734  |
| wavelet-HLH | glcm       | Idm                              | 0.190867309  |
| wavelet-HLH | glcm       | Correlation                      | 0.016430011  |
| wavelet-HLH | glcm       | Autocorrelation                  | 277.1859409  |
| wavelet-HLH | glcm       | SumEntropy                       | 4.150144698  |
| wavelet-HLH | glcm       | SumSquares                       | 23.72236465  |
| wavelet-HLH | glcm       | ClusterProminence                | 9720.754822  |
| wavelet-HLH | glcm       | Imc2                             | 0.979571246  |
| wavelet-HLH | glcm       | Imc1                             | -0.428805609 |
| wavelet-HLH | glcm       | DifferenceAverage                | 5.201881077  |
| wavelet-HLH | glcm       | Id                               | 0.281088967  |
| wavelet-HLH | glcm       | ClusterTendency                  | 47.90577546  |
| wavelet-HLH | firstorder | InterquartileRange               | 157.6481667  |
| wavelet-HLH | firstorder | Skewness                         | -0.278008346 |
| wavelet-HLH | firstorder | Uniformity                       | 0.071220325  |
| wavelet-HLH | firstorder | Median                           | 21.70109046  |
| wavelet-HLH | firstorder | Energy                           | 1725804.9    |
| wavelet-HLH | firstorder | RobustMeanAbsoluteDeviation      | 73.47516745  |
| wavelet-HLH | firstorder | MeanAbsoluteDeviation            | 105.1117579  |
| wavelet-HLH | firstorder | TotalEnergy                      | 46596732.3   |
| wavelet-HLH | firstorder | Maximum                          | 412.274595   |
| wavelet-HLH | firstorder | RootMeanSquared                  | 132.7036325  |
| wavelet-HLH | firstorder | 90Percentile                     | 124.1584334  |
| wavelet-HLH | firstorder | Minimum                          | -389.3567594 |
| wavelet-HLH | firstorder | Entropy                          | 4.056158306  |
| wavelet-HLH | firstorder | Range                            | 801.6313545  |
| wavelet-HLH | firstorder | Variance                         | 17585.72934  |
| wavelet-HLH | firstorder | 10Percentile                     | -178.0361581 |
| wavelet-HLH | firstorder | Kurtosis                         | 3.760894027  |
| wavelet-HLH | firstorder | Mean                             | -4.952246079 |
| wavelet-HLH | grlm       | ShortRunLowGrayLevelEmphasis     | 0.018473098  |
| wavelet-HLH | grlm       | GrayLevelVariance                | 28.23198898  |
| wavelet-HLH | grlm       | LowGrayLevelRunEmphasis          | 0.018591667  |
| wavelet-HLH | grlm       | GrayLevelNonUniformityNormalized | 0.06972948   |
| wavelet-HLH | grlm       | RunVariance                      | 0.043387307  |
| wavelet-HLH | grlm       | GrayLevelNonUniformity           | 6.573404498  |
| wavelet-HLH | grlm       | LongRunEmphasis                  | 1.12720918   |
| wavelet-HLH | grlm       | ShortRunHighGrayLevelEmphasis    | 283.7796968  |
| wavelet-HLH | grlm       | RunLengthNonUniformity           | 87.49645425  |
| wavelet-HLH | grlm       | ShortRunEmphasis                 | 0.971026744  |
| wavelet-HLH | grlm       | LongRunHighGrayLevelEmphasis     | 332.9792668  |
| wavelet-HLH | grlm       | RunPercentage                    | 0.961538462  |
| wavelet-HLH | grlm       | LongRunLowGrayLevelEmphasis      | 0.019137011  |
| wavelet-HLH | grlm       | RunEntropy                       | 4.21967341   |
| wavelet-HLH | grlm       | HighGrayLevelRunEmphasis         | 293.0521539  |
| wavelet-HLH | grlm       | RunLengthNonUniformityNormalized | 0.927423742  |
| wavelet-HLH | glszm      | GrayLevelVariance                | 32.90745562  |

|             |       |                                  |             |
|-------------|-------|----------------------------------|-------------|
| wavelet-HLH | glszm | ZoneVariance                     | 1.265325444 |
| wavelet-HLH | glszm | GrayLevelNonUniformityNormalized | 0.062248521 |
| wavelet-HLH | glszm | SizeZoneNonUniformityNormalized  | 0.627455621 |
| wavelet-HLH | glszm | SizeZoneNonUniformity            | 40.78461538 |
| wavelet-HLH | glszm | GrayLevelNonUniformity           | 4.046153846 |
| wavelet-HLH | glszm | LargeAreaEmphasis                | 3.538461538 |
| wavelet-HLH | glszm | SmallAreaHighGrayLevelEmphasis   | 232.8262607 |
| wavelet-HLH | glszm | ZonePercentage                   | 0.663265306 |
| wavelet-HLH | glszm | LargeAreaLowGrayLevelEmphasis    | 0.036432202 |
| wavelet-HLH | glszm | LargeAreaHighGrayLevelEmphasis   | 1071.215385 |
| wavelet-HLH | glszm | HighGrayLevelZoneEmphasis        | 288.4153846 |
| wavelet-HLH | glszm | SmallAreaEmphasis                | 0.812128205 |
| wavelet-HLH | glszm | LowGrayLevelZoneEmphasis         | 0.024876028 |
| wavelet-HLH | glszm | ZoneEntropy                      | 4.818693491 |
| wavelet-HLH | glszm | SmallAreaLowGrayLevelEmphasis    | 0.024006411 |
| wavelet-HLH | ngtdm | Coarseness                       | 0.042170647 |
| wavelet-HLH | ngtdm | Complexity                       | 957.5616724 |
| wavelet-HLH | ngtdm | Strength                         | 9.891015179 |
| wavelet-HLH | ngtdm | Contrast                         | 0.521139348 |
| wavelet-HLH | ngtdm | Busyness                         | 0.068962292 |

| Image type | Feature Class | Feature Name                         | Value                                                                                                                                                                                                                                                                                                                                                                                                             |
|------------|---------------|--------------------------------------|-------------------------------------------------------------------------------------------------------------------------------------------------------------------------------------------------------------------------------------------------------------------------------------------------------------------------------------------------------------------------------------------------------------------|
| general    | info          | BoundingBox                          | 19: RTSTRUCT: C99-DNU_segment_GTV-ITV<br>(0, 1, 1, 6, 6, 4)                                                                                                                                                                                                                                                                                                                                                       |
| general    | info          | EnabledImageTypes                    | {u'Original': {}, u'Wavelet': {}}                                                                                                                                                                                                                                                                                                                                                                                 |
|            |               |                                      | {'distances': [1], 'additionalInfo': True, 'force2D': False, 'interpolator': 'sitkBSpline', 'resampledPixelSpacing': [3.0], 'label': 1, 'normalizeScale': 1, 'normalize': False, 'force2Ddimension': 0, 'removeOutliers': None, 'minimumROISize': None, u'binWidth': 25.0, 'minimumROIDimensions': 1, u'correctMask': True, 'preCrop': False, u'symmetricalGLCM': True, 'resegmentRange': None, 'padDistance': 5} |
| general    | info          | GeneralSettings                      | aeb4aef6349d5e94d6f750a749bf3392e8d17e7e                                                                                                                                                                                                                                                                                                                                                                          |
| general    | info          | ImageHash                            | (0.9765624999999998, 0.9765624999999998, 1.9999999999999999)                                                                                                                                                                                                                                                                                                                                                      |
| general    | info          | ImageSpacing                         | e15dfa8d72c5d3b4fc6c9c50abd8eff4658a5690                                                                                                                                                                                                                                                                                                                                                                          |
| general    | info          | MaskHash                             | 1.13.1                                                                                                                                                                                                                                                                                                                                                                                                            |
| general    | info          | NumpyVersion                         | 0.5.2                                                                                                                                                                                                                                                                                                                                                                                                             |
| general    | info          | PyWaveletVersion                     | 1.1.0                                                                                                                                                                                                                                                                                                                                                                                                             |
| general    | info          | SimpleITKVersion                     | 1.3.0.post102+g1b0eb74                                                                                                                                                                                                                                                                                                                                                                                            |
| general    | info          | Version                              |                                                                                                                                                                                                                                                                                                                                                                                                                   |
| general    | info          | VolumeNum                            | 1                                                                                                                                                                                                                                                                                                                                                                                                                 |
| general    | info          | VoxelNum                             | 83                                                                                                                                                                                                                                                                                                                                                                                                                |
| original   | shape         | Maximum3DDiameter                    | 17.74823935                                                                                                                                                                                                                                                                                                                                                                                                       |
| original   | shape         | Maximum2DDiameterSlice               | 17.49285568                                                                                                                                                                                                                                                                                                                                                                                                       |
| original   | shape         | Sphericity                           | 0.900629479                                                                                                                                                                                                                                                                                                                                                                                                       |
| original   | shape         | MinorAxis                            | 15.19453706                                                                                                                                                                                                                                                                                                                                                                                                       |
| original   | shape         | Elongation                           | 0.856798445                                                                                                                                                                                                                                                                                                                                                                                                       |
| original   | shape         | SurfaceVolumeRatio                   | 0.410321255                                                                                                                                                                                                                                                                                                                                                                                                       |
| original   | shape         | Volume                               | 2241                                                                                                                                                                                                                                                                                                                                                                                                              |
| original   | shape         | MajorAxis                            | 17.73408571                                                                                                                                                                                                                                                                                                                                                                                                       |
| original   | shape         | SurfaceArea                          | 919.5299321                                                                                                                                                                                                                                                                                                                                                                                                       |
| original   | shape         | Flatness                             | 0.663183293                                                                                                                                                                                                                                                                                                                                                                                                       |
| original   | shape         | LeastAxis                            | 11.76094937                                                                                                                                                                                                                                                                                                                                                                                                       |
| original   | shape         | Maximum2DDiameterColumn              | 16.15549442                                                                                                                                                                                                                                                                                                                                                                                                       |
| original   | shape         | Maximum2DDiameterRow                 | 16.15549442                                                                                                                                                                                                                                                                                                                                                                                                       |
| original   | gldm          | GrayLevelVariance                    | 100.7806648                                                                                                                                                                                                                                                                                                                                                                                                       |
| original   | gldm          | HighGrayLevelEmphasis                | 624.253012                                                                                                                                                                                                                                                                                                                                                                                                        |
| original   | gldm          | DependenceEntropy                    | 5.380710214                                                                                                                                                                                                                                                                                                                                                                                                       |
| original   | gldm          | DependenceNonUniformity              | 33.45783133                                                                                                                                                                                                                                                                                                                                                                                                       |
| original   | gldm          | GrayLevelNonUniformity               | 3.819277108                                                                                                                                                                                                                                                                                                                                                                                                       |
| original   | gldm          | SmallDependenceEmphasis              | 0.629110767                                                                                                                                                                                                                                                                                                                                                                                                       |
| original   | gldm          | SmallDependenceHighGrayLevelEmphasis | 326.9995749                                                                                                                                                                                                                                                                                                                                                                                                       |
| original   | gldm          | DependenceNonUniformityNormalized    | 0.403106402                                                                                                                                                                                                                                                                                                                                                                                                       |
| original   | gldm          | LargeDependenceEmphasis              | 7.144578313                                                                                                                                                                                                                                                                                                                                                                                                       |
| original   | gldm          | LargeDependenceLowGrayLevelEmphasis  | 0.024609756                                                                                                                                                                                                                                                                                                                                                                                                       |
| original   | gldm          | DependenceVariance                   | 3.192625925                                                                                                                                                                                                                                                                                                                                                                                                       |
| original   | gldm          | LargeDependenceHighGrayLevelEmphasis | 7767.096386                                                                                                                                                                                                                                                                                                                                                                                                       |
| original   | gldm          | SmallDependenceLowGrayLevelEmphasis  | 0.015730878                                                                                                                                                                                                                                                                                                                                                                                                       |
| original   | gldm          | LowGrayLevelEmphasis                 | 0.016759358                                                                                                                                                                                                                                                                                                                                                                                                       |
| original   | glcm          | JointAverage                         | 25.5592951                                                                                                                                                                                                                                                                                                                                                                                                        |
| original   | glcm          | SumAverage                           | 51.1185902                                                                                                                                                                                                                                                                                                                                                                                                        |
| original   | glcm          | JointEntropy                         | 6.330046009                                                                                                                                                                                                                                                                                                                                                                                                       |
| original   | glcm          | ClusterShade                         | -1617.40831                                                                                                                                                                                                                                                                                                                                                                                                       |
| original   | glcm          | MaximumProbability                   | 0.04019865                                                                                                                                                                                                                                                                                                                                                                                                        |
| original   | glcm          | Idmn                                 | 0.907747615                                                                                                                                                                                                                                                                                                                                                                                                       |
| original   | glcm          | JointEnergy                          | 0.013924131                                                                                                                                                                                                                                                                                                                                                                                                       |
| original   | glcm          | Contrast                             | 164.8371853                                                                                                                                                                                                                                                                                                                                                                                                       |
| original   | glcm          | DifferenceEntropy                    | 4.195451771                                                                                                                                                                                                                                                                                                                                                                                                       |

|          |            |                                  |              |
|----------|------------|----------------------------------|--------------|
| original | glcm       | InverseVariance                  | 0.105922612  |
| original | glcm       | DifferenceVariance               | 62.03757557  |
| original | glcm       | Idn                              | 0.808943438  |
| original | glcm       | Idm                              | 0.125821214  |
| original | glcm       | Correlation                      | 0.135600009  |
| original | glcm       | Autocorrelation                  | 665.8907898  |
| original | glcm       | SumEntropy                       | 4.798509479  |
| original | glcm       | SumSquares                       | 94.98821025  |
| original | glcm       | ClusterProminence                | 115404.1297  |
| original | glcm       | Imc2                             | 0.997294987  |
| original | glcm       | Imc1                             | -0.58513582  |
| original | glcm       | DifferenceAverage                | 9.995508337  |
| original | glcm       | Id                               | 0.203396648  |
| original | glcm       | ClusterTendency                  | 215.1156557  |
| original | firstorder | InterquartileRange               | 448.5        |
| original | firstorder | Skewness                         | -0.274011369 |
| original | firstorder | Uniformity                       | 0.046015387  |
| original | firstorder | Median                           | -289         |
| original | firstorder | Energy                           | 12304588     |
| original | firstorder | RobustMeanAbsoluteDeviation      | 175.947929   |
| original | firstorder | MeanAbsoluteDeviation            | 218.7864712  |
| original | firstorder | TotalEnergy                      | 332223876    |
| original | firstorder | Maximum                          | 55           |
| original | firstorder | RootMeanSquared                  | 385.0299316  |
| original | firstorder | 90Percentile                     | 27.8         |
| original | firstorder | Minimum                          | -831         |
| original | firstorder | Entropy                          | 4.711336993  |
| original | firstorder | Range                            | 886          |
| original | firstorder | Variance                         | 63405.6943   |
| original | firstorder | 10Percentile                     | -651.6       |
| original | firstorder | Kurtosis                         | 1.808758438  |
| original | firstorder | Mean                             | -291.2771084 |
| original | glrlm      | ShortRunLowGrayLevelEmphasis     | 0.017314572  |
| original | glrlm      | GrayLevelVariance                | 99.13053593  |
| original | glrlm      | LowGrayLevelRunEmphasis          | 0.017367226  |
| original | glrlm      | GrayLevelNonUniformityNormalized | 0.043152276  |
| original | glrlm      | RunVariance                      | 0.043896453  |
| original | glrlm      | GrayLevelNonUniformity           | 3.448401636  |
| original | glrlm      | LongRunEmphasis                  | 1.128045786  |
| original | glrlm      | ShortRunHighGrayLevelEmphasis    | 578.2763753  |
| original | glrlm      | RunLengthNonUniformity           | 74.31924154  |
| original | glrlm      | ShortRunEmphasis                 | 0.971408589  |
| original | glrlm      | LongRunHighGrayLevelEmphasis     | 739.8172564  |
| original | glrlm      | RunPercentage                    | 0.962001854  |
| original | glrlm      | LongRunLowGrayLevelEmphasis      | 0.017593431  |
| original | glrlm      | RunEntropy                       | 4.836663368  |
| original | glrlm      | HighGrayLevelRunEmphasis         | 607.7287168  |
| original | glrlm      | RunLengthNonUniformityNormalized | 0.929096747  |
| original | glszm      | GrayLevelVariance                | 93.22033898  |
| original | glszm      | ZoneVariance                     | 1.529445562  |
| original | glszm      | GrayLevelNonUniformityNormalized | 0.038207412  |
| original | glszm      | SizeZoneNonUniformityNormalized  | 0.617925883  |
| original | glszm      | SizeZoneNonUniformity            | 36.45762712  |
| original | glszm      | GrayLevelNonUniformity           | 2.254237288  |
| original | glszm      | LargeAreaEmphasis                | 3.508474576  |
| original | glszm      | SmallAreaHighGrayLevelEmphasis   | 412.8175895  |
| original | glszm      | ZonePercentage                   | 0.710843373  |
| original | glszm      | LargeAreaLowGrayLevelEmphasis    | 0.026715484  |

|             |            |                                      |              |
|-------------|------------|--------------------------------------|--------------|
| original    | glszm      | LargeAreaHighGrayLevelEmphasis       | 3180.559322  |
| original    | glszm      | HighGrayLevelZoneEmphasis            | 534.220339   |
| original    | glszm      | SmallAreaEmphasis                    | 0.813258004  |
| original    | glszm      | LowGrayLevelZoneEmphasis             | 0.022548628  |
| original    | glszm      | ZoneEntropy                          | 5.106805125  |
| original    | glszm      | SmallAreaLowGrayLevelEmphasis        | 0.021895952  |
| original    | ngtdm      | Coarseness                           | 0.035399013  |
| original    | ngtdm      | Complexity                           | 3373.695666  |
| original    | ngtdm      | Strength                             | 21.00047027  |
| original    | ngtdm      | Contrast                             | 1.66386408   |
| original    | ngtdm      | Busyness                             | 0.041499083  |
| wavelet-HHH | gldm       | GrayLevelVariance                    | 9.641167078  |
| wavelet-HHH | gldm       | HighGrayLevelEmphasis                | 96.60240964  |
| wavelet-HHH | gldm       | DependenceEntropy                    | 4.97107166   |
| wavelet-HHH | gldm       | DependenceNonUniformity              | 17.98795181  |
| wavelet-HHH | gldm       | GrayLevelNonUniformity               | 9.289156627  |
| wavelet-HHH | gldm       | SmallDependenceEmphasis              | 0.397951807  |
| wavelet-HHH | gldm       | SmallDependenceHighGrayLevelEmphasis | 35.32920348  |
| wavelet-HHH | gldm       | DependenceNonUniformityNormalized    | 0.216722311  |
| wavelet-HHH | gldm       | LargeDependenceEmphasis              | 8.662650602  |
| wavelet-HHH | gldm       | LargeDependenceLowGrayLevelEmphasis  | 0.123264295  |
| wavelet-HHH | gldm       | DependenceVariance                   | 2.076934243  |
| wavelet-HHH | gldm       | LargeDependenceHighGrayLevelEmphasis | 864.5783133  |
| wavelet-HHH | gldm       | SmallDependenceLowGrayLevelEmphasis  | 0.030563889  |
| wavelet-HHH | gldm       | LowGrayLevelEmphasis                 | 0.037504629  |
| wavelet-HHH | glcm       | JointAverage                         | 9.395343163  |
| wavelet-HHH | glcm       | SumAverage                           | 18.79068633  |
| wavelet-HHH | glcm       | JointEntropy                         | 5.724384203  |
| wavelet-HHH | glcm       | ClusterShade                         | -35.03924732 |
| wavelet-HHH | glcm       | MaximumProbability                   | 0.052010153  |
| wavelet-HHH | glcm       | Idmn                                 | 0.938150394  |
| wavelet-HHH | glcm       | JointEnergy                          | 0.02263303   |
| wavelet-HHH | glcm       | Contrast                             | 19.51478211  |
| wavelet-HHH | glcm       | DifferenceEntropy                    | 3.071800885  |
| wavelet-HHH | glcm       | InverseVariance                      | 0.275297123  |
| wavelet-HHH | glcm       | DifferenceVariance                   | 7.822663569  |
| wavelet-HHH | glcm       | Idn                                  | 0.840625218  |
| wavelet-HHH | glcm       | Idm                                  | 0.262785125  |
| wavelet-HHH | glcm       | Correlation                          | -0.037772763 |
| wavelet-HHH | glcm       | Autocorrelation                      | 87.96968598  |
| wavelet-HHH | glcm       | SumEntropy                           | 3.737101092  |
| wavelet-HHH | glcm       | SumSquares                           | 9.437976433  |
| wavelet-HHH | glcm       | ClusterProminence                    | 1164.722506  |
| wavelet-HHH | glcm       | Imc2                                 | 0.937090661  |
| wavelet-HHH | glcm       | Imc1                                 | -0.314752393 |
| wavelet-HHH | glcm       | DifferenceAverage                    | 3.395691994  |
| wavelet-HHH | glcm       | Id                                   | 0.351155431  |
| wavelet-HHH | glcm       | ClusterTendency                      | 18.23712362  |
| wavelet-HHH | firstorder | InterquartileRange                   | 90.65697745  |
| wavelet-HHH | firstorder | Skewness                             | -0.688907935 |
| wavelet-HHH | firstorder | Uniformity                           | 0.11191755   |
| wavelet-HHH | firstorder | Median                               | 0.455080447  |
| wavelet-HHH | firstorder | Energy                               | 482677.6177  |
| wavelet-HHH | firstorder | RobustMeanAbsoluteDeviation          | 36.01011544  |
| wavelet-HHH | firstorder | MeanAbsoluteDeviation                | 57.65433039  |
| wavelet-HHH | firstorder | TotalEnergy                          | 13032295.68  |
| wavelet-HHH | firstorder | Maximum                              | 165.0765639  |
| wavelet-HHH | firstorder | RootMeanSquared                      | 76.25872399  |

|             |            |                                      |              |
|-------------|------------|--------------------------------------|--------------|
| wavelet-HHH | firstorder | 90Percentile                         | 77.28981697  |
| wavelet-HHH | firstorder | Minimum                              | -213.0825373 |
| wavelet-HHH | firstorder | Entropy                              | 3.432765627  |
| wavelet-HHH | firstorder | Range                                | 378.1591012  |
| wavelet-HHH | firstorder | Variance                             | 5803.050338  |
| wavelet-HHH | firstorder | 10Percentile                         | -94.45152007 |
| wavelet-HHH | firstorder | Kurtosis                             | 3.435988252  |
| wavelet-HHH | firstorder | Mean                                 | -3.513210291 |
| wavelet-HHH | glrlm      | ShortRunLowGrayLevelEmphasis         | 0.038689439  |
| wavelet-HHH | glrlm      | GrayLevelVariance                    | 10.05821009  |
| wavelet-HHH | glrlm      | LowGrayLevelRunEmphasis              | 0.039202942  |
| wavelet-HHH | glrlm      | GrayLevelNonUniformityNormalized     | 0.108585171  |
| wavelet-HHH | glrlm      | RunVariance                          | 0.069831642  |
| wavelet-HHH | glrlm      | GrayLevelNonUniformity               | 8.473795786  |
| wavelet-HHH | glrlm      | LongRunEmphasis                      | 1.204295644  |
| wavelet-HHH | glrlm      | ShortRunHighGrayLevelEmphasis        | 91.65599447  |
| wavelet-HHH | glrlm      | RunLengthNonUniformity               | 69.37723069  |
| wavelet-HHH | glrlm      | ShortRunEmphasis                     | 0.954464532  |
| wavelet-HHH | glrlm      | LongRunHighGrayLevelEmphasis         | 116.8542896  |
| wavelet-HHH | glrlm      | RunPercentage                        | 0.939759036  |
| wavelet-HHH | glrlm      | LongRunLowGrayLevelEmphasis          | 0.041510025  |
| wavelet-HHH | glrlm      | RunEntropy                           | 3.712429128  |
| wavelet-HHH | glrlm      | HighGrayLevelRunEmphasis             | 96.30366181  |
| wavelet-HHH | glrlm      | RunLengthNonUniformityNormalized     | 0.888352068  |
| wavelet-HHH | glszm      | GrayLevelVariance                    | 16.97222222  |
| wavelet-HHH | glszm      | ZoneVariance                         | 7.93441358   |
| wavelet-HHH | glszm      | GrayLevelNonUniformityNormalized     | 0.080246914  |
| wavelet-HHH | glszm      | SizeZoneNonUniformityNormalized      | 0.50308642   |
| wavelet-HHH | glszm      | SizeZoneNonUniformity                | 18.11111111  |
| wavelet-HHH | glszm      | GrayLevelNonUniformity               | 2.888888889  |
| wavelet-HHH | glszm      | LargeAreaEmphasis                    | 13.25        |
| wavelet-HHH | glszm      | SmallAreaHighGrayLevelEmphasis       | 62.59218878  |
| wavelet-HHH | glszm      | ZonePercentage                       | 0.43373494   |
| wavelet-HHH | glszm      | LargeAreaLowGrayLevelEmphasis        | 0.204447743  |
| wavelet-HHH | glszm      | LargeAreaHighGrayLevelEmphasis       | 1332.055556  |
| wavelet-HHH | glszm      | HighGrayLevelZoneEmphasis            | 89.22222222  |
| wavelet-HHH | glszm      | SmallAreaEmphasis                    | 0.730065129  |
| wavelet-HHH | glszm      | LowGrayLevelZoneEmphasis             | 0.071697546  |
| wavelet-HHH | glszm      | ZoneEntropy                          | 4.447702779  |
| wavelet-HHH | glszm      | SmallAreaLowGrayLevelEmphasis        | 0.068261458  |
| wavelet-HHH | ngtdm      | Coarseness                           | 0.063264259  |
| wavelet-HHH | ngtdm      | Complexity                           | 222.7076354  |
| wavelet-HHH | ngtdm      | Strength                             | 4.574810913  |
| wavelet-HHH | ngtdm      | Contrast                             | 0.230601377  |
| wavelet-HHH | ngtdm      | Busyness                             | 0.109732117  |
| wavelet-HLL | gldm       | GrayLevelVariance                    | 185.0471767  |
| wavelet-HLL | gldm       | HighGrayLevelEmphasis                | 634.1807229  |
| wavelet-HLL | gldm       | DependenceEntropy                    | 5.585765034  |
| wavelet-HLL | gldm       | DependenceNonUniformity              | 43.72289157  |
| wavelet-HLL | gldm       | GrayLevelNonUniformity               | 2.686746988  |
| wavelet-HLL | gldm       | SmallDependenceEmphasis              | 0.745629183  |
| wavelet-HLL | gldm       | SmallDependenceHighGrayLevelEmphasis | 544.3235408  |
| wavelet-HLL | gldm       | DependenceNonUniformityNormalized    | 0.526781826  |
| wavelet-HLL | gldm       | LargeDependenceEmphasis              | 2.638554217  |
| wavelet-HLL | gldm       | LargeDependenceLowGrayLevelEmphasis  | 0.047306592  |
| wavelet-HLL | gldm       | DependenceVariance                   | 0.582958339  |
| wavelet-HLL | gldm       | LargeDependenceHighGrayLevelEmphasis | 1068.759036  |
| wavelet-HLL | gldm       | SmallDependenceLowGrayLevelEmphasis  | 0.032419881  |

|             |            |                                  |              |
|-------------|------------|----------------------------------|--------------|
| wavelet-HLL | gldm       | LowGrayLevelEmphasis             | 0.03437066   |
| wavelet-HLL | glcm       | JointAverage                     | 19.97071318  |
| wavelet-HLL | glcm       | SumAverage                       | 39.94142636  |
| wavelet-HLL | glcm       | JointEntropy                     | 6.530247154  |
| wavelet-HLL | glcm       | ClusterShade                     | 7233.008346  |
| wavelet-HLL | glcm       | MaximumProbability               | 0.023503762  |
| wavelet-HLL | glcm       | Idmn                             | 0.938571087  |
| wavelet-HLL | glcm       | JointEnergy                      | 0.011242425  |
| wavelet-HLL | glcm       | Contrast                         | 216.1311514  |
| wavelet-HLL | glcm       | DifferenceEntropy                | 4.245141626  |
| wavelet-HLL | glcm       | InverseVariance                  | 0.100665343  |
| wavelet-HLL | glcm       | DifferenceVariance               | 71.72679039  |
| wavelet-HLL | glcm       | Idn                              | 0.839256895  |
| wavelet-HLL | glcm       | Idm                              | 0.090151502  |
| wavelet-HLL | glcm       | Correlation                      | 0.364416929  |
| wavelet-HLL | glcm       | Autocorrelation                  | 465.1012178  |
| wavelet-HLL | glcm       | SumEntropy                       | 5.046686422  |
| wavelet-HLL | glcm       | SumSquares                       | 173.9816282  |
| wavelet-HLL | glcm       | ClusterProminence                | 662672.8161  |
| wavelet-HLL | glcm       | Imc2                             | 0.999500937  |
| wavelet-HLL | glcm       | Imc1                             | -0.693748268 |
| wavelet-HLL | glcm       | DifferenceAverage                | 11.4972432   |
| wavelet-HLL | glcm       | Id                               | 0.166804461  |
| wavelet-HLL | glcm       | ClusterTendency                  | 479.7953615  |
| wavelet-HLL | firstorder | InterquartileRange               | 466.7844147  |
| wavelet-HLL | firstorder | Skewness                         | 0.678118796  |
| wavelet-HLL | firstorder | Uniformity                       | 0.032370446  |
| wavelet-HLL | firstorder | Median                           | -84.14647773 |
| wavelet-HLL | firstorder | Energy                           | 9632700.302  |
| wavelet-HLL | firstorder | RobustMeanAbsoluteDeviation      | 196.3384744  |
| wavelet-HLL | firstorder | MeanAbsoluteDeviation            | 277.4909523  |
| wavelet-HLL | firstorder | TotalEnergy                      | 260082908.1  |
| wavelet-HLL | firstorder | Maximum                          | 781.4392045  |
| wavelet-HLL | firstorder | RootMeanSquared                  | 340.6708531  |
| wavelet-HLL | firstorder | 90Percentile                     | 441.7648403  |
| wavelet-HLL | firstorder | Minimum                          | -546.196345  |
| wavelet-HLL | firstorder | Entropy                          | 5.158946697  |
| wavelet-HLL | firstorder | Range                            | 1327.635549  |
| wavelet-HLL | firstorder | Variance                         | 114925.526   |
| wavelet-HLL | firstorder | 10Percentile                     | -428.7165678 |
| wavelet-HLL | firstorder | Kurtosis                         | 2.733773042  |
| wavelet-HLL | firstorder | Mean                             | -33.63189234 |
| wavelet-HLL | glrlm      | ShortRunLowGrayLevelEmphasis     | 0.034724938  |
| wavelet-HLL | glrlm      | GrayLevelVariance                | 186.3978342  |
| wavelet-HLL | glrlm      | LowGrayLevelRunEmphasis          | 0.034824917  |
| wavelet-HLL | glrlm      | GrayLevelNonUniformityNormalized | 0.031779984  |
| wavelet-HLL | glrlm      | RunVariance                      | 0.016671009  |
| wavelet-HLL | glrlm      | GrayLevelNonUniformity           | 2.594063077  |
| wavelet-HLL | glrlm      | LongRunEmphasis                  | 1.051284657  |
| wavelet-HLL | glrlm      | ShortRunHighGrayLevelEmphasis    | 635.9501019  |
| wavelet-HLL | glrlm      | RunLengthNonUniformity           | 78.9146741   |
| wavelet-HLL | glrlm      | ShortRunEmphasis                 | 0.987178836  |
| wavelet-HLL | glrlm      | LongRunHighGrayLevelEmphasis     | 655.389819   |
| wavelet-HLL | glrlm      | RunPercentage                    | 0.983317887  |
| wavelet-HLL | glrlm      | LongRunLowGrayLevelEmphasis      | 0.035224832  |
| wavelet-HLL | glrlm      | RunEntropy                       | 5.205437618  |
| wavelet-HLL | glrlm      | HighGrayLevelRunEmphasis         | 639.8380453  |
| wavelet-HLL | glrlm      | RunLengthNonUniformityNormalized | 0.966657981  |



|             |       |                                      |              |
|-------------|-------|--------------------------------------|--------------|
| wavelet-HLL | glszm | GrayLevelVariance                    | 201.6252163  |
| wavelet-HLL | glszm | ZoneVariance                         | 0.348399654  |
| wavelet-HLL | glszm | GrayLevelNonUniformityNormalized     | 0.028114187  |
| wavelet-HLL | glszm | SizeZoneNonUniformityNormalized      | 0.704584775  |
| wavelet-HLL | glszm | SizeZoneNonUniformity                | 47.91176471  |
| wavelet-HLL | glszm | GrayLevelNonUniformity               | 1.911764706  |
| wavelet-HLL | glszm | LargeAreaEmphasis                    | 1.838235294  |
| wavelet-HLL | glszm | SmallAreaHighGrayLevelEmphasis       | 646.8652941  |
| wavelet-HLL | glszm | ZonePercentage                       | 0.819277108  |
| wavelet-HLL | glszm | LargeAreaLowGrayLevelEmphasis        | 0.046810451  |
| wavelet-HLL | glszm | LargeAreaHighGrayLevelEmphasis       | 944.9558824  |
| wavelet-HLL | glszm | HighGrayLevelZoneEmphasis            | 699.3088235  |
| wavelet-HLL | glszm | SmallAreaEmphasis                    | 0.864558824  |
| wavelet-HLL | glszm | LowGrayLevelZoneEmphasis             | 0.040252626  |
| wavelet-HLL | glszm | ZoneEntropy                          | 5.506436738  |
| wavelet-HLL | glszm | SmallAreaLowGrayLevelEmphasis        | 0.039225712  |
| wavelet-HLL | ngtdm | Coarseness                           | 0.059101756  |
| wavelet-HLL | ngtdm | Complexity                           | 5842.001679  |
| wavelet-HLL | ngtdm | Strength                             | 56.82879929  |
| wavelet-HLL | ngtdm | Contrast                             | 1.663980783  |
| wavelet-HLL | ngtdm | Busyness                             | 0.027754103  |
| wavelet-LHL | gldm  | GrayLevelVariance                    | 137.2364639  |
| wavelet-LHL | gldm  | HighGrayLevelEmphasis                | 700.0120482  |
| wavelet-LHL | gldm  | DependenceEntropy                    | 5.525288528  |
| wavelet-LHL | gldm  | DependenceNonUniformity              | 33.98795181  |
| wavelet-LHL | gldm  | GrayLevelNonUniformity               | 3.144578313  |
| wavelet-LHL | gldm  | SmallDependenceEmphasis              | 0.655120482  |
| wavelet-LHL | gldm  | SmallDependenceHighGrayLevelEmphasis | 462.7254853  |
| wavelet-LHL | gldm  | DependenceNonUniformityNormalized    | 0.409493395  |
| wavelet-LHL | gldm  | LargeDependenceEmphasis              | 3.674698795  |
| wavelet-LHL | gldm  | LargeDependenceLowGrayLevelEmphasis  | 0.028755456  |
| wavelet-LHL | gldm  | DependenceVariance                   | 0.870082741  |
| wavelet-LHL | gldm  | LargeDependenceHighGrayLevelEmphasis | 2295.240964  |
| wavelet-LHL | gldm  | SmallDependenceLowGrayLevelEmphasis  | 0.015920448  |
| wavelet-LHL | gldm  | LowGrayLevelEmphasis                 | 0.017454939  |
| wavelet-LHL | glcm  | JointAverage                         | 22.61204771  |
| wavelet-LHL | glcm  | SumAverage                           | 45.22409543  |
| wavelet-LHL | glcm  | JointEntropy                         | 6.463851485  |
| wavelet-LHL | glcm  | ClusterShade                         | 4017.986079  |
| wavelet-LHL | glcm  | MaximumProbability                   | 0.023320839  |
| wavelet-LHL | glcm  | Idmn                                 | 0.930651034  |
| wavelet-LHL | glcm  | JointEnergy                          | 0.011881298  |
| wavelet-LHL | glcm  | Contrast                             | 202.5570277  |
| wavelet-LHL | glcm  | DifferenceEntropy                    | 4.154845657  |
| wavelet-LHL | glcm  | InverseVariance                      | 0.114449397  |
| wavelet-LHL | glcm  | DifferenceVariance                   | 79.79543699  |
| wavelet-LHL | glcm  | Idn                                  | 0.837309341  |
| wavelet-LHL | glcm  | Idm                                  | 0.112650047  |
| wavelet-LHL | glcm  | Correlation                          | 0.284498343  |
| wavelet-LHL | glcm  | Autocorrelation                      | 556.4515257  |
| wavelet-LHL | glcm  | SumEntropy                           | 4.967325417  |
| wavelet-LHL | glcm  | SumSquares                           | 145.4469245  |
| wavelet-LHL | glcm  | ClusterProminence                    | 387347.6683  |
| wavelet-LHL | glcm  | Imc2                                 | 0.999135102  |
| wavelet-LHL | glcm  | Imc1                                 | -0.663365523 |
| wavelet-LHL | glcm  | DifferenceAverage                    | 10.47734346  |
| wavelet-LHL | glcm  | Id                                   | 0.191963996  |
| wavelet-LHL | glcm  | ClusterTendency                      | 379.2306702  |

|             |            |                                  |              |
|-------------|------------|----------------------------------|--------------|
| wavelet-LHL | firstorder | InterquartileRange               | 420.8612484  |
| wavelet-LHL | firstorder | Skewness                         | 0.288509986  |
| wavelet-LHL | firstorder | Uniformity                       | 0.037886486  |
| wavelet-LHL | firstorder | Median                           | -65.24117566 |
| wavelet-LHL | firstorder | Energy                           | 7113103.753  |
| wavelet-LHL | firstorder | RobustMeanAbsoluteDeviation      | 176.5434974  |
| wavelet-LHL | firstorder | MeanAbsoluteDeviation            | 243.2084769  |
| wavelet-LHL | firstorder | TotalEnergy                      | 192053801.3  |
| wavelet-LHL | firstorder | Maximum                          | 598.6821725  |
| wavelet-LHL | firstorder | RootMeanSquared                  | 292.7457006  |
| wavelet-LHL | firstorder | 90Percentile                     | 438.5153027  |
| wavelet-LHL | firstorder | Minimum                          | -574.0958856 |
| wavelet-LHL | firstorder | Entropy                          | 4.972081938  |
| wavelet-LHL | firstorder | Range                            | 1172.778058  |
| wavelet-LHL | firstorder | Variance                         | 85678.96136  |
| wavelet-LHL | firstorder | 10Percentile                     | -356.2122941 |
| wavelet-LHL | firstorder | Kurtosis                         | 2.17804248   |
| wavelet-LHL | firstorder | Mean                             | 4.591716427  |
| wavelet-LHL | glrlm      | ShortRunLowGrayLevelEmphasis     | 0.017725546  |
| wavelet-LHL | glrlm      | GrayLevelVariance                | 137.7456714  |
| wavelet-LHL | glrlm      | LowGrayLevelRunEmphasis          | 0.017809643  |
| wavelet-LHL | glrlm      | GrayLevelNonUniformityNormalized | 0.03722937   |
| wavelet-LHL | glrlm      | RunVariance                      | 0.027872299  |
| wavelet-LHL | glrlm      | GrayLevelNonUniformity           | 3.010143019  |
| wavelet-LHL | glrlm      | LongRunEmphasis                  | 1.08291233   |
| wavelet-LHL | glrlm      | ShortRunHighGrayLevelEmphasis    | 688.9904526  |
| wavelet-LHL | glrlm      | RunLengthNonUniformity           | 76.83962363  |
| wavelet-LHL | glrlm      | ShortRunEmphasis                 | 0.980367688  |
| wavelet-LHL | glrlm      | LongRunHighGrayLevelEmphasis     | 753.6004126  |
| wavelet-LHL | glrlm      | RunPercentage                    | 0.974050046  |
| wavelet-LHL | glrlm      | LongRunLowGrayLevelEmphasis      | 0.018168395  |
| wavelet-LHL | glrlm      | RunEntropy                       | 5.056771857  |
| wavelet-LHL | glrlm      | HighGrayLevelRunEmphasis         | 701.7406278  |
| wavelet-LHL | glrlm      | RunLengthNonUniformityNormalized | 0.949869117  |
| wavelet-LHL | glszm      | GrayLevelVariance                | 141.8521903  |
| wavelet-LHL | glszm      | ZoneVariance                     | 0.68959957   |
| wavelet-LHL | glszm      | GrayLevelNonUniformityNormalized | 0.03251814   |
| wavelet-LHL | glszm      | SizeZoneNonUniformityNormalized  | 0.638806772  |
| wavelet-LHL | glszm      | SizeZoneNonUniformity            | 38.96721311  |
| wavelet-LHL | glszm      | GrayLevelNonUniformity           | 1.983606557  |
| wavelet-LHL | glszm      | LargeAreaEmphasis                | 2.540983607  |
| wavelet-LHL | glszm      | SmallAreaHighGrayLevelEmphasis   | 585.281439   |
| wavelet-LHL | glszm      | ZonePercentage                   | 0.734939759  |
| wavelet-LHL | glszm      | LargeAreaLowGrayLevelEmphasis    | 0.029261281  |
| wavelet-LHL | glszm      | LargeAreaHighGrayLevelEmphasis   | 1624.967213  |
| wavelet-LHL | glszm      | HighGrayLevelZoneEmphasis        | 717.0655738  |
| wavelet-LHL | glszm      | SmallAreaEmphasis                | 0.826020036  |
| wavelet-LHL | glszm      | LowGrayLevelZoneEmphasis         | 0.02205664   |
| wavelet-LHL | glszm      | ZoneEntropy                      | 5.369021559  |
| wavelet-LHL | glszm      | SmallAreaLowGrayLevelEmphasis    | 0.021310144  |
| wavelet-LHL | ngtdm      | Coarseness                       | 0.058140476  |
| wavelet-LHL | ngtdm      | Complexity                       | 4474.044784  |
| wavelet-LHL | ngtdm      | Strength                         | 40.10269518  |
| wavelet-LHL | ngtdm      | Contrast                         | 1.344255184  |
| wavelet-LHL | ngtdm      | Busyness                         | 0.022646291  |
| wavelet-LHH | gldm       | GrayLevelVariance                | 26.43867034  |
| wavelet-LHH | gldm       | HighGrayLevelEmphasis            | 253.9759036  |
| wavelet-LHH | gldm       | DependenceEntropy                | 5.284324672  |

|             |            |                                      |              |
|-------------|------------|--------------------------------------|--------------|
| wavelet-LHH | gldm       | DependenceNonUniformity              | 23.65060241  |
| wavelet-LHH | gldm       | GrayLevelNonUniformity               | 5.771084337  |
| wavelet-LHH | gldm       | SmallDependenceEmphasis              | 0.47772423   |
| wavelet-LHH | gldm       | SmallDependenceHighGrayLevelEmphasis | 116.197085   |
| wavelet-LHH | gldm       | DependenceNonUniformityNormalized    | 0.284947017  |
| wavelet-LHH | gldm       | LargeDependenceEmphasis              | 5.43373494   |
| wavelet-LHH | gldm       | LargeDependenceLowGrayLevelEmphasis  | 0.124954282  |
| wavelet-LHH | gldm       | DependenceVariance                   | 1.089272754  |
| wavelet-LHH | gldm       | LargeDependenceHighGrayLevelEmphasis | 1482.433735  |
| wavelet-LHH | gldm       | SmallDependenceLowGrayLevelEmphasis  | 0.013235087  |
| wavelet-LHH | gldm       | LowGrayLevelEmphasis                 | 0.033780853  |
| wavelet-LHH | glcm       | JointAverage                         | 15.28029842  |
| wavelet-LHH | glcm       | SumAverage                           | 30.56059684  |
| wavelet-LHH | glcm       | JointEntropy                         | 6.186920468  |
| wavelet-LHH | glcm       | ClusterShade                         | -210.3521053 |
| wavelet-LHH | glcm       | MaximumProbability                   | 0.03361604   |
| wavelet-LHH | glcm       | Idmn                                 | 0.945367172  |
| wavelet-LHH | glcm       | JointEnergy                          | 0.015204464  |
| wavelet-LHH | glcm       | Contrast                             | 51.0731581   |
| wavelet-LHH | glcm       | DifferenceEntropy                    | 3.476493057  |
| wavelet-LHH | glcm       | InverseVariance                      | 0.213081392  |
| wavelet-LHH | glcm       | DifferenceVariance                   | 22.57535003  |
| wavelet-LHH | glcm       | Idn                                  | 0.854323706  |
| wavelet-LHH | glcm       | Idm                                  | 0.195362087  |
| wavelet-LHH | glcm       | Correlation                          | 0.032851448  |
| wavelet-LHH | glcm       | Autocorrelation                      | 234.5563622  |
| wavelet-LHH | glcm       | SumEntropy                           | 4.265862688  |
| wavelet-LHH | glcm       | SumSquares                           | 26.50893327  |
| wavelet-LHH | glcm       | ClusterProminence                    | 12878.89526  |
| wavelet-LHH | glcm       | Imc2                                 | 0.987246552  |
| wavelet-LHH | glcm       | Imc1                                 | -0.463158027 |
| wavelet-LHH | glcm       | DifferenceAverage                    | 5.212959397  |
| wavelet-LHH | glcm       | Id                                   | 0.284887559  |
| wavelet-LHH | glcm       | ClusterTendency                      | 54.96257498  |
| wavelet-LHH | firstorder | InterquartileRange                   | 145.5110204  |
| wavelet-LHH | firstorder | Skewness                             | -0.658179238 |
| wavelet-LHH | firstorder | Uniformity                           | 0.069531137  |
| wavelet-LHH | firstorder | Median                               | 0.435261295  |
| wavelet-LHH | firstorder | Energy                               | 1405407.128  |
| wavelet-LHH | firstorder | RobustMeanAbsoluteDeviation          | 59.98523996  |
| wavelet-LHH | firstorder | MeanAbsoluteDeviation                | 97.53807359  |
| wavelet-LHH | firstorder | TotalEnergy                          | 37945992.45  |
| wavelet-LHH | firstorder | Maximum                              | 293.4431125  |
| wavelet-LHH | firstorder | RootMeanSquared                      | 130.1253857  |
| wavelet-LHH | firstorder | 90Percentile                         | 120.2025509  |
| wavelet-LHH | firstorder | Minimum                              | -373.9631916 |
| wavelet-LHH | firstorder | Entropy                              | 4.095291047  |
| wavelet-LHH | firstorder | Range                                | 667.4063041  |
| wavelet-LHH | firstorder | Variance                             | 16799.36331  |
| wavelet-LHH | firstorder | 10Percentile                         | -182.6471295 |
| wavelet-LHH | firstorder | Kurtosis                             | 3.859523425  |
| wavelet-LHH | firstorder | Mean                                 | -11.54351275 |
| wavelet-LHH | glrlm      | ShortRunLowGrayLevelEmphasis         | 0.033124193  |
| wavelet-LHH | glrlm      | GrayLevelVariance                    | 26.86765442  |
| wavelet-LHH | glrlm      | LowGrayLevelRunEmphasis              | 0.034049557  |
| wavelet-LHH | glrlm      | GrayLevelNonUniformityNormalized     | 0.068726223  |
| wavelet-LHH | glrlm      | RunVariance                          | 0.043457832  |
| wavelet-LHH | glrlm      | GrayLevelNonUniformity               | 5.466520592  |

|             |       |                                      |             |
|-------------|-------|--------------------------------------|-------------|
| wavelet-LHH | glrlm | LongRunEmphasis                      | 1.135656712 |
| wavelet-LHH | glrlm | ShortRunHighGrayLevelEmphasis        | 244.1958855 |
| wavelet-LHH | glrlm | RunLengthNonUniformity               | 73.2119658  |
| wavelet-LHH | glrlm | ShortRunEmphasis                     | 0.967195823 |
| wavelet-LHH | glrlm | LongRunHighGrayLevelEmphasis         | 290.2736879 |
| wavelet-LHH | glrlm | RunPercentage                        | 0.958294717 |
| wavelet-LHH | glrlm | LongRunLowGrayLevelEmphasis          | 0.037764716 |
| wavelet-LHH | glrlm | RunEntropy                           | 4.259048282 |
| wavelet-LHH | glrlm | HighGrayLevelRunEmphasis             | 253.1237337 |
| wavelet-LHH | glrlm | RunLengthNonUniformityNormalized     | 0.91868912  |
| wavelet-LHH | glszm | GrayLevelVariance                    | 32.37326389 |
| wavelet-LHH | glszm | ZoneVariance                         | 1.655815972 |
| wavelet-LHH | glszm | GrayLevelNonUniformityNormalized     | 0.059027778 |
| wavelet-LHH | glszm | SizeZoneNonUniformityNormalized      | 0.460069444 |
| wavelet-LHH | glszm | SizeZoneNonUniformity                | 22.08333333 |
| wavelet-LHH | glszm | GrayLevelNonUniformity               | 2.833333333 |
| wavelet-LHH | glszm | LargeAreaEmphasis                    | 4.645833333 |
| wavelet-LHH | glszm | SmallAreaHighGrayLevelEmphasis       | 169.7273669 |
| wavelet-LHH | glszm | ZonePercentage                       | 0.578313253 |
| wavelet-LHH | glszm | LargeAreaLowGrayLevelEmphasis        | 0.112438466 |
| wavelet-LHH | glszm | LargeAreaHighGrayLevelEmphasis       | 1239.25     |
| wavelet-LHH | glszm | HighGrayLevelZoneEmphasis            | 243.8333333 |
| wavelet-LHH | glszm | SmallAreaEmphasis                    | 0.704247685 |
| wavelet-LHH | glszm | LowGrayLevelZoneEmphasis             | 0.034242292 |
| wavelet-LHH | glszm | ZoneEntropy                          | 4.970175521 |
| wavelet-LHH | glszm | SmallAreaLowGrayLevelEmphasis        | 0.017074765 |
| wavelet-LHH | ngtdm | Coarseness                           | 0.058917304 |
| wavelet-LHH | ngtdm | Complexity                           | 863.224893  |
| wavelet-LHH | ngtdm | Strength                             | 11.52255386 |
| wavelet-LHH | ngtdm | Contrast                             | 0.4167764   |
| wavelet-LHH | ngtdm | Busyness                             | 0.048185601 |
| wavelet-LLH | gldm  | GrayLevelVariance                    | 71.38220351 |
| wavelet-LLH | gldm  | HighGrayLevelEmphasis                | 412.9638554 |
| wavelet-LLH | gldm  | DependenceEntropy                    | 5.278418347 |
| wavelet-LLH | gldm  | DependenceNonUniformity              | 33          |
| wavelet-LLH | gldm  | GrayLevelNonUniformity               | 3.819277108 |
| wavelet-LLH | gldm  | SmallDependenceEmphasis              | 0.591783802 |
| wavelet-LLH | gldm  | SmallDependenceHighGrayLevelEmphasis | 265.0566432 |
| wavelet-LLH | gldm  | DependenceNonUniformityNormalized    | 0.397590361 |
| wavelet-LLH | gldm  | LargeDependenceEmphasis              | 3.578313253 |
| wavelet-LLH | gldm  | LargeDependenceLowGrayLevelEmphasis  | 0.033536349 |
| wavelet-LLH | gldm  | DependenceVariance                   | 0.692408187 |
| wavelet-LLH | gldm  | LargeDependenceHighGrayLevelEmphasis | 1187.807229 |
| wavelet-LLH | gldm  | SmallDependenceLowGrayLevelEmphasis  | 0.016555266 |
| wavelet-LLH | gldm  | LowGrayLevelEmphasis                 | 0.01879033  |
| wavelet-LLH | glcm  | JointAverage                         | 17.98708897 |
| wavelet-LLH | glcm  | SumAverage                           | 35.97417793 |
| wavelet-LLH | glcm  | JointEntropy                         | 6.400351135 |
| wavelet-LLH | glcm  | ClusterShade                         | 1434.739767 |
| wavelet-LLH | glcm  | MaximumProbability                   | 0.025321221 |
| wavelet-LLH | glcm  | Idmn                                 | 0.943265711 |
| wavelet-LLH | glcm  | JointEnergy                          | 0.012570001 |
| wavelet-LLH | glcm  | Contrast                             | 94.33990191 |
| wavelet-LLH | glcm  | DifferenceEntropy                    | 3.895858576 |
| wavelet-LLH | glcm  | InverseVariance                      | 0.137918402 |
| wavelet-LLH | glcm  | DifferenceVariance                   | 34.85744289 |
| wavelet-LLH | glcm  | Idn                                  | 0.845686989 |
| wavelet-LLH | glcm  | Idm                                  | 0.130724154 |

|             |            |                                  |              |
|-------------|------------|----------------------------------|--------------|
| wavelet-LLH | glcm       | Correlation                      | 0.343318075  |
| wavelet-LLH | glcm       | Autocorrelation                  | 348.8336507  |
| wavelet-LLH | glcm       | SumEntropy                       | 4.839083807  |
| wavelet-LLH | glcm       | SumSquares                       | 72.41620065  |
| wavelet-LLH | glcm       | ClusterProminence                | 88674.74376  |
| wavelet-LLH | glcm       | Imc2                             | 0.997306825  |
| wavelet-LLH | glcm       | Imc1                             | -0.583885351 |
| wavelet-LLH | glcm       | DifferenceAverage                | 7.501342661  |
| wavelet-LLH | glcm       | Id                               | 0.218589272  |
| wavelet-LLH | glcm       | ClusterTendency                  | 195.3249007  |
| wavelet-LLH | firstorder | InterquartileRange               | 334.9553611  |
| wavelet-LLH | firstorder | Skewness                         | 0.347362614  |
| wavelet-LLH | firstorder | Uniformity                       | 0.046015387  |
| wavelet-LLH | firstorder | Median                           | -91.93631252 |
| wavelet-LLH | firstorder | Energy                           | 3969507.788  |
| wavelet-LLH | firstorder | RobustMeanAbsoluteDeviation      | 128.2540606  |
| wavelet-LLH | firstorder | MeanAbsoluteDeviation            | 177.3025046  |
| wavelet-LLH | firstorder | TotalEnergy                      | 107176710.3  |
| wavelet-LLH | firstorder | Maximum                          | 418.2131593  |
| wavelet-LLH | firstorder | RootMeanSquared                  | 218.6901805  |
| wavelet-LLH | firstorder | 90Percentile                     | 276.8034382  |
| wavelet-LLH | firstorder | Minimum                          | -499.6638343 |
| wavelet-LLH | firstorder | Entropy                          | 4.617357848  |
| wavelet-LLH | firstorder | Range                            | 917.8769936  |
| wavelet-LLH | firstorder | Variance                         | 45275.63056  |
| wavelet-LLH | firstorder | 10Percentile                     | -271.3046626 |
| wavelet-LLH | firstorder | Kurtosis                         | 2.315293317  |
| wavelet-LLH | firstorder | Mean                             | -50.49519263 |
| wavelet-LLH | glrlm      | ShortRunLowGrayLevelEmphasis     | 0.019040994  |
| wavelet-LLH | glrlm      | GrayLevelVariance                | 71.85442393  |
| wavelet-LLH | glrlm      | LowGrayLevelRunEmphasis          | 0.01915898   |
| wavelet-LLH | glrlm      | GrayLevelNonUniformityNormalized | 0.045798285  |
| wavelet-LLH | glrlm      | RunVariance                      | 0.026819759  |
| wavelet-LLH | glrlm      | GrayLevelNonUniformity           | 3.699365086  |
| wavelet-LLH | glrlm      | LongRunEmphasis                  | 1.083973784  |
| wavelet-LLH | glrlm      | ShortRunHighGrayLevelEmphasis    | 408.581358   |
| wavelet-LLH | glrlm      | RunLengthNonUniformity           | 76.49270321  |
| wavelet-LLH | glrlm      | ShortRunEmphasis                 | 0.979006554  |
| wavelet-LLH | glrlm      | LongRunHighGrayLevelEmphasis     | 442.7425221  |
| wavelet-LLH | glrlm      | RunPercentage                    | 0.973123262  |
| wavelet-LLH | glrlm      | LongRunLowGrayLevelEmphasis      | 0.019630924  |
| wavelet-LLH | glrlm      | RunEntropy                       | 4.699438645  |
| wavelet-LLH | glrlm      | HighGrayLevelRunEmphasis         | 415.4135908  |
| wavelet-LLH | glrlm      | RunLengthNonUniformityNormalized | 0.946360482  |
| wavelet-LLH | glszm      | GrayLevelVariance                | 77.51724138  |
| wavelet-LLH | glszm      | ZoneVariance                     | 0.555588585  |
| wavelet-LLH | glszm      | GrayLevelNonUniformityNormalized | 0.042211653  |
| wavelet-LLH | glszm      | SizeZoneNonUniformityNormalized  | 0.529726516  |
| wavelet-LLH | glszm      | SizeZoneNonUniformity            | 30.72413793  |
| wavelet-LLH | glszm      | GrayLevelNonUniformity           | 2.448275862  |
| wavelet-LLH | glszm      | LargeAreaEmphasis                | 2.603448276  |
| wavelet-LLH | glszm      | SmallAreaHighGrayLevelEmphasis   | 343.3990661  |
| wavelet-LLH | glszm      | ZonePercentage                   | 0.698795181  |
| wavelet-LLH | glszm      | LargeAreaLowGrayLevelEmphasis    | 0.033267038  |
| wavelet-LLH | glszm      | LargeAreaHighGrayLevelEmphasis   | 971.4827586  |
| wavelet-LLH | glszm      | HighGrayLevelZoneEmphasis        | 438.5172414  |
| wavelet-LLH | glszm      | SmallAreaEmphasis                | 0.753591954  |
| wavelet-LLH | glszm      | LowGrayLevelZoneEmphasis         | 0.024541087  |

|             |            |                                      |              |
|-------------|------------|--------------------------------------|--------------|
| wavelet-LLH | glszm      | ZoneEntropy                          | 5.245743495  |
| wavelet-LLH | glszm      | SmallAreaLowGrayLevelEmphasis        | 0.023199713  |
| wavelet-LLH | ngtdm      | Coarseness                           | 0.059251261  |
| wavelet-LLH | ngtdm      | Complexity                           | 1881.346143  |
| wavelet-LLH | ngtdm      | Strength                             | 22.94787261  |
| wavelet-LLH | ngtdm      | Contrast                             | 0.896512558  |
| wavelet-LLH | ngtdm      | Busyness                             | 0.046353874  |
| wavelet-LLL | gldm       | GrayLevelVariance                    | 477.8499056  |
| wavelet-LLL | gldm       | HighGrayLevelEmphasis                | 2169.73494   |
| wavelet-LLL | gldm       | DependenceEntropy                    | 5.775347413  |
| wavelet-LLL | gldm       | DependenceNonUniformity              | 56.4939759   |
| wavelet-LLL | gldm       | GrayLevelNonUniformity               | 1.819277108  |
| wavelet-LLL | gldm       | SmallDependenceEmphasis              | 0.852074967  |
| wavelet-LLL | gldm       | SmallDependenceHighGrayLevelEmphasis | 1930.757697  |
| wavelet-LLL | gldm       | DependenceNonUniformityNormalized    | 0.680650312  |
| wavelet-LLL | gldm       | LargeDependenceEmphasis              | 1.698795181  |
| wavelet-LLL | gldm       | LargeDependenceLowGrayLevelEmphasis  | 0.023226172  |
| wavelet-LLL | gldm       | DependenceVariance                   | 0.218028741  |
| wavelet-LLL | gldm       | LargeDependenceHighGrayLevelEmphasis | 3284.626506  |
| wavelet-LLL | gldm       | SmallDependenceLowGrayLevelEmphasis  | 0.016773442  |
| wavelet-LLL | gldm       | LowGrayLevelEmphasis                 | 0.018049472  |
| wavelet-LLL | glcm       | JointAverage                         | 47.6540049   |
| wavelet-LLL | glcm       | SumAverage                           | 95.3080098   |
| wavelet-LLL | glcm       | JointEntropy                         | 6.581940943  |
| wavelet-LLL | glcm       | ClusterShade                         | -1163.286735 |
| wavelet-LLL | glcm       | MaximumProbability                   | 0.01715694   |
| wavelet-LLL | glcm       | Idmn                                 | 0.924155716  |
| wavelet-LLL | glcm       | JointEnergy                          | 0.010632866  |
| wavelet-LLL | glcm       | Contrast                             | 796.085511   |
| wavelet-LLL | glcm       | DifferenceEntropy                    | 4.859002552  |
| wavelet-LLL | glcm       | InverseVariance                      | 0.035501192  |
| wavelet-LLL | glcm       | DifferenceVariance                   | 247.3156037  |
| wavelet-LLL | glcm       | Idn                                  | 0.815665978  |
| wavelet-LLL | glcm       | Idm                                  | 0.037131604  |
| wavelet-LLL | glcm       | Correlation                          | 0.222747602  |
| wavelet-LLL | glcm       | Autocorrelation                      | 2381.537695  |
| wavelet-LLL | glcm       | SumEntropy                           | 5.289987037  |
| wavelet-LLL | glcm       | SumSquares                           | 508.0916416  |
| wavelet-LLL | glcm       | ClusterProminence                    | 3786311.261  |
| wavelet-LLL | glcm       | Imc2                                 | 0.99994131   |
| wavelet-LLL | glcm       | Imc1                                 | -0.817022339 |
| wavelet-LLL | glcm       | DifferenceAverage                    | 23.11567084  |
| wavelet-LLL | glcm       | Id                                   | 0.091466548  |
| wavelet-LLL | glcm       | ClusterTendency                      | 1236.281056  |
| wavelet-LLL | firstorder | InterquartileRange                   | 740.0988297  |
| wavelet-LLL | firstorder | Skewness                             | 0.272443817  |
| wavelet-LLL | firstorder | Uniformity                           | 0.021919001  |
| wavelet-LLL | firstorder | Median                               | -977.9478086 |
| wavelet-LLL | firstorder | Energy                               | 93286972.11  |
| wavelet-LLL | firstorder | RobustMeanAbsoluteDeviation          | 311.6620496  |
| wavelet-LLL | firstorder | MeanAbsoluteDeviation                | 446.659375   |
| wavelet-LLL | firstorder | TotalEnergy                          | 2518748247   |
| wavelet-LLL | firstorder | Maximum                              | 377.9059713  |
| wavelet-LLL | firstorder | RootMeanSquared                      | 1060.160093  |
| wavelet-LLL | firstorder | 90Percentile                         | -169.3987913 |
| wavelet-LLL | firstorder | Minimum                              | -1917.148005 |
| wavelet-LLL | firstorder | Entropy                              | 5.675773166  |
| wavelet-LLL | firstorder | Range                                | 2295.053977  |

|             |            |                                      |              |
|-------------|------------|--------------------------------------|--------------|
| wavelet-LLL | firstorder | Variance                             | 298774.5601  |
| wavelet-LLL | firstorder | 10Percentile                         | -1578.069669 |
| wavelet-LLL | firstorder | Kurtosis                             | 2.428397363  |
| wavelet-LLL | firstorder | Mean                                 | -908.3858558 |
| wavelet-LLL | glrlm      | ShortRunLowGrayLevelEmphasis         | 0.018085827  |
| wavelet-LLL | glrlm      | GrayLevelVariance                    | 479.129126   |
| wavelet-LLL | glrlm      | LowGrayLevelRunEmphasis              | 0.018135914  |
| wavelet-LLL | glrlm      | GrayLevelNonUniformityNormalized     | 0.021865489  |
| wavelet-LLL | glrlm      | RunVariance                          | 0.008338107  |
| wavelet-LLL | glrlm      | GrayLevelNonUniformity               | 1.799780318  |
| wavelet-LLL | glrlm      | LongRunEmphasis                      | 1.025467306  |
| wavelet-LLL | glrlm      | ShortRunHighGrayLevelEmphasis        | 2164.315241  |
| wavelet-LLL | glrlm      | RunLengthNonUniformity               | 80.94765247  |
| wavelet-LLL | glrlm      | ShortRunEmphasis                     | 0.993633174  |
| wavelet-LLL | glrlm      | LongRunHighGrayLevelEmphasis         | 2215.398383  |
| wavelet-LLL | glrlm      | RunPercentage                        | 0.991658943  |
| wavelet-LLL | glrlm      | LongRunLowGrayLevelEmphasis          | 0.018336259  |
| wavelet-LLL | glrlm      | RunEntropy                           | 5.687724768  |
| wavelet-LLL | glrlm      | HighGrayLevelRunEmphasis             | 2174.53187   |
| wavelet-LLL | glrlm      | RunLengthNonUniformityNormalized     | 0.983323785  |
| wavelet-LLL | glszm      | GrayLevelVariance                    | 496.0827246  |
| wavelet-LLL | glszm      | ZoneVariance                         | 0.160883857  |
| wavelet-LLL | glszm      | GrayLevelNonUniformityNormalized     | 0.021548576  |
| wavelet-LLL | glszm      | SizeZoneNonUniformityNormalized      | 0.825054785  |
| wavelet-LLL | glszm      | SizeZoneNonUniformity                | 61.05405405  |
| wavelet-LLL | glszm      | GrayLevelNonUniformity               | 1.594594595  |
| wavelet-LLL | glszm      | LargeAreaEmphasis                    | 1.418918919  |
| wavelet-LLL | glszm      | SmallAreaHighGrayLevelEmphasis       | 2116.819444  |
| wavelet-LLL | glszm      | ZonePercentage                       | 0.891566265  |
| wavelet-LLL | glszm      | LargeAreaLowGrayLevelEmphasis        | 0.022204533  |
| wavelet-LLL | glszm      | LargeAreaHighGrayLevelEmphasis       | 2903.945946  |
| wavelet-LLL | glszm      | HighGrayLevelZoneEmphasis            | 2238.581081  |
| wavelet-LLL | glszm      | SmallAreaEmphasis                    | 0.9253003    |
| wavelet-LLL | glszm      | LowGrayLevelZoneEmphasis             | 0.019283067  |
| wavelet-LLL | glszm      | ZoneEntropy                          | 5.726015021  |
| wavelet-LLL | glszm      | SmallAreaLowGrayLevelEmphasis        | 0.018573052  |
| wavelet-LLL | ngtdm      | Coarseness                           | 0.039928694  |
| wavelet-LLL | ngtdm      | Complexity                           | 26908.01052  |
| wavelet-LLL | ngtdm      | Strength                             | 94.37466303  |
| wavelet-LLL | ngtdm      | Contrast                             | 4.574090132  |
| wavelet-LLL | ngtdm      | Busyness                             | 0.014170545  |
| wavelet-HHL | gldm       | GrayLevelVariance                    | 18.0325156   |
| wavelet-HHL | gldm       | HighGrayLevelEmphasis                | 116.8313253  |
| wavelet-HHL | gldm       | DependenceEntropy                    | 5.072160329  |
| wavelet-HHL | gldm       | DependenceNonUniformity              | 28.20481928  |
| wavelet-HHL | gldm       | GrayLevelNonUniformity               | 5.939759036  |
| wavelet-HHL | gldm       | SmallDependenceEmphasis              | 0.496884203  |
| wavelet-HHL | gldm       | SmallDependenceHighGrayLevelEmphasis | 60.36727242  |
| wavelet-HHL | gldm       | DependenceNonUniformityNormalized    | 0.3398171    |
| wavelet-HHL | gldm       | LargeDependenceEmphasis              | 4.301204819  |
| wavelet-HHL | gldm       | LargeDependenceLowGrayLevelEmphasis  | 0.086164534  |
| wavelet-HHL | gldm       | DependenceVariance                   | 0.723181884  |
| wavelet-HHL | gldm       | LargeDependenceHighGrayLevelEmphasis | 457.3373494  |
| wavelet-HHL | gldm       | SmallDependenceLowGrayLevelEmphasis  | 0.025780265  |
| wavelet-HHL | gldm       | LowGrayLevelEmphasis                 | 0.033754596  |
| wavelet-HHL | glcm       | JointAverage                         | 9.89547812   |
| wavelet-HHL | glcm       | SumAverage                           | 19.79095624  |
| wavelet-HHL | glcm       | JointEntropy                         | 6.191667155  |

|             |            |                                  |              |
|-------------|------------|----------------------------------|--------------|
| wavelet-HHL | glcm       | ClusterShade                     | 4.371356663  |
| wavelet-HHL | glcm       | MaximumProbability               | 0.032440814  |
| wavelet-HHL | glcm       | Idmn                             | 0.932251637  |
| wavelet-HHL | glcm       | JointEnergy                      | 0.015072993  |
| wavelet-HHL | glcm       | Contrast                         | 36.12964024  |
| wavelet-HHL | glcm       | DifferenceEntropy                | 3.373728002  |
| wavelet-HHL | glcm       | InverseVariance                  | 0.188770071  |
| wavelet-HHL | glcm       | DifferenceVariance               | 12.17267407  |
| wavelet-HHL | glcm       | Idn                              | 0.827083271  |
| wavelet-HHL | glcm       | Idm                              | 0.173584869  |
| wavelet-HHL | glcm       | Correlation                      | -0.012240759 |
| wavelet-HHL | glcm       | Autocorrelation                  | 97.78618659  |
| wavelet-HHL | glcm       | SumEntropy                       | 4.084494461  |
| wavelet-HHL | glcm       | SumSquares                       | 17.887554    |
| wavelet-HHL | glcm       | ClusterProminence                | 3445.368717  |
| wavelet-HHL | glcm       | Imc2                             | 0.980794965  |
| wavelet-HHL | glcm       | Imc1                             | -0.422508681 |
| wavelet-HHL | glcm       | DifferenceAverage                | 4.839580106  |
| wavelet-HHL | glcm       | Id                               | 0.270162547  |
| wavelet-HHL | glcm       | ClusterTendency                  | 35.42057575  |
| wavelet-HHL | firstorder | InterquartileRange               | 152.716299   |
| wavelet-HHL | firstorder | Skewness                         | 0.243849108  |
| wavelet-HHL | firstorder | Uniformity                       | 0.071563362  |
| wavelet-HHL | firstorder | Median                           | 1.430747967  |
| wavelet-HHL | firstorder | Energy                           | 921681.4813  |
| wavelet-HHL | firstorder | RobustMeanAbsoluteDeviation      | 63.4477701   |
| wavelet-HHL | firstorder | MeanAbsoluteDeviation            | 87.30581425  |
| wavelet-HHL | firstorder | TotalEnergy                      | 24885399.99  |
| wavelet-HHL | firstorder | Maximum                          | 278.1598061  |
| wavelet-HHL | firstorder | RootMeanSquared                  | 105.3783477  |
| wavelet-HHL | firstorder | 90Percentile                     | 148.8111136  |
| wavelet-HHL | firstorder | Minimum                          | -203.0239887 |
| wavelet-HHL | firstorder | Entropy                          | 3.97072844   |
| wavelet-HHL | firstorder | Range                            | 481.1837949  |
| wavelet-HHL | firstorder | Variance                         | 10964.10284  |
| wavelet-HHL | firstorder | 10Percentile                     | -122.3846494 |
| wavelet-HHL | firstorder | Kurtosis                         | 2.523691775  |
| wavelet-HHL | firstorder | Mean                             | 11.85298774  |
| wavelet-HHL | glrlm      | ShortRunLowGrayLevelEmphasis     | 0.033978133  |
| wavelet-HHL | glrlm      | GrayLevelVariance                | 18.27197575  |
| wavelet-HHL | glrlm      | LowGrayLevelRunEmphasis          | 0.034398098  |
| wavelet-HHL | glrlm      | GrayLevelNonUniformityNormalized | 0.071091611  |
| wavelet-HHL | glrlm      | RunVariance                      | 0.036165138  |
| wavelet-HHL | glrlm      | GrayLevelNonUniformity           | 5.69894873   |
| wavelet-HHL | glrlm      | LongRunEmphasis                  | 1.110047498  |
| wavelet-HHL | glrlm      | ShortRunHighGrayLevelEmphasis    | 114.3762259  |
| wavelet-HHL | glrlm      | RunLengthNonUniformity           | 74.87956446  |
| wavelet-HHL | glrlm      | ShortRunEmphasis                 | 0.973583896  |
| wavelet-HHL | glrlm      | LongRunHighGrayLevelEmphasis     | 128.8264376  |
| wavelet-HHL | glrlm      | RunPercentage                    | 0.96570899   |
| wavelet-HHL | glrlm      | LongRunLowGrayLevelEmphasis      | 0.036146442  |
| wavelet-HHL | glrlm      | RunEntropy                       | 4.089610332  |
| wavelet-HHL | glrlm      | HighGrayLevelRunEmphasis         | 117.2101648  |
| wavelet-HHL | glrlm      | RunLengthNonUniformityNormalized | 0.93328344   |
| wavelet-HHL | glszm      | GrayLevelVariance                | 21.97693195  |
| wavelet-HHL | glszm      | ZoneVariance                     | 0.978854287  |
| wavelet-HHL | glszm      | GrayLevelNonUniformityNormalized | 0.064206075  |
| wavelet-HHL | glszm      | SizeZoneNonUniformityNormalized  | 0.442522107  |



|             |            |                                      |              |
|-------------|------------|--------------------------------------|--------------|
| wavelet-HHL | glszm      | SizeZoneNonUniformity                | 22.56862745  |
| wavelet-HHL | glszm      | GrayLevelNonUniformity               | 3.274509804  |
| wavelet-HHL | glszm      | LargeAreaEmphasis                    | 3.62745098   |
| wavelet-HHL | glszm      | SmallAreaHighGrayLevelEmphasis       | 83.70630174  |
| wavelet-HHL | glszm      | ZonePercentage                       | 0.614457831  |
| wavelet-HHL | glszm      | LargeAreaLowGrayLevelEmphasis        | 0.084308285  |
| wavelet-HHL | glszm      | LargeAreaHighGrayLevelEmphasis       | 405.9411765  |
| wavelet-HHL | glszm      | HighGrayLevelZoneEmphasis            | 120.8039216  |
| wavelet-HHL | glszm      | SmallAreaEmphasis                    | 0.683077342  |
| wavelet-HHL | glszm      | LowGrayLevelZoneEmphasis             | 0.04514472   |
| wavelet-HHL | glszm      | ZoneEntropy                          | 4.961353528  |
| wavelet-HHL | glszm      | SmallAreaLowGrayLevelEmphasis        | 0.040024485  |
| wavelet-HHL | ngtdm      | Coarseness                           | 0.061287936  |
| wavelet-HHL | ngtdm      | Complexity                           | 471.641522   |
| wavelet-HHL | ngtdm      | Strength                             | 7.194193952  |
| wavelet-HHL | ngtdm      | Contrast                             | 0.361365359  |
| wavelet-HHL | ngtdm      | Busyness                             | 0.119507878  |
| wavelet-HLH | gldm       | GrayLevelVariance                    | 21.29191465  |
| wavelet-HLH | gldm       | HighGrayLevelEmphasis                | 162.9879518  |
| wavelet-HLH | gldm       | DependenceEntropy                    | 5.065782919  |
| wavelet-HLH | gldm       | DependenceNonUniformity              | 23.53012048  |
| wavelet-HLH | gldm       | GrayLevelNonUniformity               | 5.86746988   |
| wavelet-HLH | gldm       | SmallDependenceEmphasis              | 0.498408532  |
| wavelet-HLH | gldm       | SmallDependenceHighGrayLevelEmphasis | 98.47337998  |
| wavelet-HLH | gldm       | DependenceNonUniformityNormalized    | 0.283495427  |
| wavelet-HLH | gldm       | LargeDependenceEmphasis              | 6.421686747  |
| wavelet-HLH | gldm       | LargeDependenceLowGrayLevelEmphasis  | 0.163709127  |
| wavelet-HLH | gldm       | DependenceVariance                   | 1.770648861  |
| wavelet-HLH | gldm       | LargeDependenceHighGrayLevelEmphasis | 838.939759   |
| wavelet-HLH | gldm       | SmallDependenceLowGrayLevelEmphasis  | 0.012179244  |
| wavelet-HLH | gldm       | LowGrayLevelEmphasis                 | 0.03617293   |
| wavelet-HLH | glcm       | JointAverage                         | 11.97228772  |
| wavelet-HLH | glcm       | SumAverage                           | 23.94457543  |
| wavelet-HLH | glcm       | JointEntropy                         | 6.129189668  |
| wavelet-HLH | glcm       | ClusterShade                         | 14.11376247  |
| wavelet-HLH | glcm       | MaximumProbability                   | 0.034528197  |
| wavelet-HLH | glcm       | Idmn                                 | 0.95497618   |
| wavelet-HLH | glcm       | JointEnergy                          | 0.015910649  |
| wavelet-HLH | glcm       | Contrast                             | 35.20460184  |
| wavelet-HLH | glcm       | DifferenceEntropy                    | 3.395651181  |
| wavelet-HLH | glcm       | InverseVariance                      | 0.203130734  |
| wavelet-HLH | glcm       | DifferenceVariance                   | 13.34829342  |
| wavelet-HLH | glcm       | Idn                                  | 0.860494094  |
| wavelet-HLH | glcm       | Idm                                  | 0.198394543  |
| wavelet-HLH | glcm       | Correlation                          | -0.018798278 |
| wavelet-HLH | glcm       | Autocorrelation                      | 143.3286481  |
| wavelet-HLH | glcm       | SumEntropy                           | 4.082120796  |
| wavelet-HLH | glcm       | SumSquares                           | 17.51121587  |
| wavelet-HLH | glcm       | ClusterProminence                    | 4875.788482  |
| wavelet-HLH | glcm       | Imc2                                 | 0.981685638  |
| wavelet-HLH | glcm       | Imc1                                 | -0.428921656 |
| wavelet-HLH | glcm       | DifferenceAverage                    | 4.621962197  |
| wavelet-HLH | glcm       | Id                                   | 0.29203167   |
| wavelet-HLH | glcm       | ClusterTendency                      | 34.84026164  |
| wavelet-HLH | firstorder | InterquartileRange                   | 126.8598816  |
| wavelet-HLH | firstorder | Skewness                             | 0.084129405  |
| wavelet-HLH | firstorder | Uniformity                           | 0.070692408  |
| wavelet-HLH | firstorder | Median                               | 16.79446227  |

|             |            |                                  |              |
|-------------|------------|----------------------------------|--------------|
| wavelet-HLH | firstorder | Energy                           | 1077472.568  |
| wavelet-HLH | firstorder | RobustMeanAbsoluteDeviation      | 56.69923089  |
| wavelet-HLH | firstorder | MeanAbsoluteDeviation            | 87.64421309  |
| wavelet-HLH | firstorder | TotalEnergy                      | 29091759.33  |
| wavelet-HLH | firstorder | Maximum                          | 352.3300201  |
| wavelet-HLH | firstorder | RootMeanSquared                  | 113.9368123  |
| wavelet-HLH | firstorder | 90Percentile                     | 143.8426443  |
| wavelet-HLH | firstorder | Minimum                          | -268.762082  |
| wavelet-HLH | firstorder | Entropy                          | 4.058263363  |
| wavelet-HLH | firstorder | Range                            | 621.0921021  |
| wavelet-HLH | firstorder | Variance                         | 12885.17864  |
| wavelet-HLH | firstorder | 10Percentile                     | -132.9821095 |
| wavelet-HLH | firstorder | Kurtosis                         | 3.421789929  |
| wavelet-HLH | firstorder | Mean                             | 9.819295507  |
| wavelet-HLH | glrlm      | ShortRunLowGrayLevelEmphasis     | 0.035213161  |
| wavelet-HLH | glrlm      | GrayLevelVariance                | 21.86511728  |
| wavelet-HLH | glrlm      | LowGrayLevelRunEmphasis          | 0.036349586  |
| wavelet-HLH | glrlm      | GrayLevelNonUniformityNormalized | 0.069276868  |
| wavelet-HLH | glrlm      | RunVariance                      | 0.0482308    |
| wavelet-HLH | glrlm      | GrayLevelNonUniformity           | 5.494632093  |
| wavelet-HLH | glrlm      | LongRunEmphasis                  | 1.145595136  |
| wavelet-HLH | glrlm      | ShortRunHighGrayLevelEmphasis    | 160.3148047  |
| wavelet-HLH | glrlm      | RunLengthNonUniformity           | 72.63660789  |
| wavelet-HLH | glrlm      | ShortRunEmphasis                 | 0.965793117  |
| wavelet-HLH | glrlm      | LongRunHighGrayLevelEmphasis     | 183.0661507  |
| wavelet-HLH | glrlm      | RunPercentage                    | 0.955514365  |
| wavelet-HLH | glrlm      | LongRunLowGrayLevelEmphasis      | 0.040982959  |
| wavelet-HLH | glrlm      | RunEntropy                       | 4.237482903  |
| wavelet-HLH | glrlm      | HighGrayLevelRunEmphasis         | 164.6897218  |
| wavelet-HLH | glrlm      | RunLengthNonUniformityNormalized | 0.914763586  |
| wavelet-HLH | glszm      | GrayLevelVariance                | 28.90972222  |
| wavelet-HLH | glszm      | ZoneVariance                     | 2.197482639  |
| wavelet-HLH | glszm      | GrayLevelNonUniformityNormalized | 0.060763889  |
| wavelet-HLH | glszm      | SizeZoneNonUniformityNormalized  | 0.512152778  |
| wavelet-HLH | glszm      | SizeZoneNonUniformity            | 24.58333333  |
| wavelet-HLH | glszm      | GrayLevelNonUniformity           | 2.916666667  |
| wavelet-HLH | glszm      | LargeAreaEmphasis                | 5.1875       |
| wavelet-HLH | glszm      | SmallAreaHighGrayLevelEmphasis   | 154.4652022  |
| wavelet-HLH | glszm      | ZonePercentage                   | 0.578313253  |
| wavelet-HLH | glszm      | LargeAreaLowGrayLevelEmphasis    | 0.137549103  |
| wavelet-HLH | glszm      | LargeAreaHighGrayLevelEmphasis   | 737.8333333  |
| wavelet-HLH | glszm      | HighGrayLevelZoneEmphasis        | 187.25       |
| wavelet-HLH | glszm      | SmallAreaEmphasis                | 0.739939059  |
| wavelet-HLH | glszm      | LowGrayLevelZoneEmphasis         | 0.033600512  |
| wavelet-HLH | glszm      | ZoneEntropy                      | 4.631328386  |
| wavelet-HLH | glszm      | SmallAreaLowGrayLevelEmphasis    | 0.014363946  |
| wavelet-HLH | ngtdm      | Coarseness                       | 0.062737147  |
| wavelet-HLH | ngtdm      | Complexity                       | 613.040653   |
| wavelet-HLH | ngtdm      | Strength                         | 8.896572405  |
| wavelet-HLH | ngtdm      | Contrast                         | 0.37185548   |
| wavelet-HLH | ngtdm      | Busyness                         | 0.074576108  |

| Image type | Feature Class | Feature Name                         |                                                                                                                                                                                                                                                                                                                                                                                                                   |
|------------|---------------|--------------------------------------|-------------------------------------------------------------------------------------------------------------------------------------------------------------------------------------------------------------------------------------------------------------------------------------------------------------------------------------------------------------------------------------------------------------------|
| general    | info          | BoundingBox                          | 7: RTSTRUCT: C99-DNU_segment_Tumor<br>(0, 0, 1, 13, 14, 10)                                                                                                                                                                                                                                                                                                                                                       |
| general    | info          | EnabledImageTypes                    | {u'Original': {}, u'Wavelet': {}}                                                                                                                                                                                                                                                                                                                                                                                 |
|            |               |                                      | {'distances': [1], 'additionalInfo': True, 'force2D': False, 'interpolator': 'sitkBSpline', 'resampledPixelSpacing': [3.0], 'label': 1, 'normalizeScale': 1, 'normalize': False, 'force2Ddimension': 0, 'removeOutliers': None, 'minimumROISize': None, u'binWidth': 25.0, 'minimumROIDimensions': 1, u'correctMask': True, 'preCrop': False, u'symmetricalGLCM': True, 'resegmentRange': None, 'padDistance': 5} |
| general    | info          | GeneralSettings                      |                                                                                                                                                                                                                                                                                                                                                                                                                   |
| general    | info          | ImageHash                            | df35b8cc2892c855fb3db383e2ab5f5433fd6eb7                                                                                                                                                                                                                                                                                                                                                                          |
| general    | info          | ImageSpacing                         | (0.9765624999999998, 0.9765624999999998, 1.9999999999999999)                                                                                                                                                                                                                                                                                                                                                      |
| general    | info          | MaskHash                             | c756dc44384675343f5b4f798be2f1955eaf701d                                                                                                                                                                                                                                                                                                                                                                          |
| general    | info          | NumpyVersion                         | 1.13.1                                                                                                                                                                                                                                                                                                                                                                                                            |
| general    | info          | PyWaveletVersion                     | 0.5.2                                                                                                                                                                                                                                                                                                                                                                                                             |
| general    | info          | SimpleITKVersion                     | 1.1.0                                                                                                                                                                                                                                                                                                                                                                                                             |
| general    | info          | Version                              | 1.3.0.post102+g1b0eb74                                                                                                                                                                                                                                                                                                                                                                                            |
| general    | info          | VolumeNum                            | 1                                                                                                                                                                                                                                                                                                                                                                                                                 |
| general    | info          | VoxelNum                             | 889                                                                                                                                                                                                                                                                                                                                                                                                               |
| original   | shape         | Maximum3DDiameter                    | 46.44558124                                                                                                                                                                                                                                                                                                                                                                                                       |
| original   | shape         | Maximum2DDiameterSlice               | 40.26470338                                                                                                                                                                                                                                                                                                                                                                                                       |
| original   | shape         | Sphericity                           | 0.805567221                                                                                                                                                                                                                                                                                                                                                                                                       |
| original   | shape         | MinorAxis                            | 31.70529992                                                                                                                                                                                                                                                                                                                                                                                                       |
| original   | shape         | Elongation                           | 0.809675562                                                                                                                                                                                                                                                                                                                                                                                                       |
| original   | shape         | SurfaceVolumeRatio                   | 0.205882311                                                                                                                                                                                                                                                                                                                                                                                                       |
| original   | shape         | Volume                               | 24790.76385                                                                                                                                                                                                                                                                                                                                                                                                       |
| original   | shape         | MajorAxis                            | 39.15802997                                                                                                                                                                                                                                                                                                                                                                                                       |
| original   | shape         | SurfaceArea                          | 5103.979762                                                                                                                                                                                                                                                                                                                                                                                                       |
| original   | shape         | Flatness                             | 0.714638696                                                                                                                                                                                                                                                                                                                                                                                                       |
| original   | shape         | LeastAxis                            | 27.98384346                                                                                                                                                                                                                                                                                                                                                                                                       |
| original   | shape         | Maximum2DDiameterColumn              | 37.1219625                                                                                                                                                                                                                                                                                                                                                                                                        |
| original   | shape         | Maximum2DDiameterRow                 | 44.19395561                                                                                                                                                                                                                                                                                                                                                                                                       |
| original   | gldm          | GrayLevelVariance                    | 124.2467359                                                                                                                                                                                                                                                                                                                                                                                                       |
| original   | gldm          | HighGrayLevelEmphasis                | 467.7725332                                                                                                                                                                                                                                                                                                                                                                                                       |
| original   | gldm          | DependenceEntropy                    | 7.692969016                                                                                                                                                                                                                                                                                                                                                                                                       |
| original   | gldm          | DependenceNonUniformity              | 1339.668667                                                                                                                                                                                                                                                                                                                                                                                                       |
| original   | gldm          | GrayLevelNonUniformity               | 287.2809002                                                                                                                                                                                                                                                                                                                                                                                                       |
| original   | gldm          | SmallDependenceEmphasis              | 0.271408223                                                                                                                                                                                                                                                                                                                                                                                                       |
| original   | gldm          | SmallDependenceHighGrayLevelEmphasis | 117.1191776                                                                                                                                                                                                                                                                                                                                                                                                       |
| original   | gldm          | DependenceNonUniformityNormalized    | 0.154606886                                                                                                                                                                                                                                                                                                                                                                                                       |
| original   | gldm          | LargeDependenceEmphasis              | 18.25147144                                                                                                                                                                                                                                                                                                                                                                                                       |
| original   | gldm          | LargeDependenceLowGrayLevelEmphasis  | 0.340005624                                                                                                                                                                                                                                                                                                                                                                                                       |
| original   | gldm          | DependenceVariance                   | 5.615969479                                                                                                                                                                                                                                                                                                                                                                                                       |
| original   | gldm          | LargeDependenceHighGrayLevelEmphasis | 10161.43462                                                                                                                                                                                                                                                                                                                                                                                                       |
| original   | gldm          | SmallDependenceLowGrayLevelEmphasis  | 0.002814434                                                                                                                                                                                                                                                                                                                                                                                                       |
| original   | gldm          | LowGrayLevelEmphasis                 | 0.013995172                                                                                                                                                                                                                                                                                                                                                                                                       |

|          |            |                                  |              |
|----------|------------|----------------------------------|--------------|
| original | glcm       | JointAverage                     | 19.58975624  |
| original | glcm       | SumAverage                       | 39.17951248  |
| original | glcm       | JointEntropy                     | 9.21837314   |
| original | glcm       | ClusterShade                     | 826.9569312  |
| original | glcm       | MaximumProbability               | 0.010297076  |
| original | glcm       | Idmn                             | 0.984880896  |
| original | glcm       | JointEnergy                      | 0.002755493  |
| original | glcm       | Contrast                         | 43.61001153  |
| original | glcm       | DifferenceEntropy                | 3.692477002  |
| original | glcm       | InverseVariance                  | 0.251073637  |
| original | glcm       | DifferenceVariance               | 20.21777246  |
| original | glcm       | Idn                              | 0.923274952  |
| original | glcm       | Idm                              | 0.25622894   |
| original | glcm       | Correlation                      | 0.825212326  |
| original | glcm       | Autocorrelation                  | 486.6433957  |
| original | glcm       | SumEntropy                       | 6.056587281  |
| original | glcm       | SumSquares                       | 124.5342086  |
| original | glcm       | ClusterProminence                | 321711.8908  |
| original | glcm       | Imc2                             | 0.905888578  |
| original | glcm       | Imc1                             | -0.187381444 |
| original | glcm       | DifferenceAverage                | 4.669296457  |
| original | glcm       | Id                               | 0.335944642  |
| original | glcm       | ClusterTendency                  | 454.526823   |
| original | firstorder | InterquartileRange               | 548          |
| original | firstorder | Skewness                         | 0.234701008  |
| original | firstorder | Uniformity                       | 0.033154172  |
| original | firstorder | Median                           | -483         |
| original | firstorder | Energy                           | 2235098668   |
| original | firstorder | RobustMeanAbsoluteDeviation      | 215.6812964  |
| original | firstorder | MeanAbsoluteDeviation            | 252.112067   |
| original | firstorder | TotalEnergy                      | 6394668583   |
| original | firstorder | Maximum                          | 404          |
| original | firstorder | RootMeanSquared                  | 507.8834562  |
| original | firstorder | 90Percentile                     | -34          |
| original | firstorder | Minimum                          | -863         |
| original | firstorder | Entropy                          | 5.064263913  |
| original | firstorder | Range                            | 1267         |
| original | firstorder | Variance                         | 77652.11469  |
| original | firstorder | 10Percentile                     | -756         |
| original | firstorder | Kurtosis                         | 1.558780423  |
| original | firstorder | Mean                             | -424.6098096 |
| original | glrlm      | ShortRunLowGrayLevelEmphasis     | 0.012322716  |
| original | glrlm      | GrayLevelVariance                | 119.5016804  |
| original | glrlm      | LowGrayLevelRunEmphasis          | 0.013584962  |
| original | glrlm      | GrayLevelNonUniformityNormalized | 0.032345466  |
| original | glrlm      | RunVariance                      | 0.141506282  |
| original | glrlm      | GrayLevelNonUniformity           | 252.8281101  |
| original | glrlm      | LongRunEmphasis                  | 1.3789224    |
| original | glrlm      | ShortRunHighGrayLevelEmphasis    | 423.8350691  |
| original | glrlm      | RunLengthNonUniformity           | 6507.179713  |
| original | glrlm      | ShortRunEmphasis                 | 0.927817631  |
| original | glrlm      | LongRunHighGrayLevelEmphasis     | 662.7726079  |
| original | glrlm      | RunPercentage                    | 0.901744418  |
| original | glrlm      | LongRunLowGrayLevelEmphasis      | 0.020329713  |

|             |       |                                      |              |
|-------------|-------|--------------------------------------|--------------|
| original    | glrlm | RunEntropy                           | 5.555502916  |
| original    | glrlm | HighGrayLevelRunEmphasis             | 461.3612018  |
| original    | glrlm | RunLengthNonUniformityNormalized     | 0.830231394  |
| original    | glszm | GrayLevelVariance                    | 77.20140262  |
| original    | glszm | ZoneVariance                         | 125.7923919  |
| original    | glszm | GrayLevelNonUniformityNormalized     | 0.031926308  |
| original    | glszm | SizeZoneNonUniformityNormalized      | 0.365436473  |
| original    | glszm | SizeZoneNonUniformity                | 990.3328413  |
| original    | glszm | GrayLevelNonUniformity               | 86.5202952   |
| original    | glszm | LargeAreaEmphasis                    | 136.0158672  |
| original    | glszm | SmallAreaHighGrayLevelEmphasis       | 267.4284159  |
| original    | glszm | ZonePercentage                       | 0.312752452  |
| original    | glszm | LargeAreaLowGrayLevelEmphasis        | 1.399548172  |
| original    | glszm | LargeAreaHighGrayLevelEmphasis       | 112887.1996  |
| original    | glszm | HighGrayLevelZoneEmphasis            | 414.9878229  |
| original    | glszm | SmallAreaEmphasis                    | 0.625842517  |
| original    | glszm | LowGrayLevelZoneEmphasis             | 0.010508291  |
| original    | glszm | ZoneEntropy                          | 7.053871628  |
| original    | glszm | SmallAreaLowGrayLevelEmphasis        | 0.005931613  |
| original    | ngtdm | Coarseness                           | 0.001386134  |
| original    | ngtdm | Complexity                           | 2485.472504  |
| original    | ngtdm | Strength                             | 1.377368378  |
| original    | ngtdm | Contrast                             | 0.317322134  |
| original    | ngtdm | Busyness                             | 0.910091265  |
| wavelet-HHH | gldm  | GrayLevelVariance                    | 0.382947682  |
| wavelet-HHH | gldm  | HighGrayLevelEmphasis                | 12.62608194  |
| wavelet-HHH | gldm  | DependenceEntropy                    | 4.825629137  |
| wavelet-HHH | gldm  | DependenceNonUniformity              | 744.7698788  |
| wavelet-HHH | gldm  | GrayLevelNonUniformity               | 3816.628159  |
| wavelet-HHH | gldm  | SmallDependenceEmphasis              | 0.03732168   |
| wavelet-HHH | gldm  | SmallDependenceHighGrayLevelEmphasis | 0.519108194  |
| wavelet-HHH | gldm  | DependenceNonUniformityNormalized    | 0.085951515  |
| wavelet-HHH | gldm  | LargeDependenceEmphasis              | 132.7507213  |
| wavelet-HHH | gldm  | LargeDependenceLowGrayLevelEmphasis  | 11.56556626  |
| wavelet-HHH | gldm  | DependenceVariance                   | 13.25920435  |
| wavelet-HHH | gldm  | LargeDependenceHighGrayLevelEmphasis | 1657.8794    |
| wavelet-HHH | gldm  | SmallDependenceLowGrayLevelEmphasis  | 0.005360892  |
| wavelet-HHH | gldm  | LowGrayLevelEmphasis                 | 0.091029813  |
| wavelet-HHH | glcm  | JointAverage                         | 3.498459547  |
| wavelet-HHH | glcm  | SumAverage                           | 6.996919094  |
| wavelet-HHH | glcm  | JointEntropy                         | 2.699371127  |
| wavelet-HHH | glcm  | ClusterShade                         | 0.010681602  |
| wavelet-HHH | glcm  | MaximumProbability                   | 0.230699313  |
| wavelet-HHH | glcm  | Idmn                                 | 0.979460841  |
| wavelet-HHH | glcm  | JointEnergy                          | 0.195883348  |
| wavelet-HHH | glcm  | Contrast                             | 0.787874401  |
| wavelet-HHH | glcm  | DifferenceEntropy                    | 1.302057008  |
| wavelet-HHH | glcm  | InverseVariance                      | 0.51471814   |
| wavelet-HHH | glcm  | DifferenceVariance                   | 0.383684472  |
| wavelet-HHH | glcm  | Idn                                  | 0.912089439  |
| wavelet-HHH | glcm  | Idm                                  | 0.698312435  |
| wavelet-HHH | glcm  | Correlation                          | -0.022366726 |
| wavelet-HHH | glcm  | Autocorrelation                      | 12.23059524  |
| wavelet-HHH | glcm  | SumEntropy                           | 1.833271656  |

|             |            |                                  |              |
|-------------|------------|----------------------------------|--------------|
| wavelet-HHH | glcm       | SumSquares                       | 0.385312618  |
| wavelet-HHH | glcm       | ClusterProminence                | 1.812381705  |
| wavelet-HHH | glcm       | Imc2                             | 0.127525171  |
| wavelet-HHH | glcm       | Imc1                             | -0.009128082 |
| wavelet-HHH | glcm       | DifferenceAverage                | 0.63403885   |
| wavelet-HHH | glcm       | Id                               | 0.706962878  |
| wavelet-HHH | glcm       | ClusterTendency                  | 0.753376073  |
| wavelet-HHH | firstorder | InterquartileRange               | 15.97700012  |
| wavelet-HHH | firstorder | Skewness                         | -0.017813488 |
| wavelet-HHH | firstorder | Uniformity                       | 0.440464877  |
| wavelet-HHH | firstorder | Median                           | 0.003050767  |
| wavelet-HHH | firstorder | Energy                           | 1493725.117  |
| wavelet-HHH | firstorder | RobustMeanAbsoluteDeviation      | 6.731797393  |
| wavelet-HHH | firstorder | MeanAbsoluteDeviation            | 10.09520496  |
| wavelet-HHH | firstorder | TotalEnergy                      | 4273581.839  |
| wavelet-HHH | firstorder | Maximum                          | 66.84876619  |
| wavelet-HHH | firstorder | RootMeanSquared                  | 13.12958679  |
| wavelet-HHH | firstorder | 90Percentile                     | 15.90109541  |
| wavelet-HHH | firstorder | Minimum                          | -67.18238834 |
| wavelet-HHH | firstorder | Entropy                          | 1.351232495  |
| wavelet-HHH | firstorder | Range                            | 134.0311545  |
| wavelet-HHH | firstorder | Variance                         | 172.386044   |
| wavelet-HHH | firstorder | 10Percentile                     | -16.1322021  |
| wavelet-HHH | firstorder | Kurtosis                         | 3.946476443  |
| wavelet-HHH | firstorder | Mean                             | 0.002293567  |
| wavelet-HHH | glrlm      | ShortRunLowGrayLevelEmphasis     | 0.066147345  |
| wavelet-HHH | glrlm      | GrayLevelVariance                | 0.455431924  |
| wavelet-HHH | glrlm      | LowGrayLevelRunEmphasis          | 0.09333896   |
| wavelet-HHH | glrlm      | GrayLevelNonUniformityNormalized | 0.41150361   |
| wavelet-HHH | glrlm      | RunVariance                      | 1.019930322  |
| wavelet-HHH | glrlm      | GrayLevelNonUniformity           | 2204.630153  |
| wavelet-HHH | glrlm      | LongRunEmphasis                  | 3.664873019  |
| wavelet-HHH | glrlm      | ShortRunHighGrayLevelEmphasis    | 8.809118265  |
| wavelet-HHH | glrlm      | RunLengthNonUniformity           | 2422.287817  |
| wavelet-HHH | glrlm      | ShortRunEmphasis                 | 0.689390854  |
| wavelet-HHH | glrlm      | LongRunHighGrayLevelEmphasis     | 46.0373733   |
| wavelet-HHH | glrlm      | RunPercentage                    | 0.618030095  |
| wavelet-HHH | glrlm      | LongRunLowGrayLevelEmphasis      | 0.325658976  |
| wavelet-HHH | glrlm      | RunEntropy                       | 2.966334316  |
| wavelet-HHH | glrlm      | HighGrayLevelRunEmphasis         | 12.69713063  |
| wavelet-HHH | glrlm      | RunLengthNonUniformityNormalized | 0.450462432  |
| wavelet-HHH | glszm      | GrayLevelVariance                | 2.407121167  |
| wavelet-HHH | glszm      | ZoneVariance                     | 117899.307   |
| wavelet-HHH | glszm      | GrayLevelNonUniformityNormalized | 0.452514695  |
| wavelet-HHH | glszm      | SizeZoneNonUniformityNormalized  | 0.452801418  |
| wavelet-HHH | glszm      | SizeZoneNonUniformity            | 125.4259928  |
| wavelet-HHH | glszm      | GrayLevelNonUniformity           | 125.3465704  |
| wavelet-HHH | glszm      | LargeAreaEmphasis                | 118877.8448  |
| wavelet-HHH | glszm      | SmallAreaHighGrayLevelEmphasis   | 10.06605318  |
| wavelet-HHH | glszm      | ZonePercentage                   | 0.031967686  |
| wavelet-HHH | glszm      | LargeAreaLowGrayLevelEmphasis    | 10310.55303  |
| wavelet-HHH | glszm      | LargeAreaHighGrayLevelEmphasis   | 1487322.054  |
| wavelet-HHH | glszm      | HighGrayLevelZoneEmphasis        | 14.36823105  |
| wavelet-HHH | glszm      | SmallAreaEmphasis                | 0.699779243  |

|             |            |                                      |              |
|-------------|------------|--------------------------------------|--------------|
| wavelet-HHH | glszm      | LowGrayLevelZoneEmphasis             | 0.161220417  |
| wavelet-HHH | glszm      | ZoneEntropy                          | 3.067403661  |
| wavelet-HHH | glszm      | SmallAreaLowGrayLevelEmphasis        | 0.117478016  |
| wavelet-HHH | ngtdm      | Coarseness                           | 0.000507899  |
| wavelet-HHH | ngtdm      | Complexity                           | 9.229335214  |
| wavelet-HHH | ngtdm      | Strength                             | 0.00790477   |
| wavelet-HHH | ngtdm      | Contrast                             | 0.014758253  |
| wavelet-HHH | ngtdm      | Busyness                             | 72.0928332   |
| wavelet-HLL | gldm       | GrayLevelVariance                    | 43.57125711  |
| wavelet-HLL | gldm       | HighGrayLevelEmphasis                | 765.2050779  |
| wavelet-HLL | gldm       | DependenceEntropy                    | 7.186264176  |
| wavelet-HLL | gldm       | DependenceNonUniformity              | 1775.917023  |
| wavelet-HLL | gldm       | GrayLevelNonUniformity               | 378.8321985  |
| wavelet-HLL | gldm       | SmallDependenceEmphasis              | 0.331891819  |
| wavelet-HLL | gldm       | SmallDependenceHighGrayLevelEmphasis | 252.3545673  |
| wavelet-HLL | gldm       | DependenceNonUniformityNormalized    | 0.204952917  |
| wavelet-HLL | gldm       | LargeDependenceEmphasis              | 10.77541835  |
| wavelet-HLL | gldm       | LargeDependenceLowGrayLevelEmphasis  | 0.017505804  |
| wavelet-HLL | gldm       | DependenceVariance                   | 2.841427994  |
| wavelet-HLL | gldm       | LargeDependenceHighGrayLevelEmphasis | 8226.974957  |
| wavelet-HLL | gldm       | SmallDependenceLowGrayLevelEmphasis  | 0.000964872  |
| wavelet-HLL | gldm       | LowGrayLevelEmphasis                 | 0.002113674  |
| wavelet-HLL | glcm       | JointAverage                         | 26.69501936  |
| wavelet-HLL | glcm       | SumAverage                           | 53.39003872  |
| wavelet-HLL | glcm       | JointEntropy                         | 9.150648603  |
| wavelet-HLL | glcm       | ClusterShade                         | -125.368607  |
| wavelet-HLL | glcm       | MaximumProbability                   | 0.009255128  |
| wavelet-HLL | glcm       | Idmn                                 | 0.978523689  |
| wavelet-HLL | glcm       | JointEnergy                          | 0.002704562  |
| wavelet-HLL | glcm       | Contrast                             | 64.38311635  |
| wavelet-HLL | glcm       | DifferenceEntropy                    | 3.900309993  |
| wavelet-HLL | glcm       | InverseVariance                      | 0.203298371  |
| wavelet-HLL | glcm       | DifferenceVariance                   | 27.68351125  |
| wavelet-HLL | glcm       | Idn                                  | 0.908318134  |
| wavelet-HLL | glcm       | Idm                                  | 0.199657354  |
| wavelet-HLL | glcm       | Correlation                          | 0.285352588  |
| wavelet-HLL | glcm       | Autocorrelation                      | 725.2732808  |
| wavelet-HLL | glcm       | SumEntropy                           | 5.426669497  |
| wavelet-HLL | glcm       | SumSquares                           | 44.83456965  |
| wavelet-HLL | glcm       | ClusterProminence                    | 42876.38897  |
| wavelet-HLL | glcm       | Imc2                                 | 0.626804235  |
| wavelet-HLL | glcm       | Imc1                                 | -0.084701131 |
| wavelet-HLL | glcm       | DifferenceAverage                    | 5.726216026  |
| wavelet-HLL | glcm       | Id                                   | 0.285800631  |
| wavelet-HLL | glcm       | ClusterTendency                      | 114.9551623  |
| wavelet-HLL | firstorder | InterquartileRange                   | 215.1764457  |
| wavelet-HLL | firstorder | Skewness                             | -0.185219199 |
| wavelet-HLL | firstorder | Uniformity                           | 0.043719815  |
| wavelet-HLL | firstorder | Median                               | -6.022060806 |
| wavelet-HLL | firstorder | Energy                               | 237777268.8  |
| wavelet-HLL | firstorder | RobustMeanAbsoluteDeviation          | 89.65666335  |
| wavelet-HLL | firstorder | MeanAbsoluteDeviation                | 130.032132   |
| wavelet-HLL | firstorder | TotalEnergy                          | 680286222.9  |
| wavelet-HLL | firstorder | Maximum                              | 602.0779991  |

|             |            |                                      |              |
|-------------|------------|--------------------------------------|--------------|
| wavelet-HLL | firstorder | RootMeanSquared                      | 165.653602   |
| wavelet-HLL | firstorder | 90Percentile                         | 194.0379191  |
| wavelet-HLL | firstorder | Minimum                              | -674.3894487 |
| wavelet-HLL | firstorder | Entropy                              | 4.755244278  |
| wavelet-HLL | firstorder | Range                                | 1276.467448  |
| wavelet-HLL | firstorder | Variance                             | 27190.03537  |
| wavelet-HLL | firstorder | 10Percentile                         | -235.2142481 |
| wavelet-HLL | firstorder | Kurtosis                             | 3.083152807  |
| wavelet-HLL | firstorder | Mean                                 | -15.84551933 |
| wavelet-HLL | glrlm      | ShortRunLowGrayLevelEmphasis         | 0.002065049  |
| wavelet-HLL | glrlm      | GrayLevelVariance                    | 44.53022963  |
| wavelet-HLL | glrlm      | LowGrayLevelRunEmphasis              | 0.002150537  |
| wavelet-HLL | glrlm      | GrayLevelNonUniformityNormalized     | 0.043001537  |
| wavelet-HLL | glrlm      | RunVariance                          | 0.093248096  |
| wavelet-HLL | glrlm      | GrayLevelNonUniformity               | 346.5723889  |
| wavelet-HLL | glrlm      | LongRunEmphasis                      | 1.256205732  |
| wavelet-HLL | glrlm      | ShortRunHighGrayLevelEmphasis        | 725.3858638  |
| wavelet-HLL | glrlm      | RunLengthNonUniformity               | 7076.943397  |
| wavelet-HLL | glrlm      | ShortRunEmphasis                     | 0.948172326  |
| wavelet-HLL | glrlm      | LongRunHighGrayLevelEmphasis         | 961.6152451  |
| wavelet-HLL | glrlm      | RunPercentage                        | 0.930125616  |
| wavelet-HLL | glrlm      | LongRunLowGrayLevelEmphasis          | 0.002566696  |
| wavelet-HLL | glrlm      | RunEntropy                           | 5.140914878  |
| wavelet-HLL | glrlm      | HighGrayLevelRunEmphasis             | 765.1040924  |
| wavelet-HLL | glrlm      | RunLengthNonUniformityNormalized     | 0.875316005  |
| wavelet-HLL | glszm      | GrayLevelVariance                    | 56.53403559  |
| wavelet-HLL | glszm      | ZoneVariance                         | 25.22525138  |
| wavelet-HLL | glszm      | GrayLevelNonUniformityNormalized     | 0.036950557  |
| wavelet-HLL | glszm      | SizeZoneNonUniformityNormalized      | 0.361798465  |
| wavelet-HLL | glszm      | SizeZoneNonUniformity                | 1248.566502  |
| wavelet-HLL | glszm      | GrayLevelNonUniformity               | 127.5163721  |
| wavelet-HLL | glszm      | LargeAreaEmphasis                    | 31.52970154  |
| wavelet-HLL | glszm      | SmallAreaHighGrayLevelEmphasis       | 471.8329001  |
| wavelet-HLL | glszm      | ZonePercentage                       | 0.398268898  |
| wavelet-HLL | glszm      | LargeAreaLowGrayLevelEmphasis        | 0.047820781  |
| wavelet-HLL | glszm      | LargeAreaHighGrayLevelEmphasis       | 23383.38858  |
| wavelet-HLL | glszm      | HighGrayLevelZoneEmphasis            | 766.1211243  |
| wavelet-HLL | glszm      | SmallAreaEmphasis                    | 0.621807132  |
| wavelet-HLL | glszm      | LowGrayLevelZoneEmphasis             | 0.002757421  |
| wavelet-HLL | glszm      | ZoneEntropy                          | 6.978945192  |
| wavelet-HLL | glszm      | SmallAreaLowGrayLevelEmphasis        | 0.002047537  |
| wavelet-HLL | ngtdm      | Coarseness                           | 0.000901166  |
| wavelet-HLL | ngtdm      | Complexity                           | 4194.503212  |
| wavelet-HLL | ngtdm      | Strength                             | 0.742980951  |
| wavelet-HLL | ngtdm      | Contrast                             | 0.141220149  |
| wavelet-HLL | ngtdm      | Busyness                             | 0.679698475  |
| wavelet-LHL | gldm       | GrayLevelVariance                    | 5.816689822  |
| wavelet-LHL | gldm       | HighGrayLevelEmphasis                | 215.152337   |
| wavelet-LHL | gldm       | DependenceEntropy                    | 6.440721709  |
| wavelet-LHL | gldm       | DependenceNonUniformity              | 888.7290248  |
| wavelet-LHL | gldm       | GrayLevelNonUniformity               | 1225.09925   |
| wavelet-LHL | gldm       | SmallDependenceEmphasis              | 0.117303861  |
| wavelet-LHL | gldm       | SmallDependenceHighGrayLevelEmphasis | 25.93480869  |
| wavelet-LHL | gldm       | DependenceNonUniformityNormalized    | 0.102565381  |



|             |            |                                      |              |
|-------------|------------|--------------------------------------|--------------|
| wavelet-LHL | gldm       | LargeDependenceEmphasis              | 38.12244662  |
| wavelet-LHL | gldm       | LargeDependenceLowGrayLevelEmphasis  | 0.188240853  |
| wavelet-LHL | gldm       | DependenceVariance                   | 8.97241692   |
| wavelet-LHL | gldm       | LargeDependenceHighGrayLevelEmphasis | 8137.055857  |
| wavelet-LHL | gldm       | SmallDependenceLowGrayLevelEmphasis  | 0.000863744  |
| wavelet-LHL | gldm       | LowGrayLevelEmphasis                 | 0.005523057  |
| wavelet-LHL | glcm       | JointAverage                         | 14.4495804   |
| wavelet-LHL | glcm       | SumAverage                           | 28.89916081  |
| wavelet-LHL | glcm       | JointEntropy                         | 6.262649721  |
| wavelet-LHL | glcm       | ClusterShade                         | -11.22549581 |
| wavelet-LHL | glcm       | MaximumProbability                   | 0.056730263  |
| wavelet-LHL | glcm       | Idmn                                 | 0.990434082  |
| wavelet-LHL | glcm       | JointEnergy                          | 0.023827816  |
| wavelet-LHL | glcm       | Contrast                             | 7.373315665  |
| wavelet-LHL | glcm       | DifferenceEntropy                    | 2.56416029   |
| wavelet-LHL | glcm       | InverseVariance                      | 0.399232166  |
| wavelet-LHL | glcm       | DifferenceVariance                   | 3.497373874  |
| wavelet-LHL | glcm       | Idn                                  | 0.93681848   |
| wavelet-LHL | glcm       | Idm                                  | 0.415983284  |
| wavelet-LHL | glcm       | Correlation                          | 0.383423745  |
| wavelet-LHL | glcm       | Autocorrelation                      | 211.0791444  |
| wavelet-LHL | glcm       | SumEntropy                           | 3.964862976  |
| wavelet-LHL | glcm       | SumSquares                           | 5.975382985  |
| wavelet-LHL | glcm       | ClusterProminence                    | 1653.367739  |
| wavelet-LHL | glcm       | Imc2                                 | 0.53799485   |
| wavelet-LHL | glcm       | Imc1                                 | -0.068376435 |
| wavelet-LHL | glcm       | DifferenceAverage                    | 1.933391679  |
| wavelet-LHL | glcm       | Id                                   | 0.48070311   |
| wavelet-LHL | glcm       | ClusterTendency                      | 16.52821628  |
| wavelet-LHL | firstorder | InterquartileRange                   | 61.06581247  |
| wavelet-LHL | firstorder | Skewness                             | -0.118352517 |
| wavelet-LHL | firstorder | Uniformity                           | 0.141384795  |
| wavelet-LHL | firstorder | Median                               | 0.912301323  |
| wavelet-LHL | firstorder | Energy                               | 31048479.47  |
| wavelet-LHL | firstorder | RobustMeanAbsoluteDeviation          | 26.05098671  |
| wavelet-LHL | firstorder | MeanAbsoluteDeviation                | 42.76082133  |
| wavelet-LHL | firstorder | TotalEnergy                          | 88830412.31  |
| wavelet-LHL | firstorder | Maximum                              | 319.1573252  |
| wavelet-LHL | firstorder | RootMeanSquared                      | 59.8598859   |
| wavelet-LHL | firstorder | 90Percentile                         | 64.46847331  |
| wavelet-LHL | firstorder | Minimum                              | -325.1703716 |
| wavelet-LHL | firstorder | Entropy                              | 3.2189959    |
| wavelet-LHL | firstorder | Range                                | 644.3276968  |
| wavelet-LHL | firstorder | Variance                             | 3582.640943  |
| wavelet-LHL | firstorder | 10Percentile                         | -69.07295777 |
| wavelet-LHL | firstorder | Kurtosis                             | 6.043466457  |
| wavelet-LHL | firstorder | Mean                                 | -0.751663257 |
| wavelet-LHL | glrlm      | ShortRunLowGrayLevelEmphasis         | 0.004978984  |
| wavelet-LHL | glrlm      | GrayLevelVariance                    | 6.409509892  |
| wavelet-LHL | glrlm      | LowGrayLevelRunEmphasis              | 0.005624527  |
| wavelet-LHL | glrlm      | GrayLevelNonUniformityNormalized     | 0.131937984  |
| wavelet-LHL | glrlm      | RunVariance                          | 0.282839352  |
| wavelet-LHL | glrlm      | GrayLevelNonUniformity               | 950.2637536  |
| wavelet-LHL | glrlm      | LongRunEmphasis                      | 1.746951152  |

|             |       |                                      |             |
|-------------|-------|--------------------------------------|-------------|
| wavelet-LHL | glrlm | ShortRunHighGrayLevelEmphasis        | 188.1916885 |
| wavelet-LHL | glrlm | RunLengthNonUniformity               | 5209.856362 |
| wavelet-LHL | glrlm | ShortRunEmphasis                     | 0.872719458 |
| wavelet-LHL | glrlm | LongRunHighGrayLevelEmphasis         | 375.0492959 |
| wavelet-LHL | glrlm | RunPercentage                        | 0.830804741 |
| wavelet-LHL | glrlm | LongRunLowGrayLevelEmphasis          | 0.009362142 |
| wavelet-LHL | glrlm | RunEntropy                           | 4.059348003 |
| wavelet-LHL | glrlm | HighGrayLevelRunEmphasis             | 215.4295657 |
| wavelet-LHL | glrlm | RunLengthNonUniformityNormalized     | 0.720498891 |
| wavelet-LHL | glszm | GrayLevelVariance                    | 17.62798468 |
| wavelet-LHL | glszm | ZoneVariance                         | 6342.46682  |
| wavelet-LHL | glszm | GrayLevelNonUniformityNormalized     | 0.071855118 |
| wavelet-LHL | glszm | SizeZoneNonUniformityNormalized      | 0.26508888  |
| wavelet-LHL | glszm | SizeZoneNonUniformity                | 262.1729019 |
| wavelet-LHL | glszm | GrayLevelNonUniformity               | 71.06471183 |
| wavelet-LHL | glszm | LargeAreaEmphasis                    | 6419.228514 |
| wavelet-LHL | glszm | SmallAreaHighGrayLevelEmphasis       | 118.8220785 |
| wavelet-LHL | glszm | ZonePercentage                       | 0.114137334 |
| wavelet-LHL | glszm | LargeAreaLowGrayLevelEmphasis        | 30.75287476 |
| wavelet-LHL | glszm | LargeAreaHighGrayLevelEmphasis       | 1358084.159 |
| wavelet-LHL | glszm | HighGrayLevelZoneEmphasis            | 224.3013145 |
| wavelet-LHL | glszm | SmallAreaEmphasis                    | 0.525108026 |
| wavelet-LHL | glszm | LowGrayLevelZoneEmphasis             | 0.007886779 |
| wavelet-LHL | glszm | ZoneEntropy                          | 6.488213114 |
| wavelet-LHL | glszm | SmallAreaLowGrayLevelEmphasis        | 0.004680444 |
| wavelet-LHL | ngtdm | Coarseness                           | 0.000948671 |
| wavelet-LHL | ngtdm | Complexity                           | 378.676802  |
| wavelet-LHL | ngtdm | Strength                             | 0.300334175 |
| wavelet-LHL | ngtdm | Contrast                             | 0.022553438 |
| wavelet-LHL | ngtdm | Busyness                             | 1.892599853 |
| wavelet-LHH | gldm  | GrayLevelVariance                    | 0.716234155 |
| wavelet-LHH | gldm  | HighGrayLevelEmphasis                | 30.99988459 |
| wavelet-LHH | gldm  | DependenceEntropy                    | 5.409249537 |
| wavelet-LHH | gldm  | DependenceNonUniformity              | 585.6063474 |
| wavelet-LHH | gldm  | GrayLevelNonUniformity               | 3064.354876 |
| wavelet-LHH | gldm  | SmallDependenceEmphasis              | 0.044080197 |
| wavelet-LHH | gldm  | SmallDependenceHighGrayLevelEmphasis | 1.509850287 |
| wavelet-LHH | gldm  | DependenceNonUniformityNormalized    | 0.06758296  |
| wavelet-LHH | gldm  | LargeDependenceEmphasis              | 111.7212926 |
| wavelet-LHH | gldm  | LargeDependenceLowGrayLevelEmphasis  | 3.840244778 |
| wavelet-LHH | gldm  | DependenceVariance                   | 16.89887448 |
| wavelet-LHH | gldm  | LargeDependenceHighGrayLevelEmphasis | 3397.949452 |
| wavelet-LHH | gldm  | SmallDependenceLowGrayLevelEmphasis  | 0.001985307 |
| wavelet-LHH | gldm  | LowGrayLevelEmphasis                 | 0.036018561 |
| wavelet-LHH | glcm  | JointAverage                         | 5.504198687 |
| wavelet-LHH | glcm  | SumAverage                           | 11.00839737 |
| wavelet-LHH | glcm  | JointEntropy                         | 3.525633549 |
| wavelet-LHH | glcm  | ClusterShade                         | 0.05969771  |
| wavelet-LHH | glcm  | MaximumProbability                   | 0.187399078 |
| wavelet-LHH | glcm  | Idmn                                 | 0.987143444 |
| wavelet-LHH | glcm  | JointEnergy                          | 0.131303688 |
| wavelet-LHH | glcm  | Contrast                             | 1.361268882 |
| wavelet-LHH | glcm  | DifferenceEntropy                    | 1.601455086 |
| wavelet-LHH | glcm  | InverseVariance                      | 0.495735151 |

|             |            |                                  |              |
|-------------|------------|----------------------------------|--------------|
| wavelet-LHH | glcm       | DifferenceVariance               | 0.674753676  |
| wavelet-LHH | glcm       | Idn                              | 0.929360717  |
| wavelet-LHH | glcm       | Idm                              | 0.642071786  |
| wavelet-LHH | glcm       | Correlation                      | 0.068662153  |
| wavelet-LHH | glcm       | Autocorrelation                  | 30.3462517   |
| wavelet-LHH | glcm       | SumEntropy                       | 2.322183834  |
| wavelet-LHH | glcm       | SumSquares                       | 0.730681881  |
| wavelet-LHH | glcm       | ClusterProminence                | 11.50836102  |
| wavelet-LHH | glcm       | Imc2                             | 0.298506234  |
| wavelet-LHH | glcm       | Imc1                             | -0.035537447 |
| wavelet-LHH | glcm       | DifferenceAverage                | 0.819017372  |
| wavelet-LHH | glcm       | Id                               | 0.662909681  |
| wavelet-LHH | glcm       | ClusterTendency                  | 1.56145864   |
| wavelet-LHH | firstorder | InterquartileRange               | 22.44875516  |
| wavelet-LHH | firstorder | Skewness                         | 0.075402936  |
| wavelet-LHH | firstorder | Uniformity                       | 0.353647418  |
| wavelet-LHH | firstorder | Median                           | -0.117106964 |
| wavelet-LHH | firstorder | Energy                           | 3374737.633  |
| wavelet-LHH | firstorder | RobustMeanAbsoluteDeviation      | 9.451721703  |
| wavelet-LHH | firstorder | MeanAbsoluteDeviation            | 14.69054715  |
| wavelet-LHH | firstorder | TotalEnergy                      | 9655201.814  |
| wavelet-LHH | firstorder | Maximum                          | 121.8963198  |
| wavelet-LHH | firstorder | RootMeanSquared                  | 19.73493606  |
| wavelet-LHH | firstorder | 90Percentile                     | 23.18728616  |
| wavelet-LHH | firstorder | Minimum                          | -109.0292214 |
| wavelet-LHH | firstorder | Entropy                          | 1.780574061  |
| wavelet-LHH | firstorder | Range                            | 230.9255411  |
| wavelet-LHH | firstorder | Variance                         | 389.467636   |
| wavelet-LHH | firstorder | 10Percentile                     | -22.79090319 |
| wavelet-LHH | firstorder | Kurtosis                         | 5.012700784  |
| wavelet-LHH | firstorder | Mean                             | -0.008086054 |
| wavelet-LHH | glrlm      | ShortRunLowGrayLevelEmphasis     | 0.0274898    |
| wavelet-LHH | glrlm      | GrayLevelVariance                | 0.881816666  |
| wavelet-LHH | glrlm      | LowGrayLevelRunEmphasis          | 0.03672012   |
| wavelet-LHH | glrlm      | GrayLevelNonUniformityNormalized | 0.31609557   |
| wavelet-LHH | glrlm      | RunVariance                      | 0.833029565  |
| wavelet-LHH | glrlm      | GrayLevelNonUniformity           | 1818.655017  |
| wavelet-LHH | glrlm      | LongRunEmphasis                  | 3.14444141   |
| wavelet-LHH | glrlm      | ShortRunHighGrayLevelEmphasis    | 23.14746581  |
| wavelet-LHH | glrlm      | RunLengthNonUniformity           | 2935.968316  |
| wavelet-LHH | glrlm      | ShortRunEmphasis                 | 0.735066122  |
| wavelet-LHH | glrlm      | LongRunHighGrayLevelEmphasis     | 96.62405157  |
| wavelet-LHH | glrlm      | RunPercentage                    | 0.663935372  |
| wavelet-LHH | glrlm      | LongRunLowGrayLevelEmphasis      | 0.110771823  |
| wavelet-LHH | glrlm      | RunEntropy                       | 3.258819139  |
| wavelet-LHH | glrlm      | HighGrayLevelRunEmphasis         | 31.24682308  |
| wavelet-LHH | glrlm      | RunLengthNonUniformityNormalized | 0.506311937  |
| wavelet-LHH | glszm      | GrayLevelVariance                | 3.729635136  |
| wavelet-LHH | glszm      | ZoneVariance                     | 73694.00679  |
| wavelet-LHH | glszm      | GrayLevelNonUniformityNormalized | 0.268619065  |
| wavelet-LHH | glszm      | SizeZoneNonUniformityNormalized  | 0.276838518  |
| wavelet-LHH | glszm      | SizeZoneNonUniformity            | 95.78612717  |
| wavelet-LHH | glszm      | GrayLevelNonUniformity           | 92.94219653  |
| wavelet-LHH | glszm      | LargeAreaEmphasis                | 74321.1763   |

|             |            |                                      |              |
|-------------|------------|--------------------------------------|--------------|
| wavelet-LHH | glszm      | SmallAreaHighGrayLevelEmphasis       | 19.31226338  |
| wavelet-LHH | glszm      | ZonePercentage                       | 0.039930756  |
| wavelet-LHH | glszm      | LargeAreaLowGrayLevelEmphasis        | 2528.028728  |
| wavelet-LHH | glszm      | LargeAreaHighGrayLevelEmphasis       | 2259613.127  |
| wavelet-LHH | glszm      | HighGrayLevelZoneEmphasis            | 34.10693642  |
| wavelet-LHH | glszm      | SmallAreaEmphasis                    | 0.535320372  |
| wavelet-LHH | glszm      | LowGrayLevelZoneEmphasis             | 0.051746483  |
| wavelet-LHH | glszm      | ZoneEntropy                          | 4.67526615   |
| wavelet-LHH | glszm      | SmallAreaLowGrayLevelEmphasis        | 0.026745486  |
| wavelet-LHH | ngtdm      | Coarseness                           | 0.000646145  |
| wavelet-LHH | ngtdm      | Complexity                           | 29.99054552  |
| wavelet-LHH | ngtdm      | Strength                             | 0.031364052  |
| wavelet-LHH | ngtdm      | Contrast                             | 0.010502249  |
| wavelet-LHH | ngtdm      | Busyness                             | 19.24037396  |
| wavelet-LLH | gldm       | GrayLevelVariance                    | 8.256211454  |
| wavelet-LLH | gldm       | HighGrayLevelEmphasis                | 426.8493941  |
| wavelet-LLH | gldm       | DependenceEntropy                    | 6.667393043  |
| wavelet-LLH | gldm       | DependenceNonUniformity              | 943.2504328  |
| wavelet-LLH | gldm       | GrayLevelNonUniformity               | 1013.956492  |
| wavelet-LLH | gldm       | SmallDependenceEmphasis              | 0.14287138   |
| wavelet-LLH | gldm       | SmallDependenceHighGrayLevelEmphasis | 60.9294999   |
| wavelet-LLH | gldm       | DependenceNonUniformityNormalized    | 0.108857523  |
| wavelet-LLH | gldm       | LargeDependenceEmphasis              | 33.8932487   |
| wavelet-LLH | gldm       | LargeDependenceLowGrayLevelEmphasis  | 0.082978733  |
| wavelet-LLH | gldm       | DependenceVariance                   | 8.761511849  |
| wavelet-LLH | gldm       | LargeDependenceHighGrayLevelEmphasis | 14404.13987  |
| wavelet-LLH | gldm       | SmallDependenceLowGrayLevelEmphasis  | 0.000542508  |
| wavelet-LLH | gldm       | LowGrayLevelEmphasis                 | 0.002744043  |
| wavelet-LLH | glcm       | JointAverage                         | 20.44218005  |
| wavelet-LLH | glcm       | SumAverage                           | 40.88436011  |
| wavelet-LLH | glcm       | JointEntropy                         | 6.736536687  |
| wavelet-LLH | glcm       | ClusterShade                         | -38.90736706 |
| wavelet-LLH | glcm       | MaximumProbability                   | 0.048797806  |
| wavelet-LLH | glcm       | Idmn                                 | 0.992855409  |
| wavelet-LLH | glcm       | JointEnergy                          | 0.01700467   |
| wavelet-LLH | glcm       | Contrast                             | 10.21995446  |
| wavelet-LLH | glcm       | DifferenceEntropy                    | 2.761247068  |
| wavelet-LLH | glcm       | InverseVariance                      | 0.364582632  |
| wavelet-LLH | glcm       | DifferenceVariance                   | 4.879487193  |
| wavelet-LLH | glcm       | Idn                                  | 0.945269984  |
| wavelet-LLH | glcm       | Idm                                  | 0.381960717  |
| wavelet-LLH | glcm       | Correlation                          | 0.388696745  |
| wavelet-LLH | glcm       | Autocorrelation                      | 421.1273795  |
| wavelet-LLH | glcm       | SumEntropy                           | 4.233350757  |
| wavelet-LLH | glcm       | SumSquares                           | 8.354596352  |
| wavelet-LLH | glcm       | ClusterProminence                    | 3217.669271  |
| wavelet-LLH | glcm       | Imc2                                 | 0.567818641  |
| wavelet-LLH | glcm       | Imc1                                 | -0.074470724 |
| wavelet-LLH | glcm       | DifferenceAverage                    | 2.259797162  |
| wavelet-LLH | glcm       | Id                                   | 0.452711064  |
| wavelet-LLH | glcm       | ClusterTendency                      | 23.19843095  |
| wavelet-LLH | firstorder | InterquartileRange                   | 74.47370694  |
| wavelet-LLH | firstorder | Skewness                             | -0.363841675 |
| wavelet-LLH | firstorder | Uniformity                           | 0.117017483  |

|             |            |                                  |              |
|-------------|------------|----------------------------------|--------------|
| wavelet-LLH | firstorder | Median                           | 2.385273539  |
| wavelet-LLH | firstorder | Energy                           | 44366619.01  |
| wavelet-LLH | firstorder | RobustMeanAbsoluteDeviation      | 31.86747419  |
| wavelet-LLH | firstorder | MeanAbsoluteDeviation            | 51.55498182  |
| wavelet-LLH | firstorder | TotalEnergy                      | 126933915.2  |
| wavelet-LLH | firstorder | Maximum                          | 408.6852701  |
| wavelet-LLH | firstorder | RootMeanSquared                  | 71.55564217  |
| wavelet-LLH | firstorder | 90Percentile                     | 80.54993967  |
| wavelet-LLH | firstorder | Minimum                          | -483.876196  |
| wavelet-LLH | firstorder | Entropy                          | 3.481939672  |
| wavelet-LLH | firstorder | Range                            | 892.5614661  |
| wavelet-LLH | firstorder | Variance                         | 5119.250909  |
| wavelet-LLH | firstorder | 10Percentile                     | -85.59679255 |
| wavelet-LLH | firstorder | Kurtosis                         | 6.339522795  |
| wavelet-LLH | firstorder | Mean                             | -0.979294175 |
| wavelet-LLH | glrlm      | ShortRunLowGrayLevelEmphasis     | 0.002506446  |
| wavelet-LLH | glrlm      | GrayLevelVariance                | 8.999455146  |
| wavelet-LLH | glrlm      | LowGrayLevelRunEmphasis          | 0.0027933    |
| wavelet-LLH | glrlm      | GrayLevelNonUniformityNormalized | 0.109681835  |
| wavelet-LLH | glrlm      | RunVariance                      | 0.256133242  |
| wavelet-LLH | glrlm      | GrayLevelNonUniformity           | 804.0057873  |
| wavelet-LLH | glrlm      | LongRunEmphasis                  | 1.669228882  |
| wavelet-LLH | glrlm      | ShortRunHighGrayLevelEmphasis    | 378.029523   |
| wavelet-LLH | glrlm      | RunLengthNonUniformity           | 5472.207545  |
| wavelet-LLH | glrlm      | ShortRunEmphasis                 | 0.885064679  |
| wavelet-LLH | glrlm      | LongRunHighGrayLevelEmphasis     | 712.0943547  |
| wavelet-LLH | glrlm      | RunPercentage                    | 0.845647832  |
| wavelet-LLH | glrlm      | LongRunLowGrayLevelEmphasis      | 0.004444156  |
| wavelet-LLH | glrlm      | RunEntropy                       | 4.257436062  |
| wavelet-LLH | glrlm      | HighGrayLevelRunEmphasis         | 427.0077229  |
| wavelet-LLH | glrlm      | RunLengthNonUniformityNormalized | 0.74364446   |
| wavelet-LLH | glszm      | GrayLevelVariance                | 22.23663116  |
| wavelet-LLH | glszm      | ZoneVariance                     | 3752.500817  |
| wavelet-LLH | glszm      | GrayLevelNonUniformityNormalized | 0.063371058  |
| wavelet-LLH | glszm      | SizeZoneNonUniformityNormalized  | 0.294746433  |
| wavelet-LLH | glszm      | SizeZoneNonUniformity            | 369.9067729  |
| wavelet-LLH | glszm      | GrayLevelNonUniformity           | 79.53067729  |
| wavelet-LLH | glszm      | LargeAreaEmphasis                | 3800.171315  |
| wavelet-LLH | glszm      | SmallAreaHighGrayLevelEmphasis   | 238.0153404  |
| wavelet-LLH | glszm      | ZonePercentage                   | 0.144835545  |
| wavelet-LLH | glszm      | LargeAreaLowGrayLevelEmphasis    | 9.07579736   |
| wavelet-LLH | glszm      | LargeAreaHighGrayLevelEmphasis   | 1602245.782  |
| wavelet-LLH | glszm      | HighGrayLevelZoneEmphasis        | 427.6733068  |
| wavelet-LLH | glszm      | SmallAreaEmphasis                | 0.558455157  |
| wavelet-LLH | glszm      | LowGrayLevelZoneEmphasis         | 0.003976588  |
| wavelet-LLH | glszm      | ZoneEntropy                      | 6.575762518  |
| wavelet-LLH | glszm      | SmallAreaLowGrayLevelEmphasis    | 0.00258936   |
| wavelet-LLH | ngtdm      | Coarseness                       | 0.001058237  |
| wavelet-LLH | ngtdm      | Complexity                       | 799.0694468  |
| wavelet-LLH | ngtdm      | Strength                         | 0.64969054   |
| wavelet-LLH | ngtdm      | Contrast                         | 0.019736109  |
| wavelet-LLH | ngtdm      | Busyness                         | 0.857581278  |
| wavelet-LLL | gldm       | GrayLevelVariance                | 926.2908213  |
| wavelet-LLL | gldm       | HighGrayLevelEmphasis            | 3373.131564  |

|             |            |                                      |              |
|-------------|------------|--------------------------------------|--------------|
| wavelet-LLL | gldm       | DependenceEntropy                    | 8.355564695  |
| wavelet-LLL | gldm       | DependenceNonUniformity              | 2615.524409  |
| wavelet-LLL | gldm       | GrayLevelNonUniformity               | 100.0351991  |
| wavelet-LLL | gldm       | SmallDependenceEmphasis              | 0.530973834  |
| wavelet-LLL | gldm       | SmallDependenceHighGrayLevelEmphasis | 1698.749818  |
| wavelet-LLL | gldm       | DependenceNonUniformityNormalized    | 0.301849326  |
| wavelet-LLL | gldm       | LargeDependenceEmphasis              | 6.125908829  |
| wavelet-LLL | gldm       | LargeDependenceLowGrayLevelEmphasis  | 0.024822361  |
| wavelet-LLL | gldm       | DependenceVariance                   | 1.826447951  |
| wavelet-LLL | gldm       | LargeDependenceHighGrayLevelEmphasis | 22387.1805   |
| wavelet-LLL | gldm       | SmallDependenceLowGrayLevelEmphasis  | 0.00108596   |
| wavelet-LLL | gldm       | LowGrayLevelEmphasis                 | 0.002548281  |
| wavelet-LLL | glcm       | JointAverage                         | 52.39168324  |
| wavelet-LLL | glcm       | SumAverage                           | 104.7833665  |
| wavelet-LLL | glcm       | JointEntropy                         | 11.69583229  |
| wavelet-LLL | glcm       | ClusterShade                         | 19154.4621   |
| wavelet-LLL | glcm       | MaximumProbability                   | 0.002057636  |
| wavelet-LLL | glcm       | Idmn                                 | 0.984374981  |
| wavelet-LLL | glcm       | JointEnergy                          | 0.000441852  |
| wavelet-LLL | glcm       | Contrast                             | 251.0871037  |
| wavelet-LLL | glcm       | DifferenceEntropy                    | 4.897361509  |
| wavelet-LLL | glcm       | InverseVariance                      | 0.127648639  |
| wavelet-LLL | glcm       | DifferenceVariance                   | 109.3270698  |
| wavelet-LLL | glcm       | Idn                                  | 0.920326894  |
| wavelet-LLL | glcm       | Idm                                  | 0.124400022  |
| wavelet-LLL | glcm       | Correlation                          | 0.864980181  |
| wavelet-LLL | glcm       | Autocorrelation                      | 3548.51992   |
| wavelet-LLL | glcm       | SumEntropy                           | 7.539533493  |
| wavelet-LLL | glcm       | SumSquares                           | 928.0000863  |
| wavelet-LLL | glcm       | ClusterProminence                    | 19007244.48  |
| wavelet-LLL | glcm       | Imc2                                 | 0.968193055  |
| wavelet-LLL | glcm       | Imc1                                 | -0.221469496 |
| wavelet-LLL | glcm       | DifferenceAverage                    | 11.46283671  |
| wavelet-LLL | glcm       | Id                                   | 0.199648524  |
| wavelet-LLL | glcm       | ClusterTendency                      | 3460.913242  |
| wavelet-LLL | firstorder | InterquartileRange                   | 1462.767161  |
| wavelet-LLL | firstorder | Skewness                             | 0.24268173   |
| wavelet-LLL | firstorder | Uniformity                           | 0.011544743  |
| wavelet-LLL | firstorder | Median                               | -1344.396354 |
| wavelet-LLL | firstorder | Energy                               | 17509311679  |
| wavelet-LLL | firstorder | RobustMeanAbsoluteDeviation          | 576.1577616  |
| wavelet-LLL | firstorder | MeanAbsoluteDeviation                | 682.6812319  |
| wavelet-LLL | firstorder | TotalEnergy                          | 50094542537  |
| wavelet-LLL | firstorder | Maximum                              | 634.2199006  |
| wavelet-LLL | firstorder | RootMeanSquared                      | 1421.511093  |
| wavelet-LLL | firstorder | 90Percentile                         | -120.1392576 |
| wavelet-LLL | firstorder | Minimum                              | -2422.609278 |
| wavelet-LLL | firstorder | Entropy                              | 6.556454337  |
| wavelet-LLL | firstorder | Range                                | 3056.829178  |
| wavelet-LLL | firstorder | Variance                             | 578746.111   |
| wavelet-LLL | firstorder | 10Percentile                         | -2119.275147 |
| wavelet-LLL | firstorder | Kurtosis                             | 1.6047197    |
| wavelet-LLL | firstorder | Mean                                 | -1200.811258 |
| wavelet-LLL | glrlm      | ShortRunLowGrayLevelEmphasis         | 0.002380695  |

|             |       |                                      |             |
|-------------|-------|--------------------------------------|-------------|
| wavelet-LLL | glrlm | GrayLevelVariance                    | 910.2637322 |
| wavelet-LLL | glrlm | LowGrayLevelRunEmphasis              | 0.002494315 |
| wavelet-LLL | glrlm | GrayLevelNonUniformityNormalized     | 0.011453864 |
| wavelet-LLL | glrlm | RunVariance                          | 0.049235841 |
| wavelet-LLL | glrlm | GrayLevelNonUniformity               | 95.15419983 |
| wavelet-LLL | glrlm | LongRunEmphasis                      | 1.138280725 |
| wavelet-LLL | glrlm | ShortRunHighGrayLevelEmphasis        | 3248.115322 |
| wavelet-LLL | glrlm | RunLengthNonUniformity               | 7677.31339  |
| wavelet-LLL | glrlm | ShortRunEmphasis                     | 0.96966313  |
| wavelet-LLL | glrlm | LongRunHighGrayLevelEmphasis         | 3865.414869 |
| wavelet-LLL | glrlm | RunPercentage                        | 0.958710995 |
| wavelet-LLL | glrlm | LongRunLowGrayLevelEmphasis          | 0.003024708 |
| wavelet-LLL | glrlm | RunEntropy                           | 6.790631332 |
| wavelet-LLL | glrlm | HighGrayLevelRunEmphasis             | 3360.132349 |
| wavelet-LLL | glrlm | RunLengthNonUniformityNormalized     | 0.923667308 |
| wavelet-LLL | glszm | GrayLevelVariance                    | 739.3185489 |
| wavelet-LLL | glszm | ZoneVariance                         | 3.708301827 |
| wavelet-LLL | glszm | GrayLevelNonUniformityNormalized     | 0.011052125 |
| wavelet-LLL | glszm | SizeZoneNonUniformityNormalized      | 0.551778928 |
| wavelet-LLL | glszm | SizeZoneNonUniformity                | 2879.182445 |
| wavelet-LLL | glszm | GrayLevelNonUniformity               | 57.6699885  |
| wavelet-LLL | glszm | LargeAreaEmphasis                    | 6.465887313 |
| wavelet-LLL | glszm | SmallAreaHighGrayLevelEmphasis       | 2434.55333  |
| wavelet-LLL | glszm | ZonePercentage                       | 0.602192729 |
| wavelet-LLL | glszm | LargeAreaLowGrayLevelEmphasis        | 0.022863654 |
| wavelet-LLL | glszm | LargeAreaHighGrayLevelEmphasis       | 26611.64335 |
| wavelet-LLL | glszm | HighGrayLevelZoneEmphasis            | 3192.415293 |
| wavelet-LLL | glszm | SmallAreaEmphasis                    | 0.771086639 |
| wavelet-LLL | glszm | LowGrayLevelZoneEmphasis             | 0.002079284 |
| wavelet-LLL | glszm | ZoneEntropy                          | 7.841342632 |
| wavelet-LLL | glszm | SmallAreaLowGrayLevelEmphasis        | 0.00150602  |
| wavelet-LLL | ngtdm | Coarseness                           | 0.001886114 |
| wavelet-LLL | ngtdm | Complexity                           | 27781.61787 |
| wavelet-LLL | ngtdm | Strength                             | 9.791714816 |
| wavelet-LLL | ngtdm | Contrast                             | 0.809563857 |
| wavelet-LLL | ngtdm | Busyness                             | 0.122884058 |
| wavelet-HHL | gldm  | GrayLevelVariance                    | 1.862354852 |
| wavelet-HHL | gldm  | HighGrayLevelEmphasis                | 74.29001731 |
| wavelet-HHL | gldm  | DependenceEntropy                    | 5.739887963 |
| wavelet-HHL | gldm  | DependenceNonUniformity              | 706.1725332 |
| wavelet-HHL | gldm  | GrayLevelNonUniformity               | 1930.995615 |
| wavelet-HHL | gldm  | SmallDependenceEmphasis              | 0.086728636 |
| wavelet-HHL | gldm  | SmallDependenceHighGrayLevelEmphasis | 6.91781853  |
| wavelet-HHL | gldm  | DependenceNonUniformityNormalized    | 0.081497119 |
| wavelet-HHL | gldm  | LargeDependenceEmphasis              | 56.02527409 |
| wavelet-HHL | gldm  | LargeDependenceLowGrayLevelEmphasis  | 0.797884782 |
| wavelet-HHL | gldm  | DependenceVariance                   | 12.0835992  |
| wavelet-HHL | gldm  | LargeDependenceHighGrayLevelEmphasis | 4082.306405 |
| wavelet-HHL | gldm  | SmallDependenceLowGrayLevelEmphasis  | 0.001628563 |
| wavelet-HHL | gldm  | LowGrayLevelEmphasis                 | 0.015325899 |
| wavelet-HHL | glcm  | JointAverage                         | 8.514905897 |
| wavelet-HHL | glcm  | SumAverage                           | 17.02981179 |
| wavelet-HHL | glcm  | JointEntropy                         | 4.860551886 |
| wavelet-HHL | glcm  | ClusterShade                         | 0.851914691 |

|             |            |                                  |              |
|-------------|------------|----------------------------------|--------------|
| wavelet-HHL | glcm       | MaximumProbability               | 0.102017844  |
| wavelet-HHL | glcm       | Idmn                             | 0.985000635  |
| wavelet-HHL | glcm       | JointEnergy                      | 0.053965645  |
| wavelet-HHL | glcm       | Contrast                         | 3.589905116  |
| wavelet-HHL | glcm       | DifferenceEntropy                | 2.157713958  |
| wavelet-HHL | glcm       | InverseVariance                  | 0.450936624  |
| wavelet-HHL | glcm       | DifferenceVariance               | 1.588740283  |
| wavelet-HHL | glcm       | Idn                              | 0.919979687  |
| wavelet-HHL | glcm       | Idm                              | 0.492404546  |
| wavelet-HHL | glcm       | Correlation                      | 0.027651224  |
| wavelet-HHL | glcm       | Autocorrelation                  | 72.55696708  |
| wavelet-HHL | glcm       | SumEntropy                       | 2.966939465  |
| wavelet-HHL | glcm       | SumSquares                       | 1.848291802  |
| wavelet-HHL | glcm       | ClusterProminence                | 63.79351206  |
| wavelet-HHL | glcm       | Imc2                             | 0.294832481  |
| wavelet-HHL | glcm       | Imc1                             | -0.030662019 |
| wavelet-HHL | glcm       | DifferenceAverage                | 1.396371578  |
| wavelet-HHL | glcm       | Id                               | 0.543196573  |
| wavelet-HHL | glcm       | ClusterTendency                  | 3.803262091  |
| wavelet-HHL | firstorder | InterquartileRange               | 39.80977593  |
| wavelet-HHL | firstorder | Skewness                         | 0.091035203  |
| wavelet-HHL | firstorder | Uniformity                       | 0.222850042  |
| wavelet-HHL | firstorder | Median                           | -0.008080039 |
| wavelet-HHL | firstorder | Energy                           | 9619527.92   |
| wavelet-HHL | firstorder | RobustMeanAbsoluteDeviation      | 16.68529161  |
| wavelet-HHL | firstorder | MeanAbsoluteDeviation            | 25.33751411  |
| wavelet-HHL | firstorder | TotalEnergy                      | 27521690.14  |
| wavelet-HHL | firstorder | Maximum                          | 155.7398619  |
| wavelet-HHL | firstorder | RootMeanSquared                  | 33.31904893  |
| wavelet-HHL | firstorder | 90Percentile                     | 40.42839558  |
| wavelet-HHL | firstorder | Minimum                          | -190.6780895 |
| wavelet-HHL | firstorder | Entropy                          | 2.470488976  |
| wavelet-HHL | firstorder | Range                            | 346.4179515  |
| wavelet-HHL | firstorder | Variance                         | 1110.098684  |
| wavelet-HHL | firstorder | 10Percentile                     | -39.09771928 |
| wavelet-HHL | firstorder | Kurtosis                         | 4.345043803  |
| wavelet-HHL | firstorder | Mean                             | 0.24563734   |
| wavelet-HHL | glrlm      | ShortRunLowGrayLevelEmphasis     | 0.013210309  |
| wavelet-HHL | glrlm      | GrayLevelVariance                | 2.139213662  |
| wavelet-HHL | glrlm      | LowGrayLevelRunEmphasis          | 0.015577783  |
| wavelet-HHL | glrlm      | GrayLevelNonUniformityNormalized | 0.202751112  |
| wavelet-HHL | glrlm      | RunVariance                      | 0.43383353   |
| wavelet-HHL | glrlm      | GrayLevelNonUniformity           | 1376.375562  |
| wavelet-HHL | glrlm      | LongRunEmphasis                  | 2.103644791  |
| wavelet-HHL | glrlm      | ShortRunHighGrayLevelEmphasis    | 62.63414783  |
| wavelet-HHL | glrlm      | RunLengthNonUniformity           | 4507.361637  |
| wavelet-HHL | glrlm      | ShortRunEmphasis                 | 0.836673991  |
| wavelet-HHL | glrlm      | LongRunHighGrayLevelEmphasis     | 155.1829042  |
| wavelet-HHL | glrlm      | RunPercentage                    | 0.783505704  |
| wavelet-HHL | glrlm      | LongRunLowGrayLevelEmphasis      | 0.031484071  |
| wavelet-HHL | glrlm      | RunEntropy                       | 3.485008099  |
| wavelet-HHL | glrlm      | HighGrayLevelRunEmphasis         | 74.61304751  |
| wavelet-HHL | glrlm      | RunLengthNonUniformityNormalized | 0.658524299  |
| wavelet-HHL | glszm      | GrayLevelVariance                | 7.638844588  |



|             |       |                                      |              |
|-------------|-------|--------------------------------------|--------------|
| wavelet-HHL | glszm | ZoneVariance                         | 23696.59546  |
| wavelet-HHL | glszm | GrayLevelNonUniformityNormalized     | 0.14046328   |
| wavelet-HHL | glszm | SizeZoneNonUniformityNormalized      | 0.320661742  |
| wavelet-HHL | glszm | SizeZoneNonUniformity                | 202.3375594  |
| wavelet-HHL | glszm | GrayLevelNonUniformity               | 88.63232964  |
| wavelet-HHL | glszm | LargeAreaEmphasis                    | 23885.16799  |
| wavelet-HHL | glszm | SmallAreaHighGrayLevelEmphasis       | 48.97116098  |
| wavelet-HHL | glszm | ZonePercentage                       | 0.072821696  |
| wavelet-HHL | glszm | LargeAreaLowGrayLevelEmphasis        | 339.9443465  |
| wavelet-HHL | glszm | LargeAreaHighGrayLevelEmphasis       | 1725530.509  |
| wavelet-HHL | glszm | HighGrayLevelZoneEmphasis            | 82.75911252  |
| wavelet-HHL | glszm | SmallAreaEmphasis                    | 0.576305482  |
| wavelet-HHL | glszm | LowGrayLevelZoneEmphasis             | 0.021173358  |
| wavelet-HHL | glszm | ZoneEntropy                          | 5.229195114  |
| wavelet-HHL | glszm | SmallAreaLowGrayLevelEmphasis        | 0.012124436  |
| wavelet-HHL | ngtdm | Coarseness                           | 0.000730612  |
| wavelet-HHL | ngtdm | Complexity                           | 106.0574331  |
| wavelet-HHL | ngtdm | Strength                             | 0.069104939  |
| wavelet-HHL | ngtdm | Contrast                             | 0.01847406   |
| wavelet-HHL | ngtdm | Busyness                             | 7.428288842  |
| wavelet-HLH | gldm  | GrayLevelVariance                    | 2.285771552  |
| wavelet-HLH | gldm  | HighGrayLevelEmphasis                | 74.49948067  |
| wavelet-HLH | gldm  | DependenceEntropy                    | 5.941309646  |
| wavelet-HLH | gldm  | DependenceNonUniformity              | 714.5469129  |
| wavelet-HLH | gldm  | GrayLevelNonUniformity               | 1782.035199  |
| wavelet-HLH | gldm  | SmallDependenceEmphasis              | 0.098138817  |
| wavelet-HLH | gldm  | SmallDependenceHighGrayLevelEmphasis | 7.968192682  |
| wavelet-HLH | gldm  | DependenceNonUniformityNormalized    | 0.082463579  |
| wavelet-HLH | gldm  | LargeDependenceEmphasis              | 54.16191575  |
| wavelet-HLH | gldm  | LargeDependenceLowGrayLevelEmphasis  | 0.775808693  |
| wavelet-HLH | gldm  | DependenceVariance                   | 13.03778166  |
| wavelet-HLH | gldm  | LargeDependenceHighGrayLevelEmphasis | 3949.411425  |
| wavelet-HLH | gldm  | SmallDependenceLowGrayLevelEmphasis  | 0.001938568  |
| wavelet-HLH | gldm  | LowGrayLevelEmphasis                 | 0.01563144   |
| wavelet-HLH | glcm  | JointAverage                         | 8.502186384  |
| wavelet-HLH | glcm  | SumAverage                           | 17.00437277  |
| wavelet-HLH | glcm  | JointEntropy                         | 5.160865757  |
| wavelet-HLH | glcm  | ClusterShade                         | 1.57338419   |
| wavelet-HLH | glcm  | MaximumProbability                   | 0.093601361  |
| wavelet-HLH | glcm  | Idmn                                 | 0.983303808  |
| wavelet-HLH | glcm  | JointEnergy                          | 0.046353482  |
| wavelet-HLH | glcm  | Contrast                             | 4.611457746  |
| wavelet-HLH | glcm  | DifferenceEntropy                    | 2.305431972  |
| wavelet-HLH | glcm  | InverseVariance                      | 0.427907928  |
| wavelet-HLH | glcm  | DifferenceVariance                   | 2.122734648  |
| wavelet-HLH | glcm  | Idn                                  | 0.91731598   |
| wavelet-HLH | glcm  | Idm                                  | 0.471466689  |
| wavelet-HLH | glcm  | Correlation                          | 0.015893338  |
| wavelet-HLH | glcm  | Autocorrelation                      | 72.31996002  |
| wavelet-HLH | glcm  | SumEntropy                           | 3.117553349  |
| wavelet-HLH | glcm  | SumSquares                           | 2.338505773  |
| wavelet-HLH | glcm  | ClusterProminence                    | 106.2394475  |
| wavelet-HLH | glcm  | Imc2                                 | 0.332784868  |
| wavelet-HLH | glcm  | Imc1                                 | -0.035411757 |

|             |            |                                  |              |
|-------------|------------|----------------------------------|--------------|
| wavelet-HLH | glcm       | DifferenceAverage                | 1.554612129  |
| wavelet-HLH | glcm       | Id                               | 0.526630366  |
| wavelet-HLH | glcm       | ClusterTendency                  | 4.742565346  |
| wavelet-HLH | firstorder | InterquartileRange               | 41.86362477  |
| wavelet-HLH | firstorder | Skewness                         | 0.177769695  |
| wavelet-HLH | firstorder | Uniformity                       | 0.205658996  |
| wavelet-HLH | firstorder | Median                           | -0.617750545 |
| wavelet-HLH | firstorder | Energy                           | 11946714.24  |
| wavelet-HLH | firstorder | RobustMeanAbsoluteDeviation      | 17.76458226  |
| wavelet-HLH | firstorder | MeanAbsoluteDeviation            | 27.70354249  |
| wavelet-HLH | firstorder | TotalEnergy                      | 34179823.6   |
| wavelet-HLH | firstorder | Maximum                          | 193.0105178  |
| wavelet-HLH | firstorder | RootMeanSquared                  | 37.13128288  |
| wavelet-HLH | firstorder | 90Percentile                     | 45.50005309  |
| wavelet-HLH | firstorder | Minimum                          | -178.9296059 |
| wavelet-HLH | firstorder | Entropy                          | 2.60889775   |
| wavelet-HLH | firstorder | Range                            | 371.9401237  |
| wavelet-HLH | firstorder | Variance                         | 1378.73194   |
| wavelet-HLH | firstorder | 10Percentile                     | -43.95829232 |
| wavelet-HLH | firstorder | Kurtosis                         | 4.548040901  |
| wavelet-HLH | firstorder | Mean                             | -0.015106766 |
| wavelet-HLH | glrlm      | ShortRunLowGrayLevelEmphasis     | 0.013617043  |
| wavelet-HLH | glrlm      | GrayLevelVariance                | 2.616895911  |
| wavelet-HLH | glrlm      | LowGrayLevelRunEmphasis          | 0.015914604  |
| wavelet-HLH | glrlm      | GrayLevelNonUniformityNormalized | 0.18652088   |
| wavelet-HLH | glrlm      | RunVariance                      | 0.414540656  |
| wavelet-HLH | glrlm      | GrayLevelNonUniformity           | 1279.999703  |
| wavelet-HLH | glrlm      | LongRunEmphasis                  | 2.051016604  |
| wavelet-HLH | glrlm      | ShortRunHighGrayLevelEmphasis    | 63.40533254  |
| wavelet-HLH | glrlm      | RunLengthNonUniformity           | 4642.977767  |
| wavelet-HLH | glrlm      | ShortRunEmphasis                 | 0.843428329  |
| wavelet-HLH | glrlm      | LongRunHighGrayLevelEmphasis     | 151.5577052  |
| wavelet-HLH | glrlm      | RunPercentage                    | 0.791814994  |
| wavelet-HLH | glrlm      | LongRunLowGrayLevelEmphasis      | 0.031193332  |
| wavelet-HLH | glrlm      | RunEntropy                       | 3.595591846  |
| wavelet-HLH | glrlm      | HighGrayLevelRunEmphasis         | 74.87699333  |
| wavelet-HLH | glrlm      | RunLengthNonUniformityNormalized | 0.67079827   |
| wavelet-HLH | glszm      | GrayLevelVariance                | 8.646281958  |
| wavelet-HLH | glszm      | ZoneVariance                     | 17846.30613  |
| wavelet-HLH | glszm      | GrayLevelNonUniformityNormalized | 0.120343316  |
| wavelet-HLH | glszm      | SizeZoneNonUniformityNormalized  | 0.320971512  |
| wavelet-HLH | glszm      | SizeZoneNonUniformity            | 237.5189189  |
| wavelet-HLH | glszm      | GrayLevelNonUniformity           | 89.05405405  |
| wavelet-HLH | glszm      | LargeAreaEmphasis                | 17983.41757  |
| wavelet-HLH | glszm      | SmallAreaHighGrayLevelEmphasis   | 50.48148801  |
| wavelet-HLH | glszm      | ZonePercentage                   | 0.085401039  |
| wavelet-HLH | glszm      | LargeAreaLowGrayLevelEmphasis    | 259.6806216  |
| wavelet-HLH | glszm      | LargeAreaHighGrayLevelEmphasis   | 1280073.922  |
| wavelet-HLH | glszm      | HighGrayLevelZoneEmphasis        | 85.23243243  |
| wavelet-HLH | glszm      | SmallAreaEmphasis                | 0.581797685  |
| wavelet-HLH | glszm      | LowGrayLevelZoneEmphasis         | 0.021370928  |
| wavelet-HLH | glszm      | ZoneEntropy                      | 5.499089517  |
| wavelet-HLH | glszm      | SmallAreaLowGrayLevelEmphasis    | 0.013286992  |
| wavelet-HLH | ngtdm      | Coarseness                       | 0.000762687  |

|             |       |            |             |
|-------------|-------|------------|-------------|
| wavelet-HLH | ngtdm | Complexity | 129.888916  |
| wavelet-HLH | ngtdm | Strength   | 0.075951584 |
| wavelet-HLH | ngtdm | Contrast   | 0.021798403 |
| wavelet-HLH | ngtdm | Busyness   | 6.754851469 |

| Image type | Feature Class | Feature Name                         |                                                                                                                                                                                                                                                                                                                                                                                                                                              |
|------------|---------------|--------------------------------------|----------------------------------------------------------------------------------------------------------------------------------------------------------------------------------------------------------------------------------------------------------------------------------------------------------------------------------------------------------------------------------------------------------------------------------------------|
| general    | info          | BoundingBox                          | 6: RTSTRUCT: C99-DNU_segment_GTV<br>(0, 0, 1, 9, 10, 5)                                                                                                                                                                                                                                                                                                                                                                                      |
| general    | info          | EnabledImageTypes                    | {u'Original': {}, u'Wavelet': {}}                                                                                                                                                                                                                                                                                                                                                                                                            |
|            |               |                                      | {'distances': [1], 'additionalInfo': True,<br>'force2D': False, 'interpolator': 'sitkBSpline',<br>'resampledPixelSpacing': [3.0], 'label': 1,<br>'normalizeScale': 1, 'normalize': False,<br>'force2Ddimension': 0, 'removeOutliers':<br>None, 'minimumROISize': None, u'binWidth':<br>25.0, 'minimumROIDimensions': 1,<br>u'correctMask': True, 'preCrop': False,<br>u'symmetricalGLCM': True,<br>'resegmentRange': None, 'padDistance': 5} |
| general    | info          | GeneralSettings                      | a421262054b63230ffa464398cece7ffa7880d3                                                                                                                                                                                                                                                                                                                                                                                                      |
| general    | info          | ImageHash                            | e                                                                                                                                                                                                                                                                                                                                                                                                                                            |
| general    | info          | ImageSpacing                         | (0.9765624999999998, 0.9765624999999998,<br>1.9999999999999999)                                                                                                                                                                                                                                                                                                                                                                              |
| general    | info          | MaskHash                             | a6c8bc7ca80a807397818ebce93f8ea90a5731                                                                                                                                                                                                                                                                                                                                                                                                       |
| general    | info          | NumpyVersion                         | b2                                                                                                                                                                                                                                                                                                                                                                                                                                           |
| general    | info          | PyWaveletVersion                     | 1.13.1                                                                                                                                                                                                                                                                                                                                                                                                                                       |
| general    | info          | SimpleITKVersion                     | 0.5.2                                                                                                                                                                                                                                                                                                                                                                                                                                        |
| general    | info          | Version                              | 1.1.0                                                                                                                                                                                                                                                                                                                                                                                                                                        |
| general    | info          | VolumeNum                            | 1.3.0.post102+g1b0eb74                                                                                                                                                                                                                                                                                                                                                                                                                       |
| general    | info          | VoxelNum                             | 1                                                                                                                                                                                                                                                                                                                                                                                                                                            |
| original   | shape         | Maximum3DDiameter                    | 223                                                                                                                                                                                                                                                                                                                                                                                                                                          |
| original   | shape         | Maximum2DDiameterSlice               | 30.39815941                                                                                                                                                                                                                                                                                                                                                                                                                                  |
| original   | shape         | Sphericity                           | 27.15124761                                                                                                                                                                                                                                                                                                                                                                                                                                  |
| original   | shape         | MinorAxis                            | 0.787526062                                                                                                                                                                                                                                                                                                                                                                                                                                  |
| original   | shape         | Elongation                           | 23.27686898                                                                                                                                                                                                                                                                                                                                                                                                                                  |
| original   | shape         | SurfaceVolumeRatio                   | 0.876900308                                                                                                                                                                                                                                                                                                                                                                                                                                  |
| original   | shape         | Volume                               | 0.333447524                                                                                                                                                                                                                                                                                                                                                                                                                                  |
| original   | shape         | MajorAxis                            | 6245.613098                                                                                                                                                                                                                                                                                                                                                                                                                                  |
| original   | shape         | SurfaceArea                          | 26.54448717                                                                                                                                                                                                                                                                                                                                                                                                                                  |
| original   | shape         | Flatness                             | 2082.584223                                                                                                                                                                                                                                                                                                                                                                                                                                  |
| original   | shape         | LeastAxis                            | 0.535714537                                                                                                                                                                                                                                                                                                                                                                                                                                  |
| original   | shape         | Maximum2DDiameterColumn              | 14.22026766                                                                                                                                                                                                                                                                                                                                                                                                                                  |
| original   | shape         | Maximum2DDiameterRow                 | 25.5672415                                                                                                                                                                                                                                                                                                                                                                                                                                   |
| original   | gldm          | GrayLevelVariance                    | 28.78681407                                                                                                                                                                                                                                                                                                                                                                                                                                  |
| original   | gldm          | HighGrayLevelEmphasis                | 95.00571421                                                                                                                                                                                                                                                                                                                                                                                                                                  |
| original   | gldm          | DependenceEntropy                    | 508.6985799                                                                                                                                                                                                                                                                                                                                                                                                                                  |
| original   | gldm          | DependenceNonUniformity              | 7.184637345                                                                                                                                                                                                                                                                                                                                                                                                                                  |
| original   | gldm          | GrayLevelNonUniformity               | 487.2775996                                                                                                                                                                                                                                                                                                                                                                                                                                  |
| original   | gldm          | SmallDependenceEmphasis              | 69.0494732                                                                                                                                                                                                                                                                                                                                                                                                                                   |
| original   | gldm          | SmallDependenceHighGrayLevelEmphasis | 0.36768497                                                                                                                                                                                                                                                                                                                                                                                                                                   |
| original   | gldm          | DependenceNonUniformityNormalized    | 157.5037792                                                                                                                                                                                                                                                                                                                                                                                                                                  |
| original   | gldm          | LargeDependenceEmphasis              | 0.223214659                                                                                                                                                                                                                                                                                                                                                                                                                                  |
| original   | gldm          | LargeDependenceLowGrayLevelEmphasis  | 11.0897847                                                                                                                                                                                                                                                                                                                                                                                                                                   |
| original   | gldm          | DependenceVariance                   | 0.060164692                                                                                                                                                                                                                                                                                                                                                                                                                                  |
| original   | gldm          | LargeDependenceHighGrayLevelEmphasis | 3.613330342                                                                                                                                                                                                                                                                                                                                                                                                                                  |
| original   | gldm          | SmallDependenceLowGrayLevelEmphasis  | 9174.108566                                                                                                                                                                                                                                                                                                                                                                                                                                  |
| original   | gldm          |                                      | 0.003036474                                                                                                                                                                                                                                                                                                                                                                                                                                  |

|          |            |                                  |              |
|----------|------------|----------------------------------|--------------|
| original | gldm       | LowGrayLevelEmphasis             | 0.007261312  |
| original | glcm       | JointAverage                     | 22.17147786  |
| original | glcm       | SumAverage                       | 44.34295572  |
| original | glcm       | JointEntropy                     | 9.219312283  |
| original | glcm       | ClusterShade                     | 25.85794696  |
| original | glcm       | MaximumProbability               | 0.013349899  |
| original | glcm       | ldmn                             | 0.957801401  |
| original | glcm       | JointEnergy                      | 0.002404678  |
| original | glcm       | Contrast                         | 69.72707595  |
| original | glcm       | DifferenceEntropy                | 3.943384451  |
| original | glcm       | InverseVariance                  | 0.192154954  |
| original | glcm       | DifferenceVariance               | 25.13180181  |
| original | glcm       | ldn                              | 0.870367639  |
| original | glcm       | ldm                              | 0.194213707  |
| original | glcm       | Correlation                      | 0.642046311  |
| original | glcm       | Autocorrelation                  | 553.3612581  |
| original | glcm       | SumEntropy                       | 5.981542032  |
| original | glcm       | SumSquares                       | 96.09988222  |
| original | glcm       | ClusterProminence                | 193693.81    |
| original | glcm       | lmc2                             | 0.878988943  |
| original | glcm       | lmc1                             | -0.171474917 |
| original | glcm       | DifferenceAverage                | 6.281809964  |
| original | glcm       | ld                               | 0.275449244  |
| original | glcm       | ClusterTendency                  | 314.6724529  |
| original | firstorder | InterquartileRange               | 400          |
| original | firstorder | Skewness                         | 0.23160833   |
| original | firstorder | Uniformity                       | 0.031630542  |
| original | firstorder | Median                           | -430         |
| original | firstorder | Energy                           | 486263368    |
| original | firstorder | RobustMeanAbsoluteDeviation      | 167.2901577  |
| original | firstorder | MeanAbsoluteDeviation            | 209.6195203  |
| original | firstorder | TotalEnergy                      | 1391210655   |
| original | firstorder | Maximum                          | 41           |
| original | firstorder | RootMeanSquared                  | 471.9640389  |
| original | firstorder | 90Percentile                     | -29          |
| original | firstorder | Minimum                          | -879         |
| original | firstorder | Entropy                          | 5.065871817  |
| original | firstorder | Range                            | 920          |
| original | firstorder | Variance                         | 59266.70875  |
| original | firstorder | 10Percentile                     | -705         |
| original | firstorder | Kurtosis                         | 1.870242213  |
| original | firstorder | Mean                             | -404.3307375 |
| original | glrlm      | ShortRunLowGrayLevelEmphasis     | 0.007055927  |
| original | glrlm      | GrayLevelVariance                | 91.21823274  |
| original | glrlm      | LowGrayLevelRunEmphasis          | 0.007355004  |
| original | glrlm      | GrayLevelNonUniformityNormalized | 0.031439562  |
| original | glrlm      | RunVariance                      | 0.090884576  |
| original | glrlm      | GrayLevelNonUniformity           | 64.05013923  |
| original | glrlm      | LongRunEmphasis                  | 1.246479777  |
| original | glrlm      | ShortRunHighGrayLevelEmphasis    | 459.7859158  |
| original | glrlm      | RunLengthNonUniformity           | 1801.835475  |
| original | glrlm      | ShortRunEmphasis                 | 0.950819431  |
| original | glrlm      | LongRunHighGrayLevelEmphasis     | 673.7599177  |

|             |       |                                      |             |
|-------------|-------|--------------------------------------|-------------|
| original    | glrlm | RunPercentage                        | 0.933295747 |
| original    | glrlm | LongRunLowGrayLevelEmphasis          | 0.008804407 |
| original    | glrlm | RunEntropy                           | 5.386674047 |
| original    | glrlm | HighGrayLevelRunEmphasis             | 493.7873672 |
| original    | glrlm | RunLengthNonUniformityNormalized     | 0.881452492 |
| original    | glszm | GrayLevelVariance                    | 67.92444749 |
| original    | glszm | ZoneVariance                         | 19.63458738 |
| original    | glszm | GrayLevelNonUniformityNormalized     | 0.033597393 |
| original    | glszm | SizeZoneNonUniformityNormalized      | 0.381736687 |
| original    | glszm | SizeZoneNonUniformity                | 370.6663234 |
| original    | glszm | GrayLevelNonUniformity               | 32.623069   |
| original    | glszm | LargeAreaEmphasis                    | 24.68898043 |
| original    | glszm | SmallAreaHighGrayLevelEmphasis       | 268.8806249 |
| original    | glszm | ZonePercentage                       | 0.444800733 |
| original    | glszm | LargeAreaLowGrayLevelEmphasis        | 0.075615585 |
| original    | glszm | LargeAreaHighGrayLevelEmphasis       | 25771.21421 |
| original    | glszm | HighGrayLevelZoneEmphasis            | 421.4109166 |
| original    | glszm | SmallAreaEmphasis                    | 0.639272964 |
| original    | glszm | LowGrayLevelZoneEmphasis             | 0.008199995 |
| original    | glszm | ZoneEntropy                          | 6.741151657 |
| original    | glszm | SmallAreaLowGrayLevelEmphasis        | 0.005500682 |
| original    | ngtdm | Coarseness                           | 0.003463263 |
| original    | ngtdm | Complexity                           | 2245.252503 |
| original    | ngtdm | Strength                             | 1.79630208  |
| original    | ngtdm | Contrast                             | 0.565651522 |
| original    | ngtdm | Busyness                             | 0.54757345  |
| wavelet-HHH | gldm  | GrayLevelVariance                    | 0.353455438 |
| wavelet-HHH | gldm  | HighGrayLevelEmphasis                | 6.645900137 |
| wavelet-HHH | gldm  | DependenceEntropy                    | 4.805470274 |
| wavelet-HHH | gldm  | DependenceNonUniformity              | 179.822721  |
| wavelet-HHH | gldm  | GrayLevelNonUniformity               | 987.8841044 |
| wavelet-HHH | gldm  | SmallDependenceEmphasis              | 0.043072846 |
| wavelet-HHH | gldm  | SmallDependenceHighGrayLevelEmphasis | 0.327181162 |
| wavelet-HHH | gldm  | DependenceNonUniformityNormalized    | 0.082374128 |
| wavelet-HHH | gldm  | LargeDependenceEmphasis              | 113.8731104 |
| wavelet-HHH | gldm  | LargeDependenceLowGrayLevelEmphasis  | 20.19090548 |
| wavelet-HHH | gldm  | DependenceVariance                   | 12.65089186 |
| wavelet-HHH | gldm  | LargeDependenceHighGrayLevelEmphasis | 755.7810353 |
| wavelet-HHH | gldm  | SmallDependenceLowGrayLevelEmphasis  | 0.019509964 |
| wavelet-HHH | gldm  | LowGrayLevelEmphasis                 | 0.196160737 |
| wavelet-HHH | glcm  | JointAverage                         | 2.512545102 |
| wavelet-HHH | glcm  | SumAverage                           | 5.025090204 |
| wavelet-HHH | glcm  | JointEntropy                         | 2.553080328 |
| wavelet-HHH | glcm  | ClusterShade                         | 0.015908262 |
| wavelet-HHH | glcm  | MaximumProbability                   | 0.241385806 |
| wavelet-HHH | glcm  | ldmn                                 | 0.973572237 |
| wavelet-HHH | glcm  | JointEnergy                          | 0.208422081 |
| wavelet-HHH | glcm  | Contrast                             | 0.712601151 |
| wavelet-HHH | glcm  | DifferenceEntropy                    | 1.238254816 |
| wavelet-HHH | glcm  | InverseVariance                      | 0.516324476 |
| wavelet-HHH | glcm  | DifferenceVariance                   | 0.34572301  |
| wavelet-HHH | glcm  | ldn                                  | 0.901884486 |
| wavelet-HHH | glcm  | ldm                                  | 0.708915283 |

|             |            |                                  |              |
|-------------|------------|----------------------------------|--------------|
| wavelet-HHH | glcm       | Correlation                      | -0.019615265 |
| wavelet-HHH | glcm       | Autocorrelation                  | 6.306121213  |
| wavelet-HHH | glcm       | SumEntropy                       | 1.763091321  |
| wavelet-HHH | glcm       | SumSquares                       | 0.349536889  |
| wavelet-HHH | glcm       | ClusterProminence                | 1.401739091  |
| wavelet-HHH | glcm       | Imc2                             | 0.139947199  |
| wavelet-HHH | glcm       | Imc1                             | -0.010853667 |
| wavelet-HHH | glcm       | DifferenceAverage                | 0.603867225  |
| wavelet-HHH | glcm       | Id                               | 0.715365817  |
| wavelet-HHH | glcm       | ClusterTendency                  | 0.685546403  |
| wavelet-HHH | firstorder | InterquartileRange               | 15.82354948  |
| wavelet-HHH | firstorder | Skewness                         | 0.051011129  |
| wavelet-HHH | firstorder | Uniformity                       | 0.452535091  |
| wavelet-HHH | firstorder | Median                           | 0.106882295  |
| wavelet-HHH | firstorder | Energy                           | 336503.1555  |
| wavelet-HHH | firstorder | RobustMeanAbsoluteDeviation      | 6.572642253  |
| wavelet-HHH | firstorder | MeanAbsoluteDeviation            | 9.684961369  |
| wavelet-HHH | firstorder | TotalEnergy                      | 962743.2505  |
| wavelet-HHH | firstorder | Maximum                          | 53.28719496  |
| wavelet-HHH | firstorder | RootMeanSquared                  | 12.41559973  |
| wavelet-HHH | firstorder | 90Percentile                     | 14.96381231  |
| wavelet-HHH | firstorder | Minimum                          | -42.34574297 |
| wavelet-HHH | firstorder | Entropy                          | 1.291682845  |
| wavelet-HHH | firstorder | Range                            | 95.63293793  |
| wavelet-HHH | firstorder | Variance                         | 154.1288078  |
| wavelet-HHH | firstorder | 10Percentile                     | -15.83923188 |
| wavelet-HHH | firstorder | Kurtosis                         | 3.505155648  |
| wavelet-HHH | firstorder | Mean                             | -0.135310001 |
| wavelet-HHH | glrlm      | ShortRunLowGrayLevelEmphasis     | 0.152932691  |
| wavelet-HHH | glrlm      | GrayLevelVariance                | 0.405556923  |
| wavelet-HHH | glrlm      | LowGrayLevelRunEmphasis          | 0.205319113  |
| wavelet-HHH | glrlm      | GrayLevelNonUniformityNormalized | 0.430644384  |
| wavelet-HHH | glrlm      | RunVariance                      | 0.788046719  |
| wavelet-HHH | glrlm      | GrayLevelNonUniformity           | 612.9905621  |
| wavelet-HHH | glrlm      | LongRunEmphasis                  | 3.195194997  |
| wavelet-HHH | glrlm      | ShortRunHighGrayLevelEmphasis    | 4.770634926  |
| wavelet-HHH | glrlm      | RunLengthNonUniformity           | 686.9292057  |
| wavelet-HHH | glrlm      | ShortRunEmphasis                 | 0.709840425  |
| wavelet-HHH | glrlm      | LongRunHighGrayLevelEmphasis     | 21.1900693   |
| wavelet-HHH | glrlm      | RunPercentage                    | 0.651502872  |
| wavelet-HHH | glrlm      | LongRunLowGrayLevelEmphasis      | 0.597155681  |
| wavelet-HHH | glrlm      | RunEntropy                       | 2.76236626   |
| wavelet-HHH | glrlm      | HighGrayLevelRunEmphasis         | 6.675859032  |
| wavelet-HHH | glrlm      | RunLengthNonUniformityNormalized | 0.478676977  |
| wavelet-HHH | glszm      | GrayLevelVariance                | 2.299861496  |
| wavelet-HHH | glszm      | ZoneVariance                     | 27478.04207  |
| wavelet-HHH | glszm      | GrayLevelNonUniformityNormalized | 0.452908587  |
| wavelet-HHH | glszm      | SizeZoneNonUniformityNormalized  | 0.531855956  |
| wavelet-HHH | glszm      | SizeZoneNonUniformity            | 40.42105263  |
| wavelet-HHH | glszm      | GrayLevelNonUniformity           | 34.42105263  |
| wavelet-HHH | glszm      | LargeAreaEmphasis                | 28303.09211  |
| wavelet-HHH | glszm      | SmallAreaHighGrayLevelEmphasis   | 5.779415363  |
| wavelet-HHH | glszm      | ZonePercentage                   | 0.034814475  |

|             |            |                                      |              |
|-------------|------------|--------------------------------------|--------------|
| wavelet-HHH | glszm      | LargeAreaLowGrayLevelEmphasis        | 5088.311725  |
| wavelet-HHH | glszm      | LargeAreaHighGrayLevelEmphasis       | 184799.1842  |
| wavelet-HHH | glszm      | HighGrayLevelZoneEmphasis            | 8.289473684  |
| wavelet-HHH | glszm      | SmallAreaEmphasis                    | 0.756717861  |
| wavelet-HHH | glszm      | LowGrayLevelZoneEmphasis             | 0.546100146  |
| wavelet-HHH | glszm      | ZoneEntropy                          | 2.499967857  |
| wavelet-HHH | glszm      | SmallAreaLowGrayLevelEmphasis        | 0.457009781  |
| wavelet-HHH | ngtdm      | Coarseness                           | 0.00196711   |
| wavelet-HHH | ngtdm      | Complexity                           | 6.291212894  |
| wavelet-HHH | ngtdm      | Strength                             | 0.021116855  |
| wavelet-HHH | ngtdm      | Contrast                             | 0.019897471  |
| wavelet-HHH | ngtdm      | Busyness                             | 33.63285273  |
| wavelet-HLL | gldm       | GrayLevelVariance                    | 87.25407445  |
| wavelet-HLL | gldm       | HighGrayLevelEmphasis                | 883.4864865  |
| wavelet-HLL | gldm       | DependenceEntropy                    | 7.306770092  |
| wavelet-HLL | gldm       | DependenceNonUniformity              | 552.6188731  |
| wavelet-HLL | gldm       | GrayLevelNonUniformity               | 64.39532753  |
| wavelet-HLL | gldm       | SmallDependenceEmphasis              | 0.425267617  |
| wavelet-HLL | gldm       | SmallDependenceHighGrayLevelEmphasis | 371.2971207  |
| wavelet-HLL | gldm       | DependenceNonUniformityNormalized    | 0.253146529  |
| wavelet-HLL | gldm       | LargeDependenceEmphasis              | 7.393953275  |
| wavelet-HLL | gldm       | LargeDependenceLowGrayLevelEmphasis  | 0.025013816  |
| wavelet-HLL | gldm       | DependenceVariance                   | 1.886621499  |
| wavelet-HLL | gldm       | LargeDependenceHighGrayLevelEmphasis | 6606.365094  |
| wavelet-HLL | gldm       | SmallDependenceLowGrayLevelEmphasis  | 0.001162023  |
| wavelet-HLL | gldm       | LowGrayLevelEmphasis                 | 0.003444213  |
| wavelet-HLL | glcm       | JointAverage                         | 27.96043151  |
| wavelet-HLL | glcm       | SumAverage                           | 55.92086301  |
| wavelet-HLL | glcm       | JointEntropy                         | 9.559197279  |
| wavelet-HLL | glcm       | ClusterShade                         | 359.4401665  |
| wavelet-HLL | glcm       | MaximumProbability                   | 0.005034525  |
| wavelet-HLL | glcm       | Idmn                                 | 0.960771958  |
| wavelet-HLL | glcm       | JointEnergy                          | 0.001726003  |
| wavelet-HLL | glcm       | Contrast                             | 118.7527766  |
| wavelet-HLL | glcm       | DifferenceEntropy                    | 4.235224142  |
| wavelet-HLL | glcm       | InverseVariance                      | 0.160170469  |
| wavelet-HLL | glcm       | DifferenceVariance                   | 44.60014187  |
| wavelet-HLL | glcm       | Idn                                  | 0.877322879  |
| wavelet-HLL | glcm       | Idm                                  | 0.158477504  |
| wavelet-HLL | glcm       | Correlation                          | 0.271712399  |
| wavelet-HLL | glcm       | Autocorrelation                      | 806.2101284  |
| wavelet-HLL | glcm       | SumEntropy                           | 5.779653162  |
| wavelet-HLL | glcm       | SumSquares                           | 83.77688252  |
| wavelet-HLL | glcm       | ClusterProminence                    | 122836.1356  |
| wavelet-HLL | glcm       | Imc2                                 | 0.854921666  |
| wavelet-HLL | glcm       | Imc1                                 | -0.157516841 |
| wavelet-HLL | glcm       | DifferenceAverage                    | 7.956336739  |
| wavelet-HLL | glcm       | Id                                   | 0.240388018  |
| wavelet-HLL | glcm       | ClusterTendency                      | 216.3547535  |
| wavelet-HLL | firstorder | InterquartileRange                   | 353.3143669  |
| wavelet-HLL | firstorder | Skewness                             | 0.047998935  |
| wavelet-HLL | firstorder | Uniformity                           | 0.029498547  |
| wavelet-HLL | firstorder | Median                               | -90.43157443 |



|             |            |                                  |              |
|-------------|------------|----------------------------------|--------------|
| wavelet-HLL | firstorder | Energy                           | 133653733    |
| wavelet-HLL | firstorder | RobustMeanAbsoluteDeviation      | 144.3303603  |
| wavelet-HLL | firstorder | MeanAbsoluteDeviation            | 193.958172   |
| wavelet-HLL | firstorder | TotalEnergy                      | 382386397.4  |
| wavelet-HLL | firstorder | Maximum                          | 482.8740097  |
| wavelet-HLL | firstorder | RootMeanSquared                  | 247.4364515  |
| wavelet-HLL | firstorder | 90Percentile                     | 246.8078964  |
| wavelet-HLL | firstorder | Minimum                          | -771.4625218 |
| wavelet-HLL | firstorder | Entropy                          | 5.219869547  |
| wavelet-HLL | firstorder | Range                            | 1254.336531  |
| wavelet-HLL | firstorder | Variance                         | 54511.0922   |
| wavelet-HLL | firstorder | 10Percentile                     | -379.6890291 |
| wavelet-HLL | firstorder | Kurtosis                         | 2.352261707  |
| wavelet-HLL | firstorder | Mean                             | -81.9372036  |
| wavelet-HLL | grlm       | ShortRunLowGrayLevelEmphasis     | 0.003263258  |
| wavelet-HLL | grlm       | GrayLevelVariance                | 87.88916579  |
| wavelet-HLL | grlm       | LowGrayLevelRunEmphasis          | 0.003420568  |
| wavelet-HLL | grlm       | GrayLevelNonUniformityNormalized | 0.029388505  |
| wavelet-HLL | grlm       | RunVariance                      | 0.068998167  |
| wavelet-HLL | grlm       | GrayLevelNonUniformity           | 60.81717676  |
| wavelet-HLL | grlm       | LongRunEmphasis                  | 1.188775892  |
| wavelet-HLL | grlm       | ShortRunHighGrayLevelEmphasis    | 848.6594743  |
| wavelet-HLL | grlm       | RunLengthNonUniformity           | 1884.731609  |
| wavelet-HLL | grlm       | ShortRunEmphasis                 | 0.9617794    |
| wavelet-HLL | grlm       | LongRunHighGrayLevelEmphasis     | 1051.670107  |
| wavelet-HLL | grlm       | RunPercentage                    | 0.948201135  |
| wavelet-HLL | grlm       | LongRunLowGrayLevelEmphasis      | 0.004112807  |
| wavelet-HLL | grlm       | RunEntropy                       | 5.489483294  |
| wavelet-HLL | grlm       | HighGrayLevelRunEmphasis         | 882.7896921  |
| wavelet-HLL | grlm       | RunLengthNonUniformityNormalized | 0.907364932  |
| wavelet-HLL | glszm      | GrayLevelVariance                | 93.5774731   |
| wavelet-HLL | glszm      | ZoneVariance                     | 4.020644694  |
| wavelet-HLL | glszm      | GrayLevelNonUniformityNormalized | 0.028650486  |
| wavelet-HLL | glszm      | SizeZoneNonUniformityNormalized  | 0.425721008  |
| wavelet-HLL | glszm      | SizeZoneNonUniformity            | 474.6789238  |
| wavelet-HLL | glszm      | GrayLevelNonUniformity           | 31.94529148  |
| wavelet-HLL | glszm      | LargeAreaEmphasis                | 7.853811659  |
| wavelet-HLL | glszm      | SmallAreaHighGrayLevelEmphasis   | 586.565753   |
| wavelet-HLL | glszm      | ZonePercentage                   | 0.510765002  |
| wavelet-HLL | glszm      | LargeAreaLowGrayLevelEmphasis    | 0.021674467  |
| wavelet-HLL | glszm      | LargeAreaHighGrayLevelEmphasis   | 6965.991928  |
| wavelet-HLL | glszm      | HighGrayLevelZoneEmphasis        | 870.2618834  |
| wavelet-HLL | glszm      | SmallAreaEmphasis                | 0.676519293  |
| wavelet-HLL | glszm      | LowGrayLevelZoneEmphasis         | 0.003229864  |
| wavelet-HLL | glszm      | ZoneEntropy                      | 6.840506967  |
| wavelet-HLL | glszm      | SmallAreaLowGrayLevelEmphasis    | 0.001781126  |
| wavelet-HLL | ngtdm      | Coarseness                       | 0.003242626  |
| wavelet-HLL | ngtdm      | Complexity                       | 5413.344166  |
| wavelet-HLL | ngtdm      | Strength                         | 2.448963529  |
| wavelet-HLL | ngtdm      | Contrast                         | 0.399064963  |
| wavelet-HLL | ngtdm      | Busyness                         | 0.261252041  |
| wavelet-LHL | gldm       | GrayLevelVariance                | 3.048151407  |
| wavelet-LHL | gldm       | HighGrayLevelEmphasis            | 56.92899679  |

|             |            |                                      |              |
|-------------|------------|--------------------------------------|--------------|
| wavelet-LHL | gldm       | DependenceEntropy                    | 6.078393158  |
| wavelet-LHL | gldm       | DependenceNonUniformity              | 231.0458085  |
| wavelet-LHL | gldm       | GrayLevelNonUniformity               | 364.4429684  |
| wavelet-LHL | gldm       | SmallDependenceEmphasis              | 0.119406066  |
| wavelet-LHL | gldm       | SmallDependenceHighGrayLevelEmphasis | 7.088458448  |
| wavelet-LHL | gldm       | DependenceNonUniformityNormalized    | 0.105838666  |
| wavelet-LHL | gldm       | LargeDependenceEmphasis              | 38.0774164   |
| wavelet-LHL | gldm       | LargeDependenceLowGrayLevelEmphasis  | 0.799538962  |
| wavelet-LHL | gldm       | DependenceVariance                   | 9.298098894  |
| wavelet-LHL | gldm       | LargeDependenceHighGrayLevelEmphasis | 2062.693541  |
| wavelet-LHL | gldm       | SmallDependenceLowGrayLevelEmphasis  | 0.004423191  |
| wavelet-LHL | gldm       | LowGrayLevelEmphasis                 | 0.024182886  |
| wavelet-LHL | glcm       | JointAverage                         | 7.289610648  |
| wavelet-LHL | glcm       | SumAverage                           | 14.5792213   |
| wavelet-LHL | glcm       | JointEntropy                         | 5.52522847   |
| wavelet-LHL | glcm       | ClusterShade                         | -0.752835704 |
| wavelet-LHL | glcm       | MaximumProbability                   | 0.06883161   |
| wavelet-LHL | glcm       | ldmn                                 | 0.976807343  |
| wavelet-LHL | glcm       | JointEnergy                          | 0.03195745   |
| wavelet-LHL | glcm       | Contrast                             | 4.243993379  |
| wavelet-LHL | glcm       | DifferenceEntropy                    | 2.252800745  |
| wavelet-LHL | glcm       | InverseVariance                      | 0.423061081  |
| wavelet-LHL | glcm       | DifferenceVariance                   | 1.701448909  |
| wavelet-LHL | glcm       | ldn                                  | 0.899436589  |
| wavelet-LHL | glcm       | ldm                                  | 0.451052661  |
| wavelet-LHL | glcm       | Correlation                          | 0.303324228  |
| wavelet-LHL | glcm       | Autocorrelation                      | 54.06601066  |
| wavelet-LHL | glcm       | SumEntropy                           | 3.515163242  |
| wavelet-LHL | glcm       | SumSquares                           | 3.049044837  |
| wavelet-LHL | glcm       | ClusterProminence                    | 224.6428385  |
| wavelet-LHL | glcm       | lmc2                                 | 0.447966686  |
| wavelet-LHL | glcm       | lmc1                                 | -0.055650783 |
| wavelet-LHL | glcm       | DifferenceAverage                    | 1.566904274  |
| wavelet-LHL | glcm       | ld                                   | 0.511447644  |
| wavelet-LHL | glcm       | ClusterTendency                      | 7.952185968  |
| wavelet-LHL | firstorder | InterquartileRange                   | 53.96413205  |
| wavelet-LHL | firstorder | Skewness                             | -0.098233347 |
| wavelet-LHL | firstorder | Uniformity                           | 0.166945931  |
| wavelet-LHL | firstorder | Median                               | -2.9950243   |
| wavelet-LHL | firstorder | Energy                               | 4056682.326  |
| wavelet-LHL | firstorder | RobustMeanAbsoluteDeviation          | 22.81255368  |
| wavelet-LHL | firstorder | MeanAbsoluteDeviation                | 33.61608602  |
| wavelet-LHL | firstorder | TotalEnergy                          | 11606261.23  |
| wavelet-LHL | firstorder | Maximum                              | 146.0495356  |
| wavelet-LHL | firstorder | RootMeanSquared                      | 43.10807523  |
| wavelet-LHL | firstorder | 90Percentile                         | 50.23002883  |
| wavelet-LHL | firstorder | Minimum                              | -167.2315681 |
| wavelet-LHL | firstorder | Entropy                              | 2.842547079  |
| wavelet-LHL | firstorder | Range                                | 313.2811037  |
| wavelet-LHL | firstorder | Variance                             | 1841.555597  |
| wavelet-LHL | firstorder | 10Percentile                         | -59.8906612  |
| wavelet-LHL | firstorder | Kurtosis                             | 3.302926547  |
| wavelet-LHL | firstorder | Mean                                 | -4.092744008 |

|             |       |                                      |             |
|-------------|-------|--------------------------------------|-------------|
| wavelet-LHL | gllm  | ShortRunLowGrayLevelEmphasis         | 0.022012117 |
| wavelet-LHL | gllm  | GrayLevelVariance                    | 3.284598046 |
| wavelet-LHL | gllm  | LowGrayLevelRunEmphasis              | 0.024768352 |
| wavelet-LHL | gllm  | GrayLevelNonUniformityNormalized     | 0.158583189 |
| wavelet-LHL | gllm  | RunVariance                          | 0.270241479 |
| wavelet-LHL | gllm  | GrayLevelNonUniformity               | 288.0934723 |
| wavelet-LHL | gllm  | LongRunEmphasis                      | 1.733745102 |
| wavelet-LHL | gllm  | ShortRunHighGrayLevelEmphasis        | 50.12471034 |
| wavelet-LHL | gllm  | RunLengthNonUniformity               | 1315.938359 |
| wavelet-LHL | gllm  | ShortRunEmphasis                     | 0.871861199 |
| wavelet-LHL | gllm  | LongRunHighGrayLevelEmphasis         | 97.59544196 |
| wavelet-LHL | gllm  | RunPercentage                        | 0.832129391 |
| wavelet-LHL | gllm  | LongRunLowGrayLevelEmphasis          | 0.04034403  |
| wavelet-LHL | gllm  | RunEntropy                           | 3.645985547 |
| wavelet-LHL | gllm  | HighGrayLevelRunEmphasis             | 57.26505649 |
| wavelet-LHL | gllm  | RunLengthNonUniformityNormalized     | 0.720069378 |
| wavelet-LHL | glszm | GrayLevelVariance                    | 7.289998679 |
| wavelet-LHL | glszm | ZoneVariance                         | 1937.733416 |
| wavelet-LHL | glszm | GrayLevelNonUniformityNormalized     | 0.120535518 |
| wavelet-LHL | glszm | SizeZoneNonUniformityNormalized      | 0.266217466 |
| wavelet-LHL | glszm | SizeZoneNonUniformity                | 69.48275862 |
| wavelet-LHL | glszm | GrayLevelNonUniformity               | 31.45977011 |
| wavelet-LHL | glszm | LargeAreaEmphasis                    | 2007.689655 |
| wavelet-LHL | glszm | SmallAreaHighGrayLevelEmphasis       | 31.84442543 |
| wavelet-LHL | glszm | ZonePercentage                       | 0.119560238 |
| wavelet-LHL | glszm | LargeAreaLowGrayLevelEmphasis        | 37.82831141 |
| wavelet-LHL | glszm | LargeAreaHighGrayLevelEmphasis       | 111218.7433 |
| wavelet-LHL | glszm | HighGrayLevelZoneEmphasis            | 60.56321839 |
| wavelet-LHL | glszm | SmallAreaEmphasis                    | 0.52641749  |
| wavelet-LHL | glszm | LowGrayLevelZoneEmphasis             | 0.039901994 |
| wavelet-LHL | glszm | ZoneEntropy                          | 5.571820767 |
| wavelet-LHL | glszm | SmallAreaLowGrayLevelEmphasis        | 0.025445895 |
| wavelet-LHL | ngtdm | Coarseness                           | 0.003252018 |
| wavelet-LHL | ngtdm | Complexity                           | 77.55011154 |
| wavelet-LHL | ngtdm | Strength                             | 0.185054751 |
| wavelet-LHL | ngtdm | Contrast                             | 0.043169764 |
| wavelet-LHL | ngtdm | Busyness                             | 2.706624735 |
| wavelet-LHH | gldm  | GrayLevelVariance                    | 0.565046735 |
| wavelet-LHH | gldm  | HighGrayLevelEmphasis                | 12.89051764 |
| wavelet-LHH | gldm  | DependenceEntropy                    | 5.208258545 |
| wavelet-LHH | gldm  | DependenceNonUniformity              | 150.9725149 |
| wavelet-LHH | gldm  | GrayLevelNonUniformity               | 815.6568942 |
| wavelet-LHH | gldm  | SmallDependenceEmphasis              | 0.05195683  |
| wavelet-LHH | gldm  | SmallDependenceHighGrayLevelEmphasis | 0.696939119 |
| wavelet-LHH | gldm  | DependenceNonUniformityNormalized    | 0.069158275 |
| wavelet-LHH | gldm  | LargeDependenceEmphasis              | 96.19377004 |
| wavelet-LHH | gldm  | LargeDependenceLowGrayLevelEmphasis  | 8.439418486 |
| wavelet-LHH | gldm  | DependenceVariance                   | 15.88491422 |
| wavelet-LHH | gldm  | LargeDependenceHighGrayLevelEmphasis | 1206.856619 |
| wavelet-LHH | gldm  | SmallDependenceLowGrayLevelEmphasis  | 0.008403875 |
| wavelet-LHH | gldm  | LowGrayLevelEmphasis                 | 0.095944673 |
| wavelet-LHH | glcm  | JointAverage                         | 3.514503902 |
| wavelet-LHH | glcm  | SumAverage                           | 7.029007804 |

|             |            |                                  |              |
|-------------|------------|----------------------------------|--------------|
| wavelet-LHH | glcm       | JointEntropy                     | 3.229448718  |
| wavelet-LHH | glcm       | ClusterShade                     | 0.072920784  |
| wavelet-LHH | glcm       | MaximumProbability               | 0.197082352  |
| wavelet-LHH | glcm       | Idmn                             | 0.97251427   |
| wavelet-LHH | glcm       | JointEnergy                      | 0.144535269  |
| wavelet-LHH | glcm       | Contrast                         | 1.079289291  |
| wavelet-LHH | glcm       | DifferenceEntropy                | 1.47846612   |
| wavelet-LHH | glcm       | InverseVariance                  | 0.506483168  |
| wavelet-LHH | glcm       | DifferenceVariance               | 0.505754749  |
| wavelet-LHH | glcm       | Idn                              | 0.898243636  |
| wavelet-LHH | glcm       | Idm                              | 0.656759873  |
| wavelet-LHH | glcm       | Correlation                      | 0.038720583  |
| wavelet-LHH | glcm       | Autocorrelation                  | 12.3736076   |
| wavelet-LHH | glcm       | SumEntropy                       | 2.145774689  |
| wavelet-LHH | glcm       | SumSquares                       | 0.56151025   |
| wavelet-LHH | glcm       | ClusterProminence                | 4.37137761   |
| wavelet-LHH | glcm       | Imc2                             | 0.166372866  |
| wavelet-LHH | glcm       | Imc1                             | -0.018490869 |
| wavelet-LHH | glcm       | DifferenceAverage                | 0.751709963  |
| wavelet-LHH | glcm       | Id                               | 0.674251352  |
| wavelet-LHH | glcm       | ClusterTendency                  | 1.166751708  |
| wavelet-LHH | firstorder | InterquartileRange               | 21.05503051  |
| wavelet-LHH | firstorder | Skewness                         | 0.105658517  |
| wavelet-LHH | firstorder | Uniformity                       | 0.373640355  |
| wavelet-LHH | firstorder | Median                           | -0.023803894 |
| wavelet-LHH | firstorder | Energy                           | 648090.4513  |
| wavelet-LHH | firstorder | RobustMeanAbsoluteDeviation      | 8.876027718  |
| wavelet-LHH | firstorder | MeanAbsoluteDeviation            | 13.31420645  |
| wavelet-LHH | firstorder | TotalEnergy                      | 1854201.654  |
| wavelet-LHH | firstorder | Maximum                          | 70.91663333  |
| wavelet-LHH | firstorder | RootMeanSquared                  | 17.23022479  |
| wavelet-LHH | firstorder | 90Percentile                     | 22.26269552  |
| wavelet-LHH | firstorder | Minimum                          | -62.34396314 |
| wavelet-LHH | firstorder | Entropy                          | 1.634479779  |
| wavelet-LHH | firstorder | Range                            | 133.2605965  |
| wavelet-LHH | firstorder | Variance                         | 296.8665496  |
| wavelet-LHH | firstorder | 10Percentile                     | -21.37105075 |
| wavelet-LHH | firstorder | Kurtosis                         | 3.398481684  |
| wavelet-LHH | firstorder | Mean                             | -0.118730097 |
| wavelet-LHH | grlm       | ShortRunLowGrayLevelEmphasis     | 0.077182615  |
| wavelet-LHH | grlm       | GrayLevelVariance                | 0.6694359    |
| wavelet-LHH | grlm       | LowGrayLevelRunEmphasis          | 0.099152903  |
| wavelet-LHH | grlm       | GrayLevelNonUniformityNormalized | 0.341574552  |
| wavelet-LHH | grlm       | RunVariance                      | 0.637374585  |
| wavelet-LHH | grlm       | GrayLevelNonUniformity           | 517.6377184  |
| wavelet-LHH | grlm       | LongRunEmphasis                  | 2.749413001  |
| wavelet-LHH | grlm       | ShortRunHighGrayLevelEmphasis    | 9.910021888  |
| wavelet-LHH | grlm       | RunLengthNonUniformity           | 813.0613522  |
| wavelet-LHH | grlm       | ShortRunEmphasis                 | 0.754070886  |
| wavelet-LHH | grlm       | LongRunHighGrayLevelEmphasis     | 35.02256054  |
| wavelet-LHH | grlm       | RunPercentage                    | 0.69378766   |
| wavelet-LHH | grlm       | LongRunLowGrayLevelEmphasis      | 0.253949949  |
| wavelet-LHH | grlm       | RunEntropy                       | 2.968009804  |

|             |       |                                      |              |
|-------------|-------|--------------------------------------|--------------|
| wavelet-LHH | grlm  | HighGrayLevelRunEmphasis             | 13.01858294  |
| wavelet-LHH | grlm  | RunLengthNonUniformityNormalized     | 0.532749792  |
| wavelet-LHH | glszm | GrayLevelVariance                    | 2.498823147  |
| wavelet-LHH | glszm | ZoneVariance                         | 15201.57357  |
| wavelet-LHH | glszm | GrayLevelNonUniformityNormalized     | 0.395178963  |
| wavelet-LHH | glszm | SizeZoneNonUniformityNormalized      | 0.248275302  |
| wavelet-LHH | glszm | SizeZoneNonUniformity                | 27.55855856  |
| wavelet-LHH | glszm | GrayLevelNonUniformity               | 43.86486486  |
| wavelet-LHH | glszm | LargeAreaEmphasis                    | 15588.35135  |
| wavelet-LHH | glszm | SmallAreaHighGrayLevelEmphasis       | 6.356676063  |
| wavelet-LHH | glszm | ZonePercentage                       | 0.050847458  |
| wavelet-LHH | glszm | LargeAreaLowGrayLevelEmphasis        | 1363.96452   |
| wavelet-LHH | glszm | LargeAreaHighGrayLevelEmphasis       | 193473.8378  |
| wavelet-LHH | glszm | HighGrayLevelZoneEmphasis            | 14.34234234  |
| wavelet-LHH | glszm | SmallAreaEmphasis                    | 0.501965081  |
| wavelet-LHH | glszm | LowGrayLevelZoneEmphasis             | 0.174109109  |
| wavelet-LHH | glszm | ZoneEntropy                          | 3.958871864  |
| wavelet-LHH | glszm | SmallAreaLowGrayLevelEmphasis        | 0.109623231  |
| wavelet-LHH | ngtdm | Coarseness                           | 0.002396992  |
| wavelet-LHH | ngtdm | Complexity                           | 9.501420367  |
| wavelet-LHH | ngtdm | Strength                             | 0.030325534  |
| wavelet-LHH | ngtdm | Contrast                             | 0.023774951  |
| wavelet-LHH | ngtdm | Busyness                             | 16.72036502  |
| wavelet-LLH | gldm  | GrayLevelVariance                    | 4.700953879  |
| wavelet-LLH | gldm  | HighGrayLevelEmphasis                | 111.5671095  |
| wavelet-LLH | gldm  | DependenceEntropy                    | 6.29908625   |
| wavelet-LLH | gldm  | DependenceNonUniformity              | 236.2725607  |
| wavelet-LLH | gldm  | GrayLevelNonUniformity               | 295.7759963  |
| wavelet-LLH | gldm  | SmallDependenceEmphasis              | 0.130792756  |
| wavelet-LLH | gldm  | SmallDependenceHighGrayLevelEmphasis | 14.97768746  |
| wavelet-LLH | gldm  | DependenceNonUniformityNormalized    | 0.108232964  |
| wavelet-LLH | gldm  | LargeDependenceEmphasis              | 33.5139716   |
| wavelet-LLH | gldm  | LargeDependenceLowGrayLevelEmphasis  | 0.342104508  |
| wavelet-LLH | gldm  | DependenceVariance                   | 7.393116215  |
| wavelet-LLH | gldm  | LargeDependenceHighGrayLevelEmphasis | 3667.949153  |
| wavelet-LLH | gldm  | SmallDependenceLowGrayLevelEmphasis  | 0.002641661  |
| wavelet-LLH | gldm  | LowGrayLevelEmphasis                 | 0.012619661  |
| wavelet-LLH | glcm  | JointAverage                         | 10.27356939  |
| wavelet-LLH | glcm  | SumAverage                           | 20.54713877  |
| wavelet-LLH | glcm  | JointEntropy                         | 6.071439939  |
| wavelet-LLH | glcm  | ClusterShade                         | -6.595933327 |
| wavelet-LLH | glcm  | MaximumProbability                   | 0.050596906  |
| wavelet-LLH | glcm  | ldmn                                 | 0.982871979  |
| wavelet-LLH | glcm  | JointEnergy                          | 0.021901991  |
| wavelet-LLH | glcm  | Contrast                             | 5.976064908  |
| wavelet-LLH | glcm  | DifferenceEntropy                    | 2.455609591  |
| wavelet-LLH | glcm  | InverseVariance                      | 0.406138441  |
| wavelet-LLH | glcm  | DifferenceVariance                   | 2.632476809  |
| wavelet-LLH | glcm  | ldn                                  | 0.914911463  |
| wavelet-LLH | glcm  | ldm                                  | 0.426814063  |
| wavelet-LLH | glcm  | Correlation                          | 0.361890445  |
| wavelet-LLH | glcm  | Autocorrelation                      | 107.2428966  |
| wavelet-LLH | glcm  | SumEntropy                           | 3.85860134   |

|             |            |                                  |              |
|-------------|------------|----------------------------------|--------------|
| wavelet-LLH | glcm       | SumSquares                       | 4.684190933  |
| wavelet-LLH | glcm       | ClusterProminence                | 566.7633816  |
| wavelet-LLH | glcm       | Imc2                             | 0.550168846  |
| wavelet-LLH | glcm       | Imc1                             | -0.072233631 |
| wavelet-LLH | glcm       | DifferenceAverage                | 1.798905916  |
| wavelet-LLH | glcm       | Id                               | 0.490372347  |
| wavelet-LLH | glcm       | ClusterTendency                  | 12.76069882  |
| wavelet-LLH | firstorder | InterquartileRange               | 67.54144398  |
| wavelet-LLH | firstorder | Skewness                         | -0.258524163 |
| wavelet-LLH | firstorder | Uniformity                       | 0.135490608  |
| wavelet-LLH | firstorder | Median                           | -2.041943819 |
| wavelet-LLH | firstorder | Energy                           | 6338006.849  |
| wavelet-LLH | firstorder | RobustMeanAbsoluteDeviation      | 28.22994288  |
| wavelet-LLH | firstorder | MeanAbsoluteDeviation            | 41.72753305  |
| wavelet-LLH | firstorder | TotalEnergy                      | 18133183.05  |
| wavelet-LLH | firstorder | Maximum                          | 179.6546168  |
| wavelet-LLH | firstorder | RootMeanSquared                  | 53.8827167   |
| wavelet-LLH | firstorder | 90Percentile                     | 61.52545719  |
| wavelet-LLH | firstorder | Minimum                          | -248.8746745 |
| wavelet-LLH | firstorder | Entropy                          | 3.148093369  |
| wavelet-LLH | firstorder | Range                            | 428.5292913  |
| wavelet-LLH | firstorder | Variance                         | 2888.887937  |
| wavelet-LLH | firstorder | 10Percentile                     | -70.48875642 |
| wavelet-LLH | firstorder | Kurtosis                         | 3.760458235  |
| wavelet-LLH | firstorder | Mean                             | -3.80252836  |
| wavelet-LLH | glrlm      | ShortRunLowGrayLevelEmphasis     | 0.011739558  |
| wavelet-LLH | glrlm      | GrayLevelVariance                | 5.046196569  |
| wavelet-LLH | glrlm      | LowGrayLevelRunEmphasis          | 0.013029724  |
| wavelet-LLH | glrlm      | GrayLevelNonUniformityNormalized | 0.130124671  |
| wavelet-LLH | glrlm      | RunVariance                      | 0.24921468   |
| wavelet-LLH | glrlm      | GrayLevelNonUniformity           | 239.2120056  |
| wavelet-LLH | glrlm      | LongRunEmphasis                  | 1.681051218  |
| wavelet-LLH | glrlm      | ShortRunHighGrayLevelEmphasis    | 98.37967637  |
| wavelet-LLH | glrlm      | RunLengthNonUniformity           | 1354.288343  |
| wavelet-LLH | glrlm      | ShortRunEmphasis                 | 0.878548589  |
| wavelet-LLH | glrlm      | LongRunHighGrayLevelEmphasis     | 186.9331868  |
| wavelet-LLH | glrlm      | RunPercentage                    | 0.84189013   |
| wavelet-LLH | glrlm      | LongRunLowGrayLevelEmphasis      | 0.020106628  |
| wavelet-LLH | glrlm      | RunEntropy                       | 3.914164442  |
| wavelet-LLH | glrlm      | HighGrayLevelRunEmphasis         | 111.8009704  |
| wavelet-LLH | glrlm      | RunLengthNonUniformityNormalized | 0.732382789  |
| wavelet-LLH | glszm      | GrayLevelVariance                | 11.48080738  |
| wavelet-LLH | glszm      | ZoneVariance                     | 1079.116582  |
| wavelet-LLH | glszm      | GrayLevelNonUniformityNormalized | 0.083515176  |
| wavelet-LLH | glszm      | SizeZoneNonUniformityNormalized  | 0.289724261  |
| wavelet-LLH | glszm      | SizeZoneNonUniformity            | 82.28169014  |
| wavelet-LLH | glszm      | GrayLevelNonUniformity           | 23.71830986  |
| wavelet-LLH | glszm      | LargeAreaEmphasis                | 1138.200704  |
| wavelet-LLH | glszm      | SmallAreaHighGrayLevelEmphasis   | 64.75912228  |
| wavelet-LLH | glszm      | ZonePercentage                   | 0.130096198  |
| wavelet-LLH | glszm      | LargeAreaLowGrayLevelEmphasis    | 11.47956106  |
| wavelet-LLH | glszm      | LargeAreaHighGrayLevelEmphasis   | 117683.1092  |
| wavelet-LLH | glszm      | HighGrayLevelZoneEmphasis        | 114.7464789  |

|             |            |                                      |              |
|-------------|------------|--------------------------------------|--------------|
| wavelet-LLH | glszm      | SmallAreaEmphasis                    | 0.55602865   |
| wavelet-LLH | glszm      | LowGrayLevelZoneEmphasis             | 0.023017485  |
| wavelet-LLH | glszm      | ZoneEntropy                          | 5.935454008  |
| wavelet-LLH | glszm      | SmallAreaLowGrayLevelEmphasis        | 0.01421966   |
| wavelet-LLH | ngtdm      | Coarseness                           | 0.003872573  |
| wavelet-LLH | ngtdm      | Complexity                           | 163.6061831  |
| wavelet-LLH | ngtdm      | Strength                             | 0.450873542  |
| wavelet-LLH | ngtdm      | Contrast                             | 0.036320289  |
| wavelet-LLH | ngtdm      | Busyness                             | 1.084808794  |
| wavelet-LLL | gldm       | GrayLevelVariance                    | 657.4612486  |
| wavelet-LLL | gldm       | HighGrayLevelEmphasis                | 3077.848832  |
| wavelet-LLL | gldm       | DependenceEntropy                    | 7.77873522   |
| wavelet-LLL | gldm       | DependenceNonUniformity              | 924.3421896  |
| wavelet-LLL | gldm       | GrayLevelNonUniformity               | 25.39395328  |
| wavelet-LLL | gldm       | SmallDependenceEmphasis              | 0.649778465  |
| wavelet-LLL | gldm       | SmallDependenceHighGrayLevelEmphasis | 1797.921798  |
| wavelet-LLL | gldm       | DependenceNonUniformityNormalized    | 0.42342748   |
| wavelet-LLL | gldm       | LargeDependenceEmphasis              | 3.230874943  |
| wavelet-LLL | gldm       | LargeDependenceLowGrayLevelEmphasis  | 0.010393653  |
| wavelet-LLL | gldm       | DependenceVariance                   | 0.661778466  |
| wavelet-LLL | gldm       | LargeDependenceHighGrayLevelEmphasis | 12741.67201  |
| wavelet-LLL | gldm       | SmallDependenceLowGrayLevelEmphasis  | 0.002163416  |
| wavelet-LLL | gldm       | LowGrayLevelEmphasis                 | 0.003631279  |
| wavelet-LLL | glcm       | JointAverage                         | 54.16229547  |
| wavelet-LLL | glcm       | SumAverage                           | 108.3245909  |
| wavelet-LLL | glcm       | JointEntropy                         | 10.99707828  |
| wavelet-LLL | glcm       | ClusterShade                         | 7912.731071  |
| wavelet-LLL | glcm       | MaximumProbability                   | 0.001902333  |
| wavelet-LLL | glcm       | ldmn                                 | 0.967032677  |
| wavelet-LLL | glcm       | JointEnergy                          | 0.000560654  |
| wavelet-LLL | glcm       | Contrast                             | 385.2236761  |
| wavelet-LLL | glcm       | DifferenceEntropy                    | 5.088574981  |
| wavelet-LLL | glcm       | InverseVariance                      | 0.084074001  |
| wavelet-LLL | glcm       | DifferenceVariance                   | 125.1238204  |
| wavelet-LLL | glcm       | ldn                                  | 0.88106662   |
| wavelet-LLL | glcm       | ldm                                  | 0.080522513  |
| wavelet-LLL | glcm       | Correlation                          | 0.716205407  |
| wavelet-LLL | glcm       | Autocorrelation                      | 3413.210666  |
| wavelet-LLL | glcm       | SumEntropy                           | 7.409180136  |
| wavelet-LLL | glcm       | SumSquares                           | 668.153965   |
| wavelet-LLL | glcm       | ClusterProminence                    | 10750519.93  |
| wavelet-LLL | glcm       | lmc2                                 | 0.991884413  |
| wavelet-LLL | glcm       | lmc1                                 | -0.317961455 |
| wavelet-LLL | glcm       | DifferenceAverage                    | 15.13298149  |
| wavelet-LLL | glcm       | ld                                   | 0.149830688  |
| wavelet-LLL | glcm       | ClusterTendency                      | 2287.392184  |
| wavelet-LLL | firstorder | InterquartileRange                   | 1009.094667  |
| wavelet-LLL | firstorder | Skewness                             | 0.327714629  |
| wavelet-LLL | firstorder | Uniformity                           | 0.011632594  |
| wavelet-LLL | firstorder | Median                               | -1239.239897 |
| wavelet-LLL | firstorder | Energy                               | 3822200214   |
| wavelet-LLL | firstorder | RobustMeanAbsoluteDeviation          | 415.8214503  |
| wavelet-LLL | firstorder | MeanAbsoluteDeviation                | 542.0627509  |

|             |            |                                  |              |
|-------------|------------|----------------------------------|--------------|
| wavelet-LLL | firstorder | TotalEnergy                      | 10935402530  |
| wavelet-LLL | firstorder | Maximum                          | 183.9851495  |
| wavelet-LLL | firstorder | RootMeanSquared                  | 1323.213272  |
| wavelet-LLL | firstorder | 90Percentile                     | -167.5631182 |
| wavelet-LLL | firstorder | Minimum                          | -2374.068834 |
| wavelet-LLL | firstorder | Entropy                          | 6.529988966  |
| wavelet-LLL | firstorder | Range                            | 2558.053983  |
| wavelet-LLL | firstorder | Variance                         | 410619.7056  |
| wavelet-LLL | firstorder | 10Percentile                     | -1928.276686 |
| wavelet-LLL | firstorder | Kurtosis                         | 2.065724442  |
| wavelet-LLL | firstorder | Mean                             | -1157.701887 |
| wavelet-LLL | glrlm      | ShortRunLowGrayLevelEmphasis     | 0.003570801  |
| wavelet-LLL | glrlm      | GrayLevelVariance                | 651.2953665  |
| wavelet-LLL | glrlm      | LowGrayLevelRunEmphasis          | 0.003633723  |
| wavelet-LLL | glrlm      | GrayLevelNonUniformityNormalized | 0.011661894  |
| wavelet-LLL | glrlm      | RunVariance                      | 0.026783836  |
| wavelet-LLL | glrlm      | GrayLevelNonUniformity           | 24.86617009  |
| wavelet-LLL | glrlm      | LongRunEmphasis                  | 1.075800482  |
| wavelet-LLL | glrlm      | ShortRunHighGrayLevelEmphasis    | 2987.9047    |
| wavelet-LLL | glrlm      | RunLengthNonUniformity           | 2040.523995  |
| wavelet-LLL | glrlm      | ShortRunEmphasis                 | 0.982933357  |
| wavelet-LLL | glrlm      | LongRunHighGrayLevelEmphasis     | 3369.730998  |
| wavelet-LLL | glrlm      | RunPercentage                    | 0.976813841  |
| wavelet-LLL | glrlm      | LongRunLowGrayLevelEmphasis      | 0.003890949  |
| wavelet-LLL | glrlm      | RunEntropy                       | 6.647748539  |
| wavelet-LLL | glrlm      | HighGrayLevelRunEmphasis         | 3054.799562  |
| wavelet-LLL | glrlm      | RunLengthNonUniformityNormalized | 0.956402853  |
| wavelet-LLL | glszm      | GrayLevelVariance                | 580.4294997  |
| wavelet-LLL | glszm      | ZoneVariance                     | 0.672348364  |
| wavelet-LLL | glszm      | GrayLevelNonUniformityNormalized | 0.012093862  |
| wavelet-LLL | glszm      | SizeZoneNonUniformityNormalized  | 0.608302275  |
| wavelet-LLL | glszm      | SizeZoneNonUniformity            | 973.8919425  |
| wavelet-LLL | glszm      | GrayLevelNonUniformity           | 19.36227358  |
| wavelet-LLL | glszm      | LargeAreaEmphasis                | 2.531542786  |
| wavelet-LLL | glszm      | SmallAreaHighGrayLevelEmphasis   | 2177.185802  |
| wavelet-LLL | glszm      | ZonePercentage                   | 0.733394411  |
| wavelet-LLL | glszm      | LargeAreaLowGrayLevelEmphasis    | 0.008186396  |
| wavelet-LLL | glszm      | LargeAreaHighGrayLevelEmphasis   | 9538.124922  |
| wavelet-LLL | glszm      | HighGrayLevelZoneEmphasis        | 2808.021861  |
| wavelet-LLL | glszm      | SmallAreaEmphasis                | 0.808408613  |
| wavelet-LLL | glszm      | LowGrayLevelZoneEmphasis         | 0.003558951  |
| wavelet-LLL | glszm      | ZoneEntropy                      | 7.408821612  |
| wavelet-LLL | glszm      | SmallAreaLowGrayLevelEmphasis    | 0.0026138    |
| wavelet-LLL | ngtdm      | Coarseness                       | 0.004253254  |
| wavelet-LLL | ngtdm      | Complexity                       | 34931.00458  |
| wavelet-LLL | ngtdm      | Strength                         | 15.70697892  |
| wavelet-LLL | ngtdm      | Contrast                         | 1.164993447  |
| wavelet-LLL | ngtdm      | Busyness                         | 0.080285722  |
| wavelet-HHL | gldm       | GrayLevelVariance                | 1.523149461  |
| wavelet-HHL | gldm       | HighGrayLevelEmphasis            | 21.93632616  |
| wavelet-HHL | gldm       | DependenceEntropy                | 5.551036648  |
| wavelet-HHL | gldm       | DependenceNonUniformity          | 197.0467247  |
| wavelet-HHL | gldm       | GrayLevelNonUniformity           | 502.0600092  |



|             |            |                                      |              |
|-------------|------------|--------------------------------------|--------------|
| wavelet-HHL | gldm       | SmallDependenceEmphasis              | 0.101183003  |
| wavelet-HHL | gldm       | SmallDependenceHighGrayLevelEmphasis | 2.466667521  |
| wavelet-HHL | gldm       | DependenceNonUniformityNormalized    | 0.090264189  |
| wavelet-HHL | gldm       | LargeDependenceEmphasis              | 46.58772332  |
| wavelet-HHL | gldm       | LargeDependenceLowGrayLevelEmphasis  | 2.54045592   |
| wavelet-HHL | gldm       | DependenceVariance                   | 10.4721933   |
| wavelet-HHL | gldm       | LargeDependenceHighGrayLevelEmphasis | 974.0206138  |
| wavelet-HHL | gldm       | SmallDependenceLowGrayLevelEmphasis  | 0.01264705   |
| wavelet-HHL | gldm       | LowGrayLevelEmphasis                 | 0.067757976  |
| wavelet-HHL | glcm       | JointAverage                         | 4.524118269  |
| wavelet-HHL | glcm       | SumAverage                           | 9.048236539  |
| wavelet-HHL | glcm       | JointEntropy                         | 4.57747623   |
| wavelet-HHL | glcm       | ClusterShade                         | 0.270469861  |
| wavelet-HHL | glcm       | MaximumProbability                   | 0.104957049  |
| wavelet-HHL | glcm       | Idmn                                 | 0.967146756  |
| wavelet-HHL | glcm       | JointEnergy                          | 0.057958657  |
| wavelet-HHL | glcm       | Contrast                             | 2.958251466  |
| wavelet-HHL | glcm       | DifferenceEntropy                    | 2.031819894  |
| wavelet-HHL | glcm       | InverseVariance                      | 0.46769228   |
| wavelet-HHL | glcm       | DifferenceVariance                   | 1.198134435  |
| wavelet-HHL | glcm       | Idn                                  | 0.882632223  |
| wavelet-HHL | glcm       | Idm                                  | 0.499612202  |
| wavelet-HHL | glcm       | Correlation                          | 0.00076395   |
| wavelet-HHL | glcm       | Autocorrelation                      | 20.47162051  |
| wavelet-HHL | glcm       | SumEntropy                           | 2.801383051  |
| wavelet-HHL | glcm       | SumSquares                           | 1.483028232  |
| wavelet-HHL | glcm       | ClusterProminence                    | 29.2844881   |
| wavelet-HHL | glcm       | Imc2                                 | 0.309253865  |
| wavelet-HHL | glcm       | Imc1                                 | -0.034454533 |
| wavelet-HHL | glcm       | DifferenceAverage                    | 1.308571099  |
| wavelet-HHL | glcm       | Id                                   | 0.548687318  |
| wavelet-HHL | glcm       | ClusterTendency                      | 2.973861461  |
| wavelet-HHL | firstorder | InterquartileRange                   | 39.50997146  |
| wavelet-HHL | firstorder | Skewness                             | 0.087736138  |
| wavelet-HHL | firstorder | Uniformity                           | 0.229986262  |
| wavelet-HHL | firstorder | Median                               | -0.10734481  |
| wavelet-HHL | firstorder | Energy                               | 1984804.178  |
| wavelet-HHL | firstorder | RobustMeanAbsoluteDeviation          | 16.41766528  |
| wavelet-HHL | firstorder | MeanAbsoluteDeviation                | 23.85473451  |
| wavelet-HHL | firstorder | TotalEnergy                          | 5678570.302  |
| wavelet-HHL | firstorder | Maximum                              | 100.8016764  |
| wavelet-HHL | firstorder | RootMeanSquared                      | 30.15309978  |
| wavelet-HHL | firstorder | 90Percentile                         | 38.94161955  |
| wavelet-HHL | firstorder | Minimum                              | -92.50361755 |
| wavelet-HHL | firstorder | Entropy                              | 2.348603394  |
| wavelet-HHL | firstorder | Range                                | 193.3052939  |
| wavelet-HHL | firstorder | Variance                             | 909.008739   |
| wavelet-HHL | firstorder | 10Percentile                         | -38.71282395 |
| wavelet-HHL | firstorder | Kurtosis                             | 3.029138511  |
| wavelet-HHL | firstorder | Mean                                 | 0.447981411  |
| wavelet-HHL | grlm       | ShortRunLowGrayLevelEmphasis         | 0.061977068  |
| wavelet-HHL | grlm       | GrayLevelVariance                    | 1.700283806  |
| wavelet-HHL | grlm       | LowGrayLevelRunEmphasis              | 0.070527293  |

|             |       |                                      |             |
|-------------|-------|--------------------------------------|-------------|
| wavelet-HHL | glrlm | GrayLevelNonUniformityNormalized     | 0.213975405 |
| wavelet-HHL | glrlm | RunVariance                          | 0.328961815 |
| wavelet-HHL | glrlm | GrayLevelNonUniformity               | 377.0515886 |
| wavelet-HHL | glrlm | LongRunEmphasis                      | 1.901948816 |
| wavelet-HHL | glrlm | ShortRunHighGrayLevelEmphasis        | 18.9525554  |
| wavelet-HHL | glrlm | RunLengthNonUniformity               | 1214.59159  |
| wavelet-HHL | glrlm | ShortRunEmphasis                     | 0.850137085 |
| wavelet-HHL | glrlm | LongRunHighGrayLevelEmphasis         | 41.16744077 |
| wavelet-HHL | glrlm | RunPercentage                        | 0.807322316 |
| wavelet-HHL | glrlm | LongRunLowGrayLevelEmphasis          | 0.12127097  |
| wavelet-HHL | glrlm | RunEntropy                           | 3.247272552 |
| wavelet-HHL | glrlm | HighGrayLevelRunEmphasis             | 22.13189684 |
| wavelet-HHL | glrlm | RunLengthNonUniformityNormalized     | 0.682914129 |
| wavelet-HHL | glszm | GrayLevelVariance                    | 5.116696168 |
| wavelet-HHL | glszm | ZoneVariance                         | 4369.741228 |
| wavelet-HHL | glszm | GrayLevelNonUniformityNormalized     | 0.181226572 |
| wavelet-HHL | glszm | SizeZoneNonUniformityNormalized      | 0.296438984 |
| wavelet-HHL | glszm | SizeZoneNonUniformity                | 58.10204082 |
| wavelet-HHL | glszm | GrayLevelNonUniformity               | 35.52040816 |
| wavelet-HHL | glszm | LargeAreaEmphasis                    | 4493.790816 |
| wavelet-HHL | glszm | SmallAreaHighGrayLevelEmphasis       | 14.30106433 |
| wavelet-HHL | glszm | ZonePercentage                       | 0.0897847   |
| wavelet-HHL | glszm | LargeAreaLowGrayLevelEmphasis        | 234.3297899 |
| wavelet-HHL | glszm | LargeAreaHighGrayLevelEmphasis       | 92083.97449 |
| wavelet-HHL | glszm | HighGrayLevelZoneEmphasis            | 25.1377551  |
| wavelet-HHL | glszm | SmallAreaEmphasis                    | 0.557120572 |
| wavelet-HHL | glszm | LowGrayLevelZoneEmphasis             | 0.144535597 |
| wavelet-HHL | glszm | ZoneEntropy                          | 4.777216023 |
| wavelet-HHL | glszm | SmallAreaLowGrayLevelEmphasis        | 0.100119695 |
| wavelet-HHL | ngtdm | Coarseness                           | 0.00276026  |
| wavelet-HHL | ngtdm | Complexity                           | 33.39300684 |
| wavelet-HHL | ngtdm | Strength                             | 0.069889944 |
| wavelet-HHL | ngtdm | Contrast                             | 0.042039919 |
| wavelet-HHL | ngtdm | Busyness                             | 7.803485252 |
| wavelet-HLH | gldm  | GrayLevelVariance                    | 2.285718842 |
| wavelet-HLH | gldm  | HighGrayLevelEmphasis                | 58.99358681 |
| wavelet-HLH | gldm  | DependenceEntropy                    | 5.758925124 |
| wavelet-HLH | gldm  | DependenceNonUniformity              | 203.8685295 |
| wavelet-HLH | gldm  | GrayLevelNonUniformity               | 451.1969766 |
| wavelet-HLH | gldm  | SmallDependenceEmphasis              | 0.108974787 |
| wavelet-HLH | gldm  | SmallDependenceHighGrayLevelEmphasis | 7.40037703  |
| wavelet-HLH | gldm  | DependenceNonUniformityNormalized    | 0.093389157 |
| wavelet-HLH | gldm  | LargeDependenceEmphasis              | 44.82867613 |
| wavelet-HLH | gldm  | LargeDependenceLowGrayLevelEmphasis  | 0.844752017 |
| wavelet-HLH | gldm  | DependenceVariance                   | 10.94593105 |
| wavelet-HLH | gldm  | LargeDependenceHighGrayLevelEmphasis | 2517.94732  |
| wavelet-HLH | gldm  | SmallDependenceLowGrayLevelEmphasis  | 0.003099666 |
| wavelet-HLH | gldm  | LowGrayLevelEmphasis                 | 0.020878042 |
| wavelet-HLH | glcm  | JointAverage                         | 7.517995978 |
| wavelet-HLH | glcm  | SumAverage                           | 15.03599196 |
| wavelet-HLH | glcm  | JointEntropy                         | 5.10521521  |
| wavelet-HLH | glcm  | ClusterShade                         | 2.295046335 |
| wavelet-HLH | glcm  | MaximumProbability                   | 0.10054368  |

|             |            |                                  |              |
|-------------|------------|----------------------------------|--------------|
| wavelet-HLH | glcm       | Idmn                             | 0.980638588  |
| wavelet-HLH | glcm       | JointEnergy                      | 0.047896215  |
| wavelet-HLH | glcm       | Contrast                         | 4.752619922  |
| wavelet-HLH | glcm       | DifferenceEntropy                | 2.299446423  |
| wavelet-HLH | glcm       | InverseVariance                  | 0.433863233  |
| wavelet-HLH | glcm       | DifferenceVariance               | 2.162995798  |
| wavelet-HLH | glcm       | Idn                              | 0.91172027   |
| wavelet-HLH | glcm       | Idm                              | 0.469443228  |
| wavelet-HLH | glcm       | Correlation                      | 0.000683582  |
| wavelet-HLH | glcm       | Autocorrelation                  | 56.50732368  |
| wavelet-HLH | glcm       | SumEntropy                       | 3.096175801  |
| wavelet-HLH | glcm       | SumSquares                       | 2.363313552  |
| wavelet-HLH | glcm       | ClusterProminence                | 103.2278537  |
| wavelet-HLH | glcm       | Imc2                             | 0.441353967  |
| wavelet-HLH | glcm       | Imc1                             | -0.05483676  |
| wavelet-HLH | glcm       | DifferenceAverage                | 1.574870446  |
| wavelet-HLH | glcm       | Id                               | 0.524049836  |
| wavelet-HLH | glcm       | ClusterTendency                  | 4.700634284  |
| wavelet-HLH | firstorder | InterquartileRange               | 41.66444576  |
| wavelet-HLH | firstorder | Skewness                         | 0.290020031  |
| wavelet-HLH | firstorder | Uniformity                       | 0.206686659  |
| wavelet-HLH | firstorder | Median                           | -0.573419148 |
| wavelet-HLH | firstorder | Energy                           | 3010284.52   |
| wavelet-HLH | firstorder | RobustMeanAbsoluteDeviation      | 17.7425077   |
| wavelet-HLH | firstorder | MeanAbsoluteDeviation            | 27.70796967  |
| wavelet-HLH | firstorder | TotalEnergy                      | 8612493.097  |
| wavelet-HLH | firstorder | Maximum                          | 184.5758442  |
| wavelet-HLH | firstorder | RootMeanSquared                  | 37.13444221  |
| wavelet-HLH | firstorder | 90Percentile                     | 45.84601095  |
| wavelet-HLH | firstorder | Minimum                          | -157.3906658 |
| wavelet-HLH | firstorder | Entropy                          | 2.605300394  |
| wavelet-HLH | firstorder | Range                            | 341.9665099  |
| wavelet-HLH | firstorder | Variance                         | 1378.242476  |
| wavelet-HLH | firstorder | 10Percentile                     | -42.60126604 |
| wavelet-HLH | firstorder | Kurtosis                         | 4.534150707  |
| wavelet-HLH | firstorder | Mean                             | 0.851071079  |
| wavelet-HLH | glrlm      | ShortRunLowGrayLevelEmphasis     | 0.018535285  |
| wavelet-HLH | glrlm      | GrayLevelVariance                | 2.577723572  |
| wavelet-HLH | glrlm      | LowGrayLevelRunEmphasis          | 0.021277571  |
| wavelet-HLH | glrlm      | GrayLevelNonUniformityNormalized | 0.18944018   |
| wavelet-HLH | glrlm      | RunVariance                      | 0.354311855  |
| wavelet-HLH | glrlm      | GrayLevelNonUniformity           | 337.1303699  |
| wavelet-HLH | glrlm      | LongRunEmphasis                  | 1.924849768  |
| wavelet-HLH | glrlm      | ShortRunHighGrayLevelEmphasis    | 51.52547793  |
| wavelet-HLH | glrlm      | RunLengthNonUniformity           | 1262.933231  |
| wavelet-HLH | glrlm      | ShortRunEmphasis                 | 0.858304604  |
| wavelet-HLH | glrlm      | LongRunHighGrayLevelEmphasis     | 111.8266646  |
| wavelet-HLH | glrlm      | RunPercentage                    | 0.814581204  |
| wavelet-HLH | glrlm      | LongRunLowGrayLevelEmphasis      | 0.038983094  |
| wavelet-HLH | glrlm      | RunEntropy                       | 3.491870387  |
| wavelet-HLH | glrlm      | HighGrayLevelRunEmphasis         | 59.56628357  |
| wavelet-HLH | glrlm      | RunLengthNonUniformityNormalized | 0.700227375  |
| wavelet-HLH | glszm      | GrayLevelVariance                | 8.037946429  |

|             |       |                                  |             |
|-------------|-------|----------------------------------|-------------|
| wavelet-HLH | glszm | ZoneVariance                     | 3444.359355 |
| wavelet-HLH | glszm | GrayLevelNonUniformityNormalized | 0.12496014  |
| wavelet-HLH | glszm | SizeZoneNonUniformityNormalized  | 0.271006059 |
| wavelet-HLH | glszm | SizeZoneNonUniformity            | 60.70535714 |
| wavelet-HLH | glszm | GrayLevelNonUniformity           | 27.99107143 |
| wavelet-HLH | glszm | LargeAreaEmphasis                | 3539.334821 |
| wavelet-HLH | glszm | SmallAreaHighGrayLevelEmphasis   | 39.69646046 |
| wavelet-HLH | glszm | ZonePercentage                   | 0.102611086 |
| wavelet-HLH | glszm | LargeAreaLowGrayLevelEmphasis    | 64.02013725 |
| wavelet-HLH | glszm | LargeAreaHighGrayLevelEmphasis   | 201029.1563 |
| wavelet-HLH | glszm | HighGrayLevelZoneEmphasis        | 70.05357143 |
| wavelet-HLH | glszm | SmallAreaEmphasis                | 0.532928091 |
| wavelet-HLH | glszm | LowGrayLevelZoneEmphasis         | 0.030945336 |
| wavelet-HLH | glszm | ZoneEntropy                      | 5.383621377 |
| wavelet-HLH | glszm | SmallAreaLowGrayLevelEmphasis    | 0.018948369 |
| wavelet-HLH | ngtdm | Coarseness                       | 0.002961786 |
| wavelet-HLH | ngtdm | Complexity                       | 112.8691163 |
| wavelet-HLH | ngtdm | Strength                         | 0.253870415 |
| wavelet-HLH | ngtdm | Contrast                         | 0.024949869 |
| wavelet-HLH | ngtdm | Busyness                         | 2.155132039 |

| Image type | Feature Class | Feature Name                         |                                                                                                                                                                                                                                                                                                                                                                                                                                                 |
|------------|---------------|--------------------------------------|-------------------------------------------------------------------------------------------------------------------------------------------------------------------------------------------------------------------------------------------------------------------------------------------------------------------------------------------------------------------------------------------------------------------------------------------------|
| general    | info          | BoundingBox                          | 9: RTSTRUCT: C99-DNU_segment_CTV-3<br>(0, 0, 1, 12, 10, 9)                                                                                                                                                                                                                                                                                                                                                                                      |
| general    | info          | EnabledImageTypes                    | {u'Original': {}, u'Wavelet': {}}                                                                                                                                                                                                                                                                                                                                                                                                               |
|            |               |                                      | {'distances': [1], 'additionalInfo': True,<br>'force2D': False, 'interpolator': 'sitkBSpline',<br>'resampledPixelSpacing': [3.0], 'label': 1,<br>'normalizeScale': 1, 'normalize': False,<br>'force2Ddimension': 0, 'removeOutliers':<br>None, 'minimumROISize': None,<br>u'binWidth': 25.0,<br>'minimumROIDimensions': 1,<br>u'correctMask': True, 'preCrop': False,<br>u'symmetricalGLCM': True,<br>'resegmentRange': None, 'padDistance': 5} |
| general    | info          | GeneralSettings                      | ebb91dfcf660d0c53479d2f2a38c7fb51b87f                                                                                                                                                                                                                                                                                                                                                                                                           |
| general    | info          | ImageHash                            | 1c6                                                                                                                                                                                                                                                                                                                                                                                                                                             |
| general    | info          | ImageSpacing                         | (0.9765624999999998,<br>0.9765624999999998,<br>1.9999999999999999)                                                                                                                                                                                                                                                                                                                                                                              |
| general    | info          | MaskHash                             | 95b5b73428a59cf6b7acfe8d8a4e264ede0b                                                                                                                                                                                                                                                                                                                                                                                                            |
| general    | info          | NumpyVersion                         | b259                                                                                                                                                                                                                                                                                                                                                                                                                                            |
| general    | info          | PyWaveletVersion                     | 1.13.1                                                                                                                                                                                                                                                                                                                                                                                                                                          |
| general    | info          | SimpleITKVersion                     | 0.5.2                                                                                                                                                                                                                                                                                                                                                                                                                                           |
| general    | info          | Version                              | 1.1.0                                                                                                                                                                                                                                                                                                                                                                                                                                           |
| general    | info          | VolumeNum                            | 1.3.0.post102+g1b0eb74                                                                                                                                                                                                                                                                                                                                                                                                                          |
| general    | info          | VoxelNum                             | 1                                                                                                                                                                                                                                                                                                                                                                                                                                               |
| original   | shape         | Maximum3DDiameter                    | 447                                                                                                                                                                                                                                                                                                                                                                                                                                             |
| original   | shape         | Maximum2DDiameterSlice               | 34.33656943                                                                                                                                                                                                                                                                                                                                                                                                                                     |
| original   | shape         | Sphericity                           | 33.54101966                                                                                                                                                                                                                                                                                                                                                                                                                                     |
| original   | shape         | MinorAxis                            | 0.834379777                                                                                                                                                                                                                                                                                                                                                                                                                                     |
| original   | shape         | Elongation                           | 27.5844907                                                                                                                                                                                                                                                                                                                                                                                                                                      |
| original   | shape         | SurfaceVolumeRatio                   | 0.921844407                                                                                                                                                                                                                                                                                                                                                                                                                                     |
| original   | shape         | Volume                               | 0.252675573                                                                                                                                                                                                                                                                                                                                                                                                                                     |
| original   | shape         | MajorAxis                            | 12069                                                                                                                                                                                                                                                                                                                                                                                                                                           |
| original   | shape         | SurfaceArea                          | 29.92315241                                                                                                                                                                                                                                                                                                                                                                                                                                     |
| original   | shape         | Flatness                             | 3049.541492                                                                                                                                                                                                                                                                                                                                                                                                                                     |
| original   | shape         | LeastAxis                            | 0.707904875                                                                                                                                                                                                                                                                                                                                                                                                                                     |
| original   | shape         | Maximum2DDiameterColumn              | 21.18274547                                                                                                                                                                                                                                                                                                                                                                                                                                     |
| original   | shape         | Maximum2DDiameterRow                 | 33.13608305                                                                                                                                                                                                                                                                                                                                                                                                                                     |
| original   | gldm          | GrayLevelVariance                    | 28.46049894                                                                                                                                                                                                                                                                                                                                                                                                                                     |
| original   | gldm          | HighGrayLevelEmphasis                | 47.42681261                                                                                                                                                                                                                                                                                                                                                                                                                                     |
| original   | gldm          | DependenceEntropy                    | 762.0022371                                                                                                                                                                                                                                                                                                                                                                                                                                     |
| original   | gldm          | DependenceNonUniformity              | 6.370564713                                                                                                                                                                                                                                                                                                                                                                                                                                     |
| original   | gldm          | GrayLevelNonUniformity               | 79.94854586                                                                                                                                                                                                                                                                                                                                                                                                                                     |
| original   | gldm          | SmallDependenceEmphasis              | 29.75167785                                                                                                                                                                                                                                                                                                                                                                                                                                     |
| original   | gldm          | SmallDependenceHighGrayLevelEmphasis | 0.399778183                                                                                                                                                                                                                                                                                                                                                                                                                                     |
| original   | gldm          | DependenceNonUniformityNormalized    | 222.3455483                                                                                                                                                                                                                                                                                                                                                                                                                                     |
|            |               |                                      | 0.178855807                                                                                                                                                                                                                                                                                                                                                                                                                                     |

|          |            |                                      |              |
|----------|------------|--------------------------------------|--------------|
| original | gldm       | LargeDependenceEmphasis              | 21.19239374  |
| original | gldm       | LargeDependenceLowGrayLevelEmphasis  | 0.025376318  |
| original | gldm       | DependenceVariance                   | 9.028372095  |
| original | gldm       | LargeDependenceHighGrayLevelEmphasis | 21501.17002  |
| original | gldm       | SmallDependenceLowGrayLevelEmphasis  | 0.004261772  |
| original | gldm       | LowGrayLevelEmphasis                 | 0.005036066  |
| original | glcm       | JointAverage                         | 28.21027368  |
| original | glcm       | SumAverage                           | 56.42054736  |
| original | glcm       | JointEntropy                         | 7.2194181    |
| original | glcm       | ClusterShade                         | -1351.585934 |
| original | glcm       | MaximumProbability                   | 0.049650875  |
| original | glcm       | Idmn                                 | 0.96964877   |
| original | glcm       | JointEnergy                          | 0.012664531  |
| original | glcm       | Contrast                             | 43.17492382  |
| original | glcm       | DifferenceEntropy                    | 3.637758989  |
| original | glcm       | InverseVariance                      | 0.266452933  |
| original | glcm       | DifferenceVariance                   | 22.38279727  |
| original | glcm       | Idn                                  | 0.897375541  |
| original | glcm       | Idm                                  | 0.279849367  |
| original | glcm       | Correlation                          | 0.406318767  |
| original | glcm       | Autocorrelation                      | 810.8991153  |
| original | glcm       | SumEntropy                           | 4.825403297  |
| original | glcm       | SumSquares                           | 36.59883482  |
| original | glcm       | ClusterProminence                    | 47419.96167  |
| original | glcm       | Imc2                                 | 0.900533894  |
| original | glcm       | Imc1                                 | -0.209441001 |
| original | glcm       | DifferenceAverage                    | 4.497998133  |
| original | glcm       | Id                                   | 0.35554809   |
| original | glcm       | ClusterTendency                      | 103.2204155  |
| original | firstorder | InterquartileRange                   | 225          |
| original | firstorder | Skewness                             | -1.149333852 |
| original | firstorder | Uniformity                           | 0.066558563  |
| original | firstorder | Median                               | -53          |
| original | firstorder | Energy                               | 19590861     |
| original | firstorder | RobustMeanAbsoluteDeviation          | 101.407608   |
| original | firstorder | MeanAbsoluteDeviation                | 140.1826244  |
| original | firstorder | TotalEnergy                          | 528953247    |
| original | firstorder | Maximum                              | 88           |
| original | firstorder | RootMeanSquared                      | 209.3500168  |
| original | firstorder | 90Percentile                         | 42           |
| original | firstorder | Minimum                              | -761         |
| original | firstorder | Entropy                              | 4.328539077  |
| original | firstorder | Range                                | 849          |
| original | firstorder | Variance                             | 29511.60147  |
| original | firstorder | 10Percentile                         | -385.8       |
| original | firstorder | Kurtosis                             | 3.682175131  |
| original | firstorder | Mean                                 | -119.6487696 |
| original | glrlm      | ShortRunLowGrayLevelEmphasis         | 0.005379504  |
| original | glrlm      | GrayLevelVariance                    | 48.94613211  |
| original | glrlm      | LowGrayLevelRunEmphasis              | 0.005455576  |
| original | glrlm      | GrayLevelNonUniformityNormalized     | 0.059380098  |
| original | glrlm      | RunVariance                          | 0.134415337  |

|             |       |                                      |              |
|-------------|-------|--------------------------------------|--------------|
| original    | glrlm | GrayLevelNonUniformity               | 24.01120331  |
| original    | glrlm | LongRunEmphasis                      | 1.358657441  |
| original    | glrlm | ShortRunHighGrayLevelEmphasis        | 671.0128288  |
| original    | glrlm | RunLengthNonUniformity               | 338.3833697  |
| original    | glrlm | ShortRunEmphasis                     | 0.93131037   |
| original    | glrlm | LongRunHighGrayLevelEmphasis         | 1094.522411  |
| original    | glrlm | RunPercentage                        | 0.904319394  |
| original    | glrlm | LongRunLowGrayLevelEmphasis          | 0.005840404  |
| original    | glrlm | RunEntropy                           | 4.800552326  |
| original    | glrlm | HighGrayLevelRunEmphasis             | 738.1214976  |
| original    | glrlm | RunLengthNonUniformityNormalized     | 0.836621051  |
| original    | glszm | GrayLevelVariance                    | 52.49412796  |
| original    | glszm | ZoneVariance                         | 38.68585928  |
| original    | glszm | GrayLevelNonUniformityNormalized     | 0.043415878  |
| original    | glszm | SizeZoneNonUniformityNormalized      | 0.581570836  |
| original    | glszm | SizeZoneNonUniformity                | 112.8247423  |
| original    | glszm | GrayLevelNonUniformity               | 8.422680412  |
| original    | glszm | LargeAreaEmphasis                    | 43.99484536  |
| original    | glszm | SmallAreaHighGrayLevelEmphasis       | 407.2772939  |
| original    | glszm | ZonePercentage                       | 0.434004474  |
| original    | glszm | LargeAreaLowGrayLevelEmphasis        | 0.052704769  |
| original    | glszm | LargeAreaHighGrayLevelEmphasis       | 44714.12887  |
| original    | glszm | HighGrayLevelZoneEmphasis            | 551.8092784  |
| original    | glszm | SmallAreaEmphasis                    | 0.789498686  |
| original    | glszm | LowGrayLevelZoneEmphasis             | 0.010009121  |
| original    | glszm | ZoneEntropy                          | 5.544270946  |
| original    | glszm | SmallAreaLowGrayLevelEmphasis        | 0.009618093  |
| original    | ngtdm | Coarseness                           | 0.013899791  |
| original    | ngtdm | Complexity                           | 1418.618927  |
| original    | ngtdm | Strength                             | 7.822912365  |
| original    | ngtdm | Contrast                             | 0.348807163  |
| original    | ngtdm | Busyness                             | 0.071151469  |
| wavelet-HHH | gldm  | GrayLevelVariance                    | 4.377650656  |
| wavelet-HHH | gldm  | HighGrayLevelEmphasis                | 93.75838926  |
| wavelet-HHH | gldm  | DependenceEntropy                    | 5.780290886  |
| wavelet-HHH | gldm  | DependenceNonUniformity              | 47.83668904  |
| wavelet-HHH | gldm  | GrayLevelNonUniformity               | 72.12751678  |
| wavelet-HHH | gldm  | SmallDependenceEmphasis              | 0.224326152  |
| wavelet-HHH | gldm  | SmallDependenceHighGrayLevelEmphasis | 22.88055344  |
| wavelet-HHH | gldm  | DependenceNonUniformityNormalized    | 0.107017201  |
| wavelet-HHH | gldm  | LargeDependenceEmphasis              | 33.65324385  |
| wavelet-HHH | gldm  | LargeDependenceLowGrayLevelEmphasis  | 0.393931599  |
| wavelet-HHH | gldm  | DependenceVariance                   | 10.88305332  |
| wavelet-HHH | gldm  | LargeDependenceHighGrayLevelEmphasis | 3018.340045  |
| wavelet-HHH | gldm  | SmallDependenceLowGrayLevelEmphasis  | 0.0061699    |
| wavelet-HHH | gldm  | LowGrayLevelEmphasis                 | 0.015848477  |
| wavelet-HHH | glcm  | JointAverage                         | 9.457996074  |
| wavelet-HHH | glcm  | SumAverage                           | 18.91599215  |
| wavelet-HHH | glcm  | JointEntropy                         | 5.621984374  |
| wavelet-HHH | glcm  | ClusterShade                         | -0.532409626 |
| wavelet-HHH | glcm  | MaximumProbability                   | 0.082652039  |
| wavelet-HHH | glcm  | ldmn                                 | 0.974533677  |

|             |            |                                  |              |
|-------------|------------|----------------------------------|--------------|
| wavelet-HHH | glcm       | JointEnergy                      | 0.03438171   |
| wavelet-HHH | glcm       | Contrast                         | 8.335451455  |
| wavelet-HHH | glcm       | DifferenceEntropy                | 2.654795423  |
| wavelet-HHH | glcm       | InverseVariance                  | 0.379950916  |
| wavelet-HHH | glcm       | DifferenceVariance               | 3.99833257   |
| wavelet-HHH | glcm       | Idn                              | 0.900500915  |
| wavelet-HHH | glcm       | Idm                              | 0.406038849  |
| wavelet-HHH | glcm       | Correlation                      | -0.037012626 |
| wavelet-HHH | glcm       | Autocorrelation                  | 89.29558739  |
| wavelet-HHH | glcm       | SumEntropy                       | 3.382157482  |
| wavelet-HHH | glcm       | SumSquares                       | 4.008997365  |
| wavelet-HHH | glcm       | ClusterProminence                | 314.4728834  |
| wavelet-HHH | glcm       | Imc2                             | 0.633217634  |
| wavelet-HHH | glcm       | Imc1                             | -0.089333113 |
| wavelet-HHH | glcm       | DifferenceAverage                | 2.063615585  |
| wavelet-HHH | glcm       | Id                               | 0.472548838  |
| wavelet-HHH | glcm       | ClusterTendency                  | 7.700538003  |
| wavelet-HHH | firstorder | InterquartileRange               | 52.91921564  |
| wavelet-HHH | firstorder | Skewness                         | -0.0503477   |
| wavelet-HHH | firstorder | Uniformity                       | 0.161359098  |
| wavelet-HHH | firstorder | Median                           | -2.132439146 |
| wavelet-HHH | firstorder | Energy                           | 1198974.134  |
| wavelet-HHH | firstorder | RobustMeanAbsoluteDeviation      | 22.6034399   |
| wavelet-HHH | firstorder | MeanAbsoluteDeviation            | 37.34652697  |
| wavelet-HHH | firstorder | TotalEnergy                      | 32372301.61  |
| wavelet-HHH | firstorder | Maximum                          | 195.5193957  |
| wavelet-HHH | firstorder | RootMeanSquared                  | 51.7906242   |
| wavelet-HHH | firstorder | 90Percentile                     | 60.08673258  |
| wavelet-HHH | firstorder | Minimum                          | -218.1815493 |
| wavelet-HHH | firstorder | Entropy                          | 3.016956007  |
| wavelet-HHH | firstorder | Range                            | 413.7009451  |
| wavelet-HHH | firstorder | Variance                         | 2681.597567  |
| wavelet-HHH | firstorder | 10Percentile                     | -57.01628356 |
| wavelet-HHH | firstorder | Kurtosis                         | 4.995604663  |
| wavelet-HHH | firstorder | Mean                             | -0.819260776 |
| wavelet-HHH | glrlm      | ShortRunLowGrayLevelEmphasis     | 0.015266757  |
| wavelet-HHH | glrlm      | GrayLevelVariance                | 4.927226841  |
| wavelet-HHH | glrlm      | LowGrayLevelRunEmphasis          | 0.016530583  |
| wavelet-HHH | glrlm      | GrayLevelNonUniformityNormalized | 0.14662963   |
| wavelet-HHH | glrlm      | RunVariance                      | 0.227101705  |
| wavelet-HHH | glrlm      | GrayLevelNonUniformity           | 56.05022698  |
| wavelet-HHH | glrlm      | LongRunEmphasis                  | 1.598883219  |
| wavelet-HHH | glrlm      | ShortRunHighGrayLevelEmphasis    | 84.97146084  |
| wavelet-HHH | glrlm      | RunLengthNonUniformity           | 291.1443423  |
| wavelet-HHH | glrlm      | ShortRunEmphasis                 | 0.894386322  |
| wavelet-HHH | glrlm      | LongRunHighGrayLevelEmphasis     | 148.2711203  |
| wavelet-HHH | glrlm      | RunPercentage                    | 0.854930305  |
| wavelet-HHH | glrlm      | LongRunLowGrayLevelEmphasis      | 0.023580617  |
| wavelet-HHH | glrlm      | RunEntropy                       | 3.72377638   |
| wavelet-HHH | glrlm      | HighGrayLevelRunEmphasis         | 94.43691023  |
| wavelet-HHH | glrlm      | RunLengthNonUniformityNormalized | 0.76087205   |
| wavelet-HHH | glszm      | GrayLevelVariance                | 12.50451749  |



|             |       |                                      |             |
|-------------|-------|--------------------------------------|-------------|
| wavelet-HHH | glszm | ZoneVariance                         | 208.8636101 |
| wavelet-HHH | glszm | GrayLevelNonUniformityNormalized     | 0.091695502 |
| wavelet-HHH | glszm | SizeZoneNonUniformityNormalized      | 0.472702807 |
| wavelet-HHH | glszm | SizeZoneNonUniformity                | 48.21568627 |
| wavelet-HHH | glszm | GrayLevelNonUniformity               | 9.352941176 |
| wavelet-HHH | glszm | LargeAreaEmphasis                    | 228.0686275 |
| wavelet-HHH | glszm | SmallAreaHighGrayLevelEmphasis       | 74.21876605 |
| wavelet-HHH | glszm | ZonePercentage                       | 0.228187919 |
| wavelet-HHH | glszm | LargeAreaLowGrayLevelEmphasis        | 2.645990402 |
| wavelet-HHH | glszm | LargeAreaHighGrayLevelEmphasis       | 20293.80392 |
| wavelet-HHH | glszm | HighGrayLevelZoneEmphasis            | 103.127451  |
| wavelet-HHH | glszm | SmallAreaEmphasis                    | 0.712428187 |
| wavelet-HHH | glszm | LowGrayLevelZoneEmphasis             | 0.027964742 |
| wavelet-HHH | glszm | ZoneEntropy                          | 4.946237843 |
| wavelet-HHH | glszm | SmallAreaLowGrayLevelEmphasis        | 0.02350465  |
| wavelet-HHH | ngtdm | Coarseness                           | 0.014927366 |
| wavelet-HHH | ngtdm | Complexity                           | 164.6947484 |
| wavelet-HHH | ngtdm | Strength                             | 1.174912387 |
| wavelet-HHH | ngtdm | Contrast                             | 0.059179389 |
| wavelet-HHH | ngtdm | Busyness                             | 0.352128427 |
| wavelet-HLL | gldm  | GrayLevelVariance                    | 20.21516548 |
| wavelet-HLL | gldm  | HighGrayLevelEmphasis                | 195.1409396 |
| wavelet-HLL | gldm  | DependenceEntropy                    | 6.353001103 |
| wavelet-HLL | gldm  | DependenceNonUniformity              | 87.38926174 |
| wavelet-HLL | gldm  | GrayLevelNonUniformity               | 29.75167785 |
| wavelet-HLL | gldm  | SmallDependenceEmphasis              | 0.345713639 |
| wavelet-HLL | gldm  | SmallDependenceHighGrayLevelEmphasis | 74.44980689 |
| wavelet-HLL | gldm  | DependenceNonUniformityNormalized    | 0.195501704 |
| wavelet-HLL | gldm  | LargeDependenceEmphasis              | 12.0917226  |
| wavelet-HLL | gldm  | LargeDependenceLowGrayLevelEmphasis  | 0.083459754 |
| wavelet-HLL | gldm  | DependenceVariance                   | 3.594562807 |
| wavelet-HLL | gldm  | LargeDependenceHighGrayLevelEmphasis | 2296.644295 |
| wavelet-HLL | gldm  | SmallDependenceLowGrayLevelEmphasis  | 0.006524832 |
| wavelet-HLL | gldm  | LowGrayLevelEmphasis                 | 0.011608146 |
| wavelet-HLL | glcm  | JointAverage                         | 13.08341679 |
| wavelet-HLL | glcm  | SumAverage                           | 26.16683357 |
| wavelet-HLL | glcm  | JointEntropy                         | 7.484413423 |
| wavelet-HLL | glcm  | ClusterShade                         | 114.7833774 |
| wavelet-HLL | glcm  | MaximumProbability                   | 0.021199978 |
| wavelet-HLL | glcm  | Idmn                                 | 0.968741085 |
| wavelet-HLL | glcm  | JointEnergy                          | 0.007343888 |
| wavelet-HLL | glcm  | Contrast                             | 27.52553821 |
| wavelet-HLL | glcm  | DifferenceEntropy                    | 3.402523197 |
| wavelet-HLL | glcm  | InverseVariance                      | 0.244739654 |
| wavelet-HLL | glcm  | DifferenceVariance                   | 10.95442102 |
| wavelet-HLL | glcm  | Idn                                  | 0.885174681 |
| wavelet-HLL | glcm  | Idm                                  | 0.241938999 |
| wavelet-HLL | glcm  | Correlation                          | 0.224328374 |
| wavelet-HLL | glcm  | Autocorrelation                      | 175.2897417 |
| wavelet-HLL | glcm  | SumEntropy                           | 4.632726332 |
| wavelet-HLL | glcm  | SumSquares                           | 17.86760023 |
| wavelet-HLL | glcm  | ClusterProminence                    | 7102.382115 |

|             |            |                                  |              |
|-------------|------------|----------------------------------|--------------|
| wavelet-HLL | glcm       | Imc2                             | 0.846961957  |
| wavelet-HLL | glcm       | Imc1                             | -0.161185873 |
| wavelet-HLL | glcm       | DifferenceAverage                | 3.962473337  |
| wavelet-HLL | glcm       | Id                               | 0.330856424  |
| wavelet-HLL | glcm       | ClusterTendency                  | 43.94486273  |
| wavelet-HLL | firstorder | InterquartileRange               | 144.1096053  |
| wavelet-HLL | firstorder | Skewness                         | 0.36429873   |
| wavelet-HLL | firstorder | Uniformity                       | 0.066558563  |
| wavelet-HLL | firstorder | Median                           | -60.59764741 |
| wavelet-HLL | firstorder | Energy                           | 7083894.481  |
| wavelet-HLL | firstorder | RobustMeanAbsoluteDeviation      | 59.20351481  |
| wavelet-HLL | firstorder | MeanAbsoluteDeviation            | 87.44387725  |
| wavelet-HLL | firstorder | TotalEnergy                      | 191265151    |
| wavelet-HLL | firstorder | Maximum                          | 322.8042196  |
| wavelet-HLL | firstorder | RootMeanSquared                  | 125.8874047  |
| wavelet-HLL | firstorder | 90Percentile                     | 82.33180759  |
| wavelet-HLL | firstorder | Minimum                          | -371.2392357 |
| wavelet-HLL | firstorder | Entropy                          | 4.162309261  |
| wavelet-HLL | firstorder | Range                            | 694.0434553  |
| wavelet-HLL | firstorder | Variance                         | 12569.18435  |
| wavelet-HLL | firstorder | 10Percentile                     | -197.9389173 |
| wavelet-HLL | firstorder | Kurtosis                         | 3.354454962  |
| wavelet-HLL | firstorder | Mean                             | -57.25778822 |
| wavelet-HLL | glrlm      | ShortRunLowGrayLevelEmphasis     | 0.011583675  |
| wavelet-HLL | glrlm      | GrayLevelVariance                | 21.02242239  |
| wavelet-HLL | glrlm      | LowGrayLevelRunEmphasis          | 0.011978443  |
| wavelet-HLL | glrlm      | GrayLevelNonUniformityNormalized | 0.064700212  |
| wavelet-HLL | glrlm      | RunVariance                      | 0.091258072  |
| wavelet-HLL | glrlm      | GrayLevelNonUniformity           | 26.79533166  |
| wavelet-HLL | glrlm      | LongRunEmphasis                  | 1.259949494  |
| wavelet-HLL | glrlm      | ShortRunHighGrayLevelEmphasis    | 185.6163311  |
| wavelet-HLL | glrlm      | RunLengthNonUniformity           | 359.1248222  |
| wavelet-HLL | glrlm      | ShortRunEmphasis                 | 0.944592471  |
| wavelet-HLL | glrlm      | LongRunHighGrayLevelEmphasis     | 244.3651867  |
| wavelet-HLL | glrlm      | RunPercentage                    | 0.926346584  |
| wavelet-HLL | glrlm      | LongRunLowGrayLevelEmphasis      | 0.013775845  |
| wavelet-HLL | glrlm      | RunEntropy                       | 4.538203328  |
| wavelet-HLL | glrlm      | HighGrayLevelRunEmphasis         | 195.8839693  |
| wavelet-HLL | glrlm      | RunLengthNonUniformityNormalized | 0.865870734  |
| wavelet-HLL | glszm      | GrayLevelVariance                | 31.67494635  |
| wavelet-HLL | glszm      | ZoneVariance                     | 14.19369398  |
| wavelet-HLL | glszm      | GrayLevelNonUniformityNormalized | 0.051129908  |
| wavelet-HLL | glszm      | SizeZoneNonUniformityNormalized  | 0.413773513  |
| wavelet-HLL | glszm      | SizeZoneNonUniformity            | 73.65168539  |
| wavelet-HLL | glszm      | GrayLevelNonUniformity           | 9.101123596  |
| wavelet-HLL | glszm      | LargeAreaEmphasis                | 20.5         |
| wavelet-HLL | glszm      | SmallAreaHighGrayLevelEmphasis   | 149.4396431  |
| wavelet-HLL | glszm      | ZonePercentage                   | 0.398210291  |
| wavelet-HLL | glszm      | LargeAreaLowGrayLevelEmphasis    | 0.146875133  |
| wavelet-HLL | glszm      | LargeAreaHighGrayLevelEmphasis   | 3775.977528  |
| wavelet-HLL | glszm      | HighGrayLevelZoneEmphasis        | 212.7134831  |
| wavelet-HLL | glszm      | SmallAreaEmphasis                | 0.66696929   |

|             |            |                                      |              |
|-------------|------------|--------------------------------------|--------------|
| wavelet-HLL | glszm      | LowGrayLevelZoneEmphasis             | 0.017747092  |
| wavelet-HLL | glszm      | ZoneEntropy                          | 5.781855255  |
| wavelet-HLL | glszm      | SmallAreaLowGrayLevelEmphasis        | 0.014725397  |
| wavelet-HLL | ngtdm      | Coarseness                           | 0.016178955  |
| wavelet-HLL | ngtdm      | Complexity                           | 867.1076907  |
| wavelet-HLL | ngtdm      | Strength                             | 3.876207585  |
| wavelet-HLL | ngtdm      | Contrast                             | 0.150528635  |
| wavelet-HLL | ngtdm      | Busyness                             | 0.161468102  |
| wavelet-LHL | gldm       | GrayLevelVariance                    | 20.41278421  |
| wavelet-LHL | gldm       | HighGrayLevelEmphasis                | 336.5682327  |
| wavelet-LHL | gldm       | DependenceEntropy                    | 6.245599411  |
| wavelet-LHL | gldm       | DependenceNonUniformity              | 76.56599553  |
| wavelet-LHL | gldm       | GrayLevelNonUniformity               | 36.17673378  |
| wavelet-LHL | gldm       | SmallDependenceEmphasis              | 0.331124324  |
| wavelet-LHL | gldm       | SmallDependenceHighGrayLevelEmphasis | 122.818159   |
| wavelet-LHL | gldm       | DependenceNonUniformityNormalized    | 0.171288581  |
| wavelet-LHL | gldm       | LargeDependenceEmphasis              | 14.3557047   |
| wavelet-LHL | gldm       | LargeDependenceLowGrayLevelEmphasis  | 0.053340669  |
| wavelet-LHL | gldm       | DependenceVariance                   | 4.306662863  |
| wavelet-LHL | gldm       | LargeDependenceHighGrayLevelEmphasis | 4791.727069  |
| wavelet-LHL | gldm       | SmallDependenceLowGrayLevelEmphasis  | 0.003910028  |
| wavelet-LHL | gldm       | LowGrayLevelEmphasis                 | 0.007103121  |
| wavelet-LHL | glcm       | JointAverage                         | 17.69801971  |
| wavelet-LHL | glcm       | SumAverage                           | 35.39603941  |
| wavelet-LHL | glcm       | JointEntropy                         | 7.046550597  |
| wavelet-LHL | glcm       | ClusterShade                         | 73.13482387  |
| wavelet-LHL | glcm       | MaximumProbability                   | 0.033099553  |
| wavelet-LHL | glcm       | Idmn                                 | 0.990677032  |
| wavelet-LHL | glcm       | JointEnergy                          | 0.011446253  |
| wavelet-LHL | glcm       | Contrast                             | 24.88359585  |
| wavelet-LHL | glcm       | DifferenceEntropy                    | 3.28360225   |
| wavelet-LHL | glcm       | InverseVariance                      | 0.278546769  |
| wavelet-LHL | glcm       | DifferenceVariance                   | 11.85975483  |
| wavelet-LHL | glcm       | Idn                                  | 0.937369681  |
| wavelet-LHL | glcm       | Idm                                  | 0.273762966  |
| wavelet-LHL | glcm       | Correlation                          | 0.17447828   |
| wavelet-LHL | glcm       | Autocorrelation                      | 315.9067034  |
| wavelet-LHL | glcm       | SumEntropy                           | 4.377878224  |
| wavelet-LHL | glcm       | SumSquares                           | 15.11873521  |
| wavelet-LHL | glcm       | ClusterProminence                    | 10609.8706   |
| wavelet-LHL | glcm       | Imc2                                 | 0.819497007  |
| wavelet-LHL | glcm       | Imc1                                 | -0.150952662 |
| wavelet-LHL | glcm       | DifferenceAverage                    | 3.543044131  |
| wavelet-LHL | glcm       | Id                                   | 0.359176132  |
| wavelet-LHL | glcm       | ClusterTendency                      | 35.591345    |
| wavelet-LHL | firstorder | InterquartileRange                   | 114.3752814  |
| wavelet-LHL | firstorder | Skewness                             | 0.918385151  |
| wavelet-LHL | firstorder | Uniformity                           | 0.08093229   |
| wavelet-LHL | firstorder | Median                               | -36.91155185 |
| wavelet-LHL | firstorder | Energy                               | 6478822.092  |
| wavelet-LHL | firstorder | RobustMeanAbsoluteDeviation          | 48.52621581  |
| wavelet-LHL | firstorder | MeanAbsoluteDeviation                | 78.66046722  |

|             |            |                                  |              |
|-------------|------------|----------------------------------|--------------|
| wavelet-LHL | firstorder | TotalEnergy                      | 174928196.5  |
| wavelet-LHL | firstorder | Maximum                          | 771.7098296  |
| wavelet-LHL | firstorder | RootMeanSquared                  | 120.3910676  |
| wavelet-LHL | firstorder | 90Percentile                     | 80.51294785  |
| wavelet-LHL | firstorder | Minimum                          | -463.1715976 |
| wavelet-LHL | firstorder | Entropy                          | 4.002738515  |
| wavelet-LHL | firstorder | Range                            | 1234.881427  |
| wavelet-LHL | firstorder | Variance                         | 12667.52253  |
| wavelet-LHL | firstorder | 10Percentile                     | -177.5950244 |
| wavelet-LHL | firstorder | Kurtosis                         | 10.51913834  |
| wavelet-LHL | firstorder | Mean                             | -42.73741476 |
| wavelet-LHL | glrlm      | ShortRunLowGrayLevelEmphasis     | 0.007155764  |
| wavelet-LHL | glrlm      | GrayLevelVariance                | 21.6610171   |
| wavelet-LHL | glrlm      | LowGrayLevelRunEmphasis          | 0.007400127  |
| wavelet-LHL | glrlm      | GrayLevelNonUniformityNormalized | 0.077029382  |
| wavelet-LHL | glrlm      | RunVariance                      | 0.112876928  |
| wavelet-LHL | glrlm      | GrayLevelNonUniformity           | 31.56462637  |
| wavelet-LHL | glrlm      | LongRunEmphasis                  | 1.30598046   |
| wavelet-LHL | glrlm      | ShortRunHighGrayLevelEmphasis    | 317.4994348  |
| wavelet-LHL | glrlm      | RunLengthNonUniformity           | 349.5850741  |
| wavelet-LHL | glrlm      | ShortRunEmphasis                 | 0.938622231  |
| wavelet-LHL | glrlm      | LongRunHighGrayLevelEmphasis     | 438.2853518  |
| wavelet-LHL | glrlm      | RunPercentage                    | 0.916537601  |
| wavelet-LHL | glrlm      | LongRunLowGrayLevelEmphasis      | 0.008555914  |
| wavelet-LHL | glrlm      | RunEntropy                       | 4.438686412  |
| wavelet-LHL | glrlm      | HighGrayLevelRunEmphasis         | 337.4239848  |
| wavelet-LHL | glrlm      | RunLengthNonUniformityNormalized | 0.852301452  |
| wavelet-LHL | glszm      | GrayLevelVariance                | 40.83503123  |
| wavelet-LHL | glszm      | ZoneVariance                     | 38.61373438  |
| wavelet-LHL | glszm      | GrayLevelNonUniformityNormalized | 0.053316478  |
| wavelet-LHL | glszm      | SizeZoneNonUniformityNormalized  | 0.458581202  |
| wavelet-LHL | glszm      | SizeZoneNonUniformity            | 75.20731707  |
| wavelet-LHL | glszm      | GrayLevelNonUniformity           | 8.743902439  |
| wavelet-LHL | glszm      | LargeAreaEmphasis                | 46.04268293  |
| wavelet-LHL | glszm      | SmallAreaHighGrayLevelEmphasis   | 273.2147911  |
| wavelet-LHL | glszm      | ZonePercentage                   | 0.36689038   |
| wavelet-LHL | glszm      | LargeAreaLowGrayLevelEmphasis    | 0.152846225  |
| wavelet-LHL | glszm      | LargeAreaHighGrayLevelEmphasis   | 15765.9878   |
| wavelet-LHL | glszm      | HighGrayLevelZoneEmphasis        | 365.4939024  |
| wavelet-LHL | glszm      | SmallAreaEmphasis                | 0.702777883  |
| wavelet-LHL | glszm      | LowGrayLevelZoneEmphasis         | 0.011826617  |
| wavelet-LHL | glszm      | ZoneEntropy                      | 5.677099759  |
| wavelet-LHL | glszm      | SmallAreaLowGrayLevelEmphasis    | 0.009530077  |
| wavelet-LHL | ngtdm      | Coarseness                       | 0.015670223  |
| wavelet-LHL | ngtdm      | Complexity                       | 1215.532906  |
| wavelet-LHL | ngtdm      | Strength                         | 7.03445582   |
| wavelet-LHL | ngtdm      | Contrast                         | 0.121440613  |
| wavelet-LHL | ngtdm      | Busyness                         | 0.093446374  |
| wavelet-LHH | gldm       | GrayLevelVariance                | 8.900930389  |
| wavelet-LHH | gldm       | HighGrayLevelEmphasis            | 189.8545861  |
| wavelet-LHH | gldm       | DependenceEntropy                | 5.982149519  |
| wavelet-LHH | gldm       | DependenceNonUniformity          | 63.21029083  |

|             |            |                                      |              |
|-------------|------------|--------------------------------------|--------------|
| wavelet-LHH | gldm       | GrayLevelNonUniformity               | 50.82550336  |
| wavelet-LHH | gldm       | SmallDependenceEmphasis              | 0.299870257  |
| wavelet-LHH | gldm       | SmallDependenceHighGrayLevelEmphasis | 60.40180357  |
| wavelet-LHH | gldm       | DependenceNonUniformityNormalized    | 0.141410047  |
| wavelet-LHH | gldm       | LargeDependenceEmphasis              | 23.41610738  |
| wavelet-LHH | gldm       | LargeDependenceLowGrayLevelEmphasis  | 0.133256389  |
| wavelet-LHH | gldm       | DependenceVariance                   | 8.489207193  |
| wavelet-LHH | gldm       | LargeDependenceHighGrayLevelEmphasis | 4349.174497  |
| wavelet-LHH | gldm       | SmallDependenceLowGrayLevelEmphasis  | 0.004844935  |
| wavelet-LHH | gldm       | LowGrayLevelEmphasis                 | 0.009012376  |
| wavelet-LHH | glcm       | JointAverage                         | 13.51473639  |
| wavelet-LHH | glcm       | SumAverage                           | 27.02947278  |
| wavelet-LHH | glcm       | JointEntropy                         | 6.37988336   |
| wavelet-LHH | glcm       | ClusterShade                         | -9.018924886 |
| wavelet-LHH | glcm       | MaximumProbability                   | 0.057364071  |
| wavelet-LHH | glcm       | ldmn                                 | 0.976400394  |
| wavelet-LHH | glcm       | JointEnergy                          | 0.01947692   |
| wavelet-LHH | glcm       | Contrast                             | 15.13342888  |
| wavelet-LHH | glcm       | DifferenceEntropy                    | 3.040820807  |
| wavelet-LHH | glcm       | InverseVariance                      | 0.312954628  |
| wavelet-LHH | glcm       | DifferenceVariance                   | 6.998833482  |
| wavelet-LHH | glcm       | ldn                                  | 0.902738763  |
| wavelet-LHH | glcm       | ldm                                  | 0.32827993   |
| wavelet-LHH | glcm       | Correlation                          | -0.02360025  |
| wavelet-LHH | glcm       | Autocorrelation                      | 182.4518346  |
| wavelet-LHH | glcm       | SumEntropy                           | 3.81888808   |
| wavelet-LHH | glcm       | SumSquares                           | 7.369106277  |
| wavelet-LHH | glcm       | ClusterProminence                    | 1039.096147  |
| wavelet-LHH | glcm       | lmc2                                 | 0.729428866  |
| wavelet-LHH | glcm       | lmc1                                 | -0.113973417 |
| wavelet-LHH | glcm       | DifferenceAverage                    | 2.820703066  |
| wavelet-LHH | glcm       | ld                                   | 0.407511713  |
| wavelet-LHH | glcm       | ClusterTendency                      | 14.34299623  |
| wavelet-LHH | firstorder | InterquartileRange                   | 73.58047761  |
| wavelet-LHH | firstorder | Skewness                             | -0.168032383 |
| wavelet-LHH | firstorder | Uniformity                           | 0.113703587  |
| wavelet-LHH | firstorder | Median                               | 0.386422313  |
| wavelet-LHH | firstorder | Energy                               | 2471665.431  |
| wavelet-LHH | firstorder | RobustMeanAbsoluteDeviation          | 32.2770176   |
| wavelet-LHH | firstorder | MeanAbsoluteDeviation                | 53.83036157  |
| wavelet-LHH | firstorder | TotalEnergy                          | 66734966.64  |
| wavelet-LHH | firstorder | Maximum                              | 258.5691027  |
| wavelet-LHH | firstorder | RootMeanSquared                      | 74.36029092  |
| wavelet-LHH | firstorder | 90Percentile                         | 87.67552518  |
| wavelet-LHH | firstorder | Minimum                              | -313.5084305 |
| wavelet-LHH | firstorder | Entropy                              | 3.523835329  |
| wavelet-LHH | firstorder | Range                                | 572.0775332  |
| wavelet-LHH | firstorder | Variance                             | 5526.383498  |
| wavelet-LHH | firstorder | 10Percentile                         | -93.04949676 |
| wavelet-LHH | firstorder | Kurtosis                             | 4.618662191  |
| wavelet-LHH | firstorder | Mean                                 | -1.751961145 |
| wavelet-LHH | gllm       | ShortRunLowGrayLevelEmphasis         | 0.008982583  |

|             |       |                                      |             |
|-------------|-------|--------------------------------------|-------------|
| wavelet-LHH | glrlm | GrayLevelVariance                    | 9.760535849 |
| wavelet-LHH | glrlm | LowGrayLevelRunEmphasis              | 0.009429495 |
| wavelet-LHH | glrlm | GrayLevelNonUniformityNormalized     | 0.104590891 |
| wavelet-LHH | glrlm | RunVariance                          | 0.167470266 |
| wavelet-LHH | glrlm | GrayLevelNonUniformity               | 41.61105081 |
| wavelet-LHH | glrlm | LongRunEmphasis                      | 1.431978247 |
| wavelet-LHH | glrlm | ShortRunHighGrayLevelEmphasis        | 175.7736047 |
| wavelet-LHH | glrlm | RunLengthNonUniformity               | 324.4815056 |
| wavelet-LHH | glrlm | ShortRunEmphasis                     | 0.921276036 |
| wavelet-LHH | glrlm | LongRunHighGrayLevelEmphasis         | 270.4094951 |
| wavelet-LHH | glrlm | RunPercentage                        | 0.889864051 |
| wavelet-LHH | glrlm | LongRunLowGrayLevelEmphasis          | 0.011866145 |
| wavelet-LHH | glrlm | RunEntropy                           | 4.077533754 |
| wavelet-LHH | glrlm | HighGrayLevelRunEmphasis             | 190.3966646 |
| wavelet-LHH | glrlm | RunLengthNonUniformityNormalized     | 0.815213664 |
| wavelet-LHH | glszm | GrayLevelVariance                    | 21.89786981 |
| wavelet-LHH | glszm | ZoneVariance                         | 108.542766  |
| wavelet-LHH | glszm | GrayLevelNonUniformityNormalized     | 0.067041522 |
| wavelet-LHH | glszm | SizeZoneNonUniformityNormalized      | 0.535791522 |
| wavelet-LHH | glszm | SizeZoneNonUniformity                | 72.86764706 |
| wavelet-LHH | glszm | GrayLevelNonUniformity               | 9.117647059 |
| wavelet-LHH | glszm | LargeAreaEmphasis                    | 119.3455882 |
| wavelet-LHH | glszm | SmallAreaHighGrayLevelEmphasis       | 156.8329011 |
| wavelet-LHH | glszm | ZonePercentage                       | 0.304250559 |
| wavelet-LHH | glszm | LargeAreaLowGrayLevelEmphasis        | 0.659186876 |
| wavelet-LHH | glszm | LargeAreaHighGrayLevelEmphasis       | 22473.06618 |
| wavelet-LHH | glszm | HighGrayLevelZoneEmphasis            | 199.6102941 |
| wavelet-LHH | glszm | SmallAreaEmphasis                    | 0.759221182 |
| wavelet-LHH | glszm | LowGrayLevelZoneEmphasis             | 0.016284131 |
| wavelet-LHH | glszm | ZoneEntropy                          | 5.140859527 |
| wavelet-LHH | glszm | SmallAreaLowGrayLevelEmphasis        | 0.014494721 |
| wavelet-LHH | ngtdm | Coarseness                           | 0.015011938 |
| wavelet-LHH | ngtdm | Complexity                           | 410.6640082 |
| wavelet-LHH | ngtdm | Strength                             | 2.065750623 |
| wavelet-LHH | ngtdm | Contrast                             | 0.097781323 |
| wavelet-LHH | ngtdm | Busyness                             | 0.195034464 |
| wavelet-LLH | gldm  | GrayLevelVariance                    | 28.14089455 |
| wavelet-LLH | gldm  | HighGrayLevelEmphasis                | 511.8456376 |
| wavelet-LLH | gldm  | DependenceEntropy                    | 6.213344962 |
| wavelet-LLH | gldm  | DependenceNonUniformity              | 90.19910515 |
| wavelet-LLH | gldm  | GrayLevelNonUniformity               | 29.84563758 |
| wavelet-LLH | gldm  | SmallDependenceEmphasis              | 0.385986525 |
| wavelet-LLH | gldm  | SmallDependenceHighGrayLevelEmphasis | 196.3193552 |
| wavelet-LLH | gldm  | DependenceNonUniformityNormalized    | 0.201787707 |
| wavelet-LLH | gldm  | LargeDependenceEmphasis              | 10.97762864 |
| wavelet-LLH | gldm  | LargeDependenceLowGrayLevelEmphasis  | 0.025273016 |
| wavelet-LLH | gldm  | DependenceVariance                   | 3.244998974 |
| wavelet-LLH | gldm  | LargeDependenceHighGrayLevelEmphasis | 5674.230425 |
| wavelet-LLH | gldm  | SmallDependenceLowGrayLevelEmphasis  | 0.003446747 |
| wavelet-LLH | gldm  | LowGrayLevelEmphasis                 | 0.004814202 |
| wavelet-LLH | glcm  | JointAverage                         | 21.88444058 |
| wavelet-LLH | glcm  | SumAverage                           | 43.76888116 |

|             |            |                                  |              |
|-------------|------------|----------------------------------|--------------|
| wavelet-LLH | glcm       | JointEntropy                     | 7.455729743  |
| wavelet-LLH | glcm       | ClusterShade                     | 149.0687566  |
| wavelet-LLH | glcm       | MaximumProbability               | 0.029439746  |
| wavelet-LLH | glcm       | Idmn                             | 0.979072055  |
| wavelet-LLH | glcm       | JointEnergy                      | 0.008558775  |
| wavelet-LLH | glcm       | Contrast                         | 37.27876408  |
| wavelet-LLH | glcm       | DifferenceEntropy                | 3.560674744  |
| wavelet-LLH | glcm       | InverseVariance                  | 0.252900613  |
| wavelet-LLH | glcm       | DifferenceVariance               | 17.49660768  |
| wavelet-LLH | glcm       | Idn                              | 0.909317858  |
| wavelet-LLH | glcm       | Idm                              | 0.239721317  |
| wavelet-LLH | glcm       | Correlation                      | 0.198011627  |
| wavelet-LLH | glcm       | Autocorrelation                  | 483.6425926  |
| wavelet-LLH | glcm       | SumEntropy                       | 4.673290679  |
| wavelet-LLH | glcm       | SumSquares                       | 23.3474076   |
| wavelet-LLH | glcm       | ClusterProminence                | 19146.32749  |
| wavelet-LLH | glcm       | Imc2                             | 0.889346748  |
| wavelet-LLH | glcm       | Imc1                             | -0.193720213 |
| wavelet-LLH | glcm       | DifferenceAverage                | 4.347426948  |
| wavelet-LLH | glcm       | Id                               | 0.325963503  |
| wavelet-LLH | glcm       | ClusterTendency                  | 56.11086631  |
| wavelet-LLH | firstorder | InterquartileRange               | 129.230038   |
| wavelet-LLH | firstorder | Skewness                         | 0.29411342   |
| wavelet-LLH | firstorder | Uniformity                       | 0.066768764  |
| wavelet-LLH | firstorder | Median                           | -37.39060643 |
| wavelet-LLH | firstorder | Energy                           | 8439435.809  |
| wavelet-LLH | firstorder | RobustMeanAbsoluteDeviation      | 58.23060357  |
| wavelet-LLH | firstorder | MeanAbsoluteDeviation            | 95.62395653  |
| wavelet-LLH | firstorder | TotalEnergy                      | 227864766.8  |
| wavelet-LLH | firstorder | Maximum                          | 424.3785197  |
| wavelet-LLH | firstorder | RootMeanSquared                  | 137.4051294  |
| wavelet-LLH | firstorder | 90Percentile                     | 112.3330896  |
| wavelet-LLH | firstorder | Minimum                          | -564.8594492 |
| wavelet-LLH | firstorder | Entropy                          | 4.274343159  |
| wavelet-LLH | firstorder | Range                            | 989.2379689  |
| wavelet-LLH | firstorder | Variance                         | 17470.41969  |
| wavelet-LLH | firstorder | 10Percentile                     | -190.2227525 |
| wavelet-LLH | firstorder | Kurtosis                         | 4.882305476  |
| wavelet-LLH | firstorder | Mean                             | -37.54663642 |
| wavelet-LLH | glrlm      | ShortRunLowGrayLevelEmphasis     | 0.004907803  |
| wavelet-LLH | glrlm      | GrayLevelVariance                | 29.43303791  |
| wavelet-LLH | glrlm      | LowGrayLevelRunEmphasis          | 0.00501505   |
| wavelet-LLH | glrlm      | GrayLevelNonUniformityNormalized | 0.06385048   |
| wavelet-LLH | glrlm      | RunVariance                      | 0.089449254  |
| wavelet-LLH | glrlm      | GrayLevelNonUniformity           | 26.59583893  |
| wavelet-LLH | glrlm      | LongRunEmphasis                  | 1.245238196  |
| wavelet-LLH | glrlm      | ShortRunHighGrayLevelEmphasis    | 485.8704368  |
| wavelet-LLH | glrlm      | RunLengthNonUniformity           | 366.3033098  |
| wavelet-LLH | glrlm      | ShortRunEmphasis                 | 0.949886522  |
| wavelet-LLH | glrlm      | LongRunHighGrayLevelEmphasis     | 638.1927865  |
| wavelet-LLH | glrlm      | RunPercentage                    | 0.931509207  |
| wavelet-LLH | glrlm      | LongRunLowGrayLevelEmphasis      | 0.005530883  |

|             |       |                                      |              |
|-------------|-------|--------------------------------------|--------------|
| wavelet-LLH | glrlm | RunEntropy                           | 4.625897589  |
| wavelet-LLH | glrlm | HighGrayLevelRunEmphasis             | 511.6133537  |
| wavelet-LLH | glrlm | RunLengthNonUniformityNormalized     | 0.878316922  |
| wavelet-LLH | glszm | GrayLevelVariance                    | 47.93376731  |
| wavelet-LLH | glszm | ZoneVariance                         | 26.60722992  |
| wavelet-LLH | glszm | GrayLevelNonUniformityNormalized     | 0.046592798  |
| wavelet-LLH | glszm | SizeZoneNonUniformityNormalized      | 0.50166205   |
| wavelet-LLH | glszm | SizeZoneNonUniformity                | 95.31578947  |
| wavelet-LLH | glszm | GrayLevelNonUniformity               | 8.852631579  |
| wavelet-LLH | glszm | LargeAreaEmphasis                    | 32.14210526  |
| wavelet-LLH | glszm | SmallAreaHighGrayLevelEmphasis       | 373.5445203  |
| wavelet-LLH | glszm | ZonePercentage                       | 0.425055928  |
| wavelet-LLH | glszm | LargeAreaLowGrayLevelEmphasis        | 0.069565219  |
| wavelet-LLH | glszm | LargeAreaHighGrayLevelEmphasis       | 16800.24737  |
| wavelet-LLH | glszm | HighGrayLevelZoneEmphasis            | 511.0894737  |
| wavelet-LLH | glszm | SmallAreaEmphasis                    | 0.735639582  |
| wavelet-LLH | glszm | LowGrayLevelZoneEmphasis             | 0.008377737  |
| wavelet-LLH | glszm | ZoneEntropy                          | 5.753471157  |
| wavelet-LLH | glszm | SmallAreaLowGrayLevelEmphasis        | 0.007712134  |
| wavelet-LLH | ngtdm | Coarseness                           | 0.015643045  |
| wavelet-LLH | ngtdm | Complexity                           | 1571.564124  |
| wavelet-LLH | ngtdm | Strength                             | 6.163467551  |
| wavelet-LLH | ngtdm | Contrast                             | 0.167611523  |
| wavelet-LLH | ngtdm | Busyness                             | 0.073735465  |
| wavelet-LLL | gldm  | GrayLevelVariance                    | 333.5294306  |
| wavelet-LLL | gldm  | HighGrayLevelEmphasis                | 4410.080537  |
| wavelet-LLL | gldm  | DependenceEntropy                    | 6.903437499  |
| wavelet-LLL | gldm  | DependenceNonUniformity              | 156.5928412  |
| wavelet-LLL | gldm  | GrayLevelNonUniformity               | 10.82550336  |
| wavelet-LLL | gldm  | SmallDependenceEmphasis              | 0.607754422  |
| wavelet-LLL | gldm  | SmallDependenceHighGrayLevelEmphasis | 2168.701231  |
| wavelet-LLL | gldm  | DependenceNonUniformityNormalized    | 0.350319555  |
| wavelet-LLL | gldm  | LargeDependenceEmphasis              | 6.955257271  |
| wavelet-LLL | gldm  | LargeDependenceLowGrayLevelEmphasis  | 0.003701607  |
| wavelet-LLL | gldm  | DependenceVariance                   | 2.691540421  |
| wavelet-LLL | gldm  | LargeDependenceHighGrayLevelEmphasis | 42759.89262  |
| wavelet-LLL | gldm  | SmallDependenceLowGrayLevelEmphasis  | 0.002531483  |
| wavelet-LLL | gldm  | LowGrayLevelEmphasis                 | 0.00263095   |
| wavelet-LLL | glcm  | JointAverage                         | 68.14545075  |
| wavelet-LLL | glcm  | SumAverage                           | 136.2909015  |
| wavelet-LLL | glcm  | JointEntropy                         | 8.673758117  |
| wavelet-LLL | glcm  | ClusterShade                         | -21465.28656 |
| wavelet-LLL | glcm  | MaximumProbability                   | 0.013760989  |
| wavelet-LLL | glcm  | ldmn                                 | 0.969276592  |
| wavelet-LLL | glcm  | JointEnergy                          | 0.003262141  |
| wavelet-LLL | glcm  | Contrast                             | 260.6150802  |
| wavelet-LLL | glcm  | DifferenceEntropy                    | 4.855691923  |
| wavelet-LLL | glcm  | InverseVariance                      | 0.138263199  |
| wavelet-LLL | glcm  | DifferenceVariance                   | 115.7371478  |
| wavelet-LLL | glcm  | ldn                                  | 0.890829877  |
| wavelet-LLL | glcm  | ldm                                  | 0.136382032  |
| wavelet-LLL | glcm  | Correlation                          | 0.509934566  |



|             |            |                                  |              |
|-------------|------------|----------------------------------|--------------|
| wavelet-LLL | glcm       | Autocorrelation                  | 4782.029321  |
| wavelet-LLL | glcm       | SumEntropy                       | 6.220395221  |
| wavelet-LLL | glcm       | SumSquares                       | 267.9248355  |
| wavelet-LLL | glcm       | ClusterProminence                | 2138913.018  |
| wavelet-LLL | glcm       | Imc2                             | 0.993998413  |
| wavelet-LLL | glcm       | Imc1                             | -0.407930814 |
| wavelet-LLL | glcm       | DifferenceAverage                | 11.77148745  |
| wavelet-LLL | glcm       | Id                               | 0.206657793  |
| wavelet-LLL | glcm       | ClusterTendency                  | 811.0842619  |
| wavelet-LLL | firstorder | InterquartileRange               | 730.7606714  |
| wavelet-LLL | firstorder | Skewness                         | -0.770202129 |
| wavelet-LLL | firstorder | Uniformity                       | 0.024218128  |
| wavelet-LLL | firstorder | Median                           | -234.5487303 |
| wavelet-LLL | firstorder | Energy                           | 152898467.9  |
| wavelet-LLL | firstorder | RobustMeanAbsoluteDeviation      | 296.0849626  |
| wavelet-LLL | firstorder | MeanAbsoluteDeviation            | 384.6969801  |
| wavelet-LLL | firstorder | TotalEnergy                      | 4128258634   |
| wavelet-LLL | firstorder | Maximum                          | 222.0310831  |
| wavelet-LLL | firstorder | RootMeanSquared                  | 584.8544589  |
| wavelet-LLL | firstorder | 90Percentile                     | 122.135387   |
| wavelet-LLL | firstorder | Minimum                          | -1942.005012 |
| wavelet-LLL | firstorder | Entropy                          | 5.701981163  |
| wavelet-LLL | firstorder | Range                            | 2164.036095  |
| wavelet-LLL | firstorder | Variance                         | 208096.0005  |
| wavelet-LLL | firstorder | 10Percentile                     | -1074.658817 |
| wavelet-LLL | firstorder | Kurtosis                         | 2.720863269  |
| wavelet-LLL | firstorder | Mean                             | -366.0037398 |
| wavelet-LLL | glrlm      | ShortRunLowGrayLevelEmphasis     | 0.002728593  |
| wavelet-LLL | glrlm      | GrayLevelVariance                | 333.7048099  |
| wavelet-LLL | glrlm      | LowGrayLevelRunEmphasis          | 0.002734938  |
| wavelet-LLL | glrlm      | GrayLevelNonUniformityNormalized | 0.022954488  |
| wavelet-LLL | glrlm      | RunVariance                      | 0.045933342  |
| wavelet-LLL | glrlm      | GrayLevelNonUniformity           | 9.841216078  |
| wavelet-LLL | glrlm      | LongRunEmphasis                  | 1.133621266  |
| wavelet-LLL | glrlm      | ShortRunHighGrayLevelEmphasis    | 4145.05149   |
| wavelet-LLL | glrlm      | RunLengthNonUniformity           | 395.4978552  |
| wavelet-LLL | glrlm      | ShortRunEmphasis                 | 0.969315992  |
| wavelet-LLL | glrlm      | LongRunHighGrayLevelEmphasis     | 5163.245542  |
| wavelet-LLL | glrlm      | RunPercentage                    | 0.959043194  |
| wavelet-LLL | glrlm      | LongRunLowGrayLevelEmphasis      | 0.002761941  |
| wavelet-LLL | glrlm      | RunEntropy                       | 5.905939906  |
| wavelet-LLL | glrlm      | HighGrayLevelRunEmphasis         | 4334.030074  |
| wavelet-LLL | glrlm      | RunLengthNonUniformityNormalized | 0.922338124  |
| wavelet-LLL | glszm      | GrayLevelVariance                | 307.3321764  |
| wavelet-LLL | glszm      | ZoneVariance                     | 4.698563099  |
| wavelet-LLL | glszm      | GrayLevelNonUniformityNormalized | 0.019019853  |
| wavelet-LLL | glszm      | SizeZoneNonUniformityNormalized  | 0.680063862  |
| wavelet-LLL | glszm      | SizeZoneNonUniformity            | 199.9387755  |
| wavelet-LLL | glszm      | GrayLevelNonUniformity           | 5.591836735  |
| wavelet-LLL | glszm      | LargeAreaEmphasis                | 7.010204082  |
| wavelet-LLL | glszm      | SmallAreaHighGrayLevelEmphasis   | 2895.175622  |
| wavelet-LLL | glszm      | ZonePercentage                   | 0.657718121  |

|             |            |                                      |              |
|-------------|------------|--------------------------------------|--------------|
| wavelet-LLL | glszm      | LargeAreaLowGrayLevelEmphasis        | 0.004910707  |
| wavelet-LLL | glszm      | LargeAreaHighGrayLevelEmphasis       | 42997.59184  |
| wavelet-LLL | glszm      | HighGrayLevelZoneEmphasis            | 3636.70068   |
| wavelet-LLL | glszm      | SmallAreaEmphasis                    | 0.848841276  |
| wavelet-LLL | glszm      | LowGrayLevelZoneEmphasis             | 0.003878408  |
| wavelet-LLL | glszm      | ZoneEntropy                          | 6.432381639  |
| wavelet-LLL | glszm      | SmallAreaLowGrayLevelEmphasis        | 0.003826863  |
| wavelet-LLL | ngtdm      | Coarseness                           | 0.014367445  |
| wavelet-LLL | ngtdm      | Complexity                           | 16343.24778  |
| wavelet-LLL | ngtdm      | Strength                             | 37.48518097  |
| wavelet-LLL | ngtdm      | Contrast                             | 1.070892471  |
| wavelet-LLL | ngtdm      | Busyness                             | 0.014142411  |
| wavelet-HHL | gldm       | GrayLevelVariance                    | 5.390658078  |
| wavelet-HHL | gldm       | HighGrayLevelEmphasis                | 77.9261745   |
| wavelet-HHL | gldm       | DependenceEntropy                    | 5.760973374  |
| wavelet-HHL | gldm       | DependenceNonUniformity              | 59.72035794  |
| wavelet-HHL | gldm       | GrayLevelNonUniformity               | 59.27293065  |
| wavelet-HHL | gldm       | SmallDependenceEmphasis              | 0.266414176  |
| wavelet-HHL | gldm       | SmallDependenceHighGrayLevelEmphasis | 22.1975434   |
| wavelet-HHL | gldm       | DependenceNonUniformityNormalized    | 0.13360259   |
| wavelet-HHL | gldm       | LargeDependenceEmphasis              | 20.95973154  |
| wavelet-HHL | gldm       | LargeDependenceLowGrayLevelEmphasis  | 0.334824563  |
| wavelet-HHL | gldm       | DependenceVariance                   | 5.998238318  |
| wavelet-HHL | gldm       | LargeDependenceHighGrayLevelEmphasis | 1524.825503  |
| wavelet-HHL | gldm       | SmallDependenceLowGrayLevelEmphasis  | 0.008798543  |
| wavelet-HHL | gldm       | LowGrayLevelEmphasis                 | 0.02349969   |
| wavelet-HHL | glcm       | JointAverage                         | 8.532953562  |
| wavelet-HHL | glcm       | SumAverage                           | 17.06590712  |
| wavelet-HHL | glcm       | JointEntropy                         | 5.988467414  |
| wavelet-HHL | glcm       | ClusterShade                         | -0.577116485 |
| wavelet-HHL | glcm       | MaximumProbability                   | 0.053339622  |
| wavelet-HHL | glcm       | Idmn                                 | 0.970557114  |
| wavelet-HHL | glcm       | JointEnergy                          | 0.023210801  |
| wavelet-HHL | glcm       | Contrast                             | 9.633261026  |
| wavelet-HHL | glcm       | DifferenceEntropy                    | 2.738465305  |
| wavelet-HHL | glcm       | InverseVariance                      | 0.361997617  |
| wavelet-HHL | glcm       | DifferenceVariance                   | 4.155873328  |
| wavelet-HHL | glcm       | Idn                                  | 0.888943697  |
| wavelet-HHL | glcm       | Idm                                  | 0.353529858  |
| wavelet-HHL | glcm       | Correlation                          | -0.012991425 |
| wavelet-HHL | glcm       | Autocorrelation                      | 72.74745538  |
| wavelet-HHL | glcm       | SumEntropy                           | 3.57204231   |
| wavelet-HHL | glcm       | SumSquares                           | 4.750100432  |
| wavelet-HHL | glcm       | ClusterProminence                    | 371.2754607  |
| wavelet-HHL | glcm       | Imc2                                 | 0.635321164  |
| wavelet-HHL | glcm       | Imc1                                 | -0.084689722 |
| wavelet-HHL | glcm       | DifferenceAverage                    | 2.317443446  |
| wavelet-HHL | glcm       | Id                                   | 0.429799762  |
| wavelet-HHL | glcm       | ClusterTendency                      | 9.367140703  |
| wavelet-HHL | firstorder | InterquartileRange                   | 69.40339385  |
| wavelet-HHL | firstorder | Skewness                             | -0.019472886 |
| wavelet-HHL | firstorder | Uniformity                           | 0.132601635  |

|             |            |                                  |              |
|-------------|------------|----------------------------------|--------------|
| wavelet-HHL | firstorder | Median                           | -1.278121513 |
| wavelet-HHL | firstorder | Energy                           | 1459730.763  |
| wavelet-HHL | firstorder | RobustMeanAbsoluteDeviation      | 28.61172166  |
| wavelet-HHL | firstorder | MeanAbsoluteDeviation            | 43.66057215  |
| wavelet-HHL | firstorder | TotalEnergy                      | 39412730.6   |
| wavelet-HHL | firstorder | Maximum                          | 202.8851783  |
| wavelet-HHL | firstorder | RootMeanSquared                  | 57.14557655  |
| wavelet-HHL | firstorder | 90Percentile                     | 71.50524496  |
| wavelet-HHL | firstorder | Minimum                          | -195.2337842 |
| wavelet-HHL | firstorder | Entropy                          | 3.224331713  |
| wavelet-HHL | firstorder | Range                            | 398.1189625  |
| wavelet-HHL | firstorder | Variance                         | 3265.325411  |
| wavelet-HHL | firstorder | 10Percentile                     | -64.37753166 |
| wavelet-HHL | firstorder | Kurtosis                         | 3.861909125  |
| wavelet-HHL | firstorder | Mean                             | 0.539915096  |
| wavelet-HHL | glrlm      | ShortRunLowGrayLevelEmphasis     | 0.022909327  |
| wavelet-HHL | glrlm      | GrayLevelVariance                | 5.816472773  |
| wavelet-HHL | glrlm      | LowGrayLevelRunEmphasis          | 0.024341244  |
| wavelet-HHL | glrlm      | GrayLevelNonUniformityNormalized | 0.125337484  |
| wavelet-HHL | glrlm      | RunVariance                      | 0.147969535  |
| wavelet-HHL | glrlm      | GrayLevelNonUniformity           | 49.85858452  |
| wavelet-HHL | glrlm      | LongRunEmphasis                  | 1.416352441  |
| wavelet-HHL | glrlm      | ShortRunHighGrayLevelEmphasis    | 72.23550672  |
| wavelet-HHL | glrlm      | RunLengthNonUniformity           | 320.1984416  |
| wavelet-HHL | glrlm      | ShortRunEmphasis                 | 0.915987661  |
| wavelet-HHL | glrlm      | LongRunHighGrayLevelEmphasis     | 109.110644   |
| wavelet-HHL | glrlm      | RunPercentage                    | 0.889691964  |
| wavelet-HHL | glrlm      | LongRunLowGrayLevelEmphasis      | 0.031241076  |
| wavelet-HHL | glrlm      | RunEntropy                       | 3.782070665  |
| wavelet-HHL | glrlm      | HighGrayLevelRunEmphasis         | 78.44936622  |
| wavelet-HHL | glrlm      | RunLengthNonUniformityNormalized | 0.803697882  |
| wavelet-HHL | glszm      | GrayLevelVariance                | 12.73652991  |
| wavelet-HHL | glszm      | ZoneVariance                     | 142.369183   |
| wavelet-HHL | glszm      | GrayLevelNonUniformityNormalized | 0.092013276  |
| wavelet-HHL | glszm      | SizeZoneNonUniformityNormalized  | 0.523338747  |
| wavelet-HHL | glszm      | SizeZoneNonUniformity            | 62.27731092  |
| wavelet-HHL | glszm      | GrayLevelNonUniformity           | 10.94957983  |
| wavelet-HHL | glszm      | LargeAreaEmphasis                | 156.4789916  |
| wavelet-HHL | glszm      | SmallAreaHighGrayLevelEmphasis   | 63.76310807  |
| wavelet-HHL | glszm      | ZonePercentage                   | 0.266219239  |
| wavelet-HHL | glszm      | LargeAreaLowGrayLevelEmphasis    | 2.391559452  |
| wavelet-HHL | glszm      | LargeAreaHighGrayLevelEmphasis   | 11055.36975  |
| wavelet-HHL | glszm      | HighGrayLevelZoneEmphasis        | 85.48739496  |
| wavelet-HHL | glszm      | SmallAreaEmphasis                | 0.750107713  |
| wavelet-HHL | glszm      | LowGrayLevelZoneEmphasis         | 0.037561159  |
| wavelet-HHL | glszm      | ZoneEntropy                      | 4.768358387  |
| wavelet-HHL | glszm      | SmallAreaLowGrayLevelEmphasis    | 0.026881288  |
| wavelet-HHL | ngtdm      | Coarseness                       | 0.015005551  |
| wavelet-HHL | ngtdm      | Complexity                       | 177.334765   |
| wavelet-HHL | ngtdm      | Strength                         | 1.104392915  |
| wavelet-HHL | ngtdm      | Contrast                         | 0.080482087  |
| wavelet-HHL | ngtdm      | Busyness                         | 0.426935189  |

|             |            |                                      |              |
|-------------|------------|--------------------------------------|--------------|
| wavelet-HLH | gldm       | GrayLevelVariance                    | 7.22307804   |
| wavelet-HLH | gldm       | HighGrayLevelEmphasis                | 118.4854586  |
| wavelet-HLH | gldm       | DependenceEntropy                    | 6.046343872  |
| wavelet-HLH | gldm       | DependenceNonUniformity              | 52.37360179  |
| wavelet-HLH | gldm       | GrayLevelNonUniformity               | 58.54809843  |
| wavelet-HLH | gldm       | SmallDependenceEmphasis              | 0.258630669  |
| wavelet-HLH | gldm       | SmallDependenceHighGrayLevelEmphasis | 34.66433979  |
| wavelet-HLH | gldm       | DependenceNonUniformityNormalized    | 0.117166894  |
| wavelet-HLH | gldm       | LargeDependenceEmphasis              | 31.55033557  |
| wavelet-HLH | gldm       | LargeDependenceLowGrayLevelEmphasis  | 0.305666411  |
| wavelet-HLH | gldm       | DependenceVariance                   | 11.18944592  |
| wavelet-HLH | gldm       | LargeDependenceHighGrayLevelEmphasis | 3504.369128  |
| wavelet-HLH | gldm       | SmallDependenceLowGrayLevelEmphasis  | 0.006505958  |
| wavelet-HLH | gldm       | LowGrayLevelEmphasis                 | 0.014906033  |
| wavelet-HLH | glcm       | JointAverage                         | 10.54705338  |
| wavelet-HLH | glcm       | SumAverage                           | 21.09410677  |
| wavelet-HLH | glcm       | JointEntropy                         | 6.094807792  |
| wavelet-HLH | glcm       | ClusterShade                         | 0.832386651  |
| wavelet-HLH | glcm       | MaximumProbability                   | 0.071663782  |
| wavelet-HLH | glcm       | ldmn                                 | 0.974343975  |
| wavelet-HLH | glcm       | JointEnergy                          | 0.026181402  |
| wavelet-HLH | glcm       | Contrast                             | 12.89711447  |
| wavelet-HLH | glcm       | DifferenceEntropy                    | 2.920829005  |
| wavelet-HLH | glcm       | InverseVariance                      | 0.348117474  |
| wavelet-HLH | glcm       | DifferenceVariance                   | 6.508841199  |
| wavelet-HLH | glcm       | ldn                                  | 0.902694289  |
| wavelet-HLH | glcm       | ldm                                  | 0.375306336  |
| wavelet-HLH | glcm       | Correlation                          | -0.019235159 |
| wavelet-HLH | glcm       | Autocorrelation                      | 111.1146817  |
| wavelet-HLH | glcm       | SumEntropy                           | 3.702721011  |
| wavelet-HLH | glcm       | SumSquares                           | 6.321433984  |
| wavelet-HLH | glcm       | ClusterProminence                    | 821.3275297  |
| wavelet-HLH | glcm       | lmc2                                 | 0.711702536  |
| wavelet-HLH | glcm       | lmc1                                 | -0.111155071 |
| wavelet-HLH | glcm       | DifferenceAverage                    | 2.505266886  |
| wavelet-HLH | glcm       | ld                                   | 0.445247073  |
| wavelet-HLH | glcm       | ClusterTendency                      | 12.38862147  |
| wavelet-HLH | firstorder | InterquartileRange                   | 64.91954904  |
| wavelet-HLH | firstorder | Skewness                             | 0.091677059  |
| wavelet-HLH | firstorder | Uniformity                           | 0.130980086  |
| wavelet-HLH | firstorder | Median                               | 1.911791865  |
| wavelet-HLH | firstorder | Energy                               | 1985839.129  |
| wavelet-HLH | firstorder | RobustMeanAbsoluteDeviation          | 28.9367634   |
| wavelet-HLH | firstorder | MeanAbsoluteDeviation                | 48.00846565  |
| wavelet-HLH | firstorder | TotalEnergy                          | 53617656.49  |
| wavelet-HLH | firstorder | Maximum                              | 254.9257375  |
| wavelet-HLH | firstorder | RootMeanSquared                      | 66.65278036  |
| wavelet-HLH | firstorder | 90Percentile                         | 74.53776221  |
| wavelet-HLH | firstorder | Minimum                              | -235.7113267 |
| wavelet-HLH | firstorder | Entropy                              | 3.354009558  |
| wavelet-HLH | firstorder | Range                                | 490.6370642  |
| wavelet-HLH | firstorder | Variance                             | 4442.064963  |

|             |            |                                  |              |
|-------------|------------|----------------------------------|--------------|
| wavelet-HLH | firstorder | 10Percentile                     | -76.56205723 |
| wavelet-HLH | firstorder | Kurtosis                         | 4.864692374  |
| wavelet-HLH | firstorder | Mean                             | 0.726750786  |
| wavelet-HLH | glrlm      | ShortRunLowGrayLevelEmphasis     | 0.014709032  |
| wavelet-HLH | glrlm      | GrayLevelVariance                | 8.065905156  |
| wavelet-HLH | glrlm      | LowGrayLevelRunEmphasis          | 0.015693438  |
| wavelet-HLH | glrlm      | GrayLevelNonUniformityNormalized | 0.117831735  |
| wavelet-HLH | glrlm      | RunVariance                      | 0.209282713  |
| wavelet-HLH | glrlm      | GrayLevelNonUniformity           | 45.56698942  |
| wavelet-HLH | glrlm      | LongRunEmphasis                  | 1.550320573  |
| wavelet-HLH | glrlm      | ShortRunHighGrayLevelEmphasis    | 108.4077649  |
| wavelet-HLH | glrlm      | RunLengthNonUniformity           | 300.1889963  |
| wavelet-HLH | glrlm      | ShortRunEmphasis                 | 0.90169998   |
| wavelet-HLH | glrlm      | LongRunHighGrayLevelEmphasis     | 180.9765267  |
| wavelet-HLH | glrlm      | RunPercentage                    | 0.864911375  |
| wavelet-HLH | glrlm      | LongRunLowGrayLevelEmphasis      | 0.021102433  |
| wavelet-HLH | glrlm      | RunEntropy                       | 4.019260165  |
| wavelet-HLH | glrlm      | HighGrayLevelRunEmphasis         | 119.4810567  |
| wavelet-HLH | glrlm      | RunLengthNonUniformityNormalized | 0.775289021  |
| wavelet-HLH | glszm      | GrayLevelVariance                | 17.549056    |
| wavelet-HLH | glszm      | ZoneVariance                     | 128.500224   |
| wavelet-HLH | glszm      | GrayLevelNonUniformityNormalized | 0.080832     |
| wavelet-HLH | glszm      | SizeZoneNonUniformityNormalized  | 0.465088     |
| wavelet-HLH | glszm      | SizeZoneNonUniformity            | 58.136       |
| wavelet-HLH | glszm      | GrayLevelNonUniformity           | 10.104       |
| wavelet-HLH | glszm      | LargeAreaEmphasis                | 141.288      |
| wavelet-HLH | glszm      | SmallAreaHighGrayLevelEmphasis   | 99.63268015  |
| wavelet-HLH | glszm      | ZonePercentage                   | 0.279642058  |
| wavelet-HLH | glszm      | LargeAreaLowGrayLevelEmphasis    | 1.313522357  |
| wavelet-HLH | glszm      | LargeAreaHighGrayLevelEmphasis   | 15915.832    |
| wavelet-HLH | glszm      | HighGrayLevelZoneEmphasis        | 132.296      |
| wavelet-HLH | glszm      | SmallAreaEmphasis                | 0.707904197  |
| wavelet-HLH | glszm      | LowGrayLevelZoneEmphasis         | 0.025511712  |
| wavelet-HLH | glszm      | ZoneEntropy                      | 5.089650189  |
| wavelet-HLH | glszm      | SmallAreaLowGrayLevelEmphasis    | 0.020321052  |
| wavelet-HLH | ngtdm      | Coarseness                       | 0.015897543  |
| wavelet-HLH | ngtdm      | Complexity                       | 319.9986043  |
| wavelet-HLH | ngtdm      | Strength                         | 1.915661921  |
| wavelet-HLH | ngtdm      | Contrast                         | 0.076518571  |
| wavelet-HLH | ngtdm      | Busyness                         | 0.237507416  |

| Image type | Feature Class | Feature Name                         |                                                                                                                                                                                                                                                                                                                                                                                                                   |
|------------|---------------|--------------------------------------|-------------------------------------------------------------------------------------------------------------------------------------------------------------------------------------------------------------------------------------------------------------------------------------------------------------------------------------------------------------------------------------------------------------------|
| general    | info          | BoundingBox                          | 2: RTSTRUCT: C99-DNU_A_segment_LLL ITV<br>(0, 0, 1, 4, 4, 3)                                                                                                                                                                                                                                                                                                                                                      |
| general    | info          | EnabledImageTypes                    | {u'Original': {}, u'Wavelet': {}}                                                                                                                                                                                                                                                                                                                                                                                 |
|            |               |                                      | {'distances': [1], 'additionalInfo': True, 'force2D': False, 'interpolator': 'sitkBSpline', 'resampledPixelSpacing': [3.0], 'label': 1, 'normalizeScale': 1, 'normalize': False, 'force2Ddimension': 0, 'removeOutliers': None, 'minimumROISize': None, u'binWidth': 25.0, 'minimumROIDimensions': 1, u'correctMask': True, 'preCrop': False, u'symmetricalGLCM': True, 'resegmentRange': None, 'padDistance': 5} |
| general    | info          | GeneralSettings                      | d735430f2299ab8fbe60722a980b096311fa749                                                                                                                                                                                                                                                                                                                                                                           |
| general    | info          | ImageHash                            | 9                                                                                                                                                                                                                                                                                                                                                                                                                 |
| general    | info          | ImageSpacing                         | (0.9765624999999998, 0.9765624999999998, 1.9999999999999999)                                                                                                                                                                                                                                                                                                                                                      |
| general    | info          | MaskHash                             | d2e61c6330d19aa1792d5534c5cb87343b48cd4                                                                                                                                                                                                                                                                                                                                                                           |
| general    | info          | NumpyVersion                         | f                                                                                                                                                                                                                                                                                                                                                                                                                 |
| general    | info          | PyWaveletVersion                     | 1.13.1                                                                                                                                                                                                                                                                                                                                                                                                            |
| general    | info          | SimpleITKVersion                     | 0.5.2                                                                                                                                                                                                                                                                                                                                                                                                             |
| general    | info          | Version                              | 1.1.0                                                                                                                                                                                                                                                                                                                                                                                                             |
| general    | info          | VolumeNum                            | 1.3.0.post102+g1b0eb74                                                                                                                                                                                                                                                                                                                                                                                            |
| general    | info          | VoxelNum                             | 1                                                                                                                                                                                                                                                                                                                                                                                                                 |
| original   | shape         | Maximum3DDiameter                    | 19                                                                                                                                                                                                                                                                                                                                                                                                                |
| original   | shape         | Maximum2DDiameterSlice               | 11.22497216                                                                                                                                                                                                                                                                                                                                                                                                       |
| original   | shape         | Sphericity                           | 9.486832981                                                                                                                                                                                                                                                                                                                                                                                                       |
| original   | shape         | MinorAxis                            | 0.975655024                                                                                                                                                                                                                                                                                                                                                                                                       |
| original   | shape         | Elongation                           | 8.411277122                                                                                                                                                                                                                                                                                                                                                                                                       |
| original   | shape         | SurfaceVolumeRatio                   | 0.690844849                                                                                                                                                                                                                                                                                                                                                                                                       |
| original   | shape         | Volume                               | 0.61917781                                                                                                                                                                                                                                                                                                                                                                                                        |
| original   | shape         | MajorAxis                            | 513                                                                                                                                                                                                                                                                                                                                                                                                               |
| original   | shape         | SurfaceArea                          | 12.17534897                                                                                                                                                                                                                                                                                                                                                                                                       |
| original   | shape         | Flatness                             | 317.6382168                                                                                                                                                                                                                                                                                                                                                                                                       |
| original   | shape         | LeastAxis                            | 0.561116505                                                                                                                                                                                                                                                                                                                                                                                                       |
| original   | shape         | Maximum2DDiameterColumn              | 6.831789263                                                                                                                                                                                                                                                                                                                                                                                                       |
| original   | shape         | Maximum2DDiameterRow                 | 9                                                                                                                                                                                                                                                                                                                                                                                                                 |
| original   | gldm          | GrayLevelVariance                    | 9.486832981                                                                                                                                                                                                                                                                                                                                                                                                       |
| original   | gldm          | HighGrayLevelEmphasis                | 149.734072                                                                                                                                                                                                                                                                                                                                                                                                        |
| original   | gldm          | DependenceEntropy                    | 681.1578947                                                                                                                                                                                                                                                                                                                                                                                                       |
| original   | gldm          | DependenceNonUniformity              | 3.93213804                                                                                                                                                                                                                                                                                                                                                                                                        |
| original   | gldm          | GrayLevelNonUniformity               | 12.68421053                                                                                                                                                                                                                                                                                                                                                                                                       |
| original   | gldm          | SmallDependenceEmphasis              | 1.315789474                                                                                                                                                                                                                                                                                                                                                                                                       |
| original   | gldm          | SmallDependenceHighGrayLevelEmphasis | 0.842105263                                                                                                                                                                                                                                                                                                                                                                                                       |
| original   | gldm          | DependenceNonUniformityNormalized    | 546.9473684                                                                                                                                                                                                                                                                                                                                                                                                       |
| original   | gldm          | LargeDependenceEmphasis              | 0.667590028                                                                                                                                                                                                                                                                                                                                                                                                       |
| original   | gldm          | LargeDependenceLowGrayLevelEmphasis  | 1.631578947                                                                                                                                                                                                                                                                                                                                                                                                       |
| original   | gldm          | DependenceVariance                   | 0.060767345                                                                                                                                                                                                                                                                                                                                                                                                       |
| original   | gldm          | LargeDependenceHighGrayLevelEmphasis | 0.166204986                                                                                                                                                                                                                                                                                                                                                                                                       |
| original   | gldm          | SmallDependenceLowGrayLevelEmphasis  | 1218                                                                                                                                                                                                                                                                                                                                                                                                              |
|            |               |                                      | 0.056573266                                                                                                                                                                                                                                                                                                                                                                                                       |

|          |            |                                  |              |
|----------|------------|----------------------------------|--------------|
| original | gldm       | LowGrayLevelEmphasis             | 0.057412082  |
| original | glcm       | JointAverage                     | 25.02336691  |
| original | glcm       | SumAverage                       | 50.04673382  |
| original | glcm       | JointEntropy                     | 3.728977219  |
| original | glcm       | ClusterShade                     | -1034.49243  |
| original | glcm       | MaximumProbability               | 0.088951326  |
| original | glcm       | Idmn                             | 0.86225623   |
| original | glcm       | JointEnergy                      | 0.081283057  |
| original | glcm       | Contrast                         | 321.7721195  |
| original | glcm       | DifferenceEntropy                | 2.660320875  |
| original | glcm       | InverseVariance                  | 0.058530655  |
| original | glcm       | DifferenceVariance               | 86.22358328  |
| original | glcm       | Idn                              | 0.754025678  |
| original | glcm       | Idm                              | 0.055576846  |
| original | glcm       | Correlation                      | -0.113643892 |
| original | glcm       | Autocorrelation                  | 616.0647852  |
| original | glcm       | SumEntropy                       | 2.692438757  |
| original | glcm       | SumSquares                       | 143.1672292  |
| original | glcm       | ClusterProminence                | 151665.674   |
| original | glcm       | Imc2                             | 0.998862525  |
| original | glcm       | Imc1                             | -0.915709923 |
| original | glcm       | DifferenceAverage                | 15.00477023  |
| original | glcm       | Id                               | 0.122501338  |
| original | glcm       | ClusterTendency                  | 250.8967973  |
| original | firstorder | InterquartileRange               | 506.5        |
| original | firstorder | Skewness                         | 0.000638871  |
| original | firstorder | Uniformity                       | 0.069252078  |
| original | firstorder | Median                           | -370         |
| original | firstorder | Energy                           | 4272857      |
| original | firstorder | RobustMeanAbsoluteDeviation      | 201.0577778  |
| original | firstorder | MeanAbsoluteDeviation            | 257.1966759  |
| original | firstorder | TotalEnergy                      | 115367139    |
| original | firstorder | Maximum                          | 89           |
| original | firstorder | RootMeanSquared                  | 474.2227436  |
| original | firstorder | 90Percentile                     | 53.6         |
| original | firstorder | Minimum                          | -902         |
| original | firstorder | Entropy                          | 3.93213804   |
| original | firstorder | Range                            | 991          |
| original | firstorder | Variance                         | 92199.56233  |
| original | firstorder | 10Percentile                     | -717.4       |
| original | firstorder | Kurtosis                         | 1.867965855  |
| original | firstorder | Mean                             | -364.2631579 |
| original | glrlm      | ShortRunLowGrayLevelEmphasis     | 0.057823323  |
| original | glrlm      | GrayLevelVariance                | 148.9497229  |
| original | glrlm      | LowGrayLevelRunEmphasis          | 0.057857378  |
| original | glrlm      | GrayLevelNonUniformityNormalized | 0.069044256  |
| original | glrlm      | RunVariance                      | 0.008072175  |
| original | glrlm      | GrayLevelNonUniformity           | 1.301394512  |
| original | glrlm      | LongRunEmphasis                  | 1.025641026  |
| original | glrlm      | ShortRunHighGrayLevelEmphasis    | 674.2660819  |
| original | glrlm      | RunLengthNonUniformity           | 18.55555556  |
| original | glrlm      | ShortRunEmphasis                 | 0.993589744  |
| original | glrlm      | LongRunHighGrayLevelEmphasis     | 701.5096716  |
| original | glrlm      | RunPercentage                    | 0.991902834  |

|             |       |                                      |             |
|-------------|-------|--------------------------------------|-------------|
| original    | glrlm | LongRunLowGrayLevelEmphasis          | 0.057993596 |
| original    | glrlm | RunEntropy                           | 3.934532615 |
| original    | glrlm | HighGrayLevelRunEmphasis             | 679.7147998 |
| original    | glrlm | RunLengthNonUniformityNormalized     | 0.983855651 |
| original    | glszm | GrayLevelVariance                    | 140.3806228 |
| original    | glszm | ZoneVariance                         | 0.103806228 |
| original    | glszm | GrayLevelNonUniformityNormalized     | 0.065743945 |
| original    | glszm | SizeZoneNonUniformityNormalized      | 0.792387543 |
| original    | glszm | SizeZoneNonUniformity                | 13.47058824 |
| original    | glszm | GrayLevelNonUniformity               | 1.117647059 |
| original    | glszm | LargeAreaEmphasis                    | 1.352941176 |
| original    | glszm | SmallAreaHighGrayLevelEmphasis       | 586.2941176 |
| original    | glszm | ZonePercentage                       | 0.894736842 |
| original    | glszm | LargeAreaLowGrayLevelEmphasis        | 0.065416445 |
| original    | glszm | LargeAreaHighGrayLevelEmphasis       | 961.2941176 |
| original    | glszm | HighGrayLevelZoneEmphasis            | 661.2941176 |
| original    | glszm | SmallAreaEmphasis                    | 0.911764706 |
| original    | glszm | LowGrayLevelZoneEmphasis             | 0.063541445 |
| original    | glszm | ZoneEntropy                          | 3.969815782 |
| original    | glszm | SmallAreaLowGrayLevelEmphasis        | 0.063072695 |
| original    | ngtdm | Coarseness                           | 0.063552832 |
| original    | ngtdm | Complexity                           | 3029.224044 |
| original    | ngtdm | Strength                             | 44.83587507 |
| original    | ngtdm | Contrast                             | 13.7159668  |
| original    | ngtdm | Busyness                             | 0.068822251 |
| wavelet-HHH | gldm  | GrayLevelVariance                    | 15.58448753 |
| wavelet-HHH | gldm  | HighGrayLevelEmphasis                | 102.3684211 |
| wavelet-HHH | gldm  | DependenceEntropy                    | 3.40582225  |
| wavelet-HHH | gldm  | DependenceNonUniformity              | 6.789473684 |
| wavelet-HHH | gldm  | GrayLevelNonUniformity               | 2.894736842 |
| wavelet-HHH | gldm  | SmallDependenceEmphasis              | 0.486842105 |
| wavelet-HHH | gldm  | SmallDependenceHighGrayLevelEmphasis | 51.76315789 |
| wavelet-HHH | gldm  | DependenceNonUniformityNormalized    | 0.35734072  |
| wavelet-HHH | gldm  | LargeDependenceEmphasis              | 5.421052632 |
| wavelet-HHH | gldm  | LargeDependenceLowGrayLevelEmphasis  | 0.138214    |
| wavelet-HHH | gldm  | DependenceVariance                   | 1.207756233 |
| wavelet-HHH | gldm  | LargeDependenceHighGrayLevelEmphasis | 456.3684211 |
| wavelet-HHH | gldm  | SmallDependenceLowGrayLevelEmphasis  | 0.07039663  |
| wavelet-HHH | gldm  | LowGrayLevelEmphasis                 | 0.076558788 |
| wavelet-HHH | glcm  | JointAverage                         | 8.995054945 |
| wavelet-HHH | glcm  | SumAverage                           | 17.99010989 |
| wavelet-HHH | glcm  | JointEntropy                         | 3.584776975 |
| wavelet-HHH | glcm  | ClusterShade                         | 16.96816036 |
| wavelet-HHH | glcm  | MaximumProbability                   | 0.145239483 |
| wavelet-HHH | glcm  | Idmn                                 | 0.918638678 |
| wavelet-HHH | glcm  | JointEnergy                          | 0.096409421 |
| wavelet-HHH | glcm  | Contrast                             | 33.3519203  |
| wavelet-HHH | glcm  | DifferenceEntropy                    | 2.383148318 |
| wavelet-HHH | glcm  | InverseVariance                      | 0.182258213 |
| wavelet-HHH | glcm  | DifferenceVariance                   | 10.05605767 |
| wavelet-HHH | glcm  | Idn                                  | 0.818943934 |
| wavelet-HHH | glcm  | Idm                                  | 0.226498082 |
| wavelet-HHH | glcm  | Correlation                          | 0.030661644 |
| wavelet-HHH | glcm  | Autocorrelation                      | 81.24191364 |



|             |            |                                  |              |
|-------------|------------|----------------------------------|--------------|
| wavelet-HHH | glcm       | SumEntropy                       | 2.519576763  |
| wavelet-HHH | glcm       | SumSquares                       | 16.61986713  |
| wavelet-HHH | glcm       | ClusterProminence                | 3250.202441  |
| wavelet-HHH | glcm       | Imc2                             | 0.986112496  |
| wavelet-HHH | glcm       | Imc1                             | -0.731845212 |
| wavelet-HHH | glcm       | DifferenceAverage                | 4.508175158  |
| wavelet-HHH | glcm       | Id                               | 0.316693214  |
| wavelet-HHH | glcm       | ClusterTendency                  | 33.12754823  |
| wavelet-HHH | firstorder | InterquartileRange               | 91.1145781   |
| wavelet-HHH | firstorder | Skewness                         | 0.017656069  |
| wavelet-HHH | firstorder | Uniformity                       | 0.152354571  |
| wavelet-HHH | firstorder | Median                           | -0.863205488 |
| wavelet-HHH | firstorder | Energy                           | 196161.9134  |
| wavelet-HHH | firstorder | RobustMeanAbsoluteDeviation      | 49.44278771  |
| wavelet-HHH | firstorder | MeanAbsoluteDeviation            | 77.38235682  |
| wavelet-HHH | firstorder | TotalEnergy                      | 5296371.661  |
| wavelet-HHH | firstorder | Maximum                          | 242.410973   |
| wavelet-HHH | firstorder | RootMeanSquared                  | 101.6086179  |
| wavelet-HHH | firstorder | 90Percentile                     | 144.5226795  |
| wavelet-HHH | firstorder | Minimum                          | -179.576758  |
| wavelet-HHH | firstorder | Entropy                          | 3.115834092  |
| wavelet-HHH | firstorder | Range                            | 421.987731   |
| wavelet-HHH | firstorder | Variance                         | 9853.657015  |
| wavelet-HHH | firstorder | 10Percentile                     | -75.17674514 |
| wavelet-HHH | firstorder | Kurtosis                         | 3.144436976  |
| wavelet-HHH | firstorder | Mean                             | 21.69456647  |
| wavelet-HHH | glrlm      | ShortRunLowGrayLevelEmphasis     | 0.078889768  |
| wavelet-HHH | glrlm      | GrayLevelVariance                | 16.09557992  |
| wavelet-HHH | glrlm      | LowGrayLevelRunEmphasis          | 0.079325945  |
| wavelet-HHH | glrlm      | GrayLevelNonUniformityNormalized | 0.145303551  |
| wavelet-HHH | glrlm      | RunVariance                      | 0.040186713  |
| wavelet-HHH | glrlm      | GrayLevelNonUniformity           | 2.653832923  |
| wavelet-HHH | glrlm      | LongRunEmphasis                  | 1.131221719  |
| wavelet-HHH | glrlm      | ShortRunHighGrayLevelEmphasis    | 100.2486009  |
| wavelet-HHH | glrlm      | RunLengthNonUniformity           | 16.81598793  |
| wavelet-HHH | glrlm      | ShortRunEmphasis                 | 0.96719457   |
| wavelet-HHH | glrlm      | LongRunHighGrayLevelEmphasis     | 114.3860443  |
| wavelet-HHH | glrlm      | RunPercentage                    | 0.95951417   |
| wavelet-HHH | glrlm      | LongRunLowGrayLevelEmphasis      | 0.081070651  |
| wavelet-HHH | glrlm      | RunEntropy                       | 3.24620497   |
| wavelet-HHH | glrlm      | HighGrayLevelRunEmphasis         | 103.0760895  |
| wavelet-HHH | glrlm      | RunLengthNonUniformityNormalized | 0.919626574  |
| wavelet-HHH | glszm      | GrayLevelVariance                | 23.83471074  |
| wavelet-HHH | glszm      | ZoneVariance                     | 2.016528926  |
| wavelet-HHH | glszm      | GrayLevelNonUniformityNormalized | 0.090909091  |
| wavelet-HHH | glszm      | SizeZoneNonUniformityNormalized  | 0.487603306  |
| wavelet-HHH | glszm      | SizeZoneNonUniformity            | 5.363636364  |
| wavelet-HHH | glszm      | GrayLevelNonUniformity           | 1            |
| wavelet-HHH | glszm      | LargeAreaEmphasis                | 5            |
| wavelet-HHH | glszm      | SmallAreaHighGrayLevelEmphasis   | 75.72979798  |
| wavelet-HHH | glszm      | ZonePercentage                   | 5.79E-01     |
| wavelet-HHH | glszm      | LargeAreaLowGrayLevelEmphasis    | 0.179099998  |
| wavelet-HHH | glszm      | LargeAreaHighGrayLevelEmphasis   | 427.1818182  |
| wavelet-HHH | glszm      | HighGrayLevelZoneEmphasis        | 109.8181818  |

|             |            |                                      |              |
|-------------|------------|--------------------------------------|--------------|
| wavelet-HHH | glszm      | SmallAreaEmphasis                    | 0.707070707  |
| wavelet-HHH | glszm      | LowGrayLevelZoneEmphasis             | 0.123011406  |
| wavelet-HHH | glszm      | ZoneEntropy                          | 3.459431619  |
| wavelet-HHH | glszm      | SmallAreaLowGrayLevelEmphasis        | 0.120037238  |
| wavelet-HHH | ngtdm      | Coarseness                           | 0.187253445  |
| wavelet-HHH | ngtdm      | Complexity                           | 201.9418131  |
| wavelet-HHH | ngtdm      | Strength                             | 14.97153458  |
| wavelet-HHH | ngtdm      | Contrast                             | 0.863894711  |
| wavelet-HHH | ngtdm      | Busyness                             | 0.060541025  |
| wavelet-HLL | gldm       | GrayLevelVariance                    | 98.09418283  |
| wavelet-HLL | gldm       | HighGrayLevelEmphasis                | 534.6842105  |
| wavelet-HLL | gldm       | DependenceEntropy                    | 3.93213804   |
| wavelet-HLL | gldm       | DependenceNonUniformity              | 12.68421053  |
| wavelet-HLL | gldm       | GrayLevelNonUniformity               | 1.315789474  |
| wavelet-HLL | gldm       | SmallDependenceEmphasis              | 0.842105263  |
| wavelet-HLL | gldm       | SmallDependenceHighGrayLevelEmphasis | 423.7631579  |
| wavelet-HLL | gldm       | DependenceNonUniformityNormalized    | 0.667590028  |
| wavelet-HLL | gldm       | LargeDependenceEmphasis              | 1.631578947  |
| wavelet-HLL | gldm       | LargeDependenceLowGrayLevelEmphasis  | 0.059183292  |
| wavelet-HLL | gldm       | DependenceVariance                   | 0.166204986  |
| wavelet-HLL | gldm       | LargeDependenceHighGrayLevelEmphasis | 978.3684211  |
| wavelet-HLL | gldm       | SmallDependenceLowGrayLevelEmphasis  | 0.058057885  |
| wavelet-HLL | gldm       | LowGrayLevelEmphasis                 | 0.058282966  |
| wavelet-HLL | glcm       | JointAverage                         | 21.09630786  |
| wavelet-HLL | glcm       | SumAverage                           | 42.19261572  |
| wavelet-HLL | glcm       | JointEntropy                         | 3.696401461  |
| wavelet-HLL | glcm       | ClusterShade                         | -744.6553546 |
| wavelet-HLL | glcm       | MaximumProbability                   | 0.097896548  |
| wavelet-HLL | glcm       | Idmn                                 | 0.902754826  |
| wavelet-HLL | glcm       | JointEnergy                          | 0.08315543   |
| wavelet-HLL | glcm       | Contrast                             | 184.0176962  |
| wavelet-HLL | glcm       | DifferenceEntropy                    | 2.537776753  |
| wavelet-HLL | glcm       | InverseVariance                      | 0.080099723  |
| wavelet-HLL | glcm       | DifferenceVariance                   | 33.87489764  |
| wavelet-HLL | glcm       | Idn                                  | 0.790904298  |
| wavelet-HLL | glcm       | Idm                                  | 0.071310315  |
| wavelet-HLL | glcm       | Correlation                          | 0.131282186  |
| wavelet-HLL | glcm       | Autocorrelation                      | 459.5179876  |
| wavelet-HLL | glcm       | SumEntropy                           | 2.608022295  |
| wavelet-HLL | glcm       | SumSquares                           | 103.9520048  |
| wavelet-HLL | glcm       | ClusterProminence                    | 109638.9278  |
| wavelet-HLL | glcm       | Imc2                                 | 0.999002621  |
| wavelet-HLL | glcm       | Imc1                                 | -0.928352468 |
| wavelet-HLL | glcm       | DifferenceAverage                    | 11.36282884  |
| wavelet-HLL | glcm       | Id                                   | 0.147927172  |
| wavelet-HLL | glcm       | ClusterTendency                      | 231.7903232  |
| wavelet-HLL | firstorder | InterquartileRange                   | 290.6667917  |
| wavelet-HLL | firstorder | Skewness                             | -0.382412489 |
| wavelet-HLL | firstorder | Uniformity                           | 0.069252078  |
| wavelet-HLL | firstorder | Median                               | 61.2817681   |
| wavelet-HLL | firstorder | Energy                               | 1216939.502  |
| wavelet-HLL | firstorder | RobustMeanAbsoluteDeviation          | 141.3618399  |
| wavelet-HLL | firstorder | MeanAbsoluteDeviation                | 203.499076   |
| wavelet-HLL | firstorder | TotalEnergy                          | 32857366.55  |

|             |            |                                      |              |
|-------------|------------|--------------------------------------|--------------|
| wavelet-HLL | firstorder | Maximum                              | 477.002421   |
| wavelet-HLL | firstorder | RootMeanSquared                      | 253.0799231  |
| wavelet-HLL | firstorder | 90Percentile                         | 287.6606156  |
| wavelet-HLL | firstorder | Minimum                              | -474.5965923 |
| wavelet-HLL | firstorder | Entropy                              | 3.93213804   |
| wavelet-HLL | firstorder | Range                                | 951.5990133  |
| wavelet-HLL | firstorder | Variance                             | 62952.08171  |
| wavelet-HLL | firstorder | 10Percentile                         | -354.7549283 |
| wavelet-HLL | firstorder | Kurtosis                             | 2.445859607  |
| wavelet-HLL | firstorder | Mean                                 | 33.12651147  |
| wavelet-HLL | glrlm      | ShortRunLowGrayLevelEmphasis         | 0.058759789  |
| wavelet-HLL | glrlm      | GrayLevelVariance                    | 98.64688214  |
| wavelet-HLL | glrlm      | LowGrayLevelRunEmphasis              | 0.058768927  |
| wavelet-HLL | glrlm      | GrayLevelNonUniformityNormalized     | 0.069044256  |
| wavelet-HLL | glrlm      | RunVariance                          | 0.008072175  |
| wavelet-HLL | glrlm      | GrayLevelNonUniformity               | 1.301394512  |
| wavelet-HLL | glrlm      | LongRunEmphasis                      | 1.025641026  |
| wavelet-HLL | glrlm      | ShortRunHighGrayLevelEmphasis        | 528.7466824  |
| wavelet-HLL | glrlm      | RunLengthNonUniformity               | 18.55555556  |
| wavelet-HLL | glrlm      | ShortRunEmphasis                     | 0.993589744  |
| wavelet-HLL | glrlm      | LongRunHighGrayLevelEmphasis         | 551.2627081  |
| wavelet-HLL | glrlm      | RunPercentage                        | 0.991902834  |
| wavelet-HLL | glrlm      | LongRunLowGrayLevelEmphasis          | 0.058805479  |
| wavelet-HLL | glrlm      | RunEntropy                           | 3.934532615  |
| wavelet-HLL | glrlm      | HighGrayLevelRunEmphasis             | 533.2498875  |
| wavelet-HLL | glrlm      | RunLengthNonUniformityNormalized     | 0.983855651  |
| wavelet-HLL | glszm      | GrayLevelVariance                    | 105.4740484  |
| wavelet-HLL | glszm      | ZoneVariance                         | 0.103806228  |
| wavelet-HLL | glszm      | GrayLevelNonUniformityNormalized     | 0.065743945  |
| wavelet-HLL | glszm      | SizeZoneNonUniformityNormalized      | 0.792387543  |
| wavelet-HLL | glszm      | SizeZoneNonUniformity                | 13.47058824  |
| wavelet-HLL | glszm      | GrayLevelNonUniformity               | 1.117647059  |
| wavelet-HLL | glszm      | LargeAreaEmphasis                    | 1.352941176  |
| wavelet-HLL | glszm      | SmallAreaHighGrayLevelEmphasis       | 452.9558824  |
| wavelet-HLL | glszm      | ZonePercentage                       | 0.894736842  |
| wavelet-HLL | glszm      | LargeAreaLowGrayLevelEmphasis        | 0.065475201  |
| wavelet-HLL | glszm      | LargeAreaHighGrayLevelEmphasis       | 762.8823529  |
| wavelet-HLL | glszm      | HighGrayLevelZoneEmphasis            | 514.9411765  |
| wavelet-HLL | glszm      | SmallAreaEmphasis                    | 0.911764706  |
| wavelet-HLL | glszm      | LowGrayLevelZoneEmphasis             | 0.064972078  |
| wavelet-HLL | glszm      | ZoneEntropy                          | 3.969815782  |
| wavelet-HLL | glszm      | SmallAreaLowGrayLevelEmphasis        | 0.064846297  |
| wavelet-HLL | ngtdm      | Coarseness                           | 0.128199161  |
| wavelet-HLL | ngtdm      | Complexity                           | 1403.521751  |
| wavelet-HLL | ngtdm      | Strength                             | 56.30623143  |
| wavelet-HLL | ngtdm      | Contrast                             | 5.144504903  |
| wavelet-HLL | ngtdm      | Busyness                             | 0.03283272   |
| wavelet-LHL | gldm       | GrayLevelVariance                    | 251.2077562  |
| wavelet-LHL | gldm       | HighGrayLevelEmphasis                | 1148.052632  |
| wavelet-LHL | gldm       | DependenceEntropy                    | 3.787143961  |
| wavelet-LHL | gldm       | DependenceNonUniformity              | 8.894736842  |
| wavelet-LHL | gldm       | GrayLevelNonUniformity               | 1.526315789  |
| wavelet-LHL | gldm       | SmallDependenceEmphasis              | 0.701754386  |
| wavelet-LHL | gldm       | SmallDependenceHighGrayLevelEmphasis | 957.5526316  |

|             |            |                                      |              |
|-------------|------------|--------------------------------------|--------------|
| wavelet-LHL | gldm       | DependenceNonUniformityNormalized    | 0.468144044  |
| wavelet-LHL | gldm       | LargeDependenceEmphasis              | 2.894736842  |
| wavelet-LHL | gldm       | LargeDependenceLowGrayLevelEmphasis  | 0.094064342  |
| wavelet-LHL | gldm       | DependenceVariance                   | 0.565096953  |
| wavelet-LHL | gldm       | LargeDependenceHighGrayLevelEmphasis | 1935.315789  |
| wavelet-LHL | gldm       | SmallDependenceLowGrayLevelEmphasis  | 0.053664732  |
| wavelet-LHL | gldm       | LowGrayLevelEmphasis                 | 0.057846019  |
| wavelet-LHL | glcm       | JointAverage                         | 29.13586552  |
| wavelet-LHL | glcm       | SumAverage                           | 58.27173105  |
| wavelet-LHL | glcm       | JointEntropy                         | 3.692313882  |
| wavelet-LHL | glcm       | ClusterShade                         | -5871.328427 |
| wavelet-LHL | glcm       | MaximumProbability                   | 0.107282995  |
| wavelet-LHL | glcm       | Idmn                                 | 0.851751397  |
| wavelet-LHL | glcm       | JointEnergy                          | 0.084324626  |
| wavelet-LHL | glcm       | Contrast                             | 534.1544983  |
| wavelet-LHL | glcm       | DifferenceEntropy                    | 2.61526593   |
| wavelet-LHL | glcm       | InverseVariance                      | 0.051317479  |
| wavelet-LHL | glcm       | DifferenceVariance                   | 115.8483596  |
| wavelet-LHL | glcm       | Idn                                  | 0.755600991  |
| wavelet-LHL | glcm       | Idm                                  | 0.085796993  |
| wavelet-LHL | glcm       | Correlation                          | 0.032466691  |
| wavelet-LHL | glcm       | Autocorrelation                      | 853.5026751  |
| wavelet-LHL | glcm       | SumEntropy                           | 2.661358726  |
| wavelet-LHL | glcm       | SumSquares                           | 265.9341379  |
| wavelet-LHL | glcm       | ClusterProminence                    | 712989.2874  |
| wavelet-LHL | glcm       | Imc2                                 | 0.997292445  |
| wavelet-LHL | glcm       | Imc1                                 | -0.859592314 |
| wavelet-LHL | glcm       | DifferenceAverage                    | 18.73105506  |
| wavelet-LHL | glcm       | Id                                   | 0.142489075  |
| wavelet-LHL | glcm       | ClusterTendency                      | 529.5820532  |
| wavelet-LHL | firstorder | InterquartileRange                   | 628.780488   |
| wavelet-LHL | firstorder | Skewness                             | -0.547459832 |
| wavelet-LHL | firstorder | Uniformity                           | 0.08033241   |
| wavelet-LHL | firstorder | Median                               | 133.711787   |
| wavelet-LHL | firstorder | Energy                               | 2985064.588  |
| wavelet-LHL | firstorder | RobustMeanAbsoluteDeviation          | 275.3580264  |
| wavelet-LHL | firstorder | MeanAbsoluteDeviation                | 345.7919986  |
| wavelet-LHL | firstorder | TotalEnergy                          | 80596743.89  |
| wavelet-LHL | firstorder | Maximum                              | 511.3009429  |
| wavelet-LHL | firstorder | RootMeanSquared                      | 396.3693512  |
| wavelet-LHL | firstorder | 90Percentile                         | 419.5523459  |
| wavelet-LHL | firstorder | Minimum                              | -724.1576184 |
| wavelet-LHL | firstorder | Entropy                              | 3.787143961  |
| wavelet-LHL | firstorder | Range                                | 1235.458561  |
| wavelet-LHL | firstorder | Variance                             | 156964.3195  |
| wavelet-LHL | firstorder | 10Percentile                         | -590.2821581 |
| wavelet-LHL | firstorder | Kurtosis                             | 1.902476061  |
| wavelet-LHL | firstorder | Mean                                 | 12.01428443  |
| wavelet-LHL | glrlm      | ShortRunLowGrayLevelEmphasis         | 0.05843205   |
| wavelet-LHL | glrlm      | GrayLevelVariance                    | 247.1487427  |
| wavelet-LHL | glrlm      | LowGrayLevelRunEmphasis              | 0.058710619  |
| wavelet-LHL | glrlm      | GrayLevelNonUniformityNormalized     | 0.078875025  |
| wavelet-LHL | glrlm      | RunVariance                          | 0.020180437  |
| wavelet-LHL | glrlm      | GrayLevelNonUniformity               | 1.469185785  |

|             |       |                                      |              |
|-------------|-------|--------------------------------------|--------------|
| wavelet-LHL | glrlm | LongRunEmphasis                      | 1.064102564  |
| wavelet-LHL | glrlm | ShortRunHighGrayLevelEmphasis        | 1154.208671  |
| wavelet-LHL | glrlm | RunLengthNonUniformity               | 17.88888889  |
| wavelet-LHL | glrlm | ShortRunEmphasis                     | 0.983974359  |
| wavelet-LHL | glrlm | LongRunHighGrayLevelEmphasis         | 1193.583671  |
| wavelet-LHL | glrlm | RunPercentage                        | 0.979757085  |
| wavelet-LHL | glrlm | LongRunLowGrayLevelEmphasis          | 0.059824896  |
| wavelet-LHL | glrlm | RunEntropy                           | 3.825351305  |
| wavelet-LHL | glrlm | HighGrayLevelRunEmphasis             | 1162.083671  |
| wavelet-LHL | glrlm | RunLengthNonUniformityNormalized     | 0.959639126  |
| wavelet-LHL | glszm | GrayLevelVariance                    | 208.1955556  |
| wavelet-LHL | glszm | ZoneVariance                         | 0.328888889  |
| wavelet-LHL | glszm | GrayLevelNonUniformityNormalized     | 0.066666667  |
| wavelet-LHL | glszm | SizeZoneNonUniformityNormalized      | 0.662222222  |
| wavelet-LHL | glszm | SizeZoneNonUniformity                | 9.933333333  |
| wavelet-LHL | glszm | GrayLevelNonUniformity               | 1            |
| wavelet-LHL | glszm | LargeAreaEmphasis                    | 1.933333333  |
| wavelet-LHL | glszm | SmallAreaHighGrayLevelEmphasis       | 1173.216667  |
| wavelet-LHL | glszm | ZonePercentage                       | 0.789473684  |
| wavelet-LHL | glszm | LargeAreaLowGrayLevelEmphasis        | 0.084860101  |
| wavelet-LHL | glszm | LargeAreaHighGrayLevelEmphasis       | 1781.8       |
| wavelet-LHL | glszm | HighGrayLevelZoneEmphasis            | 1292.8       |
| wavelet-LHL | glszm | SmallAreaEmphasis                    | 0.840740741  |
| wavelet-LHL | glszm | LowGrayLevelZoneEmphasis             | 0.069329237  |
| wavelet-LHL | glszm | ZoneEntropy                          | 3.906890596  |
| wavelet-LHL | glszm | SmallAreaLowGrayLevelEmphasis        | 0.067504134  |
| wavelet-LHL | ngtdm | Coarseness                           | 0.046265405  |
| wavelet-LHL | ngtdm | Complexity                           | 4227.430946  |
| wavelet-LHL | ngtdm | Strength                             | 60.1783455   |
| wavelet-LHL | ngtdm | Contrast                             | 29.39769028  |
| wavelet-LHL | ngtdm | Busyness                             | 0.098153447  |
| wavelet-LHH | gldm  | GrayLevelVariance                    | 71.74515235  |
| wavelet-LHH | gldm  | HighGrayLevelEmphasis                | 440.7894737  |
| wavelet-LHH | gldm  | DependenceEntropy                    | 4.037401198  |
| wavelet-LHH | gldm  | DependenceNonUniformity              | 15.42105263  |
| wavelet-LHH | gldm  | GrayLevelNonUniformity               | 1.210526316  |
| wavelet-LHH | gldm  | SmallDependenceEmphasis              | 0.921052632  |
| wavelet-LHH | gldm  | SmallDependenceHighGrayLevelEmphasis | 417.9736842  |
| wavelet-LHH | gldm  | DependenceNonUniformityNormalized    | 0.811634349  |
| wavelet-LHH | gldm  | LargeDependenceEmphasis              | 1.315789474  |
| wavelet-LHH | gldm  | LargeDependenceLowGrayLevelEmphasis  | 0.057998311  |
| wavelet-LHH | gldm  | DependenceVariance                   | 0.094182825  |
| wavelet-LHH | gldm  | LargeDependenceHighGrayLevelEmphasis | 532.0526316  |
| wavelet-LHH | gldm  | SmallDependenceLowGrayLevelEmphasis  | 0.05663244   |
| wavelet-LHH | gldm  | LowGrayLevelEmphasis                 | 0.056905614  |
| wavelet-LHH | glcm  | JointAverage                         | 19.82460734  |
| wavelet-LHH | glcm  | SumAverage                           | 39.64921467  |
| wavelet-LHH | glcm  | JointEntropy                         | 3.736669527  |
| wavelet-LHH | glcm  | ClusterShade                         | -145.0365888 |
| wavelet-LHH | glcm  | MaximumProbability                   | 0.085105173  |
| wavelet-LHH | glcm  | Idmn                                 | 0.897578341  |
| wavelet-LHH | glcm  | JointEnergy                          | 0.080898442  |
| wavelet-LHH | glcm  | Contrast                             | 169.2687784  |
| wavelet-LHH | glcm  | DifferenceEntropy                    | 2.531932597  |

|             |            |                                  |              |
|-------------|------------|----------------------------------|--------------|
| wavelet-LHH | glcm       | InverseVariance                  | 0.090606165  |
| wavelet-LHH | glcm       | DifferenceVariance               | 52.42902592  |
| wavelet-LHH | glcm       | Idn                              | 0.790030562  |
| wavelet-LHH | glcm       | Idm                              | 0.068325109  |
| wavelet-LHH | glcm       | Correlation                      | -0.29169229  |
| wavelet-LHH | glcm       | Autocorrelation                  | 376.0965784  |
| wavelet-LHH | glcm       | SumEntropy                       | 2.626132841  |
| wavelet-LHH | glcm       | SumSquares                       | 64.88480523  |
| wavelet-LHH | glcm       | ClusterProminence                | 24355.81397  |
| wavelet-LHH | glcm       | Imc2                             | 0.998892698  |
| wavelet-LHH | glcm       | Imc1                             | -0.92546826  |
| wavelet-LHH | glcm       | DifferenceAverage                | 10.46288434  |
| wavelet-LHH | glcm       | Id                               | 0.151884732  |
| wavelet-LHH | glcm       | ClusterTendency                  | 90.27044246  |
| wavelet-LHH | firstorder | InterquartileRange               | 213.0585119  |
| wavelet-LHH | firstorder | Skewness                         | -0.065727509 |
| wavelet-LHH | firstorder | Uniformity                       | 0.063711911  |
| wavelet-LHH | firstorder | Median                           | 29.70436985  |
| wavelet-LHH | firstorder | Energy                           | 890928.9149  |
| wavelet-LHH | firstorder | RobustMeanAbsoluteDeviation      | 105.3471968  |
| wavelet-LHH | firstorder | MeanAbsoluteDeviation            | 163.3384535  |
| wavelet-LHH | firstorder | TotalEnergy                      | 24055080.7   |
| wavelet-LHH | firstorder | Maximum                          | 445.6055868  |
| wavelet-LHH | firstorder | RootMeanSquared                  | 216.5432879  |
| wavelet-LHH | firstorder | 90Percentile                     | 354.457392   |
| wavelet-LHH | firstorder | Minimum                          | -423.1586987 |
| wavelet-LHH | firstorder | Entropy                          | 4.037401198  |
| wavelet-LHH | firstorder | Range                            | 868.7642856  |
| wavelet-LHH | firstorder | Variance                         | 45218.06653  |
| wavelet-LHH | firstorder | 10Percentile                     | -208.3534999 |
| wavelet-LHH | firstorder | Kurtosis                         | 2.846808932  |
| wavelet-LHH | firstorder | Mean                             | 40.90145468  |
| wavelet-LHH | glrlm      | ShortRunLowGrayLevelEmphasis     | 0.057122923  |
| wavelet-LHH | glrlm      | GrayLevelVariance                | 72.02971328  |
| wavelet-LHH | glrlm      | LowGrayLevelRunEmphasis          | 0.057134013  |
| wavelet-LHH | glrlm      | GrayLevelNonUniformityNormalized | 0.063559333  |
| wavelet-LHH | glrlm      | RunVariance                      | 0.004036087  |
| wavelet-LHH | glrlm      | GrayLevelNonUniformity           | 1.202878992  |
| wavelet-LHH | glrlm      | LongRunEmphasis                  | 1.012820513  |
| wavelet-LHH | glrlm      | ShortRunHighGrayLevelEmphasis    | 440.5118646  |
| wavelet-LHH | glrlm      | RunLengthNonUniformity           | 18.77777778  |
| wavelet-LHH | glrlm      | ShortRunEmphasis                 | 0.996794872  |
| wavelet-LHH | glrlm      | LongRunHighGrayLevelEmphasis     | 445.1432749  |
| wavelet-LHH | glrlm      | RunPercentage                    | 0.995951417  |
| wavelet-LHH | glrlm      | LongRunLowGrayLevelEmphasis      | 0.057178375  |
| wavelet-LHH | glrlm      | RunEntropy                       | 4.039048328  |
| wavelet-LHH | glrlm      | HighGrayLevelRunEmphasis         | 441.4381466  |
| wavelet-LHH | glrlm      | RunLengthNonUniformityNormalized | 0.991927825  |
| wavelet-LHH | glszm      | GrayLevelVariance                | 75.44444444  |
| wavelet-LHH | glszm      | ZoneVariance                     | 0.052469136  |
| wavelet-LHH | glszm      | GrayLevelNonUniformityNormalized | 0.061728395  |
| wavelet-LHH | glszm      | SizeZoneNonUniformityNormalized  | 0.895061728  |
| wavelet-LHH | glszm      | SizeZoneNonUniformity            | 16.11111111  |
| wavelet-LHH | glszm      | GrayLevelNonUniformity           | 1.111111111  |

|             |            |                                      |              |
|-------------|------------|--------------------------------------|--------------|
| wavelet-LHH | glszm      | LargeAreaEmphasis                    | 1.166666667  |
| wavelet-LHH | glszm      | SmallAreaHighGrayLevelEmphasis       | 437.1805556  |
| wavelet-LHH | glszm      | ZonePercentage                       | 0.947368421  |
| wavelet-LHH | glszm      | LargeAreaLowGrayLevelEmphasis        | 0.060451504  |
| wavelet-LHH | glszm      | LargeAreaHighGrayLevelEmphasis       | 497.3888889  |
| wavelet-LHH | glszm      | HighGrayLevelZoneEmphasis            | 449.2222222  |
| wavelet-LHH | glszm      | SmallAreaEmphasis                    | 0.958333333  |
| wavelet-LHH | glszm      | LowGrayLevelZoneEmphasis             | 0.059874803  |
| wavelet-LHH | glszm      | ZoneEntropy                          | 4.05881389   |
| wavelet-LHH | glszm      | SmallAreaLowGrayLevelEmphasis        | 0.059730628  |
| wavelet-LHH | ngtdm      | Coarseness                           | 0.107416472  |
| wavelet-LHH | ngtdm      | Complexity                           | 1688.612479  |
| wavelet-LHH | ngtdm      | Strength                             | 32.85810023  |
| wavelet-LHH | ngtdm      | Contrast                             | 4.300080429  |
| wavelet-LHH | ngtdm      | Busyness                             | 0.046893326  |
| wavelet-LLH | gldm       | GrayLevelVariance                    | 363.7950139  |
| wavelet-LLH | gldm       | HighGrayLevelEmphasis                | 1783.894737  |
| wavelet-LLH | gldm       | DependenceEntropy                    | 3.93213804   |
| wavelet-LLH | gldm       | DependenceNonUniformity              | 12.68421053  |
| wavelet-LLH | gldm       | GrayLevelNonUniformity               | 1.315789474  |
| wavelet-LLH | gldm       | SmallDependenceEmphasis              | 0.842105263  |
| wavelet-LLH | gldm       | SmallDependenceHighGrayLevelEmphasis | 1279.5       |
| wavelet-LLH | gldm       | DependenceNonUniformityNormalized    | 0.667590028  |
| wavelet-LLH | gldm       | LargeDependenceEmphasis              | 1.631578947  |
| wavelet-LLH | gldm       | LargeDependenceLowGrayLevelEmphasis  | 0.055202304  |
| wavelet-LLH | gldm       | DependenceVariance                   | 0.166204986  |
| wavelet-LLH | gldm       | LargeDependenceHighGrayLevelEmphasis | 3801.473684  |
| wavelet-LLH | gldm       | SmallDependenceLowGrayLevelEmphasis  | 0.054954471  |
| wavelet-LLH | gldm       | LowGrayLevelEmphasis                 | 0.055004038  |
| wavelet-LLH | glcm       | JointAverage                         | 38.16044789  |
| wavelet-LLH | glcm       | SumAverage                           | 76.32089577  |
| wavelet-LLH | glcm       | JointEntropy                         | 3.728122518  |
| wavelet-LLH | glcm       | ClusterShade                         | -12908.31052 |
| wavelet-LLH | glcm       | MaximumProbability                   | 0.089378677  |
| wavelet-LLH | glcm       | Idmn                                 | 0.869159287  |
| wavelet-LLH | glcm       | JointEnergy                          | 0.081373276  |
| wavelet-LLH | glcm       | Contrast                             | 706.0650849  |
| wavelet-LLH | glcm       | DifferenceEntropy                    | 2.397616535  |
| wavelet-LLH | glcm       | InverseVariance                      | 0.052297774  |
| wavelet-LLH | glcm       | DifferenceVariance                   | 221.7939368  |
| wavelet-LLH | glcm       | Idn                                  | 0.781988054  |
| wavelet-LLH | glcm       | Idm                                  | 0.054850301  |
| wavelet-LLH | glcm       | Correlation                          | 0.116445196  |
| wavelet-LLH | glcm       | Autocorrelation                      | 1494.452029  |
| wavelet-LLH | glcm       | SumEntropy                           | 2.656175021  |
| wavelet-LLH | glcm       | SumSquares                           | 389.4203067  |
| wavelet-LLH | glcm       | ClusterProminence                    | 1651105.278  |
| wavelet-LLH | glcm       | Imc2                                 | 0.998449108  |
| wavelet-LLH | glcm       | Imc1                                 | -0.92080297  |
| wavelet-LLH | glcm       | DifferenceAverage                    | 20.08026973  |
| wavelet-LLH | glcm       | Id                                   | 0.123234597  |
| wavelet-LLH | glcm       | ClusterTendency                      | 851.6161419  |
| wavelet-LLH | firstorder | InterquartileRange                   | 827.6049159  |
| wavelet-LLH | firstorder | Skewness                             | -0.573412188 |

|             |            |                                  |              |
|-------------|------------|----------------------------------|--------------|
| wavelet-LLH | firstorder | Uniformity                       | 0.069252078  |
| wavelet-LLH | firstorder | Median                           | 180.0132496  |
| wavelet-LLH | firstorder | Energy                           | 4281624.385  |
| wavelet-LLH | firstorder | RobustMeanAbsoluteDeviation      | 343.7291876  |
| wavelet-LLH | firstorder | MeanAbsoluteDeviation            | 426.2823862  |
| wavelet-LLH | firstorder | TotalEnergy                      | 115603858.4  |
| wavelet-LLH | firstorder | Maximum                          | 532.7012503  |
| wavelet-LLH | firstorder | RootMeanSquared                  | 474.7090181  |
| wavelet-LLH | firstorder | 90Percentile                     | 484.4726697  |
| wavelet-LLH | firstorder | Minimum                          | -930.199993  |
| wavelet-LLH | firstorder | Entropy                          | 3.93213804   |
| wavelet-LLH | firstorder | Range                            | 1462.901243  |
| wavelet-LLH | firstorder | Variance                         | 224883.9257  |
| wavelet-LLH | firstorder | 10Percentile                     | -699.4766756 |
| wavelet-LLH | firstorder | Kurtosis                         | 1.82847812   |
| wavelet-LLH | firstorder | Mean                             | -21.55750805 |
| wavelet-LLH | glrlm      | ShortRunLowGrayLevelEmphasis     | 0.055469462  |
| wavelet-LLH | glrlm      | GrayLevelVariance                | 363.6900355  |
| wavelet-LLH | glrlm      | LowGrayLevelRunEmphasis          | 0.055471474  |
| wavelet-LLH | glrlm      | GrayLevelNonUniformityNormalized | 0.069044256  |
| wavelet-LLH | glrlm      | RunVariance                      | 0.008072175  |
| wavelet-LLH | glrlm      | GrayLevelNonUniformity           | 1.301394512  |
| wavelet-LLH | glrlm      | LongRunEmphasis                  | 1.025641026  |
| wavelet-LLH | glrlm      | ShortRunHighGrayLevelEmphasis    | 1751.360717  |
| wavelet-LLH | glrlm      | RunLengthNonUniformity           | 18.55555556  |
| wavelet-LLH | glrlm      | ShortRunEmphasis                 | 0.993589744  |
| wavelet-LLH | glrlm      | LongRunHighGrayLevelEmphasis     | 1853.748538  |
| wavelet-LLH | glrlm      | RunPercentage                    | 0.991902834  |
| wavelet-LLH | glrlm      | LongRunLowGrayLevelEmphasis      | 0.055479524  |
| wavelet-LLH | glrlm      | RunEntropy                       | 3.934532615  |
| wavelet-LLH | glrlm      | HighGrayLevelRunEmphasis         | 1771.838282  |
| wavelet-LLH | glrlm      | RunLengthNonUniformityNormalized | 0.983855651  |
| wavelet-LLH | glszm      | GrayLevelVariance                | 359.7785467  |
| wavelet-LLH | glszm      | ZoneVariance                     | 0.103806228  |
| wavelet-LLH | glszm      | GrayLevelNonUniformityNormalized | 0.065743945  |
| wavelet-LLH | glszm      | SizeZoneNonUniformityNormalized  | 0.792387543  |
| wavelet-LLH | glszm      | SizeZoneNonUniformity            | 13.47058824  |
| wavelet-LLH | glszm      | GrayLevelNonUniformity           | 1.117647059  |
| wavelet-LLH | glszm      | LargeAreaEmphasis                | 1.352941176  |
| wavelet-LLH | glszm      | SmallAreaHighGrayLevelEmphasis   | 1336.073529  |
| wavelet-LLH | glszm      | ZonePercentage                   | 0.894736842  |
| wavelet-LLH | glszm      | LargeAreaLowGrayLevelEmphasis    | 0.061548965  |
| wavelet-LLH | glszm      | LargeAreaHighGrayLevelEmphasis   | 2745.411765  |
| wavelet-LLH | glszm      | HighGrayLevelZoneEmphasis        | 1617.941176  |
| wavelet-LLH | glszm      | SmallAreaEmphasis                | 0.911764706  |
| wavelet-LLH | glszm      | LowGrayLevelZoneEmphasis         | 0.061438169  |
| wavelet-LLH | glszm      | ZoneEntropy                      | 3.969815782  |
| wavelet-LLH | glszm      | SmallAreaLowGrayLevelEmphasis    | 0.06141047   |
| wavelet-LLH | ngtdm      | Coarseness                       | 0.062973982  |
| wavelet-LLH | ngtdm      | Complexity                       | 4972.577959  |
| wavelet-LLH | ngtdm      | Strength                         | 99.81633843  |
| wavelet-LLH | ngtdm      | Contrast                         | 38.20835393  |
| wavelet-LLH | ngtdm      | Busyness                         | 0.031310908  |
| wavelet-LLL | gldm       | GrayLevelVariance                | 372.166205   |



|             |            |                                      |              |
|-------------|------------|--------------------------------------|--------------|
| wavelet-LLL | gldm       | HighGrayLevelEmphasis                | 1346.263158  |
| wavelet-LLL | gldm       | DependenceEntropy                    | 4.037401198  |
| wavelet-LLL | gldm       | DependenceNonUniformity              | 19           |
| wavelet-LLL | gldm       | GrayLevelNonUniformity               | 1.210526316  |
| wavelet-LLL | gldm       | SmallDependenceEmphasis              | 1            |
| wavelet-LLL | gldm       | SmallDependenceHighGrayLevelEmphasis | 1346.263158  |
| wavelet-LLL | gldm       | DependenceNonUniformityNormalized    | 1            |
| wavelet-LLL | gldm       | LargeDependenceEmphasis              | 1            |
| wavelet-LLL | gldm       | LargeDependenceLowGrayLevelEmphasis  | 0.060518665  |
| wavelet-LLL | gldm       | DependenceVariance                   | 0            |
| wavelet-LLL | gldm       | LargeDependenceHighGrayLevelEmphasis | 1346.263158  |
| wavelet-LLL | gldm       | SmallDependenceLowGrayLevelEmphasis  | 0.060518665  |
| wavelet-LLL | gldm       | LowGrayLevelEmphasis                 | 0.060518665  |
| wavelet-LLL | glcm       | JointAverage                         | 34.82398296  |
| wavelet-LLL | glcm       | SumAverage                           | 69.64796592  |
| wavelet-LLL | glcm       | JointEntropy                         | 3.746284911  |
| wavelet-LLL | glcm       | ClusterShade                         | -4035.57983  |
| wavelet-LLL | glcm       | MaximumProbability                   | 0.08029748   |
| wavelet-LLL | glcm       | Idmn                                 | 0.869862994  |
| wavelet-LLL | glcm       | JointEnergy                          | 0.08029748   |
| wavelet-LLL | glcm       | Contrast                             | 661.5290793  |
| wavelet-LLL | glcm       | DifferenceEntropy                    | 2.679190894  |
| wavelet-LLL | glcm       | InverseVariance                      | 0.060395652  |
| wavelet-LLL | glcm       | DifferenceVariance                   | 196.1231274  |
| wavelet-LLL | glcm       | Idn                                  | 0.764713389  |
| wavelet-LLL | glcm       | Idm                                  | 0.037209489  |
| wavelet-LLL | glcm       | Correlation                          | 0.014350027  |
| wavelet-LLL | glcm       | Autocorrelation                      | 1236.074007  |
| wavelet-LLL | glcm       | SumEntropy                           | 2.732298897  |
| wavelet-LLL | glcm       | SumSquares                           | 341.0892253  |
| wavelet-LLL | glcm       | ClusterProminence                    | 1123956.881  |
| wavelet-LLL | glcm       | Imc2                                 | 0.999258912  |
| wavelet-LLL | glcm       | Imc1                                 | -0.949777427 |
| wavelet-LLL | glcm       | DifferenceAverage                    | 21.21662504  |
| wavelet-LLL | glcm       | Id                                   | 0.094042792  |
| wavelet-LLL | glcm       | ClusterTendency                      | 702.8278221  |
| wavelet-LLL | firstorder | InterquartileRange                   | 889.1425691  |
| wavelet-LLL | firstorder | Skewness                             | 0.042602615  |
| wavelet-LLL | firstorder | Uniformity                           | 0.063711911  |
| wavelet-LLL | firstorder | Median                               | -1343.247806 |
| wavelet-LLL | firstorder | Energy                               | 36945680.84  |
| wavelet-LLL | firstorder | RobustMeanAbsoluteDeviation          | 357.114553   |
| wavelet-LLL | firstorder | MeanAbsoluteDeviation                | 433.0722845  |
| wavelet-LLL | firstorder | TotalEnergy                          | 997533382.6  |
| wavelet-LLL | firstorder | Maximum                              | -573.8984004 |
| wavelet-LLL | firstorder | RootMeanSquared                      | 1394.456711  |
| wavelet-LLL | firstorder | 90Percentile                         | -670.4867428 |
| wavelet-LLL | firstorder | Minimum                              | -2069.161137 |
| wavelet-LLL | firstorder | Entropy                              | 4.037401198  |
| wavelet-LLL | firstorder | Range                                | 1495.262736  |
| wavelet-LLL | firstorder | Variance                             | 233934.1185  |
| wavelet-LLL | firstorder | 10Percentile                         | -1878.127855 |
| wavelet-LLL | firstorder | Kurtosis                             | 1.580746042  |
| wavelet-LLL | firstorder | Mean                                 | -1307.889674 |

|             |       |                                      |             |
|-------------|-------|--------------------------------------|-------------|
| wavelet-LLL | glrlm | ShortRunLowGrayLevelEmphasis         | 0.060518665 |
| wavelet-LLL | glrlm | GrayLevelVariance                    | 372.166205  |
| wavelet-LLL | glrlm | LowGrayLevelRunEmphasis              | 0.060518665 |
| wavelet-LLL | glrlm | GrayLevelNonUniformityNormalized     | 0.063711911 |
| wavelet-LLL | glrlm | RunVariance                          | 0           |
| wavelet-LLL | glrlm | GrayLevelNonUniformity               | 1.210526316 |
| wavelet-LLL | glrlm | LongRunEmphasis                      | 1           |
| wavelet-LLL | glrlm | ShortRunHighGrayLevelEmphasis        | 1346.263158 |
| wavelet-LLL | glrlm | RunLengthNonUniformity               | 19          |
| wavelet-LLL | glrlm | ShortRunEmphasis                     | 1           |
| wavelet-LLL | glrlm | LongRunHighGrayLevelEmphasis         | 1346.263158 |
| wavelet-LLL | glrlm | RunPercentage                        | 1           |
| wavelet-LLL | glrlm | LongRunLowGrayLevelEmphasis          | 0.060518665 |
| wavelet-LLL | glrlm | RunEntropy                           | 4.037401198 |
| wavelet-LLL | glrlm | HighGrayLevelRunEmphasis             | 1346.263158 |
| wavelet-LLL | glrlm | RunLengthNonUniformityNormalized     | 1           |
| wavelet-LLL | glszm | GrayLevelVariance                    | 372.166205  |
| wavelet-LLL | glszm | ZoneVariance                         | 0           |
| wavelet-LLL | glszm | GrayLevelNonUniformityNormalized     | 0.063711911 |
| wavelet-LLL | glszm | SizeZoneNonUniformityNormalized      | 1           |
| wavelet-LLL | glszm | SizeZoneNonUniformity                | 19          |
| wavelet-LLL | glszm | GrayLevelNonUniformity               | 1.210526316 |
| wavelet-LLL | glszm | LargeAreaEmphasis                    | 1           |
| wavelet-LLL | glszm | SmallAreaHighGrayLevelEmphasis       | 1346.263158 |
| wavelet-LLL | glszm | ZonePercentage                       | 1           |
| wavelet-LLL | glszm | LargeAreaLowGrayLevelEmphasis        | 0.060518665 |
| wavelet-LLL | glszm | LargeAreaHighGrayLevelEmphasis       | 1346.263158 |
| wavelet-LLL | glszm | HighGrayLevelZoneEmphasis            | 1346.263158 |
| wavelet-LLL | glszm | SmallAreaEmphasis                    | 1           |
| wavelet-LLL | glszm | LowGrayLevelZoneEmphasis             | 0.060518665 |
| wavelet-LLL | glszm | ZoneEntropy                          | 4.037401198 |
| wavelet-LLL | glszm | SmallAreaLowGrayLevelEmphasis        | 0.060518665 |
| wavelet-LLL | ngtdm | Coarseness                           | 0.049585363 |
| wavelet-LLL | ngtdm | Complexity                           | 6766.237012 |
| wavelet-LLL | ngtdm | Strength                             | 82.00424645 |
| wavelet-LLL | ngtdm | Contrast                             | 45.02806767 |
| wavelet-LLL | ngtdm | Busyness                             | 0.049276954 |
| wavelet-HHL | gldm  | GrayLevelVariance                    | 13.87811634 |
| wavelet-HHL | gldm  | HighGrayLevelEmphasis                | 119.2105263 |
| wavelet-HHL | gldm  | DependenceEntropy                    | 3.576617645 |
| wavelet-HHL | gldm  | DependenceNonUniformity              | 9.736842105 |
| wavelet-HHL | gldm  | GrayLevelNonUniformity               | 2.368421053 |
| wavelet-HHL | gldm  | SmallDependenceEmphasis              | 0.684210526 |
| wavelet-HHL | gldm  | SmallDependenceHighGrayLevelEmphasis | 75.15789474 |
| wavelet-HHL | gldm  | DependenceNonUniformityNormalized    | 0.512465374 |
| wavelet-HHL | gldm  | LargeDependenceEmphasis              | 2.263157895 |
| wavelet-HHL | gldm  | LargeDependenceLowGrayLevelEmphasis  | 0.074444084 |
| wavelet-HHL | gldm  | DependenceVariance                   | 0.243767313 |
| wavelet-HHL | gldm  | LargeDependenceHighGrayLevelEmphasis | 295.4210526 |
| wavelet-HHL | gldm  | SmallDependenceLowGrayLevelEmphasis  | 0.060819192 |
| wavelet-HHL | gldm  | LowGrayLevelEmphasis                 | 0.063544171 |
| wavelet-HHL | glcm  | JointAverage                         | 10.39126152 |
| wavelet-HHL | glcm  | SumAverage                           | 20.78252303 |
| wavelet-HHL | glcm  | JointEntropy                         | 3.599106211 |

|             |            |                                  |              |
|-------------|------------|----------------------------------|--------------|
| wavelet-HHL | glcm       | ClusterShade                     | -7.811132506 |
| wavelet-HHL | glcm       | MaximumProbability               | 0.104063992  |
| wavelet-HHL | glcm       | Idmn                             | 0.911298018  |
| wavelet-HHL | glcm       | JointEnergy                      | 0.088308719  |
| wavelet-HHL | glcm       | Contrast                         | 33.06280386  |
| wavelet-HHL | glcm       | DifferenceEntropy                | 2.2889343    |
| wavelet-HHL | glcm       | InverseVariance                  | 0.207622488  |
| wavelet-HHL | glcm       | DifferenceVariance               | 9.878618431  |
| wavelet-HHL | glcm       | Idn                              | 0.8017147    |
| wavelet-HHL | glcm       | Idm                              | 0.160646313  |
| wavelet-HHL | glcm       | Correlation                      | -0.191434698 |
| wavelet-HHL | glcm       | Autocorrelation                  | 105.9831474  |
| wavelet-HHL | glcm       | SumEntropy                       | 2.5059515    |
| wavelet-HHL | glcm       | SumSquares                       | 13.67209039  |
| wavelet-HHL | glcm       | ClusterProminence                | 1248.137229  |
| wavelet-HHL | glcm       | Imc2                             | 0.990647293  |
| wavelet-HHL | glcm       | Imc1                             | -0.736688882 |
| wavelet-HHL | glcm       | DifferenceAverage                | 4.667798868  |
| wavelet-HHL | glcm       | Id                               | 0.260223682  |
| wavelet-HHL | glcm       | ClusterTendency                  | 21.62555768  |
| wavelet-HHL | firstorder | InterquartileRange               | 65.42128124  |
| wavelet-HHL | firstorder | Skewness                         | -0.371727089 |
| wavelet-HHL | firstorder | Uniformity                       | 0.12465374   |
| wavelet-HHL | firstorder | Median                           | -33.29378812 |
| wavelet-HHL | firstorder | Energy                           | 184907.5273  |
| wavelet-HHL | firstorder | RobustMeanAbsoluteDeviation      | 41.04868602  |
| wavelet-HHL | firstorder | MeanAbsoluteDeviation            | 67.8471746   |
| wavelet-HHL | firstorder | TotalEnergy                      | 4992503.238  |
| wavelet-HHL | firstorder | Maximum                          | 131.925434   |
| wavelet-HHL | firstorder | RootMeanSquared                  | 98.65077355  |
| wavelet-HHL | firstorder | 90Percentile                     | 113.7533158  |
| wavelet-HHL | firstorder | Minimum                          | -257.8218584 |
| wavelet-HHL | firstorder | Entropy                          | 3.141635408  |
| wavelet-HHL | firstorder | Range                            | 389.7472924  |
| wavelet-HHL | firstorder | Variance                         | 8783.201394  |
| wavelet-HHL | firstorder | 10Percentile                     | -153.2854391 |
| wavelet-HHL | firstorder | Kurtosis                         | 3.319787241  |
| wavelet-HHL | firstorder | Mean                             | -30.80217084 |
| wavelet-HHL | glrlm      | ShortRunLowGrayLevelEmphasis     | 0.06437226   |
| wavelet-HHL | glrlm      | GrayLevelVariance                | 13.95692955  |
| wavelet-HHL | glrlm      | LowGrayLevelRunEmphasis          | 0.06448289   |
| wavelet-HHL | glrlm      | GrayLevelNonUniformityNormalized | 0.124760281  |
| wavelet-HHL | glrlm      | RunVariance                      | 0.016144349  |
| wavelet-HHL | glrlm      | GrayLevelNonUniformity           | 2.331983806  |
| wavelet-HHL | glrlm      | LongRunEmphasis                  | 1.051282051  |
| wavelet-HHL | glrlm      | ShortRunHighGrayLevelEmphasis    | 117.0752362  |
| wavelet-HHL | glrlm      | RunLengthNonUniformity           | 18.11111111  |
| wavelet-HHL | glrlm      | ShortRunEmphasis                 | 0.987179487  |
| wavelet-HHL | glrlm      | LongRunHighGrayLevelEmphasis     | 126.0175439  |
| wavelet-HHL | glrlm      | RunPercentage                    | 0.983805668  |
| wavelet-HHL | glrlm      | LongRunLowGrayLevelEmphasis      | 0.064925408  |
| wavelet-HHL | glrlm      | RunEntropy                       | 3.168230763  |
| wavelet-HHL | glrlm      | HighGrayLevelRunEmphasis         | 118.8636977  |
| wavelet-HHL | glrlm      | RunLengthNonUniformityNormalized | 0.967711301  |

|             |       |                                      |              |
|-------------|-------|--------------------------------------|--------------|
| wavelet-HHL | glszm | GrayLevelVariance                    | 15.12888889  |
| wavelet-HHL | glszm | ZoneVariance                         | 0.195555556  |
| wavelet-HHL | glszm | GrayLevelNonUniformityNormalized     | 0.12         |
| wavelet-HHL | glszm | SizeZoneNonUniformityNormalized      | 0.608888889  |
| wavelet-HHL | glszm | SizeZoneNonUniformity                | 9.133333333  |
| wavelet-HHL | glszm | GrayLevelNonUniformity               | 1.8          |
| wavelet-HHL | glszm | LargeAreaEmphasis                    | 1.8          |
| wavelet-HHL | glszm | SmallAreaHighGrayLevelEmphasis       | 85.9         |
| wavelet-HHL | glszm | ZonePercentage                       | 0.789473684  |
| wavelet-HHL | glszm | LargeAreaLowGrayLevelEmphasis        | 0.085091469  |
| wavelet-HHL | glszm | LargeAreaHighGrayLevelEmphasis       | 225.4        |
| wavelet-HHL | glszm | HighGrayLevelZoneEmphasis            | 113.8        |
| wavelet-HHL | glszm | SmallAreaEmphasis                    | 0.8          |
| wavelet-HHL | glszm | LowGrayLevelZoneEmphasis             | 0.07818819   |
| wavelet-HHL | glszm | ZoneEntropy                          | 3.589898095  |
| wavelet-HHL | glszm | SmallAreaLowGrayLevelEmphasis        | 0.076462371  |
| wavelet-HHL | ngtdm | Coarseness                           | 0.181711334  |
| wavelet-HHL | ngtdm | Complexity                           | 181.0403679  |
| wavelet-HHL | ngtdm | Strength                             | 11.98606051  |
| wavelet-HHL | ngtdm | Contrast                             | 0.972612193  |
| wavelet-HHL | ngtdm | Busyness                             | 0.072915932  |
| wavelet-HLH | gldm  | GrayLevelVariance                    | 27.92797784  |
| wavelet-HLH | gldm  | HighGrayLevelEmphasis                | 85.36842105  |
| wavelet-HLH | gldm  | DependenceEntropy                    | 3.616348566  |
| wavelet-HLH | gldm  | DependenceNonUniformity              | 9.526315789  |
| wavelet-HLH | gldm  | GrayLevelNonUniformity               | 1.842105263  |
| wavelet-HLH | gldm  | SmallDependenceEmphasis              | 0.716374269  |
| wavelet-HLH | gldm  | SmallDependenceHighGrayLevelEmphasis | 78.53216374  |
| wavelet-HLH | gldm  | DependenceNonUniformityNormalized    | 0.501385042  |
| wavelet-HLH | gldm  | LargeDependenceEmphasis              | 2.368421053  |
| wavelet-HLH | gldm  | LargeDependenceLowGrayLevelEmphasis  | 0.951031375  |
| wavelet-HLH | gldm  | DependenceVariance                   | 0.349030471  |
| wavelet-HLH | gldm  | LargeDependenceHighGrayLevelEmphasis | 112.9473684  |
| wavelet-HLH | gldm  | SmallDependenceLowGrayLevelEmphasis  | 0.06943751   |
| wavelet-HLH | gldm  | LowGrayLevelEmphasis                 | 0.198972657  |
| wavelet-HLH | glcm  | JointAverage                         | 7.374286824  |
| wavelet-HLH | glcm  | SumAverage                           | 14.74857365  |
| wavelet-HLH | glcm  | JointEntropy                         | 3.628794069  |
| wavelet-HLH | glcm  | ClusterShade                         | 72.17461485  |
| wavelet-HLH | glcm  | MaximumProbability                   | 0.11239455   |
| wavelet-HLH | glcm  | Idmn                                 | 0.858034599  |
| wavelet-HLH | glcm  | JointEnergy                          | 0.088200138  |
| wavelet-HLH | glcm  | Contrast                             | 64.96849817  |
| wavelet-HLH | glcm  | DifferenceEntropy                    | 2.405804546  |
| wavelet-HLH | glcm  | InverseVariance                      | 0.137358603  |
| wavelet-HLH | glcm  | DifferenceVariance                   | 12.91783216  |
| wavelet-HLH | glcm  | Idn                                  | 0.75303973   |
| wavelet-HLH | glcm  | Idm                                  | 0.129752729  |
| wavelet-HLH | glcm  | Correlation                          | -0.138071877 |
| wavelet-HLH | glcm  | Autocorrelation                      | 50.83043068  |
| wavelet-HLH | glcm  | SumEntropy                           | 2.465023521  |
| wavelet-HLH | glcm  | SumSquares                           | 27.64213006  |
| wavelet-HLH | glcm  | ClusterProminence                    | 5556.087865  |
| wavelet-HLH | glcm  | Imc2                                 | 0.995023517  |

|             |            |                                  |              |
|-------------|------------|----------------------------------|--------------|
| wavelet-HLH | glcm       | Imc1                             | -0.800163135 |
| wavelet-HLH | glcm       | DifferenceAverage                | 6.681795982  |
| wavelet-HLH | glcm       | Id                               | 0.21959645   |
| wavelet-HLH | glcm       | ClusterTendency                  | 45.60002205  |
| wavelet-HLH | firstorder | InterquartileRange               | 203.1988976  |
| wavelet-HLH | firstorder | Skewness                         | 0.403560255  |
| wavelet-HLH | firstorder | Uniformity                       | 0.096952909  |
| wavelet-HLH | firstorder | Median                           | 14.92697228  |
| wavelet-HLH | firstorder | Energy                           | 341529.922   |
| wavelet-HLH | firstorder | RobustMeanAbsoluteDeviation      | 86.41450379  |
| wavelet-HLH | firstorder | MeanAbsoluteDeviation            | 110.3023192  |
| wavelet-HLH | firstorder | TotalEnergy                      | 9221307.893  |
| wavelet-HLH | firstorder | Maximum                          | 277.1100677  |
| wavelet-HLH | firstorder | RootMeanSquared                  | 134.0718429  |
| wavelet-HLH | firstorder | 90Percentile                     | 226.2801202  |
| wavelet-HLH | firstorder | Minimum                          | -135.7063567 |
| wavelet-HLH | firstorder | Entropy                          | 3.471354487  |
| wavelet-HLH | firstorder | Range                            | 412.8164245  |
| wavelet-HLH | firstorder | Variance                         | 17164.36641  |
| wavelet-HLH | firstorder | 10Percentile                     | -127.4850208 |
| wavelet-HLH | firstorder | Kurtosis                         | 1.948733359  |
| wavelet-HLH | firstorder | Mean                             | 28.47617673  |
| wavelet-HLH | glrlm      | ShortRunLowGrayLevelEmphasis     | 0.187056269  |
| wavelet-HLH | glrlm      | GrayLevelVariance                | 28.00213281  |
| wavelet-HLH | glrlm      | LowGrayLevelRunEmphasis          | 0.193620968  |
| wavelet-HLH | glrlm      | GrayLevelNonUniformityNormalized | 0.096560941  |
| wavelet-HLH | glrlm      | RunVariance                      | 0.016144349  |
| wavelet-HLH | glrlm      | GrayLevelNonUniformity           | 1.805218174  |
| wavelet-HLH | glrlm      | LongRunEmphasis                  | 1.051282051  |
| wavelet-HLH | glrlm      | ShortRunHighGrayLevelEmphasis    | 86.17706928  |
| wavelet-HLH | glrlm      | RunLengthNonUniformity           | 18.11111111  |
| wavelet-HLH | glrlm      | ShortRunEmphasis                 | 0.987179487  |
| wavelet-HLH | glrlm      | LongRunHighGrayLevelEmphasis     | 87.57130004  |
| wavelet-HLH | glrlm      | RunPercentage                    | 0.983805668  |
| wavelet-HLH | glrlm      | LongRunLowGrayLevelEmphasis      | 0.219879762  |
| wavelet-HLH | glrlm      | RunEntropy                       | 3.491813043  |
| wavelet-HLH | glrlm      | HighGrayLevelRunEmphasis         | 86.45591543  |
| wavelet-HLH | glrlm      | RunLengthNonUniformityNormalized | 0.967711301  |
| wavelet-HLH | glszm      | GrayLevelVariance                | 28.37333333  |
| wavelet-HLH | glszm      | ZoneVariance                     | 0.328888889  |
| wavelet-HLH | glszm      | GrayLevelNonUniformityNormalized | 0.093333333  |
| wavelet-HLH | glszm      | SizeZoneNonUniformityNormalized  | 0.662222222  |
| wavelet-HLH | glszm      | SizeZoneNonUniformity            | 9.933333333  |
| wavelet-HLH | glszm      | GrayLevelNonUniformity           | 1.4          |
| wavelet-HLH | glszm      | LargeAreaEmphasis                | 1.933333333  |
| wavelet-HLH | glszm      | SmallAreaHighGrayLevelEmphasis   | 98.02407407  |
| wavelet-HLH | glszm      | ZonePercentage                   | 0.789473684  |
| wavelet-HLH | glszm      | LargeAreaLowGrayLevelEmphasis    | 0.658456824  |
| wavelet-HLH | glszm      | LargeAreaHighGrayLevelEmphasis   | 119.8666667  |
| wavelet-HLH | glszm      | HighGrayLevelZoneEmphasis        | 102.3333333  |
| wavelet-HLH | glszm      | SmallAreaEmphasis                | 0.840740741  |
| wavelet-HLH | glszm      | LowGrayLevelZoneEmphasis         | 0.115486303  |
| wavelet-HLH | glszm      | ZoneEntropy                      | 3.506890596  |
| wavelet-HLH | glszm      | SmallAreaLowGrayLevelEmphasis    | 0.053817746  |

|             |       |            |             |
|-------------|-------|------------|-------------|
| wavelet-HLH | ngtdm | Coarseness | 0.121278179 |
| wavelet-HLH | ngtdm | Complexity | 414.1694409 |
| wavelet-HLH | ngtdm | Strength   | 16.25702161 |
| wavelet-HLH | ngtdm | Contrast   | 1.990736491 |
| wavelet-HLH | ngtdm | Busyness   | 0.190126968 |

| Image type | Feature Class | Feature Name                         |                                                                                                                                                                                                                                                                                                                                                                                                                   |
|------------|---------------|--------------------------------------|-------------------------------------------------------------------------------------------------------------------------------------------------------------------------------------------------------------------------------------------------------------------------------------------------------------------------------------------------------------------------------------------------------------------|
| general    | info          | BoundingBox                          | 9: RTSTRUCT: C99-DNU_segment_RUL lesion<br>(1, 0, 1, 6, 9, 8)                                                                                                                                                                                                                                                                                                                                                     |
| general    | info          | EnabledImageTypes                    | {u'Original': {}, u'Wavelet': {}}                                                                                                                                                                                                                                                                                                                                                                                 |
|            |               |                                      | {'distances': [1], 'additionalInfo': True, 'force2D': False, 'interpolator': 'sitkBSpline', 'resampledPixelSpacing': [3.0], 'label': 1, 'normalizeScale': 1, 'normalize': False, 'force2Ddimension': 0, 'removeOutliers': None, 'minimumROISize': None, u'binWidth': 25.0, 'minimumROIDimensions': 1, u'correctMask': True, 'preCrop': False, u'symmetricalGLCM': True, 'resegmentRange': None, 'padDistance': 5} |
| general    | info          | GeneralSettings                      |                                                                                                                                                                                                                                                                                                                                                                                                                   |
| general    | info          | ImageHash                            | 90565b602af816a65a6a29d8e7ffd3d5c9bc1c97<br>(0.9765625000000002, 0.9765625000000002, 2.0)                                                                                                                                                                                                                                                                                                                         |
| general    | info          | ImageSpacing                         |                                                                                                                                                                                                                                                                                                                                                                                                                   |
| general    | info          | MaskHash                             | 88d1b19b7fa321a6192825e12b05d84e00a8d024                                                                                                                                                                                                                                                                                                                                                                          |
| general    | info          | NumpyVersion                         | 1.13.1                                                                                                                                                                                                                                                                                                                                                                                                            |
| general    | info          | PyWaveletVersion                     | 0.5.2                                                                                                                                                                                                                                                                                                                                                                                                             |
| general    | info          | SimpleITKVersion                     | 1.1.0                                                                                                                                                                                                                                                                                                                                                                                                             |
| general    | info          | Version                              | 1.3.0.post102+g1b0eb74                                                                                                                                                                                                                                                                                                                                                                                            |
| general    | info          | VolumeNum                            | 1                                                                                                                                                                                                                                                                                                                                                                                                                 |
| general    | info          | VoxelNum                             | 174                                                                                                                                                                                                                                                                                                                                                                                                               |
| original   | shape         | Maximum3DDiameter                    | 29.85208694                                                                                                                                                                                                                                                                                                                                                                                                       |
| original   | shape         | Maximum2DDiameterSlice               | 24.89755622                                                                                                                                                                                                                                                                                                                                                                                                       |
| original   | shape         | Sphericity                           | 0.701836135                                                                                                                                                                                                                                                                                                                                                                                                       |
| original   | shape         | MinorAxis                            | 21.32511311                                                                                                                                                                                                                                                                                                                                                                                                       |
| original   | shape         | Elongation                           | 0.907476489                                                                                                                                                                                                                                                                                                                                                                                                       |
| original   | shape         | SurfaceVolumeRatio                   | 0.41464188                                                                                                                                                                                                                                                                                                                                                                                                        |
| original   | shape         | Volume                               | 4589.080811                                                                                                                                                                                                                                                                                                                                                                                                       |
| original   | shape         | MajorAxis                            | 23.49935604                                                                                                                                                                                                                                                                                                                                                                                                       |
| original   | shape         | SurfaceArea                          | 1902.825093                                                                                                                                                                                                                                                                                                                                                                                                       |
| original   | shape         | Flatness                             | 0.64484956                                                                                                                                                                                                                                                                                                                                                                                                        |
| original   | shape         | LeastAxis                            | 15.15354941                                                                                                                                                                                                                                                                                                                                                                                                       |
| original   | shape         | Maximum2DDiameterColumn              | 24.48697363                                                                                                                                                                                                                                                                                                                                                                                                       |
| original   | shape         | Maximum2DDiameterRow                 | 26.44293056                                                                                                                                                                                                                                                                                                                                                                                                       |
| original   | gldm          | GrayLevelVariance                    | 151.9313135                                                                                                                                                                                                                                                                                                                                                                                                       |
| original   | gldm          | HighGrayLevelEmphasis                | 973.1134663                                                                                                                                                                                                                                                                                                                                                                                                       |
| original   | gldm          | DependenceEntropy                    | 7.213264945                                                                                                                                                                                                                                                                                                                                                                                                       |
| original   | gldm          | DependenceNonUniformity              | 530.6300914                                                                                                                                                                                                                                                                                                                                                                                                       |
| original   | gldm          | GrayLevelNonUniformity               | 96.84206151                                                                                                                                                                                                                                                                                                                                                                                                       |
| original   | gldm          | SmallDependenceEmphasis              | 0.445682095                                                                                                                                                                                                                                                                                                                                                                                                       |
| original   | gldm          | SmallDependenceHighGrayLevelEmphasis | 309.5413137                                                                                                                                                                                                                                                                                                                                                                                                       |
| original   | gldm          | DependenceNonUniformityNormalized    | 0.22054451                                                                                                                                                                                                                                                                                                                                                                                                        |
| original   | gldm          | LargeDependenceEmphasis              | 26.06566916                                                                                                                                                                                                                                                                                                                                                                                                       |
| original   | gldm          | LargeDependenceLowGrayLevelEmphasis  | 0.034716897                                                                                                                                                                                                                                                                                                                                                                                                       |
| original   | gldm          | DependenceVariance                   | 13.94045366                                                                                                                                                                                                                                                                                                                                                                                                       |
| original   | gldm          | LargeDependenceHighGrayLevelEmphasis | 43490.19493                                                                                                                                                                                                                                                                                                                                                                                                       |
| original   | gldm          | SmallDependenceLowGrayLevelEmphasis  | 0.002566802                                                                                                                                                                                                                                                                                                                                                                                                       |
| original   | gldm          | LowGrayLevelEmphasis                 | 0.005064605                                                                                                                                                                                                                                                                                                                                                                                                       |
| original   | glcm          | JointAverage                         | 30.62481889                                                                                                                                                                                                                                                                                                                                                                                                       |
| original   | glcm          | SumAverage                           | 61.24963778                                                                                                                                                                                                                                                                                                                                                                                                       |

|          |            |                                  |              |
|----------|------------|----------------------------------|--------------|
| original | glcm       | JointEntropy                     | 9.017882674  |
| original | glcm       | ClusterShade                     | -5678.725239 |
| original | glcm       | MaximumProbability               | 0.05391314   |
| original | glcm       | Idmn                             | 0.959275072  |
| original | glcm       | JointEnergy                      | 0.007879805  |
| original | glcm       | Contrast                         | 96.38391179  |
| original | glcm       | DifferenceEntropy                | 4.232473625  |
| original | glcm       | InverseVariance                  | 0.207403207  |
| original | glcm       | DifferenceVariance               | 46.76076354  |
| original | glcm       | Idn                              | 0.880397863  |
| original | glcm       | Idm                              | 0.235085528  |
| original | glcm       | Correlation                      | 0.656248818  |
| original | glcm       | Autocorrelation                  | 1031.118546  |
| original | glcm       | SumEntropy                       | 5.913524439  |
| original | glcm       | SumSquares                       | 141.1017199  |
| original | glcm       | ClusterProminence                | 464556.9745  |
| original | glcm       | Imc2                             | 0.896607136  |
| original | glcm       | Imc1                             | -0.170724359 |
| original | glcm       | DifferenceAverage                | 6.93391878   |
| original | glcm       | Id                               | 0.30490236   |
| original | glcm       | ClusterTendency                  | 468.0229676  |
| original | firstorder | InterquartileRange               | 577          |
| original | firstorder | Skewness                         | -0.394009649 |
| original | firstorder | Uniformity                       | 0.040250233  |
| original | firstorder | Median                           | -244         |
| original | firstorder | Energy                           | 440089769    |
| original | firstorder | RobustMeanAbsoluteDeviation      | 227.8031474  |
| original | firstorder | MeanAbsoluteDeviation            | 272.9943864  |
| original | firstorder | TotalEnergy                      | 839404619.2  |
| original | firstorder | Maximum                          | 122          |
| original | firstorder | RootMeanSquared                  | 427.6838242  |
| original | firstorder | 90Percentile                     | 48.5         |
| original | firstorder | Minimum                          | -980         |
| original | firstorder | Entropy                          | 5.092174226  |
| original | firstorder | Range                            | 1102         |
| original | firstorder | Variance                         | 94888.7785   |
| original | firstorder | 10Percentile                     | -752         |
| original | firstorder | Kurtosis                         | 1.783020717  |
| original | firstorder | Mean                             | -296.6895262 |
| original | glrlm      | ShortRunLowGrayLevelEmphasis     | 0.005211369  |
| original | glrlm      | GrayLevelVariance                | 147.9141903  |
| original | glrlm      | LowGrayLevelRunEmphasis          | 0.005371403  |
| original | glrlm      | GrayLevelNonUniformityNormalized | 0.032432479  |
| original | glrlm      | RunVariance                      | 0.174554882  |
| original | glrlm      | GrayLevelNonUniformity           | 70.62634401  |
| original | glrlm      | LongRunEmphasis                  | 1.398900496  |
| original | glrlm      | ShortRunHighGrayLevelEmphasis    | 819.5017878  |
| original | glrlm      | RunLengthNonUniformity           | 1857.288352  |
| original | glrlm      | ShortRunEmphasis                 | 0.938023098  |
| original | glrlm      | LongRunHighGrayLevelEmphasis     | 1546.695578  |
| original | glrlm      | RunPercentage                    | 0.904533538  |
| original | glrlm      | LongRunLowGrayLevelEmphasis      | 0.006119975  |
| original | glrlm      | RunEntropy                       | 5.573832641  |
| original | glrlm      | HighGrayLevelRunEmphasis         | 911.9740323  |
| original | glrlm      | RunLengthNonUniformityNormalized | 0.852840089  |



|             |       |                                      |              |
|-------------|-------|--------------------------------------|--------------|
| original    | glszm | GrayLevelVariance                    | 113.9172818  |
| original    | glszm | ZoneVariance                         | 107.1363084  |
| original    | glszm | GrayLevelNonUniformityNormalized     | 0.026694509  |
| original    | glszm | SizeZoneNonUniformityNormalized      | 0.54139577   |
| original    | glszm | SizeZoneNonUniformity                | 659.9614438  |
| original    | glszm | GrayLevelNonUniformity               | 32.54060705  |
| original    | glszm | LargeAreaEmphasis                    | 111.0319934  |
| original    | glszm | SmallAreaHighGrayLevelEmphasis       | 507.3336994  |
| original    | glszm | ZonePercentage                       | 0.506650042  |
| original    | glszm | LargeAreaLowGrayLevelEmphasis        | 0.082511362  |
| original    | glszm | LargeAreaHighGrayLevelEmphasis       | 194802.0582  |
| original    | glszm | HighGrayLevelZoneEmphasis            | 681.7169811  |
| original    | glszm | SmallAreaEmphasis                    | 0.764089348  |
| original    | glszm | LowGrayLevelZoneEmphasis             | 0.006226272  |
| original    | glszm | ZoneEntropy                          | 6.499786992  |
| original    | glszm | SmallAreaLowGrayLevelEmphasis        | 0.004352921  |
| original    | ngtdm | Coarseness                           | 0.00296517   |
| original    | ngtdm | Complexity                           | 3610.825387  |
| original    | ngtdm | Strength                             | 2.896082285  |
| original    | ngtdm | Contrast                             | 0.698907739  |
| original    | ngtdm | Busyness                             | 0.236664262  |
| wavelet-HHH | gldm  | GrayLevelVariance                    | 1.100282682  |
| wavelet-HHH | gldm  | HighGrayLevelEmphasis                | 31.24522028  |
| wavelet-HHH | gldm  | DependenceEntropy                    | 5.479522621  |
| wavelet-HHH | gldm  | DependenceNonUniformity              | 166.6317539  |
| wavelet-HHH | gldm  | GrayLevelNonUniformity               | 683.1429759  |
| wavelet-HHH | gldm  | SmallDependenceEmphasis              | 0.097566731  |
| wavelet-HHH | gldm  | SmallDependenceHighGrayLevelEmphasis | 3.308579953  |
| wavelet-HHH | gldm  | DependenceNonUniformityNormalized    | 0.069256756  |
| wavelet-HHH | gldm  | LargeDependenceEmphasis              | 71.87780549  |
| wavelet-HHH | gldm  | LargeDependenceLowGrayLevelEmphasis  | 2.465403393  |
| wavelet-HHH | gldm  | DependenceVariance                   | 16.11924608  |
| wavelet-HHH | gldm  | LargeDependenceHighGrayLevelEmphasis | 2205.083957  |
| wavelet-HHH | gldm  | SmallDependenceLowGrayLevelEmphasis  | 0.005516983  |
| wavelet-HHH | gldm  | LowGrayLevelEmphasis                 | 0.038364288  |
| wavelet-HHH | glcm  | JointAverage                         | 5.493539949  |
| wavelet-HHH | glcm  | SumAverage                           | 10.9870799   |
| wavelet-HHH | glcm  | JointEntropy                         | 4.119958331  |
| wavelet-HHH | glcm  | ClusterShade                         | -0.081650309 |
| wavelet-HHH | glcm  | MaximumProbability                   | 0.143384718  |
| wavelet-HHH | glcm  | Idmn                                 | 0.975705924  |
| wavelet-HHH | glcm  | JointEnergy                          | 0.088156293  |
| wavelet-HHH | glcm  | Contrast                             | 2.153770523  |
| wavelet-HHH | glcm  | DifferenceEntropy                    | 1.885636391  |
| wavelet-HHH | glcm  | InverseVariance                      | 0.482759184  |
| wavelet-HHH | glcm  | DifferenceVariance                   | 0.996529869  |
| wavelet-HHH | glcm  | Idn                                  | 0.901595939  |
| wavelet-HHH | glcm  | Idm                                  | 0.565220203  |
| wavelet-HHH | glcm  | Correlation                          | -0.012704218 |
| wavelet-HHH | glcm  | Autocorrelation                      | 30.16546701  |
| wavelet-HHH | glcm  | SumEntropy                           | 2.559906528  |
| wavelet-HHH | glcm  | SumSquares                           | 1.063335002  |
| wavelet-HHH | glcm  | ClusterProminence                    | 16.8489253   |
| wavelet-HHH | glcm  | Imc2                                 | 0.234582154  |
| wavelet-HHH | glcm  | Imc1                                 | -0.014768109 |

|             |            |                                  |              |
|-------------|------------|----------------------------------|--------------|
| wavelet-HHH | glcm       | DifferenceAverage                | 1.073499195  |
| wavelet-HHH | glcm       | Id                               | 0.601292504  |
| wavelet-HHH | glcm       | ClusterTendency                  | 2.099569484  |
| wavelet-HHH | firstorder | InterquartileRange               | 29.34299156  |
| wavelet-HHH | firstorder | Skewness                         | -0.001880462 |
| wavelet-HHH | firstorder | Uniformity                       | 0.283933074  |
| wavelet-HHH | firstorder | Median                           | -0.302204311 |
| wavelet-HHH | firstorder | Energy                           | 1501603.468  |
| wavelet-HHH | firstorder | RobustMeanAbsoluteDeviation      | 12.29797493  |
| wavelet-HHH | firstorder | MeanAbsoluteDeviation            | 18.91409774  |
| wavelet-HHH | firstorder | TotalEnergy                      | 2864081.322  |
| wavelet-HHH | firstorder | Maximum                          | 97.78068712  |
| wavelet-HHH | firstorder | RootMeanSquared                  | 24.98215047  |
| wavelet-HHH | firstorder | 90Percentile                     | 30.52071417  |
| wavelet-HHH | firstorder | Minimum                          | -101.0719841 |
| wavelet-HHH | firstorder | Entropy                          | 2.10185441   |
| wavelet-HHH | firstorder | Range                            | 198.8526713  |
| wavelet-HHH | firstorder | Variance                         | 624.0778165  |
| wavelet-HHH | firstorder | 10Percentile                     | -31.31392685 |
| wavelet-HHH | firstorder | Kurtosis                         | 3.838844111  |
| wavelet-HHH | firstorder | Mean                             | -0.173279166 |
| wavelet-HHH | glrlm      | ShortRunLowGrayLevelEmphasis     | 0.033021088  |
| wavelet-HHH | glrlm      | GrayLevelVariance                | 1.309576121  |
| wavelet-HHH | glrlm      | LowGrayLevelRunEmphasis          | 0.039557981  |
| wavelet-HHH | glrlm      | GrayLevelNonUniformityNormalized | 0.253724258  |
| wavelet-HHH | glrlm      | RunVariance                      | 0.495448217  |
| wavelet-HHH | glrlm      | GrayLevelNonUniformity           | 458.7160094  |
| wavelet-HHH | glrlm      | LongRunEmphasis                  | 2.272246037  |
| wavelet-HHH | glrlm      | ShortRunHighGrayLevelEmphasis    | 25.69089737  |
| wavelet-HHH | glrlm      | RunLengthNonUniformity           | 1117.137024  |
| wavelet-HHH | glrlm      | ShortRunEmphasis                 | 0.81351745   |
| wavelet-HHH | glrlm      | LongRunHighGrayLevelEmphasis     | 70.54697352  |
| wavelet-HHH | glrlm      | RunPercentage                    | 0.751262868  |
| wavelet-HHH | glrlm      | LongRunLowGrayLevelEmphasis      | 0.083519847  |
| wavelet-HHH | glrlm      | RunEntropy                       | 3.235352059  |
| wavelet-HHH | glrlm      | HighGrayLevelRunEmphasis         | 31.41802143  |
| wavelet-HHH | glrlm      | RunLengthNonUniformityNormalized | 0.61716212   |
| wavelet-HHH | glszm      | GrayLevelVariance                | 4.830357143  |
| wavelet-HHH | glszm      | ZoneVariance                     | 7696.036339  |
| wavelet-HHH | glszm      | GrayLevelNonUniformityNormalized | 0.190805914  |
| wavelet-HHH | glszm      | SizeZoneNonUniformityNormalized  | 0.482663474  |
| wavelet-HHH | glszm      | SizeZoneNonUniformity            | 94.60204082  |
| wavelet-HHH | glszm      | GrayLevelNonUniformity           | 37.39795918  |
| wavelet-HHH | glszm      | LargeAreaEmphasis                | 7846.72449   |
| wavelet-HHH | glszm      | SmallAreaHighGrayLevelEmphasis   | 25.71753703  |
| wavelet-HHH | glszm      | ZonePercentage                   | 0.081463009  |
| wavelet-HHH | glszm      | LargeAreaLowGrayLevelEmphasis    | 267.9230106  |
| wavelet-HHH | glszm      | LargeAreaHighGrayLevelEmphasis   | 240314.7551  |
| wavelet-HHH | glszm      | HighGrayLevelZoneEmphasis        | 34.68877551  |
| wavelet-HHH | glszm      | SmallAreaEmphasis                | 0.721219399  |
| wavelet-HHH | glszm      | LowGrayLevelZoneEmphasis         | 0.063127784  |
| wavelet-HHH | glszm      | ZoneEntropy                      | 4.059339312  |
| wavelet-HHH | glszm      | SmallAreaLowGrayLevelEmphasis    | 0.04775738   |
| wavelet-HHH | ngtdm      | Coarseness                       | 0.00242001   |
| wavelet-HHH | ngtdm      | Complexity                       | 29.70478808  |

|             |            |                                      |              |
|-------------|------------|--------------------------------------|--------------|
| wavelet-HHH | ngtdm      | Strength                             | 0.069719692  |
| wavelet-HHH | ngtdm      | Contrast                             | 0.026261476  |
| wavelet-HHH | ngtdm      | Busyness                             | 6.534497891  |
| wavelet-HLL | gldm       | GrayLevelVariance                    | 95.30402312  |
| wavelet-HLL | gldm       | HighGrayLevelEmphasis                | 1427.341646  |
| wavelet-HLL | gldm       | DependenceEntropy                    | 7.223370796  |
| wavelet-HLL | gldm       | DependenceNonUniformity              | 657.840399   |
| wavelet-HLL | gldm       | GrayLevelNonUniformity               | 79.3433084   |
| wavelet-HLL | gldm       | SmallDependenceEmphasis              | 0.487889256  |
| wavelet-HLL | gldm       | SmallDependenceHighGrayLevelEmphasis | 710.636528   |
| wavelet-HLL | gldm       | DependenceNonUniformityNormalized    | 0.273416625  |
| wavelet-HLL | gldm       | LargeDependenceEmphasis              | 9.00166251   |
| wavelet-HLL | gldm       | LargeDependenceLowGrayLevelEmphasis  | 0.008049515  |
| wavelet-HLL | gldm       | DependenceVariance                   | 3.444140411  |
| wavelet-HLL | gldm       | LargeDependenceHighGrayLevelEmphasis | 12730.10474  |
| wavelet-HLL | gldm       | SmallDependenceLowGrayLevelEmphasis  | 0.001034084  |
| wavelet-HLL | gldm       | LowGrayLevelEmphasis                 | 0.001543668  |
| wavelet-HLL | glcm       | JointAverage                         | 36.54464377  |
| wavelet-HLL | glcm       | SumAverage                           | 73.08928754  |
| wavelet-HLL | glcm       | JointEntropy                         | 9.662682497  |
| wavelet-HLL | glcm       | ClusterShade                         | -430.7045778 |
| wavelet-HLL | glcm       | MaximumProbability                   | 0.013397878  |
| wavelet-HLL | glcm       | Idmn                                 | 0.975050062  |
| wavelet-HLL | glcm       | JointEnergy                          | 0.002220602  |
| wavelet-HLL | glcm       | Contrast                             | 135.0423767  |
| wavelet-HLL | glcm       | DifferenceEntropy                    | 4.43370997   |
| wavelet-HLL | glcm       | InverseVariance                      | 0.163146566  |
| wavelet-HLL | glcm       | DifferenceVariance                   | 63.37979198  |
| wavelet-HLL | glcm       | Idn                                  | 0.903241771  |
| wavelet-HLL | glcm       | Idm                                  | 0.161014677  |
| wavelet-HLL | glcm       | Correlation                          | 0.245727195  |
| wavelet-HLL | glcm       | Autocorrelation                      | 1358.594191  |
| wavelet-HLL | glcm       | SumEntropy                           | 5.849408651  |
| wavelet-HLL | glcm       | SumSquares                           | 90.5975551   |
| wavelet-HLL | glcm       | ClusterProminence                    | 198681.5326  |
| wavelet-HLL | glcm       | Imc2                                 | 0.871874958  |
| wavelet-HLL | glcm       | Imc1                                 | -0.145595096 |
| wavelet-HLL | glcm       | DifferenceAverage                    | 8.151718374  |
| wavelet-HLL | glcm       | Id                                   | 0.242031005  |
| wavelet-HLL | glcm       | ClusterTendency                      | 227.3478437  |
| wavelet-HLL | firstorder | InterquartileRange                   | 285.8404055  |
| wavelet-HLL | firstorder | Skewness                             | -0.16172176  |
| wavelet-HLL | firstorder | Uniformity                           | 0.032977269  |
| wavelet-HLL | firstorder | Median                               | -36.16769437 |
| wavelet-HLL | firstorder | Energy                               | 149191676.6  |
| wavelet-HLL | firstorder | RobustMeanAbsoluteDeviation          | 121.508279   |
| wavelet-HLL | firstorder | MeanAbsoluteDeviation                | 185.6001602  |
| wavelet-HLL | firstorder | TotalEnergy                          | 284560540.4  |
| wavelet-HLL | firstorder | Maximum                              | 755.6396239  |
| wavelet-HLL | firstorder | RootMeanSquared                      | 249.0144135  |
| wavelet-HLL | firstorder | 90Percentile                         | 264.2781329  |
| wavelet-HLL | firstorder | Minimum                              | -941.0861014 |
| wavelet-HLL | firstorder | Entropy                              | 5.266519129  |
| wavelet-HLL | firstorder | Range                                | 1696.725725  |
| wavelet-HLL | firstorder | Variance                             | 59493.06356  |

|             |            |                                      |              |
|-------------|------------|--------------------------------------|--------------|
| wavelet-HLL | firstorder | 10Percentile                         | -364.7043849 |
| wavelet-HLL | firstorder | Kurtosis                             | 3.406248728  |
| wavelet-HLL | firstorder | Mean                                 | -50.15091816 |
| wavelet-HLL | glrlm      | ShortRunLowGrayLevelEmphasis         | 0.001546229  |
| wavelet-HLL | glrlm      | GrayLevelVariance                    | 98.21799127  |
| wavelet-HLL | glrlm      | LowGrayLevelRunEmphasis              | 0.001580192  |
| wavelet-HLL | glrlm      | GrayLevelNonUniformityNormalized     | 0.031558721  |
| wavelet-HLL | glrlm      | RunVariance                          | 0.069895622  |
| wavelet-HLL | glrlm      | GrayLevelNonUniformity               | 71.98636233  |
| wavelet-HLL | glrlm      | LongRunEmphasis                      | 1.185462096  |
| wavelet-HLL | glrlm      | ShortRunHighGrayLevelEmphasis        | 1376.650813  |
| wavelet-HLL | glrlm      | RunLengthNonUniformity               | 2071.521217  |
| wavelet-HLL | glrlm      | ShortRunEmphasis                     | 0.962563353  |
| wavelet-HLL | glrlm      | LongRunHighGrayLevelEmphasis         | 1688.883365  |
| wavelet-HLL | glrlm      | RunPercentage                        | 0.947790779  |
| wavelet-HLL | glrlm      | LongRunLowGrayLevelEmphasis          | 0.001742324  |
| wavelet-HLL | glrlm      | RunEntropy                           | 5.56387788   |
| wavelet-HLL | glrlm      | HighGrayLevelRunEmphasis             | 1428.930002  |
| wavelet-HLL | glrlm      | RunLengthNonUniformityNormalized     | 0.907402452  |
| wavelet-HLL | glszm      | GrayLevelVariance                    | 125.5422977  |
| wavelet-HLL | glszm      | ZoneVariance                         | 13.32851526  |
| wavelet-HLL | glszm      | GrayLevelNonUniformityNormalized     | 0.025157202  |
| wavelet-HLL | glszm      | SizeZoneNonUniformityNormalized      | 0.512779627  |
| wavelet-HLL | glszm      | SizeZoneNonUniformity                | 693.7908352  |
| wavelet-HLL | glszm      | GrayLevelNonUniformity               | 34.03769401  |
| wavelet-HLL | glszm      | LargeAreaEmphasis                    | 16.49076127  |
| wavelet-HLL | glszm      | SmallAreaHighGrayLevelEmphasis       | 1090.20465   |
| wavelet-HLL | glszm      | ZonePercentage                       | 0.56234414   |
| wavelet-HLL | glszm      | LargeAreaLowGrayLevelEmphasis        | 0.013476169  |
| wavelet-HLL | glszm      | LargeAreaHighGrayLevelEmphasis       | 23765.54028  |
| wavelet-HLL | glszm      | HighGrayLevelZoneEmphasis            | 1451.675536  |
| wavelet-HLL | glszm      | SmallAreaEmphasis                    | 0.744159661  |
| wavelet-HLL | glszm      | LowGrayLevelZoneEmphasis             | 0.002001564  |
| wavelet-HLL | glszm      | ZoneEntropy                          | 6.827556126  |
| wavelet-HLL | glszm      | SmallAreaLowGrayLevelEmphasis        | 0.001709786  |
| wavelet-HLL | ngtdm      | Coarseness                           | 0.00330663   |
| wavelet-HLL | ngtdm      | Complexity                           | 8902.151201  |
| wavelet-HLL | ngtdm      | Strength                             | 3.987402213  |
| wavelet-HLL | ngtdm      | Contrast                             | 0.28018113   |
| wavelet-HLL | ngtdm      | Busyness                             | 0.11745294   |
| wavelet-LHL | gldm       | GrayLevelVariance                    | 20.12084588  |
| wavelet-LHL | gldm       | HighGrayLevelEmphasis                | 458.3844555  |
| wavelet-LHL | gldm       | DependenceEntropy                    | 6.776386434  |
| wavelet-LHL | gldm       | DependenceNonUniformity              | 391.6009975  |
| wavelet-LHL | gldm       | GrayLevelNonUniformity               | 172.364921   |
| wavelet-LHL | gldm       | SmallDependenceEmphasis              | 0.305924975  |
| wavelet-LHL | gldm       | SmallDependenceHighGrayLevelEmphasis | 143.0638939  |
| wavelet-LHL | gldm       | DependenceNonUniformityNormalized    | 0.162760182  |
| wavelet-LHL | gldm       | LargeDependenceEmphasis              | 17.61180382  |
| wavelet-LHL | gldm       | LargeDependenceLowGrayLevelEmphasis  | 0.042295638  |
| wavelet-LHL | gldm       | DependenceVariance                   | 6.007672009  |
| wavelet-LHL | gldm       | LargeDependenceHighGrayLevelEmphasis | 7975.086866  |
| wavelet-LHL | gldm       | SmallDependenceLowGrayLevelEmphasis  | 0.001547338  |
| wavelet-LHL | gldm       | LowGrayLevelEmphasis                 | 0.003326239  |
| wavelet-LHL | glcm       | JointAverage                         | 20.8263515   |

|             |            |                                  |              |
|-------------|------------|----------------------------------|--------------|
| wavelet-LHL | glcm       | SumAverage                       | 41.65270299  |
| wavelet-LHL | glcm       | JointEntropy                     | 7.88323186   |
| wavelet-LHL | glcm       | ClusterShade                     | -23.3482391  |
| wavelet-LHL | glcm       | MaximumProbability               | 0.029357383  |
| wavelet-LHL | glcm       | Idmn                             | 0.98189584   |
| wavelet-LHL | glcm       | JointEnergy                      | 0.00757458   |
| wavelet-LHL | glcm       | Contrast                         | 25.45583049  |
| wavelet-LHL | glcm       | DifferenceEntropy                | 3.389048408  |
| wavelet-LHL | glcm       | InverseVariance                  | 0.262956615  |
| wavelet-LHL | glcm       | DifferenceVariance               | 11.33118896  |
| wavelet-LHL | glcm       | Idn                              | 0.91321757   |
| wavelet-LHL | glcm       | Idm                              | 0.268941262  |
| wavelet-LHL | glcm       | Correlation                      | 0.326013945  |
| wavelet-LHL | glcm       | Autocorrelation                  | 439.9530613  |
| wavelet-LHL | glcm       | SumEntropy                       | 4.80634737   |
| wavelet-LHL | glcm       | SumSquares                       | 18.94320762  |
| wavelet-LHL | glcm       | ClusterProminence                | 9662.265477  |
| wavelet-LHL | glcm       | Imc2                             | 0.65903098   |
| wavelet-LHL | glcm       | Imc1                             | -0.079618592 |
| wavelet-LHL | glcm       | DifferenceAverage                | 3.687297756  |
| wavelet-LHL | glcm       | Id                               | 0.354444285  |
| wavelet-LHL | glcm       | ClusterTendency                  | 50.31699999  |
| wavelet-LHL | firstorder | InterquartileRange               | 121.9118404  |
| wavelet-LHL | firstorder | Skewness                         | -0.210442807 |
| wavelet-LHL | firstorder | Uniformity                       | 0.071639618  |
| wavelet-LHL | firstorder | Median                           | -9.741031722 |
| wavelet-LHL | firstorder | Energy                           | 30499478.18  |
| wavelet-LHL | firstorder | RobustMeanAbsoluteDeviation      | 53.44906755  |
| wavelet-LHL | firstorder | MeanAbsoluteDeviation            | 83.63521594  |
| wavelet-LHL | firstorder | TotalEnergy                      | 58173138.01  |
| wavelet-LHL | firstorder | Maximum                          | 365.6875195  |
| wavelet-LHL | firstorder | RootMeanSquared                  | 112.5896303  |
| wavelet-LHL | firstorder | 90Percentile                     | 129.4507513  |
| wavelet-LHL | firstorder | Minimum                          | -511.624249  |
| wavelet-LHL | firstorder | Entropy                          | 4.15804634   |
| wavelet-LHL | firstorder | Range                            | 877.3117685  |
| wavelet-LHL | firstorder | Variance                         | 12475.5435   |
| wavelet-LHL | firstorder | 10Percentile                     | -153.8463724 |
| wavelet-LHL | firstorder | Kurtosis                         | 3.825315948  |
| wavelet-LHL | firstorder | Mean                             | -14.17326178 |
| wavelet-LHL | glrlm      | ShortRunLowGrayLevelEmphasis     | 0.003255416  |
| wavelet-LHL | glrlm      | GrayLevelVariance                | 21.27851535  |
| wavelet-LHL | glrlm      | LowGrayLevelRunEmphasis          | 0.003419477  |
| wavelet-LHL | glrlm      | GrayLevelNonUniformityNormalized | 0.067723345  |
| wavelet-LHL | glrlm      | RunVariance                      | 0.134443809  |
| wavelet-LHL | glrlm      | GrayLevelNonUniformity           | 147.912298   |
| wavelet-LHL | glrlm      | LongRunEmphasis                  | 1.352566227  |
| wavelet-LHL | glrlm      | ShortRunHighGrayLevelEmphasis    | 428.3094145  |
| wavelet-LHL | glrlm      | RunLengthNonUniformity           | 1835.450896  |
| wavelet-LHL | glrlm      | ShortRunEmphasis                 | 0.932684938  |
| wavelet-LHL | glrlm      | LongRunHighGrayLevelEmphasis     | 618.4977693  |
| wavelet-LHL | glrlm      | RunPercentage                    | 0.907442931  |
| wavelet-LHL | glrlm      | LongRunLowGrayLevelEmphasis      | 0.004268758  |
| wavelet-LHL | glrlm      | RunEntropy                       | 4.657209731  |
| wavelet-LHL | glrlm      | HighGrayLevelRunEmphasis         | 458.8872443  |

|             |       |                                      |              |
|-------------|-------|--------------------------------------|--------------|
| wavelet-LHL | glrlm | RunLengthNonUniformityNormalized     | 0.839516903  |
| wavelet-LHL | glszm | GrayLevelVariance                    | 34.58292077  |
| wavelet-LHL | glszm | ZoneVariance                         | 101.308055   |
| wavelet-LHL | glszm | GrayLevelNonUniformityNormalized     | 0.047912888  |
| wavelet-LHL | glszm | SizeZoneNonUniformityNormalized      | 0.41016351   |
| wavelet-LHL | glszm | SizeZoneNonUniformity                | 346.5881657  |
| wavelet-LHL | glszm | GrayLevelNonUniformity               | 40.48639053  |
| wavelet-LHL | glszm | LargeAreaEmphasis                    | 109.4153846  |
| wavelet-LHL | glszm | SmallAreaHighGrayLevelEmphasis       | 313.5590667  |
| wavelet-LHL | glszm | ZonePercentage                       | 0.35120532   |
| wavelet-LHL | glszm | LargeAreaLowGrayLevelEmphasis        | 0.251745908  |
| wavelet-LHL | glszm | LargeAreaHighGrayLevelEmphasis       | 49011.70769  |
| wavelet-LHL | glszm | HighGrayLevelZoneEmphasis            | 467.912426   |
| wavelet-LHL | glszm | SmallAreaEmphasis                    | 0.664556652  |
| wavelet-LHL | glszm | LowGrayLevelZoneEmphasis             | 0.004822593  |
| wavelet-LHL | glszm | ZoneEntropy                          | 6.316969734  |
| wavelet-LHL | glszm | SmallAreaLowGrayLevelEmphasis        | 0.003847111  |
| wavelet-LHL | ngtdm | Coarseness                           | 0.003547593  |
| wavelet-LHL | ngtdm | Complexity                           | 1299.826045  |
| wavelet-LHL | ngtdm | Strength                             | 1.538706716  |
| wavelet-LHL | ngtdm | Contrast                             | 0.084123846  |
| wavelet-LHL | ngtdm | Busyness                             | 0.30389779   |
| wavelet-LHH | gldm  | GrayLevelVariance                    | 2.772819959  |
| wavelet-LHH | gldm  | HighGrayLevelEmphasis                | 59.46633416  |
| wavelet-LHH | gldm  | DependenceEntropy                    | 6.033076472  |
| wavelet-LHH | gldm  | DependenceNonUniformity              | 205.3990025  |
| wavelet-LHH | gldm  | GrayLevelNonUniformity               | 450.1122195  |
| wavelet-LHH | gldm  | SmallDependenceEmphasis              | 0.150565585  |
| wavelet-LHH | gldm  | SmallDependenceHighGrayLevelEmphasis | 9.501663329  |
| wavelet-LHH | gldm  | DependenceNonUniformityNormalized    | 0.085369494  |
| wavelet-LHH | gldm  | LargeDependenceEmphasis              | 49.93017456  |
| wavelet-LHH | gldm  | LargeDependenceLowGrayLevelEmphasis  | 0.934139764  |
| wavelet-LHH | gldm  | DependenceVariance                   | 15.05835163  |
| wavelet-LHH | gldm  | LargeDependenceHighGrayLevelEmphasis | 2828.214464  |
| wavelet-LHH | gldm  | SmallDependenceLowGrayLevelEmphasis  | 0.005076601  |
| wavelet-LHH | gldm  | LowGrayLevelEmphasis                 | 0.022116454  |
| wavelet-LHH | glcm  | JointAverage                         | 7.52354192   |
| wavelet-LHH | glcm  | SumAverage                           | 15.04708384  |
| wavelet-LHH | glcm  | JointEntropy                         | 5.301916826  |
| wavelet-LHH | glcm  | ClusterShade                         | -0.037718265 |
| wavelet-LHH | glcm  | MaximumProbability                   | 0.094397033  |
| wavelet-LHH | glcm  | Idmn                                 | 0.977677737  |
| wavelet-LHH | glcm  | JointEnergy                          | 0.043721333  |
| wavelet-LHH | glcm  | Contrast                             | 4.810242098  |
| wavelet-LHH | glcm  | DifferenceEntropy                    | 2.352068206  |
| wavelet-LHH | glcm  | InverseVariance                      | 0.424690262  |
| wavelet-LHH | glcm  | DifferenceVariance                   | 2.24096848   |
| wavelet-LHH | glcm  | Idn                                  | 0.905500591  |
| wavelet-LHH | glcm  | Idm                                  | 0.467101435  |
| wavelet-LHH | glcm  | Correlation                          | 0.071684283  |
| wavelet-LHH | glcm  | Autocorrelation                      | 56.79206808  |
| wavelet-LHH | glcm  | SumEntropy                           | 3.233581087  |
| wavelet-LHH | glcm  | SumSquares                           | 2.593470975  |
| wavelet-LHH | glcm  | ClusterProminence                    | 132.9079519  |
| wavelet-LHH | glcm  | Imc2                                 | 0.365971766  |

|             |            |                                  |              |
|-------------|------------|----------------------------------|--------------|
| wavelet-LHH | glcm       | Imc1                             | -0.032674496 |
| wavelet-LHH | glcm       | DifferenceAverage                | 1.591749011  |
| wavelet-LHH | glcm       | Id                               | 0.522836724  |
| wavelet-LHH | glcm       | ClusterTendency                  | 5.563641801  |
| wavelet-LHH | firstorder | InterquartileRange               | 45.03616825  |
| wavelet-LHH | firstorder | Skewness                         | -0.005568454 |
| wavelet-LHH | firstorder | Uniformity                       | 0.18707906   |
| wavelet-LHH | firstorder | Median                           | 0.626283223  |
| wavelet-LHH | firstorder | Energy                           | 4022232.444  |
| wavelet-LHH | firstorder | RobustMeanAbsoluteDeviation      | 19.25083317  |
| wavelet-LHH | firstorder | MeanAbsoluteDeviation            | 30.38629124  |
| wavelet-LHH | firstorder | TotalEnergy                      | 7671799.553  |
| wavelet-LHH | firstorder | Maximum                          | 167.1714645  |
| wavelet-LHH | firstorder | RootMeanSquared                  | 40.88704939  |
| wavelet-LHH | firstorder | 90Percentile                     | 52.09464166  |
| wavelet-LHH | firstorder | Minimum                          | -169.6103405 |
| wavelet-LHH | firstorder | Entropy                          | 2.750773567  |
| wavelet-LHH | firstorder | Range                            | 336.781805   |
| wavelet-LHH | firstorder | Variance                         | 1671.146956  |
| wavelet-LHH | firstorder | 10Percentile                     | -48.89881909 |
| wavelet-LHH | firstorder | Kurtosis                         | 4.058377061  |
| wavelet-LHH | firstorder | Mean                             | 0.777079024  |
| wavelet-LHH | glrlm      | ShortRunLowGrayLevelEmphasis     | 0.020217068  |
| wavelet-LHH | glrlm      | GrayLevelVariance                | 3.170096095  |
| wavelet-LHH | glrlm      | LowGrayLevelRunEmphasis          | 0.022843847  |
| wavelet-LHH | glrlm      | GrayLevelNonUniformityNormalized | 0.167995632  |
| wavelet-LHH | glrlm      | RunVariance                      | 0.348139972  |
| wavelet-LHH | glrlm      | GrayLevelNonUniformity           | 327.9813121  |
| wavelet-LHH | glrlm      | LongRunEmphasis                  | 1.873215876  |
| wavelet-LHH | glrlm      | ShortRunHighGrayLevelEmphasis    | 52.11479888  |
| wavelet-LHH | glrlm      | RunLengthNonUniformity           | 1374.611713  |
| wavelet-LHH | glrlm      | ShortRunEmphasis                 | 0.863479772  |
| wavelet-LHH | glrlm      | LongRunHighGrayLevelEmphasis     | 109.9776078  |
| wavelet-LHH | glrlm      | RunPercentage                    | 0.811337042  |
| wavelet-LHH | glrlm      | LongRunLowGrayLevelEmphasis      | 0.039294044  |
| wavelet-LHH | glrlm      | RunEntropy                       | 3.656237949  |
| wavelet-LHH | glrlm      | HighGrayLevelRunEmphasis         | 59.96061387  |
| wavelet-LHH | glrlm      | RunLengthNonUniformityNormalized | 0.702846404  |
| wavelet-LHH | glszm      | GrayLevelVariance                | 8.258981803  |
| wavelet-LHH | glszm      | ZoneVariance                     | 2181.244155  |
| wavelet-LHH | glszm      | GrayLevelNonUniformityNormalized | 0.113958824  |
| wavelet-LHH | glszm      | SizeZoneNonUniformityNormalized  | 0.376103468  |
| wavelet-LHH | glszm      | SizeZoneNonUniformity            | 138.0299728  |
| wavelet-LHH | glszm      | GrayLevelNonUniformity           | 41.82288828  |
| wavelet-LHH | glszm      | LargeAreaEmphasis                | 2224.223433  |
| wavelet-LHH | glszm      | SmallAreaHighGrayLevelEmphasis   | 40.61357618  |
| wavelet-LHH | glszm      | ZonePercentage                   | 0.152535328  |
| wavelet-LHH | glszm      | LargeAreaLowGrayLevelEmphasis    | 39.80917387  |
| wavelet-LHH | glszm      | LargeAreaHighGrayLevelEmphasis   | 127702.5504  |
| wavelet-LHH | glszm      | HighGrayLevelZoneEmphasis        | 63.22888283  |
| wavelet-LHH | glszm      | SmallAreaEmphasis                | 0.636247873  |
| wavelet-LHH | glszm      | LowGrayLevelZoneEmphasis         | 0.035581939  |
| wavelet-LHH | glszm      | ZoneEntropy                      | 5.266628482  |
| wavelet-LHH | glszm      | SmallAreaLowGrayLevelEmphasis    | 0.025633631  |
| wavelet-LHH | ngtdm      | Coarseness                       | 0.002953832  |

|             |            |                                      |              |
|-------------|------------|--------------------------------------|--------------|
| wavelet-LHH | ngtdm      | Complexity                           | 98.14732137  |
| wavelet-LHH | ngtdm      | Strength                             | 0.18408509   |
| wavelet-LHH | ngtdm      | Contrast                             | 0.036645348  |
| wavelet-LHH | ngtdm      | Busyness                             | 2.483581372  |
| wavelet-LLH | gldm       | GrayLevelVariance                    | 40.09724166  |
| wavelet-LLH | gldm       | HighGrayLevelEmphasis                | 666.5527847  |
| wavelet-LLH | gldm       | DependenceEntropy                    | 7.03794483   |
| wavelet-LLH | gldm       | DependenceNonUniformity              | 454.3848712  |
| wavelet-LLH | gldm       | GrayLevelNonUniformity               | 131.0207814  |
| wavelet-LLH | gldm       | SmallDependenceEmphasis              | 0.361751011  |
| wavelet-LLH | gldm       | SmallDependenceHighGrayLevelEmphasis | 252.3402469  |
| wavelet-LLH | gldm       | DependenceNonUniformityNormalized    | 0.188854892  |
| wavelet-LLH | gldm       | LargeDependenceEmphasis              | 18.44389027  |
| wavelet-LLH | gldm       | LargeDependenceLowGrayLevelEmphasis  | 0.031377568  |
| wavelet-LLH | gldm       | DependenceVariance                   | 7.934005386  |
| wavelet-LLH | gldm       | LargeDependenceHighGrayLevelEmphasis | 12000.95428  |
| wavelet-LLH | gldm       | SmallDependenceLowGrayLevelEmphasis  | 0.001422274  |
| wavelet-LLH | gldm       | LowGrayLevelEmphasis                 | 0.00268545   |
| wavelet-LLH | glcm       | JointAverage                         | 24.84079144  |
| wavelet-LLH | glcm       | SumAverage                           | 49.68158289  |
| wavelet-LLH | glcm       | JointEntropy                         | 8.579288467  |
| wavelet-LLH | glcm       | ClusterShade                         | 33.53427706  |
| wavelet-LLH | glcm       | MaximumProbability                   | 0.030112625  |
| wavelet-LLH | glcm       | Idmn                                 | 0.981664723  |
| wavelet-LLH | glcm       | JointEnergy                          | 0.005957977  |
| wavelet-LLH | glcm       | Contrast                             | 48.28095207  |
| wavelet-LLH | glcm       | DifferenceEntropy                    | 3.785846783  |
| wavelet-LLH | glcm       | InverseVariance                      | 0.235023883  |
| wavelet-LLH | glcm       | DifferenceVariance                   | 23.32431757  |
| wavelet-LLH | glcm       | Idn                                  | 0.916037559  |
| wavelet-LLH | glcm       | Idm                                  | 0.24327343   |
| wavelet-LLH | glcm       | Correlation                          | 0.353760353  |
| wavelet-LLH | glcm       | Autocorrelation                      | 630.4514255  |
| wavelet-LLH | glcm       | SumEntropy                           | 5.259769247  |
| wavelet-LLH | glcm       | SumSquares                           | 37.52053666  |
| wavelet-LLH | glcm       | ClusterProminence                    | 43720.45479  |
| wavelet-LLH | glcm       | Imc2                                 | 0.784011867  |
| wavelet-LLH | glcm       | Imc1                                 | -0.114602797 |
| wavelet-LLH | glcm       | DifferenceAverage                    | 4.888192053  |
| wavelet-LLH | glcm       | Id                                   | 0.32487087   |
| wavelet-LLH | glcm       | ClusterTendency                      | 101.8011946  |
| wavelet-LLH | firstorder | InterquartileRange                   | 165.5761385  |
| wavelet-LLH | firstorder | Skewness                             | -0.036844413 |
| wavelet-LLH | firstorder | Uniformity                           | 0.054455853  |
| wavelet-LLH | firstorder | Median                               | -9.374448084 |
| wavelet-LLH | firstorder | Energy                               | 60692654.77  |
| wavelet-LLH | firstorder | RobustMeanAbsoluteDeviation          | 70.67855852  |
| wavelet-LLH | firstorder | MeanAbsoluteDeviation                | 115.4067047  |
| wavelet-LLH | firstorder | TotalEnergy                          | 115762052.1  |
| wavelet-LLH | firstorder | Maximum                              | 596.5112641  |
| wavelet-LLH | firstorder | RootMeanSquared                      | 158.825509   |
| wavelet-LLH | firstorder | 90Percentile                         | 183.6929236  |
| wavelet-LLH | firstorder | Minimum                              | -618.1497124 |
| wavelet-LLH | firstorder | Entropy                              | 4.622840532  |
| wavelet-LLH | firstorder | Range                                | 1214.660977  |



|             |            |                                      |              |
|-------------|------------|--------------------------------------|--------------|
| wavelet-LLH | firstorder | Variance                             | 25085.65541  |
| wavelet-LLH | firstorder | 10Percentile                         | -206.6078565 |
| wavelet-LLH | firstorder | Kurtosis                             | 4.026761632  |
| wavelet-LLH | firstorder | Mean                                 | -11.82737859 |
| wavelet-LLH | glrlm      | ShortRunLowGrayLevelEmphasis         | 0.002663434  |
| wavelet-LLH | glrlm      | GrayLevelVariance                    | 42.53132995  |
| wavelet-LLH | glrlm      | LowGrayLevelRunEmphasis              | 0.002773079  |
| wavelet-LLH | glrlm      | GrayLevelNonUniformityNormalized     | 0.050218773  |
| wavelet-LLH | glrlm      | RunVariance                          | 0.130073765  |
| wavelet-LLH | glrlm      | GrayLevelNonUniformity               | 110.4438325  |
| wavelet-LLH | glrlm      | LongRunEmphasis                      | 1.330656873  |
| wavelet-LLH | glrlm      | ShortRunHighGrayLevelEmphasis        | 628.9405276  |
| wavelet-LLH | glrlm      | RunLengthNonUniformity               | 1879.341572  |
| wavelet-LLH | glrlm      | ShortRunEmphasis                     | 0.939017822  |
| wavelet-LLH | glrlm      | LongRunHighGrayLevelEmphasis         | 882.5749177  |
| wavelet-LLH | glrlm      | RunPercentage                        | 0.913773259  |
| wavelet-LLH | glrlm      | LongRunLowGrayLevelEmphasis          | 0.003347704  |
| wavelet-LLH | glrlm      | RunEntropy                           | 5.090563168  |
| wavelet-LLH | glrlm      | HighGrayLevelRunEmphasis             | 668.3932081  |
| wavelet-LLH | glrlm      | RunLengthNonUniformityNormalized     | 0.85383806   |
| wavelet-LLH | glszm      | GrayLevelVariance                    | 64.24393768  |
| wavelet-LLH | glszm      | ZoneVariance                         | 73.68471322  |
| wavelet-LLH | glszm      | GrayLevelNonUniformityNormalized     | 0.035734391  |
| wavelet-LLH | glszm      | SizeZoneNonUniformityNormalized      | 0.43096687   |
| wavelet-LLH | glszm      | SizeZoneNonUniformity                | 440.4481409  |
| wavelet-LLH | glszm      | GrayLevelNonUniformity               | 36.52054795  |
| wavelet-LLH | glszm      | LargeAreaEmphasis                    | 79.22700587  |
| wavelet-LLH | glszm      | SmallAreaHighGrayLevelEmphasis       | 485.0968436  |
| wavelet-LLH | glszm      | ZonePercentage                       | 0.424771405  |
| wavelet-LLH | glszm      | LargeAreaLowGrayLevelEmphasis        | 0.128417688  |
| wavelet-LLH | glszm      | LargeAreaHighGrayLevelEmphasis       | 50756.33464  |
| wavelet-LLH | glszm      | HighGrayLevelZoneEmphasis            | 698.6232877  |
| wavelet-LLH | glszm      | SmallAreaEmphasis                    | 0.682165091  |
| wavelet-LLH | glszm      | LowGrayLevelZoneEmphasis             | 0.003723976  |
| wavelet-LLH | glszm      | ZoneEntropy                          | 6.624507482  |
| wavelet-LLH | glszm      | SmallAreaLowGrayLevelEmphasis        | 0.002980997  |
| wavelet-LLH | ngtdm      | Coarseness                           | 0.003633828  |
| wavelet-LLH | ngtdm      | Complexity                           | 3010.644264  |
| wavelet-LLH | ngtdm      | Strength                             | 2.612953288  |
| wavelet-LLH | ngtdm      | Contrast                             | 0.125927074  |
| wavelet-LLH | ngtdm      | Busyness                             | 0.187882358  |
| wavelet-LLL | gldm       | GrayLevelVariance                    | 1038.839041  |
| wavelet-LLL | gldm       | HighGrayLevelEmphasis                | 6893.823774  |
| wavelet-LLL | gldm       | DependenceEntropy                    | 7.870986094  |
| wavelet-LLL | gldm       | DependenceNonUniformity              | 1039.643392  |
| wavelet-LLL | gldm       | GrayLevelNonUniformity               | 29.04239401  |
| wavelet-LLL | gldm       | SmallDependenceEmphasis              | 0.681373856  |
| wavelet-LLL | gldm       | SmallDependenceHighGrayLevelEmphasis | 3837.550122  |
| wavelet-LLL | gldm       | DependenceNonUniformityNormalized    | 0.432104485  |
| wavelet-LLL | gldm       | LargeDependenceEmphasis              | 5.690773067  |
| wavelet-LLL | gldm       | LargeDependenceLowGrayLevelEmphasis  | 0.002061217  |
| wavelet-LLL | gldm       | DependenceVariance                   | 2.334232305  |
| wavelet-LLL | gldm       | LargeDependenceHighGrayLevelEmphasis | 64296.54115  |
| wavelet-LLL | gldm       | SmallDependenceLowGrayLevelEmphasis  | 0.00109888   |
| wavelet-LLL | gldm       | LowGrayLevelEmphasis                 | 0.001230112  |

|             |            |                                  |              |
|-------------|------------|----------------------------------|--------------|
| wavelet-LLL | glcm       | JointAverage                     | 81.99540038  |
| wavelet-LLL | glcm       | SumAverage                       | 163.9908008  |
| wavelet-LLL | glcm       | JointEntropy                     | 10.94217871  |
| wavelet-LLL | glcm       | ClusterShade                     | -89037.11196 |
| wavelet-LLL | glcm       | MaximumProbability               | 0.007922917  |
| wavelet-LLL | glcm       | Idmn                             | 0.970002498  |
| wavelet-LLL | glcm       | JointEnergy                      | 0.000972063  |
| wavelet-LLL | glcm       | Contrast                         | 510.7100168  |
| wavelet-LLL | glcm       | DifferenceEntropy                | 5.435045005  |
| wavelet-LLL | glcm       | InverseVariance                  | 0.103004106  |
| wavelet-LLL | glcm       | DifferenceVariance               | 215.9473393  |
| wavelet-LLL | glcm       | Idn                              | 0.889615357  |
| wavelet-LLL | glcm       | Idm                              | 0.100768972  |
| wavelet-LLL | glcm       | Correlation                      | 0.735734538  |
| wavelet-LLL | glcm       | Autocorrelation                  | 7442.199568  |
| wavelet-LLL | glcm       | SumEntropy                       | 7.438019901  |
| wavelet-LLL | glcm       | SumSquares                       | 971.4658003  |
| wavelet-LLL | glcm       | ClusterProminence                | 23846265.36  |
| wavelet-LLL | glcm       | Imc2                             | 0.992658282  |
| wavelet-LLL | glcm       | Imc1                             | -0.324318004 |
| wavelet-LLL | glcm       | DifferenceAverage                | 16.85425732  |
| wavelet-LLL | glcm       | Id                               | 0.163318016  |
| wavelet-LLL | glcm       | ClusterTendency                  | 3375.153184  |
| wavelet-LLL | firstorder | InterquartileRange               | 1454.510331  |
| wavelet-LLL | firstorder | Skewness                         | -0.278770041 |
| wavelet-LLL | firstorder | Uniformity                       | 0.01207082   |
| wavelet-LLL | firstorder | Median                           | -782.782018  |
| wavelet-LLL | firstorder | Energy                           | 3298210637   |
| wavelet-LLL | firstorder | RobustMeanAbsoluteDeviation      | 572.9392671  |
| wavelet-LLL | firstorder | MeanAbsoluteDeviation            | 702.8437369  |
| wavelet-LLL | firstorder | TotalEnergy                      | 6290837549   |
| wavelet-LLL | firstorder | Maximum                          | 348.3104611  |
| wavelet-LLL | firstorder | RootMeanSquared                  | 1170.82337   |
| wavelet-LLL | firstorder | 90Percentile                     | 146.4988577  |
| wavelet-LLL | firstorder | Minimum                          | -2726.752123 |
| wavelet-LLL | firstorder | Entropy                          | 6.65769637   |
| wavelet-LLL | firstorder | Range                            | 3075.062584  |
| wavelet-LLL | firstorder | Variance                         | 649142.2894  |
| wavelet-LLL | firstorder | 10Percentile                     | -1982.420643 |
| wavelet-LLL | firstorder | Kurtosis                         | 1.860594231  |
| wavelet-LLL | firstorder | Mean                             | -849.5204966 |
| wavelet-LLL | glrlm      | ShortRunLowGrayLevelEmphasis     | 0.001256093  |
| wavelet-LLL | glrlm      | GrayLevelVariance                | 1026.126559  |
| wavelet-LLL | glrlm      | LowGrayLevelRunEmphasis          | 0.001262347  |
| wavelet-LLL | glrlm      | GrayLevelNonUniformityNormalized | 0.011405249  |
| wavelet-LLL | glrlm      | RunVariance                      | 0.041764017  |
| wavelet-LLL | glrlm      | GrayLevelNonUniformity           | 26.56588358  |
| wavelet-LLL | glrlm      | LongRunEmphasis                  | 1.109388165  |
| wavelet-LLL | glrlm      | ShortRunHighGrayLevelEmphasis    | 6499.034201  |
| wavelet-LLL | glrlm      | RunLengthNonUniformity           | 2196.761255  |
| wavelet-LLL | glrlm      | ShortRunEmphasis                 | 0.977535798  |
| wavelet-LLL | glrlm      | LongRunHighGrayLevelEmphasis     | 8003.014559  |
| wavelet-LLL | glrlm      | RunPercentage                    | 0.967996675  |
| wavelet-LLL | glrlm      | LongRunLowGrayLevelEmphasis      | 0.0012889    |
| wavelet-LLL | glrlm      | RunEntropy                       | 6.831811529  |

|             |       |                                      |             |
|-------------|-------|--------------------------------------|-------------|
| wavelet-LLL | glrlm | HighGrayLevelRunEmphasis             | 6747.88997  |
| wavelet-LLL | glrlm | RunLengthNonUniformityNormalized     | 0.943031884 |
| wavelet-LLL | glszm | GrayLevelVariance                    | 890.3252274 |
| wavelet-LLL | glszm | ZoneVariance                         | 7.563967459 |
| wavelet-LLL | glszm | GrayLevelNonUniformityNormalized     | 0.009659411 |
| wavelet-LLL | glszm | SizeZoneNonUniformityNormalized      | 0.726420866 |
| wavelet-LLL | glszm | SizeZoneNonUniformity                | 1277.774304 |
| wavelet-LLL | glszm | GrayLevelNonUniformity               | 16.99090392 |
| wavelet-LLL | glszm | LargeAreaEmphasis                    | 9.434906197 |
| wavelet-LLL | glszm | SmallAreaHighGrayLevelEmphasis       | 4783.760246 |
| wavelet-LLL | glszm | ZonePercentage                       | 0.731088944 |
| wavelet-LLL | glszm | LargeAreaLowGrayLevelEmphasis        | 0.002529774 |
| wavelet-LLL | glszm | LargeAreaHighGrayLevelEmphasis       | 115086.0352 |
| wavelet-LLL | glszm | HighGrayLevelZoneEmphasis            | 5687.876066 |
| wavelet-LLL | glszm | SmallAreaEmphasis                    | 0.876110524 |
| wavelet-LLL | glszm | LowGrayLevelZoneEmphasis             | 0.001551713 |
| wavelet-LLL | glszm | ZoneEntropy                          | 7.420211091 |
| wavelet-LLL | glszm | SmallAreaLowGrayLevelEmphasis        | 0.001473841 |
| wavelet-LLL | ngtdm | Coarseness                           | 0.004253686 |
| wavelet-LLL | ngtdm | Complexity                           | 55499.26074 |
| wavelet-LLL | ngtdm | Strength                             | 27.00952718 |
| wavelet-LLL | ngtdm | Contrast                             | 1.308286818 |
| wavelet-LLL | ngtdm | Busyness                             | 0.024755374 |
| wavelet-HHL | gldm  | GrayLevelVariance                    | 5.862298569 |
| wavelet-HHL | gldm  | HighGrayLevelEmphasis                | 163.4451372 |
| wavelet-HHL | gldm  | DependenceEntropy                    | 6.158527052 |
| wavelet-HHL | gldm  | DependenceNonUniformity              | 290.5444722 |
| wavelet-HHL | gldm  | GrayLevelNonUniformity               | 315.0872818 |
| wavelet-HHL | gldm  | SmallDependenceEmphasis              | 0.221061612 |
| wavelet-HHL | gldm  | SmallDependenceHighGrayLevelEmphasis | 37.14573877 |
| wavelet-HHL | gldm  | DependenceNonUniformityNormalized    | 0.120758301 |
| wavelet-HHL | gldm  | LargeDependenceEmphasis              | 28.3358271  |
| wavelet-HHL | gldm  | LargeDependenceLowGrayLevelEmphasis  | 0.186463352 |
| wavelet-HHL | gldm  | DependenceVariance                   | 9.152446537 |
| wavelet-HHL | gldm  | LargeDependenceHighGrayLevelEmphasis | 4499.916459 |
| wavelet-HHL | gldm  | SmallDependenceLowGrayLevelEmphasis  | 0.00253302  |
| wavelet-HHL | gldm  | LowGrayLevelEmphasis                 | 0.007878402 |
| wavelet-HHL | glcm  | JointAverage                         | 12.55149464 |
| wavelet-HHL | glcm  | SumAverage                           | 25.10298929 |
| wavelet-HHL | glcm  | JointEntropy                         | 6.340581896 |
| wavelet-HHL | glcm  | ClusterShade                         | 0.858421905 |
| wavelet-HHL | glcm  | MaximumProbability                   | 0.053513092 |
| wavelet-HHL | glcm  | Idmn                                 | 0.981079289 |
| wavelet-HHL | glcm  | JointEnergy                          | 0.020619027 |
| wavelet-HHL | glcm  | Contrast                             | 10.88597634 |
| wavelet-HHL | glcm  | DifferenceEntropy                    | 2.849749716 |
| wavelet-HHL | glcm  | InverseVariance                      | 0.346008302 |
| wavelet-HHL | glcm  | DifferenceVariance                   | 4.898282358 |
| wavelet-HHL | glcm  | Idn                                  | 0.911137086 |
| wavelet-HHL | glcm  | Idm                                  | 0.357303669 |
| wavelet-HHL | glcm  | Correlation                          | 0.022172402 |
| wavelet-HHL | glcm  | Autocorrelation                      | 157.6828314 |
| wavelet-HHL | glcm  | SumEntropy                           | 3.740744374 |
| wavelet-HHL | glcm  | SumSquares                           | 5.585581911 |
| wavelet-HHL | glcm  | ClusterProminence                    | 616.0989911 |

|             |            |                                  |              |
|-------------|------------|----------------------------------|--------------|
| wavelet-HHL | glcm       | Imc2                             | 0.451100627  |
| wavelet-HHL | glcm       | Imc1                             | -0.041862888 |
| wavelet-HHL | glcm       | DifferenceAverage                | 2.419929734  |
| wavelet-HHL | glcm       | Id                               | 0.432540811  |
| wavelet-HHL | glcm       | ClusterTendency                  | 11.4563513   |
| wavelet-HHL | firstorder | InterquartileRange               | 66.04297132  |
| wavelet-HHL | firstorder | Skewness                         | 0.025141306  |
| wavelet-HHL | firstorder | Uniformity                       | 0.13095897   |
| wavelet-HHL | firstorder | Median                           | 0.374529025  |
| wavelet-HHL | firstorder | Energy                           | 8659193.21   |
| wavelet-HHL | firstorder | RobustMeanAbsoluteDeviation      | 28.36890447  |
| wavelet-HHL | firstorder | MeanAbsoluteDeviation            | 44.69611902  |
| wavelet-HHL | firstorder | TotalEnergy                      | 16516100.33  |
| wavelet-HHL | firstorder | Maximum                          | 264.2154475  |
| wavelet-HHL | firstorder | RootMeanSquared                  | 59.99166335  |
| wavelet-HHL | firstorder | 90Percentile                     | 77.49928513  |
| wavelet-HHL | firstorder | Minimum                          | -286.0645883 |
| wavelet-HHL | firstorder | Entropy                          | 3.274630856  |
| wavelet-HHL | firstorder | Range                            | 550.2800358  |
| wavelet-HHL | firstorder | Variance                         | 3596.831495  |
| wavelet-HHL | firstorder | 10Percentile                     | -69.59467182 |
| wavelet-HHL | firstorder | Kurtosis                         | 4.29522972   |
| wavelet-HHL | firstorder | Mean                             | 1.472473079  |
| wavelet-HHL | glrlm      | ShortRunLowGrayLevelEmphasis     | 0.007431911  |
| wavelet-HHL | glrlm      | GrayLevelVariance                | 6.418809645  |
| wavelet-HHL | glrlm      | LowGrayLevelRunEmphasis          | 0.008065595  |
| wavelet-HHL | glrlm      | GrayLevelNonUniformityNormalized | 0.121263373  |
| wavelet-HHL | glrlm      | RunVariance                      | 0.203325789  |
| wavelet-HHL | glrlm      | GrayLevelNonUniformity           | 253.8946084  |
| wavelet-HHL | glrlm      | LongRunEmphasis                  | 1.530559962  |
| wavelet-HHL | glrlm      | ShortRunHighGrayLevelEmphasis    | 148.8016152  |
| wavelet-HHL | glrlm      | RunLengthNonUniformity           | 1640.51557   |
| wavelet-HHL | glrlm      | ShortRunEmphasis                 | 0.905028597  |
| wavelet-HHL | glrlm      | LongRunHighGrayLevelEmphasis     | 248.7044688  |
| wavelet-HHL | glrlm      | RunPercentage                    | 0.870004476  |
| wavelet-HHL | glrlm      | LongRunLowGrayLevelEmphasis      | 0.011572242  |
| wavelet-HHL | glrlm      | RunEntropy                       | 3.942412669  |
| wavelet-HHL | glrlm      | HighGrayLevelRunEmphasis         | 164.0004236  |
| wavelet-HHL | glrlm      | RunLengthNonUniformityNormalized | 0.782120828  |
| wavelet-HHL | glszm      | GrayLevelVariance                | 14.42229751  |
| wavelet-HHL | glszm      | ZoneVariance                     | 860.2341809  |
| wavelet-HHL | glszm      | GrayLevelNonUniformityNormalized | 0.080837988  |
| wavelet-HHL | glszm      | SizeZoneNonUniformityNormalized  | 0.439380836  |
| wavelet-HHL | glszm      | SizeZoneNonUniformity            | 238.5837937  |
| wavelet-HHL | glszm      | GrayLevelNonUniformity           | 43.89502762  |
| wavelet-HHL | glszm      | LargeAreaEmphasis                | 879.8674033  |
| wavelet-HHL | glszm      | SmallAreaHighGrayLevelEmphasis   | 116.5847819  |
| wavelet-HHL | glszm      | ZonePercentage                   | 0.225685786  |
| wavelet-HHL | glszm      | LargeAreaLowGrayLevelEmphasis    | 5.776489566  |
| wavelet-HHL | glszm      | LargeAreaHighGrayLevelEmphasis   | 136883.6041  |
| wavelet-HHL | glszm      | HighGrayLevelZoneEmphasis        | 169.9594843  |
| wavelet-HHL | glszm      | SmallAreaEmphasis                | 0.689062488  |
| wavelet-HHL | glszm      | LowGrayLevelZoneEmphasis         | 0.011622308  |
| wavelet-HHL | glszm      | ZoneEntropy                      | 5.49040145   |
| wavelet-HHL | glszm      | SmallAreaLowGrayLevelEmphasis    | 0.009135636  |

|             |            |                                      |              |
|-------------|------------|--------------------------------------|--------------|
| wavelet-HHL | ngtdm      | Coarseness                           | 0.002874052  |
| wavelet-HHL | ngtdm      | Complexity                           | 380.2924302  |
| wavelet-HHL | ngtdm      | Strength                             | 0.490578055  |
| wavelet-HHL | ngtdm      | Contrast                             | 0.045528434  |
| wavelet-HHL | ngtdm      | Busyness                             | 0.934270515  |
| wavelet-HLH | gldm       | GrayLevelVariance                    | 9.170748143  |
| wavelet-HLH | gldm       | HighGrayLevelEmphasis                | 167.6313383  |
| wavelet-HLH | gldm       | DependenceEntropy                    | 6.468426752  |
| wavelet-HLH | gldm       | DependenceNonUniformity              | 323.7863674  |
| wavelet-HLH | gldm       | GrayLevelNonUniformity               | 254.6392352  |
| wavelet-HLH | gldm       | SmallDependenceEmphasis              | 0.246576961  |
| wavelet-HLH | gldm       | SmallDependenceHighGrayLevelEmphasis | 43.56148287  |
| wavelet-HLH | gldm       | DependenceNonUniformityNormalized    | 0.13457455   |
| wavelet-HLH | gldm       | LargeDependenceEmphasis              | 29.34497091  |
| wavelet-HLH | gldm       | LargeDependenceLowGrayLevelEmphasis  | 0.20127772   |
| wavelet-HLH | gldm       | DependenceVariance                   | 11.53418546  |
| wavelet-HLH | gldm       | LargeDependenceHighGrayLevelEmphasis | 4583.247298  |
| wavelet-HLH | gldm       | SmallDependenceLowGrayLevelEmphasis  | 0.003042838  |
| wavelet-HLH | gldm       | LowGrayLevelEmphasis                 | 0.008716808  |
| wavelet-HLH | glcm       | JointAverage                         | 12.5897347   |
| wavelet-HLH | glcm       | SumAverage                           | 25.17946941  |
| wavelet-HLH | glcm       | JointEntropy                         | 6.908915157  |
| wavelet-HLH | glcm       | ClusterShade                         | 2.629213349  |
| wavelet-HLH | glcm       | MaximumProbability                   | 0.057891825  |
| wavelet-HLH | glcm       | Idmn                                 | 0.974324242  |
| wavelet-HLH | glcm       | JointEnergy                          | 0.015678085  |
| wavelet-HLH | glcm       | Contrast                             | 16.51310621  |
| wavelet-HLH | glcm       | DifferenceEntropy                    | 3.118470629  |
| wavelet-HLH | glcm       | InverseVariance                      | 0.310372786  |
| wavelet-HLH | glcm       | DifferenceVariance                   | 7.653322606  |
| wavelet-HLH | glcm       | Idn                                  | 0.899595985  |
| wavelet-HLH | glcm       | Idm                                  | 0.329591518  |
| wavelet-HLH | glcm       | Correlation                          | 0.052249746  |
| wavelet-HLH | glcm       | Autocorrelation                      | 158.9859928  |
| wavelet-HLH | glcm       | SumEntropy                           | 4.072518824  |
| wavelet-HLH | glcm       | SumSquares                           | 8.739477104  |
| wavelet-HLH | glcm       | ClusterProminence                    | 1484.73987   |
| wavelet-HLH | glcm       | Imc2                                 | 0.519214469  |
| wavelet-HLH | glcm       | Imc1                                 | -0.05291865  |
| wavelet-HLH | glcm       | DifferenceAverage                    | 2.937096954  |
| wavelet-HLH | glcm       | Id                                   | 0.406793135  |
| wavelet-HLH | glcm       | ClusterTendency                      | 18.4448022   |
| wavelet-HLH | firstorder | InterquartileRange                   | 83.09091201  |
| wavelet-HLH | firstorder | Skewness                             | 0.056720366  |
| wavelet-HLH | firstorder | Uniformity                           | 0.105835094  |
| wavelet-HLH | firstorder | Median                               | -0.615554001 |
| wavelet-HLH | firstorder | Energy                               | 13671777.81  |
| wavelet-HLH | firstorder | RobustMeanAbsoluteDeviation          | 35.60205377  |
| wavelet-HLH | firstorder | MeanAbsoluteDeviation                | 56.20191437  |
| wavelet-HLH | firstorder | TotalEnergy                          | 26076846.71  |
| wavelet-HLH | firstorder | Maximum                              | 289.8754216  |
| wavelet-HLH | firstorder | RootMeanSquared                      | 75.38148424  |
| wavelet-HLH | firstorder | 90Percentile                         | 93.92981283  |
| wavelet-HLH | firstorder | Minimum                              | -280.4595585 |
| wavelet-HLH | firstorder | Entropy                              | 3.597797874  |

|             |            |                                  |              |
|-------------|------------|----------------------------------|--------------|
| wavelet-HLH | firstorder | Range                            | 570.3349801  |
| wavelet-HLH | firstorder | Variance                         | 5676.898074  |
| wavelet-HLH | firstorder | 10Percentile                     | -91.93531329 |
| wavelet-HLH | firstorder | Kurtosis                         | 3.928244672  |
| wavelet-HLH | firstorder | Mean                             | 2.338822782  |
| wavelet-HLH | glrlm      | ShortRunLowGrayLevelEmphasis     | 0.008334734  |
| wavelet-HLH | glrlm      | GrayLevelVariance                | 9.992094718  |
| wavelet-HLH | glrlm      | LowGrayLevelRunEmphasis          | 0.008964485  |
| wavelet-HLH | glrlm      | GrayLevelNonUniformityNormalized | 0.097132891  |
| wavelet-HLH | glrlm      | RunVariance                      | 0.205272009  |
| wavelet-HLH | glrlm      | GrayLevelNonUniformity           | 204.8165847  |
| wavelet-HLH | glrlm      | LongRunEmphasis                  | 1.516946341  |
| wavelet-HLH | glrlm      | ShortRunHighGrayLevelEmphasis    | 154.4275148  |
| wavelet-HLH | glrlm      | RunLengthNonUniformity           | 1680.744832  |
| wavelet-HLH | glrlm      | ShortRunEmphasis                 | 0.910969487  |
| wavelet-HLH | glrlm      | LongRunHighGrayLevelEmphasis     | 251.0198537  |
| wavelet-HLH | glrlm      | RunPercentage                    | 0.876142976  |
| wavelet-HLH | glrlm      | LongRunLowGrayLevelEmphasis      | 0.012549254  |
| wavelet-HLH | glrlm      | RunEntropy                       | 4.231321437  |
| wavelet-HLH | glrlm      | HighGrayLevelRunEmphasis         | 168.7395914  |
| wavelet-HLH | glrlm      | RunLengthNonUniformityNormalized | 0.795075129  |
| wavelet-HLH | glszm      | GrayLevelVariance                | 18.96934164  |
| wavelet-HLH | glszm      | ZoneVariance                     | 397.7320272  |
| wavelet-HLH | glszm      | GrayLevelNonUniformityNormalized | 0.064771147  |
| wavelet-HLH | glszm      | SizeZoneNonUniformityNormalized  | 0.383610571  |
| wavelet-HLH | glszm      | SizeZoneNonUniformity            | 250.4977029  |
| wavelet-HLH | glszm      | GrayLevelNonUniformity           | 42.29555896  |
| wavelet-HLH | glszm      | LargeAreaEmphasis                | 411.3078101  |
| wavelet-HLH | glszm      | SmallAreaHighGrayLevelEmphasis   | 115.7527385  |
| wavelet-HLH | glszm      | ZonePercentage                   | 0.271404821  |
| wavelet-HLH | glszm      | LargeAreaLowGrayLevelEmphasis    | 2.683761724  |
| wavelet-HLH | glszm      | LargeAreaHighGrayLevelEmphasis   | 64385.31547  |
| wavelet-HLH | glszm      | HighGrayLevelZoneEmphasis        | 176.6967841  |
| wavelet-HLH | glszm      | SmallAreaEmphasis                | 0.6421023    |
| wavelet-HLH | glszm      | LowGrayLevelZoneEmphasis         | 0.012499912  |
| wavelet-HLH | glszm      | ZoneEntropy                      | 5.958235795  |
| wavelet-HLH | glszm      | SmallAreaLowGrayLevelEmphasis    | 0.009040492  |
| wavelet-HLH | ngtdm      | Coarseness                       | 0.002967761  |
| wavelet-HLH | ngtdm      | Complexity                       | 511.8216085  |
| wavelet-HLH | ngtdm      | Strength                         | 0.522064532  |
| wavelet-HLH | ngtdm      | Contrast                         | 0.072496418  |
| wavelet-HLH | ngtdm      | Busyness                         | 0.883188516  |

| Image type | Feature Class | Feature Name                         |                                                                                                                                                                                                                                                                                                                                                                                                                                              |
|------------|---------------|--------------------------------------|----------------------------------------------------------------------------------------------------------------------------------------------------------------------------------------------------------------------------------------------------------------------------------------------------------------------------------------------------------------------------------------------------------------------------------------------|
| general    | info          | BoundingBox                          | 9: RTSTRUCT: C99-DNU_segment_LUL mass<br>(0, 0, 0, 17, 14, 15)                                                                                                                                                                                                                                                                                                                                                                               |
| general    | info          | EnabledImageTypes                    | {u'Original': {}, u'Wavelet': {}}                                                                                                                                                                                                                                                                                                                                                                                                            |
|            |               |                                      | {'distances': [1], 'additionalInfo': True,<br>'force2D': False, 'interpolator': 'sitkBSpline',<br>'resampledPixelSpacing': [3.0], 'label': 1,<br>'normalizeScale': 1, 'normalize': False,<br>'force2Ddimension': 0, 'removeOutliers':<br>None, 'minimumROISize': None, u'binWidth':<br>25.0, 'minimumROIDimensions': 1,<br>u'correctMask': True, 'preCrop': False,<br>u'symmetricalGLCM': True, 'resegmentRange':<br>None, 'padDistance': 5} |
| general    | info          | GeneralSettings                      | 566607f9a53e47b1cc1030dd16f4a64eb639bf2<br>c                                                                                                                                                                                                                                                                                                                                                                                                 |
| general    | info          | ImageHash                            | (0.9765625000000002, 0.9765625000000002,<br>2.0)                                                                                                                                                                                                                                                                                                                                                                                             |
| general    | info          | ImageSpacing                         | e94dd18420e58888a1655b4ed9450e48c65c3<br>8e6                                                                                                                                                                                                                                                                                                                                                                                                 |
| general    | info          | MaskHash                             | 1.13.1                                                                                                                                                                                                                                                                                                                                                                                                                                       |
| general    | info          | NumpyVersion                         | 0.5.2                                                                                                                                                                                                                                                                                                                                                                                                                                        |
| general    | info          | PyWaveletVersion                     | 1.1.0                                                                                                                                                                                                                                                                                                                                                                                                                                        |
| general    | info          | SimpleITKVersion                     | 1.3.0.post102+g1b0eb74                                                                                                                                                                                                                                                                                                                                                                                                                       |
| general    | info          | Version                              |                                                                                                                                                                                                                                                                                                                                                                                                                                              |
| general    | info          | VolumeNum                            | 1                                                                                                                                                                                                                                                                                                                                                                                                                                            |
| general    | info          | VoxelNum                             | 1338                                                                                                                                                                                                                                                                                                                                                                                                                                         |
| original   | shape         | Maximum3DDiameter                    | 49.83974318                                                                                                                                                                                                                                                                                                                                                                                                                                  |
| original   | shape         | Maximum2DDiameterSlice               | 48.83646179                                                                                                                                                                                                                                                                                                                                                                                                                                  |
| original   | shape         | Sphericity                           | 0.856286262                                                                                                                                                                                                                                                                                                                                                                                                                                  |
| original   | shape         | MinorAxis                            | 34.41543804                                                                                                                                                                                                                                                                                                                                                                                                                                  |
| original   | shape         | Elongation                           | 0.751573823                                                                                                                                                                                                                                                                                                                                                                                                                                  |
| original   | shape         | SurfaceVolumeRatio                   | 0.170840902                                                                                                                                                                                                                                                                                                                                                                                                                                  |
| original   | shape         | Volume                               | 36126                                                                                                                                                                                                                                                                                                                                                                                                                                        |
| original   | shape         | MajorAxis                            | 45.79116112                                                                                                                                                                                                                                                                                                                                                                                                                                  |
| original   | shape         | SurfaceArea                          | 6171.798421                                                                                                                                                                                                                                                                                                                                                                                                                                  |
| original   | shape         | Flatness                             | 0.704668874                                                                                                                                                                                                                                                                                                                                                                                                                                  |
| original   | shape         | LeastAxis                            | 32.26760595                                                                                                                                                                                                                                                                                                                                                                                                                                  |
| original   | shape         | Maximum2DDiameterColumn              | 47.4341649                                                                                                                                                                                                                                                                                                                                                                                                                                   |
| original   | shape         | Maximum2DDiameterRow                 | 41.67733197                                                                                                                                                                                                                                                                                                                                                                                                                                  |
| original   | gldm          | GrayLevelVariance                    | 91.0184042                                                                                                                                                                                                                                                                                                                                                                                                                                   |
| original   | gldm          | HighGrayLevelEmphasis                | 833.5605381                                                                                                                                                                                                                                                                                                                                                                                                                                  |
| original   | gldm          | DependenceEntropy                    | 6.71124449                                                                                                                                                                                                                                                                                                                                                                                                                                   |
| original   | gldm          | DependenceNonUniformity              | 186.3124066                                                                                                                                                                                                                                                                                                                                                                                                                                  |
| original   | gldm          | GrayLevelNonUniformity               | 153.1091181                                                                                                                                                                                                                                                                                                                                                                                                                                  |
| original   | gldm          | SmallDependenceEmphasis              | 0.363861269                                                                                                                                                                                                                                                                                                                                                                                                                                  |
| original   | gldm          | SmallDependenceHighGrayLevelEmphasis | 183.3793325                                                                                                                                                                                                                                                                                                                                                                                                                                  |
| original   | gldm          | DependenceNonUniformityNormalized    | 0.139246941                                                                                                                                                                                                                                                                                                                                                                                                                                  |
| original   | gldm          | LargeDependenceEmphasis              | 75.42750374                                                                                                                                                                                                                                                                                                                                                                                                                                  |
| original   | gldm          | LargeDependenceLowGrayLevelEmphasis  | 0.077107664                                                                                                                                                                                                                                                                                                                                                                                                                                  |
| original   | gldm          | DependenceVariance                   | 36.40703278                                                                                                                                                                                                                                                                                                                                                                                                                                  |
| original   | gldm          | LargeDependenceHighGrayLevelEmphasis | 88459.01196                                                                                                                                                                                                                                                                                                                                                                                                                                  |

|          |            |                                     |              |
|----------|------------|-------------------------------------|--------------|
| original | gldm       | SmallDependenceLowGrayLevelEmphasis | 0.004791415  |
| original | gldm       | LowGrayLevelEmphasis                | 0.006735716  |
| original | glcm       | JointAverage                        | 28.95168928  |
| original | glcm       | SumAverage                          | 57.90337857  |
| original | glcm       | JointEntropy                        | 6.916539001  |
| original | glcm       | ClusterShade                        | -4101.503032 |
| original | glcm       | MaximumProbability                  | 0.12539283   |
| original | glcm       | ldmn                                | 0.952599555  |
| original | glcm       | JointEnergy                         | 0.042494211  |
| original | glcm       | Contrast                            | 78.1949405   |
| original | glcm       | DifferenceEntropy                   | 3.7555992    |
| original | glcm       | InverseVariance                     | 0.27189493   |
| original | glcm       | DifferenceVariance                  | 48.40069341  |
| original | glcm       | ldn                                 | 0.889685131  |
| original | glcm       | ldm                                 | 0.387386874  |
| original | glcm       | Correlation                         | 0.471578348  |
| original | glcm       | Autocorrelation                     | 873.2525889  |
| original | glcm       | SumEntropy                          | 4.799968237  |
| original | glcm       | SumSquares                          | 74.12397128  |
| original | glcm       | ClusterProminence                   | 175927.3092  |
| original | glcm       | lmc2                                | 0.845494728  |
| original | glcm       | lmc1                                | -0.168801563 |
| original | glcm       | DifferenceAverage                   | 5.428832605  |
| original | glcm       | ld                                  | 0.43596955   |
| original | glcm       | ClusterTendency                     | 218.3009446  |
| original | firstorder | InterquartileRange                  | 349.75       |
| original | firstorder | Skewness                            | -1.044894887 |
| original | firstorder | Uniformity                          | 0.114431329  |
| original | firstorder | Median                              | -11          |
| original | firstorder | Energy                              | 108718830    |
| original | firstorder | RobustMeanAbsoluteDeviation         | 155.3386268  |
| original | firstorder | MeanAbsoluteDeviation               | 203.7134737  |
| original | firstorder | TotalEnergy                         | 2935408410   |
| original | firstorder | Maximum                             | 70           |
| original | firstorder | RootMeanSquared                     | 285.0521548  |
| original | firstorder | 90Percentile                        | 35           |
| original | firstorder | Minimum                             | -805         |
| original | firstorder | Entropy                             | 4.120309633  |
| original | firstorder | Range                               | 875          |
| original | firstorder | Variance                            | 56712.62825  |
| original | firstorder | 10Percentile                        | -553.6       |
| original | firstorder | Kurtosis                            | 2.736230476  |
| original | firstorder | Mean                                | -156.6591928 |
| original | glrlm      | ShortRunLowGrayLevelEmphasis        | 0.007943943  |
| original | glrlm      | GrayLevelVariance                   | 97.17812745  |
| original | glrlm      | LowGrayLevelRunEmphasis             | 0.008125388  |
| original | glrlm      | GrayLevelNonUniformityNormalized    | 0.071718979  |
| original | glrlm      | RunVariance                         | 0.498295315  |
| original | glrlm      | GrayLevelNonUniformity              | 76.71816839  |
| original | glrlm      | LongRunEmphasis                     | 2.071382498  |
| original | glrlm      | ShortRunHighGrayLevelEmphasis       | 608.7246007  |
| original | glrlm      | RunLengthNonUniformity              | 774.7462451  |
| original | glrlm      | ShortRunEmphasis                    | 0.873945069  |



|             |       |                                      |              |
|-------------|-------|--------------------------------------|--------------|
| original    | glrlm | LongRunHighGrayLevelEmphasis         | 1996.697661  |
| original    | glrlm | RunPercentage                        | 0.798206278  |
| original    | glrlm | LongRunLowGrayLevelEmphasis          | 0.009359071  |
| original    | glrlm | RunEntropy                           | 5.152265809  |
| original    | glrlm | HighGrayLevelRunEmphasis             | 752.3462066  |
| original    | glrlm | RunLengthNonUniformityNormalized     | 0.725064278  |
| original    | glszm | GrayLevelVariance                    | 80.74366485  |
| original    | glszm | ZoneVariance                         | 336.4640596  |
| original    | glszm | GrayLevelNonUniformityNormalized     | 0.033997117  |
| original    | glszm | SizeZoneNonUniformityNormalized      | 0.626787834  |
| original    | glszm | SizeZoneNonUniformity                | 333.4511278  |
| original    | glszm | GrayLevelNonUniformity               | 18.08646617  |
| original    | glszm | LargeAreaEmphasis                    | 342.7894737  |
| original    | glszm | SmallAreaHighGrayLevelEmphasis       | 391.6440297  |
| original    | glszm | ZonePercentage                       | 0.397608371  |
| original    | glszm | LargeAreaLowGrayLevelEmphasis        | 0.312370696  |
| original    | glszm | LargeAreaHighGrayLevelEmphasis       | 404488.1692  |
| original    | glszm | HighGrayLevelZoneEmphasis            | 498.9154135  |
| original    | glszm | SmallAreaEmphasis                    | 0.818820471  |
| original    | glszm | LowGrayLevelZoneEmphasis             | 0.013093746  |
| original    | glszm | ZoneEntropy                          | 5.873929325  |
| original    | glszm | SmallAreaLowGrayLevelEmphasis        | 0.011392581  |
| original    | ngtdm | Coarseness                           | 0.002624196  |
| original    | ngtdm | Complexity                           | 2496.229823  |
| original    | ngtdm | Strength                             | 3.401689998  |
| original    | ngtdm | Contrast                             | 0.629618938  |
| original    | ngtdm | Busyness                             | 0.274768609  |
| wavelet-HHH | gldm  | GrayLevelVariance                    | 4.015734727  |
| wavelet-HHH | gldm  | HighGrayLevelEmphasis                | 75.7077728   |
| wavelet-HHH | gldm  | DependenceEntropy                    | 5.935654719  |
| wavelet-HHH | gldm  | DependenceNonUniformity              | 121.45142    |
| wavelet-HHH | gldm  | GrayLevelNonUniformity               | 229.1778774  |
| wavelet-HHH | gldm  | SmallDependenceEmphasis              | 0.191024489  |
| wavelet-HHH | gldm  | SmallDependenceHighGrayLevelEmphasis | 15.927062    |
| wavelet-HHH | gldm  | DependenceNonUniformityNormalized    | 0.090770867  |
| wavelet-HHH | gldm  | LargeDependenceEmphasis              | 50.30493274  |
| wavelet-HHH | gldm  | LargeDependenceLowGrayLevelEmphasis  | 0.721195271  |
| wavelet-HHH | gldm  | DependenceVariance                   | 17.35836232  |
| wavelet-HHH | gldm  | LargeDependenceHighGrayLevelEmphasis | 3668.265321  |
| wavelet-HHH | gldm  | SmallDependenceLowGrayLevelEmphasis  | 0.00687933   |
| wavelet-HHH | gldm  | LowGrayLevelEmphasis                 | 0.019935024  |
| wavelet-HHH | glcm  | JointAverage                         | 8.469797251  |
| wavelet-HHH | glcm  | SumAverage                           | 16.9395945   |
| wavelet-HHH | glcm  | JointEntropy                         | 5.576856742  |
| wavelet-HHH | glcm  | ClusterShade                         | -2.093392906 |
| wavelet-HHH | glcm  | MaximumProbability                   | 0.103351973  |
| wavelet-HHH | glcm  | Idmn                                 | 0.974407946  |
| wavelet-HHH | glcm  | JointEnergy                          | 0.042934763  |
| wavelet-HHH | glcm  | Contrast                             | 7.359979318  |
| wavelet-HHH | glcm  | DifferenceEntropy                    | 2.607195783  |
| wavelet-HHH | glcm  | InverseVariance                      | 0.391592223  |
| wavelet-HHH | glcm  | DifferenceVariance                   | 3.623837047  |
| wavelet-HHH | glcm  | Idn                                  | 0.901848088  |

|             |            |                                  |              |
|-------------|------------|----------------------------------|--------------|
| wavelet-HHH | glcm       | Idm                              | 0.435293262  |
| wavelet-HHH | glcm       | Correlation                      | -0.025312803 |
| wavelet-HHH | glcm       | Autocorrelation                  | 71.64244308  |
| wavelet-HHH | glcm       | SumEntropy                       | 3.337967363  |
| wavelet-HHH | glcm       | SumSquares                       | 3.584762181  |
| wavelet-HHH | glcm       | ClusterProminence                | 237.9705029  |
| wavelet-HHH | glcm       | Imc2                             | 0.477988604  |
| wavelet-HHH | glcm       | Imc1                             | -0.047319632 |
| wavelet-HHH | glcm       | DifferenceAverage                | 1.920988817  |
| wavelet-HHH | glcm       | Id                               | 0.495917996  |
| wavelet-HHH | glcm       | ClusterTendency                  | 6.979069404  |
| wavelet-HHH | firstorder | InterquartileRange               | 47.04236714  |
| wavelet-HHH | firstorder | Skewness                         | -0.054260536 |
| wavelet-HHH | firstorder | Uniformity                       | 0.171283914  |
| wavelet-HHH | firstorder | Median                           | -0.254971361 |
| wavelet-HHH | firstorder | Energy                           | 3290125.041  |
| wavelet-HHH | firstorder | RobustMeanAbsoluteDeviation      | 20.72121197  |
| wavelet-HHH | firstorder | MeanAbsoluteDeviation            | 35.20813335  |
| wavelet-HHH | firstorder | TotalEnergy                      | 88833376.1   |
| wavelet-HHH | firstorder | Maximum                          | 193.181738   |
| wavelet-HHH | firstorder | RootMeanSquared                  | 49.58817727  |
| wavelet-HHH | firstorder | 90Percentile                     | 57.90792241  |
| wavelet-HHH | firstorder | Minimum                          | -185.0090226 |
| wavelet-HHH | firstorder | Entropy                          | 2.962626615  |
| wavelet-HHH | firstorder | Range                            | 378.1907607  |
| wavelet-HHH | firstorder | Variance                         | 2458.440284  |
| wavelet-HHH | firstorder | 10Percentile                     | -62.64478973 |
| wavelet-HHH | firstorder | Kurtosis                         | 4.461969891  |
| wavelet-HHH | firstorder | Mean                             | -0.739621941 |
| wavelet-HHH | glrlm      | ShortRunLowGrayLevelEmphasis     | 0.019235082  |
| wavelet-HHH | glrlm      | GrayLevelVariance                | 4.691239995  |
| wavelet-HHH | glrlm      | LowGrayLevelRunEmphasis          | 0.021119528  |
| wavelet-HHH | glrlm      | GrayLevelNonUniformityNormalized | 0.147183076  |
| wavelet-HHH | glrlm      | RunVariance                      | 0.355716976  |
| wavelet-HHH | glrlm      | GrayLevelNonUniformity           | 161.1017063  |
| wavelet-HHH | glrlm      | LongRunEmphasis                  | 1.855622302  |
| wavelet-HHH | glrlm      | ShortRunHighGrayLevelEmphasis    | 66.92438259  |
| wavelet-HHH | glrlm      | RunLengthNonUniformity           | 788.1991371  |
| wavelet-HHH | glrlm      | ShortRunEmphasis                 | 0.872597393  |
| wavelet-HHH | glrlm      | LongRunHighGrayLevelEmphasis     | 138.8567873  |
| wavelet-HHH | glrlm      | RunPercentage                    | 0.817695757  |
| wavelet-HHH | glrlm      | LongRunLowGrayLevelEmphasis      | 0.033554511  |
| wavelet-HHH | glrlm      | RunEntropy                       | 3.83989655   |
| wavelet-HHH | glrlm      | HighGrayLevelRunEmphasis         | 76.26808884  |
| wavelet-HHH | glrlm      | RunLengthNonUniformityNormalized | 0.719584613  |
| wavelet-HHH | glszm      | GrayLevelVariance                | 12.10185686  |
| wavelet-HHH | glszm      | ZoneVariance                     | 918.1901929  |
| wavelet-HHH | glszm      | GrayLevelNonUniformityNormalized | 0.097650382  |
| wavelet-HHH | glszm      | SizeZoneNonUniformityNormalized  | 0.438615468  |
| wavelet-HHH | glszm      | SizeZoneNonUniformity            | 113.1627907  |
| wavelet-HHH | glszm      | GrayLevelNonUniformity           | 25.19379845  |
| wavelet-HHH | glszm      | LargeAreaEmphasis                | 945.0852713  |
| wavelet-HHH | glszm      | SmallAreaHighGrayLevelEmphasis   | 59.79039957  |

|             |            |                                      |              |
|-------------|------------|--------------------------------------|--------------|
| wavelet-HHH | glszm      | ZonePercentage                       | 0.192825112  |
| wavelet-HHH | glszm      | LargeAreaLowGrayLevelEmphasis        | 13.31294094  |
| wavelet-HHH | glszm      | LargeAreaHighGrayLevelEmphasis       | 68647.56202  |
| wavelet-HHH | glszm      | HighGrayLevelZoneEmphasis            | 82.19379845  |
| wavelet-HHH | glszm      | SmallAreaEmphasis                    | 0.688712483  |
| wavelet-HHH | glszm      | LowGrayLevelZoneEmphasis             | 0.037679165  |
| wavelet-HHH | glszm      | ZoneEntropy                          | 5.138124325  |
| wavelet-HHH | glszm      | SmallAreaLowGrayLevelEmphasis        | 0.029946285  |
| wavelet-HHH | ngtdm      | Coarseness                           | 0.005236419  |
| wavelet-HHH | ngtdm      | Complexity                           | 155.9096004  |
| wavelet-HHH | ngtdm      | Strength                             | 0.394954561  |
| wavelet-HHH | ngtdm      | Contrast                             | 0.051201304  |
| wavelet-HHH | ngtdm      | Busyness                             | 1.089508795  |
| wavelet-HLL | gldm       | GrayLevelVariance                    | 33.24502414  |
| wavelet-HLL | gldm       | HighGrayLevelEmphasis                | 564.4820628  |
| wavelet-HLL | gldm       | DependenceEntropy                    | 6.890494619  |
| wavelet-HLL | gldm       | DependenceNonUniformity              | 215.2361734  |
| wavelet-HLL | gldm       | GrayLevelNonUniformity               | 87.68161435  |
| wavelet-HLL | gldm       | SmallDependenceEmphasis              | 0.335107714  |
| wavelet-HLL | gldm       | SmallDependenceHighGrayLevelEmphasis | 190.3312813  |
| wavelet-HLL | gldm       | DependenceNonUniformityNormalized    | 0.160864106  |
| wavelet-HLL | gldm       | LargeDependenceEmphasis              | 30.31091181  |
| wavelet-HLL | gldm       | LargeDependenceLowGrayLevelEmphasis  | 0.054575776  |
| wavelet-HLL | gldm       | DependenceVariance                   | 14.13103689  |
| wavelet-HLL | gldm       | LargeDependenceHighGrayLevelEmphasis | 18006.05456  |
| wavelet-HLL | gldm       | SmallDependenceLowGrayLevelEmphasis  | 0.001999697  |
| wavelet-HLL | gldm       | LowGrayLevelEmphasis                 | 0.003423449  |
| wavelet-HLL | glcm       | JointAverage                         | 22.86601893  |
| wavelet-HLL | glcm       | SumAverage                           | 45.73203786  |
| wavelet-HLL | glcm       | JointEntropy                         | 7.914307058  |
| wavelet-HLL | glcm       | ClusterShade                         | 41.46147455  |
| wavelet-HLL | glcm       | MaximumProbability                   | 0.058096133  |
| wavelet-HLL | glcm       | ldmn                                 | 0.979397784  |
| wavelet-HLL | glcm       | JointEnergy                          | 0.012279634  |
| wavelet-HLL | glcm       | Contrast                             | 40.7483916   |
| wavelet-HLL | glcm       | DifferenceEntropy                    | 3.640244494  |
| wavelet-HLL | glcm       | InverseVariance                      | 0.261293151  |
| wavelet-HLL | glcm       | DifferenceVariance                   | 21.10130254  |
| wavelet-HLL | glcm       | ldn                                  | 0.914223962  |
| wavelet-HLL | glcm       | ldm                                  | 0.288217626  |
| wavelet-HLL | glcm       | Correlation                          | 0.28917797   |
| wavelet-HLL | glcm       | Autocorrelation                      | 531.5241676  |
| wavelet-HLL | glcm       | SumEntropy                           | 4.933568269  |
| wavelet-HLL | glcm       | SumSquares                           | 29.04264727  |
| wavelet-HLL | glcm       | ClusterProminence                    | 25269.0369   |
| wavelet-HLL | glcm       | lmc2                                 | 0.843709045  |
| wavelet-HLL | glcm       | lmc1                                 | -0.150629867 |
| wavelet-HLL | glcm       | DifferenceAverage                    | 4.345955347  |
| wavelet-HLL | glcm       | ld                                   | 0.363637669  |
| wavelet-HLL | glcm       | ClusterTendency                      | 75.42219748  |
| wavelet-HLL | firstorder | InterquartileRange                   | 140.1078109  |
| wavelet-HLL | firstorder | Skewness                             | 0.017988551  |
| wavelet-HLL | firstorder | Uniformity                           | 0.065531849  |

|             |            |                                  |              |
|-------------|------------|----------------------------------|--------------|
| wavelet-HLL | firstorder | Median                           | -18.90126889 |
| wavelet-HLL | firstorder | Energy                           | 29530924.6   |
| wavelet-HLL | firstorder | RobustMeanAbsoluteDeviation      | 67.20985857  |
| wavelet-HLL | firstorder | MeanAbsoluteDeviation            | 107.0101634  |
| wavelet-HLL | firstorder | TotalEnergy                      | 797334964.3  |
| wavelet-HLL | firstorder | Maximum                          | 444.2485828  |
| wavelet-HLL | firstorder | RootMeanSquared                  | 148.5629333  |
| wavelet-HLL | firstorder | 90Percentile                     | 152.4746163  |
| wavelet-HLL | firstorder | Minimum                          | -575.4709988 |
| wavelet-HLL | firstorder | Entropy                          | 4.422180532  |
| wavelet-HLL | firstorder | Range                            | 1019.719582  |
| wavelet-HLL | firstorder | Variance                         | 20770.07416  |
| wavelet-HLL | firstorder | 10Percentile                     | -224.7546884 |
| wavelet-HLL | firstorder | Kurtosis                         | 3.795023024  |
| wavelet-HLL | firstorder | Mean                             | -36.06758916 |
| wavelet-HLL | gllm       | ShortRunLowGrayLevelEmphasis     | 0.003475001  |
| wavelet-HLL | gllm       | GrayLevelVariance                | 36.21559346  |
| wavelet-HLL | gllm       | LowGrayLevelRunEmphasis          | 0.003628848  |
| wavelet-HLL | gllm       | GrayLevelNonUniformityNormalized | 0.05568577   |
| wavelet-HLL | gllm       | RunVariance                      | 0.200526839  |
| wavelet-HLL | gllm       | GrayLevelNonUniformity           | 65.8953407   |
| wavelet-HLL | gllm       | LongRunEmphasis                  | 1.484555273  |
| wavelet-HLL | gllm       | ShortRunHighGrayLevelEmphasis    | 515.9699063  |
| wavelet-HLL | gllm       | RunLengthNonUniformity           | 962.2999094  |
| wavelet-HLL | gllm       | ShortRunEmphasis                 | 0.919879531  |
| wavelet-HLL | gllm       | LongRunHighGrayLevelEmphasis     | 845.8916058  |
| wavelet-HLL | gllm       | RunPercentage                    | 0.883753018  |
| wavelet-HLL | gllm       | LongRunLowGrayLevelEmphasis      | 0.004520103  |
| wavelet-HLL | gllm       | RunEntropy                       | 5.010596632  |
| wavelet-HLL | gllm       | HighGrayLevelRunEmphasis         | 562.1895514  |
| wavelet-HLL | gllm       | RunLengthNonUniformityNormalized | 0.812915342  |
| wavelet-HLL | glszm      | GrayLevelVariance                | 55.06435653  |
| wavelet-HLL | glszm      | ZoneVariance                     | 103.0668543  |
| wavelet-HLL | glszm      | GrayLevelNonUniformityNormalized | 0.038148253  |
| wavelet-HLL | glszm      | SizeZoneNonUniformityNormalized  | 0.443982302  |
| wavelet-HLL | glszm      | SizeZoneNonUniformity            | 231.3147793  |
| wavelet-HLL | glszm      | GrayLevelNonUniformity           | 19.87523992  |
| wavelet-HLL | glszm      | LargeAreaEmphasis                | 109.6621881  |
| wavelet-HLL | glszm      | SmallAreaHighGrayLevelEmphasis   | 396.0256994  |
| wavelet-HLL | glszm      | ZonePercentage                   | 0.389387145  |
| wavelet-HLL | glszm      | LargeAreaLowGrayLevelEmphasis    | 0.190523647  |
| wavelet-HLL | glszm      | LargeAreaHighGrayLevelEmphasis   | 65437.92898  |
| wavelet-HLL | glszm      | HighGrayLevelZoneEmphasis        | 569.1612284  |
| wavelet-HLL | glszm      | SmallAreaEmphasis                | 0.692116326  |
| wavelet-HLL | glszm      | LowGrayLevelZoneEmphasis         | 0.005503867  |
| wavelet-HLL | glszm      | ZoneEntropy                      | 6.329269498  |
| wavelet-HLL | glszm      | SmallAreaLowGrayLevelEmphasis    | 0.004734177  |
| wavelet-HLL | ngtdm      | Coarseness                       | 0.006180073  |
| wavelet-HLL | ngtdm      | Complexity                       | 1934.029509  |
| wavelet-HLL | ngtdm      | Strength                         | 3.094061722  |
| wavelet-HLL | ngtdm      | Contrast                         | 0.142880145  |
| wavelet-HLL | ngtdm      | Busyness                         | 0.15176018   |
| wavelet-LHL | gldm       | GrayLevelVariance                | 48.46983763  |

|             |            |                                      |              |
|-------------|------------|--------------------------------------|--------------|
| wavelet-LHL | gldm       | HighGrayLevelEmphasis                | 473.7294469  |
| wavelet-LHL | gldm       | DependenceEntropy                    | 6.953929746  |
| wavelet-LHL | gldm       | DependenceNonUniformity              | 236.5964126  |
| wavelet-LHL | gldm       | GrayLevelNonUniformity               | 81.99103139  |
| wavelet-LHL | gldm       | SmallDependenceEmphasis              | 0.375021853  |
| wavelet-LHL | gldm       | SmallDependenceHighGrayLevelEmphasis | 206.7923033  |
| wavelet-LHL | gldm       | DependenceNonUniformityNormalized    | 0.17682841   |
| wavelet-LHL | gldm       | LargeDependenceEmphasis              | 28.14200299  |
| wavelet-LHL | gldm       | LargeDependenceLowGrayLevelEmphasis  | 0.074714831  |
| wavelet-LHL | gldm       | DependenceVariance                   | 13.65880182  |
| wavelet-LHL | gldm       | LargeDependenceHighGrayLevelEmphasis | 12808.26756  |
| wavelet-LHL | gldm       | SmallDependenceLowGrayLevelEmphasis  | 0.002403162  |
| wavelet-LHL | gldm       | LowGrayLevelEmphasis                 | 0.005825795  |
| wavelet-LHL | glcm       | JointAverage                         | 20.19178112  |
| wavelet-LHL | glcm       | SumAverage                           | 40.38356223  |
| wavelet-LHL | glcm       | JointEntropy                         | 8.148746993  |
| wavelet-LHL | glcm       | ClusterShade                         | 884.4208199  |
| wavelet-LHL | glcm       | MaximumProbability                   | 0.051648082  |
| wavelet-LHL | glcm       | ldmn                                 | 0.981607657  |
| wavelet-LHL | glcm       | JointEnergy                          | 0.011140732  |
| wavelet-LHL | glcm       | Contrast                             | 64.69323739  |
| wavelet-LHL | glcm       | DifferenceEntropy                    | 3.906693857  |
| wavelet-LHL | glcm       | InverseVariance                      | 0.236336951  |
| wavelet-LHL | glcm       | DifferenceVariance                   | 35.04994846  |
| wavelet-LHL | glcm       | ldn                                  | 0.920555977  |
| wavelet-LHL | glcm       | ldm                                  | 0.264391798  |
| wavelet-LHL | glcm       | Correlation                          | 0.236546073  |
| wavelet-LHL | glcm       | Autocorrelation                      | 418.116322   |
| wavelet-LHL | glcm       | SumEntropy                           | 5.101255922  |
| wavelet-LHL | glcm       | SumSquares                           | 42.74830389  |
| wavelet-LHL | glcm       | ClusterProminence                    | 67907.88918  |
| wavelet-LHL | glcm       | lmc2                                 | 0.880507821  |
| wavelet-LHL | glcm       | lmc1                                 | -0.172136893 |
| wavelet-LHL | glcm       | DifferenceAverage                    | 5.335059821  |
| wavelet-LHL | glcm       | ld                                   | 0.339240265  |
| wavelet-LHL | glcm       | ClusterTendency                      | 106.2999782  |
| wavelet-LHL | firstorder | InterquartileRange                   | 148.2290862  |
| wavelet-LHL | firstorder | Skewness                             | 0.736351736  |
| wavelet-LHL | firstorder | Uniformity                           | 0.061278798  |
| wavelet-LHL | firstorder | Median                               | -16.11648552 |
| wavelet-LHL | firstorder | Energy                               | 41177187.98  |
| wavelet-LHL | firstorder | RobustMeanAbsoluteDeviation          | 72.16469783  |
| wavelet-LHL | firstorder | MeanAbsoluteDeviation                | 121.992047   |
| wavelet-LHL | firstorder | TotalEnergy                          | 1111784076   |
| wavelet-LHL | firstorder | Maximum                              | 855.0428428  |
| wavelet-LHL | firstorder | RootMeanSquared                      | 175.4285549  |
| wavelet-LHL | firstorder | 90Percentile                         | 198.8350699  |
| wavelet-LHL | firstorder | Minimum                              | -517.0712914 |
| wavelet-LHL | firstorder | Entropy                              | 4.609465858  |
| wavelet-LHL | firstorder | Range                                | 1372.114134  |
| wavelet-LHL | firstorder | Variance                             | 30279.7262   |
| wavelet-LHL | firstorder | 10Percentile                         | -220.0536396 |
| wavelet-LHL | firstorder | Kurtosis                             | 5.225417852  |

|             |            |                                      |              |
|-------------|------------|--------------------------------------|--------------|
| wavelet-LHL | firstorder | Mean                                 | -22.25874359 |
| wavelet-LHL | glrlm      | ShortRunLowGrayLevelEmphasis         | 0.005877699  |
| wavelet-LHL | glrlm      | GrayLevelVariance                    | 53.03087222  |
| wavelet-LHL | glrlm      | LowGrayLevelRunEmphasis              | 0.006135553  |
| wavelet-LHL | glrlm      | GrayLevelNonUniformityNormalized     | 0.051713782  |
| wavelet-LHL | glrlm      | RunVariance                          | 0.198665948  |
| wavelet-LHL | glrlm      | GrayLevelNonUniformity               | 61.80185131  |
| wavelet-LHL | glrlm      | LongRunEmphasis                      | 1.459088814  |
| wavelet-LHL | glrlm      | ShortRunHighGrayLevelEmphasis        | 445.5669951  |
| wavelet-LHL | glrlm      | RunLengthNonUniformity               | 992.6988762  |
| wavelet-LHL | glrlm      | ShortRunEmphasis                     | 0.928046709  |
| wavelet-LHL | glrlm      | LongRunHighGrayLevelEmphasis         | 682.6990233  |
| wavelet-LHL | glrlm      | RunPercentage                        | 0.892089226  |
| wavelet-LHL | glrlm      | LongRunLowGrayLevelEmphasis          | 0.007543853  |
| wavelet-LHL | glrlm      | RunEntropy                           | 5.169709408  |
| wavelet-LHL | glrlm      | HighGrayLevelRunEmphasis             | 477.3024385  |
| wavelet-LHL | glrlm      | RunLengthNonUniformityNormalized     | 0.830790842  |
| wavelet-LHL | glszm      | GrayLevelVariance                    | 83.21252914  |
| wavelet-LHL | glszm      | ZoneVariance                         | 91.09887671  |
| wavelet-LHL | glszm      | GrayLevelNonUniformityNormalized     | 0.032638613  |
| wavelet-LHL | glszm      | SizeZoneNonUniformityNormalized      | 0.493466078  |
| wavelet-LHL | glszm      | SizeZoneNonUniformity                | 280.2887324  |
| wavelet-LHL | glszm      | GrayLevelNonUniformity               | 18.53873239  |
| wavelet-LHL | glszm      | LargeAreaEmphasis                    | 96.64788732  |
| wavelet-LHL | glszm      | SmallAreaHighGrayLevelEmphasis       | 423.9634698  |
| wavelet-LHL | glszm      | ZonePercentage                       | 0.4245142    |
| wavelet-LHL | glszm      | LargeAreaLowGrayLevelEmphasis        | 0.22998077   |
| wavelet-LHL | glszm      | LargeAreaHighGrayLevelEmphasis       | 43961.35211  |
| wavelet-LHL | glszm      | HighGrayLevelZoneEmphasis            | 536.7975352  |
| wavelet-LHL | glszm      | SmallAreaEmphasis                    | 0.730321403  |
| wavelet-LHL | glszm      | LowGrayLevelZoneEmphasis             | 0.007342406  |
| wavelet-LHL | glszm      | ZoneEntropy                          | 6.419585674  |
| wavelet-LHL | glszm      | SmallAreaLowGrayLevelEmphasis        | 0.004523734  |
| wavelet-LHL | ngtdm      | Coarseness                           | 0.005687242  |
| wavelet-LHL | ngtdm      | Complexity                           | 3771.212163  |
| wavelet-LHL | ngtdm      | Strength                             | 5.058239898  |
| wavelet-LHL | ngtdm      | Contrast                             | 0.171187039  |
| wavelet-LHL | ngtdm      | Busyness                             | 0.147600142  |
| wavelet-LHH | gldm       | GrayLevelVariance                    | 13.77763925  |
| wavelet-LHH | gldm       | HighGrayLevelEmphasis                | 475.8669656  |
| wavelet-LHH | gldm       | DependenceEntropy                    | 6.472910047  |
| wavelet-LHH | gldm       | DependenceNonUniformity              | 176.935725   |
| wavelet-LHH | gldm       | GrayLevelNonUniformity               | 141.0298954  |
| wavelet-LHH | gldm       | SmallDependenceEmphasis              | 0.301478515  |
| wavelet-LHH | gldm       | SmallDependenceHighGrayLevelEmphasis | 148.2160935  |
| wavelet-LHH | gldm       | DependenceNonUniformityNormalized    | 0.132238957  |
| wavelet-LHH | gldm       | LargeDependenceEmphasis              | 39.88938714  |
| wavelet-LHH | gldm       | LargeDependenceLowGrayLevelEmphasis  | 0.090227891  |
| wavelet-LHH | gldm       | DependenceVariance                   | 18.09765596  |
| wavelet-LHH | gldm       | LargeDependenceHighGrayLevelEmphasis | 18037.67564  |
| wavelet-LHH | gldm       | SmallDependenceLowGrayLevelEmphasis  | 0.001607985  |
| wavelet-LHH | gldm       | LowGrayLevelEmphasis                 | 0.003199233  |
| wavelet-LHH | glcm       | JointAverage                         | 21.5560835   |

|             |            |                                  |              |
|-------------|------------|----------------------------------|--------------|
| wavelet-LHH | glcm       | SumAverage                       | 43.112167    |
| wavelet-LHH | glcm       | JointEntropy                     | 6.940367652  |
| wavelet-LHH | glcm       | ClusterShade                     | -35.94180126 |
| wavelet-LHH | glcm       | MaximumProbability               | 0.089688984  |
| wavelet-LHH | glcm       | Idmn                             | 0.981668155  |
| wavelet-LHH | glcm       | JointEnergy                      | 0.021325128  |
| wavelet-LHH | glcm       | Contrast                         | 23.3784319   |
| wavelet-LHH | glcm       | DifferenceEntropy                | 3.300128135  |
| wavelet-LHH | glcm       | InverseVariance                  | 0.300474374  |
| wavelet-LHH | glcm       | DifferenceVariance               | 12.24790605  |
| wavelet-LHH | glcm       | Idn                              | 0.918672376  |
| wavelet-LHH | glcm       | Idm                              | 0.339236449  |
| wavelet-LHH | glcm       | Correlation                      | 0.034974917  |
| wavelet-LHH | glcm       | Autocorrelation                  | 465.1282233  |
| wavelet-LHH | glcm       | SumEntropy                       | 4.169160253  |
| wavelet-LHH | glcm       | SumSquares                       | 12.15220991  |
| wavelet-LHH | glcm       | ClusterProminence                | 3817.651655  |
| wavelet-LHH | glcm       | Imc2                             | 0.701444162  |
| wavelet-LHH | glcm       | Imc1                             | -0.095886296 |
| wavelet-LHH | glcm       | DifferenceAverage                | 3.301446731  |
| wavelet-LHH | glcm       | Id                               | 0.411203781  |
| wavelet-LHH | glcm       | ClusterTendency                  | 25.23040773  |
| wavelet-LHH | firstorder | InterquartileRange               | 84.651601    |
| wavelet-LHH | firstorder | Skewness                         | -0.339334267 |
| wavelet-LHH | firstorder | Uniformity                       | 0.105403509  |
| wavelet-LHH | firstorder | Median                           | -2.651574775 |
| wavelet-LHH | firstorder | Energy                           | 11436743.65  |
| wavelet-LHH | firstorder | RobustMeanAbsoluteDeviation      | 36.5455635   |
| wavelet-LHH | firstorder | MeanAbsoluteDeviation            | 63.93643129  |
| wavelet-LHH | firstorder | TotalEnergy                      | 308792078.5  |
| wavelet-LHH | firstorder | Maximum                          | 310.83511    |
| wavelet-LHH | firstorder | RootMeanSquared                  | 92.45345311  |
| wavelet-LHH | firstorder | 90Percentile                     | 107.7442172  |
| wavelet-LHH | firstorder | Minimum                          | -509.373965  |
| wavelet-LHH | firstorder | Entropy                          | 3.76824477   |
| wavelet-LHH | firstorder | Range                            | 820.209075   |
| wavelet-LHH | firstorder | Variance                         | 8547.602603  |
| wavelet-LHH | firstorder | 10Percentile                     | -109.2877241 |
| wavelet-LHH | firstorder | Kurtosis                         | 5.352390792  |
| wavelet-LHH | firstorder | Mean                             | -0.195933214 |
| wavelet-LHH | grlm       | ShortRunLowGrayLevelEmphasis     | 0.003145377  |
| wavelet-LHH | grlm       | GrayLevelVariance                | 15.61341888  |
| wavelet-LHH | grlm       | LowGrayLevelRunEmphasis          | 0.003357475  |
| wavelet-LHH | grlm       | GrayLevelNonUniformityNormalized | 0.088336814  |
| wavelet-LHH | grlm       | RunVariance                      | 0.268877847  |
| wavelet-LHH | grlm       | GrayLevelNonUniformity           | 101.564271   |
| wavelet-LHH | grlm       | LongRunEmphasis                  | 1.62838359   |
| wavelet-LHH | grlm       | ShortRunHighGrayLevelEmphasis    | 435.3146845  |
| wavelet-LHH | grlm       | RunLengthNonUniformity           | 902.2460322  |
| wavelet-LHH | grlm       | ShortRunEmphasis                 | 0.905390165  |
| wavelet-LHH | grlm       | LongRunHighGrayLevelEmphasis     | 765.0476177  |
| wavelet-LHH | grlm       | RunPercentage                    | 0.858916868  |
| wavelet-LHH | grlm       | LongRunLowGrayLevelEmphasis      | 0.004767016  |

|             |       |                                      |             |
|-------------|-------|--------------------------------------|-------------|
| wavelet-LHH | grlm  | RunEntropy                           | 4.475987314 |
| wavelet-LHH | grlm  | HighGrayLevelRunEmphasis             | 478.8891613 |
| wavelet-LHH | grlm  | RunLengthNonUniformityNormalized     | 0.784136909 |
| wavelet-LHH | glszm | GrayLevelVariance                    | 30.56694411 |
| wavelet-LHH | glszm | ZoneVariance                         | 270.0471185 |
| wavelet-LHH | glszm | GrayLevelNonUniformityNormalized     | 0.056160655 |
| wavelet-LHH | glszm | SizeZoneNonUniformityNormalized      | 0.492022724 |
| wavelet-LHH | glszm | SizeZoneNonUniformity                | 214.0298851 |
| wavelet-LHH | glszm | GrayLevelNonUniformity               | 24.42988506 |
| wavelet-LHH | glszm | LargeAreaEmphasis                    | 279.508046  |
| wavelet-LHH | glszm | SmallAreaHighGrayLevelEmphasis       | 360.8314682 |
| wavelet-LHH | glszm | ZonePercentage                       | 0.325112108 |
| wavelet-LHH | glszm | LargeAreaLowGrayLevelEmphasis        | 0.630347384 |
| wavelet-LHH | glszm | LargeAreaHighGrayLevelEmphasis       | 125225.6782 |
| wavelet-LHH | glszm | HighGrayLevelZoneEmphasis            | 493.5586207 |
| wavelet-LHH | glszm | SmallAreaEmphasis                    | 0.729048195 |
| wavelet-LHH | glszm | LowGrayLevelZoneEmphasis             | 0.005142352 |
| wavelet-LHH | glszm | ZoneEntropy                          | 5.776889936 |
| wavelet-LHH | glszm | SmallAreaLowGrayLevelEmphasis        | 0.004483375 |
| wavelet-LHH | ngtdm | Coarseness                           | 0.005661266 |
| wavelet-LHH | ngtdm | Complexity                           | 989.0510421 |
| wavelet-LHH | ngtdm | Strength                             | 1.755567307 |
| wavelet-LHH | ngtdm | Contrast                             | 0.082097975 |
| wavelet-LHH | ngtdm | Busyness                             | 0.204277096 |
| wavelet-LLH | gldm  | GrayLevelVariance                    | 42.01174197 |
| wavelet-LLH | gldm  | HighGrayLevelEmphasis                | 1322.399851 |
| wavelet-LLH | gldm  | DependenceEntropy                    | 6.941288154 |
| wavelet-LLH | gldm  | DependenceNonUniformity              | 227.6218236 |
| wavelet-LLH | gldm  | GrayLevelNonUniformity               | 90.65022422 |
| wavelet-LLH | gldm  | SmallDependenceEmphasis              | 0.364006043 |
| wavelet-LLH | gldm  | SmallDependenceHighGrayLevelEmphasis | 505.7802219 |
| wavelet-LLH | gldm  | DependenceNonUniformityNormalized    | 0.170120944 |
| wavelet-LLH | gldm  | LargeDependenceEmphasis              | 31.73243647 |
| wavelet-LLH | gldm  | LargeDependenceLowGrayLevelEmphasis  | 0.025013926 |
| wavelet-LLH | gldm  | DependenceVariance                   | 16.02999368 |
| wavelet-LLH | gldm  | LargeDependenceHighGrayLevelEmphasis | 42188.7003  |
| wavelet-LLH | gldm  | SmallDependenceLowGrayLevelEmphasis  | 0.001108931 |
| wavelet-LLH | gldm  | LowGrayLevelEmphasis                 | 0.00164016  |
| wavelet-LLH | glcm  | JointAverage                         | 35.68349375 |
| wavelet-LLH | glcm  | SumAverage                           | 71.3669875  |
| wavelet-LLH | glcm  | JointEntropy                         | 7.999291831 |
| wavelet-LLH | glcm  | ClusterShade                         | 510.2259672 |
| wavelet-LLH | glcm  | MaximumProbability                   | 0.057450818 |
| wavelet-LLH | glcm  | ldmn                                 | 0.986013634 |
| wavelet-LLH | glcm  | JointEnergy                          | 0.011718098 |
| wavelet-LLH | glcm  | Contrast                             | 55.59246047 |
| wavelet-LLH | glcm  | DifferenceEntropy                    | 3.797654252 |
| wavelet-LLH | glcm  | InverseVariance                      | 0.247973714 |
| wavelet-LLH | glcm  | DifferenceVariance                   | 30.79758008 |
| wavelet-LLH | glcm  | ldn                                  | 0.930498704 |
| wavelet-LLH | glcm  | ldm                                  | 0.278271591 |
| wavelet-LLH | glcm  | Correlation                          | 0.244003975 |
| wavelet-LLH | glcm  | Autocorrelation                      | 1282.61322  |



|             |            |                                  |              |
|-------------|------------|----------------------------------|--------------|
| wavelet-LLH | glcm       | SumEntropy                       | 5.021889697  |
| wavelet-LLH | glcm       | SumSquares                       | 37.09173436  |
| wavelet-LLH | glcm       | ClusterProminence                | 48078.87916  |
| wavelet-LLH | glcm       | Imc2                             | 0.860980335  |
| wavelet-LLH | glcm       | Imc1                             | -0.159625862 |
| wavelet-LLH | glcm       | DifferenceAverage                | 4.897504034  |
| wavelet-LLH | glcm       | Id                               | 0.353153267  |
| wavelet-LLH | glcm       | ClusterTendency                  | 92.77447697  |
| wavelet-LLH | firstorder | InterquartileRange               | 129.6094804  |
| wavelet-LLH | firstorder | Skewness                         | 0.279515592  |
| wavelet-LLH | firstorder | Uniformity                       | 0.067750541  |
| wavelet-LLH | firstorder | Median                           | -13.93753285 |
| wavelet-LLH | firstorder | Energy                           | 35459528.83  |
| wavelet-LLH | firstorder | RobustMeanAbsoluteDeviation      | 63.09788579  |
| wavelet-LLH | firstorder | MeanAbsoluteDeviation            | 110.9432498  |
| wavelet-LLH | firstorder | TotalEnergy                      | 957407278.3  |
| wavelet-LLH | firstorder | Maximum                          | 597.5017077  |
| wavelet-LLH | firstorder | RootMeanSquared                  | 162.794011   |
| wavelet-LLH | firstorder | 90Percentile                     | 171.663534   |
| wavelet-LLH | firstorder | Minimum                          | -887.0478193 |
| wavelet-LLH | firstorder | Entropy                          | 4.488658816  |
| wavelet-LLH | firstorder | Range                            | 1484.549527  |
| wavelet-LLH | firstorder | Variance                         | 26181.46183  |
| wavelet-LLH | firstorder | 10Percentile                     | -202.3401525 |
| wavelet-LLH | firstorder | Kurtosis                         | 5.617867363  |
| wavelet-LLH | firstorder | Mean                             | -17.90050781 |
| wavelet-LLH | glrlm      | ShortRunLowGrayLevelEmphasis     | 0.001691054  |
| wavelet-LLH | glrlm      | GrayLevelVariance                | 46.30814739  |
| wavelet-LLH | glrlm      | LowGrayLevelRunEmphasis          | 0.001750934  |
| wavelet-LLH | glrlm      | GrayLevelNonUniformityNormalized | 0.05715707   |
| wavelet-LLH | glrlm      | RunVariance                      | 0.215822737  |
| wavelet-LLH | glrlm      | GrayLevelNonUniformity           | 67.8243372   |
| wavelet-LLH | glrlm      | LongRunEmphasis                  | 1.49331993   |
| wavelet-LLH | glrlm      | ShortRunHighGrayLevelEmphasis    | 1226.245327  |
| wavelet-LLH | glrlm      | RunLengthNonUniformity           | 977.9120555  |
| wavelet-LLH | glrlm      | ShortRunEmphasis                 | 0.924800826  |
| wavelet-LLH | glrlm      | LongRunHighGrayLevelEmphasis     | 1973.277846  |
| wavelet-LLH | glrlm      | RunPercentage                    | 0.886052662  |
| wavelet-LLH | glrlm      | LongRunLowGrayLevelEmphasis      | 0.002134767  |
| wavelet-LLH | glrlm      | RunEntropy                       | 5.078576116  |
| wavelet-LLH | glrlm      | HighGrayLevelRunEmphasis         | 1324.1005    |
| wavelet-LLH | glrlm      | RunLengthNonUniformityNormalized | 0.824074465  |
| wavelet-LLH | glszm      | GrayLevelVariance                | 76.07304324  |
| wavelet-LLH | glszm      | ZoneVariance                     | 96.93451603  |
| wavelet-LLH | glszm      | GrayLevelNonUniformityNormalized | 0.034357594  |
| wavelet-LLH | glszm      | SizeZoneNonUniformityNormalized  | 0.491286261  |
| wavelet-LLH | glszm      | SizeZoneNonUniformity            | 270.6987296  |
| wavelet-LLH | glszm      | GrayLevelNonUniformity           | 18.93103448  |
| wavelet-LLH | glszm      | LargeAreaEmphasis                | 102.831216   |
| wavelet-LLH | glszm      | SmallAreaHighGrayLevelEmphasis   | 1030.087217  |
| wavelet-LLH | glszm      | ZonePercentage                   | 0.41180867   |
| wavelet-LLH | glszm      | LargeAreaLowGrayLevelEmphasis    | 0.080000659  |
| wavelet-LLH | glszm      | LargeAreaHighGrayLevelEmphasis   | 136402.7568  |

|             |            |                                      |              |
|-------------|------------|--------------------------------------|--------------|
| wavelet-LLH | glszm      | HighGrayLevelZoneEmphasis            | 1380.056261  |
| wavelet-LLH | glszm      | SmallAreaEmphasis                    | 0.728365133  |
| wavelet-LLH | glszm      | LowGrayLevelZoneEmphasis             | 0.00280215   |
| wavelet-LLH | glszm      | ZoneEntropy                          | 6.401786636  |
| wavelet-LLH | glszm      | SmallAreaLowGrayLevelEmphasis        | 0.002557224  |
| wavelet-LLH | ngtdm      | Coarseness                           | 0.005445365  |
| wavelet-LLH | ngtdm      | Complexity                           | 3735.376982  |
| wavelet-LLH | ngtdm      | Strength                             | 5.434137613  |
| wavelet-LLH | ngtdm      | Contrast                             | 0.132467604  |
| wavelet-LLH | ngtdm      | Busyness                             | 0.080970873  |
| wavelet-LLL | gldm       | GrayLevelVariance                    | 572.2723791  |
| wavelet-LLL | gldm       | HighGrayLevelEmphasis                | 5961.785501  |
| wavelet-LLL | gldm       | DependenceEntropy                    | 7.519496895  |
| wavelet-LLL | gldm       | DependenceNonUniformity              | 374.4050822  |
| wavelet-LLL | gldm       | GrayLevelNonUniformity               | 40.89088191  |
| wavelet-LLL | gldm       | SmallDependenceEmphasis              | 0.544423934  |
| wavelet-LLL | gldm       | SmallDependenceHighGrayLevelEmphasis | 2379.51003   |
| wavelet-LLL | gldm       | DependenceNonUniformityNormalized    | 0.279824426  |
| wavelet-LLL | gldm       | LargeDependenceEmphasis              | 24.34678625  |
| wavelet-LLL | gldm       | LargeDependenceLowGrayLevelEmphasis  | 0.003963202  |
| wavelet-LLL | gldm       | DependenceVariance                   | 13.97049117  |
| wavelet-LLL | gldm       | LargeDependenceHighGrayLevelEmphasis | 212453.9245  |
| wavelet-LLL | gldm       | SmallDependenceLowGrayLevelEmphasis  | 0.001069743  |
| wavelet-LLL | gldm       | LowGrayLevelEmphasis                 | 0.001162872  |
| wavelet-LLL | glcm       | JointAverage                         | 77.97896728  |
| wavelet-LLL | glcm       | SumAverage                           | 155.9579346  |
| wavelet-LLL | glcm       | JointEntropy                         | 9.312152285  |
| wavelet-LLL | glcm       | ClusterShade                         | -56643.19381 |
| wavelet-LLL | glcm       | MaximumProbability                   | 0.037872053  |
| wavelet-LLL | glcm       | Idmn                                 | 0.966644254  |
| wavelet-LLL | glcm       | JointEnergy                          | 0.005620845  |
| wavelet-LLL | glcm       | Contrast                             | 392.2089711  |
| wavelet-LLL | glcm       | DifferenceEntropy                    | 5.040913009  |
| wavelet-LLL | glcm       | InverseVariance                      | 0.16701686   |
| wavelet-LLL | glcm       | DifferenceVariance                   | 209.7390215  |
| wavelet-LLL | glcm       | Idn                                  | 0.895756765  |
| wavelet-LLL | glcm       | Idm                                  | 0.197526776  |
| wavelet-LLL | glcm       | Correlation                          | 0.586623575  |
| wavelet-LLL | glcm       | Autocorrelation                      | 6359.839182  |
| wavelet-LLL | glcm       | SumEntropy                           | 6.463968425  |
| wavelet-LLL | glcm       | SumSquares                           | 474.9541869  |
| wavelet-LLL | glcm       | ClusterProminence                    | 6762630.346  |
| wavelet-LLL | glcm       | Imc2                                 | 0.986265679  |
| wavelet-LLL | glcm       | Imc1                                 | -0.325644271 |
| wavelet-LLL | glcm       | DifferenceAverage                    | 13.38387566  |
| wavelet-LLL | glcm       | Id                                   | 0.25615617   |
| wavelet-LLL | glcm       | ClusterTendency                      | 1507.607776  |
| wavelet-LLL | firstorder | InterquartileRange                   | 993.1809308  |
| wavelet-LLL | firstorder | Skewness                             | -0.776773835 |
| wavelet-LLL | firstorder | Uniformity                           | 0.030561197  |
| wavelet-LLL | firstorder | Median                               | -254.0024206 |
| wavelet-LLL | firstorder | Energy                               | 752001531.7  |
| wavelet-LLL | firstorder | RobustMeanAbsoluteDeviation          | 406.8052824  |

|             |            |                                  |              |
|-------------|------------|----------------------------------|--------------|
| wavelet-LLL | firstorder | MeanAbsoluteDeviation            | 513.9125611  |
| wavelet-LLL | firstorder | TotalEnergy                      | 20304041357  |
| wavelet-LLL | firstorder | Maximum                          | 231.4160615  |
| wavelet-LLL | firstorder | RootMeanSquared                  | 749.6892888  |
| wavelet-LLL | firstorder | 90Percentile                     | 121.4641748  |
| wavelet-LLL | firstorder | Minimum                          | -2250.774662 |
| wavelet-LLL | firstorder | Entropy                          | 5.835024514  |
| wavelet-LLL | firstorder | Range                            | 2482.190723  |
| wavelet-LLL | firstorder | Variance                         | 357727.7602  |
| wavelet-LLL | firstorder | 10Percentile                     | -1388.108911 |
| wavelet-LLL | firstorder | Kurtosis                         | 2.383505785  |
| wavelet-LLL | firstorder | Mean                             | -452.0025105 |
| wavelet-LLL | grlm       | ShortRunLowGrayLevelEmphasis     | 0.001250752  |
| wavelet-LLL | grlm       | GrayLevelVariance                | 578.7616577  |
| wavelet-LLL | grlm       | LowGrayLevelRunEmphasis          | 0.001258809  |
| wavelet-LLL | grlm       | GrayLevelNonUniformityNormalized | 0.023998145  |
| wavelet-LLL | grlm       | RunVariance                      | 0.151665649  |
| wavelet-LLL | grlm       | GrayLevelNonUniformity           | 29.38301277  |
| wavelet-LLL | grlm       | LongRunEmphasis                  | 1.34798373   |
| wavelet-LLL | grlm       | ShortRunHighGrayLevelEmphasis    | 5235.39321   |
| wavelet-LLL | grlm       | RunLengthNonUniformity           | 1061.521696  |
| wavelet-LLL | grlm       | ShortRunEmphasis                 | 0.944626663  |
| wavelet-LLL | grlm       | LongRunHighGrayLevelEmphasis     | 8738.56565   |
| wavelet-LLL | grlm       | RunPercentage                    | 0.914568242  |
| wavelet-LLL | grlm       | LongRunLowGrayLevelEmphasis      | 0.001305206  |
| wavelet-LLL | grlm       | RunEntropy                       | 6.292908679  |
| wavelet-LLL | grlm       | HighGrayLevelRunEmphasis         | 5710.05236   |
| wavelet-LLL | grlm       | RunLengthNonUniformityNormalized | 0.867293274  |
| wavelet-LLL | glszm      | GrayLevelVariance                | 508.8504107  |
| wavelet-LLL | glszm      | ZoneVariance                     | 44.77238453  |
| wavelet-LLL | glszm      | GrayLevelNonUniformityNormalized | 0.013557272  |
| wavelet-LLL | glszm      | SizeZoneNonUniformityNormalized  | 0.706693056  |
| wavelet-LLL | glszm      | SizeZoneNonUniformity            | 549.8071979  |
| wavelet-LLL | glszm      | GrayLevelNonUniformity           | 10.54755784  |
| wavelet-LLL | glszm      | LargeAreaEmphasis                | 47.73007712  |
| wavelet-LLL | glszm      | SmallAreaHighGrayLevelEmphasis   | 3603.072213  |
| wavelet-LLL | glszm      | ZonePercentage                   | 0.581464873  |
| wavelet-LLL | glszm      | LargeAreaLowGrayLevelEmphasis    | 0.007212322  |
| wavelet-LLL | glszm      | LargeAreaHighGrayLevelEmphasis   | 423981.2198  |
| wavelet-LLL | glszm      | HighGrayLevelZoneEmphasis        | 4390.236504  |
| wavelet-LLL | glszm      | SmallAreaEmphasis                | 0.864892665  |
| wavelet-LLL | glszm      | LowGrayLevelZoneEmphasis         | 0.001869457  |
| wavelet-LLL | glszm      | ZoneEntropy                      | 6.974047918  |
| wavelet-LLL | glszm      | SmallAreaLowGrayLevelEmphasis    | 0.001819498  |
| wavelet-LLL | ngtdm      | Coarseness                       | 0.004647521  |
| wavelet-LLL | ngtdm      | Complexity                       | 34652.79385  |
| wavelet-LLL | ngtdm      | Strength                         | 27.58206365  |
| wavelet-LLL | ngtdm      | Contrast                         | 1.145590834  |
| wavelet-LLL | ngtdm      | Busyness                         | 0.023941505  |
| wavelet-HHL | gldm       | GrayLevelVariance                | 8.91570758   |
| wavelet-HHL | gldm       | HighGrayLevelEmphasis            | 222.2765321  |
| wavelet-HHL | gldm       | DependenceEntropy                | 6.318184799  |
| wavelet-HHL | gldm       | DependenceNonUniformity          | 151.8565022  |

|             |            |                                      |              |
|-------------|------------|--------------------------------------|--------------|
| wavelet-HHL | gldm       | GrayLevelNonUniformity               | 163.3198804  |
| wavelet-HHL | gldm       | SmallDependenceEmphasis              | 0.246578864  |
| wavelet-HHL | gldm       | SmallDependenceHighGrayLevelEmphasis | 57.47688913  |
| wavelet-HHL | gldm       | DependenceNonUniformityNormalized    | 0.113495144  |
| wavelet-HHL | gldm       | LargeDependenceEmphasis              | 40.5470852   |
| wavelet-HHL | gldm       | LargeDependenceLowGrayLevelEmphasis  | 0.20135337   |
| wavelet-HHL | gldm       | DependenceVariance                   | 16.17094653  |
| wavelet-HHL | gldm       | LargeDependenceHighGrayLevelEmphasis | 8420.279522  |
| wavelet-HHL | gldm       | SmallDependenceLowGrayLevelEmphasis  | 0.002709891  |
| wavelet-HHL | gldm       | LowGrayLevelEmphasis                 | 0.006535864  |
| wavelet-HHL | glcm       | JointAverage                         | 14.59693535  |
| wavelet-HHL | glcm       | SumAverage                           | 29.19387069  |
| wavelet-HHL | glcm       | JointEntropy                         | 6.507075749  |
| wavelet-HHL | glcm       | ClusterShade                         | 0.682887361  |
| wavelet-HHL | glcm       | MaximumProbability                   | 0.083722863  |
| wavelet-HHL | glcm       | Idmn                                 | 0.981472261  |
| wavelet-HHL | glcm       | JointEnergy                          | 0.025162684  |
| wavelet-HHL | glcm       | Contrast                             | 16.00863005  |
| wavelet-HHL | glcm       | DifferenceEntropy                    | 3.065413412  |
| wavelet-HHL | glcm       | InverseVariance                      | 0.33266739   |
| wavelet-HHL | glcm       | DifferenceVariance                   | 8.26978007   |
| wavelet-HHL | glcm       | Idn                                  | 0.917571895  |
| wavelet-HHL | glcm       | Idm                                  | 0.368316476  |
| wavelet-HHL | glcm       | Correlation                          | -0.00533445  |
| wavelet-HHL | glcm       | Autocorrelation                      | 213.0355211  |
| wavelet-HHL | glcm       | SumEntropy                           | 3.884355489  |
| wavelet-HHL | glcm       | SumSquares                           | 7.967825158  |
| wavelet-HHL | glcm       | ClusterProminence                    | 1369.075871  |
| wavelet-HHL | glcm       | Imc2                                 | 0.625938693  |
| wavelet-HHL | glcm       | Imc1                                 | -0.0766218   |
| wavelet-HHL | glcm       | DifferenceAverage                    | 2.754409615  |
| wavelet-HHL | glcm       | Id                                   | 0.437656395  |
| wavelet-HHL | glcm       | ClusterTendency                      | 15.86267059  |
| wavelet-HHL | firstorder | InterquartileRange                   | 70.17121102  |
| wavelet-HHL | firstorder | Skewness                             | -0.055235628 |
| wavelet-HHL | firstorder | Uniformity                           | 0.122062691  |
| wavelet-HHL | firstorder | Median                               | -0.885847763 |
| wavelet-HHL | firstorder | Energy                               | 7373328.55   |
| wavelet-HHL | firstorder | RobustMeanAbsoluteDeviation          | 30.33133625  |
| wavelet-HHL | firstorder | MeanAbsoluteDeviation                | 52.15562152  |
| wavelet-HHL | firstorder | TotalEnergy                          | 199079870.9  |
| wavelet-HHL | firstorder | Maximum                              | 339.0548983  |
| wavelet-HHL | firstorder | RootMeanSquared                      | 74.23414936  |
| wavelet-HHL | firstorder | 90Percentile                         | 93.61950517  |
| wavelet-HHL | firstorder | Minimum                              | -327.5418907 |
| wavelet-HHL | firstorder | Entropy                              | 3.496814428  |
| wavelet-HHL | firstorder | Range                                | 666.596789   |
| wavelet-HHL | firstorder | Variance                             | 5503.496182  |
| wavelet-HHL | firstorder | 10Percentile                         | -76.32881441 |
| wavelet-HHL | firstorder | Kurtosis                             | 4.957131462  |
| wavelet-HHL | firstorder | Mean                                 | 2.685656172  |
| wavelet-HHL | glrlm      | ShortRunLowGrayLevelEmphasis         | 0.006303046  |
| wavelet-HHL | glrlm      | GrayLevelVariance                    | 10.11587124  |

|             |       |                                      |             |
|-------------|-------|--------------------------------------|-------------|
| wavelet-HHL | glrlm | LowGrayLevelRunEmphasis              | 0.00682014  |
| wavelet-HHL | glrlm | GrayLevelNonUniformityNormalized     | 0.105309418 |
| wavelet-HHL | glrlm | RunVariance                          | 0.282383296 |
| wavelet-HHL | glrlm | GrayLevelNonUniformity               | 119.6272801 |
| wavelet-HHL | glrlm | LongRunEmphasis                      | 1.676997718 |
| wavelet-HHL | glrlm | ShortRunHighGrayLevelEmphasis        | 202.1732029 |
| wavelet-HHL | glrlm | RunLengthNonUniformity               | 870.4542833 |
| wavelet-HHL | glrlm | ShortRunEmphasis                     | 0.895934257 |
| wavelet-HHL | glrlm | LongRunHighGrayLevelEmphasis         | 366.3326785 |
| wavelet-HHL | glrlm | RunPercentage                        | 0.848568472 |
| wavelet-HHL | glrlm | LongRunLowGrayLevelEmphasis          | 0.01017137  |
| wavelet-HHL | glrlm | RunEntropy                           | 4.247468786 |
| wavelet-HHL | glrlm | HighGrayLevelRunEmphasis             | 224.3042787 |
| wavelet-HHL | glrlm | RunLengthNonUniformityNormalized     | 0.765275968 |
| wavelet-HHL | glszm | GrayLevelVariance                    | 21.60222036 |
| wavelet-HHL | glszm | ZoneVariance                         | 392.7843391 |
| wavelet-HHL | glszm | GrayLevelNonUniformityNormalized     | 0.068457265 |
| wavelet-HHL | glszm | SizeZoneNonUniformityNormalized      | 0.445919076 |
| wavelet-HHL | glszm | SizeZoneNonUniformity                | 158.747191  |
| wavelet-HHL | glszm | GrayLevelNonUniformity               | 24.37078652 |
| wavelet-HHL | glszm | LargeAreaEmphasis                    | 406.9101124 |
| wavelet-HHL | glszm | SmallAreaHighGrayLevelEmphasis       | 163.2371977 |
| wavelet-HHL | glszm | ZonePercentage                       | 0.266068759 |
| wavelet-HHL | glszm | LargeAreaLowGrayLevelEmphasis        | 1.99963238  |
| wavelet-HHL | glszm | LargeAreaHighGrayLevelEmphasis       | 83929.53371 |
| wavelet-HHL | glszm | HighGrayLevelZoneEmphasis            | 237.3455056 |
| wavelet-HHL | glszm | SmallAreaEmphasis                    | 0.694111936 |
| wavelet-HHL | glszm | LowGrayLevelZoneEmphasis             | 0.010657117 |
| wavelet-HHL | glszm | ZoneEntropy                          | 5.599858004 |
| wavelet-HHL | glszm | SmallAreaLowGrayLevelEmphasis        | 0.008958305 |
| wavelet-HHL | ngtdm | Coarseness                           | 0.005590196 |
| wavelet-HHL | ngtdm | Complexity                           | 617.0967425 |
| wavelet-HHL | ngtdm | Strength                             | 1.220267819 |
| wavelet-HHL | ngtdm | Contrast                             | 0.059671841 |
| wavelet-HHL | ngtdm | Busyness                             | 0.344773964 |
| wavelet-HLH | gldm  | GrayLevelVariance                    | 8.006115926 |
| wavelet-HLH | gldm  | HighGrayLevelEmphasis                | 191.7929746 |
| wavelet-HLH | gldm  | DependenceEntropy                    | 6.234895275 |
| wavelet-HLH | gldm  | DependenceNonUniformity              | 141.3901345 |
| wavelet-HLH | gldm  | GrayLevelNonUniformity               | 182.2720478 |
| wavelet-HLH | gldm  | SmallDependenceEmphasis              | 0.224750463 |
| wavelet-HLH | gldm  | SmallDependenceHighGrayLevelEmphasis | 46.40846477 |
| wavelet-HLH | gldm  | DependenceNonUniformityNormalized    | 0.105672746 |
| wavelet-HLH | gldm  | LargeDependenceEmphasis              | 41.81016442 |
| wavelet-HLH | gldm  | LargeDependenceLowGrayLevelEmphasis  | 0.239995243 |
| wavelet-HLH | gldm  | DependenceVariance                   | 15.60005005 |
| wavelet-HLH | gldm  | LargeDependenceHighGrayLevelEmphasis | 7494.999253 |
| wavelet-HLH | gldm  | SmallDependenceLowGrayLevelEmphasis  | 0.002842005 |
| wavelet-HLH | gldm  | LowGrayLevelEmphasis                 | 0.007432913 |
| wavelet-HLH | glcm  | JointAverage                         | 13.593544   |
| wavelet-HLH | glcm  | SumAverage                           | 27.187088   |
| wavelet-HLH | glcm  | JointEntropy                         | 6.289312276 |
| wavelet-HLH | glcm  | ClusterShade                         | 16.58752358 |

|             |            |                                  |              |
|-------------|------------|----------------------------------|--------------|
| wavelet-HLH | glcm       | MaximumProbability               | 0.090005919  |
| wavelet-HLH | glcm       | Idmn                             | 0.978672488  |
| wavelet-HLH | glcm       | JointEnergy                      | 0.02980083   |
| wavelet-HLH | glcm       | Contrast                         | 13.88580263  |
| wavelet-HLH | glcm       | DifferenceEntropy                | 2.956402714  |
| wavelet-HLH | glcm       | InverseVariance                  | 0.352545719  |
| wavelet-HLH | glcm       | DifferenceVariance               | 7.340561578  |
| wavelet-HLH | glcm       | Idn                              | 0.912710224  |
| wavelet-HLH | glcm       | Idm                              | 0.386591459  |
| wavelet-HLH | glcm       | Correlation                      | 6.07E-05     |
| wavelet-HLH | glcm       | Autocorrelation                  | 184.8229568  |
| wavelet-HLH | glcm       | SumEntropy                       | 3.775137123  |
| wavelet-HLH | glcm       | SumSquares                       | 6.978610921  |
| wavelet-HLH | glcm       | ClusterProminence                | 1171.270603  |
| wavelet-HLH | glcm       | Imc2                             | 0.601663736  |
| wavelet-HLH | glcm       | Imc1                             | -0.072342047 |
| wavelet-HLH | glcm       | DifferenceAverage                | 2.535207928  |
| wavelet-HLH | glcm       | Id                               | 0.453139531  |
| wavelet-HLH | glcm       | ClusterTendency                  | 14.02864106  |
| wavelet-HLH | firstorder | InterquartileRange               | 61.94498533  |
| wavelet-HLH | firstorder | Skewness                         | 0.175328422  |
| wavelet-HLH | firstorder | Uniformity                       | 0.136227241  |
| wavelet-HLH | firstorder | Median                           | -2.344539471 |
| wavelet-HLH | firstorder | Energy                           | 6626202.429  |
| wavelet-HLH | firstorder | RobustMeanAbsoluteDeviation      | 26.91622031  |
| wavelet-HLH | firstorder | MeanAbsoluteDeviation            | 48.2440218   |
| wavelet-HLH | firstorder | TotalEnergy                      | 178907465.6  |
| wavelet-HLH | firstorder | Maximum                          | 273.2000309  |
| wavelet-HLH | firstorder | RootMeanSquared                  | 70.37271279  |
| wavelet-HLH | firstorder | 90Percentile                     | 85.93854233  |
| wavelet-HLH | firstorder | Minimum                          | -319.2785181 |
| wavelet-HLH | firstorder | Entropy                          | 3.387451098  |
| wavelet-HLH | firstorder | Range                            | 592.478549   |
| wavelet-HLH | firstorder | Variance                         | 4949.90553   |
| wavelet-HLH | firstorder | 10Percentile                     | -74.25107895 |
| wavelet-HLH | firstorder | Kurtosis                         | 5.378388067  |
| wavelet-HLH | firstorder | Mean                             | 1.553440148  |
| wavelet-HLH | glrlm      | ShortRunLowGrayLevelEmphasis     | 0.007124408  |
| wavelet-HLH | glrlm      | GrayLevelVariance                | 9.185058579  |
| wavelet-HLH | glrlm      | LowGrayLevelRunEmphasis          | 0.007755024  |
| wavelet-HLH | glrlm      | GrayLevelNonUniformityNormalized | 0.116443717  |
| wavelet-HLH | glrlm      | RunVariance                      | 0.293742916  |
| wavelet-HLH | glrlm      | GrayLevelNonUniformity           | 131.1828406  |
| wavelet-HLH | glrlm      | LongRunEmphasis                  | 1.711061892  |
| wavelet-HLH | glrlm      | ShortRunHighGrayLevelEmphasis    | 173.5986622  |
| wavelet-HLH | glrlm      | RunLengthNonUniformity           | 849.5154304  |
| wavelet-HLH | glrlm      | ShortRunEmphasis                 | 0.890190246  |
| wavelet-HLH | glrlm      | LongRunHighGrayLevelEmphasis     | 322.2623839  |
| wavelet-HLH | glrlm      | RunPercentage                    | 0.841554559  |
| wavelet-HLH | glrlm      | LongRunLowGrayLevelEmphasis      | 0.011829909  |
| wavelet-HLH | glrlm      | RunEntropy                       | 4.18528427   |
| wavelet-HLH | glrlm      | HighGrayLevelRunEmphasis         | 193.6987934  |
| wavelet-HLH | glrlm      | RunLengthNonUniformityNormalized | 0.753385458  |

|             |       |                                  |             |
|-------------|-------|----------------------------------|-------------|
| wavelet-HLH | glszm | GrayLevelVariance                | 21.97134462 |
| wavelet-HLH | glszm | ZoneVariance                     | 518.934012  |
| wavelet-HLH | glszm | GrayLevelNonUniformityNormalized | 0.065437643 |
| wavelet-HLH | glszm | SizeZoneNonUniformityNormalized  | 0.437525182 |
| wavelet-HLH | glszm | SizeZoneNonUniformity            | 139.5705329 |
| wavelet-HLH | glszm | GrayLevelNonUniformity           | 20.87460815 |
| wavelet-HLH | glszm | LargeAreaEmphasis                | 536.5266458 |
| wavelet-HLH | glszm | SmallAreaHighGrayLevelEmphasis   | 144.7338011 |
| wavelet-HLH | glszm | ZonePercentage                   | 0.238415546 |
| wavelet-HLH | glszm | LargeAreaLowGrayLevelEmphasis    | 3.038378532 |
| wavelet-HLH | glszm | LargeAreaHighGrayLevelEmphasis   | 95976.94984 |
| wavelet-HLH | glszm | HighGrayLevelZoneEmphasis        | 207.5799373 |
| wavelet-HLH | glszm | SmallAreaEmphasis                | 0.687682424 |
| wavelet-HLH | glszm | LowGrayLevelZoneEmphasis         | 0.01253872  |
| wavelet-HLH | glszm | ZoneEntropy                      | 5.612401952 |
| wavelet-HLH | glszm | SmallAreaLowGrayLevelEmphasis    | 0.01033412  |
| wavelet-HLH | ngtdm | Coarseness                       | 0.005610904 |
| wavelet-HLH | ngtdm | Complexity                       | 467.9109853 |
| wavelet-HLH | ngtdm | Strength                         | 1.017205468 |
| wavelet-HLH | ngtdm | Contrast                         | 0.058353349 |
| wavelet-HLH | ngtdm | Busyness                         | 0.404946756 |

| Image type | Feature Class | Feature Name                         |                                                                                                                                                                                                                                                                                                                                                                                                                   |
|------------|---------------|--------------------------------------|-------------------------------------------------------------------------------------------------------------------------------------------------------------------------------------------------------------------------------------------------------------------------------------------------------------------------------------------------------------------------------------------------------------------|
| general    | info          | BoundingBox                          | 9: RTSTRUCT: C99-DNU_segment_CTV<br>(1, 1, 1, 12, 13, 12)                                                                                                                                                                                                                                                                                                                                                         |
| general    | info          | EnabledImageTypes                    | {u'Original': {}, u'Wavelet': {}}                                                                                                                                                                                                                                                                                                                                                                                 |
|            |               |                                      | {'distances': [1], 'additionalInfo': True, 'force2D': False, 'interpolator': 'sitkBSpline', 'resampledPixelSpacing': [3.0], 'label': 1, 'normalizeScale': 1, 'normalize': False, 'force2Ddimension': 0, 'removeOutliers': None, 'minimumROISize': None, u'binWidth': 25.0, 'minimumROIDimensions': 1, u'correctMask': True, 'preCrop': False, u'symmetricalGLCM': True, 'resegmentRange': None, 'padDistance': 5} |
| general    | info          | GeneralSettings                      | a332a5c78ece82eb351de748aaf75cb8500d6                                                                                                                                                                                                                                                                                                                                                                             |
| general    | info          | ImageHash                            | 548                                                                                                                                                                                                                                                                                                                                                                                                               |
| general    | info          | ImageSpacing                         | (0.9765624999999998, 0.9765624999999998, 2.9999999999999999)                                                                                                                                                                                                                                                                                                                                                      |
| general    | info          | MaskHash                             | 4e123a06b9dee7f8cd9dde646112fd205c288                                                                                                                                                                                                                                                                                                                                                                             |
| general    | info          | NumpyVersion                         | 264                                                                                                                                                                                                                                                                                                                                                                                                               |
| general    | info          | PyWaveletVersion                     | 1.13.1                                                                                                                                                                                                                                                                                                                                                                                                            |
| general    | info          | SimpleITKVersion                     | 0.5.2                                                                                                                                                                                                                                                                                                                                                                                                             |
| general    | info          | Version                              | 1.1.0                                                                                                                                                                                                                                                                                                                                                                                                             |
| general    | info          | VolumeNum                            | 1.3.0.post102+g1b0eb74                                                                                                                                                                                                                                                                                                                                                                                            |
| general    | info          | VoxelNum                             | 1                                                                                                                                                                                                                                                                                                                                                                                                                 |
| original   | shape         | Maximum3DDiameter                    | 719                                                                                                                                                                                                                                                                                                                                                                                                               |
| original   | shape         | Maximum2DDiameterSlice               | 40.02499219                                                                                                                                                                                                                                                                                                                                                                                                       |
| original   | shape         | Sphericity                           | 37.58989226                                                                                                                                                                                                                                                                                                                                                                                                       |
| original   | shape         | MinorAxis                            | 0.81158305                                                                                                                                                                                                                                                                                                                                                                                                        |
| original   | shape         | Elongation                           | 29.76841516                                                                                                                                                                                                                                                                                                                                                                                                       |
| original   | shape         | SurfaceVolumeRatio                   | 0.838949337                                                                                                                                                                                                                                                                                                                                                                                                       |
| original   | shape         | Volume                               | 0.221710845                                                                                                                                                                                                                                                                                                                                                                                                       |
| original   | shape         | MajorAxis                            | 19413                                                                                                                                                                                                                                                                                                                                                                                                             |
| original   | shape         | SurfaceArea                          | 35.4829712                                                                                                                                                                                                                                                                                                                                                                                                        |
| original   | shape         | Flatness                             | 4304.072643                                                                                                                                                                                                                                                                                                                                                                                                       |
| original   | shape         | LeastAxis                            | 0.784079455                                                                                                                                                                                                                                                                                                                                                                                                       |
| original   | shape         | Maximum2DDiameterColumn              | 27.82146871                                                                                                                                                                                                                                                                                                                                                                                                       |
| original   | shape         | Maximum2DDiameterRow                 | 36.24913792                                                                                                                                                                                                                                                                                                                                                                                                       |
| original   | gldm          | GrayLevelVariance                    | 39                                                                                                                                                                                                                                                                                                                                                                                                                |
| original   | gldm          | HighGrayLevelEmphasis                | 97.82534466                                                                                                                                                                                                                                                                                                                                                                                                       |
| original   | gldm          | DependenceEntropy                    | 840.6342142                                                                                                                                                                                                                                                                                                                                                                                                       |
| original   | gldm          | DependenceNonUniformity              | 6.628276458                                                                                                                                                                                                                                                                                                                                                                                                       |
| original   | gldm          | GrayLevelNonUniformity               | 127.6258693                                                                                                                                                                                                                                                                                                                                                                                                       |
| original   | gldm          | SmallDependenceEmphasis              | 58.91655076                                                                                                                                                                                                                                                                                                                                                                                                       |
| original   | gldm          | SmallDependenceHighGrayLevelEmphasis | 0.41272736                                                                                                                                                                                                                                                                                                                                                                                                        |
| original   | gldm          | DependenceNonUniformityNormalized    | 219.8094233                                                                                                                                                                                                                                                                                                                                                                                                       |
| original   | gldm          | LargeDependenceEmphasis              | 0.177504686                                                                                                                                                                                                                                                                                                                                                                                                       |
| original   | gldm          | LargeDependenceLowGrayLevelEmphasis  | 46.44923505                                                                                                                                                                                                                                                                                                                                                                                                       |
| original   | gldm          | DependenceVariance                   | 0.04414981                                                                                                                                                                                                                                                                                                                                                                                                        |
| original   | gldm          | LargeDependenceHighGrayLevelEmphasis | 23.57184004                                                                                                                                                                                                                                                                                                                                                                                                       |
|            |               |                                      | 57901.91377                                                                                                                                                                                                                                                                                                                                                                                                       |



|          |            |                                     |              |
|----------|------------|-------------------------------------|--------------|
| original | gldm       | SmallDependenceLowGrayLevelEmphasis | 0.00497077   |
| original | gldm       | LowGrayLevelEmphasis                | 0.005939583  |
| original | glcm       | JointAverage                        | 29.36177415  |
| original | glcm       | SumAverage                          | 58.72354831  |
| original | glcm       | JointEntropy                        | 7.251263495  |
| original | glcm       | ClusterShade                        | -3673.82444  |
| original | glcm       | MaximumProbability                  | 0.098076562  |
| original | glcm       | Idmn                                | 0.953556836  |
| original | glcm       | JointEnergy                         | 0.025567241  |
| original | glcm       | Contrast                            | 83.71373287  |
| original | glcm       | DifferenceEntropy                   | 3.933573814  |
| original | glcm       | InverseVariance                     | 0.259793597  |
| original | glcm       | DifferenceVariance                  | 48.48986398  |
| original | glcm       | Idn                                 | 0.884339366  |
| original | glcm       | Idm                                 | 0.327311174  |
| original | glcm       | Correlation                         | 0.45475059   |
| original | glcm       | Autocorrelation                     | 897.5183148  |
| original | glcm       | SumEntropy                          | 5.035978008  |
| original | glcm       | SumSquares                          | 77.1791461   |
| original | glcm       | ClusterProminence                   | 161139.8681  |
| original | glcm       | Imc2                                | 0.914975785  |
| original | glcm       | Imc1                                | -0.224378182 |
| original | glcm       | DifferenceAverage                   | 5.900487221  |
| original | glcm       | Id                                  | 0.384389805  |
| original | glcm       | ClusterTendency                     | 225.0028516  |
| original | firstorder | InterquartileRange                  | 388.5        |
| original | firstorder | Skewness                            | -0.869615363 |
| original | firstorder | Uniformity                          | 0.081942352  |
| original | firstorder | Median                              | -58          |
| original | firstorder | Energy                              | 67923738     |
| original | firstorder | RobustMeanAbsoluteDeviation         | 169.1747429  |
| original | firstorder | MeanAbsoluteDeviation               | 214.3434147  |
| original | firstorder | TotalEnergy                         | 1833940926   |
| original | firstorder | Maximum                             | 85           |
| original | firstorder | RootMeanSquared                     | 307.3592897  |
| original | firstorder | 90Percentile                        | 40           |
| original | firstorder | Minimum                             | -837         |
| original | firstorder | Entropy                             | 4.426529488  |
| original | firstorder | Range                               | 922          |
| original | firstorder | Variance                            | 61378.1256   |
| original | firstorder | 10Percentile                        | -593.6       |
| original | firstorder | Kurtosis                            | 2.411122534  |
| original | firstorder | Mean                                | -181.9109875 |
| original | glrlm      | ShortRunLowGrayLevelEmphasis        | 0.006685568  |
| original | glrlm      | GrayLevelVariance                   | 100.8378007  |
| original | glrlm      | LowGrayLevelRunEmphasis             | 0.006786173  |
| original | glrlm      | GrayLevelNonUniformityNormalized    | 0.057853074  |
| original | glrlm      | RunVariance                         | 0.286034111  |
| original | glrlm      | GrayLevelNonUniformity              | 35.57572161  |
| original | glrlm      | LongRunEmphasis                     | 1.658080729  |
| original | glrlm      | ShortRunHighGrayLevelEmphasis       | 662.8651308  |
| original | glrlm      | RunLengthNonUniformity              | 481.936548   |
| original | glrlm      | ShortRunEmphasis                    | 0.904965386  |

|             |       |                                      |              |
|-------------|-------|--------------------------------------|--------------|
| original    | glrlm | LongRunHighGrayLevelEmphasis         | 1584.670976  |
| original    | glrlm | RunPercentage                        | 0.85449877   |
| original    | glrlm | LongRunLowGrayLevelEmphasis          | 0.007407298  |
| original    | glrlm | RunEntropy                           | 5.167443579  |
| original    | glrlm | HighGrayLevelRunEmphasis             | 776.5256973  |
| original    | glrlm | RunLengthNonUniformityNormalized     | 0.783898813  |
| original    | glszm | GrayLevelVariance                    | 88.74433902  |
| original    | glszm | ZoneVariance                         | 99.57352574  |
| original    | glszm | GrayLevelNonUniformityNormalized     | 0.031660831  |
| original    | glszm | SizeZoneNonUniformityNormalized      | 0.606932678  |
| original    | glszm | SizeZoneNonUniformity                | 199.6808511  |
| original    | glszm | GrayLevelNonUniformity               | 10.41641337  |
| original    | glszm | LargeAreaEmphasis                    | 104.3495441  |
| original    | glszm | SmallAreaHighGrayLevelEmphasis       | 404.3570766  |
| original    | glszm | ZonePercentage                       | 0.457579972  |
| original    | glszm | LargeAreaLowGrayLevelEmphasis        | 0.095750495  |
| original    | glszm | LargeAreaHighGrayLevelEmphasis       | 130433.7508  |
| original    | glszm | HighGrayLevelZoneEmphasis            | 533.8389058  |
| original    | glszm | SmallAreaEmphasis                    | 0.806980924  |
| original    | glszm | LowGrayLevelZoneEmphasis             | 0.011263078  |
| original    | glszm | ZoneEntropy                          | 5.882511646  |
| original    | glszm | SmallAreaLowGrayLevelEmphasis        | 0.010602239  |
| original    | ngtdm | Coarseness                           | 0.005649746  |
| original    | ngtdm | Complexity                           | 2943.133753  |
| original    | ngtdm | Strength                             | 6.05616835   |
| original    | ngtdm | Contrast                             | 0.675697521  |
| original    | ngtdm | Busyness                             | 0.127146915  |
| wavelet-HHH | gldm  | GrayLevelVariance                    | 3.998758127  |
| wavelet-HHH | gldm  | HighGrayLevelEmphasis                | 113.6216968  |
| wavelet-HHH | gldm  | DependenceEntropy                    | 5.882981528  |
| wavelet-HHH | gldm  | DependenceNonUniformity              | 73.94297636  |
| wavelet-HHH | gldm  | GrayLevelNonUniformity               | 120.8191933  |
| wavelet-HHH | gldm  | SmallDependenceEmphasis              | 0.208123572  |
| wavelet-HHH | gldm  | SmallDependenceHighGrayLevelEmphasis | 24.49914629  |
| wavelet-HHH | gldm  | DependenceNonUniformityNormalized    | 0.102841414  |
| wavelet-HHH | gldm  | LargeDependenceEmphasis              | 37.35605007  |
| wavelet-HHH | gldm  | LargeDependenceLowGrayLevelEmphasis  | 0.351453403  |
| wavelet-HHH | gldm  | DependenceVariance                   | 12.41165194  |
| wavelet-HHH | gldm  | LargeDependenceHighGrayLevelEmphasis | 4122.1363    |
| wavelet-HHH | gldm  | SmallDependenceLowGrayLevelEmphasis  | 0.004279547  |
| wavelet-HHH | gldm  | LowGrayLevelEmphasis                 | 0.012113111  |
| wavelet-HHH | glcm  | JointAverage                         | 10.50379286  |
| wavelet-HHH | glcm  | SumAverage                           | 21.00758571  |
| wavelet-HHH | glcm  | JointEntropy                         | 5.595201018  |
| wavelet-HHH | glcm  | ClusterShade                         | -1.589644403 |
| wavelet-HHH | glcm  | MaximumProbability                   | 0.084825963  |
| wavelet-HHH | glcm  | Idmn                                 | 0.978407631  |
| wavelet-HHH | glcm  | JointEnergy                          | 0.035806246  |
| wavelet-HHH | glcm  | Contrast                             | 7.794643887  |
| wavelet-HHH | glcm  | DifferenceEntropy                    | 2.628131621  |
| wavelet-HHH | glcm  | InverseVariance                      | 0.389752952  |
| wavelet-HHH | glcm  | DifferenceVariance                   | 3.780763373  |
| wavelet-HHH | glcm  | Idn                                  | 0.907839649  |

|             |            |                                  |              |
|-------------|------------|----------------------------------|--------------|
| wavelet-HHH | glcm       | Idm                              | 0.413944945  |
| wavelet-HHH | glcm       | Correlation                      | -0.032377451 |
| wavelet-HHH | glcm       | Autocorrelation                  | 110.2020169  |
| wavelet-HHH | glcm       | SumEntropy                       | 3.363167595  |
| wavelet-HHH | glcm       | SumSquares                       | 3.769437708  |
| wavelet-HHH | glcm       | ClusterProminence                | 280.973619   |
| wavelet-HHH | glcm       | Imc2                             | 0.552146114  |
| wavelet-HHH | glcm       | Imc1                             | -0.064122251 |
| wavelet-HHH | glcm       | DifferenceAverage                | 1.993867739  |
| wavelet-HHH | glcm       | Id                               | 0.478811401  |
| wavelet-HHH | glcm       | ClusterTendency                  | 7.283106945  |
| wavelet-HHH | firstorder | InterquartileRange               | 50.95127455  |
| wavelet-HHH | firstorder | Skewness                         | -0.241322738 |
| wavelet-HHH | firstorder | Uniformity                       | 0.168037821  |
| wavelet-HHH | firstorder | Median                           | 0.146836621  |
| wavelet-HHH | firstorder | Energy                           | 1739076.845  |
| wavelet-HHH | firstorder | RobustMeanAbsoluteDeviation      | 21.63527361  |
| wavelet-HHH | firstorder | MeanAbsoluteDeviation            | 35.29591129  |
| wavelet-HHH | firstorder | TotalEnergy                      | 46955074.83  |
| wavelet-HHH | firstorder | Maximum                          | 190.2313753  |
| wavelet-HHH | firstorder | RootMeanSquared                  | 49.18072665  |
| wavelet-HHH | firstorder | 90Percentile                     | 57.33296292  |
| wavelet-HHH | firstorder | Minimum                          | -226.8196092 |
| wavelet-HHH | firstorder | Entropy                          | 2.942352873  |
| wavelet-HHH | firstorder | Range                            | 417.0509845  |
| wavelet-HHH | firstorder | Variance                         | 2417.780228  |
| wavelet-HHH | firstorder | 10Percentile                     | -58.47641301 |
| wavelet-HHH | firstorder | Kurtosis                         | 5.363260233  |
| wavelet-HHH | firstorder | Mean                             | -0.981654765 |
| wavelet-HHH | glrlm      | ShortRunLowGrayLevelEmphasis     | 0.011541871  |
| wavelet-HHH | glrlm      | GrayLevelVariance                | 4.515970069  |
| wavelet-HHH | glrlm      | LowGrayLevelRunEmphasis          | 0.0125995    |
| wavelet-HHH | glrlm      | GrayLevelNonUniformityNormalized | 0.152346748  |
| wavelet-HHH | glrlm      | RunVariance                      | 0.249339851  |
| wavelet-HHH | glrlm      | GrayLevelNonUniformity           | 92.71738731  |
| wavelet-HHH | glrlm      | LongRunEmphasis                  | 1.646990692  |
| wavelet-HHH | glrlm      | ShortRunHighGrayLevelEmphasis    | 101.6723623  |
| wavelet-HHH | glrlm      | RunLengthNonUniformity           | 456.6302236  |
| wavelet-HHH | glrlm      | ShortRunEmphasis                 | 0.888780257  |
| wavelet-HHH | glrlm      | LongRunHighGrayLevelEmphasis     | 186.0881397  |
| wavelet-HHH | glrlm      | RunPercentage                    | 0.846367819  |
| wavelet-HHH | glrlm      | LongRunLowGrayLevelEmphasis      | 0.018676621  |
| wavelet-HHH | glrlm      | RunEntropy                       | 3.694527709  |
| wavelet-HHH | glrlm      | HighGrayLevelRunEmphasis         | 114.0411679  |
| wavelet-HHH | glrlm      | RunLengthNonUniformityNormalized | 0.7498234    |
| wavelet-HHH | glszm      | GrayLevelVariance                | 11.84678819  |
| wavelet-HHH | glszm      | ZoneVariance                     | 448.5763407  |
| wavelet-HHH | glszm      | GrayLevelNonUniformityNormalized | 0.105709877  |
| wavelet-HHH | glszm      | SizeZoneNonUniformityNormalized  | 0.501157407  |
| wavelet-HHH | glszm      | SizeZoneNonUniformity            | 72.16666667  |
| wavelet-HHH | glszm      | GrayLevelNonUniformity           | 15.22222222  |
| wavelet-HHH | glszm      | LargeAreaEmphasis                | 473.5069444  |
| wavelet-HHH | glszm      | SmallAreaHighGrayLevelEmphasis   | 87.23577768  |

|             |            |                                      |              |
|-------------|------------|--------------------------------------|--------------|
| wavelet-HHH | glszm      | ZonePercentage                       | 0.200278164  |
| wavelet-HHH | glszm      | LargeAreaLowGrayLevelEmphasis        | 4.226577926  |
| wavelet-HHH | glszm      | LargeAreaHighGrayLevelEmphasis       | 54255.93056  |
| wavelet-HHH | glszm      | HighGrayLevelZoneEmphasis            | 115.6319444  |
| wavelet-HHH | glszm      | SmallAreaEmphasis                    | 0.733330157  |
| wavelet-HHH | glszm      | LowGrayLevelZoneEmphasis             | 0.021852035  |
| wavelet-HHH | glszm      | ZoneEntropy                          | 4.886254417  |
| wavelet-HHH | glszm      | SmallAreaLowGrayLevelEmphasis        | 0.0181192    |
| wavelet-HHH | ngtdm      | Coarseness                           | 0.009197409  |
| wavelet-HHH | ngtdm      | Complexity                           | 166.0562954  |
| wavelet-HHH | ngtdm      | Strength                             | 0.819838627  |
| wavelet-HHH | ngtdm      | Contrast                             | 0.051083105  |
| wavelet-HHH | ngtdm      | Busyness                             | 0.500487784  |
| wavelet-HLL | gldm       | GrayLevelVariance                    | 28.52898768  |
| wavelet-HLL | gldm       | HighGrayLevelEmphasis                | 368.2364395  |
| wavelet-HLL | gldm       | DependenceEntropy                    | 6.755817024  |
| wavelet-HLL | gldm       | DependenceNonUniformity              | 127.4506259  |
| wavelet-HLL | gldm       | GrayLevelNonUniformity               | 42.48539638  |
| wavelet-HLL | gldm       | SmallDependenceEmphasis              | 0.325496355  |
| wavelet-HLL | gldm       | SmallDependenceHighGrayLevelEmphasis | 112.8518524  |
| wavelet-HLL | gldm       | DependenceNonUniformityNormalized    | 0.177260954  |
| wavelet-HLL | gldm       | LargeDependenceEmphasis              | 17.18080668  |
| wavelet-HLL | gldm       | LargeDependenceLowGrayLevelEmphasis  | 0.054677316  |
| wavelet-HLL | gldm       | DependenceVariance                   | 6.507272309  |
| wavelet-HLL | gldm       | LargeDependenceHighGrayLevelEmphasis | 6906.161335  |
| wavelet-HLL | gldm       | SmallDependenceLowGrayLevelEmphasis  | 0.005321772  |
| wavelet-HLL | gldm       | LowGrayLevelEmphasis                 | 0.00798082   |
| wavelet-HLL | glcm       | JointAverage                         | 18.44989486  |
| wavelet-HLL | glcm       | SumAverage                           | 36.89978973  |
| wavelet-HLL | glcm       | JointEntropy                         | 7.820145978  |
| wavelet-HLL | glcm       | ClusterShade                         | -232.2084693 |
| wavelet-HLL | glcm       | MaximumProbability                   | 0.03195995   |
| wavelet-HLL | glcm       | Idmn                                 | 0.972014793  |
| wavelet-HLL | glcm       | JointEnergy                          | 0.007029426  |
| wavelet-HLL | glcm       | Contrast                             | 28.13770223  |
| wavelet-HLL | glcm       | DifferenceEntropy                    | 3.443956345  |
| wavelet-HLL | glcm       | InverseVariance                      | 0.251846448  |
| wavelet-HLL | glcm       | DifferenceVariance                   | 12.02389388  |
| wavelet-HLL | glcm       | Idn                                  | 0.892931906  |
| wavelet-HLL | glcm       | Idm                                  | 0.258487625  |
| wavelet-HLL | glcm       | Correlation                          | 0.410859852  |
| wavelet-HLL | glcm       | Autocorrelation                      | 350.5529188  |
| wavelet-HLL | glcm       | SumEntropy                           | 4.961988079  |
| wavelet-HLL | glcm       | SumSquares                           | 24.20855195  |
| wavelet-HLL | glcm       | ClusterProminence                    | 16564.29125  |
| wavelet-HLL | glcm       | Imc2                                 | 0.839042054  |
| wavelet-HLL | glcm       | Imc1                                 | -0.151997242 |
| wavelet-HLL | glcm       | DifferenceAverage                    | 3.929962054  |
| wavelet-HLL | glcm       | Id                                   | 0.343764327  |
| wavelet-HLL | glcm       | ClusterTendency                      | 68.69650558  |
| wavelet-HLL | firstorder | InterquartileRange                   | 157.1988653  |
| wavelet-HLL | firstorder | Skewness                             | -0.468046471 |
| wavelet-HLL | firstorder | Uniformity                           | 0.059089564  |

|             |            |                                  |              |
|-------------|------------|----------------------------------|--------------|
| wavelet-HLL | firstorder | Median                           | -33.92221361 |
| wavelet-HLL | firstorder | Energy                           | 14728602.44  |
| wavelet-HLL | firstorder | RobustMeanAbsoluteDeviation      | 69.86058105  |
| wavelet-HLL | firstorder | MeanAbsoluteDeviation            | 104.4952742  |
| wavelet-HLL | firstorder | TotalEnergy                      | 397672265.9  |
| wavelet-HLL | firstorder | Maximum                          | 249.4727171  |
| wavelet-HLL | firstorder | RootMeanSquared                  | 143.1252719  |
| wavelet-HLL | firstorder | 90Percentile                     | 112.9372198  |
| wavelet-HLL | firstorder | Minimum                          | -495.1491059 |
| wavelet-HLL | firstorder | Entropy                          | 4.358974036  |
| wavelet-HLL | firstorder | Range                            | 744.621823   |
| wavelet-HLL | firstorder | Variance                         | 17816.87236  |
| wavelet-HLL | firstorder | 10Percentile                     | -234.2174265 |
| wavelet-HLL | firstorder | Kurtosis                         | 3.227980034  |
| wavelet-HLL | firstorder | Mean                             | -51.65240641 |
| wavelet-HLL | glrlm      | ShortRunLowGrayLevelEmphasis     | 0.00822343   |
| wavelet-HLL | glrlm      | GrayLevelVariance                | 29.76136297  |
| wavelet-HLL | glrlm      | LowGrayLevelRunEmphasis          | 0.008434067  |
| wavelet-HLL | glrlm      | GrayLevelNonUniformityNormalized | 0.055941022  |
| wavelet-HLL | glrlm      | RunVariance                      | 0.121381624  |
| wavelet-HLL | glrlm      | GrayLevelNonUniformity           | 36.7248535   |
| wavelet-HLL | glrlm      | LongRunEmphasis                  | 1.325122331  |
| wavelet-HLL | glrlm      | ShortRunHighGrayLevelEmphasis    | 341.2613373  |
| wavelet-HLL | glrlm      | RunLengthNonUniformity           | 557.9121875  |
| wavelet-HLL | glrlm      | ShortRunEmphasis                 | 0.936711885  |
| wavelet-HLL | glrlm      | LongRunHighGrayLevelEmphasis     | 493.8184876  |
| wavelet-HLL | glrlm      | RunPercentage                    | 0.912806248  |
| wavelet-HLL | glrlm      | LongRunLowGrayLevelEmphasis      | 0.009493767  |
| wavelet-HLL | glrlm      | RunEntropy                       | 4.798672519  |
| wavelet-HLL | glrlm      | HighGrayLevelRunEmphasis         | 365.9562294  |
| wavelet-HLL | glrlm      | RunLengthNonUniformityNormalized | 0.848788704  |
| wavelet-HLL | glszm      | GrayLevelVariance                | 41.58360768  |
| wavelet-HLL | glszm      | ZoneVariance                     | 28.75677641  |
| wavelet-HLL | glszm      | GrayLevelNonUniformityNormalized | 0.044471879  |
| wavelet-HLL | glszm      | SizeZoneNonUniformityNormalized  | 0.406419753  |
| wavelet-HLL | glszm      | SizeZoneNonUniformity            | 109.7333333  |
| wavelet-HLL | glszm      | GrayLevelNonUniformity           | 12.00740741  |
| wavelet-HLL | glszm      | LargeAreaEmphasis                | 35.84814815  |
| wavelet-HLL | glszm      | SmallAreaHighGrayLevelEmphasis   | 226.4592188  |
| wavelet-HLL | glszm      | ZonePercentage                   | 0.375521558  |
| wavelet-HLL | glszm      | LargeAreaLowGrayLevelEmphasis    | 0.114392299  |
| wavelet-HLL | glszm      | LargeAreaHighGrayLevelEmphasis   | 14111.00741  |
| wavelet-HLL | glszm      | HighGrayLevelZoneEmphasis        | 353.0407407  |
| wavelet-HLL | glszm      | SmallAreaEmphasis                | 0.662315503  |
| wavelet-HLL | glszm      | LowGrayLevelZoneEmphasis         | 0.014937424  |
| wavelet-HLL | glszm      | ZoneEntropy                      | 6.127506689  |
| wavelet-HLL | glszm      | SmallAreaLowGrayLevelEmphasis    | 0.013218719  |
| wavelet-HLL | ngtdm      | Coarseness                       | 0.011055495  |
| wavelet-HLL | ngtdm      | Complexity                       | 886.981238   |
| wavelet-HLL | ngtdm      | Strength                         | 3.136722209  |
| wavelet-HLL | ngtdm      | Contrast                         | 0.192828696  |
| wavelet-HLL | ngtdm      | Busyness                         | 0.165098327  |
| wavelet-LHL | gldm       | GrayLevelVariance                | 69.6963446   |

|             |            |                                      |              |
|-------------|------------|--------------------------------------|--------------|
| wavelet-LHL | gldm       | HighGrayLevelEmphasis                | 1259.226704  |
| wavelet-LHL | gldm       | DependenceEntropy                    | 6.809748394  |
| wavelet-LHL | gldm       | DependenceNonUniformity              | 166.4130737  |
| wavelet-LHL | gldm       | GrayLevelNonUniformity               | 32.6077886   |
| wavelet-LHL | gldm       | SmallDependenceEmphasis              | 0.460785601  |
| wavelet-LHL | gldm       | SmallDependenceHighGrayLevelEmphasis | 592.2377081  |
| wavelet-LHL | gldm       | DependenceNonUniformityNormalized    | 0.231450728  |
| wavelet-LHL | gldm       | LargeDependenceEmphasis              | 16.91933241  |
| wavelet-LHL | gldm       | LargeDependenceLowGrayLevelEmphasis  | 0.015073981  |
| wavelet-LHL | gldm       | DependenceVariance                   | 8.250034335  |
| wavelet-LHL | gldm       | LargeDependenceHighGrayLevelEmphasis | 22111.47983  |
| wavelet-LHL | gldm       | SmallDependenceLowGrayLevelEmphasis  | 0.002024337  |
| wavelet-LHL | gldm       | LowGrayLevelEmphasis                 | 0.002523689  |
| wavelet-LHL | glcm       | JointAverage                         | 33.96954875  |
| wavelet-LHL | glcm       | SumAverage                           | 67.93909751  |
| wavelet-LHL | glcm       | JointEntropy                         | 8.324743617  |
| wavelet-LHL | glcm       | ClusterShade                         | 399.3049997  |
| wavelet-LHL | glcm       | MaximumProbability                   | 0.034869591  |
| wavelet-LHL | glcm       | Idmn                                 | 0.980183658  |
| wavelet-LHL | glcm       | JointEnergy                          | 0.006128527  |
| wavelet-LHL | glcm       | Contrast                             | 105.1787986  |
| wavelet-LHL | glcm       | DifferenceEntropy                    | 4.138380018  |
| wavelet-LHL | glcm       | InverseVariance                      | 0.213028979  |
| wavelet-LHL | glcm       | DifferenceVariance                   | 57.95123686  |
| wavelet-LHL | glcm       | Idn                                  | 0.919238834  |
| wavelet-LHL | glcm       | Idm                                  | 0.219242499  |
| wavelet-LHL | glcm       | Correlation                          | 0.152644163  |
| wavelet-LHL | glcm       | Autocorrelation                      | 1164.512008  |
| wavelet-LHL | glcm       | SumEntropy                           | 5.316235037  |
| wavelet-LHL | glcm       | SumSquares                           | 63.14026427  |
| wavelet-LHL | glcm       | ClusterProminence                    | 114213.8838  |
| wavelet-LHL | glcm       | Imc2                                 | 0.952874481  |
| wavelet-LHL | glcm       | Imc1                                 | -0.254150341 |
| wavelet-LHL | glcm       | DifferenceAverage                    | 6.649963442  |
| wavelet-LHL | glcm       | Id                                   | 0.297324434  |
| wavelet-LHL | glcm       | ClusterTendency                      | 147.3822584  |
| wavelet-LHL | firstorder | InterquartileRange                   | 187.4490616  |
| wavelet-LHL | firstorder | Skewness                             | 0.126500357  |
| wavelet-LHL | firstorder | Uniformity                           | 0.045351584  |
| wavelet-LHL | firstorder | Median                               | -45.02915593 |
| wavelet-LHL | firstorder | Energy                               | 33024593.5   |
| wavelet-LHL | firstorder | RobustMeanAbsoluteDeviation          | 89.97444706  |
| wavelet-LHL | firstorder | MeanAbsoluteDeviation                | 150.378735   |
| wavelet-LHL | firstorder | TotalEnergy                          | 891664024.6  |
| wavelet-LHL | firstorder | Maximum                              | 777.6075807  |
| wavelet-LHL | firstorder | RootMeanSquared                      | 214.315852   |
| wavelet-LHL | firstorder | 90Percentile                         | 224.7322771  |
| wavelet-LHL | firstorder | Minimum                              | -889.3132791 |
| wavelet-LHL | firstorder | Entropy                              | 4.911957796  |
| wavelet-LHL | firstorder | Range                                | 1666.92086   |
| wavelet-LHL | firstorder | Variance                             | 43442.48785  |
| wavelet-LHL | firstorder | 10Percentile                         | -306.8033877 |
| wavelet-LHL | firstorder | Kurtosis                             | 4.312879173  |

|             |            |                                      |              |
|-------------|------------|--------------------------------------|--------------|
| wavelet-LHL | firstorder | Mean                                 | -49.88783992 |
| wavelet-LHL | glrlm      | ShortRunLowGrayLevelEmphasis         | 0.002615775  |
| wavelet-LHL | glrlm      | GrayLevelVariance                    | 73.81021094  |
| wavelet-LHL | glrlm      | LowGrayLevelRunEmphasis              | 0.002660595  |
| wavelet-LHL | glrlm      | GrayLevelNonUniformityNormalized     | 0.041417023  |
| wavelet-LHL | glrlm      | RunVariance                          | 0.10867044   |
| wavelet-LHL | glrlm      | GrayLevelNonUniformity               | 27.55823204  |
| wavelet-LHL | glrlm      | LongRunEmphasis                      | 1.278392724  |
| wavelet-LHL | glrlm      | ShortRunHighGrayLevelEmphasis        | 1191.023262  |
| wavelet-LHL | glrlm      | RunLengthNonUniformity               | 580.5426187  |
| wavelet-LHL | glrlm      | ShortRunEmphasis                     | 0.947336627  |
| wavelet-LHL | glrlm      | LongRunHighGrayLevelEmphasis         | 1614.772656  |
| wavelet-LHL | glrlm      | RunPercentage                        | 0.925216647  |
| wavelet-LHL | glrlm      | LongRunLowGrayLevelEmphasis          | 0.002891605  |
| wavelet-LHL | glrlm      | RunEntropy                           | 5.296561745  |
| wavelet-LHL | glrlm      | HighGrayLevelRunEmphasis             | 1257.879807  |
| wavelet-LHL | glrlm      | RunLengthNonUniformityNormalized     | 0.872136208  |
| wavelet-LHL | glszm      | GrayLevelVariance                    | 106.2263791  |
| wavelet-LHL | glszm      | ZoneVariance                         | 19.57729453  |
| wavelet-LHL | glszm      | GrayLevelNonUniformityNormalized     | 0.028987742  |
| wavelet-LHL | glszm      | SizeZoneNonUniformityNormalized      | 0.559932727  |
| wavelet-LHL | glszm      | SizeZoneNonUniformity                | 206.6151762  |
| wavelet-LHL | glszm      | GrayLevelNonUniformity               | 10.69647696  |
| wavelet-LHL | glszm      | LargeAreaEmphasis                    | 23.37398374  |
| wavelet-LHL | glszm      | SmallAreaHighGrayLevelEmphasis       | 1006.668615  |
| wavelet-LHL | glszm      | ZonePercentage                       | 0.513212796  |
| wavelet-LHL | glszm      | LargeAreaLowGrayLevelEmphasis        | 0.021747207  |
| wavelet-LHL | glszm      | LargeAreaHighGrayLevelEmphasis       | 30308.13008  |
| wavelet-LHL | glszm      | HighGrayLevelZoneEmphasis            | 1283.701897  |
| wavelet-LHL | glszm      | SmallAreaEmphasis                    | 0.775979561  |
| wavelet-LHL | glszm      | LowGrayLevelZoneEmphasis             | 0.004053117  |
| wavelet-LHL | glszm      | ZoneEntropy                          | 6.312320397  |
| wavelet-LHL | glszm      | SmallAreaLowGrayLevelEmphasis        | 0.003822798  |
| wavelet-LHL | ngtdm      | Coarseness                           | 0.011250253  |
| wavelet-LHL | ngtdm      | Complexity                           | 5486.3206    |
| wavelet-LHL | ngtdm      | Strength                             | 9.865152577  |
| wavelet-LHL | ngtdm      | Contrast                             | 0.251318635  |
| wavelet-LHL | ngtdm      | Busyness                             | 0.041724666  |
| wavelet-LHH | gldm       | GrayLevelVariance                    | 16.49020719  |
| wavelet-LHH | gldm       | HighGrayLevelEmphasis                | 293.8817803  |
| wavelet-LHH | gldm       | DependenceEntropy                    | 6.255168624  |
| wavelet-LHH | gldm       | DependenceNonUniformity              | 116.0653686  |
| wavelet-LHH | gldm       | GrayLevelNonUniformity               | 68.79694019  |
| wavelet-LHH | gldm       | SmallDependenceEmphasis              | 0.340696805  |
| wavelet-LHH | gldm       | SmallDependenceHighGrayLevelEmphasis | 107.0522087  |
| wavelet-LHH | gldm       | DependenceNonUniformityNormalized    | 0.161426104  |
| wavelet-LHH | gldm       | LargeDependenceEmphasis              | 26.9054242   |
| wavelet-LHH | gldm       | LargeDependenceLowGrayLevelEmphasis  | 0.106167063  |
| wavelet-LHH | gldm       | DependenceVariance                   | 12.05238693  |
| wavelet-LHH | gldm       | LargeDependenceHighGrayLevelEmphasis | 7220.090403  |
| wavelet-LHH | gldm       | SmallDependenceLowGrayLevelEmphasis  | 0.003304938  |
| wavelet-LHH | gldm       | LowGrayLevelEmphasis                 | 0.006079789  |
| wavelet-LHH | glcm       | JointAverage                         | 16.67089762  |

|             |            |                                  |              |
|-------------|------------|----------------------------------|--------------|
| wavelet-LHH | glcm       | SumAverage                       | 33.34179524  |
| wavelet-LHH | glcm       | JointEntropy                     | 7.087623332  |
| wavelet-LHH | glcm       | ClusterShade                     | 15.10326909  |
| wavelet-LHH | glcm       | MaximumProbability               | 0.070085693  |
| wavelet-LHH | glcm       | Idmn                             | 0.974174064  |
| wavelet-LHH | glcm       | JointEnergy                      | 0.016036276  |
| wavelet-LHH | glcm       | Contrast                         | 29.96836585  |
| wavelet-LHH | glcm       | DifferenceEntropy                | 3.459620358  |
| wavelet-LHH | glcm       | InverseVariance                  | 0.278630386  |
| wavelet-LHH | glcm       | DifferenceVariance               | 15.09367601  |
| wavelet-LHH | glcm       | Idn                              | 0.903003703  |
| wavelet-LHH | glcm       | Idm                              | 0.299857325  |
| wavelet-LHH | glcm       | Correlation                      | -0.008899447 |
| wavelet-LHH | glcm       | Autocorrelation                  | 277.7520137  |
| wavelet-LHH | glcm       | SumEntropy                       | 4.291034716  |
| wavelet-LHH | glcm       | SumSquares                       | 14.81019603  |
| wavelet-LHH | glcm       | ClusterProminence                | 4485.365557  |
| wavelet-LHH | glcm       | Imc2                             | 0.781958944  |
| wavelet-LHH | glcm       | Imc1                             | -0.126640504 |
| wavelet-LHH | glcm       | DifferenceAverage                | 3.810468393  |
| wavelet-LHH | glcm       | Id                               | 0.376506591  |
| wavelet-LHH | glcm       | ClusterTendency                  | 29.27241829  |
| wavelet-LHH | firstorder | InterquartileRange               | 98.25892871  |
| wavelet-LHH | firstorder | Skewness                         | 0.181903755  |
| wavelet-LHH | firstorder | Uniformity                       | 0.095684201  |
| wavelet-LHH | firstorder | Median                           | -5.799928482 |
| wavelet-LHH | firstorder | Energy                           | 7389889.352  |
| wavelet-LHH | firstorder | RobustMeanAbsoluteDeviation      | 41.55061027  |
| wavelet-LHH | firstorder | MeanAbsoluteDeviation            | 72.00658435  |
| wavelet-LHH | firstorder | TotalEnergy                      | 199527012.5  |
| wavelet-LHH | firstorder | Maximum                          | 377.4957852  |
| wavelet-LHH | firstorder | RootMeanSquared                  | 101.3805219  |
| wavelet-LHH | firstorder | 90Percentile                     | 131.0138276  |
| wavelet-LHH | firstorder | Minimum                          | -380.3370513 |
| wavelet-LHH | firstorder | Entropy                          | 3.898342294  |
| wavelet-LHH | firstorder | Range                            | 757.8328364  |
| wavelet-LHH | firstorder | Variance                         | 10261.93517  |
| wavelet-LHH | firstorder | 10Percentile                     | -106.5214868 |
| wavelet-LHH | firstorder | Kurtosis                         | 4.454913925  |
| wavelet-LHH | firstorder | Mean                             | 4.009371143  |
| wavelet-LHH | glrlm      | ShortRunLowGrayLevelEmphasis     | 0.006041636  |
| wavelet-LHH | glrlm      | GrayLevelVariance                | 18.07407646  |
| wavelet-LHH | glrlm      | LowGrayLevelRunEmphasis          | 0.006342663  |
| wavelet-LHH | glrlm      | GrayLevelNonUniformityNormalized | 0.083467954  |
| wavelet-LHH | glrlm      | RunVariance                      | 0.17934864   |
| wavelet-LHH | glrlm      | GrayLevelNonUniformity           | 53.45220963  |
| wavelet-LHH | glrlm      | LongRunEmphasis                  | 1.443903969  |
| wavelet-LHH | glrlm      | ShortRunHighGrayLevelEmphasis    | 275.5968849  |
| wavelet-LHH | glrlm      | RunLengthNonUniformity           | 525.7490051  |
| wavelet-LHH | glrlm      | ShortRunEmphasis                 | 0.923516843  |
| wavelet-LHH | glrlm      | LongRunHighGrayLevelEmphasis     | 416.6997809  |
| wavelet-LHH | glrlm      | RunPercentage                    | 0.89023216   |
| wavelet-LHH | glrlm      | LongRunLowGrayLevelEmphasis      | 0.008105095  |



|             |       |                                      |             |
|-------------|-------|--------------------------------------|-------------|
| wavelet-LHH | glrlm | RunEntropy                           | 4.464073063 |
| wavelet-LHH | glrlm | HighGrayLevelRunEmphasis             | 296.5765697 |
| wavelet-LHH | glrlm | RunLengthNonUniformityNormalized     | 0.820566632 |
| wavelet-LHH | glszm | GrayLevelVariance                    | 32.16246914 |
| wavelet-LHH | glszm | ZoneVariance                         | 92.37899863 |
| wavelet-LHH | glszm | GrayLevelNonUniformityNormalized     | 0.051961591 |
| wavelet-LHH | glszm | SizeZoneNonUniformityNormalized      | 0.487379973 |
| wavelet-LHH | glszm | SizeZoneNonUniformity                | 131.5925926 |
| wavelet-LHH | glszm | GrayLevelNonUniformity               | 14.02962963 |
| wavelet-LHH | glszm | LargeAreaEmphasis                    | 99.47037037 |
| wavelet-LHH | glszm | SmallAreaHighGrayLevelEmphasis       | 231.8769142 |
| wavelet-LHH | glszm | ZonePercentage                       | 0.375521558 |
| wavelet-LHH | glszm | LargeAreaLowGrayLevelEmphasis        | 0.388656287 |
| wavelet-LHH | glszm | LargeAreaHighGrayLevelEmphasis       | 26247.24074 |
| wavelet-LHH | glszm | HighGrayLevelZoneEmphasis            | 318.1481481 |
| wavelet-LHH | glszm | SmallAreaEmphasis                    | 0.725166176 |
| wavelet-LHH | glszm | LowGrayLevelZoneEmphasis             | 0.009260322 |
| wavelet-LHH | glszm | ZoneEntropy                          | 5.699732822 |
| wavelet-LHH | glszm | SmallAreaLowGrayLevelEmphasis        | 0.007965607 |
| wavelet-LHH | ngtdm | Coarseness                           | 0.00989693  |
| wavelet-LHH | ngtdm | Complexity                           | 910.413638  |
| wavelet-LHH | ngtdm | Strength                             | 2.21329382  |
| wavelet-LHH | ngtdm | Contrast                             | 0.131881386 |
| wavelet-LHH | ngtdm | Busyness                             | 0.179106437 |
| wavelet-LLH | gldm  | GrayLevelVariance                    | 164.2320678 |
| wavelet-LLH | gldm  | HighGrayLevelEmphasis                | 11268.52573 |
| wavelet-LLH | gldm  | DependenceEntropy                    | 6.817454602 |
| wavelet-LLH | gldm  | DependenceNonUniformity              | 167.9123783 |
| wavelet-LLH | gldm  | GrayLevelNonUniformity               | 38.73574409 |
| wavelet-LLH | gldm  | SmallDependenceEmphasis              | 0.466556034 |
| wavelet-LLH | gldm  | SmallDependenceHighGrayLevelEmphasis | 5314.056619 |
| wavelet-LLH | gldm  | DependenceNonUniformityNormalized    | 0.233535992 |
| wavelet-LLH | gldm  | LargeDependenceEmphasis              | 13.76773296 |
| wavelet-LLH | gldm  | LargeDependenceLowGrayLevelEmphasis  | 0.002626884 |
| wavelet-LLH | gldm  | DependenceVariance                   | 5.882494037 |
| wavelet-LLH | gldm  | LargeDependenceHighGrayLevelEmphasis | 154851.5716 |
| wavelet-LLH | gldm  | SmallDependenceLowGrayLevelEmphasis  | 0.001439443 |
| wavelet-LLH | gldm  | LowGrayLevelEmphasis                 | 0.001487898 |
| wavelet-LLH | glcm  | JointAverage                         | 105.4236327 |
| wavelet-LLH | glcm  | SumAverage                           | 210.8472653 |
| wavelet-LLH | glcm  | JointEntropy                         | 8.122731787 |
| wavelet-LLH | glcm  | ClusterShade                         | 2161.493152 |
| wavelet-LLH | glcm  | MaximumProbability                   | 0.033731438 |
| wavelet-LLH | glcm  | Idmn                                 | 0.993344041 |
| wavelet-LLH | glcm  | JointEnergy                          | 0.007197528 |
| wavelet-LLH | glcm  | Contrast                             | 234.0661786 |
| wavelet-LLH | glcm  | DifferenceEntropy                    | 4.193681667 |
| wavelet-LLH | glcm  | InverseVariance                      | 0.213287484 |
| wavelet-LLH | glcm  | DifferenceVariance                   | 169.016061  |
| wavelet-LLH | glcm  | Idn                                  | 0.960401592 |
| wavelet-LLH | glcm  | Idm                                  | 0.213030579 |
| wavelet-LLH | glcm  | Correlation                          | 0.051282631 |
| wavelet-LLH | glcm  | Autocorrelation                      | 11123.57243 |

|             |            |                                  |              |
|-------------|------------|----------------------------------|--------------|
| wavelet-LLH | glcm       | SumEntropy                       | 5.257222135  |
| wavelet-LLH | glcm       | SumSquares                       | 126.4493448  |
| wavelet-LLH | glcm       | ClusterProminence                | 1574384.942  |
| wavelet-LLH | glcm       | Imc2                             | 0.954740531  |
| wavelet-LLH | glcm       | Imc1                             | -0.263671943 |
| wavelet-LLH | glcm       | DifferenceAverage                | 7.732349773  |
| wavelet-LLH | glcm       | Id                               | 0.291478662  |
| wavelet-LLH | glcm       | ClusterTendency                  | 271.7312004  |
| wavelet-LLH | firstorder | InterquartileRange               | 160.406842   |
| wavelet-LLH | firstorder | Skewness                         | -0.729088055 |
| wavelet-LLH | firstorder | Uniformity                       | 0.05387447   |
| wavelet-LLH | firstorder | Median                           | -27.39085924 |
| wavelet-LLH | firstorder | Energy                           | 74401777.14  |
| wavelet-LLH | firstorder | RobustMeanAbsoluteDeviation      | 77.46945459  |
| wavelet-LLH | firstorder | MeanAbsoluteDeviation            | 172.6571941  |
| wavelet-LLH | firstorder | TotalEnergy                      | 2008847983   |
| wavelet-LLH | firstorder | Maximum                          | 1599.312307  |
| wavelet-LLH | firstorder | RootMeanSquared                  | 321.6823327  |
| wavelet-LLH | firstorder | 90Percentile                     | 224.6536831  |
| wavelet-LLH | firstorder | Minimum                          | -2628.719304 |
| wavelet-LLH | firstorder | Entropy                          | 4.88073832   |
| wavelet-LLH | firstorder | Range                            | 4228.031611  |
| wavelet-LLH | firstorder | Variance                         | 102720.0457  |
| wavelet-LLH | firstorder | 10Percentile                     | -271.6928961 |
| wavelet-LLH | firstorder | Kurtosis                         | 18.11690911  |
| wavelet-LLH | firstorder | Mean                             | -27.55861826 |
| wavelet-LLH | glrlm      | ShortRunLowGrayLevelEmphasis     | 0.001589387  |
| wavelet-LLH | glrlm      | GrayLevelVariance                | 175.103679   |
| wavelet-LLH | glrlm      | LowGrayLevelRunEmphasis          | 0.00159377   |
| wavelet-LLH | glrlm      | GrayLevelNonUniformityNormalized | 0.049051967  |
| wavelet-LLH | glrlm      | RunVariance                      | 0.103899904  |
| wavelet-LLH | glrlm      | GrayLevelNonUniformity           | 32.83646669  |
| wavelet-LLH | glrlm      | LongRunEmphasis                  | 1.262203883  |
| wavelet-LLH | glrlm      | ShortRunHighGrayLevelEmphasis    | 10728.7489   |
| wavelet-LLH | glrlm      | RunLengthNonUniformity           | 590.6347499  |
| wavelet-LLH | glrlm      | ShortRunEmphasis                 | 0.951332622  |
| wavelet-LLH | glrlm      | LongRunHighGrayLevelEmphasis     | 14215.77329  |
| wavelet-LLH | glrlm      | RunPercentage                    | 0.930458971  |
| wavelet-LLH | glrlm      | LongRunLowGrayLevelEmphasis      | 0.001617271  |
| wavelet-LLH | glrlm      | RunEntropy                       | 5.263315062  |
| wavelet-LLH | glrlm      | HighGrayLevelRunEmphasis         | 11273.2226   |
| wavelet-LLH | glrlm      | RunLengthNonUniformityNormalized | 0.881736969  |
| wavelet-LLH | glszm      | GrayLevelVariance                | 288.6109482  |
| wavelet-LLH | glszm      | ZoneVariance                     | 28.59505973  |
| wavelet-LLH | glszm      | GrayLevelNonUniformityNormalized | 0.030061846  |
| wavelet-LLH | glszm      | SizeZoneNonUniformityNormalized  | 0.581435752  |
| wavelet-LLH | glszm      | SizeZoneNonUniformity            | 213.386921   |
| wavelet-LLH | glszm      | GrayLevelNonUniformity           | 11.03269755  |
| wavelet-LLH | glszm      | LargeAreaEmphasis                | 32.43324251  |
| wavelet-LLH | glszm      | SmallAreaHighGrayLevelEmphasis   | 9022.437796  |
| wavelet-LLH | glszm      | ZonePercentage                   | 0.510431154  |
| wavelet-LLH | glszm      | LargeAreaLowGrayLevelEmphasis    | 0.00561915   |
| wavelet-LLH | glszm      | LargeAreaHighGrayLevelEmphasis   | 365877.5477  |

|             |            |                                      |              |
|-------------|------------|--------------------------------------|--------------|
| wavelet-LLH | glszm      | HighGrayLevelZoneEmphasis            | 11375.49591  |
| wavelet-LLH | glszm      | SmallAreaEmphasis                    | 0.789360526  |
| wavelet-LLH | glszm      | LowGrayLevelZoneEmphasis             | 0.002828065  |
| wavelet-LLH | glszm      | ZoneEntropy                          | 6.410372509  |
| wavelet-LLH | glszm      | SmallAreaLowGrayLevelEmphasis        | 0.002808639  |
| wavelet-LLH | ngtdm      | Coarseness                           | 0.009256634  |
| wavelet-LLH | ngtdm      | Complexity                           | 19135.0296   |
| wavelet-LLH | ngtdm      | Strength                             | 41.15809095  |
| wavelet-LLH | ngtdm      | Contrast                             | 0.396708918  |
| wavelet-LLH | ngtdm      | Busyness                             | 0.010220896  |
| wavelet-LLL | gldm       | GrayLevelVariance                    | 668.1242763  |
| wavelet-LLL | gldm       | HighGrayLevelEmphasis                | 4567.162726  |
| wavelet-LLL | gldm       | DependenceEntropy                    | 7.258616194  |
| wavelet-LLL | gldm       | DependenceNonUniformity              | 284.5215577  |
| wavelet-LLL | gldm       | GrayLevelNonUniformity               | 14.77468707  |
| wavelet-LLL | gldm       | SmallDependenceEmphasis              | 0.652518116  |
| wavelet-LLL | gldm       | SmallDependenceHighGrayLevelEmphasis | 2266.934596  |
| wavelet-LLL | gldm       | DependenceNonUniformityNormalized    | 0.395718439  |
| wavelet-LLL | gldm       | LargeDependenceEmphasis              | 8.938803894  |
| wavelet-LLL | gldm       | LargeDependenceLowGrayLevelEmphasis  | 0.004574858  |
| wavelet-LLL | gldm       | DependenceVariance                   | 4.321385946  |
| wavelet-LLL | gldm       | LargeDependenceHighGrayLevelEmphasis | 64051.29068  |
| wavelet-LLL | gldm       | SmallDependenceLowGrayLevelEmphasis  | 0.003232815  |
| wavelet-LLL | gldm       | LowGrayLevelEmphasis                 | 0.003329534  |
| wavelet-LLL | glcm       | JointAverage                         | 68.38462253  |
| wavelet-LLL | glcm       | SumAverage                           | 136.7692451  |
| wavelet-LLL | glcm       | JointEntropy                         | 9.29748147   |
| wavelet-LLL | glcm       | ClusterShade                         | -58782.63723 |
| wavelet-LLL | glcm       | MaximumProbability                   | 0.019916574  |
| wavelet-LLL | glcm       | Idmn                                 | 0.957816702  |
| wavelet-LLL | glcm       | JointEnergy                          | 0.002805069  |
| wavelet-LLL | glcm       | Contrast                             | 475.594922   |
| wavelet-LLL | glcm       | DifferenceEntropy                    | 5.261607371  |
| wavelet-LLL | glcm       | InverseVariance                      | 0.13276233   |
| wavelet-LLL | glcm       | DifferenceVariance                   | 229.2073882  |
| wavelet-LLL | glcm       | Idn                                  | 0.876987114  |
| wavelet-LLL | glcm       | Idm                                  | 0.133640272  |
| wavelet-LLL | glcm       | Correlation                          | 0.566601605  |
| wavelet-LLL | glcm       | Autocorrelation                      | 4990.63136   |
| wavelet-LLL | glcm       | SumEntropy                           | 6.703886979  |
| wavelet-LLL | glcm       | SumSquares                           | 551.3564887  |
| wavelet-LLL | glcm       | ClusterProminence                    | 7949457.064  |
| wavelet-LLL | glcm       | Imc2                                 | 0.996485761  |
| wavelet-LLL | glcm       | Imc1                                 | -0.421816255 |
| wavelet-LLL | glcm       | DifferenceAverage                    | 15.5602849   |
| wavelet-LLL | glcm       | Id                                   | 0.196006655  |
| wavelet-LLL | glcm       | ClusterTendency                      | 1729.831033  |
| wavelet-LLL | firstorder | InterquartileRange                   | 1138.933648  |
| wavelet-LLL | firstorder | Skewness                             | -0.581305523 |
| wavelet-LLL | firstorder | Uniformity                           | 0.020548939  |
| wavelet-LLL | firstorder | Median                               | -396.0888893 |
| wavelet-LLL | firstorder | Energy                               | 518444299.9  |
| wavelet-LLL | firstorder | RobustMeanAbsoluteDeviation          | 446.756241   |

|             |            |                                  |              |
|-------------|------------|----------------------------------|--------------|
| wavelet-LLL | firstorder | MeanAbsoluteDeviation            | 560.3493527  |
| wavelet-LLL | firstorder | TotalEnergy                      | 13997996097  |
| wavelet-LLL | firstorder | Maximum                          | 334.2404822  |
| wavelet-LLL | firstorder | RootMeanSquared                  | 849.1542875  |
| wavelet-LLL | firstorder | 90Percentile                     | 124.8919858  |
| wavelet-LLL | firstorder | Minimum                          | -2093.001082 |
| wavelet-LLL | firstorder | Entropy                          | 6.133660365  |
| wavelet-LLL | firstorder | Range                            | 2427.241565  |
| wavelet-LLL | firstorder | Variance                         | 417544.9806  |
| wavelet-LLL | firstorder | 10Percentile                     | -1555.117984 |
| wavelet-LLL | firstorder | Kurtosis                         | 2.0900295    |
| wavelet-LLL | firstorder | Mean                             | -550.9246985 |
| wavelet-LLL | glrlm      | ShortRunLowGrayLevelEmphasis     | 0.003469376  |
| wavelet-LLL | glrlm      | GrayLevelVariance                | 668.841104   |
| wavelet-LLL | glrlm      | LowGrayLevelRunEmphasis          | 0.003475487  |
| wavelet-LLL | glrlm      | GrayLevelNonUniformityNormalized | 0.018277281  |
| wavelet-LLL | glrlm      | RunVariance                      | 0.060828288  |
| wavelet-LLL | glrlm      | GrayLevelNonUniformity           | 12.56714778  |
| wavelet-LLL | glrlm      | LongRunEmphasis                  | 1.156290662  |
| wavelet-LLL | glrlm      | ShortRunHighGrayLevelEmphasis    | 4221.813287  |
| wavelet-LLL | glrlm      | RunLengthNonUniformity           | 634.8720629  |
| wavelet-LLL | glrlm      | ShortRunEmphasis                 | 0.969335603  |
| wavelet-LLL | glrlm      | LongRunHighGrayLevelEmphasis     | 5582.464182  |
| wavelet-LLL | glrlm      | RunPercentage                    | 0.9558147    |
| wavelet-LLL | glrlm      | LongRunLowGrayLevelEmphasis      | 0.003504318  |
| wavelet-LLL | glrlm      | RunEntropy                       | 6.368776459  |
| wavelet-LLL | glrlm      | HighGrayLevelRunEmphasis         | 4442.376838  |
| wavelet-LLL | glrlm      | RunLengthNonUniformityNormalized | 0.923439649  |
| wavelet-LLL | glszm      | GrayLevelVariance                | 624.401824   |
| wavelet-LLL | glszm      | ZoneVariance                     | 7.714156     |
| wavelet-LLL | glszm      | GrayLevelNonUniformityNormalized | 0.012736     |
| wavelet-LLL | glszm      | SizeZoneNonUniformityNormalized  | 0.736896     |
| wavelet-LLL | glszm      | SizeZoneNonUniformity            | 368.448      |
| wavelet-LLL | glszm      | GrayLevelNonUniformity           | 6.368        |
| wavelet-LLL | glszm      | LargeAreaEmphasis                | 9.782        |
| wavelet-LLL | glszm      | SmallAreaHighGrayLevelEmphasis   | 2908.82155   |
| wavelet-LLL | glszm      | ZonePercentage                   | 0.695410292  |
| wavelet-LLL | glszm      | LargeAreaLowGrayLevelEmphasis    | 0.005971654  |
| wavelet-LLL | glszm      | LargeAreaHighGrayLevelEmphasis   | 70290.084    |
| wavelet-LLL | glszm      | HighGrayLevelZoneEmphasis        | 3564.644     |
| wavelet-LLL | glszm      | SmallAreaEmphasis                | 0.8805341    |
| wavelet-LLL | glszm      | LowGrayLevelZoneEmphasis         | 0.004680802  |
| wavelet-LLL | glszm      | ZoneEntropy                      | 6.870807668  |
| wavelet-LLL | glszm      | SmallAreaLowGrayLevelEmphasis    | 0.004628744  |
| wavelet-LLL | ngtdm      | Coarseness                       | 0.00879967   |
| wavelet-LLL | ngtdm      | Complexity                       | 38104.1103   |
| wavelet-LLL | ngtdm      | Strength                         | 39.90633791  |
| wavelet-LLL | ngtdm      | Contrast                         | 1.566355767  |
| wavelet-LLL | ngtdm      | Busyness                         | 0.016412608  |
| wavelet-HHL | gldm       | GrayLevelVariance                | 6.376794381  |
| wavelet-HHL | gldm       | HighGrayLevelEmphasis            | 115.9123783  |
| wavelet-HHL | gldm       | DependenceEntropy                | 6.046900707  |
| wavelet-HHL | gldm       | DependenceNonUniformity          | 88.84979138  |

|             |            |                                      |              |
|-------------|------------|--------------------------------------|--------------|
| wavelet-HHL | gldm       | GrayLevelNonUniformity               | 94.12100139  |
| wavelet-HHL | gldm       | SmallDependenceEmphasis              | 0.222418286  |
| wavelet-HHL | gldm       | SmallDependenceHighGrayLevelEmphasis | 28.81780697  |
| wavelet-HHL | gldm       | DependenceNonUniformityNormalized    | 0.123574119  |
| wavelet-HHL | gldm       | LargeDependenceEmphasis              | 32.82475661  |
| wavelet-HHL | gldm       | LargeDependenceLowGrayLevelEmphasis  | 0.326407569  |
| wavelet-HHL | gldm       | DependenceVariance                   | 12.43055085  |
| wavelet-HHL | gldm       | LargeDependenceHighGrayLevelEmphasis | 3495.848401  |
| wavelet-HHL | gldm       | SmallDependenceLowGrayLevelEmphasis  | 0.0064187    |
| wavelet-HHL | gldm       | LowGrayLevelEmphasis                 | 0.014637716  |
| wavelet-HHL | glcm       | JointAverage                         | 10.48452852  |
| wavelet-HHL | glcm       | SumAverage                           | 20.96905704  |
| wavelet-HHL | glcm       | JointEntropy                         | 6.25293144   |
| wavelet-HHL | glcm       | ClusterShade                         | -0.03801868  |
| wavelet-HHL | glcm       | MaximumProbability                   | 0.079045307  |
| wavelet-HHL | glcm       | Idmn                                 | 0.972672596  |
| wavelet-HHL | glcm       | JointEnergy                          | 0.023497621  |
| wavelet-HHL | glcm       | Contrast                             | 12.4750585   |
| wavelet-HHL | glcm       | DifferenceEntropy                    | 2.910470699  |
| wavelet-HHL | glcm       | InverseVariance                      | 0.346167652  |
| wavelet-HHL | glcm       | DifferenceVariance                   | 6.086975705  |
| wavelet-HHL | glcm       | Idn                                  | 0.898423991  |
| wavelet-HHL | glcm       | Idm                                  | 0.368249939  |
| wavelet-HHL | glcm       | Correlation                          | -0.001398379 |
| wavelet-HHL | glcm       | Autocorrelation                      | 109.934146   |
| wavelet-HHL | glcm       | SumEntropy                           | 3.74512549   |
| wavelet-HHL | glcm       | SumSquares                           | 6.241947163  |
| wavelet-HHL | glcm       | ClusterProminence                    | 797.7568248  |
| wavelet-HHL | glcm       | Imc2                                 | 0.629440164  |
| wavelet-HHL | glcm       | Imc1                                 | -0.080811669 |
| wavelet-HHL | glcm       | DifferenceAverage                    | 2.499647003  |
| wavelet-HHL | glcm       | Id                                   | 0.440007616  |
| wavelet-HHL | glcm       | ClusterTendency                      | 12.49273016  |
| wavelet-HHL | firstorder | InterquartileRange                   | 66.92393332  |
| wavelet-HHL | firstorder | Skewness                             | 0.054357189  |
| wavelet-HHL | firstorder | Uniformity                           | 0.130905426  |
| wavelet-HHL | firstorder | Median                               | -4.436401124 |
| wavelet-HHL | firstorder | Energy                               | 2841132.94   |
| wavelet-HHL | firstorder | RobustMeanAbsoluteDeviation          | 28.76105786  |
| wavelet-HHL | firstorder | MeanAbsoluteDeviation                | 46.15442284  |
| wavelet-HHL | firstorder | TotalEnergy                          | 76710589.37  |
| wavelet-HHL | firstorder | Maximum                              | 249.1082266  |
| wavelet-HHL | firstorder | RootMeanSquared                      | 62.86100679  |
| wavelet-HHL | firstorder | 90Percentile                         | 77.2420554   |
| wavelet-HHL | firstorder | Minimum                              | -233.929031  |
| wavelet-HHL | firstorder | Entropy                              | 3.304757993  |
| wavelet-HHL | firstorder | Range                                | 483.0372577  |
| wavelet-HHL | firstorder | Variance                             | 3950.591459  |
| wavelet-HHL | firstorder | 10Percentile                         | -70.0919001  |
| wavelet-HHL | firstorder | Kurtosis                             | 4.517756964  |
| wavelet-HHL | firstorder | Mean                                 | -0.956407883 |
| wavelet-HHL | glrlm      | ShortRunLowGrayLevelEmphasis         | 0.014409088  |
| wavelet-HHL | glrlm      | GrayLevelVariance                    | 7.074338803  |

|             |       |                                      |             |
|-------------|-------|--------------------------------------|-------------|
| wavelet-HHL | glrlm | LowGrayLevelRunEmphasis              | 0.015373553 |
| wavelet-HHL | glrlm | GrayLevelNonUniformityNormalized     | 0.118850552 |
| wavelet-HHL | glrlm | RunVariance                          | 0.22109381  |
| wavelet-HHL | glrlm | GrayLevelNonUniformity               | 73.90247324 |
| wavelet-HHL | glrlm | LongRunEmphasis                      | 1.562193714 |
| wavelet-HHL | glrlm | ShortRunHighGrayLevelEmphasis        | 106.5302928 |
| wavelet-HHL | glrlm | RunLengthNonUniformity               | 485.7702222 |
| wavelet-HHL | glrlm | ShortRunEmphasis                     | 0.903891968 |
| wavelet-HHL | glrlm | LongRunHighGrayLevelEmphasis         | 177.8832095 |
| wavelet-HHL | glrlm | RunPercentage                        | 0.864769445 |
| wavelet-HHL | glrlm | LongRunLowGrayLevelEmphasis          | 0.020950072 |
| wavelet-HHL | glrlm | RunEntropy                           | 3.972477971 |
| wavelet-HHL | glrlm | HighGrayLevelRunEmphasis             | 117.0407833 |
| wavelet-HHL | glrlm | RunLengthNonUniformityNormalized     | 0.780171743 |
| wavelet-HHL | glszm | GrayLevelVariance                    | 15.746755   |
| wavelet-HHL | glszm | ZoneVariance                         | 234.5896092 |
| wavelet-HHL | glszm | GrayLevelNonUniformityNormalized     | 0.079570038 |
| wavelet-HHL | glszm | SizeZoneNonUniformityNormalized      | 0.381963223 |
| wavelet-HHL | glszm | SizeZoneNonUniformity                | 65.69767442 |
| wavelet-HHL | glszm | GrayLevelNonUniformity               | 13.68604651 |
| wavelet-HHL | glszm | LargeAreaEmphasis                    | 252.0639535 |
| wavelet-HHL | glszm | SmallAreaHighGrayLevelEmphasis       | 86.43755834 |
| wavelet-HHL | glszm | ZonePercentage                       | 0.23922114  |
| wavelet-HHL | glszm | LargeAreaLowGrayLevelEmphasis        | 2.482970619 |
| wavelet-HHL | glszm | LargeAreaHighGrayLevelEmphasis       | 26594.52907 |
| wavelet-HHL | glszm | HighGrayLevelZoneEmphasis            | 129.4418605 |
| wavelet-HHL | glszm | SmallAreaEmphasis                    | 0.639642379 |
| wavelet-HHL | glszm | LowGrayLevelZoneEmphasis             | 0.028301938 |
| wavelet-HHL | glszm | ZoneEntropy                          | 5.42604838  |
| wavelet-HHL | glszm | SmallAreaLowGrayLevelEmphasis        | 0.023545834 |
| wavelet-HHL | ngtdm | Coarseness                           | 0.00952081  |
| wavelet-HHL | ngtdm | Complexity                           | 276.2242682 |
| wavelet-HHL | ngtdm | Strength                             | 1.040598012 |
| wavelet-HHL | ngtdm | Contrast                             | 0.071109598 |
| wavelet-HHL | ngtdm | Busyness                             | 0.42648633  |
| wavelet-HLH | gldm  | GrayLevelVariance                    | 8.569338886 |
| wavelet-HLH | gldm  | HighGrayLevelEmphasis                | 99.91933241 |
| wavelet-HLH | gldm  | DependenceEntropy                    | 6.141281038 |
| wavelet-HLH | gldm  | DependenceNonUniformity              | 92.57162726 |
| wavelet-HLH | gldm  | GrayLevelNonUniformity               | 86.02086231 |
| wavelet-HLH | gldm  | SmallDependenceEmphasis              | 0.25419071  |
| wavelet-HLH | gldm  | SmallDependenceHighGrayLevelEmphasis | 30.66890075 |
| wavelet-HLH | gldm  | DependenceNonUniformityNormalized    | 0.128750525 |
| wavelet-HLH | gldm  | LargeDependenceEmphasis              | 26.98887344 |
| wavelet-HLH | gldm  | LargeDependenceLowGrayLevelEmphasis  | 0.34752235  |
| wavelet-HLH | gldm  | DependenceVariance                   | 9.428227661 |
| wavelet-HLH | gldm  | LargeDependenceHighGrayLevelEmphasis | 2414.91516  |
| wavelet-HLH | gldm  | SmallDependenceLowGrayLevelEmphasis  | 0.011788413 |
| wavelet-HLH | gldm  | LowGrayLevelEmphasis                 | 0.024428894 |
| wavelet-HLH | glcm  | JointAverage                         | 9.558615215 |
| wavelet-HLH | glcm  | SumAverage                           | 19.11723043 |
| wavelet-HLH | glcm  | JointEntropy                         | 6.428097053 |
| wavelet-HLH | glcm  | ClusterShade                         | 31.83883264 |

|             |            |                                  |              |
|-------------|------------|----------------------------------|--------------|
| wavelet-HLH | glcm       | MaximumProbability               | 0.059077613  |
| wavelet-HLH | glcm       | Idmn                             | 0.978387255  |
| wavelet-HLH | glcm       | JointEnergy                      | 0.021165281  |
| wavelet-HLH | glcm       | Contrast                         | 15.27291403  |
| wavelet-HLH | glcm       | DifferenceEntropy                | 3.016071071  |
| wavelet-HLH | glcm       | InverseVariance                  | 0.341083402  |
| wavelet-HLH | glcm       | DifferenceVariance               | 7.773685139  |
| wavelet-HLH | glcm       | Idn                              | 0.909918066  |
| wavelet-HLH | glcm       | Idm                              | 0.350098519  |
| wavelet-HLH | glcm       | Correlation                      | -0.005068064 |
| wavelet-HLH | glcm       | Autocorrelation                  | 91.33664504  |
| wavelet-HLH | glcm       | SumEntropy                       | 3.843108875  |
| wavelet-HLH | glcm       | SumSquares                       | 7.603635459  |
| wavelet-HLH | glcm       | ClusterProminence                | 1393.651336  |
| wavelet-HLH | glcm       | Imc2                             | 0.681468202  |
| wavelet-HLH | glcm       | Imc1                             | -0.094610572 |
| wavelet-HLH | glcm       | DifferenceAverage                | 2.717432332  |
| wavelet-HLH | glcm       | Id                               | 0.423688217  |
| wavelet-HLH | glcm       | ClusterTendency                  | 15.14162781  |
| wavelet-HLH | firstorder | InterquartileRange               | 71.85775983  |
| wavelet-HLH | firstorder | Skewness                         | 0.487860988  |
| wavelet-HLH | firstorder | Uniformity                       | 0.119639586  |
| wavelet-HLH | firstorder | Median                           | -0.658501606 |
| wavelet-HLH | firstorder | Energy                           | 3806718.62   |
| wavelet-HLH | firstorder | RobustMeanAbsoluteDeviation      | 30.48360512  |
| wavelet-HLH | firstorder | MeanAbsoluteDeviation            | 51.44777782  |
| wavelet-HLH | firstorder | TotalEnergy                      | 102781402.7  |
| wavelet-HLH | firstorder | Maximum                          | 380.0238783  |
| wavelet-HLH | firstorder | RootMeanSquared                  | 72.76305804  |
| wavelet-HLH | firstorder | 90Percentile                     | 86.82300185  |
| wavelet-HLH | firstorder | Minimum                          | -224.6939774 |
| wavelet-HLH | firstorder | Entropy                          | 3.472312876  |
| wavelet-HLH | firstorder | Range                            | 604.7178557  |
| wavelet-HLH | firstorder | Variance                         | 5292.718935  |
| wavelet-HLH | firstorder | 10Percentile                     | -79.36483503 |
| wavelet-HLH | firstorder | Kurtosis                         | 5.515368803  |
| wavelet-HLH | firstorder | Mean                             | 1.32048459   |
| wavelet-HLH | glrlm      | ShortRunLowGrayLevelEmphasis     | 0.024682057  |
| wavelet-HLH | glrlm      | GrayLevelVariance                | 9.458234313  |
| wavelet-HLH | glrlm      | LowGrayLevelRunEmphasis          | 0.02594224   |
| wavelet-HLH | glrlm      | GrayLevelNonUniformityNormalized | 0.10947709   |
| wavelet-HLH | glrlm      | RunVariance                      | 0.179471592  |
| wavelet-HLH | glrlm      | GrayLevelNonUniformity           | 69.06703628  |
| wavelet-HLH | glrlm      | LongRunEmphasis                  | 1.481829402  |
| wavelet-HLH | glrlm      | ShortRunHighGrayLevelEmphasis    | 93.11986737  |
| wavelet-HLH | glrlm      | RunLengthNonUniformity           | 499.5076079  |
| wavelet-HLH | glrlm      | ShortRunEmphasis                 | 0.909739744  |
| wavelet-HLH | glrlm      | LongRunHighGrayLevelEmphasis     | 144.5031155  |
| wavelet-HLH | glrlm      | RunPercentage                    | 0.87728683   |
| wavelet-HLH | glrlm      | LongRunLowGrayLevelEmphasis      | 0.032438288  |
| wavelet-HLH | glrlm      | RunEntropy                       | 4.097168561  |
| wavelet-HLH | glrlm      | HighGrayLevelRunEmphasis         | 101.2981754  |
| wavelet-HLH | glrlm      | RunLengthNonUniformityNormalized | 0.791058444  |

|             |       |                                  |             |
|-------------|-------|----------------------------------|-------------|
| wavelet-HLH | glszm | GrayLevelVariance                | 21.65806858 |
| wavelet-HLH | glszm | ZoneVariance                     | 175.2272142 |
| wavelet-HLH | glszm | GrayLevelNonUniformityNormalized | 0.070475042 |
| wavelet-HLH | glszm | SizeZoneNonUniformityNormalized  | 0.453468929 |
| wavelet-HLH | glszm | SizeZoneNonUniformity            | 86.61256545 |
| wavelet-HLH | glszm | GrayLevelNonUniformity           | 13.46073298 |
| wavelet-HLH | glszm | LargeAreaEmphasis                | 189.3979058 |
| wavelet-HLH | glszm | SmallAreaHighGrayLevelEmphasis   | 91.00850683 |
| wavelet-HLH | glszm | ZonePercentage                   | 0.265646732 |
| wavelet-HLH | glszm | LargeAreaLowGrayLevelEmphasis    | 2.216677029 |
| wavelet-HLH | glszm | LargeAreaHighGrayLevelEmphasis   | 17298.67016 |
| wavelet-HLH | glszm | HighGrayLevelZoneEmphasis        | 123.8691099 |
| wavelet-HLH | glszm | SmallAreaEmphasis                | 0.699938654 |
| wavelet-HLH | glszm | LowGrayLevelZoneEmphasis         | 0.048385036 |
| wavelet-HLH | glszm | ZoneEntropy                      | 5.441522875 |
| wavelet-HLH | glszm | SmallAreaLowGrayLevelEmphasis    | 0.038805032 |
| wavelet-HLH | ngtdm | Coarseness                       | 0.009841986 |
| wavelet-HLH | ngtdm | Complexity                       | 428.0395809 |
| wavelet-HLH | ngtdm | Strength                         | 1.60737345  |
| wavelet-HLH | ngtdm | Contrast                         | 0.079648397 |
| wavelet-HLH | ngtdm | Busyness                         | 0.385486711 |



| Image type | Feature Class | Feature Name                         | Value                                                                                                                                                                                                                                                                                                                                                                                                             |
|------------|---------------|--------------------------------------|-------------------------------------------------------------------------------------------------------------------------------------------------------------------------------------------------------------------------------------------------------------------------------------------------------------------------------------------------------------------------------------------------------------------|
| general    | info          | BoundingBox                          | (0, 0, 0, 10, 8, 13)                                                                                                                                                                                                                                                                                                                                                                                              |
| general    | info          | EnabledImageTypes                    | {u'Original': {}, u'Wavelet': {}}                                                                                                                                                                                                                                                                                                                                                                                 |
|            |               |                                      | {'distances': [1], 'additionalInfo': True, 'force2D': False, 'interpolator': 'sitkBSpline', 'resampledPixelSpacing': [3.0], 'label': 1, 'normalizeScale': 1, 'normalize': False, 'force2Ddimension': 0, 'removeOutliers': None, 'minimumROISize': None, u'binWidth': 25.0, 'minimumROIDimensions': 1, u'correctMask': True, 'preCrop': False, u'symmetricalGLCM': True, 'resegmentRange': None, 'padDistance': 5} |
| general    | info          | GeneralSettings                      | 2e402d0a73c236daa1e423c536dd1a26298                                                                                                                                                                                                                                                                                                                                                                               |
| general    | info          | ImageHash                            | 96920                                                                                                                                                                                                                                                                                                                                                                                                             |
| general    | info          | ImageSpacing                         | (0.9765624999999998, 0.9765624999999998, 1.9999999999999996)                                                                                                                                                                                                                                                                                                                                                      |
| general    | info          | MaskHash                             | 77132c823b951db1d7c90b0f1a7ded9e20c76e62                                                                                                                                                                                                                                                                                                                                                                          |
| general    | info          | NumpyVersion                         | 1.13.1                                                                                                                                                                                                                                                                                                                                                                                                            |
| general    | info          | PyWaveletVersion                     | 0.5.2                                                                                                                                                                                                                                                                                                                                                                                                             |
| general    | info          | SimpleITKVersion                     | 1.1.0                                                                                                                                                                                                                                                                                                                                                                                                             |
| general    | info          | Version                              | 1.3.0.post102+g1b0eb74                                                                                                                                                                                                                                                                                                                                                                                            |
| general    | info          | VolumeNum                            | 1                                                                                                                                                                                                                                                                                                                                                                                                                 |
| general    | info          | VoxelNum                             | 387                                                                                                                                                                                                                                                                                                                                                                                                               |
| original   | shape         | Maximum3DDiameter                    | 39                                                                                                                                                                                                                                                                                                                                                                                                                |
| original   | shape         | Maximum2DDiameterSlice               | 28.46049894                                                                                                                                                                                                                                                                                                                                                                                                       |
| original   | shape         | Sphericity                           | 0.761331834                                                                                                                                                                                                                                                                                                                                                                                                       |
| original   | shape         | MinorAxis                            | 25.51116183                                                                                                                                                                                                                                                                                                                                                                                                       |
| original   | shape         | Elongation                           | 0.698865723                                                                                                                                                                                                                                                                                                                                                                                                       |
| original   | shape         | SurfaceVolumeRatio                   | 0.290548447                                                                                                                                                                                                                                                                                                                                                                                                       |
| original   | shape         | Volume                               | 10449                                                                                                                                                                                                                                                                                                                                                                                                             |
| original   | shape         | MajorAxis                            | 36.50366731                                                                                                                                                                                                                                                                                                                                                                                                       |
| original   | shape         | SurfaceArea                          | 3035.940725                                                                                                                                                                                                                                                                                                                                                                                                       |
| original   | shape         | Flatness                             | 0.483501559                                                                                                                                                                                                                                                                                                                                                                                                       |
| original   | shape         | LeastAxis                            | 17.64958005                                                                                                                                                                                                                                                                                                                                                                                                       |
| original   | shape         | Maximum2DDiameterColumn              | 37.94733192                                                                                                                                                                                                                                                                                                                                                                                                       |
| original   | shape         | Maximum2DDiameterRow                 | 37.94733192                                                                                                                                                                                                                                                                                                                                                                                                       |
| original   | gldm          | GrayLevelVariance                    | 117.4768477                                                                                                                                                                                                                                                                                                                                                                                                       |
| original   | gldm          | HighGrayLevelEmphasis                | 998.6614987                                                                                                                                                                                                                                                                                                                                                                                                       |
| original   | gldm          | DependenceEntropy                    | 6.434912325                                                                                                                                                                                                                                                                                                                                                                                                       |
| original   | gldm          | DependenceNonUniformity              | 142.4366925                                                                                                                                                                                                                                                                                                                                                                                                       |
| original   | gldm          | GrayLevelNonUniformity               | 11.63565891                                                                                                                                                                                                                                                                                                                                                                                                       |
| original   | gldm          | SmallDependenceEmphasis              | 0.603296065                                                                                                                                                                                                                                                                                                                                                                                                       |
| original   | gldm          | SmallDependenceHighGrayLevelEmphasis | 514.5659176                                                                                                                                                                                                                                                                                                                                                                                                       |
| original   | gldm          | DependenceNonUniformityNormalized    | 0.368053469                                                                                                                                                                                                                                                                                                                                                                                                       |

|          |            |                                      |              |
|----------|------------|--------------------------------------|--------------|
| original | gldm       | LargeDependenceEmphasis              | 4.751937984  |
| original | gldm       | LargeDependenceLowGrayLevelEmphasis  | 0.008964341  |
| original | gldm       | DependenceVariance                   | 1.433327324  |
| original | gldm       | LargeDependenceHighGrayLevelEmphasis | 6387.581395  |
| original | gldm       | SmallDependenceLowGrayLevelEmphasis  | 0.004278776  |
| original | gldm       | LowGrayLevelEmphasis                 | 0.00480494   |
| original | glcm       | JointAverage                         | 30.97204734  |
| original | glcm       | SumAverage                           | 61.94409468  |
| original | glcm       | JointEntropy                         | 8.572038457  |
| original | glcm       | ClusterShade                         | -1213.983776 |
| original | glcm       | MaximumProbability                   | 0.011395868  |
| original | glcm       | ldmn                                 | 0.936807017  |
| original | glcm       | JointEnergy                          | 0.003052044  |
| original | glcm       | Contrast                             | 172.8082443  |
| original | glcm       | DifferenceEntropy                    | 4.646183538  |
| original | glcm       | InverseVariance                      | 0.128556306  |
| original | glcm       | DifferenceVariance                   | 71.69220473  |
| original | glcm       | ldn                                  | 0.841700124  |
| original | glcm       | ldm                                  | 0.122477283  |
| original | glcm       | Correlation                          | 0.252011488  |
| original | glcm       | Autocorrelation                      | 988.2496401  |
| original | glcm       | SumEntropy                           | 5.805675999  |
| original | glcm       | SumSquares                           | 115.3115637  |
| original | glcm       | ClusterProminence                    | 184271.5694  |
| original | glcm       | lmc2                                 | 0.984153323  |
| original | glcm       | lmc1                                 | -0.336288692 |
| original | glcm       | DifferenceAverage                    | 9.974275257  |
| original | glcm       | ld                                   | 0.200127526  |
| original | glcm       | ClusterTendency                      | 288.4380107  |
| original | firstorder | InterquartileRange                   | 471.5        |
| original | firstorder | Skewness                             | -0.216533495 |
| original | firstorder | Uniformity                           | 0.030066302  |
| original | firstorder | Median                               | -294         |
| original | firstorder | Energy                               | 68173733     |
| original | firstorder | RobustMeanAbsoluteDeviation          | 187.8343964  |
| original | firstorder | MeanAbsoluteDeviation                | 234.6792861  |
| original | firstorder | TotalEnergy                          | 1840690791   |
| original | firstorder | Maximum                              | 123          |
| original | firstorder | RootMeanSquared                      | 419.7136128  |
| original | firstorder | 90Percentile                         | 27.4         |
| original | firstorder | Minimum                              | -1027        |
| original | firstorder | Entropy                              | 5.199188186  |
| original | firstorder | Range                                | 1150         |
| original | firstorder | Variance                             | 73387.08575  |
| original | firstorder | 10Percentile                         | -688.4       |
| original | firstorder | Kurtosis                             | 1.942061873  |
| original | firstorder | Mean                                 | -320.5813953 |
| original | glrlm      | ShortRunLowGrayLevelEmphasis         | 0.004893234  |
| original | glrlm      | GrayLevelVariance                    | 117.1374507  |
| original | glrlm      | LowGrayLevelRunEmphasis              | 0.004921976  |
| original | glrlm      | GrayLevelNonUniformityNormalized     | 0.029629107  |
| original | glrlm      | RunVariance                          | 0.03527405   |

|             |       |                                      |              |
|-------------|-------|--------------------------------------|--------------|
| original    | glrlm | GrayLevelNonUniformity               | 11.10468552  |
| original    | glrlm | LongRunEmphasis                      | 1.101902386  |
| original    | glrlm | ShortRunHighGrayLevelEmphasis        | 957.0261738  |
| original    | glrlm | RunLengthNonUniformity               | 352.4213158  |
| original    | glrlm | ShortRunEmphasis                     | 0.97658679   |
| original    | glrlm | LongRunHighGrayLevelEmphasis         | 1123.488849  |
| original    | glrlm | RunPercentage                        | 0.968395945  |
| original    | glrlm | LongRunLowGrayLevelEmphasis          | 0.00504735   |
| original    | glrlm | RunEntropy                           | 5.350171344  |
| original    | glrlm | HighGrayLevelRunEmphasis             | 987.946213   |
| original    | glrlm | RunLengthNonUniformityNormalized     | 0.940206203  |
| original    | glszm | GrayLevelVariance                    | 116.0943639  |
| original    | glszm | ZoneVariance                         | 1.834482249  |
| original    | glszm | GrayLevelNonUniformityNormalized     | 0.027928994  |
| original    | glszm | SizeZoneNonUniformityNormalized      | 0.602278107  |
| original    | glszm | SizeZoneNonUniformity                | 156.5923077  |
| original    | glszm | GrayLevelNonUniformity               | 7.261538462  |
| original    | glszm | LargeAreaEmphasis                    | 4.05         |
| original    | glszm | SmallAreaHighGrayLevelEmphasis       | 656.0964583  |
| original    | glszm | ZonePercentage                       | 0.671834625  |
| original    | glszm | LargeAreaLowGrayLevelEmphasis        | 0.009863114  |
| original    | glszm | LargeAreaHighGrayLevelEmphasis       | 5172.976923  |
| original    | glszm | HighGrayLevelZoneEmphasis            | 881.0423077  |
| original    | glszm | SmallAreaEmphasis                    | 0.803730204  |
| original    | glszm | LowGrayLevelZoneEmphasis             | 0.006518829  |
| original    | glszm | ZoneEntropy                          | 6.06434912   |
| original    | glszm | SmallAreaLowGrayLevelEmphasis        | 0.006243225  |
| original    | ngtdm | Coarseness                           | 0.012866622  |
| original    | ngtdm | Complexity                           | 5508.000479  |
| original    | ngtdm | Strength                             | 9.626238498  |
| original    | ngtdm | Contrast                             | 0.892504013  |
| original    | ngtdm | Busyness                             | 0.067468115  |
| wavelet-HHH | gldm  | GrayLevelVariance                    | 17.8417296   |
| wavelet-HHH | gldm  | HighGrayLevelEmphasis                | 398.0413437  |
| wavelet-HHH | gldm  | DependenceEntropy                    | 5.864839567  |
| wavelet-HHH | gldm  | DependenceNonUniformity              | 88.10077519  |
| wavelet-HHH | gldm  | GrayLevelNonUniformity               | 31.24806202  |
| wavelet-HHH | gldm  | SmallDependenceEmphasis              | 0.413344504  |
| wavelet-HHH | gldm  | SmallDependenceHighGrayLevelEmphasis | 169.8411079  |
| wavelet-HHH | gldm  | DependenceNonUniformityNormalized    | 0.227650582  |
| wavelet-HHH | gldm  | LargeDependenceEmphasis              | 9.098191214  |
| wavelet-HHH | gldm  | LargeDependenceLowGrayLevelEmphasis  | 0.027428543  |
| wavelet-HHH | gldm  | DependenceVariance                   | 2.620048208  |
| wavelet-HHH | gldm  | LargeDependenceHighGrayLevelEmphasis | 3563.416021  |
| wavelet-HHH | gldm  | SmallDependenceLowGrayLevelEmphasis  | 0.0041151    |
| wavelet-HHH | gldm  | LowGrayLevelEmphasis                 | 0.005771318  |
| wavelet-HHH | glcm  | JointAverage                         | 19.50959393  |
| wavelet-HHH | glcm  | SumAverage                           | 39.01918786  |
| wavelet-HHH | glcm  | JointEntropy                         | 7.373847503  |
| wavelet-HHH | glcm  | ClusterShade                         | -24.97082254 |
| wavelet-HHH | glcm  | MaximumProbability                   | 0.0259538    |
| wavelet-HHH | glcm  | ldmn                                 | 0.967450568  |

|             |            |                                  |              |
|-------------|------------|----------------------------------|--------------|
| wavelet-HHH | glcm       | JointEnergy                      | 0.008310364  |
| wavelet-HHH | glcm       | Contrast                         | 38.11969921  |
| wavelet-HHH | glcm       | DifferenceEntropy                | 3.643381198  |
| wavelet-HHH | glcm       | InverseVariance                  | 0.205386443  |
| wavelet-HHH | glcm       | DifferenceVariance               | 16.23429845  |
| wavelet-HHH | glcm       | Idn                              | 0.883094544  |
| wavelet-HHH | glcm       | Idm                              | 0.208740301  |
| wavelet-HHH | glcm       | Correlation                      | -0.043707767 |
| wavelet-HHH | glcm       | Autocorrelation                  | 379.8060277  |
| wavelet-HHH | glcm       | SumEntropy                       | 4.437186918  |
| wavelet-HHH | glcm       | SumSquares                       | 18.24024401  |
| wavelet-HHH | glcm       | ClusterProminence                | 5408.059214  |
| wavelet-HHH | glcm       | Imc2                             | 0.867076219  |
| wavelet-HHH | glcm       | Imc1                             | -0.173245744 |
| wavelet-HHH | glcm       | DifferenceAverage                | 4.632917246  |
| wavelet-HHH | glcm       | Id                               | 0.301247081  |
| wavelet-HHH | glcm       | ClusterTendency                  | 34.84127684  |
| wavelet-HHH | firstorder | InterquartileRange               | 105.8315925  |
| wavelet-HHH | firstorder | Skewness                         | -0.251885806 |
| wavelet-HHH | firstorder | Uniformity                       | 0.080744346  |
| wavelet-HHH | firstorder | Median                           | 5.910536635  |
| wavelet-HHH | firstorder | Energy                           | 4325549.509  |
| wavelet-HHH | firstorder | RobustMeanAbsoluteDeviation      | 48.56252745  |
| wavelet-HHH | firstorder | MeanAbsoluteDeviation            | 77.74710211  |
| wavelet-HHH | firstorder | TotalEnergy                      | 116789836.8  |
| wavelet-HHH | firstorder | Maximum                          | 319.9189873  |
| wavelet-HHH | firstorder | RootMeanSquared                  | 105.7219491  |
| wavelet-HHH | firstorder | 90Percentile                     | 125.760954   |
| wavelet-HHH | firstorder | Minimum                          | -472.4981458 |
| wavelet-HHH | firstorder | Entropy                          | 4.010779887  |
| wavelet-HHH | firstorder | Range                            | 792.4171331  |
| wavelet-HHH | firstorder | Variance                         | 11177.10624  |
| wavelet-HHH | firstorder | 10Percentile                     | -125.8429957 |
| wavelet-HHH | firstorder | Kurtosis                         | 4.706453163  |
| wavelet-HHH | firstorder | Mean                             | 0.155795346  |
| wavelet-HHH | glrlm      | ShortRunLowGrayLevelEmphasis     | 0.005841462  |
| wavelet-HHH | glrlm      | GrayLevelVariance                | 18.6441108   |
| wavelet-HHH | glrlm      | LowGrayLevelRunEmphasis          | 0.00596403   |
| wavelet-HHH | glrlm      | GrayLevelNonUniformityNormalized | 0.077421629  |
| wavelet-HHH | glrlm      | RunVariance                      | 0.068954148  |
| wavelet-HHH | glrlm      | GrayLevelNonUniformity           | 28.18496347  |
| wavelet-HHH | glrlm      | LongRunEmphasis                  | 1.200032107  |
| wavelet-HHH | glrlm      | ShortRunHighGrayLevelEmphasis    | 381.2183995  |
| wavelet-HHH | glrlm      | RunLengthNonUniformity           | 323.8217375  |
| wavelet-HHH | glrlm      | ShortRunEmphasis                 | 0.95325136   |
| wavelet-HHH | glrlm      | LongRunHighGrayLevelEmphasis     | 476.5337571  |
| wavelet-HHH | glrlm      | RunPercentage                    | 0.940568475  |
| wavelet-HHH | glrlm      | LongRunLowGrayLevelEmphasis      | 0.006508811  |
| wavelet-HHH | glrlm      | RunEntropy                       | 4.340561434  |
| wavelet-HHH | glrlm      | HighGrayLevelRunEmphasis         | 398.5938711  |
| wavelet-HHH | glrlm      | RunLengthNonUniformityNormalized | 0.889282429  |
| wavelet-HHH | glszm      | GrayLevelVariance                | 30.54972222  |

|             |       |                                      |             |
|-------------|-------|--------------------------------------|-------------|
| wavelet-HHH | glszm | ZoneVariance                         | 9.871944444 |
| wavelet-HHH | glszm | GrayLevelNonUniformityNormalized     | 0.054259259 |
| wavelet-HHH | glszm | SizeZoneNonUniformityNormalized      | 0.485617284 |
| wavelet-HHH | glszm | SizeZoneNonUniformity                | 87.41111111 |
| wavelet-HHH | glszm | GrayLevelNonUniformity               | 9.766666667 |
| wavelet-HHH | glszm | LargeAreaEmphasis                    | 14.49444444 |
| wavelet-HHH | glszm | SmallAreaHighGrayLevelEmphasis       | 300.7859662 |
| wavelet-HHH | glszm | ZonePercentage                       | 0.465116279 |
| wavelet-HHH | glszm | LargeAreaLowGrayLevelEmphasis        | 0.045128305 |
| wavelet-HHH | glszm | LargeAreaHighGrayLevelEmphasis       | 5680.855556 |
| wavelet-HHH | glszm | HighGrayLevelZoneEmphasis            | 410.15      |
| wavelet-HHH | glszm | SmallAreaEmphasis                    | 0.722225154 |
| wavelet-HHH | glszm | LowGrayLevelZoneEmphasis             | 0.009189638 |
| wavelet-HHH | glszm | ZoneEntropy                          | 5.615115801 |
| wavelet-HHH | glszm | SmallAreaLowGrayLevelEmphasis        | 0.008362165 |
| wavelet-HHH | ngtdm | Coarseness                           | 0.016557428 |
| wavelet-HHH | ngtdm | Complexity                           | 1026.736978 |
| wavelet-HHH | ngtdm | Strength                             | 3.982288147 |
| wavelet-HHH | ngtdm | Contrast                             | 0.15708347  |
| wavelet-HHH | ngtdm | Busyness                             | 0.094758756 |
| wavelet-HLL | gldm  | GrayLevelVariance                    | 71.57808358 |
| wavelet-HLL | gldm  | HighGrayLevelEmphasis                | 716.6330749 |
| wavelet-HLL | gldm  | DependenceEntropy                    | 6.367838847 |
| wavelet-HLL | gldm  | DependenceNonUniformity              | 125.4134367 |
| wavelet-HLL | gldm  | GrayLevelNonUniformity               | 15.44444444 |
| wavelet-HLL | gldm  | SmallDependenceEmphasis              | 0.537957939 |
| wavelet-HLL | gldm  | SmallDependenceHighGrayLevelEmphasis | 422.0736348 |
| wavelet-HLL | gldm  | DependenceNonUniformityNormalized    | 0.324065728 |
| wavelet-HLL | gldm  | LargeDependenceEmphasis              | 4.73126615  |
| wavelet-HLL | gldm  | LargeDependenceLowGrayLevelEmphasis  | 0.012995846 |
| wavelet-HLL | gldm  | DependenceVariance                   | 1.065080224 |
| wavelet-HLL | gldm  | LargeDependenceHighGrayLevelEmphasis | 2985.392765 |
| wavelet-HLL | gldm  | SmallDependenceLowGrayLevelEmphasis  | 0.004135019 |
| wavelet-HLL | gldm  | LowGrayLevelEmphasis                 | 0.005080269 |
| wavelet-HLL | glcm  | JointAverage                         | 24.73423716 |
| wavelet-HLL | glcm  | SumAverage                           | 49.46847433 |
| wavelet-HLL | glcm  | JointEntropy                         | 8.390441405 |
| wavelet-HLL | glcm  | ClusterShade                         | 1295.173385 |
| wavelet-HLL | glcm  | MaximumProbability                   | 0.01075258  |
| wavelet-HLL | glcm  | Idmn                                 | 0.971386476 |
| wavelet-HLL | glcm  | JointEnergy                          | 0.003469038 |
| wavelet-HLL | glcm  | Contrast                             | 112.4435234 |
| wavelet-HLL | glcm  | DifferenceEntropy                    | 4.301441557 |
| wavelet-HLL | glcm  | InverseVariance                      | 0.155967518 |
| wavelet-HLL | glcm  | DifferenceVariance                   | 50.10835288 |
| wavelet-HLL | glcm  | Idn                                  | 0.893073922 |
| wavelet-HLL | glcm  | Idm                                  | 0.144586037 |
| wavelet-HLL | glcm  | Correlation                          | 0.232868448 |
| wavelet-HLL | glcm  | Autocorrelation                      | 629.7373096 |
| wavelet-HLL | glcm  | SumEntropy                           | 5.541894423 |
| wavelet-HLL | glcm  | SumSquares                           | 74.11961973 |
| wavelet-HLL | glcm  | ClusterProminence                    | 130592.1529 |

|             |            |                                  |              |
|-------------|------------|----------------------------------|--------------|
| wavelet-HLL | glcm       | lmc2                             | 0.974277444  |
| wavelet-HLL | glcm       | lmc1                             | -0.304540226 |
| wavelet-HLL | glcm       | DifferenceAverage                | 7.749951274  |
| wavelet-HLL | glcm       | ld                               | 0.230174658  |
| wavelet-HLL | glcm       | ClusterTendency                  | 184.0349556  |
| wavelet-HLL | firstorder | InterquartileRange               | 250.2763499  |
| wavelet-HLL | firstorder | Skewness                         | 0.613406689  |
| wavelet-HLL | firstorder | Uniformity                       | 0.039908125  |
| wavelet-HLL | firstorder | Median                           | 8.54066463   |
| wavelet-HLL | firstorder | Energy                           | 17469947.26  |
| wavelet-HLL | firstorder | RobustMeanAbsoluteDeviation      | 102.4826736  |
| wavelet-HLL | firstorder | MeanAbsoluteDeviation            | 158.9431449  |
| wavelet-HLL | firstorder | TotalEnergy                      | 471688575.9  |
| wavelet-HLL | firstorder | Maximum                          | 853.9236311  |
| wavelet-HLL | firstorder | RootMeanSquared                  | 212.4664269  |
| wavelet-HLL | firstorder | 90Percentile                     | 252.9050549  |
| wavelet-HLL | firstorder | Minimum                          | -579.2961915 |
| wavelet-HLL | firstorder | Entropy                          | 4.934161065  |
| wavelet-HLL | firstorder | Range                            | 1433.219823  |
| wavelet-HLL | firstorder | Variance                         | 44624.06508  |
| wavelet-HLL | firstorder | 10Percentile                     | -210.2757299 |
| wavelet-HLL | firstorder | Kurtosis                         | 4.380170198  |
| wavelet-HLL | firstorder | Mean                             | 22.75780082  |
| wavelet-HLL | glrlm      | ShortRunLowGrayLevelEmphasis     | 0.005134962  |
| wavelet-HLL | glrlm      | GrayLevelVariance                | 72.83774657  |
| wavelet-HLL | glrlm      | LowGrayLevelRunEmphasis          | 0.005189853  |
| wavelet-HLL | glrlm      | GrayLevelNonUniformityNormalized | 0.039479401  |
| wavelet-HLL | glrlm      | RunVariance                      | 0.038446686  |
| wavelet-HLL | glrlm      | GrayLevelNonUniformity           | 14.74126768  |
| wavelet-HLL | glrlm      | LongRunEmphasis                  | 1.113003122  |
| wavelet-HLL | glrlm      | ShortRunHighGrayLevelEmphasis    | 703.5519378  |
| wavelet-HLL | glrlm      | RunLengthNonUniformity           | 348.3018886  |
| wavelet-HLL | glrlm      | ShortRunEmphasis                 | 0.973594828  |
| wavelet-HLL | glrlm      | LongRunHighGrayLevelEmphasis     | 790.1480842  |
| wavelet-HLL | glrlm      | RunPercentage                    | 0.964818128  |
| wavelet-HLL | glrlm      | LongRunLowGrayLevelEmphasis      | 0.005425584  |
| wavelet-HLL | glrlm      | RunEntropy                       | 5.118511263  |
| wavelet-HLL | glrlm      | HighGrayLevelRunEmphasis         | 720.0734865  |
| wavelet-HLL | glrlm      | RunLengthNonUniformityNormalized | 0.93266847   |
| wavelet-HLL | glszm      | GrayLevelVariance                | 93.17814776  |
| wavelet-HLL | glszm      | ZoneVariance                     | 1.591501524  |
| wavelet-HLL | glszm      | GrayLevelNonUniformityNormalized | 0.033728758  |
| wavelet-HLL | glszm      | SizeZoneNonUniformityNormalized  | 0.520497237  |
| wavelet-HLL | glszm      | SizeZoneNonUniformity            | 125.439834   |
| wavelet-HLL | glszm      | GrayLevelNonUniformity           | 8.128630705  |
| wavelet-HLL | glszm      | LargeAreaEmphasis                | 4.170124481  |
| wavelet-HLL | glszm      | SmallAreaHighGrayLevelEmphasis   | 604.6553572  |
| wavelet-HLL | glszm      | ZonePercentage                   | 0.622739018  |
| wavelet-HLL | glszm      | LargeAreaLowGrayLevelEmphasis    | 0.013506047  |
| wavelet-HLL | glszm      | LargeAreaHighGrayLevelEmphasis   | 2682.170124  |
| wavelet-HLL | glszm      | HighGrayLevelZoneEmphasis        | 768.3153527  |
| wavelet-HLL | glszm      | SmallAreaEmphasis                | 0.749598176  |

|             |            |                                      |              |
|-------------|------------|--------------------------------------|--------------|
| wavelet-HLL | glszm      | LowGrayLevelZoneEmphasis             | 0.00692224   |
| wavelet-HLL | glszm      | ZoneEntropy                          | 6.170111421  |
| wavelet-HLL | glszm      | SmallAreaLowGrayLevelEmphasis        | 0.006410697  |
| wavelet-HLL | ngtdm      | Coarseness                           | 0.017686669  |
| wavelet-HLL | ngtdm      | Complexity                           | 4836.277153  |
| wavelet-HLL | ngtdm      | Strength                             | 15.33832129  |
| wavelet-HLL | ngtdm      | Contrast                             | 0.32109886   |
| wavelet-HLL | ngtdm      | Busyness                             | 0.045460732  |
| wavelet-LHL | gldm       | GrayLevelVariance                    | 199.7931748  |
| wavelet-LHL | gldm       | HighGrayLevelEmphasis                | 1881.640827  |
| wavelet-LHL | gldm       | DependenceEntropy                    | 6.630837893  |
| wavelet-LHL | gldm       | DependenceNonUniformity              | 174.4160207  |
| wavelet-LHL | gldm       | GrayLevelNonUniformity               | 8.705426357  |
| wavelet-LHL | gldm       | SmallDependenceEmphasis              | 0.683947746  |
| wavelet-LHL | gldm       | SmallDependenceHighGrayLevelEmphasis | 1283.246538  |
| wavelet-LHL | gldm       | DependenceNonUniformityNormalized    | 0.450687392  |
| wavelet-LHL | gldm       | LargeDependenceEmphasis              | 3.082687339  |
| wavelet-LHL | gldm       | LargeDependenceLowGrayLevelEmphasis  | 0.006038925  |
| wavelet-LHL | gldm       | DependenceVariance                   | 0.670966622  |
| wavelet-LHL | gldm       | LargeDependenceHighGrayLevelEmphasis | 5807.614987  |
| wavelet-LHL | gldm       | SmallDependenceLowGrayLevelEmphasis  | 0.004302189  |
| wavelet-LHL | gldm       | LowGrayLevelEmphasis                 | 0.004550511  |
| wavelet-LHL | glcm       | JointAverage                         | 42.03963625  |
| wavelet-LHL | glcm       | SumAverage                           | 84.07927251  |
| wavelet-LHL | glcm       | JointEntropy                         | 8.803343075  |
| wavelet-LHL | glcm       | ClusterShade                         | 1719.073146  |
| wavelet-LHL | glcm       | MaximumProbability                   | 0.007020824  |
| wavelet-LHL | glcm       | ldmn                                 | 0.953747342  |
| wavelet-LHL | glcm       | JointEnergy                          | 0.002433688  |
| wavelet-LHL | glcm       | Contrast                             | 348.3906344  |
| wavelet-LHL | glcm       | DifferenceEntropy                    | 4.999213927  |
| wavelet-LHL | glcm       | InverseVariance                      | 0.082516675  |
| wavelet-LHL | glcm       | DifferenceVariance                   | 140.0326902  |
| wavelet-LHL | glcm       | ldn                                  | 0.863703698  |
| wavelet-LHL | glcm       | ldm                                  | 0.081791247  |
| wavelet-LHL | glcm       | Correlation                          | 0.112369229  |
| wavelet-LHL | glcm       | Autocorrelation                      | 1788.738819  |
| wavelet-LHL | glcm       | SumEntropy                           | 6.041516503  |
| wavelet-LHL | glcm       | SumSquares                           | 195.4785708  |
| wavelet-LHL | glcm       | ClusterProminence                    | 631891.7423  |
| wavelet-LHL | glcm       | lmc2                                 | 0.99708082   |
| wavelet-LHL | glcm       | lmc1                                 | -0.453112841 |
| wavelet-LHL | glcm       | DifferenceAverage                    | 13.89524612  |
| wavelet-LHL | glcm       | ld                                   | 0.154743229  |
| wavelet-LHL | glcm       | ClusterTendency                      | 433.5236488  |
| wavelet-LHL | firstorder | InterquartileRange                   | 455.0948718  |
| wavelet-LHL | firstorder | Skewness                             | 0.053510252  |
| wavelet-LHL | firstorder | Uniformity                           | 0.022494642  |
| wavelet-LHL | firstorder | Median                               | -52.01280916 |
| wavelet-LHL | firstorder | Energy                               | 48912538.48  |
| wavelet-LHL | firstorder | RobustMeanAbsoluteDeviation          | 189.6960315  |
| wavelet-LHL | firstorder | MeanAbsoluteDeviation                | 277.8237398  |

|             |            |                                  |              |
|-------------|------------|----------------------------------|--------------|
| wavelet-LHL | firstorder | TotalEnergy                      | 1320638539   |
| wavelet-LHL | firstorder | Maximum                          | 919.9894782  |
| wavelet-LHL | firstorder | RootMeanSquared                  | 355.51229    |
| wavelet-LHL | firstorder | 90Percentile                     | 388.0347133  |
| wavelet-LHL | firstorder | Minimum                          | -1044.771967 |
| wavelet-LHL | firstorder | Entropy                          | 5.725263548  |
| wavelet-LHL | firstorder | Range                            | 1964.761445  |
| wavelet-LHL | firstorder | Variance                         | 125023.59    |
| wavelet-LHL | firstorder | 10Percentile                     | -489.0793333 |
| wavelet-LHL | firstorder | Kurtosis                         | 3.08619093   |
| wavelet-LHL | firstorder | Mean                             | -36.95129626 |
| wavelet-LHL | glrlm      | ShortRunLowGrayLevelEmphasis     | 0.004621569  |
| wavelet-LHL | glrlm      | GrayLevelVariance                | 201.5302381  |
| wavelet-LHL | glrlm      | LowGrayLevelRunEmphasis          | 0.004633569  |
| wavelet-LHL | glrlm      | GrayLevelNonUniformityNormalized | 0.022299251  |
| wavelet-LHL | glrlm      | RunVariance                      | 0.022080074  |
| wavelet-LHL | glrlm      | GrayLevelNonUniformity           | 8.446538956  |
| wavelet-LHL | glrlm      | LongRunEmphasis                  | 1.066312937  |
| wavelet-LHL | glrlm      | ShortRunHighGrayLevelEmphasis    | 1850.860552  |
| wavelet-LHL | glrlm      | RunLengthNonUniformity           | 363.0137761  |
| wavelet-LHL | glrlm      | ShortRunEmphasis                 | 0.983882521  |
| wavelet-LHL | glrlm      | LongRunHighGrayLevelEmphasis     | 2006.29822   |
| wavelet-LHL | glrlm      | RunPercentage                    | 0.978731862  |
| wavelet-LHL | glrlm      | LongRunLowGrayLevelEmphasis      | 0.004683043  |
| wavelet-LHL | glrlm      | RunEntropy                       | 5.821270053  |
| wavelet-LHL | glrlm      | HighGrayLevelRunEmphasis         | 1881.464477  |
| wavelet-LHL | glrlm      | RunLengthNonUniformityNormalized | 0.95823404   |
| wavelet-LHL | glszm      | GrayLevelVariance                | 223.3048026  |
| wavelet-LHL | glszm      | ZoneVariance                     | 0.606972708  |
| wavelet-LHL | glszm      | GrayLevelNonUniformityNormalized | 0.020419574  |
| wavelet-LHL | glszm      | SizeZoneNonUniformityNormalized  | 0.652133397  |
| wavelet-LHL | glszm      | SizeZoneNonUniformity            | 191.0750853  |
| wavelet-LHL | glszm      | GrayLevelNonUniformity           | 5.982935154  |
| wavelet-LHL | glszm      | LargeAreaEmphasis                | 2.351535836  |
| wavelet-LHL | glszm      | SmallAreaHighGrayLevelEmphasis   | 1567.501019  |
| wavelet-LHL | glszm      | ZonePercentage                   | 0.757105943  |
| wavelet-LHL | glszm      | LargeAreaLowGrayLevelEmphasis    | 0.00674725   |
| wavelet-LHL | glszm      | LargeAreaHighGrayLevelEmphasis   | 4382.535836  |
| wavelet-LHL | glszm      | HighGrayLevelZoneEmphasis        | 1884.215017  |
| wavelet-LHL | glszm      | SmallAreaEmphasis                | 0.834589733  |
| wavelet-LHL | glszm      | LowGrayLevelZoneEmphasis         | 0.005763528  |
| wavelet-LHL | glszm      | ZoneEntropy                      | 6.430977152  |
| wavelet-LHL | glszm      | SmallAreaLowGrayLevelEmphasis    | 0.00562727   |
| wavelet-LHL | ngtdm      | Coarseness                       | 0.015911359  |
| wavelet-LHL | ngtdm      | Complexity                       | 18088.12279  |
| wavelet-LHL | ngtdm      | Strength                         | 23.14883285  |
| wavelet-LHL | ngtdm      | Contrast                         | 0.829359306  |
| wavelet-LHL | ngtdm      | Busyness                         | 0.024089112  |
| wavelet-LHH | gldm       | GrayLevelVariance                | 59.62796039  |
| wavelet-LHH | gldm       | HighGrayLevelEmphasis            | 934.8397933  |
| wavelet-LHH | gldm       | DependenceEntropy                | 6.230684213  |
| wavelet-LHH | gldm       | DependenceNonUniformity          | 122.9844961  |



|             |            |                                      |              |
|-------------|------------|--------------------------------------|--------------|
| wavelet-LHH | gldm       | GrayLevelNonUniformity               | 18.65891473  |
| wavelet-LHH | gldm       | SmallDependenceEmphasis              | 0.554463916  |
| wavelet-LHH | gldm       | SmallDependenceHighGrayLevelEmphasis | 533.7571352  |
| wavelet-LHH | gldm       | DependenceNonUniformityNormalized    | 0.317789396  |
| wavelet-LHH | gldm       | LargeDependenceEmphasis              | 5.625322997  |
| wavelet-LHH | gldm       | LargeDependenceLowGrayLevelEmphasis  | 0.009747624  |
| wavelet-LHH | gldm       | DependenceVariance                   | 1.614980403  |
| wavelet-LHH | gldm       | LargeDependenceHighGrayLevelEmphasis | 5128.813953  |
| wavelet-LHH | gldm       | SmallDependenceLowGrayLevelEmphasis  | 0.00373485   |
| wavelet-LHH | gldm       | LowGrayLevelEmphasis                 | 0.004298234  |
| wavelet-LHH | glcm       | JointAverage                         | 29.55649682  |
| wavelet-LHH | glcm       | SumAverage                           | 59.11299364  |
| wavelet-LHH | glcm       | JointEntropy                         | 8.167759867  |
| wavelet-LHH | glcm       | ClusterShade                         | -519.5505506 |
| wavelet-LHH | glcm       | MaximumProbability                   | 0.017305883  |
| wavelet-LHH | glcm       | ldmn                                 | 0.962827191  |
| wavelet-LHH | glcm       | JointEnergy                          | 0.004444068  |
| wavelet-LHH | glcm       | Contrast                             | 129.1437697  |
| wavelet-LHH | glcm       | DifferenceEntropy                    | 4.361072967  |
| wavelet-LHH | glcm       | InverseVariance                      | 0.152825013  |
| wavelet-LHH | glcm       | DifferenceVariance                   | 61.02560897  |
| wavelet-LHH | glcm       | ldn                                  | 0.881759776  |
| wavelet-LHH | glcm       | ldm                                  | 0.14753091   |
| wavelet-LHH | glcm       | Correlation                          | -0.034349168 |
| wavelet-LHH | glcm       | Autocorrelation                      | 871.6543617  |
| wavelet-LHH | glcm       | SumEntropy                           | 5.192740203  |
| wavelet-LHH | glcm       | SumSquares                           | 62.63426367  |
| wavelet-LHH | glcm       | ClusterProminence                    | 72071.61845  |
| wavelet-LHH | glcm       | lmc2                                 | 0.972634209  |
| wavelet-LHH | glcm       | lmc1                                 | -0.305093321 |
| wavelet-LHH | glcm       | DifferenceAverage                    | 8.102669549  |
| wavelet-LHH | glcm       | ld                                   | 0.231922615  |
| wavelet-LHH | glcm       | ClusterTendency                      | 121.393285   |
| wavelet-LHH | firstorder | InterquartileRange                   | 192.9381185  |
| wavelet-LHH | firstorder | Skewness                             | -0.321073328 |
| wavelet-LHH | firstorder | Uniformity                           | 0.04821425   |
| wavelet-LHH | firstorder | Median                               | 15.46900903  |
| wavelet-LHH | firstorder | Energy                               | 14342418.75  |
| wavelet-LHH | firstorder | RobustMeanAbsoluteDeviation          | 81.00174475  |
| wavelet-LHH | firstorder | MeanAbsoluteDeviation                | 137.4674323  |
| wavelet-LHH | firstorder | TotalEnergy                          | 387245306.2  |
| wavelet-LHH | firstorder | Maximum                              | 610.1084255  |
| wavelet-LHH | firstorder | RootMeanSquared                      | 192.5110739  |
| wavelet-LHH | firstorder | 90Percentile                         | 201.055566   |
| wavelet-LHH | firstorder | Minimum                              | -713.8556933 |
| wavelet-LHH | firstorder | Entropy                              | 4.802334352  |
| wavelet-LHH | firstorder | Range                                | 1323.964119  |
| wavelet-LHH | firstorder | Variance                             | 37057.31816  |
| wavelet-LHH | firstorder | 10Percentile                         | -239.3726546 |
| wavelet-LHH | firstorder | Kurtosis                             | 4.621505923  |
| wavelet-LHH | firstorder | Mean                                 | 1.787568631  |
| wavelet-LHH | gllm       | ShortRunLowGrayLevelEmphasis         | 0.004388229  |

|             |       |                                      |             |
|-------------|-------|--------------------------------------|-------------|
| wavelet-LHH | glrlm | GrayLevelVariance                    | 61.4227727  |
| wavelet-LHH | glrlm | LowGrayLevelRunEmphasis              | 0.004422763 |
| wavelet-LHH | glrlm | GrayLevelNonUniformityNormalized     | 0.046623679 |
| wavelet-LHH | glrlm | RunVariance                          | 0.043881789 |
| wavelet-LHH | glrlm | GrayLevelNonUniformity               | 17.35005405 |
| wavelet-LHH | glrlm | LongRunEmphasis                      | 1.126449278 |
| wavelet-LHH | glrlm | ShortRunHighGrayLevelEmphasis        | 910.2134646 |
| wavelet-LHH | glrlm | RunLengthNonUniformity               | 345.3584853 |
| wavelet-LHH | glrlm | ShortRunEmphasis                     | 0.971396029 |
| wavelet-LHH | glrlm | LongRunHighGrayLevelEmphasis         | 1050.457864 |
| wavelet-LHH | glrlm | RunPercentage                        | 0.961439078 |
| wavelet-LHH | glrlm | LongRunLowGrayLevelEmphasis          | 0.004576372 |
| wavelet-LHH | glrlm | RunEntropy                           | 5.010284819 |
| wavelet-LHH | glrlm | HighGrayLevelRunEmphasis             | 936.070453  |
| wavelet-LHH | glrlm | RunLengthNonUniformityNormalized     | 0.927791426 |
| wavelet-LHH | glszm | GrayLevelVariance                    | 85.50684541 |
| wavelet-LHH | glszm | ZoneVariance                         | 2.94963414  |
| wavelet-LHH | glszm | GrayLevelNonUniformityNormalized     | 0.034627642 |
| wavelet-LHH | glszm | SizeZoneNonUniformityNormalized      | 0.595399598 |
| wavelet-LHH | glszm | SizeZoneNonUniformity                | 141.1097046 |
| wavelet-LHH | glszm | GrayLevelNonUniformity               | 8.206751055 |
| wavelet-LHH | glszm | LargeAreaEmphasis                    | 5.616033755 |
| wavelet-LHH | glszm | SmallAreaHighGrayLevelEmphasis       | 774.5390058 |
| wavelet-LHH | glszm | ZonePercentage                       | 0.612403101 |
| wavelet-LHH | glszm | LargeAreaLowGrayLevelEmphasis        | 0.011587284 |
| wavelet-LHH | glszm | LargeAreaHighGrayLevelEmphasis       | 5181.801688 |
| wavelet-LHH | glszm | HighGrayLevelZoneEmphasis            | 954.3881857 |
| wavelet-LHH | glszm | SmallAreaEmphasis                    | 0.797246665 |
| wavelet-LHH | glszm | LowGrayLevelZoneEmphasis             | 0.006234924 |
| wavelet-LHH | glszm | ZoneEntropy                          | 5.97342698  |
| wavelet-LHH | glszm | SmallAreaLowGrayLevelEmphasis        | 0.005957962 |
| wavelet-LHH | ngtdm | Coarseness                           | 0.017580457 |
| wavelet-LHH | ngtdm | Complexity                           | 5098.356919 |
| wavelet-LHH | ngtdm | Strength                             | 11.47439213 |
| wavelet-LHH | ngtdm | Contrast                             | 0.307279014 |
| wavelet-LHH | ngtdm | Busyness                             | 0.033769747 |
| wavelet-LLH | gldm  | GrayLevelVariance                    | 110.6891947 |
| wavelet-LLH | gldm  | HighGrayLevelEmphasis                | 1370.297158 |
| wavelet-LLH | gldm  | DependenceEntropy                    | 6.370275661 |
| wavelet-LLH | gldm  | DependenceNonUniformity              | 146.9896641 |
| wavelet-LLH | gldm  | GrayLevelNonUniformity               | 12.7881137  |
| wavelet-LLH | gldm  | SmallDependenceEmphasis              | 0.624757012 |
| wavelet-LLH | gldm  | SmallDependenceHighGrayLevelEmphasis | 845.1402847 |
| wavelet-LLH | gldm  | DependenceNonUniformityNormalized    | 0.379818253 |
| wavelet-LLH | gldm  | LargeDependenceEmphasis              | 4.049095607 |
| wavelet-LLH | gldm  | LargeDependenceLowGrayLevelEmphasis  | 0.006572627 |
| wavelet-LLH | gldm  | DependenceVariance                   | 0.988856172 |
| wavelet-LLH | gldm  | LargeDependenceHighGrayLevelEmphasis | 5691.470284 |
| wavelet-LLH | gldm  | SmallDependenceLowGrayLevelEmphasis  | 0.00362608  |
| wavelet-LLH | gldm  | LowGrayLevelEmphasis                 | 0.003976766 |
| wavelet-LLH | glcm  | JointAverage                         | 35.69990053 |
| wavelet-LLH | glcm  | SumAverage                           | 71.39980106 |

|             |            |                                  |              |
|-------------|------------|----------------------------------|--------------|
| wavelet-LLH | glcm       | JointEntropy                     | 8.583128045  |
| wavelet-LLH | glcm       | ClusterShade                     | 527.674737   |
| wavelet-LLH | glcm       | MaximumProbability               | 0.009423222  |
| wavelet-LLH | glcm       | Idmn                             | 0.965711166  |
| wavelet-LLH | glcm       | JointEnergy                      | 0.002999045  |
| wavelet-LLH | glcm       | Contrast                         | 223.698229   |
| wavelet-LLH | glcm       | DifferenceEntropy                | 4.713135029  |
| wavelet-LLH | glcm       | InverseVariance                  | 0.112783753  |
| wavelet-LLH | glcm       | DifferenceVariance               | 97.7334841   |
| wavelet-LLH | glcm       | Idn                              | 0.8834959    |
| wavelet-LLH | glcm       | Idm                              | 0.109953886  |
| wavelet-LLH | glcm       | Correlation                      | 0.03882806   |
| wavelet-LLH | glcm       | Autocorrelation                  | 1279.061994  |
| wavelet-LLH | glcm       | SumEntropy                       | 5.674063005  |
| wavelet-LLH | glcm       | SumSquares                       | 116.3839988  |
| wavelet-LLH | glcm       | ClusterProminence                | 254090.1751  |
| wavelet-LLH | glcm       | Imc2                             | 0.988385464  |
| wavelet-LLH | glcm       | Imc1                             | -0.361581767 |
| wavelet-LLH | glcm       | DifferenceAverage                | 10.93447366  |
| wavelet-LLH | glcm       | Id                               | 0.188272199  |
| wavelet-LLH | glcm       | ClusterTendency                  | 241.837766   |
| wavelet-LLH | firstorder | InterquartileRange               | 285.1644634  |
| wavelet-LLH | firstorder | Skewness                         | -0.06955117  |
| wavelet-LLH | firstorder | Uniformity                       | 0.033044221  |
| wavelet-LLH | firstorder | Median                           | -21.10665107 |
| wavelet-LLH | firstorder | Energy                           | 26884448.59  |
| wavelet-LLH | firstorder | RobustMeanAbsoluteDeviation      | 119.5326868  |
| wavelet-LLH | firstorder | MeanAbsoluteDeviation            | 192.3808191  |
| wavelet-LLH | firstorder | TotalEnergy                      | 725880111.8  |
| wavelet-LLH | firstorder | Maximum                          | 973.6884756  |
| wavelet-LLH | firstorder | RootMeanSquared                  | 263.5694584  |
| wavelet-LLH | firstorder | 90Percentile                     | 275.589841   |
| wavelet-LLH | firstorder | Minimum                          | -878.825554  |
| wavelet-LLH | firstorder | Entropy                          | 5.231085797  |
| wavelet-LLH | firstorder | Range                            | 1852.51403   |
| wavelet-LLH | firstorder | Variance                         | 68826.64168  |
| wavelet-LLH | firstorder | 10Percentile                     | -347.2720709 |
| wavelet-LLH | firstorder | Kurtosis                         | 4.395843757  |
| wavelet-LLH | firstorder | Mean                             | -25.34201472 |
| wavelet-LLH | glrlm      | ShortRunLowGrayLevelEmphasis     | 0.004049561  |
| wavelet-LLH | glrlm      | GrayLevelVariance                | 112.2129983  |
| wavelet-LLH | glrlm      | LowGrayLevelRunEmphasis          | 0.004069171  |
| wavelet-LLH | glrlm      | GrayLevelNonUniformityNormalized | 0.03256699   |
| wavelet-LLH | glrlm      | RunVariance                      | 0.0291923    |
| wavelet-LLH | glrlm      | GrayLevelNonUniformity           | 12.24024795  |
| wavelet-LLH | glrlm      | LongRunEmphasis                  | 1.089949313  |
| wavelet-LLH | glrlm      | ShortRunHighGrayLevelEmphasis    | 1337.602275  |
| wavelet-LLH | glrlm      | RunLengthNonUniformity           | 354.4690386  |
| wavelet-LLH | glrlm      | ShortRunEmphasis                 | 0.977741814  |
| wavelet-LLH | glrlm      | LongRunHighGrayLevelEmphasis     | 1495.98165   |
| wavelet-LLH | glrlm      | RunPercentage                    | 0.971178692  |
| wavelet-LLH | glrlm      | LongRunLowGrayLevelEmphasis      | 0.00414836   |

|             |       |                                      |             |
|-------------|-------|--------------------------------------|-------------|
| wavelet-LLH | glrlm | RunEntropy                           | 5.375044073 |
| wavelet-LLH | glrlm | HighGrayLevelRunEmphasis             | 1369.053591 |
| wavelet-LLH | glrlm | RunLengthNonUniformityNormalized     | 0.942809644 |
| wavelet-LLH | glszm | GrayLevelVariance                    | 131.9407143 |
| wavelet-LLH | glszm | ZoneVariance                         | 1.027110197 |
| wavelet-LLH | glszm | GrayLevelNonUniformityNormalized     | 0.028744162 |
| wavelet-LLH | glszm | SizeZoneNonUniformityNormalized      | 0.619367928 |
| wavelet-LLH | glszm | SizeZoneNonUniformity                | 167.8487085 |
| wavelet-LLH | glszm | GrayLevelNonUniformity               | 7.789667897 |
| wavelet-LLH | glszm | LargeAreaEmphasis                    | 3.066420664 |
| wavelet-LLH | glszm | SmallAreaHighGrayLevelEmphasis       | 1099.377683 |
| wavelet-LLH | glszm | ZonePercentage                       | 0.700258398 |
| wavelet-LLH | glszm | LargeAreaLowGrayLevelEmphasis        | 0.007090794 |
| wavelet-LLH | glszm | LargeAreaHighGrayLevelEmphasis       | 4189.442804 |
| wavelet-LLH | glszm | HighGrayLevelZoneEmphasis            | 1361.335793 |
| wavelet-LLH | glszm | SmallAreaEmphasis                    | 0.813942446 |
| wavelet-LLH | glszm | LowGrayLevelZoneEmphasis             | 0.005287963 |
| wavelet-LLH | glszm | ZoneEntropy                          | 6.087699588 |
| wavelet-LLH | glszm | SmallAreaLowGrayLevelEmphasis        | 0.005102148 |
| wavelet-LLH | ngtdm | Coarseness                           | 0.016823338 |
| wavelet-LLH | ngtdm | Complexity                           | 8900.555072 |
| wavelet-LLH | ngtdm | Strength                             | 16.20474206 |
| wavelet-LLH | ngtdm | Contrast                             | 0.581539295 |
| wavelet-LLH | ngtdm | Busyness                             | 0.030387816 |
| wavelet-LLL | gldm  | GrayLevelVariance                    | 513.2002617 |
| wavelet-LLL | gldm  | HighGrayLevelEmphasis                | 2977.925065 |
| wavelet-LLL | gldm  | DependenceEntropy                    | 6.869049054 |
| wavelet-LLL | gldm  | DependenceNonUniformity              | 229.5581395 |
| wavelet-LLL | gldm  | GrayLevelNonUniformity               | 5.496124031 |
| wavelet-LLL | gldm  | SmallDependenceEmphasis              | 0.794376256 |
| wavelet-LLL | gldm  | SmallDependenceHighGrayLevelEmphasis | 2306.268375 |
| wavelet-LLL | gldm  | DependenceNonUniformityNormalized    | 0.593173487 |
| wavelet-LLL | gldm  | LargeDependenceEmphasis              | 1.966408269 |
| wavelet-LLL | gldm  | LargeDependenceLowGrayLevelEmphasis  | 0.00491021  |
| wavelet-LLL | gldm  | DependenceVariance                   | 0.277080037 |
| wavelet-LLL | gldm  | LargeDependenceHighGrayLevelEmphasis | 6292.379845 |
| wavelet-LLL | gldm  | SmallDependenceLowGrayLevelEmphasis  | 0.003931014 |
| wavelet-LLL | gldm  | LowGrayLevelEmphasis                 | 0.004119567 |
| wavelet-LLL | glcm  | JointAverage                         | 52.4299491  |
| wavelet-LLL | glcm  | SumAverage                           | 104.8598982 |
| wavelet-LLL | glcm  | JointEntropy                         | 8.980747818 |
| wavelet-LLL | glcm  | ClusterShade                         | -3180.29059 |
| wavelet-LLL | glcm  | MaximumProbability                   | 0.004761575 |
| wavelet-LLL | glcm  | ldmn                                 | 0.957281318 |
| wavelet-LLL | glcm  | JointEnergy                          | 0.002052246 |
| wavelet-LLL | glcm  | Contrast                             | 466.5112753 |
| wavelet-LLL | glcm  | DifferenceEntropy                    | 5.273140818 |
| wavelet-LLL | glcm  | InverseVariance                      | 0.061849487 |
| wavelet-LLL | glcm  | DifferenceVariance                   | 167.812221  |
| wavelet-LLL | glcm  | ldn                                  | 0.862308598 |
| wavelet-LLL | glcm  | ldm                                  | 0.055807939 |
| wavelet-LLL | glcm  | Correlation                          | 0.500875279 |

|             |            |                                  |              |
|-------------|------------|----------------------------------|--------------|
| wavelet-LLL | glcm       | Autocorrelation                  | 2982.75859   |
| wavelet-LLL | glcm       | SumEntropy                       | 6.713139715  |
| wavelet-LLL | glcm       | SumSquares                       | 466.665307   |
| wavelet-LLL | glcm       | ClusterProminence                | 4415447.915  |
| wavelet-LLL | glcm       | Imc2                             | 0.999474378  |
| wavelet-LLL | glcm       | Imc1                             | -0.553445167 |
| wavelet-LLL | glcm       | DifferenceAverage                | 17.04539331  |
| wavelet-LLL | glcm       | Id                               | 0.121780034  |
| wavelet-LLL | glcm       | ClusterTendency                  | 1400.149953  |
| wavelet-LLL | firstorder | InterquartileRange               | 970.2640879  |
| wavelet-LLL | firstorder | Skewness                         | 0.03362554   |
| wavelet-LLL | firstorder | Uniformity                       | 0.014201871  |
| wavelet-LLL | firstorder | Median                           | -888.2624377 |
| wavelet-LLL | firstorder | Energy                           | 434771633.9  |
| wavelet-LLL | firstorder | RobustMeanAbsoluteDeviation      | 372.0969612  |
| wavelet-LLL | firstorder | MeanAbsoluteDeviation            | 480.8672912  |
| wavelet-LLL | firstorder | TotalEnergy                      | 11738834117  |
| wavelet-LLL | firstorder | Maximum                          | 318.7733638  |
| wavelet-LLL | firstorder | RootMeanSquared                  | 1059.924957  |
| wavelet-LLL | firstorder | 90Percentile                     | -124.7747939 |
| wavelet-LLL | firstorder | Minimum                          | -2113.472009 |
| wavelet-LLL | firstorder | Entropy                          | 6.286694572  |
| wavelet-LLL | firstorder | Range                            | 2432.245373  |
| wavelet-LLL | firstorder | Variance                         | 320080.8289  |
| wavelet-LLL | firstorder | 10Percentile                     | -1646.383338 |
| wavelet-LLL | firstorder | Kurtosis                         | 2.018927606  |
| wavelet-LLL | firstorder | Mean                             | -896.3035678 |
| wavelet-LLL | glrlm      | ShortRunLowGrayLevelEmphasis     | 0.004150162  |
| wavelet-LLL | glrlm      | GrayLevelVariance                | 513.3701799  |
| wavelet-LLL | glrlm      | LowGrayLevelRunEmphasis          | 0.004157669  |
| wavelet-LLL | glrlm      | GrayLevelNonUniformityNormalized | 0.014197048  |
| wavelet-LLL | glrlm      | RunVariance                      | 0.011931796  |
| wavelet-LLL | glrlm      | GrayLevelNonUniformity           | 5.430946517  |
| wavelet-LLL | glrlm      | LongRunEmphasis                  | 1.035480058  |
| wavelet-LLL | glrlm      | ShortRunHighGrayLevelEmphasis    | 2944.516535  |
| wavelet-LLL | glrlm      | RunLengthNonUniformity           | 373.8867552  |
| wavelet-LLL | glrlm      | ShortRunEmphasis                 | 0.9913555    |
| wavelet-LLL | glrlm      | LongRunHighGrayLevelEmphasis     | 3092.429572  |
| wavelet-LLL | glrlm      | RunPercentage                    | 0.988471477  |
| wavelet-LLL | glrlm      | LongRunLowGrayLevelEmphasis      | 0.004187984  |
| wavelet-LLL | glrlm      | RunEntropy                       | 6.325229779  |
| wavelet-LLL | glrlm      | HighGrayLevelRunEmphasis         | 2973.533371  |
| wavelet-LLL | glrlm      | RunLengthNonUniformityNormalized | 0.977331696  |
| wavelet-LLL | glszm      | GrayLevelVariance                | 516.4411019  |
| wavelet-LLL | glszm      | ZoneVariance                     | 0.227741047  |
| wavelet-LLL | glszm      | GrayLevelNonUniformityNormalized | 0.014141414  |
| wavelet-LLL | glszm      | SizeZoneNonUniformityNormalized  | 0.751056015  |
| wavelet-LLL | glszm      | SizeZoneNonUniformity            | 247.8484848  |
| wavelet-LLL | glszm      | GrayLevelNonUniformity           | 4.666666667  |
| wavelet-LLL | glszm      | LargeAreaEmphasis                | 1.603030303  |
| wavelet-LLL | glszm      | SmallAreaHighGrayLevelEmphasis   | 2569.676536  |
| wavelet-LLL | glszm      | ZonePercentage                   | 0.852713178  |

|             |            |                                      |              |
|-------------|------------|--------------------------------------|--------------|
| wavelet-LLL | glszm      | LargeAreaLowGrayLevelEmphasis        | 0.005155946  |
| wavelet-LLL | glszm      | LargeAreaHighGrayLevelEmphasis       | 4970.730303  |
| wavelet-LLL | glszm      | HighGrayLevelZoneEmphasis            | 2921.006061  |
| wavelet-LLL | glszm      | SmallAreaEmphasis                    | 0.89006734   |
| wavelet-LLL | glszm      | LowGrayLevelZoneEmphasis             | 0.004680374  |
| wavelet-LLL | glszm      | ZoneEntropy                          | 6.686311755  |
| wavelet-LLL | glszm      | SmallAreaLowGrayLevelEmphasis        | 0.00457271   |
| wavelet-LLL | ngtdm      | Coarseness                           | 0.017125721  |
| wavelet-LLL | ngtdm      | Complexity                           | 33804.50328  |
| wavelet-LLL | ngtdm      | Strength                             | 50.72107468  |
| wavelet-LLL | ngtdm      | Contrast                             | 1.426826363  |
| wavelet-LLL | ngtdm      | Busyness                             | 0.017089995  |
| wavelet-HHL | gldm       | GrayLevelVariance                    | 36.70133339  |
| wavelet-HHL | gldm       | HighGrayLevelEmphasis                | 350.8242894  |
| wavelet-HHL | gldm       | DependenceEntropy                    | 5.981096052  |
| wavelet-HHL | gldm       | DependenceNonUniformity              | 115.2222222  |
| wavelet-HHL | gldm       | GrayLevelNonUniformity               | 22.60723514  |
| wavelet-HHL | gldm       | SmallDependenceEmphasis              | 0.49039242   |
| wavelet-HHL | gldm       | SmallDependenceHighGrayLevelEmphasis | 188.6710147  |
| wavelet-HHL | gldm       | DependenceNonUniformityNormalized    | 0.29773184   |
| wavelet-HHL | gldm       | LargeDependenceEmphasis              | 5.558139535  |
| wavelet-HHL | gldm       | LargeDependenceLowGrayLevelEmphasis  | 0.076277071  |
| wavelet-HHL | gldm       | DependenceVariance                   | 1.316881331  |
| wavelet-HHL | gldm       | LargeDependenceHighGrayLevelEmphasis | 1770.602067  |
| wavelet-HHL | gldm       | SmallDependenceLowGrayLevelEmphasis  | 0.00644997   |
| wavelet-HHL | gldm       | LowGrayLevelEmphasis                 | 0.016354949  |
| wavelet-HHL | glcm       | JointAverage                         | 17.65374075  |
| wavelet-HHL | glcm       | SumAverage                           | 35.30748149  |
| wavelet-HHL | glcm       | JointEntropy                         | 7.884393347  |
| wavelet-HHL | glcm       | ClusterShade                         | 125.9482039  |
| wavelet-HHL | glcm       | MaximumProbability                   | 0.015247213  |
| wavelet-HHL | glcm       | Idmn                                 | 0.975078206  |
| wavelet-HHL | glcm       | JointEnergy                          | 0.005281391  |
| wavelet-HHL | glcm       | Contrast                             | 70.440017    |
| wavelet-HHL | glcm       | DifferenceEntropy                    | 3.999943947  |
| wavelet-HHL | glcm       | InverseVariance                      | 0.161954955  |
| wavelet-HHL | glcm       | DifferenceVariance                   | 30.78002416  |
| wavelet-HHL | glcm       | Idn                                  | 0.897058397  |
| wavelet-HHL | glcm       | Idm                                  | 0.157687256  |
| wavelet-HHL | glcm       | Correlation                          | 0.003766315  |
| wavelet-HHL | glcm       | Autocorrelation                      | 312.0371727  |
| wavelet-HHL | glcm       | SumEntropy                           | 4.861402431  |
| wavelet-HHL | glcm       | SumSquares                           | 35.58812631  |
| wavelet-HHL | glcm       | ClusterProminence                    | 29971.1187   |
| wavelet-HHL | glcm       | Imc2                                 | 0.920502474  |
| wavelet-HHL | glcm       | Imc1                                 | -0.214849035 |
| wavelet-HHL | glcm       | DifferenceAverage                    | 6.222292402  |
| wavelet-HHL | glcm       | Id                                   | 0.24977392   |
| wavelet-HHL | glcm       | ClusterTendency                      | 71.91248825  |
| wavelet-HHL | firstorder | InterquartileRange                   | 157.9456896  |
| wavelet-HHL | firstorder | Skewness                             | 0.414002114  |
| wavelet-HHL | firstorder | Uniformity                           | 0.058416628  |

|             |            |                                  |              |
|-------------|------------|----------------------------------|--------------|
| wavelet-HHL | firstorder | Median                           | 6.767295592  |
| wavelet-HHL | firstorder | Energy                           | 8924123.582  |
| wavelet-HHL | firstorder | RobustMeanAbsoluteDeviation      | 66.68876594  |
| wavelet-HHL | firstorder | MeanAbsoluteDeviation            | 108.4559592  |
| wavelet-HHL | firstorder | TotalEnergy                      | 240951336.7  |
| wavelet-HHL | firstorder | Maximum                          | 819.798008   |
| wavelet-HHL | firstorder | RootMeanSquared                  | 151.8543739  |
| wavelet-HHL | firstorder | 90Percentile                     | 175.0781543  |
| wavelet-HHL | firstorder | Minimum                          | -418.5226742 |
| wavelet-HHL | firstorder | Entropy                          | 4.417198548  |
| wavelet-HHL | firstorder | Range                            | 1238.320682  |
| wavelet-HHL | firstorder | Variance                         | 23029.27381  |
| wavelet-HHL | firstorder | 10Percentile                     | -154.1194454 |
| wavelet-HHL | firstorder | Kurtosis                         | 6.383424184  |
| wavelet-HHL | firstorder | Mean                             | 5.520602052  |
| wavelet-HHL | glrlm      | ShortRunLowGrayLevelEmphasis     | 0.015870963  |
| wavelet-HHL | glrlm      | GrayLevelVariance                | 37.58831348  |
| wavelet-HHL | glrlm      | LowGrayLevelRunEmphasis          | 0.016375479  |
| wavelet-HHL | glrlm      | GrayLevelNonUniformityNormalzied | 0.057286542  |
| wavelet-HHL | glrlm      | RunVariance                      | 0.044832717  |
| wavelet-HHL | glrlm      | GrayLevelNonUniformity           | 21.26533378  |
| wavelet-HHL | glrlm      | LongRunEmphasis                  | 1.13215435   |
| wavelet-HHL | glrlm      | ShortRunHighGrayLevelEmphasis    | 342.8625967  |
| wavelet-HHL | glrlm      | RunLengthNonUniformity           | 342.3596406  |
| wavelet-HHL | glrlm      | ShortRunEmphasis                 | 0.969178482  |
| wavelet-HHL | glrlm      | LongRunHighGrayLevelEmphasis     | 394.0072869  |
| wavelet-HHL | glrlm      | RunPercentage                    | 0.959252634  |
| wavelet-HHL | glrlm      | LongRunLowGrayLevelEmphasis      | 0.018418633  |
| wavelet-HHL | glrlm      | RunEntropy                       | 4.640526071  |
| wavelet-HHL | glrlm      | HighGrayLevelRunEmphasis         | 352.4438672  |
| wavelet-HHL | glrlm      | RunLengthNonUniformityNormalized | 0.921943076  |
| wavelet-HHL | glszm      | GrayLevelVariance                | 50.33763493  |
| wavelet-HHL | glszm      | ZoneVariance                     | 2.983625517  |
| wavelet-HHL | glszm      | GrayLevelNonUniformityNormalized | 0.046262479  |
| wavelet-HHL | glszm      | SizeZoneNonUniformityNormalized  | 0.480034088  |
| wavelet-HHL | glszm      | SizeZoneNonUniformity            | 106.5675676  |
| wavelet-HHL | glszm      | GrayLevelNonUniformity           | 10.27027027  |
| wavelet-HHL | glszm      | LargeAreaEmphasis                | 6.022522523  |
| wavelet-HHL | glszm      | SmallAreaHighGrayLevelEmphasis   | 285.9725153  |
| wavelet-HHL | glszm      | ZonePercentage                   | 0.573643411  |
| wavelet-HHL | glszm      | LargeAreaLowGrayLevelEmphasis    | 0.074694862  |
| wavelet-HHL | glszm      | LargeAreaHighGrayLevelEmphasis   | 1948.436937  |
| wavelet-HHL | glszm      | HighGrayLevelZoneEmphasis        | 378.5675676  |
| wavelet-HHL | glszm      | SmallAreaEmphasis                | 0.720010119  |
| wavelet-HHL | glszm      | LowGrayLevelZoneEmphasis         | 0.014614139  |
| wavelet-HHL | glszm      | ZoneEntropy                      | 5.826661967  |
| wavelet-HHL | glszm      | SmallAreaLowGrayLevelEmphasis    | 0.007953402  |
| wavelet-HHL | ngtdm      | Coarseness                       | 0.016876311  |
| wavelet-HHL | ngtdm      | Complexity                       | 2360.264033  |
| wavelet-HHL | ngtdm      | Strength                         | 7.826298603  |
| wavelet-HHL | ngtdm      | Contrast                         | 0.268663174  |
| wavelet-HHL | ngtdm      | Busyness                         | 0.085109457  |

|             |            |                                      |              |
|-------------|------------|--------------------------------------|--------------|
| wavelet-HLH | gldm       | GrayLevelVariance                    | 21.13310498  |
| wavelet-HLH | gldm       | HighGrayLevelEmphasis                | 367.2661499  |
| wavelet-HLH | gldm       | DependenceEntropy                    | 5.923324951  |
| wavelet-HLH | gldm       | DependenceNonUniformity              | 95.6873385   |
| wavelet-HLH | gldm       | GrayLevelNonUniformity               | 27.95607235  |
| wavelet-HLH | gldm       | SmallDependenceEmphasis              | 0.443773782  |
| wavelet-HLH | gldm       | SmallDependenceHighGrayLevelEmphasis | 181.041882   |
| wavelet-HLH | gldm       | DependenceNonUniformityNormalized    | 0.247254105  |
| wavelet-HLH | gldm       | LargeDependenceEmphasis              | 7.671834625  |
| wavelet-HLH | gldm       | LargeDependenceLowGrayLevelEmphasis  | 0.028266222  |
| wavelet-HLH | gldm       | DependenceVariance                   | 2.081725858  |
| wavelet-HLH | gldm       | LargeDependenceHighGrayLevelEmphasis | 2552.056848  |
| wavelet-HLH | gldm       | SmallDependenceLowGrayLevelEmphasis  | 0.004380829  |
| wavelet-HLH | gldm       | LowGrayLevelEmphasis                 | 0.006290661  |
| wavelet-HLH | glcm       | JointAverage                         | 18.58357964  |
| wavelet-HLH | glcm       | SumAverage                           | 37.16715928  |
| wavelet-HLH | glcm       | JointEntropy                         | 7.640563778  |
| wavelet-HLH | glcm       | ClusterShade                         | 26.09846062  |
| wavelet-HLH | glcm       | MaximumProbability                   | 0.020988142  |
| wavelet-HLH | glcm       | ldmn                                 | 0.966335031  |
| wavelet-HLH | glcm       | JointEnergy                          | 0.006596992  |
| wavelet-HLH | glcm       | Contrast                             | 50.24876862  |
| wavelet-HLH | glcm       | DifferenceEntropy                    | 3.812234273  |
| wavelet-HLH | glcm       | InverseVariance                      | 0.198082226  |
| wavelet-HLH | glcm       | DifferenceVariance                   | 21.98101391  |
| wavelet-HLH | glcm       | ldn                                  | 0.882293941  |
| wavelet-HLH | glcm       | ldm                                  | 0.193056617  |
| wavelet-HLH | glcm       | Correlation                          | -0.034326054 |
| wavelet-HLH | glcm       | Autocorrelation                      | 344.5421887  |
| wavelet-HLH | glcm       | SumEntropy                           | 4.642904906  |
| wavelet-HLH | glcm       | SumSquares                           | 24.3145375   |
| wavelet-HLH | glcm       | ClusterProminence                    | 9564.858461  |
| wavelet-HLH | glcm       | lmc2                                 | 0.897945708  |
| wavelet-HLH | glcm       | lmc1                                 | -0.194908479 |
| wavelet-HLH | glcm       | DifferenceAverage                    | 5.274578355  |
| wavelet-HLH | glcm       | ld                                   | 0.283145729  |
| wavelet-HLH | glcm       | ClusterTendency                      | 47.00938139  |
| wavelet-HLH | firstorder | InterquartileRange                   | 126.092663   |
| wavelet-HLH | firstorder | Skewness                             | 0.174880917  |
| wavelet-HLH | firstorder | Uniformity                           | 0.072237913  |
| wavelet-HLH | firstorder | Median                               | -3.383319023 |
| wavelet-HLH | firstorder | Energy                               | 5118751.384  |
| wavelet-HLH | firstorder | RobustMeanAbsoluteDeviation          | 53.97442408  |
| wavelet-HLH | firstorder | MeanAbsoluteDeviation                | 85.1970174   |
| wavelet-HLH | firstorder | TotalEnergy                          | 138206287.4  |
| wavelet-HLH | firstorder | Maximum                              | 432.9950679  |
| wavelet-HLH | firstorder | RootMeanSquared                      | 115.0075987  |
| wavelet-HLH | firstorder | 90Percentile                         | 139.4994854  |
| wavelet-HLH | firstorder | Minimum                              | -437.1336417 |
| wavelet-HLH | firstorder | Entropy                              | 4.136308729  |
| wavelet-HLH | firstorder | Range                                | 870.1287096  |
| wavelet-HLH | firstorder | Variance                             | 13219.81571  |



|             |            |                                  |              |
|-------------|------------|----------------------------------|--------------|
| wavelet-HLH | firstorder | 10Percentile                     | -131.7885607 |
| wavelet-HLH | firstorder | Kurtosis                         | 4.608217809  |
| wavelet-HLH | firstorder | Mean                             | 2.632879596  |
| wavelet-HLH | glrlm      | ShortRunLowGrayLevelEmphasis     | 0.006323353  |
| wavelet-HLH | glrlm      | GrayLevelVariance                | 21.92368852  |
| wavelet-HLH | glrlm      | LowGrayLevelRunEmphasis          | 0.006455211  |
| wavelet-HLH | glrlm      | GrayLevelNonUniformityNormalized | 0.070177267  |
| wavelet-HLH | glrlm      | RunVariance                      | 0.059897172  |
| wavelet-HLH | glrlm      | GrayLevelNonUniformity           | 25.73766501  |
| wavelet-HLH | glrlm      | LongRunEmphasis                  | 1.174553066  |
| wavelet-HLH | glrlm      | ShortRunHighGrayLevelEmphasis    | 356.165777   |
| wavelet-HLH | glrlm      | RunLengthNonUniformity           | 330.6914715  |
| wavelet-HLH | glrlm      | ShortRunEmphasis                 | 0.960488961  |
| wavelet-HLH | glrlm      | LongRunHighGrayLevelEmphasis     | 426.9884906  |
| wavelet-HLH | glrlm      | RunPercentage                    | 0.947525343  |
| wavelet-HLH | glrlm      | LongRunLowGrayLevelEmphasis      | 0.007036447  |
| wavelet-HLH | glrlm      | RunEntropy                       | 4.41924987   |
| wavelet-HLH | glrlm      | HighGrayLevelRunEmphasis         | 369.2760994  |
| wavelet-HLH | glrlm      | RunLengthNonUniformityNormalized | 0.90141945   |
| wavelet-HLH | glszm      | GrayLevelVariance                | 33.08545918  |
| wavelet-HLH | glszm      | ZoneVariance                     | 6.433022699  |
| wavelet-HLH | glszm      | GrayLevelNonUniformityNormalized | 0.053102874  |
| wavelet-HLH | glszm      | SizeZoneNonUniformityNormalized  | 0.483912953  |
| wavelet-HLH | glszm      | SizeZoneNonUniformity            | 94.84693878  |
| wavelet-HLH | glszm      | GrayLevelNonUniformity           | 10.40816327  |
| wavelet-HLH | glszm      | LargeAreaEmphasis                | 10.33163265  |
| wavelet-HLH | glszm      | SmallAreaHighGrayLevelEmphasis   | 306.3894172  |
| wavelet-HLH | glszm      | ZonePercentage                   | 0.506459948  |
| wavelet-HLH | glszm      | LargeAreaLowGrayLevelEmphasis    | 0.04027308   |
| wavelet-HLH | glszm      | LargeAreaHighGrayLevelEmphasis   | 3372.081633  |
| wavelet-HLH | glszm      | HighGrayLevelZoneEmphasis        | 400.9030612  |
| wavelet-HLH | glszm      | SmallAreaEmphasis                | 0.722860823  |
| wavelet-HLH | glszm      | LowGrayLevelZoneEmphasis         | 0.009101454  |
| wavelet-HLH | glszm      | ZoneEntropy                      | 5.655572669  |
| wavelet-HLH | glszm      | SmallAreaLowGrayLevelEmphasis    | 0.008099945  |
| wavelet-HLH | ngtdm      | Coarseness                       | 0.016658738  |
| wavelet-HLH | ngtdm      | Complexity                       | 1375.468577  |
| wavelet-HLH | ngtdm      | Strength                         | 5.025441614  |
| wavelet-HLH | ngtdm      | Contrast                         | 0.161883742  |
| wavelet-HLH | ngtdm      | Busyness                         | 0.089549965  |

| Image type | Feature Class | Feature Name                         |                                                                                                                                                                                                                                                                                                                                                                                                                   |
|------------|---------------|--------------------------------------|-------------------------------------------------------------------------------------------------------------------------------------------------------------------------------------------------------------------------------------------------------------------------------------------------------------------------------------------------------------------------------------------------------------------|
| general    | info          | BoundingBox                          | 8: RTSTRUCT: C99-DNU_segment_Tumor<br>(0, 0, 0, 8, 7, 4)                                                                                                                                                                                                                                                                                                                                                          |
| general    | info          | EnabledImageTypes                    | {u'Original': {}, u'Wavelet': {}}                                                                                                                                                                                                                                                                                                                                                                                 |
|            |               |                                      | {'distances': [1], 'additionalInfo': True, 'force2D': False, 'interpolator': 'sitkBSpline', 'resampledPixelSpacing': [3.0], 'label': 1, 'normalizeScale': 1, 'normalize': False, 'force2Ddimension': 0, 'removeOutliers': None, 'minimumROISize': None, u'binWidth': 25.0, 'minimumROIDimensions': 1, u'correctMask': True, 'preCrop': False, u'symmetricalGLCM': True, 'resegmentRange': None, 'padDistance': 5} |
| general    | info          | GeneralSettings                      |                                                                                                                                                                                                                                                                                                                                                                                                                   |
| general    | info          | ImageHash                            | f59d7740da168316fbc999e6656fee356be807b3<br>(0.9765624999999998, 0.9765624999999998, 1.9999999999999996)                                                                                                                                                                                                                                                                                                          |
| general    | info          | ImageSpacing                         |                                                                                                                                                                                                                                                                                                                                                                                                                   |
| general    | info          | MaskHash                             | 713b421ddbb170625b208860ec1d49942728077b                                                                                                                                                                                                                                                                                                                                                                          |
| general    | info          | NumpyVersion                         | 1.13.1                                                                                                                                                                                                                                                                                                                                                                                                            |
| general    | info          | PyWaveletVersion                     | 0.5.2                                                                                                                                                                                                                                                                                                                                                                                                             |
| general    | info          | SimpleITKVersion                     | 1.1.0                                                                                                                                                                                                                                                                                                                                                                                                             |
| general    | info          | Version                              | 1.3.0.post102+g1b0eb74                                                                                                                                                                                                                                                                                                                                                                                            |
| general    | info          | VolumeNum                            | 1                                                                                                                                                                                                                                                                                                                                                                                                                 |
| general    | info          | VoxelNum                             | 103                                                                                                                                                                                                                                                                                                                                                                                                               |
| original   | shape         | Maximum3DDiameter                    | 23.04343724                                                                                                                                                                                                                                                                                                                                                                                                       |
| original   | shape         | Maximum2DDiameterSlice               | 21.84032967                                                                                                                                                                                                                                                                                                                                                                                                       |
| original   | shape         | Sphericity                           | 0.868088526                                                                                                                                                                                                                                                                                                                                                                                                       |
| original   | shape         | MinorAxis                            | 17.22536573                                                                                                                                                                                                                                                                                                                                                                                                       |
| original   | shape         | Elongation                           | 0.831149703                                                                                                                                                                                                                                                                                                                                                                                                       |
| original   | shape         | SurfaceVolumeRatio                   | 0.396144027                                                                                                                                                                                                                                                                                                                                                                                                       |
| original   | shape         | Volume                               | 2781                                                                                                                                                                                                                                                                                                                                                                                                              |
| original   | shape         | MajorAxis                            | 20.72474509                                                                                                                                                                                                                                                                                                                                                                                                       |
| original   | shape         | SurfaceArea                          | 1101.67654                                                                                                                                                                                                                                                                                                                                                                                                        |
| original   | shape         | Flatness                             | 0.554402372                                                                                                                                                                                                                                                                                                                                                                                                       |
| original   | shape         | LeastAxis                            | 11.48984783                                                                                                                                                                                                                                                                                                                                                                                                       |
| original   | shape         | Maximum2DDiameterColumn              | 21                                                                                                                                                                                                                                                                                                                                                                                                                |
| original   | shape         | Maximum2DDiameterRow                 | 18.24828759                                                                                                                                                                                                                                                                                                                                                                                                       |
| original   | gldm          | GrayLevelVariance                    | 141.0764445                                                                                                                                                                                                                                                                                                                                                                                                       |
| original   | gldm          | HighGrayLevelEmphasis                | 517.7378641                                                                                                                                                                                                                                                                                                                                                                                                       |
| original   | gldm          | DependenceEntropy                    | 5.661754168                                                                                                                                                                                                                                                                                                                                                                                                       |
| original   | gldm          | DependenceNonUniformity              | 37.7961165                                                                                                                                                                                                                                                                                                                                                                                                        |
| original   | gldm          | GrayLevelNonUniformity               | 4.689320388                                                                                                                                                                                                                                                                                                                                                                                                       |
| original   | gldm          | SmallDependenceEmphasis              | 0.623601964                                                                                                                                                                                                                                                                                                                                                                                                       |
| original   | gldm          | SmallDependenceHighGrayLevelEmphasis | 234.9809578                                                                                                                                                                                                                                                                                                                                                                                                       |
| original   | gldm          | DependenceNonUniformityNormalized    | 0.366952587                                                                                                                                                                                                                                                                                                                                                                                                       |
| original   | gldm          | LargeDependenceEmphasis              | 7                                                                                                                                                                                                                                                                                                                                                                                                                 |
| original   | gldm          | LargeDependenceLowGrayLevelEmphasis  | 0.060920933                                                                                                                                                                                                                                                                                                                                                                                                       |
| original   | gldm          | DependenceVariance                   | 2.882646809                                                                                                                                                                                                                                                                                                                                                                                                       |
| original   | gldm          | LargeDependenceHighGrayLevelEmphasis | 6624.398058                                                                                                                                                                                                                                                                                                                                                                                                       |
| original   | gldm          | SmallDependenceLowGrayLevelEmphasis  | 0.027860351                                                                                                                                                                                                                                                                                                                                                                                                       |
| original   | gldm          | LowGrayLevelEmphasis                 | 0.032699673                                                                                                                                                                                                                                                                                                                                                                                                       |
| original   | glcm          | JointAverage                         | 22.0669354                                                                                                                                                                                                                                                                                                                                                                                                        |
| original   | glcm          | SumAverage                           | 44.13387081                                                                                                                                                                                                                                                                                                                                                                                                       |

|          |            |                                  |              |
|----------|------------|----------------------------------|--------------|
| original | glcm       | JointEntropy                     | 6.633989851  |
| original | glcm       | ClusterShade                     | -2184.634628 |
| original | glcm       | MaximumProbability               | 0.036064965  |
| original | glcm       | Idmn                             | 0.879906992  |
| original | glcm       | JointEnergy                      | 0.011441985  |
| original | glcm       | Contrast                         | 220.0545486  |
| original | glcm       | DifferenceEntropy                | 4.408509076  |
| original | glcm       | InverseVariance                  | 0.138427795  |
| original | glcm       | DifferenceVariance               | 88.66244873  |
| original | glcm       | Idn                              | 0.790031914  |
| original | glcm       | Idm                              | 0.144102411  |
| original | glcm       | Correlation                      | 0.194214663  |
| original | glcm       | Autocorrelation                  | 513.2642536  |
| original | glcm       | SumEntropy                       | 5.097809415  |
| original | glcm       | SumSquares                       | 135.9829365  |
| original | glcm       | ClusterProminence                | 216028.0921  |
| original | glcm       | Imc2                             | 0.996043203  |
| original | glcm       | Imc1                             | -0.536179242 |
| original | glcm       | DifferenceAverage                | 11.33755748  |
| original | glcm       | Id                               | 0.211762974  |
| original | glcm       | ClusterTendency                  | 323.8771974  |
| original | firstorder | InterquartileRange               | 622.5        |
| original | firstorder | Skewness                         | -0.095285141 |
| original | firstorder | Uniformity                       | 0.045527382  |
| original | firstorder | Median                           | -314         |
| original | firstorder | Energy                           | 21972727     |
| original | firstorder | RobustMeanAbsoluteDeviation      | 235.0571559  |
| original | firstorder | MeanAbsoluteDeviation            | 271.459327   |
| original | firstorder | TotalEnergy                      | 593263629    |
| original | firstorder | Maximum                          | 73           |
| original | firstorder | RootMeanSquared                  | 461.8738427  |
| original | firstorder | 90Percentile                     | 11.6         |
| original | firstorder | Minimum                          | -824         |
| original | firstorder | Entropy                          | 4.748821888  |
| original | firstorder | Range                            | 897          |
| original | firstorder | Variance                         | 88485.28909  |
| original | firstorder | 10Percentile                     | -757.2       |
| original | firstorder | Kurtosis                         | 1.435856706  |
| original | firstorder | Mean                             | -353.3300971 |
| original | glrlm      | ShortRunLowGrayLevelEmphasis     | 0.033514377  |
| original | glrlm      | GrayLevelVariance                | 139.2628683  |
| original | glrlm      | LowGrayLevelRunEmphasis          | 0.033750621  |
| original | glrlm      | GrayLevelNonUniformityNormalized | 0.043049716  |
| original | glrlm      | RunVariance                      | 0.050635793  |
| original | glrlm      | GrayLevelNonUniformity           | 4.261730776  |
| original | glrlm      | LongRunEmphasis                  | 1.136905372  |
| original | glrlm      | ShortRunHighGrayLevelEmphasis    | 475.8792985  |
| original | glrlm      | RunLengthNonUniformity           | 92.14712881  |
| original | glrlm      | ShortRunEmphasis                 | 0.972010082  |
| original | glrlm      | LongRunHighGrayLevelEmphasis     | 629.5625384  |
| original | glrlm      | RunPercentage                    | 0.960418223  |
| original | glrlm      | LongRunLowGrayLevelEmphasis      | 0.034717177  |
| original | glrlm      | RunEntropy                       | 4.903135294  |
| original | glrlm      | HighGrayLevelRunEmphasis         | 500.8485007  |
| original | glrlm      | RunLengthNonUniformityNormalized | 0.930556968  |

|             |       |                                      |              |
|-------------|-------|--------------------------------------|--------------|
| original    | glszm | GrayLevelVariance                    | 122.1091053  |
| original    | glszm | ZoneVariance                         | 1.909541758  |
| original    | glszm | GrayLevelNonUniformityNormalized     | 0.037095814  |
| original    | glszm | SizeZoneNonUniformityNormalized      | 0.659194604  |
| original    | glszm | SizeZoneNonUniformity                | 46.8028169   |
| original    | glszm | GrayLevelNonUniformity               | 2.633802817  |
| original    | glszm | LargeAreaEmphasis                    | 4.014084507  |
| original    | glszm | SmallAreaHighGrayLevelEmphasis       | 299.6595242  |
| original    | glszm | ZonePercentage                       | 0.689320388  |
| original    | glszm | LargeAreaLowGrayLevelEmphasis        | 0.062890031  |
| original    | glszm | LargeAreaHighGrayLevelEmphasis       | 3264.239437  |
| original    | glszm | HighGrayLevelZoneEmphasis            | 394.1267606  |
| original    | glszm | SmallAreaEmphasis                    | 0.83655615   |
| original    | glszm | LowGrayLevelZoneEmphasis             | 0.042037318  |
| original    | glszm | ZoneEntropy                          | 5.286589197  |
| original    | glszm | SmallAreaLowGrayLevelEmphasis        | 0.039110084  |
| original    | ngtdm | Coarseness                           | 0.022425388  |
| original    | ngtdm | Complexity                           | 5019.433268  |
| original    | ngtdm | Strength                             | 17.83021783  |
| original    | ngtdm | Contrast                             | 2.454840413  |
| original    | ngtdm | Busyness                             | 0.06585525   |
| wavelet-HHH | gldm  | GrayLevelVariance                    | 14.93618626  |
| wavelet-HHH | gldm  | HighGrayLevelEmphasis                | 128.9902913  |
| wavelet-HHH | gldm  | DependenceEntropy                    | 5.254237969  |
| wavelet-HHH | gldm  | DependenceNonUniformity              | 29.23300971  |
| wavelet-HHH | gldm  | GrayLevelNonUniformity               | 8.300970874  |
| wavelet-HHH | gldm  | SmallDependenceEmphasis              | 0.453514024  |
| wavelet-HHH | gldm  | SmallDependenceHighGrayLevelEmphasis | 59.30298813  |
| wavelet-HHH | gldm  | DependenceNonUniformityNormalized    | 0.283815628  |
| wavelet-HHH | gldm  | LargeDependenceEmphasis              | 5.67961165   |
| wavelet-HHH | gldm  | LargeDependenceLowGrayLevelEmphasis  | 0.082896704  |
| wavelet-HHH | gldm  | DependenceVariance                   | 1.158827411  |
| wavelet-HHH | gldm  | LargeDependenceHighGrayLevelEmphasis | 721.2038835  |
| wavelet-HHH | gldm  | SmallDependenceLowGrayLevelEmphasis  | 0.02711064   |
| wavelet-HHH | gldm  | LowGrayLevelEmphasis                 | 0.033823397  |
| wavelet-HHH | glcm  | JointAverage                         | 10.60362406  |
| wavelet-HHH | glcm  | SumAverage                           | 21.20724811  |
| wavelet-HHH | glcm  | JointEntropy                         | 6.331316157  |
| wavelet-HHH | glcm  | ClusterShade                         | -19.14297162 |
| wavelet-HHH | glcm  | MaximumProbability                   | 0.035580956  |
| wavelet-HHH | glcm  | Idmn                                 | 0.930315867  |
| wavelet-HHH | glcm  | JointEnergy                          | 0.014253978  |
| wavelet-HHH | glcm  | Contrast                             | 31.10269972  |
| wavelet-HHH | glcm  | DifferenceEntropy                    | 3.349462521  |
| wavelet-HHH | glcm  | InverseVariance                      | 0.208757291  |
| wavelet-HHH | glcm  | DifferenceVariance                   | 10.89977276  |
| wavelet-HHH | glcm  | Idn                                  | 0.827548817  |
| wavelet-HHH | glcm  | Idm                                  | 0.198775585  |
| wavelet-HHH | glcm  | Correlation                          | -0.030892233 |
| wavelet-HHH | glcm  | Autocorrelation                      | 111.9907713  |
| wavelet-HHH | glcm  | SumEntropy                           | 4.092026101  |
| wavelet-HHH | glcm  | SumSquares                           | 15.09467962  |
| wavelet-HHH | glcm  | ClusterProminence                    | 2632.696958  |
| wavelet-HHH | glcm  | Imc2                                 | 0.967241531  |
| wavelet-HHH | glcm  | Imc1                                 | -0.359871519 |

|             |            |                                  |              |
|-------------|------------|----------------------------------|--------------|
| wavelet-HHH | glcm       | DifferenceAverage                | 4.406306264  |
| wavelet-HHH | glcm       | Id                               | 0.293839283  |
| wavelet-HHH | glcm       | ClusterTendency                  | 29.27601876  |
| wavelet-HHH | firstorder | InterquartileRange               | 128.9414072  |
| wavelet-HHH | firstorder | Skewness                         | -0.174804647 |
| wavelet-HHH | firstorder | Uniformity                       | 0.08059195   |
| wavelet-HHH | firstorder | Median                           | 6.50636466   |
| wavelet-HHH | firstorder | Energy                           | 927190.34    |
| wavelet-HHH | firstorder | RobustMeanAbsoluteDeviation      | 49.96749009  |
| wavelet-HHH | firstorder | MeanAbsoluteDeviation            | 74.38829653  |
| wavelet-HHH | firstorder | TotalEnergy                      | 25034139.18  |
| wavelet-HHH | firstorder | Maximum                          | 217.4617323  |
| wavelet-HHH | firstorder | RootMeanSquared                  | 94.87806891  |
| wavelet-HHH | firstorder | 90Percentile                     | 125.664928   |
| wavelet-HHH | firstorder | Minimum                          | -233.2054967 |
| wavelet-HHH | firstorder | Entropy                          | 3.858850987  |
| wavelet-HHH | firstorder | Range                            | 450.667229   |
| wavelet-HHH | firstorder | Variance                         | 8976.352642  |
| wavelet-HHH | firstorder | 10Percentile                     | -118.0022586 |
| wavelet-HHH | firstorder | Kurtosis                         | 2.761033394  |
| wavelet-HHH | firstorder | Mean                             | 5.0492889    |
| wavelet-HHH | glrlm      | ShortRunLowGrayLevelEmphasis     | 0.034491869  |
| wavelet-HHH | glrlm      | GrayLevelVariance                | 15.31412465  |
| wavelet-HHH | glrlm      | LowGrayLevelRunEmphasis          | 0.034865232  |
| wavelet-HHH | glrlm      | GrayLevelNonUniformityNormalized | 0.078970229  |
| wavelet-HHH | glrlm      | RunVariance                      | 0.047911381  |
| wavelet-HHH | glrlm      | GrayLevelNonUniformity           | 7.783353578  |
| wavelet-HHH | glrlm      | LongRunEmphasis                  | 1.142577278  |
| wavelet-HHH | glrlm      | ShortRunHighGrayLevelEmphasis    | 124.9553853  |
| wavelet-HHH | glrlm      | RunLengthNonUniformity           | 90.53960922  |
| wavelet-HHH | glrlm      | ShortRunEmphasis                 | 0.967008644  |
| wavelet-HHH | glrlm      | LongRunHighGrayLevelEmphasis     | 147.2415851  |
| wavelet-HHH | glrlm      | RunPercentage                    | 0.956684093  |
| wavelet-HHH | glrlm      | LongRunLowGrayLevelEmphasis      | 0.036435002  |
| wavelet-HHH | glrlm      | RunEntropy                       | 4.047297255  |
| wavelet-HHH | glrlm      | HighGrayLevelRunEmphasis         | 129.1018373  |
| wavelet-HHH | glrlm      | RunLengthNonUniformityNormalized | 0.917707771  |
| wavelet-HHH | glszm      | GrayLevelVariance                | 22.06051976  |
| wavelet-HHH | glszm      | ZoneVariance                     | 4.128871485  |
| wavelet-HHH | glszm      | GrayLevelNonUniformityNormalized | 0.062299751  |
| wavelet-HHH | glszm      | SizeZoneNonUniformityNormalized  | 0.48237807   |
| wavelet-HHH | glszm      | SizeZoneNonUniformity            | 25.56603774  |
| wavelet-HHH | glszm      | GrayLevelNonUniformity           | 3.301886792  |
| wavelet-HHH | glszm      | LargeAreaEmphasis                | 7.905660377  |
| wavelet-HHH | glszm      | SmallAreaHighGrayLevelEmphasis   | 94.44176069  |
| wavelet-HHH | glszm      | ZonePercentage                   | 0.514563107  |
| wavelet-HHH | glszm      | LargeAreaLowGrayLevelEmphasis    | 0.123259853  |
| wavelet-HHH | glszm      | LargeAreaHighGrayLevelEmphasis   | 1006.754717  |
| wavelet-HHH | glszm      | HighGrayLevelZoneEmphasis        | 131.7169811  |
| wavelet-HHH | glszm      | SmallAreaEmphasis                | 0.716999326  |
| wavelet-HHH | glszm      | LowGrayLevelZoneEmphasis         | 0.054769838  |
| wavelet-HHH | glszm      | ZoneEntropy                      | 4.892738143  |
| wavelet-HHH | glszm      | SmallAreaLowGrayLevelEmphasis    | 0.05057045   |
| wavelet-HHH | ngtdm      | Coarseness                       | 0.056030365  |
| wavelet-HHH | ngtdm      | Complexity                       | 363.1198626  |

|             |            |                                      |              |
|-------------|------------|--------------------------------------|--------------|
| wavelet-HHH | ngtdm      | Strength                             | 4.699918798  |
| wavelet-HHH | ngtdm      | Contrast                             | 0.311481192  |
| wavelet-HHH | ngtdm      | Busyness                             | 0.106777935  |
| wavelet-HLL | gldm       | GrayLevelVariance                    | 241.9051749  |
| wavelet-HLL | gldm       | HighGrayLevelEmphasis                | 898.3592233  |
| wavelet-HLL | gldm       | DependenceEntropy                    | 5.724766061  |
| wavelet-HLL | gldm       | DependenceNonUniformity              | 50.63106796  |
| wavelet-HLL | gldm       | GrayLevelNonUniformity               | 2.980582524  |
| wavelet-HLL | gldm       | SmallDependenceEmphasis              | 0.722559331  |
| wavelet-HLL | gldm       | SmallDependenceHighGrayLevelEmphasis | 738.1092907  |
| wavelet-HLL | gldm       | DependenceNonUniformityNormalized    | 0.491563767  |
| wavelet-HLL | gldm       | LargeDependenceEmphasis              | 2.650485437  |
| wavelet-HLL | gldm       | LargeDependenceLowGrayLevelEmphasis  | 0.027744341  |
| wavelet-HLL | gldm       | DependenceVariance                   | 0.501272504  |
| wavelet-HLL | gldm       | LargeDependenceHighGrayLevelEmphasis | 1738.961165  |
| wavelet-HLL | gldm       | SmallDependenceLowGrayLevelEmphasis  | 0.015574125  |
| wavelet-HLL | gldm       | LowGrayLevelEmphasis                 | 0.017572222  |
| wavelet-HLL | glcm       | JointAverage                         | 24.03711536  |
| wavelet-HLL | glcm       | SumAverage                           | 48.07423072  |
| wavelet-HLL | glcm       | JointEntropy                         | 6.846596674  |
| wavelet-HLL | glcm       | ClusterShade                         | 6864.233668  |
| wavelet-HLL | glcm       | MaximumProbability                   | 0.017857839  |
| wavelet-HLL | glcm       | Idmn                                 | 0.926099837  |
| wavelet-HLL | glcm       | JointEnergy                          | 0.008984911  |
| wavelet-HLL | glcm       | Contrast                             | 375.1296821  |
| wavelet-HLL | glcm       | DifferenceEntropy                    | 4.571760835  |
| wavelet-HLL | glcm       | InverseVariance                      | 0.071753284  |
| wavelet-HLL | glcm       | DifferenceVariance                   | 134.8119917  |
| wavelet-HLL | glcm       | Idn                                  | 0.830032788  |
| wavelet-HLL | glcm       | Idm                                  | 0.076488163  |
| wavelet-HLL | glcm       | Correlation                          | 0.172609206  |
| wavelet-HLL | glcm       | Autocorrelation                      | 634.0686615  |
| wavelet-HLL | glcm       | SumEntropy                           | 5.289272133  |
| wavelet-HLL | glcm       | SumSquares                           | 241.3247458  |
| wavelet-HLL | glcm       | ClusterProminence                    | 835255.1752  |
| wavelet-HLL | glcm       | Imc2                                 | 0.999525716  |
| wavelet-HLL | glcm       | Imc1                                 | -0.676677749 |
| wavelet-HLL | glcm       | DifferenceAverage                    | 14.69495588  |
| wavelet-HLL | glcm       | Id                                   | 0.14930589   |
| wavelet-HLL | glcm       | ClusterTendency                      | 590.1693011  |
| wavelet-HLL | firstorder | InterquartileRange                   | 606.5179549  |
| wavelet-HLL | firstorder | Skewness                             | 0.562496463  |
| wavelet-HLL | firstorder | Uniformity                           | 0.028937694  |
| wavelet-HLL | firstorder | Median                               | -219.0997709 |
| wavelet-HLL | firstorder | Energy                               | 16495218.45  |
| wavelet-HLL | firstorder | RobustMeanAbsoluteDeviation          | 247.3088034  |
| wavelet-HLL | firstorder | MeanAbsoluteDeviation                | 330.096339   |
| wavelet-HLL | firstorder | TotalEnergy                          | 445370898.1  |
| wavelet-HLL | firstorder | Maximum                              | 827.7201171  |
| wavelet-HLL | firstorder | RootMeanSquared                      | 400.1846473  |
| wavelet-HLL | firstorder | 90Percentile                         | 520.0444021  |
| wavelet-HLL | firstorder | Minimum                              | -715.961789  |
| wavelet-HLL | firstorder | Entropy                              | 5.320633508  |
| wavelet-HLL | firstorder | Range                                | 1543.681906  |
| wavelet-HLL | firstorder | Variance                             | 150578.4328  |

|             |            |                                      |              |
|-------------|------------|--------------------------------------|--------------|
| wavelet-HLL | firstorder | 10Percentile                         | -522.9121136 |
| wavelet-HLL | firstorder | Kurtosis                             | 2.267863639  |
| wavelet-HLL | firstorder | Mean                                 | -97.82289693 |
| wavelet-HLL | glrlm      | ShortRunLowGrayLevelEmphasis         | 0.017686185  |
| wavelet-HLL | glrlm      | GrayLevelVariance                    | 243.3142328  |
| wavelet-HLL | glrlm      | LowGrayLevelRunEmphasis              | 0.017775818  |
| wavelet-HLL | glrlm      | GrayLevelNonUniformityNormalized     | 0.028577272  |
| wavelet-HLL | glrlm      | RunVariance                          | 0.017909352  |
| wavelet-HLL | glrlm      | GrayLevelNonUniformity               | 2.89116803   |
| wavelet-HLL | glrlm      | LongRunEmphasis                      | 1.055162064  |
| wavelet-HLL | glrlm      | ShortRunHighGrayLevelEmphasis        | 897.6512836  |
| wavelet-HLL | glrlm      | RunLengthNonUniformity               | 97.55702581  |
| wavelet-HLL | glrlm      | ShortRunEmphasis                     | 0.986209484  |
| wavelet-HLL | glrlm      | LongRunHighGrayLevelEmphasis         | 934.5649749  |
| wavelet-HLL | glrlm      | RunPercentage                        | 0.982076176  |
| wavelet-HLL | glrlm      | LongRunLowGrayLevelEmphasis          | 0.01813435   |
| wavelet-HLL | glrlm      | RunEntropy                           | 5.374762168  |
| wavelet-HLL | glrlm      | HighGrayLevelRunEmphasis             | 905.0340219  |
| wavelet-HLL | glrlm      | RunLengthNonUniformityNormalized     | 0.964181296  |
| wavelet-HLL | glszm      | GrayLevelVariance                    | 257.3535098  |
| wavelet-HLL | glszm      | ZoneVariance                         | 0.410023795  |
| wavelet-HLL | glszm      | GrayLevelNonUniformityNormalized     | 0.025877454  |
| wavelet-HLL | glszm      | SizeZoneNonUniformityNormalized      | 0.687091017  |
| wavelet-HLL | glszm      | SizeZoneNonUniformity                | 56.34146341  |
| wavelet-HLL | glszm      | GrayLevelNonUniformity               | 2.12195122   |
| wavelet-HLL | glszm      | LargeAreaEmphasis                    | 1.987804878  |
| wavelet-HLL | glszm      | SmallAreaHighGrayLevelEmphasis       | 896.3121138  |
| wavelet-HLL | glszm      | ZonePercentage                       | 0.796116505  |
| wavelet-HLL | glszm      | LargeAreaLowGrayLevelEmphasis        | 0.026680821  |
| wavelet-HLL | glszm      | LargeAreaHighGrayLevelEmphasis       | 1472.5       |
| wavelet-HLL | glszm      | HighGrayLevelZoneEmphasis            | 987.0121951  |
| wavelet-HLL | glszm      | SmallAreaEmphasis                    | 0.855162602  |
| wavelet-HLL | glszm      | LowGrayLevelZoneEmphasis             | 0.020293816  |
| wavelet-HLL | glszm      | ZoneEntropy                          | 5.649758102  |
| wavelet-HLL | glszm      | SmallAreaLowGrayLevelEmphasis        | 0.019163671  |
| wavelet-HLL | ngtdm      | Coarseness                           | 0.038354291  |
| wavelet-HLL | ngtdm      | Complexity                           | 10501.44495  |
| wavelet-HLL | ngtdm      | Strength                             | 52.44775556  |
| wavelet-HLL | ngtdm      | Contrast                             | 2.194434169  |
| wavelet-HLL | ngtdm      | Busyness                             | 0.029320119  |
| wavelet-LHL | gldm       | GrayLevelVariance                    | 88.69752097  |
| wavelet-LHL | gldm       | HighGrayLevelEmphasis                | 927.4466019  |
| wavelet-LHL | gldm       | DependenceEntropy                    | 5.421639605  |
| wavelet-LHL | gldm       | DependenceNonUniformity              | 47.5631068   |
| wavelet-LHL | gldm       | GrayLevelNonUniformity               | 4.572815534  |
| wavelet-LHL | gldm       | SmallDependenceEmphasis              | 0.70184466   |
| wavelet-LHL | gldm       | SmallDependenceHighGrayLevelEmphasis | 634.6143312  |
| wavelet-LHL | gldm       | DependenceNonUniformityNormalized    | 0.461777736  |
| wavelet-LHL | gldm       | LargeDependenceEmphasis              | 3.213592233  |
| wavelet-LHL | gldm       | LargeDependenceLowGrayLevelEmphasis  | 0.01713046   |
| wavelet-LHL | gldm       | DependenceVariance                   | 0.770289377  |
| wavelet-LHL | gldm       | LargeDependenceHighGrayLevelEmphasis | 3021.291262  |
| wavelet-LHL | gldm       | SmallDependenceLowGrayLevelEmphasis  | 0.013845029  |
| wavelet-LHL | gldm       | LowGrayLevelEmphasis                 | 0.0142412    |
| wavelet-LHL | glcm       | JointAverage                         | 29.18745493  |

|             |            |                                  |              |
|-------------|------------|----------------------------------|--------------|
| wavelet-LHL | glcm       | SumAverage                       | 58.37490986  |
| wavelet-LHL | glcm       | JointEntropy                     | 6.734465426  |
| wavelet-LHL | glcm       | ClusterShade                     | -1166.534341 |
| wavelet-LHL | glcm       | MaximumProbability               | 0.019625672  |
| wavelet-LHL | glcm       | Idmn                             | 0.95393984   |
| wavelet-LHL | glcm       | JointEnergy                      | 0.009945086  |
| wavelet-LHL | glcm       | Contrast                         | 124.2669768  |
| wavelet-LHL | glcm       | DifferenceEntropy                | 4.141369827  |
| wavelet-LHL | glcm       | InverseVariance                  | 0.123778524  |
| wavelet-LHL | glcm       | DifferenceVariance               | 46.72983186  |
| wavelet-LHL | glcm       | Idn                              | 0.859793201  |
| wavelet-LHL | glcm       | Idm                              | 0.113245617  |
| wavelet-LHL | glcm       | Correlation                      | 0.234215971  |
| wavelet-LHL | glcm       | Autocorrelation                  | 871.2562696  |
| wavelet-LHL | glcm       | SumEntropy                       | 4.989581935  |
| wavelet-LHL | glcm       | SumSquares                       | 81.06103633  |
| wavelet-LHL | glcm       | ClusterProminence                | 119707.0362  |
| wavelet-LHL | glcm       | Imc2                             | 0.997203614  |
| wavelet-LHL | glcm       | Imc1                             | -0.559015655 |
| wavelet-LHL | glcm       | DifferenceAverage                | 8.611590069  |
| wavelet-LHL | glcm       | Id                               | 0.198623071  |
| wavelet-LHL | glcm       | ClusterTendency                  | 199.9771685  |
| wavelet-LHL | firstorder | InterquartileRange               | 296.8581789  |
| wavelet-LHL | firstorder | Skewness                         | -0.769681375 |
| wavelet-LHL | firstorder | Uniformity                       | 0.044396267  |
| wavelet-LHL | firstorder | Median                           | -7.4091183   |
| wavelet-LHL | firstorder | Energy                           | 5863333.371  |
| wavelet-LHL | firstorder | RobustMeanAbsoluteDeviation      | 123.5322292  |
| wavelet-LHL | firstorder | MeanAbsoluteDeviation            | 185.3195706  |
| wavelet-LHL | firstorder | TotalEnergy                      | 158310001    |
| wavelet-LHL | firstorder | Maximum                          | 428.4913192  |
| wavelet-LHL | firstorder | RootMeanSquared                  | 238.5907934  |
| wavelet-LHL | firstorder | 90Percentile                     | 221.0127648  |
| wavelet-LHL | firstorder | Minimum                          | -735.6794683 |
| wavelet-LHL | firstorder | Entropy                          | 4.756401684  |
| wavelet-LHL | firstorder | Range                            | 1164.170787  |
| wavelet-LHL | firstorder | Variance                         | 55478.04682  |
| wavelet-LHL | firstorder | 10Percentile                     | -345.4917013 |
| wavelet-LHL | firstorder | Kurtosis                         | 3.52815369   |
| wavelet-LHL | firstorder | Mean                             | -38.04628617 |
| wavelet-LHL | glrlm      | ShortRunLowGrayLevelEmphasis     | 0.014507703  |
| wavelet-LHL | glrlm      | GrayLevelVariance                | 89.55331173  |
| wavelet-LHL | glrlm      | LowGrayLevelRunEmphasis          | 0.014529569  |
| wavelet-LHL | glrlm      | GrayLevelNonUniformityNormalized | 0.043820977  |
| wavelet-LHL | glrlm      | RunVariance                      | 0.021635191  |
| wavelet-LHL | glrlm      | GrayLevelNonUniformity           | 4.415959502  |
| wavelet-LHL | glrlm      | LongRunEmphasis                  | 1.066888461  |
| wavelet-LHL | glrlm      | ShortRunHighGrayLevelEmphasis    | 910.4976837  |
| wavelet-LHL | glrlm      | RunLengthNonUniformity           | 96.43916149  |
| wavelet-LHL | glrlm      | ShortRunEmphasis                 | 0.983277885  |
| wavelet-LHL | glrlm      | LongRunHighGrayLevelEmphasis     | 991.1278483  |
| wavelet-LHL | glrlm      | RunPercentage                    | 0.978342046  |
| wavelet-LHL | glrlm      | LongRunLowGrayLevelEmphasis      | 0.014617034  |
| wavelet-LHL | glrlm      | RunEntropy                       | 4.842682476  |
| wavelet-LHL | glrlm      | HighGrayLevelRunEmphasis         | 926.6237166  |



|             |       |                                      |              |
|-------------|-------|--------------------------------------|--------------|
| wavelet-LHL | glrlm | RunLengthNonUniformityNormalized     | 0.956729617  |
| wavelet-LHL | glszm | GrayLevelVariance                    | 100.3775477  |
| wavelet-LHL | glszm | ZoneVariance                         | 0.93573307   |
| wavelet-LHL | glszm | GrayLevelNonUniformityNormalized     | 0.041091387  |
| wavelet-LHL | glszm | SizeZoneNonUniformityNormalized      | 0.706771861  |
| wavelet-LHL | glszm | SizeZoneNonUniformity                | 55.12820513  |
| wavelet-LHL | glszm | GrayLevelNonUniformity               | 3.205128205  |
| wavelet-LHL | glszm | LargeAreaEmphasis                    | 2.679487179  |
| wavelet-LHL | glszm | SmallAreaHighGrayLevelEmphasis       | 776.6756352  |
| wavelet-LHL | glszm | ZonePercentage                       | 0.757281553  |
| wavelet-LHL | glszm | LargeAreaLowGrayLevelEmphasis        | 0.020598847  |
| wavelet-LHL | glszm | LargeAreaHighGrayLevelEmphasis       | 2466.423077  |
| wavelet-LHL | glszm | HighGrayLevelZoneEmphasis            | 914.0897436  |
| wavelet-LHL | glszm | SmallAreaEmphasis                    | 0.863865632  |
| wavelet-LHL | glszm | LowGrayLevelZoneEmphasis             | 0.018384441  |
| wavelet-LHL | glszm | ZoneEntropy                          | 5.137635713  |
| wavelet-LHL | glszm | SmallAreaLowGrayLevelEmphasis        | 0.018198427  |
| wavelet-LHL | ngtdm | Coarseness                           | 0.044543369  |
| wavelet-LHL | ngtdm | Complexity                           | 3547.167035  |
| wavelet-LHL | ngtdm | Strength                             | 28.30670924  |
| wavelet-LHL | ngtdm | Contrast                             | 0.943597442  |
| wavelet-LHL | ngtdm | Busyness                             | 0.022895493  |
| wavelet-LHH | gldm  | GrayLevelVariance                    | 22.80422283  |
| wavelet-LHH | gldm  | HighGrayLevelEmphasis                | 150.0776699  |
| wavelet-LHH | gldm  | DependenceEntropy                    | 5.289283022  |
| wavelet-LHH | gldm  | DependenceNonUniformity              | 31.21359223  |
| wavelet-LHH | gldm  | GrayLevelNonUniformity               | 6.980582524  |
| wavelet-LHH | gldm  | SmallDependenceEmphasis              | 0.438851133  |
| wavelet-LHH | gldm  | SmallDependenceHighGrayLevelEmphasis | 72.01607066  |
| wavelet-LHH | gldm  | DependenceNonUniformityNormalized    | 0.303044585  |
| wavelet-LHH | gldm  | LargeDependenceEmphasis              | 5.718446602  |
| wavelet-LHH | gldm  | LargeDependenceLowGrayLevelEmphasis  | 0.086327866  |
| wavelet-LHH | gldm  | DependenceVariance                   | 1.197662362  |
| wavelet-LHH | gldm  | LargeDependenceHighGrayLevelEmphasis | 730.9902913  |
| wavelet-LHH | gldm  | SmallDependenceLowGrayLevelEmphasis  | 0.016650127  |
| wavelet-LHH | gldm  | LowGrayLevelEmphasis                 | 0.025001256  |
| wavelet-LHH | glcm  | JointAverage                         | 11.33646638  |
| wavelet-LHH | glcm  | SumAverage                           | 22.67293275  |
| wavelet-LHH | glcm  | JointEntropy                         | 6.502898463  |
| wavelet-LHH | glcm  | ClusterShade                         | 107.1933919  |
| wavelet-LHH | glcm  | MaximumProbability                   | 0.030103603  |
| wavelet-LHH | glcm  | Idmn                                 | 0.932369813  |
| wavelet-LHH | glcm  | JointEnergy                          | 0.012361655  |
| wavelet-LHH | glcm  | Contrast                             | 48.90229526  |
| wavelet-LHH | glcm  | DifferenceEntropy                    | 3.626946105  |
| wavelet-LHH | glcm  | InverseVariance                      | 0.195199897  |
| wavelet-LHH | glcm  | DifferenceVariance                   | 19.44486297  |
| wavelet-LHH | glcm  | Idn                                  | 0.835779759  |
| wavelet-LHH | glcm  | Idm                                  | 0.191904278  |
| wavelet-LHH | glcm  | Correlation                          | -0.008108909 |
| wavelet-LHH | glcm  | Autocorrelation                      | 128.3662768  |
| wavelet-LHH | glcm  | SumEntropy                           | 4.329127756  |
| wavelet-LHH | glcm  | SumSquares                           | 24.29407203  |
| wavelet-LHH | glcm  | ClusterProminence                    | 8231.01935   |
| wavelet-LHH | glcm  | Imc2                                 | 0.983724637  |

|             |            |                                  |              |
|-------------|------------|----------------------------------|--------------|
| wavelet-LHH | glcm       | Imc1                             | -0.42236176  |
| wavelet-LHH | glcm       | DifferenceAverage                | 5.3295636    |
| wavelet-LHH | glcm       | Id                               | 0.281235549  |
| wavelet-LHH | glcm       | ClusterTendency                  | 48.27399285  |
| wavelet-LHH | firstorder | InterquartileRange               | 143.4720258  |
| wavelet-LHH | firstorder | Skewness                         | 0.464366113  |
| wavelet-LHH | firstorder | Uniformity                       | 0.067772646  |
| wavelet-LHH | firstorder | Median                           | -13.20328289 |
| wavelet-LHH | firstorder | Energy                           | 1477701.173  |
| wavelet-LHH | firstorder | RobustMeanAbsoluteDeviation      | 58.15945317  |
| wavelet-LHH | firstorder | MeanAbsoluteDeviation            | 92.17959867  |
| wavelet-LHH | firstorder | TotalEnergy                      | 39897931.66  |
| wavelet-LHH | firstorder | Maximum                          | 305.3828222  |
| wavelet-LHH | firstorder | RootMeanSquared                  | 119.777349   |
| wavelet-LHH | firstorder | 90Percentile                     | 164.8148265  |
| wavelet-LHH | firstorder | Minimum                          | -272.3802531 |
| wavelet-LHH | firstorder | Entropy                          | 4.10677739   |
| wavelet-LHH | firstorder | Range                            | 577.7630754  |
| wavelet-LHH | firstorder | Variance                         | 14320.77158  |
| wavelet-LHH | firstorder | 10Percentile                     | -161.6670047 |
| wavelet-LHH | firstorder | Kurtosis                         | 3.120793792  |
| wavelet-LHH | firstorder | Mean                             | -5.083477634 |
| wavelet-LHH | glrlm      | ShortRunLowGrayLevelEmphasis     | 0.025062356  |
| wavelet-LHH | glrlm      | GrayLevelVariance                | 23.21717773  |
| wavelet-LHH | glrlm      | LowGrayLevelRunEmphasis          | 0.025519132  |
| wavelet-LHH | glrlm      | GrayLevelNonUniformityNormalized | 0.067107184  |
| wavelet-LHH | glrlm      | RunVariance                      | 0.044754538  |
| wavelet-LHH | glrlm      | GrayLevelNonUniformity           | 6.612894119  |
| wavelet-LHH | glrlm      | LongRunEmphasis                  | 1.137963395  |
| wavelet-LHH | glrlm      | ShortRunHighGrayLevelEmphasis    | 146.6021221  |
| wavelet-LHH | glrlm      | RunLengthNonUniformity           | 90.19894621  |
| wavelet-LHH | glrlm      | ShortRunEmphasis                 | 0.966372485  |
| wavelet-LHH | glrlm      | LongRunHighGrayLevelEmphasis     | 168.8067714  |
| wavelet-LHH | glrlm      | RunPercentage                    | 0.956684093  |
| wavelet-LHH | glrlm      | LongRunLowGrayLevelEmphasis      | 0.027400191  |
| wavelet-LHH | glrlm      | RunEntropy                       | 4.279801683  |
| wavelet-LHH | glrlm      | HighGrayLevelRunEmphasis         | 150.9988492  |
| wavelet-LHH | glrlm      | RunLengthNonUniformityNormalized | 0.915011656  |
| wavelet-LHH | glszm      | GrayLevelVariance                | 29.49872449  |
| wavelet-LHH | glszm      | ZoneVariance                     | 1.813456633  |
| wavelet-LHH | glszm      | GrayLevelNonUniformityNormalized | 0.058673469  |
| wavelet-LHH | glszm      | SizeZoneNonUniformityNormalized  | 0.397321429  |
| wavelet-LHH | glszm      | SizeZoneNonUniformity            | 22.25        |
| wavelet-LHH | glszm      | GrayLevelNonUniformity           | 3.285714286  |
| wavelet-LHH | glszm      | LargeAreaEmphasis                | 5.196428571  |
| wavelet-LHH | glszm      | SmallAreaHighGrayLevelEmphasis   | 109.0553661  |
| wavelet-LHH | glszm      | ZonePercentage                   | 0.54368932   |
| wavelet-LHH | glszm      | LargeAreaLowGrayLevelEmphasis    | 0.08506406   |
| wavelet-LHH | glszm      | LargeAreaHighGrayLevelEmphasis   | 710.1785714  |
| wavelet-LHH | glszm      | HighGrayLevelZoneEmphasis        | 160.9285714  |
| wavelet-LHH | glszm      | SmallAreaEmphasis                | 0.646386257  |
| wavelet-LHH | glszm      | LowGrayLevelZoneEmphasis         | 0.034393708  |
| wavelet-LHH | glszm      | ZoneEntropy                      | 5.173251797  |
| wavelet-LHH | glszm      | SmallAreaLowGrayLevelEmphasis    | 0.02828102   |
| wavelet-LHH | ngtdm      | Coarseness                       | 0.055441088  |

|             |            |                                      |              |
|-------------|------------|--------------------------------------|--------------|
| wavelet-LHH | ngtdm      | Complexity                           | 694.1892285  |
| wavelet-LHH | ngtdm      | Strength                             | 7.863132165  |
| wavelet-LHH | ngtdm      | Contrast                             | 0.375813815  |
| wavelet-LHH | ngtdm      | Busyness                             | 0.092891396  |
| wavelet-LLH | gldm       | GrayLevelVariance                    | 55.5518899   |
| wavelet-LLH | gldm       | HighGrayLevelEmphasis                | 537.8446602  |
| wavelet-LLH | gldm       | DependenceEntropy                    | 5.372092003  |
| wavelet-LLH | gldm       | DependenceNonUniformity              | 35.34951456  |
| wavelet-LLH | gldm       | GrayLevelNonUniformity               | 5.058252427  |
| wavelet-LLH | gldm       | SmallDependenceEmphasis              | 0.539239482  |
| wavelet-LLH | gldm       | SmallDependenceHighGrayLevelEmphasis | 308.1357875  |
| wavelet-LLH | gldm       | DependenceNonUniformityNormalized    | 0.343199171  |
| wavelet-LLH | gldm       | LargeDependenceEmphasis              | 4.145631068  |
| wavelet-LLH | gldm       | LargeDependenceLowGrayLevelEmphasis  | 0.090435979  |
| wavelet-LLH | gldm       | DependenceVariance                   | 0.778584221  |
| wavelet-LLH | gldm       | LargeDependenceHighGrayLevelEmphasis | 2044.563107  |
| wavelet-LLH | gldm       | SmallDependenceLowGrayLevelEmphasis  | 0.008763283  |
| wavelet-LLH | gldm       | LowGrayLevelEmphasis                 | 0.0244446338 |
| wavelet-LLH | glcm       | JointAverage                         | 21.38051601  |
| wavelet-LLH | glcm       | SumAverage                           | 42.76103201  |
| wavelet-LLH | glcm       | JointEntropy                         | 6.654118764  |
| wavelet-LLH | glcm       | ClusterShade                         | 330.1263563  |
| wavelet-LLH | glcm       | MaximumProbability                   | 0.024976847  |
| wavelet-LLH | glcm       | Idmn                                 | 0.96034371   |
| wavelet-LLH | glcm       | JointEnergy                          | 0.010730715  |
| wavelet-LLH | glcm       | Contrast                             | 74.27425716  |
| wavelet-LLH | glcm       | DifferenceEntropy                    | 3.775772315  |
| wavelet-LLH | glcm       | InverseVariance                      | 0.142076534  |
| wavelet-LLH | glcm       | DifferenceVariance                   | 28.84049157  |
| wavelet-LLH | glcm       | Idn                                  | 0.869512597  |
| wavelet-LLH | glcm       | Idm                                  | 0.14345247   |
| wavelet-LLH | glcm       | Correlation                          | 0.276039045  |
| wavelet-LLH | glcm       | Autocorrelation                      | 471.6000329  |
| wavelet-LLH | glcm       | SumEntropy                           | 4.816490671  |
| wavelet-LLH | glcm       | SumSquares                           | 51.52688479  |
| wavelet-LLH | glcm       | ClusterProminence                    | 60192.64145  |
| wavelet-LLH | glcm       | Imc2                                 | 0.994260557  |
| wavelet-LLH | glcm       | Imc1                                 | -0.510215825 |
| wavelet-LLH | glcm       | DifferenceAverage                    | 6.578211563  |
| wavelet-LLH | glcm       | Id                                   | 0.235906674  |
| wavelet-LLH | glcm       | ClusterTendency                      | 131.833282   |
| wavelet-LLH | firstorder | InterquartileRange                   | 235.6520935  |
| wavelet-LLH | firstorder | Skewness                             | -0.202921936 |
| wavelet-LLH | firstorder | Uniformity                           | 0.049109247  |
| wavelet-LLH | firstorder | Median                               | -48.68247246 |
| wavelet-LLH | firstorder | Energy                               | 3697236.903  |
| wavelet-LLH | firstorder | RobustMeanAbsoluteDeviation          | 97.27141107  |
| wavelet-LLH | firstorder | MeanAbsoluteDeviation                | 144.4913857  |
| wavelet-LLH | firstorder | TotalEnergy                          | 99825396.38  |
| wavelet-LLH | firstorder | Maximum                              | 416.9014446  |
| wavelet-LLH | firstorder | RootMeanSquared                      | 189.4610881  |
| wavelet-LLH | firstorder | 90Percentile                         | 213.3332638  |
| wavelet-LLH | firstorder | Minimum                              | -566.1054777 |
| wavelet-LLH | firstorder | Entropy                              | 4.557494101  |
| wavelet-LLH | firstorder | Range                                | 983.0069223  |

|             |            |                                      |              |
|-------------|------------|--------------------------------------|--------------|
| wavelet-LLH | firstorder | Variance                             | 34470.12365  |
| wavelet-LLH | firstorder | 10Percentile                         | -232.8721681 |
| wavelet-LLH | firstorder | Kurtosis                             | 3.409522386  |
| wavelet-LLH | firstorder | Mean                                 | -37.75420857 |
| wavelet-LLH | glrlm      | ShortRunLowGrayLevelEmphasis         | 0.023718869  |
| wavelet-LLH | glrlm      | GrayLevelVariance                    | 56.13047942  |
| wavelet-LLH | glrlm      | LowGrayLevelRunEmphasis              | 0.024380436  |
| wavelet-LLH | glrlm      | GrayLevelNonUniformityNormalized     | 0.048654925  |
| wavelet-LLH | glrlm      | RunVariance                          | 0.033571294  |
| wavelet-LLH | glrlm      | GrayLevelNonUniformity               | 4.849785772  |
| wavelet-LLH | glrlm      | LongRunEmphasis                      | 1.101856477  |
| wavelet-LLH | glrlm      | ShortRunHighGrayLevelEmphasis        | 527.6124581  |
| wavelet-LLH | glrlm      | RunLengthNonUniformity               | 93.50036459  |
| wavelet-LLH | glrlm      | ShortRunEmphasis                     | 0.975382119  |
| wavelet-LLH | glrlm      | LongRunHighGrayLevelEmphasis         | 588.9904279  |
| wavelet-LLH | glrlm      | RunPercentage                        | 0.967886482  |
| wavelet-LLH | glrlm      | LongRunLowGrayLevelEmphasis          | 0.027034379  |
| wavelet-LLH | glrlm      | RunEntropy                           | 4.665836313  |
| wavelet-LLH | glrlm      | HighGrayLevelRunEmphasis             | 539.5894991  |
| wavelet-LLH | glrlm      | RunLengthNonUniformityNormalized     | 0.937381856  |
| wavelet-LLH | glszm      | GrayLevelVariance                    | 64.16236686  |
| wavelet-LLH | glszm      | ZoneVariance                         | 1.596686391  |
| wavelet-LLH | glszm      | GrayLevelNonUniformityNormalized     | 0.046153846  |
| wavelet-LLH | glszm      | SizeZoneNonUniformityNormalized      | 0.507218935  |
| wavelet-LLH | glszm      | SizeZoneNonUniformity                | 32.96923077  |
| wavelet-LLH | glszm      | GrayLevelNonUniformity               | 3            |
| wavelet-LLH | glszm      | LargeAreaEmphasis                    | 4.107692308  |
| wavelet-LLH | glszm      | SmallAreaHighGrayLevelEmphasis       | 428.7128205  |
| wavelet-LLH | glszm      | ZonePercentage                       | 0.631067961  |
| wavelet-LLH | glszm      | LargeAreaLowGrayLevelEmphasis        | 0.075460933  |
| wavelet-LLH | glszm      | LargeAreaHighGrayLevelEmphasis       | 2057.507692  |
| wavelet-LLH | glszm      | HighGrayLevelZoneEmphasis            | 563.1692308  |
| wavelet-LLH | glszm      | SmallAreaEmphasis                    | 0.737796771  |
| wavelet-LLH | glszm      | LowGrayLevelZoneEmphasis             | 0.021932042  |
| wavelet-LLH | glszm      | ZoneEntropy                          | 5.174376806  |
| wavelet-LLH | glszm      | SmallAreaLowGrayLevelEmphasis        | 0.009759072  |
| wavelet-LLH | ngtdm      | Coarseness                           | 0.051497858  |
| wavelet-LLH | ngtdm      | Complexity                           | 1706.751996  |
| wavelet-LLH | ngtdm      | Strength                             | 18.84501301  |
| wavelet-LLH | ngtdm      | Contrast                             | 0.640842432  |
| wavelet-LLH | ngtdm      | Busyness                             | 0.039826428  |
| wavelet-LLL | gldm       | GrayLevelVariance                    | 539.7720803  |
| wavelet-LLL | gldm       | HighGrayLevelEmphasis                | 2055.475728  |
| wavelet-LLL | gldm       | DependenceEntropy                    | 5.82602295   |
| wavelet-LLL | gldm       | DependenceNonUniformity              | 63.19417476  |
| wavelet-LLL | gldm       | GrayLevelNonUniformity               | 2.59223301   |
| wavelet-LLL | gldm       | SmallDependenceEmphasis              | 0.811218986  |
| wavelet-LLL | gldm       | SmallDependenceHighGrayLevelEmphasis | 1573.1548    |
| wavelet-LLL | gldm       | DependenceNonUniformityNormalized    | 0.613535677  |
| wavelet-LLL | gldm       | LargeDependenceEmphasis              | 1.970873786  |
| wavelet-LLL | gldm       | LargeDependenceLowGrayLevelEmphasis  | 0.013971123  |
| wavelet-LLL | gldm       | DependenceVariance                   | 0.303515883  |
| wavelet-LLL | gldm       | LargeDependenceHighGrayLevelEmphasis | 4376.38835   |
| wavelet-LLL | gldm       | SmallDependenceLowGrayLevelEmphasis  | 0.013013774  |
| wavelet-LLL | gldm       | LowGrayLevelEmphasis                 | 0.013177631  |

|             |            |                                  |              |
|-------------|------------|----------------------------------|--------------|
| wavelet-LLL | glcm       | JointAverage                     | 45.4606761   |
| wavelet-LLL | glcm       | SumAverage                       | 90.9213522   |
| wavelet-LLL | glcm       | JointEntropy                     | 6.900205091  |
| wavelet-LLL | glcm       | ClusterShade                     | 2000.986736  |
| wavelet-LLL | glcm       | MaximumProbability               | 0.014932273  |
| wavelet-LLL | glcm       | Idmn                             | 0.923974408  |
| wavelet-LLL | glcm       | JointEnergy                      | 0.008561835  |
| wavelet-LLL | glcm       | Contrast                         | 813.7140577  |
| wavelet-LLL | glcm       | DifferenceEntropy                | 5.043198758  |
| wavelet-LLL | glcm       | InverseVariance                  | 0.051559173  |
| wavelet-LLL | glcm       | DifferenceVariance               | 252.8222066  |
| wavelet-LLL | glcm       | Idn                              | 0.816994497  |
| wavelet-LLL | glcm       | Idm                              | 0.049300038  |
| wavelet-LLL | glcm       | Correlation                      | 0.313767981  |
| wavelet-LLL | glcm       | Autocorrelation                  | 2244.619973  |
| wavelet-LLL | glcm       | SumEntropy                       | 5.576283102  |
| wavelet-LLL | glcm       | SumSquares                       | 583.4827462  |
| wavelet-LLL | glcm       | ClusterProminence                | 5015749.706  |
| wavelet-LLL | glcm       | Imc2                             | 0.999860168  |
| wavelet-LLL | glcm       | Imc1                             | -0.748120299 |
| wavelet-LLL | glcm       | DifferenceAverage                | 23.24693909  |
| wavelet-LLL | glcm       | Id                               | 0.101833727  |
| wavelet-LLL | glcm       | ClusterTendency                  | 1520.216927  |
| wavelet-LLL | firstorder | InterquartileRange               | 926.4080442  |
| wavelet-LLL | firstorder | Skewness                         | 0.401393344  |
| wavelet-LLL | firstorder | Uniformity                       | 0.025167311  |
| wavelet-LLL | firstorder | Median                           | -1103.481446 |
| wavelet-LLL | firstorder | Energy                           | 151533508.9  |
| wavelet-LLL | firstorder | RobustMeanAbsoluteDeviation      | 371.8753121  |
| wavelet-LLL | firstorder | MeanAbsoluteDeviation            | 491.2812758  |
| wavelet-LLL | firstorder | TotalEnergy                      | 4091404739   |
| wavelet-LLL | firstorder | Maximum                          | 300.7526176  |
| wavelet-LLL | firstorder | RootMeanSquared                  | 1212.929971  |
| wavelet-LLL | firstorder | 90Percentile                     | -272.2976774 |
| wavelet-LLL | firstorder | Minimum                          | -2015.308576 |
| wavelet-LLL | firstorder | Entropy                          | 5.554429081  |
| wavelet-LLL | firstorder | Range                            | 2316.061193  |
| wavelet-LLL | firstorder | Variance                         | 337788.5802  |
| wavelet-LLL | firstorder | 10Percentile                     | -1752.713569 |
| wavelet-LLL | firstorder | Kurtosis                         | 2.231898809  |
| wavelet-LLL | firstorder | Mean                             | -1064.617553 |
| wavelet-LLL | glrlm      | ShortRunLowGrayLevelEmphasis     | 0.013311175  |
| wavelet-LLL | glrlm      | GrayLevelVariance                | 541.6342794  |
| wavelet-LLL | glrlm      | LowGrayLevelRunEmphasis          | 0.013318337  |
| wavelet-LLL | glrlm      | GrayLevelNonUniformityNormalized | 0.0250345    |
| wavelet-LLL | glrlm      | RunVariance                      | 0.011198186  |
| wavelet-LLL | glrlm      | GrayLevelNonUniformity           | 2.549666184  |
| wavelet-LLL | glrlm      | LongRunEmphasis                  | 1.034206801  |
| wavelet-LLL | glrlm      | ShortRunHighGrayLevelEmphasis    | 2029.939137  |
| wavelet-LLL | glrlm      | RunLengthNonUniformity           | 99.57963622  |
| wavelet-LLL | glrlm      | ShortRunEmphasis                 | 0.9914483    |
| wavelet-LLL | glrlm      | LongRunHighGrayLevelEmphasis     | 2134.882724  |
| wavelet-LLL | glrlm      | RunPercentage                    | 0.98879761   |
| wavelet-LLL | glrlm      | LongRunLowGrayLevelEmphasis      | 0.013346984  |
| wavelet-LLL | glrlm      | RunEntropy                       | 5.582766615  |

|             |       |                                      |             |
|-------------|-------|--------------------------------------|-------------|
| wavelet-LLL | glrlm | HighGrayLevelRunEmphasis             | 2050.927854 |
| wavelet-LLL | glrlm | RunLengthNonUniformityNormalized     | 0.977603629 |
| wavelet-LLL | glszm | GrayLevelVariance                    | 560.3279889 |
| wavelet-LLL | glszm | ZoneVariance                         | 0.222446661 |
| wavelet-LLL | glszm | GrayLevelNonUniformityNormalized     | 0.023860624 |
| wavelet-LLL | glszm | SizeZoneNonUniformityNormalized      | 0.778563313 |
| wavelet-LLL | glszm | SizeZoneNonUniformity                | 69.29213483 |
| wavelet-LLL | glszm | GrayLevelNonUniformity               | 2.123595506 |
| wavelet-LLL | glszm | LargeAreaEmphasis                    | 1.561797753 |
| wavelet-LLL | glszm | SmallAreaHighGrayLevelEmphasis       | 1726.705758 |
| wavelet-LLL | glszm | ZonePercentage                       | 0.86407767  |
| wavelet-LLL | glszm | LargeAreaLowGrayLevelEmphasis        | 0.015571725 |
| wavelet-LLL | glszm | LargeAreaHighGrayLevelEmphasis       | 3348.58427  |
| wavelet-LLL | glszm | HighGrayLevelZoneEmphasis            | 1980.516854 |
| wavelet-LLL | glszm | SmallAreaEmphasis                    | 0.90363608  |
| wavelet-LLL | glszm | LowGrayLevelZoneEmphasis             | 0.015117656 |
| wavelet-LLL | glszm | ZoneEntropy                          | 5.794506572 |
| wavelet-LLL | glszm | SmallAreaLowGrayLevelEmphasis        | 0.01503069  |
| wavelet-LLL | ngtdm | Coarseness                           | 0.026200015 |
| wavelet-LLL | ngtdm | Complexity                           | 29236.12222 |
| wavelet-LLL | ngtdm | Strength                             | 83.03836348 |
| wavelet-LLL | ngtdm | Contrast                             | 5.293043312 |
| wavelet-LLL | ngtdm | Busyness                             | 0.021746296 |
| wavelet-HHL | gldm  | GrayLevelVariance                    | 29.09699312 |
| wavelet-HHL | gldm  | HighGrayLevelEmphasis                | 225.368932  |
| wavelet-HHL | gldm  | DependenceEntropy                    | 5.369773256 |
| wavelet-HHL | gldm  | DependenceNonUniformity              | 30.82524272 |
| wavelet-HHL | gldm  | GrayLevelNonUniformity               | 6.72815534  |
| wavelet-HHL | gldm  | SmallDependenceEmphasis              | 0.500927724 |
| wavelet-HHL | gldm  | SmallDependenceHighGrayLevelEmphasis | 116.7248679 |
| wavelet-HHL | gldm  | DependenceNonUniformityNormalized    | 0.299274201 |
| wavelet-HHL | gldm  | LargeDependenceEmphasis              | 5.058252427 |
| wavelet-HHL | gldm  | LargeDependenceLowGrayLevelEmphasis  | 0.112450902 |
| wavelet-HHL | gldm  | DependenceVariance                   | 1.019323216 |
| wavelet-HHL | gldm  | LargeDependenceHighGrayLevelEmphasis | 1158.669903 |
| wavelet-HHL | gldm  | SmallDependenceLowGrayLevelEmphasis  | 0.010255778 |
| wavelet-HHL | gldm  | LowGrayLevelEmphasis                 | 0.028294666 |
| wavelet-HHL | glcm  | JointAverage                         | 14.28315196 |
| wavelet-HHL | glcm  | SumAverage                           | 28.56630391 |
| wavelet-HHL | glcm  | JointEntropy                         | 6.539687491 |
| wavelet-HHL | glcm  | ClusterShade                         | 85.61967659 |
| wavelet-HHL | glcm  | MaximumProbability                   | 0.025940272 |
| wavelet-HHL | glcm  | Idmn                                 | 0.942390237 |
| wavelet-HHL | glcm  | JointEnergy                          | 0.011872563 |
| wavelet-HHL | glcm  | Contrast                             | 59.57460881 |
| wavelet-HHL | glcm  | DifferenceEntropy                    | 3.722492419 |
| wavelet-HHL | glcm  | InverseVariance                      | 0.169091027 |
| wavelet-HHL | glcm  | DifferenceVariance                   | 23.00094881 |
| wavelet-HHL | glcm  | Idn                                  | 0.845403798 |
| wavelet-HHL | glcm  | Idm                                  | 0.167458033 |
| wavelet-HHL | glcm  | Correlation                          | 0.027377763 |
| wavelet-HHL | glcm  | Autocorrelation                      | 204.8621449 |
| wavelet-HHL | glcm  | SumEntropy                           | 4.482764163 |
| wavelet-HHL | glcm  | SumSquares                           | 30.57392902 |
| wavelet-HHL | glcm  | ClusterProminence                    | 12931.37538 |

|             |            |                                  |              |
|-------------|------------|----------------------------------|--------------|
| wavelet-HHL | glcm       | Imc2                             | 0.985370161  |
| wavelet-HHL | glcm       | Imc1                             | -0.431517189 |
| wavelet-HHL | glcm       | DifferenceAverage                | 5.914488612  |
| wavelet-HHL | glcm       | Id                               | 0.258139081  |
| wavelet-HHL | glcm       | ClusterTendency                  | 62.72110728  |
| wavelet-HHL | firstorder | InterquartileRange               | 140.4262254  |
| wavelet-HHL | firstorder | Skewness                         | 0.114447242  |
| wavelet-HHL | firstorder | Uniformity                       | 0.065321897  |
| wavelet-HHL | firstorder | Median                           | -18.91102085 |
| wavelet-HHL | firstorder | Energy                           | 1872183.007  |
| wavelet-HHL | firstorder | RobustMeanAbsoluteDeviation      | 63.41836684  |
| wavelet-HHL | firstorder | MeanAbsoluteDeviation            | 101.8970546  |
| wavelet-HHL | firstorder | TotalEnergy                      | 50548941.2   |
| wavelet-HHL | firstorder | Maximum                          | 358.5921027  |
| wavelet-HHL | firstorder | RootMeanSquared                  | 134.820377   |
| wavelet-HHL | firstorder | 90Percentile                     | 168.4164812  |
| wavelet-HHL | firstorder | Minimum                          | -344.4745576 |
| wavelet-HHL | firstorder | Entropy                          | 4.191931759  |
| wavelet-HHL | firstorder | Range                            | 703.0666603  |
| wavelet-HHL | firstorder | Variance                         | 18021.64796  |
| wavelet-HHL | firstorder | 10Percentile                     | -190.378307  |
| wavelet-HHL | firstorder | Kurtosis                         | 3.268648983  |
| wavelet-HHL | firstorder | Mean                             | -12.44532407 |
| wavelet-HHL | glrlm      | ShortRunLowGrayLevelEmphasis     | 0.027528755  |
| wavelet-HHL | glrlm      | GrayLevelVariance                | 29.41582209  |
| wavelet-HHL | glrlm      | LowGrayLevelRunEmphasis          | 0.028352507  |
| wavelet-HHL | glrlm      | GrayLevelNonUniformityNormalized | 0.064571188  |
| wavelet-HHL | glrlm      | RunVariance                      | 0.038697006  |
| wavelet-HHL | glrlm      | GrayLevelNonUniformity           | 6.392657927  |
| wavelet-HHL | glrlm      | LongRunEmphasis                  | 1.122586039  |
| wavelet-HHL | glrlm      | ShortRunHighGrayLevelEmphasis    | 218.5143896  |
| wavelet-HHL | glrlm      | RunLengthNonUniformity           | 91.41757466  |
| wavelet-HHL | glrlm      | ShortRunEmphasis                 | 0.96935349   |
| wavelet-HHL | glrlm      | LongRunHighGrayLevelEmphasis     | 252.9363267  |
| wavelet-HHL | glrlm      | RunPercentage                    | 0.961165049  |
| wavelet-HHL | glrlm      | LongRunLowGrayLevelEmphasis      | 0.031647516  |
| wavelet-HHL | glrlm      | RunEntropy                       | 4.35491559   |
| wavelet-HHL | glrlm      | HighGrayLevelRunEmphasis         | 225.398777   |
| wavelet-HHL | glrlm      | RunLengthNonUniformityNormalized | 0.922605988  |
| wavelet-HHL | glszm      | GrayLevelVariance                | 33.85219027  |
| wavelet-HHL | glszm      | ZoneVariance                     | 1.361999463  |
| wavelet-HHL | glszm      | GrayLevelNonUniformityNormalized | 0.059392636  |
| wavelet-HHL | glszm      | SizeZoneNonUniformityNormalized  | 0.482397205  |
| wavelet-HHL | glszm      | SizeZoneNonUniformity            | 29.42622951  |
| wavelet-HHL | glszm      | GrayLevelNonUniformity           | 3.62295082   |
| wavelet-HHL | glszm      | LargeAreaEmphasis                | 4.213114754  |
| wavelet-HHL | glszm      | SmallAreaHighGrayLevelEmphasis   | 170.5247814  |
| wavelet-HHL | glszm      | ZonePercentage                   | 0.59223301   |
| wavelet-HHL | glszm      | LargeAreaLowGrayLevelEmphasis    | 0.097305238  |
| wavelet-HHL | glszm      | LargeAreaHighGrayLevelEmphasis   | 953.6229508  |
| wavelet-HHL | glszm      | HighGrayLevelZoneEmphasis        | 229.3934426  |
| wavelet-HHL | glszm      | SmallAreaEmphasis                | 0.720091075  |
| wavelet-HHL | glszm      | LowGrayLevelZoneEmphasis         | 0.026546404  |
| wavelet-HHL | glszm      | ZoneEntropy                      | 5.014765158  |
| wavelet-HHL | glszm      | SmallAreaLowGrayLevelEmphasis    | 0.012242856  |

|             |            |                                      |              |
|-------------|------------|--------------------------------------|--------------|
| wavelet-HHL | ngtdm      | Coarseness                           | 0.051450512  |
| wavelet-HHL | ngtdm      | Complexity                           | 941.4673731  |
| wavelet-HHL | ngtdm      | Strength                             | 9.828366352  |
| wavelet-HHL | ngtdm      | Contrast                             | 0.434976469  |
| wavelet-HHL | ngtdm      | Busyness                             | 0.061563556  |
| wavelet-HLH | gldm       | GrayLevelVariance                    | 27.00688095  |
| wavelet-HLH | gldm       | HighGrayLevelEmphasis                | 179.7572816  |
| wavelet-HLH | gldm       | DependenceEntropy                    | 5.306104319  |
| wavelet-HLH | gldm       | DependenceNonUniformity              | 31.83495146  |
| wavelet-HLH | gldm       | GrayLevelNonUniformity               | 6.553398058  |
| wavelet-HLH | gldm       | SmallDependenceEmphasis              | 0.514700647  |
| wavelet-HLH | gldm       | SmallDependenceHighGrayLevelEmphasis | 103.5973625  |
| wavelet-HLH | gldm       | DependenceNonUniformityNormalized    | 0.309077199  |
| wavelet-HLH | gldm       | LargeDependenceEmphasis              | 5.13592233   |
| wavelet-HLH | gldm       | LargeDependenceLowGrayLevelEmphasis  | 0.063225162  |
| wavelet-HLH | gldm       | DependenceVariance                   | 1.174663022  |
| wavelet-HLH | gldm       | LargeDependenceHighGrayLevelEmphasis | 816.8640777  |
| wavelet-HLH | gldm       | SmallDependenceLowGrayLevelEmphasis  | 0.017640925  |
| wavelet-HLH | gldm       | LowGrayLevelEmphasis                 | 0.022765938  |
| wavelet-HLH | glcm       | JointAverage                         | 12.53375479  |
| wavelet-HLH | glcm       | SumAverage                           | 25.06750959  |
| wavelet-HLH | glcm       | JointEntropy                         | 6.541855119  |
| wavelet-HLH | glcm       | ClusterShade                         | 108.2777819  |
| wavelet-HLH | glcm       | MaximumProbability                   | 0.024746821  |
| wavelet-HLH | glcm       | Idmn                                 | 0.938960796  |
| wavelet-HLH | glcm       | JointEnergy                          | 0.011726718  |
| wavelet-HLH | glcm       | Contrast                             | 57.41849356  |
| wavelet-HLH | glcm       | DifferenceEntropy                    | 3.707780165  |
| wavelet-HLH | glcm       | InverseVariance                      | 0.144144507  |
| wavelet-HLH | glcm       | DifferenceVariance                   | 19.57002222  |
| wavelet-HLH | glcm       | Idn                                  | 0.836482982  |
| wavelet-HLH | glcm       | Idm                                  | 0.152517582  |
| wavelet-HLH | glcm       | Correlation                          | -0.039804712 |
| wavelet-HLH | glcm       | Autocorrelation                      | 156.029725   |
| wavelet-HLH | glcm       | SumEntropy                           | 4.425231145  |
| wavelet-HLH | glcm       | SumSquares                           | 27.53769082  |
| wavelet-HLH | glcm       | ClusterProminence                    | 8766.724725  |
| wavelet-HLH | glcm       | Imc2                                 | 0.982652941  |
| wavelet-HLH | glcm       | Imc1                                 | -0.41761147  |
| wavelet-HLH | glcm       | DifferenceAverage                    | 6.032192129  |
| wavelet-HLH | glcm       | Id                                   | 0.245644472  |
| wavelet-HLH | glcm       | ClusterTendency                      | 52.7322697   |
| wavelet-HLH | firstorder | InterquartileRange                   | 185.4689388  |
| wavelet-HLH | firstorder | Skewness                             | 0.362467024  |
| wavelet-HLH | firstorder | Uniformity                           | 0.063625224  |
| wavelet-HLH | firstorder | Median                               | -1.228645293 |
| wavelet-HLH | firstorder | Energy                               | 1745494.623  |
| wavelet-HLH | firstorder | RobustMeanAbsoluteDeviation          | 72.66427388  |
| wavelet-HLH | firstorder | MeanAbsoluteDeviation                | 104.635335   |
| wavelet-HLH | firstorder | TotalEnergy                          | 47128354.82  |
| wavelet-HLH | firstorder | Maximum                              | 380.4090118  |
| wavelet-HLH | firstorder | RootMeanSquared                      | 130.1789143  |
| wavelet-HLH | firstorder | 90Percentile                         | 163.791615   |
| wavelet-HLH | firstorder | Minimum                              | -284.4487736 |
| wavelet-HLH | firstorder | Entropy                              | 4.179084623  |



|             |            |                                  |              |
|-------------|------------|----------------------------------|--------------|
| wavelet-HLH | firstorder | Range                            | 664.8577854  |
| wavelet-HLH | firstorder | Variance                         | 16935.35642  |
| wavelet-HLH | firstorder | 10Percentile                     | -167.649168  |
| wavelet-HLH | firstorder | Kurtosis                         | 3.037673623  |
| wavelet-HLH | firstorder | Mean                             | -3.345642205 |
| wavelet-HLH | glrlm      | ShortRunLowGrayLevelEmphasis     | 0.022981532  |
| wavelet-HLH | glrlm      | GrayLevelVariance                | 27.51840355  |
| wavelet-HLH | glrlm      | LowGrayLevelRunEmphasis          | 0.023276737  |
| wavelet-HLH | glrlm      | GrayLevelNonUniformityNormalized | 0.062854147  |
| wavelet-HLH | glrlm      | RunVariance                      | 0.04113797   |
| wavelet-HLH | glrlm      | GrayLevelNonUniformity           | 6.228431203  |
| wavelet-HLH | glrlm      | LongRunEmphasis                  | 1.123742795  |
| wavelet-HLH | glrlm      | ShortRunHighGrayLevelEmphasis    | 176.1371277  |
| wavelet-HLH | glrlm      | RunLengthNonUniformity           | 91.91695487  |
| wavelet-HLH | glrlm      | ShortRunEmphasis                 | 0.970836892  |
| wavelet-HLH | glrlm      | LongRunHighGrayLevelEmphasis     | 200.1580609  |
| wavelet-HLH | glrlm      | RunPercentage                    | 0.961911875  |
| wavelet-HLH | glrlm      | LongRunLowGrayLevelEmphasis      | 0.024514405  |
| wavelet-HLH | glrlm      | RunEntropy                       | 4.337919048  |
| wavelet-HLH | glrlm      | HighGrayLevelRunEmphasis         | 180.6827917  |
| wavelet-HLH | glrlm      | RunLengthNonUniformityNormalized | 0.926736904  |
| wavelet-HLH | glszm      | GrayLevelVariance                | 35.30771298  |
| wavelet-HLH | glszm      | ZoneVariance                     | 1.624294544  |
| wavelet-HLH | glszm      | GrayLevelNonUniformityNormalized | 0.054017737  |
| wavelet-HLH | glszm      | SizeZoneNonUniformityNormalized  | 0.501209352  |
| wavelet-HLH | glszm      | SizeZoneNonUniformity            | 30.57377049  |
| wavelet-HLH | glszm      | GrayLevelNonUniformity           | 3.295081967  |
| wavelet-HLH | glszm      | LargeAreaEmphasis                | 4.475409836  |
| wavelet-HLH | glszm      | SmallAreaHighGrayLevelEmphasis   | 154.2464026  |
| wavelet-HLH | glszm      | ZonePercentage                   | 0.59223301   |
| wavelet-HLH | glszm      | LargeAreaLowGrayLevelEmphasis    | 0.065793668  |
| wavelet-HLH | glszm      | LargeAreaHighGrayLevelEmphasis   | 730.2786885  |
| wavelet-HLH | glszm      | HighGrayLevelZoneEmphasis        | 195.4754098  |
| wavelet-HLH | glszm      | SmallAreaEmphasis                | 0.734690346  |
| wavelet-HLH | glszm      | LowGrayLevelZoneEmphasis         | 0.031269324  |
| wavelet-HLH | glszm      | ZoneEntropy                      | 5.028777501  |
| wavelet-HLH | glszm      | SmallAreaLowGrayLevelEmphasis    | 0.028291884  |
| wavelet-HLH | ngtdm      | Coarseness                       | 0.042810471  |
| wavelet-HLH | ngtdm      | Complexity                       | 935.8588704  |
| wavelet-HLH | ngtdm      | Strength                         | 8.295698747  |
| wavelet-HLH | ngtdm      | Contrast                         | 0.469946996  |
| wavelet-HLH | ngtdm      | Busyness                         | 0.098701733  |

| Image type | Feature Class | Feature Name                         | Value                                                                                                                                                                                                                                                                                                                                                                                                             |
|------------|---------------|--------------------------------------|-------------------------------------------------------------------------------------------------------------------------------------------------------------------------------------------------------------------------------------------------------------------------------------------------------------------------------------------------------------------------------------------------------------------|
| general    | info          | BoundingBox                          | 5: RTSTRUCT: C99-DNU_segment_GTV- SIM<br>(0, 0, 1, 13, 13, 11)                                                                                                                                                                                                                                                                                                                                                    |
| general    | info          | EnabledImageTypes                    | {u'Original': {}, u'Wavelet': {}}                                                                                                                                                                                                                                                                                                                                                                                 |
|            |               |                                      | {'distances': [1], 'additionalInfo': True, 'force2D': False, 'interpolator': 'sitkBSpline', 'resampledPixelSpacing': [3.0], 'label': 1, 'normalizeScale': 1, 'normalize': False, 'force2Ddimension': 0, 'removeOutliers': None, 'minimumROISize': None, u'binWidth': 25.0, 'minimumROIDimensions': 1, u'correctMask': True, 'preCrop': False, u'symmetricalGLCM': True, 'resegmentRange': None, 'padDistance': 5} |
| general    | info          | GeneralSettings                      | 02e73a3f529ed4128a195f05932b6ff8f68696c0<br>(0.9765624999999998, 0.9765624999999998,                                                                                                                                                                                                                                                                                                                              |
| general    | info          | ImageHash                            | 1.9999999999999999)                                                                                                                                                                                                                                                                                                                                                                                               |
| general    | info          | ImageSpacing                         | ebeef24f2b7cf5a93cf2159e8030d9116f0c70da                                                                                                                                                                                                                                                                                                                                                                          |
| general    | info          | MaskHash                             | 1.13.1                                                                                                                                                                                                                                                                                                                                                                                                            |
| general    | info          | NumpyVersion                         | 0.5.2                                                                                                                                                                                                                                                                                                                                                                                                             |
| general    | info          | PyWaveletVersion                     | 1.1.0                                                                                                                                                                                                                                                                                                                                                                                                             |
| general    | info          | SimpleITKVersion                     | 1.3.0.post102+g1b0eb74                                                                                                                                                                                                                                                                                                                                                                                            |
| general    | info          | Version                              |                                                                                                                                                                                                                                                                                                                                                                                                                   |
| general    | info          | VolumeNum                            | 1                                                                                                                                                                                                                                                                                                                                                                                                                 |
| general    | info          | VoxelNum                             | 749                                                                                                                                                                                                                                                                                                                                                                                                               |
| original   | shape         | Maximum3DDiameter                    | 42.74331202                                                                                                                                                                                                                                                                                                                                                                                                       |
| original   | shape         | Maximum2DDiameterSlice               | 40.43015927                                                                                                                                                                                                                                                                                                                                                                                                       |
| original   | shape         | Sphericity                           | 0.755118372                                                                                                                                                                                                                                                                                                                                                                                                       |
| original   | shape         | MinorAxis                            | 31.60142469                                                                                                                                                                                                                                                                                                                                                                                                       |
| original   | shape         | Elongation                           | 0.878152475                                                                                                                                                                                                                                                                                                                                                                                                       |
| original   | shape         | SurfaceVolumeRatio                   | 0.231688224                                                                                                                                                                                                                                                                                                                                                                                                       |
| original   | shape         | Volume                               | 21120.07141                                                                                                                                                                                                                                                                                                                                                                                                       |
| original   | shape         | MajorAxis                            | 35.98626161                                                                                                                                                                                                                                                                                                                                                                                                       |
| original   | shape         | SurfaceArea                          | 4893.271836                                                                                                                                                                                                                                                                                                                                                                                                       |
| original   | shape         | Flatness                             | 0.773510841                                                                                                                                                                                                                                                                                                                                                                                                       |
| original   | shape         | LeastAxis                            | 27.83576349                                                                                                                                                                                                                                                                                                                                                                                                       |
| original   | shape         | Maximum2DDiameterColumn              | 38.2225315                                                                                                                                                                                                                                                                                                                                                                                                        |
| original   | shape         | Maximum2DDiameterRow                 | 36.33965291                                                                                                                                                                                                                                                                                                                                                                                                       |
| original   | gldm          | GrayLevelVariance                    | 135.069934                                                                                                                                                                                                                                                                                                                                                                                                        |
| original   | gldm          | HighGrayLevelEmphasis                | 1030.151179                                                                                                                                                                                                                                                                                                                                                                                                       |
| original   | gldm          | DependenceEntropy                    | 7.524608231                                                                                                                                                                                                                                                                                                                                                                                                       |
| original   | gldm          | DependenceNonUniformity              | 1513.699539                                                                                                                                                                                                                                                                                                                                                                                                       |
| original   | gldm          | GrayLevelNonUniformity               | 232.3511244                                                                                                                                                                                                                                                                                                                                                                                                       |
| original   | gldm          | SmallDependenceEmphasis              | 0.4025858                                                                                                                                                                                                                                                                                                                                                                                                         |
| original   | gldm          | SmallDependenceHighGrayLevelEmphasis | 306.7778116                                                                                                                                                                                                                                                                                                                                                                                                       |
| original   | gldm          | DependenceNonUniformityNormalized    | 0.205052769                                                                                                                                                                                                                                                                                                                                                                                                       |
| original   | gldm          | LargeDependenceEmphasis              | 17.6900569                                                                                                                                                                                                                                                                                                                                                                                                        |
| original   | gldm          | LargeDependenceLowGrayLevelEmphasis  | 0.026822709                                                                                                                                                                                                                                                                                                                                                                                                       |
| original   | gldm          | DependenceVariance                   | 8.205792998                                                                                                                                                                                                                                                                                                                                                                                                       |
| original   | gldm          | LargeDependenceHighGrayLevelEmphasis | 28736.38878                                                                                                                                                                                                                                                                                                                                                                                                       |
| original   | gldm          | SmallDependenceLowGrayLevelEmphasis  | 0.001906198                                                                                                                                                                                                                                                                                                                                                                                                       |
| original   | gldm          | LowGrayLevelEmphasis                 | 0.003809071                                                                                                                                                                                                                                                                                                                                                                                                       |
| original   | glcm          | JointAverage                         | 31.57971906                                                                                                                                                                                                                                                                                                                                                                                                       |
| original   | glcm          | SumAverage                           | 63.15943812                                                                                                                                                                                                                                                                                                                                                                                                       |
| original   | glcm          | JointEntropy                         | 9.54636541                                                                                                                                                                                                                                                                                                                                                                                                        |
| original   | glcm          | ClusterShade                         | -5345.845222                                                                                                                                                                                                                                                                                                                                                                                                      |
| original   | glcm          | MaximumProbability                   | 0.026703563                                                                                                                                                                                                                                                                                                                                                                                                       |

|          |            |                                  |              |
|----------|------------|----------------------------------|--------------|
| original | glcm       | Idmn                             | 0.969819899  |
| original | glcm       | JointEnergy                      | 0.003153567  |
| original | glcm       | Contrast                         | 78.43919658  |
| original | glcm       | DifferenceEntropy                | 4.10235528   |
| original | glcm       | InverseVariance                  | 0.19606416   |
| original | glcm       | DifferenceVariance               | 34.6225956   |
| original | glcm       | Idn                              | 0.892982472  |
| original | glcm       | Idm                              | 0.206494627  |
| original | glcm       | Correlation                      | 0.666675495  |
| original | glcm       | Autocorrelation                  | 1078.786267  |
| original | glcm       | SumEntropy                       | 6.051340795  |
| original | glcm       | SumSquares                       | 120.3051448  |
| original | glcm       | ClusterProminence                | 397582.0951  |
| original | glcm       | Imc2                             | 0.819464259  |
| original | glcm       | Imc1                             | -0.132120364 |
| original | glcm       | DifferenceAverage                | 6.369142024  |
| original | glcm       | Id                               | 0.286472025  |
| original | glcm       | ClusterTendency                  | 402.7813827  |
| original | firstorder | InterquartileRange               | 492.75       |
| original | firstorder | Skewness                         | -0.537959788 |
| original | firstorder | Uniformity                       | 0.031475362  |
| original | firstorder | Median                           | -202         |
| original | firstorder | Energy                           | 1140488520   |
| original | firstorder | RobustMeanAbsoluteDeviation      | 197.6417707  |
| original | firstorder | MeanAbsoluteDeviation            | 249.5261412  |
| original | firstorder | TotalEnergy                      | 3262963829   |
| original | firstorder | Maximum                          | 182          |
| original | firstorder | RootMeanSquared                  | 393.0596278  |
| original | firstorder | 90Percentile                     | 63           |
| original | firstorder | Minimum                          | -976         |
| original | firstorder | Entropy                          | 5.229665233  |
| original | firstorder | Range                            | 1158         |
| original | firstorder | Variance                         | 84314.94702  |
| original | firstorder | 10Percentile                     | -710         |
| original | firstorder | Kurtosis                         | 2.090357081  |
| original | firstorder | Mean                             | -264.9168247 |
| original | glrlm      | ShortRunLowGrayLevelEmphasis     | 0.003827949  |
| original | glrlm      | GrayLevelVariance                | 133.1032384  |
| original | glrlm      | LowGrayLevelRunEmphasis          | 0.003954596  |
| original | glrlm      | GrayLevelNonUniformityNormalized | 0.029043171  |
| original | glrlm      | RunVariance                      | 0.132591942  |
| original | glrlm      | GrayLevelNonUniformity           | 197.3686964  |
| original | glrlm      | LongRunEmphasis                  | 1.319232126  |
| original | glrlm      | ShortRunHighGrayLevelEmphasis    | 911.8943523  |
| original | glrlm      | RunLengthNonUniformity           | 5905.96704   |
| original | glrlm      | ShortRunEmphasis                 | 0.944935147  |
| original | glrlm      | LongRunHighGrayLevelEmphasis     | 1476.349419  |
| original | glrlm      | RunPercentage                    | 0.920013338  |
| original | glrlm      | LongRunLowGrayLevelEmphasis      | 0.004598029  |
| original | glrlm      | RunEntropy                       | 5.64265734   |
| original | glrlm      | HighGrayLevelRunEmphasis         | 990.619336   |
| original | glrlm      | RunLengthNonUniformityNormalized | 0.867861136  |
| original | glszm      | GrayLevelVariance                | 107.9151738  |
| original | glszm      | ZoneVariance                     | 135.9045007  |
| original | glszm      | GrayLevelNonUniformityNormalized | 0.026731251  |

|             |       |                                      |              |
|-------------|-------|--------------------------------------|--------------|
| original    | glszm | SizeZoneNonUniformityNormalized      | 0.485285958  |
| original    | glszm | SizeZoneNonUniformity                | 1644.63411   |
| original    | glszm | GrayLevelNonUniformity               | 90.59221009  |
| original    | glszm | LargeAreaEmphasis                    | 140.649159   |
| original    | glszm | SmallAreaHighGrayLevelEmphasis       | 513.1276377  |
| original    | glszm | ZonePercentage                       | 0.459089678  |
| original    | glszm | LargeAreaLowGrayLevelEmphasis        | 0.098177748  |
| original    | glszm | LargeAreaHighGrayLevelEmphasis       | 252012.4491  |
| original    | glszm | HighGrayLevelZoneEmphasis            | 749.8474476  |
| original    | glszm | SmallAreaEmphasis                    | 0.724400145  |
| original    | glszm | LowGrayLevelZoneEmphasis             | 0.004809768  |
| original    | glszm | ZoneEntropy                          | 6.844530517  |
| original    | glszm | SmallAreaLowGrayLevelEmphasis        | 0.003570729  |
| original    | ngtdm | Coarseness                           | 0.001238926  |
| original    | ngtdm | Complexity                           | 3640.894545  |
| original    | ngtdm | Strength                             | 1.134667519  |
| original    | ngtdm | Contrast                             | 0.489038598  |
| original    | ngtdm | Busyness                             | 0.514564072  |
| wavelet-HHH | gldm  | GrayLevelVariance                    | 0.484336199  |
| wavelet-HHH | gldm  | HighGrayLevelEmphasis                | 12.70495801  |
| wavelet-HHH | gldm  | DependenceEntropy                    | 4.974594924  |
| wavelet-HHH | gldm  | DependenceNonUniformity              | 570.4277973  |
| wavelet-HHH | gldm  | GrayLevelNonUniformity               | 2975.494175  |
| wavelet-HHH | gldm  | SmallDependenceEmphasis              | 0.04983952   |
| wavelet-HHH | gldm  | SmallDependenceHighGrayLevelEmphasis | 0.701552954  |
| wavelet-HHH | gldm  | DependenceNonUniformityNormalized    | 0.077272798  |
| wavelet-HHH | gldm  | LargeDependenceEmphasis              | 116.6746139  |
| wavelet-HHH | gldm  | LargeDependenceLowGrayLevelEmphasis  | 10.30401991  |
| wavelet-HHH | gldm  | DependenceVariance                   | 14.96047603  |
| wavelet-HHH | gldm  | LargeDependenceHighGrayLevelEmphasis | 1442.963966  |
| wavelet-HHH | gldm  | SmallDependenceLowGrayLevelEmphasis  | 0.008465519  |
| wavelet-HHH | gldm  | LowGrayLevelEmphasis                 | 0.095143593  |
| wavelet-HHH | glcm  | JointAverage                         | 3.496753456  |
| wavelet-HHH | glcm  | SumAverage                           | 6.993506912  |
| wavelet-HHH | glcm  | JointEntropy                         | 3.026385406  |
| wavelet-HHH | glcm  | ClusterShade                         | 0.000364918  |
| wavelet-HHH | glcm  | MaximumProbability                   | 0.213158798  |
| wavelet-HHH | glcm  | Idmn                                 | 0.974753332  |
| wavelet-HHH | glcm  | JointEnergy                          | 0.165832365  |
| wavelet-HHH | glcm  | Contrast                             | 0.986291016  |
| wavelet-HHH | glcm  | DifferenceEntropy                    | 1.433684293  |
| wavelet-HHH | glcm  | InverseVariance                      | 0.514871943  |
| wavelet-HHH | glcm  | DifferenceVariance                   | 0.471278398  |
| wavelet-HHH | glcm  | Idn                                  | 0.902352643  |
| wavelet-HHH | glcm  | Idm                                  | 0.668858965  |
| wavelet-HHH | glcm  | Correlation                          | -0.020554138 |
| wavelet-HHH | glcm  | Autocorrelation                      | 12.2173241   |
| wavelet-HHH | glcm  | SumEntropy                           | 1.998511454  |
| wavelet-HHH | glcm  | SumSquares                           | 0.483184286  |
| wavelet-HHH | glcm  | ClusterProminence                    | 2.994081379  |
| wavelet-HHH | glcm  | Imc2                                 | 0.126326346  |
| wavelet-HHH | glcm  | Imc1                                 | -0.007917516 |
| wavelet-HHH | glcm  | DifferenceAverage                    | 0.715982412  |
| wavelet-HHH | glcm  | Id                                   | 0.683176526  |
| wavelet-HHH | glcm  | ClusterTendency                      | 0.946446127  |

|             |            |                                  |              |
|-------------|------------|----------------------------------|--------------|
| wavelet-HHH | firstorder | InterquartileRange               | 18.85249087  |
| wavelet-HHH | firstorder | Skewness                         | -0.00482844  |
| wavelet-HHH | firstorder | Uniformity                       | 0.403074258  |
| wavelet-HHH | firstorder | Median                           | -0.124920362 |
| wavelet-HHH | firstorder | Energy                           | 1789693.939  |
| wavelet-HHH | firstorder | RobustMeanAbsoluteDeviation      | 7.873638936  |
| wavelet-HHH | firstorder | MeanAbsoluteDeviation            | 11.91787083  |
| wavelet-HHH | firstorder | TotalEnergy                      | 5120355.431  |
| wavelet-HHH | firstorder | Maximum                          | 62.04940981  |
| wavelet-HHH | firstorder | RootMeanSquared                  | 15.57049299  |
| wavelet-HHH | firstorder | 90Percentile                     | 19.29795418  |
| wavelet-HHH | firstorder | Minimum                          | -71.21064657 |
| wavelet-HHH | firstorder | Entropy                          | 1.521248299  |
| wavelet-HHH | firstorder | Range                            | 133.2600564  |
| wavelet-HHH | firstorder | Variance                         | 242.439476   |
| wavelet-HHH | firstorder | 10Percentile                     | -19.12285117 |
| wavelet-HHH | firstorder | Kurtosis                         | 3.734017513  |
| wavelet-HHH | firstorder | Mean                             | -0.027852668 |
| wavelet-HHH | glrlm      | ShortRunLowGrayLevelEmphasis     | 0.074288541  |
| wavelet-HHH | glrlm      | GrayLevelVariance                | 0.590458279  |
| wavelet-HHH | glrlm      | LowGrayLevelRunEmphasis          | 0.09870131   |
| wavelet-HHH | glrlm      | GrayLevelNonUniformityNormalized | 0.366998897  |
| wavelet-HHH | glrlm      | RunVariance                      | 0.909974985  |
| wavelet-HHH | glrlm      | GrayLevelNonUniformity           | 1763.487124  |
| wavelet-HHH | glrlm      | LongRunEmphasis                  | 3.29649511   |
| wavelet-HHH | glrlm      | ShortRunHighGrayLevelEmphasis    | 9.412125816  |
| wavelet-HHH | glrlm      | RunLengthNonUniformity           | 2373.682917  |
| wavelet-HHH | glrlm      | ShortRunEmphasis                 | 0.725104366  |
| wavelet-HHH | glrlm      | LongRunHighGrayLevelEmphasis     | 41.38412159  |
| wavelet-HHH | glrlm      | RunPercentage                    | 0.650563741  |
| wavelet-HHH | glrlm      | LongRunLowGrayLevelEmphasis      | 0.301665948  |
| wavelet-HHH | glrlm      | RunEntropy                       | 3.024950234  |
| wavelet-HHH | glrlm      | HighGrayLevelRunEmphasis         | 12.84495822  |
| wavelet-HHH | glrlm      | RunLengthNonUniformityNormalized | 0.49233516   |
| wavelet-HHH | glszm      | GrayLevelVariance                | 2.603789457  |
| wavelet-HHH | glszm      | ZoneVariance                     | 67972.35087  |
| wavelet-HHH | glszm      | GrayLevelNonUniformityNormalized | 0.394928697  |
| wavelet-HHH | glszm      | SizeZoneNonUniformityNormalized  | 0.460282807  |
| wavelet-HHH | glszm      | SizeZoneNonUniformity            | 145.4493671  |
| wavelet-HHH | glszm      | GrayLevelNonUniformity           | 124.7974684  |
| wavelet-HHH | glszm      | LargeAreaEmphasis                | 68518.07595  |
| wavelet-HHH | glszm      | SmallAreaHighGrayLevelEmphasis   | 9.999231077  |
| wavelet-HHH | glszm      | ZonePercentage                   | 0.042806827  |
| wavelet-HHH | glszm      | LargeAreaLowGrayLevelEmphasis    | 5989.261496  |
| wavelet-HHH | glszm      | LargeAreaHighGrayLevelEmphasis   | 850743.4747  |
| wavelet-HHH | glszm      | HighGrayLevelZoneEmphasis        | 14.67721519  |
| wavelet-HHH | glszm      | SmallAreaEmphasis                | 0.703010689  |
| wavelet-HHH | glszm      | LowGrayLevelZoneEmphasis         | 0.186778305  |
| wavelet-HHH | glszm      | ZoneEntropy                      | 3.470779675  |
| wavelet-HHH | glszm      | SmallAreaLowGrayLevelEmphasis    | 0.145985219  |
| wavelet-HHH | ngtdm      | Coarseness                       | 0.000641599  |
| wavelet-HHH | ngtdm      | Complexity                       | 9.584569555  |
| wavelet-HHH | ngtdm      | Strength                         | 0.008848351  |
| wavelet-HHH | ngtdm      | Contrast                         | 0.020174825  |
| wavelet-HHH | ngtdm      | Busyness                         | 60.00636364  |

|             |            |                                      |              |
|-------------|------------|--------------------------------------|--------------|
| wavelet-HLL | gldm       | GrayLevelVariance                    | 99.16142462  |
| wavelet-HLL | gldm       | HighGrayLevelEmphasis                | 1129.891493  |
| wavelet-HLL | gldm       | DependenceEntropy                    | 7.366664203  |
| wavelet-HLL | gldm       | DependenceNonUniformity              | 2006.057437  |
| wavelet-HLL | gldm       | GrayLevelNonUniformity               | 214.5865619  |
| wavelet-HLL | gldm       | SmallDependenceEmphasis              | 0.465966035  |
| wavelet-HLL | gldm       | SmallDependenceHighGrayLevelEmphasis | 539.2594764  |
| wavelet-HLL | gldm       | DependenceNonUniformityNormalized    | 0.271749856  |
| wavelet-HLL | gldm       | LargeDependenceEmphasis              | 7.143321593  |
| wavelet-HLL | gldm       | LargeDependenceLowGrayLevelEmphasis  | 0.009405728  |
| wavelet-HLL | gldm       | DependenceVariance                   | 2.115812398  |
| wavelet-HLL | gldm       | LargeDependenceHighGrayLevelEmphasis | 7713.624086  |
| wavelet-HLL | gldm       | SmallDependenceLowGrayLevelEmphasis  | 0.00111149   |
| wavelet-HLL | gldm       | LowGrayLevelEmphasis                 | 0.001882093  |
| wavelet-HLL | glcm       | JointAverage                         | 32.02285154  |
| wavelet-HLL | glcm       | SumAverage                           | 64.04570308  |
| wavelet-HLL | glcm       | JointEntropy                         | 10.13785209  |
| wavelet-HLL | glcm       | ClusterShade                         | 1121.422628  |
| wavelet-HLL | glcm       | MaximumProbability                   | 0.00530505   |
| wavelet-HLL | glcm       | Idmn                                 | 0.976130393  |
| wavelet-HLL | glcm       | JointEnergy                          | 0.001343454  |
| wavelet-HLL | glcm       | Contrast                             | 146.0724176  |
| wavelet-HLL | glcm       | DifferenceEntropy                    | 4.44983795   |
| wavelet-HLL | glcm       | InverseVariance                      | 0.149296444  |
| wavelet-HLL | glcm       | DifferenceVariance                   | 61.83438645  |
| wavelet-HLL | glcm       | Idn                                  | 0.903714134  |
| wavelet-HLL | glcm       | Idm                                  | 0.144957509  |
| wavelet-HLL | glcm       | Correlation                          | 0.249024818  |
| wavelet-HLL | glcm       | Autocorrelation                      | 1050.232467  |
| wavelet-HLL | glcm       | SumEntropy                           | 5.946219822  |
| wavelet-HLL | glcm       | SumSquares                           | 97.79815438  |
| wavelet-HLL | glcm       | ClusterProminence                    | 210479.1834  |
| wavelet-HLL | glcm       | Imc2                                 | 0.722218649  |
| wavelet-HLL | glcm       | Imc1                                 | -0.096716843 |
| wavelet-HLL | glcm       | DifferenceAverage                    | 8.638041169  |
| wavelet-HLL | glcm       | Id                                   | 0.227048684  |
| wavelet-HLL | glcm       | ClusterTendency                      | 245.1202     |
| wavelet-HLL | firstorder | InterquartileRange                   | 330.1855253  |
| wavelet-HLL | firstorder | Skewness                             | 0.238450758  |
| wavelet-HLL | firstorder | Uniformity                           | 0.029068892  |
| wavelet-HLL | firstorder | Median                               | -47.15312374 |
| wavelet-HLL | firstorder | Energy                               | 466794361.1  |
| wavelet-HLL | firstorder | RobustMeanAbsoluteDeviation          | 135.1485724  |
| wavelet-HLL | firstorder | MeanAbsoluteDeviation                | 196.0262743  |
| wavelet-HLL | firstorder | TotalEnergy                          | 1335509380   |
| wavelet-HLL | firstorder | Maximum                              | 1008.48266   |
| wavelet-HLL | firstorder | RootMeanSquared                      | 251.4639772  |
| wavelet-HLL | firstorder | 90Percentile                         | 297.1586403  |
| wavelet-HLL | firstorder | Minimum                              | -824.1093207 |
| wavelet-HLL | firstorder | Entropy                              | 5.345191389  |
| wavelet-HLL | firstorder | Range                                | 1832.591981  |
| wavelet-HLL | firstorder | Variance                             | 62002.64774  |
| wavelet-HLL | firstorder | 10Percentile                         | -347.1411018 |
| wavelet-HLL | firstorder | Kurtosis                             | 3.181685154  |
| wavelet-HLL | firstorder | Mean                                 | -35.09250762 |

|             |       |                                      |             |
|-------------|-------|--------------------------------------|-------------|
| wavelet-HLL | glrlm | ShortRunLowGrayLevelEmphasis         | 0.001863807 |
| wavelet-HLL | glrlm | GrayLevelVariance                    | 101.0048324 |
| wavelet-HLL | glrlm | LowGrayLevelRunEmphasis              | 0.001910833 |
| wavelet-HLL | glrlm | GrayLevelNonUniformityNormalized     | 0.028639887 |
| wavelet-HLL | glrlm | RunVariance                          | 0.06056296  |
| wavelet-HLL | glrlm | GrayLevelNonUniformity               | 201.3292686 |
| wavelet-HLL | glrlm | LongRunEmphasis                      | 1.166581006 |
| wavelet-HLL | glrlm | ShortRunHighGrayLevelEmphasis        | 1094.077662 |
| wavelet-HLL | glrlm | RunLengthNonUniformity               | 6428.894135 |
| wavelet-HLL | glrlm | ShortRunEmphasis                     | 0.964921824 |
| wavelet-HLL | glrlm | LongRunHighGrayLevelEmphasis         | 1312.575485 |
| wavelet-HLL | glrlm | RunPercentage                        | 0.952222662 |
| wavelet-HLL | glrlm | LongRunLowGrayLevelEmphasis          | 0.002127723 |
| wavelet-HLL | glrlm | RunEntropy                           | 5.625175258 |
| wavelet-HLL | glrlm | HighGrayLevelRunEmphasis             | 1132.209878 |
| wavelet-HLL | glrlm | RunLengthNonUniformityNormalized     | 0.9131644   |
| wavelet-HLL | glszm | GrayLevelVariance                    | 121.6427963 |
| wavelet-HLL | glszm | ZoneVariance                         | 9.348803739 |
| wavelet-HLL | glszm | GrayLevelNonUniformityNormalized     | 0.025298954 |
| wavelet-HLL | glszm | SizeZoneNonUniformityNormalized      | 0.476644344 |
| wavelet-HLL | glszm | SizeZoneNonUniformity                | 1914.203685 |
| wavelet-HLL | glszm | GrayLevelNonUniformity               | 101.6005976 |
| wavelet-HLL | glszm | LargeAreaEmphasis                    | 12.72758964 |
| wavelet-HLL | glszm | SmallAreaHighGrayLevelEmphasis       | 836.2362147 |
| wavelet-HLL | glszm | ZonePercentage                       | 0.544026009 |
| wavelet-HLL | glszm | LargeAreaLowGrayLevelEmphasis        | 0.01530314  |
| wavelet-HLL | glszm | LargeAreaHighGrayLevelEmphasis       | 13434.71738 |
| wavelet-HLL | glszm | HighGrayLevelZoneEmphasis            | 1161.528635 |
| wavelet-HLL | glszm | SmallAreaEmphasis                    | 0.717476554 |
| wavelet-HLL | glszm | LowGrayLevelZoneEmphasis             | 0.002294284 |
| wavelet-HLL | glszm | ZoneEntropy                          | 7.02347776  |
| wavelet-HLL | glszm | SmallAreaLowGrayLevelEmphasis        | 0.001833501 |
| wavelet-HLL | ngtdm | Coarseness                           | 0.001029805 |
| wavelet-HLL | ngtdm | Complexity                           | 13843.41335 |
| wavelet-HLL | ngtdm | Strength                             | 1.82479425  |
| wavelet-HLL | ngtdm | Contrast                             | 0.232395052 |
| wavelet-HLL | ngtdm | Busyness                             | 0.358049679 |
| wavelet-LHL | gldm  | GrayLevelVariance                    | 12.42865072 |
| wavelet-LHL | gldm  | HighGrayLevelEmphasis                | 213.2216202 |
| wavelet-LHL | gldm  | DependenceEntropy                    | 6.805925369 |
| wavelet-LHL | gldm  | DependenceNonUniformity              | 964.1500948 |
| wavelet-LHL | gldm  | GrayLevelNonUniformity               | 640.3752371 |
| wavelet-LHL | gldm  | SmallDependenceEmphasis              | 0.200977046 |
| wavelet-LHL | gldm  | SmallDependenceHighGrayLevelEmphasis | 45.15526078 |
| wavelet-LHL | gldm  | DependenceNonUniformityNormalized    | 0.130608249 |
| wavelet-LHL | gldm  | LargeDependenceEmphasis              | 24.18531563 |
| wavelet-LHL | gldm  | LargeDependenceLowGrayLevelEmphasis  | 0.14495123  |
| wavelet-LHL | gldm  | DependenceVariance                   | 6.815548757 |
| wavelet-LHL | gldm  | LargeDependenceHighGrayLevelEmphasis | 4888.618802 |
| wavelet-LHL | gldm  | SmallDependenceLowGrayLevelEmphasis  | 0.002252855 |
| wavelet-LHL | gldm  | LowGrayLevelEmphasis                 | 0.00775637  |
| wavelet-LHL | glcm  | JointAverage                         | 14.13604044 |
| wavelet-LHL | glcm  | SumAverage                           | 28.27208088 |
| wavelet-LHL | glcm  | JointEntropy                         | 7.350383271 |
| wavelet-LHL | glcm  | ClusterShade                         | 11.8514435  |

|             |            |                                  |              |
|-------------|------------|----------------------------------|--------------|
| wavelet-LHL | glcm       | MaximumProbability               | 0.031334558  |
| wavelet-LHL | glcm       | Idmn                             | 0.9832373    |
| wavelet-LHL | glcm       | JointEnergy                      | 0.010236547  |
| wavelet-LHL | glcm       | Contrast                         | 14.21375092  |
| wavelet-LHL | glcm       | DifferenceEntropy                | 3.002959291  |
| wavelet-LHL | glcm       | InverseVariance                  | 0.316469626  |
| wavelet-LHL | glcm       | DifferenceVariance               | 6.233294087  |
| wavelet-LHL | glcm       | Idn                              | 0.915684197  |
| wavelet-LHL | glcm       | Idm                              | 0.323352159  |
| wavelet-LHL | glcm       | Correlation                      | 0.405812424  |
| wavelet-LHL | glcm       | Autocorrelation                  | 204.7052241  |
| wavelet-LHL | glcm       | SumEntropy                       | 4.544057127  |
| wavelet-LHL | glcm       | SumSquares                       | 11.98385758  |
| wavelet-LHL | glcm       | ClusterProminence                | 4387.157359  |
| wavelet-LHL | glcm       | Imc2                             | 0.571151149  |
| wavelet-LHL | glcm       | Imc1                             | -0.069590975 |
| wavelet-LHL | glcm       | DifferenceAverage                | 2.768047951  |
| wavelet-LHL | glcm       | Id                               | 0.403984201  |
| wavelet-LHL | glcm       | ClusterTendency                  | 33.72167939  |
| wavelet-LHL | firstorder | InterquartileRange               | 104.0781785  |
| wavelet-LHL | firstorder | Skewness                         | 0.026839705  |
| wavelet-LHL | firstorder | Uniformity                       | 0.086748203  |
| wavelet-LHL | firstorder | Median                           | -10.76460151 |
| wavelet-LHL | firstorder | Energy                           | 57339463.09  |
| wavelet-LHL | firstorder | RobustMeanAbsoluteDeviation      | 43.62043918  |
| wavelet-LHL | firstorder | MeanAbsoluteDeviation            | 66.70937632  |
| wavelet-LHL | firstorder | TotalEnergy                      | 164049519.8  |
| wavelet-LHL | firstorder | Maximum                          | 329.5100435  |
| wavelet-LHL | firstorder | RootMeanSquared                  | 88.13325104  |
| wavelet-LHL | firstorder | 90Percentile                     | 103.2560572  |
| wavelet-LHL | firstorder | Minimum                          | -348.8470512 |
| wavelet-LHL | firstorder | Entropy                          | 3.839573079  |
| wavelet-LHL | firstorder | Range                            | 678.3570947  |
| wavelet-LHL | firstorder | Variance                         | 7700.018324  |
| wavelet-LHL | firstorder | 10Percentile                     | -111.5414115 |
| wavelet-LHL | firstorder | Kurtosis                         | 3.780482456  |
| wavelet-LHL | firstorder | Mean                             | -8.212893223 |
| wavelet-LHL | glrlm      | ShortRunLowGrayLevelEmphasis     | 0.007395947  |
| wavelet-LHL | glrlm      | GrayLevelVariance                | 13.19267653  |
| wavelet-LHL | glrlm      | LowGrayLevelRunEmphasis          | 0.007976753  |
| wavelet-LHL | glrlm      | GrayLevelNonUniformityNormalized | 0.082754027  |
| wavelet-LHL | glrlm      | RunVariance                      | 0.183119042  |
| wavelet-LHL | glrlm      | GrayLevelNonUniformity           | 536.4969904  |
| wavelet-LHL | glrlm      | LongRunEmphasis                  | 1.488002504  |
| wavelet-LHL | glrlm      | ShortRunHighGrayLevelEmphasis    | 195.8070758  |
| wavelet-LHL | glrlm      | RunLengthNonUniformity           | 5141.224982  |
| wavelet-LHL | glrlm      | ShortRunEmphasis                 | 0.909390053  |
| wavelet-LHL | glrlm      | LongRunHighGrayLevelEmphasis     | 314.0615578  |
| wavelet-LHL | glrlm      | RunPercentage                    | 0.878165184  |
| wavelet-LHL | glrlm      | LongRunLowGrayLevelEmphasis      | 0.011043771  |
| wavelet-LHL | glrlm      | RunEntropy                       | 4.469571883  |
| wavelet-LHL | glrlm      | HighGrayLevelRunEmphasis         | 214.4201004  |
| wavelet-LHL | glrlm      | RunLengthNonUniformityNormalized | 0.79094911   |
| wavelet-LHL | glszm      | GrayLevelVariance                | 24.23636808  |
| wavelet-LHL | glszm      | ZoneVariance                     | 917.1006491  |



|             |       |                                      |              |
|-------------|-------|--------------------------------------|--------------|
| wavelet-LHL | glszm | GrayLevelNonUniformityNormalized     | 0.056998332  |
| wavelet-LHL | glszm | SizeZoneNonUniformityNormalized      | 0.324368539  |
| wavelet-LHL | glszm | SizeZoneNonUniformity                | 526.1257707  |
| wavelet-LHL | glszm | GrayLevelNonUniformity               | 92.4512947   |
| wavelet-LHL | glszm | LargeAreaEmphasis                    | 937.8138101  |
| wavelet-LHL | glszm | SmallAreaHighGrayLevelEmphasis       | 134.6507815  |
| wavelet-LHL | glszm | ZonePercentage                       | 0.219723652  |
| wavelet-LHL | glszm | LargeAreaLowGrayLevelEmphasis        | 4.87890015   |
| wavelet-LHL | glszm | LargeAreaHighGrayLevelEmphasis       | 184756.0567  |
| wavelet-LHL | glszm | HighGrayLevelZoneEmphasis            | 228.4161529  |
| wavelet-LHL | glszm | SmallAreaEmphasis                    | 0.589228415  |
| wavelet-LHL | glszm | LowGrayLevelZoneEmphasis             | 0.011560704  |
| wavelet-LHL | glszm | ZoneEntropy                          | 6.596960549  |
| wavelet-LHL | glszm | SmallAreaLowGrayLevelEmphasis        | 0.007815837  |
| wavelet-LHL | ngtdm | Coarseness                           | 0.001259804  |
| wavelet-LHL | ngtdm | Complexity                           | 574.7280081  |
| wavelet-LHL | ngtdm | Strength                             | 0.332528782  |
| wavelet-LHL | ngtdm | Contrast                             | 0.05834807   |
| wavelet-LHL | ngtdm | Busyness                             | 1.600933176  |
| wavelet-LHH | gldm  | GrayLevelVariance                    | 0.927024378  |
| wavelet-LHH | gldm  | HighGrayLevelEmphasis                | 21.22460038  |
| wavelet-LHH | gldm  | DependenceEntropy                    | 5.565474371  |
| wavelet-LHH | gldm  | DependenceNonUniformity              | 485.509618   |
| wavelet-LHH | gldm  | GrayLevelNonUniformity               | 2255.678949  |
| wavelet-LHH | gldm  | SmallDependenceEmphasis              | 0.057499445  |
| wavelet-LHH | gldm  | SmallDependenceHighGrayLevelEmphasis | 1.381776118  |
| wavelet-LHH | gldm  | DependenceNonUniformityNormalized    | 0.065769387  |
| wavelet-LHH | gldm  | LargeDependenceEmphasis              | 91.0176104   |
| wavelet-LHH | gldm  | LargeDependenceLowGrayLevelEmphasis  | 4.811637531  |
| wavelet-LHH | gldm  | DependenceVariance                   | 17.17220158  |
| wavelet-LHH | gldm  | LargeDependenceHighGrayLevelEmphasis | 1861.896234  |
| wavelet-LHH | gldm  | SmallDependenceLowGrayLevelEmphasis  | 0.005736765  |
| wavelet-LHH | gldm  | LowGrayLevelEmphasis                 | 0.059266919  |
| wavelet-LHH | glcm  | JointAverage                         | 4.502086908  |
| wavelet-LHH | glcm  | SumAverage                           | 9.004173815  |
| wavelet-LHH | glcm  | JointEntropy                         | 3.903792075  |
| wavelet-LHH | glcm  | ClusterShade                         | 0.175543507  |
| wavelet-LHH | glcm  | MaximumProbability                   | 0.157814568  |
| wavelet-LHH | glcm  | Idmn                                 | 0.975910201  |
| wavelet-LHH | glcm  | JointEnergy                          | 0.099960649  |
| wavelet-LHH | glcm  | Contrast                             | 1.683864289  |
| wavelet-LHH | glcm  | DifferenceEntropy                    | 1.735108496  |
| wavelet-LHH | glcm  | InverseVariance                      | 0.495686118  |
| wavelet-LHH | glcm  | DifferenceVariance                   | 0.782992461  |
| wavelet-LHH | glcm  | Idn                                  | 0.902796399  |
| wavelet-LHH | glcm  | Idm                                  | 0.599727182  |
| wavelet-LHH | glcm  | Correlation                          | 0.07592419   |
| wavelet-LHH | glcm  | Autocorrelation                      | 20.33810505  |
| wavelet-LHH | glcm  | SumEntropy                           | 2.513681073  |
| wavelet-LHH | glcm  | SumSquares                           | 0.911246849  |
| wavelet-LHH | glcm  | ClusterProminence                    | 14.43688693  |
| wavelet-LHH | glcm  | Imc2                                 | 0.20257057   |
| wavelet-LHH | glcm  | Imc1                                 | -0.018529878 |
| wavelet-LHH | glcm  | DifferenceAverage                    | 0.943295929  |
| wavelet-LHH | glcm  | Id                                   | 0.628579595  |

|             |            |                                  |              |
|-------------|------------|----------------------------------|--------------|
| wavelet-LHH | glcm       | ClusterTendency                  | 1.961123108  |
| wavelet-LHH | firstorder | InterquartileRange               | 27.00899644  |
| wavelet-LHH | firstorder | Skewness                         | 0.065292051  |
| wavelet-LHH | firstorder | Uniformity                       | 0.305564745  |
| wavelet-LHH | firstorder | Median                           | -0.094360472 |
| wavelet-LHH | firstorder | Energy                           | 3836185.847  |
| wavelet-LHH | firstorder | RobustMeanAbsoluteDeviation      | 11.4217023   |
| wavelet-LHH | firstorder | MeanAbsoluteDeviation            | 17.3714911   |
| wavelet-LHH | firstorder | TotalEnergy                      | 10975415.75  |
| wavelet-LHH | firstorder | Maximum                          | 93.30180255  |
| wavelet-LHH | firstorder | RootMeanSquared                  | 22.79621787  |
| wavelet-LHH | firstorder | 90Percentile                     | 28.19247821  |
| wavelet-LHH | firstorder | Minimum                          | -95.11057714 |
| wavelet-LHH | firstorder | Entropy                          | 1.98227061   |
| wavelet-LHH | firstorder | Range                            | 188.4123797  |
| wavelet-LHH | firstorder | Variance                         | 519.6244784  |
| wavelet-LHH | firstorder | 10Percentile                     | -28.01276707 |
| wavelet-LHH | firstorder | Kurtosis                         | 3.844724732  |
| wavelet-LHH | firstorder | Mean                             | 0.207534727  |
| wavelet-LHH | glrlm      | ShortRunLowGrayLevelEmphasis     | 0.049413757  |
| wavelet-LHH | glrlm      | GrayLevelVariance                | 1.113967997  |
| wavelet-LHH | glrlm      | LowGrayLevelRunEmphasis          | 0.061567925  |
| wavelet-LHH | glrlm      | GrayLevelNonUniformityNormalized | 0.272604495  |
| wavelet-LHH | glrlm      | RunVariance                      | 0.657109133  |
| wavelet-LHH | glrlm      | GrayLevelNonUniformity           | 1424.905576  |
| wavelet-LHH | glrlm      | LongRunEmphasis                  | 2.67341576   |
| wavelet-LHH | glrlm      | ShortRunHighGrayLevelEmphasis    | 16.82663234  |
| wavelet-LHH | glrlm      | RunLengthNonUniformity           | 2949.007849  |
| wavelet-LHH | glrlm      | ShortRunEmphasis                 | 0.776180748  |
| wavelet-LHH | glrlm      | LongRunHighGrayLevelEmphasis     | 55.87473332  |
| wavelet-LHH | glrlm      | RunPercentage                    | 0.707948648  |
| wavelet-LHH | glrlm      | LongRunLowGrayLevelEmphasis      | 0.150927478  |
| wavelet-LHH | glrlm      | RunEntropy                       | 3.285246547  |
| wavelet-LHH | glrlm      | HighGrayLevelRunEmphasis         | 21.46869415  |
| wavelet-LHH | glrlm      | RunLengthNonUniformityNormalized | 0.561691869  |
| wavelet-LHH | glszm      | GrayLevelVariance                | 4.202168453  |
| wavelet-LHH | glszm      | ZoneVariance                     | 40557.57502  |
| wavelet-LHH | glszm      | GrayLevelNonUniformityNormalized | 0.221580395  |
| wavelet-LHH | glszm      | SizeZoneNonUniformityNormalized  | 0.276108324  |
| wavelet-LHH | glszm      | SizeZoneNonUniformity            | 104.0928382  |
| wavelet-LHH | glszm      | GrayLevelNonUniformity           | 83.53580902  |
| wavelet-LHH | glszm      | LargeAreaEmphasis                | 40940.98674  |
| wavelet-LHH | glszm      | SmallAreaHighGrayLevelEmphasis   | 13.8443374   |
| wavelet-LHH | glszm      | ZonePercentage                   | 0.051070171  |
| wavelet-LHH | glszm      | LargeAreaLowGrayLevelEmphasis    | 2108.450694  |
| wavelet-LHH | glszm      | LargeAreaHighGrayLevelEmphasis   | 836770.4032  |
| wavelet-LHH | glszm      | HighGrayLevelZoneEmphasis        | 24.36870027  |
| wavelet-LHH | glszm      | SmallAreaEmphasis                | 0.536722588  |
| wavelet-LHH | glszm      | LowGrayLevelZoneEmphasis         | 0.11661397   |
| wavelet-LHH | glszm      | ZoneEntropy                      | 4.883046262  |
| wavelet-LHH | glszm      | SmallAreaLowGrayLevelEmphasis    | 0.072617705  |
| wavelet-LHH | ngtdm      | Coarseness                       | 0.000823545  |
| wavelet-LHH | ngtdm      | Complexity                       | 19.68253762  |
| wavelet-LHH | ngtdm      | Strength                         | 0.018182226  |
| wavelet-LHH | ngtdm      | Contrast                         | 0.024378854  |

|             |            |                                      |              |
|-------------|------------|--------------------------------------|--------------|
| wavelet-LHH | ngtdm      | Busyness                             | 26.99774896  |
| wavelet-LLH | gldm       | GrayLevelVariance                    | 9.110145564  |
| wavelet-LLH | gldm       | HighGrayLevelEmphasis                | 341.9477106  |
| wavelet-LLH | gldm       | DependenceEntropy                    | 6.666411825  |
| wavelet-LLH | gldm       | DependenceNonUniformity              | 904.3489569  |
| wavelet-LLH | gldm       | GrayLevelNonUniformity               | 769.8564075  |
| wavelet-LLH | gldm       | SmallDependenceEmphasis              | 0.179824851  |
| wavelet-LLH | gldm       | SmallDependenceHighGrayLevelEmphasis | 63.54119945  |
| wavelet-LLH | gldm       | DependenceNonUniformityNormalized    | 0.122507309  |
| wavelet-LLH | gldm       | LargeDependenceEmphasis              | 30.16120293  |
| wavelet-LLH | gldm       | LargeDependenceLowGrayLevelEmphasis  | 0.094583801  |
| wavelet-LLH | gldm       | DependenceVariance                   | 9.503180501  |
| wavelet-LLH | gldm       | LargeDependenceHighGrayLevelEmphasis | 10043.55405  |
| wavelet-LLH | gldm       | SmallDependenceLowGrayLevelEmphasis  | 0.000797768  |
| wavelet-LLH | gldm       | LowGrayLevelEmphasis                 | 0.003455196  |
| wavelet-LLH | glcm       | JointAverage                         | 18.23727343  |
| wavelet-LLH | glcm       | SumAverage                           | 36.47454687  |
| wavelet-LLH | glcm       | JointEntropy                         | 6.972645389  |
| wavelet-LLH | glcm       | ClusterShade                         | 3.260525066  |
| wavelet-LLH | glcm       | MaximumProbability                   | 0.04532311   |
| wavelet-LLH | glcm       | Idmn                                 | 0.989174892  |
| wavelet-LLH | glcm       | JointEnergy                          | 0.013870019  |
| wavelet-LLH | glcm       | Contrast                             | 11.658913    |
| wavelet-LLH | glcm       | DifferenceEntropy                    | 2.888748541  |
| wavelet-LLH | glcm       | InverseVariance                      | 0.338132705  |
| wavelet-LLH | glcm       | DifferenceVariance                   | 5.218425774  |
| wavelet-LLH | glcm       | Idn                                  | 0.931486557  |
| wavelet-LLH | glcm       | Idm                                  | 0.350858922  |
| wavelet-LLH | glcm       | Correlation                          | 0.356959609  |
| wavelet-LLH | glcm       | Autocorrelation                      | 335.8439812  |
| wavelet-LLH | glcm       | SumEntropy                           | 4.310389886  |
| wavelet-LLH | glcm       | SumSquares                           | 9.075185404  |
| wavelet-LLH | glcm       | ClusterProminence                    | 2703.411034  |
| wavelet-LLH | glcm       | Imc2                                 | 0.523003603  |
| wavelet-LLH | glcm       | Imc1                                 | -0.058670337 |
| wavelet-LLH | glcm       | DifferenceAverage                    | 2.496894275  |
| wavelet-LLH | glcm       | Id                                   | 0.427196601  |
| wavelet-LLH | glcm       | ClusterTendency                      | 24.64182862  |
| wavelet-LLH | firstorder | InterquartileRange                   | 84.87695188  |
| wavelet-LLH | firstorder | Skewness                             | 0.021665185  |
| wavelet-LLH | firstorder | Uniformity                           | 0.104288324  |
| wavelet-LLH | firstorder | Median                               | -6.055103711 |
| wavelet-LLH | firstorder | Energy                               | 41928353.19  |
| wavelet-LLH | firstorder | RobustMeanAbsoluteDeviation          | 35.74736269  |
| wavelet-LLH | firstorder | MeanAbsoluteDeviation                | 55.99279348  |
| wavelet-LLH | firstorder | TotalEnergy                          | 119957980.7  |
| wavelet-LLH | firstorder | Maximum                              | 332.5689184  |
| wavelet-LLH | firstorder | RootMeanSquared                      | 75.36451039  |
| wavelet-LLH | firstorder | 90Percentile                         | 83.74757598  |
| wavelet-LLH | firstorder | Minimum                              | -435.0428016 |
| wavelet-LLH | firstorder | Entropy                              | 3.602214461  |
| wavelet-LLH | firstorder | Range                                | 767.61172    |
| wavelet-LLH | firstorder | Variance                             | 5638.848661  |
| wavelet-LLH | firstorder | 10Percentile                         | -97.80980971 |
| wavelet-LLH | firstorder | Kurtosis                             | 4.381352745  |

|             |            |                                      |              |
|-------------|------------|--------------------------------------|--------------|
| wavelet-LLH | firstorder | Mean                                 | -6.400059853 |
| wavelet-LLH | glrlm      | ShortRunLowGrayLevelEmphasis         | 0.003182037  |
| wavelet-LLH | glrlm      | GrayLevelVariance                    | 9.846009342  |
| wavelet-LLH | glrlm      | LowGrayLevelRunEmphasis              | 0.003500135  |
| wavelet-LLH | glrlm      | GrayLevelNonUniformityNormalized     | 0.097928998  |
| wavelet-LLH | glrlm      | RunVariance                          | 0.221156214  |
| wavelet-LLH | glrlm      | GrayLevelNonUniformity               | 624.4097935  |
| wavelet-LLH | glrlm      | LongRunEmphasis                      | 1.569007703  |
| wavelet-LLH | glrlm      | ShortRunHighGrayLevelEmphasis        | 309.7580395  |
| wavelet-LLH | glrlm      | RunLengthNonUniformity               | 4939.715478  |
| wavelet-LLH | glrlm      | ShortRunEmphasis                     | 0.900373632  |
| wavelet-LLH | glrlm      | LongRunHighGrayLevelEmphasis         | 533.3955643  |
| wavelet-LLH | glrlm      | RunPercentage                        | 0.863649626  |
| wavelet-LLH | glrlm      | LongRunLowGrayLevelEmphasis          | 0.00529702   |
| wavelet-LLH | glrlm      | RunEntropy                           | 4.297845119  |
| wavelet-LLH | glrlm      | HighGrayLevelRunEmphasis             | 343.1243766  |
| wavelet-LLH | glrlm      | RunLengthNonUniformityNormalized     | 0.772947304  |
| wavelet-LLH | glszm      | GrayLevelVariance                    | 20.71407012  |
| wavelet-LLH | glszm      | ZoneVariance                         | 1620.742252  |
| wavelet-LLH | glszm      | GrayLevelNonUniformityNormalized     | 0.062046221  |
| wavelet-LLH | glszm      | SizeZoneNonUniformityNormalized      | 0.3114878    |
| wavelet-LLH | glszm      | SizeZoneNonUniformity                | 442.3126761  |
| wavelet-LLH | glszm      | GrayLevelNonUniformity               | 88.1056338   |
| wavelet-LLH | glszm      | LargeAreaEmphasis                    | 1647.767606  |
| wavelet-LLH | glszm      | SmallAreaHighGrayLevelEmphasis       | 205.6595799  |
| wavelet-LLH | glszm      | ZonePercentage                       | 0.192359794  |
| wavelet-LLH | glszm      | LargeAreaLowGrayLevelEmphasis        | 5.035275746  |
| wavelet-LLH | glszm      | LargeAreaHighGrayLevelEmphasis       | 544193.662   |
| wavelet-LLH | glszm      | HighGrayLevelZoneEmphasis            | 357.178169   |
| wavelet-LLH | glszm      | SmallAreaEmphasis                    | 0.575831498  |
| wavelet-LLH | glszm      | LowGrayLevelZoneEmphasis             | 0.004456175  |
| wavelet-LLH | glszm      | ZoneEntropy                          | 6.495926211  |
| wavelet-LLH | glszm      | SmallAreaLowGrayLevelEmphasis        | 0.002961123  |
| wavelet-LLH | ngtdm      | Coarseness                           | 0.001200072  |
| wavelet-LLH | ngtdm      | Complexity                           | 641.3534945  |
| wavelet-LLH | ngtdm      | Strength                             | 0.441355714  |
| wavelet-LLH | ngtdm      | Contrast                             | 0.033455977  |
| wavelet-LLH | ngtdm      | Busyness                             | 1.084993774  |
| wavelet-LLL | gldm       | GrayLevelVariance                    | 956.470307   |
| wavelet-LLL | gldm       | HighGrayLevelEmphasis                | 7074.202113  |
| wavelet-LLL | gldm       | DependenceEntropy                    | 8.179937103  |
| wavelet-LLL | gldm       | DependenceNonUniformity              | 2891.191547  |
| wavelet-LLL | gldm       | GrayLevelNonUniformity               | 78.18612842  |
| wavelet-LLL | gldm       | SmallDependenceEmphasis              | 0.636877783  |
| wavelet-LLL | gldm       | SmallDependenceHighGrayLevelEmphasis | 3784.803514  |
| wavelet-LLL | gldm       | DependenceNonUniformityNormalized    | 0.391654233  |
| wavelet-LLL | gldm       | LargeDependenceEmphasis              | 5.000812788  |
| wavelet-LLL | gldm       | LargeDependenceLowGrayLevelEmphasis  | 0.002483474  |
| wavelet-LLL | gldm       | DependenceVariance                   | 1.75281002   |
| wavelet-LLL | gldm       | LargeDependenceHighGrayLevelEmphasis | 52348.2731   |
| wavelet-LLL | gldm       | SmallDependenceLowGrayLevelEmphasis  | 0.000784423  |
| wavelet-LLL | gldm       | LowGrayLevelEmphasis                 | 0.001051175  |
| wavelet-LLL | glcm       | JointAverage                         | 82.75881198  |
| wavelet-LLL | glcm       | SumAverage                           | 165.517624   |
| wavelet-LLL | glcm       | JointEntropy                         | 11.88355302  |

|             |            |                                  |              |
|-------------|------------|----------------------------------|--------------|
| wavelet-LLL | glcm       | ClusterShade                     | -93658.94775 |
| wavelet-LLL | glcm       | MaximumProbability               | 0.003378131  |
| wavelet-LLL | glcm       | Idmn                             | 0.976039981  |
| wavelet-LLL | glcm       | JointEnergy                      | 0.000430244  |
| wavelet-LLL | glcm       | Contrast                         | 433.4227412  |
| wavelet-LLL | glcm       | DifferenceEntropy                | 5.289631099  |
| wavelet-LLL | glcm       | InverseVariance                  | 0.095917946  |
| wavelet-LLL | glcm       | DifferenceVariance               | 173.2951134  |
| wavelet-LLL | glcm       | Idn                              | 0.900565569  |
| wavelet-LLL | glcm       | Idm                              | 0.093987857  |
| wavelet-LLL | glcm       | Correlation                      | 0.740685903  |
| wavelet-LLL | glcm       | Autocorrelation                  | 7488.991491  |
| wavelet-LLL | glcm       | SumEntropy                       | 7.5348014    |
| wavelet-LLL | glcm       | SumSquares                       | 853.5412623  |
| wavelet-LLL | glcm       | ClusterProminence                | 20908377.04  |
| wavelet-LLL | glcm       | Imc2                             | 0.959110677  |
| wavelet-LLL | glcm       | Imc1                             | -0.202065236 |
| wavelet-LLL | glcm       | DifferenceAverage                | 15.47106683  |
| wavelet-LLL | glcm       | Id                               | 0.161788135  |
| wavelet-LLL | glcm       | ClusterTendency                  | 2980.742308  |
| wavelet-LLL | firstorder | InterquartileRange               | 1294.482097  |
| wavelet-LLL | firstorder | Skewness                         | -0.451910046 |
| wavelet-LLL | firstorder | Uniformity                       | 0.010591456  |
| wavelet-LLL | firstorder | Median                           | -620.0203699 |
| wavelet-LLL | firstorder | Energy                           | 8645284033   |
| wavelet-LLL | firstorder | RobustMeanAbsoluteDeviation      | 525.4956576  |
| wavelet-LLL | firstorder | MeanAbsoluteDeviation            | 665.2410308  |
| wavelet-LLL | firstorder | TotalEnergy                      | 24734356022  |
| wavelet-LLL | firstorder | Maximum                          | 508.0692656  |
| wavelet-LLL | firstorder | RootMeanSquared                  | 1082.187748  |
| wavelet-LLL | firstorder | 90Percentile                     | 166.0766747  |
| wavelet-LLL | firstorder | Minimum                          | -2692.591576 |
| wavelet-LLL | firstorder | Entropy                          | 6.72005778   |
| wavelet-LLL | firstorder | Range                            | 3200.660841  |
| wavelet-LLL | firstorder | Variance                         | 597841.4082  |
| wavelet-LLL | firstorder | 10Percentile                     | -1907.847574 |
| wavelet-LLL | firstorder | Kurtosis                         | 2.068081399  |
| wavelet-LLL | firstorder | Mean                             | -757.1584466 |
| wavelet-LLL | glrlm      | ShortRunLowGrayLevelEmphasis     | 0.001056243  |
| wavelet-LLL | glrlm      | GrayLevelVariance                | 950.4269998  |
| wavelet-LLL | glrlm      | LowGrayLevelRunEmphasis          | 0.001068431  |
| wavelet-LLL | glrlm      | GrayLevelNonUniformityNormalized | 0.010391681  |
| wavelet-LLL | glrlm      | RunVariance                      | 0.038442986  |
| wavelet-LLL | glrlm      | GrayLevelNonUniformity           | 74.34961757  |
| wavelet-LLL | glrlm      | LongRunEmphasis                  | 1.10395847   |
| wavelet-LLL | glrlm      | ShortRunHighGrayLevelEmphasis    | 6745.4784    |
| wavelet-LLL | glrlm      | RunLengthNonUniformity           | 6752.611598  |
| wavelet-LLL | glrlm      | ShortRunEmphasis                 | 0.977743681  |
| wavelet-LLL | glrlm      | LongRunHighGrayLevelEmphasis     | 8059.626152  |
| wavelet-LLL | glrlm      | RunPercentage                    | 0.969145322  |
| wavelet-LLL | glrlm      | LongRunLowGrayLevelEmphasis      | 0.00111863   |
| wavelet-LLL | glrlm      | RunEntropy                       | 6.900517779  |
| wavelet-LLL | glrlm      | HighGrayLevelRunEmphasis         | 6970.655908  |
| wavelet-LLL | glrlm      | RunLengthNonUniformityNormalized | 0.943456858  |
| wavelet-LLL | glszm      | GrayLevelVariance                | 877.7772325  |

|             |       |                                      |              |
|-------------|-------|--------------------------------------|--------------|
| wavelet-LLL | glszm | ZoneVariance                         | 3.678916715  |
| wavelet-LLL | glszm | GrayLevelNonUniformityNormalized     | 0.009639318  |
| wavelet-LLL | glszm | SizeZoneNonUniformityNormalized      | 0.644263493  |
| wavelet-LLL | glszm | SizeZoneNonUniformity                | 3346.304582  |
| wavelet-LLL | glszm | GrayLevelNonUniformity               | 50.06661533  |
| wavelet-LLL | glszm | LargeAreaEmphasis                    | 5.698883327  |
| wavelet-LLL | glszm | SmallAreaHighGrayLevelEmphasis       | 4742.628401  |
| wavelet-LLL | glszm | ZonePercentage                       | 0.70360336   |
| wavelet-LLL | glszm | LargeAreaLowGrayLevelEmphasis        | 0.002378364  |
| wavelet-LLL | glszm | LargeAreaHighGrayLevelEmphasis       | 63374.24528  |
| wavelet-LLL | glszm | HighGrayLevelZoneEmphasis            | 6059.725838  |
| wavelet-LLL | glszm | SmallAreaEmphasis                    | 0.829780506  |
| wavelet-LLL | glszm | LowGrayLevelZoneEmphasis             | 0.001222623  |
| wavelet-LLL | glszm | ZoneEntropy                          | 7.74009988   |
| wavelet-LLL | glszm | SmallAreaLowGrayLevelEmphasis        | 0.001051909  |
| wavelet-LLL | ngtdm | Coarseness                           | 0.001679529  |
| wavelet-LLL | ngtdm | Complexity                           | 54090.38245  |
| wavelet-LLL | ngtdm | Strength                             | 10.13209047  |
| wavelet-LLL | ngtdm | Contrast                             | 1.006165132  |
| wavelet-LLL | ngtdm | Busyness                             | 0.057277738  |
| wavelet-HHL | gldm  | GrayLevelVariance                    | 3.97290408   |
| wavelet-HHL | gldm  | HighGrayLevelEmphasis                | 136.5533731  |
| wavelet-HHL | gldm  | DependenceEntropy                    | 6.102636003  |
| wavelet-HHL | gldm  | DependenceNonUniformity              | 767.0376592  |
| wavelet-HHL | gldm  | GrayLevelNonUniformity               | 1141.195611  |
| wavelet-HHL | gldm  | SmallDependenceEmphasis              | 0.1443427    |
| wavelet-HHL | gldm  | SmallDependenceHighGrayLevelEmphasis | 20.20022897  |
| wavelet-HHL | gldm  | DependenceNonUniformityNormalized    | 0.103906483  |
| wavelet-HHL | gldm  | LargeDependenceEmphasis              | 36.21701436  |
| wavelet-HHL | gldm  | LargeDependenceLowGrayLevelEmphasis  | 0.284651929  |
| wavelet-HHL | gldm  | DependenceVariance                   | 9.64886889   |
| wavelet-HHL | gldm  | LargeDependenceHighGrayLevelEmphasis | 4807.906123  |
| wavelet-HHL | gldm  | SmallDependenceLowGrayLevelEmphasis  | 0.001644725  |
| wavelet-HHL | gldm  | LowGrayLevelEmphasis                 | 0.008617642  |
| wavelet-HHL | glcm  | JointAverage                         | 11.51125856  |
| wavelet-HHL | glcm  | SumAverage                           | 23.02251711  |
| wavelet-HHL | glcm  | JointEntropy                         | 5.919816409  |
| wavelet-HHL | glcm  | ClusterShade                         | -1.41433321  |
| wavelet-HHL | glcm  | MaximumProbability                   | 0.063581601  |
| wavelet-HHL | glcm  | Idmn                                 | 0.983689039  |
| wavelet-HHL | glcm  | JointEnergy                          | 0.027018461  |
| wavelet-HHL | glcm  | Contrast                             | 7.711600157  |
| wavelet-HHL | glcm  | DifferenceEntropy                    | 2.627410694  |
| wavelet-HHL | glcm  | InverseVariance                      | 0.37730014   |
| wavelet-HHL | glcm  | DifferenceVariance                   | 3.390172313  |
| wavelet-HHL | glcm  | Idn                                  | 0.916693217  |
| wavelet-HHL | glcm  | Idm                                  | 0.39609907   |
| wavelet-HHL | glcm  | Correlation                          | 0.027424638  |
| wavelet-HHL | glcm  | Autocorrelation                      | 132.6168817  |
| wavelet-HHL | glcm  | SumEntropy                           | 3.513314199  |
| wavelet-HHL | glcm  | SumSquares                           | 3.963592717  |
| wavelet-HHL | glcm  | ClusterProminence                    | 292.7363495  |
| wavelet-HHL | glcm  | Imc2                                 | 0.347643139  |
| wavelet-HHL | glcm  | Imc1                                 | -0.034405999 |
| wavelet-HHL | glcm  | DifferenceAverage                    | 2.046801628  |

|             |            |                                  |              |
|-------------|------------|----------------------------------|--------------|
| wavelet-HHL | glcm       | Id                               | 0.465346416  |
| wavelet-HHL | glcm       | ClusterTendency                  | 8.14277071   |
| wavelet-HHL | firstorder | InterquartileRange               | 56.61481162  |
| wavelet-HHL | firstorder | Skewness                         | -0.02570806  |
| wavelet-HHL | firstorder | Uniformity                       | 0.154591657  |
| wavelet-HHL | firstorder | Median                           | -0.141840422 |
| wavelet-HHL | firstorder | Energy                           | 17929125.86  |
| wavelet-HHL | firstorder | RobustMeanAbsoluteDeviation      | 24.01434979  |
| wavelet-HHL | firstorder | MeanAbsoluteDeviation            | 37.11847337  |
| wavelet-HHL | firstorder | TotalEnergy                      | 51295640.55  |
| wavelet-HHL | firstorder | Maximum                          | 239.0135176  |
| wavelet-HHL | firstorder | RootMeanSquared                  | 49.2824781   |
| wavelet-HHL | firstorder | 90Percentile                     | 60.52849678  |
| wavelet-HHL | firstorder | Minimum                          | -250.0972376 |
| wavelet-HHL | firstorder | Entropy                          | 3.013707175  |
| wavelet-HHL | firstorder | Range                            | 489.1107552  |
| wavelet-HHL | firstorder | Variance                         | 2428.639284  |
| wavelet-HHL | firstorder | 10Percentile                     | -58.36994761 |
| wavelet-HHL | firstorder | Kurtosis                         | 4.270365028  |
| wavelet-HHL | firstorder | Mean                             | 0.351231654  |
| wavelet-HHL | glrlm      | ShortRunLowGrayLevelEmphasis     | 0.007809268  |
| wavelet-HHL | glrlm      | GrayLevelVariance                | 4.396118258  |
| wavelet-HHL | glrlm      | LowGrayLevelRunEmphasis          | 0.008751794  |
| wavelet-HHL | glrlm      | GrayLevelNonUniformityNormalized | 0.143312712  |
| wavelet-HHL | glrlm      | RunVariance                      | 0.279973316  |
| wavelet-HHL | glrlm      | GrayLevelNonUniformity           | 889.0365236  |
| wavelet-HHL | glrlm      | LongRunEmphasis                  | 1.717170017  |
| wavelet-HHL | glrlm      | ShortRunHighGrayLevelEmphasis    | 121.1697053  |
| wavelet-HHL | glrlm      | RunLengthNonUniformity           | 4603.94959   |
| wavelet-HHL | glrlm      | ShortRunEmphasis                 | 0.88169623   |
| wavelet-HHL | glrlm      | LongRunHighGrayLevelEmphasis     | 232.9520535  |
| wavelet-HHL | glrlm      | RunPercentage                    | 0.840214243  |
| wavelet-HHL | glrlm      | LongRunLowGrayLevelEmphasis      | 0.01442309   |
| wavelet-HHL | glrlm      | RunEntropy                       | 3.804548337  |
| wavelet-HHL | glrlm      | HighGrayLevelRunEmphasis         | 137.0515496  |
| wavelet-HHL | glrlm      | RunLengthNonUniformityNormalized | 0.738281522  |
| wavelet-HHL | glszm      | GrayLevelVariance                | 12.45497937  |
| wavelet-HHL | glszm      | ZoneVariance                     | 6460.968953  |
| wavelet-HHL | glszm      | GrayLevelNonUniformityNormalized | 0.102397079  |
| wavelet-HHL | glszm      | SizeZoneNonUniformityNormalized  | 0.364087948  |
| wavelet-HHL | glszm      | SizeZoneNonUniformity            | 361.9034205  |
| wavelet-HHL | glszm      | GrayLevelNonUniformity           | 101.7826962  |
| wavelet-HHL | glszm      | LargeAreaEmphasis                | 6516.122736  |
| wavelet-HHL | glszm      | SmallAreaHighGrayLevelEmphasis   | 87.52985929  |
| wavelet-HHL | glszm      | ZonePercentage                   | 0.134651856  |
| wavelet-HHL | glszm      | LargeAreaLowGrayLevelEmphasis    | 50.45485868  |
| wavelet-HHL | glszm      | LargeAreaHighGrayLevelEmphasis   | 860184.9909  |
| wavelet-HHL | glszm      | HighGrayLevelZoneEmphasis        | 143.2052314  |
| wavelet-HHL | glszm      | SmallAreaEmphasis                | 0.625009428  |
| wavelet-HHL | glszm      | LowGrayLevelZoneEmphasis         | 0.012066707  |
| wavelet-HHL | glszm      | ZoneEntropy                      | 5.588293118  |
| wavelet-HHL | glszm      | SmallAreaLowGrayLevelEmphasis    | 0.008412175  |
| wavelet-HHL | ngtdm      | Coarseness                       | 0.000912779  |
| wavelet-HHL | ngtdm      | Complexity                       | 293.8644151  |
| wavelet-HHL | ngtdm      | Strength                         | 0.156019846  |

|             |            |                                      |              |
|-------------|------------|--------------------------------------|--------------|
| wavelet-HHL | ngtdm      | Contrast                             | 0.028219636  |
| wavelet-HHL | ngtdm      | Busyness                             | 3.16975706   |
| wavelet-HLH | gldm       | GrayLevelVariance                    | 3.359981858  |
| wavelet-HLH | gldm       | HighGrayLevelEmphasis                | 113.5274993  |
| wavelet-HLH | gldm       | DependenceEntropy                    | 6.0449295    |
| wavelet-HLH | gldm       | DependenceNonUniformity              | 737.3362232  |
| wavelet-HLH | gldm       | GrayLevelNonUniformity               | 1231.866974  |
| wavelet-HLH | gldm       | SmallDependenceEmphasis              | 0.128114474  |
| wavelet-HLH | gldm       | SmallDependenceHighGrayLevelEmphasis | 15.12156345  |
| wavelet-HLH | gldm       | DependenceNonUniformityNormalized    | 0.099882989  |
| wavelet-HLH | gldm       | LargeDependenceEmphasis              | 40.29179084  |
| wavelet-HLH | gldm       | LargeDependenceLowGrayLevelEmphasis  | 0.376520486  |
| wavelet-HLH | gldm       | DependenceVariance                   | 10.77784327  |
| wavelet-HLH | gldm       | LargeDependenceHighGrayLevelEmphasis | 4494.480087  |
| wavelet-HLH | gldm       | SmallDependenceLowGrayLevelEmphasis  | 0.001757651  |
| wavelet-HLH | gldm       | LowGrayLevelEmphasis                 | 0.010323376  |
| wavelet-HLH | glcm       | JointAverage                         | 10.49639605  |
| wavelet-HLH | glcm       | SumAverage                           | 20.9927921   |
| wavelet-HLH | glcm       | JointEntropy                         | 5.720647799  |
| wavelet-HLH | glcm       | ClusterShade                         | -0.807059984 |
| wavelet-HLH | glcm       | MaximumProbability                   | 0.070014454  |
| wavelet-HLH | glcm       | Idmn                                 | 0.982577228  |
| wavelet-HLH | glcm       | JointEnergy                          | 0.030874782  |
| wavelet-HLH | glcm       | Contrast                             | 6.762516271  |
| wavelet-HLH | glcm       | DifferenceEntropy                    | 2.545896531  |
| wavelet-HLH | glcm       | InverseVariance                      | 0.388639513  |
| wavelet-HLH | glcm       | DifferenceVariance                   | 2.969931963  |
| wavelet-HLH | glcm       | Idn                                  | 0.914263991  |
| wavelet-HLH | glcm       | Idm                                  | 0.413401088  |
| wavelet-HLH | glcm       | Correlation                          | 0.018415948  |
| wavelet-HLH | glcm       | Autocorrelation                      | 110.2289147  |
| wavelet-HLH | glcm       | SumEntropy                           | 3.404843595  |
| wavelet-HLH | glcm       | SumSquares                           | 3.435809911  |
| wavelet-HLH | glcm       | ClusterProminence                    | 206.3534552  |
| wavelet-HLH | glcm       | Imc2                                 | 0.347372645  |
| wavelet-HLH | glcm       | Imc1                                 | -0.03435863  |
| wavelet-HLH | glcm       | DifferenceAverage                    | 1.915717259  |
| wavelet-HLH | glcm       | Id                                   | 0.479723504  |
| wavelet-HLH | glcm       | ClusterTendency                      | 6.980723371  |
| wavelet-HLH | firstorder | InterquartileRange                   | 52.76255348  |
| wavelet-HLH | firstorder | Skewness                             | -0.053088516 |
| wavelet-HLH | firstorder | Uniformity                           | 0.166874421  |
| wavelet-HLH | firstorder | Median                               | -0.073970227 |
| wavelet-HLH | firstorder | Energy                               | 15079890.16  |
| wavelet-HLH | firstorder | RobustMeanAbsoluteDeviation          | 22.24541294  |
| wavelet-HLH | firstorder | MeanAbsoluteDeviation                | 34.12745852  |
| wavelet-HLH | firstorder | TotalEnergy                          | 43143911.81  |
| wavelet-HLH | firstorder | Maximum                              | 210.7054161  |
| wavelet-HLH | firstorder | RootMeanSquared                      | 45.19725597  |
| wavelet-HLH | firstorder | 90Percentile                         | 53.93477556  |
| wavelet-HLH | firstorder | Minimum                              | -226.5495287 |
| wavelet-HLH | firstorder | Entropy                              | 2.895877744  |
| wavelet-HLH | firstorder | Range                                | 437.2549449  |
| wavelet-HLH | firstorder | Variance                             | 2042.764221  |
| wavelet-HLH | firstorder | 10Percentile                         | -56.14904919 |



|             |            |                                  |              |
|-------------|------------|----------------------------------|--------------|
| wavelet-HLH | firstorder | Kurtosis                         | 4.213609512  |
| wavelet-HLH | firstorder | Mean                             | -0.166513621 |
| wavelet-HLH | glrlm      | ShortRunLowGrayLevelEmphasis     | 0.009285666  |
| wavelet-HLH | glrlm      | GrayLevelVariance                | 3.750374982  |
| wavelet-HLH | glrlm      | LowGrayLevelRunEmphasis          | 0.010502421  |
| wavelet-HLH | glrlm      | GrayLevelNonUniformityNormalized | 0.154175666  |
| wavelet-HLH | glrlm      | RunVariance                      | 0.305685308  |
| wavelet-HLH | glrlm      | GrayLevelNonUniformity           | 944.3665018  |
| wavelet-HLH | glrlm      | LongRunEmphasis                  | 1.784105439  |
| wavelet-HLH | glrlm      | ShortRunHighGrayLevelEmphasis    | 99.54855267  |
| wavelet-HLH | glrlm      | RunLengthNonUniformity           | 4447.866113  |
| wavelet-HLH | glrlm      | ShortRunEmphasis                 | 0.87251481   |
| wavelet-HLH | glrlm      | LongRunHighGrayLevelEmphasis     | 201.6518163  |
| wavelet-HLH | glrlm      | RunPercentage                    | 0.829512536  |
| wavelet-HLH | glrlm      | LongRunLowGrayLevelEmphasis      | 0.017891891  |
| wavelet-HLH | glrlm      | RunEntropy                       | 3.728796723  |
| wavelet-HLH | glrlm      | HighGrayLevelRunEmphasis         | 113.8415974  |
| wavelet-HLH | glrlm      | RunLengthNonUniformityNormalized | 0.721644472  |
| wavelet-HLH | glszm      | GrayLevelVariance                | 11.29790601  |
| wavelet-HLH | glszm      | ZoneVariance                     | 8061.665505  |
| wavelet-HLH | glszm      | GrayLevelNonUniformityNormalized | 0.10568085   |
| wavelet-HLH | glszm      | SizeZoneNonUniformityNormalized  | 0.32113617   |
| wavelet-HLH | glszm      | SizeZoneNonUniformity            | 285.1689189  |
| wavelet-HLH | glszm      | GrayLevelNonUniformity           | 93.84459459  |
| wavelet-HLH | glszm      | LargeAreaEmphasis                | 8130.772523  |
| wavelet-HLH | glszm      | SmallAreaHighGrayLevelEmphasis   | 70.28188491  |
| wavelet-HLH | glszm      | ZonePercentage                   | 0.120292604  |
| wavelet-HLH | glszm      | LargeAreaLowGrayLevelEmphasis    | 75.09238968  |
| wavelet-HLH | glszm      | LargeAreaHighGrayLevelEmphasis   | 900381.777   |
| wavelet-HLH | glszm      | HighGrayLevelZoneEmphasis        | 120.6981982  |
| wavelet-HLH | glszm      | SmallAreaEmphasis                | 0.579451088  |
| wavelet-HLH | glszm      | LowGrayLevelZoneEmphasis         | 0.014627951  |
| wavelet-HLH | glszm      | ZoneEntropy                      | 5.626088768  |
| wavelet-HLH | glszm      | SmallAreaLowGrayLevelEmphasis    | 0.009521414  |
| wavelet-HLH | ngtdm      | Coarseness                       | 0.000899467  |
| wavelet-HLH | ngtdm      | Complexity                       | 222.4831919  |
| wavelet-HLH | ngtdm      | Strength                         | 0.124802199  |
| wavelet-HLH | ngtdm      | Contrast                         | 0.027236158  |
| wavelet-HLH | ngtdm      | Busyness                         | 3.925277959  |

| Image type | Feature Class | Feature Name                         |                                                                                                                                                                                                                                                                                                                                                                                                                                              |
|------------|---------------|--------------------------------------|----------------------------------------------------------------------------------------------------------------------------------------------------------------------------------------------------------------------------------------------------------------------------------------------------------------------------------------------------------------------------------------------------------------------------------------------|
| general    | info          | BoundingBox                          | 10: RTSTRUCT: C99-DNU_segment_GTV-R<br>(0, 0, 1, 5, 5, 4)                                                                                                                                                                                                                                                                                                                                                                                    |
| general    | info          | EnabledImageTypes                    | {u'Original': {}, u'Wavelet': {}}                                                                                                                                                                                                                                                                                                                                                                                                            |
|            |               |                                      | {'distances': [1], 'additionalInfo': True,<br>'force2D': False, 'interpolator': 'sitkBSpline',<br>'resampledPixelSpacing': [3.0], 'label': 1,<br>'normalizeScale': 1, 'normalize': False,<br>'force2Ddimension': 0, 'removeOutliers':<br>None, 'minimumROISize': None, u'binWidth':<br>25.0, 'minimumROIDimensions': 1,<br>u'correctMask': True, 'preCrop': False,<br>u'symmetricalGLCM': True, 'resegmentRange':<br>None, 'padDistance': 5} |
| general    | info          | GeneralSettings                      | 026d484ee1e9734b0dce5f9d069a6a85da9545                                                                                                                                                                                                                                                                                                                                                                                                       |
| general    | info          | ImageHash                            | c6                                                                                                                                                                                                                                                                                                                                                                                                                                           |
| general    | info          | ImageSpacing                         | (0.9765624999999999, 0.9765624999999999,<br>1.9999999999999999)                                                                                                                                                                                                                                                                                                                                                                              |
| general    | info          | MaskHash                             | 1d782dbc0e79f2c828a2678340dc4c5621645b                                                                                                                                                                                                                                                                                                                                                                                                       |
| general    | info          | NumpyVersion                         | 19                                                                                                                                                                                                                                                                                                                                                                                                                                           |
| general    | info          | PyWaveletVersion                     | 1.13.1                                                                                                                                                                                                                                                                                                                                                                                                                                       |
| general    | info          | SimpleITKVersion                     | 0.5.2                                                                                                                                                                                                                                                                                                                                                                                                                                        |
| general    | info          | Version                              | 1.1.0                                                                                                                                                                                                                                                                                                                                                                                                                                        |
| general    | info          | VolumeNum                            | 1.3.0.post102+g1b0eb74                                                                                                                                                                                                                                                                                                                                                                                                                       |
| general    | info          | VoxelNum                             | 1                                                                                                                                                                                                                                                                                                                                                                                                                                            |
| original   | shape         | Maximum3DDiameter                    | 60                                                                                                                                                                                                                                                                                                                                                                                                                                           |
| original   | shape         | Maximum2DDiameterSlice               | 14.69693846                                                                                                                                                                                                                                                                                                                                                                                                                                  |
| original   | shape         | Sphericity                           | 13.41640786                                                                                                                                                                                                                                                                                                                                                                                                                                  |
| original   | shape         | MinorAxis                            | 0.961366804                                                                                                                                                                                                                                                                                                                                                                                                                                  |
| original   | shape         | Elongation                           | 13.08948166                                                                                                                                                                                                                                                                                                                                                                                                                                  |
| original   | shape         | SurfaceVolumeRatio                   | 0.915113625                                                                                                                                                                                                                                                                                                                                                                                                                                  |
| original   | shape         | Volume                               | 0.428308471                                                                                                                                                                                                                                                                                                                                                                                                                                  |
| original   | shape         | MajorAxis                            | 1620                                                                                                                                                                                                                                                                                                                                                                                                                                         |
| original   | shape         | SurfaceArea                          | 14.30366821                                                                                                                                                                                                                                                                                                                                                                                                                                  |
| original   | shape         | Flatness                             | 693.8597237                                                                                                                                                                                                                                                                                                                                                                                                                                  |
| original   | shape         | LeastAxis                            | 0.81540016                                                                                                                                                                                                                                                                                                                                                                                                                                   |
| original   | shape         | Maximum2DDiameterColumn              | 11.66321334                                                                                                                                                                                                                                                                                                                                                                                                                                  |
| original   | shape         | Maximum2DDiameterRow                 | 13.41640786                                                                                                                                                                                                                                                                                                                                                                                                                                  |
| original   | gldm          | GrayLevelVariance                    | 13.41640786                                                                                                                                                                                                                                                                                                                                                                                                                                  |
| original   | gldm          | HighGrayLevelEmphasis                | 68.43638889                                                                                                                                                                                                                                                                                                                                                                                                                                  |
| original   | gldm          | DependenceEntropy                    | 433.8833333                                                                                                                                                                                                                                                                                                                                                                                                                                  |
| original   | gldm          | DependenceNonUniformity              | 4.875652213                                                                                                                                                                                                                                                                                                                                                                                                                                  |
| original   | gldm          | GrayLevelNonUniformity               | 21.76666667                                                                                                                                                                                                                                                                                                                                                                                                                                  |
| original   | gldm          | SmallDependenceEmphasis              | 3.766666667                                                                                                                                                                                                                                                                                                                                                                                                                                  |
| original   | gldm          | SmallDependenceHighGrayLevelEmphasis | 0.616114775                                                                                                                                                                                                                                                                                                                                                                                                                                  |
| original   | gldm          | DependenceNonUniformityNormalized    | 216.1051877                                                                                                                                                                                                                                                                                                                                                                                                                                  |
| original   | gldm          | LargeDependenceEmphasis              | 0.362777778                                                                                                                                                                                                                                                                                                                                                                                                                                  |
| original   | gldm          | LargeDependenceLowGrayLevelEmphasis  | 9.333333333                                                                                                                                                                                                                                                                                                                                                                                                                                  |
| original   | gldm          | DependenceVariance                   | 0.039955112                                                                                                                                                                                                                                                                                                                                                                                                                                  |
| original   | gldm          | LargeDependenceHighGrayLevelEmphasis | 4.195555556                                                                                                                                                                                                                                                                                                                                                                                                                                  |
| original   | gldm          | SmallDependenceLowGrayLevelEmphasis  | 6950.483333                                                                                                                                                                                                                                                                                                                                                                                                                                  |
|            |               |                                      | 0.024907163                                                                                                                                                                                                                                                                                                                                                                                                                                  |

|          |            |                                  |              |
|----------|------------|----------------------------------|--------------|
| original | gldm       | LowGrayLevelEmphasis             | 0.026208932  |
| original | glcm       | JointAverage                     | 21.15937688  |
| original | glcm       | SumAverage                       | 42.31875377  |
| original | glcm       | JointEntropy                     | 5.700980663  |
| original | glcm       | ClusterShade                     | -897.3475065 |
| original | glcm       | MaximumProbability               | 0.062385723  |
| original | glcm       | ldmn                             | 0.902695321  |
| original | glcm       | JointEnergy                      | 0.022141582  |
| original | glcm       | Contrast                         | 115.7206552  |
| original | glcm       | DifferenceEntropy                | 3.890951631  |
| original | glcm       | InverseVariance                  | 0.143388845  |
| original | glcm       | DifferenceVariance               | 45.03257639  |
| original | glcm       | ldn                              | 0.80481398   |
| original | glcm       | ldm                              | 0.167357858  |
| original | glcm       | Correlation                      | 0.122439955  |
| original | glcm       | Autocorrelation                  | 455.9423225  |
| original | glcm       | SumEntropy                       | 4.353237592  |
| original | glcm       | SumSquares                       | 66.0250103   |
| original | glcm       | ClusterProminence                | 56080.58722  |
| original | glcm       | lmc2                             | 0.99519513   |
| original | glcm       | lmc1                             | -0.581198938 |
| original | glcm       | DifferenceAverage                | 8.366898227  |
| original | glcm       | ld                               | 0.240854018  |
| original | glcm       | ClusterTendency                  | 148.379386   |
| original | firstorder | InterquartileRange               | 360.75       |
| original | firstorder | Skewness                         | -0.273093612 |
| original | firstorder | Uniformity                       | 0.062777778  |
| original | firstorder | Median                           | -269         |
| original | firstorder | Energy                           | 5823961      |
| original | firstorder | RobustMeanAbsoluteDeviation      | 145.5416667  |
| original | firstorder | MeanAbsoluteDeviation            | 177.355      |
| original | firstorder | TotalEnergy                      | 157246947    |
| original | firstorder | Maximum                          | 35           |
| original | firstorder | RootMeanSquared                  | 311.5541954  |
| original | firstorder | 90Percentile                     | 15.4         |
| original | firstorder | Minimum                          | -689         |
| original | firstorder | Entropy                          | 4.312744921  |
| original | firstorder | Range                            | 724          |
| original | firstorder | Variance                         | 42021.03639  |
| original | firstorder | 10Percentile                     | -513         |
| original | firstorder | Kurtosis                         | 1.976892748  |
| original | firstorder | Mean                             | -234.6166667 |
| original | glrlm      | ShortRunLowGrayLevelEmphasis     | 0.027374499  |
| original | glrlm      | GrayLevelVariance                | 67.33230918  |
| original | glrlm      | LowGrayLevelRunEmphasis          | 0.027457202  |
| original | glrlm      | GrayLevelNonUniformityNormalized | 0.057925354  |
| original | glrlm      | RunVariance                      | 0.051277256  |
| original | glrlm      | GrayLevelNonUniformity           | 3.308391594  |
| original | glrlm      | LongRunEmphasis                  | 1.158457532  |
| original | glrlm      | ShortRunHighGrayLevelEmphasis    | 391.784995   |
| original | glrlm      | RunLengthNonUniformity           | 51.73130827  |
| original | glrlm      | ShortRunEmphasis                 | 0.961939619  |
| original | glrlm      | LongRunHighGrayLevelEmphasis     | 533.4113875  |

|             |       |                                      |              |
|-------------|-------|--------------------------------------|--------------|
| original    | glrlm | RunPercentage                        | 0.951282051  |
| original    | glrlm | LongRunLowGrayLevelEmphasis          | 0.027795408  |
| original    | glrlm | RunEntropy                           | 4.493250265  |
| original    | glrlm | HighGrayLevelRunEmphasis             | 419.0647412  |
| original    | glrlm | RunLengthNonUniformityNormalized     | 0.905226798  |
| original    | glszm | GrayLevelVariance                    | 62.46400952  |
| original    | glszm | ZoneVariance                         | 1.907198096  |
| original    | glszm | GrayLevelNonUniformityNormalized     | 0.054134444  |
| original    | glszm | SizeZoneNonUniformityNormalized      | 0.665675193  |
| original    | glszm | SizeZoneNonUniformity                | 27.29268293  |
| original    | glszm | GrayLevelNonUniformity               | 2.219512195  |
| original    | glszm | LargeAreaEmphasis                    | 4.048780488  |
| original    | glszm | SmallAreaHighGrayLevelEmphasis       | 290.8218345  |
| original    | glszm | ZonePercentage                       | 0.683333333  |
| original    | glszm | LargeAreaLowGrayLevelEmphasis        | 0.043669829  |
| original    | glszm | LargeAreaHighGrayLevelEmphasis       | 2500.219512  |
| original    | glszm | HighGrayLevelZoneEmphasis            | 358.9756098  |
| original    | glszm | SmallAreaEmphasis                    | 0.838715748  |
| original    | glszm | LowGrayLevelZoneEmphasis             | 0.036915433  |
| original    | glszm | ZoneEntropy                          | 4.570609017  |
| original    | glszm | SmallAreaLowGrayLevelEmphasis        | 0.036159317  |
| original    | ngtdm | Coarseness                           | 0.042979924  |
| original    | ngtdm | Complexity                           | 2009.484503  |
| original    | ngtdm | Strength                             | 19.19865132  |
| original    | ngtdm | Contrast                             | 1.495164212  |
| original    | ngtdm | Busyness                             | 0.045597093  |
| wavelet-HHH | gldm  | GrayLevelVariance                    | 13.14972222  |
| wavelet-HHH | gldm  | HighGrayLevelEmphasis                | 190.4833333  |
| wavelet-HHH | gldm  | DependenceEntropy                    | 5.023231429  |
| wavelet-HHH | gldm  | DependenceNonUniformity              | 19.26666667  |
| wavelet-HHH | gldm  | GrayLevelNonUniformity               | 5.633333333  |
| wavelet-HHH | gldm  | SmallDependenceEmphasis              | 0.555412037  |
| wavelet-HHH | gldm  | SmallDependenceHighGrayLevelEmphasis | 107.5410833  |
| wavelet-HHH | gldm  | DependenceNonUniformityNormalized    | 0.321111111  |
| wavelet-HHH | gldm  | LargeDependenceEmphasis              | 4.866666667  |
| wavelet-HHH | gldm  | LargeDependenceLowGrayLevelEmphasis  | 0.04693798   |
| wavelet-HHH | gldm  | DependenceVariance                   | 1.128888889  |
| wavelet-HHH | gldm  | LargeDependenceHighGrayLevelEmphasis | 893.7833333  |
| wavelet-HHH | gldm  | SmallDependenceLowGrayLevelEmphasis  | 0.020472383  |
| wavelet-HHH | gldm  | LowGrayLevelEmphasis                 | 0.023148329  |
| wavelet-HHH | glcm  | JointAverage                         | 13.36280776  |
| wavelet-HHH | glcm  | SumAverage                           | 26.72561551  |
| wavelet-HHH | glcm  | JointEntropy                         | 5.52656159   |
| wavelet-HHH | glcm  | ClusterShade                         | -16.61426363 |
| wavelet-HHH | glcm  | MaximumProbability                   | 0.045997713  |
| wavelet-HHH | glcm  | ldmn                                 | 0.95998335   |
| wavelet-HHH | glcm  | JointEnergy                          | 0.024442756  |
| wavelet-HHH | glcm  | Contrast                             | 24.41663394  |
| wavelet-HHH | glcm  | DifferenceEntropy                    | 3.057253605  |
| wavelet-HHH | glcm  | InverseVariance                      | 0.242309613  |
| wavelet-HHH | glcm  | DifferenceVariance                   | 9.262077091  |
| wavelet-HHH | glcm  | ldn                                  | 0.866096164  |
| wavelet-HHH | glcm  | ldm                                  | 0.211760176  |

|             |            |                                  |              |
|-------------|------------|----------------------------------|--------------|
| wavelet-HHH | glcm       | Correlation                      | -0.040170388 |
| wavelet-HHH | glcm       | Autocorrelation                  | 178.1413033  |
| wavelet-HHH | glcm       | SumEntropy                       | 3.703002414  |
| wavelet-HHH | glcm       | SumSquares                       | 11.76769921  |
| wavelet-HHH | glcm       | ClusterProminence                | 1996.347431  |
| wavelet-HHH | glcm       | Imc2                             | 0.973203817  |
| wavelet-HHH | glcm       | Imc1                             | -0.425761075 |
| wavelet-HHH | glcm       | DifferenceAverage                | 3.866744997  |
| wavelet-HHH | glcm       | Id                               | 0.308313031  |
| wavelet-HHH | glcm       | ClusterTendency                  | 22.65416289  |
| wavelet-HHH | firstorder | InterquartileRange               | 116.7717966  |
| wavelet-HHH | firstorder | Skewness                         | -0.143069246 |
| wavelet-HHH | firstorder | Uniformity                       | 0.093888889  |
| wavelet-HHH | firstorder | Median                           | 1.420246058  |
| wavelet-HHH | firstorder | Energy                           | 483392.1842  |
| wavelet-HHH | firstorder | RobustMeanAbsoluteDeviation      | 49.87192651  |
| wavelet-HHH | firstorder | MeanAbsoluteDeviation            | 70.75822662  |
| wavelet-HHH | firstorder | TotalEnergy                      | 13051588.97  |
| wavelet-HHH | firstorder | Maximum                          | 243.7485231  |
| wavelet-HHH | firstorder | RootMeanSquared                  | 89.75821079  |
| wavelet-HHH | firstorder | 90Percentile                     | 94.39227824  |
| wavelet-HHH | firstorder | Minimum                          | -302.6082908 |
| wavelet-HHH | firstorder | Entropy                          | 3.623825607  |
| wavelet-HHH | firstorder | Range                            | 546.3568139  |
| wavelet-HHH | firstorder | Variance                         | 8037.604374  |
| wavelet-HHH | firstorder | 10Percentile                     | -98.17133468 |
| wavelet-HHH | firstorder | Kurtosis                         | 4.254973294  |
| wavelet-HHH | firstorder | Mean                             | -4.351095229 |
| wavelet-HHH | glrlm      | ShortRunLowGrayLevelEmphasis     | 0.0236246    |
| wavelet-HHH | glrlm      | GrayLevelVariance                | 13.45481028  |
| wavelet-HHH | glrlm      | LowGrayLevelRunEmphasis          | 0.023793018  |
| wavelet-HHH | glrlm      | GrayLevelNonUniformityNormalized | 0.092616428  |
| wavelet-HHH | glrlm      | RunVariance                      | 0.038433157  |
| wavelet-HHH | glrlm      | GrayLevelNonUniformity           | 5.35826639   |
| wavelet-HHH | glrlm      | LongRunEmphasis                  | 1.115928382  |
| wavelet-HHH | glrlm      | ShortRunHighGrayLevelEmphasis    | 185.6704179  |
| wavelet-HHH | glrlm      | RunLengthNonUniformity           | 53.90769233  |
| wavelet-HHH | glrlm      | ShortRunEmphasis                 | 0.972491527  |
| wavelet-HHH | glrlm      | LongRunHighGrayLevelEmphasis     | 212.2012973  |
| wavelet-HHH | glrlm      | RunPercentage                    | 0.964102564  |
| wavelet-HHH | glrlm      | LongRunLowGrayLevelEmphasis      | 0.024492888  |
| wavelet-HHH | glrlm      | RunEntropy                       | 3.774338815  |
| wavelet-HHH | glrlm      | HighGrayLevelRunEmphasis         | 190.7113418  |
| wavelet-HHH | glrlm      | RunLengthNonUniformityNormalized | 0.930954047  |
| wavelet-HHH | glszm      | GrayLevelVariance                | 18.50617284  |
| wavelet-HHH | glszm      | ZoneVariance                     | 2.055555556  |
| wavelet-HHH | glszm      | GrayLevelNonUniformityNormalized | 0.077160494  |
| wavelet-HHH | glszm      | SizeZoneNonUniformityNormalized  | 0.617283951  |
| wavelet-HHH | glszm      | SizeZoneNonUniformity            | 22.22222222  |
| wavelet-HHH | glszm      | GrayLevelNonUniformity           | 2.777777778  |
| wavelet-HHH | glszm      | LargeAreaEmphasis                | 4.833333333  |
| wavelet-HHH | glszm      | SmallAreaHighGrayLevelEmphasis   | 155.3503302  |
| wavelet-HHH | glszm      | ZonePercentage                   | 0.6          |

|             |            |                                      |              |
|-------------|------------|--------------------------------------|--------------|
| wavelet-HHH | glszm      | LargeAreaLowGrayLevelEmphasis        | 0.058323873  |
| wavelet-HHH | glszm      | LargeAreaHighGrayLevelEmphasis       | 885.75       |
| wavelet-HHH | glszm      | HighGrayLevelZoneEmphasis            | 193.3333333  |
| wavelet-HHH | glszm      | SmallAreaEmphasis                    | 0.798506708  |
| wavelet-HHH | glszm      | LowGrayLevelZoneEmphasis             | 0.034562425  |
| wavelet-HHH | glszm      | ZoneEntropy                          | 4.440351043  |
| wavelet-HHH | glszm      | SmallAreaLowGrayLevelEmphasis        | 0.033358451  |
| wavelet-HHH | ngtdm      | Coarseness                           | 0.077609057  |
| wavelet-HHH | ngtdm      | Complexity                           | 321.6786602  |
| wavelet-HHH | ngtdm      | Strength                             | 8.004960359  |
| wavelet-HHH | ngtdm      | Contrast                             | 0.326060091  |
| wavelet-HHH | ngtdm      | Busyness                             | 0.072701302  |
| wavelet-HLL | gldm       | GrayLevelVariance                    | 82.86972222  |
| wavelet-HLL | gldm       | HighGrayLevelEmphasis                | 319.5166667  |
| wavelet-HLL | gldm       | DependenceEntropy                    | 5.035812887  |
| wavelet-HLL | gldm       | DependenceNonUniformity              | 21.06666667  |
| wavelet-HLL | gldm       | GrayLevelNonUniformity               | 2.9          |
| wavelet-HLL | gldm       | SmallDependenceEmphasis              | 0.545601852  |
| wavelet-HLL | gldm       | SmallDependenceHighGrayLevelEmphasis | 212.2533565  |
| wavelet-HLL | gldm       | DependenceNonUniformityNormalized    | 0.351111111  |
| wavelet-HLL | gldm       | LargeDependenceEmphasis              | 3.933333333  |
| wavelet-HLL | gldm       | LargeDependenceLowGrayLevelEmphasis  | 0.173079981  |
| wavelet-HLL | gldm       | DependenceVariance                   | 0.693333333  |
| wavelet-HLL | gldm       | LargeDependenceHighGrayLevelEmphasis | 1004.683333  |
| wavelet-HLL | gldm       | SmallDependenceLowGrayLevelEmphasis  | 0.015633936  |
| wavelet-HLL | gldm       | LowGrayLevelEmphasis                 | 0.044851055  |
| wavelet-HLL | glcm       | JointAverage                         | 15.01769921  |
| wavelet-HLL | glcm       | SumAverage                           | 30.03539842  |
| wavelet-HLL | glcm       | JointEntropy                         | 5.930074166  |
| wavelet-HLL | glcm       | ClusterShade                         | 1062.13878   |
| wavelet-HLL | glcm       | MaximumProbability                   | 0.034149469  |
| wavelet-HLL | glcm       | Idmn                                 | 0.935003742  |
| wavelet-HLL | glcm       | JointEnergy                          | 0.01721407   |
| wavelet-HLL | glcm       | Contrast                             | 95.78735965  |
| wavelet-HLL | glcm       | DifferenceEntropy                    | 3.671638829  |
| wavelet-HLL | glcm       | InverseVariance                      | 0.157008966  |
| wavelet-HLL | glcm       | DifferenceVariance                   | 32.15088871  |
| wavelet-HLL | glcm       | Idn                                  | 0.837206188  |
| wavelet-HLL | glcm       | Idm                                  | 0.141856242  |
| wavelet-HLL | glcm       | Correlation                          | 0.34990461   |
| wavelet-HLL | glcm       | Autocorrelation                      | 252.7188293  |
| wavelet-HLL | glcm       | SumEntropy                           | 4.531024025  |
| wavelet-HLL | glcm       | SumSquares                           | 74.99302329  |
| wavelet-HLL | glcm       | ClusterProminence                    | 90886.1862   |
| wavelet-HLL | glcm       | Imc2                                 | 0.998392798  |
| wavelet-HLL | glcm       | Imc1                                 | -0.654743217 |
| wavelet-HLL | glcm       | DifferenceAverage                    | 7.619050218  |
| wavelet-HLL | glcm       | Id                                   | 0.225790554  |
| wavelet-HLL | glcm       | ClusterTendency                      | 204.1847335  |
| wavelet-HLL | firstorder | InterquartileRange                   | 378.8105775  |
| wavelet-HLL | firstorder | Skewness                             | 0.412877102  |
| wavelet-HLL | firstorder | Uniformity                           | 0.048333333  |
| wavelet-HLL | firstorder | Median                               | -156.8069367 |

|             |            |                                  |              |
|-------------|------------|----------------------------------|--------------|
| wavelet-HLL | firstorder | Energy                           | 3435470.362  |
| wavelet-HLL | firstorder | RobustMeanAbsoluteDeviation      | 159.0042531  |
| wavelet-HLL | firstorder | MeanAbsoluteDeviation            | 199.8328319  |
| wavelet-HLL | firstorder | TotalEnergy                      | 92757699.78  |
| wavelet-HLL | firstorder | Maximum                          | 404.6502949  |
| wavelet-HLL | firstorder | RootMeanSquared                  | 239.2861036  |
| wavelet-HLL | firstorder | 90Percentile                     | 265.0172195  |
| wavelet-HLL | firstorder | Minimum                          | -442.8940786 |
| wavelet-HLL | firstorder | Entropy                          | 4.563070754  |
| wavelet-HLL | firstorder | Range                            | 847.5443735  |
| wavelet-HLL | firstorder | Variance                         | 51495.9507   |
| wavelet-HLL | firstorder | 10Percentile                     | -318.8572401 |
| wavelet-HLL | firstorder | Kurtosis                         | 1.94588264   |
| wavelet-HLL | firstorder | Mean                             | -75.90710551 |
| wavelet-HLL | grlm       | ShortRunLowGrayLevelEmphasis     | 0.043253147  |
| wavelet-HLL | grlm       | GrayLevelVariance                | 83.67541327  |
| wavelet-HLL | grlm       | LowGrayLevelRunEmphasis          | 0.044576793  |
| wavelet-HLL | grlm       | GrayLevelNonUniformityNormalized | 0.047727125  |
| wavelet-HLL | grlm       | RunVariance                      | 0.033387107  |
| wavelet-HLL | grlm       | GrayLevelNonUniformity           | 2.777193867  |
| wavelet-HLL | grlm       | LongRunEmphasis                  | 1.103155403  |
| wavelet-HLL | grlm       | ShortRunHighGrayLevelEmphasis    | 316.7860465  |
| wavelet-HLL | grlm       | RunLengthNonUniformity           | 54.88093309  |
| wavelet-HLL | grlm       | ShortRunEmphasis                 | 0.975823792  |
| wavelet-HLL | grlm       | LongRunHighGrayLevelEmphasis     | 346.0816191  |
| wavelet-HLL | grlm       | RunPercentage                    | 0.969230769  |
| wavelet-HLL | grlm       | LongRunLowGrayLevelEmphasis      | 0.049916174  |
| wavelet-HLL | grlm       | RunEntropy                       | 4.648985419  |
| wavelet-HLL | grlm       | HighGrayLevelRunEmphasis         | 322.4593845  |
| wavelet-HLL | grlm       | RunLengthNonUniformityNormalized | 0.940948217  |
| wavelet-HLL | glszm      | GrayLevelVariance                | 93.96        |
| wavelet-HLL | glszm      | ZoneVariance                     | 0.65         |
| wavelet-HLL | glszm      | GrayLevelNonUniformityNormalized | 0.04125      |
| wavelet-HLL | glszm      | SizeZoneNonUniformityNormalized  | 0.49         |
| wavelet-HLL | glszm      | SizeZoneNonUniformity            | 19.6         |
| wavelet-HLL | glszm      | GrayLevelNonUniformity           | 1.65         |
| wavelet-HLL | glszm      | LargeAreaEmphasis                | 2.9          |
| wavelet-HLL | glszm      | SmallAreaHighGrayLevelEmphasis   | 294.0918403  |
| wavelet-HLL | glszm      | ZonePercentage                   | 0.666666667  |
| wavelet-HLL | glszm      | LargeAreaLowGrayLevelEmphasis    | 0.129649403  |
| wavelet-HLL | glszm      | LargeAreaHighGrayLevelEmphasis   | 826.275      |
| wavelet-HLL | glszm      | HighGrayLevelZoneEmphasis        | 359.65       |
| wavelet-HLL | glszm      | SmallAreaEmphasis                | 0.721180556  |
| wavelet-HLL | glszm      | LowGrayLevelZoneEmphasis         | 0.037697227  |
| wavelet-HLL | glszm      | ZoneEntropy                      | 4.953055907  |
| wavelet-HLL | glszm      | SmallAreaLowGrayLevelEmphasis    | 0.016379763  |
| wavelet-HLL | ngtdm      | Coarseness                       | 0.076941724  |
| wavelet-HLL | ngtdm      | Complexity                       | 1872.2743    |
| wavelet-HLL | ngtdm      | Strength                         | 34.70017279  |
| wavelet-HLL | ngtdm      | Contrast                         | 1.137038693  |
| wavelet-HLL | ngtdm      | Busyness                         | 0.043346913  |
| wavelet-LHL | gldm       | GrayLevelVariance                | 84.96555556  |
| wavelet-LHL | gldm       | HighGrayLevelEmphasis            | 361.6333333  |

|             |            |                                      |              |
|-------------|------------|--------------------------------------|--------------|
| wavelet-LHL | gldm       | DependenceEntropy                    | 5.306890596  |
| wavelet-LHL | gldm       | DependenceNonUniformity              | 22.96666667  |
| wavelet-LHL | gldm       | GrayLevelNonUniformity               | 2.466666667  |
| wavelet-LHL | gldm       | SmallDependenceEmphasis              | 0.578356481  |
| wavelet-LHL | gldm       | SmallDependenceHighGrayLevelEmphasis | 240.9583333  |
| wavelet-LHL | gldm       | DependenceNonUniformityNormalized    | 0.382777778  |
| wavelet-LHL | gldm       | LargeDependenceEmphasis              | 3.466666667  |
| wavelet-LHL | gldm       | LargeDependenceLowGrayLevelEmphasis  | 0.070999925  |
| wavelet-LHL | gldm       | DependenceVariance                   | 0.576666667  |
| wavelet-LHL | gldm       | LargeDependenceHighGrayLevelEmphasis | 1020.333333  |
| wavelet-LHL | gldm       | SmallDependenceLowGrayLevelEmphasis  | 0.026706263  |
| wavelet-LHL | gldm       | LowGrayLevelEmphasis                 | 0.033206624  |
| wavelet-LHL | glcm       | JointAverage                         | 16.41785393  |
| wavelet-LHL | glcm       | SumAverage                           | 32.83570787  |
| wavelet-LHL | glcm       | JointEntropy                         | 5.968976274  |
| wavelet-LHL | glcm       | ClusterShade                         | 1141.892182  |
| wavelet-LHL | glcm       | MaximumProbability                   | 0.028129543  |
| wavelet-LHL | glcm       | ldmn                                 | 0.954517315  |
| wavelet-LHL | glcm       | JointEnergy                          | 0.016582552  |
| wavelet-LHL | glcm       | Contrast                             | 87.40515402  |
| wavelet-LHL | glcm       | DifferenceEntropy                    | 3.702296438  |
| wavelet-LHL | glcm       | InverseVariance                      | 0.129490933  |
| wavelet-LHL | glcm       | DifferenceVariance                   | 28.65200086  |
| wavelet-LHL | glcm       | ldn                                  | 0.857647409  |
| wavelet-LHL | glcm       | ldm                                  | 0.126780555  |
| wavelet-LHL | glcm       | Correlation                          | 0.417812533  |
| wavelet-LHL | glcm       | Autocorrelation                      | 301.1394881  |
| wavelet-LHL | glcm       | SumEntropy                           | 4.535001772  |
| wavelet-LHL | glcm       | SumSquares                           | 75.14515569  |
| wavelet-LHL | glcm       | ClusterProminence                    | 118074.9085  |
| wavelet-LHL | glcm       | lmc2                                 | 0.999265764  |
| wavelet-LHL | glcm       | lmc1                                 | -0.710024299 |
| wavelet-LHL | glcm       | DifferenceAverage                    | 7.417544996  |
| wavelet-LHL | glcm       | ld                                   | 0.215404995  |
| wavelet-LHL | glcm       | ClusterTendency                      | 213.1754687  |
| wavelet-LHL | firstorder | InterquartileRange                   | 321.4112189  |
| wavelet-LHL | firstorder | Skewness                             | 0.422929677  |
| wavelet-LHL | firstorder | Uniformity                           | 0.041111111  |
| wavelet-LHL | firstorder | Median                               | -43.45301401 |
| wavelet-LHL | firstorder | Energy                               | 3213692.167  |
| wavelet-LHL | firstorder | RobustMeanAbsoluteDeviation          | 135.7598916  |
| wavelet-LHL | firstorder | MeanAbsoluteDeviation                | 188.7257265  |
| wavelet-LHL | firstorder | TotalEnergy                          | 86769688.51  |
| wavelet-LHL | firstorder | Maximum                              | 587.7290237  |
| wavelet-LHL | firstorder | RootMeanSquared                      | 231.4336538  |
| wavelet-LHL | firstorder | 90Percentile                         | 296.3324682  |
| wavelet-LHL | firstorder | Minimum                              | -406.3395283 |
| wavelet-LHL | firstorder | Entropy                              | 4.796404088  |
| wavelet-LHL | firstorder | Range                                | 994.068552   |
| wavelet-LHL | firstorder | Variance                             | 53102.41383  |
| wavelet-LHL | firstorder | 10Percentile                         | -325.7200903 |
| wavelet-LHL | firstorder | Kurtosis                             | 2.604452767  |
| wavelet-LHL | firstorder | Mean                                 | -21.4271389  |



|             |       |                                      |             |
|-------------|-------|--------------------------------------|-------------|
| wavelet-LHL | grlm  | ShortRunLowGrayLevelEmphasis         | 0.033383802 |
| wavelet-LHL | grlm  | GrayLevelVariance                    | 86.06268049 |
| wavelet-LHL | grlm  | LowGrayLevelRunEmphasis              | 0.033709271 |
| wavelet-LHL | grlm  | GrayLevelNonUniformityNormalized     | 0.040691121 |
| wavelet-LHL | grlm  | RunVariance                          | 0.026855067 |
| wavelet-LHL | grlm  | GrayLevelNonUniformity               | 2.376316336 |
| wavelet-LHL | grlm  | LongRunEmphasis                      | 1.084616128 |
| wavelet-LHL | grlm  | ShortRunHighGrayLevelEmphasis        | 358.3056472 |
| wavelet-LHL | grlm  | RunLengthNonUniformity               | 55.30772205 |
| wavelet-LHL | grlm  | ShortRunEmphasis                     | 0.978845968 |
| wavelet-LHL | grlm  | LongRunHighGrayLevelEmphasis         | 387.293555  |
| wavelet-LHL | grlm  | RunPercentage                        | 0.973076923 |
| wavelet-LHL | grlm  | LongRunLowGrayLevelEmphasis          | 0.035011147 |
| wavelet-LHL | grlm  | RunEntropy                           | 4.859508853 |
| wavelet-LHL | grlm  | HighGrayLevelRunEmphasis             | 364.1032288 |
| wavelet-LHL | grlm  | RunLengthNonUniformityNormalized     | 0.946289866 |
| wavelet-LHL | glszm | GrayLevelVariance                    | 103.084375  |
| wavelet-LHL | glszm | ZoneVariance                         | 0.75        |
| wavelet-LHL | glszm | GrayLevelNonUniformityNormalized     | 0.035       |
| wavelet-LHL | glszm | SizeZoneNonUniformityNormalized      | 0.525       |
| wavelet-LHL | glszm | SizeZoneNonUniformity                | 21          |
| wavelet-LHL | glszm | GrayLevelNonUniformity               | 1.4         |
| wavelet-LHL | glszm | LargeAreaEmphasis                    | 3           |
| wavelet-LHL | glszm | SmallAreaHighGrayLevelEmphasis       | 329.2279514 |
| wavelet-LHL | glszm | ZonePercentage                       | 0.666666667 |
| wavelet-LHL | glszm | LargeAreaLowGrayLevelEmphasis        | 0.073783878 |
| wavelet-LHL | glszm | LargeAreaHighGrayLevelEmphasis       | 925.05      |
| wavelet-LHL | glszm | HighGrayLevelZoneEmphasis            | 404.975     |
| wavelet-LHL | glszm | SmallAreaEmphasis                    | 0.751736111 |
| wavelet-LHL | glszm | LowGrayLevelZoneEmphasis             | 0.04180111  |
| wavelet-LHL | glszm | ZoneEntropy                          | 5.071928095 |
| wavelet-LHL | glszm | SmallAreaLowGrayLevelEmphasis        | 0.03809767  |
| wavelet-LHL | ngtdm | Coarseness                           | 0.095807366 |
| wavelet-LHL | ngtdm | Complexity                           | 2152.215945 |
| wavelet-LHL | ngtdm | Strength                             | 41.07868845 |
| wavelet-LHL | ngtdm | Contrast                             | 0.876810831 |
| wavelet-LHL | ngtdm | Busyness                             | 0.025942695 |
| wavelet-LHH | gldm  | GrayLevelVariance                    | 37.56222222 |
| wavelet-LHH | gldm  | HighGrayLevelEmphasis                | 204.8333333 |
| wavelet-LHH | gldm  | DependenceEntropy                    | 4.989898095 |
| wavelet-LHH | gldm  | DependenceNonUniformity              | 23.83333333 |
| wavelet-LHH | gldm  | GrayLevelNonUniformity               | 3.466666667 |
| wavelet-LHH | gldm  | SmallDependenceEmphasis              | 0.635416667 |
| wavelet-LHH | gldm  | SmallDependenceHighGrayLevelEmphasis | 153.6159722 |
| wavelet-LHH | gldm  | DependenceNonUniformityNormalized    | 0.397222222 |
| wavelet-LHH | gldm  | LargeDependenceEmphasis              | 3.5         |
| wavelet-LHH | gldm  | LargeDependenceLowGrayLevelEmphasis  | 0.058376669 |
| wavelet-LHH | gldm  | DependenceVariance                   | 0.722222222 |
| wavelet-LHH | gldm  | LargeDependenceHighGrayLevelEmphasis | 562.6333333 |
| wavelet-LHH | gldm  | SmallDependenceLowGrayLevelEmphasis  | 0.027743559 |
| wavelet-LHH | gldm  | LowGrayLevelEmphasis                 | 0.031946065 |
| wavelet-LHH | glcm  | JointAverage                         | 12.50193911 |
| wavelet-LHH | glcm  | SumAverage                           | 25.00387823 |

|             |            |                                  |              |
|-------------|------------|----------------------------------|--------------|
| wavelet-LHH | glcm       | JointEntropy                     | 5.902133738  |
| wavelet-LHH | glcm       | ClusterShade                     | 171.4389085  |
| wavelet-LHH | glcm       | MaximumProbability               | 0.031366846  |
| wavelet-LHH | glcm       | Idmn                             | 0.922502026  |
| wavelet-LHH | glcm       | JointEnergy                      | 0.017603541  |
| wavelet-LHH | glcm       | Contrast                         | 71.01935979  |
| wavelet-LHH | glcm       | DifferenceEntropy                | 3.613967044  |
| wavelet-LHH | glcm       | InverseVariance                  | 0.123383531  |
| wavelet-LHH | glcm       | DifferenceVariance               | 23.34986552  |
| wavelet-LHH | glcm       | Idn                              | 0.816372599  |
| wavelet-LHH | glcm       | Idm                              | 0.124241618  |
| wavelet-LHH | glcm       | Correlation                      | -0.022715799 |
| wavelet-LHH | glcm       | Autocorrelation                  | 155.7981419  |
| wavelet-LHH | glcm       | SumEntropy                       | 4.181493123  |
| wavelet-LHH | glcm       | SumSquares                       | 34.9139045   |
| wavelet-LHH | glcm       | ClusterProminence                | 14620.96516  |
| wavelet-LHH | glcm       | Imc2                             | 0.997169104  |
| wavelet-LHH | glcm       | Imc1                             | -0.615842372 |
| wavelet-LHH | glcm       | DifferenceAverage                | 6.747611549  |
| wavelet-LHH | glcm       | Id                               | 0.218898531  |
| wavelet-LHH | glcm       | ClusterTendency                  | 68.6362582   |
| wavelet-LHH | firstorder | InterquartileRange               | 221.4308065  |
| wavelet-LHH | firstorder | Skewness                         | 0.364665367  |
| wavelet-LHH | firstorder | Uniformity                       | 0.057777778  |
| wavelet-LHH | firstorder | Median                           | 30.30312763  |
| wavelet-LHH | firstorder | Energy                           | 1483451.825  |
| wavelet-LHH | firstorder | RobustMeanAbsoluteDeviation      | 87.11091476  |
| wavelet-LHH | firstorder | MeanAbsoluteDeviation            | 122.9616853  |
| wavelet-LHH | firstorder | TotalEnergy                      | 40053199.29  |
| wavelet-LHH | firstorder | Maximum                          | 394.0078296  |
| wavelet-LHH | firstorder | RootMeanSquared                  | 157.2392988  |
| wavelet-LHH | firstorder | 90Percentile                     | 236.4798094  |
| wavelet-LHH | firstorder | Minimum                          | -263.7426855 |
| wavelet-LHH | firstorder | Entropy                          | 4.369146221  |
| wavelet-LHH | firstorder | Range                            | 657.7505151  |
| wavelet-LHH | firstorder | Variance                         | 23403.48249  |
| wavelet-LHH | firstorder | 10Percentile                     | -162.1267061 |
| wavelet-LHH | firstorder | Kurtosis                         | 2.612154215  |
| wavelet-LHH | firstorder | Mean                             | 36.34163726  |
| wavelet-LHH | grlm       | ShortRunLowGrayLevelEmphasis     | 0.032284183  |
| wavelet-LHH | grlm       | GrayLevelVariance                | 38.20938017  |
| wavelet-LHH | grlm       | LowGrayLevelRunEmphasis          | 0.032503117  |
| wavelet-LHH | grlm       | GrayLevelNonUniformityNormalized | 0.056607093  |
| wavelet-LHH | grlm       | RunVariance                      | 0.025603     |
| wavelet-LHH | grlm       | GrayLevelNonUniformity           | 3.309509714  |
| wavelet-LHH | grlm       | LongRunEmphasis                  | 1.079724668  |
| wavelet-LHH | grlm       | ShortRunHighGrayLevelEmphasis    | 203.6787179  |
| wavelet-LHH | grlm       | RunLengthNonUniformity           | 55.49667903  |
| wavelet-LHH | grlm       | ShortRunEmphasis                 | 0.980068833  |
| wavelet-LHH | grlm       | LongRunHighGrayLevelEmphasis     | 217.8173721  |
| wavelet-LHH | grlm       | RunPercentage                    | 0.974358974  |
| wavelet-LHH | grlm       | LongRunLowGrayLevelEmphasis      | 0.033378851  |
| wavelet-LHH | grlm       | RunEntropy                       | 4.464409298  |

|             |       |                                      |             |
|-------------|-------|--------------------------------------|-------------|
| wavelet-LHH | grlm  | HighGrayLevelRunEmphasis             | 206.5064487 |
| wavelet-LHH | grlm  | RunLengthNonUniformityNormalized     | 0.948794001 |
| wavelet-LHH | glszm | GrayLevelVariance                    | 47.29251701 |
| wavelet-LHH | glszm | ZoneVariance                         | 1.149659864 |
| wavelet-LHH | glszm | GrayLevelNonUniformityNormalized     | 0.046485261 |
| wavelet-LHH | glszm | SizeZoneNonUniformityNormalized      | 0.636054422 |
| wavelet-LHH | glszm | SizeZoneNonUniformity                | 26.71428571 |
| wavelet-LHH | glszm | GrayLevelNonUniformity               | 1.952380952 |
| wavelet-LHH | glszm | LargeAreaEmphasis                    | 3.19047619  |
| wavelet-LHH | glszm | SmallAreaHighGrayLevelEmphasis       | 207.0887323 |
| wavelet-LHH | glszm | ZonePercentage                       | 0.7         |
| wavelet-LHH | glszm | LargeAreaLowGrayLevelEmphasis        | 0.062502725 |
| wavelet-LHH | glszm | LargeAreaHighGrayLevelEmphasis       | 559.5238095 |
| wavelet-LHH | glszm | HighGrayLevelZoneEmphasis            | 231.4761905 |
| wavelet-LHH | glszm | SmallAreaEmphasis                    | 0.820591729 |
| wavelet-LHH | glszm | LowGrayLevelZoneEmphasis             | 0.040798018 |
| wavelet-LHH | glszm | ZoneEntropy                          | 4.784941827 |
| wavelet-LHH | glszm | SmallAreaLowGrayLevelEmphasis        | 0.038569176 |
| wavelet-LHH | ngtdm | Coarseness                           | 0.077608246 |
| wavelet-LHH | ngtdm | Complexity                           | 1210.197493 |
| wavelet-LHH | ngtdm | Strength                             | 15.07468269 |
| wavelet-LHH | ngtdm | Contrast                             | 0.647400753 |
| wavelet-LHH | ngtdm | Busyness                             | 0.054955482 |
| wavelet-LLH | gldm  | GrayLevelVariance                    | 151.25      |
| wavelet-LLH | gldm  | HighGrayLevelEmphasis                | 703.5       |
| wavelet-LLH | gldm  | DependenceEntropy                    | 5.327642471 |
| wavelet-LLH | gldm  | DependenceNonUniformity              | 27.9        |
| wavelet-LLH | gldm  | GrayLevelNonUniformity               | 2.033333333 |
| wavelet-LLH | gldm  | SmallDependenceEmphasis              | 0.655555556 |
| wavelet-LLH | gldm  | SmallDependenceHighGrayLevelEmphasis | 536.7231481 |
| wavelet-LLH | gldm  | DependenceNonUniformityNormalized    | 0.465       |
| wavelet-LLH | gldm  | LargeDependenceEmphasis              | 2.6         |
| wavelet-LLH | gldm  | LargeDependenceLowGrayLevelEmphasis  | 0.038070986 |
| wavelet-LLH | gldm  | DependenceVariance                   | 0.35        |
| wavelet-LLH | gldm  | LargeDependenceHighGrayLevelEmphasis | 1457.866667 |
| wavelet-LLH | gldm  | SmallDependenceLowGrayLevelEmphasis  | 0.023153031 |
| wavelet-LLH | gldm  | LowGrayLevelEmphasis                 | 0.02596422  |
| wavelet-LLH | glcm  | JointAverage                         | 23.61236047 |
| wavelet-LLH | glcm  | SumAverage                           | 47.22472094 |
| wavelet-LLH | glcm  | JointEntropy                         | 6.025741799 |
| wavelet-LLH | glcm  | ClusterShade                         | 1614.676253 |
| wavelet-LLH | glcm  | MaximumProbability                   | 0.030179565 |
| wavelet-LLH | glcm  | ldmn                                 | 0.916833498 |
| wavelet-LLH | glcm  | JointEnergy                          | 0.015806381 |
| wavelet-LLH | glcm  | Contrast                             | 222.735401  |
| wavelet-LLH | glcm  | DifferenceEntropy                    | 4.101989586 |
| wavelet-LLH | glcm  | InverseVariance                      | 0.085275908 |
| wavelet-LLH | glcm  | DifferenceVariance                   | 73.23329755 |
| wavelet-LLH | glcm  | ldn                                  | 0.815994174 |
| wavelet-LLH | glcm  | ldm                                  | 0.088840143 |
| wavelet-LLH | glcm  | Correlation                          | 0.261971408 |
| wavelet-LLH | glcm  | Autocorrelation                      | 597.5872095 |
| wavelet-LLH | glcm  | SumEntropy                           | 4.580721539 |

|             |            |                                  |              |
|-------------|------------|----------------------------------|--------------|
| wavelet-LLH | glcm       | SumSquares                       | 151.2225598  |
| wavelet-LLH | glcm       | ClusterProminence                | 302177.4339  |
| wavelet-LLH | glcm       | Imc2                             | 0.99974172   |
| wavelet-LLH | glcm       | Imc1                             | -0.773255005 |
| wavelet-LLH | glcm       | DifferenceAverage                | 11.72182808  |
| wavelet-LLH | glcm       | Id                               | 0.167273797  |
| wavelet-LLH | glcm       | ClusterTendency                  | 382.1548383  |
| wavelet-LLH | firstorder | InterquartileRange               | 490.1678427  |
| wavelet-LLH | firstorder | Skewness                         | 0.191600378  |
| wavelet-LLH | firstorder | Uniformity                       | 0.033888889  |
| wavelet-LLH | firstorder | Median                           | -91.32294164 |
| wavelet-LLH | firstorder | Energy                           | 5700933.256  |
| wavelet-LLH | firstorder | RobustMeanAbsoluteDeviation      | 211.6777289  |
| wavelet-LLH | firstorder | MeanAbsoluteDeviation            | 268.244349   |
| wavelet-LLH | firstorder | TotalEnergy                      | 153925197.9  |
| wavelet-LLH | firstorder | Maximum                          | 532.9027323  |
| wavelet-LLH | firstorder | RootMeanSquared                  | 308.2459315  |
| wavelet-LLH | firstorder | 90Percentile                     | 427.2053531  |
| wavelet-LLH | firstorder | Minimum                          | -584.1047956 |
| wavelet-LLH | firstorder | Entropy                          | 5.043983304  |
| wavelet-LLH | firstorder | Range                            | 1117.007528  |
| wavelet-LLH | firstorder | Variance                         | 94486.67627  |
| wavelet-LLH | firstorder | 10Percentile                     | -370.8884726 |
| wavelet-LLH | firstorder | Kurtosis                         | 1.918567244  |
| wavelet-LLH | firstorder | Mean                             | -22.99734761 |
| wavelet-LLH | glrlm      | ShortRunLowGrayLevelEmphasis     | 0.02621202   |
| wavelet-LLH | glrlm      | GrayLevelVariance                | 151.7710446  |
| wavelet-LLH | glrlm      | LowGrayLevelRunEmphasis          | 0.026326375  |
| wavelet-LLH | glrlm      | GrayLevelNonUniformityNormalized | 0.033816532  |
| wavelet-LLH | glrlm      | RunVariance                      | 0.021858966  |
| wavelet-LLH | glrlm      | GrayLevelNonUniformity           | 1.990154679  |
| wavelet-LLH | glrlm      | LongRunEmphasis                  | 1.062273879  |
| wavelet-LLH | glrlm      | ShortRunHighGrayLevelEmphasis    | 701.4481963  |
| wavelet-LLH | glrlm      | RunLengthNonUniformity           | 56.7615122   |
| wavelet-LLH | glrlm      | ShortRunEmphasis                 | 0.985905152  |
| wavelet-LLH | glrlm      | LongRunHighGrayLevelEmphasis     | 738.6104282  |
| wavelet-LLH | glrlm      | RunPercentage                    | 0.980769231  |
| wavelet-LLH | glrlm      | LongRunLowGrayLevelEmphasis      | 0.026791315  |
| wavelet-LLH | glrlm      | RunEntropy                       | 5.064700686  |
| wavelet-LLH | glrlm      | HighGrayLevelRunEmphasis         | 707.9563868  |
| wavelet-LLH | glrlm      | RunLengthNonUniformityNormalized | 0.964102428  |
| wavelet-LLH | glszm      | GrayLevelVariance                | 158.5254321  |
| wavelet-LLH | glszm      | ZoneVariance                     | 0.355555556  |
| wavelet-LLH | glszm      | GrayLevelNonUniformityNormalized | 0.031111111  |
| wavelet-LLH | glszm      | SizeZoneNonUniformityNormalized  | 0.582222222  |
| wavelet-LLH | glszm      | SizeZoneNonUniformity            | 26.2         |
| wavelet-LLH | glszm      | GrayLevelNonUniformity           | 1.4          |
| wavelet-LLH | glszm      | LargeAreaEmphasis                | 2.133333333  |
| wavelet-LLH | glszm      | SmallAreaHighGrayLevelEmphasis   | 675.9030864  |
| wavelet-LLH | glszm      | ZonePercentage                   | 0.75         |
| wavelet-LLH | glszm      | LargeAreaLowGrayLevelEmphasis    | 0.040344548  |
| wavelet-LLH | glszm      | LargeAreaHighGrayLevelEmphasis   | 1308.177778  |
| wavelet-LLH | glszm      | HighGrayLevelZoneEmphasis        | 779.0888889  |

|             |            |                                      |              |
|-------------|------------|--------------------------------------|--------------|
| wavelet-LLH | glszm      | SmallAreaEmphasis                    | 0.790740741  |
| wavelet-LLH | glszm      | LowGrayLevelZoneEmphasis             | 0.032014768  |
| wavelet-LLH | glszm      | ZoneEntropy                          | 5.252855596  |
| wavelet-LLH | glszm      | SmallAreaLowGrayLevelEmphasis        | 0.03021966   |
| wavelet-LLH | ngtdm      | Coarseness                           | 0.066386192  |
| wavelet-LLH | ngtdm      | Complexity                           | 5113.653228  |
| wavelet-LLH | ngtdm      | Strength                             | 48.60400003  |
| wavelet-LLH | ngtdm      | Contrast                             | 1.851788907  |
| wavelet-LLH | ngtdm      | Busyness                             | 0.024163255  |
| wavelet-LLL | gldm       | GrayLevelVariance                    | 341.3608333  |
| wavelet-LLL | gldm       | HighGrayLevelEmphasis                | 1684.583333  |
| wavelet-LLL | gldm       | DependenceEntropy                    | 5.269146221  |
| wavelet-LLL | gldm       | DependenceNonUniformity              | 46.13333333  |
| wavelet-LLL | gldm       | GrayLevelNonUniformity               | 1.7          |
| wavelet-LLL | gldm       | SmallDependenceEmphasis              | 0.9          |
| wavelet-LLL | gldm       | SmallDependenceHighGrayLevelEmphasis | 1509.233333  |
| wavelet-LLL | gldm       | DependenceNonUniformityNormalized    | 0.768888889  |
| wavelet-LLL | gldm       | LargeDependenceEmphasis              | 1.4          |
| wavelet-LLL | gldm       | LargeDependenceLowGrayLevelEmphasis  | 0.041181069  |
| wavelet-LLL | gldm       | DependenceVariance                   | 0.115555556  |
| wavelet-LLL | gldm       | LargeDependenceHighGrayLevelEmphasis | 2385.983333  |
| wavelet-LLL | gldm       | SmallDependenceLowGrayLevelEmphasis  | 0.040651597  |
| wavelet-LLL | gldm       | LowGrayLevelEmphasis                 | 0.040757492  |
| wavelet-LLL | glcm       | JointAverage                         | 41.53785696  |
| wavelet-LLL | glcm       | SumAverage                           | 83.07571391  |
| wavelet-LLL | glcm       | JointEntropy                         | 6.070916675  |
| wavelet-LLL | glcm       | ClusterShade                         | -3066.783648 |
| wavelet-LLL | glcm       | MaximumProbability                   | 0.022415094  |
| wavelet-LLL | glcm       | ldmn                                 | 0.921082931  |
| wavelet-LLL | glcm       | JointEnergy                          | 0.015113504  |
| wavelet-LLL | glcm       | Contrast                             | 578.2719455  |
| wavelet-LLL | glcm       | DifferenceEntropy                    | 4.417856787  |
| wavelet-LLL | glcm       | InverseVariance                      | 0.062241656  |
| wavelet-LLL | glcm       | DifferenceVariance                   | 195.2428101  |
| wavelet-LLL | glcm       | ldn                                  | 0.814762683  |
| wavelet-LLL | glcm       | ldm                                  | 0.048216994  |
| wavelet-LLL | glcm       | Correlation                          | 0.187244945  |
| wavelet-LLL | glcm       | Autocorrelation                      | 1791.147987  |
| wavelet-LLL | glcm       | SumEntropy                           | 4.851409227  |
| wavelet-LLL | glcm       | SumSquares                           | 354.5511152  |
| wavelet-LLL | glcm       | ClusterProminence                    | 1807494.856  |
| wavelet-LLL | glcm       | lmc2                                 | 0.999892648  |
| wavelet-LLL | glcm       | lmc1                                 | -0.823585773 |
| wavelet-LLL | glcm       | DifferenceAverage                    | 19.42768625  |
| wavelet-LLL | glcm       | ld                                   | 0.108444985  |
| wavelet-LLL | glcm       | ClusterTendency                      | 839.9325155  |
| wavelet-LLL | firstorder | InterquartileRange                   | 582.8432965  |
| wavelet-LLL | firstorder | Skewness                             | 0.113542681  |
| wavelet-LLL | firstorder | Uniformity                           | 0.028333333  |
| wavelet-LLL | firstorder | Median                               | -767.8801058 |
| wavelet-LLL | firstorder | Energy                               | 46169721.26  |
| wavelet-LLL | firstorder | RobustMeanAbsoluteDeviation          | 256.5339056  |
| wavelet-LLL | firstorder | MeanAbsoluteDeviation                | 365.0118985  |

|             |            |                                  |              |
|-------------|------------|----------------------------------|--------------|
| wavelet-LLL | firstorder | TotalEnergy                      | 1246582474   |
| wavelet-LLL | firstorder | Maximum                          | 262.4117845  |
| wavelet-LLL | firstorder | RootMeanSquared                  | 877.2088431  |
| wavelet-LLL | firstorder | 90Percentile                     | -88.50486463 |
| wavelet-LLL | firstorder | Minimum                          | -1636.259755 |
| wavelet-LLL | firstorder | Entropy                          | 5.269146221  |
| wavelet-LLL | firstorder | Range                            | 1898.671539  |
| wavelet-LLL | firstorder | Variance                         | 211919.0992  |
| wavelet-LLL | firstorder | 10Percentile                     | -1300.306294 |
| wavelet-LLL | firstorder | Kurtosis                         | 2.508406738  |
| wavelet-LLL | firstorder | Mean                             | -746.7102886 |
| wavelet-LLL | grlm       | ShortRunLowGrayLevelEmphasis     | 0.040960383  |
| wavelet-LLL | grlm       | GrayLevelVariance                | 341.6843424  |
| wavelet-LLL | grlm       | LowGrayLevelRunEmphasis          | 0.040964524  |
| wavelet-LLL | grlm       | GrayLevelNonUniformityNormalized | 0.028366186  |
| wavelet-LLL | grlm       | RunVariance                      | 0.005126732  |
| wavelet-LLL | grlm       | GrayLevelNonUniformity           | 1.693220339  |
| wavelet-LLL | grlm       | LongRunEmphasis                  | 1.015645372  |
| wavelet-LLL | grlm       | ShortRunHighGrayLevelEmphasis    | 1677.365385  |
| wavelet-LLL | grlm       | RunLengthNonUniformity           | 59.08735332  |
| wavelet-LLL | grlm       | ShortRunEmphasis                 | 0.996088657  |
| wavelet-LLL | grlm       | LongRunHighGrayLevelEmphasis     | 1711.658083  |
| wavelet-LLL | grlm       | RunPercentage                    | 0.994871795  |
| wavelet-LLL | grlm       | LongRunLowGrayLevelEmphasis      | 0.040981092  |
| wavelet-LLL | grlm       | RunEntropy                       | 5.268789769  |
| wavelet-LLL | grlm       | HighGrayLevelRunEmphasis         | 1684.223924  |
| wavelet-LLL | grlm       | RunLengthNonUniformityNormalized | 0.989746536  |
| wavelet-LLL | glszm      | GrayLevelVariance                | 346.106824   |
| wavelet-LLL | glszm      | ZoneVariance                     | 0.066326531  |
| wavelet-LLL | glszm      | GrayLevelNonUniformityNormalized | 0.02869898   |
| wavelet-LLL | glszm      | SizeZoneNonUniformityNormalized  | 0.867346939  |
| wavelet-LLL | glszm      | SizeZoneNonUniformity            | 48.57142857  |
| wavelet-LLL | glszm      | GrayLevelNonUniformity           | 1.607142857  |
| wavelet-LLL | glszm      | LargeAreaEmphasis                | 1.214285714  |
| wavelet-LLL | glszm      | SmallAreaHighGrayLevelEmphasis   | 1585.723214  |
| wavelet-LLL | glszm      | ZonePercentage                   | 0.933333333  |
| wavelet-LLL | glszm      | LargeAreaLowGrayLevelEmphasis    | 0.043820019  |
| wavelet-LLL | glszm      | LargeAreaHighGrayLevelEmphasis   | 2055.410714  |
| wavelet-LLL | glszm      | HighGrayLevelZoneEmphasis        | 1679.660714  |
| wavelet-LLL | glszm      | SmallAreaEmphasis                | 0.946428571  |
| wavelet-LLL | glszm      | LowGrayLevelZoneEmphasis         | 0.043593102  |
| wavelet-LLL | glszm      | ZoneEntropy                      | 5.26691452   |
| wavelet-LLL | glszm      | SmallAreaLowGrayLevelEmphasis    | 0.043536373  |
| wavelet-LLL | ngtdm      | Coarseness                       | 0.04748352   |
| wavelet-LLL | ngtdm      | Complexity                       | 14513.29657  |
| wavelet-LLL | ngtdm      | Strength                         | 75.76270429  |
| wavelet-LLL | ngtdm      | Contrast                         | 5.256478875  |
| wavelet-LLL | ngtdm      | Busyness                         | 0.019778923  |
| wavelet-HHL | gldm       | GrayLevelVariance                | 21.68305556  |
| wavelet-HHL | gldm       | HighGrayLevelEmphasis            | 217.2166667  |
| wavelet-HHL | gldm       | DependenceEntropy                | 4.785487054  |
| wavelet-HHL | gldm       | DependenceNonUniformity          | 17.9         |
| wavelet-HHL | gldm       | GrayLevelNonUniformity           | 5.033333333  |

|             |            |                                      |              |
|-------------|------------|--------------------------------------|--------------|
| wavelet-HHL | gldm       | SmallDependenceEmphasis              | 0.481166667  |
| wavelet-HHL | gldm       | SmallDependenceHighGrayLevelEmphasis | 113.867      |
| wavelet-HHL | gldm       | DependenceNonUniformityNormalized    | 0.298333333  |
| wavelet-HHL | gldm       | LargeDependenceEmphasis              | 5.5          |
| wavelet-HHL | gldm       | LargeDependenceLowGrayLevelEmphasis  | 0.052656949  |
| wavelet-HHL | gldm       | DependenceVariance                   | 1.228888889  |
| wavelet-HHL | gldm       | LargeDependenceHighGrayLevelEmphasis | 1016.516667  |
| wavelet-HHL | gldm       | SmallDependenceLowGrayLevelEmphasis  | 0.019732986  |
| wavelet-HHL | gldm       | LowGrayLevelEmphasis                 | 0.022997609  |
| wavelet-HHL | glcm       | JointAverage                         | 13.81242314  |
| wavelet-HHL | glcm       | SumAverage                           | 27.62484628  |
| wavelet-HHL | glcm       | JointEntropy                         | 5.723028244  |
| wavelet-HHL | glcm       | ClusterShade                         | 81.42816208  |
| wavelet-HHL | glcm       | MaximumProbability                   | 0.04383795   |
| wavelet-HHL | glcm       | ldmn                                 | 0.945209983  |
| wavelet-HHL | glcm       | JointEnergy                          | 0.02082975   |
| wavelet-HHL | glcm       | Contrast                             | 45.54890972  |
| wavelet-HHL | glcm       | DifferenceEntropy                    | 3.393209497  |
| wavelet-HHL | glcm       | InverseVariance                      | 0.187632647  |
| wavelet-HHL | glcm       | DifferenceVariance                   | 18.63073459  |
| wavelet-HHL | glcm       | ldn                                  | 0.849856237  |
| wavelet-HHL | glcm       | ldm                                  | 0.184618569  |
| wavelet-HHL | glcm       | Correlation                          | -0.041495167 |
| wavelet-HHL | glcm       | Autocorrelation                      | 190.0517379  |
| wavelet-HHL | glcm       | SumEntropy                           | 4.006198952  |
| wavelet-HHL | glcm       | SumSquares                           | 22.01280608  |
| wavelet-HHL | glcm       | ClusterProminence                    | 7266.361355  |
| wavelet-HHL | glcm       | lmc2                                 | 0.987285361  |
| wavelet-HHL | glcm       | lmc1                                 | -0.490522032 |
| wavelet-HHL | glcm       | DifferenceAverage                    | 5.125037369  |
| wavelet-HHL | glcm       | ld                                   | 0.278468429  |
| wavelet-HHL | glcm       | ClusterTendency                      | 42.50231458  |
| wavelet-HHL | firstorder | InterquartileRange                   | 147.8262812  |
| wavelet-HHL | firstorder | Skewness                             | 0.433557301  |
| wavelet-HHL | firstorder | Uniformity                           | 0.083888889  |
| wavelet-HHL | firstorder | Median                               | 6.899584724  |
| wavelet-HHL | firstorder | Energy                               | 826126.6878  |
| wavelet-HHL | firstorder | RobustMeanAbsoluteDeviation          | 59.47655278  |
| wavelet-HHL | firstorder | MeanAbsoluteDeviation                | 89.20316433  |
| wavelet-HHL | firstorder | TotalEnergy                          | 22305420.57  |
| wavelet-HHL | firstorder | Maximum                              | 318.7254776  |
| wavelet-HHL | firstorder | RootMeanSquared                      | 117.3404369  |
| wavelet-HHL | firstorder | 90Percentile                         | 142.4726529  |
| wavelet-HHL | firstorder | Minimum                              | -313.4572493 |
| wavelet-HHL | firstorder | Entropy                              | 3.827421329  |
| wavelet-HHL | firstorder | Range                                | 632.1827269  |
| wavelet-HHL | firstorder | Variance                             | 13647.75758  |
| wavelet-HHL | firstorder | 10Percentile                         | -111.4763257 |
| wavelet-HHL | firstorder | Kurtosis                             | 3.783889936  |
| wavelet-HHL | firstorder | Mean                                 | 11.00093414  |
| wavelet-HHL | glrlm      | ShortRunLowGrayLevelEmphasis         | 0.023516022  |
| wavelet-HHL | glrlm      | GrayLevelVariance                    | 22.14418909  |
| wavelet-HHL | glrlm      | LowGrayLevelRunEmphasis              | 0.023722106  |

|             |       |                                      |             |
|-------------|-------|--------------------------------------|-------------|
| wavelet-HHL | glrlm | GrayLevelNonUniformityNormalized     | 0.081963589 |
| wavelet-HHL | glrlm | RunVariance                          | 0.046405721 |
| wavelet-HHL | glrlm | GrayLevelNonUniformity               | 4.717746418 |
| wavelet-HHL | glrlm | LongRunEmphasis                      | 1.137535925 |
| wavelet-HHL | glrlm | ShortRunHighGrayLevelEmphasis        | 212.87293   |
| wavelet-HHL | glrlm | RunLengthNonUniformity               | 53.19846169 |
| wavelet-HHL | glrlm | ShortRunEmphasis                     | 0.968754913 |
| wavelet-HHL | glrlm | LongRunHighGrayLevelEmphasis         | 244.1377787 |
| wavelet-HHL | glrlm | RunPercentage                        | 0.958974359 |
| wavelet-HHL | glrlm | LongRunLowGrayLevelEmphasis          | 0.024610503 |
| wavelet-HHL | glrlm | RunEntropy                           | 3.981217061 |
| wavelet-HHL | glrlm | HighGrayLevelRunEmphasis             | 218.6337211 |
| wavelet-HHL | glrlm | RunLengthNonUniformityNormalized     | 0.922711224 |
| wavelet-HHL | glszm | GrayLevelVariance                    | 28.39673469 |
| wavelet-HHL | glszm | ZoneVariance                         | 2.26122449  |
| wavelet-HHL | glszm | GrayLevelNonUniformityNormalized     | 0.072653061 |
| wavelet-HHL | glszm | SizeZoneNonUniformityNormalized      | 0.466122449 |
| wavelet-HHL | glszm | SizeZoneNonUniformity                | 16.31428571 |
| wavelet-HHL | glszm | GrayLevelNonUniformity               | 2.542857143 |
| wavelet-HHL | glszm | LargeAreaEmphasis                    | 5.2         |
| wavelet-HHL | glszm | SmallAreaHighGrayLevelEmphasis       | 168.9461199 |
| wavelet-HHL | glszm | ZonePercentage                       | 0.583333333 |
| wavelet-HHL | glszm | LargeAreaLowGrayLevelEmphasis        | 0.060937989 |
| wavelet-HHL | glszm | LargeAreaHighGrayLevelEmphasis       | 1011.914286 |
| wavelet-HHL | glszm | HighGrayLevelZoneEmphasis            | 234.1142857 |
| wavelet-HHL | glszm | SmallAreaEmphasis                    | 0.70070194  |
| wavelet-HHL | glszm | LowGrayLevelZoneEmphasis             | 0.034898173 |
| wavelet-HHL | glszm | ZoneEntropy                          | 4.536286231 |
| wavelet-HHL | glszm | SmallAreaLowGrayLevelEmphasis        | 0.033082521 |
| wavelet-HHL | ngtdm | Coarseness                           | 0.072694808 |
| wavelet-HHL | ngtdm | Complexity                           | 539.3901145 |
| wavelet-HHL | ngtdm | Strength                             | 10.33953468 |
| wavelet-HHL | ngtdm | Contrast                             | 0.532164299 |
| wavelet-HHL | ngtdm | Busyness                             | 0.072413444 |
| wavelet-HLH | gldm  | GrayLevelVariance                    | 30.87888889 |
| wavelet-HLH | gldm  | HighGrayLevelEmphasis                | 220.4       |
| wavelet-HLH | gldm  | DependenceEntropy                    | 4.777316637 |
| wavelet-HLH | gldm  | DependenceNonUniformity              | 20.23333333 |
| wavelet-HLH | gldm  | GrayLevelNonUniformity               | 4.2         |
| wavelet-HLH | gldm  | SmallDependenceEmphasis              | 0.546527778 |
| wavelet-HLH | gldm  | SmallDependenceHighGrayLevelEmphasis | 131.1385417 |
| wavelet-HLH | gldm  | DependenceNonUniformityNormalized    | 0.337222222 |
| wavelet-HLH | gldm  | LargeDependenceEmphasis              | 4.3         |
| wavelet-HLH | gldm  | LargeDependenceLowGrayLevelEmphasis  | 0.048583147 |
| wavelet-HLH | gldm  | DependenceVariance                   | 0.815555556 |
| wavelet-HLH | gldm  | LargeDependenceHighGrayLevelEmphasis | 862.8       |
| wavelet-HLH | gldm  | SmallDependenceLowGrayLevelEmphasis  | 0.024518185 |
| wavelet-HLH | gldm  | LowGrayLevelEmphasis                 | 0.027664159 |
| wavelet-HLH | glcm  | JointAverage                         | 13.7797355  |
| wavelet-HLH | glcm  | SumAverage                           | 27.55947099 |
| wavelet-HLH | glcm  | JointEntropy                         | 5.78986803  |
| wavelet-HLH | glcm  | ClusterShade                         | 331.8878046 |
| wavelet-HLH | glcm  | MaximumProbability                   | 0.034641769 |



|             |            |                                  |              |
|-------------|------------|----------------------------------|--------------|
| wavelet-HLH | glcm       | Idmn                             | 0.948636865  |
| wavelet-HLH | glcm       | JointEnergy                      | 0.019403022  |
| wavelet-HLH | glcm       | Contrast                         | 63.66345072  |
| wavelet-HLH | glcm       | DifferenceEntropy                | 3.511534101  |
| wavelet-HLH | glcm       | InverseVariance                  | 0.156792726  |
| wavelet-HLH | glcm       | DifferenceVariance               | 23.86551646  |
| wavelet-HLH | glcm       | Idn                              | 0.851368795  |
| wavelet-HLH | glcm       | Idm                              | 0.152104726  |
| wavelet-HLH | glcm       | Correlation                      | -0.050845531 |
| wavelet-HLH | glcm       | Autocorrelation                  | 188.313081   |
| wavelet-HLH | glcm       | SumEntropy                       | 4.117413094  |
| wavelet-HLH | glcm       | SumSquares                       | 30.23203917  |
| wavelet-HLH | glcm       | ClusterProminence                | 14856.2073   |
| wavelet-HLH | glcm       | Imc2                             | 0.992717148  |
| wavelet-HLH | glcm       | Imc1                             | -0.541326702 |
| wavelet-HLH | glcm       | DifferenceAverage                | 6.16625143   |
| wavelet-HLH | glcm       | Id                               | 0.2439705    |
| wavelet-HLH | glcm       | ClusterTendency                  | 57.26470597  |
| wavelet-HLH | firstorder | InterquartileRange               | 134.0791037  |
| wavelet-HLH | firstorder | Skewness                         | 0.733853498  |
| wavelet-HLH | firstorder | Uniformity                       | 0.07         |
| wavelet-HLH | firstorder | Median                           | -6.586666681 |
| wavelet-HLH | firstorder | Energy                           | 1151704.235  |
| wavelet-HLH | firstorder | RobustMeanAbsoluteDeviation      | 63.41872024  |
| wavelet-HLH | firstorder | MeanAbsoluteDeviation            | 100.886506   |
| wavelet-HLH | firstorder | TotalEnergy                      | 31096014.33  |
| wavelet-HLH | firstorder | Maximum                          | 456.0233294  |
| wavelet-HLH | firstorder | RootMeanSquared                  | 138.5462759  |
| wavelet-HLH | firstorder | 90Percentile                     | 174.330788   |
| wavelet-HLH | firstorder | Minimum                          | -324.9245545 |
| wavelet-HLH | firstorder | Entropy                          | 4.014527265  |
| wavelet-HLH | firstorder | Range                            | 780.9478839  |
| wavelet-HLH | firstorder | Variance                         | 19151.88271  |
| wavelet-HLH | firstorder | 10Percentile                     | -149.0830777 |
| wavelet-HLH | firstorder | Kurtosis                         | 4.859842626  |
| wavelet-HLH | firstorder | Mean                             | 6.571747236  |
| wavelet-HLH | grlm       | ShortRunLowGrayLevelEmphasis     | 0.028241404  |
| wavelet-HLH | grlm       | GrayLevelVariance                | 31.62823099  |
| wavelet-HLH | grlm       | LowGrayLevelRunEmphasis          | 0.028411644  |
| wavelet-HLH | grlm       | GrayLevelNonUniformityNormalized | 0.069420685  |
| wavelet-HLH | grlm       | RunVariance                      | 0.036036961  |
| wavelet-HLH | grlm       | GrayLevelNonUniformity           | 4.027296604  |
| wavelet-HLH | grlm       | LongRunEmphasis                  | 1.10933701   |
| wavelet-HLH | grlm       | ShortRunHighGrayLevelEmphasis    | 216.2633544  |
| wavelet-HLH | grlm       | RunLengthNonUniformity           | 54.35896662  |
| wavelet-HLH | grlm       | ShortRunEmphasis                 | 0.974278391  |
| wavelet-HLH | grlm       | LongRunHighGrayLevelEmphasis     | 242.5452621  |
| wavelet-HLH | grlm       | RunPercentage                    | 0.966666667  |
| wavelet-HLH | grlm       | LongRunLowGrayLevelEmphasis      | 0.029130777  |
| wavelet-HLH | grlm       | RunEntropy                       | 4.11532792   |
| wavelet-HLH | grlm       | HighGrayLevelRunEmphasis         | 221.3017066  |
| wavelet-HLH | grlm       | RunLengthNonUniformityNormalized | 0.93564851   |
| wavelet-HLH | glszm      | GrayLevelVariance                | 42.80955679  |

|             |       |                                  |             |
|-------------|-------|----------------------------------|-------------|
| wavelet-HLH | glszm | ZoneVariance                     | 1.296398892 |
| wavelet-HLH | glszm | GrayLevelNonUniformityNormalized | 0.065096953 |
| wavelet-HLH | glszm | SizeZoneNonUniformityNormalized  | 0.534626039 |
| wavelet-HLH | glszm | SizeZoneNonUniformity            | 20.31578947 |
| wavelet-HLH | glszm | GrayLevelNonUniformity           | 2.473684211 |
| wavelet-HLH | glszm | LargeAreaEmphasis                | 3.789473684 |
| wavelet-HLH | glszm | SmallAreaHighGrayLevelEmphasis   | 187.0061111 |
| wavelet-HLH | glszm | ZonePercentage                   | 0.633333333 |
| wavelet-HLH | glszm | LargeAreaLowGrayLevelEmphasis    | 0.057944224 |
| wavelet-HLH | glszm | LargeAreaHighGrayLevelEmphasis   | 750.5789474 |
| wavelet-HLH | glszm | HighGrayLevelZoneEmphasis        | 236.6052632 |
| wavelet-HLH | glszm | SmallAreaEmphasis                | 0.756900585 |
| wavelet-HLH | glszm | LowGrayLevelZoneEmphasis         | 0.039747507 |
| wavelet-HLH | glszm | ZoneEntropy                      | 4.471354487 |
| wavelet-HLH | glszm | SmallAreaLowGrayLevelEmphasis    | 0.037936722 |
| wavelet-HLH | ngtdm | Coarseness                       | 0.077826621 |
| wavelet-HLH | ngtdm | Complexity                       | 763.455595  |
| wavelet-HLH | ngtdm | Strength                         | 14.25974748 |
| wavelet-HLH | ngtdm | Contrast                         | 0.783561034 |
| wavelet-HLH | ngtdm | Busyness                         | 0.076695625 |

| Image type | Feature Class | Feature Name                         |                                                                                                                                                                                                                                                                                                                                                                                                                   |
|------------|---------------|--------------------------------------|-------------------------------------------------------------------------------------------------------------------------------------------------------------------------------------------------------------------------------------------------------------------------------------------------------------------------------------------------------------------------------------------------------------------|
| general    | info          | BoundingBox                          | 10: RTSTRUCT: C99-DNU_B_segment_left upper lobe<br>(0, 1, 2, 6, 5, 6)                                                                                                                                                                                                                                                                                                                                             |
| general    | info          | EnabledImageTypes                    | {u'Original': {}, u'Wavelet': {}}                                                                                                                                                                                                                                                                                                                                                                                 |
|            |               |                                      | {'distances': [1], 'additionalInfo': True, 'force2D': False, 'interpolator': 'sitkBSpline', 'resampledPixelSpacing': [3.0], 'label': 1, 'normalizeScale': 1, 'normalize': False, 'force2Ddimension': 0, 'removeOutliers': None, 'minimumROISize': None, u'binWidth': 25.0, 'minimumROIDimensions': 1, u'correctMask': True, 'preCrop': False, u'symmetricalGLCM': True, 'resegmentRange': None, 'padDistance': 5} |
| general    | info          | GeneralSettings                      |                                                                                                                                                                                                                                                                                                                                                                                                                   |
| general    | info          | ImageHash                            | 9c3ac46ba5182100365798c2412fee403996853e<br>(0.9765624999999998, 0.9765624999999998, 1.9999999999999999)                                                                                                                                                                                                                                                                                                          |
| general    | info          | ImageSpacing                         | 1.9999999999999999                                                                                                                                                                                                                                                                                                                                                                                                |
| general    | info          | MaskHash                             | 6807b071add26941b59b9b9a2cfe54f038753e11                                                                                                                                                                                                                                                                                                                                                                          |
| general    | info          | NumpyVersion                         | 1.13.1                                                                                                                                                                                                                                                                                                                                                                                                            |
| general    | info          | PyWaveletVersion                     | 0.5.2                                                                                                                                                                                                                                                                                                                                                                                                             |
| general    | info          | SimpleITKVersion                     | 1.1.0                                                                                                                                                                                                                                                                                                                                                                                                             |
| general    | info          | Version                              | 1.3.0.post102+g1b0eb74                                                                                                                                                                                                                                                                                                                                                                                            |
| general    | info          | VolumeNum                            | 1                                                                                                                                                                                                                                                                                                                                                                                                                 |
| general    | info          | VoxelNum                             | 83                                                                                                                                                                                                                                                                                                                                                                                                                |
| original   | shape         | Maximum3DDiameter                    | 19.91792393                                                                                                                                                                                                                                                                                                                                                                                                       |
| original   | shape         | Maximum2DDiameterSlice               | 17.60523084                                                                                                                                                                                                                                                                                                                                                                                                       |
| original   | shape         | Sphericity                           | 0.774776815                                                                                                                                                                                                                                                                                                                                                                                                       |
| original   | shape         | MinorAxis                            | 14.73399209                                                                                                                                                                                                                                                                                                                                                                                                       |
| original   | shape         | Elongation                           | 0.821832646                                                                                                                                                                                                                                                                                                                                                                                                       |
| original   | shape         | SurfaceVolumeRatio                   | 0.486535956                                                                                                                                                                                                                                                                                                                                                                                                       |
| original   | shape         | Volume                               | 2111.434937                                                                                                                                                                                                                                                                                                                                                                                                       |
| original   | shape         | MajorAxis                            | 17.92821466                                                                                                                                                                                                                                                                                                                                                                                                       |
| original   | shape         | SurfaceArea                          | 1027.289014                                                                                                                                                                                                                                                                                                                                                                                                       |
| original   | shape         | Flatness                             | 0.65442091                                                                                                                                                                                                                                                                                                                                                                                                        |
| original   | shape         | LeastAxis                            | 11.73259855                                                                                                                                                                                                                                                                                                                                                                                                       |
| original   | shape         | Maximum2DDiameterColumn              | 16.91257391                                                                                                                                                                                                                                                                                                                                                                                                       |
| original   | shape         | Maximum2DDiameterRow                 | 19.03494422                                                                                                                                                                                                                                                                                                                                                                                                       |
| original   | gldm          | GrayLevelVariance                    | 114.8199191                                                                                                                                                                                                                                                                                                                                                                                                       |
| original   | gldm          | HighGrayLevelEmphasis                | 725.5392954                                                                                                                                                                                                                                                                                                                                                                                                       |
| original   | gldm          | DependenceEntropy                    | 6.685794474                                                                                                                                                                                                                                                                                                                                                                                                       |
| original   | gldm          | DependenceNonUniformity              | 232.0460705                                                                                                                                                                                                                                                                                                                                                                                                       |
| original   | gldm          | GrayLevelNonUniformity               | 21.68292683                                                                                                                                                                                                                                                                                                                                                                                                       |
| original   | gldm          | SmallDependenceEmphasis              | 0.54125613                                                                                                                                                                                                                                                                                                                                                                                                        |
| original   | gldm          | SmallDependenceHighGrayLevelEmphasis | 310.663048                                                                                                                                                                                                                                                                                                                                                                                                        |
| original   | gldm          | DependenceNonUniformityNormalized    | 0.31442557                                                                                                                                                                                                                                                                                                                                                                                                        |
| original   | gldm          | LargeDependenceEmphasis              | 7.422764228                                                                                                                                                                                                                                                                                                                                                                                                       |
| original   | gldm          | LargeDependenceLowGrayLevelEmphasis  | 0.017800462                                                                                                                                                                                                                                                                                                                                                                                                       |
| original   | gldm          | DependenceVariance                   | 2.839219747                                                                                                                                                                                                                                                                                                                                                                                                       |
| original   | gldm          | LargeDependenceHighGrayLevelEmphasis | 9565.569106                                                                                                                                                                                                                                                                                                                                                                                                       |
| original   | gldm          | SmallDependenceLowGrayLevelEmphasis  | 0.003881099                                                                                                                                                                                                                                                                                                                                                                                                       |
| original   | gldm          | LowGrayLevelEmphasis                 | 0.005926146                                                                                                                                                                                                                                                                                                                                                                                                       |
| original   | glcm          | JointAverage                         | 27.35648663                                                                                                                                                                                                                                                                                                                                                                                                       |
| original   | glcm          | SumAverage                           | 54.71297325                                                                                                                                                                                                                                                                                                                                                                                                       |
| original   | glcm          | JointEntropy                         | 8.938087469                                                                                                                                                                                                                                                                                                                                                                                                       |
| original   | glcm          | ClusterShade                         | -734.3736216                                                                                                                                                                                                                                                                                                                                                                                                      |
| original   | glcm          | MaximumProbability                   | 0.01384473                                                                                                                                                                                                                                                                                                                                                                                                        |
| original   | glcm          | Idmn                                 | 0.940303027                                                                                                                                                                                                                                                                                                                                                                                                       |
| original   | glcm          | JointEnergy                          | 0.002804368                                                                                                                                                                                                                                                                                                                                                                                                       |
| original   | glcm          | Contrast                             | 124.5973777                                                                                                                                                                                                                                                                                                                                                                                                       |
| original   | glcm          | DifferenceEntropy                    | 4.351094189                                                                                                                                                                                                                                                                                                                                                                                                       |
| original   | glcm          | InverseVariance                      | 0.136132914                                                                                                                                                                                                                                                                                                                                                                                                       |

|          |            |                                  |              |
|----------|------------|----------------------------------|--------------|
| original | glcm       | DifferenceVariance               | 41.00553031  |
| original | glcm       | Idn                              | 0.842930999  |
| original | glcm       | Idm                              | 0.138357215  |
| original | glcm       | Correlation                      | 0.435827544  |
| original | glcm       | Autocorrelation                  | 797.5286914  |
| original | glcm       | SumEntropy                       | 5.929330213  |
| original | glcm       | SumSquares                       | 110.6875293  |
| original | glcm       | ClusterProminence                | 211170.9295  |
| original | glcm       | Imc2                             | 0.95592775   |
| original | glcm       | Imc1                             | -0.246223469 |
| original | glcm       | DifferenceAverage                | 8.71355746   |
| original | glcm       | Id                               | 0.217094502  |
| original | glcm       | ClusterTendency                  | 318.1527395  |
| original | firstorder | InterquartileRange               | 467          |
| original | firstorder | Skewness                         | 0.04980419   |
| original | firstorder | Uniformity                       | 0.02938066   |
| original | firstorder | Median                           | -411         |
| original | firstorder | Energy                           | 168320415    |
| original | firstorder | RobustMeanAbsoluteDeviation      | 185.2809629  |
| original | firstorder | MeanAbsoluteDeviation            | 231.3032036  |
| original | firstorder | TotalEnergy                      | 481568570.1  |
| original | firstorder | Maximum                          | 48           |
| original | firstorder | RootMeanSquared                  | 477.573495   |
| original | firstorder | 90Percentile                     | -7           |
| original | firstorder | Minimum                          | -983         |
| original | firstorder | Entropy                          | 5.188914307  |
| original | firstorder | Range                            | 1031         |
| original | firstorder | Variance                         | 71823.35166  |
| original | firstorder | 10Percentile                     | -740.3       |
| original | firstorder | Kurtosis                         | 1.847549488  |
| original | firstorder | Mean                             | -395.2886179 |
| original | glrlm      | ShortRunLowGrayLevelEmphasis     | 0.005972772  |
| original | glrlm      | GrayLevelVariance                | 111.5848621  |
| original | glrlm      | LowGrayLevelRunEmphasis          | 0.006069829  |
| original | glrlm      | GrayLevelNonUniformityNormalized | 0.02900051   |
| original | glrlm      | RunVariance                      | 0.058334731  |
| original | glrlm      | GrayLevelNonUniformity           | 20.46691137  |
| original | glrlm      | LongRunEmphasis                  | 1.15590285   |
| original | glrlm      | ShortRunHighGrayLevelEmphasis    | 668.4811928  |
| original | glrlm      | RunLengthNonUniformity           | 651.7215823  |
| original | glrlm      | ShortRunEmphasis                 | 0.968550711  |
| original | glrlm      | LongRunHighGrayLevelEmphasis     | 892.662186   |
| original | glrlm      | RunPercentage                    | 0.956118407  |
| original | glrlm      | LongRunLowGrayLevelEmphasis      | 0.006491444  |
| original | glrlm      | RunEntropy                       | 5.384384433  |
| original | glrlm      | HighGrayLevelRunEmphasis         | 704.2869227  |
| original | glrlm      | RunLengthNonUniformityNormalized | 0.922116756  |
| original | glszm      | GrayLevelVariance                | 86.86280394  |
| original | glszm      | ZoneVariance                     | 5.744748384  |
| original | glszm      | GrayLevelNonUniformityNormalized | 0.030865266  |
| original | glszm      | SizeZoneNonUniformityNormalized  | 0.553189443  |
| original | glszm      | SizeZoneNonUniformity            | 252.254386   |
| original | glszm      | GrayLevelNonUniformity           | 14.0745614   |
| original | glszm      | LargeAreaEmphasis                | 8.364035088  |
| original | glszm      | SmallAreaHighGrayLevelEmphasis   | 426.0250114  |
| original | glszm      | ZonePercentage                   | 0.617886179  |
| original | glszm      | LargeAreaLowGrayLevelEmphasis    | 0.018486446  |
| original | glszm      | LargeAreaHighGrayLevelEmphasis   | 11097.78947  |
| original | glszm      | HighGrayLevelZoneEmphasis        | 569.3201754  |

|             |            |                                      |              |
|-------------|------------|--------------------------------------|--------------|
| original    | glszm      | SmallAreaEmphasis                    | 0.772202575  |
| original    | glszm      | LowGrayLevelZoneEmphasis             | 0.007207014  |
| original    | glszm      | ZoneEntropy                          | 6.112400599  |
| original    | glszm      | SmallAreaLowGrayLevelEmphasis        | 0.005730833  |
| original    | ngtdm      | Coarseness                           | 0.008246432  |
| original    | ngtdm      | Complexity                           | 3800.088285  |
| original    | ngtdm      | Strength                             | 5.473798333  |
| original    | ngtdm      | Contrast                             | 0.754414698  |
| original    | ngtdm      | Busyness                             | 0.147664001  |
| wavelet-HHH | gldm       | GrayLevelVariance                    | 0.664221032  |
| wavelet-HHH | gldm       | HighGrayLevelEmphasis                | 20.73170732  |
| wavelet-HHH | gldm       | DependenceEntropy                    | 5.151428798  |
| wavelet-HHH | gldm       | DependenceNonUniformity              | 54.68292683  |
| wavelet-HHH | gldm       | GrayLevelNonUniformity               | 265.200542   |
| wavelet-HHH | gldm       | SmallDependenceEmphasis              | 0.077187875  |
| wavelet-HHH | gldm       | SmallDependenceHighGrayLevelEmphasis | 1.551539077  |
| wavelet-HHH | gldm       | DependenceNonUniformityNormalized    | 0.074096107  |
| wavelet-HHH | gldm       | LargeDependenceEmphasis              | 74.95663957  |
| wavelet-HHH | gldm       | LargeDependenceLowGrayLevelEmphasis  | 3.829310042  |
| wavelet-HHH | gldm       | DependenceVariance                   | 14.04051821  |
| wavelet-HHH | gldm       | LargeDependenceHighGrayLevelEmphasis | 1557.98645   |
| wavelet-HHH | gldm       | SmallDependenceLowGrayLevelEmphasis  | 0.007514986  |
| wavelet-HHH | gldm       | LowGrayLevelEmphasis                 | 0.057330001  |
| wavelet-HHH | glcm       | JointAverage                         | 4.486338795  |
| wavelet-HHH | glcm       | SumAverage                           | 8.972677591  |
| wavelet-HHH | glcm       | JointEntropy                         | 3.445925663  |
| wavelet-HHH | glcm       | ClusterShade                         | -0.138499531 |
| wavelet-HHH | glcm       | MaximumProbability                   | 0.190395801  |
| wavelet-HHH | glcm       | Idmn                                 | 0.974444658  |
| wavelet-HHH | glcm       | JointEnergy                          | 0.132485721  |
| wavelet-HHH | glcm       | Contrast                             | 1.375427918  |
| wavelet-HHH | glcm       | DifferenceEntropy                    | 1.606986681  |
| wavelet-HHH | glcm       | InverseVariance                      | 0.519092702  |
| wavelet-HHH | glcm       | DifferenceVariance                   | 0.646148528  |
| wavelet-HHH | glcm       | Idn                                  | 0.900339685  |
| wavelet-HHH | glcm       | Idm                                  | 0.625304139  |
| wavelet-HHH | glcm       | Correlation                          | -0.025548322 |
| wavelet-HHH | glcm       | Autocorrelation                      | 20.10985134  |
| wavelet-HHH | glcm       | SumEntropy                           | 2.212007571  |
| wavelet-HHH | glcm       | SumSquares                           | 0.670306055  |
| wavelet-HHH | glcm       | ClusterProminence                    | 6.560054913  |
| wavelet-HHH | glcm       | Imc2                                 | 0.27454229   |
| wavelet-HHH | glcm       | Imc1                                 | -0.02473084  |
| wavelet-HHH | glcm       | DifferenceAverage                    | 0.851348623  |
| wavelet-HHH | glcm       | Id                                   | 0.647239171  |
| wavelet-HHH | glcm       | ClusterTendency                      | 1.305796303  |
| wavelet-HHH | firstorder | InterquartileRange                   | 23.69547328  |
| wavelet-HHH | firstorder | Skewness                             | -0.041683689 |
| wavelet-HHH | firstorder | Uniformity                           | 0.359350328  |
| wavelet-HHH | firstorder | Median                               | 0.004428422  |
| wavelet-HHH | firstorder | Energy                               | 266368.2106  |
| wavelet-HHH | firstorder | RobustMeanAbsoluteDeviation          | 9.838107938  |
| wavelet-HHH | firstorder | MeanAbsoluteDeviation                | 14.67681436  |
| wavelet-HHH | firstorder | TotalEnergy                          | 762085.5634  |
| wavelet-HHH | firstorder | Maximum                              | 74.10152059  |
| wavelet-HHH | firstorder | RootMeanSquared                      | 18.99822451  |
| wavelet-HHH | firstorder | 90Percentile                         | 22.61575079  |
| wavelet-HHH | firstorder | Minimum                              | -76.51606236 |
| wavelet-HHH | firstorder | Entropy                              | 1.736371749  |

|             |            |                                      |              |
|-------------|------------|--------------------------------------|--------------|
| wavelet-HHH | firstorder | Range                                | 150.617583   |
| wavelet-HHH | firstorder | Variance                             | 360.6964378  |
| wavelet-HHH | firstorder | 10Percentile                         | -23.93571321 |
| wavelet-HHH | firstorder | Kurtosis                             | 3.810978534  |
| wavelet-HHH | firstorder | Mean                                 | -0.485897937 |
| wavelet-HHH | gllm       | ShortRunLowGrayLevelEmphasis         | 0.048691008  |
| wavelet-HHH | gllm       | GrayLevelVariance                    | 0.78052047   |
| wavelet-HHH | gllm       | LowGrayLevelRunEmphasis              | 0.059369553  |
| wavelet-HHH | gllm       | GrayLevelNonUniformityNormalized     | 0.329666194  |
| wavelet-HHH | gllm       | RunVariance                          | 0.489672671  |
| wavelet-HHH | gllm       | GrayLevelNonUniformity               | 179.7983535  |
| wavelet-HHH | gllm       | LongRunEmphasis                      | 2.343606554  |
| wavelet-HHH | gllm       | ShortRunHighGrayLevelEmphasis        | 16.46786366  |
| wavelet-HHH | gllm       | RunLengthNonUniformity               | 323.3443105  |
| wavelet-HHH | gllm       | ShortRunEmphasis                     | 0.794903357  |
| wavelet-HHH | gllm       | LongRunHighGrayLevelEmphasis         | 48.70512329  |
| wavelet-HHH | gllm       | RunPercentage                        | 0.738273921  |
| wavelet-HHH | gllm       | LongRunLowGrayLevelEmphasis          | 0.128343342  |
| wavelet-HHH | gllm       | RunEntropy                           | 2.907187533  |
| wavelet-HHH | gllm       | HighGrayLevelRunEmphasis             | 20.71670747  |
| wavelet-HHH | gllm       | RunLengthNonUniformityNormalized     | 0.590476307  |
| wavelet-HHH | glszm      | GrayLevelVariance                    | 2.868266184  |
| wavelet-HHH | glszm      | ZoneVariance                         | 3792.081485  |
| wavelet-HHH | glszm      | GrayLevelNonUniformityNormalized     | 0.282933454  |
| wavelet-HHH | glszm      | SizeZoneNonUniformityNormalized      | 0.398822997  |
| wavelet-HHH | glszm      | SizeZoneNonUniformity                | 18.74468085  |
| wavelet-HHH | glszm      | GrayLevelNonUniformity               | 13.29787234  |
| wavelet-HHH | glszm      | LargeAreaEmphasis                    | 4038.638298  |
| wavelet-HHH | glszm      | SmallAreaHighGrayLevelEmphasis       | 12.29917843  |
| wavelet-HHH | glszm      | ZonePercentage                       | 0.063685637  |
| wavelet-HHH | glszm      | LargeAreaLowGrayLevelEmphasis        | 206.0558225  |
| wavelet-HHH | glszm      | LargeAreaHighGrayLevelEmphasis       | 83415.31915  |
| wavelet-HHH | glszm      | HighGrayLevelZoneEmphasis            | 19.38297872  |
| wavelet-HHH | glszm      | SmallAreaEmphasis                    | 0.652025435  |
| wavelet-HHH | glszm      | LowGrayLevelZoneEmphasis             | 0.113341656  |
| wavelet-HHH | glszm      | ZoneEntropy                          | 3.609356469  |
| wavelet-HHH | glszm      | SmallAreaLowGrayLevelEmphasis        | 0.083352763  |
| wavelet-HHH | ngtdm      | Coarseness                           | 0.006896356  |
| wavelet-HHH | ngtdm      | Complexity                           | 14.78830259  |
| wavelet-HHH | ngtdm      | Strength                             | 0.131734508  |
| wavelet-HHH | ngtdm      | Contrast                             | 0.0222924    |
| wavelet-HHH | ngtdm      | Busyness                             | 3.637425028  |
| wavelet-HLL | gldm       | GrayLevelVariance                    | 112.6221036  |
| wavelet-HLL | gldm       | HighGrayLevelEmphasis                | 921.0149051  |
| wavelet-HLL | gldm       | DependenceEntropy                    | 6.854004386  |
| wavelet-HLL | gldm       | DependenceNonUniformity              | 223.3712737  |
| wavelet-HLL | gldm       | GrayLevelNonUniformity               | 20.58536585  |
| wavelet-HLL | gldm       | SmallDependenceEmphasis              | 0.493076634  |
| wavelet-HLL | gldm       | SmallDependenceHighGrayLevelEmphasis | 457.0206801  |
| wavelet-HLL | gldm       | DependenceNonUniformityNormalized    | 0.302671103  |
| wavelet-HLL | gldm       | LargeDependenceEmphasis              | 5.241192412  |
| wavelet-HLL | gldm       | LargeDependenceLowGrayLevelEmphasis  | 0.024459559  |
| wavelet-HLL | gldm       | DependenceVariance                   | 1.143036552  |
| wavelet-HLL | gldm       | LargeDependenceHighGrayLevelEmphasis | 4770.415989  |
| wavelet-HLL | gldm       | SmallDependenceLowGrayLevelEmphasis  | 0.002618111  |
| wavelet-HLL | gldm       | LowGrayLevelEmphasis                 | 0.005903742  |
| wavelet-HLL | glcm       | JointAverage                         | 27.79232573  |
| wavelet-HLL | glcm       | SumAverage                           | 55.58465145  |
| wavelet-HLL | glcm       | JointEntropy                         | 9.15402018   |

|             |            |                                  |              |
|-------------|------------|----------------------------------|--------------|
| wavelet-HLL | glcm       | ClusterShade                     | -737.4880669 |
| wavelet-HLL | glcm       | MaximumProbability               | 0.006900881  |
| wavelet-HLL | glcm       | Idmn                             | 0.957753945  |
| wavelet-HLL | glcm       | JointEnergy                      | 0.002075728  |
| wavelet-HLL | glcm       | Contrast                         | 122.7631647  |
| wavelet-HLL | glcm       | DifferenceEntropy                | 4.320338919  |
| wavelet-HLL | glcm       | InverseVariance                  | 0.141365279  |
| wavelet-HLL | glcm       | DifferenceVariance               | 45.66925037  |
| wavelet-HLL | glcm       | Idn                              | 0.86983907   |
| wavelet-HLL | glcm       | Idm                              | 0.137213205  |
| wavelet-HLL | glcm       | Correlation                      | 0.428456515  |
| wavelet-HLL | glcm       | Autocorrelation                  | 820.2231856  |
| wavelet-HLL | glcm       | SumEntropy                       | 5.954675694  |
| wavelet-HLL | glcm       | SumSquares                       | 109.1310326  |
| wavelet-HLL | glcm       | ClusterProminence                | 211101.2416  |
| wavelet-HLL | glcm       | Imc2                             | 0.96800142   |
| wavelet-HLL | glcm       | Imc1                             | -0.267786739 |
| wavelet-HLL | glcm       | DifferenceAverage                | 8.30054361   |
| wavelet-HLL | glcm       | Id                               | 0.221091836  |
| wavelet-HLL | glcm       | ClusterTendency                  | 313.7609657  |
| wavelet-HLL | firstorder | InterquartileRange               | 415.2786944  |
| wavelet-HLL | firstorder | Skewness                         | -0.306010888 |
| wavelet-HLL | firstorder | Uniformity                       | 0.02789345   |
| wavelet-HLL | firstorder | Median                           | -60.80918711 |
| wavelet-HLL | firstorder | Energy                           | 56102442.01  |
| wavelet-HLL | firstorder | RobustMeanAbsoluteDeviation      | 170.3546794  |
| wavelet-HLL | firstorder | MeanAbsoluteDeviation            | 224.2389847  |
| wavelet-HLL | firstorder | TotalEnergy                      | 160510374.1  |
| wavelet-HLL | firstorder | Maximum                          | 467.1742465  |
| wavelet-HLL | firstorder | RootMeanSquared                  | 275.7164651  |
| wavelet-HLL | firstorder | 90Percentile                     | 252.7048847  |
| wavelet-HLL | firstorder | Minimum                          | -769.5973253 |
| wavelet-HLL | firstorder | Entropy                          | 5.314776383  |
| wavelet-HLL | firstorder | Range                            | 1236.771572  |
| wavelet-HLL | firstorder | Variance                         | 70179.01774  |
| wavelet-HLL | firstorder | 10Percentile                     | -437.8860164 |
| wavelet-HLL | firstorder | Kurtosis                         | 2.236573336  |
| wavelet-HLL | firstorder | Mean                             | -76.42350018 |
| wavelet-HLL | glrlm      | ShortRunLowGrayLevelEmphasis     | 0.005774176  |
| wavelet-HLL | glrlm      | GrayLevelVariance                | 113.1142194  |
| wavelet-HLL | glrlm      | LowGrayLevelRunEmphasis          | 0.005932422  |
| wavelet-HLL | glrlm      | GrayLevelNonUniformityNormalized | 0.027695792  |
| wavelet-HLL | glrlm      | RunVariance                      | 0.045098042  |
| wavelet-HLL | glrlm      | GrayLevelNonUniformity           | 19.63415369  |
| wavelet-HLL | glrlm      | LongRunEmphasis                  | 1.131860932  |
| wavelet-HLL | glrlm      | ShortRunHighGrayLevelEmphasis    | 894.0302125  |
| wavelet-HLL | glrlm      | RunLengthNonUniformity           | 657.0648104  |
| wavelet-HLL | glrlm      | ShortRunEmphasis                 | 0.970014353  |
| wavelet-HLL | glrlm      | LongRunHighGrayLevelEmphasis     | 1041.02394   |
| wavelet-HLL | glrlm      | RunPercentage                    | 0.960600375  |
| wavelet-HLL | glrlm      | LongRunLowGrayLevelEmphasis      | 0.006616521  |
| wavelet-HLL | glrlm      | RunEntropy                       | 5.507971034  |
| wavelet-HLL | glrlm      | HighGrayLevelRunEmphasis         | 921.4444442  |
| wavelet-HLL | glrlm      | RunLengthNonUniformityNormalized | 0.925290043  |
| wavelet-HLL | glszm      | GrayLevelVariance                | 119.3236849  |
| wavelet-HLL | glszm      | ZoneVariance                     | 2.159124212  |
| wavelet-HLL | glszm      | GrayLevelNonUniformityNormalized | 0.026662278  |
| wavelet-HLL | glszm      | SizeZoneNonUniformityNormalized  | 0.468824991  |
| wavelet-HLL | glszm      | SizeZoneNonUniformity            | 203.4700461  |

|             |            |                                      |              |
|-------------|------------|--------------------------------------|--------------|
| wavelet-HLL | glszm      | GrayLevelNonUniformity               | 11.57142857  |
| wavelet-HLL | glszm      | LargeAreaEmphasis                    | 5.050691244  |
| wavelet-HLL | glszm      | SmallAreaHighGrayLevelEmphasis       | 658.0894511  |
| wavelet-HLL | glszm      | ZonePercentage                       | 0.588075881  |
| wavelet-HLL | glszm      | LargeAreaLowGrayLevelEmphasis        | 0.022097662  |
| wavelet-HLL | glszm      | LargeAreaHighGrayLevelEmphasis       | 4546.4447    |
| wavelet-HLL | glszm      | HighGrayLevelZoneEmphasis            | 923.843318   |
| wavelet-HLL | glszm      | SmallAreaEmphasis                    | 0.710326496  |
| wavelet-HLL | glszm      | LowGrayLevelZoneEmphasis             | 0.006027959  |
| wavelet-HLL | glszm      | ZoneEntropy                          | 6.564567727  |
| wavelet-HLL | glszm      | SmallAreaLowGrayLevelEmphasis        | 0.003572803  |
| wavelet-HLL | ngtdm      | Coarseness                           | 0.010075179  |
| wavelet-HLL | ngtdm      | Complexity                           | 4949.037315  |
| wavelet-HLL | ngtdm      | Strength                             | 7.905007426  |
| wavelet-HLL | ngtdm      | Contrast                             | 0.52326      |
| wavelet-HLL | ngtdm      | Busyness                             | 0.078587958  |
| wavelet-LHL | gldm       | GrayLevelVariance                    | 14.20338423  |
| wavelet-LHL | gldm       | HighGrayLevelEmphasis                | 176.9214092  |
| wavelet-LHL | gldm       | DependenceEntropy                    | 6.248279734  |
| wavelet-LHL | gldm       | DependenceNonUniformity              | 137.0813008  |
| wavelet-LHL | gldm       | GrayLevelNonUniformity               | 58.38211382  |
| wavelet-LHL | gldm       | SmallDependenceEmphasis              | 0.314907402  |
| wavelet-LHL | gldm       | SmallDependenceHighGrayLevelEmphasis | 57.95706958  |
| wavelet-LHL | gldm       | DependenceNonUniformityNormalized    | 0.18574702   |
| wavelet-LHL | gldm       | LargeDependenceEmphasis              | 13.31707317  |
| wavelet-LHL | gldm       | LargeDependenceLowGrayLevelEmphasis  | 0.10493603   |
| wavelet-LHL | gldm       | DependenceVariance                   | 3.922598982  |
| wavelet-LHL | gldm       | LargeDependenceHighGrayLevelEmphasis | 2262.520325  |
| wavelet-LHL | gldm       | SmallDependenceLowGrayLevelEmphasis  | 0.004296325  |
| wavelet-LHL | gldm       | LowGrayLevelEmphasis                 | 0.011824462  |
| wavelet-LHL | glcm       | JointAverage                         | 12.55097908  |
| wavelet-LHL | glcm       | SumAverage                           | 25.10195817  |
| wavelet-LHL | glcm       | JointEntropy                         | 7.321734569  |
| wavelet-LHL | glcm       | ClusterShade                         | 8.47369007   |
| wavelet-LHL | glcm       | MaximumProbability                   | 0.028666761  |
| wavelet-LHL | glcm       | Idmn                                 | 0.964684035  |
| wavelet-LHL | glcm       | JointEnergy                          | 0.008790228  |
| wavelet-LHL | glcm       | Contrast                             | 19.45845193  |
| wavelet-LHL | glcm       | DifferenceEntropy                    | 3.187617731  |
| wavelet-LHL | glcm       | InverseVariance                      | 0.277608246  |
| wavelet-LHL | glcm       | DifferenceVariance                   | 7.751196145  |
| wavelet-LHL | glcm       | Idn                                  | 0.87831425   |
| wavelet-LHL | glcm       | Idm                                  | 0.270755772  |
| wavelet-LHL | glcm       | Correlation                          | 0.272603578  |
| wavelet-LHL | glcm       | Autocorrelation                      | 161.2354122  |
| wavelet-LHL | glcm       | SumEntropy                           | 4.519785583  |
| wavelet-LHL | glcm       | SumSquares                           | 13.43311399  |
| wavelet-LHL | glcm       | ClusterProminence                    | 3771.41205   |
| wavelet-LHL | glcm       | Imc2                                 | 0.725823204  |
| wavelet-LHL | glcm       | Imc1                                 | -0.107321639 |
| wavelet-LHL | glcm       | DifferenceAverage                    | 3.339343176  |
| wavelet-LHL | glcm       | Id                                   | 0.358413401  |
| wavelet-LHL | glcm       | ClusterTendency                      | 34.27400402  |
| wavelet-LHL | firstorder | InterquartileRange                   | 118.2466806  |
| wavelet-LHL | firstorder | Skewness                             | -0.083964455 |
| wavelet-LHL | firstorder | Uniformity                           | 0.079108555  |
| wavelet-LHL | firstorder | Median                               | -18.4137427  |
| wavelet-LHL | firstorder | Energy                               | 6737128.056  |
| wavelet-LHL | firstorder | RobustMeanAbsoluteDeviation          | 48.2557982   |



|             |            |                                      |              |
|-------------|------------|--------------------------------------|--------------|
| wavelet-LHL | firstorder | MeanAbsoluteDeviation                | 72.56443836  |
| wavelet-LHL | firstorder | TotalEnergy                          | 19275077.98  |
| wavelet-LHL | firstorder | Maximum                              | 215.2535556  |
| wavelet-LHL | firstorder | RootMeanSquared                      | 95.5452762   |
| wavelet-LHL | firstorder | 90Percentile                         | 104.3529773  |
| wavelet-LHL | firstorder | Minimum                              | -322.5066753 |
| wavelet-LHL | firstorder | Entropy                              | 3.909811648  |
| wavelet-LHL | firstorder | Range                                | 537.760231   |
| wavelet-LHL | firstorder | Variance                             | 8770.938425  |
| wavelet-LHL | firstorder | 10Percentile                         | -141.8152658 |
| wavelet-LHL | firstorder | Kurtosis                             | 3.075176612  |
| wavelet-LHL | firstorder | Mean                                 | -18.91986735 |
| wavelet-LHL | glrlm      | ShortRunLowGrayLevelEmphasis         | 0.011569641  |
| wavelet-LHL | glrlm      | GrayLevelVariance                    | 14.79871073  |
| wavelet-LHL | glrlm      | LowGrayLevelRunEmphasis              | 0.012096344  |
| wavelet-LHL | glrlm      | GrayLevelNonUniformityNormalized     | 0.076333978  |
| wavelet-LHL | glrlm      | RunVariance                          | 0.100430784  |
| wavelet-LHL | glrlm      | GrayLevelNonUniformity               | 51.86321307  |
| wavelet-LHL | glrlm      | LongRunEmphasis                      | 1.284161649  |
| wavelet-LHL | glrlm      | ShortRunHighGrayLevelEmphasis        | 167.0486756  |
| wavelet-LHL | glrlm      | RunLengthNonUniformity               | 582.5596371  |
| wavelet-LHL | glrlm      | ShortRunEmphasis                     | 0.94019334   |
| wavelet-LHL | glrlm      | LongRunHighGrayLevelEmphasis         | 225.7657222  |
| wavelet-LHL | glrlm      | RunPercentage                        | 0.92057536   |
| wavelet-LHL | glrlm      | LongRunLowGrayLevelEmphasis          | 0.014550041  |
| wavelet-LHL | glrlm      | RunEntropy                           | 4.326019444  |
| wavelet-LHL | glrlm      | HighGrayLevelRunEmphasis             | 177.4003759  |
| wavelet-LHL | glrlm      | RunLengthNonUniformityNormalized     | 0.856022458  |
| wavelet-LHL | glszm      | GrayLevelVariance                    | 22.02366728  |
| wavelet-LHL | glszm      | ZoneVariance                         | 25.98394247  |
| wavelet-LHL | glszm      | GrayLevelNonUniformityNormalized     | 0.05939122   |
| wavelet-LHL | glszm      | SizeZoneNonUniformityNormalized      | 0.373594291  |
| wavelet-LHL | glszm      | SizeZoneNonUniformity                | 101.6176471  |
| wavelet-LHL | glszm      | GrayLevelNonUniformity               | 16.15441176  |
| wavelet-LHL | glszm      | LargeAreaEmphasis                    | 33.34558824  |
| wavelet-LHL | glszm      | SmallAreaHighGrayLevelEmphasis       | 118.4951491  |
| wavelet-LHL | glszm      | ZonePercentage                       | 0.368563686  |
| wavelet-LHL | glszm      | LargeAreaLowGrayLevelEmphasis        | 0.232029683  |
| wavelet-LHL | glszm      | LargeAreaHighGrayLevelEmphasis       | 5790.066176  |
| wavelet-LHL | glszm      | HighGrayLevelZoneEmphasis            | 182.9963235  |
| wavelet-LHL | glszm      | SmallAreaEmphasis                    | 0.632017076  |
| wavelet-LHL | glszm      | LowGrayLevelZoneEmphasis             | 0.01515736   |
| wavelet-LHL | glszm      | ZoneEntropy                          | 5.836081811  |
| wavelet-LHL | glszm      | SmallAreaLowGrayLevelEmphasis        | 0.008792325  |
| wavelet-LHL | ngtdm      | Coarseness                           | 0.010573933  |
| wavelet-LHL | ngtdm      | Complexity                           | 378.4378474  |
| wavelet-LHL | ngtdm      | Strength                             | 1.330378536  |
| wavelet-LHL | ngtdm      | Contrast                             | 0.154762957  |
| wavelet-LHL | ngtdm      | Busyness                             | 0.370402886  |
| wavelet-LHH | gldm       | GrayLevelVariance                    | 1.382791328  |
| wavelet-LHH | gldm       | HighGrayLevelEmphasis                | 21.63279133  |
| wavelet-LHH | gldm       | DependenceEntropy                    | 5.504492291  |
| wavelet-LHH | gldm       | DependenceNonUniformity              | 57.07859079  |
| wavelet-LHH | gldm       | GrayLevelNonUniformity               | 191.2276423  |
| wavelet-LHH | gldm       | SmallDependenceEmphasis              | 0.112262127  |
| wavelet-LHH | gldm       | SmallDependenceHighGrayLevelEmphasis | 2.901095061  |
| wavelet-LHH | gldm       | DependenceNonUniformityNormalized    | 0.077342264  |
| wavelet-LHH | gldm       | LargeDependenceEmphasis              | 57.47696477  |
| wavelet-LHH | gldm       | LargeDependenceLowGrayLevelEmphasis  | 3.105651248  |

|             |            |                                      |              |
|-------------|------------|--------------------------------------|--------------|
| wavelet-LHH | gldm       | DependenceVariance                   | 14.03850589  |
| wavelet-LHH | gldm       | LargeDependenceHighGrayLevelEmphasis | 1167.031165  |
| wavelet-LHH | gldm       | SmallDependenceLowGrayLevelEmphasis  | 0.014107522  |
| wavelet-LHH | gldm       | LowGrayLevelEmphasis                 | 0.067088442  |
| wavelet-LHH | glcm       | JointAverage                         | 4.495288328  |
| wavelet-LHH | glcm       | SumAverage                           | 8.990576656  |
| wavelet-LHH | glcm       | JointEntropy                         | 4.343235756  |
| wavelet-LHH | glcm       | ClusterShade                         | 0.647597897  |
| wavelet-LHH | glcm       | MaximumProbability                   | 0.13744444   |
| wavelet-LHH | glcm       | Idmn                                 | 0.972913103  |
| wavelet-LHH | glcm       | JointEnergy                          | 0.074985239  |
| wavelet-LHH | glcm       | Contrast                             | 2.445226482  |
| wavelet-LHH | glcm       | DifferenceEntropy                    | 1.940208651  |
| wavelet-LHH | glcm       | InverseVariance                      | 0.481138657  |
| wavelet-LHH | glcm       | DifferenceVariance                   | 1.134167825  |
| wavelet-LHH | glcm       | Idn                                  | 0.896718208  |
| wavelet-LHH | glcm       | Idm                                  | 0.550404727  |
| wavelet-LHH | glcm       | Correlation                          | 0.060680617  |
| wavelet-LHH | glcm       | Autocorrelation                      | 20.28571602  |
| wavelet-LHH | glcm       | SumEntropy                           | 2.74806021   |
| wavelet-LHH | glcm       | SumSquares                           | 1.300642126  |
| wavelet-LHH | glcm       | ClusterProminence                    | 28.62759795  |
| wavelet-LHH | glcm       | Imc2                                 | 0.332124062  |
| wavelet-LHH | glcm       | Imc1                                 | -0.031358402 |
| wavelet-LHH | glcm       | DifferenceAverage                    | 1.13869368   |
| wavelet-LHH | glcm       | Id                                   | 0.588968908  |
| wavelet-LHH | glcm       | ClusterTendency                      | 2.75734202   |
| wavelet-LHH | firstorder | InterquartileRange                   | 32.1449656   |
| wavelet-LHH | firstorder | Skewness                             | 0.248422495  |
| wavelet-LHH | firstorder | Uniformity                           | 0.259116046  |
| wavelet-LHH | firstorder | Median                               | -0.763177137 |
| wavelet-LHH | firstorder | Energy                               | 592016.6747  |
| wavelet-LHH | firstorder | RobustMeanAbsoluteDeviation          | 13.68830836  |
| wavelet-LHH | firstorder | MeanAbsoluteDeviation                | 21.25797602  |
| wavelet-LHH | firstorder | TotalEnergy                          | 1693773.293  |
| wavelet-LHH | firstorder | Maximum                              | 111.3692664  |
| wavelet-LHH | firstorder | RootMeanSquared                      | 28.32296976  |
| wavelet-LHH | firstorder | 90Percentile                         | 33.05820418  |
| wavelet-LHH | firstorder | Minimum                              | -97.56488204 |
| wavelet-LHH | firstorder | Entropy                              | 2.24863822   |
| wavelet-LHH | firstorder | Range                                | 208.9341484  |
| wavelet-LHH | firstorder | Variance                             | 802.0671128  |
| wavelet-LHH | firstorder | 10Percentile                         | -32.44303769 |
| wavelet-LHH | firstorder | Kurtosis                             | 4.363881452  |
| wavelet-LHH | firstorder | Mean                                 | 0.351430327  |
| wavelet-LHH | glrlm      | ShortRunLowGrayLevelEmphasis         | 0.061249726  |
| wavelet-LHH | glrlm      | GrayLevelVariance                    | 1.608677646  |
| wavelet-LHH | glrlm      | LowGrayLevelRunEmphasis              | 0.070430539  |
| wavelet-LHH | glrlm      | GrayLevelNonUniformityNormalized     | 0.234170124  |
| wavelet-LHH | glrlm      | RunVariance                          | 0.369857064  |
| wavelet-LHH | glrlm      | GrayLevelNonUniformity               | 135.7082547  |
| wavelet-LHH | glrlm      | LongRunEmphasis                      | 2.001102141  |
| wavelet-LHH | glrlm      | ShortRunHighGrayLevelEmphasis        | 18.5242777   |
| wavelet-LHH | glrlm      | RunLengthNonUniformity               | 380.3476602  |
| wavelet-LHH | glrlm      | ShortRunEmphasis                     | 0.835735496  |
| wavelet-LHH | glrlm      | LongRunHighGrayLevelEmphasis         | 42.58611636  |
| wavelet-LHH | glrlm      | RunPercentage                        | 0.784969773  |
| wavelet-LHH | glrlm      | LongRunLowGrayLevelEmphasis          | 0.124818241  |
| wavelet-LHH | glrlm      | RunEntropy                           | 3.239660034  |

|             |       |                                      |              |
|-------------|-------|--------------------------------------|--------------|
| wavelet-LHH | glrlm | HighGrayLevelRunEmphasis             | 21.91127923  |
| wavelet-LHH | glrlm | RunLengthNonUniformityNormalized     | 0.654827024  |
| wavelet-LHH | glszm | GrayLevelVariance                    | 5.053771965  |
| wavelet-LHH | glszm | ZoneVariance                         | 1315.031312  |
| wavelet-LHH | glszm | GrayLevelNonUniformityNormalized     | 0.162637072  |
| wavelet-LHH | glszm | SizeZoneNonUniformityNormalized      | 0.318271899  |
| wavelet-LHH | glszm | SizeZoneNonUniformity                | 27.68965517  |
| wavelet-LHH | glszm | GrayLevelNonUniformity               | 14.14942529  |
| wavelet-LHH | glszm | LargeAreaEmphasis                    | 1386.988506  |
| wavelet-LHH | glszm | SmallAreaHighGrayLevelEmphasis       | 16.2427931   |
| wavelet-LHH | glszm | ZonePercentage                       | 0.117886179  |
| wavelet-LHH | glszm | LargeAreaLowGrayLevelEmphasis        | 72.04049278  |
| wavelet-LHH | glszm | LargeAreaHighGrayLevelEmphasis       | 28427.50575  |
| wavelet-LHH | glszm | HighGrayLevelZoneEmphasis            | 25.56321839  |
| wavelet-LHH | glszm | SmallAreaEmphasis                    | 0.57064891   |
| wavelet-LHH | glszm | LowGrayLevelZoneEmphasis             | 0.1334454    |
| wavelet-LHH | glszm | ZoneEntropy                          | 4.580506428  |
| wavelet-LHH | glszm | SmallAreaLowGrayLevelEmphasis        | 0.09237987   |
| wavelet-LHH | ngtdm | Coarseness                           | 0.00905581   |
| wavelet-LHH | ngtdm | Complexity                           | 28.40104775  |
| wavelet-LHH | ngtdm | Strength                             | 0.233693313  |
| wavelet-LHH | ngtdm | Contrast                             | 0.033271604  |
| wavelet-LHH | ngtdm | Busyness                             | 2.262734394  |
| wavelet-LLH | gldm  | GrayLevelVariance                    | 9.813441441  |
| wavelet-LLH | gldm  | HighGrayLevelEmphasis                | 149.0406504  |
| wavelet-LLH | gldm  | DependenceEntropy                    | 6.264917987  |
| wavelet-LLH | gldm  | DependenceNonUniformity              | 118.5365854  |
| wavelet-LLH | gldm  | GrayLevelNonUniformity               | 67.72628726  |
| wavelet-LLH | gldm  | SmallDependenceEmphasis              | 0.249676186  |
| wavelet-LLH | gldm  | SmallDependenceHighGrayLevelEmphasis | 37.66412201  |
| wavelet-LLH | gldm  | DependenceNonUniformityNormalized    | 0.160618679  |
| wavelet-LLH | gldm  | LargeDependenceEmphasis              | 15.93766938  |
| wavelet-LLH | gldm  | LargeDependenceLowGrayLevelEmphasis  | 0.142036702  |
| wavelet-LLH | gldm  | DependenceVariance                   | 3.998678036  |
| wavelet-LLH | gldm  | LargeDependenceHighGrayLevelEmphasis | 2315.533875  |
| wavelet-LLH | gldm  | SmallDependenceLowGrayLevelEmphasis  | 0.00401377   |
| wavelet-LLH | gldm  | LowGrayLevelEmphasis                 | 0.012564123  |
| wavelet-LLH | glcm  | JointAverage                         | 11.65871932  |
| wavelet-LLH | glcm  | SumAverage                           | 23.31743863  |
| wavelet-LLH | glcm  | JointEntropy                         | 6.932862054  |
| wavelet-LLH | glcm  | ClusterShade                         | -9.22340995  |
| wavelet-LLH | glcm  | MaximumProbability                   | 0.027824402  |
| wavelet-LLH | glcm  | ldmn                                 | 0.971043942  |
| wavelet-LLH | glcm  | JointEnergy                          | 0.010910493  |
| wavelet-LLH | glcm  | Contrast                             | 12.87376008  |
| wavelet-LLH | glcm  | DifferenceEntropy                    | 2.941815168  |
| wavelet-LLH | glcm  | InverseVariance                      | 0.31187988   |
| wavelet-LLH | glcm  | DifferenceVariance                   | 5.151414874  |
| wavelet-LLH | glcm  | ldn                                  | 0.888010058  |
| wavelet-LLH | glcm  | ldm                                  | 0.309892782  |
| wavelet-LLH | glcm  | Correlation                          | 0.302059945  |
| wavelet-LLH | glcm  | Autocorrelation                      | 138.7497291  |
| wavelet-LLH | glcm  | SumEntropy                           | 4.290745538  |
| wavelet-LLH | glcm  | SumSquares                           | 9.256216557  |
| wavelet-LLH | glcm  | ClusterProminence                    | 1667.859545  |
| wavelet-LLH | glcm  | lmc2                                 | 0.654275994  |
| wavelet-LLH | glcm  | lmc1                                 | -0.087369386 |
| wavelet-LLH | glcm  | DifferenceAverage                    | 2.735540125  |
| wavelet-LLH | glcm  | ld                                   | 0.394154293  |

|             |            |                                  |              |
|-------------|------------|----------------------------------|--------------|
| wavelet-LLH | glcm       | ClusterTendency                  | 24.15110615  |
| wavelet-LLH | firstorder | InterquartileRange               | 103.2985463  |
| wavelet-LLH | firstorder | Skewness                         | -0.254418428 |
| wavelet-LLH | firstorder | Uniformity                       | 0.091770037  |
| wavelet-LLH | firstorder | Median                           | -16.79702317 |
| wavelet-LLH | firstorder | Energy                           | 4748206.832  |
| wavelet-LLH | firstorder | RobustMeanAbsoluteDeviation      | 42.72150379  |
| wavelet-LLH | firstorder | MeanAbsoluteDeviation            | 61.69334566  |
| wavelet-LLH | firstorder | TotalEnergy                      | 13584728.71  |
| wavelet-LLH | firstorder | Maximum                          | 198.0734193  |
| wavelet-LLH | firstorder | RootMeanSquared                  | 80.21149915  |
| wavelet-LLH | firstorder | 90Percentile                     | 83.4396244   |
| wavelet-LLH | firstorder | Minimum                          | -297.5592032 |
| wavelet-LLH | firstorder | Entropy                          | 3.667253069  |
| wavelet-LLH | firstorder | Range                            | 495.6326225  |
| wavelet-LLH | firstorder | Variance                         | 6122.485063  |
| wavelet-LLH | firstorder | 10Percentile                     | -119.7259964 |
| wavelet-LLH | firstorder | Kurtosis                         | 3.118036785  |
| wavelet-LLH | firstorder | Mean                             | -17.64651617 |
| wavelet-LLH | glrlm      | ShortRunLowGrayLevelEmphasis     | 0.012187356  |
| wavelet-LLH | glrlm      | GrayLevelVariance                | 10.18026033  |
| wavelet-LLH | glrlm      | LowGrayLevelRunEmphasis          | 0.012883433  |
| wavelet-LLH | glrlm      | GrayLevelNonUniformityNormalized | 0.089729168  |
| wavelet-LLH | glrlm      | RunVariance                      | 0.121301363  |
| wavelet-LLH | glrlm      | GrayLevelNonUniformity           | 59.96311487  |
| wavelet-LLH | glrlm      | LongRunEmphasis                  | 1.344092979  |
| wavelet-LLH | glrlm      | ShortRunHighGrayLevelEmphasis    | 138.8854109  |
| wavelet-LLH | glrlm      | RunLengthNonUniformity           | 555.5079018  |
| wavelet-LLH | glrlm      | ShortRunEmphasis                 | 0.928591743  |
| wavelet-LLH | glrlm      | LongRunHighGrayLevelEmphasis     | 199.6866611  |
| wavelet-LLH | glrlm      | RunPercentage                    | 0.905565979  |
| wavelet-LLH | glrlm      | LongRunLowGrayLevelEmphasis      | 0.016104522  |
| wavelet-LLH | glrlm      | RunEntropy                       | 4.149550722  |
| wavelet-LLH | glrlm      | HighGrayLevelRunEmphasis         | 149.3277139  |
| wavelet-LLH | glrlm      | RunLengthNonUniformityNormalized | 0.8301106    |
| wavelet-LLH | glszm      | GrayLevelVariance                | 16.31387373  |
| wavelet-LLH | glszm      | ZoneVariance                     | 54.34156597  |
| wavelet-LLH | glszm      | GrayLevelNonUniformityNormalized | 0.069379261  |
| wavelet-LLH | glszm      | SizeZoneNonUniformityNormalized  | 0.322644354  |
| wavelet-LLH | glszm      | SizeZoneNonUniformity            | 70.01382488  |
| wavelet-LLH | glszm      | GrayLevelNonUniformity           | 15.05529954  |
| wavelet-LLH | glszm      | LargeAreaEmphasis                | 65.9078341   |
| wavelet-LLH | glszm      | SmallAreaHighGrayLevelEmphasis   | 88.43973933  |
| wavelet-LLH | glszm      | ZonePercentage                   | 0.29403794   |
| wavelet-LLH | glszm      | LargeAreaLowGrayLevelEmphasis    | 0.523914815  |
| wavelet-LLH | glszm      | LargeAreaHighGrayLevelEmphasis   | 9392.43318   |
| wavelet-LLH | glszm      | HighGrayLevelZoneEmphasis        | 152.4608295  |
| wavelet-LLH | glszm      | SmallAreaEmphasis                | 0.585369212  |
| wavelet-LLH | glszm      | LowGrayLevelZoneEmphasis         | 0.017753612  |
| wavelet-LLH | glszm      | ZoneEntropy                      | 5.784364429  |
| wavelet-LLH | glszm      | SmallAreaLowGrayLevelEmphasis    | 0.010139557  |
| wavelet-LLH | ngtdm      | Coarseness                       | 0.010727709  |
| wavelet-LLH | ngtdm      | Complexity                       | 292.9459339  |
| wavelet-LLH | ngtdm      | Strength                         | 1.318081568  |
| wavelet-LLH | ngtdm      | Contrast                         | 0.09504775   |
| wavelet-LLH | ngtdm      | Busyness                         | 0.366244016  |
| wavelet-LLL | gldm       | GrayLevelVariance                | 744.8983409  |
| wavelet-LLL | gldm       | HighGrayLevelEmphasis            | 4684.246612  |
| wavelet-LLL | gldm       | DependenceEntropy                | 7.299929757  |

|             |            |                                      |              |
|-------------|------------|--------------------------------------|--------------|
| wavelet-LLL | gldm       | DependenceNonUniformity              | 416.3794038  |
| wavelet-LLL | gldm       | GrayLevelNonUniformity               | 8.745257453  |
| wavelet-LLL | gldm       | SmallDependenceEmphasis              | 0.777879027  |
| wavelet-LLL | gldm       | SmallDependenceHighGrayLevelEmphasis | 3446.475901  |
| wavelet-LLL | gldm       | DependenceNonUniformityNormalized    | 0.564199734  |
| wavelet-LLL | gldm       | LargeDependenceEmphasis              | 2.281842818  |
| wavelet-LLL | gldm       | LargeDependenceLowGrayLevelEmphasis  | 0.002588914  |
| wavelet-LLL | gldm       | DependenceVariance                   | 0.423682259  |
| wavelet-LLL | gldm       | LargeDependenceHighGrayLevelEmphasis | 12625.04607  |
| wavelet-LLL | gldm       | SmallDependenceLowGrayLevelEmphasis  | 0.002047371  |
| wavelet-LLL | gldm       | LowGrayLevelEmphasis                 | 0.002133639  |
| wavelet-LLL | glcm       | JointAverage                         | 70.03924965  |
| wavelet-LLL | glcm       | SumAverage                           | 140.0784993  |
| wavelet-LLL | glcm       | JointEntropy                         | 9.871389678  |
| wavelet-LLL | glcm       | ClusterShade                         | 3695.583857  |
| wavelet-LLL | glcm       | MaximumProbability                   | 0.003370785  |
| wavelet-LLL | glcm       | ldmn                                 | 0.955165051  |
| wavelet-LLL | glcm       | JointEnergy                          | 0.00112752   |
| wavelet-LLL | glcm       | Contrast                             | 698.187445   |
| wavelet-LLL | glcm       | DifferenceEntropy                    | 5.455305762  |
| wavelet-LLL | glcm       | InverseVariance                      | 0.052133789  |
| wavelet-LLL | glcm       | DifferenceVariance                   | 192.7380825  |
| wavelet-LLL | glcm       | ldn                                  | 0.857016738  |
| wavelet-LLL | glcm       | ldm                                  | 0.050873925  |
| wavelet-LLL | glcm       | Correlation                          | 0.512360824  |
| wavelet-LLL | glcm       | Autocorrelation                      | 5279.637883  |
| wavelet-LLL | glcm       | SumEntropy                           | 7.186425872  |
| wavelet-LLL | glcm       | SumSquares                           | 716.9809269  |
| wavelet-LLL | glcm       | ClusterProminence                    | 10070817.56  |
| wavelet-LLL | glcm       | lmc2                                 | 0.999141678  |
| wavelet-LLL | glcm       | lmc1                                 | -0.488283981 |
| wavelet-LLL | glcm       | DifferenceAverage                    | 21.34245823  |
| wavelet-LLL | glcm       | ld                                   | 0.108316826  |
| wavelet-LLL | glcm       | ClusterTendency                      | 2169.736263  |
| wavelet-LLL | firstorder | InterquartileRange                   | 1111.5861    |
| wavelet-LLL | firstorder | Skewness                             | 0.229443295  |
| wavelet-LLL | firstorder | Uniformity                           | 0.011849942  |
| wavelet-LLL | firstorder | Median                               | -1238.390267 |
| wavelet-LLL | firstorder | Energy                               | 1308604675   |
| wavelet-LLL | firstorder | RobustMeanAbsoluteDeviation          | 447.421004   |
| wavelet-LLL | firstorder | MeanAbsoluteDeviation                | 581.2509718  |
| wavelet-LLL | firstorder | TotalEnergy                          | 3743948006   |
| wavelet-LLL | firstorder | Maximum                              | 236.2565077  |
| wavelet-LLL | firstorder | RootMeanSquared                      | 1331.606949  |
| wavelet-LLL | firstorder | 90Percentile                         | -134.0249465 |
| wavelet-LLL | firstorder | Minimum                              | -2694.304861 |
| wavelet-LLL | firstorder | Entropy                              | 6.561477952  |
| wavelet-LLL | firstorder | Range                                | 2930.561369  |
| wavelet-LLL | firstorder | Variance                             | 466179.7803  |
| wavelet-LLL | firstorder | 10Percentile                         | -1976.842527 |
| wavelet-LLL | firstorder | Kurtosis                             | 2.055749969  |
| wavelet-LLL | firstorder | Mean                                 | -1143.23982  |
| wavelet-LLL | glrlm      | ShortRunLowGrayLevelEmphasis         | 0.00215495   |
| wavelet-LLL | glrlm      | GrayLevelVariance                    | 742.8260987  |
| wavelet-LLL | glrlm      | LowGrayLevelRunEmphasis              | 0.002158846  |
| wavelet-LLL | glrlm      | GrayLevelNonUniformityNormalized     | 0.011827713  |
| wavelet-LLL | glrlm      | RunVariance                          | 0.014601598  |
| wavelet-LLL | glrlm      | GrayLevelNonUniformity               | 8.607263059  |
| wavelet-LLL | glrlm      | LongRunEmphasis                      | 1.043524467  |

|             |       |                                      |             |
|-------------|-------|--------------------------------------|-------------|
| wavelet-LLL | gllm  | ShortRunHighGrayLevelEmphasis        | 4603.930544 |
| wavelet-LLL | gllm  | RunLengthNonUniformity               | 707.9809216 |
| wavelet-LLL | gllm  | ShortRunEmphasis                     | 0.989476677 |
| wavelet-LLL | gllm  | LongRunHighGrayLevelEmphasis         | 4923.275854 |
| wavelet-LLL | gllm  | RunPercentage                        | 0.986032937 |
| wavelet-LLL | gllm  | LongRunLowGrayLevelEmphasis          | 0.002174945 |
| wavelet-LLL | gllm  | RunEntropy                           | 6.619882547 |
| wavelet-LLL | gllm  | HighGrayLevelRunEmphasis             | 4666.558976 |
| wavelet-LLL | gllm  | RunLengthNonUniformityNormalized     | 0.972673941 |
| wavelet-LLL | glszm | GrayLevelVariance                    | 718.3076634 |
| wavelet-LLL | glszm | ZoneVariance                         | 0.361626016 |
| wavelet-LLL | glszm | GrayLevelNonUniformityNormalized     | 0.011725825 |
| wavelet-LLL | glszm | SizeZoneNonUniformityNormalized      | 0.751026505 |
| wavelet-LLL | glszm | SizeZoneNonUniformity                | 461.8813008 |
| wavelet-LLL | glszm | GrayLevelNonUniformity               | 7.211382114 |
| wavelet-LLL | glszm | LargeAreaEmphasis                    | 1.801626016 |
| wavelet-LLL | glszm | SmallAreaHighGrayLevelEmphasis       | 3892.197586 |
| wavelet-LLL | glszm | ZonePercentage                       | 0.833333333 |
| wavelet-LLL | glszm | LargeAreaLowGrayLevelEmphasis        | 0.00277019  |
| wavelet-LLL | glszm | LargeAreaHighGrayLevelEmphasis       | 9672.364228 |
| wavelet-LLL | glszm | HighGrayLevelZoneEmphasis            | 4467.530081 |
| wavelet-LLL | glszm | SmallAreaEmphasis                    | 0.889103546 |
| wavelet-LLL | glszm | LowGrayLevelZoneEmphasis             | 0.002483794 |
| wavelet-LLL | glszm | ZoneEntropy                          | 7.048984565 |
| wavelet-LLL | glszm | SmallAreaLowGrayLevelEmphasis        | 0.002439237 |
| wavelet-LLL | ngtdm | Coarseness                           | 0.009628388 |
| wavelet-LLL | ngtdm | Complexity                           | 58437.63376 |
| wavelet-LLL | ngtdm | Strength                             | 44.39021984 |
| wavelet-LLL | ngtdm | Contrast                             | 1.482703291 |
| wavelet-LLL | ngtdm | Busyness                             | 0.020867594 |
| wavelet-HHL | gldm  | GrayLevelVariance                    | 4.76226122  |
| wavelet-HHL | gldm  | HighGrayLevelEmphasis                | 78.26151762 |
| wavelet-HHL | gldm  | DependenceEntropy                    | 5.835646804 |
| wavelet-HHL | gldm  | DependenceNonUniformity              | 92.94308943 |
| wavelet-HHL | gldm  | GrayLevelNonUniformity               | 105.7533875 |
| wavelet-HHL | gldm  | SmallDependenceEmphasis              | 0.212173755 |
| wavelet-HHL | gldm  | SmallDependenceHighGrayLevelEmphasis | 18.74164169 |
| wavelet-HHL | gldm  | DependenceNonUniformityNormalized    | 0.125939146 |
| wavelet-HHL | gldm  | LargeDependenceEmphasis              | 23.94850949 |
| wavelet-HHL | gldm  | LargeDependenceLowGrayLevelEmphasis  | 0.353581424 |
| wavelet-HHL | gldm  | DependenceVariance                   | 6.462966635 |
| wavelet-HHL | gldm  | LargeDependenceHighGrayLevelEmphasis | 1781.136856 |
| wavelet-HHL | gldm  | SmallDependenceLowGrayLevelEmphasis  | 0.006395869 |
| wavelet-HHL | gldm  | LowGrayLevelEmphasis                 | 0.018856428 |
| wavelet-HHL | glcm  | JointAverage                         | 8.596688155 |
| wavelet-HHL | glcm  | SumAverage                           | 17.19337631 |
| wavelet-HHL | glcm  | JointEntropy                         | 5.928218655 |
| wavelet-HHL | glcm  | ClusterShade                         | 8.540264248 |
| wavelet-HHL | glcm  | MaximumProbability                   | 0.05764161  |
| wavelet-HHL | glcm  | Idmn                                 | 0.979809094 |
| wavelet-HHL | glcm  | JointEnergy                          | 0.024703517 |
| wavelet-HHL | glcm  | Contrast                             | 8.804326008 |
| wavelet-HHL | glcm  | DifferenceEntropy                    | 2.691124967 |
| wavelet-HHL | glcm  | InverseVariance                      | 0.36972614  |
| wavelet-HHL | glcm  | DifferenceVariance                   | 3.865068298 |
| wavelet-HHL | glcm  | Idn                                  | 0.907757065 |
| wavelet-HHL | glcm  | Idm                                  | 0.374272671 |
| wavelet-HHL | glcm  | Correlation                          | 0.012704163 |
| wavelet-HHL | glcm  | Autocorrelation                      | 73.96755262 |

|             |            |                                  |              |
|-------------|------------|----------------------------------|--------------|
| wavelet-HHL | glcm       | SumEntropy                       | 3.550958851  |
| wavelet-HHL | glcm       | SumSquares                       | 4.466078619  |
| wavelet-HHL | glcm       | ClusterProminence                | 382.4964825  |
| wavelet-HHL | glcm       | Imc2                             | 0.55265224   |
| wavelet-HHL | glcm       | Imc1                             | -0.067837121 |
| wavelet-HHL | glcm       | DifferenceAverage                | 2.193219108  |
| wavelet-HHL | glcm       | Id                               | 0.447022462  |
| wavelet-HHL | glcm       | ClusterTendency                  | 9.059988468  |
| wavelet-HHL | firstorder | InterquartileRange               | 65.39672248  |
| wavelet-HHL | firstorder | Skewness                         | 0.378117226  |
| wavelet-HHL | firstorder | Uniformity                       | 0.143297273  |
| wavelet-HHL | firstorder | Median                           | 0.050768182  |
| wavelet-HHL | firstorder | Energy                           | 2150367.843  |
| wavelet-HHL | firstorder | RobustMeanAbsoluteDeviation      | 26.27116264  |
| wavelet-HHL | firstorder | MeanAbsoluteDeviation            | 40.36104272  |
| wavelet-HHL | firstorder | TotalEnergy                      | 6152251.747  |
| wavelet-HHL | firstorder | Maximum                          | 279.2193472  |
| wavelet-HHL | firstorder | RootMeanSquared                  | 53.97941797  |
| wavelet-HHL | firstorder | 90Percentile                     | 64.85176459  |
| wavelet-HHL | firstorder | Minimum                          | -189.1582841 |
| wavelet-HHL | firstorder | Entropy                          | 3.119512579  |
| wavelet-HHL | firstorder | Range                            | 468.3776313  |
| wavelet-HHL | firstorder | Variance                         | 2910.418504  |
| wavelet-HHL | firstorder | 10Percentile                     | -60.57853931 |
| wavelet-HHL | firstorder | Kurtosis                         | 5.018825341  |
| wavelet-HHL | firstorder | Mean                             | 1.832773925  |
| wavelet-HHL | glrlm      | ShortRunLowGrayLevelEmphasis     | 0.018023965  |
| wavelet-HHL | glrlm      | GrayLevelVariance                | 5.173377437  |
| wavelet-HHL | glrlm      | LowGrayLevelRunEmphasis          | 0.019408724  |
| wavelet-HHL | glrlm      | GrayLevelNonUniformityNormalized | 0.135596847  |
| wavelet-HHL | glrlm      | RunVariance                      | 0.177017035  |
| wavelet-HHL | glrlm      | GrayLevelNonUniformity           | 87.8300362   |
| wavelet-HHL | glrlm      | LongRunEmphasis                  | 1.487975116  |
| wavelet-HHL | glrlm      | ShortRunHighGrayLevelEmphasis    | 71.8290266   |
| wavelet-HHL | glrlm      | RunLengthNonUniformity           | 513.4911673  |
| wavelet-HHL | glrlm      | ShortRunEmphasis                 | 0.9079092    |
| wavelet-HHL | glrlm      | LongRunHighGrayLevelEmphasis     | 115.2484049  |
| wavelet-HHL | glrlm      | RunPercentage                    | 0.877631853  |
| wavelet-HHL | glrlm      | LongRunLowGrayLevelEmphasis      | 0.026702925  |
| wavelet-HHL | glrlm      | RunEntropy                       | 3.73622316   |
| wavelet-HHL | glrlm      | HighGrayLevelRunEmphasis         | 78.74252715  |
| wavelet-HHL | glrlm      | RunLengthNonUniformityNormalized | 0.789500835  |
| wavelet-HHL | glszm      | GrayLevelVariance                | 13.07803254  |
| wavelet-HHL | glszm      | ZoneVariance                     | 277.2223866  |
| wavelet-HHL | glszm      | GrayLevelNonUniformityNormalized | 0.089086128  |
| wavelet-HHL | glszm      | SizeZoneNonUniformityNormalized  | 0.424227482  |
| wavelet-HHL | glszm      | SizeZoneNonUniformity            | 66.17948718  |
| wavelet-HHL | glszm      | GrayLevelNonUniformity           | 13.8974359   |
| wavelet-HHL | glszm      | LargeAreaEmphasis                | 299.6025641  |
| wavelet-HHL | glszm      | SmallAreaHighGrayLevelEmphasis   | 63.5994848   |
| wavelet-HHL | glszm      | ZonePercentage                   | 0.211382114  |
| wavelet-HHL | glszm      | LargeAreaLowGrayLevelEmphasis    | 4.331292725  |
| wavelet-HHL | glszm      | LargeAreaHighGrayLevelEmphasis   | 21703.8141   |
| wavelet-HHL | glszm      | HighGrayLevelZoneEmphasis        | 87.63461538  |
| wavelet-HHL | glszm      | SmallAreaEmphasis                | 0.676782185  |
| wavelet-HHL | glszm      | LowGrayLevelZoneEmphasis         | 0.031413986  |
| wavelet-HHL | glszm      | ZoneEntropy                      | 5.209615964  |
| wavelet-HHL | glszm      | SmallAreaLowGrayLevelEmphasis    | 0.024695769  |
| wavelet-HHL | ngtdm      | Coarseness                       | 0.009095359  |

|             |            |                                      |              |
|-------------|------------|--------------------------------------|--------------|
| wavelet-HHL | ngtdm      | Complexity                           | 253.9698963  |
| wavelet-HHL | ngtdm      | Strength                             | 1.212481005  |
| wavelet-HHL | ngtdm      | Contrast                             | 0.044880912  |
| wavelet-HHL | ngtdm      | Busyness                             | 0.514027565  |
| wavelet-HLH | gldm       | GrayLevelVariance                    | 4.153496596  |
| wavelet-HLH | gldm       | HighGrayLevelEmphasis                | 46.93360434  |
| wavelet-HLH | gldm       | DependenceEntropy                    | 5.732140478  |
| wavelet-HLH | gldm       | DependenceNonUniformity              | 105.2926829  |
| wavelet-HLH | gldm       | GrayLevelNonUniformity               | 103.6070461  |
| wavelet-HLH | gldm       | SmallDependenceEmphasis              | 0.205389078  |
| wavelet-HLH | gldm       | SmallDependenceHighGrayLevelEmphasis | 11.38737536  |
| wavelet-HLH | gldm       | DependenceNonUniformityNormalized    | 0.142673012  |
| wavelet-HLH | gldm       | LargeDependenceEmphasis              | 19.95392954  |
| wavelet-HLH | gldm       | LargeDependenceLowGrayLevelEmphasis  | 0.594845591  |
| wavelet-HLH | gldm       | DependenceVariance                   | 4.872599349  |
| wavelet-HLH | gldm       | LargeDependenceHighGrayLevelEmphasis | 851.2777778  |
| wavelet-HLH | gldm       | SmallDependenceLowGrayLevelEmphasis  | 0.00865663   |
| wavelet-HLH | gldm       | LowGrayLevelEmphasis                 | 0.037151491  |
| wavelet-HLH | glcm       | JointAverage                         | 6.560374609  |
| wavelet-HLH | glcm       | SumAverage                           | 13.12074922  |
| wavelet-HLH | glcm       | JointEntropy                         | 5.944987308  |
| wavelet-HLH | glcm       | ClusterShade                         | 3.484589265  |
| wavelet-HLH | glcm       | MaximumProbability                   | 0.049354939  |
| wavelet-HLH | glcm       | Idmn                                 | 0.955733366  |
| wavelet-HLH | glcm       | JointEnergy                          | 0.021847268  |
| wavelet-HLH | glcm       | Contrast                             | 8.667568321  |
| wavelet-HLH | glcm       | DifferenceEntropy                    | 2.680221265  |
| wavelet-HLH | glcm       | InverseVariance                      | 0.350661838  |
| wavelet-HLH | glcm       | DifferenceVariance                   | 3.320793491  |
| wavelet-HLH | glcm       | Idn                                  | 0.862914613  |
| wavelet-HLH | glcm       | Idm                                  | 0.349092533  |
| wavelet-HLH | glcm       | Correlation                          | -0.029081967 |
| wavelet-HLH | glcm       | Autocorrelation                      | 42.91136816  |
| wavelet-HLH | glcm       | SumEntropy                           | 3.50115882   |
| wavelet-HLH | glcm       | SumSquares                           | 4.206324147  |
| wavelet-HLH | glcm       | ClusterProminence                    | 227.3907942  |
| wavelet-HLH | glcm       | Imc2                                 | 0.523192793  |
| wavelet-HLH | glcm       | Imc1                                 | -0.061889156 |
| wavelet-HLH | glcm       | DifferenceAverage                    | 2.27189658   |
| wavelet-HLH | glcm       | Id                                   | 0.427980772  |
| wavelet-HLH | glcm       | ClusterTendency                      | 8.157728267  |
| wavelet-HLH | firstorder | InterquartileRange                   | 65.85951653  |
| wavelet-HLH | firstorder | Skewness                             | 0.231947254  |
| wavelet-HLH | firstorder | Uniformity                           | 0.140388951  |
| wavelet-HLH | firstorder | Median                               | -3.290762831 |
| wavelet-HLH | firstorder | Energy                               | 1883935.417  |
| wavelet-HLH | firstorder | RobustMeanAbsoluteDeviation          | 27.79291388  |
| wavelet-HLH | firstorder | MeanAbsoluteDeviation                | 40.12592685  |
| wavelet-HLH | firstorder | TotalEnergy                          | 5389982.462  |
| wavelet-HLH | firstorder | Maximum                              | 150.4985506  |
| wavelet-HLH | firstorder | RootMeanSquared                      | 50.52482575  |
| wavelet-HLH | firstorder | 90Percentile                         | 68.44748936  |
| wavelet-HLH | firstorder | Minimum                              | -136.1372328 |
| wavelet-HLH | firstorder | Entropy                              | 3.059096548  |
| wavelet-HLH | firstorder | Range                                | 286.6357834  |
| wavelet-HLH | firstorder | Variance                             | 2551.904424  |
| wavelet-HLH | firstorder | 10Percentile                         | -60.51210247 |
| wavelet-HLH | firstorder | Kurtosis                             | 2.912896138  |
| wavelet-HLH | firstorder | Mean                                 | 0.923901331  |



|             |       |                                  |             |
|-------------|-------|----------------------------------|-------------|
| wavelet-HLH | glrlm | ShortRunLowGrayLevelEmphasis     | 0.035177361 |
| wavelet-HLH | glrlm | GrayLevelVariance                | 4.385480007 |
| wavelet-HLH | glrlm | LowGrayLevelRunEmphasis          | 0.037808037 |
| wavelet-HLH | glrlm | GrayLevelNonUniformityNormalized | 0.135209821 |
| wavelet-HLH | glrlm | RunVariance                      | 0.157511277 |
| wavelet-HLH | glrlm | GrayLevelNonUniformity           | 88.69266207 |
| wavelet-HLH | glrlm | LongRunEmphasis                  | 1.436259541 |
| wavelet-HLH | glrlm | ShortRunHighGrayLevelEmphasis    | 43.79340985 |
| wavelet-HLH | glrlm | RunLengthNonUniformity           | 532.5933753 |
| wavelet-HLH | glrlm | ShortRunEmphasis                 | 0.916208424 |
| wavelet-HLH | glrlm | LongRunHighGrayLevelEmphasis     | 66.23818645 |
| wavelet-HLH | glrlm | RunPercentage                    | 0.889097353 |
| wavelet-HLH | glrlm | LongRunLowGrayLevelEmphasis      | 0.05191898  |
| wavelet-HLH | glrlm | RunEntropy                       | 3.614802796 |
| wavelet-HLH | glrlm | HighGrayLevelRunEmphasis         | 47.4209801  |
| wavelet-HLH | glrlm | RunLengthNonUniformityNormalized | 0.807565579 |
| wavelet-HLH | glszm | GrayLevelVariance                | 8.131210938 |
| wavelet-HLH | glszm | ZoneVariance                     | 214.2498438 |
| wavelet-HLH | glszm | GrayLevelNonUniformityNormalized | 0.10203125  |
| wavelet-HLH | glszm | SizeZoneNonUniformityNormalized  | 0.331484375 |
| wavelet-HLH | glszm | SizeZoneNonUniformity            | 53.0375     |
| wavelet-HLH | glszm | GrayLevelNonUniformity           | 16.325      |
| wavelet-HLH | glszm | LargeAreaEmphasis                | 235.525     |
| wavelet-HLH | glszm | SmallAreaHighGrayLevelEmphasis   | 36.04297168 |
| wavelet-HLH | glszm | ZonePercentage                   | 0.216802168 |
| wavelet-HLH | glszm | LargeAreaLowGrayLevelEmphasis    | 6.47775606  |
| wavelet-HLH | glszm | LargeAreaHighGrayLevelEmphasis   | 9326.09375  |
| wavelet-HLH | glszm | HighGrayLevelZoneEmphasis        | 57.04375    |
| wavelet-HLH | glszm | SmallAreaEmphasis                | 0.595898552 |
| wavelet-HLH | glszm | LowGrayLevelZoneEmphasis         | 0.046056348 |
| wavelet-HLH | glszm | ZoneEntropy                      | 5.214312741 |
| wavelet-HLH | glszm | SmallAreaLowGrayLevelEmphasis    | 0.02454863  |
| wavelet-HLH | ngtdm | Coarseness                       | 0.008376794 |
| wavelet-HLH | ngtdm | Complexity                       | 107.2440566 |
| wavelet-HLH | ngtdm | Strength                         | 0.397155865 |
| wavelet-HLH | ngtdm | Contrast                         | 0.086746975 |
| wavelet-HLH | ngtdm | Busyness                         | 1.385489843 |

|            |               |                                      |                                                                                                                                                                                                                                                                                                                                                                                                                   |
|------------|---------------|--------------------------------------|-------------------------------------------------------------------------------------------------------------------------------------------------------------------------------------------------------------------------------------------------------------------------------------------------------------------------------------------------------------------------------------------------------------------|
| Image type | Feature Class | Feature Name                         | 10: RTSTRUCT: C99-DNU_segment_LUL Tumor                                                                                                                                                                                                                                                                                                                                                                           |
| general    | info          | BoundingBox                          | (0, 0, 1, 8, 9, 9)                                                                                                                                                                                                                                                                                                                                                                                                |
| general    | info          | EnabledImageTypes                    | {u'Original': {}, u'Wavelet': {}}                                                                                                                                                                                                                                                                                                                                                                                 |
|            |               |                                      | {'distances': [1], 'additionalInfo': True, 'force2D': False, 'interpolator': 'sitkBSpline', 'resampledPixelSpacing': [3.0], 'label': 1, 'normalizeScale': 1, 'normalize': False, 'force2Ddimension': 0, 'removeOutliers': None, 'minimumROISize': None, u'binWidth': 25.0, 'minimumROIDimensions': 1, u'correctMask': True, 'preCrop': False, u'symmetricalGLCM': True, 'resegmentRange': None, 'padDistance': 5} |
| general    | info          | GeneralSettings                      |                                                                                                                                                                                                                                                                                                                                                                                                                   |
| general    | info          | ImageHash                            | 802a8917e0f287c6e117fbc43dec2b8c7df0bfca (0.9765624999999998, 0.9765624999999998, 1.9999999999999999)                                                                                                                                                                                                                                                                                                             |
| general    | info          | ImageSpacing                         | 3b32e19f3489a355bce1889bcbe7e67142805305                                                                                                                                                                                                                                                                                                                                                                          |
| general    | info          | MaskHash                             | 1.13.1                                                                                                                                                                                                                                                                                                                                                                                                            |
| general    | info          | NumpyVersion                         | 0.5.2                                                                                                                                                                                                                                                                                                                                                                                                             |
| general    | info          | PyWaveletVersion                     | 1.1.0                                                                                                                                                                                                                                                                                                                                                                                                             |
| general    | info          | SimpleITKVersion                     | 1.3.0.post102+g1b0eb74                                                                                                                                                                                                                                                                                                                                                                                            |
| general    | info          | Version                              |                                                                                                                                                                                                                                                                                                                                                                                                                   |
| general    | info          | VolumeNum                            | 1                                                                                                                                                                                                                                                                                                                                                                                                                 |
| general    | info          | VoxelNum                             | 246                                                                                                                                                                                                                                                                                                                                                                                                               |
| original   | shape         | Maximum3DDiameter                    | 32.31098884                                                                                                                                                                                                                                                                                                                                                                                                       |
| original   | shape         | Maximum2DDiameterSlice               | 22.84731932                                                                                                                                                                                                                                                                                                                                                                                                       |
| original   | shape         | Sphericity                           | 0.817874071                                                                                                                                                                                                                                                                                                                                                                                                       |
| original   | shape         | MinorAxis                            | 18.95250428                                                                                                                                                                                                                                                                                                                                                                                                       |
| original   | shape         | Elongation                           | 0.60609475                                                                                                                                                                                                                                                                                                                                                                                                        |
| original   | shape         | SurfaceVolumeRatio                   | 0.314556063                                                                                                                                                                                                                                                                                                                                                                                                       |
| original   | shape         | Volume                               | 6642                                                                                                                                                                                                                                                                                                                                                                                                              |
| original   | shape         | MajorAxis                            | 31.26987037                                                                                                                                                                                                                                                                                                                                                                                                       |
| original   | shape         | SurfaceArea                          | 2089.281371                                                                                                                                                                                                                                                                                                                                                                                                       |
| original   | shape         | Flatness                             | 0.519225804                                                                                                                                                                                                                                                                                                                                                                                                       |
| original   | shape         | LeastAxis                            | 16.23612357                                                                                                                                                                                                                                                                                                                                                                                                       |
| original   | shape         | Maximum2DDiameterColumn              | 26.83281573                                                                                                                                                                                                                                                                                                                                                                                                       |
| original   | shape         | Maximum2DDiameterRow                 | 30                                                                                                                                                                                                                                                                                                                                                                                                                |
| original   | gldm          | GrayLevelVariance                    | 125.8169079                                                                                                                                                                                                                                                                                                                                                                                                       |
| original   | gldm          | HighGrayLevelEmphasis                | 592.4471545                                                                                                                                                                                                                                                                                                                                                                                                       |
| original   | gldm          | DependenceEntropy                    | 6.15778614                                                                                                                                                                                                                                                                                                                                                                                                        |
| original   | gldm          | DependenceNonUniformity              | 86.22764228                                                                                                                                                                                                                                                                                                                                                                                                       |
| original   | gldm          | GrayLevelNonUniformity               | 8.593495935                                                                                                                                                                                                                                                                                                                                                                                                       |
| original   | gldm          | SmallDependenceEmphasis              | 0.598441809                                                                                                                                                                                                                                                                                                                                                                                                       |
| original   | gldm          | SmallDependenceHighGrayLevelEmphasis | 270.0906626                                                                                                                                                                                                                                                                                                                                                                                                       |
| original   | gldm          | DependenceNonUniformityNormalized    | 0.350518871                                                                                                                                                                                                                                                                                                                                                                                                       |
| original   | gldm          | LargeDependenceEmphasis              | 6.154471545                                                                                                                                                                                                                                                                                                                                                                                                       |
| original   | gldm          | LargeDependenceLowGrayLevelEmphasis  | 0.027998778                                                                                                                                                                                                                                                                                                                                                                                                       |
| original   | gldm          | DependenceVariance                   | 2.186925772                                                                                                                                                                                                                                                                                                                                                                                                       |
| original   | gldm          | LargeDependenceHighGrayLevelEmphasis | 6353.414634                                                                                                                                                                                                                                                                                                                                                                                                       |
| original   | gldm          | SmallDependenceLowGrayLevelEmphasis  | 0.011218849                                                                                                                                                                                                                                                                                                                                                                                                       |
| original   | gldm          | LowGrayLevelEmphasis                 | 0.01376179                                                                                                                                                                                                                                                                                                                                                                                                        |
| original   | glcm          | JointAverage                         | 24.05132701                                                                                                                                                                                                                                                                                                                                                                                                       |
| original   | glcm          | SumAverage                           | 48.10265402                                                                                                                                                                                                                                                                                                                                                                                                       |
| original   | glcm          | JointEntropy                         | 7.89178997                                                                                                                                                                                                                                                                                                                                                                                                        |
| original   | glcm          | ClusterShade                         | -1652.722967                                                                                                                                                                                                                                                                                                                                                                                                      |
| original   | glcm          | MaximumProbability                   | 0.020597434                                                                                                                                                                                                                                                                                                                                                                                                       |
| original   | glcm          | Idmn                                 | 0.916309825                                                                                                                                                                                                                                                                                                                                                                                                       |

|          |            |                                  |              |
|----------|------------|----------------------------------|--------------|
| original | glcm       | JointEnergy                      | 0.005042092  |
| original | glcm       | Contrast                         | 163.708635   |
| original | glcm       | DifferenceEntropy                | 4.557813725  |
| original | glcm       | InverseVariance                  | 0.129180727  |
| original | glcm       | DifferenceVariance               | 65.31067048  |
| original | glcm       | Idn                              | 0.819383602  |
| original | glcm       | Idm                              | 0.133126602  |
| original | glcm       | Correlation                      | 0.329051313  |
| original | glcm       | Autocorrelation                  | 618.5212904  |
| original | glcm       | SumEntropy                       | 5.688730921  |
| original | glcm       | SumSquares                       | 121.7849232  |
| original | glcm       | ClusterProminence                | 213190.8807  |
| original | glcm       | Imc2                             | 0.98902048   |
| original | glcm       | Imc1                             | -0.391460938 |
| original | glcm       | DifferenceAverage                | 9.835087221  |
| original | glcm       | Id                               | 0.208960041  |
| original | glcm       | ClusterTendency                  | 323.4310577  |
| original | firstorder | InterquartileRange               | 514.5        |
| original | firstorder | Skewness                         | -0.015373696 |
| original | firstorder | Uniformity                       | 0.03493291   |
| original | firstorder | Median                           | -357         |
| original | firstorder | Energy                           | 48835108     |
| original | firstorder | RobustMeanAbsoluteDeviation      | 208.4057684  |
| original | firstorder | MeanAbsoluteDeviation            | 249.5691057  |
| original | firstorder | TotalEnergy                      | 1318547916   |
| original | firstorder | Maximum                          | 82           |
| original | firstorder | RootMeanSquared                  | 445.5521285  |
| original | firstorder | 90Percentile                     | 24.5         |
| original | firstorder | Minimum                          | -861         |
| original | firstorder | Entropy                          | 5.012099633  |
| original | firstorder | Range                            | 943          |
| original | firstorder | Variance                         | 78107.69919  |
| original | firstorder | 10Percentile                     | -710         |
| original | firstorder | Kurtosis                         | 1.635934866  |
| original | firstorder | Mean                             | -347         |
| original | glrlm      | ShortRunLowGrayLevelEmphasis     | 0.014030763  |
| original | glrlm      | GrayLevelVariance                | 123.6046008  |
| original | glrlm      | LowGrayLevelRunEmphasis          | 0.014149793  |
| original | glrlm      | GrayLevelNonUniformityNormalized | 0.033922703  |
| original | glrlm      | RunVariance                      | 0.043311034  |
| original | glrlm      | GrayLevelNonUniformity           | 8.027240733  |
| original | glrlm      | LongRunEmphasis                  | 1.124773179  |
| original | glrlm      | ShortRunHighGrayLevelEmphasis    | 548.3354443  |
| original | glrlm      | RunLengthNonUniformity           | 219.7725803  |
| original | glrlm      | ShortRunEmphasis                 | 0.971719813  |
| original | glrlm      | LongRunHighGrayLevelEmphasis     | 702.8720365  |
| original | glrlm      | RunPercentage                    | 0.961851157  |
| original | glrlm      | LongRunLowGrayLevelEmphasis      | 0.014634667  |
| original | glrlm      | RunEntropy                       | 5.168568681  |
| original | glrlm      | HighGrayLevelRunEmphasis         | 576.136613   |
| original | glrlm      | RunLengthNonUniformityNormalized | 0.928519505  |
| original | glszm      | GrayLevelVariance                | 100.5261018  |
| original | glszm      | ZoneVariance                     | 3.354209793  |
| original | glszm      | GrayLevelNonUniformityNormalized | 0.033008393  |
| original | glszm      | SizeZoneNonUniformityNormalized  | 0.630170499  |
| original | glszm      | SizeZoneNonUniformity            | 102.7177914  |

|             |            |                                      |              |
|-------------|------------|--------------------------------------|--------------|
| original    | glszm      | GrayLevelNonUniformity               | 5.380368098  |
| original    | glszm      | LargeAreaEmphasis                    | 5.63190184   |
| original    | glszm      | SmallAreaHighGrayLevelEmphasis       | 355.0238267  |
| original    | glszm      | ZonePercentage                       | 0.662601626  |
| original    | glszm      | LargeAreaLowGrayLevelEmphasis        | 0.029745517  |
| original    | glszm      | LargeAreaHighGrayLevelEmphasis       | 5726.06135   |
| original    | glszm      | HighGrayLevelZoneEmphasis            | 456.1840491  |
| original    | glszm      | SmallAreaEmphasis                    | 0.820747306  |
| original    | glszm      | LowGrayLevelZoneEmphasis             | 0.017952952  |
| original    | glszm      | ZoneEntropy                          | 5.690757661  |
| original    | glszm      | SmallAreaLowGrayLevelEmphasis        | 0.01626687   |
| original    | ngtdm      | Coarseness                           | 0.015552407  |
| original    | ngtdm      | Complexity                           | 4419.911306  |
| original    | ngtdm      | Strength                             | 10.50356391  |
| original    | ngtdm      | Contrast                             | 1.307282608  |
| original    | ngtdm      | Busyness                             | 0.082468653  |
| wavelet-HHH | gldm       | GrayLevelVariance                    | 9.900142111  |
| wavelet-HHH | gldm       | HighGrayLevelEmphasis                | 142.5243902  |
| wavelet-HHH | gldm       | DependenceEntropy                    | 5.61261409   |
| wavelet-HHH | gldm       | DependenceNonUniformity              | 55.7398374   |
| wavelet-HHH | gldm       | GrayLevelNonUniformity               | 23.04878049  |
| wavelet-HHH | gldm       | SmallDependenceEmphasis              | 0.38491076   |
| wavelet-HHH | gldm       | SmallDependenceHighGrayLevelEmphasis | 59.36216756  |
| wavelet-HHH | gldm       | DependenceNonUniformityNormalized    | 0.226584705  |
| wavelet-HHH | gldm       | LargeDependenceEmphasis              | 8.455284553  |
| wavelet-HHH | gldm       | LargeDependenceLowGrayLevelEmphasis  | 0.079379331  |
| wavelet-HHH | gldm       | DependenceVariance                   | 2.062198427  |
| wavelet-HHH | gldm       | LargeDependenceHighGrayLevelEmphasis | 1148.191057  |
| wavelet-HHH | gldm       | SmallDependenceLowGrayLevelEmphasis  | 0.008041902  |
| wavelet-HHH | gldm       | LowGrayLevelEmphasis                 | 0.013928582  |
| wavelet-HHH | glcm       | JointAverage                         | 11.52336648  |
| wavelet-HHH | glcm       | SumAverage                           | 23.04673295  |
| wavelet-HHH | glcm       | JointEntropy                         | 6.703480051  |
| wavelet-HHH | glcm       | ClusterShade                         | -6.278162145 |
| wavelet-HHH | glcm       | MaximumProbability                   | 0.029996268  |
| wavelet-HHH | glcm       | ldmn                                 | 0.955534661  |
| wavelet-HHH | glcm       | JointEnergy                          | 0.011981705  |
| wavelet-HHH | glcm       | Contrast                             | 20.52600992  |
| wavelet-HHH | glcm       | DifferenceEntropy                    | 3.226449458  |
| wavelet-HHH | glcm       | InverseVariance                      | 0.253192563  |
| wavelet-HHH | glcm       | DifferenceVariance                   | 7.663821647  |
| wavelet-HHH | glcm       | ldn                                  | 0.860177466  |
| wavelet-HHH | glcm       | ldm                                  | 0.238154638  |
| wavelet-HHH | glcm       | Correlation                          | -0.032247675 |
| wavelet-HHH | glcm       | Autocorrelation                      | 132.4965064  |
| wavelet-HHH | glcm       | SumEntropy                           | 4.040959446  |
| wavelet-HHH | glcm       | SumSquares                           | 9.968625529  |
| wavelet-HHH | glcm       | ClusterProminence                    | 1274.394947  |
| wavelet-HHH | glcm       | lmc2                                 | 0.823836023  |
| wavelet-HHH | glcm       | lmc1                                 | -0.157205048 |
| wavelet-HHH | glcm       | DifferenceAverage                    | 3.553030423  |
| wavelet-HHH | glcm       | ld                                   | 0.331792015  |
| wavelet-HHH | glcm       | ClusterTendency                      | 19.3484922   |
| wavelet-HHH | firstorder | InterquartileRange                   | 106.7102728  |
| wavelet-HHH | firstorder | Skewness                             | -0.040232419 |
| wavelet-HHH | firstorder | Uniformity                           | 0.09369423   |

|             |            |                                  |              |
|-------------|------------|----------------------------------|--------------|
| wavelet-HHH | firstorder | Median                           | 3.3361564    |
| wavelet-HHH | firstorder | Energy                           | 1505890.833  |
| wavelet-HHH | firstorder | RobustMeanAbsoluteDeviation      | 42.4251241   |
| wavelet-HHH | firstorder | MeanAbsoluteDeviation            | 61.73409476  |
| wavelet-HHH | firstorder | TotalEnergy                      | 40659052.49  |
| wavelet-HHH | firstorder | Maximum                          | 224.5889491  |
| wavelet-HHH | firstorder | RootMeanSquared                  | 78.24006296  |
| wavelet-HHH | firstorder | 90Percentile                     | 98.10826337  |
| wavelet-HHH | firstorder | Minimum                          | -266.7279254 |
| wavelet-HHH | firstorder | Entropy                          | 3.647678715  |
| wavelet-HHH | firstorder | Range                            | 491.3168746  |
| wavelet-HHH | firstorder | Variance                         | 6121.424766  |
| wavelet-HHH | firstorder | 10Percentile                     | -97.13423468 |
| wavelet-HHH | firstorder | Kurtosis                         | 3.270296031  |
| wavelet-HHH | firstorder | Mean                             | 0.287551196  |
| wavelet-HHH | grlm       | ShortRunLowGrayLevelEmphasis     | 0.013833684  |
| wavelet-HHH | grlm       | GrayLevelVariance                | 10.18799619  |
| wavelet-HHH | grlm       | LowGrayLevelRunEmphasis          | 0.014235153  |
| wavelet-HHH | grlm       | GrayLevelNonUniformityNormalized | 0.092052459  |
| wavelet-HHH | grlm       | RunVariance                      | 0.066503491  |
| wavelet-HHH | grlm       | GrayLevelNonUniformity           | 21.31281211  |
| wavelet-HHH | grlm       | LongRunEmphasis                  | 1.196014012  |
| wavelet-HHH | grlm       | ShortRunHighGrayLevelEmphasis    | 136.9131609  |
| wavelet-HHH | grlm       | RunLengthNonUniformity           | 206.0496987  |
| wavelet-HHH | grlm       | ShortRunEmphasis                 | 0.955434463  |
| wavelet-HHH | grlm       | LongRunHighGrayLevelEmphasis     | 169.429125   |
| wavelet-HHH | grlm       | RunPercentage                    | 0.941213258  |
| wavelet-HHH | grlm       | LongRunLowGrayLevelEmphasis      | 0.01601074   |
| wavelet-HHH | grlm       | RunEntropy                       | 3.95007857   |
| wavelet-HHH | grlm       | HighGrayLevelRunEmphasis         | 142.9715497  |
| wavelet-HHH | grlm       | RunLengthNonUniformityNormalized | 0.889545235  |
| wavelet-HHH | glszm      | GrayLevelVariance                | 15.29197279  |
| wavelet-HHH | glszm      | ZoneVariance                     | 12.91102041  |
| wavelet-HHH | glszm      | GrayLevelNonUniformityNormalized | 0.075192744  |
| wavelet-HHH | glszm      | SizeZoneNonUniformityNormalized  | 0.453424036  |
| wavelet-HHH | glszm      | SizeZoneNonUniformity            | 47.60952381  |
| wavelet-HHH | glszm      | GrayLevelNonUniformity           | 7.895238095  |
| wavelet-HHH | glszm      | LargeAreaEmphasis                | 18.4         |
| wavelet-HHH | glszm      | SmallAreaHighGrayLevelEmphasis   | 111.6907853  |
| wavelet-HHH | glszm      | ZonePercentage                   | 0.426829268  |
| wavelet-HHH | glszm      | LargeAreaLowGrayLevelEmphasis    | 0.161790157  |
| wavelet-HHH | glszm      | LargeAreaHighGrayLevelEmphasis   | 2559.171429  |
| wavelet-HHH | glszm      | HighGrayLevelZoneEmphasis        | 151.1809524  |
| wavelet-HHH | glszm      | SmallAreaEmphasis                | 0.6990877    |
| wavelet-HHH | glszm      | LowGrayLevelZoneEmphasis         | 0.02022322   |
| wavelet-HHH | glszm      | ZoneEntropy                      | 5.098238229  |
| wavelet-HHH | glszm      | SmallAreaLowGrayLevelEmphasis    | 0.016820975  |
| wavelet-HHH | ngtdm      | Coarseness                       | 0.022863366  |
| wavelet-HHH | ngtdm      | Complexity                       | 324.2602988  |
| wavelet-HHH | ngtdm      | Strength                         | 2.158141335  |
| wavelet-HHH | ngtdm      | Contrast                         | 0.170821278  |
| wavelet-HHH | ngtdm      | Busyness                         | 0.218078771  |
| wavelet-HLL | gldm       | GrayLevelVariance                | 46.17284685  |
| wavelet-HLL | gldm       | HighGrayLevelEmphasis            | 502.3252033  |
| wavelet-HLL | gldm       | DependenceEntropy                | 6.028178801  |
| wavelet-HLL | gldm       | DependenceNonUniformity          | 76.48780488  |

|             |            |                                      |              |
|-------------|------------|--------------------------------------|--------------|
| wavelet-HLL | gldm       | GrayLevelNonUniformity               | 11.19512195  |
| wavelet-HLL | gldm       | SmallDependenceEmphasis              | 0.493641599  |
| wavelet-HLL | gldm       | SmallDependenceHighGrayLevelEmphasis | 243.7774673  |
| wavelet-HLL | gldm       | DependenceNonUniformityNormalized    | 0.310926036  |
| wavelet-HLL | gldm       | LargeDependenceEmphasis              | 4.731707317  |
| wavelet-HLL | gldm       | LargeDependenceLowGrayLevelEmphasis  | 0.017304224  |
| wavelet-HLL | gldm       | DependenceVariance                   | 0.860731046  |
| wavelet-HLL | gldm       | LargeDependenceHighGrayLevelEmphasis | 2535.430894  |
| wavelet-HLL | gldm       | SmallDependenceLowGrayLevelEmphasis  | 0.006927755  |
| wavelet-HLL | gldm       | LowGrayLevelEmphasis                 | 0.008267164  |
| wavelet-HLL | glcm       | JointAverage                         | 21.19326759  |
| wavelet-HLL | glcm       | SumAverage                           | 42.38653519  |
| wavelet-HLL | glcm       | JointEntropy                         | 7.839262445  |
| wavelet-HLL | glcm       | ClusterShade                         | 277.1753227  |
| wavelet-HLL | glcm       | MaximumProbability                   | 0.012370326  |
| wavelet-HLL | glcm       | Idmn                                 | 0.964116282  |
| wavelet-HLL | glcm       | JointEnergy                          | 0.004909591  |
| wavelet-HLL | glcm       | Contrast                             | 72.78608625  |
| wavelet-HLL | glcm       | DifferenceEntropy                    | 4.008177301  |
| wavelet-HLL | glcm       | InverseVariance                      | 0.155436161  |
| wavelet-HLL | glcm       | DifferenceVariance                   | 29.45203936  |
| wavelet-HLL | glcm       | Idn                                  | 0.876040415  |
| wavelet-HLL | glcm       | Idm                                  | 0.149608402  |
| wavelet-HLL | glcm       | Correlation                          | 0.271186417  |
| wavelet-HLL | glcm       | Autocorrelation                      | 462.5856506  |
| wavelet-HLL | glcm       | SumEntropy                           | 5.239893814  |
| wavelet-HLL | glcm       | SumSquares                           | 49.81375184  |
| wavelet-HLL | glcm       | ClusterProminence                    | 44065.60758  |
| wavelet-HLL | glcm       | Imc2                                 | 0.977049808  |
| wavelet-HLL | glcm       | Imc1                                 | -0.331166057 |
| wavelet-HLL | glcm       | DifferenceAverage                    | 6.494941092  |
| wavelet-HLL | glcm       | Id                                   | 0.240487472  |
| wavelet-HLL | glcm       | ClusterTendency                      | 126.4689211  |
| wavelet-HLL | firstorder | InterquartileRange                   | 235.9859768  |
| wavelet-HLL | firstorder | Skewness                             | -0.008786369 |
| wavelet-HLL | firstorder | Uniformity                           | 0.045508626  |
| wavelet-HLL | firstorder | Median                               | -32.02571474 |
| wavelet-HLL | firstorder | Energy                               | 7307496.926  |
| wavelet-HLL | firstorder | RobustMeanAbsoluteDeviation          | 96.22340472  |
| wavelet-HLL | firstorder | MeanAbsoluteDeviation                | 136.2038292  |
| wavelet-HLL | firstorder | TotalEnergy                          | 197302417    |
| wavelet-HLL | firstorder | Maximum                              | 488.2921173  |
| wavelet-HLL | firstorder | RootMeanSquared                      | 172.3521745  |
| wavelet-HLL | firstorder | 90Percentile                         | 172.625398   |
| wavelet-HLL | firstorder | Minimum                              | -549.5876325 |
| wavelet-HLL | firstorder | Entropy                              | 4.664480444  |
| wavelet-HLL | firstorder | Range                                | 1037.87975   |
| wavelet-HLL | firstorder | Variance                             | 28876.26948  |
| wavelet-HLL | firstorder | 10Percentile                         | -226.0072532 |
| wavelet-HLL | firstorder | Kurtosis                             | 3.188943074  |
| wavelet-HLL | firstorder | Mean                                 | -28.79240475 |
| wavelet-HLL | glrlm      | ShortRunLowGrayLevelEmphasis         | 0.008420278  |
| wavelet-HLL | glrlm      | GrayLevelVariance                    | 46.65484072  |
| wavelet-HLL | glrlm      | LowGrayLevelRunEmphasis              | 0.008491624  |
| wavelet-HLL | glrlm      | GrayLevelNonUniformityNormalized     | 0.045248168  |
| wavelet-HLL | glrlm      | RunVariance                          | 0.039112039  |

|             |       |                                      |             |
|-------------|-------|--------------------------------------|-------------|
| wavelet-HLL | glrlm | GrayLevelNonUniformity               | 10.71754587 |
| wavelet-HLL | glrlm | LongRunEmphasis                      | 1.118844622 |
| wavelet-HLL | glrlm | ShortRunHighGrayLevelEmphasis        | 485.9353459 |
| wavelet-HLL | glrlm | RunLengthNonUniformity               | 219.7762651 |
| wavelet-HLL | glrlm | ShortRunEmphasis                     | 0.971395739 |
| wavelet-HLL | glrlm | LongRunHighGrayLevelEmphasis         | 564.336579  |
| wavelet-HLL | glrlm | RunPercentage                        | 0.962789243 |
| wavelet-HLL | glrlm | LongRunLowGrayLevelEmphasis          | 0.008790229 |
| wavelet-HLL | glrlm | RunEntropy                           | 4.83438226  |
| wavelet-HLL | glrlm | HighGrayLevelRunEmphasis             | 501.1698648 |
| wavelet-HLL | glrlm | RunLengthNonUniformityNormalized     | 0.92740814  |
| wavelet-HLL | glszm | GrayLevelVariance                    | 55.99682603 |
| wavelet-HLL | glszm | ZoneVariance                         | 1.801626661 |
| wavelet-HLL | glszm | GrayLevelNonUniformityNormalized     | 0.042154334 |
| wavelet-HLL | glszm | SizeZoneNonUniformityNormalized      | 0.472128546 |
| wavelet-HLL | glszm | SizeZoneNonUniformity                | 67.04225352 |
| wavelet-HLL | glszm | GrayLevelNonUniformity               | 5.985915493 |
| wavelet-HLL | glszm | LargeAreaEmphasis                    | 4.802816901 |
| wavelet-HLL | glszm | SmallAreaHighGrayLevelEmphasis       | 352.0129036 |
| wavelet-HLL | glszm | ZonePercentage                       | 0.577235772 |
| wavelet-HLL | glszm | LargeAreaLowGrayLevelEmphasis        | 0.021955867 |
| wavelet-HLL | glszm | LargeAreaHighGrayLevelEmphasis       | 2441.535211 |
| wavelet-HLL | glszm | HighGrayLevelZoneEmphasis            | 494.6338028 |
| wavelet-HLL | glszm | SmallAreaEmphasis                    | 0.711458273 |
| wavelet-HLL | glszm | LowGrayLevelZoneEmphasis             | 0.012414153 |
| wavelet-HLL | glszm | ZoneEntropy                          | 5.754358677 |
| wavelet-HLL | glszm | SmallAreaLowGrayLevelEmphasis        | 0.011605874 |
| wavelet-HLL | ngtdm | Coarseness                           | 0.026198152 |
| wavelet-HLL | ngtdm | Complexity                           | 1923.09405  |
| wavelet-HLL | ngtdm | Strength                             | 10.51082748 |
| wavelet-HLL | ngtdm | Contrast                             | 0.346718419 |
| wavelet-HLL | ngtdm | Busyness                             | 0.058647758 |
| wavelet-LHL | gldm  | GrayLevelVariance                    | 72.94257717 |
| wavelet-LHL | gldm  | HighGrayLevelEmphasis                | 496.5325203 |
| wavelet-LHL | gldm  | DependenceEntropy                    | 6.153368766 |
| wavelet-LHL | gldm  | DependenceNonUniformity              | 94.89430894 |
| wavelet-LHL | gldm  | GrayLevelNonUniformity               | 8.552845528 |
| wavelet-LHL | gldm  | SmallDependenceEmphasis              | 0.632815041 |
| wavelet-LHL | gldm  | SmallDependenceHighGrayLevelEmphasis | 305.686556  |
| wavelet-LHL | gldm  | DependenceNonUniformityNormalized    | 0.385749223 |
| wavelet-LHL | gldm  | LargeDependenceEmphasis              | 4.268292683 |
| wavelet-LHL | gldm  | LargeDependenceLowGrayLevelEmphasis  | 0.031510763 |
| wavelet-LHL | gldm  | DependenceVariance                   | 1.155793509 |
| wavelet-LHL | gldm  | LargeDependenceHighGrayLevelEmphasis | 2324.930894 |
| wavelet-LHL | gldm  | SmallDependenceLowGrayLevelEmphasis  | 0.010036003 |
| wavelet-LHL | gldm  | LowGrayLevelEmphasis                 | 0.012350838 |
| wavelet-LHL | glcm  | JointAverage                         | 20.31063625 |
| wavelet-LHL | glcm  | SumAverage                           | 40.6212725  |
| wavelet-LHL | glcm  | JointEntropy                         | 8.007286324 |
| wavelet-LHL | glcm  | ClusterShade                         | 118.8628967 |
| wavelet-LHL | glcm  | MaximumProbability                   | 0.012657729 |
| wavelet-LHL | glcm  | ldmn                                 | 0.933919365 |
| wavelet-LHL | glcm  | JointEnergy                          | 0.004321687 |
| wavelet-LHL | glcm  | Contrast                             | 119.697842  |
| wavelet-LHL | glcm  | DifferenceEntropy                    | 4.31108576  |
| wavelet-LHL | glcm  | InverseVariance                      | 0.128203971 |

|             |            |                                  |              |
|-------------|------------|----------------------------------|--------------|
| wavelet-LHL | glcm       | DifferenceVariance               | 45.9200709   |
| wavelet-LHL | glcm       | Idn                              | 0.83621949   |
| wavelet-LHL | glcm       | Idm                              | 0.121792806  |
| wavelet-LHL | glcm       | Correlation                      | 0.212969667  |
| wavelet-LHL | glcm       | Autocorrelation                  | 428.8032683  |
| wavelet-LHL | glcm       | SumEntropy                       | 5.442785408  |
| wavelet-LHL | glcm       | SumSquares                       | 76.06098771  |
| wavelet-LHL | glcm       | ClusterProminence                | 86277.63371  |
| wavelet-LHL | glcm       | Imc2                             | 0.990892511  |
| wavelet-LHL | glcm       | Imc1                             | -0.40193633  |
| wavelet-LHL | glcm       | DifferenceAverage                | 8.374010525  |
| wavelet-LHL | glcm       | Id                               | 0.207678128  |
| wavelet-LHL | glcm       | ClusterTendency                  | 184.5461089  |
| wavelet-LHL | firstorder | InterquartileRange               | 305.4375772  |
| wavelet-LHL | firstorder | Skewness                         | -0.178730388 |
| wavelet-LHL | firstorder | Uniformity                       | 0.034767665  |
| wavelet-LHL | firstorder | Median                           | -44.2739172  |
| wavelet-LHL | firstorder | Energy                           | 11793448.63  |
| wavelet-LHL | firstorder | RobustMeanAbsoluteDeviation      | 128.1663294  |
| wavelet-LHL | firstorder | MeanAbsoluteDeviation            | 175.6706831  |
| wavelet-LHL | firstorder | TotalEnergy                      | 318423113.1  |
| wavelet-LHL | firstorder | Maximum                          | 385.1552423  |
| wavelet-LHL | firstorder | RootMeanSquared                  | 218.9539863  |
| wavelet-LHL | firstorder | 90Percentile                     | 233.4825762  |
| wavelet-LHL | firstorder | Minimum                          | -545.8781885 |
| wavelet-LHL | firstorder | Entropy                          | 5.005814275  |
| wavelet-LHL | firstorder | Range                            | 931.0334308  |
| wavelet-LHL | firstorder | Variance                         | 45645.85595  |
| wavelet-LHL | firstorder | 10Percentile                     | -343.9118499 |
| wavelet-LHL | firstorder | Kurtosis                         | 2.333734054  |
| wavelet-LHL | firstorder | Mean                             | -47.90607633 |
| wavelet-LHL | grlm       | ShortRunLowGrayLevelEmphasis     | 0.012390459  |
| wavelet-LHL | grlm       | GrayLevelVariance                | 73.4673835   |
| wavelet-LHL | grlm       | LowGrayLevelRunEmphasis          | 0.012535183  |
| wavelet-LHL | grlm       | GrayLevelNonUniformityNormalized | 0.034367505  |
| wavelet-LHL | grlm       | RunVariance                      | 0.030652783  |
| wavelet-LHL | grlm       | GrayLevelNonUniformity           | 8.206722379  |
| wavelet-LHL | grlm       | LongRunEmphasis                  | 1.093119145  |
| wavelet-LHL | grlm       | ShortRunHighGrayLevelEmphasis    | 483.0032607  |
| wavelet-LHL | grlm       | RunLengthNonUniformity           | 225.1637656  |
| wavelet-LHL | grlm       | ShortRunEmphasis                 | 0.977452322  |
| wavelet-LHL | grlm       | LongRunHighGrayLevelEmphasis     | 546.1100688  |
| wavelet-LHL | grlm       | RunPercentage                    | 0.970606629  |
| wavelet-LHL | grlm       | LongRunLowGrayLevelEmphasis      | 0.013117521  |
| wavelet-LHL | grlm       | RunEntropy                       | 5.133436808  |
| wavelet-LHL | grlm       | HighGrayLevelRunEmphasis         | 495.1118231  |
| wavelet-LHL | grlm       | RunLengthNonUniformityNormalized | 0.942452769  |
| wavelet-LHL | glszm      | GrayLevelVariance                | 79.62777177  |
| wavelet-LHL | glszm      | ZoneVariance                     | 1.326527853  |
| wavelet-LHL | glszm      | GrayLevelNonUniformityNormalized | 0.03190914   |
| wavelet-LHL | glszm      | SizeZoneNonUniformityNormalized  | 0.642036236  |
| wavelet-LHL | glszm      | SizeZoneNonUniformity            | 110.4302326  |
| wavelet-LHL | glszm      | GrayLevelNonUniformity           | 5.488372093  |
| wavelet-LHL | glszm      | LargeAreaEmphasis                | 3.372093023  |
| wavelet-LHL | glszm      | SmallAreaHighGrayLevelEmphasis   | 396.8584485  |
| wavelet-LHL | glszm      | ZonePercentage                   | 0.699186992  |



|             |            |                                      |              |
|-------------|------------|--------------------------------------|--------------|
| wavelet-LHL | glszm      | LargeAreaLowGrayLevelEmphasis        | 0.026270484  |
| wavelet-LHL | glszm      | LargeAreaHighGrayLevelEmphasis       | 1856.656977  |
| wavelet-LHL | glszm      | HighGrayLevelZoneEmphasis            | 479.1627907  |
| wavelet-LHL | glszm      | SmallAreaEmphasis                    | 0.827071171  |
| wavelet-LHL | glszm      | LowGrayLevelZoneEmphasis             | 0.015114216  |
| wavelet-LHL | glszm      | ZoneEntropy                          | 5.732301407  |
| wavelet-LHL | glszm      | SmallAreaLowGrayLevelEmphasis        | 0.013955581  |
| wavelet-LHL | ngtdm      | Coarseness                           | 0.026095537  |
| wavelet-LHL | ngtdm      | Complexity                           | 2874.388612  |
| wavelet-LHL | ngtdm      | Strength                             | 10.68510387  |
| wavelet-LHL | ngtdm      | Contrast                             | 0.583091086  |
| wavelet-LHL | ngtdm      | Busyness                             | 0.058253306  |
| wavelet-LHH | gldm       | GrayLevelVariance                    | 34.63601362  |
| wavelet-LHH | gldm       | HighGrayLevelEmphasis                | 457.5569106  |
| wavelet-LHH | gldm       | DependenceEntropy                    | 6.037620606  |
| wavelet-LHH | gldm       | DependenceNonUniformity              | 71.89430894  |
| wavelet-LHH | gldm       | GrayLevelNonUniformity               | 13.66666667  |
| wavelet-LHH | gldm       | SmallDependenceEmphasis              | 0.487107231  |
| wavelet-LHH | gldm       | SmallDependenceHighGrayLevelEmphasis | 218.3221144  |
| wavelet-LHH | gldm       | DependenceNonUniformityNormalized    | 0.292253288  |
| wavelet-LHH | gldm       | LargeDependenceEmphasis              | 6.203252033  |
| wavelet-LHH | gldm       | LargeDependenceLowGrayLevelEmphasis  | 0.020119688  |
| wavelet-LHH | gldm       | DependenceVariance                   | 1.700575055  |
| wavelet-LHH | gldm       | LargeDependenceHighGrayLevelEmphasis | 2823.109756  |
| wavelet-LHH | gldm       | SmallDependenceLowGrayLevelEmphasis  | 0.005916124  |
| wavelet-LHH | gldm       | LowGrayLevelEmphasis                 | 0.007237063  |
| wavelet-LHH | glcm       | JointAverage                         | 20.59548599  |
| wavelet-LHH | glcm       | SumAverage                           | 41.19097198  |
| wavelet-LHH | glcm       | JointEntropy                         | 7.601896926  |
| wavelet-LHH | glcm       | ClusterShade                         | 128.5191636  |
| wavelet-LHH | glcm       | MaximumProbability                   | 0.019954299  |
| wavelet-LHH | glcm       | ldmn                                 | 0.959246477  |
| wavelet-LHH | glcm       | JointEnergy                          | 0.006192914  |
| wavelet-LHH | glcm       | Contrast                             | 71.06679993  |
| wavelet-LHH | glcm       | DifferenceEntropy                    | 3.984280334  |
| wavelet-LHH | glcm       | InverseVariance                      | 0.148989029  |
| wavelet-LHH | glcm       | DifferenceVariance                   | 26.40895051  |
| wavelet-LHH | glcm       | ldn                                  | 0.867708624  |
| wavelet-LHH | glcm       | ldm                                  | 0.155218891  |
| wavelet-LHH | glcm       | Correlation                          | -0.013974878 |
| wavelet-LHH | glcm       | Autocorrelation                      | 423.6045338  |
| wavelet-LHH | glcm       | SumEntropy                           | 4.812957376  |
| wavelet-LHH | glcm       | SumSquares                           | 34.95268041  |
| wavelet-LHH | glcm       | ClusterProminence                    | 16312.82166  |
| wavelet-LHH | glcm       | lmc2                                 | 0.963301202  |
| wavelet-LHH | glcm       | lmc1                                 | -0.297493852 |
| wavelet-LHH | glcm       | DifferenceAverage                    | 6.511315925  |
| wavelet-LHH | glcm       | ld                                   | 0.244960355  |
| wavelet-LHH | glcm       | ClusterTendency                      | 68.74392171  |
| wavelet-LHH | firstorder | InterquartileRange                   | 180.6340711  |
| wavelet-LHH | firstorder | Skewness                             | 0.17961804   |
| wavelet-LHH | firstorder | Uniformity                           | 0.055555556  |
| wavelet-LHH | firstorder | Median                               | -2.622726875 |
| wavelet-LHH | firstorder | Energy                               | 5264082.369  |
| wavelet-LHH | firstorder | RobustMeanAbsoluteDeviation          | 74.11065683  |
| wavelet-LHH | firstorder | MeanAbsoluteDeviation                | 112.19629    |

|             |            |                                      |              |
|-------------|------------|--------------------------------------|--------------|
| wavelet-LHH | firstorder | TotalEnergy                          | 142130224    |
| wavelet-LHH | firstorder | Maximum                              | 469.640989   |
| wavelet-LHH | firstorder | RootMeanSquared                      | 146.2829751  |
| wavelet-LHH | firstorder | 90Percentile                         | 185.128976   |
| wavelet-LHH | firstorder | Minimum                              | -475.4110328 |
| wavelet-LHH | firstorder | Entropy                              | 4.472265746  |
| wavelet-LHH | firstorder | Range                                | 945.0520218  |
| wavelet-LHH | firstorder | Variance                             | 21388.9911   |
| wavelet-LHH | firstorder | 10Percentile                         | -161.5940544 |
| wavelet-LHH | firstorder | Kurtosis                             | 3.606261358  |
| wavelet-LHH | firstorder | Mean                                 | 3.117325643  |
| wavelet-LHH | grlm       | ShortRunLowGrayLevelEmphasis         | 0.007371052  |
| wavelet-LHH | grlm       | GrayLevelVariance                    | 35.42959976  |
| wavelet-LHH | grlm       | LowGrayLevelRunEmphasis              | 0.007452379  |
| wavelet-LHH | grlm       | GrayLevelNonUniformityNormalized     | 0.05437273   |
| wavelet-LHH | grlm       | RunVariance                          | 0.048982174  |
| wavelet-LHH | grlm       | GrayLevelNonUniformity               | 12.80050605  |
| wavelet-LHH | grlm       | LongRunEmphasis                      | 1.14270612   |
| wavelet-LHH | grlm       | ShortRunHighGrayLevelEmphasis        | 442.4059337  |
| wavelet-LHH | grlm       | RunLengthNonUniformity               | 216.4776936  |
| wavelet-LHH | grlm       | ShortRunEmphasis                     | 0.967660657  |
| wavelet-LHH | grlm       | LongRunHighGrayLevelEmphasis         | 523.2452007  |
| wavelet-LHH | grlm       | RunPercentage                        | 0.95684803   |
| wavelet-LHH | grlm       | LongRunLowGrayLevelEmphasis          | 0.007810493  |
| wavelet-LHH | grlm       | RunEntropy                           | 4.681308443  |
| wavelet-LHH | grlm       | HighGrayLevelRunEmphasis             | 457.3562843  |
| wavelet-LHH | grlm       | RunLengthNonUniformityNormalized     | 0.918957047  |
| wavelet-LHH | glszm      | GrayLevelVariance                    | 46.34325772  |
| wavelet-LHH | glszm      | ZoneVariance                         | 3.488972905  |
| wavelet-LHH | glszm      | GrayLevelNonUniformityNormalized     | 0.0457887    |
| wavelet-LHH | glszm      | SizeZoneNonUniformityNormalized      | 0.486557446  |
| wavelet-LHH | glszm      | SizeZoneNonUniformity                | 67.14492754  |
| wavelet-LHH | glszm      | GrayLevelNonUniformity               | 6.31884058   |
| wavelet-LHH | glszm      | LargeAreaEmphasis                    | 6.666666667  |
| wavelet-LHH | glszm      | SmallAreaHighGrayLevelEmphasis       | 321.7776565  |
| wavelet-LHH | glszm      | ZonePercentage                       | 0.56097561   |
| wavelet-LHH | glszm      | LargeAreaLowGrayLevelEmphasis        | 0.02473179   |
| wavelet-LHH | glszm      | LargeAreaHighGrayLevelEmphasis       | 3027.210145  |
| wavelet-LHH | glszm      | HighGrayLevelZoneEmphasis            | 450.7028986  |
| wavelet-LHH | glszm      | SmallAreaEmphasis                    | 0.724431719  |
| wavelet-LHH | glszm      | LowGrayLevelZoneEmphasis             | 0.0109105    |
| wavelet-LHH | glszm      | ZoneEntropy                          | 5.672451518  |
| wavelet-LHH | glszm      | SmallAreaLowGrayLevelEmphasis        | 0.010171162  |
| wavelet-LHH | ngtdm      | Coarseness                           | 0.023455096  |
| wavelet-LHH | ngtdm      | Complexity                           | 1863.959459  |
| wavelet-LHH | ngtdm      | Strength                             | 7.246235008  |
| wavelet-LHH | ngtdm      | Contrast                             | 0.332810165  |
| wavelet-LHH | ngtdm      | Busyness                             | 0.067213481  |
| wavelet-LLH | gldm       | GrayLevelVariance                    | 112.0860599  |
| wavelet-LLH | gldm       | HighGrayLevelEmphasis                | 984.495935   |
| wavelet-LLH | gldm       | DependenceEntropy                    | 6.301456     |
| wavelet-LLH | gldm       | DependenceNonUniformity              | 100.0569106  |
| wavelet-LLH | gldm       | GrayLevelNonUniformity               | 7.691056911  |
| wavelet-LLH | gldm       | SmallDependenceEmphasis              | 0.652073171  |
| wavelet-LLH | gldm       | SmallDependenceHighGrayLevelEmphasis | 647.1126287  |
| wavelet-LLH | gldm       | DependenceNonUniformityNormalized    | 0.406735409  |

|             |            |                                      |              |
|-------------|------------|--------------------------------------|--------------|
| wavelet-LLH | gldm       | LargeDependenceEmphasis              | 3.756097561  |
| wavelet-LLH | gldm       | LargeDependenceLowGrayLevelEmphasis  | 0.010613468  |
| wavelet-LLH | gldm       | DependenceVariance                   | 0.923854848  |
| wavelet-LLH | gldm       | LargeDependenceHighGrayLevelEmphasis | 3761.00813   |
| wavelet-LLH | gldm       | SmallDependenceLowGrayLevelEmphasis  | 0.006513612  |
| wavelet-LLH | gldm       | LowGrayLevelEmphasis                 | 0.007012095  |
| wavelet-LLH | glcm       | JointAverage                         | 29.33320492  |
| wavelet-LLH | glcm       | SumAverage                           | 58.66640985  |
| wavelet-LLH | glcm       | JointEntropy                         | 8.08545463   |
| wavelet-LLH | glcm       | ClusterShade                         | -723.7972112 |
| wavelet-LLH | glcm       | MaximumProbability                   | 0.010579181  |
| wavelet-LLH | glcm       | ldmn                                 | 0.950008325  |
| wavelet-LLH | glcm       | JointEnergy                          | 0.003990413  |
| wavelet-LLH | glcm       | Contrast                             | 203.4542165  |
| wavelet-LLH | glcm       | DifferenceEntropy                    | 4.595489033  |
| wavelet-LLH | glcm       | InverseVariance                      | 0.116572876  |
| wavelet-LLH | glcm       | DifferenceVariance                   | 81.01298065  |
| wavelet-LLH | glcm       | ldn                                  | 0.858984143  |
| wavelet-LLH | glcm       | ldm                                  | 0.109402651  |
| wavelet-LLH | glcm       | Correlation                          | 0.105832159  |
| wavelet-LLH | glcm       | Autocorrelation                      | 872.9753317  |
| wavelet-LLH | glcm       | SumEntropy                           | 5.613978495  |
| wavelet-LLH | glcm       | SumSquares                           | 114.2197227  |
| wavelet-LLH | glcm       | ClusterProminence                    | 184200.8578  |
| wavelet-LLH | glcm       | lmc2                                 | 0.996085319  |
| wavelet-LLH | glcm       | lmc1                                 | -0.462356153 |
| wavelet-LLH | glcm       | DifferenceAverage                    | 10.65483817  |
| wavelet-LLH | glcm       | ld                                   | 0.187856378  |
| wavelet-LLH | glcm       | ClusterTendency                      | 253.4246743  |
| wavelet-LLH | firstorder | InterquartileRange                   | 389.3343592  |
| wavelet-LLH | firstorder | Skewness                             | -0.283813653 |
| wavelet-LLH | firstorder | Uniformity                           | 0.031264459  |
| wavelet-LLH | firstorder | Median                               | 8.085906349  |
| wavelet-LLH | firstorder | Energy                               | 17875188.62  |
| wavelet-LLH | firstorder | RobustMeanAbsoluteDeviation          | 155.6983752  |
| wavelet-LLH | firstorder | MeanAbsoluteDeviation                | 216.6466065  |
| wavelet-LLH | firstorder | TotalEnergy                          | 482630092.7  |
| wavelet-LLH | firstorder | Maximum                              | 651.8294495  |
| wavelet-LLH | firstorder | RootMeanSquared                      | 269.5614371  |
| wavelet-LLH | firstorder | 90Percentile                         | 261.8127912  |
| wavelet-LLH | firstorder | Minimum                              | -766.6331573 |
| wavelet-LLH | firstorder | Entropy                              | 5.247072159  |
| wavelet-LLH | firstorder | Range                                | 1418.462607  |
| wavelet-LLH | firstorder | Variance                             | 70248.61067  |
| wavelet-LLH | firstorder | 10Percentile                         | -402.0530902 |
| wavelet-LLH | firstorder | Kurtosis                             | 2.755468233  |
| wavelet-LLH | firstorder | Mean                                 | -49.1401842  |
| wavelet-LLH | glrlm      | ShortRunLowGrayLevelEmphasis         | 0.007139186  |
| wavelet-LLH | glrlm      | GrayLevelVariance                    | 113.682014   |
| wavelet-LLH | glrlm      | LowGrayLevelRunEmphasis              | 0.007165722  |
| wavelet-LLH | glrlm      | GrayLevelNonUniformityNormalized     | 0.030782343  |
| wavelet-LLH | glrlm      | RunVariance                          | 0.029503723  |
| wavelet-LLH | glrlm      | GrayLevelNonUniformity               | 7.374283872  |
| wavelet-LLH | glrlm      | LongRunEmphasis                      | 1.084769367  |
| wavelet-LLH | glrlm      | ShortRunHighGrayLevelEmphasis        | 965.1249818  |
| wavelet-LLH | glrlm      | RunLengthNonUniformity               | 227.7365036  |

|             |       |                                      |              |
|-------------|-------|--------------------------------------|--------------|
| wavelet-LLH | glrlm | ShortRunEmphasis                     | 0.980626197  |
| wavelet-LLH | glrlm | LongRunHighGrayLevelEmphasis         | 1068.671796  |
| wavelet-LLH | glrlm | RunPercentage                        | 0.973733583  |
| wavelet-LLH | glrlm | LongRunLowGrayLevelEmphasis          | 0.007279926  |
| wavelet-LLH | glrlm | RunEntropy                           | 5.365058434  |
| wavelet-LLH | glrlm | HighGrayLevelRunEmphasis             | 984.2766499  |
| wavelet-LLH | glrlm | RunLengthNonUniformityNormalized     | 0.950427922  |
| wavelet-LLH | glszm | GrayLevelVariance                    | 134.1076957  |
| wavelet-LLH | glszm | ZoneVariance                         | 1.141817485  |
| wavelet-LLH | glszm | GrayLevelNonUniformityNormalized     | 0.02626959   |
| wavelet-LLH | glszm | SizeZoneNonUniformityNormalized      | 0.652973284  |
| wavelet-LLH | glszm | SizeZoneNonUniformity                | 115.5762712  |
| wavelet-LLH | glszm | GrayLevelNonUniformity               | 4.649717514  |
| wavelet-LLH | glszm | LargeAreaEmphasis                    | 3.073446328  |
| wavelet-LLH | glszm | SmallAreaHighGrayLevelEmphasis       | 831.2960315  |
| wavelet-LLH | glszm | ZonePercentage                       | 0.719512195  |
| wavelet-LLH | glszm | LargeAreaLowGrayLevelEmphasis        | 0.011885627  |
| wavelet-LLH | glszm | LargeAreaHighGrayLevelEmphasis       | 3063.514124  |
| wavelet-LLH | glszm | HighGrayLevelZoneEmphasis            | 989.5875706  |
| wavelet-LLH | glszm | SmallAreaEmphasis                    | 0.834165049  |
| wavelet-LLH | glszm | LowGrayLevelZoneEmphasis             | 0.00919635   |
| wavelet-LLH | glszm | ZoneEntropy                          | 6.020840108  |
| wavelet-LLH | glszm | SmallAreaLowGrayLevelEmphasis        | 0.008945515  |
| wavelet-LLH | ngtdm | Coarseness                           | 0.021790214  |
| wavelet-LLH | ngtdm | Complexity                           | 7295.717011  |
| wavelet-LLH | ngtdm | Strength                             | 18.25249384  |
| wavelet-LLH | ngtdm | Contrast                             | 0.701004401  |
| wavelet-LLH | ngtdm | Busyness                             | 0.032154209  |
| wavelet-LLL | gldm  | GrayLevelVariance                    | 657.6611144  |
| wavelet-LLL | gldm  | HighGrayLevelEmphasis                | 2942.96748   |
| wavelet-LLL | gldm  | DependenceEntropy                    | 6.58304229   |
| wavelet-LLL | gldm  | DependenceNonUniformity              | 155.5691057  |
| wavelet-LLL | gldm  | GrayLevelNonUniformity               | 3.398373984  |
| wavelet-LLL | gldm  | SmallDependenceEmphasis              | 0.822267389  |
| wavelet-LLL | gldm  | SmallDependenceHighGrayLevelEmphasis | 2162.410343  |
| wavelet-LLL | gldm  | DependenceNonUniformityNormalized    | 0.632394739  |
| wavelet-LLL | gldm  | LargeDependenceEmphasis              | 1.837398374  |
| wavelet-LLL | gldm  | LargeDependenceLowGrayLevelEmphasis  | 0.008419008  |
| wavelet-LLL | gldm  | DependenceVariance                   | 0.249388591  |
| wavelet-LLL | gldm  | LargeDependenceHighGrayLevelEmphasis | 6816         |
| wavelet-LLL | gldm  | SmallDependenceLowGrayLevelEmphasis  | 0.007665971  |
| wavelet-LLL | gldm  | LowGrayLevelEmphasis                 | 0.007812296  |
| wavelet-LLL | glcm  | JointAverage                         | 54.29204824  |
| wavelet-LLL | glcm  | SumAverage                           | 108.5840965  |
| wavelet-LLL | glcm  | JointEntropy                         | 8.33910025   |
| wavelet-LLL | glcm  | ClusterShade                         | -16675.81507 |
| wavelet-LLL | glcm  | MaximumProbability                   | 0.006378864  |
| wavelet-LLL | glcm  | ldmn                                 | 0.94668619   |
| wavelet-LLL | glcm  | JointEnergy                          | 0.003163413  |
| wavelet-LLL | glcm  | Contrast                             | 634.0610429  |
| wavelet-LLL | glcm  | DifferenceEntropy                    | 5.360184032  |
| wavelet-LLL | glcm  | InverseVariance                      | 0.058279282  |
| wavelet-LLL | glcm  | DifferenceVariance                   | 224.3998563  |
| wavelet-LLL | glcm  | ldn                                  | 0.847244914  |
| wavelet-LLL | glcm  | ldm                                  | 0.050921944  |
| wavelet-LLL | glcm  | Correlation                          | 0.504878947  |

|             |            |                                  |              |
|-------------|------------|----------------------------------|--------------|
| wavelet-LLL | glcm       | Autocorrelation                  | 3269.359469  |
| wavelet-LLL | glcm       | SumEntropy                       | 6.575648779  |
| wavelet-LLL | glcm       | SumSquares                       | 637.8433526  |
| wavelet-LLL | glcm       | ClusterProminence                | 7740529.819  |
| wavelet-LLL | glcm       | Imc2                             | 0.999859318  |
| wavelet-LLL | glcm       | Imc1                             | -0.659029568 |
| wavelet-LLL | glcm       | DifferenceAverage                | 19.98652621  |
| wavelet-LLL | glcm       | Id                               | 0.110724558  |
| wavelet-LLL | glcm       | ClusterTendency                  | 1917.312367  |
| wavelet-LLL | firstorder | InterquartileRange               | 1124.116904  |
| wavelet-LLL | firstorder | Skewness                         | 0.115282156  |
| wavelet-LLL | firstorder | Uniformity                       | 0.013814528  |
| wavelet-LLL | firstorder | Median                           | -1085.746659 |
| wavelet-LLL | firstorder | Energy                           | 356249822.2  |
| wavelet-LLL | firstorder | RobustMeanAbsoluteDeviation      | 442.1801058  |
| wavelet-LLL | firstorder | MeanAbsoluteDeviation            | 556.7827682  |
| wavelet-LLL | firstorder | TotalEnergy                      | 9618745201   |
| wavelet-LLL | firstorder | Maximum                          | 306.9957081  |
| wavelet-LLL | firstorder | RootMeanSquared                  | 1203.399356  |
| wavelet-LLL | firstorder | 90Percentile                     | -147.5527344 |
| wavelet-LLL | firstorder | Minimum                          | -2180.097598 |
| wavelet-LLL | firstorder | Entropy                          | 6.306829539  |
| wavelet-LLL | firstorder | Range                            | 2487.093306  |
| wavelet-LLL | firstorder | Variance                         | 411726.322   |
| wavelet-LLL | firstorder | 10Percentile                     | -1849.699741 |
| wavelet-LLL | firstorder | Kurtosis                         | 1.875186437  |
| wavelet-LLL | firstorder | Mean                             | -1018.058784 |
| wavelet-LLL | grlm       | ShortRunLowGrayLevelEmphasis     | 0.007877891  |
| wavelet-LLL | grlm       | GrayLevelVariance                | 656.199352   |
| wavelet-LLL | grlm       | LowGrayLevelRunEmphasis          | 0.007883714  |
| wavelet-LLL | grlm       | GrayLevelNonUniformityNormalized | 0.013796244  |
| wavelet-LLL | grlm       | RunVariance                      | 0.010004183  |
| wavelet-LLL | grlm       | GrayLevelNonUniformity           | 3.359949781  |
| wavelet-LLL | grlm       | LongRunEmphasis                  | 1.030406195  |
| wavelet-LLL | grlm       | ShortRunHighGrayLevelEmphasis    | 2892.476018  |
| wavelet-LLL | grlm       | RunLengthNonUniformity           | 238.6789237  |
| wavelet-LLL | grlm       | ShortRunEmphasis                 | 0.992398451  |
| wavelet-LLL | grlm       | LongRunHighGrayLevelEmphasis     | 3064.589467  |
| wavelet-LLL | grlm       | RunPercentage                    | 0.989993746  |
| wavelet-LLL | grlm       | LongRunLowGrayLevelEmphasis      | 0.007907003  |
| wavelet-LLL | grlm       | RunEntropy                       | 6.333330106  |
| wavelet-LLL | grlm       | HighGrayLevelRunEmphasis         | 2926.898708  |
| wavelet-LLL | grlm       | RunLengthNonUniformityNormalized | 0.979991635  |
| wavelet-LLL | glszm      | GrayLevelVariance                | 634.9722222  |
| wavelet-LLL | glszm      | ZoneVariance                     | 0.147376543  |
| wavelet-LLL | glszm      | GrayLevelNonUniformityNormalized | 0.013674554  |
| wavelet-LLL | glszm      | SizeZoneNonUniformityNormalized  | 0.77816358   |
| wavelet-LLL | glszm      | SizeZoneNonUniformity            | 168.0833333  |
| wavelet-LLL | glszm      | GrayLevelNonUniformity           | 2.953703704  |
| wavelet-LLL | glszm      | LargeAreaEmphasis                | 1.444444444  |
| wavelet-LLL | glszm      | SmallAreaHighGrayLevelEmphasis   | 2324.006173  |
| wavelet-LLL | glszm      | ZonePercentage                   | 0.87804878   |
| wavelet-LLL | glszm      | LargeAreaLowGrayLevelEmphasis    | 0.009125567  |
| wavelet-LLL | glszm      | LargeAreaHighGrayLevelEmphasis   | 4748.666667  |
| wavelet-LLL | glszm      | HighGrayLevelZoneEmphasis        | 2735.666667  |
| wavelet-LLL | glszm      | SmallAreaEmphasis                | 0.904320988  |

|             |            |                                      |              |
|-------------|------------|--------------------------------------|--------------|
| wavelet-LLL | glszm      | LowGrayLevelZoneEmphasis             | 0.008785572  |
| wavelet-LLL | glszm      | ZoneEntropy                          | 6.528404215  |
| wavelet-LLL | glszm      | SmallAreaLowGrayLevelEmphasis        | 0.008703184  |
| wavelet-LLL | ngtdm      | Coarseness                           | 0.023146116  |
| wavelet-LLL | ngtdm      | Complexity                           | 41295.99446  |
| wavelet-LLL | ngtdm      | Strength                             | 79.25415449  |
| wavelet-LLL | ngtdm      | Contrast                             | 2.178570152  |
| wavelet-LLL | ngtdm      | Busyness                             | 0.012665627  |
| wavelet-HHL | gldm       | GrayLevelVariance                    | 15.35369159  |
| wavelet-HHL | gldm       | HighGrayLevelEmphasis                | 217.3170732  |
| wavelet-HHL | gldm       | DependenceEntropy                    | 5.652560515  |
| wavelet-HHL | gldm       | DependenceNonUniformity              | 61.77235772  |
| wavelet-HHL | gldm       | GrayLevelNonUniformity               | 20.2195122   |
| wavelet-HHL | gldm       | SmallDependenceEmphasis              | 0.421250225  |
| wavelet-HHL | gldm       | SmallDependenceHighGrayLevelEmphasis | 92.7931355   |
| wavelet-HHL | gldm       | DependenceNonUniformityNormalized    | 0.251107145  |
| wavelet-HHL | gldm       | LargeDependenceEmphasis              | 8.138211382  |
| wavelet-HHL | gldm       | LargeDependenceLowGrayLevelEmphasis  | 0.056732826  |
| wavelet-HHL | gldm       | DependenceVariance                   | 2.307753321  |
| wavelet-HHL | gldm       | LargeDependenceHighGrayLevelEmphasis | 1545.04065   |
| wavelet-HHL | gldm       | SmallDependenceLowGrayLevelEmphasis  | 0.007232712  |
| wavelet-HHL | gldm       | LowGrayLevelEmphasis                 | 0.010604602  |
| wavelet-HHL | glcm       | JointAverage                         | 14.2757848   |
| wavelet-HHL | glcm       | SumAverage                           | 28.55156961  |
| wavelet-HHL | glcm       | JointEntropy                         | 7.131647049  |
| wavelet-HHL | glcm       | ClusterShade                         | 35.54062655  |
| wavelet-HHL | glcm       | MaximumProbability                   | 0.028097094  |
| wavelet-HHL | glcm       | Idmn                                 | 0.956481553  |
| wavelet-HHL | glcm       | JointEnergy                          | 0.008955366  |
| wavelet-HHL | glcm       | Contrast                             | 34.15351526  |
| wavelet-HHL | glcm       | DifferenceEntropy                    | 3.533389836  |
| wavelet-HHL | glcm       | InverseVariance                      | 0.217456646  |
| wavelet-HHL | glcm       | DifferenceVariance                   | 12.96547863  |
| wavelet-HHL | glcm       | Idn                                  | 0.863480908  |
| wavelet-HHL | glcm       | Idm                                  | 0.20828999   |
| wavelet-HHL | glcm       | Correlation                          | 0.020850232  |
| wavelet-HHL | glcm       | Autocorrelation                      | 204.13415    |
| wavelet-HHL | glcm       | SumEntropy                           | 4.406248075  |
| wavelet-HHL | glcm       | SumSquares                           | 17.39380698  |
| wavelet-HHL | glcm       | ClusterProminence                    | 4588.836001  |
| wavelet-HHL | glcm       | Imc2                                 | 0.893894062  |
| wavelet-HHL | glcm       | Imc1                                 | -0.204165999 |
| wavelet-HHL | glcm       | DifferenceAverage                    | 4.513416745  |
| wavelet-HHL | glcm       | Id                                   | 0.299682869  |
| wavelet-HHL | glcm       | ClusterTendency                      | 35.42171266  |
| wavelet-HHL | firstorder | InterquartileRange                   | 127.4759188  |
| wavelet-HHL | firstorder | Skewness                             | 0.155334511  |
| wavelet-HHL | firstorder | Uniformity                           | 0.082193139  |
| wavelet-HHL | firstorder | Median                               | -22.19501826 |
| wavelet-HHL | firstorder | Energy                               | 2353702.359  |
| wavelet-HHL | firstorder | RobustMeanAbsoluteDeviation          | 53.15874474  |
| wavelet-HHL | firstorder | MeanAbsoluteDeviation                | 77.41481536  |
| wavelet-HHL | firstorder | TotalEnergy                          | 63549963.69  |
| wavelet-HHL | firstorder | Maximum                              | 281.8939674  |
| wavelet-HHL | firstorder | RootMeanSquared                      | 97.81562129  |
| wavelet-HHL | firstorder | 90Percentile                         | 129.4161267  |

|             |            |                                      |              |
|-------------|------------|--------------------------------------|--------------|
| wavelet-HHL | firstorder | Minimum                              | -340.9413863 |
| wavelet-HHL | firstorder | Entropy                              | 3.891444417  |
| wavelet-HHL | firstorder | Range                                | 622.8353537  |
| wavelet-HHL | firstorder | Variance                             | 9508.126895  |
| wavelet-HHL | firstorder | 10Percentile                         | -121.9983429 |
| wavelet-HHL | firstorder | Kurtosis                             | 3.291129716  |
| wavelet-HHL | firstorder | Mean                                 | -7.731033104 |
| wavelet-HHL | grlm       | ShortRunLowGrayLevelEmphasis         | 0.010608165  |
| wavelet-HHL | grlm       | GrayLevelVariance                    | 15.66427095  |
| wavelet-HHL | grlm       | LowGrayLevelRunEmphasis              | 0.010859696  |
| wavelet-HHL | grlm       | GrayLevelNonUniformityNormalized     | 0.080007496  |
| wavelet-HHL | grlm       | RunVariance                          | 0.064365631  |
| wavelet-HHL | grlm       | GrayLevelNonUniformity               | 18.60834681  |
| wavelet-HHL | grlm       | LongRunEmphasis                      | 1.1842585    |
| wavelet-HHL | grlm       | ShortRunHighGrayLevelEmphasis        | 210.2287271  |
| wavelet-HHL | grlm       | RunLengthNonUniformity               | 209.305233   |
| wavelet-HHL | grlm       | ShortRunEmphasis                     | 0.95943862   |
| wavelet-HHL | grlm       | LongRunHighGrayLevelEmphasis         | 254.7379533  |
| wavelet-HHL | grlm       | RunPercentage                        | 0.945590994  |
| wavelet-HHL | grlm       | LongRunLowGrayLevelEmphasis          | 0.012005393  |
| wavelet-HHL | grlm       | RunEntropy                           | 4.16176603   |
| wavelet-HHL | grlm       | HighGrayLevelRunEmphasis             | 218.3800345  |
| wavelet-HHL | grlm       | RunLengthNonUniformityNormalized     | 0.899193868  |
| wavelet-HHL | glszm      | GrayLevelVariance                    | 21.06729388  |
| wavelet-HHL | glszm      | ZoneVariance                         | 8.111462223  |
| wavelet-HHL | glszm      | GrayLevelNonUniformityNormalized     | 0.065067509  |
| wavelet-HHL | glszm      | SizeZoneNonUniformityNormalized      | 0.454179833  |
| wavelet-HHL | glszm      | SizeZoneNonUniformity                | 53.59322034  |
| wavelet-HHL | glszm      | GrayLevelNonUniformity               | 7.677966102  |
| wavelet-HHL | glszm      | LargeAreaEmphasis                    | 12.45762712  |
| wavelet-HHL | glszm      | SmallAreaHighGrayLevelEmphasis       | 152.5997617  |
| wavelet-HHL | glszm      | ZonePercentage                       | 0.479674797  |
| wavelet-HHL | glszm      | LargeAreaLowGrayLevelEmphasis        | 0.084163061  |
| wavelet-HHL | glszm      | LargeAreaHighGrayLevelEmphasis       | 2404.864407  |
| wavelet-HHL | glszm      | HighGrayLevelZoneEmphasis            | 221.6016949  |
| wavelet-HHL | glszm      | SmallAreaEmphasis                    | 0.699482583  |
| wavelet-HHL | glszm      | LowGrayLevelZoneEmphasis             | 0.015855415  |
| wavelet-HHL | glszm      | ZoneEntropy                          | 5.29817083   |
| wavelet-HHL | glszm      | SmallAreaLowGrayLevelEmphasis        | 0.014127384  |
| wavelet-HHL | ngtdm      | Coarseness                           | 0.021801645  |
| wavelet-HHL | ngtdm      | Complexity                           | 616.3311507  |
| wavelet-HHL | ngtdm      | Strength                             | 3.561655323  |
| wavelet-HHL | ngtdm      | Contrast                             | 0.209280336  |
| wavelet-HHL | ngtdm      | Busyness                             | 0.15267024   |
| wavelet-HLH | gldm       | GrayLevelVariance                    | 21.71281975  |
| wavelet-HLH | gldm       | HighGrayLevelEmphasis                | 364.8658537  |
| wavelet-HLH | gldm       | DependenceEntropy                    | 5.696455275  |
| wavelet-HLH | gldm       | DependenceNonUniformity              | 67.75609756  |
| wavelet-HLH | gldm       | GrayLevelNonUniformity               | 15.83739837  |
| wavelet-HLH | gldm       | SmallDependenceEmphasis              | 0.467065266  |
| wavelet-HLH | gldm       | SmallDependenceHighGrayLevelEmphasis | 173.2089182  |
| wavelet-HLH | gldm       | DependenceNonUniformityNormalized    | 0.275431291  |
| wavelet-HLH | gldm       | LargeDependenceEmphasis              | 5.894308943  |
| wavelet-HLH | gldm       | LargeDependenceLowGrayLevelEmphasis  | 0.022621829  |
| wavelet-HLH | gldm       | DependenceVariance                   | 1.252561306  |
| wavelet-HLH | gldm       | LargeDependenceHighGrayLevelEmphasis | 2124.223577  |

|             |            |                                     |              |
|-------------|------------|-------------------------------------|--------------|
| wavelet-HLH | gldm       | SmallDependenceLowGrayLevelEmphasis | 0.00607749   |
| wavelet-HLH | gldm       | LowGrayLevelEmphasis                | 0.007759951  |
| wavelet-HLH | glcm       | JointAverage                        | 18.60217963  |
| wavelet-HLH | glcm       | SumAverage                          | 37.20435927  |
| wavelet-HLH | glcm       | JointEntropy                        | 7.38236965   |
| wavelet-HLH | glcm       | ClusterShade                        | -43.74131224 |
| wavelet-HLH | glcm       | MaximumProbability                  | 0.020905522  |
| wavelet-HLH | glcm       | ldmn                                | 0.959791587  |
| wavelet-HLH | glcm       | JointEnergy                         | 0.007201849  |
| wavelet-HLH | glcm       | Contrast                            | 44.44804604  |
| wavelet-HLH | glcm       | DifferenceEntropy                   | 3.697575362  |
| wavelet-HLH | glcm       | InverseVariance                     | 0.196527151  |
| wavelet-HLH | glcm       | DifferenceVariance                  | 17.26637532  |
| wavelet-HLH | glcm       | ldn                                 | 0.86846855   |
| wavelet-HLH | glcm       | ldm                                 | 0.183142796  |
| wavelet-HLH | glcm       | Correlation                         | 0.00123623   |
| wavelet-HLH | glcm       | Autocorrelation                     | 346.0555217  |
| wavelet-HLH | glcm       | SumEntropy                          | 4.567068546  |
| wavelet-HLH | glcm       | SumSquares                          | 22.22716821  |
| wavelet-HLH | glcm       | ClusterProminence                   | 7107.015001  |
| wavelet-HLH | glcm       | lmc2                                | 0.929760185  |
| wavelet-HLH | glcm       | lmc1                                | -0.240074984 |
| wavelet-HLH | glcm       | DifferenceAverage                   | 5.13937135   |
| wavelet-HLH | glcm       | ld                                  | 0.275400733  |
| wavelet-HLH | glcm       | ClusterTendency                     | 44.46062678  |
| wavelet-HLH | firstorder | InterquartileRange                  | 151.4935271  |
| wavelet-HLH | firstorder | Skewness                            | -0.168490093 |
| wavelet-HLH | firstorder | Uniformity                          | 0.064379668  |
| wavelet-HLH | firstorder | Median                              | -3.803378256 |
| wavelet-HLH | firstorder | Energy                              | 3358145.219  |
| wavelet-HLH | firstorder | RobustMeanAbsoluteDeviation         | 63.07759076  |
| wavelet-HLH | firstorder | MeanAbsoluteDeviation               | 91.58312933  |
| wavelet-HLH | firstorder | TotalEnergy                         | 90669920.91  |
| wavelet-HLH | firstorder | Maximum                             | 306.1933571  |
| wavelet-HLH | firstorder | RootMeanSquared                     | 116.8374804  |
| wavelet-HLH | firstorder | 90Percentile                        | 144.0334645  |
| wavelet-HLH | firstorder | Minimum                             | -448.0565315 |
| wavelet-HLH | firstorder | Entropy                             | 4.201393016  |
| wavelet-HLH | firstorder | Range                               | 754.2498885  |
| wavelet-HLH | firstorder | Variance                            | 13650.77714  |
| wavelet-HLH | firstorder | 10Percentile                        | -138.2212067 |
| wavelet-HLH | firstorder | Kurtosis                            | 3.579375369  |
| wavelet-HLH | firstorder | Mean                                | 0.46870181   |
| wavelet-HLH | glrlm      | ShortRunLowGrayLevelEmphasis        | 0.007874475  |
| wavelet-HLH | glrlm      | GrayLevelVariance                   | 22.33702764  |
| wavelet-HLH | glrlm      | LowGrayLevelRunEmphasis             | 0.007979497  |
| wavelet-HLH | glrlm      | GrayLevelNonUniformityNormalized    | 0.063350749  |
| wavelet-HLH | glrlm      | RunVariance                         | 0.047522638  |
| wavelet-HLH | glrlm      | GrayLevelNonUniformity              | 14.89370429  |
| wavelet-HLH | glrlm      | LongRunEmphasis                     | 1.143841095  |
| wavelet-HLH | glrlm      | ShortRunHighGrayLevelEmphasis       | 352.8351781  |
| wavelet-HLH | glrlm      | RunLengthNonUniformity              | 215.1036728  |
| wavelet-HLH | glrlm      | ShortRunEmphasis                    | 0.965861383  |
| wavelet-HLH | glrlm      | LongRunHighGrayLevelEmphasis        | 416.9751647  |
| wavelet-HLH | glrlm      | RunPercentage                       | 0.955597248  |
| wavelet-HLH | glrlm      | LongRunLowGrayLevelEmphasis         | 0.008421458  |



|             |       |                                  |             |
|-------------|-------|----------------------------------|-------------|
| wavelet-HLH | glrlm | RunEntropy                       | 4.423371498 |
| wavelet-HLH | glrlm | HighGrayLevelRunEmphasis         | 365.0943191 |
| wavelet-HLH | glrlm | RunLengthNonUniformityNormalized | 0.914346165 |
| wavelet-HLH | glszm | GrayLevelVariance                | 32.10198428 |
| wavelet-HLH | glszm | ZoneVariance                     | 3.315732941 |
| wavelet-HLH | glszm | GrayLevelNonUniformityNormalized | 0.055005936 |
| wavelet-HLH | glszm | SizeZoneNonUniformityNormalized  | 0.487930352 |
| wavelet-HLH | glszm | SizeZoneNonUniformity            | 64.89473684 |
| wavelet-HLH | glszm | GrayLevelNonUniformity           | 7.315789474 |
| wavelet-HLH | glszm | LargeAreaEmphasis                | 6.736842105 |
| wavelet-HLH | glszm | SmallAreaHighGrayLevelEmphasis   | 270.5491004 |
| wavelet-HLH | glszm | ZonePercentage                   | 0.540650407 |
| wavelet-HLH | glszm | LargeAreaLowGrayLevelEmphasis    | 0.028587251 |
| wavelet-HLH | glszm | LargeAreaHighGrayLevelEmphasis   | 2499.075188 |
| wavelet-HLH | glszm | HighGrayLevelZoneEmphasis        | 366.7443609 |
| wavelet-HLH | glszm | SmallAreaEmphasis                | 0.725845047 |
| wavelet-HLH | glszm | LowGrayLevelZoneEmphasis         | 0.011723356 |
| wavelet-HLH | glszm | ZoneEntropy                      | 5.448051538 |
| wavelet-HLH | glszm | SmallAreaLowGrayLevelEmphasis    | 0.010798895 |
| wavelet-HLH | ngtdm | Coarseness                       | 0.024628652 |
| wavelet-HLH | ngtdm | Complexity                       | 1027.623573 |
| wavelet-HLH | ngtdm | Strength                         | 5.256183841 |
| wavelet-HLH | ngtdm | Contrast                         | 0.227908039 |
| wavelet-HLH | ngtdm | Busyness                         | 0.082783834 |

|            |               |                                      |                                                                                                                                                                                                                                                                                                                                                                                                                   |
|------------|---------------|--------------------------------------|-------------------------------------------------------------------------------------------------------------------------------------------------------------------------------------------------------------------------------------------------------------------------------------------------------------------------------------------------------------------------------------------------------------------|
| Image type | Feature Class | Feature Name                         | 10: RTSTRUCT: C99-DNU_A_segment_RLL ITV                                                                                                                                                                                                                                                                                                                                                                           |
| general    | info          | BoundingBox                          | (0, 0, 1, 15, 11, 22)                                                                                                                                                                                                                                                                                                                                                                                             |
| general    | info          | EnabledImageTypes                    | {u'Original': {}, u'Wavelet': {}}                                                                                                                                                                                                                                                                                                                                                                                 |
|            |               |                                      | {'distances': [1], 'additionalInfo': True, 'force2D': False, 'interpolator': 'sitkBSpline', 'resampledPixelSpacing': [3.0], 'label': 1, 'normalizeScale': 1, 'normalize': False, 'force2Ddimension': 0, 'removeOutliers': None, 'minimumROISize': None, u'binWidth': 25.0, 'minimumROIDimensions': 1, u'correctMask': True, 'preCrop': False, u'symmetricalGLCM': True, 'resegmentRange': None, 'padDistance': 5} |
| general    | info          | GeneralSettings                      |                                                                                                                                                                                                                                                                                                                                                                                                                   |
| general    | info          | ImageHash                            | 9df7db8e457111e0846140ecb278b32f347baf64 (0.9765624999999998, 0.9765624999999998, 1.9999999999999999)                                                                                                                                                                                                                                                                                                             |
| general    | info          | ImageSpacing                         |                                                                                                                                                                                                                                                                                                                                                                                                                   |
| general    | info          | MaskHash                             | 03fd66bbba2552a8c440fa28b84ecad4c6865104                                                                                                                                                                                                                                                                                                                                                                          |
| general    | info          | NumpyVersion                         | 1.13.1                                                                                                                                                                                                                                                                                                                                                                                                            |
| general    | info          | PyWaveletVersion                     | 0.5.2                                                                                                                                                                                                                                                                                                                                                                                                             |
| general    | info          | SimpleITKVersion                     | 1.1.0                                                                                                                                                                                                                                                                                                                                                                                                             |
| general    | info          | Version                              | 1.3.0.post102+g1b0eb74                                                                                                                                                                                                                                                                                                                                                                                            |
| general    | info          | VolumeNum                            | 1                                                                                                                                                                                                                                                                                                                                                                                                                 |
| general    | info          | VoxelNum                             | 920                                                                                                                                                                                                                                                                                                                                                                                                               |
| original   | shape         | Maximum3DDiameter                    | 64.76109943                                                                                                                                                                                                                                                                                                                                                                                                       |
| original   | shape         | Maximum2DDiameterSlice               | 34.20526275                                                                                                                                                                                                                                                                                                                                                                                                       |
| original   | shape         | Sphericity                           | 0.691083749                                                                                                                                                                                                                                                                                                                                                                                                       |
| original   | shape         | MinorAxis                            | 27.47832253                                                                                                                                                                                                                                                                                                                                                                                                       |
| original   | shape         | Elongation                           | 0.461397076                                                                                                                                                                                                                                                                                                                                                                                                       |
| original   | shape         | SurfaceVolumeRatio                   | 0.239829672                                                                                                                                                                                                                                                                                                                                                                                                       |
| original   | shape         | Volume                               | 24840                                                                                                                                                                                                                                                                                                                                                                                                             |
| original   | shape         | MajorAxis                            | 59.5546091                                                                                                                                                                                                                                                                                                                                                                                                        |
| original   | shape         | SurfaceArea                          | 5957.369054                                                                                                                                                                                                                                                                                                                                                                                                       |
| original   | shape         | Flatness                             | 0.38589669                                                                                                                                                                                                                                                                                                                                                                                                        |
| original   | shape         | LeastAxis                            | 22.98192651                                                                                                                                                                                                                                                                                                                                                                                                       |
| original   | shape         | Maximum2DDiameterColumn              | 63.63961031                                                                                                                                                                                                                                                                                                                                                                                                       |
| original   | shape         | Maximum2DDiameterRow                 | 63.63961031                                                                                                                                                                                                                                                                                                                                                                                                       |
| original   | gldm          | GrayLevelVariance                    | 95.82043478                                                                                                                                                                                                                                                                                                                                                                                                       |
| original   | gldm          | HighGrayLevelEmphasis                | 803.3804348                                                                                                                                                                                                                                                                                                                                                                                                       |
| original   | gldm          | DependenceEntropy                    | 6.87201432                                                                                                                                                                                                                                                                                                                                                                                                        |
| original   | gldm          | DependenceNonUniformity              | 226.9152174                                                                                                                                                                                                                                                                                                                                                                                                       |
| original   | gldm          | GrayLevelNonUniformity               | 34.22391304                                                                                                                                                                                                                                                                                                                                                                                                       |
| original   | gldm          | SmallDependenceEmphasis              | 0.482231472                                                                                                                                                                                                                                                                                                                                                                                                       |
| original   | gldm          | SmallDependenceHighGrayLevelEmphasis | 294.4264197                                                                                                                                                                                                                                                                                                                                                                                                       |
| original   | gldm          | DependenceNonUniformityNormalized    | 0.246646975                                                                                                                                                                                                                                                                                                                                                                                                       |
| original   | gldm          | LargeDependenceEmphasis              | 12.30869565                                                                                                                                                                                                                                                                                                                                                                                                       |
| original   | gldm          | LargeDependenceLowGrayLevelEmphasis  | 0.016624134                                                                                                                                                                                                                                                                                                                                                                                                       |
| original   | gldm          | DependenceVariance                   | 5.3436862                                                                                                                                                                                                                                                                                                                                                                                                         |
| original   | gldm          | LargeDependenceHighGrayLevelEmphasis | 14895.40652                                                                                                                                                                                                                                                                                                                                                                                                       |
| original   | gldm          | SmallDependenceLowGrayLevelEmphasis  | 0.004021833                                                                                                                                                                                                                                                                                                                                                                                                       |
| original   | gldm          | LowGrayLevelEmphasis                 | 0.004948169                                                                                                                                                                                                                                                                                                                                                                                                       |
| original   | glcm          | JointAverage                         | 28.5767954                                                                                                                                                                                                                                                                                                                                                                                                        |
| original   | glcm          | SumAverage                           | 57.1535908                                                                                                                                                                                                                                                                                                                                                                                                        |
| original   | glcm          | JointEntropy                         | 8.730978441                                                                                                                                                                                                                                                                                                                                                                                                       |
| original   | glcm          | ClusterShade                         | -2678.623426                                                                                                                                                                                                                                                                                                                                                                                                      |
| original   | glcm          | MaximumProbability                   | 0.027630217                                                                                                                                                                                                                                                                                                                                                                                                       |
| original   | glcm          | Idmn                                 | 0.959063878                                                                                                                                                                                                                                                                                                                                                                                                       |

|          |            |                                  |              |
|----------|------------|----------------------------------|--------------|
| original | glcm       | JointEnergy                      | 0.004142685  |
| original | glcm       | Contrast                         | 84.78133046  |
| original | glcm       | DifferenceEntropy                | 4.203907986  |
| original | glcm       | InverseVariance                  | 0.181046833  |
| original | glcm       | DifferenceVariance               | 39.06726783  |
| original | glcm       | Idn                              | 0.875329353  |
| original | glcm       | Idm                              | 0.189844212  |
| original | glcm       | Correlation                      | 0.475195815  |
| original | glcm       | Autocorrelation                  | 855.1323825  |
| original | glcm       | SumEntropy                       | 5.639842597  |
| original | glcm       | SumSquares                       | 80.82448828  |
| original | glcm       | ClusterProminence                | 148577.4847  |
| original | glcm       | Imc2                             | 0.90785477   |
| original | glcm       | Imc1                             | -0.182499743 |
| original | glcm       | DifferenceAverage                | 6.697778701  |
| original | glcm       | Id                               | 0.271504626  |
| original | glcm       | ClusterTendency                  | 238.5166227  |
| original | firstorder | InterquartileRange               | 412          |
| original | firstorder | Skewness                         | -0.559304258 |
| original | firstorder | Uniformity                       | 0.037199905  |
| original | firstorder | Median                           | -177.5       |
| original | firstorder | Energy                           | 111596114    |
| original | firstorder | RobustMeanAbsoluteDeviation      | 167.3727793  |
| original | firstorder | MeanAbsoluteDeviation            | 211.2015123  |
| original | firstorder | TotalEnergy                      | 3013095078   |
| original | firstorder | Maximum                          | 131          |
| original | firstorder | RootMeanSquared                  | 348.2816732  |
| original | firstorder | 90Percentile                     | 23           |
| original | firstorder | Minimum                          | -881         |
| original | firstorder | Entropy                          | 5.002955522  |
| original | firstorder | Range                            | 1012         |
| original | firstorder | Variance                         | 59882.35454  |
| original | firstorder | 10Percentile                     | -614         |
| original | firstorder | Kurtosis                         | 2.129672269  |
| original | firstorder | Mean                             | -247.826087  |
| original | glrlm      | ShortRunLowGrayLevelEmphasis     | 0.005132912  |
| original | glrlm      | GrayLevelVariance                | 96.00554507  |
| original | glrlm      | LowGrayLevelRunEmphasis          | 0.005194202  |
| original | glrlm      | GrayLevelNonUniformityNormalized | 0.034732283  |
| original | glrlm      | RunVariance                      | 0.08033023   |
| original | glrlm      | GrayLevelNonUniformity           | 29.94339017  |
| original | glrlm      | LongRunEmphasis                  | 1.22018529   |
| original | glrlm      | ShortRunHighGrayLevelEmphasis    | 728.9322308  |
| original | glrlm      | RunLengthNonUniformity           | 765.316242   |
| original | glrlm      | ShortRunEmphasis                 | 0.954322133  |
| original | glrlm      | LongRunHighGrayLevelEmphasis     | 1035.375166  |
| original | glrlm      | RunPercentage                    | 0.936956522  |
| original | glrlm      | LongRunLowGrayLevelEmphasis      | 0.005475038  |
| original | glrlm      | RunEntropy                       | 5.327531908  |
| original | glrlm      | HighGrayLevelRunEmphasis         | 780.3601268  |
| original | glrlm      | RunLengthNonUniformityNormalized | 0.887520175  |
| original | glszm      | GrayLevelVariance                | 93.97258975  |
| original | glszm      | ZoneVariance                     | 18.08498771  |
| original | glszm      | GrayLevelNonUniformityNormalized | 0.029748885  |
| original | glszm      | SizeZoneNonUniformityNormalized  | 0.5582169    |
| original | glszm      | SizeZoneNonUniformity            | 279.6666667  |

|             |            |                                      |              |
|-------------|------------|--------------------------------------|--------------|
| original    | glszm      | GrayLevelNonUniformity               | 14.90419162  |
| original    | glszm      | LargeAreaEmphasis                    | 21.45708583  |
| original    | glszm      | SmallAreaHighGrayLevelEmphasis       | 446.88014    |
| original    | glszm      | ZonePercentage                       | 0.544565217  |
| original    | glszm      | LargeAreaLowGrayLevelEmphasis        | 0.025819572  |
| original    | glszm      | LargeAreaHighGrayLevelEmphasis       | 27387.45709  |
| original    | glszm      | HighGrayLevelZoneEmphasis            | 619.5808383  |
| original    | glszm      | SmallAreaEmphasis                    | 0.775036026  |
| original    | glszm      | LowGrayLevelZoneEmphasis             | 0.007705264  |
| original    | glszm      | ZoneEntropy                          | 6.266962331  |
| original    | glszm      | SmallAreaLowGrayLevelEmphasis        | 0.007139659  |
| original    | ngtdm      | Coarseness                           | 0.007235587  |
| original    | ngtdm      | Complexity                           | 3287.276738  |
| original    | ngtdm      | Strength                             | 5.104570639  |
| original    | ngtdm      | Contrast                             | 0.534971955  |
| original    | ngtdm      | Busyness                             | 0.112825451  |
| wavelet-HHH | gldm       | GrayLevelVariance                    | 6.504234405  |
| wavelet-HHH | gldm       | HighGrayLevelEmphasis                | 95.84782609  |
| wavelet-HHH | gldm       | DependenceEntropy                    | 5.816736657  |
| wavelet-HHH | gldm       | DependenceNonUniformity              | 147.4086957  |
| wavelet-HHH | gldm       | GrayLevelNonUniformity               | 106.5586957  |
| wavelet-HHH | gldm       | SmallDependenceEmphasis              | 0.263217046  |
| wavelet-HHH | gldm       | SmallDependenceHighGrayLevelEmphasis | 26.20341082  |
| wavelet-HHH | gldm       | DependenceNonUniformityNormalized    | 0.160226843  |
| wavelet-HHH | gldm       | LargeDependenceEmphasis              | 15.85434783  |
| wavelet-HHH | gldm       | LargeDependenceLowGrayLevelEmphasis  | 0.195252694  |
| wavelet-HHH | gldm       | DependenceVariance                   | 4.116275992  |
| wavelet-HHH | gldm       | LargeDependenceHighGrayLevelEmphasis | 1490.947826  |
| wavelet-HHH | gldm       | SmallDependenceLowGrayLevelEmphasis  | 0.009658256  |
| wavelet-HHH | gldm       | LowGrayLevelEmphasis                 | 0.019426141  |
| wavelet-HHH | glcm       | JointAverage                         | 9.452553846  |
| wavelet-HHH | glcm       | SumAverage                           | 18.90510769  |
| wavelet-HHH | glcm       | JointEntropy                         | 6.535889856  |
| wavelet-HHH | glcm       | ClusterShade                         | -4.535269831 |
| wavelet-HHH | glcm       | MaximumProbability                   | 0.038214511  |
| wavelet-HHH | glcm       | ldmn                                 | 0.960459907  |
| wavelet-HHH | glcm       | JointEnergy                          | 0.015675359  |
| wavelet-HHH | glcm       | Contrast                             | 13.13585066  |
| wavelet-HHH | glcm       | DifferenceEntropy                    | 2.987513958  |
| wavelet-HHH | glcm       | InverseVariance                      | 0.315243539  |
| wavelet-HHH | glcm       | DifferenceVariance                   | 5.335838255  |
| wavelet-HHH | glcm       | ldn                                  | 0.870542554  |
| wavelet-HHH | glcm       | ldm                                  | 0.305869415  |
| wavelet-HHH | glcm       | Correlation                          | -0.030964587 |
| wavelet-HHH | glcm       | Autocorrelation                      | 89.15238806  |
| wavelet-HHH | glcm       | SumEntropy                           | 3.796546753  |
| wavelet-HHH | glcm       | SumSquares                           | 6.369119801  |
| wavelet-HHH | glcm       | ClusterProminence                    | 566.0896245  |
| wavelet-HHH | glcm       | lmc2                                 | 0.53262948   |
| wavelet-HHH | glcm       | lmc1                                 | -0.051993781 |
| wavelet-HHH | glcm       | DifferenceAverage                    | 2.773640631  |
| wavelet-HHH | glcm       | ld                                   | 0.389980973  |
| wavelet-HHH | glcm       | ClusterTendency                      | 12.34062854  |
| wavelet-HHH | firstorder | InterquartileRange                   | 79.38416426  |
| wavelet-HHH | firstorder | Skewness                             | -0.128574549 |
| wavelet-HHH | firstorder | Uniformity                           | 0.115824669  |

|             |            |                                  |              |
|-------------|------------|----------------------------------|--------------|
| wavelet-HHH | firstorder | Median                           | 0.731193741  |
| wavelet-HHH | firstorder | Energy                           | 3694074.199  |
| wavelet-HHH | firstorder | RobustMeanAbsoluteDeviation      | 33.45759127  |
| wavelet-HHH | firstorder | MeanAbsoluteDeviation            | 49.32032869  |
| wavelet-HHH | firstorder | TotalEnergy                      | 99740003.37  |
| wavelet-HHH | firstorder | Maximum                          | 199.8433583  |
| wavelet-HHH | firstorder | RootMeanSquared                  | 63.36637943  |
| wavelet-HHH | firstorder | 90Percentile                     | 73.62391535  |
| wavelet-HHH | firstorder | Minimum                          | -219.6689477 |
| wavelet-HHH | firstorder | Entropy                          | 3.371715106  |
| wavelet-HHH | firstorder | Range                            | 419.5123059  |
| wavelet-HHH | firstorder | Variance                         | 4014.313877  |
| wavelet-HHH | firstorder | 10Percentile                     | -80.04750059 |
| wavelet-HHH | firstorder | Kurtosis                         | 3.475864882  |
| wavelet-HHH | firstorder | Mean                             | -0.992051117 |
| wavelet-HHH | grlm       | ShortRunLowGrayLevelEmphasis     | 0.019291229  |
| wavelet-HHH | grlm       | GrayLevelVariance                | 6.891682567  |
| wavelet-HHH | grlm       | LowGrayLevelRunEmphasis          | 0.020160953  |
| wavelet-HHH | grlm       | GrayLevelNonUniformityNormalized | 0.111215007  |
| wavelet-HHH | grlm       | RunVariance                      | 0.116522451  |
| wavelet-HHH | grlm       | GrayLevelNonUniformity           | 92.77119157  |
| wavelet-HHH | grlm       | LongRunEmphasis                  | 1.333915693  |
| wavelet-HHH | grlm       | ShortRunHighGrayLevelEmphasis    | 89.35716226  |
| wavelet-HHH | grlm       | RunLengthNonUniformity           | 693.8352904  |
| wavelet-HHH | grlm       | ShortRunEmphasis                 | 0.929437902  |
| wavelet-HHH | grlm       | LongRunHighGrayLevelEmphasis     | 127.3704387  |
| wavelet-HHH | grlm       | RunPercentage                    | 0.906688963  |
| wavelet-HHH | grlm       | LongRunLowGrayLevelEmphasis      | 0.02426708   |
| wavelet-HHH | grlm       | RunEntropy                       | 3.865481345  |
| wavelet-HHH | grlm       | HighGrayLevelRunEmphasis         | 96.0227813   |
| wavelet-HHH | grlm       | RunLengthNonUniformityNormalized | 0.831392773  |
| wavelet-HHH | glszm      | GrayLevelVariance                | 14.164496    |
| wavelet-HHH | glszm      | ZoneVariance                     | 174.8656     |
| wavelet-HHH | glszm      | GrayLevelNonUniformityNormalized | 0.081184     |
| wavelet-HHH | glszm      | SizeZoneNonUniformityNormalized  | 0.422336     |
| wavelet-HHH | glszm      | SizeZoneNonUniformity            | 105.584      |
| wavelet-HHH | glszm      | GrayLevelNonUniformity           | 20.296       |
| wavelet-HHH | glszm      | LargeAreaEmphasis                | 188.408      |
| wavelet-HHH | glszm      | SmallAreaHighGrayLevelEmphasis   | 68.51384735  |
| wavelet-HHH | glszm      | ZonePercentage                   | 0.27173913   |
| wavelet-HHH | glszm      | LargeAreaLowGrayLevelEmphasis    | 2.099782107  |
| wavelet-HHH | glszm      | LargeAreaHighGrayLevelEmphasis   | 17858.256    |
| wavelet-HHH | glszm      | HighGrayLevelZoneEmphasis        | 99.764       |
| wavelet-HHH | glszm      | SmallAreaEmphasis                | 0.675630981  |
| wavelet-HHH | glszm      | LowGrayLevelZoneEmphasis         | 0.036837621  |
| wavelet-HHH | glszm      | ZoneEntropy                      | 5.406904145  |
| wavelet-HHH | glszm      | SmallAreaLowGrayLevelEmphasis    | 0.031357062  |
| wavelet-HHH | ngtdm      | Coarseness                       | 0.006674211  |
| wavelet-HHH | ngtdm      | Complexity                       | 234.1078741  |
| wavelet-HHH | ngtdm      | Strength                         | 0.543103294  |
| wavelet-HHH | ngtdm      | Contrast                         | 0.099937228  |
| wavelet-HHH | ngtdm      | Busyness                         | 0.83410387   |
| wavelet-HLL | gldm       | GrayLevelVariance                | 27.92343573  |
| wavelet-HLL | gldm       | HighGrayLevelEmphasis            | 258.7652174  |
| wavelet-HLL | gldm       | DependenceEntropy                | 6.511366293  |
| wavelet-HLL | gldm       | DependenceNonUniformity          | 182.6695652  |

|             |            |                                      |              |
|-------------|------------|--------------------------------------|--------------|
| wavelet-HLL | gldm       | GrayLevelNonUniformity               | 58.25652174  |
| wavelet-HLL | gldm       | SmallDependenceEmphasis              | 0.353541213  |
| wavelet-HLL | gldm       | SmallDependenceHighGrayLevelEmphasis | 106.699598   |
| wavelet-HLL | gldm       | DependenceNonUniformityNormalized    | 0.198553875  |
| wavelet-HLL | gldm       | LargeDependenceEmphasis              | 10.75        |
| wavelet-HLL | gldm       | LargeDependenceLowGrayLevelEmphasis  | 0.061822205  |
| wavelet-HLL | gldm       | DependenceVariance                   | 2.849012287  |
| wavelet-HLL | gldm       | LargeDependenceHighGrayLevelEmphasis | 2475.119565  |
| wavelet-HLL | gldm       | SmallDependenceLowGrayLevelEmphasis  | 0.006146044  |
| wavelet-HLL | gldm       | LowGrayLevelEmphasis                 | 0.009879086  |
| wavelet-HLL | glcm       | JointAverage                         | 14.98740832  |
| wavelet-HLL | glcm       | SumAverage                           | 29.97481664  |
| wavelet-HLL | glcm       | JointEntropy                         | 7.868453973  |
| wavelet-HLL | glcm       | ClusterShade                         | 464.6456661  |
| wavelet-HLL | glcm       | MaximumProbability                   | 0.01800281   |
| wavelet-HLL | glcm       | Idmn                                 | 0.987365864  |
| wavelet-HLL | glcm       | JointEnergy                          | 0.006016081  |
| wavelet-HLL | glcm       | Contrast                             | 32.28020231  |
| wavelet-HLL | glcm       | DifferenceEntropy                    | 3.521204641  |
| wavelet-HLL | glcm       | InverseVariance                      | 0.237629603  |
| wavelet-HLL | glcm       | DifferenceVariance                   | 14.10310072  |
| wavelet-HLL | glcm       | Idn                                  | 0.925633868  |
| wavelet-HLL | glcm       | Idm                                  | 0.23255259   |
| wavelet-HLL | glcm       | Correlation                          | 0.285949909  |
| wavelet-HLL | glcm       | Autocorrelation                      | 231.2532948  |
| wavelet-HLL | glcm       | SumEntropy                           | 4.79166585   |
| wavelet-HLL | glcm       | SumSquares                           | 22.76524495  |
| wavelet-HLL | glcm       | ClusterProminence                    | 32613.38291  |
| wavelet-HLL | glcm       | Imc2                                 | 0.788566907  |
| wavelet-HLL | glcm       | Imc1                                 | -0.12024789  |
| wavelet-HLL | glcm       | DifferenceAverage                    | 4.185472548  |
| wavelet-HLL | glcm       | Id                                   | 0.322286406  |
| wavelet-HLL | glcm       | ClusterTendency                      | 58.78077749  |
| wavelet-HLL | firstorder | InterquartileRange                   | 143.6394216  |
| wavelet-HLL | firstorder | Skewness                             | 1.183822141  |
| wavelet-HLL | firstorder | Uniformity                           | 0.063322306  |
| wavelet-HLL | firstorder | Median                               | -13.10934512 |
| wavelet-HLL | firstorder | Energy                               | 16082781.18  |
| wavelet-HLL | firstorder | RobustMeanAbsoluteDeviation          | 61.02669378  |
| wavelet-HLL | firstorder | MeanAbsoluteDeviation                | 95.0262847   |
| wavelet-HLL | firstorder | TotalEnergy                          | 434235091.9  |
| wavelet-HLL | firstorder | Maximum                              | 846.2649734  |
| wavelet-HLL | firstorder | RootMeanSquared                      | 132.2168064  |
| wavelet-HLL | firstorder | 90Percentile                         | 137.1076772  |
| wavelet-HLL | firstorder | Minimum                              | -369.0357707 |
| wavelet-HLL | firstorder | Entropy                              | 4.291067537  |
| wavelet-HLL | firstorder | Range                                | 1215.300744  |
| wavelet-HLL | firstorder | Variance                             | 17415.45531  |
| wavelet-HLL | firstorder | 10Percentile                         | -155.9974681 |
| wavelet-HLL | firstorder | Kurtosis                             | 9.009557312  |
| wavelet-HLL | firstorder | Mean                                 | -8.113481486 |
| wavelet-HLL | glrlm      | ShortRunLowGrayLevelEmphasis         | 0.009921081  |
| wavelet-HLL | glrlm      | GrayLevelVariance                    | 29.2069812   |
| wavelet-HLL | glrlm      | LowGrayLevelRunEmphasis              | 0.010209747  |
| wavelet-HLL | glrlm      | GrayLevelNonUniformityNormalized     | 0.061572222  |
| wavelet-HLL | glrlm      | RunVariance                          | 0.084080196  |

|             |       |                                      |             |
|-------------|-------|--------------------------------------|-------------|
| wavelet-HLL | glrlm | GrayLevelNonUniformity               | 52.70062694 |
| wavelet-HLL | glrlm | LongRunEmphasis                      | 1.240707597 |
| wavelet-HLL | glrlm | ShortRunHighGrayLevelEmphasis        | 248.749304  |
| wavelet-HLL | glrlm | RunLengthNonUniformity               | 746.4604227 |
| wavelet-HLL | glrlm | ShortRunEmphasis                     | 0.947517073 |
| wavelet-HLL | glrlm | LongRunHighGrayLevelEmphasis         | 316.1585941 |
| wavelet-HLL | glrlm | RunPercentage                        | 0.930351171 |
| wavelet-HLL | glrlm | LongRunLowGrayLevelEmphasis          | 0.011526504 |
| wavelet-HLL | glrlm | RunEntropy                           | 4.670196104 |
| wavelet-HLL | glrlm | HighGrayLevelRunEmphasis             | 260.8955029 |
| wavelet-HLL | glrlm | RunLengthNonUniformityNormalized     | 0.87153174  |
| wavelet-HLL | glszm | GrayLevelVariance                    | 50.30508351 |
| wavelet-HLL | glszm | ZoneVariance                         | 22.260373   |
| wavelet-HLL | glszm | GrayLevelNonUniformityNormalized     | 0.045938347 |
| wavelet-HLL | glszm | SizeZoneNonUniformityNormalized      | 0.426130295 |
| wavelet-HLL | glszm | SizeZoneNonUniformity                | 158.0943396 |
| wavelet-HLL | glszm | GrayLevelNonUniformity               | 17.04312668 |
| wavelet-HLL | glszm | LargeAreaEmphasis                    | 28.4097035  |
| wavelet-HLL | glszm | SmallAreaHighGrayLevelEmphasis       | 217.408023  |
| wavelet-HLL | glszm | ZonePercentage                       | 0.40326087  |
| wavelet-HLL | glszm | LargeAreaLowGrayLevelEmphasis        | 0.153194032 |
| wavelet-HLL | glszm | LargeAreaHighGrayLevelEmphasis       | 6408.857143 |
| wavelet-HLL | glszm | HighGrayLevelZoneEmphasis            | 296.0592992 |
| wavelet-HLL | glszm | SmallAreaEmphasis                    | 0.678587216 |
| wavelet-HLL | glszm | LowGrayLevelZoneEmphasis             | 0.01618204  |
| wavelet-HLL | glszm | ZoneEntropy                          | 6.199862618 |
| wavelet-HLL | glszm | SmallAreaLowGrayLevelEmphasis        | 0.014052574 |
| wavelet-HLL | ngtdm | Coarseness                           | 0.008351353 |
| wavelet-HLL | ngtdm | Complexity                           | 2094.194698 |
| wavelet-HLL | ngtdm | Strength                             | 6.544929816 |
| wavelet-HLL | ngtdm | Contrast                             | 0.117121234 |
| wavelet-HLL | ngtdm | Busyness                             | 0.169732442 |
| wavelet-LHL | gldm  | GrayLevelVariance                    | 78.90726725 |
| wavelet-LHL | gldm  | HighGrayLevelEmphasis                | 1361.870652 |
| wavelet-LHL | gldm  | DependenceEntropy                    | 6.676054401 |
| wavelet-LHL | gldm  | DependenceNonUniformity              | 308.7173913 |
| wavelet-LHL | gldm  | GrayLevelNonUniformity               | 32.52826087 |
| wavelet-LHL | gldm  | SmallDependenceEmphasis              | 0.576054518 |
| wavelet-LHL | gldm  | SmallDependenceHighGrayLevelEmphasis | 819.3721607 |
| wavelet-LHL | gldm  | DependenceNonUniformityNormalized    | 0.335562382 |
| wavelet-LHL | gldm  | LargeDependenceEmphasis              | 5.763043478 |
| wavelet-LHL | gldm  | LargeDependenceLowGrayLevelEmphasis  | 0.006189666 |
| wavelet-LHL | gldm  | DependenceVariance                   | 1.87528828  |
| wavelet-LHL | gldm  | LargeDependenceHighGrayLevelEmphasis | 7334.577174 |
| wavelet-LHL | gldm  | SmallDependenceLowGrayLevelEmphasis  | 0.001681025 |
| wavelet-LHL | gldm  | LowGrayLevelEmphasis                 | 0.002070864 |
| wavelet-LHL | glcm  | JointAverage                         | 35.28872202 |
| wavelet-LHL | glcm  | SumAverage                           | 70.57744405 |
| wavelet-LHL | glcm  | JointEntropy                         | 9.077914758 |
| wavelet-LHL | glcm  | ClusterShade                         | 1000.708891 |
| wavelet-LHL | glcm  | MaximumProbability                   | 0.011094845 |
| wavelet-LHL | glcm  | ldmn                                 | 0.972760387 |
| wavelet-LHL | glcm  | JointEnergy                          | 0.002485717 |
| wavelet-LHL | glcm  | Contrast                             | 121.1164335 |
| wavelet-LHL | glcm  | DifferenceEntropy                    | 4.38804888  |
| wavelet-LHL | glcm  | InverseVariance                      | 0.138027749 |

|             |            |                                  |              |
|-------------|------------|----------------------------------|--------------|
| wavelet-LHL | glcm       | DifferenceVariance               | 50.16183052  |
| wavelet-LHL | glcm       | Idn                              | 0.893873711  |
| wavelet-LHL | glcm       | Idm                              | 0.134191987  |
| wavelet-LHL | glcm       | Correlation                      | 0.146603872  |
| wavelet-LHL | glcm       | Autocorrelation                  | 1256.771025  |
| wavelet-LHL | glcm       | SumEntropy                       | 5.546084066  |
| wavelet-LHL | glcm       | SumSquares                       | 72.01782726  |
| wavelet-LHL | glcm       | ClusterProminence                | 114476.961   |
| wavelet-LHL | glcm       | Imc2                             | 0.92937798   |
| wavelet-LHL | glcm       | Imc1                             | -0.201305326 |
| wavelet-LHL | glcm       | DifferenceAverage                | 8.154899691  |
| wavelet-LHL | glcm       | Id                               | 0.219798846  |
| wavelet-LHL | glcm       | ClusterTendency                  | 166.9548755  |
| wavelet-LHL | firstorder | InterquartileRange               | 275.1244349  |
| wavelet-LHL | firstorder | Skewness                         | 0.230021759  |
| wavelet-LHL | firstorder | Uniformity                       | 0.035356805  |
| wavelet-LHL | firstorder | Median                           | -57.1870843  |
| wavelet-LHL | firstorder | Energy                           | 46985772.99  |
| wavelet-LHL | firstorder | RobustMeanAbsoluteDeviation      | 113.3062154  |
| wavelet-LHL | firstorder | MeanAbsoluteDeviation            | 171.1603322  |
| wavelet-LHL | firstorder | TotalEnergy                      | 1268615871   |
| wavelet-LHL | firstorder | Maximum                          | 642.7939111  |
| wavelet-LHL | firstorder | RootMeanSquared                  | 225.9900272  |
| wavelet-LHL | firstorder | 90Percentile                     | 268.300531   |
| wavelet-LHL | firstorder | Minimum                          | -912.9733115 |
| wavelet-LHL | firstorder | Entropy                          | 5.121926416  |
| wavelet-LHL | firstorder | Range                            | 1555.767223  |
| wavelet-LHL | firstorder | Variance                         | 49285.31283  |
| wavelet-LHL | firstorder | 10Percentile                     | -310.2283764 |
| wavelet-LHL | firstorder | Kurtosis                         | 3.382032976  |
| wavelet-LHL | firstorder | Mean                             | -42.26321744 |
| wavelet-LHL | glrlm      | ShortRunLowGrayLevelEmphasis     | 0.002092009  |
| wavelet-LHL | glrlm      | GrayLevelVariance                | 80.65677925  |
| wavelet-LHL | glrlm      | LowGrayLevelRunEmphasis          | 0.002116919  |
| wavelet-LHL | glrlm      | GrayLevelNonUniformityNormalized | 0.034387728  |
| wavelet-LHL | glrlm      | RunVariance                      | 0.042221823  |
| wavelet-LHL | glrlm      | GrayLevelNonUniformity           | 30.45684105  |
| wavelet-LHL | glrlm      | LongRunEmphasis                  | 1.121946469  |
| wavelet-LHL | glrlm      | ShortRunHighGrayLevelEmphasis    | 1330.757849  |
| wavelet-LHL | glrlm      | RunLengthNonUniformity           | 823.1737045  |
| wavelet-LHL | glrlm      | ShortRunEmphasis                 | 0.972105535  |
| wavelet-LHL | glrlm      | LongRunHighGrayLevelEmphasis     | 1519.199931  |
| wavelet-LHL | glrlm      | RunPercentage                    | 0.962625418  |
| wavelet-LHL | glrlm      | LongRunLowGrayLevelEmphasis      | 0.002225175  |
| wavelet-LHL | glrlm      | RunEntropy                       | 5.335616071  |
| wavelet-LHL | glrlm      | HighGrayLevelRunEmphasis         | 1365.906212  |
| wavelet-LHL | glrlm      | RunLengthNonUniformityNormalized | 0.92920463   |
| wavelet-LHL | glszm      | GrayLevelVariance                | 99.2082697   |
| wavelet-LHL | glszm      | ZoneVariance                     | 4.194803091  |
| wavelet-LHL | glszm      | GrayLevelNonUniformityNormalized | 0.029171873  |
| wavelet-LHL | glszm      | SizeZoneNonUniformityNormalized  | 0.602700264  |
| wavelet-LHL | glszm      | SizeZoneNonUniformity            | 354.3877551  |
| wavelet-LHL | glszm      | GrayLevelNonUniformity           | 17.15306122  |
| wavelet-LHL | glszm      | LargeAreaEmphasis                | 6.642857143  |
| wavelet-LHL | glszm      | SmallAreaHighGrayLevelEmphasis   | 1155.524585  |
| wavelet-LHL | glszm      | ZonePercentage                   | 0.639130435  |



|             |            |                                      |              |
|-------------|------------|--------------------------------------|--------------|
| wavelet-LHL | glszm      | LargeAreaLowGrayLevelEmphasis        | 0.007550064  |
| wavelet-LHL | glszm      | LargeAreaHighGrayLevelEmphasis       | 8406.04932   |
| wavelet-LHL | glszm      | HighGrayLevelZoneEmphasis            | 1414.87415   |
| wavelet-LHL | glszm      | SmallAreaEmphasis                    | 0.803915775  |
| wavelet-LHL | glszm      | LowGrayLevelZoneEmphasis             | 0.002726736  |
| wavelet-LHL | glszm      | ZoneEntropy                          | 6.267373565  |
| wavelet-LHL | glszm      | SmallAreaLowGrayLevelEmphasis        | 0.002539735  |
| wavelet-LHL | ngtdm      | Coarseness                           | 0.00738215   |
| wavelet-LHL | ngtdm      | Complexity                           | 6358.855082  |
| wavelet-LHL | ngtdm      | Strength                             | 6.009000041  |
| wavelet-LHL | ngtdm      | Contrast                             | 0.362938409  |
| wavelet-LHL | ngtdm      | Busyness                             | 0.074551158  |
| wavelet-LHH | gldm       | GrayLevelVariance                    | 22.7435716   |
| wavelet-LHH | gldm       | HighGrayLevelEmphasis                | 369.8771739  |
| wavelet-LHH | gldm       | DependenceEntropy                    | 6.227217113  |
| wavelet-LHH | gldm       | DependenceNonUniformity              | 223.9        |
| wavelet-LHH | gldm       | GrayLevelNonUniformity               | 59.93043478  |
| wavelet-LHH | gldm       | SmallDependenceEmphasis              | 0.435751473  |
| wavelet-LHH | gldm       | SmallDependenceHighGrayLevelEmphasis | 167.4319834  |
| wavelet-LHH | gldm       | DependenceNonUniformityNormalized    | 0.243369565  |
| wavelet-LHH | gldm       | LargeDependenceEmphasis              | 8.267391304  |
| wavelet-LHH | gldm       | LargeDependenceLowGrayLevelEmphasis  | 0.028005614  |
| wavelet-LHH | gldm       | DependenceVariance                   | 2.402570888  |
| wavelet-LHH | gldm       | LargeDependenceHighGrayLevelEmphasis | 2897.020652  |
| wavelet-LHH | gldm       | SmallDependenceLowGrayLevelEmphasis  | 0.003436705  |
| wavelet-LHH | gldm       | LowGrayLevelEmphasis                 | 0.005280674  |
| wavelet-LHH | glcm       | JointAverage                         | 18.66625324  |
| wavelet-LHH | glcm       | SumAverage                           | 37.33250647  |
| wavelet-LHH | glcm       | JointEntropy                         | 7.959943472  |
| wavelet-LHH | glcm       | ClusterShade                         | 34.75222353  |
| wavelet-LHH | glcm       | MaximumProbability                   | 0.016204317  |
| wavelet-LHH | glcm       | ldmn                                 | 0.974077447  |
| wavelet-LHH | glcm       | JointEnergy                          | 0.00559779   |
| wavelet-LHH | glcm       | Contrast                             | 43.76028565  |
| wavelet-LHH | glcm       | DifferenceEntropy                    | 3.749240818  |
| wavelet-LHH | glcm       | InverseVariance                      | 0.20172195   |
| wavelet-LHH | glcm       | DifferenceVariance                   | 17.9625543   |
| wavelet-LHH | glcm       | ldn                                  | 0.894106279  |
| wavelet-LHH | glcm       | ldm                                  | 0.193836425  |
| wavelet-LHH | glcm       | Correlation                          | -0.004199857 |
| wavelet-LHH | glcm       | Autocorrelation                      | 348.339269   |
| wavelet-LHH | glcm       | SumEntropy                           | 4.656662251  |
| wavelet-LHH | glcm       | SumSquares                           | 21.77702249  |
| wavelet-LHH | glcm       | ClusterProminence                    | 7590.75741   |
| wavelet-LHH | glcm       | lmc2                                 | 0.770719157  |
| wavelet-LHH | glcm       | lmc1                                 | -0.109570118 |
| wavelet-LHH | glcm       | DifferenceAverage                    | 4.997926037  |
| wavelet-LHH | glcm       | ld                                   | 0.28558999   |
| wavelet-LHH | glcm       | ClusterTendency                      | 43.34780432  |
| wavelet-LHH | firstorder | InterquartileRange                   | 145.1341529  |
| wavelet-LHH | firstorder | Skewness                             | 0.118535994  |
| wavelet-LHH | firstorder | Uniformity                           | 0.065141777  |
| wavelet-LHH | firstorder | Median                               | 2.902143198  |
| wavelet-LHH | firstorder | Energy                               | 13084354.19  |
| wavelet-LHH | firstorder | RobustMeanAbsoluteDeviation          | 59.74258216  |
| wavelet-LHH | firstorder | MeanAbsoluteDeviation                | 90.74706419  |

|             |            |                                      |              |
|-------------|------------|--------------------------------------|--------------|
| wavelet-LHH | firstorder | TotalEnergy                          | 353277563.1  |
| wavelet-LHH | firstorder | Maximum                              | 522.8062194  |
| wavelet-LHH | firstorder | RootMeanSquared                      | 119.2565475  |
| wavelet-LHH | firstorder | 90Percentile                         | 153.9655592  |
| wavelet-LHH | firstorder | Minimum                              | -427.3151119 |
| wavelet-LHH | firstorder | Entropy                              | 4.242622243  |
| wavelet-LHH | firstorder | Range                                | 950.1213313  |
| wavelet-LHH | firstorder | Variance                             | 14211.35642  |
| wavelet-LHH | firstorder | 10Percentile                         | -143.139221  |
| wavelet-LHH | firstorder | Kurtosis                             | 4.061644577  |
| wavelet-LHH | firstorder | Mean                                 | 3.281417104  |
| wavelet-LHH | glrlm      | ShortRunLowGrayLevelEmphasis         | 0.005273211  |
| wavelet-LHH | glrlm      | GrayLevelVariance                    | 23.53559861  |
| wavelet-LHH | glrlm      | LowGrayLevelRunEmphasis              | 0.005403249  |
| wavelet-LHH | glrlm      | GrayLevelNonUniformityNormalized     | 0.0635569    |
| wavelet-LHH | glrlm      | RunVariance                          | 0.063748261  |
| wavelet-LHH | glrlm      | GrayLevelNonUniformity               | 55.2768208   |
| wavelet-LHH | glrlm      | LongRunEmphasis                      | 1.183755375  |
| wavelet-LHH | glrlm      | ShortRunHighGrayLevelEmphasis        | 356.4332932  |
| wavelet-LHH | glrlm      | RunLengthNonUniformity               | 781.5976683  |
| wavelet-LHH | glrlm      | ShortRunEmphasis                     | 0.959092229  |
| wavelet-LHH | glrlm      | LongRunHighGrayLevelEmphasis         | 435.6660366  |
| wavelet-LHH | glrlm      | RunPercentage                        | 0.945317726  |
| wavelet-LHH | glrlm      | LongRunLowGrayLevelEmphasis          | 0.005985339  |
| wavelet-LHH | glrlm      | RunEntropy                           | 4.552409283  |
| wavelet-LHH | glrlm      | HighGrayLevelRunEmphasis             | 370.8715773  |
| wavelet-LHH | glrlm      | RunLengthNonUniformityNormalized     | 0.898261372  |
| wavelet-LHH | glszm      | GrayLevelVariance                    | 34.85617778  |
| wavelet-LHH | glszm      | ZoneVariance                         | 12.22469136  |
| wavelet-LHH | glszm      | GrayLevelNonUniformityNormalized     | 0.04988642   |
| wavelet-LHH | glszm      | SizeZoneNonUniformityNormalized      | 0.491940741  |
| wavelet-LHH | glszm      | SizeZoneNonUniformity                | 221.3733333  |
| wavelet-LHH | glszm      | GrayLevelNonUniformity               | 22.44888889  |
| wavelet-LHH | glszm      | LargeAreaEmphasis                    | 16.40444444  |
| wavelet-LHH | glszm      | SmallAreaHighGrayLevelEmphasis       | 284.1333863  |
| wavelet-LHH | glszm      | ZonePercentage                       | 0.489130435  |
| wavelet-LHH | glszm      | LargeAreaLowGrayLevelEmphasis        | 0.054387355  |
| wavelet-LHH | glszm      | LargeAreaHighGrayLevelEmphasis       | 5717.846667  |
| wavelet-LHH | glszm      | HighGrayLevelZoneEmphasis            | 384.7955556  |
| wavelet-LHH | glszm      | SmallAreaEmphasis                    | 0.728932411  |
| wavelet-LHH | glszm      | LowGrayLevelZoneEmphasis             | 0.007421453  |
| wavelet-LHH | glszm      | ZoneEntropy                          | 5.90103013   |
| wavelet-LHH | glszm      | SmallAreaLowGrayLevelEmphasis        | 0.006482823  |
| wavelet-LHH | ngtdm      | Coarseness                           | 0.006959764  |
| wavelet-LHH | ngtdm      | Complexity                           | 1863.678243  |
| wavelet-LHH | ngtdm      | Strength                             | 2.719597277  |
| wavelet-LHH | ngtdm      | Contrast                             | 0.141411908  |
| wavelet-LHH | ngtdm      | Busyness                             | 0.183702154  |
| wavelet-LLH | gldm       | GrayLevelVariance                    | 67.74371928  |
| wavelet-LLH | gldm       | HighGrayLevelEmphasis                | 899.0630435  |
| wavelet-LLH | gldm       | DependenceEntropy                    | 6.735394716  |
| wavelet-LLH | gldm       | DependenceNonUniformity              | 258.8173913  |
| wavelet-LLH | gldm       | GrayLevelNonUniformity               | 35.70869565  |
| wavelet-LLH | gldm       | SmallDependenceEmphasis              | 0.496848411  |
| wavelet-LLH | gldm       | SmallDependenceHighGrayLevelEmphasis | 457.706791   |
| wavelet-LLH | gldm       | DependenceNonUniformityNormalized    | 0.281323251  |

|             |            |                                      |              |
|-------------|------------|--------------------------------------|--------------|
| wavelet-LLH | gldm       | LargeDependenceEmphasis              | 5.986956522  |
| wavelet-LLH | gldm       | LargeDependenceLowGrayLevelEmphasis  | 0.010234747  |
| wavelet-LLH | gldm       | DependenceVariance                   | 1.485179584  |
| wavelet-LLH | gldm       | LargeDependenceHighGrayLevelEmphasis | 5252.652174  |
| wavelet-LLH | gldm       | SmallDependenceLowGrayLevelEmphasis  | 0.002055609  |
| wavelet-LLH | gldm       | LowGrayLevelEmphasis                 | 0.002937961  |
| wavelet-LLH | glcm       | JointAverage                         | 28.36217087  |
| wavelet-LLH | glcm       | SumAverage                           | 56.72434173  |
| wavelet-LLH | glcm       | JointEntropy                         | 8.869886385  |
| wavelet-LLH | glcm       | ClusterShade                         | 641.7873624  |
| wavelet-LLH | glcm       | MaximumProbability                   | 0.010544076  |
| wavelet-LLH | glcm       | ldmn                                 | 0.974434904  |
| wavelet-LLH | glcm       | JointEnergy                          | 0.002917347  |
| wavelet-LLH | glcm       | Contrast                             | 99.47234628  |
| wavelet-LLH | glcm       | DifferenceEntropy                    | 4.202868136  |
| wavelet-LLH | glcm       | InverseVariance                      | 0.167364088  |
| wavelet-LLH | glcm       | DifferenceVariance                   | 46.31173074  |
| wavelet-LLH | glcm       | ldn                                  | 0.900265689  |
| wavelet-LLH | glcm       | ldm                                  | 0.157807429  |
| wavelet-LLH | glcm       | Correlation                          | 0.188212929  |
| wavelet-LLH | glcm       | Autocorrelation                      | 817.3520836  |
| wavelet-LLH | glcm       | SumEntropy                           | 5.482425447  |
| wavelet-LLH | glcm       | SumSquares                           | 62.63424128  |
| wavelet-LLH | glcm       | ClusterProminence                    | 99584.83616  |
| wavelet-LLH | glcm       | lmc2                                 | 0.922497153  |
| wavelet-LLH | glcm       | lmc1                                 | -0.199029024 |
| wavelet-LLH | glcm       | DifferenceAverage                    | 7.062947547  |
| wavelet-LLH | glcm       | ld                                   | 0.245147916  |
| wavelet-LLH | glcm       | ClusterTendency                      | 151.0646188  |
| wavelet-LLH | firstorder | InterquartileRange                   | 229.9517596  |
| wavelet-LLH | firstorder | Skewness                             | 0.256600683  |
| wavelet-LLH | firstorder | Uniformity                           | 0.0388138    |
| wavelet-LLH | firstorder | Median                               | -47.40474682 |
| wavelet-LLH | firstorder | Energy                               | 40414535.45  |
| wavelet-LLH | firstorder | RobustMeanAbsoluteDeviation          | 99.20691124  |
| wavelet-LLH | firstorder | MeanAbsoluteDeviation                | 154.1586421  |
| wavelet-LLH | firstorder | TotalEnergy                          | 1091192457   |
| wavelet-LLH | firstorder | Maximum                              | 689.4331282  |
| wavelet-LLH | firstorder | RootMeanSquared                      | 209.5920869  |
| wavelet-LLH | firstorder | 90Percentile                         | 217.6774649  |
| wavelet-LLH | firstorder | Minimum                              | -725.7447437 |
| wavelet-LLH | firstorder | Entropy                              | 5.00095921   |
| wavelet-LLH | firstorder | Range                                | 1415.177872  |
| wavelet-LLH | firstorder | Variance                             | 42188.26084  |
| wavelet-LLH | firstorder | 10Percentile                         | -290.7140092 |
| wavelet-LLH | firstorder | Kurtosis                             | 3.868075458  |
| wavelet-LLH | firstorder | Mean                                 | -41.72028335 |
| wavelet-LLH | glrlm      | ShortRunLowGrayLevelEmphasis         | 0.002949199  |
| wavelet-LLH | glrlm      | GrayLevelVariance                    | 69.10211298  |
| wavelet-LLH | glrlm      | LowGrayLevelRunEmphasis              | 0.003000532  |
| wavelet-LLH | glrlm      | GrayLevelNonUniformityNormalized     | 0.038084959  |
| wavelet-LLH | glrlm      | RunVariance                          | 0.049388547  |
| wavelet-LLH | glrlm      | GrayLevelNonUniformity               | 33.52631777  |
| wavelet-LLH | glrlm      | LongRunEmphasis                      | 1.143037109  |
| wavelet-LLH | glrlm      | ShortRunHighGrayLevelEmphasis        | 871.8365812  |
| wavelet-LLH | glrlm      | RunLengthNonUniformity               | 809.5494824  |

|             |       |                                      |             |
|-------------|-------|--------------------------------------|-------------|
| wavelet-LLH | glrlm | ShortRunEmphasis                     | 0.967662768 |
| wavelet-LLH | glrlm | LongRunHighGrayLevelEmphasis         | 1025.528149 |
| wavelet-LLH | glrlm | RunPercentage                        | 0.956856187 |
| wavelet-LLH | glrlm | LongRunLowGrayLevelEmphasis          | 0.003221604 |
| wavelet-LLH | glrlm | RunEntropy                           | 5.238693581 |
| wavelet-LLH | glrlm | HighGrayLevelRunEmphasis             | 900.1180687 |
| wavelet-LLH | glrlm | RunLengthNonUniformityNormalized     | 0.91890712  |
| wavelet-LLH | glszm | GrayLevelVariance                    | 88.71117031 |
| wavelet-LLH | glszm | ZoneVariance                         | 6.779231469 |
| wavelet-LLH | glszm | GrayLevelNonUniformityNormalized     | 0.031557602 |
| wavelet-LLH | glszm | SizeZoneNonUniformityNormalized      | 0.530268735 |
| wavelet-LLH | glszm | SizeZoneNonUniformity                | 274.1489362 |
| wavelet-LLH | glszm | GrayLevelNonUniformity               | 16.31528046 |
| wavelet-LLH | glszm | LargeAreaEmphasis                    | 9.945841393 |
| wavelet-LLH | glszm | SmallAreaHighGrayLevelEmphasis       | 702.2827056 |
| wavelet-LLH | glszm | ZonePercentage                       | 0.561956522 |
| wavelet-LLH | glszm | LargeAreaLowGrayLevelEmphasis        | 0.015938966 |
| wavelet-LLH | glszm | LargeAreaHighGrayLevelEmphasis       | 8498.769826 |
| wavelet-LLH | glszm | HighGrayLevelZoneEmphasis            | 917.9729207 |
| wavelet-LLH | glszm | SmallAreaEmphasis                    | 0.756326339 |
| wavelet-LLH | glszm | LowGrayLevelZoneEmphasis             | 0.003947871 |
| wavelet-LLH | glszm | ZoneEntropy                          | 6.357582501 |
| wavelet-LLH | glszm | SmallAreaLowGrayLevelEmphasis        | 0.00342388  |
| wavelet-LLH | ngtdm | Coarseness                           | 0.008071396 |
| wavelet-LLH | ngtdm | Complexity                           | 5508.590377 |
| wavelet-LLH | ngtdm | Strength                             | 6.855528376 |
| wavelet-LLH | ngtdm | Contrast                             | 0.263519278 |
| wavelet-LLH | ngtdm | Busyness                             | 0.076134684 |
| wavelet-LLL | gldm  | GrayLevelVariance                    | 647.8810952 |
| wavelet-LLL | gldm  | HighGrayLevelEmphasis                | 4824.833696 |
| wavelet-LLL | gldm  | DependenceEntropy                    | 7.371153248 |
| wavelet-LLL | gldm  | DependenceNonUniformity              | 447.326087  |
| wavelet-LLL | gldm  | GrayLevelNonUniformity               | 11.73478261 |
| wavelet-LLL | gldm  | SmallDependenceEmphasis              | 0.719693218 |
| wavelet-LLL | gldm  | SmallDependenceHighGrayLevelEmphasis | 2962.39174  |
| wavelet-LLL | gldm  | DependenceNonUniformityNormalized    | 0.486224008 |
| wavelet-LLL | gldm  | LargeDependenceEmphasis              | 3.010869565 |
| wavelet-LLL | gldm  | LargeDependenceLowGrayLevelEmphasis  | 0.002511141 |
| wavelet-LLL | gldm  | DependenceVariance                   | 0.728142722 |
| wavelet-LLL | gldm  | LargeDependenceHighGrayLevelEmphasis | 19704.41413 |
| wavelet-LLL | gldm  | SmallDependenceLowGrayLevelEmphasis  | 0.001906481 |
| wavelet-LLL | gldm  | LowGrayLevelEmphasis                 | 0.00200239  |
| wavelet-LLL | glcm  | JointAverage                         | 70.48487587 |
| wavelet-LLL | glcm  | SumAverage                           | 140.9697517 |
| wavelet-LLL | glcm  | JointEntropy                         | 10.04546093 |
| wavelet-LLL | glcm  | ClusterShade                         | -41016.9889 |
| wavelet-LLL | glcm  | MaximumProbability                   | 0.004343463 |
| wavelet-LLL | glcm  | ldmn                                 | 0.966722314 |
| wavelet-LLL | glcm  | JointEnergy                          | 0.00106683  |
| wavelet-LLL | glcm  | Contrast                             | 439.4855324 |
| wavelet-LLL | glcm  | DifferenceEntropy                    | 5.313347145 |
| wavelet-LLL | glcm  | InverseVariance                      | 0.080089172 |
| wavelet-LLL | glcm  | DifferenceVariance                   | 171.1803389 |
| wavelet-LLL | glcm  | ldn                                  | 0.880774553 |
| wavelet-LLL | glcm  | ldm                                  | 0.076062373 |
| wavelet-LLL | glcm  | Correlation                          | 0.602260301 |

|             |            |                                  |              |
|-------------|------------|----------------------------------|--------------|
| wavelet-LLL | glcm       | Autocorrelation                  | 5301.614926  |
| wavelet-LLL | glcm       | SumEntropy                       | 7.03637753   |
| wavelet-LLL | glcm       | SumSquares                       | 552.5532826  |
| wavelet-LLL | glcm       | ClusterProminence                | 7462025.906  |
| wavelet-LLL | glcm       | Imc2                             | 0.996671455  |
| wavelet-LLL | glcm       | Imc1                             | -0.399663299 |
| wavelet-LLL | glcm       | DifferenceAverage                | 16.08006068  |
| wavelet-LLL | glcm       | Id                               | 0.143703918  |
| wavelet-LLL | glcm       | ClusterTendency                  | 1770.727598  |
| wavelet-LLL | firstorder | InterquartileRange               | 1099.817529  |
| wavelet-LLL | firstorder | Skewness                         | -0.331080039 |
| wavelet-LLL | firstorder | Uniformity                       | 0.012755198  |
| wavelet-LLL | firstorder | Median                           | -682.9435809 |
| wavelet-LLL | firstorder | Energy                           | 885215329.4  |
| wavelet-LLL | firstorder | RobustMeanAbsoluteDeviation      | 436.4635937  |
| wavelet-LLL | firstorder | MeanAbsoluteDeviation            | 549.2173601  |
| wavelet-LLL | firstorder | TotalEnergy                      | 23900813894  |
| wavelet-LLL | firstorder | Maximum                          | 353.8082522  |
| wavelet-LLL | firstorder | RootMeanSquared                  | 980.9131335  |
| wavelet-LLL | firstorder | 90Percentile                     | 34.87137441  |
| wavelet-LLL | firstorder | Minimum                          | -2348.699561 |
| wavelet-LLL | firstorder | Entropy                          | 6.446682538  |
| wavelet-LLL | firstorder | Range                            | 2702.507814  |
| wavelet-LLL | firstorder | Variance                         | 404651.985   |
| wavelet-LLL | firstorder | 10Percentile                     | -1657.010266 |
| wavelet-LLL | firstorder | Kurtosis                         | 1.985101147  |
| wavelet-LLL | firstorder | Mean                             | -746.6850678 |
| wavelet-LLL | glrlm      | ShortRunLowGrayLevelEmphasis     | 0.002032474  |
| wavelet-LLL | glrlm      | GrayLevelVariance                | 645.9052114  |
| wavelet-LLL | glrlm      | LowGrayLevelRunEmphasis          | 0.0020368    |
| wavelet-LLL | glrlm      | GrayLevelNonUniformityNormalized | 0.012637334  |
| wavelet-LLL | glrlm      | RunVariance                      | 0.020664932  |
| wavelet-LLL | glrlm      | GrayLevelNonUniformity           | 11.39809743  |
| wavelet-LLL | glrlm      | LongRunEmphasis                  | 1.061292978  |
| wavelet-LLL | glrlm      | ShortRunHighGrayLevelEmphasis    | 4675.584965  |
| wavelet-LLL | glrlm      | RunLengthNonUniformity           | 867.4430155  |
| wavelet-LLL | glrlm      | ShortRunEmphasis                 | 0.985247222  |
| wavelet-LLL | glrlm      | LongRunHighGrayLevelEmphasis     | 5215.445008  |
| wavelet-LLL | glrlm      | RunPercentage                    | 0.980351171  |
| wavelet-LLL | glrlm      | LongRunLowGrayLevelEmphasis      | 0.002054362  |
| wavelet-LLL | glrlm      | RunEntropy                       | 6.542315228  |
| wavelet-LLL | glrlm      | HighGrayLevelRunEmphasis         | 4779.490204  |
| wavelet-LLL | glrlm      | RunLengthNonUniformityNormalized | 0.961685211  |
| wavelet-LLL | glszm      | GrayLevelVariance                | 610.8276021  |
| wavelet-LLL | glszm      | ZoneVariance                     | 0.713225949  |
| wavelet-LLL | glszm      | GrayLevelNonUniformityNormalized | 0.012138246  |
| wavelet-LLL | glszm      | SizeZoneNonUniformityNormalized  | 0.703706856  |
| wavelet-LLL | glszm      | SizeZoneNonUniformity            | 505.9652295  |
| wavelet-LLL | glszm      | GrayLevelNonUniformity           | 8.727399166  |
| wavelet-LLL | glszm      | LargeAreaEmphasis                | 2.350486787  |
| wavelet-LLL | glszm      | SmallAreaHighGrayLevelEmphasis   | 3421.423902  |
| wavelet-LLL | glszm      | ZonePercentage                   | 0.781521739  |
| wavelet-LLL | glszm      | LargeAreaLowGrayLevelEmphasis    | 0.002809739  |
| wavelet-LLL | glszm      | LargeAreaHighGrayLevelEmphasis   | 14260.08762  |
| wavelet-LLL | glszm      | HighGrayLevelZoneEmphasis        | 4267.292072  |
| wavelet-LLL | glszm      | SmallAreaEmphasis                | 0.863535355  |

|             |            |                                      |              |
|-------------|------------|--------------------------------------|--------------|
| wavelet-LLL | glszm      | LowGrayLevelZoneEmphasis             | 0.002473548  |
| wavelet-LLL | glszm      | ZoneEntropy                          | 7.068752308  |
| wavelet-LLL | glszm      | SmallAreaLowGrayLevelEmphasis        | 0.002418896  |
| wavelet-LLL | ngtdm      | Coarseness                           | 0.009415076  |
| wavelet-LLL | ngtdm      | Complexity                           | 41079.23809  |
| wavelet-LLL | ngtdm      | Strength                             | 37.46018356  |
| wavelet-LLL | ngtdm      | Contrast                             | 1.192810816  |
| wavelet-LLL | ngtdm      | Busyness                             | 0.016391828  |
| wavelet-HHL | gldm       | GrayLevelVariance                    | 14.42975425  |
| wavelet-HHL | gldm       | HighGrayLevelEmphasis                | 321.5934783  |
| wavelet-HHL | gldm       | DependenceEntropy                    | 6.12896847   |
| wavelet-HHL | gldm       | DependenceNonUniformity              | 173.1652174  |
| wavelet-HHL | gldm       | GrayLevelNonUniformity               | 79.10652174  |
| wavelet-HHL | gldm       | SmallDependenceEmphasis              | 0.342524948  |
| wavelet-HHL | gldm       | SmallDependenceHighGrayLevelEmphasis | 115.8708697  |
| wavelet-HHL | gldm       | DependenceNonUniformityNormalized    | 0.188223062  |
| wavelet-HHL | gldm       | LargeDependenceEmphasis              | 11.99565217  |
| wavelet-HHL | gldm       | LargeDependenceLowGrayLevelEmphasis  | 0.049687048  |
| wavelet-HHL | gldm       | DependenceVariance                   | 3.357164461  |
| wavelet-HHL | gldm       | LargeDependenceHighGrayLevelEmphasis | 3788.321739  |
| wavelet-HHL | gldm       | SmallDependenceLowGrayLevelEmphasis  | 0.002048478  |
| wavelet-HHL | gldm       | LowGrayLevelEmphasis                 | 0.006089962  |
| wavelet-HHL | glcm       | JointAverage                         | 17.52399882  |
| wavelet-HHL | glcm       | SumAverage                           | 35.04799764  |
| wavelet-HHL | glcm       | JointEntropy                         | 7.314564455  |
| wavelet-HHL | glcm       | ClusterShade                         | -7.872934537 |
| wavelet-HHL | glcm       | MaximumProbability                   | 0.024966444  |
| wavelet-HHL | glcm       | ldmn                                 | 0.98353626   |
| wavelet-HHL | glcm       | JointEnergy                          | 0.009358879  |
| wavelet-HHL | glcm       | Contrast                             | 29.00692255  |
| wavelet-HHL | glcm       | DifferenceEntropy                    | 3.423860064  |
| wavelet-HHL | glcm       | InverseVariance                      | 0.259716058  |
| wavelet-HHL | glcm       | DifferenceVariance                   | 13.32233009  |
| wavelet-HHL | glcm       | ldn                                  | 0.917181562  |
| wavelet-HHL | glcm       | ldm                                  | 0.250634066  |
| wavelet-HHL | glcm       | Correlation                          | -0.034547794 |
| wavelet-HHL | glcm       | Autocorrelation                      | 306.597872   |
| wavelet-HHL | glcm       | SumEntropy                           | 4.279276792  |
| wavelet-HHL | glcm       | SumSquares                           | 14.00988108  |
| wavelet-HHL | glcm       | ClusterProminence                    | 4475.583019  |
| wavelet-HHL | glcm       | lmc2                                 | 0.718788864  |
| wavelet-HHL | glcm       | lmc1                                 | -0.098724216 |
| wavelet-HHL | glcm       | DifferenceAverage                    | 3.885759727  |
| wavelet-HHL | glcm       | ld                                   | 0.338376162  |
| wavelet-HHL | glcm       | ClusterTendency                      | 27.03260178  |
| wavelet-HHL | firstorder | InterquartileRange                   | 107.0207085  |
| wavelet-HHL | firstorder | Skewness                             | 0.009159782  |
| wavelet-HHL | firstorder | Uniformity                           | 0.08598535   |
| wavelet-HHL | firstorder | Median                               | 2.942885591  |
| wavelet-HHL | firstorder | Energy                               | 8223883.046  |
| wavelet-HHL | firstorder | RobustMeanAbsoluteDeviation          | 44.33789409  |
| wavelet-HHL | firstorder | MeanAbsoluteDeviation                | 69.35243749  |
| wavelet-HHL | firstorder | TotalEnergy                          | 222044842.2  |
| wavelet-HHL | firstorder | Maximum                              | 554.1880307  |
| wavelet-HHL | firstorder | RootMeanSquared                      | 94.54630247  |
| wavelet-HHL | firstorder | 90Percentile                         | 107.0046453  |

|             |            |                                      |              |
|-------------|------------|--------------------------------------|--------------|
| wavelet-HHL | firstorder | Minimum                              | -422.8545051 |
| wavelet-HHL | firstorder | Entropy                              | 3.87111416   |
| wavelet-HHL | firstorder | Range                                | 977.0425358  |
| wavelet-HHL | firstorder | Variance                             | 8937.996     |
| wavelet-HHL | firstorder | 10Percentile                         | -112.2228321 |
| wavelet-HHL | firstorder | Kurtosis                             | 6.213903674  |
| wavelet-HHL | firstorder | Mean                                 | 1.003648866  |
| wavelet-HHL | grlm       | ShortRunLowGrayLevelEmphasis         | 0.005941586  |
| wavelet-HHL | grlm       | GrayLevelVariance                    | 15.146127    |
| wavelet-HHL | grlm       | LowGrayLevelRunEmphasis              | 0.006206527  |
| wavelet-HHL | grlm       | GrayLevelNonUniformityNormalized     | 0.08287159   |
| wavelet-HHL | grlm       | RunVariance                          | 0.094513439  |
| wavelet-HHL | grlm       | GrayLevelNonUniformity               | 70.54995904  |
| wavelet-HHL | grlm       | LongRunEmphasis                      | 1.263801153  |
| wavelet-HHL | grlm       | ShortRunHighGrayLevelEmphasis        | 304.7168337  |
| wavelet-HHL | grlm       | RunLengthNonUniformity               | 737.5610619  |
| wavelet-HHL | grlm       | ShortRunEmphasis                     | 0.944647385  |
| wavelet-HHL | grlm       | LongRunHighGrayLevelEmphasis         | 405.1907283  |
| wavelet-HHL | grlm       | RunPercentage                        | 0.92541806   |
| wavelet-HHL | grlm       | LongRunLowGrayLevelEmphasis          | 0.007405632  |
| wavelet-HHL | grlm       | RunEntropy                           | 4.279832298  |
| wavelet-HHL | grlm       | HighGrayLevelRunEmphasis             | 322.1426624  |
| wavelet-HHL | grlm       | RunLengthNonUniformityNormalized     | 0.865590949  |
| wavelet-HHL | glszm      | GrayLevelVariance                    | 26.74726203  |
| wavelet-HHL | glszm      | ZoneVariance                         | 41.44632234  |
| wavelet-HHL | glszm      | GrayLevelNonUniformityNormalized     | 0.060353569  |
| wavelet-HHL | glszm      | SizeZoneNonUniformityNormalized      | 0.458524878  |
| wavelet-HHL | glszm      | SizeZoneNonUniformity                | 157.7325581  |
| wavelet-HHL | glszm      | GrayLevelNonUniformity               | 20.76162791  |
| wavelet-HHL | glszm      | LargeAreaEmphasis                    | 48.59883721  |
| wavelet-HHL | glszm      | SmallAreaHighGrayLevelEmphasis       | 244.3243388  |
| wavelet-HHL | glszm      | ZonePercentage                       | 0.373913043  |
| wavelet-HHL | glszm      | LargeAreaLowGrayLevelEmphasis        | 0.171923414  |
| wavelet-HHL | glszm      | LargeAreaHighGrayLevelEmphasis       | 15320.7093   |
| wavelet-HHL | glszm      | HighGrayLevelZoneEmphasis            | 334.8313953  |
| wavelet-HHL | glszm      | SmallAreaEmphasis                    | 0.70366755   |
| wavelet-HHL | glszm      | LowGrayLevelZoneEmphasis             | 0.007397802  |
| wavelet-HHL | glszm      | ZoneEntropy                          | 5.724247885  |
| wavelet-HHL | glszm      | SmallAreaLowGrayLevelEmphasis        | 0.003930936  |
| wavelet-HHL | ngtdm      | Coarseness                           | 0.007083837  |
| wavelet-HHL | ngtdm      | Complexity                           | 1171.493631  |
| wavelet-HHL | ngtdm      | Strength                             | 2.461122162  |
| wavelet-HHL | ngtdm      | Contrast                             | 0.096759089  |
| wavelet-HHL | ngtdm      | Busyness                             | 0.206999474  |
| wavelet-HLH | gldm       | GrayLevelVariance                    | 11.20888351  |
| wavelet-HLH | gldm       | HighGrayLevelEmphasis                | 252.8423913  |
| wavelet-HLH | gldm       | DependenceEntropy                    | 6.07871173   |
| wavelet-HLH | gldm       | DependenceNonUniformity              | 153.1673913  |
| wavelet-HLH | gldm       | GrayLevelNonUniformity               | 89.15434783  |
| wavelet-HLH | gldm       | SmallDependenceEmphasis              | 0.322071301  |
| wavelet-HLH | gldm       | SmallDependenceHighGrayLevelEmphasis | 86.36664435  |
| wavelet-HLH | gldm       | DependenceNonUniformityNormalized    | 0.166486295  |
| wavelet-HLH | gldm       | LargeDependenceEmphasis              | 14.87826087  |
| wavelet-HLH | gldm       | LargeDependenceLowGrayLevelEmphasis  | 0.066257827  |
| wavelet-HLH | gldm       | DependenceVariance                   | 4.414442344  |
| wavelet-HLH | gldm       | LargeDependenceHighGrayLevelEmphasis | 3619.83587   |

|             |            |                                     |              |
|-------------|------------|-------------------------------------|--------------|
| wavelet-HLH | gldm       | SmallDependenceLowGrayLevelEmphasis | 0.00312799   |
| wavelet-HLH | gldm       | LowGrayLevelEmphasis                | 0.006215403  |
| wavelet-HLH | glcm       | JointAverage                        | 15.56216219  |
| wavelet-HLH | glcm       | SumAverage                          | 31.12432437  |
| wavelet-HLH | glcm       | JointEntropy                        | 7.023436623  |
| wavelet-HLH | glcm       | ClusterShade                        | 16.36206961  |
| wavelet-HLH | glcm       | MaximumProbability                  | 0.030573288  |
| wavelet-HLH | glcm       | ldmn                                | 0.977069009  |
| wavelet-HLH | glcm       | JointEnergy                         | 0.012083416  |
| wavelet-HLH | glcm       | Contrast                            | 21.58747002  |
| wavelet-HLH | glcm       | DifferenceEntropy                   | 3.260578216  |
| wavelet-HLH | glcm       | InverseVariance                     | 0.29280586   |
| wavelet-HLH | glcm       | DifferenceVariance                  | 10.0192017   |
| wavelet-HLH | glcm       | ldn                                 | 0.903748437  |
| wavelet-HLH | glcm       | ldm                                 | 0.282705373  |
| wavelet-HLH | glcm       | Correlation                         | -0.009045802 |
| wavelet-HLH | glcm       | Autocorrelation                     | 242.1332699  |
| wavelet-HLH | glcm       | SumEntropy                          | 4.131965027  |
| wavelet-HLH | glcm       | SumSquares                          | 10.73953603  |
| wavelet-HLH | glcm       | ClusterProminence                   | 2361.108602  |
| wavelet-HLH | glcm       | lmc2                                | 0.68638107   |
| wavelet-HLH | glcm       | lmc1                                | -0.089267288 |
| wavelet-HLH | glcm       | DifferenceAverage                   | 3.363550143  |
| wavelet-HLH | glcm       | ld                                  | 0.366824927  |
| wavelet-HLH | glcm       | ClusterTendency                     | 21.3706741   |
| wavelet-HLH | firstorder | InterquartileRange                  | 88.94579131  |
| wavelet-HLH | firstorder | Skewness                            | 0.150954093  |
| wavelet-HLH | firstorder | Uniformity                          | 0.0969069    |
| wavelet-HLH | firstorder | Median                              | 0.091157752  |
| wavelet-HLH | firstorder | Energy                              | 6348465.06   |
| wavelet-HLH | firstorder | RobustMeanAbsoluteDeviation         | 38.64294277  |
| wavelet-HLH | firstorder | MeanAbsoluteDeviation               | 61.48103723  |
| wavelet-HLH | firstorder | TotalEnergy                         | 171408556.6  |
| wavelet-HLH | firstorder | Maximum                             | 333.501471   |
| wavelet-HLH | firstorder | RootMeanSquared                     | 83.06928133  |
| wavelet-HLH | firstorder | 90Percentile                        | 95.17067955  |
| wavelet-HLH | firstorder | Minimum                             | -355.2443344 |
| wavelet-HLH | firstorder | Entropy                             | 3.72000058   |
| wavelet-HLH | firstorder | Range                               | 688.7458054  |
| wavelet-HLH | firstorder | Variance                            | 6898.575337  |
| wavelet-HLH | firstorder | 10Percentile                        | -96.59971285 |
| wavelet-HLH | firstorder | Kurtosis                            | 4.656926189  |
| wavelet-HLH | firstorder | Mean                                | 1.389303076  |
| wavelet-HLH | glrlm      | ShortRunLowGrayLevelEmphasis        | 0.006105999  |
| wavelet-HLH | glrlm      | GrayLevelVariance                   | 11.91644886  |
| wavelet-HLH | glrlm      | LowGrayLevelRunEmphasis             | 0.006387802  |
| wavelet-HLH | glrlm      | GrayLevelNonUniformityNormalized    | 0.092608174  |
| wavelet-HLH | glrlm      | RunVariance                         | 0.111317357  |
| wavelet-HLH | glrlm      | GrayLevelNonUniformity              | 77.87940768  |
| wavelet-HLH | glrlm      | LongRunEmphasis                     | 1.309946842  |
| wavelet-HLH | glrlm      | ShortRunHighGrayLevelEmphasis       | 238.0526171  |
| wavelet-HLH | glrlm      | RunLengthNonUniformity              | 712.1277974  |
| wavelet-HLH | glrlm      | ShortRunEmphasis                    | 0.936046003  |
| wavelet-HLH | glrlm      | LongRunHighGrayLevelEmphasis        | 329.1681609  |
| wavelet-HLH | glrlm      | RunPercentage                       | 0.914046823  |
| wavelet-HLH | glrlm      | LongRunLowGrayLevelEmphasis         | 0.007745993  |



|             |       |                                  |             |
|-------------|-------|----------------------------------|-------------|
| wavelet-HLH | glrlm | RunEntropy                       | 4.185031788 |
| wavelet-HLH | glrlm | HighGrayLevelRunEmphasis         | 253.6821792 |
| wavelet-HLH | glrlm | RunLengthNonUniformityNormalized | 0.846202732 |
| wavelet-HLH | glszm | GrayLevelVariance                | 22.88503445 |
| wavelet-HLH | glszm | ZoneVariance                     | 84.26430059 |
| wavelet-HLH | glszm | GrayLevelNonUniformityNormalized | 0.061949207 |
| wavelet-HLH | glszm | SizeZoneNonUniformityNormalized  | 0.485699407 |
| wavelet-HLH | glszm | SizeZoneNonUniformity            | 153.4810127 |
| wavelet-HLH | glszm | GrayLevelNonUniformity           | 19.57594937 |
| wavelet-HLH | glszm | LargeAreaEmphasis                | 92.74050633 |
| wavelet-HLH | glszm | SmallAreaHighGrayLevelEmphasis   | 198.6789016 |
| wavelet-HLH | glszm | ZonePercentage                   | 0.343478261 |
| wavelet-HLH | glszm | LargeAreaLowGrayLevelEmphasis    | 0.403470126 |
| wavelet-HLH | glszm | LargeAreaHighGrayLevelEmphasis   | 22096.98418 |
| wavelet-HLH | glszm | HighGrayLevelZoneEmphasis        | 270.4493671 |
| wavelet-HLH | glszm | SmallAreaEmphasis                | 0.723678832 |
| wavelet-HLH | glszm | LowGrayLevelZoneEmphasis         | 0.00946551  |
| wavelet-HLH | glszm | ZoneEntropy                      | 5.605362598 |
| wavelet-HLH | glszm | SmallAreaLowGrayLevelEmphasis    | 0.008088769 |
| wavelet-HLH | ngtdm | Coarseness                       | 0.007252309 |
| wavelet-HLH | ngtdm | Complexity                       | 764.5104307 |
| wavelet-HLH | ngtdm | Strength                         | 1.76456908  |
| wavelet-HLH | ngtdm | Contrast                         | 0.080675006 |
| wavelet-HLH | ngtdm | Busyness                         | 0.257657552 |

| Image type | Feature Class | Feature Name                         |                                                                                                                                                                                                                                                                                                                                                                                                                     |
|------------|---------------|--------------------------------------|---------------------------------------------------------------------------------------------------------------------------------------------------------------------------------------------------------------------------------------------------------------------------------------------------------------------------------------------------------------------------------------------------------------------|
| general    | info          | BoundingBox                          | 10: RTSTRUCT: C99-DNU_segment_RUL ITV                                                                                                                                                                                                                                                                                                                                                                               |
| general    | info          | EnabledImageTypes                    | {0, 1, 1, 4, 5, 4}                                                                                                                                                                                                                                                                                                                                                                                                  |
|            |               |                                      | {u'Original': {}, u'Wavelet': {}}                                                                                                                                                                                                                                                                                                                                                                                   |
|            |               |                                      | {'distances': [1], 'additionalInfo': True, 'force2D': False, 'interpolator': 'sitkBSpline', 'resampledPixelSpacing': [3.0], 'label': 1, 'normalizeScale': 1, 'normalize': False, 'force2Ddimension': 0, 'removeOutliers': None, 'minimumROIDSize': None, u'binWidth': 25.0, 'minimumROIDDimensions': 1, u'correctMask': True, 'preCrop': False, u'symmetricalGLCM': True, 'resegmentRange': None, 'padDistance': 5} |
| general    | info          | GeneralSettings                      | 15dd808cf93957de59c1f3b5a3a290de50e1593                                                                                                                                                                                                                                                                                                                                                                             |
| general    | info          | ImageHash                            | d                                                                                                                                                                                                                                                                                                                                                                                                                   |
| general    | info          | ImageSpacing                         | (0.9765625000000002, 0.9765625000000002, 2.0)                                                                                                                                                                                                                                                                                                                                                                       |
| general    | info          | MaskHash                             | fc1cb6359a1d482356c58bb208a847e2afdb264                                                                                                                                                                                                                                                                                                                                                                             |
| general    | info          | NumpyVersion                         | a                                                                                                                                                                                                                                                                                                                                                                                                                   |
| general    | info          | PyWaveletVersion                     | 1.13.1                                                                                                                                                                                                                                                                                                                                                                                                              |
| general    | info          | SimpleITKVersion                     | 0.5.2                                                                                                                                                                                                                                                                                                                                                                                                               |
| general    | info          | Version                              | 1.1.0                                                                                                                                                                                                                                                                                                                                                                                                               |
| general    | info          | VolumeNum                            | 1.3.0.post102+g1b0eb74                                                                                                                                                                                                                                                                                                                                                                                              |
| general    | info          | VoxelNum                             | 1                                                                                                                                                                                                                                                                                                                                                                                                                   |
| original   | shape         | Maximum3DDiameter                    | 48                                                                                                                                                                                                                                                                                                                                                                                                                  |
| original   | shape         | Maximum2DDiameterSlice               | 14.69693846                                                                                                                                                                                                                                                                                                                                                                                                         |
| original   | shape         | Sphericity                           | 13.41640786                                                                                                                                                                                                                                                                                                                                                                                                         |
| original   | shape         | MinorAxis                            | 0.9309882                                                                                                                                                                                                                                                                                                                                                                                                           |
| original   | shape         | Elongation                           | 11.91588087                                                                                                                                                                                                                                                                                                                                                                                                         |
| original   | shape         | SurfaceVolumeRatio                   | 0.780783685                                                                                                                                                                                                                                                                                                                                                                                                         |
| original   | shape         | Volume                               | 0.476436415                                                                                                                                                                                                                                                                                                                                                                                                         |
| original   | shape         | MajorAxis                            | 1296                                                                                                                                                                                                                                                                                                                                                                                                                |
| original   | shape         | SurfaceArea                          | 15.26143681                                                                                                                                                                                                                                                                                                                                                                                                         |
| original   | shape         | Flatness                             | 617.4615933                                                                                                                                                                                                                                                                                                                                                                                                         |
| original   | shape         | LeastAxis                            | 0.655984116                                                                                                                                                                                                                                                                                                                                                                                                         |
| original   | shape         | Maximum2DDiameterColumn              | 10.01126014                                                                                                                                                                                                                                                                                                                                                                                                         |
| original   | shape         | Maximum2DDiameterRow                 | 10.81665383                                                                                                                                                                                                                                                                                                                                                                                                         |
| original   | gldm          | GrayLevelVariance                    | 13.41640786                                                                                                                                                                                                                                                                                                                                                                                                         |
| original   | gldm          | HighGrayLevelEmphasis                | 95.62326389                                                                                                                                                                                                                                                                                                                                                                                                         |
| original   | gldm          | DependenceEntropy                    | 487.3333333                                                                                                                                                                                                                                                                                                                                                                                                         |
| original   | gldm          | DependenceNonUniformity              | 4.704448699                                                                                                                                                                                                                                                                                                                                                                                                         |
| original   | gldm          | GrayLevelNonUniformity               | 17.375                                                                                                                                                                                                                                                                                                                                                                                                              |
| original   | gldm          | SmallDependenceEmphasis              | 3.125                                                                                                                                                                                                                                                                                                                                                                                                               |
| original   | gldm          | SmallDependenceHighGrayLevelEmphasis | 0.614733796                                                                                                                                                                                                                                                                                                                                                                                                         |
| original   | gldm          | DependenceNonUniformityNormalized    | 194.0927373                                                                                                                                                                                                                                                                                                                                                                                                         |
| original   | gldm          | LargeDependenceEmphasis              | 0.361979167                                                                                                                                                                                                                                                                                                                                                                                                         |
| original   | gldm          | LargeDependenceLowGrayLevelEmphasis  | 5.708333333                                                                                                                                                                                                                                                                                                                                                                                                         |
| original   | gldm          | DependenceVariance                   | 0.042054084                                                                                                                                                                                                                                                                                                                                                                                                         |
| original   | gldm          | LargeDependenceHighGrayLevelEmphasis | 1.873263889                                                                                                                                                                                                                                                                                                                                                                                                         |
| original   | gldm          | SmallDependenceLowGrayLevelEmphasis  | 4454.416667                                                                                                                                                                                                                                                                                                                                                                                                         |
| original   | gldm          | LowGrayLevelEmphasis                 | 0.035642301                                                                                                                                                                                                                                                                                                                                                                                                         |
| original   | gldm          |                                      | 0.036204626                                                                                                                                                                                                                                                                                                                                                                                                         |

|          |            |                                  |              |
|----------|------------|----------------------------------|--------------|
| original | glcm       | JointAverage                     | 22.191963    |
| original | glcm       | SumAverage                       | 44.383926    |
| original | glcm       | JointEntropy                     | 5.342863491  |
| original | glcm       | ClusterShade                     | -1833.146425 |
| original | glcm       | MaximumProbability               | 0.052007612  |
| original | glcm       | Idmn                             | 0.882855914  |
| original | glcm       | JointEnergy                      | 0.027039101  |
| original | glcm       | Contrast                         | 159.4535117  |
| original | glcm       | DifferenceEntropy                | 3.701660488  |
| original | glcm       | InverseVariance                  | 0.182801994  |
| original | glcm       | DifferenceVariance               | 67.94856085  |
| original | glcm       | Idn                              | 0.797424719  |
| original | glcm       | Idm                              | 0.178143041  |
| original | glcm       | Correlation                      | 0.045696554  |
| original | glcm       | Autocorrelation                  | 496.4347948  |
| original | glcm       | SumEntropy                       | 4.011069683  |
| original | glcm       | SumSquares                       | 83.49191108  |
| original | glcm       | ClusterProminence                | 93475.04771  |
| original | glcm       | Imc2                             | 0.995732417  |
| original | glcm       | Imc1                             | -0.62342342  |
| original | glcm       | DifferenceAverage                | 9.452117     |
| original | glcm       | Id                               | 0.245704513  |
| original | glcm       | ClusterTendency                  | 174.5141326  |
| original | firstorder | InterquartileRange               | 418.25       |
| original | firstorder | Skewness                         | -0.566549664 |
| original | firstorder | Uniformity                       | 0.065104167  |
| original | firstorder | Median                           | -138.5       |
| original | firstorder | Energy                           | 5116809      |
| original | firstorder | RobustMeanAbsoluteDeviation      | 176.7479224  |
| original | firstorder | MeanAbsoluteDeviation            | 215.21875    |
| original | firstorder | TotalEnergy                      | 138153843    |
| original | firstorder | Maximum                          | 59           |
| original | firstorder | RootMeanSquared                  | 326.4968415  |
| original | firstorder | 90Percentile                     | 34.7         |
| original | firstorder | Minimum                          | -689         |
| original | firstorder | Entropy                          | 4.22487474   |
| original | firstorder | Range                            | 748          |
| original | firstorder | Variance                         | 59321.12109  |
| original | firstorder | 10Percentile                     | -593.1       |
| original | firstorder | Kurtosis                         | 1.833077568  |
| original | firstorder | Mean                             | -217.4375    |
| original | glrlm      | ShortRunLowGrayLevelEmphasis     | 0.037518882  |
| original | glrlm      | GrayLevelVariance                | 95.97196336  |
| original | glrlm      | LowGrayLevelRunEmphasis          | 0.037555905  |
| original | glrlm      | GrayLevelNonUniformityNormalized | 0.062294976  |
| original | glrlm      | RunVariance                      | 0.040170504  |
| original | glrlm      | GrayLevelNonUniformity           | 2.881097156  |
| original | glrlm      | LongRunEmphasis                  | 1.119607518  |
| original | glrlm      | ShortRunHighGrayLevelEmphasis    | 451.9354444  |
| original | glrlm      | RunLengthNonUniformity           | 43.00521834  |
| original | glrlm      | ShortRunEmphasis                 | 0.971997456  |
| original | glrlm      | LongRunHighGrayLevelEmphasis     | 572.3842058  |
| original | glrlm      | RunPercentage                    | 0.963141026  |
| original | glrlm      | LongRunLowGrayLevelEmphasis      | 0.037712436  |

|             |       |                                      |              |
|-------------|-------|--------------------------------------|--------------|
| original    | glrlm | RunEntropy                           | 4.370231263  |
| original    | glrlm | HighGrayLevelRunEmphasis             | 474.6576753  |
| original    | glrlm | RunLengthNonUniformityNormalized     | 0.929459562  |
| original    | glszm | GrayLevelVariance                    | 90.94433594  |
| original    | glszm | ZoneVariance                         | 1.6875       |
| original    | glszm | GrayLevelNonUniformityNormalized     | 0.052734375  |
| original    | glszm | SizeZoneNonUniformityNormalized      | 0.673828125  |
| original    | glszm | SizeZoneNonUniformity                | 21.5625      |
| original    | glszm | GrayLevelNonUniformity               | 1.6875       |
| original    | glszm | LargeAreaEmphasis                    | 3.9375       |
| original    | glszm | SmallAreaHighGrayLevelEmphasis       | 231.2241753  |
| original    | glszm | ZonePercentage                       | 0.666666667  |
| original    | glszm | LargeAreaLowGrayLevelEmphasis        | 0.057402868  |
| original    | glszm | LargeAreaHighGrayLevelEmphasis       | 2733.875     |
| original    | glszm | HighGrayLevelZoneEmphasis            | 341.96875    |
| original    | glszm | SmallAreaEmphasis                    | 0.839626736  |
| original    | glszm | LowGrayLevelZoneEmphasis             | 0.053606379  |
| original    | glszm | ZoneEntropy                          | 4.452819531  |
| original    | glszm | SmallAreaLowGrayLevelEmphasis        | 0.05333689   |
| original    | ngtdm | Coarseness                           | 0.041429183  |
| original    | ngtdm | Complexity                           | 2583.649644  |
| original    | ngtdm | Strength                             | 22.72055824  |
| original    | ngtdm | Contrast                             | 3.126406994  |
| original    | ngtdm | Busyness                             | 0.048582841  |
| wavelet-HHH | gldm  | GrayLevelVariance                    | 22.88888889  |
| wavelet-HHH | gldm  | HighGrayLevelEmphasis                | 183.3333333  |
| wavelet-HHH | gldm  | DependenceEntropy                    | 4.534829752  |
| wavelet-HHH | gldm  | DependenceNonUniformity              | 15.54166667  |
| wavelet-HHH | gldm  | GrayLevelNonUniformity               | 3.958333333  |
| wavelet-HHH | gldm  | SmallDependenceEmphasis              | 0.486834491  |
| wavelet-HHH | gldm  | SmallDependenceHighGrayLevelEmphasis | 94.92361111  |
| wavelet-HHH | gldm  | DependenceNonUniformityNormalized    | 0.323784722  |
| wavelet-HHH | gldm  | LargeDependenceEmphasis              | 4.583333333  |
| wavelet-HHH | gldm  | LargeDependenceLowGrayLevelEmphasis  | 0.080701122  |
| wavelet-HHH | gldm  | DependenceVariance                   | 0.748263889  |
| wavelet-HHH | gldm  | LargeDependenceHighGrayLevelEmphasis | 721.8333333  |
| wavelet-HHH | gldm  | SmallDependenceLowGrayLevelEmphasis  | 0.045222576  |
| wavelet-HHH | gldm  | LowGrayLevelEmphasis                 | 0.049404391  |
| wavelet-HHH | glcm  | JointAverage                         | 12.58162107  |
| wavelet-HHH | glcm  | SumAverage                           | 25.16324213  |
| wavelet-HHH | glcm  | JointEntropy                         | 5.369157983  |
| wavelet-HHH | glcm  | ClusterShade                         | -3.022666865 |
| wavelet-HHH | glcm  | MaximumProbability                   | 0.045051273  |
| wavelet-HHH | glcm  | Idmn                                 | 0.922100899  |
| wavelet-HHH | glcm  | JointEnergy                          | 0.026329763  |
| wavelet-HHH | glcm  | Contrast                             | 42.73029119  |
| wavelet-HHH | glcm  | DifferenceEntropy                    | 3.30615204   |
| wavelet-HHH | glcm  | InverseVariance                      | 0.155364133  |
| wavelet-HHH | glcm  | DifferenceVariance                   | 14.54280823  |
| wavelet-HHH | glcm  | Idn                                  | 0.816870348  |
| wavelet-HHH | glcm  | Idm                                  | 0.174067821  |
| wavelet-HHH | glcm  | Correlation                          | -0.032197265 |
| wavelet-HHH | glcm  | Autocorrelation                      | 157.3533576  |
| wavelet-HHH | glcm  | SumEntropy                           | 3.82402513   |

|             |            |                                  |              |
|-------------|------------|----------------------------------|--------------|
| wavelet-HHH | glcm       | SumSquares                       | 20.36520653  |
| wavelet-HHH | glcm       | ClusterProminence                | 3943.594476  |
| wavelet-HHH | glcm       | Imc2                             | 0.98976259   |
| wavelet-HHH | glcm       | Imc1                             | -0.551224428 |
| wavelet-HHH | glcm       | DifferenceAverage                | 5.239833121  |
| wavelet-HHH | glcm       | Id                               | 0.269168466  |
| wavelet-HHH | glcm       | ClusterTendency                  | 38.73053492  |
| wavelet-HHH | firstorder | InterquartileRange               | 158.9863257  |
| wavelet-HHH | firstorder | Skewness                         | -0.317832846 |
| wavelet-HHH | firstorder | Uniformity                       | 0.082465278  |
| wavelet-HHH | firstorder | Median                           | -11.03026279 |
| wavelet-HHH | firstorder | Energy                           | 703098.6588  |
| wavelet-HHH | firstorder | RobustMeanAbsoluteDeviation      | 74.86906626  |
| wavelet-HHH | firstorder | MeanAbsoluteDeviation            | 100.3834486  |
| wavelet-HHH | firstorder | TotalEnergy                      | 18983663.79  |
| wavelet-HHH | firstorder | Maximum                          | 216.7461027  |
| wavelet-HHH | firstorder | RootMeanSquared                  | 121.0284625  |
| wavelet-HHH | firstorder | 90Percentile                     | 154.1176976  |
| wavelet-HHH | firstorder | Minimum                          | -298.7050585 |
| wavelet-HHH | firstorder | Entropy                          | 3.795914522  |
| wavelet-HHH | firstorder | Range                            | 515.4511612  |
| wavelet-HHH | firstorder | Variance                         | 14636.93355  |
| wavelet-HHH | firstorder | 10Percentile                     | -140.7151675 |
| wavelet-HHH | firstorder | Kurtosis                         | 2.76138445   |
| wavelet-HHH | firstorder | Mean                             | 3.309860304  |
| wavelet-HHH | glrlm      | ShortRunLowGrayLevelEmphasis     | 0.050742837  |
| wavelet-HHH | glrlm      | GrayLevelVariance                | 23.31554721  |
| wavelet-HHH | glrlm      | LowGrayLevelRunEmphasis          | 0.050992574  |
| wavelet-HHH | glrlm      | GrayLevelNonUniformityNormalized | 0.081462561  |
| wavelet-HHH | glrlm      | RunVariance                      | 0.036725424  |
| wavelet-HHH | glrlm      | GrayLevelNonUniformity           | 3.766290727  |
| wavelet-HHH | glrlm      | LongRunEmphasis                  | 1.116659659  |
| wavelet-HHH | glrlm      | ShortRunHighGrayLevelEmphasis    | 179.742733   |
| wavelet-HHH | glrlm      | RunLengthNonUniformity           | 42.88695523  |
| wavelet-HHH | glrlm      | ShortRunEmphasis                 | 0.970835085  |
| wavelet-HHH | glrlm      | LongRunHighGrayLevelEmphasis     | 202.7137366  |
| wavelet-HHH | glrlm      | RunPercentage                    | 0.963141026  |
| wavelet-HHH | glrlm      | LongRunLowGrayLevelEmphasis      | 0.051991524  |
| wavelet-HHH | glrlm      | RunEntropy                       | 3.910940791  |
| wavelet-HHH | glrlm      | HighGrayLevelRunEmphasis         | 184.3369337  |
| wavelet-HHH | glrlm      | RunLengthNonUniformityNormalized | 0.926549152  |
| wavelet-HHH | glszm      | GrayLevelVariance                | 30.69387755  |
| wavelet-HHH | glszm      | ZoneVariance                     | 1.704081633  |
| wavelet-HHH | glszm      | GrayLevelNonUniformityNormalized | 0.068877551  |
| wavelet-HHH | glszm      | SizeZoneNonUniformityNormalized  | 0.459183673  |
| wavelet-HHH | glszm      | SizeZoneNonUniformity            | 12.85714286  |
| wavelet-HHH | glszm      | GrayLevelNonUniformity           | 1.928571429  |
| wavelet-HHH | glszm      | LargeAreaEmphasis                | 4.642857143  |
| wavelet-HHH | glszm      | SmallAreaHighGrayLevelEmphasis   | 137.8705053  |
| wavelet-HHH | glszm      | ZonePercentage                   | 0.583333333  |
| wavelet-HHH | glszm      | LargeAreaLowGrayLevelEmphasis    | 0.11038866   |
| wavelet-HHH | glszm      | LargeAreaHighGrayLevelEmphasis   | 725.7142857  |
| wavelet-HHH | glszm      | HighGrayLevelZoneEmphasis        | 196          |
| wavelet-HHH | glszm      | SmallAreaEmphasis                | 0.702365768  |

|             |            |                                      |              |
|-------------|------------|--------------------------------------|--------------|
| wavelet-HHH | glszm      | LowGrayLevelZoneEmphasis             | 0.078826483  |
| wavelet-HHH | glszm      | ZoneEntropy                          | 4.450212065  |
| wavelet-HHH | glszm      | SmallAreaLowGrayLevelEmphasis        | 0.076546855  |
| wavelet-HHH | ngtdm      | Coarseness                           | 0.071351838  |
| wavelet-HHH | ngtdm      | Complexity                           | 480.8497928  |
| wavelet-HHH | ngtdm      | Strength                             | 8.36797656   |
| wavelet-HHH | ngtdm      | Contrast                             | 0.810457935  |
| wavelet-HHH | ngtdm      | Busyness                             | 0.099046331  |
| wavelet-HLL | gldm       | GrayLevelVariance                    | 147.625      |
| wavelet-HLL | gldm       | HighGrayLevelEmphasis                | 903.875      |
| wavelet-HLL | gldm       | DependenceEntropy                    | 4.970175521  |
| wavelet-HLL | gldm       | DependenceNonUniformity              | 26.66666667  |
| wavelet-HLL | gldm       | GrayLevelNonUniformity               | 2            |
| wavelet-HLL | gldm       | SmallDependenceEmphasis              | 0.75         |
| wavelet-HLL | gldm       | SmallDependenceHighGrayLevelEmphasis | 797.1875     |
| wavelet-HLL | gldm       | DependenceNonUniformityNormalized    | 0.555555556  |
| wavelet-HLL | gldm       | LargeDependenceEmphasis              | 2            |
| wavelet-HLL | gldm       | LargeDependenceLowGrayLevelEmphasis  | 0.026112422  |
| wavelet-HLL | gldm       | DependenceVariance                   | 0.222222222  |
| wavelet-HLL | gldm       | LargeDependenceHighGrayLevelEmphasis | 1330.625     |
| wavelet-HLL | gldm       | SmallDependenceLowGrayLevelEmphasis  | 0.022112645  |
| wavelet-HLL | gldm       | LowGrayLevelEmphasis                 | 0.022912601  |
| wavelet-HLL | glcm       | JointAverage                         | 27.33838032  |
| wavelet-HLL | glcm       | SumAverage                           | 54.67676063  |
| wavelet-HLL | glcm       | JointEntropy                         | 5.52581669   |
| wavelet-HLL | glcm       | ClusterShade                         | 3109.224589  |
| wavelet-HLL | glcm       | MaximumProbability                   | 0.039180828  |
| wavelet-HLL | glcm       | Idmn                                 | 0.942026805  |
| wavelet-HLL | glcm       | JointEnergy                          | 0.022620582  |
| wavelet-HLL | glcm       | Contrast                             | 201.7360825  |
| wavelet-HLL | glcm       | DifferenceEntropy                    | 3.711456144  |
| wavelet-HLL | glcm       | InverseVariance                      | 0.151004416  |
| wavelet-HLL | glcm       | DifferenceVariance                   | 72.11993033  |
| wavelet-HLL | glcm       | Idn                                  | 0.848619695  |
| wavelet-HLL | glcm       | Idm                                  | 0.11147953   |
| wavelet-HLL | glcm       | Correlation                          | 0.304100836  |
| wavelet-HLL | glcm       | Autocorrelation                      | 792.137601   |
| wavelet-HLL | glcm       | SumEntropy                           | 4.223776391  |
| wavelet-HLL | glcm       | SumSquares                           | 144.7821065  |
| wavelet-HLL | glcm       | ClusterProminence                    | 305753.4487  |
| wavelet-HLL | glcm       | Imc2                                 | 0.999598845  |
| wavelet-HLL | glcm       | Imc1                                 | -0.791322186 |
| wavelet-HLL | glcm       | DifferenceAverage                    | 10.81986938  |
| wavelet-HLL | glcm       | Id                                   | 0.186601376  |
| wavelet-HLL | glcm       | ClusterTendency                      | 377.3923436  |
| wavelet-HLL | firstorder | InterquartileRange                   | 481.6594506  |
| wavelet-HLL | firstorder | Skewness                             | 0.292645104  |
| wavelet-HLL | firstorder | Uniformity                           | 0.041666667  |
| wavelet-HLL | firstorder | Median                               | -204.636842  |
| wavelet-HLL | firstorder | Energy                               | 5136841.745  |
| wavelet-HLL | firstorder | RobustMeanAbsoluteDeviation          | 209.0228578  |
| wavelet-HLL | firstorder | MeanAbsoluteDeviation                | 266.1723735  |
| wavelet-HLL | firstorder | TotalEnergy                          | 138694727.1  |
| wavelet-HLL | firstorder | Maximum                              | 545.0781699  |

|             |            |                                      |              |
|-------------|------------|--------------------------------------|--------------|
| wavelet-HLL | firstorder | RootMeanSquared                      | 327.1353487  |
| wavelet-HLL | firstorder | 90Percentile                         | 286.1448942  |
| wavelet-HLL | firstorder | Minimum                              | -779.6323042 |
| wavelet-HLL | firstorder | Entropy                              | 4.740601563  |
| wavelet-HLL | firstorder | Range                                | 1324.710474  |
| wavelet-HLL | firstorder | Variance                             | 91530.58673  |
| wavelet-HLL | firstorder | 10Percentile                         | -436.0852179 |
| wavelet-HLL | firstorder | Kurtosis                             | 2.146553591  |
| wavelet-HLL | firstorder | Mean                                 | -124.4465734 |
| wavelet-HLL | glrlm      | ShortRunLowGrayLevelEmphasis         | 0.023141568  |
| wavelet-HLL | glrlm      | GrayLevelVariance                    | 148.2520978  |
| wavelet-HLL | glrlm      | LowGrayLevelRunEmphasis              | 0.023173409  |
| wavelet-HLL | glrlm      | GrayLevelNonUniformityNormalizd      | 0.041645684  |
| wavelet-HLL | glrlm      | RunVariance                          | 0.012805493  |
| wavelet-HLL | glrlm      | GrayLevelNonUniformity               | 1.973457625  |
| wavelet-HLL | glrlm      | LongRunEmphasis                      | 1.039706824  |
| wavelet-HLL | glrlm      | ShortRunHighGrayLevelEmphasis        | 905.9857593  |
| wavelet-HLL | glrlm      | RunLengthNonUniformity               | 46.1936953   |
| wavelet-HLL | glrlm      | ShortRunEmphasis                     | 0.990073294  |
| wavelet-HLL | glrlm      | LongRunHighGrayLevelEmphasis         | 927.098422   |
| wavelet-HLL | glrlm      | RunPercentage                        | 0.987179487  |
| wavelet-HLL | glrlm      | LongRunLowGrayLevelEmphasis          | 0.023300771  |
| wavelet-HLL | glrlm      | RunEntropy                           | 4.755434496  |
| wavelet-HLL | glrlm      | HighGrayLevelRunEmphasis             | 910.2082918  |
| wavelet-HLL | glrlm      | RunLengthNonUniformityNormalized     | 0.974389013  |
| wavelet-HLL | glszm      | GrayLevelVariance                    | 155.3975     |
| wavelet-HLL | glszm      | ZoneVariance                         | 0.16         |
| wavelet-HLL | glszm      | GrayLevelNonUniformityNormalized     | 0.04         |
| wavelet-HLL | glszm      | SizeZoneNonUniformityNormalized      | 0.68         |
| wavelet-HLL | glszm      | SizeZoneNonUniformity                | 27.2         |
| wavelet-HLL | glszm      | GrayLevelNonUniformity               | 1.6          |
| wavelet-HLL | glszm      | LargeAreaEmphasis                    | 1.6          |
| wavelet-HLL | glszm      | SmallAreaHighGrayLevelEmphasis       | 935.2875     |
| wavelet-HLL | glszm      | ZonePercentage                       | 0.833333333  |
| wavelet-HLL | glszm      | LargeAreaLowGrayLevelEmphasis        | 0.028775049  |
| wavelet-HLL | glszm      | LargeAreaHighGrayLevelEmphasis       | 1255.35      |
| wavelet-HLL | glszm      | HighGrayLevelZoneEmphasis            | 999.3        |
| wavelet-HLL | glszm      | SmallAreaEmphasis                    | 0.85         |
| wavelet-HLL | glszm      | LowGrayLevelZoneEmphasis             | 0.026855156  |
| wavelet-HLL | glszm      | ZoneEntropy                          | 4.98418372   |
| wavelet-HLL | glszm      | SmallAreaLowGrayLevelEmphasis        | 0.026375183  |
| wavelet-HLL | ngtdm      | Coarseness                           | 0.073208293  |
| wavelet-HLL | ngtdm      | Complexity                           | 3770.935326  |
| wavelet-HLL | ngtdm      | Strength                             | 54.6161123   |
| wavelet-HLL | ngtdm      | Contrast                             | 2.529038235  |
| wavelet-HLL | ngtdm      | Busyness                             | 0.027089052  |
| wavelet-LHL | gldm       | GrayLevelVariance                    | 78.41493056  |
| wavelet-LHL | gldm       | HighGrayLevelEmphasis                | 319.9583333  |
| wavelet-LHL | gldm       | DependenceEntropy                    | 4.522055209  |
| wavelet-LHL | gldm       | DependenceNonUniformity              | 17           |
| wavelet-LHL | gldm       | GrayLevelNonUniformity               | 3.291666667  |
| wavelet-LHL | gldm       | SmallDependenceEmphasis              | 0.595596065  |
| wavelet-LHL | gldm       | SmallDependenceHighGrayLevelEmphasis | 172.0452199  |
| wavelet-LHL | gldm       | DependenceNonUniformityNormalized    | 0.354166667  |

|             |            |                                      |              |
|-------------|------------|--------------------------------------|--------------|
| wavelet-LHL | gldm       | LargeDependenceEmphasis              | 4.666666667  |
| wavelet-LHL | gldm       | LargeDependenceLowGrayLevelEmphasis  | 0.084045913  |
| wavelet-LHL | gldm       | DependenceVariance                   | 1.151041667  |
| wavelet-LHL | gldm       | LargeDependenceHighGrayLevelEmphasis | 1600.416667  |
| wavelet-LHL | gldm       | SmallDependenceLowGrayLevelEmphasis  | 0.056768885  |
| wavelet-LHL | gldm       | LowGrayLevelEmphasis                 | 0.059190746  |
| wavelet-LHL | glcm       | JointAverage                         | 14.98586453  |
| wavelet-LHL | glcm       | SumAverage                           | 29.97172906  |
| wavelet-LHL | glcm       | JointEntropy                         | 5.406158102  |
| wavelet-LHL | glcm       | ClusterShade                         | 677.4824561  |
| wavelet-LHL | glcm       | MaximumProbability                   | 0.048166638  |
| wavelet-LHL | glcm       | Idmn                                 | 0.912171164  |
| wavelet-LHL | glcm       | JointEnergy                          | 0.025467421  |
| wavelet-LHL | glcm       | Contrast                             | 100.0404591  |
| wavelet-LHL | glcm       | DifferenceEntropy                    | 3.58003504   |
| wavelet-LHL | glcm       | InverseVariance                      | 0.1643599    |
| wavelet-LHL | glcm       | DifferenceVariance                   | 40.46051627  |
| wavelet-LHL | glcm       | Idn                                  | 0.8197288    |
| wavelet-LHL | glcm       | Idm                                  | 0.167426315  |
| wavelet-LHL | glcm       | Correlation                          | 0.339634592  |
| wavelet-LHL | glcm       | Autocorrelation                      | 251.5577988  |
| wavelet-LHL | glcm       | SumEntropy                           | 4.150804978  |
| wavelet-LHL | glcm       | SumSquares                           | 76.63468324  |
| wavelet-LHL | glcm       | ClusterProminence                    | 78251.34505  |
| wavelet-LHL | glcm       | Imc2                                 | 0.995994258  |
| wavelet-LHL | glcm       | Imc1                                 | -0.626136293 |
| wavelet-LHL | glcm       | DifferenceAverage                    | 7.438865034  |
| wavelet-LHL | glcm       | Id                                   | 0.249502964  |
| wavelet-LHL | glcm       | ClusterTendency                      | 206.4982738  |
| wavelet-LHL | firstorder | InterquartileRange                   | 393.7931496  |
| wavelet-LHL | firstorder | Skewness                             | -0.047315652 |
| wavelet-LHL | firstorder | Uniformity                           | 0.068576389  |
| wavelet-LHL | firstorder | Median                               | -32.72068418 |
| wavelet-LHL | firstorder | Energy                               | 2399021.307  |
| wavelet-LHL | firstorder | RobustMeanAbsoluteDeviation          | 172.1541963  |
| wavelet-LHL | firstorder | MeanAbsoluteDeviation                | 202.4641542  |
| wavelet-LHL | firstorder | TotalEnergy                          | 64773575.3   |
| wavelet-LHL | firstorder | Maximum                              | 313.7963741  |
| wavelet-LHL | firstorder | RootMeanSquared                      | 223.561201   |
| wavelet-LHL | firstorder | 90Percentile                         | 251.6775711  |
| wavelet-LHL | firstorder | Minimum                              | -389.5540375 |
| wavelet-LHL | firstorder | Entropy                              | 4.062179502  |
| wavelet-LHL | firstorder | Range                                | 703.3504116  |
| wavelet-LHL | firstorder | Variance                             | 49300.97335  |
| wavelet-LHL | firstorder | 10Percentile                         | -323.1141612 |
| wavelet-LHL | firstorder | Kurtosis                             | 1.491108087  |
| wavelet-LHL | firstorder | Mean                                 | -26.05066635 |
| wavelet-LHL | glrlm      | ShortRunLowGrayLevelEmphasis         | 0.060874536  |
| wavelet-LHL | glrlm      | GrayLevelVariance                    | 78.79921531  |
| wavelet-LHL | glrlm      | LowGrayLevelRunEmphasis              | 0.061044885  |
| wavelet-LHL | glrlm      | GrayLevelNonUniformityNormalized     | 0.067130004  |
| wavelet-LHL | glrlm      | RunVariance                          | 0.03357719   |
| wavelet-LHL | glrlm      | GrayLevelNonUniformity               | 3.114438396  |
| wavelet-LHL | glrlm      | LongRunEmphasis                      | 1.105486373  |



|             |       |                                      |              |
|-------------|-------|--------------------------------------|--------------|
| wavelet-LHL | glrlm | ShortRunHighGrayLevelEmphasis        | 309.2018238  |
| wavelet-LHL | glrlm | RunLengthNonUniformity               | 43.29864086  |
| wavelet-LHL | glrlm | ShortRunEmphasis                     | 0.973628407  |
| wavelet-LHL | glrlm | LongRunHighGrayLevelEmphasis         | 356.3595185  |
| wavelet-LHL | glrlm | RunPercentage                        | 0.966346154  |
| wavelet-LHL | glrlm | LongRunLowGrayLevelEmphasis          | 0.061726284  |
| wavelet-LHL | glrlm | RunEntropy                           | 4.184454817  |
| wavelet-LHL | glrlm | HighGrayLevelRunEmphasis             | 318.6333628  |
| wavelet-LHL | glrlm | RunLengthNonUniformityNormalized     | 0.932845621  |
| wavelet-LHL | glszm | GrayLevelVariance                    | 83.67871094  |
| wavelet-LHL | glszm | ZoneVariance                         | 1.25         |
| wavelet-LHL | glszm | GrayLevelNonUniformityNormalized     | 0.060546875  |
| wavelet-LHL | glszm | SizeZoneNonUniformityNormalized      | 0.625        |
| wavelet-LHL | glszm | SizeZoneNonUniformity                | 20           |
| wavelet-LHL | glszm | GrayLevelNonUniformity               | 1.9375       |
| wavelet-LHL | glszm | LargeAreaEmphasis                    | 3.5          |
| wavelet-LHL | glszm | SmallAreaHighGrayLevelEmphasis       | 226.8701389  |
| wavelet-LHL | glszm | ZonePercentage                       | 0.666666667  |
| wavelet-LHL | glszm | LargeAreaLowGrayLevelEmphasis        | 0.102065063  |
| wavelet-LHL | glszm | LargeAreaHighGrayLevelEmphasis       | 1208.0625    |
| wavelet-LHL | glszm | HighGrayLevelZoneEmphasis            | 296.65625    |
| wavelet-LHL | glszm | SmallAreaEmphasis                    | 0.812612847  |
| wavelet-LHL | glszm | LowGrayLevelZoneEmphasis             | 0.085706163  |
| wavelet-LHL | glszm | ZoneEntropy                          | 4.241729297  |
| wavelet-LHL | glszm | SmallAreaLowGrayLevelEmphasis        | 0.084711394  |
| wavelet-LHL | ngtdm | Coarseness                           | 0.062048021  |
| wavelet-LHL | ngtdm | Complexity                           | 1300.032895  |
| wavelet-LHL | ngtdm | Strength                             | 26.10381508  |
| wavelet-LHL | ngtdm | Contrast                             | 2.160142438  |
| wavelet-LHL | ngtdm | Busyness                             | 0.050364217  |
| wavelet-LHH | gldm  | GrayLevelVariance                    | 42.18359375  |
| wavelet-LHH | gldm  | HighGrayLevelEmphasis                | 300.1875     |
| wavelet-LHH | gldm  | DependenceEntropy                    | 4.511842188  |
| wavelet-LHH | gldm  | DependenceNonUniformity              | 27.79166667  |
| wavelet-LHH | gldm  | GrayLevelNonUniformity               | 2.541666667  |
| wavelet-LHH | gldm  | SmallDependenceEmphasis              | 0.788194444  |
| wavelet-LHH | gldm  | SmallDependenceHighGrayLevelEmphasis | 217.4131944  |
| wavelet-LHH | gldm  | DependenceNonUniformityNormalized    | 0.578993056  |
| wavelet-LHH | gldm  | LargeDependenceEmphasis              | 2.125        |
| wavelet-LHH | gldm  | LargeDependenceLowGrayLevelEmphasis  | 0.033709997  |
| wavelet-LHH | gldm  | DependenceVariance                   | 0.347222222  |
| wavelet-LHH | gldm  | LargeDependenceHighGrayLevelEmphasis | 819.0625     |
| wavelet-LHH | gldm  | SmallDependenceLowGrayLevelEmphasis  | 0.027724441  |
| wavelet-LHH | gldm  | LowGrayLevelEmphasis                 | 0.02883937   |
| wavelet-LHH | glcm  | JointAverage                         | 15.81940825  |
| wavelet-LHH | glcm  | SumAverage                           | 31.6388165   |
| wavelet-LHH | glcm  | JointEntropy                         | 5.556051419  |
| wavelet-LHH | glcm  | ClusterShade                         | -136.3035604 |
| wavelet-LHH | glcm  | MaximumProbability                   | 0.034416324  |
| wavelet-LHH | glcm  | Idmn                                 | 0.900122243  |
| wavelet-LHH | glcm  | JointEnergy                          | 0.021899099  |
| wavelet-LHH | glcm  | Contrast                             | 101.7197239  |
| wavelet-LHH | glcm  | DifferenceEntropy                    | 3.654865729  |
| wavelet-LHH | glcm  | InverseVariance                      | 0.102249687  |

|             |            |                                  |              |
|-------------|------------|----------------------------------|--------------|
| wavelet-LHH | glcm       | DifferenceVariance               | 30.07798447  |
| wavelet-LHH | glcm       | Idn                              | 0.790156657  |
| wavelet-LHH | glcm       | Idm                              | 0.090975006  |
| wavelet-LHH | glcm       | Correlation                      | -0.002724048 |
| wavelet-LHH | glcm       | Autocorrelation                  | 250.2758852  |
| wavelet-LHH | glcm       | SumEntropy                       | 4.028204945  |
| wavelet-LHH | glcm       | SumSquares                       | 50.66370341  |
| wavelet-LHH | glcm       | ClusterProminence                | 27066.62835  |
| wavelet-LHH | glcm       | Imc2                             | 0.998872985  |
| wavelet-LHH | glcm       | Imc1                             | -0.714627546 |
| wavelet-LHH | glcm       | DifferenceAverage                | 8.27511997   |
| wavelet-LHH | glcm       | Id                               | 0.181090218  |
| wavelet-LHH | glcm       | ClusterTendency                  | 100.9350897  |
| wavelet-LHH | firstorder | InterquartileRange               | 218.1680065  |
| wavelet-LHH | firstorder | Skewness                         | -0.0581832   |
| wavelet-LHH | firstorder | Uniformity                       | 0.052951389  |
| wavelet-LHH | firstorder | Median                           | -23.68753789 |
| wavelet-LHH | firstorder | Energy                           | 1290408.833  |
| wavelet-LHH | firstorder | RobustMeanAbsoluteDeviation      | 95.98133876  |
| wavelet-LHH | firstorder | MeanAbsoluteDeviation            | 134.0322189  |
| wavelet-LHH | firstorder | TotalEnergy                      | 34841038.49  |
| wavelet-LHH | firstorder | Maximum                          | 288.7442903  |
| wavelet-LHH | firstorder | RootMeanSquared                  | 163.9619387  |
| wavelet-LHH | firstorder | 90Percentile                     | 245.9402822  |
| wavelet-LHH | firstorder | Minimum                          | -378.1993298 |
| wavelet-LHH | firstorder | Entropy                          | 4.339661719  |
| wavelet-LHH | firstorder | Range                            | 666.94362    |
| wavelet-LHH | firstorder | Variance                         | 26771.4896   |
| wavelet-LHH | firstorder | 10Percentile                     | -211.8542829 |
| wavelet-LHH | firstorder | Kurtosis                         | 2.409121758  |
| wavelet-LHH | firstorder | Mean                             | -10.58431625 |
| wavelet-LHH | glrlm      | ShortRunLowGrayLevelEmphasis     | 0.029115105  |
| wavelet-LHH | glrlm      | GrayLevelVariance                | 42.00574975  |
| wavelet-LHH | glrlm      | LowGrayLevelRunEmphasis          | 0.029161459  |
| wavelet-LHH | glrlm      | GrayLevelNonUniformityNormalized | 0.053087363  |
| wavelet-LHH | glrlm      | RunVariance                      | 0.012795518  |
| wavelet-LHH | glrlm      | GrayLevelNonUniformity           | 2.51548918   |
| wavelet-LHH | glrlm      | LongRunEmphasis                  | 1.039934534  |
| wavelet-LHH | glrlm      | ShortRunHighGrayLevelEmphasis    | 294.0373954  |
| wavelet-LHH | glrlm      | RunLengthNonUniformity           | 46.200982    |
| wavelet-LHH | glrlm      | ShortRunEmphasis                 | 0.990016367  |
| wavelet-LHH | glrlm      | LongRunHighGrayLevelEmphasis     | 315.7789394  |
| wavelet-LHH | glrlm      | RunPercentage                    | 0.987179487  |
| wavelet-LHH | glrlm      | LongRunLowGrayLevelEmphasis      | 0.029346877  |
| wavelet-LHH | glrlm      | RunEntropy                       | 4.358517553  |
| wavelet-LHH | glrlm      | HighGrayLevelRunEmphasis         | 298.3857042  |
| wavelet-LHH | glrlm      | RunLengthNonUniformityNormalized | 0.974408964  |
| wavelet-LHH | glszm      | GrayLevelVariance                | 41.02676978  |
| wavelet-LHH | glszm      | ZoneVariance                     | 0.190362879  |
| wavelet-LHH | glszm      | GrayLevelNonUniformityNormalized | 0.055324212  |
| wavelet-LHH | glszm      | SizeZoneNonUniformityNormalized  | 0.744199881  |
| wavelet-LHH | glszm      | SizeZoneNonUniformity            | 30.51219512  |
| wavelet-LHH | glszm      | GrayLevelNonUniformity           | 2.268292683  |
| wavelet-LHH | glszm      | LargeAreaEmphasis                | 1.56097561   |

|             |            |                                      |              |
|-------------|------------|--------------------------------------|--------------|
| wavelet-LHH | glszm      | SmallAreaHighGrayLevelEmphasis       | 242.045393   |
| wavelet-LHH | glszm      | ZonePercentage                       | 0.854166667  |
| wavelet-LHH | glszm      | LargeAreaLowGrayLevelEmphasis        | 0.035591737  |
| wavelet-LHH | glszm      | LargeAreaHighGrayLevelEmphasis       | 520.9512195  |
| wavelet-LHH | glszm      | HighGrayLevelZoneEmphasis            | 283.1707317  |
| wavelet-LHH | glszm      | SmallAreaEmphasis                    | 0.886856369  |
| wavelet-LHH | glszm      | LowGrayLevelZoneEmphasis             | 0.032884959  |
| wavelet-LHH | glszm      | ZoneEntropy                          | 4.461091334  |
| wavelet-LHH | glszm      | SmallAreaLowGrayLevelEmphasis        | 0.032248353  |
| wavelet-LHH | ngtdm      | Coarseness                           | 0.082135814  |
| wavelet-LHH | ngtdm      | Complexity                           | 1136.496035  |
| wavelet-LHH | ngtdm      | Strength                             | 16.85571907  |
| wavelet-LHH | ngtdm      | Contrast                             | 0.992542066  |
| wavelet-LHH | ngtdm      | Busyness                             | 0.050808375  |
| wavelet-LLH | gldm       | GrayLevelVariance                    | 233.999566   |
| wavelet-LLH | gldm       | HighGrayLevelEmphasis                | 1354.854167  |
| wavelet-LLH | gldm       | DependenceEntropy                    | 5.084962501  |
| wavelet-LLH | gldm       | DependenceNonUniformity              | 28.54166667  |
| wavelet-LLH | gldm       | GrayLevelNonUniformity               | 1.583333333  |
| wavelet-LLH | gldm       | SmallDependenceEmphasis              | 0.793981481  |
| wavelet-LLH | gldm       | SmallDependenceHighGrayLevelEmphasis | 1118.84375   |
| wavelet-LLH | gldm       | DependenceNonUniformityNormalized    | 0.594618056  |
| wavelet-LLH | gldm       | LargeDependenceEmphasis              | 1.916666667  |
| wavelet-LLH | gldm       | LargeDependenceLowGrayLevelEmphasis  | 0.024001036  |
| wavelet-LLH | gldm       | DependenceVariance                   | 0.248263889  |
| wavelet-LLH | gldm       | LargeDependenceHighGrayLevelEmphasis | 2339.729167  |
| wavelet-LLH | gldm       | SmallDependenceLowGrayLevelEmphasis  | 0.022054303  |
| wavelet-LLH | gldm       | LowGrayLevelEmphasis                 | 0.022401657  |
| wavelet-LLH | glcm       | JointAverage                         | 32.87212215  |
| wavelet-LLH | glcm       | SumAverage                           | 65.7442443   |
| wavelet-LLH | glcm       | JointEntropy                         | 5.592027054  |
| wavelet-LLH | glcm       | ClusterShade                         | 3938.014311  |
| wavelet-LLH | glcm       | MaximumProbability                   | 0.031522432  |
| wavelet-LLH | glcm       | Idmn                                 | 0.939840863  |
| wavelet-LLH | glcm       | JointEnergy                          | 0.021293582  |
| wavelet-LLH | glcm       | Contrast                             | 330.1263772  |
| wavelet-LLH | glcm       | DifferenceEntropy                    | 3.99048603   |
| wavelet-LLH | glcm       | InverseVariance                      | 0.078293493  |
| wavelet-LLH | glcm       | DifferenceVariance                   | 94.83256588  |
| wavelet-LLH | glcm       | Idn                                  | 0.83878079   |
| wavelet-LLH | glcm       | Idm                                  | 0.069534361  |
| wavelet-LLH | glcm       | Correlation                          | 0.281347379  |
| wavelet-LLH | glcm       | Autocorrelation                      | 1147.130854  |
| wavelet-LLH | glcm       | SumEntropy                           | 4.382886419  |
| wavelet-LLH | glcm       | SumSquares                           | 230.8364572  |
| wavelet-LLH | glcm       | ClusterProminence                    | 740597.2551  |
| wavelet-LLH | glcm       | Imc2                                 | 0.999796996  |
| wavelet-LLH | glcm       | Imc1                                 | -0.824427773 |
| wavelet-LLH | glcm       | DifferenceAverage                    | 14.42614324  |
| wavelet-LLH | glcm       | Id                                   | 0.139558599  |
| wavelet-LLH | glcm       | ClusterTendency                      | 593.2194515  |
| wavelet-LLH | firstorder | InterquartileRange                   | 595.1648667  |
| wavelet-LLH | firstorder | Skewness                             | 0.234712342  |
| wavelet-LLH | firstorder | Uniformity                           | 0.032986111  |

|             |            |                                  |              |
|-------------|------------|----------------------------------|--------------|
| wavelet-LLH | firstorder | Median                           | -32.53441035 |
| wavelet-LLH | firstorder | Energy                           | 6984282.92   |
| wavelet-LLH | firstorder | RobustMeanAbsoluteDeviation      | 252.3866305  |
| wavelet-LLH | firstorder | MeanAbsoluteDeviation            | 326.0462203  |
| wavelet-LLH | firstorder | TotalEnergy                      | 188575638.8  |
| wavelet-LLH | firstorder | Maximum                          | 868.2478936  |
| wavelet-LLH | firstorder | RootMeanSquared                  | 381.4523485  |
| wavelet-LLH | firstorder | 90Percentile                     | 540.0696552  |
| wavelet-LLH | firstorder | Minimum                          | -801.5008791 |
| wavelet-LLH | firstorder | Entropy                          | 5.027569011  |
| wavelet-LLH | firstorder | Range                            | 1669.748773  |
| wavelet-LLH | firstorder | Variance                         | 145505.7649  |
| wavelet-LLH | firstorder | 10Percentile                     | -421.7441217 |
| wavelet-LLH | firstorder | Kurtosis                         | 2.182886894  |
| wavelet-LLH | firstorder | Mean                             | -0.359602053 |
| wavelet-LLH | glrlm      | ShortRunLowGrayLevelEmphasis     | 0.022628807  |
| wavelet-LLH | glrlm      | GrayLevelVariance                | 234.6027027  |
| wavelet-LLH | glrlm      | LowGrayLevelRunEmphasis          | 0.022641491  |
| wavelet-LLH | glrlm      | GrayLevelNonUniformityNormalized | 0.032942012  |
| wavelet-LLH | glrlm      | RunVariance                      | 0.014548136  |
| wavelet-LLH | glrlm      | GrayLevelNonUniformity           | 1.56355701   |
| wavelet-LLH | glrlm      | LongRunEmphasis                  | 1.038141322  |
| wavelet-LLH | glrlm      | ShortRunHighGrayLevelEmphasis    | 1348.63278   |
| wavelet-LLH | glrlm      | RunLengthNonUniformity           | 46.56500391  |
| wavelet-LLH | glrlm      | ShortRunEmphasis                 | 0.992322715  |
| wavelet-LLH | glrlm      | LongRunHighGrayLevelEmphasis     | 1397.629035  |
| wavelet-LLH | glrlm      | RunPercentage                    | 0.988782051  |
| wavelet-LLH | glrlm      | LongRunLowGrayLevelEmphasis      | 0.02270908   |
| wavelet-LLH | glrlm      | RunEntropy                       | 5.02910854   |
| wavelet-LLH | glrlm      | HighGrayLevelRunEmphasis         | 1357.776513  |
| wavelet-LLH | glrlm      | RunLengthNonUniformityNormalized | 0.980719054  |
| wavelet-LLH | glszm      | GrayLevelVariance                | 243.2433076  |
| wavelet-LLH | glszm      | ZoneVariance                     | 0.190362879  |
| wavelet-LLH | glszm      | GrayLevelNonUniformityNormalized | 0.031528852  |
| wavelet-LLH | glszm      | SizeZoneNonUniformityNormalized  | 0.744199881  |
| wavelet-LLH | glszm      | SizeZoneNonUniformity            | 30.51219512  |
| wavelet-LLH | glszm      | GrayLevelNonUniformity           | 1.292682927  |
| wavelet-LLH | glszm      | LargeAreaEmphasis                | 1.56097561   |
| wavelet-LLH | glszm      | SmallAreaHighGrayLevelEmphasis   | 1262.719512  |
| wavelet-LLH | glszm      | ZonePercentage                   | 0.854166667  |
| wavelet-LLH | glszm      | LargeAreaLowGrayLevelEmphasis    | 0.02692422   |
| wavelet-LLH | glszm      | LargeAreaHighGrayLevelEmphasis   | 1984.853659  |
| wavelet-LLH | glszm      | HighGrayLevelZoneEmphasis        | 1397.585366  |
| wavelet-LLH | glszm      | SmallAreaEmphasis                | 0.886856369  |
| wavelet-LLH | glszm      | LowGrayLevelZoneEmphasis         | 0.025932692  |
| wavelet-LLH | glszm      | ZoneEntropy                      | 5.064869078  |
| wavelet-LLH | glszm      | SmallAreaLowGrayLevelEmphasis    | 0.025746262  |
| wavelet-LLH | ngtdm      | Coarseness                       | 0.082963405  |
| wavelet-LLH | ngtdm      | Complexity                       | 6155.314514  |
| wavelet-LLH | ngtdm      | Strength                         | 87.94522184  |
| wavelet-LLH | ngtdm      | Contrast                         | 3.270119127  |
| wavelet-LLH | ngtdm      | Busyness                         | 0.017813065  |
| wavelet-LLL | gldm       | GrayLevelVariance                | 446.3958333  |
| wavelet-LLL | gldm       | HighGrayLevelEmphasis            | 2026.458333  |

|             |            |                                      |              |
|-------------|------------|--------------------------------------|--------------|
| wavelet-LLL | gldm       | DependenceEntropy                    | 4.970175521  |
| wavelet-LLL | gldm       | DependenceNonUniformity              | 33.04166667  |
| wavelet-LLL | gldm       | GrayLevelNonUniformity               | 1.75         |
| wavelet-LLL | gldm       | SmallDependenceEmphasis              | 0.856481481  |
| wavelet-LLL | gldm       | SmallDependenceHighGrayLevelEmphasis | 1792.734954  |
| wavelet-LLL | gldm       | DependenceNonUniformityNormalized    | 0.688368056  |
| wavelet-LLL | gldm       | LargeDependenceEmphasis              | 1.666666667  |
| wavelet-LLL | gldm       | LargeDependenceLowGrayLevelEmphasis  | 0.024115377  |
| wavelet-LLL | gldm       | DependenceVariance                   | 0.206597222  |
| wavelet-LLL | gldm       | LargeDependenceHighGrayLevelEmphasis | 3109.5       |
| wavelet-LLL | gldm       | SmallDependenceLowGrayLevelEmphasis  | 0.022479852  |
| wavelet-LLL | gldm       | LowGrayLevelEmphasis                 | 0.022795383  |
| wavelet-LLL | glcm       | JointAverage                         | 46.11520358  |
| wavelet-LLL | glcm       | SumAverage                           | 92.23040716  |
| wavelet-LLL | glcm       | JointEntropy                         | 5.591549225  |
| wavelet-LLL | glcm       | ClusterShade                         | -3660.811922 |
| wavelet-LLL | glcm       | MaximumProbability                   | 0.030865479  |
| wavelet-LLL | glcm       | Idmn                                 | 0.909274552  |
| wavelet-LLL | glcm       | JointEnergy                          | 0.021246048  |
| wavelet-LLL | glcm       | Contrast                             | 915.7194368  |
| wavelet-LLL | glcm       | DifferenceEntropy                    | 4.262801782  |
| wavelet-LLL | glcm       | InverseVariance                      | 0.039606244  |
| wavelet-LLL | glcm       | DifferenceVariance                   | 292.2941064  |
| wavelet-LLL | glcm       | Idn                                  | 0.801057489  |
| wavelet-LLL | glcm       | Idm                                  | 0.039950191  |
| wavelet-LLL | glcm       | Correlation                          | 0.073926244  |
| wavelet-LLL | glcm       | Autocorrelation                      | 2158.148966  |
| wavelet-LLL | glcm       | SumEntropy                           | 4.465753778  |
| wavelet-LLL | glcm       | SumSquares                           | 487.9227987  |
| wavelet-LLL | glcm       | ClusterProminence                    | 2886205.272  |
| wavelet-LLL | glcm       | Imc2                                 | 0.999823009  |
| wavelet-LLL | glcm       | Imc1                                 | -0.83551343  |
| wavelet-LLL | glcm       | DifferenceAverage                    | 24.60718682  |
| wavelet-LLL | glcm       | Id                                   | 0.091707174  |
| wavelet-LLL | glcm       | ClusterTendency                      | 1035.971758  |
| wavelet-LLL | firstorder | InterquartileRange                   | 714.4350784  |
| wavelet-LLL | firstorder | Skewness                             | 0.31326579   |
| wavelet-LLL | firstorder | Uniformity                           | 0.036458333  |
| wavelet-LLL | firstorder | Median                               | -847.5625829 |
| wavelet-LLL | firstorder | Energy                               | 45554817.11  |
| wavelet-LLL | firstorder | RobustMeanAbsoluteDeviation          | 292.8180075  |
| wavelet-LLL | firstorder | MeanAbsoluteDeviation                | 418.8424361  |
| wavelet-LLL | firstorder | TotalEnergy                          | 1229980062   |
| wavelet-LLL | firstorder | Maximum                              | 409.6879319  |
| wavelet-LLL | firstorder | RootMeanSquared                      | 974.1964329  |
| wavelet-LLL | firstorder | 90Percentile                         | -114.5634138 |
| wavelet-LLL | firstorder | Minimum                              | -1793.994863 |
| wavelet-LLL | firstorder | Entropy                              | 4.912782032  |
| wavelet-LLL | firstorder | Range                                | 2203.682795  |
| wavelet-LLL | firstorder | Variance                             | 278104.7497  |
| wavelet-LLL | firstorder | 10Percentile                         | -1519.111368 |
| wavelet-LLL | firstorder | Kurtosis                             | 2.535266187  |
| wavelet-LLL | firstorder | Mean                                 | -819.1177816 |
| wavelet-LLL | glrlm      | ShortRunLowGrayLevelEmphasis         | 0.022952276  |

|             |       |                                      |             |
|-------------|-------|--------------------------------------|-------------|
| wavelet-LLL | glrlm | GrayLevelVariance                    | 448.3676278 |
| wavelet-LLL | glrlm | LowGrayLevelRunEmphasis              | 0.022964982 |
| wavelet-LLL | glrlm | GrayLevelNonUniformityNormalized     | 0.036399752 |
| wavelet-LLL | glrlm | RunVariance                          | 0.008009193 |
| wavelet-LLL | glrlm | GrayLevelNonUniformity               | 1.733224223 |
| wavelet-LLL | glrlm | LongRunEmphasis                      | 1.024549918 |
| wavelet-LLL | glrlm | ShortRunHighGrayLevelEmphasis        | 2019.753001 |
| wavelet-LLL | glrlm | RunLengthNonUniformity               | 46.86252046 |
| wavelet-LLL | glrlm | ShortRunEmphasis                     | 0.99386252  |
| wavelet-LLL | glrlm | LongRunHighGrayLevelEmphasis         | 2069.656847 |
| wavelet-LLL | glrlm | RunPercentage                        | 0.991987179 |
| wavelet-LLL | glrlm | LongRunLowGrayLevelEmphasis          | 0.023015808 |
| wavelet-LLL | glrlm | RunEntropy                           | 4.920983448 |
| wavelet-LLL | glrlm | HighGrayLevelRunEmphasis             | 2029.73377  |
| wavelet-LLL | glrlm | RunLengthNonUniformityNormalized     | 0.983981614 |
| wavelet-LLL | glszm | GrayLevelVariance                    | 474.8599243 |
| wavelet-LLL | glszm | ZoneVariance                         | 0.149269876 |
| wavelet-LLL | glszm | GrayLevelNonUniformityNormalized     | 0.036235803 |
| wavelet-LLL | glszm | SizeZoneNonUniformityNormalized      | 0.828015143 |
| wavelet-LLL | glszm | SizeZoneNonUniformity                | 35.60465116 |
| wavelet-LLL | glszm | GrayLevelNonUniformity               | 1.558139535 |
| wavelet-LLL | glszm | LargeAreaEmphasis                    | 1.395348837 |
| wavelet-LLL | glszm | SmallAreaHighGrayLevelEmphasis       | 1953.919251 |
| wavelet-LLL | glszm | ZonePercentage                       | 0.895833333 |
| wavelet-LLL | glszm | LargeAreaLowGrayLevelEmphasis        | 0.025956549 |
| wavelet-LLL | glszm | LargeAreaHighGrayLevelEmphasis       | 2714.697674 |
| wavelet-LLL | glszm | HighGrayLevelZoneEmphasis            | 2073        |
| wavelet-LLL | glszm | SmallAreaEmphasis                    | 0.927002584 |
| wavelet-LLL | glszm | LowGrayLevelZoneEmphasis             | 0.025205273 |
| wavelet-LLL | glszm | ZoneEntropy                          | 4.926037429 |
| wavelet-LLL | glszm | SmallAreaLowGrayLevelEmphasis        | 0.025033604 |
| wavelet-LLL | ngtdm | Coarseness                           | 0.036424788 |
| wavelet-LLL | ngtdm | Complexity                           | 16761.74718 |
| wavelet-LLL | ngtdm | Strength                             | 83.88723917 |
| wavelet-LLL | ngtdm | Contrast                             | 13.89224599 |
| wavelet-LLL | ngtdm | Busyness                             | 0.031289389 |
| wavelet-HHL | gldm  | GrayLevelVariance                    | 18.82638889 |
| wavelet-HHL | gldm  | HighGrayLevelEmphasis                | 110.6666667 |
| wavelet-HHL | gldm  | DependenceEntropy                    | 4.563721876 |
| wavelet-HHL | gldm  | DependenceNonUniformity              | 15.125      |
| wavelet-HHL | gldm  | GrayLevelNonUniformity               | 4.083333333 |
| wavelet-HHL | gldm  | SmallDependenceEmphasis              | 0.391458333 |
| wavelet-HHL | gldm  | SmallDependenceHighGrayLevelEmphasis | 47.3197338  |
| wavelet-HHL | gldm  | DependenceNonUniformityNormalized    | 0.315104167 |
| wavelet-HHL | gldm  | LargeDependenceEmphasis              | 5.625       |
| wavelet-HHL | gldm  | LargeDependenceLowGrayLevelEmphasis  | 0.629645226 |
| wavelet-HHL | gldm  | DependenceVariance                   | 0.930555556 |
| wavelet-HHL | gldm  | LargeDependenceHighGrayLevelEmphasis | 589         |
| wavelet-HHL | gldm  | SmallDependenceLowGrayLevelEmphasis  | 0.013942202 |
| wavelet-HHL | gldm  | LowGrayLevelEmphasis                 | 0.077658747 |
| wavelet-HHL | glcm  | JointAverage                         | 9.407013309 |
| wavelet-HHL | glcm  | SumAverage                           | 18.81402662 |
| wavelet-HHL | glcm  | JointEntropy                         | 5.298188341 |
| wavelet-HHL | glcm  | ClusterShade                         | -27.8706233 |

|             |            |                                  |              |
|-------------|------------|----------------------------------|--------------|
| wavelet-HHL | glcm       | MaximumProbability               | 0.047264824  |
| wavelet-HHL | glcm       | Idmn                             | 0.918161297  |
| wavelet-HHL | glcm       | JointEnergy                      | 0.027531959  |
| wavelet-HHL | glcm       | Contrast                         | 37.16652883  |
| wavelet-HHL | glcm       | DifferenceEntropy                | 3.182218237  |
| wavelet-HHL | glcm       | InverseVariance                  | 0.168182425  |
| wavelet-HHL | glcm       | DifferenceVariance               | 13.02950481  |
| wavelet-HHL | glcm       | Idn                              | 0.814382368  |
| wavelet-HHL | glcm       | Idm                              | 0.195558794  |
| wavelet-HHL | glcm       | Correlation                      | 0.029893476  |
| wavelet-HHL | glcm       | Autocorrelation                  | 89.21518384  |
| wavelet-HHL | glcm       | SumEntropy                       | 3.780828495  |
| wavelet-HHL | glcm       | SumSquares                       | 19.22837785  |
| wavelet-HHL | glcm       | ClusterProminence                | 4415.953953  |
| wavelet-HHL | glcm       | Imc2                             | 0.98900263   |
| wavelet-HHL | glcm       | Imc1                             | -0.543345399 |
| wavelet-HHL | glcm       | DifferenceAverage                | 4.853089229  |
| wavelet-HHL | glcm       | Id                               | 0.289243928  |
| wavelet-HHL | glcm       | ClusterTendency                  | 39.74698256  |
| wavelet-HHL | firstorder | InterquartileRange               | 143.5177256  |
| wavelet-HHL | firstorder | Skewness                         | 0.078224853  |
| wavelet-HHL | firstorder | Uniformity                       | 0.085069444  |
| wavelet-HHL | firstorder | Median                           | 10.09349898  |
| wavelet-HHL | firstorder | Energy                           | 576050.0161  |
| wavelet-HHL | firstorder | RobustMeanAbsoluteDeviation      | 58.72984688  |
| wavelet-HHL | firstorder | MeanAbsoluteDeviation            | 86.28632201  |
| wavelet-HHL | firstorder | TotalEnergy                      | 15553350.43  |
| wavelet-HHL | firstorder | Maximum                          | 249.7377376  |
| wavelet-HHL | firstorder | RootMeanSquared                  | 109.5492675  |
| wavelet-HHL | firstorder | 90Percentile                     | 131.7927557  |
| wavelet-HHL | firstorder | Minimum                          | -222.9403485 |
| wavelet-HHL | firstorder | Entropy                          | 3.714328127  |
| wavelet-HHL | firstorder | Range                            | 472.6780861  |
| wavelet-HHL | firstorder | Variance                         | 11986.64884  |
| wavelet-HHL | firstorder | 10Percentile                     | -125.8474029 |
| wavelet-HHL | firstorder | Kurtosis                         | 2.72902533   |
| wavelet-HHL | firstorder | Mean                             | 3.793831586  |
| wavelet-HHL | glrlm      | ShortRunLowGrayLevelEmphasis     | 0.071308804  |
| wavelet-HHL | glrlm      | GrayLevelVariance                | 18.96120275  |
| wavelet-HHL | glrlm      | LowGrayLevelRunEmphasis          | 0.075630658  |
| wavelet-HHL | glrlm      | GrayLevelNonUniformityNormalized | 0.084906872  |
| wavelet-HHL | glrlm      | RunVariance                      | 0.044562688  |
| wavelet-HHL | glrlm      | GrayLevelNonUniformity           | 3.892310531  |
| wavelet-HHL | glrlm      | LongRunEmphasis                  | 1.144261289  |
| wavelet-HHL | glrlm      | ShortRunHighGrayLevelEmphasis    | 107.3739665  |
| wavelet-HHL | glrlm      | RunLengthNonUniformity           | 41.84713048  |
| wavelet-HHL | glrlm      | ShortRunEmphasis                 | 0.963934678  |
| wavelet-HHL | glrlm      | LongRunHighGrayLevelEmphasis     | 125.833264   |
| wavelet-HHL | glrlm      | RunPercentage                    | 0.955128205  |
| wavelet-HHL | glrlm      | LongRunLowGrayLevelEmphasis      | 0.092918075  |
| wavelet-HHL | glrlm      | RunEntropy                       | 3.843869637  |
| wavelet-HHL | glrlm      | HighGrayLevelRunEmphasis         | 111.065826   |
| wavelet-HHL | glrlm      | RunLengthNonUniformityNormalized | 0.910874624  |
| wavelet-HHL | glszm      | GrayLevelVariance                | 22.81770833  |

|             |       |                                      |              |
|-------------|-------|--------------------------------------|--------------|
| wavelet-HHL | glszm | ZoneVariance                         | 2            |
| wavelet-HHL | glszm | GrayLevelNonUniformityNormalized     | 0.086805556  |
| wavelet-HHL | glszm | SizeZoneNonUniformityNormalized      | 0.336805556  |
| wavelet-HHL | glszm | SizeZoneNonUniformity                | 8.083333333  |
| wavelet-HHL | glszm | GrayLevelNonUniformity               | 2.083333333  |
| wavelet-HHL | glszm | LargeAreaEmphasis                    | 6            |
| wavelet-HHL | glszm | SmallAreaHighGrayLevelEmphasis       | 72.38509188  |
| wavelet-HHL | glszm | ZonePercentage                       | 0.5          |
| wavelet-HHL | glszm | LargeAreaLowGrayLevelEmphasis        | 0.45089678   |
| wavelet-HHL | glszm | LargeAreaHighGrayLevelEmphasis       | 651.5        |
| wavelet-HHL | glszm | HighGrayLevelZoneEmphasis            | 115.4583333  |
| wavelet-HHL | glszm | SmallAreaEmphasis                    | 0.582447562  |
| wavelet-HHL | glszm | LowGrayLevelZoneEmphasis             | 0.059071348  |
| wavelet-HHL | glszm | ZoneEntropy                          | 4.136842188  |
| wavelet-HHL | glszm | SmallAreaLowGrayLevelEmphasis        | 0.015742864  |
| wavelet-HHL | ngtdm | Coarseness                           | 0.085170879  |
| wavelet-HHL | ngtdm | Complexity                           | 336.7484249  |
| wavelet-HHL | ngtdm | Strength                             | 7.990375063  |
| wavelet-HHL | ngtdm | Contrast                             | 0.612096009  |
| wavelet-HHL | ngtdm | Busyness                             | 0.122836293  |
| wavelet-HLH | gldm  | GrayLevelVariance                    | 46.99826389  |
| wavelet-HLH | gldm  | HighGrayLevelEmphasis                | 475.8333333  |
| wavelet-HLH | gldm  | DependenceEntropy                    | 4.803508855  |
| wavelet-HLH | gldm  | DependenceNonUniformity              | 20.16666667  |
| wavelet-HLH | gldm  | GrayLevelNonUniformity               | 2.708333333  |
| wavelet-HLH | gldm  | SmallDependenceEmphasis              | 0.638888889  |
| wavelet-HLH | gldm  | SmallDependenceHighGrayLevelEmphasis | 309.4930556  |
| wavelet-HLH | gldm  | DependenceNonUniformityNormalized    | 0.420138889  |
| wavelet-HLH | gldm  | LargeDependenceEmphasis              | 3            |
| wavelet-HLH | gldm  | LargeDependenceLowGrayLevelEmphasis  | 0.030533792  |
| wavelet-HLH | gldm  | DependenceVariance                   | 0.493055556  |
| wavelet-HLH | gldm  | LargeDependenceHighGrayLevelEmphasis | 1322.583333  |
| wavelet-HLH | gldm  | SmallDependenceLowGrayLevelEmphasis  | 0.023354951  |
| wavelet-HLH | gldm  | LowGrayLevelEmphasis                 | 0.024347204  |
| wavelet-HLH | glcm  | JointAverage                         | 20.85572691  |
| wavelet-HLH | glcm  | SumAverage                           | 41.71145382  |
| wavelet-HLH | glcm  | JointEntropy                         | 5.497140543  |
| wavelet-HLH | glcm  | ClusterShade                         | -182.1729454 |
| wavelet-HLH | glcm  | MaximumProbability                   | 0.036562058  |
| wavelet-HLH | glcm  | Idmn                                 | 0.92987223   |
| wavelet-HLH | glcm  | JointEnergy                          | 0.023300087  |
| wavelet-HLH | glcm  | Contrast                             | 106.4978008  |
| wavelet-HLH | glcm  | DifferenceEntropy                    | 3.616995284  |
| wavelet-HLH | glcm  | InverseVariance                      | 0.121225545  |
| wavelet-HLH | glcm  | DifferenceVariance                   | 39.05885481  |
| wavelet-HLH | glcm  | Idn                                  | 0.828411397  |
| wavelet-HLH | glcm  | Idm                                  | 0.12088402   |
| wavelet-HLH | glcm  | Correlation                          | -0.046114362 |
| wavelet-HLH | glcm  | Autocorrelation                      | 432.4552347  |
| wavelet-HLH | glcm  | SumEntropy                           | 4.008305175  |
| wavelet-HLH | glcm  | SumSquares                           | 50.53262885  |
| wavelet-HLH | glcm  | ClusterProminence                    | 27499.27463  |
| wavelet-HLH | glcm  | Imc2                                 | 0.998340684  |
| wavelet-HLH | glcm  | Imc1                                 | -0.694628728 |



|             |            |                                  |              |
|-------------|------------|----------------------------------|--------------|
| wavelet-HLH | glcm       | DifferenceAverage                | 8.098792743  |
| wavelet-HLH | glcm       | Id                               | 0.207713198  |
| wavelet-HLH | glcm       | ClusterTendency                  | 95.63271461  |
| wavelet-HLH | firstorder | InterquartileRange               | 226.4752729  |
| wavelet-HLH | firstorder | Skewness                         | -0.377974321 |
| wavelet-HLH | firstorder | Uniformity                       | 0.056423611  |
| wavelet-HLH | firstorder | Median                           | 44.90442385  |
| wavelet-HLH | firstorder | Energy                           | 1426046.871  |
| wavelet-HLH | firstorder | RobustMeanAbsoluteDeviation      | 90.02426954  |
| wavelet-HLH | firstorder | MeanAbsoluteDeviation            | 132.9295907  |
| wavelet-HLH | firstorder | TotalEnergy                      | 38503265.5   |
| wavelet-HLH | firstorder | Maximum                          | 386.9767689  |
| wavelet-HLH | firstorder | RootMeanSquared                  | 172.3638878  |
| wavelet-HLH | firstorder | 90Percentile                     | 233.3947957  |
| wavelet-HLH | firstorder | Minimum                          | -459.149839  |
| wavelet-HLH | firstorder | Entropy                          | 4.28226823   |
| wavelet-HLH | firstorder | Range                            | 846.1266079  |
| wavelet-HLH | firstorder | Variance                         | 28833.53641  |
| wavelet-HLH | firstorder | 10Percentile                     | -159.5973858 |
| wavelet-HLH | firstorder | Kurtosis                         | 3.362309574  |
| wavelet-HLH | firstorder | Mean                             | 29.59346883  |
| wavelet-HLH | glrlm      | ShortRunLowGrayLevelEmphasis     | 0.024800606  |
| wavelet-HLH | glrlm      | GrayLevelVariance                | 47.56125241  |
| wavelet-HLH | glrlm      | LowGrayLevelRunEmphasis          | 0.024853057  |
| wavelet-HLH | glrlm      | GrayLevelNonUniformityNormalized | 0.056265685  |
| wavelet-HLH | glrlm      | RunVariance                      | 0.022351866  |
| wavelet-HLH | glrlm      | GrayLevelNonUniformity           | 2.640526898  |
| wavelet-HLH | glrlm      | LongRunEmphasis                  | 1.070946999  |
| wavelet-HLH | glrlm      | ShortRunHighGrayLevelEmphasis    | 468.969881   |
| wavelet-HLH | glrlm      | RunLengthNonUniformity           | 44.88568859  |
| wavelet-HLH | glrlm      | ShortRunEmphasis                 | 0.98226325   |
| wavelet-HLH | glrlm      | LongRunHighGrayLevelEmphasis     | 507.7908126  |
| wavelet-HLH | glrlm      | RunPercentage                    | 0.977564103  |
| wavelet-HLH | glrlm      | LongRunLowGrayLevelEmphasis      | 0.025062859  |
| wavelet-HLH | glrlm      | RunEntropy                       | 4.336687877  |
| wavelet-HLH | glrlm      | HighGrayLevelRunEmphasis         | 476.7340673  |
| wavelet-HLH | glrlm      | RunLengthNonUniformityNormalized | 0.955296267  |
| wavelet-HLH | glszm      | GrayLevelVariance                | 55.44444444  |
| wavelet-HLH | glszm      | ZoneVariance                     | 0.333333333  |
| wavelet-HLH | glszm      | GrayLevelNonUniformityNormalized | 0.052469136  |
| wavelet-HLH | glszm      | SizeZoneNonUniformityNormalized  | 0.574074074  |
| wavelet-HLH | glszm      | SizeZoneNonUniformity            | 20.66666667  |
| wavelet-HLH | glszm      | GrayLevelNonUniformity           | 1.888888889  |
| wavelet-HLH | glszm      | LargeAreaEmphasis                | 2.111111111  |
| wavelet-HLH | glszm      | SmallAreaHighGrayLevelEmphasis   | 379.7237654  |
| wavelet-HLH | glszm      | ZonePercentage                   | 0.75         |
| wavelet-HLH | glszm      | LargeAreaLowGrayLevelEmphasis    | 0.034769018  |
| wavelet-HLH | glszm      | LargeAreaHighGrayLevelEmphasis   | 974.5        |
| wavelet-HLH | glszm      | HighGrayLevelZoneEmphasis        | 482.5555556  |
| wavelet-HLH | glszm      | SmallAreaEmphasis                | 0.783950617  |
| wavelet-HLH | glszm      | LowGrayLevelZoneEmphasis         | 0.031531656  |
| wavelet-HLH | glszm      | ZoneEntropy                      | 4.836591668  |
| wavelet-HLH | glszm      | SmallAreaLowGrayLevelEmphasis    | 0.030968713  |
| wavelet-HLH | ngtdm      | Coarseness                       | 0.077174613  |

|             |       |            |             |
|-------------|-------|------------|-------------|
| wavelet-HLH | ngtdm | Complexity | 1333.739652 |
| wavelet-HLH | ngtdm | Strength   | 18.83589599 |
| wavelet-HLH | ngtdm | Contrast   | 1.173086507 |
| wavelet-HLH | ngtdm | Busyness   | 0.042694    |

| Image type | Feature Class | Feature Name                         | Value                                                                                                                                                                                                                                                                                                                                                                                                             |
|------------|---------------|--------------------------------------|-------------------------------------------------------------------------------------------------------------------------------------------------------------------------------------------------------------------------------------------------------------------------------------------------------------------------------------------------------------------------------------------------------------------|
| general    | info          | BoundingBox                          | 10: RTSTRUCT: C99-DNU_A_segment_RUL ITV<br>(5, 1, 1, 6, 6, 6)                                                                                                                                                                                                                                                                                                                                                     |
| general    | info          | EnabledImageTypes                    | {u'Original': {}, u'Wavelet': {}}                                                                                                                                                                                                                                                                                                                                                                                 |
|            |               |                                      | {'distances': [1], 'additionalInfo': True, 'force2D': False, 'interpolator': 'sitkBSpline', 'resampledPixelSpacing': [3.0], 'label': 1, 'normalizeScale': 1, 'normalize': False, 'force2Ddimension': 0, 'removeOutliers': None, 'minimumROISize': None, u'binWidth': 25.0, 'minimumROIDimensions': 1, u'correctMask': True, 'preCrop': False, u'symmetricalGLCM': True, 'resegmentRange': None, 'padDistance': 5} |
| general    | info          | GeneralSettings                      |                                                                                                                                                                                                                                                                                                                                                                                                                   |
| general    | info          | ImageHash                            | 4072bf1329b15faf8f6abecd7e113d800cee3d9d                                                                                                                                                                                                                                                                                                                                                                          |
| general    | info          | ImageSpacing                         | (0.8359375, 0.8359375, 2.0)                                                                                                                                                                                                                                                                                                                                                                                       |
| general    | info          | MaskHash                             | 6354f2ac22fece298d47e5ee26554967d53183d5                                                                                                                                                                                                                                                                                                                                                                          |
| general    | info          | NumpyVersion                         | 1.13.1                                                                                                                                                                                                                                                                                                                                                                                                            |
| general    | info          | PyWaveletVersion                     | 0.5.2                                                                                                                                                                                                                                                                                                                                                                                                             |
| general    | info          | SimpleITKVersion                     | 1.1.0                                                                                                                                                                                                                                                                                                                                                                                                             |
| general    | info          | Version                              | 1.3.0.post102+g1b0eb74                                                                                                                                                                                                                                                                                                                                                                                            |
| general    | info          | VolumeNum                            | 1                                                                                                                                                                                                                                                                                                                                                                                                                 |
| general    | info          | VoxelNum                             | 104                                                                                                                                                                                                                                                                                                                                                                                                               |
| original   | shape         | Maximum3DDiameter                    | 21.21320344                                                                                                                                                                                                                                                                                                                                                                                                       |
| original   | shape         | Maximum2DDiameterSlice               | 17.49285568                                                                                                                                                                                                                                                                                                                                                                                                       |
| original   | shape         | Sphericity                           | 0.8907489                                                                                                                                                                                                                                                                                                                                                                                                         |
| original   | shape         | MinorAxis                            | 16.02116929                                                                                                                                                                                                                                                                                                                                                                                                       |
| original   | shape         | Elongation                           | 0.811935729                                                                                                                                                                                                                                                                                                                                                                                                       |
| original   | shape         | SurfaceVolumeRatio                   | 0.384824867                                                                                                                                                                                                                                                                                                                                                                                                       |
| original   | shape         | Volume                               | 2808                                                                                                                                                                                                                                                                                                                                                                                                              |
| original   | shape         | MajorAxis                            | 19.73206588                                                                                                                                                                                                                                                                                                                                                                                                       |
| original   | shape         | SurfaceArea                          | 1080.588228                                                                                                                                                                                                                                                                                                                                                                                                       |
| original   | shape         | Flatness                             | 0.643519499                                                                                                                                                                                                                                                                                                                                                                                                       |
| original   | shape         | LeastAxis                            | 12.69796915                                                                                                                                                                                                                                                                                                                                                                                                       |
| original   | shape         | Maximum2DDiameterColumn              | 17.49285568                                                                                                                                                                                                                                                                                                                                                                                                       |
| original   | shape         | Maximum2DDiameterRow                 | 17.49285568                                                                                                                                                                                                                                                                                                                                                                                                       |
| original   | gldm          | GrayLevelVariance                    | 108.303162                                                                                                                                                                                                                                                                                                                                                                                                        |
| original   | gldm          | HighGrayLevelEmphasis                | 827.4711538                                                                                                                                                                                                                                                                                                                                                                                                       |
| original   | gldm          | DependenceEntropy                    | 5.602949665                                                                                                                                                                                                                                                                                                                                                                                                       |
| original   | gldm          | DependenceNonUniformity              | 44.46153846                                                                                                                                                                                                                                                                                                                                                                                                       |
| original   | gldm          | GrayLevelNonUniformity               | 3.826923077                                                                                                                                                                                                                                                                                                                                                                                                       |
| original   | gldm          | SmallDependenceEmphasis              | 0.651308761                                                                                                                                                                                                                                                                                                                                                                                                       |
| original   | gldm          | SmallDependenceHighGrayLevelEmphasis | 534.8681891                                                                                                                                                                                                                                                                                                                                                                                                       |
| original   | gldm          | DependenceNonUniformityNormalized    | 0.427514793                                                                                                                                                                                                                                                                                                                                                                                                       |
| original   | gldm          | LargeDependenceEmphasis              | 3.038461538                                                                                                                                                                                                                                                                                                                                                                                                       |
| original   | gldm          | LargeDependenceLowGrayLevelEmphasis  | 0.016961428                                                                                                                                                                                                                                                                                                                                                                                                       |
| original   | gldm          | DependenceVariance                   | 0.551775148                                                                                                                                                                                                                                                                                                                                                                                                       |
| original   | gldm          | LargeDependenceHighGrayLevelEmphasis | 2762.586538                                                                                                                                                                                                                                                                                                                                                                                                       |
| original   | gldm          | SmallDependenceLowGrayLevelEmphasis  | 0.012098426                                                                                                                                                                                                                                                                                                                                                                                                       |
| original   | gldm          | LowGrayLevelEmphasis                 | 0.012885227                                                                                                                                                                                                                                                                                                                                                                                                       |
| original   | glcm          | JointAverage                         | 28.22849195                                                                                                                                                                                                                                                                                                                                                                                                       |
| original   | glcm          | SumAverage                           | 56.45698391                                                                                                                                                                                                                                                                                                                                                                                                       |
| original   | glcm          | JointEntropy                         | 6.827091908                                                                                                                                                                                                                                                                                                                                                                                                       |
| original   | glcm          | ClusterShade                         | -716.4576132                                                                                                                                                                                                                                                                                                                                                                                                      |
| original   | glcm          | MaximumProbability                   | 0.020070371                                                                                                                                                                                                                                                                                                                                                                                                       |
| original   | glcm          | Idmn                                 | 0.90996557                                                                                                                                                                                                                                                                                                                                                                                                        |
| original   | glcm          | JointEnergy                          | 0.009312714                                                                                                                                                                                                                                                                                                                                                                                                       |

|          |            |                                  |              |
|----------|------------|----------------------------------|--------------|
| original | glcm       | Contrast                         | 227.203915   |
| original | glcm       | DifferenceEntropy                | 4.517911242  |
| original | glcm       | InverseVariance                  | 0.101779163  |
| original | glcm       | DifferenceVariance               | 85.80452296  |
| original | glcm       | Idn                              | 0.808662409  |
| original | glcm       | Idm                              | 0.098285353  |
| original | glcm       | Correlation                      | 0.01146354   |
| original | glcm       | Autocorrelation                  | 798.1914702  |
| original | glcm       | SumEntropy                       | 5.098873345  |
| original | glcm       | SumSquares                       | 114.8510695  |
| original | glcm       | ClusterProminence                | 132309.1398  |
| original | glcm       | Imc2                             | 0.998365081  |
| original | glcm       | Imc1                             | -0.594920338 |
| original | glcm       | DifferenceAverage                | 11.82206834  |
| original | glcm       | Id                               | 0.171800914  |
| original | glcm       | ClusterTendency                  | 232.2003628  |
| original | firstorder | InterquartileRange               | 471.75       |
| original | firstorder | Skewness                         | -0.212676709 |
| original | firstorder | Uniformity                       | 0.036797337  |
| original | firstorder | Median                           | -304         |
| original | firstorder | Energy                           | 19161865     |
| original | firstorder | RobustMeanAbsoluteDeviation      | 181.2817535  |
| original | firstorder | MeanAbsoluteDeviation            | 225.4497041  |
| original | firstorder | TotalEnergy                      | 517370355    |
| original | firstorder | Maximum                          | 87           |
| original | firstorder | RootMeanSquared                  | 429.2420086  |
| original | firstorder | 90Percentile                     | -2.1         |
| original | firstorder | Minimum                          | -980         |
| original | firstorder | Entropy                          | 4.942497291  |
| original | firstorder | Range                            | 1067         |
| original | firstorder | Variance                         | 67475.35494  |
| original | firstorder | 10Percentile                     | -680         |
| original | firstorder | Kurtosis                         | 2.007405697  |
| original | firstorder | Mean                             | -341.7211538 |
| original | glrlm      | ShortRunLowGrayLevelEmphasis     | 0.013096611  |
| original | glrlm      | GrayLevelVariance                | 108.287828   |
| original | glrlm      | LowGrayLevelRunEmphasis          | 0.013132886  |
| original | glrlm      | GrayLevelNonUniformityNormalized | 0.036565776  |
| original | glrlm      | RunVariance                      | 0.022157142  |
| original | glrlm      | GrayLevelNonUniformity           | 3.718783599  |
| original | glrlm      | LongRunEmphasis                  | 1.068922188  |
| original | glrlm      | ShortRunHighGrayLevelEmphasis    | 810.2265382  |
| original | glrlm      | RunLengthNonUniformity           | 97.24014349  |
| original | glrlm      | ShortRunEmphasis                 | 0.982769453  |
| original | glrlm      | LongRunHighGrayLevelEmphasis     | 887.915802   |
| original | glrlm      | RunPercentage                    | 0.977810651  |
| original | glrlm      | LongRunLowGrayLevelEmphasis      | 0.013277986  |
| original | glrlm      | RunEntropy                       | 5.013497055  |
| original | glrlm      | HighGrayLevelRunEmphasis         | 825.7643909  |
| original | glrlm      | RunLengthNonUniformityNormalized | 0.955685716  |
| original | glszm      | GrayLevelVariance                | 108.0921053  |
| original | glszm      | ZoneVariance                     | 0.653739612  |
| original | glszm      | GrayLevelNonUniformityNormalized | 0.03566482   |
| original | glszm      | SizeZoneNonUniformityNormalized  | 0.609764543  |
| original | glszm      | SizeZoneNonUniformity            | 46.34210526  |
| original | glszm      | GrayLevelNonUniformity           | 2.710526316  |

|             |            |                                      |              |
|-------------|------------|--------------------------------------|--------------|
| original    | glszm      | LargeAreaEmphasis                    | 2.526315789  |
| original    | glszm      | SmallAreaHighGrayLevelEmphasis       | 664.2408626  |
| original    | glszm      | ZonePercentage                       | 0.730769231  |
| original    | glszm      | LargeAreaLowGrayLevelEmphasis        | 0.019810834  |
| original    | glszm      | LargeAreaHighGrayLevelEmphasis       | 2329.776316  |
| original    | glszm      | HighGrayLevelZoneEmphasis            | 810.3421053  |
| original    | glszm      | SmallAreaEmphasis                    | 0.808479532  |
| original    | glszm      | LowGrayLevelZoneEmphasis             | 0.016822993  |
| original    | glszm      | ZoneEntropy                          | 5.387610698  |
| original    | glszm      | SmallAreaLowGrayLevelEmphasis        | 0.016360816  |
| original    | ngtdm      | Coarseness                           | 0.031106942  |
| original    | ngtdm      | Complexity                           | 4914.105197  |
| original    | ngtdm      | Strength                             | 18.87966117  |
| original    | ngtdm      | Contrast                             | 1.516559711  |
| original    | ngtdm      | Busyness                             | 0.042231579  |
| wavelet-HHH | gldm       | GrayLevelVariance                    | 24.75998521  |
| wavelet-HHH | gldm       | HighGrayLevelEmphasis                | 262.0384615  |
| wavelet-HHH | gldm       | DependenceEntropy                    | 5.565448372  |
| wavelet-HHH | gldm       | DependenceNonUniformity              | 29.88461538  |
| wavelet-HHH | gldm       | GrayLevelNonUniformity               | 7            |
| wavelet-HHH | gldm       | SmallDependenceEmphasis              | 0.515910791  |
| wavelet-HHH | gldm       | SmallDependenceHighGrayLevelEmphasis | 141.8935016  |
| wavelet-HHH | gldm       | DependenceNonUniformityNormalized    | 0.287352071  |
| wavelet-HHH | gldm       | LargeDependenceEmphasis              | 6.115384615  |
| wavelet-HHH | gldm       | LargeDependenceLowGrayLevelEmphasis  | 0.040916412  |
| wavelet-HHH | gldm       | DependenceVariance                   | 1.640532544  |
| wavelet-HHH | gldm       | LargeDependenceHighGrayLevelEmphasis | 1466.884615  |
| wavelet-HHH | gldm       | SmallDependenceLowGrayLevelEmphasis  | 0.01472511   |
| wavelet-HHH | gldm       | LowGrayLevelEmphasis                 | 0.016986372  |
| wavelet-HHH | glcm       | JointAverage                         | 15.43701439  |
| wavelet-HHH | glcm       | SumAverage                           | 30.87402878  |
| wavelet-HHH | glcm       | JointEntropy                         | 6.501950151  |
| wavelet-HHH | glcm       | ClusterShade                         | -4.251588457 |
| wavelet-HHH | glcm       | MaximumProbability                   | 0.02844516   |
| wavelet-HHH | glcm       | Idmn                                 | 0.952949612  |
| wavelet-HHH | glcm       | JointEnergy                          | 0.012310643  |
| wavelet-HHH | glcm       | Contrast                             | 53.81129233  |
| wavelet-HHH | glcm       | DifferenceEntropy                    | 3.689981603  |
| wavelet-HHH | glcm       | InverseVariance                      | 0.178279137  |
| wavelet-HHH | glcm       | DifferenceVariance                   | 21.80349572  |
| wavelet-HHH | glcm       | Idn                                  | 0.859670496  |
| wavelet-HHH | glcm       | Idm                                  | 0.177655221  |
| wavelet-HHH | glcm       | Correlation                          | -0.038992496 |
| wavelet-HHH | glcm       | Autocorrelation                      | 237.39791    |
| wavelet-HHH | glcm       | SumEntropy                           | 4.355631712  |
| wavelet-HHH | glcm       | SumSquares                           | 25.99038505  |
| wavelet-HHH | glcm       | ClusterProminence                    | 9313.926253  |
| wavelet-HHH | glcm       | Imc2                                 | 0.980854125  |
| wavelet-HHH | glcm       | Imc1                                 | -0.405549054 |
| wavelet-HHH | glcm       | DifferenceAverage                    | 5.596515353  |
| wavelet-HHH | glcm       | Id                                   | 0.268438961  |
| wavelet-HHH | glcm       | ClusterTendency                      | 50.15024788  |
| wavelet-HHH | firstorder | InterquartileRange                   | 152.044027   |
| wavelet-HHH | firstorder | Skewness                             | -0.124334328 |
| wavelet-HHH | firstorder | Uniformity                           | 0.067307692  |
| wavelet-HHH | firstorder | Median                               | 15.99518659  |

|             |            |                                  |              |
|-------------|------------|----------------------------------|--------------|
| wavelet-HHH | firstorder | Energy                           | 1629362.718  |
| wavelet-HHH | firstorder | RobustMeanAbsoluteDeviation      | 61.38696348  |
| wavelet-HHH | firstorder | MeanAbsoluteDeviation            | 95.29023484  |
| wavelet-HHH | firstorder | TotalEnergy                      | 43992793.39  |
| wavelet-HHH | firstorder | Maximum                          | 395.4610263  |
| wavelet-HHH | firstorder | RootMeanSquared                  | 125.1676844  |
| wavelet-HHH | firstorder | 90Percentile                     | 131.866377   |
| wavelet-HHH | firstorder | Minimum                          | -362.0403022 |
| wavelet-HHH | firstorder | Entropy                          | 4.111289243  |
| wavelet-HHH | firstorder | Range                            | 757.5013284  |
| wavelet-HHH | firstorder | Variance                         | 15660.19755  |
| wavelet-HHH | firstorder | 10Percentile                     | -137.0202413 |
| wavelet-HHH | firstorder | Kurtosis                         | 4.191129697  |
| wavelet-HHH | firstorder | Mean                             | -2.598395784 |
| wavelet-HHH | grlm       | ShortRunLowGrayLevelEmphasis     | 0.017390663  |
| wavelet-HHH | grlm       | GrayLevelVariance                | 25.57746617  |
| wavelet-HHH | grlm       | LowGrayLevelRunEmphasis          | 0.01754734   |
| wavelet-HHH | grlm       | GrayLevelNonUniformityNormalized | 0.066026101  |
| wavelet-HHH | grlm       | RunVariance                      | 0.045852637  |
| wavelet-HHH | grlm       | GrayLevelNonUniformity           | 6.57495977   |
| wavelet-HHH | grlm       | LongRunEmphasis                  | 1.14001135   |
| wavelet-HHH | grlm       | ShortRunHighGrayLevelEmphasis    | 255.1061906  |
| wavelet-HHH | grlm       | RunLengthNonUniformity           | 91.43654776  |
| wavelet-HHH | grlm       | ShortRunEmphasis                 | 0.966750441  |
| wavelet-HHH | grlm       | LongRunHighGrayLevelEmphasis     | 296.6663746  |
| wavelet-HHH | grlm       | RunPercentage                    | 0.957100592  |
| wavelet-HHH | grlm       | LongRunLowGrayLevelEmphasis      | 0.018201441  |
| wavelet-HHH | grlm       | RunEntropy                       | 4.299980085  |
| wavelet-HHH | grlm       | HighGrayLevelRunEmphasis         | 263.059156   |
| wavelet-HHH | grlm       | RunLengthNonUniformityNormalized | 0.917227829  |
| wavelet-HHH | glszm      | GrayLevelVariance                | 35.93860562  |
| wavelet-HHH | glszm      | ZoneVariance                     | 1.960457856  |
| wavelet-HHH | glszm      | GrayLevelNonUniformityNormalized | 0.056191467  |
| wavelet-HHH | glszm      | SizeZoneNonUniformityNormalized  | 0.529656608  |
| wavelet-HHH | glszm      | SizeZoneNonUniformity            | 32.83870968  |
| wavelet-HHH | glszm      | GrayLevelNonUniformity           | 3.483870968  |
| wavelet-HHH | glszm      | LargeAreaEmphasis                | 4.774193548  |
| wavelet-HHH | glszm      | SmallAreaHighGrayLevelEmphasis   | 209.4877509  |
| wavelet-HHH | glszm      | ZonePercentage                   | 0.596153846  |
| wavelet-HHH | glszm      | LargeAreaLowGrayLevelEmphasis    | 0.04237497   |
| wavelet-HHH | glszm      | LargeAreaHighGrayLevelEmphasis   | 1207.774194  |
| wavelet-HHH | glszm      | HighGrayLevelZoneEmphasis        | 271.7096774  |
| wavelet-HHH | glszm      | SmallAreaEmphasis                | 0.754566532  |
| wavelet-HHH | glszm      | LowGrayLevelZoneEmphasis         | 0.025345571  |
| wavelet-HHH | glszm      | ZoneEntropy                      | 5.131300343  |
| wavelet-HHH | glszm      | SmallAreaLowGrayLevelEmphasis    | 0.024186977  |
| wavelet-HHH | ngtdm      | Coarseness                       | 0.052671034  |
| wavelet-HHH | ngtdm      | Complexity                       | 881.4285924  |
| wavelet-HHH | ngtdm      | Strength                         | 9.970685759  |
| wavelet-HHH | ngtdm      | Contrast                         | 0.387698208  |
| wavelet-HHH | ngtdm      | Busyness                         | 0.057673788  |
| wavelet-HLL | gldm       | GrayLevelVariance                | 77.65153476  |
| wavelet-HLL | gldm       | HighGrayLevelEmphasis            | 495.9326923  |
| wavelet-HLL | gldm       | DependenceEntropy                | 5.581174064  |
| wavelet-HLL | gldm       | DependenceNonUniformity          | 39.84615385  |
| wavelet-HLL | gldm       | GrayLevelNonUniformity           | 4.153846154  |

|             |            |                                      |              |
|-------------|------------|--------------------------------------|--------------|
| wavelet-HLL | gldm       | SmallDependenceEmphasis              | 0.588274573  |
| wavelet-HLL | gldm       | SmallDependenceHighGrayLevelEmphasis | 290.2895967  |
| wavelet-HLL | gldm       | DependenceNonUniformityNormalized    | 0.383136095  |
| wavelet-HLL | gldm       | LargeDependenceEmphasis              | 3.461538462  |
| wavelet-HLL | gldm       | LargeDependenceLowGrayLevelEmphasis  | 0.029379702  |
| wavelet-HLL | gldm       | DependenceVariance                   | 0.597633136  |
| wavelet-HLL | gldm       | LargeDependenceHighGrayLevelEmphasis | 1732.432692  |
| wavelet-HLL | gldm       | SmallDependenceLowGrayLevelEmphasis  | 0.017526752  |
| wavelet-HLL | gldm       | LowGrayLevelEmphasis                 | 0.019184609  |
| wavelet-HLL | glcm       | JointAverage                         | 19.97884657  |
| wavelet-HLL | glcm       | SumAverage                           | 39.95769314  |
| wavelet-HLL | glcm       | JointEntropy                         | 6.790282779  |
| wavelet-HLL | glcm       | ClusterShade                         | 75.56451027  |
| wavelet-HLL | glcm       | MaximumProbability                   | 0.021823882  |
| wavelet-HLL | glcm       | ldmn                                 | 0.92502333   |
| wavelet-HLL | glcm       | JointEnergy                          | 0.009634153  |
| wavelet-HLL | glcm       | Contrast                             | 133.9544054  |
| wavelet-HLL | glcm       | DifferenceEntropy                    | 4.189536406  |
| wavelet-HLL | glcm       | InverseVariance                      | 0.11990405   |
| wavelet-HLL | glcm       | DifferenceVariance                   | 46.08545623  |
| wavelet-HLL | glcm       | ldn                                  | 0.822636318  |
| wavelet-HLL | glcm       | ldm                                  | 0.11663513   |
| wavelet-HLL | glcm       | Correlation                          | 0.077160122  |
| wavelet-HLL | glcm       | Autocorrelation                      | 405.76788    |
| wavelet-HLL | glcm       | SumEntropy                           | 4.913245417  |
| wavelet-HLL | glcm       | SumSquares                           | 73.40527458  |
| wavelet-HLL | glcm       | ClusterProminence                    | 63928.4286   |
| wavelet-HLL | glcm       | lmc2                                 | 0.997919089  |
| wavelet-HLL | glcm       | lmc1                                 | -0.578130173 |
| wavelet-HLL | glcm       | DifferenceAverage                    | 9.161705012  |
| wavelet-HLL | glcm       | ld                                   | 0.197030111  |
| wavelet-HLL | glcm       | ClusterTendency                      | 159.6666929  |
| wavelet-HLL | firstorder | InterquartileRange                   | 390.2990379  |
| wavelet-HLL | firstorder | Skewness                             | -0.180063698 |
| wavelet-HLL | firstorder | Uniformity                           | 0.039940828  |
| wavelet-HLL | firstorder | Median                               | -53.00471613 |
| wavelet-HLL | firstorder | Energy                               | 5324836.542  |
| wavelet-HLL | firstorder | RobustMeanAbsoluteDeviation          | 140.8014678  |
| wavelet-HLL | firstorder | MeanAbsoluteDeviation                | 184.5021215  |
| wavelet-HLL | firstorder | TotalEnergy                          | 143770586.6  |
| wavelet-HLL | firstorder | Maximum                              | 375.5724081  |
| wavelet-HLL | firstorder | RootMeanSquared                      | 226.2749464  |
| wavelet-HLL | firstorder | 90Percentile                         | 223.8683566  |
| wavelet-HLL | firstorder | Minimum                              | -541.8200883 |
| wavelet-HLL | firstorder | Entropy                              | 4.845631581  |
| wavelet-HLL | firstorder | Range                                | 917.3924964  |
| wavelet-HLL | firstorder | Variance                             | 48480.81153  |
| wavelet-HLL | firstorder | 10Percentile                         | -325.0993081 |
| wavelet-HLL | firstorder | Kurtosis                             | 2.110031769  |
| wavelet-HLL | firstorder | Mean                                 | -52.1492075  |
| wavelet-HLL | glrlm      | ShortRunLowGrayLevelEmphasis         | 0.01951846   |
| wavelet-HLL | glrlm      | GrayLevelVariance                    | 77.93824319  |
| wavelet-HLL | glrlm      | LowGrayLevelRunEmphasis              | 0.019604397  |
| wavelet-HLL | glrlm      | GrayLevelNonUniformityNormalized     | 0.03966443   |
| wavelet-HLL | glrlm      | RunVariance                          | 0.026546408  |
| wavelet-HLL | glrlm      | GrayLevelNonUniformity               | 4.015032878  |

|             |       |                                      |             |
|-------------|-------|--------------------------------------|-------------|
| wavelet-HLL | glrlm | LongRunEmphasis                      | 1.083562583 |
| wavelet-HLL | glrlm | ShortRunHighGrayLevelEmphasis        | 485.3621304 |
| wavelet-HLL | glrlm | RunLengthNonUniformity               | 95.94751855 |
| wavelet-HLL | glrlm | ShortRunEmphasis                     | 0.979109354 |
| wavelet-HLL | glrlm | LongRunHighGrayLevelEmphasis         | 537.6143463 |
| wavelet-HLL | glrlm | RunPercentage                        | 0.973372781 |
| wavelet-HLL | glrlm | LongRunLowGrayLevelEmphasis          | 0.019948147 |
| wavelet-HLL | glrlm | RunEntropy                           | 4.929630998 |
| wavelet-HLL | glrlm | HighGrayLevelRunEmphasis             | 495.8125736 |
| wavelet-HLL | glrlm | RunLengthNonUniformityNormalized     | 0.946907184 |
| wavelet-HLL | glszm | GrayLevelVariance                    | 83.81770833 |
| wavelet-HLL | glszm | ZoneVariance                         | 0.635802469 |
| wavelet-HLL | glszm | GrayLevelNonUniformityNormalized     | 0.036651235 |
| wavelet-HLL | glszm | SizeZoneNonUniformityNormalized      | 0.530864198 |
| wavelet-HLL | glszm | SizeZoneNonUniformity                | 38.22222222 |
| wavelet-HLL | glszm | GrayLevelNonUniformity               | 2.638888889 |
| wavelet-HLL | glszm | LargeAreaEmphasis                    | 2.722222222 |
| wavelet-HLL | glszm | SmallAreaHighGrayLevelEmphasis       | 373.809429  |
| wavelet-HLL | glszm | ZonePercentage                       | 0.692307692 |
| wavelet-HLL | glszm | LargeAreaLowGrayLevelEmphasis        | 0.032888319 |
| wavelet-HLL | glszm | LargeAreaHighGrayLevelEmphasis       | 1365.875    |
| wavelet-HLL | glszm | HighGrayLevelZoneEmphasis            | 495.5694444 |
| wavelet-HLL | glszm | SmallAreaEmphasis                    | 0.755667438 |
| wavelet-HLL | glszm | LowGrayLevelZoneEmphasis             | 0.025906901 |
| wavelet-HLL | glszm | ZoneEntropy                          | 5.428479474 |
| wavelet-HLL | glszm | SmallAreaLowGrayLevelEmphasis        | 0.02493391  |
| wavelet-HLL | ngtdm | Coarseness                           | 0.04069921  |
| wavelet-HLL | ngtdm | Complexity                           | 3193.070272 |
| wavelet-HLL | ngtdm | Strength                             | 19.30640395 |
| wavelet-HLL | ngtdm | Contrast                             | 0.860826505 |
| wavelet-HLL | ngtdm | Busyness                             | 0.037197685 |
| wavelet-LHL | gldm  | GrayLevelVariance                    | 192.5368898 |
| wavelet-LHL | gldm  | HighGrayLevelEmphasis                | 1553.721154 |
| wavelet-LHL | gldm  | DependenceEntropy                    | 5.700063756 |
| wavelet-LHL | gldm  | DependenceNonUniformity              | 49.36538462 |
| wavelet-LHL | gldm  | GrayLevelNonUniformity               | 3.365384615 |
| wavelet-LHL | gldm  | SmallDependenceEmphasis              | 0.708501603 |
| wavelet-LHL | gldm  | SmallDependenceHighGrayLevelEmphasis | 1169.352329 |
| wavelet-LHL | gldm  | DependenceNonUniformityNormalized    | 0.47466716  |
| wavelet-LHL | gldm  | LargeDependenceEmphasis              | 3.134615385 |
| wavelet-LHL | gldm  | LargeDependenceLowGrayLevelEmphasis  | 0.013561035 |
| wavelet-LHL | gldm  | DependenceVariance                   | 0.767751479 |
| wavelet-LHL | gldm  | LargeDependenceHighGrayLevelEmphasis | 4235.586538 |
| wavelet-LHL | gldm  | SmallDependenceLowGrayLevelEmphasis  | 0.01094621  |
| wavelet-LHL | gldm  | LowGrayLevelEmphasis                 | 0.011291765 |
| wavelet-LHL | glcm  | JointAverage                         | 36.01536744 |
| wavelet-LHL | glcm  | SumAverage                           | 72.03073487 |
| wavelet-LHL | glcm  | JointEntropy                         | 6.850969591 |
| wavelet-LHL | glcm  | ClusterShade                         | 873.3909232 |
| wavelet-LHL | glcm  | MaximumProbability                   | 0.021696912 |
| wavelet-LHL | glcm  | ldmn                                 | 0.940758134 |
| wavelet-LHL | glcm  | JointEnergy                          | 0.009190429 |
| wavelet-LHL | glcm  | Contrast                             | 368.2981029 |
| wavelet-LHL | glcm  | DifferenceEntropy                    | 4.607966159 |
| wavelet-LHL | glcm  | InverseVariance                      | 0.074301411 |
| wavelet-LHL | glcm  | DifferenceVariance                   | 150.0886927 |



|             |            |                                  |              |
|-------------|------------|----------------------------------|--------------|
| wavelet-LHL | glcm       | Idn                              | 0.84838579   |
| wavelet-LHL | glcm       | Idm                              | 0.081651757  |
| wavelet-LHL | glcm       | Correlation                      | -0.042894831 |
| wavelet-LHL | glcm       | Autocorrelation                  | 1290.786074  |
| wavelet-LHL | glcm       | SumEntropy                       | 5.200469817  |
| wavelet-LHL | glcm       | SumSquares                       | 177.5507639  |
| wavelet-LHL | glcm       | ClusterProminence                | 420999.7983  |
| wavelet-LHL | glcm       | Imc2                             | 0.999327703  |
| wavelet-LHL | glcm       | Imc1                             | -0.653123664 |
| wavelet-LHL | glcm       | DifferenceAverage                | 14.18241062  |
| wavelet-LHL | glcm       | Id                               | 0.155208809  |
| wavelet-LHL | glcm       | ClusterTendency                  | 341.9049528  |
| wavelet-LHL | firstorder | InterquartileRange               | 441.9718959  |
| wavelet-LHL | firstorder | Skewness                         | -0.051957995 |
| wavelet-LHL | firstorder | Uniformity                       | 0.032359467  |
| wavelet-LHL | firstorder | Median                           | -30.42818308 |
| wavelet-LHL | firstorder | Energy                           | 12663426.05  |
| wavelet-LHL | firstorder | RobustMeanAbsoluteDeviation      | 180.1092484  |
| wavelet-LHL | firstorder | MeanAbsoluteDeviation            | 270.9318724  |
| wavelet-LHL | firstorder | TotalEnergy                      | 341912503.2  |
| wavelet-LHL | firstorder | Maximum                          | 779.5518167  |
| wavelet-LHL | firstorder | RootMeanSquared                  | 348.9465747  |
| wavelet-LHL | firstorder | 90Percentile                     | 372.3657095  |
| wavelet-LHL | firstorder | Minimum                          | -934.3973472 |
| wavelet-LHL | firstorder | Entropy                          | 5.271185305  |
| wavelet-LHL | firstorder | Range                            | 1713.949164  |
| wavelet-LHL | firstorder | Variance                         | 120231.6983  |
| wavelet-LHL | firstorder | 10Percentile                     | -477.7319878 |
| wavelet-LHL | firstorder | Kurtosis                         | 2.924684899  |
| wavelet-LHL | firstorder | Mean                             | -39.14094607 |
| wavelet-LHL | glrlm      | ShortRunLowGrayLevelEmphasis     | 0.01149232   |
| wavelet-LHL | glrlm      | GrayLevelVariance                | 194.7429435  |
| wavelet-LHL | glrlm      | LowGrayLevelRunEmphasis          | 0.011509828  |
| wavelet-LHL | glrlm      | GrayLevelNonUniformityNormalized | 0.031987534  |
| wavelet-LHL | glrlm      | RunVariance                      | 0.022217976  |
| wavelet-LHL | glrlm      | GrayLevelNonUniformity           | 3.257619143  |
| wavelet-LHL | glrlm      | LongRunEmphasis                  | 1.065804241  |
| wavelet-LHL | glrlm      | ShortRunHighGrayLevelEmphasis    | 1539.345128  |
| wavelet-LHL | glrlm      | RunLengthNonUniformity           | 97.82652997  |
| wavelet-LHL | glrlm      | ShortRunEmphasis                 | 0.98440364   |
| wavelet-LHL | glrlm      | LongRunHighGrayLevelEmphasis     | 1644.163223  |
| wavelet-LHL | glrlm      | RunPercentage                    | 0.979289941  |
| wavelet-LHL | glrlm      | LongRunLowGrayLevelEmphasis      | 0.011582499  |
| wavelet-LHL | glrlm      | RunEntropy                       | 5.331333244  |
| wavelet-LHL | glrlm      | HighGrayLevelRunEmphasis         | 1559.422593  |
| wavelet-LHL | glrlm      | RunLengthNonUniformityNormalized | 0.96004097   |
| wavelet-LHL | glszm      | GrayLevelVariance                | 218.521262   |
| wavelet-LHL | glszm      | ZoneVariance                     | 0.549001677  |
| wavelet-LHL | glszm      | GrayLevelNonUniformityNormalized | 0.029111416  |
| wavelet-LHL | glszm      | SizeZoneNonUniformityNormalized  | 0.68175583   |
| wavelet-LHL | glszm      | SizeZoneNonUniformity            | 55.22222222  |
| wavelet-LHL | glszm      | GrayLevelNonUniformity           | 2.358024691  |
| wavelet-LHL | glszm      | LargeAreaEmphasis                | 2.197530864  |
| wavelet-LHL | glszm      | SmallAreaHighGrayLevelEmphasis   | 1426.073388  |
| wavelet-LHL | glszm      | ZonePercentage                   | 0.778846154  |
| wavelet-LHL | glszm      | LargeAreaLowGrayLevelEmphasis    | 0.015483936  |

|             |            |                                      |              |
|-------------|------------|--------------------------------------|--------------|
| wavelet-LHL | glszm      | LargeAreaHighGrayLevelEmphasis       | 3120.555556  |
| wavelet-LHL | glszm      | HighGrayLevelZoneEmphasis            | 1626.160494  |
| wavelet-LHL | glszm      | SmallAreaEmphasis                    | 0.851508916  |
| wavelet-LHL | glszm      | LowGrayLevelZoneEmphasis             | 0.014169361  |
| wavelet-LHL | glszm      | ZoneEntropy                          | 5.617265743  |
| wavelet-LHL | glszm      | SmallAreaLowGrayLevelEmphasis        | 0.013983004  |
| wavelet-LHL | ngtdm      | Coarseness                           | 0.039675793  |
| wavelet-LHL | ngtdm      | Complexity                           | 11484.18252  |
| wavelet-LHL | ngtdm      | Strength                             | 41.96403468  |
| wavelet-LHL | ngtdm      | Contrast                             | 1.853837062  |
| wavelet-LHL | ngtdm      | Busyness                             | 0.017245264  |
| wavelet-LHH | gldm       | GrayLevelVariance                    | 40.74075444  |
| wavelet-LHH | gldm       | HighGrayLevelEmphasis                | 309.8269231  |
| wavelet-LHH | gldm       | DependenceEntropy                    | 5.370595848  |
| wavelet-LHH | gldm       | DependenceNonUniformity              | 41.32692308  |
| wavelet-LHH | gldm       | GrayLevelNonUniformity               | 5.269230769  |
| wavelet-LHH | gldm       | SmallDependenceEmphasis              | 0.578325321  |
| wavelet-LHH | gldm       | SmallDependenceHighGrayLevelEmphasis | 181.0357906  |
| wavelet-LHH | gldm       | DependenceNonUniformityNormalized    | 0.39737426   |
| wavelet-LHH | gldm       | LargeDependenceEmphasis              | 3.307692308  |
| wavelet-LHH | gldm       | LargeDependenceLowGrayLevelEmphasis  | 0.026580149  |
| wavelet-LHH | gldm       | DependenceVariance                   | 0.508505917  |
| wavelet-LHH | gldm       | LargeDependenceHighGrayLevelEmphasis | 1038.346154  |
| wavelet-LHH | gldm       | SmallDependenceLowGrayLevelEmphasis  | 0.015414806  |
| wavelet-LHH | gldm       | LowGrayLevelEmphasis                 | 0.017214152  |
| wavelet-LHH | glcm       | JointAverage                         | 16.57781447  |
| wavelet-LHH | glcm       | SumAverage                           | 33.15562894  |
| wavelet-LHH | glcm       | JointEntropy                         | 6.773056038  |
| wavelet-LHH | glcm       | ClusterShade                         | 57.63850555  |
| wavelet-LHH | glcm       | MaximumProbability                   | 0.01885779   |
| wavelet-LHH | glcm       | ldmn                                 | 0.943638428  |
| wavelet-LHH | glcm       | JointEnergy                          | 0.00971199   |
| wavelet-LHH | glcm       | Contrast                             | 83.56255309  |
| wavelet-LHH | glcm       | DifferenceEntropy                    | 3.966874377  |
| wavelet-LHH | glcm       | InverseVariance                      | 0.16068738   |
| wavelet-LHH | glcm       | DifferenceVariance                   | 32.99721895  |
| wavelet-LHH | glcm       | ldn                                  | 0.847102697  |
| wavelet-LHH | glcm       | ldm                                  | 0.14023198   |
| wavelet-LHH | glcm       | Correlation                          | -0.017541619 |
| wavelet-LHH | glcm       | Autocorrelation                      | 273.9811403  |
| wavelet-LHH | glcm       | SumEntropy                           | 4.636451825  |
| wavelet-LHH | glcm       | SumSquares                           | 40.90016526  |
| wavelet-LHH | glcm       | ClusterProminence                    | 20552.44996  |
| wavelet-LHH | glcm       | lmc2                                 | 0.994434536  |
| wavelet-LHH | glcm       | lmc1                                 | -0.502418068 |
| wavelet-LHH | glcm       | DifferenceAverage                    | 7.032213877  |
| wavelet-LHH | glcm       | ld                                   | 0.228225222  |
| wavelet-LHH | glcm       | ClusterTendency                      | 80.03810797  |
| wavelet-LHH | firstorder | InterquartileRange                   | 181.2806008  |
| wavelet-LHH | firstorder | Skewness                             | 0.241409378  |
| wavelet-LHH | firstorder | Uniformity                           | 0.05066568   |
| wavelet-LHH | firstorder | Median                               | -12.4751897  |
| wavelet-LHH | firstorder | Energy                               | 2651517.141  |
| wavelet-LHH | firstorder | RobustMeanAbsoluteDeviation          | 82.38278229  |
| wavelet-LHH | firstorder | MeanAbsoluteDeviation                | 123.9976098  |
| wavelet-LHH | firstorder | TotalEnergy                          | 71590962.82  |

|             |            |                                      |              |
|-------------|------------|--------------------------------------|--------------|
| wavelet-LHH | firstorder | Maximum                              | 470.3031477  |
| wavelet-LHH | firstorder | RootMeanSquared                      | 159.6726562  |
| wavelet-LHH | firstorder | 90Percentile                         | 200.9211999  |
| wavelet-LHH | firstorder | Minimum                              | -376.6660674 |
| wavelet-LHH | firstorder | Entropy                              | 4.526524936  |
| wavelet-LHH | firstorder | Range                                | 846.9692152  |
| wavelet-LHH | firstorder | Variance                             | 25486.1016   |
| wavelet-LHH | firstorder | 10Percentile                         | -195.5062106 |
| wavelet-LHH | firstorder | Kurtosis                             | 3.314975517  |
| wavelet-LHH | firstorder | Mean                                 | -3.042289831 |
| wavelet-LHH | grlm       | ShortRunLowGrayLevelEmphasis         | 0.017480512  |
| wavelet-LHH | grlm       | GrayLevelVariance                    | 41.36608639  |
| wavelet-LHH | grlm       | LowGrayLevelRunEmphasis              | 0.017563492  |
| wavelet-LHH | grlm       | GrayLevelNonUniformityNormalized     | 0.050343779  |
| wavelet-LHH | grlm       | RunVariance                          | 0.025856505  |
| wavelet-LHH | grlm       | GrayLevelNonUniformity               | 5.100622161  |
| wavelet-LHH | grlm       | LongRunEmphasis                      | 1.080163185  |
| wavelet-LHH | grlm       | ShortRunHighGrayLevelEmphasis        | 303.5388195  |
| wavelet-LHH | grlm       | RunLengthNonUniformity               | 96.09644235  |
| wavelet-LHH | grlm       | ShortRunEmphasis                     | 0.979959204  |
| wavelet-LHH | grlm       | LongRunHighGrayLevelEmphasis         | 334.7538363  |
| wavelet-LHH | grlm       | RunPercentage                        | 0.974112426  |
| wavelet-LHH | grlm       | LongRunLowGrayLevelEmphasis          | 0.017895412  |
| wavelet-LHH | grlm       | RunEntropy                           | 4.629352395  |
| wavelet-LHH | grlm       | HighGrayLevelRunEmphasis             | 309.7818229  |
| wavelet-LHH | grlm       | RunLengthNonUniformityNormalized     | 0.948286991  |
| wavelet-LHH | glszm      | GrayLevelVariance                    | 50.69888117  |
| wavelet-LHH | glszm      | ZoneVariance                         | 0.49691358   |
| wavelet-LHH | glszm      | GrayLevelNonUniformityNormalized     | 0.045910494  |
| wavelet-LHH | glszm      | SizeZoneNonUniformityNormalized      | 0.507330247  |
| wavelet-LHH | glszm      | SizeZoneNonUniformity                | 36.52777778  |
| wavelet-LHH | glszm      | GrayLevelNonUniformity               | 3.305555556  |
| wavelet-LHH | glszm      | LargeAreaEmphasis                    | 2.583333333  |
| wavelet-LHH | glszm      | SmallAreaHighGrayLevelEmphasis       | 230.873071   |
| wavelet-LHH | glszm      | ZonePercentage                       | 0.692307692  |
| wavelet-LHH | glszm      | LargeAreaLowGrayLevelEmphasis        | 0.02952633   |
| wavelet-LHH | glszm      | LargeAreaHighGrayLevelEmphasis       | 812.0555556  |
| wavelet-LHH | glszm      | HighGrayLevelZoneEmphasis            | 309.8194444  |
| wavelet-LHH | glszm      | SmallAreaEmphasis                    | 0.735821759  |
| wavelet-LHH | glszm      | LowGrayLevelZoneEmphasis             | 0.022985391  |
| wavelet-LHH | glszm      | ZoneEntropy                          | 5.290977605  |
| wavelet-LHH | glszm      | SmallAreaLowGrayLevelEmphasis        | 0.021833435  |
| wavelet-LHH | ngtdm      | Coarseness                           | 0.051719956  |
| wavelet-LHH | ngtdm      | Complexity                           | 1656.209037  |
| wavelet-LHH | ngtdm      | Strength                             | 13.76737041  |
| wavelet-LHH | ngtdm      | Contrast                             | 0.517632118  |
| wavelet-LHH | ngtdm      | Busyness                             | 0.048295447  |
| wavelet-LLH | gldm       | GrayLevelVariance                    | 132.6934172  |
| wavelet-LLH | gldm       | HighGrayLevelEmphasis                | 1054.75      |
| wavelet-LLH | gldm       | DependenceEntropy                    | 5.583718896  |
| wavelet-LLH | gldm       | DependenceNonUniformity              | 58.53846154  |
| wavelet-LLH | gldm       | GrayLevelNonUniformity               | 3.576923077  |
| wavelet-LLH | gldm       | SmallDependenceEmphasis              | 0.775641026  |
| wavelet-LLH | gldm       | SmallDependenceHighGrayLevelEmphasis | 813.1864316  |
| wavelet-LLH | gldm       | DependenceNonUniformityNormalized    | 0.562869822  |
| wavelet-LLH | gldm       | LargeDependenceEmphasis              | 2.153846154  |

|             |            |                                      |              |
|-------------|------------|--------------------------------------|--------------|
| wavelet-LLH | gldm       | LargeDependenceLowGrayLevelEmphasis  | 0.03222811   |
| wavelet-LLH | gldm       | DependenceVariance                   | 0.341715976  |
| wavelet-LLH | gldm       | LargeDependenceHighGrayLevelEmphasis | 2350.961538  |
| wavelet-LLH | gldm       | SmallDependenceLowGrayLevelEmphasis  | 0.012544447  |
| wavelet-LLH | gldm       | LowGrayLevelEmphasis                 | 0.016437363  |
| wavelet-LLH | glcm       | JointAverage                         | 29.51550148  |
| wavelet-LLH | glcm       | SumAverage                           | 59.03100296  |
| wavelet-LLH | glcm       | JointEntropy                         | 6.921549572  |
| wavelet-LLH | glcm       | ClusterShade                         | -984.3968278 |
| wavelet-LLH | glcm       | MaximumProbability                   | 0.015799696  |
| wavelet-LLH | glcm       | ldmn                                 | 0.929141916  |
| wavelet-LLH | glcm       | JointEnergy                          | 0.008474483  |
| wavelet-LLH | glcm       | Contrast                             | 312.9165652  |
| wavelet-LLH | glcm       | DifferenceEntropy                    | 4.583336087  |
| wavelet-LLH | glcm       | InverseVariance                      | 0.073129495  |
| wavelet-LLH | glcm       | DifferenceVariance                   | 110.5361978  |
| wavelet-LLH | glcm       | ldn                                  | 0.827968468  |
| wavelet-LLH | glcm       | ldm                                  | 0.068435735  |
| wavelet-LLH | glcm       | Correlation                          | 0.055811119  |
| wavelet-LLH | glcm       | Autocorrelation                      | 880.7994933  |
| wavelet-LLH | glcm       | SumEntropy                           | 5.233540485  |
| wavelet-LLH | glcm       | SumSquares                           | 165.7312204  |
| wavelet-LLH | glcm       | ClusterProminence                    | 355305.3608  |
| wavelet-LLH | glcm       | lmc2                                 | 0.999288683  |
| wavelet-LLH | glcm       | lmc1                                 | -0.645994489 |
| wavelet-LLH | glcm       | DifferenceAverage                    | 13.74095007  |
| wavelet-LLH | glcm       | ld                                   | 0.141732106  |
| wavelet-LLH | glcm       | ClusterTendency                      | 350.0083164  |
| wavelet-LLH | firstorder | InterquartileRange                   | 406.7469264  |
| wavelet-LLH | firstorder | Skewness                             | -0.187705327 |
| wavelet-LLH | firstorder | Uniformity                           | 0.034393491  |
| wavelet-LLH | firstorder | Median                               | -26.96383619 |
| wavelet-LLH | firstorder | Energy                               | 8928349.753  |
| wavelet-LLH | firstorder | RobustMeanAbsoluteDeviation          | 162.1317897  |
| wavelet-LLH | firstorder | MeanAbsoluteDeviation                | 232.2732907  |
| wavelet-LLH | firstorder | TotalEnergy                          | 241065443.3  |
| wavelet-LLH | firstorder | Maximum                              | 650.534406   |
| wavelet-LLH | firstorder | RootMeanSquared                      | 293.000882   |
| wavelet-LLH | firstorder | 90Percentile                         | 297.1961399  |
| wavelet-LLH | firstorder | Minimum                              | -777.7663419 |
| wavelet-LLH | firstorder | Entropy                              | 5.077917368  |
| wavelet-LLH | firstorder | Range                                | 1428.300748  |
| wavelet-LLH | firstorder | Variance                             | 83040.78406  |
| wavelet-LLH | firstorder | 10Percentile                         | -386.526061  |
| wavelet-LLH | firstorder | Kurtosis                             | 2.987838711  |
| wavelet-LLH | firstorder | Mean                                 | -52.9974791  |
| wavelet-LLH | glrlm      | ShortRunLowGrayLevelEmphasis         | 0.016302437  |
| wavelet-LLH | glrlm      | GrayLevelVariance                    | 132.6890583  |
| wavelet-LLH | glrlm      | LowGrayLevelRunEmphasis              | 0.016456318  |
| wavelet-LLH | glrlm      | GrayLevelNonUniformityNormalized     | 0.034208127  |
| wavelet-LLH | glrlm      | RunVariance                          | 0.013304434  |
| wavelet-LLH | glrlm      | GrayLevelNonUniformity               | 3.510518873  |
| wavelet-LLH | glrlm      | LongRunEmphasis                      | 1.040906282  |
| wavelet-LLH | glrlm      | ShortRunHighGrayLevelEmphasis        | 1042.722002  |
| wavelet-LLH | glrlm      | RunLengthNonUniformity               | 99.91309198  |
| wavelet-LLH | glrlm      | ShortRunEmphasis                     | 0.989773429  |

|             |       |                                      |             |
|-------------|-------|--------------------------------------|-------------|
| wavelet-LLH | glrlm | LongRunHighGrayLevelEmphasis         | 1099.314785 |
| wavelet-LLH | glrlm | RunPercentage                        | 0.986686391 |
| wavelet-LLH | glrlm | LongRunLowGrayLevelEmphasis          | 0.017071844 |
| wavelet-LLH | glrlm | RunEntropy                           | 5.121499441 |
| wavelet-LLH | glrlm | HighGrayLevelRunEmphasis             | 1054.040558 |
| wavelet-LLH | glrlm | RunLengthNonUniformityNormalized     | 0.973391132 |
| wavelet-LLH | glszm | GrayLevelVariance                    | 131.7233452 |
| wavelet-LLH | glszm | ZoneVariance                         | 0.249174263 |
| wavelet-LLH | glszm | GrayLevelNonUniformityNormalized     | 0.032104637 |
| wavelet-LLH | glszm | SizeZoneNonUniformityNormalized      | 0.736292773 |
| wavelet-LLH | glszm | SizeZoneNonUniformity                | 64.05747126 |
| wavelet-LLH | glszm | GrayLevelNonUniformity               | 2.793103448 |
| wavelet-LLH | glszm | LargeAreaEmphasis                    | 1.67816092  |
| wavelet-LLH | glszm | SmallAreaHighGrayLevelEmphasis       | 922.3496169 |
| wavelet-LLH | glszm | ZonePercentage                       | 0.836538462 |
| wavelet-LLH | glszm | LargeAreaLowGrayLevelEmphasis        | 0.025963629 |
| wavelet-LLH | glszm | LargeAreaHighGrayLevelEmphasis       | 1811.195402 |
| wavelet-LLH | glszm | HighGrayLevelZoneEmphasis            | 1046.264368 |
| wavelet-LLH | glszm | SmallAreaEmphasis                    | 0.881545338 |
| wavelet-LLH | glszm | LowGrayLevelZoneEmphasis             | 0.016532237 |
| wavelet-LLH | glszm | ZoneEntropy                          | 5.484505818 |
| wavelet-LLH | glszm | SmallAreaLowGrayLevelEmphasis        | 0.014219011 |
| wavelet-LLH | ngtdm | Coarseness                           | 0.037616772 |
| wavelet-LLH | ngtdm | Complexity                           | 6765.103762 |
| wavelet-LLH | ngtdm | Strength                             | 30.06181663 |
| wavelet-LLH | ngtdm | Contrast                             | 1.44730272  |
| wavelet-LLH | ngtdm | Busyness                             | 0.02543819  |
| wavelet-LLL | gldm  | GrayLevelVariance                    | 299.6419194 |
| wavelet-LLL | gldm  | HighGrayLevelEmphasis                | 1402.009615 |
| wavelet-LLL | gldm  | DependenceEntropy                    | 5.844482507 |
| wavelet-LLL | gldm  | DependenceNonUniformity              | 59.90384615 |
| wavelet-LLL | gldm  | GrayLevelNonUniformity               | 2.480769231 |
| wavelet-LLL | gldm  | SmallDependenceEmphasis              | 0.775106838 |
| wavelet-LLL | gldm  | SmallDependenceHighGrayLevelEmphasis | 1160.731838 |
| wavelet-LLL | gldm  | DependenceNonUniformityNormalized    | 0.575998521 |
| wavelet-LLL | gldm  | LargeDependenceEmphasis              | 1.942307692 |
| wavelet-LLL | gldm  | LargeDependenceLowGrayLevelEmphasis  | 0.028390587 |
| wavelet-LLL | gldm  | DependenceVariance                   | 0.232248521 |
| wavelet-LLL | gldm  | LargeDependenceHighGrayLevelEmphasis | 2396.009615 |
| wavelet-LLL | gldm  | SmallDependenceLowGrayLevelEmphasis  | 0.02160126  |
| wavelet-LLL | gldm  | LowGrayLevelEmphasis                 | 0.022946482 |
| wavelet-LLL | glcm  | JointAverage                         | 37.64371573 |
| wavelet-LLL | glcm  | SumAverage                           | 75.28743146 |
| wavelet-LLL | glcm  | JointEntropy                         | 6.951197191 |
| wavelet-LLL | glcm  | ClusterShade                         | 3294.029068 |
| wavelet-LLL | glcm  | MaximumProbability                   | 0.014734935 |
| wavelet-LLL | glcm  | ldmn                                 | 0.937952042 |
| wavelet-LLL | glcm  | JointEnergy                          | 0.008245417 |
| wavelet-LLL | glcm  | Contrast                             | 453.260546  |
| wavelet-LLL | glcm  | DifferenceEntropy                    | 4.812798798 |
| wavelet-LLL | glcm  | InverseVariance                      | 0.060952882 |
| wavelet-LLL | glcm  | DifferenceVariance                   | 160.2794694 |
| wavelet-LLL | glcm  | ldn                                  | 0.836097309 |
| wavelet-LLL | glcm  | ldm                                  | 0.056345421 |
| wavelet-LLL | glcm  | Correlation                          | 0.251908353 |
| wavelet-LLL | glcm  | Autocorrelation                      | 1491.548862 |

|             |            |                                  |              |
|-------------|------------|----------------------------------|--------------|
| wavelet-LLL | glcm       | SumEntropy                       | 5.472527065  |
| wavelet-LLL | glcm       | SumSquares                       | 300.8398244  |
| wavelet-LLL | glcm       | ClusterProminence                | 1381157.098  |
| wavelet-LLL | glcm       | Imc2                             | 0.999813858  |
| wavelet-LLL | glcm       | Imc1                             | -0.725807561 |
| wavelet-LLL | glcm       | DifferenceAverage                | 16.89211847  |
| wavelet-LLL | glcm       | Id                               | 0.122044178  |
| wavelet-LLL | glcm       | ClusterTendency                  | 750.0987517  |
| wavelet-LLL | firstorder | InterquartileRange               | 543.9167647  |
| wavelet-LLL | firstorder | Skewness                         | 0.318065037  |
| wavelet-LLL | firstorder | Uniformity                       | 0.02385355   |
| wavelet-LLL | firstorder | Median                           | -1102.279815 |
| wavelet-LLL | firstorder | Energy                           | 135766713.3  |
| wavelet-LLL | firstorder | RobustMeanAbsoluteDeviation      | 248.0883604  |
| wavelet-LLL | firstorder | MeanAbsoluteDeviation            | 352.0795176  |
| wavelet-LLL | firstorder | TotalEnergy                      | 3665701259   |
| wavelet-LLL | firstorder | Maximum                          | 69.82975856  |
| wavelet-LLL | firstorder | RootMeanSquared                  | 1142.562544  |
| wavelet-LLL | firstorder | 90Percentile                     | -413.4367318 |
| wavelet-LLL | firstorder | Minimum                          | -1855.404034 |
| wavelet-LLL | firstorder | Entropy                          | 5.580213819  |
| wavelet-LLL | firstorder | Range                            | 1925.233793  |
| wavelet-LLL | firstorder | Variance                         | 187002.944   |
| wavelet-LLL | firstorder | 10Percentile                     | -1626.325827 |
| wavelet-LLL | firstorder | Kurtosis                         | 2.507566645  |
| wavelet-LLL | firstorder | Mean                             | -1057.566179 |
| wavelet-LLL | glrlm      | ShortRunLowGrayLevelEmphasis     | 0.023098975  |
| wavelet-LLL | glrlm      | GrayLevelVariance                | 300.1370881  |
| wavelet-LLL | glrlm      | LowGrayLevelRunEmphasis          | 0.02315334   |
| wavelet-LLL | glrlm      | GrayLevelNonUniformityNormalized | 0.023823909  |
| wavelet-LLL | glrlm      | RunVariance                      | 0.011821512  |
| wavelet-LLL | glrlm      | GrayLevelNonUniformity           | 2.448501055  |
| wavelet-LLL | glrlm      | LongRunEmphasis                  | 1.036521229  |
| wavelet-LLL | glrlm      | ShortRunHighGrayLevelEmphasis    | 1396.500366  |
| wavelet-LLL | glrlm      | RunLengthNonUniformity           | 100.3782924  |
| wavelet-LLL | glrlm      | ShortRunEmphasis                 | 0.990869693  |
| wavelet-LLL | glrlm      | LongRunHighGrayLevelEmphasis     | 1444.879554  |
| wavelet-LLL | glrlm      | RunPercentage                    | 0.98816568   |
| wavelet-LLL | glrlm      | LongRunLowGrayLevelEmphasis      | 0.023370799  |
| wavelet-LLL | glrlm      | RunEntropy                       | 5.598135995  |
| wavelet-LLL | glrlm      | HighGrayLevelRunEmphasis         | 1406.176203  |
| wavelet-LLL | glrlm      | RunLengthNonUniformityNormalized | 0.976356976  |
| wavelet-LLL | glszm      | GrayLevelVariance                | 306.9203254  |
| wavelet-LLL | glszm      | ZoneVariance                     | 0.171487603  |
| wavelet-LLL | glszm      | GrayLevelNonUniformityNormalized | 0.022985537  |
| wavelet-LLL | glszm      | SizeZoneNonUniformityNormalized  | 0.713584711  |
| wavelet-LLL | glszm      | SizeZoneNonUniformity            | 62.79545455  |
| wavelet-LLL | glszm      | GrayLevelNonUniformity           | 2.022727273  |
| wavelet-LLL | glszm      | LargeAreaEmphasis                | 1.568181818  |
| wavelet-LLL | glszm      | SmallAreaHighGrayLevelEmphasis   | 1323.467172  |
| wavelet-LLL | glszm      | ZonePercentage                   | 0.846153846  |
| wavelet-LLL | glszm      | LargeAreaLowGrayLevelEmphasis    | 0.029285631  |
| wavelet-LLL | glszm      | LargeAreaHighGrayLevelEmphasis   | 2058.738636  |
| wavelet-LLL | glszm      | HighGrayLevelZoneEmphasis        | 1463.693182  |
| wavelet-LLL | glszm      | SmallAreaEmphasis                | 0.870580808  |
| wavelet-LLL | glszm      | LowGrayLevelZoneEmphasis         | 0.026051849  |

|             |            |                                      |              |
|-------------|------------|--------------------------------------|--------------|
| wavelet-LLL | glszm      | ZoneEntropy                          | 5.811482187  |
| wavelet-LLL | glszm      | SmallAreaLowGrayLevelEmphasis        | 0.025262082  |
| wavelet-LLL | ngtdm      | Coarseness                           | 0.038102018  |
| wavelet-LLL | ngtdm      | Complexity                           | 16424.05026  |
| wavelet-LLL | ngtdm      | Strength                             | 62.88869664  |
| wavelet-LLL | ngtdm      | Contrast                             | 2.287933491  |
| wavelet-LLL | ngtdm      | Busyness                             | 0.019290944  |
| wavelet-HHL | gldm       | GrayLevelVariance                    | 38.94193787  |
| wavelet-HHL | gldm       | HighGrayLevelEmphasis                | 590.2884615  |
| wavelet-HHL | gldm       | DependenceEntropy                    | 5.362377069  |
| wavelet-HHL | gldm       | DependenceNonUniformity              | 40.26923077  |
| wavelet-HHL | gldm       | GrayLevelNonUniformity               | 6.576923077  |
| wavelet-HHL | gldm       | SmallDependenceEmphasis              | 0.608758013  |
| wavelet-HHL | gldm       | SmallDependenceHighGrayLevelEmphasis | 357.1980529  |
| wavelet-HHL | gldm       | DependenceNonUniformityNormalized    | 0.387204142  |
| wavelet-HHL | gldm       | LargeDependenceEmphasis              | 3.596153846  |
| wavelet-HHL | gldm       | LargeDependenceLowGrayLevelEmphasis  | 0.01658821   |
| wavelet-HHL | gldm       | DependenceVariance                   | 0.732248521  |
| wavelet-HHL | gldm       | LargeDependenceHighGrayLevelEmphasis | 2101.480769  |
| wavelet-HHL | gldm       | SmallDependenceLowGrayLevelEmphasis  | 0.011220776  |
| wavelet-HHL | gldm       | LowGrayLevelEmphasis                 | 0.011914814  |
| wavelet-HHL | glcm       | JointAverage                         | 23.57042001  |
| wavelet-HHL | glcm       | SumAverage                           | 47.14084001  |
| wavelet-HHL | glcm       | JointEntropy                         | 6.667839629  |
| wavelet-HHL | glcm       | ClusterShade                         | -143.4702766 |
| wavelet-HHL | glcm       | MaximumProbability                   | 0.029348798  |
| wavelet-HHL | glcm       | ldmn                                 | 0.958596979  |
| wavelet-HHL | glcm       | JointEnergy                          | 0.010949742  |
| wavelet-HHL | glcm       | Contrast                             | 100.2976956  |
| wavelet-HHL | glcm       | DifferenceEntropy                    | 3.950679924  |
| wavelet-HHL | glcm       | InverseVariance                      | 0.16300556   |
| wavelet-HHL | glcm       | DifferenceVariance                   | 44.55332743  |
| wavelet-HHL | glcm       | ldn                                  | 0.872192501  |
| wavelet-HHL | glcm       | ldm                                  | 0.143147533  |
| wavelet-HHL | glcm       | Correlation                          | -0.014027219 |
| wavelet-HHL | glcm       | Autocorrelation                      | 555.0568008  |
| wavelet-HHL | glcm       | SumEntropy                           | 4.608115312  |
| wavelet-HHL | glcm       | SumSquares                           | 49.62424884  |
| wavelet-HHL | glcm       | ClusterProminence                    | 40297.70814  |
| wavelet-HHL | glcm       | lmc2                                 | 0.994124099  |
| wavelet-HHL | glcm       | lmc1                                 | -0.50407819  |
| wavelet-HHL | glcm       | DifferenceAverage                    | 7.346866464  |
| wavelet-HHL | glcm       | ld                                   | 0.231180743  |
| wavelet-HHL | glcm       | ClusterTendency                      | 98.19929973  |
| wavelet-HHL | firstorder | InterquartileRange                   | 146.1302709  |
| wavelet-HHL | firstorder | Skewness                             | -0.253507587 |
| wavelet-HHL | firstorder | Uniformity                           | 0.063239645  |
| wavelet-HHL | firstorder | Median                               | -2.929006499 |
| wavelet-HHL | firstorder | Energy                               | 2537069.155  |
| wavelet-HHL | firstorder | RobustMeanAbsoluteDeviation          | 66.45717745  |
| wavelet-HHL | firstorder | MeanAbsoluteDeviation                | 112.3251718  |
| wavelet-HHL | firstorder | TotalEnergy                          | 68500867.18  |
| wavelet-HHL | firstorder | Maximum                              | 547.6142201  |
| wavelet-HHL | firstorder | RootMeanSquared                      | 156.1886543  |
| wavelet-HHL | firstorder | 90Percentile                         | 176.3826366  |
| wavelet-HHL | firstorder | Minimum                              | -557.7140046 |

|             |            |                                      |              |
|-------------|------------|--------------------------------------|--------------|
| wavelet-HHL | firstorder | Entropy                              | 4.34773242   |
| wavelet-HHL | firstorder | Range                                | 1105.328225  |
| wavelet-HHL | firstorder | Variance                             | 24394.82057  |
| wavelet-HHL | firstorder | 10Percentile                         | -211.2126388 |
| wavelet-HHL | firstorder | Kurtosis                             | 4.981022784  |
| wavelet-HHL | firstorder | Mean                                 | -0.274139922 |
| wavelet-HHL | glrlm      | ShortRunLowGrayLevelEmphasis         | 0.012158407  |
| wavelet-HHL | glrlm      | GrayLevelVariance                    | 39.77934945  |
| wavelet-HHL | glrlm      | LowGrayLevelRunEmphasis              | 0.012193724  |
| wavelet-HHL | glrlm      | GrayLevelNonUniformityNormalized     | 0.062031429  |
| wavelet-HHL | glrlm      | RunVariance                          | 0.029653394  |
| wavelet-HHL | glrlm      | GrayLevelNonUniformity               | 6.280510856  |
| wavelet-HHL | glrlm      | LongRunEmphasis                      | 1.085693548  |
| wavelet-HHL | glrlm      | ShortRunHighGrayLevelEmphasis        | 578.7395507  |
| wavelet-HHL | glrlm      | RunLengthNonUniformity               | 96.16746563  |
| wavelet-HHL | glrlm      | ShortRunEmphasis                     | 0.980277889  |
| wavelet-HHL | glrlm      | LongRunHighGrayLevelEmphasis         | 640.7084266  |
| wavelet-HHL | glrlm      | RunPercentage                        | 0.973372781  |
| wavelet-HHL | glrlm      | LongRunLowGrayLevelEmphasis          | 0.012346882  |
| wavelet-HHL | glrlm      | RunEntropy                           | 4.468912896  |
| wavelet-HHL | glrlm      | HighGrayLevelRunEmphasis             | 590.3489918  |
| wavelet-HHL | glrlm      | RunLengthNonUniformityNormalized     | 0.949647379  |
| wavelet-HHL | glszm      | GrayLevelVariance                    | 52.656219    |
| wavelet-HHL | glszm      | ZoneVariance                         | 1.37552073   |
| wavelet-HHL | glszm      | GrayLevelNonUniformityNormalized     | 0.048204721  |
| wavelet-HHL | glszm      | SizeZoneNonUniformityNormalized      | 0.588176949  |
| wavelet-HHL | glszm      | SizeZoneNonUniformity                | 41.76056338  |
| wavelet-HHL | glszm      | GrayLevelNonUniformity               | 3.422535211  |
| wavelet-HHL | glszm      | LargeAreaEmphasis                    | 3.521126761  |
| wavelet-HHL | glszm      | SmallAreaHighGrayLevelEmphasis       | 464.4246327  |
| wavelet-HHL | glszm      | ZonePercentage                       | 0.682692308  |
| wavelet-HHL | glszm      | LargeAreaLowGrayLevelEmphasis        | 0.021173874  |
| wavelet-HHL | glszm      | LargeAreaHighGrayLevelEmphasis       | 2043.830986  |
| wavelet-HHL | glszm      | HighGrayLevelZoneEmphasis            | 588.1549296  |
| wavelet-HHL | glszm      | SmallAreaEmphasis                    | 0.795044775  |
| wavelet-HHL | glszm      | LowGrayLevelZoneEmphasis             | 0.016628015  |
| wavelet-HHL | glszm      | ZoneEntropy                          | 5.272780042  |
| wavelet-HHL | glszm      | SmallAreaLowGrayLevelEmphasis        | 0.016267158  |
| wavelet-HHL | ngtdm      | Coarseness                           | 0.057873541  |
| wavelet-HHL | ngtdm      | Complexity                           | 1575.137623  |
| wavelet-HHL | ngtdm      | Strength                             | 15.99699103  |
| wavelet-HHL | ngtdm      | Contrast                             | 0.446810883  |
| wavelet-HHL | ngtdm      | Busyness                             | 0.025154277  |
| wavelet-HLH | gldm       | GrayLevelVariance                    | 52.46116864  |
| wavelet-HLH | gldm       | HighGrayLevelEmphasis                | 780.4230769  |
| wavelet-HLH | gldm       | DependenceEntropy                    | 5.441844978  |
| wavelet-HLH | gldm       | DependenceNonUniformity              | 34.84615385  |
| wavelet-HLH | gldm       | GrayLevelNonUniformity               | 6.403846154  |
| wavelet-HLH | gldm       | SmallDependenceEmphasis              | 0.539463141  |
| wavelet-HLH | gldm       | SmallDependenceHighGrayLevelEmphasis | 449.0523504  |
| wavelet-HLH | gldm       | DependenceNonUniformityNormalized    | 0.335059172  |
| wavelet-HLH | gldm       | LargeDependenceEmphasis              | 4.576923077  |
| wavelet-HLH | gldm       | LargeDependenceLowGrayLevelEmphasis  | 0.017843043  |
| wavelet-HLH | gldm       | DependenceVariance                   | 1.025147929  |
| wavelet-HLH | gldm       | LargeDependenceHighGrayLevelEmphasis | 3306.557692  |
| wavelet-HLH | gldm       | SmallDependenceLowGrayLevelEmphasis  | 0.010662906  |



|             |            |                                  |              |
|-------------|------------|----------------------------------|--------------|
| wavelet-HLH | gldm       | LowGrayLevelEmphasis             | 0.011588333  |
| wavelet-HLH | glcm       | JointAverage                     | 27.13329019  |
| wavelet-HLH | glcm       | SumAverage                       | 54.26658037  |
| wavelet-HLH | glcm       | JointEntropy                     | 6.607997423  |
| wavelet-HLH | glcm       | ClusterShade                     | -138.2385945 |
| wavelet-HLH | glcm       | MaximumProbability               | 0.030461786  |
| wavelet-HLH | glcm       | ldmn                             | 0.961155517  |
| wavelet-HLH | glcm       | JointEnergy                      | 0.011547301  |
| wavelet-HLH | glcm       | Contrast                         | 104.6743543  |
| wavelet-HLH | glcm       | DifferenceEntropy                | 3.95783295   |
| wavelet-HLH | glcm       | InverseVariance                  | 0.161846473  |
| wavelet-HLH | glcm       | DifferenceVariance               | 49.896723    |
| wavelet-HLH | glcm       | ldn                              | 0.878740941  |
| wavelet-HLH | glcm       | ldm                              | 0.156278125  |
| wavelet-HLH | glcm       | Correlation                      | -0.009869711 |
| wavelet-HLH | glcm       | Autocorrelation                  | 736.3627928  |
| wavelet-HLH | glcm       | SumEntropy                       | 4.624014938  |
| wavelet-HLH | glcm       | SumSquares                       | 52.38848146  |
| wavelet-HLH | glcm       | ClusterProminence                | 58160.1799   |
| wavelet-HLH | glcm       | lmc2                             | 0.992586782  |
| wavelet-HLH | glcm       | lmc1                             | -0.48657352  |
| wavelet-HLH | glcm       | DifferenceAverage                | 7.273131503  |
| wavelet-HLH | glcm       | ld                               | 0.243574329  |
| wavelet-HLH | glcm       | ClusterTendency                  | 104.8795715  |
| wavelet-HLH | firstorder | InterquartileRange               | 142.5289581  |
| wavelet-HLH | firstorder | Skewness                         | -0.431944787 |
| wavelet-HLH | firstorder | Uniformity                       | 0.061575444  |
| wavelet-HLH | firstorder | Median                           | -23.43524099 |
| wavelet-HLH | firstorder | Energy                           | 3430070.035  |
| wavelet-HLH | firstorder | RobustMeanAbsoluteDeviation      | 67.3122206   |
| wavelet-HLH | firstorder | MeanAbsoluteDeviation            | 124.0729921  |
| wavelet-HLH | firstorder | TotalEnergy                      | 92611890.95  |
| wavelet-HLH | firstorder | Maximum                          | 490.2748928  |
| wavelet-HLH | firstorder | RootMeanSquared                  | 181.6079366  |
| wavelet-HLH | firstorder | 90Percentile                     | 201.9643879  |
| wavelet-HLH | firstorder | Minimum                          | -667.3915477 |
| wavelet-HLH | firstorder | Entropy                          | 4.391131244  |
| wavelet-HLH | firstorder | Range                            | 1157.66644   |
| wavelet-HLH | firstorder | Variance                         | 32856.0447   |
| wavelet-HLH | firstorder | 10Percentile                     | -188.5940385 |
| wavelet-HLH | firstorder | Kurtosis                         | 5.372102257  |
| wavelet-HLH | firstorder | Mean                             | -11.19812252 |
| wavelet-HLH | glrlm      | ShortRunLowGrayLevelEmphasis     | 0.011884404  |
| wavelet-HLH | glrlm      | GrayLevelVariance                | 53.73899606  |
| wavelet-HLH | glrlm      | LowGrayLevelRunEmphasis          | 0.011933502  |
| wavelet-HLH | glrlm      | GrayLevelNonUniformityNormalized | 0.059965971  |
| wavelet-HLH | glrlm      | RunVariance                      | 0.033960833  |
| wavelet-HLH | glrlm      | GrayLevelNonUniformity           | 6.02529159   |
| wavelet-HLH | glrlm      | LongRunEmphasis                  | 1.106304842  |
| wavelet-HLH | glrlm      | ShortRunHighGrayLevelEmphasis    | 763.9198176  |
| wavelet-HLH | glrlm      | RunLengthNonUniformity           | 93.67816135  |
| wavelet-HLH | glrlm      | ShortRunEmphasis                 | 0.97342379   |
| wavelet-HLH | glrlm      | LongRunHighGrayLevelEmphasis     | 858.5430532  |
| wavelet-HLH | glrlm      | RunPercentage                    | 0.965976331  |
| wavelet-HLH | glrlm      | LongRunLowGrayLevelEmphasis      | 0.012129892  |
| wavelet-HLH | glrlm      | RunEntropy                       | 4.5445354    |

|             |       |                                  |             |
|-------------|-------|----------------------------------|-------------|
| wavelet-HLH | glrlm | HighGrayLevelRunEmphasis         | 782.8444647 |
| wavelet-HLH | glrlm | RunLengthNonUniformityNormalized | 0.932078335 |
| wavelet-HLH | glszm | GrayLevelVariance                | 71.63544536 |
| wavelet-HLH | glszm | ZoneVariance                     | 1.153351699 |
| wavelet-HLH | glszm | GrayLevelNonUniformityNormalized | 0.044077135 |
| wavelet-HLH | glszm | SizeZoneNonUniformityNormalized  | 0.505050505 |
| wavelet-HLH | glszm | SizeZoneNonUniformity            | 33.33333333 |
| wavelet-HLH | glszm | GrayLevelNonUniformity           | 2.909090909 |
| wavelet-HLH | glszm | LargeAreaEmphasis                | 3.636363636 |
| wavelet-HLH | glszm | SmallAreaHighGrayLevelEmphasis   | 626.4099327 |
| wavelet-HLH | glszm | ZonePercentage                   | 0.634615385 |
| wavelet-HLH | glszm | LargeAreaLowGrayLevelEmphasis    | 0.021783915 |
| wavelet-HLH | glszm | LargeAreaHighGrayLevelEmphasis   | 2700.151515 |
| wavelet-HLH | glszm | HighGrayLevelZoneEmphasis        | 817.0909091 |
| wavelet-HLH | glszm | SmallAreaEmphasis                | 0.737058081 |
| wavelet-HLH | glszm | LowGrayLevelZoneEmphasis         | 0.017153033 |
| wavelet-HLH | glszm | ZoneEntropy                      | 5.331976695 |
| wavelet-HLH | glszm | SmallAreaLowGrayLevelEmphasis    | 0.016569575 |
| wavelet-HLH | ngtdm | Coarseness                       | 0.0575114   |
| wavelet-HLH | ngtdm | Complexity                       | 2056.903482 |
| wavelet-HLH | ngtdm | Strength                         | 20.82715131 |
| wavelet-HLH | ngtdm | Contrast                         | 0.606181839 |
| wavelet-HLH | ngtdm | Busyness                         | 0.022036767 |

| Image type | Feature Class | Feature Name                         |                                                                                                                                                                                                                                                                                                                                                                                                                   |
|------------|---------------|--------------------------------------|-------------------------------------------------------------------------------------------------------------------------------------------------------------------------------------------------------------------------------------------------------------------------------------------------------------------------------------------------------------------------------------------------------------------|
| general    | info          | BoundingBox                          | 16: RTSTRUCT: C99-DNU_C_segment_Right lower lobe<br>(0, 0, 1, 7, 7, 5)                                                                                                                                                                                                                                                                                                                                            |
| general    | info          | EnabledImageTypes                    | {u'Original': {}, u'Wavelet': {}}                                                                                                                                                                                                                                                                                                                                                                                 |
|            |               |                                      | {'distances': [1], 'additionalInfo': True, 'force2D': False, 'interpolator': 'sitkBSpline', 'resampledPixelSpacing': [3.0], 'label': 1, 'normalizeScale': 1, 'normalize': False, 'force2Ddimension': 0, 'removeOutliers': None, 'minimumROISize': None, u'binWidth': 25.0, 'minimumROIDimensions': 1, u'correctMask': True, 'preCrop': False, u'symmetricalGLCM': True, 'resegmentRange': None, 'padDistance': 5} |
| general    | info          | GeneralSettings                      |                                                                                                                                                                                                                                                                                                                                                                                                                   |
| general    | info          | ImageHash                            | 03af5153992b82136b7408041edb4e28f07eacb3<br>(0.9765624999999998, 0.9765624999999998, 1.9999999999999999)                                                                                                                                                                                                                                                                                                          |
| general    | info          | ImageSpacing                         |                                                                                                                                                                                                                                                                                                                                                                                                                   |
| general    | info          | MaskHash                             | fc2883ece848eb9a35f871ecbb76159e80243afb                                                                                                                                                                                                                                                                                                                                                                          |
| general    | info          | NumpyVersion                         | 1.13.1                                                                                                                                                                                                                                                                                                                                                                                                            |
| general    | info          | PyWaveletVersion                     | 0.5.2                                                                                                                                                                                                                                                                                                                                                                                                             |
| general    | info          | SimpleITKVersion                     | 1.1.0                                                                                                                                                                                                                                                                                                                                                                                                             |
| general    | info          | Version                              | 1.3.0.post102+g1b0eb74                                                                                                                                                                                                                                                                                                                                                                                            |
| general    | info          | VolumeNum                            | 1                                                                                                                                                                                                                                                                                                                                                                                                                 |
| general    | info          | VoxelNum                             | 114                                                                                                                                                                                                                                                                                                                                                                                                               |
| original   | shape         | Maximum3DDiameter                    | 22.44994432                                                                                                                                                                                                                                                                                                                                                                                                       |
| original   | shape         | Maximum2DDiameterSlice               | 20.1246118                                                                                                                                                                                                                                                                                                                                                                                                        |
| original   | shape         | Sphericity                           | 0.888815544                                                                                                                                                                                                                                                                                                                                                                                                       |
| original   | shape         | MinorAxis                            | 15.55434351                                                                                                                                                                                                                                                                                                                                                                                                       |
| original   | shape         | Elongation                           | 0.75387029                                                                                                                                                                                                                                                                                                                                                                                                        |
| original   | shape         | SurfaceVolumeRatio                   | 0.374038476                                                                                                                                                                                                                                                                                                                                                                                                       |
| original   | shape         | Volume                               | 3078                                                                                                                                                                                                                                                                                                                                                                                                              |
| original   | shape         | MajorAxis                            | 20.63265222                                                                                                                                                                                                                                                                                                                                                                                                       |
| original   | shape         | SurfaceArea                          | 1151.290428                                                                                                                                                                                                                                                                                                                                                                                                       |
| original   | shape         | Flatness                             | 0.678577066                                                                                                                                                                                                                                                                                                                                                                                                       |
| original   | shape         | LeastAxis                            | 14.00084462                                                                                                                                                                                                                                                                                                                                                                                                       |
| original   | shape         | Maximum2DDiameterColumn              | 16.15549442                                                                                                                                                                                                                                                                                                                                                                                                       |
| original   | shape         | Maximum2DDiameterRow                 | 19.20937271                                                                                                                                                                                                                                                                                                                                                                                                       |
| original   | gldm          | GrayLevelVariance                    | 105.9972299                                                                                                                                                                                                                                                                                                                                                                                                       |
| original   | gldm          | HighGrayLevelEmphasis                | 728.3684211                                                                                                                                                                                                                                                                                                                                                                                                       |
| original   | gldm          | DependenceEntropy                    | 5.605579462                                                                                                                                                                                                                                                                                                                                                                                                       |
| original   | gldm          | DependenceNonUniformity              | 39.70175439                                                                                                                                                                                                                                                                                                                                                                                                       |
| original   | gldm          | GrayLevelNonUniformity               | 5.035087719                                                                                                                                                                                                                                                                                                                                                                                                       |
| original   | gldm          | SmallDependenceEmphasis              | 0.583365619                                                                                                                                                                                                                                                                                                                                                                                                       |
| original   | gldm          | SmallDependenceHighGrayLevelEmphasis | 312.9836964                                                                                                                                                                                                                                                                                                                                                                                                       |
| original   | gldm          | DependenceNonUniformityNormalized    | 0.348261003                                                                                                                                                                                                                                                                                                                                                                                                       |
| original   | gldm          | LargeDependenceEmphasis              | 5.456140351                                                                                                                                                                                                                                                                                                                                                                                                       |
| original   | gldm          | LargeDependenceLowGrayLevelEmphasis  | 0.017803371                                                                                                                                                                                                                                                                                                                                                                                                       |
| original   | gldm          | DependenceVariance                   | 1.731917513                                                                                                                                                                                                                                                                                                                                                                                                       |
| original   | gldm          | LargeDependenceHighGrayLevelEmphasis | 6002.719298                                                                                                                                                                                                                                                                                                                                                                                                       |
| original   | gldm          | SmallDependenceLowGrayLevelEmphasis  | 0.012241666                                                                                                                                                                                                                                                                                                                                                                                                       |
| original   | gldm          | LowGrayLevelEmphasis                 | 0.01291334                                                                                                                                                                                                                                                                                                                                                                                                        |
| original   | glcm          | JointAverage                         | 27.66422248                                                                                                                                                                                                                                                                                                                                                                                                       |
| original   | glcm          | SumAverage                           | 55.32844497                                                                                                                                                                                                                                                                                                                                                                                                       |
| original   | glcm          | JointEntropy                         | 6.7409247                                                                                                                                                                                                                                                                                                                                                                                                         |
| original   | glcm          | ClusterShade                         | -1840.566522                                                                                                                                                                                                                                                                                                                                                                                                      |
| original   | glcm          | MaximumProbability                   | 0.028644056                                                                                                                                                                                                                                                                                                                                                                                                       |
| original   | glcm          | Idmn                                 | 0.923534502                                                                                                                                                                                                                                                                                                                                                                                                       |
| original   | glcm          | JointEnergy                          | 0.010529157                                                                                                                                                                                                                                                                                                                                                                                                       |
| original   | glcm          | Contrast                             | 146.4389717                                                                                                                                                                                                                                                                                                                                                                                                       |
| original   | glcm          | DifferenceEntropy                    | 4.256406035                                                                                                                                                                                                                                                                                                                                                                                                       |

|          |            |                                  |              |
|----------|------------|----------------------------------|--------------|
| original | glcm       | InverseVariance                  | 0.146574855  |
| original | glcm       | DifferenceVariance               | 57.59732554  |
| original | glcm       | Idn                              | 0.827930984  |
| original | glcm       | Idm                              | 0.143194796  |
| original | glcm       | Correlation                      | 0.201350467  |
| original | glcm       | Autocorrelation                  | 784.8228434  |
| original | glcm       | SumEntropy                       | 5.000381719  |
| original | glcm       | SumSquares                       | 92.32925482  |
| original | glcm       | ClusterProminence                | 125998.3103  |
| original | glcm       | Imc2                             | 0.994256605  |
| original | glcm       | Imc1                             | -0.500789837 |
| original | glcm       | DifferenceAverage                | 9.24891241   |
| original | glcm       | Id                               | 0.219313162  |
| original | glcm       | ClusterTendency                  | 222.8780476  |
| original | firstorder | InterquartileRange               | 440          |
| original | firstorder | Skewness                         | -0.349027262 |
| original | firstorder | Uniformity                       | 0.044167436  |
| original | firstorder | Median                           | -279.5       |
| original | firstorder | Energy                           | 17171736     |
| original | firstorder | RobustMeanAbsoluteDeviation      | 185.1906173  |
| original | firstorder | MeanAbsoluteDeviation            | 226.9412127  |
| original | firstorder | TotalEnergy                      | 463636872    |
| original | firstorder | Maximum                          | 55           |
| original | firstorder | RootMeanSquared                  | 388.1098597  |
| original | firstorder | 90Percentile                     | 6.1          |
| original | firstorder | Minimum                          | -877         |
| original | firstorder | Entropy                          | 4.780289736  |
| original | firstorder | Range                            | 932          |
| original | firstorder | Variance                         | 66630.98677  |
| original | firstorder | 10Percentile                     | -645.8       |
| original | firstorder | Kurtosis                         | 1.870962191  |
| original | firstorder | Mean                             | -289.8245614 |
| original | glrlm      | ShortRunLowGrayLevelEmphasis     | 0.013315227  |
| original | glrlm      | GrayLevelVariance                | 105.7411813  |
| original | glrlm      | LowGrayLevelRunEmphasis          | 0.013350004  |
| original | glrlm      | GrayLevelNonUniformityNormalized | 0.042574182  |
| original | glrlm      | RunVariance                      | 0.04142705   |
| original | glrlm      | GrayLevelNonUniformity           | 4.682165343  |
| original | glrlm      | LongRunEmphasis                  | 1.11839753   |
| original | glrlm      | ShortRunHighGrayLevelEmphasis    | 684.6909151  |
| original | glrlm      | RunLengthNonUniformity           | 102.6913381  |
| original | glrlm      | ShortRunEmphasis                 | 0.973603436  |
| original | glrlm      | LongRunHighGrayLevelEmphasis     | 847.1076807  |
| original | glrlm      | RunPercentage                    | 0.964237517  |
| original | glrlm      | LongRunLowGrayLevelEmphasis      | 0.013498864  |
| original | glrlm      | RunEntropy                       | 4.925521685  |
| original | glrlm      | HighGrayLevelRunEmphasis         | 713.8064966  |
| original | glrlm      | RunLengthNonUniformityNormalized | 0.933508477  |
| original | glszm      | GrayLevelVariance                | 94.59240321  |
| original | glszm      | ZoneVariance                     | 2.464572681  |
| original | glszm      | GrayLevelNonUniformityNormalized | 0.03725347   |
| original | glszm      | SizeZoneNonUniformityNormalized  | 0.601168736  |
| original | glszm      | SizeZoneNonUniformity            | 44.48648649  |
| original | glszm      | GrayLevelNonUniformity           | 2.756756757  |
| original | glszm      | LargeAreaEmphasis                | 4.837837838  |
| original | glszm      | SmallAreaHighGrayLevelEmphasis   | 391.0668285  |
| original | glszm      | ZonePercentage                   | 0.649122807  |
| original | glszm      | LargeAreaLowGrayLevelEmphasis    | 0.023197817  |
| original | glszm      | LargeAreaHighGrayLevelEmphasis   | 5152.621622  |

|             |            |                                      |              |
|-------------|------------|--------------------------------------|--------------|
| original    | glszm      | HighGrayLevelZoneEmphasis            | 552.7837838  |
| original    | glszm      | SmallAreaEmphasis                    | 0.802620858  |
| original    | glszm      | LowGrayLevelZoneEmphasis             | 0.019108008  |
| original    | glszm      | ZoneEntropy                          | 5.315683562  |
| original    | glszm      | SmallAreaLowGrayLevelEmphasis        | 0.018692223  |
| original    | ngtdm      | Coarseness                           | 0.029493402  |
| original    | ngtdm      | Complexity                           | 3850.651323  |
| original    | ngtdm      | Strength                             | 19.94149524  |
| original    | ngtdm      | Contrast                             | 1.281131148  |
| original    | ngtdm      | Busyness                             | 0.036913355  |
| wavelet-HHH | gldm       | GrayLevelVariance                    | 8.573099415  |
| wavelet-HHH | gldm       | HighGrayLevelEmphasis                | 95.68421053  |
| wavelet-HHH | gldm       | DependenceEntropy                    | 5.165230945  |
| wavelet-HHH | gldm       | DependenceNonUniformity              | 25.14035088  |
| wavelet-HHH | gldm       | GrayLevelNonUniformity               | 12.29824561  |
| wavelet-HHH | gldm       | SmallDependenceEmphasis              | 0.36518618   |
| wavelet-HHH | gldm       | SmallDependenceHighGrayLevelEmphasis | 38.08924419  |
| wavelet-HHH | gldm       | DependenceNonUniformityNormalized    | 0.220529394  |
| wavelet-HHH | gldm       | LargeDependenceEmphasis              | 9.052631579  |
| wavelet-HHH | gldm       | LargeDependenceLowGrayLevelEmphasis  | 0.13163859   |
| wavelet-HHH | gldm       | DependenceVariance                   | 2.127423823  |
| wavelet-HHH | gldm       | LargeDependenceHighGrayLevelEmphasis | 829.9824561  |
| wavelet-HHH | gldm       | SmallDependenceLowGrayLevelEmphasis  | 0.018658307  |
| wavelet-HHH | gldm       | LowGrayLevelEmphasis                 | 0.027792382  |
| wavelet-HHH | glcm       | JointAverage                         | 9.394645007  |
| wavelet-HHH | glcm       | SumAverage                           | 18.78929001  |
| wavelet-HHH | glcm       | JointEntropy                         | 6.104185102  |
| wavelet-HHH | glcm       | ClusterShade                         | -3.133348542 |
| wavelet-HHH | glcm       | MaximumProbability                   | 0.04750933   |
| wavelet-HHH | glcm       | Idmn                                 | 0.947729016  |
| wavelet-HHH | glcm       | JointEnergy                          | 0.017648474  |
| wavelet-HHH | glcm       | Contrast                             | 17.81485138  |
| wavelet-HHH | glcm       | DifferenceEntropy                    | 3.083538737  |
| wavelet-HHH | glcm       | InverseVariance                      | 0.274320347  |
| wavelet-HHH | glcm       | DifferenceVariance                   | 6.798939357  |
| wavelet-HHH | glcm       | Idn                                  | 0.850816438  |
| wavelet-HHH | glcm       | Idm                                  | 0.263063254  |
| wavelet-HHH | glcm       | Correlation                          | -0.026449269 |
| wavelet-HHH | glcm       | Autocorrelation                      | 88.03832565  |
| wavelet-HHH | glcm       | SumEntropy                           | 3.819081018  |
| wavelet-HHH | glcm       | SumSquares                           | 8.680714559  |
| wavelet-HHH | glcm       | ClusterProminence                    | 895.4371428  |
| wavelet-HHH | glcm       | Imc2                                 | 0.914958246  |
| wavelet-HHH | glcm       | Imc1                                 | -0.261498773 |
| wavelet-HHH | glcm       | DifferenceAverage                    | 3.290943478  |
| wavelet-HHH | glcm       | Id                                   | 0.352678947  |
| wavelet-HHH | glcm       | ClusterTendency                      | 16.90800686  |
| wavelet-HHH | firstorder | InterquartileRange                   | 80.88051528  |
| wavelet-HHH | firstorder | Skewness                             | -0.080691027 |
| wavelet-HHH | firstorder | Uniformity                           | 0.107879347  |
| wavelet-HHH | firstorder | Median                               | -3.259311299 |
| wavelet-HHH | firstorder | Energy                               | 602957.1115  |
| wavelet-HHH | firstorder | RobustMeanAbsoluteDeviation          | 35.22078162  |
| wavelet-HHH | firstorder | MeanAbsoluteDeviation                | 55.09078866  |
| wavelet-HHH | firstorder | TotalEnergy                          | 16279842.01  |
| wavelet-HHH | firstorder | Maximum                              | 193.0923407  |
| wavelet-HHH | firstorder | RootMeanSquared                      | 72.72618146  |
| wavelet-HHH | firstorder | 90Percentile                         | 77.67024954  |
| wavelet-HHH | firstorder | Minimum                              | -203.5071792 |

|             |            |                                      |              |
|-------------|------------|--------------------------------------|--------------|
| wavelet-HHH | firstorder | Entropy                              | 3.507387969  |
| wavelet-HHH | firstorder | Range                                | 396.5995199  |
| wavelet-HHH | firstorder | Variance                             | 5273.755405  |
| wavelet-HHH | firstorder | 10Percentile                         | -86.85608563 |
| wavelet-HHH | firstorder | Kurtosis                             | 3.692622652  |
| wavelet-HHH | firstorder | Mean                                 | -3.916894655 |
| wavelet-HHH | glrlm      | ShortRunLowGrayLevelEmphasis         | 0.028098677  |
| wavelet-HHH | glrlm      | GrayLevelVariance                    | 8.923627933  |
| wavelet-HHH | glrlm      | LowGrayLevelRunEmphasis              | 0.028761445  |
| wavelet-HHH | glrlm      | GrayLevelNonUniformityNormalized     | 0.105149696  |
| wavelet-HHH | glrlm      | RunVariance                          | 0.066690818  |
| wavelet-HHH | glrlm      | GrayLevelNonUniformity               | 11.23705973  |
| wavelet-HHH | glrlm      | LongRunEmphasis                      | 1.206702963  |
| wavelet-HHH | glrlm      | ShortRunHighGrayLevelEmphasis        | 91.48887153  |
| wavelet-HHH | glrlm      | RunLengthNonUniformity               | 93.99595351  |
| wavelet-HHH | glrlm      | ShortRunEmphasis                     | 0.950721039  |
| wavelet-HHH | glrlm      | LongRunHighGrayLevelEmphasis         | 114.7876865  |
| wavelet-HHH | glrlm      | RunPercentage                        | 0.937246964  |
| wavelet-HHH | glrlm      | LongRunLowGrayLevelEmphasis          | 0.031533619  |
| wavelet-HHH | glrlm      | RunEntropy                           | 3.79867693   |
| wavelet-HHH | glrlm      | HighGrayLevelRunEmphasis             | 95.99171327  |
| wavelet-HHH | glrlm      | RunLengthNonUniformityNormalized     | 0.878830379  |
| wavelet-HHH | glszm      | GrayLevelVariance                    | 14.76301541  |
| wavelet-HHH | glszm      | ZoneVariance                         | 6.138275718  |
| wavelet-HHH | glszm      | GrayLevelNonUniformityNormalized     | 0.082049146  |
| wavelet-HHH | glszm      | SizeZoneNonUniformityNormalized      | 0.404414827  |
| wavelet-HHH | glszm      | SizeZoneNonUniformity                | 19.81632653  |
| wavelet-HHH | glszm      | GrayLevelNonUniformity               | 4.020408163  |
| wavelet-HHH | glszm      | LargeAreaEmphasis                    | 11.55102041  |
| wavelet-HHH | glszm      | SmallAreaHighGrayLevelEmphasis       | 71.20162385  |
| wavelet-HHH | glszm      | ZonePercentage                       | 0.429824561  |
| wavelet-HHH | glszm      | LargeAreaLowGrayLevelEmphasis        | 0.183265112  |
| wavelet-HHH | glszm      | LargeAreaHighGrayLevelEmphasis       | 1042.612245  |
| wavelet-HHH | glszm      | HighGrayLevelZoneEmphasis            | 102.5102041  |
| wavelet-HHH | glszm      | SmallAreaEmphasis                    | 0.656071549  |
| wavelet-HHH | glszm      | LowGrayLevelZoneEmphasis             | 0.04594199   |
| wavelet-HHH | glszm      | ZoneEntropy                          | 4.74216112   |
| wavelet-HHH | glszm      | SmallAreaLowGrayLevelEmphasis        | 0.040418165  |
| wavelet-HHH | ngtdm      | Coarseness                           | 0.053727278  |
| wavelet-HHH | ngtdm      | Complexity                           | 246.5442633  |
| wavelet-HHH | ngtdm      | Strength                             | 4.113489889  |
| wavelet-HHH | ngtdm      | Contrast                             | 0.149382795  |
| wavelet-HHH | ngtdm      | Busyness                             | 0.112052555  |
| wavelet-HLL | gldm       | GrayLevelVariance                    | 79.95106187  |
| wavelet-HLL | gldm       | HighGrayLevelEmphasis                | 499.122807   |
| wavelet-HLL | gldm       | DependenceEntropy                    | 5.852412492  |
| wavelet-HLL | gldm       | DependenceNonUniformity              | 37.70175439  |
| wavelet-HLL | gldm       | GrayLevelNonUniformity               | 4.578947368  |
| wavelet-HLL | gldm       | SmallDependenceEmphasis              | 0.553089669  |
| wavelet-HLL | gldm       | SmallDependenceHighGrayLevelEmphasis | 277.0298489  |
| wavelet-HLL | gldm       | DependenceNonUniformityNormalized    | 0.330717144  |
| wavelet-HLL | gldm       | LargeDependenceEmphasis              | 4.666666667  |
| wavelet-HLL | gldm       | LargeDependenceLowGrayLevelEmphasis  | 0.03413201   |
| wavelet-HLL | gldm       | DependenceVariance                   | 1.076638966  |
| wavelet-HLL | gldm       | LargeDependenceHighGrayLevelEmphasis | 2127.982456  |
| wavelet-HLL | gldm       | SmallDependenceLowGrayLevelEmphasis  | 0.012265955  |
| wavelet-HLL | gldm       | LowGrayLevelEmphasis                 | 0.014261186  |
| wavelet-HLL | glcm       | JointAverage                         | 19.86335042  |
| wavelet-HLL | glcm       | SumAverage                           | 39.72670084  |

|             |            |                                  |              |
|-------------|------------|----------------------------------|--------------|
| wavelet-HLL | glcm       | JointEntropy                     | 6.862293896  |
| wavelet-HLL | glcm       | ClusterShade                     | 637.0146615  |
| wavelet-HLL | glcm       | MaximumProbability               | 0.020517446  |
| wavelet-HLL | glcm       | Idmn                             | 0.95137475   |
| wavelet-HLL | glcm       | JointEnergy                      | 0.009255139  |
| wavelet-HLL | glcm       | Contrast                         | 73.11020682  |
| wavelet-HLL | glcm       | DifferenceEntropy                | 3.858874606  |
| wavelet-HLL | glcm       | InverseVariance                  | 0.15040895   |
| wavelet-HLL | glcm       | DifferenceVariance               | 25.22787136  |
| wavelet-HLL | glcm       | Idn                              | 0.855853777  |
| wavelet-HLL | glcm       | Idm                              | 0.147119801  |
| wavelet-HLL | glcm       | Correlation                      | 0.524382847  |
| wavelet-HLL | glcm       | Autocorrelation                  | 437.1972039  |
| wavelet-HLL | glcm       | SumEntropy                       | 5.097496213  |
| wavelet-HLL | glcm       | SumSquares                       | 78.81114518  |
| wavelet-HLL | glcm       | ClusterProminence                | 105436.2359  |
| wavelet-HLL | glcm       | Imc2                             | 0.997274374  |
| wavelet-HLL | glcm       | Imc1                             | -0.553844645 |
| wavelet-HLL | glcm       | DifferenceAverage                | 6.671690932  |
| wavelet-HLL | glcm       | Id                               | 0.236902813  |
| wavelet-HLL | glcm       | ClusterTendency                  | 242.1343739  |
| wavelet-HLL | firstorder | InterquartileRange               | 408.5268969  |
| wavelet-HLL | firstorder | Skewness                         | 0.012353399  |
| wavelet-HLL | firstorder | Uniformity                       | 0.040166205  |
| wavelet-HLL | firstorder | Median                           | -68.9301592  |
| wavelet-HLL | firstorder | Energy                           | 6348253.215  |
| wavelet-HLL | firstorder | RobustMeanAbsoluteDeviation      | 157.3379324  |
| wavelet-HLL | firstorder | MeanAbsoluteDeviation            | 195.8212092  |
| wavelet-HLL | firstorder | TotalEnergy                      | 171402836.8  |
| wavelet-HLL | firstorder | Maximum                          | 319.6342571  |
| wavelet-HLL | firstorder | RootMeanSquared                  | 235.9797273  |
| wavelet-HLL | firstorder | 90Percentile                     | 224.8308512  |
| wavelet-HLL | firstorder | Minimum                          | -551.4195606 |
| wavelet-HLL | firstorder | Entropy                          | 4.80957009   |
| wavelet-HLL | firstorder | Range                            | 871.0538177  |
| wavelet-HLL | firstorder | Variance                         | 49799.75421  |
| wavelet-HLL | firstorder | 10Percentile                     | -348.6689368 |
| wavelet-HLL | firstorder | Kurtosis                         | 1.806354638  |
| wavelet-HLL | firstorder | Mean                             | -76.72468637 |
| wavelet-HLL | glrlm      | ShortRunLowGrayLevelEmphasis     | 0.014466223  |
| wavelet-HLL | glrlm      | GrayLevelVariance                | 79.64925506  |
| wavelet-HLL | glrlm      | LowGrayLevelRunEmphasis          | 0.014600494  |
| wavelet-HLL | glrlm      | GrayLevelNonUniformityNormalized | 0.03958096   |
| wavelet-HLL | glrlm      | RunVariance                      | 0.038737886  |
| wavelet-HLL | glrlm      | GrayLevelNonUniformity           | 4.357533024  |
| wavelet-HLL | glrlm      | LongRunEmphasis                  | 1.113743061  |
| wavelet-HLL | glrlm      | ShortRunHighGrayLevelEmphasis    | 488.2090696  |
| wavelet-HLL | glrlm      | RunLengthNonUniformity           | 102.9245324  |
| wavelet-HLL | glrlm      | ShortRunEmphasis                 | 0.973664683  |
| wavelet-HLL | glrlm      | LongRunHighGrayLevelEmphasis     | 557.4108339  |
| wavelet-HLL | glrlm      | RunPercentage                    | 0.965587045  |
| wavelet-HLL | glrlm      | LongRunLowGrayLevelEmphasis      | 0.015144437  |
| wavelet-HLL | glrlm      | RunEntropy                       | 4.933993461  |
| wavelet-HLL | glrlm      | HighGrayLevelRunEmphasis         | 499.9909833  |
| wavelet-HLL | glrlm      | RunLengthNonUniformityNormalized | 0.933777373  |
| wavelet-HLL | glszm      | GrayLevelVariance                | 79.86959877  |
| wavelet-HLL | glszm      | ZoneVariance                     | 1.409722222  |
| wavelet-HLL | glszm      | GrayLevelNonUniformityNormalized | 0.035493827  |
| wavelet-HLL | glszm      | SizeZoneNonUniformityNormalized  | 0.547839506  |

|             |            |                                      |              |
|-------------|------------|--------------------------------------|--------------|
| wavelet-HLL | glszm      | SizeZoneNonUniformity                | 39.44444444  |
| wavelet-HLL | glszm      | GrayLevelNonUniformity               | 2.555555556  |
| wavelet-HLL | glszm      | LargeAreaEmphasis                    | 3.916666667  |
| wavelet-HLL | glszm      | SmallAreaHighGrayLevelEmphasis       | 383.3636188  |
| wavelet-HLL | glszm      | ZonePercentage                       | 0.631578947  |
| wavelet-HLL | glszm      | LargeAreaLowGrayLevelEmphasis        | 0.035369102  |
| wavelet-HLL | glszm      | LargeAreaHighGrayLevelEmphasis       | 1801.138889  |
| wavelet-HLL | glszm      | HighGrayLevelZoneEmphasis            | 505.8333333  |
| wavelet-HLL | glszm      | SmallAreaEmphasis                    | 0.762925347  |
| wavelet-HLL | glszm      | LowGrayLevelZoneEmphasis             | 0.019924521  |
| wavelet-HLL | glszm      | ZoneEntropy                          | 5.503258335  |
| wavelet-HLL | glszm      | SmallAreaLowGrayLevelEmphasis        | 0.018955835  |
| wavelet-HLL | ngtdm      | Coarseness                           | 0.056005801  |
| wavelet-HLL | ngtdm      | Complexity                           | 1733.032728  |
| wavelet-HLL | ngtdm      | Strength                             | 25.52485948  |
| wavelet-HLL | ngtdm      | Contrast                             | 0.610867983  |
| wavelet-HLL | ngtdm      | Busyness                             | 0.033834831  |
| wavelet-LHL | gldm       | GrayLevelVariance                    | 67.60541705  |
| wavelet-LHL | gldm       | HighGrayLevelEmphasis                | 405.6491228  |
| wavelet-LHL | gldm       | DependenceEntropy                    | 5.687552952  |
| wavelet-LHL | gldm       | DependenceNonUniformity              | 44.57894737  |
| wavelet-LHL | gldm       | GrayLevelNonUniformity               | 4.719298246  |
| wavelet-LHL | gldm       | SmallDependenceEmphasis              | 0.614887914  |
| wavelet-LHL | gldm       | SmallDependenceHighGrayLevelEmphasis | 253.8533748  |
| wavelet-LHL | gldm       | DependenceNonUniformityNormalized    | 0.391043398  |
| wavelet-LHL | gldm       | LargeDependenceEmphasis              | 3.561403509  |
| wavelet-LHL | gldm       | LargeDependenceLowGrayLevelEmphasis  | 0.028360566  |
| wavelet-LHL | gldm       | DependenceVariance                   | 0.724838412  |
| wavelet-LHL | gldm       | LargeDependenceHighGrayLevelEmphasis | 1366.473684  |
| wavelet-LHL | gldm       | SmallDependenceLowGrayLevelEmphasis  | 0.016395001  |
| wavelet-LHL | gldm       | LowGrayLevelEmphasis                 | 0.017939434  |
| wavelet-LHL | glcm       | JointAverage                         | 17.81720524  |
| wavelet-LHL | glcm       | SumAverage                           | 35.63441047  |
| wavelet-LHL | glcm       | JointEntropy                         | 6.875750175  |
| wavelet-LHL | glcm       | ClusterShade                         | 1488.339499  |
| wavelet-LHL | glcm       | MaximumProbability                   | 0.018682758  |
| wavelet-LHL | glcm       | Idmn                                 | 0.959840114  |
| wavelet-LHL | glcm       | JointEnergy                          | 0.009125355  |
| wavelet-LHL | glcm       | Contrast                             | 80.9972661   |
| wavelet-LHL | glcm       | DifferenceEntropy                    | 3.941670472  |
| wavelet-LHL | glcm       | InverseVariance                      | 0.144012001  |
| wavelet-LHL | glcm       | DifferenceVariance                   | 29.45518629  |
| wavelet-LHL | glcm       | Idn                                  | 0.866633023  |
| wavelet-LHL | glcm       | Idm                                  | 0.129998166  |
| wavelet-LHL | glcm       | Correlation                          | 0.365575892  |
| wavelet-LHL | glcm       | Autocorrelation                      | 341.8831818  |
| wavelet-LHL | glcm       | SumEntropy                           | 5.002081417  |
| wavelet-LHL | glcm       | SumSquares                           | 64.81540791  |
| wavelet-LHL | glcm       | ClusterProminence                    | 103616.1385  |
| wavelet-LHL | glcm       | Imc2                                 | 0.997506592  |
| wavelet-LHL | glcm       | Imc1                                 | -0.560004286 |
| wavelet-LHL | glcm       | DifferenceAverage                    | 7.037982516  |
| wavelet-LHL | glcm       | Id                                   | 0.220181467  |
| wavelet-LHL | glcm       | ClusterTendency                      | 178.2643655  |
| wavelet-LHL | firstorder | InterquartileRange                   | 299.0967655  |
| wavelet-LHL | firstorder | Skewness                             | 0.361258567  |
| wavelet-LHL | firstorder | Uniformity                           | 0.041397353  |
| wavelet-LHL | firstorder | Median                               | -51.19393957 |
| wavelet-LHL | firstorder | Energy                               | 4903828.659  |



|             |            |                                      |              |
|-------------|------------|--------------------------------------|--------------|
| wavelet-LHL | firstorder | RobustMeanAbsoluteDeviation          | 116.6298011  |
| wavelet-LHL | firstorder | MeanAbsoluteDeviation                | 166.6850177  |
| wavelet-LHL | firstorder | TotalEnergy                          | 132403373.8  |
| wavelet-LHL | firstorder | Maximum                              | 572.0858254  |
| wavelet-LHL | firstorder | RootMeanSquared                      | 207.4030879  |
| wavelet-LHL | firstorder | 90Percentile                         | 250.1642901  |
| wavelet-LHL | firstorder | Minimum                              | -466.9925192 |
| wavelet-LHL | firstorder | Entropy                              | 4.823775876  |
| wavelet-LHL | firstorder | Range                                | 1039.078345  |
| wavelet-LHL | firstorder | Variance                             | 42205.34793  |
| wavelet-LHL | firstorder | 10Percentile                         | -257.9447714 |
| wavelet-LHL | firstorder | Kurtosis                             | 2.990750434  |
| wavelet-LHL | firstorder | Mean                                 | -28.47266993 |
| wavelet-LHL | gllm       | ShortRunLowGrayLevelEmphasis         | 0.018236145  |
| wavelet-LHL | gllm       | GrayLevelVariance                    | 68.31318127  |
| wavelet-LHL | gllm       | LowGrayLevelRunEmphasis              | 0.01831886   |
| wavelet-LHL | gllm       | GrayLevelNonUniformityNormalized     | 0.041038721  |
| wavelet-LHL | gllm       | RunVariance                          | 0.026272532  |
| wavelet-LHL | gllm       | GrayLevelNonUniformity               | 4.555292334  |
| wavelet-LHL | gllm       | LongRunEmphasis                      | 1.08189458   |
| wavelet-LHL | gllm       | ShortRunHighGrayLevelEmphasis        | 398.3369411  |
| wavelet-LHL | gllm       | RunLengthNonUniformity               | 105.2239881  |
| wavelet-LHL | gllm       | ShortRunEmphasis                     | 0.979526355  |
| wavelet-LHL | gllm       | LongRunHighGrayLevelEmphasis         | 437.7348052  |
| wavelet-LHL | gllm       | RunPercentage                        | 0.973684211  |
| wavelet-LHL | gllm       | LongRunLowGrayLevelEmphasis          | 0.018649723  |
| wavelet-LHL | gllm       | RunEntropy                           | 4.922089116  |
| wavelet-LHL | gllm       | HighGrayLevelRunEmphasis             | 406.2165139  |
| wavelet-LHL | gllm       | RunLengthNonUniformityNormalized     | 0.947454937  |
| wavelet-LHL | glszm      | GrayLevelVariance                    | 77.78174059  |
| wavelet-LHL | glszm      | ZoneVariance                         | 0.611796982  |
| wavelet-LHL | glszm      | GrayLevelNonUniformityNormalized     | 0.036732205  |
| wavelet-LHL | glszm      | SizeZoneNonUniformityNormalized      | 0.568663314  |
| wavelet-LHL | glszm      | SizeZoneNonUniformity                | 46.0617284   |
| wavelet-LHL | glszm      | GrayLevelNonUniformity               | 2.975308642  |
| wavelet-LHL | glszm      | LargeAreaEmphasis                    | 2.592592593  |
| wavelet-LHL | glszm      | SmallAreaHighGrayLevelEmphasis       | 325.2015604  |
| wavelet-LHL | glszm      | ZonePercentage                       | 0.710526316  |
| wavelet-LHL | glszm      | LargeAreaLowGrayLevelEmphasis        | 0.030359715  |
| wavelet-LHL | glszm      | LargeAreaHighGrayLevelEmphasis       | 997.2098765  |
| wavelet-LHL | glszm      | HighGrayLevelZoneEmphasis            | 414.345679   |
| wavelet-LHL | glszm      | SmallAreaEmphasis                    | 0.781893004  |
| wavelet-LHL | glszm      | LowGrayLevelZoneEmphasis             | 0.023573775  |
| wavelet-LHL | glszm      | ZoneEntropy                          | 5.564615589  |
| wavelet-LHL | glszm      | SmallAreaLowGrayLevelEmphasis        | 0.022727216  |
| wavelet-LHL | ngtdm      | Coarseness                           | 0.059228746  |
| wavelet-LHL | ngtdm      | Complexity                           | 2198.293605  |
| wavelet-LHL | ngtdm      | Strength                             | 27.18696305  |
| wavelet-LHL | ngtdm      | Contrast                             | 0.475805851  |
| wavelet-LHL | ngtdm      | Busyness                             | 0.030711339  |
| wavelet-LHH | gldm       | GrayLevelVariance                    | 40.09602955  |
| wavelet-LHH | gldm       | HighGrayLevelEmphasis                | 321.9824561  |
| wavelet-LHH | gldm       | DependenceEntropy                    | 5.444260518  |
| wavelet-LHH | gldm       | DependenceNonUniformity              | 35.78947368  |
| wavelet-LHH | gldm       | GrayLevelNonUniformity               | 6.456140351  |
| wavelet-LHH | gldm       | SmallDependenceEmphasis              | 0.519480994  |
| wavelet-LHH | gldm       | SmallDependenceHighGrayLevelEmphasis | 167.5021272  |
| wavelet-LHH | gldm       | DependenceNonUniformityNormalized    | 0.313942752  |
| wavelet-LHH | gldm       | LargeDependenceEmphasis              | 5.315789474  |

|             |            |                                      |              |
|-------------|------------|--------------------------------------|--------------|
| wavelet-LHH | gldm       | LargeDependenceLowGrayLevelEmphasis  | 0.036481937  |
| wavelet-LHH | gldm       | DependenceVariance                   | 1.315789474  |
| wavelet-LHH | gldm       | LargeDependenceHighGrayLevelEmphasis | 1462.508772  |
| wavelet-LHH | gldm       | SmallDependenceLowGrayLevelEmphasis  | 0.013608369  |
| wavelet-LHH | gldm       | LowGrayLevelEmphasis                 | 0.015897864  |
| wavelet-LHH | glcm       | JointAverage                         | 16.80280695  |
| wavelet-LHH | glcm       | SumAverage                           | 33.60561389  |
| wavelet-LHH | glcm       | JointEntropy                         | 6.72910197   |
| wavelet-LHH | glcm       | ClusterShade                         | 330.9434223  |
| wavelet-LHH | glcm       | MaximumProbability                   | 0.027244653  |
| wavelet-LHH | glcm       | Idmn                                 | 0.949144491  |
| wavelet-LHH | glcm       | JointEnergy                          | 0.010471033  |
| wavelet-LHH | glcm       | Contrast                             | 81.52094478  |
| wavelet-LHH | glcm       | DifferenceEntropy                    | 3.917733515  |
| wavelet-LHH | glcm       | InverseVariance                      | 0.148700895  |
| wavelet-LHH | glcm       | DifferenceVariance                   | 33.65842895  |
| wavelet-LHH | glcm       | Idn                                  | 0.856360229  |
| wavelet-LHH | glcm       | Idm                                  | 0.153146018  |
| wavelet-LHH | glcm       | Correlation                          | 0.010028477  |
| wavelet-LHH | glcm       | Autocorrelation                      | 282.9003005  |
| wavelet-LHH | glcm       | SumEntropy                           | 4.634066672  |
| wavelet-LHH | glcm       | SumSquares                           | 41.26563653  |
| wavelet-LHH | glcm       | ClusterProminence                    | 28684.36716  |
| wavelet-LHH | glcm       | Imc2                                 | 0.992182     |
| wavelet-LHH | glcm       | Imc1                                 | -0.474581758 |
| wavelet-LHH | glcm       | DifferenceAverage                    | 6.747619159  |
| wavelet-LHH | glcm       | Id                                   | 0.242696338  |
| wavelet-LHH | glcm       | ClusterTendency                      | 83.54160134  |
| wavelet-LHH | firstorder | InterquartileRange                   | 164.7599111  |
| wavelet-LHH | firstorder | Skewness                             | 0.371362619  |
| wavelet-LHH | firstorder | Uniformity                           | 0.05663281   |
| wavelet-LHH | firstorder | Median                               | -8.179232585 |
| wavelet-LHH | firstorder | Energy                               | 2844480.792  |
| wavelet-LHH | firstorder | RobustMeanAbsoluteDeviation          | 74.5753495   |
| wavelet-LHH | firstorder | MeanAbsoluteDeviation                | 118.8323736  |
| wavelet-LHH | firstorder | TotalEnergy                          | 76800981.38  |
| wavelet-LHH | firstorder | Maximum                              | 486.0680554  |
| wavelet-LHH | firstorder | RootMeanSquared                      | 157.96071    |
| wavelet-LHH | firstorder | 90Percentile                         | 195.4764111  |
| wavelet-LHH | firstorder | Minimum                              | -398.4602078 |
| wavelet-LHH | firstorder | Entropy                              | 4.425252784  |
| wavelet-LHH | firstorder | Range                                | 884.5282631  |
| wavelet-LHH | firstorder | Variance                             | 24902.43957  |
| wavelet-LHH | firstorder | 10Percentile                         | -184.3411607 |
| wavelet-LHH | firstorder | Kurtosis                             | 3.934338589  |
| wavelet-LHH | firstorder | Mean                                 | 7.010443551  |
| wavelet-LHH | glrlm      | ShortRunLowGrayLevelEmphasis         | 0.016209374  |
| wavelet-LHH | glrlm      | GrayLevelVariance                    | 40.90783263  |
| wavelet-LHH | glrlm      | LowGrayLevelRunEmphasis              | 0.016350097  |
| wavelet-LHH | glrlm      | GrayLevelNonUniformityNormalized     | 0.055544582  |
| wavelet-LHH | glrlm      | RunVariance                          | 0.042495182  |
| wavelet-LHH | glrlm      | GrayLevelNonUniformity               | 6.087623509  |
| wavelet-LHH | glrlm      | LongRunEmphasis                      | 1.126241751  |
| wavelet-LHH | glrlm      | ShortRunHighGrayLevelEmphasis        | 314.9399201  |
| wavelet-LHH | glrlm      | RunLengthNonUniformity               | 101.7654427  |
| wavelet-LHH | glrlm      | ShortRunEmphasis                     | 0.970784954  |
| wavelet-LHH | glrlm      | LongRunHighGrayLevelEmphasis         | 359.7361565  |
| wavelet-LHH | glrlm      | RunPercentage                        | 0.961538462  |
| wavelet-LHH | glrlm      | LongRunLowGrayLevelEmphasis          | 0.016949838  |

|             |       |                                      |              |
|-------------|-------|--------------------------------------|--------------|
| wavelet-LHH | glrlm | RunEntropy                           | 4.579041283  |
| wavelet-LHH | glrlm | HighGrayLevelRunEmphasis             | 323.3582713  |
| wavelet-LHH | glrlm | RunLengthNonUniformityNormalized     | 0.92724804   |
| wavelet-LHH | glszm | GrayLevelVariance                    | 51.13489796  |
| wavelet-LHH | glszm | ZoneVariance                         | 1.633469388  |
| wavelet-LHH | glszm | GrayLevelNonUniformityNormalized     | 0.048163265  |
| wavelet-LHH | glszm | SizeZoneNonUniformityNormalized      | 0.496326531  |
| wavelet-LHH | glszm | SizeZoneNonUniformity                | 34.74285714  |
| wavelet-LHH | glszm | GrayLevelNonUniformity               | 3.371428571  |
| wavelet-LHH | glszm | LargeAreaEmphasis                    | 4.285714286  |
| wavelet-LHH | glszm | SmallAreaHighGrayLevelEmphasis       | 232.9218502  |
| wavelet-LHH | glszm | ZonePercentage                       | 0.614035088  |
| wavelet-LHH | glszm | LargeAreaLowGrayLevelEmphasis        | 0.038045636  |
| wavelet-LHH | glszm | LargeAreaHighGrayLevelEmphasis       | 1242.628571  |
| wavelet-LHH | glszm | HighGrayLevelZoneEmphasis            | 329.0714286  |
| wavelet-LHH | glszm | SmallAreaEmphasis                    | 0.730971109  |
| wavelet-LHH | glszm | LowGrayLevelZoneEmphasis             | 0.022957307  |
| wavelet-LHH | glszm | ZoneEntropy                          | 5.246791053  |
| wavelet-LHH | glszm | SmallAreaLowGrayLevelEmphasis        | 0.021632983  |
| wavelet-LHH | ngtdm | Coarseness                           | 0.046266048  |
| wavelet-LHH | ngtdm | Complexity                           | 1629.891859  |
| wavelet-LHH | ngtdm | Strength                             | 13.04341531  |
| wavelet-LHH | ngtdm | Contrast                             | 0.480518735  |
| wavelet-LHH | ngtdm | Busyness                             | 0.049394793  |
| wavelet-LLH | gldm  | GrayLevelVariance                    | 73.08279471  |
| wavelet-LLH | gldm  | HighGrayLevelEmphasis                | 605.3157895  |
| wavelet-LLH | gldm  | DependenceEntropy                    | 5.740527514  |
| wavelet-LLH | gldm  | DependenceNonUniformity              | 42.03508772  |
| wavelet-LLH | gldm  | GrayLevelNonUniformity               | 5.228070175  |
| wavelet-LLH | gldm  | SmallDependenceEmphasis              | 0.557994639  |
| wavelet-LLH | gldm  | SmallDependenceHighGrayLevelEmphasis | 373.8433504  |
| wavelet-LLH | gldm  | DependenceNonUniformityNormalized    | 0.36872884   |
| wavelet-LLH | gldm  | LargeDependenceEmphasis              | 4.98245614   |
| wavelet-LLH | gldm  | LargeDependenceLowGrayLevelEmphasis  | 0.022499567  |
| wavelet-LLH | gldm  | DependenceVariance                   | 1.39242844   |
| wavelet-LLH | gldm  | LargeDependenceHighGrayLevelEmphasis | 2642.333333  |
| wavelet-LLH | gldm  | SmallDependenceLowGrayLevelEmphasis  | 0.011171472  |
| wavelet-LLH | gldm  | LowGrayLevelEmphasis                 | 0.012511044  |
| wavelet-LLH | glcm  | JointAverage                         | 22.52827677  |
| wavelet-LLH | glcm  | SumAverage                           | 45.05655354  |
| wavelet-LLH | glcm  | JointEntropy                         | 6.846553653  |
| wavelet-LLH | glcm  | ClusterShade                         | 834.3837076  |
| wavelet-LLH | glcm  | MaximumProbability                   | 0.022294207  |
| wavelet-LLH | glcm  | ldmn                                 | 0.974259885  |
| wavelet-LLH | glcm  | JointEnergy                          | 0.009422148  |
| wavelet-LLH | glcm  | Contrast                             | 88.30316136  |
| wavelet-LLH | glcm  | DifferenceEntropy                    | 3.985004394  |
| wavelet-LLH | glcm  | InverseVariance                      | 0.124420864  |
| wavelet-LLH | glcm  | DifferenceVariance                   | 32.46735958  |
| wavelet-LLH | glcm  | ldn                                  | 0.891656077  |
| wavelet-LLH | glcm  | ldm                                  | 0.132335214  |
| wavelet-LLH | glcm  | Correlation                          | 0.301916942  |
| wavelet-LLH | glcm  | Autocorrelation                      | 525.869624   |
| wavelet-LLH | glcm  | SumEntropy                           | 4.995173913  |
| wavelet-LLH | glcm  | SumSquares                           | 62.43649904  |
| wavelet-LLH | glcm  | ClusterProminence                    | 98288.17776  |
| wavelet-LLH | glcm  | lmc2                                 | 0.99497934   |
| wavelet-LLH | glcm  | lmc1                                 | -0.505915715 |
| wavelet-LLH | glcm  | DifferenceAverage                    | 7.304470956  |

|             |            |                                  |              |
|-------------|------------|----------------------------------|--------------|
| wavelet-LLH | glcm       | Id                               | 0.221808526  |
| wavelet-LLH | glcm       | ClusterTendency                  | 161.4428348  |
| wavelet-LLH | firstorder | InterquartileRange               | 253.4842716  |
| wavelet-LLH | firstorder | Skewness                         | 0.486400214  |
| wavelet-LLH | firstorder | Uniformity                       | 0.045860265  |
| wavelet-LLH | firstorder | Median                           | -57.7692374  |
| wavelet-LLH | firstorder | Energy                           | 5591365.909  |
| wavelet-LLH | firstorder | RobustMeanAbsoluteDeviation      | 106.0349131  |
| wavelet-LLH | firstorder | MeanAbsoluteDeviation            | 162.9667568  |
| wavelet-LLH | firstorder | TotalEnergy                      | 150966879.6  |
| wavelet-LLH | firstorder | Maximum                          | 770.3690388  |
| wavelet-LLH | firstorder | RootMeanSquared                  | 221.4657296  |
| wavelet-LLH | firstorder | 90Percentile                     | 217.91509    |
| wavelet-LLH | firstorder | Minimum                          | -601.0016609 |
| wavelet-LLH | firstorder | Entropy                          | 4.71734805   |
| wavelet-LLH | firstorder | Range                            | 1371.3707    |
| wavelet-LLH | firstorder | Variance                         | 45343.47435  |
| wavelet-LLH | firstorder | 10Percentile                     | -290.7229083 |
| wavelet-LLH | firstorder | Kurtosis                         | 4.424596496  |
| wavelet-LLH | firstorder | Mean                             | -60.85716914 |
| wavelet-LLH | glrlm      | ShortRunLowGrayLevelEmphasis     | 0.012793948  |
| wavelet-LLH | glrlm      | GrayLevelVariance                | 74.58375237  |
| wavelet-LLH | glrlm      | LowGrayLevelRunEmphasis          | 0.012863652  |
| wavelet-LLH | glrlm      | GrayLevelNonUniformityNormalized | 0.044780438  |
| wavelet-LLH | glrlm      | RunVariance                      | 0.039948663  |
| wavelet-LLH | glrlm      | GrayLevelNonUniformity           | 4.930246776  |
| wavelet-LLH | glrlm      | LongRunEmphasis                  | 1.113632933  |
| wavelet-LLH | glrlm      | ShortRunHighGrayLevelEmphasis    | 595.3654493  |
| wavelet-LLH | glrlm      | RunLengthNonUniformity           | 103.1491501  |
| wavelet-LLH | glrlm      | ShortRunEmphasis                 | 0.974715069  |
| wavelet-LLH | glrlm      | LongRunHighGrayLevelEmphasis     | 666.9834007  |
| wavelet-LLH | glrlm      | RunPercentage                    | 0.965587045  |
| wavelet-LLH | glrlm      | LongRunLowGrayLevelEmphasis      | 0.013169176  |
| wavelet-LLH | glrlm      | RunEntropy                       | 4.853181265  |
| wavelet-LLH | glrlm      | HighGrayLevelRunEmphasis         | 608.504721   |
| wavelet-LLH | glrlm      | RunLengthNonUniformityNormalized | 0.936417071  |
| wavelet-LLH | glszm      | GrayLevelVariance                | 90.03093333  |
| wavelet-LLH | glszm      | ZoneVariance                     | 1.342933333  |
| wavelet-LLH | glszm      | GrayLevelNonUniformityNormalized | 0.037155556  |
| wavelet-LLH | glszm      | SizeZoneNonUniformityNormalized  | 0.527822222  |
| wavelet-LLH | glszm      | SizeZoneNonUniformity            | 39.58666667  |
| wavelet-LLH | glszm      | GrayLevelNonUniformity           | 2.786666667  |
| wavelet-LLH | glszm      | LargeAreaEmphasis                | 3.653333333  |
| wavelet-LLH | glszm      | SmallAreaHighGrayLevelEmphasis   | 515.760463   |
| wavelet-LLH | glszm      | ZonePercentage                   | 0.657894737  |
| wavelet-LLH | glszm      | LargeAreaLowGrayLevelEmphasis    | 0.024397853  |
| wavelet-LLH | glszm      | LargeAreaHighGrayLevelEmphasis   | 2008.426667  |
| wavelet-LLH | glszm      | HighGrayLevelZoneEmphasis        | 650.7733333  |
| wavelet-LLH | glszm      | SmallAreaEmphasis                | 0.747610072  |
| wavelet-LLH | glszm      | LowGrayLevelZoneEmphasis         | 0.017488169  |
| wavelet-LLH | glszm      | ZoneEntropy                      | 5.611956524  |
| wavelet-LLH | glszm      | SmallAreaLowGrayLevelEmphasis    | 0.016658698  |
| wavelet-LLH | ngtdm      | Coarseness                       | 0.049966713  |
| wavelet-LLH | ngtdm      | Complexity                       | 2536.132997  |
| wavelet-LLH | ngtdm      | Strength                         | 27.08481765  |
| wavelet-LLH | ngtdm      | Contrast                         | 0.64648856   |
| wavelet-LLH | ngtdm      | Busyness                         | 0.030776438  |
| wavelet-LLL | gldm       | GrayLevelVariance                | 579.9757618  |
| wavelet-LLL | gldm       | HighGrayLevelEmphasis            | 2942.447368  |

|             |            |                                      |              |
|-------------|------------|--------------------------------------|--------------|
| wavelet-LLL | gldm       | DependenceEntropy                    | 5.990441768  |
| wavelet-LLL | gldm       | DependenceNonUniformity              | 75.89473684  |
| wavelet-LLL | gldm       | GrayLevelNonUniformity               | 2.438596491  |
| wavelet-LLL | gldm       | SmallDependenceEmphasis              | 0.843384503  |
| wavelet-LLL | gldm       | SmallDependenceHighGrayLevelEmphasis | 2377.986659  |
| wavelet-LLL | gldm       | DependenceNonUniformityNormalized    | 0.665743306  |
| wavelet-LLL | gldm       | LargeDependenceEmphasis              | 1.842105263  |
| wavelet-LLL | gldm       | LargeDependenceLowGrayLevelEmphasis  | 0.01313938   |
| wavelet-LLL | gldm       | DependenceVariance                   | 0.290550939  |
| wavelet-LLL | gldm       | LargeDependenceHighGrayLevelEmphasis | 6368.342105  |
| wavelet-LLL | gldm       | SmallDependenceLowGrayLevelEmphasis  | 0.012525309  |
| wavelet-LLL | gldm       | LowGrayLevelEmphasis                 | 0.012637823  |
| wavelet-LLL | glcm       | JointAverage                         | 55.98149813  |
| wavelet-LLL | glcm       | SumAverage                           | 111.9629963  |
| wavelet-LLL | glcm       | JointEntropy                         | 7.110654642  |
| wavelet-LLL | glcm       | ClusterShade                         | -7814.125202 |
| wavelet-LLL | glcm       | MaximumProbability                   | 0.012952427  |
| wavelet-LLL | glcm       | Idmn                                 | 0.931339257  |
| wavelet-LLL | glcm       | JointEnergy                          | 0.007365188  |
| wavelet-LLL | glcm       | Contrast                             | 800.756047   |
| wavelet-LLL | glcm       | DifferenceEntropy                    | 5.045868525  |
| wavelet-LLL | glcm       | InverseVariance                      | 0.040622719  |
| wavelet-LLL | glcm       | DifferenceVariance                   | 238.92687    |
| wavelet-LLL | glcm       | Idn                                  | 0.823879852  |
| wavelet-LLL | glcm       | Idm                                  | 0.04070814   |
| wavelet-LLL | glcm       | Correlation                          | 0.281577383  |
| wavelet-LLL | glcm       | Autocorrelation                      | 3293.380242  |
| wavelet-LLL | glcm       | SumEntropy                           | 5.709737065  |
| wavelet-LLL | glcm       | SumSquares                           | 557.0776865  |
| wavelet-LLL | glcm       | ClusterProminence                    | 4694196.318  |
| wavelet-LLL | glcm       | Imc2                                 | 0.999866777  |
| wavelet-LLL | glcm       | Imc1                                 | -0.735551786 |
| wavelet-LLL | glcm       | DifferenceAverage                    | 23.18101173  |
| wavelet-LLL | glcm       | Id                                   | 0.094406862  |
| wavelet-LLL | glcm       | ClusterTendency                      | 1427.554699  |
| wavelet-LLL | firstorder | InterquartileRange                   | 984.8579015  |
| wavelet-LLL | firstorder | Skewness                             | 0.095788706  |
| wavelet-LLL | firstorder | Uniformity                           | 0.021391197  |
| wavelet-LLL | firstorder | Median                               | -984.846133  |
| wavelet-LLL | firstorder | Energy                               | 133063860.7  |
| wavelet-LLL | firstorder | RobustMeanAbsoluteDeviation          | 389.1524827  |
| wavelet-LLL | firstorder | MeanAbsoluteDeviation                | 512.6569829  |
| wavelet-LLL | firstorder | TotalEnergy                          | 3592724238   |
| wavelet-LLL | firstorder | Maximum                              | 370.5707062  |
| wavelet-LLL | firstorder | RootMeanSquared                      | 1080.382732  |
| wavelet-LLL | firstorder | 90Percentile                         | -77.82252069 |
| wavelet-LLL | firstorder | Minimum                              | -2079.58536  |
| wavelet-LLL | firstorder | Entropy                              | 5.715142839  |
| wavelet-LLL | firstorder | Range                                | 2450.156067  |
| wavelet-LLL | firstorder | Variance                             | 361527.4096  |
| wavelet-LLL | firstorder | 10Percentile                         | -1652.0436   |
| wavelet-LLL | firstorder | Kurtosis                             | 2.081776102  |
| wavelet-LLL | firstorder | Mean                                 | -897.6076194 |
| wavelet-LLL | glrlm      | ShortRunLowGrayLevelEmphasis         | 0.012748489  |
| wavelet-LLL | glrlm      | GrayLevelVariance                    | 579.4212393  |
| wavelet-LLL | glrlm      | LowGrayLevelRunEmphasis              | 0.012753143  |
| wavelet-LLL | glrlm      | GrayLevelNonUniformityNormalized     | 0.021291291  |
| wavelet-LLL | glrlm      | RunVariance                          | 0.009442989  |
| wavelet-LLL | glrlm      | GrayLevelNonUniformity               | 2.404361824  |

|             |       |                                      |              |
|-------------|-------|--------------------------------------|--------------|
| wavelet-LLL | glrlm | LongRunEmphasis                      | 1.028848125  |
| wavelet-LLL | glrlm | ShortRunHighGrayLevelEmphasis        | 2905.718057  |
| wavelet-LLL | glrlm | RunLengthNonUniformity               | 110.8078421  |
| wavelet-LLL | glrlm | ShortRunEmphasis                     | 0.992787969  |
| wavelet-LLL | glrlm | LongRunHighGrayLevelEmphasis         | 3045.055218  |
| wavelet-LLL | glrlm | RunPercentage                        | 0.990553306  |
| wavelet-LLL | glrlm | LongRunLowGrayLevelEmphasis          | 0.01277176   |
| wavelet-LLL | glrlm | RunEntropy                           | 5.739736733  |
| wavelet-LLL | glrlm | HighGrayLevelRunEmphasis             | 2933.585489  |
| wavelet-LLL | glrlm | RunLengthNonUniformityNormalized     | 0.981114022  |
| wavelet-LLL | glszm | GrayLevelVariance                    | 575.2332124  |
| wavelet-LLL | glszm | ZoneVariance                         | 0.191353789  |
| wavelet-LLL | glszm | GrayLevelNonUniformityNormalized     | 0.020488187  |
| wavelet-LLL | glszm | SizeZoneNonUniformityNormalized      | 0.818253112  |
| wavelet-LLL | glszm | SizeZoneNonUniformity                | 82.64356436  |
| wavelet-LLL | glszm | GrayLevelNonUniformity               | 2.069306931  |
| wavelet-LLL | glszm | LargeAreaEmphasis                    | 1.465346535  |
| wavelet-LLL | glszm | SmallAreaHighGrayLevelEmphasis       | 2582.691488  |
| wavelet-LLL | glszm | ZonePercentage                       | 0.885964912  |
| wavelet-LLL | glszm | LargeAreaLowGrayLevelEmphasis        | 0.014462089  |
| wavelet-LLL | glszm | LargeAreaHighGrayLevelEmphasis       | 4673.514851  |
| wavelet-LLL | glszm | HighGrayLevelZoneEmphasis            | 2847.029703  |
| wavelet-LLL | glszm | SmallAreaEmphasis                    | 0.922511001  |
| wavelet-LLL | glszm | LowGrayLevelZoneEmphasis             | 0.014176315  |
| wavelet-LLL | glszm | ZoneEntropy                          | 5.905349106  |
| wavelet-LLL | glszm | SmallAreaLowGrayLevelEmphasis        | 0.014115878  |
| wavelet-LLL | ngtdm | Coarseness                           | 0.028980514  |
| wavelet-LLL | ngtdm | Complexity                           | 31936.52468  |
| wavelet-LLL | ngtdm | Strength                             | 87.73646516  |
| wavelet-LLL | ngtdm | Contrast                             | 5.070006802  |
| wavelet-LLL | ngtdm | Busyness                             | 0.015687648  |
| wavelet-HHL | gldm  | GrayLevelVariance                    | 13.11980609  |
| wavelet-HHL | gldm  | HighGrayLevelEmphasis                | 106.3947368  |
| wavelet-HHL | gldm  | DependenceEntropy                    | 5.322391576  |
| wavelet-HHL | gldm  | DependenceNonUniformity              | 28.33333333  |
| wavelet-HHL | gldm  | GrayLevelNonUniformity               | 9.736842105  |
| wavelet-HHL | gldm  | SmallDependenceEmphasis              | 0.44129013   |
| wavelet-HHL | gldm  | SmallDependenceHighGrayLevelEmphasis | 48.99790921  |
| wavelet-HHL | gldm  | DependenceNonUniformityNormalized    | 0.248538012  |
| wavelet-HHL | gldm  | LargeDependenceEmphasis              | 7.368421053  |
| wavelet-HHL | gldm  | LargeDependenceLowGrayLevelEmphasis  | 0.117166628  |
| wavelet-HHL | gldm  | DependenceVariance                   | 1.75900277   |
| wavelet-HHL | gldm  | LargeDependenceHighGrayLevelEmphasis | 758.7631579  |
| wavelet-HHL | gldm  | SmallDependenceLowGrayLevelEmphasis  | 0.027720832  |
| wavelet-HHL | gldm  | LowGrayLevelEmphasis                 | 0.035760559  |
| wavelet-HHL | glcm  | JointAverage                         | 9.738807087  |
| wavelet-HHL | glcm  | SumAverage                           | 19.47761417  |
| wavelet-HHL | glcm  | JointEntropy                         | 6.435673479  |
| wavelet-HHL | glcm  | ClusterShade                         | -5.34984911  |
| wavelet-HHL | glcm  | MaximumProbability                   | 0.038066988  |
| wavelet-HHL | glcm  | ldmn                                 | 0.944049515  |
| wavelet-HHL | glcm  | JointEnergy                          | 0.013525577  |
| wavelet-HHL | glcm  | Contrast                             | 26.22655821  |
| wavelet-HHL | glcm  | DifferenceEntropy                    | 3.341414024  |
| wavelet-HHL | glcm  | InverseVariance                      | 0.217653992  |
| wavelet-HHL | glcm  | DifferenceVariance                   | 9.340342447  |
| wavelet-HHL | glcm  | ldn                                  | 0.843478506  |
| wavelet-HHL | glcm  | ldm                                  | 0.215019682  |
| wavelet-HHL | glcm  | Correlation                          | -0.019347692 |

|             |            |                                  |              |
|-------------|------------|----------------------------------|--------------|
| wavelet-HHL | glcm       | Autocorrelation                  | 94.70714596  |
| wavelet-HHL | glcm       | SumEntropy                       | 4.078875354  |
| wavelet-HHL | glcm       | SumSquares                       | 12.95141068  |
| wavelet-HHL | glcm       | ClusterProminence                | 2010.159631  |
| wavelet-HHL | glcm       | Imc2                             | 0.936401438  |
| wavelet-HHL | glcm       | Imc1                             | -0.282509929 |
| wavelet-HHL | glcm       | DifferenceAverage                | 4.078090068  |
| wavelet-HHL | glcm       | Id                               | 0.309333104  |
| wavelet-HHL | glcm       | ClusterTendency                  | 25.57908452  |
| wavelet-HHL | firstorder | InterquartileRange               | 113.2790235  |
| wavelet-HHL | firstorder | Skewness                         | 0.023717144  |
| wavelet-HHL | firstorder | Uniformity                       | 0.085410896  |
| wavelet-HHL | firstorder | Median                           | -1.569670068 |
| wavelet-HHL | firstorder | Energy                           | 914043.3695  |
| wavelet-HHL | firstorder | RobustMeanAbsoluteDeviation      | 48.77320714  |
| wavelet-HHL | firstorder | MeanAbsoluteDeviation            | 70.61967029  |
| wavelet-HHL | firstorder | TotalEnergy                      | 24679170.98  |
| wavelet-HHL | firstorder | Maximum                          | 269.154008   |
| wavelet-HHL | firstorder | RootMeanSquared                  | 89.54286289  |
| wavelet-HHL | firstorder | 90Percentile                     | 117.9942894  |
| wavelet-HHL | firstorder | Minimum                          | -209.0505462 |
| wavelet-HHL | firstorder | Entropy                          | 3.792516904  |
| wavelet-HHL | firstorder | Range                            | 478.2045542  |
| wavelet-HHL | firstorder | Variance                         | 8001.051812  |
| wavelet-HHL | firstorder | 10Percentile                     | -102.9792028 |
| wavelet-HHL | firstorder | Kurtosis                         | 3.002471544  |
| wavelet-HHL | firstorder | Mean                             | 4.107612689  |
| wavelet-HHL | glrlm      | ShortRunLowGrayLevelEmphasis     | 0.036503752  |
| wavelet-HHL | glrlm      | GrayLevelVariance                | 13.48838698  |
| wavelet-HHL | glrlm      | LowGrayLevelRunEmphasis          | 0.03702528   |
| wavelet-HHL | glrlm      | GrayLevelNonUniformityNormalized | 0.083451705  |
| wavelet-HHL | glrlm      | RunVariance                      | 0.062662133  |
| wavelet-HHL | glrlm      | GrayLevelNonUniformity           | 9.016700038  |
| wavelet-HHL | glrlm      | LongRunEmphasis                  | 1.178886835  |
| wavelet-HHL | glrlm      | ShortRunHighGrayLevelEmphasis    | 102.5423781  |
| wavelet-HHL | glrlm      | RunLengthNonUniformity           | 97.6470075   |
| wavelet-HHL | glrlm      | ShortRunEmphasis                 | 0.961012565  |
| wavelet-HHL | glrlm      | LongRunHighGrayLevelEmphasis     | 124.8637357  |
| wavelet-HHL | glrlm      | RunPercentage                    | 0.947368421  |
| wavelet-HHL | glrlm      | LongRunLowGrayLevelEmphasis      | 0.039379948  |
| wavelet-HHL | glrlm      | RunEntropy                       | 4.029060228  |
| wavelet-HHL | glrlm      | HighGrayLevelRunEmphasis         | 106.592913   |
| wavelet-HHL | glrlm      | RunLengthNonUniformityNormalized | 0.903311142  |
| wavelet-HHL | glszm      | GrayLevelVariance                | 19.52774235  |
| wavelet-HHL | glszm      | ZoneVariance                     | 6.99872449   |
| wavelet-HHL | glszm      | GrayLevelNonUniformityNormalized | 0.069515306  |
| wavelet-HHL | glszm      | SizeZoneNonUniformityNormalized  | 0.52869898   |
| wavelet-HHL | glszm      | SizeZoneNonUniformity            | 29.60714286  |
| wavelet-HHL | glszm      | GrayLevelNonUniformity           | 3.892857143  |
| wavelet-HHL | glszm      | LargeAreaEmphasis                | 11.14285714  |
| wavelet-HHL | glszm      | SmallAreaHighGrayLevelEmphasis   | 84.66713514  |
| wavelet-HHL | glszm      | ZonePercentage                   | 0.49122807   |
| wavelet-HHL | glszm      | LargeAreaLowGrayLevelEmphasis    | 0.18861706   |
| wavelet-HHL | glszm      | LargeAreaHighGrayLevelEmphasis   | 1053.089286  |
| wavelet-HHL | glszm      | HighGrayLevelZoneEmphasis        | 111.4821429  |
| wavelet-HHL | glszm      | SmallAreaEmphasis                | 0.747641645  |
| wavelet-HHL | glszm      | LowGrayLevelZoneEmphasis         | 0.058327868  |
| wavelet-HHL | glszm      | ZoneEntropy                      | 4.773885226  |
| wavelet-HHL | glszm      | SmallAreaLowGrayLevelEmphasis    | 0.054083693  |

|             |            |                                      |              |
|-------------|------------|--------------------------------------|--------------|
| wavelet-HHL | ngtdm      | Coarseness                           | 0.04945178   |
| wavelet-HHL | ngtdm      | Complexity                           | 359.3969192  |
| wavelet-HHL | ngtdm      | Strength                             | 4.56398024   |
| wavelet-HHL | ngtdm      | Contrast                             | 0.255180169  |
| wavelet-HHL | ngtdm      | Busyness                             | 0.131715002  |
| wavelet-HLH | gldm       | GrayLevelVariance                    | 11.35180055  |
| wavelet-HLH | gldm       | HighGrayLevelEmphasis                | 126.6315789  |
| wavelet-HLH | gldm       | DependenceEntropy                    | 5.219107037  |
| wavelet-HLH | gldm       | DependenceNonUniformity              | 24.9122807   |
| wavelet-HLH | gldm       | GrayLevelNonUniformity               | 12.31578947  |
| wavelet-HLH | gldm       | SmallDependenceEmphasis              | 0.399346694  |
| wavelet-HLH | gldm       | SmallDependenceHighGrayLevelEmphasis | 51.06527259  |
| wavelet-HLH | gldm       | DependenceNonUniformityNormalized    | 0.218528778  |
| wavelet-HLH | gldm       | LargeDependenceEmphasis              | 10.40350877  |
| wavelet-HLH | gldm       | LargeDependenceLowGrayLevelEmphasis  | 0.106772276  |
| wavelet-HLH | gldm       | DependenceVariance                   | 3.292397661  |
| wavelet-HLH | gldm       | LargeDependenceHighGrayLevelEmphasis | 1283.736842  |
| wavelet-HLH | gldm       | SmallDependenceLowGrayLevelEmphasis  | 0.01767414   |
| wavelet-HLH | gldm       | LowGrayLevelEmphasis                 | 0.023313137  |
| wavelet-HLH | glcm       | JointAverage                         | 10.69459815  |
| wavelet-HLH | glcm       | SumAverage                           | 21.3891963   |
| wavelet-HLH | glcm       | JointEntropy                         | 6.137749025  |
| wavelet-HLH | glcm       | ClusterShade                         | -6.813686206 |
| wavelet-HLH | glcm       | MaximumProbability                   | 0.051122662  |
| wavelet-HLH | glcm       | Idmn                                 | 0.955275351  |
| wavelet-HLH | glcm       | JointEnergy                          | 0.017817594  |
| wavelet-HLH | glcm       | Contrast                             | 23.30794647  |
| wavelet-HLH | glcm       | DifferenceEntropy                    | 3.215750133  |
| wavelet-HLH | glcm       | InverseVariance                      | 0.239984817  |
| wavelet-HLH | glcm       | DifferenceVariance                   | 9.274040776  |
| wavelet-HLH | glcm       | Idn                                  | 0.862650003  |
| wavelet-HLH | glcm       | Idm                                  | 0.245970096  |
| wavelet-HLH | glcm       | Correlation                          | 0.018601271  |
| wavelet-HLH | glcm       | Autocorrelation                      | 114.5968659  |
| wavelet-HLH | glcm       | SumEntropy                           | 3.992872773  |
| wavelet-HLH | glcm       | SumSquares                           | 11.86006247  |
| wavelet-HLH | glcm       | ClusterProminence                    | 2237.555271  |
| wavelet-HLH | glcm       | Imc2                                 | 0.938014683  |
| wavelet-HLH | glcm       | Imc1                                 | -0.297381763 |
| wavelet-HLH | glcm       | DifferenceAverage                    | 3.68753698   |
| wavelet-HLH | glcm       | Id                                   | 0.337759563  |
| wavelet-HLH | glcm       | ClusterTendency                      | 24.13230339  |
| wavelet-HLH | firstorder | InterquartileRange                   | 98.03940287  |
| wavelet-HLH | firstorder | Skewness                             | -0.059012862 |
| wavelet-HLH | firstorder | Uniformity                           | 0.108033241  |
| wavelet-HLH | firstorder | Median                               | 13.26582629  |
| wavelet-HLH | firstorder | Energy                               | 778054.5958  |
| wavelet-HLH | firstorder | RobustMeanAbsoluteDeviation          | 39.3865156   |
| wavelet-HLH | firstorder | MeanAbsoluteDeviation                | 61.96781002  |
| wavelet-HLH | firstorder | TotalEnergy                          | 21007474.09  |
| wavelet-HLH | firstorder | Maximum                              | 251.4266581  |
| wavelet-HLH | firstorder | RootMeanSquared                      | 82.6138022   |
| wavelet-HLH | firstorder | 90Percentile                         | 96.88167863  |
| wavelet-HLH | firstorder | Minimum                              | -226.0718582 |
| wavelet-HLH | firstorder | Entropy                              | 3.586259102  |
| wavelet-HLH | firstorder | Range                                | 477.4985163  |
| wavelet-HLH | firstorder | Variance                             | 6786.568058  |
| wavelet-HLH | firstorder | 10Percentile                         | -90.26721219 |
| wavelet-HLH | firstorder | Kurtosis                             | 3.859194752  |



|             |            |                                  |             |
|-------------|------------|----------------------------------|-------------|
| wavelet-HLH | firstorder | Mean                             | 6.202600776 |
| wavelet-HLH | glrlm      | ShortRunLowGrayLevelEmphasis     | 0.023849771 |
| wavelet-HLH | glrlm      | GrayLevelVariance                | 11.89778515 |
| wavelet-HLH | glrlm      | LowGrayLevelRunEmphasis          | 0.024293733 |
| wavelet-HLH | glrlm      | GrayLevelNonUniformityNormalized | 0.102540279 |
| wavelet-HLH | glrlm      | RunVariance                      | 0.073984582 |
| wavelet-HLH | glrlm      | GrayLevelNonUniformity           | 10.94298382 |
| wavelet-HLH | glrlm      | LongRunEmphasis                  | 1.217291908 |
| wavelet-HLH | glrlm      | ShortRunHighGrayLevelEmphasis    | 120.7113286 |
| wavelet-HLH | glrlm      | RunLengthNonUniformity           | 93.91343859 |
| wavelet-HLH | glrlm      | ShortRunEmphasis                 | 0.951013314 |
| wavelet-HLH | glrlm      | LongRunHighGrayLevelEmphasis     | 153.7299147 |
| wavelet-HLH | glrlm      | RunPercentage                    | 0.935897436 |
| wavelet-HLH | glrlm      | LongRunLowGrayLevelEmphasis      | 0.026275132 |
| wavelet-HLH | glrlm      | RunEntropy                       | 3.893981334 |
| wavelet-HLH | glrlm      | HighGrayLevelRunEmphasis         | 126.8082757 |
| wavelet-HLH | glrlm      | RunLengthNonUniformityNormalized | 0.879482747 |
| wavelet-HLH | glszm      | GrayLevelVariance                | 18.95061728 |
| wavelet-HLH | glszm      | ZoneVariance                     | 4.395061728 |
| wavelet-HLH | glszm      | GrayLevelNonUniformityNormalized | 0.072702332 |
| wavelet-HLH | glszm      | SizeZoneNonUniformityNormalized  | 0.429355281 |
| wavelet-HLH | glszm      | SizeZoneNonUniformity            | 23.18518519 |
| wavelet-HLH | glszm      | GrayLevelNonUniformity           | 3.925925926 |
| wavelet-HLH | glszm      | LargeAreaEmphasis                | 8.851851852 |
| wavelet-HLH | glszm      | SmallAreaHighGrayLevelEmphasis   | 87.60640432 |
| wavelet-HLH | glszm      | ZonePercentage                   | 0.473684211 |
| wavelet-HLH | glszm      | LargeAreaLowGrayLevelEmphasis    | 0.115121424 |
| wavelet-HLH | glszm      | LargeAreaHighGrayLevelEmphasis   | 1051.592593 |
| wavelet-HLH | glszm      | HighGrayLevelZoneEmphasis        | 130.3703704 |
| wavelet-HLH | glszm      | SmallAreaEmphasis                | 0.679460887 |
| wavelet-HLH | glszm      | LowGrayLevelZoneEmphasis         | 0.038607678 |
| wavelet-HLH | glszm      | ZoneEntropy                      | 4.898134493 |
| wavelet-HLH | glszm      | SmallAreaLowGrayLevelEmphasis    | 0.035685369 |
| wavelet-HLH | ngtdm      | Coarseness                       | 0.050556747 |
| wavelet-HLH | ngtdm      | Complexity                       | 332.5729062 |
| wavelet-HLH | ngtdm      | Strength                         | 5.586478599 |
| wavelet-HLH | ngtdm      | Contrast                         | 0.191491153 |
| wavelet-HLH | ngtdm      | Busyness                         | 0.098107027 |

| Image type | Feature Class | Feature Name                         | Value                                                       |
|------------|---------------|--------------------------------------|-------------------------------------------------------------|
| general    | info          | BoundingBox                          | 11: RTSTRUCT: C99-DNU_segment_Tumor<br>(0, 0, 1, 11, 13, 8) |
| general    | info          | EnabledImageTypes                    | {u'Original': {}, u'Wavelet': {}}                           |
| general    | info          | GeneralSettings                      | {'distances': [1], 'additionalInfo': True, 'force2D':       |
| general    | info          | ImageHash                            | 0140bc6b3f88f77093e72f4d9e0389115ddf7459                    |
| general    | info          | ImageSpacing                         | (1.26953125, 1.26953125, 2.0)                               |
| general    | info          | MaskHash                             | fc2d95cc0a3e1bdaaa600f53559744301d30b48                     |
| general    | info          | NumpyVersion                         | 1.13.1                                                      |
| general    | info          | PyWaveletVersion                     | 0.5.2                                                       |
| general    | info          | SimpleITKVersion                     | 1.1.0                                                       |
| general    | info          | Version                              | 1.3.0.post102+g1b0eb74                                      |
| general    | info          | VolumeNum                            | 1                                                           |
| general    | info          | VoxelNum                             | 430                                                         |
| original   | shape         | Maximum3DDiameter                    | 39.45883931                                                 |
| original   | shape         | Maximum2DDiameterSlice               | 33.54101966                                                 |
| original   | shape         | Sphericity                           | 0.78340173                                                  |
| original   | shape         | MinorAxis                            | 27.47424462                                                 |
| original   | shape         | Elongation                           | 0.878612758                                                 |
| original   | shape         | SurfaceVolumeRatio                   | 0.272618626                                                 |
| original   | shape         | Volume                               | 11610                                                       |
| original   | shape         | MajorAxis                            | 31.27002694                                                 |
| original   | shape         | SurfaceArea                          | 3165.102252                                                 |
| original   | shape         | Flatness                             | 0.678990627                                                 |
| original   | shape         | LeastAxis                            | 21.23205519                                                 |
| original   | shape         | Maximum2DDiameterColumn              | 30.88689042                                                 |
| original   | shape         | Maximum2DDiameterRow                 | 36.12478374                                                 |
| original   | gldm          | GrayLevelVariance                    | 80.70179016                                                 |
| original   | gldm          | HighGrayLevelEmphasis                | 753.9232558                                                 |
| original   | gldm          | DependenceEntropy                    | 6.513712387                                                 |
| original   | gldm          | DependenceNonUniformity              | 85.62325581                                                 |
| original   | gldm          | GrayLevelNonUniformity               | 25.6744186                                                  |
| original   | gldm          | SmallDependenceEmphasis              | 0.431657106                                                 |
| original   | gldm          | SmallDependenceHighGrayLevelEmphasis | 224.9480617                                                 |
| original   | gldm          | DependenceNonUniformityNormalized    | 0.199123851                                                 |
| original   | gldm          | LargeDependenceEmphasis              | 24                                                          |
| original   | gldm          | LargeDependenceLowGrayLevelEmphasis  | 0.031931753                                                 |
| original   | gldm          | DependenceVariance                   | 11.24015143                                                 |
| original   | gldm          | LargeDependenceHighGrayLevelEmphasis | 27108.04419                                                 |
| original   | gldm          | SmallDependenceLowGrayLevelEmphasis  | 0.007396553                                                 |
| original   | gldm          | LowGrayLevelEmphasis                 | 0.00860857                                                  |
| original   | glcm          | JointAverage                         | 27.99135071                                                 |
| original   | glcm          | SumAverage                           | 55.98270142                                                 |
| original   | glcm          | JointEntropy                         | 7.481250607                                                 |
| original   | glcm          | ClusterShade                         | -2511.896411                                                |
| original   | glcm          | MaximumProbability                   | 0.059033103                                                 |
| original   | glcm          | Idmn                                 | 0.956615397                                                 |
| original   | glcm          | JointEnergy                          | 0.013591257                                                 |
| original   | glcm          | Contrast                             | 75.59624603                                                 |
| original   | glcm          | DifferenceEntropy                    | 3.980985371                                                 |
| original   | glcm          | InverseVariance                      | 0.233453409                                                 |
| original   | glcm          | DifferenceVariance                   | 39.54091374                                                 |
| original   | glcm          | Idn                                  | 0.880082889                                                 |
| original   | glcm          | Idm                                  | 0.266523443                                                 |
| original   | glcm          | Correlation                          | 0.436290259                                                 |

|          |            |                                  |              |
|----------|------------|----------------------------------|--------------|
| original | glcm       | Autocorrelation                  | 813.1778427  |
| original | glcm       | SumEntropy                       | 5.177232942  |
| original | glcm       | SumSquares                       | 67.34061931  |
| original | glcm       | ClusterProminence                | 118917.9709  |
| original | glcm       | Imc2                             | 0.947553582  |
| original | glcm       | Imc1                             | -0.265897336 |
| original | glcm       | DifferenceAverage                | 5.959363192  |
| original | glcm       | Id                               | 0.335625339  |
| original | glcm       | ClusterTendency                  | 193.7662312  |
| original | firstorder | InterquartileRange               | 361          |
| original | firstorder | Skewness                         | -0.719515924 |
| original | firstorder | Uniformity                       | 0.05970795   |
| original | firstorder | Median                           | -150.5       |
| original | firstorder | Energy                           | 41503702     |
| original | firstorder | RobustMeanAbsoluteDeviation      | 153.6328502  |
| original | firstorder | MeanAbsoluteDeviation            | 193.3204976  |
| original | firstorder | TotalEnergy                      | 1120599954   |
| original | firstorder | Maximum                          | 76           |
| original | firstorder | RootMeanSquared                  | 310.6770626  |
| original | firstorder | 90Percentile                     | 11           |
| original | firstorder | Minimum                          | -848         |
| original | firstorder | Entropy                          | 4.614459682  |
| original | firstorder | Range                            | 924          |
| original | firstorder | Variance                         | 50365.21071  |
| original | firstorder | 10Percentile                     | -539.2       |
| original | firstorder | Kurtosis                         | 2.479660606  |
| original | firstorder | Mean                             | -214.8372093 |
| original | glrlm      | ShortRunLowGrayLevelEmphasis     | 0.009320018  |
| original | glrlm      | GrayLevelVariance                | 81.22874833  |
| original | glrlm      | LowGrayLevelRunEmphasis          | 0.0094164    |
| original | glrlm      | GrayLevelNonUniformityNormalized | 0.049378781  |
| original | glrlm      | RunVariance                      | 0.148174127  |
| original | glrlm      | GrayLevelNonUniformity           | 19.14707156  |
| original | glrlm      | LongRunEmphasis                  | 1.381847469  |
| original | glrlm      | ShortRunHighGrayLevelEmphasis    | 641.8511483  |
| original | glrlm      | RunLengthNonUniformity           | 323.1082051  |
| original | glrlm      | ShortRunEmphasis                 | 0.929683477  |
| original | glrlm      | LongRunHighGrayLevelEmphasis     | 1137.458049  |
| original | glrlm      | RunPercentage                    | 0.901073345  |
| original | glrlm      | LongRunLowGrayLevelEmphasis      | 0.009886713  |
| original | glrlm      | RunEntropy                       | 5.101241489  |
| original | glrlm      | HighGrayLevelRunEmphasis         | 717.0853707  |
| original | glrlm      | RunLengthNonUniformityNormalized | 0.833239876  |
| original | glszm      | GrayLevelVariance                | 70.97109229  |
| original | glszm      | ZoneVariance                     | 32.56728286  |
| original | glszm      | GrayLevelNonUniformityNormalized | 0.036454707  |
| original | glszm      | SizeZoneNonUniformityNormalized  | 0.557152804  |
| original | glszm      | SizeZoneNonUniformity            | 117.5592417  |
| original | glszm      | GrayLevelNonUniformity           | 7.691943128  |
| original | glszm      | LargeAreaEmphasis                | 36.72037915  |
| original | glszm      | SmallAreaHighGrayLevelEmphasis   | 379.3357412  |
| original | glszm      | ZonePercentage                   | 0.490697674  |
| original | glszm      | LargeAreaLowGrayLevelEmphasis    | 0.04949069   |
| original | glszm      | LargeAreaHighGrayLevelEmphasis   | 42127.10427  |

|             |            |                                      |              |
|-------------|------------|--------------------------------------|--------------|
| original    | glszm      | HighGrayLevelZoneEmphasis            | 527.4312796  |
| original    | glszm      | SmallAreaEmphasis                    | 0.774502126  |
| original    | glszm      | LowGrayLevelZoneEmphasis             | 0.015587679  |
| original    | glszm      | ZoneEntropy                          | 5.816895958  |
| original    | glszm      | SmallAreaLowGrayLevelEmphasis        | 0.014738688  |
| original    | ngtdm      | Coarseness                           | 0.011265914  |
| original    | ngtdm      | Complexity                           | 2674.805532  |
| original    | ngtdm      | Strength                             | 9.570138482  |
| original    | ngtdm      | Contrast                             | 0.514142092  |
| original    | ngtdm      | Busyness                             | 0.073008165  |
| wavelet-HHH | gldm       | GrayLevelVariance                    | 9.011141157  |
| wavelet-HHH | gldm       | HighGrayLevelEmphasis                | 167.8883721  |
| wavelet-HHH | gldm       | DependenceEntropy                    | 5.971601106  |
| wavelet-HHH | gldm       | DependenceNonUniformity              | 67.16744186  |
| wavelet-HHH | gldm       | GrayLevelNonUniformity               | 46.0372093   |
| wavelet-HHH | gldm       | SmallDependenceEmphasis              | 0.307383586  |
| wavelet-HHH | gldm       | SmallDependenceHighGrayLevelEmphasis | 56.09479254  |
| wavelet-HHH | gldm       | DependenceNonUniformityNormalized    | 0.156203353  |
| wavelet-HHH | gldm       | LargeDependenceEmphasis              | 19.17674419  |
| wavelet-HHH | gldm       | LargeDependenceLowGrayLevelEmphasis  | 0.12952081   |
| wavelet-HHH | gldm       | DependenceVariance                   | 6.681341266  |
| wavelet-HHH | gldm       | LargeDependenceHighGrayLevelEmphasis | 3067.567442  |
| wavelet-HHH | gldm       | SmallDependenceLowGrayLevelEmphasis  | 0.005882563  |
| wavelet-HHH | gldm       | LowGrayLevelEmphasis                 | 0.010711171  |
| wavelet-HHH | glcm       | JointAverage                         | 12.56089718  |
| wavelet-HHH | glcm       | SumAverage                           | 25.12179435  |
| wavelet-HHH | glcm       | JointEntropy                         | 6.580613483  |
| wavelet-HHH | glcm       | ClusterShade                         | -1.943165876 |
| wavelet-HHH | glcm       | MaximumProbability                   | 0.049068828  |
| wavelet-HHH | glcm       | Idmn                                 | 0.973657675  |
| wavelet-HHH | glcm       | JointEnergy                          | 0.015856223  |
| wavelet-HHH | glcm       | Contrast                             | 17.01769208  |
| wavelet-HHH | glcm       | DifferenceEntropy                    | 3.131867689  |
| wavelet-HHH | glcm       | InverseVariance                      | 0.294381963  |
| wavelet-HHH | glcm       | DifferenceVariance                   | 7.643233256  |
| wavelet-HHH | glcm       | Idn                                  | 0.895829561  |
| wavelet-HHH | glcm       | Idm                                  | 0.304441824  |
| wavelet-HHH | glcm       | Correlation                          | -0.034617082 |
| wavelet-HHH | glcm       | Autocorrelation                      | 157.4753166  |
| wavelet-HHH | glcm       | SumEntropy                           | 3.917718056  |
| wavelet-HHH | glcm       | SumSquares                           | 8.20700979   |
| wavelet-HHH | glcm       | ClusterProminence                    | 1131.936451  |
| wavelet-HHH | glcm       | Imc2                                 | 0.723303325  |
| wavelet-HHH | glcm       | Imc1                                 | -0.107827303 |
| wavelet-HHH | glcm       | DifferenceAverage                    | 3.042949359  |
| wavelet-HHH | glcm       | Id                                   | 0.387291587  |
| wavelet-HHH | glcm       | ClusterTendency                      | 15.81034708  |
| wavelet-HHH | firstorder | InterquartileRange                   | 81.13852523  |
| wavelet-HHH | firstorder | Skewness                             | -0.030456362 |
| wavelet-HHH | firstorder | Uniformity                           | 0.107063277  |
| wavelet-HHH | firstorder | Median                               | 2.538223447  |
| wavelet-HHH | firstorder | Energy                               | 2376178.813  |
| wavelet-HHH | firstorder | RobustMeanAbsoluteDeviation          | 34.72754224  |
| wavelet-HHH | firstorder | MeanAbsoluteDeviation                | 54.75475182  |

|             |            |                                  |              |
|-------------|------------|----------------------------------|--------------|
| wavelet-HHH | firstorder | TotalEnergy                      | 64156827.96  |
| wavelet-HHH | firstorder | Maximum                          | 287.0064948  |
| wavelet-HHH | firstorder | RootMeanSquared                  | 74.3370516   |
| wavelet-HHH | firstorder | 90Percentile                     | 89.53541838  |
| wavelet-HHH | firstorder | Minimum                          | -275.1083716 |
| wavelet-HHH | firstorder | Entropy                          | 3.55940591   |
| wavelet-HHH | firstorder | Range                            | 562.1148663  |
| wavelet-HHH | firstorder | Variance                         | 5520.708566  |
| wavelet-HHH | firstorder | 10Percentile                     | -86.55453408 |
| wavelet-HHH | firstorder | Kurtosis                         | 4.587702589  |
| wavelet-HHH | firstorder | Mean                             | 2.299711864  |
| wavelet-HHH | glrlm      | ShortRunLowGrayLevelEmphasis     | 0.010665687  |
| wavelet-HHH | glrlm      | GrayLevelVariance                | 9.730693324  |
| wavelet-HHH | glrlm      | LowGrayLevelRunEmphasis          | 0.011147577  |
| wavelet-HHH | glrlm      | GrayLevelNonUniformityNormalized | 0.100653954  |
| wavelet-HHH | glrlm      | RunVariance                      | 0.134833718  |
| wavelet-HHH | glrlm      | GrayLevelNonUniformity           | 39.06672331  |
| wavelet-HHH | glrlm      | LongRunEmphasis                  | 1.364058141  |
| wavelet-HHH | glrlm      | ShortRunHighGrayLevelEmphasis    | 157.329493   |
| wavelet-HHH | glrlm      | RunLengthNonUniformity           | 322.2406437  |
| wavelet-HHH | glrlm      | ShortRunEmphasis                 | 0.928484066  |
| wavelet-HHH | glrlm      | LongRunHighGrayLevelEmphasis     | 227.015904   |
| wavelet-HHH | glrlm      | RunPercentage                    | 0.902504472  |
| wavelet-HHH | glrlm      | LongRunLowGrayLevelEmphasis      | 0.013570006  |
| wavelet-HHH | glrlm      | RunEntropy                       | 4.056491622  |
| wavelet-HHH | glrlm      | HighGrayLevelRunEmphasis         | 168.747764   |
| wavelet-HHH | glrlm      | RunLengthNonUniformityNormalized | 0.829912838  |
| wavelet-HHH | glszm      | GrayLevelVariance                | 19.88498215  |
| wavelet-HHH | glszm      | ZoneVariance                     | 66.17477627  |
| wavelet-HHH | glszm      | GrayLevelNonUniformityNormalized | 0.073206514  |
| wavelet-HHH | glszm      | SizeZoneNonUniformityNormalized  | 0.460707125  |
| wavelet-HHH | glszm      | SizeZoneNonUniformity            | 65.88111888  |
| wavelet-HHH | glszm      | GrayLevelNonUniformity           | 10.46853147  |
| wavelet-HHH | glszm      | LargeAreaEmphasis                | 75.21678322  |
| wavelet-HHH | glszm      | SmallAreaHighGrayLevelEmphasis   | 132.9161065  |
| wavelet-HHH | glszm      | ZonePercentage                   | 0.33255814   |
| wavelet-HHH | glszm      | LargeAreaLowGrayLevelEmphasis    | 0.491151136  |
| wavelet-HHH | glszm      | LargeAreaHighGrayLevelEmphasis   | 12114.6014   |
| wavelet-HHH | glszm      | HighGrayLevelZoneEmphasis        | 180.4475524  |
| wavelet-HHH | glszm      | SmallAreaEmphasis                | 0.705375875  |
| wavelet-HHH | glszm      | LowGrayLevelZoneEmphasis         | 0.018442718  |
| wavelet-HHH | glszm      | ZoneEntropy                      | 5.319445558  |
| wavelet-HHH | glszm      | SmallAreaLowGrayLevelEmphasis    | 0.016094436  |
| wavelet-HHH | ngtdm      | Coarseness                       | 0.015508636  |
| wavelet-HHH | ngtdm      | Complexity                       | 502.9209936  |
| wavelet-HHH | ngtdm      | Strength                         | 2.517901837  |
| wavelet-HHH | ngtdm      | Contrast                         | 0.083507983  |
| wavelet-HHH | ngtdm      | Busyness                         | 0.176538863  |
| wavelet-HLL | gldm       | GrayLevelVariance                | 48.83340184  |
| wavelet-HLL | gldm       | HighGrayLevelEmphasis            | 643.7395349  |
| wavelet-HLL | gldm       | DependenceEntropy                | 6.357325581  |
| wavelet-HLL | gldm       | DependenceNonUniformity          | 110.3627907  |
| wavelet-HLL | gldm       | GrayLevelNonUniformity           | 20.77209302  |
| wavelet-HLL | gldm       | SmallDependenceEmphasis          | 0.4683424    |

|             |            |                                      |              |
|-------------|------------|--------------------------------------|--------------|
| wavelet-HLL | gldm       | SmallDependenceHighGrayLevelEmphasis | 322.001469   |
| wavelet-HLL | gldm       | DependenceNonUniformityNormalized    | 0.256657653  |
| wavelet-HLL | gldm       | LargeDependenceEmphasis              | 7.655813953  |
| wavelet-HLL | gldm       | LargeDependenceLowGrayLevelEmphasis  | 0.017586723  |
| wavelet-HLL | gldm       | DependenceVariance                   | 2.247485127  |
| wavelet-HLL | gldm       | LargeDependenceHighGrayLevelEmphasis | 4417.511628  |
| wavelet-HLL | gldm       | SmallDependenceLowGrayLevelEmphasis  | 0.003499173  |
| wavelet-HLL | gldm       | LowGrayLevelEmphasis                 | 0.004583677  |
| wavelet-HLL | glcm       | JointAverage                         | 24.11128938  |
| wavelet-HLL | glcm       | SumAverage                           | 48.22257877  |
| wavelet-HLL | glcm       | JointEntropy                         | 8.108385984  |
| wavelet-HLL | glcm       | ClusterShade                         | 1088.675051  |
| wavelet-HLL | glcm       | MaximumProbability                   | 0.018070478  |
| wavelet-HLL | glcm       | Idmn                                 | 0.972784046  |
| wavelet-HLL | glcm       | JointEnergy                          | 0.004893397  |
| wavelet-HLL | glcm       | Contrast                             | 68.17262137  |
| wavelet-HLL | glcm       | DifferenceEntropy                    | 3.979420583  |
| wavelet-HLL | glcm       | InverseVariance                      | 0.189607498  |
| wavelet-HLL | glcm       | DifferenceVariance                   | 30.91478748  |
| wavelet-HLL | glcm       | Idn                                  | 0.89596113   |
| wavelet-HLL | glcm       | Idm                                  | 0.183602484  |
| wavelet-HLL | glcm       | Correlation                          | 0.280421599  |
| wavelet-HLL | glcm       | Autocorrelation                      | 594.736333   |
| wavelet-HLL | glcm       | SumEntropy                           | 5.218256407  |
| wavelet-HLL | glcm       | SumSquares                           | 47.45647764  |
| wavelet-HLL | glcm       | ClusterProminence                    | 67137.09501  |
| wavelet-HLL | glcm       | Imc2                                 | 0.952011345  |
| wavelet-HLL | glcm       | Imc1                                 | -0.256265466 |
| wavelet-HLL | glcm       | DifferenceAverage                    | 5.985597169  |
| wavelet-HLL | glcm       | Id                                   | 0.271324532  |
| wavelet-HLL | glcm       | ClusterTendency                      | 121.6532892  |
| wavelet-HLL | firstorder | InterquartileRange                   | 200.6944541  |
| wavelet-HLL | firstorder | Skewness                             | 0.423773158  |
| wavelet-HLL | firstorder | Uniformity                           | 0.048307193  |
| wavelet-HLL | firstorder | Median                               | -22.92824433 |
| wavelet-HLL | firstorder | Energy                               | 13160855.08  |
| wavelet-HLL | firstorder | RobustMeanAbsoluteDeviation          | 84.12528426  |
| wavelet-HLL | firstorder | MeanAbsoluteDeviation                | 132.001368   |
| wavelet-HLL | firstorder | TotalEnergy                          | 355343087.1  |
| wavelet-HLL | firstorder | Maximum                              | 560.0872641  |
| wavelet-HLL | firstorder | RootMeanSquared                      | 174.9475342  |
| wavelet-HLL | firstorder | 90Percentile                         | 220.6653328  |
| wavelet-HLL | firstorder | Minimum                              | -598.8426718 |
| wavelet-HLL | firstorder | Entropy                              | 4.719760744  |
| wavelet-HLL | firstorder | Range                                | 1158.929936  |
| wavelet-HLL | firstorder | Variance                             | 30598.25189  |
| wavelet-HLL | firstorder | 10Percentile                         | -195.3444641 |
| wavelet-HLL | firstorder | Kurtosis                             | 3.798475874  |
| wavelet-HLL | firstorder | Mean                                 | -2.896173871 |
| wavelet-HLL | glrlm      | ShortRunLowGrayLevelEmphasis         | 0.004647004  |
| wavelet-HLL | glrlm      | GrayLevelVariance                    | 50.32654722  |
| wavelet-HLL | glrlm      | LowGrayLevelRunEmphasis              | 0.00472398   |
| wavelet-HLL | glrlm      | GrayLevelNonUniformityNormalized     | 0.046715019  |
| wavelet-HLL | glrlm      | RunVariance                          | 0.05688506   |

|             |       |                                      |             |
|-------------|-------|--------------------------------------|-------------|
| wavelet-HLL | glrlm | GrayLevelNonUniformity               | 19.06428928 |
| wavelet-HLL | glrlm | LongRunEmphasis                      | 1.168145659 |
| wavelet-HLL | glrlm | ShortRunHighGrayLevelEmphasis        | 624.5717836 |
| wavelet-HLL | glrlm | RunLengthNonUniformity               | 368.7491314 |
| wavelet-HLL | glrlm | ShortRunEmphasis                     | 0.961251318 |
| wavelet-HLL | glrlm | LongRunHighGrayLevelEmphasis         | 744.4010362 |
| wavelet-HLL | glrlm | RunPercentage                        | 0.9490161   |
| wavelet-HLL | glrlm | LongRunLowGrayLevelEmphasis          | 0.005058011 |
| wavelet-HLL | glrlm | RunEntropy                           | 4.98375053  |
| wavelet-HLL | glrlm | HighGrayLevelRunEmphasis             | 647.1583772 |
| wavelet-HLL | glrlm | RunLengthNonUniformityNormalized     | 0.903150835 |
| wavelet-HLL | glszm | GrayLevelVariance                    | 67.75961557 |
| wavelet-HLL | glszm | ZoneVariance                         | 7.461032398 |
| wavelet-HLL | glszm | GrayLevelNonUniformityNormalized     | 0.038309719 |
| wavelet-HLL | glszm | SizeZoneNonUniformityNormalized      | 0.518697203 |
| wavelet-HLL | glszm | SizeZoneNonUniformity                | 118.7816594 |
| wavelet-HLL | glszm | GrayLevelNonUniformity               | 8.772925764 |
| wavelet-HLL | glszm | LargeAreaEmphasis                    | 10.98689956 |
| wavelet-HLL | glszm | SmallAreaHighGrayLevelEmphasis       | 521.089181  |
| wavelet-HLL | glszm | ZonePercentage                       | 0.53255814  |
| wavelet-HLL | glszm | LargeAreaLowGrayLevelEmphasis        | 0.025864544 |
| wavelet-HLL | glszm | LargeAreaHighGrayLevelEmphasis       | 6310.113537 |
| wavelet-HLL | glszm | HighGrayLevelZoneEmphasis            | 685.3580786 |
| wavelet-HLL | glszm | SmallAreaEmphasis                    | 0.747267331 |
| wavelet-HLL | glszm | LowGrayLevelZoneEmphasis             | 0.006839055 |
| wavelet-HLL | glszm | ZoneEntropy                          | 5.919073303 |
| wavelet-HLL | glszm | SmallAreaLowGrayLevelEmphasis        | 0.006297632 |
| wavelet-HLL | ngtdm | Coarseness                           | 0.016096681 |
| wavelet-HLL | ngtdm | Complexity                           | 2912.117264 |
| wavelet-HLL | ngtdm | Strength                             | 9.329781054 |
| wavelet-HLL | ngtdm | Contrast                             | 0.242344831 |
| wavelet-HLL | ngtdm | Busyness                             | 0.05804827  |
| wavelet-LHL | gldm  | GrayLevelVariance                    | 37.26836668 |
| wavelet-LHL | gldm  | HighGrayLevelEmphasis                | 985.7651163 |
| wavelet-LHL | gldm  | DependenceEntropy                    | 6.273893628 |
| wavelet-LHL | gldm  | DependenceNonUniformity              | 108.255814  |
| wavelet-LHL | gldm  | GrayLevelNonUniformity               | 23.06511628 |
| wavelet-LHL | gldm  | SmallDependenceEmphasis              | 0.46240078  |
| wavelet-LHL | gldm  | SmallDependenceHighGrayLevelEmphasis | 469.7301575 |
| wavelet-LHL | gldm  | DependenceNonUniformityNormalized    | 0.251757707 |
| wavelet-LHL | gldm  | LargeDependenceEmphasis              | 7.688372093 |
| wavelet-LHL | gldm  | LargeDependenceLowGrayLevelEmphasis  | 0.010919918 |
| wavelet-LHL | gldm  | DependenceVariance                   | 2.193163872 |
| wavelet-LHL | gldm  | LargeDependenceHighGrayLevelEmphasis | 7300.881395 |
| wavelet-LHL | gldm  | SmallDependenceLowGrayLevelEmphasis  | 0.00293073  |
| wavelet-LHL | gldm  | LowGrayLevelEmphasis                 | 0.003537903 |
| wavelet-LHL | glcm  | JointAverage                         | 30.65332802 |
| wavelet-LHL | glcm  | SumAverage                           | 61.30665604 |
| wavelet-LHL | glcm  | JointEntropy                         | 7.842202099 |
| wavelet-LHL | glcm  | ClusterShade                         | 352.4797705 |
| wavelet-LHL | glcm  | MaximumProbability                   | 0.020528322 |
| wavelet-LHL | glcm  | Idmn                                 | 0.984237136 |
| wavelet-LHL | glcm  | JointEnergy                          | 0.005928529 |
| wavelet-LHL | glcm  | Contrast                             | 44.65166143 |

|             |            |                                  |              |
|-------------|------------|----------------------------------|--------------|
| wavelet-LHL | glcm       | DifferenceEntropy                | 3.684453156  |
| wavelet-LHL | glcm       | InverseVariance                  | 0.219639967  |
| wavelet-LHL | glcm       | DifferenceVariance               | 20.04461361  |
| wavelet-LHL | glcm       | Idn                              | 0.918165777  |
| wavelet-LHL | glcm       | Idm                              | 0.203298249  |
| wavelet-LHL | glcm       | Correlation                      | 0.267827753  |
| wavelet-LHL | glcm       | Autocorrelation                  | 948.0365807  |
| wavelet-LHL | glcm       | SumEntropy                       | 4.977834679  |
| wavelet-LHL | glcm       | SumSquares                       | 30.7152697   |
| wavelet-LHL | glcm       | ClusterProminence                | 27024.11589  |
| wavelet-LHL | glcm       | Imc2                             | 0.920545802  |
| wavelet-LHL | glcm       | Imc1                             | -0.2170273   |
| wavelet-LHL | glcm       | DifferenceAverage                | 4.872698821  |
| wavelet-LHL | glcm       | Id                               | 0.293857186  |
| wavelet-LHL | glcm       | ClusterTendency                  | 78.20941735  |
| wavelet-LHL | firstorder | InterquartileRange               | 171.0990031  |
| wavelet-LHL | firstorder | Skewness                         | 0.025377342  |
| wavelet-LHL | firstorder | Uniformity                       | 0.053639805  |
| wavelet-LHL | firstorder | Median                           | -23.62113254 |
| wavelet-LHL | firstorder | Energy                           | 10206386.47  |
| wavelet-LHL | firstorder | RobustMeanAbsoluteDeviation      | 72.02968539  |
| wavelet-LHL | firstorder | MeanAbsoluteDeviation            | 113.1382899  |
| wavelet-LHL | firstorder | TotalEnergy                      | 275572434.7  |
| wavelet-LHL | firstorder | Maximum                          | 487.6134935  |
| wavelet-LHL | firstorder | RootMeanSquared                  | 154.0642155  |
| wavelet-LHL | firstorder | 90Percentile                     | 163.3675203  |
| wavelet-LHL | firstorder | Minimum                          | -754.0797937 |
| wavelet-LHL | firstorder | Entropy                          | 4.541262085  |
| wavelet-LHL | firstorder | Range                            | 1241.693287  |
| wavelet-LHL | firstorder | Variance                         | 23414.67282  |
| wavelet-LHL | firstorder | 10Percentile                     | -196.0138262 |
| wavelet-LHL | firstorder | Kurtosis                         | 4.964271371  |
| wavelet-LHL | firstorder | Mean                             | -17.91953323 |
| wavelet-LHL | glrlm      | ShortRunLowGrayLevelEmphasis     | 0.003628066  |
| wavelet-LHL | glrlm      | GrayLevelVariance                | 38.60212496  |
| wavelet-LHL | glrlm      | LowGrayLevelRunEmphasis          | 0.003670915  |
| wavelet-LHL | glrlm      | GrayLevelNonUniformityNormalized | 0.052048021  |
| wavelet-LHL | glrlm      | RunVariance                      | 0.060978584  |
| wavelet-LHL | glrlm      | GrayLevelNonUniformity           | 21.22425742  |
| wavelet-LHL | glrlm      | LongRunEmphasis                  | 1.174115147  |
| wavelet-LHL | glrlm      | ShortRunHighGrayLevelEmphasis    | 951.2055794  |
| wavelet-LHL | glrlm      | RunLengthNonUniformity           | 368.9896231  |
| wavelet-LHL | glrlm      | ShortRunEmphasis                 | 0.961549459  |
| wavelet-LHL | glrlm      | LongRunHighGrayLevelEmphasis     | 1152.663159  |
| wavelet-LHL | glrlm      | RunPercentage                    | 0.948300537  |
| wavelet-LHL | glrlm      | LongRunLowGrayLevelEmphasis      | 0.003864936  |
| wavelet-LHL | glrlm      | RunEntropy                       | 4.813330518  |
| wavelet-LHL | glrlm      | HighGrayLevelRunEmphasis         | 987.7753998  |
| wavelet-LHL | glrlm      | RunLengthNonUniformityNormalized | 0.904315934  |
| wavelet-LHL | glszm      | GrayLevelVariance                | 57.53813394  |
| wavelet-LHL | glszm      | ZoneVariance                     | 10.89297926  |
| wavelet-LHL | glszm      | GrayLevelNonUniformityNormalized | 0.040478287  |
| wavelet-LHL | glszm      | SizeZoneNonUniformityNormalized  | 0.531541123  |
| wavelet-LHL | glszm      | SizeZoneNonUniformity            | 117.4705882  |



|             |            |                                      |              |
|-------------|------------|--------------------------------------|--------------|
| wavelet-LHL | glszm      | GrayLevelNonUniformity               | 8.945701357  |
| wavelet-LHL | glszm      | LargeAreaEmphasis                    | 14.67873303  |
| wavelet-LHL | glszm      | SmallAreaHighGrayLevelEmphasis       | 776.1036363  |
| wavelet-LHL | glszm      | ZonePercentage                       | 0.513953488  |
| wavelet-LHL | glszm      | LargeAreaLowGrayLevelEmphasis        | 0.020736634  |
| wavelet-LHL | glszm      | LargeAreaHighGrayLevelEmphasis       | 13840.9638   |
| wavelet-LHL | glszm      | HighGrayLevelZoneEmphasis            | 1017.41629   |
| wavelet-LHL | glszm      | SmallAreaEmphasis                    | 0.75676243   |
| wavelet-LHL | glszm      | LowGrayLevelZoneEmphasis             | 0.005821251  |
| wavelet-LHL | glszm      | ZoneEntropy                          | 5.882729809  |
| wavelet-LHL | glszm      | SmallAreaLowGrayLevelEmphasis        | 0.005539468  |
| wavelet-LHL | ngtdm      | Coarseness                           | 0.016866427  |
| wavelet-LHL | ngtdm      | Complexity                           | 2221.491607  |
| wavelet-LHL | ngtdm      | Strength                             | 8.517350761  |
| wavelet-LHL | ngtdm      | Contrast                             | 0.200810475  |
| wavelet-LHL | ngtdm      | Busyness                             | 0.047029198  |
| wavelet-LHH | gldm       | GrayLevelVariance                    | 14.73677123  |
| wavelet-LHH | gldm       | HighGrayLevelEmphasis                | 323.7604651  |
| wavelet-LHH | gldm       | DependenceEntropy                    | 6.144120966  |
| wavelet-LHH | gldm       | DependenceNonUniformity              | 78.68837209  |
| wavelet-LHH | gldm       | GrayLevelNonUniformity               | 35.85581395  |
| wavelet-LHH | gldm       | SmallDependenceEmphasis              | 0.347612297  |
| wavelet-LHH | gldm       | SmallDependenceHighGrayLevelEmphasis | 114.4968211  |
| wavelet-LHH | gldm       | DependenceNonUniformityNormalized    | 0.182996214  |
| wavelet-LHH | gldm       | LargeDependenceEmphasis              | 13.59069767  |
| wavelet-LHH | gldm       | LargeDependenceLowGrayLevelEmphasis  | 0.049362332  |
| wavelet-LHH | gldm       | DependenceVariance                   | 4.337782585  |
| wavelet-LHH | gldm       | LargeDependenceHighGrayLevelEmphasis | 4183.923256  |
| wavelet-LHH | gldm       | SmallDependenceLowGrayLevelEmphasis  | 0.003970027  |
| wavelet-LHH | gldm       | LowGrayLevelEmphasis                 | 0.006259489  |
| wavelet-LHH | glcm       | JointAverage                         | 17.57806028  |
| wavelet-LHH | glcm       | SumAverage                           | 35.15612057  |
| wavelet-LHH | glcm       | JointEntropy                         | 7.122151887  |
| wavelet-LHH | glcm       | ClusterShade                         | -29.56752408 |
| wavelet-LHH | glcm       | MaximumProbability                   | 0.030405021  |
| wavelet-LHH | glcm       | Idmn                                 | 0.970558234  |
| wavelet-LHH | glcm       | JointEnergy                          | 0.010017795  |
| wavelet-LHH | glcm       | Contrast                             | 28.29931687  |
| wavelet-LHH | glcm       | DifferenceEntropy                    | 3.436405669  |
| wavelet-LHH | glcm       | InverseVariance                      | 0.249485932  |
| wavelet-LHH | glcm       | DifferenceVariance                   | 12.75202498  |
| wavelet-LHH | glcm       | Idn                                  | 0.890837018  |
| wavelet-LHH | glcm       | Idm                                  | 0.255838029  |
| wavelet-LHH | glcm       | Correlation                          | -0.023012995 |
| wavelet-LHH | glcm       | Autocorrelation                      | 308.6675375  |
| wavelet-LHH | glcm       | SumEntropy                           | 4.266633489  |
| wavelet-LHH | glcm       | SumSquares                           | 13.82545091  |
| wavelet-LHH | glcm       | ClusterProminence                    | 3432.571649  |
| wavelet-LHH | glcm       | Imc2                                 | 0.81141759   |
| wavelet-LHH | glcm       | Imc1                                 | -0.141773991 |
| wavelet-LHH | glcm       | DifferenceAverage                    | 3.89836228   |
| wavelet-LHH | glcm       | Id                                   | 0.342771638  |
| wavelet-LHH | glcm       | ClusterTendency                      | 27.00248679  |
| wavelet-LHH | firstorder | InterquartileRange                   | 108.4568092  |

|             |            |                                  |              |
|-------------|------------|----------------------------------|--------------|
| wavelet-LHH | firstorder | Skewness                         | -0.275200591 |
| wavelet-LHH | firstorder | Uniformity                       | 0.083385614  |
| wavelet-LHH | firstorder | Median                           | -2.503356105 |
| wavelet-LHH | firstorder | Energy                           | 3943593.408  |
| wavelet-LHH | firstorder | RobustMeanAbsoluteDeviation      | 46.39168802  |
| wavelet-LHH | firstorder | MeanAbsoluteDeviation            | 71.86549371  |
| wavelet-LHH | firstorder | TotalEnergy                      | 106477022    |
| wavelet-LHH | firstorder | Maximum                          | 284.8675768  |
| wavelet-LHH | firstorder | RootMeanSquared                  | 95.7661081   |
| wavelet-LHH | firstorder | 90Percentile                     | 122.0525099  |
| wavelet-LHH | firstorder | Minimum                          | -405.1670102 |
| wavelet-LHH | firstorder | Entropy                          | 3.899210148  |
| wavelet-LHH | firstorder | Range                            | 690.034587   |
| wavelet-LHH | firstorder | Variance                         | 9169.173464  |
| wavelet-LHH | firstorder | 10Percentile                     | -105.3721374 |
| wavelet-LHH | firstorder | Kurtosis                         | 4.339635046  |
| wavelet-LHH | firstorder | Mean                             | 1.404990369  |
| wavelet-LHH | glrlm      | ShortRunLowGrayLevelEmphasis     | 0.006295717  |
| wavelet-LHH | glrlm      | GrayLevelVariance                | 15.5469175   |
| wavelet-LHH | glrlm      | LowGrayLevelRunEmphasis          | 0.006500415  |
| wavelet-LHH | glrlm      | GrayLevelNonUniformityNormalized | 0.080208187  |
| wavelet-LHH | glrlm      | RunVariance                      | 0.095423455  |
| wavelet-LHH | glrlm      | GrayLevelNonUniformity           | 31.78035292  |
| wavelet-LHH | glrlm      | LongRunEmphasis                  | 1.274465878  |
| wavelet-LHH | glrlm      | ShortRunHighGrayLevelEmphasis    | 306.1120378  |
| wavelet-LHH | glrlm      | RunLengthNonUniformity           | 339.4299642  |
| wavelet-LHH | glrlm      | ShortRunEmphasis                 | 0.94051563   |
| wavelet-LHH | glrlm      | LongRunHighGrayLevelEmphasis     | 410.1792263  |
| wavelet-LHH | glrlm      | RunPercentage                    | 0.921466905  |
| wavelet-LHH | glrlm      | LongRunLowGrayLevelEmphasis      | 0.007446705  |
| wavelet-LHH | glrlm      | RunEntropy                       | 4.307986237  |
| wavelet-LHH | glrlm      | HighGrayLevelRunEmphasis         | 324.7556116  |
| wavelet-LHH | glrlm      | RunLengthNonUniformityNormalized | 0.856040597  |
| wavelet-LHH | glszm      | GrayLevelVariance                | 26.53418911  |
| wavelet-LHH | glszm      | ZoneVariance                     | 25.44200222  |
| wavelet-LHH | glszm      | GrayLevelNonUniformityNormalized | 0.059414106  |
| wavelet-LHH | glszm      | SizeZoneNonUniformityNormalized  | 0.456416508  |
| wavelet-LHH | glszm      | SizeZoneNonUniformity            | 76.22155689  |
| wavelet-LHH | glszm      | GrayLevelNonUniformity           | 9.922155689  |
| wavelet-LHH | glszm      | LargeAreaEmphasis                | 32.07185629  |
| wavelet-LHH | glszm      | SmallAreaHighGrayLevelEmphasis   | 230.3724394  |
| wavelet-LHH | glszm      | ZonePercentage                   | 0.388372093  |
| wavelet-LHH | glszm      | LargeAreaLowGrayLevelEmphasis    | 0.114706008  |
| wavelet-LHH | glszm      | LargeAreaHighGrayLevelEmphasis   | 9908.532934  |
| wavelet-LHH | glszm      | HighGrayLevelZoneEmphasis        | 330.7964072  |
| wavelet-LHH | glszm      | SmallAreaEmphasis                | 0.700574577  |
| wavelet-LHH | glszm      | LowGrayLevelZoneEmphasis         | 0.01066115   |
| wavelet-LHH | glszm      | ZoneEntropy                      | 5.608837205  |
| wavelet-LHH | glszm      | SmallAreaLowGrayLevelEmphasis    | 0.00953369   |
| wavelet-LHH | ngtdm      | Coarseness                       | 0.014669504  |
| wavelet-LHH | ngtdm      | Complexity                       | 806.2878802  |
| wavelet-LHH | ngtdm      | Strength                         | 3.045442986  |
| wavelet-LHH | ngtdm      | Contrast                         | 0.136176742  |
| wavelet-LHH | ngtdm      | Busyness                         | 0.128883593  |

|             |            |                                      |              |
|-------------|------------|--------------------------------------|--------------|
| wavelet-LLH | gldm       | GrayLevelVariance                    | 44.78382369  |
| wavelet-LLH | gldm       | HighGrayLevelEmphasis                | 447.4860465  |
| wavelet-LLH | gldm       | DependenceEntropy                    | 6.40438105   |
| wavelet-LLH | gldm       | DependenceNonUniformity              | 116.0837209  |
| wavelet-LLH | gldm       | GrayLevelNonUniformity               | 21.1255814   |
| wavelet-LLH | gldm       | SmallDependenceEmphasis              | 0.50635378   |
| wavelet-LLH | gldm       | SmallDependenceHighGrayLevelEmphasis | 236.5655513  |
| wavelet-LLH | gldm       | DependenceNonUniformityNormalized    | 0.269962142  |
| wavelet-LLH | gldm       | LargeDependenceEmphasis              | 8.827906977  |
| wavelet-LLH | gldm       | LargeDependenceLowGrayLevelEmphasis  | 0.028037006  |
| wavelet-LLH | gldm       | DependenceVariance                   | 3.245127096  |
| wavelet-LLH | gldm       | LargeDependenceHighGrayLevelEmphasis | 3846.5       |
| wavelet-LLH | gldm       | SmallDependenceLowGrayLevelEmphasis  | 0.005724398  |
| wavelet-LLH | gldm       | LowGrayLevelEmphasis                 | 0.007319347  |
| wavelet-LLH | glcm       | JointAverage                         | 19.71760263  |
| wavelet-LLH | glcm       | SumAverage                           | 39.43520526  |
| wavelet-LLH | glcm       | JointEntropy                         | 8.051533872  |
| wavelet-LLH | glcm       | ClusterShade                         | 297.3924154  |
| wavelet-LLH | glcm       | MaximumProbability                   | 0.0188944    |
| wavelet-LLH | glcm       | Idmn                                 | 0.965512332  |
| wavelet-LLH | glcm       | JointEnergy                          | 0.005164978  |
| wavelet-LLH | glcm       | Contrast                             | 71.52646451  |
| wavelet-LLH | glcm       | DifferenceEntropy                    | 3.998881498  |
| wavelet-LLH | glcm       | InverseVariance                      | 0.191665432  |
| wavelet-LLH | glcm       | DifferenceVariance                   | 32.55407165  |
| wavelet-LLH | glcm       | Idn                                  | 0.884043965  |
| wavelet-LLH | glcm       | Idm                                  | 0.186096681  |
| wavelet-LLH | glcm       | Correlation                          | 0.1447045    |
| wavelet-LLH | glcm       | Autocorrelation                      | 395.0028998  |
| wavelet-LLH | glcm       | SumEntropy                           | 5.112309393  |
| wavelet-LLH | glcm       | SumSquares                           | 41.97558665  |
| wavelet-LLH | glcm       | ClusterProminence                    | 37603.89499  |
| wavelet-LLH | glcm       | Imc2                                 | 0.942601107  |
| wavelet-LLH | glcm       | Imc1                                 | -0.242130266 |
| wavelet-LLH | glcm       | DifferenceAverage                    | 6.112424341  |
| wavelet-LLH | glcm       | Id                                   | 0.271893997  |
| wavelet-LLH | glcm       | ClusterTendency                      | 96.3758821   |
| wavelet-LLH | firstorder | InterquartileRange                   | 194.1324194  |
| wavelet-LLH | firstorder | Skewness                             | 0.151047923  |
| wavelet-LLH | firstorder | Uniformity                           | 0.049129259  |
| wavelet-LLH | firstorder | Median                               | -31.77652621 |
| wavelet-LLH | firstorder | Energy                               | 12610346.39  |
| wavelet-LLH | firstorder | RobustMeanAbsoluteDeviation          | 82.1502523   |
| wavelet-LLH | firstorder | MeanAbsoluteDeviation                | 126.4902652  |
| wavelet-LLH | firstorder | TotalEnergy                          | 340479352.6  |
| wavelet-LLH | firstorder | Maximum                              | 514.4217537  |
| wavelet-LLH | firstorder | RootMeanSquared                      | 171.2494875  |
| wavelet-LLH | firstorder | 90Percentile                         | 178.9363023  |
| wavelet-LLH | firstorder | Minimum                              | -512.1072626 |
| wavelet-LLH | firstorder | Entropy                              | 4.668878894  |
| wavelet-LLH | firstorder | Range                                | 1026.529016  |
| wavelet-LLH | firstorder | Variance                             | 28024.0939   |
| wavelet-LLH | firstorder | 10Percentile                         | -238.4182526 |
| wavelet-LLH | firstorder | Kurtosis                             | 3.651999854  |

|             |            |                                      |              |
|-------------|------------|--------------------------------------|--------------|
| wavelet-LLH | firstorder | Mean                                 | -36.08729772 |
| wavelet-LLH | glrlm      | ShortRunLowGrayLevelEmphasis         | 0.00745363   |
| wavelet-LLH | glrlm      | GrayLevelVariance                    | 46.36633791  |
| wavelet-LLH | glrlm      | LowGrayLevelRunEmphasis              | 0.007566728  |
| wavelet-LLH | glrlm      | GrayLevelNonUniformityNormalized     | 0.047287092  |
| wavelet-LLH | glrlm      | RunVariance                          | 0.062881984  |
| wavelet-LLH | glrlm      | GrayLevelNonUniformity               | 19.26952328  |
| wavelet-LLH | glrlm      | LongRunEmphasis                      | 1.177651151  |
| wavelet-LLH | glrlm      | ShortRunHighGrayLevelEmphasis        | 431.8886766  |
| wavelet-LLH | glrlm      | RunLengthNonUniformity               | 368.3578905  |
| wavelet-LLH | glrlm      | ShortRunEmphasis                     | 0.961225574  |
| wavelet-LLH | glrlm      | LongRunHighGrayLevelEmphasis         | 525.0731391  |
| wavelet-LLH | glrlm      | RunPercentage                        | 0.947584973  |
| wavelet-LLH | glrlm      | LongRunLowGrayLevelEmphasis          | 0.008071318  |
| wavelet-LLH | glrlm      | RunEntropy                           | 4.943560671  |
| wavelet-LLH | glrlm      | HighGrayLevelRunEmphasis             | 448.4768885  |
| wavelet-LLH | glrlm      | RunLengthNonUniformityNormalized     | 0.903507596  |
| wavelet-LLH | glszm      | GrayLevelVariance                    | 62.39738981  |
| wavelet-LLH | glszm      | ZoneVariance                         | 7.041857028  |
| wavelet-LLH | glszm      | GrayLevelNonUniformityNormalized     | 0.037758667  |
| wavelet-LLH | glszm      | SizeZoneNonUniformityNormalized      | 0.569369793  |
| wavelet-LLH | glszm      | SizeZoneNonUniformity                | 138.9262295  |
| wavelet-LLH | glszm      | GrayLevelNonUniformity               | 9.213114754  |
| wavelet-LLH | glszm      | LargeAreaEmphasis                    | 10.14754098  |
| wavelet-LLH | glszm      | SmallAreaHighGrayLevelEmphasis       | 370.306821   |
| wavelet-LLH | glszm      | ZonePercentage                       | 0.56744186   |
| wavelet-LLH | glszm      | LargeAreaLowGrayLevelEmphasis        | 0.034144932  |
| wavelet-LLH | glszm      | LargeAreaHighGrayLevelEmphasis       | 4442.135246  |
| wavelet-LLH | glszm      | HighGrayLevelZoneEmphasis            | 462.8893443  |
| wavelet-LLH | glszm      | SmallAreaEmphasis                    | 0.782369082  |
| wavelet-LLH | glszm      | LowGrayLevelZoneEmphasis             | 0.010533759  |
| wavelet-LLH | glszm      | ZoneEntropy                          | 5.867516833  |
| wavelet-LLH | glszm      | SmallAreaLowGrayLevelEmphasis        | 0.009705277  |
| wavelet-LLH | ngtdm      | Coarseness                           | 0.01522267   |
| wavelet-LLH | ngtdm      | Complexity                           | 2689.445277  |
| wavelet-LLH | ngtdm      | Strength                             | 7.314664054  |
| wavelet-LLH | ngtdm      | Contrast                             | 0.275661349  |
| wavelet-LLH | ngtdm      | Busyness                             | 0.079756009  |
| wavelet-LLL | gldm       | GrayLevelVariance                    | 472.0342942  |
| wavelet-LLL | gldm       | HighGrayLevelEmphasis                | 4358.54186   |
| wavelet-LLL | gldm       | DependenceEntropy                    | 7.061243471  |
| wavelet-LLL | gldm       | DependenceNonUniformity              | 166.5116279  |
| wavelet-LLL | gldm       | GrayLevelNonUniformity               | 7.362790698  |
| wavelet-LLL | gldm       | SmallDependenceEmphasis              | 0.630868804  |
| wavelet-LLL | gldm       | SmallDependenceHighGrayLevelEmphasis | 2231.886123  |
| wavelet-LLL | gldm       | DependenceNonUniformityNormalized    | 0.387236344  |
| wavelet-LLL | gldm       | LargeDependenceEmphasis              | 5.246511628  |
| wavelet-LLL | gldm       | LargeDependenceLowGrayLevelEmphasis  | 0.003660697  |
| wavelet-LLL | gldm       | DependenceVariance                   | 1.836906436  |
| wavelet-LLL | gldm       | LargeDependenceHighGrayLevelEmphasis | 34400.37907  |
| wavelet-LLL | gldm       | SmallDependenceLowGrayLevelEmphasis  | 0.002773172  |
| wavelet-LLL | gldm       | LowGrayLevelEmphasis                 | 0.002875898  |
| wavelet-LLL | glcm       | JointAverage                         | 67.85808941  |
| wavelet-LLL | glcm       | SumAverage                           | 135.7161788  |

|             |            |                                  |              |
|-------------|------------|----------------------------------|--------------|
| wavelet-LLL | glcm       | JointEntropy                     | 8.912096946  |
| wavelet-LLL | glcm       | ClusterShade                     | -25836.13211 |
| wavelet-LLL | glcm       | MaximumProbability               | 0.010754385  |
| wavelet-LLL | glcm       | Idmn                             | 0.965718031  |
| wavelet-LLL | glcm       | JointEnergy                      | 0.002432634  |
| wavelet-LLL | glcm       | Contrast                         | 355.8916401  |
| wavelet-LLL | glcm       | DifferenceEntropy                | 5.092811725  |
| wavelet-LLL | glcm       | InverseVariance                  | 0.103899349  |
| wavelet-LLL | glcm       | DifferenceVariance               | 151.1879274  |
| wavelet-LLL | glcm       | Idn                              | 0.882312377  |
| wavelet-LLL | glcm       | Idm                              | 0.107209083  |
| wavelet-LLL | glcm       | Correlation                      | 0.570973322  |
| wavelet-LLL | glcm       | Autocorrelation                  | 4842.880688  |
| wavelet-LLL | glcm       | SumEntropy                       | 6.553777726  |
| wavelet-LLL | glcm       | SumSquares                       | 415.0500086  |
| wavelet-LLL | glcm       | ClusterProminence                | 4251988.442  |
| wavelet-LLL | glcm       | Imc2                             | 0.998432089  |
| wavelet-LLL | glcm       | Imc1                             | -0.489003712 |
| wavelet-LLL | glcm       | DifferenceAverage                | 14.0948798   |
| wavelet-LLL | glcm       | Id                               | 0.175483923  |
| wavelet-LLL | glcm       | ClusterTendency                  | 1304.308394  |
| wavelet-LLL | firstorder | InterquartileRange               | 916.845859   |
| wavelet-LLL | firstorder | Skewness                         | -0.346717847 |
| wavelet-LLL | firstorder | Uniformity                       | 0.017122769  |
| wavelet-LLL | firstorder | Median                           | -648.5550796 |
| wavelet-LLL | firstorder | Energy                           | 296897426.5  |
| wavelet-LLL | firstorder | RobustMeanAbsoluteDeviation      | 367.8830969  |
| wavelet-LLL | firstorder | MeanAbsoluteDeviation            | 463.9288709  |
| wavelet-LLL | firstorder | TotalEnergy                      | 8016230516   |
| wavelet-LLL | firstorder | Maximum                          | 213.2934185  |
| wavelet-LLL | firstorder | RootMeanSquared                  | 830.938705   |
| wavelet-LLL | firstorder | 90Percentile                     | 39.81704075  |
| wavelet-LLL | firstorder | Minimum                          | -2168.550706 |
| wavelet-LLL | firstorder | Entropy                          | 6.092144438  |
| wavelet-LLL | firstorder | Range                            | 2381.844125  |
| wavelet-LLL | firstorder | Variance                         | 294876.9848  |
| wavelet-LLL | firstorder | 10Percentile                     | -1354.640663 |
| wavelet-LLL | firstorder | Kurtosis                         | 2.198601162  |
| wavelet-LLL | firstorder | Mean                             | -628.953215  |
| wavelet-LLL | glrlm      | ShortRunLowGrayLevelEmphasis     | 0.002960392  |
| wavelet-LLL | glrlm      | GrayLevelVariance                | 468.2704792  |
| wavelet-LLL | glrlm      | LowGrayLevelRunEmphasis          | 0.002965821  |
| wavelet-LLL | glrlm      | GrayLevelNonUniformityNormalized | 0.016580123  |
| wavelet-LLL | glrlm      | RunVariance                      | 0.036980122  |
| wavelet-LLL | glrlm      | GrayLevelNonUniformity           | 6.898042895  |
| wavelet-LLL | glrlm      | LongRunEmphasis                  | 1.106073768  |
| wavelet-LLL | glrlm      | ShortRunHighGrayLevelEmphasis    | 4127.393063  |
| wavelet-LLL | glrlm      | RunLengthNonUniformity           | 390.74976    |
| wavelet-LLL | glrlm      | ShortRunEmphasis                 | 0.975971828  |
| wavelet-LLL | glrlm      | LongRunHighGrayLevelEmphasis     | 4987.460421  |
| wavelet-LLL | glrlm      | RunPercentage                    | 0.96744186   |
| wavelet-LLL | glrlm      | LongRunLowGrayLevelEmphasis      | 0.002988779  |
| wavelet-LLL | glrlm      | RunEntropy                       | 6.234607563  |
| wavelet-LLL | glrlm      | HighGrayLevelRunEmphasis         | 4283.439935  |

|             |       |                                      |              |
|-------------|-------|--------------------------------------|--------------|
| wavelet-LLL | glrlm | RunLengthNonUniformityNormalized     | 0.938953131  |
| wavelet-LLL | glszm | GrayLevelVariance                    | 423.0157945  |
| wavelet-LLL | glszm | ZoneVariance                         | 2.01233982   |
| wavelet-LLL | glszm | GrayLevelNonUniformityNormalized     | 0.01497776   |
| wavelet-LLL | glszm | SizeZoneNonUniformityNormalized      | 0.639120981  |
| wavelet-LLL | glszm | SizeZoneNonUniformity                | 192.3754153  |
| wavelet-LLL | glszm | GrayLevelNonUniformity               | 4.508305648  |
| wavelet-LLL | glszm | LargeAreaEmphasis                    | 4.053156146  |
| wavelet-LLL | glszm | SmallAreaHighGrayLevelEmphasis       | 2792.048788  |
| wavelet-LLL | glszm | ZonePercentage                       | 0.7          |
| wavelet-LLL | glszm | LargeAreaLowGrayLevelEmphasis        | 0.004564707  |
| wavelet-LLL | glszm | LargeAreaHighGrayLevelEmphasis       | 25149.80399  |
| wavelet-LLL | glszm | HighGrayLevelZoneEmphasis            | 3633.122924  |
| wavelet-LLL | glszm | SmallAreaEmphasis                    | 0.826468408  |
| wavelet-LLL | glszm | LowGrayLevelZoneEmphasis             | 0.003998642  |
| wavelet-LLL | glszm | ZoneEntropy                          | 6.756476565  |
| wavelet-LLL | glszm | SmallAreaLowGrayLevelEmphasis        | 0.003938635  |
| wavelet-LLL | ngtdm | Coarseness                           | 0.017549541  |
| wavelet-LLL | ngtdm | Complexity                           | 24490.25788  |
| wavelet-LLL | ngtdm | Strength                             | 52.706354    |
| wavelet-LLL | ngtdm | Contrast                             | 1.208767383  |
| wavelet-LLL | ngtdm | Busyness                             | 0.011378411  |
| wavelet-HHL | gldm  | GrayLevelVariance                    | 13.03368848  |
| wavelet-HHL | gldm  | HighGrayLevelEmphasis                | 193.0302326  |
| wavelet-HHL | gldm  | DependenceEntropy                    | 6.031611749  |
| wavelet-HHL | gldm  | DependenceNonUniformity              | 80.60465116  |
| wavelet-HHL | gldm  | GrayLevelNonUniformity               | 36.4         |
| wavelet-HHL | gldm  | SmallDependenceEmphasis              | 0.332534367  |
| wavelet-HHL | gldm  | SmallDependenceHighGrayLevelEmphasis | 67.85216025  |
| wavelet-HHL | gldm  | DependenceNonUniformityNormalized    | 0.187452677  |
| wavelet-HHL | gldm  | LargeDependenceEmphasis              | 14.5255814   |
| wavelet-HHL | gldm  | LargeDependenceLowGrayLevelEmphasis  | 0.092717165  |
| wavelet-HHL | gldm  | DependenceVariance                   | 4.901157382  |
| wavelet-HHL | gldm  | LargeDependenceHighGrayLevelEmphasis | 2602.82093   |
| wavelet-HHL | gldm  | SmallDependenceLowGrayLevelEmphasis  | 0.00616406   |
| wavelet-HHL | gldm  | LowGrayLevelEmphasis                 | 0.010501046  |
| wavelet-HHL | glcm  | JointAverage                         | 13.49248237  |
| wavelet-HHL | glcm  | SumAverage                           | 26.98496475  |
| wavelet-HHL | glcm  | JointEntropy                         | 7.048739814  |
| wavelet-HHL | glcm  | ClusterShade                         | -18.22288883 |
| wavelet-HHL | glcm  | MaximumProbability                   | 0.038165668  |
| wavelet-HHL | glcm  | Idmn                                 | 0.957954362  |
| wavelet-HHL | glcm  | JointEnergy                          | 0.011084335  |
| wavelet-HHL | glcm  | Contrast                             | 23.84394821  |
| wavelet-HHL | glcm  | DifferenceEntropy                    | 3.34677879   |
| wavelet-HHL | glcm  | InverseVariance                      | 0.265235505  |
| wavelet-HHL | glcm  | DifferenceVariance                   | 10.21928204  |
| wavelet-HHL | glcm  | Idn                                  | 0.869720144  |
| wavelet-HHL | glcm  | Idm                                  | 0.265708835  |
| wavelet-HHL | glcm  | Correlation                          | -0.007284224 |
| wavelet-HHL | glcm  | Autocorrelation                      | 181.989344   |
| wavelet-HHL | glcm  | SumEntropy                           | 4.204636257  |
| wavelet-HHL | glcm  | SumSquares                           | 11.86012708  |
| wavelet-HHL | glcm  | ClusterProminence                    | 2052.271582  |

|             |            |                                  |              |
|-------------|------------|----------------------------------|--------------|
| wavelet-HHL | glcm       | Imc2                             | 0.775400906  |
| wavelet-HHL | glcm       | Imc1                             | -0.123595702 |
| wavelet-HHL | glcm       | DifferenceAverage                | 3.654592332  |
| wavelet-HHL | glcm       | Id                               | 0.351306962  |
| wavelet-HHL | glcm       | ClusterTendency                  | 23.5965601   |
| wavelet-HHL | firstorder | InterquartileRange               | 107.4103499  |
| wavelet-HHL | firstorder | Skewness                         | -0.20723352  |
| wavelet-HHL | firstorder | Uniformity                       | 0.084651163  |
| wavelet-HHL | firstorder | Median                           | -2.508584702 |
| wavelet-HHL | firstorder | Energy                           | 3460675.63   |
| wavelet-HHL | firstorder | RobustMeanAbsoluteDeviation      | 45.60904409  |
| wavelet-HHL | firstorder | MeanAbsoluteDeviation            | 68.83596747  |
| wavelet-HHL | firstorder | TotalEnergy                      | 93438242     |
| wavelet-HHL | firstorder | Maximum                          | 220.8102432  |
| wavelet-HHL | firstorder | RootMeanSquared                  | 89.71110778  |
| wavelet-HHL | firstorder | 90Percentile                     | 115.6323247  |
| wavelet-HHL | firstorder | Minimum                          | -307.6252914 |
| wavelet-HHL | firstorder | Entropy                          | 3.841836251  |
| wavelet-HHL | firstorder | Range                            | 528.4355346  |
| wavelet-HHL | firstorder | Variance                         | 8044.780724  |
| wavelet-HHL | firstorder | 10Percentile                     | -113.2773172 |
| wavelet-HHL | firstorder | Kurtosis                         | 3.302917183  |
| wavelet-HHL | firstorder | Mean                             | -1.817178027 |
| wavelet-HHL | glrlm      | ShortRunLowGrayLevelEmphasis     | 0.010510328  |
| wavelet-HHL | glrlm      | GrayLevelVariance                | 13.76413179  |
| wavelet-HHL | glrlm      | LowGrayLevelRunEmphasis          | 0.010878611  |
| wavelet-HHL | glrlm      | GrayLevelNonUniformityNormalized | 0.080421602  |
| wavelet-HHL | glrlm      | RunVariance                      | 0.109163089  |
| wavelet-HHL | glrlm      | GrayLevelNonUniformity           | 31.79060536  |
| wavelet-HHL | glrlm      | LongRunEmphasis                  | 1.294059622  |
| wavelet-HHL | glrlm      | ShortRunHighGrayLevelEmphasis    | 183.3215222  |
| wavelet-HHL | glrlm      | RunLengthNonUniformity           | 339.446361   |
| wavelet-HHL | glrlm      | ShortRunEmphasis                 | 0.941363024  |
| wavelet-HHL | glrlm      | LongRunHighGrayLevelEmphasis     | 247.3544967  |
| wavelet-HHL | glrlm      | RunPercentage                    | 0.919141324  |
| wavelet-HHL | glrlm      | LongRunLowGrayLevelEmphasis      | 0.012697062  |
| wavelet-HHL | glrlm      | RunEntropy                       | 4.257324881  |
| wavelet-HHL | glrlm      | HighGrayLevelRunEmphasis         | 194.0196529  |
| wavelet-HHL | glrlm      | RunLengthNonUniformityNormalized | 0.858385091  |
| wavelet-HHL | glszm      | GrayLevelVariance                | 23.09641873  |
| wavelet-HHL | glszm      | ZoneVariance                     | 33.95996327  |
| wavelet-HHL | glszm      | GrayLevelNonUniformityNormalized | 0.061891644  |
| wavelet-HHL | glszm      | SizeZoneNonUniformityNormalized  | 0.40855831   |
| wavelet-HHL | glszm      | SizeZoneNonUniformity            | 67.41212121  |
| wavelet-HHL | glszm      | GrayLevelNonUniformity           | 10.21212121  |
| wavelet-HHL | glszm      | LargeAreaEmphasis                | 40.75151515  |
| wavelet-HHL | glszm      | SmallAreaHighGrayLevelEmphasis   | 137.5203414  |
| wavelet-HHL | glszm      | ZonePercentage                   | 0.38372093   |
| wavelet-HHL | glszm      | LargeAreaLowGrayLevelEmphasis    | 0.25090545   |
| wavelet-HHL | glszm      | LargeAreaHighGrayLevelEmphasis   | 7285.472727  |
| wavelet-HHL | glszm      | HighGrayLevelZoneEmphasis        | 204.1212121  |
| wavelet-HHL | glszm      | SmallAreaEmphasis                | 0.662617723  |
| wavelet-HHL | glszm      | LowGrayLevelZoneEmphasis         | 0.017049869  |
| wavelet-HHL | glszm      | ZoneEntropy                      | 5.56653447   |

|             |            |                                      |              |
|-------------|------------|--------------------------------------|--------------|
| wavelet-HHL | glszm      | SmallAreaLowGrayLevelEmphasis        | 0.014680532  |
| wavelet-HHL | ngtdm      | Coarseness                           | 0.015455762  |
| wavelet-HHL | ngtdm      | Complexity                           | 534.9503611  |
| wavelet-HHL | ngtdm      | Strength                             | 2.060002276  |
| wavelet-HHL | ngtdm      | Contrast                             | 0.159628319  |
| wavelet-HHL | ngtdm      | Busyness                             | 0.207879461  |
| wavelet-HLH | gldm       | GrayLevelVariance                    | 20.64134667  |
| wavelet-HLH | gldm       | HighGrayLevelEmphasis                | 323.644186   |
| wavelet-HLH | gldm       | DependenceEntropy                    | 6.12581791   |
| wavelet-HLH | gldm       | DependenceNonUniformity              | 97.35813953  |
| wavelet-HLH | gldm       | GrayLevelNonUniformity               | 31.09767442  |
| wavelet-HLH | gldm       | SmallDependenceEmphasis              | 0.429168545  |
| wavelet-HLH | gldm       | SmallDependenceHighGrayLevelEmphasis | 149.048502   |
| wavelet-HLH | gldm       | DependenceNonUniformityNormalized    | 0.226414278  |
| wavelet-HLH | gldm       | LargeDependenceEmphasis              | 14.25116279  |
| wavelet-HLH | gldm       | LargeDependenceLowGrayLevelEmphasis  | 0.053148958  |
| wavelet-HLH | gldm       | DependenceVariance                   | 6.2803894    |
| wavelet-HLH | gldm       | LargeDependenceHighGrayLevelEmphasis | 4266.788372  |
| wavelet-HLH | gldm       | SmallDependenceLowGrayLevelEmphasis  | 0.004463431  |
| wavelet-HLH | gldm       | LowGrayLevelEmphasis                 | 0.006652849  |
| wavelet-HLH | glcm       | JointAverage                         | 17.43580682  |
| wavelet-HLH | glcm       | SumAverage                           | 34.87161365  |
| wavelet-HLH | glcm       | JointEntropy                         | 7.4177968    |
| wavelet-HLH | glcm       | ClusterShade                         | 13.77547464  |
| wavelet-HLH | glcm       | MaximumProbability                   | 0.041466136  |
| wavelet-HLH | glcm       | Idmn                                 | 0.975943646  |
| wavelet-HLH | glcm       | JointEnergy                          | 0.008864859  |
| wavelet-HLH | glcm       | Contrast                             | 38.54164624  |
| wavelet-HLH | glcm       | DifferenceEntropy                    | 3.640192349  |
| wavelet-HLH | glcm       | InverseVariance                      | 0.229909098  |
| wavelet-HLH | glcm       | DifferenceVariance                   | 17.23274324  |
| wavelet-HLH | glcm       | Idn                                  | 0.900568841  |
| wavelet-HLH | glcm       | Idm                                  | 0.232074282  |
| wavelet-HLH | glcm       | Correlation                          | -0.020723995 |
| wavelet-HLH | glcm       | Autocorrelation                      | 303.6104317  |
| wavelet-HLH | glcm       | SumEntropy                           | 4.47169419   |
| wavelet-HLH | glcm       | SumSquares                           | 18.86945554  |
| wavelet-HLH | glcm       | ClusterProminence                    | 5852.028044  |
| wavelet-HLH | glcm       | Imc2                                 | 0.852563454  |
| wavelet-HLH | glcm       | Imc1                                 | -0.161749977 |
| wavelet-HLH | glcm       | DifferenceAverage                    | 4.563408125  |
| wavelet-HLH | glcm       | Id                                   | 0.318216161  |
| wavelet-HLH | glcm       | ClusterTendency                      | 36.93617592  |
| wavelet-HLH | firstorder | InterquartileRange                   | 124.9133801  |
| wavelet-HLH | firstorder | Skewness                             | 0.228951539  |
| wavelet-HLH | firstorder | Uniformity                           | 0.072320173  |
| wavelet-HLH | firstorder | Median                               | -9.007940334 |
| wavelet-HLH | firstorder | Energy                               | 5496922.804  |
| wavelet-HLH | firstorder | RobustMeanAbsoluteDeviation          | 52.77747078  |
| wavelet-HLH | firstorder | MeanAbsoluteDeviation                | 83.68236997  |
| wavelet-HLH | firstorder | TotalEnergy                          | 148416915.7  |
| wavelet-HLH | firstorder | Maximum                              | 515.6661728  |
| wavelet-HLH | firstorder | RootMeanSquared                      | 113.0643242  |
| wavelet-HLH | firstorder | 90Percentile                         | 138.1535848  |



|             |            |                                  |              |
|-------------|------------|----------------------------------|--------------|
| wavelet-HLH | firstorder | Minimum                          | -414.5726001 |
| wavelet-HLH | firstorder | Entropy                          | 4.107739976  |
| wavelet-HLH | firstorder | Range                            | 930.238773   |
| wavelet-HLH | firstorder | Variance                         | 12777.63331  |
| wavelet-HLH | firstorder | 10Percentile                     | -138.9733158 |
| wavelet-HLH | firstorder | Kurtosis                         | 4.630329479  |
| wavelet-HLH | firstorder | Mean                             | -2.430656734 |
| wavelet-HLH | glrlm      | ShortRunLowGrayLevelEmphasis     | 0.006700948  |
| wavelet-HLH | glrlm      | GrayLevelVariance                | 21.79642339  |
| wavelet-HLH | glrlm      | LowGrayLevelRunEmphasis          | 0.006883007  |
| wavelet-HLH | glrlm      | GrayLevelNonUniformityNormalized | 0.068192483  |
| wavelet-HLH | glrlm      | RunVariance                      | 0.095947532  |
| wavelet-HLH | glrlm      | GrayLevelNonUniformity           | 27.26755697  |
| wavelet-HLH | glrlm      | LongRunEmphasis                  | 1.253233582  |
| wavelet-HLH | glrlm      | ShortRunHighGrayLevelEmphasis    | 310.2225847  |
| wavelet-HLH | glrlm      | RunLengthNonUniformity           | 351.2565837  |
| wavelet-HLH | glrlm      | ShortRunEmphasis                 | 0.950037234  |
| wavelet-HLH | glrlm      | LongRunHighGrayLevelEmphasis     | 401.6653463  |
| wavelet-HLH | glrlm      | RunPercentage                    | 0.929874776  |
| wavelet-HLH | glrlm      | LongRunLowGrayLevelEmphasis      | 0.007791001  |
| wavelet-HLH | glrlm      | RunEntropy                       | 4.467403363  |
| wavelet-HLH | glrlm      | HighGrayLevelRunEmphasis         | 325.3023002  |
| wavelet-HLH | glrlm      | RunLengthNonUniformityNormalized | 0.878115898  |
| wavelet-HLH | glszm      | GrayLevelVariance                | 33.84036967  |
| wavelet-HLH | glszm      | ZoneVariance                     | 19.46262457  |
| wavelet-HLH | glszm      | GrayLevelNonUniformityNormalized | 0.052439964  |
| wavelet-HLH | glszm      | SizeZoneNonUniformityNormalized  | 0.510840393  |
| wavelet-HLH | glszm      | SizeZoneNonUniformity            | 105.7439614  |
| wavelet-HLH | glszm      | GrayLevelNonUniformity           | 10.85507246  |
| wavelet-HLH | glszm      | LargeAreaEmphasis                | 23.77777778  |
| wavelet-HLH | glszm      | SmallAreaHighGrayLevelEmphasis   | 264.0707712  |
| wavelet-HLH | glszm      | ZonePercentage                   | 0.481395349  |
| wavelet-HLH | glszm      | LargeAreaLowGrayLevelEmphasis    | 0.090560046  |
| wavelet-HLH | glszm      | LargeAreaHighGrayLevelEmphasis   | 6973.086957  |
| wavelet-HLH | glszm      | HighGrayLevelZoneEmphasis        | 345.4396135  |
| wavelet-HLH | glszm      | SmallAreaEmphasis                | 0.742643138  |
| wavelet-HLH | glszm      | LowGrayLevelZoneEmphasis         | 0.009759616  |
| wavelet-HLH | glszm      | ZoneEntropy                      | 5.557817542  |
| wavelet-HLH | glszm      | SmallAreaLowGrayLevelEmphasis    | 0.008673637  |
| wavelet-HLH | ngtdm      | Coarseness                       | 0.015544217  |
| wavelet-HLH | ngtdm      | Complexity                       | 1064.186783  |
| wavelet-HLH | ngtdm      | Strength                         | 3.7331784    |
| wavelet-HLH | ngtdm      | Contrast                         | 0.205172083  |
| wavelet-HLH | ngtdm      | Busyness                         | 0.131104364  |

|            |               |                                      |                                                                                                                                                                                                                                                                                                                                                                                                                   |
|------------|---------------|--------------------------------------|-------------------------------------------------------------------------------------------------------------------------------------------------------------------------------------------------------------------------------------------------------------------------------------------------------------------------------------------------------------------------------------------------------------------|
| Image type | Feature Class | Feature Name                         | 15: RTSTRUCT: C99-DNU_segment_GTV                                                                                                                                                                                                                                                                                                                                                                                 |
| general    | info          | BoundingBox                          | (0, 1, 1, 6, 4, 5)                                                                                                                                                                                                                                                                                                                                                                                                |
| general    | info          | EnabledImageTypes                    | {u'Original': {}, u'Wavelet': {}}                                                                                                                                                                                                                                                                                                                                                                                 |
|            |               |                                      | {'distances': [1], 'additionalInfo': True, 'force2D': False, 'interpolator': 'sitkBSpline', 'resampledPixelSpacing': [3.0], 'label': 1, 'normalizeScale': 1, 'normalize': False, 'force2Ddimension': 0, 'removeOutliers': None, 'minimumROISize': None, u'binWidth': 25.0, 'minimumROIDimensions': 1, u'correctMask': True, 'preCrop': False, u'symmetricalGLCM': True, 'resegmentRange': None, 'padDistance': 5} |
| general    | info          | GeneralSettings                      | 9e2978dc791598def72b50319c44d4974d985                                                                                                                                                                                                                                                                                                                                                                             |
| general    | info          | ImageHash                            | 1cc                                                                                                                                                                                                                                                                                                                                                                                                               |
| general    | info          | ImageSpacing                         | (0.9765625000000002, 0.9765625000000002, 2.0)                                                                                                                                                                                                                                                                                                                                                                     |
| general    | info          | MaskHash                             | 98b9a54f3a4d48bb01d29d672dabfcb725edb                                                                                                                                                                                                                                                                                                                                                                             |
| general    | info          | NumpyVersion                         | 93e                                                                                                                                                                                                                                                                                                                                                                                                               |
| general    | info          | PyWaveletVersion                     | 1.13.1                                                                                                                                                                                                                                                                                                                                                                                                            |
| general    | info          | SimpleITKVersion                     | 0.5.2                                                                                                                                                                                                                                                                                                                                                                                                             |
| general    | info          | Version                              | 1.1.0                                                                                                                                                                                                                                                                                                                                                                                                             |
| general    | info          | VolumeNum                            | 1.3.0.post102+g1b0eb74                                                                                                                                                                                                                                                                                                                                                                                            |
| general    | info          | VoxelNum                             | 1                                                                                                                                                                                                                                                                                                                                                                                                                 |
| original   | shape         | Maximum3DDiameter                    | 56                                                                                                                                                                                                                                                                                                                                                                                                                |
| original   | shape         | Maximum2DDiameterSlice               | 18                                                                                                                                                                                                                                                                                                                                                                                                                |
| original   | shape         | Sphericity                           | 13.41640786                                                                                                                                                                                                                                                                                                                                                                                                       |
| original   | shape         | MinorAxis                            | 0.87220829                                                                                                                                                                                                                                                                                                                                                                                                        |
| original   | shape         | Elongation                           | 12.90047591                                                                                                                                                                                                                                                                                                                                                                                                       |
| original   | shape         | SurfaceVolumeRatio                   | 0.760313834                                                                                                                                                                                                                                                                                                                                                                                                       |
| original   | shape         | Volume                               | 0.483073615                                                                                                                                                                                                                                                                                                                                                                                                       |
| original   | shape         | MajorAxis                            | 1512                                                                                                                                                                                                                                                                                                                                                                                                              |
| original   | shape         | SurfaceArea                          | 16.96730393                                                                                                                                                                                                                                                                                                                                                                                                       |
| original   | shape         | Flatness                             | 730.4073054                                                                                                                                                                                                                                                                                                                                                                                                       |
| original   | shape         | LeastAxis                            | 0.601599281                                                                                                                                                                                                                                                                                                                                                                                                       |
| original   | shape         | Maximum2DDiameterColumn              | 10.20751785                                                                                                                                                                                                                                                                                                                                                                                                       |
| original   | shape         | Maximum2DDiameterRow                 | 16.97056275                                                                                                                                                                                                                                                                                                                                                                                                       |
| original   | gldm          | GrayLevelVariance                    | 13.41640786                                                                                                                                                                                                                                                                                                                                                                                                       |
| original   | gldm          | HighGrayLevelEmphasis                | 97.42059949                                                                                                                                                                                                                                                                                                                                                                                                       |
| original   | gldm          | DependenceEntropy                    | 653.875                                                                                                                                                                                                                                                                                                                                                                                                           |
| original   | gldm          | DependenceNonUniformity              | 5.008160502                                                                                                                                                                                                                                                                                                                                                                                                       |
| original   | gldm          | GrayLevelNonUniformity               | 25.92857143                                                                                                                                                                                                                                                                                                                                                                                                       |
| original   | gldm          | SmallDependenceEmphasis              | 2.785714286                                                                                                                                                                                                                                                                                                                                                                                                       |
| original   | gldm          | SmallDependenceHighGrayLevelEmphasis | 0.70421131                                                                                                                                                                                                                                                                                                                                                                                                        |
| original   | gldm          | DependenceNonUniformityNormalized    | 409.7857143                                                                                                                                                                                                                                                                                                                                                                                                       |
| original   | gldm          | LargeDependenceEmphasis              | 0.463010204                                                                                                                                                                                                                                                                                                                                                                                                       |
| original   | gldm          |                                      | 3.785714286                                                                                                                                                                                                                                                                                                                                                                                                       |

|          |            |                                      |              |
|----------|------------|--------------------------------------|--------------|
| original | gldm       | LargeDependenceLowGrayLevelEmphasis  | 0.028853451  |
| original | gldm       | DependenceVariance                   | 1.086734694  |
| original | gldm       | LargeDependenceHighGrayLevelEmphasis | 3524.982143  |
| original | gldm       | SmallDependenceLowGrayLevelEmphasis  | 0.024983171  |
| original | gldm       | LowGrayLevelEmphasis                 | 0.025481557  |
| original | glcm       | JointAverage                         | 25.86380138  |
| original | glcm       | SumAverage                           | 51.72760276  |
| original | glcm       | JointEntropy                         | 5.66088081   |
| original | glcm       | ClusterShade                         | -653.822083  |
| original | glcm       | MaximumProbability                   | 0.039298739  |
| original | glcm       | ldmn                                 | 0.926511117  |
| original | glcm       | JointEnergy                          | 0.020967672  |
| original | glcm       | Contrast                             | 143.1802665  |
| original | glcm       | DifferenceEntropy                    | 3.785624336  |
| original | glcm       | InverseVariance                      | 0.138233599  |
| original | glcm       | DifferenceVariance                   | 55.84391937  |
| original | glcm       | ldn                                  | 0.828943128  |
| original | glcm       | ldm                                  | 0.127418657  |
| original | glcm       | Correlation                          | 0.15839726   |
| original | glcm       | Autocorrelation                      | 682.7590644  |
| original | glcm       | SumEntropy                           | 4.307867072  |
| original | glcm       | SumSquares                           | 84.81899856  |
| original | glcm       | ClusterProminence                    | 79880.73536  |
| original | glcm       | lmc2                                 | 0.998065859  |
| original | glcm       | lmc1                                 | -0.661169249 |
| original | glcm       | DifferenceAverage                    | 9.133583083  |
| original | glcm       | ld                                   | 0.206635104  |
| original | glcm       | ClusterTendency                      | 196.0957278  |
| original | firstorder | InterquartileRange                   | 439.25       |
| original | firstorder | Skewness                             | -0.33158332  |
| original | firstorder | Uniformity                           | 0.049744898  |
| original | firstorder | Median                               | -231         |
| original | firstorder | Energy                               | 6864557      |
| original | firstorder | RobustMeanAbsoluteDeviation          | 164          |
| original | firstorder | MeanAbsoluteDeviation                | 211.5535714  |
| original | firstorder | TotalEnergy                          | 185343039    |
| original | firstorder | Maximum                              | 126          |
| original | firstorder | RootMeanSquared                      | 350.1162307  |
| original | firstorder | 90Percentile                         | 48.5         |
| original | firstorder | Minimum                              | -821         |
| original | firstorder | Entropy                              | 4.539148672  |
| original | firstorder | Range                                | 947          |
| original | firstorder | Variance                             | 61333.96397  |
| original | firstorder | 10Percentile                         | -548         |
| original | firstorder | Kurtosis                             | 2.177746964  |
| original | firstorder | Mean                                 | -247.4821429 |
| original | glrlm      | ShortRunLowGrayLevelEmphasis         | 0.026081292  |
| original | glrlm      | GrayLevelVariance                    | 97.58512494  |

|             |       |                                      |             |
|-------------|-------|--------------------------------------|-------------|
| original    | glrlm | LowGrayLevelRunEmphasis              | 0.026105698 |
| original    | glrlm | GrayLevelNonUniformityNormalized     | 0.048520933 |
| original    | glrlm | RunVariance                          | 0.030674699 |
| original    | glrlm | GrayLevelNonUniformity               | 2.651133661 |
| original    | glrlm | LongRunEmphasis                      | 1.083678068 |
| original    | glrlm | ShortRunHighGrayLevelEmphasis        | 629.0764638 |
| original    | glrlm | RunLengthNonUniformity               | 52.22905914 |
| original    | glrlm | ShortRunEmphasis                     | 0.982432251 |
| original    | glrlm | LongRunHighGrayLevelEmphasis         | 726.2175831 |
| original    | glrlm | RunPercentage                        | 0.975274725 |
| original    | glrlm | LongRunLowGrayLevelEmphasis          | 0.026218713 |
| original    | glrlm | RunEntropy                           | 4.616760235 |
| original    | glrlm | HighGrayLevelRunEmphasis             | 645.9560032 |
| original    | glrlm | RunLengthNonUniformityNormalized     | 0.955685471 |
| original    | glszm | GrayLevelVariance                    | 102.0843699 |
| original    | glszm | ZoneVariance                         | 0.676041103 |
| original    | glszm | GrayLevelNonUniformityNormalized     | 0.042725798 |
| original    | glszm | SizeZoneNonUniformityNormalized      | 0.711195241 |
| original    | glszm | SizeZoneNonUniformity                | 30.58139535 |
| original    | glszm | GrayLevelNonUniformity               | 1.837209302 |
| original    | glszm | LargeAreaEmphasis                    | 2.372093023 |
| original    | glszm | SmallAreaHighGrayLevelEmphasis       | 497.1653747 |
| original    | glszm | ZonePercentage                       | 0.767857143 |
| original    | glszm | LargeAreaLowGrayLevelEmphasis        | 0.034556458 |
| original    | glszm | LargeAreaHighGrayLevelEmphasis       | 1908.906977 |
| original    | glszm | HighGrayLevelZoneEmphasis            | 590.1860465 |
| original    | glszm | SmallAreaEmphasis                    | 0.865432817 |
| original    | glszm | LowGrayLevelZoneEmphasis             | 0.032708357 |
| original    | glszm | ZoneEntropy                          | 4.850569697 |
| original    | glszm | SmallAreaLowGrayLevelEmphasis        | 0.032436818 |
| original    | ngtdm | Coarseness                           | 0.057077122 |
| original    | ngtdm | Complexity                           | 2738.032433 |
| original    | ngtdm | Strength                             | 30.14911806 |
| original    | ngtdm | Contrast                             | 2.015183402 |
| original    | ngtdm | Busyness                             | 0.03039432  |
| wavelet-HHH | gldm  | GrayLevelVariance                    | 13.75892857 |
| wavelet-HHH | gldm  | HighGrayLevelEmphasis                | 99.32142857 |
| wavelet-HHH | gldm  | DependenceEntropy                    | 4.632811395 |
| wavelet-HHH | gldm  | DependenceNonUniformity              | 16.57142857 |
| wavelet-HHH | gldm  | GrayLevelNonUniformity               | 4.964285714 |
| wavelet-HHH | gldm  | SmallDependenceEmphasis              | 0.533468198 |
| wavelet-HHH | gldm  | SmallDependenceHighGrayLevelEmphasis | 50.26646269 |
| wavelet-HHH | gldm  | DependenceNonUniformityNormalized    | 0.295918367 |
| wavelet-HHH | gldm  | LargeDependenceEmphasis              | 8.642857143 |
| wavelet-HHH | gldm  | LargeDependenceLowGrayLevelEmphasis  | 0.123117031 |
| wavelet-HHH | gldm  | DependenceVariance                   | 3.253826531 |
| wavelet-HHH | gldm  | LargeDependenceHighGrayLevelEmphasis | 863.9285714 |

|             |            |                                     |              |
|-------------|------------|-------------------------------------|--------------|
| wavelet-HHH | gldm       | SmallDependenceLowGrayLevelEmphasis | 0.035021827  |
| wavelet-HHH | gldm       | LowGrayLevelEmphasis                | 0.040695253  |
| wavelet-HHH | glcm       | JointAverage                        | 9.389889497  |
| wavelet-HHH | glcm       | SumAverage                          | 18.77977899  |
| wavelet-HHH | glcm       | JointEntropy                        | 5.389427061  |
| wavelet-HHH | glcm       | ClusterShade                        | -0.540624244 |
| wavelet-HHH | glcm       | MaximumProbability                  | 0.073535349  |
| wavelet-HHH | glcm       | Idmn                                | 0.93527952   |
| wavelet-HHH | glcm       | JointEnergy                         | 0.028171067  |
| wavelet-HHH | glcm       | Contrast                            | 25.78001028  |
| wavelet-HHH | glcm       | DifferenceEntropy                   | 3.05808646   |
| wavelet-HHH | glcm       | InverseVariance                     | 0.20684338   |
| wavelet-HHH | glcm       | DifferenceVariance                  | 9.011198943  |
| wavelet-HHH | glcm       | Idn                                 | 0.83471885   |
| wavelet-HHH | glcm       | Idm                                 | 0.221060692  |
| wavelet-HHH | glcm       | Correlation                         | -0.058573672 |
| wavelet-HHH | glcm       | Autocorrelation                     | 87.45084706  |
| wavelet-HHH | glcm       | SumEntropy                          | 3.612144557  |
| wavelet-HHH | glcm       | SumSquares                          | 12.15561772  |
| wavelet-HHH | glcm       | ClusterProminence                   | 1705.796247  |
| wavelet-HHH | glcm       | Imc2                                | 0.987263041  |
| wavelet-HHH | glcm       | Imc1                                | -0.518024535 |
| wavelet-HHH | glcm       | DifferenceAverage                   | 3.969371104  |
| wavelet-HHH | glcm       | Id                                  | 0.317634851  |
| wavelet-HHH | glcm       | ClusterTendency                     | 22.84246061  |
| wavelet-HHH | firstorder | InterquartileRange                  | 118.3898436  |
| wavelet-HHH | firstorder | Skewness                            | 0.031500311  |
| wavelet-HHH | firstorder | Uniformity                          | 0.088647959  |
| wavelet-HHH | firstorder | Median                              | 2.619419956  |
| wavelet-HHH | firstorder | Energy                              | 486893.0374  |
| wavelet-HHH | firstorder | RobustMeanAbsoluteDeviation         | 50.75245443  |
| wavelet-HHH | firstorder | MeanAbsoluteDeviation               | 74.54113352  |
| wavelet-HHH | firstorder | TotalEnergy                         | 13146112.01  |
| wavelet-HHH | firstorder | Maximum                             | 215.3559565  |
| wavelet-HHH | firstorder | RootMeanSquared                     | 93.24440211  |
| wavelet-HHH | firstorder | 90Percentile                        | 117.9521101  |
| wavelet-HHH | firstorder | Minimum                             | -218.8030947 |
| wavelet-HHH | firstorder | Entropy                             | 3.786866855  |
| wavelet-HHH | firstorder | Range                               | 434.1590512  |
| wavelet-HHH | firstorder | Variance                            | 8628.805762  |
| wavelet-HHH | firstorder | 10Percentile                        | -122.9311432 |
| wavelet-HHH | firstorder | Kurtosis                            | 2.712168321  |
| wavelet-HHH | firstorder | Mean                                | -8.106340919 |
| wavelet-HHH | glrlm      | ShortRunLowGrayLevelEmphasis        | 0.041856047  |
| wavelet-HHH | glrlm      | GrayLevelVariance                   | 14.30406156  |
| wavelet-HHH | glrlm      | LowGrayLevelRunEmphasis             | 0.042313794  |
| wavelet-HHH | glrlm      | GrayLevelNonUniformityNormalized    | 0.082620295  |
| wavelet-HHH | glrlm      | RunVariance                         | 0.053251162  |
| wavelet-HHH | glrlm      | GrayLevelNonUniformity              | 4.395984814  |
| wavelet-HHH | glrlm      | LongRunEmphasis                     | 1.168014111  |

|             |       |                                      |             |
|-------------|-------|--------------------------------------|-------------|
| wavelet-HHH | glrlm | ShortRunHighGrayLevelEmphasis        | 95.1107211  |
| wavelet-HHH | glrlm | RunLengthNonUniformity               | 48.08069395 |
| wavelet-HHH | glrlm | ShortRunEmphasis                     | 0.959579252 |
| wavelet-HHH | glrlm | LongRunHighGrayLevelEmphasis         | 116.2355082 |
| wavelet-HHH | glrlm | RunPercentage                        | 0.949175824 |
| wavelet-HHH | glrlm | LongRunLowGrayLevelEmphasis          | 0.044208095 |
| wavelet-HHH | glrlm | RunEntropy                           | 3.977377226 |
| wavelet-HHH | glrlm | HighGrayLevelRunEmphasis             | 99.20905616 |
| wavelet-HHH | glrlm | RunLengthNonUniformityNormalized     | 0.901886406 |
| wavelet-HHH | glszm | GrayLevelVariance                    | 18.75086505 |
| wavelet-HHH | glszm | ZoneVariance                         | 3.169550173 |
| wavelet-HHH | glszm | GrayLevelNonUniformityNormalized     | 0.07266436  |
| wavelet-HHH | glszm | SizeZoneNonUniformityNormalized      | 0.567474048 |
| wavelet-HHH | glszm | SizeZoneNonUniformity                | 19.29411765 |
| wavelet-HHH | glszm | GrayLevelNonUniformity               | 2.470588235 |
| wavelet-HHH | glszm | LargeAreaEmphasis                    | 5.882352941 |
| wavelet-HHH | glszm | SmallAreaHighGrayLevelEmphasis       | 72.54983829 |
| wavelet-HHH | glszm | ZonePercentage                       | 0.607142857 |
| wavelet-HHH | glszm | LargeAreaLowGrayLevelEmphasis        | 0.114251903 |
| wavelet-HHH | glszm | LargeAreaHighGrayLevelEmphasis       | 579.7058824 |
| wavelet-HHH | glszm | HighGrayLevelZoneEmphasis            | 97.64705882 |
| wavelet-HHH | glszm | SmallAreaEmphasis                    | 0.780676079 |
| wavelet-HHH | glszm | LowGrayLevelZoneEmphasis             | 0.059153906 |
| wavelet-HHH | glszm | ZoneEntropy                          | 4.233946665 |
| wavelet-HHH | glszm | SmallAreaLowGrayLevelEmphasis        | 0.056380126 |
| wavelet-HHH | ngtdm | Coarseness                           | 0.097125005 |
| wavelet-HHH | ngtdm | Complexity                           | 320.7028423 |
| wavelet-HHH | ngtdm | Strength                             | 7.313278983 |
| wavelet-HHH | ngtdm | Contrast                             | 0.325811805 |
| wavelet-HHH | ngtdm | Busyness                             | 0.079287204 |
| wavelet-HLL | gldm  | GrayLevelVariance                    | 79.34917092 |
| wavelet-HLL | gldm  | HighGrayLevelEmphasis                | 330.2321429 |
| wavelet-HLL | gldm  | DependenceEntropy                    | 5.151017645 |
| wavelet-HLL | gldm  | DependenceNonUniformity              | 25.71428571 |
| wavelet-HLL | gldm  | GrayLevelNonUniformity               | 2.357142857 |
| wavelet-HLL | gldm  | SmallDependenceEmphasis              | 0.668650794 |
| wavelet-HLL | gldm  | SmallDependenceHighGrayLevelEmphasis | 264.405754  |
| wavelet-HLL | gldm  | DependenceNonUniformityNormalized    | 0.459183673 |
| wavelet-HLL | gldm  | LargeDependenceEmphasis              | 2.642857143 |
| wavelet-HLL | gldm  | LargeDependenceLowGrayLevelEmphasis  | 0.073344772 |
| wavelet-HLL | gldm  | DependenceVariance                   | 0.392857143 |
| wavelet-HLL | gldm  | LargeDependenceHighGrayLevelEmphasis | 680.125     |
| wavelet-HLL | gldm  | SmallDependenceLowGrayLevelEmphasis  | 0.042022515 |
| wavelet-HLL | gldm  | LowGrayLevelEmphasis                 | 0.047888441 |
| wavelet-HLL | glcm  | JointAverage                         | 15.90788353 |
| wavelet-HLL | glcm  | SumAverage                           | 31.81576705 |

|             |            |                                  |              |
|-------------|------------|----------------------------------|--------------|
| wavelet-HLL | glcm       | JointEntropy                     | 5.786112073  |
| wavelet-HLL | glcm       | ClusterShade                     | 777.8466922  |
| wavelet-HLL | glcm       | MaximumProbability               | 0.031133991  |
| wavelet-HLL | glcm       | Idmn                             | 0.958016582  |
| wavelet-HLL | glcm       | JointEnergy                      | 0.018727016  |
| wavelet-HLL | glcm       | Contrast                         | 72.22675087  |
| wavelet-HLL | glcm       | DifferenceEntropy                | 3.517087875  |
| wavelet-HLL | glcm       | InverseVariance                  | 0.147299689  |
| wavelet-HLL | glcm       | DifferenceVariance               | 24.16078519  |
| wavelet-HLL | glcm       | Idn                              | 0.862230932  |
| wavelet-HLL | glcm       | Idm                              | 0.129820087  |
| wavelet-HLL | glcm       | Correlation                      | 0.49219015   |
| wavelet-HLL | glcm       | Autocorrelation                  | 288.9835475  |
| wavelet-HLL | glcm       | SumEntropy                       | 4.439396827  |
| wavelet-HLL | glcm       | SumSquares                       | 71.71557019  |
| wavelet-HLL | glcm       | ClusterProminence                | 113199.7552  |
| wavelet-HLL | glcm       | Imc2                             | 0.999265459  |
| wavelet-HLL | glcm       | Imc1                             | -0.728226194 |
| wavelet-HLL | glcm       | DifferenceAverage                | 6.762647712  |
| wavelet-HLL | glcm       | Id                               | 0.221415923  |
| wavelet-HLL | glcm       | ClusterTendency                  | 214.6355299  |
| wavelet-HLL | firstorder | InterquartileRange               | 332.8385363  |
| wavelet-HLL | firstorder | Skewness                         | 0.443786897  |
| wavelet-HLL | firstorder | Uniformity                       | 0.042091837  |
| wavelet-HLL | firstorder | Median                           | -85.20225254 |
| wavelet-HLL | firstorder | Energy                           | 3029990.51   |
| wavelet-HLL | firstorder | RobustMeanAbsoluteDeviation      | 127.1213518  |
| wavelet-HLL | firstorder | MeanAbsoluteDeviation            | 181.7516281  |
| wavelet-HLL | firstorder | TotalEnergy                      | 81809743.78  |
| wavelet-HLL | firstorder | Maximum                          | 508.703164   |
| wavelet-HLL | firstorder | RootMeanSquared                  | 232.609057   |
| wavelet-HLL | firstorder | 90Percentile                     | 212.9723343  |
| wavelet-HLL | firstorder | Minimum                          | -447.0755202 |
| wavelet-HLL | firstorder | Entropy                          | 4.731200234  |
| wavelet-HLL | firstorder | Range                            | 955.7786842  |
| wavelet-HLL | firstorder | Variance                         | 49767.65012  |
| wavelet-HLL | firstorder | 10Percentile                     | -338.4068023 |
| wavelet-HLL | firstorder | Kurtosis                         | 2.712276285  |
| wavelet-HLL | firstorder | Mean                             | -65.87354008 |
| wavelet-HLL | glrlm      | ShortRunLowGrayLevelEmphasis     | 0.048266952  |
| wavelet-HLL | glrlm      | GrayLevelVariance                | 80.07479623  |
| wavelet-HLL | glrlm      | LowGrayLevelRunEmphasis          | 0.048510847  |
| wavelet-HLL | glrlm      | GrayLevelNonUniformityNormalized | 0.041912901  |
| wavelet-HLL | glrlm      | RunVariance                      | 0.019212971  |
| wavelet-HLL | glrlm      | GrayLevelNonUniformity           | 2.302049802  |
| wavelet-HLL | glrlm      | LongRunEmphasis                  | 1.059362859  |
| wavelet-HLL | glrlm      | ShortRunHighGrayLevelEmphasis    | 329.585804   |
| wavelet-HLL | glrlm      | RunLengthNonUniformity           | 52.83159803  |
| wavelet-HLL | glrlm      | ShortRunEmphasis                 | 0.985159285  |
| wavelet-HLL | glrlm      | LongRunHighGrayLevelEmphasis     | 344.9733331  |
| wavelet-HLL | glrlm      | RunPercentage                    | 0.980769231  |

|             |       |                                      |             |
|-------------|-------|--------------------------------------|-------------|
| wavelet-HLL | glrlm | LongRunLowGrayLevelEmphasis          | 0.049486425 |
| wavelet-HLL | glrlm | RunEntropy                           | 4.76691823  |
| wavelet-HLL | glrlm | HighGrayLevelRunEmphasis             | 332.6633098 |
| wavelet-HLL | glrlm | RunLengthNonUniformityNormalized     | 0.961574059 |
| wavelet-HLL | glszm | GrayLevelVariance                    | 91.05045351 |
| wavelet-HLL | glszm | ZoneVariance                         | 0.412698413 |
| wavelet-HLL | glszm | GrayLevelNonUniformityNormalized     | 0.038548753 |
| wavelet-HLL | glszm | SizeZoneNonUniformityNormalized      | 0.609977324 |
| wavelet-HLL | glszm | SizeZoneNonUniformity                | 25.61904762 |
| wavelet-HLL | glszm | GrayLevelNonUniformity               | 1.619047619 |
| wavelet-HLL | glszm | LargeAreaEmphasis                    | 2.19047619  |
| wavelet-HLL | glszm | SmallAreaHighGrayLevelEmphasis       | 335.2671958 |
| wavelet-HLL | glszm | ZonePercentage                       | 0.75        |
| wavelet-HLL | glszm | LargeAreaLowGrayLevelEmphasis        | 0.075962231 |
| wavelet-HLL | glszm | LargeAreaHighGrayLevelEmphasis       | 630.452381  |
| wavelet-HLL | glszm | HighGrayLevelZoneEmphasis            | 371.2142857 |
| wavelet-HLL | glszm | SmallAreaEmphasis                    | 0.808201058 |
| wavelet-HLL | glszm | LowGrayLevelZoneEmphasis             | 0.058393555 |
| wavelet-HLL | glszm | ZoneEntropy                          | 4.99339153  |
| wavelet-HLL | glszm | SmallAreaLowGrayLevelEmphasis        | 0.054665595 |
| wavelet-HLL | ngtdm | Coarseness                           | 0.122539836 |
| wavelet-HLL | ngtdm | Complexity                           | 1580.244684 |
| wavelet-HLL | ngtdm | Strength                             | 49.36853228 |
| wavelet-HLL | ngtdm | Contrast                             | 0.738268748 |
| wavelet-HLL | ngtdm | Busyness                             | 0.025810135 |
| wavelet-LHL | gldm  | GrayLevelVariance                    | 156.4282526 |
| wavelet-LHL | gldm  | HighGrayLevelEmphasis                | 709.5178571 |
| wavelet-LHL | gldm  | DependenceEntropy                    | 4.945485949 |
| wavelet-LHL | gldm  | DependenceNonUniformity              | 26.85714286 |
| wavelet-LHL | gldm  | GrayLevelNonUniformity               | 2.321428571 |
| wavelet-LHL | gldm  | SmallDependenceEmphasis              | 0.712301587 |
| wavelet-LHL | gldm  | SmallDependenceHighGrayLevelEmphasis | 545.0634921 |
| wavelet-LHL | gldm  | DependenceNonUniformityNormalized    | 0.479591837 |
| wavelet-LHL | gldm  | LargeDependenceEmphasis              | 2.785714286 |
| wavelet-LHL | gldm  | LargeDependenceLowGrayLevelEmphasis  | 0.152563228 |
| wavelet-LHL | gldm  | DependenceVariance                   | 0.535714286 |
| wavelet-LHL | gldm  | LargeDependenceHighGrayLevelEmphasis | 1628.446429 |
| wavelet-LHL | gldm  | SmallDependenceLowGrayLevelEmphasis  | 0.011543596 |
| wavelet-LHL | gldm  | LowGrayLevelEmphasis                 | 0.039355388 |
| wavelet-LHL | glcm  | JointAverage                         | 22.59059928 |
| wavelet-LHL | glcm  | SumAverage                           | 45.18119855 |
| wavelet-LHL | glcm  | JointEntropy                         | 5.79872785  |
| wavelet-LHL | glcm  | ClusterShade                         | 4899.148917 |
| wavelet-LHL | glcm  | MaximumProbability                   | 0.028947431 |
| wavelet-LHL | glcm  | ldmn                                 | 0.921132518 |
| wavelet-LHL | glcm  | JointEnergy                          | 0.018478332 |



|             |            |                                  |              |
|-------------|------------|----------------------------------|--------------|
| wavelet-LHL | glcm       | Contrast                         | 302.6062337  |
| wavelet-LHL | glcm       | DifferenceEntropy                | 3.982884056  |
| wavelet-LHL | glcm       | InverseVariance                  | 0.079387359  |
| wavelet-LHL | glcm       | DifferenceVariance               | 128.4414289  |
| wavelet-LHL | glcm       | Idn                              | 0.829897945  |
| wavelet-LHL | glcm       | Idm                              | 0.090481372  |
| wavelet-LHL | glcm       | Correlation                      | 0.129463536  |
| wavelet-LHL | glcm       | Autocorrelation                  | 530.7659496  |
| wavelet-LHL | glcm       | SumEntropy                       | 4.411407513  |
| wavelet-LHL | glcm       | SumSquares                       | 171.3351004  |
| wavelet-LHL | glcm       | ClusterProminence                | 492249.703   |
| wavelet-LHL | glcm       | Imc2                             | 0.999553843  |
| wavelet-LHL | glcm       | Imc1                             | -0.758525216 |
| wavelet-LHL | glcm       | DifferenceAverage                | 12.66560402  |
| wavelet-LHL | glcm       | Id                               | 0.170878857  |
| wavelet-LHL | glcm       | ClusterTendency                  | 382.734168   |
| wavelet-LHL | firstorder | InterquartileRange               | 362.7685429  |
| wavelet-LHL | firstorder | Skewness                         | 0.563803218  |
| wavelet-LHL | firstorder | Uniformity                       | 0.041454082  |
| wavelet-LHL | firstorder | Median                           | -99.92309516 |
| wavelet-LHL | firstorder | Energy                           | 5503584.502  |
| wavelet-LHL | firstorder | RobustMeanAbsoluteDeviation      | 161.8925724  |
| wavelet-LHL | firstorder | MeanAbsoluteDeviation            | 243.0784626  |
| wavelet-LHL | firstorder | TotalEnergy                      | 148596781.5  |
| wavelet-LHL | firstorder | Maximum                          | 677.8629372  |
| wavelet-LHL | firstorder | RootMeanSquared                  | 313.4936916  |
| wavelet-LHL | firstorder | 90Percentile                     | 447.9627184  |
| wavelet-LHL | firstorder | Minimum                          | -619.4357282 |
| wavelet-LHL | firstorder | Entropy                          | 4.76691452   |
| wavelet-LHL | firstorder | Range                            | 1297.298665  |
| wavelet-LHL | firstorder | Variance                         | 95871.43827  |
| wavelet-LHL | firstorder | 10Percentile                     | -405.6135937 |
| wavelet-LHL | firstorder | Kurtosis                         | 2.66492368   |
| wavelet-LHL | firstorder | Mean                             | -49.05972274 |
| wavelet-LHL | glrlm      | ShortRunLowGrayLevelEmphasis     | 0.037478479  |
| wavelet-LHL | glrlm      | GrayLevelVariance                | 156.8182395  |
| wavelet-LHL | glrlm      | LowGrayLevelRunEmphasis          | 0.038618415  |
| wavelet-LHL | glrlm      | GrayLevelNonUniformityNormalized | 0.041188675  |
| wavelet-LHL | glrlm      | RunVariance                      | 0.01920399   |
| wavelet-LHL | glrlm      | GrayLevelNonUniformity           | 2.262442659  |
| wavelet-LHL | glrlm      | LongRunEmphasis                  | 1.059682456  |
| wavelet-LHL | glrlm      | ShortRunHighGrayLevelEmphasis    | 705.0423711  |
| wavelet-LHL | glrlm      | RunLengthNonUniformity           | 52.84352964  |
| wavelet-LHL | glrlm      | ShortRunEmphasis                 | 0.985079386  |
| wavelet-LHL | glrlm      | LongRunHighGrayLevelEmphasis     | 744.8796756  |
| wavelet-LHL | glrlm      | RunPercentage                    | 0.980769231  |
| wavelet-LHL | glrlm      | LongRunLowGrayLevelEmphasis      | 0.04317816   |
| wavelet-LHL | glrlm      | RunEntropy                       | 4.807576178  |
| wavelet-LHL | glrlm      | HighGrayLevelRunEmphasis         | 713.009832   |
| wavelet-LHL | glrlm      | RunLengthNonUniformityNormalized | 0.96159202   |
| wavelet-LHL | glszm      | GrayLevelVariance                | 158.2081612  |

|             |       |                                      |             |
|-------------|-------|--------------------------------------|-------------|
| wavelet-LHL | glszm | ZoneVariance                         | 0.425619835 |
| wavelet-LHL | glszm | GrayLevelNonUniformityNormalized     | 0.040289256 |
| wavelet-LHL | glszm | SizeZoneNonUniformityNormalized      | 0.684917355 |
| wavelet-LHL | glszm | SizeZoneNonUniformity                | 30.13636364 |
| wavelet-LHL | glszm | GrayLevelNonUniformity               | 1.772727273 |
| wavelet-LHL | glszm | LargeAreaEmphasis                    | 2.045454545 |
| wavelet-LHL | glszm | SmallAreaHighGrayLevelEmphasis       | 660.6560922 |
| wavelet-LHL | glszm | ZonePercentage                       | 0.785714286 |
| wavelet-LHL | glszm | LargeAreaLowGrayLevelEmphasis        | 0.097960116 |
| wavelet-LHL | glszm | LargeAreaHighGrayLevelEmphasis       | 1328.25     |
| wavelet-LHL | glszm | HighGrayLevelZoneEmphasis            | 748.4772727 |
| wavelet-LHL | glszm | SmallAreaEmphasis                    | 0.853061869 |
| wavelet-LHL | glszm | LowGrayLevelZoneEmphasis             | 0.026424959 |
| wavelet-LHL | glszm | ZoneEntropy                          | 4.896820539 |
| wavelet-LHL | glszm | SmallAreaLowGrayLevelEmphasis        | 0.008824456 |
| wavelet-LHL | ngtdm | Coarseness                           | 0.058563612 |
| wavelet-LHL | ngtdm | Complexity                           | 4750.756775 |
| wavelet-LHL | ngtdm | Strength                             | 46.09597127 |
| wavelet-LHL | ngtdm | Contrast                             | 2.743809566 |
| wavelet-LHL | ngtdm | Busyness                             | 0.033542345 |
| wavelet-LHH | gldm  | GrayLevelVariance                    | 17.46141582 |
| wavelet-LHH | gldm  | HighGrayLevelEmphasis                | 88.80357143 |
| wavelet-LHH | gldm  | DependenceEntropy                    | 4.76691452  |
| wavelet-LHH | gldm  | DependenceNonUniformity              | 22.67857143 |
| wavelet-LHH | gldm  | GrayLevelNonUniformity               | 4.392857143 |
| wavelet-LHH | gldm  | SmallDependenceEmphasis              | 0.619295635 |
| wavelet-LHH | gldm  | SmallDependenceHighGrayLevelEmphasis | 62.08060516 |
| wavelet-LHH | gldm  | DependenceNonUniformityNormalized    | 0.40497449  |
| wavelet-LHH | gldm  | LargeDependenceEmphasis              | 3.321428571 |
| wavelet-LHH | gldm  | LargeDependenceLowGrayLevelEmphasis  | 0.122532618 |
| wavelet-LHH | gldm  | DependenceVariance                   | 0.62244898  |
| wavelet-LHH | gldm  | LargeDependenceHighGrayLevelEmphasis | 246.375     |
| wavelet-LHH | gldm  | SmallDependenceLowGrayLevelEmphasis  | 0.054349731 |
| wavelet-LHH | gldm  | LowGrayLevelEmphasis                 | 0.06399821  |
| wavelet-LHH | glcm  | JointAverage                         | 8.515841457 |
| wavelet-LHH | glcm  | SumAverage                           | 17.03168291 |
| wavelet-LHH | glcm  | JointEntropy                         | 5.510937822 |
| wavelet-LHH | glcm  | ClusterShade                         | 16.7317366  |
| wavelet-LHH | glcm  | MaximumProbability                   | 0.044517345 |
| wavelet-LHH | glcm  | ldmn                                 | 0.922676739 |
| wavelet-LHH | glcm  | JointEnergy                          | 0.023792506 |
| wavelet-LHH | glcm  | Contrast                             | 33.72946087 |
| wavelet-LHH | glcm  | DifferenceEntropy                    | 3.170304784 |
| wavelet-LHH | glcm  | InverseVariance                      | 0.166546678 |
| wavelet-LHH | glcm  | DifferenceVariance                   | 9.532401733 |
| wavelet-LHH | glcm  | ldn                                  | 0.810775433 |

|             |            |                                  |              |
|-------------|------------|----------------------------------|--------------|
| wavelet-LHH | glcm       | Idm                              | 0.152187852  |
| wavelet-LHH | glcm       | Correlation                      | -0.109865627 |
| wavelet-LHH | glcm       | Autocorrelation                  | 70.89626768  |
| wavelet-LHH | glcm       | SumEntropy                       | 3.731454462  |
| wavelet-LHH | glcm       | SumSquares                       | 15.16769107  |
| wavelet-LHH | glcm       | ClusterProminence                | 1893.149101  |
| wavelet-LHH | glcm       | Imc2                             | 0.988336787  |
| wavelet-LHH | glcm       | Imc1                             | -0.514910774 |
| wavelet-LHH | glcm       | DifferenceAverage                | 4.839568048  |
| wavelet-LHH | glcm       | Id                               | 0.254287622  |
| wavelet-LHH | glcm       | ClusterTendency                  | 26.9413034   |
| wavelet-LHH | firstorder | InterquartileRange               | 137.7453276  |
| wavelet-LHH | firstorder | Skewness                         | 0.507794568  |
| wavelet-LHH | firstorder | Uniformity                       | 0.078443878  |
| wavelet-LHH | firstorder | Median                           | -17.25843517 |
| wavelet-LHH | firstorder | Energy                           | 598349.141   |
| wavelet-LHH | firstorder | RobustMeanAbsoluteDeviation      | 56.47851559  |
| wavelet-LHH | firstorder | MeanAbsoluteDeviation            | 82.88087412  |
| wavelet-LHH | firstorder | TotalEnergy                      | 16155426.81  |
| wavelet-LHH | firstorder | Maximum                          | 263.2674998  |
| wavelet-LHH | firstorder | RootMeanSquared                  | 103.3673357  |
| wavelet-LHH | firstorder | 90Percentile                     | 147.7998167  |
| wavelet-LHH | firstorder | Minimum                          | -178.5708152 |
| wavelet-LHH | firstorder | Entropy                          | 3.874232719  |
| wavelet-LHH | firstorder | Range                            | 441.8383149  |
| wavelet-LHH | firstorder | Variance                         | 10681.18168  |
| wavelet-LHH | firstorder | 10Percentile                     | -127.845317  |
| wavelet-LHH | firstorder | Kurtosis                         | 2.827344271  |
| wavelet-LHH | firstorder | Mean                             | -1.903788759 |
| wavelet-LHH | glrlm      | ShortRunLowGrayLevelEmphasis     | 0.064527131  |
| wavelet-LHH | glrlm      | GrayLevelVariance                | 17.71435186  |
| wavelet-LHH | glrlm      | LowGrayLevelRunEmphasis          | 0.064997888  |
| wavelet-LHH | glrlm      | GrayLevelNonUniformityNormalized | 0.077776716  |
| wavelet-LHH | glrlm      | RunVariance                      | 0.027575755  |
| wavelet-LHH | glrlm      | GrayLevelNonUniformity           | 4.248319954  |
| wavelet-LHH | glrlm      | LongRunEmphasis                  | 1.080318424  |
| wavelet-LHH | glrlm      | ShortRunHighGrayLevelEmphasis    | 88.04542545  |
| wavelet-LHH | glrlm      | RunLengthNonUniformity           | 52.10353755  |
| wavelet-LHH | glrlm      | ShortRunEmphasis                 | 0.981533037  |
| wavelet-LHH | glrlm      | LongRunHighGrayLevelEmphasis     | 94.7724911   |
| wavelet-LHH | glrlm      | RunPercentage                    | 0.975274725  |
| wavelet-LHH | glrlm      | LongRunLowGrayLevelEmphasis      | 0.067012559  |
| wavelet-LHH | glrlm      | RunEntropy                       | 3.963097621  |
| wavelet-LHH | glrlm      | HighGrayLevelRunEmphasis         | 89.32762297  |
| wavelet-LHH | glrlm      | RunLengthNonUniformityNormalized | 0.953228149  |
| wavelet-LHH | glszm      | GrayLevelVariance                | 21.81985536  |
| wavelet-LHH | glszm      | ZoneVariance                     | 0.861275477  |
| wavelet-LHH | glszm      | GrayLevelNonUniformityNormalized | 0.067718606  |
| wavelet-LHH | glszm      | SizeZoneNonUniformityNormalized  | 0.588428665  |
| wavelet-LHH | glszm      | SizeZoneNonUniformity            | 22.94871795  |
| wavelet-LHH | glszm      | GrayLevelNonUniformity           | 2.641025641  |

|             |       |                                      |              |
|-------------|-------|--------------------------------------|--------------|
| wavelet-LHH | glszm | LargeAreaEmphasis                    | 2.923076923  |
| wavelet-LHH | glszm | SmallAreaHighGrayLevelEmphasis       | 82.0375641   |
| wavelet-LHH | glszm | ZonePercentage                       | 0.696428571  |
| wavelet-LHH | glszm | LargeAreaLowGrayLevelEmphasis        | 0.125014918  |
| wavelet-LHH | glszm | LargeAreaHighGrayLevelEmphasis       | 238.1794872  |
| wavelet-LHH | glszm | HighGrayLevelZoneEmphasis            | 96.48717949  |
| wavelet-LHH | glszm | SmallAreaEmphasis                    | 0.792692308  |
| wavelet-LHH | glszm | LowGrayLevelZoneEmphasis             | 0.081253077  |
| wavelet-LHH | glszm | ZoneEntropy                          | 4.528741321  |
| wavelet-LHH | glszm | SmallAreaLowGrayLevelEmphasis        | 0.075736998  |
| wavelet-LHH | ngtdm | Coarseness                           | 0.07543155   |
| wavelet-LHH | ngtdm | Complexity                           | 465.2037102  |
| wavelet-LHH | ngtdm | Strength                             | 8.271530854  |
| wavelet-LHH | ngtdm | Contrast                             | 0.430240847  |
| wavelet-LHH | ngtdm | Busyness                             | 0.115673875  |
| wavelet-LLH | gldm  | GrayLevelVariance                    | 119.1782526  |
| wavelet-LLH | gldm  | HighGrayLevelEmphasis                | 770.3392857  |
| wavelet-LLH | gldm  | DependenceEntropy                    | 5.039148672  |
| wavelet-LLH | gldm  | DependenceNonUniformity              | 28.17857143  |
| wavelet-LLH | gldm  | GrayLevelNonUniformity               | 2.357142857  |
| wavelet-LLH | gldm  | SmallDependenceEmphasis              | 0.724082341  |
| wavelet-LLH | gldm  | SmallDependenceHighGrayLevelEmphasis | 533.0560516  |
| wavelet-LLH | gldm  | DependenceNonUniformityNormalized    | 0.503188776  |
| wavelet-LLH | gldm  | LargeDependenceEmphasis              | 3.5          |
| wavelet-LLH | gldm  | LargeDependenceLowGrayLevelEmphasis  | 0.042932371  |
| wavelet-LLH | gldm  | DependenceVariance                   | 0.917091837  |
| wavelet-LLH | gldm  | LargeDependenceHighGrayLevelEmphasis | 2893.767857  |
| wavelet-LLH | gldm  | SmallDependenceLowGrayLevelEmphasis  | 0.038478557  |
| wavelet-LLH | gldm  | LowGrayLevelEmphasis                 | 0.038938266  |
| wavelet-LLH | glcm  | JointAverage                         | 25.58603568  |
| wavelet-LLH | glcm  | SumAverage                           | 51.17207135  |
| wavelet-LLH | glcm  | JointEntropy                         | 5.761827757  |
| wavelet-LLH | glcm  | ClusterShade                         | -439.7572073 |
| wavelet-LLH | glcm  | MaximumProbability                   | 0.035360925  |
| wavelet-LLH | glcm  | Idmn                                 | 0.941421     |
| wavelet-LLH | glcm  | JointEnergy                          | 0.019281759  |
| wavelet-LLH | glcm  | Contrast                             | 153.998202   |
| wavelet-LLH | glcm  | DifferenceEntropy                    | 3.828287495  |
| wavelet-LLH | glcm  | InverseVariance                      | 0.112374019  |
| wavelet-LLH | glcm  | DifferenceVariance                   | 59.47630522  |
| wavelet-LLH | glcm  | Idn                                  | 0.846568655  |
| wavelet-LLH | glcm  | Idm                                  | 0.114392159  |
| wavelet-LLH | glcm  | Correlation                          | 0.258680135  |
| wavelet-LLH | glcm  | Autocorrelation                      | 682.1702542  |
| wavelet-LLH | glcm  | SumEntropy                           | 4.430507185  |
| wavelet-LLH | glcm  | SumSquares                           | 104.2943089  |

|             |            |                                  |              |
|-------------|------------|----------------------------------|--------------|
| wavelet-LLH | glcm       | ClusterProminence                | 198519.3733  |
| wavelet-LLH | glcm       | Imc2                             | 0.999403955  |
| wavelet-LLH | glcm       | Imc1                             | -0.742820418 |
| wavelet-LLH | glcm       | DifferenceAverage                | 9.366344747  |
| wavelet-LLH | glcm       | Id                               | 0.197739119  |
| wavelet-LLH | glcm       | ClusterTendency                  | 263.1790337  |
| wavelet-LLH | firstorder | InterquartileRange               | 375.6370987  |
| wavelet-LLH | firstorder | Skewness                         | -0.218294928 |
| wavelet-LLH | firstorder | Uniformity                       | 0.042091837  |
| wavelet-LLH | firstorder | Median                           | -93.04640715 |
| wavelet-LLH | firstorder | Energy                           | 4700642.962  |
| wavelet-LLH | firstorder | RobustMeanAbsoluteDeviation      | 144.3972219  |
| wavelet-LLH | firstorder | MeanAbsoluteDeviation            | 216.6573821  |
| wavelet-LLH | firstorder | TotalEnergy                      | 126917360    |
| wavelet-LLH | firstorder | Maximum                          | 414.3245121  |
| wavelet-LLH | firstorder | RootMeanSquared                  | 289.7240979  |
| wavelet-LLH | firstorder | 90Percentile                     | 234.358486   |
| wavelet-LLH | firstorder | Minimum                          | -723.1579576 |
| wavelet-LLH | firstorder | Entropy                          | 4.753434386  |
| wavelet-LLH | firstorder | Range                            | 1137.48247   |
| wavelet-LLH | firstorder | Variance                         | 73936.40406  |
| wavelet-LLH | firstorder | 10Percentile                     | -433.9394857 |
| wavelet-LLH | firstorder | Kurtosis                         | 2.742731888  |
| wavelet-LLH | firstorder | Mean                             | -100.0182425 |
| wavelet-LLH | glrlm      | ShortRunLowGrayLevelEmphasis     | 0.039825886  |
| wavelet-LLH | glrlm      | GrayLevelVariance                | 119.9560173  |
| wavelet-LLH | glrlm      | LowGrayLevelRunEmphasis          | 0.039853685  |
| wavelet-LLH | glrlm      | GrayLevelNonUniformityNormalized | 0.041375387  |
| wavelet-LLH | glrlm      | RunVariance                      | 0.026235397  |
| wavelet-LLH | glrlm      | GrayLevelNonUniformity           | 2.263714348  |
| wavelet-LLH | glrlm      | LongRunEmphasis                  | 1.076534577  |
| wavelet-LLH | glrlm      | ShortRunHighGrayLevelEmphasis    | 752.6594897  |
| wavelet-LLH | glrlm      | RunLengthNonUniformity           | 52.3355946   |
| wavelet-LLH | glrlm      | ShortRunEmphasis                 | 0.982510011  |
| wavelet-LLH | glrlm      | LongRunHighGrayLevelEmphasis     | 832.9613956  |
| wavelet-LLH | glrlm      | RunPercentage                    | 0.976648352  |
| wavelet-LLH | glrlm      | LongRunLowGrayLevelEmphasis      | 0.039978464  |
| wavelet-LLH | glrlm      | RunEntropy                       | 4.821186903  |
| wavelet-LLH | glrlm      | HighGrayLevelRunEmphasis         | 768.0834475  |
| wavelet-LLH | glrlm      | RunLengthNonUniformityNormalized | 0.955892884  |
| wavelet-LLH | glszm      | GrayLevelVariance                | 128.1544421  |
| wavelet-LLH | glszm      | ZoneVariance                     | 0.561983471  |
| wavelet-LLH | glszm      | GrayLevelNonUniformityNormalized | 0.03822314   |
| wavelet-LLH | glszm      | SizeZoneNonUniformityNormalized  | 0.752066116  |
| wavelet-LLH | glszm      | SizeZoneNonUniformity            | 33.09090909  |
| wavelet-LLH | glszm      | GrayLevelNonUniformity           | 1.681818182  |
| wavelet-LLH | glszm      | LargeAreaEmphasis                | 2.181818182  |
| wavelet-LLH | glszm      | SmallAreaHighGrayLevelEmphasis   | 647.8718434  |
| wavelet-LLH | glszm      | ZonePercentage                   | 0.785714286  |
| wavelet-LLH | glszm      | LargeAreaLowGrayLevelEmphasis    | 0.05106821   |
| wavelet-LLH | glszm      | LargeAreaHighGrayLevelEmphasis   | 1715.659091  |

|             |       |                                      |              |
|-------------|-------|--------------------------------------|--------------|
| wavelet-LLH | glszm | HighGrayLevelZoneEmphasis            | 749.75       |
| wavelet-LLH | glszm | SmallAreaEmphasis                    | 0.882891414  |
| wavelet-LLH | glszm | LowGrayLevelZoneEmphasis             | 0.049103744  |
| wavelet-LLH | glszm | ZoneEntropy                          | 4.92511855   |
| wavelet-LLH | glszm | SmallAreaLowGrayLevelEmphasis        | 0.048902242  |
| wavelet-LLH | ngtdm | Coarseness                           | 0.069447218  |
| wavelet-LLH | ngtdm | Complexity                           | 3501.501927  |
| wavelet-LLH | ngtdm | Strength                             | 42.17832098  |
| wavelet-LLH | ngtdm | Contrast                             | 1.716860418  |
| wavelet-LLH | ngtdm | Busyness                             | 0.02216514   |
| wavelet-LLL | gldm  | GrayLevelVariance                    | 469.3877551  |
| wavelet-LLL | gldm  | HighGrayLevelEmphasis                | 2156.25      |
| wavelet-LLL | gldm  | DependenceEntropy                    | 5.231200234  |
| wavelet-LLL | gldm  | DependenceNonUniformity              | 52.14285714  |
| wavelet-LLL | gldm  | GrayLevelNonUniformity               | 1.642857143  |
| wavelet-LLL | gldm  | SmallDependenceEmphasis              | 0.973214286  |
| wavelet-LLL | gldm  | SmallDependenceHighGrayLevelEmphasis | 2032.392857  |
| wavelet-LLL | gldm  | DependenceNonUniformityNormalized    | 0.931122449  |
| wavelet-LLL | gldm  | LargeDependenceEmphasis              | 1.107142857  |
| wavelet-LLL | gldm  | LargeDependenceLowGrayLevelEmphasis  | 0.021222844  |
| wavelet-LLL | gldm  | DependenceVariance                   | 0.034438776  |
| wavelet-LLL | gldm  | LargeDependenceHighGrayLevelEmphasis | 2651.678571  |
| wavelet-LLL | gldm  | SmallDependenceLowGrayLevelEmphasis  | 0.02119388   |
| wavelet-LLL | gldm  | LowGrayLevelEmphasis                 | 0.021199673  |
| wavelet-LLL | glcm  | JointAverage                         | 47.79623326  |
| wavelet-LLL | glcm  | SumAverage                           | 95.59246651  |
| wavelet-LLL | glcm  | JointEntropy                         | 5.822191859  |
| wavelet-LLL | glcm  | ClusterShade                         | 5606.987533  |
| wavelet-LLL | glcm  | MaximumProbability                   | 0.023990551  |
| wavelet-LLL | glcm  | ldmn                                 | 0.922690921  |
| wavelet-LLL | glcm  | JointEnergy                          | 0.018142912  |
| wavelet-LLL | glcm  | Contrast                             | 808.8592269  |
| wavelet-LLL | glcm  | DifferenceEntropy                    | 4.312654496  |
| wavelet-LLL | glcm  | InverseVariance                      | 0.032734045  |
| wavelet-LLL | glcm  | DifferenceVariance                   | 237.5726651  |
| wavelet-LLL | glcm  | ldn                                  | 0.812212938  |
| wavelet-LLL | glcm  | ldm                                  | 0.025898008  |
| wavelet-LLL | glcm  | Correlation                          | 0.187280655  |
| wavelet-LLL | glcm  | Autocorrelation                      | 2377.199014  |
| wavelet-LLL | glcm  | SumEntropy                           | 4.625232878  |
| wavelet-LLL | glcm  | SumSquares                           | 494.477745   |
| wavelet-LLL | glcm  | ClusterProminence                    | 2977669.796  |
| wavelet-LLL | glcm  | lmc2                                 | 0.999908733  |
| wavelet-LLL | glcm  | lmc1                                 | -0.854619079 |
| wavelet-LLL | glcm  | DifferenceAverage                    | 23.54831454  |
| wavelet-LLL | glcm  | ld                                   | 0.081283652  |

|             |            |                                  |              |
|-------------|------------|----------------------------------|--------------|
| wavelet-LLL | glcm       | ClusterTendency                  | 1169.051753  |
| wavelet-LLL | firstorder | InterquartileRange               | 789.9997097  |
| wavelet-LLL | firstorder | Skewness                         | 0.359992369  |
| wavelet-LLL | firstorder | Uniformity                       | 0.029336735  |
| wavelet-LLL | firstorder | Median                           | -951.7023311 |
| wavelet-LLL | firstorder | Energy                           | 57855936.75  |
| wavelet-LLL | firstorder | RobustMeanAbsoluteDeviation      | 332.4585174  |
| wavelet-LLL | firstorder | MeanAbsoluteDeviation            | 454.6572582  |
| wavelet-LLL | firstorder | TotalEnergy                      | 1562110292   |
| wavelet-LLL | firstorder | Maximum                          | 443.697002   |
| wavelet-LLL | firstorder | RootMeanSquared                  | 1016.435796  |
| wavelet-LLL | firstorder | 90Percentile                     | -174.4276907 |
| wavelet-LLL | firstorder | Minimum                          | -1854.130189 |
| wavelet-LLL | firstorder | Entropy                          | 5.231200234  |
| wavelet-LLL | firstorder | Range                            | 2297.827191  |
| wavelet-LLL | firstorder | Variance                         | 294985.4471  |
| wavelet-LLL | firstorder | 10Percentile                     | -1483.856673 |
| wavelet-LLL | firstorder | Kurtosis                         | 2.451476734  |
| wavelet-LLL | firstorder | Mean                             | -859.1602182 |
| wavelet-LLL | glrlm      | ShortRunLowGrayLevelEmphasis     | 0.021228794  |
| wavelet-LLL | glrlm      | GrayLevelVariance                | 469.0116087  |
| wavelet-LLL | glrlm      | LowGrayLevelRunEmphasis          | 0.021229021  |
| wavelet-LLL | glrlm      | GrayLevelNonUniformityNormalized | 0.029343254  |
| wavelet-LLL | glrlm      | RunVariance                      | 0.001373172  |
| wavelet-LLL | glrlm      | GrayLevelNonUniformity           | 1.640959041  |
| wavelet-LLL | glrlm      | LongRunEmphasis                  | 1.004195804  |
| wavelet-LLL | glrlm      | ShortRunHighGrayLevelEmphasis    | 2147.948252  |
| wavelet-LLL | glrlm      | RunLengthNonUniformity           | 55.77202797  |
| wavelet-LLL | glrlm      | ShortRunEmphasis                 | 0.998951049  |
| wavelet-LLL | glrlm      | LongRunHighGrayLevelEmphasis     | 2172.2       |
| wavelet-LLL | glrlm      | RunPercentage                    | 0.998626374  |
| wavelet-LLL | glrlm      | LongRunLowGrayLevelEmphasis      | 0.021229928  |
| wavelet-LLL | glrlm      | RunEntropy                       | 5.231191995  |
| wavelet-LLL | glrlm      | HighGrayLevelRunEmphasis         | 2152.798601  |
| wavelet-LLL | glrlm      | RunLengthNonUniformityNormalized | 0.997253655  |
| wavelet-LLL | glszm      | GrayLevelVariance                | 464.4978512  |
| wavelet-LLL | glszm      | ZoneVariance                     | 0.01785124   |
| wavelet-LLL | glszm      | GrayLevelNonUniformityNormalized | 0.029421488  |
| wavelet-LLL | glszm      | SizeZoneNonUniformityNormalized  | 0.964297521  |
| wavelet-LLL | glszm      | SizeZoneNonUniformity            | 53.03636364  |
| wavelet-LLL | glszm      | GrayLevelNonUniformity           | 1.618181818  |
| wavelet-LLL | glszm      | LargeAreaEmphasis                | 1.054545455  |
| wavelet-LLL | glszm      | SmallAreaHighGrayLevelEmphasis   | 2048.327273  |
| wavelet-LLL | glszm      | ZonePercentage                   | 0.982142857  |
| wavelet-LLL | glszm      | LargeAreaLowGrayLevelEmphasis    | 0.021592986  |
| wavelet-LLL | glszm      | LargeAreaHighGrayLevelEmphasis   | 2363.6       |
| wavelet-LLL | glszm      | HighGrayLevelZoneEmphasis        | 2111.381818  |
| wavelet-LLL | glszm      | SmallAreaEmphasis                | 0.986363636  |
| wavelet-LLL | glszm      | LowGrayLevelZoneEmphasis         | 0.02158119   |
| wavelet-LLL | glszm      | ZoneEntropy                      | 5.231093122  |
| wavelet-LLL | glszm      | SmallAreaLowGrayLevelEmphasis    | 0.021578241  |

|             |            |                                      |              |
|-------------|------------|--------------------------------------|--------------|
| wavelet-LLL | ngtdm      | Coarseness                           | 0.039360532  |
| wavelet-LLL | ngtdm      | Complexity                           | 19863.74361  |
| wavelet-LLL | ngtdm      | Strength                             | 93.55937342  |
| wavelet-LLL | ngtdm      | Contrast                             | 8.887818393  |
| wavelet-LLL | ngtdm      | Busyness                             | 0.023676113  |
| wavelet-HHL | gldm       | GrayLevelVariance                    | 27.78284439  |
| wavelet-HHL | gldm       | HighGrayLevelEmphasis                | 142.1964286  |
| wavelet-HHL | gldm       | DependenceEntropy                    | 4.614605145  |
| wavelet-HHL | gldm       | DependenceNonUniformity              | 18.85714286  |
| wavelet-HHL | gldm       | GrayLevelNonUniformity               | 4.464285714  |
| wavelet-HHL | gldm       | SmallDependenceEmphasis              | 0.562098214  |
| wavelet-HHL | gldm       | SmallDependenceHighGrayLevelEmphasis | 106.456875   |
| wavelet-HHL | gldm       | DependenceNonUniformityNormalized    | 0.336734694  |
| wavelet-HHL | gldm       | LargeDependenceEmphasis              | 4.428571429  |
| wavelet-HHL | gldm       | LargeDependenceLowGrayLevelEmphasis  | 0.10452854   |
| wavelet-HHL | gldm       | DependenceVariance                   | 0.979591837  |
| wavelet-HHL | gldm       | LargeDependenceHighGrayLevelEmphasis | 381.7678571  |
| wavelet-HHL | gldm       | SmallDependenceLowGrayLevelEmphasis  | 0.025399087  |
| wavelet-HHL | gldm       | LowGrayLevelEmphasis                 | 0.034421167  |
| wavelet-HHL | glcm       | JointAverage                         | 10.57406961  |
| wavelet-HHL | glcm       | SumAverage                           | 21.14813921  |
| wavelet-HHL | glcm       | JointEntropy                         | 5.490165895  |
| wavelet-HHL | glcm       | ClusterShade                         | 174.8628096  |
| wavelet-HHL | glcm       | MaximumProbability                   | 0.054857559  |
| wavelet-HHL | glcm       | ldmn                                 | 0.926155768  |
| wavelet-HHL | glcm       | JointEnergy                          | 0.025048469  |
| wavelet-HHL | glcm       | Contrast                             | 57.09731564  |
| wavelet-HHL | glcm       | DifferenceEntropy                    | 3.487837056  |
| wavelet-HHL | glcm       | InverseVariance                      | 0.170423492  |
| wavelet-HHL | glcm       | DifferenceVariance                   | 19.54905245  |
| wavelet-HHL | glcm       | ldn                                  | 0.822947552  |
| wavelet-HHL | glcm       | ldm                                  | 0.164948015  |
| wavelet-HHL | glcm       | Correlation                          | -0.055894907 |
| wavelet-HHL | glcm       | Autocorrelation                      | 110.4006041  |
| wavelet-HHL | glcm       | SumEntropy                           | 3.906616706  |
| wavelet-HHL | glcm       | SumSquares                           | 27.01383399  |
| wavelet-HHL | glcm       | ClusterProminence                    | 7879.774098  |
| wavelet-HHL | glcm       | lmc2                                 | 0.99126268   |
| wavelet-HHL | glcm       | lmc1                                 | -0.550112344 |
| wavelet-HHL | glcm       | DifferenceAverage                    | 5.998788423  |
| wavelet-HHL | glcm       | ld                                   | 0.253046782  |
| wavelet-HHL | glcm       | ClusterTendency                      | 50.9580203   |
| wavelet-HHL | firstorder | InterquartileRange                   | 182.0041549  |
| wavelet-HHL | firstorder | Skewness                             | 0.655832789  |
| wavelet-HHL | firstorder | Uniformity                           | 0.079719388  |
| wavelet-HHL | firstorder | Median                               | -38.00991726 |



|             |            |                                  |              |
|-------------|------------|----------------------------------|--------------|
| wavelet-HHL | firstorder | Energy                           | 967286.3199  |
| wavelet-HHL | firstorder | RobustMeanAbsoluteDeviation      | 78.63012537  |
| wavelet-HHL | firstorder | MeanAbsoluteDeviation            | 109.8988757  |
| wavelet-HHL | firstorder | TotalEnergy                      | 26116730.64  |
| wavelet-HHL | firstorder | Maximum                          | 352.8895603  |
| wavelet-HHL | firstorder | RootMeanSquared                  | 131.4266716  |
| wavelet-HHL | firstorder | 90Percentile                     | 194.8237737  |
| wavelet-HHL | firstorder | Minimum                          | -246.1954092 |
| wavelet-HHL | firstorder | Entropy                          | 3.944452799  |
| wavelet-HHL | firstorder | Range                            | 599.0849694  |
| wavelet-HHL | firstorder | Variance                         | 17246.49252  |
| wavelet-HHL | firstorder | 10Percentile                     | -135.3386698 |
| wavelet-HHL | firstorder | Kurtosis                         | 2.96058326   |
| wavelet-HHL | firstorder | Mean                             | 5.145627046  |
| wavelet-HHL | glrlm      | ShortRunLowGrayLevelEmphasis     | 0.034386542  |
| wavelet-HHL | glrlm      | GrayLevelVariance                | 28.21550555  |
| wavelet-HHL | glrlm      | LowGrayLevelRunEmphasis          | 0.034904037  |
| wavelet-HHL | glrlm      | GrayLevelNonUniformityNormalized | 0.077650561  |
| wavelet-HHL | glrlm      | RunVariance                      | 0.038813584  |
| wavelet-HHL | glrlm      | GrayLevelNonUniformity           | 4.206236342  |
| wavelet-HHL | glrlm      | LongRunEmphasis                  | 1.110384745  |
| wavelet-HHL | glrlm      | ShortRunHighGrayLevelEmphasis    | 142.8542084  |
| wavelet-HHL | glrlm      | RunLengthNonUniformity           | 50.91205419  |
| wavelet-HHL | glrlm      | ShortRunEmphasis                 | 0.975723353  |
| wavelet-HHL | glrlm      | LongRunHighGrayLevelEmphasis     | 153.1026352  |
| wavelet-HHL | glrlm      | RunPercentage                    | 0.967032967  |
| wavelet-HHL | glrlm      | LongRunLowGrayLevelEmphasis      | 0.037110946  |
| wavelet-HHL | glrlm      | RunEntropy                       | 4.069514052  |
| wavelet-HHL | glrlm      | HighGrayLevelRunEmphasis         | 144.55696    |
| wavelet-HHL | glrlm      | RunLengthNonUniformityNormalized | 0.939076497  |
| wavelet-HHL | glszm      | GrayLevelVariance                | 33.11346939  |
| wavelet-HHL | glszm      | ZoneVariance                     | 2.011428571  |
| wavelet-HHL | glszm      | GrayLevelNonUniformityNormalized | 0.062857143  |
| wavelet-HHL | glszm      | SizeZoneNonUniformityNormalized  | 0.575510204  |
| wavelet-HHL | glszm      | SizeZoneNonUniformity            | 20.14285714  |
| wavelet-HHL | glszm      | GrayLevelNonUniformity           | 2.2          |
| wavelet-HHL | glszm      | LargeAreaEmphasis                | 4.571428571  |
| wavelet-HHL | glszm      | SmallAreaHighGrayLevelEmphasis   | 160.6261687  |
| wavelet-HHL | glszm      | ZonePercentage                   | 0.625        |
| wavelet-HHL | glszm      | LargeAreaLowGrayLevelEmphasis    | 0.116997265  |
| wavelet-HHL | glszm      | LargeAreaHighGrayLevelEmphasis   | 416.2571429  |
| wavelet-HHL | glszm      | HighGrayLevelZoneEmphasis        | 181.2571429  |
| wavelet-HHL | glszm      | SmallAreaEmphasis                | 0.785121032  |
| wavelet-HHL | glszm      | LowGrayLevelZoneEmphasis         | 0.042609982  |
| wavelet-HHL | glszm      | ZoneEntropy                      | 4.357295874  |
| wavelet-HHL | glszm      | SmallAreaLowGrayLevelEmphasis    | 0.038249111  |
| wavelet-HHL | ngtdm      | Coarseness                       | 0.059054306  |
| wavelet-HHL | ngtdm      | Complexity                       | 817.5413748  |
| wavelet-HHL | ngtdm      | Strength                         | 12.24778311  |
| wavelet-HHL | ngtdm      | Contrast                         | 0.679377225  |
| wavelet-HHL | ngtdm      | Busyness                         | 0.10676421   |

|             |            |                                      |              |
|-------------|------------|--------------------------------------|--------------|
| wavelet-HLH | gldm       | GrayLevelVariance                    | 27.1348852   |
| wavelet-HLH | gldm       | HighGrayLevelEmphasis                | 206.9821429  |
| wavelet-HLH | gldm       | DependenceEntropy                    | 4.641565413  |
| wavelet-HLH | gldm       | DependenceNonUniformity              | 14.85714286  |
| wavelet-HLH | gldm       | GrayLevelNonUniformity               | 4.892857143  |
| wavelet-HLH | gldm       | SmallDependenceEmphasis              | 0.48000496   |
| wavelet-HLH | gldm       | SmallDependenceHighGrayLevelEmphasis | 88.4490873   |
| wavelet-HLH | gldm       | DependenceNonUniformityNormalized    | 0.265306122  |
| wavelet-HLH | gldm       | LargeDependenceEmphasis              | 7.142857143  |
| wavelet-HLH | gldm       | LargeDependenceLowGrayLevelEmphasis  | 0.06627967   |
| wavelet-HLH | gldm       | DependenceVariance                   | 1.918367347  |
| wavelet-HLH | gldm       | LargeDependenceHighGrayLevelEmphasis | 1386.696429  |
| wavelet-HLH | gldm       | SmallDependenceLowGrayLevelEmphasis  | 0.026828597  |
| wavelet-HLH | gldm       | LowGrayLevelEmphasis                 | 0.029798218  |
| wavelet-HLH | glcm       | JointAverage                         | 13.27770346  |
| wavelet-HLH | glcm       | SumAverage                           | 26.55540692  |
| wavelet-HLH | glcm       | JointEntropy                         | 5.376222804  |
| wavelet-HLH | glcm       | ClusterShade                         | 175.0287635  |
| wavelet-HLH | glcm       | MaximumProbability                   | 0.058501824  |
| wavelet-HLH | glcm       | ldmn                                 | 0.94540458   |
| wavelet-HLH | glcm       | JointEnergy                          | 0.027327714  |
| wavelet-HLH | glcm       | Contrast                             | 47.61298298  |
| wavelet-HLH | glcm       | DifferenceEntropy                    | 3.267238509  |
| wavelet-HLH | glcm       | InverseVariance                      | 0.200559615  |
| wavelet-HLH | glcm       | DifferenceVariance                   | 21.98435344  |
| wavelet-HLH | glcm       | ldn                                  | 0.856705811  |
| wavelet-HLH | glcm       | ldm                                  | 0.216036836  |
| wavelet-HLH | glcm       | Correlation                          | -0.037288694 |
| wavelet-HLH | glcm       | Autocorrelation                      | 175.5716223  |
| wavelet-HLH | glcm       | SumEntropy                           | 3.802234786  |
| wavelet-HLH | glcm       | SumSquares                           | 22.85113713  |
| wavelet-HLH | glcm       | ClusterProminence                    | 8056.219813  |
| wavelet-HLH | glcm       | lmc2                                 | 0.986011645  |
| wavelet-HLH | glcm       | lmc1                                 | -0.511444057 |
| wavelet-HLH | glcm       | DifferenceAverage                    | 4.957585469  |
| wavelet-HLH | glcm       | ld                                   | 0.30583025   |
| wavelet-HLH | glcm       | ClusterTendency                      | 43.79156554  |
| wavelet-HLH | firstorder | InterquartileRange                   | 118.1160824  |
| wavelet-HLH | firstorder | Skewness                             | 0.386908004  |
| wavelet-HLH | firstorder | Uniformity                           | 0.087372449  |
| wavelet-HLH | firstorder | Median                               | 10.58935741  |
| wavelet-HLH | firstorder | Energy                               | 973386.0381  |
| wavelet-HLH | firstorder | RobustMeanAbsoluteDeviation          | 56.50203622  |
| wavelet-HLH | firstorder | MeanAbsoluteDeviation                | 95.57626321  |
| wavelet-HLH | firstorder | TotalEnergy                          | 26281423.03  |
| wavelet-HLH | firstorder | Maximum                              | 347.9138489  |

|             |            |                                  |              |
|-------------|------------|----------------------------------|--------------|
| wavelet-HLH | firstorder | RootMeanSquared                  | 131.8404093  |
| wavelet-HLH | firstorder | 90Percentile                     | 207.8832947  |
| wavelet-HLH | firstorder | Minimum                          | -284.5985178 |
| wavelet-HLH | firstorder | Entropy                          | 3.766628584  |
| wavelet-HLH | firstorder | Range                            | 632.5123666  |
| wavelet-HLH | firstorder | Variance                         | 16869.04568  |
| wavelet-HLH | firstorder | 10Percentile                     | -120.4639708 |
| wavelet-HLH | firstorder | Kurtosis                         | 3.55314718   |
| wavelet-HLH | firstorder | Mean                             | 22.64614444  |
| wavelet-HLH | glrlm      | ShortRunLowGrayLevelEmphasis     | 0.030833509  |
| wavelet-HLH | glrlm      | GrayLevelVariance                | 27.94161841  |
| wavelet-HLH | glrlm      | LowGrayLevelRunEmphasis          | 0.031060082  |
| wavelet-HLH | glrlm      | GrayLevelNonUniformityNormalized | 0.084499691  |
| wavelet-HLH | glrlm      | RunVariance                      | 0.052209737  |
| wavelet-HLH | glrlm      | GrayLevelNonUniformity           | 4.49895092   |
| wavelet-HLH | glrlm      | LongRunEmphasis                  | 1.161203773  |
| wavelet-HLH | glrlm      | ShortRunHighGrayLevelEmphasis    | 199.2234393  |
| wavelet-HLH | glrlm      | RunLengthNonUniformity           | 48.17714801  |
| wavelet-HLH | glrlm      | ShortRunEmphasis                 | 0.961374941  |
| wavelet-HLH | glrlm      | LongRunHighGrayLevelEmphasis     | 239.9241504  |
| wavelet-HLH | glrlm      | RunPercentage                    | 0.950549451  |
| wavelet-HLH | glrlm      | LongRunLowGrayLevelEmphasis      | 0.032006037  |
| wavelet-HLH | glrlm      | RunEntropy                       | 3.966195517  |
| wavelet-HLH | glrlm      | HighGrayLevelRunEmphasis         | 207.137002   |
| wavelet-HLH | glrlm      | RunLengthNonUniformityNormalized | 0.903920513  |
| wavelet-HLH | glszm      | GrayLevelVariance                | 37.01        |
| wavelet-HLH | glszm      | ZoneVariance                     | 3.648888889  |
| wavelet-HLH | glszm      | GrayLevelNonUniformityNormalized | 0.071111111  |
| wavelet-HLH | glszm      | SizeZoneNonUniformityNormalized  | 0.557777778  |
| wavelet-HLH | glszm      | SizeZoneNonUniformity            | 16.733333333 |
| wavelet-HLH | glszm      | GrayLevelNonUniformity           | 2.133333333  |
| wavelet-HLH | glszm      | LargeAreaEmphasis                | 7.133333333  |
| wavelet-HLH | glszm      | SmallAreaHighGrayLevelEmphasis   | 132.7160289  |
| wavelet-HLH | glszm      | ZonePercentage                   | 0.535714286  |
| wavelet-HLH | glszm      | LargeAreaLowGrayLevelEmphasis    | 0.087416662  |
| wavelet-HLH | glszm      | LargeAreaHighGrayLevelEmphasis   | 1371.3       |
| wavelet-HLH | glszm      | HighGrayLevelZoneEmphasis        | 198.3        |
| wavelet-HLH | glszm      | SmallAreaEmphasis                | 0.767622118  |
| wavelet-HLH | glszm      | LowGrayLevelZoneEmphasis         | 0.050612654  |
| wavelet-HLH | glszm      | ZoneEntropy                      | 4.164735179  |
| wavelet-HLH | glszm      | SmallAreaLowGrayLevelEmphasis    | 0.049380982  |
| wavelet-HLH | ngtdm      | Coarseness                       | 0.075065397  |
| wavelet-HLH | ngtdm      | Complexity                       | 592.4493613  |
| wavelet-HLH | ngtdm      | Strength                         | 11.57790393  |
| wavelet-HLH | ngtdm      | Contrast                         | 0.794154548  |
| wavelet-HLH | ngtdm      | Busyness                         | 0.0683165    |

| Image type | Feature Class | Feature Name                         | Value                                                                                                                                                                                                                                                                                                                                                                                                             |
|------------|---------------|--------------------------------------|-------------------------------------------------------------------------------------------------------------------------------------------------------------------------------------------------------------------------------------------------------------------------------------------------------------------------------------------------------------------------------------------------------------------|
| general    | info          | BoundingBox                          | (0, 0, 1, 15, 13, 12)                                                                                                                                                                                                                                                                                                                                                                                             |
| general    | info          | EnabledImageTypes                    | {u'Original': {}, u'Wavelet': {}}                                                                                                                                                                                                                                                                                                                                                                                 |
|            |               |                                      | {'distances': [1], 'additionalInfo': True, 'force2D': False, 'interpolator': 'sitkBSpline', 'resampledPixelSpacing': [3.0], 'label': 1, 'normalizeScale': 1, 'normalize': False, 'force2Ddimension': 0, 'removeOutliers': None, 'minimumROISize': None, u'binWidth': 25.0, 'minimumROIDimensions': 1, u'correctMask': True, 'preCrop': False, u'symmetricalGLCM': True, 'resegmentRange': None, 'padDistance': 5} |
| general    | info          | GeneralSettings                      | ba62d046cf972dcb5c72ea93a8987cb4b787d8f4                                                                                                                                                                                                                                                                                                                                                                          |
| general    | info          | ImageHash                            | 8f4                                                                                                                                                                                                                                                                                                                                                                                                               |
| general    | info          | ImageSpacing                         | (0.9765624999999998, 0.9765624999999998, 1.9999999999999999)                                                                                                                                                                                                                                                                                                                                                      |
| general    | info          | MaskHash                             | a08abd13bb93e17f0140382377f23fc1d67d48e1                                                                                                                                                                                                                                                                                                                                                                          |
| general    | info          | NumpyVersion                         | 1.13.1                                                                                                                                                                                                                                                                                                                                                                                                            |
| general    | info          | PyWaveletVersion                     | 0.5.2                                                                                                                                                                                                                                                                                                                                                                                                             |
| general    | info          | SimpleITKVersion                     | 1.1.0                                                                                                                                                                                                                                                                                                                                                                                                             |
| general    | info          | Version                              | 1.3.0.post102+g1b0eb74                                                                                                                                                                                                                                                                                                                                                                                            |
| general    | info          | VolumeNum                            | 1                                                                                                                                                                                                                                                                                                                                                                                                                 |
| general    | info          | VoxelNum                             | 1023                                                                                                                                                                                                                                                                                                                                                                                                              |
| original   | shape         | Maximum3DDiameter                    | 45.19955752                                                                                                                                                                                                                                                                                                                                                                                                       |
| original   | shape         | Maximum2DDiameterSlice               | 44.59820624                                                                                                                                                                                                                                                                                                                                                                                                       |
| original   | shape         | Sphericity                           | 0.834911391                                                                                                                                                                                                                                                                                                                                                                                                       |
| original   | shape         | MinorAxis                            | 35.79967513                                                                                                                                                                                                                                                                                                                                                                                                       |
| original   | shape         | Elongation                           | 0.93532003                                                                                                                                                                                                                                                                                                                                                                                                        |
| original   | shape         | SurfaceVolumeRatio                   | 0.191615486                                                                                                                                                                                                                                                                                                                                                                                                       |
| original   | shape         | Volume                               | 27621                                                                                                                                                                                                                                                                                                                                                                                                             |
| original   | shape         | MajorAxis                            | 38.27532177                                                                                                                                                                                                                                                                                                                                                                                                       |
| original   | shape         | SurfaceArea                          | 5292.611343                                                                                                                                                                                                                                                                                                                                                                                                       |
| original   | shape         | Flatness                             | 0.757048607                                                                                                                                                                                                                                                                                                                                                                                                       |
| original   | shape         | LeastAxis                            | 28.97627903                                                                                                                                                                                                                                                                                                                                                                                                       |
| original   | shape         | Maximum2DDiameterColumn              | 44.29446918                                                                                                                                                                                                                                                                                                                                                                                                       |
| original   | shape         | Maximum2DDiameterRow                 | 40.36087214                                                                                                                                                                                                                                                                                                                                                                                                       |
| original   | gldm          | GrayLevelVariance                    | 161.2271327                                                                                                                                                                                                                                                                                                                                                                                                       |
| original   | gldm          | HighGrayLevelEmphasis                | 586.6832845                                                                                                                                                                                                                                                                                                                                                                                                       |
| original   | gldm          | DependenceEntropy                    | 7.029050091                                                                                                                                                                                                                                                                                                                                                                                                       |
| original   | gldm          | DependenceNonUniformity              | 153.7487781                                                                                                                                                                                                                                                                                                                                                                                                       |
| original   | gldm          | GrayLevelNonUniformity               | 65.24046921                                                                                                                                                                                                                                                                                                                                                                                                       |
| original   | gldm          | SmallDependenceEmphasis              | 0.364718007                                                                                                                                                                                                                                                                                                                                                                                                       |
| original   | gldm          | SmallDependenceHighGrayLevelEmphasis | 163.3304765                                                                                                                                                                                                                                                                                                                                                                                                       |
| original   | gldm          | DependenceNonUniformityNormalized    | 0.150292061                                                                                                                                                                                                                                                                                                                                                                                                       |
| original   | gldm          | LargeDependenceEmphasis              | 51.06060606                                                                                                                                                                                                                                                                                                                                                                                                       |
| original   | gldm          | LargeDependenceLowGrayLevelEmphasis  | 0.338625072                                                                                                                                                                                                                                                                                                                                                                                                       |
| original   | gldm          | DependenceVariance                   | 27.65695361                                                                                                                                                                                                                                                                                                                                                                                                       |

|          |            |                                      |              |
|----------|------------|--------------------------------------|--------------|
| original | gldm       | LargeDependenceHighGrayLevelEmphasis | 56030.57967  |
| original | gldm       | SmallDependenceLowGrayLevelEmphasis  | 0.007126614  |
| original | gldm       | LowGrayLevelEmphasis                 | 0.021449902  |
| original | glcm       | JointAverage                         | 21.34928467  |
| original | glcm       | SumAverage                           | 42.69856933  |
| original | glcm       | JointEntropy                         | 7.959445927  |
| original | glcm       | ClusterShade                         | -2110.565056 |
| original | glcm       | MaximumProbability                   | 0.110385208  |
| original | glcm       | ldmn                                 | 0.953182447  |
| original | glcm       | JointEnergy                          | 0.018417761  |
| original | glcm       | Contrast                             | 85.23059239  |
| original | glcm       | DifferenceEntropy                    | 3.988609766  |
| original | glcm       | InverseVariance                      | 0.243142992  |
| original | glcm       | DifferenceVariance                   | 49.36581761  |
| original | glcm       | ldn                                  | 0.88371795   |
| original | glcm       | ldm                                  | 0.316818474  |
| original | glcm       | Correlation                          | 0.734106232  |
| original | glcm       | Autocorrelation                      | 573.5453061  |
| original | glcm       | SumEntropy                           | 5.567045226  |
| original | glcm       | SumSquares                           | 160.3509823  |
| original | glcm       | ClusterProminence                    | 447646.0145  |
| original | glcm       | lmc2                                 | 0.948168099  |
| original | glcm       | lmc1                                 | -0.253602289 |
| original | glcm       | DifferenceAverage                    | 5.940391159  |
| original | glcm       | ld                                   | 0.377785137  |
| original | glcm       | ClusterTendency                      | 556.1733369  |
| original | firstorder | InterquartileRange                   | 682.5        |
| original | firstorder | Skewness                             | -0.103071253 |
| original | firstorder | Uniformity                           | 0.063773675  |
| original | firstorder | Median                               | -302         |
| original | firstorder | Energy                               | 209557092    |
| original | firstorder | RobustMeanAbsoluteDeviation          | 267.7184466  |
| original | firstorder | MeanAbsoluteDeviation                | 294.9538197  |
| original | firstorder | TotalEnergy                          | 5658041484   |
| original | firstorder | Maximum                              | 113          |
| original | firstorder | RootMeanSquared                      | 452.5987652  |
| original | firstorder | 90Percentile                         | 42           |
| original | firstorder | Minimum                              | -801         |
| original | firstorder | Entropy                              | 4.61746304   |
| original | firstorder | Range                                | 914          |
| original | firstorder | Variance                             | 100966.3989  |
| original | firstorder | 10Percentile                         | -738         |
| original | firstorder | Kurtosis                             | 1.330913305  |
| original | firstorder | Mean                                 | -322.3030303 |
| original | gllm       | ShortRunLowGrayLevelEmphasis         | 0.021394402  |
| original | gllm       | GrayLevelVariance                    | 151.5429643  |
| original | gllm       | LowGrayLevelRunEmphasis              | 0.02292935   |
| original | gllm       | GrayLevelNonUniformityNormalized     | 0.044878076  |
| original | gllm       | RunVariance                          | 0.338243154  |
| original | gllm       | GrayLevelNonUniformity               | 39.15379491  |
| original | gllm       | LongRunEmphasis                      | 1.716016547  |
| original | gllm       | ShortRunHighGrayLevelEmphasis        | 443.7916468  |
| original | gllm       | RunLengthNonUniformity               | 691.6252069  |

|             |       |                                      |              |
|-------------|-------|--------------------------------------|--------------|
| original    | glrlm | ShortRunEmphasis                     | 0.909124293  |
| original    | glrlm | LongRunHighGrayLevelEmphasis         | 1250.663162  |
| original    | glrlm | RunPercentage                        | 0.852394917  |
| original    | glrlm | LongRunLowGrayLevelEmphasis          | 0.030216655  |
| original    | glrlm | RunEntropy                           | 5.321369847  |
| original    | glrlm | HighGrayLevelRunEmphasis             | 522.5967799  |
| original    | glrlm | RunLengthNonUniformityNormalized     | 0.792923344  |
| original    | glszm | GrayLevelVariance                    | 99.85551888  |
| original    | glszm | ZoneVariance                         | 110.5061295  |
| original    | glszm | GrayLevelNonUniformityNormalized     | 0.030292726  |
| original    | glszm | SizeZoneNonUniformityNormalized      | 0.556941766  |
| original    | glszm | SizeZoneNonUniformity                | 230.0169492  |
| original    | glszm | GrayLevelNonUniformity               | 12.51089588  |
| original    | glszm | LargeAreaEmphasis                    | 116.6416465  |
| original    | glszm | SmallAreaHighGrayLevelEmphasis       | 348.6213787  |
| original    | glszm | ZonePercentage                       | 0.403714565  |
| original    | glszm | LargeAreaLowGrayLevelEmphasis        | 1.083143405  |
| original    | glszm | LargeAreaHighGrayLevelEmphasis       | 124267.954   |
| original    | glszm | HighGrayLevelZoneEmphasis            | 443.8547215  |
| original    | glszm | SmallAreaEmphasis                    | 0.773863338  |
| original    | glszm | LowGrayLevelZoneEmphasis             | 0.019132638  |
| original    | glszm | ZoneEntropy                          | 6.172849796  |
| original    | glszm | SmallAreaLowGrayLevelEmphasis        | 0.014389317  |
| original    | ngtdm | Coarseness                           | 0.005478201  |
| original    | ngtdm | Complexity                           | 2618.755982  |
| original    | ngtdm | Strength                             | 5.015319852  |
| original    | ngtdm | Contrast                             | 0.960548088  |
| original    | ngtdm | Busyness                             | 0.195114036  |
| wavelet-HHH | gldm  | GrayLevelVariance                    | 8.168771243  |
| wavelet-HHH | gldm  | HighGrayLevelEmphasis                | 165.2385142  |
| wavelet-HHH | gldm  | DependenceEntropy                    | 6.112138975  |
| wavelet-HHH | gldm  | DependenceNonUniformity              | 132.14174    |
| wavelet-HHH | gldm  | GrayLevelNonUniformity               | 130.4740958  |
| wavelet-HHH | gldm  | SmallDependenceEmphasis              | 0.266789505  |
| wavelet-HHH | gldm  | SmallDependenceHighGrayLevelEmphasis | 45.91800438  |
| wavelet-HHH | gldm  | DependenceNonUniformityNormalized    | 0.129170811  |
| wavelet-HHH | gldm  | LargeDependenceEmphasis              | 29.56109482  |
| wavelet-HHH | gldm  | LargeDependenceLowGrayLevelEmphasis  | 0.196929949  |
| wavelet-HHH | gldm  | DependenceVariance                   | 11.22126764  |
| wavelet-HHH | gldm  | LargeDependenceHighGrayLevelEmphasis | 4655.115347  |
| wavelet-HHH | gldm  | SmallDependenceLowGrayLevelEmphasis  | 0.004194791  |
| wavelet-HHH | gldm  | LowGrayLevelEmphasis                 | 0.009354321  |
| wavelet-HHH | glcm  | JointAverage                         | 12.5273496   |
| wavelet-HHH | glcm  | SumAverage                           | 25.0546992   |
| wavelet-HHH | glcm  | JointEntropy                         | 6.650007766  |
| wavelet-HHH | glcm  | ClusterShade                         | -6.905576643 |
| wavelet-HHH | glcm  | MaximumProbability                   | 0.066892502  |
| wavelet-HHH | glcm  | ldmn                                 | 0.971219283  |
| wavelet-HHH | glcm  | JointEnergy                          | 0.021257224  |
| wavelet-HHH | glcm  | Contrast                             | 17.19067018  |
| wavelet-HHH | glcm  | DifferenceEntropy                    | 3.153832708  |
| wavelet-HHH | glcm  | InverseVariance                      | 0.310702089  |
| wavelet-HHH | glcm  | DifferenceVariance                   | 8.189380482  |

|             |            |                                  |              |
|-------------|------------|----------------------------------|--------------|
| wavelet-HHH | glcm       | Idn                              | 0.894833652  |
| wavelet-HHH | glcm       | Idm                              | 0.33309642   |
| wavelet-HHH | glcm       | Correlation                      | -0.036369577 |
| wavelet-HHH | glcm       | Autocorrelation                  | 156.6372003  |
| wavelet-HHH | glcm       | SumEntropy                       | 3.925628412  |
| wavelet-HHH | glcm       | SumSquares                       | 8.297852918  |
| wavelet-HHH | glcm       | ClusterProminence                | 1107.676456  |
| wavelet-HHH | glcm       | Imc2                             | 0.611102604  |
| wavelet-HHH | glcm       | Imc1                             | -0.069779271 |
| wavelet-HHH | glcm       | DifferenceAverage                | 2.983982371  |
| wavelet-HHH | glcm       | Id                               | 0.40868603   |
| wavelet-HHH | glcm       | ClusterTendency                  | 16.0007415   |
| wavelet-HHH | firstorder | InterquartileRange               | 66.56734017  |
| wavelet-HHH | firstorder | Skewness                         | -0.17795932  |
| wavelet-HHH | firstorder | Uniformity                       | 0.127540661  |
| wavelet-HHH | firstorder | Median                           | 1.067045217  |
| wavelet-HHH | firstorder | Energy                           | 5203591.948  |
| wavelet-HHH | firstorder | RobustMeanAbsoluteDeviation      | 29.18787692  |
| wavelet-HHH | firstorder | MeanAbsoluteDeviation            | 50.35173346  |
| wavelet-HHH | firstorder | TotalEnergy                      | 140496982.6  |
| wavelet-HHH | firstorder | Maximum                          | 270.6537201  |
| wavelet-HHH | firstorder | RootMeanSquared                  | 71.32040483  |
| wavelet-HHH | firstorder | 90Percentile                     | 84.3744714   |
| wavelet-HHH | firstorder | Minimum                          | -284.5734513 |
| wavelet-HHH | firstorder | Entropy                          | 3.440037754  |
| wavelet-HHH | firstorder | Range                            | 555.2271714  |
| wavelet-HHH | firstorder | Variance                         | 5086.137028  |
| wavelet-HHH | firstorder | 10Percentile                     | -81.62808422 |
| wavelet-HHH | firstorder | Kurtosis                         | 4.632415741  |
| wavelet-HHH | firstorder | Mean                             | 0.680526675  |
| wavelet-HHH | glrlm      | ShortRunLowGrayLevelEmphasis     | 0.009132865  |
| wavelet-HHH | glrlm      | GrayLevelVariance                | 9.058964809  |
| wavelet-HHH | glrlm      | LowGrayLevelRunEmphasis          | 0.00973872   |
| wavelet-HHH | glrlm      | GrayLevelNonUniformityNormalzied | 0.113347462  |
| wavelet-HHH | glrlm      | RunVariance                      | 0.1964519    |
| wavelet-HHH | glrlm      | GrayLevelNonUniformity           | 101.3172502  |
| wavelet-HHH | glrlm      | LongRunEmphasis                  | 1.506879207  |
| wavelet-HHH | glrlm      | ShortRunHighGrayLevelEmphasis    | 151.843832   |
| wavelet-HHH | glrlm      | RunLengthNonUniformity           | 708.0727131  |
| wavelet-HHH | glrlm      | ShortRunEmphasis                 | 0.910118362  |
| wavelet-HHH | glrlm      | LongRunHighGrayLevelEmphasis     | 246.5033496  |
| wavelet-HHH | glrlm      | RunPercentage                    | 0.873749906  |
| wavelet-HHH | glrlm      | LongRunLowGrayLevelEmphasis      | 0.013117587  |
| wavelet-HHH | glrlm      | RunEntropy                       | 4.096064972  |
| wavelet-HHH | glrlm      | HighGrayLevelRunEmphasis         | 166.1641186  |
| wavelet-HHH | glrlm      | RunLengthNonUniformityNormalized | 0.791976113  |
| wavelet-HHH | glszm      | GrayLevelVariance                | 19.80622644  |
| wavelet-HHH | glszm      | ZoneVariance                     | 313.5705589  |
| wavelet-HHH | glszm      | GrayLevelNonUniformityNormalized | 0.072679032  |
| wavelet-HHH | glszm      | SizeZoneNonUniformityNormalized  | 0.476740726  |
| wavelet-HHH | glszm      | SizeZoneNonUniformity            | 135.3943662  |
| wavelet-HHH | glszm      | GrayLevelNonUniformity           | 20.64084507  |
| wavelet-HHH | glszm      | LargeAreaEmphasis                | 326.5457746  |

|             |            |                                      |              |
|-------------|------------|--------------------------------------|--------------|
| wavelet-HHH | glszm      | SmallAreaHighGrayLevelEmphasis       | 124.8141377  |
| wavelet-HHH | glszm      | ZonePercentage                       | 0.277614858  |
| wavelet-HHH | glszm      | LargeAreaLowGrayLevelEmphasis        | 2.119435077  |
| wavelet-HHH | glszm      | LargeAreaHighGrayLevelEmphasis       | 51241.68662  |
| wavelet-HHH | glszm      | HighGrayLevelZoneEmphasis            | 175.7922535  |
| wavelet-HHH | glszm      | SmallAreaEmphasis                    | 0.717564274  |
| wavelet-HHH | glszm      | LowGrayLevelZoneEmphasis             | 0.015557653  |
| wavelet-HHH | glszm      | ZoneEntropy                          | 5.360523615  |
| wavelet-HHH | glszm      | SmallAreaLowGrayLevelEmphasis        | 0.013255095  |
| wavelet-HHH | ngtdm      | Coarseness                           | 0.007308967  |
| wavelet-HHH | ngtdm      | Complexity                           | 452.877454   |
| wavelet-HHH | ngtdm      | Strength                             | 1.09846888   |
| wavelet-HHH | ngtdm      | Contrast                             | 0.069326232  |
| wavelet-HHH | ngtdm      | Busyness                             | 0.358925275  |
| wavelet-HLL | gldm       | GrayLevelVariance                    | 33.86145248  |
| wavelet-HLL | gldm       | HighGrayLevelEmphasis                | 471.4604106  |
| wavelet-HLL | gldm       | DependenceEntropy                    | 6.743985875  |
| wavelet-HLL | gldm       | DependenceNonUniformity              | 208.2473118  |
| wavelet-HLL | gldm       | GrayLevelNonUniformity               | 56.78494624  |
| wavelet-HLL | gldm       | SmallDependenceEmphasis              | 0.371437526  |
| wavelet-HLL | gldm       | SmallDependenceHighGrayLevelEmphasis | 187.7315534  |
| wavelet-HLL | gldm       | DependenceNonUniformityNormalized    | 0.20356531   |
| wavelet-HLL | gldm       | LargeDependenceEmphasis              | 14.68719453  |
| wavelet-HLL | gldm       | LargeDependenceLowGrayLevelEmphasis  | 0.039584289  |
| wavelet-HLL | gldm       | DependenceVariance                   | 5.792456779  |
| wavelet-HLL | gldm       | LargeDependenceHighGrayLevelEmphasis | 6353.237537  |
| wavelet-HLL | gldm       | SmallDependenceLowGrayLevelEmphasis  | 0.002357183  |
| wavelet-HLL | gldm       | LowGrayLevelEmphasis                 | 0.004166162  |
| wavelet-HLL | glcm       | JointAverage                         | 20.73947755  |
| wavelet-HLL | glcm       | SumAverage                           | 41.4789551   |
| wavelet-HLL | glcm       | JointEntropy                         | 8.353821832  |
| wavelet-HLL | glcm       | ClusterShade                         | 199.9553735  |
| wavelet-HLL | glcm       | MaximumProbability                   | 0.024071466  |
| wavelet-HLL | glcm       | ldmn                                 | 0.979867165  |
| wavelet-HLL | glcm       | JointEnergy                          | 0.005003278  |
| wavelet-HLL | glcm       | Contrast                             | 46.86476883  |
| wavelet-HLL | glcm       | DifferenceEntropy                    | 3.760676129  |
| wavelet-HLL | glcm       | InverseVariance                      | 0.231605579  |
| wavelet-HLL | glcm       | DifferenceVariance                   | 21.84914745  |
| wavelet-HLL | glcm       | ldn                                  | 0.910900051  |
| wavelet-HLL | glcm       | ldm                                  | 0.229696262  |
| wavelet-HLL | glcm       | Correlation                          | 0.293626048  |
| wavelet-HLL | glcm       | Autocorrelation                      | 439.9321843  |
| wavelet-HLL | glcm       | SumEntropy                           | 5.155820181  |
| wavelet-HLL | glcm       | SumSquares                           | 33.23522172  |
| wavelet-HLL | glcm       | ClusterProminence                    | 29250.1123   |
| wavelet-HLL | glcm       | lmc2                                 | 0.832156297  |
| wavelet-HLL | glcm       | lmc1                                 | -0.138405146 |
| wavelet-HLL | glcm       | DifferenceAverage                    | 4.895035933  |
| wavelet-HLL | glcm       | ld                                   | 0.314085484  |
| wavelet-HLL | glcm       | ClusterTendency                      | 86.07611805  |
| wavelet-HLL | firstorder | InterquartileRange                   | 166.9684731  |
| wavelet-HLL | firstorder | Skewness                             | 0.284640851  |



|             |            |                                  |              |
|-------------|------------|----------------------------------|--------------|
| wavelet-HLL | firstorder | Uniformity                       | 0.055508256  |
| wavelet-HLL | firstorder | Median                           | 10.10871024  |
| wavelet-HLL | firstorder | Energy                           | 21711547.75  |
| wavelet-HLL | firstorder | RobustMeanAbsoluteDeviation      | 69.54230252  |
| wavelet-HLL | firstorder | MeanAbsoluteDeviation            | 108.2795685  |
| wavelet-HLL | firstorder | TotalEnergy                      | 586211789.4  |
| wavelet-HLL | firstorder | Maximum                          | 636.8428412  |
| wavelet-HLL | firstorder | RootMeanSquared                  | 145.6825636  |
| wavelet-HLL | firstorder | 90Percentile                     | 173.733338   |
| wavelet-HLL | firstorder | Minimum                          | -492.5808306 |
| wavelet-HLL | firstorder | Entropy                          | 4.499070034  |
| wavelet-HLL | firstorder | Range                            | 1129.423672  |
| wavelet-HLL | firstorder | Variance                         | 21118.42496  |
| wavelet-HLL | firstorder | 10Percentile                     | -171.9115963 |
| wavelet-HLL | firstorder | Kurtosis                         | 4.327993129  |
| wavelet-HLL | firstorder | Mean                             | 10.2461883   |
| wavelet-HLL | grlm       | ShortRunLowGrayLevelEmphasis     | 0.004137246  |
| wavelet-HLL | grlm       | GrayLevelVariance                | 35.50424776  |
| wavelet-HLL | grlm       | LowGrayLevelRunEmphasis          | 0.004286564  |
| wavelet-HLL | grlm       | GrayLevelNonUniformityNormalized | 0.052912263  |
| wavelet-HLL | grlm       | RunVariance                      | 0.104307165  |
| wavelet-HLL | grlm       | GrayLevelNonUniformity           | 50.01296775  |
| wavelet-HLL | grlm       | LongRunEmphasis                  | 1.27861148   |
| wavelet-HLL | grlm       | ShortRunHighGrayLevelEmphasis    | 449.984059   |
| wavelet-HLL | grlm       | RunLengthNonUniformity           | 818.8494743  |
| wavelet-HLL | grlm       | ShortRunEmphasis                 | 0.944679272  |
| wavelet-HLL | grlm       | LongRunHighGrayLevelEmphasis     | 595.1659848  |
| wavelet-HLL | grlm       | RunPercentage                    | 0.923753666  |
| wavelet-HLL | grlm       | LongRunLowGrayLevelEmphasis      | 0.00505358   |
| wavelet-HLL | grlm       | RunEntropy                       | 4.901106483  |
| wavelet-HLL | grlm       | HighGrayLevelRunEmphasis         | 474.3307691  |
| wavelet-HLL | grlm       | RunLengthNonUniformityNormalized | 0.865710143  |
| wavelet-HLL | glszm      | GrayLevelVariance                | 52.3182129   |
| wavelet-HLL | glszm      | ZoneVariance                     | 17.77225718  |
| wavelet-HLL | glszm      | GrayLevelNonUniformityNormalized | 0.041063463  |
| wavelet-HLL | glszm      | SizeZoneNonUniformityNormalized  | 0.43644264   |
| wavelet-HLL | glszm      | SizeZoneNonUniformity            | 190.2889908  |
| wavelet-HLL | glszm      | GrayLevelNonUniformity           | 17.90366972  |
| wavelet-HLL | glszm      | LargeAreaEmphasis                | 23.27752294  |
| wavelet-HLL | glszm      | SmallAreaHighGrayLevelEmphasis   | 354.5182651  |
| wavelet-HLL | glszm      | ZonePercentage                   | 0.426197458  |
| wavelet-HLL | glszm      | LargeAreaLowGrayLevelEmphasis    | 0.063837476  |
| wavelet-HLL | glszm      | LargeAreaHighGrayLevelEmphasis   | 9952.646789  |
| wavelet-HLL | glszm      | HighGrayLevelZoneEmphasis        | 504.0756881  |
| wavelet-HLL | glszm      | SmallAreaEmphasis                | 0.686646848  |
| wavelet-HLL | glszm      | LowGrayLevelZoneEmphasis         | 0.005950708  |
| wavelet-HLL | glszm      | ZoneEntropy                      | 6.317734638  |
| wavelet-HLL | glszm      | SmallAreaLowGrayLevelEmphasis    | 0.004983868  |
| wavelet-HLL | ngtdm      | Coarseness                       | 0.007710321  |
| wavelet-HLL | ngtdm      | Complexity                       | 2249.778475  |
| wavelet-HLL | ngtdm      | Strength                         | 4.340833552  |
| wavelet-HLL | ngtdm      | Contrast                         | 0.146296913  |
| wavelet-HLL | ngtdm      | Busyness                         | 0.132296698  |

|             |            |                                      |              |
|-------------|------------|--------------------------------------|--------------|
| wavelet-LHL | gldm       | GrayLevelVariance                    | 64.82886762  |
| wavelet-LHL | gldm       | HighGrayLevelEmphasis                | 2085.783969  |
| wavelet-LHL | gldm       | DependenceEntropy                    | 7.030494992  |
| wavelet-LHL | gldm       | DependenceNonUniformity              | 222.3861193  |
| wavelet-LHL | gldm       | GrayLevelNonUniformity               | 51.9599218   |
| wavelet-LHL | gldm       | SmallDependenceEmphasis              | 0.43318216   |
| wavelet-LHL | gldm       | SmallDependenceHighGrayLevelEmphasis | 914.5522623  |
| wavelet-LHL | gldm       | DependenceNonUniformityNormalized    | 0.217386236  |
| wavelet-LHL | gldm       | LargeDependenceEmphasis              | 18.21407625  |
| wavelet-LHL | gldm       | LargeDependenceLowGrayLevelEmphasis  | 0.009974207  |
| wavelet-LHL | gldm       | DependenceVariance                   | 8.882633926  |
| wavelet-LHL | gldm       | LargeDependenceHighGrayLevelEmphasis | 37856.6696   |
| wavelet-LHL | gldm       | SmallDependenceLowGrayLevelEmphasis  | 0.001261504  |
| wavelet-LHL | gldm       | LowGrayLevelEmphasis                 | 0.001556468  |
| wavelet-LHL | glcm       | JointAverage                         | 44.9507353   |
| wavelet-LHL | glcm       | SumAverage                           | 89.9014706   |
| wavelet-LHL | glcm       | JointEntropy                         | 8.696558319  |
| wavelet-LHL | glcm       | ClusterShade                         | -647.1467675 |
| wavelet-LHL | glcm       | MaximumProbability                   | 0.031304177  |
| wavelet-LHL | glcm       | ldmn                                 | 0.980080364  |
| wavelet-LHL | glcm       | JointEnergy                          | 0.005146865  |
| wavelet-LHL | glcm       | Contrast                             | 128.9707465  |
| wavelet-LHL | glcm       | DifferenceEntropy                    | 4.30931576   |
| wavelet-LHL | glcm       | InverseVariance                      | 0.189791587  |
| wavelet-LHL | glcm       | DifferenceVariance                   | 71.66393685  |
| wavelet-LHL | glcm       | ldn                                  | 0.918828128  |
| wavelet-LHL | glcm       | ldm                                  | 0.208643497  |
| wavelet-LHL | glcm       | Correlation                          | 0.035258126  |
| wavelet-LHL | glcm       | Autocorrelation                      | 2023.018211  |
| wavelet-LHL | glcm       | SumEntropy                           | 5.374970325  |
| wavelet-LHL | glcm       | SumSquares                           | 66.93101004  |
| wavelet-LHL | glcm       | ClusterProminence                    | 116313.8529  |
| wavelet-LHL | glcm       | lmc2                                 | 0.926601615  |
| wavelet-LHL | glcm       | lmc1                                 | -0.20475319  |
| wavelet-LHL | glcm       | DifferenceAverage                    | 7.373871464  |
| wavelet-LHL | glcm       | ld                                   | 0.286114134  |
| wavelet-LHL | glcm       | ClusterTendency                      | 138.7532936  |
| wavelet-LHL | firstorder | InterquartileRange                   | 180.7348533  |
| wavelet-LHL | firstorder | Skewness                             | -0.601801305 |
| wavelet-LHL | firstorder | Uniformity                           | 0.050791712  |
| wavelet-LHL | firstorder | Median                               | -4.028790971 |
| wavelet-LHL | firstorder | Energy                               | 41570880.51  |
| wavelet-LHL | firstorder | RobustMeanAbsoluteDeviation          | 77.05964775  |
| wavelet-LHL | firstorder | MeanAbsoluteDeviation                | 137.542596   |
| wavelet-LHL | firstorder | TotalEnergy                          | 1122413774   |
| wavelet-LHL | firstorder | Maximum                              | 725.8703425  |
| wavelet-LHL | firstorder | RootMeanSquared                      | 201.5843417  |
| wavelet-LHL | firstorder | 90Percentile                         | 220.8908742  |
| wavelet-LHL | firstorder | Minimum                              | -1100.097996 |
| wavelet-LHL | firstorder | Entropy                              | 4.831738658  |
| wavelet-LHL | firstorder | Range                                | 1825.968339  |
| wavelet-LHL | firstorder | Variance                             | 40451.82703  |
| wavelet-LHL | firstorder | 10Percentile                         | -242.3893816 |

|             |            |                                      |              |
|-------------|------------|--------------------------------------|--------------|
| wavelet-LHL | firstorder | Kurtosis                             | 6.040432109  |
| wavelet-LHL | firstorder | Mean                                 | -13.58012526 |
| wavelet-LHL | glrlm      | ShortRunLowGrayLevelEmphasis         | 0.001620275  |
| wavelet-LHL | glrlm      | GrayLevelVariance                    | 69.08593733  |
| wavelet-LHL | glrlm      | LowGrayLevelRunEmphasis              | 0.001647856  |
| wavelet-LHL | glrlm      | GrayLevelNonUniformityNormalized     | 0.046095689  |
| wavelet-LHL | glrlm      | RunVariance                          | 0.119504379  |
| wavelet-LHL | glrlm      | GrayLevelNonUniformity               | 43.4437875   |
| wavelet-LHL | glrlm      | LongRunEmphasis                      | 1.300617934  |
| wavelet-LHL | glrlm      | ShortRunHighGrayLevelEmphasis        | 1973.384379  |
| wavelet-LHL | glrlm      | RunLengthNonUniformity               | 818.1894487  |
| wavelet-LHL | glrlm      | ShortRunEmphasis                     | 0.945189914  |
| wavelet-LHL | glrlm      | LongRunHighGrayLevelEmphasis         | 2711.760987  |
| wavelet-LHL | glrlm      | RunPercentage                        | 0.920971502  |
| wavelet-LHL | glrlm      | LongRunLowGrayLevelEmphasis          | 0.001797106  |
| wavelet-LHL | glrlm      | RunEntropy                           | 5.259738099  |
| wavelet-LHL | glrlm      | HighGrayLevelRunEmphasis             | 2086.771172  |
| wavelet-LHL | glrlm      | RunLengthNonUniformityNormalized     | 0.867709183  |
| wavelet-LHL | glszm      | GrayLevelVariance                    | 106.0073265  |
| wavelet-LHL | glszm      | ZoneVariance                         | 26.45288382  |
| wavelet-LHL | glszm      | GrayLevelNonUniformityNormalized     | 0.031031758  |
| wavelet-LHL | glszm      | SizeZoneNonUniformityNormalized      | 0.526080225  |
| wavelet-LHL | glszm      | SizeZoneNonUniformity                | 261.9879518  |
| wavelet-LHL | glszm      | GrayLevelNonUniformity               | 15.45381526  |
| wavelet-LHL | glszm      | LargeAreaEmphasis                    | 30.67269076  |
| wavelet-LHL | glszm      | SmallAreaHighGrayLevelEmphasis       | 1596.436343  |
| wavelet-LHL | glszm      | ZonePercentage                       | 0.486803519  |
| wavelet-LHL | glszm      | LargeAreaLowGrayLevelEmphasis        | 0.017131842  |
| wavelet-LHL | glszm      | LargeAreaHighGrayLevelEmphasis       | 63556.85341  |
| wavelet-LHL | glszm      | HighGrayLevelZoneEmphasis            | 2100.580321  |
| wavelet-LHL | glszm      | SmallAreaEmphasis                    | 0.753086139  |
| wavelet-LHL | glszm      | LowGrayLevelZoneEmphasis             | 0.002657012  |
| wavelet-LHL | glszm      | ZoneEntropy                          | 6.481509695  |
| wavelet-LHL | glszm      | SmallAreaLowGrayLevelEmphasis        | 0.00251844   |
| wavelet-LHL | ngtdm      | Coarseness                           | 0.007630212  |
| wavelet-LHL | ngtdm      | Complexity                           | 7623.333683  |
| wavelet-LHL | ngtdm      | Strength                             | 9.187733853  |
| wavelet-LHL | ngtdm      | Contrast                             | 0.191864709  |
| wavelet-LHL | ngtdm      | Busyness                             | 0.036789769  |
| wavelet-LHH | gldm       | GrayLevelVariance                    | 32.01977012  |
| wavelet-LHH | gldm       | HighGrayLevelEmphasis                | 630.3792766  |
| wavelet-LHH | gldm       | DependenceEntropy                    | 6.615708124  |
| wavelet-LHH | gldm       | DependenceNonUniformity              | 179.2502444  |
| wavelet-LHH | gldm       | GrayLevelNonUniformity               | 80.17302053  |
| wavelet-LHH | gldm       | SmallDependenceEmphasis              | 0.372849318  |
| wavelet-LHH | gldm       | SmallDependenceHighGrayLevelEmphasis | 259.6788409  |
| wavelet-LHH | gldm       | DependenceNonUniformityNormalized    | 0.17522018   |
| wavelet-LHH | gldm       | LargeDependenceEmphasis              | 25.12316716  |
| wavelet-LHH | gldm       | LargeDependenceLowGrayLevelEmphasis  | 0.044977678  |
| wavelet-LHH | gldm       | DependenceVariance                   | 11.65003359  |
| wavelet-LHH | gldm       | LargeDependenceHighGrayLevelEmphasis | 14861.51515  |
| wavelet-LHH | gldm       | SmallDependenceLowGrayLevelEmphasis  | 0.001891498  |
| wavelet-LHH | gldm       | LowGrayLevelEmphasis                 | 0.003122552  |

|             |            |                                  |              |
|-------------|------------|----------------------------------|--------------|
| wavelet-LHH | glcm       | JointAverage                     | 24.46906274  |
| wavelet-LHH | glcm       | SumAverage                       | 48.93812549  |
| wavelet-LHH | glcm       | JointEntropy                     | 7.868099316  |
| wavelet-LHH | glcm       | ClusterShade                     | 168.3796282  |
| wavelet-LHH | glcm       | MaximumProbability               | 0.055269155  |
| wavelet-LHH | glcm       | Idmn                             | 0.976932506  |
| wavelet-LHH | glcm       | JointEnergy                      | 0.011996852  |
| wavelet-LHH | glcm       | Contrast                         | 68.47903035  |
| wavelet-LHH | glcm       | DifferenceEntropy                | 3.944229843  |
| wavelet-LHH | glcm       | InverseVariance                  | 0.240599518  |
| wavelet-LHH | glcm       | DifferenceVariance               | 37.33515894  |
| wavelet-LHH | glcm       | Idn                              | 0.911893164  |
| wavelet-LHH | glcm       | Idm                              | 0.264170851  |
| wavelet-LHH | glcm       | Correlation                      | -0.036270378 |
| wavelet-LHH | glcm       | Autocorrelation                  | 597.5479694  |
| wavelet-LHH | glcm       | SumEntropy                       | 4.746400356  |
| wavelet-LHH | glcm       | SumSquares                       | 33.05144873  |
| wavelet-LHH | glcm       | ClusterProminence                | 24155.55959  |
| wavelet-LHH | glcm       | Imc2                             | 0.871463747  |
| wavelet-LHH | glcm       | Imc1                             | -0.168103672 |
| wavelet-LHH | glcm       | DifferenceAverage                | 5.501205573  |
| wavelet-LHH | glcm       | Id                               | 0.337664381  |
| wavelet-LHH | glcm       | ClusterTendency                  | 63.72676459  |
| wavelet-LHH | firstorder | InterquartileRange               | 110.3721044  |
| wavelet-LHH | firstorder | Skewness                         | 0.319303734  |
| wavelet-LHH | firstorder | Uniformity                       | 0.078370499  |
| wavelet-LHH | firstorder | Median                           | -2.398882033 |
| wavelet-LHH | firstorder | Energy                           | 20390381.6   |
| wavelet-LHH | firstorder | RobustMeanAbsoluteDeviation      | 50.51536229  |
| wavelet-LHH | firstorder | MeanAbsoluteDeviation            | 94.0356063   |
| wavelet-LHH | firstorder | TotalEnergy                      | 550540303.3  |
| wavelet-LHH | firstorder | Maximum                          | 665.3137992  |
| wavelet-LHH | firstorder | RootMeanSquared                  | 141.1805469  |
| wavelet-LHH | firstorder | 90Percentile                     | 155.8191578  |
| wavelet-LHH | firstorder | Minimum                          | -590.7139997 |
| wavelet-LHH | firstorder | Entropy                          | 4.286910777  |
| wavelet-LHH | firstorder | Range                            | 1256.027799  |
| wavelet-LHH | firstorder | Variance                         | 19930.50836  |
| wavelet-LHH | firstorder | 10Percentile                     | -163.3826303 |
| wavelet-LHH | firstorder | Kurtosis                         | 5.834209959  |
| wavelet-LHH | firstorder | Mean                             | -1.199359785 |
| wavelet-LHH | glrlm      | ShortRunLowGrayLevelEmphasis     | 0.003146404  |
| wavelet-LHH | glrlm      | GrayLevelVariance                | 35.06066508  |
| wavelet-LHH | glrlm      | LowGrayLevelRunEmphasis          | 0.003275402  |
| wavelet-LHH | glrlm      | GrayLevelNonUniformityNormalized | 0.06761827   |
| wavelet-LHH | glrlm      | RunVariance                      | 0.165981284  |
| wavelet-LHH | glrlm      | GrayLevelNonUniformity           | 62.11766207  |
| wavelet-LHH | glrlm      | LongRunEmphasis                  | 1.410704333  |
| wavelet-LHH | glrlm      | ShortRunHighGrayLevelEmphasis    | 592.9342591  |
| wavelet-LHH | glrlm      | RunLengthNonUniformity           | 764.3612729  |
| wavelet-LHH | glrlm      | ShortRunEmphasis                 | 0.928887713  |
| wavelet-LHH | glrlm      | LongRunHighGrayLevelEmphasis     | 877.3329712  |
| wavelet-LHH | glrlm      | RunPercentage                    | 0.89728551   |

|             |       |                                      |              |
|-------------|-------|--------------------------------------|--------------|
| wavelet-LHH | grlm  | LongRunLowGrayLevelEmphasis          | 0.004007707  |
| wavelet-LHH | grlm  | RunEntropy                           | 4.835946805  |
| wavelet-LHH | grlm  | HighGrayLevelRunEmphasis             | 634.972447   |
| wavelet-LHH | grlm  | RunLengthNonUniformityNormalized     | 0.831981419  |
| wavelet-LHH | glszm | GrayLevelVariance                    | 59.80632234  |
| wavelet-LHH | glszm | ZoneVariance                         | 81.64002704  |
| wavelet-LHH | glszm | GrayLevelNonUniformityNormalized     | 0.040713899  |
| wavelet-LHH | glszm | SizeZoneNonUniformityNormalized      | 0.497988102  |
| wavelet-LHH | glszm | SizeZoneNonUniformity                | 214.1348837  |
| wavelet-LHH | glszm | GrayLevelNonUniformity               | 17.50697674  |
| wavelet-LHH | glszm | LargeAreaEmphasis                    | 87.3         |
| wavelet-LHH | glszm | SmallAreaHighGrayLevelEmphasis       | 527.1060439  |
| wavelet-LHH | glszm | ZonePercentage                       | 0.420332356  |
| wavelet-LHH | glszm | LargeAreaLowGrayLevelEmphasis        | 0.151025687  |
| wavelet-LHH | glszm | LargeAreaHighGrayLevelEmphasis       | 52119.3907   |
| wavelet-LHH | glszm | HighGrayLevelZoneEmphasis            | 686.0860465  |
| wavelet-LHH | glszm | SmallAreaEmphasis                    | 0.733546422  |
| wavelet-LHH | glszm | LowGrayLevelZoneEmphasis             | 0.004791772  |
| wavelet-LHH | glszm | ZoneEntropy                          | 6.151879121  |
| wavelet-LHH | glszm | SmallAreaLowGrayLevelEmphasis        | 0.004171309  |
| wavelet-LHH | ngtdm | Coarseness                           | 0.008116264  |
| wavelet-LHH | ngtdm | Complexity                           | 2701.295177  |
| wavelet-LHH | ngtdm | Strength                             | 3.954087414  |
| wavelet-LHH | ngtdm | Contrast                             | 0.147295735  |
| wavelet-LHH | ngtdm | Busyness                             | 0.092477832  |
| wavelet-LLH | gldm  | GrayLevelVariance                    | 60.70087881  |
| wavelet-LLH | gldm  | HighGrayLevelEmphasis                | 2458.636364  |
| wavelet-LLH | gldm  | DependenceEntropy                    | 6.816753586  |
| wavelet-LLH | gldm  | DependenceNonUniformity              | 225.4203324  |
| wavelet-LLH | gldm  | GrayLevelNonUniformity               | 56.01857283  |
| wavelet-LLH | gldm  | SmallDependenceEmphasis              | 0.43049267   |
| wavelet-LLH | gldm  | SmallDependenceHighGrayLevelEmphasis | 1055.611037  |
| wavelet-LLH | gldm  | DependenceNonUniformityNormalized    | 0.220352231  |
| wavelet-LLH | gldm  | LargeDependenceEmphasis              | 19.88954057  |
| wavelet-LLH | gldm  | LargeDependenceLowGrayLevelEmphasis  | 0.009266446  |
| wavelet-LLH | gldm  | DependenceVariance                   | 9.877234171  |
| wavelet-LLH | gldm  | LargeDependenceHighGrayLevelEmphasis | 48832.21799  |
| wavelet-LLH | gldm  | SmallDependenceLowGrayLevelEmphasis  | 0.00120472   |
| wavelet-LLH | gldm  | LowGrayLevelEmphasis                 | 0.001458143  |
| wavelet-LLH | glcm  | JointAverage                         | 48.92136593  |
| wavelet-LLH | glcm  | SumAverage                           | 97.84273186  |
| wavelet-LLH | glcm  | JointEntropy                         | 8.489593876  |
| wavelet-LLH | glcm  | ClusterShade                         | -857.8245658 |
| wavelet-LLH | glcm  | MaximumProbability                   | 0.040396313  |
| wavelet-LLH | glcm  | ldmn                                 | 0.982776134  |
| wavelet-LLH | glcm  | JointEnergy                          | 0.006692606  |
| wavelet-LLH | glcm  | Contrast                             | 110.1351383  |
| wavelet-LLH | glcm  | DifferenceEntropy                    | 4.209894971  |
| wavelet-LLH | glcm  | InverseVariance                      | 0.206610429  |
| wavelet-LLH | glcm  | DifferenceVariance                   | 61.39262508  |
| wavelet-LLH | glcm  | ldn                                  | 0.923938965  |
| wavelet-LLH | glcm  | ldm                                  | 0.222708271  |
| wavelet-LLH | glcm  | Correlation                          | 0.04936664   |

|             |            |                                  |              |
|-------------|------------|----------------------------------|--------------|
| wavelet-LLH | glcm       | Autocorrelation                  | 2396.010336  |
| wavelet-LLH | glcm       | SumEntropy                       | 5.248750246  |
| wavelet-LLH | glcm       | SumSquares                       | 57.77462234  |
| wavelet-LLH | glcm       | ClusterProminence                | 102219.7116  |
| wavelet-LLH | glcm       | Imc2                             | 0.911490064  |
| wavelet-LLH | glcm       | Imc1                             | -0.191553978 |
| wavelet-LLH | glcm       | DifferenceAverage                | 6.821211995  |
| wavelet-LLH | glcm       | Id                               | 0.299092216  |
| wavelet-LLH | glcm       | ClusterTendency                  | 120.9633511  |
| wavelet-LLH | firstorder | InterquartileRange               | 171.9158763  |
| wavelet-LLH | firstorder | Skewness                         | -0.982357005 |
| wavelet-LLH | firstorder | Uniformity                       | 0.054759113  |
| wavelet-LLH | firstorder | Median                           | -4.487559702 |
| wavelet-LLH | firstorder | Energy                           | 39057211.13  |
| wavelet-LLH | firstorder | RobustMeanAbsoluteDeviation      | 73.6483708   |
| wavelet-LLH | firstorder | MeanAbsoluteDeviation            | 131.1850408  |
| wavelet-LLH | firstorder | TotalEnergy                      | 1054544701   |
| wavelet-LLH | firstorder | Maximum                          | 626.496577   |
| wavelet-LLH | firstorder | RootMeanSquared                  | 195.3947083  |
| wavelet-LLH | firstorder | 90Percentile                     | 202.9120286  |
| wavelet-LLH | firstorder | Minimum                          | -1207.517145 |
| wavelet-LLH | firstorder | Entropy                          | 4.733251087  |
| wavelet-LLH | firstorder | Range                            | 1834.013722  |
| wavelet-LLH | firstorder | Variance                         | 37993.05654  |
| wavelet-LLH | firstorder | 10Percentile                     | -233.8475752 |
| wavelet-LLH | firstorder | Kurtosis                         | 7.517381884  |
| wavelet-LLH | firstorder | Mean                             | -13.63948223 |
| wavelet-LLH | glrlm      | ShortRunLowGrayLevelEmphasis     | 0.001527982  |
| wavelet-LLH | glrlm      | GrayLevelVariance                | 65.06769263  |
| wavelet-LLH | glrlm      | LowGrayLevelRunEmphasis          | 0.001552579  |
| wavelet-LLH | glrlm      | GrayLevelNonUniformityNormalized | 0.048788427  |
| wavelet-LLH | glrlm      | RunVariance                      | 0.126867613  |
| wavelet-LLH | glrlm      | GrayLevelNonUniformity           | 45.77297131  |
| wavelet-LLH | glrlm      | LongRunEmphasis                  | 1.318269036  |
| wavelet-LLH | glrlm      | ShortRunHighGrayLevelEmphasis    | 2318.013304  |
| wavelet-LLH | glrlm      | RunLengthNonUniformity           | 808.2131127  |
| wavelet-LLH | glrlm      | ShortRunEmphasis                 | 0.942351795  |
| wavelet-LLH | glrlm      | LongRunHighGrayLevelEmphasis     | 3240.335466  |
| wavelet-LLH | glrlm      | RunPercentage                    | 0.916760659  |
| wavelet-LLH | glrlm      | LongRunLowGrayLevelEmphasis      | 0.001686597  |
| wavelet-LLH | glrlm      | RunEntropy                       | 5.179588655  |
| wavelet-LLH | glrlm      | HighGrayLevelRunEmphasis         | 2459.220757  |
| wavelet-LLH | glrlm      | RunLengthNonUniformityNormalized | 0.861235608  |
| wavelet-LLH | glszm      | GrayLevelVariance                | 99.14553737  |
| wavelet-LLH | glszm      | ZoneVariance                     | 37.27944398  |
| wavelet-LLH | glszm      | GrayLevelNonUniformityNormalized | 0.032086792  |
| wavelet-LLH | glszm      | SizeZoneNonUniformityNormalized  | 0.512698211  |
| wavelet-LLH | glszm      | SizeZoneNonUniformity            | 257.374502   |
| wavelet-LLH | glszm      | GrayLevelNonUniformity           | 16.10756972  |
| wavelet-LLH | glszm      | LargeAreaEmphasis                | 41.43227092  |
| wavelet-LLH | glszm      | SmallAreaHighGrayLevelEmphasis   | 1818.958294  |
| wavelet-LLH | glszm      | ZonePercentage                   | 0.490713587  |
| wavelet-LLH | glszm      | LargeAreaLowGrayLevelEmphasis    | 0.019109018  |

|             |            |                                      |              |
|-------------|------------|--------------------------------------|--------------|
| wavelet-LLH | glszm      | LargeAreaHighGrayLevelEmphasis       | 101720.2131  |
| wavelet-LLH | glszm      | HighGrayLevelZoneEmphasis            | 2458.163347  |
| wavelet-LLH | glszm      | SmallAreaEmphasis                    | 0.74345434   |
| wavelet-LLH | glszm      | LowGrayLevelZoneEmphasis             | 0.002517909  |
| wavelet-LLH | glszm      | ZoneEntropy                          | 6.40003027   |
| wavelet-LLH | glszm      | SmallAreaLowGrayLevelEmphasis        | 0.002393793  |
| wavelet-LLH | ngtdm      | Coarseness                           | 0.00765395   |
| wavelet-LLH | ngtdm      | Complexity                           | 7158.319581  |
| wavelet-LLH | ngtdm      | Strength                             | 9.322793181  |
| wavelet-LLH | ngtdm      | Contrast                             | 0.184638834  |
| wavelet-LLH | ngtdm      | Busyness                             | 0.034176932  |
| wavelet-LLL | gldm       | GrayLevelVariance                    | 1101.808051  |
| wavelet-LLL | gldm       | HighGrayLevelEmphasis                | 4299.196481  |
| wavelet-LLL | gldm       | DependenceEntropy                    | 7.702097134  |
| wavelet-LLL | gldm       | DependenceNonUniformity              | 337.8035191  |
| wavelet-LLL | gldm       | GrayLevelNonUniformity               | 17.39882698  |
| wavelet-LLL | gldm       | SmallDependenceEmphasis              | 0.582736172  |
| wavelet-LLL | gldm       | SmallDependenceHighGrayLevelEmphasis | 1912.493156  |
| wavelet-LLL | gldm       | DependenceNonUniformityNormalized    | 0.330208719  |
| wavelet-LLL | gldm       | LargeDependenceEmphasis              | 14.31378299  |
| wavelet-LLL | gldm       | LargeDependenceLowGrayLevelEmphasis  | 0.009605055  |
| wavelet-LLL | gldm       | DependenceVariance                   | 8.308169196  |
| wavelet-LLL | gldm       | LargeDependenceHighGrayLevelEmphasis | 122509.6422  |
| wavelet-LLL | gldm       | SmallDependenceLowGrayLevelEmphasis  | 0.002622776  |
| wavelet-LLL | gldm       | LowGrayLevelEmphasis                 | 0.00346404   |
| wavelet-LLL | glcm       | JointAverage                         | 58.69362049  |
| wavelet-LLL | glcm       | SumAverage                           | 117.387241   |
| wavelet-LLL | glcm       | JointEntropy                         | 9.790072846  |
| wavelet-LLL | glcm       | ClusterShade                         | -3153.278779 |
| wavelet-LLL | glcm       | MaximumProbability                   | 0.033447486  |
| wavelet-LLL | glcm       | Idmn                                 | 0.975731523  |
| wavelet-LLL | glcm       | JointEnergy                          | 0.002613174  |
| wavelet-LLL | glcm       | Contrast                             | 299.8259693  |
| wavelet-LLL | glcm       | DifferenceEntropy                    | 5.017115655  |
| wavelet-LLL | glcm       | InverseVariance                      | 0.124436383  |
| wavelet-LLL | glcm       | DifferenceVariance                   | 140.00457    |
| wavelet-LLL | glcm       | Idn                                  | 0.903417899  |
| wavelet-LLL | glcm       | Idm                                  | 0.142840524  |
| wavelet-LLL | glcm       | Correlation                          | 0.862996474  |
| wavelet-LLL | glcm       | Autocorrelation                      | 4391.051373  |
| wavelet-LLL | glcm       | SumEntropy                           | 7.117376659  |
| wavelet-LLL | glcm       | SumSquares                           | 1095.88149   |
| wavelet-LLL | glcm       | ClusterProminence                    | 24096392.15  |
| wavelet-LLL | glcm       | Imc2                                 | 0.997801393  |
| wavelet-LLL | glcm       | Imc1                                 | -0.434611308 |
| wavelet-LLL | glcm       | DifferenceAverage                    | 12.43484163  |
| wavelet-LLL | glcm       | Id                                   | 0.21154762   |
| wavelet-LLL | glcm       | ClusterTendency                      | 4083.699991  |
| wavelet-LLL | firstorder | InterquartileRange                   | 1723.593848  |
| wavelet-LLL | firstorder | Skewness                             | 0.05892126   |
| wavelet-LLL | firstorder | Uniformity                           | 0.017007651  |
| wavelet-LLL | firstorder | Median                               | -1057.744279 |
| wavelet-LLL | firstorder | Energy                               | 1577632634   |

|             |            |                                  |              |
|-------------|------------|----------------------------------|--------------|
| wavelet-LLL | firstorder | RobustMeanAbsoluteDeviation      | 659.6558845  |
| wavelet-LLL | firstorder | MeanAbsoluteDeviation            | 755.2322846  |
| wavelet-LLL | firstorder | TotalEnergy                      | 42596081111  |
| wavelet-LLL | firstorder | Maximum                          | 312.4331582  |
| wavelet-LLL | firstorder | RootMeanSquared                  | 1241.838511  |
| wavelet-LLL | firstorder | 90Percentile                     | 138.7768801  |
| wavelet-LLL | firstorder | Minimum                          | -2321.866711 |
| wavelet-LLL | firstorder | Entropy                          | 6.328004044  |
| wavelet-LLL | firstorder | Range                            | 2634.299869  |
| wavelet-LLL | firstorder | Variance                         | 689323.9653  |
| wavelet-LLL | firstorder | 10Percentile                     | -1986.206588 |
| wavelet-LLL | firstorder | Kurtosis                         | 1.456257932  |
| wavelet-LLL | firstorder | Mean                             | -923.492784  |
| wavelet-LLL | grlm       | ShortRunLowGrayLevelEmphasis     | 0.003565923  |
| wavelet-LLL | grlm       | GrayLevelVariance                | 1069.397721  |
| wavelet-LLL | grlm       | LowGrayLevelRunEmphasis          | 0.003609541  |
| wavelet-LLL | grlm       | GrayLevelNonUniformityNormalized | 0.014403992  |
| wavelet-LLL | grlm       | RunVariance                      | 0.089084115  |
| wavelet-LLL | grlm       | GrayLevelNonUniformity           | 13.91810272  |
| wavelet-LLL | grlm       | LongRunEmphasis                  | 1.21178443   |
| wavelet-LLL | grlm       | ShortRunHighGrayLevelEmphasis    | 3826.612018  |
| wavelet-LLL | grlm       | RunLengthNonUniformity           | 879.4913407  |
| wavelet-LLL | grlm       | ShortRunEmphasis                 | 0.963422068  |
| wavelet-LLL | grlm       | LongRunHighGrayLevelEmphasis     | 5790.970655  |
| wavelet-LLL | grlm       | RunPercentage                    | 0.944206331  |
| wavelet-LLL | grlm       | LongRunLowGrayLevelEmphasis      | 0.003796607  |
| wavelet-LLL | grlm       | RunEntropy                       | 6.598676862  |
| wavelet-LLL | grlm       | HighGrayLevelRunEmphasis         | 4095.449856  |
| wavelet-LLL | grlm       | RunLengthNonUniformityNormalized | 0.910160043  |
| wavelet-LLL | glszm      | GrayLevelVariance                | 848.096791   |
| wavelet-LLL | glszm      | ZoneVariance                     | 9.330936256  |
| wavelet-LLL | glszm      | GrayLevelNonUniformityNormalized | 0.011615372  |
| wavelet-LLL | glszm      | SizeZoneNonUniformityNormalized  | 0.62904049   |
| wavelet-LLL | glszm      | SizeZoneNonUniformity            | 415.795764   |
| wavelet-LLL | glszm      | GrayLevelNonUniformity           | 7.677760968  |
| wavelet-LLL | glszm      | LargeAreaEmphasis                | 11.72617247  |
| wavelet-LLL | glszm      | SmallAreaHighGrayLevelEmphasis   | 2592.266812  |
| wavelet-LLL | glszm      | ZonePercentage                   | 0.646138807  |
| wavelet-LLL | glszm      | LargeAreaLowGrayLevelEmphasis    | 0.009233901  |
| wavelet-LLL | glszm      | LargeAreaHighGrayLevelEmphasis   | 98842.4115   |
| wavelet-LLL | glszm      | HighGrayLevelZoneEmphasis        | 3305.316188  |
| wavelet-LLL | glszm      | SmallAreaEmphasis                | 0.820060957  |
| wavelet-LLL | glszm      | LowGrayLevelZoneEmphasis         | 0.004370356  |
| wavelet-LLL | glszm      | ZoneEntropy                      | 7.284511082  |
| wavelet-LLL | glszm      | SmallAreaLowGrayLevelEmphasis    | 0.003844721  |
| wavelet-LLL | ngtdm      | Coarseness                       | 0.011156226  |
| wavelet-LLL | ngtdm      | Complexity                       | 29400.39992  |
| wavelet-LLL | ngtdm      | Strength                         | 61.43114054  |
| wavelet-LLL | ngtdm      | Contrast                         | 1.371559054  |
| wavelet-LLL | ngtdm      | Busyness                         | 0.014410052  |
| wavelet-HHL | gldm       | GrayLevelVariance                | 14.79065559  |
| wavelet-HHL | gldm       | HighGrayLevelEmphasis            | 255.9657869  |
| wavelet-HHL | gldm       | DependenceEntropy                | 6.264167139  |



|             |            |                                      |              |
|-------------|------------|--------------------------------------|--------------|
| wavelet-HHL | gldm       | DependenceNonUniformity              | 172.6324536  |
| wavelet-HHL | gldm       | GrayLevelNonUniformity               | 97.41837732  |
| wavelet-HHL | gldm       | SmallDependenceEmphasis              | 0.329851787  |
| wavelet-HHL | gldm       | SmallDependenceHighGrayLevelEmphasis | 87.49020244  |
| wavelet-HHL | gldm       | DependenceNonUniformityNormalized    | 0.168751177  |
| wavelet-HHL | gldm       | LargeDependenceEmphasis              | 22.28445748  |
| wavelet-HHL | gldm       | LargeDependenceLowGrayLevelEmphasis  | 0.099625688  |
| wavelet-HHL | gldm       | DependenceVariance                   | 9.58913322   |
| wavelet-HHL | gldm       | LargeDependenceHighGrayLevelEmphasis | 5296.581623  |
| wavelet-HHL | gldm       | SmallDependenceLowGrayLevelEmphasis  | 0.003781329  |
| wavelet-HHL | gldm       | LowGrayLevelEmphasis                 | 0.006831058  |
| wavelet-HHL | glcm       | JointAverage                         | 15.53332307  |
| wavelet-HHL | glcm       | SumAverage                           | 31.06664613  |
| wavelet-HHL | glcm       | JointEntropy                         | 7.378980899  |
| wavelet-HHL | glcm       | ClusterShade                         | 24.22645219  |
| wavelet-HHL | glcm       | MaximumProbability                   | 0.056130243  |
| wavelet-HHL | glcm       | Idmn                                 | 0.969576102  |
| wavelet-HHL | glcm       | JointEnergy                          | 0.012530364  |
| wavelet-HHL | glcm       | Contrast                             | 31.61368484  |
| wavelet-HHL | glcm       | DifferenceEntropy                    | 3.523677339  |
| wavelet-HHL | glcm       | InverseVariance                      | 0.268044861  |
| wavelet-HHL | glcm       | DifferenceVariance                   | 15.34842596  |
| wavelet-HHL | glcm       | Idn                                  | 0.893010877  |
| wavelet-HHL | glcm       | Idm                                  | 0.276156231  |
| wavelet-HHL | glcm       | Correlation                          | -0.035192134 |
| wavelet-HHL | glcm       | Autocorrelation                      | 240.7631117  |
| wavelet-HHL | glcm       | SumEntropy                           | 4.348275844  |
| wavelet-HHL | glcm       | SumSquares                           | 15.2855836   |
| wavelet-HHL | glcm       | ClusterProminence                    | 4393.307793  |
| wavelet-HHL | glcm       | Imc2                                 | 0.722154356  |
| wavelet-HHL | glcm       | Imc1                                 | -0.09764777  |
| wavelet-HHL | glcm       | DifferenceAverage                    | 3.990603195  |
| wavelet-HHL | glcm       | Id                                   | 0.356427243  |
| wavelet-HHL | glcm       | ClusterTendency                      | 29.52864957  |
| wavelet-HHL | firstorder | InterquartileRange                   | 93.10207299  |
| wavelet-HHL | firstorder | Skewness                             | 0.140346562  |
| wavelet-HHL | firstorder | Uniformity                           | 0.09522813   |
| wavelet-HHL | firstorder | Median                               | -1.652862174 |
| wavelet-HHL | firstorder | Energy                               | 9370350.121  |
| wavelet-HHL | firstorder | RobustMeanAbsoluteDeviation          | 39.71544585  |
| wavelet-HHL | firstorder | MeanAbsoluteDeviation                | 67.73549218  |
| wavelet-HHL | firstorder | TotalEnergy                          | 252999453.3  |
| wavelet-HHL | firstorder | Maximum                              | 367.3012811  |
| wavelet-HHL | firstorder | RootMeanSquared                      | 95.70620428  |
| wavelet-HHL | firstorder | 90Percentile                         | 112.4415428  |
| wavelet-HHL | firstorder | Minimum                              | -358.4103535 |
| wavelet-HHL | firstorder | Entropy                              | 3.866392138  |
| wavelet-HHL | firstorder | Range                                | 725.7116346  |
| wavelet-HHL | firstorder | Variance                             | 9158.385391  |
| wavelet-HHL | firstorder | 10Percentile                         | -108.415256  |
| wavelet-HHL | firstorder | Kurtosis                             | 4.867107173  |
| wavelet-HHL | firstorder | Mean                                 | 1.136726234  |
| wavelet-HHL | glrlm      | ShortRunLowGrayLevelEmphasis         | 0.006794721  |

|             |       |                                      |             |
|-------------|-------|--------------------------------------|-------------|
| wavelet-HHL | glrlm | GrayLevelVariance                    | 16.01509223 |
| wavelet-HHL | glrlm | LowGrayLevelRunEmphasis              | 0.00709847  |
| wavelet-HHL | glrlm | GrayLevelNonUniformityNormalized     | 0.085998207 |
| wavelet-HHL | glrlm | RunVariance                          | 0.156864299 |
| wavelet-HHL | glrlm | GrayLevelNonUniformity               | 79.32257835 |
| wavelet-HHL | glrlm | LongRunEmphasis                      | 1.389449946 |
| wavelet-HHL | glrlm | ShortRunHighGrayLevelEmphasis        | 240.5772876 |
| wavelet-HHL | glrlm | RunLengthNonUniformity               | 771.9595761 |
| wavelet-HHL | glrlm | ShortRunEmphasis                     | 0.931231074 |
| wavelet-HHL | glrlm | LongRunHighGrayLevelEmphasis         | 351.4662703 |
| wavelet-HHL | glrlm | RunPercentage                        | 0.901421159 |
| wavelet-HHL | glrlm | LongRunLowGrayLevelEmphasis          | 0.008806588 |
| wavelet-HHL | glrlm | RunEntropy                           | 4.390554971 |
| wavelet-HHL | glrlm | HighGrayLevelRunEmphasis             | 257.3956726 |
| wavelet-HHL | glrlm | RunLengthNonUniformityNormalized     | 0.836609409 |
| wavelet-HHL | glszm | GrayLevelVariance                    | 29.58192256 |
| wavelet-HHL | glszm | ZoneVariance                         | 125.1411607 |
| wavelet-HHL | glszm | GrayLevelNonUniformityNormalized     | 0.055306128 |
| wavelet-HHL | glszm | SizeZoneNonUniformityNormalized      | 0.462123595 |
| wavelet-HHL | glszm | SizeZoneNonUniformity                | 172.8342246 |
| wavelet-HHL | glszm | GrayLevelNonUniformity               | 20.68449198 |
| wavelet-HHL | glszm | LargeAreaEmphasis                    | 132.6229947 |
| wavelet-HHL | glszm | SmallAreaHighGrayLevelEmphasis       | 189.0001196 |
| wavelet-HHL | glszm | ZonePercentage                       | 0.365591398 |
| wavelet-HHL | glszm | LargeAreaLowGrayLevelEmphasis        | 0.567727492 |
| wavelet-HHL | glszm | LargeAreaHighGrayLevelEmphasis       | 31773.04545 |
| wavelet-HHL | glszm | HighGrayLevelZoneEmphasis            | 266.6925134 |
| wavelet-HHL | glszm | SmallAreaEmphasis                    | 0.706294326 |
| wavelet-HHL | glszm | LowGrayLevelZoneEmphasis             | 0.010895809 |
| wavelet-HHL | glszm | ZoneEntropy                          | 5.800846377 |
| wavelet-HHL | glszm | SmallAreaLowGrayLevelEmphasis        | 0.009404383 |
| wavelet-HHL | ngtdm | Coarseness                           | 0.007385189 |
| wavelet-HHL | ngtdm | Complexity                           | 996.7522329 |
| wavelet-HHL | ngtdm | Strength                             | 1.845853318 |
| wavelet-HHL | ngtdm | Contrast                             | 0.096918971 |
| wavelet-HHL | ngtdm | Busyness                             | 0.22482347  |
| wavelet-HLH | gldm  | GrayLevelVariance                    | 13.39898655 |
| wavelet-HLH | gldm  | HighGrayLevelEmphasis                | 195.0029326 |
| wavelet-HLH | gldm  | DependenceEntropy                    | 6.287038024 |
| wavelet-HLH | gldm  | DependenceNonUniformity              | 149.6158358 |
| wavelet-HLH | gldm  | GrayLevelNonUniformity               | 105.4281525 |
| wavelet-HLH | gldm  | SmallDependenceEmphasis              | 0.290405557 |
| wavelet-HLH | gldm  | SmallDependenceHighGrayLevelEmphasis | 66.59194921 |
| wavelet-HLH | gldm  | DependenceNonUniformityNormalized    | 0.146252039 |
| wavelet-HLH | gldm  | LargeDependenceEmphasis              | 25.47507331 |
| wavelet-HLH | gldm  | LargeDependenceLowGrayLevelEmphasis  | 0.153187718 |
| wavelet-HLH | gldm  | DependenceVariance                   | 10.23990162 |
| wavelet-HLH | gldm  | LargeDependenceHighGrayLevelEmphasis | 4547.962854 |
| wavelet-HLH | gldm  | SmallDependenceLowGrayLevelEmphasis  | 0.004606933 |
| wavelet-HLH | gldm  | LowGrayLevelEmphasis                 | 0.00931612  |
| wavelet-HLH | glcm  | JointAverage                         | 13.49976018 |
| wavelet-HLH | glcm  | SumAverage                           | 26.99952036 |
| wavelet-HLH | glcm  | JointEntropy                         | 7.162862125 |

|             |            |                                  |              |
|-------------|------------|----------------------------------|--------------|
| wavelet-HLH | glcm       | ClusterShade                     | 56.20254137  |
| wavelet-HLH | glcm       | MaximumProbability               | 0.054888218  |
| wavelet-HLH | glcm       | Idmn                             | 0.973663658  |
| wavelet-HLH | glcm       | JointEnergy                      | 0.014323301  |
| wavelet-HLH | glcm       | Contrast                         | 27.06523248  |
| wavelet-HLH | glcm       | DifferenceEntropy                | 3.411832776  |
| wavelet-HLH | glcm       | InverseVariance                  | 0.28142151   |
| wavelet-HLH | glcm       | DifferenceVariance               | 13.45837855  |
| wavelet-HLH | glcm       | Idn                              | 0.900913552  |
| wavelet-HLH | glcm       | Idm                              | 0.298883172  |
| wavelet-HLH | glcm       | Correlation                      | -0.018665278 |
| wavelet-HLH | glcm       | Autocorrelation                  | 181.9745493  |
| wavelet-HLH | glcm       | SumEntropy                       | 4.246875465  |
| wavelet-HLH | glcm       | SumSquares                       | 13.2634446   |
| wavelet-HLH | glcm       | ClusterProminence                | 3667.921867  |
| wavelet-HLH | glcm       | Imc2                             | 0.699021076  |
| wavelet-HLH | glcm       | Imc1                             | -0.092061517 |
| wavelet-HLH | glcm       | DifferenceAverage                | 3.649984778  |
| wavelet-HLH | glcm       | Id                               | 0.3770237    |
| wavelet-HLH | glcm       | ClusterTendency                  | 25.98854593  |
| wavelet-HLH | firstorder | InterquartileRange               | 78.93356973  |
| wavelet-HLH | firstorder | Skewness                         | 0.578548672  |
| wavelet-HLH | firstorder | Uniformity                       | 0.103057823  |
| wavelet-HLH | firstorder | Median                           | -3.08030045  |
| wavelet-HLH | firstorder | Energy                           | 8479993.681  |
| wavelet-HLH | firstorder | RobustMeanAbsoluteDeviation      | 35.6794174   |
| wavelet-HLH | firstorder | MeanAbsoluteDeviation            | 62.9980535   |
| wavelet-HLH | firstorder | TotalEnergy                      | 228959829.4  |
| wavelet-HLH | firstorder | Maximum                          | 405.6592789  |
| wavelet-HLH | firstorder | RootMeanSquared                  | 91.04580653  |
| wavelet-HLH | firstorder | 90Percentile                     | 105.1824176  |
| wavelet-HLH | firstorder | Minimum                          | -309.671635  |
| wavelet-HLH | firstorder | Entropy                          | 3.755148905  |
| wavelet-HLH | firstorder | Range                            | 715.3309139  |
| wavelet-HLH | firstorder | Variance                         | 8289.307456  |
| wavelet-HLH | firstorder | 10Percentile                     | -101.7393243 |
| wavelet-HLH | firstorder | Kurtosis                         | 5.496139449  |
| wavelet-HLH | firstorder | Mean                             | -0.177285361 |
| wavelet-HLH | gllm       | ShortRunLowGrayLevelEmphasis     | 0.009239774  |
| wavelet-HLH | gllm       | GrayLevelVariance                | 14.69714058  |
| wavelet-HLH | gllm       | LowGrayLevelRunEmphasis          | 0.009724734  |
| wavelet-HLH | gllm       | GrayLevelNonUniformityNormalized | 0.092955826  |
| wavelet-HLH | gllm       | RunVariance                      | 0.179904894  |
| wavelet-HLH | gllm       | GrayLevelNonUniformity           | 84.49094775  |
| wavelet-HLH | gllm       | LongRunEmphasis                  | 1.450032549  |
| wavelet-HLH | gllm       | ShortRunHighGrayLevelEmphasis    | 182.6575321  |
| wavelet-HLH | gllm       | RunLengthNonUniformity           | 741.2262611  |
| wavelet-HLH | gllm       | ShortRunEmphasis                 | 0.921031452  |
| wavelet-HLH | gllm       | LongRunHighGrayLevelEmphasis     | 277.5683534  |
| wavelet-HLH | gllm       | RunPercentage                    | 0.888337469  |
| wavelet-HLH | gllm       | LongRunLowGrayLevelEmphasis      | 0.012445091  |
| wavelet-HLH | gllm       | RunEntropy                       | 4.341705841  |
| wavelet-HLH | gllm       | HighGrayLevelRunEmphasis         | 196.916077   |

|             |       |                                  |             |
|-------------|-------|----------------------------------|-------------|
| wavelet-HLH | g1rlm | RunLengthNonUniformityNormalized | 0.814846239 |
| wavelet-HLH | glszm | GrayLevelVariance                | 30.63530455 |
| wavelet-HLH | glszm | ZoneVariance                     | 112.8694857 |
| wavelet-HLH | glszm | GrayLevelNonUniformityNormalized | 0.054110734 |
| wavelet-HLH | glszm | SizeZoneNonUniformityNormalized  | 0.432396227 |
| wavelet-HLH | glszm | SizeZoneNonUniformity            | 142.2583587 |
| wavelet-HLH | glszm | GrayLevelNonUniformity           | 17.80243161 |
| wavelet-HLH | glszm | LargeAreaEmphasis                | 122.5379939 |
| wavelet-HLH | glszm | SmallAreaHighGrayLevelEmphasis   | 167.3450392 |
| wavelet-HLH | glszm | ZonePercentage                   | 0.321603128 |
| wavelet-HLH | glszm | LargeAreaLowGrayLevelEmphasis    | 0.713379968 |
| wavelet-HLH | glszm | LargeAreaHighGrayLevelEmphasis   | 21863.02736 |
| wavelet-HLH | glszm | HighGrayLevelZoneEmphasis        | 225.106383  |
| wavelet-HLH | glszm | SmallAreaEmphasis                | 0.683285545 |
| wavelet-HLH | glszm | LowGrayLevelZoneEmphasis         | 0.015406208 |
| wavelet-HLH | glszm | ZoneEntropy                      | 5.838969628 |
| wavelet-HLH | glszm | SmallAreaLowGrayLevelEmphasis    | 0.012746806 |
| wavelet-HLH | ngtdm | Coarseness                       | 0.007407187 |
| wavelet-HLH | ngtdm | Complexity                       | 847.0048288 |
| wavelet-HLH | ngtdm | Strength                         | 1.785198032 |
| wavelet-HLH | ngtdm | Contrast                         | 0.09436848  |
| wavelet-HLH | ngtdm | Busyness                         | 0.280915101 |

| Image type | Feature Class | Feature Name                         |                                                                                                                                                                                                                                                                                                                                                                                                                   |
|------------|---------------|--------------------------------------|-------------------------------------------------------------------------------------------------------------------------------------------------------------------------------------------------------------------------------------------------------------------------------------------------------------------------------------------------------------------------------------------------------------------|
| general    | info          | BoundingBox                          | 6: RTSTRUCT: C99-DNU_segment_ITV - CTV<br>(1, 1, 2, 7, 6, 9)                                                                                                                                                                                                                                                                                                                                                      |
| general    | info          | EnabledImageTypes                    | {u'Original': {}, u'Wavelet': {}}                                                                                                                                                                                                                                                                                                                                                                                 |
|            |               |                                      | {'distances': [1], 'additionalInfo': True, 'force2D': False, 'interpolator': 'sitkBSpline', 'resampledPixelSpacing': [3.0], 'label': 1, 'normalizeScale': 1, 'normalize': False, 'force2Ddimension': 0, 'removeOutliers': None, 'minimumROISize': None, u'binWidth': 25.0, 'minimumROIDimensions': 1, u'correctMask': True, 'preCrop': False, u'symmetricalGLCM': True, 'resegmentRange': None, 'padDistance': 5} |
| general    | info          | GeneralSettings                      |                                                                                                                                                                                                                                                                                                                                                                                                                   |
| general    | info          | ImageHash                            | 6c3164f8d2c116d6d9b5d5dbfb83e4d0e6c7d03e<br>(0.9765624999999998, 0.9765624999999998, 1.9999999999999999)                                                                                                                                                                                                                                                                                                          |
| general    | info          | ImageSpacing                         |                                                                                                                                                                                                                                                                                                                                                                                                                   |
| general    | info          | MaskHash                             | f04cd43b4b519ab5b4fb612c68120ecdbd70aeeb                                                                                                                                                                                                                                                                                                                                                                          |
| general    | info          | NumpyVersion                         | 1.13.1                                                                                                                                                                                                                                                                                                                                                                                                            |
| general    | info          | PyWaveletVersion                     | 0.5.2                                                                                                                                                                                                                                                                                                                                                                                                             |
| general    | info          | SimpleITKVersion                     | 1.1.0                                                                                                                                                                                                                                                                                                                                                                                                             |
| general    | info          | Version                              | 1.3.0.post102+g1b0eb74                                                                                                                                                                                                                                                                                                                                                                                            |
| general    | info          | VolumeNum                            | 1                                                                                                                                                                                                                                                                                                                                                                                                                 |
| general    | info          | VoxelNum                             | 163                                                                                                                                                                                                                                                                                                                                                                                                               |
| original   | shape         | Maximum3DDiameter                    | 25.8069758                                                                                                                                                                                                                                                                                                                                                                                                        |
| original   | shape         | Maximum2DDiameterSlice               | 19.20937271                                                                                                                                                                                                                                                                                                                                                                                                       |
| original   | shape         | Sphericity                           | 0.875618488                                                                                                                                                                                                                                                                                                                                                                                                       |
| original   | shape         | MinorAxis                            | 17.16453789                                                                                                                                                                                                                                                                                                                                                                                                       |
| original   | shape         | Elongation                           | 0.705829702                                                                                                                                                                                                                                                                                                                                                                                                       |
| original   | shape         | SurfaceVolumeRatio                   | 0.33701721                                                                                                                                                                                                                                                                                                                                                                                                        |
| original   | shape         | Volume                               | 4401                                                                                                                                                                                                                                                                                                                                                                                                              |
| original   | shape         | MajorAxis                            | 24.31824255                                                                                                                                                                                                                                                                                                                                                                                                       |
| original   | shape         | SurfaceArea                          | 1483.212741                                                                                                                                                                                                                                                                                                                                                                                                       |
| original   | shape         | Flatness                             | 0.615758375                                                                                                                                                                                                                                                                                                                                                                                                       |
| original   | shape         | LeastAxis                            | 14.97416152                                                                                                                                                                                                                                                                                                                                                                                                       |
| original   | shape         | Maximum2DDiameterColumn              | 25.63201124                                                                                                                                                                                                                                                                                                                                                                                                       |
| original   | shape         | Maximum2DDiameterRow                 | 24.18677324                                                                                                                                                                                                                                                                                                                                                                                                       |
| original   | gldm          | GrayLevelVariance                    | 84.46693515                                                                                                                                                                                                                                                                                                                                                                                                       |
| original   | gldm          | HighGrayLevelEmphasis                | 676.4785276                                                                                                                                                                                                                                                                                                                                                                                                       |
| original   | gldm          | DependenceEntropy                    | 5.812411342                                                                                                                                                                                                                                                                                                                                                                                                       |
| original   | gldm          | DependenceNonUniformity              | 39.12269939                                                                                                                                                                                                                                                                                                                                                                                                       |
| original   | gldm          | GrayLevelNonUniformity               | 13.3803681                                                                                                                                                                                                                                                                                                                                                                                                        |
| original   | gldm          | SmallDependenceEmphasis              | 0.498073151                                                                                                                                                                                                                                                                                                                                                                                                       |
| original   | gldm          | SmallDependenceHighGrayLevelEmphasis | 206.095673                                                                                                                                                                                                                                                                                                                                                                                                        |
| original   | gldm          | DependenceNonUniformityNormalized    | 0.240016561                                                                                                                                                                                                                                                                                                                                                                                                       |
| original   | gldm          | LargeDependenceEmphasis              | 30.39877301                                                                                                                                                                                                                                                                                                                                                                                                       |
| original   | gldm          | LargeDependenceLowGrayLevelEmphasis  | 0.041117365                                                                                                                                                                                                                                                                                                                                                                                                       |
| original   | gldm          | DependenceVariance                   | 15.03044902                                                                                                                                                                                                                                                                                                                                                                                                       |
| original   | gldm          | LargeDependenceHighGrayLevelEmphasis | 31326.71166                                                                                                                                                                                                                                                                                                                                                                                                       |
| original   | gldm          | SmallDependenceLowGrayLevelEmphasis  | 0.009906045                                                                                                                                                                                                                                                                                                                                                                                                       |
| original   | gldm          | LowGrayLevelEmphasis                 | 0.010803276                                                                                                                                                                                                                                                                                                                                                                                                       |
| original   | glcm          | JointAverage                         | 26.54481182                                                                                                                                                                                                                                                                                                                                                                                                       |
| original   | glcm          | SumAverage                           | 53.08962364                                                                                                                                                                                                                                                                                                                                                                                                       |
| original   | glcm          | JointEntropy                         | 6.281136473                                                                                                                                                                                                                                                                                                                                                                                                       |

|          |            |                                  |              |
|----------|------------|----------------------------------|--------------|
| original | glcm       | ClusterShade                     | -2324.691384 |
| original | glcm       | MaximumProbability               | 0.085904571  |
| original | glcm       | Idmn                             | 0.932063424  |
| original | glcm       | JointEnergy                      | 0.025976324  |
| original | glcm       | Contrast                         | 102.1168842  |
| original | glcm       | DifferenceEntropy                | 4.013113951  |
| original | glcm       | InverseVariance                  | 0.224574395  |
| original | glcm       | DifferenceVariance               | 54.04435862  |
| original | glcm       | Idn                              | 0.855732268  |
| original | glcm       | Idm                              | 0.290945403  |
| original | glcm       | Correlation                      | 0.263800838  |
| original | glcm       | Autocorrelation                  | 723.0869037  |
| original | glcm       | SumEntropy                       | 4.725664282  |
| original | glcm       | SumSquares                       | 69.4748735   |
| original | glcm       | ClusterProminence                | 97644.57317  |
| original | glcm       | Imc2                             | 0.97230446   |
| original | glcm       | Imc1                             | -0.378106588 |
| original | glcm       | DifferenceAverage                | 6.882737944  |
| original | glcm       | Id                               | 0.350196524  |
| original | glcm       | ClusterTendency                  | 175.7826098  |
| original | firstorder | InterquartileRange               | 394.5        |
| original | firstorder | Skewness                         | -0.750075507 |
| original | firstorder | Uniformity                       | 0.082088148  |
| original | firstorder | Median                           | -78          |
| original | firstorder | Energy                           | 13775524     |
| original | firstorder | RobustMeanAbsoluteDeviation      | 163.1153846  |
| original | firstorder | MeanAbsoluteDeviation            | 200.7412398  |
| original | firstorder | TotalEnergy                      | 371939148    |
| original | firstorder | Maximum                          | 61           |
| original | firstorder | RootMeanSquared                  | 290.7101945  |
| original | firstorder | 90Percentile                     | 34.8         |
| original | firstorder | Minimum                          | -757         |
| original | firstorder | Entropy                          | 4.287713801  |
| original | firstorder | Range                            | 818          |
| original | firstorder | Variance                         | 52473.61346  |
| original | firstorder | 10Percentile                     | -534         |
| original | firstorder | Kurtosis                         | 2.190679027  |
| original | firstorder | Mean                             | -178.993865  |
| original | glrlm      | ShortRunLowGrayLevelEmphasis     | 0.011932555  |
| original | glrlm      | GrayLevelVariance                | 85.67026609  |
| original | glrlm      | LowGrayLevelRunEmphasis          | 0.01203132   |
| original | glrlm      | GrayLevelNonUniformityNormalized | 0.063866754  |
| original | glrlm      | RunVariance                      | 0.169564702  |
| original | glrlm      | GrayLevelNonUniformity           | 9.258292208  |
| original | glrlm      | LongRunEmphasis                  | 1.442577562  |
| original | glrlm      | ShortRunHighGrayLevelEmphasis    | 550.4027947  |
| original | glrlm      | RunLengthNonUniformity           | 117.9241356  |
| original | glrlm      | ShortRunEmphasis                 | 0.919789241  |
| original | glrlm      | LongRunHighGrayLevelEmphasis     | 1086.76536   |
| original | glrlm      | RunPercentage                    | 0.887682869  |
| original | glrlm      | LongRunLowGrayLevelEmphasis      | 0.012542438  |
| original | glrlm      | RunEntropy                       | 4.813230747  |
| original | glrlm      | HighGrayLevelRunEmphasis         | 632.1140478  |
| original | glrlm      | RunLengthNonUniformityNormalized | 0.813696691  |
| original | glszm      | GrayLevelVariance                | 70.40482955  |

|             |       |                                      |              |
|-------------|-------|--------------------------------------|--------------|
| original    | glszm | ZoneVariance                         | 17.48954029  |
| original    | glszm | GrayLevelNonUniformityNormalized     | 0.042613636  |
| original    | glszm | SizeZoneNonUniformityNormalized      | 0.698863636  |
| original    | glszm | SizeZoneNonUniformity                | 61.5         |
| original    | glszm | GrayLevelNonUniformity               | 3.75         |
| original    | glszm | LargeAreaEmphasis                    | 20.92045455  |
| original    | glszm | SmallAreaHighGrayLevelEmphasis       | 334.9122365  |
| original    | glszm | ZonePercentage                       | 0.539877301  |
| original    | glszm | LargeAreaLowGrayLevelEmphasis        | 0.039937578  |
| original    | glszm | LargeAreaHighGrayLevelEmphasis       | 21148.77273  |
| original    | glszm | HighGrayLevelZoneEmphasis            | 436.1704545  |
| original    | glszm | SmallAreaEmphasis                    | 0.85806058   |
| original    | glszm | LowGrayLevelZoneEmphasis             | 0.018568389  |
| original    | glszm | ZoneEntropy                          | 5.078638721  |
| original    | glszm | SmallAreaLowGrayLevelEmphasis        | 0.018128547  |
| original    | ngtdm | Coarseness                           | 0.017782237  |
| original    | ngtdm | Complexity                           | 2553.035231  |
| original    | ngtdm | Strength                             | 13.71476949  |
| original    | ngtdm | Contrast                             | 1.073150005  |
| original    | ngtdm | Busyness                             | 0.058657026  |
| wavelet-HHH | gldm  | GrayLevelVariance                    | 11.40223569  |
| wavelet-HHH | gldm  | HighGrayLevelEmphasis                | 168.4969325  |
| wavelet-HHH | gldm  | DependenceEntropy                    | 5.402576435  |
| wavelet-HHH | gldm  | DependenceNonUniformity              | 33.29447853  |
| wavelet-HHH | gldm  | GrayLevelNonUniformity               | 15.82208589  |
| wavelet-HHH | gldm  | SmallDependenceEmphasis              | 0.364673602  |
| wavelet-HHH | gldm  | SmallDependenceHighGrayLevelEmphasis | 62.4398148   |
| wavelet-HHH | gldm  | DependenceNonUniformityNormalized    | 0.204260604  |
| wavelet-HHH | gldm  | LargeDependenceEmphasis              | 9.45398773   |
| wavelet-HHH | gldm  | LargeDependenceLowGrayLevelEmphasis  | 0.071344685  |
| wavelet-HHH | gldm  | DependenceVariance                   | 2.134141292  |
| wavelet-HHH | gldm  | LargeDependenceHighGrayLevelEmphasis | 1531.895706  |
| wavelet-HHH | gldm  | SmallDependenceLowGrayLevelEmphasis  | 0.010362504  |
| wavelet-HHH | gldm  | LowGrayLevelEmphasis                 | 0.014696445  |
| wavelet-HHH | glcm  | JointAverage                         | 12.50229061  |
| wavelet-HHH | glcm  | SumAverage                           | 25.00458122  |
| wavelet-HHH | glcm  | JointEntropy                         | 6.464142215  |
| wavelet-HHH | glcm  | ClusterShade                         | -9.415427979 |
| wavelet-HHH | glcm  | MaximumProbability                   | 0.037934071  |
| wavelet-HHH | glcm  | Idmn                                 | 0.963517307  |
| wavelet-HHH | glcm  | JointEnergy                          | 0.014397883  |
| wavelet-HHH | glcm  | Contrast                             | 22.10767383  |
| wavelet-HHH | glcm  | DifferenceEntropy                    | 3.219944667  |
| wavelet-HHH | glcm  | InverseVariance                      | 0.262600702  |
| wavelet-HHH | glcm  | DifferenceVariance                   | 9.096113387  |
| wavelet-HHH | glcm  | Idn                                  | 0.876197036  |
| wavelet-HHH | glcm  | Idm                                  | 0.255190253  |
| wavelet-HHH | glcm  | Correlation                          | -0.030975019 |
| wavelet-HHH | glcm  | Autocorrelation                      | 155.9464184  |
| wavelet-HHH | glcm  | SumEntropy                           | 4.007499568  |
| wavelet-HHH | glcm  | SumSquares                           | 10.68927126  |
| wavelet-HHH | glcm  | ClusterProminence                    | 1643.572626  |
| wavelet-HHH | glcm  | Imc2                                 | 0.904650242  |
| wavelet-HHH | glcm  | Imc1                                 | -0.234959543 |
| wavelet-HHH | glcm  | DifferenceAverage                    | 3.563148129  |

|             |            |                                  |              |
|-------------|------------|----------------------------------|--------------|
| wavelet-HHH | glcm       | Id                               | 0.344751895  |
| wavelet-HHH | glcm       | ClusterTendency                  | 20.64941122  |
| wavelet-HHH | firstorder | InterquartileRange               | 100.1543498  |
| wavelet-HHH | firstorder | Skewness                         | -0.134969666 |
| wavelet-HHH | firstorder | Uniformity                       | 0.097068012  |
| wavelet-HHH | firstorder | Median                           | 3.048396471  |
| wavelet-HHH | firstorder | Energy                           | 1171892.922  |
| wavelet-HHH | firstorder | RobustMeanAbsoluteDeviation      | 40.74681623  |
| wavelet-HHH | firstorder | MeanAbsoluteDeviation            | 64.04573444  |
| wavelet-HHH | firstorder | TotalEnergy                      | 31641108.91  |
| wavelet-HHH | firstorder | Maximum                          | 256.3056582  |
| wavelet-HHH | firstorder | RootMeanSquared                  | 84.79107931  |
| wavelet-HHH | firstorder | 90Percentile                     | 103.1834887  |
| wavelet-HHH | firstorder | Minimum                          | -276.7388818 |
| wavelet-HHH | firstorder | Entropy                          | 3.687127425  |
| wavelet-HHH | firstorder | Range                            | 533.04454    |
| wavelet-HHH | firstorder | Variance                         | 7188.502242  |
| wavelet-HHH | firstorder | 10Percentile                     | -103.2938852 |
| wavelet-HHH | firstorder | Kurtosis                         | 3.805874268  |
| wavelet-HHH | firstorder | Mean                             | 1.012368213  |
| wavelet-HHH | glrlm      | ShortRunLowGrayLevelEmphasis     | 0.014919161  |
| wavelet-HHH | glrlm      | GrayLevelVariance                | 11.94793859  |
| wavelet-HHH | glrlm      | LowGrayLevelRunEmphasis          | 0.015263071  |
| wavelet-HHH | glrlm      | GrayLevelNonUniformityNormalized | 0.093445511  |
| wavelet-HHH | glrlm      | RunVariance                      | 0.073348234  |
| wavelet-HHH | glrlm      | GrayLevelNonUniformity           | 14.234186    |
| wavelet-HHH | glrlm      | LongRunEmphasis                  | 1.221831376  |
| wavelet-HHH | glrlm      | ShortRunHighGrayLevelEmphasis    | 160.57773    |
| wavelet-HHH | glrlm      | RunLengthNonUniformity           | 133.6388081  |
| wavelet-HHH | glrlm      | ShortRunEmphasis                 | 0.949158322  |
| wavelet-HHH | glrlm      | LongRunHighGrayLevelEmphasis     | 205.1764974  |
| wavelet-HHH | glrlm      | RunPercentage                    | 0.93440302   |
| wavelet-HHH | glrlm      | LongRunLowGrayLevelEmphasis      | 0.016752344  |
| wavelet-HHH | glrlm      | RunEntropy                       | 4.017838689  |
| wavelet-HHH | glrlm      | HighGrayLevelRunEmphasis         | 168.8615263  |
| wavelet-HHH | glrlm      | RunLengthNonUniformityNormalized | 0.875959913  |
| wavelet-HHH | glszm      | GrayLevelVariance                | 22.20828402  |
| wavelet-HHH | glszm      | ZoneVariance                     | 19.26532544  |
| wavelet-HHH | glszm      | GrayLevelNonUniformityNormalized | 0.076449704  |
| wavelet-HHH | glszm      | SizeZoneNonUniformityNormalized  | 0.484970414  |
| wavelet-HHH | glszm      | SizeZoneNonUniformity            | 31.52307692  |
| wavelet-HHH | glszm      | GrayLevelNonUniformity           | 4.969230769  |
| wavelet-HHH | glszm      | LargeAreaEmphasis                | 25.55384615  |
| wavelet-HHH | glszm      | SmallAreaHighGrayLevelEmphasis   | 123.6345796  |
| wavelet-HHH | glszm      | ZonePercentage                   | 0.398773006  |
| wavelet-HHH | glszm      | LargeAreaLowGrayLevelEmphasis    | 0.183070022  |
| wavelet-HHH | glszm      | LargeAreaHighGrayLevelEmphasis   | 4192.630769  |
| wavelet-HHH | glszm      | HighGrayLevelZoneEmphasis        | 171.8        |
| wavelet-HHH | glszm      | SmallAreaEmphasis                | 0.722271734  |
| wavelet-HHH | glszm      | LowGrayLevelZoneEmphasis         | 0.026751871  |
| wavelet-HHH | glszm      | ZoneEntropy                      | 4.911001183  |
| wavelet-HHH | glszm      | SmallAreaLowGrayLevelEmphasis    | 0.024673315  |
| wavelet-HHH | ngtdm      | Coarseness                       | 0.037892031  |
| wavelet-HHH | ngtdm      | Complexity                       | 424.6341348  |
| wavelet-HHH | ngtdm      | Strength                         | 4.489199774  |



|             |            |                                      |              |
|-------------|------------|--------------------------------------|--------------|
| wavelet-HHH | ngtdm      | Contrast                             | 0.162264936  |
| wavelet-HHH | ngtdm      | Busyness                             | 0.098531679  |
| wavelet-HLL | gldm       | GrayLevelVariance                    | 93.46448869  |
| wavelet-HLL | gldm       | HighGrayLevelEmphasis                | 400.2515337  |
| wavelet-HLL | gldm       | DependenceEntropy                    | 5.926876164  |
| wavelet-HLL | gldm       | DependenceNonUniformity              | 46.05521472  |
| wavelet-HLL | gldm       | GrayLevelNonUniformity               | 7.576687117  |
| wavelet-HLL | gldm       | SmallDependenceEmphasis              | 0.437532379  |
| wavelet-HLL | gldm       | SmallDependenceHighGrayLevelEmphasis | 222.2614179  |
| wavelet-HLL | gldm       | DependenceNonUniformityNormalized    | 0.28254733   |
| wavelet-HLL | gldm       | LargeDependenceEmphasis              | 5.650306748  |
| wavelet-HLL | gldm       | LargeDependenceLowGrayLevelEmphasis  | 0.04618653   |
| wavelet-HLL | gldm       | DependenceVariance                   | 1.065979149  |
| wavelet-HLL | gldm       | LargeDependenceHighGrayLevelEmphasis | 1624.300613  |
| wavelet-HLL | gldm       | SmallDependenceLowGrayLevelEmphasis  | 0.009264094  |
| wavelet-HLL | gldm       | LowGrayLevelEmphasis                 | 0.012929583  |
| wavelet-HLL | glcm       | JointAverage                         | 16.81532092  |
| wavelet-HLL | glcm       | SumAverage                           | 33.63064184  |
| wavelet-HLL | glcm       | JointEntropy                         | 7.202161622  |
| wavelet-HLL | glcm       | ClusterShade                         | 6046.60206   |
| wavelet-HLL | glcm       | MaximumProbability                   | 0.023150764  |
| wavelet-HLL | glcm       | Idmn                                 | 0.976586607  |
| wavelet-HLL | glcm       | JointEnergy                          | 0.007791673  |
| wavelet-HLL | glcm       | Contrast                             | 76.26767638  |
| wavelet-HLL | glcm       | DifferenceEntropy                    | 3.91033144   |
| wavelet-HLL | glcm       | InverseVariance                      | 0.163477489  |
| wavelet-HLL | glcm       | DifferenceVariance                   | 32.97593103  |
| wavelet-HLL | glcm       | Idn                                  | 0.901913368  |
| wavelet-HLL | glcm       | Idm                                  | 0.165329407  |
| wavelet-HLL | glcm       | Correlation                          | 0.526937607  |
| wavelet-HLL | glcm       | Autocorrelation                      | 326.2614212  |
| wavelet-HLL | glcm       | SumEntropy                           | 5.114555075  |
| wavelet-HLL | glcm       | SumSquares                           | 81.61798189  |
| wavelet-HLL | glcm       | ClusterProminence                    | 329294.5884  |
| wavelet-HLL | glcm       | Imc2                                 | 0.992070702  |
| wavelet-HLL | glcm       | Imc1                                 | -0.44927185  |
| wavelet-HLL | glcm       | DifferenceAverage                    | 6.382900578  |
| wavelet-HLL | glcm       | Id                                   | 0.255204811  |
| wavelet-HLL | glcm       | ClusterTendency                      | 250.2042512  |
| wavelet-HLL | firstorder | InterquartileRange                   | 279.5713501  |
| wavelet-HLL | firstorder | Skewness                             | 1.327333611  |
| wavelet-HLL | firstorder | Uniformity                           | 0.046482743  |
| wavelet-HLL | firstorder | Median                               | -91.24840351 |
| wavelet-HLL | firstorder | Energy                               | 9649715.32   |
| wavelet-HLL | firstorder | RobustMeanAbsoluteDeviation          | 119.4913583  |
| wavelet-HLL | firstorder | MeanAbsoluteDeviation                | 186.625855   |
| wavelet-HLL | firstorder | TotalEnergy                          | 260542313.6  |
| wavelet-HLL | firstorder | Maximum                              | 894.0469289  |
| wavelet-HLL | firstorder | RootMeanSquared                      | 243.3119551  |
| wavelet-HLL | firstorder | 90Percentile                         | 320.184014   |
| wavelet-HLL | firstorder | Minimum                              | -441.155694  |
| wavelet-HLL | firstorder | Entropy                              | 4.744608494  |
| wavelet-HLL | firstorder | Range                                | 1335.202623  |
| wavelet-HLL | firstorder | Variance                             | 58601.45027  |
| wavelet-HLL | firstorder | 10Percentile                         | -259.6659076 |

|             |            |                                      |              |
|-------------|------------|--------------------------------------|--------------|
| wavelet-HLL | firstorder | Kurtosis                             | 4.699654789  |
| wavelet-HLL | firstorder | Mean                                 | -24.47973072 |
| wavelet-HLL | glrlm      | ShortRunLowGrayLevelEmphasis         | 0.012982253  |
| wavelet-HLL | glrlm      | GrayLevelVariance                    | 95.06408748  |
| wavelet-HLL | glrlm      | LowGrayLevelRunEmphasis              | 0.013207949  |
| wavelet-HLL | glrlm      | GrayLevelNonUniformityNormalized     | 0.045769058  |
| wavelet-HLL | glrlm      | RunVariance                          | 0.049687563  |
| wavelet-HLL | glrlm      | GrayLevelNonUniformity               | 7.132618691  |
| wavelet-HLL | glrlm      | LongRunEmphasis                      | 1.144969381  |
| wavelet-HLL | glrlm      | ShortRunHighGrayLevelEmphasis        | 396.3551501  |
| wavelet-HLL | glrlm      | RunLengthNonUniformity               | 143.1341953  |
| wavelet-HLL | glrlm      | ShortRunEmphasis                     | 0.967066905  |
| wavelet-HLL | glrlm      | LongRunHighGrayLevelEmphasis         | 446.4427598  |
| wavelet-HLL | glrlm      | RunPercentage                        | 0.956111373  |
| wavelet-HLL | glrlm      | LongRunLowGrayLevelEmphasis          | 0.014218908  |
| wavelet-HLL | glrlm      | RunEntropy                           | 4.920601649  |
| wavelet-HLL | glrlm      | HighGrayLevelRunEmphasis             | 405.7153911  |
| wavelet-HLL | glrlm      | RunLengthNonUniformityNormalized     | 0.91767957   |
| wavelet-HLL | glszm      | GrayLevelVariance                    | 119.8858502  |
| wavelet-HLL | glszm      | ZoneVariance                         | 2.685163166  |
| wavelet-HLL | glszm      | GrayLevelNonUniformityNormalized     | 0.038182058  |
| wavelet-HLL | glszm      | SizeZoneNonUniformityNormalized      | 0.416039107  |
| wavelet-HLL | glszm      | SizeZoneNonUniformity                | 36.1954023   |
| wavelet-HLL | glszm      | GrayLevelNonUniformity               | 3.32183908   |
| wavelet-HLL | glszm      | LargeAreaEmphasis                    | 6.195402299  |
| wavelet-HLL | glszm      | SmallAreaHighGrayLevelEmphasis       | 362.9246527  |
| wavelet-HLL | glszm      | ZonePercentage                       | 0.533742331  |
| wavelet-HLL | glszm      | LargeAreaLowGrayLevelEmphasis        | 0.052866447  |
| wavelet-HLL | glszm      | LargeAreaHighGrayLevelEmphasis       | 1858.310345  |
| wavelet-HLL | glszm      | HighGrayLevelZoneEmphasis            | 484.8275862  |
| wavelet-HLL | glszm      | SmallAreaEmphasis                    | 0.665716262  |
| wavelet-HLL | glszm      | LowGrayLevelZoneEmphasis             | 0.018434     |
| wavelet-HLL | glszm      | ZoneEntropy                          | 5.700079237  |
| wavelet-HLL | glszm      | SmallAreaLowGrayLevelEmphasis        | 0.016387989  |
| wavelet-HLL | ngtdm      | Coarseness                           | 0.040806867  |
| wavelet-HLL | ngtdm      | Complexity                           | 2798.954603  |
| wavelet-HLL | ngtdm      | Strength                             | 35.3551848   |
| wavelet-HLL | ngtdm      | Contrast                             | 0.539468925  |
| wavelet-HLL | ngtdm      | Busyness                             | 0.05221062   |
| wavelet-LHL | gldm       | GrayLevelVariance                    | 146.6979563  |
| wavelet-LHL | gldm       | HighGrayLevelEmphasis                | 1149.993865  |
| wavelet-LHL | gldm       | DependenceEntropy                    | 6.060675988  |
| wavelet-LHL | gldm       | DependenceNonUniformity              | 70.69325153  |
| wavelet-LHL | gldm       | GrayLevelNonUniformity               | 4.766871166  |
| wavelet-LHL | gldm       | SmallDependenceEmphasis              | 0.667476142  |
| wavelet-LHL | gldm       | SmallDependenceHighGrayLevelEmphasis | 722.6686264  |
| wavelet-LHL | gldm       | DependenceNonUniformityNormalized    | 0.43370093   |
| wavelet-LHL | gldm       | LargeDependenceEmphasis              | 3.331288344  |
| wavelet-LHL | gldm       | LargeDependenceLowGrayLevelEmphasis  | 0.010443203  |
| wavelet-LHL | gldm       | DependenceVariance                   | 0.767360458  |
| wavelet-LHL | gldm       | LargeDependenceHighGrayLevelEmphasis | 3919.797546  |
| wavelet-LHL | gldm       | SmallDependenceLowGrayLevelEmphasis  | 0.007554346  |
| wavelet-LHL | gldm       | LowGrayLevelEmphasis                 | 0.007919567  |
| wavelet-LHL | glcm       | JointAverage                         | 30.65368183  |
| wavelet-LHL | glcm       | SumAverage                           | 61.30736366  |

|             |            |                                  |              |
|-------------|------------|----------------------------------|--------------|
| wavelet-LHL | glcm       | JointEntropy                     | 7.578903981  |
| wavelet-LHL | glcm       | ClusterShade                     | 2629.29375   |
| wavelet-LHL | glcm       | MaximumProbability               | 0.013927499  |
| wavelet-LHL | glcm       | Idmn                             | 0.944921427  |
| wavelet-LHL | glcm       | JointEnergy                      | 0.005545796  |
| wavelet-LHL | glcm       | Contrast                         | 242.0552121  |
| wavelet-LHL | glcm       | DifferenceEntropy                | 4.525933385  |
| wavelet-LHL | glcm       | InverseVariance                  | 0.100138062  |
| wavelet-LHL | glcm       | DifferenceVariance               | 101.5345533  |
| wavelet-LHL | glcm       | Idn                              | 0.854182787  |
| wavelet-LHL | glcm       | Idm                              | 0.097169327  |
| wavelet-LHL | glcm       | Correlation                      | 0.112341657  |
| wavelet-LHL | glcm       | Autocorrelation                  | 957.9436006  |
| wavelet-LHL | glcm       | SumEntropy                       | 5.452249832  |
| wavelet-LHL | glcm       | SumSquares                       | 139.0793604  |
| wavelet-LHL | glcm       | ClusterProminence                | 325478.7974  |
| wavelet-LHL | glcm       | Imc2                             | 0.99854147   |
| wavelet-LHL | glcm       | Imc1                             | -0.557163996 |
| wavelet-LHL | glcm       | DifferenceAverage                | 11.40143455  |
| wavelet-LHL | glcm       | Id                               | 0.176581125  |
| wavelet-LHL | glcm       | ClusterTendency                  | 314.2622296  |
| wavelet-LHL | firstorder | InterquartileRange               | 414.7636633  |
| wavelet-LHL | firstorder | Skewness                         | 0.201430588  |
| wavelet-LHL | firstorder | Uniformity                       | 0.029244608  |
| wavelet-LHL | firstorder | Median                           | -91.44114772 |
| wavelet-LHL | firstorder | Energy                           | 15250603.5   |
| wavelet-LHL | firstorder | RobustMeanAbsoluteDeviation      | 166.8302059  |
| wavelet-LHL | firstorder | MeanAbsoluteDeviation            | 242.5358131  |
| wavelet-LHL | firstorder | TotalEnergy                      | 411766294.5  |
| wavelet-LHL | firstorder | Maximum                          | 646.0575134  |
| wavelet-LHL | firstorder | RootMeanSquared                  | 305.879036   |
| wavelet-LHL | firstorder | 90Percentile                     | 357.0716245  |
| wavelet-LHL | firstorder | Minimum                          | -806.7930903 |
| wavelet-LHL | firstorder | Entropy                          | 5.320323885  |
| wavelet-LHL | firstorder | Range                            | 1452.850604  |
| wavelet-LHL | firstorder | Variance                         | 91560.53082  |
| wavelet-LHL | firstorder | 10Percentile                     | -443.7532241 |
| wavelet-LHL | firstorder | Kurtosis                         | 2.584386733  |
| wavelet-LHL | firstorder | Mean                             | -44.73761101 |
| wavelet-LHL | glrlm      | ShortRunLowGrayLevelEmphasis     | 0.008063818  |
| wavelet-LHL | glrlm      | GrayLevelVariance                | 147.9994376  |
| wavelet-LHL | glrlm      | LowGrayLevelRunEmphasis          | 0.008082948  |
| wavelet-LHL | glrlm      | GrayLevelNonUniformityNormalized | 0.028782642  |
| wavelet-LHL | glrlm      | RunVariance                      | 0.024095374  |
| wavelet-LHL | glrlm      | GrayLevelNonUniformity           | 4.583771889  |
| wavelet-LHL | glrlm      | LongRunEmphasis                  | 1.072742651  |
| wavelet-LHL | glrlm      | ShortRunHighGrayLevelEmphasis    | 1126.318611  |
| wavelet-LHL | glrlm      | RunLengthNonUniformity           | 152.0759768  |
| wavelet-LHL | glrlm      | ShortRunEmphasis                 | 0.982372965  |
| wavelet-LHL | glrlm      | LongRunHighGrayLevelEmphasis     | 1237.118863  |
| wavelet-LHL | glrlm      | RunPercentage                    | 0.976875885  |
| wavelet-LHL | glrlm      | LongRunLowGrayLevelEmphasis      | 0.008162128  |
| wavelet-LHL | glrlm      | RunEntropy                       | 5.410667004  |
| wavelet-LHL | glrlm      | HighGrayLevelRunEmphasis         | 1148.102816  |
| wavelet-LHL | glrlm      | RunLengthNonUniformityNormalized | 0.954648397  |

|             |       |                                      |              |
|-------------|-------|--------------------------------------|--------------|
| wavelet-LHL | glszm | GrayLevelVariance                    | 162.8405164  |
| wavelet-LHL | glszm | ZoneVariance                         | 0.920838741  |
| wavelet-LHL | glszm | GrayLevelNonUniformityNormalized     | 0.025203197  |
| wavelet-LHL | glszm | SizeZoneNonUniformityNormalized      | 0.644423195  |
| wavelet-LHL | glszm | SizeZoneNonUniformity                | 77.97520661  |
| wavelet-LHL | glszm | GrayLevelNonUniformity               | 3.049586777  |
| wavelet-LHL | glszm | LargeAreaEmphasis                    | 2.73553719   |
| wavelet-LHL | glszm | SmallAreaHighGrayLevelEmphasis       | 885.543567   |
| wavelet-LHL | glszm | ZonePercentage                       | 0.742331288  |
| wavelet-LHL | glszm | LargeAreaLowGrayLevelEmphasis        | 0.012250064  |
| wavelet-LHL | glszm | LargeAreaHighGrayLevelEmphasis       | 3037.842975  |
| wavelet-LHL | glszm | HighGrayLevelZoneEmphasis            | 1120.768595  |
| wavelet-LHL | glszm | SmallAreaEmphasis                    | 0.829748495  |
| wavelet-LHL | glszm | LowGrayLevelZoneEmphasis             | 0.010282973  |
| wavelet-LHL | glszm | ZoneEntropy                          | 5.859540382  |
| wavelet-LHL | glszm | SmallAreaLowGrayLevelEmphasis        | 0.010097942  |
| wavelet-LHL | ngtdm | Coarseness                           | 0.033937857  |
| wavelet-LHL | ngtdm | Complexity                           | 7533.626488  |
| wavelet-LHL | ngtdm | Strength                             | 26.50280277  |
| wavelet-LHL | ngtdm | Contrast                             | 1.079143572  |
| wavelet-LHL | ngtdm | Busyness                             | 0.025473879  |
| wavelet-LHH | gldm  | GrayLevelVariance                    | 21.94045692  |
| wavelet-LHH | gldm  | HighGrayLevelEmphasis                | 273.8343558  |
| wavelet-LHH | gldm  | DependenceEntropy                    | 5.797549075  |
| wavelet-LHH | gldm  | DependenceNonUniformity              | 39.62576687  |
| wavelet-LHH | gldm  | GrayLevelNonUniformity               | 11.55214724  |
| wavelet-LHH | gldm  | SmallDependenceEmphasis              | 0.450806284  |
| wavelet-LHH | gldm  | SmallDependenceHighGrayLevelEmphasis | 143.3880061  |
| wavelet-LHH | gldm  | DependenceNonUniformityNormalized    | 0.243102864  |
| wavelet-LHH | gldm  | LargeDependenceEmphasis              | 8.17791411   |
| wavelet-LHH | gldm  | LargeDependenceLowGrayLevelEmphasis  | 0.046759869  |
| wavelet-LHH | gldm  | DependenceVariance                   | 2.364786029  |
| wavelet-LHH | gldm  | LargeDependenceHighGrayLevelEmphasis | 1898.582822  |
| wavelet-LHH | gldm  | SmallDependenceLowGrayLevelEmphasis  | 0.008585543  |
| wavelet-LHH | gldm  | LowGrayLevelEmphasis                 | 0.011504406  |
| wavelet-LHH | glcm  | JointAverage                         | 15.92538405  |
| wavelet-LHH | glcm  | SumAverage                           | 31.8507681   |
| wavelet-LHH | glcm  | JointEntropy                         | 6.936802757  |
| wavelet-LHH | glcm  | ClusterShade                         | 69.74100461  |
| wavelet-LHH | glcm  | MaximumProbability                   | 0.026927265  |
| wavelet-LHH | glcm  | Idmn                                 | 0.96227298   |
| wavelet-LHH | glcm  | JointEnergy                          | 0.009796301  |
| wavelet-LHH | glcm  | Contrast                             | 42.28619745  |
| wavelet-LHH | glcm  | DifferenceEntropy                    | 3.61759716   |
| wavelet-LHH | glcm  | InverseVariance                      | 0.201596778  |
| wavelet-LHH | glcm  | DifferenceVariance                   | 17.58133447  |
| wavelet-LHH | glcm  | Idn                                  | 0.874440028  |
| wavelet-LHH | glcm  | Idm                                  | 0.202696008  |
| wavelet-LHH | glcm  | Correlation                          | 0.000973774  |
| wavelet-LHH | glcm  | Autocorrelation                      | 253.5790954  |
| wavelet-LHH | glcm  | SumEntropy                           | 4.384329636  |
| wavelet-LHH | glcm  | SumSquares                           | 21.08641662  |
| wavelet-LHH | glcm  | ClusterProminence                    | 7399.554463  |
| wavelet-LHH | glcm  | Imc2                                 | 0.955418381  |
| wavelet-LHH | glcm  | Imc1                                 | -0.299547388 |

|             |            |                                  |              |
|-------------|------------|----------------------------------|--------------|
| wavelet-LHH | glcm       | DifferenceAverage                | 4.894089792  |
| wavelet-LHH | glcm       | Id                               | 0.293423324  |
| wavelet-LHH | glcm       | ClusterTendency                  | 42.05946902  |
| wavelet-LHH | firstorder | InterquartileRange               | 140.4491495  |
| wavelet-LHH | firstorder | Skewness                         | 0.287589088  |
| wavelet-LHH | firstorder | Uniformity                       | 0.070872069  |
| wavelet-LHH | firstorder | Median                           | -5.176770334 |
| wavelet-LHH | firstorder | Energy                           | 2249831.209  |
| wavelet-LHH | firstorder | RobustMeanAbsoluteDeviation      | 55.77574864  |
| wavelet-LHH | firstorder | MeanAbsoluteDeviation            | 88.28933299  |
| wavelet-LHH | firstorder | TotalEnergy                      | 60745442.65  |
| wavelet-LHH | firstorder | Maximum                          | 375.3409395  |
| wavelet-LHH | firstorder | RootMeanSquared                  | 117.4846605  |
| wavelet-LHH | firstorder | 90Percentile                     | 151.7598404  |
| wavelet-LHH | firstorder | Minimum                          | -371.1280752 |
| wavelet-LHH | firstorder | Entropy                          | 4.104336329  |
| wavelet-LHH | firstorder | Range                            | 746.4690147  |
| wavelet-LHH | firstorder | Variance                         | 13732.80145  |
| wavelet-LHH | firstorder | 10Percentile                     | -117.7914956 |
| wavelet-LHH | firstorder | Kurtosis                         | 3.965412062  |
| wavelet-LHH | firstorder | Mean                             | 8.357272544  |
| wavelet-LHH | glrlm      | ShortRunLowGrayLevelEmphasis     | 0.011673067  |
| wavelet-LHH | glrlm      | GrayLevelVariance                | 22.7834823   |
| wavelet-LHH | glrlm      | LowGrayLevelRunEmphasis          | 0.011880339  |
| wavelet-LHH | glrlm      | GrayLevelNonUniformityNormalized | 0.068947481  |
| wavelet-LHH | glrlm      | RunVariance                      | 0.062027932  |
| wavelet-LHH | glrlm      | GrayLevelNonUniformity           | 10.62979956  |
| wavelet-LHH | glrlm      | LongRunEmphasis                  | 1.182324457  |
| wavelet-LHH | glrlm      | ShortRunHighGrayLevelEmphasis    | 266.7300907  |
| wavelet-LHH | glrlm      | RunLengthNonUniformity           | 138.700328   |
| wavelet-LHH | glrlm      | ShortRunEmphasis                 | 0.958913172  |
| wavelet-LHH | glrlm      | LongRunHighGrayLevelEmphasis     | 318.5441071  |
| wavelet-LHH | glrlm      | RunPercentage                    | 0.945729118  |
| wavelet-LHH | glrlm      | LongRunLowGrayLevelEmphasis      | 0.012795942  |
| wavelet-LHH | glrlm      | RunEntropy                       | 4.361768686  |
| wavelet-LHH | glrlm      | HighGrayLevelRunEmphasis         | 276.2657482  |
| wavelet-LHH | glrlm      | RunLengthNonUniformityNormalized | 0.898661579  |
| wavelet-LHH | glszm      | GrayLevelVariance                | 34.03344671  |
| wavelet-LHH | glszm      | ZoneVariance                     | 5.436933107  |
| wavelet-LHH | glszm      | GrayLevelNonUniformityNormalized | 0.055555556  |
| wavelet-LHH | glszm      | SizeZoneNonUniformityNormalized  | 0.501133787  |
| wavelet-LHH | glszm      | SizeZoneNonUniformity            | 42.0952381   |
| wavelet-LHH | glszm      | GrayLevelNonUniformity           | 4.666666667  |
| wavelet-LHH | glszm      | LargeAreaEmphasis                | 9.202380952  |
| wavelet-LHH | glszm      | SmallAreaHighGrayLevelEmphasis   | 244.448928   |
| wavelet-LHH | glszm      | ZonePercentage                   | 0.515337423  |
| wavelet-LHH | glszm      | LargeAreaLowGrayLevelEmphasis    | 0.056459619  |
| wavelet-LHH | glszm      | LargeAreaHighGrayLevelEmphasis   | 2204.202381  |
| wavelet-LHH | glszm      | HighGrayLevelZoneEmphasis        | 307.8571429  |
| wavelet-LHH | glszm      | SmallAreaEmphasis                | 0.733552589  |
| wavelet-LHH | glszm      | LowGrayLevelZoneEmphasis         | 0.017506961  |
| wavelet-LHH | glszm      | ZoneEntropy                      | 5.370004292  |
| wavelet-LHH | glszm      | SmallAreaLowGrayLevelEmphasis    | 0.015880981  |
| wavelet-LHH | ngtdm      | Coarseness                       | 0.036159955  |
| wavelet-LHH | ngtdm      | Complexity                       | 875.2374192  |

|             |            |                                      |              |
|-------------|------------|--------------------------------------|--------------|
| wavelet-LHH | ngtdm      | Strength                             | 7.087963152  |
| wavelet-LHH | ngtdm      | Contrast                             | 0.264076042  |
| wavelet-LHH | ngtdm      | Busyness                             | 0.07517927   |
| wavelet-LLH | gldm       | GrayLevelVariance                    | 62.01272159  |
| wavelet-LLH | gldm       | HighGrayLevelEmphasis                | 444.7791411  |
| wavelet-LLH | gldm       | DependenceEntropy                    | 5.840571406  |
| wavelet-LLH | gldm       | DependenceNonUniformity              | 55.01226994  |
| wavelet-LLH | gldm       | GrayLevelNonUniformity               | 7.073619632  |
| wavelet-LLH | gldm       | SmallDependenceEmphasis              | 0.506574642  |
| wavelet-LLH | gldm       | SmallDependenceHighGrayLevelEmphasis | 238.7092604  |
| wavelet-LLH | gldm       | DependenceNonUniformityNormalized    | 0.337498589  |
| wavelet-LLH | gldm       | LargeDependenceEmphasis              | 4.938650307  |
| wavelet-LLH | gldm       | LargeDependenceLowGrayLevelEmphasis  | 0.037310377  |
| wavelet-LLH | gldm       | DependenceVariance                   | 1.108585193  |
| wavelet-LLH | gldm       | LargeDependenceHighGrayLevelEmphasis | 1937.576687  |
| wavelet-LLH | gldm       | SmallDependenceLowGrayLevelEmphasis  | 0.010482233  |
| wavelet-LLH | gldm       | LowGrayLevelEmphasis                 | 0.012762578  |
| wavelet-LLH | glcm       | JointAverage                         | 18.90794373  |
| wavelet-LLH | glcm       | SumAverage                           | 37.81588746  |
| wavelet-LLH | glcm       | JointEntropy                         | 7.272949605  |
| wavelet-LLH | glcm       | ClusterShade                         | 442.8981187  |
| wavelet-LLH | glcm       | MaximumProbability                   | 0.020607359  |
| wavelet-LLH | glcm       | Idmn                                 | 0.948830537  |
| wavelet-LLH | glcm       | JointEnergy                          | 0.007334343  |
| wavelet-LLH | glcm       | Contrast                             | 105.4463879  |
| wavelet-LLH | glcm       | DifferenceEntropy                    | 4.072766009  |
| wavelet-LLH | glcm       | InverseVariance                      | 0.14444602   |
| wavelet-LLH | glcm       | DifferenceVariance                   | 40.50868552  |
| wavelet-LLH | glcm       | Idn                                  | 0.856661762  |
| wavelet-LLH | glcm       | Idm                                  | 0.141971836  |
| wavelet-LLH | glcm       | Correlation                          | 0.098685823  |
| wavelet-LLH | glcm       | Autocorrelation                      | 364.1437699  |
| wavelet-LLH | glcm       | SumEntropy                           | 5.024952632  |
| wavelet-LLH | glcm       | SumSquares                           | 59.29504958  |
| wavelet-LLH | glcm       | ClusterProminence                    | 62366.93601  |
| wavelet-LLH | glcm       | Imc2                                 | 0.993022115  |
| wavelet-LLH | glcm       | Imc1                                 | -0.457570832 |
| wavelet-LLH | glcm       | DifferenceAverage                    | 7.676533383  |
| wavelet-LLH | glcm       | Id                                   | 0.227805793  |
| wavelet-LLH | glcm       | ClusterTendency                      | 131.7338105  |
| wavelet-LLH | firstorder | InterquartileRange                   | 242.6465664  |
| wavelet-LLH | firstorder | Skewness                             | 0.163376202  |
| wavelet-LLH | firstorder | Uniformity                           | 0.043396439  |
| wavelet-LLH | firstorder | Median                               | -82.63865995 |
| wavelet-LLH | firstorder | Energy                               | 7157738.886  |
| wavelet-LLH | firstorder | RobustMeanAbsoluteDeviation          | 101.1382671  |
| wavelet-LLH | firstorder | MeanAbsoluteDeviation                | 152.7425654  |
| wavelet-LLH | firstorder | TotalEnergy                          | 193258949.9  |
| wavelet-LLH | firstorder | Maximum                              | 451.6061079  |
| wavelet-LLH | firstorder | RootMeanSquared                      | 209.5531162  |
| wavelet-LLH | firstorder | 90Percentile                         | 179.6739578  |
| wavelet-LLH | firstorder | Minimum                              | -530.9893924 |
| wavelet-LLH | firstorder | Entropy                              | 4.819465397  |
| wavelet-LLH | firstorder | Range                                | 982.5955003  |
| wavelet-LLH | firstorder | Variance                             | 38455.19968  |

|             |            |                                      |              |
|-------------|------------|--------------------------------------|--------------|
| wavelet-LLH | firstorder | 10Percentile                         | -331.9764234 |
| wavelet-LLH | firstorder | Kurtosis                             | 2.956428927  |
| wavelet-LLH | firstorder | Mean                                 | -73.87360027 |
| wavelet-LLH | glrlm      | ShortRunLowGrayLevelEmphasis         | 0.012888283  |
| wavelet-LLH | glrlm      | GrayLevelVariance                    | 62.89307078  |
| wavelet-LLH | glrlm      | LowGrayLevelRunEmphasis              | 0.013041845  |
| wavelet-LLH | glrlm      | GrayLevelNonUniformityNormalized     | 0.042685733  |
| wavelet-LLH | glrlm      | RunVariance                          | 0.040758095  |
| wavelet-LLH | glrlm      | GrayLevelNonUniformity               | 6.704014335  |
| wavelet-LLH | glrlm      | LongRunEmphasis                      | 1.121454295  |
| wavelet-LLH | glrlm      | ShortRunHighGrayLevelEmphasis        | 435.6121343  |
| wavelet-LLH | glrlm      | RunLengthNonUniformity               | 146.2221256  |
| wavelet-LLH | glrlm      | ShortRunEmphasis                     | 0.971930925  |
| wavelet-LLH | glrlm      | LongRunHighGrayLevelEmphasis         | 494.1483146  |
| wavelet-LLH | glrlm      | RunPercentage                        | 0.963190184  |
| wavelet-LLH | glrlm      | LongRunLowGrayLevelEmphasis          | 0.013738473  |
| wavelet-LLH | glrlm      | RunEntropy                           | 4.969135107  |
| wavelet-LLH | glrlm      | HighGrayLevelRunEmphasis             | 446.7861288  |
| wavelet-LLH | glrlm      | RunLengthNonUniformityNormalized     | 0.929917806  |
| wavelet-LLH | glszm      | GrayLevelVariance                    | 78.21997843  |
| wavelet-LLH | glszm      | ZoneVariance                         | 1.444956377  |
| wavelet-LLH | glszm      | GrayLevelNonUniformityNormalized     | 0.036172924  |
| wavelet-LLH | glszm      | SizeZoneNonUniformityNormalized      | 0.473581021  |
| wavelet-LLH | glszm      | SizeZoneNonUniformity                | 47.83168317  |
| wavelet-LLH | glszm      | GrayLevelNonUniformity               | 3.653465347  |
| wavelet-LLH | glszm      | LargeAreaEmphasis                    | 4.04950495   |
| wavelet-LLH | glszm      | SmallAreaHighGrayLevelEmphasis       | 335.3686304  |
| wavelet-LLH | glszm      | ZonePercentage                       | 0.619631902  |
| wavelet-LLH | glszm      | LargeAreaLowGrayLevelEmphasis        | 0.032652619  |
| wavelet-LLH | glszm      | LargeAreaHighGrayLevelEmphasis       | 1655.455446  |
| wavelet-LLH | glszm      | HighGrayLevelZoneEmphasis            | 465.2574257  |
| wavelet-LLH | glszm      | SmallAreaEmphasis                    | 0.701421655  |
| wavelet-LLH | glszm      | LowGrayLevelZoneEmphasis             | 0.017699707  |
| wavelet-LLH | glszm      | ZoneEntropy                          | 5.69139227   |
| wavelet-LLH | glszm      | SmallAreaLowGrayLevelEmphasis        | 0.016465601  |
| wavelet-LLH | ngtdm      | Coarseness                           | 0.033986624  |
| wavelet-LLH | ngtdm      | Complexity                           | 3225.676588  |
| wavelet-LLH | ngtdm      | Strength                             | 16.53150581  |
| wavelet-LLH | ngtdm      | Contrast                             | 0.471502697  |
| wavelet-LLH | ngtdm      | Busyness                             | 0.040857395  |
| wavelet-LLL | gldm       | GrayLevelVariance                    | 565.0147917  |
| wavelet-LLL | gldm       | HighGrayLevelEmphasis                | 3446.662577  |
| wavelet-LLL | gldm       | DependenceEntropy                    | 6.360638277  |
| wavelet-LLL | gldm       | DependenceNonUniformity              | 93.30674847  |
| wavelet-LLL | gldm       | GrayLevelNonUniformity               | 3.085889571  |
| wavelet-LLL | gldm       | SmallDependenceEmphasis              | 0.78502045   |
| wavelet-LLL | gldm       | SmallDependenceHighGrayLevelEmphasis | 2299.473926  |
| wavelet-LLL | gldm       | DependenceNonUniformityNormalized    | 0.57243404   |
| wavelet-LLL | gldm       | LargeDependenceEmphasis              | 2.325153374  |
| wavelet-LLL | gldm       | LargeDependenceLowGrayLevelEmphasis  | 0.007514057  |
| wavelet-LLL | gldm       | DependenceVariance                   | 0.4534608    |
| wavelet-LLL | gldm       | LargeDependenceHighGrayLevelEmphasis | 11176.42945  |
| wavelet-LLL | gldm       | SmallDependenceLowGrayLevelEmphasis  | 0.007080194  |
| wavelet-LLL | gldm       | LowGrayLevelEmphasis                 | 0.007152758  |
| wavelet-LLL | glcm       | JointAverage                         | 60.51928117  |

|             |            |                                  |              |
|-------------|------------|----------------------------------|--------------|
| wavelet-LLL | glcm       | SumAverage                       | 121.0385623  |
| wavelet-LLL | glcm       | JointEntropy                     | 7.681510236  |
| wavelet-LLL | glcm       | ClusterShade                     | -21186.97969 |
| wavelet-LLL | glcm       | MaximumProbability               | 0.010248799  |
| wavelet-LLL | glcm       | Idmn                             | 0.937449277  |
| wavelet-LLL | glcm       | JointEnergy                      | 0.00500599   |
| wavelet-LLL | glcm       | Contrast                         | 647.0567667  |
| wavelet-LLL | glcm       | DifferenceEntropy                | 5.231024381  |
| wavelet-LLL | glcm       | InverseVariance                  | 0.062060572  |
| wavelet-LLL | glcm       | DifferenceVariance               | 238.9366216  |
| wavelet-LLL | glcm       | Idn                              | 0.837661811  |
| wavelet-LLL | glcm       | Idm                              | 0.060305078  |
| wavelet-LLL | glcm       | Correlation                      | 0.378738664  |
| wavelet-LLL | glcm       | Autocorrelation                  | 3858.685286  |
| wavelet-LLL | glcm       | SumEntropy                       | 6.071382151  |
| wavelet-LLL | glcm       | SumSquares                       | 519.1813083  |
| wavelet-LLL | glcm       | ClusterProminence                | 4574258.36   |
| wavelet-LLL | glcm       | Imc2                             | 0.999810804  |
| wavelet-LLL | glcm       | Imc1                             | -0.679284225 |
| wavelet-LLL | glcm       | DifferenceAverage                | 20.0207269   |
| wavelet-LLL | glcm       | Id                               | 0.120028763  |
| wavelet-LLL | glcm       | ClusterTendency                  | 1429.668466  |
| wavelet-LLL | firstorder | InterquartileRange               | 1082.021918  |
| wavelet-LLL | firstorder | Skewness                         | -0.130222376 |
| wavelet-LLL | firstorder | Uniformity                       | 0.018931838  |
| wavelet-LLL | firstorder | Median                           | -569.483217  |
| wavelet-LLL | firstorder | Energy                           | 120673777.4  |
| wavelet-LLL | firstorder | RobustMeanAbsoluteDeviation      | 411.316031   |
| wavelet-LLL | firstorder | MeanAbsoluteDeviation            | 515.1407002  |
| wavelet-LLL | firstorder | TotalEnergy                      | 3258191990   |
| wavelet-LLL | firstorder | Maximum                          | 358.0090541  |
| wavelet-LLL | firstorder | RootMeanSquared                  | 860.424269   |
| wavelet-LLL | firstorder | 90Percentile                     | 177.3281308  |
| wavelet-LLL | firstorder | Minimum                          | -1945.884172 |
| wavelet-LLL | firstorder | Entropy                          | 5.938135078  |
| wavelet-LLL | firstorder | Range                            | 2303.893226  |
| wavelet-LLL | firstorder | Variance                         | 354097.4291  |
| wavelet-LLL | firstorder | 10Percentile                     | -1398.025336 |
| wavelet-LLL | firstorder | Kurtosis                         | 1.838924566  |
| wavelet-LLL | firstorder | Mean                             | -621.4760604 |
| wavelet-LLL | glrlm      | ShortRunLowGrayLevelEmphasis     | 0.007248609  |
| wavelet-LLL | glrlm      | GrayLevelVariance                | 563.0242101  |
| wavelet-LLL | glrlm      | LowGrayLevelRunEmphasis          | 0.007251822  |
| wavelet-LLL | glrlm      | GrayLevelNonUniformityNormalized | 0.018797096  |
| wavelet-LLL | glrlm      | RunVariance                      | 0.014150162  |
| wavelet-LLL | glrlm      | GrayLevelNonUniformity           | 3.020676348  |
| wavelet-LLL | glrlm      | LongRunEmphasis                  | 1.043345789  |
| wavelet-LLL | glrlm      | ShortRunHighGrayLevelEmphasis    | 3353.680725  |
| wavelet-LLL | glrlm      | RunLengthNonUniformity           | 156.1717809  |
| wavelet-LLL | glrlm      | ShortRunEmphasis                 | 0.989163553  |
| wavelet-LLL | glrlm      | LongRunHighGrayLevelEmphasis     | 3659.640628  |
| wavelet-LLL | glrlm      | RunPercentage                    | 0.985842378  |
| wavelet-LLL | glrlm      | LongRunLowGrayLevelEmphasis      | 0.007264673  |
| wavelet-LLL | glrlm      | RunEntropy                       | 5.984049176  |
| wavelet-LLL | glrlm      | HighGrayLevelRunEmphasis         | 3414.872706  |



|             |       |                                      |              |
|-------------|-------|--------------------------------------|--------------|
| wavelet-LLL | glrlm | RunLengthNonUniformityNormalized     | 0.971699677  |
| wavelet-LLL | glszm | GrayLevelVariance                    | 526.8161224  |
| wavelet-LLL | glszm | ZoneVariance                         | 0.364997837  |
| wavelet-LLL | glszm | GrayLevelNonUniformityNormalized     | 0.018057958  |
| wavelet-LLL | glszm | SizeZoneNonUniformityNormalized      | 0.772491349  |
| wavelet-LLL | glszm | SizeZoneNonUniformity                | 105.0588235  |
| wavelet-LLL | glszm | GrayLevelNonUniformity               | 2.455882353  |
| wavelet-LLL | glszm | LargeAreaEmphasis                    | 1.801470588  |
| wavelet-LLL | glszm | SmallAreaHighGrayLevelEmphasis       | 2525.067655  |
| wavelet-LLL | glszm | ZonePercentage                       | 0.834355828  |
| wavelet-LLL | glszm | LargeAreaLowGrayLevelEmphasis        | 0.008726168  |
| wavelet-LLL | glszm | LargeAreaHighGrayLevelEmphasis       | 7790.779412  |
| wavelet-LLL | glszm | HighGrayLevelZoneEmphasis            | 3026.080882  |
| wavelet-LLL | glszm | SmallAreaEmphasis                    | 0.898220997  |
| wavelet-LLL | glszm | LowGrayLevelZoneEmphasis             | 0.00851095   |
| wavelet-LLL | glszm | ZoneEntropy                          | 6.193721113  |
| wavelet-LLL | glszm | SmallAreaLowGrayLevelEmphasis        | 0.008471484  |
| wavelet-LLL | ngtdm | Coarseness                           | 0.02347146   |
| wavelet-LLL | ngtdm | Complexity                           | 35165.41372  |
| wavelet-LLL | ngtdm | Strength                             | 78.08495199  |
| wavelet-LLL | ngtdm | Contrast                             | 3.009808801  |
| wavelet-LLL | ngtdm | Busyness                             | 0.012611786  |
| wavelet-HHL | gldm  | GrayLevelVariance                    | 17.61360985  |
| wavelet-HHL | gldm  | HighGrayLevelEmphasis                | 179.3558282  |
| wavelet-HHL | gldm  | DependenceEntropy                    | 5.579912013  |
| wavelet-HHL | gldm  | DependenceNonUniformity              | 43.40490798  |
| wavelet-HHL | gldm  | GrayLevelNonUniformity               | 11.83435583  |
| wavelet-HHL | gldm  | SmallDependenceEmphasis              | 0.491217464  |
| wavelet-HHL | gldm  | SmallDependenceHighGrayLevelEmphasis | 96.53202739  |
| wavelet-HHL | gldm  | DependenceNonUniformityNormalized    | 0.266287779  |
| wavelet-HHL | gldm  | LargeDependenceEmphasis              | 7.355828221  |
| wavelet-HHL | gldm  | LargeDependenceLowGrayLevelEmphasis  | 0.067608845  |
| wavelet-HHL | gldm  | DependenceVariance                   | 2.175317099  |
| wavelet-HHL | gldm  | LargeDependenceHighGrayLevelEmphasis | 1071.601227  |
| wavelet-HHL | gldm  | SmallDependenceLowGrayLevelEmphasis  | 0.012357462  |
| wavelet-HHL | gldm  | LowGrayLevelEmphasis                 | 0.016174308  |
| wavelet-HHL | glcm  | JointAverage                         | 12.70043552  |
| wavelet-HHL | glcm  | SumAverage                           | 25.40087103  |
| wavelet-HHL | glcm  | JointEntropy                         | 6.856687865  |
| wavelet-HHL | glcm  | ClusterShade                         | 54.98109589  |
| wavelet-HHL | glcm  | MaximumProbability                   | 0.025651479  |
| wavelet-HHL | glcm  | Idmn                                 | 0.948855929  |
| wavelet-HHL | glcm  | JointEnergy                          | 0.010191929  |
| wavelet-HHL | glcm  | Contrast                             | 34.70160682  |
| wavelet-HHL | glcm  | DifferenceEntropy                    | 3.519971271  |
| wavelet-HHL | glcm  | InverseVariance                      | 0.214503776  |
| wavelet-HHL | glcm  | DifferenceVariance                   | 13.19064621  |
| wavelet-HHL | glcm  | Idn                                  | 0.852145191  |
| wavelet-HHL | glcm  | Idm                                  | 0.201906137  |
| wavelet-HHL | glcm  | Correlation                          | -0.027211225 |
| wavelet-HHL | glcm  | Autocorrelation                      | 160.9324721  |
| wavelet-HHL | glcm  | SumEntropy                           | 4.297049173  |
| wavelet-HHL | glcm  | SumSquares                           | 16.94616604  |
| wavelet-HHL | glcm  | ClusterProminence                    | 3538.931889  |
| wavelet-HHL | glcm  | Imc2                                 | 0.939496907  |

|             |            |                                  |              |
|-------------|------------|----------------------------------|--------------|
| wavelet-HHL | glcm       | Imc1                             | -0.272857257 |
| wavelet-HHL | glcm       | DifferenceAverage                | 4.591745245  |
| wavelet-HHL | glcm       | Id                               | 0.293799923  |
| wavelet-HHL | glcm       | ClusterTendency                  | 33.08305735  |
| wavelet-HHL | firstorder | InterquartileRange               | 136.5753841  |
| wavelet-HHL | firstorder | Skewness                         | 0.142996619  |
| wavelet-HHL | firstorder | Uniformity                       | 0.07260341   |
| wavelet-HHL | firstorder | Median                           | -9.823418482 |
| wavelet-HHL | firstorder | Energy                           | 1806406.58   |
| wavelet-HHL | firstorder | RobustMeanAbsoluteDeviation      | 58.89907203  |
| wavelet-HHL | firstorder | MeanAbsoluteDeviation            | 84.47478432  |
| wavelet-HHL | firstorder | TotalEnergy                      | 48772977.67  |
| wavelet-HHL | firstorder | Maximum                          | 279.9320533  |
| wavelet-HHL | firstorder | RootMeanSquared                  | 105.2722611  |
| wavelet-HHL | firstorder | 90Percentile                     | 156.2206002  |
| wavelet-HHL | firstorder | Minimum                          | -299.5990042 |
| wavelet-HHL | firstorder | Entropy                          | 4.010099419  |
| wavelet-HHL | firstorder | Range                            | 579.5310575  |
| wavelet-HHL | firstorder | Variance                         | 11044.87712  |
| wavelet-HHL | firstorder | 10Percentile                     | -109.3577345 |
| wavelet-HHL | firstorder | Kurtosis                         | 2.948700591  |
| wavelet-HHL | firstorder | Mean                             | 6.113250714  |
| wavelet-HHL | glrlm      | ShortRunLowGrayLevelEmphasis     | 0.016322998  |
| wavelet-HHL | glrlm      | GrayLevelVariance                | 18.16776953  |
| wavelet-HHL | glrlm      | LowGrayLevelRunEmphasis          | 0.016605368  |
| wavelet-HHL | glrlm      | GrayLevelNonUniformityNormalized | 0.070943993  |
| wavelet-HHL | glrlm      | RunVariance                      | 0.057904228  |
| wavelet-HHL | glrlm      | GrayLevelNonUniformity           | 10.99735785  |
| wavelet-HHL | glrlm      | LongRunEmphasis                  | 1.164599253  |
| wavelet-HHL | glrlm      | ShortRunHighGrayLevelEmphasis    | 175.4392896  |
| wavelet-HHL | glrlm      | RunLengthNonUniformity           | 140.9673606  |
| wavelet-HHL | glrlm      | ShortRunEmphasis                 | 0.963589748  |
| wavelet-HHL | glrlm      | LongRunHighGrayLevelEmphasis     | 205.0767146  |
| wavelet-HHL | glrlm      | RunPercentage                    | 0.950920245  |
| wavelet-HHL | glrlm      | LongRunLowGrayLevelEmphasis      | 0.01791438   |
| wavelet-HHL | glrlm      | RunEntropy                       | 4.249119397  |
| wavelet-HHL | glrlm      | HighGrayLevelRunEmphasis         | 180.9460153  |
| wavelet-HHL | glrlm      | RunLengthNonUniformityNormalized | 0.909067259  |
| wavelet-HHL | glszm      | GrayLevelVariance                | 24.8794896   |
| wavelet-HHL | glszm      | ZoneVariance                     | 3.545723062  |
| wavelet-HHL | glszm      | GrayLevelNonUniformityNormalized | 0.05741966   |
| wavelet-HHL | glszm      | SizeZoneNonUniformityNormalized  | 0.525283554  |
| wavelet-HHL | glszm      | SizeZoneNonUniformity            | 48.32608696  |
| wavelet-HHL | glszm      | GrayLevelNonUniformity           | 5.282608696  |
| wavelet-HHL | glszm      | LargeAreaEmphasis                | 6.684782609  |
| wavelet-HHL | glszm      | SmallAreaHighGrayLevelEmphasis   | 150.7517029  |
| wavelet-HHL | glszm      | ZonePercentage                   | 0.564417178  |
| wavelet-HHL | glszm      | LargeAreaLowGrayLevelEmphasis    | 0.068944486  |
| wavelet-HHL | glszm      | LargeAreaHighGrayLevelEmphasis   | 989.8586957  |
| wavelet-HHL | glszm      | HighGrayLevelZoneEmphasis        | 196.7173913  |
| wavelet-HHL | glszm      | SmallAreaEmphasis                | 0.751108847  |
| wavelet-HHL | glszm      | LowGrayLevelZoneEmphasis         | 0.022703368  |
| wavelet-HHL | glszm      | ZoneEntropy                      | 5.11542201   |
| wavelet-HHL | glszm      | SmallAreaLowGrayLevelEmphasis    | 0.021001811  |
| wavelet-HHL | ngtdm      | Coarseness                       | 0.033453679  |

|             |            |                                      |              |
|-------------|------------|--------------------------------------|--------------|
| wavelet-HHL | ngtdm      | Complexity                           | 623.884252   |
| wavelet-HHL | ngtdm      | Strength                             | 4.790143311  |
| wavelet-HHL | ngtdm      | Contrast                             | 0.261421731  |
| wavelet-HHL | ngtdm      | Busyness                             | 0.123196178  |
| wavelet-HLH | gldm       | GrayLevelVariance                    | 10.70390304  |
| wavelet-HLH | gldm       | HighGrayLevelEmphasis                | 100.7791411  |
| wavelet-HLH | gldm       | DependenceEntropy                    | 5.437960038  |
| wavelet-HLH | gldm       | DependenceNonUniformity              | 31.98159509  |
| wavelet-HLH | gldm       | GrayLevelNonUniformity               | 16.11656442  |
| wavelet-HLH | gldm       | SmallDependenceEmphasis              | 0.376976946  |
| wavelet-HLH | gldm       | SmallDependenceHighGrayLevelEmphasis | 44.07984511  |
| wavelet-HLH | gldm       | DependenceNonUniformityNormalized    | 0.196206105  |
| wavelet-HLH | gldm       | LargeDependenceEmphasis              | 11.56441718  |
| wavelet-HLH | gldm       | LargeDependenceLowGrayLevelEmphasis  | 0.170535652  |
| wavelet-HLH | gldm       | DependenceVariance                   | 3.42617336   |
| wavelet-HLH | gldm       | LargeDependenceHighGrayLevelEmphasis | 992.7177914  |
| wavelet-HLH | gldm       | SmallDependenceLowGrayLevelEmphasis  | 0.020544329  |
| wavelet-HLH | gldm       | LowGrayLevelEmphasis                 | 0.029553365  |
| wavelet-HLH | glcm       | JointAverage                         | 9.518960744  |
| wavelet-HLH | glcm       | SumAverage                           | 19.03792149  |
| wavelet-HLH | glcm       | JointEntropy                         | 6.405983204  |
| wavelet-HLH | glcm       | ClusterShade                         | 8.506290399  |
| wavelet-HLH | glcm       | MaximumProbability                   | 0.042401111  |
| wavelet-HLH | glcm       | Idmn                                 | 0.952149313  |
| wavelet-HLH | glcm       | JointEnergy                          | 0.01552663   |
| wavelet-HLH | glcm       | Contrast                             | 20.73940426  |
| wavelet-HLH | glcm       | DifferenceEntropy                    | 3.179123114  |
| wavelet-HLH | glcm       | InverseVariance                      | 0.281067168  |
| wavelet-HLH | glcm       | DifferenceVariance                   | 8.857660623  |
| wavelet-HLH | glcm       | Idn                                  | 0.860927713  |
| wavelet-HLH | glcm       | Idm                                  | 0.270845318  |
| wavelet-HLH | glcm       | Correlation                          | -0.020608743 |
| wavelet-HLH | glcm       | Autocorrelation                      | 90.43539148  |
| wavelet-HLH | glcm       | SumEntropy                           | 4.003107316  |
| wavelet-HLH | glcm       | SumSquares                           | 10.18882982  |
| wavelet-HLH | glcm       | ClusterProminence                    | 1432.254372  |
| wavelet-HLH | glcm       | Imc2                                 | 0.892447269  |
| wavelet-HLH | glcm       | Imc1                                 | -0.222774269 |
| wavelet-HLH | glcm       | DifferenceAverage                    | 3.41935471   |
| wavelet-HLH | glcm       | Id                                   | 0.357053386  |
| wavelet-HLH | glcm       | ClusterTendency                      | 20.01591501  |
| wavelet-HLH | firstorder | InterquartileRange                   | 87.50174339  |
| wavelet-HLH | firstorder | Skewness                             | 0.219199303  |
| wavelet-HLH | firstorder | Uniformity                           | 0.098874628  |
| wavelet-HLH | firstorder | Median                               | -5.13882471  |
| wavelet-HLH | firstorder | Energy                               | 1062566.352  |
| wavelet-HLH | firstorder | RobustMeanAbsoluteDeviation          | 38.90566411  |
| wavelet-HLH | firstorder | MeanAbsoluteDeviation                | 61.29615555  |
| wavelet-HLH | firstorder | TotalEnergy                          | 28689291.51  |
| wavelet-HLH | firstorder | Maximum                              | 230.5357899  |
| wavelet-HLH | firstorder | RootMeanSquared                      | 80.73916012  |
| wavelet-HLH | firstorder | 90Percentile                         | 99.09354303  |
| wavelet-HLH | firstorder | Minimum                              | -223.3273538 |
| wavelet-HLH | firstorder | Entropy                              | 3.650370338  |
| wavelet-HLH | firstorder | Range                                | 453.8631437  |

|             |            |                                  |              |
|-------------|------------|----------------------------------|--------------|
| wavelet-HLH | firstorder | Variance                         | 6518.494893  |
| wavelet-HLH | firstorder | 10Percentile                     | -96.04937238 |
| wavelet-HLH | firstorder | Kurtosis                         | 3.674612922  |
| wavelet-HLH | firstorder | Mean                             | -0.563102062 |
| wavelet-HLH | glrlm      | ShortRunLowGrayLevelEmphasis     | 0.030046012  |
| wavelet-HLH | glrlm      | GrayLevelVariance                | 11.26993262  |
| wavelet-HLH | glrlm      | LowGrayLevelRunEmphasis          | 0.030785309  |
| wavelet-HLH | glrlm      | GrayLevelNonUniformityNormalized | 0.094276956  |
| wavelet-HLH | glrlm      | RunVariance                      | 0.084184452  |
| wavelet-HLH | glrlm      | GrayLevelNonUniformity           | 14.2744618   |
| wavelet-HLH | glrlm      | LongRunEmphasis                  | 1.244719392  |
| wavelet-HLH | glrlm      | ShortRunHighGrayLevelEmphasis    | 97.14571863  |
| wavelet-HLH | glrlm      | RunLengthNonUniformity           | 131.4710457  |
| wavelet-HLH | glrlm      | ShortRunEmphasis                 | 0.946007307  |
| wavelet-HLH | glrlm      | LongRunHighGrayLevelEmphasis     | 123.1762889  |
| wavelet-HLH | glrlm      | RunPercentage                    | 0.928739972  |
| wavelet-HLH | glrlm      | LongRunLowGrayLevelEmphasis      | 0.034084889  |
| wavelet-HLH | glrlm      | RunEntropy                       | 3.993666148  |
| wavelet-HLH | glrlm      | HighGrayLevelRunEmphasis         | 101.835693   |
| wavelet-HLH | glrlm      | RunLengthNonUniformityNormalized | 0.867974349  |
| wavelet-HLH | glszm      | GrayLevelVariance                | 18.94693878  |
| wavelet-HLH | glszm      | ZoneVariance                     | 14.50632653  |
| wavelet-HLH | glszm      | GrayLevelNonUniformityNormalized | 0.071428571  |
| wavelet-HLH | glszm      | SizeZoneNonUniformityNormalized  | 0.464897959  |
| wavelet-HLH | glszm      | SizeZoneNonUniformity            | 32.54285714  |
| wavelet-HLH | glszm      | GrayLevelNonUniformity           | 5            |
| wavelet-HLH | glszm      | LargeAreaEmphasis                | 19.92857143  |
| wavelet-HLH | glszm      | SmallAreaHighGrayLevelEmphasis   | 85.93997631  |
| wavelet-HLH | glszm      | ZonePercentage                   | 0.429447853  |
| wavelet-HLH | glszm      | LargeAreaLowGrayLevelEmphasis    | 0.289928208  |
| wavelet-HLH | glszm      | LargeAreaHighGrayLevelEmphasis   | 1791.128571  |
| wavelet-HLH | glszm      | HighGrayLevelZoneEmphasis        | 113.3142857  |
| wavelet-HLH | glszm      | SmallAreaEmphasis                | 0.707332916  |
| wavelet-HLH | glszm      | LowGrayLevelZoneEmphasis         | 0.050451361  |
| wavelet-HLH | glszm      | ZoneEntropy                      | 4.834351547  |
| wavelet-HLH | glszm      | SmallAreaLowGrayLevelEmphasis    | 0.045308464  |
| wavelet-HLH | ngtdm      | Coarseness                       | 0.038353851  |
| wavelet-HLH | ngtdm      | Complexity                       | 297.3222893  |
| wavelet-HLH | ngtdm      | Strength                         | 3.410023333  |
| wavelet-HLH | ngtdm      | Contrast                         | 0.179032868  |
| wavelet-HLH | ngtdm      | Busyness                         | 0.157859711  |

| Image type | Feature Class | Feature Name                         |                                                                                                                                                                                                                                                                                                                                                                                                                                              |
|------------|---------------|--------------------------------------|----------------------------------------------------------------------------------------------------------------------------------------------------------------------------------------------------------------------------------------------------------------------------------------------------------------------------------------------------------------------------------------------------------------------------------------------|
| general    | info          | BoundingBox                          | 5: RTSTRUCT: C99_DNU_B_segment_ITV<br>(0, 1, 1, 9, 7, 7)                                                                                                                                                                                                                                                                                                                                                                                     |
| general    | info          | EnabledImageTypes                    | {u'Original': {}, u'Wavelet': {}}                                                                                                                                                                                                                                                                                                                                                                                                            |
|            |               |                                      | {'distances': [1], 'additionalInfo': True,<br>'force2D': False, 'interpolator': 'sitkBSpline',<br>'resampledPixelSpacing': [3.0], 'label': 1,<br>'normalizeScale': 1, 'normalize': False,<br>'force2Ddimension': 0, 'removeOutliers':<br>None, 'minimumROISize': None, u'binWidth':<br>25.0, 'minimumROIDimensions': 1,<br>u'correctMask': True, 'preCrop': False,<br>u'symmetricalGLCM': True,<br>'resegmentRange': None, 'padDistance': 5} |
| general    | info          | GeneralSettings                      | 5200d2255f484c654a1f4f71464d2081092a7                                                                                                                                                                                                                                                                                                                                                                                                        |
| general    | info          | ImageHash                            | 2ad                                                                                                                                                                                                                                                                                                                                                                                                                                          |
| general    | info          | ImageSpacing                         | (0.9765625000000002,<br>0.9765625000000002, 2.0)                                                                                                                                                                                                                                                                                                                                                                                             |
| general    | info          | MaskHash                             | e1360b3132cfce55d37b3bba824004d66934a                                                                                                                                                                                                                                                                                                                                                                                                        |
| general    | info          | NumpyVersion                         | 064                                                                                                                                                                                                                                                                                                                                                                                                                                          |
| general    | info          | PyWaveletVersion                     | 1.13.1                                                                                                                                                                                                                                                                                                                                                                                                                                       |
| general    | info          | SimpleITKVersion                     | 0.5.2                                                                                                                                                                                                                                                                                                                                                                                                                                        |
| general    | info          | Version                              | 1.1.0                                                                                                                                                                                                                                                                                                                                                                                                                                        |
| general    | info          | VolumeNum                            | 1.3.0.post102+g1b0eb74                                                                                                                                                                                                                                                                                                                                                                                                                       |
| general    | info          | VoxelNum                             | 1                                                                                                                                                                                                                                                                                                                                                                                                                                            |
| original   | shape         | Maximum3DDiameter                    | 124                                                                                                                                                                                                                                                                                                                                                                                                                                          |
| original   | shape         | Maximum2DDiameterSlice               | 32.03123476                                                                                                                                                                                                                                                                                                                                                                                                                                  |
| original   | shape         | Sphericity                           | 19.20937271                                                                                                                                                                                                                                                                                                                                                                                                                                  |
| original   | shape         | MinorAxis                            | 0.747482242                                                                                                                                                                                                                                                                                                                                                                                                                                  |
| original   | shape         | Elongation                           | 17.18613644                                                                                                                                                                                                                                                                                                                                                                                                                                  |
| original   | shape         | SurfaceVolumeRatio                   | 0.547583893                                                                                                                                                                                                                                                                                                                                                                                                                                  |
| original   | shape         | Volume                               | 0.432468781                                                                                                                                                                                                                                                                                                                                                                                                                                  |
| original   | shape         | MajorAxis                            | 3348                                                                                                                                                                                                                                                                                                                                                                                                                                         |
| original   | shape         | SurfaceArea                          | 31.38539438                                                                                                                                                                                                                                                                                                                                                                                                                                  |
| original   | shape         | Flatness                             | 1447.905478                                                                                                                                                                                                                                                                                                                                                                                                                                  |
| original   | shape         | LeastAxis                            | 0.385846775                                                                                                                                                                                                                                                                                                                                                                                                                                  |
| original   | shape         | Maximum2DDiameterColumn              | 12.10995319                                                                                                                                                                                                                                                                                                                                                                                                                                  |
| original   | shape         | Maximum2DDiameterRow                 | 26.83281573                                                                                                                                                                                                                                                                                                                                                                                                                                  |
| original   | gldm          | GrayLevelVariance                    | 21.21320344                                                                                                                                                                                                                                                                                                                                                                                                                                  |
| original   | gldm          | HighGrayLevelEmphasis                | 103.9544095                                                                                                                                                                                                                                                                                                                                                                                                                                  |
| original   | gldm          | DependenceEntropy                    | 676.4758065                                                                                                                                                                                                                                                                                                                                                                                                                                  |
| original   | gldm          | DependenceNonUniformity              | 5.654739182                                                                                                                                                                                                                                                                                                                                                                                                                                  |
| original   | gldm          | GrayLevelNonUniformity               | 38.46774194                                                                                                                                                                                                                                                                                                                                                                                                                                  |
| original   | gldm          | SmallDependenceEmphasis              | 7.241935484                                                                                                                                                                                                                                                                                                                                                                                                                                  |
| original   | gldm          | SmallDependenceHighGrayLevelEmphasis | 0.573678547                                                                                                                                                                                                                                                                                                                                                                                                                                  |
| original   | gldm          | DependenceNonUniformityNormalized    | 254.4076161                                                                                                                                                                                                                                                                                                                                                                                                                                  |
| original   | gldm          | LargeDependenceEmphasis              | 0.310223725                                                                                                                                                                                                                                                                                                                                                                                                                                  |
| original   | gldm          | LargeDependenceLowGrayLevelEmphasis  | 14.9516129                                                                                                                                                                                                                                                                                                                                                                                                                                   |
| original   | gldm          | DependenceVariance                   | 0.02944537                                                                                                                                                                                                                                                                                                                                                                                                                                   |
| original   | gldm          | LargeDependenceHighGrayLevelEmphasis | 7.344693028                                                                                                                                                                                                                                                                                                                                                                                                                                  |
| original   | gldm          | SmallDependenceLowGrayLevelEmphasis  | 15889.1371                                                                                                                                                                                                                                                                                                                                                                                                                                   |
|            |               |                                      | 0.014735638                                                                                                                                                                                                                                                                                                                                                                                                                                  |

|          |            |                                  |              |
|----------|------------|----------------------------------|--------------|
| original | gldm       | LowGrayLevelEmphasis             | 0.015458235  |
| original | glcm       | JointAverage                     | 26.36547733  |
| original | glcm       | SumAverage                       | 52.73095465  |
| original | glcm       | JointEntropy                     | 6.354352707  |
| original | glcm       | ClusterShade                     | -2537.98632  |
| original | glcm       | MaximumProbability               | 0.068130545  |
| original | glcm       | ldmn                             | 0.921239592  |
| original | glcm       | JointEnergy                      | 0.018286364  |
| original | glcm       | Contrast                         | 135.2646696  |
| original | glcm       | DifferenceEntropy                | 4.077565271  |
| original | glcm       | InverseVariance                  | 0.201233305  |
| original | glcm       | DifferenceVariance               | 64.90535886  |
| original | glcm       | ldn                              | 0.838306252  |
| original | glcm       | ldm                              | 0.226885089  |
| original | glcm       | Correlation                      | 0.20514736   |
| original | glcm       | Autocorrelation                  | 713.7584872  |
| original | glcm       | SumEntropy                       | 4.772707507  |
| original | glcm       | SumSquares                       | 85.80833626  |
| original | glcm       | ClusterProminence                | 122405.9161  |
| original | glcm       | lmc2                             | 0.992440407  |
| original | glcm       | lmc1                             | -0.503425443 |
| original | glcm       | DifferenceAverage                | 8.261225497  |
| original | glcm       | ld                               | 0.291303814  |
| original | glcm       | ClusterTendency                  | 207.9686755  |
| original | firstorder | InterquartileRange               | 439.25       |
| original | firstorder | Skewness                         | -0.633492003 |
| original | firstorder | Uniformity                       | 0.058402706  |
| original | firstorder | Median                           | -126         |
| original | firstorder | Energy                           | 13808148     |
| original | firstorder | RobustMeanAbsoluteDeviation      | 179.3848397  |
| original | firstorder | MeanAbsoluteDeviation            | 224.2627471  |
| original | firstorder | TotalEnergy                      | 372819996    |
| original | firstorder | Maximum                          | 82           |
| original | firstorder | RootMeanSquared                  | 333.7005128  |
| original | firstorder | 90Percentile                     | 42.1         |
| original | firstorder | Minimum                          | -786         |
| original | firstorder | Entropy                          | 4.667274239  |
| original | firstorder | Range                            | 868          |
| original | firstorder | Variance                         | 65228.07804  |
| original | firstorder | 10Percentile                     | -632.8       |
| original | firstorder | Kurtosis                         | 2.026082929  |
| original | firstorder | Mean                             | -214.7741935 |
| original | glrlm      | ShortRunLowGrayLevelEmphasis     | 0.016451073  |
| original | glrlm      | GrayLevelVariance                | 104.6800747  |
| original | glrlm      | LowGrayLevelRunEmphasis          | 0.016510096  |
| original | glrlm      | GrayLevelNonUniformityNormalized | 0.049678193  |
| original | glrlm      | RunVariance                      | 0.085004392  |
| original | glrlm      | GrayLevelNonUniformity           | 5.755077596  |
| original | glrlm      | LongRunEmphasis                  | 1.238698867  |
| original | glrlm      | ShortRunHighGrayLevelEmphasis    | 594.5269373  |
| original | glrlm      | RunLengthNonUniformity           | 101.7981978  |
| original | glrlm      | ShortRunEmphasis                 | 0.950325687  |
| original | glrlm      | LongRunHighGrayLevelEmphasis     | 903.6046665  |

|             |       |                                      |              |
|-------------|-------|--------------------------------------|--------------|
| original    | glrlm | RunPercentage                        | 0.932382134  |
| original    | glrlm | LongRunLowGrayLevelEmphasis          | 0.016782419  |
| original    | glrlm | RunEntropy                           | 4.982646274  |
| original    | glrlm | HighGrayLevelRunEmphasis             | 647.5035984  |
| original    | glrlm | RunLengthNonUniformityNormalized     | 0.879245574  |
| original    | glszm | GrayLevelVariance                    | 95.334722    |
| original    | glszm | ZoneVariance                         | 5.105912514  |
| original    | glszm | GrayLevelNonUniformityNormalized     | 0.032526839  |
| original    | glszm | SizeZoneNonUniformityNormalized      | 0.676333921  |
| original    | glszm | SizeZoneNonUniformity                | 53.43037975  |
| original    | glszm | GrayLevelNonUniformity               | 2.569620253  |
| original    | glszm | LargeAreaEmphasis                    | 7.569620253  |
| original    | glszm | SmallAreaHighGrayLevelEmphasis       | 353.4468825  |
| original    | glszm | ZonePercentage                       | 0.637096774  |
| original    | glszm | LargeAreaLowGrayLevelEmphasis        | 0.030388226  |
| original    | glszm | LargeAreaHighGrayLevelEmphasis       | 7605.886076  |
| original    | glszm | HighGrayLevelZoneEmphasis            | 482.278481   |
| original    | glszm | SmallAreaEmphasis                    | 0.846838478  |
| original    | glszm | LowGrayLevelZoneEmphasis             | 0.023396663  |
| original    | glszm | ZoneEntropy                          | 5.331704957  |
| original    | glszm | SmallAreaLowGrayLevelEmphasis        | 0.022992343  |
| original    | ngtdm | Coarseness                           | 0.025760248  |
| original    | ngtdm | Complexity                           | 3549.20757   |
| original    | ngtdm | Strength                             | 18.66621141  |
| original    | ngtdm | Contrast                             | 1.229750185  |
| original    | ngtdm | Busyness                             | 0.039290994  |
| wavelet-HHH | gldm  | GrayLevelVariance                    | 11.73387097  |
| wavelet-HHH | gldm  | HighGrayLevelEmphasis                | 101.983871   |
| wavelet-HHH | gldm  | DependenceEntropy                    | 5.284576807  |
| wavelet-HHH | gldm  | DependenceNonUniformity              | 35.70967742  |
| wavelet-HHH | gldm  | GrayLevelNonUniformity               | 10.48387097  |
| wavelet-HHH | gldm  | SmallDependenceEmphasis              | 0.411460573  |
| wavelet-HHH | gldm  | SmallDependenceHighGrayLevelEmphasis | 47.11575941  |
| wavelet-HHH | gldm  | DependenceNonUniformityNormalized    | 0.28798127   |
| wavelet-HHH | gldm  | LargeDependenceEmphasis              | 6.096774194  |
| wavelet-HHH | gldm  | LargeDependenceLowGrayLevelEmphasis  | 0.108870316  |
| wavelet-HHH | gldm  | DependenceVariance                   | 1.214099896  |
| wavelet-HHH | gldm  | LargeDependenceHighGrayLevelEmphasis | 604.9193548  |
| wavelet-HHH | gldm  | SmallDependenceLowGrayLevelEmphasis  | 0.01595137   |
| wavelet-HHH | gldm  | LowGrayLevelEmphasis                 | 0.028458322  |
| wavelet-HHH | glcm  | JointAverage                         | 9.503932011  |
| wavelet-HHH | glcm  | SumAverage                           | 19.00786402  |
| wavelet-HHH | glcm  | JointEntropy                         | 6.354289195  |
| wavelet-HHH | glcm  | ClusterShade                         | -0.520375886 |
| wavelet-HHH | glcm  | MaximumProbability                   | 0.02902155   |
| wavelet-HHH | glcm  | ldmn                                 | 0.937339828  |
| wavelet-HHH | glcm  | JointEnergy                          | 0.01388453   |
| wavelet-HHH | glcm  | Contrast                             | 24.32356052  |
| wavelet-HHH | glcm  | DifferenceEntropy                    | 3.26842062   |
| wavelet-HHH | glcm  | InverseVariance                      | 0.220607425  |
| wavelet-HHH | glcm  | DifferenceVariance                   | 8.609880698  |
| wavelet-HHH | glcm  | ldn                                  | 0.834986102  |
| wavelet-HHH | glcm  | ldm                                  | 0.217450948  |

|             |            |                                  |              |
|-------------|------------|----------------------------------|--------------|
| wavelet-HHH | glcm       | Correlation                      | -0.038238012 |
| wavelet-HHH | glcm       | Autocorrelation                  | 89.88130589  |
| wavelet-HHH | glcm       | SumEntropy                       | 4.0075494    |
| wavelet-HHH | glcm       | SumSquares                       | 11.70398502  |
| wavelet-HHH | glcm       | ClusterProminence                | 1469.299903  |
| wavelet-HHH | glcm       | Imc2                             | 0.94373359   |
| wavelet-HHH | glcm       | Imc1                             | -0.299892908 |
| wavelet-HHH | glcm       | DifferenceAverage                | 3.927384066  |
| wavelet-HHH | glcm       | Id                               | 0.313172675  |
| wavelet-HHH | glcm       | ClusterTendency                  | 22.49237956  |
| wavelet-HHH | firstorder | InterquartileRange               | 114.7738408  |
| wavelet-HHH | firstorder | Skewness                         | -0.03319728  |
| wavelet-HHH | firstorder | Uniformity                       | 0.084547347  |
| wavelet-HHH | firstorder | Median                           | 5.379480942  |
| wavelet-HHH | firstorder | Energy                           | 891792.4997  |
| wavelet-HHH | firstorder | RobustMeanAbsoluteDeviation      | 47.67229159  |
| wavelet-HHH | firstorder | MeanAbsoluteDeviation            | 68.56454447  |
| wavelet-HHH | firstorder | TotalEnergy                      | 24078397.49  |
| wavelet-HHH | firstorder | Maximum                          | 201.5615885  |
| wavelet-HHH | firstorder | RootMeanSquared                  | 84.80492319  |
| wavelet-HHH | firstorder | 90Percentile                     | 103.9724397  |
| wavelet-HHH | firstorder | Minimum                          | -201.7057906 |
| wavelet-HHH | firstorder | Entropy                          | 3.771427762  |
| wavelet-HHH | firstorder | Range                            | 403.2673791  |
| wavelet-HHH | firstorder | Variance                         | 7191.737403  |
| wavelet-HHH | firstorder | 10Percentile                     | -113.8329301 |
| wavelet-HHH | firstorder | Kurtosis                         | 2.644732235  |
| wavelet-HHH | firstorder | Mean                             | -0.370938118 |
| wavelet-HHH | glrlm      | ShortRunLowGrayLevelEmphasis     | 0.028348913  |
| wavelet-HHH | glrlm      | GrayLevelVariance                | 11.9685412   |
| wavelet-HHH | glrlm      | LowGrayLevelRunEmphasis          | 0.028988544  |
| wavelet-HHH | glrlm      | GrayLevelNonUniformityNormalized | 0.083751556  |
| wavelet-HHH | glrlm      | RunVariance                      | 0.050348094  |
| wavelet-HHH | glrlm      | GrayLevelNonUniformity           | 9.901818736  |
| wavelet-HHH | glrlm      | LongRunEmphasis                  | 1.151251763  |
| wavelet-HHH | glrlm      | ShortRunHighGrayLevelEmphasis    | 98.79343572  |
| wavelet-HHH | glrlm      | RunLengthNonUniformity           | 107.7057802  |
| wavelet-HHH | glrlm      | ShortRunEmphasis                 | 0.964398251  |
| wavelet-HHH | glrlm      | LongRunHighGrayLevelEmphasis     | 117.0208136  |
| wavelet-HHH | glrlm      | RunPercentage                    | 0.953473945  |
| wavelet-HHH | glrlm      | LongRunLowGrayLevelEmphasis      | 0.031623273  |
| wavelet-HHH | glrlm      | RunEntropy                       | 3.986251148  |
| wavelet-HHH | glrlm      | HighGrayLevelRunEmphasis         | 102.2206304  |
| wavelet-HHH | glrlm      | RunLengthNonUniformityNormalized | 0.910515063  |
| wavelet-HHH | glszm      | GrayLevelVariance                | 15.75442248  |
| wavelet-HHH | glszm      | ZoneVariance                     | 2.935483871  |
| wavelet-HHH | glszm      | GrayLevelNonUniformityNormalized | 0.073881374  |
| wavelet-HHH | glszm      | SizeZoneNonUniformityNormalized  | 0.38917794   |
| wavelet-HHH | glszm      | SizeZoneNonUniformity            | 24.12903226  |
| wavelet-HHH | glszm      | GrayLevelNonUniformity           | 4.580645161  |
| wavelet-HHH | glszm      | LargeAreaEmphasis                | 6.935483871  |
| wavelet-HHH | glszm      | SmallAreaHighGrayLevelEmphasis   | 77.56710144  |
| wavelet-HHH | glszm      | ZonePercentage                   | 0.5          |



|             |            |                                      |              |
|-------------|------------|--------------------------------------|--------------|
| wavelet-HHH | glszm      | LargeAreaLowGrayLevelEmphasis        | 0.130376052  |
| wavelet-HHH | glszm      | LargeAreaHighGrayLevelEmphasis       | 675.3870968  |
| wavelet-HHH | glszm      | HighGrayLevelZoneEmphasis            | 110.0322581  |
| wavelet-HHH | glszm      | SmallAreaEmphasis                    | 0.636019128  |
| wavelet-HHH | glszm      | LowGrayLevelZoneEmphasis             | 0.037513321  |
| wavelet-HHH | glszm      | ZoneEntropy                          | 5.099042278  |
| wavelet-HHH | glszm      | SmallAreaLowGrayLevelEmphasis        | 0.02771737   |
| wavelet-HHH | ngtdm      | Coarseness                           | 0.043516334  |
| wavelet-HHH | ngtdm      | Complexity                           | 345.3137884  |
| wavelet-HHH | ngtdm      | Strength                             | 3.776796337  |
| wavelet-HHH | ngtdm      | Contrast                             | 0.227857153  |
| wavelet-HHH | ngtdm      | Busyness                             | 0.148566463  |
| wavelet-HLL | gldm       | GrayLevelVariance                    | 108.5262097  |
| wavelet-HLL | gldm       | HighGrayLevelEmphasis                | 824.0887097  |
| wavelet-HLL | gldm       | DependenceEntropy                    | 5.822714355  |
| wavelet-HLL | gldm       | DependenceNonUniformity              | 49.51612903  |
| wavelet-HLL | gldm       | GrayLevelNonUniformity               | 4.274193548  |
| wavelet-HLL | gldm       | SmallDependenceEmphasis              | 0.621807796  |
| wavelet-HLL | gldm       | SmallDependenceHighGrayLevelEmphasis | 494.2735775  |
| wavelet-HLL | gldm       | DependenceNonUniformityNormalized    | 0.399323621  |
| wavelet-HLL | gldm       | LargeDependenceEmphasis              | 3.322580645  |
| wavelet-HLL | gldm       | LargeDependenceLowGrayLevelEmphasis  | 0.017372875  |
| wavelet-HLL | gldm       | DependenceVariance                   | 0.616024974  |
| wavelet-HLL | gldm       | LargeDependenceHighGrayLevelEmphasis | 2811.459677  |
| wavelet-HLL | gldm       | SmallDependenceLowGrayLevelEmphasis  | 0.012139981  |
| wavelet-HLL | gldm       | LowGrayLevelEmphasis                 | 0.012874741  |
| wavelet-HLL | glcm       | JointAverage                         | 26.51234167  |
| wavelet-HLL | glcm       | SumAverage                           | 53.02468334  |
| wavelet-HLL | glcm       | JointEntropy                         | 6.913246855  |
| wavelet-HLL | glcm       | ClusterShade                         | 162.0986781  |
| wavelet-HLL | glcm       | MaximumProbability                   | 0.018825633  |
| wavelet-HLL | glcm       | Idmn                                 | 0.94882981   |
| wavelet-HLL | glcm       | JointEnergy                          | 0.008826569  |
| wavelet-HLL | glcm       | Contrast                             | 122.5506923  |
| wavelet-HLL | glcm       | DifferenceEntropy                    | 4.085165313  |
| wavelet-HLL | glcm       | InverseVariance                      | 0.141854702  |
| wavelet-HLL | glcm       | DifferenceVariance                   | 44.61098492  |
| wavelet-HLL | glcm       | Idn                                  | 0.854118429  |
| wavelet-HLL | glcm       | Idm                                  | 0.126805897  |
| wavelet-HLL | glcm       | Correlation                          | 0.368179561  |
| wavelet-HLL | glcm       | Autocorrelation                      | 740.4749963  |
| wavelet-HLL | glcm       | SumEntropy                           | 5.16956895   |
| wavelet-HLL | glcm       | SumSquares                           | 98.68714524  |
| wavelet-HLL | glcm       | ClusterProminence                    | 162639.8147  |
| wavelet-HLL | glcm       | Imc2                                 | 0.99846664   |
| wavelet-HLL | glcm       | Imc1                                 | -0.593625094 |
| wavelet-HLL | glcm       | DifferenceAverage                    | 8.519922934  |
| wavelet-HLL | glcm       | Id                                   | 0.208809684  |
| wavelet-HLL | glcm       | ClusterTendency                      | 272.1978887  |
| wavelet-HLL | firstorder | InterquartileRange                   | 440.8311844  |
| wavelet-HLL | firstorder | Skewness                             | -0.202278159 |
| wavelet-HLL | firstorder | Uniformity                           | 0.034469303  |
| wavelet-HLL | firstorder | Median                               | -35.94989363 |

|             |            |                                  |              |
|-------------|------------|----------------------------------|--------------|
| wavelet-HLL | firstorder | Energy                           | 8938374.804  |
| wavelet-HLL | firstorder | RobustMeanAbsoluteDeviation      | 171.9622503  |
| wavelet-HLL | firstorder | MeanAbsoluteDeviation            | 222.544631   |
| wavelet-HLL | firstorder | TotalEnergy                      | 241336119.7  |
| wavelet-HLL | firstorder | Maximum                          | 397.395514   |
| wavelet-HLL | firstorder | RootMeanSquared                  | 268.4840177  |
| wavelet-HLL | firstorder | 90Percentile                     | 267.6811498  |
| wavelet-HLL | firstorder | Minimum                          | -702.2988584 |
| wavelet-HLL | firstorder | Entropy                          | 5.031328142  |
| wavelet-HLL | firstorder | Range                            | 1099.694372  |
| wavelet-HLL | firstorder | Variance                         | 67581.1379   |
| wavelet-HLL | firstorder | 10Percentile                     | -378.5471002 |
| wavelet-HLL | firstorder | Kurtosis                         | 2.189371929  |
| wavelet-HLL | firstorder | Mean                             | -67.10089327 |
| wavelet-HLL | grlm       | ShortRunLowGrayLevelEmphasis     | 0.013119859  |
| wavelet-HLL | grlm       | GrayLevelVariance                | 108.9705414  |
| wavelet-HLL | grlm       | LowGrayLevelRunEmphasis          | 0.013157155  |
| wavelet-HLL | grlm       | GrayLevelNonUniformityNormalized | 0.034315727  |
| wavelet-HLL | grlm       | RunVariance                      | 0.026080852  |
| wavelet-HLL | grlm       | GrayLevelNonUniformity           | 4.149708126  |
| wavelet-HLL | grlm       | LongRunEmphasis                  | 1.078805263  |
| wavelet-HLL | grlm       | ShortRunHighGrayLevelEmphasis    | 806.8903036  |
| wavelet-HLL | grlm       | RunLengthNonUniformity           | 115.1514301  |
| wavelet-HLL | grlm       | ShortRunEmphasis                 | 0.981029198  |
| wavelet-HLL | grlm       | LongRunHighGrayLevelEmphasis     | 891.6567796  |
| wavelet-HLL | grlm       | RunPercentage                    | 0.975186104  |
| wavelet-HLL | grlm       | LongRunLowGrayLevelEmphasis      | 0.013308595  |
| wavelet-HLL | grlm       | RunEntropy                       | 5.110527588  |
| wavelet-HLL | grlm       | HighGrayLevelRunEmphasis         | 823.0862023  |
| wavelet-HLL | grlm       | RunLengthNonUniformityNormalized | 0.951580774  |
| wavelet-HLL | glszm      | GrayLevelVariance                | 114.7774271  |
| wavelet-HLL | glszm      | ZoneVariance                     | 0.553212978  |
| wavelet-HLL | glszm      | GrayLevelNonUniformityNormalized | 0.031940412  |
| wavelet-HLL | glszm      | SizeZoneNonUniformityNormalized  | 0.570003787  |
| wavelet-HLL | glszm      | SizeZoneNonUniformity            | 50.73033708  |
| wavelet-HLL | glszm      | GrayLevelNonUniformity           | 2.842696629  |
| wavelet-HLL | glszm      | LargeAreaEmphasis                | 2.494382022  |
| wavelet-HLL | glszm      | SmallAreaHighGrayLevelEmphasis   | 616.261392   |
| wavelet-HLL | glszm      | ZonePercentage                   | 0.717741935  |
| wavelet-HLL | glszm      | LargeAreaLowGrayLevelEmphasis    | 0.020060203  |
| wavelet-HLL | glszm      | LargeAreaHighGrayLevelEmphasis   | 2104.258427  |
| wavelet-HLL | glszm      | HighGrayLevelZoneEmphasis        | 807.2359551  |
| wavelet-HLL | glszm      | SmallAreaEmphasis                | 0.783629838  |
| wavelet-HLL | glszm      | LowGrayLevelZoneEmphasis         | 0.017170024  |
| wavelet-HLL | glszm      | ZoneEntropy                      | 5.680295369  |
| wavelet-HLL | glszm      | SmallAreaLowGrayLevelEmphasis    | 0.016751807  |
| wavelet-HLL | ngtdm      | Coarseness                       | 0.047288458  |
| wavelet-HLL | ngtdm      | Complexity                       | 3445.58732   |
| wavelet-HLL | ngtdm      | Strength                         | 30.98317841  |
| wavelet-HLL | ngtdm      | Contrast                         | 0.800279352  |
| wavelet-HLL | ngtdm      | Busyness                         | 0.024422587  |
| wavelet-LHL | gldm       | GrayLevelVariance                | 105.8376691  |
| wavelet-LHL | gldm       | HighGrayLevelEmphasis            | 633.3548387  |

|             |            |                                      |              |
|-------------|------------|--------------------------------------|--------------|
| wavelet-LHL | gldm       | DependenceEntropy                    | 5.728282855  |
| wavelet-LHL | gldm       | DependenceNonUniformity              | 62.32258065  |
| wavelet-LHL | gldm       | GrayLevelNonUniformity               | 4.080645161  |
| wavelet-LHL | gldm       | SmallDependenceEmphasis              | 0.731742832  |
| wavelet-LHL | gldm       | SmallDependenceHighGrayLevelEmphasis | 474.3200045  |
| wavelet-LHL | gldm       | DependenceNonUniformityNormalized    | 0.502601457  |
| wavelet-LHL | gldm       | LargeDependenceEmphasis              | 2.612903226  |
| wavelet-LHL | gldm       | LargeDependenceLowGrayLevelEmphasis  | 0.017734495  |
| wavelet-LHL | gldm       | DependenceVariance                   | 0.505723205  |
| wavelet-LHL | gldm       | LargeDependenceHighGrayLevelEmphasis | 1416.145161  |
| wavelet-LHL | gldm       | SmallDependenceLowGrayLevelEmphasis  | 0.011984766  |
| wavelet-LHL | gldm       | LowGrayLevelEmphasis                 | 0.012656228  |
| wavelet-LHL | glcm       | JointAverage                         | 22.58338969  |
| wavelet-LHL | glcm       | SumAverage                           | 45.16677937  |
| wavelet-LHL | glcm       | JointEntropy                         | 6.970139914  |
| wavelet-LHL | glcm       | ClusterShade                         | 1166.991128  |
| wavelet-LHL | glcm       | MaximumProbability                   | 0.01754824   |
| wavelet-LHL | glcm       | ldmn                                 | 0.945210652  |
| wavelet-LHL | glcm       | JointEnergy                          | 0.008437786  |
| wavelet-LHL | glcm       | Contrast                             | 160.3632151  |
| wavelet-LHL | glcm       | DifferenceEntropy                    | 4.272963515  |
| wavelet-LHL | glcm       | InverseVariance                      | 0.104397188  |
| wavelet-LHL | glcm       | DifferenceVariance                   | 60.41488734  |
| wavelet-LHL | glcm       | ldn                                  | 0.84826885   |
| wavelet-LHL | glcm       | ldm                                  | 0.09579904   |
| wavelet-LHL | glcm       | Correlation                          | 0.145363093  |
| wavelet-LHL | glcm       | Autocorrelation                      | 526.5210645  |
| wavelet-LHL | glcm       | SumEntropy                           | 5.146255241  |
| wavelet-LHL | glcm       | SumSquares                           | 96.38906579  |
| wavelet-LHL | glcm       | ClusterProminence                    | 145427.2348  |
| wavelet-LHL | glcm       | lmc2                                 | 0.998711409  |
| wavelet-LHL | glcm       | lmc1                                 | -0.604846255 |
| wavelet-LHL | glcm       | DifferenceAverage                    | 9.731720877  |
| wavelet-LHL | glcm       | ld                                   | 0.179876776  |
| wavelet-LHL | glcm       | ClusterTendency                      | 225.1930481  |
| wavelet-LHL | firstorder | InterquartileRange                   | 385.8324984  |
| wavelet-LHL | firstorder | Skewness                             | 0.368146772  |
| wavelet-LHL | firstorder | Uniformity                           | 0.032908429  |
| wavelet-LHL | firstorder | Median                               | -101.8301478 |
| wavelet-LHL | firstorder | Energy                               | 8698235.999  |
| wavelet-LHL | firstorder | RobustMeanAbsoluteDeviation          | 153.520632   |
| wavelet-LHL | firstorder | MeanAbsoluteDeviation                | 212.6384877  |
| wavelet-LHL | firstorder | TotalEnergy                          | 234852372    |
| wavelet-LHL | firstorder | Maximum                              | 588.237795   |
| wavelet-LHL | firstorder | RootMeanSquared                      | 264.8529111  |
| wavelet-LHL | firstorder | 90Percentile                         | 287.9267588  |
| wavelet-LHL | firstorder | Minimum                              | -610.5487771 |
| wavelet-LHL | firstorder | Entropy                              | 5.118083235  |
| wavelet-LHL | firstorder | Range                                | 1198.786572  |
| wavelet-LHL | firstorder | Variance                             | 66127.65194  |
| wavelet-LHL | firstorder | 10Percentile                         | -349.5750406 |
| wavelet-LHL | firstorder | Kurtosis                             | 2.527211162  |
| wavelet-LHL | firstorder | Mean                                 | -63.39883727 |

|             |       |                                      |             |
|-------------|-------|--------------------------------------|-------------|
| wavelet-LHL | grlm  | ShortRunLowGrayLevelEmphasis         | 0.012791654 |
| wavelet-LHL | grlm  | GrayLevelVariance                    | 106.7842163 |
| wavelet-LHL | grlm  | LowGrayLevelRunEmphasis              | 0.012830234 |
| wavelet-LHL | grlm  | GrayLevelNonUniformityNormalized     | 0.032665055 |
| wavelet-LHL | grlm  | RunVariance                          | 0.017356095 |
| wavelet-LHL | grlm  | GrayLevelNonUniformity               | 3.980321378 |
| wavelet-LHL | grlm  | LongRunEmphasis                      | 1.053439452 |
| wavelet-LHL | grlm  | ShortRunHighGrayLevelEmphasis        | 628.1935848 |
| wavelet-LHL | grlm  | RunLengthNonUniformity               | 117.6484306 |
| wavelet-LHL | grlm  | ShortRunEmphasis                     | 0.986640137 |
| wavelet-LHL | grlm  | LongRunHighGrayLevelEmphasis         | 663.4292256 |
| wavelet-LHL | grlm  | RunPercentage                        | 0.982630273 |
| wavelet-LHL | grlm  | LongRunLowGrayLevelEmphasis          | 0.012984556 |
| wavelet-LHL | grlm  | RunEntropy                           | 5.177133621 |
| wavelet-LHL | grlm  | HighGrayLevelRunEmphasis             | 635.2407129 |
| wavelet-LHL | grlm  | RunLengthNonUniformityNormalized     | 0.965287809 |
| wavelet-LHL | glszm | GrayLevelVariance                    | 119.2499    |
| wavelet-LHL | glszm | ZoneVariance                         | 0.3224      |
| wavelet-LHL | glszm | GrayLevelNonUniformityNormalized     | 0.0308      |
| wavelet-LHL | glszm | SizeZoneNonUniformityNormalized      | 0.691       |
| wavelet-LHL | glszm | SizeZoneNonUniformity                | 69.1        |
| wavelet-LHL | glszm | GrayLevelNonUniformity               | 3.08        |
| wavelet-LHL | glszm | LargeAreaEmphasis                    | 1.86        |
| wavelet-LHL | glszm | SmallAreaHighGrayLevelEmphasis       | 556.400625  |
| wavelet-LHL | glszm | ZonePercentage                       | 0.806451613 |
| wavelet-LHL | glszm | LargeAreaLowGrayLevelEmphasis        | 0.017525561 |
| wavelet-LHL | glszm | LargeAreaHighGrayLevelEmphasis       | 1101.96     |
| wavelet-LHL | glszm | HighGrayLevelZoneEmphasis            | 647.79      |
| wavelet-LHL | glszm | SmallAreaEmphasis                    | 0.857569444 |
| wavelet-LHL | glszm | LowGrayLevelZoneEmphasis             | 0.015070663 |
| wavelet-LHL | glszm | ZoneEntropy                          | 5.598821255 |
| wavelet-LHL | glszm | SmallAreaLowGrayLevelEmphasis        | 0.014751521 |
| wavelet-LHL | ngtdm | Coarseness                           | 0.039422957 |
| wavelet-LHL | ngtdm | Complexity                           | 4790.808412 |
| wavelet-LHL | ngtdm | Strength                             | 26.54856428 |
| wavelet-LHL | ngtdm | Contrast                             | 0.924331747 |
| wavelet-LHL | ngtdm | Busyness                             | 0.043932279 |
| wavelet-LHH | gldm  | GrayLevelVariance                    | 37.89509625 |
| wavelet-LHH | gldm  | HighGrayLevelEmphasis                | 309.8790323 |
| wavelet-LHH | gldm  | DependenceEntropy                    | 5.446880815 |
| wavelet-LHH | gldm  | DependenceNonUniformity              | 42.4516129  |
| wavelet-LHH | gldm  | GrayLevelNonUniformity               | 6.806451613 |
| wavelet-LHH | gldm  | SmallDependenceEmphasis              | 0.571601703 |
| wavelet-LHH | gldm  | SmallDependenceHighGrayLevelEmphasis | 193.5299574 |
| wavelet-LHH | gldm  | DependenceNonUniformityNormalized    | 0.342351717 |
| wavelet-LHH | gldm  | LargeDependenceEmphasis              | 4.35483871  |
| wavelet-LHH | gldm  | LargeDependenceLowGrayLevelEmphasis  | 0.085514346 |
| wavelet-LHH | gldm  | DependenceVariance                   | 0.973985432 |
| wavelet-LHH | gldm  | LargeDependenceHighGrayLevelEmphasis | 1212.766129 |
| wavelet-LHH | gldm  | SmallDependenceLowGrayLevelEmphasis  | 0.009629523 |
| wavelet-LHH | gldm  | LowGrayLevelEmphasis                 | 0.023473884 |
| wavelet-LHH | glcm  | JointAverage                         | 16.44226172 |
| wavelet-LHH | glcm  | SumAverage                           | 32.88452343 |

|             |            |                                  |              |
|-------------|------------|----------------------------------|--------------|
| wavelet-LHH | glcm       | JointEntropy                     | 6.745363905  |
| wavelet-LHH | glcm       | ClusterShade                     | 19.77207535  |
| wavelet-LHH | glcm       | MaximumProbability               | 0.026473748  |
| wavelet-LHH | glcm       | Idmn                             | 0.943983303  |
| wavelet-LHH | glcm       | JointEnergy                      | 0.010294079  |
| wavelet-LHH | glcm       | Contrast                         | 74.07759296  |
| wavelet-LHH | glcm       | DifferenceEntropy                | 3.906491641  |
| wavelet-LHH | glcm       | InverseVariance                  | 0.166642435  |
| wavelet-LHH | glcm       | DifferenceVariance               | 29.32552238  |
| wavelet-LHH | glcm       | Idn                              | 0.848446256  |
| wavelet-LHH | glcm       | Idm                              | 0.1573884    |
| wavelet-LHH | glcm       | Correlation                      | -0.050288136 |
| wavelet-LHH | glcm       | Autocorrelation                  | 268.7197757  |
| wavelet-LHH | glcm       | SumEntropy                       | 4.575834921  |
| wavelet-LHH | glcm       | SumSquares                       | 35.28214748  |
| wavelet-LHH | glcm       | ClusterProminence                | 15141.91991  |
| wavelet-LHH | glcm       | Imc2                             | 0.988647512  |
| wavelet-LHH | glcm       | Imc1                             | -0.440231053 |
| wavelet-LHH | glcm       | DifferenceAverage                | 6.57828336   |
| wavelet-LHH | glcm       | Id                               | 0.245095139  |
| wavelet-LHH | glcm       | ClusterTendency                  | 67.05099694  |
| wavelet-LHH | firstorder | InterquartileRange               | 185.6186784  |
| wavelet-LHH | firstorder | Skewness                         | 0.058987789  |
| wavelet-LHH | firstorder | Uniformity                       | 0.054890739  |
| wavelet-LHH | firstorder | Median                           | -4.979982605 |
| wavelet-LHH | firstorder | Energy                           | 2914032.463  |
| wavelet-LHH | firstorder | RobustMeanAbsoluteDeviation      | 76.18135142  |
| wavelet-LHH | firstorder | MeanAbsoluteDeviation            | 118.2419832  |
| wavelet-LHH | firstorder | TotalEnergy                      | 78678876.5   |
| wavelet-LHH | firstorder | Maximum                          | 404.2830593  |
| wavelet-LHH | firstorder | RootMeanSquared                  | 153.2979511  |
| wavelet-LHH | firstorder | 90Percentile                     | 233.4722328  |
| wavelet-LHH | firstorder | Minimum                          | -398.1797976 |
| wavelet-LHH | firstorder | Entropy                          | 4.412369116  |
| wavelet-LHH | firstorder | Range                            | 802.4628568  |
| wavelet-LHH | firstorder | Variance                         | 23499.89659  |
| wavelet-LHH | firstorder | 10Percentile                     | -184.9049068 |
| wavelet-LHH | firstorder | Kurtosis                         | 3.148232683  |
| wavelet-LHH | firstorder | Mean                             | 0.604327622  |
| wavelet-LHH | grlm       | ShortRunLowGrayLevelEmphasis     | 0.02281895   |
| wavelet-LHH | grlm       | GrayLevelVariance                | 38.72817394  |
| wavelet-LHH | grlm       | LowGrayLevelRunEmphasis          | 0.023439122  |
| wavelet-LHH | grlm       | GrayLevelNonUniformityNormalized | 0.054069697  |
| wavelet-LHH | grlm       | RunVariance                      | 0.03468774   |
| wavelet-LHH | grlm       | GrayLevelNonUniformity           | 6.489891928  |
| wavelet-LHH | grlm       | LongRunEmphasis                  | 1.104357665  |
| wavelet-LHH | grlm       | ShortRunHighGrayLevelEmphasis    | 304.5944649  |
| wavelet-LHH | grlm       | RunLengthNonUniformity           | 112.6994695  |
| wavelet-LHH | grlm       | ShortRunEmphasis                 | 0.975335184  |
| wavelet-LHH | grlm       | LongRunHighGrayLevelEmphasis     | 339.2822212  |
| wavelet-LHH | grlm       | RunPercentage                    | 0.967741935  |
| wavelet-LHH | grlm       | LongRunLowGrayLevelEmphasis      | 0.025943593  |
| wavelet-LHH | grlm       | RunEntropy                       | 4.546079609  |

|             |       |                                      |             |
|-------------|-------|--------------------------------------|-------------|
| wavelet-LHH | grlm  | HighGrayLevelRunEmphasis             | 311.2577759 |
| wavelet-LHH | grlm  | RunLengthNonUniformityNormalized     | 0.938123945 |
| wavelet-LHH | glszm | GrayLevelVariance                    | 50.774375   |
| wavelet-LHH | glszm | ZoneVariance                         | 1.3725      |
| wavelet-LHH | glszm | GrayLevelNonUniformityNormalized     | 0.045625    |
| wavelet-LHH | glszm | SizeZoneNonUniformityNormalized      | 0.5653125   |
| wavelet-LHH | glszm | SizeZoneNonUniformity                | 45.225      |
| wavelet-LHH | glszm | GrayLevelNonUniformity               | 3.65        |
| wavelet-LHH | glszm | LargeAreaEmphasis                    | 3.775       |
| wavelet-LHH | glszm | SmallAreaHighGrayLevelEmphasis       | 270.2389485 |
| wavelet-LHH | glszm | ZonePercentage                       | 0.64516129  |
| wavelet-LHH | glszm | LargeAreaLowGrayLevelEmphasis        | 0.070311123 |
| wavelet-LHH | glszm | LargeAreaHighGrayLevelEmphasis       | 1080.2875   |
| wavelet-LHH | glszm | HighGrayLevelZoneEmphasis            | 330.5       |
| wavelet-LHH | glszm | SmallAreaEmphasis                    | 0.779140519 |
| wavelet-LHH | glszm | LowGrayLevelZoneEmphasis             | 0.021659387 |
| wavelet-LHH | glszm | ZoneEntropy                          | 5.179950014 |
| wavelet-LHH | glszm | SmallAreaLowGrayLevelEmphasis        | 0.011375986 |
| wavelet-LHH | ngtdm | Coarseness                           | 0.043333778 |
| wavelet-LHH | ngtdm | Complexity                           | 1436.319853 |
| wavelet-LHH | ngtdm | Strength                             | 9.741602642 |
| wavelet-LHH | ngtdm | Contrast                             | 0.538486773 |
| wavelet-LHH | ngtdm | Busyness                             | 0.064436793 |
| wavelet-LLH | gldm  | GrayLevelVariance                    | 90.43704475 |
| wavelet-LLH | gldm  | HighGrayLevelEmphasis                | 600.3225806 |
| wavelet-LLH | gldm  | DependenceEntropy                    | 5.570816827 |
| wavelet-LLH | gldm  | DependenceNonUniformity              | 54.77419355 |
| wavelet-LLH | gldm  | GrayLevelNonUniformity               | 5.129032258 |
| wavelet-LLH | gldm  | SmallDependenceEmphasis              | 0.678091398 |
| wavelet-LLH | gldm  | SmallDependenceHighGrayLevelEmphasis | 414.6147513 |
| wavelet-LLH | gldm  | DependenceNonUniformityNormalized    | 0.441727367 |
| wavelet-LLH | gldm  | LargeDependenceEmphasis              | 3.080645161 |
| wavelet-LLH | gldm  | LargeDependenceLowGrayLevelEmphasis  | 0.026054945 |
| wavelet-LLH | gldm  | DependenceVariance                   | 0.632934443 |
| wavelet-LLH | gldm  | LargeDependenceHighGrayLevelEmphasis | 1816        |
| wavelet-LLH | gldm  | SmallDependenceLowGrayLevelEmphasis  | 0.013626639 |
| wavelet-LLH | gldm  | LowGrayLevelEmphasis                 | 0.015733543 |
| wavelet-LLH | glcm  | JointAverage                         | 22.12897232 |
| wavelet-LLH | glcm  | SumAverage                           | 44.25794463 |
| wavelet-LLH | glcm  | JointEntropy                         | 6.902505607 |
| wavelet-LLH | glcm  | ClusterShade                         | 88.26695509 |
| wavelet-LLH | glcm  | MaximumProbability                   | 0.022919968 |
| wavelet-LLH | glcm  | ldmn                                 | 0.935622681 |
| wavelet-LLH | glcm  | JointEnergy                          | 0.009064598 |
| wavelet-LLH | glcm  | Contrast                             | 155.6438478 |
| wavelet-LLH | glcm  | DifferenceEntropy                    | 4.304026242 |
| wavelet-LLH | glcm  | InverseVariance                      | 0.099317004 |
| wavelet-LLH | glcm  | DifferenceVariance                   | 55.91201371 |
| wavelet-LLH | glcm  | ldn                                  | 0.83523092  |
| wavelet-LLH | glcm  | ldm                                  | 0.101044449 |
| wavelet-LLH | glcm  | Correlation                          | 0.062102028 |
| wavelet-LLH | glcm  | Autocorrelation                      | 496.8806446 |
| wavelet-LLH | glcm  | SumEntropy                           | 5.062490658 |

|             |            |                                  |              |
|-------------|------------|----------------------------------|--------------|
| wavelet-LLH | glcm       | SumSquares                       | 84.93533466  |
| wavelet-LLH | glcm       | ClusterProminence                | 111855.0165  |
| wavelet-LLH | glcm       | Imc2                             | 0.997127651  |
| wavelet-LLH | glcm       | Imc1                             | -0.54824503  |
| wavelet-LLH | glcm       | DifferenceAverage                | 9.681110492  |
| wavelet-LLH | glcm       | Id                               | 0.1840649    |
| wavelet-LLH | glcm       | ClusterTendency                  | 184.0974909  |
| wavelet-LLH | firstorder | InterquartileRange               | 262.4622322  |
| wavelet-LLH | firstorder | Skewness                         | 0.051854208  |
| wavelet-LLH | firstorder | Uniformity                       | 0.041363163  |
| wavelet-LLH | firstorder | Median                           | -30.63106448 |
| wavelet-LLH | firstorder | Energy                           | 7030208.283  |
| wavelet-LLH | firstorder | RobustMeanAbsoluteDeviation      | 122.0210477  |
| wavelet-LLH | firstorder | MeanAbsoluteDeviation            | 184.5599977  |
| wavelet-LLH | firstorder | TotalEnergy                      | 189815623.7  |
| wavelet-LLH | firstorder | Maximum                          | 512.6060417  |
| wavelet-LLH | firstorder | RootMeanSquared                  | 238.1075977  |
| wavelet-LLH | firstorder | 90Percentile                     | 287.431831   |
| wavelet-LLH | firstorder | Minimum                          | -570.6632558 |
| wavelet-LLH | firstorder | Entropy                          | 4.89623021   |
| wavelet-LLH | firstorder | Range                            | 1083.269297  |
| wavelet-LLH | firstorder | Variance                         | 56166.19806  |
| wavelet-LLH | firstorder | 10Percentile                     | -338.2990627 |
| wavelet-LLH | firstorder | Kurtosis                         | 2.819115724  |
| wavelet-LLH | firstorder | Mean                             | -23.00065286 |
| wavelet-LLH | glrlm      | ShortRunLowGrayLevelEmphasis     | 0.015866439  |
| wavelet-LLH | glrlm      | GrayLevelVariance                | 90.85061777  |
| wavelet-LLH | glrlm      | LowGrayLevelRunEmphasis          | 0.015960297  |
| wavelet-LLH | glrlm      | GrayLevelNonUniformityNormalized | 0.040774794  |
| wavelet-LLH | glrlm      | RunVariance                      | 0.024200384  |
| wavelet-LLH | glrlm      | GrayLevelNonUniformity           | 4.947005107  |
| wavelet-LLH | glrlm      | LongRunEmphasis                  | 1.070119784  |
| wavelet-LLH | glrlm      | ShortRunHighGrayLevelEmphasis    | 591.0611321  |
| wavelet-LLH | glrlm      | RunLengthNonUniformity           | 116.4219583  |
| wavelet-LLH | glrlm      | ShortRunEmphasis                 | 0.983876993  |
| wavelet-LLH | glrlm      | LongRunHighGrayLevelEmphasis     | 641.3473778  |
| wavelet-LLH | glrlm      | RunPercentage                    | 0.978287841  |
| wavelet-LLH | glrlm      | LongRunLowGrayLevelEmphasis      | 0.016349718  |
| wavelet-LLH | glrlm      | RunEntropy                       | 4.972697505  |
| wavelet-LLH | glrlm      | HighGrayLevelRunEmphasis         | 600.637859   |
| wavelet-LLH | glrlm      | RunLengthNonUniformityNormalized | 0.959102646  |
| wavelet-LLH | glszm      | GrayLevelVariance                | 98.84587814  |
| wavelet-LLH | glszm      | ZoneVariance                     | 0.716845878  |
| wavelet-LLH | glszm      | GrayLevelNonUniformityNormalized | 0.036651636  |
| wavelet-LLH | glszm      | SizeZoneNonUniformityNormalized  | 0.652907851  |
| wavelet-LLH | glszm      | SizeZoneNonUniformity            | 60.72043011  |
| wavelet-LLH | glszm      | GrayLevelNonUniformity           | 3.408602151  |
| wavelet-LLH | glszm      | LargeAreaEmphasis                | 2.494623656  |
| wavelet-LLH | glszm      | SmallAreaHighGrayLevelEmphasis   | 515.5822255  |
| wavelet-LLH | glszm      | ZonePercentage                   | 0.75         |
| wavelet-LLH | glszm      | LargeAreaLowGrayLevelEmphasis    | 0.026307315  |
| wavelet-LLH | glszm      | LargeAreaHighGrayLevelEmphasis   | 1393.505376  |
| wavelet-LLH | glszm      | HighGrayLevelZoneEmphasis        | 612.6236559  |

|             |            |                                      |              |
|-------------|------------|--------------------------------------|--------------|
| wavelet-LLH | glszm      | SmallAreaEmphasis                    | 0.834822191  |
| wavelet-LLH | glszm      | LowGrayLevelZoneEmphasis             | 0.01898504   |
| wavelet-LLH | glszm      | ZoneEntropy                          | 5.384319129  |
| wavelet-LLH | glszm      | SmallAreaLowGrayLevelEmphasis        | 0.017702735  |
| wavelet-LLH | ngtdm      | Coarseness                           | 0.040523508  |
| wavelet-LLH | ngtdm      | Complexity                           | 4000.722501  |
| wavelet-LLH | ngtdm      | Strength                             | 22.19341258  |
| wavelet-LLH | ngtdm      | Contrast                             | 0.851288471  |
| wavelet-LLH | ngtdm      | Busyness                             | 0.031071814  |
| wavelet-LLL | gldm       | GrayLevelVariance                    | 596.4726197  |
| wavelet-LLL | gldm       | HighGrayLevelEmphasis                | 2707.282258  |
| wavelet-LLL | gldm       | DependenceEntropy                    | 6.086061306  |
| wavelet-LLL | gldm       | DependenceNonUniformity              | 89.87096774  |
| wavelet-LLL | gldm       | GrayLevelNonUniformity               | 2.35483871   |
| wavelet-LLL | gldm       | SmallDependenceEmphasis              | 0.876792115  |
| wavelet-LLL | gldm       | SmallDependenceHighGrayLevelEmphasis | 2142.450717  |
| wavelet-LLL | gldm       | DependenceNonUniformityNormalized    | 0.724765869  |
| wavelet-LLL | gldm       | LargeDependenceEmphasis              | 1.564516129  |
| wavelet-LLL | gldm       | LargeDependenceLowGrayLevelEmphasis  | 0.019571184  |
| wavelet-LLL | gldm       | DependenceVariance                   | 0.178199792  |
| wavelet-LLL | gldm       | LargeDependenceHighGrayLevelEmphasis | 5310.443548  |
| wavelet-LLL | gldm       | SmallDependenceLowGrayLevelEmphasis  | 0.019169819  |
| wavelet-LLL | gldm       | LowGrayLevelEmphasis                 | 0.019246401  |
| wavelet-LLL | glcm       | JointAverage                         | 53.42920092  |
| wavelet-LLL | glcm       | SumAverage                           | 106.8584018  |
| wavelet-LLL | glcm       | JointEntropy                         | 7.095169052  |
| wavelet-LLL | glcm       | ClusterShade                         | -16426.92303 |
| wavelet-LLL | glcm       | MaximumProbability                   | 0.013706966  |
| wavelet-LLL | glcm       | ldmn                                 | 0.924767901  |
| wavelet-LLL | glcm       | JointEnergy                          | 0.007482228  |
| wavelet-LLL | glcm       | Contrast                             | 734.1614074  |
| wavelet-LLL | glcm       | DifferenceEntropy                    | 5.000046642  |
| wavelet-LLL | glcm       | InverseVariance                      | 0.038322557  |
| wavelet-LLL | glcm       | DifferenceVariance                   | 239.3814468  |
| wavelet-LLL | glcm       | ldn                                  | 0.818407047  |
| wavelet-LLL | glcm       | ldm                                  | 0.038110867  |
| wavelet-LLL | glcm       | Correlation                          | 0.349844204  |
| wavelet-LLL | glcm       | Autocorrelation                      | 3059.598347  |
| wavelet-LLL | glcm       | SumEntropy                           | 5.644789691  |
| wavelet-LLL | glcm       | SumSquares                           | 568.6077513  |
| wavelet-LLL | glcm       | ClusterProminence                    | 4988080.488  |
| wavelet-LLL | glcm       | lmc2                                 | 0.999918331  |
| wavelet-LLL | glcm       | lmc1                                 | -0.762405336 |
| wavelet-LLL | glcm       | DifferenceAverage                    | 21.85559996  |
| wavelet-LLL | glcm       | ld                                   | 0.095824506  |
| wavelet-LLL | glcm       | ClusterTendency                      | 1540.269598  |
| wavelet-LLL | firstorder | InterquartileRange                   | 1033.383972  |
| wavelet-LLL | firstorder | Skewness                             | -0.004044665 |
| wavelet-LLL | firstorder | Uniformity                           | 0.018990635  |
| wavelet-LLL | firstorder | Median                               | -789.2641639 |
| wavelet-LLL | firstorder | Energy                               | 118745825.8  |
| wavelet-LLL | firstorder | RobustMeanAbsoluteDeviation          | 410.5714605  |
| wavelet-LLL | firstorder | MeanAbsoluteDeviation                | 526.4719186  |



|             |            |                                  |              |
|-------------|------------|----------------------------------|--------------|
| wavelet-LLL | firstorder | TotalEnergy                      | 3206137297   |
| wavelet-LLL | firstorder | Maximum                          | 316.9304208  |
| wavelet-LLL | firstorder | RootMeanSquared                  | 978.584502   |
| wavelet-LLL | firstorder | 90Percentile                     | 93.06613814  |
| wavelet-LLL | firstorder | Minimum                          | -1888.166473 |
| wavelet-LLL | firstorder | Entropy                          | 5.906507577  |
| wavelet-LLL | firstorder | Range                            | 2205.096894  |
| wavelet-LLL | firstorder | Variance                         | 373250.9295  |
| wavelet-LLL | firstorder | 10Percentile                     | -1629.911912 |
| wavelet-LLL | firstorder | Kurtosis                         | 1.870277884  |
| wavelet-LLL | firstorder | Mean                             | -764.4453532 |
| wavelet-LLL | grlm       | ShortRunLowGrayLevelEmphasis     | 0.0193724    |
| wavelet-LLL | grlm       | GrayLevelVariance                | 594.6227994  |
| wavelet-LLL | grlm       | LowGrayLevelRunEmphasis          | 0.019375484  |
| wavelet-LLL | grlm       | GrayLevelNonUniformityNormalized | 0.018962334  |
| wavelet-LLL | grlm       | RunVariance                      | 0.006822098  |
| wavelet-LLL | grlm       | GrayLevelNonUniformity           | 2.335292344  |
| wavelet-LLL | grlm       | LongRunEmphasis                  | 1.020761689  |
| wavelet-LLL | grlm       | ShortRunHighGrayLevelEmphasis    | 2670.28059   |
| wavelet-LLL | grlm       | RunLengthNonUniformity           | 121.4855304  |
| wavelet-LLL | grlm       | ShortRunEmphasis                 | 0.994809578  |
| wavelet-LLL | grlm       | LongRunHighGrayLevelEmphasis     | 2789.718273  |
| wavelet-LLL | grlm       | RunPercentage                    | 0.993176179  |
| wavelet-LLL | grlm       | LongRunLowGrayLevelEmphasis      | 0.019387821  |
| wavelet-LLL | grlm       | RunEntropy                       | 5.920157794  |
| wavelet-LLL | grlm       | HighGrayLevelRunEmphasis         | 2694.168127  |
| wavelet-LLL | grlm       | RunLengthNonUniformityNormalized | 0.986355804  |
| wavelet-LLL | glszm      | GrayLevelVariance                | 568.2911739  |
| wavelet-LLL | glszm      | ZoneVariance                     | 0.123267288  |
| wavelet-LLL | glszm      | GrayLevelNonUniformityNormalized | 0.018717206  |
| wavelet-LLL | glszm      | SizeZoneNonUniformityNormalized  | 0.85120213   |
| wavelet-LLL | glszm      | SizeZoneNonUniformity            | 96.18584071  |
| wavelet-LLL | glszm      | GrayLevelNonUniformity           | 2.115044248  |
| wavelet-LLL | glszm      | LargeAreaEmphasis                | 1.327433628  |
| wavelet-LLL | glszm      | SmallAreaHighGrayLevelEmphasis   | 2239.058751  |
| wavelet-LLL | glszm      | ZonePercentage                   | 0.911290323  |
| wavelet-LLL | glszm      | LargeAreaLowGrayLevelEmphasis    | 0.02124482   |
| wavelet-LLL | glszm      | LargeAreaHighGrayLevelEmphasis   | 4036.20354   |
| wavelet-LLL | glszm      | HighGrayLevelZoneEmphasis        | 2523.026549  |
| wavelet-LLL | glszm      | SmallAreaEmphasis                | 0.937807276  |
| wavelet-LLL | glszm      | LowGrayLevelZoneEmphasis         | 0.021062063  |
| wavelet-LLL | glszm      | ZoneEntropy                      | 6.026827277  |
| wavelet-LLL | glszm      | SmallAreaLowGrayLevelEmphasis    | 0.021021438  |
| wavelet-LLL | ngtdm      | Coarseness                       | 0.029283984  |
| wavelet-LLL | ngtdm      | Complexity                       | 35534.8717   |
| wavelet-LLL | ngtdm      | Strength                         | 90.94149017  |
| wavelet-LLL | ngtdm      | Contrast                         | 3.845453123  |
| wavelet-LLL | ngtdm      | Busyness                         | 0.012533288  |
| wavelet-HHL | gldm       | GrayLevelVariance                | 26.97261967  |
| wavelet-HHL | gldm       | HighGrayLevelEmphasis            | 184.6370968  |
| wavelet-HHL | gldm       | DependenceEntropy                | 5.017541804  |
| wavelet-HHL | gldm       | DependenceNonUniformity          | 44.61290323  |
| wavelet-HHL | gldm       | GrayLevelNonUniformity           | 7.870967742  |

|             |            |                                      |              |
|-------------|------------|--------------------------------------|--------------|
| wavelet-HHL | gldm       | SmallDependenceEmphasis              | 0.531193996  |
| wavelet-HHL | gldm       | SmallDependenceHighGrayLevelEmphasis | 107.3734319  |
| wavelet-HHL | gldm       | DependenceNonUniformityNormalized    | 0.359781478  |
| wavelet-HHL | gldm       | LargeDependenceEmphasis              | 3.790322581  |
| wavelet-HHL | gldm       | LargeDependenceLowGrayLevelEmphasis  | 0.049394413  |
| wavelet-HHL | gldm       | DependenceVariance                   | 0.585067638  |
| wavelet-HHL | gldm       | LargeDependenceHighGrayLevelEmphasis | 636.1693548  |
| wavelet-HHL | gldm       | SmallDependenceLowGrayLevelEmphasis  | 0.019256636  |
| wavelet-HHL | gldm       | LowGrayLevelEmphasis                 | 0.02366358   |
| wavelet-HHL | glcm       | JointAverage                         | 12.18912021  |
| wavelet-HHL | glcm       | SumAverage                           | 24.37824042  |
| wavelet-HHL | glcm       | JointEntropy                         | 6.679321697  |
| wavelet-HHL | glcm       | ClusterShade                         | 92.53502377  |
| wavelet-HHL | glcm       | MaximumProbability                   | 0.024834783  |
| wavelet-HHL | glcm       | Idmn                                 | 0.941557787  |
| wavelet-HHL | glcm       | JointEnergy                          | 0.010894631  |
| wavelet-HHL | glcm       | Contrast                             | 51.63323014  |
| wavelet-HHL | glcm       | DifferenceEntropy                    | 3.68012762   |
| wavelet-HHL | glcm       | InverseVariance                      | 0.180625937  |
| wavelet-HHL | glcm       | DifferenceVariance                   | 19.18983006  |
| wavelet-HHL | glcm       | Idn                                  | 0.842005514  |
| wavelet-HHL | glcm       | Idm                                  | 0.162720722  |
| wavelet-HHL | glcm       | Correlation                          | 0.001580158  |
| wavelet-HHL | glcm       | Autocorrelation                      | 148.8673645  |
| wavelet-HHL | glcm       | SumEntropy                           | 4.494740716  |
| wavelet-HHL | glcm       | SumSquares                           | 25.98516018  |
| wavelet-HHL | glcm       | ClusterProminence                    | 8271.392296  |
| wavelet-HHL | glcm       | Imc2                                 | 0.981419952  |
| wavelet-HHL | glcm       | Imc1                                 | -0.401300506 |
| wavelet-HHL | glcm       | DifferenceAverage                    | 5.611872102  |
| wavelet-HHL | glcm       | Id                                   | 0.255322262  |
| wavelet-HHL | glcm       | ClusterTendency                      | 52.30741057  |
| wavelet-HHL | firstorder | InterquartileRange                   | 173.6993661  |
| wavelet-HHL | firstorder | Skewness                             | 0.318719899  |
| wavelet-HHL | firstorder | Uniformity                           | 0.063475546  |
| wavelet-HHL | firstorder | Median                               | 28.19869252  |
| wavelet-HHL | firstorder | Energy                               | 2167329.971  |
| wavelet-HHL | firstorder | RobustMeanAbsoluteDeviation          | 69.70767968  |
| wavelet-HHL | firstorder | MeanAbsoluteDeviation                | 102.7903831  |
| wavelet-HHL | firstorder | TotalEnergy                          | 58517909.22  |
| wavelet-HHL | firstorder | Maximum                              | 399.7385129  |
| wavelet-HHL | firstorder | RootMeanSquared                      | 132.2061553  |
| wavelet-HHL | firstorder | 90Percentile                         | 173.8644554  |
| wavelet-HHL | firstorder | Minimum                              | -251.378785  |
| wavelet-HHL | firstorder | Entropy                              | 4.251824341  |
| wavelet-HHL | firstorder | Range                                | 651.117298   |
| wavelet-HHL | firstorder | Variance                             | 16823.31082  |
| wavelet-HHL | firstorder | 10Percentile                         | -119.3746791 |
| wavelet-HHL | firstorder | Kurtosis                             | 3.18204681   |
| wavelet-HHL | firstorder | Mean                                 | 25.59602883  |
| wavelet-HHL | glrlm      | ShortRunLowGrayLevelEmphasis         | 0.023898098  |
| wavelet-HHL | glrlm      | GrayLevelVariance                    | 27.34626221  |
| wavelet-HHL | glrlm      | LowGrayLevelRunEmphasis              | 0.024117996  |

|             |       |                                      |             |
|-------------|-------|--------------------------------------|-------------|
| wavelet-HHL | grlm  | GrayLevelNonUniformityNormalized     | 0.062520946 |
| wavelet-HHL | grlm  | RunVariance                          | 0.030343835 |
| wavelet-HHL | grlm  | GrayLevelNonUniformity               | 7.517983135 |
| wavelet-HHL | grlm  | LongRunEmphasis                      | 1.094780281 |
| wavelet-HHL | grlm  | ShortRunHighGrayLevelEmphasis        | 181.4614816 |
| wavelet-HHL | grlm  | RunLengthNonUniformity               | 112.9890161 |
| wavelet-HHL | grlm  | ShortRunEmphasis                     | 0.97630493  |
| wavelet-HHL | grlm  | LongRunHighGrayLevelEmphasis         | 200.7663398 |
| wavelet-HHL | grlm  | RunPercentage                        | 0.969602978 |
| wavelet-HHL | grlm  | LongRunLowGrayLevelEmphasis          | 0.024997588 |
| wavelet-HHL | grlm  | RunEntropy                           | 4.390937288 |
| wavelet-HHL | grlm  | HighGrayLevelRunEmphasis             | 185.3224532 |
| wavelet-HHL | grlm  | RunLengthNonUniformityNormalized     | 0.93931233  |
| wavelet-HHL | glszm | GrayLevelVariance                    | 33.5933344  |
| wavelet-HHL | glszm | ZoneVariance                         | 0.95401378  |
| wavelet-HHL | glszm | GrayLevelNonUniformityNormalized     | 0.053356834 |
| wavelet-HHL | glszm | SizeZoneNonUniformityNormalized      | 0.475404583 |
| wavelet-HHL | glszm | SizeZoneNonUniformity                | 37.55696203 |
| wavelet-HHL | glszm | GrayLevelNonUniformity               | 4.215189873 |
| wavelet-HHL | glszm | LargeAreaEmphasis                    | 3.417721519 |
| wavelet-HHL | glszm | SmallAreaHighGrayLevelEmphasis       | 148.1823347 |
| wavelet-HHL | glszm | ZonePercentage                       | 0.637096774 |
| wavelet-HHL | glszm | LargeAreaLowGrayLevelEmphasis        | 0.053551821 |
| wavelet-HHL | glszm | LargeAreaHighGrayLevelEmphasis       | 597.0759494 |
| wavelet-HHL | glszm | HighGrayLevelZoneEmphasis            | 195.4303797 |
| wavelet-HHL | glszm | SmallAreaEmphasis                    | 0.713410689 |
| wavelet-HHL | glszm | LowGrayLevelZoneEmphasis             | 0.031900292 |
| wavelet-HHL | glszm | ZoneEntropy                          | 5.0796893   |
| wavelet-HHL | glszm | SmallAreaLowGrayLevelEmphasis        | 0.029126727 |
| wavelet-HHL | ngtdm | Coarseness                           | 0.0424029   |
| wavelet-HHL | ngtdm | Complexity                           | 1030.452433 |
| wavelet-HHL | ngtdm | Strength                             | 9.153080233 |
| wavelet-HHL | ngtdm | Contrast                             | 0.33991095  |
| wavelet-HHL | ngtdm | Busyness                             | 0.077787101 |
| wavelet-HLH | gldm  | GrayLevelVariance                    | 20.02256764 |
| wavelet-HLH | gldm  | HighGrayLevelEmphasis                | 175.266129  |
| wavelet-HLH | gldm  | DependenceEntropy                    | 5.387647121 |
| wavelet-HLH | gldm  | DependenceNonUniformity              | 35.90322581 |
| wavelet-HLH | gldm  | GrayLevelNonUniformity               | 8.693548387 |
| wavelet-HLH | gldm  | SmallDependenceEmphasis              | 0.458725358 |
| wavelet-HLH | gldm  | SmallDependenceHighGrayLevelEmphasis | 87.0655802  |
| wavelet-HLH | gldm  | DependenceNonUniformityNormalized    | 0.289542144 |
| wavelet-HLH | gldm  | LargeDependenceEmphasis              | 5.274193548 |
| wavelet-HLH | gldm  | LargeDependenceLowGrayLevelEmphasis  | 0.055517452 |
| wavelet-HLH | gldm  | DependenceVariance                   | 0.945109261 |
| wavelet-HLH | gldm  | LargeDependenceHighGrayLevelEmphasis | 887.8790323 |
| wavelet-HLH | gldm  | SmallDependenceLowGrayLevelEmphasis  | 0.014706193 |
| wavelet-HLH | gldm  | LowGrayLevelEmphasis                 | 0.019489072 |
| wavelet-HLH | glcm  | JointAverage                         | 12.55029423 |
| wavelet-HLH | glcm  | SumAverage                           | 25.10058846 |
| wavelet-HLH | glcm  | JointEntropy                         | 6.554783056 |
| wavelet-HLH | glcm  | ClusterShade                         | 52.66193955 |
| wavelet-HLH | glcm  | MaximumProbability                   | 0.029021235 |

|             |            |                                  |              |
|-------------|------------|----------------------------------|--------------|
| wavelet-HLH | glcm       | Idmn                             | 0.940548747  |
| wavelet-HLH | glcm       | JointEnergy                      | 0.012088591  |
| wavelet-HLH | glcm       | Contrast                         | 41.03239771  |
| wavelet-HLH | glcm       | DifferenceEntropy                | 3.567874303  |
| wavelet-HLH | glcm       | InverseVariance                  | 0.200950935  |
| wavelet-HLH | glcm       | DifferenceVariance               | 15.22197132  |
| wavelet-HLH | glcm       | Idn                              | 0.841985249  |
| wavelet-HLH | glcm       | Idm                              | 0.195145855  |
| wavelet-HLH | glcm       | Correlation                      | -0.015485002 |
| wavelet-HLH | glcm       | Autocorrelation                  | 157.277152   |
| wavelet-HLH | glcm       | SumEntropy                       | 4.32136813   |
| wavelet-HLH | glcm       | SumSquares                       | 20.22238565  |
| wavelet-HLH | glcm       | ClusterProminence                | 4760.251486  |
| wavelet-HLH | glcm       | Imc2                             | 0.973848178  |
| wavelet-HLH | glcm       | Imc1                             | -0.374645449 |
| wavelet-HLH | glcm       | DifferenceAverage                | 5.003333863  |
| wavelet-HLH | glcm       | Id                               | 0.284968312  |
| wavelet-HLH | glcm       | ClusterTendency                  | 39.8571449   |
| wavelet-HLH | firstorder | InterquartileRange               | 162.9251581  |
| wavelet-HLH | firstorder | Skewness                         | 0.172442392  |
| wavelet-HLH | firstorder | Uniformity                       | 0.070109261  |
| wavelet-HLH | firstorder | Median                           | -7.075899717 |
| wavelet-HLH | firstorder | Energy                           | 1592617.093  |
| wavelet-HLH | firstorder | RobustMeanAbsoluteDeviation      | 61.19021637  |
| wavelet-HLH | firstorder | MeanAbsoluteDeviation            | 90.0604728   |
| wavelet-HLH | firstorder | TotalEnergy                      | 43000661.51  |
| wavelet-HLH | firstorder | Maximum                          | 294.9529481  |
| wavelet-HLH | firstorder | RootMeanSquared                  | 113.3299882  |
| wavelet-HLH | firstorder | 90Percentile                     | 140.0118737  |
| wavelet-HLH | firstorder | Minimum                          | -288.5654366 |
| wavelet-HLH | firstorder | Entropy                          | 4.053384982  |
| wavelet-HLH | firstorder | Range                            | 583.5183847  |
| wavelet-HLH | firstorder | Variance                         | 12843.66966  |
| wavelet-HLH | firstorder | 10Percentile                     | -137.659973  |
| wavelet-HLH | firstorder | Kurtosis                         | 2.827354616  |
| wavelet-HLH | firstorder | Mean                             | -0.128721617 |
| wavelet-HLH | grlm       | ShortRunLowGrayLevelEmphasis     | 0.019707958  |
| wavelet-HLH | grlm       | GrayLevelVariance                | 20.39571933  |
| wavelet-HLH | grlm       | LowGrayLevelRunEmphasis          | 0.019966182  |
| wavelet-HLH | grlm       | GrayLevelNonUniformityNormalized | 0.069492586  |
| wavelet-HLH | grlm       | RunVariance                      | 0.046707725  |
| wavelet-HLH | grlm       | GrayLevelNonUniformity           | 8.259362075  |
| wavelet-HLH | grlm       | LongRunEmphasis                  | 1.136236721  |
| wavelet-HLH | grlm       | ShortRunHighGrayLevelEmphasis    | 170.4329008  |
| wavelet-HLH | grlm       | RunLengthNonUniformity           | 109.578655   |
| wavelet-HLH | grlm       | ShortRunEmphasis                 | 0.968863192  |
| wavelet-HLH | grlm       | LongRunHighGrayLevelEmphasis     | 197.8674598  |
| wavelet-HLH | grlm       | RunPercentage                    | 0.958436725  |
| wavelet-HLH | grlm       | LongRunLowGrayLevelEmphasis      | 0.021159779  |
| wavelet-HLH | grlm       | RunEntropy                       | 4.229462717  |
| wavelet-HLH | grlm       | HighGrayLevelRunEmphasis         | 175.6955862  |
| wavelet-HLH | grlm       | RunLengthNonUniformityNormalized | 0.921552494  |
| wavelet-HLH | glszm      | GrayLevelVariance                | 27.11427935  |

|             |       |                                  |             |
|-------------|-------|----------------------------------|-------------|
| wavelet-HLH | glszm | ZoneVariance                     | 2.365783025 |
| wavelet-HLH | glszm | GrayLevelNonUniformityNormalized | 0.060815326 |
| wavelet-HLH | glszm | SizeZoneNonUniformityNormalized  | 0.447092894 |
| wavelet-HLH | glszm | SizeZoneNonUniformity            | 29.95522388 |
| wavelet-HLH | glszm | GrayLevelNonUniformity           | 4.074626866 |
| wavelet-HLH | glszm | LargeAreaEmphasis                | 5.791044776 |
| wavelet-HLH | glszm | SmallAreaHighGrayLevelEmphasis   | 134.6428614 |
| wavelet-HLH | glszm | ZonePercentage                   | 0.540322581 |
| wavelet-HLH | glszm | LargeAreaLowGrayLevelEmphasis    | 0.066567508 |
| wavelet-HLH | glszm | LargeAreaHighGrayLevelEmphasis   | 994.4328358 |
| wavelet-HLH | glszm | HighGrayLevelZoneEmphasis        | 182.4328358 |
| wavelet-HLH | glszm | SmallAreaEmphasis                | 0.692549394 |
| wavelet-HLH | glszm | LowGrayLevelZoneEmphasis         | 0.02882813  |
| wavelet-HLH | glszm | ZoneEntropy                      | 5.030505937 |
| wavelet-HLH | glszm | SmallAreaLowGrayLevelEmphasis    | 0.025868637 |
| wavelet-HLH | ngtdm | Coarseness                       | 0.043393337 |
| wavelet-HLH | ngtdm | Complexity                       | 687.7906997 |
| wavelet-HLH | ngtdm | Strength                         | 6.372412093 |
| wavelet-HLH | ngtdm | Contrast                         | 0.319927401 |
| wavelet-HLH | ngtdm | Busyness                         | 0.096104849 |

| Image type | Feature Class | Feature Name                         | Value                                                                                                                                                                                                                                                                                                                                                                                                             |
|------------|---------------|--------------------------------------|-------------------------------------------------------------------------------------------------------------------------------------------------------------------------------------------------------------------------------------------------------------------------------------------------------------------------------------------------------------------------------------------------------------------|
| general    | info          | BoundingBox                          | 10: RTSTRUCT: C99-DNU_segment_LUL Tumor<br>(0, 1, 1, 9, 6, 8)                                                                                                                                                                                                                                                                                                                                                     |
| general    | info          | EnabledImageTypes                    | {u'Original': {}, u'Wavelet': {}}                                                                                                                                                                                                                                                                                                                                                                                 |
|            |               |                                      | {'distances': [1], 'additionalInfo': True, 'force2D': False, 'interpolator': 'sitkBSpline', 'resampledPixelSpacing': [3.0], 'label': 1, 'normalizeScale': 1, 'normalize': False, 'force2Ddimension': 0, 'removeOutliers': None, 'minimumROISize': None, u'binWidth': 25.0, 'minimumROIDimensions': 1, u'correctMask': True, 'preCrop': False, u'symmetricalGLCM': True, 'resegmentRange': None, 'padDistance': 5} |
| general    | info          | GeneralSettings                      |                                                                                                                                                                                                                                                                                                                                                                                                                   |
| general    | info          | ImageHash                            | 528187f0b38ba7169c8339dac304835f361d9aee                                                                                                                                                                                                                                                                                                                                                                          |
| general    | info          | ImageSpacing                         | (0.8730468799999999, 0.8730468799999999, 2.0)                                                                                                                                                                                                                                                                                                                                                                     |
| general    | info          | MaskHash                             | bb23381e8263f9930c9d469f338ede2837193c1d                                                                                                                                                                                                                                                                                                                                                                          |
| general    | info          | NumpyVersion                         | 1.13.1                                                                                                                                                                                                                                                                                                                                                                                                            |
| general    | info          | PyWaveletVersion                     | 0.5.2                                                                                                                                                                                                                                                                                                                                                                                                             |
| general    | info          | SimpleITKVersion                     | 1.1.0                                                                                                                                                                                                                                                                                                                                                                                                             |
| general    | info          | Version                              | 1.3.0.post102+g1b0eb74                                                                                                                                                                                                                                                                                                                                                                                            |
| general    | info          | VolumeNum                            | 1                                                                                                                                                                                                                                                                                                                                                                                                                 |
| general    | info          | VoxelNum                             | 196                                                                                                                                                                                                                                                                                                                                                                                                               |
| original   | shape         | Maximum3DDiameter                    | 28.46049894                                                                                                                                                                                                                                                                                                                                                                                                       |
| original   | shape         | Maximum2DDiameterSlice               | 22.84731932                                                                                                                                                                                                                                                                                                                                                                                                       |
| original   | shape         | Sphericity                           | 0.876287545                                                                                                                                                                                                                                                                                                                                                                                                       |
| original   | shape         | MinorAxis                            | 19.25014957                                                                                                                                                                                                                                                                                                                                                                                                       |
| original   | shape         | Elongation                           | 0.732727795                                                                                                                                                                                                                                                                                                                                                                                                       |
| original   | shape         | SurfaceVolumeRatio                   | 0.316687465                                                                                                                                                                                                                                                                                                                                                                                                       |
| original   | shape         | Volume                               | 5292                                                                                                                                                                                                                                                                                                                                                                                                              |
| original   | shape         | MajorAxis                            | 26.27189754                                                                                                                                                                                                                                                                                                                                                                                                       |
| original   | shape         | SurfaceArea                          | 1675.910065                                                                                                                                                                                                                                                                                                                                                                                                       |
| original   | shape         | Flatness                             | 0.562211663                                                                                                                                                                                                                                                                                                                                                                                                       |
| original   | shape         | LeastAxis                            | 14.7703672                                                                                                                                                                                                                                                                                                                                                                                                        |
| original   | shape         | Maximum2DDiameterColumn              | 25.8069758                                                                                                                                                                                                                                                                                                                                                                                                        |
| original   | shape         | Maximum2DDiameterRow                 | 22.84731932                                                                                                                                                                                                                                                                                                                                                                                                       |
| original   | gldm          | GrayLevelVariance                    | 98.72147022                                                                                                                                                                                                                                                                                                                                                                                                       |
| original   | gldm          | HighGrayLevelEmphasis                | 819.4795918                                                                                                                                                                                                                                                                                                                                                                                                       |
| original   | gldm          | DependenceEntropy                    | 5.852329092                                                                                                                                                                                                                                                                                                                                                                                                       |
| original   | gldm          | DependenceNonUniformity              | 45.07142857                                                                                                                                                                                                                                                                                                                                                                                                       |
| original   | gldm          | GrayLevelNonUniformity               | 17.25510204                                                                                                                                                                                                                                                                                                                                                                                                       |
| original   | gldm          | SmallDependenceEmphasis              | 0.486595558                                                                                                                                                                                                                                                                                                                                                                                                       |
| original   | gldm          | SmallDependenceHighGrayLevelEmphasis | 263.6589886                                                                                                                                                                                                                                                                                                                                                                                                       |
| original   | gldm          | DependenceNonUniformityNormalized    | 0.229956268                                                                                                                                                                                                                                                                                                                                                                                                       |
| original   | gldm          | LargeDependenceEmphasis              | 26.96938776                                                                                                                                                                                                                                                                                                                                                                                                       |
| original   | gldm          | LargeDependenceLowGrayLevelEmphasis  | 0.045422925                                                                                                                                                                                                                                                                                                                                                                                                       |
| original   | gldm          | DependenceVariance                   | 12.48281966                                                                                                                                                                                                                                                                                                                                                                                                       |
| original   | gldm          | LargeDependenceHighGrayLevelEmphasis | 31477.57143                                                                                                                                                                                                                                                                                                                                                                                                       |
| original   | gldm          | SmallDependenceLowGrayLevelEmphasis  | 0.010525951                                                                                                                                                                                                                                                                                                                                                                                                       |
| original   | gldm          | LowGrayLevelEmphasis                 | 0.013477619                                                                                                                                                                                                                                                                                                                                                                                                       |
| original   | glcm          | JointAverage                         | 28.85744417                                                                                                                                                                                                                                                                                                                                                                                                       |
| original   | glcm          | SumAverage                           | 57.71488834                                                                                                                                                                                                                                                                                                                                                                                                       |
| original   | glcm          | JointEntropy                         | 6.300261995                                                                                                                                                                                                                                                                                                                                                                                                       |
| original   | glcm          | ClusterShade                         | -4196.413196                                                                                                                                                                                                                                                                                                                                                                                                      |
| original   | glcm          | MaximumProbability                   | 0.08524042                                                                                                                                                                                                                                                                                                                                                                                                        |
| original   | glcm          | Idmn                                 | 0.94278602                                                                                                                                                                                                                                                                                                                                                                                                        |
| original   | glcm          | JointEnergy                          | 0.027856349                                                                                                                                                                                                                                                                                                                                                                                                       |
| original   | glcm          | Contrast                             | 96.95800176                                                                                                                                                                                                                                                                                                                                                                                                       |
| original   | glcm          | DifferenceEntropy                    | 3.883089962                                                                                                                                                                                                                                                                                                                                                                                                       |
| original   | glcm          | InverseVariance                      | 0.265796                                                                                                                                                                                                                                                                                                                                                                                                          |

|          |            |                                  |              |
|----------|------------|----------------------------------|--------------|
| original | glcm       | DifferenceVariance               | 53.23864095  |
| original | glcm       | Idn                              | 0.86978241   |
| original | glcm       | Idm                              | 0.301795008  |
| original | glcm       | Correlation                      | 0.368268931  |
| original | glcm       | Autocorrelation                  | 862.3843596  |
| original | glcm       | SumEntropy                       | 4.687687761  |
| original | glcm       | SumSquares                       | 78.01438469  |
| original | glcm       | ClusterProminence                | 186365.449   |
| original | glcm       | Imc2                             | 0.971573807  |
| original | glcm       | Imc1                             | -0.376386378 |
| original | glcm       | DifferenceAverage                | 6.46383766   |
| original | glcm       | Id                               | 0.358762231  |
| original | glcm       | ClusterTendency                  | 215.099537   |
| original | firstorder | InterquartileRange               | 337.5        |
| original | firstorder | Skewness                         | -1.094975931 |
| original | firstorder | Uniformity                       | 0.088036235  |
| original | firstorder | Median                           | -51          |
| original | firstorder | Energy                           | 17598638     |
| original | firstorder | RobustMeanAbsoluteDeviation      | 149.4431417  |
| original | firstorder | MeanAbsoluteDeviation            | 205.4737609  |
| original | firstorder | TotalEnergy                      | 475163226    |
| original | firstorder | Maximum                          | 72           |
| original | firstorder | RootMeanSquared                  | 299.6480759  |
| original | firstorder | 90Percentile                     | 41           |
| original | firstorder | Minimum                          | -825         |
| original | firstorder | Entropy                          | 4.302629684  |
| original | firstorder | Range                            | 897          |
| original | firstorder | Variance                         | 61882.92597  |
| original | firstorder | 10Percentile                     | -603.5       |
| original | firstorder | Kurtosis                         | 2.971901234  |
| original | firstorder | Mean                             | -167.0510204 |
| original | glrlm      | ShortRunLowGrayLevelEmphasis     | 0.014689036  |
| original | glrlm      | GrayLevelVariance                | 101.9914949  |
| original | glrlm      | LowGrayLevelRunEmphasis          | 0.014867813  |
| original | glrlm      | GrayLevelNonUniformityNormalized | 0.070120708  |
| original | glrlm      | RunVariance                      | 0.150878371  |
| original | glrlm      | GrayLevelNonUniformity           | 12.27668624  |
| original | glrlm      | LongRunEmphasis                  | 1.410619644  |
| original | glrlm      | ShortRunHighGrayLevelEmphasis    | 686.4775901  |
| original | glrlm      | RunLengthNonUniformity           | 142.8613782  |
| original | glrlm      | ShortRunEmphasis                 | 0.921558694  |
| original | glrlm      | LongRunHighGrayLevelEmphasis     | 1256.687881  |
| original | glrlm      | RunPercentage                    | 0.892072214  |
| original | glrlm      | LongRunLowGrayLevelEmphasis      | 0.015664325  |
| original | glrlm      | RunEntropy                       | 4.849992191  |
| original | glrlm      | HighGrayLevelRunEmphasis         | 777.4499309  |
| original | glrlm      | RunLengthNonUniformityNormalized | 0.816133805  |
| original | glszm      | GrayLevelVariance                | 87.26967944  |
| original | glszm      | ZoneVariance                     | 25.24399569  |
| original | glszm      | GrayLevelNonUniformityNormalized | 0.038917753  |
| original | glszm      | SizeZoneNonUniformityNormalized  | 0.749044211  |
| original | glszm      | SizeZoneNonUniformity            | 75.65346535  |
| original | glszm      | GrayLevelNonUniformity           | 3.930693069  |
| original | glszm      | LargeAreaEmphasis                | 29.00990099  |
| original | glszm      | SmallAreaHighGrayLevelEmphasis   | 458.2302055  |
| original | glszm      | ZonePercentage                   | 0.515306122  |
| original | glszm      | LargeAreaLowGrayLevelEmphasis    | 0.055283169  |
| original | glszm      | LargeAreaHighGrayLevelEmphasis   | 33895.36634  |

|             |            |                                      |              |
|-------------|------------|--------------------------------------|--------------|
| original    | glszm      | HighGrayLevelZoneEmphasis            | 539.990099   |
| original    | glszm      | SmallAreaEmphasis                    | 0.883663367  |
| original    | glszm      | LowGrayLevelZoneEmphasis             | 0.022104295  |
| original    | glszm      | ZoneEntropy                          | 5.151982311  |
| original    | glszm      | SmallAreaLowGrayLevelEmphasis        | 0.019559879  |
| original    | ngtdm      | Coarseness                           | 0.016758113  |
| original    | ngtdm      | Complexity                           | 3057.775753  |
| original    | ngtdm      | Strength                             | 19.35573216  |
| original    | ngtdm      | Contrast                             | 0.8217387    |
| original    | ngtdm      | Busyness                             | 0.043493789  |
| wavelet-HHH | gldm       | GrayLevelVariance                    | 7.547688463  |
| wavelet-HHH | gldm       | HighGrayLevelEmphasis                | 115.877551   |
| wavelet-HHH | gldm       | DependenceEntropy                    | 5.394282248  |
| wavelet-HHH | gldm       | DependenceNonUniformity              | 33.53061224  |
| wavelet-HHH | gldm       | GrayLevelNonUniformity               | 22.71428571  |
| wavelet-HHH | gldm       | SmallDependenceEmphasis              | 0.289143108  |
| wavelet-HHH | gldm       | SmallDependenceHighGrayLevelEmphasis | 36.05823091  |
| wavelet-HHH | gldm       | DependenceNonUniformityNormalized    | 0.171074552  |
| wavelet-HHH | gldm       | LargeDependenceEmphasis              | 14.76530612  |
| wavelet-HHH | gldm       | LargeDependenceLowGrayLevelEmphasis  | 0.148623143  |
| wavelet-HHH | gldm       | DependenceVariance                   | 4.103082049  |
| wavelet-HHH | gldm       | LargeDependenceHighGrayLevelEmphasis | 1694.530612  |
| wavelet-HHH | gldm       | SmallDependenceLowGrayLevelEmphasis  | 0.009527921  |
| wavelet-HHH | gldm       | LowGrayLevelEmphasis                 | 0.017677922  |
| wavelet-HHH | glcm       | JointAverage                         | 10.45834753  |
| wavelet-HHH | glcm       | SumAverage                           | 20.91669505  |
| wavelet-HHH | glcm       | JointEntropy                         | 6.126255716  |
| wavelet-HHH | glcm       | ClusterShade                         | -7.391722486 |
| wavelet-HHH | glcm       | MaximumProbability                   | 0.058225995  |
| wavelet-HHH | glcm       | Idmn                                 | 0.960969554  |
| wavelet-HHH | glcm       | JointEnergy                          | 0.019937462  |
| wavelet-HHH | glcm       | Contrast                             | 14.84193657  |
| wavelet-HHH | glcm       | DifferenceEntropy                    | 2.976977007  |
| wavelet-HHH | glcm       | InverseVariance                      | 0.30931594   |
| wavelet-HHH | glcm       | DifferenceVariance                   | 6.472403434  |
| wavelet-HHH | glcm       | Idn                                  | 0.874215824  |
| wavelet-HHH | glcm       | Idm                                  | 0.308633955  |
| wavelet-HHH | glcm       | Correlation                          | -0.026166877 |
| wavelet-HHH | glcm       | Autocorrelation                      | 109.1712746  |
| wavelet-HHH | glcm       | SumEntropy                           | 3.750800731  |
| wavelet-HHH | glcm       | SumSquares                           | 7.213692877  |
| wavelet-HHH | glcm       | ClusterProminence                    | 835.1621512  |
| wavelet-HHH | glcm       | Imc2                                 | 0.834853498  |
| wavelet-HHH | glcm       | Imc1                                 | -0.178126372 |
| wavelet-HHH | glcm       | DifferenceAverage                    | 2.865050875  |
| wavelet-HHH | glcm       | Id                                   | 0.391859428  |
| wavelet-HHH | glcm       | ClusterTendency                      | 14.01283494  |
| wavelet-HHH | firstorder | InterquartileRange                   | 74.11997344  |
| wavelet-HHH | firstorder | Skewness                             | -0.311947483 |
| wavelet-HHH | firstorder | Uniformity                           | 0.115889213  |
| wavelet-HHH | firstorder | Median                               | 2.80845335   |
| wavelet-HHH | firstorder | Energy                               | 907455.1563  |
| wavelet-HHH | firstorder | RobustMeanAbsoluteDeviation          | 33.1647316   |
| wavelet-HHH | firstorder | MeanAbsoluteDeviation                | 51.38465093  |
| wavelet-HHH | firstorder | TotalEnergy                          | 24501289.22  |
| wavelet-HHH | firstorder | Maximum                              | 184.0957671  |
| wavelet-HHH | firstorder | RootMeanSquared                      | 68.04317193  |
| wavelet-HHH | firstorder | 90Percentile                         | 77.09292542  |



|             |            |                                      |              |
|-------------|------------|--------------------------------------|--------------|
| wavelet-HHH | firstorder | Minimum                              | -244.8741145 |
| wavelet-HHH | firstorder | Entropy                              | 3.423353251  |
| wavelet-HHH | firstorder | Range                                | 428.9698816  |
| wavelet-HHH | firstorder | Variance                             | 4625.767762  |
| wavelet-HHH | firstorder | 10Percentile                         | -84.76539468 |
| wavelet-HHH | firstorder | Kurtosis                             | 3.956623889  |
| wavelet-HHH | firstorder | Mean                                 | -2.026199418 |
| wavelet-HHH | glrlm      | ShortRunLowGrayLevelEmphasis         | 0.017706659  |
| wavelet-HHH | glrlm      | GrayLevelVariance                    | 8.012376333  |
| wavelet-HHH | glrlm      | LowGrayLevelRunEmphasis              | 0.018404649  |
| wavelet-HHH | glrlm      | GrayLevelNonUniformityNormalized     | 0.109811178  |
| wavelet-HHH | glrlm      | RunVariance                          | 0.099885692  |
| wavelet-HHH | glrlm      | GrayLevelNonUniformity               | 19.6483747   |
| wavelet-HHH | glrlm      | LongRunEmphasis                      | 1.302989583  |
| wavelet-HHH | glrlm      | ShortRunHighGrayLevelEmphasis        | 108.3377672  |
| wavelet-HHH | glrlm      | RunLengthNonUniformity               | 150.0760636  |
| wavelet-HHH | glrlm      | ShortRunEmphasis                     | 0.931720609  |
| wavelet-HHH | glrlm      | LongRunHighGrayLevelEmphasis         | 150.5840422  |
| wavelet-HHH | glrlm      | RunPercentage                        | 0.912872841  |
| wavelet-HHH | glrlm      | LongRunLowGrayLevelEmphasis          | 0.021455989  |
| wavelet-HHH | glrlm      | RunEntropy                           | 3.85187604   |
| wavelet-HHH | glrlm      | HighGrayLevelRunEmphasis             | 116.0878805  |
| wavelet-HHH | glrlm      | RunLengthNonUniformityNormalized     | 0.83732994   |
| wavelet-HHH | glszm      | GrayLevelVariance                    | 15.26429831  |
| wavelet-HHH | glszm      | ZoneVariance                         | 37.90828924  |
| wavelet-HHH | glszm      | GrayLevelNonUniformityNormalized     | 0.087931469  |
| wavelet-HHH | glszm      | SizeZoneNonUniformityNormalized      | 0.409926934  |
| wavelet-HHH | glszm      | SizeZoneNonUniformity                | 25.82539683  |
| wavelet-HHH | glszm      | GrayLevelNonUniformity               | 5.53968254   |
| wavelet-HHH | glszm      | LargeAreaEmphasis                    | 47.58730159  |
| wavelet-HHH | glszm      | SmallAreaHighGrayLevelEmphasis       | 85.90289917  |
| wavelet-HHH | glszm      | ZonePercentage                       | 0.321428571  |
| wavelet-HHH | glszm      | LargeAreaLowGrayLevelEmphasis        | 0.46868636   |
| wavelet-HHH | glszm      | LargeAreaHighGrayLevelEmphasis       | 5409.68254   |
| wavelet-HHH | glszm      | HighGrayLevelZoneEmphasis            | 121.7142857  |
| wavelet-HHH | glszm      | SmallAreaEmphasis                    | 0.66216105   |
| wavelet-HHH | glszm      | LowGrayLevelZoneEmphasis             | 0.0320491    |
| wavelet-HHH | glszm      | ZoneEntropy                          | 4.818649472  |
| wavelet-HHH | glszm      | SmallAreaLowGrayLevelEmphasis        | 0.026576368  |
| wavelet-HHH | ngtdm      | Coarseness                           | 0.033554248  |
| wavelet-HHH | ngtdm      | Complexity                           | 235.4154134  |
| wavelet-HHH | ngtdm      | Strength                             | 2.613904515  |
| wavelet-HHH | ngtdm      | Contrast                             | 0.120665365  |
| wavelet-HHH | ngtdm      | Busyness                             | 0.152977351  |
| wavelet-HLL | gldm       | GrayLevelVariance                    | 81.67982091  |
| wavelet-HLL | gldm       | HighGrayLevelEmphasis                | 433.0510204  |
| wavelet-HLL | gldm       | DependenceEntropy                    | 6.060329888  |
| wavelet-HLL | gldm       | DependenceNonUniformity              | 59.07142857  |
| wavelet-HLL | gldm       | GrayLevelNonUniformity               | 8.071428571  |
| wavelet-HLL | gldm       | SmallDependenceEmphasis              | 0.499691043  |
| wavelet-HLL | gldm       | SmallDependenceHighGrayLevelEmphasis | 267.7012684  |
| wavelet-HLL | gldm       | DependenceNonUniformityNormalized    | 0.30138484   |
| wavelet-HLL | gldm       | LargeDependenceEmphasis              | 5.020408163  |
| wavelet-HLL | gldm       | LargeDependenceLowGrayLevelEmphasis  | 0.038723691  |
| wavelet-HLL | gldm       | DependenceVariance                   | 1.020408163  |
| wavelet-HLL | gldm       | LargeDependenceHighGrayLevelEmphasis | 1660.153061  |
| wavelet-HLL | gldm       | SmallDependenceLowGrayLevelEmphasis  | 0.012614373  |
| wavelet-HLL | gldm       | LowGrayLevelEmphasis                 | 0.015505458  |

|             |            |                                  |              |
|-------------|------------|----------------------------------|--------------|
| wavelet-HLL | glcm       | JointAverage                     | 18.09216356  |
| wavelet-HLL | glcm       | SumAverage                       | 36.18432712  |
| wavelet-HLL | glcm       | JointEntropy                     | 7.550249537  |
| wavelet-HLL | glcm       | ClusterShade                     | 3173.815452  |
| wavelet-HLL | glcm       | MaximumProbability               | 0.018569686  |
| wavelet-HLL | glcm       | Idmn                             | 0.960995181  |
| wavelet-HLL | glcm       | JointEnergy                      | 0.006088874  |
| wavelet-HLL | glcm       | Contrast                         | 99.63946616  |
| wavelet-HLL | glcm       | DifferenceEntropy                | 4.096872505  |
| wavelet-HLL | glcm       | InverseVariance                  | 0.144837041  |
| wavelet-HLL | glcm       | DifferenceVariance               | 43.59455686  |
| wavelet-HLL | glcm       | Idn                              | 0.87471716   |
| wavelet-HLL | glcm       | Idm                              | 0.145173845  |
| wavelet-HLL | glcm       | Correlation                      | 0.354226567  |
| wavelet-HLL | glcm       | Autocorrelation                  | 355.1557293  |
| wavelet-HLL | glcm       | SumEntropy                       | 5.255440241  |
| wavelet-HLL | glcm       | SumSquares                       | 77.62506769  |
| wavelet-HLL | glcm       | ClusterProminence                | 167534.1416  |
| wavelet-HLL | glcm       | Imc2                             | 0.991468096  |
| wavelet-HLL | glcm       | Imc1                             | -0.42850022  |
| wavelet-HLL | glcm       | DifferenceAverage                | 7.309770876  |
| wavelet-HLL | glcm       | Id                               | 0.233175792  |
| wavelet-HLL | glcm       | ClusterTendency                  | 210.8608046  |
| wavelet-HLL | firstorder | InterquartileRange               | 292.1106437  |
| wavelet-HLL | firstorder | Skewness                         | 0.749538451  |
| wavelet-HLL | firstorder | Uniformity                       | 0.041180758  |
| wavelet-HLL | firstorder | Median                           | -109.3024718 |
| wavelet-HLL | firstorder | Energy                           | 10962636.14  |
| wavelet-HLL | firstorder | RobustMeanAbsoluteDeviation      | 129.8794186  |
| wavelet-HLL | firstorder | MeanAbsoluteDeviation            | 182.5628607  |
| wavelet-HLL | firstorder | TotalEnergy                      | 295991175.7  |
| wavelet-HLL | firstorder | Maximum                          | 601.4314307  |
| wavelet-HLL | firstorder | RootMeanSquared                  | 236.4990846  |
| wavelet-HLL | firstorder | 90Percentile                     | 241.9487897  |
| wavelet-HLL | firstorder | Minimum                          | -519.5526649 |
| wavelet-HLL | firstorder | Entropy                          | 4.843551363  |
| wavelet-HLL | firstorder | Range                            | 1120.984096  |
| wavelet-HLL | firstorder | Variance                         | 51148.41882  |
| wavelet-HLL | firstorder | 10Percentile                     | -308.7964536 |
| wavelet-HLL | firstorder | Kurtosis                         | 2.973830047  |
| wavelet-HLL | firstorder | Mean                             | -69.1621153  |
| wavelet-HLL | glrlm      | ShortRunLowGrayLevelEmphasis     | 0.015726173  |
| wavelet-HLL | glrlm      | GrayLevelVariance                | 82.97319944  |
| wavelet-HLL | glrlm      | LowGrayLevelRunEmphasis          | 0.015899857  |
| wavelet-HLL | glrlm      | GrayLevelNonUniformityNormalized | 0.040694109  |
| wavelet-HLL | glrlm      | RunVariance                      | 0.039151727  |
| wavelet-HLL | glrlm      | GrayLevelNonUniformity           | 7.670605339  |
| wavelet-HLL | glrlm      | LongRunEmphasis                  | 1.122480573  |
| wavelet-HLL | glrlm      | ShortRunHighGrayLevelEmphasis    | 428.3282877  |
| wavelet-HLL | glrlm      | RunLengthNonUniformity           | 174.3352558  |
| wavelet-HLL | glrlm      | ShortRunEmphasis                 | 0.969839373  |
| wavelet-HLL | glrlm      | LongRunHighGrayLevelEmphasis     | 476.2135669  |
| wavelet-HLL | glrlm      | RunPercentage                    | 0.961538462  |
| wavelet-HLL | glrlm      | LongRunLowGrayLevelEmphasis      | 0.016609787  |
| wavelet-HLL | glrlm      | RunEntropy                       | 5.009621693  |
| wavelet-HLL | glrlm      | HighGrayLevelRunEmphasis         | 437.8608623  |
| wavelet-HLL | glrlm      | RunLengthNonUniformityNormalized | 0.924057868  |
| wavelet-HLL | glszm      | GrayLevelVariance                | 99.66469428  |

|             |            |                                      |             |
|-------------|------------|--------------------------------------|-------------|
| wavelet-HLL | glszm      | ZoneVariance                         | 1.432975382 |
| wavelet-HLL | glszm      | GrayLevelNonUniformityNormalized     | 0.035137702 |
| wavelet-HLL | glszm      | SizeZoneNonUniformityNormalized      | 0.472130908 |
| wavelet-HLL | glszm      | SizeZoneNonUniformity                | 55.23931624 |
| wavelet-HLL | glszm      | GrayLevelNonUniformity               | 4.111111111 |
| wavelet-HLL | glszm      | LargeAreaEmphasis                    | 4.239316239 |
| wavelet-HLL | glszm      | SmallAreaHighGrayLevelEmphasis       | 407.027103  |
| wavelet-HLL | glszm      | ZonePercentage                       | 0.596938776 |
| wavelet-HLL | glszm      | LargeAreaLowGrayLevelEmphasis        | 0.041909416 |
| wavelet-HLL | glszm      | LargeAreaHighGrayLevelEmphasis       | 1453.025641 |
| wavelet-HLL | glszm      | HighGrayLevelZoneEmphasis            | 508.9487179 |
| wavelet-HLL | glszm      | SmallAreaEmphasis                    | 0.714267496 |
| wavelet-HLL | glszm      | LowGrayLevelZoneEmphasis             | 0.022015673 |
| wavelet-HLL | glszm      | ZoneEntropy                          | 5.897300861 |
| wavelet-HLL | glszm      | SmallAreaLowGrayLevelEmphasis        | 0.020409257 |
| wavelet-HLL | ngtdm      | Coarseness                           | 0.030876205 |
| wavelet-HLL | ngtdm      | Complexity                           | 3220.653321 |
| wavelet-HLL | ngtdm      | Strength                             | 20.30724795 |
| wavelet-HLL | ngtdm      | Contrast                             | 0.556207127 |
| wavelet-HLL | ngtdm      | Busyness                             | 0.056826104 |
| wavelet-LHL | gldm       | GrayLevelVariance                    | 188.6929144 |
| wavelet-LHL | gldm       | HighGrayLevelEmphasis                | 951.9744898 |
| wavelet-LHL | gldm       | DependenceEntropy                    | 6.227328867 |
| wavelet-LHL | gldm       | DependenceNonUniformity              | 67.60204082 |
| wavelet-LHL | gldm       | GrayLevelNonUniformity               | 7.051020408 |
| wavelet-LHL | gldm       | SmallDependenceEmphasis              | 0.594798753 |
| wavelet-LHL | gldm       | SmallDependenceHighGrayLevelEmphasis | 653.5564583 |
| wavelet-LHL | gldm       | DependenceNonUniformityNormalized    | 0.344908372 |
| wavelet-LHL | gldm       | LargeDependenceEmphasis              | 5.153061224 |
| wavelet-LHL | gldm       | LargeDependenceLowGrayLevelEmphasis  | 0.025307874 |
| wavelet-LHL | gldm       | DependenceVariance                   | 1.472927947 |
| wavelet-LHL | gldm       | LargeDependenceHighGrayLevelEmphasis | 3682.494898 |
| wavelet-LHL | gldm       | SmallDependenceLowGrayLevelEmphasis  | 0.008691979 |
| wavelet-LHL | gldm       | LowGrayLevelEmphasis                 | 0.010089184 |
| wavelet-LHL | glcm       | JointAverage                         | 26.49445625 |
| wavelet-LHL | glcm       | SumAverage                           | 52.9889125  |
| wavelet-LHL | glcm       | JointEntropy                         | 7.60018749  |
| wavelet-LHL | glcm       | ClusterShade                         | 7381.790401 |
| wavelet-LHL | glcm       | MaximumProbability                   | 0.018340411 |
| wavelet-LHL | glcm       | Idmn                                 | 0.940601544 |
| wavelet-LHL | glcm       | JointEnergy                          | 0.005869585 |
| wavelet-LHL | glcm       | Contrast                             | 366.2614899 |
| wavelet-LHL | glcm       | DifferenceEntropy                    | 4.585460995 |
| wavelet-LHL | glcm       | InverseVariance                      | 0.125659924 |
| wavelet-LHL | glcm       | DifferenceVariance                   | 186.3153711 |
| wavelet-LHL | glcm       | Idn                                  | 0.86418953  |
| wavelet-LHL | glcm       | Idm                                  | 0.126577742 |
| wavelet-LHL | glcm       | Correlation                          | -0.03871553 |
| wavelet-LHL | glcm       | Autocorrelation                      | 702.9548054 |
| wavelet-LHL | glcm       | SumEntropy                           | 5.444178492 |
| wavelet-LHL | glcm       | SumSquares                           | 183.7217244 |
| wavelet-LHL | glcm       | ClusterProminence                    | 780987.651  |
| wavelet-LHL | glcm       | Imc2                                 | 0.996476868 |
| wavelet-LHL | glcm       | Imc1                                 | -0.49302342 |
| wavelet-LHL | glcm       | DifferenceAverage                    | 12.43895775 |
| wavelet-LHL | glcm       | Id                                   | 0.203821352 |
| wavelet-LHL | glcm       | ClusterTendency                      | 368.6254076 |
| wavelet-LHL | firstorder | InterquartileRange                   | 260.096671  |

|             |            |                                  |              |
|-------------|------------|----------------------------------|--------------|
| wavelet-LHL | firstorder | Skewness                         | 0.986744176  |
| wavelet-LHL | firstorder | Uniformity                       | 0.035974594  |
| wavelet-LHL | firstorder | Median                           | -103.7594305 |
| wavelet-LHL | firstorder | Energy                           | 23573175.91  |
| wavelet-LHL | firstorder | RobustMeanAbsoluteDeviation      | 136.0789906  |
| wavelet-LHL | firstorder | MeanAbsoluteDeviation            | 246.2732308  |
| wavelet-LHL | firstorder | TotalEnergy                      | 636475749.5  |
| wavelet-LHL | firstorder | Maximum                          | 914.3445692  |
| wavelet-LHL | firstorder | RootMeanSquared                  | 346.8015364  |
| wavelet-LHL | firstorder | 90Percentile                     | 489.7223945  |
| wavelet-LHL | firstorder | Minimum                          | -700.2218674 |
| wavelet-LHL | firstorder | Entropy                          | 5.147368865  |
| wavelet-LHL | firstorder | Range                            | 1614.566437  |
| wavelet-LHL | firstorder | Variance                         | 118070.5774  |
| wavelet-LHL | firstorder | 10Percentile                     | -418.653862  |
| wavelet-LHL | firstorder | Kurtosis                         | 3.952805775  |
| wavelet-LHL | firstorder | Mean                             | -46.91191952 |
| wavelet-LHL | glrlm      | ShortRunLowGrayLevelEmphasis     | 0.010241286  |
| wavelet-LHL | glrlm      | GrayLevelVariance                | 191.9986606  |
| wavelet-LHL | glrlm      | LowGrayLevelRunEmphasis          | 0.010328513  |
| wavelet-LHL | glrlm      | GrayLevelNonUniformityNormalized | 0.035342426  |
| wavelet-LHL | glrlm      | RunVariance                      | 0.041939897  |
| wavelet-LHL | glrlm      | GrayLevelNonUniformity           | 6.683920299  |
| wavelet-LHL | glrlm      | LongRunEmphasis                  | 1.118803343  |
| wavelet-LHL | glrlm      | ShortRunHighGrayLevelEmphasis    | 944.1305267  |
| wavelet-LHL | glrlm      | RunLengthNonUniformity           | 176.9104614  |
| wavelet-LHL | glrlm      | ShortRunEmphasis                 | 0.973833936  |
| wavelet-LHL | glrlm      | LongRunHighGrayLevelEmphasis     | 1042.702517  |
| wavelet-LHL | glrlm      | RunPercentage                    | 0.964678179  |
| wavelet-LHL | glrlm      | LongRunLowGrayLevelEmphasis      | 0.010793683  |
| wavelet-LHL | glrlm      | RunEntropy                       | 5.299014262  |
| wavelet-LHL | glrlm      | HighGrayLevelRunEmphasis         | 962.0922211  |
| wavelet-LHL | glrlm      | RunLengthNonUniformityNormalized | 0.934506017  |
| wavelet-LHL | glszm      | GrayLevelVariance                | 229.2225952  |
| wavelet-LHL | glszm      | ZoneVariance                     | 2.170898438  |
| wavelet-LHL | glszm      | GrayLevelNonUniformityNormalized | 0.030029297  |
| wavelet-LHL | glszm      | SizeZoneNonUniformityNormalized  | 0.63684082   |
| wavelet-LHL | glszm      | SizeZoneNonUniformity            | 81.515625    |
| wavelet-LHL | glszm      | GrayLevelNonUniformity           | 3.84375      |
| wavelet-LHL | glszm      | LargeAreaEmphasis                | 4.515625     |
| wavelet-LHL | glszm      | SmallAreaHighGrayLevelEmphasis   | 933.3708304  |
| wavelet-LHL | glszm      | ZonePercentage                   | 0.653061224  |
| wavelet-LHL | glszm      | LargeAreaLowGrayLevelEmphasis    | 0.025170328  |
| wavelet-LHL | glszm      | LargeAreaHighGrayLevelEmphasis   | 3325.148438  |
| wavelet-LHL | glszm      | HighGrayLevelZoneEmphasis        | 1085.242188  |
| wavelet-LHL | glszm      | SmallAreaEmphasis                | 0.822804175  |
| wavelet-LHL | glszm      | LowGrayLevelZoneEmphasis         | 0.013595422  |
| wavelet-LHL | glszm      | ZoneEntropy                      | 5.863101223  |
| wavelet-LHL | glszm      | SmallAreaLowGrayLevelEmphasis    | 0.013030448  |
| wavelet-LHL | ngtdm      | Coarseness                       | 0.024539597  |
| wavelet-LHL | ngtdm      | Complexity                       | 11984.95131  |
| wavelet-LHL | ngtdm      | Strength                         | 31.23825137  |
| wavelet-LHL | ngtdm      | Contrast                         | 1.402367326  |
| wavelet-LHL | ngtdm      | Busyness                         | 0.032057617  |
| wavelet-LHH | gldm       | GrayLevelVariance                | 13.38983757  |
| wavelet-LHH | gldm       | HighGrayLevelEmphasis            | 126.877551   |
| wavelet-LHH | gldm       | DependenceEntropy                | 5.689727195  |
| wavelet-LHH | gldm       | DependenceNonUniformity          | 38.98979592  |

|             |            |                                      |              |
|-------------|------------|--------------------------------------|--------------|
| wavelet-LHH | gldm       | GrayLevelNonUniformity               | 17.69387755  |
| wavelet-LHH | gldm       | SmallDependenceEmphasis              | 0.371997382  |
| wavelet-LHH | gldm       | SmallDependenceHighGrayLevelEmphasis | 52.656931    |
| wavelet-LHH | gldm       | DependenceNonUniformityNormalized    | 0.19892753   |
| wavelet-LHH | gldm       | LargeDependenceEmphasis              | 11.14285714  |
| wavelet-LHH | gldm       | LargeDependenceLowGrayLevelEmphasis  | 0.150338044  |
| wavelet-LHH | gldm       | DependenceVariance                   | 3.268533944  |
| wavelet-LHH | gldm       | LargeDependenceHighGrayLevelEmphasis | 1218.642857  |
| wavelet-LHH | gldm       | SmallDependenceLowGrayLevelEmphasis  | 0.016368543  |
| wavelet-LHH | gldm       | LowGrayLevelEmphasis                 | 0.026417684  |
| wavelet-LHH | glcm       | JointAverage                         | 10.63200364  |
| wavelet-LHH | glcm       | SumAverage                           | 21.26400728  |
| wavelet-LHH | glcm       | JointEntropy                         | 6.660105228  |
| wavelet-LHH | glcm       | ClusterShade                         | 33.03592176  |
| wavelet-LHH | glcm       | MaximumProbability                   | 0.035347485  |
| wavelet-LHH | glcm       | Idmn                                 | 0.950495739  |
| wavelet-LHH | glcm       | JointEnergy                          | 0.013052006  |
| wavelet-LHH | glcm       | Contrast                             | 26.38676861  |
| wavelet-LHH | glcm       | DifferenceEntropy                    | 3.350963739  |
| wavelet-LHH | glcm       | InverseVariance                      | 0.27064128   |
| wavelet-LHH | glcm       | DifferenceVariance                   | 11.39929409  |
| wavelet-LHH | glcm       | Idn                                  | 0.860217497  |
| wavelet-LHH | glcm       | Idm                                  | 0.258264232  |
| wavelet-LHH | glcm       | Correlation                          | 0.016855716  |
| wavelet-LHH | glcm       | Autocorrelation                      | 113.2498429  |
| wavelet-LHH | glcm       | SumEntropy                           | 4.174070614  |
| wavelet-LHH | glcm       | SumSquares                           | 13.40034671  |
| wavelet-LHH | glcm       | ClusterProminence                    | 3005.116785  |
| wavelet-LHH | glcm       | Imc2                                 | 0.900739063  |
| wavelet-LHH | glcm       | Imc1                                 | -0.224291586 |
| wavelet-LHH | glcm       | DifferenceAverage                    | 3.823502488  |
| wavelet-LHH | glcm       | Id                                   | 0.343009815  |
| wavelet-LHH | glcm       | ClusterTendency                      | 27.21461822  |
| wavelet-LHH | firstorder | InterquartileRange                   | 100.298656   |
| wavelet-LHH | firstorder | Skewness                             | 0.075343367  |
| wavelet-LHH | firstorder | Uniformity                           | 0.090274885  |
| wavelet-LHH | firstorder | Median                               | 3.478512563  |
| wavelet-LHH | firstorder | Energy                               | 1631901.387  |
| wavelet-LHH | firstorder | RobustMeanAbsoluteDeviation          | 43.61520148  |
| wavelet-LHH | firstorder | MeanAbsoluteDeviation                | 69.09866815  |
| wavelet-LHH | firstorder | TotalEnergy                          | 44061337.46  |
| wavelet-LHH | firstorder | Maximum                              | 271.4375412  |
| wavelet-LHH | firstorder | RootMeanSquared                      | 91.24706838  |
| wavelet-LHH | firstorder | 90Percentile                         | 136.6638063  |
| wavelet-LHH | firstorder | Minimum                              | -241.5340385 |
| wavelet-LHH | firstorder | Entropy                              | 3.785941073  |
| wavelet-LHH | firstorder | Range                                | 512.9715797  |
| wavelet-LHH | firstorder | Variance                             | 8312.180144  |
| wavelet-LHH | firstorder | 10Percentile                         | -109.6376792 |
| wavelet-LHH | firstorder | Kurtosis                             | 3.476044816  |
| wavelet-LHH | firstorder | Mean                                 | 3.721201876  |
| wavelet-LHH | glrlm      | ShortRunLowGrayLevelEmphasis         | 0.0266542    |
| wavelet-LHH | glrlm      | GrayLevelVariance                    | 13.97228983  |
| wavelet-LHH | glrlm      | LowGrayLevelRunEmphasis              | 0.027389456  |
| wavelet-LHH | glrlm      | GrayLevelNonUniformityNormalized     | 0.087062627  |
| wavelet-LHH | glrlm      | RunVariance                          | 0.078288646  |
| wavelet-LHH | glrlm      | GrayLevelNonUniformity               | 15.88163625  |
| wavelet-LHH | glrlm      | LongRunEmphasis                      | 1.235100903  |

|             |       |                                      |             |
|-------------|-------|--------------------------------------|-------------|
| wavelet-LHH | glrlm | ShortRunHighGrayLevelEmphasis        | 122.074211  |
| wavelet-LHH | glrlm | RunLengthNonUniformity               | 158.7495946 |
| wavelet-LHH | glrlm | ShortRunEmphasis                     | 0.946416678 |
| wavelet-LHH | glrlm | LongRunHighGrayLevelEmphasis         | 154.2199692 |
| wavelet-LHH | glrlm | RunPercentage                        | 0.930533752 |
| wavelet-LHH | glrlm | LongRunLowGrayLevelEmphasis          | 0.03052611  |
| wavelet-LHH | glrlm | RunEntropy                           | 4.127168676 |
| wavelet-LHH | glrlm | HighGrayLevelRunEmphasis             | 128.0443651 |
| wavelet-LHH | glrlm | RunLengthNonUniformityNormalized     | 0.869430753 |
| wavelet-LHH | glszm | GrayLevelVariance                    | 20.63081066 |
| wavelet-LHH | glszm | ZoneVariance                         | 13.55555556 |
| wavelet-LHH | glszm | GrayLevelNonUniformityNormalized     | 0.067176871 |
| wavelet-LHH | glszm | SizeZoneNonUniformityNormalized      | 0.450113379 |
| wavelet-LHH | glszm | SizeZoneNonUniformity                | 37.80952381 |
| wavelet-LHH | glszm | GrayLevelNonUniformity               | 5.642857143 |
| wavelet-LHH | glszm | LargeAreaEmphasis                    | 19          |
| wavelet-LHH | glszm | SmallAreaHighGrayLevelEmphasis       | 101.708493  |
| wavelet-LHH | glszm | ZonePercentage                       | 0.428571429 |
| wavelet-LHH | glszm | LargeAreaLowGrayLevelEmphasis        | 0.251199146 |
| wavelet-LHH | glszm | LargeAreaHighGrayLevelEmphasis       | 2059.595238 |
| wavelet-LHH | glszm | HighGrayLevelZoneEmphasis            | 141.8928571 |
| wavelet-LHH | glszm | SmallAreaEmphasis                    | 0.69594815  |
| wavelet-LHH | glszm | LowGrayLevelZoneEmphasis             | 0.041051277 |
| wavelet-LHH | glszm | ZoneEntropy                          | 5.097733275 |
| wavelet-LHH | glszm | SmallAreaLowGrayLevelEmphasis        | 0.034644762 |
| wavelet-LHH | ngtdm | Coarseness                           | 0.032567893 |
| wavelet-LHH | ngtdm | Complexity                           | 399.4691142 |
| wavelet-LHH | ngtdm | Strength                             | 3.466043667 |
| wavelet-LHH | ngtdm | Contrast                             | 0.197713308 |
| wavelet-LHH | ngtdm | Busyness                             | 0.143031588 |
| wavelet-LLH | gldm  | GrayLevelVariance                    | 64.85139005 |
| wavelet-LLH | gldm  | HighGrayLevelEmphasis                | 592.6785714 |
| wavelet-LLH | gldm  | DependenceEntropy                    | 6.072407806 |
| wavelet-LLH | gldm  | DependenceNonUniformity              | 52.81632653 |
| wavelet-LLH | gldm  | GrayLevelNonUniformity               | 10.32653061 |
| wavelet-LLH | gldm  | SmallDependenceEmphasis              | 0.494756901 |
| wavelet-LLH | gldm  | SmallDependenceHighGrayLevelEmphasis | 287.1402811 |
| wavelet-LLH | gldm  | DependenceNonUniformityNormalized    | 0.269471054 |
| wavelet-LLH | gldm  | LargeDependenceEmphasis              | 6.704081633 |
| wavelet-LLH | gldm  | LargeDependenceLowGrayLevelEmphasis  | 0.018998019 |
| wavelet-LLH | gldm  | DependenceVariance                   | 1.801020408 |
| wavelet-LLH | gldm  | LargeDependenceHighGrayLevelEmphasis | 3905.964286 |
| wavelet-LLH | gldm  | SmallDependenceLowGrayLevelEmphasis  | 0.006848206 |
| wavelet-LLH | gldm  | LowGrayLevelEmphasis                 | 0.007899837 |
| wavelet-LLH | glcm  | JointAverage                         | 22.29331654 |
| wavelet-LLH | glcm  | SumAverage                           | 44.58663308 |
| wavelet-LLH | glcm  | JointEntropy                         | 7.358755364 |
| wavelet-LLH | glcm  | ClusterShade                         | 1925.828267 |
| wavelet-LLH | glcm  | MaximumProbability                   | 0.02142299  |
| wavelet-LLH | glcm  | Idmn                                 | 0.979221575 |
| wavelet-LLH | glcm  | JointEnergy                          | 0.007242231 |
| wavelet-LLH | glcm  | Contrast                             | 98.84207204 |
| wavelet-LLH | glcm  | DifferenceEntropy                    | 3.958239738 |
| wavelet-LLH | glcm  | InverseVariance                      | 0.192492108 |
| wavelet-LLH | glcm  | DifferenceVariance                   | 53.4745713  |
| wavelet-LLH | glcm  | Idn                                  | 0.915237014 |
| wavelet-LLH | glcm  | Idm                                  | 0.183756869 |
| wavelet-LLH | glcm  | Correlation                          | 0.143254215 |

|             |            |                                  |              |
|-------------|------------|----------------------------------|--------------|
| wavelet-LLH | glcm       | Autocorrelation                  | 505.4433845  |
| wavelet-LLH | glcm       | SumEntropy                       | 4.945309173  |
| wavelet-LLH | glcm       | SumSquares                       | 57.83459176  |
| wavelet-LLH | glcm       | ClusterProminence                | 148363.8481  |
| wavelet-LLH | glcm       | Imc2                             | 0.980834013  |
| wavelet-LLH | glcm       | Imc1                             | -0.365972143 |
| wavelet-LLH | glcm       | DifferenceAverage                | 6.570370688  |
| wavelet-LLH | glcm       | Id                               | 0.27063997   |
| wavelet-LLH | glcm       | ClusterTendency                  | 132.496295   |
| wavelet-LLH | firstorder | InterquartileRange               | 171.1445333  |
| wavelet-LLH | firstorder | Skewness                         | 1.335931146  |
| wavelet-LLH | firstorder | Uniformity                       | 0.052686381  |
| wavelet-LLH | firstorder | Median                           | -54.78664101 |
| wavelet-LLH | firstorder | Energy                           | 8196358.15   |
| wavelet-LLH | firstorder | RobustMeanAbsoluteDeviation      | 76.04341112  |
| wavelet-LLH | firstorder | MeanAbsoluteDeviation            | 136.2739141  |
| wavelet-LLH | firstorder | TotalEnergy                      | 221301670.1  |
| wavelet-LLH | firstorder | Maximum                          | 995.7903548  |
| wavelet-LLH | firstorder | RootMeanSquared                  | 204.4948748  |
| wavelet-LLH | firstorder | 90Percentile                     | 165.4213518  |
| wavelet-LLH | firstorder | Minimum                          | -575.321357  |
| wavelet-LLH | firstorder | Entropy                          | 4.605479806  |
| wavelet-LLH | firstorder | Range                            | 1571.111712  |
| wavelet-LLH | firstorder | Variance                         | 40337.68745  |
| wavelet-LLH | firstorder | 10Percentile                     | -244.1818741 |
| wavelet-LLH | firstorder | Kurtosis                         | 7.694206215  |
| wavelet-LLH | firstorder | Mean                             | -38.47682915 |
| wavelet-LLH | glrlm      | ShortRunLowGrayLevelEmphasis     | 0.008120914  |
| wavelet-LLH | glrlm      | GrayLevelVariance                | 66.6617909   |
| wavelet-LLH | glrlm      | LowGrayLevelRunEmphasis          | 0.008190976  |
| wavelet-LLH | glrlm      | GrayLevelNonUniformityNormalized | 0.051433023  |
| wavelet-LLH | glrlm      | RunVariance                      | 0.053173748  |
| wavelet-LLH | glrlm      | GrayLevelNonUniformity           | 9.61064962   |
| wavelet-LLH | glrlm      | LongRunEmphasis                  | 1.154576349  |
| wavelet-LLH | glrlm      | ShortRunHighGrayLevelEmphasis    | 572.2967413  |
| wavelet-LLH | glrlm      | RunLengthNonUniformity           | 170.6136158  |
| wavelet-LLH | glrlm      | ShortRunEmphasis                 | 0.965037989  |
| wavelet-LLH | glrlm      | LongRunHighGrayLevelEmphasis     | 683.586795   |
| wavelet-LLH | glrlm      | RunPercentage                    | 0.953296703  |
| wavelet-LLH | glrlm      | LongRunLowGrayLevelEmphasis      | 0.008498686  |
| wavelet-LLH | glrlm      | RunEntropy                       | 4.818812756  |
| wavelet-LLH | glrlm      | HighGrayLevelRunEmphasis         | 592.9136666  |
| wavelet-LLH | glrlm      | RunLengthNonUniformityNormalized | 0.9125619    |
| wavelet-LLH | glszm      | GrayLevelVariance                | 87.82341554  |
| wavelet-LLH | glszm      | ZoneVariance                     | 4.674859019  |
| wavelet-LLH | glszm      | GrayLevelNonUniformityNormalized | 0.041158152  |
| wavelet-LLH | glszm      | SizeZoneNonUniformityNormalized  | 0.54818618   |
| wavelet-LLH | glszm      | SizeZoneNonUniformity            | 59.75229358  |
| wavelet-LLH | glszm      | GrayLevelNonUniformity           | 4.486238532  |
| wavelet-LLH | glszm      | LargeAreaEmphasis                | 7.908256881  |
| wavelet-LLH | glszm      | SmallAreaHighGrayLevelEmphasis   | 439.8478556  |
| wavelet-LLH | glszm      | ZonePercentage                   | 0.556122449  |
| wavelet-LLH | glszm      | LargeAreaLowGrayLevelEmphasis    | 0.02530338   |
| wavelet-LLH | glszm      | LargeAreaHighGrayLevelEmphasis   | 4710.669725  |
| wavelet-LLH | glszm      | HighGrayLevelZoneEmphasis        | 587.2844037  |
| wavelet-LLH | glszm      | SmallAreaEmphasis                | 0.766938308  |
| wavelet-LLH | glszm      | LowGrayLevelZoneEmphasis         | 0.01258336   |
| wavelet-LLH | glszm      | ZoneEntropy                      | 5.61301549   |

|             |            |                                      |              |
|-------------|------------|--------------------------------------|--------------|
| wavelet-LLH | glszm      | SmallAreaLowGrayLevelEmphasis        | 0.012052671  |
| wavelet-LLH | ngtdm      | Coarseness                           | 0.034622484  |
| wavelet-LLH | ngtdm      | Complexity                           | 2851.11064   |
| wavelet-LLH | ngtdm      | Strength                             | 20.13504395  |
| wavelet-LLH | ngtdm      | Contrast                             | 0.45689647   |
| wavelet-LLH | ngtdm      | Busyness                             | 0.03419589   |
| wavelet-LLL | gldm       | GrayLevelVariance                    | 651.445101   |
| wavelet-LLL | gldm       | HighGrayLevelEmphasis                | 4709.005102  |
| wavelet-LLL | gldm       | DependenceEntropy                    | 6.517404138  |
| wavelet-LLL | gldm       | DependenceNonUniformity              | 109.1836735  |
| wavelet-LLL | gldm       | GrayLevelNonUniformity               | 3.459183673  |
| wavelet-LLL | gldm       | SmallDependenceEmphasis              | 0.774820011  |
| wavelet-LLL | gldm       | SmallDependenceHighGrayLevelEmphasis | 3211.453165  |
| wavelet-LLL | gldm       | DependenceNonUniformityNormalized    | 0.557059559  |
| wavelet-LLL | gldm       | LargeDependenceEmphasis              | 2.642857143  |
| wavelet-LLL | gldm       | LargeDependenceLowGrayLevelEmphasis  | 0.007567352  |
| wavelet-LLL | gldm       | DependenceVariance                   | 0.631091212  |
| wavelet-LLL | gldm       | LargeDependenceHighGrayLevelEmphasis | 17128.58673  |
| wavelet-LLL | gldm       | SmallDependenceLowGrayLevelEmphasis  | 0.007037702  |
| wavelet-LLL | gldm       | LowGrayLevelEmphasis                 | 0.007126323  |
| wavelet-LLL | glcm       | JointAverage                         | 70.18193462  |
| wavelet-LLL | glcm       | SumAverage                           | 140.3638692  |
| wavelet-LLL | glcm       | JointEntropy                         | 7.930389222  |
| wavelet-LLL | glcm       | ClusterShade                         | -53156.89119 |
| wavelet-LLL | glcm       | MaximumProbability                   | 0.010244786  |
| wavelet-LLL | glcm       | Idmn                                 | 0.943940362  |
| wavelet-LLL | glcm       | JointEnergy                          | 0.004291921  |
| wavelet-LLL | glcm       | Contrast                             | 648.0169849  |
| wavelet-LLL | glcm       | DifferenceEntropy                    | 5.271265931  |
| wavelet-LLL | glcm       | InverseVariance                      | 0.063303329  |
| wavelet-LLL | glcm       | DifferenceVariance                   | 240.3700216  |
| wavelet-LLL | glcm       | Idn                                  | 0.847362262  |
| wavelet-LLL | glcm       | Idm                                  | 0.063282683  |
| wavelet-LLL | glcm       | Correlation                          | 0.432687574  |
| wavelet-LLL | glcm       | Autocorrelation                      | 5177.638032  |
| wavelet-LLL | glcm       | SumEntropy                           | 6.201264789  |
| wavelet-LLL | glcm       | SumSquares                           | 575.1739292  |
| wavelet-LLL | glcm       | ClusterProminence                    | 8114563.515  |
| wavelet-LLL | glcm       | Imc2                                 | 0.999756452  |
| wavelet-LLL | glcm       | Imc1                                 | -0.65051508  |
| wavelet-LLL | glcm       | DifferenceAverage                    | 19.80501795  |
| wavelet-LLL | glcm       | Id                                   | 0.124973346  |
| wavelet-LLL | glcm       | ClusterTendency                      | 1652.678732  |
| wavelet-LLL | firstorder | InterquartileRange                   | 955.6571941  |
| wavelet-LLL | firstorder | Skewness                             | -0.513094951 |
| wavelet-LLL | firstorder | Uniformity                           | 0.017648896  |
| wavelet-LLL | firstorder | Median                               | -476.5922178 |
| wavelet-LLL | firstorder | Energy                               | 143435755.1  |
| wavelet-LLL | firstorder | RobustMeanAbsoluteDeviation          | 403.3866034  |
| wavelet-LLL | firstorder | MeanAbsoluteDeviation                | 531.6210311  |
| wavelet-LLL | firstorder | TotalEnergy                          | 3872765388   |
| wavelet-LLL | firstorder | Maximum                              | 319.9921427  |
| wavelet-LLL | firstorder | RootMeanSquared                      | 855.4619086  |
| wavelet-LLL | firstorder | 90Percentile                         | 215.9286503  |
| wavelet-LLL | firstorder | Minimum                              | -2144.666133 |
| wavelet-LLL | firstorder | Entropy                              | 6.07234011   |
| wavelet-LLL | firstorder | Range                                | 2464.658275  |
| wavelet-LLL | firstorder | Variance                             | 407389.3206  |



|             |            |                                      |              |
|-------------|------------|--------------------------------------|--------------|
| wavelet-LLL | firstorder | 10Percentile                         | -1528.714557 |
| wavelet-LLL | firstorder | Kurtosis                             | 2.285703353  |
| wavelet-LLL | firstorder | Mean                                 | -569.583845  |
| wavelet-LLL | glrlm      | ShortRunLowGrayLevelEmphasis         | 0.007234533  |
| wavelet-LLL | glrlm      | GrayLevelVariance                    | 648.8092117  |
| wavelet-LLL | glrlm      | LowGrayLevelRunEmphasis              | 0.007238386  |
| wavelet-LLL | glrlm      | GrayLevelNonUniformityNormalized     | 0.017480118  |
| wavelet-LLL | glrlm      | RunVariance                          | 0.017674708  |
| wavelet-LLL | glrlm      | GrayLevelNonUniformity               | 3.371201885  |
| wavelet-LLL | glrlm      | LongRunEmphasis                      | 1.050961442  |
| wavelet-LLL | glrlm      | ShortRunHighGrayLevelEmphasis        | 4583.229439  |
| wavelet-LLL | glrlm      | RunLengthNonUniformity               | 186.979541   |
| wavelet-LLL | glrlm      | ShortRunEmphasis                     | 0.98814534   |
| wavelet-LLL | glrlm      | LongRunHighGrayLevelEmphasis         | 5039.459165  |
| wavelet-LLL | glrlm      | RunPercentage                        | 0.983908948  |
| wavelet-LLL | glrlm      | LongRunLowGrayLevelEmphasis          | 0.007254169  |
| wavelet-LLL | glrlm      | RunEntropy                           | 6.122364475  |
| wavelet-LLL | glrlm      | HighGrayLevelRunEmphasis             | 4667.669662  |
| wavelet-LLL | glrlm      | RunLengthNonUniformityNormalized     | 0.969383803  |
| wavelet-LLL | glszm      | GrayLevelVariance                    | 610.4048544  |
| wavelet-LLL | glszm      | ZoneVariance                         | 0.437433318  |
| wavelet-LLL | glszm      | GrayLevelNonUniformityNormalized     | 0.016079866  |
| wavelet-LLL | glszm      | SizeZoneNonUniformityNormalized      | 0.765965554  |
| wavelet-LLL | glszm      | SizeZoneNonUniformity                | 124.0864198  |
| wavelet-LLL | glszm      | GrayLevelNonUniformity               | 2.604938272  |
| wavelet-LLL | glszm      | LargeAreaEmphasis                    | 1.901234568  |
| wavelet-LLL | glszm      | SmallAreaHighGrayLevelEmphasis       | 3613.284568  |
| wavelet-LLL | glszm      | ZonePercentage                       | 0.826530612  |
| wavelet-LLL | glszm      | LargeAreaLowGrayLevelEmphasis        | 0.00880283   |
| wavelet-LLL | glszm      | LargeAreaHighGrayLevelEmphasis       | 10997.84568  |
| wavelet-LLL | glszm      | HighGrayLevelZoneEmphasis            | 4242.32716   |
| wavelet-LLL | glszm      | SmallAreaEmphasis                    | 0.895459534  |
| wavelet-LLL | glszm      | LowGrayLevelZoneEmphasis             | 0.008547184  |
| wavelet-LLL | glszm      | ZoneEntropy                          | 6.384249657  |
| wavelet-LLL | glszm      | SmallAreaLowGrayLevelEmphasis        | 0.008497259  |
| wavelet-LLL | ngtdm      | Coarseness                           | 0.023778562  |
| wavelet-LLL | ngtdm      | Complexity                           | 39871.98104  |
| wavelet-LLL | ngtdm      | Strength                             | 89.10687684  |
| wavelet-LLL | ngtdm      | Contrast                             | 2.693961795  |
| wavelet-LLL | ngtdm      | Busyness                             | 0.008361893  |
| wavelet-HHL | gldm       | GrayLevelVariance                    | 11.32267805  |
| wavelet-HHL | gldm       | HighGrayLevelEmphasis                | 106.2857143  |
| wavelet-HHL | gldm       | DependenceEntropy                    | 5.56516795   |
| wavelet-HHL | gldm       | DependenceNonUniformity              | 44.19387755  |
| wavelet-HHL | gldm       | GrayLevelNonUniformity               | 17.23469388  |
| wavelet-HHL | gldm       | SmallDependenceEmphasis              | 0.364836101  |
| wavelet-HHL | gldm       | SmallDependenceHighGrayLevelEmphasis | 41.60601556  |
| wavelet-HHL | gldm       | DependenceNonUniformityNormalized    | 0.225478967  |
| wavelet-HHL | gldm       | LargeDependenceEmphasis              | 9.785714286  |
| wavelet-HHL | gldm       | LargeDependenceLowGrayLevelEmphasis  | 0.141651595  |
| wavelet-HHL | gldm       | DependenceVariance                   | 2.746980425  |
| wavelet-HHL | gldm       | LargeDependenceHighGrayLevelEmphasis | 883.6428571  |
| wavelet-HHL | gldm       | SmallDependenceLowGrayLevelEmphasis  | 0.014245665  |
| wavelet-HHL | gldm       | LowGrayLevelEmphasis                 | 0.023229237  |
| wavelet-HHL | glcm       | JointAverage                         | 9.778273701  |
| wavelet-HHL | glcm       | SumAverage                           | 19.5565474   |
| wavelet-HHL | glcm       | JointEntropy                         | 6.711809874  |
| wavelet-HHL | glcm       | ClusterShade                         | 9.709739365  |

|             |            |                                  |              |
|-------------|------------|----------------------------------|--------------|
| wavelet-HHL | glcm       | MaximumProbability               | 0.033949593  |
| wavelet-HHL | glcm       | Idmn                             | 0.938408526  |
| wavelet-HHL | glcm       | JointEnergy                      | 0.012054678  |
| wavelet-HHL | glcm       | Contrast                         | 21.67999051  |
| wavelet-HHL | glcm       | DifferenceEntropy                | 3.244565926  |
| wavelet-HHL | glcm       | InverseVariance                  | 0.265674847  |
| wavelet-HHL | glcm       | DifferenceVariance               | 8.503795331  |
| wavelet-HHL | glcm       | Idn                              | 0.84061045   |
| wavelet-HHL | glcm       | Idm                              | 0.250735795  |
| wavelet-HHL | glcm       | Correlation                      | 0.010650573  |
| wavelet-HHL | glcm       | Autocorrelation                  | 95.70893224  |
| wavelet-HHL | glcm       | SumEntropy                       | 4.12446969   |
| wavelet-HHL | glcm       | SumSquares                       | 10.92897748  |
| wavelet-HHL | glcm       | ClusterProminence                | 1392.364657  |
| wavelet-HHL | glcm       | Imc2                             | 0.854322883  |
| wavelet-HHL | glcm       | Imc1                             | -0.179283663 |
| wavelet-HHL | glcm       | DifferenceAverage                | 3.600840435  |
| wavelet-HHL | glcm       | Id                               | 0.339686927  |
| wavelet-HHL | glcm       | ClusterTendency                  | 22.0359194   |
| wavelet-HHL | firstorder | InterquartileRange               | 112.3134467  |
| wavelet-HHL | firstorder | Skewness                         | 0.011589231  |
| wavelet-HHL | firstorder | Uniformity                       | 0.087932112  |
| wavelet-HHL | firstorder | Median                           | -5.248255211 |
| wavelet-HHL | firstorder | Energy                           | 1388347.069  |
| wavelet-HHL | firstorder | RobustMeanAbsoluteDeviation      | 48.20684178  |
| wavelet-HHL | firstorder | MeanAbsoluteDeviation            | 68.11296668  |
| wavelet-HHL | firstorder | TotalEnergy                      | 37485370.88  |
| wavelet-HHL | firstorder | Maximum                          | 184.9435925  |
| wavelet-HHL | firstorder | RootMeanSquared                  | 84.1629575   |
| wavelet-HHL | firstorder | 90Percentile                     | 118.6648125  |
| wavelet-HHL | firstorder | Minimum                          | -213.4108321 |
| wavelet-HHL | firstorder | Entropy                          | 3.719769853  |
| wavelet-HHL | firstorder | Range                            | 398.3544246  |
| wavelet-HHL | firstorder | Variance                         | 7051.827852  |
| wavelet-HHL | firstorder | 10Percentile                     | -103.1009122 |
| wavelet-HHL | firstorder | Kurtosis                         | 2.584113453  |
| wavelet-HHL | firstorder | Mean                             | 5.619213795  |
| wavelet-HHL | glrlm      | ShortRunLowGrayLevelEmphasis     | 0.023239627  |
| wavelet-HHL | glrlm      | GrayLevelVariance                | 11.72425732  |
| wavelet-HHL | glrlm      | LowGrayLevelRunEmphasis          | 0.023876375  |
| wavelet-HHL | glrlm      | GrayLevelNonUniformityNormalized | 0.085127317  |
| wavelet-HHL | glrlm      | RunVariance                      | 0.079174829  |
| wavelet-HHL | glrlm      | GrayLevelNonUniformity           | 15.62431163  |
| wavelet-HHL | glrlm      | LongRunEmphasis                  | 1.22051803   |
| wavelet-HHL | glrlm      | ShortRunHighGrayLevelEmphasis    | 102.7671763  |
| wavelet-HHL | glrlm      | RunLengthNonUniformity           | 162.6836813  |
| wavelet-HHL | glrlm      | ShortRunEmphasis                 | 0.953518791  |
| wavelet-HHL | glrlm      | LongRunHighGrayLevelEmphasis     | 127.5715803  |
| wavelet-HHL | glrlm      | RunPercentage                    | 0.936420722  |
| wavelet-HHL | glrlm      | LongRunLowGrayLevelEmphasis      | 0.026911056  |
| wavelet-HHL | glrlm      | RunEntropy                       | 4.03191153   |
| wavelet-HHL | glrlm      | HighGrayLevelRunEmphasis         | 107.1640614  |
| wavelet-HHL | glrlm      | RunLengthNonUniformityNormalized | 0.885900912  |
| wavelet-HHL | glszm      | GrayLevelVariance                | 17.46201814  |
| wavelet-HHL | glszm      | ZoneVariance                     | 11.12698413  |
| wavelet-HHL | glszm      | GrayLevelNonUniformityNormalized | 0.070861678  |
| wavelet-HHL | glszm      | SizeZoneNonUniformityNormalized  | 0.382936508  |
| wavelet-HHL | glszm      | SizeZoneNonUniformity            | 32.16666667  |

|             |            |                                      |              |
|-------------|------------|--------------------------------------|--------------|
| wavelet-HHL | glszm      | GrayLevelNonUniformity               | 5.952380952  |
| wavelet-HHL | glszm      | LargeAreaEmphasis                    | 16.57142857  |
| wavelet-HHL | glszm      | SmallAreaHighGrayLevelEmphasis       | 73.80446078  |
| wavelet-HHL | glszm      | ZonePercentage                       | 0.428571429  |
| wavelet-HHL | glszm      | LargeAreaLowGrayLevelEmphasis        | 0.238506294  |
| wavelet-HHL | glszm      | LargeAreaHighGrayLevelEmphasis       | 1466.5       |
| wavelet-HHL | glszm      | HighGrayLevelZoneEmphasis            | 115.0952381  |
| wavelet-HHL | glszm      | SmallAreaEmphasis                    | 0.641242863  |
| wavelet-HHL | glszm      | LowGrayLevelZoneEmphasis             | 0.035827934  |
| wavelet-HHL | glszm      | ZoneEntropy                          | 5.150190084  |
| wavelet-HHL | glszm      | SmallAreaLowGrayLevelEmphasis        | 0.030356416  |
| wavelet-HHL | ngtdm      | Coarseness                           | 0.030126319  |
| wavelet-HHL | ngtdm      | Complexity                           | 280.3229763  |
| wavelet-HHL | ngtdm      | Strength                             | 2.320452673  |
| wavelet-HHL | ngtdm      | Contrast                             | 0.223297146  |
| wavelet-HHL | ngtdm      | Busyness                             | 0.238697504  |
| wavelet-HLH | gldm       | GrayLevelVariance                    | 20.31932007  |
| wavelet-HLH | gldm       | HighGrayLevelEmphasis                | 274.8520408  |
| wavelet-HLH | gldm       | DependenceEntropy                    | 5.722494169  |
| wavelet-HLH | gldm       | DependenceNonUniformity              | 43.42857143  |
| wavelet-HLH | gldm       | GrayLevelNonUniformity               | 16.09183673  |
| wavelet-HLH | gldm       | SmallDependenceEmphasis              | 0.407167328  |
| wavelet-HLH | gldm       | SmallDependenceHighGrayLevelEmphasis | 118.4345385  |
| wavelet-HLH | gldm       | DependenceNonUniformityNormalized    | 0.221574344  |
| wavelet-HLH | gldm       | LargeDependenceEmphasis              | 10.40816327  |
| wavelet-HLH | gldm       | LargeDependenceLowGrayLevelEmphasis  | 0.053428662  |
| wavelet-HLH | gldm       | DependenceVariance                   | 3.369429404  |
| wavelet-HLH | gldm       | LargeDependenceHighGrayLevelEmphasis | 2534.392857  |
| wavelet-HLH | gldm       | SmallDependenceLowGrayLevelEmphasis  | 0.008595069  |
| wavelet-HLH | gldm       | LowGrayLevelEmphasis                 | 0.011244577  |
| wavelet-HLH | glcm       | JointAverage                         | 15.90398035  |
| wavelet-HLH | glcm       | SumAverage                           | 31.8079607   |
| wavelet-HLH | glcm       | JointEntropy                         | 6.831366299  |
| wavelet-HLH | glcm       | ClusterShade                         | 27.37201825  |
| wavelet-HLH | glcm       | MaximumProbability                   | 0.031633431  |
| wavelet-HLH | glcm       | Idmn                                 | 0.962045248  |
| wavelet-HLH | glcm       | JointEnergy                          | 0.01144046   |
| wavelet-HLH | glcm       | Contrast                             | 40.31730036  |
| wavelet-HLH | glcm       | DifferenceEntropy                    | 3.600508879  |
| wavelet-HLH | glcm       | InverseVariance                      | 0.237757464  |
| wavelet-HLH | glcm       | DifferenceVariance                   | 18.63318363  |
| wavelet-HLH | glcm       | Idn                                  | 0.879208722  |
| wavelet-HLH | glcm       | Idm                                  | 0.233117859  |
| wavelet-HLH | glcm       | Correlation                          | 0.013404919  |
| wavelet-HLH | glcm       | Autocorrelation                      | 253.361009   |
| wavelet-HLH | glcm       | SumEntropy                           | 4.421155627  |
| wavelet-HLH | glcm       | SumSquares                           | 20.56086127  |
| wavelet-HLH | glcm       | ClusterProminence                    | 7904.757966  |
| wavelet-HLH | glcm       | Imc2                                 | 0.946867304  |
| wavelet-HLH | glcm       | Imc1                                 | -0.286105349 |
| wavelet-HLH | glcm       | DifferenceAverage                    | 4.59668656   |
| wavelet-HLH | glcm       | Id                                   | 0.318962974  |
| wavelet-HLH | glcm       | ClusterTendency                      | 41.92614472  |
| wavelet-HLH | firstorder | InterquartileRange                   | 105.8414959  |
| wavelet-HLH | firstorder | Skewness                             | 0.051929509  |
| wavelet-HLH | firstorder | Uniformity                           | 0.082101208  |
| wavelet-HLH | firstorder | Median                               | -5.363162538 |
| wavelet-HLH | firstorder | Energy                               | 2505053.388  |

|             |            |                                  |              |
|-------------|------------|----------------------------------|--------------|
| wavelet-HLH | firstorder | RobustMeanAbsoluteDeviation      | 50.66792186  |
| wavelet-HLH | firstorder | MeanAbsoluteDeviation            | 82.59317379  |
| wavelet-HLH | firstorder | TotalEnergy                      | 67636441.46  |
| wavelet-HLH | firstorder | Maximum                          | 366.8613053  |
| wavelet-HLH | firstorder | RootMeanSquared                  | 113.0525746  |
| wavelet-HLH | firstorder | 90Percentile                     | 153.758545   |
| wavelet-HLH | firstorder | Minimum                          | -356.3794825 |
| wavelet-HLH | firstorder | Entropy                          | 4.010016743  |
| wavelet-HLH | firstorder | Range                            | 723.2407879  |
| wavelet-HLH | firstorder | Variance                         | 12664.12747  |
| wavelet-HLH | firstorder | 10Percentile                     | -95.90701625 |
| wavelet-HLH | firstorder | Kurtosis                         | 4.475501419  |
| wavelet-HLH | firstorder | Mean                             | 10.80542284  |
| wavelet-HLH | glrlm      | ShortRunLowGrayLevelEmphasis     | 0.011492926  |
| wavelet-HLH | glrlm      | GrayLevelVariance                | 21.27667251  |
| wavelet-HLH | glrlm      | LowGrayLevelRunEmphasis          | 0.011708758  |
| wavelet-HLH | glrlm      | GrayLevelNonUniformityNormalized | 0.078615785  |
| wavelet-HLH | glrlm      | RunVariance                      | 0.074162918  |
| wavelet-HLH | glrlm      | GrayLevelNonUniformity           | 14.42918053  |
| wavelet-HLH | glrlm      | LongRunEmphasis                  | 1.216375985  |
| wavelet-HLH | glrlm      | ShortRunHighGrayLevelEmphasis    | 264.6604298  |
| wavelet-HLH | glrlm      | RunLengthNonUniformity           | 162.1126211  |
| wavelet-HLH | glrlm      | ShortRunEmphasis                 | 0.952021741  |
| wavelet-HLH | glrlm      | LongRunHighGrayLevelEmphasis     | 330.8929894  |
| wavelet-HLH | glrlm      | RunPercentage                    | 0.936420722  |
| wavelet-HLH | glrlm      | LongRunLowGrayLevelEmphasis      | 0.012669178  |
| wavelet-HLH | glrlm      | RunEntropy                       | 4.333157154  |
| wavelet-HLH | glrlm      | HighGrayLevelRunEmphasis         | 276.5645816  |
| wavelet-HLH | glrlm      | RunLengthNonUniformityNormalized | 0.882401158  |
| wavelet-HLH | glszm      | GrayLevelVariance                | 34.01734305  |
| wavelet-HLH | glszm      | ZoneVariance                     | 8.246502486  |
| wavelet-HLH | glszm      | GrayLevelNonUniformityNormalized | 0.055613366  |
| wavelet-HLH | glszm      | SizeZoneNonUniformityNormalized  | 0.451728524  |
| wavelet-HLH | glszm      | SizeZoneNonUniformity            | 42.01075269  |
| wavelet-HLH | glszm      | GrayLevelNonUniformity           | 5.172043011  |
| wavelet-HLH | glszm      | LargeAreaEmphasis                | 12.68817204  |
| wavelet-HLH | glszm      | SmallAreaHighGrayLevelEmphasis   | 204.8791421  |
| wavelet-HLH | glszm      | ZonePercentage                   | 0.474489796  |
| wavelet-HLH | glszm      | LargeAreaLowGrayLevelEmphasis    | 0.072915592  |
| wavelet-HLH | glszm      | LargeAreaHighGrayLevelEmphasis   | 2988.419355  |
| wavelet-HLH | glszm      | HighGrayLevelZoneEmphasis        | 292.0860215  |
| wavelet-HLH | glszm      | SmallAreaEmphasis                | 0.696460905  |
| wavelet-HLH | glszm      | LowGrayLevelZoneEmphasis         | 0.018761438  |
| wavelet-HLH | glszm      | ZoneEntropy                      | 5.31428351   |
| wavelet-HLH | glszm      | SmallAreaLowGrayLevelEmphasis    | 0.017399962  |
| wavelet-HLH | ngtdm      | Coarseness                       | 0.031484502  |
| wavelet-HLH | ngtdm      | Complexity                       | 991.8159849  |
| wavelet-HLH | ngtdm      | Strength                         | 7.729988716  |
| wavelet-HLH | ngtdm      | Contrast                         | 0.177961408  |
| wavelet-HLH | ngtdm      | Busyness                         | 0.062114956  |

| Image type | Feature Class | Feature Name                         |                                                                                                                                                                                                                                                                                                                                                                                                                   |
|------------|---------------|--------------------------------------|-------------------------------------------------------------------------------------------------------------------------------------------------------------------------------------------------------------------------------------------------------------------------------------------------------------------------------------------------------------------------------------------------------------------|
| general    | info          | BoundingBox                          | 16: RTSTRUCT: C99-DNU_segment_Tumor_4D<br>(0, 1, 1, 11, 12, 18)                                                                                                                                                                                                                                                                                                                                                   |
| general    | info          | EnabledImageTypes                    | {u'Original': {}, u'Wavelet': {}}                                                                                                                                                                                                                                                                                                                                                                                 |
|            |               |                                      | {'distances': [1], 'additionalInfo': True, 'force2D': False, 'interpolator': 'sitkBSpline', 'resampledPixelSpacing': [3.0], 'label': 1, 'normalizeScale': 1, 'normalize': False, 'force2Ddimension': 0, 'removeOutliers': None, 'minimumROISize': None, u'binWidth': 25.0, 'minimumROIDimensions': 1, u'correctMask': True, 'preCrop': False, u'symmetricalGLCM': True, 'resegmentRange': None, 'padDistance': 5} |
| general    | info          | GeneralSettings                      |                                                                                                                                                                                                                                                                                                                                                                                                                   |
| general    | info          | ImageHash                            | 878c812bfa79254df149f4c7f71a48dad23c0f25                                                                                                                                                                                                                                                                                                                                                                          |
| general    | info          | ImageSpacing                         | (0.9765625000000002, 0.9765625000000002, 2.0)                                                                                                                                                                                                                                                                                                                                                                     |
| general    | info          | MaskHash                             | 277cd6725566a6991e1a4b60831e826c5cde0f23                                                                                                                                                                                                                                                                                                                                                                          |
| general    | info          | NumpyVersion                         | 1.13.1                                                                                                                                                                                                                                                                                                                                                                                                            |
| general    | info          | PyWaveletVersion                     | 0.5.2                                                                                                                                                                                                                                                                                                                                                                                                             |
| general    | info          | SimpleITKVersion                     | 1.1.0                                                                                                                                                                                                                                                                                                                                                                                                             |
| general    | info          | Version                              | 1.3.0.post102+g1b0eb74                                                                                                                                                                                                                                                                                                                                                                                            |
| general    | info          | VolumeNum                            | 2                                                                                                                                                                                                                                                                                                                                                                                                                 |
| general    | info          | VoxelNum                             | 397                                                                                                                                                                                                                                                                                                                                                                                                               |
| original   | shape         | Maximum3DDiameter                    | 58.01723882                                                                                                                                                                                                                                                                                                                                                                                                       |
| original   | shape         | Maximum2DDiameterSlice               | 28.3019434                                                                                                                                                                                                                                                                                                                                                                                                        |
| original   | shape         | Sphericity                           | 0.690805362                                                                                                                                                                                                                                                                                                                                                                                                       |
| original   | shape         | MinorAxis                            | 23.96644109                                                                                                                                                                                                                                                                                                                                                                                                       |
| original   | shape         | Elongation                           | 0.344099787                                                                                                                                                                                                                                                                                                                                                                                                       |
| original   | shape         | SurfaceVolumeRatio                   | 0.317499955                                                                                                                                                                                                                                                                                                                                                                                                       |
| original   | shape         | Volume                               | 10719                                                                                                                                                                                                                                                                                                                                                                                                             |
| original   | shape         | MajorAxis                            | 69.64968307                                                                                                                                                                                                                                                                                                                                                                                                       |
| original   | shape         | SurfaceArea                          | 3403.282012                                                                                                                                                                                                                                                                                                                                                                                                       |
| original   | shape         | Flatness                             | 0.2470485                                                                                                                                                                                                                                                                                                                                                                                                         |
| original   | shape         | LeastAxis                            | 17.20684975                                                                                                                                                                                                                                                                                                                                                                                                       |
| original   | shape         | Maximum2DDiameterColumn              | 40.02499219                                                                                                                                                                                                                                                                                                                                                                                                       |
| original   | shape         | Maximum2DDiameterRow                 | 57.70615219                                                                                                                                                                                                                                                                                                                                                                                                       |
| original   | gldm          | GrayLevelVariance                    | 81.65141585                                                                                                                                                                                                                                                                                                                                                                                                       |
| original   | gldm          | HighGrayLevelEmphasis                | 636.9244332                                                                                                                                                                                                                                                                                                                                                                                                       |
| original   | gldm          | DependenceEntropy                    | 6.461990475                                                                                                                                                                                                                                                                                                                                                                                                       |
| original   | gldm          | DependenceNonUniformity              | 107.836272                                                                                                                                                                                                                                                                                                                                                                                                        |
| original   | gldm          | GrayLevelNonUniformity               | 17.2115869                                                                                                                                                                                                                                                                                                                                                                                                        |
| original   | gldm          | SmallDependenceEmphasis              | 0.522495796                                                                                                                                                                                                                                                                                                                                                                                                       |
| original   | gldm          | SmallDependenceHighGrayLevelEmphasis | 251.2292088                                                                                                                                                                                                                                                                                                                                                                                                       |
| original   | gldm          | DependenceNonUniformityNormalized    | 0.271627889                                                                                                                                                                                                                                                                                                                                                                                                       |
| original   | gldm          | LargeDependenceEmphasis              | 9.77581864                                                                                                                                                                                                                                                                                                                                                                                                        |
| original   | gldm          | LargeDependenceLowGrayLevelEmphasis  | 0.020212621                                                                                                                                                                                                                                                                                                                                                                                                       |
| original   | gldm          | DependenceVariance                   | 3.768997963                                                                                                                                                                                                                                                                                                                                                                                                       |
| original   | gldm          | LargeDependenceHighGrayLevelEmphasis | 9369.866499                                                                                                                                                                                                                                                                                                                                                                                                       |
| original   | gldm          | SmallDependenceLowGrayLevelEmphasis  | 0.007318833                                                                                                                                                                                                                                                                                                                                                                                                       |
| original   | gldm          | LowGrayLevelEmphasis                 | 0.00848147                                                                                                                                                                                                                                                                                                                                                                                                        |
| original   | glcm          | JointAverage                         | 25.10162352                                                                                                                                                                                                                                                                                                                                                                                                       |
| original   | glcm          | SumAverage                           | 50.20324705                                                                                                                                                                                                                                                                                                                                                                                                       |
| original   | glcm          | JointEntropy                         | 8.011117535                                                                                                                                                                                                                                                                                                                                                                                                       |
| original   | glcm          | ClusterShade                         | -1371.744358                                                                                                                                                                                                                                                                                                                                                                                                      |
| original   | glcm          | MaximumProbability                   | 0.031476163                                                                                                                                                                                                                                                                                                                                                                                                       |
| original   | glcm          | ldmn                                 | 0.955087636                                                                                                                                                                                                                                                                                                                                                                                                       |
| original   | glcm          | JointEnergy                          | 0.005944896                                                                                                                                                                                                                                                                                                                                                                                                       |

|          |            |                                  |              |
|----------|------------|----------------------------------|--------------|
| original | glcm       | Contrast                         | 98.89448018  |
| original | glcm       | DifferenceEntropy                | 4.252659998  |
| original | glcm       | InverseVariance                  | 0.180566753  |
| original | glcm       | DifferenceVariance               | 45.89518811  |
| original | glcm       | Idn                              | 0.870135069  |
| original | glcm       | Idm                              | 0.186837901  |
| original | glcm       | Correlation                      | 0.295458434  |
| original | glcm       | Autocorrelation                  | 651.0883405  |
| original | glcm       | SumEntropy                       | 5.423424446  |
| original | glcm       | SumSquares                       | 70.35815295  |
| original | glcm       | ClusterProminence                | 87044.67994  |
| original | glcm       | Imc2                             | 0.959456862  |
| original | glcm       | Imc1                             | -0.273967255 |
| original | glcm       | DifferenceAverage                | 7.22703069   |
| original | glcm       | Id                               | 0.265207793  |
| original | glcm       | ClusterTendency                  | 182.5381316  |
| original | firstorder | InterquartileRange               | 373          |
| original | firstorder | Skewness                         | -0.549326161 |
| original | firstorder | Uniformity                       | 0.043354123  |
| original | firstorder | Median                           | -181         |
| original | firstorder | Energy                           | 40211083     |
| original | firstorder | RobustMeanAbsoluteDeviation      | 148.6762133  |
| original | firstorder | MeanAbsoluteDeviation            | 191.8325984  |
| original | firstorder | TotalEnergy                      | 1085699241   |
| original | firstorder | Maximum                          | 261          |
| original | firstorder | RootMeanSquared                  | 318.256756   |
| original | firstorder | 90Percentile                     | 26.4         |
| original | firstorder | Minimum                          | -791         |
| original | firstorder | Entropy                          | 4.831874631  |
| original | firstorder | Range                            | 1052         |
| original | firstorder | Variance                         | 51056.05278  |
| original | firstorder | 10Percentile                     | -563.8       |
| original | firstorder | Kurtosis                         | 2.252849382  |
| original | firstorder | Mean                             | -224.1234257 |
| original | glrlm      | ShortRunLowGrayLevelEmphasis     | 0.008812274  |
| original | glrlm      | GrayLevelVariance                | 81.73794403  |
| original | glrlm      | LowGrayLevelRunEmphasis          | 0.008885249  |
| original | glrlm      | GrayLevelNonUniformityNormalized | 0.040465287  |
| original | glrlm      | RunVariance                      | 0.06303185   |
| original | glrlm      | GrayLevelNonUniformity           | 15.172655    |
| original | glrlm      | LongRunEmphasis                  | 1.185737446  |
| original | glrlm      | ShortRunHighGrayLevelEmphasis    | 580.5051635  |
| original | glrlm      | RunLengthNonUniformity           | 335.6408681  |
| original | glrlm      | ShortRunEmphasis                 | 0.957724928  |
| original | glrlm      | LongRunHighGrayLevelEmphasis     | 793.3785215  |
| original | glrlm      | RunPercentage                    | 0.944196861  |
| original | glrlm      | LongRunLowGrayLevelEmphasis      | 0.009192765  |
| original | glrlm      | RunEntropy                       | 5.111775034  |
| original | glrlm      | HighGrayLevelRunEmphasis         | 619.4956823  |
| original | glrlm      | RunLengthNonUniformityNormalized | 0.894937159  |
| original | glszm      | GrayLevelVariance                | 76.77975425  |
| original | glszm      | ZoneVariance                     | 6.338015123  |
| original | glszm      | GrayLevelNonUniformityNormalized | 0.034291115  |
| original | glszm      | SizeZoneNonUniformityNormalized  | 0.609905482  |
| original | glszm      | SizeZoneNonUniformity            | 140.2782609  |
| original | glszm      | GrayLevelNonUniformity           | 7.886956522  |

|             |            |                                      |              |
|-------------|------------|--------------------------------------|--------------|
| original    | glszm      | LargeAreaEmphasis                    | 9.317391304  |
| original    | glszm      | SmallAreaHighGrayLevelEmphasis       | 365.8415004  |
| original    | glszm      | ZonePercentage                       | 0.579345088  |
| original    | glszm      | LargeAreaLowGrayLevelEmphasis        | 0.023710125  |
| original    | glszm      | LargeAreaHighGrayLevelEmphasis       | 8881.621739  |
| original    | glszm      | HighGrayLevelZoneEmphasis            | 481.8391304  |
| original    | glszm      | SmallAreaEmphasis                    | 0.806868472  |
| original    | glszm      | LowGrayLevelZoneEmphasis             | 0.013097283  |
| original    | glszm      | ZoneEntropy                          | 5.811910172  |
| original    | glszm      | SmallAreaLowGrayLevelEmphasis        | 0.012347343  |
| original    | ngtdm      | Coarseness                           | 0.012504414  |
| original    | ngtdm      | Complexity                           | 3036.67913   |
| original    | ngtdm      | Strength                             | 7.307251418  |
| original    | ngtdm      | Contrast                             | 0.678085702  |
| original    | ngtdm      | Busyness                             | 0.084152689  |
| wavelet-HHH | gldm       | GrayLevelVariance                    | 9.895830822  |
| wavelet-HHH | gldm       | HighGrayLevelEmphasis                | 219.0151134  |
| wavelet-HHH | gldm       | DependenceEntropy                    | 5.646978189  |
| wavelet-HHH | gldm       | DependenceNonUniformity              | 80.15869018  |
| wavelet-HHH | gldm       | GrayLevelNonUniformity               | 40.19395466  |
| wavelet-HHH | gldm       | SmallDependenceEmphasis              | 0.342598442  |
| wavelet-HHH | gldm       | SmallDependenceHighGrayLevelEmphasis | 80.05213649  |
| wavelet-HHH | gldm       | DependenceNonUniformityNormalized    | 0.201911058  |
| wavelet-HHH | gldm       | LargeDependenceEmphasis              | 9.962216625  |
| wavelet-HHH | gldm       | LargeDependenceLowGrayLevelEmphasis  | 0.053986306  |
| wavelet-HHH | gldm       | DependenceVariance                   | 2.326808748  |
| wavelet-HHH | gldm       | LargeDependenceHighGrayLevelEmphasis | 2130.284635  |
| wavelet-HHH | gldm       | SmallDependenceLowGrayLevelEmphasis  | 0.004655279  |
| wavelet-HHH | gldm       | LowGrayLevelEmphasis                 | 0.008290157  |
| wavelet-HHH | glcm       | JointAverage                         | 14.47896542  |
| wavelet-HHH | glcm       | SumAverage                           | 28.95793084  |
| wavelet-HHH | glcm       | JointEntropy                         | 6.756917979  |
| wavelet-HHH | glcm       | ClusterShade                         | -2.551611837 |
| wavelet-HHH | glcm       | MaximumProbability                   | 0.029531936  |
| wavelet-HHH | glcm       | Idmn                                 | 0.972349391  |
| wavelet-HHH | glcm       | JointEnergy                          | 0.012247723  |
| wavelet-HHH | glcm       | Contrast                             | 21.1129891   |
| wavelet-HHH | glcm       | DifferenceEntropy                    | 3.238961832  |
| wavelet-HHH | glcm       | InverseVariance                      | 0.262524763  |
| wavelet-HHH | glcm       | DifferenceVariance                   | 8.926664229  |
| wavelet-HHH | glcm       | Idn                                  | 0.890839186  |
| wavelet-HHH | glcm       | Idm                                  | 0.255978482  |
| wavelet-HHH | glcm       | Correlation                          | -0.03962955  |
| wavelet-HHH | glcm       | Autocorrelation                      | 209.2294101  |
| wavelet-HHH | glcm       | SumEntropy                           | 4.034321741  |
| wavelet-HHH | glcm       | SumSquares                           | 10.14433356  |
| wavelet-HHH | glcm       | ClusterProminence                    | 1835.766401  |
| wavelet-HHH | glcm       | Imc2                                 | 0.786951695  |
| wavelet-HHH | glcm       | Imc1                                 | -0.135336768 |
| wavelet-HHH | glcm       | DifferenceAverage                    | 3.456820024  |
| wavelet-HHH | glcm       | Id                                   | 0.347083609  |
| wavelet-HHH | glcm       | ClusterTendency                      | 19.46434516  |
| wavelet-HHH | firstorder | InterquartileRange                   | 92.92445191  |
| wavelet-HHH | firstorder | Skewness                             | -0.123021589 |
| wavelet-HHH | firstorder | Uniformity                           | 0.101244218  |
| wavelet-HHH | firstorder | Median                               | 1.524209629  |

|             |            |                                  |              |
|-------------|------------|----------------------------------|--------------|
| wavelet-HHH | firstorder | Energy                           | 2397739.243  |
| wavelet-HHH | firstorder | RobustMeanAbsoluteDeviation      | 37.85733265  |
| wavelet-HHH | firstorder | MeanAbsoluteDeviation            | 58.11395649  |
| wavelet-HHH | firstorder | TotalEnergy                      | 64738959.57  |
| wavelet-HHH | firstorder | Maximum                          | 278.6456491  |
| wavelet-HHH | firstorder | RootMeanSquared                  | 77.71515585  |
| wavelet-HHH | firstorder | 90Percentile                     | 82.75779956  |
| wavelet-HHH | firstorder | Minimum                          | -336.6872351 |
| wavelet-HHH | firstorder | Entropy                          | 3.617684946  |
| wavelet-HHH | firstorder | Range                            | 615.3328842  |
| wavelet-HHH | firstorder | Variance                         | 6038.980096  |
| wavelet-HHH | firstorder | 10Percentile                     | -93.5598594  |
| wavelet-HHH | firstorder | Kurtosis                         | 4.861332445  |
| wavelet-HHH | firstorder | Mean                             | -0.815691701 |
| wavelet-HHH | grlm       | ShortRunLowGrayLevelEmphasis     | 0.00824302   |
| wavelet-HHH | grlm       | GrayLevelVariance                | 10.31386972  |
| wavelet-HHH | grlm       | LowGrayLevelRunEmphasis          | 0.008512454  |
| wavelet-HHH | grlm       | GrayLevelNonUniformityNormalized | 0.098656931  |
| wavelet-HHH | grlm       | RunVariance                      | 0.079945606  |
| wavelet-HHH | grlm       | GrayLevelNonUniformity           | 36.51052571  |
| wavelet-HHH | grlm       | LongRunEmphasis                  | 1.231351151  |
| wavelet-HHH | grlm       | ShortRunHighGrayLevelEmphasis    | 208.6618148  |
| wavelet-HHH | grlm       | RunLengthNonUniformity           | 323.7353509  |
| wavelet-HHH | grlm       | ShortRunEmphasis                 | 0.948905604  |
| wavelet-HHH | grlm       | LongRunHighGrayLevelEmphasis     | 268.8276284  |
| wavelet-HHH | grlm       | RunPercentage                    | 0.932183685  |
| wavelet-HHH | grlm       | LongRunLowGrayLevelEmphasis      | 0.009719064  |
| wavelet-HHH | grlm       | RunEntropy                       | 3.978960947  |
| wavelet-HHH | grlm       | HighGrayLevelRunEmphasis         | 219.4854879  |
| wavelet-HHH | grlm       | RunLengthNonUniformityNormalized | 0.874491774  |
| wavelet-HHH | glszm      | GrayLevelVariance                | 18.36674024  |
| wavelet-HHH | glszm      | ZoneVariance                     | 19.24309716  |
| wavelet-HHH | glszm      | GrayLevelNonUniformityNormalized | 0.075176794  |
| wavelet-HHH | glszm      | SizeZoneNonUniformityNormalized  | 0.435160578  |
| wavelet-HHH | glszm      | SizeZoneNonUniformity            | 64.83892617  |
| wavelet-HHH | glszm      | GrayLevelNonUniformity           | 11.20134228  |
| wavelet-HHH | glszm      | LargeAreaEmphasis                | 26.34228188  |
| wavelet-HHH | glszm      | SmallAreaHighGrayLevelEmphasis   | 165.3917089  |
| wavelet-HHH | glszm      | ZonePercentage                   | 0.375314861  |
| wavelet-HHH | glszm      | LargeAreaLowGrayLevelEmphasis    | 0.137140061  |
| wavelet-HHH | glszm      | LargeAreaHighGrayLevelEmphasis   | 5763.926174  |
| wavelet-HHH | glszm      | HighGrayLevelZoneEmphasis        | 230.4697987  |
| wavelet-HHH | glszm      | SmallAreaEmphasis                | 0.685472386  |
| wavelet-HHH | glszm      | LowGrayLevelZoneEmphasis         | 0.013146924  |
| wavelet-HHH | glszm      | ZoneEntropy                      | 5.36954323   |
| wavelet-HHH | glszm      | SmallAreaLowGrayLevelEmphasis    | 0.011104159  |
| wavelet-HHH | ngtdm      | Coarseness                       | 0.015624772  |
| wavelet-HHH | ngtdm      | Complexity                       | 584.3874602  |
| wavelet-HHH | ngtdm      | Strength                         | 2.902080034  |
| wavelet-HHH | ngtdm      | Contrast                         | 0.089463315  |
| wavelet-HHH | ngtdm      | Busyness                         | 0.147426521  |
| wavelet-HLL | gldm       | GrayLevelVariance                | 56.12449797  |
| wavelet-HLL | gldm       | HighGrayLevelEmphasis            | 1013.224181  |
| wavelet-HLL | gldm       | DependenceEntropy                | 6.395778207  |
| wavelet-HLL | gldm       | DependenceNonUniformity          | 114.1788413  |
| wavelet-HLL | gldm       | GrayLevelNonUniformity           | 16.75314861  |



|             |            |                                      |              |
|-------------|------------|--------------------------------------|--------------|
| wavelet-HLL | gldm       | SmallDependenceEmphasis              | 0.49516773   |
| wavelet-HLL | gldm       | SmallDependenceHighGrayLevelEmphasis | 514.6509222  |
| wavelet-HLL | gldm       | DependenceNonUniformityNormalized    | 0.287604134  |
| wavelet-HLL | gldm       | LargeDependenceEmphasis              | 6.073047859  |
| wavelet-HLL | gldm       | LargeDependenceLowGrayLevelEmphasis  | 0.009678489  |
| wavelet-HLL | gldm       | DependenceVariance                   | 1.606799104  |
| wavelet-HLL | gldm       | LargeDependenceHighGrayLevelEmphasis | 5854.327456  |
| wavelet-HLL | gldm       | SmallDependenceLowGrayLevelEmphasis  | 0.003304302  |
| wavelet-HLL | gldm       | LowGrayLevelEmphasis                 | 0.00388482   |
| wavelet-HLL | glcm       | JointAverage                         | 30.96590486  |
| wavelet-HLL | glcm       | SumAverage                           | 61.93180973  |
| wavelet-HLL | glcm       | JointEntropy                         | 8.125155663  |
| wavelet-HLL | glcm       | ClusterShade                         | 351.0592314  |
| wavelet-HLL | glcm       | MaximumProbability                   | 0.015102989  |
| wavelet-HLL | glcm       | Idmn                                 | 0.976067147  |
| wavelet-HLL | glcm       | JointEnergy                          | 0.004361445  |
| wavelet-HLL | glcm       | Contrast                             | 79.82177164  |
| wavelet-HLL | glcm       | DifferenceEntropy                    | 4.044625396  |
| wavelet-HLL | glcm       | InverseVariance                      | 0.172887334  |
| wavelet-HLL | glcm       | DifferenceVariance                   | 37.0338743   |
| wavelet-HLL | glcm       | Idn                                  | 0.901600246  |
| wavelet-HLL | glcm       | Idm                                  | 0.167149038  |
| wavelet-HLL | glcm       | Correlation                          | 0.197717374  |
| wavelet-HLL | glcm       | Autocorrelation                      | 969.4132359  |
| wavelet-HLL | glcm       | SumEntropy                           | 5.254455848  |
| wavelet-HLL | glcm       | SumSquares                           | 50.42223009  |
| wavelet-HLL | glcm       | ClusterProminence                    | 58352.32325  |
| wavelet-HLL | glcm       | Imc2                                 | 0.963683979  |
| wavelet-HLL | glcm       | Imc1                                 | -0.281821914 |
| wavelet-HLL | glcm       | DifferenceAverage                    | 6.430464909  |
| wavelet-HLL | glcm       | Id                                   | 0.255665349  |
| wavelet-HLL | glcm       | ClusterTendency                      | 121.8671487  |
| wavelet-HLL | firstorder | InterquartileRange                   | 228.7423021  |
| wavelet-HLL | firstorder | Skewness                             | -0.096943239 |
| wavelet-HLL | firstorder | Uniformity                           | 0.042199367  |
| wavelet-HLL | firstorder | Median                               | -49.72926016 |
| wavelet-HLL | firstorder | Energy                               | 14599437.5   |
| wavelet-HLL | firstorder | RobustMeanAbsoluteDeviation          | 97.31376277  |
| wavelet-HLL | firstorder | MeanAbsoluteDeviation                | 145.1701791  |
| wavelet-HLL | firstorder | TotalEnergy                          | 394184812.5  |
| wavelet-HLL | firstorder | Maximum                              | 540.0815701  |
| wavelet-HLL | firstorder | RootMeanSquared                      | 191.7665293  |
| wavelet-HLL | firstorder | 90Percentile                         | 215.1609349  |
| wavelet-HLL | firstorder | Minimum                              | -785.5140846 |
| wavelet-HLL | firstorder | Entropy                              | 4.837283087  |
| wavelet-HLL | firstorder | Range                                | 1325.595655  |
| wavelet-HLL | firstorder | Variance                             | 35264.35625  |
| wavelet-HLL | firstorder | 10Percentile                         | -239.6370668 |
| wavelet-HLL | firstorder | Kurtosis                             | 3.759648805  |
| wavelet-HLL | firstorder | Mean                                 | -38.85930404 |
| wavelet-HLL | glrlm      | ShortRunLowGrayLevelEmphasis         | 0.003971651  |
| wavelet-HLL | glrlm      | GrayLevelVariance                    | 57.55690324  |
| wavelet-HLL | glrlm      | LowGrayLevelRunEmphasis              | 0.004008147  |
| wavelet-HLL | glrlm      | GrayLevelNonUniformityNormalized     | 0.041432585  |
| wavelet-HLL | glrlm      | RunVariance                          | 0.048417629  |
| wavelet-HLL | glrlm      | GrayLevelNonUniformity               | 15.74501813  |

|             |       |                                      |              |
|-------------|-------|--------------------------------------|--------------|
| wavelet-HLL | glrlm | LongRunEmphasis                      | 1.140591495  |
| wavelet-HLL | glrlm | ShortRunHighGrayLevelEmphasis        | 983.7752002  |
| wavelet-HLL | glrlm | RunLengthNonUniformity               | 349.425956   |
| wavelet-HLL | glrlm | ShortRunEmphasis                     | 0.967920171  |
| wavelet-HLL | glrlm | LongRunHighGrayLevelEmphasis         | 1150.916567  |
| wavelet-HLL | glrlm | RunPercentage                        | 0.957178841  |
| wavelet-HLL | glrlm | LongRunLowGrayLevelEmphasis          | 0.00416911   |
| wavelet-HLL | glrlm | RunEntropy                           | 5.057440361  |
| wavelet-HLL | glrlm | HighGrayLevelRunEmphasis             | 1015.126148  |
| wavelet-HLL | glrlm | RunLengthNonUniformityNormalized     | 0.919173034  |
| wavelet-HLL | glszm | GrayLevelVariance                    | 76.99952327  |
| wavelet-HLL | glszm | ZoneVariance                         | 3.060048435  |
| wavelet-HLL | glszm | GrayLevelNonUniformityNormalized     | 0.034991705  |
| wavelet-HLL | glszm | SizeZoneNonUniformityNormalized      | 0.497721249  |
| wavelet-HLL | glszm | SizeZoneNonUniformity                | 113.9781659  |
| wavelet-HLL | glszm | GrayLevelNonUniformity               | 8.013100437  |
| wavelet-HLL | glszm | LargeAreaEmphasis                    | 6.065502183  |
| wavelet-HLL | glszm | SmallAreaHighGrayLevelEmphasis       | 768.3777466  |
| wavelet-HLL | glszm | ZonePercentage                       | 0.576826196  |
| wavelet-HLL | glszm | LargeAreaLowGrayLevelEmphasis        | 0.011793733  |
| wavelet-HLL | glszm | LargeAreaHighGrayLevelEmphasis       | 5732.31441   |
| wavelet-HLL | glszm | HighGrayLevelZoneEmphasis            | 1039.353712  |
| wavelet-HLL | glszm | SmallAreaEmphasis                    | 0.733393134  |
| wavelet-HLL | glszm | LowGrayLevelZoneEmphasis             | 0.005891066  |
| wavelet-HLL | glszm | ZoneEntropy                          | 6.126172678  |
| wavelet-HLL | glszm | SmallAreaLowGrayLevelEmphasis        | 0.005582928  |
| wavelet-HLL | ngtdm | Coarseness                           | 0.017473004  |
| wavelet-HLL | ngtdm | Complexity                           | 3421.854488  |
| wavelet-HLL | ngtdm | Strength                             | 10.73986854  |
| wavelet-HLL | ngtdm | Contrast                             | 0.293147523  |
| wavelet-HLL | ngtdm | Busyness                             | 0.04269793   |
| wavelet-LHL | gldm  | GrayLevelVariance                    | 94.97716501  |
| wavelet-LHL | gldm  | HighGrayLevelEmphasis                | 1265.926952  |
| wavelet-LHL | gldm  | DependenceEntropy                    | 6.352591458  |
| wavelet-LHL | gldm  | DependenceNonUniformity              | 148.0377834  |
| wavelet-LHL | gldm  | GrayLevelNonUniformity               | 13.81612091  |
| wavelet-LHL | gldm  | SmallDependenceEmphasis              | 0.616298629  |
| wavelet-LHL | gldm  | SmallDependenceHighGrayLevelEmphasis | 817.2385894  |
| wavelet-LHL | gldm  | DependenceNonUniformityNormalized    | 0.372891142  |
| wavelet-LHL | gldm  | LargeDependenceEmphasis              | 4.123425693  |
| wavelet-LHL | gldm  | LargeDependenceLowGrayLevelEmphasis  | 0.007038875  |
| wavelet-LHL | gldm  | DependenceVariance                   | 1.005577093  |
| wavelet-LHL | gldm  | LargeDependenceHighGrayLevelEmphasis | 4934.934509  |
| wavelet-LHL | gldm  | SmallDependenceLowGrayLevelEmphasis  | 0.00368443   |
| wavelet-LHL | gldm  | LowGrayLevelEmphasis                 | 0.004076594  |
| wavelet-LHL | glcm  | JointAverage                         | 34.69058889  |
| wavelet-LHL | glcm  | SumAverage                           | 69.38117778  |
| wavelet-LHL | glcm  | JointEntropy                         | 8.373957628  |
| wavelet-LHL | glcm  | ClusterShade                         | -89.95358551 |
| wavelet-LHL | glcm  | MaximumProbability                   | 0.010659982  |
| wavelet-LHL | glcm  | ldmn                                 | 0.972036793  |
| wavelet-LHL | glcm  | JointEnergy                          | 0.003559987  |
| wavelet-LHL | glcm  | Contrast                             | 134.6313679  |
| wavelet-LHL | glcm  | DifferenceEntropy                    | 4.380322548  |
| wavelet-LHL | glcm  | InverseVariance                      | 0.142656161  |
| wavelet-LHL | glcm  | DifferenceVariance                   | 59.93246156  |

|             |            |                                  |              |
|-------------|------------|----------------------------------|--------------|
| wavelet-LHL | glcm       | Idn                              | 0.894620482  |
| wavelet-LHL | glcm       | Idm                              | 0.130369208  |
| wavelet-LHL | glcm       | Correlation                      | 0.199481261  |
| wavelet-LHL | glcm       | Autocorrelation                  | 1220.750624  |
| wavelet-LHL | glcm       | SumEntropy                       | 5.492456194  |
| wavelet-LHL | glcm       | SumSquares                       | 84.54522097  |
| wavelet-LHL | glcm       | ClusterProminence                | 203740.5956  |
| wavelet-LHL | glcm       | Imc2                             | 0.984343659  |
| wavelet-LHL | glcm       | Imc1                             | -0.343845485 |
| wavelet-LHL | glcm       | DifferenceAverage                | 8.405932954  |
| wavelet-LHL | glcm       | Id                               | 0.216044151  |
| wavelet-LHL | glcm       | ClusterTendency                  | 203.549516   |
| wavelet-LHL | firstorder | InterquartileRange               | 264.842401   |
| wavelet-LHL | firstorder | Skewness                         | -0.035106618 |
| wavelet-LHL | firstorder | Uniformity                       | 0.034801312  |
| wavelet-LHL | firstorder | Median                           | -32.44565354 |
| wavelet-LHL | firstorder | Energy                           | 23950680.21  |
| wavelet-LHL | firstorder | RobustMeanAbsoluteDeviation      | 110.083238   |
| wavelet-LHL | firstorder | MeanAbsoluteDeviation            | 179.4295923  |
| wavelet-LHL | firstorder | TotalEnergy                      | 646668365.7  |
| wavelet-LHL | firstorder | Maximum                          | 729.7797404  |
| wavelet-LHL | firstorder | RootMeanSquared                  | 245.6199693  |
| wavelet-LHL | firstorder | 90Percentile                     | 255.7203695  |
| wavelet-LHL | firstorder | Minimum                          | -871.8696837 |
| wavelet-LHL | firstorder | Entropy                          | 5.178108919  |
| wavelet-LHL | firstorder | Range                            | 1601.649424  |
| wavelet-LHL | firstorder | Variance                         | 59297.19292  |
| wavelet-LHL | firstorder | 10Percentile                     | -319.0854559 |
| wavelet-LHL | firstorder | Kurtosis                         | 4.045057746  |
| wavelet-LHL | firstorder | Mean                             | -32.12438914 |
| wavelet-LHL | glrlm      | ShortRunLowGrayLevelEmphasis     | 0.004149728  |
| wavelet-LHL | glrlm      | GrayLevelVariance                | 97.10683529  |
| wavelet-LHL | glrlm      | LowGrayLevelRunEmphasis          | 0.004171355  |
| wavelet-LHL | glrlm      | GrayLevelNonUniformityNormalized | 0.034195923  |
| wavelet-LHL | glrlm      | RunVariance                      | 0.033057576  |
| wavelet-LHL | glrlm      | GrayLevelNonUniformity           | 13.17703724  |
| wavelet-LHL | glrlm      | LongRunEmphasis                  | 1.095351317  |
| wavelet-LHL | glrlm      | ShortRunHighGrayLevelEmphasis    | 1243.350096  |
| wavelet-LHL | glrlm      | RunLengthNonUniformity           | 363.8912582  |
| wavelet-LHL | glrlm      | ShortRunEmphasis                 | 0.978085974  |
| wavelet-LHL | glrlm      | LongRunHighGrayLevelEmphasis     | 1381.544234  |
| wavelet-LHL | glrlm      | RunPercentage                    | 0.970548343  |
| wavelet-LHL | glrlm      | LongRunLowGrayLevelEmphasis      | 0.004263562  |
| wavelet-LHL | glrlm      | RunEntropy                       | 5.336178345  |
| wavelet-LHL | glrlm      | HighGrayLevelRunEmphasis         | 1268.788366  |
| wavelet-LHL | glrlm      | RunLengthNonUniformityNormalzied | 0.944052802  |
| wavelet-LHL | glszm      | GrayLevelVariance                | 125.7010705  |
| wavelet-LHL | glszm      | ZoneVariance                     | 1.476305688  |
| wavelet-LHL | glszm      | GrayLevelNonUniformityNormalized | 0.028384516  |
| wavelet-LHL | glszm      | SizeZoneNonUniformityNormalized  | 0.622188581  |
| wavelet-LHL | glszm      | SizeZoneNonUniformity            | 169.2352941  |
| wavelet-LHL | glszm      | GrayLevelNonUniformity           | 7.720588235  |
| wavelet-LHL | glszm      | LargeAreaEmphasis                | 3.606617647  |
| wavelet-LHL | glszm      | SmallAreaHighGrayLevelEmphasis   | 1093.597896  |
| wavelet-LHL | glszm      | ZonePercentage                   | 0.685138539  |
| wavelet-LHL | glszm      | LargeAreaLowGrayLevelEmphasis    | 0.007921709  |

|             |            |                                      |              |
|-------------|------------|--------------------------------------|--------------|
| wavelet-LHL | glszm      | LargeAreaHighGrayLevelEmphasis       | 4398.636029  |
| wavelet-LHL | glszm      | HighGrayLevelZoneEmphasis            | 1306.330882  |
| wavelet-LHL | glszm      | SmallAreaEmphasis                    | 0.815713473  |
| wavelet-LHL | glszm      | LowGrayLevelZoneEmphasis             | 0.005495024  |
| wavelet-LHL | glszm      | ZoneEntropy                          | 6.121198839  |
| wavelet-LHL | glszm      | SmallAreaLowGrayLevelEmphasis        | 0.005291486  |
| wavelet-LHL | ngtdm      | Coarseness                           | 0.017990446  |
| wavelet-LHL | ngtdm      | Complexity                           | 7387.967792  |
| wavelet-LHL | ngtdm      | Strength                             | 17.80721201  |
| wavelet-LHL | ngtdm      | Contrast                             | 0.375871447  |
| wavelet-LHL | ngtdm      | Busyness                             | 0.027230833  |
| wavelet-LHH | gldm       | GrayLevelVariance                    | 17.90905342  |
| wavelet-LHH | gldm       | HighGrayLevelEmphasis                | 363.5692695  |
| wavelet-LHH | gldm       | DependenceEntropy                    | 5.981796727  |
| wavelet-LHH | gldm       | DependenceNonUniformity              | 91.32241814  |
| wavelet-LHH | gldm       | GrayLevelNonUniformity               | 29.28715365  |
| wavelet-LHH | gldm       | SmallDependenceEmphasis              | 0.375983157  |
| wavelet-LHH | gldm       | SmallDependenceHighGrayLevelEmphasis | 141.9352951  |
| wavelet-LHH | gldm       | DependenceNonUniformityNormalized    | 0.23003128   |
| wavelet-LHH | gldm       | LargeDependenceEmphasis              | 8.173803526  |
| wavelet-LHH | gldm       | LargeDependenceLowGrayLevelEmphasis  | 0.028108666  |
| wavelet-LHH | gldm       | DependenceVariance                   | 1.866999981  |
| wavelet-LHH | gldm       | LargeDependenceHighGrayLevelEmphasis | 2883.100756  |
| wavelet-LHH | gldm       | SmallDependenceLowGrayLevelEmphasis  | 0.004019046  |
| wavelet-LHH | gldm       | LowGrayLevelEmphasis                 | 0.006023459  |
| wavelet-LHH | glcm       | JointAverage                         | 18.54910177  |
| wavelet-LHH | glcm       | SumAverage                           | 37.09820353  |
| wavelet-LHH | glcm       | JointEntropy                         | 7.390194165  |
| wavelet-LHH | glcm       | ClusterShade                         | -18.84802911 |
| wavelet-LHH | glcm       | MaximumProbability                   | 0.021811113  |
| wavelet-LHH | glcm       | ldmn                                 | 0.969813193  |
| wavelet-LHH | glcm       | JointEnergy                          | 0.007681322  |
| wavelet-LHH | glcm       | Contrast                             | 34.83680906  |
| wavelet-LHH | glcm       | DifferenceEntropy                    | 3.583387839  |
| wavelet-LHH | glcm       | InverseVariance                      | 0.21923472   |
| wavelet-LHH | glcm       | DifferenceVariance                   | 14.58766306  |
| wavelet-LHH | glcm       | ldn                                  | 0.886486883  |
| wavelet-LHH | glcm       | ldm                                  | 0.216139121  |
| wavelet-LHH | glcm       | Correlation                          | -0.022143471 |
| wavelet-LHH | glcm       | Autocorrelation                      | 343.6785589  |
| wavelet-LHH | glcm       | SumEntropy                           | 4.430490103  |
| wavelet-LHH | glcm       | SumSquares                           | 17.02520935  |
| wavelet-LHH | glcm       | ClusterProminence                    | 4282.515339  |
| wavelet-LHH | glcm       | lmc2                                 | 0.855202445  |
| wavelet-LHH | glcm       | lmc1                                 | -0.165500582 |
| wavelet-LHH | glcm       | DifferenceAverage                    | 4.459782298  |
| wavelet-LHH | glcm       | ld                                   | 0.307175333  |
| wavelet-LHH | glcm       | ClusterTendency                      | 33.26402833  |
| wavelet-LHH | firstorder | InterquartileRange                   | 126.3260318  |
| wavelet-LHH | firstorder | Skewness                             | -0.107297348 |
| wavelet-LHH | firstorder | Uniformity                           | 0.073771168  |
| wavelet-LHH | firstorder | Median                               | 3.538004098  |
| wavelet-LHH | firstorder | Energy                               | 4378370.27   |
| wavelet-LHH | firstorder | RobustMeanAbsoluteDeviation          | 52.15511323  |
| wavelet-LHH | firstorder | MeanAbsoluteDeviation                | 79.77599745  |
| wavelet-LHH | firstorder | TotalEnergy                          | 118215997.3  |

|             |            |                                      |              |
|-------------|------------|--------------------------------------|--------------|
| wavelet-LHH | firstorder | Maximum                              | 339.2413647  |
| wavelet-LHH | firstorder | RootMeanSquared                      | 105.0173342  |
| wavelet-LHH | firstorder | 90Percentile                         | 137.7063555  |
| wavelet-LHH | firstorder | Minimum                              | -449.35769   |
| wavelet-LHH | firstorder | Entropy                              | 4.053138409  |
| wavelet-LHH | firstorder | Range                                | 788.5990547  |
| wavelet-LHH | firstorder | Variance                             | 11022.60489  |
| wavelet-LHH | firstorder | 10Percentile                         | -128.8759957 |
| wavelet-LHH | firstorder | Kurtosis                             | 4.069384967  |
| wavelet-LHH | firstorder | Mean                                 | 2.456743903  |
| wavelet-LHH | grlm       | ShortRunLowGrayLevelEmphasis         | 0.00606832   |
| wavelet-LHH | grlm       | GrayLevelVariance                    | 18.54734716  |
| wavelet-LHH | grlm       | LowGrayLevelRunEmphasis              | 0.006203289  |
| wavelet-LHH | grlm       | GrayLevelNonUniformityNormalized     | 0.071925188  |
| wavelet-LHH | grlm       | RunVariance                          | 0.070827777  |
| wavelet-LHH | grlm       | GrayLevelNonUniformity               | 26.89508903  |
| wavelet-LHH | grlm       | LongRunEmphasis                      | 1.19922659   |
| wavelet-LHH | grlm       | ShortRunHighGrayLevelEmphasis        | 348.9567561  |
| wavelet-LHH | grlm       | RunLengthNonUniformity               | 334.1253753  |
| wavelet-LHH | grlm       | ShortRunEmphasis                     | 0.956848842  |
| wavelet-LHH | grlm       | LongRunHighGrayLevelEmphasis         | 434.3154314  |
| wavelet-LHH | grlm       | RunPercentage                        | 0.94187173   |
| wavelet-LHH | grlm       | LongRunLowGrayLevelEmphasis          | 0.006825664  |
| wavelet-LHH | grlm       | RunEntropy                           | 4.363929996  |
| wavelet-LHH | grlm       | HighGrayLevelRunEmphasis             | 364.2396918  |
| wavelet-LHH | grlm       | RunLengthNonUniformityNormalized     | 0.893093152  |
| wavelet-LHH | glszm      | GrayLevelVariance                    | 29.27642086  |
| wavelet-LHH | glszm      | ZoneVariance                         | 9.456446924  |
| wavelet-LHH | glszm      | GrayLevelNonUniformityNormalized     | 0.054562464  |
| wavelet-LHH | glszm      | SizeZoneNonUniformityNormalized      | 0.406662434  |
| wavelet-LHH | glszm      | SizeZoneNonUniformity                | 70.35260116  |
| wavelet-LHH | glszm      | GrayLevelNonUniformity               | 9.439306358  |
| wavelet-LHH | glszm      | LargeAreaEmphasis                    | 14.72254335  |
| wavelet-LHH | glszm      | SmallAreaHighGrayLevelEmphasis       | 254.5522825  |
| wavelet-LHH | glszm      | ZonePercentage                       | 0.435768262  |
| wavelet-LHH | glszm      | LargeAreaLowGrayLevelEmphasis        | 0.051337032  |
| wavelet-LHH | glszm      | LargeAreaHighGrayLevelEmphasis       | 5157.277457  |
| wavelet-LHH | glszm      | HighGrayLevelZoneEmphasis            | 375.9248555  |
| wavelet-LHH | glszm      | SmallAreaEmphasis                    | 0.662201826  |
| wavelet-LHH | glszm      | LowGrayLevelZoneEmphasis             | 0.009712611  |
| wavelet-LHH | glszm      | ZoneEntropy                          | 5.773990044  |
| wavelet-LHH | glszm      | SmallAreaLowGrayLevelEmphasis        | 0.008562685  |
| wavelet-LHH | ngtdm      | Coarseness                           | 0.016029676  |
| wavelet-LHH | ngtdm      | Complexity                           | 990.8740191  |
| wavelet-LHH | ngtdm      | Strength                             | 3.57327151   |
| wavelet-LHH | ngtdm      | Contrast                             | 0.171029043  |
| wavelet-LHH | ngtdm      | Busyness                             | 0.11352477   |
| wavelet-LLH | gldm       | GrayLevelVariance                    | 73.24806325  |
| wavelet-LLH | gldm       | HighGrayLevelEmphasis                | 947.440806   |
| wavelet-LLH | gldm       | DependenceEntropy                    | 6.3243569    |
| wavelet-LLH | gldm       | DependenceNonUniformity              | 133.2468514  |
| wavelet-LLH | gldm       | GrayLevelNonUniformity               | 16.12846348  |
| wavelet-LLH | gldm       | SmallDependenceEmphasis              | 0.564114889  |
| wavelet-LLH | gldm       | SmallDependenceHighGrayLevelEmphasis | 562.9895977  |
| wavelet-LLH | gldm       | DependenceNonUniformityNormalized    | 0.335634386  |
| wavelet-LLH | gldm       | LargeDependenceEmphasis              | 4.511335013  |

|             |            |                                      |              |
|-------------|------------|--------------------------------------|--------------|
| wavelet-LLH | gldm       | LargeDependenceLowGrayLevelEmphasis  | 0.011734893  |
| wavelet-LLH | gldm       | DependenceVariance                   | 1.027517464  |
| wavelet-LLH | gldm       | LargeDependenceHighGrayLevelEmphasis | 4002.458438  |
| wavelet-LLH | gldm       | SmallDependenceLowGrayLevelEmphasis  | 0.003684224  |
| wavelet-LLH | gldm       | LowGrayLevelEmphasis                 | 0.004838291  |
| wavelet-LLH | glcm       | JointAverage                         | 29.33373563  |
| wavelet-LLH | glcm       | SumAverage                           | 58.66747126  |
| wavelet-LLH | glcm       | JointEntropy                         | 8.254173478  |
| wavelet-LLH | glcm       | ClusterShade                         | -14.18566959 |
| wavelet-LLH | glcm       | MaximumProbability                   | 0.011501716  |
| wavelet-LLH | glcm       | ldmn                                 | 0.973515601  |
| wavelet-LLH | glcm       | JointEnergy                          | 0.003937425  |
| wavelet-LLH | glcm       | Contrast                             | 112.9890113  |
| wavelet-LLH | glcm       | DifferenceEntropy                    | 4.245767283  |
| wavelet-LLH | glcm       | InverseVariance                      | 0.151265581  |
| wavelet-LLH | glcm       | DifferenceVariance                   | 50.3231927   |
| wavelet-LLH | glcm       | ldn                                  | 0.896938706  |
| wavelet-LLH | glcm       | ldm                                  | 0.141077899  |
| wavelet-LLH | glcm       | Correlation                          | 0.131531609  |
| wavelet-LLH | glcm       | Autocorrelation                      | 870.1323858  |
| wavelet-LLH | glcm       | SumEntropy                           | 5.357742637  |
| wavelet-LLH | glcm       | SumSquares                           | 66.133595    |
| wavelet-LLH | glcm       | ClusterProminence                    | 113331.2434  |
| wavelet-LLH | glcm       | lmc2                                 | 0.974040215  |
| wavelet-LLH | glcm       | lmc1                                 | -0.306878112 |
| wavelet-LLH | glcm       | DifferenceAverage                    | 7.676729482  |
| wavelet-LLH | glcm       | ld                                   | 0.227957597  |
| wavelet-LLH | glcm       | ClusterTendency                      | 151.5453687  |
| wavelet-LLH | firstorder | InterquartileRange                   | 235.3770813  |
| wavelet-LLH | firstorder | Skewness                             | -0.028418693 |
| wavelet-LLH | firstorder | Uniformity                           | 0.040625853  |
| wavelet-LLH | firstorder | Median                               | -53.41123999 |
| wavelet-LLH | firstorder | Energy                               | 18993260.28  |
| wavelet-LLH | firstorder | RobustMeanAbsoluteDeviation          | 98.92514658  |
| wavelet-LLH | firstorder | MeanAbsoluteDeviation                | 157.5624751  |
| wavelet-LLH | firstorder | TotalEnergy                          | 512818027.7  |
| wavelet-LLH | firstorder | Maximum                              | 736.7611186  |
| wavelet-LLH | firstorder | RootMeanSquared                      | 218.7280628  |
| wavelet-LLH | firstorder | 90Percentile                         | 187.0263353  |
| wavelet-LLH | firstorder | Minimum                              | -757.2182393 |
| wavelet-LLH | firstorder | Entropy                              | 4.948780856  |
| wavelet-LLH | firstorder | Range                                | 1493.979358  |
| wavelet-LLH | firstorder | Variance                             | 45508.81142  |
| wavelet-LLH | firstorder | 10Percentile                         | -312.4920816 |
| wavelet-LLH | firstorder | Kurtosis                             | 4.442941548  |
| wavelet-LLH | firstorder | Mean                                 | -48.30273318 |
| wavelet-LLH | glrlm      | ShortRunLowGrayLevelEmphasis         | 0.004872623  |
| wavelet-LLH | glrlm      | GrayLevelVariance                    | 74.49400693  |
| wavelet-LLH | glrlm      | LowGrayLevelRunEmphasis              | 0.004929263  |
| wavelet-LLH | glrlm      | GrayLevelNonUniformityNormalized     | 0.040003498  |
| wavelet-LLH | glrlm      | RunVariance                          | 0.035686878  |
| wavelet-LLH | glrlm      | GrayLevelNonUniformity               | 15.3519136   |
| wavelet-LLH | glrlm      | LongRunEmphasis                      | 1.106471971  |
| wavelet-LLH | glrlm      | ShortRunHighGrayLevelEmphasis        | 927.7892881  |
| wavelet-LLH | glrlm      | RunLengthNonUniformity               | 359.2056294  |
| wavelet-LLH | glrlm      | ShortRunEmphasis                     | 0.974728062  |

|             |       |                                      |              |
|-------------|-------|--------------------------------------|--------------|
| wavelet-LLH | glrlm | LongRunHighGrayLevelEmphasis         | 1042.791383  |
| wavelet-LLH | glrlm | RunPercentage                        | 0.966673125  |
| wavelet-LLH | glrlm | LongRunLowGrayLevelEmphasis          | 0.005162988  |
| wavelet-LLH | glrlm | RunEntropy                           | 5.124010859  |
| wavelet-LLH | glrlm | HighGrayLevelRunEmphasis             | 949.9736973  |
| wavelet-LLH | glrlm | RunLengthNonUniformityNormalized     | 0.935626968  |
| wavelet-LLH | glszm | GrayLevelVariance                    | 91.03988158  |
| wavelet-LLH | glszm | ZoneVariance                         | 1.946819394  |
| wavelet-LLH | glszm | GrayLevelNonUniformityNormalized     | 0.034720069  |
| wavelet-LLH | glszm | SizeZoneNonUniformityNormalized      | 0.563178126  |
| wavelet-LLH | glszm | SizeZoneNonUniformity                | 143.0472441  |
| wavelet-LLH | glszm | GrayLevelNonUniformity               | 8.818897638  |
| wavelet-LLH | glszm | LargeAreaEmphasis                    | 4.38976378   |
| wavelet-LLH | glszm | SmallAreaHighGrayLevelEmphasis       | 788.2944067  |
| wavelet-LLH | glszm | ZonePercentage                       | 0.639798489  |
| wavelet-LLH | glszm | LargeAreaLowGrayLevelEmphasis        | 0.012366459  |
| wavelet-LLH | glszm | LargeAreaHighGrayLevelEmphasis       | 3939.700787  |
| wavelet-LLH | glszm | HighGrayLevelZoneEmphasis            | 984.6732283  |
| wavelet-LLH | glszm | SmallAreaEmphasis                    | 0.778663393  |
| wavelet-LLH | glszm | LowGrayLevelZoneEmphasis             | 0.00621867   |
| wavelet-LLH | glszm | ZoneEntropy                          | 6.0650993    |
| wavelet-LLH | glszm | SmallAreaLowGrayLevelEmphasis        | 0.005470422  |
| wavelet-LLH | ngtdm | Coarseness                           | 0.016308357  |
| wavelet-LLH | ngtdm | Complexity                           | 5350.421135  |
| wavelet-LLH | ngtdm | Strength                             | 13.27732126  |
| wavelet-LLH | ngtdm | Contrast                             | 0.370419667  |
| wavelet-LLH | ngtdm | Busyness                             | 0.040468646  |
| wavelet-LLL | gldm  | GrayLevelVariance                    | 440.1359186  |
| wavelet-LLL | gldm  | HighGrayLevelEmphasis                | 3248.06801   |
| wavelet-LLL | gldm  | DependenceEntropy                    | 6.877414131  |
| wavelet-LLL | gldm  | DependenceNonUniformity              | 206.279597   |
| wavelet-LLL | gldm  | GrayLevelNonUniformity               | 6.183879093  |
| wavelet-LLL | gldm  | SmallDependenceEmphasis              | 0.742128463  |
| wavelet-LLL | gldm  | SmallDependenceHighGrayLevelEmphasis | 2272.811398  |
| wavelet-LLL | gldm  | DependenceNonUniformityNormalized    | 0.519595962  |
| wavelet-LLL | gldm  | LargeDependenceEmphasis              | 2.390428212  |
| wavelet-LLL | gldm  | LargeDependenceLowGrayLevelEmphasis  | 0.004312405  |
| wavelet-LLL | gldm  | DependenceVariance                   | 0.407793971  |
| wavelet-LLL | gldm  | LargeDependenceHighGrayLevelEmphasis | 8976.103275  |
| wavelet-LLL | gldm  | SmallDependenceLowGrayLevelEmphasis  | 0.003426202  |
| wavelet-LLL | gldm  | LowGrayLevelEmphasis                 | 0.003583683  |
| wavelet-LLL | glcm  | JointAverage                         | 57.15131073  |
| wavelet-LLL | glcm  | SumAverage                           | 114.3026215  |
| wavelet-LLL | glcm  | JointEntropy                         | 8.92718642   |
| wavelet-LLL | glcm  | ClusterShade                         | -4609.410611 |
| wavelet-LLL | glcm  | MaximumProbability                   | 0.005895084  |
| wavelet-LLL | glcm  | ldmn                                 | 0.964056594  |
| wavelet-LLL | glcm  | JointEnergy                          | 0.002153257  |
| wavelet-LLL | glcm  | Contrast                             | 410.1198959  |
| wavelet-LLL | glcm  | DifferenceEntropy                    | 5.181430982  |
| wavelet-LLL | glcm  | InverseVariance                      | 0.065919636  |
| wavelet-LLL | glcm  | DifferenceVariance                   | 149.0643645  |
| wavelet-LLL | glcm  | ldn                                  | 0.872663251  |
| wavelet-LLL | glcm  | ldm                                  | 0.064959274  |
| wavelet-LLL | glcm  | Correlation                          | 0.472867194  |
| wavelet-LLL | glcm  | Autocorrelation                      | 3451.697416  |

|             |            |                                  |              |
|-------------|------------|----------------------------------|--------------|
| wavelet-LLL | glcm       | SumEntropy                       | 6.632611134  |
| wavelet-LLL | glcm       | SumSquares                       | 389.7641631  |
| wavelet-LLL | glcm       | ClusterProminence                | 3100865.783  |
| wavelet-LLL | glcm       | Imc2                             | 0.99922779   |
| wavelet-LLL | glcm       | Imc1                             | -0.53303693  |
| wavelet-LLL | glcm       | DifferenceAverage                | 15.95294659  |
| wavelet-LLL | glcm       | Id                               | 0.131868708  |
| wavelet-LLL | glcm       | ClusterTendency                  | 1148.936756  |
| wavelet-LLL | firstorder | InterquartileRange               | 796.4425046  |
| wavelet-LLL | firstorder | Skewness                         | -0.062615784 |
| wavelet-LLL | firstorder | Uniformity                       | 0.015576522  |
| wavelet-LLL | firstorder | Median                           | -659.3830935 |
| wavelet-LLL | firstorder | Energy                           | 283472302.1  |
| wavelet-LLL | firstorder | RobustMeanAbsoluteDeviation      | 331.1601645  |
| wavelet-LLL | firstorder | MeanAbsoluteDeviation            | 439.8109169  |
| wavelet-LLL | firstorder | TotalEnergy                      | 7653752156   |
| wavelet-LLL | firstorder | Maximum                          | 528.7979045  |
| wavelet-LLL | firstorder | RootMeanSquared                  | 845.0065239  |
| wavelet-LLL | firstorder | 90Percentile                     | 46.14911487  |
| wavelet-LLL | firstorder | Minimum                          | -1964.462497 |
| wavelet-LLL | firstorder | Entropy                          | 6.189912948  |
| wavelet-LLL | firstorder | Range                            | 2493.260401  |
| wavelet-LLL | firstorder | Variance                         | 275271.9456  |
| wavelet-LLL | firstorder | 10Percentile                     | -1397.406291 |
| wavelet-LLL | firstorder | Kurtosis                         | 2.214014293  |
| wavelet-LLL | firstorder | Mean                             | -662.3926931 |
| wavelet-LLL | glrlm      | ShortRunLowGrayLevelEmphasis     | 0.0036255    |
| wavelet-LLL | glrlm      | GrayLevelVariance                | 439.7009377  |
| wavelet-LLL | glrlm      | LowGrayLevelRunEmphasis          | 0.003632124  |
| wavelet-LLL | glrlm      | GrayLevelNonUniformityNormalized | 0.015521441  |
| wavelet-LLL | glrlm      | RunVariance                      | 0.016872558  |
| wavelet-LLL | glrlm      | GrayLevelNonUniformity           | 6.06531003   |
| wavelet-LLL | glrlm      | LongRunEmphasis                  | 1.049235828  |
| wavelet-LLL | glrlm      | ShortRunHighGrayLevelEmphasis    | 3190.198     |
| wavelet-LLL | glrlm      | RunLengthNonUniformity           | 379.0013043  |
| wavelet-LLL | glrlm      | ShortRunEmphasis                 | 0.988349635  |
| wavelet-LLL | glrlm      | LongRunHighGrayLevelEmphasis     | 3433.192618  |
| wavelet-LLL | glrlm      | RunPercentage                    | 0.984305367  |
| wavelet-LLL | glrlm      | LongRunLowGrayLevelEmphasis      | 0.003659312  |
| wavelet-LLL | glrlm      | RunEntropy                       | 6.249258607  |
| wavelet-LLL | glrlm      | HighGrayLevelRunEmphasis         | 3236.323609  |
| wavelet-LLL | glrlm      | RunLengthNonUniformityNormalized | 0.96975034   |
| wavelet-LLL | glszm      | GrayLevelVariance                | 433.5001465  |
| wavelet-LLL | glszm      | ZoneVariance                     | 0.357724609  |
| wavelet-LLL | glszm      | GrayLevelNonUniformityNormalized | 0.015019531  |
| wavelet-LLL | glszm      | SizeZoneNonUniformityNormalized  | 0.705527344  |
| wavelet-LLL | glszm      | SizeZoneNonUniformity            | 225.76875    |
| wavelet-LLL | glszm      | GrayLevelNonUniformity           | 4.80625      |
| wavelet-LLL | glszm      | LargeAreaEmphasis                | 1.896875     |
| wavelet-LLL | glszm      | SmallAreaHighGrayLevelEmphasis   | 2610.616515  |
| wavelet-LLL | glszm      | ZonePercentage                   | 0.80604534   |
| wavelet-LLL | glszm      | LargeAreaLowGrayLevelEmphasis    | 0.004774569  |
| wavelet-LLL | glszm      | LargeAreaHighGrayLevelEmphasis   | 6775.846875  |
| wavelet-LLL | glszm      | HighGrayLevelZoneEmphasis        | 3093.803125  |
| wavelet-LLL | glszm      | SmallAreaEmphasis                | 0.864865451  |
| wavelet-LLL | glszm      | LowGrayLevelZoneEmphasis         | 0.00430698   |



|             |            |                                      |              |
|-------------|------------|--------------------------------------|--------------|
| wavelet-LLL | glszm      | ZoneEntropy                          | 6.681844602  |
| wavelet-LLL | glszm      | SmallAreaLowGrayLevelEmphasis        | 0.004216679  |
| wavelet-LLL | ngtdm      | Coarseness                           | 0.018082555  |
| wavelet-LLL | ngtdm      | Complexity                           | 29660.52984  |
| wavelet-LLL | ngtdm      | Strength                             | 48.62010433  |
| wavelet-LLL | ngtdm      | Contrast                             | 1.199602247  |
| wavelet-LLL | ngtdm      | Busyness                             | 0.015027901  |
| wavelet-HHL | gldm       | GrayLevelVariance                    | 29.05774416  |
| wavelet-HHL | gldm       | HighGrayLevelEmphasis                | 348.2695214  |
| wavelet-HHL | gldm       | DependenceEntropy                    | 6.095003363  |
| wavelet-HHL | gldm       | DependenceNonUniformity              | 107.4634761  |
| wavelet-HHL | gldm       | GrayLevelNonUniformity               | 24.27455919  |
| wavelet-HHL | gldm       | SmallDependenceEmphasis              | 0.482546926  |
| wavelet-HHL | gldm       | SmallDependenceHighGrayLevelEmphasis | 177.0990617  |
| wavelet-HHL | gldm       | DependenceNonUniformityNormalized    | 0.270688857  |
| wavelet-HHL | gldm       | LargeDependenceEmphasis              | 7.267002519  |
| wavelet-HHL | gldm       | LargeDependenceLowGrayLevelEmphasis  | 0.030399937  |
| wavelet-HHL | gldm       | DependenceVariance                   | 2.161906998  |
| wavelet-HHL | gldm       | LargeDependenceHighGrayLevelEmphasis | 2352.073048  |
| wavelet-HHL | gldm       | SmallDependenceLowGrayLevelEmphasis  | 0.005733056  |
| wavelet-HHL | gldm       | LowGrayLevelEmphasis                 | 0.007896668  |
| wavelet-HHL | glcm       | JointAverage                         | 17.69137875  |
| wavelet-HHL | glcm       | SumAverage                           | 35.38275749  |
| wavelet-HHL | glcm       | JointEntropy                         | 7.702881132  |
| wavelet-HHL | glcm       | ClusterShade                         | -50.02381682 |
| wavelet-HHL | glcm       | MaximumProbability                   | 0.020768162  |
| wavelet-HHL | glcm       | ldmn                                 | 0.964100308  |
| wavelet-HHL | glcm       | JointEnergy                          | 0.006405962  |
| wavelet-HHL | glcm       | Contrast                             | 56.99675662  |
| wavelet-HHL | glcm       | DifferenceEntropy                    | 3.886944202  |
| wavelet-HHL | glcm       | InverseVariance                      | 0.19096514   |
| wavelet-HHL | glcm       | DifferenceVariance                   | 24.68671417  |
| wavelet-HHL | glcm       | ldn                                  | 0.879352938  |
| wavelet-HHL | glcm       | ldm                                  | 0.185776651  |
| wavelet-HHL | glcm       | Correlation                          | -0.028422866 |
| wavelet-HHL | glcm       | Autocorrelation                      | 312.2599254  |
| wavelet-HHL | glcm       | SumEntropy                           | 4.71713919   |
| wavelet-HHL | glcm       | SumSquares                           | 27.76282477  |
| wavelet-HHL | glcm       | ClusterProminence                    | 12781.37363  |
| wavelet-HHL | glcm       | lmc2                                 | 0.914309803  |
| wavelet-HHL | glcm       | lmc1                                 | -0.211065072 |
| wavelet-HHL | glcm       | DifferenceAverage                    | 5.598868306  |
| wavelet-HHL | glcm       | ld                                   | 0.275401015  |
| wavelet-HHL | glcm       | ClusterTendency                      | 54.05454244  |
| wavelet-HHL | firstorder | InterquartileRange                   | 137.3566698  |
| wavelet-HHL | firstorder | Skewness                             | -0.023623007 |
| wavelet-HHL | firstorder | Uniformity                           | 0.061144985  |
| wavelet-HHL | firstorder | Median                               | 7.530423887  |
| wavelet-HHL | firstorder | Energy                               | 7241994.371  |
| wavelet-HHL | firstorder | RobustMeanAbsoluteDeviation          | 63.29102647  |
| wavelet-HHL | firstorder | MeanAbsoluteDeviation                | 100.6679496  |
| wavelet-HHL | firstorder | TotalEnergy                          | 195533848    |
| wavelet-HHL | firstorder | Maximum                              | 479.0975967  |
| wavelet-HHL | firstorder | RootMeanSquared                      | 135.0622058  |
| wavelet-HHL | firstorder | 90Percentile                         | 176.579227   |
| wavelet-HHL | firstorder | Minimum                              | -408.5815254 |

|             |            |                                      |              |
|-------------|------------|--------------------------------------|--------------|
| wavelet-HHL | firstorder | Entropy                              | 4.354842933  |
| wavelet-HHL | firstorder | Range                                | 887.6791221  |
| wavelet-HHL | firstorder | Variance                             | 18159.84617  |
| wavelet-HHL | firstorder | 10Percentile                         | -165.7974223 |
| wavelet-HHL | firstorder | Kurtosis                             | 3.71156373   |
| wavelet-HHL | firstorder | Mean                                 | 9.05280376   |
| wavelet-HHL | glrlm      | ShortRunLowGrayLevelEmphasis         | 0.007969076  |
| wavelet-HHL | glrlm      | GrayLevelVariance                    | 30.04421151  |
| wavelet-HHL | glrlm      | LowGrayLevelRunEmphasis              | 0.008107855  |
| wavelet-HHL | glrlm      | GrayLevelNonUniformityNormalized     | 0.059252783  |
| wavelet-HHL | glrlm      | RunVariance                          | 0.055276773  |
| wavelet-HHL | glrlm      | GrayLevelNonUniformity               | 22.38759432  |
| wavelet-HHL | glrlm      | LongRunEmphasis                      | 1.161206745  |
| wavelet-HHL | glrlm      | ShortRunHighGrayLevelEmphasis        | 337.6879465  |
| wavelet-HHL | glrlm      | RunLengthNonUniformity               | 343.7645568  |
| wavelet-HHL | glrlm      | ShortRunEmphasis                     | 0.96361923   |
| wavelet-HHL | glrlm      | LongRunHighGrayLevelEmphasis         | 401.6785413  |
| wavelet-HHL | glrlm      | RunPercentage                        | 0.951559775  |
| wavelet-HHL | glrlm      | LongRunLowGrayLevelEmphasis          | 0.008714948  |
| wavelet-HHL | glrlm      | RunEntropy                           | 4.618914034  |
| wavelet-HHL | glrlm      | HighGrayLevelRunEmphasis             | 349.508024   |
| wavelet-HHL | glrlm      | RunLengthNonUniformityNormalized     | 0.909263095  |
| wavelet-HHL | glszm      | GrayLevelVariance                    | 42.66461156  |
| wavelet-HHL | glszm      | ZoneVariance                         | 5.770747412  |
| wavelet-HHL | glszm      | GrayLevelNonUniformityNormalized     | 0.045156132  |
| wavelet-HHL | glszm      | SizeZoneNonUniformityNormalized      | 0.520074068  |
| wavelet-HHL | glszm      | SizeZoneNonUniformity                | 113.3761468  |
| wavelet-HHL | glszm      | GrayLevelNonUniformity               | 9.844036697  |
| wavelet-HHL | glszm      | LargeAreaEmphasis                    | 9.087155963  |
| wavelet-HHL | glszm      | SmallAreaHighGrayLevelEmphasis       | 279.2477456  |
| wavelet-HHL | glszm      | ZonePercentage                       | 0.549118388  |
| wavelet-HHL | glszm      | LargeAreaLowGrayLevelEmphasis        | 0.039394672  |
| wavelet-HHL | glszm      | LargeAreaHighGrayLevelEmphasis       | 2926.958716  |
| wavelet-HHL | glszm      | HighGrayLevelZoneEmphasis            | 365.8394495  |
| wavelet-HHL | glszm      | SmallAreaEmphasis                    | 0.749085366  |
| wavelet-HHL | glszm      | LowGrayLevelZoneEmphasis             | 0.011103239  |
| wavelet-HHL | glszm      | ZoneEntropy                          | 5.718806239  |
| wavelet-HHL | glszm      | SmallAreaLowGrayLevelEmphasis        | 0.009871959  |
| wavelet-HHL | ngtdm      | Coarseness                           | 0.016873925  |
| wavelet-HHL | ngtdm      | Complexity                           | 1689.9164    |
| wavelet-HHL | ngtdm      | Strength                             | 4.862212815  |
| wavelet-HHL | ngtdm      | Contrast                             | 0.244757864  |
| wavelet-HHL | ngtdm      | Busyness                             | 0.096339377  |
| wavelet-HLH | gldm       | GrayLevelVariance                    | 13.45669346  |
| wavelet-HLH | gldm       | HighGrayLevelEmphasis                | 126.5012594  |
| wavelet-HLH | gldm       | DependenceEntropy                    | 5.571090138  |
| wavelet-HLH | gldm       | DependenceNonUniformity              | 106.7329975  |
| wavelet-HLH | gldm       | GrayLevelNonUniformity               | 31.5440806   |
| wavelet-HLH | gldm       | SmallDependenceEmphasis              | 0.403079302  |
| wavelet-HLH | gldm       | SmallDependenceHighGrayLevelEmphasis | 57.41136733  |
| wavelet-HLH | gldm       | DependenceNonUniformityNormalized    | 0.26884886   |
| wavelet-HLH | gldm       | LargeDependenceEmphasis              | 6.319899244  |
| wavelet-HLH | gldm       | LargeDependenceLowGrayLevelEmphasis  | 0.104649401  |
| wavelet-HLH | gldm       | DependenceVariance                   | 1.214803723  |
| wavelet-HLH | gldm       | LargeDependenceHighGrayLevelEmphasis | 735.6347607  |
| wavelet-HLH | gldm       | SmallDependenceLowGrayLevelEmphasis  | 0.009700418  |

|             |            |                                  |              |
|-------------|------------|----------------------------------|--------------|
| wavelet-HLH | gldm       | LowGrayLevelEmphasis             | 0.022139519  |
| wavelet-HLH | glcm       | JointAverage                     | 10.60798255  |
| wavelet-HLH | glcm       | SumAverage                       | 21.21596511  |
| wavelet-HLH | glcm       | JointEntropy                     | 7.238694876  |
| wavelet-HLH | glcm       | ClusterShade                     | 4.051251802  |
| wavelet-HLH | glcm       | MaximumProbability               | 0.021050801  |
| wavelet-HLH | glcm       | ldmn                             | 0.943902348  |
| wavelet-HLH | glcm       | JointEnergy                      | 0.008305205  |
| wavelet-HLH | glcm       | Contrast                         | 26.6300684   |
| wavelet-HLH | glcm       | DifferenceEntropy                | 3.401602725  |
| wavelet-HLH | glcm       | InverseVariance                  | 0.219747265  |
| wavelet-HLH | glcm       | DifferenceVariance               | 9.508940996  |
| wavelet-HLH | glcm       | ldn                              | 0.842799202  |
| wavelet-HLH | glcm       | ldm                              | 0.205547189  |
| wavelet-HLH | glcm       | Correlation                      | 0.008913605  |
| wavelet-HLH | glcm       | Autocorrelation                  | 112.6561726  |
| wavelet-HLH | glcm       | SumEntropy                       | 4.323414268  |
| wavelet-HLH | glcm       | SumSquares                       | 13.42914535  |
| wavelet-HLH | glcm       | ClusterProminence                | 2231.368722  |
| wavelet-HLH | glcm       | lmc2                             | 0.798673434  |
| wavelet-HLH | glcm       | lmc1                             | -0.132344427 |
| wavelet-HLH | glcm       | DifferenceAverage                | 4.098168838  |
| wavelet-HLH | glcm       | ld                               | 0.301867361  |
| wavelet-HLH | glcm       | ClusterTendency                  | 27.08651298  |
| wavelet-HLH | firstorder | InterquartileRange               | 117.5682592  |
| wavelet-HLH | firstorder | Skewness                         | 0.059194019  |
| wavelet-HLH | firstorder | Uniformity                       | 0.079456122  |
| wavelet-HLH | firstorder | Median                           | 1.882094572  |
| wavelet-HLH | firstorder | Energy                           | 3280534.415  |
| wavelet-HLH | firstorder | RobustMeanAbsoluteDeviation      | 51.19956196  |
| wavelet-HLH | firstorder | MeanAbsoluteDeviation            | 72.88409325  |
| wavelet-HLH | firstorder | TotalEnergy                      | 88574429.2   |
| wavelet-HLH | firstorder | Maximum                          | 237.9192543  |
| wavelet-HLH | firstorder | RootMeanSquared                  | 90.90275501  |
| wavelet-HLH | firstorder | 90Percentile                     | 121.5485597  |
| wavelet-HLH | firstorder | Minimum                          | -240.5757789 |
| wavelet-HLH | firstorder | Entropy                          | 3.875715526  |
| wavelet-HLH | firstorder | Range                            | 478.4950332  |
| wavelet-HLH | firstorder | Variance                         | 8256.555959  |
| wavelet-HLH | firstorder | 10Percentile                     | -114.4363828 |
| wavelet-HLH | firstorder | Kurtosis                         | 2.845486573  |
| wavelet-HLH | firstorder | Mean                             | 2.599020751  |
| wavelet-HLH | glrlm      | ShortRunLowGrayLevelEmphasis     | 0.021718833  |
| wavelet-HLH | glrlm      | GrayLevelVariance                | 13.70658976  |
| wavelet-HLH | glrlm      | LowGrayLevelRunEmphasis          | 0.022374431  |
| wavelet-HLH | glrlm      | GrayLevelNonUniformityNormalized | 0.07842803   |
| wavelet-HLH | glrlm      | RunVariance                      | 0.054422557  |
| wavelet-HLH | glrlm      | GrayLevelNonUniformity           | 29.62823356  |
| wavelet-HLH | glrlm      | LongRunEmphasis                  | 1.15990698   |
| wavelet-HLH | glrlm      | ShortRunHighGrayLevelEmphasis    | 122.9208916  |
| wavelet-HLH | glrlm      | RunLengthNonUniformity           | 343.2189193  |
| wavelet-HLH | glrlm      | ShortRunEmphasis                 | 0.963235082  |
| wavelet-HLH | glrlm      | LongRunHighGrayLevelEmphasis     | 145.4438013  |
| wavelet-HLH | glrlm      | RunPercentage                    | 0.951559775  |
| wavelet-HLH | glrlm      | LongRunLowGrayLevelEmphasis      | 0.025141381  |
| wavelet-HLH | glrlm      | RunEntropy                       | 4.139278725  |

|             |       |                                  |             |
|-------------|-------|----------------------------------|-------------|
| wavelet-HLH | glrlm | HighGrayLevelRunEmphasis         | 127.1215885 |
| wavelet-HLH | glrlm | RunLengthNonUniformityNormalized | 0.907984204 |
| wavelet-HLH | glszm | GrayLevelVariance                | 18.45057232 |
| wavelet-HLH | glszm | ZoneVariance                     | 6.804514973 |
| wavelet-HLH | glszm | GrayLevelNonUniformityNormalized | 0.066134813 |
| wavelet-HLH | glszm | SizeZoneNonUniformityNormalized  | 0.408775581 |
| wavelet-HLH | glszm | SizeZoneNonUniformity            | 76.03225806 |
| wavelet-HLH | glszm | GrayLevelNonUniformity           | 12.30107527 |
| wavelet-HLH | glszm | LargeAreaEmphasis                | 11.36021505 |
| wavelet-HLH | glszm | SmallAreaHighGrayLevelEmphasis   | 99.36376037 |
| wavelet-HLH | glszm | ZonePercentage                   | 0.468513854 |
| wavelet-HLH | glszm | LargeAreaLowGrayLevelEmphasis    | 0.173055103 |
| wavelet-HLH | glszm | LargeAreaHighGrayLevelEmphasis   | 1217.252688 |
| wavelet-HLH | glszm | HighGrayLevelZoneEmphasis        | 140.1612903 |
| wavelet-HLH | glszm | SmallAreaEmphasis                | 0.663211868 |
| wavelet-HLH | glszm | LowGrayLevelZoneEmphasis         | 0.026314696 |
| wavelet-HLH | glszm | ZoneEntropy                      | 5.474714657 |
| wavelet-HLH | glszm | SmallAreaLowGrayLevelEmphasis    | 0.016492101 |
| wavelet-HLH | ngtdm | Coarseness                       | 0.01474931  |
| wavelet-HLH | ngtdm | Complexity                       | 425.5347685 |
| wavelet-HLH | ngtdm | Strength                         | 1.593208084 |
| wavelet-HLH | ngtdm | Contrast                         | 0.209277936 |
| wavelet-HLH | ngtdm | Busyness                         | 0.353374215 |

| Image type | Feature Class | Feature Name                         |                                                                                                                                                                                                                                                                                                                                                                                                                                           |
|------------|---------------|--------------------------------------|-------------------------------------------------------------------------------------------------------------------------------------------------------------------------------------------------------------------------------------------------------------------------------------------------------------------------------------------------------------------------------------------------------------------------------------------|
| general    | info          | BoundingBox                          | 10: RTSTRUCT: C99-DNU_segment_LLL Tumor<br>(0, 1, 1, 11, 10, 10)                                                                                                                                                                                                                                                                                                                                                                          |
| general    | info          | EnabledImageTypes                    | {u'Original': {}, u'Wavelet': {}}                                                                                                                                                                                                                                                                                                                                                                                                         |
|            |               |                                      | {'distances': [1], 'additionalInfo': True, 'force2D':<br>False, 'interpolator': 'sitkBSpline',<br>'resampledPixelSpacing': [3.0], 'label': 1,<br>'normalizeScale': 1, 'normalize': False,<br>'force2Ddimension': 0, 'removeOutliers': None,<br>'minimumROISize': None, u'binWidth': 25.0,<br>'minimumROIDimensions': 1, u'correctMask':<br>True, 'preCrop': False, u'symmetricalGLCM':<br>True, 'resegmentRange': None, 'padDistance': 5} |
| general    | info          | GeneralSettings                      |                                                                                                                                                                                                                                                                                                                                                                                                                                           |
| general    | info          | ImageHash                            | 8f6d7b02a24c98fb614c8545bed8f96e17e10a9a                                                                                                                                                                                                                                                                                                                                                                                                  |
| general    | info          | ImageSpacing                         | (1.26953125, 1.26953125, 2.0)                                                                                                                                                                                                                                                                                                                                                                                                             |
| general    | info          | MaskHash                             | 83760d78df618baf4b55ad3bfb4b3a73e366e826                                                                                                                                                                                                                                                                                                                                                                                                  |
| general    | info          | NumpyVersion                         | 1.13.1                                                                                                                                                                                                                                                                                                                                                                                                                                    |
| general    | info          | PyWaveletVersion                     | 0.5.2                                                                                                                                                                                                                                                                                                                                                                                                                                     |
| general    | info          | SimpleITKVersion                     | 1.1.0                                                                                                                                                                                                                                                                                                                                                                                                                                     |
| general    | info          | Version                              | 1.3.0.post102+g1b0eb74                                                                                                                                                                                                                                                                                                                                                                                                                    |
| general    | info          | VolumeNum                            | 1                                                                                                                                                                                                                                                                                                                                                                                                                                         |
| general    | info          | VoxelNum                             | 566                                                                                                                                                                                                                                                                                                                                                                                                                                       |
| original   | shape         | Maximum3DDiameter                    | 37.22902094                                                                                                                                                                                                                                                                                                                                                                                                                               |
| original   | shape         | Maximum2DDiameterSlice               | 31.32091953                                                                                                                                                                                                                                                                                                                                                                                                                               |
| original   | shape         | Sphericity                           | 0.805894658                                                                                                                                                                                                                                                                                                                                                                                                                               |
| original   | shape         | MinorAxis                            | 29.44119898                                                                                                                                                                                                                                                                                                                                                                                                                               |
| original   | shape         | Elongation                           | 0.90033678                                                                                                                                                                                                                                                                                                                                                                                                                                |
| original   | shape         | SurfaceVolumeRatio                   | 0.241812705                                                                                                                                                                                                                                                                                                                                                                                                                               |
| original   | shape         | Volume                               | 15282                                                                                                                                                                                                                                                                                                                                                                                                                                     |
| original   | shape         | MajorAxis                            | 32.7002069                                                                                                                                                                                                                                                                                                                                                                                                                                |
| original   | shape         | SurfaceArea                          | 3695.381763                                                                                                                                                                                                                                                                                                                                                                                                                               |
| original   | shape         | Flatness                             | 0.745311416                                                                                                                                                                                                                                                                                                                                                                                                                               |
| original   | shape         | LeastAxis                            | 24.37183751                                                                                                                                                                                                                                                                                                                                                                                                                               |
| original   | shape         | Maximum2DDiameterColumn              | 36.61966685                                                                                                                                                                                                                                                                                                                                                                                                                               |
| original   | shape         | Maximum2DDiameterRow                 | 32.44996148                                                                                                                                                                                                                                                                                                                                                                                                                               |
| original   | gldm          | GrayLevelVariance                    | 115.0093646                                                                                                                                                                                                                                                                                                                                                                                                                               |
| original   | gldm          | HighGrayLevelEmphasis                | 486.0141343                                                                                                                                                                                                                                                                                                                                                                                                                               |
| original   | gldm          | DependenceEntropy                    | 6.760008628                                                                                                                                                                                                                                                                                                                                                                                                                               |
| original   | gldm          | DependenceNonUniformity              | 120.3250883                                                                                                                                                                                                                                                                                                                                                                                                                               |
| original   | gldm          | GrayLevelNonUniformity               | 24.44169611                                                                                                                                                                                                                                                                                                                                                                                                                               |
| original   | gldm          | SmallDependenceEmphasis              | 0.432846112                                                                                                                                                                                                                                                                                                                                                                                                                               |
| original   | gldm          | SmallDependenceHighGrayLevelEmphasis | 161.182288                                                                                                                                                                                                                                                                                                                                                                                                                                |
| original   | gldm          | DependenceNonUniformityNormalized    | 0.212588495                                                                                                                                                                                                                                                                                                                                                                                                                               |
| original   | gldm          | LargeDependenceEmphasis              | 19.19787986                                                                                                                                                                                                                                                                                                                                                                                                                               |
| original   | gldm          | LargeDependenceLowGrayLevelEmphasis  | 0.073165528                                                                                                                                                                                                                                                                                                                                                                                                                               |
| original   | gldm          | DependenceVariance                   | 9.307632759                                                                                                                                                                                                                                                                                                                                                                                                                               |
| original   | gldm          | LargeDependenceHighGrayLevelEmphasis | 17919.35336                                                                                                                                                                                                                                                                                                                                                                                                                               |
| original   | gldm          | SmallDependenceLowGrayLevelEmphasis  | 0.006850677                                                                                                                                                                                                                                                                                                                                                                                                                               |
| original   | gldm          | LowGrayLevelEmphasis                 | 0.011498215                                                                                                                                                                                                                                                                                                                                                                                                                               |
| original   | glcm          | JointAverage                         | 20.88451226                                                                                                                                                                                                                                                                                                                                                                                                                               |
| original   | glcm          | SumAverage                           | 41.76902452                                                                                                                                                                                                                                                                                                                                                                                                                               |

|          |            |                                  |              |
|----------|------------|----------------------------------|--------------|
| original | glcm       | JointEntropy                     | 8.214759652  |
| original | glcm       | ClusterShade                     | -188.1186255 |
| original | glcm       | MaximumProbability               | 0.041833893  |
| original | glcm       | Idmn                             | 0.944385679  |
| original | glcm       | JointEnergy                      | 0.006356859  |
| original | glcm       | Contrast                         | 89.85971175  |
| original | glcm       | DifferenceEntropy                | 4.134594222  |
| original | glcm       | InverseVariance                  | 0.214459209  |
| original | glcm       | DifferenceVariance               | 44.83705857  |
| original | glcm       | Idn                              | 0.863116788  |
| original | glcm       | Idm                              | 0.231412665  |
| original | glcm       | Correlation                      | 0.62114274   |
| original | glcm       | Autocorrelation                  | 510.0110865  |
| original | glcm       | SumEntropy                       | 5.682863839  |
| original | glcm       | SumSquares                       | 118.5552231  |
| original | glcm       | ClusterProminence                | 229464.3931  |
| original | glcm       | Imc2                             | 0.955430871  |
| original | glcm       | Imc1                             | -0.260126457 |
| original | glcm       | DifferenceAverage                | 6.633432791  |
| original | glcm       | Id                               | 0.304639185  |
| original | glcm       | ClusterTendency                  | 384.3611807  |
| original | firstorder | InterquartileRange               | 548.75       |
| original | firstorder | Skewness                         | 0.20026173   |
| original | firstorder | Uniformity                       | 0.043183209  |
| original | firstorder | Median                           | -416.5       |
| original | firstorder | Energy                           | 112467887    |
| original | firstorder | RobustMeanAbsoluteDeviation      | 211.8691611  |
| original | firstorder | MeanAbsoluteDeviation            | 243.548777   |
| original | firstorder | TotalEnergy                      | 3036632949   |
| original | firstorder | Maximum                          | 73           |
| original | firstorder | RootMeanSquared                  | 445.7650885  |
| original | firstorder | 90Percentile                     | 12           |
| original | firstorder | Minimum                          | -806         |
| original | firstorder | Entropy                          | 4.807917408  |
| original | firstorder | Range                            | 879          |
| original | firstorder | Variance                         | 71886.21744  |
| original | firstorder | 10Percentile                     | -675.5       |
| original | firstorder | Kurtosis                         | 1.489750114  |
| original | firstorder | Mean                             | -356.1183746 |
| original | glrlm      | ShortRunLowGrayLevelEmphasis     | 0.011698928  |
| original | glrlm      | GrayLevelVariance                | 109.449088   |
| original | glrlm      | LowGrayLevelRunEmphasis          | 0.012041876  |
| original | glrlm      | GrayLevelNonUniformityNormalized | 0.039370647  |
| original | glrlm      | RunVariance                      | 0.119751935  |
| original | glrlm      | GrayLevelNonUniformity           | 20.45195913  |
| original | glrlm      | LongRunEmphasis                  | 1.309348791  |
| original | glrlm      | ShortRunHighGrayLevelEmphasis    | 413.5733214  |
| original | glrlm      | RunLengthNonUniformity           | 447.4522952  |
| original | glrlm      | ShortRunEmphasis                 | 0.942219951  |
| original | glrlm      | LongRunHighGrayLevelEmphasis     | 712.8222307  |
| original | glrlm      | RunPercentage                    | 0.917504757  |
| original | glrlm      | LongRunLowGrayLevelEmphasis      | 0.013635827  |
| original | glrlm      | RunEntropy                       | 5.193282968  |
| original | glrlm      | HighGrayLevelRunEmphasis         | 457.71016    |
| original | glrlm      | RunLengthNonUniformityNormalized | 0.86102179   |

|             |       |                                      |              |
|-------------|-------|--------------------------------------|--------------|
| original    | glszm | GrayLevelVariance                    | 80.86079237  |
| original    | glszm | ZoneVariance                         | 17.66784452  |
| original    | glszm | GrayLevelNonUniformityNormalized     | 0.034024648  |
| original    | glszm | SizeZoneNonUniformityNormalized      | 0.512492352  |
| original    | glszm | SizeZoneNonUniformity                | 145.0353357  |
| original    | glszm | GrayLevelNonUniformity               | 9.628975265  |
| original    | glszm | LargeAreaEmphasis                    | 21.66784452  |
| original    | glszm | SmallAreaHighGrayLevelEmphasis       | 272.0335981  |
| original    | glszm | ZonePercentage                       | 0.5          |
| original    | glszm | LargeAreaLowGrayLevelEmphasis        | 0.093431136  |
| original    | glszm | LargeAreaHighGrayLevelEmphasis       | 19166.00707  |
| original    | glszm | HighGrayLevelZoneEmphasis            | 373.5971731  |
| original    | glszm | SmallAreaEmphasis                    | 0.743160395  |
| original    | glszm | LowGrayLevelZoneEmphasis             | 0.014988288  |
| original    | glszm | ZoneEntropy                          | 6.038739166  |
| original    | glszm | SmallAreaLowGrayLevelEmphasis        | 0.012477751  |
| original    | ngtdm | Coarseness                           | 0.00899442   |
| original    | ngtdm | Complexity                           | 2593.155964  |
| original    | ngtdm | Strength                             | 5.978201531  |
| original    | ngtdm | Contrast                             | 0.868214709  |
| original    | ngtdm | Busyness                             | 0.166373825  |
| wavelet-HHH | gldm  | GrayLevelVariance                    | 8.774850479  |
| wavelet-HHH | gldm  | HighGrayLevelEmphasis                | 217.8480565  |
| wavelet-HHH | gldm  | DependenceEntropy                    | 5.906312134  |
| wavelet-HHH | gldm  | DependenceNonUniformity              | 81.86572438  |
| wavelet-HHH | gldm  | GrayLevelNonUniformity               | 65.90106007  |
| wavelet-HHH | gldm  | SmallDependenceEmphasis              | 0.292473116  |
| wavelet-HHH | gldm  | SmallDependenceHighGrayLevelEmphasis | 64.42093759  |
| wavelet-HHH | gldm  | DependenceNonUniformityNormalized    | 0.144639089  |
| wavelet-HHH | gldm  | LargeDependenceEmphasis              | 19.16607774  |
| wavelet-HHH | gldm  | LargeDependenceLowGrayLevelEmphasis  | 0.095100205  |
| wavelet-HHH | gldm  | DependenceVariance                   | 5.893830613  |
| wavelet-HHH | gldm  | LargeDependenceHighGrayLevelEmphasis | 4135.55477   |
| wavelet-HHH | gldm  | SmallDependenceLowGrayLevelEmphasis  | 0.004433431  |
| wavelet-HHH | gldm  | LowGrayLevelEmphasis                 | 0.008045089  |
| wavelet-HHH | glcm  | JointAverage                         | 14.47931977  |
| wavelet-HHH | glcm  | SumAverage                           | 28.95863953  |
| wavelet-HHH | glcm  | JointEntropy                         | 6.497484024  |
| wavelet-HHH | glcm  | ClusterShade                         | -22.3256546  |
| wavelet-HHH | glcm  | MaximumProbability                   | 0.049942558  |
| wavelet-HHH | glcm  | Idmn                                 | 0.9761234    |
| wavelet-HHH | glcm  | JointEnergy                          | 0.017674154  |
| wavelet-HHH | glcm  | Contrast                             | 16.92911072  |
| wavelet-HHH | glcm  | DifferenceEntropy                    | 3.090400243  |
| wavelet-HHH | glcm  | InverseVariance                      | 0.315987327  |
| wavelet-HHH | glcm  | DifferenceVariance                   | 8.183389061  |
| wavelet-HHH | glcm  | Idn                                  | 0.903126479  |
| wavelet-HHH | glcm  | Idm                                  | 0.316622275  |
| wavelet-HHH | glcm  | Correlation                          | -0.0373748   |
| wavelet-HHH | glcm  | Autocorrelation                      | 209.3458335  |
| wavelet-HHH | glcm  | SumEntropy                           | 3.871437425  |
| wavelet-HHH | glcm  | SumSquares                           | 8.158858864  |
| wavelet-HHH | glcm  | ClusterProminence                    | 1421.778631  |
| wavelet-HHH | glcm  | Imc2                                 | 0.722176844  |
| wavelet-HHH | glcm  | Imc1                                 | -0.108124184 |

|             |            |                                  |              |
|-------------|------------|----------------------------------|--------------|
| wavelet-HHH | glcm       | DifferenceAverage                | 2.935659546  |
| wavelet-HHH | glcm       | Id                               | 0.397066597  |
| wavelet-HHH | glcm       | ClusterTendency                  | 15.70632474  |
| wavelet-HHH | firstorder | InterquartileRange               | 75.97085327  |
| wavelet-HHH | firstorder | Skewness                         | -0.474896382 |
| wavelet-HHH | firstorder | Uniformity                       | 0.116432968  |
| wavelet-HHH | firstorder | Median                           | 2.91811485   |
| wavelet-HHH | firstorder | Energy                           | 3032693.419  |
| wavelet-HHH | firstorder | RobustMeanAbsoluteDeviation      | 32.45114625  |
| wavelet-HHH | firstorder | MeanAbsoluteDeviation            | 52.81158323  |
| wavelet-HHH | firstorder | TotalEnergy                      | 81882722.31  |
| wavelet-HHH | firstorder | Maximum                          | 271.5999994  |
| wavelet-HHH | firstorder | RootMeanSquared                  | 73.19915014  |
| wavelet-HHH | firstorder | 90Percentile                     | 76.35863686  |
| wavelet-HHH | firstorder | Minimum                          | -329.1364075 |
| wavelet-HHH | firstorder | Entropy                          | 3.487142541  |
| wavelet-HHH | firstorder | Range                            | 600.7364069  |
| wavelet-HHH | firstorder | Variance                         | 5356.289291  |
| wavelet-HHH | firstorder | 10Percentile                     | -84.22553775 |
| wavelet-HHH | firstorder | Kurtosis                         | 5.596716025  |
| wavelet-HHH | firstorder | Mean                             | -1.351403064 |
| wavelet-HHH | glrlm      | ShortRunLowGrayLevelEmphasis     | 0.008041631  |
| wavelet-HHH | glrlm      | GrayLevelVariance                | 9.50141017   |
| wavelet-HHH | glrlm      | LowGrayLevelRunEmphasis          | 0.008404645  |
| wavelet-HHH | glrlm      | GrayLevelNonUniformityNormalized | 0.109176893  |
| wavelet-HHH | glrlm      | RunVariance                      | 0.141896901  |
| wavelet-HHH | glrlm      | GrayLevelNonUniformity           | 55.52113311  |
| wavelet-HHH | glrlm      | LongRunEmphasis                  | 1.381982606  |
| wavelet-HHH | glrlm      | ShortRunHighGrayLevelEmphasis    | 201.9227586  |
| wavelet-HHH | glrlm      | RunLengthNonUniformity           | 419.1464034  |
| wavelet-HHH | glrlm      | ShortRunEmphasis                 | 0.925693908  |
| wavelet-HHH | glrlm      | LongRunHighGrayLevelEmphasis     | 300.4029229  |
| wavelet-HHH | glrlm      | RunPercentage                    | 0.898341941  |
| wavelet-HHH | glrlm      | LongRunLowGrayLevelEmphasis      | 0.010264415  |
| wavelet-HHH | glrlm      | RunEntropy                       | 4.015811387  |
| wavelet-HHH | glrlm      | HighGrayLevelRunEmphasis         | 218.0375277  |
| wavelet-HHH | glrlm      | RunLengthNonUniformityNormalized | 0.823978086  |
| wavelet-HHH | glszm      | GrayLevelVariance                | 20.07271809  |
| wavelet-HHH | glszm      | ZoneVariance                     | 100.0013887  |
| wavelet-HHH | glszm      | GrayLevelNonUniformityNormalized | 0.075369272  |
| wavelet-HHH | glszm      | SizeZoneNonUniformityNormalized  | 0.482893574  |
| wavelet-HHH | glszm      | SizeZoneNonUniformity            | 85.95505618  |
| wavelet-HHH | glszm      | GrayLevelNonUniformity           | 13.41573034  |
| wavelet-HHH | glszm      | LargeAreaEmphasis                | 110.1123596  |
| wavelet-HHH | glszm      | SmallAreaHighGrayLevelEmphasis   | 159.1889665  |
| wavelet-HHH | glszm      | ZonePercentage                   | 0.314487633  |
| wavelet-HHH | glszm      | LargeAreaLowGrayLevelEmphasis    | 0.540081     |
| wavelet-HHH | glszm      | LargeAreaHighGrayLevelEmphasis   | 23340.25843  |
| wavelet-HHH | glszm      | HighGrayLevelZoneEmphasis        | 220.8202247  |
| wavelet-HHH | glszm      | SmallAreaEmphasis                | 0.721111899  |
| wavelet-HHH | glszm      | LowGrayLevelZoneEmphasis         | 0.014648278  |
| wavelet-HHH | glszm      | ZoneEntropy                      | 5.249300114  |
| wavelet-HHH | glszm      | SmallAreaLowGrayLevelEmphasis    | 0.01297455   |
| wavelet-HHH | ngtdm      | Coarseness                       | 0.011565582  |
| wavelet-HHH | ngtdm      | Complexity                       | 495.0740986  |



|             |            |                                      |              |
|-------------|------------|--------------------------------------|--------------|
| wavelet-HHH | ngtdm      | Strength                             | 2.11333463   |
| wavelet-HHH | ngtdm      | Contrast                             | 0.078557814  |
| wavelet-HHH | ngtdm      | Busyness                             | 0.198381391  |
| wavelet-HLL | gldm       | GrayLevelVariance                    | 44.5068736   |
| wavelet-HLL | gldm       | HighGrayLevelEmphasis                | 412.5229682  |
| wavelet-HLL | gldm       | DependenceEntropy                    | 6.606045089  |
| wavelet-HLL | gldm       | DependenceNonUniformity              | 148.6325088  |
| wavelet-HLL | gldm       | GrayLevelNonUniformity               | 24.26855124  |
| wavelet-HLL | gldm       | SmallDependenceEmphasis              | 0.429750603  |
| wavelet-HLL | gldm       | SmallDependenceHighGrayLevelEmphasis | 182.6969159  |
| wavelet-HLL | gldm       | DependenceNonUniformityNormalized    | 0.262601606  |
| wavelet-HLL | gldm       | LargeDependenceEmphasis              | 6.77385159   |
| wavelet-HLL | gldm       | LargeDependenceLowGrayLevelEmphasis  | 0.044334219  |
| wavelet-HLL | gldm       | DependenceVariance                   | 1.611482226  |
| wavelet-HLL | gldm       | LargeDependenceHighGrayLevelEmphasis | 2706.710247  |
| wavelet-HLL | gldm       | SmallDependenceLowGrayLevelEmphasis  | 0.005492231  |
| wavelet-HLL | gldm       | LowGrayLevelEmphasis                 | 0.01084443   |
| wavelet-HLL | glcm       | JointAverage                         | 18.72723834  |
| wavelet-HLL | glcm       | SumAverage                           | 37.45447668  |
| wavelet-HLL | glcm       | JointEntropy                         | 8.541401721  |
| wavelet-HLL | glcm       | ClusterShade                         | -35.49297746 |
| wavelet-HLL | glcm       | MaximumProbability                   | 0.010805726  |
| wavelet-HLL | glcm       | Idmn                                 | 0.95629007   |
| wavelet-HLL | glcm       | JointEnergy                          | 0.003292446  |
| wavelet-HLL | glcm       | Contrast                             | 68.18836465  |
| wavelet-HLL | glcm       | DifferenceEntropy                    | 3.977465298  |
| wavelet-HLL | glcm       | InverseVariance                      | 0.174046381  |
| wavelet-HLL | glcm       | DifferenceVariance                   | 28.68098697  |
| wavelet-HLL | glcm       | Idn                                  | 0.868397633  |
| wavelet-HLL | glcm       | Idm                                  | 0.170883405  |
| wavelet-HLL | glcm       | Correlation                          | 0.270039317  |
| wavelet-HLL | glcm       | Autocorrelation                      | 363.3001571  |
| wavelet-HLL | glcm       | SumEntropy                           | 5.360897155  |
| wavelet-HLL | glcm       | SumSquares                           | 46.63359029  |
| wavelet-HLL | glcm       | ClusterProminence                    | 39116.04974  |
| wavelet-HLL | glcm       | Imc2                                 | 0.927694778  |
| wavelet-HLL | glcm       | Imc1                                 | -0.210118427 |
| wavelet-HLL | glcm       | DifferenceAverage                    | 6.085142489  |
| wavelet-HLL | glcm       | Id                                   | 0.261326973  |
| wavelet-HLL | glcm       | ClusterTendency                      | 118.3459965  |
| wavelet-HLL | firstorder | InterquartileRange                   | 231.4947431  |
| wavelet-HLL | firstorder | Skewness                             | -0.188352434 |
| wavelet-HLL | firstorder | Uniformity                           | 0.042877299  |
| wavelet-HLL | firstorder | Median                               | 2.59457394   |
| wavelet-HLL | firstorder | Energy                               | 15729614.74  |
| wavelet-HLL | firstorder | RobustMeanAbsoluteDeviation          | 94.31953213  |
| wavelet-HLL | firstorder | MeanAbsoluteDeviation                | 133.6875004  |
| wavelet-HLL | firstorder | TotalEnergy                          | 424699597.9  |
| wavelet-HLL | firstorder | Maximum                              | 412.4181896  |
| wavelet-HLL | firstorder | RootMeanSquared                      | 166.705845   |
| wavelet-HLL | firstorder | 90Percentile                         | 199.8793887  |
| wavelet-HLL | firstorder | Minimum                              | -461.2803294 |
| wavelet-HLL | firstorder | Entropy                              | 4.742988505  |
| wavelet-HLL | firstorder | Range                                | 873.698519   |
| wavelet-HLL | firstorder | Variance                             | 27725.14158  |

|             |            |                                      |              |
|-------------|------------|--------------------------------------|--------------|
| wavelet-HLL | firstorder | 10Percentile                         | -238.2799147 |
| wavelet-HLL | firstorder | Kurtosis                             | 2.725353831  |
| wavelet-HLL | firstorder | Mean                                 | -8.105379564 |
| wavelet-HLL | glrlm      | ShortRunLowGrayLevelEmphasis         | 0.010769602  |
| wavelet-HLL | glrlm      | GrayLevelVariance                    | 45.10007746  |
| wavelet-HLL | glrlm      | LowGrayLevelRunEmphasis              | 0.011037178  |
| wavelet-HLL | glrlm      | GrayLevelNonUniformityNormalized     | 0.042571194  |
| wavelet-HLL | glrlm      | RunVariance                          | 0.057762918  |
| wavelet-HLL | glrlm      | GrayLevelNonUniformity               | 22.91717888  |
| wavelet-HLL | glrlm      | LongRunEmphasis                      | 1.165082033  |
| wavelet-HLL | glrlm      | ShortRunHighGrayLevelEmphasis        | 398.4495293  |
| wavelet-HLL | glrlm      | RunLengthNonUniformity               | 490.1284984  |
| wavelet-HLL | glrlm      | ShortRunEmphasis                     | 0.963687483  |
| wavelet-HLL | glrlm      | LongRunHighGrayLevelEmphasis         | 478.8440324  |
| wavelet-HLL | glrlm      | RunPercentage                        | 0.951073661  |
| wavelet-HLL | glrlm      | LongRunLowGrayLevelEmphasis          | 0.012186985  |
| wavelet-HLL | glrlm      | RunEntropy                           | 4.987053538  |
| wavelet-HLL | glrlm      | HighGrayLevelRunEmphasis             | 413.136636   |
| wavelet-HLL | glrlm      | RunLengthNonUniformityNormalized     | 0.909654312  |
| wavelet-HLL | glszm      | GrayLevelVariance                    | 52.04701196  |
| wavelet-HLL | glszm      | ZoneVariance                         | 3.161203433  |
| wavelet-HLL | glszm      | GrayLevelNonUniformityNormalized     | 0.040243791  |
| wavelet-HLL | glszm      | SizeZoneNonUniformityNormalized      | 0.415723156  |
| wavelet-HLL | glszm      | SizeZoneNonUniformity                | 123.0540541  |
| wavelet-HLL | glszm      | GrayLevelNonUniformity               | 11.91216216  |
| wavelet-HLL | glszm      | LargeAreaEmphasis                    | 6.817567568  |
| wavelet-HLL | glszm      | SmallAreaHighGrayLevelEmphasis       | 287.0427971  |
| wavelet-HLL | glszm      | ZonePercentage                       | 0.522968198  |
| wavelet-HLL | glszm      | LargeAreaLowGrayLevelEmphasis        | 0.047110661  |
| wavelet-HLL | glszm      | LargeAreaHighGrayLevelEmphasis       | 2639.195946  |
| wavelet-HLL | glszm      | HighGrayLevelZoneEmphasis            | 423.2601351  |
| wavelet-HLL | glszm      | SmallAreaEmphasis                    | 0.668170138  |
| wavelet-HLL | glszm      | LowGrayLevelZoneEmphasis             | 0.013196012  |
| wavelet-HLL | glszm      | ZoneEntropy                          | 6.256019306  |
| wavelet-HLL | glszm      | SmallAreaLowGrayLevelEmphasis        | 0.0088841    |
| wavelet-HLL | ngtdm      | Coarseness                           | 0.013057134  |
| wavelet-HLL | ngtdm      | Complexity                           | 1940.608891  |
| wavelet-HLL | ngtdm      | Strength                             | 4.724929395  |
| wavelet-HLL | ngtdm      | Contrast                             | 0.29079661   |
| wavelet-HLL | ngtdm      | Busyness                             | 0.116200641  |
| wavelet-LHL | gldm       | GrayLevelVariance                    | 67.11813108  |
| wavelet-LHL | gldm       | HighGrayLevelEmphasis                | 1396.918728  |
| wavelet-LHL | gldm       | DependenceEntropy                    | 6.697023721  |
| wavelet-LHL | gldm       | DependenceNonUniformity              | 144.459364   |
| wavelet-LHL | gldm       | GrayLevelNonUniformity               | 23.42756184  |
| wavelet-LHL | gldm       | SmallDependenceEmphasis              | 0.470819692  |
| wavelet-LHL | gldm       | SmallDependenceHighGrayLevelEmphasis | 664.7516528  |
| wavelet-LHL | gldm       | DependenceNonUniformityNormalized    | 0.255228558  |
| wavelet-LHL | gldm       | LargeDependenceEmphasis              | 7.703180212  |
| wavelet-LHL | gldm       | LargeDependenceLowGrayLevelEmphasis  | 0.008043692  |
| wavelet-LHL | gldm       | DependenceVariance                   | 2.280700221  |
| wavelet-LHL | gldm       | LargeDependenceHighGrayLevelEmphasis | 10506.5583   |
| wavelet-LHL | gldm       | SmallDependenceLowGrayLevelEmphasis  | 0.002285172  |
| wavelet-LHL | gldm       | LowGrayLevelEmphasis                 | 0.002716573  |
| wavelet-LHL | glcm       | JointAverage                         | 36.59065582  |

|             |            |                                  |              |
|-------------|------------|----------------------------------|--------------|
| wavelet-LHL | glcm       | SumAverage                       | 73.18131165  |
| wavelet-LHL | glcm       | JointEntropy                     | 8.556532671  |
| wavelet-LHL | glcm       | ClusterShade                     | 759.7352853  |
| wavelet-LHL | glcm       | MaximumProbability               | 0.01681219   |
| wavelet-LHL | glcm       | Idmn                             | 0.979193226  |
| wavelet-LHL | glcm       | JointEnergy                      | 0.00364269   |
| wavelet-LHL | glcm       | Contrast                         | 94.30140721  |
| wavelet-LHL | glcm       | DifferenceEntropy                | 4.208298338  |
| wavelet-LHL | glcm       | InverseVariance                  | 0.168385161  |
| wavelet-LHL | glcm       | DifferenceVariance               | 43.19868073  |
| wavelet-LHL | glcm       | Idn                              | 0.908705977  |
| wavelet-LHL | glcm       | Idm                              | 0.169140741  |
| wavelet-LHL | glcm       | Correlation                      | 0.231145099  |
| wavelet-LHL | glcm       | Autocorrelation                  | 1353.575921  |
| wavelet-LHL | glcm       | SumEntropy                       | 5.460618636  |
| wavelet-LHL | glcm       | SumSquares                       | 61.83197454  |
| wavelet-LHL | glcm       | ClusterProminence                | 89775.8017   |
| wavelet-LHL | glcm       | Imc2                             | 0.954233958  |
| wavelet-LHL | glcm       | Imc1                             | -0.249527633 |
| wavelet-LHL | glcm       | DifferenceAverage                | 6.989308622  |
| wavelet-LHL | glcm       | Id                               | 0.254240007  |
| wavelet-LHL | glcm       | ClusterTendency                  | 153.026491   |
| wavelet-LHL | firstorder | InterquartileRange               | 237.1292314  |
| wavelet-LHL | firstorder | Skewness                         | -0.002294672 |
| wavelet-LHL | firstorder | Uniformity                       | 0.041391452  |
| wavelet-LHL | firstorder | Median                           | -14.01383666 |
| wavelet-LHL | firstorder | Energy                           | 23787031.58  |
| wavelet-LHL | firstorder | RobustMeanAbsoluteDeviation      | 100.3643955  |
| wavelet-LHL | firstorder | MeanAbsoluteDeviation            | 154.1533218  |
| wavelet-LHL | firstorder | TotalEnergy                      | 642249852.7  |
| wavelet-LHL | firstorder | Maximum                          | 684.6862682  |
| wavelet-LHL | firstorder | RootMeanSquared                  | 205.0037989  |
| wavelet-LHL | firstorder | 90Percentile                     | 268.2306994  |
| wavelet-LHL | firstorder | Minimum                          | -898.5121555 |
| wavelet-LHL | firstorder | Entropy                          | 4.94873183   |
| wavelet-LHL | firstorder | Range                            | 1583.198424  |
| wavelet-LHL | firstorder | Variance                         | 42024.7861   |
| wavelet-LHL | firstorder | 10Percentile                     | -248.6488239 |
| wavelet-LHL | firstorder | Kurtosis                         | 4.085866047  |
| wavelet-LHL | firstorder | Mean                             | -1.330965383 |
| wavelet-LHL | glrlm      | ShortRunLowGrayLevelEmphasis     | 0.002789205  |
| wavelet-LHL | glrlm      | GrayLevelVariance                | 69.14251262  |
| wavelet-LHL | glrlm      | LowGrayLevelRunEmphasis          | 0.002820108  |
| wavelet-LHL | glrlm      | GrayLevelNonUniformityNormalized | 0.039846048  |
| wavelet-LHL | glrlm      | RunVariance                      | 0.058731957  |
| wavelet-LHL | glrlm      | GrayLevelNonUniformity           | 21.4024091   |
| wavelet-LHL | glrlm      | LongRunEmphasis                  | 1.170343876  |
| wavelet-LHL | glrlm      | ShortRunHighGrayLevelEmphasis    | 1345.844561  |
| wavelet-LHL | glrlm      | RunLengthNonUniformity           | 485.9888872  |
| wavelet-LHL | glrlm      | ShortRunEmphasis                 | 0.961690616  |
| wavelet-LHL | glrlm      | LongRunHighGrayLevelEmphasis     | 1631.069453  |
| wavelet-LHL | glrlm      | RunPercentage                    | 0.948899157  |
| wavelet-LHL | glrlm      | LongRunLowGrayLevelEmphasis      | 0.002957087  |
| wavelet-LHL | glrlm      | RunEntropy                       | 5.220302891  |
| wavelet-LHL | glrlm      | HighGrayLevelRunEmphasis         | 1398.444148  |

|             |       |                                      |             |
|-------------|-------|--------------------------------------|-------------|
| wavelet-LHL | glrlm | RunLengthNonUniformityNormalized     | 0.90439455  |
| wavelet-LHL | glszm | GrayLevelVariance                    | 96.17579273 |
| wavelet-LHL | glszm | ZoneVariance                         | 5.381518354 |
| wavelet-LHL | glszm | GrayLevelNonUniformityNormalized     | 0.030305688 |
| wavelet-LHL | glszm | SizeZoneNonUniformityNormalized      | 0.520349985 |
| wavelet-LHL | glszm | SizeZoneNonUniformity                | 157.1456954 |
| wavelet-LHL | glszm | GrayLevelNonUniformity               | 9.152317881 |
| wavelet-LHL | glszm | LargeAreaEmphasis                    | 8.894039735 |
| wavelet-LHL | glszm | SmallAreaHighGrayLevelEmphasis       | 1060.937124 |
| wavelet-LHL | glszm | ZonePercentage                       | 0.533568905 |
| wavelet-LHL | glszm | LargeAreaLowGrayLevelEmphasis        | 0.010648311 |
| wavelet-LHL | glszm | LargeAreaHighGrayLevelEmphasis       | 11964.66887 |
| wavelet-LHL | glszm | HighGrayLevelZoneEmphasis            | 1417.811258 |
| wavelet-LHL | glszm | SmallAreaEmphasis                    | 0.748495295 |
| wavelet-LHL | glszm | LowGrayLevelZoneEmphasis             | 0.004381824 |
| wavelet-LHL | glszm | ZoneEntropy                          | 6.323790726 |
| wavelet-LHL | glszm | SmallAreaLowGrayLevelEmphasis        | 0.004173091 |
| wavelet-LHL | ngtdm | Coarseness                           | 0.012272032 |
| wavelet-LHL | ngtdm | Complexity                           | 5215.875401 |
| wavelet-LHL | ngtdm | Strength                             | 10.40331992 |
| wavelet-LHL | ngtdm | Contrast                             | 0.284891353 |
| wavelet-LHL | ngtdm | Busyness                             | 0.04139662  |
| wavelet-LHH | gldm  | GrayLevelVariance                    | 40.58027007 |
| wavelet-LHH | gldm  | HighGrayLevelEmphasis                | 919.8180212 |
| wavelet-LHH | gldm  | DependenceEntropy                    | 6.401906864 |
| wavelet-LHH | gldm  | DependenceNonUniformity              | 120.8939929 |
| wavelet-LHH | gldm  | GrayLevelNonUniformity               | 35.00706714 |
| wavelet-LHH | gldm  | SmallDependenceEmphasis              | 0.425561213 |
| wavelet-LHH | gldm  | SmallDependenceHighGrayLevelEmphasis | 416.6665969 |
| wavelet-LHH | gldm  | DependenceNonUniformityNormalized    | 0.213593627 |
| wavelet-LHH | gldm  | LargeDependenceEmphasis              | 11.24381625 |
| wavelet-LHH | gldm  | LargeDependenceLowGrayLevelEmphasis  | 0.015563586 |
| wavelet-LHH | gldm  | DependenceVariance                   | 3.802294947 |
| wavelet-LHH | gldm  | LargeDependenceHighGrayLevelEmphasis | 9915.708481 |
| wavelet-LHH | gldm  | SmallDependenceLowGrayLevelEmphasis  | 0.002858155 |
| wavelet-LHH | gldm  | LowGrayLevelEmphasis                 | 0.003564588 |
| wavelet-LHH | glcm  | JointAverage                         | 29.58466057 |
| wavelet-LHH | glcm  | SumAverage                           | 59.16932113 |
| wavelet-LHH | glcm  | JointEntropy                         | 7.836349771 |
| wavelet-LHH | glcm  | ClusterShade                         | 210.019159  |
| wavelet-LHH | glcm  | MaximumProbability                   | 0.023276382 |
| wavelet-LHH | glcm  | Idmn                                 | 0.985282932 |
| wavelet-LHH | glcm  | JointEnergy                          | 0.006719662 |
| wavelet-LHH | glcm  | Contrast                             | 75.34064707 |
| wavelet-LHH | glcm  | DifferenceEntropy                    | 3.899276586 |
| wavelet-LHH | glcm  | InverseVariance                      | 0.221995193 |
| wavelet-LHH | glcm  | DifferenceVariance                   | 41.90515602 |
| wavelet-LHH | glcm  | Idn                                  | 0.928546907 |
| wavelet-LHH | glcm  | Idm                                  | 0.218735051 |
| wavelet-LHH | glcm  | Correlation                          | 0.009239612 |
| wavelet-LHH | glcm  | Autocorrelation                      | 876.1074084 |
| wavelet-LHH | glcm  | SumEntropy                           | 4.813240997 |
| wavelet-LHH | glcm  | SumSquares                           | 38.519863   |
| wavelet-LHH | glcm  | ClusterProminence                    | 63881.09776 |
| wavelet-LHH | glcm  | Imc2                                 | 0.911592513 |

|             |            |                                  |              |
|-------------|------------|----------------------------------|--------------|
| wavelet-LHH | glcm       | Imc1                             | -0.207591468 |
| wavelet-LHH | glcm       | DifferenceAverage                | 5.645008915  |
| wavelet-LHH | glcm       | Id                               | 0.302847462  |
| wavelet-LHH | glcm       | ClusterTendency                  | 78.73880495  |
| wavelet-LHH | firstorder | InterquartileRange               | 143.5310633  |
| wavelet-LHH | firstorder | Skewness                         | 0.439756825  |
| wavelet-LHH | firstorder | Uniformity                       | 0.061849942  |
| wavelet-LHH | firstorder | Median                           | -0.462711384 |
| wavelet-LHH | firstorder | Energy                           | 14362862.32  |
| wavelet-LHH | firstorder | RobustMeanAbsoluteDeviation      | 61.22944773  |
| wavelet-LHH | firstorder | MeanAbsoluteDeviation            | 107.22156    |
| wavelet-LHH | firstorder | TotalEnergy                      | 387797282.7  |
| wavelet-LHH | firstorder | Maximum                          | 935.5179868  |
| wavelet-LHH | firstorder | RootMeanSquared                  | 159.2987189  |
| wavelet-LHH | firstorder | 90Percentile                     | 170.5889172  |
| wavelet-LHH | firstorder | Minimum                          | -709.3814181 |
| wavelet-LHH | firstorder | Entropy                          | 4.44416982   |
| wavelet-LHH | firstorder | Range                            | 1644.899405  |
| wavelet-LHH | firstorder | Variance                         | 25364.60721  |
| wavelet-LHH | firstorder | 10Percentile                     | -166.5644797 |
| wavelet-LHH | firstorder | Kurtosis                         | 8.234190543  |
| wavelet-LHH | firstorder | Mean                             | 3.38742168   |
| wavelet-LHH | glrlm      | ShortRunLowGrayLevelEmphasis     | 0.003675756  |
| wavelet-LHH | glrlm      | GrayLevelVariance                | 42.82982468  |
| wavelet-LHH | glrlm      | LowGrayLevelRunEmphasis          | 0.00373478   |
| wavelet-LHH | glrlm      | GrayLevelNonUniformityNormalized | 0.058782021  |
| wavelet-LHH | glrlm      | RunVariance                      | 0.080816789  |
| wavelet-LHH | glrlm      | GrayLevelNonUniformity           | 31.06503908  |
| wavelet-LHH | glrlm      | LongRunEmphasis                  | 1.229767048  |
| wavelet-LHH | glrlm      | ShortRunHighGrayLevelEmphasis    | 879.3025014  |
| wavelet-LHH | glrlm      | RunLengthNonUniformity           | 464.6336069  |
| wavelet-LHH | glrlm      | ShortRunEmphasis                 | 0.95055083   |
| wavelet-LHH | glrlm      | LongRunHighGrayLevelEmphasis     | 1124.823395  |
| wavelet-LHH | glrlm      | RunPercentage                    | 0.933541723  |
| wavelet-LHH | glrlm      | LongRunLowGrayLevelEmphasis      | 0.004007284  |
| wavelet-LHH | glrlm      | RunEntropy                       | 4.806851215  |
| wavelet-LHH | glrlm      | HighGrayLevelRunEmphasis         | 922.7408918  |
| wavelet-LHH | glrlm      | RunLengthNonUniformityNormalized | 0.878734462  |
| wavelet-LHH | glszm      | GrayLevelVariance                | 72.03696051  |
| wavelet-LHH | glszm      | ZoneVariance                     | 24.00958448  |
| wavelet-LHH | glszm      | GrayLevelNonUniformityNormalized | 0.041465794  |
| wavelet-LHH | glszm      | SizeZoneNonUniformityNormalized  | 0.546143251  |
| wavelet-LHH | glszm      | SizeZoneNonUniformity            | 144.1818182  |
| wavelet-LHH | glszm      | GrayLevelNonUniformity           | 10.9469697   |
| wavelet-LHH | glszm      | LargeAreaEmphasis                | 28.60606061  |
| wavelet-LHH | glszm      | SmallAreaHighGrayLevelEmphasis   | 767.0996638  |
| wavelet-LHH | glszm      | ZonePercentage                   | 0.466431095  |
| wavelet-LHH | glszm      | LargeAreaLowGrayLevelEmphasis    | 0.038166658  |
| wavelet-LHH | glszm      | LargeAreaHighGrayLevelEmphasis   | 25208.125    |
| wavelet-LHH | glszm      | HighGrayLevelZoneEmphasis        | 970.219697   |
| wavelet-LHH | glszm      | SmallAreaEmphasis                | 0.766113458  |
| wavelet-LHH | glszm      | LowGrayLevelZoneEmphasis         | 0.006250476  |
| wavelet-LHH | glszm      | ZoneEntropy                      | 5.897661044  |
| wavelet-LHH | glszm      | SmallAreaLowGrayLevelEmphasis    | 0.005939823  |
| wavelet-LHH | ngtdm      | Coarseness                       | 0.012753644  |

|             |            |                                      |              |
|-------------|------------|--------------------------------------|--------------|
| wavelet-LHH | ngtdm      | Complexity                           | 3810.802799  |
| wavelet-LHH | ngtdm      | Strength                             | 10.00987014  |
| wavelet-LHH | ngtdm      | Contrast                             | 0.176192414  |
| wavelet-LHH | ngtdm      | Busyness                             | 0.045902707  |
| wavelet-LLH | gldm       | GrayLevelVariance                    | 57.16975178  |
| wavelet-LLH | gldm       | HighGrayLevelEmphasis                | 1457.595406  |
| wavelet-LLH | gldm       | DependenceEntropy                    | 6.573691763  |
| wavelet-LLH | gldm       | DependenceNonUniformity              | 142.7279152  |
| wavelet-LLH | gldm       | GrayLevelNonUniformity               | 26.25088339  |
| wavelet-LLH | gldm       | SmallDependenceEmphasis              | 0.468968143  |
| wavelet-LLH | gldm       | SmallDependenceHighGrayLevelEmphasis | 670.9709777  |
| wavelet-LLH | gldm       | DependenceNonUniformityNormalized    | 0.252169461  |
| wavelet-LLH | gldm       | LargeDependenceEmphasis              | 8.201413428  |
| wavelet-LLH | gldm       | LargeDependenceLowGrayLevelEmphasis  | 0.008253259  |
| wavelet-LLH | gldm       | DependenceVariance                   | 2.579655134  |
| wavelet-LLH | gldm       | LargeDependenceHighGrayLevelEmphasis | 11988.58481  |
| wavelet-LLH | gldm       | SmallDependenceLowGrayLevelEmphasis  | 0.002712189  |
| wavelet-LLH | gldm       | LowGrayLevelEmphasis                 | 0.003099222  |
| wavelet-LLH | glcm       | JointAverage                         | 37.55272776  |
| wavelet-LLH | glcm       | SumAverage                           | 75.10545552  |
| wavelet-LLH | glcm       | JointEntropy                         | 8.381742913  |
| wavelet-LLH | glcm       | ClusterShade                         | -510.6505229 |
| wavelet-LLH | glcm       | MaximumProbability                   | 0.014871133  |
| wavelet-LLH | glcm       | Idmn                                 | 0.980395784  |
| wavelet-LLH | glcm       | JointEnergy                          | 0.004107313  |
| wavelet-LLH | glcm       | Contrast                             | 87.71823363  |
| wavelet-LLH | glcm       | DifferenceEntropy                    | 4.094105976  |
| wavelet-LLH | glcm       | InverseVariance                      | 0.183936183  |
| wavelet-LLH | glcm       | DifferenceVariance                   | 42.81090056  |
| wavelet-LLH | glcm       | Idn                                  | 0.91343839   |
| wavelet-LLH | glcm       | Idm                                  | 0.180629065  |
| wavelet-LLH | glcm       | Correlation                          | 0.135775167  |
| wavelet-LLH | glcm       | Autocorrelation                      | 1417.702943  |
| wavelet-LLH | glcm       | SumEntropy                           | 5.263673974  |
| wavelet-LLH | glcm       | SumSquares                           | 51.34471307  |
| wavelet-LLH | glcm       | ClusterProminence                    | 74435.60822  |
| wavelet-LLH | glcm       | Imc2                                 | 0.937257224  |
| wavelet-LLH | glcm       | Imc1                                 | -0.227534563 |
| wavelet-LLH | glcm       | DifferenceAverage                    | 6.520610856  |
| wavelet-LLH | glcm       | Id                                   | 0.266841294  |
| wavelet-LLH | glcm       | ClusterTendency                      | 117.6606187  |
| wavelet-LLH | firstorder | InterquartileRange                   | 184.7452525  |
| wavelet-LLH | firstorder | Skewness                             | -0.689530085 |
| wavelet-LLH | firstorder | Uniformity                           | 0.046379653  |
| wavelet-LLH | firstorder | Median                               | -22.62823851 |
| wavelet-LLH | firstorder | Energy                               | 20613809.84  |
| wavelet-LLH | firstorder | RobustMeanAbsoluteDeviation          | 83.51429924  |
| wavelet-LLH | firstorder | MeanAbsoluteDeviation                | 135.3051684  |
| wavelet-LLH | firstorder | TotalEnergy                          | 556572865.8  |
| wavelet-LLH | firstorder | Maximum                              | 601.9096901  |
| wavelet-LLH | firstorder | RootMeanSquared                      | 190.8406632  |
| wavelet-LLH | firstorder | 90Percentile                         | 203.3190614  |
| wavelet-LLH | firstorder | Minimum                              | -928.1889278 |
| wavelet-LLH | firstorder | Entropy                              | 4.789447795  |
| wavelet-LLH | firstorder | Range                                | 1530.098618  |

|             |            |                                      |              |
|-------------|------------|--------------------------------------|--------------|
| wavelet-LLH | firstorder | Variance                             | 35724.366    |
| wavelet-LLH | firstorder | 10Percentile                         | -252.4715953 |
| wavelet-LLH | firstorder | Kurtosis                             | 5.900732795  |
| wavelet-LLH | firstorder | Mean                                 | -26.37788343 |
| wavelet-LLH | glrlm      | ShortRunLowGrayLevelEmphasis         | 0.003203624  |
| wavelet-LLH | glrlm      | GrayLevelVariance                    | 59.23358512  |
| wavelet-LLH | glrlm      | LowGrayLevelRunEmphasis              | 0.003232116  |
| wavelet-LLH | glrlm      | GrayLevelNonUniformityNormalized     | 0.04499985   |
| wavelet-LLH | glrlm      | RunVariance                          | 0.060047814  |
| wavelet-LLH | glrlm      | GrayLevelNonUniformity               | 24.12807112  |
| wavelet-LLH | glrlm      | LongRunEmphasis                      | 1.175174836  |
| wavelet-LLH | glrlm      | ShortRunHighGrayLevelEmphasis        | 1398.47377   |
| wavelet-LLH | glrlm      | RunLengthNonUniformity               | 483.3309971  |
| wavelet-LLH | glrlm      | ShortRunEmphasis                     | 0.9603824    |
| wavelet-LLH | glrlm      | LongRunHighGrayLevelEmphasis         | 1713.655994  |
| wavelet-LLH | glrlm      | RunPercentage                        | 0.947268279  |
| wavelet-LLH | glrlm      | LongRunLowGrayLevelEmphasis          | 0.003358736  |
| wavelet-LLH | glrlm      | RunEntropy                           | 5.072501959  |
| wavelet-LLH | glrlm      | HighGrayLevelRunEmphasis             | 1456.918942  |
| wavelet-LLH | glrlm      | RunLengthNonUniformityNormalized     | 0.901133689  |
| wavelet-LLH | glszm      | GrayLevelVariance                    | 86.3056116   |
| wavelet-LLH | glszm      | ZoneVariance                         | 6.288803123  |
| wavelet-LLH | glszm      | GrayLevelNonUniformityNormalized     | 0.03471339   |
| wavelet-LLH | glszm      | SizeZoneNonUniformityNormalized      | 0.519889479  |
| wavelet-LLH | glszm      | SizeZoneNonUniformity                | 157.0066225  |
| wavelet-LLH | glszm      | GrayLevelNonUniformity               | 10.48344371  |
| wavelet-LLH | glszm      | LargeAreaEmphasis                    | 9.801324503  |
| wavelet-LLH | glszm      | SmallAreaHighGrayLevelEmphasis       | 1064.032382  |
| wavelet-LLH | glszm      | ZonePercentage                       | 0.533568905  |
| wavelet-LLH | glszm      | LargeAreaLowGrayLevelEmphasis        | 0.011538728  |
| wavelet-LLH | glszm      | LargeAreaHighGrayLevelEmphasis       | 14053.2947   |
| wavelet-LLH | glszm      | HighGrayLevelZoneEmphasis            | 1444.301325  |
| wavelet-LLH | glszm      | SmallAreaEmphasis                    | 0.748765995  |
| wavelet-LLH | glszm      | LowGrayLevelZoneEmphasis             | 0.005172909  |
| wavelet-LLH | glszm      | ZoneEntropy                          | 6.190985878  |
| wavelet-LLH | glszm      | SmallAreaLowGrayLevelEmphasis        | 0.004987689  |
| wavelet-LLH | ngtdm      | Coarseness                           | 0.012402031  |
| wavelet-LLH | ngtdm      | Complexity                           | 5015.167601  |
| wavelet-LLH | ngtdm      | Strength                             | 11.25076207  |
| wavelet-LLH | ngtdm      | Contrast                             | 0.237513606  |
| wavelet-LLH | ngtdm      | Busyness                             | 0.036696862  |
| wavelet-LLL | gldm       | GrayLevelVariance                    | 733.3407584  |
| wavelet-LLL | gldm       | HighGrayLevelEmphasis                | 2974.342756  |
| wavelet-LLL | gldm       | DependenceEntropy                    | 7.207287404  |
| wavelet-LLL | gldm       | DependenceNonUniformity              | 266.8480565  |
| wavelet-LLL | gldm       | GrayLevelNonUniformity               | 7.713780919  |
| wavelet-LLL | gldm       | SmallDependenceEmphasis              | 0.708244674  |
| wavelet-LLL | gldm       | SmallDependenceHighGrayLevelEmphasis | 1924.060676  |
| wavelet-LLL | gldm       | DependenceNonUniformityNormalized    | 0.471462997  |
| wavelet-LLL | gldm       | LargeDependenceEmphasis              | 3.685512367  |
| wavelet-LLL | gldm       | LargeDependenceLowGrayLevelEmphasis  | 0.012614431  |
| wavelet-LLL | gldm       | DependenceVariance                   | 1.134550313  |
| wavelet-LLL | gldm       | LargeDependenceHighGrayLevelEmphasis | 13402.54064  |
| wavelet-LLL | gldm       | SmallDependenceLowGrayLevelEmphasis  | 0.003633936  |
| wavelet-LLL | gldm       | LowGrayLevelEmphasis                 | 0.004436993  |

|             |            |                                  |              |
|-------------|------------|----------------------------------|--------------|
| wavelet-LLL | glcm       | JointAverage                     | 51.41298148  |
| wavelet-LLL | glcm       | SumAverage                       | 102.825963   |
| wavelet-LLL | glcm       | JointEntropy                     | 9.461700255  |
| wavelet-LLL | glcm       | ClusterShade                     | 2301.897298  |
| wavelet-LLL | glcm       | MaximumProbability               | 0.006222035  |
| wavelet-LLL | glcm       | Idmn                             | 0.960818413  |
| wavelet-LLL | glcm       | JointEnergy                      | 0.00156472   |
| wavelet-LLL | glcm       | Contrast                         | 412.0630529  |
| wavelet-LLL | glcm       | DifferenceEntropy                | 5.219880333  |
| wavelet-LLL | glcm       | InverseVariance                  | 0.088672977  |
| wavelet-LLL | glcm       | DifferenceVariance               | 169.8069554  |
| wavelet-LLL | glcm       | Idn                              | 0.873692303  |
| wavelet-LLL | glcm       | Idm                              | 0.085265986  |
| wavelet-LLL | glcm       | Correlation                      | 0.730363326  |
| wavelet-LLL | glcm       | Autocorrelation                  | 3202.673167  |
| wavelet-LLL | glcm       | SumEntropy                       | 7.093005106  |
| wavelet-LLL | glcm       | SumSquares                       | 763.7728114  |
| wavelet-LLL | glcm       | ClusterProminence                | 11880106.5   |
| wavelet-LLL | glcm       | Imc2                             | 0.999128648  |
| wavelet-LLL | glcm       | Imc1                             | -0.502963264 |
| wavelet-LLL | glcm       | DifferenceAverage                | 15.31578797  |
| wavelet-LLL | glcm       | Id                               | 0.154286804  |
| wavelet-LLL | glcm       | ClusterTendency                  | 2643.028193  |
| wavelet-LLL | firstorder | InterquartileRange               | 1257.568203  |
| wavelet-LLL | firstorder | Skewness                         | 0.214684198  |
| wavelet-LLL | firstorder | Uniformity                       | 0.013628588  |
| wavelet-LLL | firstorder | Median                           | -1090.302417 |
| wavelet-LLL | firstorder | Energy                           | 829459112.3  |
| wavelet-LLL | firstorder | RobustMeanAbsoluteDeviation      | 486.6935801  |
| wavelet-LLL | firstorder | MeanAbsoluteDeviation            | 593.3079968  |
| wavelet-LLL | firstorder | TotalEnergy                      | 22395396033  |
| wavelet-LLL | firstorder | Maximum                          | 217.2328507  |
| wavelet-LLL | firstorder | RootMeanSquared                  | 1210.56824   |
| wavelet-LLL | firstorder | 90Percentile                     | -5.812936522 |
| wavelet-LLL | firstorder | Minimum                          | -2163.152974 |
| wavelet-LLL | firstorder | Entropy                          | 6.338265158  |
| wavelet-LLL | firstorder | Range                            | 2380.385825  |
| wavelet-LLL | firstorder | Variance                         | 458072.7558  |
| wavelet-LLL | firstorder | 10Percentile                     | -1838.239082 |
| wavelet-LLL | firstorder | Kurtosis                         | 1.71280712   |
| wavelet-LLL | firstorder | Mean                             | -1003.694529 |
| wavelet-LLL | glrlm      | ShortRunLowGrayLevelEmphasis     | 0.004428185  |
| wavelet-LLL | glrlm      | GrayLevelVariance                | 722.0948967  |
| wavelet-LLL | glrlm      | LowGrayLevelRunEmphasis          | 0.004475225  |
| wavelet-LLL | glrlm      | GrayLevelNonUniformityNormalized | 0.013488331  |
| wavelet-LLL | glrlm      | RunVariance                      | 0.025769032  |
| wavelet-LLL | glrlm      | GrayLevelNonUniformity           | 7.459571908  |
| wavelet-LLL | glrlm      | LongRunEmphasis                  | 1.073716109  |
| wavelet-LLL | glrlm      | ShortRunHighGrayLevelEmphasis    | 2890.771224  |
| wavelet-LLL | glrlm      | RunLengthNonUniformity           | 529.1377513  |
| wavelet-LLL | glrlm      | ShortRunEmphasis                 | 0.983139356  |
| wavelet-LLL | glrlm      | LongRunHighGrayLevelEmphasis     | 3236.362792  |
| wavelet-LLL | glrlm      | RunPercentage                    | 0.977031802  |
| wavelet-LLL | glrlm      | LongRunLowGrayLevelEmphasis      | 0.00468465   |
| wavelet-LLL | glrlm      | RunEntropy                       | 6.433559828  |



|             |       |                                      |              |
|-------------|-------|--------------------------------------|--------------|
| wavelet-LLL | glrlm | HighGrayLevelRunEmphasis             | 2954.653429  |
| wavelet-LLL | glrlm | RunLengthNonUniformityNormalized     | 0.956653613  |
| wavelet-LLL | glszm | GrayLevelVariance                    | 611.9318004  |
| wavelet-LLL | glszm | ZoneVariance                         | 0.922013521  |
| wavelet-LLL | glszm | GrayLevelNonUniformityNormalized     | 0.013159204  |
| wavelet-LLL | glszm | SizeZoneNonUniformityNormalized      | 0.698746917  |
| wavelet-LLL | glszm | SizeZoneNonUniformity                | 305.3524027  |
| wavelet-LLL | glszm | GrayLevelNonUniformity               | 5.750572082  |
| wavelet-LLL | glszm | LargeAreaEmphasis                    | 2.599542334  |
| wavelet-LLL | glszm | SmallAreaHighGrayLevelEmphasis       | 2292.815345  |
| wavelet-LLL | glszm | ZonePercentage                       | 0.772084806  |
| wavelet-LLL | glszm | LargeAreaLowGrayLevelEmphasis        | 0.00873245   |
| wavelet-LLL | glszm | LargeAreaHighGrayLevelEmphasis       | 10159.18078  |
| wavelet-LLL | glszm | HighGrayLevelZoneEmphasis            | 2735.306636  |
| wavelet-LLL | glszm | SmallAreaEmphasis                    | 0.861102141  |
| wavelet-LLL | glszm | LowGrayLevelZoneEmphasis             | 0.004963061  |
| wavelet-LLL | glszm | ZoneEntropy                          | 6.888224007  |
| wavelet-LLL | glszm | SmallAreaLowGrayLevelEmphasis        | 0.004553637  |
| wavelet-LLL | ngtdm | Coarseness                           | 0.014819674  |
| wavelet-LLL | ngtdm | Complexity                           | 29512.90342  |
| wavelet-LLL | ngtdm | Strength                             | 55.00223029  |
| wavelet-LLL | ngtdm | Contrast                             | 1.506856578  |
| wavelet-LLL | ngtdm | Busyness                             | 0.019532155  |
| wavelet-HHL | gldm  | GrayLevelVariance                    | 10.03060658  |
| wavelet-HHL | gldm  | HighGrayLevelEmphasis                | 99.94522968  |
| wavelet-HHL | gldm  | DependenceEntropy                    | 5.86513068   |
| wavelet-HHL | gldm  | DependenceNonUniformity              | 106.6855124  |
| wavelet-HHL | gldm  | GrayLevelNonUniformity               | 54.09893993  |
| wavelet-HHL | gldm  | SmallDependenceEmphasis              | 0.345697333  |
| wavelet-HHL | gldm  | SmallDependenceHighGrayLevelEmphasis | 38.0793728   |
| wavelet-HHL | gldm  | DependenceNonUniformityNormalized    | 0.188490305  |
| wavelet-HHL | gldm  | LargeDependenceEmphasis              | 11.4664311   |
| wavelet-HHL | gldm  | LargeDependenceLowGrayLevelEmphasis  | 0.161051117  |
| wavelet-HHL | gldm  | DependenceVariance                   | 3.009227235  |
| wavelet-HHL | gldm  | LargeDependenceHighGrayLevelEmphasis | 1045.916961  |
| wavelet-HHL | gldm  | SmallDependenceLowGrayLevelEmphasis  | 0.014269517  |
| wavelet-HHL | gldm  | LowGrayLevelEmphasis                 | 0.024048057  |
| wavelet-HHL | glcm  | JointAverage                         | 9.51657517   |
| wavelet-HHL | glcm  | SumAverage                           | 19.03315034  |
| wavelet-HHL | glcm  | JointEntropy                         | 6.999858778  |
| wavelet-HHL | glcm  | ClusterShade                         | 4.855400075  |
| wavelet-HHL | glcm  | MaximumProbability                   | 0.028746786  |
| wavelet-HHL | glcm  | Idmn                                 | 0.957480286  |
| wavelet-HHL | glcm  | JointEnergy                          | 0.010922364  |
| wavelet-HHL | glcm  | Contrast                             | 19.7329333   |
| wavelet-HHL | glcm  | DifferenceEntropy                    | 3.235690862  |
| wavelet-HHL | glcm  | InverseVariance                      | 0.273102705  |
| wavelet-HHL | glcm  | DifferenceVariance                   | 7.895877289  |
| wavelet-HHL | glcm  | Idn                                  | 0.865483317  |
| wavelet-HHL | glcm  | Idm                                  | 0.258112084  |
| wavelet-HHL | glcm  | Correlation                          | -0.009054285 |
| wavelet-HHL | glcm  | Autocorrelation                      | 90.48200299  |
| wavelet-HHL | glcm  | SumEntropy                           | 4.104369103  |
| wavelet-HHL | glcm  | SumSquares                           | 9.782386015  |
| wavelet-HHL | glcm  | ClusterProminence                    | 1360.22217   |

|             |            |                                  |              |
|-------------|------------|----------------------------------|--------------|
| wavelet-HHL | glcm       | Imc2                             | 0.679973913  |
| wavelet-HHL | glcm       | Imc1                             | -0.086328488 |
| wavelet-HHL | glcm       | DifferenceAverage                | 3.414851151  |
| wavelet-HHL | glcm       | Id                               | 0.347572763  |
| wavelet-HHL | glcm       | ClusterTendency                  | 19.39661076  |
| wavelet-HHL | firstorder | InterquartileRange               | 95.15186493  |
| wavelet-HHL | firstorder | Skewness                         | 0.155067143  |
| wavelet-HHL | firstorder | Uniformity                       | 0.095581166  |
| wavelet-HHL | firstorder | Median                           | -3.443314039 |
| wavelet-HHL | firstorder | Energy                           | 3562719.271  |
| wavelet-HHL | firstorder | RobustMeanAbsoluteDeviation      | 40.3358992   |
| wavelet-HHL | firstorder | MeanAbsoluteDeviation            | 61.16540452  |
| wavelet-HHL | firstorder | TotalEnergy                      | 96193420.32  |
| wavelet-HHL | firstorder | Maximum                          | 256.4793028  |
| wavelet-HHL | firstorder | RootMeanSquared                  | 79.33824435  |
| wavelet-HHL | firstorder | 90Percentile                     | 95.94122109  |
| wavelet-HHL | firstorder | Minimum                          | -222.4694377 |
| wavelet-HHL | firstorder | Entropy                          | 3.674902138  |
| wavelet-HHL | firstorder | Range                            | 478.9487405  |
| wavelet-HHL | firstorder | Variance                         | 6294.053332  |
| wavelet-HHL | firstorder | 10Percentile                     | -96.08270615 |
| wavelet-HHL | firstorder | Kurtosis                         | 3.418185972  |
| wavelet-HHL | firstorder | Mean                             | -0.709707471 |
| wavelet-HHL | glrlm      | ShortRunLowGrayLevelEmphasis     | 0.024124181  |
| wavelet-HHL | glrlm      | GrayLevelVariance                | 10.5180861   |
| wavelet-HHL | glrlm      | LowGrayLevelRunEmphasis          | 0.024879109  |
| wavelet-HHL | glrlm      | GrayLevelNonUniformityNormalized | 0.09229617   |
| wavelet-HHL | glrlm      | RunVariance                      | 0.089703829  |
| wavelet-HHL | glrlm      | GrayLevelNonUniformity           | 48.40732604  |
| wavelet-HHL | glrlm      | LongRunEmphasis                  | 1.255003309  |
| wavelet-HHL | glrlm      | ShortRunHighGrayLevelEmphasis    | 95.48990156  |
| wavelet-HHL | glrlm      | RunLengthNonUniformity           | 454.2032651  |
| wavelet-HHL | glrlm      | ShortRunEmphasis                 | 0.945053608  |
| wavelet-HHL | glrlm      | LongRunHighGrayLevelEmphasis     | 124.1299629  |
| wavelet-HHL | glrlm      | RunPercentage                    | 0.926610492  |
| wavelet-HHL | glrlm      | LongRunLowGrayLevelEmphasis      | 0.02831071   |
| wavelet-HHL | glrlm      | RunEntropy                       | 4.070757057  |
| wavelet-HHL | glrlm      | HighGrayLevelRunEmphasis         | 100.5522417  |
| wavelet-HHL | glrlm      | RunLengthNonUniformityNormalized | 0.865771526  |
| wavelet-HHL | glszm      | GrayLevelVariance                | 19.08407268  |
| wavelet-HHL | glszm      | ZoneVariance                     | 40.30201478  |
| wavelet-HHL | glszm      | GrayLevelNonUniformityNormalized | 0.06632825   |
| wavelet-HHL | glszm      | SizeZoneNonUniformityNormalized  | 0.479796051  |
| wavelet-HHL | glszm      | SizeZoneNonUniformity            | 101.2369668  |
| wavelet-HHL | glszm      | GrayLevelNonUniformity           | 13.99526066  |
| wavelet-HHL | glszm      | LargeAreaEmphasis                | 47.49763033  |
| wavelet-HHL | glszm      | SmallAreaHighGrayLevelEmphasis   | 81.92440603  |
| wavelet-HHL | glszm      | ZonePercentage                   | 0.372791519  |
| wavelet-HHL | glszm      | LargeAreaLowGrayLevelEmphasis    | 0.63426951   |
| wavelet-HHL | glszm      | LargeAreaHighGrayLevelEmphasis   | 4050.563981  |
| wavelet-HHL | glszm      | HighGrayLevelZoneEmphasis        | 109.4691943  |
| wavelet-HHL | glszm      | SmallAreaEmphasis                | 0.719202846  |
| wavelet-HHL | glszm      | LowGrayLevelZoneEmphasis         | 0.040767828  |
| wavelet-HHL | glszm      | ZoneEntropy                      | 5.407317666  |
| wavelet-HHL | glszm      | SmallAreaLowGrayLevelEmphasis    | 0.034967246  |

|             |            |                                      |              |
|-------------|------------|--------------------------------------|--------------|
| wavelet-HHL | ngtdm      | Coarseness                           | 0.01166624   |
| wavelet-HHL | ngtdm      | Complexity                           | 375.5090871  |
| wavelet-HHL | ngtdm      | Strength                             | 1.255360484  |
| wavelet-HHL | ngtdm      | Contrast                             | 0.131707877  |
| wavelet-HHL | ngtdm      | Busyness                             | 0.426200098  |
| wavelet-HLH | gldm       | GrayLevelVariance                    | 10.37574761  |
| wavelet-HLH | gldm       | HighGrayLevelEmphasis                | 144.2561837  |
| wavelet-HLH | gldm       | DependenceEntropy                    | 6.077853801  |
| wavelet-HLH | gldm       | DependenceNonUniformity              | 92.78798587  |
| wavelet-HLH | gldm       | GrayLevelNonUniformity               | 58.06713781  |
| wavelet-HLH | gldm       | SmallDependenceEmphasis              | 0.306932275  |
| wavelet-HLH | gldm       | SmallDependenceHighGrayLevelEmphasis | 49.64244021  |
| wavelet-HLH | gldm       | DependenceNonUniformityNormalized    | 0.163936371  |
| wavelet-HLH | gldm       | LargeDependenceEmphasis              | 16.11660777  |
| wavelet-HLH | gldm       | LargeDependenceLowGrayLevelEmphasis  | 0.136468527  |
| wavelet-HLH | gldm       | DependenceVariance                   | 4.918952665  |
| wavelet-HLH | gldm       | LargeDependenceHighGrayLevelEmphasis | 2143.111307  |
| wavelet-HLH | gldm       | SmallDependenceLowGrayLevelEmphasis  | 0.006679718  |
| wavelet-HLH | gldm       | LowGrayLevelEmphasis                 | 0.012671924  |
| wavelet-HLH | glcm       | JointAverage                         | 11.53991376  |
| wavelet-HLH | glcm       | SumAverage                           | 23.07982753  |
| wavelet-HLH | glcm       | JointEntropy                         | 6.879147202  |
| wavelet-HLH | glcm       | ClusterShade                         | 20.57996194  |
| wavelet-HLH | glcm       | MaximumProbability                   | 0.032202966  |
| wavelet-HLH | glcm       | Idmn                                 | 0.975344945  |
| wavelet-HLH | glcm       | JointEnergy                          | 0.012614472  |
| wavelet-HLH | glcm       | Contrast                             | 20.1107783   |
| wavelet-HLH | glcm       | DifferenceEntropy                    | 3.227125077  |
| wavelet-HLH | glcm       | InverseVariance                      | 0.279724101  |
| wavelet-HLH | glcm       | DifferenceVariance                   | 9.003445457  |
| wavelet-HLH | glcm       | Idn                                  | 0.89911555   |
| wavelet-HLH | glcm       | Idm                                  | 0.283170312  |
| wavelet-HLH | glcm       | Correlation                          | -0.00372127  |
| wavelet-HLH | glcm       | Autocorrelation                      | 133.1397345  |
| wavelet-HLH | glcm       | SumEntropy                           | 4.081385104  |
| wavelet-HLH | glcm       | SumSquares                           | 10.02511961  |
| wavelet-HLH | glcm       | ClusterProminence                    | 1923.173809  |
| wavelet-HLH | glcm       | Imc2                                 | 0.735891697  |
| wavelet-HLH | glcm       | Imc1                                 | -0.108846053 |
| wavelet-HLH | glcm       | DifferenceAverage                    | 3.296153591  |
| wavelet-HLH | glcm       | Id                                   | 0.369032026  |
| wavelet-HLH | glcm       | ClusterTendency                      | 19.98970015  |
| wavelet-HLH | firstorder | InterquartileRange                   | 88.0804292   |
| wavelet-HLH | firstorder | Skewness                             | 0.313303762  |
| wavelet-HLH | firstorder | Uniformity                           | 0.102592116  |
| wavelet-HLH | firstorder | Median                               | -1.396053687 |
| wavelet-HLH | firstorder | Energy                               | 3645487.905  |
| wavelet-HLH | firstorder | RobustMeanAbsoluteDeviation          | 37.30445259  |
| wavelet-HLH | firstorder | MeanAbsoluteDeviation                | 59.27338186  |
| wavelet-HLH | firstorder | TotalEnergy                          | 98428173.43  |
| wavelet-HLH | firstorder | Maximum                              | 379.5346428  |
| wavelet-HLH | firstorder | RootMeanSquared                      | 80.254541    |
| wavelet-HLH | firstorder | 90Percentile                         | 90.04345548  |
| wavelet-HLH | firstorder | Minimum                              | -250.2612834 |
| wavelet-HLH | firstorder | Entropy                              | 3.644968485  |

|             |            |                                  |              |
|-------------|------------|----------------------------------|--------------|
| wavelet-HLH | firstorder | Range                            | 629.7959261  |
| wavelet-HLH | firstorder | Variance                         | 6437.247941  |
| wavelet-HLH | firstorder | 10Percentile                     | -88.98260014 |
| wavelet-HLH | firstorder | Kurtosis                         | 4.872124728  |
| wavelet-HLH | firstorder | Mean                             | 1.882394677  |
| wavelet-HLH | glrlm      | ShortRunLowGrayLevelEmphasis     | 0.012544048  |
| wavelet-HLH | glrlm      | GrayLevelVariance                | 11.06866235  |
| wavelet-HLH | glrlm      | LowGrayLevelRunEmphasis          | 0.013106224  |
| wavelet-HLH | glrlm      | GrayLevelNonUniformityNormalized | 0.098183152  |
| wavelet-HLH | glrlm      | RunVariance                      | 0.117885783  |
| wavelet-HLH | glrlm      | GrayLevelNonUniformity           | 50.56202957  |
| wavelet-HLH | glrlm      | LongRunEmphasis                  | 1.328176937  |
| wavelet-HLH | glrlm      | ShortRunHighGrayLevelEmphasis    | 136.1817847  |
| wavelet-HLH | glrlm      | RunLengthNonUniformity           | 432.4132338  |
| wavelet-HLH | glrlm      | ShortRunEmphasis                 | 0.932641746  |
| wavelet-HLH | glrlm      | LongRunHighGrayLevelEmphasis     | 189.1631082  |
| wavelet-HLH | glrlm      | RunPercentage                    | 0.909758086  |
| wavelet-HLH | glrlm      | LongRunLowGrayLevelEmphasis      | 0.015830289  |
| wavelet-HLH | glrlm      | RunEntropy                       | 4.123196233  |
| wavelet-HLH | glrlm      | HighGrayLevelRunEmphasis         | 145.2569023  |
| wavelet-HLH | glrlm      | RunLengthNonUniformityNormalized | 0.83896019   |
| wavelet-HLH | glszm      | GrayLevelVariance                | 22.67289993  |
| wavelet-HLH | glszm      | ZoneVariance                     | 70.60727538  |
| wavelet-HLH | glszm      | GrayLevelNonUniformityNormalized | 0.060978817  |
| wavelet-HLH | glszm      | SizeZoneNonUniformityNormalized  | 0.476464573  |
| wavelet-HLH | glszm      | SizeZoneNonUniformity            | 88.14594595  |
| wavelet-HLH | glszm      | GrayLevelNonUniformity           | 11.28108108  |
| wavelet-HLH | glszm      | LargeAreaEmphasis                | 79.96756757  |
| wavelet-HLH | glszm      | SmallAreaHighGrayLevelEmphasis   | 120.5993647  |
| wavelet-HLH | glszm      | ZonePercentage                   | 0.326855124  |
| wavelet-HLH | glszm      | LargeAreaLowGrayLevelEmphasis    | 0.657515058  |
| wavelet-HLH | glszm      | LargeAreaHighGrayLevelEmphasis   | 10372.42703  |
| wavelet-HLH | glszm      | HighGrayLevelZoneEmphasis        | 160.2594595  |
| wavelet-HLH | glszm      | SmallAreaEmphasis                | 0.715217783  |
| wavelet-HLH | glszm      | LowGrayLevelZoneEmphasis         | 0.021345409  |
| wavelet-HLH | glszm      | ZoneEntropy                      | 5.517336807  |
| wavelet-HLH | glszm      | SmallAreaLowGrayLevelEmphasis    | 0.018444194  |
| wavelet-HLH | ngtdm      | Coarseness                       | 0.011490108  |
| wavelet-HLH | ngtdm      | Complexity                       | 567.2220779  |
| wavelet-HLH | ngtdm      | Strength                         | 2.167367283  |
| wavelet-HLH | ngtdm      | Contrast                         | 0.092138949  |
| wavelet-HLH | ngtdm      | Busyness                         | 0.255626635  |

| Image type | Feature Class | Feature Name                         |                                                                                                                                                                                                                                                                                                                                                                                                                   |
|------------|---------------|--------------------------------------|-------------------------------------------------------------------------------------------------------------------------------------------------------------------------------------------------------------------------------------------------------------------------------------------------------------------------------------------------------------------------------------------------------------------|
| general    | info          | BoundingBox                          | 5: RTSTRUCT: C99-DNU_segment_GTV CT sim<br>(1, 0, 1, 7, 7, 5)                                                                                                                                                                                                                                                                                                                                                     |
| general    | info          | EnabledImageTypes                    | {u'Original': {}, u'Wavelet': {}}                                                                                                                                                                                                                                                                                                                                                                                 |
|            |               |                                      | {'distances': [1], 'additionalInfo': True, 'force2D': False, 'interpolator': 'sitkBSpline', 'resampledPixelSpacing': [3.0], 'label': 1, 'normalizeScale': 1, 'normalize': False, 'force2Ddimension': 0, 'removeOutliers': None, 'minimumROISize': None, u'binWidth': 25.0, 'minimumROIDimensions': 1, u'correctMask': True, 'preCrop': False, u'symmetricalGLCM': True, 'resegmentRange': None, 'padDistance': 5} |
| general    | info          | GeneralSettings                      |                                                                                                                                                                                                                                                                                                                                                                                                                   |
| general    | info          | ImageHash                            | f92f62318e858b7e5162ce4d8710fed21652652b                                                                                                                                                                                                                                                                                                                                                                          |
| general    | info          | ImageSpacing                         | (0.9765625000000002, 0.9765625000000002, 2.0)                                                                                                                                                                                                                                                                                                                                                                     |
| general    | info          | MaskHash                             | 0a3c8f6bcebdc54cebdeab45630d03b1bc9ba347                                                                                                                                                                                                                                                                                                                                                                          |
| general    | info          | NumpyVersion                         | 1.13.1                                                                                                                                                                                                                                                                                                                                                                                                            |
| general    | info          | PyWaveletVersion                     | 0.5.2                                                                                                                                                                                                                                                                                                                                                                                                             |
| general    | info          | SimpleITKVersion                     | 1.1.0                                                                                                                                                                                                                                                                                                                                                                                                             |
| general    | info          | Version                              | 1.3.0.post102+g1b0eb74                                                                                                                                                                                                                                                                                                                                                                                            |
| general    | info          | VolumeNum                            | 1                                                                                                                                                                                                                                                                                                                                                                                                                 |
| general    | info          | VoxelNum                             | 122                                                                                                                                                                                                                                                                                                                                                                                                               |
| original   | shape         | Maximum3DDiameter                    | 20.34698995                                                                                                                                                                                                                                                                                                                                                                                                       |
| original   | shape         | Maximum2DDiameterSlice               | 18.97366596                                                                                                                                                                                                                                                                                                                                                                                                       |
| original   | shape         | Sphericity                           | 0.904057667                                                                                                                                                                                                                                                                                                                                                                                                       |
| original   | shape         | MinorAxis                            | 16.98147437                                                                                                                                                                                                                                                                                                                                                                                                       |
| original   | shape         | Elongation                           | 0.860450008                                                                                                                                                                                                                                                                                                                                                                                                       |
| original   | shape         | SurfaceVolumeRatio                   | 0.359512057                                                                                                                                                                                                                                                                                                                                                                                                       |
| original   | shape         | Volume                               | 3294                                                                                                                                                                                                                                                                                                                                                                                                              |
| original   | shape         | MajorAxis                            | 19.7355735                                                                                                                                                                                                                                                                                                                                                                                                        |
| original   | shape         | SurfaceArea                          | 1184.232714                                                                                                                                                                                                                                                                                                                                                                                                       |
| original   | shape         | Flatness                             | 0.700437561                                                                                                                                                                                                                                                                                                                                                                                                       |
| original   | shape         | LeastAxis                            | 13.82353696                                                                                                                                                                                                                                                                                                                                                                                                       |
| original   | shape         | Maximum2DDiameterColumn              | 20.1246118                                                                                                                                                                                                                                                                                                                                                                                                        |
| original   | shape         | Maximum2DDiameterRow                 | 20.1246118                                                                                                                                                                                                                                                                                                                                                                                                        |
| original   | gldm          | GrayLevelVariance                    | 163.5608707                                                                                                                                                                                                                                                                                                                                                                                                       |
| original   | gldm          | HighGrayLevelEmphasis                | 977.2131148                                                                                                                                                                                                                                                                                                                                                                                                       |
| original   | gldm          | DependenceEntropy                    | 5.700908649                                                                                                                                                                                                                                                                                                                                                                                                       |
| original   | gldm          | DependenceNonUniformity              | 37.47540984                                                                                                                                                                                                                                                                                                                                                                                                       |
| original   | gldm          | GrayLevelNonUniformity               | 8.295081967                                                                                                                                                                                                                                                                                                                                                                                                       |
| original   | gldm          | SmallDependenceEmphasis              | 0.568743949                                                                                                                                                                                                                                                                                                                                                                                                       |
| original   | gldm          | SmallDependenceHighGrayLevelEmphasis | 346.9453575                                                                                                                                                                                                                                                                                                                                                                                                       |
| original   | gldm          | DependenceNonUniformityNormalized    | 0.30717549                                                                                                                                                                                                                                                                                                                                                                                                        |
| original   | gldm          | LargeDependenceEmphasis              | 15.98360656                                                                                                                                                                                                                                                                                                                                                                                                       |
| original   | gldm          | LargeDependenceLowGrayLevelEmphasis  | 0.025866105                                                                                                                                                                                                                                                                                                                                                                                                       |
| original   | gldm          | DependenceVariance                   | 7.372749261                                                                                                                                                                                                                                                                                                                                                                                                       |
| original   | gldm          | LargeDependenceHighGrayLevelEmphasis | 24526.4918                                                                                                                                                                                                                                                                                                                                                                                                        |
| original   | gldm          | SmallDependenceLowGrayLevelEmphasis  | 0.015760215                                                                                                                                                                                                                                                                                                                                                                                                       |
| original   | gldm          | LowGrayLevelEmphasis                 | 0.01610723                                                                                                                                                                                                                                                                                                                                                                                                        |
| original   | glcm          | JointAverage                         | 31.18536697                                                                                                                                                                                                                                                                                                                                                                                                       |
| original   | glcm          | SumAverage                           | 62.37073393                                                                                                                                                                                                                                                                                                                                                                                                       |
| original   | glcm          | JointEntropy                         | 6.400295959                                                                                                                                                                                                                                                                                                                                                                                                       |
| original   | glcm          | ClusterShade                         | -6568.988989                                                                                                                                                                                                                                                                                                                                                                                                      |
| original   | glcm          | MaximumProbability                   | 0.066011473                                                                                                                                                                                                                                                                                                                                                                                                       |

|          |            |                                  |              |
|----------|------------|----------------------------------|--------------|
| original | glcm       | Idmn                             | 0.916403106  |
| original | glcm       | JointEnergy                      | 0.017852302  |
| original | glcm       | Contrast                         | 202.3501865  |
| original | glcm       | DifferenceEntropy                | 4.29961017   |
| original | glcm       | InverseVariance                  | 0.202110379  |
| original | glcm       | DifferenceVariance               | 103.6551116  |
| original | glcm       | Idn                              | 0.838053519  |
| original | glcm       | Idm                              | 0.227205782  |
| original | glcm       | Correlation                      | 0.271726419  |
| original | glcm       | Autocorrelation                  | 1011.739714  |
| original | glcm       | SumEntropy                       | 4.944842818  |
| original | glcm       | SumSquares                       | 139.9874191  |
| original | glcm       | ClusterProminence                | 388241.9091  |
| original | glcm       | Imc2                             | 0.987888788  |
| original | glcm       | Imc1                             | -0.45598782  |
| original | glcm       | DifferenceAverage                | 9.85177718   |
| original | glcm       | Id                               | 0.286651595  |
| original | glcm       | ClusterTendency                  | 357.5994898  |
| original | firstorder | InterquartileRange               | 584.5        |
| original | firstorder | Skewness                         | -0.705390845 |
| original | firstorder | Uniformity                       | 0.067992475  |
| original | firstorder | Median                           | -133         |
| original | firstorder | Energy                           | 20105193     |
| original | firstorder | RobustMeanAbsoluteDeviation      | 225.7693698  |
| original | firstorder | MeanAbsoluteDeviation            | 280.1474066  |
| original | firstorder | TotalEnergy                      | 542840211    |
| original | firstorder | Maximum                          | 96           |
| original | firstorder | RootMeanSquared                  | 405.9515537  |
| original | firstorder | 90Percentile                     | 49           |
| original | firstorder | Minimum                          | -928         |
| original | firstorder | Entropy                          | 4.519311822  |
| original | firstorder | Range                            | 1024         |
| original | firstorder | Variance                         | 102276.1705  |
| original | firstorder | 10Percentile                     | -757.1       |
| original | firstorder | Kurtosis                         | 2.006695128  |
| original | firstorder | Mean                             | -250.0409836 |
| original | glrlm      | ShortRunLowGrayLevelEmphasis     | 0.017317291  |
| original | glrlm      | GrayLevelVariance                | 166.005281   |
| original | glrlm      | LowGrayLevelRunEmphasis          | 0.017354916  |
| original | glrlm      | GrayLevelNonUniformityNormalized | 0.057659605  |
| original | glrlm      | RunVariance                      | 0.098695061  |
| original | glrlm      | GrayLevelNonUniformity           | 6.516828143  |
| original | glrlm      | LongRunEmphasis                  | 1.267580265  |
| original | glrlm      | ShortRunHighGrayLevelEmphasis    | 846.9813018  |
| original | glrlm      | RunLengthNonUniformity           | 98.03324761  |
| original | glrlm      | ShortRunEmphasis                 | 0.945450009  |
| original | glrlm      | LongRunHighGrayLevelEmphasis     | 1345.547867  |
| original | glrlm      | RunPercentage                    | 0.925598991  |
| original | glrlm      | LongRunLowGrayLevelEmphasis      | 0.017536835  |
| original | glrlm      | RunEntropy                       | 4.886168759  |
| original | glrlm      | HighGrayLevelRunEmphasis         | 931.158674   |
| original | glrlm      | RunLengthNonUniformityNormalized | 0.867477918  |
| original | glszm      | GrayLevelVariance                | 149.6844136  |
| original | glszm      | ZoneVariance                     | 9.156635802  |
| original | glszm      | GrayLevelNonUniformityNormalized | 0.03433642   |
| original | glszm      | SizeZoneNonUniformityNormalized  | 0.793981481  |

|             |            |                                      |              |
|-------------|------------|--------------------------------------|--------------|
| original    | glszm      | SizeZoneNonUniformity                | 57.16666667  |
| original    | glszm      | GrayLevelNonUniformity               | 2.472222222  |
| original    | glszm      | LargeAreaEmphasis                    | 12.02777778  |
| original    | glszm      | SmallAreaHighGrayLevelEmphasis       | 507.7940993  |
| original    | glszm      | ZonePercentage                       | 0.590163934  |
| original    | glszm      | LargeAreaLowGrayLevelEmphasis        | 0.034035257  |
| original    | glszm      | LargeAreaHighGrayLevelEmphasis       | 17804.11111  |
| original    | glszm      | HighGrayLevelZoneEmphasis            | 620.3333333  |
| original    | glszm      | SmallAreaEmphasis                    | 0.903636095  |
| original    | glszm      | LowGrayLevelZoneEmphasis             | 0.026767495  |
| original    | glszm      | ZoneEntropy                          | 5.155764585  |
| original    | glszm      | SmallAreaLowGrayLevelEmphasis        | 0.026645797  |
| original    | ngtdm      | Coarseness                           | 0.019119842  |
| original    | ngtdm      | Complexity                           | 5433.254844  |
| original    | ngtdm      | Strength                             | 25.79437117  |
| original    | ngtdm      | Contrast                             | 2.250776706  |
| original    | ngtdm      | Busyness                             | 0.040019104  |
| wavelet-HHH | gldm       | GrayLevelVariance                    | 18.22547702  |
| wavelet-HHH | gldm       | HighGrayLevelEmphasis                | 293.4590164  |
| wavelet-HHH | gldm       | DependenceEntropy                    | 5.418911698  |
| wavelet-HHH | gldm       | DependenceNonUniformity              | 26.52459016  |
| wavelet-HHH | gldm       | GrayLevelNonUniformity               | 11.73770492  |
| wavelet-HHH | gldm       | SmallDependenceEmphasis              | 0.42627235   |
| wavelet-HHH | gldm       | SmallDependenceHighGrayLevelEmphasis | 124.8137032  |
| wavelet-HHH | gldm       | DependenceNonUniformityNormalized    | 0.217414673  |
| wavelet-HHH | gldm       | LargeDependenceEmphasis              | 10.26229508  |
| wavelet-HHH | gldm       | LargeDependenceLowGrayLevelEmphasis  | 0.047320914  |
| wavelet-HHH | gldm       | DependenceVariance                   | 3.122010212  |
| wavelet-HHH | gldm       | LargeDependenceHighGrayLevelEmphasis | 2895.360656  |
| wavelet-HHH | gldm       | SmallDependenceLowGrayLevelEmphasis  | 0.010709628  |
| wavelet-HHH | gldm       | LowGrayLevelEmphasis                 | 0.012897219  |
| wavelet-HHH | glcm       | JointAverage                         | 16.59562085  |
| wavelet-HHH | glcm       | SumAverage                           | 33.19124169  |
| wavelet-HHH | glcm       | JointEntropy                         | 6.328755778  |
| wavelet-HHH | glcm       | ClusterShade                         | -5.714191047 |
| wavelet-HHH | glcm       | MaximumProbability                   | 0.049949777  |
| wavelet-HHH | glcm       | ldmn                                 | 0.963653628  |
| wavelet-HHH | glcm       | JointEnergy                          | 0.015978624  |
| wavelet-HHH | glcm       | Contrast                             | 39.00468713  |
| wavelet-HHH | glcm       | DifferenceEntropy                    | 3.466249793  |
| wavelet-HHH | glcm       | InverseVariance                      | 0.234858557  |
| wavelet-HHH | glcm       | DifferenceVariance                   | 18.95186927  |
| wavelet-HHH | glcm       | ldn                                  | 0.882555301  |
| wavelet-HHH | glcm       | ldm                                  | 0.239403328  |
| wavelet-HHH | glcm       | Correlation                          | -0.036327614 |
| wavelet-HHH | glcm       | Autocorrelation                      | 274.721817   |
| wavelet-HHH | glcm       | SumEntropy                           | 4.15760552   |
| wavelet-HHH | glcm       | SumSquares                           | 18.79744567  |
| wavelet-HHH | glcm       | ClusterProminence                    | 6903.818855  |
| wavelet-HHH | glcm       | lmc2                                 | 0.952521416  |
| wavelet-HHH | glcm       | lmc1                                 | -0.32025641  |
| wavelet-HHH | glcm       | DifferenceAverage                    | 4.458765345  |
| wavelet-HHH | glcm       | ld                                   | 0.326139098  |
| wavelet-HHH | glcm       | ClusterTendency                      | 36.18509555  |
| wavelet-HHH | firstorder | InterquartileRange                   | 94.13719948  |
| wavelet-HHH | firstorder | Skewness                             | -0.001228957 |

|             |            |                                  |              |
|-------------|------------|----------------------------------|--------------|
| wavelet-HHH | firstorder | Uniformity                       | 0.096210696  |
| wavelet-HHH | firstorder | Median                           | 0.794491965  |
| wavelet-HHH | firstorder | Energy                           | 1371847.91   |
| wavelet-HHH | firstorder | RobustMeanAbsoluteDeviation      | 39.42592724  |
| wavelet-HHH | firstorder | MeanAbsoluteDeviation            | 72.06073899  |
| wavelet-HHH | firstorder | TotalEnergy                      | 37039893.57  |
| wavelet-HHH | firstorder | Maximum                          | 336.0793646  |
| wavelet-HHH | firstorder | RootMeanSquared                  | 106.0408176  |
| wavelet-HHH | firstorder | 90Percentile                     | 107.2262783  |
| wavelet-HHH | firstorder | Minimum                          | -391.3024445 |
| wavelet-HHH | firstorder | Entropy                          | 3.771844375  |
| wavelet-HHH | firstorder | Range                            | 727.3818091  |
| wavelet-HHH | firstorder | Variance                         | 11236.6093   |
| wavelet-HHH | firstorder | 10Percentile                     | -109.5827751 |
| wavelet-HHH | firstorder | Kurtosis                         | 5.650357626  |
| wavelet-HHH | firstorder | Mean                             | 2.836495164  |
| wavelet-HHH | glrlm      | ShortRunLowGrayLevelEmphasis     | 0.013343486  |
| wavelet-HHH | glrlm      | GrayLevelVariance                | 19.13680621  |
| wavelet-HHH | glrlm      | LowGrayLevelRunEmphasis          | 0.01353047   |
| wavelet-HHH | glrlm      | GrayLevelNonUniformityNormalized | 0.091402466  |
| wavelet-HHH | glrlm      | RunVariance                      | 0.07219614   |
| wavelet-HHH | glrlm      | GrayLevelNonUniformity           | 10.43615354  |
| wavelet-HHH | glrlm      | LongRunEmphasis                  | 1.21603129   |
| wavelet-HHH | glrlm      | ShortRunHighGrayLevelEmphasis    | 279.8963024  |
| wavelet-HHH | glrlm      | RunLengthNonUniformity           | 100.2827615  |
| wavelet-HHH | glrlm      | ShortRunEmphasis                 | 0.950237616  |
| wavelet-HHH | glrlm      | LongRunHighGrayLevelEmphasis     | 355.4947328  |
| wavelet-HHH | glrlm      | RunPercentage                    | 0.935687264  |
| wavelet-HHH | glrlm      | LongRunLowGrayLevelEmphasis      | 0.014339911  |
| wavelet-HHH | glrlm      | RunEntropy                       | 4.07430705   |
| wavelet-HHH | glrlm      | HighGrayLevelRunEmphasis         | 294.0750991  |
| wavelet-HHH | glrlm      | RunLengthNonUniformityNormalized | 0.87773315   |
| wavelet-HHH | glszm      | GrayLevelVariance                | 29.70698075  |
| wavelet-HHH | glszm      | ZoneVariance                     | 8.33438667   |
| wavelet-HHH | glszm      | GrayLevelNonUniformityNormalized | 0.068083884  |
| wavelet-HHH | glszm      | SizeZoneNonUniformityNormalized  | 0.514507325  |
| wavelet-HHH | glszm      | SizeZoneNonUniformity            | 30.3559322   |
| wavelet-HHH | glszm      | GrayLevelNonUniformity           | 4.016949153  |
| wavelet-HHH | glszm      | LargeAreaEmphasis                | 12.61016949  |
| wavelet-HHH | glszm      | SmallAreaHighGrayLevelEmphasis   | 217.3952971  |
| wavelet-HHH | glszm      | ZonePercentage                   | 0.483606557  |
| wavelet-HHH | glszm      | LargeAreaLowGrayLevelEmphasis    | 0.066579183  |
| wavelet-HHH | glszm      | LargeAreaHighGrayLevelEmphasis   | 3488.338983  |
| wavelet-HHH | glszm      | HighGrayLevelZoneEmphasis        | 301.1186441  |
| wavelet-HHH | glszm      | SmallAreaEmphasis                | 0.743602218  |
| wavelet-HHH | glszm      | LowGrayLevelZoneEmphasis         | 0.02255873   |
| wavelet-HHH | glszm      | ZoneEntropy                      | 4.916209998  |
| wavelet-HHH | glszm      | SmallAreaLowGrayLevelEmphasis    | 0.021592309  |
| wavelet-HHH | ngtdm      | Coarseness                       | 0.053983129  |
| wavelet-HHH | ngtdm      | Complexity                       | 645.1826417  |
| wavelet-HHH | ngtdm      | Strength                         | 8.880580677  |
| wavelet-HHH | ngtdm      | Contrast                         | 0.246259514  |
| wavelet-HHH | ngtdm      | Busyness                         | 0.046170739  |
| wavelet-HLL | gldm       | GrayLevelVariance                | 157.408022   |
| wavelet-HLL | gldm       | HighGrayLevelEmphasis            | 849.2704918  |
| wavelet-HLL | gldm       | DependenceEntropy                | 5.735544407  |



|             |            |                                      |              |
|-------------|------------|--------------------------------------|--------------|
| wavelet-HLL | gldm       | DependenceNonUniformity              | 64.50819672  |
| wavelet-HLL | gldm       | GrayLevelNonUniformity               | 3.508196721  |
| wavelet-HLL | gldm       | SmallDependenceEmphasis              | 0.75         |
| wavelet-HLL | gldm       | SmallDependenceHighGrayLevelEmphasis | 609.1106557  |
| wavelet-HLL | gldm       | DependenceNonUniformityNormalized    | 0.528755711  |
| wavelet-HLL | gldm       | LargeDependenceEmphasis              | 2.327868852  |
| wavelet-HLL | gldm       | LargeDependenceLowGrayLevelEmphasis  | 0.014672397  |
| wavelet-HLL | gldm       | DependenceVariance                   | 0.386186509  |
| wavelet-HLL | gldm       | LargeDependenceHighGrayLevelEmphasis | 2179.745902  |
| wavelet-HLL | gldm       | SmallDependenceLowGrayLevelEmphasis  | 0.01140365   |
| wavelet-HLL | gldm       | LowGrayLevelEmphasis                 | 0.011939495  |
| wavelet-HLL | glcm       | JointAverage                         | 25.35974685  |
| wavelet-HLL | glcm       | SumAverage                           | 50.7194937   |
| wavelet-HLL | glcm       | JointEntropy                         | 7.127966366  |
| wavelet-HLL | glcm       | ClusterShade                         | 4579.998296  |
| wavelet-HLL | glcm       | MaximumProbability                   | 0.015066901  |
| wavelet-HLL | glcm       | ldmn                                 | 0.94486992   |
| wavelet-HLL | glcm       | JointEnergy                          | 0.007487058  |
| wavelet-HLL | glcm       | Contrast                             | 188.8705664  |
| wavelet-HLL | glcm       | DifferenceEntropy                    | 4.375286507  |
| wavelet-HLL | glcm       | InverseVariance                      | 0.090995585  |
| wavelet-HLL | glcm       | DifferenceVariance                   | 56.38717282  |
| wavelet-HLL | glcm       | ldn                                  | 0.842173993  |
| wavelet-HLL | glcm       | ldm                                  | 0.079208358  |
| wavelet-HLL | glcm       | Correlation                          | 0.314002884  |
| wavelet-HLL | glcm       | Autocorrelation                      | 689.3951143  |
| wavelet-HLL | glcm       | SumEntropy                           | 5.343526871  |
| wavelet-HLL | glcm       | SumSquares                           | 140.5789465  |
| wavelet-HLL | glcm       | ClusterProminence                    | 397793.9093  |
| wavelet-HLL | glcm       | lmc2                                 | 0.999214267  |
| wavelet-HLL | glcm       | lmc1                                 | -0.624878136 |
| wavelet-HLL | glcm       | DifferenceAverage                    | 11.05128638  |
| wavelet-HLL | glcm       | ld                                   | 0.157306906  |
| wavelet-HLL | glcm       | ClusterTendency                      | 373.4452195  |
| wavelet-HLL | firstorder | InterquartileRange                   | 424.4634669  |
| wavelet-HLL | firstorder | Skewness                             | 0.370372093  |
| wavelet-HLL | firstorder | Uniformity                           | 0.028755711  |
| wavelet-HLL | firstorder | Median                               | -113.7040621 |
| wavelet-HLL | firstorder | Energy                               | 12807173.98  |
| wavelet-HLL | firstorder | RobustMeanAbsoluteDeviation          | 181.8999202  |
| wavelet-HLL | firstorder | MeanAbsoluteDeviation                | 256.373659   |
| wavelet-HLL | firstorder | TotalEnergy                          | 345793697.5  |
| wavelet-HLL | firstorder | Maximum                              | 602.9299398  |
| wavelet-HLL | firstorder | RootMeanSquared                      | 324.00129    |
| wavelet-HLL | firstorder | 90Percentile                         | 413.5414589  |
| wavelet-HLL | firstorder | Minimum                              | -720.5846128 |
| wavelet-HLL | firstorder | Entropy                              | 5.297363162  |
| wavelet-HLL | firstorder | Range                                | 1323.514553  |
| wavelet-HLL | firstorder | Variance                             | 98433.14066  |
| wavelet-HLL | firstorder | 10Percentile                         | -457.0407608 |
| wavelet-HLL | firstorder | Kurtosis                             | 2.385798695  |
| wavelet-HLL | firstorder | Mean                                 | -80.89310997 |
| wavelet-HLL | glrlm      | ShortRunLowGrayLevelEmphasis         | 0.012068489  |
| wavelet-HLL | glrlm      | GrayLevelVariance                    | 157.5694725  |
| wavelet-HLL | glrlm      | LowGrayLevelRunEmphasis              | 0.012092931  |
| wavelet-HLL | glrlm      | GrayLevelNonUniformityNormalized     | 0.0286569    |

|             |       |                                      |             |
|-------------|-------|--------------------------------------|-------------|
| wavelet-HLL | glrlm | RunVariance                          | 0.015117707 |
| wavelet-HLL | glrlm | GrayLevelNonUniformity               | 3.443405425 |
| wavelet-HLL | glrlm | LongRunEmphasis                      | 1.046742219 |
| wavelet-HLL | glrlm | ShortRunHighGrayLevelEmphasis        | 835.5894619 |
| wavelet-HLL | glrlm | RunLengthNonUniformity               | 116.5709313 |
| wavelet-HLL | glrlm | ShortRunEmphasis                     | 0.988314445 |
| wavelet-HLL | glrlm | LongRunHighGrayLevelEmphasis         | 893.2608029 |
| wavelet-HLL | glrlm | RunPercentage                        | 0.984867591 |
| wavelet-HLL | glrlm | LongRunLowGrayLevelEmphasis          | 0.012190701 |
| wavelet-HLL | glrlm | RunEntropy                           | 5.342400908 |
| wavelet-HLL | glrlm | HighGrayLevelRunEmphasis             | 847.1237301 |
| wavelet-HLL | glrlm | RunLengthNonUniformityNormalized     | 0.969764586 |
| wavelet-HLL | glszm | GrayLevelVariance                    | 162.707887  |
| wavelet-HLL | glszm | ZoneVariance                         | 0.319763289 |
| wavelet-HLL | glszm | GrayLevelNonUniformityNormalized     | 0.027854301 |
| wavelet-HLL | glszm | SizeZoneNonUniformityNormalized      | 0.716151413 |
| wavelet-HLL | glszm | SizeZoneNonUniformity                | 70.8989899  |
| wavelet-HLL | glszm | GrayLevelNonUniformity               | 2.757575758 |
| wavelet-HLL | glszm | LargeAreaEmphasis                    | 1.838383838 |
| wavelet-HLL | glszm | SmallAreaHighGrayLevelEmphasis       | 702.627385  |
| wavelet-HLL | glszm | ZonePercentage                       | 0.81147541  |
| wavelet-HLL | glszm | LargeAreaLowGrayLevelEmphasis        | 0.016026432 |
| wavelet-HLL | glszm | LargeAreaHighGrayLevelEmphasis       | 1595.949495 |
| wavelet-HLL | glszm | HighGrayLevelZoneEmphasis            | 829.8080808 |
| wavelet-HLL | glszm | SmallAreaEmphasis                    | 0.868967452 |
| wavelet-HLL | glszm | LowGrayLevelZoneEmphasis             | 0.014211073 |
| wavelet-HLL | glszm | ZoneEntropy                          | 5.568158135 |
| wavelet-HLL | glszm | SmallAreaLowGrayLevelEmphasis        | 0.013928693 |
| wavelet-HLL | ngtdm | Coarseness                           | 0.045029802 |
| wavelet-HLL | ngtdm | Complexity                           | 6230.117591 |
| wavelet-HLL | ngtdm | Strength                             | 38.61062351 |
| wavelet-HLL | ngtdm | Contrast                             | 1.097728688 |
| wavelet-HLL | ngtdm | Busyness                             | 0.024716887 |
| wavelet-LHL | gldm  | GrayLevelVariance                    | 216.8272642 |
| wavelet-LHL | gldm  | HighGrayLevelEmphasis                | 947.1557377 |
| wavelet-LHL | gldm  | DependenceEntropy                    | 5.915374198 |
| wavelet-LHL | gldm  | DependenceNonUniformity              | 58.37704918 |
| wavelet-LHL | gldm  | GrayLevelNonUniformity               | 3.540983607 |
| wavelet-LHL | gldm  | SmallDependenceEmphasis              | 0.690004554 |
| wavelet-LHL | gldm  | SmallDependenceHighGrayLevelEmphasis | 707.3261043 |
| wavelet-LHL | gldm  | DependenceNonUniformityNormalized    | 0.478500403 |
| wavelet-LHL | gldm  | LargeDependenceEmphasis              | 2.606557377 |
| wavelet-LHL | gldm  | LargeDependenceLowGrayLevelEmphasis  | 0.072041022 |
| wavelet-LHL | gldm  | DependenceVariance                   | 0.429723193 |
| wavelet-LHL | gldm  | LargeDependenceHighGrayLevelEmphasis | 2178.07377  |
| wavelet-LHL | gldm  | SmallDependenceLowGrayLevelEmphasis  | 0.006832468 |
| wavelet-LHL | gldm  | LowGrayLevelEmphasis                 | 0.019773363 |
| wavelet-LHL | glcm  | JointAverage                         | 26.2097841  |
| wavelet-LHL | glcm  | SumAverage                           | 52.4195682  |
| wavelet-LHL | glcm  | JointEntropy                         | 7.180165173 |
| wavelet-LHL | glcm  | ClusterShade                         | 13842.27036 |
| wavelet-LHL | glcm  | MaximumProbability                   | 0.013338882 |
| wavelet-LHL | glcm  | ldmn                                 | 0.961106069 |
| wavelet-LHL | glcm  | JointEnergy                          | 0.00712487  |
| wavelet-LHL | glcm  | Contrast                             | 307.461948  |
| wavelet-LHL | glcm  | DifferenceEntropy                    | 4.512352275 |

|             |            |                                  |              |
|-------------|------------|----------------------------------|--------------|
| wavelet-LHL | glcm       | InverseVariance                  | 0.097495735  |
| wavelet-LHL | glcm       | DifferenceVariance               | 141.8119826  |
| wavelet-LHL | glcm       | Idn                              | 0.87745966   |
| wavelet-LHL | glcm       | Idm                              | 0.088082496  |
| wavelet-LHL | glcm       | Correlation                      | 0.252407419  |
| wavelet-LHL | glcm       | Autocorrelation                  | 746.3475527  |
| wavelet-LHL | glcm       | SumEntropy                       | 5.429220322  |
| wavelet-LHL | glcm       | SumSquares                       | 212.3750701  |
| wavelet-LHL | glcm       | ClusterProminence                | 1415930.876  |
| wavelet-LHL | glcm       | Imc2                             | 0.999396143  |
| wavelet-LHL | glcm       | Imc1                             | -0.640153025 |
| wavelet-LHL | glcm       | DifferenceAverage                | 12.49654275  |
| wavelet-LHL | glcm       | Id                               | 0.164685127  |
| wavelet-LHL | glcm       | ClusterTendency                  | 542.0383326  |
| wavelet-LHL | firstorder | InterquartileRange               | 402.9098123  |
| wavelet-LHL | firstorder | Skewness                         | 1.182595131  |
| wavelet-LHL | firstorder | Uniformity                       | 0.029024456  |
| wavelet-LHL | firstorder | Median                           | -51.84487716 |
| wavelet-LHL | firstorder | Energy                           | 16518056.68  |
| wavelet-LHL | firstorder | RobustMeanAbsoluteDeviation      | 167.3616629  |
| wavelet-LHL | firstorder | MeanAbsoluteDeviation            | 271.1228674  |
| wavelet-LHL | firstorder | TotalEnergy                      | 445987530.5  |
| wavelet-LHL | firstorder | Maximum                          | 1300.462994  |
| wavelet-LHL | firstorder | RootMeanSquared                  | 367.9591108  |
| wavelet-LHL | firstorder | 90Percentile                     | 430.9343405  |
| wavelet-LHL | firstorder | Minimum                          | -665.509618  |
| wavelet-LHL | firstorder | Entropy                          | 5.318760163  |
| wavelet-LHL | firstorder | Range                            | 1965.972612  |
| wavelet-LHL | firstorder | Variance                         | 135275.5806  |
| wavelet-LHL | firstorder | 10Percentile                     | -402.5625566 |
| wavelet-LHL | firstorder | Kurtosis                         | 4.971433862  |
| wavelet-LHL | firstorder | Mean                             | -10.87780589 |
| wavelet-LHL | glrlm      | ShortRunLowGrayLevelEmphasis     | 0.018940071  |
| wavelet-LHL | glrlm      | GrayLevelVariance                | 218.7629791  |
| wavelet-LHL | glrlm      | LowGrayLevelRunEmphasis          | 0.019457216  |
| wavelet-LHL | glrlm      | GrayLevelNonUniformityNormalized | 0.028871232  |
| wavelet-LHL | glrlm      | RunVariance                      | 0.018259567  |
| wavelet-LHL | glrlm      | GrayLevelNonUniformity           | 3.457796941  |
| wavelet-LHL | glrlm      | LongRunEmphasis                  | 1.05664866   |
| wavelet-LHL | glrlm      | ShortRunHighGrayLevelEmphasis    | 939.557879   |
| wavelet-LHL | glrlm      | RunLengthNonUniformity           | 115.4535782  |
| wavelet-LHL | glrlm      | ShortRunEmphasis                 | 0.985837835  |
| wavelet-LHL | glrlm      | LongRunHighGrayLevelEmphasis     | 994.1640788  |
| wavelet-LHL | glrlm      | RunPercentage                    | 0.981715006  |
| wavelet-LHL | glrlm      | LongRunLowGrayLevelEmphasis      | 0.021525792  |
| wavelet-LHL | glrlm      | RunEntropy                       | 5.372801925  |
| wavelet-LHL | glrlm      | HighGrayLevelRunEmphasis         | 950.479119   |
| wavelet-LHL | glrlm      | RunLengthNonUniformityNormalized | 0.963480865  |
| wavelet-LHL | glszm      | GrayLevelVariance                | 243.6558449  |
| wavelet-LHL | glszm      | ZoneVariance                     | 0.350803324  |
| wavelet-LHL | glszm      | GrayLevelNonUniformityNormalized | 0.027368421  |
| wavelet-LHL | glszm      | SizeZoneNonUniformityNormalized  | 0.631024931  |
| wavelet-LHL | glszm      | SizeZoneNonUniformity            | 59.94736842  |
| wavelet-LHL | glszm      | GrayLevelNonUniformity           | 2.6          |
| wavelet-LHL | glszm      | LargeAreaEmphasis                | 2            |
| wavelet-LHL | glszm      | SmallAreaHighGrayLevelEmphasis   | 857.4138158  |

|             |            |                                      |              |
|-------------|------------|--------------------------------------|--------------|
| wavelet-LHL | glszm      | ZonePercentage                       | 0.778688525  |
| wavelet-LHL | glszm      | LargeAreaLowGrayLevelEmphasis        | 0.047800282  |
| wavelet-LHL | glszm      | LargeAreaHighGrayLevelEmphasis       | 1768.410526  |
| wavelet-LHL | glszm      | HighGrayLevelZoneEmphasis            | 996.1473684  |
| wavelet-LHL | glszm      | SmallAreaEmphasis                    | 0.820906433  |
| wavelet-LHL | glszm      | LowGrayLevelZoneEmphasis             | 0.014289299  |
| wavelet-LHL | glszm      | ZoneEntropy                          | 5.800177551  |
| wavelet-LHL | glszm      | SmallAreaLowGrayLevelEmphasis        | 0.006006698  |
| wavelet-LHL | ngtdm      | Coarseness                           | 0.040470385  |
| wavelet-LHL | ngtdm      | Complexity                           | 9782.702494  |
| wavelet-LHL | ngtdm      | Strength                             | 56.08966047  |
| wavelet-LHL | ngtdm      | Contrast                             | 1.630874495  |
| wavelet-LHL | ngtdm      | Busyness                             | 0.027211551  |
| wavelet-LHH | gldm       | GrayLevelVariance                    | 65.48830959  |
| wavelet-LHH | gldm       | HighGrayLevelEmphasis                | 679.0655738  |
| wavelet-LHH | gldm       | DependenceEntropy                    | 5.744931678  |
| wavelet-LHH | gldm       | DependenceNonUniformity              | 40.62295082  |
| wavelet-LHH | gldm       | GrayLevelNonUniformity               | 6.262295082  |
| wavelet-LHH | gldm       | SmallDependenceEmphasis              | 0.557252833  |
| wavelet-LHH | gldm       | SmallDependenceHighGrayLevelEmphasis | 391.6485499  |
| wavelet-LHH | gldm       | DependenceNonUniformityNormalized    | 0.332975007  |
| wavelet-LHH | gldm       | LargeDependenceEmphasis              | 5.540983607  |
| wavelet-LHH | gldm       | LargeDependenceLowGrayLevelEmphasis  | 0.020186518  |
| wavelet-LHH | gldm       | DependenceVariance                   | 1.671056168  |
| wavelet-LHH | gldm       | LargeDependenceHighGrayLevelEmphasis | 3287.491803  |
| wavelet-LHH | gldm       | SmallDependenceLowGrayLevelEmphasis  | 0.010546033  |
| wavelet-LHH | gldm       | LowGrayLevelEmphasis                 | 0.011382407  |
| wavelet-LHH | glcm       | JointAverage                         | 24.6713861   |
| wavelet-LHH | glcm       | SumAverage                           | 49.3427722   |
| wavelet-LHH | glcm       | JointEntropy                         | 6.962879228  |
| wavelet-LHH | glcm       | ClusterShade                         | -27.6197256  |
| wavelet-LHH | glcm       | MaximumProbability                   | 0.02586682   |
| wavelet-LHH | glcm       | ldmn                                 | 0.942958983  |
| wavelet-LHH | glcm       | JointEnergy                          | 0.008875674  |
| wavelet-LHH | glcm       | Contrast                             | 144.7340275  |
| wavelet-LHH | glcm       | DifferenceEntropy                    | 4.226987929  |
| wavelet-LHH | glcm       | InverseVariance                      | 0.138962755  |
| wavelet-LHH | glcm       | DifferenceVariance                   | 61.12674508  |
| wavelet-LHH | glcm       | ldn                                  | 0.851603911  |
| wavelet-LHH | glcm       | ldm                                  | 0.141206067  |
| wavelet-LHH | glcm       | Correlation                          | 0.000535619  |
| wavelet-LHH | glcm       | Autocorrelation                      | 608.3418825  |
| wavelet-LHH | glcm       | SumEntropy                           | 4.962786709  |
| wavelet-LHH | glcm       | SumSquares                           | 71.93646185  |
| wavelet-LHH | glcm       | ClusterProminence                    | 84128.18186  |
| wavelet-LHH | glcm       | lmc2                                 | 0.995292785  |
| wavelet-LHH | glcm       | lmc1                                 | -0.505273818 |
| wavelet-LHH | glcm       | DifferenceAverage                    | 8.882507211  |
| wavelet-LHH | glcm       | ld                                   | 0.221017562  |
| wavelet-LHH | glcm       | ClusterTendency                      | 143.01182    |
| wavelet-LHH | firstorder | InterquartileRange                   | 220.6837688  |
| wavelet-LHH | firstorder | Skewness                             | -0.062016095 |
| wavelet-LHH | firstorder | Uniformity                           | 0.051330288  |
| wavelet-LHH | firstorder | Median                               | -25.49571995 |
| wavelet-LHH | firstorder | Energy                               | 4947892.709  |
| wavelet-LHH | firstorder | RobustMeanAbsoluteDeviation          | 95.54967066  |

|             |            |                                      |              |
|-------------|------------|--------------------------------------|--------------|
| wavelet-LHH | firstorder | MeanAbsoluteDeviation                | 152.6557119  |
| wavelet-LHH | firstorder | TotalEnergy                          | 133593103.1  |
| wavelet-LHH | firstorder | Maximum                              | 500.1451856  |
| wavelet-LHH | firstorder | RootMeanSquared                      | 201.3864385  |
| wavelet-LHH | firstorder | 90Percentile                         | 263.3746287  |
| wavelet-LHH | firstorder | Minimum                              | -597.1057039 |
| wavelet-LHH | firstorder | Entropy                              | 4.66157409   |
| wavelet-LHH | firstorder | Range                                | 1097.25089   |
| wavelet-LHH | firstorder | Variance                             | 40515.72497  |
| wavelet-LHH | firstorder | 10Percentile                         | -214.1551374 |
| wavelet-LHH | firstorder | Kurtosis                             | 3.720918489  |
| wavelet-LHH | firstorder | Mean                                 | 6.385345829  |
| wavelet-LHH | glrlm      | ShortRunLowGrayLevelEmphasis         | 0.011698846  |
| wavelet-LHH | glrlm      | GrayLevelVariance                    | 67.09597433  |
| wavelet-LHH | glrlm      | LowGrayLevelRunEmphasis              | 0.011751234  |
| wavelet-LHH | glrlm      | GrayLevelNonUniformityNormalized     | 0.049571363  |
| wavelet-LHH | glrlm      | RunVariance                          | 0.043709908  |
| wavelet-LHH | glrlm      | GrayLevelNonUniformity               | 5.824226516  |
| wavelet-LHH | glrlm      | LongRunEmphasis                      | 1.123624433  |
| wavelet-LHH | glrlm      | ShortRunHighGrayLevelEmphasis        | 665.4379499  |
| wavelet-LHH | glrlm      | RunLengthNonUniformity               | 109.5107532  |
| wavelet-LHH | glrlm      | ShortRunEmphasis                     | 0.972765568  |
| wavelet-LHH | glrlm      | LongRunHighGrayLevelEmphasis         | 755.9575464  |
| wavelet-LHH | glrlm      | RunPercentage                        | 0.962799496  |
| wavelet-LHH | glrlm      | LongRunLowGrayLevelEmphasis          | 0.011989663  |
| wavelet-LHH | glrlm      | RunEntropy                           | 4.813193542  |
| wavelet-LHH | glrlm      | HighGrayLevelRunEmphasis             | 682.0398872  |
| wavelet-LHH | glrlm      | RunLengthNonUniformityNormalized     | 0.931689141  |
| wavelet-LHH | glszm      | GrayLevelVariance                    | 85.34467456  |
| wavelet-LHH | glszm      | ZoneVariance                         | 2.374095989  |
| wavelet-LHH | glszm      | GrayLevelNonUniformityNormalized     | 0.039447732  |
| wavelet-LHH | glszm      | SizeZoneNonUniformityNormalized      | 0.552596976  |
| wavelet-LHH | glszm      | SizeZoneNonUniformity                | 43.1025641   |
| wavelet-LHH | glszm      | GrayLevelNonUniformity               | 3.076923077  |
| wavelet-LHH | glszm      | LargeAreaEmphasis                    | 4.820512821  |
| wavelet-LHH | glszm      | SmallAreaHighGrayLevelEmphasis       | 545.9129937  |
| wavelet-LHH | glszm      | ZonePercentage                       | 0.639344262  |
| wavelet-LHH | glszm      | LargeAreaLowGrayLevelEmphasis        | 0.024153165  |
| wavelet-LHH | glszm      | LargeAreaHighGrayLevelEmphasis       | 2886.538462  |
| wavelet-LHH | glszm      | HighGrayLevelZoneEmphasis            | 708.4230769  |
| wavelet-LHH | glszm      | SmallAreaEmphasis                    | 0.771044522  |
| wavelet-LHH | glszm      | LowGrayLevelZoneEmphasis             | 0.016714736  |
| wavelet-LHH | glszm      | ZoneEntropy                          | 5.474066161  |
| wavelet-LHH | glszm      | SmallAreaLowGrayLevelEmphasis        | 0.016299551  |
| wavelet-LHH | ngtdm      | Coarseness                           | 0.039663513  |
| wavelet-LHH | ngtdm      | Complexity                           | 3072.780616  |
| wavelet-LHH | ngtdm      | Strength                             | 18.07416608  |
| wavelet-LHH | ngtdm      | Contrast                             | 0.735390252  |
| wavelet-LHH | ngtdm      | Busyness                             | 0.034096071  |
| wavelet-LLH | gldm       | GrayLevelVariance                    | 111.0679925  |
| wavelet-LLH | gldm       | HighGrayLevelEmphasis                | 983.7377049  |
| wavelet-LLH | gldm       | DependenceEntropy                    | 5.708126555  |
| wavelet-LLH | gldm       | DependenceNonUniformity              | 47.54098361  |
| wavelet-LLH | gldm       | GrayLevelNonUniformity               | 4.180327869  |
| wavelet-LLH | gldm       | SmallDependenceEmphasis              | 0.628458561  |
| wavelet-LLH | gldm       | SmallDependenceHighGrayLevelEmphasis | 655.631719   |

|             |            |                                      |              |
|-------------|------------|--------------------------------------|--------------|
| wavelet-LLH | gldm       | DependenceNonUniformityNormalized    | 0.389680193  |
| wavelet-LLH | gldm       | LargeDependenceEmphasis              | 3.770491803  |
| wavelet-LLH | gldm       | LargeDependenceLowGrayLevelEmphasis  | 0.014213115  |
| wavelet-LLH | gldm       | DependenceVariance                   | 0.863746305  |
| wavelet-LLH | gldm       | LargeDependenceHighGrayLevelEmphasis | 3145.295082  |
| wavelet-LLH | gldm       | SmallDependenceLowGrayLevelEmphasis  | 0.009491167  |
| wavelet-LLH | gldm       | LowGrayLevelEmphasis                 | 0.010027133  |
| wavelet-LLH | glcm       | JointAverage                         | 28.87866849  |
| wavelet-LLH | glcm       | SumAverage                           | 57.75733698  |
| wavelet-LLH | glcm       | JointEntropy                         | 7.098348663  |
| wavelet-LLH | glcm       | ClusterShade                         | 1892.505691  |
| wavelet-LLH | glcm       | MaximumProbability                   | 0.01853045   |
| wavelet-LLH | glcm       | Idmn                                 | 0.959684711  |
| wavelet-LLH | glcm       | JointEnergy                          | 0.007737413  |
| wavelet-LLH | glcm       | Contrast                             | 155.34126    |
| wavelet-LLH | glcm       | DifferenceEntropy                    | 4.29425131   |
| wavelet-LLH | glcm       | InverseVariance                      | 0.103265112  |
| wavelet-LLH | glcm       | DifferenceVariance                   | 59.72145919  |
| wavelet-LLH | glcm       | Idn                                  | 0.868608538  |
| wavelet-LLH | glcm       | Idm                                  | 0.107803429  |
| wavelet-LLH | glcm       | Correlation                          | 0.246086436  |
| wavelet-LLH | glcm       | Autocorrelation                      | 859.4421384  |
| wavelet-LLH | glcm       | SumEntropy                           | 5.231423038  |
| wavelet-LLH | glcm       | SumSquares                           | 103.011746   |
| wavelet-LLH | glcm       | ClusterProminence                    | 199995.3609  |
| wavelet-LLH | glcm       | Imc2                                 | 0.998681044  |
| wavelet-LLH | glcm       | Imc1                                 | -0.592359125 |
| wavelet-LLH | glcm       | DifferenceAverage                    | 9.608689085  |
| wavelet-LLH | glcm       | Id                                   | 0.190782886  |
| wavelet-LLH | glcm       | ClusterTendency                      | 256.7057239  |
| wavelet-LLH | firstorder | InterquartileRange                   | 342.5408142  |
| wavelet-LLH | firstorder | Skewness                             | 0.104864386  |
| wavelet-LLH | firstorder | Uniformity                           | 0.034264983  |
| wavelet-LLH | firstorder | Median                               | -48.84483243 |
| wavelet-LLH | firstorder | Energy                               | 8587792.244  |
| wavelet-LLH | firstorder | RobustMeanAbsoluteDeviation          | 151.4549585  |
| wavelet-LLH | firstorder | MeanAbsoluteDeviation                | 214.7196367  |
| wavelet-LLH | firstorder | TotalEnergy                          | 231870390.6  |
| wavelet-LLH | firstorder | Maximum                              | 688.2551716  |
| wavelet-LLH | firstorder | RootMeanSquared                      | 265.3144167  |
| wavelet-LLH | firstorder | 90Percentile                         | 330.0767696  |
| wavelet-LLH | firstorder | Minimum                              | -730.0426139 |
| wavelet-LLH | firstorder | Entropy                              | 5.099291055  |
| wavelet-LLH | firstorder | Range                                | 1418.297786  |
| wavelet-LLH | firstorder | Variance                             | 69782.3359   |
| wavelet-LLH | firstorder | 10Percentile                         | -364.8430019 |
| wavelet-LLH | firstorder | Kurtosis                             | 2.700403093  |
| wavelet-LLH | firstorder | Mean                                 | -24.68610552 |
| wavelet-LLH | gllm       | ShortRunLowGrayLevelEmphasis         | 0.010236258  |
| wavelet-LLH | gllm       | GrayLevelVariance                    | 112.8553474  |
| wavelet-LLH | gllm       | LowGrayLevelRunEmphasis              | 0.010266415  |
| wavelet-LLH | gllm       | GrayLevelNonUniformityNormalized     | 0.033560153  |
| wavelet-LLH | gllm       | RunVariance                          | 0.029675328  |
| wavelet-LLH | gllm       | GrayLevelNonUniformity               | 3.983272167  |
| wavelet-LLH | gllm       | LongRunEmphasis                      | 1.086651632  |
| wavelet-LLH | gllm       | ShortRunHighGrayLevelEmphasis        | 971.7639878  |

|             |       |                                      |              |
|-------------|-------|--------------------------------------|--------------|
| wavelet-LLH | glrlm | RunLengthNonUniformity               | 112.5860509  |
| wavelet-LLH | glrlm | ShortRunEmphasis                     | 0.979779856  |
| wavelet-LLH | glrlm | LongRunHighGrayLevelEmphasis         | 1059.038932  |
| wavelet-LLH | glrlm | RunPercentage                        | 0.972887768  |
| wavelet-LLH | glrlm | LongRunLowGrayLevelEmphasis          | 0.010394959  |
| wavelet-LLH | glrlm | RunEntropy                           | 5.19746939   |
| wavelet-LLH | glrlm | HighGrayLevelRunEmphasis             | 988.3775566  |
| wavelet-LLH | glrlm | RunLengthNonUniformityNormalized     | 0.948273356  |
| wavelet-LLH | glszm | GrayLevelVariance                    | 135.9913467  |
| wavelet-LLH | glszm | ZoneVariance                         | 1.452677123  |
| wavelet-LLH | glszm | GrayLevelNonUniformityNormalized     | 0.030286641  |
| wavelet-LLH | glszm | SizeZoneNonUniformityNormalized      | 0.620876149  |
| wavelet-LLH | glszm | SizeZoneNonUniformity                | 53.39534884  |
| wavelet-LLH | glszm | GrayLevelNonUniformity               | 2.604651163  |
| wavelet-LLH | glszm | LargeAreaEmphasis                    | 3.465116279  |
| wavelet-LLH | glszm | SmallAreaHighGrayLevelEmphasis       | 860.462068   |
| wavelet-LLH | glszm | ZonePercentage                       | 0.704918033  |
| wavelet-LLH | glszm | LargeAreaLowGrayLevelEmphasis        | 0.017376115  |
| wavelet-LLH | glszm | LargeAreaHighGrayLevelEmphasis       | 2887.604651  |
| wavelet-LLH | glszm | HighGrayLevelZoneEmphasis            | 1041.581395  |
| wavelet-LLH | glszm | SmallAreaEmphasis                    | 0.815247721  |
| wavelet-LLH | glszm | LowGrayLevelZoneEmphasis             | 0.013610269  |
| wavelet-LLH | glszm | ZoneEntropy                          | 5.526449894  |
| wavelet-LLH | glszm | SmallAreaLowGrayLevelEmphasis        | 0.013355856  |
| wavelet-LLH | ngtdm | Coarseness                           | 0.045054111  |
| wavelet-LLH | ngtdm | Complexity                           | 4585.805075  |
| wavelet-LLH | ngtdm | Strength                             | 28.7102018   |
| wavelet-LLH | ngtdm | Contrast                             | 0.916989989  |
| wavelet-LLH | ngtdm | Busyness                             | 0.024166057  |
| wavelet-LLL | gldm  | GrayLevelVariance                    | 943.9696318  |
| wavelet-LLL | gldm  | HighGrayLevelEmphasis                | 4599.262295  |
| wavelet-LLL | gldm  | DependenceEntropy                    | 6.19889953   |
| wavelet-LLL | gldm  | DependenceNonUniformity              | 76.68852459  |
| wavelet-LLL | gldm  | GrayLevelNonUniformity               | 2.196721311  |
| wavelet-LLL | gldm  | SmallDependenceEmphasis              | 0.821038251  |
| wavelet-LLL | gldm  | SmallDependenceHighGrayLevelEmphasis | 3255.288251  |
| wavelet-LLL | gldm  | DependenceNonUniformityNormalized    | 0.628594464  |
| wavelet-LLL | gldm  | LargeDependenceEmphasis              | 1.93442623   |
| wavelet-LLL | gldm  | LargeDependenceLowGrayLevelEmphasis  | 0.01299453   |
| wavelet-LLL | gldm  | DependenceVariance                   | 0.299381887  |
| wavelet-LLL | gldm  | LargeDependenceHighGrayLevelEmphasis | 11902.59016  |
| wavelet-LLL | gldm  | SmallDependenceLowGrayLevelEmphasis  | 0.012675878  |
| wavelet-LLL | gldm  | LowGrayLevelEmphasis                 | 0.012734539  |
| wavelet-LLL | glcm  | JointAverage                         | 68.44360173  |
| wavelet-LLL | glcm  | SumAverage                           | 136.8872035  |
| wavelet-LLL | glcm  | JointEntropy                         | 7.242605502  |
| wavelet-LLL | glcm  | ClusterShade                         | -58277.80065 |
| wavelet-LLL | glcm  | MaximumProbability                   | 0.012838394  |
| wavelet-LLL | glcm  | Idmn                                 | 0.928240283  |
| wavelet-LLL | glcm  | JointEnergy                          | 0.006732961  |
| wavelet-LLL | glcm  | Contrast                             | 1079.661844  |
| wavelet-LLL | glcm  | DifferenceEntropy                    | 5.217870615  |
| wavelet-LLL | glcm  | InverseVariance                      | 0.044311944  |
| wavelet-LLL | glcm  | DifferenceVariance                   | 380.2480918  |
| wavelet-LLL | glcm  | Idn                                  | 0.826131782  |
| wavelet-LLL | glcm  | Idm                                  | 0.043934926  |

|             |            |                                  |              |
|-------------|------------|----------------------------------|--------------|
| wavelet-LLL | glcm       | Correlation                      | 0.401763525  |
| wavelet-LLL | glcm       | Autocorrelation                  | 5052.050478  |
| wavelet-LLL | glcm       | SumEntropy                       | 5.903376371  |
| wavelet-LLL | glcm       | SumSquares                       | 904.5079671  |
| wavelet-LLL | glcm       | ClusterProminence                | 15616279.33  |
| wavelet-LLL | glcm       | Imc2                             | 0.999931377  |
| wavelet-LLL | glcm       | Imc1                             | -0.761781348 |
| wavelet-LLL | glcm       | DifferenceAverage                | 26.05257083  |
| wavelet-LLL | glcm       | Id                               | 0.097057625  |
| wavelet-LLL | glcm       | ClusterTendency                  | 2538.370024  |
| wavelet-LLL | firstorder | InterquartileRange               | 1329.427205  |
| wavelet-LLL | firstorder | Skewness                         | -0.153338114 |
| wavelet-LLL | firstorder | Uniformity                       | 0.018005912  |
| wavelet-LLL | firstorder | Median                           | -825.4245221 |
| wavelet-LLL | firstorder | Energy                           | 160322084.6  |
| wavelet-LLL | firstorder | RobustMeanAbsoluteDeviation      | 495.7704683  |
| wavelet-LLL | firstorder | MeanAbsoluteDeviation            | 646.3752958  |
| wavelet-LLL | firstorder | TotalEnergy                      | 4328696285   |
| wavelet-LLL | firstorder | Maximum                          | 402.1078299  |
| wavelet-LLL | firstorder | RootMeanSquared                  | 1146.348746  |
| wavelet-LLL | firstorder | 90Percentile                     | 145.8553499  |
| wavelet-LLL | firstorder | Minimum                          | -2329.581665 |
| wavelet-LLL | firstorder | Entropy                          | 5.980627477  |
| wavelet-LLL | firstorder | Range                            | 2731.689495  |
| wavelet-LLL | firstorder | Variance                         | 590883.3594  |
| wavelet-LLL | firstorder | 10Percentile                     | -1892.183472 |
| wavelet-LLL | firstorder | Kurtosis                         | 1.93567631   |
| wavelet-LLL | firstorder | Mean                             | -850.4305312 |
| wavelet-LLL | glrlm      | ShortRunLowGrayLevelEmphasis     | 0.012869015  |
| wavelet-LLL | glrlm      | GrayLevelVariance                | 942.06379    |
| wavelet-LLL | glrlm      | LowGrayLevelRunEmphasis          | 0.012871404  |
| wavelet-LLL | glrlm      | GrayLevelNonUniformityNormalzied | 0.017923474  |
| wavelet-LLL | glrlm      | RunVariance                      | 0.012024185  |
| wavelet-LLL | glrlm      | GrayLevelNonUniformity           | 2.163337044  |
| wavelet-LLL | glrlm      | LongRunEmphasis                  | 1.034320586  |
| wavelet-LLL | glrlm      | ShortRunHighGrayLevelEmphasis    | 4505.424801  |
| wavelet-LLL | glrlm      | RunLengthNonUniformity           | 118.284066   |
| wavelet-LLL | glrlm      | ShortRunEmphasis                 | 0.992150367  |
| wavelet-LLL | glrlm      | LongRunHighGrayLevelEmphasis     | 4832.67597   |
| wavelet-LLL | glrlm      | RunPercentage                    | 0.989281211  |
| wavelet-LLL | glrlm      | LongRunLowGrayLevelEmphasis      | 0.012881253  |
| wavelet-LLL | glrlm      | RunEntropy                       | 6.003424782  |
| wavelet-LLL | glrlm      | HighGrayLevelRunEmphasis         | 4565.030927  |
| wavelet-LLL | glrlm      | RunLengthNonUniformityNormalzied | 0.979761538  |
| wavelet-LLL | glszm      | GrayLevelVariance                | 909.3856355  |
| wavelet-LLL | glszm      | ZoneVariance                     | 0.22249911   |
| wavelet-LLL | glszm      | GrayLevelNonUniformityNormalzied | 0.017087932  |
| wavelet-LLL | glszm      | SizeZoneNonUniformityNormalzied  | 0.794054824  |
| wavelet-LLL | glszm      | SizeZoneNonUniformity            | 84.16981132  |
| wavelet-LLL | glszm      | GrayLevelNonUniformity           | 1.811320755  |
| wavelet-LLL | glszm      | LargeAreaEmphasis                | 1.547169811  |
| wavelet-LLL | glszm      | SmallAreaHighGrayLevelEmphasis   | 3490.520178  |
| wavelet-LLL | glszm      | ZonePercentage                   | 0.868852459  |
| wavelet-LLL | glszm      | LargeAreaLowGrayLevelEmphasis    | 0.014760711  |
| wavelet-LLL | glszm      | LargeAreaHighGrayLevelEmphasis   | 8449.433962  |
| wavelet-LLL | glszm      | HighGrayLevelZoneEmphasis        | 4142.273585  |



|             |            |                                      |              |
|-------------|------------|--------------------------------------|--------------|
| wavelet-LLL | glszm      | SmallAreaEmphasis                    | 0.910704927  |
| wavelet-LLL | glszm      | LowGrayLevelZoneEmphasis             | 0.014610117  |
| wavelet-LLL | glszm      | ZoneEntropy                          | 6.156889087  |
| wavelet-LLL | glszm      | SmallAreaLowGrayLevelEmphasis        | 0.014577945  |
| wavelet-LLL | ngtdm      | Coarseness                           | 0.025610308  |
| wavelet-LLL | ngtdm      | Complexity                           | 55199.84358  |
| wavelet-LLL | ngtdm      | Strength                             | 127.230951   |
| wavelet-LLL | ngtdm      | Contrast                             | 6.690510053  |
| wavelet-LLL | ngtdm      | Busyness                             | 0.010552903  |
| wavelet-HHL | gldm       | GrayLevelVariance                    | 26.26740124  |
| wavelet-HHL | gldm       | HighGrayLevelEmphasis                | 544.0163934  |
| wavelet-HHL | gldm       | DependenceEntropy                    | 5.364763314  |
| wavelet-HHL | gldm       | DependenceNonUniformity              | 37.45901639  |
| wavelet-HHL | gldm       | GrayLevelNonUniformity               | 8.426229508  |
| wavelet-HHL | gldm       | SmallDependenceEmphasis              | 0.526641621  |
| wavelet-HHL | gldm       | SmallDependenceHighGrayLevelEmphasis | 305.7519854  |
| wavelet-HHL | gldm       | DependenceNonUniformityNormalized    | 0.307041118  |
| wavelet-HHL | gldm       | LargeDependenceEmphasis              | 5.295081967  |
| wavelet-HHL | gldm       | LargeDependenceLowGrayLevelEmphasis  | 0.018930113  |
| wavelet-HHL | gldm       | DependenceVariance                   | 1.295081967  |
| wavelet-HHL | gldm       | LargeDependenceHighGrayLevelEmphasis | 2776.786885  |
| wavelet-HHL | gldm       | SmallDependenceLowGrayLevelEmphasis  | 0.009426807  |
| wavelet-HHL | gldm       | LowGrayLevelEmphasis                 | 0.010418673  |
| wavelet-HHL | glcm       | JointAverage                         | 22.86432979  |
| wavelet-HHL | glcm       | SumAverage                           | 45.72865957  |
| wavelet-HHL | glcm       | JointEntropy                         | 6.711704321  |
| wavelet-HHL | glcm       | ClusterShade                         | -38.82241216 |
| wavelet-HHL | glcm       | MaximumProbability                   | 0.02699098   |
| wavelet-HHL | glcm       | ldmn                                 | 0.967628958  |
| wavelet-HHL | glcm       | JointEnergy                          | 0.0108766    |
| wavelet-HHL | glcm       | Contrast                             | 47.81512246  |
| wavelet-HHL | glcm       | DifferenceEntropy                    | 3.646420629  |
| wavelet-HHL | glcm       | InverseVariance                      | 0.19669575   |
| wavelet-HHL | glcm       | DifferenceVariance                   | 19.99846105  |
| wavelet-HHL | glcm       | ldn                                  | 0.882147986  |
| wavelet-HHL | glcm       | ldm                                  | 0.180011213  |
| wavelet-HHL | glcm       | Correlation                          | -0.002707962 |
| wavelet-HHL | glcm       | Autocorrelation                      | 522.7331982  |
| wavelet-HHL | glcm       | SumEntropy                           | 4.394137524  |
| wavelet-HHL | glcm       | SumSquares                           | 23.82736599  |
| wavelet-HHL | glcm       | ClusterProminence                    | 9477.748712  |
| wavelet-HHL | glcm       | lmc2                                 | 0.977827423  |
| wavelet-HHL | glcm       | lmc1                                 | -0.381522708 |
| wavelet-HHL | glcm       | DifferenceAverage                    | 5.241349925  |
| wavelet-HHL | glcm       | ld                                   | 0.272667366  |
| wavelet-HHL | glcm       | ClusterTendency                      | 47.49434151  |
| wavelet-HHL | firstorder | InterquartileRange                   | 136.7634555  |
| wavelet-HHL | firstorder | Skewness                             | -0.436668417 |
| wavelet-HHL | firstorder | Uniformity                           | 0.069067455  |
| wavelet-HHL | firstorder | Median                               | 7.952850323  |
| wavelet-HHL | firstorder | Energy                               | 1997743.019  |
| wavelet-HHL | firstorder | RobustMeanAbsoluteDeviation          | 55.58440441  |
| wavelet-HHL | firstorder | MeanAbsoluteDeviation                | 92.41093609  |
| wavelet-HHL | firstorder | TotalEnergy                          | 53939061.52  |
| wavelet-HHL | firstorder | Maximum                              | 334.6587816  |
| wavelet-HHL | firstorder | RootMeanSquared                      | 127.9646153  |

|             |            |                                      |              |
|-------------|------------|--------------------------------------|--------------|
| wavelet-HHL | firstorder | 90Percentile                         | 154.7891977  |
| wavelet-HHL | firstorder | Minimum                              | -528.6417458 |
| wavelet-HHL | firstorder | Entropy                              | 4.180340976  |
| wavelet-HHL | firstorder | Range                                | 863.3005274  |
| wavelet-HHL | firstorder | Variance                             | 16343.52485  |
| wavelet-HHL | firstorder | 10Percentile                         | -124.3544634 |
| wavelet-HHL | firstorder | Kurtosis                             | 5.365500586  |
| wavelet-HHL | firstorder | Mean                                 | 5.605169642  |
| wavelet-HHL | grlm       | ShortRunLowGrayLevelEmphasis         | 0.010699251  |
| wavelet-HHL | grlm       | GrayLevelVariance                    | 27.13560739  |
| wavelet-HHL | grlm       | LowGrayLevelRunEmphasis              | 0.010756458  |
| wavelet-HHL | grlm       | GrayLevelNonUniformityNormalized     | 0.067328327  |
| wavelet-HHL | grlm       | RunVariance                          | 0.046367105  |
| wavelet-HHL | grlm       | GrayLevelNonUniformity               | 7.899358916  |
| wavelet-HHL | grlm       | LongRunEmphasis                      | 1.128667769  |
| wavelet-HHL | grlm       | ShortRunHighGrayLevelEmphasis        | 530.8759803  |
| wavelet-HHL | grlm       | RunLengthNonUniformity               | 109.0305875  |
| wavelet-HHL | grlm       | ShortRunEmphasis                     | 0.971922478  |
| wavelet-HHL | grlm       | LongRunHighGrayLevelEmphasis         | 611.7463873  |
| wavelet-HHL | grlm       | RunPercentage                        | 0.961538462  |
| wavelet-HHL | grlm       | LongRunLowGrayLevelEmphasis          | 0.011014706  |
| wavelet-HHL | grlm       | RunEntropy                           | 4.362213563  |
| wavelet-HHL | grlm       | HighGrayLevelRunEmphasis             | 545.2184843  |
| wavelet-HHL | grlm       | RunLengthNonUniformityNormalized     | 0.929100451  |
| wavelet-HHL | glszm      | GrayLevelVariance                    | 40.09420154  |
| wavelet-HHL | glszm      | ZoneVariance                         | 2.576843685  |
| wavelet-HHL | glszm      | GrayLevelNonUniformityNormalized     | 0.054606868  |
| wavelet-HHL | glszm      | SizeZoneNonUniformityNormalized      | 0.542127979  |
| wavelet-HHL | glszm      | SizeZoneNonUniformity                | 39.57534247  |
| wavelet-HHL | glszm      | GrayLevelNonUniformity               | 3.98630137   |
| wavelet-HHL | glszm      | LargeAreaEmphasis                    | 5.369863014  |
| wavelet-HHL | glszm      | SmallAreaHighGrayLevelEmphasis       | 452.4805978  |
| wavelet-HHL | glszm      | ZonePercentage                       | 0.598360656  |
| wavelet-HHL | glszm      | LargeAreaLowGrayLevelEmphasis        | 0.024536131  |
| wavelet-HHL | glszm      | LargeAreaHighGrayLevelEmphasis       | 2875.041096  |
| wavelet-HHL | glszm      | HighGrayLevelZoneEmphasis            | 567.2054795  |
| wavelet-HHL | glszm      | SmallAreaEmphasis                    | 0.762341874  |
| wavelet-HHL | glszm      | LowGrayLevelZoneEmphasis             | 0.01603318   |
| wavelet-HHL | glszm      | ZoneEntropy                          | 5.151599217  |
| wavelet-HHL | glszm      | SmallAreaLowGrayLevelEmphasis        | 0.015503108  |
| wavelet-HHL | ngtdm      | Coarseness                           | 0.051497674  |
| wavelet-HHL | ngtdm      | Complexity                           | 1080.350747  |
| wavelet-HHL | ngtdm      | Strength                             | 11.85470323  |
| wavelet-HHL | ngtdm      | Contrast                             | 0.28393171   |
| wavelet-HHL | ngtdm      | Busyness                             | 0.030845256  |
| wavelet-HLH | gldm       | GrayLevelVariance                    | 48.11509003  |
| wavelet-HLH | gldm       | HighGrayLevelEmphasis                | 441.9098361  |
| wavelet-HLH | gldm       | DependenceEntropy                    | 5.538427994  |
| wavelet-HLH | gldm       | DependenceNonUniformity              | 41.98360656  |
| wavelet-HLH | gldm       | GrayLevelNonUniformity               | 6.606557377  |
| wavelet-HLH | gldm       | SmallDependenceEmphasis              | 0.582923497  |
| wavelet-HLH | gldm       | SmallDependenceHighGrayLevelEmphasis | 287.77352    |
| wavelet-HLH | gldm       | DependenceNonUniformityNormalized    | 0.344127923  |
| wavelet-HLH | gldm       | LargeDependenceEmphasis              | 4.737704918  |
| wavelet-HLH | gldm       | LargeDependenceLowGrayLevelEmphasis  | 0.025609251  |
| wavelet-HLH | gldm       | DependenceVariance                   | 1.183552808  |

|             |            |                                      |              |
|-------------|------------|--------------------------------------|--------------|
| wavelet-HLH | gldm       | LargeDependenceHighGrayLevelEmphasis | 1763.745902  |
| wavelet-HLH | gldm       | SmallDependenceLowGrayLevelEmphasis  | 0.011139588  |
| wavelet-HLH | gldm       | LowGrayLevelEmphasis                 | 0.012701255  |
| wavelet-HLH | glcm       | JointAverage                         | 19.79446129  |
| wavelet-HLH | glcm       | SumAverage                           | 39.58892257  |
| wavelet-HLH | glcm       | JointEntropy                         | 6.885371482  |
| wavelet-HLH | glcm       | ClusterShade                         | 330.7984682  |
| wavelet-HLH | glcm       | MaximumProbability                   | 0.027050168  |
| wavelet-HLH | glcm       | ldmn                                 | 0.950352433  |
| wavelet-HLH | glcm       | JointEnergy                          | 0.009532552  |
| wavelet-HLH | glcm       | Contrast                             | 97.48248012  |
| wavelet-HLH | glcm       | DifferenceEntropy                    | 4.02020846   |
| wavelet-HLH | glcm       | InverseVariance                      | 0.157137325  |
| wavelet-HLH | glcm       | DifferenceVariance                   | 41.70396217  |
| wavelet-HLH | glcm       | ldn                                  | 0.859744172  |
| wavelet-HLH | glcm       | ldm                                  | 0.148404032  |
| wavelet-HLH | glcm       | Correlation                          | -0.022322085 |
| wavelet-HLH | glcm       | Autocorrelation                      | 390.7118998  |
| wavelet-HLH | glcm       | SumEntropy                           | 4.722052429  |
| wavelet-HLH | glcm       | SumSquares                           | 47.60775528  |
| wavelet-HLH | glcm       | ClusterProminence                    | 35666.00437  |
| wavelet-HLH | glcm       | lmc2                                 | 0.991261536  |
| wavelet-HLH | glcm       | lmc1                                 | -0.456616919 |
| wavelet-HLH | glcm       | DifferenceAverage                    | 7.314392341  |
| wavelet-HLH | glcm       | ld                                   | 0.234836482  |
| wavelet-HLH | glcm       | ClusterTendency                      | 92.94854101  |
| wavelet-HLH | firstorder | InterquartileRange                   | 188.8725365  |
| wavelet-HLH | firstorder | Skewness                             | 0.293519768  |
| wavelet-HLH | firstorder | Uniformity                           | 0.05415211   |
| wavelet-HLH | firstorder | Median                               | -3.829825034 |
| wavelet-HLH | firstorder | Energy                               | 3622368.995  |
| wavelet-HLH | firstorder | RobustMeanAbsoluteDeviation          | 76.5131122   |
| wavelet-HLH | firstorder | MeanAbsoluteDeviation                | 127.2858079  |
| wavelet-HLH | firstorder | TotalEnergy                          | 97803962.87  |
| wavelet-HLH | firstorder | Maximum                              | 507.7858319  |
| wavelet-HLH | firstorder | RootMeanSquared                      | 172.3123592  |
| wavelet-HLH | firstorder | 90Percentile                         | 213.257313   |
| wavelet-HLH | firstorder | Minimum                              | -468.326954  |
| wavelet-HLH | firstorder | Entropy                              | 4.497804793  |
| wavelet-HLH | firstorder | Range                                | 976.1127859  |
| wavelet-HLH | firstorder | Variance                             | 29598.09295  |
| wavelet-HLH | firstorder | 10Percentile                         | -177.2342147 |
| wavelet-HLH | firstorder | Kurtosis                             | 3.877856329  |
| wavelet-HLH | firstorder | Mean                                 | 9.667274378  |
| wavelet-HLH | glrlm      | ShortRunLowGrayLevelEmphasis         | 0.012936764  |
| wavelet-HLH | glrlm      | GrayLevelVariance                    | 49.25301019  |
| wavelet-HLH | glrlm      | LowGrayLevelRunEmphasis              | 0.01302708   |
| wavelet-HLH | glrlm      | GrayLevelNonUniformityNormalized     | 0.053189582  |
| wavelet-HLH | glrlm      | RunVariance                          | 0.039332998  |
| wavelet-HLH | glrlm      | GrayLevelNonUniformity               | 6.268626772  |
| wavelet-HLH | glrlm      | LongRunEmphasis                      | 1.11241741   |
| wavelet-HLH | glrlm      | ShortRunHighGrayLevelEmphasis        | 435.8999046  |
| wavelet-HLH | glrlm      | RunLengthNonUniformity               | 110.4486351  |
| wavelet-HLH | glrlm      | ShortRunEmphasis                     | 0.974890485  |
| wavelet-HLH | glrlm      | LongRunHighGrayLevelEmphasis         | 485.138224   |
| wavelet-HLH | glrlm      | RunPercentage                        | 0.965952081  |

|             |       |                                  |             |
|-------------|-------|----------------------------------|-------------|
| wavelet-HLH | glrlm | LongRunLowGrayLevelEmphasis      | 0.013425859 |
| wavelet-HLH | glrlm | RunEntropy                       | 4.636333679 |
| wavelet-HLH | glrlm | HighGrayLevelRunEmphasis         | 444.8986978 |
| wavelet-HLH | glrlm | RunLengthNonUniformityNormalized | 0.936597552 |
| wavelet-HLH | glszm | GrayLevelVariance                | 64.22359375 |
| wavelet-HLH | glszm | ZoneVariance                     | 1.399375    |
| wavelet-HLH | glszm | GrayLevelNonUniformityNormalized | 0.04375     |
| wavelet-HLH | glszm | SizeZoneNonUniformityNormalized  | 0.598125    |
| wavelet-HLH | glszm | SizeZoneNonUniformity            | 47.85       |
| wavelet-HLH | glszm | GrayLevelNonUniformity           | 3.5         |
| wavelet-HLH | glszm | LargeAreaEmphasis                | 3.725       |
| wavelet-HLH | glszm | SmallAreaHighGrayLevelEmphasis   | 404.7909252 |
| wavelet-HLH | glszm | ZonePercentage                   | 0.655737705 |
| wavelet-HLH | glszm | LargeAreaLowGrayLevelEmphasis    | 0.026747925 |
| wavelet-HLH | glszm | LargeAreaHighGrayLevelEmphasis   | 1447.5875   |
| wavelet-HLH | glszm | HighGrayLevelZoneEmphasis        | 482.9375    |
| wavelet-HLH | glszm | SmallAreaEmphasis                | 0.798216908 |
| wavelet-HLH | glszm | LowGrayLevelZoneEmphasis         | 0.017465124 |
| wavelet-HLH | glszm | ZoneEntropy                      | 5.281198333 |
| wavelet-HLH | glszm | SmallAreaLowGrayLevelEmphasis    | 0.016646473 |
| wavelet-HLH | ngtdm | Coarseness                       | 0.046047637 |
| wavelet-HLH | ngtdm | Complexity                       | 1974.82898  |
| wavelet-HLH | ngtdm | Strength                         | 14.70107679 |
| wavelet-HLH | ngtdm | Contrast                         | 0.583938197 |
| wavelet-HLH | ngtdm | Busyness                         | 0.041893523 |

| Image type | Feature Class | Feature Name                         | Value                                                                                                                                                                                                                                                                                                                                                                                                                                        |
|------------|---------------|--------------------------------------|----------------------------------------------------------------------------------------------------------------------------------------------------------------------------------------------------------------------------------------------------------------------------------------------------------------------------------------------------------------------------------------------------------------------------------------------|
| general    | info          | BoundingBox                          | 16: RTSTRUCT: C99-DNU_segment_Tumor<br>(0, 0, 1, 8, 10, 9)                                                                                                                                                                                                                                                                                                                                                                                   |
| general    | info          | EnabledImageTypes                    | {u'Original': {}, u'Wavelet': {}}                                                                                                                                                                                                                                                                                                                                                                                                            |
|            |               |                                      | {'distances': [1], 'additionalInfo': True,<br>'force2D': False, 'interpolator': 'sitkBSpline',<br>'resampledPixelSpacing': [3.0], 'label': 1,<br>'normalizeScale': 1, 'normalize': False,<br>'force2Ddimension': 0, 'removeOutliers':<br>None, 'minimumROISize': None, u'binWidth':<br>25.0, 'minimumROIDimensions': 1,<br>u'correctMask': True, 'preCrop': False,<br>u'symmetricalGLCM': True,<br>'resegmentRange': None, 'padDistance': 5} |
| general    | info          | GeneralSettings                      | 4c3e2c92400da13306dbc0b6207468ef06f50                                                                                                                                                                                                                                                                                                                                                                                                        |
| general    | info          | ImageHash                            | 9e3                                                                                                                                                                                                                                                                                                                                                                                                                                          |
| general    | info          | ImageSpacing                         | (0.9765625000000002,<br>0.9765625000000002, 2.0)                                                                                                                                                                                                                                                                                                                                                                                             |
| general    | info          | MaskHash                             | 285a489b0c7823a9f6b5f973c66816a1bdfca3                                                                                                                                                                                                                                                                                                                                                                                                       |
| general    | info          | NumpyVersion                         | a4                                                                                                                                                                                                                                                                                                                                                                                                                                           |
| general    | info          | PyWaveletVersion                     | 1.13.1                                                                                                                                                                                                                                                                                                                                                                                                                                       |
| general    | info          | SimpleITKVersion                     | 0.5.2                                                                                                                                                                                                                                                                                                                                                                                                                                        |
| general    | info          | Version                              | 1.1.0                                                                                                                                                                                                                                                                                                                                                                                                                                        |
| general    | info          | VolumeNum                            | 1.3.0.post102+g1b0eb74                                                                                                                                                                                                                                                                                                                                                                                                                       |
| general    | info          | VoxelNum                             | 1                                                                                                                                                                                                                                                                                                                                                                                                                                            |
| original   | shape         | Maximum3DDiameter                    | 350                                                                                                                                                                                                                                                                                                                                                                                                                                          |
| original   | shape         | Maximum2DDiameterSlice               | 33.13608305                                                                                                                                                                                                                                                                                                                                                                                                                                  |
| original   | shape         | Sphericity                           | 28.46049894                                                                                                                                                                                                                                                                                                                                                                                                                                  |
| original   | shape         | MinorAxis                            | 0.835047757                                                                                                                                                                                                                                                                                                                                                                                                                                  |
| original   | shape         | Elongation                           | 23.64686029                                                                                                                                                                                                                                                                                                                                                                                                                                  |
| original   | shape         | SurfaceVolumeRatio                   | 0.779182243                                                                                                                                                                                                                                                                                                                                                                                                                                  |
| original   | shape         | Volume                               | 0.273923237                                                                                                                                                                                                                                                                                                                                                                                                                                  |
| original   | shape         | MajorAxis                            | 9450                                                                                                                                                                                                                                                                                                                                                                                                                                         |
| original   | shape         | SurfaceArea                          | 30.3483049                                                                                                                                                                                                                                                                                                                                                                                                                                   |
| original   | shape         | Flatness                             | 2588.574586                                                                                                                                                                                                                                                                                                                                                                                                                                  |
| original   | shape         | LeastAxis                            | 0.617298115                                                                                                                                                                                                                                                                                                                                                                                                                                  |
| original   | shape         | Maximum2DDiameterColumn              | 18.7339514                                                                                                                                                                                                                                                                                                                                                                                                                                   |
| original   | shape         | Maximum2DDiameterRow                 | 28.3019434                                                                                                                                                                                                                                                                                                                                                                                                                                   |
| original   | gldm          | GrayLevelVariance                    | 31.89043744                                                                                                                                                                                                                                                                                                                                                                                                                                  |
| original   | gldm          | HighGrayLevelEmphasis                | 137.9642857                                                                                                                                                                                                                                                                                                                                                                                                                                  |
| original   | gldm          | DependenceEntropy                    | 600.2142857                                                                                                                                                                                                                                                                                                                                                                                                                                  |
| original   | gldm          | DependenceNonUniformity              | 6.370566586                                                                                                                                                                                                                                                                                                                                                                                                                                  |
| original   | gldm          | GrayLevelNonUniformity               | 80.93714286                                                                                                                                                                                                                                                                                                                                                                                                                                  |
| original   | gldm          | SmallDependenceEmphasis              | 17.51428571                                                                                                                                                                                                                                                                                                                                                                                                                                  |
| original   | gldm          | SmallDependenceHighGrayLevelEmphasis | 0.465316735                                                                                                                                                                                                                                                                                                                                                                                                                                  |
| original   | gldm          | DependenceNonUniformityNormalized    | 184.2932419                                                                                                                                                                                                                                                                                                                                                                                                                                  |
| original   | gldm          | LargeDependenceEmphasis              | 0.23124898                                                                                                                                                                                                                                                                                                                                                                                                                                   |
| original   | gldm          | LargeDependenceLowGrayLevelEmphasis  | 18.23428571                                                                                                                                                                                                                                                                                                                                                                                                                                  |
| original   | gldm          | DependenceVariance                   | 0.058863616                                                                                                                                                                                                                                                                                                                                                                                                                                  |
| original   | gldm          | LargeDependenceHighGrayLevelEmphasis | 8.535510204                                                                                                                                                                                                                                                                                                                                                                                                                                  |
| original   | gldm          | LargeDependenceHighGrayLevelEmphasis | 19697.98571                                                                                                                                                                                                                                                                                                                                                                                                                                  |

|          |            |                                     |              |
|----------|------------|-------------------------------------|--------------|
| original | gldm       | SmallDependenceLowGrayLevelEmphasis | 0.009949998  |
| original | gldm       | LowGrayLevelEmphasis                | 0.015294326  |
| original | glcm       | JointAverage                        | 24.10578529  |
| original | glcm       | SumAverage                          | 48.21157059  |
| original | glcm       | JointEntropy                        | 7.672531616  |
| original | glcm       | ClusterShade                        | -3685.474702 |
| original | glcm       | MaximumProbability                  | 0.051742674  |
| original | glcm       | Idmn                                | 0.931482717  |
| original | glcm       | JointEnergy                         | 0.009877132  |
| original | glcm       | Contrast                            | 121.0666823  |
| original | glcm       | DifferenceEntropy                   | 4.238805369  |
| original | glcm       | InverseVariance                     | 0.21234582   |
| original | glcm       | DifferenceVariance                  | 60.52861838  |
| original | glcm       | Idn                                 | 0.85120518   |
| original | glcm       | Idm                                 | 0.231965789  |
| original | glcm       | Correlation                         | 0.510923141  |
| original | glcm       | Autocorrelation                     | 646.1054243  |
| original | glcm       | SumEntropy                          | 5.526565341  |
| original | glcm       | SumSquares                          | 125.152541   |
| original | glcm       | ClusterProminence                   | 271499.2232  |
| original | glcm       | Imc2                                | 0.973294513  |
| original | glcm       | Imc1                                | -0.323434915 |
| original | glcm       | DifferenceAverage                   | 7.671541729  |
| original | glcm       | Id                                  | 0.299661382  |
| original | glcm       | ClusterTendency                     | 379.5434818  |
| original | firstorder | InterquartileRange                  | 610.25       |
| original | firstorder | Skewness                            | -0.203598741 |
| original | firstorder | Uniformity                          | 0.050040816  |
| original | firstorder | Median                              | -233.5       |
| original | firstorder | Energy                              | 61629521     |
| original | firstorder | RobustMeanAbsoluteDeviation         | 241.9128564  |
| original | firstorder | MeanAbsoluteDeviation               | 271.5133878  |
| original | firstorder | TotalEnergy                         | 1663997067   |
| original | firstorder | Maximum                             | 84           |
| original | firstorder | RootMeanSquared                     | 419.6240528  |
| original | firstorder | 90Percentile                        | 30           |
| original | firstorder | Minimum                             | -821         |
| original | firstorder | Entropy                             | 4.752615856  |
| original | firstorder | Range                               | 905          |
| original | firstorder | Variance                            | 85766.92347  |
| original | firstorder | 10Percentile                        | -688.2       |
| original | firstorder | Kurtosis                            | 1.404292532  |
| original | firstorder | Mean                                | -300.5285714 |
| original | gllm       | ShortRunLowGrayLevelEmphasis        | 0.01592539   |
| original | gllm       | GrayLevelVariance                   | 135.0060381  |
| original | gllm       | LowGrayLevelRunEmphasis             | 0.016233518  |
| original | gllm       | GrayLevelNonUniformityNormalized    | 0.043202367  |
| original | gllm       | RunVariance                         | 0.11006474   |
| original | gllm       | GrayLevelNonUniformity              | 13.89479721  |
| original | gllm       | LongRunEmphasis                     | 1.296089233  |
| original | gllm       | ShortRunHighGrayLevelEmphasis       | 505.3315777  |
| original | gllm       | RunLengthNonUniformity              | 276.2488578  |
| original | gllm       | ShortRunEmphasis                    | 0.941466956  |

|             |       |                                      |              |
|-------------|-------|--------------------------------------|--------------|
| original    | glrlm | LongRunHighGrayLevelEmphasis         | 868.7726574  |
| original    | glrlm | RunPercentage                        | 0.918681319  |
| original    | glrlm | LongRunLowGrayLevelEmphasis          | 0.017518537  |
| original    | glrlm | RunEntropy                           | 5.134242432  |
| original    | glrlm | HighGrayLevelRunEmphasis             | 563.3764148  |
| original    | glrlm | RunLengthNonUniformityNormalized     | 0.85872938   |
| original    | glszm | GrayLevelVariance                    | 100.4976298  |
| original    | glszm | ZoneVariance                         | 17.21181639  |
| original    | glszm | GrayLevelNonUniformityNormalized     | 0.035264192  |
| original    | glszm | SizeZoneNonUniformityNormalized      | 0.557983582  |
| original    | glszm | SizeZoneNonUniformity                | 103.7849462  |
| original    | glszm | GrayLevelNonUniformity               | 6.559139785  |
| original    | glszm | LargeAreaEmphasis                    | 20.75268817  |
| original    | glszm | SmallAreaHighGrayLevelEmphasis       | 295.0853792  |
| original    | glszm | ZonePercentage                       | 0.531428571  |
| original    | glszm | LargeAreaLowGrayLevelEmphasis        | 0.066927371  |
| original    | glszm | LargeAreaHighGrayLevelEmphasis       | 22280.01613  |
| original    | glszm | HighGrayLevelZoneEmphasis            | 398.7096774  |
| original    | glszm | SmallAreaEmphasis                    | 0.773964731  |
| original    | glszm | LowGrayLevelZoneEmphasis             | 0.02108792   |
| original    | glszm | ZoneEntropy                          | 5.784008146  |
| original    | glszm | SmallAreaLowGrayLevelEmphasis        | 0.017164169  |
| original    | ngtdm | Coarseness                           | 0.01134038   |
| original    | ngtdm | Complexity                           | 3446.026476  |
| original    | ngtdm | Strength                             | 9.517540963  |
| original    | ngtdm | Contrast                             | 1.188260428  |
| original    | ngtdm | Busyness                             | 0.095344958  |
| wavelet-HHH | gldm  | GrayLevelVariance                    | 10.8031102   |
| wavelet-HHH | gldm  | HighGrayLevelEmphasis                | 252.1171429  |
| wavelet-HHH | gldm  | DependenceEntropy                    | 5.881962227  |
| wavelet-HHH | gldm  | DependenceNonUniformity              | 57.14857143  |
| wavelet-HHH | gldm  | GrayLevelNonUniformity               | 38.32571429  |
| wavelet-HHH | gldm  | SmallDependenceEmphasis              | 0.338365341  |
| wavelet-HHH | gldm  | SmallDependenceHighGrayLevelEmphasis | 92.32120115  |
| wavelet-HHH | gldm  | DependenceNonUniformityNormalized    | 0.163281633  |
| wavelet-HHH | gldm  | LargeDependenceEmphasis              | 19.50857143  |
| wavelet-HHH | gldm  | LargeDependenceLowGrayLevelEmphasis  | 0.086659499  |
| wavelet-HHH | gldm  | DependenceVariance                   | 7.198497959  |
| wavelet-HHH | gldm  | LargeDependenceHighGrayLevelEmphasis | 4718.894286  |
| wavelet-HHH | gldm  | SmallDependenceLowGrayLevelEmphasis  | 0.004924157  |
| wavelet-HHH | gldm  | LowGrayLevelEmphasis                 | 0.007914438  |
| wavelet-HHH | glcm  | JointAverage                         | 15.52115051  |
| wavelet-HHH | glcm  | SumAverage                           | 31.04230101  |
| wavelet-HHH | glcm  | JointEntropy                         | 6.502223788  |
| wavelet-HHH | glcm  | ClusterShade                         | -5.139220321 |
| wavelet-HHH | glcm  | MaximumProbability                   | 0.05614627   |
| wavelet-HHH | glcm  | Idmn                                 | 0.976580747  |
| wavelet-HHH | glcm  | JointEnergy                          | 0.017931363  |
| wavelet-HHH | glcm  | Contrast                             | 19.30099582  |
| wavelet-HHH | glcm  | DifferenceEntropy                    | 3.171912396  |
| wavelet-HHH | glcm  | InverseVariance                      | 0.297347966  |
| wavelet-HHH | glcm  | DifferenceVariance                   | 9.198524639  |
| wavelet-HHH | glcm  | Idn                                  | 0.903424749  |

|             |            |                                  |              |
|-------------|------------|----------------------------------|--------------|
| wavelet-HHH | glcm       | Idm                              | 0.304559224  |
| wavelet-HHH | glcm       | Correlation                      | -0.03620386  |
| wavelet-HHH | glcm       | Autocorrelation                  | 240.5352664  |
| wavelet-HHH | glcm       | SumEntropy                       | 3.949863885  |
| wavelet-HHH | glcm       | SumSquares                       | 9.276610358  |
| wavelet-HHH | glcm       | ClusterProminence                | 1725.421194  |
| wavelet-HHH | glcm       | Imc2                             | 0.785189611  |
| wavelet-HHH | glcm       | Imc1                             | -0.138032461 |
| wavelet-HHH | glcm       | DifferenceAverage                | 3.152885538  |
| wavelet-HHH | glcm       | Id                               | 0.386085495  |
| wavelet-HHH | glcm       | ClusterTendency                  | 17.80544561  |
| wavelet-HHH | firstorder | InterquartileRange               | 78.27281222  |
| wavelet-HHH | firstorder | Skewness                         | -0.199799595 |
| wavelet-HHH | firstorder | Uniformity                       | 0.109502041  |
| wavelet-HHH | firstorder | Median                           | 0.24322208   |
| wavelet-HHH | firstorder | Energy                           | 2323797.395  |
| wavelet-HHH | firstorder | RobustMeanAbsoluteDeviation      | 34.95786317  |
| wavelet-HHH | firstorder | MeanAbsoluteDeviation            | 58.21612441  |
| wavelet-HHH | firstorder | TotalEnergy                      | 62742529.66  |
| wavelet-HHH | firstorder | Maximum                          | 276.4321823  |
| wavelet-HHH | firstorder | RootMeanSquared                  | 81.48264311  |
| wavelet-HHH | firstorder | 90Percentile                     | 104.4148275  |
| wavelet-HHH | firstorder | Minimum                          | -356.213403  |
| wavelet-HHH | firstorder | Entropy                          | 3.612506141  |
| wavelet-HHH | firstorder | Range                            | 632.6455854  |
| wavelet-HHH | firstorder | Variance                         | 6638.306311  |
| wavelet-HHH | firstorder | 10Percentile                     | -91.00813338 |
| wavelet-HHH | firstorder | Kurtosis                         | 4.974489066  |
| wavelet-HHH | firstorder | Mean                             | 1.05584898   |
| wavelet-HHH | glrlm      | ShortRunLowGrayLevelEmphasis     | 0.007986881  |
| wavelet-HHH | glrlm      | GrayLevelVariance                | 11.69010822  |
| wavelet-HHH | glrlm      | LowGrayLevelRunEmphasis          | 0.008296289  |
| wavelet-HHH | glrlm      | GrayLevelNonUniformityNormalized | 0.10034071   |
| wavelet-HHH | glrlm      | RunVariance                      | 0.131019372  |
| wavelet-HHH | glrlm      | GrayLevelNonUniformity           | 31.74295635  |
| wavelet-HHH | glrlm      | LongRunEmphasis                  | 1.357649785  |
| wavelet-HHH | glrlm      | ShortRunHighGrayLevelEmphasis    | 236.3359449  |
| wavelet-HHH | glrlm      | RunLengthNonUniformity           | 263.2249222  |
| wavelet-HHH | glrlm      | ShortRunEmphasis                 | 0.929183753  |
| wavelet-HHH | glrlm      | LongRunHighGrayLevelEmphasis     | 339.2866426  |
| wavelet-HHH | glrlm      | RunPercentage                    | 0.903516484  |
| wavelet-HHH | glrlm      | LongRunLowGrayLevelEmphasis      | 0.009850153  |
| wavelet-HHH | glrlm      | RunEntropy                       | 4.105093395  |
| wavelet-HHH | glrlm      | HighGrayLevelRunEmphasis         | 253.3750767  |
| wavelet-HHH | glrlm      | RunLengthNonUniformityNormalized | 0.831759032  |
| wavelet-HHH | glszm      | GrayLevelVariance                | 22.672896    |
| wavelet-HHH | glszm      | ZoneVariance                     | 59.824       |
| wavelet-HHH | glszm      | GrayLevelNonUniformityNormalized | 0.066752     |
| wavelet-HHH | glszm      | SizeZoneNonUniformityNormalized  | 0.536256     |
| wavelet-HHH | glszm      | SizeZoneNonUniformity            | 67.032       |
| wavelet-HHH | glszm      | GrayLevelNonUniformity           | 8.344        |
| wavelet-HHH | glszm      | LargeAreaEmphasis                | 67.664       |
| wavelet-HHH | glszm      | SmallAreaHighGrayLevelEmphasis   | 211.9075639  |



|             |            |                                      |              |
|-------------|------------|--------------------------------------|--------------|
| wavelet-HHH | glszm      | ZonePercentage                       | 0.357142857  |
| wavelet-HHH | glszm      | LargeAreaLowGrayLevelEmphasis        | 0.29777373   |
| wavelet-HHH | glszm      | LargeAreaHighGrayLevelEmphasis       | 16187.304    |
| wavelet-HHH | glszm      | HighGrayLevelZoneEmphasis            | 273.832      |
| wavelet-HHH | glszm      | SmallAreaEmphasis                    | 0.756852256  |
| wavelet-HHH | glszm      | LowGrayLevelZoneEmphasis             | 0.014082526  |
| wavelet-HHH | glszm      | ZoneEntropy                          | 5.247545127  |
| wavelet-HHH | glszm      | SmallAreaLowGrayLevelEmphasis        | 0.012896751  |
| wavelet-HHH | ngtdm      | Coarseness                           | 0.020580067  |
| wavelet-HHH | ngtdm      | Complexity                           | 547.9992854  |
| wavelet-HHH | ngtdm      | Strength                             | 3.38337055   |
| wavelet-HHH | ngtdm      | Contrast                             | 0.106102359  |
| wavelet-HHH | ngtdm      | Busyness                             | 0.111680769  |
| wavelet-HLL | gldm       | GrayLevelVariance                    | 78.60297143  |
| wavelet-HLL | gldm       | HighGrayLevelEmphasis                | 555.5885714  |
| wavelet-HLL | gldm       | DependenceEntropy                    | 6.554693008  |
| wavelet-HLL | gldm       | DependenceNonUniformity              | 94.50285714  |
| wavelet-HLL | gldm       | GrayLevelNonUniformity               | 13.24571429  |
| wavelet-HLL | gldm       | SmallDependenceEmphasis              | 0.491271728  |
| wavelet-HLL | gldm       | SmallDependenceHighGrayLevelEmphasis | 281.0825847  |
| wavelet-HLL | gldm       | DependenceNonUniformityNormalized    | 0.270008163  |
| wavelet-HLL | gldm       | LargeDependenceEmphasis              | 7.08         |
| wavelet-HLL | gldm       | LargeDependenceLowGrayLevelEmphasis  | 0.046256145  |
| wavelet-HLL | gldm       | DependenceVariance                   | 2.0624       |
| wavelet-HLL | gldm       | LargeDependenceHighGrayLevelEmphasis | 3603.457143  |
| wavelet-HLL | gldm       | SmallDependenceLowGrayLevelEmphasis  | 0.004547597  |
| wavelet-HLL | gldm       | LowGrayLevelEmphasis                 | 0.01045808   |
| wavelet-HLL | glcm       | JointAverage                         | 21.48420346  |
| wavelet-HLL | glcm       | SumAverage                           | 42.96840692  |
| wavelet-HLL | glcm       | JointEntropy                         | 8.231563236  |
| wavelet-HLL | glcm       | ClusterShade                         | 2203.623373  |
| wavelet-HLL | glcm       | MaximumProbability                   | 0.015301997  |
| wavelet-HLL | glcm       | ldmn                                 | 0.964473924  |
| wavelet-HLL | glcm       | JointEnergy                          | 0.004046769  |
| wavelet-HLL | glcm       | Contrast                             | 100.5767146  |
| wavelet-HLL | glcm       | DifferenceEntropy                    | 4.200232458  |
| wavelet-HLL | glcm       | InverseVariance                      | 0.156840501  |
| wavelet-HLL | glcm       | DifferenceVariance                   | 44.68878378  |
| wavelet-HLL | glcm       | ldn                                  | 0.882017028  |
| wavelet-HLL | glcm       | ldm                                  | 0.1606472    |
| wavelet-HLL | glcm       | Correlation                          | 0.348284744  |
| wavelet-HLL | glcm       | Autocorrelation                      | 489.5546872  |
| wavelet-HLL | glcm       | SumEntropy                           | 5.554126114  |
| wavelet-HLL | glcm       | SumSquares                           | 78.240171    |
| wavelet-HLL | glcm       | ClusterProminence                    | 163598.4844  |
| wavelet-HLL | glcm       | lmc2                                 | 0.982189705  |
| wavelet-HLL | glcm       | lmc1                                 | -0.339543511 |
| wavelet-HLL | glcm       | DifferenceAverage                    | 7.27367603   |
| wavelet-HLL | glcm       | ld                                   | 0.245815044  |
| wavelet-HLL | glcm       | ClusterTendency                      | 212.3839694  |
| wavelet-HLL | firstorder | InterquartileRange                   | 261.8080283  |
| wavelet-HLL | firstorder | Skewness                             | 0.555920985  |
| wavelet-HLL | firstorder | Uniformity                           | 0.037844898  |

|             |            |                                  |              |
|-------------|------------|----------------------------------|--------------|
| wavelet-HLL | firstorder | Median                           | -35.75135114 |
| wavelet-HLL | firstorder | Energy                           | 17238857.27  |
| wavelet-HLL | firstorder | RobustMeanAbsoluteDeviation      | 110.094173   |
| wavelet-HLL | firstorder | MeanAbsoluteDeviation            | 168.890296   |
| wavelet-HLL | firstorder | TotalEnergy                      | 465449146.4  |
| wavelet-HLL | firstorder | Maximum                          | 658.8796816  |
| wavelet-HLL | firstorder | RootMeanSquared                  | 221.9321471  |
| wavelet-HLL | firstorder | 90Percentile                     | 277.53847    |
| wavelet-HLL | firstorder | Minimum                          | -542.8901127 |
| wavelet-HLL | firstorder | Entropy                          | 5.008817338  |
| wavelet-HLL | firstorder | Range                            | 1201.769794  |
| wavelet-HLL | firstorder | Variance                         | 48972.32829  |
| wavelet-HLL | firstorder | 10Percentile                     | -281.2241312 |
| wavelet-HLL | firstorder | Kurtosis                         | 3.409704155  |
| wavelet-HLL | firstorder | Mean                             | -16.77944074 |
| wavelet-HLL | grlm       | ShortRunLowGrayLevelEmphasis     | 0.010310317  |
| wavelet-HLL | grlm       | GrayLevelVariance                | 79.7245809   |
| wavelet-HLL | grlm       | LowGrayLevelRunEmphasis          | 0.010596495  |
| wavelet-HLL | grlm       | GrayLevelNonUniformityNormalized | 0.037076116  |
| wavelet-HLL | grlm       | RunVariance                      | 0.053646252  |
| wavelet-HLL | grlm       | GrayLevelNonUniformity           | 12.35850511  |
| wavelet-HLL | grlm       | LongRunEmphasis                  | 1.157559135  |
| wavelet-HLL | grlm       | ShortRunHighGrayLevelEmphasis    | 538.8813276  |
| wavelet-HLL | grlm       | RunLengthNonUniformity           | 303.4895734  |
| wavelet-HLL | grlm       | ShortRunEmphasis                 | 0.964016259  |
| wavelet-HLL | grlm       | LongRunHighGrayLevelEmphasis     | 638.7849325  |
| wavelet-HLL | grlm       | RunPercentage                    | 0.952307692  |
| wavelet-HLL | grlm       | LongRunLowGrayLevelEmphasis      | 0.011784279  |
| wavelet-HLL | grlm       | RunEntropy                       | 5.237930514  |
| wavelet-HLL | grlm       | HighGrayLevelRunEmphasis         | 557.5416942  |
| wavelet-HLL | grlm       | RunLengthNonUniformityNormalized | 0.90992818   |
| wavelet-HLL | glszm      | GrayLevelVariance                | 92.17435897  |
| wavelet-HLL | glszm      | ZoneVariance                     | 3.414332676  |
| wavelet-HLL | glszm      | GrayLevelNonUniformityNormalized | 0.032636423  |
| wavelet-HLL | glszm      | SizeZoneNonUniformityNormalized  | 0.534464168  |
| wavelet-HLL | glszm      | SizeZoneNonUniformity            | 104.2205128  |
| wavelet-HLL | glszm      | GrayLevelNonUniformity           | 6.364102564  |
| wavelet-HLL | glszm      | LargeAreaEmphasis                | 6.635897436  |
| wavelet-HLL | glszm      | SmallAreaHighGrayLevelEmphasis   | 434.9941717  |
| wavelet-HLL | glszm      | ZonePercentage                   | 0.557142857  |
| wavelet-HLL | glszm      | LargeAreaLowGrayLevelEmphasis    | 0.043899622  |
| wavelet-HLL | glszm      | LargeAreaHighGrayLevelEmphasis   | 3324.194872  |
| wavelet-HLL | glszm      | HighGrayLevelZoneEmphasis        | 576.174359   |
| wavelet-HLL | glszm      | SmallAreaEmphasis                | 0.755681167  |
| wavelet-HLL | glszm      | LowGrayLevelZoneEmphasis         | 0.011136751  |
| wavelet-HLL | glszm      | ZoneEntropy                      | 6.012125989  |
| wavelet-HLL | glszm      | SmallAreaLowGrayLevelEmphasis    | 0.006481124  |
| wavelet-HLL | ngtdm      | Coarseness                       | 0.01958553   |
| wavelet-HLL | ngtdm      | Complexity                       | 4160.904823  |
| wavelet-HLL | ngtdm      | Strength                         | 14.03058004  |
| wavelet-HLL | ngtdm      | Contrast                         | 0.384871211  |
| wavelet-HLL | ngtdm      | Busyness                         | 0.055330914  |
| wavelet-LHL | gldm       | GrayLevelVariance                | 43.81244898  |

|             |            |                                      |              |
|-------------|------------|--------------------------------------|--------------|
| wavelet-LHL | gldm       | HighGrayLevelEmphasis                | 598.7514286  |
| wavelet-LHL | gldm       | DependenceEntropy                    | 6.36575259   |
| wavelet-LHL | gldm       | DependenceNonUniformity              | 89.84571429  |
| wavelet-LHL | gldm       | GrayLevelNonUniformity               | 16.09142857  |
| wavelet-LHL | gldm       | SmallDependenceEmphasis              | 0.452098252  |
| wavelet-LHL | gldm       | SmallDependenceHighGrayLevelEmphasis | 283.533085   |
| wavelet-LHL | gldm       | DependenceNonUniformityNormalized    | 0.256702041  |
| wavelet-LHL | gldm       | LargeDependenceEmphasis              | 7.451428571  |
| wavelet-LHL | gldm       | LargeDependenceLowGrayLevelEmphasis  | 0.018606089  |
| wavelet-LHL | gldm       | DependenceVariance                   | 2.095510204  |
| wavelet-LHL | gldm       | LargeDependenceHighGrayLevelEmphasis | 4336.254286  |
| wavelet-LHL | gldm       | SmallDependenceLowGrayLevelEmphasis  | 0.004182147  |
| wavelet-LHL | gldm       | LowGrayLevelEmphasis                 | 0.005395744  |
| wavelet-LHL | glcm       | JointAverage                         | 23.53637216  |
| wavelet-LHL | glcm       | SumAverage                           | 47.07274431  |
| wavelet-LHL | glcm       | JointEntropy                         | 8.094680702  |
| wavelet-LHL | glcm       | ClusterShade                         | 168.8712462  |
| wavelet-LHL | glcm       | MaximumProbability                   | 0.015671466  |
| wavelet-LHL | glcm       | ldmn                                 | 0.96627952   |
| wavelet-LHL | glcm       | JointEnergy                          | 0.004473866  |
| wavelet-LHL | glcm       | Contrast                             | 68.19580328  |
| wavelet-LHL | glcm       | DifferenceEntropy                    | 3.984198942  |
| wavelet-LHL | glcm       | InverseVariance                      | 0.168711117  |
| wavelet-LHL | glcm       | DifferenceVariance                   | 28.07220517  |
| wavelet-LHL | glcm       | ldn                                  | 0.88198232   |
| wavelet-LHL | glcm       | ldm                                  | 0.172326785  |
| wavelet-LHL | glcm       | Correlation                          | 0.23773817   |
| wavelet-LHL | glcm       | Autocorrelation                      | 564.3824167  |
| wavelet-LHL | glcm       | SumEntropy                           | 5.224815995  |
| wavelet-LHL | glcm       | SumSquares                           | 44.50345296  |
| wavelet-LHL | glcm       | ClusterProminence                    | 38668.23582  |
| wavelet-LHL | glcm       | lmc2                                 | 0.963842743  |
| wavelet-LHL | glcm       | lmc1                                 | -0.282458067 |
| wavelet-LHL | glcm       | DifferenceAverage                    | 6.167279649  |
| wavelet-LHL | glcm       | ld                                   | 0.261157641  |
| wavelet-LHL | glcm       | ClusterTendency                      | 109.8180085  |
| wavelet-LHL | firstorder | InterquartileRange                   | 208.8824707  |
| wavelet-LHL | firstorder | Skewness                             | -0.13101423  |
| wavelet-LHL | firstorder | Uniformity                           | 0.04597551   |
| wavelet-LHL | firstorder | Median                               | -15.51968159 |
| wavelet-LHL | firstorder | Energy                               | 9771110.055  |
| wavelet-LHL | firstorder | RobustMeanAbsoluteDeviation          | 87.36874589  |
| wavelet-LHL | firstorder | MeanAbsoluteDeviation                | 129.103526   |
| wavelet-LHL | firstorder | TotalEnergy                          | 263819971.5  |
| wavelet-LHL | firstorder | Maximum                              | 434.5014793  |
| wavelet-LHL | firstorder | RootMeanSquared                      | 167.0851798  |
| wavelet-LHL | firstorder | 90Percentile                         | 180.3381592  |
| wavelet-LHL | firstorder | Minimum                              | -594.6210176 |
| wavelet-LHL | firstorder | Entropy                              | 4.710205061  |
| wavelet-LHL | firstorder | Range                                | 1029.122497  |
| wavelet-LHL | firstorder | Variance                             | 27339.82108  |
| wavelet-LHL | firstorder | 10Percentile                         | -235.77446   |
| wavelet-LHL | firstorder | Kurtosis                             | 3.251345747  |

|             |            |                                      |              |
|-------------|------------|--------------------------------------|--------------|
| wavelet-LHL | firstorder | Mean                                 | -24.03406363 |
| wavelet-LHL | glrlm      | ShortRunLowGrayLevelEmphasis         | 0.00548976   |
| wavelet-LHL | glrlm      | GrayLevelVariance                    | 44.93630054  |
| wavelet-LHL | glrlm      | LowGrayLevelRunEmphasis              | 0.005570425  |
| wavelet-LHL | glrlm      | GrayLevelNonUniformityNormalized     | 0.044964277  |
| wavelet-LHL | glrlm      | RunVariance                          | 0.059275597  |
| wavelet-LHL | glrlm      | GrayLevelNonUniformity               | 14.94262718  |
| wavelet-LHL | glrlm      | LongRunEmphasis                      | 1.16979068   |
| wavelet-LHL | glrlm      | ShortRunHighGrayLevelEmphasis        | 578.3686154  |
| wavelet-LHL | glrlm      | RunLengthNonUniformity               | 301.3389806  |
| wavelet-LHL | glrlm      | ShortRunEmphasis                     | 0.962392812  |
| wavelet-LHL | glrlm      | LongRunHighGrayLevelEmphasis         | 697.4375097  |
| wavelet-LHL | glrlm      | RunPercentage                        | 0.949450549  |
| wavelet-LHL | glrlm      | LongRunLowGrayLevelEmphasis          | 0.005932349  |
| wavelet-LHL | glrlm      | RunEntropy                           | 4.963597729  |
| wavelet-LHL | glrlm      | HighGrayLevelRunEmphasis             | 600.0420012  |
| wavelet-LHL | glrlm      | RunLengthNonUniformityNormalized     | 0.906236675  |
| wavelet-LHL | glszm      | GrayLevelVariance                    | 59.52929738  |
| wavelet-LHL | glszm      | ZoneVariance                         | 4.261603134  |
| wavelet-LHL | glszm      | GrayLevelNonUniformityNormalized     | 0.038748606  |
| wavelet-LHL | glszm      | SizeZoneNonUniformityNormalized      | 0.467928737  |
| wavelet-LHL | glszm      | SizeZoneNonUniformity                | 87.5026738   |
| wavelet-LHL | glszm      | GrayLevelNonUniformity               | 7.245989305  |
| wavelet-LHL | glszm      | LargeAreaEmphasis                    | 7.764705882  |
| wavelet-LHL | glszm      | SmallAreaHighGrayLevelEmphasis       | 452.5451919  |
| wavelet-LHL | glszm      | ZonePercentage                       | 0.534285714  |
| wavelet-LHL | glszm      | LargeAreaLowGrayLevelEmphasis        | 0.021760705  |
| wavelet-LHL | glszm      | LargeAreaHighGrayLevelEmphasis       | 4528.700535  |
| wavelet-LHL | glszm      | HighGrayLevelZoneEmphasis            | 622.0053476  |
| wavelet-LHL | glszm      | SmallAreaEmphasis                    | 0.710267305  |
| wavelet-LHL | glszm      | LowGrayLevelZoneEmphasis             | 0.008187438  |
| wavelet-LHL | glszm      | ZoneEntropy                          | 6.02443288   |
| wavelet-LHL | glszm      | SmallAreaLowGrayLevelEmphasis        | 0.007523938  |
| wavelet-LHL | ngtdm      | Coarseness                           | 0.018923807  |
| wavelet-LHL | ngtdm      | Complexity                           | 2394.959705  |
| wavelet-LHL | ngtdm      | Strength                             | 8.351040784  |
| wavelet-LHL | ngtdm      | Contrast                             | 0.274420613  |
| wavelet-LHL | ngtdm      | Busyness                             | 0.059132859  |
| wavelet-LHH | gldm       | GrayLevelVariance                    | 20.61306939  |
| wavelet-LHH | gldm       | HighGrayLevelEmphasis                | 404.4371429  |
| wavelet-LHH | gldm       | DependenceEntropy                    | 5.997762872  |
| wavelet-LHH | gldm       | DependenceNonUniformity              | 69.41142857  |
| wavelet-LHH | gldm       | GrayLevelNonUniformity               | 28.04571429  |
| wavelet-LHH | gldm       | SmallDependenceEmphasis              | 0.393350736  |
| wavelet-LHH | gldm       | SmallDependenceHighGrayLevelEmphasis | 168.7367916  |
| wavelet-LHH | gldm       | DependenceNonUniformityNormalized    | 0.198318367  |
| wavelet-LHH | gldm       | LargeDependenceEmphasis              | 12.05714286  |
| wavelet-LHH | gldm       | LargeDependenceLowGrayLevelEmphasis  | 0.036318105  |
| wavelet-LHH | gldm       | DependenceVariance                   | 3.729795918  |
| wavelet-LHH | gldm       | LargeDependenceHighGrayLevelEmphasis | 4588.705714  |
| wavelet-LHH | gldm       | SmallDependenceLowGrayLevelEmphasis  | 0.00427589   |
| wavelet-LHH | gldm       | LowGrayLevelEmphasis                 | 0.005985219  |
| wavelet-LHH | glcm       | JointAverage                         | 19.65020872  |

|             |            |                                  |              |
|-------------|------------|----------------------------------|--------------|
| wavelet-LHH | glcm       | SumAverage                       | 39.30041744  |
| wavelet-LHH | glcm       | JointEntropy                     | 7.180400767  |
| wavelet-LHH | glcm       | ClusterShade                     | 45.53780638  |
| wavelet-LHH | glcm       | MaximumProbability               | 0.03566766   |
| wavelet-LHH | glcm       | Idmn                             | 0.971847814  |
| wavelet-LHH | glcm       | JointEnergy                      | 0.010612128  |
| wavelet-LHH | glcm       | Contrast                         | 37.02349645  |
| wavelet-LHH | glcm       | DifferenceEntropy                | 3.584038476  |
| wavelet-LHH | glcm       | InverseVariance                  | 0.246072634  |
| wavelet-LHH | glcm       | DifferenceVariance               | 17.28533476  |
| wavelet-LHH | glcm       | Idn                              | 0.895205189  |
| wavelet-LHH | glcm       | Idm                              | 0.243791999  |
| wavelet-LHH | glcm       | Correlation                      | -0.022430701 |
| wavelet-LHH | glcm       | Autocorrelation                  | 385.7531885  |
| wavelet-LHH | glcm       | SumEntropy                       | 4.408681096  |
| wavelet-LHH | glcm       | SumSquares                       | 18.13011913  |
| wavelet-LHH | glcm       | ClusterProminence                | 5999.092284  |
| wavelet-LHH | glcm       | Imc2                             | 0.873417688  |
| wavelet-LHH | glcm       | Imc1                             | -0.184534032 |
| wavelet-LHH | glcm       | DifferenceAverage                | 4.382139836  |
| wavelet-LHH | glcm       | Id                               | 0.328840584  |
| wavelet-LHH | glcm       | ClusterTendency                  | 35.49698009  |
| wavelet-LHH | firstorder | InterquartileRange               | 110.3355585  |
| wavelet-LHH | firstorder | Skewness                         | 0.139101502  |
| wavelet-LHH | firstorder | Uniformity                       | 0.080130612  |
| wavelet-LHH | firstorder | Median                           | -4.238125041 |
| wavelet-LHH | firstorder | Energy                           | 4488045.455  |
| wavelet-LHH | firstorder | RobustMeanAbsoluteDeviation      | 49.09268655  |
| wavelet-LHH | firstorder | MeanAbsoluteDeviation            | 81.5528336   |
| wavelet-LHH | firstorder | TotalEnergy                      | 121177227.3  |
| wavelet-LHH | firstorder | Maximum                          | 359.3804269  |
| wavelet-LHH | firstorder | RootMeanSquared                  | 113.2386286  |
| wavelet-LHH | firstorder | 90Percentile                     | 136.2943041  |
| wavelet-LHH | firstorder | Minimum                          | -468.7408364 |
| wavelet-LHH | firstorder | Entropy                          | 4.071387942  |
| wavelet-LHH | firstorder | Range                            | 828.1212633  |
| wavelet-LHH | firstorder | Variance                         | 12817.25802  |
| wavelet-LHH | firstorder | 10Percentile                     | -125.4479472 |
| wavelet-LHH | firstorder | Kurtosis                         | 4.497671986  |
| wavelet-LHH | firstorder | Mean                             | 2.393531672  |
| wavelet-LHH | grlm       | ShortRunLowGrayLevelEmphasis     | 0.006088314  |
| wavelet-LHH | grlm       | GrayLevelVariance                | 21.82338823  |
| wavelet-LHH | grlm       | LowGrayLevelRunEmphasis          | 0.006237919  |
| wavelet-LHH | grlm       | GrayLevelNonUniformityNormalized | 0.075224636  |
| wavelet-LHH | grlm       | RunVariance                      | 0.09421636   |
| wavelet-LHH | grlm       | GrayLevelNonUniformity           | 24.4231265   |
| wavelet-LHH | grlm       | LongRunEmphasis                  | 1.258251242  |
| wavelet-LHH | grlm       | ShortRunHighGrayLevelEmphasis    | 385.6381854  |
| wavelet-LHH | grlm       | RunLengthNonUniformity           | 282.077858   |
| wavelet-LHH | grlm       | ShortRunEmphasis                 | 0.946115865  |
| wavelet-LHH | grlm       | LongRunHighGrayLevelEmphasis     | 504.4372278  |
| wavelet-LHH | grlm       | RunPercentage                    | 0.927472527  |
| wavelet-LHH | grlm       | LongRunLowGrayLevelEmphasis      | 0.006953028  |

|             |       |                                      |             |
|-------------|-------|--------------------------------------|-------------|
| wavelet-LHH | grlm  | RunEntropy                           | 4.45298531  |
| wavelet-LHH | grlm  | HighGrayLevelRunEmphasis             | 406.2562921 |
| wavelet-LHH | grlm  | RunLengthNonUniformityNormalized     | 0.868381884 |
| wavelet-LHH | glszm | GrayLevelVariance                    | 39.23447772 |
| wavelet-LHH | glszm | ZoneVariance                         | 35.24525201 |
| wavelet-LHH | glszm | GrayLevelNonUniformityNormalized     | 0.051680058 |
| wavelet-LHH | glszm | SizeZoneNonUniformityNormalized      | 0.563367421 |
| wavelet-LHH | glszm | SizeZoneNonUniformity                | 83.37837838 |
| wavelet-LHH | glszm | GrayLevelNonUniformity               | 7.648648649 |
| wavelet-LHH | glszm | LargeAreaEmphasis                    | 40.83783784 |
| wavelet-LHH | glszm | SmallAreaHighGrayLevelEmphasis       | 338.3680835 |
| wavelet-LHH | glszm | ZonePercentage                       | 0.422857143 |
| wavelet-LHH | glszm | LargeAreaLowGrayLevelEmphasis        | 0.119989978 |
| wavelet-LHH | glszm | LargeAreaHighGrayLevelEmphasis       | 15131.15541 |
| wavelet-LHH | glszm | HighGrayLevelZoneEmphasis            | 431.7027027 |
| wavelet-LHH | glszm | SmallAreaEmphasis                    | 0.776647864 |
| wavelet-LHH | glszm | LowGrayLevelZoneEmphasis             | 0.010328233 |
| wavelet-LHH | glszm | ZoneEntropy                          | 5.439726364 |
| wavelet-LHH | glszm | SmallAreaLowGrayLevelEmphasis        | 0.009671278 |
| wavelet-LHH | ngtdm | Coarseness                           | 0.019188715 |
| wavelet-LHH | ngtdm | Complexity                           | 1127.159865 |
| wavelet-LHH | ngtdm | Strength                             | 4.653269042 |
| wavelet-LHH | ngtdm | Contrast                             | 0.175802871 |
| wavelet-LHH | ngtdm | Busyness                             | 0.080907947 |
| wavelet-LLH | gldm  | GrayLevelVariance                    | 75.66113469 |
| wavelet-LLH | gldm  | HighGrayLevelEmphasis                | 582.6828571 |
| wavelet-LLH | gldm  | DependenceEntropy                    | 6.431842381 |
| wavelet-LLH | gldm  | DependenceNonUniformity              | 108.8457143 |
| wavelet-LLH | gldm  | GrayLevelNonUniformity               | 14.06857143 |
| wavelet-LLH | gldm  | SmallDependenceEmphasis              | 0.540564987 |
| wavelet-LLH | gldm  | SmallDependenceHighGrayLevelEmphasis | 370.3912391 |
| wavelet-LLH | gldm  | DependenceNonUniformityNormalized    | 0.310987755 |
| wavelet-LLH | gldm  | LargeDependenceEmphasis              | 5.771428571 |
| wavelet-LLH | gldm  | LargeDependenceLowGrayLevelEmphasis  | 0.020953897 |
| wavelet-LLH | gldm  | DependenceVariance                   | 1.679477551 |
| wavelet-LLH | gldm  | LargeDependenceHighGrayLevelEmphasis | 2761.562857 |
| wavelet-LLH | gldm  | SmallDependenceLowGrayLevelEmphasis  | 0.005046836 |
| wavelet-LLH | gldm  | LowGrayLevelEmphasis                 | 0.006646295 |
| wavelet-LLH | glcm  | JointAverage                         | 21.46628925 |
| wavelet-LLH | glcm  | SumAverage                           | 42.93257851 |
| wavelet-LLH | glcm  | JointEntropy                         | 8.182215197 |
| wavelet-LLH | glcm  | ClusterShade                         | 2175.109866 |
| wavelet-LLH | glcm  | MaximumProbability                   | 0.012082951 |
| wavelet-LLH | glcm  | ldmn                                 | 0.96948324  |
| wavelet-LLH | glcm  | JointEnergy                          | 0.004102272 |
| wavelet-LLH | glcm  | Contrast                             | 110.2319031 |
| wavelet-LLH | glcm  | DifferenceEntropy                    | 4.214157835 |
| wavelet-LLH | glcm  | InverseVariance                      | 0.153418463 |
| wavelet-LLH | glcm  | DifferenceVariance                   | 52.42943081 |
| wavelet-LLH | glcm  | ldn                                  | 0.89098057  |
| wavelet-LLH | glcm  | ldm                                  | 0.147473231 |
| wavelet-LLH | glcm  | Correlation                          | 0.195358784 |
| wavelet-LLH | glcm  | Autocorrelation                      | 475.4582954 |

|             |            |                                  |              |
|-------------|------------|----------------------------------|--------------|
| wavelet-LLH | glcm       | SumEntropy                       | 5.359206087  |
| wavelet-LLH | glcm       | SumSquares                       | 69.70005644  |
| wavelet-LLH | glcm       | ClusterProminence                | 144733.6235  |
| wavelet-LLH | glcm       | Imc2                             | 0.972873565  |
| wavelet-LLH | glcm       | Imc1                             | -0.305746609 |
| wavelet-LLH | glcm       | DifferenceAverage                | 7.447748639  |
| wavelet-LLH | glcm       | Id                               | 0.234842252  |
| wavelet-LLH | glcm       | ClusterTendency                  | 168.5683226  |
| wavelet-LLH | firstorder | InterquartileRange               | 229.2608305  |
| wavelet-LLH | firstorder | Skewness                         | 0.794569076  |
| wavelet-LLH | firstorder | Uniformity                       | 0.040195918  |
| wavelet-LLH | firstorder | Median                           | -56.11476052 |
| wavelet-LLH | firstorder | Energy                           | 16688482.58  |
| wavelet-LLH | firstorder | RobustMeanAbsoluteDeviation      | 102.1891256  |
| wavelet-LLH | firstorder | MeanAbsoluteDeviation            | 162.5505601  |
| wavelet-LLH | firstorder | TotalEnergy                      | 450589029.5  |
| wavelet-LLH | firstorder | Maximum                          | 781.0270615  |
| wavelet-LLH | firstorder | RootMeanSquared                  | 218.3606622  |
| wavelet-LLH | firstorder | 90Percentile                     | 272.3550724  |
| wavelet-LLH | firstorder | Minimum                          | -561.7914418 |
| wavelet-LLH | firstorder | Entropy                          | 4.924853694  |
| wavelet-LLH | firstorder | Range                            | 1342.818503  |
| wavelet-LLH | firstorder | Variance                         | 47091.57311  |
| wavelet-LLH | firstorder | 10Percentile                     | -261.1573519 |
| wavelet-LLH | firstorder | Kurtosis                         | 4.122623226  |
| wavelet-LLH | firstorder | Mean                             | -24.28591521 |
| wavelet-LLH | glrlm      | ShortRunLowGrayLevelEmphasis     | 0.006698558  |
| wavelet-LLH | glrlm      | GrayLevelVariance                | 77.34979465  |
| wavelet-LLH | glrlm      | LowGrayLevelRunEmphasis          | 0.006787435  |
| wavelet-LLH | glrlm      | GrayLevelNonUniformityNormalized | 0.039553559  |
| wavelet-LLH | glrlm      | RunVariance                      | 0.045754193  |
| wavelet-LLH | glrlm      | GrayLevelNonUniformity           | 13.29860976  |
| wavelet-LLH | glrlm      | LongRunEmphasis                  | 1.1304073    |
| wavelet-LLH | glrlm      | ShortRunHighGrayLevelEmphasis    | 574.42271    |
| wavelet-LLH | glrlm      | RunLengthNonUniformity           | 311.8710977  |
| wavelet-LLH | glrlm      | ShortRunEmphasis                 | 0.971023391  |
| wavelet-LLH | glrlm      | LongRunHighGrayLevelEmphasis     | 647.1471881  |
| wavelet-LLH | glrlm      | RunPercentage                    | 0.960659341  |
| wavelet-LLH | glrlm      | LongRunLowGrayLevelEmphasis      | 0.007223722  |
| wavelet-LLH | glrlm      | RunEntropy                       | 5.119305821  |
| wavelet-LLH | glrlm      | HighGrayLevelRunEmphasis         | 587.826438   |
| wavelet-LLH | glrlm      | RunLengthNonUniformityNormalized | 0.927026739  |
| wavelet-LLH | glszm      | GrayLevelVariance                | 98.01168199  |
| wavelet-LLH | glszm      | ZoneVariance                     | 2.652031123  |
| wavelet-LLH | glszm      | GrayLevelNonUniformityNormalized | 0.033348762  |
| wavelet-LLH | glszm      | SizeZoneNonUniformityNormalized  | 0.559963852  |
| wavelet-LLH | glszm      | SizeZoneNonUniformity            | 119.2723005  |
| wavelet-LLH | glszm      | GrayLevelNonUniformity           | 7.103286385  |
| wavelet-LLH | glszm      | LargeAreaEmphasis                | 5.352112676  |
| wavelet-LLH | glszm      | SmallAreaHighGrayLevelEmphasis   | 556.7325858  |
| wavelet-LLH | glszm      | ZonePercentage                   | 0.608571429  |
| wavelet-LLH | glszm      | LargeAreaLowGrayLevelEmphasis    | 0.022155433  |
| wavelet-LLH | glszm      | LargeAreaHighGrayLevelEmphasis   | 2533.488263  |

|             |            |                                      |              |
|-------------|------------|--------------------------------------|--------------|
| wavelet-LLH | glszm      | HighGrayLevelZoneEmphasis            | 665.0328638  |
| wavelet-LLH | glszm      | SmallAreaEmphasis                    | 0.775854882  |
| wavelet-LLH | glszm      | LowGrayLevelZoneEmphasis             | 0.008718808  |
| wavelet-LLH | glszm      | ZoneEntropy                          | 6.068613935  |
| wavelet-LLH | glszm      | SmallAreaLowGrayLevelEmphasis        | 0.007875878  |
| wavelet-LLH | ngtdm      | Coarseness                           | 0.019610889  |
| wavelet-LLH | ngtdm      | Complexity                           | 4477.974202  |
| wavelet-LLH | ngtdm      | Strength                             | 14.40017371  |
| wavelet-LLH | ngtdm      | Contrast                             | 0.384384627  |
| wavelet-LLH | ngtdm      | Busyness                             | 0.05149556   |
| wavelet-LLL | gldm       | GrayLevelVariance                    | 828.1799265  |
| wavelet-LLL | gldm       | HighGrayLevelEmphasis                | 3621.151429  |
| wavelet-LLL | gldm       | DependenceEntropy                    | 6.967374614  |
| wavelet-LLL | gldm       | DependenceNonUniformity              | 181.44       |
| wavelet-LLL | gldm       | GrayLevelNonUniformity               | 5.108571429  |
| wavelet-LLL | gldm       | SmallDependenceEmphasis              | 0.747783333  |
| wavelet-LLL | gldm       | SmallDependenceHighGrayLevelEmphasis | 2292.071877  |
| wavelet-LLL | gldm       | DependenceNonUniformityNormalized    | 0.5184       |
| wavelet-LLL | gldm       | LargeDependenceEmphasis              | 2.954285714  |
| wavelet-LLL | gldm       | LargeDependenceLowGrayLevelEmphasis  | 0.006932324  |
| wavelet-LLL | gldm       | DependenceVariance                   | 0.729926531  |
| wavelet-LLL | gldm       | LargeDependenceHighGrayLevelEmphasis | 15903.02     |
| wavelet-LLL | gldm       | SmallDependenceLowGrayLevelEmphasis  | 0.005195129  |
| wavelet-LLL | gldm       | LowGrayLevelEmphasis                 | 0.005461341  |
| wavelet-LLL | glcm       | JointAverage                         | 59.77972245  |
| wavelet-LLL | glcm       | SumAverage                           | 119.5594449  |
| wavelet-LLL | glcm       | JointEntropy                         | 8.780436298  |
| wavelet-LLL | glcm       | ClusterShade                         | -33970.56648 |
| wavelet-LLL | glcm       | MaximumProbability                   | 0.008289281  |
| wavelet-LLL | glcm       | Idmn                                 | 0.949774815  |
| wavelet-LLL | glcm       | JointEnergy                          | 0.002448702  |
| wavelet-LLL | glcm       | Contrast                             | 605.4426141  |
| wavelet-LLL | glcm       | DifferenceEntropy                    | 5.377996251  |
| wavelet-LLL | glcm       | InverseVariance                      | 0.076442752  |
| wavelet-LLL | glcm       | DifferenceVariance                   | 229.6252321  |
| wavelet-LLL | glcm       | Idn                                  | 0.856237208  |
| wavelet-LLL | glcm       | Idm                                  | 0.073261131  |
| wavelet-LLL | glcm       | Correlation                          | 0.60620523   |
| wavelet-LLL | glcm       | Autocorrelation                      | 4049.969374  |
| wavelet-LLL | glcm       | SumEntropy                           | 6.830048331  |
| wavelet-LLL | glcm       | SumSquares                           | 776.3275168  |
| wavelet-LLL | glcm       | ClusterProminence                    | 11733730.01  |
| wavelet-LLL | glcm       | Imc2                                 | 0.999625026  |
| wavelet-LLL | glcm       | Imc1                                 | -0.581570221 |
| wavelet-LLL | glcm       | DifferenceAverage                    | 18.98963782  |
| wavelet-LLL | glcm       | Id                                   | 0.135248199  |
| wavelet-LLL | glcm       | ClusterTendency                      | 2499.867453  |
| wavelet-LLL | firstorder | InterquartileRange                   | 1393.022449  |
| wavelet-LLL | firstorder | Skewness                             | -0.00171901  |
| wavelet-LLL | firstorder | Uniformity                           | 0.014595918  |
| wavelet-LLL | firstorder | Median                               | -876.4456182 |
| wavelet-LLL | firstorder | Energy                               | 443727086.4  |
| wavelet-LLL | firstorder | RobustMeanAbsoluteDeviation          | 531.1984154  |



|             |            |                                  |              |
|-------------|------------|----------------------------------|--------------|
| wavelet-LLL | firstorder | MeanAbsoluteDeviation            | 636.7299406  |
| wavelet-LLL | firstorder | TotalEnergy                      | 11980631332  |
| wavelet-LLL | firstorder | Maximum                          | 360.5092351  |
| wavelet-LLL | firstorder | RootMeanSquared                  | 1125.962555  |
| wavelet-LLL | firstorder | 90Percentile                     | 104.5889855  |
| wavelet-LLL | firstorder | Minimum                          | -2152.926257 |
| wavelet-LLL | firstorder | Entropy                          | 6.294651881  |
| wavelet-LLL | firstorder | Range                            | 2513.435492  |
| wavelet-LLL | firstorder | Variance                         | 517727.4835  |
| wavelet-LLL | firstorder | 10Percentile                     | -1830.471164 |
| wavelet-LLL | firstorder | Kurtosis                         | 1.647770775  |
| wavelet-LLL | firstorder | Mean                             | -866.0624642 |
| wavelet-LLL | grlm       | ShortRunLowGrayLevelEmphasis     | 0.005539163  |
| wavelet-LLL | grlm       | GrayLevelVariance                | 821.1198284  |
| wavelet-LLL | grlm       | LowGrayLevelRunEmphasis          | 0.005550137  |
| wavelet-LLL | grlm       | GrayLevelNonUniformityNormalized | 0.014447039  |
| wavelet-LLL | grlm       | RunVariance                      | 0.020247442  |
| wavelet-LLL | grlm       | GrayLevelNonUniformity           | 4.960970687  |
| wavelet-LLL | grlm       | LongRunEmphasis                  | 1.059413524  |
| wavelet-LLL | grlm       | ShortRunHighGrayLevelEmphasis    | 3493.116742  |
| wavelet-LLL | grlm       | RunLengthNonUniformity           | 330.8953193  |
| wavelet-LLL | grlm       | ShortRunEmphasis                 | 0.985901543  |
| wavelet-LLL | grlm       | LongRunHighGrayLevelEmphasis     | 3923.343141  |
| wavelet-LLL | grlm       | RunPercentage                    | 0.981098901  |
| wavelet-LLL | grlm       | LongRunLowGrayLevelEmphasis      | 0.00560635   |
| wavelet-LLL | grlm       | RunEntropy                       | 6.364863518  |
| wavelet-LLL | grlm       | HighGrayLevelRunEmphasis         | 3577.282449  |
| wavelet-LLL | grlm       | RunLengthNonUniformityNormalized | 0.96347737   |
| wavelet-LLL | glszm      | GrayLevelVariance                | 735.3581122  |
| wavelet-LLL | glszm      | ZoneVariance                     | 0.644642857  |
| wavelet-LLL | glszm      | GrayLevelNonUniformityNormalized | 0.01377551   |
| wavelet-LLL | glszm      | SizeZoneNonUniformityNormalized  | 0.754107143  |
| wavelet-LLL | glszm      | SizeZoneNonUniformity            | 211.15       |
| wavelet-LLL | glszm      | GrayLevelNonUniformity           | 3.857142857  |
| wavelet-LLL | glszm      | LargeAreaEmphasis                | 2.207142857  |
| wavelet-LLL | glszm      | SmallAreaHighGrayLevelEmphasis   | 2643.815402  |
| wavelet-LLL | glszm      | ZonePercentage                   | 0.8          |
| wavelet-LLL | glszm      | LargeAreaLowGrayLevelEmphasis    | 0.007554413  |
| wavelet-LLL | glszm      | LargeAreaHighGrayLevelEmphasis   | 10746.63214  |
| wavelet-LLL | glszm      | HighGrayLevelZoneEmphasis        | 3158.107143  |
| wavelet-LLL | glszm      | SmallAreaEmphasis                | 0.887823854  |
| wavelet-LLL | glszm      | LowGrayLevelZoneEmphasis         | 0.006568408  |
| wavelet-LLL | glszm      | ZoneEntropy                      | 6.707645296  |
| wavelet-LLL | glszm      | SmallAreaLowGrayLevelEmphasis    | 0.006431738  |
| wavelet-LLL | ngtdm      | Coarseness                       | 0.016706582  |
| wavelet-LLL | ngtdm      | Complexity                       | 43767.14595  |
| wavelet-LLL | ngtdm      | Strength                         | 76.09537296  |
| wavelet-LLL | ngtdm      | Contrast                         | 2.209480179  |
| wavelet-LLL | ngtdm      | Busyness                         | 0.012629218  |
| wavelet-HHL | gldm       | GrayLevelVariance                | 14.32568163  |
| wavelet-HHL | gldm       | HighGrayLevelEmphasis            | 284.4114286  |
| wavelet-HHL | gldm       | DependenceEntropy                | 5.917400808  |
| wavelet-HHL | gldm       | DependenceNonUniformity          | 66.72        |

|             |            |                                      |              |
|-------------|------------|--------------------------------------|--------------|
| wavelet-HHL | gldm       | GrayLevelNonUniformity               | 29.16        |
| wavelet-HHL | gldm       | SmallDependenceEmphasis              | 0.326618029  |
| wavelet-HHL | gldm       | SmallDependenceHighGrayLevelEmphasis | 95.03333877  |
| wavelet-HHL | gldm       | DependenceNonUniformityNormalized    | 0.190628571  |
| wavelet-HHL | gldm       | LargeDependenceEmphasis              | 11.78285714  |
| wavelet-HHL | gldm       | LargeDependenceLowGrayLevelEmphasis  | 0.05121939   |
| wavelet-HHL | gldm       | DependenceVariance                   | 3.12244898   |
| wavelet-HHL | gldm       | LargeDependenceHighGrayLevelEmphasis | 3132.388571  |
| wavelet-HHL | gldm       | SmallDependenceLowGrayLevelEmphasis  | 0.004613032  |
| wavelet-HHL | gldm       | LowGrayLevelEmphasis                 | 0.007365466  |
| wavelet-HHL | glcm       | JointAverage                         | 16.43556293  |
| wavelet-HHL | glcm       | SumAverage                           | 32.87112587  |
| wavelet-HHL | glcm       | JointEntropy                         | 7.103670445  |
| wavelet-HHL | glcm       | ClusterShade                         | -19.27829031 |
| wavelet-HHL | glcm       | MaximumProbability                   | 0.028846574  |
| wavelet-HHL | glcm       | Idmn                                 | 0.967299639  |
| wavelet-HHL | glcm       | JointEnergy                          | 0.009766218  |
| wavelet-HHL | glcm       | Contrast                             | 28.96927171  |
| wavelet-HHL | glcm       | DifferenceEntropy                    | 3.463715927  |
| wavelet-HHL | glcm       | InverseVariance                      | 0.237746143  |
| wavelet-HHL | glcm       | DifferenceVariance                   | 12.11528565  |
| wavelet-HHL | glcm       | Idn                                  | 0.883426473  |
| wavelet-HHL | glcm       | Idm                                  | 0.24409395   |
| wavelet-HHL | glcm       | Correlation                          | -0.008685383 |
| wavelet-HHL | glcm       | Autocorrelation                      | 269.9697998  |
| wavelet-HHL | glcm       | SumEntropy                           | 4.311120985  |
| wavelet-HHL | glcm       | SumSquares                           | 14.32573445  |
| wavelet-HHL | glcm       | ClusterProminence                    | 3039.298633  |
| wavelet-HHL | glcm       | Imc2                                 | 0.827574398  |
| wavelet-HHL | glcm       | Imc1                                 | -0.152658296 |
| wavelet-HHL | glcm       | DifferenceAverage                    | 4.04522117   |
| wavelet-HHL | glcm       | Id                                   | 0.33225066   |
| wavelet-HHL | glcm       | ClusterTendency                      | 28.33366609  |
| wavelet-HHL | firstorder | InterquartileRange                   | 107.8920037  |
| wavelet-HHL | firstorder | Skewness                             | -0.177964775 |
| wavelet-HHL | firstorder | Uniformity                           | 0.083314286  |
| wavelet-HHL | firstorder | Median                               | -6.503863031 |
| wavelet-HHL | firstorder | Energy                               | 3123834.721  |
| wavelet-HHL | firstorder | RobustMeanAbsoluteDeviation          | 47.09952132  |
| wavelet-HHL | firstorder | MeanAbsoluteDeviation                | 71.81225556  |
| wavelet-HHL | firstorder | TotalEnergy                          | 84343537.46  |
| wavelet-HHL | firstorder | Maximum                              | 282.5684852  |
| wavelet-HHL | firstorder | RootMeanSquared                      | 94.47349924  |
| wavelet-HHL | firstorder | 90Percentile                         | 119.8843898  |
| wavelet-HHL | firstorder | Minimum                              | -393.5955005 |
| wavelet-HHL | firstorder | Entropy                              | 3.855848426  |
| wavelet-HHL | firstorder | Range                                | 676.1639857  |
| wavelet-HHL | firstorder | Variance                             | 8923.292575  |
| wavelet-HHL | firstorder | 10Percentile                         | -109.7258295 |
| wavelet-HHL | firstorder | Kurtosis                             | 3.945998786  |
| wavelet-HHL | firstorder | Mean                                 | -1.396239025 |
| wavelet-HHL | glrlm      | ShortRunLowGrayLevelEmphasis         | 0.007406756  |
| wavelet-HHL | glrlm      | GrayLevelVariance                    | 15.00779088  |

|             |       |                                      |              |
|-------------|-------|--------------------------------------|--------------|
| wavelet-HHL | glrlm | LowGrayLevelRunEmphasis              | 0.00763454   |
| wavelet-HHL | glrlm | GrayLevelNonUniformityNormalized     | 0.080713974  |
| wavelet-HHL | glrlm | RunVariance                          | 0.092114254  |
| wavelet-HHL | glrlm | GrayLevelNonUniformity               | 26.14373072  |
| wavelet-HHL | glrlm | LongRunEmphasis                      | 1.263170767  |
| wavelet-HHL | glrlm | ShortRunHighGrayLevelEmphasis        | 270.3121401  |
| wavelet-HHL | glrlm | RunLengthNonUniformity               | 280.2962498  |
| wavelet-HHL | glrlm | ShortRunEmphasis                     | 0.944025678  |
| wavelet-HHL | glrlm | LongRunHighGrayLevelEmphasis         | 356.5097944  |
| wavelet-HHL | glrlm | RunPercentage                        | 0.925274725  |
| wavelet-HHL | glrlm | LongRunLowGrayLevelEmphasis          | 0.008706101  |
| wavelet-HHL | glrlm | RunEntropy                           | 4.237234114  |
| wavelet-HHL | glrlm | HighGrayLevelRunEmphasis             | 285.5354159  |
| wavelet-HHL | glrlm | RunLengthNonUniformityNormalized     | 0.864386285  |
| wavelet-HHL | glszm | GrayLevelVariance                    | 25.39919804  |
| wavelet-HHL | glszm | ZoneVariance                         | 18.07329027  |
| wavelet-HHL | glszm | GrayLevelNonUniformityNormalized     | 0.059590109  |
| wavelet-HHL | glszm | SizeZoneNonUniformityNormalized      | 0.390621519  |
| wavelet-HHL | glszm | SizeZoneNonUniformity                | 52.34328358  |
| wavelet-HHL | glszm | GrayLevelNonUniformity               | 7.985074627  |
| wavelet-HHL | glszm | LargeAreaEmphasis                    | 24.89552239  |
| wavelet-HHL | glszm | SmallAreaHighGrayLevelEmphasis       | 188.9186672  |
| wavelet-HHL | glszm | ZonePercentage                       | 0.382857143  |
| wavelet-HHL | glszm | LargeAreaLowGrayLevelEmphasis        | 0.107964046  |
| wavelet-HHL | glszm | LargeAreaHighGrayLevelEmphasis       | 6621.477612  |
| wavelet-HHL | glszm | HighGrayLevelZoneEmphasis            | 297.4029851  |
| wavelet-HHL | glszm | SmallAreaEmphasis                    | 0.646023591  |
| wavelet-HHL | glszm | LowGrayLevelZoneEmphasis             | 0.012635722  |
| wavelet-HHL | glszm | ZoneEntropy                          | 5.523669019  |
| wavelet-HHL | glszm | SmallAreaLowGrayLevelEmphasis        | 0.011178697  |
| wavelet-HHL | ngtdm | Coarseness                           | 0.017411448  |
| wavelet-HHL | ngtdm | Complexity                           | 650.980867   |
| wavelet-HHL | ngtdm | Strength                             | 2.958837619  |
| wavelet-HHL | ngtdm | Contrast                             | 0.167618791  |
| wavelet-HHL | ngtdm | Busyness                             | 0.143366594  |
| wavelet-HLH | gldm  | GrayLevelVariance                    | 25.46788571  |
| wavelet-HLH | gldm  | HighGrayLevelEmphasis                | 252.8742857  |
| wavelet-HLH | gldm  | DependenceEntropy                    | 6.195477549  |
| wavelet-HLH | gldm  | DependenceNonUniformity              | 73.41714286  |
| wavelet-HLH | gldm  | GrayLevelNonUniformity               | 24.35428571  |
| wavelet-HLH | gldm  | SmallDependenceEmphasis              | 0.398464129  |
| wavelet-HLH | gldm  | SmallDependenceHighGrayLevelEmphasis | 105.1689398  |
| wavelet-HLH | gldm  | DependenceNonUniformityNormalized    | 0.209763265  |
| wavelet-HLH | gldm  | LargeDependenceEmphasis              | 10.64        |
| wavelet-HLH | gldm  | LargeDependenceLowGrayLevelEmphasis  | 0.06574244   |
| wavelet-HLH | gldm  | DependenceVariance                   | 3.2416       |
| wavelet-HLH | gldm  | LargeDependenceHighGrayLevelEmphasis | 2494.788571  |
| wavelet-HLH | gldm  | SmallDependenceLowGrayLevelEmphasis  | 0.011394802  |
| wavelet-HLH | gldm  | LowGrayLevelEmphasis                 | 0.015013565  |
| wavelet-HLH | glcm  | JointAverage                         | 15.17864082  |
| wavelet-HLH | glcm  | SumAverage                           | 30.35728165  |
| wavelet-HLH | glcm  | JointEntropy                         | 7.42314376   |
| wavelet-HLH | glcm  | ClusterShade                         | -165.0242892 |

|             |            |                                  |              |
|-------------|------------|----------------------------------|--------------|
| wavelet-HLH | glcm       | MaximumProbability               | 0.028558909  |
| wavelet-HLH | glcm       | Idmn                             | 0.971054303  |
| wavelet-HLH | glcm       | JointEnergy                      | 0.008349758  |
| wavelet-HLH | glcm       | Contrast                         | 45.37624896  |
| wavelet-HLH | glcm       | DifferenceEntropy                | 3.702179926  |
| wavelet-HLH | glcm       | InverseVariance                  | 0.216593021  |
| wavelet-HLH | glcm       | DifferenceVariance               | 20.6768452   |
| wavelet-HLH | glcm       | Idn                              | 0.892860705  |
| wavelet-HLH | glcm       | Idm                              | 0.220614406  |
| wavelet-HLH | glcm       | Correlation                      | 0.074139475  |
| wavelet-HLH | glcm       | Autocorrelation                  | 232.259923   |
| wavelet-HLH | glcm       | SumEntropy                       | 4.669249309  |
| wavelet-HLH | glcm       | SumSquares                       | 24.52425477  |
| wavelet-HLH | glcm       | ClusterProminence                | 11518.07862  |
| wavelet-HLH | glcm       | Imc2                             | 0.913433751  |
| wavelet-HLH | glcm       | Imc1                             | -0.219380151 |
| wavelet-HLH | glcm       | DifferenceAverage                | 4.882922479  |
| wavelet-HLH | glcm       | Id                               | 0.308013086  |
| wavelet-HLH | glcm       | ClusterTendency                  | 52.72077012  |
| wavelet-HLH | firstorder | InterquartileRange               | 128.0088871  |
| wavelet-HLH | firstorder | Skewness                         | -0.006575481 |
| wavelet-HLH | firstorder | Uniformity                       | 0.069583673  |
| wavelet-HLH | firstorder | Median                           | -9.687267741 |
| wavelet-HLH | firstorder | Energy                           | 5523331.519  |
| wavelet-HLH | firstorder | RobustMeanAbsoluteDeviation      | 56.5052233   |
| wavelet-HLH | firstorder | MeanAbsoluteDeviation            | 91.99339854  |
| wavelet-HLH | firstorder | TotalEnergy                      | 149129951    |
| wavelet-HLH | firstorder | Maximum                          | 525.1935356  |
| wavelet-HLH | firstorder | RootMeanSquared                  | 125.6222401  |
| wavelet-HLH | firstorder | 90Percentile                     | 152.2481386  |
| wavelet-HLH | firstorder | Minimum                          | -360.734189  |
| wavelet-HLH | firstorder | Entropy                          | 4.217684944  |
| wavelet-HLH | firstorder | Range                            | 885.9277246  |
| wavelet-HLH | firstorder | Variance                         | 15662.45345  |
| wavelet-HLH | firstorder | 10Percentile                     | -178.0799043 |
| wavelet-HLH | firstorder | Kurtosis                         | 4.06118027   |
| wavelet-HLH | firstorder | Mean                             | -10.88548338 |
| wavelet-HLH | grlm       | ShortRunLowGrayLevelEmphasis     | 0.015412057  |
| wavelet-HLH | grlm       | GrayLevelVariance                | 26.57360147  |
| wavelet-HLH | grlm       | LowGrayLevelRunEmphasis          | 0.015687174  |
| wavelet-HLH | grlm       | GrayLevelNonUniformityNormalized | 0.066770734  |
| wavelet-HLH | grlm       | RunVariance                      | 0.084356181  |
| wavelet-HLH | grlm       | GrayLevelNonUniformity           | 21.82756511  |
| wavelet-HLH | grlm       | LongRunEmphasis                  | 1.232917129  |
| wavelet-HLH | grlm       | ShortRunHighGrayLevelEmphasis    | 242.3422257  |
| wavelet-HLH | grlm       | RunLengthNonUniformity           | 288.341037   |
| wavelet-HLH | grlm       | ShortRunEmphasis                 | 0.951488751  |
| wavelet-HLH | grlm       | LongRunHighGrayLevelEmphasis     | 308.9864942  |
| wavelet-HLH | grlm       | RunPercentage                    | 0.933846154  |
| wavelet-HLH | grlm       | LongRunLowGrayLevelEmphasis      | 0.016970089  |
| wavelet-HLH | grlm       | RunEntropy                       | 4.552979406  |
| wavelet-HLH | grlm       | HighGrayLevelRunEmphasis         | 253.965347   |
| wavelet-HLH | grlm       | RunLengthNonUniformityNormalized | 0.881370713  |

|             |       |                                  |             |
|-------------|-------|----------------------------------|-------------|
| wavelet-HLH | glszm | GrayLevelVariance                | 41.06114464 |
| wavelet-HLH | glszm | ZoneVariance                     | 17.27533819 |
| wavelet-HLH | glszm | GrayLevelNonUniformityNormalized | 0.048824142 |
| wavelet-HLH | glszm | SizeZoneNonUniformityNormalized  | 0.493028096 |
| wavelet-HLH | glszm | SizeZoneNonUniformity            | 76.41935484 |
| wavelet-HLH | glszm | GrayLevelNonUniformity           | 7.567741935 |
| wavelet-HLH | glszm | LargeAreaEmphasis                | 22.37419355 |
| wavelet-HLH | glszm | SmallAreaHighGrayLevelEmphasis   | 193.2036279 |
| wavelet-HLH | glszm | ZonePercentage                   | 0.442857143 |
| wavelet-HLH | glszm | LargeAreaLowGrayLevelEmphasis    | 0.13338738  |
| wavelet-HLH | glszm | LargeAreaHighGrayLevelEmphasis   | 5197.212903 |
| wavelet-HLH | glszm | HighGrayLevelZoneEmphasis        | 264.3225806 |
| wavelet-HLH | glszm | SmallAreaEmphasis                | 0.728001621 |
| wavelet-HLH | glszm | LowGrayLevelZoneEmphasis         | 0.026444245 |
| wavelet-HLH | glszm | ZoneEntropy                      | 5.673984542 |
| wavelet-HLH | glszm | SmallAreaLowGrayLevelEmphasis    | 0.024662197 |
| wavelet-HLH | ngtdm | Coarseness                       | 0.018362    |
| wavelet-HLH | ngtdm | Complexity                       | 1266.352124 |
| wavelet-HLH | ngtdm | Strength                         | 5.145568307 |
| wavelet-HLH | ngtdm | Contrast                         | 0.212914332 |
| wavelet-HLH | ngtdm | Busyness                         | 0.1059374   |

| Image type | Feature Class | Feature Name                         |                                                                                                                                                                                                                                                                                                                                                                                                                   |
|------------|---------------|--------------------------------------|-------------------------------------------------------------------------------------------------------------------------------------------------------------------------------------------------------------------------------------------------------------------------------------------------------------------------------------------------------------------------------------------------------------------|
| general    | info          | BoundingBox                          | 16: RTSTRUCT: C99-DNU_segment_Tumor<br>(0, 0, 0, 5, 5, 5)                                                                                                                                                                                                                                                                                                                                                         |
| general    | info          | EnabledImageTypes                    | {u'Original': {}, u'Wavelet': {}}                                                                                                                                                                                                                                                                                                                                                                                 |
|            |               |                                      | {'distances': [1], 'additionalInfo': True, 'force2D': False, 'interpolator': 'sitkBSpline', 'resampledPixelSpacing': [3.0], 'label': 1, 'normalizeScale': 1, 'normalize': False, 'force2Ddimension': 0, 'removeOutliers': None, 'minimumROISize': None, u'binWidth': 25.0, 'minimumROIDimensions': 1, u'correctMask': True, 'preCrop': False, u'symmetricalGLCM': True, 'resegmentRange': None, 'padDistance': 5} |
| general    | info          | GeneralSettings                      | 53bbbed552ed23c3a6a65bb6151bd5417873ba04                                                                                                                                                                                                                                                                                                                                                                          |
| general    | info          | ImageHash                            | 9                                                                                                                                                                                                                                                                                                                                                                                                                 |
| general    | info          | ImageSpacing                         | (0.9765624999999998, 0.9765624999999998, 1.9999999999999996)                                                                                                                                                                                                                                                                                                                                                      |
| general    | info          | MaskHash                             | d8fc7aedef77579c3e1f9f32eba6c24618e6f4295                                                                                                                                                                                                                                                                                                                                                                         |
| general    | info          | NumpyVersion                         | 1.13.1                                                                                                                                                                                                                                                                                                                                                                                                            |
| general    | info          | PyWaveletVersion                     | 0.5.2                                                                                                                                                                                                                                                                                                                                                                                                             |
| general    | info          | SimpleITKVersion                     | 1.1.0                                                                                                                                                                                                                                                                                                                                                                                                             |
| general    | info          | Version                              | 1.3.0.post102+g1b0eb74                                                                                                                                                                                                                                                                                                                                                                                            |
| general    | info          | VolumeNum                            | 1                                                                                                                                                                                                                                                                                                                                                                                                                 |
| general    | info          | VoxelNum                             | 37                                                                                                                                                                                                                                                                                                                                                                                                                |
| original   | shape         | Maximum3DDiameter                    | 16.15549442                                                                                                                                                                                                                                                                                                                                                                                                       |
| original   | shape         | Maximum2DDiameterSlice               | 12.36931688                                                                                                                                                                                                                                                                                                                                                                                                       |
| original   | shape         | Sphericity                           | 0.845513894                                                                                                                                                                                                                                                                                                                                                                                                       |
| original   | shape         | MinorAxis                            | 10.71840953                                                                                                                                                                                                                                                                                                                                                                                                       |
| original   | shape         | Elongation                           | 0.660002958                                                                                                                                                                                                                                                                                                                                                                                                       |
| original   | shape         | SurfaceVolumeRatio                   | 0.572147775                                                                                                                                                                                                                                                                                                                                                                                                       |
| original   | shape         | Volume                               | 999                                                                                                                                                                                                                                                                                                                                                                                                               |
| original   | shape         | MajorAxis                            | 16.23994165                                                                                                                                                                                                                                                                                                                                                                                                       |
| original   | shape         | SurfaceArea                          | 571.5756271                                                                                                                                                                                                                                                                                                                                                                                                       |
| original   | shape         | Flatness                             | 0.585140699                                                                                                                                                                                                                                                                                                                                                                                                       |
| original   | shape         | LeastAxis                            | 9.50265081                                                                                                                                                                                                                                                                                                                                                                                                        |
| original   | shape         | Maximum2DDiameterColumn              | 12.72792206                                                                                                                                                                                                                                                                                                                                                                                                       |
| original   | shape         | Maximum2DDiameterRow                 | 15                                                                                                                                                                                                                                                                                                                                                                                                                |
| original   | gldm          | GrayLevelVariance                    | 82.72753835                                                                                                                                                                                                                                                                                                                                                                                                       |
| original   | gldm          | HighGrayLevelEmphasis                | 466.6756757                                                                                                                                                                                                                                                                                                                                                                                                       |
| original   | gldm          | DependenceEntropy                    | 4.324186136                                                                                                                                                                                                                                                                                                                                                                                                       |
| original   | gldm          | DependenceNonUniformity              | 18.02702703                                                                                                                                                                                                                                                                                                                                                                                                       |
| original   | gldm          | GrayLevelNonUniformity               | 2.72972973                                                                                                                                                                                                                                                                                                                                                                                                        |
| original   | gldm          | SmallDependenceEmphasis              | 0.720157658                                                                                                                                                                                                                                                                                                                                                                                                       |
| original   | gldm          | SmallDependenceHighGrayLevelEmphasis | 280.1171171                                                                                                                                                                                                                                                                                                                                                                                                       |
| original   | gldm          | DependenceNonUniformityNormalized    | 0.487216947                                                                                                                                                                                                                                                                                                                                                                                                       |
| original   | gldm          | LargeDependenceEmphasis              | 2.783783784                                                                                                                                                                                                                                                                                                                                                                                                       |
| original   | gldm          | LargeDependenceLowGrayLevelEmphasis  | 0.062410553                                                                                                                                                                                                                                                                                                                                                                                                       |
| original   | gldm          | DependenceVariance                   | 0.574141709                                                                                                                                                                                                                                                                                                                                                                                                       |
| original   | gldm          | LargeDependenceHighGrayLevelEmphasis | 1733.810811                                                                                                                                                                                                                                                                                                                                                                                                       |
| original   | gldm          | SmallDependenceLowGrayLevelEmphasis  | 0.059093639                                                                                                                                                                                                                                                                                                                                                                                                       |
| original   | gldm          | LowGrayLevelEmphasis                 | 0.059587529                                                                                                                                                                                                                                                                                                                                                                                                       |
| original   | glcm          | JointAverage                         | 21.99916097                                                                                                                                                                                                                                                                                                                                                                                                       |
| original   | glcm          | SumAverage                           | 43.99832193                                                                                                                                                                                                                                                                                                                                                                                                       |

|          |            |                                  |              |
|----------|------------|----------------------------------|--------------|
| original | glcm       | JointEntropy                     | 4.836476189  |
| original | glcm       | ClusterShade                     | -1086.079243 |
| original | glcm       | MaximumProbability               | 0.061231893  |
| original | glcm       | Idmn                             | 0.901500564  |
| original | glcm       | JointEnergy                      | 0.037121238  |
| original | glcm       | Contrast                         | 126.2343749  |
| original | glcm       | DifferenceEntropy                | 3.370986215  |
| original | glcm       | InverseVariance                  | 0.140094064  |
| original | glcm       | DifferenceVariance               | 47.75133202  |
| original | glcm       | Idn                              | 0.801193084  |
| original | glcm       | Idm                              | 0.130591902  |
| original | glcm       | Correlation                      | 0.038740264  |
| original | glcm       | Autocorrelation                  | 487.6662787  |
| original | glcm       | SumEntropy                       | 3.577817038  |
| original | glcm       | SumSquares                       | 66.33553177  |
| original | glcm       | ClusterProminence                | 54046.53627  |
| original | glcm       | Imc2                             | 0.996614451  |
| original | glcm       | Imc1                             | -0.697117851 |
| original | glcm       | DifferenceAverage                | 8.799364181  |
| original | glcm       | Id                               | 0.209322635  |
| original | glcm       | ClusterTendency                  | 139.1077522  |
| original | firstorder | InterquartileRange               | 339          |
| original | firstorder | Skewness                         | -0.564370546 |
| original | firstorder | Uniformity                       | 0.073776479  |
| original | firstorder | Median                           | -187         |
| original | firstorder | Energy                           | 3381963      |
| original | firstorder | RobustMeanAbsoluteDeviation      | 149.1795482  |
| original | firstorder | MeanAbsoluteDeviation            | 191.1351351  |
| original | firstorder | TotalEnergy                      | 91313001     |
| original | firstorder | Maximum                          | 88           |
| original | firstorder | RootMeanSquared                  | 302.331615   |
| original | firstorder | 90Percentile                     | 49.4         |
| original | firstorder | Minimum                          | -668         |
| original | firstorder | Entropy                          | 3.956358015  |
| original | firstorder | Range                            | 756          |
| original | firstorder | Variance                         | 51803.40541  |
| original | firstorder | 10Percentile                     | -520.2       |
| original | firstorder | Kurtosis                         | 2.073423221  |
| original | firstorder | Mean                             | -199         |
| original | glrlm      | ShortRunLowGrayLevelEmphasis     | 0.060677885  |
| original | glrlm      | GrayLevelVariance                | 83.15174257  |
| original | glrlm      | LowGrayLevelRunEmphasis          | 0.060701696  |
| original | glrlm      | GrayLevelNonUniformityNormalized | 0.07291413   |
| original | glrlm      | RunVariance                      | 0.018696581  |
| original | glrlm      | GrayLevelNonUniformity           | 2.647609148  |
| original | glrlm      | LongRunEmphasis                  | 1.057692308  |
| original | glrlm      | ShortRunHighGrayLevelEmphasis    | 452.2944387  |
| original | glrlm      | RunLengthNonUniformity           | 34.96153846  |
| original | glrlm      | ShortRunEmphasis                 | 0.985576923  |
| original | glrlm      | LongRunHighGrayLevelEmphasis     | 502.3425156  |
| original | glrlm      | RunPercentage                    | 0.981288981  |
| original | glrlm      | LongRunLowGrayLevelEmphasis      | 0.060796937  |
| original | glrlm      | RunEntropy                       | 4.009656315  |
| original | glrlm      | HighGrayLevelRunEmphasis         | 462.3040541  |
| original | glrlm      | RunLengthNonUniformityNormalized | 0.962606838  |

|             |       |                                      |              |
|-------------|-------|--------------------------------------|--------------|
| original    | glszm | GrayLevelVariance                    | 86.7824019   |
| original    | glszm | ZoneVariance                         | 0.613555291  |
| original    | glszm | GrayLevelNonUniformityNormalized     | 0.070154578  |
| original    | glszm | SizeZoneNonUniformityNormalized      | 0.705112961  |
| original    | glszm | SizeZoneNonUniformity                | 20.44827586  |
| original    | glszm | GrayLevelNonUniformity               | 2.034482759  |
| original    | glszm | LargeAreaEmphasis                    | 2.24137931   |
| original    | glszm | SmallAreaHighGrayLevelEmphasis       | 320.9606897  |
| original    | glszm | ZonePercentage                       | 0.783783784  |
| original    | glszm | LargeAreaLowGrayLevelEmphasis        | 0.077489963  |
| original    | glszm | LargeAreaHighGrayLevelEmphasis       | 1296.517241  |
| original    | glszm | HighGrayLevelZoneEmphasis            | 407.0689655  |
| original    | glszm | SmallAreaEmphasis                    | 0.863448276  |
| original    | glszm | LowGrayLevelZoneEmphasis             | 0.075557119  |
| original    | glszm | ZoneEntropy                          | 4.168325823  |
| original    | glszm | SmallAreaLowGrayLevelEmphasis        | 0.075295582  |
| original    | ngtdm | Coarseness                           | 0.048385687  |
| original    | ngtdm | Complexity                           | 1773.455513  |
| original    | ngtdm | Strength                             | 21.34524496  |
| original    | ngtdm | Contrast                             | 4.112367715  |
| original    | ngtdm | Busyness                             | 0.067587851  |
| wavelet-HHH | gldm  | GrayLevelVariance                    | 20.69393718  |
| wavelet-HHH | gldm  | HighGrayLevelEmphasis                | 116.9459459  |
| wavelet-HHH | gldm  | DependenceEntropy                    | 4.33743546   |
| wavelet-HHH | gldm  | DependenceNonUniformity              | 14.83783784  |
| wavelet-HHH | gldm  | GrayLevelNonUniformity               | 2.675675676  |
| wavelet-HHH | gldm  | SmallDependenceEmphasis              | 0.629129129  |
| wavelet-HHH | gldm  | SmallDependenceHighGrayLevelEmphasis | 76.09009009  |
| wavelet-HHH | gldm  | DependenceNonUniformityNormalized    | 0.401022644  |
| wavelet-HHH | gldm  | LargeDependenceEmphasis              | 3.324324324  |
| wavelet-HHH | gldm  | LargeDependenceLowGrayLevelEmphasis  | 0.098226969  |
| wavelet-HHH | gldm  | DependenceVariance                   | 0.606281958  |
| wavelet-HHH | gldm  | LargeDependenceHighGrayLevelEmphasis | 387.7567568  |
| wavelet-HHH | gldm  | SmallDependenceLowGrayLevelEmphasis  | 0.070982295  |
| wavelet-HHH | gldm  | LowGrayLevelEmphasis                 | 0.074948155  |
| wavelet-HHH | glcm  | JointAverage                         | 9.669090664  |
| wavelet-HHH | glcm  | SumAverage                           | 19.33818133  |
| wavelet-HHH | glcm  | JointEntropy                         | 4.819090727  |
| wavelet-HHH | glcm  | ClusterShade                         | 14.50685405  |
| wavelet-HHH | glcm  | MaximumProbability                   | 0.061689769  |
| wavelet-HHH | glcm  | Idmn                                 | 0.915019213  |
| wavelet-HHH | glcm  | JointEnergy                          | 0.037875501  |
| wavelet-HHH | glcm  | Contrast                             | 39.63815841  |
| wavelet-HHH | glcm  | DifferenceEntropy                    | 2.905438706  |
| wavelet-HHH | glcm  | InverseVariance                      | 0.19494805   |
| wavelet-HHH | glcm  | DifferenceVariance                   | 13.32208571  |
| wavelet-HHH | glcm  | Idn                                  | 0.81158888   |
| wavelet-HHH | glcm  | Idm                                  | 0.180019112  |
| wavelet-HHH | glcm  | Correlation                          | -0.045718931 |
| wavelet-HHH | glcm  | Autocorrelation                      | 92.37158903  |
| wavelet-HHH | glcm  | SumEntropy                           | 3.344598419  |
| wavelet-HHH | glcm  | SumSquares                           | 18.63759735  |
| wavelet-HHH | glcm  | ClusterProminence                    | 3711.732932  |
| wavelet-HHH | glcm  | Imc2                                 | 0.997335546  |
| wavelet-HHH | glcm  | Imc1                                 | -0.711938394 |



|             |            |                                  |              |
|-------------|------------|----------------------------------|--------------|
| wavelet-HHH | glcm       | DifferenceAverage                | 4.96713916   |
| wavelet-HHH | glcm       | Id                               | 0.274060858  |
| wavelet-HHH | glcm       | ClusterTendency                  | 34.91223099  |
| wavelet-HHH | firstorder | InterquartileRange               | 151.335848   |
| wavelet-HHH | firstorder | Skewness                         | -0.085190543 |
| wavelet-HHH | firstorder | Uniformity                       | 0.072315559  |
| wavelet-HHH | firstorder | Median                           | 4.637870777  |
| wavelet-HHH | firstorder | Energy                           | 460877.7719  |
| wavelet-HHH | firstorder | RobustMeanAbsoluteDeviation      | 64.02138287  |
| wavelet-HHH | firstorder | MeanAbsoluteDeviation            | 91.22636224  |
| wavelet-HHH | firstorder | TotalEnergy                      | 12443699.84  |
| wavelet-HHH | firstorder | Maximum                          | 228.6093201  |
| wavelet-HHH | firstorder | RootMeanSquared                  | 111.6071503  |
| wavelet-HHH | firstorder | 90Percentile                     | 145.5607628  |
| wavelet-HHH | firstorder | Minimum                          | -220.2198323 |
| wavelet-HHH | firstorder | Entropy                          | 3.969607339  |
| wavelet-HHH | firstorder | Range                            | 448.8291524  |
| wavelet-HHH | firstorder | Variance                         | 12406.20776  |
| wavelet-HHH | firstorder | 10Percentile                     | -135.1921497 |
| wavelet-HHH | firstorder | Kurtosis                         | 2.413064264  |
| wavelet-HHH | firstorder | Mean                             | 7.067406941  |
| wavelet-HHH | glrlm      | ShortRunLowGrayLevelEmphasis     | 0.076445229  |
| wavelet-HHH | glrlm      | GrayLevelVariance                | 21.1129609   |
| wavelet-HHH | glrlm      | LowGrayLevelRunEmphasis          | 0.076647188  |
| wavelet-HHH | glrlm      | GrayLevelNonUniformityNormalized | 0.071722359  |
| wavelet-HHH | glrlm      | RunVariance                      | 0.024864292  |
| wavelet-HHH | glrlm      | GrayLevelNonUniformity           | 2.588245582  |
| wavelet-HHH | glrlm      | LongRunEmphasis                  | 1.078786899  |
| wavelet-HHH | glrlm      | ShortRunHighGrayLevelEmphasis    | 114.7566825  |
| wavelet-HHH | glrlm      | RunLengthNonUniformity           | 34.32802557  |
| wavelet-HHH | glrlm      | ShortRunEmphasis                 | 0.980303275  |
| wavelet-HHH | glrlm      | LongRunHighGrayLevelEmphasis     | 126.0292531  |
| wavelet-HHH | glrlm      | RunPercentage                    | 0.975051975  |
| wavelet-HHH | glrlm      | LongRunLowGrayLevelEmphasis      | 0.077455024  |
| wavelet-HHH | glrlm      | RunEntropy                       | 4.029008238  |
| wavelet-HHH | glrlm      | HighGrayLevelRunEmphasis         | 117.0111966  |
| wavelet-HHH | glrlm      | RunLengthNonUniformityNormalized | 0.950271416  |
| wavelet-HHH | glszm      | GrayLevelVariance                | 26.68587106  |
| wavelet-HHH | glszm      | ZoneVariance                     | 0.455418381  |
| wavelet-HHH | glszm      | GrayLevelNonUniformityNormalized | 0.067215364  |
| wavelet-HHH | glszm      | SizeZoneNonUniformityNormalized  | 0.582990398  |
| wavelet-HHH | glszm      | SizeZoneNonUniformity            | 15.74074074  |
| wavelet-HHH | glszm      | GrayLevelNonUniformity           | 1.814814815  |
| wavelet-HHH | glszm      | LargeAreaEmphasis                | 2.333333333  |
| wavelet-HHH | glszm      | SmallAreaHighGrayLevelEmphasis   | 96.45473251  |
| wavelet-HHH | glszm      | ZonePercentage                   | 0.72972973   |
| wavelet-HHH | glszm      | LargeAreaLowGrayLevelEmphasis    | 0.112330396  |
| wavelet-HHH | glszm      | LargeAreaHighGrayLevelEmphasis   | 272.5555556  |
| wavelet-HHH | glszm      | HighGrayLevelZoneEmphasis        | 118.7037037  |
| wavelet-HHH | glszm      | SmallAreaEmphasis                | 0.790123457  |
| wavelet-HHH | glszm      | LowGrayLevelZoneEmphasis         | 0.098828502  |
| wavelet-HHH | glszm      | ZoneEntropy                      | 4.282484261  |
| wavelet-HHH | glszm      | SmallAreaLowGrayLevelEmphasis    | 0.096490365  |
| wavelet-HHH | ngtdm      | Coarseness                       | 0.116099256  |
| wavelet-HHH | ngtdm      | Complexity                       | 501.5488953  |

|             |            |                                      |              |
|-------------|------------|--------------------------------------|--------------|
| wavelet-HHH | ngtdm      | Strength                             | 11.79293751  |
| wavelet-HHH | ngtdm      | Contrast                             | 0.555962778  |
| wavelet-HHH | ngtdm      | Busyness                             | 0.067149773  |
| wavelet-HLL | gldm       | GrayLevelVariance                    | 123.3046019  |
| wavelet-HLL | gldm       | HighGrayLevelEmphasis                | 405          |
| wavelet-HLL | gldm       | DependenceEntropy                    | 4.506750663  |
| wavelet-HLL | gldm       | DependenceNonUniformity              | 17.21621622  |
| wavelet-HLL | gldm       | GrayLevelNonUniformity               | 2.243243243  |
| wavelet-HLL | gldm       | SmallDependenceEmphasis              | 0.698573574  |
| wavelet-HLL | gldm       | SmallDependenceHighGrayLevelEmphasis | 357.5168919  |
| wavelet-HLL | gldm       | DependenceNonUniformityNormalized    | 0.465303141  |
| wavelet-HLL | gldm       | LargeDependenceEmphasis              | 3.054054054  |
| wavelet-HLL | gldm       | LargeDependenceLowGrayLevelEmphasis  | 0.257845455  |
| wavelet-HLL | gldm       | DependenceVariance                   | 0.680788897  |
| wavelet-HLL | gldm       | LargeDependenceHighGrayLevelEmphasis | 663.6486486  |
| wavelet-HLL | gldm       | SmallDependenceLowGrayLevelEmphasis  | 0.025014345  |
| wavelet-HLL | gldm       | LowGrayLevelEmphasis                 | 0.069485879  |
| wavelet-HLL | glcm       | JointAverage                         | 15.04001444  |
| wavelet-HLL | glcm       | SumAverage                           | 30.08002887  |
| wavelet-HLL | glcm       | JointEntropy                         | 4.887009043  |
| wavelet-HLL | glcm       | ClusterShade                         | 1593.729423  |
| wavelet-HLL | glcm       | MaximumProbability                   | 0.05569893   |
| wavelet-HLL | glcm       | Idmn                                 | 0.870840515  |
| wavelet-HLL | glcm       | JointEnergy                          | 0.035558965  |
| wavelet-HLL | glcm       | Contrast                             | 255.5116733  |
| wavelet-HLL | glcm       | DifferenceEntropy                    | 3.375785159  |
| wavelet-HLL | glcm       | InverseVariance                      | 0.115366109  |
| wavelet-HLL | glcm       | DifferenceVariance                   | 81.83283053  |
| wavelet-HLL | glcm       | Idn                                  | 0.779297513  |
| wavelet-HLL | glcm       | Idm                                  | 0.113593922  |
| wavelet-HLL | glcm       | Correlation                          | 0.030286156  |
| wavelet-HLL | glcm       | Autocorrelation                      | 234.4750489  |
| wavelet-HLL | glcm       | SumEntropy                           | 3.783146852  |
| wavelet-HLL | glcm       | SumSquares                           | 134.3611619  |
| wavelet-HLL | glcm       | ClusterProminence                    | 175505.3798  |
| wavelet-HLL | glcm       | Imc2                                 | 0.998585417  |
| wavelet-HLL | glcm       | Imc1                                 | -0.766058672 |
| wavelet-HLL | glcm       | DifferenceAverage                    | 12.37338499  |
| wavelet-HLL | glcm       | Id                                   | 0.183814047  |
| wavelet-HLL | glcm       | ClusterTendency                      | 281.9329744  |
| wavelet-HLL | firstorder | InterquartileRange                   | 456.3349334  |
| wavelet-HLL | firstorder | Skewness                             | 0.337776777  |
| wavelet-HLL | firstorder | Uniformity                           | 0.060628196  |
| wavelet-HLL | firstorder | Median                               | -195.554437  |
| wavelet-HLL | firstorder | Energy                               | 3172551.122  |
| wavelet-HLL | firstorder | RobustMeanAbsoluteDeviation          | 207.2555356  |
| wavelet-HLL | firstorder | MeanAbsoluteDeviation                | 253.8480842  |
| wavelet-HLL | firstorder | TotalEnergy                          | 85658880.31  |
| wavelet-HLL | firstorder | Maximum                              | 407.3534791  |
| wavelet-HLL | firstorder | RootMeanSquared                      | 292.8218314  |
| wavelet-HLL | firstorder | 90Percentile                         | 295.3026978  |
| wavelet-HLL | firstorder | Minimum                              | -492.5685584 |
| wavelet-HLL | firstorder | Entropy                              | 4.226628285  |
| wavelet-HLL | firstorder | Range                                | 899.9220374  |
| wavelet-HLL | firstorder | Variance                             | 77181.31716  |

|             |            |                                      |              |
|-------------|------------|--------------------------------------|--------------|
| wavelet-HLL | firstorder | 10Percentile                         | -384.7521199 |
| wavelet-HLL | firstorder | Kurtosis                             | 1.692954413  |
| wavelet-HLL | firstorder | Mean                                 | -92.53814223 |
| wavelet-HLL | glrlm      | ShortRunLowGrayLevelEmphasis         | 0.066668927  |
| wavelet-HLL | glrlm      | GrayLevelVariance                    | 123.8435068  |
| wavelet-HLL | glrlm      | LowGrayLevelRunEmphasis              | 0.068531011  |
| wavelet-HLL | glrlm      | GrayLevelNonUniformityNormalized     | 0.059487315  |
| wavelet-HLL | glrlm      | RunVariance                          | 0.020709496  |
| wavelet-HLL | glrlm      | GrayLevelNonUniformity               | 2.156488874  |
| wavelet-HLL | glrlm      | LongRunEmphasis                      | 1.065966387  |
| wavelet-HLL | glrlm      | ShortRunHighGrayLevelEmphasis        | 408.6103767  |
| wavelet-HLL | glrlm      | RunLengthNonUniformity               | 34.78101702  |
| wavelet-HLL | glrlm      | ShortRunEmphasis                     | 0.983508403  |
| wavelet-HLL | glrlm      | LongRunHighGrayLevelEmphasis         | 419.9569884  |
| wavelet-HLL | glrlm      | RunPercentage                        | 0.979209979  |
| wavelet-HLL | glrlm      | LongRunLowGrayLevelEmphasis          | 0.075979348  |
| wavelet-HLL | glrlm      | RunEntropy                           | 4.277457782  |
| wavelet-HLL | glrlm      | HighGrayLevelRunEmphasis             | 410.8796991  |
| wavelet-HLL | glrlm      | RunLengthNonUniformityNormalized     | 0.958581008  |
| wavelet-HLL | glszm      | GrayLevelVariance                    | 125.4554102  |
| wavelet-HLL | glszm      | ZoneVariance                         | 0.40665874   |
| wavelet-HLL | glszm      | GrayLevelNonUniformityNormalized     | 0.053507729  |
| wavelet-HLL | glszm      | SizeZoneNonUniformityNormalized      | 0.659928656  |
| wavelet-HLL | glszm      | SizeZoneNonUniformity                | 19.13793103  |
| wavelet-HLL | glszm      | GrayLevelNonUniformity               | 1.551724138  |
| wavelet-HLL | glszm      | LargeAreaEmphasis                    | 2.034482759  |
| wavelet-HLL | glszm      | SmallAreaHighGrayLevelEmphasis       | 446.950431   |
| wavelet-HLL | glszm      | ZonePercentage                       | 0.783783784  |
| wavelet-HLL | glszm      | LargeAreaLowGrayLevelEmphasis        | 0.1673423    |
| wavelet-HLL | glszm      | LargeAreaHighGrayLevelEmphasis       | 617.4137931  |
| wavelet-HLL | glszm      | HighGrayLevelZoneEmphasis            | 474.7586207  |
| wavelet-HLL | glszm      | SmallAreaEmphasis                    | 0.838362069  |
| wavelet-HLL | glszm      | LowGrayLevelZoneEmphasis             | 0.050587586  |
| wavelet-HLL | glszm      | ZoneEntropy                          | 4.444187892  |
| wavelet-HLL | glszm      | SmallAreaLowGrayLevelEmphasis        | 0.022596225  |
| wavelet-HLL | ngtdm      | Coarseness                           | 0.061783725  |
| wavelet-HLL | ngtdm      | Complexity                           | 2552.68087   |
| wavelet-HLL | ngtdm      | Strength                             | 34.43771648  |
| wavelet-HLL | ngtdm      | Contrast                             | 4.919555776  |
| wavelet-HLL | ngtdm      | Busyness                             | 0.061308683  |
| wavelet-LHL | gldm       | GrayLevelVariance                    | 91.70927684  |
| wavelet-LHL | gldm       | HighGrayLevelEmphasis                | 597.3513514  |
| wavelet-LHL | gldm       | DependenceEntropy                    | 4.64851046   |
| wavelet-LHL | gldm       | DependenceNonUniformity              | 22.40540541  |
| wavelet-LHL | gldm       | GrayLevelNonUniformity               | 1.864864865  |
| wavelet-LHL | gldm       | SmallDependenceEmphasis              | 0.806306306  |
| wavelet-LHL | gldm       | SmallDependenceHighGrayLevelEmphasis | 490.527027   |
| wavelet-LHL | gldm       | DependenceNonUniformityNormalized    | 0.605551497  |
| wavelet-LHL | gldm       | LargeDependenceEmphasis              | 2.135135135  |
| wavelet-LHL | gldm       | LargeDependenceLowGrayLevelEmphasis  | 0.034773904  |
| wavelet-LHL | gldm       | DependenceVariance                   | 0.381300219  |
| wavelet-LHL | gldm       | LargeDependenceHighGrayLevelEmphasis | 1141.405405  |
| wavelet-LHL | gldm       | SmallDependenceLowGrayLevelEmphasis  | 0.031520497  |
| wavelet-LHL | gldm       | LowGrayLevelEmphasis                 | 0.031948734  |
| wavelet-LHL | glcm       | JointAverage                         | 22.44721296  |

|             |            |                                  |              |
|-------------|------------|----------------------------------|--------------|
| wavelet-LHL | glcm       | SumAverage                       | 44.89442592  |
| wavelet-LHL | glcm       | JointEntropy                     | 4.940797611  |
| wavelet-LHL | glcm       | ClusterShade                     | -107.2212462 |
| wavelet-LHL | glcm       | MaximumProbability               | 0.051287671  |
| wavelet-LHL | glcm       | Idmn                             | 0.926624984  |
| wavelet-LHL | glcm       | JointEnergy                      | 0.033916483  |
| wavelet-LHL | glcm       | Contrast                         | 143.2439898  |
| wavelet-LHL | glcm       | DifferenceEntropy                | 3.34634901   |
| wavelet-LHL | glcm       | InverseVariance                  | 0.11966387   |
| wavelet-LHL | glcm       | DifferenceVariance               | 53.83626326  |
| wavelet-LHL | glcm       | Idn                              | 0.824631991  |
| wavelet-LHL | glcm       | Idm                              | 0.102593538  |
| wavelet-LHL | glcm       | Correlation                      | -0.062180876 |
| wavelet-LHL | glcm       | Autocorrelation                  | 501.394115   |
| wavelet-LHL | glcm       | SumEntropy                       | 3.639035996  |
| wavelet-LHL | glcm       | SumSquares                       | 67.93373457  |
| wavelet-LHL | glcm       | ClusterProminence                | 44705.44733  |
| wavelet-LHL | glcm       | Imc2                             | 0.99933628   |
| wavelet-LHL | glcm       | Imc1                             | -0.810214279 |
| wavelet-LHL | glcm       | DifferenceAverage                | 9.306609115  |
| wavelet-LHL | glcm       | Id                               | 0.185077864  |
| wavelet-LHL | glcm       | ClusterTendency                  | 128.4909484  |
| wavelet-LHL | firstorder | InterquartileRange               | 355.3634882  |
| wavelet-LHL | firstorder | Skewness                         | -0.252384036 |
| wavelet-LHL | firstorder | Uniformity                       | 0.050401753  |
| wavelet-LHL | firstorder | Median                           | -128.4734807 |
| wavelet-LHL | firstorder | Energy                           | 2695782.322  |
| wavelet-LHL | firstorder | RobustMeanAbsoluteDeviation      | 140.0328162  |
| wavelet-LHL | firstorder | MeanAbsoluteDeviation            | 195.8020133  |
| wavelet-LHL | firstorder | TotalEnergy                      | 72786122.69  |
| wavelet-LHL | firstorder | Maximum                          | 286.7703132  |
| wavelet-LHL | firstorder | RootMeanSquared                  | 269.9240294  |
| wavelet-LHL | firstorder | 90Percentile                     | 163.119392   |
| wavelet-LHL | firstorder | Minimum                          | -650.2610099 |
| wavelet-LHL | firstorder | Entropy                          | 4.486348298  |
| wavelet-LHL | firstorder | Range                            | 937.0313231  |
| wavelet-LHL | firstorder | Variance                         | 57147.20702  |
| wavelet-LHL | firstorder | 10Percentile                     | -446.5803242 |
| wavelet-LHL | firstorder | Kurtosis                         | 2.368901242  |
| wavelet-LHL | firstorder | Mean                             | -125.346618  |
| wavelet-LHL | glrlm      | ShortRunLowGrayLevelEmphasis     | 0.032304728  |
| wavelet-LHL | glrlm      | GrayLevelVariance                | 92.50424736  |
| wavelet-LHL | glrlm      | LowGrayLevelRunEmphasis          | 0.032327701  |
| wavelet-LHL | glrlm      | GrayLevelNonUniformityNormalized | 0.04981272   |
| wavelet-LHL | glrlm      | RunVariance                      | 0.012464387  |
| wavelet-LHL | glrlm      | GrayLevelNonUniformity           | 1.82039732   |
| wavelet-LHL | glrlm      | LongRunEmphasis                  | 1.038461538  |
| wavelet-LHL | glrlm      | ShortRunHighGrayLevelEmphasis    | 593.6758345  |
| wavelet-LHL | glrlm      | RunLengthNonUniformity           | 35.64102564  |
| wavelet-LHL | glrlm      | ShortRunEmphasis                 | 0.990384615  |
| wavelet-LHL | glrlm      | LongRunHighGrayLevelEmphasis     | 617.9626935  |
| wavelet-LHL | glrlm      | RunPercentage                    | 0.987525988  |
| wavelet-LHL | glrlm      | LongRunLowGrayLevelEmphasis      | 0.032419595  |
| wavelet-LHL | glrlm      | RunEntropy                       | 4.516002423  |
| wavelet-LHL | glrlm      | HighGrayLevelRunEmphasis         | 598.5332063  |

|             |       |                                      |              |
|-------------|-------|--------------------------------------|--------------|
| wavelet-LHL | glrlm | RunLengthNonUniformityNormalized     | 0.975071225  |
| wavelet-LHL | glszm | GrayLevelVariance                    | 101.2490234  |
| wavelet-LHL | glszm | ZoneVariance                         | 0.194335938  |
| wavelet-LHL | glszm | GrayLevelNonUniformityNormalized     | 0.044921875  |
| wavelet-LHL | glszm | SizeZoneNonUniformityNormalized      | 0.775390625  |
| wavelet-LHL | glszm | SizeZoneNonUniformity                | 24.8125      |
| wavelet-LHL | glszm | GrayLevelNonUniformity               | 1.4375       |
| wavelet-LHL | glszm | LargeAreaEmphasis                    | 1.53125      |
| wavelet-LHL | glszm | SmallAreaHighGrayLevelEmphasis       | 548.8359375  |
| wavelet-LHL | glszm | ZonePercentage                       | 0.864864865  |
| wavelet-LHL | glszm | LargeAreaLowGrayLevelEmphasis        | 0.03783669   |
| wavelet-LHL | glszm | LargeAreaHighGrayLevelEmphasis       | 880.125      |
| wavelet-LHL | glszm | HighGrayLevelZoneEmphasis            | 606.09375    |
| wavelet-LHL | glszm | SmallAreaEmphasis                    | 0.901909722  |
| wavelet-LHL | glszm | LowGrayLevelZoneEmphasis             | 0.036589191  |
| wavelet-LHL | glszm | ZoneEntropy                          | 4.6875       |
| wavelet-LHL | glszm | SmallAreaLowGrayLevelEmphasis        | 0.036384483  |
| wavelet-LHL | ngtdm | Coarseness                           | 0.084556912  |
| wavelet-LHL | ngtdm | Complexity                           | 2695.356852  |
| wavelet-LHL | ngtdm | Strength                             | 35.82435978  |
| wavelet-LHL | ngtdm | Contrast                             | 2.366267229  |
| wavelet-LHL | ngtdm | Busyness                             | 0.025959605  |
| wavelet-LHH | gldm  | GrayLevelVariance                    | 72.12856099  |
| wavelet-LHH | gldm  | HighGrayLevelEmphasis                | 436.2162162  |
| wavelet-LHH | gldm  | DependenceEntropy                    | 4.540402352  |
| wavelet-LHH | gldm  | DependenceNonUniformity              | 24.45945946  |
| wavelet-LHH | gldm  | GrayLevelNonUniformity               | 2.135135135  |
| wavelet-LHH | gldm  | SmallDependenceEmphasis              | 0.837837838  |
| wavelet-LHH | gldm  | SmallDependenceHighGrayLevelEmphasis | 333.972973   |
| wavelet-LHH | gldm  | DependenceNonUniformityNormalized    | 0.661066472  |
| wavelet-LHH | gldm  | LargeDependenceEmphasis              | 1.648648649  |
| wavelet-LHH | gldm  | LargeDependenceLowGrayLevelEmphasis  | 0.040731504  |
| wavelet-LHH | gldm  | DependenceVariance                   | 0.169466764  |
| wavelet-LHH | gldm  | LargeDependenceHighGrayLevelEmphasis | 845.1891892  |
| wavelet-LHH | gldm  | SmallDependenceLowGrayLevelEmphasis  | 0.039394093  |
| wavelet-LHH | gldm  | LowGrayLevelEmphasis                 | 0.039661575  |
| wavelet-LHH | glcm  | JointAverage                         | 19.02130847  |
| wavelet-LHH | glcm  | SumAverage                           | 38.04261694  |
| wavelet-LHH | glcm  | JointEntropy                         | 4.909226655  |
| wavelet-LHH | glcm  | ClusterShade                         | -326.3533959 |
| wavelet-LHH | glcm  | MaximumProbability                   | 0.055365804  |
| wavelet-LHH | glcm  | Idmn                                 | 0.892055485  |
| wavelet-LHH | glcm  | JointEnergy                          | 0.035069447  |
| wavelet-LHH | glcm  | Contrast                             | 161.782112   |
| wavelet-LHH | glcm  | DifferenceEntropy                    | 3.334557151  |
| wavelet-LHH | glcm  | InverseVariance                      | 0.099536971  |
| wavelet-LHH | glcm  | DifferenceVariance                   | 46.39693912  |
| wavelet-LHH | glcm  | Idn                                  | 0.788669617  |
| wavelet-LHH | glcm  | Idm                                  | 0.084181061  |
| wavelet-LHH | glcm  | Correlation                          | -0.000137178 |
| wavelet-LHH | glcm  | Autocorrelation                      | 363.2349533  |
| wavelet-LHH | glcm  | SumEntropy                           | 3.652982734  |
| wavelet-LHH | glcm  | SumSquares                           | 81.14997568  |
| wavelet-LHH | glcm  | ClusterProminence                    | 64882.86462  |
| wavelet-LHH | glcm  | Imc2                                 | 0.99935567   |

|             |            |                                  |              |
|-------------|------------|----------------------------------|--------------|
| wavelet-LHH | glcm       | Imc1                             | -0.814350177 |
| wavelet-LHH | glcm       | DifferenceAverage                | 10.07980146  |
| wavelet-LHH | glcm       | Id                               | 0.167842094  |
| wavelet-LHH | glcm       | ClusterTendency                  | 162.8177907  |
| wavelet-LHH | firstorder | InterquartileRange               | 340.2275672  |
| wavelet-LHH | firstorder | Skewness                         | -0.456116773 |
| wavelet-LHH | firstorder | Uniformity                       | 0.057706355  |
| wavelet-LHH | firstorder | Median                           | 77.77988123  |
| wavelet-LHH | firstorder | Energy                           | 1739394.608  |
| wavelet-LHH | firstorder | RobustMeanAbsoluteDeviation      | 127.4165242  |
| wavelet-LHH | firstorder | MeanAbsoluteDeviation            | 178.0981763  |
| wavelet-LHH | firstorder | TotalEnergy                      | 46963654.4   |
| wavelet-LHH | firstorder | Maximum                          | 386.3127821  |
| wavelet-LHH | firstorder | RootMeanSquared                  | 216.8194296  |
| wavelet-LHH | firstorder | 90Percentile                     | 294.4925698  |
| wavelet-LHH | firstorder | Minimum                          | -405.6578492 |
| wavelet-LHH | firstorder | Entropy                          | 4.368388082  |
| wavelet-LHH | firstorder | Range                            | 791.9706314  |
| wavelet-LHH | firstorder | Variance                         | 45342.38449  |
| wavelet-LHH | firstorder | 10Percentile                     | -267.8796143 |
| wavelet-LHH | firstorder | Kurtosis                         | 2.268695115  |
| wavelet-LHH | firstorder | Mean                             | 40.84459062  |
| wavelet-LHH | glrlm      | ShortRunLowGrayLevelEmphasis     | 0.039980418  |
| wavelet-LHH | glrlm      | GrayLevelVariance                | 72.38560034  |
| wavelet-LHH | glrlm      | LowGrayLevelRunEmphasis          | 0.039991127  |
| wavelet-LHH | glrlm      | GrayLevelNonUniformityNormalized | 0.057248682  |
| wavelet-LHH | glrlm      | RunVariance                      | 0.008299223  |
| wavelet-LHH | glrlm      | GrayLevelNonUniformity           | 2.101386001  |
| wavelet-LHH | glrlm      | LongRunEmphasis                  | 1.026007326  |
| wavelet-LHH | glrlm      | ShortRunHighGrayLevelEmphasis    | 430.422822   |
| wavelet-LHH | glrlm      | RunLengthNonUniformity           | 36.1030525   |
| wavelet-LHH | glrlm      | ShortRunEmphasis                 | 0.993498168  |
| wavelet-LHH | glrlm      | LongRunHighGrayLevelEmphasis     | 450.9406791  |
| wavelet-LHH | glrlm      | RunPercentage                    | 0.991683992  |
| wavelet-LHH | glrlm      | LongRunLowGrayLevelEmphasis      | 0.040033963  |
| wavelet-LHH | glrlm      | RunEntropy                       | 4.384402169  |
| wavelet-LHH | glrlm      | HighGrayLevelRunEmphasis         | 434.5263934  |
| wavelet-LHH | glrlm      | RunLengthNonUniformityNormalized | 0.983401554  |
| wavelet-LHH | glszm      | GrayLevelVariance                | 75.44352617  |
| wavelet-LHH | glszm      | ZoneVariance                     | 0.106519743  |
| wavelet-LHH | glszm      | GrayLevelNonUniformityNormalized | 0.050505051  |
| wavelet-LHH | glszm      | SizeZoneNonUniformityNormalized  | 0.786960514  |
| wavelet-LHH | glszm      | SizeZoneNonUniformity            | 25.96969697  |
| wavelet-LHH | glszm      | GrayLevelNonUniformity           | 1.666666667  |
| wavelet-LHH | glszm      | LargeAreaEmphasis                | 1.363636364  |
| wavelet-LHH | glszm      | SmallAreaHighGrayLevelEmphasis   | 355.3484848  |
| wavelet-LHH | glszm      | ZonePercentage                   | 0.891891892  |
| wavelet-LHH | glszm      | LargeAreaLowGrayLevelEmphasis    | 0.044868911  |
| wavelet-LHH | glszm      | LargeAreaHighGrayLevelEmphasis   | 641.9393939  |
| wavelet-LHH | glszm      | HighGrayLevelZoneEmphasis        | 412.6666667  |
| wavelet-LHH | glszm      | SmallAreaEmphasis                | 0.909090909  |
| wavelet-LHH | glszm      | LowGrayLevelZoneEmphasis         | 0.044269103  |
| wavelet-LHH | glszm      | ZoneEntropy                      | 4.597276316  |
| wavelet-LHH | glszm      | SmallAreaLowGrayLevelEmphasis    | 0.04411915   |
| wavelet-LHH | ngtdm      | Coarseness                       | 0.070871649  |

|             |            |                                      |              |
|-------------|------------|--------------------------------------|--------------|
| wavelet-LHH | ngtdm      | Complexity                           | 2179.77784   |
| wavelet-LHH | ngtdm      | Strength                             | 28.61550744  |
| wavelet-LHH | ngtdm      | Contrast                             | 1.889197376  |
| wavelet-LHH | ngtdm      | Busyness                             | 0.034373883  |
| wavelet-LLH | gldm       | GrayLevelVariance                    | 138.9101534  |
| wavelet-LLH | gldm       | HighGrayLevelEmphasis                | 492.7567568  |
| wavelet-LLH | gldm       | DependenceEntropy                    | 4.722966879  |
| wavelet-LLH | gldm       | DependenceNonUniformity              | 22.40540541  |
| wavelet-LLH | gldm       | GrayLevelNonUniformity               | 1.918918919  |
| wavelet-LLH | gldm       | SmallDependenceEmphasis              | 0.797297297  |
| wavelet-LLH | gldm       | SmallDependenceHighGrayLevelEmphasis | 427.7702703  |
| wavelet-LLH | gldm       | DependenceNonUniformityNormalized    | 0.605551497  |
| wavelet-LLH | gldm       | LargeDependenceEmphasis              | 1.810810811  |
| wavelet-LLH | gldm       | LargeDependenceLowGrayLevelEmphasis  | 0.04812129   |
| wavelet-LLH | gldm       | DependenceVariance                   | 0.197224251  |
| wavelet-LLH | gldm       | LargeDependenceHighGrayLevelEmphasis | 752.7027027  |
| wavelet-LLH | gldm       | SmallDependenceLowGrayLevelEmphasis  | 0.040980555  |
| wavelet-LLH | gldm       | LowGrayLevelEmphasis                 | 0.042408702  |
| wavelet-LLH | glcm       | JointAverage                         | 18.5310854   |
| wavelet-LLH | glcm       | SumAverage                           | 37.06217079  |
| wavelet-LLH | glcm       | JointEntropy                         | 4.952382464  |
| wavelet-LLH | glcm       | ClusterShade                         | 3359.098522  |
| wavelet-LLH | glcm       | MaximumProbability                   | 0.046594146  |
| wavelet-LLH | glcm       | Idmn                                 | 0.917184776  |
| wavelet-LLH | glcm       | JointEnergy                          | 0.033596978  |
| wavelet-LLH | glcm       | Contrast                             | 218.3029471  |
| wavelet-LLH | glcm       | DifferenceEntropy                    | 3.468707042  |
| wavelet-LLH | glcm       | InverseVariance                      | 0.065869811  |
| wavelet-LLH | glcm       | DifferenceVariance                   | 65.82724747  |
| wavelet-LLH | glcm       | Idn                                  | 0.810186817  |
| wavelet-LLH | glcm       | Idm                                  | 0.067973785  |
| wavelet-LLH | glcm       | Correlation                          | 0.220712791  |
| wavelet-LLH | glcm       | Autocorrelation                      | 373.7586122  |
| wavelet-LLH | glcm       | SumEntropy                           | 3.878477917  |
| wavelet-LLH | glcm       | SumSquares                           | 138.7833845  |
| wavelet-LLH | glcm       | ClusterProminence                    | 283452.3946  |
| wavelet-LLH | glcm       | Imc2                                 | 0.999338342  |
| wavelet-LLH | glcm       | Imc1                                 | -0.810684093 |
| wavelet-LLH | glcm       | DifferenceAverage                    | 11.96886395  |
| wavelet-LLH | glcm       | Id                                   | 0.146950214  |
| wavelet-LLH | glcm       | ClusterTendency                      | 336.8305908  |
| wavelet-LLH | firstorder | InterquartileRange                   | 425.0076928  |
| wavelet-LLH | firstorder | Skewness                             | 0.577612695  |
| wavelet-LLH | firstorder | Uniformity                           | 0.051862673  |
| wavelet-LLH | firstorder | Median                               | -188.8824694 |
| wavelet-LLH | firstorder | Energy                               | 3515993.772  |
| wavelet-LLH | firstorder | RobustMeanAbsoluteDeviation          | 183.0650883  |
| wavelet-LLH | firstorder | MeanAbsoluteDeviation                | 247.681813   |
| wavelet-LLH | firstorder | TotalEnergy                          | 94931831.85  |
| wavelet-LLH | firstorder | Maximum                              | 596.0093858  |
| wavelet-LLH | firstorder | RootMeanSquared                      | 308.2642676  |
| wavelet-LLH | firstorder | 90Percentile                         | 354.9482997  |
| wavelet-LLH | firstorder | Minimum                              | -530.7453261 |
| wavelet-LLH | firstorder | Entropy                              | 4.465945933  |
| wavelet-LLH | firstorder | Range                                | 1126.754712  |

|             |            |                                      |              |
|-------------|------------|--------------------------------------|--------------|
| wavelet-LLH | firstorder | Variance                             | 86465.40934  |
| wavelet-LLH | firstorder | 10Percentile                         | -393.0409261 |
| wavelet-LLH | firstorder | Kurtosis                             | 2.323046312  |
| wavelet-LLH | firstorder | Mean                                 | -92.52810041 |
| wavelet-LLH | glrlm      | ShortRunLowGrayLevelEmphasis         | 0.042734658  |
| wavelet-LLH | glrlm      | GrayLevelVariance                    | 139.5266377  |
| wavelet-LLH | glrlm      | LowGrayLevelRunEmphasis              | 0.042791361  |
| wavelet-LLH | glrlm      | GrayLevelNonUniformityNormalized     | 0.051613109  |
| wavelet-LLH | glrlm      | RunVariance                          | 0.010376621  |
| wavelet-LLH | glrlm      | GrayLevelNonUniformity               | 1.89002079   |
| wavelet-LLH | glrlm      | LongRunEmphasis                      | 1.032417582  |
| wavelet-LLH | glrlm      | ShortRunHighGrayLevelEmphasis        | 491.9538536  |
| wavelet-LLH | glrlm      | RunLengthNonUniformity               | 35.87655678  |
| wavelet-LLH | glrlm      | ShortRunEmphasis                     | 0.991895604  |
| wavelet-LLH | glrlm      | LongRunHighGrayLevelEmphasis         | 505.0843481  |
| wavelet-LLH | glrlm      | RunPercentage                        | 0.98960499   |
| wavelet-LLH | glrlm      | LongRunLowGrayLevelEmphasis          | 0.043018172  |
| wavelet-LLH | glrlm      | RunEntropy                           | 4.484722755  |
| wavelet-LLH | glrlm      | HighGrayLevelRunEmphasis             | 494.5799525  |
| wavelet-LLH | glrlm      | RunLengthNonUniformityNormalized     | 0.979246759  |
| wavelet-LLH | glszm      | GrayLevelVariance                    | 147.8896484  |
| wavelet-LLH | glszm      | ZoneVariance                         | 0.131835938  |
| wavelet-LLH | glszm      | GrayLevelNonUniformityNormalized     | 0.046875     |
| wavelet-LLH | glszm      | SizeZoneNonUniformityNormalized      | 0.736328125  |
| wavelet-LLH | glszm      | SizeZoneNonUniformity                | 23.5625      |
| wavelet-LLH | glszm      | GrayLevelNonUniformity               | 1.5          |
| wavelet-LLH | glszm      | LargeAreaEmphasis                    | 1.46875      |
| wavelet-LLH | glszm      | SmallAreaHighGrayLevelEmphasis       | 482.0859375  |
| wavelet-LLH | glszm      | ZonePercentage                       | 0.864864865  |
| wavelet-LLH | glszm      | LargeAreaLowGrayLevelEmphasis        | 0.051236788  |
| wavelet-LLH | glszm      | LargeAreaHighGrayLevelEmphasis       | 669.9375     |
| wavelet-LLH | glszm      | HighGrayLevelZoneEmphasis            | 519.65625    |
| wavelet-LLH | glszm      | SmallAreaEmphasis                    | 0.8828125    |
| wavelet-LLH | glszm      | LowGrayLevelZoneEmphasis             | 0.047934198  |
| wavelet-LLH | glszm      | ZoneEntropy                          | 4.75         |
| wavelet-LLH | glszm      | SmallAreaLowGrayLevelEmphasis        | 0.04710855   |
| wavelet-LLH | ngtdm      | Coarseness                           | 0.072577134  |
| wavelet-LLH | ngtdm      | Complexity                           | 3310.217134  |
| wavelet-LLH | ngtdm      | Strength                             | 53.46723492  |
| wavelet-LLH | ngtdm      | Contrast                             | 3.681110685  |
| wavelet-LLH | ngtdm      | Busyness                             | 0.043812516  |
| wavelet-LLL | gldm       | GrayLevelVariance                    | 439.2213294  |
| wavelet-LLL | gldm       | HighGrayLevelEmphasis                | 1996.27027   |
| wavelet-LLL | gldm       | DependenceEntropy                    | 4.831074987  |
| wavelet-LLL | gldm       | DependenceNonUniformity              | 25.32432432  |
| wavelet-LLL | gldm       | GrayLevelNonUniformity               | 1.486486486  |
| wavelet-LLL | gldm       | SmallDependenceEmphasis              | 0.854354354  |
| wavelet-LLL | gldm       | SmallDependenceHighGrayLevelEmphasis | 1444.381381  |
| wavelet-LLL | gldm       | DependenceNonUniformityNormalized    | 0.684441198  |
| wavelet-LLL | gldm       | LargeDependenceEmphasis              | 1.702702703  |
| wavelet-LLL | gldm       | LargeDependenceLowGrayLevelEmphasis  | 0.029729028  |
| wavelet-LLL | gldm       | DependenceVariance                   | 0.223520818  |
| wavelet-LLL | gldm       | LargeDependenceHighGrayLevelEmphasis | 4695.837838  |
| wavelet-LLL | gldm       | SmallDependenceLowGrayLevelEmphasis  | 0.029497799  |
| wavelet-LLL | gldm       | LowGrayLevelEmphasis                 | 0.02953818   |



|             |            |                                  |              |
|-------------|------------|----------------------------------|--------------|
| wavelet-LLL | glcm       | JointAverage                     | 45.68492529  |
| wavelet-LLL | glcm       | SumAverage                       | 91.36985058  |
| wavelet-LLL | glcm       | JointEntropy                     | 4.952176761  |
| wavelet-LLL | glcm       | ClusterShade                     | -4544.885594 |
| wavelet-LLL | glcm       | MaximumProbability               | 0.045879457  |
| wavelet-LLL | glcm       | Idmn                             | 0.919849022  |
| wavelet-LLL | glcm       | JointEnergy                      | 0.033474878  |
| wavelet-LLL | glcm       | Contrast                         | 671.9992862  |
| wavelet-LLL | glcm       | DifferenceEntropy                | 3.680288654  |
| wavelet-LLL | glcm       | InverseVariance                  | 0.044003941  |
| wavelet-LLL | glcm       | DifferenceVariance               | 200.0442807  |
| wavelet-LLL | glcm       | Idn                              | 0.810030336  |
| wavelet-LLL | glcm       | Idm                              | 0.048134999  |
| wavelet-LLL | glcm       | Correlation                      | 0.177096786  |
| wavelet-LLL | glcm       | Autocorrelation                  | 2163.343735  |
| wavelet-LLL | glcm       | SumEntropy                       | 3.885231612  |
| wavelet-LLL | glcm       | SumSquares                       | 408.1620195  |
| wavelet-LLL | glcm       | ClusterProminence                | 2055248.001  |
| wavelet-LLL | glcm       | Imc2                             | 0.999710018  |
| wavelet-LLL | glcm       | Imc1                             | -0.863765819 |
| wavelet-LLL | glcm       | DifferenceAverage                | 21.40017089  |
| wavelet-LLL | glcm       | Id                               | 0.103503613  |
| wavelet-LLL | glcm       | ClusterTendency                  | 960.6487919  |
| wavelet-LLL | firstorder | InterquartileRange               | 879.1099133  |
| wavelet-LLL | firstorder | Skewness                         | 0.158791146  |
| wavelet-LLL | firstorder | Uniformity                       | 0.04017531   |
| wavelet-LLL | firstorder | Median                           | -831.4437217 |
| wavelet-LLL | firstorder | Energy                           | 32434132.06  |
| wavelet-LLL | firstorder | RobustMeanAbsoluteDeviation      | 334.8537399  |
| wavelet-LLL | firstorder | MeanAbsoluteDeviation            | 442.9934822  |
| wavelet-LLL | firstorder | TotalEnergy                      | 875721565.5  |
| wavelet-LLL | firstorder | Maximum                          | 317.3065381  |
| wavelet-LLL | firstorder | RootMeanSquared                  | 936.2682114  |
| wavelet-LLL | firstorder | 90Percentile                     | -89.87567954 |
| wavelet-LLL | firstorder | Minimum                          | -1740.693773 |
| wavelet-LLL | firstorder | Entropy                          | 4.756618568  |
| wavelet-LLL | firstorder | Range                            | 2058.000311  |
| wavelet-LLL | firstorder | Variance                         | 276219.706   |
| wavelet-LLL | firstorder | 10Percentile                     | -1358.810527 |
| wavelet-LLL | firstorder | Kurtosis                         | 2.06794474   |
| wavelet-LLL | firstorder | Mean                             | -774.8409241 |
| wavelet-LLL | glrlm      | ShortRunLowGrayLevelEmphasis     | 0.029786546  |
| wavelet-LLL | glrlm      | GrayLevelVariance                | 438.3720077  |
| wavelet-LLL | glrlm      | LowGrayLevelRunEmphasis          | 0.029788302  |
| wavelet-LLL | glrlm      | GrayLevelNonUniformityNormalized | 0.039921939  |
| wavelet-LLL | glrlm      | RunVariance                      | 0.008309592  |
| wavelet-LLL | glrlm      | GrayLevelNonUniformity           | 1.465003465  |
| wavelet-LLL | glrlm      | LongRunEmphasis                  | 1.025641026  |
| wavelet-LLL | glrlm      | ShortRunHighGrayLevelEmphasis    | 1956.188179  |
| wavelet-LLL | glrlm      | RunLengthNonUniformity           | 36.09401709  |
| wavelet-LLL | glrlm      | ShortRunEmphasis                 | 0.993589744  |
| wavelet-LLL | glrlm      | LongRunHighGrayLevelEmphasis     | 2078.640102  |
| wavelet-LLL | glrlm      | RunPercentage                    | 0.991683992  |
| wavelet-LLL | glrlm      | LongRunLowGrayLevelEmphasis      | 0.029795325  |
| wavelet-LLL | glrlm      | RunEntropy                       | 4.769452652  |

|             |       |                                      |              |
|-------------|-------|--------------------------------------|--------------|
| wavelet-LLL | glrlm | HighGrayLevelRunEmphasis             | 1980.678563  |
| wavelet-LLL | glrlm | RunLengthNonUniformityNormalizd      | 0.983380817  |
| wavelet-LLL | glszm | GrayLevelVariance                    | 421.8034894  |
| wavelet-LLL | glszm | ZoneVariance                         | 0.167125803  |
| wavelet-LLL | glszm | GrayLevelNonUniformityNormalized     | 0.037649219  |
| wavelet-LLL | glszm | SizeZoneNonUniformityNormalized      | 0.831037649  |
| wavelet-LLL | glszm | SizeZoneNonUniformity                | 27.42424242  |
| wavelet-LLL | glszm | GrayLevelNonUniformity               | 1.242424242  |
| wavelet-LLL | glszm | LargeAreaEmphasis                    | 1.424242424  |
| wavelet-LLL | glszm | SmallAreaHighGrayLevelEmphasis       | 1503.685185  |
| wavelet-LLL | glszm | ZonePercentage                       | 0.891891892  |
| wavelet-LLL | glszm | LargeAreaLowGrayLevelEmphasis        | 0.033199757  |
| wavelet-LLL | glszm | LargeAreaHighGrayLevelEmphasis       | 3412.666667  |
| wavelet-LLL | glszm | HighGrayLevelZoneEmphasis            | 1775.151515  |
| wavelet-LLL | glszm | SmallAreaEmphasis                    | 0.927609428  |
| wavelet-LLL | glszm | LowGrayLevelZoneEmphasis             | 0.033085368  |
| wavelet-LLL | glszm | ZoneEntropy                          | 4.801969877  |
| wavelet-LLL | glszm | SmallAreaLowGrayLevelEmphasis        | 0.033064991  |
| wavelet-LLL | ngtdm | Coarseness                           | 0.047089241  |
| wavelet-LLL | ngtdm | Complexity                           | 11597.01092  |
| wavelet-LLL | ngtdm | Strength                             | 91.15319505  |
| wavelet-LLL | ngtdm | Contrast                             | 16.20636727  |
| wavelet-LLL | ngtdm | Busyness                             | 0.02356755   |
| wavelet-HHL | gldm  | GrayLevelVariance                    | 14.94375457  |
| wavelet-HHL | gldm  | HighGrayLevelEmphasis                | 123.2162162  |
| wavelet-HHL | gldm  | DependenceEntropy                    | 4.249729717  |
| wavelet-HHL | gldm  | DependenceNonUniformity              | 14.83783784  |
| wavelet-HHL | gldm  | GrayLevelNonUniformity               | 3.378378378  |
| wavelet-HHL | gldm  | SmallDependenceEmphasis              | 0.629129129  |
| wavelet-HHL | gldm  | SmallDependenceHighGrayLevelEmphasis | 73.19219219  |
| wavelet-HHL | gldm  | DependenceNonUniformityNormalized    | 0.401022644  |
| wavelet-HHL | gldm  | LargeDependenceEmphasis              | 3.324324324  |
| wavelet-HHL | gldm  | LargeDependenceLowGrayLevelEmphasis  | 0.065746424  |
| wavelet-HHL | gldm  | DependenceVariance                   | 0.606281958  |
| wavelet-HHL | gldm  | LargeDependenceHighGrayLevelEmphasis | 460.7297297  |
| wavelet-HHL | gldm  | SmallDependenceLowGrayLevelEmphasis  | 0.043694859  |
| wavelet-HHL | gldm  | LowGrayLevelEmphasis                 | 0.046921977  |
| wavelet-HHL | glcm  | JointAverage                         | 10.7680387   |
| wavelet-HHL | glcm  | SumAverage                           | 21.5360774   |
| wavelet-HHL | glcm  | JointEntropy                         | 4.811718797  |
| wavelet-HHL | glcm  | ClusterShade                         | -66.35380516 |
| wavelet-HHL | glcm  | MaximumProbability                   | 0.065110261  |
| wavelet-HHL | glcm  | Idmn                                 | 0.931701609  |
| wavelet-HHL | glcm  | JointEnergy                          | 0.037769771  |
| wavelet-HHL | glcm  | Contrast                             | 30.44421243  |
| wavelet-HHL | glcm  | DifferenceEntropy                    | 2.917341992  |
| wavelet-HHL | glcm  | InverseVariance                      | 0.217098821  |
| wavelet-HHL | glcm  | DifferenceVariance                   | 10.60542919  |
| wavelet-HHL | glcm  | Idn                                  | 0.827422543  |
| wavelet-HHL | glcm  | Idm                                  | 0.187392618  |
| wavelet-HHL | glcm  | Correlation                          | -0.045732302 |
| wavelet-HHL | glcm  | Autocorrelation                      | 115.9820215  |
| wavelet-HHL | glcm  | SumEntropy                           | 3.35256209   |
| wavelet-HHL | glcm  | SumSquares                           | 14.76727694  |
| wavelet-HHL | glcm  | ClusterProminence                    | 2557.35529   |

|             |            |                                  |              |
|-------------|------------|----------------------------------|--------------|
| wavelet-HHL | glcm       | Imc2                             | 0.994027562  |
| wavelet-HHL | glcm       | Imc1                             | -0.635364091 |
| wavelet-HHL | glcm       | DifferenceAverage                | 4.387799607  |
| wavelet-HHL | glcm       | Id                               | 0.284311516  |
| wavelet-HHL | glcm       | ClusterTendency                  | 28.62489532  |
| wavelet-HHL | firstorder | InterquartileRange               | 98.67788124  |
| wavelet-HHL | firstorder | Skewness                         | -0.367564464 |
| wavelet-HHL | firstorder | Uniformity                       | 0.091307524  |
| wavelet-HHL | firstorder | Median                           | -15.37854817 |
| wavelet-HHL | firstorder | Energy                           | 370930.3731  |
| wavelet-HHL | firstorder | RobustMeanAbsoluteDeviation      | 45.04071604  |
| wavelet-HHL | firstorder | MeanAbsoluteDeviation            | 73.29752149  |
| wavelet-HHL | firstorder | TotalEnergy                      | 10015120.07  |
| wavelet-HHL | firstorder | Maximum                          | 198.9841024  |
| wavelet-HHL | firstorder | RootMeanSquared                  | 100.1256472  |
| wavelet-HHL | firstorder | 90Percentile                     | 83.39225242  |
| wavelet-HHL | firstorder | Minimum                          | -250.0713961 |
| wavelet-HHL | firstorder | Entropy                          | 3.699337069  |
| wavelet-HHL | firstorder | Range                            | 449.0554985  |
| wavelet-HHL | firstorder | Variance                         | 9316.705171  |
| wavelet-HHL | firstorder | 10Percentile                     | -152.8928989 |
| wavelet-HHL | firstorder | Kurtosis                         | 3.2029094    |
| wavelet-HHL | firstorder | Mean                             | -26.6165371  |
| wavelet-HHL | glrlm      | ShortRunLowGrayLevelEmphasis     | 0.047772232  |
| wavelet-HHL | glrlm      | GrayLevelVariance                | 15.14499592  |
| wavelet-HHL | glrlm      | LowGrayLevelRunEmphasis          | 0.047935956  |
| wavelet-HHL | glrlm      | GrayLevelNonUniformityNormalized | 0.090849955  |
| wavelet-HHL | glrlm      | RunVariance                      | 0.024864292  |
| wavelet-HHL | glrlm      | GrayLevelNonUniformity           | 3.278482814  |
| wavelet-HHL | glrlm      | LongRunEmphasis                  | 1.078786899  |
| wavelet-HHL | glrlm      | ShortRunHighGrayLevelEmphasis    | 119.9458729  |
| wavelet-HHL | glrlm      | RunLengthNonUniformity           | 34.32802557  |
| wavelet-HHL | glrlm      | ShortRunEmphasis                 | 0.980303275  |
| wavelet-HHL | glrlm      | LongRunHighGrayLevelEmphasis     | 133.8879112  |
| wavelet-HHL | glrlm      | RunPercentage                    | 0.975051975  |
| wavelet-HHL | glrlm      | LongRunLowGrayLevelEmphasis      | 0.048590855  |
| wavelet-HHL | glrlm      | RunEntropy                       | 3.773900203  |
| wavelet-HHL | glrlm      | HighGrayLevelRunEmphasis         | 122.7342805  |
| wavelet-HHL | glrlm      | RunLengthNonUniformityNormalized | 0.950271416  |
| wavelet-HHL | glszm      | GrayLevelVariance                | 17.92592593  |
| wavelet-HHL | glszm      | ZoneVariance                     | 0.455418381  |
| wavelet-HHL | glszm      | GrayLevelNonUniformityNormalized | 0.080932785  |
| wavelet-HHL | glszm      | SizeZoneNonUniformityNormalized  | 0.582990398  |
| wavelet-HHL | glszm      | SizeZoneNonUniformity            | 15.74074074  |
| wavelet-HHL | glszm      | GrayLevelNonUniformity           | 2.185185185  |
| wavelet-HHL | glszm      | LargeAreaEmphasis                | 2.333333333  |
| wavelet-HHL | glszm      | SmallAreaHighGrayLevelEmphasis   | 90.91255144  |
| wavelet-HHL | glszm      | ZonePercentage                   | 0.72972973   |
| wavelet-HHL | glszm      | LargeAreaLowGrayLevelEmphasis    | 0.072121555  |
| wavelet-HHL | glszm      | LargeAreaHighGrayLevelEmphasis   | 307.2962963  |
| wavelet-HHL | glszm      | HighGrayLevelZoneEmphasis        | 117.9259259  |
| wavelet-HHL | glszm      | SmallAreaEmphasis                | 0.790123457  |
| wavelet-HHL | glszm      | LowGrayLevelZoneEmphasis         | 0.061144086  |
| wavelet-HHL | glszm      | ZoneEntropy                      | 4.236368984  |
| wavelet-HHL | glszm      | SmallAreaLowGrayLevelEmphasis    | 0.059237645  |

|             |            |                                      |              |
|-------------|------------|--------------------------------------|--------------|
| wavelet-HHL | ngtdm      | Coarseness                           | 0.128159996  |
| wavelet-HHL | ngtdm      | Complexity                           | 312.3064964  |
| wavelet-HHL | ngtdm      | Strength                             | 11.9987614   |
| wavelet-HHL | ngtdm      | Contrast                             | 0.382517609  |
| wavelet-HHL | ngtdm      | Busyness                             | 0.050000283  |
| wavelet-HLH | gldm       | GrayLevelVariance                    | 31.27830533  |
| wavelet-HLH | gldm       | HighGrayLevelEmphasis                | 278.7027027  |
| wavelet-HLH | gldm       | DependenceEntropy                    | 4.411891879  |
| wavelet-HLH | gldm       | DependenceNonUniformity              | 15.97297297  |
| wavelet-HLH | gldm       | GrayLevelNonUniformity               | 3.162162162  |
| wavelet-HLH | gldm       | SmallDependenceEmphasis              | 0.67210961   |
| wavelet-HLH | gldm       | SmallDependenceHighGrayLevelEmphasis | 201.7484985  |
| wavelet-HLH | gldm       | DependenceNonUniformityNormalized    | 0.431701972  |
| wavelet-HLH | gldm       | LargeDependenceEmphasis              | 3.216216216  |
| wavelet-HLH | gldm       | LargeDependenceLowGrayLevelEmphasis  | 0.042405105  |
| wavelet-HLH | gldm       | DependenceVariance                   | 0.673484295  |
| wavelet-HLH | gldm       | LargeDependenceHighGrayLevelEmphasis | 819.5675676  |
| wavelet-HLH | gldm       | SmallDependenceLowGrayLevelEmphasis  | 0.030540609  |
| wavelet-HLH | gldm       | LowGrayLevelEmphasis                 | 0.032132806  |
| wavelet-HLH | glcm       | JointAverage                         | 15.54101707  |
| wavelet-HLH | glcm       | SumAverage                           | 31.08203413  |
| wavelet-HLH | glcm       | JointEntropy                         | 4.783569439  |
| wavelet-HLH | glcm       | ClusterShade                         | 47.73291715  |
| wavelet-HLH | glcm       | MaximumProbability                   | 0.063521271  |
| wavelet-HLH | glcm       | Idmn                                 | 0.963598736  |
| wavelet-HLH | glcm       | JointEnergy                          | 0.038830748  |
| wavelet-HLH | glcm       | Contrast                             | 47.4452379   |
| wavelet-HLH | glcm       | DifferenceEntropy                    | 2.997909746  |
| wavelet-HLH | glcm       | InverseVariance                      | 0.171789818  |
| wavelet-HLH | glcm       | DifferenceVariance                   | 15.71396649  |
| wavelet-HLH | glcm       | Idn                                  | 0.869076451  |
| wavelet-HLH | glcm       | Idm                                  | 0.154094465  |
| wavelet-HLH | glcm       | Correlation                          | 0.005663435  |
| wavelet-HLH | glcm       | Autocorrelation                      | 242.8225952  |
| wavelet-HLH | glcm       | SumEntropy                           | 3.31424153   |
| wavelet-HLH | glcm       | SumSquares                           | 24.44938685  |
| wavelet-HLH | glcm       | ClusterProminence                    | 10780.28378  |
| wavelet-HLH | glcm       | Imc2                                 | 0.995518803  |
| wavelet-HLH | glcm       | Imc1                                 | -0.671729657 |
| wavelet-HLH | glcm       | DifferenceAverage                    | 5.510924481  |
| wavelet-HLH | glcm       | Id                                   | 0.248361491  |
| wavelet-HLH | glcm       | ClusterTendency                      | 50.35230951  |
| wavelet-HLH | firstorder | InterquartileRange                   | 137.9454642  |
| wavelet-HLH | firstorder | Skewness                             | 0.410776952  |
| wavelet-HLH | firstorder | Uniformity                           | 0.085463842  |
| wavelet-HLH | firstorder | Median                               | 30.06094476  |
| wavelet-HLH | firstorder | Energy                               | 758854.2569  |
| wavelet-HLH | firstorder | RobustMeanAbsoluteDeviation          | 59.57332894  |
| wavelet-HLH | firstorder | MeanAbsoluteDeviation                | 99.76888957  |
| wavelet-HLH | firstorder | TotalEnergy                          | 20489064.94  |
| wavelet-HLH | firstorder | Maximum                              | 490.3698997  |
| wavelet-HLH | firstorder | RootMeanSquared                      | 143.2116424  |
| wavelet-HLH | firstorder | 90Percentile                         | 200.5946625  |
| wavelet-HLH | firstorder | Minimum                              | -346.2698044 |
| wavelet-HLH | firstorder | Entropy                              | 3.841096866  |

|             |            |                                  |              |
|-------------|------------|----------------------------------|--------------|
| wavelet-HLH | firstorder | Range                            | 836.6397041  |
| wavelet-HLH | firstorder | Variance                         | 19601.12185  |
| wavelet-HLH | firstorder | 10Percentile                     | -123.8867665 |
| wavelet-HLH | firstorder | Kurtosis                         | 5.276446595  |
| wavelet-HLH | firstorder | Mean                             | 30.14054836  |
| wavelet-HLH | glrlm      | ShortRunLowGrayLevelEmphasis     | 0.032707672  |
| wavelet-HLH | glrlm      | GrayLevelVariance                | 31.86310601  |
| wavelet-HLH | glrlm      | LowGrayLevelRunEmphasis          | 0.032793539  |
| wavelet-HLH | glrlm      | GrayLevelNonUniformityNormalized | 0.084143417  |
| wavelet-HLH | glrlm      | RunVariance                      | 0.022786894  |
| wavelet-HLH | glrlm      | GrayLevelNonUniformity           | 3.043428432  |
| wavelet-HLH | glrlm      | LongRunEmphasis                  | 1.072376643  |
| wavelet-HLH | glrlm      | ShortRunHighGrayLevelEmphasis    | 275.325232   |
| wavelet-HLH | glrlm      | RunLengthNonUniformity           | 34.5545213   |
| wavelet-HLH | glrlm      | ShortRunEmphasis                 | 0.981905839  |
| wavelet-HLH | glrlm      | LongRunHighGrayLevelEmphasis     | 296.9709307  |
| wavelet-HLH | glrlm      | RunPercentage                    | 0.977130977  |
| wavelet-HLH | glrlm      | LongRunLowGrayLevelEmphasis      | 0.033137006  |
| wavelet-HLH | glrlm      | RunEntropy                       | 3.92077703   |
| wavelet-HLH | glrlm      | HighGrayLevelRunEmphasis         | 279.6543717  |
| wavelet-HLH | glrlm      | RunLengthNonUniformityNormalized | 0.954426212  |
| wavelet-HLH | glszm      | GrayLevelVariance                | 40.09876543  |
| wavelet-HLH | glszm      | ZoneVariance                     | 0.825788752  |
| wavelet-HLH | glszm      | GrayLevelNonUniformityNormalized | 0.072702332  |
| wavelet-HLH | glszm      | SizeZoneNonUniformityNormalized  | 0.676268861  |
| wavelet-HLH | glszm      | SizeZoneNonUniformity            | 18.25925926  |
| wavelet-HLH | glszm      | GrayLevelNonUniformity           | 1.962962963  |
| wavelet-HLH | glszm      | LargeAreaEmphasis                | 2.703703704  |
| wavelet-HLH | glszm      | SmallAreaHighGrayLevelEmphasis   | 257.8390535  |
| wavelet-HLH | glszm      | ZonePercentage                   | 0.72972973   |
| wavelet-HLH | glszm      | LargeAreaLowGrayLevelEmphasis    | 0.049871944  |
| wavelet-HLH | glszm      | LargeAreaHighGrayLevelEmphasis   | 730.2962963  |
| wavelet-HLH | glszm      | HighGrayLevelZoneEmphasis        | 292.5555556  |
| wavelet-HLH | glszm      | SmallAreaEmphasis                | 0.843045267  |
| wavelet-HLH | glszm      | LowGrayLevelZoneEmphasis         | 0.042271368  |
| wavelet-HLH | glszm      | ZoneEntropy                      | 4.236368984  |
| wavelet-HLH | glszm      | SmallAreaLowGrayLevelEmphasis    | 0.041470356  |
| wavelet-HLH | ngtdm      | Coarseness                       | 0.114334714  |
| wavelet-HLH | ngtdm      | Complexity                       | 666.5185809  |
| wavelet-HLH | ngtdm      | Strength                         | 20.70208743  |
| wavelet-HLH | ngtdm      | Contrast                         | 0.837219268  |
| wavelet-HLH | ngtdm      | Busyness                         | 0.035530441  |

| Image type | Feature Class | Feature Name                         |                                                                                                                                                                                                                                                                                                                                                                                                                                              |
|------------|---------------|--------------------------------------|----------------------------------------------------------------------------------------------------------------------------------------------------------------------------------------------------------------------------------------------------------------------------------------------------------------------------------------------------------------------------------------------------------------------------------------------|
| general    | info          | BoundingBox                          | 21: RTSTRUCT: C99-DNU_segment_GTV<br>(0, 0, 1, 11, 12, 13)                                                                                                                                                                                                                                                                                                                                                                                   |
| general    | info          | EnabledImageTypes                    | {u'Original': {}, u'Wavelet': {}}                                                                                                                                                                                                                                                                                                                                                                                                            |
|            |               |                                      | {'distances': [1], 'additionalInfo': True,<br>'force2D': False, 'interpolator': 'sitkBSpline',<br>'resampledPixelSpacing': [3.0], 'label': 1,<br>'normalizeScale': 1, 'normalize': False,<br>'force2Ddimension': 0, 'removeOutliers':<br>None, 'minimumROISize': None, u'binWidth':<br>25.0, 'minimumROIDimensions': 1,<br>u'correctMask': True, 'preCrop': False,<br>u'symmetricalGLCM': True,<br>'resegmentRange': None, 'padDistance': 5} |
| general    | info          | GeneralSettings                      | bbc830dcd81071827089e87ede09967601c5<br>4c90                                                                                                                                                                                                                                                                                                                                                                                                 |
| general    | info          | ImageHash                            | (0.9765624999999998,<br>0.9765624999999998, 1.9999999999999999)<br>7b69a5f86ff686e1c4f0f074f1c8539a5646ac3<br>4                                                                                                                                                                                                                                                                                                                              |
| general    | info          | ImageSpacing                         | 4                                                                                                                                                                                                                                                                                                                                                                                                                                            |
| general    | info          | MaskHash                             | 1.13.1                                                                                                                                                                                                                                                                                                                                                                                                                                       |
| general    | info          | NumpyVersion                         | 0.5.2                                                                                                                                                                                                                                                                                                                                                                                                                                        |
| general    | info          | PyWaveletVersion                     | 1.1.0                                                                                                                                                                                                                                                                                                                                                                                                                                        |
| general    | info          | SimpleITKVersion                     | 1.3.0.post102+g1b0eb74                                                                                                                                                                                                                                                                                                                                                                                                                       |
| general    | info          | Version                              |                                                                                                                                                                                                                                                                                                                                                                                                                                              |
| general    | info          | VolumeNum                            | 1                                                                                                                                                                                                                                                                                                                                                                                                                                            |
| general    | info          | VoxelNum                             | 566                                                                                                                                                                                                                                                                                                                                                                                                                                          |
| original   | shape         | Maximum3DDiameter                    | 40.91454509                                                                                                                                                                                                                                                                                                                                                                                                                                  |
| original   | shape         | Maximum2DDiameterSlice               | 29.54657341                                                                                                                                                                                                                                                                                                                                                                                                                                  |
| original   | shape         | Sphericity                           | 0.795647762                                                                                                                                                                                                                                                                                                                                                                                                                                  |
| original   | shape         | MinorAxis                            | 26.06175893                                                                                                                                                                                                                                                                                                                                                                                                                                  |
| original   | shape         | Elongation                           | 0.666736447                                                                                                                                                                                                                                                                                                                                                                                                                                  |
| original   | shape         | SurfaceVolumeRatio                   | 0.244926935                                                                                                                                                                                                                                                                                                                                                                                                                                  |
| original   | shape         | Volume                               | 15282                                                                                                                                                                                                                                                                                                                                                                                                                                        |
| original   | shape         | MajorAxis                            | 39.088547                                                                                                                                                                                                                                                                                                                                                                                                                                    |
| original   | shape         | SurfaceArea                          | 3742.973415                                                                                                                                                                                                                                                                                                                                                                                                                                  |
| original   | shape         | Flatness                             | 0.566429378                                                                                                                                                                                                                                                                                                                                                                                                                                  |
| original   | shape         | LeastAxis                            | 22.14090138                                                                                                                                                                                                                                                                                                                                                                                                                                  |
| original   | shape         | Maximum2DDiameterColumn              | 37.94733192                                                                                                                                                                                                                                                                                                                                                                                                                                  |
| original   | shape         | Maximum2DDiameterRow                 | 37.94733192                                                                                                                                                                                                                                                                                                                                                                                                                                  |
| original   | gldm          | GrayLevelVariance                    | 66.14634969                                                                                                                                                                                                                                                                                                                                                                                                                                  |
| original   | gldm          | HighGrayLevelEmphasis                | 894.4876325                                                                                                                                                                                                                                                                                                                                                                                                                                  |
| original   | gldm          | DependenceEntropy                    | 6.499302094                                                                                                                                                                                                                                                                                                                                                                                                                                  |
| original   | gldm          | DependenceNonUniformity              | 84.91166078                                                                                                                                                                                                                                                                                                                                                                                                                                  |
| original   | gldm          | GrayLevelNonUniformity               | 61.22614841                                                                                                                                                                                                                                                                                                                                                                                                                                  |
| original   | gldm          | SmallDependenceEmphasis              | 0.374731562                                                                                                                                                                                                                                                                                                                                                                                                                                  |
| original   | gldm          | SmallDependenceHighGrayLevelEmphasis | 230.9233069                                                                                                                                                                                                                                                                                                                                                                                                                                  |
| original   | gldm          | DependenceNonUniformityNormalized    | 0.150020602                                                                                                                                                                                                                                                                                                                                                                                                                                  |
| original   | gldm          | LargeDependenceEmphasis              | 57.24734982                                                                                                                                                                                                                                                                                                                                                                                                                                  |
| original   | gldm          | LargeDependenceLowGrayLevelEmphasis  | 0.058959193                                                                                                                                                                                                                                                                                                                                                                                                                                  |
| original   | gldm          | DependenceVariance                   | 29.04111676                                                                                                                                                                                                                                                                                                                                                                                                                                  |
| original   | gldm          | LargeDependenceHighGrayLevelEmphasis | 66210.37102                                                                                                                                                                                                                                                                                                                                                                                                                                  |

|          |            |                                     |              |
|----------|------------|-------------------------------------|--------------|
| original | gldm       | SmallDependenceLowGrayLevelEmphasis | 0.004208872  |
| original | gldm       | LowGrayLevelEmphasis                | 0.005314993  |
| original | glcm       | JointAverage                        | 30.20723818  |
| original | glcm       | SumAverage                          | 60.41447636  |
| original | glcm       | JointEntropy                        | 6.585705756  |
| original | glcm       | ClusterShade                        | -3673.248433 |
| original | glcm       | MaximumProbability                  | 0.139733599  |
| original | glcm       | ldmn                                | 0.968232516  |
| original | glcm       | JointEnergy                         | 0.037370001  |
| original | glcm       | Contrast                            | 51.39974673  |
| original | glcm       | DifferenceEntropy                   | 3.609074261  |
| original | glcm       | InverseVariance                     | 0.278014414  |
| original | glcm       | DifferenceVariance                  | 30.53344213  |
| original | glcm       | ldn                                 | 0.904902809  |
| original | glcm       | ldm                                 | 0.369531949  |
| original | glcm       | Correlation                         | 0.501336571  |
| original | glcm       | Autocorrelation                     | 938.9590731  |
| original | glcm       | SumEntropy                          | 4.618527313  |
| original | glcm       | SumSquares                          | 52.15199462  |
| original | glcm       | ClusterProminence                   | 155800.4779  |
| original | glcm       | lmc2                                | 0.91237275   |
| original | glcm       | lmc1                                | -0.241030914 |
| original | glcm       | DifferenceAverage                   | 4.516578724  |
| original | glcm       | ld                                  | 0.4268453    |
| original | glcm       | ClusterTendency                     | 157.2082318  |
| original | firstorder | InterquartileRange                  | 225.5        |
| original | firstorder | Skewness                            | -1.485288695 |
| original | firstorder | Uniformity                          | 0.108173407  |
| original | firstorder | Median                              | -14          |
| original | firstorder | Energy                              | 31368301     |
| original | firstorder | RobustMeanAbsoluteDeviation         | 107.2785034  |
| original | firstorder | MeanAbsoluteDeviation               | 160.5874652  |
| original | firstorder | TotalEnergy                         | 846944127    |
| original | firstorder | Maximum                             | 83           |
| original | firstorder | RootMeanSquared                     | 235.4167082  |
| original | firstorder | 90Percentile                        | 36           |
| original | firstorder | Minimum                             | -824         |
| original | firstorder | Entropy                             | 4.111384925  |
| original | firstorder | Range                               | 907          |
| original | firstorder | Variance                            | 41244.46392  |
| original | firstorder | 10Percentile                        | -421         |
| original | firstorder | Kurtosis                            | 4.385174719  |
| original | firstorder | Mean                                | -119.065371  |
| original | glrlm      | ShortRunLowGrayLevelEmphasis        | 0.006010994  |
| original | glrlm      | GrayLevelVariance                   | 71.57045337  |
| original | glrlm      | LowGrayLevelRunEmphasis             | 0.006146422  |
| original | glrlm      | GrayLevelNonUniformityNormalized    | 0.074973208  |
| original | glrlm      | RunVariance                         | 0.353608847  |
| original | glrlm      | GrayLevelNonUniformity              | 35.43584668  |
| original | glrlm      | LongRunEmphasis                     | 1.794212194  |
| original | glrlm      | ShortRunHighGrayLevelEmphasis       | 723.41071    |
| original | glrlm      | RunLengthNonUniformity              | 360.0943167  |
| original | glrlm      | ShortRunEmphasis                    | 0.89355244   |

|             |       |                                      |             |
|-------------|-------|--------------------------------------|-------------|
| original    | glrlm | LongRunHighGrayLevelEmphasis         | 1757.239346 |
| original    | glrlm | RunPercentage                        | 0.834194074 |
| original    | glrlm | LongRunLowGrayLevelEmphasis          | 0.007005013 |
| original    | glrlm | RunEntropy                           | 4.940830573 |
| original    | glrlm | HighGrayLevelRunEmphasis             | 844.4504962 |
| original    | glrlm | RunLengthNonUniformityNormalized     | 0.761989386 |
| original    | glszm | GrayLevelVariance                    | 73.95299938 |
| original    | glszm | ZoneVariance                         | 125.8838852 |
| original    | glszm | GrayLevelNonUniformityNormalized     | 0.039785611 |
| original    | glszm | SizeZoneNonUniformityNormalized      | 0.610127246 |
| original    | glszm | SizeZoneNonUniformity                | 140.9393939 |
| original    | glszm | GrayLevelNonUniformity               | 9.19047619  |
| original    | glszm | LargeAreaEmphasis                    | 131.8874459 |
| original    | glszm | SmallAreaHighGrayLevelEmphasis       | 465.8857648 |
| original    | glszm | ZonePercentage                       | 0.408127208 |
| original    | glszm | LargeAreaLowGrayLevelEmphasis        | 0.126184812 |
| original    | glszm | LargeAreaHighGrayLevelEmphasis       | 154310.8571 |
| original    | glszm | HighGrayLevelZoneEmphasis            | 616.1774892 |
| original    | glszm | SmallAreaEmphasis                    | 0.808547125 |
| original    | glszm | LowGrayLevelZoneEmphasis             | 0.010749934 |
| original    | glszm | ZoneEntropy                          | 5.669812722 |
| original    | glszm | SmallAreaLowGrayLevelEmphasis        | 0.010056072 |
| original    | ngtdm | Coarseness                           | 0.008317027 |
| original    | ngtdm | Complexity                           | 2154.821435 |
| original    | ngtdm | Strength                             | 10.02319869 |
| original    | ngtdm | Contrast                             | 0.357318    |
| original    | ngtdm | Busyness                             | 0.077957866 |
| wavelet-HHH | gldm  | GrayLevelVariance                    | 4.713431308 |
| wavelet-HHH | gldm  | HighGrayLevelEmphasis                | 61.78798587 |
| wavelet-HHH | gldm  | DependenceEntropy                    | 5.837358478 |
| wavelet-HHH | gldm  | DependenceNonUniformity              | 65.13427562 |
| wavelet-HHH | gldm  | GrayLevelNonUniformity               | 86.67137809 |
| wavelet-HHH | gldm  | SmallDependenceEmphasis              | 0.226149938 |
| wavelet-HHH | gldm  | SmallDependenceHighGrayLevelEmphasis | 17.54379712 |
| wavelet-HHH | gldm  | DependenceNonUniformityNormalized    | 0.115078225 |
| wavelet-HHH | gldm  | LargeDependenceEmphasis              | 33.35689046 |
| wavelet-HHH | gldm  | LargeDependenceLowGrayLevelEmphasis  | 0.70645338  |
| wavelet-HHH | gldm  | DependenceVariance                   | 11.63404463 |
| wavelet-HHH | gldm  | LargeDependenceHighGrayLevelEmphasis | 1847.498233 |
| wavelet-HHH | gldm  | SmallDependenceLowGrayLevelEmphasis  | 0.009733377 |
| wavelet-HHH | gldm  | LowGrayLevelEmphasis                 | 0.033600953 |
| wavelet-HHH | glcm  | JointAverage                         | 7.518206334 |
| wavelet-HHH | glcm  | SumAverage                           | 15.03641267 |
| wavelet-HHH | glcm  | JointEntropy                         | 5.669123948 |
| wavelet-HHH | glcm  | ClusterShade                         | 1.230151963 |
| wavelet-HHH | glcm  | MaximumProbability                   | 0.085796031 |
| wavelet-HHH | glcm  | Idmn                                 | 0.974897679 |
| wavelet-HHH | glcm  | JointEnergy                          | 0.033746222 |
| wavelet-HHH | glcm  | Contrast                             | 8.153801877 |
| wavelet-HHH | glcm  | DifferenceEntropy                    | 2.658857983 |
| wavelet-HHH | glcm  | InverseVariance                      | 0.381990292 |
| wavelet-HHH | glcm  | DifferenceVariance                   | 3.831952039 |
| wavelet-HHH | glcm  | Idn                                  | 0.90003054  |



|             |            |                                  |              |
|-------------|------------|----------------------------------|--------------|
| wavelet-HHH | glcm       | Idm                              | 0.399955834  |
| wavelet-HHH | glcm       | Correlation                      | -0.031754054 |
| wavelet-HHH | glcm       | Autocorrelation                  | 56.38713958  |
| wavelet-HHH | glcm       | SumEntropy                       | 3.406229218  |
| wavelet-HHH | glcm       | SumSquares                       | 3.93896883   |
| wavelet-HHH | glcm       | ClusterProminence                | 281.521811   |
| wavelet-HHH | glcm       | Imc2                             | 0.574178805  |
| wavelet-HHH | glcm       | Imc1                             | -0.069650334 |
| wavelet-HHH | glcm       | DifferenceAverage                | 2.066253866  |
| wavelet-HHH | glcm       | Id                               | 0.467598112  |
| wavelet-HHH | glcm       | ClusterTendency                  | 7.602073444  |
| wavelet-HHH | firstorder | InterquartileRange               | 55.84408696  |
| wavelet-HHH | firstorder | Skewness                         | 0.229591306  |
| wavelet-HHH | firstorder | Uniformity                       | 0.153129643  |
| wavelet-HHH | firstorder | Median                           | -0.431895122 |
| wavelet-HHH | firstorder | Energy                           | 1645731.153  |
| wavelet-HHH | firstorder | RobustMeanAbsoluteDeviation      | 23.89367978  |
| wavelet-HHH | firstorder | MeanAbsoluteDeviation            | 39.20510045  |
| wavelet-HHH | firstorder | TotalEnergy                      | 44434741.13  |
| wavelet-HHH | firstorder | Maximum                          | 242.467598   |
| wavelet-HHH | firstorder | RootMeanSquared                  | 53.92265029  |
| wavelet-HHH | firstorder | 90Percentile                     | 64.29964827  |
| wavelet-HHH | firstorder | Minimum                          | -166.5880149 |
| wavelet-HHH | firstorder | Entropy                          | 3.07416405   |
| wavelet-HHH | firstorder | Range                            | 409.0556129  |
| wavelet-HHH | firstorder | Variance                         | 2905.907768  |
| wavelet-HHH | firstorder | 10Percentile                     | -59.61008434 |
| wavelet-HHH | firstorder | Kurtosis                         | 4.679903366  |
| wavelet-HHH | firstorder | Mean                             | 1.32077462   |
| wavelet-HHH | glrlm      | ShortRunLowGrayLevelEmphasis     | 0.03271494   |
| wavelet-HHH | glrlm      | GrayLevelVariance                | 5.256247929  |
| wavelet-HHH | glrlm      | LowGrayLevelRunEmphasis          | 0.035242974  |
| wavelet-HHH | glrlm      | GrayLevelNonUniformityNormalized | 0.138199538  |
| wavelet-HHH | glrlm      | RunVariance                      | 0.218528204  |
| wavelet-HHH | glrlm      | GrayLevelNonUniformity           | 67.22393651  |
| wavelet-HHH | glrlm      | LongRunEmphasis                  | 1.575692136  |
| wavelet-HHH | glrlm      | ShortRunHighGrayLevelEmphasis    | 57.00422702  |
| wavelet-HHH | glrlm      | RunLengthNonUniformity           | 373.0892783  |
| wavelet-HHH | glrlm      | ShortRunEmphasis                 | 0.897413505  |
| wavelet-HHH | glrlm      | LongRunHighGrayLevelEmphasis     | 94.89394124  |
| wavelet-HHH | glrlm      | RunPercentage                    | 0.85920087   |
| wavelet-HHH | glrlm      | LongRunLowGrayLevelEmphasis      | 0.048434444  |
| wavelet-HHH | glrlm      | RunEntropy                       | 3.763098315  |
| wavelet-HHH | glrlm      | HighGrayLevelRunEmphasis         | 62.75294451  |
| wavelet-HHH | glrlm      | RunLengthNonUniformityNormalized | 0.766456337  |
| wavelet-HHH | glszm      | GrayLevelVariance                | 11.94952226  |
| wavelet-HHH | glszm      | ZoneVariance                     | 271.0900787  |
| wavelet-HHH | glszm      | GrayLevelNonUniformityNormalized | 0.098251307  |
| wavelet-HHH | glszm      | SizeZoneNonUniformityNormalized  | 0.462652485  |
| wavelet-HHH | glszm      | SizeZoneNonUniformity            | 59.68217054  |
| wavelet-HHH | glszm      | GrayLevelNonUniformity           | 12.6744186   |
| wavelet-HHH | glszm      | LargeAreaEmphasis                | 290.3410853  |
| wavelet-HHH | glszm      | SmallAreaHighGrayLevelEmphasis   | 60.22489075  |

|             |            |                                      |              |
|-------------|------------|--------------------------------------|--------------|
| wavelet-HHH | glszm      | ZonePercentage                       | 0.227915194  |
| wavelet-HHH | glszm      | LargeAreaLowGrayLevelEmphasis        | 5.511188041  |
| wavelet-HHH | glszm      | LargeAreaHighGrayLevelEmphasis       | 16305.92248  |
| wavelet-HHH | glszm      | HighGrayLevelZoneEmphasis            | 78.20155039  |
| wavelet-HHH | glszm      | SmallAreaEmphasis                    | 0.706789746  |
| wavelet-HHH | glszm      | LowGrayLevelZoneEmphasis             | 0.053382023  |
| wavelet-HHH | glszm      | ZoneEntropy                          | 4.900900754  |
| wavelet-HHH | glszm      | SmallAreaLowGrayLevelEmphasis        | 0.032168611  |
| wavelet-HHH | ngtdm      | Coarseness                           | 0.01210819   |
| wavelet-HHH | ngtdm      | Complexity                           | 174.5520382  |
| wavelet-HHH | ngtdm      | Strength                             | 0.943029373  |
| wavelet-HHH | ngtdm      | Contrast                             | 0.065877187  |
| wavelet-HHH | ngtdm      | Busyness                             | 0.55572327   |
| wavelet-HLL | gldm       | GrayLevelVariance                    | 38.22741263  |
| wavelet-HLL | gldm       | HighGrayLevelEmphasis                | 389.1607774  |
| wavelet-HLL | gldm       | DependenceEntropy                    | 6.564975979  |
| wavelet-HLL | gldm       | DependenceNonUniformity              | 118.1943463  |
| wavelet-HLL | gldm       | GrayLevelNonUniformity               | 30.19081272  |
| wavelet-HLL | gldm       | SmallDependenceEmphasis              | 0.398004997  |
| wavelet-HLL | gldm       | SmallDependenceHighGrayLevelEmphasis | 161.8351118  |
| wavelet-HLL | gldm       | DependenceNonUniformityNormalized    | 0.208823933  |
| wavelet-HLL | gldm       | LargeDependenceEmphasis              | 13.00706714  |
| wavelet-HLL | gldm       | LargeDependenceLowGrayLevelEmphasis  | 0.054646383  |
| wavelet-HLL | gldm       | DependenceVariance                   | 4.875501005  |
| wavelet-HLL | gldm       | LargeDependenceHighGrayLevelEmphasis | 5113.10424   |
| wavelet-HLL | gldm       | SmallDependenceLowGrayLevelEmphasis  | 0.002885998  |
| wavelet-HLL | gldm       | LowGrayLevelEmphasis                 | 0.007842475  |
| wavelet-HLL | glcm       | JointAverage                         | 18.5707583   |
| wavelet-HLL | glcm       | SumAverage                           | 37.1415166   |
| wavelet-HLL | glcm       | JointEntropy                         | 7.901323314  |
| wavelet-HLL | glcm       | ClusterShade                         | 331.8360381  |
| wavelet-HLL | glcm       | MaximumProbability                   | 0.024904625  |
| wavelet-HLL | glcm       | ldmn                                 | 0.968162814  |
| wavelet-HLL | glcm       | JointEnergy                          | 0.006224495  |
| wavelet-HLL | glcm       | Contrast                             | 44.25323097  |
| wavelet-HLL | glcm       | DifferenceEntropy                    | 3.707066932  |
| wavelet-HLL | glcm       | InverseVariance                      | 0.218442162  |
| wavelet-HLL | glcm       | DifferenceVariance                   | 18.89855021  |
| wavelet-HLL | glcm       | ldn                                  | 0.887486533  |
| wavelet-HLL | glcm       | ldm                                  | 0.222517485  |
| wavelet-HLL | glcm       | Correlation                          | 0.360845408  |
| wavelet-HLL | glcm       | Autocorrelation                      | 357.5576904  |
| wavelet-HLL | glcm       | SumEntropy                           | 5.113207783  |
| wavelet-HLL | glcm       | SumSquares                           | 34.79449273  |
| wavelet-HLL | glcm       | ClusterProminence                    | 30709.70437  |
| wavelet-HLL | glcm       | lmc2                                 | 0.913902086  |
| wavelet-HLL | glcm       | lmc1                                 | -0.209699267 |
| wavelet-HLL | glcm       | DifferenceAverage                    | 4.887488139  |
| wavelet-HLL | glcm       | ld                                   | 0.308895048  |
| wavelet-HLL | glcm       | ClusterTendency                      | 94.92473994  |
| wavelet-HLL | firstorder | InterquartileRange                   | 182.7438069  |
| wavelet-HLL | firstorder | Skewness                             | 0.270230836  |
| wavelet-HLL | firstorder | Uniformity                           | 0.053340659  |

|             |            |                                  |              |
|-------------|------------|----------------------------------|--------------|
| wavelet-HLL | firstorder | Median                           | -41.0831327  |
| wavelet-HLL | firstorder | Energy                           | 14520891.65  |
| wavelet-HLL | firstorder | RobustMeanAbsoluteDeviation      | 80.43081828  |
| wavelet-HLL | firstorder | MeanAbsoluteDeviation            | 119.7191779  |
| wavelet-HLL | firstorder | TotalEnergy                      | 392064074.6  |
| wavelet-HLL | firstorder | Maximum                          | 357.6766071  |
| wavelet-HLL | firstorder | RootMeanSquared                  | 160.1726743  |
| wavelet-HLL | firstorder | 90Percentile                     | 176.8554633  |
| wavelet-HLL | firstorder | Minimum                          | -499.0969564 |
| wavelet-HLL | firstorder | Entropy                          | 4.527405697  |
| wavelet-HLL | firstorder | Range                            | 856.7735635  |
| wavelet-HLL | firstorder | Variance                         | 23735.8541   |
| wavelet-HLL | firstorder | 10Percentile                     | -233.8652917 |
| wavelet-HLL | firstorder | Kurtosis                         | 2.990435797  |
| wavelet-HLL | firstorder | Mean                             | -43.81131705 |
| wavelet-HLL | grlm       | ShortRunLowGrayLevelEmphasis     | 0.007733966  |
| wavelet-HLL | grlm       | GrayLevelVariance                | 39.60532424  |
| wavelet-HLL | grlm       | LowGrayLevelRunEmphasis          | 0.008030229  |
| wavelet-HLL | grlm       | GrayLevelNonUniformityNormalized | 0.05110896   |
| wavelet-HLL | grlm       | RunVariance                      | 0.105106667  |
| wavelet-HLL | grlm       | GrayLevelNonUniformity           | 26.87564059  |
| wavelet-HLL | grlm       | LongRunEmphasis                  | 1.268626889  |
| wavelet-HLL | grlm       | ShortRunHighGrayLevelEmphasis    | 370.5114162  |
| wavelet-HLL | grlm       | RunLengthNonUniformity           | 462.2503396  |
| wavelet-HLL | grlm       | ShortRunEmphasis                 | 0.949620881  |
| wavelet-HLL | grlm       | LongRunHighGrayLevelEmphasis     | 494.2223575  |
| wavelet-HLL | grlm       | RunPercentage                    | 0.928784996  |
| wavelet-HLL | grlm       | LongRunLowGrayLevelEmphasis      | 0.009393629  |
| wavelet-HLL | grlm       | RunEntropy                       | 4.878230633  |
| wavelet-HLL | grlm       | HighGrayLevelRunEmphasis         | 389.5532563  |
| wavelet-HLL | grlm       | RunLengthNonUniformityNormalized | 0.877870104  |
| wavelet-HLL | glszm      | GrayLevelVariance                | 51.29075623  |
| wavelet-HLL | glszm      | ZoneVariance                     | 19.42425537  |
| wavelet-HLL | glszm      | GrayLevelNonUniformityNormalized | 0.041320801  |
| wavelet-HLL | glszm      | SizeZoneNonUniformityNormalized  | 0.479858398  |
| wavelet-HLL | glszm      | SizeZoneNonUniformity            | 122.84375    |
| wavelet-HLL | glszm      | GrayLevelNonUniformity           | 10.578125    |
| wavelet-HLL | glszm      | LargeAreaEmphasis                | 24.3125      |
| wavelet-HLL | glszm      | SmallAreaHighGrayLevelEmphasis   | 297.9545292  |
| wavelet-HLL | glszm      | ZonePercentage                   | 0.45229682   |
| wavelet-HLL | glszm      | LargeAreaLowGrayLevelEmphasis    | 0.088239624  |
| wavelet-HLL | glszm      | LargeAreaHighGrayLevelEmphasis   | 9379.886719  |
| wavelet-HLL | glszm      | HighGrayLevelZoneEmphasis        | 406.2304688  |
| wavelet-HLL | glszm      | SmallAreaEmphasis                | 0.719632676  |
| wavelet-HLL | glszm      | LowGrayLevelZoneEmphasis         | 0.008930814  |
| wavelet-HLL | glszm      | ZoneEntropy                      | 5.974321117  |
| wavelet-HLL | glszm      | SmallAreaLowGrayLevelEmphasis    | 0.004737961  |
| wavelet-HLL | ngtdm      | Coarseness                       | 0.013413907  |
| wavelet-HLL | ngtdm      | Complexity                       | 1420.082508  |
| wavelet-HLL | ngtdm      | Strength                         | 4.413587685  |
| wavelet-HLL | ngtdm      | Contrast                         | 0.250568542  |
| wavelet-HLL | ngtdm      | Busyness                         | 0.127589939  |
| wavelet-LHL | gldm       | GrayLevelVariance                | 61.14210753  |

|             |            |                                      |              |
|-------------|------------|--------------------------------------|--------------|
| wavelet-LHL | gldm       | HighGrayLevelEmphasis                | 620.5565371  |
| wavelet-LHL | gldm       | DependenceEntropy                    | 6.638481704  |
| wavelet-LHL | gldm       | DependenceNonUniformity              | 144.2685512  |
| wavelet-LHL | gldm       | GrayLevelNonUniformity               | 25.74911661  |
| wavelet-LHL | gldm       | SmallDependenceEmphasis              | 0.500098629  |
| wavelet-LHL | gldm       | SmallDependenceHighGrayLevelEmphasis | 324.5229749  |
| wavelet-LHL | gldm       | DependenceNonUniformityNormalized    | 0.254891433  |
| wavelet-LHL | gldm       | LargeDependenceEmphasis              | 13.72438163  |
| wavelet-LHL | gldm       | LargeDependenceLowGrayLevelEmphasis  | 0.027039874  |
| wavelet-LHL | gldm       | DependenceVariance                   | 6.378940928  |
| wavelet-LHL | gldm       | LargeDependenceHighGrayLevelEmphasis | 8644.581272  |
| wavelet-LHL | gldm       | SmallDependenceLowGrayLevelEmphasis  | 0.003633083  |
| wavelet-LHL | gldm       | LowGrayLevelEmphasis                 | 0.004801058  |
| wavelet-LHL | glcm       | JointAverage                         | 23.15066447  |
| wavelet-LHL | glcm       | SumAverage                           | 46.30132895  |
| wavelet-LHL | glcm       | JointEntropy                         | 8.200269494  |
| wavelet-LHL | glcm       | ClusterShade                         | 554.4949098  |
| wavelet-LHL | glcm       | MaximumProbability                   | 0.030655017  |
| wavelet-LHL | glcm       | ldmn                                 | 0.968001923  |
| wavelet-LHL | glcm       | JointEnergy                          | 0.005857092  |
| wavelet-LHL | glcm       | Contrast                             | 90.18423004  |
| wavelet-LHL | glcm       | DifferenceEntropy                    | 4.156095656  |
| wavelet-LHL | glcm       | InverseVariance                      | 0.192986194  |
| wavelet-LHL | glcm       | DifferenceVariance                   | 43.52778993  |
| wavelet-LHL | glcm       | ldn                                  | 0.891511326  |
| wavelet-LHL | glcm       | ldm                                  | 0.199255112  |
| wavelet-LHL | glcm       | Correlation                          | 0.135244558  |
| wavelet-LHL | glcm       | Autocorrelation                      | 543.2781443  |
| wavelet-LHL | glcm       | SumEntropy                           | 5.190829156  |
| wavelet-LHL | glcm       | SumSquares                           | 52.3930999   |
| wavelet-LHL | glcm       | ClusterProminence                    | 68086.43804  |
| wavelet-LHL | glcm       | lmc2                                 | 0.948453193  |
| wavelet-LHL | glcm       | lmc1                                 | -0.24728839  |
| wavelet-LHL | glcm       | DifferenceAverage                    | 6.659458284  |
| wavelet-LHL | glcm       | ld                                   | 0.27936746   |
| wavelet-LHL | glcm       | ClusterTendency                      | 119.3881696  |
| wavelet-LHL | firstorder | InterquartileRange                   | 198.4708223  |
| wavelet-LHL | firstorder | Skewness                             | 0.259320814  |
| wavelet-LHL | firstorder | Uniformity                           | 0.045493139  |
| wavelet-LHL | firstorder | Median                               | -38.33491546 |
| wavelet-LHL | firstorder | Energy                               | 22762178.97  |
| wavelet-LHL | firstorder | RobustMeanAbsoluteDeviation          | 90.31874497  |
| wavelet-LHL | firstorder | MeanAbsoluteDeviation                | 145.3691626  |
| wavelet-LHL | firstorder | TotalEnergy                          | 614578832.2  |
| wavelet-LHL | firstorder | Maximum                              | 579.8949072  |
| wavelet-LHL | firstorder | RootMeanSquared                      | 200.5389336  |
| wavelet-LHL | firstorder | 90Percentile                         | 214.4265367  |
| wavelet-LHL | firstorder | Minimum                              | -606.9547739 |
| wavelet-LHL | firstorder | Entropy                              | 4.852142144  |
| wavelet-LHL | firstorder | Range                                | 1186.849681  |
| wavelet-LHL | firstorder | Variance                             | 38073.8766   |
| wavelet-LHL | firstorder | 10Percentile                         | -306.1279797 |
| wavelet-LHL | firstorder | Kurtosis                             | 3.585084326  |

|             |            |                                      |              |
|-------------|------------|--------------------------------------|--------------|
| wavelet-LHL | firstorder | Mean                                 | -46.28160873 |
| wavelet-LHL | glrlm      | ShortRunLowGrayLevelEmphasis         | 0.004909711  |
| wavelet-LHL | glrlm      | GrayLevelVariance                    | 64.26695264  |
| wavelet-LHL | glrlm      | LowGrayLevelRunEmphasis              | 0.005001993  |
| wavelet-LHL | glrlm      | GrayLevelNonUniformityNormalized     | 0.042182268  |
| wavelet-LHL | glrlm      | RunVariance                          | 0.096488469  |
| wavelet-LHL | glrlm      | GrayLevelNonUniformity               | 22.31050893  |
| wavelet-LHL | glrlm      | LongRunEmphasis                      | 1.243970751  |
| wavelet-LHL | glrlm      | ShortRunHighGrayLevelEmphasis        | 593.9119433  |
| wavelet-LHL | glrlm      | RunLengthNonUniformity               | 470.6018765  |
| wavelet-LHL | glrlm      | ShortRunEmphasis                     | 0.95471203   |
| wavelet-LHL | glrlm      | LongRunHighGrayLevelEmphasis         | 771.7186796  |
| wavelet-LHL | glrlm      | RunPercentage                        | 0.934221256  |
| wavelet-LHL | glrlm      | LongRunLowGrayLevelEmphasis          | 0.005469488  |
| wavelet-LHL | glrlm      | RunEntropy                           | 5.181837138  |
| wavelet-LHL | glrlm      | HighGrayLevelRunEmphasis             | 621.2362755  |
| wavelet-LHL | glrlm      | RunLengthNonUniformityNormalized     | 0.889425102  |
| wavelet-LHL | glszm      | GrayLevelVariance                    | 89.83633598  |
| wavelet-LHL | glszm      | ZoneVariance                         | 14.02715145  |
| wavelet-LHL | glszm      | GrayLevelNonUniformityNormalized     | 0.032020333  |
| wavelet-LHL | glszm      | SizeZoneNonUniformityNormalized      | 0.598342333  |
| wavelet-LHL | glszm      | SizeZoneNonUniformity                | 187.2811502  |
| wavelet-LHL | glszm      | GrayLevelNonUniformity               | 10.02236422  |
| wavelet-LHL | glszm      | LargeAreaEmphasis                    | 17.2971246   |
| wavelet-LHL | glszm      | SmallAreaHighGrayLevelEmphasis       | 526.2131904  |
| wavelet-LHL | glszm      | ZonePercentage                       | 0.553003534  |
| wavelet-LHL | glszm      | LargeAreaLowGrayLevelEmphasis        | 0.034550252  |
| wavelet-LHL | glszm      | LargeAreaHighGrayLevelEmphasis       | 10885.90735  |
| wavelet-LHL | glszm      | HighGrayLevelZoneEmphasis            | 645.3194888  |
| wavelet-LHL | glszm      | SmallAreaEmphasis                    | 0.800410186  |
| wavelet-LHL | glszm      | LowGrayLevelZoneEmphasis             | 0.006886328  |
| wavelet-LHL | glszm      | ZoneEntropy                          | 6.083546762  |
| wavelet-LHL | glszm      | SmallAreaLowGrayLevelEmphasis        | 0.006306254  |
| wavelet-LHL | ngtdm      | Coarseness                           | 0.013055303  |
| wavelet-LHL | ngtdm      | Complexity                           | 3772.460315  |
| wavelet-LHL | ngtdm      | Strength                             | 7.523270399  |
| wavelet-LHL | ngtdm      | Contrast                             | 0.30885792   |
| wavelet-LHL | ngtdm      | Busyness                             | 0.068891591  |
| wavelet-LHH | gldm       | GrayLevelVariance                    | 19.24050744  |
| wavelet-LHH | gldm       | HighGrayLevelEmphasis                | 445.8162544  |
| wavelet-LHH | gldm       | DependenceEntropy                    | 6.211406664  |
| wavelet-LHH | gldm       | DependenceNonUniformity              | 100.1625442  |
| wavelet-LHH | gldm       | GrayLevelNonUniformity               | 46.09540636  |
| wavelet-LHH | gldm       | SmallDependenceEmphasis              | 0.35967069   |
| wavelet-LHH | gldm       | SmallDependenceHighGrayLevelEmphasis | 169.3706432  |
| wavelet-LHH | gldm       | DependenceNonUniformityNormalized    | 0.176965626  |
| wavelet-LHH | gldm       | LargeDependenceEmphasis              | 16.86925795  |
| wavelet-LHH | gldm       | LargeDependenceLowGrayLevelEmphasis  | 0.055683759  |
| wavelet-LHH | gldm       | DependenceVariance                   | 6.231979423  |
| wavelet-LHH | gldm       | LargeDependenceHighGrayLevelEmphasis | 7111.169611  |
| wavelet-LHH | gldm       | SmallDependenceLowGrayLevelEmphasis  | 0.001990248  |
| wavelet-LHH | gldm       | LowGrayLevelEmphasis                 | 0.006274135  |
| wavelet-LHH | glcm       | JointAverage                         | 20.6610845   |

|             |            |                                  |              |
|-------------|------------|----------------------------------|--------------|
| wavelet-LHH | glcm       | SumAverage                       | 41.322169    |
| wavelet-LHH | glcm       | JointEntropy                     | 7.246655525  |
| wavelet-LHH | glcm       | ClusterShade                     | -6.278358014 |
| wavelet-LHH | glcm       | MaximumProbability               | 0.039025047  |
| wavelet-LHH | glcm       | Idmn                             | 0.977126513  |
| wavelet-LHH | glcm       | JointEnergy                      | 0.011397534  |
| wavelet-LHH | glcm       | Contrast                         | 35.85894343  |
| wavelet-LHH | glcm       | DifferenceEntropy                | 3.533050317  |
| wavelet-LHH | glcm       | InverseVariance                  | 0.264116652  |
| wavelet-LHH | glcm       | DifferenceVariance               | 18.07497841  |
| wavelet-LHH | glcm       | Idn                              | 0.907694633  |
| wavelet-LHH | glcm       | Idm                              | 0.267490493  |
| wavelet-LHH | glcm       | Correlation                      | 0.002504473  |
| wavelet-LHH | glcm       | Autocorrelation                  | 426.9130659  |
| wavelet-LHH | glcm       | SumEntropy                       | 4.397022184  |
| wavelet-LHH | glcm       | SumSquares                       | 17.94455915  |
| wavelet-LHH | glcm       | ClusterProminence                | 8436.239548  |
| wavelet-LHH | glcm       | Imc2                             | 0.833282607  |
| wavelet-LHH | glcm       | Imc1                             | -0.154796757 |
| wavelet-LHH | glcm       | DifferenceAverage                | 4.145109875  |
| wavelet-LHH | glcm       | Id                               | 0.349247237  |
| wavelet-LHH | glcm       | ClusterTendency                  | 35.91929316  |
| wavelet-LHH | firstorder | InterquartileRange               | 105.9404453  |
| wavelet-LHH | firstorder | Skewness                         | -0.119892021 |
| wavelet-LHH | firstorder | Uniformity                       | 0.081440647  |
| wavelet-LHH | firstorder | Median                           | -1.221160159 |
| wavelet-LHH | firstorder | Energy                           | 6753222.982  |
| wavelet-LHH | firstorder | RobustMeanAbsoluteDeviation      | 46.6678028   |
| wavelet-LHH | firstorder | MeanAbsoluteDeviation            | 78.01100786  |
| wavelet-LHH | firstorder | TotalEnergy                      | 182337020.5  |
| wavelet-LHH | firstorder | Maximum                          | 406.1915447  |
| wavelet-LHH | firstorder | RootMeanSquared                  | 109.2313571  |
| wavelet-LHH | firstorder | 90Percentile                     | 132.4608133  |
| wavelet-LHH | firstorder | Minimum                          | -487.3983319 |
| wavelet-LHH | firstorder | Entropy                          | 4.029915565  |
| wavelet-LHH | firstorder | Range                            | 893.5898765  |
| wavelet-LHH | firstorder | Variance                         | 11917.72726  |
| wavelet-LHH | firstorder | 10Percentile                     | -113.2007515 |
| wavelet-LHH | firstorder | Kurtosis                         | 5.181329171  |
| wavelet-LHH | firstorder | Mean                             | 3.709731285  |
| wavelet-LHH | grlm       | ShortRunLowGrayLevelEmphasis     | 0.006200029  |
| wavelet-LHH | grlm       | GrayLevelVariance                | 20.57093154  |
| wavelet-LHH | grlm       | LowGrayLevelRunEmphasis          | 0.006477247  |
| wavelet-LHH | grlm       | GrayLevelNonUniformityNormalized | 0.075424516  |
| wavelet-LHH | grlm       | RunVariance                      | 0.12071524   |
| wavelet-LHH | grlm       | GrayLevelNonUniformity           | 38.98741259  |
| wavelet-LHH | grlm       | LongRunEmphasis                  | 1.323300782  |
| wavelet-LHH | grlm       | ShortRunHighGrayLevelEmphasis    | 421.1172556  |
| wavelet-LHH | grlm       | RunLengthNonUniformity           | 439.7856247  |
| wavelet-LHH | grlm       | ShortRunEmphasis                 | 0.937133239  |
| wavelet-LHH | grlm       | LongRunHighGrayLevelEmphasis     | 584.4749178  |
| wavelet-LHH | grlm       | RunPercentage                    | 0.913019842  |
| wavelet-LHH | grlm       | LongRunLowGrayLevelEmphasis      | 0.007763806  |

|             |       |                                      |             |
|-------------|-------|--------------------------------------|-------------|
| wavelet-LHH | grlm  | RunEntropy                           | 4.483282893 |
| wavelet-LHH | grlm  | HighGrayLevelRunEmphasis             | 447.9177684 |
| wavelet-LHH | grlm  | RunLengthNonUniformityNormalized     | 0.849901074 |
| wavelet-LHH | glszm | GrayLevelVariance                    | 34.49219467 |
| wavelet-LHH | glszm | ZoneVariance                         | 48.03107138 |
| wavelet-LHH | glszm | GrayLevelNonUniformityNormalized     | 0.052753884 |
| wavelet-LHH | glszm | SizeZoneNonUniformityNormalized      | 0.47107438  |
| wavelet-LHH | glszm | SizeZoneNonUniformity                | 108.8181818 |
| wavelet-LHH | glszm | GrayLevelNonUniformity               | 12.18614719 |
| wavelet-LHH | glszm | LargeAreaEmphasis                    | 54.03463203 |
| wavelet-LHH | glszm | SmallAreaHighGrayLevelEmphasis       | 340.5849727 |
| wavelet-LHH | glszm | ZonePercentage                       | 0.408127208 |
| wavelet-LHH | glszm | LargeAreaLowGrayLevelEmphasis        | 0.149066697 |
| wavelet-LHH | glszm | LargeAreaHighGrayLevelEmphasis       | 22593.63636 |
| wavelet-LHH | glszm | HighGrayLevelZoneEmphasis            | 469.1515152 |
| wavelet-LHH | glszm | SmallAreaEmphasis                    | 0.712462159 |
| wavelet-LHH | glszm | LowGrayLevelZoneEmphasis             | 0.007388809 |
| wavelet-LHH | glszm | ZoneEntropy                          | 5.691954711 |
| wavelet-LHH | glszm | SmallAreaLowGrayLevelEmphasis        | 0.003352689 |
| wavelet-LHH | ngtdm | Coarseness                           | 0.012828047 |
| wavelet-LHH | ngtdm | Complexity                           | 1311.919711 |
| wavelet-LHH | ngtdm | Strength                             | 3.904687353 |
| wavelet-LHH | ngtdm | Contrast                             | 0.123475491 |
| wavelet-LHH | ngtdm | Busyness                             | 0.093941508 |
| wavelet-LLH | gldm  | GrayLevelVariance                    | 72.86749741 |
| wavelet-LLH | gldm  | HighGrayLevelEmphasis                | 989.4805654 |
| wavelet-LLH | gldm  | DependenceEntropy                    | 6.580029886 |
| wavelet-LLH | gldm  | DependenceNonUniformity              | 132.9964664 |
| wavelet-LLH | gldm  | GrayLevelNonUniformity               | 30.66077739 |
| wavelet-LLH | gldm  | SmallDependenceEmphasis              | 0.455960049 |
| wavelet-LLH | gldm  | SmallDependenceHighGrayLevelEmphasis | 503.6531958 |
| wavelet-LLH | gldm  | DependenceNonUniformityNormalized    | 0.234976089 |
| wavelet-LLH | gldm  | LargeDependenceEmphasis              | 11.92579505 |
| wavelet-LLH | gldm  | LargeDependenceLowGrayLevelEmphasis  | 0.015362435 |
| wavelet-LLH | gldm  | DependenceVariance                   | 4.732784777 |
| wavelet-LLH | gldm  | LargeDependenceHighGrayLevelEmphasis | 11314.25795 |
| wavelet-LLH | gldm  | SmallDependenceLowGrayLevelEmphasis  | 0.002586836 |
| wavelet-LLH | gldm  | LowGrayLevelEmphasis                 | 0.003260018 |
| wavelet-LLH | glcm  | JointAverage                         | 29.64594084 |
| wavelet-LLH | glcm  | SumAverage                           | 59.29188168 |
| wavelet-LLH | glcm  | JointEntropy                         | 8.023037907 |
| wavelet-LLH | glcm  | ClusterShade                         | 2039.949886 |
| wavelet-LLH | glcm  | MaximumProbability                   | 0.028200056 |
| wavelet-LLH | glcm  | ldmn                                 | 0.983315636 |
| wavelet-LLH | glcm  | JointEnergy                          | 0.006467825 |
| wavelet-LLH | glcm  | Contrast                             | 112.0737525 |
| wavelet-LLH | glcm  | DifferenceEntropy                    | 4.088621984 |
| wavelet-LLH | glcm  | InverseVariance                      | 0.213740305 |
| wavelet-LLH | glcm  | DifferenceVariance                   | 65.484016   |
| wavelet-LLH | glcm  | ldn                                  | 0.927216729 |
| wavelet-LLH | glcm  | ldm                                  | 0.210472453 |
| wavelet-LLH | glcm  | Correlation                          | 0.100325934 |
| wavelet-LLH | glcm  | Autocorrelation                      | 887.0413709 |

|             |            |                                  |              |
|-------------|------------|----------------------------------|--------------|
| wavelet-LLH | glcm       | SumEntropy                       | 5.134010938  |
| wavelet-LLH | glcm       | SumSquares                       | 64.15778488  |
| wavelet-LLH | glcm       | ClusterProminence                | 210446.6578  |
| wavelet-LLH | glcm       | Imc2                             | 0.951007703  |
| wavelet-LLH | glcm       | Imc1                             | -0.259897516 |
| wavelet-LLH | glcm       | DifferenceAverage                | 6.628255411  |
| wavelet-LLH | glcm       | Id                               | 0.291425083  |
| wavelet-LLH | glcm       | ClusterTendency                  | 144.557387   |
| wavelet-LLH | firstorder | InterquartileRange               | 155.8885659  |
| wavelet-LLH | firstorder | Skewness                         | 1.231404928  |
| wavelet-LLH | firstorder | Uniformity                       | 0.054170985  |
| wavelet-LLH | firstorder | Median                           | -39.04690211 |
| wavelet-LLH | firstorder | Energy                           | 26236535.47  |
| wavelet-LLH | firstorder | RobustMeanAbsoluteDeviation      | 74.26165773  |
| wavelet-LLH | firstorder | MeanAbsoluteDeviation            | 138.9067174  |
| wavelet-LLH | firstorder | TotalEnergy                      | 708386457.7  |
| wavelet-LLH | firstorder | Maximum                          | 1102.416048  |
| wavelet-LLH | firstorder | RootMeanSquared                  | 215.3004945  |
| wavelet-LLH | firstorder | 90Percentile                     | 187.0193467  |
| wavelet-LLH | firstorder | Minimum                          | -751.6815337 |
| wavelet-LLH | firstorder | Entropy                          | 4.736770964  |
| wavelet-LLH | firstorder | Range                            | 1854.097582  |
| wavelet-LLH | firstorder | Variance                         | 45400.03942  |
| wavelet-LLH | firstorder | 10Percentile                     | -241.1155074 |
| wavelet-LLH | firstorder | Kurtosis                         | 7.881515365  |
| wavelet-LLH | firstorder | Mean                             | -30.89115626 |
| wavelet-LLH | glrlm      | ShortRunLowGrayLevelEmphasis     | 0.003351007  |
| wavelet-LLH | glrlm      | GrayLevelVariance                | 76.94976981  |
| wavelet-LLH | glrlm      | LowGrayLevelRunEmphasis          | 0.003405585  |
| wavelet-LLH | glrlm      | GrayLevelNonUniformityNormalized | 0.050838049  |
| wavelet-LLH | glrlm      | RunVariance                      | 0.086846673  |
| wavelet-LLH | glrlm      | GrayLevelNonUniformity           | 26.91622302  |
| wavelet-LLH | glrlm      | LongRunEmphasis                  | 1.230852716  |
| wavelet-LLH | glrlm      | ShortRunHighGrayLevelEmphasis    | 952.0312941  |
| wavelet-LLH | glrlm      | RunLengthNonUniformity           | 469.3980104  |
| wavelet-LLH | glrlm      | ShortRunEmphasis                 | 0.953709054  |
| wavelet-LLH | glrlm      | LongRunHighGrayLevelEmphasis     | 1207.7552    |
| wavelet-LLH | glrlm      | RunPercentage                    | 0.935308508  |
| wavelet-LLH | glrlm      | LongRunLowGrayLevelEmphasis      | 0.003671485  |
| wavelet-LLH | glrlm      | RunEntropy                       | 5.091094169  |
| wavelet-LLH | glrlm      | HighGrayLevelRunEmphasis         | 994.3194716  |
| wavelet-LLH | glrlm      | RunLengthNonUniformityNormalized | 0.886320031  |
| wavelet-LLH | glszm      | GrayLevelVariance                | 123.4748147  |
| wavelet-LLH | glszm      | ZoneVariance                     | 17.5968918   |
| wavelet-LLH | glszm      | GrayLevelNonUniformityNormalized | 0.033584368  |
| wavelet-LLH | glszm      | SizeZoneNonUniformityNormalized  | 0.540570635  |
| wavelet-LLH | glszm      | SizeZoneNonUniformity            | 156.2249135  |
| wavelet-LLH | glszm      | GrayLevelNonUniformity           | 9.705882353  |
| wavelet-LLH | glszm      | LargeAreaEmphasis                | 21.43252595  |
| wavelet-LLH | glszm      | SmallAreaHighGrayLevelEmphasis   | 872.7635654  |
| wavelet-LLH | glszm      | ZonePercentage                   | 0.510600707  |
| wavelet-LLH | glszm      | LargeAreaLowGrayLevelEmphasis    | 0.027083447  |
| wavelet-LLH | glszm      | LargeAreaHighGrayLevelEmphasis   | 20634.92734  |



|             |            |                                      |              |
|-------------|------------|--------------------------------------|--------------|
| wavelet-LLH | glszm      | HighGrayLevelZoneEmphasis            | 1081.259516  |
| wavelet-LLH | glszm      | SmallAreaEmphasis                    | 0.762894128  |
| wavelet-LLH | glszm      | LowGrayLevelZoneEmphasis             | 0.005214381  |
| wavelet-LLH | glszm      | ZoneEntropy                          | 6.258517398  |
| wavelet-LLH | glszm      | SmallAreaLowGrayLevelEmphasis        | 0.004899383  |
| wavelet-LLH | ngtdm      | Coarseness                           | 0.012876915  |
| wavelet-LLH | ngtdm      | Complexity                           | 6476.190713  |
| wavelet-LLH | ngtdm      | Strength                             | 16.6442655   |
| wavelet-LLH | ngtdm      | Contrast                             | 0.234408037  |
| wavelet-LLH | ngtdm      | Busyness                             | 0.036597259  |
| wavelet-LLL | gldm       | GrayLevelVariance                    | 513.4495748  |
| wavelet-LLL | gldm       | HighGrayLevelEmphasis                | 4725.597173  |
| wavelet-LLL | gldm       | DependenceEntropy                    | 7.156954608  |
| wavelet-LLL | gldm       | DependenceNonUniformity              | 202.8904594  |
| wavelet-LLL | gldm       | GrayLevelNonUniformity               | 12.92932862  |
| wavelet-LLL | gldm       | SmallDependenceEmphasis              | 0.61873988   |
| wavelet-LLL | gldm       | SmallDependenceHighGrayLevelEmphasis | 2368.359521  |
| wavelet-LLL | gldm       | DependenceNonUniformityNormalized    | 0.358463709  |
| wavelet-LLL | gldm       | LargeDependenceEmphasis              | 8.056537102  |
| wavelet-LLL | gldm       | LargeDependenceLowGrayLevelEmphasis  | 0.007746362  |
| wavelet-LLL | gldm       | DependenceVariance                   | 3.44087203   |
| wavelet-LLL | gldm       | LargeDependenceHighGrayLevelEmphasis | 53877.90459  |
| wavelet-LLL | gldm       | SmallDependenceLowGrayLevelEmphasis  | 0.005226833  |
| wavelet-LLL | gldm       | LowGrayLevelEmphasis                 | 0.005543016  |
| wavelet-LLL | glcm       | JointAverage                         | 69.84022369  |
| wavelet-LLL | glcm       | SumAverage                           | 139.6804474  |
| wavelet-LLL | glcm       | JointEntropy                         | 8.928387246  |
| wavelet-LLL | glcm       | ClusterShade                         | -62918.2249  |
| wavelet-LLL | glcm       | MaximumProbability                   | 0.014262316  |
| wavelet-LLL | glcm       | Idmn                                 | 0.962185569  |
| wavelet-LLL | glcm       | JointEnergy                          | 0.002962486  |
| wavelet-LLL | glcm       | Contrast                             | 367.9610492  |
| wavelet-LLL | glcm       | DifferenceEntropy                    | 5.058912255  |
| wavelet-LLL | glcm       | InverseVariance                      | 0.137576971  |
| wavelet-LLL | glcm       | DifferenceVariance                   | 173.4380127  |
| wavelet-LLL | glcm       | Idn                                  | 0.883046081  |
| wavelet-LLL | glcm       | Idm                                  | 0.138857836  |
| wavelet-LLL | glcm       | Correlation                          | 0.561875435  |
| wavelet-LLL | glcm       | Autocorrelation                      | 5116.765784  |
| wavelet-LLL | glcm       | SumEntropy                           | 6.373582898  |
| wavelet-LLL | glcm       | SumSquares                           | 422.8228369  |
| wavelet-LLL | glcm       | ClusterProminence                    | 7453284.716  |
| wavelet-LLL | glcm       | Imc2                                 | 0.995106608  |
| wavelet-LLL | glcm       | Imc1                                 | -0.412386579 |
| wavelet-LLL | glcm       | DifferenceAverage                    | 13.7042733   |
| wavelet-LLL | glcm       | Id                                   | 0.205259458  |
| wavelet-LLL | glcm       | ClusterTendency                      | 1323.330298  |
| wavelet-LLL | firstorder | InterquartileRange                   | 867.8027185  |
| wavelet-LLL | firstorder | Skewness                             | -0.932667578 |
| wavelet-LLL | firstorder | Uniformity                           | 0.022843337  |
| wavelet-LLL | firstorder | Median                               | -233.5668714 |
| wavelet-LLL | firstorder | Energy                               | 279704240.7  |
| wavelet-LLL | firstorder | RobustMeanAbsoluteDeviation          | 353.0221783  |

|             |            |                                  |              |
|-------------|------------|----------------------------------|--------------|
| wavelet-LLL | firstorder | MeanAbsoluteDeviation            | 473.7157364  |
| wavelet-LLL | firstorder | TotalEnergy                      | 7552014500   |
| wavelet-LLL | firstorder | Maximum                          | 273.7897296  |
| wavelet-LLL | firstorder | RootMeanSquared                  | 702.9773139  |
| wavelet-LLL | firstorder | 90Percentile                     | 138.3865734  |
| wavelet-LLL | firstorder | Minimum                          | -2014.822851 |
| wavelet-LLL | firstorder | Entropy                          | 5.906541938  |
| wavelet-LLL | firstorder | Range                            | 2288.612581  |
| wavelet-LLL | firstorder | Variance                         | 321526.8347  |
| wavelet-LLL | firstorder | 10Percentile                     | -1225.560668 |
| wavelet-LLL | firstorder | Kurtosis                         | 2.956423039  |
| wavelet-LLL | firstorder | Mean                             | -415.5120565 |
| wavelet-LLL | grlm       | ShortRunLowGrayLevelEmphasis     | 0.005762261  |
| wavelet-LLL | grlm       | GrayLevelVariance                | 516.4530018  |
| wavelet-LLL | grlm       | LowGrayLevelRunEmphasis          | 0.005778491  |
| wavelet-LLL | grlm       | GrayLevelNonUniformityNormalized | 0.021190103  |
| wavelet-LLL | grlm       | RunVariance                      | 0.054714306  |
| wavelet-LLL | grlm       | GrayLevelNonUniformity           | 11.46785673  |
| wavelet-LLL | grlm       | LongRunEmphasis                  | 1.150150104  |
| wavelet-LLL | grlm       | ShortRunHighGrayLevelEmphasis    | 4420.498546  |
| wavelet-LLL | grlm       | RunLengthNonUniformity           | 498.1877976  |
| wavelet-LLL | grlm       | ShortRunEmphasis                 | 0.968243449  |
| wavelet-LLL | grlm       | LongRunHighGrayLevelEmphasis     | 5647.161435  |
| wavelet-LLL | grlm       | RunPercentage                    | 0.955830389  |
| wavelet-LLL | grlm       | LongRunLowGrayLevelEmphasis      | 0.005846646  |
| wavelet-LLL | grlm       | RunEntropy                       | 6.135769747  |
| wavelet-LLL | grlm       | HighGrayLevelRunEmphasis         | 4632.650373  |
| wavelet-LLL | grlm       | RunLengthNonUniformityNormalized | 0.920477484  |
| wavelet-LLL | glszm      | GrayLevelVariance                | 499.2697338  |
| wavelet-LLL | glszm      | ZoneVariance                     | 5.231430602  |
| wavelet-LLL | glszm      | GrayLevelNonUniformityNormalized | 0.015204497  |
| wavelet-LLL | glszm      | SizeZoneNonUniformityNormalized  | 0.704592307  |
| wavelet-LLL | glszm      | SizeZoneNonUniformity            | 265.6312997  |
| wavelet-LLL | glszm      | GrayLevelNonUniformity           | 5.732095491  |
| wavelet-LLL | glszm      | LargeAreaEmphasis                | 7.485411141  |
| wavelet-LLL | glszm      | SmallAreaHighGrayLevelEmphasis   | 3178.181234  |
| wavelet-LLL | glszm      | ZonePercentage                   | 0.666077739  |
| wavelet-LLL | glszm      | LargeAreaLowGrayLevelEmphasis    | 0.009841283  |
| wavelet-LLL | glszm      | LargeAreaHighGrayLevelEmphasis   | 49314.4191   |
| wavelet-LLL | glszm      | HighGrayLevelZoneEmphasis        | 3899.366048  |
| wavelet-LLL | glszm      | SmallAreaEmphasis                | 0.862049196  |
| wavelet-LLL | glszm      | LowGrayLevelZoneEmphasis         | 0.007965322  |
| wavelet-LLL | glszm      | ZoneEntropy                      | 6.720384409  |
| wavelet-LLL | glszm      | SmallAreaLowGrayLevelEmphasis    | 0.007766212  |
| wavelet-LLL | ngtdm      | Coarseness                       | 0.010830105  |
| wavelet-LLL | ngtdm      | Complexity                       | 30011.99938  |
| wavelet-LLL | ngtdm      | Strength                         | 46.04518126  |
| wavelet-LLL | ngtdm      | Contrast                         | 1.357001536  |
| wavelet-LLL | ngtdm      | Busyness                         | 0.013724986  |
| wavelet-HHL | gldm       | GrayLevelVariance                | 15.83614791  |
| wavelet-HHL | gldm       | HighGrayLevelEmphasis            | 187.4646643  |
| wavelet-HHL | gldm       | DependenceEntropy                | 6.210756529  |
| wavelet-HHL | gldm       | DependenceNonUniformity          | 92.10954064  |

|             |            |                                      |              |
|-------------|------------|--------------------------------------|--------------|
| wavelet-HHL | gldm       | GrayLevelNonUniformity               | 51.77738516  |
| wavelet-HHL | gldm       | SmallDependenceEmphasis              | 0.315784364  |
| wavelet-HHL | gldm       | SmallDependenceHighGrayLevelEmphasis | 69.97392169  |
| wavelet-HHL | gldm       | DependenceNonUniformityNormalized    | 0.162737704  |
| wavelet-HHL | gldm       | LargeDependenceEmphasis              | 22.04240283  |
| wavelet-HHL | gldm       | LargeDependenceLowGrayLevelEmphasis  | 0.16948842   |
| wavelet-HHL | gldm       | DependenceVariance                   | 8.744396858  |
| wavelet-HHL | gldm       | LargeDependenceHighGrayLevelEmphasis | 3380.05477   |
| wavelet-HHL | gldm       | SmallDependenceLowGrayLevelEmphasis  | 0.005111317  |
| wavelet-HHL | gldm       | LowGrayLevelEmphasis                 | 0.012645981  |
| wavelet-HHL | glcm       | JointAverage                         | 12.92318655  |
| wavelet-HHL | glcm       | SumAverage                           | 25.8463731   |
| wavelet-HHL | glcm       | JointEntropy                         | 6.929513987  |
| wavelet-HHL | glcm       | ClusterShade                         | 110.3435532  |
| wavelet-HHL | glcm       | MaximumProbability                   | 0.060730845  |
| wavelet-HHL | glcm       | Idmn                                 | 0.977015022  |
| wavelet-HHL | glcm       | JointEnergy                          | 0.015311866  |
| wavelet-HHL | glcm       | Contrast                             | 25.05861964  |
| wavelet-HHL | glcm       | DifferenceEntropy                    | 3.311407354  |
| wavelet-HHL | glcm       | InverseVariance                      | 0.292291756  |
| wavelet-HHL | glcm       | DifferenceVariance                   | 12.37308906  |
| wavelet-HHL | glcm       | Idn                                  | 0.906909001  |
| wavelet-HHL | glcm       | Idm                                  | 0.300738649  |
| wavelet-HHL | glcm       | Correlation                          | 0.039994024  |
| wavelet-HHL | glcm       | Autocorrelation                      | 167.7066115  |
| wavelet-HHL | glcm       | SumEntropy                           | 4.227308764  |
| wavelet-HHL | glcm       | SumSquares                           | 13.19095965  |
| wavelet-HHL | glcm       | ClusterProminence                    | 4041.208512  |
| wavelet-HHL | glcm       | Imc2                                 | 0.797870908  |
| wavelet-HHL | glcm       | Imc1                                 | -0.140178817 |
| wavelet-HHL | glcm       | DifferenceAverage                    | 3.499117766  |
| wavelet-HHL | glcm       | Id                                   | 0.379471781  |
| wavelet-HHL | glcm       | ClusterTendency                      | 27.70521898  |
| wavelet-HHL | firstorder | InterquartileRange                   | 103.9044079  |
| wavelet-HHL | firstorder | Skewness                             | 0.568471245  |
| wavelet-HHL | firstorder | Uniformity                           | 0.091479479  |
| wavelet-HHL | firstorder | Median                               | 1.117521966  |
| wavelet-HHL | firstorder | Energy                               | 5789176.446  |
| wavelet-HHL | firstorder | RobustMeanAbsoluteDeviation          | 44.00037724  |
| wavelet-HHL | firstorder | MeanAbsoluteDeviation                | 73.01525767  |
| wavelet-HHL | firstorder | TotalEnergy                          | 156307764.1  |
| wavelet-HHL | firstorder | Maximum                              | 472.5194853  |
| wavelet-HHL | firstorder | RootMeanSquared                      | 101.134697   |
| wavelet-HHL | firstorder | 90Percentile                         | 139.0280846  |
| wavelet-HHL | firstorder | Minimum                              | -292.9922423 |
| wavelet-HHL | firstorder | Entropy                              | 3.879183684  |
| wavelet-HHL | firstorder | Range                                | 765.5117276  |
| wavelet-HHL | firstorder | Variance                             | 9998.316884  |
| wavelet-HHL | firstorder | 10Percentile                         | -89.45659495 |
| wavelet-HHL | firstorder | Kurtosis                             | 4.78895765   |
| wavelet-HHL | firstorder | Mean                                 | 15.16278515  |
| wavelet-HHL | glrlm      | ShortRunLowGrayLevelEmphasis         | 0.012488976  |
| wavelet-HHL | glrlm      | GrayLevelVariance                    | 17.08277365  |

|             |       |                                      |             |
|-------------|-------|--------------------------------------|-------------|
| wavelet-HHL | glrlm | LowGrayLevelRunEmphasis              | 0.01312534  |
| wavelet-HHL | glrlm | GrayLevelNonUniformityNormalized     | 0.082979415 |
| wavelet-HHL | glrlm | RunVariance                          | 0.155907579 |
| wavelet-HHL | glrlm | GrayLevelNonUniformity               | 42.1993753  |
| wavelet-HHL | glrlm | LongRunEmphasis                      | 1.40095432  |
| wavelet-HHL | glrlm | ShortRunHighGrayLevelEmphasis        | 179.1350028 |
| wavelet-HHL | glrlm | RunLengthNonUniformity               | 422.5452373 |
| wavelet-HHL | glrlm | ShortRunEmphasis                     | 0.92749885  |
| wavelet-HHL | glrlm | LongRunHighGrayLevelEmphasis         | 253.8413851 |
| wavelet-HHL | glrlm | RunPercentage                        | 0.898206034 |
| wavelet-HHL | glrlm | LongRunLowGrayLevelEmphasis          | 0.01643555  |
| wavelet-HHL | glrlm | RunEntropy                           | 4.390733761 |
| wavelet-HHL | glrlm | HighGrayLevelRunEmphasis             | 190.7664919 |
| wavelet-HHL | glrlm | RunLengthNonUniformityNormalized     | 0.829528503 |
| wavelet-HHL | glszm | GrayLevelVariance                    | 29.56479731 |
| wavelet-HHL | glszm | ZoneVariance                         | 59.54776074 |
| wavelet-HHL | glszm | GrayLevelNonUniformityNormalized     | 0.05780765  |
| wavelet-HHL | glszm | SizeZoneNonUniformityNormalized      | 0.413895307 |
| wavelet-HHL | glszm | SizeZoneNonUniformity                | 85.6763285  |
| wavelet-HHL | glszm | GrayLevelNonUniformity               | 11.96618357 |
| wavelet-HHL | glszm | LargeAreaEmphasis                    | 67.02415459 |
| wavelet-HHL | glszm | SmallAreaHighGrayLevelEmphasis       | 154.6664458 |
| wavelet-HHL | glszm | ZonePercentage                       | 0.365724382 |
| wavelet-HHL | glszm | LargeAreaLowGrayLevelEmphasis        | 0.480679629 |
| wavelet-HHL | glszm | LargeAreaHighGrayLevelEmphasis       | 10245.05797 |
| wavelet-HHL | glszm | HighGrayLevelZoneEmphasis            | 218.3285024 |
| wavelet-HHL | glszm | SmallAreaEmphasis                    | 0.666869677 |
| wavelet-HHL | glszm | LowGrayLevelZoneEmphasis             | 0.017588706 |
| wavelet-HHL | glszm | ZoneEntropy                          | 5.723292487 |
| wavelet-HHL | glszm | SmallAreaLowGrayLevelEmphasis        | 0.011369171 |
| wavelet-HHL | ngtdm | Coarseness                           | 0.013130469 |
| wavelet-HHL | ngtdm | Complexity                           | 860.8625991 |
| wavelet-HHL | ngtdm | Strength                             | 3.129451949 |
| wavelet-HHL | ngtdm | Contrast                             | 0.116011179 |
| wavelet-HHL | ngtdm | Busyness                             | 0.172320005 |
| wavelet-HLH | gldm  | GrayLevelVariance                    | 7.429412903 |
| wavelet-HLH | gldm  | HighGrayLevelEmphasis                | 190.4434629 |
| wavelet-HLH | gldm  | DependenceEntropy                    | 6.02180324  |
| wavelet-HLH | gldm  | DependenceNonUniformity              | 69.41696113 |
| wavelet-HLH | gldm  | GrayLevelNonUniformity               | 73.95053004 |
| wavelet-HLH | gldm  | SmallDependenceEmphasis              | 0.258307408 |
| wavelet-HLH | gldm  | SmallDependenceHighGrayLevelEmphasis | 52.03229225 |
| wavelet-HLH | gldm  | DependenceNonUniformityNormalized    | 0.122644808 |
| wavelet-HLH | gldm  | LargeDependenceEmphasis              | 32.20848057 |
| wavelet-HLH | gldm  | LargeDependenceLowGrayLevelEmphasis  | 0.185839683 |
| wavelet-HLH | gldm  | DependenceVariance                   | 12.16466681 |
| wavelet-HLH | gldm  | LargeDependenceHighGrayLevelEmphasis | 5803.701413 |
| wavelet-HLH | gldm  | SmallDependenceLowGrayLevelEmphasis  | 0.003768799 |
| wavelet-HLH | gldm  | LowGrayLevelEmphasis                 | 0.008204599 |
| wavelet-HLH | glcm  | JointAverage                         | 13.55984874 |
| wavelet-HLH | glcm  | SumAverage                           | 27.11969748 |
| wavelet-HLH | glcm  | JointEntropy                         | 6.164011048 |
| wavelet-HLH | glcm  | ClusterShade                         | 1.117561272 |

|             |            |                                  |              |
|-------------|------------|----------------------------------|--------------|
| wavelet-HLH | glcm       | MaximumProbability               | 0.084346578  |
| wavelet-HLH | glcm       | Idmn                             | 0.975884942  |
| wavelet-HLH | glcm       | JointEnergy                      | 0.02636448   |
| wavelet-HLH | glcm       | Contrast                         | 13.30032966  |
| wavelet-HLH | glcm       | DifferenceEntropy                | 2.932676475  |
| wavelet-HLH | glcm       | InverseVariance                  | 0.347976402  |
| wavelet-HLH | glcm       | DifferenceVariance               | 6.773479952  |
| wavelet-HLH | glcm       | Idn                              | 0.90548607   |
| wavelet-HLH | glcm       | Idm                              | 0.371362696  |
| wavelet-HLH | glcm       | Correlation                      | -0.017194549 |
| wavelet-HLH | glcm       | Autocorrelation                  | 183.7839178  |
| wavelet-HLH | glcm       | SumEntropy                       | 3.733844099  |
| wavelet-HLH | glcm       | SumSquares                       | 6.560606314  |
| wavelet-HLH | glcm       | ClusterProminence                | 897.5755335  |
| wavelet-HLH | glcm       | Imc2                             | 0.674021942  |
| wavelet-HLH | glcm       | Imc1                             | -0.095812288 |
| wavelet-HLH | glcm       | DifferenceAverage                | 2.535241748  |
| wavelet-HLH | glcm       | Id                               | 0.441884216  |
| wavelet-HLH | glcm       | ClusterTendency                  | 12.9420956   |
| wavelet-HLH | firstorder | InterquartileRange               | 62.62850762  |
| wavelet-HLH | firstorder | Skewness                         | -0.017986605 |
| wavelet-HLH | firstorder | Uniformity                       | 0.130654647  |
| wavelet-HLH | firstorder | Median                           | -1.477925044 |
| wavelet-HLH | firstorder | Energy                           | 2593373.376  |
| wavelet-HLH | firstorder | RobustMeanAbsoluteDeviation      | 27.37336459  |
| wavelet-HLH | firstorder | MeanAbsoluteDeviation            | 47.55305329  |
| wavelet-HLH | firstorder | TotalEnergy                      | 70021081.16  |
| wavelet-HLH | firstorder | Maximum                          | 214.1389741  |
| wavelet-HLH | firstorder | RootMeanSquared                  | 67.68996794  |
| wavelet-HLH | firstorder | 90Percentile                     | 78.31640788  |
| wavelet-HLH | firstorder | Minimum                          | -305.1938261 |
| wavelet-HLH | firstorder | Entropy                          | 3.355806153  |
| wavelet-HLH | firstorder | Range                            | 519.3328002  |
| wavelet-HLH | firstorder | Variance                         | 4580.525414  |
| wavelet-HLH | firstorder | 10Percentile                     | -75.03205035 |
| wavelet-HLH | firstorder | Kurtosis                         | 5.04044442   |
| wavelet-HLH | firstorder | Mean                             | 1.185894751  |
| wavelet-HLH | grlm       | ShortRunLowGrayLevelEmphasis     | 0.008031968  |
| wavelet-HLH | grlm       | GrayLevelVariance                | 8.291782358  |
| wavelet-HLH | grlm       | LowGrayLevelRunEmphasis          | 0.008587425  |
| wavelet-HLH | grlm       | GrayLevelNonUniformityNormalized | 0.116880599  |
| wavelet-HLH | grlm       | RunVariance                      | 0.20878798   |
| wavelet-HLH | grlm       | GrayLevelNonUniformity           | 57.31267775  |
| wavelet-HLH | grlm       | LongRunEmphasis                  | 1.543609594  |
| wavelet-HLH | grlm       | ShortRunHighGrayLevelEmphasis    | 173.8557918  |
| wavelet-HLH | grlm       | RunLengthNonUniformity           | 381.7774844  |
| wavelet-HLH | grlm       | ShortRunEmphasis                 | 0.90324133   |
| wavelet-HLH | grlm       | LongRunHighGrayLevelEmphasis     | 290.5454339  |
| wavelet-HLH | grlm       | RunPercentage                    | 0.866268008  |
| wavelet-HLH | grlm       | LongRunLowGrayLevelEmphasis      | 0.011703419  |
| wavelet-HLH | grlm       | RunEntropy                       | 4.019726385  |
| wavelet-HLH | grlm       | HighGrayLevelRunEmphasis         | 191.6371099  |
| wavelet-HLH | grlm       | RunLengthNonUniformityNormalized | 0.77801879   |

|             |       |                                  |             |
|-------------|-------|----------------------------------|-------------|
| wavelet-HLH | glszm | GrayLevelVariance                | 17.91303477 |
| wavelet-HLH | glszm | ZoneVariance                     | 167.9394328 |
| wavelet-HLH | glszm | GrayLevelNonUniformityNormalized | 0.078913636 |
| wavelet-HLH | glszm | SizeZoneNonUniformityNormalized  | 0.446963628 |
| wavelet-HLH | glszm | SizeZoneNonUniformity            | 70.62025316 |
| wavelet-HLH | glszm | GrayLevelNonUniformity           | 12.46835443 |
| wavelet-HLH | glszm | LargeAreaEmphasis                | 180.7721519 |
| wavelet-HLH | glszm | SmallAreaHighGrayLevelEmphasis   | 142.7610792 |
| wavelet-HLH | glszm | ZonePercentage                   | 0.279151943 |
| wavelet-HLH | glszm | LargeAreaLowGrayLevelEmphasis    | 1.022679852 |
| wavelet-HLH | glszm | LargeAreaHighGrayLevelEmphasis   | 32645.29747 |
| wavelet-HLH | glszm | HighGrayLevelZoneEmphasis        | 202.5632911 |
| wavelet-HLH | glszm | SmallAreaEmphasis                | 0.693917966 |
| wavelet-HLH | glszm | LowGrayLevelZoneEmphasis         | 0.014202977 |
| wavelet-HLH | glszm | ZoneEntropy                      | 5.195901871 |
| wavelet-HLH | glszm | SmallAreaLowGrayLevelEmphasis    | 0.012019001 |
| wavelet-HLH | ngtdm | Coarseness                       | 0.012749173 |
| wavelet-HLH | ngtdm | Complexity                       | 325.8746477 |
| wavelet-HLH | ngtdm | Strength                         | 1.594323795 |
| wavelet-HLH | ngtdm | Contrast                         | 0.078075852 |
| wavelet-HLH | ngtdm | Busyness                         | 0.23158358  |

| Image type | Feature Class | Feature Name                         | Value                                                                                                                                                                                                                                                                                                                                                                                                             |
|------------|---------------|--------------------------------------|-------------------------------------------------------------------------------------------------------------------------------------------------------------------------------------------------------------------------------------------------------------------------------------------------------------------------------------------------------------------------------------------------------------------|
| general    | info          | BoundingBox                          | 15: RTSTRUCT: C99-DNU_segment_GTV free<br>(1, 1, 1, 7, 8, 10)                                                                                                                                                                                                                                                                                                                                                     |
| general    | info          | EnabledImageTypes                    | {u'Original': {}, u'Wavelet': {}}                                                                                                                                                                                                                                                                                                                                                                                 |
|            |               |                                      | {'distances': [1], 'additionalInfo': True, 'force2D': False, 'interpolator': 'sitkBSpline', 'resampledPixelSpacing': [3.0], 'label': 1, 'normalizeScale': 1, 'normalize': False, 'force2Ddimension': 0, 'removeOutliers': None, 'minimumROISize': None, u'binWidth': 25.0, 'minimumROIDimensions': 1, u'correctMask': True, 'preCrop': False, u'symmetricalGLCM': True, 'resegmentRange': None, 'padDistance': 5} |
| general    | info          | GeneralSettings                      |                                                                                                                                                                                                                                                                                                                                                                                                                   |
| general    | info          | ImageHash                            | 4e42e1fde929cfe97182187505be39e8caf0246b                                                                                                                                                                                                                                                                                                                                                                          |
| general    | info          | ImageSpacing                         | (0.9765625000000002, 0.9765625000000002, 2.0)                                                                                                                                                                                                                                                                                                                                                                     |
| general    | info          | MaskHash                             | 601d02d41a85228f4e963e8e96abf1e24b90d72f                                                                                                                                                                                                                                                                                                                                                                          |
| general    | info          | NumpyVersion                         | 1.13.1                                                                                                                                                                                                                                                                                                                                                                                                            |
| general    | info          | PyWaveletVersion                     | 0.5.2                                                                                                                                                                                                                                                                                                                                                                                                             |
| general    | info          | SimpleITKVersion                     | 1.1.0                                                                                                                                                                                                                                                                                                                                                                                                             |
| general    | info          | Version                              | 1.3.0.post102+g1b0eb74                                                                                                                                                                                                                                                                                                                                                                                            |
| general    | info          | VolumeNum                            | 1                                                                                                                                                                                                                                                                                                                                                                                                                 |
| general    | info          | VoxelNum                             | 243                                                                                                                                                                                                                                                                                                                                                                                                               |
| original   | shape         | Maximum3DDiameter                    | 29.84962311                                                                                                                                                                                                                                                                                                                                                                                                       |
| original   | shape         | Maximum2DDiameterSlice               | 24.18677324                                                                                                                                                                                                                                                                                                                                                                                                       |
| original   | shape         | Sphericity                           | 0.799012772                                                                                                                                                                                                                                                                                                                                                                                                       |
| original   | shape         | MinorAxis                            | 22.47133978                                                                                                                                                                                                                                                                                                                                                                                                       |
| original   | shape         | Elongation                           | 0.822033836                                                                                                                                                                                                                                                                                                                                                                                                       |
| original   | shape         | SurfaceVolumeRatio                   | 0.323301007                                                                                                                                                                                                                                                                                                                                                                                                       |
| original   | shape         | Volume                               | 6561                                                                                                                                                                                                                                                                                                                                                                                                              |
| original   | shape         | MajorAxis                            | 27.33627107                                                                                                                                                                                                                                                                                                                                                                                                       |
| original   | shape         | SurfaceArea                          | 2121.177906                                                                                                                                                                                                                                                                                                                                                                                                       |
| original   | shape         | Flatness                             | 0.589298924                                                                                                                                                                                                                                                                                                                                                                                                       |
| original   | shape         | LeastAxis                            | 16.10923512                                                                                                                                                                                                                                                                                                                                                                                                       |
| original   | shape         | Maximum2DDiameterColumn              | 27.65863337                                                                                                                                                                                                                                                                                                                                                                                                       |
| original   | shape         | Maximum2DDiameterRow                 | 28.46049894                                                                                                                                                                                                                                                                                                                                                                                                       |
| original   | gldm          | GrayLevelVariance                    | 24.38219106                                                                                                                                                                                                                                                                                                                                                                                                       |
| original   | gldm          | HighGrayLevelEmphasis                | 543.5843621                                                                                                                                                                                                                                                                                                                                                                                                       |
| original   | gldm          | DependenceEntropy                    | 5.830065427                                                                                                                                                                                                                                                                                                                                                                                                       |
| original   | gldm          | DependenceNonUniformity              | 32.25102881                                                                                                                                                                                                                                                                                                                                                                                                       |
| original   | gldm          | GrayLevelNonUniformity               | 28.3909465                                                                                                                                                                                                                                                                                                                                                                                                        |
| original   | gldm          | SmallDependenceEmphasis              | 0.325103248                                                                                                                                                                                                                                                                                                                                                                                                       |
| original   | gldm          | SmallDependenceHighGrayLevelEmphasis | 121.1553879                                                                                                                                                                                                                                                                                                                                                                                                       |
| original   | gldm          | DependenceNonUniformityNormalized    | 0.132720283                                                                                                                                                                                                                                                                                                                                                                                                       |
| original   | gldm          | LargeDependenceEmphasis              | 29.82304527                                                                                                                                                                                                                                                                                                                                                                                                       |
| original   | gldm          | LargeDependenceLowGrayLevelEmphasis  | 0.050966467                                                                                                                                                                                                                                                                                                                                                                                                       |
| original   | gldm          | DependenceVariance                   | 10.97386916                                                                                                                                                                                                                                                                                                                                                                                                       |
| original   | gldm          | LargeDependenceHighGrayLevelEmphasis | 19611.85597                                                                                                                                                                                                                                                                                                                                                                                                       |
| original   | gldm          | SmallDependenceLowGrayLevelEmphasis  | 0.005896411                                                                                                                                                                                                                                                                                                                                                                                                       |
| original   | gldm          | LowGrayLevelEmphasis                 | 0.007016876                                                                                                                                                                                                                                                                                                                                                                                                       |
| original   | glcm          | JointAverage                         | 23.77158165                                                                                                                                                                                                                                                                                                                                                                                                       |
| original   | glcm          | SumAverage                           | 47.5431633                                                                                                                                                                                                                                                                                                                                                                                                        |
| original   | glcm          | JointEntropy                         | 5.995389058                                                                                                                                                                                                                                                                                                                                                                                                       |
| original   | glcm          | ClusterShade                         | -485.2120963                                                                                                                                                                                                                                                                                                                                                                                                      |
| original   | glcm          | MaximumProbability                   | 0.090788992                                                                                                                                                                                                                                                                                                                                                                                                       |
| original   | glcm          | Idmn                                 | 0.973610711                                                                                                                                                                                                                                                                                                                                                                                                       |
| original   | glcm          | JointEnergy                          | 0.028070821                                                                                                                                                                                                                                                                                                                                                                                                       |
| original   | glcm          | Contrast                             | 28.46186108                                                                                                                                                                                                                                                                                                                                                                                                       |
| original   | glcm          | DifferenceEntropy                    | 3.184827298                                                                                                                                                                                                                                                                                                                                                                                                       |
| original   | glcm          | InverseVariance                      | 0.335647844                                                                                                                                                                                                                                                                                                                                                                                                       |

|          |            |                                  |              |
|----------|------------|----------------------------------|--------------|
| original | glcm       | DifferenceVariance               | 17.34582597  |
| original | glcm       | Idn                              | 0.911962756  |
| original | glcm       | Idm                              | 0.373251634  |
| original | glcm       | Correlation                      | 0.210330827  |
| original | glcm       | Autocorrelation                  | 568.8924242  |
| original | glcm       | SumEntropy                       | 4.138270607  |
| original | glcm       | SumSquares                       | 18.01684901  |
| original | glcm       | ClusterProminence                | 11411.92252  |
| original | glcm       | Imc2                             | 0.850122315  |
| original | glcm       | Imc1                             | -0.194708972 |
| original | glcm       | DifferenceAverage                | 3.319662723  |
| original | glcm       | Id                               | 0.436642472  |
| original | glcm       | ClusterTendency                  | 43.60553497  |
| original | firstorder | InterquartileRange               | 116          |
| original | firstorder | Skewness                         | -1.850715378 |
| original | firstorder | Uniformity                       | 0.116835171  |
| original | firstorder | Median                           | 4            |
| original | firstorder | Energy                           | 4141269      |
| original | firstorder | RobustMeanAbsoluteDeviation      | 53.31937507  |
| original | firstorder | MeanAbsoluteDeviation            | 91.0611526   |
| original | firstorder | TotalEnergy                      | 111814263    |
| original | firstorder | Maximum                          | 130          |
| original | firstorder | RootMeanSquared                  | 130.5460044  |
| original | firstorder | 90Percentile                     | 52           |
| original | firstorder | Minimum                          | -576         |
| original | firstorder | Entropy                          | 3.654661987  |
| original | firstorder | Range                            | 706          |
| original | firstorder | Variance                         | 15095.74296  |
| original | firstorder | 10Percentile                     | -202.6       |
| original | firstorder | Kurtosis                         | 6.472164798  |
| original | firstorder | Mean                             | -44.11934156 |
| original | glrlm      | ShortRunLowGrayLevelEmphasis     | 0.007682786  |
| original | glrlm      | GrayLevelVariance                | 26.41554045  |
| original | glrlm      | LowGrayLevelRunEmphasis          | 0.007827504  |
| original | glrlm      | GrayLevelNonUniformityNormalized | 0.101802411  |
| original | glrlm      | RunVariance                      | 0.20139702   |
| original | glrlm      | GrayLevelNonUniformity           | 21.57664461  |
| original | glrlm      | LongRunEmphasis                  | 1.521696456  |
| original | glrlm      | ShortRunHighGrayLevelEmphasis    | 467.1949879  |
| original | glrlm      | RunLengthNonUniformity           | 166.8489802  |
| original | glrlm      | ShortRunEmphasis                 | 0.907481316  |
| original | glrlm      | LongRunHighGrayLevelEmphasis     | 868.3253634  |
| original | glrlm      | RunPercentage                    | 0.871478316  |
| original | glrlm      | LongRunLowGrayLevelEmphasis      | 0.008638716  |
| original | glrlm      | RunEntropy                       | 4.280074402  |
| original | glrlm      | HighGrayLevelRunEmphasis         | 527.4159155  |
| original | glrlm      | RunLengthNonUniformityNormalized | 0.786900944  |
| original | glszm      | GrayLevelVariance                | 34.65669909  |
| original | glszm      | ZoneVariance                     | 62.21164175  |
| original | glszm      | GrayLevelNonUniformityNormalized | 0.062563507  |
| original | glszm      | SizeZoneNonUniformityNormalized  | 0.625199594  |
| original | glszm      | SizeZoneNonUniformity            | 51.89156627  |
| original | glszm      | GrayLevelNonUniformity           | 5.192771084  |
| original | glszm      | LargeAreaEmphasis                | 70.78313253  |
| original | glszm      | SmallAreaHighGrayLevelEmphasis   | 276.7010328  |
| original | glszm      | ZonePercentage                   | 0.341563786  |
| original | glszm      | LargeAreaLowGrayLevelEmphasis    | 0.124647196  |
| original | glszm      | LargeAreaHighGrayLevelEmphasis   | 46129        |



|             |            |                                      |              |
|-------------|------------|--------------------------------------|--------------|
| original    | glszm      | HighGrayLevelZoneEmphasis            | 374.9036145  |
| original    | glszm      | SmallAreaEmphasis                    | 0.813299907  |
| original    | glszm      | LowGrayLevelZoneEmphasis             | 0.017382536  |
| original    | glszm      | ZoneEntropy                          | 4.939201745  |
| original    | glszm      | SmallAreaLowGrayLevelEmphasis        | 0.017000108  |
| original    | ngtdm      | Coarseness                           | 0.020999004  |
| original    | ngtdm      | Complexity                           | 802.7805522  |
| original    | ngtdm      | Strength                             | 10.32506967  |
| original    | ngtdm      | Contrast                             | 0.20292402   |
| original    | ngtdm      | Busyness                             | 0.056793866  |
| wavelet-HHH | gldm       | GrayLevelVariance                    | 9.201171908  |
| wavelet-HHH | gldm       | HighGrayLevelEmphasis                | 120.7078189  |
| wavelet-HHH | gldm       | DependenceEntropy                    | 5.753168936  |
| wavelet-HHH | gldm       | DependenceNonUniformity              | 40.29218107  |
| wavelet-HHH | gldm       | GrayLevelNonUniformity               | 28.15226337  |
| wavelet-HHH | gldm       | SmallDependenceEmphasis              | 0.343819304  |
| wavelet-HHH | gldm       | SmallDependenceHighGrayLevelEmphasis | 46.27907041  |
| wavelet-HHH | gldm       | DependenceNonUniformityNormalized    | 0.165811445  |
| wavelet-HHH | gldm       | LargeDependenceEmphasis              | 19.79012346  |
| wavelet-HHH | gldm       | LargeDependenceLowGrayLevelEmphasis  | 0.195363629  |
| wavelet-HHH | gldm       | DependenceVariance                   | 7.29404393   |
| wavelet-HHH | gldm       | LargeDependenceHighGrayLevelEmphasis | 2195.596708  |
| wavelet-HHH | gldm       | SmallDependenceLowGrayLevelEmphasis  | 0.010901129  |
| wavelet-HHH | gldm       | LowGrayLevelEmphasis                 | 0.017569278  |
| wavelet-HHH | glcm       | JointAverage                         | 10.53381077  |
| wavelet-HHH | glcm       | SumAverage                           | 21.06762155  |
| wavelet-HHH | glcm       | JointEntropy                         | 6.244961094  |
| wavelet-HHH | glcm       | ClusterShade                         | 9.689797452  |
| wavelet-HHH | glcm       | MaximumProbability                   | 0.056898933  |
| wavelet-HHH | glcm       | Idmn                                 | 0.962539408  |
| wavelet-HHH | glcm       | JointEnergy                          | 0.02037652   |
| wavelet-HHH | glcm       | Contrast                             | 17.73045668  |
| wavelet-HHH | glcm       | DifferenceEntropy                    | 3.083235048  |
| wavelet-HHH | glcm       | InverseVariance                      | 0.322309685  |
| wavelet-HHH | glcm       | DifferenceVariance                   | 8.543068371  |
| wavelet-HHH | glcm       | Idn                                  | 0.881932205  |
| wavelet-HHH | glcm       | Idm                                  | 0.32631408   |
| wavelet-HHH | glcm       | Correlation                          | -0.040620757 |
| wavelet-HHH | glcm       | Autocorrelation                      | 110.6122243  |
| wavelet-HHH | glcm       | SumEntropy                           | 3.818622664  |
| wavelet-HHH | glcm       | SumSquares                           | 8.513740642  |
| wavelet-HHH | glcm       | ClusterProminence                    | 1272.379183  |
| wavelet-HHH | glcm       | Imc2                                 | 0.856419772  |
| wavelet-HHH | glcm       | Imc1                                 | -0.194016413 |
| wavelet-HHH | glcm       | DifferenceAverage                    | 3.001288379  |
| wavelet-HHH | glcm       | Id                                   | 0.402645361  |
| wavelet-HHH | glcm       | ClusterTendency                      | 16.32450589  |
| wavelet-HHH | firstorder | InterquartileRange                   | 70.23614838  |
| wavelet-HHH | firstorder | Skewness                             | 0.129484455  |
| wavelet-HHH | firstorder | Uniformity                           | 0.115852936  |
| wavelet-HHH | firstorder | Median                               | -2.035301076 |
| wavelet-HHH | firstorder | Energy                               | 1403136.688  |
| wavelet-HHH | firstorder | RobustMeanAbsoluteDeviation          | 31.96260124  |
| wavelet-HHH | firstorder | MeanAbsoluteDeviation                | 54.78633266  |
| wavelet-HHH | firstorder | TotalEnergy                          | 37884690.57  |
| wavelet-HHH | firstorder | Maximum                              | 244.1933541  |
| wavelet-HHH | firstorder | RootMeanSquared                      | 75.98832181  |
| wavelet-HHH | firstorder | 90Percentile                         | 102.3728148  |

|             |            |                                      |              |
|-------------|------------|--------------------------------------|--------------|
| wavelet-HHH | firstorder | Minimum                              | -247.5151901 |
| wavelet-HHH | firstorder | Entropy                              | 3.520660816  |
| wavelet-HHH | firstorder | Range                                | 491.7085442  |
| wavelet-HHH | firstorder | Variance                             | 5771.60714   |
| wavelet-HHH | firstorder | 10Percentile                         | -82.25346371 |
| wavelet-HHH | firstorder | Kurtosis                             | 4.261372025  |
| wavelet-HHH | firstorder | Mean                                 | 1.617996265  |
| wavelet-HHH | glrlm      | ShortRunLowGrayLevelEmphasis         | 0.017736998  |
| wavelet-HHH | glrlm      | GrayLevelVariance                    | 9.998798044  |
| wavelet-HHH | glrlm      | LowGrayLevelRunEmphasis              | 0.018422116  |
| wavelet-HHH | glrlm      | GrayLevelNonUniformityNormalized     | 0.107408127  |
| wavelet-HHH | glrlm      | RunVariance                          | 0.137432248  |
| wavelet-HHH | glrlm      | GrayLevelNonUniformity               | 23.56169077  |
| wavelet-HHH | glrlm      | LongRunEmphasis                      | 1.366737934  |
| wavelet-HHH | glrlm      | ShortRunHighGrayLevelEmphasis        | 114.0167924  |
| wavelet-HHH | glrlm      | RunLengthNonUniformity               | 182.8877747  |
| wavelet-HHH | glrlm      | ShortRunEmphasis                     | 0.929911443  |
| wavelet-HHH | glrlm      | LongRunHighGrayLevelEmphasis         | 162.3950384  |
| wavelet-HHH | glrlm      | RunPercentage                        | 0.902500791  |
| wavelet-HHH | glrlm      | LongRunLowGrayLevelEmphasis          | 0.021963796  |
| wavelet-HHH | glrlm      | RunEntropy                           | 4.007860754  |
| wavelet-HHH | glrlm      | HighGrayLevelRunEmphasis             | 121.787956   |
| wavelet-HHH | glrlm      | RunLengthNonUniformityNormalized     | 0.833480257  |
| wavelet-HHH | glszm      | GrayLevelVariance                    | 19.52952542  |
| wavelet-HHH | glszm      | ZoneVariance                         | 38.52868011  |
| wavelet-HHH | glszm      | GrayLevelNonUniformityNormalized     | 0.069436058  |
| wavelet-HHH | glszm      | SizeZoneNonUniformityNormalized      | 0.500543413  |
| wavelet-HHH | glszm      | SizeZoneNonUniformity                | 45.54945055  |
| wavelet-HHH | glszm      | GrayLevelNonUniformity               | 6.318681319  |
| wavelet-HHH | glszm      | LargeAreaEmphasis                    | 45.65934066  |
| wavelet-HHH | glszm      | SmallAreaHighGrayLevelEmphasis       | 101.9640031  |
| wavelet-HHH | glszm      | ZonePercentage                       | 0.374485597  |
| wavelet-HHH | glszm      | LargeAreaLowGrayLevelEmphasis        | 0.466545181  |
| wavelet-HHH | glszm      | LargeAreaHighGrayLevelEmphasis       | 4883.802198  |
| wavelet-HHH | glszm      | HighGrayLevelZoneEmphasis            | 135.032967   |
| wavelet-HHH | glszm      | SmallAreaEmphasis                    | 0.734061615  |
| wavelet-HHH | glszm      | LowGrayLevelZoneEmphasis             | 0.030139442  |
| wavelet-HHH | glszm      | ZoneEntropy                          | 5.050898735  |
| wavelet-HHH | glszm      | SmallAreaLowGrayLevelEmphasis        | 0.02716668   |
| wavelet-HHH | ngtdm      | Coarseness                           | 0.028907768  |
| wavelet-HHH | ngtdm      | Complexity                           | 341.8369144  |
| wavelet-HHH | ngtdm      | Strength                             | 2.998844436  |
| wavelet-HHH | ngtdm      | Contrast                             | 0.112853604  |
| wavelet-HHH | ngtdm      | Busyness                             | 0.141126269  |
| wavelet-HLL | gldm       | GrayLevelVariance                    | 15.22908093  |
| wavelet-HLL | gldm       | HighGrayLevelEmphasis                | 182.308642   |
| wavelet-HLL | gldm       | DependenceEntropy                    | 5.801804867  |
| wavelet-HLL | gldm       | DependenceNonUniformity              | 41.19753086  |
| wavelet-HLL | gldm       | GrayLevelNonUniformity               | 22.44032922  |
| wavelet-HLL | gldm       | SmallDependenceEmphasis              | 0.34539579   |
| wavelet-HLL | gldm       | SmallDependenceHighGrayLevelEmphasis | 72.64200051  |
| wavelet-HLL | gldm       | DependenceNonUniformityNormalized    | 0.169537164  |
| wavelet-HLL | gldm       | LargeDependenceEmphasis              | 15.38683128  |
| wavelet-HLL | gldm       | LargeDependenceLowGrayLevelEmphasis  | 0.216987312  |
| wavelet-HLL | gldm       | DependenceVariance                   | 4.897762875  |
| wavelet-HLL | gldm       | LargeDependenceHighGrayLevelEmphasis | 2834.580247  |
| wavelet-HLL | gldm       | SmallDependenceLowGrayLevelEmphasis  | 0.006506695  |
| wavelet-HLL | gldm       | LowGrayLevelEmphasis                 | 0.024857859  |

|             |            |                                  |              |
|-------------|------------|----------------------------------|--------------|
| wavelet-HLL | glcm       | JointAverage                     | 13.09072081  |
| wavelet-HLL | glcm       | SumAverage                       | 26.18144163  |
| wavelet-HLL | glcm       | JointEntropy                     | 6.527060737  |
| wavelet-HLL | glcm       | ClusterShade                     | -106.8457577 |
| wavelet-HLL | glcm       | MaximumProbability               | 0.044157191  |
| wavelet-HLL | glcm       | Idmn                             | 0.970642724  |
| wavelet-HLL | glcm       | JointEnergy                      | 0.015676673  |
| wavelet-HLL | glcm       | Contrast                         | 19.67915038  |
| wavelet-HLL | glcm       | DifferenceEntropy                | 3.120605323  |
| wavelet-HLL | glcm       | InverseVariance                  | 0.305236394  |
| wavelet-HLL | glcm       | DifferenceVariance               | 9.42838261   |
| wavelet-HLL | glcm       | Idn                              | 0.893743481  |
| wavelet-HLL | glcm       | Idm                              | 0.302746703  |
| wavelet-HLL | glcm       | Correlation                      | 0.149179156  |
| wavelet-HLL | glcm       | Autocorrelation                  | 173.2927319  |
| wavelet-HLL | glcm       | SumEntropy                       | 4.167664392  |
| wavelet-HLL | glcm       | SumSquares                       | 11.74637807  |
| wavelet-HLL | glcm       | ClusterProminence                | 3935.066723  |
| wavelet-HLL | glcm       | Imc2                             | 0.869854895  |
| wavelet-HLL | glcm       | Imc1                             | -0.199077936 |
| wavelet-HLL | glcm       | DifferenceAverage                | 3.155378387  |
| wavelet-HLL | glcm       | Id                               | 0.384404275  |
| wavelet-HLL | glcm       | ClusterTendency                  | 27.30636189  |
| wavelet-HLL | firstorder | InterquartileRange               | 92.67436298  |
| wavelet-HLL | firstorder | Skewness                         | -0.560292515 |
| wavelet-HLL | firstorder | Uniformity                       | 0.092347034  |
| wavelet-HLL | firstorder | Median                           | -29.28062265 |
| wavelet-HLL | firstorder | Energy                           | 2658130.735  |
| wavelet-HLL | firstorder | RobustMeanAbsoluteDeviation      | 40.22789609  |
| wavelet-HLL | firstorder | MeanAbsoluteDeviation            | 69.44846237  |
| wavelet-HLL | firstorder | TotalEnergy                      | 71769529.84  |
| wavelet-HLL | firstorder | Maximum                          | 240.3957031  |
| wavelet-HLL | firstorder | RootMeanSquared                  | 104.5887643  |
| wavelet-HLL | firstorder | 90Percentile                     | 61.51986764  |
| wavelet-HLL | firstorder | Minimum                          | -343.1747285 |
| wavelet-HLL | firstorder | Entropy                          | 3.823043564  |
| wavelet-HLL | firstorder | Range                            | 583.5704317  |
| wavelet-HLL | firstorder | Variance                         | 9353.660436  |
| wavelet-HLL | firstorder | 10Percentile                     | -159.820333  |
| wavelet-HLL | firstorder | Kurtosis                         | 4.473807471  |
| wavelet-HLL | firstorder | Mean                             | -39.81393189 |
| wavelet-HLL | glrlm      | ShortRunLowGrayLevelEmphasis     | 0.024100449  |
| wavelet-HLL | glrlm      | GrayLevelVariance                | 16.1520006   |
| wavelet-HLL | glrlm      | LowGrayLevelRunEmphasis          | 0.025416902  |
| wavelet-HLL | glrlm      | GrayLevelNonUniformityNormalized | 0.086526435  |
| wavelet-HLL | glrlm      | RunVariance                      | 0.105399336  |
| wavelet-HLL | glrlm      | GrayLevelNonUniformity           | 19.22066579  |
| wavelet-HLL | glrlm      | LongRunEmphasis                  | 1.304654008  |
| wavelet-HLL | glrlm      | ShortRunHighGrayLevelEmphasis    | 171.2528707  |
| wavelet-HLL | glrlm      | RunLengthNonUniformity           | 187.663179   |
| wavelet-HLL | glrlm      | ShortRunEmphasis                 | 0.934891267  |
| wavelet-HLL | glrlm      | LongRunHighGrayLevelEmphasis     | 237.1820702  |
| wavelet-HLL | glrlm      | RunPercentage                    | 0.913896803  |
| wavelet-HLL | glrlm      | LongRunLowGrayLevelEmphasis      | 0.030917138  |
| wavelet-HLL | glrlm      | RunEntropy                       | 4.251126485  |
| wavelet-HLL | glrlm      | HighGrayLevelRunEmphasis         | 182.7409078  |
| wavelet-HLL | glrlm      | RunLengthNonUniformityNormalized | 0.844140332  |
| wavelet-HLL | glszm      | GrayLevelVariance                | 27.5242191   |

|             |            |                                      |              |
|-------------|------------|--------------------------------------|--------------|
| wavelet-HLL | glszm      | ZoneVariance                         | 30.60445903  |
| wavelet-HLL | glszm      | GrayLevelNonUniformityNormalized     | 0.060208239  |
| wavelet-HLL | glszm      | SizeZoneNonUniformityNormalized      | 0.490040742  |
| wavelet-HLL | glszm      | SizeZoneNonUniformity                | 46.06382979  |
| wavelet-HLL | glszm      | GrayLevelNonUniformity               | 5.659574468  |
| wavelet-HLL | glszm      | LargeAreaEmphasis                    | 37.28723404  |
| wavelet-HLL | glszm      | SmallAreaHighGrayLevelEmphasis       | 161.2995814  |
| wavelet-HLL | glszm      | ZonePercentage                       | 0.386831276  |
| wavelet-HLL | glszm      | LargeAreaLowGrayLevelEmphasis        | 0.330405606  |
| wavelet-HLL | glszm      | LargeAreaHighGrayLevelEmphasis       | 6918.308511  |
| wavelet-HLL | glszm      | HighGrayLevelZoneEmphasis            | 200.9787234  |
| wavelet-HLL | glszm      | SmallAreaEmphasis                    | 0.725840751  |
| wavelet-HLL | glszm      | LowGrayLevelZoneEmphasis             | 0.027607461  |
| wavelet-HLL | glszm      | ZoneEntropy                          | 5.122193076  |
| wavelet-HLL | glszm      | SmallAreaLowGrayLevelEmphasis        | 0.011911986  |
| wavelet-HLL | ngtdm      | Coarseness                           | 0.02942539   |
| wavelet-HLL | ngtdm      | Complexity                           | 501.931642   |
| wavelet-HLL | ngtdm      | Strength                             | 4.697473295  |
| wavelet-HLL | ngtdm      | Contrast                             | 0.150283877  |
| wavelet-HLL | ngtdm      | Busyness                             | 0.09866397   |
| wavelet-LHL | gldm       | GrayLevelVariance                    | 23.92043896  |
| wavelet-LHL | gldm       | HighGrayLevelEmphasis                | 311.6625514  |
| wavelet-LHL | gldm       | DependenceEntropy                    | 6.022324981  |
| wavelet-LHL | gldm       | DependenceNonUniformity              | 49.90534979  |
| wavelet-LHL | gldm       | GrayLevelNonUniformity               | 16.35802469  |
| wavelet-LHL | gldm       | SmallDependenceEmphasis              | 0.379599769  |
| wavelet-LHL | gldm       | SmallDependenceHighGrayLevelEmphasis | 128.5036799  |
| wavelet-LHL | gldm       | DependenceNonUniformityNormalized    | 0.20537181   |
| wavelet-LHL | gldm       | LargeDependenceEmphasis              | 10.26748971  |
| wavelet-LHL | gldm       | LargeDependenceLowGrayLevelEmphasis  | 0.045954466  |
| wavelet-LHL | gldm       | DependenceVariance                   | 2.823350099  |
| wavelet-LHL | gldm       | LargeDependenceHighGrayLevelEmphasis | 2992.090535  |
| wavelet-LHL | gldm       | SmallDependenceLowGrayLevelEmphasis  | 0.008153586  |
| wavelet-LHL | gldm       | LowGrayLevelEmphasis                 | 0.010686544  |
| wavelet-LHL | glcm       | JointAverage                         | 17.08366492  |
| wavelet-LHL | glcm       | SumAverage                           | 34.16732983  |
| wavelet-LHL | glcm       | JointEntropy                         | 7.063960889  |
| wavelet-LHL | glcm       | ClusterShade                         | -1.553624117 |
| wavelet-LHL | glcm       | MaximumProbability                   | 0.028691145  |
| wavelet-LHL | glcm       | Idmn                                 | 0.970669518  |
| wavelet-LHL | glcm       | JointEnergy                          | 0.009839016  |
| wavelet-LHL | glcm       | Contrast                             | 32.28610506  |
| wavelet-LHL | glcm       | DifferenceEntropy                    | 3.459324114  |
| wavelet-LHL | glcm       | InverseVariance                      | 0.24938627   |
| wavelet-LHL | glcm       | DifferenceVariance                   | 14.64015699  |
| wavelet-LHL | glcm       | Idn                                  | 0.891436773  |
| wavelet-LHL | glcm       | Idm                                  | 0.242886878  |
| wavelet-LHL | glcm       | Correlation                          | 0.145634756  |
| wavelet-LHL | glcm       | Autocorrelation                      | 294.6998323  |
| wavelet-LHL | glcm       | SumEntropy                           | 4.507359579  |
| wavelet-LHL | glcm       | SumSquares                           | 18.97394963  |
| wavelet-LHL | glcm       | ClusterProminence                    | 8029.432747  |
| wavelet-LHL | glcm       | Imc2                                 | 0.926259851  |
| wavelet-LHL | glcm       | Imc1                                 | -0.244524647 |
| wavelet-LHL | glcm       | DifferenceAverage                    | 4.145536026  |
| wavelet-LHL | glcm       | Id                                   | 0.329970356  |
| wavelet-LHL | glcm       | ClusterTendency                      | 43.60969346  |
| wavelet-LHL | firstorder | InterquartileRange                   | 129.6929179  |

|             |            |                                  |              |
|-------------|------------|----------------------------------|--------------|
| wavelet-LHL | firstorder | Skewness                         | -0.102810245 |
| wavelet-LHL | firstorder | Uniformity                       | 0.067316974  |
| wavelet-LHL | firstorder | Median                           | -16.4085763  |
| wavelet-LHL | firstorder | Energy                           | 3674739.255  |
| wavelet-LHL | firstorder | RobustMeanAbsoluteDeviation      | 57.57695348  |
| wavelet-LHL | firstorder | MeanAbsoluteDeviation            | 91.28543639  |
| wavelet-LHL | firstorder | TotalEnergy                      | 99217959.87  |
| wavelet-LHL | firstorder | Maximum                          | 341.5857883  |
| wavelet-LHL | firstorder | RootMeanSquared                  | 122.9731018  |
| wavelet-LHL | firstorder | 90Percentile                     | 132.859492   |
| wavelet-LHL | firstorder | Minimum                          | -422.9952188 |
| wavelet-LHL | firstorder | Entropy                          | 4.206908737  |
| wavelet-LHL | firstorder | Range                            | 764.5810072  |
| wavelet-LHL | firstorder | Variance                         | 14932.28842  |
| wavelet-LHL | firstorder | 10Percentile                     | -164.9248791 |
| wavelet-LHL | firstorder | Kurtosis                         | 3.938815096  |
| wavelet-LHL | firstorder | Mean                             | -13.78750683 |
| wavelet-LHL | glrlm      | ShortRunLowGrayLevelEmphasis     | 0.010970326  |
| wavelet-LHL | glrlm      | GrayLevelVariance                | 25.10960871  |
| wavelet-LHL | glrlm      | LowGrayLevelRunEmphasis          | 0.01117386   |
| wavelet-LHL | glrlm      | GrayLevelNonUniformityNormalized | 0.064633683  |
| wavelet-LHL | glrlm      | RunVariance                      | 0.072192946  |
| wavelet-LHL | glrlm      | GrayLevelNonUniformity           | 14.66427659  |
| wavelet-LHL | glrlm      | LongRunEmphasis                  | 1.221672525  |
| wavelet-LHL | glrlm      | ShortRunHighGrayLevelEmphasis    | 297.895614   |
| wavelet-LHL | glrlm      | RunLengthNonUniformity           | 198.1946771  |
| wavelet-LHL | glrlm      | ShortRunEmphasis                 | 0.948018932  |
| wavelet-LHL | glrlm      | LongRunHighGrayLevelEmphasis     | 377.7902091  |
| wavelet-LHL | glrlm      | RunPercentage                    | 0.933523267  |
| wavelet-LHL | glrlm      | LongRunLowGrayLevelEmphasis      | 0.012036572  |
| wavelet-LHL | glrlm      | RunEntropy                       | 4.538190388  |
| wavelet-LHL | glrlm      | HighGrayLevelRunEmphasis         | 313.0762358  |
| wavelet-LHL | glrlm      | RunLengthNonUniformityNormalized | 0.872695037  |
| wavelet-LHL | glszm      | GrayLevelVariance                | 42.00505008  |
| wavelet-LHL | glszm      | ZoneVariance                     | 8.085009679  |
| wavelet-LHL | glszm      | GrayLevelNonUniformityNormalized | 0.047218248  |
| wavelet-LHL | glszm      | SizeZoneNonUniformityNormalized  | 0.425637573  |
| wavelet-LHL | glszm      | SizeZoneNonUniformity            | 46.39449541  |
| wavelet-LHL | glszm      | GrayLevelNonUniformity           | 5.146788991  |
| wavelet-LHL | glszm      | LargeAreaEmphasis                | 13.05504587  |
| wavelet-LHL | glszm      | SmallAreaHighGrayLevelEmphasis   | 236.5416541  |
| wavelet-LHL | glszm      | ZonePercentage                   | 0.448559671  |
| wavelet-LHL | glszm      | LargeAreaLowGrayLevelEmphasis    | 0.064664144  |
| wavelet-LHL | glszm      | LargeAreaHighGrayLevelEmphasis   | 3761.321101  |
| wavelet-LHL | glszm      | HighGrayLevelZoneEmphasis        | 333.1926606  |
| wavelet-LHL | glszm      | SmallAreaEmphasis                | 0.67792218   |
| wavelet-LHL | glszm      | LowGrayLevelZoneEmphasis         | 0.018919333  |
| wavelet-LHL | glszm      | ZoneEntropy                      | 5.617871683  |
| wavelet-LHL | glszm      | SmallAreaLowGrayLevelEmphasis    | 0.017478336  |
| wavelet-LHL | ngtdm      | Coarseness                       | 0.029555399  |
| wavelet-LHL | ngtdm      | Complexity                       | 979.1185759  |
| wavelet-LHL | ngtdm      | Strength                         | 6.883440017  |
| wavelet-LHL | ngtdm      | Contrast                         | 0.205828342  |
| wavelet-LHL | ngtdm      | Busyness                         | 0.06893591   |
| wavelet-LHH | gldm       | GrayLevelVariance                | 48.05327779  |
| wavelet-LHH | gldm       | HighGrayLevelEmphasis            | 580.0864198  |
| wavelet-LHH | gldm       | DependenceEntropy                | 6.068923655  |
| wavelet-LHH | gldm       | DependenceNonUniformity          | 61.69958848  |

|             |            |                                      |              |
|-------------|------------|--------------------------------------|--------------|
| wavelet-LHH | gldm       | GrayLevelNonUniformity               | 16.65432099  |
| wavelet-LHH | gldm       | SmallDependenceEmphasis              | 0.49152197   |
| wavelet-LHH | gldm       | SmallDependenceHighGrayLevelEmphasis | 306.4755065  |
| wavelet-LHH | gldm       | DependenceNonUniformityNormalized    | 0.253907772  |
| wavelet-LHH | gldm       | LargeDependenceEmphasis              | 9.83127572   |
| wavelet-LHH | gldm       | LargeDependenceLowGrayLevelEmphasis  | 0.025337094  |
| wavelet-LHH | gldm       | DependenceVariance                   | 3.550373419  |
| wavelet-LHH | gldm       | LargeDependenceHighGrayLevelEmphasis | 5220.563786  |
| wavelet-LHH | gldm       | SmallDependenceLowGrayLevelEmphasis  | 0.006875564  |
| wavelet-LHH | gldm       | LowGrayLevelEmphasis                 | 0.00793808   |
| wavelet-LHH | glcm       | JointAverage                         | 22.87621009  |
| wavelet-LHH | glcm       | SumAverage                           | 45.75242017  |
| wavelet-LHH | glcm       | JointEntropy                         | 7.109988083  |
| wavelet-LHH | glcm       | ClusterShade                         | 572.6757939  |
| wavelet-LHH | glcm       | MaximumProbability                   | 0.034200122  |
| wavelet-LHH | glcm       | Idmn                                 | 0.965344681  |
| wavelet-LHH | glcm       | JointEnergy                          | 0.010456438  |
| wavelet-LHH | glcm       | Contrast                             | 104.4043567  |
| wavelet-LHH | glcm       | DifferenceEntropy                    | 3.950077593  |
| wavelet-LHH | glcm       | InverseVariance                      | 0.234329243  |
| wavelet-LHH | glcm       | DifferenceVariance                   | 60.55406831  |
| wavelet-LHH | glcm       | Idn                                  | 0.897026092  |
| wavelet-LHH | glcm       | Idm                                  | 0.221007988  |
| wavelet-LHH | glcm       | Correlation                          | -0.065549429 |
| wavelet-LHH | glcm       | Autocorrelation                      | 520.7863956  |
| wavelet-LHH | glcm       | SumEntropy                           | 4.679996719  |
| wavelet-LHH | glcm       | SumSquares                           | 49.61734922  |
| wavelet-LHH | glcm       | ClusterProminence                    | 65424.17124  |
| wavelet-LHH | glcm       | Imc2                                 | 0.977074397  |
| wavelet-LHH | glcm       | Imc1                                 | -0.359234362 |
| wavelet-LHH | glcm       | DifferenceAverage                    | 6.510777537  |
| wavelet-LHH | glcm       | Id                                   | 0.300313699  |
| wavelet-LHH | glcm       | ClusterTendency                      | 94.06504018  |
| wavelet-LHH | firstorder | InterquartileRange                   | 124.3985665  |
| wavelet-LHH | firstorder | Skewness                             | 0.561151076  |
| wavelet-LHH | firstorder | Uniformity                           | 0.0685363    |
| wavelet-LHH | firstorder | Median                               | 3.011313686  |
| wavelet-LHH | firstorder | Energy                               | 7277415.952  |
| wavelet-LHH | firstorder | RobustMeanAbsoluteDeviation          | 55.92900863  |
| wavelet-LHH | firstorder | MeanAbsoluteDeviation                | 113.1144103  |
| wavelet-LHH | firstorder | TotalEnergy                          | 196490230.7  |
| wavelet-LHH | firstorder | Maximum                              | 652.1405292  |
| wavelet-LHH | firstorder | RootMeanSquared                      | 173.0555223  |
| wavelet-LHH | firstorder | 90Percentile                         | 181.4280093  |
| wavelet-LHH | firstorder | Minimum                              | -529.4898299 |
| wavelet-LHH | firstorder | Entropy                              | 4.411985404  |
| wavelet-LHH | firstorder | Range                                | 1181.630359  |
| wavelet-LHH | firstorder | Variance                             | 29746.11907  |
| wavelet-LHH | firstorder | 10Percentile                         | -164.1501978 |
| wavelet-LHH | firstorder | Kurtosis                             | 5.868832688  |
| wavelet-LHH | firstorder | Mean                                 | 14.21600257  |
| wavelet-LHH | glrlm      | ShortRunLowGrayLevelEmphasis         | 0.008221039  |
| wavelet-LHH | glrlm      | GrayLevelVariance                    | 50.52969456  |
| wavelet-LHH | glrlm      | LowGrayLevelRunEmphasis              | 0.008305832  |
| wavelet-LHH | glrlm      | GrayLevelNonUniformityNormalized     | 0.064599139  |
| wavelet-LHH | glrlm      | RunVariance                          | 0.074008841  |
| wavelet-LHH | glrlm      | GrayLevelNonUniformity               | 14.7931757   |
| wavelet-LHH | glrlm      | LongRunEmphasis                      | 1.202707541  |

|             |       |                                      |              |
|-------------|-------|--------------------------------------|--------------|
| wavelet-LHH | glrlm | ShortRunHighGrayLevelEmphasis        | 561.2403884  |
| wavelet-LHH | glrlm | RunLengthNonUniformity               | 205.5123419  |
| wavelet-LHH | glrlm | ShortRunEmphasis                     | 0.958087098  |
| wavelet-LHH | glrlm | LongRunHighGrayLevelEmphasis         | 690.1267207  |
| wavelet-LHH | glrlm | RunPercentage                        | 0.942070275  |
| wavelet-LHH | glrlm | LongRunLowGrayLevelEmphasis          | 0.008713242  |
| wavelet-LHH | glrlm | RunEntropy                           | 4.721355754  |
| wavelet-LHH | glrlm | HighGrayLevelRunEmphasis             | 583.3744568  |
| wavelet-LHH | glrlm | RunLengthNonUniformityNormalized     | 0.896882619  |
| wavelet-LHH | glszm | GrayLevelVariance                    | 79.70230154  |
| wavelet-LHH | glszm | ZoneVariance                         | 12.10275825  |
| wavelet-LHH | glszm | GrayLevelNonUniformityNormalized     | 0.039360615  |
| wavelet-LHH | glszm | SizeZoneNonUniformityNormalized      | 0.609037918  |
| wavelet-LHH | glszm | SizeZoneNonUniformity                | 78.56589147  |
| wavelet-LHH | glszm | GrayLevelNonUniformity               | 5.07751938   |
| wavelet-LHH | glszm | LargeAreaEmphasis                    | 15.65116279  |
| wavelet-LHH | glszm | SmallAreaHighGrayLevelEmphasis       | 511.6390594  |
| wavelet-LHH | glszm | ZonePercentage                       | 0.530864198  |
| wavelet-LHH | glszm | LargeAreaLowGrayLevelEmphasis        | 0.041967521  |
| wavelet-LHH | glszm | LargeAreaHighGrayLevelEmphasis       | 8232.534884  |
| wavelet-LHH | glszm | HighGrayLevelZoneEmphasis            | 623.0620155  |
| wavelet-LHH | glszm | SmallAreaEmphasis                    | 0.806885752  |
| wavelet-LHH | glszm | LowGrayLevelZoneEmphasis             | 0.013133289  |
| wavelet-LHH | glszm | ZoneEntropy                          | 5.675415046  |
| wavelet-LHH | glszm | SmallAreaLowGrayLevelEmphasis        | 0.012699736  |
| wavelet-LHH | ngtdm | Coarseness                           | 0.029468873  |
| wavelet-LHH | ngtdm | Complexity                           | 3282.15041   |
| wavelet-LHH | ngtdm | Strength                             | 15.78988183  |
| wavelet-LHH | ngtdm | Contrast                             | 0.284430176  |
| wavelet-LHH | ngtdm | Busyness                             | 0.029172819  |
| wavelet-LLH | gldm  | GrayLevelVariance                    | 121.7716811  |
| wavelet-LLH | gldm  | HighGrayLevelEmphasis                | 2635.37037   |
| wavelet-LLH | gldm  | DependenceEntropy                    | 6.314920286  |
| wavelet-LLH | gldm  | DependenceNonUniformity              | 73.4691358   |
| wavelet-LLH | gldm  | GrayLevelNonUniformity               | 10.32510288  |
| wavelet-LLH | gldm  | SmallDependenceEmphasis              | 0.545643477  |
| wavelet-LLH | gldm  | SmallDependenceHighGrayLevelEmphasis | 1417.778638  |
| wavelet-LLH | gldm  | DependenceNonUniformityNormalized    | 0.302342123  |
| wavelet-LLH | gldm  | LargeDependenceEmphasis              | 6.917695473  |
| wavelet-LLH | gldm  | LargeDependenceLowGrayLevelEmphasis  | 0.007056262  |
| wavelet-LLH | gldm  | DependenceVariance                   | 2.249961896  |
| wavelet-LLH | gldm  | LargeDependenceHighGrayLevelEmphasis | 18913.14815  |
| wavelet-LLH | gldm  | SmallDependenceLowGrayLevelEmphasis  | 0.004588334  |
| wavelet-LLH | gldm  | LowGrayLevelEmphasis                 | 0.004785299  |
| wavelet-LLH | glcm  | JointAverage                         | 51.28192674  |
| wavelet-LLH | glcm  | SumAverage                           | 102.5638535  |
| wavelet-LLH | glcm  | JointEntropy                         | 7.60017209   |
| wavelet-LLH | glcm  | ClusterShade                         | -3751.293633 |
| wavelet-LLH | glcm  | MaximumProbability                   | 0.022942265  |
| wavelet-LLH | glcm  | Idmn                                 | 0.976770238  |
| wavelet-LLH | glcm  | JointEnergy                          | 0.006387932  |
| wavelet-LLH | glcm  | Contrast                             | 195.1757721  |
| wavelet-LLH | glcm  | DifferenceEntropy                    | 4.216690749  |
| wavelet-LLH | glcm  | InverseVariance                      | 0.185117105  |
| wavelet-LLH | glcm  | DifferenceVariance                   | 119.4321746  |
| wavelet-LLH | glcm  | Idn                                  | 0.91747188   |
| wavelet-LLH | glcm  | Idm                                  | 0.175294675  |
| wavelet-LLH | glcm  | Correlation                          | 0.032049085  |

|             |            |                                  |              |
|-------------|------------|----------------------------------|--------------|
| wavelet-LLH | glcm       | Autocorrelation                  | 2635.095015  |
| wavelet-LLH | glcm       | SumEntropy                       | 5.241457332  |
| wavelet-LLH | glcm       | SumSquares                       | 102.7809675  |
| wavelet-LLH | glcm       | ClusterProminence                | 448550.1765  |
| wavelet-LLH | glcm       | Imc2                             | 0.990350742  |
| wavelet-LLH | glcm       | Imc1                             | -0.414061815 |
| wavelet-LLH | glcm       | DifferenceAverage                | 8.424208986  |
| wavelet-LLH | glcm       | Id                               | 0.257288313  |
| wavelet-LLH | glcm       | ClusterTendency                  | 215.9480981  |
| wavelet-LLH | firstorder | InterquartileRange               | 204.8109203  |
| wavelet-LLH | firstorder | Skewness                         | -1.229424152 |
| wavelet-LLH | firstorder | Uniformity                       | 0.042490135  |
| wavelet-LLH | firstorder | Median                           | -26.80175572 |
| wavelet-LLH | firstorder | Energy                           | 19245683.08  |
| wavelet-LLH | firstorder | RobustMeanAbsoluteDeviation      | 91.0164547   |
| wavelet-LLH | firstorder | MeanAbsoluteDeviation            | 179.8289592  |
| wavelet-LLH | firstorder | TotalEnergy                      | 519633443.1  |
| wavelet-LLH | firstorder | Maximum                          | 745.8733     |
| wavelet-LLH | firstorder | RootMeanSquared                  | 281.425553   |
| wavelet-LLH | firstorder | 90Percentile                     | 198.8115768  |
| wavelet-LLH | firstorder | Minimum                          | -1282.052929 |
| wavelet-LLH | firstorder | Entropy                          | 4.992626885  |
| wavelet-LLH | firstorder | Range                            | 2027.926229  |
| wavelet-LLH | firstorder | Variance                         | 75744.37984  |
| wavelet-LLH | firstorder | 10Percentile                     | -319.4439771 |
| wavelet-LLH | firstorder | Kurtosis                         | 7.357477144  |
| wavelet-LLH | firstorder | Mean                             | -58.78743097 |
| wavelet-LLH | glrlm      | ShortRunLowGrayLevelEmphasis     | 0.004978417  |
| wavelet-LLH | glrlm      | GrayLevelVariance                | 126.3194318  |
| wavelet-LLH | glrlm      | LowGrayLevelRunEmphasis          | 0.00499188   |
| wavelet-LLH | glrlm      | GrayLevelNonUniformityNormalized | 0.040718848  |
| wavelet-LLH | glrlm      | RunVariance                      | 0.050531878  |
| wavelet-LLH | glrlm      | GrayLevelNonUniformity           | 9.456032562  |
| wavelet-LLH | glrlm      | LongRunEmphasis                  | 1.147404043  |
| wavelet-LLH | glrlm      | ShortRunHighGrayLevelEmphasis    | 2539.811918  |
| wavelet-LLH | glrlm      | RunLengthNonUniformity           | 212.8191679  |
| wavelet-LLH | glrlm      | ShortRunEmphasis                 | 0.966512447  |
| wavelet-LLH | glrlm      | LongRunHighGrayLevelEmphasis     | 3032.516698  |
| wavelet-LLH | glrlm      | RunPercentage                    | 0.955365622  |
| wavelet-LLH | glrlm      | LongRunLowGrayLevelEmphasis      | 0.005050837  |
| wavelet-LLH | glrlm      | RunEntropy                       | 5.216523474  |
| wavelet-LLH | glrlm      | HighGrayLevelRunEmphasis         | 2631.152354  |
| wavelet-LLH | glrlm      | RunLengthNonUniformityNormalized | 0.916072643  |
| wavelet-LLH | glszm      | GrayLevelVariance                | 180.1230043  |
| wavelet-LLH | glszm      | ZoneVariance                     | 5.124531445  |
| wavelet-LLH | glszm      | GrayLevelNonUniformityNormalized | 0.030033782  |
| wavelet-LLH | glszm      | SizeZoneNonUniformityNormalized  | 0.60414642   |
| wavelet-LLH | glszm      | SizeZoneNonUniformity            | 88.80952381  |
| wavelet-LLH | glszm      | GrayLevelNonUniformity           | 4.414965986  |
| wavelet-LLH | glszm      | LargeAreaEmphasis                | 7.857142857  |
| wavelet-LLH | glszm      | SmallAreaHighGrayLevelEmphasis   | 2087.347413  |
| wavelet-LLH | glszm      | ZonePercentage                   | 0.604938272  |
| wavelet-LLH | glszm      | LargeAreaLowGrayLevelEmphasis    | 0.010225951  |
| wavelet-LLH | glszm      | LargeAreaHighGrayLevelEmphasis   | 21484.48299  |
| wavelet-LLH | glszm      | HighGrayLevelZoneEmphasis        | 2597.14966   |
| wavelet-LLH | glszm      | SmallAreaEmphasis                | 0.804534679  |
| wavelet-LLH | glszm      | LowGrayLevelZoneEmphasis         | 0.007637191  |
| wavelet-LLH | glszm      | ZoneEntropy                      | 5.977463141  |



|             |            |                                      |              |
|-------------|------------|--------------------------------------|--------------|
| wavelet-LLH | glszm      | SmallAreaLowGrayLevelEmphasis        | 0.007540244  |
| wavelet-LLH | ngtdm      | Coarseness                           | 0.030875841  |
| wavelet-LLH | ngtdm      | Complexity                           | 7960.03498   |
| wavelet-LLH | ngtdm      | Strength                             | 34.32803584  |
| wavelet-LLH | ngtdm      | Contrast                             | 0.59692738   |
| wavelet-LLH | ngtdm      | Busyness                             | 0.010810074  |
| wavelet-LLL | gldm       | GrayLevelVariance                    | 194.2807838  |
| wavelet-LLL | gldm       | HighGrayLevelEmphasis                | 2247.526749  |
| wavelet-LLL | gldm       | DependenceEntropy                    | 6.418464564  |
| wavelet-LLL | gldm       | DependenceNonUniformity              | 87.65020576  |
| wavelet-LLL | gldm       | GrayLevelNonUniformity               | 7.057613169  |
| wavelet-LLL | gldm       | SmallDependenceEmphasis              | 0.610512263  |
| wavelet-LLL | gldm       | SmallDependenceHighGrayLevelEmphasis | 1190.150791  |
| wavelet-LLL | gldm       | DependenceNonUniformityNormalized    | 0.360700435  |
| wavelet-LLL | gldm       | LargeDependenceEmphasis              | 5.510288066  |
| wavelet-LLL | gldm       | LargeDependenceLowGrayLevelEmphasis  | 0.006655398  |
| wavelet-LLL | gldm       | DependenceVariance                   | 1.848498704  |
| wavelet-LLL | gldm       | LargeDependenceHighGrayLevelEmphasis | 16131.84774  |
| wavelet-LLL | gldm       | SmallDependenceLowGrayLevelEmphasis  | 0.004779827  |
| wavelet-LLL | gldm       | LowGrayLevelEmphasis                 | 0.004962556  |
| wavelet-LLL | glcm       | JointAverage                         | 47.99341206  |
| wavelet-LLL | glcm       | SumAverage                           | 95.98682413  |
| wavelet-LLL | glcm       | JointEntropy                         | 7.925502505  |
| wavelet-LLL | glcm       | ClusterShade                         | -6856.037551 |
| wavelet-LLL | glcm       | MaximumProbability                   | 0.01781217   |
| wavelet-LLL | glcm       | Idmn                                 | 0.972525577  |
| wavelet-LLL | glcm       | JointEnergy                          | 0.004721642  |
| wavelet-LLL | glcm       | Contrast                             | 192.0793651  |
| wavelet-LLL | glcm       | DifferenceEntropy                    | 4.562420577  |
| wavelet-LLL | glcm       | InverseVariance                      | 0.139752335  |
| wavelet-LLL | glcm       | DifferenceVariance                   | 89.40036082  |
| wavelet-LLL | glcm       | Idn                                  | 0.896520223  |
| wavelet-LLL | glcm       | Idm                                  | 0.135501228  |
| wavelet-LLL | glcm       | Correlation                          | 0.369197015  |
| wavelet-LLL | glcm       | Autocorrelation                      | 2359.340303  |
| wavelet-LLL | glcm       | SumEntropy                           | 5.74335858   |
| wavelet-LLL | glcm       | SumSquares                           | 151.8435933  |
| wavelet-LLL | glcm       | ClusterProminence                    | 581499.583   |
| wavelet-LLL | glcm       | Imc2                                 | 0.995605228  |
| wavelet-LLL | glcm       | Imc1                                 | -0.461280177 |
| wavelet-LLL | glcm       | DifferenceAverage                    | 10.02730419  |
| wavelet-LLL | glcm       | Id                                   | 0.212905117  |
| wavelet-LLL | glcm       | ClusterTendency                      | 415.2950082  |
| wavelet-LLL | firstorder | InterquartileRange                   | 482.5733989  |
| wavelet-LLL | firstorder | Skewness                             | -0.641330295 |
| wavelet-LLL | firstorder | Uniformity                           | 0.029043676  |
| wavelet-LLL | firstorder | Median                               | -70.28304556 |
| wavelet-LLL | firstorder | Energy                               | 35290071.7   |
| wavelet-LLL | firstorder | RobustMeanAbsoluteDeviation          | 196.3697381  |
| wavelet-LLL | firstorder | MeanAbsoluteDeviation                | 280.656162   |
| wavelet-LLL | firstorder | TotalEnergy                          | 952831935.8  |
| wavelet-LLL | firstorder | Maximum                              | 676.0541148  |
| wavelet-LLL | firstorder | RootMeanSquared                      | 381.0861222  |
| wavelet-LLL | firstorder | 90Percentile                         | 188.4262015  |
| wavelet-LLL | firstorder | Minimum                              | -1266.264907 |
| wavelet-LLL | firstorder | Entropy                              | 5.40917686   |
| wavelet-LLL | firstorder | Range                                | 1942.319022  |
| wavelet-LLL | firstorder | Variance                             | 121245.1427  |

|             |            |                                      |              |
|-------------|------------|--------------------------------------|--------------|
| wavelet-LLL | firstorder | 10Percentile                         | -675.8099677 |
| wavelet-LLL | firstorder | Kurtosis                             | 3.044152802  |
| wavelet-LLL | firstorder | Mean                                 | -154.8595811 |
| wavelet-LLL | glrlm      | ShortRunLowGrayLevelEmphasis         | 0.005118403  |
| wavelet-LLL | glrlm      | GrayLevelVariance                    | 196.0631339  |
| wavelet-LLL | glrlm      | LowGrayLevelRunEmphasis              | 0.00512901   |
| wavelet-LLL | glrlm      | GrayLevelNonUniformityNormalized     | 0.028445252  |
| wavelet-LLL | glrlm      | RunVariance                          | 0.040355927  |
| wavelet-LLL | glrlm      | GrayLevelNonUniformity               | 6.669770003  |
| wavelet-LLL | glrlm      | LongRunEmphasis                      | 1.115019519  |
| wavelet-LLL | glrlm      | ShortRunHighGrayLevelEmphasis        | 2146.700476  |
| wavelet-LLL | glrlm      | RunLengthNonUniformity               | 219.1806722  |
| wavelet-LLL | glrlm      | ShortRunEmphasis                     | 0.974180013  |
| wavelet-LLL | glrlm      | LongRunHighGrayLevelEmphasis         | 2559.063535  |
| wavelet-LLL | glrlm      | RunPercentage                        | 0.964862298  |
| wavelet-LLL | glrlm      | LongRunLowGrayLevelEmphasis          | 0.005176496  |
| wavelet-LLL | glrlm      | RunEntropy                           | 5.547168078  |
| wavelet-LLL | glrlm      | HighGrayLevelRunEmphasis             | 2222.539378  |
| wavelet-LLL | glrlm      | RunLengthNonUniformityNormalized     | 0.934554635  |
| wavelet-LLL | glszm      | GrayLevelVariance                    | 215.3494674  |
| wavelet-LLL | glszm      | ZoneVariance                         | 2.053596296  |
| wavelet-LLL | glszm      | GrayLevelNonUniformityNormalized     | 0.024953894  |
| wavelet-LLL | glszm      | SizeZoneNonUniformityNormalized      | 0.643193195  |
| wavelet-LLL | glszm      | SizeZoneNonUniformity                | 104.8404908  |
| wavelet-LLL | glszm      | GrayLevelNonUniformity               | 4.067484663  |
| wavelet-LLL | glszm      | LargeAreaEmphasis                    | 4.27607362   |
| wavelet-LLL | glszm      | SmallAreaHighGrayLevelEmphasis       | 1560.76033   |
| wavelet-LLL | glszm      | ZonePercentage                       | 0.670781893  |
| wavelet-LLL | glszm      | LargeAreaLowGrayLevelEmphasis        | 0.008425975  |
| wavelet-LLL | glszm      | LargeAreaHighGrayLevelEmphasis       | 11881.20859  |
| wavelet-LLL | glszm      | HighGrayLevelZoneEmphasis            | 1986.055215  |
| wavelet-LLL | glszm      | SmallAreaEmphasis                    | 0.827471312  |
| wavelet-LLL | glszm      | LowGrayLevelZoneEmphasis             | 0.007179019  |
| wavelet-LLL | glszm      | ZoneEntropy                          | 6.088621734  |
| wavelet-LLL | glszm      | SmallAreaLowGrayLevelEmphasis        | 0.007084617  |
| wavelet-LLL | ngtdm      | Coarseness                           | 0.026938445  |
| wavelet-LLL | ngtdm      | Complexity                           | 10067.53127  |
| wavelet-LLL | ngtdm      | Strength                             | 38.26542625  |
| wavelet-LLL | ngtdm      | Contrast                             | 0.842689006  |
| wavelet-LLL | ngtdm      | Busyness                             | 0.013441822  |
| wavelet-HHL | gldm       | GrayLevelVariance                    | 5.655675795  |
| wavelet-HHL | gldm       | HighGrayLevelEmphasis                | 99.02057613  |
| wavelet-HHL | gldm       | DependenceEntropy                    | 5.5770869    |
| wavelet-HHL | gldm       | DependenceNonUniformity              | 34.95061728  |
| wavelet-HHL | gldm       | GrayLevelNonUniformity               | 32.26748971  |
| wavelet-HHL | gldm       | SmallDependenceEmphasis              | 0.264967626  |
| wavelet-HHL | gldm       | SmallDependenceHighGrayLevelEmphasis | 28.81539828  |
| wavelet-HHL | gldm       | DependenceNonUniformityNormalized    | 0.143829701  |
| wavelet-HHL | gldm       | LargeDependenceEmphasis              | 18.41563786  |
| wavelet-HHL | gldm       | LargeDependenceLowGrayLevelEmphasis  | 0.215006538  |
| wavelet-HHL | gldm       | DependenceVariance                   | 4.971193416  |
| wavelet-HHL | gldm       | LargeDependenceHighGrayLevelEmphasis | 1761.358025  |
| wavelet-HHL | gldm       | SmallDependenceLowGrayLevelEmphasis  | 0.012227357  |
| wavelet-HHL | gldm       | LowGrayLevelEmphasis                 | 0.021035729  |
| wavelet-HHL | glcm       | JointAverage                         | 9.583781699  |
| wavelet-HHL | glcm       | SumAverage                           | 19.1675634   |
| wavelet-HHL | glcm       | JointEntropy                         | 5.852056898  |
| wavelet-HHL | glcm       | ClusterShade                         | -2.266024813 |

|             |            |                                  |              |
|-------------|------------|----------------------------------|--------------|
| wavelet-HHL | glcm       | MaximumProbability               | 0.055666194  |
| wavelet-HHL | glcm       | Idmn                             | 0.969341022  |
| wavelet-HHL | glcm       | JointEnergy                      | 0.024413506  |
| wavelet-HHL | glcm       | Contrast                         | 10.13943252  |
| wavelet-HHL | glcm       | DifferenceEntropy                | 2.751399791  |
| wavelet-HHL | glcm       | InverseVariance                  | 0.354363584  |
| wavelet-HHL | glcm       | DifferenceVariance               | 4.46009782   |
| wavelet-HHL | glcm       | Idn                              | 0.887335137  |
| wavelet-HHL | glcm       | Idm                              | 0.351652895  |
| wavelet-HHL | glcm       | Correlation                      | -0.034299136 |
| wavelet-HHL | glcm       | Autocorrelation                  | 91.67113527  |
| wavelet-HHL | glcm       | SumEntropy                       | 3.528027115  |
| wavelet-HHL | glcm       | SumSquares                       | 4.888396888  |
| wavelet-HHL | glcm       | ClusterProminence                | 384.5871136  |
| wavelet-HHL | glcm       | Imc2                             | 0.729487655  |
| wavelet-HHL | glcm       | Imc1                             | -0.123553327 |
| wavelet-HHL | glcm       | DifferenceAverage                | 2.362980042  |
| wavelet-HHL | glcm       | Id                               | 0.428399064  |
| wavelet-HHL | glcm       | ClusterTendency                  | 9.41415503   |
| wavelet-HHL | firstorder | InterquartileRange               | 68.97026046  |
| wavelet-HHL | firstorder | Skewness                         | -0.16904086  |
| wavelet-HHL | firstorder | Uniformity                       | 0.132788024  |
| wavelet-HHL | firstorder | Median                           | 8.748123951  |
| wavelet-HHL | firstorder | Energy                           | 856388.5127  |
| wavelet-HHL | firstorder | RobustMeanAbsoluteDeviation      | 29.22657801  |
| wavelet-HHL | firstorder | MeanAbsoluteDeviation            | 45.25578661  |
| wavelet-HHL | firstorder | TotalEnergy                      | 23122489.84  |
| wavelet-HHL | firstorder | Maximum                          | 178.2185887  |
| wavelet-HHL | firstorder | RootMeanSquared                  | 59.36524709  |
| wavelet-HHL | firstorder | 90Percentile                     | 73.02147233  |
| wavelet-HHL | firstorder | Minimum                          | -205.701362  |
| wavelet-HHL | firstorder | Entropy                          | 3.220736624  |
| wavelet-HHL | firstorder | Range                            | 383.9199507  |
| wavelet-HHL | firstorder | Variance                         | 3508.114195  |
| wavelet-HHL | firstorder | 10Percentile                     | -73.03413238 |
| wavelet-HHL | firstorder | Kurtosis                         | 4.096093854  |
| wavelet-HHL | firstorder | Mean                             | 4.014768714  |
| wavelet-HHL | glrlm      | ShortRunLowGrayLevelEmphasis     | 0.021270432  |
| wavelet-HHL | glrlm      | GrayLevelVariance                | 6.100103996  |
| wavelet-HHL | glrlm      | LowGrayLevelRunEmphasis          | 0.022144202  |
| wavelet-HHL | glrlm      | GrayLevelNonUniformityNormalized | 0.126238992  |
| wavelet-HHL | glrlm      | RunVariance                      | 0.142966371  |
| wavelet-HHL | glrlm      | GrayLevelNonUniformity           | 27.54010474  |
| wavelet-HHL | glrlm      | LongRunEmphasis                  | 1.388276677  |
| wavelet-HHL | glrlm      | ShortRunHighGrayLevelEmphasis    | 92.15984707  |
| wavelet-HHL | glrlm      | RunLengthNonUniformity           | 179.1046049  |
| wavelet-HHL | glrlm      | ShortRunEmphasis                 | 0.923792449  |
| wavelet-HHL | glrlm      | LongRunHighGrayLevelEmphasis     | 136.2991405  |
| wavelet-HHL | glrlm      | RunPercentage                    | 0.897435897  |
| wavelet-HHL | glrlm      | LongRunLowGrayLevelEmphasis      | 0.026572524  |
| wavelet-HHL | glrlm      | RunEntropy                       | 3.730262373  |
| wavelet-HHL | glrlm      | HighGrayLevelRunEmphasis         | 99.45053695  |
| wavelet-HHL | glrlm      | RunLengthNonUniformityNormalized | 0.820217122  |
| wavelet-HHL | glszm      | GrayLevelVariance                | 14.60828402  |
| wavelet-HHL | glszm      | ZoneVariance                     | 69.73159763  |
| wavelet-HHL | glszm      | GrayLevelNonUniformityNormalized | 0.080236686  |
| wavelet-HHL | glszm      | SizeZoneNonUniformityNormalized  | 0.480236686  |
| wavelet-HHL | glszm      | SizeZoneNonUniformity            | 31.21538462  |

|             |            |                                      |              |
|-------------|------------|--------------------------------------|--------------|
| wavelet-HHL | glszm      | GrayLevelNonUniformity               | 5.215384615  |
| wavelet-HHL | glszm      | LargeAreaEmphasis                    | 83.70769231  |
| wavelet-HHL | glszm      | SmallAreaHighGrayLevelEmphasis       | 81.49733142  |
| wavelet-HHL | glszm      | ZonePercentage                       | 0.267489712  |
| wavelet-HHL | glszm      | LargeAreaLowGrayLevelEmphasis        | 0.969321448  |
| wavelet-HHL | glszm      | LargeAreaHighGrayLevelEmphasis       | 7863.661538  |
| wavelet-HHL | glszm      | HighGrayLevelZoneEmphasis            | 110.0461538  |
| wavelet-HHL | glszm      | SmallAreaEmphasis                    | 0.715886809  |
| wavelet-HHL | glszm      | LowGrayLevelZoneEmphasis             | 0.046257696  |
| wavelet-HHL | glszm      | ZoneEntropy                          | 4.722314067  |
| wavelet-HHL | glszm      | SmallAreaLowGrayLevelEmphasis        | 0.042216253  |
| wavelet-HHL | ngtdm      | Coarseness                           | 0.026053813  |
| wavelet-HHL | ngtdm      | Complexity                           | 162.9240844  |
| wavelet-HHL | ngtdm      | Strength                             | 1.733906205  |
| wavelet-HHL | ngtdm      | Contrast                             | 0.101553611  |
| wavelet-HHL | ngtdm      | Busyness                             | 0.244670772  |
| wavelet-HLH | gldm       | GrayLevelVariance                    | 17.40215753  |
| wavelet-HLH | gldm       | HighGrayLevelEmphasis                | 289.9917695  |
| wavelet-HLH | gldm       | DependenceEntropy                    | 5.708274695  |
| wavelet-HLH | gldm       | DependenceNonUniformity              | 40.31687243  |
| wavelet-HLH | gldm       | GrayLevelNonUniformity               | 26.7037037   |
| wavelet-HLH | gldm       | SmallDependenceEmphasis              | 0.342018243  |
| wavelet-HLH | gldm       | SmallDependenceHighGrayLevelEmphasis | 109.6278012  |
| wavelet-HLH | gldm       | DependenceNonUniformityNormalized    | 0.165913055  |
| wavelet-HLH | gldm       | LargeDependenceEmphasis              | 17.781893    |
| wavelet-HLH | gldm       | LargeDependenceLowGrayLevelEmphasis  | 0.07027642   |
| wavelet-HLH | gldm       | DependenceVariance                   | 6.143406324  |
| wavelet-HLH | gldm       | LargeDependenceHighGrayLevelEmphasis | 4952.024691  |
| wavelet-HLH | gldm       | SmallDependenceLowGrayLevelEmphasis  | 0.005985268  |
| wavelet-HLH | gldm       | LowGrayLevelEmphasis                 | 0.008521764  |
| wavelet-HLH | glcm       | JointAverage                         | 16.54523927  |
| wavelet-HLH | glcm       | SumAverage                           | 33.09047853  |
| wavelet-HLH | glcm       | JointEntropy                         | 6.203764434  |
| wavelet-HLH | glcm       | ClusterShade                         | 187.4108309  |
| wavelet-HLH | glcm       | MaximumProbability                   | 0.068188967  |
| wavelet-HLH | glcm       | Idmn                                 | 0.987799172  |
| wavelet-HLH | glcm       | JointEnergy                          | 0.020681261  |
| wavelet-HLH | glcm       | Contrast                             | 24.68970946  |
| wavelet-HLH | glcm       | DifferenceEntropy                    | 3.134093446  |
| wavelet-HLH | glcm       | InverseVariance                      | 0.290207888  |
| wavelet-HLH | glcm       | DifferenceVariance                   | 13.9073146   |
| wavelet-HLH | glcm       | Idn                                  | 0.933563887  |
| wavelet-HLH | glcm       | Idm                                  | 0.305919496  |
| wavelet-HLH | glcm       | Correlation                          | -0.013387488 |
| wavelet-HLH | glcm       | Autocorrelation                      | 273.6932253  |
| wavelet-HLH | glcm       | SumEntropy                           | 3.896378794  |
| wavelet-HLH | glcm       | SumSquares                           | 12.28325659  |
| wavelet-HLH | glcm       | ClusterProminence                    | 9347.521312  |
| wavelet-HLH | glcm       | Imc2                                 | 0.848560047  |
| wavelet-HLH | glcm       | Imc1                                 | -0.188149171 |
| wavelet-HLH | glcm       | DifferenceAverage                    | 3.240653221  |
| wavelet-HLH | glcm       | Id                                   | 0.388993885  |
| wavelet-HLH | glcm       | ClusterTendency                      | 24.44331692  |
| wavelet-HLH | firstorder | InterquartileRange                   | 79.18614305  |
| wavelet-HLH | firstorder | Skewness                             | 1.466324992  |
| wavelet-HLH | firstorder | Uniformity                           | 0.109891785  |
| wavelet-HLH | firstorder | Median                               | 0.390288231  |
| wavelet-HLH | firstorder | Energy                               | 2627931.495  |

|             |            |                                  |              |
|-------------|------------|----------------------------------|--------------|
| wavelet-HLH | firstorder | RobustMeanAbsoluteDeviation      | 35.43486197  |
| wavelet-HLH | firstorder | MeanAbsoluteDeviation            | 65.05497081  |
| wavelet-HLH | firstorder | TotalEnergy                      | 70954150.37  |
| wavelet-HLH | firstorder | Maximum                          | 638.9022365  |
| wavelet-HLH | firstorder | RootMeanSquared                  | 103.9929464  |
| wavelet-HLH | firstorder | 90Percentile                     | 83.80269761  |
| wavelet-HLH | firstorder | Minimum                          | -399.070522  |
| wavelet-HLH | firstorder | Entropy                          | 3.644322106  |
| wavelet-HLH | firstorder | Range                            | 1037.972758  |
| wavelet-HLH | firstorder | Variance                         | 10814.49865  |
| wavelet-HLH | firstorder | 10Percentile                     | -93.23850967 |
| wavelet-HLH | firstorder | Kurtosis                         | 12.27049461  |
| wavelet-HLH | firstorder | Mean                             | 0.18508365   |
| wavelet-HLH | glrlm      | ShortRunLowGrayLevelEmphasis     | 0.008756115  |
| wavelet-HLH | glrlm      | GrayLevelVariance                | 18.96921599  |
| wavelet-HLH | glrlm      | LowGrayLevelRunEmphasis          | 0.009012966  |
| wavelet-HLH | glrlm      | GrayLevelNonUniformityNormalized | 0.100796612  |
| wavelet-HLH | glrlm      | RunVariance                      | 0.123975617  |
| wavelet-HLH | glrlm      | GrayLevelNonUniformity           | 22.23440935  |
| wavelet-HLH | glrlm      | LongRunEmphasis                  | 1.341785983  |
| wavelet-HLH | glrlm      | ShortRunHighGrayLevelEmphasis    | 272.8638307  |
| wavelet-HLH | glrlm      | RunLengthNonUniformity           | 185.1808147  |
| wavelet-HLH | glrlm      | ShortRunEmphasis                 | 0.932040168  |
| wavelet-HLH | glrlm      | LongRunHighGrayLevelEmphasis     | 385.7699654  |
| wavelet-HLH | glrlm      | RunPercentage                    | 0.907249129  |
| wavelet-HLH | glrlm      | LongRunLowGrayLevelEmphasis      | 0.01029196   |
| wavelet-HLH | glrlm      | RunEntropy                       | 4.117327477  |
| wavelet-HLH | glrlm      | HighGrayLevelRunEmphasis         | 291.5134328  |
| wavelet-HLH | glrlm      | RunLengthNonUniformityNormalized | 0.838805472  |
| wavelet-HLH | glszm      | GrayLevelVariance                | 41.12570946  |
| wavelet-HLH | glszm      | ZoneVariance                     | 38.90230648  |
| wavelet-HLH | glszm      | GrayLevelNonUniformityNormalized | 0.064847241  |
| wavelet-HLH | glszm      | SizeZoneNonUniformityNormalized  | 0.514309866  |
| wavelet-HLH | glszm      | SizeZoneNonUniformity            | 46.8021978   |
| wavelet-HLH | glszm      | GrayLevelNonUniformity           | 5.901098901  |
| wavelet-HLH | glszm      | LargeAreaEmphasis                | 46.03296703  |
| wavelet-HLH | glszm      | SmallAreaHighGrayLevelEmphasis   | 245.0058693  |
| wavelet-HLH | glszm      | ZonePercentage                   | 0.374485597  |
| wavelet-HLH | glszm      | LargeAreaLowGrayLevelEmphasis    | 0.185899452  |
| wavelet-HLH | glszm      | LargeAreaHighGrayLevelEmphasis   | 12494.57143  |
| wavelet-HLH | glszm      | HighGrayLevelZoneEmphasis        | 318.6593407  |
| wavelet-HLH | glszm      | SmallAreaEmphasis                | 0.741054592  |
| wavelet-HLH | glszm      | LowGrayLevelZoneEmphasis         | 0.016332783  |
| wavelet-HLH | glszm      | ZoneEntropy                      | 5.278868333  |
| wavelet-HLH | glszm      | SmallAreaLowGrayLevelEmphasis    | 0.015311235  |
| wavelet-HLH | ngtdm      | Coarseness                       | 0.025768379  |
| wavelet-HLH | ngtdm      | Complexity                       | 876.3726199  |
| wavelet-HLH | ngtdm      | Strength                         | 8.650110258  |
| wavelet-HLH | ngtdm      | Contrast                         | 0.147238543  |
| wavelet-HLH | ngtdm      | Busyness                         | 0.070807646  |

| Image type | Feature Class | Feature Name                         |                                                                                                                                                                                                                                                                                                                                                                                                                                              |
|------------|---------------|--------------------------------------|----------------------------------------------------------------------------------------------------------------------------------------------------------------------------------------------------------------------------------------------------------------------------------------------------------------------------------------------------------------------------------------------------------------------------------------------|
| general    | info          | BoundingBox                          | 18: RTSTRUCT: C99-DNU_segment_Tumor<br>(0, 2, 1, 9, 12, 8)                                                                                                                                                                                                                                                                                                                                                                                   |
| general    | info          | EnabledImageTypes                    | {u'Original': {}, u'Wavelet': {}}                                                                                                                                                                                                                                                                                                                                                                                                            |
|            |               |                                      | {'distances': [1], 'additionalInfo': True,<br>'force2D': False, 'interpolator': 'sitkBSpline',<br>'resampledPixelSpacing': [3.0], 'label': 1,<br>'normalizeScale': 1, 'normalize': False,<br>'force2Ddimension': 0, 'removeOutliers':<br>None, 'minimumROISize': None, u'binWidth':<br>25.0, 'minimumROIDimensions': 1,<br>u'correctMask': True, 'preCrop': False,<br>u'symmetricalGLCM': True,<br>'resegmentRange': None, 'padDistance': 5} |
| general    | info          | GeneralSettings                      | 01f4f23fd35d7f54fb155a53154dc3259eed058                                                                                                                                                                                                                                                                                                                                                                                                      |
| general    | info          | ImageHash                            | b                                                                                                                                                                                                                                                                                                                                                                                                                                            |
| general    | info          | ImageSpacing                         | (1.26953125, 1.26953125, 2.0)                                                                                                                                                                                                                                                                                                                                                                                                                |
|            |               |                                      | 4deb099ec379e25ca48397b1526afda1359fef                                                                                                                                                                                                                                                                                                                                                                                                       |
| general    | info          | MaskHash                             | af                                                                                                                                                                                                                                                                                                                                                                                                                                           |
| general    | info          | NumpyVersion                         | 1.13.1                                                                                                                                                                                                                                                                                                                                                                                                                                       |
| general    | info          | PyWaveletVersion                     | 0.5.2                                                                                                                                                                                                                                                                                                                                                                                                                                        |
| general    | info          | SimpleITKVersion                     | 1.1.0                                                                                                                                                                                                                                                                                                                                                                                                                                        |
| general    | info          | Version                              | 1.3.0.post102+g1b0eb74                                                                                                                                                                                                                                                                                                                                                                                                                       |
| general    | info          | VolumeNum                            | 1                                                                                                                                                                                                                                                                                                                                                                                                                                            |
| general    | info          | VoxelNum                             | 391                                                                                                                                                                                                                                                                                                                                                                                                                                          |
| original   | shape         | Maximum3DDiameter                    | 40.47221269                                                                                                                                                                                                                                                                                                                                                                                                                                  |
| original   | shape         | Maximum2DDiameterSlice               | 30.59411708                                                                                                                                                                                                                                                                                                                                                                                                                                  |
| original   | shape         | Sphericity                           | 0.803881391                                                                                                                                                                                                                                                                                                                                                                                                                                  |
| original   | shape         | MinorAxis                            | 21.95131296                                                                                                                                                                                                                                                                                                                                                                                                                                  |
| original   | shape         | Elongation                           | 0.628948828                                                                                                                                                                                                                                                                                                                                                                                                                                  |
| original   | shape         | SurfaceVolumeRatio                   | 0.274228113                                                                                                                                                                                                                                                                                                                                                                                                                                  |
| original   | shape         | Volume                               | 10557                                                                                                                                                                                                                                                                                                                                                                                                                                        |
| original   | shape         | MajorAxis                            | 34.90158814                                                                                                                                                                                                                                                                                                                                                                                                                                  |
| original   | shape         | SurfaceArea                          | 2895.026191                                                                                                                                                                                                                                                                                                                                                                                                                                  |
| original   | shape         | Flatness                             | 0.57756638                                                                                                                                                                                                                                                                                                                                                                                                                                   |
| original   | shape         | LeastAxis                            | 20.15798394                                                                                                                                                                                                                                                                                                                                                                                                                                  |
| original   | shape         | Maximum2DDiameterColumn              | 25.8069758                                                                                                                                                                                                                                                                                                                                                                                                                                   |
| original   | shape         | Maximum2DDiameterRow                 | 35.11409973                                                                                                                                                                                                                                                                                                                                                                                                                                  |
| original   | gldm          | GrayLevelVariance                    | 140.8059733                                                                                                                                                                                                                                                                                                                                                                                                                                  |
| original   | gldm          | HighGrayLevelEmphasis                | 578.9104859                                                                                                                                                                                                                                                                                                                                                                                                                                  |
| original   | gldm          | DependenceEntropy                    | 6.597399984                                                                                                                                                                                                                                                                                                                                                                                                                                  |
| original   | gldm          | DependenceNonUniformity              | 102.3657289                                                                                                                                                                                                                                                                                                                                                                                                                                  |
| original   | gldm          | GrayLevelNonUniformity               | 14.94373402                                                                                                                                                                                                                                                                                                                                                                                                                                  |
| original   | gldm          | SmallDependenceEmphasis              | 0.499489948                                                                                                                                                                                                                                                                                                                                                                                                                                  |
| original   | gldm          | SmallDependenceHighGrayLevelEmphasis | 229.2814294                                                                                                                                                                                                                                                                                                                                                                                                                                  |
| original   | gldm          | DependenceNonUniformityNormalized    | 0.261804933                                                                                                                                                                                                                                                                                                                                                                                                                                  |
| original   | gldm          | LargeDependenceEmphasis              | 15.7314578                                                                                                                                                                                                                                                                                                                                                                                                                                   |
| original   | gldm          | LargeDependenceLowGrayLevelEmphasis  | 0.156194829                                                                                                                                                                                                                                                                                                                                                                                                                                  |
| original   | gldm          | DependenceVariance                   | 7.715752775                                                                                                                                                                                                                                                                                                                                                                                                                                  |
| original   | gldm          | LargeDependenceHighGrayLevelEmphasis | 17544.72123                                                                                                                                                                                                                                                                                                                                                                                                                                  |
| original   | gldm          | SmallDependenceLowGrayLevelEmphasis  | 0.007139726                                                                                                                                                                                                                                                                                                                                                                                                                                  |

|          |            |                                  |              |
|----------|------------|----------------------------------|--------------|
| original | gldm       | LowGrayLevelEmphasis             | 0.022738926  |
| original | glcm       | JointAverage                     | 23.32983399  |
| original | glcm       | SumAverage                       | 46.65966798  |
| original | glcm       | JointEntropy                     | 8.085896712  |
| original | glcm       | ClusterShade                     | -2400.700712 |
| original | glcm       | MaximumProbability               | 0.039337997  |
| original | glcm       | ldmn                             | 0.932512896  |
| original | glcm       | JointEnergy                      | 0.00710248   |
| original | glcm       | Contrast                         | 130.7569129  |
| original | glcm       | DifferenceEntropy                | 4.415040777  |
| original | glcm       | InverseVariance                  | 0.175294395  |
| original | glcm       | DifferenceVariance               | 59.72698371  |
| original | glcm       | ldn                              | 0.844044975  |
| original | glcm       | ldm                              | 0.195784961  |
| original | glcm       | Correlation                      | 0.529012204  |
| original | glcm       | Autocorrelation                  | 618.587712   |
| original | glcm       | SumEntropy                       | 5.782566871  |
| original | glcm       | SumSquares                       | 139.3844137  |
| original | glcm       | ClusterProminence                | 343150.1743  |
| original | glcm       | lmc2                             | 0.982234957  |
| original | glcm       | lmc1                             | -0.34329892  |
| original | glcm       | DifferenceAverage                | 8.336621494  |
| original | glcm       | ld                               | 0.26587852   |
| original | glcm       | ClusterTendency                  | 426.7807417  |
| original | firstorder | InterquartileRange               | 589          |
| original | firstorder | Skewness                         | 0.001636461  |
| original | firstorder | Uniformity                       | 0.038310843  |
| original | firstorder | Median                           | -368         |
| original | firstorder | Energy                           | 86384096     |
| original | firstorder | RobustMeanAbsoluteDeviation      | 223.52422    |
| original | firstorder | MeanAbsoluteDeviation            | 262.8675244  |
| original | firstorder | TotalEnergy                      | 2332370592   |
| original | firstorder | Maximum                          | 75           |
| original | firstorder | RootMeanSquared                  | 470.0331816  |
| original | firstorder | 90Percentile                     | 30           |
| original | firstorder | Minimum                          | -867         |
| original | firstorder | Entropy                          | 5.006382067  |
| original | firstorder | Range                            | 942          |
| original | firstorder | Variance                         | 88241.48424  |
| original | firstorder | 10Percentile                     | -763         |
| original | firstorder | Kurtosis                         | 1.589877275  |
| original | firstorder | Mean                             | -364.2659847 |
| original | glrlm      | ShortRunLowGrayLevelEmphasis     | 0.022214048  |
| original | glrlm      | GrayLevelVariance                | 134.4960729  |
| original | glrlm      | LowGrayLevelRunEmphasis          | 0.023167513  |
| original | glrlm      | GrayLevelNonUniformityNormalized | 0.033837112  |
| original | glrlm      | RunVariance                      | 0.09351251   |
| original | glrlm      | GrayLevelNonUniformity           | 12.30597463  |
| original | glrlm      | LongRunEmphasis                  | 1.25255934   |
| original | glrlm      | ShortRunHighGrayLevelEmphasis    | 499.4236834  |
| original | glrlm      | RunLengthNonUniformity           | 319.1124265  |
| original | glrlm      | ShortRunEmphasis                 | 0.949527688  |
| original | glrlm      | LongRunHighGrayLevelEmphasis     | 802.2529444  |

|             |       |                                      |              |
|-------------|-------|--------------------------------------|--------------|
| original    | glrlm | RunPercentage                        | 0.929569152  |
| original    | glrlm | LongRunLowGrayLevelEmphasis          | 0.027176     |
| original    | glrlm | RunEntropy                           | 5.336417034  |
| original    | glrlm | HighGrayLevelRunEmphasis             | 547.7751767  |
| original    | glrlm | RunLengthNonUniformityNormalized     | 0.877264836  |
| original    | glszm | GrayLevelVariance                    | 94.96422611  |
| original    | glszm | ZoneVariance                         | 11.35172636  |
| original    | glszm | GrayLevelNonUniformityNormalized     | 0.029982505  |
| original    | glszm | SizeZoneNonUniformityNormalized      | 0.561422912  |
| original    | glszm | SizeZoneNonUniformity                | 125.1973094  |
| original    | glszm | GrayLevelNonUniformity               | 6.686098655  |
| original    | glszm | LargeAreaEmphasis                    | 14.42600897  |
| original    | glszm | SmallAreaHighGrayLevelEmphasis       | 354.5325385  |
| original    | glszm | ZonePercentage                       | 0.570332481  |
| original    | glszm | LargeAreaLowGrayLevelEmphasis        | 0.136448781  |
| original    | glszm | LargeAreaHighGrayLevelEmphasis       | 16063.96413  |
| original    | glszm | HighGrayLevelZoneEmphasis            | 452.3946188  |
| original    | glszm | SmallAreaEmphasis                    | 0.777563759  |
| original    | glszm | LowGrayLevelZoneEmphasis             | 0.017318148  |
| original    | glszm | ZoneEntropy                          | 5.957616132  |
| original    | glszm | SmallAreaLowGrayLevelEmphasis        | 0.00803045   |
| original    | ngtdm | Coarseness                           | 0.012308564  |
| original    | ngtdm | Complexity                           | 3562.963678  |
| original    | ngtdm | Strength                             | 9.466013414  |
| original    | ngtdm | Contrast                             | 1.074577851  |
| original    | ngtdm | Busyness                             | 0.102385392  |
| wavelet-HHH | gldm  | GrayLevelVariance                    | 13.07844663  |
| wavelet-HHH | gldm  | HighGrayLevelEmphasis                | 251.0741688  |
| wavelet-HHH | gldm  | DependenceEntropy                    | 5.941577158  |
| wavelet-HHH | gldm  | DependenceNonUniformity              | 71.38363171  |
| wavelet-HHH | gldm  | GrayLevelNonUniformity               | 36.86189258  |
| wavelet-HHH | gldm  | SmallDependenceEmphasis              | 0.344630042  |
| wavelet-HHH | gldm  | SmallDependenceHighGrayLevelEmphasis | 87.80276584  |
| wavelet-HHH | gldm  | DependenceNonUniformityNormalized    | 0.182566833  |
| wavelet-HHH | gldm  | LargeDependenceEmphasis              | 13.79283887  |
| wavelet-HHH | gldm  | LargeDependenceLowGrayLevelEmphasis  | 0.063361991  |
| wavelet-HHH | gldm  | DependenceVariance                   | 4.358043184  |
| wavelet-HHH | gldm  | LargeDependenceHighGrayLevelEmphasis | 3395.094629  |
| wavelet-HHH | gldm  | SmallDependenceLowGrayLevelEmphasis  | 0.005596992  |
| wavelet-HHH | gldm  | LowGrayLevelEmphasis                 | 0.008549206  |
| wavelet-HHH | glcm  | JointAverage                         | 15.43862069  |
| wavelet-HHH | glcm  | SumAverage                           | 30.87724139  |
| wavelet-HHH | glcm  | JointEntropy                         | 6.897774233  |
| wavelet-HHH | glcm  | ClusterShade                         | -11.46082783 |
| wavelet-HHH | glcm  | MaximumProbability                   | 0.034763289  |
| wavelet-HHH | glcm  | ldmn                                 | 0.973435505  |
| wavelet-HHH | glcm  | JointEnergy                          | 0.011789269  |
| wavelet-HHH | glcm  | Contrast                             | 25.51631604  |
| wavelet-HHH | glcm  | DifferenceEntropy                    | 3.350720629  |
| wavelet-HHH | glcm  | InverseVariance                      | 0.256700511  |
| wavelet-HHH | glcm  | DifferenceVariance                   | 11.74669773  |
| wavelet-HHH | glcm  | ldn                                  | 0.896252955  |
| wavelet-HHH | glcm  | ldm                                  | 0.262219785  |



|             |            |                                  |              |
|-------------|------------|----------------------------------|--------------|
| wavelet-HHH | glcm       | Correlation                      | -0.036239246 |
| wavelet-HHH | glcm       | Autocorrelation                  | 237.9097873  |
| wavelet-HHH | glcm       | SumEntropy                       | 4.143882428  |
| wavelet-HHH | glcm       | SumSquares                       | 12.31528197  |
| wavelet-HHH | glcm       | ClusterProminence                | 3100.412478  |
| wavelet-HHH | glcm       | Imc2                             | 0.809872533  |
| wavelet-HHH | glcm       | Imc1                             | -0.144933713 |
| wavelet-HHH | glcm       | DifferenceAverage                | 3.671839272  |
| wavelet-HHH | glcm       | Id                               | 0.350334374  |
| wavelet-HHH | glcm       | ClusterTendency                  | 23.74481186  |
| wavelet-HHH | firstorder | InterquartileRange               | 95.13689885  |
| wavelet-HHH | firstorder | Skewness                         | -0.1444308   |
| wavelet-HHH | firstorder | Uniformity                       | 0.09427594   |
| wavelet-HHH | firstorder | Median                           | 0.306460622  |
| wavelet-HHH | firstorder | Energy                           | 3197113.268  |
| wavelet-HHH | firstorder | RobustMeanAbsoluteDeviation      | 40.9956681   |
| wavelet-HHH | firstorder | MeanAbsoluteDeviation            | 65.27156573  |
| wavelet-HHH | firstorder | TotalEnergy                      | 86322058.24  |
| wavelet-HHH | firstorder | Maximum                          | 345.4195257  |
| wavelet-HHH | firstorder | RootMeanSquared                  | 90.42544043  |
| wavelet-HHH | firstorder | 90Percentile                     | 96.57964091  |
| wavelet-HHH | firstorder | Minimum                          | -368.472359  |
| wavelet-HHH | firstorder | Entropy                          | 3.750686169  |
| wavelet-HHH | firstorder | Range                            | 713.8918847  |
| wavelet-HHH | firstorder | Variance                         | 8174.593437  |
| wavelet-HHH | firstorder | 10Percentile                     | -106.9722545 |
| wavelet-HHH | firstorder | Kurtosis                         | 5.396537998  |
| wavelet-HHH | firstorder | Mean                             | -1.472018818 |
| wavelet-HHH | glrlm      | ShortRunLowGrayLevelEmphasis     | 0.00865368   |
| wavelet-HHH | glrlm      | GrayLevelVariance                | 13.84514483  |
| wavelet-HHH | glrlm      | LowGrayLevelRunEmphasis          | 0.008912992  |
| wavelet-HHH | glrlm      | GrayLevelNonUniformityNormalized | 0.089969279  |
| wavelet-HHH | glrlm      | RunVariance                      | 0.099189856  |
| wavelet-HHH | glrlm      | GrayLevelNonUniformity           | 32.37507266  |
| wavelet-HHH | glrlm      | LongRunEmphasis                  | 1.280572734  |
| wavelet-HHH | glrlm      | ShortRunHighGrayLevelEmphasis    | 236.602949   |
| wavelet-HHH | glrlm      | RunLengthNonUniformity           | 308.0697655  |
| wavelet-HHH | glrlm      | ShortRunEmphasis                 | 0.940503283  |
| wavelet-HHH | glrlm      | LongRunHighGrayLevelEmphasis     | 320.4911963  |
| wavelet-HHH | glrlm      | RunPercentage                    | 0.920322644  |
| wavelet-HHH | glrlm      | LongRunLowGrayLevelEmphasis      | 0.010135942  |
| wavelet-HHH | glrlm      | RunEntropy                       | 4.170275443  |
| wavelet-HHH | glrlm      | HighGrayLevelRunEmphasis         | 251.3987856  |
| wavelet-HHH | glrlm      | RunLengthNonUniformityNormalized | 0.855785446  |
| wavelet-HHH | glszm      | GrayLevelVariance                | 26.16048403  |
| wavelet-HHH | glszm      | ZoneVariance                     | 37.87586788  |
| wavelet-HHH | glszm      | GrayLevelNonUniformityNormalized | 0.065661575  |
| wavelet-HHH | glszm      | SizeZoneNonUniformityNormalized  | 0.50238048   |
| wavelet-HHH | glszm      | SizeZoneNonUniformity            | 71.33802817  |
| wavelet-HHH | glszm      | GrayLevelNonUniformity           | 9.323943662  |
| wavelet-HHH | glszm      | LargeAreaEmphasis                | 45.45774648  |
| wavelet-HHH | glszm      | SmallAreaHighGrayLevelEmphasis   | 188.2600126  |
| wavelet-HHH | glszm      | ZonePercentage                   | 0.363171355  |

|             |            |                                      |              |
|-------------|------------|--------------------------------------|--------------|
| wavelet-HHH | glszm      | LargeAreaLowGrayLevelEmphasis        | 0.205562378  |
| wavelet-HHH | glszm      | LargeAreaHighGrayLevelEmphasis       | 11003.30986  |
| wavelet-HHH | glszm      | HighGrayLevelZoneEmphasis            | 257.971831   |
| wavelet-HHH | glszm      | SmallAreaEmphasis                    | 0.73164863   |
| wavelet-HHH | glszm      | LowGrayLevelZoneEmphasis             | 0.015683631  |
| wavelet-HHH | glszm      | ZoneEntropy                          | 5.398632286  |
| wavelet-HHH | glszm      | SmallAreaLowGrayLevelEmphasis        | 0.014380738  |
| wavelet-HHH | ngtdm      | Coarseness                           | 0.016915475  |
| wavelet-HHH | ngtdm      | Complexity                           | 857.2883276  |
| wavelet-HHH | ngtdm      | Strength                             | 4.160676079  |
| wavelet-HHH | ngtdm      | Contrast                             | 0.102709508  |
| wavelet-HHH | ngtdm      | Busyness                             | 0.110654928  |
| wavelet-HLL | gldm       | GrayLevelVariance                    | 49.45137721  |
| wavelet-HLL | gldm       | HighGrayLevelEmphasis                | 839.4782609  |
| wavelet-HLL | gldm       | DependenceEntropy                    | 6.465893559  |
| wavelet-HLL | gldm       | DependenceNonUniformity              | 106.1713555  |
| wavelet-HLL | gldm       | GrayLevelNonUniformity               | 16.86700767  |
| wavelet-HLL | gldm       | SmallDependenceEmphasis              | 0.440269253  |
| wavelet-HLL | gldm       | SmallDependenceHighGrayLevelEmphasis | 375.9330605  |
| wavelet-HLL | gldm       | DependenceNonUniformityNormalized    | 0.271537994  |
| wavelet-HLL | gldm       | LargeDependenceEmphasis              | 6.314578005  |
| wavelet-HLL | gldm       | LargeDependenceLowGrayLevelEmphasis  | 0.012158528  |
| wavelet-HLL | gldm       | DependenceVariance                   | 1.420411954  |
| wavelet-HLL | gldm       | LargeDependenceHighGrayLevelEmphasis | 5024.255754  |
| wavelet-HLL | gldm       | SmallDependenceLowGrayLevelEmphasis  | 0.003314353  |
| wavelet-HLL | gldm       | LowGrayLevelEmphasis                 | 0.004158354  |
| wavelet-HLL | glcm       | JointAverage                         | 27.95977913  |
| wavelet-HLL | glcm       | SumAverage                           | 55.91955826  |
| wavelet-HLL | glcm       | JointEntropy                         | 8.219986302  |
| wavelet-HLL | glcm       | ClusterShade                         | 208.1836197  |
| wavelet-HLL | glcm       | MaximumProbability                   | 0.012010204  |
| wavelet-HLL | glcm       | Idmn                                 | 0.975260565  |
| wavelet-HLL | glcm       | JointEnergy                          | 0.004036728  |
| wavelet-HLL | glcm       | Contrast                             | 60.70247323  |
| wavelet-HLL | glcm       | DifferenceEntropy                    | 3.917407552  |
| wavelet-HLL | glcm       | InverseVariance                      | 0.184295546  |
| wavelet-HLL | glcm       | DifferenceVariance                   | 25.43001807  |
| wavelet-HLL | glcm       | Idn                                  | 0.897318479  |
| wavelet-HLL | glcm       | Idm                                  | 0.175132293  |
| wavelet-HLL | glcm       | Correlation                          | 0.365145516  |
| wavelet-HLL | glcm       | Autocorrelation                      | 799.6466308  |
| wavelet-HLL | glcm       | SumEntropy                           | 5.360104503  |
| wavelet-HLL | glcm       | SumSquares                           | 48.23258078  |
| wavelet-HLL | glcm       | ClusterProminence                    | 50290.96981  |
| wavelet-HLL | glcm       | Imc2                                 | 0.959682774  |
| wavelet-HLL | glcm       | Imc1                                 | -0.268943371 |
| wavelet-HLL | glcm       | DifferenceAverage                    | 5.825498864  |
| wavelet-HLL | glcm       | Id                                   | 0.264830226  |
| wavelet-HLL | glcm       | ClusterTendency                      | 132.2278499  |
| wavelet-HLL | firstorder | InterquartileRange                   | 214.7413473  |
| wavelet-HLL | firstorder | Skewness                             | -0.19576249  |
| wavelet-HLL | firstorder | Uniformity                           | 0.043138127  |
| wavelet-HLL | firstorder | Median                               | -30.7657009  |

|             |            |                                  |              |
|-------------|------------|----------------------------------|--------------|
| wavelet-HLL | firstorder | Energy                           | 12514685     |
| wavelet-HLL | firstorder | RobustMeanAbsoluteDeviation      | 92.71438387  |
| wavelet-HLL | firstorder | MeanAbsoluteDeviation            | 137.0415278  |
| wavelet-HLL | firstorder | TotalEnergy                      | 337896495.1  |
| wavelet-HLL | firstorder | Maximum                          | 443.6049594  |
| wavelet-HLL | firstorder | RootMeanSquared                  | 178.9046311  |
| wavelet-HLL | firstorder | 90Percentile                     | 199.434648   |
| wavelet-HLL | firstorder | Minimum                          | -702.5081792 |
| wavelet-HLL | firstorder | Entropy                          | 4.768090896  |
| wavelet-HLL | firstorder | Range                            | 1146.113139  |
| wavelet-HLL | firstorder | Variance                         | 30801.71904  |
| wavelet-HLL | firstorder | 10Percentile                     | -284.8959106 |
| wavelet-HLL | firstorder | Kurtosis                         | 3.161016465  |
| wavelet-HLL | firstorder | Mean                             | -34.7152413  |
| wavelet-HLL | grlm       | ShortRunLowGrayLevelEmphasis     | 0.004234589  |
| wavelet-HLL | grlm       | GrayLevelVariance                | 50.2342153   |
| wavelet-HLL | grlm       | LowGrayLevelRunEmphasis          | 0.004288844  |
| wavelet-HLL | grlm       | GrayLevelNonUniformityNormalized | 0.042720017  |
| wavelet-HLL | grlm       | RunVariance                      | 0.050193224  |
| wavelet-HLL | grlm       | GrayLevelNonUniformity           | 15.92452806  |
| wavelet-HLL | grlm       | LongRunEmphasis                  | 1.151564979  |
| wavelet-HLL | grlm       | ShortRunHighGrayLevelEmphasis    | 812.5342947  |
| wavelet-HLL | grlm       | RunLengthNonUniformity           | 339.54217    |
| wavelet-HLL | grlm       | ShortRunEmphasis                 | 0.964187392  |
| wavelet-HLL | grlm       | LongRunHighGrayLevelEmphasis     | 963.2164162  |
| wavelet-HLL | grlm       | RunPercentage                    | 0.953373992  |
| wavelet-HLL | grlm       | LongRunLowGrayLevelEmphasis      | 0.004517153  |
| wavelet-HLL | grlm       | RunEntropy                       | 4.991742175  |
| wavelet-HLL | grlm       | HighGrayLevelRunEmphasis         | 841.2522453  |
| wavelet-HLL | grlm       | RunLengthNonUniformityNormalized | 0.910235358  |
| wavelet-HLL | glszm      | GrayLevelVariance                | 61.35789571  |
| wavelet-HLL | glszm      | ZoneVariance                     | 3.692284578  |
| wavelet-HLL | glszm      | GrayLevelNonUniformityNormalized | 0.037953033  |
| wavelet-HLL | glszm      | SizeZoneNonUniformityNormalized  | 0.430843195  |
| wavelet-HLL | glszm      | SizeZoneNonUniformity            | 89.61538462  |
| wavelet-HLL | glszm      | GrayLevelNonUniformity           | 7.894230769  |
| wavelet-HLL | glszm      | LargeAreaEmphasis                | 7.225961538  |
| wavelet-HLL | glszm      | SmallAreaHighGrayLevelEmphasis   | 582.8553373  |
| wavelet-HLL | glszm      | ZonePercentage                   | 0.531969309  |
| wavelet-HLL | glszm      | LargeAreaLowGrayLevelEmphasis    | 0.015762976  |
| wavelet-HLL | glszm      | LargeAreaHighGrayLevelEmphasis   | 5654.759615  |
| wavelet-HLL | glszm      | HighGrayLevelZoneEmphasis        | 864.3173077  |
| wavelet-HLL | glszm      | SmallAreaEmphasis                | 0.678287067  |
| wavelet-HLL | glszm      | LowGrayLevelZoneEmphasis         | 0.006480444  |
| wavelet-HLL | glszm      | ZoneEntropy                      | 6.12920802   |
| wavelet-HLL | glszm      | SmallAreaLowGrayLevelEmphasis    | 0.006001642  |
| wavelet-HLL | ngtdm      | Coarseness                       | 0.019263112  |
| wavelet-HLL | ngtdm      | Complexity                       | 2105.743788  |
| wavelet-HLL | ngtdm      | Strength                         | 8.52524055   |
| wavelet-HLL | ngtdm      | Contrast                         | 0.297523283  |
| wavelet-HLL | ngtdm      | Busyness                         | 0.054867986  |
| wavelet-LHL | gldm       | GrayLevelVariance                | 77.45732956  |
| wavelet-LHL | gldm       | HighGrayLevelEmphasis            | 1262.859335  |

|             |            |                                      |              |
|-------------|------------|--------------------------------------|--------------|
| wavelet-LHL | gldm       | DependenceEntropy                    | 6.474219068  |
| wavelet-LHL | gldm       | DependenceNonUniformity              | 113.2813299  |
| wavelet-LHL | gldm       | GrayLevelNonUniformity               | 15.30690537  |
| wavelet-LHL | gldm       | SmallDependenceEmphasis              | 0.498278253  |
| wavelet-LHL | gldm       | SmallDependenceHighGrayLevelEmphasis | 657.8541039  |
| wavelet-LHL | gldm       | DependenceNonUniformityNormalized    | 0.289722071  |
| wavelet-LHL | gldm       | LargeDependenceEmphasis              | 5.62915601   |
| wavelet-LHL | gldm       | LargeDependenceLowGrayLevelEmphasis  | 0.008220142  |
| wavelet-LHL | gldm       | DependenceVariance                   | 1.326979808  |
| wavelet-LHL | gldm       | LargeDependenceHighGrayLevelEmphasis | 6569.68798   |
| wavelet-LHL | gldm       | SmallDependenceLowGrayLevelEmphasis  | 0.003162119  |
| wavelet-LHL | gldm       | LowGrayLevelEmphasis                 | 0.003664184  |
| wavelet-LHL | glcm       | JointAverage                         | 34.26726895  |
| wavelet-LHL | glcm       | SumAverage                           | 68.53453791  |
| wavelet-LHL | glcm       | JointEntropy                         | 8.384410346  |
| wavelet-LHL | glcm       | ClusterShade                         | 771.5063284  |
| wavelet-LHL | glcm       | MaximumProbability                   | 0.011292172  |
| wavelet-LHL | glcm       | ldmn                                 | 0.969881336  |
| wavelet-LHL | glcm       | JointEnergy                          | 0.00356881   |
| wavelet-LHL | glcm       | Contrast                             | 118.0736718  |
| wavelet-LHL | glcm       | DifferenceEntropy                    | 4.289780956  |
| wavelet-LHL | glcm       | InverseVariance                      | 0.153175926  |
| wavelet-LHL | glcm       | DifferenceVariance                   | 54.54845269  |
| wavelet-LHL | glcm       | ldn                                  | 0.892341683  |
| wavelet-LHL | glcm       | ldm                                  | 0.150360124  |
| wavelet-LHL | glcm       | Correlation                          | 0.227363205  |
| wavelet-LHL | glcm       | Autocorrelation                      | 1191.774615  |
| wavelet-LHL | glcm       | SumEntropy                           | 5.525312354  |
| wavelet-LHL | glcm       | SumSquares                           | 76.5377843   |
| wavelet-LHL | glcm       | ClusterProminence                    | 130104.7288  |
| wavelet-LHL | glcm       | lmc2                                 | 0.979157459  |
| wavelet-LHL | glcm       | lmc1                                 | -0.321164271 |
| wavelet-LHL | glcm       | DifferenceAverage                    | 7.743151331  |
| wavelet-LHL | glcm       | ld                                   | 0.235947876  |
| wavelet-LHL | glcm       | ClusterTendency                      | 188.0774654  |
| wavelet-LHL | firstorder | InterquartileRange                   | 231.0241318  |
| wavelet-LHL | firstorder | Skewness                             | 0.022891728  |
| wavelet-LHL | firstorder | Uniformity                           | 0.039148096  |
| wavelet-LHL | firstorder | Median                               | -30.07591578 |
| wavelet-LHL | firstorder | Energy                               | 19193287.05  |
| wavelet-LHL | firstorder | RobustMeanAbsoluteDeviation          | 102.0860311  |
| wavelet-LHL | firstorder | MeanAbsoluteDeviation                | 163.7505833  |
| wavelet-LHL | firstorder | TotalEnergy                          | 518218750.5  |
| wavelet-LHL | firstorder | Maximum                              | 560.0570008  |
| wavelet-LHL | firstorder | RootMeanSquared                      | 221.5574207  |
| wavelet-LHL | firstorder | 90Percentile                         | 291.8115672  |
| wavelet-LHL | firstorder | Minimum                              | -852.66016   |
| wavelet-LHL | firstorder | Entropy                              | 4.999524773  |
| wavelet-LHL | firstorder | Range                                | 1412.717161  |
| wavelet-LHL | firstorder | Variance                             | 48394.4073   |
| wavelet-LHL | firstorder | 10Percentile                         | -277.4378068 |
| wavelet-LHL | firstorder | Kurtosis                             | 3.750735097  |
| wavelet-LHL | firstorder | Mean                                 | -26.33027485 |

|             |       |                                      |             |
|-------------|-------|--------------------------------------|-------------|
| wavelet-LHL | glrlm | ShortRunLowGrayLevelEmphasis         | 0.003749421 |
| wavelet-LHL | glrlm | GrayLevelVariance                    | 79.03596936 |
| wavelet-LHL | glrlm | LowGrayLevelRunEmphasis              | 0.003779883 |
| wavelet-LHL | glrlm | GrayLevelNonUniformityNormalized     | 0.038560902 |
| wavelet-LHL | glrlm | RunVariance                          | 0.046179386 |
| wavelet-LHL | glrlm | GrayLevelNonUniformity               | 14.45398528 |
| wavelet-LHL | glrlm | LongRunEmphasis                      | 1.134821874 |
| wavelet-LHL | glrlm | ShortRunHighGrayLevelEmphasis        | 1230.555521 |
| wavelet-LHL | glrlm | RunLengthNonUniformity               | 345.6660003 |
| wavelet-LHL | glrlm | ShortRunEmphasis                     | 0.969054694 |
| wavelet-LHL | glrlm | LongRunHighGrayLevelEmphasis         | 1423.75971  |
| wavelet-LHL | glrlm | RunPercentage                        | 0.958685815 |
| wavelet-LHL | glrlm | LongRunLowGrayLevelEmphasis          | 0.003914208 |
| wavelet-LHL | glrlm | RunEntropy                           | 5.20316093  |
| wavelet-LHL | glrlm | HighGrayLevelRunEmphasis             | 1266.940449 |
| wavelet-LHL | glrlm | RunLengthNonUniformityNormalized     | 0.921844926 |
| wavelet-LHL | glszm | GrayLevelVariance                    | 98.8731394  |
| wavelet-LHL | glszm | ZoneVariance                         | 3.187292593 |
| wavelet-LHL | glszm | GrayLevelNonUniformityNormalized     | 0.033010538 |
| wavelet-LHL | glszm | SizeZoneNonUniformityNormalized      | 0.502959499 |
| wavelet-LHL | glszm | SizeZoneNonUniformity                | 114.1718062 |
| wavelet-LHL | glszm | GrayLevelNonUniformity               | 7.49339207  |
| wavelet-LHL | glszm | LargeAreaEmphasis                    | 6.154185022 |
| wavelet-LHL | glszm | SmallAreaHighGrayLevelEmphasis       | 983.0080512 |
| wavelet-LHL | glszm | ZonePercentage                       | 0.58056266  |
| wavelet-LHL | glszm | LargeAreaLowGrayLevelEmphasis        | 0.010501875 |
| wavelet-LHL | glszm | LargeAreaHighGrayLevelEmphasis       | 7289.603524 |
| wavelet-LHL | glszm | HighGrayLevelZoneEmphasis            | 1313.718062 |
| wavelet-LHL | glszm | SmallAreaEmphasis                    | 0.736248192 |
| wavelet-LHL | glszm | LowGrayLevelZoneEmphasis             | 0.005592984 |
| wavelet-LHL | glszm | ZoneEntropy                          | 6.163537892 |
| wavelet-LHL | glszm | SmallAreaLowGrayLevelEmphasis        | 0.005323175 |
| wavelet-LHL | ngtdm | Coarseness                           | 0.016805161 |
| wavelet-LHL | ngtdm | Complexity                           | 4776.58151  |
| wavelet-LHL | ngtdm | Strength                             | 11.84670014 |
| wavelet-LHL | ngtdm | Contrast                             | 0.405267869 |
| wavelet-LHL | ngtdm | Busyness                             | 0.036977695 |
| wavelet-LHH | gldm  | GrayLevelVariance                    | 33.65845331 |
| wavelet-LHH | gldm  | HighGrayLevelEmphasis                | 686.8465473 |
| wavelet-LHH | gldm  | DependenceEntropy                    | 6.150104111 |
| wavelet-LHH | gldm  | DependenceNonUniformity              | 99.2455243  |
| wavelet-LHH | gldm  | GrayLevelNonUniformity               | 24.09462916 |
| wavelet-LHH | gldm  | SmallDependenceEmphasis              | 0.436537303 |
| wavelet-LHH | gldm  | SmallDependenceHighGrayLevelEmphasis | 316.6370066 |
| wavelet-LHH | gldm  | DependenceNonUniformityNormalized    | 0.25382487  |
| wavelet-LHH | gldm  | LargeDependenceEmphasis              | 7.588235294 |
| wavelet-LHH | gldm  | LargeDependenceLowGrayLevelEmphasis  | 0.016391721 |
| wavelet-LHH | gldm  | DependenceVariance                   | 2.039861068 |
| wavelet-LHH | gldm  | LargeDependenceHighGrayLevelEmphasis | 4811.480818 |
| wavelet-LHH | gldm  | SmallDependenceLowGrayLevelEmphasis  | 0.004341514 |
| wavelet-LHH | gldm  | LowGrayLevelEmphasis                 | 0.005291163 |
| wavelet-LHH | glcm  | JointAverage                         | 25.56172276 |
| wavelet-LHH | glcm  | SumAverage                           | 51.12344553 |

|             |            |                                  |              |
|-------------|------------|----------------------------------|--------------|
| wavelet-LHH | glcm       | JointEntropy                     | 7.717898849  |
| wavelet-LHH | glcm       | ClusterShade                     | -115.2584845 |
| wavelet-LHH | glcm       | MaximumProbability               | 0.019627331  |
| wavelet-LHH | glcm       | Idmn                             | 0.970071521  |
| wavelet-LHH | glcm       | JointEnergy                      | 0.006361007  |
| wavelet-LHH | glcm       | Contrast                         | 65.03216313  |
| wavelet-LHH | glcm       | DifferenceEntropy                | 3.918478103  |
| wavelet-LHH | glcm       | InverseVariance                  | 0.196834521  |
| wavelet-LHH | glcm       | DifferenceVariance               | 30.62509142  |
| wavelet-LHH | glcm       | Idn                              | 0.892006649  |
| wavelet-LHH | glcm       | Idm                              | 0.190170603  |
| wavelet-LHH | glcm       | Correlation                      | -0.025944892 |
| wavelet-LHH | glcm       | Autocorrelation                  | 652.8526296  |
| wavelet-LHH | glcm       | SumEntropy                       | 4.746622212  |
| wavelet-LHH | glcm       | SumSquares                       | 31.96201568  |
| wavelet-LHH | glcm       | ClusterProminence                | 25835.68401  |
| wavelet-LHH | glcm       | Imc2                             | 0.922474882  |
| wavelet-LHH | glcm       | Imc1                             | -0.22166254  |
| wavelet-LHH | glcm       | DifferenceAverage                | 5.753281951  |
| wavelet-LHH | glcm       | Id                               | 0.278298532  |
| wavelet-LHH | glcm       | ClusterTendency                  | 62.81589957  |
| wavelet-LHH | firstorder | InterquartileRange               | 152.9769032  |
| wavelet-LHH | firstorder | Skewness                         | -0.206257426 |
| wavelet-LHH | firstorder | Uniformity                       | 0.061623092  |
| wavelet-LHH | firstorder | Median                           | -8.8039473   |
| wavelet-LHH | firstorder | Energy                           | 8180503.358  |
| wavelet-LHH | firstorder | RobustMeanAbsoluteDeviation      | 63.63937856  |
| wavelet-LHH | firstorder | MeanAbsoluteDeviation            | 103.852241   |
| wavelet-LHH | firstorder | TotalEnergy                      | 220873590.7  |
| wavelet-LHH | firstorder | Maximum                          | 441.7944982  |
| wavelet-LHH | firstorder | RootMeanSquared                  | 144.6444035  |
| wavelet-LHH | firstorder | 90Percentile                     | 187.3536513  |
| wavelet-LHH | firstorder | Minimum                          | -614.6476189 |
| wavelet-LHH | firstorder | Entropy                          | 4.38265603   |
| wavelet-LHH | firstorder | Range                            | 1056.442117  |
| wavelet-LHH | firstorder | Variance                         | 20920.07347  |
| wavelet-LHH | firstorder | 10Percentile                     | -152.9965504 |
| wavelet-LHH | firstorder | Kurtosis                         | 5.285945231  |
| wavelet-LHH | firstorder | Mean                             | 1.389245306  |
| wavelet-LHH | grlm       | ShortRunLowGrayLevelEmphasis     | 0.005424825  |
| wavelet-LHH | grlm       | GrayLevelVariance                | 34.84821192  |
| wavelet-LHH | grlm       | LowGrayLevelRunEmphasis          | 0.00549045   |
| wavelet-LHH | grlm       | GrayLevelNonUniformityNormalized | 0.059705449  |
| wavelet-LHH | grlm       | RunVariance                      | 0.061179182  |
| wavelet-LHH | grlm       | GrayLevelNonUniformity           | 22.12801202  |
| wavelet-LHH | grlm       | LongRunEmphasis                  | 1.175224048  |
| wavelet-LHH | grlm       | ShortRunHighGrayLevelEmphasis    | 664.987361   |
| wavelet-LHH | grlm       | RunLengthNonUniformity           | 334.9945816  |
| wavelet-LHH | grlm       | ShortRunEmphasis                 | 0.961228345  |
| wavelet-LHH | grlm       | LongRunHighGrayLevelEmphasis     | 801.1391503  |
| wavelet-LHH | grlm       | RunPercentage                    | 0.947865434  |
| wavelet-LHH | grlm       | LongRunLowGrayLevelEmphasis      | 0.005785814  |
| wavelet-LHH | grlm       | RunEntropy                       | 4.658228504  |

|             |       |                                      |             |
|-------------|-------|--------------------------------------|-------------|
| wavelet-LHH | grlm  | HighGrayLevelRunEmphasis             | 689.650858  |
| wavelet-LHH | grlm  | RunLengthNonUniformityNormalized     | 0.903418973 |
| wavelet-LHH | glszm | GrayLevelVariance                    | 52.04039983 |
| wavelet-LHH | glszm | ZoneVariance                         | 8.147933153 |
| wavelet-LHH | glszm | GrayLevelNonUniformityNormalized     | 0.044981258 |
| wavelet-LHH | glszm | SizeZoneNonUniformityNormalized      | 0.470897543 |
| wavelet-LHH | glszm | SizeZoneNonUniformity                | 92.29591837 |
| wavelet-LHH | glszm | GrayLevelNonUniformity               | 8.816326531 |
| wavelet-LHH | glszm | LargeAreaEmphasis                    | 12.12755102 |
| wavelet-LHH | glszm | SmallAreaHighGrayLevelEmphasis       | 524.4835941 |
| wavelet-LHH | glszm | ZonePercentage                       | 0.501278772 |
| wavelet-LHH | glszm | LargeAreaLowGrayLevelEmphasis        | 0.02769987  |
| wavelet-LHH | glszm | LargeAreaHighGrayLevelEmphasis       | 7552.464286 |
| wavelet-LHH | glszm | HighGrayLevelZoneEmphasis            | 726.9795918 |
| wavelet-LHH | glszm | SmallAreaEmphasis                    | 0.7121887   |
| wavelet-LHH | glszm | LowGrayLevelZoneEmphasis             | 0.008872485 |
| wavelet-LHH | glszm | ZoneEntropy                          | 5.83794226  |
| wavelet-LHH | glszm | SmallAreaLowGrayLevelEmphasis        | 0.008395447 |
| wavelet-LHH | ngtdm | Coarseness                           | 0.016661249 |
| wavelet-LHH | ngtdm | Complexity                           | 2302.038761 |
| wavelet-LHH | ngtdm | Strength                             | 7.05694843  |
| wavelet-LHH | ngtdm | Contrast                             | 0.247703665 |
| wavelet-LHH | ngtdm | Busyness                             | 0.059546789 |
| wavelet-LLH | gldm  | GrayLevelVariance                    | 61.47423159 |
| wavelet-LLH | gldm  | HighGrayLevelEmphasis                | 513.2813299 |
| wavelet-LLH | gldm  | DependenceEntropy                    | 6.460042536 |
| wavelet-LLH | gldm  | DependenceNonUniformity              | 116.3861893 |
| wavelet-LLH | gldm  | GrayLevelNonUniformity               | 15.51662404 |
| wavelet-LLH | gldm  | SmallDependenceEmphasis              | 0.502540585 |
| wavelet-LLH | gldm  | SmallDependenceHighGrayLevelEmphasis | 278.6489294 |
| wavelet-LLH | gldm  | DependenceNonUniformityNormalized    | 0.297662888 |
| wavelet-LLH | gldm  | LargeDependenceEmphasis              | 5.900255754 |
| wavelet-LLH | gldm  | LargeDependenceLowGrayLevelEmphasis  | 0.022430929 |
| wavelet-LLH | gldm  | DependenceVariance                   | 1.57683427  |
| wavelet-LLH | gldm  | LargeDependenceHighGrayLevelEmphasis | 2691.649616 |
| wavelet-LLH | gldm  | SmallDependenceLowGrayLevelEmphasis  | 0.005311198 |
| wavelet-LLH | gldm  | LowGrayLevelEmphasis                 | 0.006952517 |
| wavelet-LLH | glcm  | JointAverage                         | 20.33062112 |
| wavelet-LLH | glcm  | SumAverage                           | 40.66124224 |
| wavelet-LLH | glcm  | JointEntropy                         | 8.295547054 |
| wavelet-LLH | glcm  | ClusterShade                         | 668.1076975 |
| wavelet-LLH | glcm  | MaximumProbability                   | 0.011466713 |
| wavelet-LLH | glcm  | ldmn                                 | 0.962095718 |
| wavelet-LLH | glcm  | JointEnergy                          | 0.00378214  |
| wavelet-LLH | glcm  | Contrast                             | 93.8234535  |
| wavelet-LLH | glcm  | DifferenceEntropy                    | 4.176526634 |
| wavelet-LLH | glcm  | InverseVariance                      | 0.159564466 |
| wavelet-LLH | glcm  | DifferenceVariance                   | 39.87376328 |
| wavelet-LLH | glcm  | ldn                                  | 0.876834085 |
| wavelet-LLH | glcm  | ldm                                  | 0.153932295 |
| wavelet-LLH | glcm  | Correlation                          | 0.155707979 |
| wavelet-LLH | glcm  | Autocorrelation                      | 423.2317847 |
| wavelet-LLH | glcm  | SumEntropy                           | 5.322049583 |

|             |            |                                  |              |
|-------------|------------|----------------------------------|--------------|
| wavelet-LLH | glcm       | SumSquares                       | 56.73726771  |
| wavelet-LLH | glcm       | ClusterProminence                | 66452.46765  |
| wavelet-LLH | glcm       | Imc2                             | 0.965648017  |
| wavelet-LLH | glcm       | Imc1                             | -0.281449375 |
| wavelet-LLH | glcm       | DifferenceAverage                | 7.154072962  |
| wavelet-LLH | glcm       | Id                               | 0.24031478   |
| wavelet-LLH | glcm       | ClusterTendency                  | 133.1256173  |
| wavelet-LLH | firstorder | InterquartileRange               | 244.8637786  |
| wavelet-LLH | firstorder | Skewness                         | 0.367146645  |
| wavelet-LLH | firstorder | Uniformity                       | 0.03968446   |
| wavelet-LLH | firstorder | Median                           | -40.28319103 |
| wavelet-LLH | firstorder | Energy                           | 15437996.96  |
| wavelet-LLH | firstorder | RobustMeanAbsoluteDeviation      | 104.9659133  |
| wavelet-LLH | firstorder | MeanAbsoluteDeviation            | 153.7426327  |
| wavelet-LLH | firstorder | TotalEnergy                      | 416825918    |
| wavelet-LLH | firstorder | Maximum                          | 595.0842637  |
| wavelet-LLH | firstorder | RootMeanSquared                  | 198.7042229  |
| wavelet-LLH | firstorder | 90Percentile                     | 226.6056991  |
| wavelet-LLH | firstorder | Minimum                          | -549.9352761 |
| wavelet-LLH | firstorder | Entropy                          | 4.910384889  |
| wavelet-LLH | firstorder | Range                            | 1145.01954   |
| wavelet-LLH | firstorder | Variance                         | 38497.92775  |
| wavelet-LLH | firstorder | 10Percentile                     | -271.8854489 |
| wavelet-LLH | firstorder | Kurtosis                         | 3.177971999  |
| wavelet-LLH | firstorder | Mean                             | -31.39172571 |
| wavelet-LLH | glrlm      | ShortRunLowGrayLevelEmphasis     | 0.007010936  |
| wavelet-LLH | glrlm      | GrayLevelVariance                | 62.60261126  |
| wavelet-LLH | glrlm      | LowGrayLevelRunEmphasis          | 0.007113822  |
| wavelet-LLH | glrlm      | GrayLevelNonUniformityNormalized | 0.039125812  |
| wavelet-LLH | glrlm      | RunVariance                      | 0.046430223  |
| wavelet-LLH | glrlm      | GrayLevelNonUniformity           | 14.6637641   |
| wavelet-LLH | glrlm      | LongRunEmphasis                  | 1.136126888  |
| wavelet-LLH | glrlm      | ShortRunHighGrayLevelEmphasis    | 501.8385113  |
| wavelet-LLH | glrlm      | RunLengthNonUniformity           | 345.5063456  |
| wavelet-LLH | glrlm      | ShortRunEmphasis                 | 0.968779378  |
| wavelet-LLH | glrlm      | LongRunHighGrayLevelEmphasis     | 577.4473542  |
| wavelet-LLH | glrlm      | RunPercentage                    | 0.958489081  |
| wavelet-LLH | glrlm      | LongRunLowGrayLevelEmphasis      | 0.00755407   |
| wavelet-LLH | glrlm      | RunEntropy                       | 5.119591215  |
| wavelet-LLH | glrlm      | HighGrayLevelRunEmphasis         | 515.960344   |
| wavelet-LLH | glrlm      | RunLengthNonUniformityNormalized | 0.92134975   |
| wavelet-LLH | glszm      | GrayLevelVariance                | 76.1947259   |
| wavelet-LLH | glszm      | ZoneVariance                     | 2.08826087   |
| wavelet-LLH | glszm      | GrayLevelNonUniformityNormalized | 0.034782609  |
| wavelet-LLH | glszm      | SizeZoneNonUniformityNormalized  | 0.489149338  |
| wavelet-LLH | glszm      | SizeZoneNonUniformity            | 112.5043478  |
| wavelet-LLH | glszm      | GrayLevelNonUniformity           | 8            |
| wavelet-LLH | glszm      | LargeAreaEmphasis                | 4.97826087   |
| wavelet-LLH | glszm      | SmallAreaHighGrayLevelEmphasis   | 412.4839231  |
| wavelet-LLH | glszm      | ZonePercentage                   | 0.588235294  |
| wavelet-LLH | glszm      | LargeAreaLowGrayLevelEmphasis    | 0.022152472  |
| wavelet-LLH | glszm      | LargeAreaHighGrayLevelEmphasis   | 2311.378261  |
| wavelet-LLH | glszm      | HighGrayLevelZoneEmphasis        | 550.1086957  |



|             |            |                                      |              |
|-------------|------------|--------------------------------------|--------------|
| wavelet-LLH | glszm      | SmallAreaEmphasis                    | 0.726772942  |
| wavelet-LLH | glszm      | LowGrayLevelZoneEmphasis             | 0.009494287  |
| wavelet-LLH | glszm      | ZoneEntropy                          | 6.175852147  |
| wavelet-LLH | glszm      | SmallAreaLowGrayLevelEmphasis        | 0.008603065  |
| wavelet-LLH | ngtdm      | Coarseness                           | 0.01644869   |
| wavelet-LLH | ngtdm      | Complexity                           | 3732.358509  |
| wavelet-LLH | ngtdm      | Strength                             | 9.499120047  |
| wavelet-LLH | ngtdm      | Contrast                             | 0.360509036  |
| wavelet-LLH | ngtdm      | Busyness                             | 0.071936213  |
| wavelet-LLL | gldm       | GrayLevelVariance                    | 847.374677   |
| wavelet-LLL | gldm       | HighGrayLevelEmphasis                | 3541.542199  |
| wavelet-LLL | gldm       | DependenceEntropy                    | 7.065478419  |
| wavelet-LLL | gldm       | DependenceNonUniformity              | 211.971867   |
| wavelet-LLL | gldm       | GrayLevelNonUniformity               | 4.938618926  |
| wavelet-LLL | gldm       | SmallDependenceEmphasis              | 0.762992327  |
| wavelet-LLL | gldm       | SmallDependenceHighGrayLevelEmphasis | 2410.119796  |
| wavelet-LLL | gldm       | DependenceNonUniformityNormalized    | 0.542127537  |
| wavelet-LLL | gldm       | LargeDependenceEmphasis              | 2.47314578   |
| wavelet-LLL | gldm       | LargeDependenceLowGrayLevelEmphasis  | 0.020729522  |
| wavelet-LLL | gldm       | DependenceVariance                   | 0.501671234  |
| wavelet-LLL | gldm       | LargeDependenceHighGrayLevelEmphasis | 11931.11253  |
| wavelet-LLL | gldm       | SmallDependenceLowGrayLevelEmphasis  | 0.007730994  |
| wavelet-LLL | gldm       | LowGrayLevelEmphasis                 | 0.009715349  |
| wavelet-LLL | glcm       | JointAverage                         | 58.37521737  |
| wavelet-LLL | glcm       | SumAverage                           | 116.7504347  |
| wavelet-LLL | glcm       | JointEntropy                         | 9.006773396  |
| wavelet-LLL | glcm       | ClusterShade                         | -13812.97395 |
| wavelet-LLL | glcm       | MaximumProbability                   | 0.0055824    |
| wavelet-LLL | glcm       | ldmn                                 | 0.953002375  |
| wavelet-LLL | glcm       | JointEnergy                          | 0.002032178  |
| wavelet-LLL | glcm       | Contrast                             | 607.8376143  |
| wavelet-LLL | glcm       | DifferenceEntropy                    | 5.409168674  |
| wavelet-LLL | glcm       | InverseVariance                      | 0.069102851  |
| wavelet-LLL | glcm       | DifferenceVariance                   | 224.4461483  |
| wavelet-LLL | glcm       | ldn                                  | 0.858486602  |
| wavelet-LLL | glcm       | ldm                                  | 0.064204597  |
| wavelet-LLL | glcm       | Correlation                          | 0.644004275  |
| wavelet-LLL | glcm       | Autocorrelation                      | 3960.615019  |
| wavelet-LLL | glcm       | SumEntropy                           | 6.998788662  |
| wavelet-LLL | glcm       | SumSquares                           | 854.5855242  |
| wavelet-LLL | glcm       | ClusterProminence                    | 15523726.12  |
| wavelet-LLL | glcm       | lmc2                                 | 0.999758638  |
| wavelet-LLL | glcm       | lmc1                                 | -0.59609426  |
| wavelet-LLL | glcm       | DifferenceAverage                    | 19.21901031  |
| wavelet-LLL | glcm       | ld                                   | 0.125712192  |
| wavelet-LLL | glcm       | ClusterTendency                      | 2810.504483  |
| wavelet-LLL | firstorder | InterquartileRange                   | 1226.525756  |
| wavelet-LLL | firstorder | Skewness                             | 0.183158706  |
| wavelet-LLL | firstorder | Uniformity                           | 0.012630739  |
| wavelet-LLL | firstorder | Median                               | -1079.043223 |
| wavelet-LLL | firstorder | Energy                               | 629638614.4  |
| wavelet-LLL | firstorder | RobustMeanAbsoluteDeviation          | 489.2200604  |
| wavelet-LLL | firstorder | MeanAbsoluteDeviation                | 621.4018381  |

|             |            |                                  |              |
|-------------|------------|----------------------------------|--------------|
| wavelet-LLL | firstorder | TotalEnergy                      | 17000242588  |
| wavelet-LLL | firstorder | Maximum                          | 305.3363416  |
| wavelet-LLL | firstorder | RootMeanSquared                  | 1268.987367  |
| wavelet-LLL | firstorder | 90Percentile                     | 68.36245758  |
| wavelet-LLL | firstorder | Minimum                          | -2305.835024 |
| wavelet-LLL | firstorder | Entropy                          | 6.462264226  |
| wavelet-LLL | firstorder | Range                            | 2611.171366  |
| wavelet-LLL | firstorder | Variance                         | 529814.986   |
| wavelet-LLL | firstorder | 10Percentile                     | -1946.169623 |
| wavelet-LLL | firstorder | Kurtosis                         | 1.892718564  |
| wavelet-LLL | firstorder | Mean                             | -1039.47773  |
| wavelet-LLL | grlm       | ShortRunLowGrayLevelEmphasis     | 0.009650285  |
| wavelet-LLL | grlm       | GrayLevelVariance                | 840.6099447  |
| wavelet-LLL | grlm       | LowGrayLevelRunEmphasis          | 0.009743908  |
| wavelet-LLL | grlm       | GrayLevelNonUniformityNormalized | 0.012601075  |
| wavelet-LLL | grlm       | RunVariance                      | 0.015937478  |
| wavelet-LLL | grlm       | GrayLevelNonUniformity           | 4.850522067  |
| wavelet-LLL | grlm       | LongRunEmphasis                  | 1.047966251  |
| wavelet-LLL | grlm       | ShortRunHighGrayLevelEmphasis    | 3451.137105  |
| wavelet-LLL | grlm       | RunLengthNonUniformity           | 373.1577872  |
| wavelet-LLL | grlm       | ShortRunEmphasis                 | 0.988232181  |
| wavelet-LLL | grlm       | LongRunHighGrayLevelEmphasis     | 3765.321545  |
| wavelet-LLL | grlm       | RunPercentage                    | 0.984457997  |
| wavelet-LLL | grlm       | LongRunLowGrayLevelEmphasis      | 0.010121899  |
| wavelet-LLL | grlm       | RunEntropy                       | 6.514846965  |
| wavelet-LLL | grlm       | HighGrayLevelRunEmphasis         | 3513.92817   |
| wavelet-LLL | grlm       | RunLengthNonUniformityNormalized | 0.969307957  |
| wavelet-LLL | glszm      | GrayLevelVariance                | 762.5632709  |
| wavelet-LLL | glszm      | ZoneVariance                     | 0.376122126  |
| wavelet-LLL | glszm      | GrayLevelNonUniformityNormalized | 0.012528993  |
| wavelet-LLL | glszm      | SizeZoneNonUniformityNormalized  | 0.739521161  |
| wavelet-LLL | glszm      | SizeZoneNonUniformity            | 237.3862928  |
| wavelet-LLL | glszm      | GrayLevelNonUniformity           | 4.021806854  |
| wavelet-LLL | glszm      | LargeAreaEmphasis                | 1.859813084  |
| wavelet-LLL | glszm      | SmallAreaHighGrayLevelEmphasis   | 2717.841421  |
| wavelet-LLL | glszm      | ZonePercentage                   | 0.820971867  |
| wavelet-LLL | glszm      | LargeAreaLowGrayLevelEmphasis    | 0.017362381  |
| wavelet-LLL | glszm      | LargeAreaHighGrayLevelEmphasis   | 8062.894081  |
| wavelet-LLL | glszm      | HighGrayLevelZoneEmphasis        | 3219.448598  |
| wavelet-LLL | glszm      | SmallAreaEmphasis                | 0.882647975  |
| wavelet-LLL | glszm      | LowGrayLevelZoneEmphasis         | 0.009891265  |
| wavelet-LLL | glszm      | ZoneEntropy                      | 6.856712014  |
| wavelet-LLL | glszm      | SmallAreaLowGrayLevelEmphasis    | 0.008934487  |
| wavelet-LLL | ngtdm      | Coarseness                       | 0.018306202  |
| wavelet-LLL | ngtdm      | Complexity                       | 44785.13405  |
| wavelet-LLL | ngtdm      | Strength                         | 82.0772205   |
| wavelet-LLL | ngtdm      | Contrast                         | 1.856420366  |
| wavelet-LLL | ngtdm      | Busyness                         | 0.012473505  |
| wavelet-HHL | gldm       | GrayLevelVariance                | 17.81762286  |
| wavelet-HHL | gldm       | HighGrayLevelEmphasis            | 158.3401535  |
| wavelet-HHL | gldm       | DependenceEntropy                | 6.022564485  |
| wavelet-HHL | gldm       | DependenceNonUniformity          | 76.89769821  |
| wavelet-HHL | gldm       | GrayLevelNonUniformity           | 32.35549872  |

|             |            |                                      |              |
|-------------|------------|--------------------------------------|--------------|
| wavelet-HHL | gldm       | SmallDependenceEmphasis              | 0.348489274  |
| wavelet-HHL | gldm       | SmallDependenceHighGrayLevelEmphasis | 65.04867746  |
| wavelet-HHL | gldm       | DependenceNonUniformityNormalized    | 0.196669305  |
| wavelet-HHL | gldm       | LargeDependenceEmphasis              | 10.87212276  |
| wavelet-HHL | gldm       | LargeDependenceLowGrayLevelEmphasis  | 0.101280545  |
| wavelet-HHL | gldm       | DependenceVariance                   | 2.856417737  |
| wavelet-HHL | gldm       | LargeDependenceHighGrayLevelEmphasis | 1484.381074  |
| wavelet-HHL | gldm       | SmallDependenceLowGrayLevelEmphasis  | 0.007281101  |
| wavelet-HHL | gldm       | LowGrayLevelEmphasis                 | 0.013782691  |
| wavelet-HHL | glcm       | JointAverage                         | 11.76189185  |
| wavelet-HHL | glcm       | SumAverage                           | 23.52378371  |
| wavelet-HHL | glcm       | JointEntropy                         | 7.081306914  |
| wavelet-HHL | glcm       | ClusterShade                         | 200.6892326  |
| wavelet-HHL | glcm       | MaximumProbability                   | 0.027410645  |
| wavelet-HHL | glcm       | Idmn                                 | 0.982218324  |
| wavelet-HHL | glcm       | JointEnergy                          | 0.009905075  |
| wavelet-HHL | glcm       | Contrast                             | 28.51357135  |
| wavelet-HHL | glcm       | DifferenceEntropy                    | 3.403036009  |
| wavelet-HHL | glcm       | InverseVariance                      | 0.261371365  |
| wavelet-HHL | glcm       | DifferenceVariance                   | 13.39342272  |
| wavelet-HHL | glcm       | Idn                                  | 0.913854721  |
| wavelet-HHL | glcm       | Idm                                  | 0.249627062  |
| wavelet-HHL | glcm       | Correlation                          | 0.029804348  |
| wavelet-HHL | glcm       | Autocorrelation                      | 138.9206999  |
| wavelet-HHL | glcm       | SumEntropy                           | 4.271212266  |
| wavelet-HHL | glcm       | SumSquares                           | 14.83188713  |
| wavelet-HHL | glcm       | ClusterProminence                    | 8943.129447  |
| wavelet-HHL | glcm       | Imc2                                 | 0.823200207  |
| wavelet-HHL | glcm       | Imc1                                 | -0.148990709 |
| wavelet-HHL | glcm       | DifferenceAverage                    | 3.860984985  |
| wavelet-HHL | glcm       | Id                                   | 0.337583423  |
| wavelet-HHL | glcm       | ClusterTendency                      | 30.81397716  |
| wavelet-HHL | firstorder | InterquartileRange                   | 108.478231   |
| wavelet-HHL | firstorder | Skewness                             | 1.32581251   |
| wavelet-HHL | firstorder | Uniformity                           | 0.082750636  |
| wavelet-HHL | firstorder | Median                               | -0.374822852 |
| wavelet-HHL | firstorder | Energy                               | 4373781.291  |
| wavelet-HHL | firstorder | RobustMeanAbsoluteDeviation          | 46.42776603  |
| wavelet-HHL | firstorder | MeanAbsoluteDeviation                | 74.97092215  |
| wavelet-HHL | firstorder | TotalEnergy                          | 118092094.9  |
| wavelet-HHL | firstorder | Maximum                              | 652.605816   |
| wavelet-HHL | firstorder | RootMeanSquared                      | 105.7645565  |
| wavelet-HHL | firstorder | 90Percentile                         | 126.0261525  |
| wavelet-HHL | firstorder | Minimum                              | -261.0247232 |
| wavelet-HHL | firstorder | Entropy                              | 3.916472491  |
| wavelet-HHL | firstorder | Range                                | 913.6305392  |
| wavelet-HHL | firstorder | Variance                             | 11109.25783  |
| wavelet-HHL | firstorder | 10Percentile                         | -99.7990325  |
| wavelet-HHL | firstorder | Kurtosis                             | 8.288867499  |
| wavelet-HHL | firstorder | Mean                                 | 8.76832803   |
| wavelet-HHL | glrlm      | ShortRunLowGrayLevelEmphasis         | 0.013650114  |
| wavelet-HHL | glrlm      | GrayLevelVariance                    | 18.675832    |
| wavelet-HHL | glrlm      | LowGrayLevelRunEmphasis              | 0.014134219  |

|             |       |                                      |             |
|-------------|-------|--------------------------------------|-------------|
| wavelet-HHL | grlm  | GrayLevelNonUniformityNormalized     | 0.080357163 |
| wavelet-HHL | grlm  | RunVariance                          | 0.086221115 |
| wavelet-HHL | grlm  | GrayLevelNonUniformity               | 29.20725487 |
| wavelet-HHL | grlm  | LongRunEmphasis                      | 1.245136335 |
| wavelet-HHL | grlm  | ShortRunHighGrayLevelEmphasis        | 152.5724459 |
| wavelet-HHL | grlm  | RunLengthNonUniformity               | 317.1070926 |
| wavelet-HHL | grlm  | ShortRunEmphasis                     | 0.94743922  |
| wavelet-HHL | grlm  | LongRunHighGrayLevelEmphasis         | 193.6444564 |
| wavelet-HHL | grlm  | RunPercentage                        | 0.929569152 |
| wavelet-HHL | grlm  | LongRunLowGrayLevelEmphasis          | 0.016376416 |
| wavelet-HHL | grlm  | RunEntropy                           | 4.284858506 |
| wavelet-HHL | grlm  | HighGrayLevelRunEmphasis             | 159.8700311 |
| wavelet-HHL | grlm  | RunLengthNonUniformityNormalized     | 0.871745919 |
| wavelet-HHL | glszm | GrayLevelVariance                    | 32.88735102 |
| wavelet-HHL | glszm | ZoneVariance                         | 16.37763253 |
| wavelet-HHL | glszm | GrayLevelNonUniformityNormalized     | 0.060105088 |
| wavelet-HHL | glszm | SizeZoneNonUniformityNormalized      | 0.43073177  |
| wavelet-HHL | glszm | SizeZoneNonUniformity                | 65.90196078 |
| wavelet-HHL | glszm | GrayLevelNonUniformity               | 9.196078431 |
| wavelet-HHL | glszm | LargeAreaEmphasis                    | 22.90849673 |
| wavelet-HHL | glszm | SmallAreaHighGrayLevelEmphasis       | 136.2310665 |
| wavelet-HHL | glszm | ZonePercentage                       | 0.391304348 |
| wavelet-HHL | glszm | LargeAreaLowGrayLevelEmphasis        | 0.20957547  |
| wavelet-HHL | glszm | LargeAreaHighGrayLevelEmphasis       | 3081.20915  |
| wavelet-HHL | glszm | HighGrayLevelZoneEmphasis            | 185.9673203 |
| wavelet-HHL | glszm | SmallAreaEmphasis                    | 0.682100141 |
| wavelet-HHL | glszm | LowGrayLevelZoneEmphasis             | 0.020221349 |
| wavelet-HHL | glszm | ZoneEntropy                          | 5.579067947 |
| wavelet-HHL | glszm | SmallAreaLowGrayLevelEmphasis        | 0.016355137 |
| wavelet-HHL | ngtdm | Coarseness                           | 0.016381841 |
| wavelet-HHL | ngtdm | Complexity                           | 1073.690121 |
| wavelet-HHL | ngtdm | Strength                             | 5.652041322 |
| wavelet-HHL | ngtdm | Contrast                             | 0.140553524 |
| wavelet-HHL | ngtdm | Busyness                             | 0.160193645 |
| wavelet-HLH | gldm  | GrayLevelVariance                    | 12.2747104  |
| wavelet-HLH | gldm  | HighGrayLevelEmphasis                | 123.1432225 |
| wavelet-HLH | gldm  | DependenceEntropy                    | 5.782879855 |
| wavelet-HLH | gldm  | DependenceNonUniformity              | 86.14066496 |
| wavelet-HLH | gldm  | GrayLevelNonUniformity               | 33.80306905 |
| wavelet-HLH | gldm  | SmallDependenceEmphasis              | 0.3728069   |
| wavelet-HLH | gldm  | SmallDependenceHighGrayLevelEmphasis | 51.33786536 |
| wavelet-HLH | gldm  | DependenceNonUniformityNormalized    | 0.220308606 |
| wavelet-HLH | gldm  | LargeDependenceEmphasis              | 10.15089514 |
| wavelet-HLH | gldm  | LargeDependenceLowGrayLevelEmphasis  | 0.121932698 |
| wavelet-HLH | gldm  | DependenceVariance                   | 3.035236557 |
| wavelet-HLH | gldm  | LargeDependenceHighGrayLevelEmphasis | 1107.88491  |
| wavelet-HLH | gldm  | SmallDependenceLowGrayLevelEmphasis  | 0.013269274 |
| wavelet-HLH | gldm  | LowGrayLevelEmphasis                 | 0.02107883  |
| wavelet-HLH | glcm  | JointAverage                         | 10.56753732 |
| wavelet-HLH | glcm  | SumAverage                           | 21.13507464 |
| wavelet-HLH | glcm  | JointEntropy                         | 7.13687418  |
| wavelet-HLH | glcm  | ClusterShade                         | 27.43797469 |
| wavelet-HLH | glcm  | MaximumProbability                   | 0.03061093  |

|             |            |                                  |              |
|-------------|------------|----------------------------------|--------------|
| wavelet-HLH | glcm       | Idmn                             | 0.959968561  |
| wavelet-HLH | glcm       | JointEnergy                      | 0.009617278  |
| wavelet-HLH | glcm       | Contrast                         | 26.67245945  |
| wavelet-HLH | glcm       | DifferenceEntropy                | 3.41885663   |
| wavelet-HLH | glcm       | InverseVariance                  | 0.244912991  |
| wavelet-HLH | glcm       | DifferenceVariance               | 10.90852725  |
| wavelet-HLH | glcm       | Idn                              | 0.869899597  |
| wavelet-HLH | glcm       | Idm                              | 0.233626468  |
| wavelet-HLH | glcm       | Correlation                      | -0.028075392 |
| wavelet-HLH | glcm       | Autocorrelation                  | 111.3028821  |
| wavelet-HLH | glcm       | SumEntropy                       | 4.249773854  |
| wavelet-HLH | glcm       | SumSquares                       | 12.96326436  |
| wavelet-HLH | glcm       | ClusterProminence                | 2322.750692  |
| wavelet-HLH | glcm       | Imc2                             | 0.7949128    |
| wavelet-HLH | glcm       | Imc1                             | -0.131900511 |
| wavelet-HLH | glcm       | DifferenceAverage                | 3.941762214  |
| wavelet-HLH | glcm       | Id                               | 0.324379986  |
| wavelet-HLH | glcm       | ClusterTendency                  | 25.18059799  |
| wavelet-HLH | firstorder | InterquartileRange               | 106.1413489  |
| wavelet-HLH | firstorder | Skewness                         | 0.288541569  |
| wavelet-HLH | firstorder | Uniformity                       | 0.086452862  |
| wavelet-HLH | firstorder | Median                           | -1.413424762 |
| wavelet-HLH | firstorder | Energy                           | 2948658.413  |
| wavelet-HLH | firstorder | RobustMeanAbsoluteDeviation      | 44.43086469  |
| wavelet-HLH | firstorder | MeanAbsoluteDeviation            | 66.62928382  |
| wavelet-HLH | firstorder | TotalEnergy                      | 79613777.16  |
| wavelet-HLH | firstorder | Maximum                          | 330.1187608  |
| wavelet-HLH | firstorder | RootMeanSquared                  | 86.84080761  |
| wavelet-HLH | firstorder | 90Percentile                     | 103.519972   |
| wavelet-HLH | firstorder | Minimum                          | -233.6897715 |
| wavelet-HLH | firstorder | Entropy                          | 3.793664659  |
| wavelet-HLH | firstorder | Range                            | 563.8085323  |
| wavelet-HLH | firstorder | Variance                         | 7541.007898  |
| wavelet-HLH | firstorder | 10Percentile                     | -107.3926802 |
| wavelet-HLH | firstorder | Kurtosis                         | 3.737344726  |
| wavelet-HLH | firstorder | Mean                             | 0.563886382  |
| wavelet-HLH | glrlm      | ShortRunLowGrayLevelEmphasis     | 0.021176265  |
| wavelet-HLH | glrlm      | GrayLevelVariance                | 12.78367843  |
| wavelet-HLH | glrlm      | LowGrayLevelRunEmphasis          | 0.021733411  |
| wavelet-HLH | glrlm      | GrayLevelNonUniformityNormalized | 0.083711228  |
| wavelet-HLH | glrlm      | RunVariance                      | 0.077432551  |
| wavelet-HLH | glrlm      | GrayLevelNonUniformity           | 30.63487655  |
| wavelet-HLH | glrlm      | LongRunEmphasis                  | 1.220390387  |
| wavelet-HLH | glrlm      | ShortRunHighGrayLevelEmphasis    | 118.7331412  |
| wavelet-HLH | glrlm      | RunLengthNonUniformity           | 323.110252   |
| wavelet-HLH | glrlm      | ShortRunEmphasis                 | 0.952275201  |
| wavelet-HLH | glrlm      | LongRunHighGrayLevelEmphasis     | 148.2604451  |
| wavelet-HLH | glrlm      | RunPercentage                    | 0.935864647  |
| wavelet-HLH | glrlm      | LongRunLowGrayLevelEmphasis      | 0.024269266  |
| wavelet-HLH | glrlm      | RunEntropy                       | 4.128388698  |
| wavelet-HLH | glrlm      | HighGrayLevelRunEmphasis         | 124.0240012  |
| wavelet-HLH | glrlm      | RunLengthNonUniformityNormalized | 0.882509588  |
| wavelet-HLH | glszm      | GrayLevelVariance                | 19.93044014  |

|             |       |                                  |             |
|-------------|-------|----------------------------------|-------------|
| wavelet-HLH | glszm | ZoneVariance                     | 11.40911734 |
| wavelet-HLH | glszm | GrayLevelNonUniformityNormalized | 0.068157724 |
| wavelet-HLH | glszm | SizeZoneNonUniformityNormalized  | 0.409185732 |
| wavelet-HLH | glszm | SizeZoneNonUniformity            | 69.97076023 |
| wavelet-HLH | glszm | GrayLevelNonUniformity           | 11.65497076 |
| wavelet-HLH | glszm | LargeAreaEmphasis                | 16.6374269  |
| wavelet-HLH | glszm | SmallAreaHighGrayLevelEmphasis   | 95.46633569 |
| wavelet-HLH | glszm | ZonePercentage                   | 0.437340153 |
| wavelet-HLH | glszm | LargeAreaLowGrayLevelEmphasis    | 0.195253598 |
| wavelet-HLH | glszm | LargeAreaHighGrayLevelEmphasis   | 1847.233918 |
| wavelet-HLH | glszm | HighGrayLevelZoneEmphasis        | 135.9649123 |
| wavelet-HLH | glszm | SmallAreaEmphasis                | 0.663661679 |
| wavelet-HLH | glszm | LowGrayLevelZoneEmphasis         | 0.032702861 |
| wavelet-HLH | glszm | ZoneEntropy                      | 5.509631186 |
| wavelet-HLH | glszm | SmallAreaLowGrayLevelEmphasis    | 0.027865488 |
| wavelet-HLH | ngtdm | Coarseness                       | 0.015626902 |
| wavelet-HLH | ngtdm | Complexity                       | 496.6518589 |
| wavelet-HLH | ngtdm | Strength                         | 2.088343815 |
| wavelet-HLH | ngtdm | Contrast                         | 0.166512846 |
| wavelet-HLH | ngtdm | Busyness                         | 0.286202356 |

| Image type | Feature Class | Feature Name                         |                                                                                                                                                                                                                                                                                                                                                                                                                                              |
|------------|---------------|--------------------------------------|----------------------------------------------------------------------------------------------------------------------------------------------------------------------------------------------------------------------------------------------------------------------------------------------------------------------------------------------------------------------------------------------------------------------------------------------|
| general    | info          | BoundingBox                          | 2: RTSTRUCT: C99-DNU_segment_ITV<br>(0, 0, 1, 9, 7, 6)                                                                                                                                                                                                                                                                                                                                                                                       |
| general    | info          | EnabledImageTypes                    | {u'Original': {}, u'Wavelet': {}}                                                                                                                                                                                                                                                                                                                                                                                                            |
|            |               |                                      | {'distances': [1], 'additionalInfo': True,<br>'force2D': False, 'interpolator': 'sitkBSpline',<br>'resampledPixelSpacing': [3.0], 'label': 1,<br>'normalizeScale': 1, 'normalize': False,<br>'force2Ddimension': 0, 'removeOutliers':<br>None, 'minimumROISize': None, u'binWidth':<br>25.0, 'minimumROIDimensions': 1,<br>u'correctMask': True, 'preCrop': False,<br>u'symmetricalGLCM': True,<br>'resegmentRange': None, 'padDistance': 5} |
| general    | info          | GeneralSettings                      | 27015b361fe199c1e68e0e7b36d3b2cd450ffe<br>f1                                                                                                                                                                                                                                                                                                                                                                                                 |
| general    | info          | ImageHash                            | (0.9765624999999998, 0.9765624999999998,<br>1.9999999999999999)                                                                                                                                                                                                                                                                                                                                                                              |
| general    | info          | ImageSpacing                         | 6f2b49606bbaa305bd81d501bc7e0c62dc659<br>71c                                                                                                                                                                                                                                                                                                                                                                                                 |
| general    | info          | MaskHash                             | 71c                                                                                                                                                                                                                                                                                                                                                                                                                                          |
| general    | info          | NumpyVersion                         | 1.13.1                                                                                                                                                                                                                                                                                                                                                                                                                                       |
| general    | info          | PyWaveletVersion                     | 0.5.2                                                                                                                                                                                                                                                                                                                                                                                                                                        |
| general    | info          | SimpleITKVersion                     | 1.1.0                                                                                                                                                                                                                                                                                                                                                                                                                                        |
| general    | info          | Version                              | 1.3.0.post102+g1b0eb74                                                                                                                                                                                                                                                                                                                                                                                                                       |
| general    | info          | VolumeNum                            | 1                                                                                                                                                                                                                                                                                                                                                                                                                                            |
| general    | info          | VoxelNum                             | 103                                                                                                                                                                                                                                                                                                                                                                                                                                          |
| original   | shape         | Maximum3DDiameter                    | 28.93095228                                                                                                                                                                                                                                                                                                                                                                                                                                  |
| original   | shape         | Maximum2DDiameterSlice               | 21.63330765                                                                                                                                                                                                                                                                                                                                                                                                                                  |
| original   | shape         | Sphericity                           | 0.780974827                                                                                                                                                                                                                                                                                                                                                                                                                                  |
| original   | shape         | MinorAxis                            | 17.31789558                                                                                                                                                                                                                                                                                                                                                                                                                                  |
| original   | shape         | Elongation                           | 0.78689982                                                                                                                                                                                                                                                                                                                                                                                                                                   |
| original   | shape         | SurfaceVolumeRatio                   | 0.440331842                                                                                                                                                                                                                                                                                                                                                                                                                                  |
| original   | shape         | Volume                               | 2781                                                                                                                                                                                                                                                                                                                                                                                                                                         |
| original   | shape         | MajorAxis                            | 22.00775136                                                                                                                                                                                                                                                                                                                                                                                                                                  |
| original   | shape         | SurfaceArea                          | 1224.562854                                                                                                                                                                                                                                                                                                                                                                                                                                  |
| original   | shape         | Flatness                             | 0.561129484                                                                                                                                                                                                                                                                                                                                                                                                                                  |
| original   | shape         | LeastAxis                            | 12.34919816                                                                                                                                                                                                                                                                                                                                                                                                                                  |
| original   | shape         | Maximum2DDiameterColumn              | 17.49285568                                                                                                                                                                                                                                                                                                                                                                                                                                  |
| original   | shape         | Maximum2DDiameterRow                 | 20.1246118                                                                                                                                                                                                                                                                                                                                                                                                                                   |
| original   | gldm          | GrayLevelVariance                    | 111.1213121                                                                                                                                                                                                                                                                                                                                                                                                                                  |
| original   | gldm          | HighGrayLevelEmphasis                | 465.1456311                                                                                                                                                                                                                                                                                                                                                                                                                                  |
| original   | gldm          | DependenceEntropy                    | 5.419476319                                                                                                                                                                                                                                                                                                                                                                                                                                  |
| original   | gldm          | DependenceNonUniformity              | 50.26213592                                                                                                                                                                                                                                                                                                                                                                                                                                  |
| original   | gldm          | GrayLevelNonUniformity               | 3.932038835                                                                                                                                                                                                                                                                                                                                                                                                                                  |
| original   | gldm          | SmallDependenceEmphasis              | 0.723633188                                                                                                                                                                                                                                                                                                                                                                                                                                  |
| original   | gldm          | SmallDependenceHighGrayLevelEmphasis | 291.9011569                                                                                                                                                                                                                                                                                                                                                                                                                                  |
| original   | gldm          | DependenceNonUniformityNormalized    | 0.487981902                                                                                                                                                                                                                                                                                                                                                                                                                                  |
| original   | gldm          | LargeDependenceEmphasis              | 7.27184466                                                                                                                                                                                                                                                                                                                                                                                                                                   |
| original   | gldm          | LargeDependenceLowGrayLevelEmphasis  | 0.046220765                                                                                                                                                                                                                                                                                                                                                                                                                                  |
| original   | gldm          | DependenceVariance                   | 3.687623716                                                                                                                                                                                                                                                                                                                                                                                                                                  |
| original   | gldm          | LargeDependenceHighGrayLevelEmphasis | 7584.563107                                                                                                                                                                                                                                                                                                                                                                                                                                  |
| original   | gldm          | SmallDependenceLowGrayLevelEmphasis  | 0.027241795                                                                                                                                                                                                                                                                                                                                                                                                                                  |

|          |            |                                  |              |
|----------|------------|----------------------------------|--------------|
| original | gldm       | LowGrayLevelEmphasis             | 0.030128002  |
| original | glcm       | JointAverage                     | 21.63139772  |
| original | glcm       | SumAverage                       | 43.26279544  |
| original | glcm       | JointEntropy                     | 6.667299274  |
| original | glcm       | ClusterShade                     | -399.9437749 |
| original | glcm       | MaximumProbability               | 0.038508576  |
| original | glcm       | ldmn                             | 0.89296253   |
| original | glcm       | JointEnergy                      | 0.011009145  |
| original | glcm       | Contrast                         | 193.906522   |
| original | glcm       | DifferenceEntropy                | 4.42472873   |
| original | glcm       | InverseVariance                  | 0.08014129   |
| original | glcm       | DifferenceVariance               | 66.18072752  |
| original | glcm       | ldn                              | 0.788809984  |
| original | glcm       | ldm                              | 0.109883538  |
| original | glcm       | Correlation                      | 0.158267625  |
| original | glcm       | Autocorrelation                  | 485.909494   |
| original | glcm       | SumEntropy                       | 5.082718558  |
| original | glcm       | SumSquares                       | 114.7783669  |
| original | glcm       | ClusterProminence                | 153735.1771  |
| original | glcm       | lmc2                             | 0.998245738  |
| original | glcm       | lmc1                             | -0.596355369 |
| original | glcm       | DifferenceAverage                | 11.22014179  |
| original | glcm       | ld                               | 0.182941522  |
| original | glcm       | ClusterTendency                  | 265.2069456  |
| original | firstorder | InterquartileRange               | 461          |
| original | firstorder | Skewness                         | 0.176900533  |
| original | firstorder | Uniformity                       | 0.038175134  |
| original | firstorder | Median                           | -397         |
| original | firstorder | Energy                           | 23097101     |
| original | firstorder | RobustMeanAbsoluteDeviation      | 182.2563634  |
| original | firstorder | MeanAbsoluteDeviation            | 230.1773966  |
| original | firstorder | TotalEnergy                      | 623621727    |
| original | firstorder | Maximum                          | 70           |
| original | firstorder | RootMeanSquared                  | 473.5437668  |
| original | firstorder | 90Percentile                     | -0.8         |
| original | firstorder | Minimum                          | -845         |
| original | firstorder | Entropy                          | 4.909014888  |
| original | firstorder | Range                            | 915          |
| original | firstorder | Variance                         | 70008.29503  |
| original | firstorder | 10Percentile                     | -731.2       |
| original | firstorder | Kurtosis                         | 1.813922132  |
| original | firstorder | Mean                             | -392.7281553 |
| original | glrlm      | ShortRunLowGrayLevelEmphasis     | 0.030903118  |
| original | glrlm      | GrayLevelVariance                | 106.988952   |
| original | glrlm      | LowGrayLevelRunEmphasis          | 0.0310325    |
| original | glrlm      | GrayLevelNonUniformityNormalized | 0.036438316  |
| original | glrlm      | RunVariance                      | 0.037427194  |
| original | glrlm      | GrayLevelNonUniformity           | 3.624977365  |
| original | glrlm      | LongRunEmphasis                  | 1.11048104   |
| original | glrlm      | ShortRunHighGrayLevelEmphasis    | 422.4501639  |
| original | glrlm      | RunLengthNonUniformity           | 92.95789797  |
| original | glrlm      | ShortRunEmphasis                 | 0.974124027  |
| original | glrlm      | LongRunHighGrayLevelEmphasis     | 555.0942903  |



|             |       |                                      |              |
|-------------|-------|--------------------------------------|--------------|
| original    | glrlm | RunPercentage                        | 0.965646004  |
| original    | glrlm | LongRunLowGrayLevelEmphasis          | 0.03155541   |
| original    | glrlm | RunEntropy                           | 5.026725707  |
| original    | glrlm | HighGrayLevelRunEmphasis             | 447.170512   |
| original    | glrlm | RunLengthNonUniformityNormalized     | 0.934276423  |
| original    | glszm | GrayLevelVariance                    | 95.71734375  |
| original    | glszm | ZoneVariance                         | 1.10484375   |
| original    | glszm | GrayLevelNonUniformityNormalized     | 0.035625     |
| original    | glszm | SizeZoneNonUniformityNormalized      | 0.7525       |
| original    | glszm | SizeZoneNonUniformity                | 60.2         |
| original    | glszm | GrayLevelNonUniformity               | 2.85         |
| original    | glszm | LargeAreaEmphasis                    | 2.7625       |
| original    | glszm | SmallAreaHighGrayLevelEmphasis       | 359.6562361  |
| original    | glszm | ZonePercentage                       | 0.776699029  |
| original    | glszm | LargeAreaLowGrayLevelEmphasis        | 0.044952137  |
| original    | glszm | LargeAreaHighGrayLevelEmphasis       | 1987.475     |
| original    | glszm | HighGrayLevelZoneEmphasis            | 405.0375     |
| original    | glszm | SmallAreaEmphasis                    | 0.887807099  |
| original    | glszm | LowGrayLevelZoneEmphasis             | 0.036226112  |
| original    | glszm | ZoneEntropy                          | 5.184506614  |
| original    | glszm | SmallAreaLowGrayLevelEmphasis        | 0.034460875  |
| original    | ngtdm | Coarseness                           | 0.031442884  |
| original    | ngtdm | Complexity                           | 4328.962357  |
| original    | ngtdm | Strength                             | 18.36926983  |
| original    | ngtdm | Contrast                             | 1.515614461  |
| original    | ngtdm | Busyness                             | 0.055170118  |
| wavelet-HHH | gldm  | GrayLevelVariance                    | 7.723819399  |
| wavelet-HHH | gldm  | HighGrayLevelEmphasis                | 97.14563107  |
| wavelet-HHH | gldm  | DependenceEntropy                    | 4.93841928   |
| wavelet-HHH | gldm  | DependenceNonUniformity              | 22.84466019  |
| wavelet-HHH | gldm  | GrayLevelNonUniformity               | 12.24271845  |
| wavelet-HHH | gldm  | SmallDependenceEmphasis              | 0.426785329  |
| wavelet-HHH | gldm  | SmallDependenceHighGrayLevelEmphasis | 42.46198759  |
| wavelet-HHH | gldm  | DependenceNonUniformityNormalized    | 0.221792817  |
| wavelet-HHH | gldm  | LargeDependenceEmphasis              | 8.844660194  |
| wavelet-HHH | gldm  | LargeDependenceLowGrayLevelEmphasis  | 0.111592509  |
| wavelet-HHH | gldm  | DependenceVariance                   | 2.32481855   |
| wavelet-HHH | gldm  | LargeDependenceHighGrayLevelEmphasis | 847.7669903  |
| wavelet-HHH | gldm  | SmallDependenceLowGrayLevelEmphasis  | 0.017839204  |
| wavelet-HHH | gldm  | LowGrayLevelEmphasis                 | 0.024579553  |
| wavelet-HHH | glcm  | JointAverage                         | 9.397790206  |
| wavelet-HHH | glcm  | SumAverage                           | 18.79558041  |
| wavelet-HHH | glcm  | JointEntropy                         | 5.851132413  |
| wavelet-HHH | glcm  | ClusterShade                         | -3.731875605 |
| wavelet-HHH | glcm  | MaximumProbability                   | 0.050687919  |
| wavelet-HHH | glcm  | ldmn                                 | 0.953271619  |
| wavelet-HHH | glcm  | JointEnergy                          | 0.021189174  |
| wavelet-HHH | glcm  | Contrast                             | 17.72090792  |
| wavelet-HHH | glcm  | DifferenceEntropy                    | 3.00974301   |
| wavelet-HHH | glcm  | InverseVariance                      | 0.277322074  |
| wavelet-HHH | glcm  | DifferenceVariance                   | 7.019108272  |
| wavelet-HHH | glcm  | ldn                                  | 0.858886503  |
| wavelet-HHH | glcm  | ldm                                  | 0.266441482  |

|             |            |                                  |              |
|-------------|------------|----------------------------------|--------------|
| wavelet-HHH | glcm       | Correlation                      | -0.053973083 |
| wavelet-HHH | glcm       | Autocorrelation                  | 87.90394185  |
| wavelet-HHH | glcm       | SumEntropy                       | 3.741861704  |
| wavelet-HHH | glcm       | SumSquares                       | 8.441175589  |
| wavelet-HHH | glcm       | ClusterProminence                | 864.1874272  |
| wavelet-HHH | glcm       | Imc2                             | 0.923875185  |
| wavelet-HHH | glcm       | Imc1                             | -0.284887508 |
| wavelet-HHH | glcm       | DifferenceAverage                | 3.256235392  |
| wavelet-HHH | glcm       | Id                               | 0.355706069  |
| wavelet-HHH | glcm       | ClusterTendency                  | 16.04379444  |
| wavelet-HHH | firstorder | InterquartileRange               | 76.96935878  |
| wavelet-HHH | firstorder | Skewness                         | 0.016661809  |
| wavelet-HHH | firstorder | Uniformity                       | 0.118861344  |
| wavelet-HHH | firstorder | Median                           | -1.95364852  |
| wavelet-HHH | firstorder | Energy                           | 471343.4572  |
| wavelet-HHH | firstorder | RobustMeanAbsoluteDeviation      | 31.45380051  |
| wavelet-HHH | firstorder | MeanAbsoluteDeviation            | 50.61863984  |
| wavelet-HHH | firstorder | TotalEnergy                      | 12726273.34  |
| wavelet-HHH | firstorder | Maximum                          | 212.0289964  |
| wavelet-HHH | firstorder | RootMeanSquared                  | 67.64724732  |
| wavelet-HHH | firstorder | 90Percentile                     | 70.68137824  |
| wavelet-HHH | firstorder | Minimum                          | -205.6000901 |
| wavelet-HHH | firstorder | Entropy                          | 3.369024143  |
| wavelet-HHH | firstorder | Range                            | 417.6290865  |
| wavelet-HHH | firstorder | Variance                         | 4576.126545  |
| wavelet-HHH | firstorder | 10Percentile                     | -84.90164086 |
| wavelet-HHH | firstorder | Kurtosis                         | 4.03890116   |
| wavelet-HHH | firstorder | Mean                             | 0.153376242  |
| wavelet-HHH | glrlm      | ShortRunLowGrayLevelEmphasis     | 0.024911553  |
| wavelet-HHH | glrlm      | GrayLevelVariance                | 8.11045343   |
| wavelet-HHH | glrlm      | LowGrayLevelRunEmphasis          | 0.025437483  |
| wavelet-HHH | glrlm      | GrayLevelNonUniformityNormalized | 0.114781977  |
| wavelet-HHH | glrlm      | RunVariance                      | 0.065778382  |
| wavelet-HHH | glrlm      | GrayLevelNonUniformity           | 11.120819    |
| wavelet-HHH | glrlm      | LongRunEmphasis                  | 1.199721872  |
| wavelet-HHH | glrlm      | ShortRunHighGrayLevelEmphasis    | 92.80174582  |
| wavelet-HHH | glrlm      | RunLengthNonUniformity           | 85.99811813  |
| wavelet-HHH | glrlm      | ShortRunEmphasis                 | 0.953640743  |
| wavelet-HHH | glrlm      | LongRunHighGrayLevelEmphasis     | 116.4923502  |
| wavelet-HHH | glrlm      | RunPercentage                    | 0.940253921  |
| wavelet-HHH | glrlm      | LongRunLowGrayLevelEmphasis      | 0.027674958  |
| wavelet-HHH | glrlm      | RunEntropy                       | 3.664289371  |
| wavelet-HHH | glrlm      | HighGrayLevelRunEmphasis         | 97.22044253  |
| wavelet-HHH | glrlm      | RunLengthNonUniformityNormalized | 0.886461396  |
| wavelet-HHH | glszm      | GrayLevelVariance                | 14.06770833  |
| wavelet-HHH | glszm      | ZoneVariance                     | 8.666232639  |
| wavelet-HHH | glszm      | GrayLevelNonUniformityNormalized | 0.0859375    |
| wavelet-HHH | glszm      | SizeZoneNonUniformityNormalized  | 0.548611111  |
| wavelet-HHH | glszm      | SizeZoneNonUniformity            | 26.33333333  |
| wavelet-HHH | glszm      | GrayLevelNonUniformity           | 4.125        |
| wavelet-HHH | glszm      | LargeAreaEmphasis                | 13.27083333  |
| wavelet-HHH | glszm      | SmallAreaHighGrayLevelEmphasis   | 76.48577914  |
| wavelet-HHH | glszm      | ZonePercentage                   | 0.466019417  |

|             |            |                                      |              |
|-------------|------------|--------------------------------------|--------------|
| wavelet-HHH | glszm      | LargeAreaLowGrayLevelEmphasis        | 0.174224186  |
| wavelet-HHH | glszm      | LargeAreaHighGrayLevelEmphasis       | 1275.041667  |
| wavelet-HHH | glszm      | HighGrayLevelZoneEmphasis            | 97.33333333  |
| wavelet-HHH | glszm      | SmallAreaEmphasis                    | 0.763894539  |
| wavelet-HHH | glszm      | LowGrayLevelZoneEmphasis             | 0.039716049  |
| wavelet-HHH | glszm      | ZoneEntropy                          | 4.405187699  |
| wavelet-HHH | glszm      | SmallAreaLowGrayLevelEmphasis        | 0.036455618  |
| wavelet-HHH | ngtdm      | Coarseness                           | 0.057031707  |
| wavelet-HHH | ngtdm      | Complexity                           | 217.9816783  |
| wavelet-HHH | ngtdm      | Strength                             | 4.315731655  |
| wavelet-HHH | ngtdm      | Contrast                             | 0.143526042  |
| wavelet-HHH | ngtdm      | Busyness                             | 0.107937659  |
| wavelet-HLL | gldm       | GrayLevelVariance                    | 87.58073334  |
| wavelet-HLL | gldm       | HighGrayLevelEmphasis                | 670.592233   |
| wavelet-HLL | gldm       | DependenceEntropy                    | 5.603501741  |
| wavelet-HLL | gldm       | DependenceNonUniformity              | 31.25242718  |
| wavelet-HLL | gldm       | GrayLevelNonUniformity               | 4.126213592  |
| wavelet-HLL | gldm       | SmallDependenceEmphasis              | 0.518373786  |
| wavelet-HLL | gldm       | SmallDependenceHighGrayLevelEmphasis | 312.8606472  |
| wavelet-HLL | gldm       | DependenceNonUniformityNormalized    | 0.303421623  |
| wavelet-HLL | gldm       | LargeDependenceEmphasis              | 5.077669903  |
| wavelet-HLL | gldm       | LargeDependenceLowGrayLevelEmphasis  | 0.022107072  |
| wavelet-HLL | gldm       | DependenceVariance                   | 1.116410595  |
| wavelet-HLL | gldm       | LargeDependenceHighGrayLevelEmphasis | 3831.252427  |
| wavelet-HLL | gldm       | SmallDependenceLowGrayLevelEmphasis  | 0.011356696  |
| wavelet-HLL | gldm       | LowGrayLevelEmphasis                 | 0.012571691  |
| wavelet-HLL | glcm       | JointAverage                         | 23.43509245  |
| wavelet-HLL | glcm       | SumAverage                           | 46.87018491  |
| wavelet-HLL | glcm       | JointEntropy                         | 6.675289807  |
| wavelet-HLL | glcm       | ClusterShade                         | 630.9076628  |
| wavelet-HLL | glcm       | MaximumProbability                   | 0.024327666  |
| wavelet-HLL | glcm       | Idmn                                 | 0.947854283  |
| wavelet-HLL | glcm       | JointEnergy                          | 0.010369088  |
| wavelet-HLL | glcm       | Contrast                             | 111.6518772  |
| wavelet-HLL | glcm       | DifferenceEntropy                    | 4.016037127  |
| wavelet-HLL | glcm       | InverseVariance                      | 0.13454387   |
| wavelet-HLL | glcm       | DifferenceVariance                   | 44.55864518  |
| wavelet-HLL | glcm       | Idn                                  | 0.857257143  |
| wavelet-HLL | glcm       | Idm                                  | 0.147549599  |
| wavelet-HLL | glcm       | Correlation                          | 0.408984354  |
| wavelet-HLL | glcm       | Autocorrelation                      | 587.9737344  |
| wavelet-HLL | glcm       | SumEntropy                           | 5.059929466  |
| wavelet-HLL | glcm       | SumSquares                           | 94.15069347  |
| wavelet-HLL | glcm       | ClusterProminence                    | 141499.1941  |
| wavelet-HLL | glcm       | Imc2                                 | 0.998394712  |
| wavelet-HLL | glcm       | Imc1                                 | -0.603553078 |
| wavelet-HLL | glcm       | DifferenceAverage                    | 7.861705766  |
| wavelet-HLL | glcm       | Id                                   | 0.233071382  |
| wavelet-HLL | glcm       | ClusterTendency                      | 264.9508967  |
| wavelet-HLL | firstorder | InterquartileRange                   | 394.935974   |
| wavelet-HLL | firstorder | Skewness                             | -0.068665019 |
| wavelet-HLL | firstorder | Uniformity                           | 0.040060326  |
| wavelet-HLL | firstorder | Median                               | -21.22038267 |

|             |            |                                  |              |
|-------------|------------|----------------------------------|--------------|
| wavelet-HLL | firstorder | Energy                           | 5779305.703  |
| wavelet-HLL | firstorder | RobustMeanAbsoluteDeviation      | 161.5828401  |
| wavelet-HLL | firstorder | MeanAbsoluteDeviation            | 205.0412132  |
| wavelet-HLL | firstorder | TotalEnergy                      | 156041254    |
| wavelet-HLL | firstorder | Maximum                          | 403.2671044  |
| wavelet-HLL | firstorder | RootMeanSquared                  | 236.8749968  |
| wavelet-HLL | firstorder | 90Percentile                     | 269.1404054  |
| wavelet-HLL | firstorder | Minimum                          | -603.1321932 |
| wavelet-HLL | firstorder | Entropy                          | 4.852295344  |
| wavelet-HLL | firstorder | Range                            | 1006.399298  |
| wavelet-HLL | firstorder | Variance                         | 54911.27774  |
| wavelet-HLL | firstorder | 10Percentile                     | -327.241776  |
| wavelet-HLL | firstorder | Kurtosis                         | 1.938356448  |
| wavelet-HLL | firstorder | Mean                             | -34.61916185 |
| wavelet-HLL | grlm       | ShortRunLowGrayLevelEmphasis     | 0.012908768  |
| wavelet-HLL | grlm       | GrayLevelVariance                | 87.49154422  |
| wavelet-HLL | grlm       | LowGrayLevelRunEmphasis          | 0.012981003  |
| wavelet-HLL | grlm       | GrayLevelNonUniformityNormalized | 0.039379378  |
| wavelet-HLL | grlm       | RunVariance                      | 0.039479568  |
| wavelet-HLL | grlm       | GrayLevelNonUniformity           | 3.902969299  |
| wavelet-HLL | grlm       | LongRunEmphasis                  | 1.122325624  |
| wavelet-HLL | grlm       | ShortRunHighGrayLevelEmphasis    | 644.334691   |
| wavelet-HLL | grlm       | RunLengthNonUniformity           | 91.82328262  |
| wavelet-HLL | grlm       | ShortRunEmphasis                 | 0.970273295  |
| wavelet-HLL | grlm       | LongRunHighGrayLevelEmphasis     | 760.8567449  |
| wavelet-HLL | grlm       | RunPercentage                    | 0.961911875  |
| wavelet-HLL | grlm       | LongRunLowGrayLevelEmphasis      | 0.013272899  |
| wavelet-HLL | grlm       | RunEntropy                       | 4.974681023  |
| wavelet-HLL | grlm       | HighGrayLevelRunEmphasis         | 666.8486744  |
| wavelet-HLL | grlm       | RunLengthNonUniformityNormalized | 0.925563942  |
| wavelet-HLL | glszm      | GrayLevelVariance                | 86.12109375  |
| wavelet-HLL | glszm      | ZoneVariance                     | 1.456787109  |
| wavelet-HLL | glszm      | GrayLevelNonUniformityNormalized | 0.037109375  |
| wavelet-HLL | glszm      | SizeZoneNonUniformityNormalized  | 0.496582031  |
| wavelet-HLL | glszm      | SizeZoneNonUniformity            | 31.78125     |
| wavelet-HLL | glszm      | GrayLevelNonUniformity           | 2.375        |
| wavelet-HLL | glszm      | LargeAreaEmphasis                | 4.046875     |
| wavelet-HLL | glszm      | SmallAreaHighGrayLevelEmphasis   | 432.6354384  |
| wavelet-HLL | glszm      | ZonePercentage                   | 0.621359223  |
| wavelet-HLL | glszm      | LargeAreaLowGrayLevelEmphasis    | 0.025854448  |
| wavelet-HLL | glszm      | LargeAreaHighGrayLevelEmphasis   | 2989.390625  |
| wavelet-HLL | glszm      | HighGrayLevelZoneEmphasis        | 629.59375    |
| wavelet-HLL | glszm      | SmallAreaEmphasis                | 0.730660807  |
| wavelet-HLL | glszm      | LowGrayLevelZoneEmphasis         | 0.018680534  |
| wavelet-HLL | glszm      | ZoneEntropy                      | 5.413909766  |
| wavelet-HLL | glszm      | SmallAreaLowGrayLevelEmphasis    | 0.017982809  |
| wavelet-HLL | ngtdm      | Coarseness                       | 0.05420556   |
| wavelet-HLL | ngtdm      | Complexity                       | 2215.835158  |
| wavelet-HLL | ngtdm      | Strength                         | 26.70410303  |
| wavelet-HLL | ngtdm      | Contrast                         | 0.749698618  |
| wavelet-HLL | ngtdm      | Busyness                         | 0.02802534   |
| wavelet-LHL | gldm       | GrayLevelVariance                | 129.4568762  |
| wavelet-LHL | gldm       | HighGrayLevelEmphasis            | 821.7087379  |

|             |            |                                      |              |
|-------------|------------|--------------------------------------|--------------|
| wavelet-LHL | gldm       | DependenceEntropy                    | 5.695829653  |
| wavelet-LHL | gldm       | DependenceNonUniformity              | 50.59223301  |
| wavelet-LHL | gldm       | GrayLevelNonUniformity               | 3.563106796  |
| wavelet-LHL | gldm       | SmallDependenceEmphasis              | 0.70745685   |
| wavelet-LHL | gldm       | SmallDependenceHighGrayLevelEmphasis | 620.9496359  |
| wavelet-LHL | gldm       | DependenceNonUniformityNormalized    | 0.491186728  |
| wavelet-LHL | gldm       | LargeDependenceEmphasis              | 2.495145631  |
| wavelet-LHL | gldm       | LargeDependenceLowGrayLevelEmphasis  | 0.022177116  |
| wavelet-LHL | gldm       | DependenceVariance                   | 0.402488453  |
| wavelet-LHL | gldm       | LargeDependenceHighGrayLevelEmphasis | 1948.252427  |
| wavelet-LHL | gldm       | SmallDependenceLowGrayLevelEmphasis  | 0.012296939  |
| wavelet-LHL | gldm       | LowGrayLevelEmphasis                 | 0.014167119  |
| wavelet-LHL | glcm       | JointAverage                         | 24.83171391  |
| wavelet-LHL | glcm       | SumAverage                           | 49.66342782  |
| wavelet-LHL | glcm       | JointEntropy                         | 6.764161092  |
| wavelet-LHL | glcm       | ClusterShade                         | 273.9826194  |
| wavelet-LHL | glcm       | MaximumProbability                   | 0.019282649  |
| wavelet-LHL | glcm       | ldmn                                 | 0.917449795  |
| wavelet-LHL | glcm       | JointEnergy                          | 0.009569837  |
| wavelet-LHL | glcm       | Contrast                             | 226.9513885  |
| wavelet-LHL | glcm       | DifferenceEntropy                    | 4.409262529  |
| wavelet-LHL | glcm       | InverseVariance                      | 0.090643449  |
| wavelet-LHL | glcm       | DifferenceVariance                   | 79.22615571  |
| wavelet-LHL | glcm       | ldn                                  | 0.816255284  |
| wavelet-LHL | glcm       | ldm                                  | 0.088461882  |
| wavelet-LHL | glcm       | Correlation                          | 0.141224003  |
| wavelet-LHL | glcm       | Autocorrelation                      | 637.2479217  |
| wavelet-LHL | glcm       | SumEntropy                           | 5.098121427  |
| wavelet-LHL | glcm       | SumSquares                           | 133.6972415  |
| wavelet-LHL | glcm       | ClusterProminence                    | 227307.1029  |
| wavelet-LHL | glcm       | lmc2                                 | 0.999179476  |
| wavelet-LHL | glcm       | lmc1                                 | -0.645133057 |
| wavelet-LHL | glcm       | DifferenceAverage                    | 11.72038463  |
| wavelet-LHL | glcm       | ld                                   | 0.165208799  |
| wavelet-LHL | glcm       | ClusterTendency                      | 307.8375776  |
| wavelet-LHL | firstorder | InterquartileRange                   | 423.5702715  |
| wavelet-LHL | firstorder | Skewness                             | -0.300326765 |
| wavelet-LHL | firstorder | Uniformity                           | 0.03459327   |
| wavelet-LHL | firstorder | Median                               | -6.901730374 |
| wavelet-LHL | firstorder | Energy                               | 8422430.917  |
| wavelet-LHL | firstorder | RobustMeanAbsoluteDeviation          | 173.0538136  |
| wavelet-LHL | firstorder | MeanAbsoluteDeviation                | 236.3080142  |
| wavelet-LHL | firstorder | TotalEnergy                          | 227405634.8  |
| wavelet-LHL | firstorder | Maximum                              | 450.5523329  |
| wavelet-LHL | firstorder | RootMeanSquared                      | 285.9565945  |
| wavelet-LHL | firstorder | 90Percentile                         | 309.8604103  |
| wavelet-LHL | firstorder | Minimum                              | -674.2318444 |
| wavelet-LHL | firstorder | Entropy                              | 5.036700377  |
| wavelet-LHL | firstorder | Range                                | 1124.784177  |
| wavelet-LHL | firstorder | Variance                             | 80799.17211  |
| wavelet-LHL | firstorder | 10Percentile                         | -457.7918064 |
| wavelet-LHL | firstorder | Kurtosis                             | 2.160949497  |
| wavelet-LHL | firstorder | Mean                                 | -31.17694416 |

|             |       |                                      |             |
|-------------|-------|--------------------------------------|-------------|
| wavelet-LHL | grlm  | ShortRunLowGrayLevelEmphasis         | 0.01423988  |
| wavelet-LHL | grlm  | GrayLevelVariance                    | 129.6032219 |
| wavelet-LHL | grlm  | LowGrayLevelRunEmphasis              | 0.014315932 |
| wavelet-LHL | grlm  | GrayLevelNonUniformityNormalized     | 0.034472436 |
| wavelet-LHL | grlm  | RunVariance                          | 0.018713369 |
| wavelet-LHL | grlm  | GrayLevelNonUniformity               | 3.489907059 |
| wavelet-LHL | grlm  | LongRunEmphasis                      | 1.054636912 |
| wavelet-LHL | grlm  | ShortRunHighGrayLevelEmphasis        | 814.455757  |
| wavelet-LHL | grlm  | RunLengthNonUniformity               | 97.93873279 |
| wavelet-LHL | grlm  | ShortRunEmphasis                     | 0.987204106 |
| wavelet-LHL | grlm  | LongRunHighGrayLevelEmphasis         | 864.0244063 |
| wavelet-LHL | grlm  | RunPercentage                        | 0.982823002 |
| wavelet-LHL | grlm  | LongRunLowGrayLevelEmphasis          | 0.014622661 |
| wavelet-LHL | grlm  | RunEntropy                           | 5.083375518 |
| wavelet-LHL | grlm  | HighGrayLevelRunEmphasis             | 823.4239632 |
| wavelet-LHL | grlm  | RunLengthNonUniformityNormalized     | 0.967093994 |
| wavelet-LHL | glszm | GrayLevelVariance                    | 131.885     |
| wavelet-LHL | glszm | ZoneVariance                         | 0.45484375  |
| wavelet-LHL | glszm | GrayLevelNonUniformityNormalized     | 0.0325      |
| wavelet-LHL | glszm | SizeZoneNonUniformityNormalized      | 0.6615625   |
| wavelet-LHL | glszm | SizeZoneNonUniformity                | 52.925      |
| wavelet-LHL | glszm | GrayLevelNonUniformity               | 2.6         |
| wavelet-LHL | glszm | LargeAreaEmphasis                    | 2.1125      |
| wavelet-LHL | glszm | SmallAreaHighGrayLevelEmphasis       | 749.5081111 |
| wavelet-LHL | glszm | ZonePercentage                       | 0.776699029 |
| wavelet-LHL | glszm | LargeAreaLowGrayLevelEmphasis        | 0.021924451 |
| wavelet-LHL | glszm | LargeAreaHighGrayLevelEmphasis       | 1745.525    |
| wavelet-LHL | glszm | HighGrayLevelZoneEmphasis            | 850.125     |
| wavelet-LHL | glszm | SmallAreaEmphasis                    | 0.840430556 |
| wavelet-LHL | glszm | LowGrayLevelZoneEmphasis             | 0.016573889 |
| wavelet-LHL | glszm | ZoneEntropy                          | 5.480875438 |
| wavelet-LHL | glszm | SmallAreaLowGrayLevelEmphasis        | 0.015416802 |
| wavelet-LHL | ngtdm | Coarseness                           | 0.036096117 |
| wavelet-LHL | ngtdm | Complexity                           | 5490.501862 |
| wavelet-LHL | ngtdm | Strength                             | 24.75191697 |
| wavelet-LHL | ngtdm | Contrast                             | 1.604207425 |
| wavelet-LHL | ngtdm | Busyness                             | 0.032606871 |
| wavelet-LHH | gldm  | GrayLevelVariance                    | 21.07248563 |
| wavelet-LHH | gldm  | HighGrayLevelEmphasis                | 234.5728155 |
| wavelet-LHH | gldm  | DependenceEntropy                    | 5.096077833 |
| wavelet-LHH | gldm  | DependenceNonUniformity              | 38.9223301  |
| wavelet-LHH | gldm  | GrayLevelNonUniformity               | 7.582524272 |
| wavelet-LHH | gldm  | SmallDependenceEmphasis              | 0.533274002 |
| wavelet-LHH | gldm  | SmallDependenceHighGrayLevelEmphasis | 129.3653533 |
| wavelet-LHH | gldm  | DependenceNonUniformityNormalized    | 0.3778867   |
| wavelet-LHH | gldm  | LargeDependenceEmphasis              | 3.951456311 |
| wavelet-LHH | gldm  | LargeDependenceLowGrayLevelEmphasis  | 0.032245822 |
| wavelet-LHH | gldm  | DependenceVariance                   | 0.725421812 |
| wavelet-LHH | gldm  | LargeDependenceHighGrayLevelEmphasis | 860.8834951 |
| wavelet-LHH | gldm  | SmallDependenceLowGrayLevelEmphasis  | 0.014008731 |
| wavelet-LHH | gldm  | LowGrayLevelEmphasis                 | 0.016429438 |
| wavelet-LHH | glcm  | JointAverage                         | 14.8562356  |
| wavelet-LHH | glcm  | SumAverage                           | 29.71247119 |

|             |            |                                  |              |
|-------------|------------|----------------------------------|--------------|
| wavelet-LHH | glcm       | JointEntropy                     | 6.377885621  |
| wavelet-LHH | glcm       | ClusterShade                     | -7.06101564  |
| wavelet-LHH | glcm       | MaximumProbability               | 0.032775499  |
| wavelet-LHH | glcm       | Idmn                             | 0.947902529  |
| wavelet-LHH | glcm       | JointEnergy                      | 0.013543268  |
| wavelet-LHH | glcm       | Contrast                         | 45.26493804  |
| wavelet-LHH | glcm       | DifferenceEntropy                | 3.566159933  |
| wavelet-LHH | glcm       | InverseVariance                  | 0.190510021  |
| wavelet-LHH | glcm       | DifferenceVariance               | 17.14596554  |
| wavelet-LHH | glcm       | Idn                              | 0.850328253  |
| wavelet-LHH | glcm       | Idm                              | 0.169979903  |
| wavelet-LHH | glcm       | Correlation                      | -0.027974136 |
| wavelet-LHH | glcm       | Autocorrelation                  | 220.2077693  |
| wavelet-LHH | glcm       | SumEntropy                       | 4.227614882  |
| wavelet-LHH | glcm       | SumSquares                       | 22.08604605  |
| wavelet-LHH | glcm       | ClusterProminence                | 6580.981582  |
| wavelet-LHH | glcm       | Imc2                             | 0.983179087  |
| wavelet-LHH | glcm       | Imc1                             | -0.427005206 |
| wavelet-LHH | glcm       | DifferenceAverage                | 5.240145946  |
| wavelet-LHH | glcm       | Id                               | 0.26428283   |
| wavelet-LHH | glcm       | ClusterTendency                  | 43.07924616  |
| wavelet-LHH | firstorder | InterquartileRange               | 131.9689324  |
| wavelet-LHH | firstorder | Skewness                         | -0.024379704 |
| wavelet-LHH | firstorder | Uniformity                       | 0.073616741  |
| wavelet-LHH | firstorder | Median                           | -5.522878949 |
| wavelet-LHH | firstorder | Energy                           | 1342992.412  |
| wavelet-LHH | firstorder | RobustMeanAbsoluteDeviation      | 57.97419531  |
| wavelet-LHH | firstorder | MeanAbsoluteDeviation            | 88.84751003  |
| wavelet-LHH | firstorder | TotalEnergy                      | 36260795.12  |
| wavelet-LHH | firstorder | Maximum                          | 301.508901   |
| wavelet-LHH | firstorder | RootMeanSquared                  | 114.1873955  |
| wavelet-LHH | firstorder | 90Percentile                     | 146.1156636  |
| wavelet-LHH | firstorder | Minimum                          | -334.9638992 |
| wavelet-LHH | firstorder | Entropy                          | 4.047500655  |
| wavelet-LHH | firstorder | Range                            | 636.4728003  |
| wavelet-LHH | firstorder | Variance                         | 13034.25061  |
| wavelet-LHH | firstorder | 10Percentile                     | -127.7274232 |
| wavelet-LHH | firstorder | Kurtosis                         | 3.295048515  |
| wavelet-LHH | firstorder | Mean                             | 2.123833528  |
| wavelet-LHH | glrlm      | ShortRunLowGrayLevelEmphasis     | 0.016657843  |
| wavelet-LHH | glrlm      | GrayLevelVariance                | 21.50183918  |
| wavelet-LHH | glrlm      | LowGrayLevelRunEmphasis          | 0.016784886  |
| wavelet-LHH | glrlm      | GrayLevelNonUniformityNormalized | 0.072448469  |
| wavelet-LHH | glrlm      | RunVariance                      | 0.03054441   |
| wavelet-LHH | glrlm      | GrayLevelNonUniformity           | 7.235062088  |
| wavelet-LHH | glrlm      | LongRunEmphasis                  | 1.095834783  |
| wavelet-LHH | glrlm      | ShortRunHighGrayLevelEmphasis    | 229.9019255  |
| wavelet-LHH | glrlm      | RunLengthNonUniformity           | 93.81142433  |
| wavelet-LHH | glrlm      | ShortRunEmphasis                 | 0.976041304  |
| wavelet-LHH | glrlm      | LongRunHighGrayLevelEmphasis     | 255.9682862  |
| wavelet-LHH | glrlm      | RunPercentage                    | 0.969380134  |
| wavelet-LHH | glrlm      | LongRunLowGrayLevelEmphasis      | 0.017293055  |
| wavelet-LHH | glrlm      | RunEntropy                       | 4.184084919  |

|             |       |                                      |             |
|-------------|-------|--------------------------------------|-------------|
| wavelet-LHH | grlm  | HighGrayLevelRunEmphasis             | 235.1151976 |
| wavelet-LHH | grlm  | RunLengthNonUniformityNormalized     | 0.93891118  |
| wavelet-LHH | glszm | GrayLevelVariance                    | 28.12608599 |
| wavelet-LHH | glszm | ZoneVariance                         | 0.935174872 |
| wavelet-LHH | glszm | GrayLevelNonUniformityNormalized     | 0.059924259 |
| wavelet-LHH | glszm | SizeZoneNonUniformityNormalized      | 0.484072176 |
| wavelet-LHH | glszm | SizeZoneNonUniformity                | 32.43283582 |
| wavelet-LHH | glszm | GrayLevelNonUniformity               | 4.014925373 |
| wavelet-LHH | glszm | LargeAreaEmphasis                    | 3.298507463 |
| wavelet-LHH | glszm | SmallAreaHighGrayLevelEmphasis       | 172.6332919 |
| wavelet-LHH | glszm | ZonePercentage                       | 0.650485437 |
| wavelet-LHH | glszm | LargeAreaLowGrayLevelEmphasis        | 0.034355023 |
| wavelet-LHH | glszm | LargeAreaHighGrayLevelEmphasis       | 740.5820896 |
| wavelet-LHH | glszm | HighGrayLevelZoneEmphasis            | 240.3283582 |
| wavelet-LHH | glszm | SmallAreaEmphasis                    | 0.706979558 |
| wavelet-LHH | glszm | LowGrayLevelZoneEmphasis             | 0.022477969 |
| wavelet-LHH | glszm | ZoneEntropy                          | 5.028629862 |
| wavelet-LHH | glszm | SmallAreaLowGrayLevelEmphasis        | 0.020972165 |
| wavelet-LHH | ngtdm | Coarseness                           | 0.053574591 |
| wavelet-LHH | ngtdm | Complexity                           | 676.8233693 |
| wavelet-LHH | ngtdm | Strength                             | 8.064483473 |
| wavelet-LHH | ngtdm | Contrast                             | 0.33435625  |
| wavelet-LHH | ngtdm | Busyness                             | 0.065971902 |
| wavelet-LLH | gldm  | GrayLevelVariance                    | 87.15731926 |
| wavelet-LLH | gldm  | HighGrayLevelEmphasis                | 642.8349515 |
| wavelet-LLH | gldm  | DependenceEntropy                    | 5.501654896 |
| wavelet-LLH | gldm  | DependenceNonUniformity              | 48.00970874 |
| wavelet-LLH | gldm  | GrayLevelNonUniformity               | 3.990291262 |
| wavelet-LLH | gldm  | SmallDependenceEmphasis              | 0.670577131 |
| wavelet-LLH | gldm  | SmallDependenceHighGrayLevelEmphasis | 464.5782093 |
| wavelet-LLH | gldm  | DependenceNonUniformityNormalized    | 0.466113677 |
| wavelet-LLH | gldm  | LargeDependenceEmphasis              | 2.708737864 |
| wavelet-LLH | gldm  | LargeDependenceLowGrayLevelEmphasis  | 0.019526872 |
| wavelet-LLH | gldm  | DependenceVariance                   | 0.444151192 |
| wavelet-LLH | gldm  | LargeDependenceHighGrayLevelEmphasis | 1619.76699  |
| wavelet-LLH | gldm  | SmallDependenceLowGrayLevelEmphasis  | 0.011913598 |
| wavelet-LLH | gldm  | LowGrayLevelEmphasis                 | 0.013313583 |
| wavelet-LLH | glcm  | JointAverage                         | 23.01269554 |
| wavelet-LLH | glcm  | SumAverage                           | 46.02539107 |
| wavelet-LLH | glcm  | JointEntropy                         | 6.721371244 |
| wavelet-LLH | glcm  | ClusterShade                         | 486.3461229 |
| wavelet-LLH | glcm  | MaximumProbability                   | 0.022520258 |
| wavelet-LLH | glcm  | ldmn                                 | 0.938156681 |
| wavelet-LLH | glcm  | JointEnergy                          | 0.010008906 |
| wavelet-LLH | glcm  | Contrast                             | 160.895215  |
| wavelet-LLH | glcm  | DifferenceEntropy                    | 4.161496668 |
| wavelet-LLH | glcm  | InverseVariance                      | 0.107715784 |
| wavelet-LLH | glcm  | DifferenceVariance                   | 55.34728636 |
| wavelet-LLH | glcm  | ldn                                  | 0.838967574 |
| wavelet-LLH | glcm  | ldm                                  | 0.099708089 |
| wavelet-LLH | glcm  | Correlation                          | 0.178222989 |
| wavelet-LLH | glcm  | Autocorrelation                      | 547.96847   |
| wavelet-LLH | glcm  | SumEntropy                           | 5.018844585 |



|             |            |                                  |              |
|-------------|------------|----------------------------------|--------------|
| wavelet-LLH | glcm       | SumSquares                       | 98.73785033  |
| wavelet-LLH | glcm       | ClusterProminence                | 144974.986   |
| wavelet-LLH | glcm       | Imc2                             | 0.998954006  |
| wavelet-LLH | glcm       | Imc1                             | -0.633650754 |
| wavelet-LLH | glcm       | DifferenceAverage                | 9.837627505  |
| wavelet-LLH | glcm       | Id                               | 0.181814474  |
| wavelet-LLH | glcm       | ClusterTendency                  | 234.0561863  |
| wavelet-LLH | firstorder | InterquartileRange               | 327.6439419  |
| wavelet-LLH | firstorder | Skewness                         | 0.029565327  |
| wavelet-LLH | firstorder | Uniformity                       | 0.038740692  |
| wavelet-LLH | firstorder | Median                           | -39.92759322 |
| wavelet-LLH | firstorder | Energy                           | 5843022.705  |
| wavelet-LLH | firstorder | RobustMeanAbsoluteDeviation      | 129.3833586  |
| wavelet-LLH | firstorder | MeanAbsoluteDeviation            | 186.8307962  |
| wavelet-LLH | firstorder | TotalEnergy                      | 157761613    |
| wavelet-LLH | firstorder | Maximum                          | 503.9027894  |
| wavelet-LLH | firstorder | RootMeanSquared                  | 238.1771941  |
| wavelet-LLH | firstorder | 90Percentile                     | 195.961779   |
| wavelet-LLH | firstorder | Minimum                          | -604.5149915 |
| wavelet-LLH | firstorder | Entropy                          | 4.914311029  |
| wavelet-LLH | firstorder | Range                            | 1108.417781  |
| wavelet-LLH | firstorder | Variance                         | 54446.13584  |
| wavelet-LLH | firstorder | 10Percentile                     | -350.9672388 |
| wavelet-LLH | firstorder | Kurtosis                         | 2.705149357  |
| wavelet-LLH | firstorder | Mean                             | -47.77279492 |
| wavelet-LLH | grlm       | ShortRunLowGrayLevelEmphasis     | 0.013445428  |
| wavelet-LLH | grlm       | GrayLevelVariance                | 87.60430639  |
| wavelet-LLH | grlm       | LowGrayLevelRunEmphasis          | 0.013505958  |
| wavelet-LLH | grlm       | GrayLevelNonUniformityNormalized | 0.038718034  |
| wavelet-LLH | grlm       | RunVariance                      | 0.020853007  |
| wavelet-LLH | grlm       | GrayLevelNonUniformity           | 3.910065089  |
| wavelet-LLH | grlm       | LongRunEmphasis                  | 1.063194608  |
| wavelet-LLH | grlm       | ShortRunHighGrayLevelEmphasis    | 636.5657294  |
| wavelet-LLH | grlm       | RunLengthNonUniformity           | 97.38404446  |
| wavelet-LLH | grlm       | ShortRunEmphasis                 | 0.985047587  |
| wavelet-LLH | grlm       | LongRunHighGrayLevelEmphasis     | 680.4217635  |
| wavelet-LLH | grlm       | RunPercentage                    | 0.980582524  |
| wavelet-LLH | grlm       | LongRunLowGrayLevelEmphasis      | 0.013751386  |
| wavelet-LLH | grlm       | RunEntropy                       | 4.952813238  |
| wavelet-LLH | grlm       | HighGrayLevelRunEmphasis         | 644.6436977  |
| wavelet-LLH | grlm       | RunLengthNonUniformityNormalized | 0.962818429  |
| wavelet-LLH | glszm      | GrayLevelVariance                | 92.50632911  |
| wavelet-LLH | glszm      | ZoneVariance                     | 0.363403301  |
| wavelet-LLH | glszm      | GrayLevelNonUniformityNormalized | 0.038615606  |
| wavelet-LLH | glszm      | SizeZoneNonUniformityNormalized  | 0.610318859  |
| wavelet-LLH | glszm      | SizeZoneNonUniformity            | 48.21518987  |
| wavelet-LLH | glszm      | GrayLevelNonUniformity           | 3.050632911  |
| wavelet-LLH | glszm      | LargeAreaEmphasis                | 2.063291139  |
| wavelet-LLH | glszm      | SmallAreaHighGrayLevelEmphasis   | 567.8734177  |
| wavelet-LLH | glszm      | ZonePercentage                   | 0.766990291  |
| wavelet-LLH | glszm      | LargeAreaLowGrayLevelEmphasis    | 0.02004294   |
| wavelet-LLH | glszm      | LargeAreaHighGrayLevelEmphasis   | 1298.886076  |
| wavelet-LLH | glszm      | HighGrayLevelZoneEmphasis        | 668.5063291  |

|             |            |                                      |              |
|-------------|------------|--------------------------------------|--------------|
| wavelet-LLH | glszm      | SmallAreaEmphasis                    | 0.805379747  |
| wavelet-LLH | glszm      | LowGrayLevelZoneEmphasis             | 0.016118866  |
| wavelet-LLH | glszm      | ZoneEntropy                          | 5.341260495  |
| wavelet-LLH | glszm      | SmallAreaLowGrayLevelEmphasis        | 0.015234423  |
| wavelet-LLH | ngtdm      | Coarseness                           | 0.045132447  |
| wavelet-LLH | ngtdm      | Complexity                           | 3698.770138  |
| wavelet-LLH | ngtdm      | Strength                             | 25.62055396  |
| wavelet-LLH | ngtdm      | Contrast                             | 0.849401474  |
| wavelet-LLH | ngtdm      | Busyness                             | 0.029072253  |
| wavelet-LLL | gldm       | GrayLevelVariance                    | 520.7848054  |
| wavelet-LLL | gldm       | HighGrayLevelEmphasis                | 1796.592233  |
| wavelet-LLL | gldm       | DependenceEntropy                    | 5.802815576  |
| wavelet-LLL | gldm       | DependenceNonUniformity              | 73.29126214  |
| wavelet-LLL | gldm       | GrayLevelNonUniformity               | 2.59223301   |
| wavelet-LLL | gldm       | SmallDependenceEmphasis              | 0.868932039  |
| wavelet-LLL | gldm       | SmallDependenceHighGrayLevelEmphasis | 1632.145631  |
| wavelet-LLL | gldm       | DependenceNonUniformityNormalized    | 0.711565652  |
| wavelet-LLL | gldm       | LargeDependenceEmphasis              | 1.524271845  |
| wavelet-LLL | gldm       | LargeDependenceLowGrayLevelEmphasis  | 0.015234317  |
| wavelet-LLL | gldm       | DependenceVariance                   | 0.144217174  |
| wavelet-LLL | gldm       | LargeDependenceHighGrayLevelEmphasis | 2454.378641  |
| wavelet-LLL | gldm       | SmallDependenceLowGrayLevelEmphasis  | 0.01387455   |
| wavelet-LLL | gldm       | LowGrayLevelEmphasis                 | 0.014146503  |
| wavelet-LLL | glcm       | JointAverage                         | 43.22351695  |
| wavelet-LLL | glcm       | SumAverage                           | 86.4470339   |
| wavelet-LLL | glcm       | JointEntropy                         | 6.837591885  |
| wavelet-LLL | glcm       | ClusterShade                         | 15235.69781  |
| wavelet-LLL | glcm       | MaximumProbability                   | 0.014890405  |
| wavelet-LLL | glcm       | ldmn                                 | 0.924206957  |
| wavelet-LLL | glcm       | JointEnergy                          | 0.0088956    |
| wavelet-LLL | glcm       | Contrast                             | 773.8970067  |
| wavelet-LLL | glcm       | DifferenceEntropy                    | 4.92938064   |
| wavelet-LLL | glcm       | InverseVariance                      | 0.052355253  |
| wavelet-LLL | glcm       | DifferenceVariance                   | 236.9838316  |
| wavelet-LLL | glcm       | ldn                                  | 0.816259946  |
| wavelet-LLL | glcm       | ldm                                  | 0.043626192  |
| wavelet-LLL | glcm       | Correlation                          | 0.326914355  |
| wavelet-LLL | glcm       | Autocorrelation                      | 2050.722421  |
| wavelet-LLL | glcm       | SumEntropy                           | 5.542049676  |
| wavelet-LLL | glcm       | SumSquares                           | 568.1021014  |
| wavelet-LLL | glcm       | ClusterProminence                    | 5209831.36   |
| wavelet-LLL | glcm       | lmc2                                 | 0.999898635  |
| wavelet-LLL | glcm       | lmc1                                 | -0.769004915 |
| wavelet-LLL | glcm       | DifferenceAverage                    | 22.79823058  |
| wavelet-LLL | glcm       | ld                                   | 0.097684303  |
| wavelet-LLL | glcm       | ClusterTendency                      | 1498.511399  |
| wavelet-LLL | firstorder | InterquartileRange                   | 929.7403955  |
| wavelet-LLL | firstorder | Skewness                             | 0.620059646  |
| wavelet-LLL | firstorder | Uniformity                           | 0.025167311  |
| wavelet-LLL | firstorder | Median                               | -1275.184255 |
| wavelet-LLL | firstorder | Energy                               | 180358993.8  |
| wavelet-LLL | firstorder | RobustMeanAbsoluteDeviation          | 334.980281   |
| wavelet-LLL | firstorder | MeanAbsoluteDeviation                | 466.4331412  |

|             |            |                                  |              |
|-------------|------------|----------------------------------|--------------|
| wavelet-LLL | firstorder | TotalEnergy                      | 4869692833   |
| wavelet-LLL | firstorder | Maximum                          | 201.9487707  |
| wavelet-LLL | firstorder | RootMeanSquared                  | 1323.275554  |
| wavelet-LLL | firstorder | 90Percentile                     | -403.3855465 |
| wavelet-LLL | firstorder | Minimum                          | -2052.458805 |
| wavelet-LLL | firstorder | Entropy                          | 5.581738877  |
| wavelet-LLL | firstorder | Range                            | 2254.407576  |
| wavelet-LLL | firstorder | Variance                         | 324350.4361  |
| wavelet-LLL | firstorder | 10Percentile                     | -1896.012102 |
| wavelet-LLL | firstorder | Kurtosis                         | 2.595966429  |
| wavelet-LLL | firstorder | Mean                             | -1194.448725 |
| wavelet-LLL | grlm       | ShortRunLowGrayLevelEmphasis     | 0.014218376  |
| wavelet-LLL | grlm       | GrayLevelVariance                | 522.7594555  |
| wavelet-LLL | grlm       | LowGrayLevelRunEmphasis          | 0.014229089  |
| wavelet-LLL | grlm       | GrayLevelNonUniformityNormalized | 0.025054098  |
| wavelet-LLL | grlm       | RunVariance                      | 0.006718545  |
| wavelet-LLL | grlm       | GrayLevelNonUniformity           | 2.563468865  |
| wavelet-LLL | grlm       | LongRunEmphasis                  | 1.020542538  |
| wavelet-LLL | grlm       | ShortRunHighGrayLevelEmphasis    | 1793.927668  |
| wavelet-LLL | grlm       | RunLengthNonUniformity           | 100.9490492  |
| wavelet-LLL | grlm       | ShortRunEmphasis                 | 0.994864365  |
| wavelet-LLL | grlm       | LongRunHighGrayLevelEmphasis     | 1825.999282  |
| wavelet-LLL | grlm       | RunPercentage                    | 0.993278566  |
| wavelet-LLL | grlm       | LongRunLowGrayLevelEmphasis      | 0.014271938  |
| wavelet-LLL | grlm       | RunEntropy                       | 5.599396287  |
| wavelet-LLL | grlm       | HighGrayLevelRunEmphasis         | 1800.341991  |
| wavelet-LLL | grlm       | RunLengthNonUniformityNormalized | 0.986562911  |
| wavelet-LLL | glszm      | GrayLevelVariance                | 548.6461068  |
| wavelet-LLL | glszm      | ZoneVariance                     | 0.086577637  |
| wavelet-LLL | glszm      | GrayLevelNonUniformityNormalized | 0.023540063  |
| wavelet-LLL | glszm      | SizeZoneNonUniformityNormalized  | 0.826844726  |
| wavelet-LLL | glszm      | SizeZoneNonUniformity            | 77.72340426  |
| wavelet-LLL | glszm      | GrayLevelNonUniformity           | 2.212765957  |
| wavelet-LLL | glszm      | LargeAreaEmphasis                | 1.287234043  |
| wavelet-LLL | glszm      | SmallAreaHighGrayLevelEmphasis   | 1758.382979  |
| wavelet-LLL | glszm      | ZonePercentage                   | 0.912621359  |
| wavelet-LLL | glszm      | LargeAreaLowGrayLevelEmphasis    | 0.015898278  |
| wavelet-LLL | glszm      | LargeAreaHighGrayLevelEmphasis   | 2208.861702  |
| wavelet-LLL | glszm      | HighGrayLevelZoneEmphasis        | 1848.478723  |
| wavelet-LLL | glszm      | SmallAreaEmphasis                | 0.928191489  |
| wavelet-LLL | glszm      | LowGrayLevelZoneEmphasis         | 0.015302295  |
| wavelet-LLL | glszm      | ZoneEntropy                      | 5.799061724  |
| wavelet-LLL | glszm      | SmallAreaLowGrayLevelEmphasis    | 0.015153299  |
| wavelet-LLL | ngtdm      | Coarseness                       | 0.027174031  |
| wavelet-LLL | ngtdm      | Complexity                       | 28372.82118  |
| wavelet-LLL | ngtdm      | Strength                         | 93.45052647  |
| wavelet-LLL | ngtdm      | Contrast                         | 4.628900955  |
| wavelet-LLL | ngtdm      | Busyness                         | 0.025304312  |
| wavelet-HHL | gldm       | GrayLevelVariance                | 23.3002168   |
| wavelet-HHL | gldm       | HighGrayLevelEmphasis            | 161.0776699  |
| wavelet-HHL | gldm       | DependenceEntropy                | 5.238610392  |
| wavelet-HHL | gldm       | DependenceNonUniformity          | 36.65048544  |
| wavelet-HHL | gldm       | GrayLevelNonUniformity           | 6.45631068   |

|             |            |                                      |              |
|-------------|------------|--------------------------------------|--------------|
| wavelet-HHL | gldm       | SmallDependenceEmphasis              | 0.587211435  |
| wavelet-HHL | gldm       | SmallDependenceHighGrayLevelEmphasis | 102.9398948  |
| wavelet-HHL | gldm       | DependenceNonUniformityNormalized    | 0.355829956  |
| wavelet-HHL | gldm       | LargeDependenceEmphasis              | 4.339805825  |
| wavelet-HHL | gldm       | LargeDependenceLowGrayLevelEmphasis  | 0.0663913    |
| wavelet-HHL | gldm       | DependenceVariance                   | 1.043642191  |
| wavelet-HHL | gldm       | LargeDependenceHighGrayLevelEmphasis | 627.8543689  |
| wavelet-HHL | gldm       | SmallDependenceLowGrayLevelEmphasis  | 0.018735507  |
| wavelet-HHL | gldm       | LowGrayLevelEmphasis                 | 0.024024036  |
| wavelet-HHL | glcm       | JointAverage                         | 11.90308682  |
| wavelet-HHL | glcm       | SumAverage                           | 23.80617363  |
| wavelet-HHL | glcm       | JointEntropy                         | 6.533261807  |
| wavelet-HHL | glcm       | ClusterShade                         | 108.4023687  |
| wavelet-HHL | glcm       | MaximumProbability                   | 0.024031293  |
| wavelet-HHL | glcm       | Idmn                                 | 0.933493226  |
| wavelet-HHL | glcm       | JointEnergy                          | 0.011659813  |
| wavelet-HHL | glcm       | Contrast                             | 51.08603461  |
| wavelet-HHL | glcm       | DifferenceEntropy                    | 3.622082608  |
| wavelet-HHL | glcm       | InverseVariance                      | 0.179468924  |
| wavelet-HHL | glcm       | DifferenceVariance                   | 18.18150147  |
| wavelet-HHL | glcm       | Idn                                  | 0.832855691  |
| wavelet-HHL | glcm       | Idm                                  | 0.165394224  |
| wavelet-HHL | glcm       | Correlation                          | -0.004816515 |
| wavelet-HHL | glcm       | Autocorrelation                      | 141.6944738  |
| wavelet-HHL | glcm       | SumEntropy                           | 4.399684077  |
| wavelet-HHL | glcm       | SumSquares                           | 25.51779684  |
| wavelet-HHL | glcm       | ClusterProminence                    | 7654.805894  |
| wavelet-HHL | glcm       | Imc2                                 | 0.98735231   |
| wavelet-HHL | glcm       | Imc1                                 | -0.442970489 |
| wavelet-HHL | glcm       | DifferenceAverage                    | 5.594683517  |
| wavelet-HHL | glcm       | Id                                   | 0.258020005  |
| wavelet-HHL | glcm       | ClusterTendency                      | 50.98515274  |
| wavelet-HHL | firstorder | InterquartileRange                   | 146.729043   |
| wavelet-HHL | firstorder | Skewness                             | 0.37821195   |
| wavelet-HHL | firstorder | Uniformity                           | 0.062682628  |
| wavelet-HHL | firstorder | Median                               | -2.923518813 |
| wavelet-HHL | firstorder | Energy                               | 1501834.123  |
| wavelet-HHL | firstorder | RobustMeanAbsoluteDeviation          | 64.96177899  |
| wavelet-HHL | firstorder | MeanAbsoluteDeviation                | 95.97756021  |
| wavelet-HHL | firstorder | TotalEnergy                          | 40549521.32  |
| wavelet-HHL | firstorder | Maximum                              | 334.1576441  |
| wavelet-HHL | firstorder | RootMeanSquared                      | 120.7514547  |
| wavelet-HHL | firstorder | 90Percentile                         | 181.2284727  |
| wavelet-HHL | firstorder | Minimum                              | -250.3917563 |
| wavelet-HHL | firstorder | Entropy                              | 4.191552705  |
| wavelet-HHL | firstorder | Range                                | 584.5494004  |
| wavelet-HHL | firstorder | Variance                             | 14540.42655  |
| wavelet-HHL | firstorder | 10Percentile                         | -144.8452061 |
| wavelet-HHL | firstorder | Kurtosis                             | 2.839618838  |
| wavelet-HHL | firstorder | Mean                                 | 6.362960517  |
| wavelet-HHL | glrlm      | ShortRunLowGrayLevelEmphasis         | 0.024068471  |
| wavelet-HHL | glrlm      | GrayLevelVariance                    | 23.54155983  |
| wavelet-HHL | glrlm      | LowGrayLevelRunEmphasis              | 0.024386731  |

|             |       |                                      |              |
|-------------|-------|--------------------------------------|--------------|
| wavelet-HHL | grlm  | GrayLevelNonUniformityNormalized     | 0.062172378  |
| wavelet-HHL | grlm  | RunVariance                          | 0.031287544  |
| wavelet-HHL | grlm  | GrayLevelNonUniformity               | 6.203281563  |
| wavelet-HHL | grlm  | LongRunEmphasis                      | 1.098281743  |
| wavelet-HHL | grlm  | ShortRunHighGrayLevelEmphasis        | 158.2875532  |
| wavelet-HHL | grlm  | RunLengthNonUniformity               | 93.59483354  |
| wavelet-HHL | grlm  | ShortRunEmphasis                     | 0.975429564  |
| wavelet-HHL | grlm  | LongRunHighGrayLevelEmphasis         | 175.5742277  |
| wavelet-HHL | grlm  | RunPercentage                        | 0.968633308  |
| wavelet-HHL | grlm  | LongRunLowGrayLevelEmphasis          | 0.025659771  |
| wavelet-HHL | grlm  | RunEntropy                           | 4.323676665  |
| wavelet-HHL | grlm  | HighGrayLevelRunEmphasis             | 161.7448881  |
| wavelet-HHL | grlm  | RunLengthNonUniformityNormalized     | 0.937424913  |
| wavelet-HHL | glszm | GrayLevelVariance                    | 27.2932526   |
| wavelet-HHL | glszm | ZoneVariance                         | 1.367430796  |
| wavelet-HHL | glszm | GrayLevelNonUniformityNormalized     | 0.058823529  |
| wavelet-HHL | glszm | SizeZoneNonUniformityNormalized      | 0.584342561  |
| wavelet-HHL | glszm | SizeZoneNonUniformity                | 39.73529412  |
| wavelet-HHL | glszm | GrayLevelNonUniformity               | 4            |
| wavelet-HHL | glszm | LargeAreaEmphasis                    | 3.661764706  |
| wavelet-HHL | glszm | SmallAreaHighGrayLevelEmphasis       | 141.9717067  |
| wavelet-HHL | glszm | ZonePercentage                       | 0.660194175  |
| wavelet-HHL | glszm | LargeAreaLowGrayLevelEmphasis        | 0.060192206  |
| wavelet-HHL | glszm | LargeAreaHighGrayLevelEmphasis       | 553.9264706  |
| wavelet-HHL | glszm | HighGrayLevelZoneEmphasis            | 170.5882353  |
| wavelet-HHL | glszm | SmallAreaEmphasis                    | 0.791840153  |
| wavelet-HHL | glszm | LowGrayLevelZoneEmphasis             | 0.030055431  |
| wavelet-HHL | glszm | ZoneEntropy                          | 4.903587937  |
| wavelet-HHL | glszm | SmallAreaLowGrayLevelEmphasis        | 0.027273096  |
| wavelet-HHL | ngtdm | Coarseness                           | 0.053891287  |
| wavelet-HHL | ngtdm | Complexity                           | 758.8306502  |
| wavelet-HHL | ngtdm | Strength                             | 8.241712256  |
| wavelet-HHL | ngtdm | Contrast                             | 0.357800162  |
| wavelet-HHL | ngtdm | Busyness                             | 0.090597988  |
| wavelet-HLH | gldm  | GrayLevelVariance                    | 23.20576869  |
| wavelet-HLH | gldm  | HighGrayLevelEmphasis                | 317.8446602  |
| wavelet-HLH | gldm  | DependenceEntropy                    | 5.217721765  |
| wavelet-HLH | gldm  | DependenceNonUniformity              | 34.51456311  |
| wavelet-HLH | gldm  | GrayLevelNonUniformity               | 7.174757282  |
| wavelet-HLH | gldm  | SmallDependenceEmphasis              | 0.543352211  |
| wavelet-HLH | gldm  | SmallDependenceHighGrayLevelEmphasis | 180.1773867  |
| wavelet-HLH | gldm  | DependenceNonUniformityNormalized    | 0.335092846  |
| wavelet-HLH | gldm  | LargeDependenceEmphasis              | 4.281553398  |
| wavelet-HLH | gldm  | LargeDependenceLowGrayLevelEmphasis  | 0.028592685  |
| wavelet-HLH | gldm  | DependenceVariance                   | 0.842869262  |
| wavelet-HLH | gldm  | LargeDependenceHighGrayLevelEmphasis | 1290.427184  |
| wavelet-HLH | gldm  | SmallDependenceLowGrayLevelEmphasis  | 0.014298979  |
| wavelet-HLH | gldm  | LowGrayLevelEmphasis                 | 0.016017029  |
| wavelet-HLH | glcm  | JointAverage                         | 17.15742654  |
| wavelet-HLH | glcm  | SumAverage                           | 34.31485307  |
| wavelet-HLH | glcm  | JointEntropy                         | 6.386448666  |
| wavelet-HLH | glcm  | ClusterShade                         | -89.67510172 |
| wavelet-HLH | glcm  | MaximumProbability                   | 0.029216041  |

|             |            |                                  |              |
|-------------|------------|----------------------------------|--------------|
| wavelet-HLH | glcm       | Idmn                             | 0.951803123  |
| wavelet-HLH | glcm       | JointEnergy                      | 0.013310082  |
| wavelet-HLH | glcm       | Contrast                         | 48.20645271  |
| wavelet-HLH | glcm       | DifferenceEntropy                | 3.566296494  |
| wavelet-HLH | glcm       | InverseVariance                  | 0.188571427  |
| wavelet-HLH | glcm       | DifferenceVariance               | 17.99187772  |
| wavelet-HLH | glcm       | Idn                              | 0.855564012  |
| wavelet-HLH | glcm       | Idm                              | 0.170663949  |
| wavelet-HLH | glcm       | Correlation                      | -0.013389085 |
| wavelet-HLH | glcm       | Autocorrelation                  | 294.198024   |
| wavelet-HLH | glcm       | SumEntropy                       | 4.265924349  |
| wavelet-HLH | glcm       | SumSquares                       | 23.79436696  |
| wavelet-HLH | glcm       | ClusterProminence                | 8935.515957  |
| wavelet-HLH | glcm       | Imc2                             | 0.982924007  |
| wavelet-HLH | glcm       | Imc1                             | -0.42344249  |
| wavelet-HLH | glcm       | DifferenceAverage                | 5.384678092  |
| wavelet-HLH | glcm       | Id                               | 0.263202337  |
| wavelet-HLH | glcm       | ClusterTendency                  | 46.97101513  |
| wavelet-HLH | firstorder | InterquartileRange               | 156.7785741  |
| wavelet-HLH | firstorder | Skewness                         | -0.238779448 |
| wavelet-HLH | firstorder | Uniformity                       | 0.069657838  |
| wavelet-HLH | firstorder | Median                           | -9.297991478 |
| wavelet-HLH | firstorder | Energy                           | 1511250.05   |
| wavelet-HLH | firstorder | RobustMeanAbsoluteDeviation      | 61.8701264   |
| wavelet-HLH | firstorder | MeanAbsoluteDeviation            | 93.20949874  |
| wavelet-HLH | firstorder | TotalEnergy                      | 40803751.36  |
| wavelet-HLH | firstorder | Maximum                          | 296.3330977  |
| wavelet-HLH | firstorder | RootMeanSquared                  | 121.129396   |
| wavelet-HLH | firstorder | 90Percentile                     | 151.363631   |
| wavelet-HLH | firstorder | Minimum                          | -409.8911789 |
| wavelet-HLH | firstorder | Entropy                          | 4.065821203  |
| wavelet-HLH | firstorder | Range                            | 706.2242766  |
| wavelet-HLH | firstorder | Variance                         | 14606.94276  |
| wavelet-HLH | firstorder | 10Percentile                     | -139.4799836 |
| wavelet-HLH | firstorder | Kurtosis                         | 4.049382076  |
| wavelet-HLH | firstorder | Mean                             | -8.086274111 |
| wavelet-HLH | grlm       | ShortRunLowGrayLevelEmphasis     | 0.016345278  |
| wavelet-HLH | grlm       | GrayLevelVariance                | 23.69008156  |
| wavelet-HLH | grlm       | LowGrayLevelRunEmphasis          | 0.016441866  |
| wavelet-HLH | grlm       | GrayLevelNonUniformityNormalized | 0.068727365  |
| wavelet-HLH | grlm       | RunVariance                      | 0.03772072   |
| wavelet-HLH | grlm       | GrayLevelNonUniformity           | 6.84807905   |
| wavelet-HLH | grlm       | LongRunEmphasis                  | 1.109331776  |
| wavelet-HLH | grlm       | ShortRunHighGrayLevelEmphasis    | 311.1787312  |
| wavelet-HLH | grlm       | RunLengthNonUniformity           | 93.46731485  |
| wavelet-HLH | grlm       | ShortRunEmphasis                 | 0.975018645  |
| wavelet-HLH | grlm       | LongRunHighGrayLevelEmphasis     | 351.9111778  |
| wavelet-HLH | grlm       | RunPercentage                    | 0.967139656  |
| wavelet-HLH | grlm       | LongRunLowGrayLevelEmphasis      | 0.016849547  |
| wavelet-HLH | grlm       | RunEntropy                       | 4.210163547  |
| wavelet-HLH | grlm       | HighGrayLevelRunEmphasis         | 318.4955801  |
| wavelet-HLH | grlm       | RunLengthNonUniformityNormalized | 0.937064013  |
| wavelet-HLH | glszm      | GrayLevelVariance                | 32.07004283  |

|             |       |                                  |             |
|-------------|-------|----------------------------------|-------------|
| wavelet-HLH | glszm | ZoneVariance                     | 2.104812295 |
| wavelet-HLH | glszm | GrayLevelNonUniformityNormalized | 0.058201058 |
| wavelet-HLH | glszm | SizeZoneNonUniformityNormalized  | 0.539430587 |
| wavelet-HLH | glszm | SizeZoneNonUniformity            | 33.98412698 |
| wavelet-HLH | glszm | GrayLevelNonUniformity           | 3.666666667 |
| wavelet-HLH | glszm | LargeAreaEmphasis                | 4.777777778 |
| wavelet-HLH | glszm | SmallAreaHighGrayLevelEmphasis   | 255.9493827 |
| wavelet-HLH | glszm | ZonePercentage                   | 0.611650485 |
| wavelet-HLH | glszm | LargeAreaLowGrayLevelEmphasis    | 0.0385885   |
| wavelet-HLH | glszm | LargeAreaHighGrayLevelEmphasis   | 1402.15873  |
| wavelet-HLH | glszm | HighGrayLevelZoneEmphasis        | 330.3174603 |
| wavelet-HLH | glszm | SmallAreaEmphasis                | 0.759611993 |
| wavelet-HLH | glszm | LowGrayLevelZoneEmphasis         | 0.023768841 |
| wavelet-HLH | glszm | ZoneEntropy                      | 4.953004923 |
| wavelet-HLH | glszm | SmallAreaLowGrayLevelEmphasis    | 0.022888949 |
| wavelet-HLH | ngtdm | Coarseness                       | 0.04381653  |
| wavelet-HLH | ngtdm | Complexity                       | 802.8517714 |
| wavelet-HLH | ngtdm | Strength                         | 8.335712474 |
| wavelet-HLH | ngtdm | Contrast                         | 0.40369642  |
| wavelet-HLH | ngtdm | Busyness                         | 0.071450183 |

| Image type | Feature Class | Feature Name            |                                                                                                                                                                                                                                                                                                                                                                                                                   |
|------------|---------------|-------------------------|-------------------------------------------------------------------------------------------------------------------------------------------------------------------------------------------------------------------------------------------------------------------------------------------------------------------------------------------------------------------------------------------------------------------|
| general    | info          | BoundingBox             | 5: RTSTRUCT: C99-DNU_segment_gtv<br>(0, 1, 1, 6, 7, 6)                                                                                                                                                                                                                                                                                                                                                            |
| general    | info          | EnabledImageTypes       | {u'Original': {}, u'Wavelet': {}}                                                                                                                                                                                                                                                                                                                                                                                 |
|            |               |                         | {'distances': [1], 'additionalInfo': True, 'force2D': False, 'interpolator': 'sitkBSpline', 'resampledPixelSpacing': [3.0], 'label': 1, 'normalizeScale': 1, 'normalize': False, 'force2Ddimension': 0, 'removeOutliers': None, 'minimumROISize': None, u'binWidth': 25.0, 'minimumROIDimensions': 1, u'correctMask': True, 'preCrop': False, u'symmetricalGLCM': True, 'resegmentRange': None, 'padDistance': 5} |
| general    | info          | GeneralSettings         | 1063ab84dfddd43b81aba5e1cb200cb2432cdc79                                                                                                                                                                                                                                                                                                                                                                          |
| general    | info          | ImageHash               | (0.9765624999999998, 0.9765624999999998, 1.9999999999999999)                                                                                                                                                                                                                                                                                                                                                      |
| general    | info          | ImageSpacing            | da56bc1c4a00882ed7626970e656dcad4bd48fd4                                                                                                                                                                                                                                                                                                                                                                          |
| general    | info          | MaskHash                | bd48fd4                                                                                                                                                                                                                                                                                                                                                                                                           |
| general    | info          | NumpyVersion            | 1.13.1                                                                                                                                                                                                                                                                                                                                                                                                            |
| general    | info          | PyWaveletVersion        | 0.5.2                                                                                                                                                                                                                                                                                                                                                                                                             |
| general    | info          | SimpleITKVersion        | 1.1.0                                                                                                                                                                                                                                                                                                                                                                                                             |
| general    | info          | Version                 | 1.3.0.post102+g1b0eb74                                                                                                                                                                                                                                                                                                                                                                                            |
| general    | info          | VolumeNum               | 1                                                                                                                                                                                                                                                                                                                                                                                                                 |
| general    | info          | VoxelNum                | 63                                                                                                                                                                                                                                                                                                                                                                                                                |
| original   | shape         | Maximum3DDiameter       | 24.73863375                                                                                                                                                                                                                                                                                                                                                                                                       |
| original   | shape         | Maximum2DDiameterSlice  | 21.63330765                                                                                                                                                                                                                                                                                                                                                                                                       |
| original   | shape         | Sphericity              | 0.772064858                                                                                                                                                                                                                                                                                                                                                                                                       |
| original   | shape         | MinorAxis               | 15.01328709                                                                                                                                                                                                                                                                                                                                                                                                       |
| original   | shape         | Elongation              | 0.606303694                                                                                                                                                                                                                                                                                                                                                                                                       |
| original   | shape         | SurfaceVolumeRatio      | 0.524721551                                                                                                                                                                                                                                                                                                                                                                                                       |
| original   | shape         | Volume                  | 1701                                                                                                                                                                                                                                                                                                                                                                                                              |
| original   | shape         | MajorAxis               | 24.7619918                                                                                                                                                                                                                                                                                                                                                                                                        |
| original   | shape         | SurfaceArea             | 892.5513577                                                                                                                                                                                                                                                                                                                                                                                                       |
| original   | shape         | Flatness                | 0.319514696                                                                                                                                                                                                                                                                                                                                                                                                       |
| original   | shape         | LeastAxis               | 7.91182029                                                                                                                                                                                                                                                                                                                                                                                                        |
| original   | shape         | Maximum2DDiameterColumn | 15.29705854                                                                                                                                                                                                                                                                                                                                                                                                       |
| original   | shape         | Maximum2DDiameterRow    | 17.49285568                                                                                                                                                                                                                                                                                                                                                                                                       |
| original   | gldm          | GrayLevelVariance       | 39.59234064                                                                                                                                                                                                                                                                                                                                                                                                       |
| original   | gldm          | HighGrayLevelEmphasis   | 254.2380952                                                                                                                                                                                                                                                                                                                                                                                                       |
| original   | gldm          | DependenceEntropy       | 4.836417971                                                                                                                                                                                                                                                                                                                                                                                                       |
| original   | gldm          | DependenceNonUniformity | 30.74603175                                                                                                                                                                                                                                                                                                                                                                                                       |
| original   | gldm          | GrayLevelNonUniformity  | 3.412698413                                                                                                                                                                                                                                                                                                                                                                                                       |
| original   | gldm          | SmallDependenceEmphasis | 0.695767196                                                                                                                                                                                                                                                                                                                                                                                                       |



|          |            |                                      |              |
|----------|------------|--------------------------------------|--------------|
| original | gldm       | SmallDependenceHighGrayLevelEmphasis | 168.2619048  |
| original | gldm       | DependenceNonUniformityNormalized    | 0.48803225   |
| original | gldm       | LargeDependenceEmphasis              | 2.428571429  |
| original | gldm       | LargeDependenceLowGrayLevelEmphasis  | 0.036494404  |
| original | gldm       | DependenceVariance                   | 0.342151675  |
| original | gldm       | LargeDependenceHighGrayLevelEmphasis | 666.7142857  |
| original | gldm       | SmallDependenceLowGrayLevelEmphasis  | 0.02549156   |
| original | gldm       | LowGrayLevelEmphasis                 | 0.027561487  |
| original | glcm       | JointAverage                         | 15.34158906  |
| original | glcm       | SumAverage                           | 30.68317811  |
| original | glcm       | JointEntropy                         | 5.742419246  |
| original | glcm       | ClusterShade                         | -57.08124544 |
| original | glcm       | MaximumProbability                   | 0.035431129  |
| original | glcm       | Idmn                                 | 0.90694509   |
| original | glcm       | JointEnergy                          | 0.020424749  |
| original | glcm       | Contrast                             | 80.57961645  |
| original | glcm       | DifferenceEntropy                    | 3.491986438  |
| original | glcm       | InverseVariance                      | 0.111748741  |
| original | glcm       | DifferenceVariance                   | 23.79046684  |
| original | glcm       | Idn                                  | 0.798134141  |
| original | glcm       | Idm                                  | 0.111307884  |
| original | glcm       | Correlation                          | 0.020768194  |
| original | glcm       | Autocorrelation                      | 235.7697773  |
| original | glcm       | SumEntropy                           | 4.15026037   |
| original | glcm       | SumSquares                           | 40.50289929  |
| original | glcm       | ClusterProminence                    | 17704.63939  |
| original | glcm       | Imc2                                 | 0.997595603  |
| original | glcm       | Imc1                                 | -0.650039568 |
| original | glcm       | DifferenceAverage                    | 7.318504115  |
| original | glcm       | Id                                   | 0.204044229  |
| original | glcm       | ClusterTendency                      | 81.4319807   |
| original | firstorder | InterquartileRange                   | 265          |
| original | firstorder | Skewness                             | 0.002793613  |
| original | firstorder | Uniformity                           | 0.054169816  |
| original | firstorder | Median                               | -381         |
| original | firstorder | Energy                               | 10208760     |
| original | firstorder | RobustMeanAbsoluteDeviation          | 97.63182007  |
| original | firstorder | MeanAbsoluteDeviation                | 132.047871   |
| original | firstorder | TotalEnergy                          | 275636520    |
| original | firstorder | Maximum                              | -84          |
| original | firstorder | RootMeanSquared                      | 402.5466551  |
| original | firstorder | 90Percentile                         | -142         |
| original | firstorder | Minimum                              | -709         |
| original | firstorder | Entropy                              | 4.376200218  |
| original | firstorder | Range                                | 625          |
| original | firstorder | Variance                             | 24414.58705  |
| original | firstorder | 10Percentile                         | -564.8       |
| original | firstorder | Kurtosis                             | 2.118728005  |
| original | firstorder | Mean                                 | -370.984127  |
| original | glrlm      | ShortRunLowGrayLevelEmphasis         | 0.027847617  |
| original | glrlm      | GrayLevelVariance                    | 39.68091671  |

|             |       |                                      |             |
|-------------|-------|--------------------------------------|-------------|
| original    | glrlm | LowGrayLevelRunEmphasis              | 0.027933574 |
| original    | glrlm | GrayLevelNonUniformityNormalized     | 0.054094178 |
| original    | glrlm | RunVariance                          | 0.017071171 |
| original    | glrlm | GrayLevelNonUniformity               | 3.349557992 |
| original    | glrlm | LongRunEmphasis                      | 1.052975634 |
| original    | glrlm | ShortRunHighGrayLevelEmphasis        | 249.8712148 |
| original    | glrlm | RunLengthNonUniformity               | 59.84036123 |
| original    | glrlm | ShortRunEmphasis                     | 0.986756092 |
| original    | glrlm | LongRunHighGrayLevelEmphasis         | 268.8491187 |
| original    | glrlm | RunPercentage                        | 0.982905983 |
| original    | glrlm | LongRunLowGrayLevelEmphasis          | 0.0282774   |
| original    | glrlm | RunEntropy                           | 4.420645144 |
| original    | glrlm | HighGrayLevelRunEmphasis             | 253.6667956 |
| original    | glrlm | RunLengthNonUniformityNormalized     | 0.965857658 |
| original    | glszm | GrayLevelVariance                    | 41.02040816 |
| original    | glszm | ZoneVariance                         | 0.448979592 |
| original    | glszm | GrayLevelNonUniformityNormalized     | 0.0545606   |
| original    | glszm | SizeZoneNonUniformityNormalized      | 0.643481883 |
| original    | glszm | SizeZoneNonUniformity                | 31.53061224 |
| original    | glszm | GrayLevelNonUniformity               | 2.673469388 |
| original    | glszm | LargeAreaEmphasis                    | 2.102040816 |
| original    | glszm | SmallAreaHighGrayLevelEmphasis       | 197.2593878 |
| original    | glszm | ZonePercentage                       | 0.777777778 |
| original    | glszm | LargeAreaLowGrayLevelEmphasis        | 0.039894472 |
| original    | glszm | LargeAreaHighGrayLevelEmphasis       | 569.7755102 |
| original    | glszm | HighGrayLevelZoneEmphasis            | 245.1020408 |
| original    | glszm | SmallAreaEmphasis                    | 0.827346939 |
| original    | glszm | LowGrayLevelZoneEmphasis             | 0.033584989 |
| original    | glszm | ZoneEntropy                          | 4.734721773 |
| original    | glszm | SmallAreaLowGrayLevelEmphasis        | 0.032325078 |
| original    | ngtdm | Coarseness                           | 0.063369449 |
| original    | ngtdm | Complexity                           | 1128.538037 |
| original    | ngtdm | Strength                             | 13.91243283 |
| original    | ngtdm | Contrast                             | 0.719465339 |
| original    | ngtdm | Busyness                             | 0.056634951 |
| wavelet-HHH | gldm  | GrayLevelVariance                    | 2.461577223 |
| wavelet-HHH | gldm  | HighGrayLevelEmphasis                | 21.79365079 |
| wavelet-HHH | gldm  | DependenceEntropy                    | 4.203492527 |
| wavelet-HHH | gldm  | DependenceNonUniformity              | 15.19047619 |
| wavelet-HHH | gldm  | GrayLevelNonUniformity               | 11.44444444 |
| wavelet-HHH | gldm  | SmallDependenceEmphasis              | 0.243531746 |
| wavelet-HHH | gldm  | SmallDependenceHighGrayLevelEmphasis | 6.108205467 |
| wavelet-HHH | gldm  | DependenceNonUniformityNormalized    | 0.24111867  |
| wavelet-HHH | gldm  | LargeDependenceEmphasis              | 10.33333333 |
| wavelet-HHH | gldm  | LargeDependenceLowGrayLevelEmphasis  | 0.745782223 |
| wavelet-HHH | gldm  | DependenceVariance                   | 1.89569161  |
| wavelet-HHH | gldm  | LargeDependenceHighGrayLevelEmphasis | 200.1111111 |
| wavelet-HHH | gldm  | SmallDependenceLowGrayLevelEmphasis  | 0.035177625 |
| wavelet-HHH | gldm  | LowGrayLevelEmphasis                 | 0.09316538  |
| wavelet-HHH | glcm  | JointAverage                         | 4.473599442 |
| wavelet-HHH | glcm  | SumAverage                           | 8.947198883 |

|             |            |                                  |              |
|-------------|------------|----------------------------------|--------------|
| wavelet-HHH | glcm       | JointEntropy                     | 4.713640367  |
| wavelet-HHH | glcm       | ClusterShade                     | 1.384206327  |
| wavelet-HHH | glcm       | MaximumProbability               | 0.086473474  |
| wavelet-HHH | glcm       | Idmn                             | 0.931835959  |
| wavelet-HHH | glcm       | JointEnergy                      | 0.044836429  |
| wavelet-HHH | glcm       | Contrast                         | 5.239991825  |
| wavelet-HHH | glcm       | DifferenceEntropy                | 2.225121593  |
| wavelet-HHH | glcm       | InverseVariance                  | 0.400441928  |
| wavelet-HHH | glcm       | DifferenceVariance               | 1.800803457  |
| wavelet-HHH | glcm       | Idn                              | 0.827832962  |
| wavelet-HHH | glcm       | Idm                              | 0.382061316  |
| wavelet-HHH | glcm       | Correlation                      | -0.06002889  |
| wavelet-HHH | glcm       | Autocorrelation                  | 19.87758056  |
| wavelet-HHH | glcm       | SumEntropy                       | 2.906122189  |
| wavelet-HHH | glcm       | SumSquares                       | 2.471302456  |
| wavelet-HHH | glcm       | ClusterProminence                | 58.3107592   |
| wavelet-HHH | glcm       | Imc2                             | 0.811106347  |
| wavelet-HHH | glcm       | Imc1                             | -0.211228838 |
| wavelet-HHH | glcm       | DifferenceAverage                | 1.839777657  |
| wavelet-HHH | glcm       | Id                               | 0.456183864  |
| wavelet-HHH | glcm       | ClusterTendency                  | 4.645217998  |
| wavelet-HHH | firstorder | InterquartileRange               | 53.8913773   |
| wavelet-HHH | firstorder | Skewness                         | -0.059716717 |
| wavelet-HHH | firstorder | Uniformity                       | 0.181657848  |
| wavelet-HHH | firstorder | Median                           | -2.429507505 |
| wavelet-HHH | firstorder | Energy                           | 88702.56854  |
| wavelet-HHH | firstorder | RobustMeanAbsoluteDeviation      | 19.72901397  |
| wavelet-HHH | firstorder | MeanAbsoluteDeviation            | 29.32767496  |
| wavelet-HHH | firstorder | TotalEnergy                      | 2394969.35   |
| wavelet-HHH | firstorder | Maximum                          | 84.3822808   |
| wavelet-HHH | firstorder | RootMeanSquared                  | 37.52302331  |
| wavelet-HHH | firstorder | 90Percentile                     | 40.60116657  |
| wavelet-HHH | firstorder | Minimum                          | -90.76628185 |
| wavelet-HHH | firstorder | Entropy                          | 2.63757802   |
| wavelet-HHH | firstorder | Range                            | 175.1485626  |
| wavelet-HHH | firstorder | Variance                         | 1402.204713  |
| wavelet-HHH | firstorder | 10Percentile                     | -54.80120568 |
| wavelet-HHH | firstorder | Kurtosis                         | 2.642945854  |
| wavelet-HHH | firstorder | Mean                             | -2.402616329 |
| wavelet-HHH | glrlm      | ShortRunLowGrayLevelEmphasis     | 0.090587163  |
| wavelet-HHH | glrlm      | GrayLevelVariance                | 2.547850465  |
| wavelet-HHH | glrlm      | LowGrayLevelRunEmphasis          | 0.09478904   |
| wavelet-HHH | glrlm      | GrayLevelNonUniformityNormalized | 0.178063201  |
| wavelet-HHH | glrlm      | RunVariance                      | 0.08914733   |
| wavelet-HHH | glrlm      | GrayLevelNonUniformity           | 10.40237707  |
| wavelet-HHH | glrlm      | LongRunEmphasis                  | 1.259753135  |
| wavelet-HHH | glrlm      | ShortRunHighGrayLevelEmphasis    | 20.90451906  |
| wavelet-HHH | glrlm      | RunLengthNonUniformity           | 50.71831971  |
| wavelet-HHH | glrlm      | ShortRunEmphasis                 | 0.944467055  |
| wavelet-HHH | glrlm      | LongRunHighGrayLevelEmphasis     | 27.13161999  |
| wavelet-HHH | glrlm      | RunPercentage                    | 0.926739927  |

|             |       |                                      |              |
|-------------|-------|--------------------------------------|--------------|
| wavelet-HHH | glrlm | LongRunLowGrayLevelEmphasis          | 0.113313384  |
| wavelet-HHH | glrlm | RunEntropy                           | 2.961775305  |
| wavelet-HHH | glrlm | HighGrayLevelRunEmphasis             | 21.97146043  |
| wavelet-HHH | glrlm | RunLengthNonUniformityNormalized     | 0.866406588  |
| wavelet-HHH | glszm | GrayLevelVariance                    | 3.936507937  |
| wavelet-HHH | glszm | ZoneVariance                         | 6.095238095  |
| wavelet-HHH | glszm | GrayLevelNonUniformityNormalized     | 0.160997732  |
| wavelet-HHH | glszm | SizeZoneNonUniformityNormalized      | 0.215419501  |
| wavelet-HHH | glszm | SizeZoneNonUniformity                | 4.523809524  |
| wavelet-HHH | glszm | GrayLevelNonUniformity               | 3.380952381  |
| wavelet-HHH | glszm | LargeAreaEmphasis                    | 15.0952381   |
| wavelet-HHH | glszm | SmallAreaHighGrayLevelEmphasis       | 11.72649451  |
| wavelet-HHH | glszm | ZonePercentage                       | 0.333333333  |
| wavelet-HHH | glszm | LargeAreaLowGrayLevelEmphasis        | 1.201301695  |
| wavelet-HHH | glszm | LargeAreaHighGrayLevelEmphasis       | 275.1904762  |
| wavelet-HHH | glszm | HighGrayLevelZoneEmphasis            | 25.71428571  |
| wavelet-HHH | glszm | SmallAreaEmphasis                    | 0.421094172  |
| wavelet-HHH | glszm | LowGrayLevelZoneEmphasis             | 0.125445214  |
| wavelet-HHH | glszm | ZoneEntropy                          | 3.784941827  |
| wavelet-HHH | glszm | SmallAreaLowGrayLevelEmphasis        | 0.081966027  |
| wavelet-HHH | ngtdm | Coarseness                           | 0.081579078  |
| wavelet-HHH | ngtdm | Complexity                           | 32.28719642  |
| wavelet-HHH | ngtdm | Strength                             | 1.397249477  |
| wavelet-HHH | ngtdm | Contrast                             | 0.123396604  |
| wavelet-HHH | ngtdm | Busyness                             | 0.444336495  |
| wavelet-HLL | gldm  | GrayLevelVariance                    | 26.24943311  |
| wavelet-HLL | gldm  | HighGrayLevelEmphasis                | 150.4126984  |
| wavelet-HLL | gldm  | DependenceEntropy                    | 4.71880036   |
| wavelet-HLL | gldm  | DependenceNonUniformity              | 22.26984127  |
| wavelet-HLL | gldm  | GrayLevelNonUniformity               | 4.26984127   |
| wavelet-HLL | gldm  | SmallDependenceEmphasis              | 0.494378307  |
| wavelet-HLL | gldm  | SmallDependenceHighGrayLevelEmphasis | 78.07804233  |
| wavelet-HLL | gldm  | DependenceNonUniformityNormalized    | 0.353489544  |
| wavelet-HLL | gldm  | LargeDependenceEmphasis              | 4.047619048  |
| wavelet-HLL | gldm  | LargeDependenceLowGrayLevelEmphasis  | 0.084040749  |
| wavelet-HLL | gldm  | DependenceVariance                   | 0.598639456  |
| wavelet-HLL | gldm  | LargeDependenceHighGrayLevelEmphasis | 610.4126984  |
| wavelet-HLL | gldm  | SmallDependenceLowGrayLevelEmphasis  | 0.030486014  |
| wavelet-HLL | gldm  | LowGrayLevelEmphasis                 | 0.039283193  |
| wavelet-HLL | glcm  | JointAverage                         | 11.34530672  |
| wavelet-HLL | glcm  | SumAverage                           | 22.69061344  |
| wavelet-HLL | glcm  | JointEntropy                         | 5.655359241  |
| wavelet-HLL | glcm  | ClusterShade                         | -83.47919944 |
| wavelet-HLL | glcm  | MaximumProbability                   | 0.037648331  |
| wavelet-HLL | glcm  | ldmn                                 | 0.926165809  |
| wavelet-HLL | glcm  | JointEnergy                          | 0.021507783  |
| wavelet-HLL | glcm  | Contrast                             | 35.57574248  |
| wavelet-HLL | glcm  | DifferenceEntropy                    | 3.237568498  |
| wavelet-HLL | glcm  | InverseVariance                      | 0.20477586   |
| wavelet-HLL | glcm  | DifferenceVariance                   | 10.61948245  |
| wavelet-HLL | glcm  | ldn                                  | 0.82081918   |

|             |            |                                  |              |
|-------------|------------|----------------------------------|--------------|
| wavelet-HLL | glcm       | Idm                              | 0.188106431  |
| wavelet-HLL | glcm       | Correlation                      | 0.234676899  |
| wavelet-HLL | glcm       | Autocorrelation                  | 134.6855704  |
| wavelet-HLL | glcm       | SumEntropy                       | 4.020741494  |
| wavelet-HLL | glcm       | SumSquares                       | 23.70846658  |
| wavelet-HLL | glcm       | ClusterProminence                | 7915.927348  |
| wavelet-HLL | glcm       | Imc2                             | 0.992485454  |
| wavelet-HLL | glcm       | Imc1                             | -0.552751116 |
| wavelet-HLL | glcm       | DifferenceAverage                | 4.830910032  |
| wavelet-HLL | glcm       | Id                               | 0.279136284  |
| wavelet-HLL | glcm       | ClusterTendency                  | 59.25812384  |
| wavelet-HLL | firstorder | InterquartileRange               | 216.3471178  |
| wavelet-HLL | firstorder | Skewness                         | -0.201659115 |
| wavelet-HLL | firstorder | Uniformity                       | 0.067775258  |
| wavelet-HLL | firstorder | Median                           | -8.656255066 |
| wavelet-HLL | firstorder | Energy                           | 1102030.718  |
| wavelet-HLL | firstorder | RobustMeanAbsoluteDeviation      | 87.05231679  |
| wavelet-HLL | firstorder | MeanAbsoluteDeviation            | 111.7781564  |
| wavelet-HLL | firstorder | TotalEnergy                      | 29754829.38  |
| wavelet-HLL | firstorder | Maximum                          | 188.1425622  |
| wavelet-HLL | firstorder | RootMeanSquared                  | 132.2594083  |
| wavelet-HLL | firstorder | 90Percentile                     | 124.2046251  |
| wavelet-HLL | firstorder | Minimum                          | -280.975593  |
| wavelet-HLL | firstorder | Entropy                          | 4.060027346  |
| wavelet-HLL | firstorder | Range                            | 469.1181552  |
| wavelet-HLL | firstorder | Variance                         | 16343.92357  |
| wavelet-HLL | firstorder | 10Percentile                     | -214.1029741 |
| wavelet-HLL | firstorder | Kurtosis                         | 1.872978626  |
| wavelet-HLL | firstorder | Mean                             | -33.89140757 |
| wavelet-HLL | glrlm      | ShortRunLowGrayLevelEmphasis     | 0.039687813  |
| wavelet-HLL | glrlm      | GrayLevelVariance                | 26.44602587  |
| wavelet-HLL | glrlm      | LowGrayLevelRunEmphasis          | 0.040095195  |
| wavelet-HLL | glrlm      | GrayLevelNonUniformityNormalized | 0.067493465  |
| wavelet-HLL | glrlm      | RunVariance                      | 0.032885517  |
| wavelet-HLL | glrlm      | GrayLevelNonUniformity           | 4.11196375   |
| wavelet-HLL | glrlm      | LongRunEmphasis                  | 1.103493078  |
| wavelet-HLL | glrlm      | ShortRunHighGrayLevelEmphasis    | 146.704064   |
| wavelet-HLL | glrlm      | RunLengthNonUniformity           | 56.9620939   |
| wavelet-HLL | glrlm      | ShortRunEmphasis                 | 0.97412673   |
| wavelet-HLL | glrlm      | LongRunHighGrayLevelEmphasis     | 165.77019    |
| wavelet-HLL | glrlm      | RunPercentage                    | 0.967032967  |
| wavelet-HLL | glrlm      | LongRunLowGrayLevelEmphasis      | 0.041724726  |
| wavelet-HLL | glrlm      | RunEntropy                       | 4.168881083  |
| wavelet-HLL | glrlm      | HighGrayLevelRunEmphasis         | 150.5172892  |
| wavelet-HLL | glrlm      | RunLengthNonUniformityNormalized | 0.934228966  |
| wavelet-HLL | glszm      | GrayLevelVariance                | 29.54766601  |
| wavelet-HLL | glszm      | ZoneVariance                     | 0.852071006  |
| wavelet-HLL | glszm      | GrayLevelNonUniformityNormalized | 0.061143984  |
| wavelet-HLL | glszm      | SizeZoneNonUniformityNormalized  | 0.434582512  |
| wavelet-HLL | glszm      | SizeZoneNonUniformity            | 16.94871795  |
| wavelet-HLL | glszm      | GrayLevelNonUniformity           | 2.384615385  |

|             |       |                                      |              |
|-------------|-------|--------------------------------------|--------------|
| wavelet-HLL | glszm | LargeAreaEmphasis                    | 3.461538462  |
| wavelet-HLL | glszm | SmallAreaHighGrayLevelEmphasis       | 109.0058689  |
| wavelet-HLL | glszm | ZonePercentage                       | 0.619047619  |
| wavelet-HLL | glszm | LargeAreaLowGrayLevelEmphasis        | 0.090096161  |
| wavelet-HLL | glszm | LargeAreaHighGrayLevelEmphasis       | 514.6666667  |
| wavelet-HLL | glszm | HighGrayLevelZoneEmphasis            | 155.1025641  |
| wavelet-HLL | glszm | SmallAreaEmphasis                    | 0.671431624  |
| wavelet-HLL | glszm | LowGrayLevelZoneEmphasis             | 0.053123197  |
| wavelet-HLL | glszm | ZoneEntropy                          | 4.663231385  |
| wavelet-HLL | glszm | SmallAreaLowGrayLevelEmphasis        | 0.046850362  |
| wavelet-HLL | ngtdm | Coarseness                           | 0.076044503  |
| wavelet-HLL | ngtdm | Complexity                           | 510.7517229  |
| wavelet-HLL | ngtdm | Strength                             | 11.22558001  |
| wavelet-HLL | ngtdm | Contrast                             | 0.468161677  |
| wavelet-HLL | ngtdm | Busyness                             | 0.06396404   |
| wavelet-LHL | gldm  | GrayLevelVariance                    | 31.17964223  |
| wavelet-LHL | gldm  | HighGrayLevelEmphasis                | 506.1428571  |
| wavelet-LHL | gldm  | DependenceEntropy                    | 4.984750955  |
| wavelet-LHL | gldm  | DependenceNonUniformity              | 18.3968254   |
| wavelet-LHL | gldm  | GrayLevelNonUniformity               | 4.841269841  |
| wavelet-LHL | gldm  | SmallDependenceEmphasis              | 0.499836861  |
| wavelet-LHL | gldm  | SmallDependenceHighGrayLevelEmphasis | 256.59194    |
| wavelet-LHL | gldm  | DependenceNonUniformityNormalized    | 0.292013102  |
| wavelet-LHL | gldm  | LargeDependenceEmphasis              | 6.301587302  |
| wavelet-LHL | gldm  | LargeDependenceLowGrayLevelEmphasis  | 0.030663759  |
| wavelet-LHL | gldm  | DependenceVariance                   | 1.709750567  |
| wavelet-LHL | gldm  | LargeDependenceHighGrayLevelEmphasis | 2955.349206  |
| wavelet-LHL | gldm  | SmallDependenceLowGrayLevelEmphasis  | 0.017333032  |
| wavelet-LHL | gldm  | LowGrayLevelEmphasis                 | 0.018433772  |
| wavelet-LHL | glcm  | JointAverage                         | 21.94501718  |
| wavelet-LHL | glcm  | SumAverage                           | 43.89003436  |
| wavelet-LHL | glcm  | JointEntropy                         | 5.508495083  |
| wavelet-LHL | glcm  | ClusterShade                         | -59.66168599 |
| wavelet-LHL | glcm  | MaximumProbability                   | 0.051580231  |
| wavelet-LHL | glcm  | ldmn                                 | 0.968213497  |
| wavelet-LHL | glcm  | JointEnergy                          | 0.02456322   |
| wavelet-LHL | glcm  | Contrast                             | 41.76183557  |
| wavelet-LHL | glcm  | DifferenceEntropy                    | 3.241626402  |
| wavelet-LHL | glcm  | InverseVariance                      | 0.214513182  |
| wavelet-LHL | glcm  | DifferenceVariance                   | 17.88041238  |
| wavelet-LHL | glcm  | ldn                                  | 0.885505604  |
| wavelet-LHL | glcm  | ldm                                  | 0.215524243  |
| wavelet-LHL | glcm  | Correlation                          | 0.169038778  |
| wavelet-LHL | glcm  | Autocorrelation                      | 486.9521017  |
| wavelet-LHL | glcm  | SumEntropy                           | 3.976594463  |
| wavelet-LHL | glcm  | SumSquares                           | 26.06584063  |
| wavelet-LHL | glcm  | ClusterProminence                    | 15695.68399  |
| wavelet-LHL | glcm  | lmc2                                 | 0.990962888  |
| wavelet-LHL | glcm  | lmc1                                 | -0.543837439 |
| wavelet-LHL | glcm  | DifferenceAverage                    | 4.816246468  |
| wavelet-LHL | glcm  | ld                                   | 0.303363634  |

|             |            |                                  |              |
|-------------|------------|----------------------------------|--------------|
| wavelet-LHL | glcm       | ClusterTendency                  | 62.50152696  |
| wavelet-LHL | firstorder | InterquartileRange               | 164.8161342  |
| wavelet-LHL | firstorder | Skewness                         | -0.826423513 |
| wavelet-LHL | firstorder | Uniformity                       | 0.076845553  |
| wavelet-LHL | firstorder | Median                           | -66.09127828 |
| wavelet-LHL | firstorder | Energy                           | 1532976.286  |
| wavelet-LHL | firstorder | RobustMeanAbsoluteDeviation      | 64.31417171  |
| wavelet-LHL | firstorder | MeanAbsoluteDeviation            | 103.9720069  |
| wavelet-LHL | firstorder | TotalEnergy                      | 41390359.72  |
| wavelet-LHL | firstorder | Maximum                          | 233.7847892  |
| wavelet-LHL | firstorder | RootMeanSquared                  | 155.9902462  |
| wavelet-LHL | firstorder | 90Percentile                     | 79.98913527  |
| wavelet-LHL | firstorder | Minimum                          | -597.6434424 |
| wavelet-LHL | firstorder | Entropy                          | 4.003906607  |
| wavelet-LHL | firstorder | Range                            | 831.4282316  |
| wavelet-LHL | firstorder | Variance                         | 19661.27446  |
| wavelet-LHL | firstorder | 10Percentile                     | -184.5003859 |
| wavelet-LHL | firstorder | Kurtosis                         | 5.432869531  |
| wavelet-LHL | firstorder | Mean                             | -68.34970708 |
| wavelet-LHL | glrlm      | ShortRunLowGrayLevelEmphasis     | 0.019107087  |
| wavelet-LHL | glrlm      | GrayLevelVariance                | 32.19381307  |
| wavelet-LHL | glrlm      | LowGrayLevelRunEmphasis          | 0.01918682   |
| wavelet-LHL | glrlm      | GrayLevelNonUniformityNormalized | 0.07481019   |
| wavelet-LHL | glrlm      | RunVariance                      | 0.043759058  |
| wavelet-LHL | glrlm      | GrayLevelNonUniformity           | 4.506374074  |
| wavelet-LHL | glrlm      | LongRunEmphasis                  | 1.139855996  |
| wavelet-LHL | glrlm      | ShortRunHighGrayLevelEmphasis    | 491.1274394  |
| wavelet-LHL | glrlm      | RunLengthNonUniformity           | 55.027798    |
| wavelet-LHL | glrlm      | ShortRunEmphasis                 | 0.965036001  |
| wavelet-LHL | glrlm      | LongRunHighGrayLevelEmphasis     | 573.8655585  |
| wavelet-LHL | glrlm      | RunPercentage                    | 0.956043956  |
| wavelet-LHL | glrlm      | LongRunLowGrayLevelEmphasis      | 0.01950575   |
| wavelet-LHL | glrlm      | RunEntropy                       | 4.183962551  |
| wavelet-LHL | glrlm      | HighGrayLevelRunEmphasis         | 507.6750632  |
| wavelet-LHL | glrlm      | RunLengthNonUniformityNormalized | 0.912481883  |
| wavelet-LHL | glszm      | GrayLevelVariance                | 45.65668371  |
| wavelet-LHL | glszm      | ZoneVariance                     | 1.992695398  |
| wavelet-LHL | glszm      | GrayLevelNonUniformityNormalized | 0.057706355  |
| wavelet-LHL | glszm      | SizeZoneNonUniformityNormalized  | 0.497443389  |
| wavelet-LHL | glszm      | SizeZoneNonUniformity            | 18.40540541  |
| wavelet-LHL | glszm      | GrayLevelNonUniformity           | 2.135135135  |
| wavelet-LHL | glszm      | LargeAreaEmphasis                | 4.891891892  |
| wavelet-LHL | glszm      | SmallAreaHighGrayLevelEmphasis   | 374.4426825  |
| wavelet-LHL | glszm      | ZonePercentage                   | 0.587301587  |
| wavelet-LHL | glszm      | LargeAreaLowGrayLevelEmphasis    | 0.038627533  |
| wavelet-LHL | glszm      | LargeAreaHighGrayLevelEmphasis   | 2352.945946  |
| wavelet-LHL | glszm      | HighGrayLevelZoneEmphasis        | 517.8378378  |
| wavelet-LHL | glszm      | SmallAreaEmphasis                | 0.731362383  |
| wavelet-LHL | glszm      | LowGrayLevelZoneEmphasis         | 0.029824284  |
| wavelet-LHL | glszm      | ZoneEntropy                      | 4.702564514  |
| wavelet-LHL | glszm      | SmallAreaLowGrayLevelEmphasis    | 0.029261312  |

|             |            |                                      |              |
|-------------|------------|--------------------------------------|--------------|
| wavelet-LHL | ngtdm      | Coarseness                           | 0.074055744  |
| wavelet-LHL | ngtdm      | Complexity                           | 798.9887457  |
| wavelet-LHL | ngtdm      | Strength                             | 17.66258203  |
| wavelet-LHL | ngtdm      | Contrast                             | 0.567730302  |
| wavelet-LHL | ngtdm      | Busyness                             | 0.035170767  |
| wavelet-LHH | gldm       | GrayLevelVariance                    | 11.67094986  |
| wavelet-LHH | gldm       | HighGrayLevelEmphasis                | 55.06349206  |
| wavelet-LHH | gldm       | DependenceEntropy                    | 4.798475757  |
| wavelet-LHH | gldm       | DependenceNonUniformity              | 17.47619048  |
| wavelet-LHH | gldm       | GrayLevelNonUniformity               | 6.079365079  |
| wavelet-LHH | gldm       | SmallDependenceEmphasis              | 0.436675485  |
| wavelet-LHH | gldm       | SmallDependenceHighGrayLevelEmphasis | 25.90313933  |
| wavelet-LHH | gldm       | DependenceNonUniformityNormalized    | 0.277399849  |
| wavelet-LHH | gldm       | LargeDependenceEmphasis              | 6.587301587  |
| wavelet-LHH | gldm       | LargeDependenceLowGrayLevelEmphasis  | 0.346232904  |
| wavelet-LHH | gldm       | DependenceVariance                   | 1.578231293  |
| wavelet-LHH | gldm       | LargeDependenceHighGrayLevelEmphasis | 339.6666667  |
| wavelet-LHH | gldm       | SmallDependenceLowGrayLevelEmphasis  | 0.040815681  |
| wavelet-LHH | gldm       | LowGrayLevelEmphasis                 | 0.072883734  |
| wavelet-LHH | glcm       | JointAverage                         | 6.623647469  |
| wavelet-LHH | glcm       | SumAverage                           | 13.24729494  |
| wavelet-LHH | glcm       | JointEntropy                         | 5.398721338  |
| wavelet-LHH | glcm       | ClusterShade                         | 23.44118285  |
| wavelet-LHH | glcm       | MaximumProbability                   | 0.050772621  |
| wavelet-LHH | glcm       | Idmn                                 | 0.916482736  |
| wavelet-LHH | glcm       | JointEnergy                          | 0.026609408  |
| wavelet-LHH | glcm       | Contrast                             | 20.88338927  |
| wavelet-LHH | glcm       | DifferenceEntropy                    | 2.984400879  |
| wavelet-LHH | glcm       | InverseVariance                      | 0.256942112  |
| wavelet-LHH | glcm       | DifferenceVariance                   | 7.572415521  |
| wavelet-LHH | glcm       | Idn                                  | 0.813915925  |
| wavelet-LHH | glcm       | Idm                                  | 0.244179048  |
| wavelet-LHH | glcm       | Correlation                          | -0.033026258 |
| wavelet-LHH | glcm       | Autocorrelation                      | 43.68325467  |
| wavelet-LHH | glcm       | SumEntropy                           | 3.574211429  |
| wavelet-LHH | glcm       | SumSquares                           | 10.18534328  |
| wavelet-LHH | glcm       | ClusterProminence                    | 1078.899971  |
| wavelet-LHH | glcm       | Imc2                                 | 0.963665999  |
| wavelet-LHH | glcm       | Imc1                                 | -0.414534647 |
| wavelet-LHH | glcm       | DifferenceAverage                    | 3.605866387  |
| wavelet-LHH | glcm       | Id                                   | 0.334626738  |
| wavelet-LHH | glcm       | ClusterTendency                      | 19.85798386  |
| wavelet-LHH | firstorder | InterquartileRange                   | 126.5098272  |
| wavelet-LHH | firstorder | Skewness                             | 0.427391704  |
| wavelet-LHH | firstorder | Uniformity                           | 0.096497858  |
| wavelet-LHH | firstorder | Median                               | 5.334501407  |
| wavelet-LHH | firstorder | Energy                               | 465698.0748  |
| wavelet-LHH | firstorder | RobustMeanAbsoluteDeviation          | 52.30758406  |
| wavelet-LHH | firstorder | MeanAbsoluteDeviation                | 71.65862765  |
| wavelet-LHH | firstorder | TotalEnergy                          | 12573848.02  |
| wavelet-LHH | firstorder | Maximum                              | 198.6261563  |



|             |            |                                  |              |
|-------------|------------|----------------------------------|--------------|
| wavelet-LHH | firstorder | RootMeanSquared                  | 85.97693256  |
| wavelet-LHH | firstorder | 90Percentile                     | 131.5167255  |
| wavelet-LHH | firstorder | Minimum                          | -128.2689532 |
| wavelet-LHH | firstorder | Entropy                          | 3.505790194  |
| wavelet-LHH | firstorder | Range                            | 326.8951094  |
| wavelet-LHH | firstorder | Variance                         | 7387.269953  |
| wavelet-LHH | firstorder | 10Percentile                     | -105.9624391 |
| wavelet-LHH | firstorder | Kurtosis                         | 2.35531676   |
| wavelet-LHH | firstorder | Mean                             | 2.18242529   |
| wavelet-LHH | glrlm      | ShortRunLowGrayLevelEmphasis     | 0.07206029   |
| wavelet-LHH | glrlm      | GrayLevelVariance                | 11.82336317  |
| wavelet-LHH | glrlm      | LowGrayLevelRunEmphasis          | 0.073884782  |
| wavelet-LHH | glrlm      | GrayLevelNonUniformityNormalized | 0.095092525  |
| wavelet-LHH | glrlm      | RunVariance                      | 0.052702196  |
| wavelet-LHH | glrlm      | GrayLevelNonUniformity           | 5.705984888  |
| wavelet-LHH | glrlm      | LongRunEmphasis                  | 1.15894858   |
| wavelet-LHH | glrlm      | ShortRunHighGrayLevelEmphasis    | 53.39995443  |
| wavelet-LHH | glrlm      | RunLengthNonUniformity           | 54.67546145  |
| wavelet-LHH | glrlm      | ShortRunEmphasis                 | 0.963262729  |
| wavelet-LHH | glrlm      | LongRunHighGrayLevelEmphasis     | 63.24778562  |
| wavelet-LHH | glrlm      | RunPercentage                    | 0.952380952  |
| wavelet-LHH | glrlm      | LongRunLowGrayLevelEmphasis      | 0.082801105  |
| wavelet-LHH | glrlm      | RunEntropy                       | 3.692179663  |
| wavelet-LHH | glrlm      | HighGrayLevelRunEmphasis         | 55.28918721  |
| wavelet-LHH | glrlm      | RunLengthNonUniformityNormalized | 0.909363083  |
| wavelet-LHH | glszm      | GrayLevelVariance                | 13.35380623  |
| wavelet-LHH | glszm      | ZoneVariance                     | 2.125432526  |
| wavelet-LHH | glszm      | GrayLevelNonUniformityNormalized | 0.088235294  |
| wavelet-LHH | glszm      | SizeZoneNonUniformityNormalized  | 0.404844291  |
| wavelet-LHH | glszm      | SizeZoneNonUniformity            | 13.76470588  |
| wavelet-LHH | glszm      | GrayLevelNonUniformity           | 3            |
| wavelet-LHH | glszm      | LargeAreaEmphasis                | 5.558823529  |
| wavelet-LHH | glszm      | SmallAreaHighGrayLevelEmphasis   | 39.62357026  |
| wavelet-LHH | glszm      | ZonePercentage                   | 0.53968254   |
| wavelet-LHH | glszm      | LargeAreaLowGrayLevelEmphasis    | 0.296262423  |
| wavelet-LHH | glszm      | LargeAreaHighGrayLevelEmphasis   | 313.5        |
| wavelet-LHH | glszm      | HighGrayLevelZoneEmphasis        | 57.14705882  |
| wavelet-LHH | glszm      | SmallAreaEmphasis                | 0.656252042  |
| wavelet-LHH | glszm      | LowGrayLevelZoneEmphasis         | 0.087700206  |
| wavelet-LHH | glszm      | ZoneEntropy                      | 4.477024974  |
| wavelet-LHH | glszm      | SmallAreaLowGrayLevelEmphasis    | 0.066394576  |
| wavelet-LHH | ngtdm      | Coarseness                       | 0.060347507  |
| wavelet-LHH | ngtdm      | Complexity                       | 197.8678301  |
| wavelet-LHH | ngtdm      | Strength                         | 3.769200511  |
| wavelet-LHH | ngtdm      | Contrast                         | 0.440782467  |
| wavelet-LHH | ngtdm      | Busyness                         | 0.299986679  |
| wavelet-LLH | gldm       | GrayLevelVariance                | 91.35348954  |
| wavelet-LLH | gldm       | HighGrayLevelEmphasis            | 390.6984127  |
| wavelet-LLH | gldm       | DependenceEntropy                | 5.000934289  |
| wavelet-LLH | gldm       | DependenceNonUniformity          | 24.77777778  |
| wavelet-LLH | gldm       | GrayLevelNonUniformity           | 3.634920635  |

|             |            |                                      |              |
|-------------|------------|--------------------------------------|--------------|
| wavelet-LLH | gldm       | SmallDependenceEmphasis              | 0.597610229  |
| wavelet-LLH | gldm       | SmallDependenceHighGrayLevelEmphasis | 230.8555996  |
| wavelet-LLH | gldm       | DependenceNonUniformityNormalized    | 0.39329806   |
| wavelet-LLH | gldm       | LargeDependenceEmphasis              | 3.888888889  |
| wavelet-LLH | gldm       | LargeDependenceLowGrayLevelEmphasis  | 0.040983695  |
| wavelet-LLH | gldm       | DependenceVariance                   | 0.895439657  |
| wavelet-LLH | gldm       | LargeDependenceHighGrayLevelEmphasis | 1283.492063  |
| wavelet-LLH | gldm       | SmallDependenceLowGrayLevelEmphasis  | 0.02460267   |
| wavelet-LLH | gldm       | LowGrayLevelEmphasis                 | 0.02638647   |
| wavelet-LLH | glcm       | JointAverage                         | 16.97447688  |
| wavelet-LLH | glcm       | SumAverage                           | 33.94895377  |
| wavelet-LLH | glcm       | JointEntropy                         | 5.673726063  |
| wavelet-LLH | glcm       | ClusterShade                         | 4043.667901  |
| wavelet-LLH | glcm       | MaximumProbability                   | 0.038572531  |
| wavelet-LLH | glcm       | ldmn                                 | 0.952786923  |
| wavelet-LLH | glcm       | JointEnergy                          | 0.021352892  |
| wavelet-LLH | glcm       | Contrast                             | 123.3421401  |
| wavelet-LLH | glcm       | DifferenceEntropy                    | 3.48028296   |
| wavelet-LLH | glcm       | InverseVariance                      | 0.124191465  |
| wavelet-LLH | glcm       | DifferenceVariance                   | 37.91455254  |
| wavelet-LLH | glcm       | ldn                                  | 0.860329267  |
| wavelet-LLH | glcm       | ldm                                  | 0.13214681   |
| wavelet-LLH | glcm       | Correlation                          | 0.316659927  |
| wavelet-LLH | glcm       | Autocorrelation                      | 312.1325982  |
| wavelet-LLH | glcm       | SumEntropy                           | 4.205664344  |
| wavelet-LLH | glcm       | SumSquares                           | 85.18905331  |
| wavelet-LLH | glcm       | ClusterProminence                    | 249002.5028  |
| wavelet-LLH | glcm       | lmc2                                 | 0.998130047  |
| wavelet-LLH | glcm       | lmc1                                 | -0.671388363 |
| wavelet-LLH | glcm       | DifferenceAverage                    | 8.452671131  |
| wavelet-LLH | glcm       | ld                                   | 0.215011295  |
| wavelet-LLH | glcm       | ClusterTendency                      | 217.4140732  |
| wavelet-LLH | firstorder | InterquartileRange                   | 203.1974165  |
| wavelet-LLH | firstorder | Skewness                             | 1.330902444  |
| wavelet-LLH | firstorder | Uniformity                           | 0.057697153  |
| wavelet-LLH | firstorder | Median                               | 93.80092818  |
| wavelet-LLH | firstorder | Energy                               | 4524148.825  |
| wavelet-LLH | firstorder | RobustMeanAbsoluteDeviation          | 91.2355013   |
| wavelet-LLH | firstorder | MeanAbsoluteDeviation                | 166.0571502  |
| wavelet-LLH | firstorder | TotalEnergy                          | 122152018.3  |
| wavelet-LLH | firstorder | Maximum                              | 865.5782808  |
| wavelet-LLH | firstorder | RootMeanSquared                      | 267.9773985  |
| wavelet-LLH | firstorder | 90Percentile                         | 306.7785167  |
| wavelet-LLH | firstorder | Minimum                              | -291.9770602 |
| wavelet-LLH | firstorder | Entropy                              | 4.360227495  |
| wavelet-LLH | firstorder | Range                                | 1157.555341  |
| wavelet-LLH | firstorder | Variance                             | 57379.05452  |
| wavelet-LLH | firstorder | 10Percentile                         | -155.0868888 |
| wavelet-LLH | firstorder | Kurtosis                             | 5.67396608   |
| wavelet-LLH | firstorder | Mean                                 | 120.1367204  |
| wavelet-LLH | glrlm      | ShortRunLowGrayLevelEmphasis         | 0.026925003  |

|             |       |                                      |             |
|-------------|-------|--------------------------------------|-------------|
| wavelet-LLH | glrlm | GrayLevelVariance                    | 92.43952198 |
| wavelet-LLH | glrlm | LowGrayLevelRunEmphasis              | 0.02703038  |
| wavelet-LLH | glrlm | GrayLevelNonUniformityNormalized     | 0.056615403 |
| wavelet-LLH | glrlm | RunVariance                          | 0.030582024 |
| wavelet-LLH | glrlm | GrayLevelNonUniformity               | 3.467859699 |
| wavelet-LLH | glrlm | LongRunEmphasis                      | 1.092381999 |
| wavelet-LLH | glrlm | ShortRunHighGrayLevelEmphasis        | 384.5606123 |
| wavelet-LLH | glrlm | RunLengthNonUniformity               | 58.0445002  |
| wavelet-LLH | glrlm | ShortRunEmphasis                     | 0.978378122 |
| wavelet-LLH | glrlm | LongRunHighGrayLevelEmphasis         | 423.5591032 |
| wavelet-LLH | glrlm | RunPercentage                        | 0.971916972 |
| wavelet-LLH | glrlm | LongRunLowGrayLevelEmphasis          | 0.027478084 |
| wavelet-LLH | glrlm | RunEntropy                           | 4.455913949 |
| wavelet-LLH | glrlm | HighGrayLevelRunEmphasis             | 392.0950585 |
| wavelet-LLH | glrlm | RunLengthNonUniformityNormalized     | 0.946244715 |
| wavelet-LLH | glszm | GrayLevelVariance                    | 104.4643595 |
| wavelet-LLH | glszm | ZoneVariance                         | 0.790805785 |
| wavelet-LLH | glszm | GrayLevelNonUniformityNormalized     | 0.048553719 |
| wavelet-LLH | glszm | SizeZoneNonUniformityNormalized      | 0.550619835 |
| wavelet-LLH | glszm | SizeZoneNonUniformity                | 24.22727273 |
| wavelet-LLH | glszm | GrayLevelNonUniformity               | 2.136363636 |
| wavelet-LLH | glszm | LargeAreaEmphasis                    | 2.840909091 |
| wavelet-LLH | glszm | SmallAreaHighGrayLevelEmphasis       | 293.4665404 |
| wavelet-LLH | glszm | ZonePercentage                       | 0.698412698 |
| wavelet-LLH | glszm | LargeAreaLowGrayLevelEmphasis        | 0.044567646 |
| wavelet-LLH | glszm | LargeAreaHighGrayLevelEmphasis       | 997.1818182 |
| wavelet-LLH | glszm | HighGrayLevelZoneEmphasis            | 397.3409091 |
| wavelet-LLH | glszm | SmallAreaEmphasis                    | 0.767045455 |
| wavelet-LLH | glszm | LowGrayLevelZoneEmphasis             | 0.035812285 |
| wavelet-LLH | glszm | ZoneEntropy                          | 4.896820539 |
| wavelet-LLH | glszm | SmallAreaLowGrayLevelEmphasis        | 0.034870261 |
| wavelet-LLH | ngtdm | Coarseness                           | 0.074407426 |
| wavelet-LLH | ngtdm | Complexity                           | 1953.480009 |
| wavelet-LLH | ngtdm | Strength                             | 38.99533531 |
| wavelet-LLH | ngtdm | Contrast                             | 1.526492273 |
| wavelet-LLH | ngtdm | Busyness                             | 0.036507834 |
| wavelet-LLL | gldm  | GrayLevelVariance                    | 255.9506173 |
| wavelet-LLL | gldm  | HighGrayLevelEmphasis                | 1084.111111 |
| wavelet-LLL | gldm  | DependenceEntropy                    | 5.489107106 |
| wavelet-LLL | gldm  | DependenceNonUniformity              | 42.93650794 |
| wavelet-LLL | gldm  | GrayLevelNonUniformity               | 1.857142857 |
| wavelet-LLL | gldm  | SmallDependenceEmphasis              | 0.852733686 |
| wavelet-LLL | gldm  | SmallDependenceHighGrayLevelEmphasis | 917.2345679 |
| wavelet-LLL | gldm  | DependenceNonUniformityNormalized    | 0.681531872 |
| wavelet-LLL | gldm  | LargeDependenceEmphasis              | 1.73015873  |
| wavelet-LLL | gldm  | LargeDependenceLowGrayLevelEmphasis  | 0.038829851 |
| wavelet-LLL | gldm  | DependenceVariance                   | 0.23633157  |
| wavelet-LLL | gldm  | LargeDependenceHighGrayLevelEmphasis | 1943.857143 |
| wavelet-LLL | gldm  | SmallDependenceLowGrayLevelEmphasis  | 0.037414361 |
| wavelet-LLL | gldm  | LowGrayLevelEmphasis                 | 0.037648035 |
| wavelet-LLL | glcm  | JointAverage                         | 30.40971156 |

|             |            |                                  |              |
|-------------|------------|----------------------------------|--------------|
| wavelet-LLL | glcm       | SumAverage                       | 60.81942313  |
| wavelet-LLL | glcm       | JointEntropy                     | 5.818291799  |
| wavelet-LLL | glcm       | ClusterShade                     | 1305.307501  |
| wavelet-LLL | glcm       | MaximumProbability               | 0.025804297  |
| wavelet-LLL | glcm       | Idmn                             | 0.918677623  |
| wavelet-LLL | glcm       | JointEnergy                      | 0.018734907  |
| wavelet-LLL | glcm       | Contrast                         | 443.901099   |
| wavelet-LLL | glcm       | DifferenceEntropy                | 4.051822018  |
| wavelet-LLL | glcm       | InverseVariance                  | 0.063867256  |
| wavelet-LLL | glcm       | DifferenceVariance               | 99.28337406  |
| wavelet-LLL | glcm       | Idn                              | 0.808744651  |
| wavelet-LLL | glcm       | Idm                              | 0.054460311  |
| wavelet-LLL | glcm       | Correlation                      | 0.166863696  |
| wavelet-LLL | glcm       | Autocorrelation                  | 954.0663879  |
| wavelet-LLL | glcm       | SumEntropy                       | 4.563924777  |
| wavelet-LLL | glcm       | SumSquares                       | 250.619017   |
| wavelet-LLL | glcm       | ClusterProminence                | 780404.0231  |
| wavelet-LLL | glcm       | Imc2                             | 0.999868273  |
| wavelet-LLL | glcm       | Imc1                             | -0.833707688 |
| wavelet-LLL | glcm       | DifferenceAverage                | 17.42228961  |
| wavelet-LLL | glcm       | Id                               | 0.115770405  |
| wavelet-LLL | glcm       | ClusterTendency                  | 558.5749689  |
| wavelet-LLL | firstorder | InterquartileRange               | 640.5889363  |
| wavelet-LLL | firstorder | Skewness                         | 0.140573523  |
| wavelet-LLL | firstorder | Uniformity                       | 0.029478458  |
| wavelet-LLL | firstorder | Median                           | -1137.589673 |
| wavelet-LLL | firstorder | Energy                           | 88745519.58  |
| wavelet-LLL | firstorder | RobustMeanAbsoluteDeviation      | 262.6498881  |
| wavelet-LLL | firstorder | MeanAbsoluteDeviation            | 343.5370429  |
| wavelet-LLL | firstorder | TotalEnergy                      | 2396129029   |
| wavelet-LLL | firstorder | Maximum                          | -162.2898935 |
| wavelet-LLL | firstorder | RootMeanSquared                  | 1186.869429  |
| wavelet-LLL | firstorder | 90Percentile                     | -619.2088149 |
| wavelet-LLL | firstorder | Minimum                          | -1821.117048 |
| wavelet-LLL | firstorder | Entropy                          | 5.262683892  |
| wavelet-LLL | firstorder | Range                            | 1658.827155  |
| wavelet-LLL | firstorder | Variance                         | 160011.6597  |
| wavelet-LLL | firstorder | 10Percentile                     | -1638.03361  |
| wavelet-LLL | firstorder | Kurtosis                         | 2.100510719  |
| wavelet-LLL | firstorder | Mean                             | -1117.428916 |
| wavelet-LLL | glrlm      | ShortRunLowGrayLevelEmphasis     | 0.037954805  |
| wavelet-LLL | glrlm      | GrayLevelVariance                | 256.6916025  |
| wavelet-LLL | glrlm      | LowGrayLevelRunEmphasis          | 0.03796543   |
| wavelet-LLL | glrlm      | GrayLevelNonUniformityNormalized | 0.029244006  |
| wavelet-LLL | glrlm      | RunVariance                      | 0.008538816  |
| wavelet-LLL | glrlm      | GrayLevelNonUniformity           | 1.826941963  |
| wavelet-LLL | glrlm      | LongRunEmphasis                  | 1.026420697  |
| wavelet-LLL | glrlm      | ShortRunHighGrayLevelEmphasis    | 1075.827142  |
| wavelet-LLL | glrlm      | RunLengthNonUniformity           | 61.41736159  |
| wavelet-LLL | glrlm      | ShortRunEmphasis                 | 0.993394826  |
| wavelet-LLL | glrlm      | LongRunHighGrayLevelEmphasis     | 1114.03777   |

|             |       |                                      |              |
|-------------|-------|--------------------------------------|--------------|
| wavelet-LLL | glrlm | RunPercentage                        | 0.991452991  |
| wavelet-LLL | glrlm | LongRunLowGrayLevelEmphasis          | 0.038007932  |
| wavelet-LLL | glrlm | RunEntropy                           | 5.285416323  |
| wavelet-LLL | glrlm | HighGrayLevelRunEmphasis             | 1083.469267  |
| wavelet-LLL | glrlm | RunLengthNonUniformityNormalized     | 0.982922369  |
| wavelet-LLL | glszm | GrayLevelVariance                    | 266.4591837  |
| wavelet-LLL | glszm | ZoneVariance                         | 0.180803571  |
| wavelet-LLL | glszm | GrayLevelNonUniformityNormalized     | 0.026785714  |
| wavelet-LLL | glszm | SizeZoneNonUniformityNormalized      | 0.833545918  |
| wavelet-LLL | glszm | SizeZoneNonUniformity                | 46.67857143  |
| wavelet-LLL | glszm | GrayLevelNonUniformity               | 1.5          |
| wavelet-LLL | glszm | LargeAreaEmphasis                    | 1.446428571  |
| wavelet-LLL | glszm | SmallAreaHighGrayLevelEmphasis       | 995.6433532  |
| wavelet-LLL | glszm | ZonePercentage                       | 0.888888889  |
| wavelet-LLL | glszm | LargeAreaLowGrayLevelEmphasis        | 0.042880623  |
| wavelet-LLL | glszm | LargeAreaHighGrayLevelEmphasis       | 1606.910714  |
| wavelet-LLL | glszm | HighGrayLevelZoneEmphasis            | 1074.642857  |
| wavelet-LLL | glszm | SmallAreaEmphasis                    | 0.928075397  |
| wavelet-LLL | glszm | LowGrayLevelZoneEmphasis             | 0.0421533    |
| wavelet-LLL | glszm | ZoneEntropy                          | 5.436731931  |
| wavelet-LLL | glszm | SmallAreaLowGrayLevelEmphasis        | 0.042040971  |
| wavelet-LLL | ngtdm | Coarseness                           | 0.048677823  |
| wavelet-LLL | ngtdm | Complexity                           | 10968.68063  |
| wavelet-LLL | ngtdm | Strength                             | 64.00466454  |
| wavelet-LLL | ngtdm | Contrast                             | 3.23636771   |
| wavelet-LLL | ngtdm | Busyness                             | 0.020381478  |
| wavelet-HHL | gldm  | GrayLevelVariance                    | 5.741496599  |
| wavelet-HHL | gldm  | HighGrayLevelEmphasis                | 66.73015873  |
| wavelet-HHL | gldm  | DependenceEntropy                    | 4.794684789  |
| wavelet-HHL | gldm  | DependenceNonUniformity              | 16.80952381  |
| wavelet-HHL | gldm  | GrayLevelNonUniformity               | 7.476190476  |
| wavelet-HHL | gldm  | SmallDependenceEmphasis              | 0.32393739   |
| wavelet-HHL | gldm  | SmallDependenceHighGrayLevelEmphasis | 20.89083333  |
| wavelet-HHL | gldm  | DependenceNonUniformityNormalized    | 0.266817838  |
| wavelet-HHL | gldm  | LargeDependenceEmphasis              | 7.253968254  |
| wavelet-HHL | gldm  | LargeDependenceLowGrayLevelEmphasis  | 0.150022784  |
| wavelet-HHL | gldm  | DependenceVariance                   | 1.200806248  |
| wavelet-HHL | gldm  | LargeDependenceHighGrayLevelEmphasis | 493.6825397  |
| wavelet-HHL | gldm  | SmallDependenceLowGrayLevelEmphasis  | 0.024310939  |
| wavelet-HHL | gldm  | LowGrayLevelEmphasis                 | 0.037440139  |
| wavelet-HHL | glcm  | JointAverage                         | 7.808359861  |
| wavelet-HHL | glcm  | SumAverage                           | 15.61671972  |
| wavelet-HHL | glcm  | JointEntropy                         | 5.218692009  |
| wavelet-HHL | glcm  | ClusterShade                         | -10.60365411 |
| wavelet-HHL | glcm  | MaximumProbability                   | 0.05323461   |
| wavelet-HHL | glcm  | ldmn                                 | 0.935659032  |
| wavelet-HHL | glcm  | JointEnergy                          | 0.030678224  |
| wavelet-HHL | glcm  | Contrast                             | 11.11312403  |
| wavelet-HHL | glcm  | DifferenceEntropy                    | 2.63134274   |
| wavelet-HHL | glcm  | InverseVariance                      | 0.295860015  |
| wavelet-HHL | glcm  | DifferenceVariance                   | 3.745726246  |

|             |            |                                  |              |
|-------------|------------|----------------------------------|--------------|
| wavelet-HHL | glcm       | Idn                              | 0.831673634  |
| wavelet-HHL | glcm       | Idm                              | 0.290285335  |
| wavelet-HHL | glcm       | Correlation                      | 0.007711834  |
| wavelet-HHL | glcm       | Autocorrelation                  | 61.03151168  |
| wavelet-HHL | glcm       | SumEntropy                       | 3.305443661  |
| wavelet-HHL | glcm       | SumSquares                       | 5.57569756   |
| wavelet-HHL | glcm       | ClusterProminence                | 380.2250491  |
| wavelet-HHL | glcm       | Imc2                             | 0.934936316  |
| wavelet-HHL | glcm       | Imc1                             | -0.346931251 |
| wavelet-HHL | glcm       | DifferenceAverage                | 2.675965867  |
| wavelet-HHL | glcm       | Id                               | 0.381136208  |
| wavelet-HHL | glcm       | ClusterTendency                  | 11.1896662   |
| wavelet-HHL | firstorder | InterquartileRange               | 82.23906203  |
| wavelet-HHL | firstorder | Skewness                         | -0.313822341 |
| wavelet-HHL | firstorder | Uniformity                       | 0.11866969   |
| wavelet-HHL | firstorder | Median                           | 3.393849771  |
| wavelet-HHL | firstorder | Energy                           | 227564.7062  |
| wavelet-HHL | firstorder | RobustMeanAbsoluteDeviation      | 33.16180438  |
| wavelet-HHL | firstorder | MeanAbsoluteDeviation            | 48.01145905  |
| wavelet-HHL | firstorder | TotalEnergy                      | 6144247.066  |
| wavelet-HHL | firstorder | Maximum                          | 122.9332148  |
| wavelet-HHL | firstorder | RootMeanSquared                  | 60.10106649  |
| wavelet-HHL | firstorder | 90Percentile                     | 82.68927963  |
| wavelet-HHL | firstorder | Minimum                          | -155.43736   |
| wavelet-HHL | firstorder | Entropy                          | 3.212472079  |
| wavelet-HHL | firstorder | Range                            | 278.3705748  |
| wavelet-HHL | firstorder | Variance                         | 3554.074606  |
| wavelet-HHL | firstorder | 10Percentile                     | -73.65470565 |
| wavelet-HHL | firstorder | Kurtosis                         | 2.786111934  |
| wavelet-HHL | firstorder | Mean                             | 7.619946617  |
| wavelet-HHL | glrlm      | ShortRunLowGrayLevelEmphasis     | 0.037738275  |
| wavelet-HHL | glrlm      | GrayLevelVariance                | 5.886291119  |
| wavelet-HHL | glrlm      | LowGrayLevelRunEmphasis          | 0.038578386  |
| wavelet-HHL | glrlm      | GrayLevelNonUniformityNormalized | 0.117678973  |
| wavelet-HHL | glrlm      | RunVariance                      | 0.05582142   |
| wavelet-HHL | glrlm      | GrayLevelNonUniformity           | 6.997301207  |
| wavelet-HHL | glrlm      | LongRunEmphasis                  | 1.180960409  |
| wavelet-HHL | glrlm      | ShortRunHighGrayLevelEmphasis    | 63.55557971  |
| wavelet-HHL | glrlm      | RunLengthNonUniformity           | 52.90802951  |
| wavelet-HHL | glrlm      | ShortRunEmphasis                 | 0.954759898  |
| wavelet-HHL | glrlm      | LongRunHighGrayLevelEmphasis     | 78.98361822  |
| wavelet-HHL | glrlm      | RunPercentage                    | 0.943833944  |
| wavelet-HHL | glrlm      | LongRunLowGrayLevelEmphasis      | 0.041938829  |
| wavelet-HHL | glrlm      | RunEntropy                       | 3.448760421  |
| wavelet-HHL | glrlm      | HighGrayLevelRunEmphasis         | 66.64118741  |
| wavelet-HHL | glrlm      | RunLengthNonUniformityNormalized | 0.88835716   |
| wavelet-HHL | glszm      | GrayLevelVariance                | 8.471879287  |
| wavelet-HHL | glszm      | ZoneVariance                     | 2.518518519  |
| wavelet-HHL | glszm      | GrayLevelNonUniformityNormalized | 0.105624143  |
| wavelet-HHL | glszm      | SizeZoneNonUniformityNormalized  | 0.27297668   |
| wavelet-HHL | glszm      | SizeZoneNonUniformity            | 7.37037037   |

|             |       |                                      |              |
|-------------|-------|--------------------------------------|--------------|
| wavelet-HHL | glszm | GrayLevelNonUniformity               | 2.851851852  |
| wavelet-HHL | glszm | LargeAreaEmphasis                    | 7.962962963  |
| wavelet-HHL | glszm | SmallAreaHighGrayLevelEmphasis       | 32.89720207  |
| wavelet-HHL | glszm | ZonePercentage                       | 0.428571429  |
| wavelet-HHL | glszm | LargeAreaLowGrayLevelEmphasis        | 0.188297121  |
| wavelet-HHL | glszm | LargeAreaHighGrayLevelEmphasis       | 542.8888889  |
| wavelet-HHL | glszm | HighGrayLevelZoneEmphasis            | 65           |
| wavelet-HHL | glszm | SmallAreaEmphasis                    | 0.517864911  |
| wavelet-HHL | glszm | LowGrayLevelZoneEmphasis             | 0.061812912  |
| wavelet-HHL | glszm | ZoneEntropy                          | 4.430632409  |
| wavelet-HHL | glszm | SmallAreaLowGrayLevelEmphasis        | 0.051848925  |
| wavelet-HHL | ngtdm | Coarseness                           | 0.088893569  |
| wavelet-HHL | ngtdm | Complexity                           | 89.27794751  |
| wavelet-HHL | ngtdm | Strength                             | 3.084767595  |
| wavelet-HHL | ngtdm | Contrast                             | 0.207324682  |
| wavelet-HHL | ngtdm | Busyness                             | 0.177178172  |
| wavelet-HLH | gldm  | GrayLevelVariance                    | 4.216679264  |
| wavelet-HLH | gldm  | HighGrayLevelEmphasis                | 44.12698413  |
| wavelet-HLH | gldm  | DependenceEntropy                    | 4.629758447  |
| wavelet-HLH | gldm  | DependenceNonUniformity              | 12.87301587  |
| wavelet-HLH | gldm  | GrayLevelNonUniformity               | 8.968253968  |
| wavelet-HLH | gldm  | SmallDependenceEmphasis              | 0.379457402  |
| wavelet-HLH | gldm  | SmallDependenceHighGrayLevelEmphasis | 18.74327952  |
| wavelet-HLH | gldm  | DependenceNonUniformityNormalized    | 0.204333585  |
| wavelet-HLH | gldm  | LargeDependenceEmphasis              | 9.857142857  |
| wavelet-HLH | gldm  | LargeDependenceLowGrayLevelEmphasis  | 0.31713826   |
| wavelet-HLH | gldm  | DependenceVariance                   | 2.489795918  |
| wavelet-HLH | gldm  | LargeDependenceHighGrayLevelEmphasis | 375.047619   |
| wavelet-HLH | gldm  | SmallDependenceLowGrayLevelEmphasis  | 0.031097673  |
| wavelet-HLH | gldm  | LowGrayLevelEmphasis                 | 0.050727985  |
| wavelet-HLH | glcm  | JointAverage                         | 6.164052413  |
| wavelet-HLH | glcm  | SumAverage                           | 12.32810483  |
| wavelet-HLH | glcm  | JointEntropy                         | 4.988980842  |
| wavelet-HLH | glcm  | ClusterShade                         | 6.690452485  |
| wavelet-HLH | glcm  | MaximumProbability                   | 0.080227709  |
| wavelet-HLH | glcm  | Idmn                                 | 0.938435042  |
| wavelet-HLH | glcm  | JointEnergy                          | 0.037671127  |
| wavelet-HLH | glcm  | Contrast                             | 8.922005862  |
| wavelet-HLH | glcm  | DifferenceEntropy                    | 2.539976648  |
| wavelet-HLH | glcm  | InverseVariance                      | 0.340941292  |
| wavelet-HLH | glcm  | DifferenceVariance                   | 3.224371905  |
| wavelet-HLH | glcm  | Idn                                  | 0.837280081  |
| wavelet-HLH | glcm  | Idm                                  | 0.326119454  |
| wavelet-HLH | glcm  | Correlation                          | -0.04318137  |
| wavelet-HLH | glcm  | Autocorrelation                      | 37.87204745  |
| wavelet-HLH | glcm  | SumEntropy                           | 3.203191716  |
| wavelet-HLH | glcm  | SumSquares                           | 4.316640177  |
| wavelet-HLH | glcm  | ClusterProminence                    | 206.2235892  |
| wavelet-HLH | glcm  | Imc2                                 | 0.927272265  |
| wavelet-HLH | glcm  | Imc1                                 | -0.341763463 |
| wavelet-HLH | glcm  | DifferenceAverage                    | 2.365054058  |

|             |            |                                  |              |
|-------------|------------|----------------------------------|--------------|
| wavelet-HLH | glcm       | Id                               | 0.409620028  |
| wavelet-HLH | glcm       | ClusterTendency                  | 8.344554846  |
| wavelet-HLH | firstorder | InterquartileRange               | 58.02869321  |
| wavelet-HLH | firstorder | Skewness                         | -0.100947388 |
| wavelet-HLH | firstorder | Uniformity                       | 0.142353238  |
| wavelet-HLH | firstorder | Median                           | -6.86178136  |
| wavelet-HLH | firstorder | Energy                           | 152775.2821  |
| wavelet-HLH | firstorder | RobustMeanAbsoluteDeviation      | 25.10790205  |
| wavelet-HLH | firstorder | MeanAbsoluteDeviation            | 38.47695472  |
| wavelet-HLH | firstorder | TotalEnergy                      | 4124932.617  |
| wavelet-HLH | firstorder | Maximum                          | 112.3421412  |
| wavelet-HLH | firstorder | RootMeanSquared                  | 49.24433447  |
| wavelet-HLH | firstorder | 90Percentile                     | 62.34373268  |
| wavelet-HLH | firstorder | Minimum                          | -135.1515273 |
| wavelet-HLH | firstorder | Entropy                          | 3.041948529  |
| wavelet-HLH | firstorder | Range                            | 247.4936686  |
| wavelet-HLH | firstorder | Variance                         | 2414.149769  |
| wavelet-HLH | firstorder | 10Percentile                     | -65.71839163 |
| wavelet-HLH | firstorder | Kurtosis                         | 2.978606465  |
| wavelet-HLH | firstorder | Mean                             | -3.294648444 |
| wavelet-HLH | glrlm      | ShortRunLowGrayLevelEmphasis     | 0.050592191  |
| wavelet-HLH | glrlm      | GrayLevelVariance                | 4.41383444   |
| wavelet-HLH | glrlm      | LowGrayLevelRunEmphasis          | 0.052191098  |
| wavelet-HLH | glrlm      | GrayLevelNonUniformityNormalized | 0.137797444  |
| wavelet-HLH | glrlm      | RunVariance                      | 0.073341313  |
| wavelet-HLH | glrlm      | GrayLevelNonUniformity           | 8.118055595  |
| wavelet-HLH | glrlm      | LongRunEmphasis                  | 1.228614781  |
| wavelet-HLH | glrlm      | ShortRunHighGrayLevelEmphasis    | 42.54243961  |
| wavelet-HLH | glrlm      | RunLengthNonUniformity           | 51.75195789  |
| wavelet-HLH | glrlm      | ShortRunEmphasis                 | 0.947541202  |
| wavelet-HLH | glrlm      | LongRunHighGrayLevelEmphasis     | 53.2582315   |
| wavelet-HLH | glrlm      | RunPercentage                    | 0.934065934  |
| wavelet-HLH | glrlm      | LongRunLowGrayLevelEmphasis      | 0.059284009  |
| wavelet-HLH | glrlm      | RunEntropy                       | 3.315255684  |
| wavelet-HLH | glrlm      | HighGrayLevelRunEmphasis         | 44.56011486  |
| wavelet-HLH | glrlm      | RunLengthNonUniformityNormalized | 0.875214556  |
| wavelet-HLH | glszm      | GrayLevelVariance                | 6.648888889  |
| wavelet-HLH | glszm      | ZoneVariance                     | 3.09         |
| wavelet-HLH | glszm      | GrayLevelNonUniformityNormalized | 0.108888889  |
| wavelet-HLH | glszm      | SizeZoneNonUniformityNormalized  | 0.395555556  |
| wavelet-HLH | glszm      | SizeZoneNonUniformity            | 11.86666667  |
| wavelet-HLH | glszm      | GrayLevelNonUniformity           | 3.266666667  |
| wavelet-HLH | glszm      | LargeAreaEmphasis                | 7.5          |
| wavelet-HLH | glszm      | SmallAreaHighGrayLevelEmphasis   | 33.11458333  |
| wavelet-HLH | glszm      | ZonePercentage                   | 0.476190476  |
| wavelet-HLH | glszm      | LargeAreaLowGrayLevelEmphasis    | 0.26661249   |
| wavelet-HLH | glszm      | LargeAreaHighGrayLevelEmphasis   | 301.4666667  |
| wavelet-HLH | glszm      | HighGrayLevelZoneEmphasis        | 48.46666667  |
| wavelet-HLH | glszm      | SmallAreaEmphasis                | 0.649770833  |
| wavelet-HLH | glszm      | LowGrayLevelZoneEmphasis         | 0.072156833  |
| wavelet-HLH | glszm      | ZoneEntropy                      | 4.298068512  |



|             |       |                               |             |
|-------------|-------|-------------------------------|-------------|
| wavelet-HLH | glszm | SmallAreaLowGrayLevelEmphasis | 0.06038675  |
| wavelet-HLH | ngtdm | Coarseness                    | 0.097055732 |
| wavelet-HLH | ngtdm | Complexity                    | 73.28869944 |
| wavelet-HLH | ngtdm | Strength                      | 2.922044122 |
| wavelet-HLH | ngtdm | Contrast                      | 0.131180484 |
| wavelet-HLH | ngtdm | Busyness                      | 0.168863575 |

| Image type | Feature Class | Feature Name                         |                                                                                                                                                                                                                                                                                                                                                                                                                   |
|------------|---------------|--------------------------------------|-------------------------------------------------------------------------------------------------------------------------------------------------------------------------------------------------------------------------------------------------------------------------------------------------------------------------------------------------------------------------------------------------------------------|
| general    | info          | BoundingBox                          | 3: RTSTRUCT: C99-DNU_segment_RUL ITV<br>(0, 0, 1, 9, 8, 6)                                                                                                                                                                                                                                                                                                                                                        |
| general    | info          | EnabledImageTypes                    | {u'Original': {}, u'Wavelet': {}}                                                                                                                                                                                                                                                                                                                                                                                 |
|            |               |                                      | {'distances': [1], 'additionalInfo': True, 'force2D': False, 'interpolator': 'sitkBSpline', 'resampledPixelSpacing': [3.0], 'label': 1, 'normalizeScale': 1, 'normalize': False, 'force2Ddimension': 0, 'removeOutliers': None, 'minimumROISize': None, u'binWidth': 25.0, 'minimumROIDimensions': 1, u'correctMask': True, 'preCrop': False, u'symmetricalGLCM': True, 'resegmentRange': None, 'padDistance': 5} |
| general    | info          | GeneralSettings                      |                                                                                                                                                                                                                                                                                                                                                                                                                   |
| general    | info          | ImageHash                            | 60d8e2eb90d6a7f85ad8bdb42ce0114614545db2<br>(0.9765624999999998, 0.9765624999999998, 1.9999999999999999)                                                                                                                                                                                                                                                                                                          |
| general    | info          | ImageSpacing                         |                                                                                                                                                                                                                                                                                                                                                                                                                   |
| general    | info          | MaskHash                             | 16b6ac16f85667d36a89764bfba8e765dc7a0698                                                                                                                                                                                                                                                                                                                                                                          |
| general    | info          | NumpyVersion                         | 1.13.1                                                                                                                                                                                                                                                                                                                                                                                                            |
| general    | info          | PyWaveletVersion                     | 0.5.2                                                                                                                                                                                                                                                                                                                                                                                                             |
| general    | info          | SimpleITKVersion                     | 1.1.0                                                                                                                                                                                                                                                                                                                                                                                                             |
| general    | info          | Version                              | 1.3.0.post102+g1b0eb74                                                                                                                                                                                                                                                                                                                                                                                            |
| general    | info          | VolumeNum                            | 1                                                                                                                                                                                                                                                                                                                                                                                                                 |
| general    | info          | VoxelNum                             | 212                                                                                                                                                                                                                                                                                                                                                                                                               |
| original   | shape         | Maximum3DDiameter                    | 27.33130074                                                                                                                                                                                                                                                                                                                                                                                                       |
| original   | shape         | Maximum2DDiameterSlice               | 25.63201124                                                                                                                                                                                                                                                                                                                                                                                                       |
| original   | shape         | Sphericity                           | 0.863145824                                                                                                                                                                                                                                                                                                                                                                                                       |
| original   | shape         | MinorAxis                            | 20.55432546                                                                                                                                                                                                                                                                                                                                                                                                       |
| original   | shape         | Elongation                           | 0.833973811                                                                                                                                                                                                                                                                                                                                                                                                       |
| original   | shape         | SurfaceVolumeRatio                   | 0.313208406                                                                                                                                                                                                                                                                                                                                                                                                       |
| original   | shape         | Volume                               | 5724                                                                                                                                                                                                                                                                                                                                                                                                              |
| original   | shape         | MajorAxis                            | 24.64624809                                                                                                                                                                                                                                                                                                                                                                                                       |
| original   | shape         | SurfaceArea                          | 1792.804915                                                                                                                                                                                                                                                                                                                                                                                                       |
| original   | shape         | Flatness                             | 0.656625473                                                                                                                                                                                                                                                                                                                                                                                                       |
| original   | shape         | LeastAxis                            | 16.18335432                                                                                                                                                                                                                                                                                                                                                                                                       |
| original   | shape         | Maximum2DDiameterColumn              | 25.63201124                                                                                                                                                                                                                                                                                                                                                                                                       |
| original   | shape         | Maximum2DDiameterRow                 | 22.84731932                                                                                                                                                                                                                                                                                                                                                                                                       |
| original   | gldm          | GrayLevelVariance                    | 71.03976059                                                                                                                                                                                                                                                                                                                                                                                                       |
| original   | gldm          | HighGrayLevelEmphasis                | 625.7311321                                                                                                                                                                                                                                                                                                                                                                                                       |
| original   | gldm          | DependenceEntropy                    | 5.957027194                                                                                                                                                                                                                                                                                                                                                                                                       |
| original   | gldm          | DependenceNonUniformity              | 50.88679245                                                                                                                                                                                                                                                                                                                                                                                                       |
| original   | gldm          | GrayLevelNonUniformity               | 15.04716981                                                                                                                                                                                                                                                                                                                                                                                                       |
| original   | gldm          | SmallDependenceEmphasis              | 0.493784516                                                                                                                                                                                                                                                                                                                                                                                                       |
| original   | gldm          | SmallDependenceHighGrayLevelEmphasis | 203.8704328                                                                                                                                                                                                                                                                                                                                                                                                       |
| original   | gldm          | DependenceNonUniformityNormalized    | 0.24003204                                                                                                                                                                                                                                                                                                                                                                                                        |
| original   | gldm          | LargeDependenceEmphasis              | 20.43396226                                                                                                                                                                                                                                                                                                                                                                                                       |
| original   | gldm          | LargeDependenceLowGrayLevelEmphasis  | 0.032434878                                                                                                                                                                                                                                                                                                                                                                                                       |
| original   | gldm          | DependenceVariance                   | 9.593716625                                                                                                                                                                                                                                                                                                                                                                                                       |
| original   | gldm          | LargeDependenceHighGrayLevelEmphasis | 19362.17453                                                                                                                                                                                                                                                                                                                                                                                                       |
| original   | gldm          | SmallDependenceLowGrayLevelEmphasis  | 0.007921165                                                                                                                                                                                                                                                                                                                                                                                                       |
| original   | gldm          | LowGrayLevelEmphasis                 | 0.009225714                                                                                                                                                                                                                                                                                                                                                                                                       |
| original   | glcm          | JointAverage                         | 25.540034                                                                                                                                                                                                                                                                                                                                                                                                         |
| original   | glcm          | SumAverage                           | 51.08006799                                                                                                                                                                                                                                                                                                                                                                                                       |

|          |            |                                  |              |
|----------|------------|----------------------------------|--------------|
| original | glcm       | JointEntropy                     | 6.666965051  |
| original | glcm       | ClusterShade                     | -1851.158273 |
| original | glcm       | MaximumProbability               | 0.0712245    |
| original | glcm       | Idmn                             | 0.934662095  |
| original | glcm       | JointEnergy                      | 0.01915099   |
| original | glcm       | Contrast                         | 86.02598457  |
| original | glcm       | DifferenceEntropy                | 3.987244168  |
| original | glcm       | InverseVariance                  | 0.214248146  |
| original | glcm       | DifferenceVariance               | 41.44907071  |
| original | glcm       | Idn                              | 0.852241572  |
| original | glcm       | Idm                              | 0.247137557  |
| original | glcm       | Correlation                      | 0.260483291  |
| original | glcm       | Autocorrelation                  | 668.0848814  |
| original | glcm       | SumEntropy                       | 4.81669465   |
| original | glcm       | SumSquares                       | 58.6408166   |
| original | glcm       | ClusterProminence                | 73477.04197  |
| original | glcm       | Imc2                             | 0.960463606  |
| original | glcm       | Imc1                             | -0.325543741 |
| original | glcm       | DifferenceAverage                | 6.518973801  |
| original | glcm       | Id                               | 0.316905199  |
| original | glcm       | ClusterTendency                  | 148.5372818  |
| original | firstorder | InterquartileRange               | 333.25       |
| original | firstorder | Skewness                         | -0.840044602 |
| original | firstorder | Uniformity                       | 0.070977216  |
| original | firstorder | Median                           | -104.5       |
| original | firstorder | Energy                           | 15832528     |
| original | firstorder | RobustMeanAbsoluteDeviation      | 135.7769274  |
| original | firstorder | MeanAbsoluteDeviation            | 177.9102884  |
| original | firstorder | TotalEnergy                      | 427478256    |
| original | firstorder | Maximum                          | 49           |
| original | firstorder | RootMeanSquared                  | 273.2795928  |
| original | firstorder | 90Percentile                     | 28.9         |
| original | firstorder | Minimum                          | -736         |
| original | firstorder | Entropy                          | 4.347260772  |
| original | firstorder | Range                            | 785          |
| original | firstorder | Variance                         | 44287.43183  |
| original | firstorder | 10Percentile                     | -520.5       |
| original | firstorder | Kurtosis                         | 2.476627587  |
| original | firstorder | Mean                             | -174.3396226 |
| original | glrlm      | ShortRunLowGrayLevelEmphasis     | 0.009886583  |
| original | glrlm      | GrayLevelVariance                | 71.54809613  |
| original | glrlm      | LowGrayLevelRunEmphasis          | 0.009984887  |
| original | glrlm      | GrayLevelNonUniformityNormalized | 0.0596756    |
| original | glrlm      | RunVariance                      | 0.133628572  |
| original | glrlm      | GrayLevelNonUniformity           | 11.5624096   |
| original | glrlm      | LongRunEmphasis                  | 1.341264154  |
| original | glrlm      | ShortRunHighGrayLevelEmphasis    | 537.6880127  |
| original | glrlm      | RunLengthNonUniformity           | 164.8549694  |
| original | glrlm      | ShortRunEmphasis                 | 0.937670178  |
| original | glrlm      | LongRunHighGrayLevelEmphasis     | 916.3886775  |
| original | glrlm      | RunPercentage                    | 0.911828737  |
| original | glrlm      | LongRunLowGrayLevelEmphasis      | 0.010472169  |
| original | glrlm      | RunEntropy                       | 4.769655617  |
| original | glrlm      | HighGrayLevelRunEmphasis         | 595.4362562  |
| original | glrlm      | RunLengthNonUniformityNormalized | 0.851420144  |

|             |       |                                      |              |
|-------------|-------|--------------------------------------|--------------|
| original    | glszm | GrayLevelVariance                    | 61.42605417  |
| original    | glszm | ZoneVariance                         | 17.40135426  |
| original    | glszm | GrayLevelNonUniformityNormalized     | 0.042320714  |
| original    | glszm | SizeZoneNonUniformityNormalized      | 0.651585103  |
| original    | glszm | SizeZoneNonUniformity                | 74.28070175  |
| original    | glszm | GrayLevelNonUniformity               | 4.824561404  |
| original    | glszm | LargeAreaEmphasis                    | 20.85964912  |
| original    | glszm | SmallAreaHighGrayLevelEmphasis       | 320.5770681  |
| original    | glszm | ZonePercentage                       | 0.537735849  |
| original    | glszm | LargeAreaLowGrayLevelEmphasis        | 0.03870163   |
| original    | glszm | LargeAreaHighGrayLevelEmphasis       | 19648.90351  |
| original    | glszm | HighGrayLevelZoneEmphasis            | 424.7631579  |
| original    | glszm | SmallAreaEmphasis                    | 0.831766229  |
| original    | glszm | LowGrayLevelZoneEmphasis             | 0.015258169  |
| original    | glszm | ZoneEntropy                          | 5.305074309  |
| original    | glszm | SmallAreaLowGrayLevelEmphasis        | 0.014386914  |
| original    | ngtdm | Coarseness                           | 0.016854178  |
| original    | ngtdm | Complexity                           | 2011.88389   |
| original    | ngtdm | Strength                             | 10.0972115   |
| original    | ngtdm | Contrast                             | 0.848917575  |
| original    | ngtdm | Busyness                             | 0.067641528  |
| wavelet-HHH | gldm  | GrayLevelVariance                    | 5.248665005  |
| wavelet-HHH | gldm  | HighGrayLevelEmphasis                | 75.74528302  |
| wavelet-HHH | gldm  | DependenceEntropy                    | 5.611182671  |
| wavelet-HHH | gldm  | DependenceNonUniformity              | 27.80188679  |
| wavelet-HHH | gldm  | GrayLevelNonUniformity               | 32.68867925  |
| wavelet-HHH | gldm  | SmallDependenceEmphasis              | 0.249367355  |
| wavelet-HHH | gldm  | SmallDependenceHighGrayLevelEmphasis | 21.4515933   |
| wavelet-HHH | gldm  | DependenceNonUniformityNormalized    | 0.131140975  |
| wavelet-HHH | gldm  | LargeDependenceEmphasis              | 27.99056604  |
| wavelet-HHH | gldm  | LargeDependenceLowGrayLevelEmphasis  | 0.417371613  |
| wavelet-HHH | gldm  | DependenceVariance                   | 9.80758277   |
| wavelet-HHH | gldm  | LargeDependenceHighGrayLevelEmphasis | 2048.518868  |
| wavelet-HHH | gldm  | SmallDependenceLowGrayLevelEmphasis  | 0.011621756  |
| wavelet-HHH | gldm  | LowGrayLevelEmphasis                 | 0.025175959  |
| wavelet-HHH | glcm  | JointAverage                         | 8.41357502   |
| wavelet-HHH | glcm  | SumAverage                           | 16.82715004  |
| wavelet-HHH | glcm  | JointEntropy                         | 5.507168215  |
| wavelet-HHH | glcm  | ClusterShade                         | -0.118479467 |
| wavelet-HHH | glcm  | MaximumProbability                   | 0.083421355  |
| wavelet-HHH | glcm  | Idmn                                 | 0.969925907  |
| wavelet-HHH | glcm  | JointEnergy                          | 0.034127671  |
| wavelet-HHH | glcm  | Contrast                             | 8.952400753  |
| wavelet-HHH | glcm  | DifferenceEntropy                    | 2.670066738  |
| wavelet-HHH | glcm  | InverseVariance                      | 0.382846973  |
| wavelet-HHH | glcm  | DifferenceVariance                   | 4.350265916  |
| wavelet-HHH | glcm  | Idn                                  | 0.89283753   |
| wavelet-HHH | glcm  | Idm                                  | 0.39636258   |
| wavelet-HHH | glcm  | Correlation                          | -0.023012042 |
| wavelet-HHH | glcm  | Autocorrelation                      | 70.67059952  |
| wavelet-HHH | glcm  | SumEntropy                           | 3.412497133  |
| wavelet-HHH | glcm  | SumSquares                           | 4.356664778  |
| wavelet-HHH | glcm  | ClusterProminence                    | 360.3594215  |
| wavelet-HHH | glcm  | Imc2                                 | 0.757654845  |
| wavelet-HHH | glcm  | Imc1                                 | -0.145295376 |

|             |            |                                  |              |
|-------------|------------|----------------------------------|--------------|
| wavelet-HHH | glcm       | DifferenceAverage                | 2.127814021  |
| wavelet-HHH | glcm       | Id                               | 0.464004931  |
| wavelet-HHH | glcm       | ClusterTendency                  | 8.474258358  |
| wavelet-HHH | firstorder | InterquartileRange               | 55.13697801  |
| wavelet-HHH | firstorder | Skewness                         | 0.105190429  |
| wavelet-HHH | firstorder | Uniformity                       | 0.154191883  |
| wavelet-HHH | firstorder | Median                           | -0.741900157 |
| wavelet-HHH | firstorder | Energy                           | 691662.1109  |
| wavelet-HHH | firstorder | RobustMeanAbsoluteDeviation      | 23.05036415  |
| wavelet-HHH | firstorder | MeanAbsoluteDeviation            | 40.21161591  |
| wavelet-HHH | firstorder | TotalEnergy                      | 18674876.99  |
| wavelet-HHH | firstorder | Maximum                          | 188.8008966  |
| wavelet-HHH | firstorder | RootMeanSquared                  | 57.11879837  |
| wavelet-HHH | firstorder | 90Percentile                     | 58.80491649  |
| wavelet-HHH | firstorder | Minimum                          | -178.9244033 |
| wavelet-HHH | firstorder | Entropy                          | 3.115051633  |
| wavelet-HHH | firstorder | Range                            | 367.7252999  |
| wavelet-HHH | firstorder | Variance                         | 3256.539685  |
| wavelet-HHH | firstorder | 10Percentile                     | -67.44544718 |
| wavelet-HHH | firstorder | Kurtosis                         | 4.81400262   |
| wavelet-HHH | firstorder | Mean                             | -2.453047483 |
| wavelet-HHH | glrlm      | ShortRunLowGrayLevelEmphasis     | 0.025121099  |
| wavelet-HHH | glrlm      | GrayLevelVariance                | 5.82595301   |
| wavelet-HHH | glrlm      | LowGrayLevelRunEmphasis          | 0.026572169  |
| wavelet-HHH | glrlm      | GrayLevelNonUniformityNormalized | 0.140701367  |
| wavelet-HHH | glrlm      | RunVariance                      | 0.188199802  |
| wavelet-HHH | glrlm      | GrayLevelNonUniformity           | 26.0896565   |
| wavelet-HHH | glrlm      | LongRunEmphasis                  | 1.499602333  |
| wavelet-HHH | glrlm      | ShortRunHighGrayLevelEmphasis    | 69.698376    |
| wavelet-HHH | glrlm      | RunLengthNonUniformity           | 146.6360136  |
| wavelet-HHH | glrlm      | ShortRunEmphasis                 | 0.908718378  |
| wavelet-HHH | glrlm      | LongRunHighGrayLevelEmphasis     | 112.6021239  |
| wavelet-HHH | glrlm      | RunPercentage                    | 0.874455733  |
| wavelet-HHH | glrlm      | LongRunLowGrayLevelEmphasis      | 0.034190673  |
| wavelet-HHH | glrlm      | RunEntropy                       | 3.723319864  |
| wavelet-HHH | glrlm      | HighGrayLevelRunEmphasis         | 76.24354458  |
| wavelet-HHH | glrlm      | RunLengthNonUniformityNormalized | 0.789896392  |
| wavelet-HHH | glszm      | GrayLevelVariance                | 13.11555556  |
| wavelet-HHH | glszm      | ZoneVariance                     | 71.74888889  |
| wavelet-HHH | glszm      | GrayLevelNonUniformityNormalized | 0.082777778  |
| wavelet-HHH | glszm      | SizeZoneNonUniformityNormalized  | 0.404444444  |
| wavelet-HHH | glszm      | SizeZoneNonUniformity            | 24.26666667  |
| wavelet-HHH | glszm      | GrayLevelNonUniformity           | 4.966666667  |
| wavelet-HHH | glszm      | LargeAreaEmphasis                | 84.23333333  |
| wavelet-HHH | glszm      | SmallAreaHighGrayLevelEmphasis   | 58.42613263  |
| wavelet-HHH | glszm      | ZonePercentage                   | 0.283018868  |
| wavelet-HHH | glszm      | LargeAreaLowGrayLevelEmphasis    | 1.228701166  |
| wavelet-HHH | glszm      | LargeAreaHighGrayLevelEmphasis   | 6199.3       |
| wavelet-HHH | glszm      | HighGrayLevelZoneEmphasis        | 84.8         |
| wavelet-HHH | glszm      | SmallAreaEmphasis                | 0.643549384  |
| wavelet-HHH | glszm      | LowGrayLevelZoneEmphasis         | 0.045711087  |
| wavelet-HHH | glszm      | ZoneEntropy                      | 4.923231429  |
| wavelet-HHH | glszm      | SmallAreaLowGrayLevelEmphasis    | 0.036037108  |
| wavelet-HHH | ngtdm      | Coarseness                       | 0.032652074  |
| wavelet-HHH | ngtdm      | Complexity                       | 162.1952571  |

|             |            |                                      |              |
|-------------|------------|--------------------------------------|--------------|
| wavelet-HHH | ngtdm      | Strength                             | 2.321574529  |
| wavelet-HHH | ngtdm      | Contrast                             | 0.075387536  |
| wavelet-HHH | ngtdm      | Busyness                             | 0.187346961  |
| wavelet-HLL | gldm       | GrayLevelVariance                    | 90.83704165  |
| wavelet-HLL | gldm       | HighGrayLevelEmphasis                | 356.8962264  |
| wavelet-HLL | gldm       | DependenceEntropy                    | 6.223259768  |
| wavelet-HLL | gldm       | DependenceNonUniformity              | 59.86792453  |
| wavelet-HLL | gldm       | GrayLevelNonUniformity               | 9.452830189  |
| wavelet-HLL | gldm       | SmallDependenceEmphasis              | 0.448187198  |
| wavelet-HLL | gldm       | SmallDependenceHighGrayLevelEmphasis | 204.1952874  |
| wavelet-HLL | gldm       | DependenceNonUniformityNormalized    | 0.28239587   |
| wavelet-HLL | gldm       | LargeDependenceEmphasis              | 5.990566038  |
| wavelet-HLL | gldm       | LargeDependenceLowGrayLevelEmphasis  | 0.067016651  |
| wavelet-HLL | gldm       | DependenceVariance                   | 1.323335707  |
| wavelet-HLL | gldm       | LargeDependenceHighGrayLevelEmphasis | 1471.150943  |
| wavelet-HLL | gldm       | SmallDependenceLowGrayLevelEmphasis  | 0.010441824  |
| wavelet-HLL | gldm       | LowGrayLevelEmphasis                 | 0.017057874  |
| wavelet-HLL | glcm       | JointAverage                         | 15.81979455  |
| wavelet-HLL | glcm       | SumAverage                           | 31.6395891   |
| wavelet-HLL | glcm       | JointEntropy                         | 7.55356111   |
| wavelet-HLL | glcm       | ClusterShade                         | 4195.817642  |
| wavelet-HLL | glcm       | MaximumProbability                   | 0.018286184  |
| wavelet-HLL | glcm       | Idmn                                 | 0.958143115  |
| wavelet-HLL | glcm       | JointEnergy                          | 0.006237356  |
| wavelet-HLL | glcm       | Contrast                             | 96.66416396  |
| wavelet-HLL | glcm       | DifferenceEntropy                    | 3.997252912  |
| wavelet-HLL | glcm       | InverseVariance                      | 0.178351059  |
| wavelet-HLL | glcm       | DifferenceVariance                   | 41.24414712  |
| wavelet-HLL | glcm       | Idn                                  | 0.876074086  |
| wavelet-HLL | glcm       | Idm                                  | 0.170843527  |
| wavelet-HLL | glcm       | Correlation                          | 0.444890525  |
| wavelet-HLL | glcm       | Autocorrelation                      | 290.3942569  |
| wavelet-HLL | glcm       | SumEntropy                           | 5.257867951  |
| wavelet-HLL | glcm       | SumSquares                           | 88.32517343  |
| wavelet-HLL | glcm       | ClusterProminence                    | 210200.0703  |
| wavelet-HLL | glcm       | Imc2                                 | 0.991413116  |
| wavelet-HLL | glcm       | Imc1                                 | -0.427937026 |
| wavelet-HLL | glcm       | DifferenceAverage                    | 7.018796242  |
| wavelet-HLL | glcm       | Id                                   | 0.256270497  |
| wavelet-HLL | glcm       | ClusterTendency                      | 256.6365298  |
| wavelet-HLL | firstorder | InterquartileRange                   | 351.4019954  |
| wavelet-HLL | firstorder | Skewness                             | 0.803788034  |
| wavelet-HLL | firstorder | Uniformity                           | 0.044588822  |
| wavelet-HLL | firstorder | Median                               | -133.1896801 |
| wavelet-HLL | firstorder | Energy                               | 12685585.16  |
| wavelet-HLL | firstorder | RobustMeanAbsoluteDeviation          | 137.9741923  |
| wavelet-HLL | firstorder | MeanAbsoluteDeviation                | 195.0807056  |
| wavelet-HLL | firstorder | TotalEnergy                          | 342510799.2  |
| wavelet-HLL | firstorder | Maximum                              | 632.3286863  |
| wavelet-HLL | firstorder | RootMeanSquared                      | 244.6173866  |
| wavelet-HLL | firstorder | 90Percentile                         | 328.7846991  |
| wavelet-HLL | firstorder | Minimum                              | -436.4838875 |
| wavelet-HLL | firstorder | Entropy                              | 4.842814571  |
| wavelet-HLL | firstorder | Range                                | 1068.812574  |
| wavelet-HLL | firstorder | Variance                             | 56736.59678  |

|             |            |                                      |              |
|-------------|------------|--------------------------------------|--------------|
| wavelet-HLL | firstorder | 10Percentile                         | -323.181979  |
| wavelet-HLL | firstorder | Kurtosis                             | 2.670126728  |
| wavelet-HLL | firstorder | Mean                                 | -55.68724308 |
| wavelet-HLL | glrlm      | ShortRunLowGrayLevelEmphasis         | 0.016965127  |
| wavelet-HLL | glrlm      | GrayLevelVariance                    | 92.48568971  |
| wavelet-HLL | glrlm      | LowGrayLevelRunEmphasis              | 0.017349748  |
| wavelet-HLL | glrlm      | GrayLevelNonUniformityNormalized     | 0.043608277  |
| wavelet-HLL | glrlm      | RunVariance                          | 0.047604202  |
| wavelet-HLL | glrlm      | GrayLevelNonUniformity               | 8.831508401  |
| wavelet-HLL | glrlm      | LongRunEmphasis                      | 1.145517677  |
| wavelet-HLL | glrlm      | ShortRunHighGrayLevelEmphasis        | 353.9612674  |
| wavelet-HLL | glrlm      | RunLengthNonUniformity               | 185.1597663  |
| wavelet-HLL | glrlm      | ShortRunEmphasis                     | 0.96518495   |
| wavelet-HLL | glrlm      | LongRunHighGrayLevelEmphasis         | 397.9247185  |
| wavelet-HLL | glrlm      | RunPercentage                        | 0.955370102  |
| wavelet-HLL | glrlm      | LongRunLowGrayLevelEmphasis          | 0.018917098  |
| wavelet-HLL | glrlm      | RunEntropy                           | 5.047221671  |
| wavelet-HLL | glrlm      | HighGrayLevelRunEmphasis             | 362.3103906  |
| wavelet-HLL | glrlm      | RunLengthNonUniformityNormalized     | 0.91300009   |
| wavelet-HLL | glszm      | GrayLevelVariance                    | 109.7091095  |
| wavelet-HLL | glszm      | ZoneVariance                         | 2.511651691  |
| wavelet-HLL | glszm      | GrayLevelNonUniformityNormalized     | 0.033676675  |
| wavelet-HLL | glszm      | SizeZoneNonUniformityNormalized      | 0.418511213  |
| wavelet-HLL | glszm      | SizeZoneNonUniformity                | 48.96581197  |
| wavelet-HLL | glszm      | GrayLevelNonUniformity               | 3.94017094   |
| wavelet-HLL | glszm      | LargeAreaEmphasis                    | 5.794871795  |
| wavelet-HLL | glszm      | SmallAreaHighGrayLevelEmphasis       | 326.3452263  |
| wavelet-HLL | glszm      | ZonePercentage                       | 0.551886792  |
| wavelet-HLL | glszm      | LargeAreaLowGrayLevelEmphasis        | 0.068695565  |
| wavelet-HLL | glszm      | LargeAreaHighGrayLevelEmphasis       | 1486.461538  |
| wavelet-HLL | glszm      | HighGrayLevelZoneEmphasis            | 433.0940171  |
| wavelet-HLL | glszm      | SmallAreaEmphasis                    | 0.667093428  |
| wavelet-HLL | glszm      | LowGrayLevelZoneEmphasis             | 0.021376302  |
| wavelet-HLL | glszm      | ZoneEntropy                          | 6.104989719  |
| wavelet-HLL | glszm      | SmallAreaLowGrayLevelEmphasis        | 0.017006701  |
| wavelet-HLL | ngtdm      | Coarseness                           | 0.030771466  |
| wavelet-HLL | ngtdm      | Complexity                           | 3240.315721  |
| wavelet-HLL | ngtdm      | Strength                             | 22.01900392  |
| wavelet-HLL | ngtdm      | Contrast                             | 0.50842631   |
| wavelet-HLL | ngtdm      | Busyness                             | 0.058602119  |
| wavelet-LHL | gldm       | GrayLevelVariance                    | 65.64638216  |
| wavelet-LHL | gldm       | HighGrayLevelEmphasis                | 533.7971698  |
| wavelet-LHL | gldm       | DependenceEntropy                    | 6.063966035  |
| wavelet-LHL | gldm       | DependenceNonUniformity              | 66.31132075  |
| wavelet-LHL | gldm       | GrayLevelNonUniformity               | 9.594339623  |
| wavelet-LHL | gldm       | SmallDependenceEmphasis              | 0.524216457  |
| wavelet-LHL | gldm       | SmallDependenceHighGrayLevelEmphasis | 322.1655149  |
| wavelet-LHL | gldm       | DependenceNonUniformityNormalized    | 0.312789249  |
| wavelet-LHL | gldm       | LargeDependenceEmphasis              | 5.066037736  |
| wavelet-LHL | gldm       | LargeDependenceLowGrayLevelEmphasis  | 0.019920409  |
| wavelet-LHL | gldm       | DependenceVariance                   | 1.178444286  |
| wavelet-LHL | gldm       | LargeDependenceHighGrayLevelEmphasis | 2342.089623  |
| wavelet-LHL | gldm       | SmallDependenceLowGrayLevelEmphasis  | 0.007285821  |
| wavelet-LHL | gldm       | LowGrayLevelEmphasis                 | 0.008688237  |
| wavelet-LHL | glcm       | JointAverage                         | 21.12677402  |

|             |            |                                  |              |
|-------------|------------|----------------------------------|--------------|
| wavelet-LHL | glcm       | SumAverage                       | 42.25354805  |
| wavelet-LHL | glcm       | JointEntropy                     | 7.538723537  |
| wavelet-LHL | glcm       | ClusterShade                     | 1449.13937   |
| wavelet-LHL | glcm       | MaximumProbability               | 0.017790763  |
| wavelet-LHL | glcm       | Idmn                             | 0.975501602  |
| wavelet-LHL | glcm       | JointEnergy                      | 0.006231401  |
| wavelet-LHL | glcm       | Contrast                         | 81.43372167  |
| wavelet-LHL | glcm       | DifferenceEntropy                | 3.974142926  |
| wavelet-LHL | glcm       | InverseVariance                  | 0.167543574  |
| wavelet-LHL | glcm       | DifferenceVariance               | 35.96744423  |
| wavelet-LHL | glcm       | Idn                              | 0.899602925  |
| wavelet-LHL | glcm       | Idm                              | 0.156500996  |
| wavelet-LHL | glcm       | Correlation                      | 0.241651017  |
| wavelet-LHL | glcm       | Autocorrelation                  | 459.6614271  |
| wavelet-LHL | glcm       | SumEntropy                       | 5.062088607  |
| wavelet-LHL | glcm       | SumSquares                       | 54.00410919  |
| wavelet-LHL | glcm       | ClusterProminence                | 106344.6025  |
| wavelet-LHL | glcm       | Imc2                             | 0.982829682  |
| wavelet-LHL | glcm       | Imc1                             | -0.367656678 |
| wavelet-LHL | glcm       | DifferenceAverage                | 6.563432446  |
| wavelet-LHL | glcm       | Id                               | 0.246286439  |
| wavelet-LHL | glcm       | ClusterTendency                  | 134.5827151  |
| wavelet-LHL | firstorder | InterquartileRange               | 227.7353294  |
| wavelet-LHL | firstorder | Skewness                         | 0.796208296  |
| wavelet-LHL | firstorder | Uniformity                       | 0.045256319  |
| wavelet-LHL | firstorder | Median                           | -61.71462895 |
| wavelet-LHL | firstorder | Energy                           | 9150462.472  |
| wavelet-LHL | firstorder | RobustMeanAbsoluteDeviation      | 94.14328292  |
| wavelet-LHL | firstorder | MeanAbsoluteDeviation            | 149.4153322  |
| wavelet-LHL | firstorder | TotalEnergy                      | 247062486.7  |
| wavelet-LHL | firstorder | Maximum                          | 757.3940125  |
| wavelet-LHL | firstorder | RootMeanSquared                  | 207.7560079  |
| wavelet-LHL | firstorder | 90Percentile                     | 222.1196376  |
| wavelet-LHL | firstorder | Minimum                          | -568.0672625 |
| wavelet-LHL | firstorder | Entropy                          | 4.75770062   |
| wavelet-LHL | firstorder | Range                            | 1325.461275  |
| wavelet-LHL | firstorder | Variance                         | 41047.86716  |
| wavelet-LHL | firstorder | 10Percentile                     | -262.9699643 |
| wavelet-LHL | firstorder | Kurtosis                         | 4.834552767  |
| wavelet-LHL | firstorder | Mean                             | -45.98577684 |
| wavelet-LHL | glrlm      | ShortRunLowGrayLevelEmphasis     | 0.008836015  |
| wavelet-LHL | glrlm      | GrayLevelVariance                | 67.26158063  |
| wavelet-LHL | glrlm      | LowGrayLevelRunEmphasis          | 0.008916967  |
| wavelet-LHL | glrlm      | GrayLevelNonUniformityNormalized | 0.044479675  |
| wavelet-LHL | glrlm      | RunVariance                      | 0.040315946  |
| wavelet-LHL | glrlm      | GrayLevelNonUniformity           | 9.078045811  |
| wavelet-LHL | glrlm      | LongRunEmphasis                  | 1.120444677  |
| wavelet-LHL | glrlm      | ShortRunHighGrayLevelEmphasis    | 524.7721563  |
| wavelet-LHL | glrlm      | RunLengthNonUniformity           | 189.5115156  |
| wavelet-LHL | glrlm      | ShortRunEmphasis                 | 0.97158024   |
| wavelet-LHL | glrlm      | LongRunHighGrayLevelEmphasis     | 590.7382725  |
| wavelet-LHL | glrlm      | RunPercentage                    | 0.962626996  |
| wavelet-LHL | glrlm      | LongRunLowGrayLevelEmphasis      | 0.009258965  |
| wavelet-LHL | glrlm      | RunEntropy                       | 4.931394431  |
| wavelet-LHL | glrlm      | HighGrayLevelRunEmphasis         | 537.351342   |



|             |       |                                      |              |
|-------------|-------|--------------------------------------|--------------|
| wavelet-LHL | glrlm | RunLengthNonUniformityNormalized     | 0.928094882  |
| wavelet-LHL | glszm | GrayLevelVariance                    | 90.4521049   |
| wavelet-LHL | glszm | ZoneVariance                         | 2.426064852  |
| wavelet-LHL | glszm | GrayLevelNonUniformityNormalized     | 0.037138074  |
| wavelet-LHL | glszm | SizeZoneNonUniformityNormalized      | 0.52520305   |
| wavelet-LHL | glszm | SizeZoneNonUniformity                | 66.7007874   |
| wavelet-LHL | glszm | GrayLevelNonUniformity               | 4.716535433  |
| wavelet-LHL | glszm | LargeAreaEmphasis                    | 5.212598425  |
| wavelet-LHL | glszm | SmallAreaHighGrayLevelEmphasis       | 483.7034023  |
| wavelet-LHL | glszm | ZonePercentage                       | 0.599056604  |
| wavelet-LHL | glszm | LargeAreaLowGrayLevelEmphasis        | 0.025442024  |
| wavelet-LHL | glszm | LargeAreaHighGrayLevelEmphasis       | 2314.937008  |
| wavelet-LHL | glszm | HighGrayLevelZoneEmphasis            | 599.007874   |
| wavelet-LHL | glszm | SmallAreaEmphasis                    | 0.752593867  |
| wavelet-LHL | glszm | LowGrayLevelZoneEmphasis             | 0.01253054   |
| wavelet-LHL | glszm | ZoneEntropy                          | 5.775981785  |
| wavelet-LHL | glszm | SmallAreaLowGrayLevelEmphasis        | 0.011793098  |
| wavelet-LHL | ngtdm | Coarseness                           | 0.032274984  |
| wavelet-LHL | ngtdm | Complexity                           | 2950.494046  |
| wavelet-LHL | ngtdm | Strength                             | 19.44616451  |
| wavelet-LHL | ngtdm | Contrast                             | 0.407428072  |
| wavelet-LHL | ngtdm | Busyness                             | 0.039011229  |
| wavelet-LHH | gldm  | GrayLevelVariance                    | 18.50469473  |
| wavelet-LHH | gldm  | HighGrayLevelEmphasis                | 243.6462264  |
| wavelet-LHH | gldm  | DependenceEntropy                    | 5.919577974  |
| wavelet-LHH | gldm  | DependenceNonUniformity              | 43.54716981  |
| wavelet-LHH | gldm  | GrayLevelNonUniformity               | 17.0754717   |
| wavelet-LHH | gldm  | SmallDependenceEmphasis              | 0.397147332  |
| wavelet-LHH | gldm  | SmallDependenceHighGrayLevelEmphasis | 100.8320685  |
| wavelet-LHH | gldm  | DependenceNonUniformityNormalized    | 0.205411178  |
| wavelet-LHH | gldm  | LargeDependenceEmphasis              | 13.41509434  |
| wavelet-LHH | gldm  | LargeDependenceLowGrayLevelEmphasis  | 0.072390532  |
| wavelet-LHH | gldm  | DependenceVariance                   | 4.806959772  |
| wavelet-LHH | gldm  | LargeDependenceHighGrayLevelEmphasis | 3199.287736  |
| wavelet-LHH | gldm  | SmallDependenceLowGrayLevelEmphasis  | 0.012214986  |
| wavelet-LHH | gldm  | LowGrayLevelEmphasis                 | 0.015534471  |
| wavelet-LHH | glcm  | JointAverage                         | 15.21878955  |
| wavelet-LHH | glcm  | SumAverage                           | 30.4375791   |
| wavelet-LHH | glcm  | JointEntropy                         | 6.767626532  |
| wavelet-LHH | glcm  | ClusterShade                         | -19.42574115 |
| wavelet-LHH | glcm  | MaximumProbability                   | 0.039589523  |
| wavelet-LHH | glcm  | Idmn                                 | 0.973029555  |
| wavelet-LHH | glcm  | JointEnergy                          | 0.012877358  |
| wavelet-LHH | glcm  | Contrast                             | 31.98386288  |
| wavelet-LHH | glcm  | DifferenceEntropy                    | 3.407827237  |
| wavelet-LHH | glcm  | InverseVariance                      | 0.26202125   |
| wavelet-LHH | glcm  | DifferenceVariance                   | 15.88772994  |
| wavelet-LHH | glcm  | Idn                                  | 0.899131057  |
| wavelet-LHH | glcm  | Idm                                  | 0.26211904   |
| wavelet-LHH | glcm  | Correlation                          | -0.022046824 |
| wavelet-LHH | glcm  | Autocorrelation                      | 231.2454525  |
| wavelet-LHH | glcm  | SumEntropy                           | 4.229703444  |
| wavelet-LHH | glcm  | SumSquares                           | 15.60784339  |
| wavelet-LHH | glcm  | ClusterProminence                    | 4951.489906  |
| wavelet-LHH | glcm  | Imc2                                 | 0.907191707  |

|             |            |                                  |              |
|-------------|------------|----------------------------------|--------------|
| wavelet-LHH | glcm       | Imc1                             | -0.228223106 |
| wavelet-LHH | glcm       | DifferenceAverage                | 3.969210736  |
| wavelet-LHH | glcm       | Id                               | 0.347275328  |
| wavelet-LHH | glcm       | ClusterTendency                  | 30.44751067  |
| wavelet-LHH | firstorder | InterquartileRange               | 114.5512852  |
| wavelet-LHH | firstorder | Skewness                         | 0.051493066  |
| wavelet-LHH | firstorder | Uniformity                       | 0.080544678  |
| wavelet-LHH | firstorder | Median                           | -7.110793192 |
| wavelet-LHH | firstorder | Energy                           | 2482046.793  |
| wavelet-LHH | firstorder | RobustMeanAbsoluteDeviation      | 46.99653563  |
| wavelet-LHH | firstorder | MeanAbsoluteDeviation            | 77.45528934  |
| wavelet-LHH | firstorder | TotalEnergy                      | 67015263.42  |
| wavelet-LHH | firstorder | Maximum                          | 403.5348395  |
| wavelet-LHH | firstorder | RootMeanSquared                  | 108.2024394  |
| wavelet-LHH | firstorder | 90Percentile                     | 111.4951054  |
| wavelet-LHH | firstorder | Minimum                          | -359.7491155 |
| wavelet-LHH | firstorder | Entropy                          | 3.965741063  |
| wavelet-LHH | firstorder | Range                            | 763.283955   |
| wavelet-LHH | firstorder | Variance                         | 11548.8715   |
| wavelet-LHH | firstorder | 10Percentile                     | -139.3000318 |
| wavelet-LHH | firstorder | Kurtosis                         | 5.075738811  |
| wavelet-LHH | firstorder | Mean                             | -12.60541111 |
| wavelet-LHH | glrlm      | ShortRunLowGrayLevelEmphasis     | 0.016110332  |
| wavelet-LHH | glrlm      | GrayLevelVariance                | 19.5734883   |
| wavelet-LHH | glrlm      | LowGrayLevelRunEmphasis          | 0.016395544  |
| wavelet-LHH | glrlm      | GrayLevelNonUniformityNormalized | 0.076079764  |
| wavelet-LHH | glrlm      | RunVariance                      | 0.083922441  |
| wavelet-LHH | glrlm      | GrayLevelNonUniformity           | 14.93095567  |
| wavelet-LHH | glrlm      | LongRunEmphasis                  | 1.253019256  |
| wavelet-LHH | glrlm      | ShortRunHighGrayLevelEmphasis    | 230.658585   |
| wavelet-LHH | glrlm      | RunLengthNonUniformity           | 168.9195969  |
| wavelet-LHH | glrlm      | ShortRunEmphasis                 | 0.942204665  |
| wavelet-LHH | glrlm      | LongRunHighGrayLevelEmphasis     | 304.0503981  |
| wavelet-LHH | glrlm      | RunPercentage                    | 0.925616836  |
| wavelet-LHH | glrlm      | LongRunLowGrayLevelEmphasis      | 0.017626533  |
| wavelet-LHH | glrlm      | RunEntropy                       | 4.33305777   |
| wavelet-LHH | glrlm      | HighGrayLevelRunEmphasis         | 244.2714707  |
| wavelet-LHH | glrlm      | RunLengthNonUniformityNormalized | 0.859889616  |
| wavelet-LHH | glszm      | GrayLevelVariance                | 30.91097459  |
| wavelet-LHH | glszm      | ZoneVariance                     | 14.27946689  |
| wavelet-LHH | glszm      | GrayLevelNonUniformityNormalized | 0.059142024  |
| wavelet-LHH | glszm      | SizeZoneNonUniformityNormalized  | 0.484173261  |
| wavelet-LHH | glszm      | SizeZoneNonUniformity            | 47.44897959  |
| wavelet-LHH | glszm      | GrayLevelNonUniformity           | 5.795918367  |
| wavelet-LHH | glszm      | LargeAreaEmphasis                | 18.95918367  |
| wavelet-LHH | glszm      | SmallAreaHighGrayLevelEmphasis   | 183.7805413  |
| wavelet-LHH | glszm      | ZonePercentage                   | 0.462264151  |
| wavelet-LHH | glszm      | LargeAreaLowGrayLevelEmphasis    | 0.10672878   |
| wavelet-LHH | glszm      | LargeAreaHighGrayLevelEmphasis   | 4589.438776  |
| wavelet-LHH | glszm      | HighGrayLevelZoneEmphasis        | 251.9489796  |
| wavelet-LHH | glszm      | SmallAreaEmphasis                | 0.717991291  |
| wavelet-LHH | glszm      | LowGrayLevelZoneEmphasis         | 0.027481763  |
| wavelet-LHH | glszm      | ZoneEntropy                      | 5.282642564  |
| wavelet-LHH | glszm      | SmallAreaLowGrayLevelEmphasis    | 0.025583979  |
| wavelet-LHH | ngtdm      | Coarseness                       | 0.031818752  |

|             |            |                                      |              |
|-------------|------------|--------------------------------------|--------------|
| wavelet-LHH | ngtdm      | Complexity                           | 759.6280343  |
| wavelet-LHH | ngtdm      | Strength                             | 5.860827079  |
| wavelet-LHH | ngtdm      | Contrast                             | 0.216268625  |
| wavelet-LHH | ngtdm      | Busyness                             | 0.082576131  |
| wavelet-LLH | gldm       | GrayLevelVariance                    | 74.0369126   |
| wavelet-LLH | gldm       | HighGrayLevelEmphasis                | 875.8349057  |
| wavelet-LLH | gldm       | DependenceEntropy                    | 6.090453269  |
| wavelet-LLH | gldm       | DependenceNonUniformity              | 54.12264151  |
| wavelet-LLH | gldm       | GrayLevelNonUniformity               | 13.37735849  |
| wavelet-LLH | gldm       | SmallDependenceEmphasis              | 0.496534391  |
| wavelet-LLH | gldm       | SmallDependenceHighGrayLevelEmphasis | 499.6069283  |
| wavelet-LLH | gldm       | DependenceNonUniformityNormalized    | 0.255295479  |
| wavelet-LLH | gldm       | LargeDependenceEmphasis              | 9.735849057  |
| wavelet-LLH | gldm       | LargeDependenceLowGrayLevelEmphasis  | 0.018208803  |
| wavelet-LLH | gldm       | DependenceVariance                   | 3.532929868  |
| wavelet-LLH | gldm       | LargeDependenceHighGrayLevelEmphasis | 7592.476415  |
| wavelet-LLH | gldm       | SmallDependenceLowGrayLevelEmphasis  | 0.00573687   |
| wavelet-LLH | gldm       | LowGrayLevelEmphasis                 | 0.006469407  |
| wavelet-LLH | glcm       | JointAverage                         | 28.08059347  |
| wavelet-LLH | glcm       | SumAverage                           | 56.16118695  |
| wavelet-LLH | glcm       | JointEntropy                         | 7.155185903  |
| wavelet-LLH | glcm       | ClusterShade                         | 2243.578239  |
| wavelet-LLH | glcm       | MaximumProbability                   | 0.02911871   |
| wavelet-LLH | glcm       | Idmn                                 | 0.975353118  |
| wavelet-LLH | glcm       | JointEnergy                          | 0.009244963  |
| wavelet-LLH | glcm       | Contrast                             | 109.7406948  |
| wavelet-LLH | glcm       | DifferenceEntropy                    | 3.96613217   |
| wavelet-LLH | glcm       | InverseVariance                      | 0.223641416  |
| wavelet-LLH | glcm       | DifferenceVariance                   | 64.69503067  |
| wavelet-LLH | glcm       | Idn                                  | 0.91301145   |
| wavelet-LLH | glcm       | Idm                                  | 0.213720663  |
| wavelet-LLH | glcm       | Correlation                          | 0.04708873   |
| wavelet-LLH | glcm       | Autocorrelation                      | 793.254611   |
| wavelet-LLH | glcm       | SumEntropy                           | 4.861569467  |
| wavelet-LLH | glcm       | SumSquares                           | 59.52433461  |
| wavelet-LLH | glcm       | ClusterProminence                    | 129988.9547  |
| wavelet-LLH | glcm       | Imc2                                 | 0.97537132   |
| wavelet-LLH | glcm       | Imc1                                 | -0.350457353 |
| wavelet-LLH | glcm       | DifferenceAverage                    | 6.597361347  |
| wavelet-LLH | glcm       | Id                                   | 0.294757647  |
| wavelet-LLH | glcm       | ClusterTendency                      | 128.3566436  |
| wavelet-LLH | firstorder | InterquartileRange                   | 127.3380147  |
| wavelet-LLH | firstorder | Skewness                             | 1.165360309  |
| wavelet-LLH | firstorder | Uniformity                           | 0.063100748  |
| wavelet-LLH | firstorder | Median                               | -58.63783805 |
| wavelet-LLH | firstorder | Energy                               | 9971124.112  |
| wavelet-LLH | firstorder | RobustMeanAbsoluteDeviation          | 62.35298934  |
| wavelet-LLH | firstorder | MeanAbsoluteDeviation                | 137.5145395  |
| wavelet-LLH | firstorder | TotalEnergy                          | 269220351    |
| wavelet-LLH | firstorder | Maximum                              | 783.1488318  |
| wavelet-LLH | firstorder | RootMeanSquared                      | 216.8723226  |
| wavelet-LLH | firstorder | 90Percentile                         | 228.4175261  |
| wavelet-LLH | firstorder | Minimum                              | -701.9136454 |
| wavelet-LLH | firstorder | Entropy                              | 4.503294104  |
| wavelet-LLH | firstorder | Range                                | 1485.062477  |

|             |            |                                      |              |
|-------------|------------|--------------------------------------|--------------|
| wavelet-LLH | firstorder | Variance                             | 46151.01499  |
| wavelet-LLH | firstorder | 10Percentile                         | -210.9120261 |
| wavelet-LLH | firstorder | Kurtosis                             | 6.304098201  |
| wavelet-LLH | firstorder | Mean                                 | -29.70840469 |
| wavelet-LLH | glrlm      | ShortRunLowGrayLevelEmphasis         | 0.006720909  |
| wavelet-LLH | glrlm      | GrayLevelVariance                    | 78.07765176  |
| wavelet-LLH | glrlm      | LowGrayLevelRunEmphasis              | 0.006780969  |
| wavelet-LLH | glrlm      | GrayLevelNonUniformityNormalized     | 0.059834067  |
| wavelet-LLH | glrlm      | RunVariance                          | 0.066438384  |
| wavelet-LLH | glrlm      | GrayLevelNonUniformity               | 11.9616123   |
| wavelet-LLH | glrlm      | LongRunEmphasis                      | 1.193266623  |
| wavelet-LLH | glrlm      | ShortRunHighGrayLevelEmphasis        | 850.0797863  |
| wavelet-LLH | glrlm      | RunLengthNonUniformity               | 178.5697017  |
| wavelet-LLH | glrlm      | ShortRunEmphasis                     | 0.956712171  |
| wavelet-LLH | glrlm      | LongRunHighGrayLevelEmphasis         | 1029.576559  |
| wavelet-LLH | glrlm      | RunPercentage                        | 0.942670537  |
| wavelet-LLH | glrlm      | LongRunLowGrayLevelEmphasis          | 0.007048459  |
| wavelet-LLH | glrlm      | RunEntropy                           | 4.799423161  |
| wavelet-LLH | glrlm      | HighGrayLevelRunEmphasis             | 882.9811078  |
| wavelet-LLH | glrlm      | RunLengthNonUniformityNormalized     | 0.892859077  |
| wavelet-LLH | glszm      | GrayLevelVariance                    | 125.6063516  |
| wavelet-LLH | glszm      | ZoneVariance                         | 7.558109641  |
| wavelet-LLH | glszm      | GrayLevelNonUniformityNormalized     | 0.037882798  |
| wavelet-LLH | glszm      | SizeZoneNonUniformityNormalized      | 0.603175803  |
| wavelet-LLH | glszm      | SizeZoneNonUniformity                | 69.36521739  |
| wavelet-LLH | glszm      | GrayLevelNonUniformity               | 4.356521739  |
| wavelet-LLH | glszm      | LargeAreaEmphasis                    | 10.95652174  |
| wavelet-LLH | glszm      | SmallAreaHighGrayLevelEmphasis       | 838.4941573  |
| wavelet-LLH | glszm      | ZonePercentage                       | 0.54245283   |
| wavelet-LLH | glszm      | LargeAreaLowGrayLevelEmphasis        | 0.024169378  |
| wavelet-LLH | glszm      | LargeAreaHighGrayLevelEmphasis       | 8559.556522  |
| wavelet-LLH | glszm      | HighGrayLevelZoneEmphasis            | 984.8608696  |
| wavelet-LLH | glszm      | SmallAreaEmphasis                    | 0.802188433  |
| wavelet-LLH | glszm      | LowGrayLevelZoneEmphasis             | 0.010710937  |
| wavelet-LLH | glszm      | ZoneEntropy                          | 5.688883695  |
| wavelet-LLH | glszm      | SmallAreaLowGrayLevelEmphasis        | 0.010401262  |
| wavelet-LLH | ngtdm      | Coarseness                           | 0.026610915  |
| wavelet-LLH | ngtdm      | Complexity                           | 4137.639996  |
| wavelet-LLH | ngtdm      | Strength                             | 21.23279346  |
| wavelet-LLH | ngtdm      | Contrast                             | 0.520210587  |
| wavelet-LLH | ngtdm      | Busyness                             | 0.030500447  |
| wavelet-LLL | gldm       | GrayLevelVariance                    | 467.2062122  |
| wavelet-LLL | gldm       | HighGrayLevelEmphasis                | 3287.216981  |
| wavelet-LLL | gldm       | DependenceEntropy                    | 6.509443893  |
| wavelet-LLL | gldm       | DependenceNonUniformity              | 117.4716981  |
| wavelet-LLL | gldm       | GrayLevelNonUniformity               | 3.981132075  |
| wavelet-LLL | gldm       | SmallDependenceEmphasis              | 0.770795335  |
| wavelet-LLL | gldm       | SmallDependenceHighGrayLevelEmphasis | 2168.964236  |
| wavelet-LLL | gldm       | DependenceNonUniformityNormalized    | 0.554111784  |
| wavelet-LLL | gldm       | LargeDependenceEmphasis              | 3.330188679  |
| wavelet-LLL | gldm       | LargeDependenceLowGrayLevelEmphasis  | 0.008230965  |
| wavelet-LLL | gldm       | DependenceVariance                   | 1.080188679  |
| wavelet-LLL | gldm       | LargeDependenceHighGrayLevelEmphasis | 17058.87736  |
| wavelet-LLL | gldm       | SmallDependenceLowGrayLevelEmphasis  | 0.005542674  |
| wavelet-LLL | gldm       | LowGrayLevelEmphasis                 | 0.006037216  |

|             |            |                                  |              |
|-------------|------------|----------------------------------|--------------|
| wavelet-LLL | glcm       | JointAverage                     | 58.85546446  |
| wavelet-LLL | glcm       | SumAverage                       | 117.7109289  |
| wavelet-LLL | glcm       | JointEntropy                     | 8.003126413  |
| wavelet-LLL | glcm       | ClusterShade                     | -21202.15285 |
| wavelet-LLL | glcm       | MaximumProbability               | 0.013456508  |
| wavelet-LLL | glcm       | Idmn                             | 0.93741787   |
| wavelet-LLL | glcm       | JointEnergy                      | 0.004194562  |
| wavelet-LLL | glcm       | Contrast                         | 541.0762473  |
| wavelet-LLL | glcm       | DifferenceEntropy                | 5.206032629  |
| wavelet-LLL | glcm       | InverseVariance                  | 0.083873277  |
| wavelet-LLL | glcm       | DifferenceVariance               | 191.2787745  |
| wavelet-LLL | glcm       | Idn                              | 0.839619533  |
| wavelet-LLL | glcm       | Idm                              | 0.078244468  |
| wavelet-LLL | glcm       | Correlation                      | 0.363561608  |
| wavelet-LLL | glcm       | Autocorrelation                  | 3620.373323  |
| wavelet-LLL | glcm       | SumEntropy                       | 6.163985436  |
| wavelet-LLL | glcm       | SumSquares                       | 425.6087367  |
| wavelet-LLL | glcm       | ClusterProminence                | 3370133.551  |
| wavelet-LLL | glcm       | Imc2                             | 0.999572449  |
| wavelet-LLL | glcm       | Imc1                             | -0.613054483 |
| wavelet-LLL | glcm       | DifferenceAverage                | 18.130861    |
| wavelet-LLL | glcm       | Id                               | 0.139273122  |
| wavelet-LLL | glcm       | ClusterTendency                  | 1161.358699  |
| wavelet-LLL | firstorder | InterquartileRange               | 885.5904006  |
| wavelet-LLL | firstorder | Skewness                         | -0.321978032 |
| wavelet-LLL | firstorder | Uniformity                       | 0.018778925  |
| wavelet-LLL | firstorder | Median                           | -481.9418986 |
| wavelet-LLL | firstorder | Energy                           | 128320445.2  |
| wavelet-LLL | firstorder | RobustMeanAbsoluteDeviation      | 363.868986   |
| wavelet-LLL | firstorder | MeanAbsoluteDeviation            | 463.2018376  |
| wavelet-LLL | firstorder | TotalEnergy                      | 3464652019   |
| wavelet-LLL | firstorder | Maximum                          | 242.4614444  |
| wavelet-LLL | firstorder | RootMeanSquared                  | 778.0007189  |
| wavelet-LLL | firstorder | 90Percentile                     | 131.6904698  |
| wavelet-LLL | firstorder | Minimum                          | -1871.800868 |
| wavelet-LLL | firstorder | Entropy                          | 5.96783114   |
| wavelet-LLL | firstorder | Range                            | 2114.262312  |
| wavelet-LLL | firstorder | Variance                         | 292354.5379  |
| wavelet-LLL | firstorder | 10Percentile                     | -1366.832675 |
| wavelet-LLL | firstorder | Kurtosis                         | 2.009894795  |
| wavelet-LLL | firstorder | Mean                             | -559.401985  |
| wavelet-LLL | glrlm      | ShortRunLowGrayLevelEmphasis     | 0.006108056  |
| wavelet-LLL | glrlm      | GrayLevelVariance                | 464.1605459  |
| wavelet-LLL | glrlm      | LowGrayLevelRunEmphasis          | 0.00612864   |
| wavelet-LLL | glrlm      | GrayLevelNonUniformityNormalized | 0.018225197  |
| wavelet-LLL | glrlm      | RunVariance                      | 0.019957577  |
| wavelet-LLL | glrlm      | GrayLevelNonUniformity           | 3.78967103   |
| wavelet-LLL | glrlm      | LongRunEmphasis                  | 1.059830011  |
| wavelet-LLL | glrlm      | ShortRunHighGrayLevelEmphasis    | 3162.903346  |
| wavelet-LLL | glrlm      | RunLengthNonUniformity           | 200.1140123  |
| wavelet-LLL | glrlm      | ShortRunEmphasis                 | 0.985453411  |
| wavelet-LLL | glrlm      | LongRunHighGrayLevelEmphasis     | 3574.744709  |
| wavelet-LLL | glrlm      | RunPercentage                    | 0.980769231  |
| wavelet-LLL | glrlm      | LongRunLowGrayLevelEmphasis      | 0.006211219  |
| wavelet-LLL | glrlm      | RunEntropy                       | 6.046915051  |

|             |       |                                      |              |
|-------------|-------|--------------------------------------|--------------|
| wavelet-LLL | glrlm | HighGrayLevelRunEmphasis             | 3243.061231  |
| wavelet-LLL | glrlm | RunLengthNonUniformityNormalized     | 0.962271776  |
| wavelet-LLL | glszm | GrayLevelVariance                    | 437.9166336  |
| wavelet-LLL | glszm | ZoneVariance                         | 0.756903158  |
| wavelet-LLL | glszm | GrayLevelNonUniformityNormalized     | 0.016118378  |
| wavelet-LLL | glszm | SizeZoneNonUniformityNormalized      | 0.772889417  |
| wavelet-LLL | glszm | SizeZoneNonUniformity                | 134.4827586  |
| wavelet-LLL | glszm | GrayLevelNonUniformity               | 2.804597701  |
| wavelet-LLL | glszm | LargeAreaEmphasis                    | 2.24137931   |
| wavelet-LLL | glszm | SmallAreaHighGrayLevelEmphasis       | 2464.734018  |
| wavelet-LLL | glszm | ZonePercentage                       | 0.820754717  |
| wavelet-LLL | glszm | LargeAreaLowGrayLevelEmphasis        | 0.008258347  |
| wavelet-LLL | glszm | LargeAreaHighGrayLevelEmphasis       | 10109.83908  |
| wavelet-LLL | glszm | HighGrayLevelZoneEmphasis            | 2888.735632  |
| wavelet-LLL | glszm | SmallAreaEmphasis                    | 0.899841954  |
| wavelet-LLL | glszm | LowGrayLevelZoneEmphasis             | 0.006948931  |
| wavelet-LLL | glszm | ZoneEntropy                          | 6.34692401   |
| wavelet-LLL | glszm | SmallAreaLowGrayLevelEmphasis        | 0.006653771  |
| wavelet-LLL | ngtdm | Coarseness                           | 0.02231351   |
| wavelet-LLL | ngtdm | Complexity                           | 26896.86791  |
| wavelet-LLL | ngtdm | Strength                             | 55.23566433  |
| wavelet-LLL | ngtdm | Contrast                             | 2.182007533  |
| wavelet-LLL | ngtdm | Busyness                             | 0.01293522   |
| wavelet-HHL | gldm  | GrayLevelVariance                    | 9.711885902  |
| wavelet-HHL | gldm  | HighGrayLevelEmphasis                | 194.6462264  |
| wavelet-HHL | gldm  | DependenceEntropy                    | 5.658638604  |
| wavelet-HHL | gldm  | DependenceNonUniformity              | 40.12264151  |
| wavelet-HHL | gldm  | GrayLevelNonUniformity               | 21.19811321  |
| wavelet-HHL | gldm  | SmallDependenceEmphasis              | 0.353639041  |
| wavelet-HHL | gldm  | SmallDependenceHighGrayLevelEmphasis | 68.18943972  |
| wavelet-HHL | gldm  | DependenceNonUniformityNormalized    | 0.189257743  |
| wavelet-HHL | gldm  | LargeDependenceEmphasis              | 11.82075472  |
| wavelet-HHL | gldm  | LargeDependenceLowGrayLevelEmphasis  | 0.069035697  |
| wavelet-HHL | gldm  | DependenceVariance                   | 3.322979708  |
| wavelet-HHL | gldm  | LargeDependenceHighGrayLevelEmphasis | 2387.193396  |
| wavelet-HHL | gldm  | SmallDependenceLowGrayLevelEmphasis  | 0.007444235  |
| wavelet-HHL | gldm  | LowGrayLevelEmphasis                 | 0.011277543  |
| wavelet-HHL | glcm  | JointAverage                         | 13.7127056   |
| wavelet-HHL | glcm  | SumAverage                           | 27.42541119  |
| wavelet-HHL | glcm  | JointEntropy                         | 6.389715117  |
| wavelet-HHL | glcm  | ClusterShade                         | -22.93975571 |
| wavelet-HHL | glcm  | MaximumProbability                   | 0.034827624  |
| wavelet-HHL | glcm  | Idmn                                 | 0.966760677  |
| wavelet-HHL | glcm  | JointEnergy                          | 0.015234932  |
| wavelet-HHL | glcm  | Contrast                             | 16.64944218  |
| wavelet-HHL | glcm  | DifferenceEntropy                    | 3.058325711  |
| wavelet-HHL | glcm  | InverseVariance                      | 0.294155971  |
| wavelet-HHL | glcm  | DifferenceVariance                   | 6.775873981  |
| wavelet-HHL | glcm  | Idn                                  | 0.880746804  |
| wavelet-HHL | glcm  | Idm                                  | 0.278889342  |
| wavelet-HHL | glcm  | Correlation                          | 0.03797298   |
| wavelet-HHL | glcm  | Autocorrelation                      | 188.3823561  |
| wavelet-HHL | glcm  | SumEntropy                           | 3.972320553  |
| wavelet-HHL | glcm  | SumSquares                           | 8.66231093   |
| wavelet-HHL | glcm  | ClusterProminence                    | 1296.205427  |

|             |            |                                  |              |
|-------------|------------|----------------------------------|--------------|
| wavelet-HHL | glcm       | Imc2                             | 0.834675935  |
| wavelet-HHL | glcm       | Imc1                             | -0.173349107 |
| wavelet-HHL | glcm       | DifferenceAverage                | 3.101210296  |
| wavelet-HHL | glcm       | Id                               | 0.366545746  |
| wavelet-HHL | glcm       | ClusterTendency                  | 17.99980154  |
| wavelet-HHL | firstorder | InterquartileRange               | 93.23353152  |
| wavelet-HHL | firstorder | Skewness                         | -0.492143205 |
| wavelet-HHL | firstorder | Uniformity                       | 0.0999911    |
| wavelet-HHL | firstorder | Median                           | 7.994841373  |
| wavelet-HHL | firstorder | Energy                           | 1269315.201  |
| wavelet-HHL | firstorder | RobustMeanAbsoluteDeviation      | 38.73415916  |
| wavelet-HHL | firstorder | MeanAbsoluteDeviation            | 59.37572612  |
| wavelet-HHL | firstorder | TotalEnergy                      | 34271510.43  |
| wavelet-HHL | firstorder | Maximum                          | 184.3156579  |
| wavelet-HHL | firstorder | RootMeanSquared                  | 77.37787704  |
| wavelet-HHL | firstorder | 90Percentile                     | 93.97569498  |
| wavelet-HHL | firstorder | Minimum                          | -301.5044097 |
| wavelet-HHL | firstorder | Entropy                          | 3.592267691  |
| wavelet-HHL | firstorder | Range                            | 485.8200676  |
| wavelet-HHL | firstorder | Variance                         | 5977.542459  |
| wavelet-HHL | firstorder | 10Percentile                     | -82.96350144 |
| wavelet-HHL | firstorder | Kurtosis                         | 4.011919425  |
| wavelet-HHL | firstorder | Mean                             | 3.12944016   |
| wavelet-HHL | glrlm      | ShortRunLowGrayLevelEmphasis     | 0.011419981  |
| wavelet-HHL | glrlm      | GrayLevelVariance                | 10.15850151  |
| wavelet-HHL | glrlm      | LowGrayLevelRunEmphasis          | 0.011736837  |
| wavelet-HHL | glrlm      | GrayLevelNonUniformityNormalized | 0.096875298  |
| wavelet-HHL | glrlm      | RunVariance                      | 0.082338618  |
| wavelet-HHL | glrlm      | GrayLevelNonUniformity           | 19.02694636  |
| wavelet-HHL | glrlm      | LongRunEmphasis                  | 1.252348935  |
| wavelet-HHL | glrlm      | ShortRunHighGrayLevelEmphasis    | 182.7699516  |
| wavelet-HHL | glrlm      | RunLengthNonUniformity           | 169.5497023  |
| wavelet-HHL | glrlm      | ShortRunEmphasis                 | 0.942256791  |
| wavelet-HHL | glrlm      | LongRunHighGrayLevelEmphasis     | 244.1821793  |
| wavelet-HHL | glrlm      | RunPercentage                    | 0.926342525  |
| wavelet-HHL | glrlm      | LongRunLowGrayLevelEmphasis      | 0.013171689  |
| wavelet-HHL | glrlm      | RunEntropy                       | 3.956120906  |
| wavelet-HHL | glrlm      | HighGrayLevelRunEmphasis         | 194.3225439  |
| wavelet-HHL | glrlm      | RunLengthNonUniformityNormalized | 0.861349161  |
| wavelet-HHL | glszm      | GrayLevelVariance                | 16.56110727  |
| wavelet-HHL | glszm      | ZoneVariance                     | 10.0617301   |
| wavelet-HHL | glszm      | GrayLevelNonUniformityNormalized | 0.073771626  |
| wavelet-HHL | glszm      | SizeZoneNonUniformityNormalized  | 0.440276817  |
| wavelet-HHL | glszm      | SizeZoneNonUniformity            | 37.42352941  |
| wavelet-HHL | glszm      | GrayLevelNonUniformity           | 6.270588235  |
| wavelet-HHL | glszm      | LargeAreaEmphasis                | 16.28235294  |
| wavelet-HHL | glszm      | SmallAreaHighGrayLevelEmphasis   | 132.61462    |
| wavelet-HHL | glszm      | ZonePercentage                   | 0.400943396  |
| wavelet-HHL | glszm      | LargeAreaLowGrayLevelEmphasis    | 0.104106926  |
| wavelet-HHL | glszm      | LargeAreaHighGrayLevelEmphasis   | 3177         |
| wavelet-HHL | glszm      | HighGrayLevelZoneEmphasis        | 195.1764706  |
| wavelet-HHL | glszm      | SmallAreaEmphasis                | 0.687027443  |
| wavelet-HHL | glszm      | LowGrayLevelZoneEmphasis         | 0.019322445  |
| wavelet-HHL | glszm      | ZoneEntropy                      | 5.073825719  |
| wavelet-HHL | glszm      | SmallAreaLowGrayLevelEmphasis    | 0.017318817  |

|             |            |                                      |              |
|-------------|------------|--------------------------------------|--------------|
| wavelet-HHL | ngtdm      | Coarseness                           | 0.029738314  |
| wavelet-HHL | ngtdm      | Complexity                           | 290.5658657  |
| wavelet-HHL | ngtdm      | Strength                             | 3.027275371  |
| wavelet-HHL | ngtdm      | Contrast                             | 0.147894912  |
| wavelet-HHL | ngtdm      | Busyness                             | 0.132966216  |
| wavelet-HLH | gldm       | GrayLevelVariance                    | 15.85590958  |
| wavelet-HLH | gldm       | HighGrayLevelEmphasis                | 328.745283   |
| wavelet-HLH | gldm       | DependenceEntropy                    | 5.839527828  |
| wavelet-HLH | gldm       | DependenceNonUniformity              | 39.73584906  |
| wavelet-HLH | gldm       | GrayLevelNonUniformity               | 19.16981132  |
| wavelet-HLH | gldm       | SmallDependenceEmphasis              | 0.368428679  |
| wavelet-HLH | gldm       | SmallDependenceHighGrayLevelEmphasis | 117.6497997  |
| wavelet-HLH | gldm       | DependenceNonUniformityNormalized    | 0.18743325   |
| wavelet-HLH | gldm       | LargeDependenceEmphasis              | 17.5754717   |
| wavelet-HLH | gldm       | LargeDependenceLowGrayLevelEmphasis  | 0.065657525  |
| wavelet-HLH | gldm       | DependenceVariance                   | 7.165717337  |
| wavelet-HLH | gldm       | LargeDependenceHighGrayLevelEmphasis | 5347.990566  |
| wavelet-HLH | gldm       | SmallDependenceLowGrayLevelEmphasis  | 0.006528107  |
| wavelet-HLH | gldm       | LowGrayLevelEmphasis                 | 0.008670193  |
| wavelet-HLH | glcm       | JointAverage                         | 17.63802888  |
| wavelet-HLH | glcm       | SumAverage                           | 35.27605777  |
| wavelet-HLH | glcm       | JointEntropy                         | 6.609662096  |
| wavelet-HLH | glcm       | ClusterShade                         | -62.0238552  |
| wavelet-HLH | glcm       | MaximumProbability                   | 0.043245991  |
| wavelet-HLH | glcm       | Idmn                                 | 0.97587356   |
| wavelet-HLH | glcm       | JointEnergy                          | 0.013962574  |
| wavelet-HLH | glcm       | Contrast                             | 30.46921496  |
| wavelet-HLH | glcm       | DifferenceEntropy                    | 3.355271505  |
| wavelet-HLH | glcm       | InverseVariance                      | 0.262044097  |
| wavelet-HLH | glcm       | DifferenceVariance                   | 15.56629409  |
| wavelet-HLH | glcm       | Idn                                  | 0.905222952  |
| wavelet-HLH | glcm       | Idm                                  | 0.277543528  |
| wavelet-HLH | glcm       | Correlation                          | -0.018713752 |
| wavelet-HLH | glcm       | Autocorrelation                      | 310.9233523  |
| wavelet-HLH | glcm       | SumEntropy                           | 4.164815105  |
| wavelet-HLH | glcm       | SumSquares                           | 15.04319911  |
| wavelet-HLH | glcm       | ClusterProminence                    | 5703.75185   |
| wavelet-HLH | glcm       | Imc2                                 | 0.903844888  |
| wavelet-HLH | glcm       | Imc1                                 | -0.231151452 |
| wavelet-HLH | glcm       | DifferenceAverage                    | 3.814544379  |
| wavelet-HLH | glcm       | Id                                   | 0.361153208  |
| wavelet-HLH | glcm       | ClusterTendency                      | 29.70358147  |
| wavelet-HLH | firstorder | InterquartileRange                   | 100.009167   |
| wavelet-HLH | firstorder | Skewness                             | -0.229446173 |
| wavelet-HLH | firstorder | Uniformity                           | 0.090423638  |
| wavelet-HLH | firstorder | Median                               | 0.683219813  |
| wavelet-HLH | firstorder | Energy                               | 2089547.651  |
| wavelet-HLH | firstorder | RobustMeanAbsoluteDeviation          | 41.53518318  |
| wavelet-HLH | firstorder | MeanAbsoluteDeviation                | 70.07720339  |
| wavelet-HLH | firstorder | TotalEnergy                          | 56417786.57  |
| wavelet-HLH | firstorder | Maximum                              | 379.6922126  |
| wavelet-HLH | firstorder | RootMeanSquared                      | 99.27918635  |
| wavelet-HLH | firstorder | 90Percentile                         | 114.4874768  |
| wavelet-HLH | firstorder | Minimum                              | -403.5383809 |
| wavelet-HLH | firstorder | Entropy                              | 3.798059308  |



|             |            |                                  |              |
|-------------|------------|----------------------------------|--------------|
| wavelet-HLH | firstorder | Range                            | 783.2305935  |
| wavelet-HLH | firstorder | Variance                         | 9837.931443  |
| wavelet-HLH | firstorder | 10Percentile                     | -95.47886186 |
| wavelet-HLH | firstorder | Kurtosis                         | 5.821999064  |
| wavelet-HLH | firstorder | Mean                             | 4.292481759  |
| wavelet-HLH | glrlm      | ShortRunLowGrayLevelEmphasis     | 0.008946052  |
| wavelet-HLH | glrlm      | GrayLevelVariance                | 16.86458042  |
| wavelet-HLH | glrlm      | LowGrayLevelRunEmphasis          | 0.009167368  |
| wavelet-HLH | glrlm      | GrayLevelNonUniformityNormalized | 0.086434284  |
| wavelet-HLH | glrlm      | RunVariance                      | 0.104852835  |
| wavelet-HLH | glrlm      | GrayLevelNonUniformity           | 16.75813164  |
| wavelet-HLH | glrlm      | LongRunEmphasis                  | 1.303140396  |
| wavelet-HLH | glrlm      | ShortRunHighGrayLevelEmphasis    | 309.3846678  |
| wavelet-HLH | glrlm      | RunLengthNonUniformity           | 163.7843762  |
| wavelet-HLH | glrlm      | ShortRunEmphasis                 | 0.934995691  |
| wavelet-HLH | glrlm      | LongRunHighGrayLevelEmphasis     | 425.4379477  |
| wavelet-HLH | glrlm      | RunPercentage                    | 0.91436865   |
| wavelet-HLH | glrlm      | LongRunLowGrayLevelEmphasis      | 0.010196787  |
| wavelet-HLH | glrlm      | RunEntropy                       | 4.197692706  |
| wavelet-HLH | glrlm      | HighGrayLevelRunEmphasis         | 329.9725821  |
| wavelet-HLH | glrlm      | RunLengthNonUniformityNormalized | 0.844012282  |
| wavelet-HLH | glszm      | GrayLevelVariance                | 27.73966942  |
| wavelet-HLH | glszm      | ZoneVariance                     | 12.90082645  |
| wavelet-HLH | glszm      | GrayLevelNonUniformityNormalized | 0.066890496  |
| wavelet-HLH | glszm      | SizeZoneNonUniformityNormalized  | 0.465134298  |
| wavelet-HLH | glszm      | SizeZoneNonUniformity            | 40.93181818  |
| wavelet-HLH | glszm      | GrayLevelNonUniformity           | 5.886363636  |
| wavelet-HLH | glszm      | LargeAreaEmphasis                | 18.70454545  |
| wavelet-HLH | glszm      | SmallAreaHighGrayLevelEmphasis   | 220.6438699  |
| wavelet-HLH | glszm      | ZonePercentage                   | 0.41509434   |
| wavelet-HLH | glszm      | LargeAreaLowGrayLevelEmphasis    | 0.075284339  |
| wavelet-HLH | glszm      | LargeAreaHighGrayLevelEmphasis   | 5901.613636  |
| wavelet-HLH | glszm      | HighGrayLevelZoneEmphasis        | 322.9545455  |
| wavelet-HLH | glszm      | SmallAreaEmphasis                | 0.7071248    |
| wavelet-HLH | glszm      | LowGrayLevelZoneEmphasis         | 0.016184742  |
| wavelet-HLH | glszm      | ZoneEntropy                      | 5.13109238   |
| wavelet-HLH | glszm      | SmallAreaLowGrayLevelEmphasis    | 0.015122511  |
| wavelet-HLH | ngtdm      | Coarseness                       | 0.030549221  |
| wavelet-HLH | ngtdm      | Complexity                       | 679.9728289  |
| wavelet-HLH | ngtdm      | Strength                         | 6.274202683  |
| wavelet-HLH | ngtdm      | Contrast                         | 0.180666444  |
| wavelet-HLH | ngtdm      | Busyness                         | 0.071859551  |

| Image type | Feature Class | Feature Name                         |                                                                                                                                                                                                                                                                                                                                                                                                                                              |
|------------|---------------|--------------------------------------|----------------------------------------------------------------------------------------------------------------------------------------------------------------------------------------------------------------------------------------------------------------------------------------------------------------------------------------------------------------------------------------------------------------------------------------------|
| general    | info          | BoundingBox                          | 18: RTSTRUCT: C99-DNU_segment_GTV<br>(1, 1, 1, 15, 14, 17)                                                                                                                                                                                                                                                                                                                                                                                   |
| general    | info          | EnabledImageTypes                    | {u'Original': {}, u'Wavelet': {}}                                                                                                                                                                                                                                                                                                                                                                                                            |
|            |               |                                      | {'distances': [1], 'additionalInfo': True,<br>'force2D': False, 'interpolator': 'sitkBSpline',<br>'resampledPixelSpacing': [3.0], 'label': 1,<br>'normalizeScale': 1, 'normalize': False,<br>'force2Ddimension': 0, 'removeOutliers':<br>None, 'minimumROISize': None, u'binWidth':<br>25.0, 'minimumROIDimensions': 1,<br>u'correctMask': True, 'preCrop': False,<br>u'symmetricalGLCM': True,<br>'resegmentRange': None, 'padDistance': 5} |
| general    | info          | GeneralSettings                      | 4abbe2dbc4d249af98648f60b18850fd036dc4                                                                                                                                                                                                                                                                                                                                                                                                       |
| general    | info          | ImageHash                            | 1c                                                                                                                                                                                                                                                                                                                                                                                                                                           |
| general    | info          | ImageSpacing                         | (0.9765625000000002, 0.9765625000000002,<br>2.0)                                                                                                                                                                                                                                                                                                                                                                                             |
| general    | info          | MaskHash                             | f73d8f06d5417b50bb626da6172ea09c8e4fd4                                                                                                                                                                                                                                                                                                                                                                                                       |
| general    | info          | NumpyVersion                         | 34                                                                                                                                                                                                                                                                                                                                                                                                                                           |
| general    | info          | PyWaveletVersion                     | 1.13.1                                                                                                                                                                                                                                                                                                                                                                                                                                       |
| general    | info          | SimpleITKVersion                     | 0.5.2                                                                                                                                                                                                                                                                                                                                                                                                                                        |
| general    | info          | Version                              | 1.1.0                                                                                                                                                                                                                                                                                                                                                                                                                                        |
| general    | info          | VolumeNum                            | 1.3.0.post102+g1b0eb74                                                                                                                                                                                                                                                                                                                                                                                                                       |
| general    | info          | VoxelNum                             | 1                                                                                                                                                                                                                                                                                                                                                                                                                                            |
| original   | shape         | Maximum3DDiameter                    | 1560                                                                                                                                                                                                                                                                                                                                                                                                                                         |
| original   | shape         | Maximum2DDiameterSlice               | 54.41507144                                                                                                                                                                                                                                                                                                                                                                                                                                  |
| original   | shape         | Sphericity                           | 49.2036584                                                                                                                                                                                                                                                                                                                                                                                                                                   |
| original   | shape         | MinorAxis                            | 0.775624173                                                                                                                                                                                                                                                                                                                                                                                                                                  |
| original   | shape         | Elongation                           | 40.57900961                                                                                                                                                                                                                                                                                                                                                                                                                                  |
| original   | shape         | SurfaceVolumeRatio                   | 0.869046496                                                                                                                                                                                                                                                                                                                                                                                                                                  |
| original   | shape         | Volume                               | 0.179199448                                                                                                                                                                                                                                                                                                                                                                                                                                  |
| original   | shape         | MajorAxis                            | 42120                                                                                                                                                                                                                                                                                                                                                                                                                                        |
| original   | shape         | SurfaceArea                          | 46.69371522                                                                                                                                                                                                                                                                                                                                                                                                                                  |
| original   | shape         | Flatness                             | 7547.880754                                                                                                                                                                                                                                                                                                                                                                                                                                  |
| original   | shape         | LeastAxis                            | 0.697826449                                                                                                                                                                                                                                                                                                                                                                                                                                  |
| original   | shape         | Maximum2DDiameterColumn              | 32.58410951                                                                                                                                                                                                                                                                                                                                                                                                                                  |
| original   | shape         | Maximum2DDiameterRow                 | 52.39274759                                                                                                                                                                                                                                                                                                                                                                                                                                  |
| original   | gldm          | GrayLevelVariance                    | 52.47856705                                                                                                                                                                                                                                                                                                                                                                                                                                  |
| original   | gldm          | HighGrayLevelEmphasis                | 40.31121631                                                                                                                                                                                                                                                                                                                                                                                                                                  |
| original   | gldm          | DependenceEntropy                    | 1213.461538                                                                                                                                                                                                                                                                                                                                                                                                                                  |
| original   | gldm          | DependenceNonUniformity              | 6.360296407                                                                                                                                                                                                                                                                                                                                                                                                                                  |
| original   | gldm          | GrayLevelNonUniformity               | 152.4461538                                                                                                                                                                                                                                                                                                                                                                                                                                  |
| original   | gldm          | SmallDependenceEmphasis              | 249.0628205                                                                                                                                                                                                                                                                                                                                                                                                                                  |
| original   | gldm          | SmallDependenceHighGrayLevelEmphasis | 0.275819942                                                                                                                                                                                                                                                                                                                                                                                                                                  |
| original   | gldm          | DependenceNonUniformityNormalized    | 237.7868753                                                                                                                                                                                                                                                                                                                                                                                                                                  |
| original   | gldm          | LargeDependenceEmphasis              | 0.097721893                                                                                                                                                                                                                                                                                                                                                                                                                                  |
| original   | gldm          | LargeDependenceLowGrayLevelEmphasis  | 61.65512821                                                                                                                                                                                                                                                                                                                                                                                                                                  |
| original   | gldm          | DependenceVariance                   | 0.0455159                                                                                                                                                                                                                                                                                                                                                                                                                                    |
| original   | gldm          | LargeDependenceHighGrayLevelEmphasis | 23.75374096                                                                                                                                                                                                                                                                                                                                                                                                                                  |
| original   | gldm          | SmallDependenceLowGrayLevelEmphasis  | 85844.47308                                                                                                                                                                                                                                                                                                                                                                                                                                  |
| original   | gldm          |                                      | 0.001263766                                                                                                                                                                                                                                                                                                                                                                                                                                  |

|          |            |                                  |              |
|----------|------------|----------------------------------|--------------|
| original | gldm       | LowGrayLevelEmphasis             | 0.001838153  |
| original | glcm       | JointAverage                     | 35.24982196  |
| original | glcm       | SumAverage                       | 70.49964392  |
| original | glcm       | JointEntropy                     | 5.96073869   |
| original | glcm       | ClusterShade                     | -1619.533945 |
| original | glcm       | MaximumProbability               | 0.123613874  |
| original | glcm       | Idmn                             | 0.981118115  |
| original | glcm       | JointEnergy                      | 0.052788621  |
| original | glcm       | Contrast                         | 37.74046437  |
| original | glcm       | DifferenceEntropy                | 3.144810941  |
| original | glcm       | InverseVariance                  | 0.377613563  |
| original | glcm       | DifferenceVariance               | 26.51465517  |
| original | glcm       | Idn                              | 0.934700549  |
| original | glcm       | Idm                              | 0.442682334  |
| original | glcm       | Correlation                      | 0.329889205  |
| original | glcm       | Autocorrelation                  | 1252.246573  |
| original | glcm       | SumEntropy                       | 3.984213642  |
| original | glcm       | SumSquares                       | 28.53878171  |
| original | glcm       | ClusterProminence                | 56209.2939   |
| original | glcm       | Imc2                             | 0.730879869  |
| original | glcm       | Imc1                             | -0.122395096 |
| original | glcm       | DifferenceAverage                | 3.338691162  |
| original | glcm       | Id                               | 0.489632095  |
| original | glcm       | ClusterTendency                  | 76.41466249  |
| original | firstorder | InterquartileRange               | 97.25        |
| original | firstorder | Skewness                         | -2.180213374 |
| original | firstorder | Uniformity                       | 0.159655654  |
| original | firstorder | Median                           | 11           |
| original | firstorder | Energy                           | 44112623     |
| original | firstorder | RobustMeanAbsoluteDeviation      | 57.26044246  |
| original | firstorder | MeanAbsoluteDeviation            | 113.2314596  |
| original | firstorder | TotalEnergy                      | 1191040821   |
| original | firstorder | Maximum                          | 110          |
| original | firstorder | RootMeanSquared                  | 168.1586228  |
| original | firstorder | 90Percentile                     | 45           |
| original | firstorder | Minimum                          | -900         |
| original | firstorder | Entropy                          | 3.536336558  |
| original | firstorder | Range                            | 1010         |
| original | firstorder | Variance                         | 25065.70276  |
| original | firstorder | 10Percentile                     | -294         |
| original | firstorder | Kurtosis                         | 7.505255178  |
| original | firstorder | Mean                             | -56.67115385 |
| original | glrlm      | ShortRunLowGrayLevelEmphasis     | 0.002014049  |
| original | glrlm      | GrayLevelVariance                | 46.97328604  |
| original | glrlm      | LowGrayLevelRunEmphasis          | 0.002112506  |
| original | glrlm      | GrayLevelNonUniformityNormalized | 0.120336011  |
| original | glrlm      | RunVariance                      | 0.4297935    |
| original | glrlm      | GrayLevelNonUniformity           | 150.57366    |
| original | glrlm      | LongRunEmphasis                  | 1.988021433  |
| original | glrlm      | ShortRunHighGrayLevelEmphasis    | 985.8231403  |
| original | glrlm      | RunLengthNonUniformity           | 887.6562757  |
| original | glrlm      | ShortRunEmphasis                 | 0.866632603  |
| original | glrlm      | LongRunHighGrayLevelEmphasis     | 2543.677404  |

|             |       |                                      |             |
|-------------|-------|--------------------------------------|-------------|
| original    | glrlm | RunPercentage                        | 0.801676529 |
| original    | glrlm | LongRunLowGrayLevelEmphasis          | 0.002831712 |
| original    | glrlm | RunEntropy                           | 4.580657296 |
| original    | glrlm | HighGrayLevelRunEmphasis             | 1170.294532 |
| original    | glrlm | RunLengthNonUniformityNormalized     | 0.709333291 |
| original    | glszm | GrayLevelVariance                    | 67.20999807 |
| original    | glszm | ZoneVariance                         | 731.2951002 |
| original    | glszm | GrayLevelNonUniformityNormalized     | 0.042692252 |
| original    | glszm | SizeZoneNonUniformityNormalized      | 0.597432724 |
| original    | glszm | SizeZoneNonUniformity                | 275.4164859 |
| original    | glszm | GrayLevelNonUniformity               | 19.68112798 |
| original    | glszm | LargeAreaEmphasis                    | 742.7462039 |
| original    | glszm | SmallAreaHighGrayLevelEmphasis       | 639.641107  |
| original    | glszm | ZonePercentage                       | 0.295512821 |
| original    | glszm | LargeAreaLowGrayLevelEmphasis        | 0.53432752  |
| original    | glszm | LargeAreaHighGrayLevelEmphasis       | 1040408.898 |
| original    | glszm | HighGrayLevelZoneEmphasis            | 865.1193059 |
| original    | glszm | SmallAreaEmphasis                    | 0.800033537 |
| original    | glszm | LowGrayLevelZoneEmphasis             | 0.004377356 |
| original    | glszm | ZoneEntropy                          | 5.809956659 |
| original    | glszm | SmallAreaLowGrayLevelEmphasis        | 0.004148476 |
| original    | ngtdm | Coarseness                           | 0.002816744 |
| original    | ngtdm | Complexity                           | 2068.849526 |
| original    | ngtdm | Strength                             | 5.102801134 |
| original    | ngtdm | Contrast                             | 0.169501171 |
| original    | ngtdm | Busyness                             | 0.171325946 |
| wavelet-HHH | gldm  | GrayLevelVariance                    | 6.467473702 |
| wavelet-HHH | gldm  | HighGrayLevelEmphasis                | 139.2192308 |
| wavelet-HHH | gldm  | DependenceEntropy                    | 6.064009077 |
| wavelet-HHH | gldm  | DependenceNonUniformity              | 149.3346154 |
| wavelet-HHH | gldm  | GrayLevelNonUniformity               | 249.7730769 |
| wavelet-HHH | gldm  | SmallDependenceEmphasis              | 0.228380897 |
| wavelet-HHH | gldm  | SmallDependenceHighGrayLevelEmphasis | 33.38909531 |
| wavelet-HHH | gldm  | DependenceNonUniformityNormalized    | 0.095727318 |
| wavelet-HHH | gldm  | LargeDependenceEmphasis              | 49.36666667 |
| wavelet-HHH | gldm  | LargeDependenceLowGrayLevelEmphasis  | 0.379974718 |
| wavelet-HHH | gldm  | DependenceVariance                   | 17.71882972 |
| wavelet-HHH | gldm  | LargeDependenceHighGrayLevelEmphasis | 6606.10641  |
| wavelet-HHH | gldm  | SmallDependenceLowGrayLevelEmphasis  | 0.005413458 |
| wavelet-HHH | gldm  | LowGrayLevelEmphasis                 | 0.011610016 |
| wavelet-HHH | glcm  | JointAverage                         | 11.51667646 |
| wavelet-HHH | glcm  | SumAverage                           | 23.03335291 |
| wavelet-HHH | glcm  | JointEntropy                         | 5.839505785 |
| wavelet-HHH | glcm  | ClusterShade                         | 1.961417167 |
| wavelet-HHH | glcm  | MaximumProbability                   | 0.104992151 |
| wavelet-HHH | glcm  | ldmn                                 | 0.982711807 |
| wavelet-HHH | glcm  | JointEnergy                          | 0.043270044 |
| wavelet-HHH | glcm  | Contrast                             | 11.08716902 |
| wavelet-HHH | glcm  | DifferenceEntropy                    | 2.791399222 |
| wavelet-HHH | glcm  | InverseVariance                      | 0.382613713 |
| wavelet-HHH | glcm  | DifferenceVariance                   | 6.122874    |
| wavelet-HHH | glcm  | ldn                                  | 0.922794261 |
| wavelet-HHH | glcm  | ldm                                  | 0.426693683 |

|             |            |                                  |              |
|-------------|------------|----------------------------------|--------------|
| wavelet-HHH | glcm       | Correlation                      | -0.036622928 |
| wavelet-HHH | glcm       | Autocorrelation                  | 132.4201237  |
| wavelet-HHH | glcm       | SumEntropy                       | 3.509367341  |
| wavelet-HHH | glcm       | SumSquares                       | 5.329391864  |
| wavelet-HHH | glcm       | ClusterProminence                | 674.3785002  |
| wavelet-HHH | glcm       | Imc2                             | 0.595976252  |
| wavelet-HHH | glcm       | Imc1                             | -0.074125035 |
| wavelet-HHH | glcm       | DifferenceAverage                | 2.210344047  |
| wavelet-HHH | glcm       | Id                               | 0.486058416  |
| wavelet-HHH | glcm       | ClusterTendency                  | 10.23039844  |
| wavelet-HHH | firstorder | InterquartileRange               | 48.59387968  |
| wavelet-HHH | firstorder | Skewness                         | 0.046237428  |
| wavelet-HHH | firstorder | Uniformity                       | 0.160110947  |
| wavelet-HHH | firstorder | Median                           | 0.090113883  |
| wavelet-HHH | firstorder | Energy                           | 6255615.323  |
| wavelet-HHH | firstorder | RobustMeanAbsoluteDeviation      | 22.51793346  |
| wavelet-HHH | firstorder | MeanAbsoluteDeviation            | 42.11646474  |
| wavelet-HHH | firstorder | TotalEnergy                      | 168901613.7  |
| wavelet-HHH | firstorder | Maximum                          | 324.4487641  |
| wavelet-HHH | firstorder | RootMeanSquared                  | 63.32463835  |
| wavelet-HHH | firstorder | 90Percentile                     | 71.46292631  |
| wavelet-HHH | firstorder | Minimum                          | -274.2139162 |
| wavelet-HHH | firstorder | Entropy                          | 3.194024481  |
| wavelet-HHH | firstorder | Range                            | 598.6626803  |
| wavelet-HHH | firstorder | Variance                         | 4009.899301  |
| wavelet-HHH | firstorder | 10Percentile                     | -69.27548554 |
| wavelet-HHH | firstorder | Kurtosis                         | 6.210974973  |
| wavelet-HHH | firstorder | Mean                             | 0.332447629  |
| wavelet-HHH | glrlm      | ShortRunLowGrayLevelEmphasis     | 0.011500547  |
| wavelet-HHH | glrlm      | GrayLevelVariance                | 7.641208024  |
| wavelet-HHH | glrlm      | LowGrayLevelRunEmphasis          | 0.012457108  |
| wavelet-HHH | glrlm      | GrayLevelNonUniformityNormalized | 0.133391585  |
| wavelet-HHH | glrlm      | RunVariance                      | 0.34520522   |
| wavelet-HHH | glrlm      | GrayLevelNonUniformity           | 171.1395477  |
| wavelet-HHH | glrlm      | LongRunEmphasis                  | 1.827587168  |
| wavelet-HHH | glrlm      | ShortRunHighGrayLevelEmphasis    | 123.6051415  |
| wavelet-HHH | glrlm      | RunLengthNonUniformity           | 932.7078607  |
| wavelet-HHH | glrlm      | ShortRunEmphasis                 | 0.876495456  |
| wavelet-HHH | glrlm      | LongRunHighGrayLevelEmphasis     | 251.2421411  |
| wavelet-HHH | glrlm      | RunPercentage                    | 0.82209073   |
| wavelet-HHH | glrlm      | LongRunLowGrayLevelEmphasis      | 0.018819478  |
| wavelet-HHH | glrlm      | RunEntropy                       | 4.082343863  |
| wavelet-HHH | glrlm      | HighGrayLevelRunEmphasis         | 140.2569449  |
| wavelet-HHH | glrlm      | RunLengthNonUniformityNormalized | 0.726778799  |
| wavelet-HHH | glszm      | GrayLevelVariance                | 19.69105691  |
| wavelet-HHH | glszm      | ZoneVariance                     | 825.3140327  |
| wavelet-HHH | glszm      | GrayLevelNonUniformityNormalized | 0.071290605  |
| wavelet-HHH | glszm      | SizeZoneNonUniformityNormalized  | 0.510094667  |
| wavelet-HHH | glszm      | SizeZoneNonUniformity            | 188.2249322  |
| wavelet-HHH | glszm      | GrayLevelNonUniformity           | 26.30623306  |
| wavelet-HHH | glszm      | LargeAreaEmphasis                | 843.1869919  |
| wavelet-HHH | glszm      | SmallAreaHighGrayLevelEmphasis   | 109.1632139  |
| wavelet-HHH | glszm      | ZonePercentage                   | 0.236538462  |

|             |            |                                      |              |
|-------------|------------|--------------------------------------|--------------|
| wavelet-HHH | glszm      | LargeAreaLowGrayLevelEmphasis        | 6.441590772  |
| wavelet-HHH | glszm      | LargeAreaHighGrayLevelEmphasis       | 111768.71    |
| wavelet-HHH | glszm      | HighGrayLevelZoneEmphasis            | 148.1355014  |
| wavelet-HHH | glszm      | SmallAreaEmphasis                    | 0.741570118  |
| wavelet-HHH | glszm      | LowGrayLevelZoneEmphasis             | 0.023422639  |
| wavelet-HHH | glszm      | ZoneEntropy                          | 5.391250918  |
| wavelet-HHH | glszm      | SmallAreaLowGrayLevelEmphasis        | 0.020954274  |
| wavelet-HHH | ngtdm      | Coarseness                           | 0.004901235  |
| wavelet-HHH | ngtdm      | Complexity                           | 430.5575026  |
| wavelet-HHH | ngtdm      | Strength                             | 0.934800235  |
| wavelet-HHH | ngtdm      | Contrast                             | 0.042684541  |
| wavelet-HHH | ngtdm      | Busyness                             | 0.513002224  |
| wavelet-HLL | gldm       | GrayLevelVariance                    | 27.10916502  |
| wavelet-HLL | gldm       | HighGrayLevelEmphasis                | 401.4820513  |
| wavelet-HLL | gldm       | DependenceEntropy                    | 6.817991049  |
| wavelet-HLL | gldm       | DependenceNonUniformity              | 215.7551282  |
| wavelet-HLL | gldm       | GrayLevelNonUniformity               | 133.2538462  |
| wavelet-HLL | gldm       | SmallDependenceEmphasis              | 0.310602439  |
| wavelet-HLL | gldm       | SmallDependenceHighGrayLevelEmphasis | 134.3262104  |
| wavelet-HLL | gldm       | DependenceNonUniformityNormalized    | 0.138304569  |
| wavelet-HLL | gldm       | LargeDependenceEmphasis              | 32.18205128  |
| wavelet-HLL | gldm       | LargeDependenceLowGrayLevelEmphasis  | 0.084344997  |
| wavelet-HLL | gldm       | DependenceVariance                   | 13.72511341  |
| wavelet-HLL | gldm       | LargeDependenceHighGrayLevelEmphasis | 13281.23846  |
| wavelet-HLL | gldm       | SmallDependenceLowGrayLevelEmphasis  | 0.002912559  |
| wavelet-HLL | gldm       | LowGrayLevelEmphasis                 | 0.005181175  |
| wavelet-HLL | glcm       | JointAverage                         | 19.32231216  |
| wavelet-HLL | glcm       | SumAverage                           | 38.64462431  |
| wavelet-HLL | glcm       | JointEntropy                         | 7.354415254  |
| wavelet-HLL | glcm       | ClusterShade                         | 119.3603919  |
| wavelet-HLL | glcm       | MaximumProbability                   | 0.064522825  |
| wavelet-HLL | glcm       | Idmn                                 | 0.986289044  |
| wavelet-HLL | glcm       | JointEnergy                          | 0.017701997  |
| wavelet-HLL | glcm       | Contrast                             | 31.87395589  |
| wavelet-HLL | glcm       | DifferenceEntropy                    | 3.417732259  |
| wavelet-HLL | glcm       | InverseVariance                      | 0.305590393  |
| wavelet-HLL | glcm       | DifferenceVariance                   | 17.94115573  |
| wavelet-HLL | glcm       | Idn                                  | 0.931986766  |
| wavelet-HLL | glcm       | Idm                                  | 0.325499232  |
| wavelet-HLL | glcm       | Correlation                          | 0.25391641   |
| wavelet-HLL | glcm       | Autocorrelation                      | 379.2054637  |
| wavelet-HLL | glcm       | SumEntropy                           | 4.576207261  |
| wavelet-HLL | glcm       | SumSquares                           | 21.78466406  |
| wavelet-HLL | glcm       | ClusterProminence                    | 19712.47358  |
| wavelet-HLL | glcm       | Imc2                                 | 0.806340757  |
| wavelet-HLL | glcm       | Imc1                                 | -0.137969816 |
| wavelet-HLL | glcm       | DifferenceAverage                    | 3.673333438  |
| wavelet-HLL | glcm       | Id                                   | 0.397233907  |
| wavelet-HLL | glcm       | ClusterTendency                      | 55.26470035  |
| wavelet-HLL | firstorder | InterquartileRange                   | 112.0859993  |
| wavelet-HLL | firstorder | Skewness                             | 0.376727976  |
| wavelet-HLL | firstorder | Uniformity                           | 0.085419132  |
| wavelet-HLL | firstorder | Median                               | -13.99102253 |

|             |            |                                  |              |
|-------------|------------|----------------------------------|--------------|
| wavelet-HLL | firstorder | Energy                           | 27607821.43  |
| wavelet-HLL | firstorder | RobustMeanAbsoluteDeviation      | 51.56547838  |
| wavelet-HLL | firstorder | MeanAbsoluteDeviation            | 89.91872723  |
| wavelet-HLL | firstorder | TotalEnergy                      | 745411178.5  |
| wavelet-HLL | firstorder | Maximum                          | 625.0693813  |
| wavelet-HLL | firstorder | RootMeanSquared                  | 133.0312799  |
| wavelet-HLL | firstorder | 90Percentile                     | 99.81959096  |
| wavelet-HLL | firstorder | Minimum                          | -492.6800339 |
| wavelet-HLL | firstorder | Entropy                          | 4.157716137  |
| wavelet-HLL | firstorder | Range                            | 1117.749415  |
| wavelet-HLL | firstorder | Variance                         | 16874.19827  |
| wavelet-HLL | firstorder | 10Percentile                     | -194.2132605 |
| wavelet-HLL | firstorder | Kurtosis                         | 5.583640095  |
| wavelet-HLL | firstorder | Mean                             | -28.69012307 |
| wavelet-HLL | grlm       | ShortRunLowGrayLevelEmphasis     | 0.005289001  |
| wavelet-HLL | grlm       | GrayLevelVariance                | 30.08380823  |
| wavelet-HLL | grlm       | LowGrayLevelRunEmphasis          | 0.005537469  |
| wavelet-HLL | grlm       | GrayLevelNonUniformityNormalized | 0.072329331  |
| wavelet-HLL | grlm       | RunVariance                      | 0.223766512  |
| wavelet-HLL | grlm       | GrayLevelNonUniformity           | 98.63250149  |
| wavelet-HLL | grlm       | LongRunEmphasis                  | 1.541433747  |
| wavelet-HLL | grlm       | ShortRunHighGrayLevelEmphasis    | 366.3487337  |
| wavelet-HLL | grlm       | RunLengthNonUniformity           | 1090.230515  |
| wavelet-HLL | grlm       | ShortRunEmphasis                 | 0.912687678  |
| wavelet-HLL | grlm       | LongRunHighGrayLevelEmphasis     | 621.4758003  |
| wavelet-HLL | grlm       | RunPercentage                    | 0.873224852  |
| wavelet-HLL | grlm       | LongRunLowGrayLevelEmphasis      | 0.006994189  |
| wavelet-HLL | grlm       | RunEntropy                       | 4.819090894  |
| wavelet-HLL | grlm       | HighGrayLevelRunEmphasis         | 401.1948842  |
| wavelet-HLL | grlm       | RunLengthNonUniformityNormalized | 0.798730617  |
| wavelet-HLL | glszm      | GrayLevelVariance                | 53.87824564  |
| wavelet-HLL | glszm      | ZoneVariance                     | 219.1755128  |
| wavelet-HLL | glszm      | GrayLevelNonUniformityNormalized | 0.041633106  |
| wavelet-HLL | glszm      | SizeZoneNonUniformityNormalized  | 0.470657634  |
| wavelet-HLL | glszm      | SizeZoneNonUniformity            | 257.4497258  |
| wavelet-HLL | glszm      | GrayLevelNonUniformity           | 22.77330896  |
| wavelet-HLL | glszm      | LargeAreaEmphasis                | 227.308958   |
| wavelet-HLL | glszm      | SmallAreaHighGrayLevelEmphasis   | 317.7922346  |
| wavelet-HLL | glszm      | ZonePercentage                   | 0.350641026  |
| wavelet-HLL | glszm      | LargeAreaLowGrayLevelEmphasis    | 0.557478321  |
| wavelet-HLL | glszm      | LargeAreaHighGrayLevelEmphasis   | 94976.91773  |
| wavelet-HLL | glszm      | HighGrayLevelZoneEmphasis        | 422.9817185  |
| wavelet-HLL | glszm      | SmallAreaEmphasis                | 0.711867514  |
| wavelet-HLL | glszm      | LowGrayLevelZoneEmphasis         | 0.00895444   |
| wavelet-HLL | glszm      | ZoneEntropy                      | 6.232706688  |
| wavelet-HLL | glszm      | SmallAreaLowGrayLevelEmphasis    | 0.007625661  |
| wavelet-HLL | ngtdm      | Coarseness                       | 0.005084697  |
| wavelet-HLL | ngtdm      | Complexity                       | 2012.722431  |
| wavelet-HLL | ngtdm      | Strength                         | 3.474908361  |
| wavelet-HLL | ngtdm      | Contrast                         | 0.093924412  |
| wavelet-HLL | ngtdm      | Busyness                         | 0.183941688  |
| wavelet-LHL | gldm       | GrayLevelVariance                | 71.41177515  |
| wavelet-LHL | gldm       | HighGrayLevelEmphasis            | 2076.384615  |

|             |            |                                      |              |
|-------------|------------|--------------------------------------|--------------|
| wavelet-LHL | gldm       | DependenceEntropy                    | 7.019898036  |
| wavelet-LHL | gldm       | DependenceNonUniformity              | 241.7038462  |
| wavelet-LHL | gldm       | GrayLevelNonUniformity               | 116.8820513  |
| wavelet-LHL | gldm       | SmallDependenceEmphasis              | 0.369016219  |
| wavelet-LHL | gldm       | SmallDependenceHighGrayLevelEmphasis | 784.2871778  |
| wavelet-LHL | gldm       | DependenceNonUniformityNormalized    | 0.154938363  |
| wavelet-LHL | gldm       | LargeDependenceEmphasis              | 34.30897436  |
| wavelet-LHL | gldm       | LargeDependenceLowGrayLevelEmphasis  | 0.01707193   |
| wavelet-LHL | gldm       | DependenceVariance                   | 15.73066404  |
| wavelet-LHL | gldm       | LargeDependenceHighGrayLevelEmphasis | 73613.7      |
| wavelet-LHL | gldm       | SmallDependenceLowGrayLevelEmphasis  | 0.001072403  |
| wavelet-LHL | gldm       | LowGrayLevelEmphasis                 | 0.001403424  |
| wavelet-LHL | glcm       | JointAverage                         | 44.62960236  |
| wavelet-LHL | glcm       | SumAverage                           | 89.25920472  |
| wavelet-LHL | glcm       | JointEntropy                         | 7.797754849  |
| wavelet-LHL | glcm       | ClusterShade                         | -239.9997406 |
| wavelet-LHL | glcm       | MaximumProbability                   | 0.071864428  |
| wavelet-LHL | glcm       | ldmn                                 | 0.985923755  |
| wavelet-LHL | glcm       | JointEnergy                          | 0.018241445  |
| wavelet-LHL | glcm       | Contrast                             | 107.6868339  |
| wavelet-LHL | glcm       | DifferenceEntropy                    | 3.950227336  |
| wavelet-LHL | glcm       | InverseVariance                      | 0.270662873  |
| wavelet-LHL | glcm       | DifferenceVariance                   | 70.69605044  |
| wavelet-LHL | glcm       | ldn                                  | 0.93919489   |
| wavelet-LHL | glcm       | ldm                                  | 0.304929974  |
| wavelet-LHL | glcm       | Correlation                          | 0.074645468  |
| wavelet-LHL | glcm       | Autocorrelation                      | 1996.849867  |
| wavelet-LHL | glcm       | SumEntropy                           | 4.975508533  |
| wavelet-LHL | glcm       | SumSquares                           | 58.88554483  |
| wavelet-LHL | glcm       | ClusterProminence                    | 148817.5124  |
| wavelet-LHL | glcm       | lmc2                                 | 0.91121181   |
| wavelet-LHL | glcm       | lmc1                                 | -0.208364934 |
| wavelet-LHL | glcm       | DifferenceAverage                    | 5.911109993  |
| wavelet-LHL | glcm       | ld                                   | 0.369899126  |
| wavelet-LHL | glcm       | ClusterTendency                      | 127.8553454  |
| wavelet-LHL | firstorder | InterquartileRange                   | 141.3760054  |
| wavelet-LHL | firstorder | Skewness                             | -0.044046876 |
| wavelet-LHL | firstorder | Uniformity                           | 0.074924392  |
| wavelet-LHL | firstorder | Median                               | -18.10674896 |
| wavelet-LHL | firstorder | Energy                               | 72480705.75  |
| wavelet-LHL | firstorder | RobustMeanAbsoluteDeviation          | 70.04700663  |
| wavelet-LHL | firstorder | MeanAbsoluteDeviation                | 136.4987654  |
| wavelet-LHL | firstorder | TotalEnergy                          | 1956979055   |
| wavelet-LHL | firstorder | Maximum                              | 865.1109577  |
| wavelet-LHL | firstorder | RootMeanSquared                      | 215.5504369  |
| wavelet-LHL | firstorder | 90Percentile                         | 172.328833   |
| wavelet-LHL | firstorder | Minimum                              | -1140.316517 |
| wavelet-LHL | firstorder | Entropy                              | 4.604892728  |
| wavelet-LHL | firstorder | Range                                | 2005.427475  |
| wavelet-LHL | firstorder | Variance                             | 44602.4491   |
| wavelet-LHL | firstorder | 10Percentile                         | -279.1956454 |
| wavelet-LHL | firstorder | Kurtosis                             | 7.100649987  |
| wavelet-LHL | firstorder | Mean                                 | -43.12240437 |



|             |       |                                      |             |
|-------------|-------|--------------------------------------|-------------|
| wavelet-LHL | grlm  | ShortRunLowGrayLevelEmphasis         | 0.001496812 |
| wavelet-LHL | grlm  | GrayLevelVariance                    | 80.25634652 |
| wavelet-LHL | grlm  | LowGrayLevelRunEmphasis              | 0.001539106 |
| wavelet-LHL | grlm  | GrayLevelNonUniformityNormalized     | 0.059076938 |
| wavelet-LHL | grlm  | RunVariance                          | 0.234718237 |
| wavelet-LHL | grlm  | GrayLevelNonUniformity               | 80.57112611 |
| wavelet-LHL | grlm  | LongRunEmphasis                      | 1.554340735 |
| wavelet-LHL | grlm  | ShortRunHighGrayLevelEmphasis        | 1889.085307 |
| wavelet-LHL | grlm  | RunLengthNonUniformity               | 1093.317954 |
| wavelet-LHL | grlm  | ShortRunEmphasis                     | 0.91386807  |
| wavelet-LHL | grlm  | LongRunHighGrayLevelEmphasis         | 3248.911452 |
| wavelet-LHL | grlm  | RunPercentage                        | 0.872682446 |
| wavelet-LHL | grlm  | LongRunLowGrayLevelEmphasis          | 0.001805648 |
| wavelet-LHL | grlm  | RunEntropy                           | 5.298002721 |
| wavelet-LHL | grlm  | HighGrayLevelRunEmphasis             | 2070.413657 |
| wavelet-LHL | grlm  | RunLengthNonUniformityNormalized     | 0.801493252 |
| wavelet-LHL | glszm | GrayLevelVariance                    | 142.8444286 |
| wavelet-LHL | glszm | ZoneVariance                         | 181.5590958 |
| wavelet-LHL | glszm | GrayLevelNonUniformityNormalized     | 0.027975555 |
| wavelet-LHL | glszm | SizeZoneNonUniformityNormalized      | 0.557998101 |
| wavelet-LHL | glszm | SizeZoneNonUniformity                | 354.8867925 |
| wavelet-LHL | glszm | GrayLevelNonUniformity               | 17.79245283 |
| wavelet-LHL | glszm | LargeAreaEmphasis                    | 187.5754717 |
| wavelet-LHL | glszm | SmallAreaHighGrayLevelEmphasis       | 1668.118944 |
| wavelet-LHL | glszm | ZonePercentage                       | 0.407692308 |
| wavelet-LHL | glszm | LargeAreaLowGrayLevelEmphasis        | 0.089443488 |
| wavelet-LHL | glszm | LargeAreaHighGrayLevelEmphasis       | 404450.4748 |
| wavelet-LHL | glszm | HighGrayLevelZoneEmphasis            | 2103.830189 |
| wavelet-LHL | glszm | SmallAreaEmphasis                    | 0.774937785 |
| wavelet-LHL | glszm | LowGrayLevelZoneEmphasis             | 0.002693653 |
| wavelet-LHL | glszm | ZoneEntropy                          | 6.607603101 |
| wavelet-LHL | glszm | SmallAreaLowGrayLevelEmphasis        | 0.002555351 |
| wavelet-LHL | ngtdm | Coarseness                           | 0.004758659 |
| wavelet-LHL | ngtdm | Complexity                           | 9769.826308 |
| wavelet-LHL | ngtdm | Strength                             | 9.791493381 |
| wavelet-LHL | ngtdm | Contrast                             | 0.143600245 |
| wavelet-LHL | ngtdm | Busyness                             | 0.046314525 |
| wavelet-LHH | gldm  | GrayLevelVariance                    | 14.65053254 |
| wavelet-LHH | gldm  | HighGrayLevelEmphasis                | 360.0384615 |
| wavelet-LHH | gldm  | DependenceEntropy                    | 6.471910332 |
| wavelet-LHH | gldm  | DependenceNonUniformity              | 176.0833333 |
| wavelet-LHH | gldm  | GrayLevelNonUniformity               | 185.6076923 |
| wavelet-LHH | gldm  | SmallDependenceEmphasis              | 0.273553756 |
| wavelet-LHH | gldm  | SmallDependenceHighGrayLevelEmphasis | 107.5011063 |
| wavelet-LHH | gldm  | DependenceNonUniformityNormalized    | 0.112873932 |
| wavelet-LHH | gldm  | LargeDependenceEmphasis              | 41.08717949 |
| wavelet-LHH | gldm  | LargeDependenceLowGrayLevelEmphasis  | 0.123299796 |
| wavelet-LHH | gldm  | DependenceVariance                   | 16.1896384  |
| wavelet-LHH | gldm  | LargeDependenceHighGrayLevelEmphasis | 14045.38205 |
| wavelet-LHH | gldm  | SmallDependenceLowGrayLevelEmphasis  | 0.002031029 |
| wavelet-LHH | gldm  | LowGrayLevelEmphasis                 | 0.004292702 |
| wavelet-LHH | glcm  | JointAverage                         | 18.60298723 |
| wavelet-LHH | glcm  | SumAverage                           | 37.20597446 |

|             |            |                                  |              |
|-------------|------------|----------------------------------|--------------|
| wavelet-LHH | glcm       | JointEntropy                     | 6.676994098  |
| wavelet-LHH | glcm       | ClusterShade                     | 50.57566868  |
| wavelet-LHH | glcm       | MaximumProbability               | 0.082773692  |
| wavelet-LHH | glcm       | Idmn                             | 0.984871929  |
| wavelet-LHH | glcm       | JointEnergy                      | 0.028534923  |
| wavelet-LHH | glcm       | Contrast                         | 24.29889777  |
| wavelet-LHH | glcm       | DifferenceEntropy                | 3.222115532  |
| wavelet-LHH | glcm       | InverseVariance                  | 0.334545977  |
| wavelet-LHH | glcm       | DifferenceVariance               | 14.26870577  |
| wavelet-LHH | glcm       | Idn                              | 0.930433012  |
| wavelet-LHH | glcm       | Idm                              | 0.372392012  |
| wavelet-LHH | glcm       | Correlation                      | 0.001789678  |
| wavelet-LHH | glcm       | Autocorrelation                  | 346.0858283  |
| wavelet-LHH | glcm       | SumEntropy                       | 4.049440045  |
| wavelet-LHH | glcm       | SumSquares                       | 12.15773801  |
| wavelet-LHH | glcm       | ClusterProminence                | 4219.343346  |
| wavelet-LHH | glcm       | Imc2                             | 0.713282636  |
| wavelet-LHH | glcm       | Imc1                             | -0.102655976 |
| wavelet-LHH | glcm       | DifferenceAverage                | 3.13870146   |
| wavelet-LHH | glcm       | Id                               | 0.437321589  |
| wavelet-LHH | glcm       | ClusterTendency                  | 24.33205426  |
| wavelet-LHH | firstorder | InterquartileRange               | 65.23686869  |
| wavelet-LHH | firstorder | Skewness                         | 0.291832201  |
| wavelet-LHH | firstorder | Uniformity                       | 0.11897929   |
| wavelet-LHH | firstorder | Median                           | -1.145016912 |
| wavelet-LHH | firstorder | Energy                           | 14084699.43  |
| wavelet-LHH | firstorder | RobustMeanAbsoluteDeviation      | 32.15900854  |
| wavelet-LHH | firstorder | MeanAbsoluteDeviation            | 62.1071751   |
| wavelet-LHH | firstorder | TotalEnergy                      | 380286884.6  |
| wavelet-LHH | firstorder | Maximum                          | 497.334314   |
| wavelet-LHH | firstorder | RootMeanSquared                  | 95.0192269   |
| wavelet-LHH | firstorder | 90Percentile                     | 113.9256565  |
| wavelet-LHH | firstorder | Minimum                          | -438.9260571 |
| wavelet-LHH | firstorder | Entropy                          | 3.708443391  |
| wavelet-LHH | firstorder | Range                            | 936.2603711  |
| wavelet-LHH | firstorder | Variance                         | 9023.948861  |
| wavelet-LHH | firstorder | 10Percentile                     | -100.9693565 |
| wavelet-LHH | firstorder | Kurtosis                         | 6.2792272    |
| wavelet-LHH | firstorder | Mean                             | 2.169013456  |
| wavelet-LHH | glrlm      | ShortRunLowGrayLevelEmphasis     | 0.004205165  |
| wavelet-LHH | glrlm      | GrayLevelVariance                | 16.89808519  |
| wavelet-LHH | glrlm      | LowGrayLevelRunEmphasis          | 0.0045272    |
| wavelet-LHH | glrlm      | GrayLevelNonUniformityNormalized | 0.098323146  |
| wavelet-LHH | glrlm      | RunVariance                      | 0.281220861  |
| wavelet-LHH | glrlm      | GrayLevelNonUniformity           | 129.9210916  |
| wavelet-LHH | glrlm      | LongRunEmphasis                  | 1.680155039  |
| wavelet-LHH | glrlm      | ShortRunHighGrayLevelEmphasis    | 326.6416909  |
| wavelet-LHH | glrlm      | RunLengthNonUniformity           | 1003.446989  |
| wavelet-LHH | glrlm      | ShortRunEmphasis                 | 0.893409082  |
| wavelet-LHH | glrlm      | LongRunHighGrayLevelEmphasis     | 595.9474985  |
| wavelet-LHH | glrlm      | RunPercentage                    | 0.846548323  |
| wavelet-LHH | glrlm      | LongRunLowGrayLevelEmphasis      | 0.006564612  |
| wavelet-LHH | glrlm      | RunEntropy                       | 4.50206685   |

|             |       |                                      |              |
|-------------|-------|--------------------------------------|--------------|
| wavelet-LHH | grlm  | HighGrayLevelRunEmphasis             | 363.2164894  |
| wavelet-LHH | grlm  | RunLengthNonUniformityNormalized     | 0.759170182  |
| wavelet-LHH | glszm | GrayLevelVariance                    | 37.1325145   |
| wavelet-LHH | glszm | ZoneVariance                         | 438.863595   |
| wavelet-LHH | glszm | GrayLevelNonUniformityNormalized     | 0.050039884  |
| wavelet-LHH | glszm | SizeZoneNonUniformityNormalized      | 0.497613927  |
| wavelet-LHH | glszm | SizeZoneNonUniformity                | 230.3952484  |
| wavelet-LHH | glszm | GrayLevelNonUniformity               | 23.16846652  |
| wavelet-LHH | glszm | LargeAreaEmphasis                    | 450.2159827  |
| wavelet-LHH | glszm | SmallAreaHighGrayLevelEmphasis       | 294.8489888  |
| wavelet-LHH | glszm | ZonePercentage                       | 0.296794872  |
| wavelet-LHH | glszm | LargeAreaLowGrayLevelEmphasis        | 1.325131303  |
| wavelet-LHH | glszm | LargeAreaHighGrayLevelEmphasis       | 154292.6479  |
| wavelet-LHH | glszm | HighGrayLevelZoneEmphasis            | 395.2656587  |
| wavelet-LHH | glszm | SmallAreaEmphasis                    | 0.733003638  |
| wavelet-LHH | glszm | LowGrayLevelZoneEmphasis             | 0.007142829  |
| wavelet-LHH | glszm | ZoneEntropy                          | 5.916600497  |
| wavelet-LHH | glszm | SmallAreaLowGrayLevelEmphasis        | 0.006227176  |
| wavelet-LHH | ngtdm | Coarseness                           | 0.005176709  |
| wavelet-LHH | ngtdm | Complexity                           | 1307.504155  |
| wavelet-LHH | ngtdm | Strength                             | 2.090368357  |
| wavelet-LHH | ngtdm | Contrast                             | 0.063940407  |
| wavelet-LHH | ngtdm | Busyness                             | 0.207452008  |
| wavelet-LLH | gldm  | GrayLevelVariance                    | 47.34789571  |
| wavelet-LLH | gldm  | HighGrayLevelEmphasis                | 827.7980769  |
| wavelet-LLH | gldm  | DependenceEntropy                    | 6.759992109  |
| wavelet-LLH | gldm  | DependenceNonUniformity              | 233.1371795  |
| wavelet-LLH | gldm  | GrayLevelNonUniformity               | 128.9512821  |
| wavelet-LLH | gldm  | SmallDependenceEmphasis              | 0.355665329  |
| wavelet-LLH | gldm  | SmallDependenceHighGrayLevelEmphasis | 294.0554802  |
| wavelet-LLH | gldm  | DependenceNonUniformityNormalized    | 0.14944691   |
| wavelet-LLH | gldm  | LargeDependenceEmphasis              | 32.78461538  |
| wavelet-LLH | gldm  | LargeDependenceLowGrayLevelEmphasis  | 0.045016703  |
| wavelet-LLH | gldm  | DependenceVariance                   | 14.47060487  |
| wavelet-LLH | gldm  | LargeDependenceHighGrayLevelEmphasis | 28347.375    |
| wavelet-LLH | gldm  | SmallDependenceLowGrayLevelEmphasis  | 0.002074601  |
| wavelet-LLH | gldm  | LowGrayLevelEmphasis                 | 0.003899839  |
| wavelet-LLH | glcm  | JointAverage                         | 27.81990233  |
| wavelet-LLH | glcm  | SumAverage                           | 55.63980466  |
| wavelet-LLH | glcm  | JointEntropy                         | 7.515474922  |
| wavelet-LLH | glcm  | ClusterShade                         | -248.8761415 |
| wavelet-LLH | glcm  | MaximumProbability                   | 0.071949621  |
| wavelet-LLH | glcm  | ldmn                                 | 0.984009592  |
| wavelet-LLH | glcm  | JointEnergy                          | 0.019490261  |
| wavelet-LLH | glcm  | Contrast                             | 68.19205682  |
| wavelet-LLH | glcm  | DifferenceEntropy                    | 3.7181483    |
| wavelet-LLH | glcm  | InverseVariance                      | 0.289261788  |
| wavelet-LLH | glcm  | DifferenceVariance                   | 43.91714553  |
| wavelet-LLH | glcm  | ldn                                  | 0.933535944  |
| wavelet-LLH | glcm  | ldm                                  | 0.315252687  |
| wavelet-LLH | glcm  | Correlation                          | 0.13215173   |
| wavelet-LLH | glcm  | Autocorrelation                      | 779.4970662  |
| wavelet-LLH | glcm  | SumEntropy                           | 4.734260396  |

|             |            |                                  |              |
|-------------|------------|----------------------------------|--------------|
| wavelet-LLH | glcm       | SumSquares                       | 39.64205291  |
| wavelet-LLH | glcm       | ClusterProminence                | 68960.27045  |
| wavelet-LLH | glcm       | Imc2                             | 0.877478022  |
| wavelet-LLH | glcm       | Imc1                             | -0.181795398 |
| wavelet-LLH | glcm       | DifferenceAverage                | 4.81938896   |
| wavelet-LLH | glcm       | Id                               | 0.383234491  |
| wavelet-LLH | glcm       | ClusterTendency                  | 90.37615483  |
| wavelet-LLH | firstorder | InterquartileRange               | 126.4191326  |
| wavelet-LLH | firstorder | Skewness                         | 0.189329597  |
| wavelet-LLH | firstorder | Uniformity                       | 0.082661078  |
| wavelet-LLH | firstorder | Median                           | -13.87973129 |
| wavelet-LLH | firstorder | Energy                           | 48380551.1   |
| wavelet-LLH | firstorder | RobustMeanAbsoluteDeviation      | 59.23915367  |
| wavelet-LLH | firstorder | MeanAbsoluteDeviation            | 112.7614904  |
| wavelet-LLH | firstorder | TotalEnergy                      | 1306274880   |
| wavelet-LLH | firstorder | Maximum                          | 760.5108795  |
| wavelet-LLH | firstorder | RootMeanSquared                  | 176.1055757  |
| wavelet-LLH | firstorder | 90Percentile                     | 105.7211919  |
| wavelet-LLH | firstorder | Minimum                          | -710.8886107 |
| wavelet-LLH | firstorder | Entropy                          | 4.377741486  |
| wavelet-LLH | firstorder | Range                            | 1471.39949   |
| wavelet-LLH | firstorder | Variance                         | 29474.67468  |
| wavelet-LLH | firstorder | 10Percentile                     | -246.6517947 |
| wavelet-LLH | firstorder | Kurtosis                         | 6.704161104  |
| wavelet-LLH | firstorder | Mean                             | -39.22370583 |
| wavelet-LLH | grlm       | ShortRunLowGrayLevelEmphasis     | 0.004084259  |
| wavelet-LLH | grlm       | GrayLevelVariance                | 53.12025757  |
| wavelet-LLH | grlm       | LowGrayLevelRunEmphasis          | 0.004233119  |
| wavelet-LLH | grlm       | GrayLevelNonUniformityNormalized | 0.067002717  |
| wavelet-LLH | grlm       | RunVariance                      | 0.229382874  |
| wavelet-LLH | grlm       | GrayLevelNonUniformity           | 91.48494701  |
| wavelet-LLH | grlm       | LongRunEmphasis                  | 1.543949702  |
| wavelet-LLH | grlm       | ShortRunHighGrayLevelEmphasis    | 751.6650741  |
| wavelet-LLH | grlm       | RunLengthNonUniformity           | 1096.056868  |
| wavelet-LLH | grlm       | ShortRunEmphasis                 | 0.914611742  |
| wavelet-LLH | grlm       | LongRunHighGrayLevelEmphasis     | 1290.432468  |
| wavelet-LLH | grlm       | RunPercentage                    | 0.873865878  |
| wavelet-LLH | grlm       | LongRunLowGrayLevelEmphasis      | 0.005061557  |
| wavelet-LLH | grlm       | RunEntropy                       | 5.056995142  |
| wavelet-LLH | grlm       | HighGrayLevelRunEmphasis         | 824.0650398  |
| wavelet-LLH | grlm       | RunLengthNonUniformityNormalized | 0.802785832  |
| wavelet-LLH | glszm      | GrayLevelVariance                | 97.60255404  |
| wavelet-LLH | glszm      | ZoneVariance                     | 213.3358324  |
| wavelet-LLH | glszm      | GrayLevelNonUniformityNormalized | 0.033822461  |
| wavelet-LLH | glszm      | SizeZoneNonUniformityNormalized  | 0.549190482  |
| wavelet-LLH | glszm      | SizeZoneNonUniformity            | 336.1045752  |
| wavelet-LLH | glszm      | GrayLevelNonUniformity           | 20.69934641  |
| wavelet-LLH | glszm      | LargeAreaEmphasis                | 219.8333333  |
| wavelet-LLH | glszm      | SmallAreaHighGrayLevelEmphasis   | 639.431114   |
| wavelet-LLH | glszm      | ZonePercentage                   | 0.392307692  |
| wavelet-LLH | glszm      | LargeAreaLowGrayLevelEmphasis    | 0.263454629  |
| wavelet-LLH | glszm      | LargeAreaHighGrayLevelEmphasis   | 191382.2533  |
| wavelet-LLH | glszm      | HighGrayLevelZoneEmphasis        | 823.3415033  |

|             |            |                                      |              |
|-------------|------------|--------------------------------------|--------------|
| wavelet-LLH | glszm      | SmallAreaEmphasis                    | 0.76887105   |
| wavelet-LLH | glszm      | LowGrayLevelZoneEmphasis             | 0.006280526  |
| wavelet-LLH | glszm      | ZoneEntropy                          | 6.345265336  |
| wavelet-LLH | glszm      | SmallAreaLowGrayLevelEmphasis        | 0.004672896  |
| wavelet-LLH | ngtdm      | Coarseness                           | 0.004946856  |
| wavelet-LLH | ngtdm      | Complexity                           | 5185.293311  |
| wavelet-LLH | ngtdm      | Strength                             | 6.426797064  |
| wavelet-LLH | ngtdm      | Contrast                             | 0.111372395  |
| wavelet-LLH | ngtdm      | Busyness                             | 0.085610184  |
| wavelet-LLL | gldm       | GrayLevelVariance                    | 318.1333185  |
| wavelet-LLL | gldm       | HighGrayLevelEmphasis                | 5473.925641  |
| wavelet-LLL | gldm       | DependenceEntropy                    | 7.37156663   |
| wavelet-LLL | gldm       | DependenceNonUniformity              | 319.8576923  |
| wavelet-LLL | gldm       | GrayLevelNonUniformity               | 76.78717949  |
| wavelet-LLL | gldm       | SmallDependenceEmphasis              | 0.456964486  |
| wavelet-LLL | gldm       | SmallDependenceHighGrayLevelEmphasis | 1867.398705  |
| wavelet-LLL | gldm       | DependenceNonUniformityNormalized    | 0.205036982  |
| wavelet-LLL | gldm       | LargeDependenceEmphasis              | 32.87692308  |
| wavelet-LLL | gldm       | LargeDependenceLowGrayLevelEmphasis  | 0.005685814  |
| wavelet-LLL | gldm       | DependenceVariance                   | 17.38563445  |
| wavelet-LLL | gldm       | LargeDependenceHighGrayLevelEmphasis | 225937.5256  |
| wavelet-LLL | gldm       | SmallDependenceLowGrayLevelEmphasis  | 0.000930327  |
| wavelet-LLL | gldm       | LowGrayLevelEmphasis                 | 0.001023449  |
| wavelet-LLL | glcm       | JointAverage                         | 75.51655221  |
| wavelet-LLL | glcm       | SumAverage                           | 151.0331044  |
| wavelet-LLL | glcm       | JointEntropy                         | 8.51114073   |
| wavelet-LLL | glcm       | ClusterShade                         | -30394.88069 |
| wavelet-LLL | glcm       | MaximumProbability                   | 0.054870717  |
| wavelet-LLL | glcm       | ldmn                                 | 0.975438097  |
| wavelet-LLL | glcm       | JointEnergy                          | 0.010239365  |
| wavelet-LLL | glcm       | Contrast                             | 238.7726286  |
| wavelet-LLL | glcm       | DifferenceEntropy                    | 4.514295496  |
| wavelet-LLL | glcm       | InverseVariance                      | 0.234631677  |
| wavelet-LLL | glcm       | DifferenceVariance                   | 147.5303063  |
| wavelet-LLL | glcm       | ldn                                  | 0.917948351  |
| wavelet-LLL | glcm       | ldm                                  | 0.267522905  |
| wavelet-LLL | glcm       | Correlation                          | 0.47349193   |
| wavelet-LLL | glcm       | Autocorrelation                      | 5813.413985  |
| wavelet-LLL | glcm       | SumEntropy                           | 5.718151463  |
| wavelet-LLL | glcm       | SumSquares                           | 229.7655401  |
| wavelet-LLL | glcm       | ClusterProminence                    | 2606603.667  |
| wavelet-LLL | glcm       | lmc2                                 | 0.955278802  |
| wavelet-LLL | glcm       | lmc1                                 | -0.25304197  |
| wavelet-LLL | glcm       | DifferenceAverage                    | 9.46650129   |
| wavelet-LLL | glcm       | ld                                   | 0.326508608  |
| wavelet-LLL | glcm       | ClusterTendency                      | 680.2895317  |
| wavelet-LLL | firstorder | InterquartileRange                   | 532.5959534  |
| wavelet-LLL | firstorder | Skewness                             | -1.38801348  |
| wavelet-LLL | firstorder | Uniformity                           | 0.049222551  |
| wavelet-LLL | firstorder | Median                               | 28.44768187  |
| wavelet-LLL | firstorder | Energy                               | 383650063.2  |
| wavelet-LLL | firstorder | RobustMeanAbsoluteDeviation          | 246.8129347  |
| wavelet-LLL | firstorder | MeanAbsoluteDeviation                | 360.2892989  |

|             |            |                                  |              |
|-------------|------------|----------------------------------|--------------|
| wavelet-LLL | firstorder | TotalEnergy                      | 10358551706  |
| wavelet-LLL | firstorder | Maximum                          | 287.5620251  |
| wavelet-LLL | firstorder | RootMeanSquared                  | 495.9128227  |
| wavelet-LLL | firstorder | 90Percentile                     | 133.5976414  |
| wavelet-LLL | firstorder | Minimum                          | -1982.71608  |
| wavelet-LLL | firstorder | Entropy                          | 5.26545276   |
| wavelet-LLL | firstorder | Range                            | 2270.278105  |
| wavelet-LLL | firstorder | Variance                         | 198653.2949  |
| wavelet-LLL | firstorder | 10Percentile                     | -920.013276  |
| wavelet-LLL | firstorder | Kurtosis                         | 4.055005376  |
| wavelet-LLL | firstorder | Mean                             | -217.4309839 |
| wavelet-LLL | grlm       | ShortRunLowGrayLevelEmphasis     | 0.001123782  |
| wavelet-LLL | grlm       | GrayLevelVariance                | 338.0853458  |
| wavelet-LLL | grlm       | LowGrayLevelRunEmphasis          | 0.001134924  |
| wavelet-LLL | grlm       | GrayLevelNonUniformityNormalized | 0.038164064  |
| wavelet-LLL | grlm       | RunVariance                      | 0.212391228  |
| wavelet-LLL | grlm       | GrayLevelNonUniformity           | 52.84930632  |
| wavelet-LLL | grlm       | LongRunEmphasis                  | 1.484831004  |
| wavelet-LLL | grlm       | ShortRunHighGrayLevelEmphasis    | 4795.405468  |
| wavelet-LLL | grlm       | RunLengthNonUniformity           | 1149.192558  |
| wavelet-LLL | grlm       | ShortRunEmphasis                 | 0.927240061  |
| wavelet-LLL | grlm       | LongRunHighGrayLevelEmphasis     | 8634.163637  |
| wavelet-LLL | grlm       | RunPercentage                    | 0.887080868  |
| wavelet-LLL | grlm       | LongRunLowGrayLevelEmphasis      | 0.001207488  |
| wavelet-LLL | grlm       | RunEntropy                       | 5.889207577  |
| wavelet-LLL | grlm       | HighGrayLevelRunEmphasis         | 5294.567051  |
| wavelet-LLL | grlm       | RunLengthNonUniformityNormalized | 0.830000372  |
| wavelet-LLL | glszm      | GrayLevelVariance                | 367.4655464  |
| wavelet-LLL | glszm      | ZoneVariance                     | 111.1821082  |
| wavelet-LLL | glszm      | GrayLevelNonUniformityNormalized | 0.016643475  |
| wavelet-LLL | glszm      | SizeZoneNonUniformityNormalized  | 0.68799437   |
| wavelet-LLL | glszm      | SizeZoneNonUniformity            | 518.059761   |
| wavelet-LLL | glszm      | GrayLevelNonUniformity           | 12.53253652  |
| wavelet-LLL | glszm      | LargeAreaEmphasis                | 115.4741036  |
| wavelet-LLL | glszm      | SmallAreaHighGrayLevelEmphasis   | 3291.48072   |
| wavelet-LLL | glszm      | ZonePercentage                   | 0.482692308  |
| wavelet-LLL | glszm      | LargeAreaLowGrayLevelEmphasis    | 0.018406341  |
| wavelet-LLL | glszm      | LargeAreaHighGrayLevelEmphasis   | 803191.8911  |
| wavelet-LLL | glszm      | HighGrayLevelZoneEmphasis        | 4108.095618  |
| wavelet-LLL | glszm      | SmallAreaEmphasis                | 0.854433068  |
| wavelet-LLL | glszm      | LowGrayLevelZoneEmphasis         | 0.001944818  |
| wavelet-LLL | glszm      | ZoneEntropy                      | 6.746510522  |
| wavelet-LLL | glszm      | SmallAreaLowGrayLevelEmphasis    | 0.001908641  |
| wavelet-LLL | ngtdm      | Coarseness                       | 0.003775183  |
| wavelet-LLL | ngtdm      | Complexity                       | 21214.93854  |
| wavelet-LLL | ngtdm      | Strength                         | 18.20133283  |
| wavelet-LLL | ngtdm      | Contrast                         | 0.730666955  |
| wavelet-LLL | ngtdm      | Busyness                         | 0.031949737  |
| wavelet-HHL | gldm       | GrayLevelVariance                | 16.52504767  |
| wavelet-HHL | gldm       | HighGrayLevelEmphasis            | 362.1512821  |
| wavelet-HHL | gldm       | DependenceEntropy                | 6.494918651  |
| wavelet-HHL | gldm       | DependenceNonUniformity          | 191.8025641  |
| wavelet-HHL | gldm       | GrayLevelNonUniformity           | 179.4512821  |

|             |            |                                      |              |
|-------------|------------|--------------------------------------|--------------|
| wavelet-HHL | gldm       | SmallDependenceEmphasis              | 0.309086546  |
| wavelet-HHL | gldm       | SmallDependenceHighGrayLevelEmphasis | 122.3753919  |
| wavelet-HHL | gldm       | DependenceNonUniformityNormalized    | 0.122950362  |
| wavelet-HHL | gldm       | LargeDependenceEmphasis              | 42.96538462  |
| wavelet-HHL | gldm       | LargeDependenceLowGrayLevelEmphasis  | 0.131193036  |
| wavelet-HHL | gldm       | DependenceVariance                   | 18.208381    |
| wavelet-HHL | gldm       | LargeDependenceHighGrayLevelEmphasis | 14553.34872  |
| wavelet-HHL | gldm       | SmallDependenceLowGrayLevelEmphasis  | 0.002076062  |
| wavelet-HHL | gldm       | LowGrayLevelEmphasis                 | 0.004501203  |
| wavelet-HHL | glcm       | JointAverage                         | 18.56014163  |
| wavelet-HHL | glcm       | SumAverage                           | 37.12028326  |
| wavelet-HHL | glcm       | JointEntropy                         | 6.813079295  |
| wavelet-HHL | glcm       | ClusterShade                         | 79.04741104  |
| wavelet-HHL | glcm       | MaximumProbability                   | 0.090787659  |
| wavelet-HHL | glcm       | Idmn                                 | 0.981790069  |
| wavelet-HHL | glcm       | JointEnergy                          | 0.028154299  |
| wavelet-HHL | glcm       | Contrast                             | 30.18009483  |
| wavelet-HHL | glcm       | DifferenceEntropy                    | 3.319878311  |
| wavelet-HHL | glcm       | InverseVariance                      | 0.328220004  |
| wavelet-HHL | glcm       | DifferenceVariance                   | 18.16509793  |
| wavelet-HHL | glcm       | Idn                                  | 0.925642124  |
| wavelet-HHL | glcm       | Idm                                  | 0.367295005  |
| wavelet-HHL | glcm       | Correlation                          | -0.005660231 |
| wavelet-HHL | glcm       | Autocorrelation                      | 344.4514932  |
| wavelet-HHL | glcm       | SumEntropy                           | 4.129889578  |
| wavelet-HHL | glcm       | SumSquares                           | 15.05303303  |
| wavelet-HHL | glcm       | ClusterProminence                    | 7390.626174  |
| wavelet-HHL | glcm       | Imc2                                 | 0.776646718  |
| wavelet-HHL | glcm       | Imc1                                 | -0.129659078 |
| wavelet-HHL | glcm       | DifferenceAverage                    | 3.420681888  |
| wavelet-HHL | glcm       | Id                                   | 0.431139821  |
| wavelet-HHL | glcm       | ClusterTendency                      | 30.03203731  |
| wavelet-HHL | firstorder | InterquartileRange                   | 69.45626503  |
| wavelet-HHL | firstorder | Skewness                             | 0.409487998  |
| wavelet-HHL | firstorder | Uniformity                           | 0.115032873  |
| wavelet-HHL | firstorder | Median                               | -3.246495512 |
| wavelet-HHL | firstorder | Energy                               | 16021420.73  |
| wavelet-HHL | firstorder | RobustMeanAbsoluteDeviation          | 34.26924892  |
| wavelet-HHL | firstorder | MeanAbsoluteDeviation                | 66.14348171  |
| wavelet-HHL | firstorder | TotalEnergy                          | 432578359.6  |
| wavelet-HHL | firstorder | Maximum                              | 497.4081311  |
| wavelet-HHL | firstorder | RootMeanSquared                      | 101.3417066  |
| wavelet-HHL | firstorder | 90Percentile                         | 117.5021243  |
| wavelet-HHL | firstorder | Minimum                              | -434.5399767 |
| wavelet-HHL | firstorder | Entropy                              | 3.775584691  |
| wavelet-HHL | firstorder | Range                                | 931.9481077  |
| wavelet-HHL | firstorder | Variance                             | 10265.06791  |
| wavelet-HHL | firstorder | 10Percentile                         | -102.2315376 |
| wavelet-HHL | firstorder | Kurtosis                             | 6.46530853   |
| wavelet-HHL | firstorder | Mean                                 | 2.252459961  |
| wavelet-HHL | glrlm      | ShortRunLowGrayLevelEmphasis         | 0.004426479  |
| wavelet-HHL | glrlm      | GrayLevelVariance                    | 19.04207309  |
| wavelet-HHL | glrlm      | LowGrayLevelRunEmphasis              | 0.004752091  |

|             |       |                                      |             |
|-------------|-------|--------------------------------------|-------------|
| wavelet-HHL | grlm  | GrayLevelNonUniformityNormalized     | 0.093599484 |
| wavelet-HHL | grlm  | RunVariance                          | 0.297785526 |
| wavelet-HHL | grlm  | GrayLevelNonUniformity               | 123.7950439 |
| wavelet-HHL | grlm  | LongRunEmphasis                      | 1.696221137 |
| wavelet-HHL | grlm  | ShortRunHighGrayLevelEmphasis        | 331.0838079 |
| wavelet-HHL | grlm  | RunLengthNonUniformity               | 1016.182821 |
| wavelet-HHL | grlm  | ShortRunEmphasis                     | 0.897243967 |
| wavelet-HHL | grlm  | LongRunHighGrayLevelEmphasis         | 602.4361458 |
| wavelet-HHL | grlm  | RunPercentage                        | 0.84709073  |
| wavelet-HHL | grlm  | LongRunLowGrayLevelEmphasis          | 0.006905283 |
| wavelet-HHL | grlm  | RunEntropy                           | 4.560627132 |
| wavelet-HHL | grlm  | HighGrayLevelRunEmphasis             | 366.133092  |
| wavelet-HHL | grlm  | RunLengthNonUniformityNormalized     | 0.767927619 |
| wavelet-HHL | glszm | GrayLevelVariance                    | 37.38938137 |
| wavelet-HHL | glszm | ZoneVariance                         | 390.3723145 |
| wavelet-HHL | glszm | GrayLevelNonUniformityNormalized     | 0.050137019 |
| wavelet-HHL | glszm | SizeZoneNonUniformityNormalized      | 0.561931293 |
| wavelet-HHL | glszm | SizeZoneNonUniformity                | 288.8326848 |
| wavelet-HHL | glszm | GrayLevelNonUniformity               | 25.77042802 |
| wavelet-HHL | glszm | LargeAreaEmphasis                    | 399.5836576 |
| wavelet-HHL | glszm | SmallAreaHighGrayLevelEmphasis       | 313.8661294 |
| wavelet-HHL | glszm | ZonePercentage                       | 0.329487179 |
| wavelet-HHL | glszm | LargeAreaLowGrayLevelEmphasis        | 1.199416057 |
| wavelet-HHL | glszm | LargeAreaHighGrayLevelEmphasis       | 134589.677  |
| wavelet-HHL | glszm | HighGrayLevelZoneEmphasis            | 396.8385214 |
| wavelet-HHL | glszm | SmallAreaEmphasis                    | 0.777532005 |
| wavelet-HHL | glszm | LowGrayLevelZoneEmphasis             | 0.006828665 |
| wavelet-HHL | glszm | ZoneEntropy                          | 5.743893979 |
| wavelet-HHL | glszm | SmallAreaLowGrayLevelEmphasis        | 0.005646326 |
| wavelet-HHL | ngtdm | Coarseness                           | 0.00515045  |
| wavelet-HHL | ngtdm | Complexity                           | 1514.41236  |
| wavelet-HHL | ngtdm | Strength                             | 2.306194482 |
| wavelet-HHL | ngtdm | Contrast                             | 0.0677163   |
| wavelet-HHL | ngtdm | Busyness                             | 0.196985813 |
| wavelet-HLH | gldm  | GrayLevelVariance                    | 7.643684665 |
| wavelet-HLH | gldm  | HighGrayLevelEmphasis                | 250.8237179 |
| wavelet-HLH | gldm  | DependenceEntropy                    | 6.210700927 |
| wavelet-HLH | gldm  | DependenceNonUniformity              | 154.3012821 |
| wavelet-HLH | gldm  | GrayLevelNonUniformity               | 232.9653846 |
| wavelet-HLH | gldm  | SmallDependenceEmphasis              | 0.241759472 |
| wavelet-HLH | gldm  | SmallDependenceHighGrayLevelEmphasis | 67.40089711 |
| wavelet-HLH | gldm  | DependenceNonUniformityNormalized    | 0.098911078 |
| wavelet-HLH | gldm  | LargeDependenceEmphasis              | 49.53589744 |
| wavelet-HLH | gldm  | LargeDependenceLowGrayLevelEmphasis  | 0.212342166 |
| wavelet-HLH | gldm  | DependenceVariance                   | 18.69069034 |
| wavelet-HLH | gldm  | LargeDependenceHighGrayLevelEmphasis | 11761.35705 |
| wavelet-HLH | gldm  | SmallDependenceLowGrayLevelEmphasis  | 0.001976496 |
| wavelet-HLH | gldm  | LowGrayLevelEmphasis                 | 0.005332952 |
| wavelet-HLH | glcm  | JointAverage                         | 15.56731421 |
| wavelet-HLH | glcm  | SumAverage                           | 31.13462842 |
| wavelet-HLH | glcm  | JointEntropy                         | 6.026275423 |
| wavelet-HLH | glcm  | ClusterShade                         | 10.41040576 |
| wavelet-HLH | glcm  | MaximumProbability                   | 0.107757104 |



|             |            |                                  |              |
|-------------|------------|----------------------------------|--------------|
| wavelet-HLH | glcm       | Idmn                             | 0.985535115  |
| wavelet-HLH | glcm       | JointEnergy                      | 0.039575016  |
| wavelet-HLH | glcm       | Contrast                         | 12.47212627  |
| wavelet-HLH | glcm       | DifferenceEntropy                | 2.859167749  |
| wavelet-HLH | glcm       | InverseVariance                  | 0.372421972  |
| wavelet-HLH | glcm       | DifferenceVariance               | 6.95863739   |
| wavelet-HLH | glcm       | Idn                              | 0.929200681  |
| wavelet-HLH | glcm       | Idm                              | 0.417589941  |
| wavelet-HLH | glcm       | Correlation                      | 0.030972668  |
| wavelet-HLH | glcm       | Autocorrelation                  | 242.5747006  |
| wavelet-HLH | glcm       | SumEntropy                       | 3.669822071  |
| wavelet-HLH | glcm       | SumSquares                       | 6.468935444  |
| wavelet-HLH | glcm       | ClusterProminence                | 1345.468446  |
| wavelet-HLH | glcm       | Imc2                             | 0.622659651  |
| wavelet-HLH | glcm       | Imc1                             | -0.079619479 |
| wavelet-HLH | glcm       | DifferenceAverage                | 2.332796743  |
| wavelet-HLH | glcm       | Id                               | 0.478245122  |
| wavelet-HLH | glcm       | ClusterTendency                  | 13.4036155   |
| wavelet-HLH | firstorder | InterquartileRange               | 52.80007109  |
| wavelet-HLH | firstorder | Skewness                         | 0.196058232  |
| wavelet-HLH | firstorder | Uniformity                       | 0.149336785  |
| wavelet-HLH | firstorder | Median                           | -1.903565953 |
| wavelet-HLH | firstorder | Energy                           | 7337806.601  |
| wavelet-HLH | firstorder | RobustMeanAbsoluteDeviation      | 24.93177126  |
| wavelet-HLH | firstorder | MeanAbsoluteDeviation            | 45.99993184  |
| wavelet-HLH | firstorder | TotalEnergy                      | 198120778.2  |
| wavelet-HLH | firstorder | Maximum                          | 322.9496765  |
| wavelet-HLH | firstorder | RootMeanSquared                  | 68.58368742  |
| wavelet-HLH | firstorder | 90Percentile                     | 82.34788505  |
| wavelet-HLH | firstorder | Minimum                          | -364.654756  |
| wavelet-HLH | firstorder | Entropy                          | 3.304112565  |
| wavelet-HLH | firstorder | Range                            | 687.6044325  |
| wavelet-HLH | firstorder | Variance                         | 4698.663285  |
| wavelet-HLH | firstorder | 10Percentile                     | -70.77733956 |
| wavelet-HLH | firstorder | Kurtosis                         | 6.291376643  |
| wavelet-HLH | firstorder | Mean                             | 2.249198771  |
| wavelet-HLH | grlm       | ShortRunLowGrayLevelEmphasis     | 0.00502749   |
| wavelet-HLH | grlm       | GrayLevelVariance                | 9.001903735  |
| wavelet-HLH | grlm       | LowGrayLevelRunEmphasis          | 0.005554684  |
| wavelet-HLH | grlm       | GrayLevelNonUniformityNormalized | 0.123370216  |
| wavelet-HLH | grlm       | RunVariance                      | 0.335653352  |
| wavelet-HLH | grlm       | GrayLevelNonUniformity           | 158.8700964  |
| wavelet-HLH | grlm       | LongRunEmphasis                  | 1.810404602  |
| wavelet-HLH | grlm       | ShortRunHighGrayLevelEmphasis    | 224.1434226  |
| wavelet-HLH | grlm       | RunLengthNonUniformity           | 938.6623546  |
| wavelet-HLH | grlm       | ShortRunEmphasis                 | 0.877558046  |
| wavelet-HLH | grlm       | LongRunHighGrayLevelEmphasis     | 446.3074246  |
| wavelet-HLH | grlm       | RunPercentage                    | 0.824852071  |
| wavelet-HLH | grlm       | LongRunLowGrayLevelEmphasis      | 0.009030441  |
| wavelet-HLH | grlm       | RunEntropy                       | 4.178239971  |
| wavelet-HLH | grlm       | HighGrayLevelRunEmphasis         | 253.4457747  |
| wavelet-HLH | grlm       | RunLengthNonUniformityNormalized | 0.728693573  |
| wavelet-HLH | glszm      | GrayLevelVariance                | 21.249272    |

|             |       |                                  |             |
|-------------|-------|----------------------------------|-------------|
| wavelet-HLH | glszm | ZoneVariance                     | 659.2116043 |
| wavelet-HLH | glszm | GrayLevelNonUniformityNormalized | 0.066987794 |
| wavelet-HLH | glszm | SizeZoneNonUniformityNormalized  | 0.485209542 |
| wavelet-HLH | glszm | SizeZoneNonUniformity            | 196.9950739 |
| wavelet-HLH | glszm | GrayLevelNonUniformity           | 27.19704433 |
| wavelet-HLH | glszm | LargeAreaEmphasis                | 673.9753695 |
| wavelet-HLH | glszm | SmallAreaHighGrayLevelEmphasis   | 208.5883388 |
| wavelet-HLH | glszm | ZonePercentage                   | 0.26025641  |
| wavelet-HLH | glszm | LargeAreaLowGrayLevelEmphasis    | 2.872562379 |
| wavelet-HLH | glszm | LargeAreaHighGrayLevelEmphasis   | 159374.5837 |
| wavelet-HLH | glszm | HighGrayLevelZoneEmphasis        | 279.3817734 |
| wavelet-HLH | glszm | SmallAreaEmphasis                | 0.723813769 |
| wavelet-HLH | glszm | LowGrayLevelZoneEmphasis         | 0.008008397 |
| wavelet-HLH | glszm | ZoneEntropy                      | 5.528099042 |
| wavelet-HLH | glszm | SmallAreaLowGrayLevelEmphasis    | 0.006632251 |
| wavelet-HLH | ngtdm | Coarseness                       | 0.00489545  |
| wavelet-HLH | ngtdm | Complexity                       | 571.9427779 |
| wavelet-HLH | ngtdm | Strength                         | 1.297267944 |
| wavelet-HLH | ngtdm | Contrast                         | 0.040505546 |
| wavelet-HLH | ngtdm | Busyness                         | 0.33563141  |

| Image type | Feature Class | Feature Name                         |                                                                                                                                                                                                                                                                                                                                                                                                                   |
|------------|---------------|--------------------------------------|-------------------------------------------------------------------------------------------------------------------------------------------------------------------------------------------------------------------------------------------------------------------------------------------------------------------------------------------------------------------------------------------------------------------|
| general    | info          | BoundingBox                          | 3: RTSTRUCT: C99-DNU_segment_GTV<br>(0, 1, 1, 4, 3, 5)                                                                                                                                                                                                                                                                                                                                                            |
| general    | info          | EnabledImageTypes                    | {u'Original': {}, u'Wavelet': {}}                                                                                                                                                                                                                                                                                                                                                                                 |
|            |               |                                      | {'distances': [1], 'additionalInfo': True, 'force2D': False, 'interpolator': 'sitkBSpline', 'resampledPixelSpacing': [3.0], 'label': 1, 'normalizeScale': 1, 'normalize': False, 'force2Ddimension': 0, 'removeOutliers': None, 'minimumROISize': None, u'binWidth': 25.0, 'minimumROIDimensions': 1, u'correctMask': True, 'preCrop': False, u'symmetricalGLCM': True, 'resegmentRange': None, 'padDistance': 5} |
| general    | info          | GeneralSettings                      | 8a575bfd2ecb947c0df504ec629a610b3b3eb                                                                                                                                                                                                                                                                                                                                                                             |
| general    | info          | ImageHash                            | b3b                                                                                                                                                                                                                                                                                                                                                                                                               |
| general    | info          | ImageSpacing                         | (0.9765624999999998, 0.9765624999999998, 1.9999999999999999)                                                                                                                                                                                                                                                                                                                                                      |
| general    | info          | MaskHash                             | f253477dcbe624fe3b9d49c5619bb3915fc17e1f                                                                                                                                                                                                                                                                                                                                                                          |
| general    | info          | NumpyVersion                         | 1.13.1                                                                                                                                                                                                                                                                                                                                                                                                            |
| general    | info          | PyWaveletVersion                     | 0.5.2                                                                                                                                                                                                                                                                                                                                                                                                             |
| general    | info          | SimpleITKVersion                     | 1.1.0                                                                                                                                                                                                                                                                                                                                                                                                             |
| general    | info          | Version                              | 1.3.0.post102+g1b0eb74                                                                                                                                                                                                                                                                                                                                                                                            |
| general    | info          | VolumeNum                            | 1                                                                                                                                                                                                                                                                                                                                                                                                                 |
| general    | info          | VoxelNum                             | 32                                                                                                                                                                                                                                                                                                                                                                                                                |
| original   | shape         | Maximum3DDiameter                    | 13.74772708                                                                                                                                                                                                                                                                                                                                                                                                       |
| original   | shape         | Maximum2DDiameterSlice               | 9.486832981                                                                                                                                                                                                                                                                                                                                                                                                       |
| original   | shape         | Sphericity                           | 0.913337401                                                                                                                                                                                                                                                                                                                                                                                                       |
| original   | shape         | MinorAxis                            | 9.632286105                                                                                                                                                                                                                                                                                                                                                                                                       |
| original   | shape         | Elongation                           | 0.669321641                                                                                                                                                                                                                                                                                                                                                                                                       |
| original   | shape         | SurfaceVolumeRatio                   | 0.555923417                                                                                                                                                                                                                                                                                                                                                                                                       |
| original   | shape         | Volume                               | 864                                                                                                                                                                                                                                                                                                                                                                                                               |
| original   | shape         | MajorAxis                            | 14.39111709                                                                                                                                                                                                                                                                                                                                                                                                       |
| original   | shape         | SurfaceArea                          | 480.317832                                                                                                                                                                                                                                                                                                                                                                                                        |
| original   | shape         | Flatness                             | 0.635340475                                                                                                                                                                                                                                                                                                                                                                                                       |
| original   | shape         | LeastAxis                            | 9.143259173                                                                                                                                                                                                                                                                                                                                                                                                       |
| original   | shape         | Maximum2DDiameterColumn              | 12.36931688                                                                                                                                                                                                                                                                                                                                                                                                       |
| original   | shape         | Maximum2DDiameterRow                 | 13.41640786                                                                                                                                                                                                                                                                                                                                                                                                       |
| original   | gldm          | GrayLevelVariance                    | 76.27734375                                                                                                                                                                                                                                                                                                                                                                                                       |
| original   | gldm          | HighGrayLevelEmphasis                | 253.5                                                                                                                                                                                                                                                                                                                                                                                                             |
| original   | gldm          | DependenceEntropy                    | 4.5                                                                                                                                                                                                                                                                                                                                                                                                               |
| original   | gldm          | DependenceNonUniformity              | 18.75                                                                                                                                                                                                                                                                                                                                                                                                             |
| original   | gldm          | GrayLevelNonUniformity               | 1.875                                                                                                                                                                                                                                                                                                                                                                                                             |
| original   | gldm          | SmallDependenceEmphasis              | 0.792100694                                                                                                                                                                                                                                                                                                                                                                                                       |
| original   | gldm          | SmallDependenceHighGrayLevelEmphasis | 236.8246528                                                                                                                                                                                                                                                                                                                                                                                                       |
| original   | gldm          | DependenceNonUniformityNormalized    | 0.5859375                                                                                                                                                                                                                                                                                                                                                                                                         |
| original   | gldm          | LargeDependenceEmphasis              | 2.8125                                                                                                                                                                                                                                                                                                                                                                                                            |
| original   | gldm          | LargeDependenceLowGrayLevelEmphasis  | 0.43681062                                                                                                                                                                                                                                                                                                                                                                                                        |
| original   | gldm          | DependenceVariance                   | 0.74609375                                                                                                                                                                                                                                                                                                                                                                                                        |
| original   | gldm          | LargeDependenceHighGrayLevelEmphasis | 324.125                                                                                                                                                                                                                                                                                                                                                                                                           |

|          |            |                                     |              |
|----------|------------|-------------------------------------|--------------|
| original | gldm       | SmallDependenceLowGrayLevelEmphasis | 0.045919643  |
| original | gldm       | LowGrayLevelEmphasis                | 0.0750527    |
| original | glcm       | JointAverage                        | 15.49350265  |
| original | glcm       | SumAverage                          | 30.9870053   |
| original | glcm       | JointEntropy                        | 4.738198746  |
| original | glcm       | ClusterShade                        | -357.7354914 |
| original | glcm       | MaximumProbability                  | 0.053665259  |
| original | glcm       | Idmn                                | 0.872763768  |
| original | glcm       | JointEnergy                         | 0.039057871  |
| original | glcm       | Contrast                            | 132.2752518  |
| original | glcm       | DifferenceEntropy                   | 3.1928689    |
| original | glcm       | InverseVariance                     | 0.107443987  |
| original | glcm       | DifferenceVariance                  | 32.45651726  |
| original | glcm       | Idn                                 | 0.763571372  |
| original | glcm       | Idm                                 | 0.10132534   |
| original | glcm       | Correlation                         | 0.073929158  |
| original | glcm       | Autocorrelation                     | 246.8444883  |
| original | glcm       | SumEntropy                          | 3.511248105  |
| original | glcm       | SumSquares                          | 71.94865373  |
| original | glcm       | ClusterProminence                   | 54061.88274  |
| original | glcm       | Imc2                                | 0.999293788  |
| original | glcm       | Imc1                                | -0.830281086 |
| original | glcm       | DifferenceAverage                   | 9.675454106  |
| original | glcm       | Id                                  | 0.17715075   |
| original | glcm       | ClusterTendency                     | 155.5193631  |
| original | firstorder | InterquartileRange                  | 405          |
| original | firstorder | Skewness                            | 0.135820173  |
| original | firstorder | Uniformity                          | 0.05859375   |
| original | firstorder | Median                              | -313.5       |
| original | firstorder | Energy                              | 5021417      |
| original | firstorder | RobustMeanAbsoluteDeviation         | 151.8298611  |
| original | firstorder | MeanAbsoluteDeviation               | 191.3808594  |
| original | firstorder | TotalEnergy                         | 135578259    |
| original | firstorder | Maximum                             | 38           |
| original | firstorder | RootMeanSquared                     | 396.1303842  |
| original | firstorder | 90Percentile                        | -24.3        |
| original | firstorder | Minimum                             | -631         |
| original | firstorder | Entropy                             | 4.288909766  |
| original | firstorder | Range                               | 669          |
| original | firstorder | Variance                            | 47627.05371  |
| original | firstorder | 10Percentile                        | -608.6       |
| original | firstorder | Kurtosis                            | 1.649401471  |
| original | firstorder | Mean                                | -330.59375   |
| original | glrlm      | ShortRunLowGrayLevelEmphasis        | 0.071164753  |
| original | glrlm      | GrayLevelVariance                   | 75.92420771  |
| original | glrlm      | LowGrayLevelRunEmphasis             | 0.073187705  |
| original | glrlm      | GrayLevelNonUniformityNormalized    | 0.057268199  |
| original | glrlm      | RunVariance                         | 0.021851583  |
| original | glrlm      | GrayLevelNonUniformity              | 1.803544537  |
| original | glrlm      | LongRunEmphasis                     | 1.059273837  |
| original | glrlm      | ShortRunHighGrayLevelEmphasis       | 256.3862684  |
| original | glrlm      | RunLengthNonUniformity              | 30.60126066  |
| original | glrlm      | ShortRunEmphasis                    | 0.988030544  |

|             |       |                                      |             |
|-------------|-------|--------------------------------------|-------------|
| original    | glrlm | LongRunHighGrayLevelEmphasis         | 260.0333105 |
| original    | glrlm | RunPercentage                        | 0.983173077 |
| original    | glrlm | LongRunLowGrayLevelEmphasis          | 0.084128516 |
| original    | glrlm | RunEntropy                           | 4.335064188 |
| original    | glrlm | HighGrayLevelRunEmphasis             | 257.10656   |
| original    | glrlm | RunLengthNonUniformityNormalized     | 0.971168628 |
| original    | glszm | GrayLevelVariance                    | 74.24142661 |
| original    | glszm | ZoneVariance                         | 0.373113855 |
| original    | glszm | GrayLevelNonUniformityNormalized     | 0.050754458 |
| original    | glszm | SizeZoneNonUniformityNormalized      | 0.796982167 |
| original    | glszm | SizeZoneNonUniformity                | 21.51851852 |
| original    | glszm | GrayLevelNonUniformity               | 1.37037037  |
| original    | glszm | LargeAreaEmphasis                    | 1.777777778 |
| original    | glszm | SmallAreaHighGrayLevelEmphasis       | 277.4351852 |
| original    | glszm | ZonePercentage                       | 0.84375     |
| original    | glszm | LargeAreaLowGrayLevelEmphasis        | 0.201003859 |
| original    | glszm | LargeAreaHighGrayLevelEmphasis       | 327.8518519 |
| original    | glszm | HighGrayLevelZoneEmphasis            | 287.1851852 |
| original    | glszm | SmallAreaEmphasis                    | 0.909722222 |
| original    | glszm | LowGrayLevelZoneEmphasis             | 0.06070287  |
| original    | glszm | ZoneEntropy                          | 4.458591206 |
| original    | glszm | SmallAreaLowGrayLevelEmphasis        | 0.051669289 |
| original    | ngtdm | Coarseness                           | 0.078849691 |
| original    | ngtdm | Complexity                           | 1886.149926 |
| original    | ngtdm | Strength                             | 30.8638441  |
| original    | ngtdm | Contrast                             | 2.300234031 |
| original    | ngtdm | Busyness                             | 0.062590292 |
| wavelet-HHH | gldm  | GrayLevelVariance                    | 12.43359375 |
| wavelet-HHH | gldm  | HighGrayLevelEmphasis                | 94.5625     |
| wavelet-HHH | gldm  | DependenceEntropy                    | 4.116729297 |
| wavelet-HHH | gldm  | DependenceNonUniformity              | 8.625       |
| wavelet-HHH | gldm  | GrayLevelNonUniformity               | 3.3125      |
| wavelet-HHH | gldm  | SmallDependenceEmphasis              | 0.439453125 |
| wavelet-HHH | gldm  | SmallDependenceHighGrayLevelEmphasis | 40.78450521 |
| wavelet-HHH | gldm  | DependenceNonUniformityNormalized    | 0.26953125  |
| wavelet-HHH | gldm  | LargeDependenceEmphasis              | 6.25        |
| wavelet-HHH | gldm  | LargeDependenceLowGrayLevelEmphasis  | 0.133291843 |
| wavelet-HHH | gldm  | DependenceVariance                   | 1.1875      |
| wavelet-HHH | gldm  | LargeDependenceHighGrayLevelEmphasis | 538.75      |
| wavelet-HHH | gldm  | SmallDependenceLowGrayLevelEmphasis  | 0.040873938 |
| wavelet-HHH | gldm  | LowGrayLevelEmphasis                 | 0.049165777 |
| wavelet-HHH | glcm  | JointAverage                         | 9.226608774 |
| wavelet-HHH | glcm  | SumAverage                           | 18.45321755 |
| wavelet-HHH | glcm  | JointEntropy                         | 4.528537653 |
| wavelet-HHH | glcm  | ClusterShade                         | 7.173350467 |
| wavelet-HHH | glcm  | MaximumProbability                   | 0.072125271 |
| wavelet-HHH | glcm  | Idmn                                 | 0.919037536 |
| wavelet-HHH | glcm  | JointEnergy                          | 0.046198111 |
| wavelet-HHH | glcm  | Contrast                             | 25.86200468 |
| wavelet-HHH | glcm  | DifferenceEntropy                    | 2.927607035 |
| wavelet-HHH | glcm  | InverseVariance                      | 0.206865831 |
| wavelet-HHH | glcm  | DifferenceVariance                   | 9.157461984 |
| wavelet-HHH | glcm  | Idn                                  | 0.816675741 |

|             |            |                                  |              |
|-------------|------------|----------------------------------|--------------|
| wavelet-HHH | glcm       | Idm                              | 0.237134414  |
| wavelet-HHH | glcm       | Correlation                      | -0.031265245 |
| wavelet-HHH | glcm       | Autocorrelation                  | 84.84033945  |
| wavelet-HHH | glcm       | SumEntropy                       | 3.206627455  |
| wavelet-HHH | glcm       | SumSquares                       | 12.59917994  |
| wavelet-HHH | glcm       | ClusterProminence                | 1650.50287   |
| wavelet-HHH | glcm       | Imc2                             | 0.985891403  |
| wavelet-HHH | glcm       | Imc1                             | -0.586144575 |
| wavelet-HHH | glcm       | DifferenceAverage                | 4.035033405  |
| wavelet-HHH | glcm       | Id                               | 0.327570349  |
| wavelet-HHH | glcm       | ClusterTendency                  | 24.53471506  |
| wavelet-HHH | firstorder | InterquartileRange               | 103.7042474  |
| wavelet-HHH | firstorder | Skewness                         | 0.088361632  |
| wavelet-HHH | firstorder | Uniformity                       | 0.103515625  |
| wavelet-HHH | firstorder | Median                           | -18.89827154 |
| wavelet-HHH | firstorder | Energy                           | 240856.7696  |
| wavelet-HHH | firstorder | RobustMeanAbsoluteDeviation      | 42.22096793  |
| wavelet-HHH | firstorder | MeanAbsoluteDeviation            | 67.39634242  |
| wavelet-HHH | firstorder | TotalEnergy                      | 6503132.78   |
| wavelet-HHH | firstorder | Maximum                          | 162.6377955  |
| wavelet-HHH | firstorder | RootMeanSquared                  | 86.75698272  |
| wavelet-HHH | firstorder | 90Percentile                     | 104.0425811  |
| wavelet-HHH | firstorder | Minimum                          | -208.5494952 |
| wavelet-HHH | firstorder | Entropy                          | 3.453626767  |
| wavelet-HHH | firstorder | Range                            | 371.1872907  |
| wavelet-HHH | firstorder | Variance                         | 7397.272367  |
| wavelet-HHH | firstorder | 10Percentile                     | -96.5492181  |
| wavelet-HHH | firstorder | Kurtosis                         | 2.775294486  |
| wavelet-HHH | firstorder | Mean                             | -11.37988063 |
| wavelet-HHH | glrlm      | ShortRunLowGrayLevelEmphasis     | 0.050279843  |
| wavelet-HHH | glrlm      | GrayLevelVariance                | 12.67483289  |
| wavelet-HHH | glrlm      | LowGrayLevelRunEmphasis          | 0.050879827  |
| wavelet-HHH | glrlm      | GrayLevelNonUniformityNormalized | 0.102242848  |
| wavelet-HHH | glrlm      | RunVariance                      | 0.047859036  |
| wavelet-HHH | glrlm      | GrayLevelNonUniformity           | 3.114372451  |
| wavelet-HHH | glrlm      | LongRunEmphasis                  | 1.153401215  |
| wavelet-HHH | glrlm      | ShortRunHighGrayLevelEmphasis    | 91.47687423  |
| wavelet-HHH | glrlm      | RunLengthNonUniformity           | 27.58025156  |
| wavelet-HHH | glrlm      | ShortRunEmphasis                 | 0.961649696  |
| wavelet-HHH | glrlm      | LongRunHighGrayLevelEmphasis     | 108.4503597  |
| wavelet-HHH | glrlm      | RunPercentage                    | 0.951923077  |
| wavelet-HHH | glrlm      | LongRunLowGrayLevelEmphasis      | 0.053279765  |
| wavelet-HHH | glrlm      | RunEntropy                       | 3.600848978  |
| wavelet-HHH | glrlm      | HighGrayLevelRunEmphasis         | 94.87157133  |
| wavelet-HHH | glrlm      | RunLengthNonUniformityNormalized | 0.904281927  |
| wavelet-HHH | glszm      | GrayLevelVariance                | 15.7191358   |
| wavelet-HHH | glszm      | ZoneVariance                     | 1.395061728  |
| wavelet-HHH | glszm      | GrayLevelNonUniformityNormalized | 0.092592593  |
| wavelet-HHH | glszm      | SizeZoneNonUniformityNormalized  | 0.419753086  |
| wavelet-HHH | glszm      | SizeZoneNonUniformity            | 7.555555556  |
| wavelet-HHH | glszm      | GrayLevelNonUniformity           | 1.666666667  |
| wavelet-HHH | glszm      | LargeAreaEmphasis                | 4.555555556  |
| wavelet-HHH | glszm      | SmallAreaHighGrayLevelEmphasis   | 61.14604938  |

|             |            |                                      |              |
|-------------|------------|--------------------------------------|--------------|
| wavelet-HHH | glszm      | ZonePercentage                       | 0.5625       |
| wavelet-HHH | glszm      | LargeAreaLowGrayLevelEmphasis        | 0.130635197  |
| wavelet-HHH | glszm      | LargeAreaHighGrayLevelEmphasis       | 404.7777778  |
| wavelet-HHH | glszm      | HighGrayLevelZoneEmphasis            | 95.72222222  |
| wavelet-HHH | glszm      | SmallAreaEmphasis                    | 0.670817901  |
| wavelet-HHH | glszm      | LowGrayLevelZoneEmphasis             | 0.075732782  |
| wavelet-HHH | glszm      | ZoneEntropy                          | 3.947702779  |
| wavelet-HHH | glszm      | SmallAreaLowGrayLevelEmphasis        | 0.071134009  |
| wavelet-HHH | ngtdm      | Coarseness                           | 0.121609558  |
| wavelet-HHH | ngtdm      | Complexity                           | 220.5302312  |
| wavelet-HHH | ngtdm      | Strength                             | 8.223009806  |
| wavelet-HHH | ngtdm      | Contrast                             | 0.490764702  |
| wavelet-HHH | ngtdm      | Busyness                             | 0.094653673  |
| wavelet-HLL | gldm       | GrayLevelVariance                    | 112.5693359  |
| wavelet-HLL | gldm       | HighGrayLevelEmphasis                | 506.34375    |
| wavelet-HLL | gldm       | DependenceEntropy                    | 4.4375       |
| wavelet-HLL | gldm       | DependenceNonUniformity              | 14.75        |
| wavelet-HLL | gldm       | GrayLevelNonUniformity               | 1.8125       |
| wavelet-HLL | gldm       | SmallDependenceEmphasis              | 0.663194444  |
| wavelet-HLL | gldm       | SmallDependenceHighGrayLevelEmphasis | 312.7621528  |
| wavelet-HLL | gldm       | DependenceNonUniformityNormalized    | 0.4609375    |
| wavelet-HLL | gldm       | LargeDependenceEmphasis              | 2.625        |
| wavelet-HLL | gldm       | LargeDependenceLowGrayLevelEmphasis  | 0.052808157  |
| wavelet-HLL | gldm       | DependenceVariance                   | 0.375        |
| wavelet-HLL | gldm       | LargeDependenceHighGrayLevelEmphasis | 1476.78125   |
| wavelet-HLL | gldm       | SmallDependenceLowGrayLevelEmphasis  | 0.046080306  |
| wavelet-HLL | gldm       | LowGrayLevelEmphasis                 | 0.04729334   |
| wavelet-HLL | glcm       | JointAverage                         | 18.7186059   |
| wavelet-HLL | glcm       | SumAverage                           | 37.4372118   |
| wavelet-HLL | glcm       | JointEntropy                         | 4.745115199  |
| wavelet-HLL | glcm       | ClusterShade                         | -73.57752378 |
| wavelet-HLL | glcm       | MaximumProbability                   | 0.054428385  |
| wavelet-HLL | glcm       | Idmn                                 | 0.899814021  |
| wavelet-HLL | glcm       | JointEnergy                          | 0.038570209  |
| wavelet-HLL | glcm       | Contrast                             | 159.4720358  |
| wavelet-HLL | glcm       | DifferenceEntropy                    | 3.28758282   |
| wavelet-HLL | glcm       | InverseVariance                      | 0.095807573  |
| wavelet-HLL | glcm       | DifferenceVariance                   | 38.46081538  |
| wavelet-HLL | glcm       | Idn                                  | 0.794257424  |
| wavelet-HLL | glcm       | Idm                                  | 0.101634041  |
| wavelet-HLL | glcm       | Correlation                          | 0.36015257   |
| wavelet-HLL | glcm       | Autocorrelation                      | 393.6249232  |
| wavelet-HLL | glcm       | SumEntropy                           | 3.6882137    |
| wavelet-HLL | glcm       | SumSquares                           | 121.7150672  |
| wavelet-HLL | glcm       | ClusterProminence                    | 192358.7255  |
| wavelet-HLL | glcm       | Imc2                                 | 0.999348142  |
| wavelet-HLL | glcm       | Imc1                                 | -0.831251934 |
| wavelet-HLL | glcm       | DifferenceAverage                    | 10.20385499  |
| wavelet-HLL | glcm       | Id                                   | 0.179978155  |
| wavelet-HLL | glcm       | ClusterTendency                      | 327.3882328  |
| wavelet-HLL | firstorder | InterquartileRange                   | 451.4195899  |
| wavelet-HLL | firstorder | Skewness                             | -0.15986952  |
| wavelet-HLL | firstorder | Uniformity                           | 0.056640625  |

|             |            |                                  |              |
|-------------|------------|----------------------------------|--------------|
| wavelet-HLL | firstorder | Median                           | -91.38447023 |
| wavelet-HLL | firstorder | Energy                           | 2372651.438  |
| wavelet-HLL | firstorder | RobustMeanAbsoluteDeviation      | 182.5941386  |
| wavelet-HLL | firstorder | MeanAbsoluteDeviation            | 233.8445821  |
| wavelet-HLL | firstorder | TotalEnergy                      | 64061588.83  |
| wavelet-HLL | firstorder | Maximum                          | 301.3598046  |
| wavelet-HLL | firstorder | RootMeanSquared                  | 272.2964514  |
| wavelet-HLL | firstorder | 90Percentile                     | 274.4799947  |
| wavelet-HLL | firstorder | Minimum                          | -525.8152647 |
| wavelet-HLL | firstorder | Entropy                          | 4.265319531  |
| wavelet-HLL | firstorder | Range                            | 827.1750692  |
| wavelet-HLL | firstorder | Variance                         | 69741.98692  |
| wavelet-HLL | firstorder | 10Percentile                     | -432.25742   |
| wavelet-HLL | firstorder | Kurtosis                         | 1.712197392  |
| wavelet-HLL | firstorder | Mean                             | -66.35789714 |
| wavelet-HLL | glrlm      | ShortRunLowGrayLevelEmphasis     | 0.048118357  |
| wavelet-HLL | glrlm      | GrayLevelVariance                | 113.1018274  |
| wavelet-HLL | glrlm      | LowGrayLevelRunEmphasis          | 0.048170485  |
| wavelet-HLL | glrlm      | GrayLevelNonUniformityNormalized | 0.056349855  |
| wavelet-HLL | glrlm      | RunVariance                      | 0.019194393  |
| wavelet-HLL | glrlm      | GrayLevelNonUniformity           | 1.768713813  |
| wavelet-HLL | glrlm      | LongRunEmphasis                  | 1.060049628  |
| wavelet-HLL | glrlm      | ShortRunHighGrayLevelEmphasis    | 495.9274297  |
| wavelet-HLL | glrlm      | RunLengthNonUniformity           | 30.20413565  |
| wavelet-HLL | glrlm      | ShortRunEmphasis                 | 0.984987593  |
| wavelet-HLL | glrlm      | LongRunHighGrayLevelEmphasis     | 539.9665116  |
| wavelet-HLL | glrlm      | RunPercentage                    | 0.980769231  |
| wavelet-HLL | glrlm      | LongRunLowGrayLevelEmphasis      | 0.048378996  |
| wavelet-HLL | glrlm      | RunEntropy                       | 4.289916089  |
| wavelet-HLL | glrlm      | HighGrayLevelRunEmphasis         | 504.7352461  |
| wavelet-HLL | glrlm      | RunLengthNonUniformityNormalized | 0.961611213  |
| wavelet-HLL | glszm      | GrayLevelVariance                | 121.2430556  |
| wavelet-HLL | glszm      | ZoneVariance                     | 0.388888889  |
| wavelet-HLL | glszm      | GrayLevelNonUniformityNormalized | 0.052083333  |
| wavelet-HLL | glszm      | SizeZoneNonUniformityNormalized  | 0.597222222  |
| wavelet-HLL | glszm      | SizeZoneNonUniformity            | 14.33333333  |
| wavelet-HLL | glszm      | GrayLevelNonUniformity           | 1.25         |
| wavelet-HLL | glszm      | LargeAreaEmphasis                | 2.166666667  |
| wavelet-HLL | glszm      | SmallAreaHighGrayLevelEmphasis   | 368.005787   |
| wavelet-HLL | glszm      | ZonePercentage                   | 0.75         |
| wavelet-HLL | glszm      | LargeAreaLowGrayLevelEmphasis    | 0.065773889  |
| wavelet-HLL | glszm      | LargeAreaHighGrayLevelEmphasis   | 1184.875     |
| wavelet-HLL | glszm      | HighGrayLevelZoneEmphasis        | 479.0833333  |
| wavelet-HLL | glszm      | SmallAreaEmphasis                | 0.800925926  |
| wavelet-HLL | glszm      | LowGrayLevelZoneEmphasis         | 0.06189854   |
| wavelet-HLL | glszm      | ZoneEntropy                      | 4.334962501  |
| wavelet-HLL | glszm      | SmallAreaLowGrayLevelEmphasis    | 0.061150596  |
| wavelet-HLL | ngtdm      | Coarseness                       | 0.090624792  |
| wavelet-HLL | ngtdm      | Complexity                       | 1891.872977  |
| wavelet-HLL | ngtdm      | Strength                         | 47.99528865  |
| wavelet-HLL | ngtdm      | Contrast                         | 3.529720217  |
| wavelet-HLL | ngtdm      | Busyness                         | 0.02962284   |
| wavelet-LHL | gldm       | GrayLevelVariance                | 76.37109375  |



|             |            |                                      |              |
|-------------|------------|--------------------------------------|--------------|
| wavelet-LHL | gldm       | HighGrayLevelEmphasis                | 334.375      |
| wavelet-LHL | gldm       | DependenceEntropy                    | 4.476409766  |
| wavelet-LHL | gldm       | DependenceNonUniformity              | 12.8125      |
| wavelet-LHL | gldm       | GrayLevelNonUniformity               | 2.125        |
| wavelet-LHL | gldm       | SmallDependenceEmphasis              | 0.639973958  |
| wavelet-LHL | gldm       | SmallDependenceHighGrayLevelEmphasis | 225.7664931  |
| wavelet-LHL | gldm       | DependenceNonUniformityNormalized    | 0.400390625  |
| wavelet-LHL | gldm       | LargeDependenceEmphasis              | 3.625        |
| wavelet-LHL | gldm       | LargeDependenceLowGrayLevelEmphasis  | 0.084844006  |
| wavelet-LHL | gldm       | DependenceVariance                   | 0.77734375   |
| wavelet-LHL | gldm       | LargeDependenceHighGrayLevelEmphasis | 959.9375     |
| wavelet-LHL | gldm       | SmallDependenceLowGrayLevelEmphasis  | 0.042189069  |
| wavelet-LHL | gldm       | LowGrayLevelEmphasis                 | 0.046754107  |
| wavelet-LHL | glcm       | JointAverage                         | 14.58590562  |
| wavelet-LHL | glcm       | SumAverage                           | 29.17181125  |
| wavelet-LHL | glcm       | JointEntropy                         | 4.674998524  |
| wavelet-LHL | glcm       | ClusterShade                         | 395.8538858  |
| wavelet-LHL | glcm       | MaximumProbability                   | 0.060283908  |
| wavelet-LHL | glcm       | Idmn                                 | 0.892602403  |
| wavelet-LHL | glcm       | JointEnergy                          | 0.041148894  |
| wavelet-LHL | glcm       | Contrast                             | 164.6425681  |
| wavelet-LHL | glcm       | DifferenceEntropy                    | 3.255536793  |
| wavelet-LHL | glcm       | InverseVariance                      | 0.084481386  |
| wavelet-LHL | glcm       | DifferenceVariance                   | 45.73152883  |
| wavelet-LHL | glcm       | Idn                                  | 0.785846001  |
| wavelet-LHL | glcm       | Idm                                  | 0.104130531  |
| wavelet-LHL | glcm       | Correlation                          | 0.013984465  |
| wavelet-LHL | glcm       | Autocorrelation                      | 214.8424335  |
| wavelet-LHL | glcm       | SumEntropy                           | 3.505906475  |
| wavelet-LHL | glcm       | SumSquares                           | 83.62171786  |
| wavelet-LHL | glcm       | ClusterProminence                    | 68503.65975  |
| wavelet-LHL | glcm       | Imc2                                 | 0.998184919  |
| wavelet-LHL | glcm       | Imc1                                 | -0.762885594 |
| wavelet-LHL | glcm       | DifferenceAverage                    | 10.42722901  |
| wavelet-LHL | glcm       | Id                                   | 0.179765662  |
| wavelet-LHL | glcm       | ClusterTendency                      | 169.8443033  |
| wavelet-LHL | firstorder | InterquartileRange                   | 404.3736774  |
| wavelet-LHL | firstorder | Skewness                             | 0.16665205   |
| wavelet-LHL | firstorder | Uniformity                           | 0.06640625   |
| wavelet-LHL | firstorder | Median                               | -41.87812613 |
| wavelet-LHL | firstorder | Energy                               | 1529644.323  |
| wavelet-LHL | firstorder | RobustMeanAbsoluteDeviation          | 139.9252282  |
| wavelet-LHL | firstorder | MeanAbsoluteDeviation                | 187.507733   |
| wavelet-LHL | firstorder | TotalEnergy                          | 41300396.72  |
| wavelet-LHL | firstorder | Maximum                              | 434.899418   |
| wavelet-LHL | firstorder | RootMeanSquared                      | 218.6352787  |
| wavelet-LHL | firstorder | 90Percentile                         | 302.9106077  |
| wavelet-LHL | firstorder | Minimum                              | -378.113177  |
| wavelet-LHL | firstorder | Entropy                              | 4.116729297  |
| wavelet-LHL | firstorder | Range                                | 813.012595   |
| wavelet-LHL | firstorder | Variance                             | 47742.74355  |
| wavelet-LHL | firstorder | 10Percentile                         | -251.8751684 |
| wavelet-LHL | firstorder | Kurtosis                             | 1.944730191  |

|             |            |                                      |              |
|-------------|------------|--------------------------------------|--------------|
| wavelet-LHL | firstorder | Mean                                 | -7.657776678 |
| wavelet-LHL | glrlm      | ShortRunLowGrayLevelEmphasis         | 0.047395402  |
| wavelet-LHL | glrlm      | GrayLevelVariance                    | 76.38205182  |
| wavelet-LHL | glrlm      | LowGrayLevelRunEmphasis              | 0.047684407  |
| wavelet-LHL | glrlm      | GrayLevelNonUniformityNormalized     | 0.065079461  |
| wavelet-LHL | glrlm      | RunVariance                          | 0.026312392  |
| wavelet-LHL | glrlm      | GrayLevelNonUniformity               | 2.028868258  |
| wavelet-LHL | glrlm      | LongRunEmphasis                      | 1.084418585  |
| wavelet-LHL | glrlm      | ShortRunHighGrayLevelEmphasis        | 330.8315343  |
| wavelet-LHL | glrlm      | RunLengthNonUniformity               | 29.57016058  |
| wavelet-LHL | glrlm      | ShortRunEmphasis                     | 0.978895354  |
| wavelet-LHL | glrlm      | LongRunHighGrayLevelEmphasis         | 358.5871495  |
| wavelet-LHL | glrlm      | RunPercentage                        | 0.973557692  |
| wavelet-LHL | glrlm      | LongRunLowGrayLevelEmphasis          | 0.048840423  |
| wavelet-LHL | glrlm      | RunEntropy                           | 4.191942947  |
| wavelet-LHL | glrlm      | HighGrayLevelRunEmphasis             | 336.3826574  |
| wavelet-LHL | glrlm      | RunLengthNonUniformityNormalized     | 0.947375215  |
| wavelet-LHL | glszm      | GrayLevelVariance                    | 74.58601134  |
| wavelet-LHL | glszm      | ZoneVariance                         | 0.672967864  |
| wavelet-LHL | glszm      | GrayLevelNonUniformityNormalized     | 0.054820416  |
| wavelet-LHL | glszm      | SizeZoneNonUniformityNormalized      | 0.629489603  |
| wavelet-LHL | glszm      | SizeZoneNonUniformity                | 14.47826087  |
| wavelet-LHL | glszm      | GrayLevelNonUniformity               | 1.260869565  |
| wavelet-LHL | glszm      | LargeAreaEmphasis                    | 2.608695652  |
| wavelet-LHL | glszm      | SmallAreaHighGrayLevelEmphasis       | 288.2161836  |
| wavelet-LHL | glszm      | ZonePercentage                       | 0.71875      |
| wavelet-LHL | glszm      | LargeAreaLowGrayLevelEmphasis        | 0.083168324  |
| wavelet-LHL | glszm      | LargeAreaHighGrayLevelEmphasis       | 775.5652174  |
| wavelet-LHL | glszm      | HighGrayLevelZoneEmphasis            | 350.4347826  |
| wavelet-LHL | glszm      | SmallAreaEmphasis                    | 0.816727053  |
| wavelet-LHL | glszm      | LowGrayLevelZoneEmphasis             | 0.059904208  |
| wavelet-LHL | glszm      | ZoneEntropy                          | 4.349648913  |
| wavelet-LHL | glszm      | SmallAreaLowGrayLevelEmphasis        | 0.057808688  |
| wavelet-LHL | ngtdm      | Coarseness                           | 0.069491752  |
| wavelet-LHL | ngtdm      | Complexity                           | 1755.50767   |
| wavelet-LHL | ngtdm      | Strength                             | 27.35381422  |
| wavelet-LHL | ngtdm      | Contrast                             | 2.807814985  |
| wavelet-LHL | ngtdm      | Busyness                             | 0.054793706  |
| wavelet-LHH | gldm       | GrayLevelVariance                    | 28.68359375  |
| wavelet-LHH | gldm       | HighGrayLevelEmphasis                | 186.5        |
| wavelet-LHH | gldm       | DependenceEntropy                    | 4.163909766  |
| wavelet-LHH | gldm       | DependenceNonUniformity              | 15           |
| wavelet-LHH | gldm       | GrayLevelNonUniformity               | 2.125        |
| wavelet-LHH | gldm       | SmallDependenceEmphasis              | 0.701388889  |
| wavelet-LHH | gldm       | SmallDependenceHighGrayLevelEmphasis | 123.40625    |
| wavelet-LHH | gldm       | DependenceNonUniformityNormalized    | 0.46875      |
| wavelet-LHH | gldm       | LargeDependenceEmphasis              | 2.75         |
| wavelet-LHH | gldm       | LargeDependenceLowGrayLevelEmphasis  | 0.057077125  |
| wavelet-LHH | gldm       | DependenceVariance                   | 0.5          |
| wavelet-LHH | gldm       | LargeDependenceHighGrayLevelEmphasis | 618.875      |
| wavelet-LHH | gldm       | SmallDependenceLowGrayLevelEmphasis  | 0.041250846  |
| wavelet-LHH | gldm       | LowGrayLevelEmphasis                 | 0.044073166  |
| wavelet-LHH | glcm       | JointAverage                         | 12.58827771  |

|             |            |                                  |              |
|-------------|------------|----------------------------------|--------------|
| wavelet-LHH | glcm       | SumAverage                       | 25.17655542  |
| wavelet-LHH | glcm       | JointEntropy                     | 4.653149832  |
| wavelet-LHH | glcm       | ClusterShade                     | -146.5166458 |
| wavelet-LHH | glcm       | MaximumProbability               | 0.070934795  |
| wavelet-LHH | glcm       | Idmn                             | 0.909004062  |
| wavelet-LHH | glcm       | JointEnergy                      | 0.04220477   |
| wavelet-LHH | glcm       | Contrast                         | 56.66769414  |
| wavelet-LHH | glcm       | DifferenceEntropy                | 2.928885934  |
| wavelet-LHH | glcm       | InverseVariance                  | 0.161014342  |
| wavelet-LHH | glcm       | DifferenceVariance               | 17.11998197  |
| wavelet-LHH | glcm       | Idn                              | 0.803303348  |
| wavelet-LHH | glcm       | Idm                              | 0.152024127  |
| wavelet-LHH | glcm       | Correlation                      | 0.010074528  |
| wavelet-LHH | glcm       | Autocorrelation                  | 158.8349889  |
| wavelet-LHH | glcm       | SumEntropy                       | 3.335236484  |
| wavelet-LHH | glcm       | SumSquares                       | 28.46157553  |
| wavelet-LHH | glcm       | ClusterProminence                | 9009.98144   |
| wavelet-LHH | glcm       | Imc2                             | 0.997855681  |
| wavelet-LHH | glcm       | Imc1                             | -0.75107695  |
| wavelet-LHH | glcm       | DifferenceAverage                | 6.042188435  |
| wavelet-LHH | glcm       | Id                               | 0.243089566  |
| wavelet-LHH | glcm       | ClusterTendency                  | 57.17860797  |
| wavelet-LHH | firstorder | InterquartileRange               | 199.8299017  |
| wavelet-LHH | firstorder | Skewness                         | -0.26220421  |
| wavelet-LHH | firstorder | Uniformity                       | 0.06640625   |
| wavelet-LHH | firstorder | Median                           | 39.38716281  |
| wavelet-LHH | firstorder | Energy                           | 575433.2558  |
| wavelet-LHH | firstorder | RobustMeanAbsoluteDeviation      | 78.71067745  |
| wavelet-LHH | firstorder | MeanAbsoluteDeviation            | 110.5163387  |
| wavelet-LHH | firstorder | TotalEnergy                      | 15536697.91  |
| wavelet-LHH | firstorder | Maximum                          | 264.4412976  |
| wavelet-LHH | firstorder | RootMeanSquared                  | 134.0980583  |
| wavelet-LHH | firstorder | 90Percentile                     | 174.6283224  |
| wavelet-LHH | firstorder | Minimum                          | -269.7046765 |
| wavelet-LHH | firstorder | Entropy                          | 4.077819531  |
| wavelet-LHH | firstorder | Range                            | 534.1459741  |
| wavelet-LHH | firstorder | Variance                         | 17263.8514   |
| wavelet-LHH | firstorder | 10Percentile                     | -130.6629161 |
| wavelet-LHH | firstorder | Kurtosis                         | 2.299966712  |
| wavelet-LHH | firstorder | Mean                             | 26.80369088  |
| wavelet-LHH | glrlm      | ShortRunLowGrayLevelEmphasis     | 0.044674457  |
| wavelet-LHH | glrlm      | GrayLevelVariance                | 28.68922098  |
| wavelet-LHH | glrlm      | LowGrayLevelRunEmphasis          | 0.044801416  |
| wavelet-LHH | glrlm      | GrayLevelNonUniformityNormalized | 0.065658951  |
| wavelet-LHH | glrlm      | RunVariance                      | 0.019141088  |
| wavelet-LHH | glrlm      | GrayLevelNonUniformity           | 2.061489262  |
| wavelet-LHH | glrlm      | LongRunEmphasis                  | 1.061093523  |
| wavelet-LHH | glrlm      | ShortRunHighGrayLevelEmphasis    | 182.0281937  |
| wavelet-LHH | glrlm      | RunLengthNonUniformity           | 30.22640541  |
| wavelet-LHH | glrlm      | ShortRunEmphasis                 | 0.984726619  |
| wavelet-LHH | glrlm      | LongRunHighGrayLevelEmphasis     | 199.7491657  |
| wavelet-LHH | glrlm      | RunPercentage                    | 0.980769231  |
| wavelet-LHH | glrlm      | LongRunLowGrayLevelEmphasis      | 0.045309252  |

|             |       |                                      |             |
|-------------|-------|--------------------------------------|-------------|
| wavelet-LHH | glrlm | RunEntropy                           | 4.118921601 |
| wavelet-LHH | glrlm | HighGrayLevelRunEmphasis             | 185.5723881 |
| wavelet-LHH | glrlm | RunLengthNonUniformityNormalized     | 0.961717825 |
| wavelet-LHH | glszm | GrayLevelVariance                    | 28.8544     |
| wavelet-LHH | glszm | ZoneVariance                         | 0.4416      |
| wavelet-LHH | glszm | GrayLevelNonUniformityNormalized     | 0.0624      |
| wavelet-LHH | glszm | SizeZoneNonUniformityNormalized      | 0.6672      |
| wavelet-LHH | glszm | SizeZoneNonUniformity                | 16.68       |
| wavelet-LHH | glszm | GrayLevelNonUniformity               | 1.56        |
| wavelet-LHH | glszm | LargeAreaEmphasis                    | 2.08        |
| wavelet-LHH | glszm | SmallAreaHighGrayLevelEmphasis       | 147.23      |
| wavelet-LHH | glszm | ZonePercentage                       | 0.78125     |
| wavelet-LHH | glszm | LargeAreaLowGrayLevelEmphasis        | 0.062126618 |
| wavelet-LHH | glszm | LargeAreaHighGrayLevelEmphasis       | 440.48      |
| wavelet-LHH | glszm | HighGrayLevelZoneEmphasis            | 176.72      |
| wavelet-LHH | glszm | SmallAreaEmphasis                    | 0.8425      |
| wavelet-LHH | glszm | LowGrayLevelZoneEmphasis             | 0.053927541 |
| wavelet-LHH | glszm | ZoneEntropy                          | 4.21366069  |
| wavelet-LHH | glszm | SmallAreaLowGrayLevelEmphasis        | 0.052224994 |
| wavelet-LHH | ngtdm | Coarseness                           | 0.110325287 |
| wavelet-LHH | ngtdm | Complexity                           | 692.0210851 |
| wavelet-LHH | ngtdm | Strength                             | 16.49219612 |
| wavelet-LHH | ngtdm | Contrast                             | 0.782681778 |
| wavelet-LHH | ngtdm | Busyness                             | 0.046752315 |
| wavelet-LLH | gldm  | GrayLevelVariance                    | 163.5       |
| wavelet-LLH | gldm  | HighGrayLevelEmphasis                | 573.5625    |
| wavelet-LLH | gldm  | DependenceEntropy                    | 4.288909766 |
| wavelet-LLH | gldm  | DependenceNonUniformity              | 22.25       |
| wavelet-LLH | gldm  | GrayLevelNonUniformity               | 1.75        |
| wavelet-LLH | gldm  | SmallDependenceEmphasis              | 0.859375    |
| wavelet-LLH | gldm  | SmallDependenceHighGrayLevelEmphasis | 504.515625  |
| wavelet-LLH | gldm  | DependenceNonUniformityNormalized    | 0.6953125   |
| wavelet-LLH | gldm  | LargeDependenceEmphasis              | 1.5625      |
| wavelet-LLH | gldm  | LargeDependenceLowGrayLevelEmphasis  | 0.110822271 |
| wavelet-LLH | gldm  | DependenceVariance                   | 0.15234375  |
| wavelet-LLH | gldm  | LargeDependenceHighGrayLevelEmphasis | 849.75      |
| wavelet-LLH | gldm  | SmallDependenceLowGrayLevelEmphasis  | 0.042691211 |
| wavelet-LLH | gldm  | LowGrayLevelEmphasis                 | 0.056317423 |
| wavelet-LLH | glcm  | JointAverage                         | 19.9327351  |
| wavelet-LLH | glcm  | SumAverage                           | 39.8654702  |
| wavelet-LLH | glcm  | JointEntropy                         | 4.726225396 |
| wavelet-LLH | glcm  | ClusterShade                         | 1107.434641 |
| wavelet-LLH | glcm  | MaximumProbability                   | 0.050915071 |
| wavelet-LLH | glcm  | Idmn                                 | 0.904772396 |
| wavelet-LLH | glcm  | JointEnergy                          | 0.039018493 |
| wavelet-LLH | glcm  | Contrast                             | 235.6407029 |
| wavelet-LLH | glcm  | DifferenceEntropy                    | 3.31949509  |
| wavelet-LLH | glcm  | InverseVariance                      | 0.084513957 |
| wavelet-LLH | glcm  | DifferenceVariance                   | 56.03337624 |
| wavelet-LLH | glcm  | Idn                                  | 0.796935068 |
| wavelet-LLH | glcm  | Idm                                  | 0.067387144 |
| wavelet-LLH | glcm  | Correlation                          | 0.300680106 |
| wavelet-LLH | glcm  | Autocorrelation                      | 448.1512143 |

|             |            |                                  |              |
|-------------|------------|----------------------------------|--------------|
| wavelet-LLH | glcm       | SumEntropy                       | 3.626993983  |
| wavelet-LLH | glcm       | SumSquares                       | 167.91725    |
| wavelet-LLH | glcm       | ClusterProminence                | 398418.9296  |
| wavelet-LLH | glcm       | Imc2                             | 0.999316338  |
| wavelet-LLH | glcm       | Imc1                             | -0.827205597 |
| wavelet-LLH | glcm       | DifferenceAverage                | 12.51125675  |
| wavelet-LLH | glcm       | Id                               | 0.14218347   |
| wavelet-LLH | glcm       | ClusterTendency                  | 436.0282971  |
| wavelet-LLH | firstorder | InterquartileRange               | 575.5384573  |
| wavelet-LLH | firstorder | Skewness                         | 0.055962717  |
| wavelet-LLH | firstorder | Uniformity                       | 0.0546875    |
| wavelet-LLH | firstorder | Median                           | -10.1620297  |
| wavelet-LLH | firstorder | Energy                           | 3280113.215  |
| wavelet-LLH | firstorder | RobustMeanAbsoluteDeviation      | 209.5494218  |
| wavelet-LLH | firstorder | MeanAbsoluteDeviation            | 274.761765   |
| wavelet-LLH | firstorder | TotalEnergy                      | 88563056.81  |
| wavelet-LLH | firstorder | Maximum                          | 563.0403492  |
| wavelet-LLH | firstorder | RootMeanSquared                  | 320.1617372  |
| wavelet-LLH | firstorder | 90Percentile                     | 407.4777363  |
| wavelet-LLH | firstorder | Minimum                          | -517.4880795 |
| wavelet-LLH | firstorder | Entropy                          | 4.288909766  |
| wavelet-LLH | firstorder | Range                            | 1080.528429  |
| wavelet-LLH | firstorder | Variance                         | 101448.7308  |
| wavelet-LLH | firstorder | 10Percentile                     | -446.1080682 |
| wavelet-LLH | firstorder | Kurtosis                         | 1.818095789  |
| wavelet-LLH | firstorder | Mean                             | -32.47779461 |
| wavelet-LLH | glrlm      | ShortRunLowGrayLevelEmphasis     | 0.055447377  |
| wavelet-LLH | glrlm      | GrayLevelVariance                | 162.4865948  |
| wavelet-LLH | glrlm      | LowGrayLevelRunEmphasis          | 0.056003919  |
| wavelet-LLH | glrlm      | GrayLevelNonUniformityNormalized | 0.054789918  |
| wavelet-LLH | glrlm      | RunVariance                      | 0.00718767   |
| wavelet-LLH | glrlm      | GrayLevelNonUniformity           | 1.740488007  |
| wavelet-LLH | glrlm      | LongRunEmphasis                  | 1.022828784  |
| wavelet-LLH | glrlm      | ShortRunHighGrayLevelEmphasis    | 571.3210815  |
| wavelet-LLH | glrlm      | RunLengthNonUniformity           | 31.33316791  |
| wavelet-LLH | glrlm      | ShortRunEmphasis                 | 0.994292804  |
| wavelet-LLH | glrlm      | LongRunHighGrayLevelEmphasis     | 585.4767887  |
| wavelet-LLH | glrlm      | RunPercentage                    | 0.992788462  |
| wavelet-LLH | glrlm      | LongRunLowGrayLevelEmphasis      | 0.05823009   |
| wavelet-LLH | glrlm      | RunEntropy                       | 4.288032224  |
| wavelet-LLH | glrlm      | HighGrayLevelRunEmphasis         | 574.1522229  |
| wavelet-LLH | glrlm      | RunLengthNonUniformityNormalized | 0.985624661  |
| wavelet-LLH | glszm      | GrayLevelVariance                | 149.7502973  |
| wavelet-LLH | glszm      | ZoneVariance                     | 0.09274673   |
| wavelet-LLH | glszm      | GrayLevelNonUniformityNormalized | 0.05588585   |
| wavelet-LLH | glszm      | SizeZoneNonUniformityNormalized  | 0.81450654   |
| wavelet-LLH | glszm      | SizeZoneNonUniformity            | 23.62068966  |
| wavelet-LLH | glszm      | GrayLevelNonUniformity           | 1.620689655  |
| wavelet-LLH | glszm      | LargeAreaEmphasis                | 1.310344828  |
| wavelet-LLH | glszm      | SmallAreaHighGrayLevelEmphasis   | 544.0086207  |
| wavelet-LLH | glszm      | ZonePercentage                   | 0.90625      |
| wavelet-LLH | glszm      | LargeAreaLowGrayLevelEmphasis    | 0.082191124  |
| wavelet-LLH | glszm      | LargeAreaHighGrayLevelEmphasis   | 734.4827586  |

|             |            |                                      |              |
|-------------|------------|--------------------------------------|--------------|
| wavelet-LLH | glszm      | HighGrayLevelZoneEmphasis            | 582.1034483  |
| wavelet-LLH | glszm      | SmallAreaEmphasis                    | 0.922413793  |
| wavelet-LLH | glszm      | LowGrayLevelZoneEmphasis             | 0.052119484  |
| wavelet-LLH | glszm      | ZoneEntropy                          | 4.280226254  |
| wavelet-LLH | glszm      | SmallAreaLowGrayLevelEmphasis        | 0.044601574  |
| wavelet-LLH | ngtdm      | Coarseness                           | 0.074848515  |
| wavelet-LLH | ngtdm      | Complexity                           | 2709.399716  |
| wavelet-LLH | ngtdm      | Strength                             | 59.11855989  |
| wavelet-LLH | ngtdm      | Contrast                             | 5.67555827   |
| wavelet-LLH | ngtdm      | Busyness                             | 0.034724675  |
| wavelet-LLL | gldm       | GrayLevelVariance                    | 344.0898438  |
| wavelet-LLL | gldm       | HighGrayLevelEmphasis                | 1117.625     |
| wavelet-LLL | gldm       | DependenceEntropy                    | 4.6875       |
| wavelet-LLL | gldm       | DependenceNonUniformity              | 25           |
| wavelet-LLL | gldm       | GrayLevelNonUniformity               | 1.5625       |
| wavelet-LLL | gldm       | SmallDependenceEmphasis              | 0.90625      |
| wavelet-LLL | gldm       | SmallDependenceHighGrayLevelEmphasis | 1002.78125   |
| wavelet-LLL | gldm       | DependenceNonUniformityNormalized    | 0.78125      |
| wavelet-LLL | gldm       | LargeDependenceEmphasis              | 1.375        |
| wavelet-LLL | gldm       | LargeDependenceLowGrayLevelEmphasis  | 0.074445482  |
| wavelet-LLL | gldm       | DependenceVariance                   | 0.109375     |
| wavelet-LLL | gldm       | LargeDependenceHighGrayLevelEmphasis | 1577         |
| wavelet-LLL | gldm       | SmallDependenceLowGrayLevelEmphasis  | 0.069564704  |
| wavelet-LLL | gldm       | LowGrayLevelEmphasis                 | 0.070540859  |
| wavelet-LLL | glcm       | JointAverage                         | 33.60701634  |
| wavelet-LLL | glcm       | SumAverage                           | 67.21403268  |
| wavelet-LLL | glcm       | JointEntropy                         | 4.768648638  |
| wavelet-LLL | glcm       | ClusterShade                         | -1237.216916 |
| wavelet-LLL | glcm       | MaximumProbability                   | 0.045700574  |
| wavelet-LLL | glcm       | Idmn                                 | 0.891307573  |
| wavelet-LLL | glcm       | JointEnergy                          | 0.037669848  |
| wavelet-LLL | glcm       | Contrast                             | 669.9640555  |
| wavelet-LLL | glcm       | DifferenceEntropy                    | 3.4531686    |
| wavelet-LLL | glcm       | InverseVariance                      | 0.021230467  |
| wavelet-LLL | glcm       | DifferenceVariance                   | 180.3782472  |
| wavelet-LLL | glcm       | Idn                                  | 0.779172504  |
| wavelet-LLL | glcm       | Idm                                  | 0.026868756  |
| wavelet-LLL | glcm       | Correlation                          | 0.029823066  |
| wavelet-LLL | glcm       | Autocorrelation                      | 1147.057346  |
| wavelet-LLL | glcm       | SumEntropy                           | 3.626260161  |
| wavelet-LLL | glcm       | SumSquares                           | 348.3643855  |
| wavelet-LLL | glcm       | ClusterProminence                    | 1218345.252  |
| wavelet-LLL | glcm       | Imc2                                 | 0.999700319  |
| wavelet-LLL | glcm       | Imc1                                 | -0.879954237 |
| wavelet-LLL | glcm       | DifferenceAverage                    | 21.64753619  |
| wavelet-LLL | glcm       | Id                                   | 0.085053658  |
| wavelet-LLL | glcm       | ClusterTendency                      | 723.4934866  |
| wavelet-LLL | firstorder | InterquartileRange                   | 729.8177519  |
| wavelet-LLL | firstorder | Skewness                             | 0.338090637  |
| wavelet-LLL | firstorder | Uniformity                           | 0.048828125  |
| wavelet-LLL | firstorder | Median                               | -1136.43307  |
| wavelet-LLL | firstorder | Energy                               | 46730386.93  |
| wavelet-LLL | firstorder | RobustMeanAbsoluteDeviation          | 286.2092228  |

|             |            |                                  |              |
|-------------|------------|----------------------------------|--------------|
| wavelet-LLL | firstorder | MeanAbsoluteDeviation            | 392.5299125  |
| wavelet-LLL | firstorder | TotalEnergy                      | 1261720447   |
| wavelet-LLL | firstorder | Maximum                          | -98.90619224 |
| wavelet-LLL | firstorder | RootMeanSquared                  | 1208.438907  |
| wavelet-LLL | firstorder | 90Percentile                     | -581.864212  |
| wavelet-LLL | firstorder | Minimum                          | -1787.746424 |
| wavelet-LLL | firstorder | Entropy                          | 4.515319531  |
| wavelet-LLL | firstorder | Range                            | 1688.840232  |
| wavelet-LLL | firstorder | Variance                         | 214582.9496  |
| wavelet-LLL | firstorder | 10Percentile                     | -1682.727542 |
| wavelet-LLL | firstorder | Kurtosis                         | 2.186757254  |
| wavelet-LLL | firstorder | Mean                             | -1116.127968 |
| wavelet-LLL | glrlm      | ShortRunLowGrayLevelEmphasis     | 0.070800508  |
| wavelet-LLL | glrlm      | GrayLevelVariance                | 343.5381204  |
| wavelet-LLL | glrlm      | LowGrayLevelRunEmphasis          | 0.070839264  |
| wavelet-LLL | glrlm      | GrayLevelNonUniformityNormalized | 0.04852014   |
| wavelet-LLL | glrlm      | RunVariance                      | 0.00480269   |
| wavelet-LLL | glrlm      | GrayLevelNonUniformity           | 1.545440447  |
| wavelet-LLL | glrlm      | LongRunEmphasis                  | 1.014888337  |
| wavelet-LLL | glrlm      | ShortRunHighGrayLevelEmphasis    | 1112.532568  |
| wavelet-LLL | glrlm      | RunLengthNonUniformity           | 31.5483871   |
| wavelet-LLL | glrlm      | ShortRunEmphasis                 | 0.996277916  |
| wavelet-LLL | glrlm      | LongRunHighGrayLevelEmphasis     | 1135.330335  |
| wavelet-LLL | glrlm      | RunPercentage                    | 0.995192308  |
| wavelet-LLL | glrlm      | LongRunLowGrayLevelEmphasis      | 0.070994286  |
| wavelet-LLL | glrlm      | RunEntropy                       | 4.529464904  |
| wavelet-LLL | glrlm      | HighGrayLevelRunEmphasis         | 1117.092122  |
| wavelet-LLL | glrlm      | RunLengthNonUniformityNormalized | 0.990394621  |
| wavelet-LLL | glszm      | GrayLevelVariance                | 337.6266667  |
| wavelet-LLL | glszm      | ZoneVariance                     | 0.062222222  |
| wavelet-LLL | glszm      | GrayLevelNonUniformityNormalized | 0.044444444  |
| wavelet-LLL | glszm      | SizeZoneNonUniformityNormalized  | 0.875555556  |
| wavelet-LLL | glszm      | SizeZoneNonUniformity            | 26.26666667  |
| wavelet-LLL | glszm      | GrayLevelNonUniformity           | 1.333333333  |
| wavelet-LLL | glszm      | LargeAreaEmphasis                | 1.2          |
| wavelet-LLL | glszm      | SmallAreaHighGrayLevelEmphasis   | 1049.216667  |
| wavelet-LLL | glszm      | ZonePercentage                   | 0.9375       |
| wavelet-LLL | glszm      | LargeAreaLowGrayLevelEmphasis    | 0.076631894  |
| wavelet-LLL | glszm      | LargeAreaHighGrayLevelEmphasis   | 1355.466667  |
| wavelet-LLL | glszm      | HighGrayLevelZoneEmphasis        | 1110.466667  |
| wavelet-LLL | glszm      | SmallAreaEmphasis                | 0.95         |
| wavelet-LLL | glszm      | LowGrayLevelZoneEmphasis         | 0.074549428  |
| wavelet-LLL | glszm      | ZoneEntropy                      | 4.706890596  |
| wavelet-LLL | glszm      | SmallAreaLowGrayLevelEmphasis    | 0.074028812  |
| wavelet-LLL | ngtdm      | Coarseness                       | 0.042814586  |
| wavelet-LLL | ngtdm      | Complexity                       | 9570.806848  |
| wavelet-LLL | ngtdm      | Strength                         | 70.4535266   |
| wavelet-LLL | ngtdm      | Contrast                         | 17.14779653  |
| wavelet-LLL | ngtdm      | Busyness                         | 0.042524399  |
| wavelet-HHL | gldm       | GrayLevelVariance                | 16.4375      |
| wavelet-HHL | gldm       | HighGrayLevelEmphasis            | 97.4375      |
| wavelet-HHL | gldm       | DependenceEntropy                | 4.4375       |
| wavelet-HHL | gldm       | DependenceNonUniformity          | 12.625       |

|             |            |                                      |              |
|-------------|------------|--------------------------------------|--------------|
| wavelet-HHL | gldm       | GrayLevelNonUniformity               | 2.6875       |
| wavelet-HHL | gldm       | SmallDependenceEmphasis              | 0.582682292  |
| wavelet-HHL | gldm       | SmallDependenceHighGrayLevelEmphasis | 52.54947917  |
| wavelet-HHL | gldm       | DependenceNonUniformityNormalized    | 0.39453125   |
| wavelet-HHL | gldm       | LargeDependenceEmphasis              | 3.4375       |
| wavelet-HHL | gldm       | LargeDependenceLowGrayLevelEmphasis  | 0.093866973  |
| wavelet-HHL | gldm       | DependenceVariance                   | 0.58984375   |
| wavelet-HHL | gldm       | LargeDependenceHighGrayLevelEmphasis | 403.8125     |
| wavelet-HHL | gldm       | SmallDependenceLowGrayLevelEmphasis  | 0.05132658   |
| wavelet-HHL | gldm       | LowGrayLevelEmphasis                 | 0.058081364  |
| wavelet-HHL | glcm       | JointAverage                         | 8.999694626  |
| wavelet-HHL | glcm       | SumAverage                           | 17.99938925  |
| wavelet-HHL | glcm       | JointEntropy                         | 4.630686867  |
| wavelet-HHL | glcm       | ClusterShade                         | 12.14803784  |
| wavelet-HHL | glcm       | MaximumProbability                   | 0.06971849   |
| wavelet-HHL | glcm       | Idmn                                 | 0.906260417  |
| wavelet-HHL | glcm       | JointEnergy                          | 0.043377465  |
| wavelet-HHL | glcm       | Contrast                             | 30.86891291  |
| wavelet-HHL | glcm       | DifferenceEntropy                    | 2.94676358   |
| wavelet-HHL | glcm       | InverseVariance                      | 0.238042303  |
| wavelet-HHL | glcm       | DifferenceVariance                   | 10.56531012  |
| wavelet-HHL | glcm       | Idn                                  | 0.802942815  |
| wavelet-HHL | glcm       | Idm                                  | 0.202777432  |
| wavelet-HHL | glcm       | Correlation                          | -0.010474483 |
| wavelet-HHL | glcm       | Autocorrelation                      | 81.32681834  |
| wavelet-HHL | glcm       | SumEntropy                           | 3.181645547  |
| wavelet-HHL | glcm       | SumSquares                           | 15.26048849  |
| wavelet-HHL | glcm       | ClusterProminence                    | 2277.849701  |
| wavelet-HHL | glcm       | Imc2                                 | 0.996227811  |
| wavelet-HHL | glcm       | Imc1                                 | -0.701146949 |
| wavelet-HHL | glcm       | DifferenceAverage                    | 4.433474712  |
| wavelet-HHL | glcm       | Id                                   | 0.293161746  |
| wavelet-HHL | glcm       | ClusterTendency                      | 30.17304103  |
| wavelet-HHL | firstorder | InterquartileRange                   | 156.2724082  |
| wavelet-HHL | firstorder | Skewness                             | -0.137912628 |
| wavelet-HHL | firstorder | Uniformity                           | 0.083984375  |
| wavelet-HHL | firstorder | Median                               | -1.95010046  |
| wavelet-HHL | firstorder | Energy                               | 333940.0165  |
| wavelet-HHL | firstorder | RobustMeanAbsoluteDeviation          | 64.96108275  |
| wavelet-HHL | firstorder | MeanAbsoluteDeviation                | 87.88140988  |
| wavelet-HHL | firstorder | TotalEnergy                          | 9016380.445  |
| wavelet-HHL | firstorder | Maximum                              | 168.271262   |
| wavelet-HHL | firstorder | RootMeanSquared                      | 102.1549094  |
| wavelet-HHL | firstorder | 90Percentile                         | 117.7628573  |
| wavelet-HHL | firstorder | Minimum                              | -222.2150278 |
| wavelet-HHL | firstorder | Entropy                              | 3.765319531  |
| wavelet-HHL | firstorder | Range                                | 390.4862898  |
| wavelet-HHL | firstorder | Variance                             | 10276.37353  |
| wavelet-HHL | firstorder | 10Percentile                         | -141.3285338 |
| wavelet-HHL | firstorder | Kurtosis                             | 2.004932146  |
| wavelet-HHL | firstorder | Mean                                 | -12.61950826 |
| wavelet-HHL | glrlm      | ShortRunLowGrayLevelEmphasis         | 0.058951169  |
| wavelet-HHL | glrlm      | GrayLevelVariance                    | 16.49446548  |



|             |       |                                      |             |
|-------------|-------|--------------------------------------|-------------|
| wavelet-HHL | glrlm | LowGrayLevelRunEmphasis              | 0.059274301 |
| wavelet-HHL | glrlm | GrayLevelNonUniformityNormalized     | 0.083330266 |
| wavelet-HHL | glrlm | RunVariance                          | 0.026349333 |
| wavelet-HHL | glrlm | GrayLevelNonUniformity               | 2.597043011 |
| wavelet-HHL | glrlm | LongRunEmphasis                      | 1.083870968 |
| wavelet-HHL | glrlm | ShortRunHighGrayLevelEmphasis        | 94.38482217 |
| wavelet-HHL | glrlm | RunLengthNonUniformity               | 29.55847808 |
| wavelet-HHL | glrlm | ShortRunEmphasis                     | 0.979032258 |
| wavelet-HHL | glrlm | LongRunHighGrayLevelEmphasis         | 106.7635443 |
| wavelet-HHL | glrlm | RunPercentage                        | 0.973557692 |
| wavelet-HHL | glrlm | LongRunLowGrayLevelEmphasis          | 0.060566829 |
| wavelet-HHL | glrlm | RunEntropy                           | 3.833088079 |
| wavelet-HHL | glrlm | HighGrayLevelRunEmphasis             | 96.86056658 |
| wavelet-HHL | glrlm | RunLengthNonUniformityNormalized     | 0.947301333 |
| wavelet-HHL | glszm | GrayLevelVariance                    | 17.78719008 |
| wavelet-HHL | glszm | ZoneVariance                         | 0.611570248 |
| wavelet-HHL | glszm | GrayLevelNonUniformityNormalized     | 0.074380165 |
| wavelet-HHL | glszm | SizeZoneNonUniformityNormalized      | 0.520661157 |
| wavelet-HHL | glszm | SizeZoneNonUniformity                | 11.45454545 |
| wavelet-HHL | glszm | GrayLevelNonUniformity               | 1.636363636 |
| wavelet-HHL | glszm | LargeAreaEmphasis                    | 2.727272727 |
| wavelet-HHL | glszm | SmallAreaHighGrayLevelEmphasis       | 66.37626263 |
| wavelet-HHL | glszm | ZonePercentage                       | 0.6875      |
| wavelet-HHL | glszm | LargeAreaLowGrayLevelEmphasis        | 0.104411432 |
| wavelet-HHL | glszm | LargeAreaHighGrayLevelEmphasis       | 297.7272727 |
| wavelet-HHL | glszm | HighGrayLevelZoneEmphasis            | 91.59090909 |
| wavelet-HHL | glszm | SmallAreaEmphasis                    | 0.746527778 |
| wavelet-HHL | glszm | LowGrayLevelZoneEmphasis             | 0.077031174 |
| wavelet-HHL | glszm | ZoneEntropy                          | 4.277613437 |
| wavelet-HHL | glszm | SmallAreaLowGrayLevelEmphasis        | 0.072858561 |
| wavelet-HHL | ngtdm | Coarseness                           | 0.109968282 |
| wavelet-HHL | ngtdm | Complexity                           | 343.0020438 |
| wavelet-HHL | ngtdm | Strength                             | 10.6384833  |
| wavelet-HHL | ngtdm | Contrast                             | 0.488476317 |
| wavelet-HHL | ngtdm | Busyness                             | 0.072530658 |
| wavelet-HLH | gldm  | GrayLevelVariance                    | 24.9375     |
| wavelet-HLH | gldm  | HighGrayLevelEmphasis                | 157.1875    |
| wavelet-HLH | gldm  | DependenceEntropy                    | 4.327819531 |
| wavelet-HLH | gldm  | DependenceNonUniformity              | 12.3125     |
| wavelet-HLH | gldm  | GrayLevelNonUniformity               | 2.8125      |
| wavelet-HLH | gldm  | SmallDependenceEmphasis              | 0.601779514 |
| wavelet-HLH | gldm  | SmallDependenceHighGrayLevelEmphasis | 105.5496962 |
| wavelet-HLH | gldm  | DependenceNonUniformityNormalized    | 0.384765625 |
| wavelet-HLH | gldm  | LargeDependenceEmphasis              | 3.5         |
| wavelet-HLH | gldm  | LargeDependenceLowGrayLevelEmphasis  | 0.287409911 |
| wavelet-HLH | gldm  | DependenceVariance                   | 0.65234375  |
| wavelet-HLH | gldm  | LargeDependenceHighGrayLevelEmphasis | 504.125     |
| wavelet-HLH | gldm  | SmallDependenceLowGrayLevelEmphasis  | 0.028464401 |
| wavelet-HLH | gldm  | LowGrayLevelEmphasis                 | 0.078800105 |
| wavelet-HLH | glcm  | JointAverage                         | 11.25651987 |
| wavelet-HLH | glcm  | SumAverage                           | 22.51303975 |
| wavelet-HLH | glcm  | JointEntropy                         | 4.604165362 |
| wavelet-HLH | glcm  | ClusterShade                         | -137.77148  |

|             |            |                                  |              |
|-------------|------------|----------------------------------|--------------|
| wavelet-HLH | glcm       | MaximumProbability               | 0.072959087  |
| wavelet-HLH | glcm       | Idmn                             | 0.910402869  |
| wavelet-HLH | glcm       | JointEnergy                      | 0.043811859  |
| wavelet-HLH | glcm       | Contrast                         | 51.40686183  |
| wavelet-HLH | glcm       | DifferenceEntropy                | 2.946110891  |
| wavelet-HLH | glcm       | InverseVariance                  | 0.192286271  |
| wavelet-HLH | glcm       | DifferenceVariance               | 16.54864994  |
| wavelet-HLH | glcm       | Idn                              | 0.80895349   |
| wavelet-HLH | glcm       | Idm                              | 0.173596519  |
| wavelet-HLH | glcm       | Correlation                      | 0.001092099  |
| wavelet-HLH | glcm       | Autocorrelation                  | 127.8775212  |
| wavelet-HLH | glcm       | SumEntropy                       | 3.342337784  |
| wavelet-HLH | glcm       | SumSquares                       | 26.58577996  |
| wavelet-HLH | glcm       | ClusterProminence                | 7944.718486  |
| wavelet-HLH | glcm       | Imc2                             | 0.993043091  |
| wavelet-HLH | glcm       | Imc1                             | -0.653541003 |
| wavelet-HLH | glcm       | DifferenceAverage                | 5.627292343  |
| wavelet-HLH | glcm       | Id                               | 0.262536898  |
| wavelet-HLH | glcm       | ClusterTendency                  | 54.93625799  |
| wavelet-HLH | firstorder | InterquartileRange               | 172.2123795  |
| wavelet-HLH | firstorder | Skewness                         | -0.421279234 |
| wavelet-HLH | firstorder | Uniformity                       | 0.087890625  |
| wavelet-HLH | firstorder | Median                           | 28.03081835  |
| wavelet-HLH | firstorder | Energy                           | 513917.6385  |
| wavelet-HLH | firstorder | RobustMeanAbsoluteDeviation      | 64.70495363  |
| wavelet-HLH | firstorder | MeanAbsoluteDeviation            | 102.3511494  |
| wavelet-HLH | firstorder | TotalEnergy                      | 13875776.24  |
| wavelet-HLH | firstorder | Maximum                          | 240.6586203  |
| wavelet-HLH | firstorder | RootMeanSquared                  | 126.7277641  |
| wavelet-HLH | firstorder | 90Percentile                     | 117.4070225  |
| wavelet-HLH | firstorder | Minimum                          | -262.6909013 |
| wavelet-HLH | firstorder | Entropy                          | 3.679229297  |
| wavelet-HLH | firstorder | Range                            | 503.3495216  |
| wavelet-HLH | firstorder | Variance                         | 16053.81889  |
| wavelet-HLH | firstorder | 10Percentile                     | -168.6415172 |
| wavelet-HLH | firstorder | Kurtosis                         | 2.652613443  |
| wavelet-HLH | firstorder | Mean                             | 2.471297183  |
| wavelet-HLH | glrlm      | ShortRunLowGrayLevelEmphasis     | 0.076250354  |
| wavelet-HLH | glrlm      | GrayLevelVariance                | 25.10438067  |
| wavelet-HLH | glrlm      | LowGrayLevelRunEmphasis          | 0.078283263  |
| wavelet-HLH | glrlm      | GrayLevelNonUniformityNormalized | 0.087467535  |
| wavelet-HLH | glrlm      | RunVariance                      | 0.031456962  |
| wavelet-HLH | glrlm      | GrayLevelNonUniformity           | 2.725642808  |
| wavelet-HLH | glrlm      | LongRunEmphasis                  | 1.089050512  |
| wavelet-HLH | glrlm      | ShortRunHighGrayLevelEmphasis    | 155.235912   |
| wavelet-HLH | glrlm      | RunLengthNonUniformity           | 29.69803485  |
| wavelet-HLH | glrlm      | ShortRunEmphasis                 | 0.980586375  |
| wavelet-HLH | glrlm      | LongRunHighGrayLevelEmphasis     | 170.1965385  |
| wavelet-HLH | glrlm      | RunPercentage                    | 0.973557692  |
| wavelet-HLH | glrlm      | LongRunLowGrayLevelEmphasis      | 0.08647304   |
| wavelet-HLH | glrlm      | RunEntropy                       | 3.737489358  |
| wavelet-HLH | glrlm      | HighGrayLevelRunEmphasis         | 157.7813136  |
| wavelet-HLH | glrlm      | RunLengthNonUniformityNormalized | 0.95195787   |

|             |       |                                  |             |
|-------------|-------|----------------------------------|-------------|
| wavelet-HLH | glszm | GrayLevelVariance                | 26.90082645 |
| wavelet-HLH | glszm | ZoneVariance                     | 0.702479339 |
| wavelet-HLH | glszm | GrayLevelNonUniformityNormalized | 0.082644628 |
| wavelet-HLH | glszm | SizeZoneNonUniformityNormalized  | 0.55785124  |
| wavelet-HLH | glszm | SizeZoneNonUniformity            | 12.27272727 |
| wavelet-HLH | glszm | GrayLevelNonUniformity           | 1.818181818 |
| wavelet-HLH | glszm | LargeAreaEmphasis                | 2.818181818 |
| wavelet-HLH | glszm | SmallAreaHighGrayLevelEmphasis   | 140.6833965 |
| wavelet-HLH | glszm | ZonePercentage                   | 0.6875      |
| wavelet-HLH | glszm | LargeAreaLowGrayLevelEmphasis    | 0.217487864 |
| wavelet-HLH | glszm | LargeAreaHighGrayLevelEmphasis   | 416.8181818 |
| wavelet-HLH | glszm | HighGrayLevelZoneEmphasis        | 168.7272727 |
| wavelet-HLH | glszm | SmallAreaEmphasis                | 0.774305556 |
| wavelet-HLH | glszm | LowGrayLevelZoneEmphasis         | 0.06515001  |
| wavelet-HLH | glszm | ZoneEntropy                      | 4.027169118 |
| wavelet-HLH | glszm | SmallAreaLowGrayLevelEmphasis    | 0.029110396 |
| wavelet-HLH | ngtdm | Coarseness                       | 0.104224512 |
| wavelet-HLH | ngtdm | Complexity                       | 462.0997398 |
| wavelet-HLH | ngtdm | Strength                         | 14.04534737 |
| wavelet-HLH | ngtdm | Contrast                         | 0.948848323 |
| wavelet-HLH | ngtdm | Busyness                         | 0.06835029  |

| Image type | Feature Class | Feature Name                         |                                                                                                                                                                                                                                                                                                                                                                                                                   |
|------------|---------------|--------------------------------------|-------------------------------------------------------------------------------------------------------------------------------------------------------------------------------------------------------------------------------------------------------------------------------------------------------------------------------------------------------------------------------------------------------------------|
| general    | info          | BoundingBox                          | 3: RTSTRUCT: C99-DNU_segment_LLL ITV<br>(0, 0, 1, 17, 15, 19)                                                                                                                                                                                                                                                                                                                                                     |
| general    | info          | EnabledImageTypes                    | {u'Original': {}, u'Wavelet': {}}                                                                                                                                                                                                                                                                                                                                                                                 |
|            |               |                                      | {'distances': [1], 'additionalInfo': True, 'force2D': False, 'interpolator': 'sitkBSpline', 'resampledPixelSpacing': [3.0], 'label': 1, 'normalizeScale': 1, 'normalize': False, 'force2Ddimension': 0, 'removeOutliers': None, 'minimumROISize': None, u'binWidth': 25.0, 'minimumROIDimensions': 1, u'correctMask': True, 'preCrop': False, u'symmetricalGLCM': True, 'resegmentRange': None, 'padDistance': 5} |
| general    | info          | GeneralSettings                      | 21712856328bc878c3d085b239b5a532eacfa66                                                                                                                                                                                                                                                                                                                                                                           |
| general    | info          | ImageHash                            | a                                                                                                                                                                                                                                                                                                                                                                                                                 |
| general    | info          | ImageSpacing                         | (0.9765624999999998, 0.9765624999999998, 1.9999999999999999)                                                                                                                                                                                                                                                                                                                                                      |
| general    | info          | MaskHash                             | 8c6892fb8517102b89306a38ebd5fd7e45c5c773                                                                                                                                                                                                                                                                                                                                                                          |
| general    | info          | NumpyVersion                         | 1.13.1                                                                                                                                                                                                                                                                                                                                                                                                            |
| general    | info          | PyWaveletVersion                     | 0.5.2                                                                                                                                                                                                                                                                                                                                                                                                             |
| general    | info          | SimpleITKVersion                     | 1.1.0                                                                                                                                                                                                                                                                                                                                                                                                             |
| general    | info          | Version                              | 1.3.0.post102+g1b0eb74                                                                                                                                                                                                                                                                                                                                                                                            |
| general    | info          | VolumeNum                            | 1                                                                                                                                                                                                                                                                                                                                                                                                                 |
| general    | info          | VoxelNum                             | 1951                                                                                                                                                                                                                                                                                                                                                                                                              |
| original   | shape         | Maximum3DDiameter                    | 60.67124525                                                                                                                                                                                                                                                                                                                                                                                                       |
| original   | shape         | Maximum2DDiameterSlice               | 46.57252409                                                                                                                                                                                                                                                                                                                                                                                                       |
| original   | shape         | Sphericity                           | 0.796451823                                                                                                                                                                                                                                                                                                                                                                                                       |
| original   | shape         | MinorAxis                            | 38.62357283                                                                                                                                                                                                                                                                                                                                                                                                       |
| original   | shape         | Elongation                           | 0.744289629                                                                                                                                                                                                                                                                                                                                                                                                       |
| original   | shape         | SurfaceVolumeRatio                   | 0.161976099                                                                                                                                                                                                                                                                                                                                                                                                       |
| original   | shape         | Volume                               | 52677                                                                                                                                                                                                                                                                                                                                                                                                             |
| original   | shape         | MajorAxis                            | 51.89320302                                                                                                                                                                                                                                                                                                                                                                                                       |
| original   | shape         | SurfaceArea                          | 8532.414985                                                                                                                                                                                                                                                                                                                                                                                                       |
| original   | shape         | Flatness                             | 0.727755641                                                                                                                                                                                                                                                                                                                                                                                                       |
| original   | shape         | LeastAxis                            | 37.76557123                                                                                                                                                                                                                                                                                                                                                                                                       |
| original   | shape         | Maximum2DDiameterColumn              | 60.37383539                                                                                                                                                                                                                                                                                                                                                                                                       |
| original   | shape         | Maximum2DDiameterRow                 | 54.33231083                                                                                                                                                                                                                                                                                                                                                                                                       |
| original   | gldm          | GrayLevelVariance                    | 32.90017526                                                                                                                                                                                                                                                                                                                                                                                                       |
| original   | gldm          | HighGrayLevelEmphasis                | 779.1055869                                                                                                                                                                                                                                                                                                                                                                                                       |
| original   | gldm          | DependenceEntropy                    | 6.37588323                                                                                                                                                                                                                                                                                                                                                                                                        |
| original   | gldm          | DependenceNonUniformity              | 170.2783188                                                                                                                                                                                                                                                                                                                                                                                                       |
| original   | gldm          | GrayLevelNonUniformity               | 316.1071246                                                                                                                                                                                                                                                                                                                                                                                                       |
| original   | gldm          | SmallDependenceEmphasis              | 0.25224223                                                                                                                                                                                                                                                                                                                                                                                                        |
| original   | gldm          | SmallDependenceHighGrayLevelEmphasis | 130.2829957                                                                                                                                                                                                                                                                                                                                                                                                       |
| original   | gldm          | DependenceNonUniformityNormalized    | 0.087277457                                                                                                                                                                                                                                                                                                                                                                                                       |
| original   | gldm          | LargeDependenceEmphasis              | 70.21578678                                                                                                                                                                                                                                                                                                                                                                                                       |
| original   | gldm          | LargeDependenceLowGrayLevelEmphasis  | 0.079593235                                                                                                                                                                                                                                                                                                                                                                                                       |
| original   | gldm          | DependenceVariance                   | 26.92329894                                                                                                                                                                                                                                                                                                                                                                                                       |
| original   | gldm          | LargeDependenceHighGrayLevelEmphasis | 63982.60738                                                                                                                                                                                                                                                                                                                                                                                                       |
| original   | gldm          | SmallDependenceLowGrayLevelEmphasis  | 0.002310829                                                                                                                                                                                                                                                                                                                                                                                                       |
| original   | gldm          | LowGrayLevelEmphasis                 | 0.003263327                                                                                                                                                                                                                                                                                                                                                                                                       |
| original   | glcm          | JointAverage                         | 28.2777435                                                                                                                                                                                                                                                                                                                                                                                                        |
| original   | glcm          | SumAverage                           | 56.555487                                                                                                                                                                                                                                                                                                                                                                                                         |

|          |            |                                  |              |
|----------|------------|----------------------------------|--------------|
| original | glcm       | JointEntropy                     | 5.85210877   |
| original | glcm       | ClusterShade                     | -1103.471569 |
| original | glcm       | MaximumProbability               | 0.143842841  |
| original | glcm       | Idmn                             | 0.980125425  |
| original | glcm       | JointEnergy                      | 0.054268945  |
| original | glcm       | Contrast                         | 27.5335458   |
| original | glcm       | DifferenceEntropy                | 3.002688287  |
| original | glcm       | InverseVariance                  | 0.382384232  |
| original | glcm       | DifferenceVariance               | 19.12590654  |
| original | glcm       | Idn                              | 0.932182314  |
| original | glcm       | Idm                              | 0.459740075  |
| original | glcm       | Correlation                      | 0.375424151  |
| original | glcm       | Autocorrelation                  | 807.9643952  |
| original | glcm       | SumEntropy                       | 3.944189602  |
| original | glcm       | SumSquares                       | 22.08587785  |
| original | glcm       | ClusterProminence                | 32598.67563  |
| original | glcm       | Imc2                             | 0.693462659  |
| original | glcm       | Imc1                             | -0.109123303 |
| original | glcm       | DifferenceAverage                | 2.883476548  |
| original | glcm       | Id                               | 0.50638417   |
| original | glcm       | ClusterTendency                  | 60.80996559  |
| original | firstorder | InterquartileRange               | 92.5         |
| original | firstorder | Skewness                         | -2.126960293 |
| original | firstorder | Uniformity                       | 0.162023129  |
| original | firstorder | Median                           | 6            |
| original | firstorder | Energy                           | 45909507     |
| original | firstorder | RobustMeanAbsoluteDeviation      | 50.94301879  |
| original | firstorder | MeanAbsoluteDeviation            | 102.0115258  |
| original | firstorder | TotalEnergy                      | 1239556689   |
| original | firstorder | Maximum                          | 103          |
| original | firstorder | RootMeanSquared                  | 153.3990535  |
| original | firstorder | 90Percentile                     | 40           |
| original | firstorder | Minimum                          | -712         |
| original | firstorder | Entropy                          | 3.45173268   |
| original | firstorder | Range                            | 815          |
| original | firstorder | Variance                         | 20518.88584  |
| original | firstorder | 10Percentile                     | -272         |
| original | firstorder | Kurtosis                         | 7.024748873  |
| original | firstorder | Mean                             | -54.88518708 |
| original | glrlm      | ShortRunLowGrayLevelEmphasis     | 0.003684145  |
| original | glrlm      | GrayLevelVariance                | 38.62033473  |
| original | glrlm      | LowGrayLevelRunEmphasis          | 0.003848339  |
| original | glrlm      | GrayLevelNonUniformityNormalized | 0.120110634  |
| original | glrlm      | RunVariance                      | 0.498994942  |
| original | glrlm      | GrayLevelNonUniformity           | 184.1727741  |
| original | glrlm      | LongRunEmphasis                  | 2.123664295  |
| original | glrlm      | ShortRunHighGrayLevelEmphasis    | 614.6318794  |
| original | glrlm      | RunLengthNonUniformity           | 1059.156158  |
| original | glrlm      | ShortRunEmphasis                 | 0.856361852  |
| original | glrlm      | LongRunHighGrayLevelEmphasis     | 1765.11848   |
| original | glrlm      | RunPercentage                    | 0.785396049  |
| original | glrlm      | LongRunLowGrayLevelEmphasis      | 0.00510775   |
| original | glrlm      | RunEntropy                       | 4.552044583  |
| original | glrlm      | HighGrayLevelRunEmphasis         | 744.2494989  |
| original | glrlm      | RunLengthNonUniformityNormalized | 0.690687249  |

|             |       |                                      |              |
|-------------|-------|--------------------------------------|--------------|
| original    | glszm | GrayLevelVariance                    | 53.48993786  |
| original    | glszm | ZoneVariance                         | 1053.107393  |
| original    | glszm | GrayLevelNonUniformityNormalized     | 0.047869534  |
| original    | glszm | SizeZoneNonUniformityNormalized      | 0.602086131  |
| original    | glszm | SizeZoneNonUniformity                | 311.27853    |
| original    | glszm | GrayLevelNonUniformity               | 24.74854932  |
| original    | glszm | LargeAreaEmphasis                    | 1067.348162  |
| original    | glszm | SmallAreaHighGrayLevelEmphasis       | 379.024065   |
| original    | glszm | ZonePercentage                       | 0.264992312  |
| original    | glszm | LargeAreaLowGrayLevelEmphasis        | 1.174541949  |
| original    | glszm | LargeAreaHighGrayLevelEmphasis       | 977972.207   |
| original    | glszm | HighGrayLevelZoneEmphasis            | 505.27853    |
| original    | glszm | SmallAreaEmphasis                    | 0.803268586  |
| original    | glszm | LowGrayLevelZoneEmphasis             | 0.008904464  |
| original    | glszm | ZoneEntropy                          | 5.604505709  |
| original    | glszm | SmallAreaLowGrayLevelEmphasis        | 0.008469674  |
| original    | ngtdm | Coarseness                           | 0.002497821  |
| original    | ngtdm | Complexity                           | 1239.696436  |
| original    | ngtdm | Strength                             | 2.861931677  |
| original    | ngtdm | Contrast                             | 0.156095848  |
| original    | ngtdm | Busyness                             | 0.279521617  |
| wavelet-HHH | gldm  | GrayLevelVariance                    | 2.899904135  |
| wavelet-HHH | gldm  | HighGrayLevelEmphasis                | 93.06714505  |
| wavelet-HHH | gldm  | DependenceEntropy                    | 5.847433537  |
| wavelet-HHH | gldm  | DependenceNonUniformity              | 143.3259867  |
| wavelet-HHH | gldm  | GrayLevelNonUniformity               | 427.7319323  |
| wavelet-HHH | gldm  | SmallDependenceEmphasis              | 0.152262319  |
| wavelet-HHH | gldm  | SmallDependenceHighGrayLevelEmphasis | 15.29231977  |
| wavelet-HHH | gldm  | DependenceNonUniformityNormalized    | 0.073462833  |
| wavelet-HHH | gldm  | LargeDependenceEmphasis              | 68.2639672   |
| wavelet-HHH | gldm  | LargeDependenceLowGrayLevelEmphasis  | 0.765204362  |
| wavelet-HHH | gldm  | DependenceVariance                   | 19.7507073   |
| wavelet-HHH | gldm  | LargeDependenceHighGrayLevelEmphasis | 6233.768324  |
| wavelet-HHH | gldm  | SmallDependenceLowGrayLevelEmphasis  | 0.003903004  |
| wavelet-HHH | gldm  | LowGrayLevelEmphasis                 | 0.013855727  |
| wavelet-HHH | glcm  | JointAverage                         | 9.498592019  |
| wavelet-HHH | glcm  | SumAverage                           | 18.99718404  |
| wavelet-HHH | glcm  | JointEntropy                         | 4.946582293  |
| wavelet-HHH | glcm  | ClusterShade                         | -0.30626362  |
| wavelet-HHH | glcm  | MaximumProbability                   | 0.14019893   |
| wavelet-HHH | glcm  | Idmn                                 | 0.985277943  |
| wavelet-HHH | glcm  | JointEnergy                          | 0.068558568  |
| wavelet-HHH | glcm  | Contrast                             | 5.243073703  |
| wavelet-HHH | glcm  | DifferenceEntropy                    | 2.344318222  |
| wavelet-HHH | glcm  | InverseVariance                      | 0.432483456  |
| wavelet-HHH | glcm  | DifferenceVariance                   | 2.870541521  |
| wavelet-HHH | glcm  | Idn                                  | 0.927909166  |
| wavelet-HHH | glcm  | Idm                                  | 0.506637972  |
| wavelet-HHH | glcm  | Correlation                          | -0.032817625 |
| wavelet-HHH | glcm  | Autocorrelation                      | 90.13271654  |
| wavelet-HHH | glcm  | SumEntropy                           | 3.012605546  |
| wavelet-HHH | glcm  | SumSquares                           | 2.530841056  |
| wavelet-HHH | glcm  | ClusterProminence                    | 159.6866263  |
| wavelet-HHH | glcm  | Imc2                                 | 0.499955275  |
| wavelet-HHH | glcm  | Imc1                                 | -0.058883038 |

|             |            |                                  |              |
|-------------|------------|----------------------------------|--------------|
| wavelet-HHH | glcm       | DifferenceAverage                | 1.527136564  |
| wavelet-HHH | glcm       | Id                               | 0.553394501  |
| wavelet-HHH | glcm       | ClusterTendency                  | 4.88029052   |
| wavelet-HHH | firstorder | InterquartileRange               | 34.37501493  |
| wavelet-HHH | firstorder | Skewness                         | -0.092277085 |
| wavelet-HHH | firstorder | Uniformity                       | 0.21923728   |
| wavelet-HHH | firstorder | Median                           | 0.639035123  |
| wavelet-HHH | firstorder | Energy                           | 3406379.528  |
| wavelet-HHH | firstorder | RobustMeanAbsoluteDeviation      | 15.58799856  |
| wavelet-HHH | firstorder | MeanAbsoluteDeviation            | 28.19546246  |
| wavelet-HHH | firstorder | TotalEnergy                      | 91972247.25  |
| wavelet-HHH | firstorder | Maximum                          | 208.0065219  |
| wavelet-HHH | firstorder | RootMeanSquared                  | 41.78475714  |
| wavelet-HHH | firstorder | 90Percentile                     | 42.54498541  |
| wavelet-HHH | firstorder | Minimum                          | -219.7624867 |
| wavelet-HHH | firstorder | Entropy                          | 2.65690899   |
| wavelet-HHH | firstorder | Range                            | 427.7690086  |
| wavelet-HHH | firstorder | Variance                         | 1745.930569  |
| wavelet-HHH | firstorder | 10Percentile                     | -45.72111307 |
| wavelet-HHH | firstorder | Kurtosis                         | 6.738893909  |
| wavelet-HHH | firstorder | Mean                             | -0.188041635 |
| wavelet-HHH | glrlm      | ShortRunLowGrayLevelEmphasis     | 0.012750219  |
| wavelet-HHH | glrlm      | GrayLevelVariance                | 3.57173794   |
| wavelet-HHH | glrlm      | LowGrayLevelRunEmphasis          | 0.014623454  |
| wavelet-HHH | glrlm      | GrayLevelNonUniformityNormalized | 0.18407668   |
| wavelet-HHH | glrlm      | RunVariance                      | 0.496353429  |
| wavelet-HHH | glrlm      | GrayLevelNonUniformity           | 276.9897376  |
| wavelet-HHH | glrlm      | LongRunEmphasis                  | 2.190877942  |
| wavelet-HHH | glrlm      | ShortRunHighGrayLevelEmphasis    | 78.52424914  |
| wavelet-HHH | glrlm      | RunLengthNonUniformity           | 983.5061808  |
| wavelet-HHH | glrlm      | ShortRunEmphasis                 | 0.835154144  |
| wavelet-HHH | glrlm      | LongRunHighGrayLevelEmphasis     | 202.3697658  |
| wavelet-HHH | glrlm      | RunPercentage                    | 0.770571305  |
| wavelet-HHH | glrlm      | LongRunLowGrayLevelEmphasis      | 0.028027208  |
| wavelet-HHH | glrlm      | RunEntropy                       | 3.749219205  |
| wavelet-HHH | glrlm      | HighGrayLevelRunEmphasis         | 93.58172024  |
| wavelet-HHH | glrlm      | RunLengthNonUniformityNormalized | 0.652814617  |
| wavelet-HHH | glszm      | GrayLevelVariance                | 11.77541597  |
| wavelet-HHH | glszm      | ZoneVariance                     | 2451.651492  |
| wavelet-HHH | glszm      | GrayLevelNonUniformityNormalized | 0.102703086  |
| wavelet-HHH | glszm      | SizeZoneNonUniformityNormalized  | 0.469845656  |
| wavelet-HHH | glszm      | SizeZoneNonUniformity            | 136.7250859  |
| wavelet-HHH | glszm      | GrayLevelNonUniformity           | 29.88659794  |
| wavelet-HHH | glszm      | LargeAreaEmphasis                | 2496.601375  |
| wavelet-HHH | glszm      | SmallAreaHighGrayLevelEmphasis   | 73.78727881  |
| wavelet-HHH | glszm      | ZonePercentage                   | 0.14915428   |
| wavelet-HHH | glszm      | LargeAreaLowGrayLevelEmphasis    | 27.67273908  |
| wavelet-HHH | glszm      | LargeAreaHighGrayLevelEmphasis   | 228549.6426  |
| wavelet-HHH | glszm      | HighGrayLevelZoneEmphasis        | 101.6666667  |
| wavelet-HHH | glszm      | SmallAreaEmphasis                | 0.711856319  |
| wavelet-HHH | glszm      | LowGrayLevelZoneEmphasis         | 0.026334246  |
| wavelet-HHH | glszm      | ZoneEntropy                      | 5.000268763  |
| wavelet-HHH | glszm      | SmallAreaLowGrayLevelEmphasis    | 0.022199809  |
| wavelet-HHH | ngtdm      | Coarseness                       | 0.00339791   |
| wavelet-HHH | ngtdm      | Complexity                       | 158.5387765  |

|             |            |                                      |              |
|-------------|------------|--------------------------------------|--------------|
| wavelet-HHH | ngtdm      | Strength                             | 0.398886971  |
| wavelet-HHH | ngtdm      | Contrast                             | 0.026939169  |
| wavelet-HHH | ngtdm      | Busyness                             | 1.25349604   |
| wavelet-HLL | gldm       | GrayLevelVariance                    | 12.5717117   |
| wavelet-HLL | gldm       | HighGrayLevelEmphasis                | 198.6263455  |
| wavelet-HLL | gldm       | DependenceEntropy                    | 6.572445511  |
| wavelet-HLL | gldm       | DependenceNonUniformity              | 191.5381855  |
| wavelet-HLL | gldm       | GrayLevelNonUniformity               | 243.1763198  |
| wavelet-HLL | gldm       | SmallDependenceEmphasis              | 0.202211229  |
| wavelet-HLL | gldm       | SmallDependenceHighGrayLevelEmphasis | 46.30994301  |
| wavelet-HLL | gldm       | DependenceNonUniformityNormalized    | 0.098174365  |
| wavelet-HLL | gldm       | LargeDependenceEmphasis              | 43.41927217  |
| wavelet-HLL | gldm       | LargeDependenceLowGrayLevelEmphasis  | 0.229850331  |
| wavelet-HLL | gldm       | DependenceVariance                   | 15.52073363  |
| wavelet-HLL | gldm       | LargeDependenceHighGrayLevelEmphasis | 8736.937981  |
| wavelet-HLL | gldm       | SmallDependenceLowGrayLevelEmphasis  | 0.003549852  |
| wavelet-HLL | gldm       | LowGrayLevelEmphasis                 | 0.008745676  |
| wavelet-HLL | glcm       | JointAverage                         | 13.57565819  |
| wavelet-HLL | glcm       | SumAverage                           | 27.15131638  |
| wavelet-HLL | glcm       | JointEntropy                         | 6.336443747  |
| wavelet-HLL | glcm       | ClusterShade                         | 125.0588772  |
| wavelet-HLL | glcm       | MaximumProbability                   | 0.079143495  |
| wavelet-HLL | glcm       | Idmn                                 | 0.994829843  |
| wavelet-HLL | glcm       | JointEnergy                          | 0.027479424  |
| wavelet-HLL | glcm       | Contrast                             | 14.35757983  |
| wavelet-HLL | glcm       | DifferenceEntropy                    | 2.849441514  |
| wavelet-HLL | glcm       | InverseVariance                      | 0.371633611  |
| wavelet-HLL | glcm       | DifferenceVariance                   | 8.440793811  |
| wavelet-HLL | glcm       | Idn                                  | 0.957755189  |
| wavelet-HLL | glcm       | Idm                                  | 0.402038264  |
| wavelet-HLL | glcm       | Correlation                          | 0.24038055   |
| wavelet-HLL | glcm       | Autocorrelation                      | 186.7598154  |
| wavelet-HLL | glcm       | SumEntropy                           | 3.968094418  |
| wavelet-HLL | glcm       | SumSquares                           | 9.638961576  |
| wavelet-HLL | glcm       | ClusterProminence                    | 10949.13619  |
| wavelet-HLL | glcm       | Imc2                                 | 0.69996926   |
| wavelet-HLL | glcm       | Imc1                                 | -0.10794103  |
| wavelet-HLL | glcm       | DifferenceAverage                    | 2.388679435  |
| wavelet-HLL | glcm       | Id                                   | 0.466711174  |
| wavelet-HLL | glcm       | ClusterTendency                      | 24.19826647  |
| wavelet-HLL | firstorder | InterquartileRange                   | 67.76804705  |
| wavelet-HLL | firstorder | Skewness                             | 1.730932904  |
| wavelet-HLL | firstorder | Uniformity                           | 0.124641886  |
| wavelet-HLL | firstorder | Median                               | -16.06935258 |
| wavelet-HLL | firstorder | Energy                               | 16150998.77  |
| wavelet-HLL | firstorder | RobustMeanAbsoluteDeviation          | 30.74245679  |
| wavelet-HLL | firstorder | MeanAbsoluteDeviation                | 55.6430568   |
| wavelet-HLL | firstorder | TotalEnergy                          | 436076966.7  |
| wavelet-HLL | firstorder | Maximum                              | 923.4566357  |
| wavelet-HLL | firstorder | RootMeanSquared                      | 90.98526352  |
| wavelet-HLL | firstorder | 90Percentile                         | 44.62615586  |
| wavelet-HLL | firstorder | Minimum                              | -335.6133397 |
| wavelet-HLL | firstorder | Entropy                              | 3.522687446  |
| wavelet-HLL | firstorder | Range                                | 1259.069975  |
| wavelet-HLL | firstorder | Variance                             | 7807.202257  |



|             |            |                                      |              |
|-------------|------------|--------------------------------------|--------------|
| wavelet-HLL | firstorder | 10Percentile                         | -117.8851999 |
| wavelet-HLL | firstorder | Kurtosis                             | 19.47557978  |
| wavelet-HLL | firstorder | Mean                                 | -21.70520492 |
| wavelet-HLL | glrlm      | ShortRunLowGrayLevelEmphasis         | 0.008727853  |
| wavelet-HLL | glrlm      | GrayLevelVariance                    | 14.5264657   |
| wavelet-HLL | glrlm      | LowGrayLevelRunEmphasis              | 0.009383348  |
| wavelet-HLL | glrlm      | GrayLevelNonUniformityNormalized     | 0.109462497  |
| wavelet-HLL | glrlm      | RunVariance                          | 0.344649409  |
| wavelet-HLL | glrlm      | GrayLevelNonUniformity               | 178.8144373  |
| wavelet-HLL | glrlm      | LongRunEmphasis                      | 1.798971975  |
| wavelet-HLL | glrlm      | ShortRunHighGrayLevelEmphasis        | 176.6817936  |
| wavelet-HLL | glrlm      | RunLengthNonUniformity               | 1222.620235  |
| wavelet-HLL | glrlm      | ShortRunEmphasis                     | 0.885707445  |
| wavelet-HLL | glrlm      | LongRunHighGrayLevelEmphasis         | 357.786284   |
| wavelet-HLL | glrlm      | RunPercentage                        | 0.83531128   |
| wavelet-HLL | glrlm      | LongRunLowGrayLevelEmphasis          | 0.013762306  |
| wavelet-HLL | glrlm      | RunEntropy                           | 4.343940658  |
| wavelet-HLL | glrlm      | HighGrayLevelRunEmphasis             | 198.9622955  |
| wavelet-HLL | glrlm      | RunLengthNonUniformityNormalized     | 0.746144649  |
| wavelet-HLL | glszm      | GrayLevelVariance                    | 38.72415316  |
| wavelet-HLL | glszm      | ZoneVariance                         | 737.2823075  |
| wavelet-HLL | glszm      | GrayLevelNonUniformityNormalized     | 0.056888486  |
| wavelet-HLL | glszm      | SizeZoneNonUniformityNormalized      | 0.408312794  |
| wavelet-HLL | glszm      | SizeZoneNonUniformity                | 172.7163121  |
| wavelet-HLL | glszm      | GrayLevelNonUniformity               | 24.06382979  |
| wavelet-HLL | glszm      | LargeAreaEmphasis                    | 758.5555556  |
| wavelet-HLL | glszm      | SmallAreaHighGrayLevelEmphasis       | 163.7244521  |
| wavelet-HLL | glszm      | ZonePercentage                       | 0.216811891  |
| wavelet-HLL | glszm      | LargeAreaLowGrayLevelEmphasis        | 3.926194244  |
| wavelet-HLL | glszm      | LargeAreaHighGrayLevelEmphasis       | 149846.8085  |
| wavelet-HLL | glszm      | HighGrayLevelZoneEmphasis            | 230.5106383  |
| wavelet-HLL | glszm      | SmallAreaEmphasis                    | 0.661665804  |
| wavelet-HLL | glszm      | LowGrayLevelZoneEmphasis             | 0.017212194  |
| wavelet-HLL | glszm      | ZoneEntropy                          | 6.040645226  |
| wavelet-HLL | glszm      | SmallAreaLowGrayLevelEmphasis        | 0.014152225  |
| wavelet-HLL | ngtdm      | Coarseness                           | 0.003889981  |
| wavelet-HLL | ngtdm      | Complexity                           | 1260.064609  |
| wavelet-HLL | ngtdm      | Strength                             | 4.058426878  |
| wavelet-HLL | ngtdm      | Contrast                             | 0.037067669  |
| wavelet-HLL | ngtdm      | Busyness                             | 0.343505078  |
| wavelet-LHL | gldm       | GrayLevelVariance                    | 38.21452495  |
| wavelet-LHL | gldm       | HighGrayLevelEmphasis                | 863.2378268  |
| wavelet-LHL | gldm       | DependenceEntropy                    | 6.8295125    |
| wavelet-LHL | gldm       | DependenceNonUniformity              | 261.2562788  |
| wavelet-LHL | gldm       | GrayLevelNonUniformity               | 180.0169144  |
| wavelet-LHL | gldm       | SmallDependenceEmphasis              | 0.319249527  |
| wavelet-LHL | gldm       | SmallDependenceHighGrayLevelEmphasis | 281.9777764  |
| wavelet-LHL | gldm       | DependenceNonUniformityNormalized    | 0.133908908  |
| wavelet-LHL | gldm       | LargeDependenceEmphasis              | 41.38441825  |
| wavelet-LHL | gldm       | LargeDependenceLowGrayLevelEmphasis  | 0.048956795  |
| wavelet-LHL | gldm       | DependenceVariance                   | 18.34343413  |
| wavelet-LHL | gldm       | LargeDependenceHighGrayLevelEmphasis | 36033.53306  |
| wavelet-LHL | gldm       | SmallDependenceLowGrayLevelEmphasis  | 0.001121879  |
| wavelet-LHL | gldm       | LowGrayLevelEmphasis                 | 0.002000521  |
| wavelet-LHL | glcm       | JointAverage                         | 28.56610349  |

|             |            |                                  |              |
|-------------|------------|----------------------------------|--------------|
| wavelet-LHL | glcm       | SumAverage                       | 57.13220699  |
| wavelet-LHL | glcm       | JointEntropy                     | 7.329157027  |
| wavelet-LHL | glcm       | ClusterShade                     | 204.454754   |
| wavelet-LHL | glcm       | MaximumProbability               | 0.079127789  |
| wavelet-LHL | glcm       | Idmn                             | 0.985544865  |
| wavelet-LHL | glcm       | JointEnergy                      | 0.023904139  |
| wavelet-LHL | glcm       | Contrast                         | 49.6710111   |
| wavelet-LHL | glcm       | DifferenceEntropy                | 3.547730709  |
| wavelet-LHL | glcm       | InverseVariance                  | 0.308712093  |
| wavelet-LHL | glcm       | DifferenceVariance               | 31.13120421  |
| wavelet-LHL | glcm       | Idn                              | 0.936140547  |
| wavelet-LHL | glcm       | Idm                              | 0.34481466   |
| wavelet-LHL | glcm       | Correlation                      | 0.178387987  |
| wavelet-LHL | glcm       | Autocorrelation                  | 821.778706   |
| wavelet-LHL | glcm       | SumEntropy                       | 4.618201806  |
| wavelet-LHL | glcm       | SumSquares                       | 30.58933538  |
| wavelet-LHL | glcm       | ClusterProminence                | 40534.90076  |
| wavelet-LHL | glcm       | Imc2                             | 0.849377282  |
| wavelet-LHL | glcm       | Imc1                             | -0.165839219 |
| wavelet-LHL | glcm       | DifferenceAverage                | 4.196419704  |
| wavelet-LHL | glcm       | Id                               | 0.409321942  |
| wavelet-LHL | glcm       | ClusterTendency                  | 72.6863304   |
| wavelet-LHL | firstorder | InterquartileRange               | 95.53410345  |
| wavelet-LHL | firstorder | Skewness                         | 0.290082333  |
| wavelet-LHL | firstorder | Uniformity                       | 0.092269049  |
| wavelet-LHL | firstorder | Median                           | -9.433677557 |
| wavelet-LHL | firstorder | Energy                           | 47141280.04  |
| wavelet-LHL | firstorder | RobustMeanAbsoluteDeviation      | 49.75207816  |
| wavelet-LHL | firstorder | MeanAbsoluteDeviation            | 99.06387802  |
| wavelet-LHL | firstorder | TotalEnergy                      | 1272814561   |
| wavelet-LHL | firstorder | Maximum                          | 639.064241   |
| wavelet-LHL | firstorder | RootMeanSquared                  | 155.4433154  |
| wavelet-LHL | firstorder | 90Percentile                     | 139.9810777  |
| wavelet-LHL | firstorder | Minimum                          | -702.0987389 |
| wavelet-LHL | firstorder | Entropy                          | 4.249058162  |
| wavelet-LHL | firstorder | Range                            | 1341.16298   |
| wavelet-LHL | firstorder | Variance                         | 23772.14361  |
| wavelet-LHL | firstorder | 10Percentile                     | -197.3318125 |
| wavelet-LHL | firstorder | Kurtosis                         | 5.846276422  |
| wavelet-LHL | firstorder | Mean                             | -19.76058467 |
| wavelet-LHL | glrlm      | ShortRunLowGrayLevelEmphasis     | 0.002020548  |
| wavelet-LHL | glrlm      | GrayLevelVariance                | 43.74616922  |
| wavelet-LHL | glrlm      | LowGrayLevelRunEmphasis          | 0.002139699  |
| wavelet-LHL | glrlm      | GrayLevelNonUniformityNormalized | 0.072098574  |
| wavelet-LHL | glrlm      | RunVariance                      | 0.285413315  |
| wavelet-LHL | glrlm      | GrayLevelNonUniformity           | 120.3105913  |
| wavelet-LHL | glrlm      | LongRunEmphasis                  | 1.663957154  |
| wavelet-LHL | glrlm      | ShortRunHighGrayLevelEmphasis    | 778.1653055  |
| wavelet-LHL | glrlm      | RunLengthNonUniformity           | 1295.881343  |
| wavelet-LHL | glrlm      | ShortRunEmphasis                 | 0.901541268  |
| wavelet-LHL | glrlm      | LongRunHighGrayLevelEmphasis     | 1438.010017  |
| wavelet-LHL | glrlm      | RunPercentage                    | 0.853842211  |
| wavelet-LHL | glrlm      | LongRunLowGrayLevelEmphasis      | 0.00292745   |
| wavelet-LHL | glrlm      | RunEntropy                       | 5.024285291  |
| wavelet-LHL | glrlm      | HighGrayLevelRunEmphasis         | 863.0659248  |

|             |       |                                      |              |
|-------------|-------|--------------------------------------|--------------|
| wavelet-LHL | glrlm | RunLengthNonUniformityNormalized     | 0.776429752  |
| wavelet-LHL | glszm | GrayLevelVariance                    | 82.02267658  |
| wavelet-LHL | glszm | ZoneVariance                         | 361.0468505  |
| wavelet-LHL | glszm | GrayLevelNonUniformityNormalized     | 0.034936851  |
| wavelet-LHL | glszm | SizeZoneNonUniformityNormalized      | 0.508495105  |
| wavelet-LHL | glszm | SizeZoneNonUniformity                | 351.8786127  |
| wavelet-LHL | glszm | GrayLevelNonUniformity               | 24.17630058  |
| wavelet-LHL | glszm | LargeAreaEmphasis                    | 368.9956647  |
| wavelet-LHL | glszm | SmallAreaHighGrayLevelEmphasis       | 661.6330827  |
| wavelet-LHL | glszm | ZonePercentage                       | 0.354689903  |
| wavelet-LHL | glszm | LargeAreaLowGrayLevelEmphasis        | 0.428161513  |
| wavelet-LHL | glszm | LargeAreaHighGrayLevelEmphasis       | 320627.7731  |
| wavelet-LHL | glszm | HighGrayLevelZoneEmphasis            | 883.8453757  |
| wavelet-LHL | glszm | SmallAreaEmphasis                    | 0.740829316  |
| wavelet-LHL | glszm | LowGrayLevelZoneEmphasis             | 0.003325078  |
| wavelet-LHL | glszm | ZoneEntropy                          | 6.380477594  |
| wavelet-LHL | glszm | SmallAreaLowGrayLevelEmphasis        | 0.002934183  |
| wavelet-LHL | ngtdm | Coarseness                           | 0.004308709  |
| wavelet-LHL | ngtdm | Complexity                           | 3080.958224  |
| wavelet-LHL | ngtdm | Strength                             | 3.725494648  |
| wavelet-LHL | ngtdm | Contrast                             | 0.107800183  |
| wavelet-LHL | ngtdm | Busyness                             | 0.119423132  |
| wavelet-LHH | gldm  | GrayLevelVariance                    | 13.71055178  |
| wavelet-LHH | gldm  | HighGrayLevelEmphasis                | 712.4741158  |
| wavelet-LHH | gldm  | DependenceEntropy                    | 6.472353207  |
| wavelet-LHH | gldm  | DependenceNonUniformity              | 195.9902614  |
| wavelet-LHH | gldm  | GrayLevelNonUniformity               | 257.0912353  |
| wavelet-LHH | gldm  | SmallDependenceEmphasis              | 0.248952641  |
| wavelet-LHH | gldm  | SmallDependenceHighGrayLevelEmphasis | 180.5470107  |
| wavelet-LHH | gldm  | DependenceNonUniformityNormalized    | 0.10045631   |
| wavelet-LHH | gldm  | LargeDependenceEmphasis              | 48.30394669  |
| wavelet-LHH | gldm  | LargeDependenceLowGrayLevelEmphasis  | 0.070554513  |
| wavelet-LHH | gldm  | DependenceVariance                   | 18.51170962  |
| wavelet-LHH | gldm  | LargeDependenceHighGrayLevelEmphasis | 33637.43465  |
| wavelet-LHH | gldm  | SmallDependenceLowGrayLevelEmphasis  | 0.001097704  |
| wavelet-LHH | gldm  | LowGrayLevelEmphasis                 | 0.002199657  |
| wavelet-LHH | glcm  | JointAverage                         | 26.47909854  |
| wavelet-LHH | glcm  | SumAverage                           | 52.95819708  |
| wavelet-LHH | glcm  | JointEntropy                         | 6.459140625  |
| wavelet-LHH | glcm  | ClusterShade                         | -96.97030137 |
| wavelet-LHH | glcm  | MaximumProbability                   | 0.099522657  |
| wavelet-LHH | glcm  | Idmn                                 | 0.989581     |
| wavelet-LHH | glcm  | JointEnergy                          | 0.033578653  |
| wavelet-LHH | glcm  | Contrast                             | 22.00741429  |
| wavelet-LHH | glcm  | DifferenceEntropy                    | 3.108879456  |
| wavelet-LHH | glcm  | InverseVariance                      | 0.350330995  |
| wavelet-LHH | glcm  | DifferenceVariance                   | 13.36007975  |
| wavelet-LHH | glcm  | Idn                                  | 0.943168854  |
| wavelet-LHH | glcm  | Idm                                  | 0.397444953  |
| wavelet-LHH | glcm  | Correlation                          | 0.034221681  |
| wavelet-LHH | glcm  | Autocorrelation                      | 701.5499334  |
| wavelet-LHH | glcm  | SumEntropy                           | 3.921661891  |
| wavelet-LHH | glcm  | SumSquares                           | 11.4097418   |
| wavelet-LHH | glcm  | ClusterProminence                    | 6050.675447  |
| wavelet-LHH | glcm  | Imc2                                 | 0.724152256  |

|             |            |                                  |              |
|-------------|------------|----------------------------------|--------------|
| wavelet-LHH | glcm       | Imc1                             | -0.112994351 |
| wavelet-LHH | glcm       | DifferenceAverage                | 2.898351972  |
| wavelet-LHH | glcm       | Id                               | 0.458563763  |
| wavelet-LHH | glcm       | ClusterTendency                  | 23.63155293  |
| wavelet-LHH | firstorder | InterquartileRange               | 59.53778834  |
| wavelet-LHH | firstorder | Skewness                         | -0.757284785 |
| wavelet-LHH | firstorder | Uniformity                       | 0.131774083  |
| wavelet-LHH | firstorder | Median                           | -2.132672642 |
| wavelet-LHH | firstorder | Energy                           | 16555770.35  |
| wavelet-LHH | firstorder | RobustMeanAbsoluteDeviation      | 28.43131783  |
| wavelet-LHH | firstorder | MeanAbsoluteDeviation            | 57.67661157  |
| wavelet-LHH | firstorder | TotalEnergy                      | 447005799.5  |
| wavelet-LHH | firstorder | Maximum                          | 428.4178523  |
| wavelet-LHH | firstorder | RootMeanSquared                  | 92.11833127  |
| wavelet-LHH | firstorder | 90Percentile                     | 103.5330997  |
| wavelet-LHH | firstorder | Minimum                          | -647.5644473 |
| wavelet-LHH | firstorder | Entropy                          | 3.583490786  |
| wavelet-LHH | firstorder | Range                            | 1075.9823    |
| wavelet-LHH | firstorder | Variance                         | 8482.867541  |
| wavelet-LHH | firstorder | 10Percentile                     | -89.02828643 |
| wavelet-LHH | firstorder | Kurtosis                         | 8.926984331  |
| wavelet-LHH | firstorder | Mean                             | -1.708629659 |
| wavelet-LHH | glrlm      | ShortRunLowGrayLevelEmphasis     | 0.002183727  |
| wavelet-LHH | glrlm      | GrayLevelVariance                | 16.15143314  |
| wavelet-LHH | glrlm      | LowGrayLevelRunEmphasis          | 0.002356573  |
| wavelet-LHH | glrlm      | GrayLevelNonUniformityNormalized | 0.107087178  |
| wavelet-LHH | glrlm      | RunVariance                      | 0.33343375   |
| wavelet-LHH | glrlm      | GrayLevelNonUniformity           | 173.2649588  |
| wavelet-LHH | glrlm      | LongRunEmphasis                  | 1.797640099  |
| wavelet-LHH | glrlm      | ShortRunHighGrayLevelEmphasis    | 631.5994195  |
| wavelet-LHH | glrlm      | RunLengthNonUniformity           | 1191.512439  |
| wavelet-LHH | glrlm      | ShortRunEmphasis                 | 0.880803075  |
| wavelet-LHH | glrlm      | LongRunHighGrayLevelEmphasis     | 1272.250715  |
| wavelet-LHH | glrlm      | RunPercentage                    | 0.828529748  |
| wavelet-LHH | glrlm      | LongRunLowGrayLevelEmphasis      | 0.003511409  |
| wavelet-LHH | glrlm      | RunEntropy                       | 4.460267554  |
| wavelet-LHH | glrlm      | HighGrayLevelRunEmphasis         | 715.1709307  |
| wavelet-LHH | glrlm      | RunLengthNonUniformityNormalized | 0.735624805  |
| wavelet-LHH | glszm      | GrayLevelVariance                | 37.90803158  |
| wavelet-LHH | glszm      | ZoneVariance                     | 707.9175585  |
| wavelet-LHH | glszm      | GrayLevelNonUniformityNormalized | 0.052405495  |
| wavelet-LHH | glszm      | SizeZoneNonUniformityNormalized  | 0.490312812  |
| wavelet-LHH | glszm      | SizeZoneNonUniformity            | 255.452975   |
| wavelet-LHH | glszm      | GrayLevelNonUniformity           | 27.30326296  |
| wavelet-LHH | glszm      | LargeAreaEmphasis                | 721.940499   |
| wavelet-LHH | glszm      | SmallAreaHighGrayLevelEmphasis   | 528.6283174  |
| wavelet-LHH | glszm      | ZonePercentage                   | 0.267042542  |
| wavelet-LHH | glszm      | LargeAreaLowGrayLevelEmphasis    | 1.041828277  |
| wavelet-LHH | glszm      | LargeAreaHighGrayLevelEmphasis   | 502805.5681  |
| wavelet-LHH | glszm      | HighGrayLevelZoneEmphasis        | 729.7696737  |
| wavelet-LHH | glszm      | SmallAreaEmphasis                | 0.727783937  |
| wavelet-LHH | glszm      | LowGrayLevelZoneEmphasis         | 0.004219201  |
| wavelet-LHH | glszm      | ZoneEntropy                      | 5.937267234  |
| wavelet-LHH | glszm      | SmallAreaLowGrayLevelEmphasis    | 0.00380088   |
| wavelet-LHH | ngtdm      | Coarseness                       | 0.004092303  |

|             |            |                                      |              |
|-------------|------------|--------------------------------------|--------------|
| wavelet-LHH | ngtdm      | Complexity                           | 1443.32042   |
| wavelet-LHH | ngtdm      | Strength                             | 2.409649211  |
| wavelet-LHH | ngtdm      | Contrast                             | 0.048844086  |
| wavelet-LHH | ngtdm      | Busyness                             | 0.164523384  |
| wavelet-LLH | gldm       | GrayLevelVariance                    | 31.14238516  |
| wavelet-LLH | gldm       | HighGrayLevelEmphasis                | 628.4700154  |
| wavelet-LLH | gldm       | DependenceEntropy                    | 6.748797871  |
| wavelet-LLH | gldm       | DependenceNonUniformity              | 228.6688877  |
| wavelet-LLH | gldm       | GrayLevelNonUniformity               | 199.2368016  |
| wavelet-LLH | gldm       | SmallDependenceEmphasis              | 0.288722123  |
| wavelet-LLH | gldm       | SmallDependenceHighGrayLevelEmphasis | 183.8685638  |
| wavelet-LLH | gldm       | DependenceNonUniformityNormalized    | 0.117205991  |
| wavelet-LLH | gldm       | LargeDependenceEmphasis              | 40.61763198  |
| wavelet-LLH | gldm       | LargeDependenceLowGrayLevelEmphasis  | 0.065387377  |
| wavelet-LLH | gldm       | DependenceVariance                   | 16.24916397  |
| wavelet-LLH | gldm       | LargeDependenceHighGrayLevelEmphasis | 26139.29216  |
| wavelet-LLH | gldm       | SmallDependenceLowGrayLevelEmphasis  | 0.001405156  |
| wavelet-LLH | gldm       | LowGrayLevelEmphasis                 | 0.002718801  |
| wavelet-LLH | glcm       | JointAverage                         | 24.37074887  |
| wavelet-LLH | glcm       | SumAverage                           | 48.74149775  |
| wavelet-LLH | glcm       | JointEntropy                         | 7.047573149  |
| wavelet-LLH | glcm       | ClusterShade                         | 191.2104959  |
| wavelet-LLH | glcm       | MaximumProbability                   | 0.079161402  |
| wavelet-LLH | glcm       | Idmn                                 | 0.987631007  |
| wavelet-LLH | glcm       | JointEnergy                          | 0.0254873    |
| wavelet-LLH | glcm       | Contrast                             | 42.43639035  |
| wavelet-LLH | glcm       | DifferenceEntropy                    | 3.395517736  |
| wavelet-LLH | glcm       | InverseVariance                      | 0.326990623  |
| wavelet-LLH | glcm       | DifferenceVariance                   | 27.44611448  |
| wavelet-LLH | glcm       | Idn                                  | 0.942111521  |
| wavelet-LLH | glcm       | Idm                                  | 0.361354001  |
| wavelet-LLH | glcm       | Correlation                          | 0.163134103  |
| wavelet-LLH | glcm       | Autocorrelation                      | 598.4170964  |
| wavelet-LLH | glcm       | SumEntropy                           | 4.464489584  |
| wavelet-LLH | glcm       | SumSquares                           | 25.69964284  |
| wavelet-LLH | glcm       | ClusterProminence                    | 34274.18309  |
| wavelet-LLH | glcm       | Imc2                                 | 0.834325215  |
| wavelet-LLH | glcm       | Imc1                                 | -0.161653339 |
| wavelet-LLH | glcm       | DifferenceAverage                    | 3.77006274   |
| wavelet-LLH | glcm       | Id                                   | 0.425438654  |
| wavelet-LLH | glcm       | ClusterTendency                      | 60.36218099  |
| wavelet-LLH | firstorder | InterquartileRange                   | 94.07685524  |
| wavelet-LLH | firstorder | Skewness                             | 0.454829611  |
| wavelet-LLH | firstorder | Uniformity                           | 0.102120349  |
| wavelet-LLH | firstorder | Median                               | -13.15024845 |
| wavelet-LLH | firstorder | Energy                               | 39283449.97  |
| wavelet-LLH | firstorder | RobustMeanAbsoluteDeviation          | 43.40554888  |
| wavelet-LLH | firstorder | MeanAbsoluteDeviation                | 88.26732997  |
| wavelet-LLH | firstorder | TotalEnergy                          | 1060653149   |
| wavelet-LLH | firstorder | Maximum                              | 731.8773039  |
| wavelet-LLH | firstorder | RootMeanSquared                      | 141.8979679  |
| wavelet-LLH | firstorder | 90Percentile                         | 83.86853668  |
| wavelet-LLH | firstorder | Minimum                              | -623.3463546 |
| wavelet-LLH | firstorder | Entropy                              | 4.059271586  |
| wavelet-LLH | firstorder | Range                                | 1355.223659  |

|             |            |                                      |              |
|-------------|------------|--------------------------------------|--------------|
| wavelet-LLH | firstorder | Variance                             | 19447.86008  |
| wavelet-LLH | firstorder | 10Percentile                         | -182.8234716 |
| wavelet-LLH | firstorder | Kurtosis                             | 7.125567153  |
| wavelet-LLH | firstorder | Mean                                 | -26.21398897 |
| wavelet-LLH | glrlm      | ShortRunLowGrayLevelEmphasis         | 0.002735344  |
| wavelet-LLH | glrlm      | GrayLevelVariance                    | 35.70594075  |
| wavelet-LLH | glrlm      | LowGrayLevelRunEmphasis              | 0.002912088  |
| wavelet-LLH | glrlm      | GrayLevelNonUniformityNormalized     | 0.08249668   |
| wavelet-LLH | glrlm      | RunVariance                          | 0.282652594  |
| wavelet-LLH | glrlm      | GrayLevelNonUniformity               | 136.759371   |
| wavelet-LLH | glrlm      | LongRunEmphasis                      | 1.679266813  |
| wavelet-LLH | glrlm      | ShortRunHighGrayLevelEmphasis        | 560.0736906  |
| wavelet-LLH | glrlm      | RunLengthNonUniformity               | 1263.738834  |
| wavelet-LLH | glrlm      | ShortRunEmphasis                     | 0.894359091  |
| wavelet-LLH | glrlm      | LongRunHighGrayLevelEmphasis         | 1060.997284  |
| wavelet-LLH | glrlm      | RunPercentage                        | 0.848598352  |
| wavelet-LLH | glrlm      | LongRunLowGrayLevelEmphasis          | 0.004019092  |
| wavelet-LLH | glrlm      | RunEntropy                           | 4.856649644  |
| wavelet-LLH | glrlm      | HighGrayLevelRunEmphasis             | 627.0161712  |
| wavelet-LLH | glrlm      | RunLengthNonUniformityNormalized     | 0.761594129  |
| wavelet-LLH | glszm      | GrayLevelVariance                    | 70.88626974  |
| wavelet-LLH | glszm      | ZoneVariance                         | 447.220881   |
| wavelet-LLH | glszm      | GrayLevelNonUniformityNormalized     | 0.039954484  |
| wavelet-LLH | glszm      | SizeZoneNonUniformityNormalized      | 0.506912238  |
| wavelet-LLH | glszm      | SizeZoneNonUniformity                | 313.7786753  |
| wavelet-LLH | glszm      | GrayLevelNonUniformity               | 24.73182553  |
| wavelet-LLH | glszm      | LargeAreaEmphasis                    | 457.1550889  |
| wavelet-LLH | glszm      | SmallAreaHighGrayLevelEmphasis       | 474.7788747  |
| wavelet-LLH | glszm      | ZonePercentage                       | 0.317273193  |
| wavelet-LLH | glszm      | LargeAreaLowGrayLevelEmphasis        | 0.715106468  |
| wavelet-LLH | glszm      | LargeAreaHighGrayLevelEmphasis       | 294949.5719  |
| wavelet-LLH | glszm      | HighGrayLevelZoneEmphasis            | 640.3909532  |
| wavelet-LLH | glszm      | SmallAreaEmphasis                    | 0.739735808  |
| wavelet-LLH | glszm      | LowGrayLevelZoneEmphasis             | 0.004707883  |
| wavelet-LLH | glszm      | ZoneEntropy                          | 6.281409954  |
| wavelet-LLH | glszm      | SmallAreaLowGrayLevelEmphasis        | 0.004063047  |
| wavelet-LLH | ngtdm      | Coarseness                           | 0.003966496  |
| wavelet-LLH | ngtdm      | Complexity                           | 2955.895685  |
| wavelet-LLH | ngtdm      | Strength                             | 4.085219859  |
| wavelet-LLH | ngtdm      | Contrast                             | 0.080182319  |
| wavelet-LLH | ngtdm      | Busyness                             | 0.143513091  |
| wavelet-LLL | gldm       | GrayLevelVariance                    | 236.3564638  |
| wavelet-LLL | gldm       | HighGrayLevelEmphasis                | 4616.950794  |
| wavelet-LLL | gldm       | DependenceEntropy                    | 7.31908552   |
| wavelet-LLL | gldm       | DependenceNonUniformity              | 343.1250641  |
| wavelet-LLL | gldm       | GrayLevelNonUniformity               | 113.1137878  |
| wavelet-LLL | gldm       | SmallDependenceEmphasis              | 0.416630965  |
| wavelet-LLL | gldm       | SmallDependenceHighGrayLevelEmphasis | 1418.978737  |
| wavelet-LLL | gldm       | DependenceNonUniformityNormalized    | 0.175871381  |
| wavelet-LLL | gldm       | LargeDependenceEmphasis              | 34.40953357  |
| wavelet-LLL | gldm       | LargeDependenceLowGrayLevelEmphasis  | 0.006750258  |
| wavelet-LLL | gldm       | DependenceVariance                   | 16.24559735  |
| wavelet-LLL | gldm       | LargeDependenceHighGrayLevelEmphasis | 197113.4582  |
| wavelet-LLL | gldm       | SmallDependenceLowGrayLevelEmphasis  | 0.000773991  |
| wavelet-LLL | gldm       | LowGrayLevelEmphasis                 | 0.000892246  |

|             |            |                                  |              |
|-------------|------------|----------------------------------|--------------|
| wavelet-LLL | glcm       | JointAverage                     | 69.21083038  |
| wavelet-LLL | glcm       | SumAverage                       | 138.4216608  |
| wavelet-LLL | glcm       | JointEntropy                     | 8.295946114  |
| wavelet-LLL | glcm       | ClusterShade                     | -20426.47203 |
| wavelet-LLL | glcm       | MaximumProbability               | 0.05748241   |
| wavelet-LLL | glcm       | Idmn                             | 0.979477991  |
| wavelet-LLL | glcm       | JointEnergy                      | 0.012842752  |
| wavelet-LLL | glcm       | Contrast                         | 160.7858371  |
| wavelet-LLL | glcm       | DifferenceEntropy                | 4.239095793  |
| wavelet-LLL | glcm       | InverseVariance                  | 0.26689141   |
| wavelet-LLL | glcm       | DifferenceVariance               | 101.1780977  |
| wavelet-LLL | glcm       | Idn                              | 0.925539194  |
| wavelet-LLL | glcm       | Idm                              | 0.295806094  |
| wavelet-LLL | glcm       | Correlation                      | 0.512765844  |
| wavelet-LLL | glcm       | Autocorrelation                  | 4875.648483  |
| wavelet-LLL | glcm       | SumEntropy                       | 5.559780263  |
| wavelet-LLL | glcm       | SumSquares                       | 165.7556775  |
| wavelet-LLL | glcm       | ClusterProminence                | 1554605.905  |
| wavelet-LLL | glcm       | Imc2                             | 0.932697116  |
| wavelet-LLL | glcm       | Imc1                             | -0.222405938 |
| wavelet-LLL | glcm       | DifferenceAverage                | 7.629959671  |
| wavelet-LLL | glcm       | Id                               | 0.353887982  |
| wavelet-LLL | glcm       | ClusterTendency                  | 502.236873   |
| wavelet-LLL | firstorder | InterquartileRange               | 405.1029245  |
| wavelet-LLL | firstorder | Skewness                         | -1.565891732 |
| wavelet-LLL | firstorder | Uniformity                       | 0.057977339  |
| wavelet-LLL | firstorder | Median                           | 17.05125509  |
| wavelet-LLL | firstorder | Energy                           | 353205683.8  |
| wavelet-LLL | firstorder | RobustMeanAbsoluteDeviation      | 194.1953144  |
| wavelet-LLL | firstorder | MeanAbsoluteDeviation            | 299.0945546  |
| wavelet-LLL | firstorder | TotalEnergy                      | 9536553462   |
| wavelet-LLL | firstorder | Maximum                          | 248.209805   |
| wavelet-LLL | firstorder | RootMeanSquared                  | 425.4859337  |
| wavelet-LLL | firstorder | 90Percentile                     | 106.7751731  |
| wavelet-LLL | firstorder | Minimum                          | -1810.943943 |
| wavelet-LLL | firstorder | Entropy                          | 5.041960265  |
| wavelet-LLL | firstorder | Range                            | 2059.153748  |
| wavelet-LLL | firstorder | Variance                         | 147634.6876  |
| wavelet-LLL | firstorder | 10Percentile                     | -790.1792816 |
| wavelet-LLL | firstorder | Kurtosis                         | 4.753340279  |
| wavelet-LLL | firstorder | Mean                             | -182.7664964 |
| wavelet-LLL | glrlm      | ShortRunLowGrayLevelEmphasis     | 0.000979605  |
| wavelet-LLL | glrlm      | GrayLevelVariance                | 253.4889939  |
| wavelet-LLL | glrlm      | LowGrayLevelRunEmphasis          | 0.00099487   |
| wavelet-LLL | glrlm      | GrayLevelNonUniformityNormalized | 0.044657269  |
| wavelet-LLL | glrlm      | RunVariance                      | 0.231647129  |
| wavelet-LLL | glrlm      | GrayLevelNonUniformity           | 76.27436212  |
| wavelet-LLL | glrlm      | LongRunEmphasis                  | 1.541725291  |
| wavelet-LLL | glrlm      | ShortRunHighGrayLevelEmphasis    | 3983.886609  |
| wavelet-LLL | glrlm      | RunLengthNonUniformity           | 1377.766574  |
| wavelet-LLL | glrlm      | ShortRunEmphasis                 | 0.916516378  |
| wavelet-LLL | glrlm      | LongRunHighGrayLevelEmphasis     | 7561.833725  |
| wavelet-LLL | glrlm      | RunPercentage                    | 0.874541655  |
| wavelet-LLL | glrlm      | LongRunLowGrayLevelEmphasis      | 0.001091868  |
| wavelet-LLL | glrlm      | RunEntropy                       | 5.734764671  |

|             |       |                                      |             |
|-------------|-------|--------------------------------------|-------------|
| wavelet-LLL | glrlm | HighGrayLevelRunEmphasis             | 4458.93385  |
| wavelet-LLL | glrlm | RunLengthNonUniformityNormalized     | 0.806786659 |
| wavelet-LLL | glszm | GrayLevelVariance                    | 287.9571103 |
| wavelet-LLL | glszm | ZoneVariance                         | 181.6590779 |
| wavelet-LLL | glszm | GrayLevelNonUniformityNormalized     | 0.019381216 |
| wavelet-LLL | glszm | SizeZoneNonUniformityNormalized      | 0.668030371 |
| wavelet-LLL | glszm | SizeZoneNonUniformity                | 577.1782407 |
| wavelet-LLL | glszm | GrayLevelNonUniformity               | 16.74537037 |
| wavelet-LLL | glszm | LargeAreaEmphasis                    | 186.7581019 |
| wavelet-LLL | glszm | SmallAreaHighGrayLevelEmphasis       | 2709.281695 |
| wavelet-LLL | glszm | ZonePercentage                       | 0.442849821 |
| wavelet-LLL | glszm | LargeAreaLowGrayLevelEmphasis        | 0.033886474 |
| wavelet-LLL | glszm | LargeAreaHighGrayLevelEmphasis       | 1080398.522 |
| wavelet-LLL | glszm | HighGrayLevelZoneEmphasis            | 3424.864583 |
| wavelet-LLL | glszm | SmallAreaEmphasis                    | 0.842839066 |
| wavelet-LLL | glszm | LowGrayLevelZoneEmphasis             | 0.001770011 |
| wavelet-LLL | glszm | ZoneEntropy                          | 6.678338452 |
| wavelet-LLL | glszm | SmallAreaLowGrayLevelEmphasis        | 0.001724256 |
| wavelet-LLL | ngtdm | Coarseness                           | 0.003385703 |
| wavelet-LLL | ngtdm | Complexity                           | 13984.41949 |
| wavelet-LLL | ngtdm | Strength                             | 15.75948768 |
| wavelet-LLL | ngtdm | Contrast                             | 0.479872363 |
| wavelet-LLL | ngtdm | Busyness                             | 0.040405994 |
| wavelet-HHL | gldm  | GrayLevelVariance                    | 4.088935454 |
| wavelet-HHL | gldm  | HighGrayLevelEmphasis                | 186.6365966 |
| wavelet-HHL | gldm  | DependenceEntropy                    | 6.013088838 |
| wavelet-HHL | gldm  | DependenceNonUniformity              | 147.2532035 |
| wavelet-HHL | gldm  | GrayLevelNonUniformity               | 396.7027166 |
| wavelet-HHL | gldm  | SmallDependenceEmphasis              | 0.163623889 |
| wavelet-HHL | gldm  | SmallDependenceHighGrayLevelEmphasis | 33.54170292 |
| wavelet-HHL | gldm  | DependenceNonUniformityNormalized    | 0.075475758 |
| wavelet-HHL | gldm  | LargeDependenceEmphasis              | 65.57201435 |
| wavelet-HHL | gldm  | LargeDependenceLowGrayLevelEmphasis  | 0.373445137 |
| wavelet-HHL | gldm  | DependenceVariance                   | 20.65934619 |
| wavelet-HHL | gldm  | LargeDependenceHighGrayLevelEmphasis | 11825.44234 |
| wavelet-HHL | gldm  | SmallDependenceLowGrayLevelEmphasis  | 0.001371924 |
| wavelet-HHL | gldm  | LowGrayLevelEmphasis                 | 0.007084573 |
| wavelet-HHL | glcm  | JointAverage                         | 13.50080449 |
| wavelet-HHL | glcm  | SumAverage                           | 27.00160898 |
| wavelet-HHL | glcm  | JointEntropy                         | 5.146667696 |
| wavelet-HHL | glcm  | ClusterShade                         | -1.23692911 |
| wavelet-HHL | glcm  | MaximumProbability                   | 0.133481976 |
| wavelet-HHL | glcm  | Idmn                                 | 0.990926913 |
| wavelet-HHL | glcm  | JointEnergy                          | 0.061881808 |
| wavelet-HHL | glcm  | Contrast                             | 6.724409744 |
| wavelet-HHL | glcm  | DifferenceEntropy                    | 2.426314628 |
| wavelet-HHL | glcm  | InverseVariance                      | 0.429483869 |
| wavelet-HHL | glcm  | DifferenceVariance                   | 3.946761501 |
| wavelet-HHL | glcm  | Idn                                  | 0.9444075   |
| wavelet-HHL | glcm  | Idm                                  | 0.492921032 |
| wavelet-HHL | glcm  | Correlation                          | 0.010839172 |
| wavelet-HHL | glcm  | Autocorrelation                      | 182.3235197 |
| wavelet-HHL | glcm  | SumEntropy                           | 3.172936473 |
| wavelet-HHL | glcm  | SumSquares                           | 3.413491291 |
| wavelet-HHL | glcm  | ClusterProminence                    | 555.7545413 |



|             |            |                                  |              |
|-------------|------------|----------------------------------|--------------|
| wavelet-HHL | glcm       | Imc2                             | 0.554600785  |
| wavelet-HHL | glcm       | Imc1                             | -0.07169319  |
| wavelet-HHL | glcm       | DifferenceAverage                | 1.652410003  |
| wavelet-HHL | glcm       | Id                               | 0.541488157  |
| wavelet-HHL | glcm       | ClusterTendency                  | 6.929555418  |
| wavelet-HHL | firstorder | InterquartileRange               | 39.02908074  |
| wavelet-HHL | firstorder | Skewness                         | -0.001154631 |
| wavelet-HHL | firstorder | Uniformity                       | 0.203333017  |
| wavelet-HHL | firstorder | Median                           | -1.129330215 |
| wavelet-HHL | firstorder | Energy                           | 4978392.443  |
| wavelet-HHL | firstorder | RobustMeanAbsoluteDeviation      | 17.38664743  |
| wavelet-HHL | firstorder | MeanAbsoluteDeviation            | 32.47623867  |
| wavelet-HHL | firstorder | TotalEnergy                      | 134416596    |
| wavelet-HHL | firstorder | Maximum                          | 320.4159954  |
| wavelet-HHL | firstorder | RootMeanSquared                  | 50.514485    |
| wavelet-HHL | firstorder | 90Percentile                     | 53.55646107  |
| wavelet-HHL | firstorder | Minimum                          | -321.138803  |
| wavelet-HHL | firstorder | Entropy                          | 2.814635993  |
| wavelet-HHL | firstorder | Range                            | 641.5547984  |
| wavelet-HHL | firstorder | Variance                         | 2551.661051  |
| wavelet-HHL | firstorder | 10Percentile                     | -46.60361286 |
| wavelet-HHL | firstorder | Kurtosis                         | 9.874530086  |
| wavelet-HHL | firstorder | Mean                             | 0.228349275  |
| wavelet-HHL | glrlm      | ShortRunLowGrayLevelEmphasis     | 0.006493583  |
| wavelet-HHL | glrlm      | GrayLevelVariance                | 4.982649616  |
| wavelet-HHL | glrlm      | LowGrayLevelRunEmphasis          | 0.00742334   |
| wavelet-HHL | glrlm      | GrayLevelNonUniformityNormalized | 0.169714868  |
| wavelet-HHL | glrlm      | RunVariance                      | 0.481598656  |
| wavelet-HHL | glrlm      | GrayLevelNonUniformity           | 258.7677484  |
| wavelet-HHL | glrlm      | LongRunEmphasis                  | 2.137036551  |
| wavelet-HHL | glrlm      | ShortRunHighGrayLevelEmphasis    | 160.03497    |
| wavelet-HHL | glrlm      | RunLengthNonUniformity           | 1024.782105  |
| wavelet-HHL | glrlm      | ShortRunEmphasis                 | 0.845020158  |
| wavelet-HHL | glrlm      | LongRunHighGrayLevelEmphasis     | 393.7321055  |
| wavelet-HHL | glrlm      | RunPercentage                    | 0.780704175  |
| wavelet-HHL | glrlm      | LongRunLowGrayLevelEmphasis      | 0.014044948  |
| wavelet-HHL | glrlm      | RunEntropy                       | 3.870813478  |
| wavelet-HHL | glrlm      | HighGrayLevelRunEmphasis         | 188.1986358  |
| wavelet-HHL | glrlm      | RunLengthNonUniformityNormalized | 0.670682505  |
| wavelet-HHL | glszm      | GrayLevelVariance                | 13.99902402  |
| wavelet-HHL | glszm      | ZoneVariance                     | 1946.829631  |
| wavelet-HHL | glszm      | GrayLevelNonUniformityNormalized | 0.095794914  |
| wavelet-HHL | glszm      | SizeZoneNonUniformityNormalized  | 0.434953153  |
| wavelet-HHL | glszm      | SizeZoneNonUniformity            | 142.6646341  |
| wavelet-HHL | glszm      | GrayLevelNonUniformity           | 31.42073171  |
| wavelet-HHL | glszm      | LargeAreaEmphasis                | 1982.210366  |
| wavelet-HHL | glszm      | SmallAreaHighGrayLevelEmphasis   | 145.6309689  |
| wavelet-HHL | glszm      | ZonePercentage                   | 0.168118913  |
| wavelet-HHL | glszm      | LargeAreaLowGrayLevelEmphasis    | 11.04890818  |
| wavelet-HHL | glszm      | LargeAreaHighGrayLevelEmphasis   | 358494.2927  |
| wavelet-HHL | glszm      | HighGrayLevelZoneEmphasis        | 205.8384146  |
| wavelet-HHL | glszm      | SmallAreaEmphasis                | 0.684714391  |
| wavelet-HHL | glszm      | LowGrayLevelZoneEmphasis         | 0.010222211  |
| wavelet-HHL | glszm      | ZoneEntropy                      | 5.271381901  |
| wavelet-HHL | glszm      | SmallAreaLowGrayLevelEmphasis    | 0.005584248  |

|             |            |                                      |              |
|-------------|------------|--------------------------------------|--------------|
| wavelet-HHL | ngtdm      | Coarseness                           | 0.003561031  |
| wavelet-HHL | ngtdm      | Complexity                           | 325.2152716  |
| wavelet-HHL | ngtdm      | Strength                             | 0.935587872  |
| wavelet-HHL | ngtdm      | Contrast                             | 0.02198648   |
| wavelet-HHL | ngtdm      | Busyness                             | 0.58752346   |
| wavelet-HLH | gldm       | GrayLevelVariance                    | 4.209257511  |
| wavelet-HLH | gldm       | HighGrayLevelEmphasis                | 135.4884675  |
| wavelet-HLH | gldm       | DependenceEntropy                    | 6.00692923   |
| wavelet-HLH | gldm       | DependenceNonUniformity              | 146.6401845  |
| wavelet-HLH | gldm       | GrayLevelNonUniformity               | 399.53306    |
| wavelet-HLH | gldm       | SmallDependenceEmphasis              | 0.166742054  |
| wavelet-HLH | gldm       | SmallDependenceHighGrayLevelEmphasis | 23.84205751  |
| wavelet-HLH | gldm       | DependenceNonUniformityNormalized    | 0.07516155   |
| wavelet-HLH | gldm       | LargeDependenceEmphasis              | 70.33982573  |
| wavelet-HLH | gldm       | LargeDependenceLowGrayLevelEmphasis  | 0.546764271  |
| wavelet-HLH | gldm       | DependenceVariance                   | 22.16868428  |
| wavelet-HLH | gldm       | LargeDependenceHighGrayLevelEmphasis | 9229.177858  |
| wavelet-HLH | gldm       | SmallDependenceLowGrayLevelEmphasis  | 0.003707181  |
| wavelet-HLH | gldm       | LowGrayLevelEmphasis                 | 0.010374583  |
| wavelet-HLH | glcm       | JointAverage                         | 11.47801148  |
| wavelet-HLH | glcm       | SumAverage                           | 22.95602296  |
| wavelet-HLH | glcm       | JointEntropy                         | 5.161726221  |
| wavelet-HLH | glcm       | ClusterShade                         | 0.092771487  |
| wavelet-HLH | glcm       | MaximumProbability                   | 0.135317775  |
| wavelet-HLH | glcm       | Idmn                                 | 0.987018148  |
| wavelet-HLH | glcm       | JointEnergy                          | 0.065061761  |
| wavelet-HLH | glcm       | Contrast                             | 6.99994968   |
| wavelet-HLH | glcm       | DifferenceEntropy                    | 2.456201858  |
| wavelet-HLH | glcm       | InverseVariance                      | 0.422504765  |
| wavelet-HLH | glcm       | DifferenceVariance                   | 4.141589677  |
| wavelet-HLH | glcm       | Idn                                  | 0.93505972   |
| wavelet-HLH | glcm       | Idm                                  | 0.499515264  |
| wavelet-HLH | glcm       | Correlation                          | 0.004531921  |
| wavelet-HLH | glcm       | Autocorrelation                      | 131.7667433  |
| wavelet-HLH | glcm       | SumEntropy                           | 3.195928753  |
| wavelet-HLH | glcm       | SumSquares                           | 3.521057413  |
| wavelet-HLH | glcm       | ClusterProminence                    | 439.8406751  |
| wavelet-HLH | glcm       | Imc2                                 | 0.550483083  |
| wavelet-HLH | glcm       | Imc1                                 | -0.070175451 |
| wavelet-HLH | glcm       | DifferenceAverage                    | 1.676444039  |
| wavelet-HLH | glcm       | Id                                   | 0.546691664  |
| wavelet-HLH | glcm       | ClusterTendency                      | 7.084279973  |
| wavelet-HLH | firstorder | InterquartileRange                   | 36.72600791  |
| wavelet-HLH | firstorder | Skewness                             | 0.047911197  |
| wavelet-HLH | firstorder | Uniformity                           | 0.204783731  |
| wavelet-HLH | firstorder | Median                               | -0.662572512 |
| wavelet-HLH | firstorder | Energy                               | 5040025.569  |
| wavelet-HLH | firstorder | RobustMeanAbsoluteDeviation          | 16.65266019  |
| wavelet-HLH | firstorder | MeanAbsoluteDeviation                | 32.51013831  |
| wavelet-HLH | firstorder | TotalEnergy                          | 136080690.4  |
| wavelet-HLH | firstorder | Maximum                              | 269.0394082  |
| wavelet-HLH | firstorder | RootMeanSquared                      | 50.82621101  |
| wavelet-HLH | firstorder | 90Percentile                         | 48.70938452  |
| wavelet-HLH | firstorder | Minimum                              | -269.0484786 |
| wavelet-HLH | firstorder | Entropy                              | 2.827376342  |

|             |            |                                  |              |
|-------------|------------|----------------------------------|--------------|
| wavelet-HLH | firstorder | Range                            | 538.0878869  |
| wavelet-HLH | firstorder | Variance                         | 2581.720548  |
| wavelet-HLH | firstorder | 10Percentile                     | -50.05051665 |
| wavelet-HLH | firstorder | Kurtosis                         | 8.253432485  |
| wavelet-HLH | firstorder | Mean                             | -1.258244037 |
| wavelet-HLH | glrlm      | ShortRunLowGrayLevelEmphasis     | 0.009885148  |
| wavelet-HLH | glrlm      | GrayLevelVariance                | 5.226190241  |
| wavelet-HLH | glrlm      | LowGrayLevelRunEmphasis          | 0.01115085   |
| wavelet-HLH | glrlm      | GrayLevelNonUniformityNormalized | 0.168189437  |
| wavelet-HLH | glrlm      | RunVariance                      | 0.491596772  |
| wavelet-HLH | glrlm      | GrayLevelNonUniformity           | 253.3318542  |
| wavelet-HLH | glrlm      | LongRunEmphasis                  | 2.180191888  |
| wavelet-HLH | glrlm      | ShortRunHighGrayLevelEmphasis    | 114.9766232  |
| wavelet-HLH | glrlm      | RunLengthNonUniformity           | 991.2746663  |
| wavelet-HLH | glrlm      | ShortRunEmphasis                 | 0.837578017  |
| wavelet-HLH | glrlm      | LongRunHighGrayLevelEmphasis     | 292.0266287  |
| wavelet-HLH | glrlm      | RunPercentage                    | 0.771517565  |
| wavelet-HLH | glrlm      | LongRunLowGrayLevelEmphasis      | 0.020312311  |
| wavelet-HLH | glrlm      | RunEntropy                       | 3.930038787  |
| wavelet-HLH | glrlm      | HighGrayLevelRunEmphasis         | 136.4938712  |
| wavelet-HLH | glrlm      | RunLengthNonUniformityNormalized | 0.657267445  |
| wavelet-HLH | glszm      | GrayLevelVariance                | 15.52649186  |
| wavelet-HLH | glszm      | ZoneVariance                     | 1855.503031  |
| wavelet-HLH | glszm      | GrayLevelNonUniformityNormalized | 0.08311762   |
| wavelet-HLH | glszm      | SizeZoneNonUniformityNormalized  | 0.429829465  |
| wavelet-HLH | glszm      | SizeZoneNonUniformity            | 146.5718475  |
| wavelet-HLH | glszm      | GrayLevelNonUniformity           | 28.3431085   |
| wavelet-HLH | glszm      | LargeAreaEmphasis                | 1888.237537  |
| wavelet-HLH | glszm      | SmallAreaHighGrayLevelEmphasis   | 98.88689789  |
| wavelet-HLH | glszm      | ZonePercentage                   | 0.174782163  |
| wavelet-HLH | glszm      | LargeAreaLowGrayLevelEmphasis    | 14.41470433  |
| wavelet-HLH | glszm      | LargeAreaHighGrayLevelEmphasis   | 249839.2258  |
| wavelet-HLH | glszm      | HighGrayLevelZoneEmphasis        | 142.7331378  |
| wavelet-HLH | glszm      | SmallAreaEmphasis                | 0.680848408  |
| wavelet-HLH | glszm      | LowGrayLevelZoneEmphasis         | 0.021901232  |
| wavelet-HLH | glszm      | ZoneEntropy                      | 5.419657932  |
| wavelet-HLH | glszm      | SmallAreaLowGrayLevelEmphasis    | 0.018859412  |
| wavelet-HLH | ngtdm      | Coarseness                       | 0.003604795  |
| wavelet-HLH | ngtdm      | Complexity                       | 261.5688554  |
| wavelet-HLH | ngtdm      | Strength                         | 0.678272404  |
| wavelet-HLH | ngtdm      | Contrast                         | 0.027780924  |
| wavelet-HLH | ngtdm      | Busyness                         | 0.771501233  |

| Image type | Feature Class | Feature Name                         | Value                                                                                                                                                                                                                                                                                                                                                                                                             |
|------------|---------------|--------------------------------------|-------------------------------------------------------------------------------------------------------------------------------------------------------------------------------------------------------------------------------------------------------------------------------------------------------------------------------------------------------------------------------------------------------------------|
| general    | info          | BoundingBox                          | 3: RTSTRUCT: C99-DNU-B_segment_GTV Right<br>(0, 0, 1, 7, 9, 5)                                                                                                                                                                                                                                                                                                                                                    |
| general    | info          | EnabledImageTypes                    | {u'Original': {}, u'Wavelet': {}}                                                                                                                                                                                                                                                                                                                                                                                 |
|            |               |                                      | {'distances': [1], 'additionalInfo': True, 'force2D': False, 'interpolator': 'sitkBSpline', 'resampledPixelSpacing': [3.0], 'label': 1, 'normalizeScale': 1, 'normalize': False, 'force2Ddimension': 0, 'removeOutliers': None, 'minimumROISize': None, u'binWidth': 25.0, 'minimumROIDimensions': 1, u'correctMask': True, 'preCrop': False, u'symmetricalGLCM': True, 'resegmentRange': None, 'padDistance': 5} |
| general    | info          | GeneralSettings                      |                                                                                                                                                                                                                                                                                                                                                                                                                   |
| general    | info          | ImageHash                            | 525b135c269d171cc15012c9eca7023d55d92887                                                                                                                                                                                                                                                                                                                                                                          |
| general    | info          | ImageSpacing                         | (0.9375, 0.9375, 2.0)                                                                                                                                                                                                                                                                                                                                                                                             |
| general    | info          | MaskHash                             | 8ee5ab5c4589e640097e6339c97e51080370cbd8                                                                                                                                                                                                                                                                                                                                                                          |
| general    | info          | NumpyVersion                         | 1.13.1                                                                                                                                                                                                                                                                                                                                                                                                            |
| general    | info          | PyWaveletVersion                     | 0.5.2                                                                                                                                                                                                                                                                                                                                                                                                             |
| general    | info          | SimpleITKVersion                     | 1.1.0                                                                                                                                                                                                                                                                                                                                                                                                             |
| general    | info          | Version                              | 1.3.0.post102+g1b0eb74                                                                                                                                                                                                                                                                                                                                                                                            |
| general    | info          | VolumeNum                            | 1                                                                                                                                                                                                                                                                                                                                                                                                                 |
| general    | info          | VoxelNum                             | 148                                                                                                                                                                                                                                                                                                                                                                                                               |
| original   | shape         | Maximum3DDiameter                    | 26.32489316                                                                                                                                                                                                                                                                                                                                                                                                       |
| original   | shape         | Maximum2DDiameterSlice               | 25.63201124                                                                                                                                                                                                                                                                                                                                                                                                       |
| original   | shape         | Sphericity                           | 0.854422316                                                                                                                                                                                                                                                                                                                                                                                                       |
| original   | shape         | MinorAxis                            | 16.73444899                                                                                                                                                                                                                                                                                                                                                                                                       |
| original   | shape         | Elongation                           | 0.660008137                                                                                                                                                                                                                                                                                                                                                                                                       |
| original   | shape         | SurfaceVolumeRatio                   | 0.356672573                                                                                                                                                                                                                                                                                                                                                                                                       |
| original   | shape         | Volume                               | 3996                                                                                                                                                                                                                                                                                                                                                                                                              |
| original   | shape         | MajorAxis                            | 25.35491315                                                                                                                                                                                                                                                                                                                                                                                                       |
| original   | shape         | SurfaceArea                          | 1425.263603                                                                                                                                                                                                                                                                                                                                                                                                       |
| original   | shape         | Flatness                             | 0.521725407                                                                                                                                                                                                                                                                                                                                                                                                       |
| original   | shape         | LeastAxis                            | 13.22830239                                                                                                                                                                                                                                                                                                                                                                                                       |
| original   | shape         | Maximum2DDiameterColumn              | 17.49285568                                                                                                                                                                                                                                                                                                                                                                                                       |
| original   | shape         | Maximum2DDiameterRow                 | 24.73863375                                                                                                                                                                                                                                                                                                                                                                                                       |
| original   | gldm          | GrayLevelVariance                    | 42.16691015                                                                                                                                                                                                                                                                                                                                                                                                       |
| original   | gldm          | HighGrayLevelEmphasis                | 216.1216216                                                                                                                                                                                                                                                                                                                                                                                                       |
| original   | gldm          | DependenceEntropy                    | 5.606266545                                                                                                                                                                                                                                                                                                                                                                                                       |
| original   | gldm          | DependenceNonUniformity              | 51.45945946                                                                                                                                                                                                                                                                                                                                                                                                       |
| original   | gldm          | GrayLevelNonUniformity               | 7.108108108                                                                                                                                                                                                                                                                                                                                                                                                       |
| original   | gldm          | SmallDependenceEmphasis              | 0.52958521                                                                                                                                                                                                                                                                                                                                                                                                        |
| original   | gldm          | SmallDependenceHighGrayLevelEmphasis | 114.3915165                                                                                                                                                                                                                                                                                                                                                                                                       |
| original   | gldm          | DependenceNonUniformityNormalized    | 0.34769905                                                                                                                                                                                                                                                                                                                                                                                                        |
| original   | gldm          | LargeDependenceEmphasis              | 4.256756757                                                                                                                                                                                                                                                                                                                                                                                                       |
| original   | gldm          | LargeDependenceLowGrayLevelEmphasis  | 0.104498521                                                                                                                                                                                                                                                                                                                                                                                                       |
| original   | gldm          | DependenceVariance                   | 0.829254931                                                                                                                                                                                                                                                                                                                                                                                                       |
| original   | gldm          | LargeDependenceHighGrayLevelEmphasis | 837.9054054                                                                                                                                                                                                                                                                                                                                                                                                       |
| original   | gldm          | SmallDependenceLowGrayLevelEmphasis  | 0.013735819                                                                                                                                                                                                                                                                                                                                                                                                       |
| original   | gldm          | LowGrayLevelEmphasis                 | 0.028494337                                                                                                                                                                                                                                                                                                                                                                                                       |
| original   | glcm          | JointAverage                         | 13.74211344                                                                                                                                                                                                                                                                                                                                                                                                       |
| original   | glcm          | SumAverage                           | 27.48422688                                                                                                                                                                                                                                                                                                                                                                                                       |
| original   | glcm          | JointEntropy                         | 7.177147114                                                                                                                                                                                                                                                                                                                                                                                                       |
| original   | glcm          | ClusterShade                         | 354.5909816                                                                                                                                                                                                                                                                                                                                                                                                       |
| original   | glcm          | MaximumProbability                   | 0.016903079                                                                                                                                                                                                                                                                                                                                                                                                       |
| original   | glcm          | Idmn                                 | 0.947295121                                                                                                                                                                                                                                                                                                                                                                                                       |
| original   | glcm          | JointEnergy                          | 0.007528683                                                                                                                                                                                                                                                                                                                                                                                                       |
| original   | glcm          | Contrast                             | 51.91983792                                                                                                                                                                                                                                                                                                                                                                                                       |
| original   | glcm          | DifferenceEntropy                    | 3.775388799                                                                                                                                                                                                                                                                                                                                                                                                       |
| original   | glcm          | InverseVariance                      | 0.171254442                                                                                                                                                                                                                                                                                                                                                                                                       |
| original   | glcm          | DifferenceVariance                   | 18.74073222                                                                                                                                                                                                                                                                                                                                                                                                       |

|          |            |                                  |              |
|----------|------------|----------------------------------|--------------|
| original | glcm       | Idn                              | 0.847484276  |
| original | glcm       | Idm                              | 0.155519861  |
| original | glcm       | Correlation                      | 0.389564771  |
| original | glcm       | Autocorrelation                  | 205.2279836  |
| original | glcm       | SumEntropy                       | 5.006427309  |
| original | glcm       | SumSquares                       | 42.30612364  |
| original | glcm       | ClusterProminence                | 36048.99296  |
| original | glcm       | Imc2                             | 0.989502066  |
| original | glcm       | Imc1                             | -0.428138395 |
| original | glcm       | DifferenceAverage                | 5.720309536  |
| original | glcm       | Id                               | 0.248772575  |
| original | glcm       | ClusterTendency                  | 117.3046566  |
| original | firstorder | InterquartileRange               | 237.25       |
| original | firstorder | Skewness                         | 0.384133113  |
| original | firstorder | Uniformity                       | 0.048027757  |
| original | firstorder | Median                           | -499.5       |
| original | firstorder | Energy                           | 38368807     |
| original | firstorder | RobustMeanAbsoluteDeviation      | 96.09420239  |
| original | firstorder | MeanAbsoluteDeviation            | 131.7205077  |
| original | firstorder | TotalEnergy                      | 1035957789   |
| original | firstorder | Maximum                          | -88          |
| original | firstorder | RootMeanSquared                  | 509.1647041  |
| original | firstorder | 90Percentile                     | -271         |
| original | firstorder | Minimum                          | -797         |
| original | firstorder | Entropy                          | 4.577349652  |
| original | firstorder | Range                            | 709          |
| original | firstorder | Variance                         | 25940.11445  |
| original | firstorder | 10Percentile                     | -681.3       |
| original | firstorder | Kurtosis                         | 2.542585321  |
| original | firstorder | Mean                             | -483.0202703 |
| original | glrlm      | ShortRunLowGrayLevelEmphasis     | 0.027885326  |
| original | glrlm      | GrayLevelVariance                | 42.5022702   |
| original | glrlm      | LowGrayLevelRunEmphasis          | 0.028560992  |
| original | glrlm      | GrayLevelNonUniformityNormalized | 0.047536662  |
| original | glrlm      | RunVariance                      | 0.03376662   |
| original | glrlm      | GrayLevelNonUniformity           | 6.805119094  |
| original | glrlm      | LongRunEmphasis                  | 1.103272878  |
| original | glrlm      | ShortRunHighGrayLevelEmphasis    | 211.5901737  |
| original | glrlm      | RunLengthNonUniformity           | 133.9895184  |
| original | glrlm      | ShortRunEmphasis                 | 0.974783683  |
| original | glrlm      | LongRunHighGrayLevelEmphasis     | 237.2861634  |
| original | glrlm      | RunPercentage                    | 0.967255717  |
| original | glrlm      | LongRunLowGrayLevelEmphasis      | 0.031280374  |
| original | glrlm      | RunEntropy                       | 4.709124704  |
| original | glrlm      | HighGrayLevelRunEmphasis         | 216.6600325  |
| original | glrlm      | RunLengthNonUniformityNormalized | 0.935602585  |
| original | glszm      | GrayLevelVariance                | 46.95246537  |
| original | glszm      | ZoneVariance                     | 0.92033241   |
| original | glszm      | GrayLevelNonUniformityNormalized | 0.04398892   |
| original | glszm      | SizeZoneNonUniformityNormalized  | 0.47700831   |
| original | glszm      | SizeZoneNonUniformity            | 45.31578947  |
| original | glszm      | GrayLevelNonUniformity           | 4.178947368  |
| original | glszm      | LargeAreaEmphasis                | 3.347368421  |
| original | glszm      | SmallAreaHighGrayLevelEmphasis   | 153.0530556  |
| original | glszm      | ZonePercentage                   | 0.641891892  |
| original | glszm      | LargeAreaLowGrayLevelEmphasis    | 0.08311425   |
| original | glszm      | LargeAreaHighGrayLevelEmphasis   | 693.0526316  |
| original | glszm      | HighGrayLevelZoneEmphasis        | 219.2526316  |
| original | glszm      | SmallAreaEmphasis                | 0.712611111  |

|             |            |                                      |              |
|-------------|------------|--------------------------------------|--------------|
| original    | glszm      | LowGrayLevelZoneEmphasis             | 0.028387579  |
| original    | glszm      | ZoneEntropy                          | 5.377662124  |
| original    | glszm      | SmallAreaLowGrayLevelEmphasis        | 0.017719618  |
| original    | ngtdm      | Coarseness                           | 0.039432813  |
| original    | ngtdm      | Complexity                           | 1233.905495  |
| original    | ngtdm      | Strength                             | 11.50296434  |
| original    | ngtdm      | Contrast                             | 0.408489536  |
| original    | ngtdm      | Busyness                             | 0.093680597  |
| wavelet-HHH | gldm       | GrayLevelVariance                    | 8.438778305  |
| wavelet-HHH | gldm       | HighGrayLevelEmphasis                | 99.07432432  |
| wavelet-HHH | gldm       | DependenceEntropy                    | 5.279324312  |
| wavelet-HHH | gldm       | DependenceNonUniformity              | 35.18918919  |
| wavelet-HHH | gldm       | GrayLevelNonUniformity               | 15.91891892  |
| wavelet-HHH | gldm       | SmallDependenceEmphasis              | 0.389492602  |
| wavelet-HHH | gldm       | SmallDependenceHighGrayLevelEmphasis | 41.99157295  |
| wavelet-HHH | gldm       | DependenceNonUniformityNormalized    | 0.237764792  |
| wavelet-HHH | gldm       | LargeDependenceEmphasis              | 8.445945946  |
| wavelet-HHH | gldm       | LargeDependenceLowGrayLevelEmphasis  | 0.117142921  |
| wavelet-HHH | gldm       | DependenceVariance                   | 2.195945946  |
| wavelet-HHH | gldm       | LargeDependenceHighGrayLevelEmphasis | 812.3310811  |
| wavelet-HHH | gldm       | SmallDependenceLowGrayLevelEmphasis  | 0.020322276  |
| wavelet-HHH | gldm       | LowGrayLevelEmphasis                 | 0.028558076  |
| wavelet-HHH | glcm       | JointAverage                         | 9.520459305  |
| wavelet-HHH | glcm       | SumAverage                           | 19.04091861  |
| wavelet-HHH | glcm       | JointEntropy                         | 6.264685638  |
| wavelet-HHH | glcm       | ClusterShade                         | -10.52619291 |
| wavelet-HHH | glcm       | MaximumProbability                   | 0.040613168  |
| wavelet-HHH | glcm       | Idmn                                 | 0.951702792  |
| wavelet-HHH | glcm       | JointEnergy                          | 0.016080161  |
| wavelet-HHH | glcm       | Contrast                             | 18.18408053  |
| wavelet-HHH | glcm       | DifferenceEntropy                    | 3.1065812    |
| wavelet-HHH | glcm       | InverseVariance                      | 0.263027174  |
| wavelet-HHH | glcm       | DifferenceVariance                   | 6.689035855  |
| wavelet-HHH | glcm       | Idn                                  | 0.854336789  |
| wavelet-HHH | glcm       | Idm                                  | 0.248322802  |
| wavelet-HHH | glcm       | Correlation                          | -0.035880705 |
| wavelet-HHH | glcm       | Autocorrelation                      | 90.36215792  |
| wavelet-HHH | glcm       | SumEntropy                           | 3.870425287  |
| wavelet-HHH | glcm       | SumSquares                           | 8.813260125  |
| wavelet-HHH | glcm       | ClusterProminence                    | 941.6372081  |
| wavelet-HHH | glcm       | Imc2                                 | 0.872736512  |
| wavelet-HHH | glcm       | Imc1                                 | -0.208078266 |
| wavelet-HHH | glcm       | DifferenceAverage                    | 3.360750254  |
| wavelet-HHH | glcm       | Id                                   | 0.341303751  |
| wavelet-HHH | glcm       | ClusterTendency                      | 17.06895997  |
| wavelet-HHH | firstorder | InterquartileRange                   | 85.33151796  |
| wavelet-HHH | firstorder | Skewness                             | -0.124815705 |
| wavelet-HHH | firstorder | Uniformity                           | 0.107560263  |
| wavelet-HHH | firstorder | Median                               | 0.484671588  |
| wavelet-HHH | firstorder | Energy                               | 769158.7602  |
| wavelet-HHH | firstorder | RobustMeanAbsoluteDeviation          | 36.13127959  |
| wavelet-HHH | firstorder | MeanAbsoluteDeviation                | 55.40045538  |
| wavelet-HHH | firstorder | TotalEnergy                          | 20767286.53  |
| wavelet-HHH | firstorder | Maximum                              | 205.1984167  |
| wavelet-HHH | firstorder | RootMeanSquared                      | 72.0903506   |
| wavelet-HHH | firstorder | 90Percentile                         | 95.60715432  |
| wavelet-HHH | firstorder | Minimum                              | -208.810421  |
| wavelet-HHH | firstorder | Entropy                              | 3.489303566  |
| wavelet-HHH | firstorder | Range                                | 414.0088377  |

|             |            |                                      |              |
|-------------|------------|--------------------------------------|--------------|
| wavelet-HHH | firstorder | Variance                             | 5197.018553  |
| wavelet-HHH | firstorder | 10Percentile                         | -85.52879581 |
| wavelet-HHH | firstorder | Kurtosis                             | 3.395890728  |
| wavelet-HHH | firstorder | Mean                                 | 0.00986166   |
| wavelet-HHH | glrlm      | ShortRunLowGrayLevelEmphasis         | 0.029008812  |
| wavelet-HHH | glrlm      | GrayLevelVariance                    | 8.780572921  |
| wavelet-HHH | glrlm      | LowGrayLevelRunEmphasis              | 0.029552549  |
| wavelet-HHH | glrlm      | GrayLevelNonUniformityNormalized     | 0.104592646  |
| wavelet-HHH | glrlm      | RunVariance                          | 0.069723228  |
| wavelet-HHH | glrlm      | GrayLevelNonUniformity               | 14.5920671   |
| wavelet-HHH | glrlm      | LongRunEmphasis                      | 1.19825329   |
| wavelet-HHH | glrlm      | ShortRunHighGrayLevelEmphasis        | 95.25341778  |
| wavelet-HHH | glrlm      | RunLengthNonUniformity               | 124.8781178  |
| wavelet-HHH | glrlm      | ShortRunEmphasis                     | 0.957022676  |
| wavelet-HHH | glrlm      | LongRunHighGrayLevelEmphasis         | 118.1885176  |
| wavelet-HHH | glrlm      | RunPercentage                        | 0.942307692  |
| wavelet-HHH | glrlm      | LongRunLowGrayLevelEmphasis          | 0.032009005  |
| wavelet-HHH | glrlm      | RunEntropy                           | 3.769640394  |
| wavelet-HHH | glrlm      | HighGrayLevelRunEmphasis             | 99.32782193  |
| wavelet-HHH | glrlm      | RunLengthNonUniformityNormalized     | 0.894325519  |
| wavelet-HHH | glszm      | GrayLevelVariance                    | 14.73940828  |
| wavelet-HHH | glszm      | ZoneVariance                         | 10.38485207  |
| wavelet-HHH | glszm      | GrayLevelNonUniformityNormalized     | 0.078343195  |
| wavelet-HHH | glszm      | SizeZoneNonUniformityNormalized      | 0.433372781  |
| wavelet-HHH | glszm      | SizeZoneNonUniformity                | 28.16923077  |
| wavelet-HHH | glszm      | GrayLevelNonUniformity               | 5.092307692  |
| wavelet-HHH | glszm      | LargeAreaEmphasis                    | 15.56923077  |
| wavelet-HHH | glszm      | SmallAreaHighGrayLevelEmphasis       | 77.09994603  |
| wavelet-HHH | glszm      | ZonePercentage                       | 0.439189189  |
| wavelet-HHH | glszm      | LargeAreaLowGrayLevelEmphasis        | 0.212965851  |
| wavelet-HHH | glszm      | LargeAreaHighGrayLevelEmphasis       | 1515.707692  |
| wavelet-HHH | glszm      | HighGrayLevelZoneEmphasis            | 106.0153846  |
| wavelet-HHH | glszm      | SmallAreaEmphasis                    | 0.682985148  |
| wavelet-HHH | glszm      | LowGrayLevelZoneEmphasis             | 0.048218111  |
| wavelet-HHH | glszm      | ZoneEntropy                          | 4.902460313  |
| wavelet-HHH | glszm      | SmallAreaLowGrayLevelEmphasis        | 0.043299605  |
| wavelet-HHH | ngtdm      | Coarseness                           | 0.042608067  |
| wavelet-HHH | ngtdm      | Complexity                           | 222.6678832  |
| wavelet-HHH | ngtdm      | Strength                             | 2.924006261  |
| wavelet-HHH | ngtdm      | Contrast                             | 0.164785663  |
| wavelet-HHH | ngtdm      | Busyness                             | 0.156309993  |
| wavelet-HLL | gldm       | GrayLevelVariance                    | 21.69649379  |
| wavelet-HLL | gldm       | HighGrayLevelEmphasis                | 160.5540541  |
| wavelet-HLL | gldm       | DependenceEntropy                    | 5.784905477  |
| wavelet-HLL | gldm       | DependenceNonUniformity              | 33.32432432  |
| wavelet-HLL | gldm       | GrayLevelNonUniformity               | 9.635135135  |
| wavelet-HLL | gldm       | SmallDependenceEmphasis              | 0.418630761  |
| wavelet-HLL | gldm       | SmallDependenceHighGrayLevelEmphasis | 79.61196069  |
| wavelet-HLL | gldm       | DependenceNonUniformityNormalized    | 0.225164354  |
| wavelet-HLL | gldm       | LargeDependenceEmphasis              | 8.432432432  |
| wavelet-HLL | gldm       | LargeDependenceLowGrayLevelEmphasis  | 0.122429261  |
| wavelet-HLL | gldm       | DependenceVariance                   | 2.11468225   |
| wavelet-HLL | gldm       | LargeDependenceHighGrayLevelEmphasis | 1179.608108  |
| wavelet-HLL | gldm       | SmallDependenceLowGrayLevelEmphasis  | 0.018381114  |
| wavelet-HLL | gldm       | LowGrayLevelEmphasis                 | 0.025481333  |
| wavelet-HLL | glcm       | JointAverage                         | 11.61258911  |
| wavelet-HLL | glcm       | SumAverage                           | 23.22517823  |
| wavelet-HLL | glcm       | JointEntropy                         | 6.842451492  |
| wavelet-HLL | glcm       | ClusterShade                         | 80.68038814  |

|             |            |                                  |              |
|-------------|------------|----------------------------------|--------------|
| wavelet-HLL | glcm       | MaximumProbability               | 0.024868417  |
| wavelet-HLL | glcm       | Idmn                             | 0.951679367  |
| wavelet-HLL | glcm       | JointEnergy                      | 0.009994718  |
| wavelet-HLL | glcm       | Contrast                         | 30.01097071  |
| wavelet-HLL | glcm       | DifferenceEntropy                | 3.396903854  |
| wavelet-HLL | glcm       | InverseVariance                  | 0.209694102  |
| wavelet-HLL | glcm       | DifferenceVariance               | 11.31738115  |
| wavelet-HLL | glcm       | Idn                              | 0.856166919  |
| wavelet-HLL | glcm       | Idm                              | 0.216677128  |
| wavelet-HLL | glcm       | Correlation                      | 0.260134557  |
| wavelet-HLL | glcm       | Autocorrelation                  | 140.3876656  |
| wavelet-HLL | glcm       | SumEntropy                       | 4.582182903  |
| wavelet-HLL | glcm       | SumSquares                       | 20.51863631  |
| wavelet-HLL | glcm       | ClusterProminence                | 6577.425358  |
| wavelet-HLL | glcm       | Imc2                             | 0.9551599    |
| wavelet-HLL | glcm       | Imc1                             | -0.30387981  |
| wavelet-HLL | glcm       | DifferenceAverage                | 4.254357581  |
| wavelet-HLL | glcm       | Id                               | 0.310025232  |
| wavelet-HLL | glcm       | ClusterTendency                  | 52.06357454  |
| wavelet-HLL | firstorder | InterquartileRange               | 179.0653366  |
| wavelet-HLL | firstorder | Skewness                         | 0.164003283  |
| wavelet-HLL | firstorder | Uniformity                       | 0.065102264  |
| wavelet-HLL | firstorder | Median                           | -44.53693376 |
| wavelet-HLL | firstorder | Energy                           | 2269035.063  |
| wavelet-HLL | firstorder | RobustMeanAbsoluteDeviation      | 73.41729204  |
| wavelet-HLL | firstorder | MeanAbsoluteDeviation            | 97.58621626  |
| wavelet-HLL | firstorder | TotalEnergy                      | 61263946.7   |
| wavelet-HLL | firstorder | Maximum                          | 243.3761955  |
| wavelet-HLL | firstorder | RootMeanSquared                  | 123.8196995  |
| wavelet-HLL | firstorder | 90Percentile                     | 100.4803782  |
| wavelet-HLL | firstorder | Minimum                          | -319.3087036 |
| wavelet-HLL | firstorder | Entropy                          | 4.084390933  |
| wavelet-HLL | firstorder | Range                            | 562.6848991  |
| wavelet-HLL | firstorder | Variance                         | 13535.0095   |
| wavelet-HLL | firstorder | 10Percentile                     | -196.1012611 |
| wavelet-HLL | firstorder | Kurtosis                         | 2.453633081  |
| wavelet-HLL | firstorder | Mean                             | -42.38287969 |
| wavelet-HLL | glrlm      | ShortRunLowGrayLevelEmphasis     | 0.025705559  |
| wavelet-HLL | glrlm      | GrayLevelVariance                | 22.04893159  |
| wavelet-HLL | glrlm      | LowGrayLevelRunEmphasis          | 0.026274801  |
| wavelet-HLL | glrlm      | GrayLevelNonUniformityNormalized | 0.064321788  |
| wavelet-HLL | glrlm      | RunVariance                      | 0.063521005  |
| wavelet-HLL | glrlm      | GrayLevelNonUniformity           | 8.966361108  |
| wavelet-HLL | glrlm      | LongRunEmphasis                  | 1.192887428  |
| wavelet-HLL | glrlm      | ShortRunHighGrayLevelEmphasis    | 155.8444288  |
| wavelet-HLL | glrlm      | RunLengthNonUniformity           | 123.9945996  |
| wavelet-HLL | glrlm      | ShortRunEmphasis                 | 0.954911453  |
| wavelet-HLL | glrlm      | LongRunHighGrayLevelEmphasis     | 188.5024292  |
| wavelet-HLL | glrlm      | RunPercentage                    | 0.941787942  |
| wavelet-HLL | glrlm      | LongRunLowGrayLevelEmphasis      | 0.028758937  |
| wavelet-HLL | glrlm      | RunEntropy                       | 4.342366144  |
| wavelet-HLL | glrlm      | HighGrayLevelRunEmphasis         | 162.0162678  |
| wavelet-HLL | glrlm      | RunLengthNonUniformityNormalized | 0.888609331  |
| wavelet-HLL | glszm      | GrayLevelVariance                | 28.81333069  |
| wavelet-HLL | glszm      | ZoneVariance                     | 4.61257687   |
| wavelet-HLL | glszm      | GrayLevelNonUniformityNormalized | 0.057329895  |
| wavelet-HLL | glszm      | SizeZoneNonUniformityNormalized  | 0.480261853  |
| wavelet-HLL | glszm      | SizeZoneNonUniformity            | 34.09859155  |
| wavelet-HLL | glszm      | GrayLevelNonUniformity           | 4.070422535  |



|             |            |                                      |              |
|-------------|------------|--------------------------------------|--------------|
| wavelet-HLL | glszm      | LargeAreaEmphasis                    | 8.957746479  |
| wavelet-HLL | glszm      | SmallAreaHighGrayLevelEmphasis       | 143.6319691  |
| wavelet-HLL | glszm      | ZonePercentage                       | 0.47972973   |
| wavelet-HLL | glszm      | LargeAreaLowGrayLevelEmphasis        | 0.14035451   |
| wavelet-HLL | glszm      | LargeAreaHighGrayLevelEmphasis       | 1217.183099  |
| wavelet-HLL | glszm      | HighGrayLevelZoneEmphasis            | 184.8873239  |
| wavelet-HLL | glszm      | SmallAreaEmphasis                    | 0.717349037  |
| wavelet-HLL | glszm      | LowGrayLevelZoneEmphasis             | 0.039938839  |
| wavelet-HLL | glszm      | ZoneEntropy                          | 5.117575112  |
| wavelet-HLL | glszm      | SmallAreaLowGrayLevelEmphasis        | 0.036585893  |
| wavelet-HLL | ngtdm      | Coarseness                           | 0.039646709  |
| wavelet-HLL | ngtdm      | Complexity                           | 504.2642424  |
| wavelet-HLL | ngtdm      | Strength                             | 5.724367253  |
| wavelet-HLL | ngtdm      | Contrast                             | 0.309412985  |
| wavelet-HLL | ngtdm      | Busyness                             | 0.134337506  |
| wavelet-LHL | gldm       | GrayLevelVariance                    | 42.63636779  |
| wavelet-LHL | gldm       | HighGrayLevelEmphasis                | 465.9391892  |
| wavelet-LHL | gldm       | DependenceEntropy                    | 5.710213018  |
| wavelet-LHL | gldm       | DependenceNonUniformity              | 47.22972973  |
| wavelet-LHL | gldm       | GrayLevelNonUniformity               | 7.608108108  |
| wavelet-LHL | gldm       | SmallDependenceEmphasis              | 0.511415165  |
| wavelet-LHL | gldm       | SmallDependenceHighGrayLevelEmphasis | 228.0713007  |
| wavelet-LHL | gldm       | DependenceNonUniformityNormalized    | 0.319119795  |
| wavelet-LHL | gldm       | LargeDependenceEmphasis              | 4.783783784  |
| wavelet-LHL | gldm       | LargeDependenceLowGrayLevelEmphasis  | 0.032933266  |
| wavelet-LHL | gldm       | DependenceVariance                   | 0.997078159  |
| wavelet-LHL | gldm       | LargeDependenceHighGrayLevelEmphasis | 2402.358108  |
| wavelet-LHL | gldm       | SmallDependenceLowGrayLevelEmphasis  | 0.009837171  |
| wavelet-LHL | gldm       | LowGrayLevelEmphasis                 | 0.013685991  |
| wavelet-LHL | glcm       | JointAverage                         | 20.24448776  |
| wavelet-LHL | glcm       | SumAverage                           | 40.48897552  |
| wavelet-LHL | glcm       | JointEntropy                         | 7.12183403   |
| wavelet-LHL | glcm       | ClusterShade                         | -348.9381312 |
| wavelet-LHL | glcm       | MaximumProbability                   | 0.021087329  |
| wavelet-LHL | glcm       | Idmn                                 | 0.938627517  |
| wavelet-LHL | glcm       | JointEnergy                          | 0.007999765  |
| wavelet-LHL | glcm       | Contrast                             | 81.72614183  |
| wavelet-LHL | glcm       | DifferenceEntropy                    | 3.989198058  |
| wavelet-LHL | glcm       | InverseVariance                      | 0.150332378  |
| wavelet-LHL | glcm       | DifferenceVariance                   | 30.14222684  |
| wavelet-LHL | glcm       | Idn                                  | 0.840819569  |
| wavelet-LHL | glcm       | Idm                                  | 0.148618502  |
| wavelet-LHL | glcm       | Correlation                          | 0.014957506  |
| wavelet-LHL | glcm       | Autocorrelation                      | 410.6762671  |
| wavelet-LHL | glcm       | SumEntropy                           | 4.826265176  |
| wavelet-LHL | glcm       | SumSquares                           | 41.69093514  |
| wavelet-LHL | glcm       | ClusterProminence                    | 25291.47332  |
| wavelet-LHL | glcm       | Imc2                                 | 0.985728037  |
| wavelet-LHL | glcm       | Imc1                                 | -0.404625875 |
| wavelet-LHL | glcm       | DifferenceAverage                    | 6.979161281  |
| wavelet-LHL | glcm       | Id                                   | 0.235861289  |
| wavelet-LHL | glcm       | ClusterTendency                      | 85.03759871  |
| wavelet-LHL | firstorder | InterquartileRange                   | 210.9809952  |
| wavelet-LHL | firstorder | Skewness                             | -0.717844159 |
| wavelet-LHL | firstorder | Uniformity                           | 0.051406136  |
| wavelet-LHL | firstorder | Median                               | 4.544265586  |
| wavelet-LHL | firstorder | Energy                               | 4005391.882  |
| wavelet-LHL | firstorder | RobustMeanAbsoluteDeviation          | 87.59413036  |
| wavelet-LHL | firstorder | MeanAbsoluteDeviation                | 128.950566   |

|             |            |                                      |              |
|-------------|------------|--------------------------------------|--------------|
| wavelet-LHL | firstorder | TotalEnergy                          | 108145580.8  |
| wavelet-LHL | firstorder | Maximum                              | 281.9274238  |
| wavelet-LHL | firstorder | RootMeanSquared                      | 164.5097525  |
| wavelet-LHL | firstorder | 90Percentile                         | 149.6482475  |
| wavelet-LHL | firstorder | Minimum                              | -509.8309151 |
| wavelet-LHL | firstorder | Entropy                              | 4.48453975   |
| wavelet-LHL | firstorder | Range                                | 791.758339   |
| wavelet-LHL | firstorder | Variance                             | 26549.49596  |
| wavelet-LHL | firstorder | 10Percentile                         | -234.0554604 |
| wavelet-LHL | firstorder | Kurtosis                             | 3.336291044  |
| wavelet-LHL | firstorder | Mean                                 | -22.67074544 |
| wavelet-LHL | glrlm      | ShortRunLowGrayLevelEmphasis         | 0.013802664  |
| wavelet-LHL | glrlm      | GrayLevelVariance                    | 43.19650255  |
| wavelet-LHL | glrlm      | LowGrayLevelRunEmphasis              | 0.013974635  |
| wavelet-LHL | glrlm      | GrayLevelNonUniformityNormalized     | 0.050777234  |
| wavelet-LHL | glrlm      | RunVariance                          | 0.039582238  |
| wavelet-LHL | glrlm      | GrayLevelNonUniformity               | 7.241784732  |
| wavelet-LHL | glrlm      | LongRunEmphasis                      | 1.117340681  |
| wavelet-LHL | glrlm      | ShortRunHighGrayLevelEmphasis        | 450.9476424  |
| wavelet-LHL | glrlm      | RunLengthNonUniformity               | 132.7296225  |
| wavelet-LHL | glrlm      | ShortRunEmphasis                     | 0.972488042  |
| wavelet-LHL | glrlm      | LongRunHighGrayLevelEmphasis         | 523.6065121  |
| wavelet-LHL | glrlm      | RunPercentage                        | 0.963617464  |
| wavelet-LHL | glrlm      | LongRunLowGrayLevelEmphasis          | 0.014675599  |
| wavelet-LHL | glrlm      | RunEntropy                           | 4.636202078  |
| wavelet-LHL | glrlm      | HighGrayLevelRunEmphasis             | 464.631589   |
| wavelet-LHL | glrlm      | RunLengthNonUniformityNormalized     | 0.930233179  |
| wavelet-LHL | glszm      | GrayLevelVariance                    | 50.82024691  |
| wavelet-LHL | glszm      | ZoneVariance                         | 1.562469136  |
| wavelet-LHL | glszm      | GrayLevelNonUniformityNormalized     | 0.045679012  |
| wavelet-LHL | glszm      | SizeZoneNonUniformityNormalized      | 0.478518519  |
| wavelet-LHL | glszm      | SizeZoneNonUniformity                | 43.06666667  |
| wavelet-LHL | glszm      | GrayLevelNonUniformity               | 4.111111111  |
| wavelet-LHL | glszm      | LargeAreaEmphasis                    | 4.266666667  |
| wavelet-LHL | glszm      | SmallAreaHighGrayLevelEmphasis       | 315.7162513  |
| wavelet-LHL | glszm      | ZonePercentage                       | 0.608108108  |
| wavelet-LHL | glszm      | LargeAreaLowGrayLevelEmphasis        | 0.034099456  |
| wavelet-LHL | glszm      | LargeAreaHighGrayLevelEmphasis       | 2123.3       |
| wavelet-LHL | glszm      | HighGrayLevelZoneEmphasis            | 449.0444444  |
| wavelet-LHL | glszm      | SmallAreaEmphasis                    | 0.717529998  |
| wavelet-LHL | glszm      | LowGrayLevelZoneEmphasis             | 0.018051263  |
| wavelet-LHL | glszm      | ZoneEntropy                          | 5.46586758   |
| wavelet-LHL | glszm      | SmallAreaLowGrayLevelEmphasis        | 0.01514573   |
| wavelet-LHL | ngtdm      | Coarseness                           | 0.03041885   |
| wavelet-LHL | ngtdm      | Complexity                           | 1688.893836  |
| wavelet-LHL | ngtdm      | Strength                             | 8.908473504  |
| wavelet-LHL | ngtdm      | Contrast                             | 0.603779602  |
| wavelet-LHL | ngtdm      | Busyness                             | 0.060399288  |
| wavelet-LHH | gldm       | GrayLevelVariance                    | 16.51734843  |
| wavelet-LHH | gldm       | HighGrayLevelEmphasis                | 225.2027027  |
| wavelet-LHH | gldm       | DependenceEntropy                    | 5.229960272  |
| wavelet-LHH | gldm       | DependenceNonUniformity              | 46.63513514  |
| wavelet-LHH | gldm       | GrayLevelNonUniformity               | 11.41891892  |
| wavelet-LHH | gldm       | SmallDependenceEmphasis              | 0.520576201  |
| wavelet-LHH | gldm       | SmallDependenceHighGrayLevelEmphasis | 123.5307376  |
| wavelet-LHH | gldm       | DependenceNonUniformityNormalized    | 0.315102264  |
| wavelet-LHH | gldm       | LargeDependenceEmphasis              | 4.743243243  |
| wavelet-LHH | gldm       | LargeDependenceLowGrayLevelEmphasis  | 0.033686912  |
| wavelet-LHH | gldm       | DependenceVariance                   | 0.956537619  |

|             |            |                                      |              |
|-------------|------------|--------------------------------------|--------------|
| wavelet-LHH | gldm       | LargeDependenceHighGrayLevelEmphasis | 1058.959459  |
| wavelet-LHH | gldm       | SmallDependenceLowGrayLevelEmphasis  | 0.011801022  |
| wavelet-LHH | gldm       | LowGrayLevelEmphasis                 | 0.014465149  |
| wavelet-LHH | glcm       | JointAverage                         | 14.50422262  |
| wavelet-LHH | glcm       | SumAverage                           | 29.00844525  |
| wavelet-LHH | glcm       | JointEntropy                         | 6.785664694  |
| wavelet-LHH | glcm       | ClusterShade                         | -44.88479029 |
| wavelet-LHH | glcm       | MaximumProbability                   | 0.025944054  |
| wavelet-LHH | glcm       | Idmn                                 | 0.948128562  |
| wavelet-LHH | glcm       | JointEnergy                          | 0.010474882  |
| wavelet-LHH | glcm       | Contrast                             | 39.01517561  |
| wavelet-LHH | glcm       | DifferenceEntropy                    | 3.509665618  |
| wavelet-LHH | glcm       | InverseVariance                      | 0.210705274  |
| wavelet-LHH | glcm       | DifferenceVariance                   | 14.96373781  |
| wavelet-LHH | glcm       | Idn                                  | 0.851266502  |
| wavelet-LHH | glcm       | Idm                                  | 0.183485006  |
| wavelet-LHH | glcm       | Correlation                          | -0.020340399 |
| wavelet-LHH | glcm       | Autocorrelation                      | 210.0301219  |
| wavelet-LHH | glcm       | SumEntropy                           | 4.345693009  |
| wavelet-LHH | glcm       | SumSquares                           | 19.15735826  |
| wavelet-LHH | glcm       | ClusterProminence                    | 5138.85194   |
| wavelet-LHH | glcm       | Imc2                                 | 0.955367608  |
| wavelet-LHH | glcm       | Imc1                                 | -0.307858525 |
| wavelet-LHH | glcm       | DifferenceAverage                    | 4.826872541  |
| wavelet-LHH | glcm       | Id                                   | 0.277706357  |
| wavelet-LHH | glcm       | ClusterTendency                      | 37.61425745  |
| wavelet-LHH | firstorder | InterquartileRange                   | 120.7578905  |
| wavelet-LHH | firstorder | Skewness                             | -0.164155158 |
| wavelet-LHH | firstorder | Uniformity                           | 0.077154858  |
| wavelet-LHH | firstorder | Median                               | -5.411758607 |
| wavelet-LHH | firstorder | Energy                               | 1536737.241  |
| wavelet-LHH | firstorder | RobustMeanAbsoluteDeviation          | 52.33470872  |
| wavelet-LHH | firstorder | MeanAbsoluteDeviation                | 78.82748628  |
| wavelet-LHH | firstorder | TotalEnergy                          | 41491905.51  |
| wavelet-LHH | firstorder | Maximum                              | 268.4471017  |
| wavelet-LHH | firstorder | RootMeanSquared                      | 101.898772   |
| wavelet-LHH | firstorder | 90Percentile                         | 133.8374287  |
| wavelet-LHH | firstorder | Minimum                              | -343.6808815 |
| wavelet-LHH | firstorder | Entropy                              | 3.947938331  |
| wavelet-LHH | firstorder | Range                                | 612.1279832  |
| wavelet-LHH | firstorder | Variance                             | 10378.03404  |
| wavelet-LHH | firstorder | 10Percentile                         | -121.7003009 |
| wavelet-LHH | firstorder | Kurtosis                             | 3.722516098  |
| wavelet-LHH | firstorder | Mean                                 | -2.307746825 |
| wavelet-LHH | glrlm      | ShortRunLowGrayLevelEmphasis         | 0.01466633   |
| wavelet-LHH | glrlm      | GrayLevelVariance                    | 16.86884842  |
| wavelet-LHH | glrlm      | LowGrayLevelRunEmphasis              | 0.014816357  |
| wavelet-LHH | glrlm      | GrayLevelNonUniformityNormalized     | 0.076102616  |
| wavelet-LHH | glrlm      | RunVariance                          | 0.03738694   |
| wavelet-LHH | glrlm      | GrayLevelNonUniformity               | 10.85241304  |
| wavelet-LHH | glrlm      | LongRunEmphasis                      | 1.115870051  |
| wavelet-LHH | glrlm      | ShortRunHighGrayLevelEmphasis        | 219.2331534  |
| wavelet-LHH | glrlm      | RunLengthNonUniformity               | 132.5187928  |
| wavelet-LHH | glrlm      | ShortRunEmphasis                     | 0.971656357  |
| wavelet-LHH | glrlm      | LongRunHighGrayLevelEmphasis         | 250.8240547  |
| wavelet-LHH | glrlm      | RunPercentage                        | 0.963617464  |
| wavelet-LHH | glrlm      | LongRunLowGrayLevelEmphasis          | 0.015427556  |
| wavelet-LHH | glrlm      | RunEntropy                           | 4.124755475  |
| wavelet-LHH | glrlm      | HighGrayLevelRunEmphasis             | 225.4390372  |

|             |       |                                      |              |
|-------------|-------|--------------------------------------|--------------|
| wavelet-LHH | gllm  | RunLengthNonUniformityNormalized     | 0.92834911   |
| wavelet-LHH | glszm | GrayLevelVariance                    | 22.77221074  |
| wavelet-LHH | glszm | ZoneVariance                         | 1.853305785  |
| wavelet-LHH | glszm | GrayLevelNonUniformityNormalized     | 0.065857438  |
| wavelet-LHH | glszm | SizeZoneNonUniformityNormalized      | 0.520661157  |
| wavelet-LHH | glszm | SizeZoneNonUniformity                | 45.81818182  |
| wavelet-LHH | glszm | GrayLevelNonUniformity               | 5.795454545  |
| wavelet-LHH | glszm | LargeAreaEmphasis                    | 4.681818182  |
| wavelet-LHH | glszm | SmallAreaHighGrayLevelEmphasis       | 181.7059383  |
| wavelet-LHH | glszm | ZonePercentage                       | 0.594594595  |
| wavelet-LHH | glszm | LargeAreaLowGrayLevelEmphasis        | 0.039789299  |
| wavelet-LHH | glszm | LargeAreaHighGrayLevelEmphasis       | 1033.545455  |
| wavelet-LHH | glszm | HighGrayLevelZoneEmphasis            | 233.6818182  |
| wavelet-LHH | glszm | SmallAreaEmphasis                    | 0.748226799  |
| wavelet-LHH | glszm | LowGrayLevelZoneEmphasis             | 0.020606381  |
| wavelet-LHH | glszm | ZoneEntropy                          | 5.058768199  |
| wavelet-LHH | glszm | SmallAreaLowGrayLevelEmphasis        | 0.019114534  |
| wavelet-LHH | ngtdm | Coarseness                           | 0.039709458  |
| wavelet-LHH | ngtdm | Complexity                           | 552.4571425  |
| wavelet-LHH | ngtdm | Strength                             | 5.360488803  |
| wavelet-LHH | ngtdm | Contrast                             | 0.257052143  |
| wavelet-LHH | ngtdm | Busyness                             | 0.090165275  |
| wavelet-LLH | gldm  | GrayLevelVariance                    | 36.70028305  |
| wavelet-LLH | gldm  | HighGrayLevelEmphasis                | 199.9527027  |
| wavelet-LLH | gldm  | DependenceEntropy                    | 5.530177863  |
| wavelet-LLH | gldm  | DependenceNonUniformity              | 37.10810811  |
| wavelet-LLH | gldm  | GrayLevelNonUniformity               | 10.54054054  |
| wavelet-LLH | gldm  | SmallDependenceEmphasis              | 0.452387857  |
| wavelet-LLH | gldm  | SmallDependenceHighGrayLevelEmphasis | 102.0452721  |
| wavelet-LLH | gldm  | DependenceNonUniformityNormalized    | 0.25073046   |
| wavelet-LLH | gldm  | LargeDependenceEmphasis              | 7.216216216  |
| wavelet-LLH | gldm  | LargeDependenceLowGrayLevelEmphasis  | 0.079799668  |
| wavelet-LLH | gldm  | DependenceVariance                   | 1.813732652  |
| wavelet-LLH | gldm  | LargeDependenceHighGrayLevelEmphasis | 1237.317568  |
| wavelet-LLH | gldm  | SmallDependenceLowGrayLevelEmphasis  | 0.011758634  |
| wavelet-LLH | gldm  | LowGrayLevelEmphasis                 | 0.017403749  |
| wavelet-LLH | glcm  | JointAverage                         | 12.45611712  |
| wavelet-LLH | glcm  | SumAverage                           | 24.91223423  |
| wavelet-LLH | glcm  | JointEntropy                         | 6.763166286  |
| wavelet-LLH | glcm  | ClusterShade                         | 1323.57279   |
| wavelet-LLH | glcm  | MaximumProbability                   | 0.027124658  |
| wavelet-LLH | glcm  | ldmn                                 | 0.973983221  |
| wavelet-LLH | glcm  | JointEnergy                          | 0.010799134  |
| wavelet-LLH | glcm  | Contrast                             | 47.84243992  |
| wavelet-LLH | glcm  | DifferenceEntropy                    | 3.597659727  |
| wavelet-LLH | glcm  | InverseVariance                      | 0.187779327  |
| wavelet-LLH | glcm  | DifferenceVariance                   | 21.41023293  |
| wavelet-LLH | glcm  | ldn                                  | 0.896940213  |
| wavelet-LLH | glcm  | ldm                                  | 0.194494269  |
| wavelet-LLH | glcm  | Correlation                          | 0.227534035  |
| wavelet-LLH | glcm  | Autocorrelation                      | 162.1400387  |
| wavelet-LLH | glcm  | SumEntropy                           | 4.473611712  |
| wavelet-LLH | glcm  | SumSquares                           | 30.89931183  |
| wavelet-LLH | glcm  | ClusterProminence                    | 60281.88237  |
| wavelet-LLH | glcm  | lmc2                                 | 0.962564594  |
| wavelet-LLH | glcm  | lmc1                                 | -0.325226085 |
| wavelet-LLH | glcm  | DifferenceAverage                    | 5.019922598  |
| wavelet-LLH | glcm  | ld                                   | 0.288955393  |
| wavelet-LLH | glcm  | ClusterTendency                      | 75.75480741  |

|             |            |                                  |              |
|-------------|------------|----------------------------------|--------------|
| wavelet-LLH | firstorder | InterquartileRange               | 127.6197584  |
| wavelet-LLH | firstorder | Skewness                         | 2.096207219  |
| wavelet-LLH | firstorder | Uniformity                       | 0.071219869  |
| wavelet-LLH | firstorder | Median                           | 13.09862989  |
| wavelet-LLH | firstorder | Energy                           | 3555109.869  |
| wavelet-LLH | firstorder | RobustMeanAbsoluteDeviation      | 58.61899406  |
| wavelet-LLH | firstorder | MeanAbsoluteDeviation            | 101.2644913  |
| wavelet-LLH | firstorder | TotalEnergy                      | 95987966.45  |
| wavelet-LLH | firstorder | Maximum                          | 724.0434263  |
| wavelet-LLH | firstorder | RootMeanSquared                  | 154.987137   |
| wavelet-LLH | firstorder | 90Percentile                     | 163.0911207  |
| wavelet-LLH | firstorder | Minimum                          | -251.9846923 |
| wavelet-LLH | firstorder | Entropy                          | 4.121834672  |
| wavelet-LLH | firstorder | Range                            | 976.0281185  |
| wavelet-LLH | firstorder | Variance                         | 22974.47404  |
| wavelet-LLH | firstorder | 10Percentile                     | -123.938655  |
| wavelet-LLH | firstorder | Kurtosis                         | 10.01835482  |
| wavelet-LLH | firstorder | Mean                             | 32.35024857  |
| wavelet-LLH | glrlm      | ShortRunLowGrayLevelEmphasis     | 0.017367104  |
| wavelet-LLH | glrlm      | GrayLevelVariance                | 37.63903199  |
| wavelet-LLH | glrlm      | LowGrayLevelRunEmphasis          | 0.017786358  |
| wavelet-LLH | glrlm      | GrayLevelNonUniformityNormalized | 0.069737666  |
| wavelet-LLH | glrlm      | RunVariance                      | 0.056283247  |
| wavelet-LLH | glrlm      | GrayLevelNonUniformity           | 9.793843954  |
| wavelet-LLH | glrlm      | LongRunEmphasis                  | 1.17022061   |
| wavelet-LLH | glrlm      | ShortRunHighGrayLevelEmphasis    | 195.0616874  |
| wavelet-LLH | glrlm      | RunLengthNonUniformity           | 127.10658    |
| wavelet-LLH | glrlm      | ShortRunEmphasis                 | 0.960622806  |
| wavelet-LLH | glrlm      | LongRunHighGrayLevelEmphasis     | 230.6501615  |
| wavelet-LLH | glrlm      | RunPercentage                    | 0.949064449  |
| wavelet-LLH | glrlm      | LongRunLowGrayLevelEmphasis      | 0.019532612  |
| wavelet-LLH | glrlm      | RunEntropy                       | 4.341738952  |
| wavelet-LLH | glrlm      | HighGrayLevelRunEmphasis         | 201.6479607  |
| wavelet-LLH | glrlm      | RunLengthNonUniformityNormalized | 0.903084131  |
| wavelet-LLH | glszm      | GrayLevelVariance                | 49.31068739  |
| wavelet-LLH | glszm      | ZoneVariance                     | 4.363723762  |
| wavelet-LLH | glszm      | GrayLevelNonUniformityNormalized | 0.062009293  |
| wavelet-LLH | glszm      | SizeZoneNonUniformityNormalized  | 0.48149335   |
| wavelet-LLH | glszm      | SizeZoneNonUniformity            | 38.03797468  |
| wavelet-LLH | glszm      | GrayLevelNonUniformity           | 4.898734177  |
| wavelet-LLH | glszm      | LargeAreaEmphasis                | 7.873417722  |
| wavelet-LLH | glszm      | SmallAreaHighGrayLevelEmphasis   | 166.5888187  |
| wavelet-LLH | glszm      | ZonePercentage                   | 0.533783784  |
| wavelet-LLH | glszm      | LargeAreaLowGrayLevelEmphasis    | 0.078667247  |
| wavelet-LLH | glszm      | LargeAreaHighGrayLevelEmphasis   | 1435.481013  |
| wavelet-LLH | glszm      | HighGrayLevelZoneEmphasis        | 220.2911392  |
| wavelet-LLH | glszm      | SmallAreaEmphasis                | 0.720782373  |
| wavelet-LLH | glszm      | LowGrayLevelZoneEmphasis         | 0.024015072  |
| wavelet-LLH | glszm      | ZoneEntropy                      | 5.141141869  |
| wavelet-LLH | glszm      | SmallAreaLowGrayLevelEmphasis    | 0.020893454  |
| wavelet-LLH | ngtdm      | Coarseness                       | 0.037309483  |
| wavelet-LLH | ngtdm      | Complexity                       | 1204.773912  |
| wavelet-LLH | ngtdm      | Strength                         | 15.22814036  |
| wavelet-LLH | ngtdm      | Contrast                         | 0.398860932  |
| wavelet-LLH | ngtdm      | Busyness                         | 0.087936596  |
| wavelet-LLL | gldm       | GrayLevelVariance                | 252.1599708  |
| wavelet-LLL | gldm       | HighGrayLevelEmphasis            | 1188.189189  |
| wavelet-LLL | gldm       | DependenceEntropy                | 6.033688038  |
| wavelet-LLL | gldm       | DependenceNonUniformity          | 63.43243243  |

|             |            |                                      |              |
|-------------|------------|--------------------------------------|--------------|
| wavelet-LLL | gldm       | GrayLevelNonUniformity               | 3.513513514  |
| wavelet-LLL | gldm       | SmallDependenceEmphasis              | 0.653387763  |
| wavelet-LLL | gldm       | SmallDependenceHighGrayLevelEmphasis | 892.8943788  |
| wavelet-LLL | gldm       | DependenceNonUniformityNormalized    | 0.428597516  |
| wavelet-LLL | gldm       | LargeDependenceEmphasis              | 2.972972973  |
| wavelet-LLL | gldm       | LargeDependenceLowGrayLevelEmphasis  | 0.01822821   |
| wavelet-LLL | gldm       | DependenceVariance                   | 0.515704894  |
| wavelet-LLL | gldm       | LargeDependenceHighGrayLevelEmphasis | 2624.72973   |
| wavelet-LLL | gldm       | SmallDependenceLowGrayLevelEmphasis  | 0.009097312  |
| wavelet-LLL | gldm       | LowGrayLevelEmphasis                 | 0.010220721  |
| wavelet-LLL | glcm       | JointAverage                         | 32.21402089  |
| wavelet-LLL | glcm       | SumAverage                           | 64.42804179  |
| wavelet-LLL | glcm       | JointEntropy                         | 7.447632441  |
| wavelet-LLL | glcm       | ClusterShade                         | 8122.153668  |
| wavelet-LLL | glcm       | MaximumProbability                   | 0.011640373  |
| wavelet-LLL | glcm       | Idmn                                 | 0.970148908  |
| wavelet-LLL | glcm       | JointEnergy                          | 0.005966349  |
| wavelet-LLL | glcm       | Contrast                             | 173.8765256  |
| wavelet-LLL | glcm       | DifferenceEntropy                    | 4.427955032  |
| wavelet-LLL | glcm       | InverseVariance                      | 0.086950243  |
| wavelet-LLL | glcm       | DifferenceVariance                   | 55.78446215  |
| wavelet-LLL | glcm       | Idn                                  | 0.881205833  |
| wavelet-LLL | glcm       | Idm                                  | 0.088635599  |
| wavelet-LLL | glcm       | Correlation                          | 0.623111033  |
| wavelet-LLL | glcm       | Autocorrelation                      | 1180.847576  |
| wavelet-LLL | glcm       | SumEntropy                           | 5.801736025  |
| wavelet-LLL | glcm       | SumSquares                           | 229.7815835  |
| wavelet-LLL | glcm       | ClusterProminence                    | 1456199.859  |
| wavelet-LLL | glcm       | Imc2                                 | 0.999609146  |
| wavelet-LLL | glcm       | Imc1                                 | -0.651337467 |
| wavelet-LLL | glcm       | DifferenceAverage                    | 10.53680736  |
| wavelet-LLL | glcm       | Id                                   | 0.168522316  |
| wavelet-LLL | glcm       | ClusterTendency                      | 745.2498085  |
| wavelet-LLL | firstorder | InterquartileRange                   | 528.9094462  |
| wavelet-LLL | firstorder | Skewness                             | 0.597140759  |
| wavelet-LLL | firstorder | Uniformity                           | 0.023739956  |
| wavelet-LLL | firstorder | Median                               | -1462.349455 |
| wavelet-LLL | firstorder | Energy                               | 312140730.4  |
| wavelet-LLL | firstorder | RobustMeanAbsoluteDeviation          | 229.3876496  |
| wavelet-LLL | firstorder | MeanAbsoluteDeviation                | 322.8697203  |
| wavelet-LLL | firstorder | TotalEnergy                          | 8427799721   |
| wavelet-LLL | firstorder | Maximum                              | -327.6348197 |
| wavelet-LLL | firstorder | RootMeanSquared                      | 1452.259959  |
| wavelet-LLL | firstorder | 90Percentile                         | -804.1794952 |
| wavelet-LLL | firstorder | Minimum                              | -2137.155173 |
| wavelet-LLL | firstorder | Entropy                              | 5.573794695  |
| wavelet-LLL | firstorder | Range                                | 1809.520353  |
| wavelet-LLL | firstorder | Variance                             | 157265.0974  |
| wavelet-LLL | firstorder | 10Percentile                         | -1859.465071 |
| wavelet-LLL | firstorder | Kurtosis                             | 2.721263673  |
| wavelet-LLL | firstorder | Mean                                 | -1397.066173 |
| wavelet-LLL | glrlm      | ShortRunLowGrayLevelEmphasis         | 0.010302345  |
| wavelet-LLL | glrlm      | GrayLevelVariance                    | 253.5174225  |
| wavelet-LLL | glrlm      | LowGrayLevelRunEmphasis              | 0.010366347  |
| wavelet-LLL | glrlm      | GrayLevelNonUniformityNormalized     | 0.023696264  |
| wavelet-LLL | glrlm      | RunVariance                          | 0.021797631  |
| wavelet-LLL | glrlm      | GrayLevelNonUniformity               | 3.430505062  |
| wavelet-LLL | glrlm      | LongRunEmphasis                      | 1.067792538  |
| wavelet-LLL | glrlm      | ShortRunHighGrayLevelEmphasis        | 1184.417312  |

|             |       |                                      |              |
|-------------|-------|--------------------------------------|--------------|
| wavelet-LLL | gllm  | RunLengthNonUniformity               | 138.5350176  |
| wavelet-LLL | gllm  | ShortRunEmphasis                     | 0.983051865  |
| wavelet-LLL | gllm  | LongRunHighGrayLevelEmphasis         | 1250.035878  |
| wavelet-LLL | gllm  | RunPercentage                        | 0.978170478  |
| wavelet-LLL | gllm  | LongRunLowGrayLevelEmphasis          | 0.010622357  |
| wavelet-LLL | gllm  | RunEntropy                           | 5.631592096  |
| wavelet-LLL | gllm  | HighGrayLevelRunEmphasis             | 1197.541025  |
| wavelet-LLL | gllm  | RunLengthNonUniformityNormalized     | 0.956404738  |
| wavelet-LLL | glszm | GrayLevelVariance                    | 274.3296694  |
| wavelet-LLL | glszm | ZoneVariance                         | 0.480661157  |
| wavelet-LLL | glszm | GrayLevelNonUniformityNormalized     | 0.023636364  |
| wavelet-LLL | glszm | SizeZoneNonUniformityNormalized      | 0.601983471  |
| wavelet-LLL | glszm | SizeZoneNonUniformity                | 66.21818182  |
| wavelet-LLL | glszm | GrayLevelNonUniformity               | 2.6          |
| wavelet-LLL | glszm | LargeAreaEmphasis                    | 2.290909091  |
| wavelet-LLL | glszm | SmallAreaHighGrayLevelEmphasis       | 1135.119255  |
| wavelet-LLL | glszm | ZonePercentage                       | 0.743243243  |
| wavelet-LLL | glszm | LargeAreaLowGrayLevelEmphasis        | 0.017482135  |
| wavelet-LLL | glszm | LargeAreaHighGrayLevelEmphasis       | 2274.872727  |
| wavelet-LLL | glszm | HighGrayLevelZoneEmphasis            | 1316.445455  |
| wavelet-LLL | glszm | SmallAreaEmphasis                    | 0.804482323  |
| wavelet-LLL | glszm | LowGrayLevelZoneEmphasis             | 0.012570718  |
| wavelet-LLL | glszm | ZoneEntropy                          | 5.910917841  |
| wavelet-LLL | glszm | SmallAreaLowGrayLevelEmphasis        | 0.012025258  |
| wavelet-LLL | ngtdm | Coarseness                           | 0.048008585  |
| wavelet-LLL | ngtdm | Complexity                           | 8601.156092  |
| wavelet-LLL | ngtdm | Strength                             | 76.99433198  |
| wavelet-LLL | ngtdm | Contrast                             | 1.023231642  |
| wavelet-LLL | ngtdm | Busyness                             | 0.019809168  |
| wavelet-HHL | gldm  | GrayLevelVariance                    | 12.1086103   |
| wavelet-HHL | gldm  | HighGrayLevelEmphasis                | 108.4932432  |
| wavelet-HHL | gldm  | DependenceEntropy                    | 5.375579319  |
| wavelet-HHL | gldm  | DependenceNonUniformity              | 39.56756757  |
| wavelet-HHL | gldm  | GrayLevelNonUniformity               | 13.08108108  |
| wavelet-HHL | gldm  | SmallDependenceEmphasis              | 0.428100486  |
| wavelet-HHL | gldm  | SmallDependenceHighGrayLevelEmphasis | 47.84647258  |
| wavelet-HHL | gldm  | DependenceNonUniformityNormalized    | 0.26734843   |
| wavelet-HHL | gldm  | LargeDependenceEmphasis              | 6.783783784  |
| wavelet-HHL | gldm  | LargeDependenceLowGrayLevelEmphasis  | 0.09605892   |
| wavelet-HHL | gldm  | DependenceVariance                   | 1.629656684  |
| wavelet-HHL | gldm  | LargeDependenceHighGrayLevelEmphasis | 721.2635135  |
| wavelet-HHL | gldm  | SmallDependenceLowGrayLevelEmphasis  | 0.015949028  |
| wavelet-HHL | gldm  | LowGrayLevelEmphasis                 | 0.024017965  |
| wavelet-HHL | glcm  | JointAverage                         | 9.789365954  |
| wavelet-HHL | glcm  | SumAverage                           | 19.57873191  |
| wavelet-HHL | glcm  | JointEntropy                         | 6.525993735  |
| wavelet-HHL | glcm  | ClusterShade                         | 2.757085305  |
| wavelet-HHL | glcm  | MaximumProbability                   | 0.032372261  |
| wavelet-HHL | glcm  | Idmn                                 | 0.938595778  |
| wavelet-HHL | glcm  | JointEnergy                          | 0.013008315  |
| wavelet-HHL | glcm  | Contrast                             | 26.30893101  |
| wavelet-HHL | glcm  | DifferenceEntropy                    | 3.300887665  |
| wavelet-HHL | glcm  | InverseVariance                      | 0.213754028  |
| wavelet-HHL | glcm  | DifferenceVariance                   | 8.755251898  |
| wavelet-HHL | glcm  | Idn                                  | 0.835189362  |
| wavelet-HHL | glcm  | Idm                                  | 0.206073848  |
| wavelet-HHL | glcm  | Correlation                          | -0.011301235 |
| wavelet-HHL | glcm  | Autocorrelation                      | 95.69006296  |
| wavelet-HHL | glcm  | SumEntropy                           | 4.144082923  |

|             |            |                                  |              |
|-------------|------------|----------------------------------|--------------|
| wavelet-HHL | glcm       | SumSquares                       | 13.00929103  |
| wavelet-HHL | glcm       | ClusterProminence                | 1889.626157  |
| wavelet-HHL | glcm       | Imc2                             | 0.917881719  |
| wavelet-HHL | glcm       | Imc1                             | -0.250702998 |
| wavelet-HHL | glcm       | DifferenceAverage                | 4.120431583  |
| wavelet-HHL | glcm       | Id                               | 0.301938788  |
| wavelet-HHL | glcm       | ClusterTendency                  | 25.72823312  |
| wavelet-HHL | firstorder | InterquartileRange               | 113.2041193  |
| wavelet-HHL | firstorder | Skewness                         | 0.090702277  |
| wavelet-HHL | firstorder | Uniformity                       | 0.088385683  |
| wavelet-HHL | firstorder | Median                           | 2.181175029  |
| wavelet-HHL | firstorder | Energy                           | 1127962.976  |
| wavelet-HHL | firstorder | RobustMeanAbsoluteDeviation      | 49.88334352  |
| wavelet-HHL | firstorder | MeanAbsoluteDeviation            | 70.81679935  |
| wavelet-HHL | firstorder | TotalEnergy                      | 30455000.36  |
| wavelet-HHL | firstorder | Maximum                          | 242.2995642  |
| wavelet-HHL | firstorder | RootMeanSquared                  | 87.30046656  |
| wavelet-HHL | firstorder | 90Percentile                     | 113.1817575  |
| wavelet-HHL | firstorder | Minimum                          | -205.3348786 |
| wavelet-HHL | firstorder | Entropy                          | 3.709945178  |
| wavelet-HHL | firstorder | Range                            | 447.6344428  |
| wavelet-HHL | firstorder | Variance                         | 7555.71577   |
| wavelet-HHL | firstorder | 10Percentile                     | -99.44169169 |
| wavelet-HHL | firstorder | Kurtosis                         | 2.703127775  |
| wavelet-HHL | firstorder | Mean                             | 8.102819907  |
| wavelet-HHL | glrlm      | ShortRunLowGrayLevelEmphasis     | 0.024085914  |
| wavelet-HHL | glrlm      | GrayLevelVariance                | 12.3758731   |
| wavelet-HHL | glrlm      | LowGrayLevelRunEmphasis          | 0.024578095  |
| wavelet-HHL | glrlm      | GrayLevelNonUniformityNormalized | 0.087038719  |
| wavelet-HHL | glrlm      | RunVariance                      | 0.054185783  |
| wavelet-HHL | glrlm      | GrayLevelNonUniformity           | 12.25283898  |
| wavelet-HHL | glrlm      | LongRunEmphasis                  | 1.161400474  |
| wavelet-HHL | glrlm      | ShortRunHighGrayLevelEmphasis    | 104.7378692  |
| wavelet-HHL | glrlm      | RunLengthNonUniformity           | 127.858711   |
| wavelet-HHL | glrlm      | ShortRunEmphasis                 | 0.96273409   |
| wavelet-HHL | glrlm      | LongRunHighGrayLevelEmphasis     | 125.5201838  |
| wavelet-HHL | glrlm      | RunPercentage                    | 0.951143451  |
| wavelet-HHL | glrlm      | LongRunLowGrayLevelEmphasis      | 0.026717835  |
| wavelet-HHL | glrlm      | RunEntropy                       | 3.946535575  |
| wavelet-HHL | glrlm      | HighGrayLevelRunEmphasis         | 108.6777284  |
| wavelet-HHL | glrlm      | RunLengthNonUniformityNormalized | 0.907313706  |
| wavelet-HHL | glszm      | GrayLevelVariance                | 16.12693333  |
| wavelet-HHL | glszm      | ZoneVariance                     | 3.812622222  |
| wavelet-HHL | glszm      | GrayLevelNonUniformityNormalized | 0.073777778  |
| wavelet-HHL | glszm      | SizeZoneNonUniformityNormalized  | 0.433244444  |
| wavelet-HHL | glszm      | SizeZoneNonUniformity            | 32.49333333  |
| wavelet-HHL | glszm      | GrayLevelNonUniformity           | 5.533333333  |
| wavelet-HHL | glszm      | LargeAreaEmphasis                | 7.706666667  |
| wavelet-HHL | glszm      | SmallAreaHighGrayLevelEmphasis   | 77.42751029  |
| wavelet-HHL | glszm      | ZonePercentage                   | 0.506756757  |
| wavelet-HHL | glszm      | LargeAreaLowGrayLevelEmphasis    | 0.122333168  |
| wavelet-HHL | glszm      | LargeAreaHighGrayLevelEmphasis   | 788.3066667  |
| wavelet-HHL | glszm      | HighGrayLevelZoneEmphasis        | 114.5333333  |
| wavelet-HHL | glszm      | SmallAreaEmphasis                | 0.678486831  |
| wavelet-HHL | glszm      | LowGrayLevelZoneEmphasis         | 0.033520229  |
| wavelet-HHL | glszm      | ZoneEntropy                      | 4.988902444  |
| wavelet-HHL | glszm      | SmallAreaLowGrayLevelEmphasis    | 0.028931883  |
| wavelet-HHL | ngtdm      | Coarseness                       | 0.034287764  |
| wavelet-HHL | ngtdm      | Complexity                       | 363.8395396  |



|             |            |                                      |              |
|-------------|------------|--------------------------------------|--------------|
| wavelet-HHL | ngtdm      | Strength                             | 3.340870781  |
| wavelet-HHL | ngtdm      | Contrast                             | 0.231009129  |
| wavelet-HHL | ngtdm      | Busyness                             | 0.177673855  |
| wavelet-HLH | gldm       | GrayLevelVariance                    | 10.65467495  |
| wavelet-HLH | gldm       | HighGrayLevelEmphasis                | 100.3918919  |
| wavelet-HLH | gldm       | DependenceEntropy                    | 5.359338589  |
| wavelet-HLH | gldm       | DependenceNonUniformity              | 33.40540541  |
| wavelet-HLH | gldm       | GrayLevelNonUniformity               | 14.85135135  |
| wavelet-HLH | gldm       | SmallDependenceEmphasis              | 0.412287271  |
| wavelet-HLH | gldm       | SmallDependenceHighGrayLevelEmphasis | 40.90299233  |
| wavelet-HLH | gldm       | DependenceNonUniformityNormalized    | 0.225712199  |
| wavelet-HLH | gldm       | LargeDependenceEmphasis              | 8.905405405  |
| wavelet-HLH | gldm       | LargeDependenceLowGrayLevelEmphasis  | 0.122040138  |
| wavelet-HLH | gldm       | DependenceVariance                   | 2.451059167  |
| wavelet-HLH | gldm       | LargeDependenceHighGrayLevelEmphasis | 899.472973   |
| wavelet-HLH | gldm       | SmallDependenceLowGrayLevelEmphasis  | 0.018183196  |
| wavelet-HLH | gldm       | LowGrayLevelEmphasis                 | 0.026149726  |
| wavelet-HLH | glcm       | JointAverage                         | 9.506749233  |
| wavelet-HLH | glcm       | SumAverage                           | 19.01349847  |
| wavelet-HLH | glcm       | JointEntropy                         | 6.258745135  |
| wavelet-HLH | glcm       | ClusterShade                         | 8.723018941  |
| wavelet-HLH | glcm       | MaximumProbability                   | 0.04316715   |
| wavelet-HLH | glcm       | Idmn                                 | 0.965946429  |
| wavelet-HLH | glcm       | JointEnergy                          | 0.015834134  |
| wavelet-HLH | glcm       | Contrast                             | 20.26252294  |
| wavelet-HLH | glcm       | DifferenceEntropy                    | 3.139133937  |
| wavelet-HLH | glcm       | InverseVariance                      | 0.249085525  |
| wavelet-HLH | glcm       | DifferenceVariance                   | 7.422784453  |
| wavelet-HLH | glcm       | Idn                                  | 0.875821813  |
| wavelet-HLH | glcm       | Idm                                  | 0.240530386  |
| wavelet-HLH | glcm       | Correlation                          | -0.034200411 |
| wavelet-HLH | glcm       | Autocorrelation                      | 90.02046092  |
| wavelet-HLH | glcm       | SumEntropy                           | 3.939710332  |
| wavelet-HLH | glcm       | SumSquares                           | 9.77128796   |
| wavelet-HLH | glcm       | ClusterProminence                    | 1194.267153  |
| wavelet-HLH | glcm       | Imc2                                 | 0.857616326  |
| wavelet-HLH | glcm       | Imc1                                 | -0.195039384 |
| wavelet-HLH | glcm       | DifferenceAverage                    | 3.526551792  |
| wavelet-HLH | glcm       | Id                                   | 0.334261658  |
| wavelet-HLH | glcm       | ClusterTendency                      | 18.8226289   |
| wavelet-HLH | firstorder | InterquartileRange                   | 104.1708933  |
| wavelet-HLH | firstorder | Skewness                             | 0.275070549  |
| wavelet-HLH | firstorder | Uniformity                           | 0.100346969  |
| wavelet-HLH | firstorder | Median                               | -6.609615928 |
| wavelet-HLH | firstorder | Energy                               | 988564.6912  |
| wavelet-HLH | firstorder | RobustMeanAbsoluteDeviation          | 44.36715851  |
| wavelet-HLH | firstorder | MeanAbsoluteDeviation                | 63.71308215  |
| wavelet-HLH | firstorder | TotalEnergy                          | 26691246.66  |
| wavelet-HLH | firstorder | Maximum                              | 326.473204   |
| wavelet-HLH | firstorder | RootMeanSquared                      | 81.728154    |
| wavelet-HLH | firstorder | 90Percentile                         | 96.68168558  |
| wavelet-HLH | firstorder | Minimum                              | -202.0906804 |
| wavelet-HLH | firstorder | Entropy                              | 3.520499866  |
| wavelet-HLH | firstorder | Range                                | 528.5638844  |
| wavelet-HLH | firstorder | Variance                             | 6678.386237  |
| wavelet-HLH | firstorder | 10Percentile                         | -109.0133287 |
| wavelet-HLH | firstorder | Kurtosis                             | 4.045321611  |
| wavelet-HLH | firstorder | Mean                                 | -1.05115151  |
| wavelet-HLH | gllm       | ShortRunLowGrayLevelEmphasis         | 0.026430931  |

|             |       |                                  |             |
|-------------|-------|----------------------------------|-------------|
| wavelet-HLH | glrlm | GrayLevelVariance                | 10.9975258  |
| wavelet-HLH | glrlm | LowGrayLevelRunEmphasis          | 0.027016942 |
| wavelet-HLH | glrlm | GrayLevelNonUniformityNormalized | 0.097554348 |
| wavelet-HLH | glrlm | RunVariance                      | 0.064381295 |
| wavelet-HLH | glrlm | GrayLevelNonUniformity           | 13.58634332 |
| wavelet-HLH | glrlm | LongRunEmphasis                  | 1.197189613 |
| wavelet-HLH | glrlm | ShortRunHighGrayLevelEmphasis    | 95.57914931 |
| wavelet-HLH | glrlm | RunLengthNonUniformity           | 123.682395  |
| wavelet-HLH | glrlm | ShortRunEmphasis                 | 0.953795469 |
| wavelet-HLH | glrlm | LongRunHighGrayLevelEmphasis     | 120.5498183 |
| wavelet-HLH | glrlm | RunPercentage                    | 0.940748441 |
| wavelet-HLH | glrlm | LongRunLowGrayLevelEmphasis      | 0.029479497 |
| wavelet-HLH | glrlm | RunEntropy                       | 3.797891551 |
| wavelet-HLH | glrlm | HighGrayLevelRunEmphasis         | 100.2713139 |
| wavelet-HLH | glrlm | RunLengthNonUniformityNormalized | 0.886868396 |
| wavelet-HLH | glszm | GrayLevelVariance                | 15.48581631 |
| wavelet-HLH | glszm | ZoneVariance                     | 7.23229518  |
| wavelet-HLH | glszm | GrayLevelNonUniformityNormalized | 0.083515176 |
| wavelet-HLH | glszm | SizeZoneNonUniformityNormalized  | 0.458044039 |
| wavelet-HLH | glszm | SizeZoneNonUniformity            | 32.52112676 |
| wavelet-HLH | glszm | GrayLevelNonUniformity           | 5.929577465 |
| wavelet-HLH | glszm | LargeAreaEmphasis                | 11.57746479 |
| wavelet-HLH | glszm | SmallAreaHighGrayLevelEmphasis   | 69.31843521 |
| wavelet-HLH | glszm | ZonePercentage                   | 0.47972973  |
| wavelet-HLH | glszm | LargeAreaLowGrayLevelEmphasis    | 0.169790733 |
| wavelet-HLH | glszm | LargeAreaHighGrayLevelEmphasis   | 1133.859155 |
| wavelet-HLH | glszm | HighGrayLevelZoneEmphasis        | 98.01408451 |
| wavelet-HLH | glszm | SmallAreaEmphasis                | 0.70241934  |
| wavelet-HLH | glszm | LowGrayLevelZoneEmphasis         | 0.040250639 |
| wavelet-HLH | glszm | ZoneEntropy                      | 4.791949542 |
| wavelet-HLH | glszm | SmallAreaLowGrayLevelEmphasis    | 0.035684463 |
| wavelet-HLH | ngtdm | Coarseness                       | 0.035580018 |
| wavelet-HLH | ngtdm | Complexity                       | 306.1711147 |
| wavelet-HLH | ngtdm | Strength                         | 3.653997468 |
| wavelet-HLH | ngtdm | Contrast                         | 0.232767557 |
| wavelet-HLH | ngtdm | Busyness                         | 0.200098043 |

| Image type | Feature Class | Feature Name                         | Value                                                                                                                                                                                                                                                                                                                                                                                                                                           |
|------------|---------------|--------------------------------------|-------------------------------------------------------------------------------------------------------------------------------------------------------------------------------------------------------------------------------------------------------------------------------------------------------------------------------------------------------------------------------------------------------------------------------------------------|
| general    | info          | BoundingBox                          | 17: RTSTRUCT: C99-DNU_A_segment_Left<br>hilar ITV<br>(0, 1, 1, 7, 7, 6)                                                                                                                                                                                                                                                                                                                                                                         |
| general    | info          | EnabledImageTypes                    | {u'Original': {}, u'Wavelet': {}}                                                                                                                                                                                                                                                                                                                                                                                                               |
|            |               |                                      | {'distances': [1], 'additionalInfo': True,<br>'force2D': False, 'interpolator':<br>'sitkBSpline', 'resampledPixelSpacing':<br>[3.0], 'label': 1, 'normalizeScale': 1,<br>'normalize': False, 'force2Ddimension': 0,<br>'removeOutliers': None, 'minimumROISize':<br>None, u'binWidth': 25.0,<br>'minimumROIDimensions': 1,<br>u'correctMask': True, 'preCrop': False,<br>u'symmetricalGLCM': True,<br>'resegmentRange': None, 'padDistance': 5} |
| general    | info          | GeneralSettings                      | 78af6f44717cfe768facfd075d066cc7eef6fe                                                                                                                                                                                                                                                                                                                                                                                                          |
| general    | info          | ImageHash                            | (0.9765625000000002,                                                                                                                                                                                                                                                                                                                                                                                                                            |
| general    | info          | ImageSpacing                         | 0.9765625000000002, 2.0)                                                                                                                                                                                                                                                                                                                                                                                                                        |
| general    | info          | MaskHash                             | 1e735a1e60b899066085c9481771711495e<br>c0c27                                                                                                                                                                                                                                                                                                                                                                                                    |
| general    | info          | NumpyVersion                         | 1.13.1                                                                                                                                                                                                                                                                                                                                                                                                                                          |
| general    | info          | PyWaveletVersion                     | 0.5.2                                                                                                                                                                                                                                                                                                                                                                                                                                           |
| general    | info          | SimpleITKVersion                     | 1.1.0                                                                                                                                                                                                                                                                                                                                                                                                                                           |
| general    | info          | Version                              | 1.3.0.post102+g1b0eb74                                                                                                                                                                                                                                                                                                                                                                                                                          |
| general    | info          | VolumeNum                            | 1                                                                                                                                                                                                                                                                                                                                                                                                                                               |
| general    | info          | VoxelNum                             | 141                                                                                                                                                                                                                                                                                                                                                                                                                                             |
| original   | shape         | Maximum3DDiameter                    | 22.44994432                                                                                                                                                                                                                                                                                                                                                                                                                                     |
| original   | shape         | Maximum2DDiameterSlice               | 19.20937271                                                                                                                                                                                                                                                                                                                                                                                                                                     |
| original   | shape         | Sphericity                           | 0.833429852                                                                                                                                                                                                                                                                                                                                                                                                                                     |
| original   | shape         | MinorAxis                            | 18.32937438                                                                                                                                                                                                                                                                                                                                                                                                                                     |
| original   | shape         | Elongation                           | 0.90917481                                                                                                                                                                                                                                                                                                                                                                                                                                      |
| original   | shape         | SurfaceVolumeRatio                   | 0.371610047                                                                                                                                                                                                                                                                                                                                                                                                                                     |
| original   | shape         | Volume                               | 3807                                                                                                                                                                                                                                                                                                                                                                                                                                            |
| original   | shape         | MajorAxis                            | 20.16045118                                                                                                                                                                                                                                                                                                                                                                                                                                     |
| original   | shape         | SurfaceArea                          | 1414.719447                                                                                                                                                                                                                                                                                                                                                                                                                                     |
| original   | shape         | Flatness                             | 0.759756491                                                                                                                                                                                                                                                                                                                                                                                                                                     |
| original   | shape         | LeastAxis                            | 15.31703364                                                                                                                                                                                                                                                                                                                                                                                                                                     |
| original   | shape         | Maximum2DDiameterColumn              | 19.20937271                                                                                                                                                                                                                                                                                                                                                                                                                                     |
| original   | shape         | Maximum2DDiameterRow                 | 21.21320344                                                                                                                                                                                                                                                                                                                                                                                                                                     |
| original   | gldm          | GrayLevelVariance                    | 76.93767919                                                                                                                                                                                                                                                                                                                                                                                                                                     |
| original   | gldm          | HighGrayLevelEmphasis                | 845.5248227                                                                                                                                                                                                                                                                                                                                                                                                                                     |
| original   | gldm          | DependenceEntropy                    | 5.901660618                                                                                                                                                                                                                                                                                                                                                                                                                                     |
| original   | gldm          | DependenceNonUniformity              | 26.12056738                                                                                                                                                                                                                                                                                                                                                                                                                                     |
| original   | gldm          | GrayLevelNonUniformity               | 12.53191489                                                                                                                                                                                                                                                                                                                                                                                                                                     |
| original   | gldm          | SmallDependenceEmphasis              | 0.416797459                                                                                                                                                                                                                                                                                                                                                                                                                                     |
| original   | gldm          | SmallDependenceHighGrayLevelEmphasis | 241.8413545                                                                                                                                                                                                                                                                                                                                                                                                                                     |
| original   | gldm          | DependenceNonUniformityNormalized    | 0.185252251                                                                                                                                                                                                                                                                                                                                                                                                                                     |
| original   | gldm          | LargeDependenceEmphasis              | 24.16312057                                                                                                                                                                                                                                                                                                                                                                                                                                     |

|          |            |                                      |              |
|----------|------------|--------------------------------------|--------------|
| original | gldm       | LargeDependenceLowGrayLevelEmphasis  | 0.040908902  |
| original | gldm       | DependenceVariance                   | 10.92590916  |
| original | gldm       | LargeDependenceHighGrayLevelEmphasis | 26129.93617  |
| original | gldm       | SmallDependenceLowGrayLevelEmphasis  | 0.018457842  |
| original | gldm       | LowGrayLevelEmphasis                 | 0.019148847  |
| original | glcm       | JointAverage                         | 29.20817963  |
| original | glcm       | SumAverage                           | 58.41635926  |
| original | glcm       | JointEntropy                         | 6.12417172   |
| original | glcm       | ClusterShade                         | -2497.766634 |
| original | glcm       | MaximumProbability                   | 0.087685611  |
| original | glcm       | Idmn                                 | 0.946188673  |
| original | glcm       | JointEnergy                          | 0.024215557  |
| original | glcm       | Contrast                             | 93.51393221  |
| original | glcm       | DifferenceEntropy                    | 3.701312047  |
| original | glcm       | InverseVariance                      | 0.271377953  |
| original | glcm       | DifferenceVariance                   | 56.71106623  |
| original | glcm       | Idn                                  | 0.879284725  |
| original | glcm       | Idm                                  | 0.31197317   |
| original | glcm       | Correlation                          | 0.189680241  |
| original | glcm       | Autocorrelation                      | 864.1217733  |
| original | glcm       | SumEntropy                           | 4.464346886  |
| original | glcm       | SumSquares                           | 57.67029702  |
| original | glcm       | ClusterProminence                    | 96974.40416  |
| original | glcm       | Imc2                                 | 0.974128152  |
| original | glcm       | Imc1                                 | -0.392936876 |
| original | glcm       | DifferenceAverage                    | 6.025958415  |
| original | glcm       | Id                                   | 0.373357454  |
| original | glcm       | ClusterTendency                      | 137.1672559  |
| original | firstorder | InterquartileRange                   | 237          |
| original | firstorder | Skewness                             | -1.463381711 |
| original | firstorder | Uniformity                           | 0.088878829  |
| original | firstorder | Median                               | -13          |
| original | firstorder | Energy                               | 8793950      |
| original | firstorder | RobustMeanAbsoluteDeviation          | 114.4858642  |
| original | firstorder | MeanAbsoluteDeviation                | 173.2175444  |
| original | firstorder | TotalEnergy                          | 237436650    |
| original | firstorder | Maximum                              | 93           |
| original | firstorder | RootMeanSquared                      | 249.7367408  |
| original | firstorder | 90Percentile                         | 49           |
| original | firstorder | Minimum                              | -782         |
| original | firstorder | Entropy                              | 4.160084296  |
| original | firstorder | Range                                | 875          |
| original | firstorder | Variance                             | 48087.34219  |
| original | firstorder | 10Percentile                         | -489         |
| original | firstorder | Kurtosis                             | 4.141963195  |
| original | firstorder | Mean                                 | -119.5035461 |
| original | glrlm      | ShortRunLowGrayLevelEmphasis         | 0.021141109  |
| original | glrlm      | GrayLevelVariance                    | 81.67146655  |
| original | glrlm      | LowGrayLevelRunEmphasis              | 0.021216485  |
| original | glrlm      | GrayLevelNonUniformityNormalized     | 0.075629277  |
| original | glrlm      | RunVariance                          | 0.133135414  |
| original | glrlm      | GrayLevelNonUniformity               | 9.590464666  |

|             |       |                                      |             |
|-------------|-------|--------------------------------------|-------------|
| original    | glrlm | LongRunEmphasis                      | 1.374925036 |
| original    | glrlm | ShortRunHighGrayLevelEmphasis        | 737.6070934 |
| original    | glrlm | RunLengthNonUniformity               | 104.425207  |
| original    | glrlm | ShortRunEmphasis                     | 0.924764853 |
| original    | glrlm | LongRunHighGrayLevelEmphasis         | 1224.275394 |
| original    | glrlm | RunPercentage                        | 0.898527005 |
| original    | glrlm | LongRunLowGrayLevelEmphasis          | 0.021586062 |
| original    | glrlm | RunEntropy                           | 4.653809582 |
| original    | glrlm | HighGrayLevelRunEmphasis             | 818.7703845 |
| original    | glrlm | RunLengthNonUniformityNormalized     | 0.823078632 |
| original    | glszm | GrayLevelVariance                    | 97.14624023 |
| original    | glszm | ZoneVariance                         | 17.72436523 |
| original    | glszm | GrayLevelNonUniformityNormalized     | 0.038085938 |
| original    | glszm | SizeZoneNonUniformityNormalized      | 0.604003906 |
| original    | glszm | SizeZoneNonUniformity                | 38.65625    |
| original    | glszm | GrayLevelNonUniformity               | 2.4375      |
| original    | glszm | LargeAreaEmphasis                    | 22.578125   |
| original    | glszm | SmallAreaHighGrayLevelEmphasis       | 419.3189621 |
| original    | glszm | ZonePercentage                       | 0.453900709 |
| original    | glszm | LargeAreaLowGrayLevelEmphasis        | 0.061061347 |
| original    | glszm | LargeAreaHighGrayLevelEmphasis       | 24354.26563 |
| original    | glszm | HighGrayLevelZoneEmphasis            | 594.296875  |
| original    | glszm | SmallAreaEmphasis                    | 0.801827191 |
| original    | glszm | LowGrayLevelZoneEmphasis             | 0.040856079 |
| original    | glszm | ZoneEntropy                          | 5.339614648 |
| original    | glszm | SmallAreaLowGrayLevelEmphasis        | 0.040499422 |
| original    | ngtdm | Coarseness                           | 0.023622462 |
| original    | ngtdm | Complexity                           | 2812.058878 |
| original    | ngtdm | Strength                             | 21.43916637 |
| original    | ngtdm | Contrast                             | 0.796997948 |
| original    | ngtdm | Busyness                             | 0.032912587 |
| wavelet-HHH | gldm  | GrayLevelVariance                    | 14.91655349 |
| wavelet-HHH | gldm  | HighGrayLevelEmphasis                | 124.9432624 |
| wavelet-HHH | gldm  | DependenceEntropy                    | 5.436527222 |
| wavelet-HHH | gldm  | DependenceNonUniformity              | 35.55319149 |
| wavelet-HHH | gldm  | GrayLevelNonUniformity               | 11.35460993 |
| wavelet-HHH | gldm  | SmallDependenceEmphasis              | 0.464872871 |
| wavelet-HHH | gldm  | SmallDependenceHighGrayLevelEmphasis | 63.61377028 |
| wavelet-HHH | gldm  | DependenceNonUniformityNormalized    | 0.252150294 |
| wavelet-HHH | gldm  | LargeDependenceEmphasis              | 7.340425532 |
| wavelet-HHH | gldm  | LargeDependenceLowGrayLevelEmphasis  | 0.095570088 |
| wavelet-HHH | gldm  | DependenceVariance                   | 1.961973744 |
| wavelet-HHH | gldm  | LargeDependenceHighGrayLevelEmphasis | 851.9929078 |
| wavelet-HHH | gldm  | SmallDependenceLowGrayLevelEmphasis  | 0.023863058 |
| wavelet-HHH | gldm  | LowGrayLevelEmphasis                 | 0.030450377 |
| wavelet-HHH | glcm  | JointAverage                         | 10.52137702 |
| wavelet-HHH | glcm  | SumAverage                           | 21.04275405 |
| wavelet-HHH | glcm  | JointEntropy                         | 6.609974293 |
| wavelet-HHH | glcm  | ClusterShade                         | 14.2229725  |
| wavelet-HHH | glcm  | MaximumProbability                   | 0.034761175 |
| wavelet-HHH | glcm  | ldmn                                 | 0.950112643 |
| wavelet-HHH | glcm  | JointEnergy                          | 0.012326915 |

|             |            |                                  |              |
|-------------|------------|----------------------------------|--------------|
| wavelet-HHH | glcm       | Contrast                         | 30.96480756  |
| wavelet-HHH | glcm       | DifferenceEntropy                | 3.42865815   |
| wavelet-HHH | glcm       | InverseVariance                  | 0.221329186  |
| wavelet-HHH | glcm       | DifferenceVariance               | 11.92974413  |
| wavelet-HHH | glcm       | Idn                              | 0.853762786  |
| wavelet-HHH | glcm       | Idm                              | 0.2125707    |
| wavelet-HHH | glcm       | Correlation                      | -0.040445037 |
| wavelet-HHH | glcm       | Autocorrelation                  | 110.1137284  |
| wavelet-HHH | glcm       | SumEntropy                       | 4.17837603   |
| wavelet-HHH | glcm       | SumSquares                       | 14.89360882  |
| wavelet-HHH | glcm       | ClusterProminence                | 2695.838596  |
| wavelet-HHH | glcm       | Imc2                             | 0.943987138  |
| wavelet-HHH | glcm       | Imc1                             | -0.288774556 |
| wavelet-HHH | glcm       | DifferenceAverage                | 4.338819878  |
| wavelet-HHH | glcm       | Id                               | 0.304407475  |
| wavelet-HHH | glcm       | ClusterTendency                  | 28.60962773  |
| wavelet-HHH | firstorder | InterquartileRange               | 111.2607282  |
| wavelet-HHH | firstorder | Skewness                         | 0.06320427   |
| wavelet-HHH | firstorder | Uniformity                       | 0.080529148  |
| wavelet-HHH | firstorder | Median                           | -0.95965619  |
| wavelet-HHH | firstorder | Energy                           | 1310628.395  |
| wavelet-HHH | firstorder | RobustMeanAbsoluteDeviation      | 49.17745981  |
| wavelet-HHH | firstorder | MeanAbsoluteDeviation            | 73.96799246  |
| wavelet-HHH | firstorder | TotalEnergy                      | 35386966.67  |
| wavelet-HHH | firstorder | Maximum                          | 321.7582543  |
| wavelet-HHH | firstorder | RootMeanSquared                  | 96.41180863  |
| wavelet-HHH | firstorder | 90Percentile                     | 119.2981553  |
| wavelet-HHH | firstorder | Minimum                          | -236.1675275 |
| wavelet-HHH | firstorder | Entropy                          | 3.891557601  |
| wavelet-HHH | firstorder | Range                            | 557.9257818  |
| wavelet-HHH | firstorder | Variance                         | 9295.124689  |
| wavelet-HHH | firstorder | 10Percentile                     | -134.4263189 |
| wavelet-HHH | firstorder | Kurtosis                         | 3.339002489  |
| wavelet-HHH | firstorder | Mean                             | -0.334894889 |
| wavelet-HHH | glrlm      | ShortRunLowGrayLevelEmphasis     | 0.031077376  |
| wavelet-HHH | glrlm      | GrayLevelVariance                | 15.47050007  |
| wavelet-HHH | glrlm      | LowGrayLevelRunEmphasis          | 0.03150472   |
| wavelet-HHH | glrlm      | GrayLevelNonUniformityNormalized | 0.078103821  |
| wavelet-HHH | glrlm      | RunVariance                      | 0.056367179  |
| wavelet-HHH | glrlm      | GrayLevelNonUniformity           | 10.45620285  |
| wavelet-HHH | glrlm      | LongRunEmphasis                  | 1.167648375  |
| wavelet-HHH | glrlm      | ShortRunHighGrayLevelEmphasis    | 121.0975245  |
| wavelet-HHH | glrlm      | RunLengthNonUniformity           | 121.0630298  |
| wavelet-HHH | glrlm      | ShortRunEmphasis                 | 0.961342084  |
| wavelet-HHH | glrlm      | LongRunHighGrayLevelEmphasis     | 144.9505233  |
| wavelet-HHH | glrlm      | RunPercentage                    | 0.949263502  |
| wavelet-HHH | glrlm      | LongRunLowGrayLevelEmphasis      | 0.03331262   |
| wavelet-HHH | glrlm      | RunEntropy                       | 4.131526797  |
| wavelet-HHH | glrlm      | HighGrayLevelRunEmphasis         | 125.481699   |
| wavelet-HHH | glrlm      | RunLengthNonUniformityNormalized | 0.903722003  |
| wavelet-HHH | glszm      | GrayLevelVariance                | 22.48407202  |
| wavelet-HHH | glszm      | ZoneVariance                     | 4.57115651   |

|             |       |                                      |             |
|-------------|-------|--------------------------------------|-------------|
| wavelet-HHH | glszm | GrayLevelNonUniformityNormalized     | 0.06267313  |
| wavelet-HHH | glszm | SizeZoneNonUniformityNormalized      | 0.505193906 |
| wavelet-HHH | glszm | SizeZoneNonUniformity                | 38.39473684 |
| wavelet-HHH | glszm | GrayLevelNonUniformity               | 4.763157895 |
| wavelet-HHH | glszm | LargeAreaEmphasis                    | 8.013157895 |
| wavelet-HHH | glszm | SmallAreaHighGrayLevelEmphasis       | 102.8765388 |
| wavelet-HHH | glszm | ZonePercentage                       | 0.539007092 |
| wavelet-HHH | glszm | LargeAreaLowGrayLevelEmphasis        | 0.117852682 |
| wavelet-HHH | glszm | LargeAreaHighGrayLevelEmphasis       | 932.6447368 |
| wavelet-HHH | glszm | HighGrayLevelZoneEmphasis            | 131.6315789 |
| wavelet-HHH | glszm | SmallAreaEmphasis                    | 0.73700464  |
| wavelet-HHH | glszm | LowGrayLevelZoneEmphasis             | 0.046650793 |
| wavelet-HHH | glszm | ZoneEntropy                          | 4.950514896 |
| wavelet-HHH | glszm | SmallAreaLowGrayLevelEmphasis        | 0.042646013 |
| wavelet-HHH | ngtdm | Coarseness                           | 0.043062459 |
| wavelet-HHH | ngtdm | Complexity                           | 463.9808378 |
| wavelet-HHH | ngtdm | Strength                             | 4.596114563 |
| wavelet-HHH | ngtdm | Contrast                             | 0.249412315 |
| wavelet-HHH | ngtdm | Busyness                             | 0.118248959 |
| wavelet-HLL | gldm  | GrayLevelVariance                    | 100.4632564 |
| wavelet-HLL | gldm  | HighGrayLevelEmphasis                | 658.2269504 |
| wavelet-HLL | gldm  | DependenceEntropy                    | 5.799353573 |
| wavelet-HLL | gldm  | DependenceNonUniformity              | 58.61702128 |
| wavelet-HLL | gldm  | GrayLevelNonUniformity               | 5.695035461 |
| wavelet-HLL | gldm  | SmallDependenceEmphasis              | 0.636130812 |
| wavelet-HLL | gldm  | SmallDependenceHighGrayLevelEmphasis | 462.8735225 |
| wavelet-HLL | gldm  | DependenceNonUniformityNormalized    | 0.415723555 |
| wavelet-HLL | gldm  | LargeDependenceEmphasis              | 3.184397163 |
| wavelet-HLL | gldm  | LargeDependenceLowGrayLevelEmphasis  | 0.015631126 |
| wavelet-HLL | gldm  | DependenceVariance                   | 0.592525527 |
| wavelet-HLL | gldm  | LargeDependenceHighGrayLevelEmphasis | 1789.333333 |
| wavelet-HLL | gldm  | SmallDependenceLowGrayLevelEmphasis  | 0.009490061 |
| wavelet-HLL | gldm  | LowGrayLevelEmphasis                 | 0.010376891 |
| wavelet-HLL | glcm  | JointAverage                         | 23.12146547 |
| wavelet-HLL | glcm  | SumAverage                           | 46.24293093 |
| wavelet-HLL | glcm  | JointEntropy                         | 7.119870333 |
| wavelet-HLL | glcm  | ClusterShade                         | 3136.483066 |
| wavelet-HLL | glcm  | MaximumProbability                   | 0.020240437 |
| wavelet-HLL | glcm  | Idmn                                 | 0.967495201 |
| wavelet-HLL | glcm  | JointEnergy                          | 0.00787397  |
| wavelet-HLL | glcm  | Contrast                             | 126.1297103 |
| wavelet-HLL | glcm  | DifferenceEntropy                    | 4.148693084 |
| wavelet-HLL | glcm  | InverseVariance                      | 0.141734085 |
| wavelet-HLL | glcm  | DifferenceVariance                   | 55.90253373 |
| wavelet-HLL | glcm  | Idn                                  | 0.885880506 |
| wavelet-HLL | glcm  | Idm                                  | 0.12430475  |
| wavelet-HLL | glcm  | Correlation                          | 0.199944037 |
| wavelet-HLL | glcm  | Autocorrelation                      | 552.7022242 |
| wavelet-HLL | glcm  | SumEntropy                           | 5.016336983 |
| wavelet-HLL | glcm  | SumSquares                           | 80.72000314 |
| wavelet-HLL | glcm  | ClusterProminence                    | 185818.6871 |
| wavelet-HLL | glcm  | Imc2                                 | 0.996142108 |

|             |            |                                  |              |
|-------------|------------|----------------------------------|--------------|
| wavelet-HLL | glcm       | lmc1                             | -0.511332647 |
| wavelet-HLL | glcm       | DifferenceAverage                | 8.230002373  |
| wavelet-HLL | glcm       | ld                               | 0.212014704  |
| wavelet-HLL | glcm       | ClusterTendency                  | 196.7503023  |
| wavelet-HLL | firstorder | InterquartileRange               | 228.2879699  |
| wavelet-HLL | firstorder | Skewness                         | 0.941129369  |
| wavelet-HLL | firstorder | Uniformity                       | 0.040390322  |
| wavelet-HLL | firstorder | Median                           | -40.44002667 |
| wavelet-HLL | firstorder | Energy                           | 8862472.642  |
| wavelet-HLL | firstorder | RobustMeanAbsoluteDeviation      | 113.8128703  |
| wavelet-HLL | firstorder | MeanAbsoluteDeviation            | 184.4754011  |
| wavelet-HLL | firstorder | TotalEnergy                      | 239286761.3  |
| wavelet-HLL | firstorder | Maximum                          | 867.0116357  |
| wavelet-HLL | firstorder | RootMeanSquared                  | 250.7078297  |
| wavelet-HLL | firstorder | 90Percentile                     | 377.9135643  |
| wavelet-HLL | firstorder | Minimum                          | -573.4476974 |
| wavelet-HLL | firstorder | Entropy                          | 4.951405958  |
| wavelet-HLL | firstorder | Range                            | 1440.459333  |
| wavelet-HLL | firstorder | Variance                         | 62846.48642  |
| wavelet-HLL | firstorder | 10Percentile                     | -254.0555599 |
| wavelet-HLL | firstorder | Kurtosis                         | 4.207675357  |
| wavelet-HLL | firstorder | Mean                             | 2.815932627  |
| wavelet-HLL | glrlm      | ShortRunLowGrayLevelEmphasis     | 0.01052757   |
| wavelet-HLL | glrlm      | GrayLevelVariance                | 102.0457663  |
| wavelet-HLL | glrlm      | LowGrayLevelRunEmphasis          | 0.010570272  |
| wavelet-HLL | glrlm      | GrayLevelNonUniformityNormalized | 0.039941415  |
| wavelet-HLL | glrlm      | RunVariance                      | 0.025695917  |
| wavelet-HLL | glrlm      | GrayLevelNonUniformity           | 5.50048841   |
| wavelet-HLL | glrlm      | LongRunEmphasis                  | 1.075147827  |
| wavelet-HLL | glrlm      | ShortRunHighGrayLevelEmphasis    | 652.2285828  |
| wavelet-HLL | glrlm      | RunLengthNonUniformity           | 131.5888734  |
| wavelet-HLL | glrlm      | ShortRunEmphasis                 | 0.982474749  |
| wavelet-HLL | glrlm      | LongRunHighGrayLevelEmphasis     | 700.9685523  |
| wavelet-HLL | glrlm      | RunPercentage                    | 0.976541189  |
| wavelet-HLL | glrlm      | LongRunLowGrayLevelEmphasis      | 0.010750684  |
| wavelet-HLL | glrlm      | RunEntropy                       | 5.044544993  |
| wavelet-HLL | glrlm      | HighGrayLevelRunEmphasis         | 661.4421275  |
| wavelet-HLL | glrlm      | RunLengthNonUniformityNormalized | 0.955193382  |
| wavelet-HLL | glszm      | GrayLevelVariance                | 124.4867359  |
| wavelet-HLL | glszm      | ZoneVariance                     | 0.530276817  |
| wavelet-HLL | glszm      | GrayLevelNonUniformityNormalized | 0.03479431   |
| wavelet-HLL | glszm      | SizeZoneNonUniformityNormalized  | 0.58496732   |
| wavelet-HLL | glszm      | SizeZoneNonUniformity            | 59.66666667  |
| wavelet-HLL | glszm      | GrayLevelNonUniformity           | 3.549019608  |
| wavelet-HLL | glszm      | LargeAreaEmphasis                | 2.441176471  |
| wavelet-HLL | glszm      | SmallAreaHighGrayLevelEmphasis   | 591.9063181  |
| wavelet-HLL | glszm      | ZonePercentage                   | 0.723404255  |
| wavelet-HLL | glszm      | LargeAreaLowGrayLevelEmphasis    | 0.016817598  |
| wavelet-HLL | glszm      | LargeAreaHighGrayLevelEmphasis   | 1481.862745  |
| wavelet-HLL | glszm      | HighGrayLevelZoneEmphasis        | 703.3137255  |
| wavelet-HLL | glszm      | SmallAreaEmphasis                | 0.792892157  |
| wavelet-HLL | glszm      | LowGrayLevelZoneEmphasis         | 0.013426964  |



|             |            |                                      |              |
|-------------|------------|--------------------------------------|--------------|
| wavelet-HLL | glszm      | ZoneEntropy                          | 5.704746671  |
| wavelet-HLL | glszm      | SmallAreaLowGrayLevelEmphasis        | 0.012912091  |
| wavelet-HLL | ngtdm      | Coarseness                           | 0.046258485  |
| wavelet-HLL | ngtdm      | Complexity                           | 4498.340992  |
| wavelet-HLL | ngtdm      | Strength                             | 34.86832434  |
| wavelet-HLL | ngtdm      | Contrast                             | 0.642966672  |
| wavelet-HLL | ngtdm      | Busyness                             | 0.025772732  |
| wavelet-LHL | gldm       | GrayLevelVariance                    | 112.2355012  |
| wavelet-LHL | gldm       | HighGrayLevelEmphasis                | 778.6808511  |
| wavelet-LHL | gldm       | DependenceEntropy                    | 5.819847806  |
| wavelet-LHL | gldm       | DependenceNonUniformity              | 59.15602837  |
| wavelet-LHL | gldm       | GrayLevelNonUniformity               | 5.439716312  |
| wavelet-LHL | gldm       | SmallDependenceEmphasis              | 0.664771474  |
| wavelet-LHL | gldm       | SmallDependenceHighGrayLevelEmphasis | 575.1269543  |
| wavelet-LHL | gldm       | DependenceNonUniformityNormalized    | 0.4195463    |
| wavelet-LHL | gldm       | LargeDependenceEmphasis              | 3.609929078  |
| wavelet-LHL | gldm       | LargeDependenceLowGrayLevelEmphasis  | 0.015001939  |
| wavelet-LHL | gldm       | DependenceVariance                   | 0.879231427  |
| wavelet-LHL | gldm       | LargeDependenceHighGrayLevelEmphasis | 2496.411348  |
| wavelet-LHL | gldm       | SmallDependenceLowGrayLevelEmphasis  | 0.008910776  |
| wavelet-LHL | gldm       | LowGrayLevelEmphasis                 | 0.009670612  |
| wavelet-LHL | glcm       | JointAverage                         | 25.89879818  |
| wavelet-LHL | glcm       | SumAverage                           | 51.79759636  |
| wavelet-LHL | glcm       | JointEntropy                         | 7.172232482  |
| wavelet-LHL | glcm       | ClusterShade                         | 2122.162959  |
| wavelet-LHL | glcm       | MaximumProbability                   | 0.018851054  |
| wavelet-LHL | glcm       | Idmn                                 | 0.966829626  |
| wavelet-LHL | glcm       | JointEnergy                          | 0.007527449  |
| wavelet-LHL | glcm       | Contrast                             | 178.9366123  |
| wavelet-LHL | glcm       | DifferenceEntropy                    | 4.357181225  |
| wavelet-LHL | glcm       | InverseVariance                      | 0.119156046  |
| wavelet-LHL | glcm       | DifferenceVariance                   | 79.04452357  |
| wavelet-LHL | glcm       | Idn                                  | 0.884787152  |
| wavelet-LHL | glcm       | Idm                                  | 0.114294126  |
| wavelet-LHL | glcm       | Correlation                          | 0.044951775  |
| wavelet-LHL | glcm       | Autocorrelation                      | 675.1600379  |
| wavelet-LHL | glcm       | SumEntropy                           | 5.171275844  |
| wavelet-LHL | glcm       | SumSquares                           | 93.77576707  |
| wavelet-LHL | glcm       | ClusterProminence                    | 172570.1579  |
| wavelet-LHL | glcm       | Imc2                                 | 0.996359781  |
| wavelet-LHL | glcm       | Imc1                                 | -0.512987971 |
| wavelet-LHL | glcm       | DifferenceAverage                    | 9.769144403  |
| wavelet-LHL | glcm       | Id                                   | 0.196868225  |
| wavelet-LHL | glcm       | ClusterTendency                      | 196.166456   |
| wavelet-LHL | firstorder | InterquartileRange                   | 284.067921   |
| wavelet-LHL | firstorder | Skewness                             | 0.95279019   |
| wavelet-LHL | firstorder | Uniformity                           | 0.038579548  |
| wavelet-LHL | firstorder | Median                               | -56.31464969 |
| wavelet-LHL | firstorder | Energy                               | 10203749.75  |
| wavelet-LHL | firstorder | RobustMeanAbsoluteDeviation          | 126.8879757  |
| wavelet-LHL | firstorder | MeanAbsoluteDeviation                | 196.4600979  |
| wavelet-LHL | firstorder | TotalEnergy                          | 275501243.3  |

|             |            |                                  |              |
|-------------|------------|----------------------------------|--------------|
| wavelet-LHL | firstorder | Maximum                          | 1014.432969  |
| wavelet-LHL | firstorder | RootMeanSquared                  | 269.0111885  |
| wavelet-LHL | firstorder | 90Percentile                     | 245.9373831  |
| wavelet-LHL | firstorder | Minimum                          | -665.0575316 |
| wavelet-LHL | firstorder | Entropy                          | 4.973980301  |
| wavelet-LHL | firstorder | Range                            | 1679.4905    |
| wavelet-LHL | firstorder | Variance                         | 70510.57184  |
| wavelet-LHL | firstorder | 10Percentile                     | -365.1824224 |
| wavelet-LHL | firstorder | Kurtosis                         | 4.879895375  |
| wavelet-LHL | firstorder | Mean                             | -43.08651405 |
| wavelet-LHL | glrlm      | ShortRunLowGrayLevelEmphasis     | 0.009825361  |
| wavelet-LHL | glrlm      | GrayLevelVariance                | 114.2030168  |
| wavelet-LHL | glrlm      | LowGrayLevelRunEmphasis          | 0.009865812  |
| wavelet-LHL | glrlm      | GrayLevelNonUniformityNormalized | 0.0380749    |
| wavelet-LHL | glrlm      | RunVariance                      | 0.027318962  |
| wavelet-LHL | glrlm      | GrayLevelNonUniformity           | 5.234488303  |
| wavelet-LHL | glrlm      | LongRunEmphasis                  | 1.080066801  |
| wavelet-LHL | glrlm      | ShortRunHighGrayLevelEmphasis    | 770.4783214  |
| wavelet-LHL | glrlm      | RunLengthNonUniformity           | 130.906089   |
| wavelet-LHL | glrlm      | ShortRunEmphasis                 | 0.981235626  |
| wavelet-LHL | glrlm      | LongRunHighGrayLevelEmphasis     | 833.5355267  |
| wavelet-LHL | glrlm      | RunPercentage                    | 0.974904528  |
| wavelet-LHL | glrlm      | LongRunLowGrayLevelEmphasis      | 0.010036871  |
| wavelet-LHL | glrlm      | RunEntropy                       | 5.073954737  |
| wavelet-LHL | glrlm      | HighGrayLevelRunEmphasis         | 782.3647493  |
| wavelet-LHL | glrlm      | RunLengthNonUniformityNormalized | 0.95195105   |
| wavelet-LHL | glszm      | GrayLevelVariance                | 138.6330436  |
| wavelet-LHL | glszm      | ZoneVariance                     | 0.786889793  |
| wavelet-LHL | glszm      | GrayLevelNonUniformityNormalized | 0.033099112  |
| wavelet-LHL | glszm      | SizeZoneNonUniformityNormalized  | 0.654585799  |
| wavelet-LHL | glszm      | SizeZoneNonUniformity            | 68.07692308  |
| wavelet-LHL | glszm      | GrayLevelNonUniformity           | 3.442307692  |
| wavelet-LHL | glszm      | LargeAreaEmphasis                | 2.625        |
| wavelet-LHL | glszm      | SmallAreaHighGrayLevelEmphasis   | 739.5785924  |
| wavelet-LHL | glszm      | ZonePercentage                   | 0.737588652  |
| wavelet-LHL | glszm      | LargeAreaLowGrayLevelEmphasis    | 0.015538406  |
| wavelet-LHL | glszm      | LargeAreaHighGrayLevelEmphasis   | 1911.980769  |
| wavelet-LHL | glszm      | HighGrayLevelZoneEmphasis        | 833.2596154  |
| wavelet-LHL | glszm      | SmallAreaEmphasis                | 0.835237714  |
| wavelet-LHL | glszm      | LowGrayLevelZoneEmphasis         | 0.012337048  |
| wavelet-LHL | glszm      | ZoneEntropy                      | 5.627854381  |
| wavelet-LHL | glszm      | SmallAreaLowGrayLevelEmphasis    | 0.011934565  |
| wavelet-LHL | ngtdm      | Coarseness                       | 0.030310923  |
| wavelet-LHL | ngtdm      | Complexity                       | 6605.376314  |
| wavelet-LHL | ngtdm      | Strength                         | 27.29720615  |
| wavelet-LHL | ngtdm      | Contrast                         | 1.039941284  |
| wavelet-LHL | ngtdm      | Busyness                         | 0.037596893  |
| wavelet-LHH | gldm       | GrayLevelVariance                | 41.84075248  |
| wavelet-LHH | gldm       | HighGrayLevelEmphasis            | 317.7304965  |
| wavelet-LHH | gldm       | DependenceEntropy                | 5.605091246  |
| wavelet-LHH | gldm       | DependenceNonUniformity          | 44.03546099  |
| wavelet-LHH | gldm       | GrayLevelNonUniformity           | 7.170212766  |

|             |            |                                      |              |
|-------------|------------|--------------------------------------|--------------|
| wavelet-LHH | gldm       | SmallDependenceEmphasis              | 0.512955083  |
| wavelet-LHH | gldm       | SmallDependenceHighGrayLevelEmphasis | 158.3340977  |
| wavelet-LHH | gldm       | DependenceNonUniformityNormalized    | 0.312308234  |
| wavelet-LHH | gldm       | LargeDependenceEmphasis              | 4.914893617  |
| wavelet-LHH | gldm       | LargeDependenceLowGrayLevelEmphasis  | 0.041439572  |
| wavelet-LHH | gldm       | DependenceVariance                   | 1.055480107  |
| wavelet-LHH | gldm       | LargeDependenceHighGrayLevelEmphasis | 1544.085106  |
| wavelet-LHH | gldm       | SmallDependenceLowGrayLevelEmphasis  | 0.021013792  |
| wavelet-LHH | gldm       | LowGrayLevelEmphasis                 | 0.023608693  |
| wavelet-LHH | glcm       | JointAverage                         | 16.55554121  |
| wavelet-LHH | glcm       | SumAverage                           | 33.11108242  |
| wavelet-LHH | glcm       | JointEntropy                         | 7.01551167   |
| wavelet-LHH | glcm       | ClusterShade                         | -22.70149053 |
| wavelet-LHH | glcm       | MaximumProbability                   | 0.02097195   |
| wavelet-LHH | glcm       | ldmn                                 | 0.94084023   |
| wavelet-LHH | glcm       | JointEnergy                          | 0.008598174  |
| wavelet-LHH | glcm       | Contrast                             | 85.01372658  |
| wavelet-LHH | glcm       | DifferenceEntropy                    | 4.008647691  |
| wavelet-LHH | glcm       | InverseVariance                      | 0.166169532  |
| wavelet-LHH | glcm       | DifferenceVariance                   | 35.64961237  |
| wavelet-LHH | glcm       | ldn                                  | 0.847135685  |
| wavelet-LHH | glcm       | ldm                                  | 0.159678833  |
| wavelet-LHH | glcm       | Correlation                          | -0.02956095  |
| wavelet-LHH | glcm       | Autocorrelation                      | 272.820204   |
| wavelet-LHH | glcm       | SumEntropy                           | 4.713556135  |
| wavelet-LHH | glcm       | SumSquares                           | 41.20053738  |
| wavelet-LHH | glcm       | ClusterProminence                    | 23147.31568  |
| wavelet-LHH | glcm       | lmc2                                 | 0.988322959  |
| wavelet-LHH | glcm       | lmc1                                 | -0.425584684 |
| wavelet-LHH | glcm       | DifferenceAverage                    | 6.919906807  |
| wavelet-LHH | glcm       | ld                                   | 0.245552606  |
| wavelet-LHH | glcm       | ClusterTendency                      | 79.78842295  |
| wavelet-LHH | firstorder | InterquartileRange                   | 205.2284656  |
| wavelet-LHH | firstorder | Skewness                             | 0.068770144  |
| wavelet-LHH | firstorder | Uniformity                           | 0.050852573  |
| wavelet-LHH | firstorder | Median                               | -8.837387793 |
| wavelet-LHH | firstorder | Energy                               | 3657046.414  |
| wavelet-LHH | firstorder | RobustMeanAbsoluteDeviation          | 83.16919004  |
| wavelet-LHH | firstorder | MeanAbsoluteDeviation                | 124.8120963  |
| wavelet-LHH | firstorder | TotalEnergy                          | 98740253.17  |
| wavelet-LHH | firstorder | Maximum                              | 430.4081202  |
| wavelet-LHH | firstorder | RootMeanSquared                      | 161.0481276  |
| wavelet-LHH | firstorder | 90Percentile                         | 209.6211632  |
| wavelet-LHH | firstorder | Minimum                              | -388.1524946 |
| wavelet-LHH | firstorder | Entropy                              | 4.524457511  |
| wavelet-LHH | firstorder | Range                                | 818.5606147  |
| wavelet-LHH | firstorder | Variance                             | 25927.40255  |
| wavelet-LHH | firstorder | 10Percentile                         | -186.0083205 |
| wavelet-LHH | firstorder | Kurtosis                             | 3.147091396  |
| wavelet-LHH | firstorder | Mean                                 | 3.016096339  |
| wavelet-LHH | glrlm      | ShortRunLowGrayLevelEmphasis         | 0.024204994  |
| wavelet-LHH | glrlm      | GrayLevelVariance                    | 42.61789616  |

|             |       |                                      |             |
|-------------|-------|--------------------------------------|-------------|
| wavelet-LHH | glrlm | LowGrayLevelRunEmphasis              | 0.024341004 |
| wavelet-LHH | glrlm | GrayLevelNonUniformityNormalized     | 0.0500655   |
| wavelet-LHH | glrlm | RunVariance                          | 0.040562397 |
| wavelet-LHH | glrlm | GrayLevelNonUniformity               | 6.798684238 |
| wavelet-LHH | glrlm | LongRunEmphasis                      | 1.12048089  |
| wavelet-LHH | glrlm | ShortRunHighGrayLevelEmphasis        | 308.5628046 |
| wavelet-LHH | glrlm | RunLengthNonUniformity               | 126.19998   |
| wavelet-LHH | glrlm | ShortRunEmphasis                     | 0.971867454 |
| wavelet-LHH | glrlm | LongRunHighGrayLevelEmphasis         | 355.8814929 |
| wavelet-LHH | glrlm | RunPercentage                        | 0.962902346 |
| wavelet-LHH | glrlm | LongRunLowGrayLevelEmphasis          | 0.024919512 |
| wavelet-LHH | glrlm | RunEntropy                           | 4.682500765 |
| wavelet-LHH | glrlm | HighGrayLevelRunEmphasis             | 317.6502088 |
| wavelet-LHH | glrlm | RunLengthNonUniformityNormalized     | 0.928859813 |
| wavelet-LHH | glszm | GrayLevelVariance                    | 53.53301038 |
| wavelet-LHH | glszm | ZoneVariance                         | 1.824775087 |
| wavelet-LHH | glszm | GrayLevelNonUniformityNormalized     | 0.043044983 |
| wavelet-LHH | glszm | SizeZoneNonUniformityNormalized      | 0.495640138 |
| wavelet-LHH | glszm | SizeZoneNonUniformity                | 42.12941176 |
| wavelet-LHH | glszm | GrayLevelNonUniformity               | 3.658823529 |
| wavelet-LHH | glszm | LargeAreaEmphasis                    | 4.576470588 |
| wavelet-LHH | glszm | SmallAreaHighGrayLevelEmphasis       | 223.1130159 |
| wavelet-LHH | glszm | ZonePercentage                       | 0.602836879 |
| wavelet-LHH | glszm | LargeAreaLowGrayLevelEmphasis        | 0.051675495 |
| wavelet-LHH | glszm | LargeAreaHighGrayLevelEmphasis       | 1429.2      |
| wavelet-LHH | glszm | HighGrayLevelZoneEmphasis            | 314.0705882 |
| wavelet-LHH | glszm | SmallAreaEmphasis                    | 0.729979475 |
| wavelet-LHH | glszm | LowGrayLevelZoneEmphasis             | 0.035852294 |
| wavelet-LHH | glszm | ZoneEntropy                          | 5.360467224 |
| wavelet-LHH | glszm | SmallAreaLowGrayLevelEmphasis        | 0.034188227 |
| wavelet-LHH | ngtdm | Coarseness                           | 0.036620585 |
| wavelet-LHH | ngtdm | Complexity                           | 1735.485241 |
| wavelet-LHH | ngtdm | Strength                             | 9.434968451 |
| wavelet-LHH | ngtdm | Contrast                             | 0.555343544 |
| wavelet-LHH | ngtdm | Busyness                             | 0.065184084 |
| wavelet-LLH | gldm  | GrayLevelVariance                    | 165.9390373 |
| wavelet-LLH | gldm  | HighGrayLevelEmphasis                | 654.6312057 |
| wavelet-LLH | gldm  | DependenceEntropy                    | 6.039136349 |
| wavelet-LLH | gldm  | DependenceNonUniformity              | 57.41134752 |
| wavelet-LLH | gldm  | GrayLevelNonUniformity               | 4.90070922  |
| wavelet-LLH | gldm  | SmallDependenceEmphasis              | 0.658518519 |
| wavelet-LLH | gldm  | SmallDependenceHighGrayLevelEmphasis | 523.7018519 |
| wavelet-LLH | gldm  | DependenceNonUniformityNormalized    | 0.407172677 |
| wavelet-LLH | gldm  | LargeDependenceEmphasis              | 4.460992908 |
| wavelet-LLH | gldm  | LargeDependenceLowGrayLevelEmphasis  | 0.144138215 |
| wavelet-LLH | gldm  | DependenceVariance                   | 1.342387204 |
| wavelet-LLH | gldm  | LargeDependenceHighGrayLevelEmphasis | 1896.985816 |
| wavelet-LLH | gldm  | SmallDependenceLowGrayLevelEmphasis  | 0.01232112  |
| wavelet-LLH | gldm  | LowGrayLevelEmphasis                 | 0.030872323 |
| wavelet-LLH | glcm  | JointAverage                         | 20.69187538 |
| wavelet-LLH | glcm  | SumAverage                           | 41.38375076 |
| wavelet-LLH | glcm  | JointEntropy                         | 7.193021986 |

|             |            |                                  |              |
|-------------|------------|----------------------------------|--------------|
| wavelet-LLH | glcm       | ClusterShade                     | 10125.18946  |
| wavelet-LLH | glcm       | MaximumProbability               | 0.021075222  |
| wavelet-LLH | glcm       | Idmn                             | 0.961113658  |
| wavelet-LLH | glcm       | JointEnergy                      | 0.007475251  |
| wavelet-LLH | glcm       | Contrast                         | 215.631032   |
| wavelet-LLH | glcm       | DifferenceEntropy                | 4.429544716  |
| wavelet-LLH | glcm       | InverseVariance                  | 0.109714261  |
| wavelet-LLH | glcm       | DifferenceVariance               | 95.98225189  |
| wavelet-LLH | glcm       | Idn                              | 0.878278263  |
| wavelet-LLH | glcm       | Idm                              | 0.115465397  |
| wavelet-LLH | glcm       | Correlation                      | 0.295492165  |
| wavelet-LLH | glcm       | Autocorrelation                  | 473.2203126  |
| wavelet-LLH | glcm       | SumEntropy                       | 5.309504283  |
| wavelet-LLH | glcm       | SumSquares                       | 152.761631   |
| wavelet-LLH | glcm       | ClusterProminence                | 803177.0212  |
| wavelet-LLH | glcm       | Imc2                             | 0.998506221  |
| wavelet-LLH | glcm       | Imc1                             | -0.578116436 |
| wavelet-LLH | glcm       | DifferenceAverage                | 10.54332069  |
| wavelet-LLH | glcm       | Id                               | 0.196431731  |
| wavelet-LLH | glcm       | ClusterTendency                  | 395.4154921  |
| wavelet-LLH | firstorder | InterquartileRange               | 319.4420613  |
| wavelet-LLH | firstorder | Skewness                         | 1.100320751  |
| wavelet-LLH | firstorder | Uniformity                       | 0.034756803  |
| wavelet-LLH | firstorder | Median                           | -57.44532705 |
| wavelet-LLH | firstorder | Energy                           | 14648940.12  |
| wavelet-LLH | firstorder | RobustMeanAbsoluteDeviation      | 142.0566682  |
| wavelet-LLH | firstorder | MeanAbsoluteDeviation            | 235.2815392  |
| wavelet-LLH | firstorder | TotalEnergy                      | 395521383.3  |
| wavelet-LLH | firstorder | Maximum                          | 1136.537155  |
| wavelet-LLH | firstorder | RootMeanSquared                  | 322.3246692  |
| wavelet-LLH | firstorder | 90Percentile                     | 458.2083818  |
| wavelet-LLH | firstorder | Minimum                          | -543.7170718 |
| wavelet-LLH | firstorder | Entropy                          | 5.166806227  |
| wavelet-LLH | firstorder | Range                            | 1680.254227  |
| wavelet-LLH | firstorder | Variance                         | 103788.7617  |
| wavelet-LLH | firstorder | 10Percentile                     | -372.2057997 |
| wavelet-LLH | firstorder | Kurtosis                         | 4.585740563  |
| wavelet-LLH | firstorder | Mean                             | -10.2191335  |
| wavelet-LLH | gllm       | ShortRunLowGrayLevelEmphasis     | 0.029578125  |
| wavelet-LLH | gllm       | GrayLevelVariance                | 169.4792478  |
| wavelet-LLH | gllm       | LowGrayLevelRunEmphasis          | 0.030537708  |
| wavelet-LLH | gllm       | GrayLevelNonUniformityNormalized | 0.033848227  |
| wavelet-LLH | gllm       | RunVariance                      | 0.032873053  |
| wavelet-LLH | gllm       | GrayLevelNonUniformity           | 4.63411673   |
| wavelet-LLH | gllm       | LongRunEmphasis                  | 1.095736991  |
| wavelet-LLH | gllm       | ShortRunHighGrayLevelEmphasis    | 655.3115217  |
| wavelet-LLH | gllm       | RunLengthNonUniformity           | 129.2949464  |
| wavelet-LLH | gllm       | ShortRunEmphasis                 | 0.977998517  |
| wavelet-LLH | gllm       | LongRunHighGrayLevelEmphasis     | 698.4627144  |
| wavelet-LLH | gllm       | RunPercentage                    | 0.970540098  |
| wavelet-LLH | gllm       | LongRunLowGrayLevelEmphasis      | 0.034401005  |
| wavelet-LLH | gllm       | RunEntropy                       | 5.288135652  |

|             |       |                                      |              |
|-------------|-------|--------------------------------------|--------------|
| wavelet-LLH | glrlm | HighGrayLevelRunEmphasis             | 663.4576089  |
| wavelet-LLH | glrlm | RunLengthNonUniformityNormalized     | 0.944165814  |
| wavelet-LLH | glszm | GrayLevelVariance                    | 203.623318   |
| wavelet-LLH | glszm | ZoneVariance                         | 1.079296424  |
| wavelet-LLH | glszm | GrayLevelNonUniformityNormalized     | 0.027681661  |
| wavelet-LLH | glszm | SizeZoneNonUniformityNormalized      | 0.675317186  |
| wavelet-LLH | glszm | SizeZoneNonUniformity                | 68.88235294  |
| wavelet-LLH | glszm | GrayLevelNonUniformity               | 2.823529412  |
| wavelet-LLH | glszm | LargeAreaEmphasis                    | 2.990196078  |
| wavelet-LLH | glszm | SmallAreaHighGrayLevelEmphasis       | 699.4876706  |
| wavelet-LLH | glszm | ZonePercentage                       | 0.723404255  |
| wavelet-LLH | glszm | LargeAreaLowGrayLevelEmphasis        | 0.108396271  |
| wavelet-LLH | glszm | LargeAreaHighGrayLevelEmphasis       | 1475.95098   |
| wavelet-LLH | glszm | HighGrayLevelZoneEmphasis            | 762.3431373  |
| wavelet-LLH | glszm | SmallAreaEmphasis                    | 0.845823718  |
| wavelet-LLH | glszm | LowGrayLevelZoneEmphasis             | 0.021243094  |
| wavelet-LLH | glszm | ZoneEntropy                          | 5.788709994  |
| wavelet-LLH | glszm | SmallAreaLowGrayLevelEmphasis        | 0.011767602  |
| wavelet-LLH | ngtdm | Coarseness                           | 0.044579535  |
| wavelet-LLH | ngtdm | Complexity                           | 7181.151111  |
| wavelet-LLH | ngtdm | Strength                             | 49.19268459  |
| wavelet-LLH | ngtdm | Contrast                             | 1.054177692  |
| wavelet-LLH | ngtdm | Busyness                             | 0.028142562  |
| wavelet-LLL | gldm  | GrayLevelVariance                    | 455.7812987  |
| wavelet-LLL | gldm  | HighGrayLevelEmphasis                | 3803.347518  |
| wavelet-LLL | gldm  | DependenceEntropy                    | 6.160550643  |
| wavelet-LLL | gldm  | DependenceNonUniformity              | 78.14893617  |
| wavelet-LLL | gldm  | GrayLevelNonUniformity               | 3.212765957  |
| wavelet-LLL | gldm  | SmallDependenceEmphasis              | 0.772704886  |
| wavelet-LLL | gldm  | SmallDependenceHighGrayLevelEmphasis | 2672.405831  |
| wavelet-LLL | gldm  | DependenceNonUniformityNormalized    | 0.554247774  |
| wavelet-LLL | gldm  | LargeDependenceEmphasis              | 2.560283688  |
| wavelet-LLL | gldm  | LargeDependenceLowGrayLevelEmphasis  | 0.008952198  |
| wavelet-LLL | gldm  | DependenceVariance                   | 0.568381872  |
| wavelet-LLL | gldm  | LargeDependenceHighGrayLevelEmphasis | 12141.50355  |
| wavelet-LLL | gldm  | SmallDependenceLowGrayLevelEmphasis  | 0.008520629  |
| wavelet-LLL | gldm  | LowGrayLevelEmphasis                 | 0.00858435   |
| wavelet-LLL | glcm  | JointAverage                         | 62.62304552  |
| wavelet-LLL | glcm  | SumAverage                           | 125.246091   |
| wavelet-LLL | glcm  | JointEntropy                         | 7.3420649    |
| wavelet-LLL | glcm  | ClusterShade                         | -31447.23401 |
| wavelet-LLL | glcm  | MaximumProbability                   | 0.012973383  |
| wavelet-LLL | glcm  | ldmn                                 | 0.947104106  |
| wavelet-LLL | glcm  | JointEnergy                          | 0.006425942  |
| wavelet-LLL | glcm  | Contrast                             | 481.6980102  |
| wavelet-LLL | glcm  | DifferenceEntropy                    | 4.910106158  |
| wavelet-LLL | glcm  | InverseVariance                      | 0.075822007  |
| wavelet-LLL | glcm  | DifferenceVariance                   | 208.9549215  |
| wavelet-LLL | glcm  | ldn                                  | 0.857014083  |
| wavelet-LLL | glcm  | ldm                                  | 0.075500418  |
| wavelet-LLL | glcm  | Correlation                          | 0.366038872  |
| wavelet-LLL | glcm  | Autocorrelation                      | 4059.40422   |

|             |            |                                  |              |
|-------------|------------|----------------------------------|--------------|
| wavelet-LLL | glcm       | SumEntropy                       | 5.740098315  |
| wavelet-LLL | glcm       | SumSquares                       | 377.598725   |
| wavelet-LLL | glcm       | ClusterProminence                | 3539256.531  |
| wavelet-LLL | glcm       | Imc2                             | 0.999645033  |
| wavelet-LLL | glcm       | Imc1                             | -0.662101362 |
| wavelet-LLL | glcm       | DifferenceAverage                | 16.18913466  |
| wavelet-LLL | glcm       | Id                               | 0.145359437  |
| wavelet-LLL | glcm       | ClusterTendency                  | 1028.69689   |
| wavelet-LLL | firstorder | InterquartileRange               | 864.9451596  |
| wavelet-LLL | firstorder | Skewness                         | -0.790405341 |
| wavelet-LLL | firstorder | Uniformity                       | 0.022785574  |
| wavelet-LLL | firstorder | Median                           | -260.9254142 |
| wavelet-LLL | firstorder | Energy                           | 64581792.38  |
| wavelet-LLL | firstorder | RobustMeanAbsoluteDeviation      | 331.8085288  |
| wavelet-LLL | firstorder | MeanAbsoluteDeviation            | 444.8359484  |
| wavelet-LLL | firstorder | TotalEnergy                      | 1743708394   |
| wavelet-LLL | firstorder | Maximum                          | 299.3652941  |
| wavelet-LLL | firstorder | RootMeanSquared                  | 676.7768438  |
| wavelet-LLL | firstorder | 90Percentile                     | 150.2403861  |
| wavelet-LLL | firstorder | Minimum                          | -1846.73752  |
| wavelet-LLL | firstorder | Entropy                          | 5.723325533  |
| wavelet-LLL | firstorder | Range                            | 2146.102814  |
| wavelet-LLL | firstorder | Variance                         | 285498.092   |
| wavelet-LLL | firstorder | 10Percentile                     | -1198.181002 |
| wavelet-LLL | firstorder | Kurtosis                         | 2.725570565  |
| wavelet-LLL | firstorder | Mean                             | -415.3658681 |
| wavelet-LLL | glrlm      | ShortRunLowGrayLevelEmphasis     | 0.008716258  |
| wavelet-LLL | glrlm      | GrayLevelVariance                | 457.1457677  |
| wavelet-LLL | glrlm      | LowGrayLevelRunEmphasis          | 0.00871932   |
| wavelet-LLL | glrlm      | GrayLevelNonUniformityNormalized | 0.022385511  |
| wavelet-LLL | glrlm      | RunVariance                      | 0.015811164  |
| wavelet-LLL | glrlm      | GrayLevelNonUniformity           | 3.106791053  |
| wavelet-LLL | glrlm      | LongRunEmphasis                  | 1.048594756  |
| wavelet-LLL | glrlm      | ShortRunHighGrayLevelEmphasis    | 3717.334768  |
| wavelet-LLL | glrlm      | RunLengthNonUniformity           | 134.4140609  |
| wavelet-LLL | glrlm      | ShortRunEmphasis                 | 0.987851311  |
| wavelet-LLL | glrlm      | LongRunHighGrayLevelEmphasis     | 4033.664048  |
| wavelet-LLL | glrlm      | RunPercentage                    | 0.984178942  |
| wavelet-LLL | glrlm      | LongRunLowGrayLevelEmphasis      | 0.008731565  |
| wavelet-LLL | glrlm      | RunEntropy                       | 5.78282179   |
| wavelet-LLL | glrlm      | HighGrayLevelRunEmphasis         | 3780.600624  |
| wavelet-LLL | glrlm      | RunLengthNonUniformityNormalized | 0.968377672  |
| wavelet-LLL | glszm      | GrayLevelVariance                | 468.6518282  |
| wavelet-LLL | glszm      | ZoneVariance                     | 0.513897146  |
| wavelet-LLL | glszm      | GrayLevelNonUniformityNormalized | 0.020065398  |
| wavelet-LLL | glszm      | SizeZoneNonUniformityNormalized  | 0.767390012  |
| wavelet-LLL | glszm      | SizeZoneNonUniformity            | 89.01724138  |
| wavelet-LLL | glszm      | GrayLevelNonUniformity           | 2.327586207  |
| wavelet-LLL | glszm      | LargeAreaEmphasis                | 1.99137931   |
| wavelet-LLL | glszm      | SmallAreaHighGrayLevelEmphasis   | 3040.362742  |
| wavelet-LLL | glszm      | ZonePercentage                   | 0.822695035  |
| wavelet-LLL | glszm      | LargeAreaLowGrayLevelEmphasis    | 0.010607707  |

|             |            |                                      |              |
|-------------|------------|--------------------------------------|--------------|
| wavelet-LLL | glszm      | LargeAreaHighGrayLevelEmphasis       | 8868.241379  |
| wavelet-LLL | glszm      | HighGrayLevelZoneEmphasis            | 3525.025862  |
| wavelet-LLL | glszm      | SmallAreaEmphasis                    | 0.89647749   |
| wavelet-LLL | glszm      | LowGrayLevelZoneEmphasis             | 0.010377252  |
| wavelet-LLL | glszm      | ZoneEntropy                          | 6.015097913  |
| wavelet-LLL | glszm      | SmallAreaLowGrayLevelEmphasis        | 0.010344557  |
| wavelet-LLL | ngtdm      | Coarseness                           | 0.031844172  |
| wavelet-LLL | ngtdm      | Complexity                           | 22946.74768  |
| wavelet-LLL | ngtdm      | Strength                             | 82.51489565  |
| wavelet-LLL | ngtdm      | Contrast                             | 2.649895724  |
| wavelet-LLL | ngtdm      | Busyness                             | 0.008710267  |
| wavelet-HHL | gldm       | GrayLevelVariance                    | 48.29223882  |
| wavelet-HHL | gldm       | HighGrayLevelEmphasis                | 511.3049645  |
| wavelet-HHL | gldm       | DependenceEntropy                    | 5.700310551  |
| wavelet-HHL | gldm       | DependenceNonUniformity              | 46.94326241  |
| wavelet-HHL | gldm       | GrayLevelNonUniformity               | 7.283687943  |
| wavelet-HHL | gldm       | SmallDependenceEmphasis              | 0.578534279  |
| wavelet-HHL | gldm       | SmallDependenceHighGrayLevelEmphasis | 324.395595   |
| wavelet-HHL | gldm       | DependenceNonUniformityNormalized    | 0.332930939  |
| wavelet-HHL | gldm       | LargeDependenceEmphasis              | 5.127659574  |
| wavelet-HHL | gldm       | LargeDependenceLowGrayLevelEmphasis  | 0.033768481  |
| wavelet-HHL | gldm       | DependenceVariance                   | 1.378904482  |
| wavelet-HHL | gldm       | LargeDependenceHighGrayLevelEmphasis | 2369.588652  |
| wavelet-HHL | gldm       | SmallDependenceLowGrayLevelEmphasis  | 0.009648174  |
| wavelet-HHL | gldm       | LowGrayLevelEmphasis                 | 0.013342962  |
| wavelet-HHL | glcm       | JointAverage                         | 21.47403916  |
| wavelet-HHL | glcm       | SumAverage                           | 42.94807832  |
| wavelet-HHL | glcm       | JointEntropy                         | 6.998534951  |
| wavelet-HHL | glcm       | ClusterShade                         | -29.12835877 |
| wavelet-HHL | glcm       | MaximumProbability                   | 0.023534835  |
| wavelet-HHL | glcm       | Idmn                                 | 0.949073179  |
| wavelet-HHL | glcm       | JointEnergy                          | 0.008859445  |
| wavelet-HHL | glcm       | Contrast                             | 93.60794609  |
| wavelet-HHL | glcm       | DifferenceEntropy                    | 3.993047476  |
| wavelet-HHL | glcm       | InverseVariance                      | 0.181142167  |
| wavelet-HHL | glcm       | DifferenceVariance                   | 44.2433393   |
| wavelet-HHL | glcm       | Idn                                  | 0.862402409  |
| wavelet-HHL | glcm       | Idm                                  | 0.165693271  |
| wavelet-HHL | glcm       | Correlation                          | -0.014222527 |
| wavelet-HHL | glcm       | Autocorrelation                      | 460.1287688  |
| wavelet-HHL | glcm       | SumEntropy                           | 4.704721388  |
| wavelet-HHL | glcm       | SumSquares                           | 45.77370245  |
| wavelet-HHL | glcm       | ClusterProminence                    | 39647.88236  |
| wavelet-HHL | glcm       | Imc2                                 | 0.989645764  |
| wavelet-HHL | glcm       | Imc1                                 | -0.436066922 |
| wavelet-HHL | glcm       | DifferenceAverage                    | 6.902972678  |
| wavelet-HHL | glcm       | Id                                   | 0.251942973  |
| wavelet-HHL | glcm       | ClusterTendency                      | 89.48686371  |
| wavelet-HHL | firstorder | InterquartileRange                   | 173.7222656  |
| wavelet-HHL | firstorder | Skewness                             | 0.042336786  |
| wavelet-HHL | firstorder | Uniformity                           | 0.051657361  |
| wavelet-HHL | firstorder | Median                               | -4.402790913 |



|             |            |                                  |              |
|-------------|------------|----------------------------------|--------------|
| wavelet-HHL | firstorder | Energy                           | 4227539.157  |
| wavelet-HHL | firstorder | RobustMeanAbsoluteDeviation      | 77.80717587  |
| wavelet-HHL | firstorder | MeanAbsoluteDeviation            | 126.8834633  |
| wavelet-HHL | firstorder | TotalEnergy                      | 114143557.2  |
| wavelet-HHL | firstorder | Maximum                          | 417.4208495  |
| wavelet-HHL | firstorder | RootMeanSquared                  | 173.1546916  |
| wavelet-HHL | firstorder | 90Percentile                     | 238.9080514  |
| wavelet-HHL | firstorder | Minimum                          | -520.4700182 |
| wavelet-HHL | firstorder | Entropy                          | 4.562989668  |
| wavelet-HHL | firstorder | Range                            | 937.8908678  |
| wavelet-HHL | firstorder | Variance                         | 29982.53692  |
| wavelet-HHL | firstorder | 10Percentile                     | -197.447506  |
| wavelet-HHL | firstorder | Kurtosis                         | 3.791666895  |
| wavelet-HHL | firstorder | Mean                             | -0.101476028 |
| wavelet-HHL | glrlm      | ShortRunLowGrayLevelEmphasis     | 0.01344207   |
| wavelet-HHL | glrlm      | GrayLevelVariance                | 49.5456333   |
| wavelet-HHL | glrlm      | LowGrayLevelRunEmphasis          | 0.013611425  |
| wavelet-HHL | glrlm      | GrayLevelNonUniformityNormalized | 0.050434088  |
| wavelet-HHL | glrlm      | RunVariance                      | 0.042845054  |
| wavelet-HHL | glrlm      | GrayLevelNonUniformity           | 6.856086765  |
| wavelet-HHL | glrlm      | LongRunEmphasis                  | 1.119657535  |
| wavelet-HHL | glrlm      | ShortRunHighGrayLevelEmphasis    | 501.8540816  |
| wavelet-HHL | glrlm      | RunLengthNonUniformity           | 126.8868137  |
| wavelet-HHL | glrlm      | ShortRunEmphasis                 | 0.973623938  |
| wavelet-HHL | glrlm      | LongRunHighGrayLevelEmphasis     | 567.1757838  |
| wavelet-HHL | glrlm      | RunPercentage                    | 0.963993453  |
| wavelet-HHL | glrlm      | LongRunLowGrayLevelEmphasis      | 0.014329997  |
| wavelet-HHL | glrlm      | RunEntropy                       | 4.726909992  |
| wavelet-HHL | glrlm      | HighGrayLevelRunEmphasis         | 513.6977984  |
| wavelet-HHL | glrlm      | RunLengthNonUniformityNormalized | 0.933174921  |
| wavelet-HHL | glszm      | GrayLevelVariance                | 63.2431495   |
| wavelet-HHL | glszm      | ZoneVariance                     | 1.540062435  |
| wavelet-HHL | glszm      | GrayLevelNonUniformityNormalized | 0.043357614  |
| wavelet-HHL | glszm      | SizeZoneNonUniformityNormalized  | 0.588391722  |
| wavelet-HHL | glszm      | SizeZoneNonUniformity            | 54.72043011  |
| wavelet-HHL | glszm      | GrayLevelNonUniformity           | 4.032258065  |
| wavelet-HHL | glszm      | LargeAreaEmphasis                | 3.838709677  |
| wavelet-HHL | glszm      | SmallAreaHighGrayLevelEmphasis   | 454.8314852  |
| wavelet-HHL | glszm      | ZonePercentage                   | 0.659574468  |
| wavelet-HHL | glszm      | LargeAreaLowGrayLevelEmphasis    | 0.031054704  |
| wavelet-HHL | glszm      | LargeAreaHighGrayLevelEmphasis   | 1831.311828  |
| wavelet-HHL | glszm      | HighGrayLevelZoneEmphasis        | 544.4086022  |
| wavelet-HHL | glszm      | SmallAreaEmphasis                | 0.79422491   |
| wavelet-HHL | glszm      | LowGrayLevelZoneEmphasis         | 0.016280071  |
| wavelet-HHL | glszm      | ZoneEntropy                      | 5.361213918  |
| wavelet-HHL | glszm      | SmallAreaLowGrayLevelEmphasis    | 0.013747762  |
| wavelet-HHL | ngtdm      | Coarseness                       | 0.040544398  |
| wavelet-HHL | ngtdm      | Complexity                       | 2168.121782  |
| wavelet-HHL | ngtdm      | Strength                         | 12.49669824  |
| wavelet-HHL | ngtdm      | Contrast                         | 0.528775493  |
| wavelet-HHL | ngtdm      | Busyness                         | 0.039987917  |
| wavelet-HHL | gldm       | GrayLevelVariance                | 32.50741914  |

|             |            |                                      |              |
|-------------|------------|--------------------------------------|--------------|
| wavelet-HLH | gldm       | HighGrayLevelEmphasis                | 276.177305   |
| wavelet-HLH | gldm       | DependenceEntropy                    | 5.609325293  |
| wavelet-HLH | gldm       | DependenceNonUniformity              | 42.60283688  |
| wavelet-HLH | gldm       | GrayLevelNonUniformity               | 7.936170213  |
| wavelet-HLH | gldm       | SmallDependenceEmphasis              | 0.5333052    |
| wavelet-HLH | gldm       | SmallDependenceHighGrayLevelEmphasis | 153.2432759  |
| wavelet-HLH | gldm       | DependenceNonUniformityNormalized    | 0.302147779  |
| wavelet-HLH | gldm       | LargeDependenceEmphasis              | 5.978723404  |
| wavelet-HLH | gldm       | LargeDependenceLowGrayLevelEmphasis  | 0.039507564  |
| wavelet-HLH | gldm       | DependenceVariance                   | 1.719330014  |
| wavelet-HLH | gldm       | LargeDependenceHighGrayLevelEmphasis | 1576.531915  |
| wavelet-HLH | gldm       | SmallDependenceLowGrayLevelEmphasis  | 0.013025694  |
| wavelet-HLH | gldm       | LowGrayLevelEmphasis                 | 0.015768314  |
| wavelet-HLH | glcm       | JointAverage                         | 15.64337959  |
| wavelet-HLH | glcm       | SumAverage                           | 31.28675919  |
| wavelet-HLH | glcm       | JointEntropy                         | 6.921927847  |
| wavelet-HLH | glcm       | ClusterShade                         | 109.6405002  |
| wavelet-HLH | glcm       | MaximumProbability                   | 0.027335691  |
| wavelet-HLH | glcm       | ldmn                                 | 0.946941026  |
| wavelet-HLH | glcm       | JointEnergy                          | 0.009514098  |
| wavelet-HLH | glcm       | Contrast                             | 62.15761347  |
| wavelet-HLH | glcm       | DifferenceEntropy                    | 3.811633126  |
| wavelet-HLH | glcm       | InverseVariance                      | 0.191322983  |
| wavelet-HLH | glcm       | DifferenceVariance                   | 25.53609299  |
| wavelet-HLH | glcm       | ldn                                  | 0.853989775  |
| wavelet-HLH | glcm       | ldm                                  | 0.180396624  |
| wavelet-HLH | glcm       | Correlation                          | -0.011392006 |
| wavelet-HLH | glcm       | Autocorrelation                      | 244.2961898  |
| wavelet-HLH | glcm       | SumEntropy                           | 4.579102186  |
| wavelet-HLH | glcm       | SumSquares                           | 30.64708646  |
| wavelet-HLH | glcm       | ClusterProminence                    | 14332.58805  |
| wavelet-HLH | glcm       | lmc2                                 | 0.981517938  |
| wavelet-HLH | glcm       | lmc1                                 | -0.388093108 |
| wavelet-HLH | glcm       | DifferenceAverage                    | 5.933141965  |
| wavelet-HLH | glcm       | ld                                   | 0.266980468  |
| wavelet-HLH | glcm       | ClusterTendency                      | 60.43073239  |
| wavelet-HLH | firstorder | InterquartileRange                   | 164.4282084  |
| wavelet-HLH | firstorder | Skewness                             | 0.130399828  |
| wavelet-HLH | firstorder | Uniformity                           | 0.056284895  |
| wavelet-HLH | firstorder | Median                               | -5.33384851  |
| wavelet-HLH | firstorder | Energy                               | 2881861.642  |
| wavelet-HLH | firstorder | RobustMeanAbsoluteDeviation          | 73.95113476  |
| wavelet-HLH | firstorder | MeanAbsoluteDeviation                | 110.4685379  |
| wavelet-HLH | firstorder | TotalEnergy                          | 77810264.33  |
| wavelet-HLH | firstorder | Maximum                              | 398.6917543  |
| wavelet-HLH | firstorder | RootMeanSquared                      | 142.9641041  |
| wavelet-HLH | firstorder | 90Percentile                         | 184.469763   |
| wavelet-HLH | firstorder | Minimum                              | -355.4088057 |
| wavelet-HLH | firstorder | Entropy                              | 4.394141997  |
| wavelet-HLH | firstorder | Range                                | 754.10056    |
| wavelet-HLH | firstorder | Variance                             | 20430.30066  |
| wavelet-HLH | firstorder | 10Percentile                         | -191.6262935 |

|             |            |                                  |             |
|-------------|------------|----------------------------------|-------------|
| wavelet-HLH | firstorder | Kurtosis                         | 3.224784816 |
| wavelet-HLH | firstorder | Mean                             | 2.904201663 |
| wavelet-HLH | glrlm      | ShortRunLowGrayLevelEmphasis     | 0.016065336 |
| wavelet-HLH | glrlm      | GrayLevelVariance                | 33.28164631 |
| wavelet-HLH | glrlm      | LowGrayLevelRunEmphasis          | 0.016227296 |
| wavelet-HLH | glrlm      | GrayLevelNonUniformityNormalized | 0.054978369 |
| wavelet-HLH | glrlm      | RunVariance                      | 0.044224319 |
| wavelet-HLH | glrlm      | GrayLevelNonUniformity           | 7.435769054 |
| wavelet-HLH | glrlm      | LongRunEmphasis                  | 1.132936909 |
| wavelet-HLH | glrlm      | ShortRunHighGrayLevelEmphasis    | 268.5068747 |
| wavelet-HLH | glrlm      | RunLengthNonUniformity           | 124.7209905 |
| wavelet-HLH | glrlm      | ShortRunEmphasis                 | 0.968684362 |
| wavelet-HLH | glrlm      | LongRunHighGrayLevelEmphasis     | 311.7625347 |
| wavelet-HLH | glrlm      | RunPercentage                    | 0.95908347  |
| wavelet-HLH | glrlm      | LongRunLowGrayLevelEmphasis      | 0.016905951 |
| wavelet-HLH | glrlm      | RunEntropy                       | 4.575870177 |
| wavelet-HLH | glrlm      | HighGrayLevelRunEmphasis         | 276.7377141 |
| wavelet-HLH | glrlm      | RunLengthNonUniformityNormalized | 0.92141738  |
| wavelet-HLH | glszm      | GrayLevelVariance                | 42.03820069 |
| wavelet-HLH | glszm      | ZoneVariance                     | 2.67183391  |
| wavelet-HLH | glszm      | GrayLevelNonUniformityNormalized | 0.049411765 |
| wavelet-HLH | glszm      | SizeZoneNonUniformityNormalized  | 0.561522491 |
| wavelet-HLH | glszm      | SizeZoneNonUniformity            | 47.72941176 |
| wavelet-HLH | glszm      | GrayLevelNonUniformity           | 4.2         |
| wavelet-HLH | glszm      | LargeAreaEmphasis                | 5.423529412 |
| wavelet-HLH | glszm      | SmallAreaHighGrayLevelEmphasis   | 224.7141532 |
| wavelet-HLH | glszm      | ZonePercentage                   | 0.602836879 |
| wavelet-HLH | glszm      | LargeAreaLowGrayLevelEmphasis    | 0.04335254  |
| wavelet-HLH | glszm      | LargeAreaHighGrayLevelEmphasis   | 1451.141176 |
| wavelet-HLH | glszm      | HighGrayLevelZoneEmphasis        | 282.1058824 |
| wavelet-HLH | glszm      | SmallAreaEmphasis                | 0.776280764 |
| wavelet-HLH | glszm      | LowGrayLevelZoneEmphasis         | 0.022569227 |
| wavelet-HLH | glszm      | ZoneEntropy                      | 5.147527631 |
| wavelet-HLH | glszm      | SmallAreaLowGrayLevelEmphasis    | 0.020945405 |
| wavelet-HLH | ngtdm      | Coarseness                       | 0.040457687 |
| wavelet-HLH | ngtdm      | Complexity                       | 1361.179174 |
| wavelet-HLH | ngtdm      | Strength                         | 8.971157207 |
| wavelet-HLH | ngtdm      | Contrast                         | 0.39749383  |
| wavelet-HLH | ngtdm      | Busyness                         | 0.061993003 |

| Image type | Feature Class | Feature Name                         |                                                                                                                                                                                                                                                                                                                                                                                                                   |
|------------|---------------|--------------------------------------|-------------------------------------------------------------------------------------------------------------------------------------------------------------------------------------------------------------------------------------------------------------------------------------------------------------------------------------------------------------------------------------------------------------------|
| general    | info          | BoundingBox                          | 3: RTSTRUCT: C99-DNU_segment_ITV LUL<br>(0, 0, 1, 7, 8, 6)                                                                                                                                                                                                                                                                                                                                                        |
| general    | info          | EnabledImageTypes                    | {u'Original': {}, u'Wavelet': {}}                                                                                                                                                                                                                                                                                                                                                                                 |
|            |               |                                      | {'distances': [1], 'additionalInfo': True, 'force2D': False, 'interpolator': 'sitkBSpline', 'resampledPixelSpacing': [3.0], 'label': 1, 'normalizeScale': 1, 'normalize': False, 'force2Ddimension': 0, 'removeOutliers': None, 'minimumROISize': None, u'binWidth': 25.0, 'minimumROIDimensions': 1, u'correctMask': True, 'preCrop': False, u'symmetricalGLCM': True, 'resegmentRange': None, 'padDistance': 5} |
| general    | info          | GeneralSettings                      |                                                                                                                                                                                                                                                                                                                                                                                                                   |
| general    | info          | ImageHash                            | 519136f8b9c9169703ad98e423fd82b63fb9b78f<br>(0.9765624999999998, 0.9765624999999998, 1.9999999999999999)                                                                                                                                                                                                                                                                                                          |
| general    | info          | ImageSpacing                         |                                                                                                                                                                                                                                                                                                                                                                                                                   |
| general    | info          | MaskHash                             | 2fd133b06238c40a37ca9e73c002f0d8c5ebb76e                                                                                                                                                                                                                                                                                                                                                                          |
| general    | info          | NumpyVersion                         | 1.13.1                                                                                                                                                                                                                                                                                                                                                                                                            |
| general    | info          | PyWaveletVersion                     | 0.5.2                                                                                                                                                                                                                                                                                                                                                                                                             |
| general    | info          | SimpleITKVersion                     | 1.1.0                                                                                                                                                                                                                                                                                                                                                                                                             |
| general    | info          | Version                              | 1.3.0.post102+g1b0eb74                                                                                                                                                                                                                                                                                                                                                                                            |
| general    | info          | VolumeNum                            | 1                                                                                                                                                                                                                                                                                                                                                                                                                 |
| general    | info          | VoxelNum                             | 151                                                                                                                                                                                                                                                                                                                                                                                                               |
| original   | shape         | Maximum3DDiameter                    | 24.18677324                                                                                                                                                                                                                                                                                                                                                                                                       |
| original   | shape         | Maximum2DDiameterSlice               | 20.1246118                                                                                                                                                                                                                                                                                                                                                                                                        |
| original   | shape         | Sphericity                           | 0.879441246                                                                                                                                                                                                                                                                                                                                                                                                       |
| original   | shape         | MinorAxis                            | 18.03378598                                                                                                                                                                                                                                                                                                                                                                                                       |
| original   | shape         | Elongation                           | 0.883919493                                                                                                                                                                                                                                                                                                                                                                                                       |
| original   | shape         | SurfaceVolumeRatio                   | 0.344215474                                                                                                                                                                                                                                                                                                                                                                                                       |
| original   | shape         | Volume                               | 4077                                                                                                                                                                                                                                                                                                                                                                                                              |
| original   | shape         | MajorAxis                            | 20.40206843                                                                                                                                                                                                                                                                                                                                                                                                       |
| original   | shape         | SurfaceArea                          | 1403.366489                                                                                                                                                                                                                                                                                                                                                                                                       |
| original   | shape         | Flatness                             | 0.777273367                                                                                                                                                                                                                                                                                                                                                                                                       |
| original   | shape         | LeastAxis                            | 15.85798442                                                                                                                                                                                                                                                                                                                                                                                                       |
| original   | shape         | Maximum2DDiameterColumn              | 19.20937271                                                                                                                                                                                                                                                                                                                                                                                                       |
| original   | shape         | Maximum2DDiameterRow                 | 21.63330765                                                                                                                                                                                                                                                                                                                                                                                                       |
| original   | gldm          | GrayLevelVariance                    | 95.79535985                                                                                                                                                                                                                                                                                                                                                                                                       |
| original   | gldm          | HighGrayLevelEmphasis                | 550.5298013                                                                                                                                                                                                                                                                                                                                                                                                       |
| original   | gldm          | DependenceEntropy                    | 5.660960515                                                                                                                                                                                                                                                                                                                                                                                                       |
| original   | gldm          | DependenceNonUniformity              | 41.58278146                                                                                                                                                                                                                                                                                                                                                                                                       |
| original   | gldm          | GrayLevelNonUniformity               | 10.29801325                                                                                                                                                                                                                                                                                                                                                                                                       |
| original   | gldm          | SmallDependenceEmphasis              | 0.532630083                                                                                                                                                                                                                                                                                                                                                                                                       |
| original   | gldm          | SmallDependenceHighGrayLevelEmphasis | 178.4981477                                                                                                                                                                                                                                                                                                                                                                                                       |
| original   | gldm          | DependenceNonUniformityNormalized    | 0.275382659                                                                                                                                                                                                                                                                                                                                                                                                       |
| original   | gldm          | LargeDependenceEmphasis              | 20.48344371                                                                                                                                                                                                                                                                                                                                                                                                       |
| original   | gldm          | LargeDependenceLowGrayLevelEmphasis  | 0.053003441                                                                                                                                                                                                                                                                                                                                                                                                       |
| original   | gldm          | DependenceVariance                   | 10.25191878                                                                                                                                                                                                                                                                                                                                                                                                       |
| original   | gldm          | LargeDependenceHighGrayLevelEmphasis | 18714.63576                                                                                                                                                                                                                                                                                                                                                                                                       |
| original   | gldm          | SmallDependenceLowGrayLevelEmphasis  | 0.014701569                                                                                                                                                                                                                                                                                                                                                                                                       |
| original   | gldm          | LowGrayLevelEmphasis                 | 0.018631714                                                                                                                                                                                                                                                                                                                                                                                                       |
| original   | glcm          | JointAverage                         | 23.89634164                                                                                                                                                                                                                                                                                                                                                                                                       |
| original   | glcm          | SumAverage                           | 47.79268328                                                                                                                                                                                                                                                                                                                                                                                                       |

|          |            |                                  |              |
|----------|------------|----------------------------------|--------------|
| original | glcm       | JointEntropy                     | 6.48729853   |
| original | glcm       | ClusterShade                     | -2352.931834 |
| original | glcm       | MaximumProbability               | 0.084578817  |
| original | glcm       | Idmn                             | 0.91280822   |
| original | glcm       | JointEnergy                      | 0.020999949  |
| original | glcm       | Contrast                         | 130.550293   |
| original | glcm       | DifferenceEntropy                | 4.150628336  |
| original | glcm       | InverseVariance                  | 0.223123558  |
| original | glcm       | DifferenceVariance               | 65.18395842  |
| original | glcm       | Idn                              | 0.83288757   |
| original | glcm       | Idm                              | 0.247751725  |
| original | glcm       | Correlation                      | 0.207764886  |
| original | glcm       | Autocorrelation                  | 588.1951814  |
| original | glcm       | SumEntropy                       | 4.844155034  |
| original | glcm       | SumSquares                       | 82.29401643  |
| original | glcm       | ClusterProminence                | 112151.1847  |
| original | glcm       | Imc2                             | 0.982174001  |
| original | glcm       | Imc1                             | -0.412815587 |
| original | glcm       | DifferenceAverage                | 8.015356881  |
| original | glcm       | Id                               | 0.307851375  |
| original | glcm       | ClusterTendency                  | 198.6257727  |
| original | firstorder | InterquartileRange               | 440          |
| original | firstorder | Skewness                         | -0.557333551 |
| original | firstorder | Uniformity                       | 0.068198763  |
| original | firstorder | Median                           | -144         |
| original | firstorder | Energy                           | 15314267     |
| original | firstorder | RobustMeanAbsoluteDeviation      | 177.3047568  |
| original | firstorder | MeanAbsoluteDeviation            | 213.5084426  |
| original | firstorder | TotalEnergy                      | 413485209    |
| original | firstorder | Maximum                          | 79           |
| original | firstorder | RootMeanSquared                  | 318.4634779  |
| original | firstorder | 90Percentile                     | 42           |
| original | firstorder | Minimum                          | -725         |
| original | firstorder | Entropy                          | 4.493235527  |
| original | firstorder | Range                            | 804          |
| original | firstorder | Variance                         | 59312.49033  |
| original | firstorder | 10Percentile                     | -578         |
| original | firstorder | Kurtosis                         | 1.88571987   |
| original | firstorder | Mean                             | -205.1986755 |
| original | glrlm      | ShortRunLowGrayLevelEmphasis     | 0.019885402  |
| original | glrlm      | GrayLevelVariance                | 95.66898652  |
| original | glrlm      | LowGrayLevelRunEmphasis          | 0.020093175  |
| original | glrlm      | GrayLevelNonUniformityNormalized | 0.054745241  |
| original | glrlm      | RunVariance                      | 0.110073621  |
| original | glrlm      | GrayLevelNonUniformity           | 7.588408326  |
| original | glrlm      | LongRunEmphasis                  | 1.308340874  |
| original | glrlm      | ShortRunHighGrayLevelEmphasis    | 461.4084181  |
| original | glrlm      | RunLengthNonUniformity           | 117.6781001  |
| original | glrlm      | ShortRunEmphasis                 | 0.937142012  |
| original | glrlm      | LongRunHighGrayLevelEmphasis     | 796.6950141  |
| original | glrlm      | RunPercentage                    | 0.915435558  |
| original | glrlm      | LongRunLowGrayLevelEmphasis      | 0.02098424   |
| original | glrlm      | RunEntropy                       | 4.882173436  |
| original | glrlm      | HighGrayLevelRunEmphasis         | 517.6577293  |
| original | glrlm      | RunLengthNonUniformityNormalized | 0.849588502  |

|             |       |                                      |              |
|-------------|-------|--------------------------------------|--------------|
| original    | glszm | GrayLevelVariance                    | 78.85728395  |
| original    | glszm | ZoneVariance                         | 10.44061728  |
| original    | glszm | GrayLevelNonUniformityNormalized     | 0.037777778  |
| original    | glszm | SizeZoneNonUniformityNormalized      | 0.650617284  |
| original    | glszm | SizeZoneNonUniformity                | 58.55555556  |
| original    | glszm | GrayLevelNonUniformity               | 3.4          |
| original    | glszm | LargeAreaEmphasis                    | 13.25555556  |
| original    | glszm | SmallAreaHighGrayLevelEmphasis       | 260.1223589  |
| original    | glszm | ZonePercentage                       | 0.59602649   |
| original    | glszm | LargeAreaLowGrayLevelEmphasis        | 0.051157734  |
| original    | glszm | LargeAreaHighGrayLevelEmphasis       | 11759.73333  |
| original    | glszm | HighGrayLevelZoneEmphasis            | 361.8444444  |
| original    | glszm | SmallAreaEmphasis                    | 0.832554469  |
| original    | glszm | LowGrayLevelZoneEmphasis             | 0.026697913  |
| original    | glszm | ZoneEntropy                          | 5.109590563  |
| original    | glszm | SmallAreaLowGrayLevelEmphasis        | 0.02364286   |
| original    | ngtdm | Coarseness                           | 0.017148324  |
| original    | ngtdm | Complexity                           | 2955.966079  |
| original    | ngtdm | Strength                             | 12.55247557  |
| original    | ngtdm | Contrast                             | 1.395251629  |
| original    | ngtdm | Busyness                             | 0.075839092  |
| wavelet-HHH | gldm  | GrayLevelVariance                    | 9.243278804  |
| wavelet-HHH | gldm  | HighGrayLevelEmphasis                | 81.32450331  |
| wavelet-HHH | gldm  | DependenceEntropy                    | 5.438533012  |
| wavelet-HHH | gldm  | DependenceNonUniformity              | 27.45033113  |
| wavelet-HHH | gldm  | GrayLevelNonUniformity               | 17.21192053  |
| wavelet-HHH | gldm  | SmallDependenceEmphasis              | 0.327511879  |
| wavelet-HHH | gldm  | SmallDependenceHighGrayLevelEmphasis | 31.49926054  |
| wavelet-HHH | gldm  | DependenceNonUniformityNormalized    | 0.181790272  |
| wavelet-HHH | gldm  | LargeDependenceEmphasis              | 14.48344371  |
| wavelet-HHH | gldm  | LargeDependenceLowGrayLevelEmphasis  | 0.25649456   |
| wavelet-HHH | gldm  | DependenceVariance                   | 4.588044384  |
| wavelet-HHH | gldm  | LargeDependenceHighGrayLevelEmphasis | 1047.562914  |
| wavelet-HHH | gldm  | SmallDependenceLowGrayLevelEmphasis  | 0.016532304  |
| wavelet-HHH | gldm  | LowGrayLevelEmphasis                 | 0.032227494  |
| wavelet-HHH | glcm  | JointAverage                         | 8.497470327  |
| wavelet-HHH | glcm  | SumAverage                           | 16.99494065  |
| wavelet-HHH | glcm  | JointEntropy                         | 6.151181095  |
| wavelet-HHH | glcm  | ClusterShade                         | 21.02402995  |
| wavelet-HHH | glcm  | MaximumProbability                   | 0.058750279  |
| wavelet-HHH | glcm  | Idmn                                 | 0.950771745  |
| wavelet-HHH | glcm  | JointEnergy                          | 0.019775494  |
| wavelet-HHH | glcm  | Contrast                             | 19.05203186  |
| wavelet-HHH | glcm  | DifferenceEntropy                    | 3.157724421  |
| wavelet-HHH | glcm  | InverseVariance                      | 0.295337568  |
| wavelet-HHH | glcm  | DifferenceVariance                   | 8.295764085  |
| wavelet-HHH | glcm  | Idn                                  | 0.861043264  |
| wavelet-HHH | glcm  | Idm                                  | 0.294489569  |
| wavelet-HHH | glcm  | Correlation                          | -0.013112662 |
| wavelet-HHH | glcm  | Autocorrelation                      | 72.07860623  |
| wavelet-HHH | glcm  | SumEntropy                           | 3.91032493   |
| wavelet-HHH | glcm  | SumSquares                           | 9.395747295  |
| wavelet-HHH | glcm  | ClusterProminence                    | 1283.078139  |
| wavelet-HHH | glcm  | Imc2                                 | 0.881792298  |
| wavelet-HHH | glcm  | Imc1                                 | -0.218902145 |

|             |            |                                  |              |
|-------------|------------|----------------------------------|--------------|
| wavelet-HHH | glcm       | DifferenceAverage                | 3.255049628  |
| wavelet-HHH | glcm       | Id                               | 0.376052476  |
| wavelet-HHH | glcm       | ClusterTendency                  | 18.53095732  |
| wavelet-HHH | firstorder | InterquartileRange               | 77.25573259  |
| wavelet-HHH | firstorder | Skewness                         | 0.276128884  |
| wavelet-HHH | firstorder | Uniformity                       | 0.113986229  |
| wavelet-HHH | firstorder | Median                           | -2.352307122 |
| wavelet-HHH | firstorder | Energy                           | 864192.1411  |
| wavelet-HHH | firstorder | RobustMeanAbsoluteDeviation      | 34.3072233   |
| wavelet-HHH | firstorder | MeanAbsoluteDeviation            | 55.66587198  |
| wavelet-HHH | firstorder | TotalEnergy                      | 23333187.81  |
| wavelet-HHH | firstorder | Maximum                          | 227.1620167  |
| wavelet-HHH | firstorder | RootMeanSquared                  | 75.65135003  |
| wavelet-HHH | firstorder | 90Percentile                     | 103.1849766  |
| wavelet-HHH | firstorder | Minimum                          | -178.9394873 |
| wavelet-HHH | firstorder | Entropy                          | 3.481221182  |
| wavelet-HHH | firstorder | Range                            | 406.101504   |
| wavelet-HHH | firstorder | Variance                         | 5723.125162  |
| wavelet-HHH | firstorder | 10Percentile                     | -88.26995688 |
| wavelet-HHH | firstorder | Kurtosis                         | 3.688790327  |
| wavelet-HHH | firstorder | Mean                             | -0.040003785 |
| wavelet-HHH | glrlm      | ShortRunLowGrayLevelEmphasis     | 0.03226569   |
| wavelet-HHH | glrlm      | GrayLevelVariance                | 9.822431161  |
| wavelet-HHH | glrlm      | LowGrayLevelRunEmphasis          | 0.033457005  |
| wavelet-HHH | glrlm      | GrayLevelNonUniformityNormalized | 0.107431561  |
| wavelet-HHH | glrlm      | RunVariance                      | 0.104395055  |
| wavelet-HHH | glrlm      | GrayLevelNonUniformity           | 14.89133355  |
| wavelet-HHH | glrlm      | LongRunEmphasis                  | 1.29517704   |
| wavelet-HHH | glrlm      | ShortRunHighGrayLevelEmphasis    | 77.56327587  |
| wavelet-HHH | glrlm      | RunLengthNonUniformity           | 117.7993315  |
| wavelet-HHH | glrlm      | ShortRunEmphasis                 | 0.937323575  |
| wavelet-HHH | glrlm      | LongRunHighGrayLevelEmphasis     | 103.3797053  |
| wavelet-HHH | glrlm      | RunPercentage                    | 0.917473255  |
| wavelet-HHH | glrlm      | LongRunLowGrayLevelEmphasis      | 0.038892156  |
| wavelet-HHH | glrlm      | RunEntropy                       | 3.885310301  |
| wavelet-HHH | glrlm      | HighGrayLevelRunEmphasis         | 82.13143337  |
| wavelet-HHH | glrlm      | RunLengthNonUniformityNormalized | 0.849161732  |
| wavelet-HHH | glszm      | GrayLevelVariance                | 17.4502924   |
| wavelet-HHH | glszm      | ZoneVariance                     | 23.17513081  |
| wavelet-HHH | glszm      | GrayLevelNonUniformityNormalized | 0.08033241   |
| wavelet-HHH | glszm      | SizeZoneNonUniformityNormalized  | 0.41089566   |
| wavelet-HHH | glszm      | SizeZoneNonUniformity            | 23.42105263  |
| wavelet-HHH | glszm      | GrayLevelNonUniformity           | 4.578947368  |
| wavelet-HHH | glszm      | LargeAreaEmphasis                | 30.19298246  |
| wavelet-HHH | glszm      | SmallAreaHighGrayLevelEmphasis   | 67.38966337  |
| wavelet-HHH | glszm      | ZonePercentage                   | 0.377483444  |
| wavelet-HHH | glszm      | LargeAreaLowGrayLevelEmphasis    | 0.489742222  |
| wavelet-HHH | glszm      | LargeAreaHighGrayLevelEmphasis   | 2283.859649  |
| wavelet-HHH | glszm      | HighGrayLevelZoneEmphasis        | 92.56140351  |
| wavelet-HHH | glszm      | SmallAreaEmphasis                | 0.660716463  |
| wavelet-HHH | glszm      | LowGrayLevelZoneEmphasis         | 0.050726476  |
| wavelet-HHH | glszm      | ZoneEntropy                      | 4.797459312  |
| wavelet-HHH | glszm      | SmallAreaLowGrayLevelEmphasis    | 0.038312456  |
| wavelet-HHH | ngtdm      | Coarseness                       | 0.043400755  |
| wavelet-HHH | ngtdm      | Complexity                       | 285.3656788  |

|             |            |                                      |              |
|-------------|------------|--------------------------------------|--------------|
| wavelet-HHH | ngtdm      | Strength                             | 3.797921395  |
| wavelet-HHH | ngtdm      | Contrast                             | 0.141001118  |
| wavelet-HHH | ngtdm      | Busyness                             | 0.140380978  |
| wavelet-HLL | gldm       | GrayLevelVariance                    | 59.71167931  |
| wavelet-HLL | gldm       | HighGrayLevelEmphasis                | 457.3311258  |
| wavelet-HLL | gldm       | DependenceEntropy                    | 5.808024362  |
| wavelet-HLL | gldm       | DependenceNonUniformity              | 52.7615894   |
| wavelet-HLL | gldm       | GrayLevelNonUniformity               | 7.21192053   |
| wavelet-HLL | gldm       | SmallDependenceEmphasis              | 0.590925313  |
| wavelet-HLL | gldm       | SmallDependenceHighGrayLevelEmphasis | 286.8169095  |
| wavelet-HLL | gldm       | DependenceNonUniformityNormalized    | 0.349414499  |
| wavelet-HLL | gldm       | LargeDependenceEmphasis              | 5.079470199  |
| wavelet-HLL | gldm       | LargeDependenceLowGrayLevelEmphasis  | 0.023624369  |
| wavelet-HLL | gldm       | DependenceVariance                   | 1.466953204  |
| wavelet-HLL | gldm       | LargeDependenceHighGrayLevelEmphasis | 2034.933775  |
| wavelet-HLL | gldm       | SmallDependenceLowGrayLevelEmphasis  | 0.008781166  |
| wavelet-HLL | gldm       | LowGrayLevelEmphasis                 | 0.010287028  |
| wavelet-HLL | glcm       | JointAverage                         | 19.51696671  |
| wavelet-HLL | glcm       | SumAverage                           | 39.03393341  |
| wavelet-HLL | glcm       | JointEntropy                         | 7.103918475  |
| wavelet-HLL | glcm       | ClusterShade                         | 1504.922305  |
| wavelet-HLL | glcm       | MaximumProbability                   | 0.020008037  |
| wavelet-HLL | glcm       | Idmn                                 | 0.963571414  |
| wavelet-HLL | glcm       | JointEnergy                          | 0.008158538  |
| wavelet-HLL | glcm       | Contrast                             | 76.44454826  |
| wavelet-HLL | glcm       | DifferenceEntropy                    | 3.910739866  |
| wavelet-HLL | glcm       | InverseVariance                      | 0.14957046   |
| wavelet-HLL | glcm       | DifferenceVariance                   | 28.06853997  |
| wavelet-HLL | glcm       | Idn                                  | 0.874078798  |
| wavelet-HLL | glcm       | Idm                                  | 0.143554065  |
| wavelet-HLL | glcm       | Correlation                          | 0.217622202  |
| wavelet-HLL | glcm       | Autocorrelation                      | 392.6388848  |
| wavelet-HLL | glcm       | SumEntropy                           | 4.842755902  |
| wavelet-HLL | glcm       | SumSquares                           | 49.90768446  |
| wavelet-HLL | glcm       | ClusterProminence                    | 70069.62998  |
| wavelet-HLL | glcm       | Imc2                                 | 0.986335236  |
| wavelet-HLL | glcm       | Imc1                                 | -0.406798285 |
| wavelet-HLL | glcm       | DifferenceAverage                    | 6.749779579  |
| wavelet-HLL | glcm       | Id                                   | 0.233702028  |
| wavelet-HLL | glcm       | ClusterTendency                      | 123.1861896  |
| wavelet-HLL | firstorder | InterquartileRange                   | 208.5442888  |
| wavelet-HLL | firstorder | Skewness                             | 0.813167715  |
| wavelet-HLL | firstorder | Uniformity                           | 0.047761063  |
| wavelet-HLL | firstorder | Median                               | -83.71479046 |
| wavelet-HLL | firstorder | Energy                               | 6230270.5    |
| wavelet-HLL | firstorder | RobustMeanAbsoluteDeviation          | 97.25802279  |
| wavelet-HLL | firstorder | MeanAbsoluteDeviation                | 147.0317707  |
| wavelet-HLL | firstorder | TotalEnergy                          | 168217303.5  |
| wavelet-HLL | firstorder | Maximum                              | 501.6712501  |
| wavelet-HLL | firstorder | RootMeanSquared                      | 203.1257481  |
| wavelet-HLL | firstorder | 90Percentile                         | 230.3692402  |
| wavelet-HLL | firstorder | Minimum                              | -540.0424485 |
| wavelet-HLL | firstorder | Entropy                              | 4.646007688  |
| wavelet-HLL | firstorder | Range                                | 1041.713699  |
| wavelet-HLL | firstorder | Variance                             | 37019.72004  |



|             |            |                                      |              |
|-------------|------------|--------------------------------------|--------------|
| wavelet-HLL | firstorder | 10Percentile                         | -282.7942369 |
| wavelet-HLL | firstorder | Kurtosis                             | 3.584993404  |
| wavelet-HLL | firstorder | Mean                                 | -65.11796597 |
| wavelet-HLL | glrlm      | ShortRunLowGrayLevelEmphasis         | 0.010447976  |
| wavelet-HLL | glrlm      | GrayLevelVariance                    | 60.6455397   |
| wavelet-HLL | glrlm      | LowGrayLevelRunEmphasis              | 0.010536762  |
| wavelet-HLL | glrlm      | GrayLevelNonUniformityNormalized     | 0.046888886  |
| wavelet-HLL | glrlm      | RunVariance                          | 0.038815439  |
| wavelet-HLL | glrlm      | GrayLevelNonUniformity               | 6.836152226  |
| wavelet-HLL | glrlm      | LongRunEmphasis                      | 1.113421983  |
| wavelet-HLL | glrlm      | ShortRunHighGrayLevelEmphasis        | 449.3273092  |
| wavelet-HLL | glrlm      | RunLengthNonUniformity               | 136.3711675  |
| wavelet-HLL | glrlm      | ShortRunEmphasis                     | 0.974019744  |
| wavelet-HLL | glrlm      | LongRunHighGrayLevelEmphasis         | 505.4505814  |
| wavelet-HLL | glrlm      | RunPercentage                        | 0.965359144  |
| wavelet-HLL | glrlm      | LongRunLowGrayLevelEmphasis          | 0.010925445  |
| wavelet-HLL | glrlm      | RunEntropy                           | 4.794054277  |
| wavelet-HLL | glrlm      | HighGrayLevelRunEmphasis             | 459.4590186  |
| wavelet-HLL | glrlm      | RunLengthNonUniformityNormalized     | 0.934649032  |
| wavelet-HLL | glszm      | GrayLevelVariance                    | 67.7131      |
| wavelet-HLL | glszm      | ZoneVariance                         | 1.5299       |
| wavelet-HLL | glszm      | GrayLevelNonUniformityNormalized     | 0.0398       |
| wavelet-HLL | glszm      | SizeZoneNonUniformityNormalized      | 0.6018       |
| wavelet-HLL | glszm      | SizeZoneNonUniformity                | 60.18        |
| wavelet-HLL | glszm      | GrayLevelNonUniformity               | 3.98         |
| wavelet-HLL | glszm      | LargeAreaEmphasis                    | 3.81         |
| wavelet-HLL | glszm      | SmallAreaHighGrayLevelEmphasis       | 394.750954   |
| wavelet-HLL | glszm      | ZonePercentage                       | 0.662251656  |
| wavelet-HLL | glszm      | LargeAreaLowGrayLevelEmphasis        | 0.023270195  |
| wavelet-HLL | glszm      | LargeAreaHighGrayLevelEmphasis       | 1570.19      |
| wavelet-HLL | glszm      | HighGrayLevelZoneEmphasis            | 482.65       |
| wavelet-HLL | glszm      | SmallAreaEmphasis                    | 0.802335941  |
| wavelet-HLL | glszm      | LowGrayLevelZoneEmphasis             | 0.013682375  |
| wavelet-HLL | glszm      | ZoneEntropy                          | 5.3978226    |
| wavelet-HLL | glszm      | SmallAreaLowGrayLevelEmphasis        | 0.012906683  |
| wavelet-HLL | ngtdm      | Coarseness                           | 0.038522357  |
| wavelet-HLL | ngtdm      | Complexity                           | 2141.085371  |
| wavelet-HLL | ngtdm      | Strength                             | 16.71336428  |
| wavelet-HLL | ngtdm      | Contrast                             | 0.54200821   |
| wavelet-HLL | ngtdm      | Busyness                             | 0.053855265  |
| wavelet-LHL | gldm       | GrayLevelVariance                    | 91.3687119   |
| wavelet-LHL | gldm       | HighGrayLevelEmphasis                | 714.0529801  |
| wavelet-LHL | gldm       | DependenceEntropy                    | 5.890570014  |
| wavelet-LHL | gldm       | DependenceNonUniformity              | 50.54966887  |
| wavelet-LHL | gldm       | GrayLevelNonUniformity               | 6.589403974  |
| wavelet-LHL | gldm       | SmallDependenceEmphasis              | 0.583714128  |
| wavelet-LHL | gldm       | SmallDependenceHighGrayLevelEmphasis | 477.6988631  |
| wavelet-LHL | gldm       | DependenceNonUniformityNormalized    | 0.334766019  |
| wavelet-LHL | gldm       | LargeDependenceEmphasis              | 5.331125828  |
| wavelet-LHL | gldm       | LargeDependenceLowGrayLevelEmphasis  | 0.020044538  |
| wavelet-LHL | gldm       | DependenceVariance                   | 1.462479716  |
| wavelet-LHL | gldm       | LargeDependenceHighGrayLevelEmphasis | 3205.721854  |
| wavelet-LHL | gldm       | SmallDependenceLowGrayLevelEmphasis  | 0.010328999  |
| wavelet-LHL | gldm       | LowGrayLevelEmphasis                 | 0.011224976  |
| wavelet-LHL | glcm       | JointAverage                         | 24.07213947  |

|             |            |                                  |              |
|-------------|------------|----------------------------------|--------------|
| wavelet-LHL | glcm       | SumAverage                       | 48.14427894  |
| wavelet-LHL | glcm       | JointEntropy                     | 7.166003948  |
| wavelet-LHL | glcm       | ClusterShade                     | 3128.201776  |
| wavelet-LHL | glcm       | MaximumProbability               | 0.021583166  |
| wavelet-LHL | glcm       | Idmn                             | 0.9597204    |
| wavelet-LHL | glcm       | JointEnergy                      | 0.007914343  |
| wavelet-LHL | glcm       | Contrast                         | 159.1971633  |
| wavelet-LHL | glcm       | DifferenceEntropy                | 4.151528716  |
| wavelet-LHL | glcm       | InverseVariance                  | 0.160698152  |
| wavelet-LHL | glcm       | DifferenceVariance               | 83.1988869   |
| wavelet-LHL | glcm       | Idn                              | 0.883295048  |
| wavelet-LHL | glcm       | Idm                              | 0.15229558   |
| wavelet-LHL | glcm       | Correlation                      | 0.123279939  |
| wavelet-LHL | glcm       | Autocorrelation                  | 594.1702641  |
| wavelet-LHL | glcm       | SumEntropy                       | 5.07796396   |
| wavelet-LHL | glcm       | SumSquares                       | 94.15201924  |
| wavelet-LHL | glcm       | ClusterProminence                | 245351.2034  |
| wavelet-LHL | glcm       | Imc2                             | 0.995834502  |
| wavelet-LHL | glcm       | Imc1                             | -0.503535355 |
| wavelet-LHL | glcm       | DifferenceAverage                | 8.357030155  |
| wavelet-LHL | glcm       | Id                               | 0.236767682  |
| wavelet-LHL | glcm       | ClusterTendency                  | 217.4109137  |
| wavelet-LHL | firstorder | InterquartileRange               | 226.0958228  |
| wavelet-LHL | firstorder | Skewness                         | 0.7192661    |
| wavelet-LHL | firstorder | Uniformity                       | 0.043638437  |
| wavelet-LHL | firstorder | Median                           | -68.23563133 |
| wavelet-LHL | firstorder | Energy                           | 8888778.773  |
| wavelet-LHL | firstorder | RobustMeanAbsoluteDeviation      | 104.4756409  |
| wavelet-LHL | firstorder | MeanAbsoluteDeviation            | 174.97689    |
| wavelet-LHL | firstorder | TotalEnergy                      | 239997026.9  |
| wavelet-LHL | firstorder | Maximum                          | 712.434659   |
| wavelet-LHL | firstorder | RootMeanSquared                  | 242.6233389  |
| wavelet-LHL | firstorder | 90Percentile                     | 267.9288203  |
| wavelet-LHL | firstorder | Minimum                          | -647.9609627 |
| wavelet-LHL | firstorder | Entropy                          | 4.848248929  |
| wavelet-LHL | firstorder | Range                            | 1360.395622  |
| wavelet-LHL | firstorder | Variance                         | 57314.25064  |
| wavelet-LHL | firstorder | 10Percentile                     | -286.8810359 |
| wavelet-LHL | firstorder | Kurtosis                         | 4.143002957  |
| wavelet-LHL | firstorder | Mean                             | -39.39332371 |
| wavelet-LHL | glrlm      | ShortRunLowGrayLevelEmphasis     | 0.011527693  |
| wavelet-LHL | glrlm      | GrayLevelVariance                | 93.98996407  |
| wavelet-LHL | glrlm      | LowGrayLevelRunEmphasis          | 0.011586613  |
| wavelet-LHL | glrlm      | GrayLevelNonUniformityNormalized | 0.042544848  |
| wavelet-LHL | glrlm      | RunVariance                      | 0.043615296  |
| wavelet-LHL | glrlm      | GrayLevelNonUniformity           | 6.188530846  |
| wavelet-LHL | glrlm      | LongRunEmphasis                  | 1.125293946  |
| wavelet-LHL | glrlm      | ShortRunHighGrayLevelEmphasis    | 703.6823876  |
| wavelet-LHL | glrlm      | RunLengthNonUniformity           | 135.4961579  |
| wavelet-LHL | glrlm      | ShortRunEmphasis                 | 0.972064048  |
| wavelet-LHL | glrlm      | LongRunHighGrayLevelEmphasis     | 792.24813    |
| wavelet-LHL | glrlm      | RunPercentage                    | 0.962812022  |
| wavelet-LHL | glrlm      | LongRunLowGrayLevelEmphasis      | 0.011844613  |
| wavelet-LHL | glrlm      | RunEntropy                       | 5.012248013  |
| wavelet-LHL | glrlm      | HighGrayLevelRunEmphasis         | 719.5503536  |

|             |       |                                      |             |
|-------------|-------|--------------------------------------|-------------|
| wavelet-LHL | glrlm | RunLengthNonUniformityNormalized     | 0.930500595 |
| wavelet-LHL | glszm | GrayLevelVariance                    | 125.3498623 |
| wavelet-LHL | glszm | ZoneVariance                         | 2.22916029  |
| wavelet-LHL | glszm | GrayLevelNonUniformityNormalized     | 0.036220794 |
| wavelet-LHL | glszm | SizeZoneNonUniformityNormalized      | 0.620855015 |
| wavelet-LHL | glszm | SizeZoneNonUniformity                | 61.46464646 |
| wavelet-LHL | glszm | GrayLevelNonUniformity               | 3.585858586 |
| wavelet-LHL | glszm | LargeAreaEmphasis                    | 4.555555556 |
| wavelet-LHL | glszm | SmallAreaHighGrayLevelEmphasis       | 683.7609282 |
| wavelet-LHL | glszm | ZonePercentage                       | 0.655629139 |
| wavelet-LHL | glszm | LargeAreaLowGrayLevelEmphasis        | 0.022952493 |
| wavelet-LHL | glszm | LargeAreaHighGrayLevelEmphasis       | 2836.20202  |
| wavelet-LHL | glszm | HighGrayLevelZoneEmphasis            | 787.2424242 |
| wavelet-LHL | glszm | SmallAreaEmphasis                    | 0.811643578 |
| wavelet-LHL | glszm | LowGrayLevelZoneEmphasis             | 0.016020587 |
| wavelet-LHL | glszm | ZoneEntropy                          | 5.601592923 |
| wavelet-LHL | glszm | SmallAreaLowGrayLevelEmphasis        | 0.015586396 |
| wavelet-LHL | ngtdm | Coarseness                           | 0.041828638 |
| wavelet-LHL | ngtdm | Complexity                           | 4249.237335 |
| wavelet-LHL | ngtdm | Strength                             | 28.8925107  |
| wavelet-LHL | ngtdm | Contrast                             | 0.646812279 |
| wavelet-LHL | ngtdm | Busyness                             | 0.02617815  |
| wavelet-LHH | gldm  | GrayLevelVariance                    | 28.15209859 |
| wavelet-LHH | gldm  | HighGrayLevelEmphasis                | 242.3576159 |
| wavelet-LHH | gldm  | DependenceEntropy                    | 5.627977402 |
| wavelet-LHH | gldm  | DependenceNonUniformity              | 45.42384106 |
| wavelet-LHH | gldm  | GrayLevelNonUniformity               | 9.781456954 |
| wavelet-LHH | gldm  | SmallDependenceEmphasis              | 0.540166768 |
| wavelet-LHH | gldm  | SmallDependenceHighGrayLevelEmphasis | 142.6493428 |
| wavelet-LHH | gldm  | DependenceNonUniformityNormalized    | 0.300820139 |
| wavelet-LHH | gldm  | LargeDependenceEmphasis              | 8.046357616 |
| wavelet-LHH | gldm  | LargeDependenceLowGrayLevelEmphasis  | 0.056952298 |
| wavelet-LHH | gldm  | DependenceVariance                   | 3.065479584 |
| wavelet-LHH | gldm  | LargeDependenceHighGrayLevelEmphasis | 1585.059603 |
| wavelet-LHH | gldm  | SmallDependenceLowGrayLevelEmphasis  | 0.014461582 |
| wavelet-LHH | gldm  | LowGrayLevelEmphasis                 | 0.016968277 |
| wavelet-LHH | glcm  | JointAverage                         | 14.81851376 |
| wavelet-LHH | glcm  | SumAverage                           | 29.63702752 |
| wavelet-LHH | glcm  | JointEntropy                         | 6.837121093 |
| wavelet-LHH | glcm  | ClusterShade                         | 87.83440498 |
| wavelet-LHH | glcm  | MaximumProbability                   | 0.037905556 |
| wavelet-LHH | glcm  | Idmn                                 | 0.952028381 |
| wavelet-LHH | glcm  | JointEnergy                          | 0.011083349 |
| wavelet-LHH | glcm  | Contrast                             | 58.54336809 |
| wavelet-LHH | glcm  | DifferenceEntropy                    | 3.796838647 |
| wavelet-LHH | glcm  | InverseVariance                      | 0.212317905 |
| wavelet-LHH | glcm  | DifferenceVariance                   | 24.04972596 |
| wavelet-LHH | glcm  | Idn                                  | 0.861169447 |
| wavelet-LHH | glcm  | Idm                                  | 0.19456587  |
| wavelet-LHH | glcm  | Correlation                          | -0.02037665 |
| wavelet-LHH | glcm  | Autocorrelation                      | 219.1149437 |
| wavelet-LHH | glcm  | SumEntropy                           | 4.577667462 |
| wavelet-LHH | glcm  | SumSquares                           | 28.74504445 |
| wavelet-LHH | glcm  | ClusterProminence                    | 12069.80855 |
| wavelet-LHH | glcm  | Imc2                                 | 0.979627297 |

|             |            |                                  |              |
|-------------|------------|----------------------------------|--------------|
| wavelet-LHH | glcm       | Imc1                             | -0.381846391 |
| wavelet-LHH | glcm       | DifferenceAverage                | 5.751535087  |
| wavelet-LHH | glcm       | Id                               | 0.277457958  |
| wavelet-LHH | glcm       | ClusterTendency                  | 56.43680969  |
| wavelet-LHH | firstorder | InterquartileRange               | 169.1162738  |
| wavelet-LHH | firstorder | Skewness                         | 0.281269073  |
| wavelet-LHH | firstorder | Uniformity                       | 0.064777861  |
| wavelet-LHH | firstorder | Median                           | -17.66802953 |
| wavelet-LHH | firstorder | Energy                           | 2643502.471  |
| wavelet-LHH | firstorder | RobustMeanAbsoluteDeviation      | 69.7974756   |
| wavelet-LHH | firstorder | MeanAbsoluteDeviation            | 103.6167862  |
| wavelet-LHH | firstorder | TotalEnergy                      | 71374566.71  |
| wavelet-LHH | firstorder | Maximum                          | 433.7661493  |
| wavelet-LHH | firstorder | RootMeanSquared                  | 132.3126558  |
| wavelet-LHH | firstorder | 90Percentile                     | 175.3880554  |
| wavelet-LHH | firstorder | Minimum                          | -327.8796637 |
| wavelet-LHH | firstorder | Entropy                          | 4.277434432  |
| wavelet-LHH | firstorder | Range                            | 761.6458129  |
| wavelet-LHH | firstorder | Variance                         | 17491.12574  |
| wavelet-LHH | firstorder | 10Percentile                     | -134.9536017 |
| wavelet-LHH | firstorder | Kurtosis                         | 3.429094596  |
| wavelet-LHH | firstorder | Mean                             | 3.938671819  |
| wavelet-LHH | glrlm      | ShortRunLowGrayLevelEmphasis     | 0.017340287  |
| wavelet-LHH | glrlm      | GrayLevelVariance                | 29.20858898  |
| wavelet-LHH | glrlm      | LowGrayLevelRunEmphasis          | 0.017540597  |
| wavelet-LHH | glrlm      | GrayLevelNonUniformityNormalized | 0.062132276  |
| wavelet-LHH | glrlm      | RunVariance                      | 0.053767634  |
| wavelet-LHH | glrlm      | GrayLevelNonUniformity           | 8.940589041  |
| wavelet-LHH | glrlm      | LongRunEmphasis                  | 1.157166855  |
| wavelet-LHH | glrlm      | ShortRunHighGrayLevelEmphasis    | 237.1176996  |
| wavelet-LHH | glrlm      | RunLengthNonUniformity           | 131.0335355  |
| wavelet-LHH | glrlm      | ShortRunEmphasis                 | 0.964072233  |
| wavelet-LHH | glrlm      | LongRunHighGrayLevelEmphasis     | 276.0231136  |
| wavelet-LHH | glrlm      | RunPercentage                    | 0.952623535  |
| wavelet-LHH | glrlm      | LongRunLowGrayLevelEmphasis      | 0.018414731  |
| wavelet-LHH | glrlm      | RunEntropy                       | 4.491433219  |
| wavelet-LHH | glrlm      | HighGrayLevelRunEmphasis         | 244.3897561  |
| wavelet-LHH | glrlm      | RunLengthNonUniformityNormalized | 0.910189278  |
| wavelet-LHH | glszm      | GrayLevelVariance                | 41.18333333  |
| wavelet-LHH | glszm      | ZoneVariance                     | 4.307283951  |
| wavelet-LHH | glszm      | GrayLevelNonUniformityNormalized | 0.048148148  |
| wavelet-LHH | glszm      | SizeZoneNonUniformityNormalized  | 0.610617284  |
| wavelet-LHH | glszm      | SizeZoneNonUniformity            | 54.95555556  |
| wavelet-LHH | glszm      | GrayLevelNonUniformity           | 4.333333333  |
| wavelet-LHH | glszm      | LargeAreaEmphasis                | 7.122222222  |
| wavelet-LHH | glszm      | SmallAreaHighGrayLevelEmphasis   | 216.1507668  |
| wavelet-LHH | glszm      | ZonePercentage                   | 0.59602649   |
| wavelet-LHH | glszm      | LargeAreaLowGrayLevelEmphasis    | 0.059956743  |
| wavelet-LHH | glszm      | LargeAreaHighGrayLevelEmphasis   | 1432.066667  |
| wavelet-LHH | glszm      | HighGrayLevelZoneEmphasis        | 261.2111111  |
| wavelet-LHH | glszm      | SmallAreaEmphasis                | 0.806782727  |
| wavelet-LHH | glszm      | LowGrayLevelZoneEmphasis         | 0.024781705  |
| wavelet-LHH | glszm      | ZoneEntropy                      | 5.236367336  |
| wavelet-LHH | glszm      | SmallAreaLowGrayLevelEmphasis    | 0.023742021  |
| wavelet-LHH | ngtdm      | Coarseness                       | 0.034433929  |

|             |            |                                      |              |
|-------------|------------|--------------------------------------|--------------|
| wavelet-LHH | ngtdm      | Complexity                           | 1284.249332  |
| wavelet-LHH | ngtdm      | Strength                             | 8.590164053  |
| wavelet-LHH | ngtdm      | Contrast                             | 0.322014363  |
| wavelet-LHH | ngtdm      | Busyness                             | 0.074300402  |
| wavelet-LLH | gldm       | GrayLevelVariance                    | 138.474102   |
| wavelet-LLH | gldm       | HighGrayLevelEmphasis                | 567.0463576  |
| wavelet-LLH | gldm       | DependenceEntropy                    | 5.920967964  |
| wavelet-LLH | gldm       | DependenceNonUniformity              | 62.11258278  |
| wavelet-LLH | gldm       | GrayLevelNonUniformity               | 4.920529801  |
| wavelet-LLH | gldm       | SmallDependenceEmphasis              | 0.655399191  |
| wavelet-LLH | gldm       | SmallDependenceHighGrayLevelEmphasis | 409.0054268  |
| wavelet-LLH | gldm       | DependenceNonUniformityNormalized    | 0.411341608  |
| wavelet-LLH | gldm       | LargeDependenceEmphasis              | 3.635761589  |
| wavelet-LLH | gldm       | LargeDependenceLowGrayLevelEmphasis  | 0.039520417  |
| wavelet-LLH | gldm       | DependenceVariance                   | 0.828472435  |
| wavelet-LLH | gldm       | LargeDependenceHighGrayLevelEmphasis | 1785.337748  |
| wavelet-LLH | gldm       | SmallDependenceLowGrayLevelEmphasis  | 0.022745397  |
| wavelet-LLH | gldm       | LowGrayLevelEmphasis                 | 0.024954144  |
| wavelet-LLH | glcm       | JointAverage                         | 19.79955812  |
| wavelet-LLH | glcm       | SumAverage                           | 39.59911624  |
| wavelet-LLH | glcm       | JointEntropy                         | 7.404943683  |
| wavelet-LLH | glcm       | ClusterShade                         | 5310.805939  |
| wavelet-LLH | glcm       | MaximumProbability                   | 0.014886444  |
| wavelet-LLH | glcm       | Idmn                                 | 0.942578702  |
| wavelet-LLH | glcm       | JointEnergy                          | 0.006301361  |
| wavelet-LLH | glcm       | Contrast                             | 184.8335147  |
| wavelet-LLH | glcm       | DifferenceEntropy                    | 4.42786635   |
| wavelet-LLH | glcm       | InverseVariance                      | 0.10756771   |
| wavelet-LLH | glcm       | DifferenceVariance                   | 71.62754661  |
| wavelet-LLH | glcm       | Idn                                  | 0.848217213  |
| wavelet-LLH | glcm       | Idm                                  | 0.106362709  |
| wavelet-LLH | glcm       | Correlation                          | 0.288951425  |
| wavelet-LLH | glcm       | Autocorrelation                      | 431.8999564  |
| wavelet-LLH | glcm       | SumEntropy                           | 5.422928026  |
| wavelet-LLH | glcm       | SumSquares                           | 132.1451925  |
| wavelet-LLH | glcm       | ClusterProminence                    | 383404.9416  |
| wavelet-LLH | glcm       | Imc2                                 | 0.998446389  |
| wavelet-LLH | glcm       | Imc1                                 | -0.562442078 |
| wavelet-LLH | glcm       | DifferenceAverage                    | 10.24896887  |
| wavelet-LLH | glcm       | Id                                   | 0.187567654  |
| wavelet-LLH | glcm       | ClusterTendency                      | 343.7472555  |
| wavelet-LLH | firstorder | InterquartileRange                   | 378.6047538  |
| wavelet-LLH | firstorder | Skewness                             | 0.60893214   |
| wavelet-LLH | firstorder | Uniformity                           | 0.03258629   |
| wavelet-LLH | firstorder | Median                               | -94.03465402 |
| wavelet-LLH | firstorder | Energy                               | 13322494.07  |
| wavelet-LLH | firstorder | RobustMeanAbsoluteDeviation          | 167.358252   |
| wavelet-LLH | firstorder | MeanAbsoluteDeviation                | 237.0144386  |
| wavelet-LLH | firstorder | TotalEnergy                          | 359707340    |
| wavelet-LLH | firstorder | Maximum                              | 702.9310334  |
| wavelet-LLH | firstorder | RootMeanSquared                      | 297.0327214  |
| wavelet-LLH | firstorder | 90Percentile                         | 391.4040051  |
| wavelet-LLH | firstorder | Minimum                              | -538.4847858 |
| wavelet-LLH | firstorder | Entropy                              | 5.241589672  |
| wavelet-LLH | firstorder | Range                                | 1241.415819  |

|             |            |                                      |              |
|-------------|------------|--------------------------------------|--------------|
| wavelet-LLH | firstorder | Variance                             | 86158.04187  |
| wavelet-LLH | firstorder | 10Percentile                         | -389.6067828 |
| wavelet-LLH | firstorder | Kurtosis                             | 2.685252091  |
| wavelet-LLH | firstorder | Mean                                 | -45.50160109 |
| wavelet-LLH | glrlm      | ShortRunLowGrayLevelEmphasis         | 0.025358817  |
| wavelet-LLH | glrlm      | GrayLevelVariance                    | 139.3388724  |
| wavelet-LLH | glrlm      | LowGrayLevelRunEmphasis              | 0.025468964  |
| wavelet-LLH | glrlm      | GrayLevelNonUniformityNormalized     | 0.032146962  |
| wavelet-LLH | glrlm      | RunVariance                          | 0.028089632  |
| wavelet-LLH | glrlm      | GrayLevelNonUniformity               | 4.728505957  |
| wavelet-LLH | glrlm      | LongRunEmphasis                      | 1.082958538  |
| wavelet-LLH | glrlm      | ShortRunHighGrayLevelEmphasis        | 560.4212544  |
| wavelet-LLH | glrlm      | RunLengthNonUniformity               | 139.7816777  |
| wavelet-LLH | glrlm      | ShortRunEmphasis                     | 0.980455751  |
| wavelet-LLH | glrlm      | LongRunHighGrayLevelEmphasis         | 607.6158865  |
| wavelet-LLH | glrlm      | RunPercentage                        | 0.974019358  |
| wavelet-LLH | glrlm      | LongRunLowGrayLevelEmphasis          | 0.025966669  |
| wavelet-LLH | glrlm      | RunEntropy                           | 5.338734104  |
| wavelet-LLH | glrlm      | HighGrayLevelRunEmphasis             | 569.7717223  |
| wavelet-LLH | glrlm      | RunLengthNonUniformityNormalized     | 0.949959837  |
| wavelet-LLH | glszm      | GrayLevelVariance                    | 150.7700674  |
| wavelet-LLH | glszm      | ZoneVariance                         | 0.644915185  |
| wavelet-LLH | glszm      | GrayLevelNonUniformityNormalized     | 0.028650272  |
| wavelet-LLH | glszm      | SizeZoneNonUniformityNormalized      | 0.64434705   |
| wavelet-LLH | glszm      | SizeZoneNonUniformity                | 71.52252252  |
| wavelet-LLH | glszm      | GrayLevelNonUniformity               | 3.18018018   |
| wavelet-LLH | glszm      | LargeAreaEmphasis                    | 2.495495495  |
| wavelet-LLH | glszm      | SmallAreaHighGrayLevelEmphasis       | 530.4723198  |
| wavelet-LLH | glszm      | ZonePercentage                       | 0.735099338  |
| wavelet-LLH | glszm      | LargeAreaLowGrayLevelEmphasis        | 0.040516033  |
| wavelet-LLH | glszm      | LargeAreaHighGrayLevelEmphasis       | 1245.405405  |
| wavelet-LLH | glszm      | HighGrayLevelZoneEmphasis            | 610.8918919  |
| wavelet-LLH | glszm      | SmallAreaEmphasis                    | 0.827625125  |
| wavelet-LLH | glszm      | LowGrayLevelZoneEmphasis             | 0.031689989  |
| wavelet-LLH | glszm      | ZoneEntropy                          | 5.781770569  |
| wavelet-LLH | glszm      | SmallAreaLowGrayLevelEmphasis        | 0.030488986  |
| wavelet-LLH | ngtdm      | Coarseness                           | 0.037222974  |
| wavelet-LLH | ngtdm      | Complexity                           | 6355.469531  |
| wavelet-LLH | ngtdm      | Strength                             | 32.78331038  |
| wavelet-LLH | ngtdm      | Contrast                             | 0.864994354  |
| wavelet-LLH | ngtdm      | Busyness                             | 0.035062876  |
| wavelet-LLL | gldm       | GrayLevelVariance                    | 571.7078198  |
| wavelet-LLL | gldm       | HighGrayLevelEmphasis                | 2604.463576  |
| wavelet-LLL | gldm       | DependenceEntropy                    | 6.277751428  |
| wavelet-LLL | gldm       | DependenceNonUniformity              | 84.20529801  |
| wavelet-LLL | gldm       | GrayLevelNonUniformity               | 2.721854305  |
| wavelet-LLL | gldm       | SmallDependenceEmphasis              | 0.77442053   |
| wavelet-LLL | gldm       | SmallDependenceHighGrayLevelEmphasis | 1749.330022  |
| wavelet-LLL | gldm       | DependenceNonUniformityNormalized    | 0.55765098   |
| wavelet-LLL | gldm       | LargeDependenceEmphasis              | 2.390728477  |
| wavelet-LLL | gldm       | LargeDependenceLowGrayLevelEmphasis  | 0.010858945  |
| wavelet-LLL | gldm       | DependenceVariance                   | 0.474979168  |
| wavelet-LLL | gldm       | LargeDependenceHighGrayLevelEmphasis | 9150.980132  |
| wavelet-LLL | gldm       | SmallDependenceLowGrayLevelEmphasis  | 0.009319659  |
| wavelet-LLL | gldm       | LowGrayLevelEmphasis                 | 0.009612166  |

|             |            |                                  |              |
|-------------|------------|----------------------------------|--------------|
| wavelet-LLL | glcm       | JointAverage                     | 52.25465339  |
| wavelet-LLL | glcm       | SumAverage                       | 104.5093068  |
| wavelet-LLL | glcm       | JointEntropy                     | 7.572516157  |
| wavelet-LLL | glcm       | ClusterShade                     | -13769.77132 |
| wavelet-LLL | glcm       | MaximumProbability               | 0.011542899  |
| wavelet-LLL | glcm       | Idmn                             | 0.922083004  |
| wavelet-LLL | glcm       | JointEnergy                      | 0.005392432  |
| wavelet-LLL | glcm       | Contrast                         | 713.7314456  |
| wavelet-LLL | glcm       | DifferenceEntropy                | 5.234381081  |
| wavelet-LLL | glcm       | InverseVariance                  | 0.064475309  |
| wavelet-LLL | glcm       | DifferenceVariance               | 253.6381924  |
| wavelet-LLL | glcm       | Idn                              | 0.820198178  |
| wavelet-LLL | glcm       | Idm                              | 0.061145153  |
| wavelet-LLL | glcm       | Correlation                      | 0.343604132  |
| wavelet-LLL | glcm       | Autocorrelation                  | 2916.342228  |
| wavelet-LLL | glcm       | SumEntropy                       | 6.074235593  |
| wavelet-LLL | glcm       | SumSquares                       | 541.3861939  |
| wavelet-LLL | glcm       | ClusterProminence                | 4594596.537  |
| wavelet-LLL | glcm       | Imc2                             | 0.999847375  |
| wavelet-LLL | glcm       | Imc1                             | -0.697633198 |
| wavelet-LLL | glcm       | DifferenceAverage                | 21.14868261  |
| wavelet-LLL | glcm       | Id                               | 0.118359784  |
| wavelet-LLL | glcm       | ClusterTendency                  | 1451.81333   |
| wavelet-LLL | firstorder | InterquartileRange               | 1017.252954  |
| wavelet-LLL | firstorder | Skewness                         | 0.012645827  |
| wavelet-LLL | firstorder | Uniformity                       | 0.018025525  |
| wavelet-LLL | firstorder | Median                           | -690.2379325 |
| wavelet-LLL | firstorder | Energy                           | 119739042.1  |
| wavelet-LLL | firstorder | RobustMeanAbsoluteDeviation      | 419.1896247  |
| wavelet-LLL | firstorder | MeanAbsoluteDeviation            | 519.1042702  |
| wavelet-LLL | firstorder | TotalEnergy                      | 3232954136   |
| wavelet-LLL | firstorder | Maximum                          | 352.9849878  |
| wavelet-LLL | firstorder | RootMeanSquared                  | 890.4907572  |
| wavelet-LLL | firstorder | 90Percentile                     | 177.4323365  |
| wavelet-LLL | firstorder | Minimum                          | -1754.841784 |
| wavelet-LLL | firstorder | Entropy                          | 5.955042448  |
| wavelet-LLL | firstorder | Range                            | 2107.826772  |
| wavelet-LLL | firstorder | Variance                         | 356556.9331  |
| wavelet-LLL | firstorder | 10Percentile                     | -1468.512608 |
| wavelet-LLL | firstorder | Kurtosis                         | 1.778017679  |
| wavelet-LLL | firstorder | Mean                             | -660.6185401 |
| wavelet-LLL | glrlm      | ShortRunLowGrayLevelEmphasis     | 0.009730267  |
| wavelet-LLL | glrlm      | GrayLevelVariance                | 567.4442676  |
| wavelet-LLL | glrlm      | LowGrayLevelRunEmphasis          | 0.009742254  |
| wavelet-LLL | glrlm      | GrayLevelNonUniformityNormalized | 0.017907883  |
| wavelet-LLL | glrlm      | RunVariance                      | 0.014757611  |
| wavelet-LLL | glrlm      | GrayLevelNonUniformity           | 2.664282624  |
| wavelet-LLL | glrlm      | LongRunEmphasis                  | 1.045589747  |
| wavelet-LLL | glrlm      | ShortRunHighGrayLevelEmphasis    | 2528.684749  |
| wavelet-LLL | glrlm      | RunLengthNonUniformity           | 144.4355217  |
| wavelet-LLL | glrlm      | ShortRunEmphasis                 | 0.988602563  |
| wavelet-LLL | glrlm      | LongRunHighGrayLevelEmphasis     | 2775.879976  |
| wavelet-LLL | glrlm      | RunPercentage                    | 0.985226694  |
| wavelet-LLL | glrlm      | LongRunLowGrayLevelEmphasis      | 0.009790205  |
| wavelet-LLL | glrlm      | RunEntropy                       | 5.995343103  |

|             |       |                                      |              |
|-------------|-------|--------------------------------------|--------------|
| wavelet-LLL | glrlm | HighGrayLevelRunEmphasis             | 2578.123794  |
| wavelet-LLL | glrlm | RunLengthNonUniformityNormalized     | 0.970484779  |
| wavelet-LLL | glszm | GrayLevelVariance                    | 520.7040186  |
| wavelet-LLL | glszm | ZoneVariance                         | 0.333648274  |
| wavelet-LLL | glszm | GrayLevelNonUniformityNormalized     | 0.017258755  |
| wavelet-LLL | glszm | SizeZoneNonUniformityNormalized      | 0.747417486  |
| wavelet-LLL | glszm | SizeZoneNonUniformity                | 94.17460317  |
| wavelet-LLL | glszm | GrayLevelNonUniformity               | 2.174603175  |
| wavelet-LLL | glszm | LargeAreaEmphasis                    | 1.76984127   |
| wavelet-LLL | glszm | SmallAreaHighGrayLevelEmphasis       | 1953.090388  |
| wavelet-LLL | glszm | ZonePercentage                       | 0.834437086  |
| wavelet-LLL | glszm | LargeAreaLowGrayLevelEmphasis        | 0.012019537  |
| wavelet-LLL | glszm | LargeAreaHighGrayLevelEmphasis       | 5849.222222  |
| wavelet-LLL | glszm | HighGrayLevelZoneEmphasis            | 2320.214286  |
| wavelet-LLL | glszm | SmallAreaEmphasis                    | 0.887497795  |
| wavelet-LLL | glszm | LowGrayLevelZoneEmphasis             | 0.011282827  |
| wavelet-LLL | glszm | ZoneEntropy                          | 6.187209487  |
| wavelet-LLL | glszm | SmallAreaLowGrayLevelEmphasis        | 0.011111109  |
| wavelet-LLL | ngtdm | Coarseness                           | 0.025473436  |
| wavelet-LLL | ngtdm | Complexity                           | 34628.5383   |
| wavelet-LLL | ngtdm | Strength                             | 75.75312549  |
| wavelet-LLL | ngtdm | Contrast                             | 3.367454693  |
| wavelet-LLL | ngtdm | Busyness                             | 0.013953148  |
| wavelet-HHL | gldm  | GrayLevelVariance                    | 7.586684795  |
| wavelet-HHL | gldm  | HighGrayLevelEmphasis                | 66.90728477  |
| wavelet-HHL | gldm  | DependenceEntropy                    | 5.501252714  |
| wavelet-HHL | gldm  | DependenceNonUniformity              | 26.8013245   |
| wavelet-HHL | gldm  | GrayLevelNonUniformity               | 16.8013245   |
| wavelet-HHL | gldm  | SmallDependenceEmphasis              | 0.315504685  |
| wavelet-HHL | gldm  | SmallDependenceHighGrayLevelEmphasis | 24.32724178  |
| wavelet-HHL | gldm  | DependenceNonUniformityNormalized    | 0.177492215  |
| wavelet-HHL | gldm  | LargeDependenceEmphasis              | 12.68211921  |
| wavelet-HHL | gldm  | LargeDependenceLowGrayLevelEmphasis  | 0.308438527  |
| wavelet-HHL | gldm  | DependenceVariance                   | 3.280382439  |
| wavelet-HHL | gldm  | LargeDependenceHighGrayLevelEmphasis | 724.8145695  |
| wavelet-HHL | gldm  | SmallDependenceLowGrayLevelEmphasis  | 0.017068684  |
| wavelet-HHL | gldm  | LowGrayLevelEmphasis                 | 0.03580729   |
| wavelet-HHL | glcm  | JointAverage                         | 7.729629695  |
| wavelet-HHL | glcm  | SumAverage                           | 15.45925939  |
| wavelet-HHL | glcm  | JointEntropy                         | 6.138218557  |
| wavelet-HHL | glcm  | ClusterShade                         | 8.740594476  |
| wavelet-HHL | glcm  | MaximumProbability                   | 0.047955947  |
| wavelet-HHL | glcm  | Idmn                                 | 0.951237876  |
| wavelet-HHL | glcm  | JointEnergy                          | 0.018533148  |
| wavelet-HHL | glcm  | Contrast                             | 14.66229062  |
| wavelet-HHL | glcm  | DifferenceEntropy                    | 2.987054929  |
| wavelet-HHL | glcm  | InverseVariance                      | 0.301793414  |
| wavelet-HHL | glcm  | DifferenceVariance                   | 5.879474867  |
| wavelet-HHL | glcm  | Idn                                  | 0.85757331   |
| wavelet-HHL | glcm  | Idm                                  | 0.295830108  |
| wavelet-HHL | glcm  | Correlation                          | -0.015454795 |
| wavelet-HHL | glcm  | Autocorrelation                      | 59.66044549  |
| wavelet-HHL | glcm  | SumEntropy                           | 3.784039283  |
| wavelet-HHL | glcm  | SumSquares                           | 7.233352641  |
| wavelet-HHL | glcm  | ClusterProminence                    | 662.3588682  |



|             |            |                                  |              |
|-------------|------------|----------------------------------|--------------|
| wavelet-HHL | glcm       | Imc2                             | 0.836559576  |
| wavelet-HHL | glcm       | Imc1                             | -0.180661941 |
| wavelet-HHL | glcm       | DifferenceAverage                | 2.941705991  |
| wavelet-HHL | glcm       | Id                               | 0.380716386  |
| wavelet-HHL | glcm       | ClusterTendency                  | 14.27111995  |
| wavelet-HHL | firstorder | InterquartileRange               | 75.37546556  |
| wavelet-HHL | firstorder | Skewness                         | 0.098985312  |
| wavelet-HHL | firstorder | Uniformity                       | 0.11126705   |
| wavelet-HHL | firstorder | Median                           | 4.552918427  |
| wavelet-HHL | firstorder | Energy                           | 707163.0669  |
| wavelet-HHL | firstorder | RobustMeanAbsoluteDeviation      | 35.6659426   |
| wavelet-HHL | firstorder | MeanAbsoluteDeviation            | 53.03291653  |
| wavelet-HHL | firstorder | TotalEnergy                      | 19093402.81  |
| wavelet-HHL | firstorder | Maximum                          | 203.5504304  |
| wavelet-HHL | firstorder | RootMeanSquared                  | 68.43390329  |
| wavelet-HHL | firstorder | 90Percentile                     | 86.2682097   |
| wavelet-HHL | firstorder | Minimum                          | -173.8099258 |
| wavelet-HHL | firstorder | Entropy                          | 3.425079342  |
| wavelet-HHL | firstorder | Range                            | 377.3603562  |
| wavelet-HHL | firstorder | Variance                         | 4663.527999  |
| wavelet-HHL | firstorder | 10Percentile                     | -93.44540379 |
| wavelet-HHL | firstorder | Kurtosis                         | 3.125345277  |
| wavelet-HHL | firstorder | Mean                             | 4.435213639  |
| wavelet-HHL | glrlm      | ShortRunLowGrayLevelEmphasis     | 0.035299002  |
| wavelet-HHL | glrlm      | GrayLevelVariance                | 7.937499536  |
| wavelet-HHL | glrlm      | LowGrayLevelRunEmphasis          | 0.036770175  |
| wavelet-HHL | glrlm      | GrayLevelNonUniformityNormalized | 0.10761698   |
| wavelet-HHL | glrlm      | RunVariance                      | 0.112512532  |
| wavelet-HHL | glrlm      | GrayLevelNonUniformity           | 14.96257231  |
| wavelet-HHL | glrlm      | LongRunEmphasis                  | 1.296240084  |
| wavelet-HHL | glrlm      | ShortRunHighGrayLevelEmphasis    | 64.28669021  |
| wavelet-HHL | glrlm      | RunLengthNonUniformity           | 119.6917205  |
| wavelet-HHL | glrlm      | ShortRunEmphasis                 | 0.942181336  |
| wavelet-HHL | glrlm      | LongRunHighGrayLevelEmphasis     | 84.82199347  |
| wavelet-HHL | glrlm      | RunPercentage                    | 0.920529801  |
| wavelet-HHL | glrlm      | LongRunLowGrayLevelEmphasis      | 0.043923346  |
| wavelet-HHL | glrlm      | RunEntropy                       | 3.802531894  |
| wavelet-HHL | glrlm      | HighGrayLevelRunEmphasis         | 67.67569895  |
| wavelet-HHL | glrlm      | RunLengthNonUniformityNormalized | 0.860142997  |
| wavelet-HHL | glszm      | GrayLevelVariance                | 13.57544379  |
| wavelet-HHL | glszm      | ZoneVariance                     | 14.97152367  |
| wavelet-HHL | glszm      | GrayLevelNonUniformityNormalized | 0.083579882  |
| wavelet-HHL | glszm      | SizeZoneNonUniformityNormalized  | 0.424556213  |
| wavelet-HHL | glszm      | SizeZoneNonUniformity            | 22.07692308  |
| wavelet-HHL | glszm      | GrayLevelNonUniformity           | 4.346153846  |
| wavelet-HHL | glszm      | LargeAreaEmphasis                | 23.40384615  |
| wavelet-HHL | glszm      | SmallAreaHighGrayLevelEmphasis   | 54.39577034  |
| wavelet-HHL | glszm      | ZonePercentage                   | 0.344370861  |
| wavelet-HHL | glszm      | LargeAreaLowGrayLevelEmphasis    | 0.545315591  |
| wavelet-HHL | glszm      | LargeAreaHighGrayLevelEmphasis   | 1367.096154  |
| wavelet-HHL | glszm      | HighGrayLevelZoneEmphasis        | 78.19230769  |
| wavelet-HHL | glszm      | SmallAreaEmphasis                | 0.672381131  |
| wavelet-HHL | glszm      | LowGrayLevelZoneEmphasis         | 0.054659865  |
| wavelet-HHL | glszm      | ZoneEntropy                      | 4.66439543   |
| wavelet-HHL | glszm      | SmallAreaLowGrayLevelEmphasis    | 0.04251131   |

|             |            |                                      |              |
|-------------|------------|--------------------------------------|--------------|
| wavelet-HHL | ngtdm      | Coarseness                           | 0.040972119  |
| wavelet-HHL | ngtdm      | Complexity                           | 181.8124986  |
| wavelet-HHL | ngtdm      | Strength                             | 2.476414794  |
| wavelet-HHL | ngtdm      | Contrast                             | 0.158725687  |
| wavelet-HHL | ngtdm      | Busyness                             | 0.22319725   |
| wavelet-HLH | gldm       | GrayLevelVariance                    | 32.63391956  |
| wavelet-HLH | gldm       | HighGrayLevelEmphasis                | 308.7218543  |
| wavelet-HLH | gldm       | DependenceEntropy                    | 5.589245803  |
| wavelet-HLH | gldm       | DependenceNonUniformity              | 41.86092715  |
| wavelet-HLH | gldm       | GrayLevelNonUniformity               | 10.25827815  |
| wavelet-HLH | gldm       | SmallDependenceEmphasis              | 0.5114561    |
| wavelet-HLH | gldm       | SmallDependenceHighGrayLevelEmphasis | 175.5697326  |
| wavelet-HLH | gldm       | DependenceNonUniformityNormalized    | 0.277224683  |
| wavelet-HLH | gldm       | LargeDependenceEmphasis              | 8.01986755   |
| wavelet-HLH | gldm       | LargeDependenceLowGrayLevelEmphasis  | 0.043480433  |
| wavelet-HLH | gldm       | DependenceVariance                   | 2.739002675  |
| wavelet-HLH | gldm       | LargeDependenceHighGrayLevelEmphasis | 2110.496689  |
| wavelet-HLH | gldm       | SmallDependenceLowGrayLevelEmphasis  | 0.011419086  |
| wavelet-HLH | gldm       | LowGrayLevelEmphasis                 | 0.013709699  |
| wavelet-HLH | glcm       | JointAverage                         | 16.48909809  |
| wavelet-HLH | glcm       | SumAverage                           | 32.97819618  |
| wavelet-HLH | glcm       | JointEntropy                         | 6.878831946  |
| wavelet-HLH | glcm       | ClusterShade                         | -10.73012671 |
| wavelet-HLH | glcm       | MaximumProbability                   | 0.03369157   |
| wavelet-HLH | glcm       | Idmn                                 | 0.971519981  |
| wavelet-HLH | glcm       | JointEnergy                          | 0.010492529  |
| wavelet-HLH | glcm       | Contrast                             | 55.82163597  |
| wavelet-HLH | glcm       | DifferenceEntropy                    | 3.708533349  |
| wavelet-HLH | glcm       | InverseVariance                      | 0.197985617  |
| wavelet-HLH | glcm       | DifferenceVariance                   | 26.08938749  |
| wavelet-HLH | glcm       | Idn                                  | 0.893521068  |
| wavelet-HLH | glcm       | Idm                                  | 0.194535771  |
| wavelet-HLH | glcm       | Correlation                          | 0.033469335  |
| wavelet-HLH | glcm       | Autocorrelation                      | 272.7335498  |
| wavelet-HLH | glcm       | SumEntropy                           | 4.53774636   |
| wavelet-HLH | glcm       | SumSquares                           | 28.66446959  |
| wavelet-HLH | glcm       | ClusterProminence                    | 18985.18496  |
| wavelet-HLH | glcm       | Imc2                                 | 0.973701069  |
| wavelet-HLH | glcm       | Imc1                                 | -0.355346726 |
| wavelet-HLH | glcm       | DifferenceAverage                    | 5.372903555  |
| wavelet-HLH | glcm       | Id                                   | 0.284600995  |
| wavelet-HLH | glcm       | ClusterTendency                      | 58.83624239  |
| wavelet-HLH | firstorder | InterquartileRange                   | 138.6815192  |
| wavelet-HLH | firstorder | Skewness                             | 0.511681763  |
| wavelet-HLH | firstorder | Uniformity                           | 0.067935617  |
| wavelet-HLH | firstorder | Median                               | -0.024763378 |
| wavelet-HLH | firstorder | Energy                               | 3027876.168  |
| wavelet-HLH | firstorder | RobustMeanAbsoluteDeviation          | 63.79212865  |
| wavelet-HLH | firstorder | MeanAbsoluteDeviation                | 102.1908421  |
| wavelet-HLH | firstorder | TotalEnergy                          | 81752656.54  |
| wavelet-HLH | firstorder | Maximum                              | 621.6234728  |
| wavelet-HLH | firstorder | RootMeanSquared                      | 141.6056498  |
| wavelet-HLH | firstorder | 90Percentile                         | 159.0196497  |
| wavelet-HLH | firstorder | Minimum                              | -387.9260552 |
| wavelet-HLH | firstorder | Entropy                              | 4.268044267  |

|             |            |                                  |              |
|-------------|------------|----------------------------------|--------------|
| wavelet-HLH | firstorder | Range                            | 1009.549528  |
| wavelet-HLH | firstorder | Variance                         | 20044.09956  |
| wavelet-HLH | firstorder | 10Percentile                     | -170.2897044 |
| wavelet-HLH | firstorder | Kurtosis                         | 5.586697062  |
| wavelet-HLH | firstorder | Mean                             | 2.839101629  |
| wavelet-HLH | glrlm      | ShortRunLowGrayLevelEmphasis     | 0.014045031  |
| wavelet-HLH | glrlm      | GrayLevelVariance                | 34.07517031  |
| wavelet-HLH | glrlm      | LowGrayLevelRunEmphasis          | 0.014204671  |
| wavelet-HLH | glrlm      | GrayLevelNonUniformityNormalized | 0.064036247  |
| wavelet-HLH | glrlm      | RunVariance                      | 0.062918509  |
| wavelet-HLH | glrlm      | GrayLevelNonUniformity           | 9.188729427  |
| wavelet-HLH | glrlm      | LongRunEmphasis                  | 1.172496392  |
| wavelet-HLH | glrlm      | ShortRunHighGrayLevelEmphasis    | 301.6411687  |
| wavelet-HLH | glrlm      | RunLengthNonUniformity           | 130.7250521  |
| wavelet-HLH | glrlm      | ShortRunEmphasis                 | 0.963933691  |
| wavelet-HLH | glrlm      | LongRunHighGrayLevelEmphasis     | 356.3776983  |
| wavelet-HLH | glrlm      | RunPercentage                    | 0.950076414  |
| wavelet-HLH | glrlm      | LongRunLowGrayLevelEmphasis      | 0.014955877  |
| wavelet-HLH | glrlm      | RunEntropy                       | 4.517743216  |
| wavelet-HLH | glrlm      | HighGrayLevelRunEmphasis         | 311.1564603  |
| wavelet-HLH | glrlm      | RunLengthNonUniformityNormalized | 0.910517925  |
| wavelet-HLH | glszm      | GrayLevelVariance                | 51.40309156  |
| wavelet-HLH | glszm      | ZoneVariance                     | 5.61976483   |
| wavelet-HLH | glszm      | GrayLevelNonUniformityNormalized | 0.049279958  |
| wavelet-HLH | glszm      | SizeZoneNonUniformityNormalized  | 0.572995112  |
| wavelet-HLH | glszm      | SizeZoneNonUniformity            | 49.85057471  |
| wavelet-HLH | glszm      | GrayLevelNonUniformity           | 4.287356322  |
| wavelet-HLH | glszm      | LargeAreaEmphasis                | 8.632183908  |
| wavelet-HLH | glszm      | SmallAreaHighGrayLevelEmphasis   | 275.6020906  |
| wavelet-HLH | glszm      | ZonePercentage                   | 0.57615894   |
| wavelet-HLH | glszm      | LargeAreaLowGrayLevelEmphasis    | 0.052026042  |
| wavelet-HLH | glszm      | LargeAreaHighGrayLevelEmphasis   | 2320.034483  |
| wavelet-HLH | glszm      | HighGrayLevelZoneEmphasis        | 336.8965517  |
| wavelet-HLH | glszm      | SmallAreaEmphasis                | 0.783896733  |
| wavelet-HLH | glszm      | LowGrayLevelZoneEmphasis         | 0.020483674  |
| wavelet-HLH | glszm      | ZoneEntropy                      | 5.217617531  |
| wavelet-HLH | glszm      | SmallAreaLowGrayLevelEmphasis    | 0.019310322  |
| wavelet-HLH | ngtdm      | Coarseness                       | 0.041839634  |
| wavelet-HLH | ngtdm      | Complexity                       | 1382.132381  |
| wavelet-HLH | ngtdm      | Strength                         | 12.58697049  |
| wavelet-HLH | ngtdm      | Contrast                         | 0.319460152  |
| wavelet-HLH | ngtdm      | Busyness                         | 0.048482243  |

| Image type | Feature Class | Feature Name                         |                                                                                                                                                                                                                                                                                                                                                                                                                                              |
|------------|---------------|--------------------------------------|----------------------------------------------------------------------------------------------------------------------------------------------------------------------------------------------------------------------------------------------------------------------------------------------------------------------------------------------------------------------------------------------------------------------------------------------|
| general    | info          | BoundingBox                          | 15: RTSTRUCT: C99-DNU_segment_ITV<br>(0, 1, 1, 7, 5, 4)                                                                                                                                                                                                                                                                                                                                                                                      |
| general    | info          | EnabledImageTypes                    | {u'Original': {}, u'Wavelet': {}}                                                                                                                                                                                                                                                                                                                                                                                                            |
|            |               |                                      | {'distances': [1], 'additionalInfo': True,<br>'force2D': False, 'interpolator': 'sitkBSpline',<br>'resampledPixelSpacing': [3.0], 'label': 1,<br>'normalizeScale': 1, 'normalize': False,<br>'force2Ddimension': 0, 'removeOutliers':<br>None, 'minimumROISize': None, u'binWidth':<br>25.0, 'minimumROIDimensions': 1,<br>u'correctMask': True, 'preCrop': False,<br>u'symmetricalGLCM': True,<br>'resegmentRange': None, 'padDistance': 5} |
| general    | info          | GeneralSettings                      | 5c611d00beda942dd7065957700871e83b5e<br>2a09                                                                                                                                                                                                                                                                                                                                                                                                 |
| general    | info          | ImageHash                            | (0.9765624999999998,<br>0.9765624999999998, 1.9999999999999999)<br>ffce53113f3801463bc55d8963e9451ca138d<br>eb0                                                                                                                                                                                                                                                                                                                              |
| general    | info          | ImageSpacing                         | 1.13.1                                                                                                                                                                                                                                                                                                                                                                                                                                       |
| general    | info          | MaskHash                             | 0.5.2                                                                                                                                                                                                                                                                                                                                                                                                                                        |
| general    | info          | NumpyVersion                         | 1.1.0                                                                                                                                                                                                                                                                                                                                                                                                                                        |
| general    | info          | PyWaveletVersion                     | 1.3.0.post102+g1b0eb74                                                                                                                                                                                                                                                                                                                                                                                                                       |
| general    | info          | SimpleITKVersion                     |                                                                                                                                                                                                                                                                                                                                                                                                                                              |
| general    | info          | Version                              |                                                                                                                                                                                                                                                                                                                                                                                                                                              |
| general    | info          | VolumeNum                            | 1                                                                                                                                                                                                                                                                                                                                                                                                                                            |
| general    | info          | VoxelNum                             | 77                                                                                                                                                                                                                                                                                                                                                                                                                                           |
| original   | shape         | Maximum3DDiameter                    | 19.20937271                                                                                                                                                                                                                                                                                                                                                                                                                                  |
| original   | shape         | Maximum2DDiameterSlice               | 16.15549442                                                                                                                                                                                                                                                                                                                                                                                                                                  |
| original   | shape         | Sphericity                           | 0.879125677                                                                                                                                                                                                                                                                                                                                                                                                                                  |
| original   | shape         | MinorAxis                            | 14.53929508                                                                                                                                                                                                                                                                                                                                                                                                                                  |
| original   | shape         | Elongation                           | 0.81066458                                                                                                                                                                                                                                                                                                                                                                                                                                   |
| original   | shape         | SurfaceVolumeRatio                   | 0.43100436                                                                                                                                                                                                                                                                                                                                                                                                                                   |
| original   | shape         | Volume                               | 2079                                                                                                                                                                                                                                                                                                                                                                                                                                         |
| original   | shape         | MajorAxis                            | 17.93503188                                                                                                                                                                                                                                                                                                                                                                                                                                  |
| original   | shape         | SurfaceArea                          | 896.0580638                                                                                                                                                                                                                                                                                                                                                                                                                                  |
| original   | shape         | Flatness                             | 0.654197168                                                                                                                                                                                                                                                                                                                                                                                                                                  |
| original   | shape         | LeastAxis                            | 11.73304706                                                                                                                                                                                                                                                                                                                                                                                                                                  |
| original   | shape         | Maximum2DDiameterColumn              | 18.97366596                                                                                                                                                                                                                                                                                                                                                                                                                                  |
| original   | shape         | Maximum2DDiameterRow                 | 13.41640786                                                                                                                                                                                                                                                                                                                                                                                                                                  |
| original   | gldm          | GrayLevelVariance                    | 57.3594198                                                                                                                                                                                                                                                                                                                                                                                                                                   |
| original   | gldm          | HighGrayLevelEmphasis                | 306.7532468                                                                                                                                                                                                                                                                                                                                                                                                                                  |
| original   | gldm          | DependenceEntropy                    | 5.220951151                                                                                                                                                                                                                                                                                                                                                                                                                                  |
| original   | gldm          | DependenceNonUniformity              | 33.96103896                                                                                                                                                                                                                                                                                                                                                                                                                                  |
| original   | gldm          | GrayLevelNonUniformity               | 4.064935065                                                                                                                                                                                                                                                                                                                                                                                                                                  |
| original   | gldm          | SmallDependenceEmphasis              | 0.687997835                                                                                                                                                                                                                                                                                                                                                                                                                                  |
| original   | gldm          | SmallDependenceHighGrayLevelEmphasis | 156.2829185                                                                                                                                                                                                                                                                                                                                                                                                                                  |
| original   | gldm          | DependenceNonUniformityNormalized    | 0.441052454                                                                                                                                                                                                                                                                                                                                                                                                                                  |
| original   | gldm          | LargeDependenceEmphasis              | 4.194805195                                                                                                                                                                                                                                                                                                                                                                                                                                  |
| original   | gldm          | LargeDependenceLowGrayLevelEmphasis  | 0.033732751                                                                                                                                                                                                                                                                                                                                                                                                                                  |
| original   | gldm          | DependenceVariance                   | 1.300387924                                                                                                                                                                                                                                                                                                                                                                                                                                  |
| original   | gldm          | LargeDependenceHighGrayLevelEmphasis | 1956.103896                                                                                                                                                                                                                                                                                                                                                                                                                                  |

|          |            |                                     |              |
|----------|------------|-------------------------------------|--------------|
| original | gldm       | SmallDependenceLowGrayLevelEmphasis | 0.024348632  |
| original | gldm       | LowGrayLevelEmphasis                | 0.025440058  |
| original | glcm       | JointAverage                        | 17.68659679  |
| original | glcm       | SumAverage                          | 35.37319358  |
| original | glcm       | JointEntropy                        | 6.224339249  |
| original | glcm       | ClusterShade                        | -232.4710172 |
| original | glcm       | MaximumProbability                  | 0.031793518  |
| original | glcm       | ldmn                                | 0.900786106  |
| original | glcm       | JointEnergy                         | 0.014309048  |
| original | glcm       | Contrast                            | 107.6249475  |
| original | glcm       | DifferenceEntropy                   | 3.989045102  |
| original | glcm       | InverseVariance                     | 0.129457748  |
| original | glcm       | DifferenceVariance                  | 36.43496392  |
| original | glcm       | ldn                                 | 0.796683592  |
| original | glcm       | ldm                                 | 0.123804247  |
| original | glcm       | Correlation                         | 0.070164346  |
| original | glcm       | Autocorrelation                     | 317.3928324  |
| original | glcm       | SumEntropy                          | 4.520192266  |
| original | glcm       | SumSquares                          | 58.10397584  |
| original | glcm       | ClusterProminence                   | 38006.22467  |
| original | glcm       | lmc2                                | 0.996687837  |
| original | glcm       | lmc1                                | -0.578982966 |
| original | glcm       | DifferenceAverage                   | 8.351643805  |
| original | glcm       | ld                                  | 0.206079552  |
| original | glcm       | ClusterTendency                     | 124.7909558  |
| original | firstorder | InterquartileRange                  | 354          |
| original | firstorder | Skewness                            | 0.07805789   |
| original | firstorder | Uniformity                          | 0.052791364  |
| original | firstorder | Median                              | -320         |
| original | firstorder | Energy                              | 9368754      |
| original | firstorder | RobustMeanAbsoluteDeviation         | 130.0773985  |
| original | firstorder | MeanAbsoluteDeviation               | 163.553719   |
| original | firstorder | TotalEnergy                         | 252956358    |
| original | firstorder | Maximum                             | 35           |
| original | firstorder | RootMeanSquared                     | 348.8153234  |
| original | firstorder | 90Percentile                        | -51          |
| original | firstorder | Minimum                             | -654         |
| original | firstorder | Entropy                             | 4.504606794  |
| original | firstorder | Range                               | 689          |
| original | firstorder | Variance                            | 35541.31456  |
| original | firstorder | 10Percentile                        | -527         |
| original | firstorder | Kurtosis                            | 1.830280835  |
| original | firstorder | Mean                                | -293.4805195 |
| original | glrlm      | ShortRunLowGrayLevelEmphasis        | 0.026013882  |
| original | glrlm      | GrayLevelVariance                   | 57.14498481  |
| original | glrlm      | LowGrayLevelRunEmphasis             | 0.026074471  |
| original | glrlm      | GrayLevelNonUniformityNormalized    | 0.051276157  |
| original | glrlm      | RunVariance                         | 0.029010726  |
| original | glrlm      | GrayLevelNonUniformity              | 3.843075317  |
| original | glrlm      | LongRunEmphasis                     | 1.086608739  |
| original | glrlm      | ShortRunHighGrayLevelEmphasis       | 291.0690801  |
| original | glrlm      | RunLengthNonUniformity              | 71.08799467  |
| original | glrlm      | ShortRunEmphasis                    | 0.979518638  |

|             |       |                                      |              |
|-------------|-------|--------------------------------------|--------------|
| original    | glrlm | LongRunHighGrayLevelEmphasis         | 344.970176   |
| original    | glrlm | RunPercentage                        | 0.973026973  |
| original    | glrlm | LongRunLowGrayLevelEmphasis          | 0.02632432   |
| original    | glrlm | RunEntropy                           | 4.604987003  |
| original    | glrlm | HighGrayLevelRunEmphasis             | 301.2638877  |
| original    | glrlm | RunLengthNonUniformityNormalized     | 0.948041165  |
| original    | glszm | GrayLevelVariance                    | 52.14281317  |
| original    | glszm | ZoneVariance                         | 1.350569406  |
| original    | glszm | GrayLevelNonUniformityNormalized     | 0.045860265  |
| original    | glszm | SizeZoneNonUniformityNormalized      | 0.721144968  |
| original    | glszm | SizeZoneNonUniformity                | 41.10526316  |
| original    | glszm | GrayLevelNonUniformity               | 2.614035088  |
| original    | glszm | LargeAreaEmphasis                    | 3.175438596  |
| original    | glszm | SmallAreaHighGrayLevelEmphasis       | 184.2463755  |
| original    | glszm | ZonePercentage                       | 0.74025974   |
| original    | glszm | LargeAreaLowGrayLevelEmphasis        | 0.038962518  |
| original    | glszm | LargeAreaHighGrayLevelEmphasis       | 1348.807018  |
| original    | glszm | HighGrayLevelZoneEmphasis            | 244.7192982  |
| original    | glszm | SmallAreaEmphasis                    | 0.871131823  |
| original    | glszm | LowGrayLevelZoneEmphasis             | 0.033221757  |
| original    | glszm | ZoneEntropy                          | 4.88947883   |
| original    | glszm | SmallAreaLowGrayLevelEmphasis        | 0.032665661  |
| original    | ngtdm | Coarseness                           | 0.040284417  |
| original    | ngtdm | Complexity                           | 2026.757827  |
| original    | ngtdm | Strength                             | 15.03172902  |
| original    | ngtdm | Contrast                             | 0.953528885  |
| original    | ngtdm | Busyness                             | 0.05837433   |
| wavelet-HHH | gldm  | GrayLevelVariance                    | 4.504638219  |
| wavelet-HHH | gldm  | HighGrayLevelEmphasis                | 35.54545455  |
| wavelet-HHH | gldm  | DependenceEntropy                    | 4.862719866  |
| wavelet-HHH | gldm  | DependenceNonUniformity              | 17.77922078  |
| wavelet-HHH | gldm  | GrayLevelNonUniformity               | 10.22077922  |
| wavelet-HHH | gldm  | SmallDependenceEmphasis              | 0.340419372  |
| wavelet-HHH | gldm  | SmallDependenceHighGrayLevelEmphasis | 14.7488456   |
| wavelet-HHH | gldm  | DependenceNonUniformityNormalized    | 0.230898971  |
| wavelet-HHH | gldm  | LargeDependenceEmphasis              | 8.792207792  |
| wavelet-HHH | gldm  | LargeDependenceLowGrayLevelEmphasis  | 0.366054268  |
| wavelet-HHH | gldm  | DependenceVariance                   | 1.978073874  |
| wavelet-HHH | gldm  | LargeDependenceHighGrayLevelEmphasis | 313.7532468  |
| wavelet-HHH | gldm  | SmallDependenceLowGrayLevelEmphasis  | 0.0326274    |
| wavelet-HHH | gldm  | LowGrayLevelEmphasis                 | 0.067782483  |
| wavelet-HHH | glcm  | JointAverage                         | 5.524957464  |
| wavelet-HHH | glcm  | SumAverage                           | 11.04991493  |
| wavelet-HHH | glcm  | JointEntropy                         | 5.310399946  |
| wavelet-HHH | glcm  | ClusterShade                         | -0.133606875 |
| wavelet-HHH | glcm  | MaximumProbability                   | 0.054985217  |
| wavelet-HHH | glcm  | Idmn                                 | 0.940331368  |
| wavelet-HHH | glcm  | JointEnergy                          | 0.029190306  |
| wavelet-HHH | glcm  | Contrast                             | 8.437923462  |
| wavelet-HHH | glcm  | DifferenceEntropy                    | 2.521622135  |
| wavelet-HHH | glcm  | InverseVariance                      | 0.330565806  |
| wavelet-HHH | glcm  | DifferenceVariance                   | 2.661732249  |
| wavelet-HHH | glcm  | Idn                                  | 0.835034295  |

|             |            |                                  |              |
|-------------|------------|----------------------------------|--------------|
| wavelet-HHH | glcm       | Idm                              | 0.307050864  |
| wavelet-HHH | glcm       | Correlation                      | -0.030360553 |
| wavelet-HHH | glcm       | Autocorrelation                  | 30.3830298   |
| wavelet-HHH | glcm       | SumEntropy                       | 3.270950159  |
| wavelet-HHH | glcm       | SumSquares                       | 4.067541797  |
| wavelet-HHH | glcm       | ClusterProminence                | 158.2216965  |
| wavelet-HHH | glcm       | Imc2                             | 0.862576199  |
| wavelet-HHH | glcm       | Imc1                             | -0.229757716 |
| wavelet-HHH | glcm       | DifferenceAverage                | 2.370378687  |
| wavelet-HHH | glcm       | Id                               | 0.39600983   |
| wavelet-HHH | glcm       | ClusterTendency                  | 7.832243726  |
| wavelet-HHH | firstorder | InterquartileRange               | 71.78974266  |
| wavelet-HHH | firstorder | Skewness                         | 0.018927189  |
| wavelet-HHH | firstorder | Uniformity                       | 0.132737392  |
| wavelet-HHH | firstorder | Median                           | 4.962882212  |
| wavelet-HHH | firstorder | Energy                           | 212816.3692  |
| wavelet-HHH | firstorder | RobustMeanAbsoluteDeviation      | 30.15379751  |
| wavelet-HHH | firstorder | MeanAbsoluteDeviation            | 42.70196781  |
| wavelet-HHH | firstorder | TotalEnergy                      | 5746041.968  |
| wavelet-HHH | firstorder | Maximum                          | 130.9351882  |
| wavelet-HHH | firstorder | RootMeanSquared                  | 52.57232114  |
| wavelet-HHH | firstorder | 90Percentile                     | 65.62027238  |
| wavelet-HHH | firstorder | Minimum                          | -116.0918038 |
| wavelet-HHH | firstorder | Entropy                          | 3.076726181  |
| wavelet-HHH | firstorder | Range                            | 247.026992   |
| wavelet-HHH | firstorder | Variance                         | 2759.855848  |
| wavelet-HHH | firstorder | 10Percentile                     | -70.69929006 |
| wavelet-HHH | firstorder | Kurtosis                         | 2.594354728  |
| wavelet-HHH | firstorder | Mean                             | 1.998274887  |
| wavelet-HHH | glrlm      | ShortRunLowGrayLevelEmphasis     | 0.067291108  |
| wavelet-HHH | glrlm      | GrayLevelVariance                | 4.656024722  |
| wavelet-HHH | glrlm      | LowGrayLevelRunEmphasis          | 0.06941932   |
| wavelet-HHH | glrlm      | GrayLevelNonUniformityNormalized | 0.13069659   |
| wavelet-HHH | glrlm      | RunVariance                      | 0.067954416  |
| wavelet-HHH | glrlm      | GrayLevelNonUniformity           | 9.443714371  |
| wavelet-HHH | glrlm      | LongRunEmphasis                  | 1.209942956  |
| wavelet-HHH | glrlm      | ShortRunHighGrayLevelEmphasis    | 33.94065913  |
| wavelet-HHH | glrlm      | RunLengthNonUniformity           | 63.91499768  |
| wavelet-HHH | glrlm      | ShortRunEmphasis                 | 0.95121767   |
| wavelet-HHH | glrlm      | LongRunHighGrayLevelEmphasis     | 42.7711705   |
| wavelet-HHH | glrlm      | RunPercentage                    | 0.938061938  |
| wavelet-HHH | glrlm      | LongRunLowGrayLevelEmphasis      | 0.078578075  |
| wavelet-HHH | glrlm      | RunEntropy                       | 3.35537382   |
| wavelet-HHH | glrlm      | HighGrayLevelRunEmphasis         | 35.63081723  |
| wavelet-HHH | glrlm      | RunLengthNonUniformityNormalized | 0.882105902  |
| wavelet-HHH | glszm      | GrayLevelVariance                | 7.626666667  |
| wavelet-HHH | glszm      | ZoneVariance                     | 6.912222222  |
| wavelet-HHH | glszm      | GrayLevelNonUniformityNormalized | 0.108888889  |
| wavelet-HHH | glszm      | SizeZoneNonUniformityNormalized  | 0.362222222  |
| wavelet-HHH | glszm      | SizeZoneNonUniformity            | 10.86666667  |
| wavelet-HHH | glszm      | GrayLevelNonUniformity           | 3.266666667  |
| wavelet-HHH | glszm      | LargeAreaEmphasis                | 13.5         |
| wavelet-HHH | glszm      | SmallAreaHighGrayLevelEmphasis   | 30.51838529  |

|             |            |                                      |              |
|-------------|------------|--------------------------------------|--------------|
| wavelet-HHH | glszm      | ZonePercentage                       | 0.38961039   |
| wavelet-HHH | glszm      | LargeAreaLowGrayLevelEmphasis        | 0.617769351  |
| wavelet-HHH | glszm      | LargeAreaHighGrayLevelEmphasis       | 446.1        |
| wavelet-HHH | glszm      | HighGrayLevelZoneEmphasis            | 41.26666667  |
| wavelet-HHH | glszm      | SmallAreaEmphasis                    | 0.62094393   |
| wavelet-HHH | glszm      | LowGrayLevelZoneEmphasis             | 0.096970079  |
| wavelet-HHH | glszm      | ZoneEntropy                          | 4.323231429  |
| wavelet-HHH | glszm      | SmallAreaLowGrayLevelEmphasis        | 0.068937331  |
| wavelet-HHH | ngtdm      | Coarseness                           | 0.066244505  |
| wavelet-HHH | ngtdm      | Complexity                           | 83.22929106  |
| wavelet-HHH | ngtdm      | Strength                             | 2.237437293  |
| wavelet-HHH | ngtdm      | Contrast                             | 0.153620859  |
| wavelet-HHH | ngtdm      | Busyness                             | 0.290590141  |
| wavelet-HLL | gldm       | GrayLevelVariance                    | 63.61443751  |
| wavelet-HLL | gldm       | HighGrayLevelEmphasis                | 339.5194805  |
| wavelet-HLL | gldm       | DependenceEntropy                    | 5.308676963  |
| wavelet-HLL | gldm       | DependenceNonUniformity              | 29.5974026   |
| wavelet-HLL | gldm       | GrayLevelNonUniformity               | 3.25974026   |
| wavelet-HLL | gldm       | SmallDependenceEmphasis              | 0.550955988  |
| wavelet-HLL | gldm       | SmallDependenceHighGrayLevelEmphasis | 207.3405483  |
| wavelet-HLL | gldm       | DependenceNonUniformityNormalized    | 0.384381852  |
| wavelet-HLL | gldm       | LargeDependenceEmphasis              | 3.519480519  |
| wavelet-HLL | gldm       | LargeDependenceLowGrayLevelEmphasis  | 0.142677114  |
| wavelet-HLL | gldm       | DependenceVariance                   | 0.536009445  |
| wavelet-HLL | gldm       | LargeDependenceHighGrayLevelEmphasis | 1098.220779  |
| wavelet-HLL | gldm       | SmallDependenceLowGrayLevelEmphasis  | 0.013665793  |
| wavelet-HLL | gldm       | LowGrayLevelEmphasis                 | 0.038445425  |
| wavelet-HLL | glcm       | JointAverage                         | 16.30875394  |
| wavelet-HLL | glcm       | SumAverage                           | 32.61750788  |
| wavelet-HLL | glcm       | JointEntropy                         | 6.250582024  |
| wavelet-HLL | glcm       | ClusterShade                         | -34.04330487 |
| wavelet-HLL | glcm       | MaximumProbability                   | 0.023967305  |
| wavelet-HLL | glcm       | ldmn                                 | 0.936031002  |
| wavelet-HLL | glcm       | JointEnergy                          | 0.013781126  |
| wavelet-HLL | glcm       | Contrast                             | 72.77142838  |
| wavelet-HLL | glcm       | DifferenceEntropy                    | 3.605423286  |
| wavelet-HLL | glcm       | InverseVariance                      | 0.125517692  |
| wavelet-HLL | glcm       | DifferenceVariance                   | 20.90115279  |
| wavelet-HLL | glcm       | ldn                                  | 0.83003621   |
| wavelet-HLL | glcm       | ldm                                  | 0.125652065  |
| wavelet-HLL | glcm       | Correlation                          | 0.420799458  |
| wavelet-HLL | glcm       | Autocorrelation                      | 294.1270309  |
| wavelet-HLL | glcm       | SumEntropy                           | 4.680323862  |
| wavelet-HLL | glcm       | SumSquares                           | 64.36525253  |
| wavelet-HLL | glcm       | ClusterProminence                    | 72137.96153  |
| wavelet-HLL | glcm       | lmc2                                 | 0.998684896  |
| wavelet-HLL | glcm       | lmc1                                 | -0.646369318 |
| wavelet-HLL | glcm       | DifferenceAverage                    | 6.947209952  |
| wavelet-HLL | glcm       | ld                                   | 0.216694086  |
| wavelet-HLL | glcm       | ClusterTendency                      | 184.6895817  |
| wavelet-HLL | firstorder | InterquartileRange                   | 287.9328096  |
| wavelet-HLL | firstorder | Skewness                             | -0.064553579 |
| wavelet-HLL | firstorder | Uniformity                           | 0.042334289  |



|             |            |                                  |              |
|-------------|------------|----------------------------------|--------------|
| wavelet-HLL | firstorder | Median                           | -50.94187353 |
| wavelet-HLL | firstorder | Energy                           | 3290595.172  |
| wavelet-HLL | firstorder | RobustMeanAbsoluteDeviation      | 125.5700302  |
| wavelet-HLL | firstorder | MeanAbsoluteDeviation            | 168.9363611  |
| wavelet-HLL | firstorder | TotalEnergy                      | 88846069.64  |
| wavelet-HLL | firstorder | Maximum                          | 310.815983   |
| wavelet-HLL | firstorder | RootMeanSquared                  | 206.7244597  |
| wavelet-HLL | firstorder | 90Percentile                     | 229.8496096  |
| wavelet-HLL | firstorder | Minimum                          | -449.0905967 |
| wavelet-HLL | firstorder | Entropy                          | 4.714539223  |
| wavelet-HLL | firstorder | Range                            | 759.9065797  |
| wavelet-HLL | firstorder | Variance                         | 40440.24545  |
| wavelet-HLL | firstorder | 10Percentile                     | -308.8296866 |
| wavelet-HLL | firstorder | Kurtosis                         | 2.130272564  |
| wavelet-HLL | firstorder | Mean                             | -47.90361972 |
| wavelet-HLL | grlm       | ShortRunLowGrayLevelEmphasis     | 0.037150169  |
| wavelet-HLL | grlm       | GrayLevelVariance                | 63.46581251  |
| wavelet-HLL | grlm       | LowGrayLevelRunEmphasis          | 0.038193081  |
| wavelet-HLL | grlm       | GrayLevelNonUniformityNormalized | 0.042364404  |
| wavelet-HLL | grlm       | RunVariance                      | 0.027830281  |
| wavelet-HLL | grlm       | GrayLevelNonUniformity           | 3.17051834   |
| wavelet-HLL | grlm       | LongRunEmphasis                  | 1.088817165  |
| wavelet-HLL | grlm       | ShortRunHighGrayLevelEmphasis    | 334.0170121  |
| wavelet-HLL | grlm       | RunLengthNonUniformity           | 70.79005038  |
| wavelet-HLL | grlm       | ShortRunEmphasis                 | 0.977795709  |
| wavelet-HLL | grlm       | LongRunHighGrayLevelEmphasis     | 367.3474143  |
| wavelet-HLL | grlm       | RunPercentage                    | 0.972027972  |
| wavelet-HLL | grlm       | LongRunLowGrayLevelEmphasis      | 0.042364727  |
| wavelet-HLL | grlm       | RunEntropy                       | 4.779471624  |
| wavelet-HLL | grlm       | HighGrayLevelRunEmphasis         | 340.6830925  |
| wavelet-HLL | grlm       | RunLengthNonUniformityNormalized | 0.944339439  |
| wavelet-HLL | glszm      | GrayLevelVariance                | 62.09763314  |
| wavelet-HLL | glszm      | ZoneVariance                     | 0.518860947  |
| wavelet-HLL | glszm      | GrayLevelNonUniformityNormalized | 0.041420118  |
| wavelet-HLL | glszm      | SizeZoneNonUniformityNormalized  | 0.481508876  |
| wavelet-HLL | glszm      | SizeZoneNonUniformity            | 25.03846154  |
| wavelet-HLL | glszm      | GrayLevelNonUniformity           | 2.153846154  |
| wavelet-HLL | glszm      | LargeAreaEmphasis                | 2.711538462  |
| wavelet-HLL | glszm      | SmallAreaHighGrayLevelEmphasis   | 277.3530983  |
| wavelet-HLL | glszm      | ZonePercentage                   | 0.675324675  |
| wavelet-HLL | glszm      | LargeAreaLowGrayLevelEmphasis    | 0.10799002   |
| wavelet-HLL | glszm      | LargeAreaHighGrayLevelEmphasis   | 860.0961538  |
| wavelet-HLL | glszm      | HighGrayLevelZoneEmphasis        | 361.6538462  |
| wavelet-HLL | glszm      | SmallAreaEmphasis                | 0.711672009  |
| wavelet-HLL | glszm      | LowGrayLevelZoneEmphasis         | 0.032250573  |
| wavelet-HLL | glszm      | ZoneEntropy                      | 5.195350055  |
| wavelet-HLL | glszm      | SmallAreaLowGrayLevelEmphasis    | 0.014193244  |
| wavelet-HLL | ngtdm      | Coarseness                       | 0.085345016  |
| wavelet-HLL | ngtdm      | Complexity                       | 1361.04908   |
| wavelet-HLL | ngtdm      | Strength                         | 28.6814057   |
| wavelet-HLL | ngtdm      | Contrast                         | 0.567805427  |
| wavelet-HLL | ngtdm      | Busyness                         | 0.028896939  |
| wavelet-LHL | gldm       | GrayLevelVariance                | 58.94417271  |

|             |            |                                      |              |
|-------------|------------|--------------------------------------|--------------|
| wavelet-LHL | gldm       | HighGrayLevelEmphasis                | 328.4155844  |
| wavelet-LHL | gldm       | DependenceEntropy                    | 5.194977125  |
| wavelet-LHL | gldm       | DependenceNonUniformity              | 24.81818182  |
| wavelet-LHL | gldm       | GrayLevelNonUniformity               | 3.753246753  |
| wavelet-LHL | gldm       | SmallDependenceEmphasis              | 0.505321068  |
| wavelet-LHL | gldm       | SmallDependenceHighGrayLevelEmphasis | 159.1259019  |
| wavelet-LHL | gldm       | DependenceNonUniformityNormalized    | 0.32231405   |
| wavelet-LHL | gldm       | LargeDependenceEmphasis              | 4.636363636  |
| wavelet-LHL | gldm       | LargeDependenceLowGrayLevelEmphasis  | 0.049338406  |
| wavelet-LHL | gldm       | DependenceVariance                   | 0.891887333  |
| wavelet-LHL | gldm       | LargeDependenceHighGrayLevelEmphasis | 1688.727273  |
| wavelet-LHL | gldm       | SmallDependenceLowGrayLevelEmphasis  | 0.019088585  |
| wavelet-LHL | gldm       | LowGrayLevelEmphasis                 | 0.023928982  |
| wavelet-LHL | glcm       | JointAverage                         | 15.97905679  |
| wavelet-LHL | glcm       | SumAverage                           | 31.95811357  |
| wavelet-LHL | glcm       | JointEntropy                         | 6.215283403  |
| wavelet-LHL | glcm       | ClusterShade                         | 584.5942008  |
| wavelet-LHL | glcm       | MaximumProbability                   | 0.030982913  |
| wavelet-LHL | glcm       | ldmn                                 | 0.932873189  |
| wavelet-LHL | glcm       | JointEnergy                          | 0.01445796   |
| wavelet-LHL | glcm       | Contrast                             | 80.88554935  |
| wavelet-LHL | glcm       | DifferenceEntropy                    | 3.714052265  |
| wavelet-LHL | glcm       | InverseVariance                      | 0.137209741  |
| wavelet-LHL | glcm       | DifferenceVariance                   | 29.21233593  |
| wavelet-LHL | glcm       | ldn                                  | 0.834434838  |
| wavelet-LHL | glcm       | ldm                                  | 0.145216019  |
| wavelet-LHL | glcm       | Correlation                          | 0.28422082   |
| wavelet-LHL | glcm       | Autocorrelation                      | 272.4594152  |
| wavelet-LHL | glcm       | SumEntropy                           | 4.69528752   |
| wavelet-LHL | glcm       | SumSquares                           | 57.40449825  |
| wavelet-LHL | glcm       | ClusterProminence                    | 51798.50342  |
| wavelet-LHL | glcm       | lmc2                                 | 0.99682732   |
| wavelet-LHL | glcm       | lmc1                                 | -0.585446551 |
| wavelet-LHL | glcm       | DifferenceAverage                    | 6.913653424  |
| wavelet-LHL | glcm       | ld                                   | 0.235361067  |
| wavelet-LHL | glcm       | ClusterTendency                      | 148.7324436  |
| wavelet-LHL | firstorder | InterquartileRange                   | 287.9685411  |
| wavelet-LHL | firstorder | Skewness                             | 0.063681243  |
| wavelet-LHL | firstorder | Uniformity                           | 0.048743464  |
| wavelet-LHL | firstorder | Median                               | -55.7393209  |
| wavelet-LHL | firstorder | Energy                               | 3031802.902  |
| wavelet-LHL | firstorder | RobustMeanAbsoluteDeviation          | 119.5529126  |
| wavelet-LHL | firstorder | MeanAbsoluteDeviation                | 159.9156279  |
| wavelet-LHL | firstorder | TotalEnergy                          | 81858678.35  |
| wavelet-LHL | firstorder | Maximum                              | 317.9279312  |
| wavelet-LHL | firstorder | RootMeanSquared                      | 198.428989   |
| wavelet-LHL | firstorder | 90Percentile                         | 228.4615748  |
| wavelet-LHL | firstorder | Minimum                              | -425.8314858 |
| wavelet-LHL | firstorder | Entropy                              | 4.456095917  |
| wavelet-LHL | firstorder | Range                                | 743.759417   |
| wavelet-LHL | firstorder | Variance                             | 36573.52272  |
| wavelet-LHL | firstorder | 10Percentile                         | -312.3520649 |
| wavelet-LHL | firstorder | Kurtosis                             | 2.141487752  |

|             |            |                                      |             |
|-------------|------------|--------------------------------------|-------------|
| wavelet-LHL | firstorder | Mean                                 | -52.9201374 |
| wavelet-LHL | glrlm      | ShortRunLowGrayLevelEmphasis         | 0.024310673 |
| wavelet-LHL | glrlm      | GrayLevelVariance                    | 59.09959278 |
| wavelet-LHL | glrlm      | LowGrayLevelRunEmphasis              | 0.024539347 |
| wavelet-LHL | glrlm      | GrayLevelNonUniformityNormalized     | 0.048564155 |
| wavelet-LHL | glrlm      | RunVariance                          | 0.035793855 |
| wavelet-LHL | glrlm      | GrayLevelNonUniformity               | 3.605524851 |
| wavelet-LHL | glrlm      | LongRunEmphasis                      | 1.114747453 |
| wavelet-LHL | glrlm      | ShortRunHighGrayLevelEmphasis        | 316.337059  |
| wavelet-LHL | glrlm      | RunLengthNonUniformity               | 69.04421541 |
| wavelet-LHL | glrlm      | ShortRunEmphasis                     | 0.971313137 |
| wavelet-LHL | glrlm      | LongRunHighGrayLevelEmphasis         | 369.1373648 |
| wavelet-LHL | glrlm      | RunPercentage                        | 0.964035964 |
| wavelet-LHL | glrlm      | LongRunLowGrayLevelEmphasis          | 0.025454042 |
| wavelet-LHL | glrlm      | RunEntropy                           | 4.554469035 |
| wavelet-LHL | glrlm      | HighGrayLevelRunEmphasis             | 326.8971201 |
| wavelet-LHL | glrlm      | RunLengthNonUniformityNormalized     | 0.92841229  |
| wavelet-LHL | glszm      | GrayLevelVariance                    | 60.06901042 |
| wavelet-LHL | glszm      | ZoneVariance                         | 0.989149306 |
| wavelet-LHL | glszm      | GrayLevelNonUniformityNormalized     | 0.047743056 |
| wavelet-LHL | glszm      | SizeZoneNonUniformityNormalized      | 0.459201389 |
| wavelet-LHL | glszm      | SizeZoneNonUniformity                | 22.04166667 |
| wavelet-LHL | glszm      | GrayLevelNonUniformity               | 2.291666667 |
| wavelet-LHL | glszm      | LargeAreaEmphasis                    | 3.5625      |
| wavelet-LHL | glszm      | SmallAreaHighGrayLevelEmphasis       | 218.5246354 |
| wavelet-LHL | glszm      | ZonePercentage                       | 0.623376623 |
| wavelet-LHL | glszm      | LargeAreaLowGrayLevelEmphasis        | 0.051949072 |
| wavelet-LHL | glszm      | LargeAreaHighGrayLevelEmphasis       | 1308.291667 |
| wavelet-LHL | glszm      | HighGrayLevelZoneEmphasis            | 310.1041667 |
| wavelet-LHL | glszm      | SmallAreaEmphasis                    | 0.697413194 |
| wavelet-LHL | glszm      | LowGrayLevelZoneEmphasis             | 0.032951304 |
| wavelet-LHL | glszm      | ZoneEntropy                          | 5.053508855 |
| wavelet-LHL | glszm      | SmallAreaLowGrayLevelEmphasis        | 0.029389604 |
| wavelet-LHL | ngtdm      | Coarseness                           | 0.055825631 |
| wavelet-LHL | ngtdm      | Complexity                           | 1301.823556 |
| wavelet-LHL | ngtdm      | Strength                             | 15.88916513 |
| wavelet-LHL | ngtdm      | Contrast                             | 1.047443777 |
| wavelet-LHL | ngtdm      | Busyness                             | 0.057875745 |
| wavelet-LHH | gldm       | GrayLevelVariance                    | 10.35351661 |
| wavelet-LHH | gldm       | HighGrayLevelEmphasis                | 66.8961039  |
| wavelet-LHH | gldm       | DependenceEntropy                    | 4.922839223 |
| wavelet-LHH | gldm       | DependenceNonUniformity              | 18.35064935 |
| wavelet-LHH | gldm       | GrayLevelNonUniformity               | 7.38961039  |
| wavelet-LHH | gldm       | SmallDependenceEmphasis              | 0.354583002 |
| wavelet-LHH | gldm       | SmallDependenceHighGrayLevelEmphasis | 20.50260123 |
| wavelet-LHH | gldm       | DependenceNonUniformityNormalized    | 0.238320121 |
| wavelet-LHH | gldm       | LargeDependenceEmphasis              | 8.87012987  |
| wavelet-LHH | gldm       | LargeDependenceLowGrayLevelEmphasis  | 0.212276292 |
| wavelet-LHH | gldm       | DependenceVariance                   | 2.190925957 |
| wavelet-LHH | gldm       | LargeDependenceHighGrayLevelEmphasis | 653.5974026 |
| wavelet-LHH | gldm       | SmallDependenceLowGrayLevelEmphasis  | 0.043634355 |
| wavelet-LHH | gldm       | LowGrayLevelEmphasis                 | 0.06185675  |
| wavelet-LHH | glcm       | JointAverage                         | 7.690692309 |

|             |            |                                  |              |
|-------------|------------|----------------------------------|--------------|
| wavelet-LHH | glcm       | SumAverage                       | 15.38138462  |
| wavelet-LHH | glcm       | JointEntropy                     | 5.690821692  |
| wavelet-LHH | glcm       | ClusterShade                     | -0.521847934 |
| wavelet-LHH | glcm       | MaximumProbability               | 0.056181591  |
| wavelet-LHH | glcm       | Idmn                             | 0.91516139   |
| wavelet-LHH | glcm       | JointEnergy                      | 0.022918223  |
| wavelet-LHH | glcm       | Contrast                         | 21.03379951  |
| wavelet-LHH | glcm       | DifferenceEntropy                | 3.072143037  |
| wavelet-LHH | glcm       | InverseVariance                  | 0.235392959  |
| wavelet-LHH | glcm       | DifferenceVariance               | 7.120181781  |
| wavelet-LHH | glcm       | Idn                              | 0.812029954  |
| wavelet-LHH | glcm       | Idm                              | 0.247723285  |
| wavelet-LHH | glcm       | Correlation                      | 0.001383284  |
| wavelet-LHH | glcm       | Autocorrelation                  | 59.15595807  |
| wavelet-LHH | glcm       | SumEntropy                       | 3.773369469  |
| wavelet-LHH | glcm       | SumSquares                       | 10.51619921  |
| wavelet-LHH | glcm       | ClusterProminence                | 1189.326387  |
| wavelet-LHH | glcm       | Imc2                             | 0.961314388  |
| wavelet-LHH | glcm       | Imc1                             | -0.378417838 |
| wavelet-LHH | glcm       | DifferenceAverage                | 3.645196541  |
| wavelet-LHH | glcm       | Id                               | 0.338410157  |
| wavelet-LHH | glcm       | ClusterTendency                  | 21.03099733  |
| wavelet-LHH | firstorder | InterquartileRange               | 111.2052491  |
| wavelet-LHH | firstorder | Skewness                         | -0.122590608 |
| wavelet-LHH | firstorder | Uniformity                       | 0.095968966  |
| wavelet-LHH | firstorder | Median                           | 7.109845205  |
| wavelet-LHH | firstorder | Energy                           | 496207.3499  |
| wavelet-LHH | firstorder | RobustMeanAbsoluteDeviation      | 47.14476559  |
| wavelet-LHH | firstorder | MeanAbsoluteDeviation            | 65.67762778  |
| wavelet-LHH | firstorder | TotalEnergy                      | 13397598.45  |
| wavelet-LHH | firstorder | Maximum                          | 168.851034   |
| wavelet-LHH | firstorder | RootMeanSquared                  | 80.27609418  |
| wavelet-LHH | firstorder | 90Percentile                     | 96.89498936  |
| wavelet-LHH | firstorder | Minimum                          | -170.5349113 |
| wavelet-LHH | firstorder | Entropy                          | 3.578558575  |
| wavelet-LHH | firstorder | Range                            | 339.3859453  |
| wavelet-LHH | firstorder | Variance                         | 6444.251202  |
| wavelet-LHH | firstorder | 10Percentile                     | -114.9836312 |
| wavelet-LHH | firstorder | Kurtosis                         | 2.37851705   |
| wavelet-LHH | firstorder | Mean                             | 0.009727192  |
| wavelet-LHH | grlm       | ShortRunLowGrayLevelEmphasis     | 0.063423689  |
| wavelet-LHH | grlm       | GrayLevelVariance                | 10.69784178  |
| wavelet-LHH | grlm       | LowGrayLevelRunEmphasis          | 0.064477634  |
| wavelet-LHH | grlm       | GrayLevelNonUniformityNormalized | 0.092764829  |
| wavelet-LHH | grlm       | RunVariance                      | 0.073902078  |
| wavelet-LHH | grlm       | GrayLevelNonUniformity           | 6.711156017  |
| wavelet-LHH | grlm       | LongRunEmphasis                  | 1.211464624  |
| wavelet-LHH | grlm       | ShortRunHighGrayLevelEmphasis    | 63.10153641  |
| wavelet-LHH | grlm       | RunLengthNonUniformity           | 64.26081125  |
| wavelet-LHH | grlm       | ShortRunEmphasis                 | 0.954023228  |
| wavelet-LHH | grlm       | LongRunHighGrayLevelEmphasis     | 82.166396    |
| wavelet-LHH | grlm       | RunPercentage                    | 0.939060939  |
| wavelet-LHH | grlm       | LongRunLowGrayLevelEmphasis      | 0.069022335  |

|             |       |                                      |              |
|-------------|-------|--------------------------------------|--------------|
| wavelet-LHH | grlm  | RunEntropy                           | 3.828746761  |
| wavelet-LHH | grlm  | HighGrayLevelRunEmphasis             | 66.44977842  |
| wavelet-LHH | grlm  | RunLengthNonUniformityNormalized     | 0.887276859  |
| wavelet-LHH | glszm | GrayLevelVariance                    | 15.20816327  |
| wavelet-LHH | glszm | ZoneVariance                         | 3.417142857  |
| wavelet-LHH | glszm | GrayLevelNonUniformityNormalized     | 0.080816327  |
| wavelet-LHH | glszm | SizeZoneNonUniformityNormalized      | 0.348571429  |
| wavelet-LHH | glszm | SizeZoneNonUniformity                | 12.2         |
| wavelet-LHH | glszm | GrayLevelNonUniformity               | 2.828571429  |
| wavelet-LHH | glszm | LargeAreaEmphasis                    | 8.257142857  |
| wavelet-LHH | glszm | SmallAreaHighGrayLevelEmphasis       | 32.414       |
| wavelet-LHH | glszm | ZonePercentage                       | 0.454545455  |
| wavelet-LHH | glszm | LargeAreaLowGrayLevelEmphasis        | 0.256871773  |
| wavelet-LHH | glszm | LargeAreaHighGrayLevelEmphasis       | 577.6285714  |
| wavelet-LHH | glszm | HighGrayLevelZoneEmphasis            | 62.22857143  |
| wavelet-LHH | glszm | SmallAreaEmphasis                    | 0.590638448  |
| wavelet-LHH | glszm | LowGrayLevelZoneEmphasis             | 0.104741429  |
| wavelet-LHH | glszm | ZoneEntropy                          | 4.536286231  |
| wavelet-LHH | glszm | SmallAreaLowGrayLevelEmphasis        | 0.08971965   |
| wavelet-LHH | ngtdm | Coarseness                           | 0.065790774  |
| wavelet-LHH | ngtdm | Complexity                           | 183.3046031  |
| wavelet-LHH | ngtdm | Strength                             | 3.584093265  |
| wavelet-LHH | ngtdm | Contrast                             | 0.307099946  |
| wavelet-LHH | ngtdm | Busyness                             | 0.179230761  |
| wavelet-LLH | gldm  | GrayLevelVariance                    | 59.56518806  |
| wavelet-LLH | gldm  | HighGrayLevelEmphasis                | 405.4285714  |
| wavelet-LLH | gldm  | DependenceEntropy                    | 5.331721606  |
| wavelet-LLH | gldm  | DependenceNonUniformity              | 34.87012987  |
| wavelet-LLH | gldm  | GrayLevelNonUniformity               | 3.311688312  |
| wavelet-LLH | gldm  | SmallDependenceEmphasis              | 0.583694084  |
| wavelet-LLH | gldm  | SmallDependenceHighGrayLevelEmphasis | 224.6825397  |
| wavelet-LLH | gldm  | DependenceNonUniformityNormalized    | 0.452858829  |
| wavelet-LLH | gldm  | LargeDependenceEmphasis              | 2.896103896  |
| wavelet-LLH | gldm  | LargeDependenceLowGrayLevelEmphasis  | 0.025971205  |
| wavelet-LLH | gldm  | DependenceVariance                   | 0.344408838  |
| wavelet-LLH | gldm  | LargeDependenceHighGrayLevelEmphasis | 1205.584416  |
| wavelet-LLH | gldm  | SmallDependenceLowGrayLevelEmphasis  | 0.016967563  |
| wavelet-LLH | gldm  | LowGrayLevelEmphasis                 | 0.018589115  |
| wavelet-LLH | glcm  | JointAverage                         | 18.74787415  |
| wavelet-LLH | glcm  | SumAverage                           | 37.4957483   |
| wavelet-LLH | glcm  | JointEntropy                         | 6.276439563  |
| wavelet-LLH | glcm  | ClusterShade                         | -3.250825843 |
| wavelet-LLH | glcm  | MaximumProbability                   | 0.02480351   |
| wavelet-LLH | glcm  | ldmn                                 | 0.928498154  |
| wavelet-LLH | glcm  | JointEnergy                          | 0.013591547  |
| wavelet-LLH | glcm  | Contrast                             | 110.3295841  |
| wavelet-LLH | glcm  | DifferenceEntropy                    | 3.888976438  |
| wavelet-LLH | glcm  | InverseVariance                      | 0.12491404   |
| wavelet-LLH | glcm  | DifferenceVariance                   | 37.46112881  |
| wavelet-LLH | glcm  | ldn                                  | 0.826754187  |
| wavelet-LLH | glcm  | ldm                                  | 0.114465819  |
| wavelet-LLH | glcm  | Correlation                          | 0.0253882    |
| wavelet-LLH | glcm  | Autocorrelation                      | 353.3010191  |

|             |            |                                  |              |
|-------------|------------|----------------------------------|--------------|
| wavelet-LLH | glcm       | SumEntropy                       | 4.540043459  |
| wavelet-LLH | glcm       | SumSquares                       | 56.90181788  |
| wavelet-LLH | glcm       | ClusterProminence                | 38548.70475  |
| wavelet-LLH | glcm       | Imc2                             | 0.998197054  |
| wavelet-LLH | glcm       | Imc1                             | -0.624097086 |
| wavelet-LLH | glcm       | DifferenceAverage                | 8.207947338  |
| wavelet-LLH | glcm       | Id                               | 0.201431525  |
| wavelet-LLH | glcm       | ClusterTendency                  | 117.2776874  |
| wavelet-LLH | firstorder | InterquartileRange               | 305.7189146  |
| wavelet-LLH | firstorder | Skewness                         | 0.014771517  |
| wavelet-LLH | firstorder | Uniformity                       | 0.043008939  |
| wavelet-LLH | firstorder | Median                           | -42.03240734 |
| wavelet-LLH | firstorder | Energy                           | 2883981.299  |
| wavelet-LLH | firstorder | RobustMeanAbsoluteDeviation      | 119.7447068  |
| wavelet-LLH | firstorder | MeanAbsoluteDeviation            | 161.1689838  |
| wavelet-LLH | firstorder | TotalEnergy                      | 77867495.08  |
| wavelet-LLH | firstorder | Maximum                          | 384.9467276  |
| wavelet-LLH | firstorder | RootMeanSquared                  | 193.5311411  |
| wavelet-LLH | firstorder | 90Percentile                     | 228.611181   |
| wavelet-LLH | firstorder | Minimum                          | -472.7415908 |
| wavelet-LLH | firstorder | Entropy                          | 4.65329523   |
| wavelet-LLH | firstorder | Range                            | 857.6883184  |
| wavelet-LLH | firstorder | Variance                         | 36927.24984  |
| wavelet-LLH | firstorder | 10Percentile                     | -256.4247687 |
| wavelet-LLH | firstorder | Kurtosis                         | 2.307523076  |
| wavelet-LLH | firstorder | Mean                             | -22.9576294  |
| wavelet-LLH | glrlm      | ShortRunLowGrayLevelEmphasis     | 0.018873916  |
| wavelet-LLH | glrlm      | GrayLevelVariance                | 59.77473995  |
| wavelet-LLH | glrlm      | LowGrayLevelRunEmphasis          | 0.018944704  |
| wavelet-LLH | glrlm      | GrayLevelNonUniformityNormalized | 0.042973051  |
| wavelet-LLH | glrlm      | RunVariance                      | 0.02289709   |
| wavelet-LLH | glrlm      | GrayLevelNonUniformity           | 3.232976252  |
| wavelet-LLH | glrlm      | LongRunEmphasis                  | 1.072618852  |
| wavelet-LLH | glrlm      | ShortRunHighGrayLevelEmphasis    | 397.1254423  |
| wavelet-LLH | glrlm      | RunLengthNonUniformity           | 71.88161387  |
| wavelet-LLH | glrlm      | ShortRunEmphasis                 | 0.981845287  |
| wavelet-LLH | glrlm      | LongRunHighGrayLevelEmphasis     | 435.9476885  |
| wavelet-LLH | glrlm      | RunPercentage                    | 0.977022977  |
| wavelet-LLH | glrlm      | LongRunLowGrayLevelEmphasis      | 0.019227858  |
| wavelet-LLH | glrlm      | RunEntropy                       | 4.712015487  |
| wavelet-LLH | glrlm      | HighGrayLevelRunEmphasis         | 404.8898916  |
| wavelet-LLH | glrlm      | RunLengthNonUniformityNormalized | 0.954205821  |
| wavelet-LLH | glszm      | GrayLevelVariance                | 63.47908093  |
| wavelet-LLH | glszm      | ZoneVariance                     | 0.429698217  |
| wavelet-LLH | glszm      | GrayLevelNonUniformityNormalized | 0.041152263  |
| wavelet-LLH | glszm      | SizeZoneNonUniformityNormalized  | 0.509602195  |
| wavelet-LLH | glszm      | SizeZoneNonUniformity            | 27.51851852  |
| wavelet-LLH | glszm      | GrayLevelNonUniformity           | 2.222222222  |
| wavelet-LLH | glszm      | LargeAreaEmphasis                | 2.462962963  |
| wavelet-LLH | glszm      | SmallAreaHighGrayLevelEmphasis   | 275.712963   |
| wavelet-LLH | glszm      | ZonePercentage                   | 0.701298701  |
| wavelet-LLH | glszm      | LargeAreaLowGrayLevelEmphasis    | 0.030475233  |
| wavelet-LLH | glszm      | LargeAreaHighGrayLevelEmphasis   | 1009.37037   |

|             |            |                                      |              |
|-------------|------------|--------------------------------------|--------------|
| wavelet-LLH | glszm      | HighGrayLevelZoneEmphasis            | 396.2037037  |
| wavelet-LLH | glszm      | SmallAreaEmphasis                    | 0.727494856  |
| wavelet-LLH | glszm      | LowGrayLevelZoneEmphasis             | 0.024848125  |
| wavelet-LLH | glszm      | ZoneEntropy                          | 5.273406021  |
| wavelet-LLH | glszm      | SmallAreaLowGrayLevelEmphasis        | 0.023783298  |
| wavelet-LLH | ngtdm      | Coarseness                           | 0.052723208  |
| wavelet-LLH | ngtdm      | Complexity                           | 2000.323679  |
| wavelet-LLH | ngtdm      | Strength                             | 15.88519694  |
| wavelet-LLH | ngtdm      | Contrast                             | 0.985182281  |
| wavelet-LLH | ngtdm      | Busyness                             | 0.05019444   |
| wavelet-LLL | gldm       | GrayLevelVariance                    | 261.8583235  |
| wavelet-LLL | gldm       | HighGrayLevelEmphasis                | 1381.064935  |
| wavelet-LLL | gldm       | DependenceEntropy                    | 5.536076638  |
| wavelet-LLL | gldm       | DependenceNonUniformity              | 39.07792208  |
| wavelet-LLL | gldm       | GrayLevelNonUniformity               | 2.246753247  |
| wavelet-LLL | gldm       | SmallDependenceEmphasis              | 0.727994228  |
| wavelet-LLL | gldm       | SmallDependenceHighGrayLevelEmphasis | 1074.769841  |
| wavelet-LLL | gldm       | DependenceNonUniformityNormalized    | 0.507505482  |
| wavelet-LLL | gldm       | LargeDependenceEmphasis              | 2.376623377  |
| wavelet-LLL | gldm       | LargeDependenceLowGrayLevelEmphasis  | 0.019655359  |
| wavelet-LLL | gldm       | DependenceVariance                   | 0.372744139  |
| wavelet-LLL | gldm       | LargeDependenceHighGrayLevelEmphasis | 3177.038961  |
| wavelet-LLL | gldm       | SmallDependenceLowGrayLevelEmphasis  | 0.017350673  |
| wavelet-LLL | gldm       | LowGrayLevelEmphasis                 | 0.017772814  |
| wavelet-LLL | glcm       | JointAverage                         | 38.28673467  |
| wavelet-LLL | glcm       | SumAverage                           | 76.57346934  |
| wavelet-LLL | glcm       | JointEntropy                         | 6.377068692  |
| wavelet-LLL | glcm       | ClusterShade                         | 2709.193066  |
| wavelet-LLL | glcm       | MaximumProbability                   | 0.021144692  |
| wavelet-LLL | glcm       | Idmn                                 | 0.922017113  |
| wavelet-LLL | glcm       | JointEnergy                          | 0.012397138  |
| wavelet-LLL | glcm       | Contrast                             | 478.0080219  |
| wavelet-LLL | glcm       | DifferenceEntropy                    | 4.567656517  |
| wavelet-LLL | glcm       | InverseVariance                      | 0.067528737  |
| wavelet-LLL | glcm       | DifferenceVariance                   | 152.3129956  |
| wavelet-LLL | glcm       | Idn                                  | 0.816459174  |
| wavelet-LLL | glcm       | Idm                                  | 0.068787235  |
| wavelet-LLL | glcm       | Correlation                          | 0.155554889  |
| wavelet-LLL | glcm       | Autocorrelation                      | 1510.328508  |
| wavelet-LLL | glcm       | SumEntropy                           | 5.005845247  |
| wavelet-LLL | glcm       | SumSquares                           | 281.9047989  |
| wavelet-LLL | glcm       | ClusterProminence                    | 1075655.352  |
| wavelet-LLL | glcm       | Imc2                                 | 0.999792592  |
| wavelet-LLL | glcm       | Imc1                                 | -0.761100482 |
| wavelet-LLL | glcm       | DifferenceAverage                    | 17.71134143  |
| wavelet-LLL | glcm       | Id                                   | 0.12944844   |
| wavelet-LLL | glcm       | ClusterTendency                      | 649.6111738  |
| wavelet-LLL | firstorder | InterquartileRange                   | 598.8354018  |
| wavelet-LLL | firstorder | Skewness                             | 0.471188321  |
| wavelet-LLL | firstorder | Uniformity                           | 0.029178614  |
| wavelet-LLL | firstorder | Median                               | -1025.29757  |
| wavelet-LLL | firstorder | Energy                               | 75052673.22  |
| wavelet-LLL | firstorder | RobustMeanAbsoluteDeviation          | 250.5701619  |

|             |            |                                  |              |
|-------------|------------|----------------------------------|--------------|
| wavelet-LLL | firstorder | MeanAbsoluteDeviation            | 339.1348363  |
| wavelet-LLL | firstorder | TotalEnergy                      | 2026422177   |
| wavelet-LLL | firstorder | Maximum                          | 29.73087256  |
| wavelet-LLL | firstorder | RootMeanSquared                  | 987.2740459  |
| wavelet-LLL | firstorder | 90Percentile                     | -346.6350919 |
| wavelet-LLL | firstorder | Minimum                          | -1705.911566 |
| wavelet-LLL | firstorder | Entropy                          | 5.233684268  |
| wavelet-LLL | firstorder | Range                            | 1735.642438  |
| wavelet-LLL | firstorder | Variance                         | 162831.2311  |
| wavelet-LLL | firstorder | 10Percentile                     | -1340.96098  |
| wavelet-LLL | firstorder | Kurtosis                         | 2.444488105  |
| wavelet-LLL | firstorder | Mean                             | -901.0431792 |
| wavelet-LLL | grlm       | ShortRunLowGrayLevelEmphasis     | 0.018022973  |
| wavelet-LLL | grlm       | GrayLevelVariance                | 263.4342551  |
| wavelet-LLL | grlm       | LowGrayLevelRunEmphasis          | 0.018040775  |
| wavelet-LLL | grlm       | GrayLevelNonUniformityNormalized | 0.029109546  |
| wavelet-LLL | grlm       | RunVariance                      | 0.015970285  |
| wavelet-LLL | grlm       | GrayLevelNonUniformity           | 2.2056683    |
| wavelet-LLL | grlm       | LongRunEmphasis                  | 1.049237335  |
| wavelet-LLL | grlm       | ShortRunHighGrayLevelEmphasis    | 1368.446475  |
| wavelet-LLL | grlm       | RunLengthNonUniformity           | 73.37367035  |
| wavelet-LLL | grlm       | ShortRunEmphasis                 | 0.987690666  |
| wavelet-LLL | grlm       | LongRunHighGrayLevelEmphasis     | 1444.057429  |
| wavelet-LLL | grlm       | RunPercentage                    | 0.984015984  |
| wavelet-LLL | grlm       | LongRunLowGrayLevelEmphasis      | 0.01811198   |
| wavelet-LLL | grlm       | RunEntropy                       | 5.264181536  |
| wavelet-LLL | grlm       | HighGrayLevelRunEmphasis         | 1383.568666  |
| wavelet-LLL | grlm       | RunLengthNonUniformityNormalized | 0.968059429  |
| wavelet-LLL | glszm      | GrayLevelVariance                | 285.6836629  |
| wavelet-LLL | glszm      | ZoneVariance                     | 0.280176899  |
| wavelet-LLL | glszm      | GrayLevelNonUniformityNormalized | 0.028095734  |
| wavelet-LLL | glszm      | SizeZoneNonUniformityNormalized  | 0.673777315  |
| wavelet-LLL | glszm      | SizeZoneNonUniformity            | 41.77419355  |
| wavelet-LLL | glszm      | GrayLevelNonUniformity           | 1.741935484  |
| wavelet-LLL | glszm      | LargeAreaEmphasis                | 1.822580645  |
| wavelet-LLL | glszm      | SmallAreaHighGrayLevelEmphasis   | 1273.162186  |
| wavelet-LLL | glszm      | ZonePercentage                   | 0.805194805  |
| wavelet-LLL | glszm      | LargeAreaLowGrayLevelEmphasis    | 0.022878561  |
| wavelet-LLL | glszm      | LargeAreaHighGrayLevelEmphasis   | 2466.580645  |
| wavelet-LLL | glszm      | HighGrayLevelZoneEmphasis        | 1430.741935  |
| wavelet-LLL | glszm      | SmallAreaEmphasis                | 0.84811828   |
| wavelet-LLL | glszm      | LowGrayLevelZoneEmphasis         | 0.021708713  |
| wavelet-LLL | glszm      | ZoneEntropy                      | 5.478232197  |
| wavelet-LLL | glszm      | SmallAreaLowGrayLevelEmphasis    | 0.02145954   |
| wavelet-LLL | ngtdm      | Coarseness                       | 0.036469933  |
| wavelet-LLL | ngtdm      | Complexity                       | 12358.19699  |
| wavelet-LLL | ngtdm      | Strength                         | 53.10571612  |
| wavelet-LLL | ngtdm      | Contrast                         | 3.794568568  |
| wavelet-LLL | ngtdm      | Busyness                         | 0.033907115  |
| wavelet-HHL | gldm       | GrayLevelVariance                | 7.678529263  |
| wavelet-HHL | gldm       | HighGrayLevelEmphasis            | 64.02597403  |
| wavelet-HHL | gldm       | DependenceEntropy                | 5.096150625  |
| wavelet-HHL | gldm       | DependenceNonUniformity          | 14.68831169  |



|             |            |                                      |              |
|-------------|------------|--------------------------------------|--------------|
| wavelet-HHL | gldm       | GrayLevelNonUniformity               | 8.506493506  |
| wavelet-HHL | gldm       | SmallDependenceEmphasis              | 0.32119747   |
| wavelet-HHL | gldm       | SmallDependenceHighGrayLevelEmphasis | 22.17669479  |
| wavelet-HHL | gldm       | DependenceNonUniformityNormalized    | 0.190757295  |
| wavelet-HHL | gldm       | LargeDependenceEmphasis              | 10.87012987  |
| wavelet-HHL | gldm       | LargeDependenceLowGrayLevelEmphasis  | 0.273304801  |
| wavelet-HHL | gldm       | DependenceVariance                   | 2.482712093  |
| wavelet-HHL | gldm       | LargeDependenceHighGrayLevelEmphasis | 650.5714286  |
| wavelet-HHL | gldm       | SmallDependenceLowGrayLevelEmphasis  | 0.024245518  |
| wavelet-HHL | gldm       | LowGrayLevelEmphasis                 | 0.041126519  |
| wavelet-HHL | glcm       | JointAverage                         | 7.524600502  |
| wavelet-HHL | glcm       | SumAverage                           | 15.049201    |
| wavelet-HHL | glcm       | JointEntropy                         | 5.615809449  |
| wavelet-HHL | glcm       | ClusterShade                         | 3.741333622  |
| wavelet-HHL | glcm       | MaximumProbability                   | 0.052494199  |
| wavelet-HHL | glcm       | Idmn                                 | 0.943413466  |
| wavelet-HHL | glcm       | JointEnergy                          | 0.023462115  |
| wavelet-HHL | glcm       | Contrast                             | 13.16864563  |
| wavelet-HHL | glcm       | DifferenceEntropy                    | 2.833375262  |
| wavelet-HHL | glcm       | InverseVariance                      | 0.277604374  |
| wavelet-HHL | glcm       | DifferenceVariance                   | 4.753551708  |
| wavelet-HHL | glcm       | Idn                                  | 0.843969994  |
| wavelet-HHL | glcm       | Idm                                  | 0.29026007   |
| wavelet-HHL | glcm       | Correlation                          | 0.061826688  |
| wavelet-HHL | glcm       | Autocorrelation                      | 57.05015784  |
| wavelet-HHL | glcm       | SumEntropy                           | 3.644006848  |
| wavelet-HHL | glcm       | SumSquares                           | 6.98625709   |
| wavelet-HHL | glcm       | ClusterProminence                    | 533.2000096  |
| wavelet-HHL | glcm       | Imc2                                 | 0.937556892  |
| wavelet-HHL | glcm       | Imc1                                 | -0.319814832 |
| wavelet-HHL | glcm       | DifferenceAverage                    | 2.857927138  |
| wavelet-HHL | glcm       | Id                                   | 0.379938133  |
| wavelet-HHL | glcm       | ClusterTendency                      | 14.77638273  |
| wavelet-HHL | firstorder | InterquartileRange                   | 102.4262651  |
| wavelet-HHL | firstorder | Skewness                             | 0.179063222  |
| wavelet-HHL | firstorder | Uniformity                           | 0.110473942  |
| wavelet-HHL | firstorder | Median                               | -13.03456569 |
| wavelet-HHL | firstorder | Energy                               | 360096.9581  |
| wavelet-HHL | firstorder | RobustMeanAbsoluteDeviation          | 42.42271402  |
| wavelet-HHL | firstorder | MeanAbsoluteDeviation                | 57.44851605  |
| wavelet-HHL | firstorder | TotalEnergy                          | 9722617.869  |
| wavelet-HHL | firstorder | Maximum                              | 157.9302159  |
| wavelet-HHL | firstorder | RootMeanSquared                      | 68.38555309  |
| wavelet-HHL | firstorder | 90Percentile                         | 87.0231937   |
| wavelet-HHL | firstorder | Minimum                              | -154.9583316 |
| wavelet-HHL | firstorder | Entropy                              | 3.420366244  |
| wavelet-HHL | firstorder | Range                                | 312.8885475  |
| wavelet-HHL | firstorder | Variance                             | 4675.548054  |
| wavelet-HHL | firstorder | 10Percentile                         | -78.14196326 |
| wavelet-HHL | firstorder | Kurtosis                             | 2.442312496  |
| wavelet-HHL | firstorder | Mean                                 | 1.017751346  |
| wavelet-HHL | glrlm      | ShortRunLowGrayLevelEmphasis         | 0.041119763  |
| wavelet-HHL | glrlm      | GrayLevelVariance                    | 7.868903848  |

|             |       |                                      |             |
|-------------|-------|--------------------------------------|-------------|
| wavelet-HHL | glrlm | LowGrayLevelRunEmphasis              | 0.042515828 |
| wavelet-HHL | glrlm | GrayLevelNonUniformityNormalized     | 0.107669987 |
| wavelet-HHL | glrlm | RunVariance                          | 0.078928463 |
| wavelet-HHL | glrlm | GrayLevelNonUniformity               | 7.685057141 |
| wavelet-HHL | glrlm | LongRunEmphasis                      | 1.248486931 |
| wavelet-HHL | glrlm | ShortRunHighGrayLevelEmphasis        | 60.8041898  |
| wavelet-HHL | glrlm | RunLengthNonUniformity               | 61.5700072  |
| wavelet-HHL | glrlm | ShortRunEmphasis                     | 0.941795407 |
| wavelet-HHL | glrlm | LongRunHighGrayLevelEmphasis         | 79.43219001 |
| wavelet-HHL | glrlm | RunPercentage                        | 0.927072927 |
| wavelet-HHL | glrlm | LongRunLowGrayLevelEmphasis          | 0.048422338 |
| wavelet-HHL | glrlm | RunEntropy                           | 3.716879018 |
| wavelet-HHL | glrlm | HighGrayLevelRunEmphasis             | 64.30492689 |
| wavelet-HHL | glrlm | RunLengthNonUniformityNormalized     | 0.860046986 |
| wavelet-HHL | glszm | GrayLevelVariance                    | 11.34333333 |
| wavelet-HHL | glszm | ZoneVariance                         | 9.445555556 |
| wavelet-HHL | glszm | GrayLevelNonUniformityNormalized     | 0.093333333 |
| wavelet-HHL | glszm | SizeZoneNonUniformityNormalized      | 0.362222222 |
| wavelet-HHL | glszm | SizeZoneNonUniformity                | 10.86666667 |
| wavelet-HHL | glszm | GrayLevelNonUniformity               | 2.8         |
| wavelet-HHL | glszm | LargeAreaEmphasis                    | 16.03333333 |
| wavelet-HHL | glszm | SmallAreaHighGrayLevelEmphasis       | 44.530262   |
| wavelet-HHL | glszm | ZonePercentage                       | 0.38961039  |
| wavelet-HHL | glszm | LargeAreaLowGrayLevelEmphasis        | 0.455687547 |
| wavelet-HHL | glszm | LargeAreaHighGrayLevelEmphasis       | 824.6666667 |
| wavelet-HHL | glszm | HighGrayLevelZoneEmphasis            | 70.63333333 |
| wavelet-HHL | glszm | SmallAreaEmphasis                    | 0.622572055 |
| wavelet-HHL | glszm | LowGrayLevelZoneEmphasis             | 0.066914829 |
| wavelet-HHL | glszm | ZoneEntropy                          | 4.389898095 |
| wavelet-HHL | glszm | SmallAreaLowGrayLevelEmphasis        | 0.056986957 |
| wavelet-HHL | ngtdm | Coarseness                           | 0.066328134 |
| wavelet-HHL | ngtdm | Complexity                           | 158.491721  |
| wavelet-HHL | ngtdm | Strength                             | 3.827064456 |
| wavelet-HHL | ngtdm | Contrast                             | 0.191846973 |
| wavelet-HHL | ngtdm | Busyness                             | 0.171425725 |
| wavelet-HLH | gldm  | GrayLevelVariance                    | 17.4444257  |
| wavelet-HLH | gldm  | HighGrayLevelEmphasis                | 131.1298701 |
| wavelet-HLH | gldm  | DependenceEntropy                    | 5.115758093 |
| wavelet-HLH | gldm  | DependenceNonUniformity              | 18.84415584 |
| wavelet-HLH | gldm  | GrayLevelNonUniformity               | 7.103896104 |
| wavelet-HLH | gldm  | SmallDependenceEmphasis              | 0.456150794 |
| wavelet-HLH | gldm  | SmallDependenceHighGrayLevelEmphasis | 65.87021284 |
| wavelet-HLH | gldm  | DependenceNonUniformityNormalized    | 0.244729297 |
| wavelet-HLH | gldm  | LargeDependenceEmphasis              | 7.415584416 |
| wavelet-HLH | gldm  | LargeDependenceLowGrayLevelEmphasis  | 0.095706046 |
| wavelet-HLH | gldm  | DependenceVariance                   | 1.890032046 |
| wavelet-HLH | gldm  | LargeDependenceHighGrayLevelEmphasis | 883.4415584 |
| wavelet-HLH | gldm  | SmallDependenceLowGrayLevelEmphasis  | 0.022152078 |
| wavelet-HLH | gldm  | LowGrayLevelEmphasis                 | 0.028451801 |
| wavelet-HLH | glcm  | JointAverage                         | 10.42235149 |
| wavelet-HLH | glcm  | SumAverage                           | 20.84470299 |
| wavelet-HLH | glcm  | JointEntropy                         | 5.82788352  |
| wavelet-HLH | glcm  | ClusterShade                         | 27.54286115 |

|             |            |                                  |              |
|-------------|------------|----------------------------------|--------------|
| wavelet-HLH | glcm       | MaximumProbability               | 0.044310368  |
| wavelet-HLH | glcm       | Idmn                             | 0.966536766  |
| wavelet-HLH | glcm       | JointEnergy                      | 0.020089801  |
| wavelet-HLH | glcm       | Contrast                         | 29.12923286  |
| wavelet-HLH | glcm       | DifferenceEntropy                | 3.14454951   |
| wavelet-HLH | glcm       | InverseVariance                  | 0.227264399  |
| wavelet-HLH | glcm       | DifferenceVariance               | 12.80302763  |
| wavelet-HLH | glcm       | Idn                              | 0.881669289  |
| wavelet-HLH | glcm       | Idm                              | 0.23103407   |
| wavelet-HLH | glcm       | Correlation                      | 0.054271406  |
| wavelet-HLH | glcm       | Autocorrelation                  | 109.5108491  |
| wavelet-HLH | glcm       | SumEntropy                       | 3.983195452  |
| wavelet-HLH | glcm       | SumSquares                       | 15.37476837  |
| wavelet-HLH | glcm       | ClusterProminence                | 4329.072046  |
| wavelet-HLH | glcm       | Imc2                             | 0.971620288  |
| wavelet-HLH | glcm       | Imc1                             | -0.40334443  |
| wavelet-HLH | glcm       | DifferenceAverage                | 3.978624713  |
| wavelet-HLH | glcm       | Id                               | 0.324544659  |
| wavelet-HLH | glcm       | ClusterTendency                  | 32.36984063  |
| wavelet-HLH | firstorder | InterquartileRange               | 108.846241   |
| wavelet-HLH | firstorder | Skewness                         | 0.984082104  |
| wavelet-HLH | firstorder | Uniformity                       | 0.092258391  |
| wavelet-HLH | firstorder | Median                           | 4.410703928  |
| wavelet-HLH | firstorder | Energy                           | 829179.9269  |
| wavelet-HLH | firstorder | RobustMeanAbsoluteDeviation      | 47.51288983  |
| wavelet-HLH | firstorder | MeanAbsoluteDeviation            | 74.79390153  |
| wavelet-HLH | firstorder | TotalEnergy                      | 22387858.03  |
| wavelet-HLH | firstorder | Maximum                          | 416.1994786  |
| wavelet-HLH | firstorder | RootMeanSquared                  | 103.7717229  |
| wavelet-HLH | firstorder | 90Percentile                     | 118.7774637  |
| wavelet-HLH | firstorder | Minimum                          | -226.1583075 |
| wavelet-HLH | firstorder | Entropy                          | 3.741612556  |
| wavelet-HLH | firstorder | Range                            | 642.3577862  |
| wavelet-HLH | firstorder | Variance                         | 10750.13761  |
| wavelet-HLH | firstorder | 10Percentile                     | -112.5641392 |
| wavelet-HLH | firstorder | Kurtosis                         | 5.974574368  |
| wavelet-HLH | firstorder | Mean                             | 4.293351466  |
| wavelet-HLH | gllm       | ShortRunLowGrayLevelEmphasis     | 0.028985235  |
| wavelet-HLH | gllm       | GrayLevelVariance                | 18.10591223  |
| wavelet-HLH | gllm       | LowGrayLevelRunEmphasis          | 0.029429056  |
| wavelet-HLH | gllm       | GrayLevelNonUniformityNormalized | 0.08958007   |
| wavelet-HLH | gllm       | RunVariance                      | 0.053807702  |
| wavelet-HLH | gllm       | GrayLevelNonUniformity           | 6.540150954  |
| wavelet-HLH | gllm       | LongRunEmphasis                  | 1.168295092  |
| wavelet-HLH | gllm       | ShortRunHighGrayLevelEmphasis    | 126.9795006  |
| wavelet-HLH | gllm       | RunLengthNonUniformity           | 65.66584282  |
| wavelet-HLH | gllm       | ShortRunEmphasis                 | 0.95909705   |
| wavelet-HLH | gllm       | LongRunHighGrayLevelEmphasis     | 151.7830327  |
| wavelet-HLH | gllm       | RunPercentage                    | 0.948051948  |
| wavelet-HLH | gllm       | LongRunLowGrayLevelEmphasis      | 0.031243046  |
| wavelet-HLH | gllm       | RunEntropy                       | 3.968553405  |
| wavelet-HLH | gllm       | HighGrayLevelRunEmphasis         | 131.8268714  |
| wavelet-HLH | gllm       | RunLengthNonUniformityNormalized | 0.898447215  |

|             |       |                                  |             |
|-------------|-------|----------------------------------|-------------|
| wavelet-HLH | glszm | GrayLevelVariance                | 27.59071981 |
| wavelet-HLH | glszm | ZoneVariance                     | 4.253420583 |
| wavelet-HLH | glszm | GrayLevelNonUniformityNormalized | 0.069601428 |
| wavelet-HLH | glszm | SizeZoneNonUniformityNormalized  | 0.500297442 |
| wavelet-HLH | glszm | SizeZoneNonUniformity            | 20.51219512 |
| wavelet-HLH | glszm | GrayLevelNonUniformity           | 2.853658537 |
| wavelet-HLH | glszm | LargeAreaEmphasis                | 7.780487805 |
| wavelet-HLH | glszm | SmallAreaHighGrayLevelEmphasis   | 108.9431205 |
| wavelet-HLH | glszm | ZonePercentage                   | 0.532467532 |
| wavelet-HLH | glszm | LargeAreaLowGrayLevelEmphasis    | 0.109890611 |
| wavelet-HLH | glszm | LargeAreaHighGrayLevelEmphasis   | 953.3902439 |
| wavelet-HLH | glszm | HighGrayLevelZoneEmphasis        | 141.195122  |
| wavelet-HLH | glszm | SmallAreaEmphasis                | 0.733898844 |
| wavelet-HLH | glszm | LowGrayLevelZoneEmphasis         | 0.043699133 |
| wavelet-HLH | glszm | ZoneEntropy                      | 4.625844688 |
| wavelet-HLH | glszm | SmallAreaLowGrayLevelEmphasis    | 0.040095992 |
| wavelet-HLH | ngtdm | Coarseness                       | 0.072652923 |
| wavelet-HLH | ngtdm | Complexity                       | 432.9076258 |
| wavelet-HLH | ngtdm | Strength                         | 10.22583906 |
| wavelet-HLH | ngtdm | Contrast                         | 0.343016047 |
| wavelet-HLH | ngtdm | Busyness                         | 0.079650795 |

| Image type | Feature Class | Feature Name                         |                                                                                                                                                                                                                                                                                                                                                                                                                   |
|------------|---------------|--------------------------------------|-------------------------------------------------------------------------------------------------------------------------------------------------------------------------------------------------------------------------------------------------------------------------------------------------------------------------------------------------------------------------------------------------------------------|
| general    | info          | BoundingBox                          | 28: RTSTRUCT: C99-DNU_segment_RLL ITV<br>(0, 0, 1, 7, 7, 6)                                                                                                                                                                                                                                                                                                                                                       |
| general    | info          | EnabledImageTypes                    | {'u'Original': {}, u'Wavelet': {}}                                                                                                                                                                                                                                                                                                                                                                                |
|            |               |                                      | {'distances': [1], 'additionalInfo': True, 'force2D': False, 'interpolator': 'sitkBSpline', 'resampledPixelSpacing': [3.0], 'label': 1, 'normalizeScale': 1, 'normalize': False, 'force2Ddimension': 0, 'removeOutliers': None, 'minimumROISize': None, u'binWidth': 25.0, 'minimumROIDimensions': 1, u'correctMask': True, 'preCrop': False, u'symmetricalGLCM': True, 'resegmentRange': None, 'padDistance': 5} |
| general    | info          | GeneralSettings                      |                                                                                                                                                                                                                                                                                                                                                                                                                   |
| general    | info          | ImageHash                            | bd0c01e78fb8326e25079663ea39632c6bdc71d0<br>(0.9765624999999998, 0.9765624999999998, 1.9999999999999999)                                                                                                                                                                                                                                                                                                          |
| general    | info          | ImageSpacing                         |                                                                                                                                                                                                                                                                                                                                                                                                                   |
| general    | info          | MaskHash                             | 01bacc67f08dd495251786d4bc5c28e749e9879a                                                                                                                                                                                                                                                                                                                                                                          |
| general    | info          | NumpyVersion                         | 1.13.1                                                                                                                                                                                                                                                                                                                                                                                                            |
| general    | info          | PyWaveletVersion                     | 0.5.2                                                                                                                                                                                                                                                                                                                                                                                                             |
| general    | info          | SimpleITKVersion                     | 1.1.0                                                                                                                                                                                                                                                                                                                                                                                                             |
| general    | info          | Version                              | 1.3.0.post102+g1b0eb74                                                                                                                                                                                                                                                                                                                                                                                            |
| general    | info          | VolumeNum                            | 1                                                                                                                                                                                                                                                                                                                                                                                                                 |
| general    | info          | VoxelNum                             | 132                                                                                                                                                                                                                                                                                                                                                                                                               |
| original   | shape         | Maximum3DDiameter                    | 20.34698995                                                                                                                                                                                                                                                                                                                                                                                                       |
| original   | shape         | Maximum2DDiameterSlice               | 19.20937271                                                                                                                                                                                                                                                                                                                                                                                                       |
| original   | shape         | Sphericity                           | 0.888560936                                                                                                                                                                                                                                                                                                                                                                                                       |
| original   | shape         | MinorAxis                            | 17.98955208                                                                                                                                                                                                                                                                                                                                                                                                       |
| original   | shape         | Elongation                           | 0.922270409                                                                                                                                                                                                                                                                                                                                                                                                       |
| original   | shape         | SurfaceVolumeRatio                   | 0.356301521                                                                                                                                                                                                                                                                                                                                                                                                       |
| original   | shape         | Volume                               | 3564                                                                                                                                                                                                                                                                                                                                                                                                              |
| original   | shape         | MajorAxis                            | 19.50572403                                                                                                                                                                                                                                                                                                                                                                                                       |
| original   | shape         | SurfaceArea                          | 1269.858621                                                                                                                                                                                                                                                                                                                                                                                                       |
| original   | shape         | Flatness                             | 0.731322527                                                                                                                                                                                                                                                                                                                                                                                                       |
| original   | shape         | LeastAxis                            | 14.26497539                                                                                                                                                                                                                                                                                                                                                                                                       |
| original   | shape         | Maximum2DDiameterColumn              | 19.20937271                                                                                                                                                                                                                                                                                                                                                                                                       |
| original   | shape         | Maximum2DDiameterRow                 | 18.97366596                                                                                                                                                                                                                                                                                                                                                                                                       |
| original   | gldm          | GrayLevelVariance                    | 84.46258035                                                                                                                                                                                                                                                                                                                                                                                                       |
| original   | gldm          | HighGrayLevelEmphasis                | 456.4848485                                                                                                                                                                                                                                                                                                                                                                                                       |
| original   | gldm          | DependenceEntropy                    | 5.623960696                                                                                                                                                                                                                                                                                                                                                                                                       |
| original   | gldm          | DependenceNonUniformity              | 45                                                                                                                                                                                                                                                                                                                                                                                                                |
| original   | gldm          | GrayLevelNonUniformity               | 5.363636364                                                                                                                                                                                                                                                                                                                                                                                                       |
| original   | gldm          | SmallDependenceEmphasis              | 0.583768939                                                                                                                                                                                                                                                                                                                                                                                                       |
| original   | gldm          | SmallDependenceHighGrayLevelEmphasis | 192.3255177                                                                                                                                                                                                                                                                                                                                                                                                       |
| original   | gldm          | DependenceNonUniformityNormalized    | 0.340909091                                                                                                                                                                                                                                                                                                                                                                                                       |
| original   | gldm          | LargeDependenceEmphasis              | 5.5                                                                                                                                                                                                                                                                                                                                                                                                               |
| original   | gldm          | LargeDependenceLowGrayLevelEmphasis  | 0.036334931                                                                                                                                                                                                                                                                                                                                                                                                       |
| original   | gldm          | DependenceVariance                   | 1.679752066                                                                                                                                                                                                                                                                                                                                                                                                       |
| original   | gldm          | LargeDependenceHighGrayLevelEmphasis | 4058.484848                                                                                                                                                                                                                                                                                                                                                                                                       |
| original   | gldm          | SmallDependenceLowGrayLevelEmphasis  | 0.023375352                                                                                                                                                                                                                                                                                                                                                                                                       |
| original   | gldm          | LowGrayLevelEmphasis                 | 0.025276103                                                                                                                                                                                                                                                                                                                                                                                                       |
| original   | glcm          | JointAverage                         | 21.82089354                                                                                                                                                                                                                                                                                                                                                                                                       |
| original   | glcm          | SumAverage                           | 43.64178708                                                                                                                                                                                                                                                                                                                                                                                                       |

|          |            |                                  |              |
|----------|------------|----------------------------------|--------------|
| original | glcm       | JointEntropy                     | 7.069930569  |
| original | glcm       | ClusterShade                     | -1229.85347  |
| original | glcm       | MaximumProbability               | 0.0219708    |
| original | glcm       | Idmn                             | 0.919286516  |
| original | glcm       | JointEnergy                      | 0.008211098  |
| original | glcm       | Contrast                         | 111.3846716  |
| original | glcm       | DifferenceEntropy                | 4.234906886  |
| original | glcm       | InverseVariance                  | 0.124841412  |
| original | glcm       | DifferenceVariance               | 42.7024836   |
| original | glcm       | Idn                              | 0.819219171  |
| original | glcm       | Idm                              | 0.134315299  |
| original | glcm       | Correlation                      | 0.256919147  |
| original | glcm       | Autocorrelation                  | 495.2021025  |
| original | glcm       | SumEntropy                       | 5.180515309  |
| original | glcm       | SumSquares                       | 74.70904372  |
| original | glcm       | ClusterProminence                | 86295.71299  |
| original | glcm       | Imc2                             | 0.993185753  |
| original | glcm       | Imc1                             | -0.46824966  |
| original | glcm       | DifferenceAverage                | 8.238044947  |
| original | glcm       | Id                               | 0.217994179  |
| original | glcm       | ClusterTendency                  | 187.4515033  |
| original | firstorder | InterquartileRange               | 391          |
| original | firstorder | Skewness                         | -0.306634858 |
| original | firstorder | Uniformity                       | 0.040633609  |
| original | firstorder | Median                           | -269.5       |
| original | firstorder | Energy                           | 19421475     |
| original | firstorder | RobustMeanAbsoluteDeviation      | 156.3796228  |
| original | firstorder | MeanAbsoluteDeviation            | 199.4573003  |
| original | firstorder | TotalEnergy                      | 524379825    |
| original | firstorder | Maximum                          | 47           |
| original | firstorder | RootMeanSquared                  | 383.5783966  |
| original | firstorder | 90Percentile                     | -19.2        |
| original | firstorder | Minimum                          | -774         |
| original | firstorder | Entropy                          | 4.77926406   |
| original | firstorder | Range                            | 821          |
| original | firstorder | Variance                         | 53426.828    |
| original | firstorder | 10Percentile                     | -656.2       |
| original | firstorder | Kurtosis                         | 1.885750709  |
| original | firstorder | Mean                             | -306.1136364 |
| original | glrlm      | ShortRunLowGrayLevelEmphasis     | 0.026033989  |
| original | glrlm      | GrayLevelVariance                | 83.87120075  |
| original | glrlm      | LowGrayLevelRunEmphasis          | 0.026123992  |
| original | glrlm      | GrayLevelNonUniformityNormalized | 0.040075487  |
| original | glrlm      | RunVariance                      | 0.039067761  |
| original | glrlm      | GrayLevelNonUniformity           | 5.096152916  |
| original | glrlm      | LongRunEmphasis                  | 1.117665492  |
| original | glrlm      | ShortRunHighGrayLevelEmphasis    | 424.9360115  |
| original | glrlm      | RunLengthNonUniformity           | 118.1798862  |
| original | glrlm      | ShortRunEmphasis                 | 0.97194038   |
| original | glrlm      | LongRunHighGrayLevelEmphasis     | 531.6755651  |
| original | glrlm      | RunPercentage                    | 0.963286713  |
| original | glrlm      | LongRunLowGrayLevelEmphasis      | 0.026499853  |
| original | glrlm      | RunEntropy                       | 4.906903573  |
| original | glrlm      | HighGrayLevelRunEmphasis         | 445.7683559  |
| original | glrlm      | RunLengthNonUniformityNormalized | 0.928899254  |

|             |       |                                      |              |
|-------------|-------|--------------------------------------|--------------|
| original    | glszm | GrayLevelVariance                    | 76.22697846  |
| original    | glszm | ZoneVariance                         | 1.445105034  |
| original    | glszm | GrayLevelNonUniformityNormalized     | 0.039239001  |
| original    | glszm | SizeZoneNonUniformityNormalized      | 0.595983617  |
| original    | glszm | SizeZoneNonUniformity                | 51.85057471  |
| original    | glszm | GrayLevelNonUniformity               | 3.413793103  |
| original    | glszm | LargeAreaEmphasis                    | 3.747126437  |
| original    | glszm | SmallAreaHighGrayLevelEmphasis       | 242.0864701  |
| original    | glszm | ZonePercentage                       | 0.659090909  |
| original    | glszm | LargeAreaLowGrayLevelEmphasis        | 0.044009351  |
| original    | glszm | LargeAreaHighGrayLevelEmphasis       | 2390.229885  |
| original    | glszm | HighGrayLevelZoneEmphasis            | 348.6666667  |
| original    | glszm | SmallAreaEmphasis                    | 0.798408268  |
| original    | glszm | LowGrayLevelZoneEmphasis             | 0.036288291  |
| original    | glszm | ZoneEntropy                          | 5.302042565  |
| original    | glszm | SmallAreaLowGrayLevelEmphasis        | 0.035004218  |
| original    | ngtdm | Coarseness                           | 0.032458302  |
| original    | ngtdm | Complexity                           | 2390.284625  |
| original    | ngtdm | Strength                             | 13.26744761  |
| original    | ngtdm | Contrast                             | 1.135368347  |
| original    | ngtdm | Busyness                             | 0.057275028  |
| wavelet-HHH | gldm  | GrayLevelVariance                    | 8.461202938  |
| wavelet-HHH | gldm  | HighGrayLevelEmphasis                | 98.13636364  |
| wavelet-HHH | gldm  | DependenceEntropy                    | 5.208743762  |
| wavelet-HHH | gldm  | DependenceNonUniformity              | 28.90909091  |
| wavelet-HHH | gldm  | GrayLevelNonUniformity               | 14.48484848  |
| wavelet-HHH | gldm  | SmallDependenceEmphasis              | 0.412653491  |
| wavelet-HHH | gldm  | SmallDependenceHighGrayLevelEmphasis | 47.06238851  |
| wavelet-HHH | gldm  | DependenceNonUniformityNormalized    | 0.219008264  |
| wavelet-HHH | gldm  | LargeDependenceEmphasis              | 8.878787879  |
| wavelet-HHH | gldm  | LargeDependenceLowGrayLevelEmphasis  | 0.138202061  |
| wavelet-HHH | gldm  | DependenceVariance                   | 2.322084481  |
| wavelet-HHH | gldm  | LargeDependenceHighGrayLevelEmphasis | 777.7575758  |
| wavelet-HHH | gldm  | SmallDependenceLowGrayLevelEmphasis  | 0.014797462  |
| wavelet-HHH | gldm  | LowGrayLevelEmphasis                 | 0.025439552  |
| wavelet-HHH | glcm  | JointAverage                         | 9.459886087  |
| wavelet-HHH | glcm  | SumAverage                           | 18.91977217  |
| wavelet-HHH | glcm  | JointEntropy                         | 6.21527996   |
| wavelet-HHH | glcm  | ClusterShade                         | 0.608851882  |
| wavelet-HHH | glcm  | MaximumProbability                   | 0.04136733   |
| wavelet-HHH | glcm  | Idmn                                 | 0.949147534  |
| wavelet-HHH | glcm  | JointEnergy                          | 0.01715833   |
| wavelet-HHH | glcm  | Contrast                             | 19.94225701  |
| wavelet-HHH | glcm  | DifferenceEntropy                    | 3.136713871  |
| wavelet-HHH | glcm  | InverseVariance                      | 0.283881783  |
| wavelet-HHH | glcm  | DifferenceVariance                   | 8.224558552  |
| wavelet-HHH | glcm  | Idn                                  | 0.855226472  |
| wavelet-HHH | glcm  | Idm                                  | 0.259892892  |
| wavelet-HHH | glcm  | Correlation                          | -0.036949751 |
| wavelet-HHH | glcm  | Autocorrelation                      | 89.14842813  |
| wavelet-HHH | glcm  | SumEntropy                           | 3.871806412  |
| wavelet-HHH | glcm  | SumSquares                           | 9.627695756  |
| wavelet-HHH | glcm  | ClusterProminence                    | 1361.238492  |
| wavelet-HHH | glcm  | Imc2                                 | 0.911639528  |
| wavelet-HHH | glcm  | Imc1                                 | -0.252326691 |

|             |            |                                  |              |
|-------------|------------|----------------------------------|--------------|
| wavelet-HHH | glcm       | DifferenceAverage                | 3.389117317  |
| wavelet-HHH | glcm       | Id                               | 0.348749062  |
| wavelet-HHH | glcm       | ClusterTendency                  | 18.56852601  |
| wavelet-HHH | firstorder | InterquartileRange               | 88.33263115  |
| wavelet-HHH | firstorder | Skewness                         | -0.049403421 |
| wavelet-HHH | firstorder | Uniformity                       | 0.109733701  |
| wavelet-HHH | firstorder | Median                           | 0.393356139  |
| wavelet-HHH | firstorder | Energy                           | 701052.7506  |
| wavelet-HHH | firstorder | RobustMeanAbsoluteDeviation      | 34.58757996  |
| wavelet-HHH | firstorder | MeanAbsoluteDeviation            | 54.71771141  |
| wavelet-HHH | firstorder | TotalEnergy                      | 18928424.27  |
| wavelet-HHH | firstorder | Maximum                          | 206.6832743  |
| wavelet-HHH | firstorder | RootMeanSquared                  | 72.87664706  |
| wavelet-HHH | firstorder | 90Percentile                     | 82.38377765  |
| wavelet-HHH | firstorder | Minimum                          | -207.6927616 |
| wavelet-HHH | firstorder | Entropy                          | 3.504388176  |
| wavelet-HHH | firstorder | Range                            | 414.3760359  |
| wavelet-HHH | firstorder | Variance                         | 5310.739786  |
| wavelet-HHH | firstorder | 10Percentile                     | -80.06240883 |
| wavelet-HHH | firstorder | Kurtosis                         | 3.739289368  |
| wavelet-HHH | firstorder | Mean                             | -0.515655568 |
| wavelet-HHH | glrlm      | ShortRunLowGrayLevelEmphasis     | 0.02538128   |
| wavelet-HHH | glrlm      | GrayLevelVariance                | 8.80491122   |
| wavelet-HHH | glrlm      | LowGrayLevelRunEmphasis          | 0.026087586  |
| wavelet-HHH | glrlm      | GrayLevelNonUniformityNormalized | 0.106150751  |
| wavelet-HHH | glrlm      | RunVariance                      | 0.068271161  |
| wavelet-HHH | glrlm      | GrayLevelNonUniformity           | 13.17121245  |
| wavelet-HHH | glrlm      | LongRunEmphasis                  | 1.201556064  |
| wavelet-HHH | glrlm      | ShortRunHighGrayLevelEmphasis    | 94.85485111  |
| wavelet-HHH | glrlm      | RunLengthNonUniformity           | 110.3131872  |
| wavelet-HHH | glrlm      | ShortRunEmphasis                 | 0.95438189   |
| wavelet-HHH | glrlm      | LongRunHighGrayLevelEmphasis     | 116.3325216  |
| wavelet-HHH | glrlm      | RunPercentage                    | 0.93997669   |
| wavelet-HHH | glrlm      | LongRunLowGrayLevelEmphasis      | 0.029166819  |
| wavelet-HHH | glrlm      | RunEntropy                       | 3.799837752  |
| wavelet-HHH | glrlm      | HighGrayLevelRunEmphasis         | 98.8475662   |
| wavelet-HHH | glrlm      | RunLengthNonUniformityNormalized | 0.888181102  |
| wavelet-HHH | glszm      | GrayLevelVariance                | 14.18305556  |
| wavelet-HHH | glszm      | ZoneVariance                     | 9.626666667  |
| wavelet-HHH | glszm      | GrayLevelNonUniformityNormalized | 0.083888889  |
| wavelet-HHH | glszm      | SizeZoneNonUniformityNormalized  | 0.516666667  |
| wavelet-HHH | glszm      | SizeZoneNonUniformity            | 31           |
| wavelet-HHH | glszm      | GrayLevelNonUniformity           | 5.033333333  |
| wavelet-HHH | glszm      | LargeAreaEmphasis                | 14.46666667  |
| wavelet-HHH | glszm      | SmallAreaHighGrayLevelEmphasis   | 89.59438643  |
| wavelet-HHH | glszm      | ZonePercentage                   | 0.454545455  |
| wavelet-HHH | glszm      | LargeAreaLowGrayLevelEmphasis    | 0.21034494   |
| wavelet-HHH | glszm      | LargeAreaHighGrayLevelEmphasis   | 1318.133333  |
| wavelet-HHH | glszm      | HighGrayLevelZoneEmphasis        | 110.55       |
| wavelet-HHH | glszm      | SmallAreaEmphasis                | 0.744090721  |
| wavelet-HHH | glszm      | LowGrayLevelZoneEmphasis         | 0.03623392   |
| wavelet-HHH | glszm      | ZoneEntropy                      | 4.590328621  |
| wavelet-HHH | glszm      | SmallAreaLowGrayLevelEmphasis    | 0.029243438  |
| wavelet-HHH | ngtdm      | Coarseness                       | 0.049662732  |
| wavelet-HHH | ngtdm      | Complexity                       | 271.2227809  |



|             |            |                                      |              |
|-------------|------------|--------------------------------------|--------------|
| wavelet-HHH | ngtdm      | Strength                             | 4.20696837   |
| wavelet-HHH | ngtdm      | Contrast                             | 0.126836121  |
| wavelet-HHH | ngtdm      | Busyness                             | 0.107905517  |
| wavelet-HLL | gldm       | GrayLevelVariance                    | 50.55280073  |
| wavelet-HLL | gldm       | HighGrayLevelEmphasis                | 280.1212121  |
| wavelet-HLL | gldm       | DependenceEntropy                    | 5.842853521  |
| wavelet-HLL | gldm       | DependenceNonUniformity              | 35.3030303   |
| wavelet-HLL | gldm       | GrayLevelNonUniformity               | 6.651515152  |
| wavelet-HLL | gldm       | SmallDependenceEmphasis              | 0.472879776  |
| wavelet-HLL | gldm       | SmallDependenceHighGrayLevelEmphasis | 150.6879628  |
| wavelet-HLL | gldm       | DependenceNonUniformityNormalized    | 0.267447199  |
| wavelet-HLL | gldm       | LargeDependenceEmphasis              | 6.575757576  |
| wavelet-HLL | gldm       | LargeDependenceLowGrayLevelEmphasis  | 0.058278574  |
| wavelet-HLL | gldm       | DependenceVariance                   | 1.682277319  |
| wavelet-HLL | gldm       | LargeDependenceHighGrayLevelEmphasis | 1482.045455  |
| wavelet-HLL | gldm       | SmallDependenceLowGrayLevelEmphasis  | 0.011745911  |
| wavelet-HLL | gldm       | LowGrayLevelEmphasis                 | 0.015896012  |
| wavelet-HLL | glcm       | JointAverage                         | 14.31469415  |
| wavelet-HLL | glcm       | SumAverage                           | 28.6293883   |
| wavelet-HLL | glcm       | JointEntropy                         | 6.870178959  |
| wavelet-HLL | glcm       | ClusterShade                         | 1202.603012  |
| wavelet-HLL | glcm       | MaximumProbability                   | 0.027802933  |
| wavelet-HLL | glcm       | Idmn                                 | 0.95869188   |
| wavelet-HLL | glcm       | JointEnergy                          | 0.009818942  |
| wavelet-HLL | glcm       | Contrast                             | 58.49136248  |
| wavelet-HLL | glcm       | DifferenceEntropy                    | 3.742152322  |
| wavelet-HLL | glcm       | InverseVariance                      | 0.17161985   |
| wavelet-HLL | glcm       | DifferenceVariance                   | 22.35312026  |
| wavelet-HLL | glcm       | Idn                                  | 0.869139628  |
| wavelet-HLL | glcm       | Idm                                  | 0.176051972  |
| wavelet-HLL | glcm       | Correlation                          | 0.358287459  |
| wavelet-HLL | glcm       | Autocorrelation                      | 221.980666   |
| wavelet-HLL | glcm       | SumEntropy                           | 4.871842083  |
| wavelet-HLL | glcm       | SumSquares                           | 46.25261843  |
| wavelet-HLL | glcm       | ClusterProminence                    | 51997.08407  |
| wavelet-HLL | glcm       | Imc2                                 | 0.989908382  |
| wavelet-HLL | glcm       | Imc1                                 | -0.44446148  |
| wavelet-HLL | glcm       | DifferenceAverage                    | 5.808559187  |
| wavelet-HLL | glcm       | Id                                   | 0.266575354  |
| wavelet-HLL | glcm       | ClusterTendency                      | 126.5191112  |
| wavelet-HLL | firstorder | InterquartileRange                   | 247.4448144  |
| wavelet-HLL | firstorder | Skewness                             | 0.627362643  |
| wavelet-HLL | firstorder | Uniformity                           | 0.050390266  |
| wavelet-HLL | firstorder | Median                               | -94.14868711 |
| wavelet-HLL | firstorder | Energy                               | 4628782.726  |
| wavelet-HLL | firstorder | RobustMeanAbsoluteDeviation          | 103.1762138  |
| wavelet-HLL | firstorder | MeanAbsoluteDeviation                | 146.3359269  |
| wavelet-HLL | firstorder | TotalEnergy                          | 124977133.6  |
| wavelet-HLL | firstorder | Maximum                              | 425.2341167  |
| wavelet-HLL | firstorder | RootMeanSquared                      | 187.2606093  |
| wavelet-HLL | firstorder | 90Percentile                         | 223.3103477  |
| wavelet-HLL | firstorder | Minimum                              | -403.6405786 |
| wavelet-HLL | firstorder | Entropy                              | 4.544071776  |
| wavelet-HLL | firstorder | Range                                | 828.8746952  |
| wavelet-HLL | firstorder | Variance                             | 31645.4239   |

|             |            |                                      |              |
|-------------|------------|--------------------------------------|--------------|
| wavelet-HLL | firstorder | 10Percentile                         | -262.3282319 |
| wavelet-HLL | firstorder | Kurtosis                             | 2.665693389  |
| wavelet-HLL | firstorder | Mean                                 | -58.49027189 |
| wavelet-HLL | glrlm      | ShortRunLowGrayLevelEmphasis         | 0.016027345  |
| wavelet-HLL | glrlm      | GrayLevelVariance                    | 51.4140049   |
| wavelet-HLL | glrlm      | LowGrayLevelRunEmphasis              | 0.016305172  |
| wavelet-HLL | glrlm      | GrayLevelNonUniformityNormalized     | 0.049423867  |
| wavelet-HLL | glrlm      | RunVariance                          | 0.052729636  |
| wavelet-HLL | glrlm      | GrayLevelNonUniformity               | 6.220444623  |
| wavelet-HLL | glrlm      | LongRunEmphasis                      | 1.155006082  |
| wavelet-HLL | glrlm      | ShortRunHighGrayLevelEmphasis        | 274.6886497  |
| wavelet-HLL | glrlm      | RunLengthNonUniformity               | 114.8094968  |
| wavelet-HLL | glrlm      | ShortRunEmphasis                     | 0.964430273  |
| wavelet-HLL | glrlm      | LongRunHighGrayLevelEmphasis         | 318.8812742  |
| wavelet-HLL | glrlm      | RunPercentage                        | 0.953379953  |
| wavelet-HLL | glrlm      | LongRunLowGrayLevelEmphasis          | 0.017463938  |
| wavelet-HLL | glrlm      | RunEntropy                           | 4.726448997  |
| wavelet-HLL | glrlm      | HighGrayLevelRunEmphasis             | 282.660405   |
| wavelet-HLL | glrlm      | RunLengthNonUniformityNormalized     | 0.911252566  |
| wavelet-HLL | glszm      | GrayLevelVariance                    | 60.67128889  |
| wavelet-HLL | glszm      | ZoneVariance                         | 1.835733333  |
| wavelet-HLL | glszm      | GrayLevelNonUniformityNormalized     | 0.042133333  |
| wavelet-HLL | glszm      | SizeZoneNonUniformityNormalized      | 0.460977778  |
| wavelet-HLL | glszm      | SizeZoneNonUniformity                | 34.57333333  |
| wavelet-HLL | glszm      | GrayLevelNonUniformity               | 3.16         |
| wavelet-HLL | glszm      | LargeAreaEmphasis                    | 4.933333333  |
| wavelet-HLL | glszm      | SmallAreaHighGrayLevelEmphasis       | 233.8180481  |
| wavelet-HLL | glszm      | ZonePercentage                       | 0.568181818  |
| wavelet-HLL | glszm      | LargeAreaLowGrayLevelEmphasis        | 0.053375664  |
| wavelet-HLL | glszm      | LargeAreaHighGrayLevelEmphasis       | 1159.28      |
| wavelet-HLL | glszm      | HighGrayLevelZoneEmphasis            | 313.6933333  |
| wavelet-HLL | glszm      | SmallAreaEmphasis                    | 0.705349074  |
| wavelet-HLL | glszm      | LowGrayLevelZoneEmphasis             | 0.021933223  |
| wavelet-HLL | glszm      | ZoneEntropy                          | 5.467226484  |
| wavelet-HLL | glszm      | SmallAreaLowGrayLevelEmphasis        | 0.019608613  |
| wavelet-HLL | ngtdm      | Coarseness                           | 0.045567308  |
| wavelet-HLL | ngtdm      | Complexity                           | 1434.660799  |
| wavelet-HLL | ngtdm      | Strength                             | 15.83544317  |
| wavelet-HLL | ngtdm      | Contrast                             | 0.473511719  |
| wavelet-HLL | ngtdm      | Busyness                             | 0.067411655  |
| wavelet-LHL | gldm       | GrayLevelVariance                    | 56.98530762  |
| wavelet-LHL | gldm       | HighGrayLevelEmphasis                | 350.1212121  |
| wavelet-LHL | gldm       | DependenceEntropy                    | 5.793653589  |
| wavelet-LHL | gldm       | DependenceNonUniformity              | 44.06060606  |
| wavelet-LHL | gldm       | GrayLevelNonUniformity               | 5.893939394  |
| wavelet-LHL | gldm       | SmallDependenceEmphasis              | 0.55395202   |
| wavelet-LHL | gldm       | SmallDependenceHighGrayLevelEmphasis | 231.7171507  |
| wavelet-LHL | gldm       | DependenceNonUniformityNormalized    | 0.33379247   |
| wavelet-LHL | gldm       | LargeDependenceEmphasis              | 4.409090909  |
| wavelet-LHL | gldm       | LargeDependenceLowGrayLevelEmphasis  | 0.034558324  |
| wavelet-LHL | gldm       | DependenceVariance                   | 0.935950413  |
| wavelet-LHL | gldm       | LargeDependenceHighGrayLevelEmphasis | 1242.969697  |
| wavelet-LHL | gldm       | SmallDependenceLowGrayLevelEmphasis  | 0.012679506  |
| wavelet-LHL | gldm       | LowGrayLevelEmphasis                 | 0.015326363  |
| wavelet-LHL | glcm       | JointAverage                         | 16.67691676  |

|             |            |                                  |              |
|-------------|------------|----------------------------------|--------------|
| wavelet-LHL | glcm       | SumAverage                       | 33.35383352  |
| wavelet-LHL | glcm       | JointEntropy                     | 7.015237636  |
| wavelet-LHL | glcm       | ClusterShade                     | 1389.698933  |
| wavelet-LHL | glcm       | MaximumProbability               | 0.017691884  |
| wavelet-LHL | glcm       | Idmn                             | 0.964002414  |
| wavelet-LHL | glcm       | JointEnergy                      | 0.008395854  |
| wavelet-LHL | glcm       | Contrast                         | 68.40067471  |
| wavelet-LHL | glcm       | DifferenceEntropy                | 3.855525425  |
| wavelet-LHL | glcm       | InverseVariance                  | 0.15583986   |
| wavelet-LHL | glcm       | DifferenceVariance               | 24.88951932  |
| wavelet-LHL | glcm       | Idn                              | 0.874177214  |
| wavelet-LHL | glcm       | Idm                              | 0.146653864  |
| wavelet-LHL | glcm       | Correlation                      | 0.281922891  |
| wavelet-LHL | glcm       | Autocorrelation                  | 292.6526997  |
| wavelet-LHL | glcm       | SumEntropy                       | 4.832780614  |
| wavelet-LHL | glcm       | SumSquares                       | 48.69111832  |
| wavelet-LHL | glcm       | ClusterProminence                | 68252.64313  |
| wavelet-LHL | glcm       | Imc2                             | 0.991717546  |
| wavelet-LHL | glcm       | Imc1                             | -0.453741658 |
| wavelet-LHL | glcm       | DifferenceAverage                | 6.416635408  |
| wavelet-LHL | glcm       | Id                               | 0.238095416  |
| wavelet-LHL | glcm       | ClusterTendency                  | 126.3637986  |
| wavelet-LHL | firstorder | InterquartileRange               | 254.1182502  |
| wavelet-LHL | firstorder | Skewness                         | 0.63915521   |
| wavelet-LHL | firstorder | Uniformity                       | 0.044651056  |
| wavelet-LHL | firstorder | Median                           | -77.74994976 |
| wavelet-LHL | firstorder | Energy                           | 5174801.906  |
| wavelet-LHL | firstorder | RobustMeanAbsoluteDeviation      | 103.4194134  |
| wavelet-LHL | firstorder | MeanAbsoluteDeviation            | 150.2421814  |
| wavelet-LHL | firstorder | TotalEnergy                      | 139719651.5  |
| wavelet-LHL | firstorder | Maximum                          | 541.4164534  |
| wavelet-LHL | firstorder | RootMeanSquared                  | 197.9975877  |
| wavelet-LHL | firstorder | 90Percentile                     | 209.0058442  |
| wavelet-LHL | firstorder | Minimum                          | -463.2062219 |
| wavelet-LHL | firstorder | Entropy                          | 4.665972747  |
| wavelet-LHL | firstorder | Range                            | 1004.622675  |
| wavelet-LHL | firstorder | Variance                         | 35665.66263  |
| wavelet-LHL | firstorder | 10Percentile                     | -268.7008669 |
| wavelet-LHL | firstorder | Kurtosis                         | 3.272687763  |
| wavelet-LHL | firstorder | Mean                             | -59.47589523 |
| wavelet-LHL | glrlm      | ShortRunLowGrayLevelEmphasis     | 0.015515041  |
| wavelet-LHL | glrlm      | GrayLevelVariance                | 57.93897485  |
| wavelet-LHL | glrlm      | LowGrayLevelRunEmphasis          | 0.015659405  |
| wavelet-LHL | glrlm      | GrayLevelNonUniformityNormalized | 0.044263403  |
| wavelet-LHL | glrlm      | RunVariance                      | 0.035659488  |
| wavelet-LHL | glrlm      | GrayLevelNonUniformity           | 5.649588318  |
| wavelet-LHL | glrlm      | LongRunEmphasis                  | 1.10656848   |
| wavelet-LHL | glrlm      | ShortRunHighGrayLevelEmphasis    | 346.3572419  |
| wavelet-LHL | glrlm      | RunLengthNonUniformity           | 119.48017    |
| wavelet-LHL | glrlm      | ShortRunEmphasis                 | 0.974759029  |
| wavelet-LHL | glrlm      | LongRunHighGrayLevelEmphasis     | 381.1410757  |
| wavelet-LHL | glrlm      | RunPercentage                    | 0.966783217  |
| wavelet-LHL | glrlm      | LongRunLowGrayLevelEmphasis      | 0.016269717  |
| wavelet-LHL | glrlm      | RunEntropy                       | 4.798937617  |
| wavelet-LHL | glrlm      | HighGrayLevelRunEmphasis         | 353.0842202  |

|             |       |                                      |              |
|-------------|-------|--------------------------------------|--------------|
| wavelet-LHL | glrlm | RunLengthNonUniformityNormalized     | 0.935751084  |
| wavelet-LHL | glszm | GrayLevelVariance                    | 71.37301038  |
| wavelet-LHL | glszm | ZoneVariance                         | 1.117785467  |
| wavelet-LHL | glszm | GrayLevelNonUniformityNormalized     | 0.040276817  |
| wavelet-LHL | glszm | SizeZoneNonUniformityNormalized      | 0.528581315  |
| wavelet-LHL | glszm | SizeZoneNonUniformity                | 44.92941176  |
| wavelet-LHL | glszm | GrayLevelNonUniformity               | 3.423529412  |
| wavelet-LHL | glszm | LargeAreaEmphasis                    | 3.529411765  |
| wavelet-LHL | glszm | SmallAreaHighGrayLevelEmphasis       | 332.4593105  |
| wavelet-LHL | glszm | ZonePercentage                       | 0.643939394  |
| wavelet-LHL | glszm | LargeAreaLowGrayLevelEmphasis        | 0.034867447  |
| wavelet-LHL | glszm | LargeAreaHighGrayLevelEmphasis       | 1060.4       |
| wavelet-LHL | glszm | HighGrayLevelZoneEmphasis            | 397.4941176  |
| wavelet-LHL | glszm | SmallAreaEmphasis                    | 0.755434641  |
| wavelet-LHL | glszm | LowGrayLevelZoneEmphasis             | 0.020565594  |
| wavelet-LHL | glszm | ZoneEntropy                          | 5.464640789  |
| wavelet-LHL | glszm | SmallAreaLowGrayLevelEmphasis        | 0.019052202  |
| wavelet-LHL | ngtdm | Coarseness                           | 0.042503906  |
| wavelet-LHL | ngtdm | Complexity                           | 2064.090649  |
| wavelet-LHL | ngtdm | Strength                             | 18.53236749  |
| wavelet-LHL | ngtdm | Contrast                             | 0.538218605  |
| wavelet-LHL | ngtdm | Busyness                             | 0.064581537  |
| wavelet-LHH | gldm  | GrayLevelVariance                    | 22.94834711  |
| wavelet-LHH | gldm  | HighGrayLevelEmphasis                | 186.0909091  |
| wavelet-LHH | gldm  | DependenceEntropy                    | 5.505314457  |
| wavelet-LHH | gldm  | DependenceNonUniformity              | 36.87878788  |
| wavelet-LHH | gldm  | GrayLevelNonUniformity               | 8.909090909  |
| wavelet-LHH | gldm  | SmallDependenceEmphasis              | 0.494149832  |
| wavelet-LHH | gldm  | SmallDependenceHighGrayLevelEmphasis | 101.1612416  |
| wavelet-LHH | gldm  | DependenceNonUniformityNormalized    | 0.279384757  |
| wavelet-LHH | gldm  | LargeDependenceEmphasis              | 6.560606061  |
| wavelet-LHH | gldm  | LargeDependenceLowGrayLevelEmphasis  | 0.066849304  |
| wavelet-LHH | gldm  | DependenceVariance                   | 1.800275482  |
| wavelet-LHH | gldm  | LargeDependenceHighGrayLevelEmphasis | 1055.80303   |
| wavelet-LHH | gldm  | SmallDependenceLowGrayLevelEmphasis  | 0.015812075  |
| wavelet-LHH | gldm  | LowGrayLevelEmphasis                 | 0.020258247  |
| wavelet-LHH | glcm  | JointAverage                         | 12.72084098  |
| wavelet-LHH | glcm  | SumAverage                           | 25.44168196  |
| wavelet-LHH | glcm  | JointEntropy                         | 6.770355804  |
| wavelet-LHH | glcm  | ClusterShade                         | -16.37130733 |
| wavelet-LHH | glcm  | MaximumProbability                   | 0.027943314  |
| wavelet-LHH | glcm  | Idmn                                 | 0.93348922   |
| wavelet-LHH | glcm  | JointEnergy                          | 0.010582931  |
| wavelet-LHH | glcm  | Contrast                             | 47.14082122  |
| wavelet-LHH | glcm  | DifferenceEntropy                    | 3.681356906  |
| wavelet-LHH | glcm  | InverseVariance                      | 0.172123704  |
| wavelet-LHH | glcm  | DifferenceVariance                   | 17.22692162  |
| wavelet-LHH | glcm  | Idn                                  | 0.832231034  |
| wavelet-LHH | glcm  | Idm                                  | 0.175619993  |
| wavelet-LHH | glcm  | Correlation                          | -0.054443465 |
| wavelet-LHH | glcm  | Autocorrelation                      | 160.6296511  |
| wavelet-LHH | glcm  | SumEntropy                           | 4.404494025  |
| wavelet-LHH | glcm  | SumSquares                           | 22.36744434  |
| wavelet-LHH | glcm  | ClusterProminence                    | 5445.580026  |
| wavelet-LHH | glcm  | Imc2                                 | 0.971141893  |

|             |            |                                  |              |
|-------------|------------|----------------------------------|--------------|
| wavelet-LHH | glcm       | Imc1                             | -0.353464669 |
| wavelet-LHH | glcm       | DifferenceAverage                | 5.388243314  |
| wavelet-LHH | glcm       | Id                               | 0.268232661  |
| wavelet-LHH | glcm       | ClusterTendency                  | 42.32895614  |
| wavelet-LHH | firstorder | InterquartileRange               | 148.0200181  |
| wavelet-LHH | firstorder | Skewness                         | -0.035523327 |
| wavelet-LHH | firstorder | Uniformity                       | 0.067493113  |
| wavelet-LHH | firstorder | Median                           | 19.81612833  |
| wavelet-LHH | firstorder | Energy                           | 1904823.693  |
| wavelet-LHH | firstorder | RobustMeanAbsoluteDeviation      | 65.49739587  |
| wavelet-LHH | firstorder | MeanAbsoluteDeviation            | 95.48366411  |
| wavelet-LHH | firstorder | TotalEnergy                      | 51430239.71  |
| wavelet-LHH | firstorder | Maximum                          | 296.498249   |
| wavelet-LHH | firstorder | RootMeanSquared                  | 120.1269434  |
| wavelet-LHH | firstorder | 90Percentile                     | 156.5579792  |
| wavelet-LHH | firstorder | Minimum                          | -286.7354358 |
| wavelet-LHH | firstorder | Entropy                          | 4.143074894  |
| wavelet-LHH | firstorder | Range                            | 583.2336847  |
| wavelet-LHH | firstorder | Variance                         | 14386.15033  |
| wavelet-LHH | firstorder | 10Percentile                     | -163.212546  |
| wavelet-LHH | firstorder | Kurtosis                         | 2.771723823  |
| wavelet-LHH | firstorder | Mean                             | 6.658242531  |
| wavelet-LHH | glrlm      | ShortRunLowGrayLevelEmphasis     | 0.020524713  |
| wavelet-LHH | glrlm      | GrayLevelVariance                | 23.58510111  |
| wavelet-LHH | glrlm      | LowGrayLevelRunEmphasis          | 0.020821308  |
| wavelet-LHH | glrlm      | GrayLevelNonUniformityNormalized | 0.065722125  |
| wavelet-LHH | glrlm      | RunVariance                      | 0.05151179   |
| wavelet-LHH | glrlm      | GrayLevelNonUniformity           | 8.28276139   |
| wavelet-LHH | glrlm      | LongRunEmphasis                  | 1.150448619  |
| wavelet-LHH | glrlm      | ShortRunHighGrayLevelEmphasis    | 181.8421089  |
| wavelet-LHH | glrlm      | RunLengthNonUniformity           | 115.3223592  |
| wavelet-LHH | glrlm      | ShortRunEmphasis                 | 0.965845968  |
| wavelet-LHH | glrlm      | LongRunHighGrayLevelEmphasis     | 211.5452789  |
| wavelet-LHH | glrlm      | RunPercentage                    | 0.954545455  |
| wavelet-LHH | glrlm      | LongRunLowGrayLevelEmphasis      | 0.022091621  |
| wavelet-LHH | glrlm      | RunEntropy                       | 4.35385083   |
| wavelet-LHH | glrlm      | HighGrayLevelRunEmphasis         | 187.3123282  |
| wavelet-LHH | glrlm      | RunLengthNonUniformityNormalized | 0.914525475  |
| wavelet-LHH | glszm      | GrayLevelVariance                | 31.65789474  |
| wavelet-LHH | glszm      | ZoneVariance                     | 3.693905817  |
| wavelet-LHH | glszm      | GrayLevelNonUniformityNormalized | 0.052285319  |
| wavelet-LHH | glszm      | SizeZoneNonUniformityNormalized  | 0.514542936  |
| wavelet-LHH | glszm      | SizeZoneNonUniformity            | 39.10526316  |
| wavelet-LHH | glszm      | GrayLevelNonUniformity           | 3.973684211  |
| wavelet-LHH | glszm      | LargeAreaEmphasis                | 6.710526316  |
| wavelet-LHH | glszm      | SmallAreaHighGrayLevelEmphasis   | 155.6201949  |
| wavelet-LHH | glszm      | ZonePercentage                   | 0.575757576  |
| wavelet-LHH | glszm      | LargeAreaLowGrayLevelEmphasis    | 0.071526201  |
| wavelet-LHH | glszm      | LargeAreaHighGrayLevelEmphasis   | 1182.368421  |
| wavelet-LHH | glszm      | HighGrayLevelZoneEmphasis        | 200.6578947  |
| wavelet-LHH | glszm      | SmallAreaEmphasis                | 0.742333587  |
| wavelet-LHH | glszm      | LowGrayLevelZoneEmphasis         | 0.028795739  |
| wavelet-LHH | glszm      | ZoneEntropy                      | 5.198263862  |
| wavelet-LHH | glszm      | SmallAreaLowGrayLevelEmphasis    | 0.026427545  |
| wavelet-LHH | ngtdm      | Coarseness                       | 0.039233069  |

|             |            |                                      |              |
|-------------|------------|--------------------------------------|--------------|
| wavelet-LHH | ngtdm      | Complexity                           | 782.4898659  |
| wavelet-LHH | ngtdm      | Strength                             | 5.989499678  |
| wavelet-LHH | ngtdm      | Contrast                             | 0.365854626  |
| wavelet-LHH | ngtdm      | Busyness                             | 0.095997166  |
| wavelet-LLH | gldm       | GrayLevelVariance                    | 58.68916437  |
| wavelet-LLH | gldm       | HighGrayLevelEmphasis                | 464.7727273  |
| wavelet-LLH | gldm       | DependenceEntropy                    | 5.789479419  |
| wavelet-LLH | gldm       | DependenceNonUniformity              | 44.68181818  |
| wavelet-LLH | gldm       | GrayLevelNonUniformity               | 5.651515152  |
| wavelet-LLH | gldm       | SmallDependenceEmphasis              | 0.556885522  |
| wavelet-LLH | gldm       | SmallDependenceHighGrayLevelEmphasis | 287.648931   |
| wavelet-LLH | gldm       | DependenceNonUniformityNormalized    | 0.338498623  |
| wavelet-LLH | gldm       | LargeDependenceEmphasis              | 4.484848485  |
| wavelet-LLH | gldm       | LargeDependenceLowGrayLevelEmphasis  | 0.027888068  |
| wavelet-LLH | gldm       | DependenceVariance                   | 1.011707989  |
| wavelet-LLH | gldm       | LargeDependenceHighGrayLevelEmphasis | 1659.257576  |
| wavelet-LLH | gldm       | SmallDependenceLowGrayLevelEmphasis  | 0.010278054  |
| wavelet-LLH | gldm       | LowGrayLevelEmphasis                 | 0.011950207  |
| wavelet-LLH | glcm       | JointAverage                         | 19.8552858   |
| wavelet-LLH | glcm       | SumAverage                           | 39.71057159  |
| wavelet-LLH | glcm       | JointEntropy                         | 7.088841463  |
| wavelet-LLH | glcm       | ClusterShade                         | 538.8825255  |
| wavelet-LLH | glcm       | MaximumProbability                   | 0.018413463  |
| wavelet-LLH | glcm       | Idmn                                 | 0.966756671  |
| wavelet-LLH | glcm       | JointEnergy                          | 0.00796634   |
| wavelet-LLH | glcm       | Contrast                             | 66.77782177  |
| wavelet-LLH | glcm       | DifferenceEntropy                    | 3.83223866   |
| wavelet-LLH | glcm       | InverseVariance                      | 0.16211475   |
| wavelet-LLH | glcm       | DifferenceVariance                   | 25.88719213  |
| wavelet-LLH | glcm       | Idn                                  | 0.879263491  |
| wavelet-LLH | glcm       | Idm                                  | 0.15016461   |
| wavelet-LLH | glcm       | Correlation                          | 0.395061615  |
| wavelet-LLH | glcm       | Autocorrelation                      | 417.0597596  |
| wavelet-LLH | glcm       | SumEntropy                           | 5.129233933  |
| wavelet-LLH | glcm       | SumSquares                           | 56.17213651  |
| wavelet-LLH | glcm       | ClusterProminence                    | 67205.95436  |
| wavelet-LLH | glcm       | Imc2                                 | 0.995145537  |
| wavelet-LLH | glcm       | Imc1                                 | -0.495813382 |
| wavelet-LLH | glcm       | DifferenceAverage                    | 6.267414732  |
| wavelet-LLH | glcm       | Id                                   | 0.241731727  |
| wavelet-LLH | glcm       | ClusterTendency                      | 157.9107243  |
| wavelet-LLH | firstorder | InterquartileRange                   | 294.0053428  |
| wavelet-LLH | firstorder | Skewness                             | 0.133451608  |
| wavelet-LLH | firstorder | Uniformity                           | 0.042814509  |
| wavelet-LLH | firstorder | Median                               | -68.19521849 |
| wavelet-LLH | firstorder | Energy                               | 5276937.95   |
| wavelet-LLH | firstorder | RobustMeanAbsoluteDeviation          | 111.3441956  |
| wavelet-LLH | firstorder | MeanAbsoluteDeviation                | 156.4975189  |
| wavelet-LLH | firstorder | TotalEnergy                          | 142477324.6  |
| wavelet-LLH | firstorder | Maximum                              | 479.4375239  |
| wavelet-LLH | firstorder | RootMeanSquared                      | 199.9419982  |
| wavelet-LLH | firstorder | 90Percentile                         | 176.5431392  |
| wavelet-LLH | firstorder | Minimum                              | -548.2089984 |
| wavelet-LLH | firstorder | Entropy                              | 4.776450136  |
| wavelet-LLH | firstorder | Range                                | 1027.646522  |

|             |            |                                      |              |
|-------------|------------|--------------------------------------|--------------|
| wavelet-LLH | firstorder | Variance                             | 36533.35092  |
| wavelet-LLH | firstorder | 10Percentile                         | -298.7575118 |
| wavelet-LLH | firstorder | Kurtosis                             | 2.749970208  |
| wavelet-LLH | firstorder | Mean                                 | -58.68093154 |
| wavelet-LLH | glrlm      | ShortRunLowGrayLevelEmphasis         | 0.012107845  |
| wavelet-LLH | glrlm      | GrayLevelVariance                    | 59.29564518  |
| wavelet-LLH | glrlm      | LowGrayLevelRunEmphasis              | 0.012217756  |
| wavelet-LLH | glrlm      | GrayLevelNonUniformityNormalized     | 0.042243478  |
| wavelet-LLH | glrlm      | RunVariance                          | 0.033141434  |
| wavelet-LLH | glrlm      | GrayLevelNonUniformity               | 5.39182695   |
| wavelet-LLH | glrlm      | LongRunEmphasis                      | 1.103955838  |
| wavelet-LLH | glrlm      | ShortRunHighGrayLevelEmphasis        | 458.5913468  |
| wavelet-LLH | glrlm      | RunLengthNonUniformity               | 119.2250368  |
| wavelet-LLH | glrlm      | ShortRunEmphasis                     | 0.974011041  |
| wavelet-LLH | glrlm      | LongRunHighGrayLevelEmphasis         | 506.3484751  |
| wavelet-LLH | glrlm      | RunPercentage                        | 0.966783217  |
| wavelet-LLH | glrlm      | LongRunLowGrayLevelEmphasis          | 0.012657402  |
| wavelet-LLH | glrlm      | RunEntropy                           | 4.917339998  |
| wavelet-LLH | glrlm      | HighGrayLevelRunEmphasis             | 468.1427725  |
| wavelet-LLH | glrlm      | RunLengthNonUniformityNormalized     | 0.933717131  |
| wavelet-LLH | glszm      | GrayLevelVariance                    | 70.67006803  |
| wavelet-LLH | glszm      | ZoneVariance                         | 1.387755102  |
| wavelet-LLH | glszm      | GrayLevelNonUniformityNormalized     | 0.037131519  |
| wavelet-LLH | glszm      | SizeZoneNonUniformityNormalized      | 0.54223356   |
| wavelet-LLH | glszm      | SizeZoneNonUniformity                | 45.54761905  |
| wavelet-LLH | glszm      | GrayLevelNonUniformity               | 3.119047619  |
| wavelet-LLH | glszm      | LargeAreaEmphasis                    | 3.857142857  |
| wavelet-LLH | glszm      | SmallAreaHighGrayLevelEmphasis       | 404.9677149  |
| wavelet-LLH | glszm      | ZonePercentage                       | 0.636363636  |
| wavelet-LLH | glszm      | LargeAreaLowGrayLevelEmphasis        | 0.028285763  |
| wavelet-LLH | glszm      | LargeAreaHighGrayLevelEmphasis       | 1552.238095  |
| wavelet-LLH | glszm      | HighGrayLevelZoneEmphasis            | 505.6904762  |
| wavelet-LLH | glszm      | SmallAreaEmphasis                    | 0.763556446  |
| wavelet-LLH | glszm      | LowGrayLevelZoneEmphasis             | 0.016595753  |
| wavelet-LLH | glszm      | ZoneEntropy                          | 5.551493727  |
| wavelet-LLH | glszm      | SmallAreaLowGrayLevelEmphasis        | 0.015775027  |
| wavelet-LLH | ngtdm      | Coarseness                           | 0.055115906  |
| wavelet-LLH | ngtdm      | Complexity                           | 1778.228549  |
| wavelet-LLH | ngtdm      | Strength                             | 23.27000624  |
| wavelet-LLH | ngtdm      | Contrast                             | 0.386124322  |
| wavelet-LLH | ngtdm      | Busyness                             | 0.031074228  |
| wavelet-LLL | gldm       | GrayLevelVariance                    | 493.8627181  |
| wavelet-LLL | gldm       | HighGrayLevelEmphasis                | 2038.590909  |
| wavelet-LLL | gldm       | DependenceEntropy                    | 6.070882805  |
| wavelet-LLL | gldm       | DependenceNonUniformity              | 85.45454545  |
| wavelet-LLL | gldm       | GrayLevelNonUniformity               | 2.727272727  |
| wavelet-LLL | gldm       | SmallDependenceEmphasis              | 0.832491582  |
| wavelet-LLL | gldm       | SmallDependenceHighGrayLevelEmphasis | 1613.39899   |
| wavelet-LLL | gldm       | DependenceNonUniformityNormalized    | 0.64738292   |
| wavelet-LLL | gldm       | LargeDependenceEmphasis              | 1.939393939  |
| wavelet-LLL | gldm       | LargeDependenceLowGrayLevelEmphasis  | 0.020447866  |
| wavelet-LLL | gldm       | DependenceVariance                   | 0.319559229  |
| wavelet-LLL | gldm       | LargeDependenceHighGrayLevelEmphasis | 4519.863636  |
| wavelet-LLL | gldm       | SmallDependenceLowGrayLevelEmphasis  | 0.019538121  |
| wavelet-LLL | gldm       | LowGrayLevelEmphasis                 | 0.019674417  |

|             |            |                                  |              |
|-------------|------------|----------------------------------|--------------|
| wavelet-LLL | glcm       | JointAverage                     | 46.1600854   |
| wavelet-LLL | glcm       | SumAverage                       | 92.3201708   |
| wavelet-LLL | glcm       | JointEntropy                     | 7.373634642  |
| wavelet-LLL | glcm       | ClusterShade                     | -1140.59808  |
| wavelet-LLL | glcm       | MaximumProbability               | 0.011214621  |
| wavelet-LLL | glcm       | Idmn                             | 0.922756364  |
| wavelet-LLL | glcm       | JointEnergy                      | 0.006129889  |
| wavelet-LLL | glcm       | Contrast                         | 648.2589169  |
| wavelet-LLL | glcm       | DifferenceEntropy                | 5.151326406  |
| wavelet-LLL | glcm       | InverseVariance                  | 0.044542249  |
| wavelet-LLL | glcm       | DifferenceVariance               | 207.460489   |
| wavelet-LLL | glcm       | Idn                              | 0.815410438  |
| wavelet-LLL | glcm       | Idm                              | 0.046146915  |
| wavelet-LLL | glcm       | Correlation                      | 0.340322192  |
| wavelet-LLL | glcm       | Autocorrelation                  | 2293.588081  |
| wavelet-LLL | glcm       | SumEntropy                       | 5.908576306  |
| wavelet-LLL | glcm       | SumSquares                       | 486.4581179  |
| wavelet-LLL | glcm       | ClusterProminence                | 3705508.936  |
| wavelet-LLL | glcm       | Imc2                             | 0.999894522  |
| wavelet-LLL | glcm       | Imc1                             | -0.731449567 |
| wavelet-LLL | glcm       | DifferenceAverage                | 20.75046768  |
| wavelet-LLL | glcm       | Id                               | 0.104781663  |
| wavelet-LLL | glcm       | ClusterTendency                  | 1297.573555  |
| wavelet-LLL | firstorder | InterquartileRange               | 853.2674635  |
| wavelet-LLL | firstorder | Skewness                         | 0.233674503  |
| wavelet-LLL | firstorder | Uniformity                       | 0.020661157  |
| wavelet-LLL | firstorder | Median                           | -991.1526001 |
| wavelet-LLL | firstorder | Energy                           | 154801300.4  |
| wavelet-LLL | firstorder | RobustMeanAbsoluteDeviation      | 350.5301641  |
| wavelet-LLL | firstorder | MeanAbsoluteDeviation            | 468.1277954  |
| wavelet-LLL | firstorder | TotalEnergy                      | 4179635111   |
| wavelet-LLL | firstorder | Maximum                          | 162.8526026  |
| wavelet-LLL | firstorder | RootMeanSquared                  | 1082.92988   |
| wavelet-LLL | firstorder | 90Percentile                     | -121.7976107 |
| wavelet-LLL | firstorder | Minimum                          | -1884.90924  |
| wavelet-LLL | firstorder | Entropy                          | 5.841605059  |
| wavelet-LLL | firstorder | Range                            | 2047.761842  |
| wavelet-LLL | firstorder | Variance                         | 308386.2755  |
| wavelet-LLL | firstorder | 10Percentile                     | -1618.109803 |
| wavelet-LLL | firstorder | Kurtosis                         | 2.044435751  |
| wavelet-LLL | firstorder | Mean                             | -929.7047105 |
| wavelet-LLL | glrlm      | ShortRunLowGrayLevelEmphasis     | 0.019868381  |
| wavelet-LLL | glrlm      | GrayLevelVariance                | 493.6409867  |
| wavelet-LLL | glrlm      | LowGrayLevelRunEmphasis          | 0.01987491   |
| wavelet-LLL | glrlm      | GrayLevelNonUniformityNormalized | 0.020532497  |
| wavelet-LLL | glrlm      | RunVariance                      | 0.010487224  |
| wavelet-LLL | glrlm      | GrayLevelNonUniformity           | 2.681876685  |
| wavelet-LLL | glrlm      | LongRunEmphasis                  | 1.03189909   |
| wavelet-LLL | glrlm      | ShortRunHighGrayLevelEmphasis    | 2011.757607  |
| wavelet-LLL | glrlm      | RunLengthNonUniformity           | 127.884043   |
| wavelet-LLL | glrlm      | ShortRunEmphasis                 | 0.992025228  |
| wavelet-LLL | glrlm      | LongRunHighGrayLevelEmphasis     | 2115.706965  |
| wavelet-LLL | glrlm      | RunPercentage                    | 0.98951049   |
| wavelet-LLL | glrlm      | LongRunLowGrayLevelEmphasis      | 0.019901026  |
| wavelet-LLL | glrlm      | RunEntropy                       | 5.868681226  |



|             |       |                                      |             |
|-------------|-------|--------------------------------------|-------------|
| wavelet-LLL | glrlm | HighGrayLevelRunEmphasis             | 2032.547478 |
| wavelet-LLL | glrlm | RunLengthNonUniformityNormalized     | 0.979025552 |
| wavelet-LLL | glszm | GrayLevelVariance                    | 497.3014269 |
| wavelet-LLL | glszm | ZoneVariance                         | 0.205112961 |
| wavelet-LLL | glszm | GrayLevelNonUniformityNormalized     | 0.019619501 |
| wavelet-LLL | glszm | SizeZoneNonUniformityNormalized      | 0.810196195 |
| wavelet-LLL | glszm | SizeZoneNonUniformity                | 93.98275862 |
| wavelet-LLL | glszm | GrayLevelNonUniformity               | 2.275862069 |
| wavelet-LLL | glszm | LargeAreaEmphasis                    | 1.5         |
| wavelet-LLL | glszm | SmallAreaHighGrayLevelEmphasis       | 1768.455759 |
| wavelet-LLL | glszm | ZonePercentage                       | 0.878787879 |
| wavelet-LLL | glszm | LargeAreaLowGrayLevelEmphasis        | 0.022713497 |
| wavelet-LLL | glszm | LargeAreaHighGrayLevelEmphasis       | 3165.431034 |
| wavelet-LLL | glszm | HighGrayLevelZoneEmphasis            | 1978.224138 |
| wavelet-LLL | glszm | SmallAreaEmphasis                    | 0.918402778 |
| wavelet-LLL | glszm | LowGrayLevelZoneEmphasis             | 0.02227252  |
| wavelet-LLL | glszm | ZoneEntropy                          | 6.02182825  |
| wavelet-LLL | glszm | SmallAreaLowGrayLevelEmphasis        | 0.02220842  |
| wavelet-LLL | ngtdm | Coarseness                           | 0.026209878 |
| wavelet-LLL | ngtdm | Complexity                           | 31032.14474 |
| wavelet-LLL | ngtdm | Strength                             | 76.19893632 |
| wavelet-LLL | ngtdm | Contrast                             | 3.075776611 |
| wavelet-LLL | ngtdm | Busyness                             | 0.019760924 |
| wavelet-HHL | gldm  | GrayLevelVariance                    | 9.626033058 |
| wavelet-HHL | gldm  | HighGrayLevelEmphasis                | 85          |
| wavelet-HHL | gldm  | DependenceEntropy                    | 5.264477715 |
| wavelet-HHL | gldm  | DependenceNonUniformity              | 31.63636364 |
| wavelet-HHL | gldm  | GrayLevelNonUniformity               | 12.72727273 |
| wavelet-HHL | gldm  | SmallDependenceEmphasis              | 0.392931397 |
| wavelet-HHL | gldm  | SmallDependenceHighGrayLevelEmphasis | 37.37000631 |
| wavelet-HHL | gldm  | DependenceNonUniformityNormalized    | 0.239669421 |
| wavelet-HHL | gldm  | LargeDependenceEmphasis              | 7.560606061 |
| wavelet-HHL | gldm  | LargeDependenceLowGrayLevelEmphasis  | 0.131283283 |
| wavelet-HHL | gldm  | DependenceVariance                   | 1.683654729 |
| wavelet-HHL | gldm  | LargeDependenceHighGrayLevelEmphasis | 614.5909091 |
| wavelet-HHL | gldm  | SmallDependenceLowGrayLevelEmphasis  | 0.019358291 |
| wavelet-HHL | gldm  | LowGrayLevelEmphasis                 | 0.029968494 |
| wavelet-HHL | glcm  | JointAverage                         | 8.80654722  |
| wavelet-HHL | glcm  | SumAverage                           | 17.61309444 |
| wavelet-HHL | glcm  | JointEntropy                         | 6.303175544 |
| wavelet-HHL | glcm  | ClusterShade                         | 17.6993522  |
| wavelet-HHL | glcm  | MaximumProbability                   | 0.036854608 |
| wavelet-HHL | glcm  | Idmn                                 | 0.950754473 |
| wavelet-HHL | glcm  | JointEnergy                          | 0.015186384 |
| wavelet-HHL | glcm  | Contrast                             | 20.64782127 |
| wavelet-HHL | glcm  | DifferenceEntropy                    | 3.171384113 |
| wavelet-HHL | glcm  | InverseVariance                      | 0.242908703 |
| wavelet-HHL | glcm  | DifferenceVariance                   | 7.373172604 |
| wavelet-HHL | glcm  | Idn                                  | 0.851768602 |
| wavelet-HHL | glcm  | Idm                                  | 0.231089793 |
| wavelet-HHL | glcm  | Correlation                          | -0.03221704 |
| wavelet-HHL | glcm  | Autocorrelation                      | 77.25002994 |
| wavelet-HHL | glcm  | SumEntropy                           | 3.935853527 |
| wavelet-HHL | glcm  | SumSquares                           | 9.9836611   |
| wavelet-HHL | glcm  | ClusterProminence                    | 1154.616934 |

|             |            |                                  |              |
|-------------|------------|----------------------------------|--------------|
| wavelet-HHL | glcm       | Imc2                             | 0.893220087  |
| wavelet-HHL | glcm       | Imc1                             | -0.22612431  |
| wavelet-HHL | glcm       | DifferenceAverage                | 3.611777376  |
| wavelet-HHL | glcm       | Id                               | 0.325986723  |
| wavelet-HHL | glcm       | ClusterTendency                  | 19.28682313  |
| wavelet-HHL | firstorder | InterquartileRange               | 101.0327417  |
| wavelet-HHL | firstorder | Skewness                         | 0.192160558  |
| wavelet-HHL | firstorder | Uniformity                       | 0.096418733  |
| wavelet-HHL | firstorder | Median                           | 5.36315279   |
| wavelet-HHL | firstorder | Energy                           | 781528.957   |
| wavelet-HHL | firstorder | RobustMeanAbsoluteDeviation      | 42.83367895  |
| wavelet-HHL | firstorder | MeanAbsoluteDeviation            | 61.66253393  |
| wavelet-HHL | firstorder | TotalEnergy                      | 21101281.84  |
| wavelet-HHL | firstorder | Maximum                          | 253.7595083  |
| wavelet-HHL | firstorder | RootMeanSquared                  | 76.94591553  |
| wavelet-HHL | firstorder | 90Percentile                     | 109.2931644  |
| wavelet-HHL | firstorder | Minimum                          | -181.4094579 |
| wavelet-HHL | firstorder | Entropy                          | 3.585381778  |
| wavelet-HHL | firstorder | Range                            | 435.1689662  |
| wavelet-HHL | firstorder | Variance                         | 5904.12336   |
| wavelet-HHL | firstorder | 10Percentile                     | -89.66958417 |
| wavelet-HHL | firstorder | Kurtosis                         | 3.076798079  |
| wavelet-HHL | firstorder | Mean                             | 4.068237497  |
| wavelet-HHL | glrlm      | ShortRunLowGrayLevelEmphasis     | 0.030097822  |
| wavelet-HHL | glrlm      | GrayLevelVariance                | 9.940603404  |
| wavelet-HHL | glrlm      | LowGrayLevelRunEmphasis          | 0.030774458  |
| wavelet-HHL | glrlm      | GrayLevelNonUniformityNormalized | 0.094371628  |
| wavelet-HHL | glrlm      | RunVariance                      | 0.061972439  |
| wavelet-HHL | glrlm      | GrayLevelNonUniformity           | 11.77517121  |
| wavelet-HHL | glrlm      | LongRunEmphasis                  | 1.182987062  |
| wavelet-HHL | glrlm      | ShortRunHighGrayLevelEmphasis    | 81.98741779  |
| wavelet-HHL | glrlm      | RunLengthNonUniformity           | 112.0441111  |
| wavelet-HHL | glrlm      | ShortRunEmphasis                 | 0.958408018  |
| wavelet-HHL | glrlm      | LongRunHighGrayLevelEmphasis     | 99.91925216  |
| wavelet-HHL | glrlm      | RunPercentage                    | 0.945221445  |
| wavelet-HHL | glrlm      | LongRunLowGrayLevelEmphasis      | 0.033726979  |
| wavelet-HHL | glrlm      | RunEntropy                       | 3.847198739  |
| wavelet-HHL | glrlm      | HighGrayLevelRunEmphasis         | 85.3035251   |
| wavelet-HHL | glrlm      | RunLengthNonUniformityNormalized | 0.897101254  |
| wavelet-HHL | glszm      | GrayLevelVariance                | 16.06926278  |
| wavelet-HHL | glszm      | ZoneVariance                     | 9.510107015  |
| wavelet-HHL | glszm      | GrayLevelNonUniformityNormalized | 0.075505351  |
| wavelet-HHL | glszm      | SizeZoneNonUniformityNormalized  | 0.448275862  |
| wavelet-HHL | glszm      | SizeZoneNonUniformity            | 26           |
| wavelet-HHL | glszm      | GrayLevelNonUniformity           | 4.379310345  |
| wavelet-HHL | glszm      | LargeAreaEmphasis                | 14.68965517  |
| wavelet-HHL | glszm      | SmallAreaHighGrayLevelEmphasis   | 69.47407411  |
| wavelet-HHL | glszm      | ZonePercentage                   | 0.439393939  |
| wavelet-HHL | glszm      | LargeAreaLowGrayLevelEmphasis    | 0.241876264  |
| wavelet-HHL | glszm      | LargeAreaHighGrayLevelEmphasis   | 1240.965517  |
| wavelet-HHL | glszm      | HighGrayLevelZoneEmphasis        | 91.87931034  |
| wavelet-HHL | glszm      | SmallAreaEmphasis                | 0.694439754  |
| wavelet-HHL | glszm      | LowGrayLevelZoneEmphasis         | 0.047003432  |
| wavelet-HHL | glszm      | ZoneEntropy                      | 4.8358394    |
| wavelet-HHL | glszm      | SmallAreaLowGrayLevelEmphasis    | 0.040446917  |

|             |            |                                      |              |
|-------------|------------|--------------------------------------|--------------|
| wavelet-HHL | ngtdm      | Coarseness                           | 0.039487413  |
| wavelet-HHL | ngtdm      | Complexity                           | 257.0952396  |
| wavelet-HHL | ngtdm      | Strength                             | 3.137357779  |
| wavelet-HHL | ngtdm      | Contrast                             | 0.21208316   |
| wavelet-HHL | ngtdm      | Busyness                             | 0.204780532  |
| wavelet-HLH | gldm       | GrayLevelVariance                    | 11.19674013  |
| wavelet-HLH | gldm       | HighGrayLevelEmphasis                | 104.3484848  |
| wavelet-HLH | gldm       | DependenceEntropy                    | 5.448936166  |
| wavelet-HLH | gldm       | DependenceNonUniformity              | 29.89393939  |
| wavelet-HLH | gldm       | GrayLevelNonUniformity               | 12.1969697   |
| wavelet-HLH | gldm       | SmallDependenceEmphasis              | 0.357003583  |
| wavelet-HLH | gldm       | SmallDependenceHighGrayLevelEmphasis | 43.87810401  |
| wavelet-HLH | gldm       | DependenceNonUniformityNormalized    | 0.226469238  |
| wavelet-HLH | gldm       | LargeDependenceEmphasis              | 10.07575758  |
| wavelet-HLH | gldm       | LargeDependenceLowGrayLevelEmphasis  | 0.163291902  |
| wavelet-HLH | gldm       | DependenceVariance                   | 2.802112029  |
| wavelet-HLH | gldm       | LargeDependenceHighGrayLevelEmphasis | 867.7727273  |
| wavelet-HLH | gldm       | SmallDependenceLowGrayLevelEmphasis  | 0.014855255  |
| wavelet-HLH | gldm       | LowGrayLevelEmphasis                 | 0.024865514  |
| wavelet-HLH | glcm       | JointAverage                         | 9.746546543  |
| wavelet-HLH | glcm       | SumAverage                           | 19.49309309  |
| wavelet-HLH | glcm       | JointEntropy                         | 6.371048707  |
| wavelet-HLH | glcm       | ClusterShade                         | 6.26811728   |
| wavelet-HLH | glcm       | MaximumProbability                   | 0.037689227  |
| wavelet-HLH | glcm       | Idmn                                 | 0.953612107  |
| wavelet-HLH | glcm       | JointEnergy                          | 0.014389862  |
| wavelet-HLH | glcm       | Contrast                             | 24.08021997  |
| wavelet-HLH | glcm       | DifferenceEntropy                    | 3.248009131  |
| wavelet-HLH | glcm       | InverseVariance                      | 0.228477999  |
| wavelet-HLH | glcm       | DifferenceVariance                   | 9.24913277   |
| wavelet-HLH | glcm       | Idn                                  | 0.85886306   |
| wavelet-HLH | glcm       | Idm                                  | 0.237007813  |
| wavelet-HLH | glcm       | Correlation                          | -0.029406431 |
| wavelet-HLH | glcm       | Autocorrelation                      | 94.72957513  |
| wavelet-HLH | glcm       | SumEntropy                           | 4.025721692  |
| wavelet-HLH | glcm       | SumSquares                           | 11.76073877  |
| wavelet-HLH | glcm       | ClusterProminence                    | 1910.512686  |
| wavelet-HLH | glcm       | Imc2                                 | 0.928946823  |
| wavelet-HLH | glcm       | Imc1                                 | -0.270590985 |
| wavelet-HLH | glcm       | DifferenceAverage                    | 3.795804889  |
| wavelet-HLH | glcm       | Id                                   | 0.329978054  |
| wavelet-HLH | glcm       | ClusterTendency                      | 22.96273511  |
| wavelet-HLH | firstorder | InterquartileRange                   | 114.1047043  |
| wavelet-HLH | firstorder | Skewness                             | 0.241376092  |
| wavelet-HLH | firstorder | Uniformity                           | 0.092401286  |
| wavelet-HLH | firstorder | Median                               | 0.476335271  |
| wavelet-HLH | firstorder | Energy                               | 881587.0156  |
| wavelet-HLH | firstorder | RobustMeanAbsoluteDeviation          | 46.01886251  |
| wavelet-HLH | firstorder | MeanAbsoluteDeviation                | 65.76275714  |
| wavelet-HLH | firstorder | TotalEnergy                          | 23802849.42  |
| wavelet-HLH | firstorder | Maximum                              | 277.5265928  |
| wavelet-HLH | firstorder | RootMeanSquared                      | 81.72324952  |
| wavelet-HLH | firstorder | 90Percentile                         | 102.8799387  |
| wavelet-HLH | firstorder | Minimum                              | -201.2873703 |
| wavelet-HLH | firstorder | Entropy                              | 3.676702255  |

|             |            |                                  |              |
|-------------|------------|----------------------------------|--------------|
| wavelet-HLH | firstorder | Range                            | 478.8139631  |
| wavelet-HLH | firstorder | Variance                         | 6664.557286  |
| wavelet-HLH | firstorder | 10Percentile                     | -89.30148149 |
| wavelet-HLH | firstorder | Kurtosis                         | 3.240193355  |
| wavelet-HLH | firstorder | Mean                             | 3.759285337  |
| wavelet-HLH | glrlm      | ShortRunLowGrayLevelEmphasis     | 0.024793002  |
| wavelet-HLH | glrlm      | GrayLevelVariance                | 11.5832238   |
| wavelet-HLH | glrlm      | LowGrayLevelRunEmphasis          | 0.02555795   |
| wavelet-HLH | glrlm      | GrayLevelNonUniformityNormalized | 0.090115932  |
| wavelet-HLH | glrlm      | RunVariance                      | 0.071039195  |
| wavelet-HLH | glrlm      | GrayLevelNonUniformity           | 11.12209712  |
| wavelet-HLH | glrlm      | LongRunEmphasis                  | 1.218632188  |
| wavelet-HLH | glrlm      | ShortRunHighGrayLevelEmphasis    | 100.8190274  |
| wavelet-HLH | glrlm      | RunLengthNonUniformity           | 108.2056596  |
| wavelet-HLH | glrlm      | ShortRunEmphasis                 | 0.948854934  |
| wavelet-HLH | glrlm      | LongRunHighGrayLevelEmphasis     | 124.7092438  |
| wavelet-HLH | glrlm      | RunPercentage                    | 0.934731935  |
| wavelet-HLH | glrlm      | LongRunLowGrayLevelEmphasis      | 0.028876048  |
| wavelet-HLH | glrlm      | RunEntropy                       | 3.98286132   |
| wavelet-HLH | glrlm      | HighGrayLevelRunEmphasis         | 105.4314644  |
| wavelet-HLH | glrlm      | RunLengthNonUniformityNormalized | 0.875469241  |
| wavelet-HLH | glszm      | GrayLevelVariance                | 17.0475      |
| wavelet-HLH | glszm      | ZoneVariance                     | 5.16         |
| wavelet-HLH | glszm      | GrayLevelNonUniformityNormalized | 0.073333333  |
| wavelet-HLH | glszm      | SizeZoneNonUniformityNormalized  | 0.352777778  |
| wavelet-HLH | glszm      | SizeZoneNonUniformity            | 21.16666667  |
| wavelet-HLH | glszm      | GrayLevelNonUniformity           | 4.4          |
| wavelet-HLH | glszm      | LargeAreaEmphasis                | 10           |
| wavelet-HLH | glszm      | SmallAreaHighGrayLevelEmphasis   | 79.44362144  |
| wavelet-HLH | glszm      | ZonePercentage                   | 0.454545455  |
| wavelet-HLH | glszm      | LargeAreaLowGrayLevelEmphasis    | 0.169472449  |
| wavelet-HLH | glszm      | LargeAreaHighGrayLevelEmphasis   | 904.1666667  |
| wavelet-HLH | glszm      | HighGrayLevelZoneEmphasis        | 118.05       |
| wavelet-HLH | glszm      | SmallAreaEmphasis                | 0.606548603  |
| wavelet-HLH | glszm      | LowGrayLevelZoneEmphasis         | 0.036472012  |
| wavelet-HLH | glszm      | ZoneEntropy                      | 5.123231429  |
| wavelet-HLH | glszm      | SmallAreaLowGrayLevelEmphasis    | 0.02980874   |
| wavelet-HLH | ngtdm      | Coarseness                       | 0.038080314  |
| wavelet-HLH | ngtdm      | Complexity                       | 344.0058197  |
| wavelet-HLH | ngtdm      | Strength                         | 4.098066342  |
| wavelet-HLH | ngtdm      | Contrast                         | 0.201721122  |
| wavelet-HLH | ngtdm      | Busyness                         | 0.160866809  |

| Image type | Feature Class | Feature Name                         | Value                                                                                                                                                                                                                                                                                                                                                                                                             |
|------------|---------------|--------------------------------------|-------------------------------------------------------------------------------------------------------------------------------------------------------------------------------------------------------------------------------------------------------------------------------------------------------------------------------------------------------------------------------------------------------------------|
| general    | info          | BoundingBox                          | 28: RTSTRUCT: C99-DNU_segment_LLL_ITVGating<br>(0, 0, 1, 8, 11, 9)                                                                                                                                                                                                                                                                                                                                                |
| general    | info          | EnabledImageTypes                    | {u'Original': {}, u'Wavelet': {}}                                                                                                                                                                                                                                                                                                                                                                                 |
|            |               |                                      | {'distances': [1], 'additionalInfo': True, 'force2D': False, 'interpolator': 'sitkBSpline', 'resampledPixelSpacing': [3.0], 'label': 1, 'normalizeScale': 1, 'normalize': False, 'force2Ddimension': 0, 'removeOutliers': None, 'minimumROISize': None, u'binWidth': 25.0, 'minimumROIDimensions': 1, u'correctMask': True, 'preCrop': False, u'symmetricalGLCM': True, 'resegmentRange': None, 'padDistance': 5} |
| general    | info          | GeneralSettings                      |                                                                                                                                                                                                                                                                                                                                                                                                                   |
| general    | info          | ImageHash                            | d7c057569dac0957bf9c61fd352b6c5effd782cf<br>(0.9765624999999998, 0.9765624999999998, 1.9999999999999999)                                                                                                                                                                                                                                                                                                          |
| general    | info          | ImageSpacing                         | 77331cd0f8490a368a0c3e49d48baa5330ff96e3                                                                                                                                                                                                                                                                                                                                                                          |
| general    | info          | MaskHash                             | 1.13.1                                                                                                                                                                                                                                                                                                                                                                                                            |
| general    | info          | NumpyVersion                         | 0.5.2                                                                                                                                                                                                                                                                                                                                                                                                             |
| general    | info          | PyWaveletVersion                     | 1.1.0                                                                                                                                                                                                                                                                                                                                                                                                             |
| general    | info          | SimpleITKVersion                     | 1.3.0.post102+g1b0eb74                                                                                                                                                                                                                                                                                                                                                                                            |
| general    | info          | Version                              |                                                                                                                                                                                                                                                                                                                                                                                                                   |
| general    | info          | VolumeNum                            | 1                                                                                                                                                                                                                                                                                                                                                                                                                 |
| general    | info          | VoxelNum                             | 251                                                                                                                                                                                                                                                                                                                                                                                                               |
| original   | shape         | Maximum3DDiameter                    | 33                                                                                                                                                                                                                                                                                                                                                                                                                |
| original   | shape         | Maximum2DDiameterSlice               | 30.88689042                                                                                                                                                                                                                                                                                                                                                                                                       |
| original   | shape         | Sphericity                           | 0.751197346                                                                                                                                                                                                                                                                                                                                                                                                       |
| original   | shape         | MinorAxis                            | 24.17258815                                                                                                                                                                                                                                                                                                                                                                                                       |
| original   | shape         | Elongation                           | 0.781816546                                                                                                                                                                                                                                                                                                                                                                                                       |
| original   | shape         | SurfaceVolumeRatio                   | 0.340186899                                                                                                                                                                                                                                                                                                                                                                                                       |
| original   | shape         | Volume                               | 6777                                                                                                                                                                                                                                                                                                                                                                                                              |
| original   | shape         | MajorAxis                            | 30.91849141                                                                                                                                                                                                                                                                                                                                                                                                       |
| original   | shape         | SurfaceArea                          | 2305.446615                                                                                                                                                                                                                                                                                                                                                                                                       |
| original   | shape         | Flatness                             | 0.466989086                                                                                                                                                                                                                                                                                                                                                                                                       |
| original   | shape         | LeastAxis                            | 14.43859803                                                                                                                                                                                                                                                                                                                                                                                                       |
| original   | shape         | Maximum2DDiameterColumn              | 27.65863337                                                                                                                                                                                                                                                                                                                                                                                                       |
| original   | shape         | Maximum2DDiameterRow                 | 31.32091953                                                                                                                                                                                                                                                                                                                                                                                                       |
| original   | gldm          | GrayLevelVariance                    | 95.02655513                                                                                                                                                                                                                                                                                                                                                                                                       |
| original   | gldm          | HighGrayLevelEmphasis                | 477.8446215                                                                                                                                                                                                                                                                                                                                                                                                       |
| original   | gldm          | DependenceEntropy                    | 6.076590294                                                                                                                                                                                                                                                                                                                                                                                                       |
| original   | gldm          | DependenceNonUniformity              | 101                                                                                                                                                                                                                                                                                                                                                                                                               |
| original   | gldm          | GrayLevelNonUniformity               | 8.203187251                                                                                                                                                                                                                                                                                                                                                                                                       |
| original   | gldm          | SmallDependenceEmphasis              | 0.605384019                                                                                                                                                                                                                                                                                                                                                                                                       |
| original   | gldm          | SmallDependenceHighGrayLevelEmphasis | 252.8492973                                                                                                                                                                                                                                                                                                                                                                                                       |
| original   | gldm          | DependenceNonUniformityNormalized    | 0.402390438                                                                                                                                                                                                                                                                                                                                                                                                       |
| original   | gldm          | LargeDependenceEmphasis              | 3.262948207                                                                                                                                                                                                                                                                                                                                                                                                       |
| original   | gldm          | LargeDependenceLowGrayLevelEmphasis  | 0.028432139                                                                                                                                                                                                                                                                                                                                                                                                       |
| original   | gldm          | DependenceVariance                   | 0.555546737                                                                                                                                                                                                                                                                                                                                                                                                       |
| original   | gldm          | LargeDependenceHighGrayLevelEmphasis | 2015.717131                                                                                                                                                                                                                                                                                                                                                                                                       |
| original   | gldm          | SmallDependenceLowGrayLevelEmphasis  | 0.013950026                                                                                                                                                                                                                                                                                                                                                                                                       |
| original   | gldm          | LowGrayLevelEmphasis                 | 0.016506692                                                                                                                                                                                                                                                                                                                                                                                                       |
| original   | glcm          | JointAverage                         | 21.87860629                                                                                                                                                                                                                                                                                                                                                                                                       |
| original   | glcm          | SumAverage                           | 43.75721258                                                                                                                                                                                                                                                                                                                                                                                                       |
| original   | glcm          | JointEntropy                         | 8.026063723                                                                                                                                                                                                                                                                                                                                                                                                       |
| original   | glcm          | ClusterShade                         | 183.8830709                                                                                                                                                                                                                                                                                                                                                                                                       |
| original   | glcm          | MaximumProbability                   | 0.01048951                                                                                                                                                                                                                                                                                                                                                                                                        |
| original   | glcm          | Idmn                                 | 0.935275537                                                                                                                                                                                                                                                                                                                                                                                                       |
| original   | glcm          | JointEnergy                          | 0.004164253                                                                                                                                                                                                                                                                                                                                                                                                       |
| original   | glcm          | Contrast                             | 118.8419798                                                                                                                                                                                                                                                                                                                                                                                                       |
| original   | glcm          | DifferenceEntropy                    | 4.344842481                                                                                                                                                                                                                                                                                                                                                                                                       |
| original   | glcm          | InverseVariance                      | 0.124311866                                                                                                                                                                                                                                                                                                                                                                                                       |

|          |            |                                  |              |
|----------|------------|----------------------------------|--------------|
| original | glcm       | DifferenceVariance               | 41.84746215  |
| original | glcm       | Idn                              | 0.833928469  |
| original | glcm       | Idm                              | 0.114456154  |
| original | glcm       | Correlation                      | 0.386789153  |
| original | glcm       | Autocorrelation                  | 515.6538737  |
| original | glcm       | SumEntropy                       | 5.663648451  |
| original | glcm       | SumSquares                       | 96.28274493  |
| original | glcm       | ClusterProminence                | 159075.5049  |
| original | glcm       | Imc2                             | 0.992027734  |
| original | glcm       | Imc1                             | -0.411313941 |
| original | glcm       | DifferenceAverage                | 8.61812152   |
| original | glcm       | Id                               | 0.198425183  |
| original | glcm       | ClusterTendency                  | 266.2889999  |
| original | firstorder | InterquartileRange               | 383          |
| original | firstorder | Skewness                         | 0.210132097  |
| original | firstorder | Uniformity                       | 0.032682021  |
| original | firstorder | Median                           | -490         |
| original | firstorder | Energy                           | 71202457     |
| original | firstorder | RobustMeanAbsoluteDeviation      | 157.0475978  |
| original | firstorder | MeanAbsoluteDeviation            | 205.1310297  |
| original | firstorder | TotalEnergy                      | 1922466339   |
| original | firstorder | Maximum                          | 22           |
| original | firstorder | RootMeanSquared                  | 532.6116104  |
| original | firstorder | 90Percentile                     | -128         |
| original | firstorder | Minimum                          | -942         |
| original | firstorder | Entropy                          | 5.075856259  |
| original | firstorder | Range                            | 964          |
| original | firstorder | Variance                         | 59501.17341  |
| original | firstorder | 10Percentile                     | -787         |
| original | firstorder | Kurtosis                         | 2.065424645  |
| original | firstorder | Mean                             | -473.4701195 |
| original | glrlm      | ShortRunLowGrayLevelEmphasis     | 0.016671153  |
| original | glrlm      | GrayLevelVariance                | 94.45623673  |
| original | glrlm      | LowGrayLevelRunEmphasis          | 0.016781356  |
| original | glrlm      | GrayLevelNonUniformityNormalized | 0.032683329  |
| original | glrlm      | RunVariance                      | 0.026699092  |
| original | glrlm      | GrayLevelNonUniformity           | 7.999757745  |
| original | glrlm      | LongRunEmphasis                  | 1.078652492  |
| original | glrlm      | ShortRunHighGrayLevelEmphasis    | 462.2722922  |
| original | glrlm      | RunLengthNonUniformity           | 233.1085691  |
| original | glrlm      | ShortRunEmphasis                 | 0.981393637  |
| original | glrlm      | LongRunHighGrayLevelEmphasis     | 524.7667175  |
| original | glrlm      | RunPercentage                    | 0.975176218  |
| original | glrlm      | LongRunLowGrayLevelEmphasis      | 0.017225967  |
| original | glrlm      | RunEntropy                       | 5.171559709  |
| original | glrlm      | HighGrayLevelRunEmphasis         | 473.8063589  |
| original | glrlm      | RunLengthNonUniformityNormalized | 0.952134481  |
| original | glszm      | GrayLevelVariance                | 88.24677169  |
| original | glszm      | ZoneVariance                     | 0.744544163  |
| original | glszm      | GrayLevelNonUniformityNormalized | 0.032993285  |
| original | glszm      | SizeZoneNonUniformityNormalized  | 0.553460744  |
| original | glszm      | SizeZoneNonUniformity            | 97.40909091  |
| original | glszm      | GrayLevelNonUniformity           | 5.806818182  |
| original | glszm      | LargeAreaEmphasis                | 2.778409091  |
| original | glszm      | SmallAreaHighGrayLevelEmphasis   | 311.6398109  |
| original | glszm      | ZonePercentage                   | 0.701195219  |
| original | glszm      | LargeAreaLowGrayLevelEmphasis    | 0.030045048  |
| original | glszm      | LargeAreaHighGrayLevelEmphasis   | 1622.267045  |
| original | glszm      | HighGrayLevelZoneEmphasis        | 428.3977273  |

|             |            |                                      |              |
|-------------|------------|--------------------------------------|--------------|
| original    | glszm      | SmallAreaEmphasis                    | 0.770407938  |
| original    | glszm      | LowGrayLevelZoneEmphasis             | 0.020925731  |
| original    | glszm      | ZoneEntropy                          | 5.827536005  |
| original    | glszm      | SmallAreaLowGrayLevelEmphasis        | 0.019259416  |
| original    | ngtdm      | Coarseness                           | 0.022783268  |
| original    | ngtdm      | Complexity                           | 3079.629292  |
| original    | ngtdm      | Strength                             | 11.41024559  |
| original    | ngtdm      | Contrast                             | 0.778744198  |
| original    | ngtdm      | Busyness                             | 0.085440407  |
| wavelet-HHH | gldm       | GrayLevelVariance                    | 2.280439993  |
| wavelet-HHH | gldm       | HighGrayLevelEmphasis                | 22.87250996  |
| wavelet-HHH | gldm       | DependenceEntropy                    | 5.24204075   |
| wavelet-HHH | gldm       | DependenceNonUniformity              | 29.34262948  |
| wavelet-HHH | gldm       | GrayLevelNonUniformity               | 50.37051793  |
| wavelet-HHH | gldm       | SmallDependenceEmphasis              | 0.178207595  |
| wavelet-HHH | gldm       | SmallDependenceHighGrayLevelEmphasis | 4.92226125   |
| wavelet-HHH | gldm       | DependenceNonUniformityNormalized    | 0.116902906  |
| wavelet-HHH | gldm       | LargeDependenceEmphasis              | 30.14741036  |
| wavelet-HHH | gldm       | LargeDependenceLowGrayLevelEmphasis  | 1.803934886  |
| wavelet-HHH | gldm       | DependenceVariance                   | 8.08361772   |
| wavelet-HHH | gldm       | LargeDependenceHighGrayLevelEmphasis | 617.0159363  |
| wavelet-HHH | gldm       | SmallDependenceLowGrayLevelEmphasis  | 0.031069294  |
| wavelet-HHH | gldm       | LowGrayLevelEmphasis                 | 0.091456015  |
| wavelet-HHH | glcm       | JointAverage                         | 4.538381807  |
| wavelet-HHH | glcm       | SumAverage                           | 9.076763614  |
| wavelet-HHH | glcm       | JointEntropy                         | 4.88017424   |
| wavelet-HHH | glcm       | ClusterShade                         | 1.272740374  |
| wavelet-HHH | glcm       | MaximumProbability                   | 0.097974846  |
| wavelet-HHH | glcm       | Idmn                                 | 0.962234795  |
| wavelet-HHH | glcm       | JointEnergy                          | 0.047675139  |
| wavelet-HHH | glcm       | Contrast                             | 4.345591954  |
| wavelet-HHH | glcm       | DifferenceEntropy                    | 2.263857092  |
| wavelet-HHH | glcm       | InverseVariance                      | 0.437497696  |
| wavelet-HHH | glcm       | DifferenceVariance                   | 1.854321963  |
| wavelet-HHH | glcm       | Idn                                  | 0.875345373  |
| wavelet-HHH | glcm       | Idm                                  | 0.452594684  |
| wavelet-HHH | glcm       | Correlation                          | -0.033793522 |
| wavelet-HHH | glcm       | Autocorrelation                      | 20.52935433  |
| wavelet-HHH | glcm       | SumEntropy                           | 2.978165703  |
| wavelet-HHH | glcm       | SumSquares                           | 2.104192936  |
| wavelet-HHH | glcm       | ClusterProminence                    | 59.86504958  |
| wavelet-HHH | glcm       | Imc2                                 | 0.559120198  |
| wavelet-HHH | glcm       | Imc1                                 | -0.074680299 |
| wavelet-HHH | glcm       | DifferenceAverage                    | 1.569268498  |
| wavelet-HHH | glcm       | Id                                   | 0.511097983  |
| wavelet-HHH | glcm       | ClusterTendency                      | 4.07117979   |
| wavelet-HHH | firstorder | InterquartileRange                   | 44.03529572  |
| wavelet-HHH | firstorder | Skewness                             | 0.265265813  |
| wavelet-HHH | firstorder | Uniformity                           | 0.200679354  |
| wavelet-HHH | firstorder | Median                               | -0.493257381 |
| wavelet-HHH | firstorder | Energy                               | 350484.9099  |
| wavelet-HHH | firstorder | RobustMeanAbsoluteDeviation          | 19.15697662  |
| wavelet-HHH | firstorder | MeanAbsoluteDeviation                | 28.65943664  |
| wavelet-HHH | firstorder | TotalEnergy                          | 9463092.568  |
| wavelet-HHH | firstorder | Maximum                              | 138.4773555  |
| wavelet-HHH | firstorder | RootMeanSquared                      | 37.36782336  |
| wavelet-HHH | firstorder | 90Percentile                         | 44.38853818  |
| wavelet-HHH | firstorder | Minimum                              | -95.34838648 |
| wavelet-HHH | firstorder | Entropy                              | 2.588522383  |

|             |            |                                      |              |
|-------------|------------|--------------------------------------|--------------|
| wavelet-HHH | firstorder | Range                                | 233.825742   |
| wavelet-HHH | firstorder | Variance                             | 1395.914078  |
| wavelet-HHH | firstorder | 10Percentile                         | -45.72938216 |
| wavelet-HHH | firstorder | Kurtosis                             | 3.843768341  |
| wavelet-HHH | firstorder | Mean                                 | 0.663434422  |
| wavelet-HHH | glrlm      | ShortRunLowGrayLevelEmphasis         | 0.08918434   |
| wavelet-HHH | glrlm      | GrayLevelVariance                    | 2.519387782  |
| wavelet-HHH | glrlm      | LowGrayLevelRunEmphasis              | 0.096107677  |
| wavelet-HHH | glrlm      | GrayLevelNonUniformityNormalized     | 0.187893466  |
| wavelet-HHH | glrlm      | RunVariance                          | 0.208942027  |
| wavelet-HHH | glrlm      | GrayLevelNonUniformity               | 40.4757496   |
| wavelet-HHH | glrlm      | LongRunEmphasis                      | 1.573494852  |
| wavelet-HHH | glrlm      | ShortRunHighGrayLevelEmphasis        | 20.99014976  |
| wavelet-HHH | glrlm      | RunLengthNonUniformity               | 164.0279426  |
| wavelet-HHH | glrlm      | ShortRunEmphasis                     | 0.893826     |
| wavelet-HHH | glrlm      | LongRunHighGrayLevelEmphasis         | 35.10258681  |
| wavelet-HHH | glrlm      | RunPercentage                        | 0.857799571  |
| wavelet-HHH | glrlm      | LongRunLowGrayLevelEmphasis          | 0.13201822   |
| wavelet-HHH | glrlm      | RunEntropy                           | 3.258111893  |
| wavelet-HHH | glrlm      | HighGrayLevelRunEmphasis             | 23.2160755   |
| wavelet-HHH | glrlm      | RunLengthNonUniformityNormalized     | 0.76021965   |
| wavelet-HHH | glszm      | GrayLevelVariance                    | 6.870740941  |
| wavelet-HHH | glszm      | ZoneVariance                         | 192.4618713  |
| wavelet-HHH | glszm      | GrayLevelNonUniformityNormalized     | 0.128177393  |
| wavelet-HHH | glszm      | SizeZoneNonUniformityNormalized      | 0.404002163  |
| wavelet-HHH | glszm      | SizeZoneNonUniformity                | 17.37209302  |
| wavelet-HHH | glszm      | GrayLevelNonUniformity               | 5.511627907  |
| wavelet-HHH | glszm      | LargeAreaEmphasis                    | 226.5348837  |
| wavelet-HHH | glszm      | SmallAreaHighGrayLevelEmphasis       | 19.66339776  |
| wavelet-HHH | glszm      | ZonePercentage                       | 0.171314741  |
| wavelet-HHH | glszm      | LargeAreaLowGrayLevelEmphasis        | 13.32878178  |
| wavelet-HHH | glszm      | LargeAreaHighGrayLevelEmphasis       | 4568.488372  |
| wavelet-HHH | glszm      | HighGrayLevelZoneEmphasis            | 28.72093023  |
| wavelet-HHH | glszm      | SmallAreaEmphasis                    | 0.653171532  |
| wavelet-HHH | glszm      | LowGrayLevelZoneEmphasis             | 0.189893982  |
| wavelet-HHH | glszm      | ZoneEntropy                          | 4.24884172   |
| wavelet-HHH | glszm      | SmallAreaLowGrayLevelEmphasis        | 0.147617961  |
| wavelet-HHH | ngtdm      | Coarseness                           | 0.024137121  |
| wavelet-HHH | ngtdm      | Complexity                           | 48.56479899  |
| wavelet-HHH | ngtdm      | Strength                             | 0.749728364  |
| wavelet-HHH | ngtdm      | Contrast                             | 0.06170184   |
| wavelet-HHH | ngtdm      | Busyness                             | 0.838217034  |
| wavelet-HLL | gldm       | GrayLevelVariance                    | 15.28677323  |
| wavelet-HLL | gldm       | HighGrayLevelEmphasis                | 97.43824701  |
| wavelet-HLL | gldm       | DependenceEntropy                    | 5.94373611   |
| wavelet-HLL | gldm       | DependenceNonUniformity              | 53.82071713  |
| wavelet-HLL | gldm       | GrayLevelNonUniformity               | 18.19521912  |
| wavelet-HLL | gldm       | SmallDependenceEmphasis              | 0.280180322  |
| wavelet-HLL | gldm       | SmallDependenceHighGrayLevelEmphasis | 24.34343567  |
| wavelet-HLL | gldm       | DependenceNonUniformityNormalized    | 0.214425168  |
| wavelet-HLL | gldm       | LargeDependenceEmphasis              | 9.733067729  |
| wavelet-HLL | gldm       | LargeDependenceLowGrayLevelEmphasis  | 0.248623143  |
| wavelet-HLL | gldm       | DependenceVariance                   | 1.709052237  |
| wavelet-HLL | gldm       | LargeDependenceHighGrayLevelEmphasis | 1009.063745  |
| wavelet-HLL | gldm       | SmallDependenceLowGrayLevelEmphasis  | 0.015884004  |
| wavelet-HLL | gldm       | LowGrayLevelEmphasis                 | 0.033986668  |
| wavelet-HLL | glcm       | JointAverage                         | 8.8299433    |
| wavelet-HLL | glcm       | SumAverage                           | 17.6598866   |
| wavelet-HLL | glcm       | JointEntropy                         | 6.988881809  |



|             |            |                                  |              |
|-------------|------------|----------------------------------|--------------|
| wavelet-HLL | glcm       | ClusterShade                     | 130.4342986  |
| wavelet-HLL | glcm       | MaximumProbability               | 0.02373199   |
| wavelet-HLL | glcm       | Idmn                             | 0.954380106  |
| wavelet-HLL | glcm       | JointEnergy                      | 0.009422123  |
| wavelet-HLL | glcm       | Contrast                         | 17.08193722  |
| wavelet-HLL | glcm       | DifferenceEntropy                | 3.028095974  |
| wavelet-HLL | glcm       | InverseVariance                  | 0.274284225  |
| wavelet-HLL | glcm       | DifferenceVariance               | 5.722121127  |
| wavelet-HLL | glcm       | Idn                              | 0.85926423   |
| wavelet-HLL | glcm       | Idm                              | 0.264631978  |
| wavelet-HLL | glcm       | Correlation                      | 0.461684336  |
| wavelet-HLL | glcm       | Autocorrelation                  | 85.39077389  |
| wavelet-HLL | glcm       | SumEntropy                       | 4.567010968  |
| wavelet-HLL | glcm       | SumSquares                       | 15.95563589  |
| wavelet-HLL | glcm       | ClusterProminence                | 5379.364463  |
| wavelet-HLL | glcm       | Imc2                             | 0.89920203   |
| wavelet-HLL | glcm       | Imc1                             | -0.219796992 |
| wavelet-HLL | glcm       | DifferenceAverage                | 3.231255625  |
| wavelet-HLL | glcm       | Id                               | 0.354701913  |
| wavelet-HLL | glcm       | ClusterTendency                  | 46.74060634  |
| wavelet-HLL | firstorder | InterquartileRange               | 139.6019022  |
| wavelet-HLL | firstorder | Skewness                         | 0.248762313  |
| wavelet-HLL | firstorder | Uniformity                       | 0.072490913  |
| wavelet-HLL | firstorder | Median                           | -33.84954947 |
| wavelet-HLL | firstorder | Energy                           | 2624136.116  |
| wavelet-HLL | firstorder | RobustMeanAbsoluteDeviation      | 57.95437382  |
| wavelet-HLL | firstorder | MeanAbsoluteDeviation            | 79.08249987  |
| wavelet-HLL | firstorder | TotalEnergy                      | 70851675.13  |
| wavelet-HLL | firstorder | Maximum                          | 192.5286215  |
| wavelet-HLL | firstorder | RootMeanSquared                  | 102.2483524  |
| wavelet-HLL | firstorder | 90Percentile                     | 101.7944576  |
| wavelet-HLL | firstorder | Minimum                          | -235.1298014 |
| wavelet-HLL | firstorder | Entropy                          | 3.930002089  |
| wavelet-HLL | firstorder | Range                            | 427.6584229  |
| wavelet-HLL | firstorder | Variance                         | 9219.003459  |
| wavelet-HLL | firstorder | 10Percentile                     | -158.0579641 |
| wavelet-HLL | firstorder | Kurtosis                         | 2.406730991  |
| wavelet-HLL | firstorder | Mean                             | -35.15283918 |
| wavelet-HLL | glrlm      | ShortRunLowGrayLevelEmphasis     | 0.033368188  |
| wavelet-HLL | glrlm      | GrayLevelVariance                | 15.19888995  |
| wavelet-HLL | glrlm      | LowGrayLevelRunEmphasis          | 0.034714291  |
| wavelet-HLL | glrlm      | GrayLevelNonUniformityNormalized | 0.072673973  |
| wavelet-HLL | glrlm      | RunVariance                      | 0.083715999  |
| wavelet-HLL | glrlm      | GrayLevelNonUniformity           | 16.9545077   |
| wavelet-HLL | glrlm      | LongRunEmphasis                  | 1.245595864  |
| wavelet-HLL | glrlm      | ShortRunHighGrayLevelEmphasis    | 91.30127582  |
| wavelet-HLL | glrlm      | RunLengthNonUniformity           | 202.9625011  |
| wavelet-HLL | glrlm      | ShortRunEmphasis                 | 0.945615048  |
| wavelet-HLL | glrlm      | LongRunHighGrayLevelEmphasis     | 122.2976598  |
| wavelet-HLL | glrlm      | RunPercentage                    | 0.929512718  |
| wavelet-HLL | glrlm      | LongRunLowGrayLevelEmphasis      | 0.040689956  |
| wavelet-HLL | glrlm      | RunEntropy                       | 4.23917145   |
| wavelet-HLL | glrlm      | HighGrayLevelRunEmphasis         | 96.9636931   |
| wavelet-HLL | glrlm      | RunLengthNonUniformityNormalized | 0.868088171  |
| wavelet-HLL | glszm      | GrayLevelVariance                | 15.42180896  |
| wavelet-HLL | glszm      | ZoneVariance                     | 7.545948557  |
| wavelet-HLL | glszm      | GrayLevelNonUniformityNormalized | 0.071368192  |
| wavelet-HLL | glszm      | SizeZoneNonUniformityNormalized  | 0.276657409  |
| wavelet-HLL | glszm      | SizeZoneNonUniformity            | 25.17582418  |

|             |            |                                      |              |
|-------------|------------|--------------------------------------|--------------|
| wavelet-HLL | glszm      | GrayLevelNonUniformity               | 6.494505495  |
| wavelet-HLL | glszm      | LargeAreaEmphasis                    | 15.15384615  |
| wavelet-HLL | glszm      | SmallAreaHighGrayLevelEmphasis       | 43.638549    |
| wavelet-HLL | glszm      | ZonePercentage                       | 0.362549801  |
| wavelet-HLL | glszm      | LargeAreaLowGrayLevelEmphasis        | 0.371836484  |
| wavelet-HLL | glszm      | LargeAreaHighGrayLevelEmphasis       | 1426.076923  |
| wavelet-HLL | glszm      | HighGrayLevelZoneEmphasis            | 90.97802198  |
| wavelet-HLL | glszm      | SmallAreaEmphasis                    | 0.53247625   |
| wavelet-HLL | glszm      | LowGrayLevelZoneEmphasis             | 0.051011874  |
| wavelet-HLL | glszm      | ZoneEntropy                          | 5.46610247   |
| wavelet-HLL | glszm      | SmallAreaLowGrayLevelEmphasis        | 0.037617829  |
| wavelet-HLL | ngtdm      | Coarseness                           | 0.030753318  |
| wavelet-HLL | ngtdm      | Complexity                           | 232.4354718  |
| wavelet-HLL | ngtdm      | Strength                             | 2.977542718  |
| wavelet-HLL | ngtdm      | Contrast                             | 0.204031438  |
| wavelet-HLL | ngtdm      | Busyness                             | 0.292471904  |
| wavelet-LHL | gldm       | GrayLevelVariance                    | 30.02958683  |
| wavelet-LHL | gldm       | HighGrayLevelEmphasis                | 253.5976096  |
| wavelet-LHL | gldm       | DependenceEntropy                    | 5.93442426   |
| wavelet-LHL | gldm       | DependenceNonUniformity              | 66.48207171  |
| wavelet-LHL | gldm       | GrayLevelNonUniformity               | 13.0876494   |
| wavelet-LHL | gldm       | SmallDependenceEmphasis              | 0.446674413  |
| wavelet-LHL | gldm       | SmallDependenceHighGrayLevelEmphasis | 123.4436166  |
| wavelet-LHL | gldm       | DependenceNonUniformityNormalized    | 0.264868812  |
| wavelet-LHL | gldm       | LargeDependenceEmphasis              | 6.147410359  |
| wavelet-LHL | gldm       | LargeDependenceLowGrayLevelEmphasis  | 0.06518978   |
| wavelet-LHL | gldm       | DependenceVariance                   | 1.293376296  |
| wavelet-LHL | gldm       | LargeDependenceHighGrayLevelEmphasis | 1411.366534  |
| wavelet-LHL | gldm       | SmallDependenceLowGrayLevelEmphasis  | 0.011798395  |
| wavelet-LHL | gldm       | LowGrayLevelEmphasis                 | 0.016588171  |
| wavelet-LHL | glcm       | JointAverage                         | 14.37807555  |
| wavelet-LHL | glcm       | SumAverage                           | 28.7561511   |
| wavelet-LHL | glcm       | JointEntropy                         | 7.577748636  |
| wavelet-LHL | glcm       | ClusterShade                         | -101.1515558 |
| wavelet-LHL | glcm       | MaximumProbability                   | 0.017006454  |
| wavelet-LHL | glcm       | Idmn                                 | 0.94961583   |
| wavelet-LHL | glcm       | JointEnergy                          | 0.006091204  |
| wavelet-LHL | glcm       | Contrast                             | 40.12784601  |
| wavelet-LHL | glcm       | DifferenceEntropy                    | 3.606041984  |
| wavelet-LHL | glcm       | InverseVariance                      | 0.198559155  |
| wavelet-LHL | glcm       | DifferenceVariance                   | 14.2041298   |
| wavelet-LHL | glcm       | Idn                                  | 0.852810413  |
| wavelet-LHL | glcm       | Idm                                  | 0.188373302  |
| wavelet-LHL | glcm       | Correlation                          | 0.344267066  |
| wavelet-LHL | glcm       | Autocorrelation                      | 217.4488383  |
| wavelet-LHL | glcm       | SumEntropy                           | 4.985264701  |
| wavelet-LHL | glcm       | SumSquares                           | 30.76076875  |
| wavelet-LHL | glcm       | ClusterProminence                    | 16114.10744  |
| wavelet-LHL | glcm       | Imc2                                 | 0.951739328  |
| wavelet-LHL | glcm       | Imc1                                 | -0.274660308 |
| wavelet-LHL | glcm       | DifferenceAverage                    | 4.941556446  |
| wavelet-LHL | glcm       | Id                                   | 0.280720343  |
| wavelet-LHL | glcm       | ClusterTendency                      | 82.91522899  |
| wavelet-LHL | firstorder | InterquartileRange                   | 205.8770179  |
| wavelet-LHL | firstorder | Skewness                             | -0.18529603  |
| wavelet-LHL | firstorder | Uniformity                           | 0.052142029  |
| wavelet-LHL | firstorder | Median                               | -24.36837766 |
| wavelet-LHL | firstorder | Energy                               | 5091925.642  |
| wavelet-LHL | firstorder | RobustMeanAbsoluteDeviation          | 83.82438435  |

|             |            |                                      |              |
|-------------|------------|--------------------------------------|--------------|
| wavelet-LHL | firstorder | MeanAbsoluteDeviation                | 113.0469885  |
| wavelet-LHL | firstorder | TotalEnergy                          | 137481992.3  |
| wavelet-LHL | firstorder | Maximum                              | 241.6642866  |
| wavelet-LHL | firstorder | RootMeanSquared                      | 142.4308827  |
| wavelet-LHL | firstorder | 90Percentile                         | 145.2422874  |
| wavelet-LHL | firstorder | Minimum                              | -381.9829023 |
| wavelet-LHL | firstorder | Entropy                              | 4.401782871  |
| wavelet-LHL | firstorder | Range                                | 623.6471889  |
| wavelet-LHL | firstorder | Variance                             | 18748.68659  |
| wavelet-LHL | firstorder | 10Percentile                         | -228.8485113 |
| wavelet-LHL | firstorder | Kurtosis                             | 2.320571201  |
| wavelet-LHL | firstorder | Mean                                 | -39.21568252 |
| wavelet-LHL | gIrlm      | ShortRunLowGrayLevelEmphasis         | 0.016618768  |
| wavelet-LHL | gIrlm      | GrayLevelVariance                    | 30.13075357  |
| wavelet-LHL | gIrlm      | LowGrayLevelRunEmphasis              | 0.016950798  |
| wavelet-LHL | gIrlm      | GrayLevelNonUniformityNormalized     | 0.051939806  |
| wavelet-LHL | gIrlm      | RunVariance                          | 0.050013364  |
| wavelet-LHL | gIrlm      | GrayLevelNonUniformity               | 12.43298499  |
| wavelet-LHL | gIrlm      | LongRunEmphasis                      | 1.150470237  |
| wavelet-LHL | gIrlm      | ShortRunHighGrayLevelEmphasis        | 246.7933692  |
| wavelet-LHL | gIrlm      | RunLengthNonUniformity               | 218.1045272  |
| wavelet-LHL | gIrlm      | ShortRunEmphasis                     | 0.9643781    |
| wavelet-LHL | gIrlm      | LongRunHighGrayLevelEmphasis         | 289.6790659  |
| wavelet-LHL | gIrlm      | RunPercentage                        | 0.953723567  |
| wavelet-LHL | gIrlm      | LongRunLowGrayLevelEmphasis          | 0.018308081  |
| wavelet-LHL | gIrlm      | RunEntropy                           | 4.604298287  |
| wavelet-LHL | gIrlm      | HighGrayLevelRunEmphasis             | 254.8270924  |
| wavelet-LHL | gIrlm      | RunLengthNonUniformityNormalized     | 0.910526732  |
| wavelet-LHL | gIrlm      | GrayLevelVariance                    | 32.29319853  |
| wavelet-LHL | gIrlm      | ZoneVariance                         | 2.630568772  |
| wavelet-LHL | gIrlm      | GrayLevelNonUniformityNormalized     | 0.051470588  |
| wavelet-LHL | gIrlm      | SizeZoneNonUniformityNormalized      | 0.439446367  |
| wavelet-LHL | gIrlm      | SizeZoneNonUniformity                | 59.76470588  |
| wavelet-LHL | gIrlm      | GrayLevelNonUniformity               | 7            |
| wavelet-LHL | gIrlm      | LargeAreaEmphasis                    | 6.036764706  |
| wavelet-LHL | gIrlm      | SmallAreaHighGrayLevelEmphasis       | 194.4015674  |
| wavelet-LHL | gIrlm      | ZonePercentage                       | 0.541832669  |
| wavelet-LHL | gIrlm      | LargeAreaLowGrayLevelEmphasis        | 0.064119408  |
| wavelet-LHL | gIrlm      | LargeAreaHighGrayLevelEmphasis       | 1484.139706  |
| wavelet-LHL | gIrlm      | HighGrayLevelZoneEmphasis            | 268.6838235  |
| wavelet-LHL | gIrlm      | SmallAreaEmphasis                    | 0.687225098  |
| wavelet-LHL | gIrlm      | LowGrayLevelZoneEmphasis             | 0.023327948  |
| wavelet-LHL | gIrlm      | ZoneEntropy                          | 5.500670794  |
| wavelet-LHL | gIrlm      | SmallAreaLowGrayLevelEmphasis        | 0.020673843  |
| wavelet-LHL | ngtdm      | Coarseness                           | 0.027301607  |
| wavelet-LHL | ngtdm      | Complexity                           | 759.2513897  |
| wavelet-LHL | ngtdm      | Strength                             | 5.090425401  |
| wavelet-LHL | ngtdm      | Contrast                             | 0.33299154   |
| wavelet-LHL | ngtdm      | Busyness                             | 0.122803992  |
| wavelet-LHH | gldm       | GrayLevelVariance                    | 21.55534039  |
| wavelet-LHH | gldm       | HighGrayLevelEmphasis                | 232.9043825  |
| wavelet-LHH | gldm       | DependenceEntropy                    | 5.905726637  |
| wavelet-LHH | gldm       | DependenceNonUniformity              | 59.98007968  |
| wavelet-LHH | gldm       | GrayLevelNonUniformity               | 18.06772908  |
| wavelet-LHH | gldm       | SmallDependenceEmphasis              | 0.444011595  |
| wavelet-LHH | gldm       | SmallDependenceHighGrayLevelEmphasis | 108.5611362  |
| wavelet-LHH | gldm       | DependenceNonUniformityNormalized    | 0.238964461  |
| wavelet-LHH | gldm       | LargeDependenceEmphasis              | 8.752988048  |
| wavelet-LHH | gldm       | LargeDependenceLowGrayLevelEmphasis  | 0.0547113    |

|             |            |                                      |              |
|-------------|------------|--------------------------------------|--------------|
| wavelet-LHH | gldm       | DependenceVariance                   | 2.592308059  |
| wavelet-LHH | gldm       | LargeDependenceHighGrayLevelEmphasis | 1910.816733  |
| wavelet-LHH | gldm       | SmallDependenceLowGrayLevelEmphasis  | 0.012560773  |
| wavelet-LHH | gldm       | LowGrayLevelEmphasis                 | 0.015551147  |
| wavelet-LHH | glcm       | JointAverage                         | 14.77724458  |
| wavelet-LHH | glcm       | SumAverage                           | 29.55448916  |
| wavelet-LHH | glcm       | JointEntropy                         | 7.09183836   |
| wavelet-LHH | glcm       | ClusterShade                         | 40.85349341  |
| wavelet-LHH | glcm       | MaximumProbability                   | 0.028638244  |
| wavelet-LHH | glcm       | Idmn                                 | 0.960454976  |
| wavelet-LHH | glcm       | JointEnergy                          | 0.009453645  |
| wavelet-LHH | glcm       | Contrast                             | 37.08270731  |
| wavelet-LHH | glcm       | DifferenceEntropy                    | 3.516955315  |
| wavelet-LHH | glcm       | InverseVariance                      | 0.220549474  |
| wavelet-LHH | glcm       | DifferenceVariance                   | 16.050869    |
| wavelet-LHH | glcm       | Idn                                  | 0.8740566    |
| wavelet-LHH | glcm       | Idm                                  | 0.218001226  |
| wavelet-LHH | glcm       | Correlation                          | 0.043713361  |
| wavelet-LHH | glcm       | Autocorrelation                      | 219.1543087  |
| wavelet-LHH | glcm       | SumEntropy                           | 4.434691013  |
| wavelet-LHH | glcm       | SumSquares                           | 19.31922428  |
| wavelet-LHH | glcm       | ClusterProminence                    | 7605.141938  |
| wavelet-LHH | glcm       | Imc2                                 | 0.93036302   |
| wavelet-LHH | glcm       | Imc1                                 | -0.251015371 |
| wavelet-LHH | glcm       | DifferenceAverage                    | 4.477282288  |
| wavelet-LHH | glcm       | Id                                   | 0.309596761  |
| wavelet-LHH | glcm       | ClusterTendency                      | 40.1941898   |
| wavelet-LHH | firstorder | InterquartileRange                   | 120.4799205  |
| wavelet-LHH | firstorder | Skewness                             | 0.160114197  |
| wavelet-LHH | firstorder | Uniformity                           | 0.071982984  |
| wavelet-LHH | firstorder | Median                               | 0.12630416   |
| wavelet-LHH | firstorder | Energy                               | 3366967.486  |
| wavelet-LHH | firstorder | RobustMeanAbsoluteDeviation          | 53.13296358  |
| wavelet-LHH | firstorder | MeanAbsoluteDeviation                | 85.87138759  |
| wavelet-LHH | firstorder | TotalEnergy                          | 90908122.13  |
| wavelet-LHH | firstorder | Maximum                              | 328.0670103  |
| wavelet-LHH | firstorder | RootMeanSquared                      | 115.819744   |
| wavelet-LHH | firstorder | 90Percentile                         | 134.81342    |
| wavelet-LHH | firstorder | Minimum                              | -338.4985251 |
| wavelet-LHH | firstorder | Entropy                              | 4.139093813  |
| wavelet-LHH | firstorder | Range                                | 666.5655355  |
| wavelet-LHH | firstorder | Variance                             | 13411.87281  |
| wavelet-LHH | firstorder | 10Percentile                         | -132.0586305 |
| wavelet-LHH | firstorder | Kurtosis                             | 3.871643058  |
| wavelet-LHH | firstorder | Mean                                 | 1.52979809   |
| wavelet-LHH | glrlm      | ShortRunLowGrayLevelEmphasis         | 0.015955891  |
| wavelet-LHH | glrlm      | GrayLevelVariance                    | 22.47189145  |
| wavelet-LHH | glrlm      | LowGrayLevelRunEmphasis              | 0.016183851  |
| wavelet-LHH | glrlm      | GrayLevelNonUniformityNormalized     | 0.069337075  |
| wavelet-LHH | glrlm      | RunVariance                          | 0.063338858  |
| wavelet-LHH | glrlm      | GrayLevelNonUniformity               | 16.4125927   |
| wavelet-LHH | glrlm      | LongRunEmphasis                      | 1.189601243  |
| wavelet-LHH | glrlm      | ShortRunHighGrayLevelEmphasis        | 224.3070082  |
| wavelet-LHH | glrlm      | RunLengthNonUniformity               | 211.252153   |
| wavelet-LHH | glrlm      | ShortRunEmphasis                     | 0.956302996  |
| wavelet-LHH | glrlm      | LongRunHighGrayLevelEmphasis         | 275.3857685  |
| wavelet-LHH | glrlm      | RunPercentage                        | 0.942997242  |
| wavelet-LHH | glrlm      | LongRunLowGrayLevelEmphasis          | 0.017159147  |
| wavelet-LHH | glrlm      | RunEntropy                           | 4.435954456  |

|             |       |                                      |              |
|-------------|-------|--------------------------------------|--------------|
| wavelet-LHH | glrlm | HighGrayLevelRunEmphasis             | 233.790593   |
| wavelet-LHH | glrlm | RunLengthNonUniformityNormalized     | 0.891740337  |
| wavelet-LHH | glszm | GrayLevelVariance                    | 33.78150352  |
| wavelet-LHH | glszm | ZoneVariance                         | 6.469923682  |
| wavelet-LHH | glszm | GrayLevelNonUniformityNormalized     | 0.050658013  |
| wavelet-LHH | glszm | SizeZoneNonUniformityNormalized      | 0.497866715  |
| wavelet-LHH | glszm | SizeZoneNonUniformity                | 64.2248062   |
| wavelet-LHH | glszm | GrayLevelNonUniformity               | 6.534883721  |
| wavelet-LHH | glszm | LargeAreaEmphasis                    | 10.25581395  |
| wavelet-LHH | glszm | SmallAreaHighGrayLevelEmphasis       | 181.2563259  |
| wavelet-LHH | glszm | ZonePercentage                       | 0.513944223  |
| wavelet-LHH | glszm | LargeAreaLowGrayLevelEmphasis        | 0.073912366  |
| wavelet-LHH | glszm | LargeAreaHighGrayLevelEmphasis       | 2161.294574  |
| wavelet-LHH | glszm | HighGrayLevelZoneEmphasis            | 245.7209302  |
| wavelet-LHH | glszm | SmallAreaEmphasis                    | 0.731151034  |
| wavelet-LHH | glszm | LowGrayLevelZoneEmphasis             | 0.025200622  |
| wavelet-LHH | glszm | ZoneEntropy                          | 5.496194771  |
| wavelet-LHH | glszm | SmallAreaLowGrayLevelEmphasis        | 0.023696453  |
| wavelet-LHH | ngtdm | Coarseness                           | 0.026293203  |
| wavelet-LHH | ngtdm | Complexity                           | 915.4089879  |
| wavelet-LHH | ngtdm | Strength                             | 5.182058789  |
| wavelet-LHH | ngtdm | Contrast                             | 0.21263688   |
| wavelet-LHH | ngtdm | Busyness                             | 0.092276546  |
| wavelet-LLH | gldm  | GrayLevelVariance                    | 197.3406771  |
| wavelet-LLH | gldm  | HighGrayLevelEmphasis                | 2124.585657  |
| wavelet-LLH | gldm  | DependenceEntropy                    | 6.517769441  |
| wavelet-LLH | gldm  | DependenceNonUniformity              | 103.9243028  |
| wavelet-LLH | gldm  | GrayLevelNonUniformity               | 6.498007968  |
| wavelet-LLH | gldm  | SmallDependenceEmphasis              | 0.658671979  |
| wavelet-LLH | gldm  | SmallDependenceHighGrayLevelEmphasis | 1381.752753  |
| wavelet-LLH | gldm  | DependenceNonUniformityNormalized    | 0.414041047  |
| wavelet-LLH | gldm  | LargeDependenceEmphasis              | 3.629482072  |
| wavelet-LLH | gldm  | LargeDependenceLowGrayLevelEmphasis  | 0.006753281  |
| wavelet-LLH | gldm  | DependenceVariance                   | 0.869383026  |
| wavelet-LLH | gldm  | LargeDependenceHighGrayLevelEmphasis | 7899.151394  |
| wavelet-LLH | gldm  | SmallDependenceLowGrayLevelEmphasis  | 0.004796312  |
| wavelet-LLH | gldm  | LowGrayLevelEmphasis                 | 0.005067552  |
| wavelet-LLH | glcm  | JointAverage                         | 44.72433878  |
| wavelet-LLH | glcm  | SumAverage                           | 89.44867756  |
| wavelet-LLH | glcm  | JointEntropy                         | 8.115322296  |
| wavelet-LLH | glcm  | ClusterShade                         | -551.6139751 |
| wavelet-LLH | glcm  | MaximumProbability                   | 0.011236469  |
| wavelet-LLH | glcm  | Idmn                                 | 0.967626059  |
| wavelet-LLH | glcm  | JointEnergy                          | 0.003890379  |
| wavelet-LLH | glcm  | Contrast                             | 295.5840264  |
| wavelet-LLH | glcm  | DifferenceEntropy                    | 4.681989969  |
| wavelet-LLH | glcm  | InverseVariance                      | 0.114614275  |
| wavelet-LLH | glcm  | DifferenceVariance                   | 136.5781071  |
| wavelet-LLH | glcm  | Idn                                  | 0.891498206  |
| wavelet-LLH | glcm  | Idm                                  | 0.108025485  |
| wavelet-LLH | glcm  | Correlation                          | 0.125516885  |
| wavelet-LLH | glcm  | Autocorrelation                      | 2025.993001  |
| wavelet-LLH | glcm  | SumEntropy                           | 5.791515718  |
| wavelet-LLH | glcm  | SumSquares                           | 173.4333715  |
| wavelet-LLH | glcm  | ClusterProminence                    | 655703.3031  |
| wavelet-LLH | glcm  | Imc2                                 | 0.998214747  |
| wavelet-LLH | glcm  | Imc1                                 | -0.516880195 |
| wavelet-LLH | glcm  | DifferenceAverage                    | 11.98441066  |
| wavelet-LLH | glcm  | Id                                   | 0.185755732  |

|             |            |                                  |              |
|-------------|------------|----------------------------------|--------------|
| wavelet-LLH | glcm       | ClusterTendency                  | 398.1494596  |
| wavelet-LLH | firstorder | InterquartileRange               | 407.9676935  |
| wavelet-LLH | firstorder | Skewness                         | -0.24645024  |
| wavelet-LLH | firstorder | Uniformity                       | 0.025888478  |
| wavelet-LLH | firstorder | Median                           | -22.42456969 |
| wavelet-LLH | firstorder | Energy                           | 32019564.94  |
| wavelet-LLH | firstorder | RobustMeanAbsoluteDeviation      | 169.2765874  |
| wavelet-LLH | firstorder | MeanAbsoluteDeviation            | 265.8728837  |
| wavelet-LLH | firstorder | TotalEnergy                      | 864528253.4  |
| wavelet-LLH | firstorder | Maximum                          | 1028.941381  |
| wavelet-LLH | firstorder | RootMeanSquared                  | 357.1666107  |
| wavelet-LLH | firstorder | 90Percentile                     | 347.483466   |
| wavelet-LLH | firstorder | Minimum                          | -1138.973631 |
| wavelet-LLH | firstorder | Entropy                          | 5.580505366  |
| wavelet-LLH | firstorder | Range                            | 2167.915012  |
| wavelet-LLH | firstorder | Variance                         | 123338.6949  |
| wavelet-LLH | firstorder | 10Percentile                     | -538.996805  |
| wavelet-LLH | firstorder | Kurtosis                         | 3.663770939  |
| wavelet-LLH | firstorder | Mean                             | -65.03301433 |
| wavelet-LLH | glrlm      | ShortRunLowGrayLevelEmphasis     | 0.005168867  |
| wavelet-LLH | glrlm      | GrayLevelVariance                | 199.9067403  |
| wavelet-LLH | glrlm      | LowGrayLevelRunEmphasis          | 0.005182393  |
| wavelet-LLH | glrlm      | GrayLevelNonUniformityNormalized | 0.02549048   |
| wavelet-LLH | glrlm      | RunVariance                      | 0.02731888   |
| wavelet-LLH | glrlm      | GrayLevelNonUniformity           | 6.235344273  |
| wavelet-LLH | glrlm      | LongRunEmphasis                  | 1.080785343  |
| wavelet-LLH | glrlm      | ShortRunHighGrayLevelEmphasis    | 2081.226846  |
| wavelet-LLH | glrlm      | RunLengthNonUniformity           | 232.6843549  |
| wavelet-LLH | glrlm      | ShortRunEmphasis                 | 0.980867619  |
| wavelet-LLH | glrlm      | LongRunHighGrayLevelEmphasis     | 2299.840157  |
| wavelet-LLH | glrlm      | RunPercentage                    | 0.974563285  |
| wavelet-LLH | glrlm      | LongRunLowGrayLevelEmphasis      | 0.005238407  |
| wavelet-LLH | glrlm      | RunEntropy                       | 5.688536225  |
| wavelet-LLH | glrlm      | HighGrayLevelRunEmphasis         | 2122.969354  |
| wavelet-LLH | glrlm      | RunLengthNonUniformityNormalized | 0.950892905  |
| wavelet-LLH | glszm      | GrayLevelVariance                | 230.0877873  |
| wavelet-LLH | glszm      | ZoneVariance                     | 0.92225512   |
| wavelet-LLH | glszm      | GrayLevelNonUniformityNormalized | 0.022374164  |
| wavelet-LLH | glszm      | SizeZoneNonUniformityNormalized  | 0.662708709  |
| wavelet-LLH | glszm      | SizeZoneNonUniformity            | 119.9502762  |
| wavelet-LLH | glszm      | GrayLevelNonUniformity           | 4.049723757  |
| wavelet-LLH | glszm      | LargeAreaEmphasis                | 2.845303867  |
| wavelet-LLH | glszm      | SmallAreaHighGrayLevelEmphasis   | 1753.178541  |
| wavelet-LLH | glszm      | ZonePercentage                   | 0.721115538  |
| wavelet-LLH | glszm      | LargeAreaLowGrayLevelEmphasis    | 0.007925172  |
| wavelet-LLH | glszm      | LargeAreaHighGrayLevelEmphasis   | 6160.325967  |
| wavelet-LLH | glszm      | HighGrayLevelZoneEmphasis        | 2104.834254  |
| wavelet-LLH | glszm      | SmallAreaEmphasis                | 0.837744735  |
| wavelet-LLH | glszm      | LowGrayLevelZoneEmphasis         | 0.006741168  |
| wavelet-LLH | glszm      | ZoneEntropy                      | 6.226951915  |
| wavelet-LLH | glszm      | SmallAreaLowGrayLevelEmphasis    | 0.00658938   |
| wavelet-LLH | ngtdm      | Coarseness                       | 0.025009838  |
| wavelet-LLH | ngtdm      | Complexity                       | 15263.60148  |
| wavelet-LLH | ngtdm      | Strength                         | 35.33266474  |
| wavelet-LLH | ngtdm      | Contrast                         | 0.875985359  |
| wavelet-LLH | ngtdm      | Busyness                         | 0.014259238  |
| wavelet-LLL | gldm       | GrayLevelVariance                | 561.8969223  |
| wavelet-LLL | gldm       | HighGrayLevelEmphasis            | 3117.179283  |
| wavelet-LLL | gldm       | DependenceEntropy                | 6.635299146  |

|             |            |                                      |              |
|-------------|------------|--------------------------------------|--------------|
| wavelet-LLL | gldm       | DependenceNonUniformity              | 146.0916335  |
| wavelet-LLL | gldm       | GrayLevelNonUniformity               | 3.844621514  |
| wavelet-LLL | gldm       | SmallDependenceEmphasis              | 0.786409916  |
| wavelet-LLL | gldm       | SmallDependenceHighGrayLevelEmphasis | 2454.776671  |
| wavelet-LLL | gldm       | DependenceNonUniformityNormalized    | 0.58203838   |
| wavelet-LLL | gldm       | LargeDependenceEmphasis              | 1.996015936  |
| wavelet-LLL | gldm       | LargeDependenceLowGrayLevelEmphasis  | 0.006285159  |
| wavelet-LLL | gldm       | DependenceVariance                   | 0.277932096  |
| wavelet-LLL | gldm       | LargeDependenceHighGrayLevelEmphasis | 5958.89243   |
| wavelet-LLL | gldm       | SmallDependenceLowGrayLevelEmphasis  | 0.004833845  |
| wavelet-LLL | gldm       | LowGrayLevelEmphasis                 | 0.00506314   |
| wavelet-LLL | glcm       | JointAverage                         | 56.23186819  |
| wavelet-LLL | glcm       | SumAverage                           | 112.4637364  |
| wavelet-LLL | glcm       | JointEntropy                         | 8.294463306  |
| wavelet-LLL | glcm       | ClusterShade                         | 11722.86533  |
| wavelet-LLL | glcm       | MaximumProbability                   | 0.006658832  |
| wavelet-LLL | glcm       | Idmn                                 | 0.95715087   |
| wavelet-LLL | glcm       | JointEnergy                          | 0.003287171  |
| wavelet-LLL | glcm       | Contrast                             | 562.6523041  |
| wavelet-LLL | glcm       | DifferenceEntropy                    | 5.257788395  |
| wavelet-LLL | glcm       | InverseVariance                      | 0.054229996  |
| wavelet-LLL | glcm       | DifferenceVariance                   | 182.5652785  |
| wavelet-LLL | glcm       | Idn                                  | 0.859811557  |
| wavelet-LLL | glcm       | Idm                                  | 0.052240979  |
| wavelet-LLL | glcm       | Correlation                          | 0.510382722  |
| wavelet-LLL | glcm       | Autocorrelation                      | 3449.978507  |
| wavelet-LLL | glcm       | SumEntropy                           | 6.502135121  |
| wavelet-LLL | glcm       | SumSquares                           | 568.319588   |
| wavelet-LLL | glcm       | ClusterProminence                    | 6890358.617  |
| wavelet-LLL | glcm       | Imc2                                 | 0.999832018  |
| wavelet-LLL | glcm       | Imc1                                 | -0.653771883 |
| wavelet-LLL | glcm       | DifferenceAverage                    | 19.06525929  |
| wavelet-LLL | glcm       | Id                                   | 0.112956301  |
| wavelet-LLL | glcm       | ClusterTendency                      | 1710.626048  |
| wavelet-LLL | firstorder | InterquartileRange                   | 874.9860642  |
| wavelet-LLL | firstorder | Skewness                             | 0.342876971  |
| wavelet-LLL | firstorder | Uniformity                           | 0.015317217  |
| wavelet-LLL | firstorder | Median                               | -1406.720798 |
| wavelet-LLL | firstorder | Energy                               | 544487250.2  |
| wavelet-LLL | firstorder | RobustMeanAbsoluteDeviation          | 361.0675318  |
| wavelet-LLL | firstorder | MeanAbsoluteDeviation                | 487.9180126  |
| wavelet-LLL | firstorder | TotalEnergy                          | 14701155754  |
| wavelet-LLL | firstorder | Maximum                              | 87.74762667  |
| wavelet-LLL | firstorder | RootMeanSquared                      | 1472.844837  |
| wavelet-LLL | firstorder | 90Percentile                         | -509.7098304 |
| wavelet-LLL | firstorder | Minimum                              | -2594.010174 |
| wavelet-LLL | firstorder | Entropy                              | 6.22368067   |
| wavelet-LLL | firstorder | Range                                | 2681.757801  |
| wavelet-LLL | firstorder | Variance                             | 350224.5107  |
| wavelet-LLL | firstorder | 10Percentile                         | -2080.366177 |
| wavelet-LLL | firstorder | Kurtosis                             | 2.38368237   |
| wavelet-LLL | firstorder | Mean                                 | -1348.720654 |
| wavelet-LLL | glrlm      | ShortRunLowGrayLevelEmphasis         | 0.005102289  |
| wavelet-LLL | glrlm      | GrayLevelVariance                    | 562.7844247  |
| wavelet-LLL | glrlm      | LowGrayLevelRunEmphasis              | 0.005110511  |
| wavelet-LLL | glrlm      | GrayLevelNonUniformityNormalized     | 0.015267505  |
| wavelet-LLL | glrlm      | RunVariance                          | 0.012566785  |
| wavelet-LLL | glrlm      | GrayLevelNonUniformity               | 3.786399682  |
| wavelet-LLL | glrlm      | LongRunEmphasis                      | 1.03702248   |

|             |       |                                      |             |
|-------------|-------|--------------------------------------|-------------|
| wavelet-LLL | gllm  | ShortRunHighGrayLevelEmphasis        | 3092.240066 |
| wavelet-LLL | gllm  | RunLengthNonUniformity               | 242.2436997 |
| wavelet-LLL | gllm  | ShortRunEmphasis                     | 0.991087633 |
| wavelet-LLL | gllm  | LongRunHighGrayLevelEmphasis         | 3226.805725 |
| wavelet-LLL | gllm  | RunPercentage                        | 0.988047809 |
| wavelet-LLL | gllm  | LongRunLowGrayLevelEmphasis          | 0.005160348 |
| wavelet-LLL | gllm  | RunEntropy                           | 6.258182893 |
| wavelet-LLL | gllm  | HighGrayLevelRunEmphasis             | 3119.130955 |
| wavelet-LLL | gllm  | RunLengthNonUniformityNormalized     | 0.976712553 |
| wavelet-LLL | glszm | GrayLevelVariance                    | 573.5116489 |
| wavelet-LLL | glszm | ZoneVariance                         | 0.231082898 |
| wavelet-LLL | glszm | GrayLevelNonUniformityNormalized     | 0.014745752 |
| wavelet-LLL | glszm | SizeZoneNonUniformityNormalized      | 0.739601931 |
| wavelet-LLL | glszm | SizeZoneNonUniformity                | 157.5352113 |
| wavelet-LLL | glszm | GrayLevelNonUniformity               | 3.14084507  |
| wavelet-LLL | glszm | LargeAreaEmphasis                    | 1.61971831  |
| wavelet-LLL | glszm | SmallAreaHighGrayLevelEmphasis       | 2762.520167 |
| wavelet-LLL | glszm | ZonePercentage                       | 0.848605578 |
| wavelet-LLL | glszm | LargeAreaLowGrayLevelEmphasis        | 0.006560963 |
| wavelet-LLL | glszm | LargeAreaHighGrayLevelEmphasis       | 4844.929577 |
| wavelet-LLL | glszm | HighGrayLevelZoneEmphasis            | 3139.671362 |
| wavelet-LLL | glszm | SmallAreaEmphasis                    | 0.884381847 |
| wavelet-LLL | glszm | LowGrayLevelZoneEmphasis             | 0.005756294 |
| wavelet-LLL | glszm | ZoneEntropy                          | 6.552138862 |
| wavelet-LLL | glszm | SmallAreaLowGrayLevelEmphasis        | 0.005645344 |
| wavelet-LLL | ngtdm | Coarseness                           | 0.025069059 |
| wavelet-LLL | ngtdm | Complexity                           | 36922.27696 |
| wavelet-LLL | ngtdm | Strength                             | 86.52927726 |
| wavelet-LLL | ngtdm | Contrast                             | 1.627504702 |
| wavelet-LLL | ngtdm | Busyness                             | 0.012129174 |
| wavelet-HHL | gldm  | GrayLevelVariance                    | 2.085776416 |
| wavelet-HHL | gldm  | HighGrayLevelEmphasis                | 33.10756972 |
| wavelet-HHL | gldm  | DependenceEntropy                    | 5.238917938 |
| wavelet-HHL | gldm  | DependenceNonUniformity              | 29.4063745  |
| wavelet-HHL | gldm  | GrayLevelNonUniformity               | 51.85258964 |
| wavelet-HHL | gldm  | SmallDependenceEmphasis              | 0.132768616 |
| wavelet-HHL | gldm  | SmallDependenceHighGrayLevelEmphasis | 5.546842104 |
| wavelet-HHL | gldm  | DependenceNonUniformityNormalized    | 0.117156871 |
| wavelet-HHL | gldm  | LargeDependenceEmphasis              | 30.29083665 |
| wavelet-HHL | gldm  | LargeDependenceLowGrayLevelEmphasis  | 1.087591508 |
| wavelet-HHL | gldm  | DependenceVariance                   | 6.471770289 |
| wavelet-HHL | gldm  | LargeDependenceHighGrayLevelEmphasis | 948         |
| wavelet-HHL | gldm  | SmallDependenceLowGrayLevelEmphasis  | 0.009444402 |
| wavelet-HHL | gldm  | LowGrayLevelEmphasis                 | 0.043627116 |
| wavelet-HHL | glcm  | JointAverage                         | 5.600582566 |
| wavelet-HHL | glcm  | SumAverage                           | 11.20116513 |
| wavelet-HHL | glcm  | JointEntropy                         | 4.834853478 |
| wavelet-HHL | glcm  | ClusterShade                         | 1.890758684 |
| wavelet-HHL | glcm  | MaximumProbability                   | 0.097329273 |
| wavelet-HHL | glcm  | ldmn                                 | 0.965200983 |
| wavelet-HHL | glcm  | JointEnergy                          | 0.047337385 |
| wavelet-HHL | glcm  | Contrast                             | 3.917030136 |
| wavelet-HHL | glcm  | DifferenceEntropy                    | 2.203428525 |
| wavelet-HHL | glcm  | InverseVariance                      | 0.426694815 |
| wavelet-HHL | glcm  | DifferenceVariance                   | 1.614629361 |
| wavelet-HHL | glcm  | ldn                                  | 0.879045246 |
| wavelet-HHL | glcm  | ldm                                  | 0.461198712 |
| wavelet-HHL | glcm  | Correlation                          | 0.015688268 |
| wavelet-HHL | glcm  | Autocorrelation                      | 31.39885286 |



|             |            |                                  |              |
|-------------|------------|----------------------------------|--------------|
| wavelet-HHL | glcm       | SumEntropy                       | 2.98216008   |
| wavelet-HHL | glcm       | SumSquares                       | 1.989151048  |
| wavelet-HHL | glcm       | ClusterProminence                | 55.29268469  |
| wavelet-HHL | glcm       | Imc2                             | 0.543167742  |
| wavelet-HHL | glcm       | Imc1                             | -0.072573433 |
| wavelet-HHL | glcm       | DifferenceAverage                | 1.506759725  |
| wavelet-HHL | glcm       | Id                               | 0.519968792  |
| wavelet-HHL | glcm       | ClusterTendency                  | 4.039574055  |
| wavelet-HHL | firstorder | InterquartileRange               | 44.04728502  |
| wavelet-HHL | firstorder | Skewness                         | 0.332711733  |
| wavelet-HHL | firstorder | Uniformity                       | 0.206584022  |
| wavelet-HHL | firstorder | Median                           | 0.612638284  |
| wavelet-HHL | firstorder | Energy                           | 327990.6332  |
| wavelet-HHL | firstorder | RobustMeanAbsoluteDeviation      | 19.68230336  |
| wavelet-HHL | firstorder | MeanAbsoluteDeviation            | 28.35010436  |
| wavelet-HHL | firstorder | TotalEnergy                      | 8855747.096  |
| wavelet-HHL | firstorder | Maximum                          | 114.6381868  |
| wavelet-HHL | firstorder | RootMeanSquared                  | 36.14879791  |
| wavelet-HHL | firstorder | 90Percentile                     | 48.78747203  |
| wavelet-HHL | firstorder | Minimum                          | -102.2904673 |
| wavelet-HHL | firstorder | Entropy                          | 2.537374806  |
| wavelet-HHL | firstorder | Range                            | 216.9286541  |
| wavelet-HHL | firstorder | Variance                         | 1302.47249   |
| wavelet-HHL | firstorder | 10Percentile                     | -40.60002861 |
| wavelet-HHL | firstorder | Kurtosis                         | 3.408094794  |
| wavelet-HHL | firstorder | Mean                             | 2.064727753  |
| wavelet-HHL | glrlm      | ShortRunLowGrayLevelEmphasis     | 0.040458545  |
| wavelet-HHL | glrlm      | GrayLevelVariance                | 2.27577197   |
| wavelet-HHL | glrlm      | LowGrayLevelRunEmphasis          | 0.044776471  |
| wavelet-HHL | glrlm      | GrayLevelNonUniformityNormalized | 0.196089083  |
| wavelet-HHL | glrlm      | RunVariance                      | 0.21650696   |
| wavelet-HHL | glrlm      | GrayLevelNonUniformity           | 41.87277556  |
| wavelet-HHL | glrlm      | LongRunEmphasis                  | 1.603132327  |
| wavelet-HHL | glrlm      | ShortRunHighGrayLevelEmphasis    | 29.8990778   |
| wavelet-HHL | glrlm      | RunLengthNonUniformity           | 158.9920107  |
| wavelet-HHL | glrlm      | ShortRunEmphasis                 | 0.885456827  |
| wavelet-HHL | glrlm      | LongRunHighGrayLevelEmphasis     | 52.28287607  |
| wavelet-HHL | glrlm      | RunPercentage                    | 0.850750843  |
| wavelet-HHL | glrlm      | LongRunLowGrayLevelEmphasis      | 0.066885423  |
| wavelet-HHL | glrlm      | RunEntropy                       | 3.241884649  |
| wavelet-HHL | glrlm      | HighGrayLevelRunEmphasis         | 33.45596981  |
| wavelet-HHL | glrlm      | RunLengthNonUniformityNormalized | 0.743153054  |
| wavelet-HHL | glszm      | GrayLevelVariance                | 6.528888889  |
| wavelet-HHL | glszm      | ZoneVariance                     | 321.4322222  |
| wavelet-HHL | glszm      | GrayLevelNonUniformityNormalized | 0.131111111  |
| wavelet-HHL | glszm      | SizeZoneNonUniformityNormalized  | 0.322222222  |
| wavelet-HHL | glszm      | SizeZoneNonUniformity            | 9.666666667  |
| wavelet-HHL | glszm      | GrayLevelNonUniformity           | 3.933333333  |
| wavelet-HHL | glszm      | LargeAreaEmphasis                | 391.4333333  |
| wavelet-HHL | glszm      | SmallAreaHighGrayLevelEmphasis   | 28.42793331  |
| wavelet-HHL | glszm      | ZonePercentage                   | 0.119521912  |
| wavelet-HHL | glszm      | LargeAreaLowGrayLevelEmphasis    | 15.07178659  |
| wavelet-HHL | glszm      | LargeAreaHighGrayLevelEmphasis   | 11320.8      |
| wavelet-HHL | glszm      | HighGrayLevelZoneEmphasis        | 45.8         |
| wavelet-HHL | glszm      | SmallAreaEmphasis                | 0.583700417  |
| wavelet-HHL | glszm      | LowGrayLevelZoneEmphasis         | 0.077600177  |
| wavelet-HHL | glszm      | ZoneEntropy                      | 4.294739663  |
| wavelet-HHL | glszm      | SmallAreaLowGrayLevelEmphasis    | 0.056796346  |
| wavelet-HHL | ngtdm      | Coarseness                       | 0.024126818  |

|             |            |                                      |              |
|-------------|------------|--------------------------------------|--------------|
| wavelet-HHL | ngtdm      | Complexity                           | 44.44495907  |
| wavelet-HHL | ngtdm      | Strength                             | 0.730080461  |
| wavelet-HHL | ngtdm      | Contrast                             | 0.052310407  |
| wavelet-HHL | ngtdm      | Busyness                             | 0.678008417  |
| wavelet-HLH | gldm       | GrayLevelVariance                    | 5.76695608   |
| wavelet-HLH | gldm       | HighGrayLevelEmphasis                | 73.38645418  |
| wavelet-HLH | gldm       | DependenceEntropy                    | 5.451851038  |
| wavelet-HLH | gldm       | DependenceNonUniformity              | 44.83266932  |
| wavelet-HLH | gldm       | GrayLevelNonUniformity               | 31.11952191  |
| wavelet-HLH | gldm       | SmallDependenceEmphasis              | 0.249618996  |
| wavelet-HLH | gldm       | SmallDependenceHighGrayLevelEmphasis | 18.39698355  |
| wavelet-HLH | gldm       | DependenceNonUniformityNormalized    | 0.178616212  |
| wavelet-HLH | gldm       | LargeDependenceEmphasis              | 12.98406375  |
| wavelet-HLH | gldm       | LargeDependenceLowGrayLevelEmphasis  | 0.214972533  |
| wavelet-HLH | gldm       | DependenceVariance                   | 2.646942112  |
| wavelet-HLH | gldm       | LargeDependenceHighGrayLevelEmphasis | 996.6055777  |
| wavelet-HLH | gldm       | SmallDependenceLowGrayLevelEmphasis  | 0.015407776  |
| wavelet-HLH | gldm       | LowGrayLevelEmphasis                 | 0.02905295   |
| wavelet-HLH | glcm       | JointAverage                         | 8.25460001   |
| wavelet-HLH | glcm       | SumAverage                           | 16.50920002  |
| wavelet-HLH | glcm       | JointEntropy                         | 6.086472631  |
| wavelet-HLH | glcm       | ClusterShade                         | -10.5422333  |
| wavelet-HLH | glcm       | MaximumProbability                   | 0.040996598  |
| wavelet-HLH | glcm       | Idmn                                 | 0.960960694  |
| wavelet-HLH | glcm       | JointEnergy                          | 0.018835412  |
| wavelet-HLH | glcm       | Contrast                             | 9.992946182  |
| wavelet-HLH | glcm       | DifferenceEntropy                    | 2.734889103  |
| wavelet-HLH | glcm       | InverseVariance                      | 0.335650901  |
| wavelet-HLH | glcm       | DifferenceVariance                   | 3.711902192  |
| wavelet-HLH | glcm       | Idn                                  | 0.868851348  |
| wavelet-HLH | glcm       | Idm                                  | 0.319795935  |
| wavelet-HLH | glcm       | Correlation                          | 0.111226584  |
| wavelet-HLH | glcm       | Autocorrelation                      | 68.8096598   |
| wavelet-HLH | glcm       | SumEntropy                           | 3.751840381  |
| wavelet-HLH | glcm       | SumSquares                           | 5.654031781  |
| wavelet-HLH | glcm       | ClusterProminence                    | 508.527276   |
| wavelet-HLH | glcm       | Imc2                                 | 0.740789374  |
| wavelet-HLH | glcm       | Imc1                                 | -0.127590634 |
| wavelet-HLH | glcm       | DifferenceAverage                    | 2.466372311  |
| wavelet-HLH | glcm       | Id                                   | 0.403751104  |
| wavelet-HLH | glcm       | ClusterTendency                      | 12.62318094  |
| wavelet-HLH | firstorder | InterquartileRange                   | 79.46194669  |
| wavelet-HLH | firstorder | Skewness                             | -0.245785766 |
| wavelet-HLH | firstorder | Uniformity                           | 0.123982159  |
| wavelet-HLH | firstorder | Median                               | -5.320570342 |
| wavelet-HLH | firstorder | Energy                               | 892708.8991  |
| wavelet-HLH | firstorder | RobustMeanAbsoluteDeviation          | 31.5162338   |
| wavelet-HLH | firstorder | MeanAbsoluteDeviation                | 46.19187092  |
| wavelet-HLH | firstorder | TotalEnergy                          | 24103140.27  |
| wavelet-HLH | firstorder | Maximum                              | 151.4677773  |
| wavelet-HLH | firstorder | RootMeanSquared                      | 59.63731348  |
| wavelet-HLH | firstorder | 90Percentile                         | 61.80680244  |
| wavelet-HLH | firstorder | Minimum                              | -182.4853441 |
| wavelet-HLH | firstorder | Entropy                              | 3.256468849  |
| wavelet-HLH | firstorder | Range                                | 333.9531215  |
| wavelet-HLH | firstorder | Variance                             | 3513.977436  |
| wavelet-HLH | firstorder | 10Percentile                         | -82.64876608 |
| wavelet-HLH | firstorder | Kurtosis                             | 3.278663488  |
| wavelet-HLH | firstorder | Mean                                 | -6.529297304 |

|             |       |                                  |             |
|-------------|-------|----------------------------------|-------------|
| wavelet-HLH | glrlm | ShortRunLowGrayLevelEmphasis     | 0.029154015 |
| wavelet-HLH | glrlm | GrayLevelVariance                | 6.013722437 |
| wavelet-HLH | glrlm | LowGrayLevelRunEmphasis          | 0.030241183 |
| wavelet-HLH | glrlm | GrayLevelNonUniformityNormalized | 0.120874406 |
| wavelet-HLH | glrlm | RunVariance                      | 0.106216971 |
| wavelet-HLH | glrlm | GrayLevelNonUniformity           | 27.75647495 |
| wavelet-HLH | glrlm | LongRunEmphasis                  | 1.307144748 |
| wavelet-HLH | glrlm | ShortRunHighGrayLevelEmphasis    | 68.40475032 |
| wavelet-HLH | glrlm | RunLengthNonUniformity           | 194.8823585 |
| wavelet-HLH | glrlm | ShortRunEmphasis                 | 0.935418007 |
| wavelet-HLH | glrlm | LongRunHighGrayLevelEmphasis     | 96.50988879 |
| wavelet-HLH | glrlm | RunPercentage                    | 0.914802329 |
| wavelet-HLH | glrlm | LongRunLowGrayLevelEmphasis      | 0.035255591 |
| wavelet-HLH | glrlm | RunEntropy                       | 3.677505792 |
| wavelet-HLH | glrlm | HighGrayLevelRunEmphasis         | 73.20899292 |
| wavelet-HLH | glrlm | RunLengthNonUniformityNormalized | 0.846337933 |
| wavelet-HLH | glszm | GrayLevelVariance                | 11.32621671 |
| wavelet-HLH | glszm | ZoneVariance                     | 46.00665748 |
| wavelet-HLH | glszm | GrayLevelNonUniformityNormalized | 0.093663912 |
| wavelet-HLH | glszm | SizeZoneNonUniformityNormalized  | 0.347566575 |
| wavelet-HLH | glszm | SizeZoneNonUniformity            | 22.93939394 |
| wavelet-HLH | glszm | GrayLevelNonUniformity           | 6.181818182 |
| wavelet-HLH | glszm | LargeAreaEmphasis                | 60.46969697 |
| wavelet-HLH | glszm | SmallAreaHighGrayLevelEmphasis   | 44.82371708 |
| wavelet-HLH | glszm | ZonePercentage                   | 0.262948207 |
| wavelet-HLH | glszm | LargeAreaLowGrayLevelEmphasis    | 0.926465615 |
| wavelet-HLH | glszm | LargeAreaHighGrayLevelEmphasis   | 4669.121212 |
| wavelet-HLH | glszm | HighGrayLevelZoneEmphasis        | 70.8030303  |
| wavelet-HLH | glszm | SmallAreaEmphasis                | 0.604304298 |
| wavelet-HLH | glszm | LowGrayLevelZoneEmphasis         | 0.061284628 |
| wavelet-HLH | glszm | ZoneEntropy                      | 4.875918127 |
| wavelet-HLH | glszm | SmallAreaLowGrayLevelEmphasis    | 0.051758642 |
| wavelet-HLH | ngtdm | Coarseness                       | 0.025357323 |
| wavelet-HLH | ngtdm | Complexity                       | 150.8778508 |
| wavelet-HLH | ngtdm | Strength                         | 1.679039094 |
| wavelet-HLH | ngtdm | Contrast                         | 0.095722888 |
| wavelet-HLH | ngtdm | Busyness                         | 0.290585998 |

|            |               |                                      |                                                                                                                                                                                                                                                                                                                                                                                                                   |
|------------|---------------|--------------------------------------|-------------------------------------------------------------------------------------------------------------------------------------------------------------------------------------------------------------------------------------------------------------------------------------------------------------------------------------------------------------------------------------------------------------------|
| Image type | Feature Class | Feature Name                         | 3: RTSTRUCT: C99-DNU_segment_ITV                                                                                                                                                                                                                                                                                                                                                                                  |
| general    | info          | BoundingBox                          | (0, 0, 1, 4, 4, 4)                                                                                                                                                                                                                                                                                                                                                                                                |
| general    | info          | EnabledImageTypes                    | {u'Original': {}, u'Wavelet': {}}                                                                                                                                                                                                                                                                                                                                                                                 |
|            |               |                                      | {'distances': [1], 'additionalInfo': True, 'force2D': False, 'interpolator': 'sitkBSpline', 'resampledPixelSpacing': [3.0], 'label': 1, 'normalizeScale': 1, 'normalize': False, 'force2Ddimension': 0, 'removeOutliers': None, 'minimumROISize': None, u'binWidth': 25.0, 'minimumROIDimensions': 1, u'correctMask': True, 'preCrop': False, u'symmetricalGLCM': True, 'resegmentRange': None, 'padDistance': 5} |
| general    | info          | GeneralSettings                      | 32a56f78f5aa84cb286322e20c5cb7fff937                                                                                                                                                                                                                                                                                                                                                                              |
| general    | info          | ImageHash                            | 7520                                                                                                                                                                                                                                                                                                                                                                                                              |
| general    | info          | ImageSpacing                         | (0.9765625000000002, 0.9765625000000002, 2.0)                                                                                                                                                                                                                                                                                                                                                                     |
| general    | info          | MaskHash                             | e27e17bb76aa5d729fa5196aeffd0d850f8b552f                                                                                                                                                                                                                                                                                                                                                                          |
| general    | info          | NumpyVersion                         | 1.13.1                                                                                                                                                                                                                                                                                                                                                                                                            |
| general    | info          | PyWaveletVersion                     | 0.5.2                                                                                                                                                                                                                                                                                                                                                                                                             |
| general    | info          | SimpleITKVersion                     | 1.1.0                                                                                                                                                                                                                                                                                                                                                                                                             |
| general    | info          | Version                              | 1.3.0.post102+g1b0eb74                                                                                                                                                                                                                                                                                                                                                                                            |
| general    | info          | VolumeNum                            | 1                                                                                                                                                                                                                                                                                                                                                                                                                 |
| general    | info          | VoxelNum                             | 38                                                                                                                                                                                                                                                                                                                                                                                                                |
| original   | shape         | Maximum3DDiameter                    | 14.07124728                                                                                                                                                                                                                                                                                                                                                                                                       |
| original   | shape         | Maximum2DDiameterSlice               | 10.81665383                                                                                                                                                                                                                                                                                                                                                                                                       |
| original   | shape         | Sphericity                           | 0.946853309                                                                                                                                                                                                                                                                                                                                                                                                       |
| original   | shape         | MinorAxis                            | 11.93750934                                                                                                                                                                                                                                                                                                                                                                                                       |
| original   | shape         | Elongation                           | 0.883751329                                                                                                                                                                                                                                                                                                                                                                                                       |
| original   | shape         | SurfaceVolumeRatio                   | 0.506390601                                                                                                                                                                                                                                                                                                                                                                                                       |
| original   | shape         | Volume                               | 1026                                                                                                                                                                                                                                                                                                                                                                                                              |
| original   | shape         | MajorAxis                            | 13.50776961                                                                                                                                                                                                                                                                                                                                                                                                       |
| original   | shape         | SurfaceArea                          | 519.5567567                                                                                                                                                                                                                                                                                                                                                                                                       |
| original   | shape         | Flatness                             | 0.642940351                                                                                                                                                                                                                                                                                                                                                                                                       |
| original   | shape         | LeastAxis                            | 8.684690133                                                                                                                                                                                                                                                                                                                                                                                                       |
| original   | shape         | Maximum2DDiameterColumn              | 12.72792206                                                                                                                                                                                                                                                                                                                                                                                                       |
| original   | shape         | Maximum2DDiameterRow                 | 10.81665383                                                                                                                                                                                                                                                                                                                                                                                                       |
| original   | gldm          | GrayLevelVariance                    | 88.58725762                                                                                                                                                                                                                                                                                                                                                                                                       |
| original   | gldm          | HighGrayLevelEmphasis                | 278.7368421                                                                                                                                                                                                                                                                                                                                                                                                       |
| original   | gldm          | DependenceEntropy                    | 4.491219948                                                                                                                                                                                                                                                                                                                                                                                                       |
| original   | gldm          | DependenceNonUniformity              | 21.57894737                                                                                                                                                                                                                                                                                                                                                                                                       |
| original   | gldm          | GrayLevelNonUniformity               | 2.210526316                                                                                                                                                                                                                                                                                                                                                                                                       |
| original   | gldm          | SmallDependenceEmphasis              | 0.763157895                                                                                                                                                                                                                                                                                                                                                                                                       |
| original   | gldm          | SmallDependenceHighGrayLevelEmphasis | 195.6842105                                                                                                                                                                                                                                                                                                                                                                                                       |
| original   | gldm          | DependenceNonUniformityNormalized    | 0.567867036                                                                                                                                                                                                                                                                                                                                                                                                       |
| original   | gldm          | LargeDependenceEmphasis              | 1.947368421                                                                                                                                                                                                                                                                                                                                                                                                       |

|          |            |                                      |              |
|----------|------------|--------------------------------------|--------------|
| original | gldm       | LargeDependenceLowGrayLevelEmphasis  | 0.059708508  |
| original | gldm       | DependenceVariance                   | 0.216066482  |
| original | gldm       | LargeDependenceHighGrayLevelEmphasis | 610.9473684  |
| original | gldm       | SmallDependenceLowGrayLevelEmphasis  | 0.043068829  |
| original | gldm       | LowGrayLevelEmphasis                 | 0.046396765  |
| original | glcm       | JointAverage                         | 16.14042321  |
| original | glcm       | SumAverage                           | 32.28084642  |
| original | glcm       | JointEntropy                         | 5.116448691  |
| original | glcm       | ClusterShade                         | 677.8047458  |
| original | glcm       | MaximumProbability                   | 0.043638247  |
| original | glcm       | ldmn                                 | 0.866242373  |
| original | glcm       | JointEnergy                          | 0.029868995  |
| original | glcm       | Contrast                             | 193.6185759  |
| original | glcm       | DifferenceEntropy                    | 3.629780748  |
| original | glcm       | InverseVariance                      | 0.089564671  |
| original | glcm       | DifferenceVariance                   | 64.17329285  |
| original | glcm       | ldn                                  | 0.76759652   |
| original | glcm       | ldm                                  | 0.082397781  |
| original | glcm       | Correlation                          | 0.037792615  |
| original | glcm       | Autocorrelation                      | 264.5864509  |
| original | glcm       | SumEntropy                           | 3.856924209  |
| original | glcm       | SumSquares                           | 100.5185239  |
| original | glcm       | ClusterProminence                    | 95380.49071  |
| original | glcm       | lmc2                                 | 0.998921686  |
| original | glcm       | lmc1                                 | -0.761684732 |
| original | glcm       | DifferenceAverage                    | 11.17599095  |
| original | glcm       | ld                                   | 0.16290169   |
| original | glcm       | ClusterTendency                      | 208.4555199  |
| original | firstorder | InterquartileRange                   | 368.25       |
| original | firstorder | Skewness                             | 0.663808151  |
| original | firstorder | Uniformity                           | 0.058171745  |
| original | firstorder | Median                               | -593         |
| original | firstorder | Energy                               | 12279862     |
| original | firstorder | RobustMeanAbsoluteDeviation          | 153.1888889  |
| original | firstorder | MeanAbsoluteDeviation                | 200.8448753  |
| original | firstorder | TotalEnergy                          | 331556274    |
| original | firstorder | Maximum                              | -67          |
| original | firstorder | RootMeanSquared                      | 568.4665893  |
| original | firstorder | 90Percentile                         | -125.8       |
| original | firstorder | Minimum                              | -826         |
| original | firstorder | Entropy                              | 4.280693632  |
| original | firstorder | Range                                | 759          |
| original | firstorder | Variance                             | 55048.3241   |
| original | firstorder | 10Percentile                         | -764.9       |
| original | firstorder | Kurtosis                             | 2.09758884   |
| original | firstorder | Mean                                 | -517.7894737 |
| original | glrlm      | ShortRunLowGrayLevelEmphasis         | 0.046673211  |
| original | glrlm      | GrayLevelVariance                    | 88.29472124  |
| original | glrlm      | LowGrayLevelRunEmphasis              | 0.046805068  |
| original | glrlm      | GrayLevelNonUniformityNormalized     | 0.058170768  |
| original | glrlm      | RunVariance                          | 0.012127339  |
| original | glrlm      | GrayLevelNonUniformity               | 2.18372421   |

|             |       |                                      |              |
|-------------|-------|--------------------------------------|--------------|
| original    | glrlm | LongRunEmphasis                      | 1.037768538  |
| original    | glrlm | ShortRunHighGrayLevelEmphasis        | 274.4754008  |
| original    | glrlm | RunLengthNonUniformity               | 36.64911065  |
| original    | glrlm | ShortRunEmphasis                     | 0.990557866  |
| original    | glrlm | LongRunHighGrayLevelEmphasis         | 291.1266915  |
| original    | glrlm | RunPercentage                        | 0.987854251  |
| original    | glrlm | LongRunLowGrayLevelEmphasis          | 0.047332496  |
| original    | glrlm | RunEntropy                           | 4.292720278  |
| original    | glrlm | HighGrayLevelRunEmphasis             | 277.8056589  |
| original    | glrlm | RunLengthNonUniformityNormalized     | 0.975745323  |
| original    | glszm | GrayLevelVariance                    | 84.68359375  |
| original    | glszm | ZoneVariance                         | 0.15234375   |
| original    | glszm | GrayLevelNonUniformityNormalized     | 0.056640625  |
| original    | glszm | SizeZoneNonUniformityNormalized      | 0.6953125    |
| original    | glszm | SizeZoneNonUniformity                | 22.25        |
| original    | glszm | GrayLevelNonUniformity               | 1.8125       |
| original    | glszm | LargeAreaEmphasis                    | 1.5625       |
| original    | glszm | SmallAreaHighGrayLevelEmphasis       | 215.9375     |
| original    | glszm | ZonePercentage                       | 0.842105263  |
| original    | glszm | LargeAreaLowGrayLevelEmphasis        | 0.06036539   |
| original    | glszm | LargeAreaHighGrayLevelEmphasis       | 462.5        |
| original    | glszm | HighGrayLevelZoneEmphasis            | 265.25       |
| original    | glszm | SmallAreaEmphasis                    | 0.859375     |
| original    | glszm | LowGrayLevelZoneEmphasis             | 0.052461542  |
| original    | glszm | ZoneEntropy                          | 4.476409766  |
| original    | glszm | SmallAreaLowGrayLevelEmphasis        | 0.05048558   |
| original    | ngtdm | Coarseness                           | 0.055711531  |
| original    | ngtdm | Complexity                           | 2373.638353  |
| original    | ngtdm | Strength                             | 26.68706858  |
| original    | ngtdm | Contrast                             | 3.090477195  |
| original    | ngtdm | Busyness                             | 0.082978711  |
| wavelet-HHH | gldm  | GrayLevelVariance                    | 3.626731302  |
| wavelet-HHH | gldm  | HighGrayLevelEmphasis                | 43.18421053  |
| wavelet-HHH | gldm  | DependenceEntropy                    | 4.043337053  |
| wavelet-HHH | gldm  | DependenceNonUniformity              | 6.947368421  |
| wavelet-HHH | gldm  | GrayLevelNonUniformity               | 6.947368421  |
| wavelet-HHH | gldm  | SmallDependenceEmphasis              | 0.298475653  |
| wavelet-HHH | gldm  | SmallDependenceHighGrayLevelEmphasis | 13.15684942  |
| wavelet-HHH | gldm  | DependenceNonUniformityNormalized    | 0.182825485  |
| wavelet-HHH | gldm  | LargeDependenceEmphasis              | 12.21052632  |
| wavelet-HHH | gldm  | LargeDependenceLowGrayLevelEmphasis  | 0.340691521  |
| wavelet-HHH | gldm  | DependenceVariance                   | 2.567867036  |
| wavelet-HHH | gldm  | LargeDependenceHighGrayLevelEmphasis | 575.1842105  |
| wavelet-HHH | gldm  | SmallDependenceLowGrayLevelEmphasis  | 0.036078631  |
| wavelet-HHH | gldm  | LowGrayLevelEmphasis                 | 0.056752731  |
| wavelet-HHH | glcm  | JointAverage                         | 6.263859049  |
| wavelet-HHH | glcm  | SumAverage                           | 12.5277181   |
| wavelet-HHH | glcm  | JointEntropy                         | 4.40788163   |
| wavelet-HHH | glcm  | ClusterShade                         | -6.994394424 |
| wavelet-HHH | glcm  | MaximumProbability                   | 0.110701888  |
| wavelet-HHH | glcm  | ldmn                                 | 0.939956689  |
| wavelet-HHH | glcm  | JointEnergy                          | 0.055610707  |

|             |            |                                  |              |
|-------------|------------|----------------------------------|--------------|
| wavelet-HHH | glcm       | Contrast                         | 8.792711809  |
| wavelet-HHH | glcm       | DifferenceEntropy                | 2.429421747  |
| wavelet-HHH | glcm       | InverseVariance                  | 0.351233159  |
| wavelet-HHH | glcm       | DifferenceVariance               | 3.448265105  |
| wavelet-HHH | glcm       | Idn                              | 0.843427596  |
| wavelet-HHH | glcm       | Idm                              | 0.355856518  |
| wavelet-HHH | glcm       | Correlation                      | -0.037001133 |
| wavelet-HHH | glcm       | Autocorrelation                  | 39.09640265  |
| wavelet-HHH | glcm       | SumEntropy                       | 3.01484095   |
| wavelet-HHH | glcm       | SumSquares                       | 4.245940015  |
| wavelet-HHH | glcm       | ClusterProminence                | 209.8552269  |
| wavelet-HHH | glcm       | Imc2                             | 0.923607539  |
| wavelet-HHH | glcm       | Imc1                             | -0.378072408 |
| wavelet-HHH | glcm       | DifferenceAverage                | 2.284429594  |
| wavelet-HHH | glcm       | Id                               | 0.432621673  |
| wavelet-HHH | glcm       | ClusterTendency                  | 8.191048252  |
| wavelet-HHH | firstorder | InterquartileRange               | 60.17015006  |
| wavelet-HHH | firstorder | Skewness                         | -0.385853918 |
| wavelet-HHH | firstorder | Uniformity                       | 0.182825485  |
| wavelet-HHH | firstorder | Median                           | 5.354149798  |
| wavelet-HHH | firstorder | Energy                           | 81299.99799  |
| wavelet-HHH | firstorder | RobustMeanAbsoluteDeviation      | 24.33382912  |
| wavelet-HHH | firstorder | MeanAbsoluteDeviation            | 35.59113148  |
| wavelet-HHH | firstorder | TotalEnergy                      | 2195099.946  |
| wavelet-HHH | firstorder | Maximum                          | 113.0973212  |
| wavelet-HHH | firstorder | RootMeanSquared                  | 46.25444445  |
| wavelet-HHH | firstorder | 90Percentile                     | 40.95629657  |
| wavelet-HHH | firstorder | Minimum                          | -140.8435256 |
| wavelet-HHH | firstorder | Entropy                          | 2.730855395  |
| wavelet-HHH | firstorder | Range                            | 253.9408467  |
| wavelet-HHH | firstorder | Variance                         | 2131.184927  |
| wavelet-HHH | firstorder | 10Percentile                     | -56.27463235 |
| wavelet-HHH | firstorder | Kurtosis                         | 3.970876487  |
| wavelet-HHH | firstorder | Mean                             | -2.879011089 |
| wavelet-HHH | glrlm      | ShortRunLowGrayLevelEmphasis     | 0.057711641  |
| wavelet-HHH | glrlm      | GrayLevelVariance                | 3.787751151  |
| wavelet-HHH | glrlm      | LowGrayLevelRunEmphasis          | 0.059476371  |
| wavelet-HHH | glrlm      | GrayLevelNonUniformityNormalized | 0.175807121  |
| wavelet-HHH | glrlm      | RunVariance                      | 0.089012926  |
| wavelet-HHH | glrlm      | GrayLevelNonUniformity           | 6.146052693  |
| wavelet-HHH | glrlm      | LongRunEmphasis                  | 1.282011832  |
| wavelet-HHH | glrlm      | ShortRunHighGrayLevelEmphasis    | 39.9607723   |
| wavelet-HHH | glrlm      | RunLengthNonUniformity           | 29.69696846  |
| wavelet-HHH | glrlm      | ShortRunEmphasis                 | 0.934767968  |
| wavelet-HHH | glrlm      | LongRunHighGrayLevelEmphasis     | 55.90162362  |
| wavelet-HHH | glrlm      | RunPercentage                    | 0.91902834   |
| wavelet-HHH | glrlm      | LongRunLowGrayLevelEmphasis      | 0.066965568  |
| wavelet-HHH | glrlm      | RunEntropy                       | 3.074762617  |
| wavelet-HHH | glrlm      | HighGrayLevelRunEmphasis         | 42.94232228  |
| wavelet-HHH | glrlm      | RunLengthNonUniformityNormalized | 0.846357768  |
| wavelet-HHH | glszm      | GrayLevelVariance                | 6.840236686  |
| wavelet-HHH | glszm      | ZoneVariance                     | 10.22485207  |

|             |       |                                      |             |
|-------------|-------|--------------------------------------|-------------|
| wavelet-HHH | glszm | GrayLevelNonUniformityNormalized     | 0.136094675 |
| wavelet-HHH | glszm | SizeZoneNonUniformityNormalized      | 0.420118343 |
| wavelet-HHH | glszm | SizeZoneNonUniformity                | 5.461538462 |
| wavelet-HHH | glszm | GrayLevelNonUniformity               | 1.769230769 |
| wavelet-HHH | glszm | LargeAreaEmphasis                    | 18.76923077 |
| wavelet-HHH | glszm | SmallAreaHighGrayLevelEmphasis       | 30.00480769 |
| wavelet-HHH | glszm | ZonePercentage                       | 0.342105263 |
| wavelet-HHH | glszm | LargeAreaLowGrayLevelEmphasis        | 0.585197282 |
| wavelet-HHH | glszm | LargeAreaHighGrayLevelEmphasis       | 845.4615385 |
| wavelet-HHH | glszm | HighGrayLevelZoneEmphasis            | 43.76923077 |
| wavelet-HHH | glszm | SmallAreaEmphasis                    | 0.644230769 |
| wavelet-HHH | glszm | LowGrayLevelZoneEmphasis             | 0.109088896 |
| wavelet-HHH | glszm | ZoneEntropy                          | 3.39274741  |
| wavelet-HHH | glszm | SmallAreaLowGrayLevelEmphasis        | 0.09737636  |
| wavelet-HHH | ngtdm | Coarseness                           | 0.127133219 |
| wavelet-HHH | ngtdm | Complexity                           | 50.77930755 |
| wavelet-HHH | ngtdm | Strength                             | 3.718766647 |
| wavelet-HHH | ngtdm | Contrast                             | 0.158827253 |
| wavelet-HHH | ngtdm | Busyness                             | 0.146232418 |
| wavelet-HLL | gldm  | GrayLevelVariance                    | 30.21952909 |
| wavelet-HLL | gldm  | HighGrayLevelEmphasis                | 229.9210526 |
| wavelet-HLL | gldm  | DependenceEntropy                    | 4.135699553 |
| wavelet-HLL | gldm  | DependenceNonUniformity              | 16.31578947 |
| wavelet-HLL | gldm  | GrayLevelNonUniformity               | 3.105263158 |
| wavelet-HLL | gldm  | SmallDependenceEmphasis              | 0.490679825 |
| wavelet-HLL | gldm  | SmallDependenceHighGrayLevelEmphasis | 113.5696272 |
| wavelet-HLL | gldm  | DependenceNonUniformityNormalized    | 0.429362881 |
| wavelet-HLL | gldm  | LargeDependenceEmphasis              | 3.684210526 |
| wavelet-HLL | gldm  | LargeDependenceLowGrayLevelEmphasis  | 0.055008697 |
| wavelet-HLL | gldm  | DependenceVariance                   | 0.48199446  |
| wavelet-HLL | gldm  | LargeDependenceHighGrayLevelEmphasis | 804.6578947 |
| wavelet-HLL | gldm  | SmallDependenceLowGrayLevelEmphasis  | 0.032502094 |
| wavelet-HLL | gldm  | LowGrayLevelEmphasis                 | 0.036237818 |
| wavelet-HLL | glcm  | JointAverage                         | 13.96200893 |
| wavelet-HLL | glcm  | SumAverage                           | 27.92401787 |
| wavelet-HLL | glcm  | JointEntropy                         | 5.001996582 |
| wavelet-HLL | glcm  | ClusterShade                         | 10.53363225 |
| wavelet-HLL | glcm  | MaximumProbability                   | 0.058949252 |
| wavelet-HLL | glcm  | Idmn                                 | 0.954544333 |
| wavelet-HLL | glcm  | JointEnergy                          | 0.033369903 |
| wavelet-HLL | glcm  | Contrast                             | 37.54640014 |
| wavelet-HLL | glcm  | DifferenceEntropy                    | 2.962180168 |
| wavelet-HLL | glcm  | InverseVariance                      | 0.209877982 |
| wavelet-HLL | glcm  | DifferenceVariance                   | 12.50481728 |
| wavelet-HLL | glcm  | Idn                                  | 0.858314179 |
| wavelet-HLL | glcm  | Idm                                  | 0.185696583 |
| wavelet-HLL | glcm  | Correlation                          | 0.295894138 |
| wavelet-HLL | glcm  | Autocorrelation                      | 203.9766179 |
| wavelet-HLL | glcm  | SumEntropy                           | 3.671446529 |
| wavelet-HLL | glcm  | SumSquares                           | 27.65929359 |
| wavelet-HLL | glcm  | ClusterProminence                    | 16022.11817 |
| wavelet-HLL | glcm  | Imc2                                 | 0.995638518 |



|             |            |                                  |              |
|-------------|------------|----------------------------------|--------------|
| wavelet-HLL | glcm       | Imc1                             | -0.65313835  |
| wavelet-HLL | glcm       | DifferenceAverage                | 4.86293845   |
| wavelet-HLL | glcm       | Id                               | 0.278047637  |
| wavelet-HLL | glcm       | ClusterTendency                  | 73.0907742   |
| wavelet-HLL | firstorder | InterquartileRange               | 135.4247206  |
| wavelet-HLL | firstorder | Skewness                         | -0.211499757 |
| wavelet-HLL | firstorder | Uniformity                       | 0.081717452  |
| wavelet-HLL | firstorder | Median                           | 17.05212727  |
| wavelet-HLL | firstorder | Energy                           | 722587.1445  |
| wavelet-HLL | firstorder | RobustMeanAbsoluteDeviation      | 63.7331091   |
| wavelet-HLL | firstorder | MeanAbsoluteDeviation            | 103.8951092  |
| wavelet-HLL | firstorder | TotalEnergy                      | 19509852.9   |
| wavelet-HLL | firstorder | Maximum                          | 303.2620869  |
| wavelet-HLL | firstorder | RootMeanSquared                  | 137.8965234  |
| wavelet-HLL | firstorder | 90Percentile                     | 154.4812832  |
| wavelet-HLL | firstorder | Minimum                          | -331.6724338 |
| wavelet-HLL | firstorder | Entropy                          | 3.882814277  |
| wavelet-HLL | firstorder | Range                            | 634.9345207  |
| wavelet-HLL | firstorder | Variance                         | 18935.9128   |
| wavelet-HLL | firstorder | 10Percentile                     | -199.3666279 |
| wavelet-HLL | firstorder | Kurtosis                         | 3.227095188  |
| wavelet-HLL | firstorder | Mean                             | -8.918428848 |
| wavelet-HLL | glrlm      | ShortRunLowGrayLevelEmphasis     | 0.03700136   |
| wavelet-HLL | glrlm      | GrayLevelVariance                | 30.77092516  |
| wavelet-HLL | glrlm      | LowGrayLevelRunEmphasis          | 0.037171157  |
| wavelet-HLL | glrlm      | GrayLevelNonUniformityNormalized | 0.080755558  |
| wavelet-HLL | glrlm      | RunVariance                      | 0.030263858  |
| wavelet-HLL | glrlm      | GrayLevelNonUniformity           | 2.976344708  |
| wavelet-HLL | glrlm      | LongRunEmphasis                  | 1.096010296  |
| wavelet-HLL | glrlm      | ShortRunHighGrayLevelEmphasis    | 224.928865   |
| wavelet-HLL | glrlm      | RunLengthNonUniformity           | 34.66303006  |
| wavelet-HLL | glrlm      | ShortRunEmphasis                 | 0.975997426  |
| wavelet-HLL | glrlm      | LongRunHighGrayLevelEmphasis     | 251.3941159  |
| wavelet-HLL | glrlm      | RunPercentage                    | 0.969635628  |
| wavelet-HLL | glrlm      | LongRunLowGrayLevelEmphasis      | 0.037850343  |
| wavelet-HLL | glrlm      | RunEntropy                       | 3.959447858  |
| wavelet-HLL | glrlm      | HighGrayLevelRunEmphasis         | 230.2219151  |
| wavelet-HLL | glrlm      | RunLengthNonUniformityNormalized | 0.939472283  |
| wavelet-HLL | glszm      | GrayLevelVariance                | 39.82638889  |
| wavelet-HLL | glszm      | ZoneVariance                     | 0.743055556  |
| wavelet-HLL | glszm      | GrayLevelNonUniformityNormalized | 0.065972222  |
| wavelet-HLL | glszm      | SizeZoneNonUniformityNormalized  | 0.46875      |
| wavelet-HLL | glszm      | SizeZoneNonUniformity            | 11.25        |
| wavelet-HLL | glszm      | GrayLevelNonUniformity           | 1.583333333  |
| wavelet-HLL | glszm      | LargeAreaEmphasis                | 3.25         |
| wavelet-HLL | glszm      | SmallAreaHighGrayLevelEmphasis   | 149.95875    |
| wavelet-HLL | glszm      | ZonePercentage                   | 0.631578947  |
| wavelet-HLL | glszm      | LargeAreaLowGrayLevelEmphasis    | 0.068762687  |
| wavelet-HLL | glszm      | LargeAreaHighGrayLevelEmphasis   | 709.625      |
| wavelet-HLL | glszm      | HighGrayLevelZoneEmphasis        | 233.5        |
| wavelet-HLL | glszm      | SmallAreaEmphasis                | 0.6475       |
| wavelet-HLL | glszm      | LowGrayLevelZoneEmphasis         | 0.053162763  |

|             |            |                                      |              |
|-------------|------------|--------------------------------------|--------------|
| wavelet-HLL | glszm      | ZoneEntropy                          | 4.136842188  |
| wavelet-HLL | glszm      | SmallAreaLowGrayLevelEmphasis        | 0.050505385  |
| wavelet-HLL | ngtdm      | Coarseness                           | 0.131866233  |
| wavelet-HLL | ngtdm      | Complexity                           | 486.6536609  |
| wavelet-HLL | ngtdm      | Strength                             | 25.10715343  |
| wavelet-HLL | ngtdm      | Contrast                             | 0.614068981  |
| wavelet-HLL | ngtdm      | Busyness                             | 0.034135373  |
| wavelet-LHL | gldm       | GrayLevelVariance                    | 122.534626   |
| wavelet-LHL | gldm       | HighGrayLevelEmphasis                | 840.2105263  |
| wavelet-LHL | gldm       | DependenceEntropy                    | 4.616348566  |
| wavelet-LHL | gldm       | DependenceNonUniformity              | 17.36842105  |
| wavelet-LHL | gldm       | GrayLevelNonUniformity               | 2.157894737  |
| wavelet-LHL | gldm       | SmallDependenceEmphasis              | 0.637426901  |
| wavelet-LHL | gldm       | SmallDependenceHighGrayLevelEmphasis | 512.0950292  |
| wavelet-LHL | gldm       | DependenceNonUniformityNormalized    | 0.457063712  |
| wavelet-LHL | gldm       | LargeDependenceEmphasis              | 2.684210526  |
| wavelet-LHL | gldm       | LargeDependenceLowGrayLevelEmphasis  | 0.035828285  |
| wavelet-LHL | gldm       | DependenceVariance                   | 0.354570637  |
| wavelet-LHL | gldm       | LargeDependenceHighGrayLevelEmphasis | 2315.947368  |
| wavelet-LHL | gldm       | SmallDependenceLowGrayLevelEmphasis  | 0.029764659  |
| wavelet-LHL | gldm       | LowGrayLevelEmphasis                 | 0.030725417  |
| wavelet-LHL | glcm       | JointAverage                         | 27.37116079  |
| wavelet-LHL | glcm       | SumAverage                           | 54.74232159  |
| wavelet-LHL | glcm       | JointEntropy                         | 5.123047782  |
| wavelet-LHL | glcm       | ClusterShade                         | -3664.206146 |
| wavelet-LHL | glcm       | MaximumProbability                   | 0.043424572  |
| wavelet-LHL | glcm       | Idmn                                 | 0.899142865  |
| wavelet-LHL | glcm       | JointEnergy                          | 0.029733786  |
| wavelet-LHL | glcm       | Contrast                             | 253.3565794  |
| wavelet-LHL | glcm       | DifferenceEntropy                    | 3.548601181  |
| wavelet-LHL | glcm       | InverseVariance                      | 0.131063018  |
| wavelet-LHL | glcm       | DifferenceVariance                   | 102.0332731  |
| wavelet-LHL | glcm       | Idn                                  | 0.810189992  |
| wavelet-LHL | glcm       | Idm                                  | 0.117709974  |
| wavelet-LHL | glcm       | Correlation                          | 0.114932708  |
| wavelet-LHL | glcm       | Autocorrelation                      | 765.217187   |
| wavelet-LHL | glcm       | SumEntropy                           | 3.931769119  |
| wavelet-LHL | glcm       | SumSquares                           | 141.7043547  |
| wavelet-LHL | glcm       | ClusterProminence                    | 273716.8289  |
| wavelet-LHL | glcm       | Imc2                                 | 0.999128812  |
| wavelet-LHL | glcm       | Imc1                                 | -0.768471081 |
| wavelet-LHL | glcm       | DifferenceAverage                    | 11.69887025  |
| wavelet-LHL | glcm       | Id                                   | 0.192498542  |
| wavelet-LHL | glcm       | ClusterTendency                      | 313.4608394  |
| wavelet-LHL | firstorder | InterquartileRange                   | 345.5627309  |
| wavelet-LHL | firstorder | Skewness                             | -0.818532727 |
| wavelet-LHL | firstorder | Uniformity                           | 0.056786704  |
| wavelet-LHL | firstorder | Median                               | 85.16436558  |
| wavelet-LHL | firstorder | Energy                               | 2899760.576  |
| wavelet-LHL | firstorder | RobustMeanAbsoluteDeviation          | 165.8083558  |
| wavelet-LHL | firstorder | MeanAbsoluteDeviation                | 228.3383596  |
| wavelet-LHL | firstorder | TotalEnergy                          | 78293535.55  |

|             |            |                                  |              |
|-------------|------------|----------------------------------|--------------|
| wavelet-LHL | firstorder | Maximum                          | 371.190946   |
| wavelet-LHL | firstorder | RootMeanSquared                  | 276.2417218  |
| wavelet-LHL | firstorder | 90Percentile                     | 249.82753    |
| wavelet-LHL | firstorder | Minimum                          | -661.2302255 |
| wavelet-LHL | firstorder | Entropy                          | 4.253863368  |
| wavelet-LHL | firstorder | Range                            | 1032.421172  |
| wavelet-LHL | firstorder | Variance                         | 75993.65562  |
| wavelet-LHL | firstorder | 10Percentile                     | -438.4512054 |
| wavelet-LHL | firstorder | Kurtosis                         | 2.556339444  |
| wavelet-LHL | firstorder | Mean                             | -17.77169723 |
| wavelet-LHL | glrlm      | ShortRunLowGrayLevelEmphasis     | 0.031272419  |
| wavelet-LHL | glrlm      | GrayLevelVariance                | 122.7362183  |
| wavelet-LHL | glrlm      | LowGrayLevelRunEmphasis          | 0.031317967  |
| wavelet-LHL | glrlm      | GrayLevelNonUniformityNormalized | 0.056686389  |
| wavelet-LHL | glrlm      | RunVariance                      | 0.020178409  |
| wavelet-LHL | glrlm      | GrayLevelNonUniformity           | 2.110415331  |
| wavelet-LHL | glrlm      | LongRunEmphasis                  | 1.063785764  |
| wavelet-LHL | glrlm      | ShortRunHighGrayLevelEmphasis    | 824.9433924  |
| wavelet-LHL | glrlm      | RunLengthNonUniformity           | 35.76975217  |
| wavelet-LHL | glrlm      | ShortRunEmphasis                 | 0.984053559  |
| wavelet-LHL | glrlm      | LongRunHighGrayLevelEmphasis     | 895.9397294  |
| wavelet-LHL | glrlm      | RunPercentage                    | 0.979757085  |
| wavelet-LHL | glrlm      | LongRunLowGrayLevelEmphasis      | 0.031500161  |
| wavelet-LHL | glrlm      | RunEntropy                       | 4.286064444  |
| wavelet-LHL | glrlm      | HighGrayLevelRunEmphasis         | 839.1426598  |
| wavelet-LHL | glrlm      | RunLengthNonUniformityNormalized | 0.959643182  |
| wavelet-LHL | glszm      | GrayLevelVariance                | 126.5242347  |
| wavelet-LHL | glszm      | ZoneVariance                     | 0.37244898   |
| wavelet-LHL | glszm      | GrayLevelNonUniformityNormalized | 0.053571429  |
| wavelet-LHL | glszm      | SizeZoneNonUniformityNormalized  | 0.56122449   |
| wavelet-LHL | glszm      | SizeZoneNonUniformity            | 15.71428571  |
| wavelet-LHL | glszm      | GrayLevelNonUniformity           | 1.5          |
| wavelet-LHL | glszm      | LargeAreaEmphasis                | 2.214285714  |
| wavelet-LHL | glszm      | SmallAreaHighGrayLevelEmphasis   | 615.6914683  |
| wavelet-LHL | glszm      | ZonePercentage                   | 0.736842105  |
| wavelet-LHL | glszm      | LargeAreaLowGrayLevelEmphasis    | 0.044520154  |
| wavelet-LHL | glszm      | LargeAreaHighGrayLevelEmphasis   | 1874.357143  |
| wavelet-LHL | glszm      | HighGrayLevelZoneEmphasis        | 823.1071429  |
| wavelet-LHL | glszm      | SmallAreaEmphasis                | 0.775793651  |
| wavelet-LHL | glszm      | LowGrayLevelZoneEmphasis         | 0.040672794  |
| wavelet-LHL | glszm      | ZoneEntropy                      | 4.521640636  |
| wavelet-LHL | glszm      | SmallAreaLowGrayLevelEmphasis    | 0.040138398  |
| wavelet-LHL | ngtdm      | Coarseness                       | 0.073795327  |
| wavelet-LHL | ngtdm      | Complexity                       | 2338.989361  |
| wavelet-LHL | ngtdm      | Strength                         | 42.74591562  |
| wavelet-LHL | ngtdm      | Contrast                         | 4.108917234  |
| wavelet-LHL | ngtdm      | Busyness                         | 0.032394172  |
| wavelet-LHH | gldm       | GrayLevelVariance                | 24.68144044  |
| wavelet-LHH | gldm       | HighGrayLevelEmphasis            | 192.3157895  |
| wavelet-LHH | gldm       | DependenceEntropy                | 4.511085408  |
| wavelet-LHH | gldm       | DependenceNonUniformity          | 13.73684211  |
| wavelet-LHH | gldm       | GrayLevelNonUniformity           | 3.052631579  |

|             |            |                                      |              |
|-------------|------------|--------------------------------------|--------------|
| wavelet-LHH | gldm       | SmallDependenceEmphasis              | 0.478435673  |
| wavelet-LHH | gldm       | SmallDependenceHighGrayLevelEmphasis | 100.0076754  |
| wavelet-LHH | gldm       | DependenceNonUniformityNormalized    | 0.361495845  |
| wavelet-LHH | gldm       | LargeDependenceEmphasis              | 4.263157895  |
| wavelet-LHH | gldm       | LargeDependenceLowGrayLevelEmphasis  | 0.059994205  |
| wavelet-LHH | gldm       | DependenceVariance                   | 0.673130194  |
| wavelet-LHH | gldm       | LargeDependenceHighGrayLevelEmphasis | 746.5263158  |
| wavelet-LHH | gldm       | SmallDependenceLowGrayLevelEmphasis  | 0.030968851  |
| wavelet-LHH | gldm       | LowGrayLevelEmphasis                 | 0.035237575  |
| wavelet-LHH | glcm       | JointAverage                         | 12.84736527  |
| wavelet-LHH | glcm       | SumAverage                           | 25.69473054  |
| wavelet-LHH | glcm       | JointEntropy                         | 4.982675187  |
| wavelet-LHH | glcm       | ClusterShade                         | 2.72365488   |
| wavelet-LHH | glcm       | MaximumProbability                   | 0.060379713  |
| wavelet-LHH | glcm       | Idmn                                 | 0.916328937  |
| wavelet-LHH | glcm       | JointEnergy                          | 0.033708739  |
| wavelet-LHH | glcm       | Contrast                             | 61.72907394  |
| wavelet-LHH | glcm       | DifferenceEntropy                    | 3.18527518   |
| wavelet-LHH | glcm       | InverseVariance                      | 0.158325333  |
| wavelet-LHH | glcm       | DifferenceVariance                   | 21.42637554  |
| wavelet-LHH | glcm       | Idn                                  | 0.813894261  |
| wavelet-LHH | glcm       | Idm                                  | 0.160277211  |
| wavelet-LHH | glcm       | Correlation                          | -0.078651758 |
| wavelet-LHH | glcm       | Autocorrelation                      | 162.7922966  |
| wavelet-LHH | glcm       | SumEntropy                           | 3.529450091  |
| wavelet-LHH | glcm       | SumSquares                           | 28.54098516  |
| wavelet-LHH | glcm       | ClusterProminence                    | 8065.630543  |
| wavelet-LHH | glcm       | Imc2                                 | 0.996960041  |
| wavelet-LHH | glcm       | Imc1                                 | -0.689017636 |
| wavelet-LHH | glcm       | DifferenceAverage                    | 6.186721117  |
| wavelet-LHH | glcm       | Id                                   | 0.249726807  |
| wavelet-LHH | glcm       | ClusterTendency                      | 52.4348667   |
| wavelet-LHH | firstorder | InterquartileRange                   | 153.1638823  |
| wavelet-LHH | firstorder | Skewness                             | 0.047017487  |
| wavelet-LHH | firstorder | Uniformity                           | 0.08033241   |
| wavelet-LHH | firstorder | Median                               | -28.50071263 |
| wavelet-LHH | firstorder | Energy                               | 598986.7868  |
| wavelet-LHH | firstorder | RobustMeanAbsoluteDeviation          | 66.73126433  |
| wavelet-LHH | firstorder | MeanAbsoluteDeviation                | 98.54682939  |
| wavelet-LHH | firstorder | TotalEnergy                          | 16172643.24  |
| wavelet-LHH | firstorder | Maximum                              | 252.5258886  |
| wavelet-LHH | firstorder | RootMeanSquared                      | 125.5500306  |
| wavelet-LHH | firstorder | 90Percentile                         | 167.0260012  |
| wavelet-LHH | firstorder | Minimum                              | -301.8898285 |
| wavelet-LHH | firstorder | Entropy                              | 3.830182698  |
| wavelet-LHH | firstorder | Range                                | 554.415717   |
| wavelet-LHH | firstorder | Variance                             | 15595.13019  |
| wavelet-LHH | firstorder | 10Percentile                         | -161.0039647 |
| wavelet-LHH | firstorder | Kurtosis                             | 2.681850908  |
| wavelet-LHH | firstorder | Mean                                 | -12.94913071 |
| wavelet-LHH | glrlm      | ShortRunLowGrayLevelEmphasis         | 0.036083515  |
| wavelet-LHH | glrlm      | GrayLevelVariance                    | 25.18694611  |

|             |       |                                      |             |
|-------------|-------|--------------------------------------|-------------|
| wavelet-LHH | glrlm | LowGrayLevelRunEmphasis              | 0.036292074 |
| wavelet-LHH | glrlm | GrayLevelNonUniformityNormalized     | 0.079683104 |
| wavelet-LHH | glrlm | RunVariance                          | 0.038619362 |
| wavelet-LHH | glrlm | GrayLevelNonUniformity               | 2.924982773 |
| wavelet-LHH | glrlm | LongRunEmphasis                      | 1.120135023 |
| wavelet-LHH | glrlm | ShortRunHighGrayLevelEmphasis        | 188.1620645 |
| wavelet-LHH | glrlm | RunLengthNonUniformity               | 34.44375144 |
| wavelet-LHH | glrlm | ShortRunEmphasis                     | 0.972723344 |
| wavelet-LHH | glrlm | LongRunHighGrayLevelEmphasis         | 213.5535144 |
| wavelet-LHH | glrlm | RunPercentage                        | 0.965587045 |
| wavelet-LHH | glrlm | LongRunLowGrayLevelEmphasis          | 0.037236594 |
| wavelet-LHH | glrlm | RunEntropy                           | 3.922535978 |
| wavelet-LHH | glrlm | HighGrayLevelRunEmphasis             | 193.0197865 |
| wavelet-LHH | glrlm | RunLengthNonUniformityNormalized     | 0.934768001 |
| wavelet-LHH | glszm | GrayLevelVariance                    | 32.63516068 |
| wavelet-LHH | glszm | ZoneVariance                         | 0.835538752 |
| wavelet-LHH | glszm | GrayLevelNonUniformityNormalized     | 0.066162571 |
| wavelet-LHH | glszm | SizeZoneNonUniformityNormalized      | 0.421550095 |
| wavelet-LHH | glszm | SizeZoneNonUniformity                | 9.695652174 |
| wavelet-LHH | glszm | GrayLevelNonUniformity               | 1.52173913  |
| wavelet-LHH | glszm | LargeAreaEmphasis                    | 3.565217391 |
| wavelet-LHH | glszm | SmallAreaHighGrayLevelEmphasis       | 141.040157  |
| wavelet-LHH | glszm | ZonePercentage                       | 0.605263158 |
| wavelet-LHH | glszm | LargeAreaLowGrayLevelEmphasis        | 0.072983856 |
| wavelet-LHH | glszm | LargeAreaHighGrayLevelEmphasis       | 633.4782609 |
| wavelet-LHH | glszm | HighGrayLevelZoneEmphasis            | 205.0434783 |
| wavelet-LHH | glszm | SmallAreaEmphasis                    | 0.651570048 |
| wavelet-LHH | glszm | LowGrayLevelZoneEmphasis             | 0.052948357 |
| wavelet-LHH | glszm | ZoneEntropy                          | 4.436605434 |
| wavelet-LHH | glszm | SmallAreaLowGrayLevelEmphasis        | 0.049995325 |
| wavelet-LHH | ngtdm | Coarseness                           | 0.104052713 |
| wavelet-LHH | ngtdm | Complexity                           | 551.4812413 |
| wavelet-LHH | ngtdm | Strength                             | 13.46706995 |
| wavelet-LHH | ngtdm | Contrast                             | 0.760997615 |
| wavelet-LHH | ngtdm | Busyness                             | 0.057493626 |
| wavelet-LLH | gldm  | GrayLevelVariance                    | 131.7984765 |
| wavelet-LLH | gldm  | HighGrayLevelEmphasis                | 537.0789474 |
| wavelet-LLH | gldm  | DependenceEntropy                    | 4.523986066 |
| wavelet-LLH | gldm  | DependenceNonUniformity              | 16.31578947 |
| wavelet-LLH | gldm  | GrayLevelNonUniformity               | 1.789473684 |
| wavelet-LLH | gldm  | SmallDependenceEmphasis              | 0.662280702 |
| wavelet-LLH | gldm  | SmallDependenceHighGrayLevelEmphasis | 364.3859649 |
| wavelet-LLH | gldm  | DependenceNonUniformityNormalized    | 0.429362881 |
| wavelet-LLH | gldm  | LargeDependenceEmphasis              | 3.052631579 |
| wavelet-LLH | gldm  | LargeDependenceLowGrayLevelEmphasis  | 0.080142267 |
| wavelet-LLH | gldm  | DependenceVariance                   | 0.559556787 |
| wavelet-LLH | gldm  | LargeDependenceHighGrayLevelEmphasis | 1595.921053 |
| wavelet-LLH | gldm  | SmallDependenceLowGrayLevelEmphasis  | 0.036282944 |
| wavelet-LLH | gldm  | LowGrayLevelEmphasis                 | 0.042179261 |
| wavelet-LLH | glcm  | JointAverage                         | 20.39670471 |
| wavelet-LLH | glcm  | SumAverage                           | 40.79340941 |
| wavelet-LLH | glcm  | JointEntropy                         | 5.141432681 |

|             |            |                                  |              |
|-------------|------------|----------------------------------|--------------|
| wavelet-LLH | glcm       | ClusterShade                     | -1490.443085 |
| wavelet-LLH | glcm       | MaximumProbability               | 0.045081035  |
| wavelet-LLH | glcm       | Idmn                             | 0.914003319  |
| wavelet-LLH | glcm       | JointEnergy                      | 0.029460069  |
| wavelet-LLH | glcm       | Contrast                         | 196.3658287  |
| wavelet-LLH | glcm       | DifferenceEntropy                | 3.469465351  |
| wavelet-LLH | glcm       | InverseVariance                  | 0.116230918  |
| wavelet-LLH | glcm       | DifferenceVariance               | 75.73036391  |
| wavelet-LLH | glcm       | Idn                              | 0.820087963  |
| wavelet-LLH | glcm       | Idm                              | 0.11841629   |
| wavelet-LLH | glcm       | Correlation                      | 0.332685048  |
| wavelet-LLH | glcm       | Autocorrelation                  | 467.0755122  |
| wavelet-LLH | glcm       | SumEntropy                       | 3.949078302  |
| wavelet-LLH | glcm       | SumSquares                       | 148.8972087  |
| wavelet-LLH | glcm       | ClusterProminence                | 302132.0418  |
| wavelet-LLH | glcm       | Imc2                             | 0.999521337  |
| wavelet-LLH | glcm       | Imc1                             | -0.814407237 |
| wavelet-LLH | glcm       | DifferenceAverage                | 10.44472821  |
| wavelet-LLH | glcm       | Id                               | 0.197148859  |
| wavelet-LLH | glcm       | ClusterTendency                  | 399.2230059  |
| wavelet-LLH | firstorder | InterquartileRange               | 491.2003094  |
| wavelet-LLH | firstorder | Skewness                         | -0.064195225 |
| wavelet-LLH | firstorder | Uniformity                       | 0.047091413  |
| wavelet-LLH | firstorder | Median                           | 19.89002685  |
| wavelet-LLH | firstorder | Energy                           | 3172174.887  |
| wavelet-LLH | firstorder | RobustMeanAbsoluteDeviation      | 208.6611877  |
| wavelet-LLH | firstorder | MeanAbsoluteDeviation            | 255.504644   |
| wavelet-LLH | firstorder | TotalEnergy                      | 85648721.96  |
| wavelet-LLH | firstorder | Maximum                          | 491.0622498  |
| wavelet-LLH | firstorder | RootMeanSquared                  | 288.9260918  |
| wavelet-LLH | firstorder | 90Percentile                     | 278.7086825  |
| wavelet-LLH | firstorder | Minimum                          | -510.7747918 |
| wavelet-LLH | firstorder | Entropy                          | 4.523986066  |
| wavelet-LLH | firstorder | Range                            | 1001.837042  |
| wavelet-LLH | firstorder | Variance                         | 82365.45878  |
| wavelet-LLH | firstorder | 10Percentile                     | -423.2443935 |
| wavelet-LLH | firstorder | Kurtosis                         | 1.768827874  |
| wavelet-LLH | firstorder | Mean                             | -33.35907261 |
| wavelet-LLH | glrlm      | ShortRunLowGrayLevelEmphasis     | 0.042428027  |
| wavelet-LLH | glrlm      | GrayLevelVariance                | 131.2244651  |
| wavelet-LLH | glrlm      | LowGrayLevelRunEmphasis          | 0.042743343  |
| wavelet-LLH | glrlm      | GrayLevelNonUniformityNormalized | 0.046723235  |
| wavelet-LLH | glrlm      | RunVariance                      | 0.022201222  |
| wavelet-LLH | glrlm      | GrayLevelNonUniformity           | 1.736033257  |
| wavelet-LLH | glrlm      | LongRunEmphasis                  | 1.07002277   |
| wavelet-LLH | glrlm      | ShortRunHighGrayLevelEmphasis    | 528.6365944  |
| wavelet-LLH | glrlm      | RunLengthNonUniformity           | 35.54314094  |
| wavelet-LLH | glrlm      | ShortRunEmphasis                 | 0.982494307  |
| wavelet-LLH | glrlm      | LongRunHighGrayLevelEmphasis     | 573.5900334  |
| wavelet-LLH | glrlm      | RunPercentage                    | 0.977732794  |
| wavelet-LLH | glrlm      | LongRunLowGrayLevelEmphasis      | 0.044004605  |
| wavelet-LLH | glrlm      | RunEntropy                       | 4.555578241  |

|             |       |                                      |             |
|-------------|-------|--------------------------------------|-------------|
| wavelet-LLH | glrlm | HighGrayLevelRunEmphasis             | 537.6272822 |
| wavelet-LLH | glrlm | RunLengthNonUniformityNormalized     | 0.955597556 |
| wavelet-LLH | glszm | GrayLevelVariance                    | 126.7300832 |
| wavelet-LLH | glszm | ZoneVariance                         | 0.35196195  |
| wavelet-LLH | glszm | GrayLevelNonUniformityNormalized     | 0.043995244 |
| wavelet-LLH | glszm | SizeZoneNonUniformityNormalized      | 0.609988109 |
| wavelet-LLH | glszm | SizeZoneNonUniformity                | 17.68965517 |
| wavelet-LLH | glszm | GrayLevelNonUniformity               | 1.275862069 |
| wavelet-LLH | glszm | LargeAreaEmphasis                    | 2.068965517 |
| wavelet-LLH | glszm | SmallAreaHighGrayLevelEmphasis       | 447.7950192 |
| wavelet-LLH | glszm | ZonePercentage                       | 0.763157895 |
| wavelet-LLH | glszm | LargeAreaLowGrayLevelEmphasis        | 0.069024949 |
| wavelet-LLH | glszm | LargeAreaHighGrayLevelEmphasis       | 1093.896552 |
| wavelet-LLH | glszm | HighGrayLevelZoneEmphasis            | 544.862069  |
| wavelet-LLH | glszm | SmallAreaEmphasis                    | 0.809386973 |
| wavelet-LLH | glszm | LowGrayLevelZoneEmphasis             | 0.049804574 |
| wavelet-LLH | glszm | ZoneEntropy                          | 4.582118926 |
| wavelet-LLH | glszm | SmallAreaLowGrayLevelEmphasis        | 0.046569464 |
| wavelet-LLH | ngtdm | Coarseness                           | 0.10119358  |
| wavelet-LLH | ngtdm | Complexity                           | 2267.922744 |
| wavelet-LLH | ngtdm | Strength                             | 60.35380045 |
| wavelet-LLH | ngtdm | Contrast                             | 2.571972293 |
| wavelet-LLH | ngtdm | Busyness                             | 0.024842411 |
| wavelet-LLL | gldm  | GrayLevelVariance                    | 272.8566482 |
| wavelet-LLL | gldm  | HighGrayLevelEmphasis                | 915.0789474 |
| wavelet-LLL | gldm  | DependenceEntropy                    | 4.826874882 |
| wavelet-LLL | gldm  | DependenceNonUniformity              | 21.57894737 |
| wavelet-LLL | gldm  | GrayLevelNonUniformity               | 1.526315789 |
| wavelet-LLL | gldm  | SmallDependenceEmphasis              | 0.763157895 |
| wavelet-LLL | gldm  | SmallDependenceHighGrayLevelEmphasis | 753.1578947 |
| wavelet-LLL | gldm  | DependenceNonUniformityNormalized    | 0.567867036 |
| wavelet-LLL | gldm  | LargeDependenceEmphasis              | 1.947368421 |
| wavelet-LLL | gldm  | LargeDependenceLowGrayLevelEmphasis  | 0.040334297 |
| wavelet-LLL | gldm  | DependenceVariance                   | 0.216066482 |
| wavelet-LLL | gldm  | LargeDependenceHighGrayLevelEmphasis | 1562.763158 |
| wavelet-LLL | gldm  | SmallDependenceLowGrayLevelEmphasis  | 0.035565418 |
| wavelet-LLL | gldm  | LowGrayLevelEmphasis                 | 0.036519194 |
| wavelet-LLL | glcm  | JointAverage                         | 29.84677939 |
| wavelet-LLL | glcm  | SumAverage                           | 59.69355879 |
| wavelet-LLL | glcm  | JointEntropy                         | 5.160746902 |
| wavelet-LLL | glcm  | ClusterShade                         | 3728.072628 |
| wavelet-LLL | glcm  | MaximumProbability                   | 0.037218351 |
| wavelet-LLL | glcm  | ldmn                                 | 0.895313494 |
| wavelet-LLL | glcm  | JointEnergy                          | 0.028779419 |
| wavelet-LLL | glcm  | Contrast                             | 559.4661411 |
| wavelet-LLL | glcm  | DifferenceEntropy                    | 3.860275605 |
| wavelet-LLL | glcm  | InverseVariance                      | 0.068346709 |
| wavelet-LLL | glcm  | DifferenceVariance                   | 185.1050155 |
| wavelet-LLL | glcm  | ldn                                  | 0.792246868 |
| wavelet-LLL | glcm  | ldm                                  | 0.063167928 |
| wavelet-LLL | glcm  | Correlation                          | 0.087063849 |
| wavelet-LLL | glcm  | Autocorrelation                      | 919.2938091 |

|             |            |                                  |              |
|-------------|------------|----------------------------------|--------------|
| wavelet-LLL | glcm       | SumEntropy                       | 4.043624647  |
| wavelet-LLL | glcm       | SumSquares                       | 307.1132478  |
| wavelet-LLL | glcm       | ClusterProminence                | 986043.5442  |
| wavelet-LLL | glcm       | Imc2                             | 0.999797309  |
| wavelet-LLL | glcm       | Imc1                             | -0.864302295 |
| wavelet-LLL | glcm       | DifferenceAverage                | 19.02450255  |
| wavelet-LLL | glcm       | Id                               | 0.123357666  |
| wavelet-LLL | glcm       | ClusterTendency                  | 668.9868503  |
| wavelet-LLL | firstorder | InterquartileRange               | 640.1506057  |
| wavelet-LLL | firstorder | Skewness                         | 0.688100082  |
| wavelet-LLL | firstorder | Uniformity                       | 0.040166205  |
| wavelet-LLL | firstorder | Median                           | -1717.241438 |
| wavelet-LLL | firstorder | Energy                           | 95249563.55  |
| wavelet-LLL | firstorder | RobustMeanAbsoluteDeviation      | 261.2789187  |
| wavelet-LLL | firstorder | MeanAbsoluteDeviation            | 352.1844849  |
| wavelet-LLL | firstorder | TotalEnergy                      | 2571738216   |
| wavelet-LLL | firstorder | Maximum                          | -570.3188996 |
| wavelet-LLL | firstorder | RootMeanSquared                  | 1583.214282  |
| wavelet-LLL | firstorder | 90Percentile                     | -845.6498402 |
| wavelet-LLL | firstorder | Minimum                          | -2138.953557 |
| wavelet-LLL | firstorder | Entropy                          | 4.754377842  |
| wavelet-LLL | firstorder | Range                            | 1568.634658  |
| wavelet-LLL | firstorder | Variance                         | 169503.3364  |
| wavelet-LLL | firstorder | 10Percentile                     | -1929.947385 |
| wavelet-LLL | firstorder | Kurtosis                         | 2.334024665  |
| wavelet-LLL | firstorder | Mean                             | -1528.745932 |
| wavelet-LLL | glrlm      | ShortRunLowGrayLevelEmphasis     | 0.036896251  |
| wavelet-LLL | glrlm      | GrayLevelVariance                | 273.3365788  |
| wavelet-LLL | glrlm      | LowGrayLevelRunEmphasis          | 0.036935465  |
| wavelet-LLL | glrlm      | GrayLevelNonUniformityNormalized | 0.040043143  |
| wavelet-LLL | glrlm      | RunVariance                      | 0.012096696  |
| wavelet-LLL | glrlm      | GrayLevelNonUniformity           | 1.503249809  |
| wavelet-LLL | glrlm      | LongRunEmphasis                  | 1.038491238  |
| wavelet-LLL | glrlm      | ShortRunHighGrayLevelEmphasis    | 911.7765448  |
| wavelet-LLL | glrlm      | RunLengthNonUniformity           | 36.66741907  |
| wavelet-LLL | glrlm      | ShortRunEmphasis                 | 0.99037719   |
| wavelet-LLL | glrlm      | LongRunHighGrayLevelEmphasis     | 944.012066   |
| wavelet-LLL | glrlm      | RunPercentage                    | 0.987854251  |
| wavelet-LLL | glrlm      | LongRunLowGrayLevelEmphasis      | 0.037092321  |
| wavelet-LLL | glrlm      | RunEntropy                       | 4.76142849   |
| wavelet-LLL | glrlm      | HighGrayLevelRunEmphasis         | 918.223649   |
| wavelet-LLL | glrlm      | RunLengthNonUniformityNormalized | 0.975806608  |
| wavelet-LLL | glszm      | GrayLevelVariance                | 280.8427734  |
| wavelet-LLL | glszm      | ZoneVariance                     | 0.15234375   |
| wavelet-LLL | glszm      | GrayLevelNonUniformityNormalized | 0.037109375  |
| wavelet-LLL | glszm      | SizeZoneNonUniformityNormalized  | 0.6953125    |
| wavelet-LLL | glszm      | SizeZoneNonUniformity            | 22.25        |
| wavelet-LLL | glszm      | GrayLevelNonUniformity           | 1.1875       |
| wavelet-LLL | glszm      | LargeAreaEmphasis                | 1.5625       |
| wavelet-LLL | glszm      | SmallAreaHighGrayLevelEmphasis   | 862.328125   |
| wavelet-LLL | glszm      | ZonePercentage                   | 0.842105263  |
| wavelet-LLL | glszm      | LargeAreaLowGrayLevelEmphasis    | 0.044876688  |



|             |            |                                      |              |
|-------------|------------|--------------------------------------|--------------|
| wavelet-LLL | glszm      | LargeAreaHighGrayLevelEmphasis       | 1343.03125   |
| wavelet-LLL | glszm      | HighGrayLevelZoneEmphasis            | 958.46875    |
| wavelet-LLL | glszm      | SmallAreaEmphasis                    | 0.859375     |
| wavelet-LLL | glszm      | LowGrayLevelZoneEmphasis             | 0.04261147   |
| wavelet-LLL | glszm      | ZoneEntropy                          | 4.875        |
| wavelet-LLL | glszm      | SmallAreaLowGrayLevelEmphasis        | 0.042045166  |
| wavelet-LLL | ngtdm      | Coarseness                           | 0.049591903  |
| wavelet-LLL | ngtdm      | Complexity                           | 8502.29834   |
| wavelet-LLL | ngtdm      | Strength                             | 63.55994567  |
| wavelet-LLL | ngtdm      | Contrast                             | 9.171734621  |
| wavelet-LLL | ngtdm      | Busyness                             | 0.036967103  |
| wavelet-HHL | gldm       | GrayLevelVariance                    | 8.914819945  |
| wavelet-HHL | gldm       | HighGrayLevelEmphasis                | 59.02631579  |
| wavelet-HHL | gldm       | DependenceEntropy                    | 3.964904158  |
| wavelet-HHL | gldm       | DependenceNonUniformity              | 14           |
| wavelet-HHL | gldm       | GrayLevelNonUniformity               | 3.947368421  |
| wavelet-HHL | gldm       | SmallDependenceEmphasis              | 0.458106725  |
| wavelet-HHL | gldm       | SmallDependenceHighGrayLevelEmphasis | 24.89565058  |
| wavelet-HHL | gldm       | DependenceNonUniformityNormalized    | 0.368421053  |
| wavelet-HHL | gldm       | LargeDependenceEmphasis              | 4.578947368  |
| wavelet-HHL | gldm       | LargeDependenceLowGrayLevelEmphasis  | 0.166328261  |
| wavelet-HHL | gldm       | DependenceVariance                   | 0.786703601  |
| wavelet-HHL | gldm       | LargeDependenceHighGrayLevelEmphasis | 239.6052632  |
| wavelet-HHL | gldm       | SmallDependenceLowGrayLevelEmphasis  | 0.052833353  |
| wavelet-HHL | gldm       | LowGrayLevelEmphasis                 | 0.064943095  |
| wavelet-HHL | glcm       | JointAverage                         | 7.088069833  |
| wavelet-HHL | glcm       | SumAverage                           | 14.17613967  |
| wavelet-HHL | glcm       | JointEntropy                         | 4.851184591  |
| wavelet-HHL | glcm       | ClusterShade                         | 0.961825079  |
| wavelet-HHL | glcm       | MaximumProbability                   | 0.070959939  |
| wavelet-HHL | glcm       | ldmn                                 | 0.910612415  |
| wavelet-HHL | glcm       | JointEnergy                          | 0.038372323  |
| wavelet-HHL | glcm       | Contrast                             | 18.8337034   |
| wavelet-HHL | glcm       | DifferenceEntropy                    | 2.79948561   |
| wavelet-HHL | glcm       | InverseVariance                      | 0.225588211  |
| wavelet-HHL | glcm       | DifferenceVariance                   | 5.598123762  |
| wavelet-HHL | glcm       | ldn                                  | 0.800068922  |
| wavelet-HHL | glcm       | ldm                                  | 0.212096778  |
| wavelet-HHL | glcm       | Correlation                          | -0.050666592 |
| wavelet-HHL | glcm       | Autocorrelation                      | 49.81464202  |
| wavelet-HHL | glcm       | SumEntropy                           | 3.328614693  |
| wavelet-HHL | glcm       | SumSquares                           | 8.948912312  |
| wavelet-HHL | glcm       | ClusterProminence                    | 737.0179015  |
| wavelet-HHL | glcm       | Imc2                                 | 0.987466702  |
| wavelet-HHL | glcm       | Imc1                                 | -0.564087092 |
| wavelet-HHL | glcm       | DifferenceAverage                    | 3.586623706  |
| wavelet-HHL | glcm       | ld                                   | 0.312610875  |
| wavelet-HHL | glcm       | ClusterTendency                      | 16.96194584  |
| wavelet-HHL | firstorder | InterquartileRange                   | 103.4029867  |
| wavelet-HHL | firstorder | Skewness                             | -0.168816174 |
| wavelet-HHL | firstorder | Uniformity                           | 0.103878116  |
| wavelet-HHL | firstorder | Median                               | -2.626994486 |

|             |            |                                  |              |
|-------------|------------|----------------------------------|--------------|
| wavelet-HHL | firstorder | Energy                           | 209574.2145  |
| wavelet-HHL | firstorder | RobustMeanAbsoluteDeviation      | 46.37771411  |
| wavelet-HHL | firstorder | MeanAbsoluteDeviation            | 62.23380807  |
| wavelet-HHL | firstorder | TotalEnergy                      | 5658503.793  |
| wavelet-HHL | firstorder | Maximum                          | 125.2672633  |
| wavelet-HHL | firstorder | RootMeanSquared                  | 74.26379272  |
| wavelet-HHL | firstorder | 90Percentile                     | 86.21020943  |
| wavelet-HHL | firstorder | Minimum                          | -157.5836628 |
| wavelet-HHL | firstorder | Entropy                          | 3.458032449  |
| wavelet-HHL | firstorder | Range                            | 282.8509261  |
| wavelet-HHL | firstorder | Variance                         | 5432.752682  |
| wavelet-HHL | firstorder | 10Percentile                     | -117.9551655 |
| wavelet-HHL | firstorder | Kurtosis                         | 2.133776693  |
| wavelet-HHL | firstorder | Mean                             | -9.075143342 |
| wavelet-HHL | glrlm      | ShortRunLowGrayLevelEmphasis     | 0.065760614  |
| wavelet-HHL | glrlm      | GrayLevelVariance                | 9.059343742  |
| wavelet-HHL | glrlm      | LowGrayLevelRunEmphasis          | 0.066460511  |
| wavelet-HHL | glrlm      | GrayLevelNonUniformityNormalized | 0.102424926  |
| wavelet-HHL | glrlm      | RunVariance                      | 0.040657077  |
| wavelet-HHL | glrlm      | GrayLevelNonUniformity           | 3.751482136  |
| wavelet-HHL | glrlm      | LongRunEmphasis                  | 1.120908821  |
| wavelet-HHL | glrlm      | ShortRunHighGrayLevelEmphasis    | 57.56729056  |
| wavelet-HHL | glrlm      | RunLengthNonUniformity           | 34.15606376  |
| wavelet-HHL | glrlm      | ShortRunEmphasis                 | 0.972214797  |
| wavelet-HHL | glrlm      | LongRunHighGrayLevelEmphasis     | 65.75442756  |
| wavelet-HHL | glrlm      | RunPercentage                    | 0.963562753  |
| wavelet-HHL | glrlm      | LongRunLowGrayLevelEmphasis      | 0.069650816  |
| wavelet-HHL | glrlm      | RunEntropy                       | 3.560571383  |
| wavelet-HHL | glrlm      | HighGrayLevelRunEmphasis         | 59.15587791  |
| wavelet-HHL | glrlm      | RunLengthNonUniformityNormalized | 0.931119126  |
| wavelet-HHL | glszm      | GrayLevelVariance                | 11.57231405  |
| wavelet-HHL | glszm      | ZoneVariance                     | 1.652892562  |
| wavelet-HHL | glszm      | GrayLevelNonUniformityNormalized | 0.095041322  |
| wavelet-HHL | glszm      | SizeZoneNonUniformityNormalized  | 0.433884298  |
| wavelet-HHL | glszm      | SizeZoneNonUniformity            | 9.545454545  |
| wavelet-HHL | glszm      | GrayLevelNonUniformity           | 2.090909091  |
| wavelet-HHL | glszm      | LargeAreaEmphasis                | 4.636363636  |
| wavelet-HHL | glszm      | SmallAreaHighGrayLevelEmphasis   | 33.00551433  |
| wavelet-HHL | glszm      | ZonePercentage                   | 0.578947368  |
| wavelet-HHL | glszm      | LargeAreaLowGrayLevelEmphasis    | 0.202668926  |
| wavelet-HHL | glszm      | LargeAreaHighGrayLevelEmphasis   | 231.6818182  |
| wavelet-HHL | glszm      | HighGrayLevelZoneEmphasis        | 58.68181818  |
| wavelet-HHL | glszm      | SmallAreaEmphasis                | 0.642341785  |
| wavelet-HHL | glszm      | LowGrayLevelZoneEmphasis         | 0.094654464  |
| wavelet-HHL | glszm      | ZoneEntropy                      | 3.697845823  |
| wavelet-HHL | glszm      | SmallAreaLowGrayLevelEmphasis    | 0.088193005  |
| wavelet-HHL | ngtdm      | Coarseness                       | 0.107102477  |
| wavelet-HHL | ngtdm      | Complexity                       | 165.5119023  |
| wavelet-HHL | ngtdm      | Strength                         | 5.673029331  |
| wavelet-HHL | ngtdm      | Contrast                         | 0.315956471  |
| wavelet-HHL | ngtdm      | Busyness                         | 0.128364828  |
| wavelet-HHL | gldm       | GrayLevelVariance                | 6.33033241   |

|             |            |                                      |              |
|-------------|------------|--------------------------------------|--------------|
| wavelet-HLH | gldm       | HighGrayLevelEmphasis                | 64.97368421  |
| wavelet-HLH | gldm       | DependenceEntropy                    | 4.38595679   |
| wavelet-HLH | gldm       | DependenceNonUniformity              | 8.526315789  |
| wavelet-HLH | gldm       | GrayLevelNonUniformity               | 5.105263158  |
| wavelet-HLH | gldm       | SmallDependenceEmphasis              | 0.326944444  |
| wavelet-HLH | gldm       | SmallDependenceHighGrayLevelEmphasis | 20.01652047  |
| wavelet-HLH | gldm       | DependenceNonUniformityNormalized    | 0.224376731  |
| wavelet-HLH | gldm       | LargeDependenceEmphasis              | 8.526315789  |
| wavelet-HLH | gldm       | LargeDependenceLowGrayLevelEmphasis  | 0.19745244   |
| wavelet-HLH | gldm       | DependenceVariance                   | 1.601108033  |
| wavelet-HLH | gldm       | LargeDependenceHighGrayLevelEmphasis | 516.9210526  |
| wavelet-HLH | gldm       | SmallDependenceLowGrayLevelEmphasis  | 0.039841461  |
| wavelet-HLH | gldm       | LowGrayLevelEmphasis                 | 0.052298029  |
| wavelet-HLH | glcm       | JointAverage                         | 7.780965141  |
| wavelet-HLH | glcm       | SumAverage                           | 15.56193028  |
| wavelet-HLH | glcm       | JointEntropy                         | 4.680933171  |
| wavelet-HLH | glcm       | ClusterShade                         | -4.301699109 |
| wavelet-HLH | glcm       | MaximumProbability                   | 0.077541498  |
| wavelet-HLH | glcm       | Idmn                                 | 0.935099388  |
| wavelet-HLH | glcm       | JointEnergy                          | 0.043410629  |
| wavelet-HLH | glcm       | Contrast                             | 10.95050552  |
| wavelet-HLH | glcm       | DifferenceEntropy                    | 2.558206399  |
| wavelet-HLH | glcm       | InverseVariance                      | 0.30722856   |
| wavelet-HLH | glcm       | DifferenceVariance                   | 3.566840595  |
| wavelet-HLH | glcm       | Idn                                  | 0.832811381  |
| wavelet-HLH | glcm       | Idm                                  | 0.308110462  |
| wavelet-HLH | glcm       | Correlation                          | -0.014963897 |
| wavelet-HLH | glcm       | Autocorrelation                      | 60.82927317  |
| wavelet-HLH | glcm       | SumEntropy                           | 3.120478564  |
| wavelet-HLH | glcm       | SumSquares                           | 5.68280234   |
| wavelet-HLH | glcm       | ClusterProminence                    | 421.6421483  |
| wavelet-HLH | glcm       | Imc2                                 | 0.952165535  |
| wavelet-HLH | glcm       | Imc1                                 | -0.421991188 |
| wavelet-HLH | glcm       | DifferenceAverage                    | 2.661749626  |
| wavelet-HLH | glcm       | Id                                   | 0.393033455  |
| wavelet-HLH | glcm       | ClusterTendency                      | 11.78070384  |
| wavelet-HLH | firstorder | InterquartileRange                   | 79.27315387  |
| wavelet-HLH | firstorder | Skewness                             | -0.39925921  |
| wavelet-HLH | firstorder | Uniformity                           | 0.13434903   |
| wavelet-HLH | firstorder | Median                               | 0.392540937  |
| wavelet-HLH | firstorder | Energy                               | 144429.8309  |
| wavelet-HLH | firstorder | RobustMeanAbsoluteDeviation          | 32.13294674  |
| wavelet-HLH | firstorder | MeanAbsoluteDeviation                | 48.67085685  |
| wavelet-HLH | firstorder | TotalEnergy                          | 3899605.433  |
| wavelet-HLH | firstorder | Maximum                              | 114.9680945  |
| wavelet-HLH | firstorder | RootMeanSquared                      | 61.65050708  |
| wavelet-HLH | firstorder | 90Percentile                         | 82.13002286  |
| wavelet-HLH | firstorder | Minimum                              | -151.8254289 |
| wavelet-HLH | firstorder | Entropy                              | 3.125005554  |
| wavelet-HLH | firstorder | Range                                | 266.7935234  |
| wavelet-HLH | firstorder | Variance                             | 3792.315114  |
| wavelet-HLH | firstorder | 10Percentile                         | -56.26176298 |

|             |            |                                  |             |
|-------------|------------|----------------------------------|-------------|
| wavelet-HLH | firstorder | Kurtosis                         | 3.178980624 |
| wavelet-HLH | firstorder | Mean                             | 2.910310721 |
| wavelet-HLH | glrlm      | ShortRunLowGrayLevelEmphasis     | 0.053653092 |
| wavelet-HLH | glrlm      | GrayLevelVariance                | 6.572287262 |
| wavelet-HLH | glrlm      | LowGrayLevelRunEmphasis          | 0.054608053 |
| wavelet-HLH | glrlm      | GrayLevelNonUniformityNormalized | 0.130927737 |
| wavelet-HLH | glrlm      | RunVariance                      | 0.066735291 |
| wavelet-HLH | glrlm      | GrayLevelNonUniformity           | 4.66452766  |
| wavelet-HLH | glrlm      | LongRunEmphasis                  | 1.212651776 |
| wavelet-HLH | glrlm      | ShortRunHighGrayLevelEmphasis    | 61.96023476 |
| wavelet-HLH | glrlm      | RunLengthNonUniformity           | 31.4240373  |
| wavelet-HLH | glrlm      | ShortRunEmphasis                 | 0.949507996 |
| wavelet-HLH | glrlm      | LongRunHighGrayLevelEmphasis     | 78.38146536 |
| wavelet-HLH | glrlm      | RunPercentage                    | 0.937246964 |
| wavelet-HLH | glrlm      | LongRunLowGrayLevelEmphasis      | 0.058645932 |
| wavelet-HLH | glrlm      | RunEntropy                       | 3.352931112 |
| wavelet-HLH | glrlm      | HighGrayLevelRunEmphasis         | 65.13978002 |
| wavelet-HLH | glrlm      | RunLengthNonUniformityNormalized | 0.878698888 |
| wavelet-HLH | glszm      | GrayLevelVariance                | 10.734375   |
| wavelet-HLH | glszm      | ZoneVariance                     | 4.734375    |
| wavelet-HLH | glszm      | GrayLevelNonUniformityNormalized | 0.109375    |
| wavelet-HLH | glszm      | SizeZoneNonUniformityNormalized  | 0.359375    |
| wavelet-HLH | glszm      | SizeZoneNonUniformity            | 5.75        |
| wavelet-HLH | glszm      | GrayLevelNonUniformity           | 1.75        |
| wavelet-HLH | glszm      | LargeAreaEmphasis                | 10.375      |
| wavelet-HLH | glszm      | SmallAreaHighGrayLevelEmphasis   | 33.70991789 |
| wavelet-HLH | glszm      | ZonePercentage                   | 0.421052632 |
| wavelet-HLH | glszm      | LargeAreaLowGrayLevelEmphasis    | 0.272870258 |
| wavelet-HLH | glszm      | LargeAreaHighGrayLevelEmphasis   | 640.1875    |
| wavelet-HLH | glszm      | HighGrayLevelZoneEmphasis        | 65.125      |
| wavelet-HLH | glszm      | SmallAreaEmphasis                | 0.582877073 |
| wavelet-HLH | glszm      | LowGrayLevelZoneEmphasis         | 0.098653054 |
| wavelet-HLH | glszm      | ZoneEntropy                      | 3.875       |
| wavelet-HLH | glszm      | SmallAreaLowGrayLevelEmphasis    | 0.091185859 |
| wavelet-HLH | ngtdm      | Coarseness                       | 0.147492725 |
| wavelet-HLH | ngtdm      | Complexity                       | 89.68609708 |
| wavelet-HLH | ngtdm      | Strength                         | 6.068492414 |
| wavelet-HLH | ngtdm      | Contrast                         | 0.214960353 |
| wavelet-HLH | ngtdm      | Busyness                         | 0.093755395 |

|            |               |                                      |                                                                                                                                                                                                                                                                                                                                                                                                                   |
|------------|---------------|--------------------------------------|-------------------------------------------------------------------------------------------------------------------------------------------------------------------------------------------------------------------------------------------------------------------------------------------------------------------------------------------------------------------------------------------------------------------|
| Image type | Feature Class | Feature Name                         | 2: RTSTRUCT: C99-DNU_segment_GTV                                                                                                                                                                                                                                                                                                                                                                                  |
| general    | info          | BoundingBox                          | (0, 0, 1, 9, 12, 10)                                                                                                                                                                                                                                                                                                                                                                                              |
| general    | info          | EnabledImageTypes                    | {u'Original': {}, u'Wavelet': {}}                                                                                                                                                                                                                                                                                                                                                                                 |
|            |               |                                      | {'distances': [1], 'additionalInfo': True, 'force2D': False, 'interpolator': 'sitkBSpline', 'resampledPixelSpacing': [3.0], 'label': 1, 'normalizeScale': 1, 'normalize': False, 'force2Ddimension': 0, 'removeOutliers': None, 'minimumROISize': None, u'binWidth': 25.0, 'minimumROIDimensions': 1, u'correctMask': True, 'preCrop': False, u'symmetricalGLCM': True, 'resegmentRange': None, 'padDistance': 5} |
| general    | info          | GeneralSettings                      | cc9f75d4dbdd99cbab9244a085d191dae8                                                                                                                                                                                                                                                                                                                                                                                |
| general    | info          | ImageHash                            | 71e28e                                                                                                                                                                                                                                                                                                                                                                                                            |
| general    | info          | ImageSpacing                         | (0.9765624999999998, 0.9765624999999998, 1.9999999999999999)                                                                                                                                                                                                                                                                                                                                                      |
| general    | info          | MaskHash                             | 42415a4218a69028e1cab5d2859a164da7                                                                                                                                                                                                                                                                                                                                                                                |
| general    | info          | NumpyVersion                         | 7e7899                                                                                                                                                                                                                                                                                                                                                                                                            |
| general    | info          | PyWaveletVersion                     | 1.13.1                                                                                                                                                                                                                                                                                                                                                                                                            |
| general    | info          | SimpleITKVersion                     | 0.5.2                                                                                                                                                                                                                                                                                                                                                                                                             |
| general    | info          | Version                              | 1.1.0                                                                                                                                                                                                                                                                                                                                                                                                             |
| general    | info          | VolumeNum                            | 1.3.0.post102+g1b0eb74                                                                                                                                                                                                                                                                                                                                                                                            |
| general    | info          | VoxelNum                             | 1                                                                                                                                                                                                                                                                                                                                                                                                                 |
| original   | shape         | Maximum3DDiameter                    | 318                                                                                                                                                                                                                                                                                                                                                                                                               |
| original   | shape         | Maximum2DDiameterSlice               | 36.24913792                                                                                                                                                                                                                                                                                                                                                                                                       |
| original   | shape         | Sphericity                           | 32.44996148                                                                                                                                                                                                                                                                                                                                                                                                       |
| original   | shape         | MinorAxis                            | 0.779121228                                                                                                                                                                                                                                                                                                                                                                                                       |
| original   | shape         | Elongation                           | 21.81054557                                                                                                                                                                                                                                                                                                                                                                                                       |
| original   | shape         | SurfaceVolumeRatio                   | 0.652328337                                                                                                                                                                                                                                                                                                                                                                                                       |
| original   | shape         | Volume                               | 0.303120605                                                                                                                                                                                                                                                                                                                                                                                                       |
| original   | shape         | MajorAxis                            | 8586                                                                                                                                                                                                                                                                                                                                                                                                              |
| original   | shape         | SurfaceArea                          | 33.43491969                                                                                                                                                                                                                                                                                                                                                                                                       |
| original   | shape         | Flatness                             | 2602.593513                                                                                                                                                                                                                                                                                                                                                                                                       |
| original   | shape         | LeastAxis                            | 0.538537661                                                                                                                                                                                                                                                                                                                                                                                                       |
| original   | shape         | Maximum2DDiameterColumn              | 18.00596346                                                                                                                                                                                                                                                                                                                                                                                                       |
| original   | shape         | Maximum2DDiameterRow                 | 27.16615541                                                                                                                                                                                                                                                                                                                                                                                                       |
| original   | gldm          | GrayLevelVariance                    | 34.20526275                                                                                                                                                                                                                                                                                                                                                                                                       |
| original   | gldm          | HighGrayLevelEmphasis                | 46.97952019                                                                                                                                                                                                                                                                                                                                                                                                       |
| original   | gldm          | DependenceEntropy                    | 802.8836478                                                                                                                                                                                                                                                                                                                                                                                                       |
| original   | gldm          | DependenceNonUniformity              | 6.02410305                                                                                                                                                                                                                                                                                                                                                                                                        |
| original   | gldm          | GrayLevelNonUniformity               | 49.99371069                                                                                                                                                                                                                                                                                                                                                                                                       |
| original   | gldm          | SmallDependenceEmphasis              | 33.37735849                                                                                                                                                                                                                                                                                                                                                                                                       |
| original   | gldm          | SmallDependenceHighGrayLevelEmphasis | 0.375412884                                                                                                                                                                                                                                                                                                                                                                                                       |
| original   | gldm          | DependenceNonUniformityNormalized    | 211.1171666                                                                                                                                                                                                                                                                                                                                                                                                       |
| original   | gldm          |                                      | 0.157212927                                                                                                                                                                                                                                                                                                                                                                                                       |

|          |            |                                      |              |
|----------|------------|--------------------------------------|--------------|
| original | gldm       | LargeDependenceEmphasis              | 32.9245283   |
| original | gldm       | LargeDependenceLowGrayLevelEmphasis  | 0.037074005  |
| original | gldm       | DependenceVariance                   | 14.20121831  |
| original | gldm       | LargeDependenceHighGrayLevelEmphasis | 34096.14151  |
| original | gldm       | SmallDependenceLowGrayLevelEmphasis  | 0.004722971  |
| original | gldm       | LowGrayLevelEmphasis                 | 0.00557865   |
| original | glcm       | JointAverage                         | 28.9528459   |
| original | glcm       | SumAverage                           | 57.90569179  |
| original | glcm       | JointEntropy                         | 6.18729809   |
| original | glcm       | ClusterShade                         | -1569.950893 |
| original | glcm       | MaximumProbability                   | 0.090353099  |
| original | glcm       | Idmn                                 | 0.967738546  |
| original | glcm       | JointEnergy                          | 0.032392591  |
| original | glcm       | Contrast                             | 44.92953468  |
| original | glcm       | DifferenceEntropy                    | 3.496414079  |
| original | glcm       | InverseVariance                      | 0.309204352  |
| original | glcm       | DifferenceVariance                   | 26.6412844   |
| original | glcm       | Idn                                  | 0.902460683  |
| original | glcm       | Idm                                  | 0.348579936  |
| original | glcm       | Correlation                          | 0.346662588  |
| original | glcm       | Autocorrelation                      | 850.2258248  |
| original | glcm       | SumEntropy                           | 4.365900443  |
| original | glcm       | SumSquares                           | 34.40578413  |
| original | glcm       | ClusterProminence                    | 52545.53254  |
| original | glcm       | Imc2                                 | 0.898449737  |
| original | glcm       | Imc1                                 | -0.236370748 |
| original | glcm       | DifferenceAverage                    | 4.253188824  |
| original | glcm       | Id                                   | 0.40944186   |
| original | glcm       | ClusterTendency                      | 92.69360184  |
| original | firstorder | InterquartileRange                   | 206.25       |
| original | firstorder | Skewness                             | -1.538273181 |
| original | firstorder | Uniformity                           | 0.104960247  |
| original | firstorder | Median                               | -17          |
| original | firstorder | Energy                               | 12452041     |
| original | firstorder | RobustMeanAbsoluteDeviation          | 89.61101606  |
| original | firstorder | MeanAbsoluteDeviation                | 133.745639   |
| original | firstorder | TotalEnergy                          | 336205107    |
| original | firstorder | Maximum                              | 58           |
| original | firstorder | RootMeanSquared                      | 197.8821913  |
| original | firstorder | 90Percentile                         | 35           |
| original | firstorder | Minimum                              | -753         |
| original | firstorder | Entropy                              | 3.932974493  |
| original | firstorder | Range                                | 811          |
| original | firstorder | Variance                             | 29060.90373  |
| original | firstorder | 10Percentile                         | -358         |
| original | firstorder | Kurtosis                             | 4.770377468  |
| original | firstorder | Mean                                 | -100.4811321 |
| original | glrlm      | ShortRunLowGrayLevelEmphasis         | 0.006150492  |
| original | glrlm      | GrayLevelVariance                    | 49.79732762  |
| original | glrlm      | LowGrayLevelRunEmphasis              | 0.006248579  |
| original | glrlm      | GrayLevelNonUniformityNormalized     | 0.085223257  |
| original | glrlm      | RunVariance                          | 0.209332221  |

|             |       |                                      |             |
|-------------|-------|--------------------------------------|-------------|
| original    | glrlm | GrayLevelNonUniformity               | 23.67604841 |
| original    | glrlm | LongRunEmphasis                      | 1.530132522 |
| original    | glrlm | ShortRunHighGrayLevelEmphasis        | 679.6881893 |
| original    | glrlm | RunLengthNonUniformity               | 220.4337502 |
| original    | glrlm | ShortRunEmphasis                     | 0.910231234 |
| original    | glrlm | LongRunHighGrayLevelEmphasis         | 1314.69064  |
| original    | glrlm | RunPercentage                        | 0.872036768 |
| original    | glrlm | LongRunLowGrayLevelEmphasis          | 0.006803144 |
| original    | glrlm | RunEntropy                           | 4.572287563 |
| original    | glrlm | HighGrayLevelRunEmphasis             | 770.5667561 |
| original    | glrlm | RunLengthNonUniformityNormalized     | 0.793466107 |
| original    | glszm | GrayLevelVariance                    | 53.87669716 |
| original    | glszm | ZoneVariance                         | 59.90886312 |
| original    | glszm | GrayLevelNonUniformityNormalized     | 0.047374862 |
| original    | glszm | SizeZoneNonUniformityNormalized      | 0.585571936 |
| original    | glszm | SizeZoneNonUniformity                | 76.70992366 |
| original    | glszm | GrayLevelNonUniformity               | 6.20610687  |
| original    | glszm | LargeAreaEmphasis                    | 65.80152672 |
| original    | glszm | SmallAreaHighGrayLevelEmphasis       | 413.7859626 |
| original    | glszm | ZonePercentage                       | 0.411949686 |
| original    | glszm | LargeAreaLowGrayLevelEmphasis        | 0.074866427 |
| original    | glszm | LargeAreaHighGrayLevelEmphasis       | 68278.08397 |
| original    | glszm | HighGrayLevelZoneEmphasis            | 566.8473282 |
| original    | glszm | SmallAreaEmphasis                    | 0.792634925 |
| original    | glszm | LowGrayLevelZoneEmphasis             | 0.011741784 |
| original    | glszm | ZoneEntropy                          | 5.305668899 |
| original    | glszm | SmallAreaLowGrayLevelEmphasis        | 0.011246009 |
| original    | ngtdm | Coarseness                           | 0.013664946 |
| original    | ngtdm | Complexity                           | 1367.963929 |
| original    | ngtdm | Strength                             | 10.06582678 |
| original    | ngtdm | Contrast                             | 0.404643422 |
| original    | ngtdm | Busyness                             | 0.067205814 |
| wavelet-HHH | gldm  | GrayLevelVariance                    | 5.292561608 |
| wavelet-HHH | gldm  | HighGrayLevelEmphasis                | 76.05345912 |
| wavelet-HHH | gldm  | DependenceEntropy                    | 5.608366564 |
| wavelet-HHH | gldm  | DependenceNonUniformity              | 39.73584906 |
| wavelet-HHH | gldm  | GrayLevelNonUniformity               | 46.41509434 |
| wavelet-HHH | gldm  | SmallDependenceEmphasis              | 0.250855019 |
| wavelet-HHH | gldm  | SmallDependenceHighGrayLevelEmphasis | 21.49926535 |
| wavelet-HHH | gldm  | DependenceNonUniformityNormalized    | 0.1249555   |
| wavelet-HHH | gldm  | LargeDependenceEmphasis              | 28.94968553 |
| wavelet-HHH | gldm  | LargeDependenceLowGrayLevelEmphasis  | 0.422932019 |
| wavelet-HHH | gldm  | DependenceVariance                   | 9.95324552  |
| wavelet-HHH | gldm  | LargeDependenceHighGrayLevelEmphasis | 2135.154088 |
| wavelet-HHH | gldm  | SmallDependenceLowGrayLevelEmphasis  | 0.009877978 |
| wavelet-HHH | gldm  | LowGrayLevelEmphasis                 | 0.023084283 |
| wavelet-HHH | glcm  | JointAverage                         | 8.479319979 |
| wavelet-HHH | glcm  | SumAverage                           | 16.95863996 |
| wavelet-HHH | glcm  | JointEntropy                         | 5.719079961 |
| wavelet-HHH | glcm  | ClusterShade                         | 0.798209535 |
| wavelet-HHH | glcm  | MaximumProbability                   | 0.085979957 |
| wavelet-HHH | glcm  | Idmn                                 | 0.970598251 |

|             |            |                                  |              |
|-------------|------------|----------------------------------|--------------|
| wavelet-HHH | glcm       | JointEnergy                      | 0.033258705  |
| wavelet-HHH | glcm       | Contrast                         | 9.717688976  |
| wavelet-HHH | glcm       | DifferenceEntropy                | 2.748822195  |
| wavelet-HHH | glcm       | InverseVariance                  | 0.364213704  |
| wavelet-HHH | glcm       | DifferenceVariance               | 4.647543955  |
| wavelet-HHH | glcm       | Idn                              | 0.893706453  |
| wavelet-HHH | glcm       | Idm                              | 0.388615687  |
| wavelet-HHH | glcm       | Correlation                      | -0.036780389 |
| wavelet-HHH | glcm       | Autocorrelation                  | 71.71633837  |
| wavelet-HHH | glcm       | SumEntropy                       | 3.481590322  |
| wavelet-HHH | glcm       | SumSquares                       | 4.674521803  |
| wavelet-HHH | glcm       | ClusterProminence                | 377.4771804  |
| wavelet-HHH | glcm       | Imc2                             | 0.707386027  |
| wavelet-HHH | glcm       | Imc1                             | -0.116113215 |
| wavelet-HHH | glcm       | DifferenceAverage                | 2.23487392   |
| wavelet-HHH | glcm       | Id                               | 0.4578602    |
| wavelet-HHH | glcm       | ClusterTendency                  | 8.980398234  |
| wavelet-HHH | firstorder | InterquartileRange               | 62.78731925  |
| wavelet-HHH | firstorder | Skewness                         | 0.017518191  |
| wavelet-HHH | firstorder | Uniformity                       | 0.145959416  |
| wavelet-HHH | firstorder | Median                           | 0.226721757  |
| wavelet-HHH | firstorder | Energy                           | 1062832.611  |
| wavelet-HHH | firstorder | RobustMeanAbsoluteDeviation      | 25.77412337  |
| wavelet-HHH | firstorder | MeanAbsoluteDeviation            | 42.17055168  |
| wavelet-HHH | firstorder | TotalEnergy                      | 28696480.51  |
| wavelet-HHH | firstorder | Maximum                          | 222.8430739  |
| wavelet-HHH | firstorder | RootMeanSquared                  | 57.81211738  |
| wavelet-HHH | firstorder | 90Percentile                     | 61.40837751  |
| wavelet-HHH | firstorder | Minimum                          | -199.9815716 |
| wavelet-HHH | firstorder | Entropy                          | 3.16473589   |
| wavelet-HHH | firstorder | Range                            | 422.8246455  |
| wavelet-HHH | firstorder | Variance                         | 3331.716131  |
| wavelet-HHH | firstorder | 10Percentile                     | -73.07349028 |
| wavelet-HHH | firstorder | Kurtosis                         | 4.325724297  |
| wavelet-HHH | firstorder | Mean                             | -3.244192611 |
| wavelet-HHH | glrlm      | ShortRunLowGrayLevelEmphasis     | 0.022806553  |
| wavelet-HHH | glrlm      | GrayLevelVariance                | 5.896940952  |
| wavelet-HHH | glrlm      | LowGrayLevelRunEmphasis          | 0.024271904  |
| wavelet-HHH | glrlm      | GrayLevelNonUniformityNormalized | 0.13098019   |
| wavelet-HHH | glrlm      | RunVariance                      | 0.184466372  |
| wavelet-HHH | glrlm      | GrayLevelNonUniformity           | 36.28346284  |
| wavelet-HHH | glrlm      | LongRunEmphasis                  | 1.506519575  |
| wavelet-HHH | glrlm      | ShortRunHighGrayLevelEmphasis    | 69.40968401  |
| wavelet-HHH | glrlm      | RunLengthNonUniformity           | 216.2467568  |
| wavelet-HHH | glrlm      | ShortRunEmphasis                 | 0.904124876  |
| wavelet-HHH | glrlm      | LongRunHighGrayLevelEmphasis     | 113.5800295  |
| wavelet-HHH | glrlm      | RunPercentage                    | 0.870827286  |
| wavelet-HHH | glrlm      | LongRunLowGrayLevelEmphasis      | 0.031875523  |
| wavelet-HHH | glrlm      | RunEntropy                       | 3.793187383  |
| wavelet-HHH | glrlm      | HighGrayLevelRunEmphasis         | 76.45733606  |
| wavelet-HHH | glrlm      | RunLengthNonUniformityNormalized | 0.779860815  |
| wavelet-HHH | glszm      | GrayLevelVariance                | 12.49807605  |



|             |       |                                      |             |
|-------------|-------|--------------------------------------|-------------|
| wavelet-HHH | glszm | ZoneVariance                         | 92.81077411 |
| wavelet-HHH | glszm | GrayLevelNonUniformityNormalized     | 0.088727931 |
| wavelet-HHH | glszm | SizeZoneNonUniformityNormalized      | 0.376641014 |
| wavelet-HHH | glszm | SizeZoneNonUniformity                | 35.40425532 |
| wavelet-HHH | glszm | GrayLevelNonUniformity               | 8.340425532 |
| wavelet-HHH | glszm | LargeAreaEmphasis                    | 104.2553191 |
| wavelet-HHH | glszm | SmallAreaHighGrayLevelEmphasis       | 57.34086491 |
| wavelet-HHH | glszm | ZonePercentage                       | 0.295597484 |
| wavelet-HHH | glszm | LargeAreaLowGrayLevelEmphasis        | 1.488918766 |
| wavelet-HHH | glszm | LargeAreaHighGrayLevelEmphasis       | 7687.223404 |
| wavelet-HHH | glszm | HighGrayLevelZoneEmphasis            | 83.30851064 |
| wavelet-HHH | glszm | SmallAreaEmphasis                    | 0.632204179 |
| wavelet-HHH | glszm | LowGrayLevelZoneEmphasis             | 0.038145438 |
| wavelet-HHH | glszm | ZoneEntropy                          | 5.002593411 |
| wavelet-HHH | glszm | SmallAreaLowGrayLevelEmphasis        | 0.02878095  |
| wavelet-HHH | ngtdm | Coarseness                           | 0.022010876 |
| wavelet-HHH | ngtdm | Complexity                           | 202.9083793 |
| wavelet-HHH | ngtdm | Strength                             | 1.775986593 |
| wavelet-HHH | ngtdm | Contrast                             | 0.069437387 |
| wavelet-HHH | ngtdm | Busyness                             | 0.256141469 |
| wavelet-HLL | gldm  | GrayLevelVariance                    | 33.65500771 |
| wavelet-HLL | gldm  | HighGrayLevelEmphasis                | 355.9591195 |
| wavelet-HLL | gldm  | DependenceEntropy                    | 6.278408303 |
| wavelet-HLL | gldm  | DependenceNonUniformity              | 65.57232704 |
| wavelet-HLL | gldm  | GrayLevelNonUniformity               | 18.66666667 |
| wavelet-HLL | gldm  | SmallDependenceEmphasis              | 0.395360728 |
| wavelet-HLL | gldm  | SmallDependenceHighGrayLevelEmphasis | 161.2002019 |
| wavelet-HLL | gldm  | DependenceNonUniformityNormalized    | 0.206202286 |
| wavelet-HLL | gldm  | LargeDependenceEmphasis              | 10.39622642 |
| wavelet-HLL | gldm  | LargeDependenceLowGrayLevelEmphasis  | 0.044181964 |
| wavelet-HLL | gldm  | DependenceVariance                   | 2.980024524 |
| wavelet-HLL | gldm  | LargeDependenceHighGrayLevelEmphasis | 3446.273585 |
| wavelet-HLL | gldm  | SmallDependenceLowGrayLevelEmphasis  | 0.008238493 |
| wavelet-HLL | gldm  | LowGrayLevelEmphasis                 | 0.010645695 |
| wavelet-HLL | glcm  | JointAverage                         | 17.57757118 |
| wavelet-HLL | glcm  | SumAverage                           | 35.15514235 |
| wavelet-HLL | glcm  | JointEntropy                         | 7.420140203 |
| wavelet-HLL | glcm  | ClusterShade                         | 186.6970741 |
| wavelet-HLL | glcm  | MaximumProbability                   | 0.024065993 |
| wavelet-HLL | glcm  | Idmn                                 | 0.973468165 |
| wavelet-HLL | glcm  | JointEnergy                          | 0.007873612 |
| wavelet-HLL | glcm  | Contrast                             | 41.25060499 |
| wavelet-HLL | glcm  | DifferenceEntropy                    | 3.59789868  |
| wavelet-HLL | glcm  | InverseVariance                      | 0.225784949 |
| wavelet-HLL | glcm  | DifferenceVariance                   | 18.09487254 |
| wavelet-HLL | glcm  | Idn                                  | 0.896734674 |
| wavelet-HLL | glcm  | Idm                                  | 0.225973649 |
| wavelet-HLL | glcm  | Correlation                          | 0.234901413 |
| wavelet-HLL | glcm  | Autocorrelation                      | 315.5758314 |
| wavelet-HLL | glcm  | SumEntropy                           | 4.819507228 |
| wavelet-HLL | glcm  | SumSquares                           | 27.22299041 |
| wavelet-HLL | glcm  | ClusterProminence                    | 19561.49786 |

|             |            |                                  |              |
|-------------|------------|----------------------------------|--------------|
| wavelet-HLL | glcm       | Imc2                             | 0.941153551  |
| wavelet-HLL | glcm       | Imc1                             | -0.259000796 |
| wavelet-HLL | glcm       | DifferenceAverage                | 4.664135193  |
| wavelet-HLL | glcm       | Id                               | 0.313186635  |
| wavelet-HLL | glcm       | ClusterTendency                  | 67.64135667  |
| wavelet-HLL | firstorder | InterquartileRange               | 153.7782408  |
| wavelet-HLL | firstorder | Skewness                         | 0.413152662  |
| wavelet-HLL | firstorder | Uniformity                       | 0.05870021   |
| wavelet-HLL | firstorder | Median                           | -65.67617326 |
| wavelet-HLL | firstorder | Energy                           | 7937645.634  |
| wavelet-HLL | firstorder | RobustMeanAbsoluteDeviation      | 70.50441122  |
| wavelet-HLL | firstorder | MeanAbsoluteDeviation            | 109.2663353  |
| wavelet-HLL | firstorder | TotalEnergy                      | 214316432.1  |
| wavelet-HLL | firstorder | Maximum                          | 417.6794002  |
| wavelet-HLL | firstorder | RootMeanSquared                  | 157.9909801  |
| wavelet-HLL | firstorder | 90Percentile                     | 139.5905638  |
| wavelet-HLL | firstorder | Minimum                          | -479.7412704 |
| wavelet-HLL | firstorder | Entropy                          | 4.413650288  |
| wavelet-HLL | firstorder | Range                            | 897.4206706  |
| wavelet-HLL | firstorder | Variance                         | 20992.93923  |
| wavelet-HLL | firstorder | 10Percentile                     | -244.9566739 |
| wavelet-HLL | firstorder | Kurtosis                         | 3.749894442  |
| wavelet-HLL | firstorder | Mean                             | -62.99373432 |
| wavelet-HLL | glrlm      | ShortRunLowGrayLevelEmphasis     | 0.010959536  |
| wavelet-HLL | glrlm      | GrayLevelVariance                | 35.11531265  |
| wavelet-HLL | glrlm      | LowGrayLevelRunEmphasis          | 0.011145908  |
| wavelet-HLL | glrlm      | GrayLevelNonUniformityNormalized | 0.056690845  |
| wavelet-HLL | glrlm      | RunVariance                      | 0.082475651  |
| wavelet-HLL | glrlm      | GrayLevelNonUniformity           | 16.84545817  |
| wavelet-HLL | glrlm      | LongRunEmphasis                  | 1.233856788  |
| wavelet-HLL | glrlm      | ShortRunHighGrayLevelEmphasis    | 341.9582961  |
| wavelet-HLL | glrlm      | RunLengthNonUniformity           | 261.4474026  |
| wavelet-HLL | glrlm      | ShortRunEmphasis                 | 0.950198974  |
| wavelet-HLL | glrlm      | LongRunHighGrayLevelEmphasis     | 433.6707666  |
| wavelet-HLL | glrlm      | RunPercentage                    | 0.933720368  |
| wavelet-HLL | glrlm      | LongRunLowGrayLevelEmphasis      | 0.012015585  |
| wavelet-HLL | glrlm      | RunEntropy                       | 4.740940011  |
| wavelet-HLL | glrlm      | HighGrayLevelRunEmphasis         | 358.2383369  |
| wavelet-HLL | glrlm      | RunLengthNonUniformityNormalized | 0.878758295  |
| wavelet-HLL | glszm      | GrayLevelVariance                | 54.82341435  |
| wavelet-HLL | glszm      | ZoneVariance                     | 10.2436305   |
| wavelet-HLL | glszm      | GrayLevelNonUniformityNormalized | 0.041517923  |
| wavelet-HLL | glszm      | SizeZoneNonUniformityNormalized  | 0.480561397  |
| wavelet-HLL | glszm      | SizeZoneNonUniformity            | 68.72027972  |
| wavelet-HLL | glszm      | GrayLevelNonUniformity           | 5.937062937  |
| wavelet-HLL | glszm      | LargeAreaEmphasis                | 15.18881119  |
| wavelet-HLL | glszm      | SmallAreaHighGrayLevelEmphasis   | 307.1937356  |
| wavelet-HLL | glszm      | ZonePercentage                   | 0.449685535  |
| wavelet-HLL | glszm      | LargeAreaLowGrayLevelEmphasis    | 0.069808733  |
| wavelet-HLL | glszm      | LargeAreaHighGrayLevelEmphasis   | 4978.244755  |
| wavelet-HLL | glszm      | HighGrayLevelZoneEmphasis        | 397.2027972  |
| wavelet-HLL | glszm      | SmallAreaEmphasis                | 0.720074446  |

|             |            |                                      |              |
|-------------|------------|--------------------------------------|--------------|
| wavelet-HLL | glszm      | LowGrayLevelZoneEmphasis             | 0.018918124  |
| wavelet-HLL | glszm      | ZoneEntropy                          | 5.816149421  |
| wavelet-HLL | glszm      | SmallAreaLowGrayLevelEmphasis        | 0.017655539  |
| wavelet-HLL | ngtdm      | Coarseness                           | 0.022871074  |
| wavelet-HLL | ngtdm      | Complexity                           | 1358.567253  |
| wavelet-HLL | ngtdm      | Strength                             | 7.792145069  |
| wavelet-HLL | ngtdm      | Contrast                             | 0.23193725   |
| wavelet-HLL | ngtdm      | Busyness                             | 0.07642346   |
| wavelet-LHL | gldm       | GrayLevelVariance                    | 28.5189767   |
| wavelet-LHL | gldm       | HighGrayLevelEmphasis                | 657.4559748  |
| wavelet-LHL | gldm       | DependenceEntropy                    | 6.152826846  |
| wavelet-LHL | gldm       | DependenceNonUniformity              | 65.32704403  |
| wavelet-LHL | gldm       | GrayLevelNonUniformity               | 21.83018868  |
| wavelet-LHL | gldm       | SmallDependenceEmphasis              | 0.40147151   |
| wavelet-LHL | gldm       | SmallDependenceHighGrayLevelEmphasis | 257.8429415  |
| wavelet-LHL | gldm       | DependenceNonUniformityNormalized    | 0.205430956  |
| wavelet-LHL | gldm       | LargeDependenceEmphasis              | 11.71698113  |
| wavelet-LHL | gldm       | LargeDependenceLowGrayLevelEmphasis  | 0.021556709  |
| wavelet-LHL | gldm       | DependenceVariance                   | 3.884023575  |
| wavelet-LHL | gldm       | LargeDependenceHighGrayLevelEmphasis | 7893.248428  |
| wavelet-LHL | gldm       | SmallDependenceLowGrayLevelEmphasis  | 0.004046619  |
| wavelet-LHL | gldm       | LowGrayLevelEmphasis                 | 0.005052416  |
| wavelet-LHL | glcm       | JointAverage                         | 25.30693629  |
| wavelet-LHL | glcm       | SumAverage                           | 50.61387258  |
| wavelet-LHL | glcm       | JointEntropy                         | 7.172396421  |
| wavelet-LHL | glcm       | ClusterShade                         | -128.4552058 |
| wavelet-LHL | glcm       | MaximumProbability                   | 0.036320621  |
| wavelet-LHL | glcm       | Idmn                                 | 0.980599489  |
| wavelet-LHL | glcm       | JointEnergy                          | 0.010618082  |
| wavelet-LHL | glcm       | Contrast                             | 35.53755794  |
| wavelet-LHL | glcm       | DifferenceEntropy                    | 3.533177439  |
| wavelet-LHL | glcm       | InverseVariance                      | 0.255986973  |
| wavelet-LHL | glcm       | DifferenceVariance                   | 16.14899064  |
| wavelet-LHL | glcm       | Idn                                  | 0.91172902   |
| wavelet-LHL | glcm       | Idm                                  | 0.247445339  |
| wavelet-LHL | glcm       | Correlation                          | 0.171350125  |
| wavelet-LHL | glcm       | Autocorrelation                      | 644.1565001  |
| wavelet-LHL | glcm       | SumEntropy                           | 4.577093628  |
| wavelet-LHL | glcm       | SumSquares                           | 21.47755655  |
| wavelet-LHL | glcm       | ClusterProminence                    | 14487.41046  |
| wavelet-LHL | glcm       | Imc2                                 | 0.916900019  |
| wavelet-LHL | glcm       | Imc1                                 | -0.230041076 |
| wavelet-LHL | glcm       | DifferenceAverage                    | 4.303449049  |
| wavelet-LHL | glcm       | Id                                   | 0.331559172  |
| wavelet-LHL | glcm       | ClusterTendency                      | 50.37266825  |
| wavelet-LHL | firstorder | InterquartileRange                   | 124.4387641  |
| wavelet-LHL | firstorder | Skewness                             | -0.464930286 |
| wavelet-LHL | firstorder | Uniformity                           | 0.068648392  |
| wavelet-LHL | firstorder | Median                               | -27.17931314 |
| wavelet-LHL | firstorder | Energy                               | 6002243.809  |
| wavelet-LHL | firstorder | RobustMeanAbsoluteDeviation          | 55.64523406  |
| wavelet-LHL | firstorder | MeanAbsoluteDeviation                | 94.7357928   |

|             |            |                                  |              |
|-------------|------------|----------------------------------|--------------|
| wavelet-LHL | firstorder | TotalEnergy                      | 162060582.9  |
| wavelet-LHL | firstorder | Maximum                          | 357.3470329  |
| wavelet-LHL | firstorder | RootMeanSquared                  | 137.3862458  |
| wavelet-LHL | firstorder | 90Percentile                     | 118.9192733  |
| wavelet-LHL | firstorder | Minimum                          | -626.1992791 |
| wavelet-LHL | firstorder | Entropy                          | 4.285246039  |
| wavelet-LHL | firstorder | Range                            | 983.546312   |
| wavelet-LHL | firstorder | Variance                         | 17616.32961  |
| wavelet-LHL | firstorder | 10Percentile                     | -195.6084247 |
| wavelet-LHL | firstorder | Kurtosis                         | 4.889659891  |
| wavelet-LHL | firstorder | Mean                             | -35.47747069 |
| wavelet-LHL | glrlm      | ShortRunLowGrayLevelEmphasis     | 0.005229397  |
| wavelet-LHL | glrlm      | GrayLevelVariance                | 29.95032696  |
| wavelet-LHL | glrlm      | LowGrayLevelRunEmphasis          | 0.005311834  |
| wavelet-LHL | glrlm      | GrayLevelNonUniformityNormalized | 0.064941984  |
| wavelet-LHL | glrlm      | RunVariance                      | 0.084582764  |
| wavelet-LHL | glrlm      | GrayLevelNonUniformity           | 19.22600952  |
| wavelet-LHL | glrlm      | LongRunEmphasis                  | 1.240634363  |
| wavelet-LHL | glrlm      | ShortRunHighGrayLevelEmphasis    | 621.5767074  |
| wavelet-LHL | glrlm      | RunLengthNonUniformity           | 258.7962049  |
| wavelet-LHL | glrlm      | ShortRunEmphasis                 | 0.948271547  |
| wavelet-LHL | glrlm      | LongRunHighGrayLevelEmphasis     | 817.813339   |
| wavelet-LHL | glrlm      | RunPercentage                    | 0.93081761   |
| wavelet-LHL | glrlm      | LongRunLowGrayLevelEmphasis      | 0.005693459  |
| wavelet-LHL | glrlm      | RunEntropy                       | 4.639678958  |
| wavelet-LHL | glrlm      | HighGrayLevelRunEmphasis         | 656.3806888  |
| wavelet-LHL | glrlm      | RunLengthNonUniformityNormalized | 0.873560123  |
| wavelet-LHL | glszm      | GrayLevelVariance                | 47.50420927  |
| wavelet-LHL | glszm      | ZoneVariance                     | 22.33512485  |
| wavelet-LHL | glszm      | GrayLevelNonUniformityNormalized | 0.049131986  |
| wavelet-LHL | glszm      | SizeZoneNonUniformityNormalized  | 0.496789536  |
| wavelet-LHL | glszm      | SizeZoneNonUniformity            | 72.03448276  |
| wavelet-LHL | glszm      | GrayLevelNonUniformity           | 7.124137931  |
| wavelet-LHL | glszm      | LargeAreaEmphasis                | 27.14482759  |
| wavelet-LHL | glszm      | SmallAreaHighGrayLevelEmphasis   | 468.2909728  |
| wavelet-LHL | glszm      | ZonePercentage                   | 0.455974843  |
| wavelet-LHL | glszm      | LargeAreaLowGrayLevelEmphasis    | 0.0486561    |
| wavelet-LHL | glszm      | LargeAreaHighGrayLevelEmphasis   | 18257.91034  |
| wavelet-LHL | glszm      | HighGrayLevelZoneEmphasis        | 646.2344828  |
| wavelet-LHL | glszm      | SmallAreaEmphasis                | 0.732071627  |
| wavelet-LHL | glszm      | LowGrayLevelZoneEmphasis         | 0.009120094  |
| wavelet-LHL | glszm      | ZoneEntropy                      | 5.644844004  |
| wavelet-LHL | glszm      | SmallAreaLowGrayLevelEmphasis    | 0.008611315  |
| wavelet-LHL | ngtdm      | Coarseness                       | 0.02151348   |
| wavelet-LHL | ngtdm      | Complexity                       | 1477.691993  |
| wavelet-LHL | ngtdm      | Strength                         | 7.863449515  |
| wavelet-LHL | ngtdm      | Contrast                         | 0.188301774  |
| wavelet-LHL | ngtdm      | Busyness                         | 0.048380586  |
| wavelet-LHH | gldm       | GrayLevelVariance                | 12.35877734  |
| wavelet-LHH | gldm       | HighGrayLevelEmphasis            | 229.0408805  |
| wavelet-LHH | gldm       | DependenceEntropy                | 5.923229896  |
| wavelet-LHH | gldm       | DependenceNonUniformity          | 52.94339623  |

|             |            |                                      |              |
|-------------|------------|--------------------------------------|--------------|
| wavelet-LHH | gldm       | GrayLevelNonUniformity               | 30.20754717  |
| wavelet-LHH | gldm       | SmallDependenceEmphasis              | 0.31438851   |
| wavelet-LHH | gldm       | SmallDependenceHighGrayLevelEmphasis | 82.09106976  |
| wavelet-LHH | gldm       | DependenceNonUniformityNormalized    | 0.166488667  |
| wavelet-LHH | gldm       | LargeDependenceEmphasis              | 18.27672956  |
| wavelet-LHH | gldm       | LargeDependenceLowGrayLevelEmphasis  | 0.09474028   |
| wavelet-LHH | gldm       | DependenceVariance                   | 6.398085519  |
| wavelet-LHH | gldm       | LargeDependenceHighGrayLevelEmphasis | 3828.028302  |
| wavelet-LHH | gldm       | SmallDependenceLowGrayLevelEmphasis  | 0.005174808  |
| wavelet-LHH | gldm       | LowGrayLevelEmphasis                 | 0.008749791  |
| wavelet-LHH | glcm       | JointAverage                         | 14.63459615  |
| wavelet-LHH | glcm       | SumAverage                           | 29.2691923   |
| wavelet-LHH | glcm       | JointEntropy                         | 6.603061443  |
| wavelet-LHH | glcm       | ClusterShade                         | 6.208990786  |
| wavelet-LHH | glcm       | MaximumProbability                   | 0.048779899  |
| wavelet-LHH | glcm       | Idmn                                 | 0.974433828  |
| wavelet-LHH | glcm       | JointEnergy                          | 0.015721315  |
| wavelet-LHH | glcm       | Contrast                             | 20.96837399  |
| wavelet-LHH | glcm       | DifferenceEntropy                    | 3.216246084  |
| wavelet-LHH | glcm       | InverseVariance                      | 0.300176618  |
| wavelet-LHH | glcm       | DifferenceVariance                   | 10.03251354  |
| wavelet-LHH | glcm       | Idn                                  | 0.900562476  |
| wavelet-LHH | glcm       | Idm                                  | 0.306421249  |
| wavelet-LHH | glcm       | Correlation                          | -0.023494588 |
| wavelet-LHH | glcm       | Autocorrelation                      | 213.9280668  |
| wavelet-LHH | glcm       | SumEntropy                           | 4.034948257  |
| wavelet-LHH | glcm       | SumSquares                           | 10.23485094  |
| wavelet-LHH | glcm       | ClusterProminence                    | 1800.644898  |
| wavelet-LHH | glcm       | Imc2                                 | 0.818162422  |
| wavelet-LHH | glcm       | Imc1                                 | -0.156270025 |
| wavelet-LHH | glcm       | DifferenceAverage                    | 3.275912818  |
| wavelet-LHH | glcm       | Id                                   | 0.385574062  |
| wavelet-LHH | glcm       | ClusterTendency                      | 19.97102976  |
| wavelet-LHH | firstorder | InterquartileRange                   | 92.595041    |
| wavelet-LHH | firstorder | Skewness                             | 0.123492697  |
| wavelet-LHH | firstorder | Uniformity                           | 0.094992287  |
| wavelet-LHH | firstorder | Median                               | 1.192600204  |
| wavelet-LHH | firstorder | Energy                               | 2445220.516  |
| wavelet-LHH | firstorder | RobustMeanAbsoluteDeviation          | 39.2687467   |
| wavelet-LHH | firstorder | MeanAbsoluteDeviation                | 64.11366879  |
| wavelet-LHH | firstorder | TotalEnergy                          | 66020953.94  |
| wavelet-LHH | firstorder | Maximum                              | 305.9961685  |
| wavelet-LHH | firstorder | RootMeanSquared                      | 87.68906827  |
| wavelet-LHH | firstorder | 90Percentile                         | 114.2181922  |
| wavelet-LHH | firstorder | Minimum                              | -345.3644092 |
| wavelet-LHH | firstorder | Entropy                              | 3.729509153  |
| wavelet-LHH | firstorder | Range                                | 651.3605777  |
| wavelet-LHH | firstorder | Variance                             | 7661.716282  |
| wavelet-LHH | firstorder | 10Percentile                         | -96.89840985 |
| wavelet-LHH | firstorder | Kurtosis                             | 4.377456912  |
| wavelet-LHH | firstorder | Mean                                 | 5.258936348  |
| wavelet-LHH | glrlm      | ShortRunLowGrayLevelEmphasis         | 0.008776649  |

|             |       |                                      |             |
|-------------|-------|--------------------------------------|-------------|
| wavelet-LHH | glrlm | GrayLevelVariance                    | 13.32783553 |
| wavelet-LHH | glrlm | LowGrayLevelRunEmphasis              | 0.00913815  |
| wavelet-LHH | glrlm | GrayLevelNonUniformityNormalized     | 0.088970309 |
| wavelet-LHH | glrlm | RunVariance                          | 0.117228029 |
| wavelet-LHH | glrlm | GrayLevelNonUniformity               | 25.63774769 |
| wavelet-LHH | glrlm | LongRunEmphasis                      | 1.338436805 |
| wavelet-LHH | glrlm | ShortRunHighGrayLevelEmphasis        | 215.8623987 |
| wavelet-LHH | glrlm | RunLengthNonUniformity               | 239.4262658 |
| wavelet-LHH | glrlm | ShortRunEmphasis                     | 0.928539835 |
| wavelet-LHH | glrlm | LongRunHighGrayLevelEmphasis         | 302.3810288 |
| wavelet-LHH | glrlm | RunPercentage                        | 0.905902274 |
| wavelet-LHH | glrlm | LongRunLowGrayLevelEmphasis          | 0.010837945 |
| wavelet-LHH | glrlm | RunEntropy                           | 4.199424742 |
| wavelet-LHH | glrlm | HighGrayLevelRunEmphasis             | 230.933071  |
| wavelet-LHH | glrlm | RunLengthNonUniformityNormalized     | 0.830142588 |
| wavelet-LHH | glszm | GrayLevelVariance                    | 25.1706302  |
| wavelet-LHH | glszm | ZoneVariance                         | 33.17449465 |
| wavelet-LHH | glszm | GrayLevelNonUniformityNormalized     | 0.063168847 |
| wavelet-LHH | glszm | SizeZoneNonUniformityNormalized      | 0.407550535 |
| wavelet-LHH | glszm | SizeZoneNonUniformity                | 47.27586207 |
| wavelet-LHH | glszm | GrayLevelNonUniformity               | 7.327586207 |
| wavelet-LHH | glszm | LargeAreaEmphasis                    | 40.68965517 |
| wavelet-LHH | glszm | SmallAreaHighGrayLevelEmphasis       | 180.7879864 |
| wavelet-LHH | glszm | ZonePercentage                       | 0.364779874 |
| wavelet-LHH | glszm | LargeAreaLowGrayLevelEmphasis        | 0.208484625 |
| wavelet-LHH | glszm | LargeAreaHighGrayLevelEmphasis       | 8618.87069  |
| wavelet-LHH | glszm | HighGrayLevelZoneEmphasis            | 254.3275862 |
| wavelet-LHH | glszm | SmallAreaEmphasis                    | 0.659773916 |
| wavelet-LHH | glszm | LowGrayLevelZoneEmphasis             | 0.015022532 |
| wavelet-LHH | glszm | ZoneEntropy                          | 5.421607104 |
| wavelet-LHH | glszm | SmallAreaLowGrayLevelEmphasis        | 0.013093606 |
| wavelet-LHH | ngtdm | Coarseness                           | 0.021013205 |
| wavelet-LHH | ngtdm | Complexity                           | 524.5474682 |
| wavelet-LHH | ngtdm | Strength                             | 3.060468433 |
| wavelet-LHH | ngtdm | Contrast                             | 0.144470808 |
| wavelet-LHH | ngtdm | Busyness                             | 0.133618298 |
| wavelet-LLH | gldm  | GrayLevelVariance                    | 51.41656778 |
| wavelet-LLH | gldm  | HighGrayLevelEmphasis                | 339.0283019 |
| wavelet-LLH | gldm  | DependenceEntropy                    | 6.278512303 |
| wavelet-LLH | gldm  | DependenceNonUniformity              | 80.49685535 |
| wavelet-LLH | gldm  | GrayLevelNonUniformity               | 16.71698113 |
| wavelet-LLH | gldm  | SmallDependenceEmphasis              | 0.476753927 |
| wavelet-LLH | gldm  | SmallDependenceHighGrayLevelEmphasis | 194.1211683 |
| wavelet-LLH | gldm  | DependenceNonUniformityNormalized    | 0.253134765 |
| wavelet-LLH | gldm  | LargeDependenceEmphasis              | 10.13207547 |
| wavelet-LLH | gldm  | LargeDependenceLowGrayLevelEmphasis  | 0.051569731 |
| wavelet-LLH | gldm  | DependenceVariance                   | 3.866342312 |
| wavelet-LLH | gldm  | LargeDependenceHighGrayLevelEmphasis | 3049.959119 |
| wavelet-LLH | gldm  | SmallDependenceLowGrayLevelEmphasis  | 0.006950123 |
| wavelet-LLH | gldm  | LowGrayLevelEmphasis                 | 0.010785103 |
| wavelet-LLH | glcm  | JointAverage                         | 16.44332478 |
| wavelet-LLH | glcm  | SumAverage                           | 32.88664955 |

|             |            |                                  |              |
|-------------|------------|----------------------------------|--------------|
| wavelet-LLH | glcm       | JointEntropy                     | 7.61793522   |
| wavelet-LLH | glcm       | ClusterShade                     | 1098.996693  |
| wavelet-LLH | glcm       | MaximumProbability               | 0.028501766  |
| wavelet-LLH | glcm       | Idmn                             | 0.973033709  |
| wavelet-LLH | glcm       | JointEnergy                      | 0.006975492  |
| wavelet-LLH | glcm       | Contrast                         | 71.55679964  |
| wavelet-LLH | glcm       | DifferenceEntropy                | 3.877578396  |
| wavelet-LLH | glcm       | InverseVariance                  | 0.204394948  |
| wavelet-LLH | glcm       | DifferenceVariance               | 36.39256992  |
| wavelet-LLH | glcm       | Idn                              | 0.900550534  |
| wavelet-LLH | glcm       | Idm                              | 0.20262571   |
| wavelet-LLH | glcm       | Correlation                      | 0.158128734  |
| wavelet-LLH | glcm       | Autocorrelation                  | 277.561244   |
| wavelet-LLH | glcm       | SumEntropy                       | 4.976418212  |
| wavelet-LLH | glcm       | SumSquares                       | 42.93638331  |
| wavelet-LLH | glcm       | ClusterProminence                | 64333.66683  |
| wavelet-LLH | glcm       | Imc2                             | 0.962839403  |
| wavelet-LLH | glcm       | Imc1                             | -0.296033295 |
| wavelet-LLH | glcm       | DifferenceAverage                | 5.774079002  |
| wavelet-LLH | glcm       | Id                               | 0.28863657   |
| wavelet-LLH | glcm       | ClusterTendency                  | 100.1887336  |
| wavelet-LLH | firstorder | InterquartileRange               | 171.3373822  |
| wavelet-LLH | firstorder | Skewness                         | 1.1113027    |
| wavelet-LLH | firstorder | Uniformity                       | 0.052569123  |
| wavelet-LLH | firstorder | Median                           | -46.24005679 |
| wavelet-LLH | firstorder | Energy                           | 10613336.68  |
| wavelet-LLH | firstorder | RobustMeanAbsoluteDeviation      | 77.30855241  |
| wavelet-LLH | firstorder | MeanAbsoluteDeviation            | 127.5594363  |
| wavelet-LLH | firstorder | TotalEnergy                      | 286560090.4  |
| wavelet-LLH | firstorder | Maximum                          | 704.4879016  |
| wavelet-LLH | firstorder | RootMeanSquared                  | 182.6890051  |
| wavelet-LLH | firstorder | 90Percentile                     | 180.1891526  |
| wavelet-LLH | firstorder | Minimum                          | -433.3935772 |
| wavelet-LLH | firstorder | Entropy                          | 4.62050166   |
| wavelet-LLH | firstorder | Range                            | 1137.881479  |
| wavelet-LLH | firstorder | Variance                         | 31889.38399  |
| wavelet-LLH | firstorder | 10Percentile                     | -232.7177842 |
| wavelet-LLH | firstorder | Kurtosis                         | 5.439585392  |
| wavelet-LLH | firstorder | Mean                             | -38.54722547 |
| wavelet-LLH | glrlm      | ShortRunLowGrayLevelEmphasis     | 0.010869973  |
| wavelet-LLH | glrlm      | GrayLevelVariance                | 53.73829419  |
| wavelet-LLH | glrlm      | LowGrayLevelRunEmphasis          | 0.011112789  |
| wavelet-LLH | glrlm      | GrayLevelNonUniformityNormalized | 0.050142397  |
| wavelet-LLH | glrlm      | RunVariance                      | 0.071770422  |
| wavelet-LLH | glrlm      | GrayLevelNonUniformity           | 15.0273012   |
| wavelet-LLH | glrlm      | LongRunEmphasis                  | 1.200282219  |
| wavelet-LLH | glrlm      | ShortRunHighGrayLevelEmphasis    | 330.1616929  |
| wavelet-LLH | glrlm      | RunLengthNonUniformity           | 268.0418063  |
| wavelet-LLH | glrlm      | ShortRunEmphasis                 | 0.957016547  |
| wavelet-LLH | glrlm      | LongRunHighGrayLevelEmphasis     | 399.7060762  |
| wavelet-LLH | glrlm      | RunPercentage                    | 0.942186744  |
| wavelet-LLH | glrlm      | LongRunLowGrayLevelEmphasis      | 0.012186255  |

|             |       |                                      |              |
|-------------|-------|--------------------------------------|--------------|
| wavelet-LLH | glrlm | RunEntropy                           | 4.906802437  |
| wavelet-LLH | glrlm | HighGrayLevelRunEmphasis             | 342.3765193  |
| wavelet-LLH | glrlm | RunLengthNonUniformityNormalized     | 0.893742992  |
| wavelet-LLH | glszm | GrayLevelVariance                    | 76.55673469  |
| wavelet-LLH | glszm | ZoneVariance                         | 7.44084898   |
| wavelet-LLH | glszm | GrayLevelNonUniformityNormalized     | 0.039804082  |
| wavelet-LLH | glszm | SizeZoneNonUniformityNormalized      | 0.528293878  |
| wavelet-LLH | glszm | SizeZoneNonUniformity                | 92.45142857  |
| wavelet-LLH | glszm | GrayLevelNonUniformity               | 6.965714286  |
| wavelet-LLH | glszm | LargeAreaEmphasis                    | 10.74285714  |
| wavelet-LLH | glszm | SmallAreaHighGrayLevelEmphasis       | 321.4677933  |
| wavelet-LLH | glszm | ZonePercentage                       | 0.550314465  |
| wavelet-LLH | glszm | LargeAreaLowGrayLevelEmphasis        | 0.057126859  |
| wavelet-LLH | glszm | LargeAreaHighGrayLevelEmphasis       | 3244.874286  |
| wavelet-LLH | glszm | HighGrayLevelZoneEmphasis            | 391.3657143  |
| wavelet-LLH | glszm | SmallAreaEmphasis                    | 0.753209836  |
| wavelet-LLH | glszm | LowGrayLevelZoneEmphasis             | 0.014152648  |
| wavelet-LLH | glszm | ZoneEntropy                          | 5.854355598  |
| wavelet-LLH | glszm | SmallAreaLowGrayLevelEmphasis        | 0.011664827  |
| wavelet-LLH | ngtdm | Coarseness                           | 0.022813101  |
| wavelet-LLH | ngtdm | Complexity                           | 2878.977078  |
| wavelet-LLH | ngtdm | Strength                             | 13.72765525  |
| wavelet-LLH | ngtdm | Contrast                             | 0.283736728  |
| wavelet-LLH | ngtdm | Busyness                             | 0.063539208  |
| wavelet-LLL | gldm  | GrayLevelVariance                    | 328.8323247  |
| wavelet-LLL | gldm  | HighGrayLevelEmphasis                | 4978.528302  |
| wavelet-LLL | gldm  | DependenceEntropy                    | 6.618571424  |
| wavelet-LLL | gldm  | DependenceNonUniformity              | 112.7358491  |
| wavelet-LLL | gldm  | GrayLevelNonUniformity               | 8.528301887  |
| wavelet-LLL | gldm  | SmallDependenceEmphasis              | 0.60937941   |
| wavelet-LLL | gldm  | SmallDependenceHighGrayLevelEmphasis | 2576.027294  |
| wavelet-LLL | gldm  | DependenceNonUniformityNormalized    | 0.354515249  |
| wavelet-LLL | gldm  | LargeDependenceEmphasis              | 7.194968553  |
| wavelet-LLL | gldm  | LargeDependenceLowGrayLevelEmphasis  | 0.004486617  |
| wavelet-LLL | gldm  | DependenceVariance                   | 2.861239666  |
| wavelet-LLL | gldm  | LargeDependenceHighGrayLevelEmphasis | 48396.93082  |
| wavelet-LLL | gldm  | SmallDependenceLowGrayLevelEmphasis  | 0.003408993  |
| wavelet-LLL | gldm  | LowGrayLevelEmphasis                 | 0.003497246  |
| wavelet-LLL | glcm  | JointAverage                         | 72.58622493  |
| wavelet-LLL | glcm  | SumAverage                           | 145.1724499  |
| wavelet-LLL | glcm  | JointEntropy                         | 8.196743798  |
| wavelet-LLL | glcm  | ClusterShade                         | -25529.02227 |
| wavelet-LLL | glcm  | MaximumProbability                   | 0.019803171  |
| wavelet-LLL | glcm  | Idmn                                 | 0.970981129  |
| wavelet-LLL | glcm  | JointEnergy                          | 0.004370285  |
| wavelet-LLL | glcm  | Contrast                             | 257.7857304  |
| wavelet-LLL | glcm  | DifferenceEntropy                    | 4.803268057  |
| wavelet-LLL | glcm  | InverseVariance                      | 0.130959482  |
| wavelet-LLL | glcm  | DifferenceVariance                   | 119.7413112  |
| wavelet-LLL | glcm  | Idn                                  | 0.894915172  |
| wavelet-LLL | glcm  | Idm                                  | 0.137585087  |
| wavelet-LLL | glcm  | Correlation                          | 0.490134253  |



|             |            |                                  |              |
|-------------|------------|----------------------------------|--------------|
| wavelet-LLL | glcm       | Autocorrelation                  | 5391.562008  |
| wavelet-LLL | glcm       | SumEntropy                       | 5.953144446  |
| wavelet-LLL | glcm       | SumSquares                       | 251.5271144  |
| wavelet-LLL | glcm       | ClusterProminence                | 2434644.96   |
| wavelet-LLL | glcm       | Imc2                             | 0.995171337  |
| wavelet-LLL | glcm       | Imc1                             | -0.442619149 |
| wavelet-LLL | glcm       | DifferenceAverage                | 11.55150795  |
| wavelet-LLL | glcm       | Id                               | 0.210243919  |
| wavelet-LLL | glcm       | ClusterTendency                  | 748.3227271  |
| wavelet-LLL | firstorder | InterquartileRange               | 651.9439292  |
| wavelet-LLL | firstorder | Skewness                         | -1.01915193  |
| wavelet-LLL | firstorder | Uniformity                       | 0.026818559  |
| wavelet-LLL | firstorder | Median                           | -186.2629816 |
| wavelet-LLL | firstorder | Energy                           | 100605821.5  |
| wavelet-LLL | firstorder | RobustMeanAbsoluteDeviation      | 276.9743909  |
| wavelet-LLL | firstorder | MeanAbsoluteDeviation            | 373.7461471  |
| wavelet-LLL | firstorder | TotalEnergy                      | 2716357179   |
| wavelet-LLL | firstorder | Maximum                          | 195.7878549  |
| wavelet-LLL | firstorder | RootMeanSquared                  | 562.4682282  |
| wavelet-LLL | firstorder | 90Percentile                     | 121.7186159  |
| wavelet-LLL | firstorder | Minimum                          | -2009.657189 |
| wavelet-LLL | firstorder | Entropy                          | 5.566964259  |
| wavelet-LLL | firstorder | Range                            | 2205.445044  |
| wavelet-LLL | firstorder | Variance                         | 205900.5926  |
| wavelet-LLL | firstorder | 10Percentile                     | -994.9018875 |
| wavelet-LLL | firstorder | Kurtosis                         | 3.403471462  |
| wavelet-LLL | firstorder | Mean                             | -332.3701477 |
| wavelet-LLL | glrlm      | ShortRunLowGrayLevelEmphasis     | 0.003637072  |
| wavelet-LLL | glrlm      | GrayLevelVariance                | 329.6758531  |
| wavelet-LLL | glrlm      | LowGrayLevelRunEmphasis          | 0.003642701  |
| wavelet-LLL | glrlm      | GrayLevelNonUniformityNormalized | 0.025309392  |
| wavelet-LLL | glrlm      | RunVariance                      | 0.050337249  |
| wavelet-LLL | glrlm      | GrayLevelNonUniformity           | 7.715897055  |
| wavelet-LLL | glrlm      | LongRunEmphasis                  | 1.140452237  |
| wavelet-LLL | glrlm      | ShortRunHighGrayLevelEmphasis    | 4697.773292  |
| wavelet-LLL | glrlm      | RunLengthNonUniformity           | 281.4884745  |
| wavelet-LLL | glrlm      | ShortRunEmphasis                 | 0.969413028  |
| wavelet-LLL | glrlm      | LongRunHighGrayLevelEmphasis     | 5853.129339  |
| wavelet-LLL | glrlm      | RunPercentage                    | 0.958393807  |
| wavelet-LLL | glrlm      | LongRunLowGrayLevelEmphasis      | 0.00366765   |
| wavelet-LLL | glrlm      | RunEntropy                       | 5.764979711  |
| wavelet-LLL | glrlm      | HighGrayLevelRunEmphasis         | 4901.87219   |
| wavelet-LLL | glrlm      | RunLengthNonUniformityNormalized | 0.923023877  |
| wavelet-LLL | glszm      | GrayLevelVariance                | 315.18216    |
| wavelet-LLL | glszm      | ZoneVariance                     | 3.202830189  |
| wavelet-LLL | glszm      | GrayLevelNonUniformityNormalized | 0.021671413  |
| wavelet-LLL | glszm      | SizeZoneNonUniformityNormalized  | 0.667675329  |
| wavelet-LLL | glszm      | SizeZoneNonUniformity            | 141.5471698  |
| wavelet-LLL | glszm      | GrayLevelNonUniformity           | 4.594339623  |
| wavelet-LLL | glszm      | LargeAreaEmphasis                | 5.452830189  |
| wavelet-LLL | glszm      | SmallAreaHighGrayLevelEmphasis   | 3448.484736  |
| wavelet-LLL | glszm      | ZonePercentage                   | 0.666666667  |

|             |            |                                      |              |
|-------------|------------|--------------------------------------|--------------|
| wavelet-LLL | glszm      | LargeAreaLowGrayLevelEmphasis        | 0.005856936  |
| wavelet-LLL | glszm      | LargeAreaHighGrayLevelEmphasis       | 35477.18868  |
| wavelet-LLL | glszm      | HighGrayLevelZoneEmphasis            | 4278.834906  |
| wavelet-LLL | glszm      | SmallAreaEmphasis                    | 0.841620904  |
| wavelet-LLL | glszm      | LowGrayLevelZoneEmphasis             | 0.005142317  |
| wavelet-LLL | glszm      | ZoneEntropy                          | 6.207649734  |
| wavelet-LLL | glszm      | SmallAreaLowGrayLevelEmphasis        | 0.005094864  |
| wavelet-LLL | ngtdm      | Coarseness                           | 0.018820135  |
| wavelet-LLL | ngtdm      | Complexity                           | 15078.16798  |
| wavelet-LLL | ngtdm      | Strength                             | 50.85395025  |
| wavelet-LLL | ngtdm      | Contrast                             | 1.259020254  |
| wavelet-LLL | ngtdm      | Busyness                             | 0.010902651  |
| wavelet-HHL | gldm       | GrayLevelVariance                    | 5.474427436  |
| wavelet-HHL | gldm       | HighGrayLevelEmphasis                | 100.6289308  |
| wavelet-HHL | gldm       | DependenceEntropy                    | 5.746653885  |
| wavelet-HHL | gldm       | DependenceNonUniformity              | 43.69811321  |
| wavelet-HHL | gldm       | GrayLevelNonUniformity               | 41.74213836  |
| wavelet-HHL | gldm       | SmallDependenceEmphasis              | 0.278073059  |
| wavelet-HHL | gldm       | SmallDependenceHighGrayLevelEmphasis | 28.8358489   |
| wavelet-HHL | gldm       | DependenceNonUniformityNormalized    | 0.13741545   |
| wavelet-HHL | gldm       | LargeDependenceEmphasis              | 20.81132075  |
| wavelet-HHL | gldm       | LargeDependenceLowGrayLevelEmphasis  | 0.239187522  |
| wavelet-HHL | gldm       | DependenceVariance                   | 6.285154859  |
| wavelet-HHL | gldm       | LargeDependenceHighGrayLevelEmphasis | 1970.125786  |
| wavelet-HHL | gldm       | SmallDependenceLowGrayLevelEmphasis  | 0.008138186  |
| wavelet-HHL | gldm       | LowGrayLevelEmphasis                 | 0.016525076  |
| wavelet-HHL | glcm       | JointAverage                         | 9.732752119  |
| wavelet-HHL | glcm       | SumAverage                           | 19.46550424  |
| wavelet-HHL | glcm       | JointEntropy                         | 5.834588864  |
| wavelet-HHL | glcm       | ClusterShade                         | 1.898354648  |
| wavelet-HHL | glcm       | MaximumProbability                   | 0.070622473  |
| wavelet-HHL | glcm       | Idmn                                 | 0.974590696  |
| wavelet-HHL | glcm       | JointEnergy                          | 0.026507211  |
| wavelet-HHL | glcm       | Contrast                             | 9.106314834  |
| wavelet-HHL | glcm       | DifferenceEntropy                    | 2.70725666   |
| wavelet-HHL | glcm       | InverseVariance                      | 0.371459318  |
| wavelet-HHL | glcm       | DifferenceVariance                   | 3.93795998   |
| wavelet-HHL | glcm       | Idn                                  | 0.896579941  |
| wavelet-HHL | glcm       | Idm                                  | 0.364318543  |
| wavelet-HHL | glcm       | Correlation                          | 0.000510363  |
| wavelet-HHL | glcm       | Autocorrelation                      | 94.7331555   |
| wavelet-HHL | glcm       | SumEntropy                           | 3.511144158  |
| wavelet-HHL | glcm       | SumSquares                           | 4.556123516  |
| wavelet-HHL | glcm       | ClusterProminence                    | 349.6741447  |
| wavelet-HHL | glcm       | Imc2                                 | 0.695243676  |
| wavelet-HHL | glcm       | Imc1                                 | -0.109281742 |
| wavelet-HHL | glcm       | DifferenceAverage                    | 2.253956831  |
| wavelet-HHL | glcm       | Id                                   | 0.438000791  |
| wavelet-HHL | glcm       | ClusterTendency                      | 9.118179228  |
| wavelet-HHL | firstorder | InterquartileRange                   | 65.2689488   |
| wavelet-HHL | firstorder | Skewness                             | -0.065623572 |
| wavelet-HHL | firstorder | Uniformity                           | 0.131264586  |

|             |            |                                  |              |
|-------------|------------|----------------------------------|--------------|
| wavelet-HHL | firstorder | Median                           | 5.507072654  |
| wavelet-HHL | firstorder | Energy                           | 1105538.525  |
| wavelet-HHL | firstorder | RobustMeanAbsoluteDeviation      | 29.69315711  |
| wavelet-HHL | firstorder | MeanAbsoluteDeviation            | 44.7614405   |
| wavelet-HHL | firstorder | TotalEnergy                      | 29849540.17  |
| wavelet-HHL | firstorder | Maximum                          | 220.7842969  |
| wavelet-HHL | firstorder | RootMeanSquared                  | 58.96215941  |
| wavelet-HHL | firstorder | 90Percentile                     | 80.63912407  |
| wavelet-HHL | firstorder | Minimum                          | -217.041424  |
| wavelet-HHL | firstorder | Entropy                          | 3.220609191  |
| wavelet-HHL | firstorder | Range                            | 437.8257209  |
| wavelet-HHL | firstorder | Variance                         | 3439.058219  |
| wavelet-HHL | firstorder | 10Percentile                     | -64.21109032 |
| wavelet-HHL | firstorder | Kurtosis                         | 4.041620225  |
| wavelet-HHL | firstorder | Mean                             | 6.121929644  |
| wavelet-HHL | glrlm      | ShortRunLowGrayLevelEmphasis     | 0.016240242  |
| wavelet-HHL | glrlm      | GrayLevelVariance                | 5.914052129  |
| wavelet-HHL | glrlm      | LowGrayLevelRunEmphasis          | 0.017155569  |
| wavelet-HHL | glrlm      | GrayLevelNonUniformityNormalized | 0.124024324  |
| wavelet-HHL | glrlm      | RunVariance                      | 0.152108641  |
| wavelet-HHL | glrlm      | GrayLevelNonUniformity           | 35.18124586  |
| wavelet-HHL | glrlm      | LongRunEmphasis                  | 1.413535335  |
| wavelet-HHL | glrlm      | ShortRunHighGrayLevelEmphasis    | 93.47129555  |
| wavelet-HHL | glrlm      | RunLengthNonUniformity           | 230.6087081  |
| wavelet-HHL | glrlm      | ShortRunEmphasis                 | 0.919722876  |
| wavelet-HHL | glrlm      | LongRunHighGrayLevelEmphasis     | 140.647076   |
| wavelet-HHL | glrlm      | RunPercentage                    | 0.891872279  |
| wavelet-HHL | glrlm      | LongRunLowGrayLevelEmphasis      | 0.021856028  |
| wavelet-HHL | glrlm      | RunEntropy                       | 3.75207368   |
| wavelet-HHL | glrlm      | HighGrayLevelRunEmphasis         | 101.2101983  |
| wavelet-HHL | glrlm      | RunLengthNonUniformityNormalized | 0.811928181  |
| wavelet-HHL | glszm      | GrayLevelVariance                | 12.15770609  |
| wavelet-HHL | glszm      | ZoneVariance                     | 77.42629206  |
| wavelet-HHL | glszm      | GrayLevelNonUniformityNormalized | 0.088218291  |
| wavelet-HHL | glszm      | SizeZoneNonUniformityNormalized  | 0.492889351  |
| wavelet-HHL | glszm      | SizeZoneNonUniformity            | 45.83870968  |
| wavelet-HHL | glszm      | GrayLevelNonUniformity           | 8.204301075  |
| wavelet-HHL | glszm      | LargeAreaEmphasis                | 89.11827957  |
| wavelet-HHL | glszm      | SmallAreaHighGrayLevelEmphasis   | 74.99349957  |
| wavelet-HHL | glszm      | ZonePercentage                   | 0.29245283   |
| wavelet-HHL | glszm      | LargeAreaLowGrayLevelEmphasis    | 1.019027246  |
| wavelet-HHL | glszm      | LargeAreaHighGrayLevelEmphasis   | 8261.44086   |
| wavelet-HHL | glszm      | HighGrayLevelZoneEmphasis        | 105.6021505  |
| wavelet-HHL | glszm      | SmallAreaEmphasis                | 0.727008093  |
| wavelet-HHL | glszm      | LowGrayLevelZoneEmphasis         | 0.028643021  |
| wavelet-HHL | glszm      | ZoneEntropy                      | 4.884175983  |
| wavelet-HHL | glszm      | SmallAreaLowGrayLevelEmphasis    | 0.025185814  |
| wavelet-HHL | ngtdm      | Coarseness                       | 0.019700865  |
| wavelet-HHL | ngtdm      | Complexity                       | 194.6382496  |
| wavelet-HHL | ngtdm      | Strength                         | 1.617471723  |
| wavelet-HHL | ngtdm      | Contrast                         | 0.084283728  |
| wavelet-HHL | ngtdm      | Busyness                         | 0.285506997  |

|             |            |                                      |              |
|-------------|------------|--------------------------------------|--------------|
| wavelet-HLH | gldm       | GrayLevelVariance                    | 11.34493295  |
| wavelet-HLH | gldm       | HighGrayLevelEmphasis                | 223.7893082  |
| wavelet-HLH | gldm       | DependenceEntropy                    | 5.882491152  |
| wavelet-HLH | gldm       | DependenceNonUniformity              | 47.22641509  |
| wavelet-HLH | gldm       | GrayLevelNonUniformity               | 35.50314465  |
| wavelet-HLH | gldm       | SmallDependenceEmphasis              | 0.311006367  |
| wavelet-HLH | gldm       | SmallDependenceHighGrayLevelEmphasis | 78.72632607  |
| wavelet-HLH | gldm       | DependenceNonUniformityNormalized    | 0.148510739  |
| wavelet-HLH | gldm       | LargeDependenceEmphasis              | 18.30188679  |
| wavelet-HLH | gldm       | LargeDependenceLowGrayLevelEmphasis  | 0.097482619  |
| wavelet-HLH | gldm       | DependenceVariance                   | 5.630077924  |
| wavelet-HLH | gldm       | LargeDependenceHighGrayLevelEmphasis | 3715.921384  |
| wavelet-HLH | gldm       | SmallDependenceLowGrayLevelEmphasis  | 0.005205271  |
| wavelet-HLH | gldm       | LowGrayLevelEmphasis                 | 0.008801237  |
| wavelet-HLH | glcm       | JointAverage                         | 14.56891262  |
| wavelet-HLH | glcm       | SumAverage                           | 29.13782523  |
| wavelet-HLH | glcm       | JointEntropy                         | 6.440291471  |
| wavelet-HLH | glcm       | ClusterShade                         | 38.85310665  |
| wavelet-HLH | glcm       | MaximumProbability                   | 0.051757982  |
| wavelet-HLH | glcm       | ldmn                                 | 0.977452488  |
| wavelet-HLH | glcm       | JointEnergy                          | 0.018631649  |
| wavelet-HLH | glcm       | Contrast                             | 19.98430899  |
| wavelet-HLH | glcm       | DifferenceEntropy                    | 3.153121453  |
| wavelet-HLH | glcm       | InverseVariance                      | 0.322622843  |
| wavelet-HLH | glcm       | DifferenceVariance                   | 10.11533645  |
| wavelet-HLH | glcm       | ldn                                  | 0.908054823  |
| wavelet-HLH | glcm       | ldm                                  | 0.322382744  |
| wavelet-HLH | glcm       | Correlation                          | 0.010661095  |
| wavelet-HLH | glcm       | Autocorrelation                      | 212.385245   |
| wavelet-HLH | glcm       | SumEntropy                           | 3.994341329  |
| wavelet-HLH | glcm       | SumSquares                           | 10.10686377  |
| wavelet-HLH | glcm       | ClusterProminence                    | 2399.771272  |
| wavelet-HLH | glcm       | lmc2                                 | 0.825710213  |
| wavelet-HLH | glcm       | lmc1                                 | -0.165349346 |
| wavelet-HLH | glcm       | DifferenceAverage                    | 3.117316413  |
| wavelet-HLH | glcm       | ld                                   | 0.398421515  |
| wavelet-HLH | glcm       | ClusterTendency                      | 20.44314607  |
| wavelet-HLH | firstorder | InterquartileRange                   | 77.48872898  |
| wavelet-HLH | firstorder | Skewness                             | 0.377550195  |
| wavelet-HLH | firstorder | Uniformity                           | 0.111645109  |
| wavelet-HLH | firstorder | Median                               | -4.2175113   |
| wavelet-HLH | firstorder | Energy                               | 2235189.456  |
| wavelet-HLH | firstorder | RobustMeanAbsoluteDeviation          | 33.50539622  |
| wavelet-HLH | firstorder | MeanAbsoluteDeviation                | 58.5871804   |
| wavelet-HLH | firstorder | TotalEnergy                          | 60350115.31  |
| wavelet-HLH | firstorder | Maximum                              | 329.8011748  |
| wavelet-HLH | firstorder | RootMeanSquared                      | 83.83852134  |
| wavelet-HLH | firstorder | 90Percentile                         | 102.0173546  |
| wavelet-HLH | firstorder | Minimum                              | -336.5422731 |
| wavelet-HLH | firstorder | Entropy                              | 3.606012034  |
| wavelet-HLH | firstorder | Range                                | 666.3434479  |
| wavelet-HLH | firstorder | Variance                             | 7025.847905  |

|             |            |                                  |              |
|-------------|------------|----------------------------------|--------------|
| wavelet-HLH | firstorder | 10Percentile                     | -79.09018246 |
| wavelet-HLH | firstorder | Kurtosis                         | 5.612429993  |
| wavelet-HLH | firstorder | Mean                             | 1.746354723  |
| wavelet-HLH | glrlm      | ShortRunLowGrayLevelEmphasis     | 0.008834179  |
| wavelet-HLH | glrlm      | GrayLevelVariance                | 12.29600624  |
| wavelet-HLH | glrlm      | LowGrayLevelRunEmphasis          | 0.00920342   |
| wavelet-HLH | glrlm      | GrayLevelNonUniformityNormalized | 0.103997199  |
| wavelet-HLH | glrlm      | RunVariance                      | 0.144087322  |
| wavelet-HLH | glrlm      | GrayLevelNonUniformity           | 29.8283755   |
| wavelet-HLH | glrlm      | LongRunEmphasis                  | 1.378806392  |
| wavelet-HLH | glrlm      | ShortRunHighGrayLevelEmphasis    | 211.3148632  |
| wavelet-HLH | glrlm      | RunLengthNonUniformity           | 238.5507024  |
| wavelet-HLH | glrlm      | ShortRunEmphasis                 | 0.928510005  |
| wavelet-HLH | glrlm      | LongRunHighGrayLevelEmphasis     | 302.871384   |
| wavelet-HLH | glrlm      | RunPercentage                    | 0.901548137  |
| wavelet-HLH | glrlm      | LongRunLowGrayLevelEmphasis      | 0.011160494  |
| wavelet-HLH | glrlm      | RunEntropy                       | 4.110531344  |
| wavelet-HLH | glrlm      | HighGrayLevelRunEmphasis         | 225.9690039  |
| wavelet-HLH | glrlm      | RunLengthNonUniformityNormalized | 0.830767292  |
| wavelet-HLH | glszm      | GrayLevelVariance                | 25.54552469  |
| wavelet-HLH | glszm      | ZoneVariance                     | 55.97839506  |
| wavelet-HLH | glszm      | GrayLevelNonUniformityNormalized | 0.063100137  |
| wavelet-HLH | glszm      | SizeZoneNonUniformityNormalized  | 0.49005487   |
| wavelet-HLH | glszm      | SizeZoneNonUniformity            | 52.92592593  |
| wavelet-HLH | glszm      | GrayLevelNonUniformity           | 6.814814815  |
| wavelet-HLH | glszm      | LargeAreaEmphasis                | 64.64814815  |
| wavelet-HLH | glszm      | SmallAreaHighGrayLevelEmphasis   | 190.1479206  |
| wavelet-HLH | glszm      | ZonePercentage                   | 0.339622642  |
| wavelet-HLH | glszm      | LargeAreaLowGrayLevelEmphasis    | 0.344985262  |
| wavelet-HLH | glszm      | LargeAreaHighGrayLevelEmphasis   | 12815.02778  |
| wavelet-HLH | glszm      | HighGrayLevelZoneEmphasis        | 254.7314815  |
| wavelet-HLH | glszm      | SmallAreaEmphasis                | 0.726766251  |
| wavelet-HLH | glszm      | LowGrayLevelZoneEmphasis         | 0.015817687  |
| wavelet-HLH | glszm      | ZoneEntropy                      | 5.13872697   |
| wavelet-HLH | glszm      | SmallAreaLowGrayLevelEmphasis    | 0.014333197  |
| wavelet-HLH | ngtdm      | Coarseness                       | 0.021223802  |
| wavelet-HLH | ngtdm      | Complexity                       | 559.2337671  |
| wavelet-HLH | ngtdm      | Strength                         | 4.344643246  |
| wavelet-HLH | ngtdm      | Contrast                         | 0.097861722  |
| wavelet-HLH | ngtdm      | Busyness                         | 0.109217979  |

| Image type | Feature Class | Feature Name                         | Value                                                                                                                                                                                                                                                                                                                                                                                                             |
|------------|---------------|--------------------------------------|-------------------------------------------------------------------------------------------------------------------------------------------------------------------------------------------------------------------------------------------------------------------------------------------------------------------------------------------------------------------------------------------------------------------|
| general    | info          | BoundingBox                          | 23: RTSTRUCT: C99-DNU_A_segment_RUL_ITV<br>(0, 0, 2, 10, 10, 8)                                                                                                                                                                                                                                                                                                                                                   |
| general    | info          | EnabledImageTypes                    | {'Original': {}, u'Wavelet': {}}                                                                                                                                                                                                                                                                                                                                                                                  |
|            |               |                                      | {'distances': [1], 'additionalInfo': True, 'force2D': False, 'interpolator': 'sitkBSpline', 'resampledPixelSpacing': [3.0], 'label': 1, 'normalizeScale': 1, 'normalize': False, 'force2Ddimension': 0, 'removeOutliers': None, 'minimumROISize': None, u'binWidth': 25.0, 'minimumROIDimensions': 1, u'correctMask': True, 'preCrop': False, u'symmetricalGLCM': True, 'resegmentRange': None, 'padDistance': 5} |
| general    | info          | GeneralSettings                      |                                                                                                                                                                                                                                                                                                                                                                                                                   |
| general    | info          | ImageHash                            | 945d6ba9a457d8e0a5da66322f0bcf1f9be219d8                                                                                                                                                                                                                                                                                                                                                                          |
| general    | info          | ImageSpacing                         | (0.95898438, 0.95898438, 2.0)                                                                                                                                                                                                                                                                                                                                                                                     |
| general    | info          | MaskHash                             | 88a4076a46c276889210545c1997ffad81d8aff6                                                                                                                                                                                                                                                                                                                                                                          |
| general    | info          | NumpyVersion                         | 1.13.1                                                                                                                                                                                                                                                                                                                                                                                                            |
| general    | info          | PyWaveletVersion                     | 0.5.2                                                                                                                                                                                                                                                                                                                                                                                                             |
| general    | info          | SimpleITKVersion                     | 1.1.0                                                                                                                                                                                                                                                                                                                                                                                                             |
| general    | info          | Version                              | 1.3.0.post102+g1b0eb74                                                                                                                                                                                                                                                                                                                                                                                            |
| general    | info          | VolumeNum                            | 1                                                                                                                                                                                                                                                                                                                                                                                                                 |
| general    | info          | VoxelNum                             | 242                                                                                                                                                                                                                                                                                                                                                                                                               |
| original   | shape         | Maximum3DDiameter                    | 29.69848481                                                                                                                                                                                                                                                                                                                                                                                                       |
| original   | shape         | Maximum2DDiameterSlice               | 27.65863337                                                                                                                                                                                                                                                                                                                                                                                                       |
| original   | shape         | Sphericity                           | 0.780029121                                                                                                                                                                                                                                                                                                                                                                                                       |
| original   | shape         | MinorAxis                            | 22.15839176                                                                                                                                                                                                                                                                                                                                                                                                       |
| original   | shape         | Elongation                           | 0.927227485                                                                                                                                                                                                                                                                                                                                                                                                       |
| original   | shape         | SurfaceVolumeRatio                   | 0.331624747                                                                                                                                                                                                                                                                                                                                                                                                       |
| original   | shape         | Volume                               | 6534                                                                                                                                                                                                                                                                                                                                                                                                              |
| original   | shape         | MajorAxis                            | 23.8974708                                                                                                                                                                                                                                                                                                                                                                                                        |
| original   | shape         | SurfaceArea                          | 2166.836096                                                                                                                                                                                                                                                                                                                                                                                                       |
| original   | shape         | Flatness                             | 0.8399328                                                                                                                                                                                                                                                                                                                                                                                                         |
| original   | shape         | LeastAxis                            | 20.07226955                                                                                                                                                                                                                                                                                                                                                                                                       |
| original   | shape         | Maximum2DDiameterColumn              | 25.63201124                                                                                                                                                                                                                                                                                                                                                                                                       |
| original   | shape         | Maximum2DDiameterRow                 | 27.16615541                                                                                                                                                                                                                                                                                                                                                                                                       |
| original   | gldm          | GrayLevelVariance                    | 130.9938017                                                                                                                                                                                                                                                                                                                                                                                                       |
| original   | gldm          | HighGrayLevelEmphasis                | 653.7396694                                                                                                                                                                                                                                                                                                                                                                                                       |
| original   | gldm          | DependenceEntropy                    | 6.107813072                                                                                                                                                                                                                                                                                                                                                                                                       |
| original   | gldm          | DependenceNonUniformity              | 70.81818182                                                                                                                                                                                                                                                                                                                                                                                                       |
| original   | gldm          | GrayLevelNonUniformity               | 12.12396694                                                                                                                                                                                                                                                                                                                                                                                                       |
| original   | gldm          | SmallDependenceEmphasis              | 0.550173876                                                                                                                                                                                                                                                                                                                                                                                                       |
| original   | gldm          | SmallDependenceHighGrayLevelEmphasis | 236.6257893                                                                                                                                                                                                                                                                                                                                                                                                       |
| original   | gldm          | DependenceNonUniformityNormalized    | 0.292637115                                                                                                                                                                                                                                                                                                                                                                                                       |
| original   | gldm          | LargeDependenceEmphasis              | 25.83471074                                                                                                                                                                                                                                                                                                                                                                                                       |
| original   | gldm          | LargeDependenceLowGrayLevelEmphasis  | 0.056880643                                                                                                                                                                                                                                                                                                                                                                                                       |
| original   | gldm          | DependenceVariance                   | 15.76326754                                                                                                                                                                                                                                                                                                                                                                                                       |
| original   | gldm          | LargeDependenceHighGrayLevelEmphasis | 30466.68182                                                                                                                                                                                                                                                                                                                                                                                                       |
| original   | gldm          | SmallDependenceLowGrayLevelEmphasis  | 0.012427939                                                                                                                                                                                                                                                                                                                                                                                                       |
| original   | gldm          | LowGrayLevelEmphasis                 | 0.016267715                                                                                                                                                                                                                                                                                                                                                                                                       |
| original   | glcm          | JointAverage                         | 25.73222755                                                                                                                                                                                                                                                                                                                                                                                                       |
| original   | glcm          | SumAverage                           | 51.46445511                                                                                                                                                                                                                                                                                                                                                                                                       |
| original   | glcm          | JointEntropy                         | 7.290774748                                                                                                                                                                                                                                                                                                                                                                                                       |
| original   | glcm          | ClusterShade                         | -3500.254906                                                                                                                                                                                                                                                                                                                                                                                                      |
| original   | glcm          | MaximumProbability                   | 0.088020019                                                                                                                                                                                                                                                                                                                                                                                                       |
| original   | glcm          | Idmn                                 | 0.917033306                                                                                                                                                                                                                                                                                                                                                                                                       |
| original   | glcm          | JointEnergy                          | 0.014240883                                                                                                                                                                                                                                                                                                                                                                                                       |

|          |            |                                  |              |
|----------|------------|----------------------------------|--------------|
| original | glcm       | Contrast                         | 151.0142517  |
| original | glcm       | DifferenceEntropy                | 4.416587415  |
| original | glcm       | InverseVariance                  | 0.171715638  |
| original | glcm       | DifferenceVariance               | 71.84010979  |
| original | glcm       | Idn                              | 0.832590002  |
| original | glcm       | Idm                              | 0.220520803  |
| original | glcm       | Correlation                      | 0.353591041  |
| original | glcm       | Autocorrelation                  | 703.6987151  |
| original | glcm       | SumEntropy                       | 5.366103543  |
| original | glcm       | SumSquares                       | 116.8384308  |
| original | glcm       | ClusterProminence                | 232461.4371  |
| original | glcm       | Imc2                             | 0.985535369  |
| original | glcm       | Imc1                             | -0.392753283 |
| original | glcm       | DifferenceAverage                | 8.837670816  |
| original | glcm       | Id                               | 0.285085577  |
| original | glcm       | ClusterTendency                  | 316.3394713  |
| original | firstorder | InterquartileRange               | 582.75       |
| original | firstorder | Skewness                         | -0.345935159 |
| original | firstorder | Uniformity                       | 0.050099037  |
| original | firstorder | Median                           | -230         |
| original | firstorder | Energy                           | 40339645     |
| original | firstorder | RobustMeanAbsoluteDeviation      | 216.9752604  |
| original | firstorder | MeanAbsoluteDeviation            | 256.5551875  |
| original | firstorder | TotalEnergy                      | 1089170415   |
| original | firstorder | Maximum                          | 63           |
| original | firstorder | RootMeanSquared                  | 408.2802321  |
| original | firstorder | 90Percentile                     | 25.7         |
| original | firstorder | Minimum                          | -830         |
| original | firstorder | Entropy                          | 4.831374347  |
| original | firstorder | Range                            | 893          |
| original | firstorder | Variance                         | 81797.57136  |
| original | firstorder | 10Percentile                     | -708.5       |
| original | firstorder | Kurtosis                         | 1.644897685  |
| original | firstorder | Mean                             | -291.3677686 |
| original | glrlm      | ShortRunLowGrayLevelEmphasis     | 0.017226003  |
| original | glrlm      | GrayLevelVariance                | 128.332102   |
| original | glrlm      | LowGrayLevelRunEmphasis          | 0.017441116  |
| original | glrlm      | GrayLevelNonUniformityNormalized | 0.039353107  |
| original | glrlm      | RunVariance                      | 0.131381532  |
| original | glrlm      | GrayLevelNonUniformity           | 8.734953028  |
| original | glrlm      | LongRunEmphasis                  | 1.323903486  |
| original | glrlm      | ShortRunHighGrayLevelEmphasis    | 547.4150245  |
| original | glrlm      | RunLengthNonUniformity           | 192.2651767  |
| original | glrlm      | ShortRunEmphasis                 | 0.944168488  |
| original | glrlm      | LongRunHighGrayLevelEmphasis     | 980.8303634  |
| original | glrlm      | RunPercentage                    | 0.91640178   |
| original | glrlm      | LongRunLowGrayLevelEmphasis      | 0.018483613  |
| original | glrlm      | RunEntropy                       | 5.198087779  |
| original | glrlm      | HighGrayLevelRunEmphasis         | 609.6933049  |
| original | glrlm      | RunLengthNonUniformityNormalized | 0.866531564  |
| original | glszm      | GrayLevelVariance                | 100.3723449  |
| original | glszm      | ZoneVariance                     | 10.35105743  |
| original | glszm      | GrayLevelNonUniformityNormalized | 0.032810403  |
| original | glszm      | SizeZoneNonUniformityNormalized  | 0.64274145   |
| original | glszm      | SizeZoneNonUniformity            | 94.4829932   |
| original | glszm      | GrayLevelNonUniformity           | 4.823129252  |

|             |            |                                      |              |
|-------------|------------|--------------------------------------|--------------|
| original    | glszm      | LargeAreaEmphasis                    | 13.06122449  |
| original    | glszm      | SmallAreaHighGrayLevelEmphasis       | 330.5618247  |
| original    | glszm      | ZonePercentage                       | 0.607438017  |
| original    | glszm      | LargeAreaLowGrayLevelEmphasis        | 0.04984504   |
| original    | glszm      | LargeAreaHighGrayLevelEmphasis       | 14673.38095  |
| original    | glszm      | HighGrayLevelZoneEmphasis            | 443          |
| original    | glszm      | SmallAreaEmphasis                    | 0.827853293  |
| original    | glszm      | LowGrayLevelZoneEmphasis             | 0.021954773  |
| original    | glszm      | ZoneEntropy                          | 5.531491629  |
| original    | glszm      | SmallAreaLowGrayLevelEmphasis        | 0.019488632  |
| original    | ngtdm      | Coarseness                           | 0.014232809  |
| original    | ngtdm      | Complexity                           | 3974.299686  |
| original    | ngtdm      | Strength                             | 11.64123379  |
| original    | ngtdm      | Contrast                             | 1.342876406  |
| original    | ngtdm      | Busyness                             | 0.073553705  |
| wavelet-HHH | gldm       | GrayLevelVariance                    | 13.776518    |
| wavelet-HHH | gldm       | HighGrayLevelEmphasis                | 167.4545455  |
| wavelet-HHH | gldm       | DependenceEntropy                    | 5.819125234  |
| wavelet-HHH | gldm       | DependenceNonUniformity              | 51.73553719  |
| wavelet-HHH | gldm       | GrayLevelNonUniformity               | 21.38016529  |
| wavelet-HHH | gldm       | SmallDependenceEmphasis              | 0.410290675  |
| wavelet-HHH | gldm       | SmallDependenceHighGrayLevelEmphasis | 68.02238339  |
| wavelet-HHH | gldm       | DependenceNonUniformityNormalized    | 0.213783212  |
| wavelet-HHH | gldm       | LargeDependenceEmphasis              | 11.31404959  |
| wavelet-HHH | gldm       | LargeDependenceLowGrayLevelEmphasis  | 0.081448493  |
| wavelet-HHH | gldm       | DependenceVariance                   | 3.785602076  |
| wavelet-HHH | gldm       | LargeDependenceHighGrayLevelEmphasis | 1923.206612  |
| wavelet-HHH | gldm       | SmallDependenceLowGrayLevelEmphasis  | 0.009414805  |
| wavelet-HHH | gldm       | LowGrayLevelEmphasis                 | 0.013820393  |
| wavelet-HHH | glcm       | JointAverage                         | 12.43172385  |
| wavelet-HHH | glcm       | SumAverage                           | 24.86344771  |
| wavelet-HHH | glcm       | JointEntropy                         | 6.827798943  |
| wavelet-HHH | glcm       | ClusterShade                         | 0.035380964  |
| wavelet-HHH | glcm       | MaximumProbability                   | 0.033385504  |
| wavelet-HHH | glcm       | Idmn                                 | 0.957078705  |
| wavelet-HHH | glcm       | JointEnergy                          | 0.011929152  |
| wavelet-HHH | glcm       | Contrast                             | 26.62866995  |
| wavelet-HHH | glcm       | DifferenceEntropy                    | 3.388987636  |
| wavelet-HHH | glcm       | InverseVariance                      | 0.241345994  |
| wavelet-HHH | glcm       | DifferenceVariance                   | 11.1943944   |
| wavelet-HHH | glcm       | Idn                                  | 0.867227905  |
| wavelet-HHH | glcm       | Idm                                  | 0.244064048  |
| wavelet-HHH | glcm       | Correlation                          | -0.022285988 |
| wavelet-HHH | glcm       | Autocorrelation                      | 154.2523385  |
| wavelet-HHH | glcm       | SumEntropy                           | 4.200751396  |
| wavelet-HHH | glcm       | SumSquares                           | 13.0159232   |
| wavelet-HHH | glcm       | ClusterProminence                    | 2569.225335  |
| wavelet-HHH | glcm       | Imc2                                 | 0.872487303  |
| wavelet-HHH | glcm       | Imc1                                 | -0.190525815 |
| wavelet-HHH | glcm       | DifferenceAverage                    | 3.895442654  |
| wavelet-HHH | glcm       | Id                                   | 0.33384742   |
| wavelet-HHH | glcm       | ClusterTendency                      | 25.43502285  |
| wavelet-HHH | firstorder | InterquartileRange                   | 104.0073318  |
| wavelet-HHH | firstorder | Skewness                             | 0.033200643  |
| wavelet-HHH | firstorder | Uniformity                           | 0.08834779   |
| wavelet-HHH | firstorder | Median                               | -4.02155252  |



|             |            |                                  |              |
|-------------|------------|----------------------------------|--------------|
| wavelet-HHH | firstorder | Energy                           | 2054088.155  |
| wavelet-HHH | firstorder | RobustMeanAbsoluteDeviation      | 44.33440782  |
| wavelet-HHH | firstorder | MeanAbsoluteDeviation            | 69.7841651   |
| wavelet-HHH | firstorder | TotalEnergy                      | 55460380.19  |
| wavelet-HHH | firstorder | Maximum                          | 270.0735206  |
| wavelet-HHH | firstorder | RootMeanSquared                  | 92.13016652  |
| wavelet-HHH | firstorder | 90Percentile                     | 115.1640797  |
| wavelet-HHH | firstorder | Minimum                          | -285.2546922 |
| wavelet-HHH | firstorder | Entropy                          | 3.826838234  |
| wavelet-HHH | firstorder | Range                            | 555.3282128  |
| wavelet-HHH | firstorder | Variance                         | 8476.504676  |
| wavelet-HHH | firstorder | 10Percentile                     | -120.3451264 |
| wavelet-HHH | firstorder | Kurtosis                         | 3.526526245  |
| wavelet-HHH | firstorder | Mean                             | -3.385691489 |
| wavelet-HHH | grlm       | ShortRunLowGrayLevelEmphasis     | 0.013968366  |
| wavelet-HHH | grlm       | GrayLevelVariance                | 14.34186783  |
| wavelet-HHH | grlm       | LowGrayLevelRunEmphasis          | 0.014322005  |
| wavelet-HHH | grlm       | GrayLevelNonUniformityNormalized | 0.084759206  |
| wavelet-HHH | grlm       | RunVariance                      | 0.076907327  |
| wavelet-HHH | grlm       | GrayLevelNonUniformity           | 19.13801712  |
| wavelet-HHH | grlm       | LongRunEmphasis                  | 1.227032075  |
| wavelet-HHH | grlm       | ShortRunHighGrayLevelEmphasis    | 158.6459232  |
| wavelet-HHH | grlm       | RunLengthNonUniformity           | 197.6554656  |
| wavelet-HHH | grlm       | ShortRunEmphasis                 | 0.948945009  |
| wavelet-HHH | grlm       | LongRunHighGrayLevelEmphasis     | 205.8119037  |
| wavelet-HHH | grlm       | RunPercentage                    | 0.932930706  |
| wavelet-HHH | grlm       | LongRunLowGrayLevelEmphasis      | 0.015875484  |
| wavelet-HHH | grlm       | RunEntropy                       | 4.17392524   |
| wavelet-HHH | grlm       | HighGrayLevelRunEmphasis         | 167.3007783  |
| wavelet-HHH | grlm       | RunLengthNonUniformityNormalized | 0.874881331  |
| wavelet-HHH | glszm      | GrayLevelVariance                | 20.31532402  |
| wavelet-HHH | glszm      | ZoneVariance                     | 10.75118906  |
| wavelet-HHH | glszm      | GrayLevelNonUniformityNormalized | 0.067033294  |
| wavelet-HHH | glszm      | SizeZoneNonUniformityNormalized  | 0.463882283  |
| wavelet-HHH | glszm      | SizeZoneNonUniformity            | 53.81034483  |
| wavelet-HHH | glszm      | GrayLevelNonUniformity           | 7.775862069  |
| wavelet-HHH | glszm      | LargeAreaEmphasis                | 15.10344828  |
| wavelet-HHH | glszm      | SmallAreaHighGrayLevelEmphasis   | 117.2126408  |
| wavelet-HHH | glszm      | ZonePercentage                   | 0.479338843  |
| wavelet-HHH | glszm      | LargeAreaLowGrayLevelEmphasis    | 0.112236808  |
| wavelet-HHH | glszm      | LargeAreaHighGrayLevelEmphasis   | 2542.155172  |
| wavelet-HHH | glszm      | HighGrayLevelZoneEmphasis        | 165.7672414  |
| wavelet-HHH | glszm      | SmallAreaEmphasis                | 0.708194552  |
| wavelet-HHH | glszm      | LowGrayLevelZoneEmphasis         | 0.020927892  |
| wavelet-HHH | glszm      | ZoneEntropy                      | 5.241065965  |
| wavelet-HHH | glszm      | SmallAreaLowGrayLevelEmphasis    | 0.018457348  |
| wavelet-HHH | ngtdm      | Coarseness                       | 0.025374822  |
| wavelet-HHH | ngtdm      | Complexity                       | 477.7064265  |
| wavelet-HHH | ngtdm      | Strength                         | 3.088145555  |
| wavelet-HHH | ngtdm      | Contrast                         | 0.193930727  |
| wavelet-HHH | ngtdm      | Busyness                         | 0.147476539  |
| wavelet-HLL | gldm       | GrayLevelVariance                | 78.5392562   |
| wavelet-HLL | gldm       | HighGrayLevelEmphasis            | 1070.789256  |
| wavelet-HLL | gldm       | DependenceEntropy                | 6.168474112  |
| wavelet-HLL | gldm       | DependenceNonUniformity          | 82.04958678  |
| wavelet-HLL | gldm       | GrayLevelNonUniformity           | 9.404958678  |

|             |            |                                      |              |
|-------------|------------|--------------------------------------|--------------|
| wavelet-HLL | gldm       | SmallDependenceEmphasis              | 0.562342137  |
| wavelet-HLL | gldm       | SmallDependenceHighGrayLevelEmphasis | 633.2641314  |
| wavelet-HLL | gldm       | DependenceNonUniformityNormalized    | 0.339047879  |
| wavelet-HLL | gldm       | LargeDependenceEmphasis              | 4.58677686   |
| wavelet-HLL | gldm       | LargeDependenceLowGrayLevelEmphasis  | 0.010233954  |
| wavelet-HLL | gldm       | DependenceVariance                   | 1.098217335  |
| wavelet-HLL | gldm       | LargeDependenceHighGrayLevelEmphasis | 4231.764463  |
| wavelet-HLL | gldm       | SmallDependenceLowGrayLevelEmphasis  | 0.004962209  |
| wavelet-HLL | gldm       | LowGrayLevelEmphasis                 | 0.005480542  |
| wavelet-HLL | glcm       | JointAverage                         | 30.84136557  |
| wavelet-HLL | glcm       | SumAverage                           | 61.68273115  |
| wavelet-HLL | glcm       | JointEntropy                         | 7.787946778  |
| wavelet-HLL | glcm       | ClusterShade                         | 1663.138909  |
| wavelet-HLL | glcm       | MaximumProbability                   | 0.013363037  |
| wavelet-HLL | glcm       | Idmn                                 | 0.974363418  |
| wavelet-HLL | glcm       | JointEnergy                          | 0.005107152  |
| wavelet-HLL | glcm       | Contrast                             | 101.1625673  |
| wavelet-HLL | glcm       | DifferenceEntropy                    | 4.136211964  |
| wavelet-HLL | glcm       | InverseVariance                      | 0.157422431  |
| wavelet-HLL | glcm       | DifferenceVariance                   | 45.06156208  |
| wavelet-HLL | glcm       | Idn                                  | 0.897873728  |
| wavelet-HLL | glcm       | Idm                                  | 0.144805257  |
| wavelet-HLL | glcm       | Correlation                          | 0.251481985  |
| wavelet-HLL | glcm       | Autocorrelation                      | 970.4339772  |
| wavelet-HLL | glcm       | SumEntropy                           | 5.310989912  |
| wavelet-HLL | glcm       | SumSquares                           | 69.74956116  |
| wavelet-HLL | glcm       | ClusterProminence                    | 125424.466   |
| wavelet-HLL | glcm       | Imc2                                 | 0.986872999  |
| wavelet-HLL | glcm       | Imc1                                 | -0.381633204 |
| wavelet-HLL | glcm       | DifferenceAverage                    | 7.325199031  |
| wavelet-HLL | glcm       | Id                                   | 0.232353006  |
| wavelet-HLL | glcm       | ClusterTendency                      | 177.8356773  |
| wavelet-HLL | firstorder | InterquartileRange                   | 248.3101555  |
| wavelet-HLL | firstorder | Skewness                             | 0.323180262  |
| wavelet-HLL | firstorder | Uniformity                           | 0.038863466  |
| wavelet-HLL | firstorder | Median                               | -81.82481273 |
| wavelet-HLL | firstorder | Energy                               | 12556862.1   |
| wavelet-HLL | firstorder | RobustMeanAbsoluteDeviation          | 115.7015091  |
| wavelet-HLL | firstorder | MeanAbsoluteDeviation                | 172.5617627  |
| wavelet-HLL | firstorder | TotalEnergy                          | 339035276.7  |
| wavelet-HLL | firstorder | Maximum                              | 640.150509   |
| wavelet-HLL | firstorder | RootMeanSquared                      | 227.7890689  |
| wavelet-HLL | firstorder | 90Percentile                         | 278.5127964  |
| wavelet-HLL | firstorder | Minimum                              | -808.8109441 |
| wavelet-HLL | firstorder | Entropy                              | 4.93477032   |
| wavelet-HLL | firstorder | Range                                | 1448.961453  |
| wavelet-HLL | firstorder | Variance                             | 49322.71957  |
| wavelet-HLL | firstorder | 10Percentile                         | -292.0292015 |
| wavelet-HLL | firstorder | Kurtosis                             | 3.577105416  |
| wavelet-HLL | firstorder | Mean                                 | -50.64721466 |
| wavelet-HLL | glrlm      | ShortRunLowGrayLevelEmphasis         | 0.005596829  |
| wavelet-HLL | glrlm      | GrayLevelVariance                    | 79.76893161  |
| wavelet-HLL | glrlm      | LowGrayLevelRunEmphasis              | 0.0056288    |
| wavelet-HLL | glrlm      | GrayLevelNonUniformityNormalized     | 0.038347944  |
| wavelet-HLL | glrlm      | RunVariance                          | 0.036686692  |
| wavelet-HLL | glrlm      | GrayLevelNonUniformity               | 8.971831874  |

|             |       |                                      |             |
|-------------|-------|--------------------------------------|-------------|
| wavelet-HLL | glrlm | LongRunEmphasis                      | 1.108890157 |
| wavelet-HLL | glrlm | ShortRunHighGrayLevelEmphasis        | 1052.054866 |
| wavelet-HLL | glrlm | RunLengthNonUniformity               | 219.2269564 |
| wavelet-HLL | glrlm | ShortRunEmphasis                     | 0.974690808 |
| wavelet-HLL | glrlm | LongRunHighGrayLevelEmphasis         | 1177.412479 |
| wavelet-HLL | glrlm | RunPercentage                        | 0.966624285 |
| wavelet-HLL | glrlm | LongRunLowGrayLevelEmphasis          | 0.005766218 |
| wavelet-HLL | glrlm | RunEntropy                           | 5.087765771 |
| wavelet-HLL | glrlm | HighGrayLevelRunEmphasis             | 1075.623588 |
| wavelet-HLL | glrlm | RunLengthNonUniformityNormalized     | 0.93618859  |
| wavelet-HLL | glszm | GrayLevelVariance                    | 98.06126726 |
| wavelet-HLL | glszm | ZoneVariance                         | 1.311472715 |
| wavelet-HLL | glszm | GrayLevelNonUniformityNormalized     | 0.033284024 |
| wavelet-HLL | glszm | SizeZoneNonUniformityNormalized      | 0.544953978 |
| wavelet-HLL | glszm | SizeZoneNonUniformity                | 85.01282051 |
| wavelet-HLL | glszm | GrayLevelNonUniformity               | 5.192307692 |
| wavelet-HLL | glszm | LargeAreaEmphasis                    | 3.717948718 |
| wavelet-HLL | glszm | SmallAreaHighGrayLevelEmphasis       | 870.8622654 |
| wavelet-HLL | glszm | ZonePercentage                       | 0.644628099 |
| wavelet-HLL | glszm | LargeAreaLowGrayLevelEmphasis        | 0.011246847 |
| wavelet-HLL | glszm | LargeAreaHighGrayLevelEmphasis       | 3672.083333 |
| wavelet-HLL | glszm | HighGrayLevelZoneEmphasis            | 1115.916667 |
| wavelet-HLL | glszm | SmallAreaEmphasis                    | 0.76615073  |
| wavelet-HLL | glszm | LowGrayLevelZoneEmphasis             | 0.0078441   |
| wavelet-HLL | glszm | ZoneEntropy                          | 5.894063559 |
| wavelet-HLL | glszm | SmallAreaLowGrayLevelEmphasis        | 0.007578832 |
| wavelet-HLL | ngtdm | Coarseness                           | 0.027600045 |
| wavelet-HLL | ngtdm | Complexity                           | 3837.239586 |
| wavelet-HLL | ngtdm | Strength                             | 18.56415038 |
| wavelet-HLL | ngtdm | Contrast                             | 0.47354856  |
| wavelet-HLL | ngtdm | Busyness                             | 0.032440569 |
| wavelet-LHL | gldm  | GrayLevelVariance                    | 125.4699816 |
| wavelet-LHL | gldm  | HighGrayLevelEmphasis                | 1571.983471 |
| wavelet-LHL | gldm  | DependenceEntropy                    | 6.398958333 |
| wavelet-LHL | gldm  | DependenceNonUniformity              | 90.56198347 |
| wavelet-LHL | gldm  | GrayLevelNonUniformity               | 7.355371901 |
| wavelet-LHL | gldm  | SmallDependenceEmphasis              | 0.610888969 |
| wavelet-LHL | gldm  | SmallDependenceHighGrayLevelEmphasis | 1021.176682 |
| wavelet-LHL | gldm  | DependenceNonUniformityNormalized    | 0.374223072 |
| wavelet-LHL | gldm  | LargeDependenceEmphasis              | 4.438016529 |
| wavelet-LHL | gldm  | LargeDependenceLowGrayLevelEmphasis  | 0.008872431 |
| wavelet-LHL | gldm  | DependenceVariance                   | 1.221774469 |
| wavelet-LHL | gldm  | LargeDependenceHighGrayLevelEmphasis | 6576.123967 |
| wavelet-LHL | gldm  | SmallDependenceLowGrayLevelEmphasis  | 0.005759596 |
| wavelet-LHL | gldm  | LowGrayLevelEmphasis                 | 0.006113524 |
| wavelet-LHL | glcm  | JointAverage                         | 37.9970894  |
| wavelet-LHL | glcm  | SumAverage                           | 75.99417879 |
| wavelet-LHL | glcm  | JointEntropy                         | 8.026112664 |
| wavelet-LHL | glcm  | ClusterShade                         | 1066.023791 |
| wavelet-LHL | glcm  | MaximumProbability                   | 0.01225688  |
| wavelet-LHL | glcm  | ldmn                                 | 0.970356125 |
| wavelet-LHL | glcm  | JointEnergy                          | 0.004190148 |
| wavelet-LHL | glcm  | Contrast                             | 177.7732676 |
| wavelet-LHL | glcm  | DifferenceEntropy                    | 4.547366539 |
| wavelet-LHL | glcm  | InverseVariance                      | 0.111290002 |
| wavelet-LHL | glcm  | DifferenceVariance                   | 73.10183146 |

|             |            |                                  |              |
|-------------|------------|----------------------------------|--------------|
| wavelet-LHL | glcm       | Idn                              | 0.888090841  |
| wavelet-LHL | glcm       | Idm                              | 0.115227806  |
| wavelet-LHL | glcm       | Correlation                      | 0.217265491  |
| wavelet-LHL | glcm       | Autocorrelation                  | 1468.450737  |
| wavelet-LHL | glcm       | SumEntropy                       | 5.665703702  |
| wavelet-LHL | glcm       | SumSquares                       | 113.4892935  |
| wavelet-LHL | glcm       | ClusterProminence                | 261169.0556  |
| wavelet-LHL | glcm       | Imc2                             | 0.994904668  |
| wavelet-LHL | glcm       | Imc1                             | -0.445443194 |
| wavelet-LHL | glcm       | DifferenceAverage                | 10.02171439  |
| wavelet-LHL | glcm       | Id                               | 0.195008121  |
| wavelet-LHL | glcm       | ClusterTendency                  | 276.1839064  |
| wavelet-LHL | firstorder | InterquartileRange               | 379.2427982  |
| wavelet-LHL | firstorder | Skewness                         | -0.105847125 |
| wavelet-LHL | firstorder | Uniformity                       | 0.030394099  |
| wavelet-LHL | firstorder | Median                           | -14.94109159 |
| wavelet-LHL | firstorder | Energy                           | 18940711.77  |
| wavelet-LHL | firstorder | RobustMeanAbsoluteDeviation      | 153.6206074  |
| wavelet-LHL | firstorder | MeanAbsoluteDeviation            | 221.1226267  |
| wavelet-LHL | firstorder | TotalEnergy                      | 511399217.7  |
| wavelet-LHL | firstorder | Maximum                          | 862.7807517  |
| wavelet-LHL | firstorder | RootMeanSquared                  | 279.7631212  |
| wavelet-LHL | firstorder | 90Percentile                     | 343.453189   |
| wavelet-LHL | firstorder | Minimum                          | -937.5863387 |
| wavelet-LHL | firstorder | Entropy                          | 5.289145734  |
| wavelet-LHL | firstorder | Range                            | 1800.36709   |
| wavelet-LHL | firstorder | Variance                         | 78115.41157  |
| wavelet-LHL | firstorder | 10Percentile                     | -349.816015  |
| wavelet-LHL | firstorder | Kurtosis                         | 3.431311205  |
| wavelet-LHL | firstorder | Mean                             | -12.32852095 |
| wavelet-LHL | glrlm      | ShortRunLowGrayLevelEmphasis     | 0.006259987  |
| wavelet-LHL | glrlm      | GrayLevelVariance                | 127.760935   |
| wavelet-LHL | glrlm      | LowGrayLevelRunEmphasis          | 0.006279769  |
| wavelet-LHL | glrlm      | GrayLevelNonUniformityNormalized | 0.029840174  |
| wavelet-LHL | glrlm      | RunVariance                      | 0.031796912  |
| wavelet-LHL | glrlm      | GrayLevelNonUniformity           | 7.001176517  |
| wavelet-LHL | glrlm      | LongRunEmphasis                  | 1.096003445  |
| wavelet-LHL | glrlm      | ShortRunHighGrayLevelEmphasis    | 1542.845055  |
| wavelet-LHL | glrlm      | RunLengthNonUniformity           | 220.6283398  |
| wavelet-LHL | glrlm      | ShortRunEmphasis                 | 0.976732842  |
| wavelet-LHL | glrlm      | LongRunHighGrayLevelEmphasis     | 1714.521141  |
| wavelet-LHL | glrlm      | RunPercentage                    | 0.96948506   |
| wavelet-LHL | glrlm      | LongRunLowGrayLevelEmphasis      | 0.006360686  |
| wavelet-LHL | glrlm      | RunEntropy                       | 5.424626233  |
| wavelet-LHL | glrlm      | HighGrayLevelRunEmphasis         | 1576.217564  |
| wavelet-LHL | glrlm      | RunLengthNonUniformityNormalized | 0.940231533  |
| wavelet-LHL | glszm      | GrayLevelVariance                | 154.486685   |
| wavelet-LHL | glszm      | ZoneVariance                     | 1.218585859  |
| wavelet-LHL | glszm      | GrayLevelNonUniformityNormalized | 0.026483012  |
| wavelet-LHL | glszm      | SizeZoneNonUniformityNormalized  | 0.604554637  |
| wavelet-LHL | glszm      | SizeZoneNonUniformity            | 99.75151515  |
| wavelet-LHL | glszm      | GrayLevelNonUniformity           | 4.36969697   |
| wavelet-LHL | glszm      | LargeAreaEmphasis                | 3.36969697   |
| wavelet-LHL | glszm      | SmallAreaHighGrayLevelEmphasis   | 1369.050333  |
| wavelet-LHL | glszm      | ZonePercentage                   | 0.681818182  |
| wavelet-LHL | glszm      | LargeAreaLowGrayLevelEmphasis    | 0.0105244    |

|             |            |                                      |              |
|-------------|------------|--------------------------------------|--------------|
| wavelet-LHL | glszm      | LargeAreaHighGrayLevelEmphasis       | 5010.957576  |
| wavelet-LHL | glszm      | HighGrayLevelZoneEmphasis            | 1642.575758  |
| wavelet-LHL | glszm      | SmallAreaEmphasis                    | 0.804720436  |
| wavelet-LHL | glszm      | LowGrayLevelZoneEmphasis             | 0.008553568  |
| wavelet-LHL | glszm      | ZoneEntropy                          | 6.057815645  |
| wavelet-LHL | glszm      | SmallAreaLowGrayLevelEmphasis        | 0.008362375  |
| wavelet-LHL | ngtdm      | Coarseness                           | 0.023719217  |
| wavelet-LHL | ngtdm      | Complexity                           | 7851.982922  |
| wavelet-LHL | ngtdm      | Strength                             | 22.81360971  |
| wavelet-LHL | ngtdm      | Contrast                             | 0.739853714  |
| wavelet-LHL | ngtdm      | Busyness                             | 0.025527166  |
| wavelet-LHH | gldm       | GrayLevelVariance                    | 32.11570248  |
| wavelet-LHH | gldm       | HighGrayLevelEmphasis                | 336.7768595  |
| wavelet-LHH | gldm       | DependenceEntropy                    | 5.821407693  |
| wavelet-LHH | gldm       | DependenceNonUniformity              | 74.20661157  |
| wavelet-LHH | gldm       | GrayLevelNonUniformity               | 13.52066116  |
| wavelet-LHH | gldm       | SmallDependenceEmphasis              | 0.538323542  |
| wavelet-LHH | gldm       | SmallDependenceHighGrayLevelEmphasis | 181.8565148  |
| wavelet-LHH | gldm       | DependenceNonUniformityNormalized    | 0.306638891  |
| wavelet-LHH | gldm       | LargeDependenceEmphasis              | 5.380165289  |
| wavelet-LHH | gldm       | LargeDependenceLowGrayLevelEmphasis  | 0.025297196  |
| wavelet-LHH | gldm       | DependenceVariance                   | 1.347039137  |
| wavelet-LHH | gldm       | LargeDependenceHighGrayLevelEmphasis | 1734.31405   |
| wavelet-LHH | gldm       | SmallDependenceLowGrayLevelEmphasis  | 0.007675955  |
| wavelet-LHH | gldm       | LowGrayLevelEmphasis                 | 0.009412012  |
| wavelet-LHH | glcm       | JointAverage                         | 17.55965206  |
| wavelet-LHH | glcm       | SumAverage                           | 35.11930412  |
| wavelet-LHH | glcm       | JointEntropy                         | 7.575226461  |
| wavelet-LHH | glcm       | ClusterShade                         | -51.86987826 |
| wavelet-LHH | glcm       | MaximumProbability                   | 0.017833408  |
| wavelet-LHH | glcm       | ldmn                                 | 0.951479059  |
| wavelet-LHH | glcm       | JointEnergy                          | 0.00624159   |
| wavelet-LHH | glcm       | Contrast                             | 64.99846967  |
| wavelet-LHH | glcm       | DifferenceEntropy                    | 3.964248436  |
| wavelet-LHH | glcm       | InverseVariance                      | 0.169583783  |
| wavelet-LHH | glcm       | DifferenceVariance                   | 23.94178201  |
| wavelet-LHH | glcm       | ldn                                  | 0.855394638  |
| wavelet-LHH | glcm       | ldm                                  | 0.15978483   |
| wavelet-LHH | glcm       | Correlation                          | 0.020233076  |
| wavelet-LHH | glcm       | Autocorrelation                      | 308.9975901  |
| wavelet-LHH | glcm       | SumEntropy                           | 4.837270179  |
| wavelet-LHH | glcm       | SumSquares                           | 33.13269875  |
| wavelet-LHH | glcm       | ClusterProminence                    | 14296.31548  |
| wavelet-LHH | glcm       | lmc2                                 | 0.959884395  |
| wavelet-LHH | glcm       | lmc1                                 | -0.291005263 |
| wavelet-LHH | glcm       | DifferenceAverage                    | 6.31542871   |
| wavelet-LHH | glcm       | ld                                   | 0.247333556  |
| wavelet-LHH | glcm       | ClusterTendency                      | 67.53232531  |
| wavelet-LHH | firstorder | InterquartileRange                   | 173.5565283  |
| wavelet-LHH | firstorder | Skewness                             | -0.050922818 |
| wavelet-LHH | firstorder | Uniformity                           | 0.055870501  |
| wavelet-LHH | firstorder | Median                               | -3.31024084  |
| wavelet-LHH | firstorder | Energy                               | 4794160.594  |
| wavelet-LHH | firstorder | RobustMeanAbsoluteDeviation          | 74.09123061  |
| wavelet-LHH | firstorder | MeanAbsoluteDeviation                | 109.9001516  |
| wavelet-LHH | firstorder | TotalEnergy                          | 129442336    |

|             |            |                                      |              |
|-------------|------------|--------------------------------------|--------------|
| wavelet-LHH | firstorder | Maximum                              | 402.7751094  |
| wavelet-LHH | firstorder | RootMeanSquared                      | 140.7500656  |
| wavelet-LHH | firstorder | 90Percentile                         | 176.7683678  |
| wavelet-LHH | firstorder | Minimum                              | -407.6359014 |
| wavelet-LHH | firstorder | Entropy                              | 4.436775585  |
| wavelet-LHH | firstorder | Range                                | 810.4110108  |
| wavelet-LHH | firstorder | Variance                             | 19807.34285  |
| wavelet-LHH | firstorder | 10Percentile                         | -200.1273553 |
| wavelet-LHH | firstorder | Kurtosis                             | 2.959841713  |
| wavelet-LHH | firstorder | Mean                                 | -1.799475623 |
| wavelet-LHH | grlm       | ShortRunLowGrayLevelEmphasis         | 0.00953765   |
| wavelet-LHH | grlm       | GrayLevelVariance                    | 32.91962035  |
| wavelet-LHH | grlm       | LowGrayLevelRunEmphasis              | 0.009644612  |
| wavelet-LHH | grlm       | GrayLevelNonUniformityNormalized     | 0.054791753  |
| wavelet-LHH | grlm       | RunVariance                          | 0.044086905  |
| wavelet-LHH | grlm       | GrayLevelNonUniformity               | 12.7455788   |
| wavelet-LHH | grlm       | LongRunEmphasis                      | 1.127167864  |
| wavelet-LHH | grlm       | ShortRunHighGrayLevelEmphasis        | 327.8298625  |
| wavelet-LHH | grlm       | RunLengthNonUniformity               | 215.6280524  |
| wavelet-LHH | grlm       | ShortRunEmphasis                     | 0.971036302  |
| wavelet-LHH | grlm       | LongRunHighGrayLevelEmphasis         | 378.4197174  |
| wavelet-LHH | grlm       | RunPercentage                        | 0.961220598  |
| wavelet-LHH | grlm       | LongRunLowGrayLevelEmphasis          | 0.01011149   |
| wavelet-LHH | grlm       | RunEntropy                           | 4.63247559   |
| wavelet-LHH | grlm       | HighGrayLevelRunEmphasis             | 337.2685043  |
| wavelet-LHH | grlm       | RunLengthNonUniformityNormalized     | 0.926619477  |
| wavelet-LHH | glszm      | GrayLevelVariance                    | 44.19234378  |
| wavelet-LHH | glszm      | ZoneVariance                         | 3.006004879  |
| wavelet-LHH | glszm      | GrayLevelNonUniformityNormalized     | 0.04334772   |
| wavelet-LHH | glszm      | SizeZoneNonUniformityNormalized      | 0.568586977  |
| wavelet-LHH | glszm      | SizeZoneNonUniformity                | 83.01369863  |
| wavelet-LHH | glszm      | GrayLevelNonUniformity               | 6.328767123  |
| wavelet-LHH | glszm      | LargeAreaEmphasis                    | 5.753424658  |
| wavelet-LHH | glszm      | SmallAreaHighGrayLevelEmphasis       | 263.1941399  |
| wavelet-LHH | glszm      | ZonePercentage                       | 0.603305785  |
| wavelet-LHH | glszm      | LargeAreaLowGrayLevelEmphasis        | 0.030418161  |
| wavelet-LHH | glszm      | LargeAreaHighGrayLevelEmphasis       | 1804.726027  |
| wavelet-LHH | glszm      | HighGrayLevelZoneEmphasis            | 341.1643836  |
| wavelet-LHH | glszm      | SmallAreaEmphasis                    | 0.781188393  |
| wavelet-LHH | glszm      | LowGrayLevelZoneEmphasis             | 0.013166441  |
| wavelet-LHH | glszm      | ZoneEntropy                          | 5.498681022  |
| wavelet-LHH | glszm      | SmallAreaLowGrayLevelEmphasis        | 0.012306639  |
| wavelet-LHH | ngtdm      | Coarseness                           | 0.023462134  |
| wavelet-LHH | ngtdm      | Complexity                           | 1534.918932  |
| wavelet-LHH | ngtdm      | Strength                             | 6.070294114  |
| wavelet-LHH | ngtdm      | Contrast                             | 0.338046109  |
| wavelet-LHH | ngtdm      | Busyness                             | 0.084470243  |
| wavelet-LLH | gldm       | GrayLevelVariance                    | 95.05820982  |
| wavelet-LLH | gldm       | HighGrayLevelEmphasis                | 476.9214876  |
| wavelet-LLH | gldm       | DependenceEntropy                    | 6.335041262  |
| wavelet-LLH | gldm       | DependenceNonUniformity              | 83.27272727  |
| wavelet-LLH | gldm       | GrayLevelNonUniformity               | 8.082644628  |
| wavelet-LLH | gldm       | SmallDependenceEmphasis              | 0.57177686   |
| wavelet-LLH | gldm       | SmallDependenceHighGrayLevelEmphasis | 315.8700184  |
| wavelet-LLH | gldm       | DependenceNonUniformityNormalized    | 0.344102179  |
| wavelet-LLH | gldm       | LargeDependenceEmphasis              | 4.347107438  |

|             |            |                                      |              |
|-------------|------------|--------------------------------------|--------------|
| wavelet-LLH | gldm       | LargeDependenceLowGrayLevelEmphasis  | 0.062511153  |
| wavelet-LLH | gldm       | DependenceVariance                   | 0.980943925  |
| wavelet-LLH | gldm       | LargeDependenceHighGrayLevelEmphasis | 1707.623967  |
| wavelet-LLH | gldm       | SmallDependenceLowGrayLevelEmphasis  | 0.007501606  |
| wavelet-LLH | gldm       | LowGrayLevelEmphasis                 | 0.016736801  |
| wavelet-LLH | glcm       | JointAverage                         | 18.76501074  |
| wavelet-LLH | glcm       | SumAverage                           | 37.53002148  |
| wavelet-LLH | glcm       | JointEntropy                         | 7.969693867  |
| wavelet-LLH | glcm       | ClusterShade                         | 2853.089226  |
| wavelet-LLH | glcm       | MaximumProbability                   | 0.012219451  |
| wavelet-LLH | glcm       | ldmn                                 | 0.961962225  |
| wavelet-LLH | glcm       | JointEnergy                          | 0.004407389  |
| wavelet-LLH | glcm       | Contrast                             | 119.8125771  |
| wavelet-LLH | glcm       | DifferenceEntropy                    | 4.299146898  |
| wavelet-LLH | glcm       | InverseVariance                      | 0.130312657  |
| wavelet-LLH | glcm       | DifferenceVariance                   | 49.40817813  |
| wavelet-LLH | glcm       | ldn                                  | 0.873975624  |
| wavelet-LLH | glcm       | ldm                                  | 0.128693807  |
| wavelet-LLH | glcm       | Correlation                          | 0.350094601  |
| wavelet-LLH | glcm       | Autocorrelation                      | 385.5416715  |
| wavelet-LLH | glcm       | SumEntropy                           | 5.57844118   |
| wavelet-LLH | glcm       | SumSquares                           | 93.2184544   |
| wavelet-LLH | glcm       | ClusterProminence                    | 217678.1243  |
| wavelet-LLH | glcm       | lmc2                                 | 0.993698135  |
| wavelet-LLH | glcm       | lmc1                                 | -0.432196021 |
| wavelet-LLH | glcm       | DifferenceAverage                    | 8.245229551  |
| wavelet-LLH | glcm       | ld                                   | 0.213970803  |
| wavelet-LLH | glcm       | ClusterTendency                      | 253.0612405  |
| wavelet-LLH | firstorder | InterquartileRange                   | 341.1911655  |
| wavelet-LLH | firstorder | Skewness                             | 0.503326804  |
| wavelet-LLH | firstorder | Uniformity                           | 0.033399358  |
| wavelet-LLH | firstorder | Median                               | -60.48434292 |
| wavelet-LLH | firstorder | Energy                               | 14539812.11  |
| wavelet-LLH | firstorder | RobustMeanAbsoluteDeviation          | 136.7913772  |
| wavelet-LLH | firstorder | MeanAbsoluteDeviation                | 196.0904542  |
| wavelet-LLH | firstorder | TotalEnergy                          | 392574926.9  |
| wavelet-LLH | firstorder | Maximum                              | 795.1554143  |
| wavelet-LLH | firstorder | RootMeanSquared                      | 245.1160301  |
| wavelet-LLH | firstorder | 90Percentile                         | 305.1877618  |
| wavelet-LLH | firstorder | Minimum                              | -498.9216921 |
| wavelet-LLH | firstorder | Entropy                              | 5.120908003  |
| wavelet-LLH | firstorder | Range                                | 1294.077106  |
| wavelet-LLH | firstorder | Variance                             | 59515.9745   |
| wavelet-LLH | firstorder | 10Percentile                         | -333.4936554 |
| wavelet-LLH | firstorder | Kurtosis                             | 2.925553315  |
| wavelet-LLH | firstorder | Mean                                 | -23.78852063 |
| wavelet-LLH | glrlm      | ShortRunLowGrayLevelEmphasis         | 0.016311546  |
| wavelet-LLH | glrlm      | GrayLevelVariance                    | 96.33859164  |
| wavelet-LLH | glrlm      | LowGrayLevelRunEmphasis              | 0.01673137   |
| wavelet-LLH | glrlm      | GrayLevelNonUniformityNormalized     | 0.032996833  |
| wavelet-LLH | glrlm      | RunVariance                          | 0.036022152  |
| wavelet-LLH | glrlm      | GrayLevelNonUniformity               | 7.72960043   |
| wavelet-LLH | glrlm      | LongRunEmphasis                      | 1.104324576  |
| wavelet-LLH | glrlm      | ShortRunHighGrayLevelEmphasis        | 471.7340116  |
| wavelet-LLH | glrlm      | RunLengthNonUniformity               | 220.1564818  |
| wavelet-LLH | glrlm      | ShortRunEmphasis                     | 0.976133088  |

|             |       |                                      |              |
|-------------|-------|--------------------------------------|--------------|
| wavelet-LLH | glrlm | LongRunHighGrayLevelEmphasis         | 519.1802345  |
| wavelet-LLH | glrlm | RunPercentage                        | 0.967895741  |
| wavelet-LLH | glrlm | LongRunLowGrayLevelEmphasis          | 0.01844039   |
| wavelet-LLH | glrlm | RunEntropy                           | 5.257179719  |
| wavelet-LLH | glrlm | HighGrayLevelRunEmphasis             | 480.5153788  |
| wavelet-LLH | glrlm | RunLengthNonUniformityNormalized     | 0.939440431  |
| wavelet-LLH | glszm | GrayLevelVariance                    | 112.1101186  |
| wavelet-LLH | glszm | ZoneVariance                         | 1.388239064  |
| wavelet-LLH | glszm | GrayLevelNonUniformityNormalized     | 0.029161993  |
| wavelet-LLH | glszm | SizeZoneNonUniformityNormalized      | 0.558884794  |
| wavelet-LLH | glszm | SizeZoneNonUniformity                | 88.30379747  |
| wavelet-LLH | glszm | GrayLevelNonUniformity               | 4.607594937  |
| wavelet-LLH | glszm | LargeAreaEmphasis                    | 3.734177215  |
| wavelet-LLH | glszm | SmallAreaHighGrayLevelEmphasis       | 446.2334725  |
| wavelet-LLH | glszm | ZonePercentage                       | 0.652892562  |
| wavelet-LLH | glszm | LargeAreaLowGrayLevelEmphasis        | 0.051142421  |
| wavelet-LLH | glszm | LargeAreaHighGrayLevelEmphasis       | 1502.322785  |
| wavelet-LLH | glszm | HighGrayLevelZoneEmphasis            | 533.3987342  |
| wavelet-LLH | glszm | SmallAreaEmphasis                    | 0.775929535  |
| wavelet-LLH | glszm | LowGrayLevelZoneEmphasis             | 0.015615475  |
| wavelet-LLH | glszm | ZoneEntropy                          | 6.019721951  |
| wavelet-LLH | glszm | SmallAreaLowGrayLevelEmphasis        | 0.009158327  |
| wavelet-LLH | ngtdm | Coarseness                           | 0.028208235  |
| wavelet-LLH | ngtdm | Complexity                           | 4074.645302  |
| wavelet-LLH | ngtdm | Strength                             | 18.85229303  |
| wavelet-LLH | ngtdm | Contrast                             | 0.552709764  |
| wavelet-LLH | ngtdm | Busyness                             | 0.052915973  |
| wavelet-LLL | gldm  | GrayLevelVariance                    | 744.7658118  |
| wavelet-LLL | gldm  | HighGrayLevelEmphasis                | 4026.35124   |
| wavelet-LLL | gldm  | DependenceEntropy                    | 6.662382324  |
| wavelet-LLL | gldm  | DependenceNonUniformity              | 133.9669421  |
| wavelet-LLL | gldm  | GrayLevelNonUniformity               | 3.867768595  |
| wavelet-LLL | gldm  | SmallDependenceEmphasis              | 0.769879477  |
| wavelet-LLL | gldm  | SmallDependenceHighGrayLevelEmphasis | 2732.099633  |
| wavelet-LLL | gldm  | DependenceNonUniformityNormalized    | 0.553582406  |
| wavelet-LLL | gldm  | LargeDependenceEmphasis              | 2.363636364  |
| wavelet-LLL | gldm  | LargeDependenceLowGrayLevelEmphasis  | 0.006655716  |
| wavelet-LLL | gldm  | DependenceVariance                   | 0.458780138  |
| wavelet-LLL | gldm  | LargeDependenceHighGrayLevelEmphasis | 13012.05372  |
| wavelet-LLL | gldm  | SmallDependenceLowGrayLevelEmphasis  | 0.006045419  |
| wavelet-LLL | gldm  | LowGrayLevelEmphasis                 | 0.006155261  |
| wavelet-LLL | glcm  | JointAverage                         | 65.00248791  |
| wavelet-LLL | glcm  | SumAverage                           | 130.0049758  |
| wavelet-LLL | glcm  | JointEntropy                         | 8.245161721  |
| wavelet-LLL | glcm  | ClusterShade                         | -20391.12401 |
| wavelet-LLL | glcm  | MaximumProbability                   | 0.008198066  |
| wavelet-LLL | glcm  | Idmn                                 | 0.945615185  |
| wavelet-LLL | glcm  | JointEnergy                          | 0.003409622  |
| wavelet-LLL | glcm  | Contrast                             | 744.1840925  |
| wavelet-LLL | glcm  | DifferenceEntropy                    | 5.466471633  |
| wavelet-LLL | glcm  | InverseVariance                      | 0.059190798  |
| wavelet-LLL | glcm  | DifferenceVariance                   | 280.3910321  |
| wavelet-LLL | glcm  | Idn                                  | 0.848376589  |
| wavelet-LLL | glcm  | Idm                                  | 0.059245642  |
| wavelet-LLL | glcm  | Correlation                          | 0.472340288  |
| wavelet-LLL | glcm  | Autocorrelation                      | 4558.839414  |



|             |            |                                  |              |
|-------------|------------|----------------------------------|--------------|
| wavelet-LLL | glcm       | SumEntropy                       | 6.512850988  |
| wavelet-LLL | glcm       | SumSquares                       | 703.9545823  |
| wavelet-LLL | glcm       | ClusterProminence                | 9166701.139  |
| wavelet-LLL | glcm       | Imc2                             | 0.999798416  |
| wavelet-LLL | glcm       | Imc1                             | -0.643726435 |
| wavelet-LLL | glcm       | DifferenceAverage                | 21.34623774  |
| wavelet-LLL | glcm       | Id                               | 0.11785696   |
| wavelet-LLL | glcm       | ClusterTendency                  | 2071.634237  |
| wavelet-LLL | firstorder | InterquartileRange               | 1232.013774  |
| wavelet-LLL | firstorder | Skewness                         | 0.025797009  |
| wavelet-LLL | firstorder | Uniformity                       | 0.015982515  |
| wavelet-LLL | firstorder | Median                           | -874.7098434 |
| wavelet-LLL | firstorder | Energy                           | 300028001.4  |
| wavelet-LLL | firstorder | RobustMeanAbsoluteDeviation      | 455.4257643  |
| wavelet-LLL | firstorder | MeanAbsoluteDeviation            | 579.8526549  |
| wavelet-LLL | firstorder | TotalEnergy                      | 8100756037   |
| wavelet-LLL | firstorder | Maximum                          | 390.818716   |
| wavelet-LLL | firstorder | RootMeanSquared                  | 1113.456389  |
| wavelet-LLL | firstorder | 90Percentile                     | 86.78581669  |
| wavelet-LLL | firstorder | Minimum                          | -2289.515157 |
| wavelet-LLL | firstorder | Entropy                          | 6.194173984  |
| wavelet-LLL | firstorder | Range                            | 2680.333873  |
| wavelet-LLL | firstorder | Variance                         | 464895.9715  |
| wavelet-LLL | firstorder | 10Percentile                     | -1768.887051 |
| wavelet-LLL | firstorder | Kurtosis                         | 1.87851341   |
| wavelet-LLL | firstorder | Mean                             | -880.2778869 |
| wavelet-LLL | glrlm      | ShortRunLowGrayLevelEmphasis     | 0.006236152  |
| wavelet-LLL | glrlm      | GrayLevelVariance                | 741.6994878  |
| wavelet-LLL | glrlm      | LowGrayLevelRunEmphasis          | 0.006240742  |
| wavelet-LLL | glrlm      | GrayLevelNonUniformityNormalized | 0.015869065  |
| wavelet-LLL | glrlm      | RunVariance                      | 0.01461648   |
| wavelet-LLL | glrlm      | GrayLevelNonUniformity           | 3.784259307  |
| wavelet-LLL | glrlm      | LongRunEmphasis                  | 1.044645119  |
| wavelet-LLL | glrlm      | ShortRunHighGrayLevelEmphasis    | 3925.530297  |
| wavelet-LLL | glrlm      | RunLengthNonUniformity           | 231.5104382  |
| wavelet-LLL | glrlm      | ShortRunEmphasis                 | 0.98883872   |
| wavelet-LLL | glrlm      | LongRunHighGrayLevelEmphasis     | 4269.972981  |
| wavelet-LLL | glrlm      | RunPercentage                    | 0.985378258  |
| wavelet-LLL | glrlm      | LongRunLowGrayLevelEmphasis      | 0.006259102  |
| wavelet-LLL | glrlm      | RunEntropy                       | 6.244188653  |
| wavelet-LLL | glrlm      | HighGrayLevelRunEmphasis         | 3994.418834  |
| wavelet-LLL | glrlm      | RunLengthNonUniformityNormalized | 0.970767039  |
| wavelet-LLL | glszm      | GrayLevelVariance                | 706.5645405  |
| wavelet-LLL | glszm      | ZoneVariance                     | 0.371327442  |
| wavelet-LLL | glszm      | GrayLevelNonUniformityNormalized | 0.015321403  |
| wavelet-LLL | glszm      | SizeZoneNonUniformityNormalized  | 0.737778768  |
| wavelet-LLL | glszm      | SizeZoneNonUniformity            | 148.2935323  |
| wavelet-LLL | glszm      | GrayLevelNonUniformity           | 3.07960199   |
| wavelet-LLL | glszm      | LargeAreaEmphasis                | 1.820895522  |
| wavelet-LLL | glszm      | SmallAreaHighGrayLevelEmphasis   | 3047.371744  |
| wavelet-LLL | glszm      | ZonePercentage                   | 0.830578512  |
| wavelet-LLL | glszm      | LargeAreaLowGrayLevelEmphasis    | 0.007618225  |
| wavelet-LLL | glszm      | LargeAreaHighGrayLevelEmphasis   | 9150.323383  |
| wavelet-LLL | glszm      | HighGrayLevelZoneEmphasis        | 3647.333333  |
| wavelet-LLL | glszm      | SmallAreaEmphasis                | 0.882771517  |
| wavelet-LLL | glszm      | LowGrayLevelZoneEmphasis         | 0.007319945  |

|             |            |                                      |              |
|-------------|------------|--------------------------------------|--------------|
| wavelet-LLL | glszm      | ZoneEntropy                          | 6.533844697  |
| wavelet-LLL | glszm      | SmallAreaLowGrayLevelEmphasis        | 0.007256831  |
| wavelet-LLL | ngtdm      | Coarseness                           | 0.019636983  |
| wavelet-LLL | ngtdm      | Complexity                           | 49147.30498  |
| wavelet-LLL | ngtdm      | Strength                             | 86.61250694  |
| wavelet-LLL | ngtdm      | Contrast                             | 2.60110929   |
| wavelet-LLL | ngtdm      | Busyness                             | 0.011195696  |
| wavelet-HHL | gldm       | GrayLevelVariance                    | 21.12869681  |
| wavelet-HHL | gldm       | HighGrayLevelEmphasis                | 266.0123967  |
| wavelet-HHL | gldm       | DependenceEntropy                    | 5.846922191  |
| wavelet-HHL | gldm       | DependenceNonUniformity              | 65.09090909  |
| wavelet-HHL | gldm       | GrayLevelNonUniformity               | 16.4214876   |
| wavelet-HHL | gldm       | SmallDependenceEmphasis              | 0.468911705  |
| wavelet-HHL | gldm       | SmallDependenceHighGrayLevelEmphasis | 133.2522538  |
| wavelet-HHL | gldm       | DependenceNonUniformityNormalized    | 0.268970699  |
| wavelet-HHL | gldm       | LargeDependenceEmphasis              | 6.950413223  |
| wavelet-HHL | gldm       | LargeDependenceLowGrayLevelEmphasis  | 0.039843696  |
| wavelet-HHL | gldm       | DependenceVariance                   | 1.897206475  |
| wavelet-HHL | gldm       | LargeDependenceHighGrayLevelEmphasis | 1677.607438  |
| wavelet-HHL | gldm       | SmallDependenceLowGrayLevelEmphasis  | 0.007012427  |
| wavelet-HHL | gldm       | LowGrayLevelEmphasis                 | 0.009759571  |
| wavelet-HHL | glcm       | JointAverage                         | 15.61976522  |
| wavelet-HHL | glcm       | SumAverage                           | 31.23953044  |
| wavelet-HHL | glcm       | JointEntropy                         | 7.230051934  |
| wavelet-HHL | glcm       | ClusterShade                         | 17.91239561  |
| wavelet-HHL | glcm       | MaximumProbability                   | 0.022952683  |
| wavelet-HHL | glcm       | ldmn                                 | 0.959573949  |
| wavelet-HHL | glcm       | JointEnergy                          | 0.008179655  |
| wavelet-HHL | glcm       | Contrast                             | 38.91574269  |
| wavelet-HHL | glcm       | DifferenceEntropy                    | 3.64408068   |
| wavelet-HHL | glcm       | InverseVariance                      | 0.206442178  |
| wavelet-HHL | glcm       | DifferenceVariance                   | 15.24690785  |
| wavelet-HHL | glcm       | ldn                                  | 0.867892649  |
| wavelet-HHL | glcm       | ldm                                  | 0.195748856  |
| wavelet-HHL | glcm       | Correlation                          | 0.016545581  |
| wavelet-HHL | glcm       | Autocorrelation                      | 244.3318953  |
| wavelet-HHL | glcm       | SumEntropy                           | 4.498633978  |
| wavelet-HHL | glcm       | SumSquares                           | 19.79931746  |
| wavelet-HHL | glcm       | ClusterProminence                    | 5514.523229  |
| wavelet-HHL | glcm       | lmc2                                 | 0.913780551  |
| wavelet-HHL | glcm       | lmc1                                 | -0.222899631 |
| wavelet-HHL | glcm       | DifferenceAverage                    | 4.828826087  |
| wavelet-HHL | glcm       | ld                                   | 0.287414127  |
| wavelet-HHL | glcm       | ClusterTendency                      | 40.28152716  |
| wavelet-HHL | firstorder | InterquartileRange                   | 151.8919737  |
| wavelet-HHL | firstorder | Skewness                             | 0.076521706  |
| wavelet-HHL | firstorder | Uniformity                           | 0.067857387  |
| wavelet-HHL | firstorder | Median                               | -8.288014727 |
| wavelet-HHL | firstorder | Energy                               | 3228088.661  |
| wavelet-HHL | firstorder | RobustMeanAbsoluteDeviation          | 61.33969451  |
| wavelet-HHL | firstorder | MeanAbsoluteDeviation                | 90.7568271   |
| wavelet-HHL | firstorder | TotalEnergy                          | 87158393.85  |
| wavelet-HHL | firstorder | Maximum                              | 348.6539923  |
| wavelet-HHL | firstorder | RootMeanSquared                      | 115.4954949  |
| wavelet-HHL | firstorder | 90Percentile                         | 156.0969834  |
| wavelet-HHL | firstorder | Minimum                              | -369.706478  |

|             |            |                                      |             |
|-------------|------------|--------------------------------------|-------------|
| wavelet-HHL | firstorder | Entropy                              | 4.107719548 |
| wavelet-HHL | firstorder | Range                                | 718.3604703 |
| wavelet-HHL | firstorder | Variance                             | 13328.26397 |
| wavelet-HHL | firstorder | 10Percentile                         | -135.73254  |
| wavelet-HHL | firstorder | Kurtosis                             | 3.205654372 |
| wavelet-HHL | firstorder | Mean                                 | 3.3083796   |
| wavelet-HHL | glrlm      | ShortRunLowGrayLevelEmphasis         | 0.009810067 |
| wavelet-HHL | glrlm      | GrayLevelVariance                    | 21.61264781 |
| wavelet-HHL | glrlm      | LowGrayLevelRunEmphasis              | 0.009993594 |
| wavelet-HHL | glrlm      | GrayLevelNonUniformityNormalized     | 0.066635286 |
| wavelet-HHL | glrlm      | RunVariance                          | 0.055248768 |
| wavelet-HHL | glrlm      | GrayLevelNonUniformity               | 15.35391662 |
| wavelet-HHL | glrlm      | LongRunEmphasis                      | 1.159453562 |
| wavelet-HHL | glrlm      | ShortRunHighGrayLevelEmphasis        | 258.6442562 |
| wavelet-HHL | glrlm      | RunLengthNonUniformity               | 209.8826231 |
| wavelet-HHL | glrlm      | ShortRunEmphasis                     | 0.964254744 |
| wavelet-HHL | glrlm      | LongRunHighGrayLevelEmphasis         | 305.7002601 |
| wavelet-HHL | glrlm      | RunPercentage                        | 0.952002543 |
| wavelet-HHL | glrlm      | LongRunLowGrayLevelEmphasis          | 0.010814391 |
| wavelet-HHL | glrlm      | RunEntropy                           | 4.341115162 |
| wavelet-HHL | glrlm      | HighGrayLevelRunEmphasis             | 267.2721124 |
| wavelet-HHL | glrlm      | RunLengthNonUniformityNormalized     | 0.910587012 |
| wavelet-HHL | glszm      | GrayLevelVariance                    | 28.1007151  |
| wavelet-HHL | glszm      | ZoneVariance                         | 4.434228712 |
| wavelet-HHL | glszm      | GrayLevelNonUniformityNormalized     | 0.058229674 |
| wavelet-HHL | glszm      | SizeZoneNonUniformityNormalized      | 0.495943753 |
| wavelet-HHL | glszm      | SizeZoneNonUniformity                | 63.97674419 |
| wavelet-HHL | glszm      | GrayLevelNonUniformity               | 7.511627907 |
| wavelet-HHL | glszm      | LargeAreaEmphasis                    | 7.953488372 |
| wavelet-HHL | glszm      | SmallAreaHighGrayLevelEmphasis       | 212.4774856 |
| wavelet-HHL | glszm      | ZonePercentage                       | 0.533057851 |
| wavelet-HHL | glszm      | LargeAreaLowGrayLevelEmphasis        | 0.048043338 |
| wavelet-HHL | glszm      | LargeAreaHighGrayLevelEmphasis       | 1918.162791 |
| wavelet-HHL | glszm      | HighGrayLevelZoneEmphasis            | 284.3488372 |
| wavelet-HHL | glszm      | SmallAreaEmphasis                    | 0.731566549 |
| wavelet-HHL | glszm      | LowGrayLevelZoneEmphasis             | 0.013781637 |
| wavelet-HHL | glszm      | ZoneEntropy                          | 5.347062699 |
| wavelet-HHL | glszm      | SmallAreaLowGrayLevelEmphasis        | 0.012392702 |
| wavelet-HHL | ngtdm      | Coarseness                           | 0.02356827  |
| wavelet-HHL | ngtdm      | Complexity                           | 755.0493886 |
| wavelet-HHL | ngtdm      | Strength                             | 3.827707736 |
| wavelet-HHL | ngtdm      | Contrast                             | 0.304727444 |
| wavelet-HHL | ngtdm      | Busyness                             | 0.137295324 |
| wavelet-HLH | gldm       | GrayLevelVariance                    | 17.99878765 |
| wavelet-HLH | gldm       | HighGrayLevelEmphasis                | 225.1446281 |
| wavelet-HLH | gldm       | DependenceEntropy                    | 5.72436616  |
| wavelet-HLH | gldm       | DependenceNonUniformity              | 62.33057851 |
| wavelet-HLH | gldm       | GrayLevelNonUniformity               | 18.08264463 |
| wavelet-HLH | gldm       | SmallDependenceEmphasis              | 0.433778275 |
| wavelet-HLH | gldm       | SmallDependenceHighGrayLevelEmphasis | 102.837104  |
| wavelet-HLH | gldm       | DependenceNonUniformityNormalized    | 0.257564374 |
| wavelet-HLH | gldm       | LargeDependenceEmphasis              | 7.595041322 |
| wavelet-HLH | gldm       | LargeDependenceLowGrayLevelEmphasis  | 0.058080018 |
| wavelet-HLH | gldm       | DependenceVariance                   | 2.086127997 |
| wavelet-HLH | gldm       | LargeDependenceHighGrayLevelEmphasis | 1534.739669 |
| wavelet-HLH | gldm       | SmallDependenceLowGrayLevelEmphasis  | 0.008555112 |

|             |            |                                  |              |
|-------------|------------|----------------------------------|--------------|
| wavelet-HLH | gldm       | LowGrayLevelEmphasis             | 0.013671868  |
| wavelet-HLH | glcm       | JointAverage                     | 14.52975058  |
| wavelet-HLH | glcm       | SumAverage                       | 29.05950116  |
| wavelet-HLH | glcm       | JointEntropy                     | 7.13662277   |
| wavelet-HLH | glcm       | ClusterShade                     | -41.98378839 |
| wavelet-HLH | glcm       | MaximumProbability               | 0.026809549  |
| wavelet-HLH | glcm       | ldmn                             | 0.948754333  |
| wavelet-HLH | glcm       | JointEnergy                      | 0.008909     |
| wavelet-HLH | glcm       | Contrast                         | 35.25427213  |
| wavelet-HLH | glcm       | DifferenceEntropy                | 3.57160413   |
| wavelet-HLH | glcm       | InverseVariance                  | 0.224910792  |
| wavelet-HLH | glcm       | DifferenceVariance               | 14.2449231   |
| wavelet-HLH | glcm       | ldn                              | 0.854058864  |
| wavelet-HLH | glcm       | ldm                              | 0.210474772  |
| wavelet-HLH | glcm       | Correlation                      | 0.018603866  |
| wavelet-HLH | glcm       | Autocorrelation                  | 211.4426647  |
| wavelet-HLH | glcm       | SumEntropy                       | 4.432242303  |
| wavelet-HLH | glcm       | SumSquares                       | 17.94628345  |
| wavelet-HLH | glcm       | ClusterProminence                | 4888.208331  |
| wavelet-HLH | glcm       | lmc2                             | 0.9021011    |
| wavelet-HLH | glcm       | lmc1                             | -0.212008395 |
| wavelet-HLH | glcm       | DifferenceAverage                | 4.550645462  |
| wavelet-HLH | glcm       | ld                               | 0.300574603  |
| wavelet-HLH | glcm       | ClusterTendency                  | 36.53086167  |
| wavelet-HLH | firstorder | InterquartileRange               | 128.169169   |
| wavelet-HLH | firstorder | Skewness                         | -0.342242669 |
| wavelet-HLH | firstorder | Uniformity                       | 0.074721672  |
| wavelet-HLH | firstorder | Median                           | -2.087611181 |
| wavelet-HLH | firstorder | Energy                           | 2665779.264  |
| wavelet-HLH | firstorder | RobustMeanAbsoluteDeviation      | 50.88048602  |
| wavelet-HLH | firstorder | MeanAbsoluteDeviation            | 79.63733802  |
| wavelet-HLH | firstorder | TotalEnergy                      | 71976040.12  |
| wavelet-HLH | firstorder | Maximum                          | 232.8767337  |
| wavelet-HLH | firstorder | RootMeanSquared                  | 104.9553085  |
| wavelet-HLH | firstorder | 90Percentile                     | 125.3028934  |
| wavelet-HLH | firstorder | Minimum                          | -339.540777  |
| wavelet-HLH | firstorder | Entropy                          | 4.010633416  |
| wavelet-HLH | firstorder | Range                            | 572.4175107  |
| wavelet-HLH | firstorder | Variance                         | 11009.54065  |
| wavelet-HLH | firstorder | 10Percentile                     | -132.9119252 |
| wavelet-HLH | firstorder | Kurtosis                         | 3.66801876   |
| wavelet-HLH | firstorder | Mean                             | -2.464982995 |
| wavelet-HLH | glrlm      | ShortRunLowGrayLevelEmphasis     | 0.013716206  |
| wavelet-HLH | glrlm      | GrayLevelVariance                | 18.50789401  |
| wavelet-HLH | glrlm      | LowGrayLevelRunEmphasis          | 0.014009659  |
| wavelet-HLH | glrlm      | GrayLevelNonUniformityNormalized | 0.072857021  |
| wavelet-HLH | glrlm      | RunVariance                      | 0.060414876  |
| wavelet-HLH | glrlm      | GrayLevelNonUniformity           | 16.71541579  |
| wavelet-HLH | glrlm      | LongRunEmphasis                  | 1.173377777  |
| wavelet-HLH | glrlm      | ShortRunHighGrayLevelEmphasis    | 218.2362223  |
| wavelet-HLH | glrlm      | RunLengthNonUniformity           | 207.5227882  |
| wavelet-HLH | glrlm      | ShortRunEmphasis                 | 0.961543891  |
| wavelet-HLH | glrlm      | LongRunHighGrayLevelEmphasis     | 261.7096497  |
| wavelet-HLH | glrlm      | RunPercentage                    | 0.948188175  |
| wavelet-HLH | glrlm      | LongRunLowGrayLevelEmphasis      | 0.015297865  |
| wavelet-HLH | glrlm      | RunEntropy                       | 4.264435621  |

|             |       |                                  |             |
|-------------|-------|----------------------------------|-------------|
| wavelet-HLH | glrlm | HighGrayLevelRunEmphasis         | 226.2053656 |
| wavelet-HLH | glrlm | RunLengthNonUniformityNormalized | 0.904075777 |
| wavelet-HLH | glszm | GrayLevelVariance                | 25.33597432 |
| wavelet-HLH | glszm | ZoneVariance                     | 8.26446281  |
| wavelet-HLH | glszm | GrayLevelNonUniformityNormalized | 0.060993102 |
| wavelet-HLH | glszm | SizeZoneNonUniformityNormalized  | 0.461512192 |
| wavelet-HLH | glszm | SizeZoneNonUniformity            | 55.84297521 |
| wavelet-HLH | glszm | GrayLevelNonUniformity           | 7.380165289 |
| wavelet-HLH | glszm | LargeAreaEmphasis                | 12.26446281 |
| wavelet-HLH | glszm | SmallAreaHighGrayLevelEmphasis   | 169.187911  |
| wavelet-HLH | glszm | ZonePercentage                   | 0.5         |
| wavelet-HLH | glszm | LargeAreaLowGrayLevelEmphasis    | 0.089698575 |
| wavelet-HLH | glszm | LargeAreaHighGrayLevelEmphasis   | 2395.46281  |
| wavelet-HLH | glszm | HighGrayLevelZoneEmphasis        | 237.6280992 |
| wavelet-HLH | glszm | SmallAreaEmphasis                | 0.704638467 |
| wavelet-HLH | glszm | LowGrayLevelZoneEmphasis         | 0.019220724 |
| wavelet-HLH | glszm | ZoneEntropy                      | 5.314490127 |
| wavelet-HLH | glszm | SmallAreaLowGrayLevelEmphasis    | 0.015560421 |
| wavelet-HLH | ngtdm | Coarseness                       | 0.026216208 |
| wavelet-HLH | ngtdm | Complexity                       | 584.197185  |
| wavelet-HLH | ngtdm | Strength                         | 3.645836186 |
| wavelet-HLH | ngtdm | Contrast                         | 0.252873917 |
| wavelet-HLH | ngtdm | Busyness                         | 0.127046311 |

| Image type | Feature Class | Feature Name                         | Value                                                                                                                                                                                                                                                                                                                                                                                                             |
|------------|---------------|--------------------------------------|-------------------------------------------------------------------------------------------------------------------------------------------------------------------------------------------------------------------------------------------------------------------------------------------------------------------------------------------------------------------------------------------------------------------|
| general    | info          | BoundingBox                          | 10: RTSTRUCT: C99-DNU_B_segment_RML ITV<br>(0, 1, 1, 4, 4, 4)                                                                                                                                                                                                                                                                                                                                                     |
| general    | info          | EnabledImageTypes                    | {u'Original': {}, u'Wavelet': {}}                                                                                                                                                                                                                                                                                                                                                                                 |
|            |               |                                      | {'distances': [1], 'additionalInfo': True, 'force2D': False, 'interpolator': 'sitkBSpline', 'resampledPixelSpacing': [3.0], 'label': 1, 'normalizeScale': 1, 'normalize': False, 'force2Ddimension': 0, 'removeOutliers': None, 'minimumROISize': None, u'binWidth': 25.0, 'minimumROIDimensions': 1, u'correctMask': True, 'preCrop': False, u'symmetricalGLCM': True, 'resegmentRange': None, 'padDistance': 5} |
| general    | info          | GeneralSettings                      |                                                                                                                                                                                                                                                                                                                                                                                                                   |
| general    | info          | ImageHash                            | 4072bf1329b15faf8f6abecd7e113d800cee3d9d                                                                                                                                                                                                                                                                                                                                                                          |
| general    | info          | ImageSpacing                         | (0.8359375, 0.8359375, 2.0)                                                                                                                                                                                                                                                                                                                                                                                       |
| general    | info          | MaskHash                             | ccfb558fbe98515dba9f259ade43fc2e34a04eea                                                                                                                                                                                                                                                                                                                                                                          |
| general    | info          | NumpyVersion                         | 1.13.1                                                                                                                                                                                                                                                                                                                                                                                                            |
| general    | info          | PyWaveletVersion                     | 0.5.2                                                                                                                                                                                                                                                                                                                                                                                                             |
| general    | info          | SimpleITKVersion                     | 1.1.0                                                                                                                                                                                                                                                                                                                                                                                                             |
| general    | info          | Version                              | 1.3.0.post102+g1b0eb74                                                                                                                                                                                                                                                                                                                                                                                            |
| general    | info          | VolumeNum                            | 1                                                                                                                                                                                                                                                                                                                                                                                                                 |
| general    | info          | VoxelNum                             | 35                                                                                                                                                                                                                                                                                                                                                                                                                |
| original   | shape         | Maximum3DDiameter                    | 13.07669683                                                                                                                                                                                                                                                                                                                                                                                                       |
| original   | shape         | Maximum2DDiameterSlice               | 10.81665383                                                                                                                                                                                                                                                                                                                                                                                                       |
| original   | shape         | Sphericity                           | 0.936698559                                                                                                                                                                                                                                                                                                                                                                                                       |
| original   | shape         | MinorAxis                            | 10.47995518                                                                                                                                                                                                                                                                                                                                                                                                       |
| original   | shape         | Elongation                           | 0.766877659                                                                                                                                                                                                                                                                                                                                                                                                       |
| original   | shape         | SurfaceVolumeRatio                   | 0.526106503                                                                                                                                                                                                                                                                                                                                                                                                       |
| original   | shape         | Volume                               | 945                                                                                                                                                                                                                                                                                                                                                                                                               |
| original   | shape         | MajorAxis                            | 13.66574584                                                                                                                                                                                                                                                                                                                                                                                                       |
| original   | shape         | SurfaceArea                          | 497.1706449                                                                                                                                                                                                                                                                                                                                                                                                       |
| original   | shape         | Flatness                             | 0.689368238                                                                                                                                                                                                                                                                                                                                                                                                       |
| original   | shape         | LeastAxis                            | 9.420731134                                                                                                                                                                                                                                                                                                                                                                                                       |
| original   | shape         | Maximum2DDiameterColumn              | 12.72792206                                                                                                                                                                                                                                                                                                                                                                                                       |
| original   | shape         | Maximum2DDiameterRow                 | 10.81665383                                                                                                                                                                                                                                                                                                                                                                                                       |
| original   | gldm          | GrayLevelVariance                    | 112.4114286                                                                                                                                                                                                                                                                                                                                                                                                       |
| original   | gldm          | HighGrayLevelEmphasis                | 488.7714286                                                                                                                                                                                                                                                                                                                                                                                                       |
| original   | gldm          | DependenceEntropy                    | 4.45757516                                                                                                                                                                                                                                                                                                                                                                                                        |
| original   | gldm          | DependenceNonUniformity              | 20.71428571                                                                                                                                                                                                                                                                                                                                                                                                       |
| original   | gldm          | GrayLevelNonUniformity               | 1.971428571                                                                                                                                                                                                                                                                                                                                                                                                       |
| original   | gldm          | SmallDependenceEmphasis              | 0.785714286                                                                                                                                                                                                                                                                                                                                                                                                       |
| original   | gldm          | SmallDependenceHighGrayLevelEmphasis | 346.1428571                                                                                                                                                                                                                                                                                                                                                                                                       |
| original   | gldm          | DependenceNonUniformityNormalized    | 0.591836735                                                                                                                                                                                                                                                                                                                                                                                                       |
| original   | gldm          | LargeDependenceEmphasis              | 1.857142857                                                                                                                                                                                                                                                                                                                                                                                                       |
| original   | gldm          | LargeDependenceLowGrayLevelEmphasis  | 0.05964241                                                                                                                                                                                                                                                                                                                                                                                                        |
| original   | gldm          | DependenceVariance                   | 0.204081633                                                                                                                                                                                                                                                                                                                                                                                                       |
| original   | gldm          | LargeDependenceHighGrayLevelEmphasis | 1059.285714                                                                                                                                                                                                                                                                                                                                                                                                       |
| original   | gldm          | SmallDependenceLowGrayLevelEmphasis  | 0.057436576                                                                                                                                                                                                                                                                                                                                                                                                       |
| original   | gldm          | LowGrayLevelEmphasis                 | 0.057877743                                                                                                                                                                                                                                                                                                                                                                                                       |
| original   | glcm          | JointAverage                         | 21.98553043                                                                                                                                                                                                                                                                                                                                                                                                       |
| original   | glcm          | SumAverage                           | 43.97106086                                                                                                                                                                                                                                                                                                                                                                                                       |
| original   | glcm          | JointEntropy                         | 4.942013363                                                                                                                                                                                                                                                                                                                                                                                                       |
| original   | glcm          | ClusterShade                         | -968.3849682                                                                                                                                                                                                                                                                                                                                                                                                      |
| original   | glcm          | MaximumProbability                   | 0.045916293                                                                                                                                                                                                                                                                                                                                                                                                       |
| original   | glcm          | Idmn                                 | 0.870448602                                                                                                                                                                                                                                                                                                                                                                                                       |
| original   | glcm          | JointEnergy                          | 0.03395463                                                                                                                                                                                                                                                                                                                                                                                                        |
| original   | glcm          | Contrast                             | 222.049564                                                                                                                                                                                                                                                                                                                                                                                                        |
| original   | glcm          | DifferenceEntropy                    | 3.596048343                                                                                                                                                                                                                                                                                                                                                                                                       |

|          |            |                                  |              |
|----------|------------|----------------------------------|--------------|
| original | glcm       | InverseVariance                  | 0.096637468  |
| original | glcm       | DifferenceVariance               | 65.56067519  |
| original | glcm       | Idn                              | 0.767460548  |
| original | glcm       | Idm                              | 0.077595509  |
| original | glcm       | Correlation                      | -0.073377329 |
| original | glcm       | Autocorrelation                  | 474.7286479  |
| original | glcm       | SumEntropy                       | 3.667036149  |
| original | glcm       | SumSquares                       | 101.4035324  |
| original | glcm       | ClusterProminence                | 90158.25833  |
| original | glcm       | Imc2                             | 0.999211668  |
| original | glcm       | Imc1                             | -0.796078571 |
| original | glcm       | DifferenceAverage                | 12.09711572  |
| original | glcm       | Id                               | 0.151634121  |
| original | glcm       | ClusterTendency                  | 183.5645658  |
| original | firstorder | InterquartileRange               | 402          |
| original | firstorder | Skewness                         | -0.293174695 |
| original | firstorder | Uniformity                       | 0.056326531  |
| original | firstorder | Median                           | -298         |
| original | firstorder | Energy                           | 6225510      |
| original | firstorder | RobustMeanAbsoluteDeviation      | 170.8971193  |
| original | firstorder | MeanAbsoluteDeviation            | 224.7983673  |
| original | firstorder | TotalEnergy                      | 168088770    |
| original | firstorder | Maximum                          | 60           |
| original | firstorder | RootMeanSquared                  | 421.7484016  |
| original | firstorder | 90Percentile                     | -0.4         |
| original | firstorder | Minimum                          | -791         |
| original | firstorder | Entropy                          | 4.300153017  |
| original | firstorder | Range                            | 851          |
| original | firstorder | Variance                         | 70325.19673  |
| original | firstorder | 10Percentile                     | -749.6       |
| original | firstorder | Kurtosis                         | 1.915585361  |
| original | firstorder | Mean                             | -327.9428571 |
| original | glrlm      | ShortRunLowGrayLevelEmphasis     | 0.058506719  |
| original | glrlm      | GrayLevelVariance                | 112.7527266  |
| original | glrlm      | LowGrayLevelRunEmphasis          | 0.058524557  |
| original | glrlm      | GrayLevelNonUniformityNormalized | 0.056337547  |
| original | glrlm      | RunVariance                      | 0.010954819  |
| original | glrlm      | GrayLevelNonUniformity           | 1.950187068  |
| original | glrlm      | LongRunEmphasis                  | 1.034759358  |
| original | glrlm      | ShortRunHighGrayLevelEmphasis    | 480.897671   |
| original | glrlm      | RunLengthNonUniformity           | 33.88797477  |
| original | glrlm      | ShortRunEmphasis                 | 0.99131016   |
| original | glrlm      | LongRunHighGrayLevelEmphasis     | 509.905281   |
| original | glrlm      | RunPercentage                    | 0.989010989  |
| original | glrlm      | LongRunLowGrayLevelEmphasis      | 0.058595907  |
| original | glrlm      | RunEntropy                       | 4.310285778  |
| original | glrlm      | HighGrayLevelRunEmphasis         | 486.699193   |
| original | glrlm      | RunLengthNonUniformityNormalized | 0.978090362  |
| original | glszm      | GrayLevelVariance                | 117.05       |
| original | glszm      | ZoneVariance                     | 0.138888889  |
| original | glszm      | GrayLevelNonUniformityNormalized | 0.055555556  |
| original | glszm      | SizeZoneNonUniformityNormalized  | 0.722222222  |
| original | glszm      | SizeZoneNonUniformity            | 21.66666667  |
| original | glszm      | GrayLevelNonUniformity           | 1.666666667  |
| original | glszm      | LargeAreaEmphasis                | 1.5          |
| original | glszm      | SmallAreaHighGrayLevelEmphasis   | 376.1        |
| original | glszm      | ZonePercentage                   | 0.857142857  |
| original | glszm      | LargeAreaLowGrayLevelEmphasis    | 0.068210293  |

|             |            |                                      |              |
|-------------|------------|--------------------------------------|--------------|
| original    | glszm      | LargeAreaHighGrayLevelEmphasis       | 792.1        |
| original    | glszm      | HighGrayLevelZoneEmphasis            | 459.3        |
| original    | glszm      | SmallAreaEmphasis                    | 0.875        |
| original    | glszm      | LowGrayLevelZoneEmphasis             | 0.067180903  |
| original    | glszm      | ZoneEntropy                          | 4.456564762  |
| original    | glszm      | SmallAreaLowGrayLevelEmphasis        | 0.066923556  |
| original    | ngtdm      | Coarseness                           | 0.053158813  |
| original    | ngtdm      | Complexity                           | 3192.826145  |
| original    | ngtdm      | Strength                             | 29.61615913  |
| original    | ngtdm      | Contrast                             | 4.752069146  |
| original    | ngtdm      | Busyness                             | 0.050053555  |
| wavelet-HHH | gldm       | GrayLevelVariance                    | 13.49061224  |
| wavelet-HHH | gldm       | HighGrayLevelEmphasis                | 87.94285714  |
| wavelet-HHH | gldm       | DependenceEntropy                    | 4.400432303  |
| wavelet-HHH | gldm       | DependenceNonUniformity              | 13.22857143  |
| wavelet-HHH | gldm       | GrayLevelNonUniformity               | 3.285714286  |
| wavelet-HHH | gldm       | SmallDependenceEmphasis              | 0.608484127  |
| wavelet-HHH | gldm       | SmallDependenceHighGrayLevelEmphasis | 56.6046746   |
| wavelet-HHH | gldm       | DependenceNonUniformityNormalized    | 0.377959184  |
| wavelet-HHH | gldm       | LargeDependenceEmphasis              | 3.971428571  |
| wavelet-HHH | gldm       | LargeDependenceLowGrayLevelEmphasis  | 0.103078424  |
| wavelet-HHH | gldm       | DependenceVariance                   | 0.933877551  |
| wavelet-HHH | gldm       | LargeDependenceHighGrayLevelEmphasis | 329.5428571  |
| wavelet-HHH | gldm       | SmallDependenceLowGrayLevelEmphasis  | 0.04927956   |
| wavelet-HHH | gldm       | LowGrayLevelEmphasis                 | 0.056628869  |
| wavelet-HHH | glcm       | JointAverage                         | 8.663389695  |
| wavelet-HHH | glcm       | SumAverage                           | 17.32677939  |
| wavelet-HHH | glcm       | JointEntropy                         | 4.85648612   |
| wavelet-HHH | glcm       | ClusterShade                         | 6.646077848  |
| wavelet-HHH | glcm       | MaximumProbability                   | 0.060134994  |
| wavelet-HHH | glcm       | Idmn                                 | 0.906949248  |
| wavelet-HHH | glcm       | JointEnergy                          | 0.036656548  |
| wavelet-HHH | glcm       | Contrast                             | 30.51250517  |
| wavelet-HHH | glcm       | DifferenceEntropy                    | 2.891931951  |
| wavelet-HHH | glcm       | InverseVariance                      | 0.209322198  |
| wavelet-HHH | glcm       | DifferenceVariance                   | 9.121629865  |
| wavelet-HHH | glcm       | Idn                                  | 0.79967426   |
| wavelet-HHH | glcm       | Idm                                  | 0.188366664  |
| wavelet-HHH | glcm       | Correlation                          | -0.028751891 |
| wavelet-HHH | glcm       | Autocorrelation                      | 74.65147323  |
| wavelet-HHH | glcm       | SumEntropy                           | 3.272492874  |
| wavelet-HHH | glcm       | SumSquares                           | 14.80864818  |
| wavelet-HHH | glcm       | ClusterProminence                    | 2070.478379  |
| wavelet-HHH | glcm       | Imc2                                 | 0.995822333  |
| wavelet-HHH | glcm       | Imc1                                 | -0.671614861 |
| wavelet-HHH | glcm       | DifferenceAverage                    | 4.478485408  |
| wavelet-HHH | glcm       | Id                                   | 0.283515704  |
| wavelet-HHH | glcm       | ClusterTendency                      | 28.72208754  |
| wavelet-HHH | firstorder | InterquartileRange                   | 108.1971956  |
| wavelet-HHH | firstorder | Skewness                             | -0.067243159 |
| wavelet-HHH | firstorder | Uniformity                           | 0.093877551  |
| wavelet-HHH | firstorder | Median                               | 12.74050387  |
| wavelet-HHH | firstorder | Energy                               | 293626.0381  |
| wavelet-HHH | firstorder | RobustMeanAbsoluteDeviation          | 46.47204372  |
| wavelet-HHH | firstorder | MeanAbsoluteDeviation                | 71.43756589  |
| wavelet-HHH | firstorder | TotalEnergy                          | 7927903.029  |
| wavelet-HHH | firstorder | Maximum                              | 185.064718   |
| wavelet-HHH | firstorder | RootMeanSquared                      | 91.59320594  |



|             |            |                                      |              |
|-------------|------------|--------------------------------------|--------------|
| wavelet-HHH | firstorder | 90Percentile                         | 133.3411491  |
| wavelet-HHH | firstorder | Minimum                              | -189.5056244 |
| wavelet-HHH | firstorder | Entropy                              | 3.703107389  |
| wavelet-HHH | firstorder | Range                                | 374.5703425  |
| wavelet-HHH | firstorder | Variance                             | 8359.822569  |
| wavelet-HHH | firstorder | 10Percentile                         | -119.8328746 |
| wavelet-HHH | firstorder | Kurtosis                             | 2.516002977  |
| wavelet-HHH | firstorder | Mean                                 | 5.430727927  |
| wavelet-HHH | glrlm      | ShortRunLowGrayLevelEmphasis         | 0.057453226  |
| wavelet-HHH | glrlm      | GrayLevelVariance                    | 13.77538405  |
| wavelet-HHH | glrlm      | LowGrayLevelRunEmphasis              | 0.057837658  |
| wavelet-HHH | glrlm      | GrayLevelNonUniformityNormalized     | 0.091473262  |
| wavelet-HHH | glrlm      | RunVariance                          | 0.028429877  |
| wavelet-HHH | glrlm      | GrayLevelNonUniformity               | 3.112443929  |
| wavelet-HHH | glrlm      | LongRunEmphasis                      | 1.091191896  |
| wavelet-HHH | glrlm      | ShortRunHighGrayLevelEmphasis        | 86.31994553  |
| wavelet-HHH | glrlm      | RunLengthNonUniformity               | 32.12781091  |
| wavelet-HHH | glrlm      | ShortRunEmphasis                     | 0.977202026  |
| wavelet-HHH | glrlm      | LongRunHighGrayLevelEmphasis         | 95.52595321  |
| wavelet-HHH | glrlm      | RunPercentage                        | 0.971428571  |
| wavelet-HHH | glrlm      | LongRunLowGrayLevelEmphasis          | 0.059375384  |
| wavelet-HHH | glrlm      | RunEntropy                           | 3.797848502  |
| wavelet-HHH | glrlm      | HighGrayLevelRunEmphasis             | 88.16114706  |
| wavelet-HHH | glrlm      | RunLengthNonUniformityNormalized     | 0.943140245  |
| wavelet-HHH | glszm      | GrayLevelVariance                    | 17.49305556  |
| wavelet-HHH | glszm      | ZoneVariance                         | 1.164930556  |
| wavelet-HHH | glszm      | GrayLevelNonUniformityNormalized     | 0.076388889  |
| wavelet-HHH | glszm      | SizeZoneNonUniformityNormalized      | 0.59375      |
| wavelet-HHH | glszm      | SizeZoneNonUniformity                | 14.25        |
| wavelet-HHH | glszm      | GrayLevelNonUniformity               | 1.833333333  |
| wavelet-HHH | glszm      | LargeAreaEmphasis                    | 3.291666667  |
| wavelet-HHH | glszm      | SmallAreaHighGrayLevelEmphasis       | 75.27546296  |
| wavelet-HHH | glszm      | ZonePercentage                       | 0.685714286  |
| wavelet-HHH | glszm      | LargeAreaLowGrayLevelEmphasis        | 0.109834194  |
| wavelet-HHH | glszm      | LargeAreaHighGrayLevelEmphasis       | 278.25       |
| wavelet-HHH | glszm      | HighGrayLevelZoneEmphasis            | 91.16666667  |
| wavelet-HHH | glszm      | SmallAreaEmphasis                    | 0.797453704  |
| wavelet-HHH | glszm      | LowGrayLevelZoneEmphasis             | 0.074519253  |
| wavelet-HHH | glszm      | ZoneEntropy                          | 4.136842188  |
| wavelet-HHH | glszm      | SmallAreaLowGrayLevelEmphasis        | 0.070154395  |
| wavelet-HHH | ngtdm      | Coarseness                           | 0.163815992  |
| wavelet-HHH | ngtdm      | Complexity                           | 270.7152503  |
| wavelet-HHH | ngtdm      | Strength                             | 10.40081529  |
| wavelet-HHH | ngtdm      | Contrast                             | 0.343485994  |
| wavelet-HHH | ngtdm      | Busyness                             | 0.050821683  |
| wavelet-HLL | gldm       | GrayLevelVariance                    | 158.0440816  |
| wavelet-HLL | gldm       | HighGrayLevelEmphasis                | 777.3428571  |
| wavelet-HLL | gldm       | DependenceEntropy                    | 4.614997303  |
| wavelet-HLL | gldm       | DependenceNonUniformity              | 19.34285714  |
| wavelet-HLL | gldm       | GrayLevelNonUniformity               | 1.628571429  |
| wavelet-HLL | gldm       | SmallDependenceEmphasis              | 0.76031746   |
| wavelet-HLL | gldm       | SmallDependenceHighGrayLevelEmphasis | 634.8285714  |
| wavelet-HLL | gldm       | DependenceNonUniformityNormalized    | 0.552653061  |
| wavelet-HLL | gldm       | LargeDependenceEmphasis              | 2.085714286  |
| wavelet-HLL | gldm       | LargeDependenceLowGrayLevelEmphasis  | 0.044274976  |
| wavelet-HLL | gldm       | DependenceVariance                   | 0.28244898   |
| wavelet-HLL | gldm       | LargeDependenceHighGrayLevelEmphasis | 1375.971429  |
| wavelet-HLL | gldm       | SmallDependenceLowGrayLevelEmphasis  | 0.03861286   |

|             |            |                                  |              |
|-------------|------------|----------------------------------|--------------|
| wavelet-HLL | gldm       | LowGrayLevelEmphasis             | 0.039632408  |
| wavelet-HLL | glcm       | JointAverage                     | 24.4638644   |
| wavelet-HLL | glcm       | SumAverage                       | 48.9277288   |
| wavelet-HLL | glcm       | JointEntropy                     | 4.97009568   |
| wavelet-HLL | glcm       | ClusterShade                     | -59.4135429  |
| wavelet-HLL | glcm       | MaximumProbability               | 0.041595542  |
| wavelet-HLL | glcm       | Idmn                             | 0.908225709  |
| wavelet-HLL | glcm       | JointEnergy                      | 0.033170689  |
| wavelet-HLL | glcm       | Contrast                         | 238.2763583  |
| wavelet-HLL | glcm       | DifferenceEntropy                | 3.38724944   |
| wavelet-HLL | glcm       | InverseVariance                  | 0.114795374  |
| wavelet-HLL | glcm       | DifferenceVariance               | 75.8972784   |
| wavelet-HLL | glcm       | Idn                              | 0.809590408  |
| wavelet-HLL | glcm       | Idm                              | 0.098764215  |
| wavelet-HLL | glcm       | Correlation                      | 0.297679182  |
| wavelet-HLL | glcm       | Autocorrelation                  | 654.1035133  |
| wavelet-HLL | glcm       | SumEntropy                       | 3.803867483  |
| wavelet-HLL | glcm       | SumSquares                       | 172.9703349  |
| wavelet-HLL | glcm       | ClusterProminence                | 373442.2475  |
| wavelet-HLL | glcm       | Imc2                             | 0.999697791  |
| wavelet-HLL | glcm       | Imc1                             | -0.860677169 |
| wavelet-HLL | glcm       | DifferenceAverage                | 11.8769065   |
| wavelet-HLL | glcm       | Id                               | 0.172114579  |
| wavelet-HLL | glcm       | ClusterTendency                  | 453.6049814  |
| wavelet-HLL | firstorder | InterquartileRange               | 513.6703811  |
| wavelet-HLL | firstorder | Skewness                         | -0.286048513 |
| wavelet-HLL | firstorder | Uniformity                       | 0.046530612  |
| wavelet-HLL | firstorder | Median                           | -45.20344074 |
| wavelet-HLL | firstorder | Energy                           | 3596529.034  |
| wavelet-HLL | firstorder | RobustMeanAbsoluteDeviation      | 222.360867   |
| wavelet-HLL | firstorder | MeanAbsoluteDeviation            | 279.3820794  |
| wavelet-HLL | firstorder | TotalEnergy                      | 97106283.93  |
| wavelet-HLL | firstorder | Maximum                          | 409.4844211  |
| wavelet-HLL | firstorder | RootMeanSquared                  | 320.5588439  |
| wavelet-HLL | firstorder | 90Percentile                     | 306.0629215  |
| wavelet-HLL | firstorder | Minimum                          | -673.9730109 |
| wavelet-HLL | firstorder | Entropy                          | 4.536286231  |
| wavelet-HLL | firstorder | Range                            | 1083.457432  |
| wavelet-HLL | firstorder | Variance                         | 98411.82886  |
| wavelet-HLL | firstorder | 10Percentile                     | -476.8622317 |
| wavelet-HLL | firstorder | Kurtosis                         | 1.809045031  |
| wavelet-HLL | firstorder | Mean                             | -65.9252877  |
| wavelet-HLL | glrlm      | ShortRunLowGrayLevelEmphasis     | 0.040077709  |
| wavelet-HLL | glrlm      | GrayLevelVariance                | 158.5691724  |
| wavelet-HLL | glrlm      | LowGrayLevelRunEmphasis          | 0.040122094  |
| wavelet-HLL | glrlm      | GrayLevelNonUniformityNormalized | 0.046330644  |
| wavelet-HLL | glrlm      | RunVariance                      | 0.01315072   |
| wavelet-HLL | glrlm      | GrayLevelNonUniformity           | 1.600391765  |
| wavelet-HLL | glrlm      | LongRunEmphasis                  | 1.041546689  |
| wavelet-HLL | glrlm      | ShortRunHighGrayLevelEmphasis    | 774.2396936  |
| wavelet-HLL | glrlm      | RunLengthNonUniformity           | 33.66173043  |
| wavelet-HLL | glrlm      | ShortRunEmphasis                 | 0.989613328  |
| wavelet-HLL | glrlm      | LongRunHighGrayLevelEmphasis     | 803.9579166  |
| wavelet-HLL | glrlm      | RunPercentage                    | 0.986813187  |
| wavelet-HLL | glrlm      | LongRunLowGrayLevelEmphasis      | 0.040299632  |
| wavelet-HLL | glrlm      | RunEntropy                       | 4.548932395  |
| wavelet-HLL | glrlm      | HighGrayLevelRunEmphasis         | 780.1833382  |
| wavelet-HLL | glrlm      | RunLengthNonUniformityNormalized | 0.97369856   |

|             |       |                                      |              |
|-------------|-------|--------------------------------------|--------------|
| wavelet-HLL | glszm | GrayLevelVariance                    | 165.6908442  |
| wavelet-HLL | glszm | ZoneVariance                         | 0.233055886  |
| wavelet-HLL | glszm | GrayLevelNonUniformityNormalized     | 0.043995244  |
| wavelet-HLL | glszm | SizeZoneNonUniformityNormalized      | 0.705112961  |
| wavelet-HLL | glszm | SizeZoneNonUniformity                | 20.44827586  |
| wavelet-HLL | glszm | GrayLevelNonUniformity               | 1.275862069  |
| wavelet-HLL | glszm | LargeAreaEmphasis                    | 1.689655172  |
| wavelet-HLL | glszm | SmallAreaHighGrayLevelEmphasis       | 736.7155172  |
| wavelet-HLL | glszm | ZonePercentage                       | 0.828571429  |
| wavelet-HLL | glszm | LargeAreaLowGrayLevelEmphasis        | 0.049904259  |
| wavelet-HLL | glszm | LargeAreaHighGrayLevelEmphasis       | 1189.344828  |
| wavelet-HLL | glszm | HighGrayLevelZoneEmphasis            | 820.3448276  |
| wavelet-HLL | glszm | SmallAreaEmphasis                    | 0.865900383  |
| wavelet-HLL | glszm | LowGrayLevelZoneEmphasis             | 0.046949453  |
| wavelet-HLL | glszm | ZoneEntropy                          | 4.582118926  |
| wavelet-HLL | glszm | SmallAreaLowGrayLevelEmphasis        | 0.046381036  |
| wavelet-HLL | ngtdm | Coarseness                           | 0.098865445  |
| wavelet-HLL | ngtdm | Complexity                           | 2971.239146  |
| wavelet-HLL | ngtdm | Strength                             | 64.66826777  |
| wavelet-HLL | ngtdm | Contrast                             | 3.886956884  |
| wavelet-HLL | ngtdm | Busyness                             | 0.022214892  |
| wavelet-LHL | gldm  | GrayLevelVariance                    | 93.51836735  |
| wavelet-LHL | gldm  | HighGrayLevelEmphasis                | 704.3142857  |
| wavelet-LHL | gldm  | DependenceEntropy                    | 4.614997303  |
| wavelet-LHL | gldm  | DependenceNonUniformity              | 22.65714286  |
| wavelet-LHL | gldm  | GrayLevelNonUniformity               | 1.628571429  |
| wavelet-LHL | gldm  | SmallDependenceEmphasis              | 0.828571429  |
| wavelet-LHL | gldm  | SmallDependenceHighGrayLevelEmphasis | 583.8428571  |
| wavelet-LHL | gldm  | DependenceNonUniformityNormalized    | 0.647346939  |
| wavelet-LHL | gldm  | LargeDependenceEmphasis              | 1.685714286  |
| wavelet-LHL | gldm  | LargeDependenceLowGrayLevelEmphasis  | 0.03207687   |
| wavelet-LHL | gldm  | DependenceVariance                   | 0.176326531  |
| wavelet-LHL | gldm  | LargeDependenceHighGrayLevelEmphasis | 1186.2       |
| wavelet-LHL | gldm  | SmallDependenceLowGrayLevelEmphasis  | 0.030751799  |
| wavelet-LHL | gldm  | LowGrayLevelEmphasis                 | 0.031016813  |
| wavelet-LHL | glcm  | JointAverage                         | 24.34300248  |
| wavelet-LHL | glcm  | SumAverage                           | 48.68600497  |
| wavelet-LHL | glcm  | JointEntropy                         | 4.965549695  |
| wavelet-LHL | glcm  | ClusterShade                         | 347.3927696  |
| wavelet-LHL | glcm  | MaximumProbability                   | 0.044153472  |
| wavelet-LHL | glcm  | Idmn                                 | 0.942975728  |
| wavelet-LHL | glcm  | JointEnergy                          | 0.033167979  |
| wavelet-LHL | glcm  | Contrast                             | 120.958982   |
| wavelet-LHL | glcm  | DifferenceEntropy                    | 3.281665418  |
| wavelet-LHL | glcm  | InverseVariance                      | 0.111952598  |
| wavelet-LHL | glcm  | DifferenceVariance                   | 31.30029803  |
| wavelet-LHL | glcm  | Idn                                  | 0.836424755  |
| wavelet-LHL | glcm  | Idm                                  | 0.087294477  |
| wavelet-LHL | glcm  | Correlation                          | 0.259295146  |
| wavelet-LHL | glcm  | Autocorrelation                      | 618.5869932  |
| wavelet-LHL | glcm  | SumEntropy                           | 3.690966695  |
| wavelet-LHL | glcm  | SumSquares                           | 85.99195094  |
| wavelet-LHL | glcm  | ClusterProminence                    | 124831.199   |
| wavelet-LHL | glcm  | Imc2                                 | 0.999550378  |
| wavelet-LHL | glcm  | Imc1                                 | -0.832780358 |
| wavelet-LHL | glcm  | DifferenceAverage                    | 9.103311714  |
| wavelet-LHL | glcm  | Id                                   | 0.171080801  |
| wavelet-LHL | glcm  | ClusterTendency                      | 223.0088217  |

|             |            |                                  |              |
|-------------|------------|----------------------------------|--------------|
| wavelet-LHL | firstorder | InterquartileRange               | 313.4537514  |
| wavelet-LHL | firstorder | Skewness                         | -0.168978699 |
| wavelet-LHL | firstorder | Uniformity                       | 0.046530612  |
| wavelet-LHL | firstorder | Median                           | -5.217883811 |
| wavelet-LHL | firstorder | Energy                           | 2048354.204  |
| wavelet-LHL | firstorder | RobustMeanAbsoluteDeviation      | 133.4675092  |
| wavelet-LHL | firstorder | MeanAbsoluteDeviation            | 196.5374205  |
| wavelet-LHL | firstorder | TotalEnergy                      | 55305563.51  |
| wavelet-LHL | firstorder | Maximum                          | 434.2804517  |
| wavelet-LHL | firstorder | RootMeanSquared                  | 241.91818    |
| wavelet-LHL | firstorder | 90Percentile                     | 310.912362   |
| wavelet-LHL | firstorder | Minimum                          | -609.3803048 |
| wavelet-LHL | firstorder | Entropy                          | 4.536286231  |
| wavelet-LHL | firstorder | Range                            | 1043.660757  |
| wavelet-LHL | firstorder | Variance                         | 58177.74025  |
| wavelet-LHL | firstorder | 10Percentile                     | -314.7020585 |
| wavelet-LHL | firstorder | Kurtosis                         | 2.65704551   |
| wavelet-LHL | firstorder | Mean                             | -18.61895762 |
| wavelet-LHL | glrlm      | ShortRunLowGrayLevelEmphasis     | 0.031273025  |
| wavelet-LHL | glrlm      | GrayLevelVariance                | 94.21520454  |
| wavelet-LHL | glrlm      | LowGrayLevelRunEmphasis          | 0.031283518  |
| wavelet-LHL | glrlm      | GrayLevelNonUniformityNormalized | 0.046453586  |
| wavelet-LHL | glrlm      | RunVariance                      | 0.008783604  |
| wavelet-LHL | glrlm      | GrayLevelNonUniformity           | 1.611635423  |
| wavelet-LHL | glrlm      | LongRunEmphasis                  | 1.027149321  |
| wavelet-LHL | glrlm      | ShortRunHighGrayLevelEmphasis    | 699.5586458  |
| wavelet-LHL | glrlm      | RunLengthNonUniformity           | 34.09502262  |
| wavelet-LHL | glrlm      | ShortRunEmphasis                 | 0.99321267   |
| wavelet-LHL | glrlm      | LongRunHighGrayLevelEmphasis     | 723.4076277  |
| wavelet-LHL | glrlm      | RunPercentage                    | 0.991208791  |
| wavelet-LHL | glrlm      | LongRunLowGrayLevelEmphasis      | 0.031325489  |
| wavelet-LHL | glrlm      | RunEntropy                       | 4.542384323  |
| wavelet-LHL | glrlm      | HighGrayLevelRunEmphasis         | 704.3284421  |
| wavelet-LHL | glrlm      | RunLengthNonUniformityNormalized | 0.982432792  |
| wavelet-LHL | glszm      | GrayLevelVariance                | 103.4755463  |
| wavelet-LHL | glszm      | ZoneVariance                     | 0.112382934  |
| wavelet-LHL | glszm      | GrayLevelNonUniformityNormalized | 0.044745057  |
| wavelet-LHL | glszm      | SizeZoneNonUniformityNormalized  | 0.775234131  |
| wavelet-LHL | glszm      | SizeZoneNonUniformity            | 24.03225806  |
| wavelet-LHL | glszm      | GrayLevelNonUniformity           | 1.387096774  |
| wavelet-LHL | glszm      | LargeAreaEmphasis                | 1.387096774  |
| wavelet-LHL | glszm      | SmallAreaHighGrayLevelEmphasis   | 636.5080645  |
| wavelet-LHL | glszm      | ZonePercentage                   | 0.885714286  |
| wavelet-LHL | glszm      | LargeAreaLowGrayLevelEmphasis    | 0.035417929  |
| wavelet-LHL | glszm      | LargeAreaHighGrayLevelEmphasis   | 976.5483871  |
| wavelet-LHL | glszm      | HighGrayLevelZoneEmphasis        | 704.516129   |
| wavelet-LHL | glszm      | SmallAreaEmphasis                | 0.903225806  |
| wavelet-LHL | glszm      | LowGrayLevelZoneEmphasis         | 0.034819509  |
| wavelet-LHL | glszm      | ZoneEntropy                      | 4.631615665  |
| wavelet-LHL | glszm      | SmallAreaLowGrayLevelEmphasis    | 0.034669904  |
| wavelet-LHL | ngtdm      | Coarseness                       | 0.13991513   |
| wavelet-LHL | ngtdm      | Complexity                       | 1744.917676  |
| wavelet-LHL | ngtdm      | Strength                         | 57.42112361  |
| wavelet-LHL | ngtdm      | Contrast                         | 1.613218269  |
| wavelet-LHL | ngtdm      | Busyness                         | 0.018634658  |
| wavelet-LHH | gldm       | GrayLevelVariance                | 23.87265306  |
| wavelet-LHH | gldm       | HighGrayLevelEmphasis            | 201.1428571  |
| wavelet-LHH | gldm       | DependenceEntropy                | 4.136286231  |

|             |            |                                      |              |
|-------------|------------|--------------------------------------|--------------|
| wavelet-LHH | gldm       | DependenceNonUniformity              | 12.48571429  |
| wavelet-LHH | gldm       | GrayLevelNonUniformity               | 2.942857143  |
| wavelet-LHH | gldm       | SmallDependenceEmphasis              | 0.557142857  |
| wavelet-LHH | gldm       | SmallDependenceHighGrayLevelEmphasis | 109.9634921  |
| wavelet-LHH | gldm       | DependenceNonUniformityNormalized    | 0.356734694  |
| wavelet-LHH | gldm       | LargeDependenceEmphasis              | 3.914285714  |
| wavelet-LHH | gldm       | LargeDependenceLowGrayLevelEmphasis  | 0.059655533  |
| wavelet-LHH | gldm       | DependenceVariance                   | 0.674285714  |
| wavelet-LHH | gldm       | LargeDependenceHighGrayLevelEmphasis | 824.4        |
| wavelet-LHH | gldm       | SmallDependenceLowGrayLevelEmphasis  | 0.034128405  |
| wavelet-LHH | gldm       | LowGrayLevelEmphasis                 | 0.037687949  |
| wavelet-LHH | glcm       | JointAverage                         | 13.45170922  |
| wavelet-LHH | glcm       | SumAverage                           | 26.90341843  |
| wavelet-LHH | glcm       | JointEntropy                         | 4.824965458  |
| wavelet-LHH | glcm       | ClusterShade                         | -146.9891614 |
| wavelet-LHH | glcm       | MaximumProbability                   | 0.065789331  |
| wavelet-LHH | glcm       | ldmn                                 | 0.924267786  |
| wavelet-LHH | glcm       | JointEnergy                          | 0.037808315  |
| wavelet-LHH | glcm       | Contrast                             | 50.0843008   |
| wavelet-LHH | glcm       | DifferenceEntropy                    | 3.045217009  |
| wavelet-LHH | glcm       | InverseVariance                      | 0.158555358  |
| wavelet-LHH | glcm       | DifferenceVariance                   | 16.6542695   |
| wavelet-LHH | glcm       | ldn                                  | 0.820526531  |
| wavelet-LHH | glcm       | ldm                                  | 0.168044333  |
| wavelet-LHH | glcm       | Correlation                          | 0.044968762  |
| wavelet-LHH | glcm       | Autocorrelation                      | 182.2150819  |
| wavelet-LHH | glcm       | SumEntropy                           | 3.511924041  |
| wavelet-LHH | glcm       | SumSquares                           | 26.00444846  |
| wavelet-LHH | glcm       | ClusterProminence                    | 8276.362718  |
| wavelet-LHH | glcm       | lmc2                                 | 0.995650466  |
| wavelet-LHH | glcm       | lmc1                                 | -0.66722355  |
| wavelet-LHH | glcm       | DifferenceAverage                    | 5.615361792  |
| wavelet-LHH | glcm       | ld                                   | 0.260602703  |
| wavelet-LHH | glcm       | ClusterTendency                      | 53.93349304  |
| wavelet-LHH | firstorder | InterquartileRange                   | 144.9094873  |
| wavelet-LHH | firstorder | Skewness                             | -0.475852192 |
| wavelet-LHH | firstorder | Uniformity                           | 0.084081633  |
| wavelet-LHH | firstorder | Median                               | 5.616300258  |
| wavelet-LHH | firstorder | Energy                               | 530114.9496  |
| wavelet-LHH | firstorder | RobustMeanAbsoluteDeviation          | 60.62955984  |
| wavelet-LHH | firstorder | MeanAbsoluteDeviation                | 94.59005991  |
| wavelet-LHH | firstorder | TotalEnergy                          | 14313103.64  |
| wavelet-LHH | firstorder | Maximum                              | 233.7789766  |
| wavelet-LHH | firstorder | RootMeanSquared                      | 123.0696608  |
| wavelet-LHH | firstorder | 90Percentile                         | 119.4066562  |
| wavelet-LHH | firstorder | Minimum                              | -309.2233273 |
| wavelet-LHH | firstorder | Entropy                              | 3.714718017  |
| wavelet-LHH | firstorder | Range                                | 543.002304   |
| wavelet-LHH | firstorder | Variance                             | 15132.28782  |
| wavelet-LHH | firstorder | 10Percentile                         | -184.4665428 |
| wavelet-LHH | firstorder | Kurtosis                             | 2.952449958  |
| wavelet-LHH | firstorder | Mean                                 | -3.722041464 |
| wavelet-LHH | glrlm      | ShortRunLowGrayLevelEmphasis         | 0.0384666    |
| wavelet-LHH | glrlm      | GrayLevelVariance                    | 24.18526656  |
| wavelet-LHH | glrlm      | LowGrayLevelRunEmphasis              | 0.038655774  |
| wavelet-LHH | glrlm      | GrayLevelNonUniformityNormalized     | 0.083393651  |
| wavelet-LHH | glrlm      | RunVariance                          | 0.030665681  |
| wavelet-LHH | glrlm      | GrayLevelNonUniformity               | 2.829753335  |

|             |       |                                      |              |
|-------------|-------|--------------------------------------|--------------|
| wavelet-LHH | glrlm | LongRunEmphasis                      | 1.097117956  |
| wavelet-LHH | glrlm | ShortRunHighGrayLevelEmphasis        | 195.7494567  |
| wavelet-LHH | glrlm | RunLengthNonUniformity               | 31.88147025  |
| wavelet-LHH | glrlm | ShortRunEmphasis                     | 0.975720511  |
| wavelet-LHH | glrlm | LongRunHighGrayLevelEmphasis         | 221.2600169  |
| wavelet-LHH | glrlm | RunPercentage                        | 0.969230769  |
| wavelet-LHH | glrlm | LongRunLowGrayLevelEmphasis          | 0.039412474  |
| wavelet-LHH | glrlm | RunEntropy                           | 3.806284124  |
| wavelet-LHH | glrlm | HighGrayLevelRunEmphasis             | 200.8515688  |
| wavelet-LHH | glrlm | RunLengthNonUniformityNormalized     | 0.938668637  |
| wavelet-LHH | glszm | GrayLevelVariance                    | 28.60113422  |
| wavelet-LHH | glszm | ZoneVariance                         | 0.771266541  |
| wavelet-LHH | glszm | GrayLevelNonUniformityNormalized     | 0.073724008  |
| wavelet-LHH | glszm | SizeZoneNonUniformityNormalized      | 0.519848771  |
| wavelet-LHH | glszm | SizeZoneNonUniformity                | 11.95652174  |
| wavelet-LHH | glszm | GrayLevelNonUniformity               | 1.695652174  |
| wavelet-LHH | glszm | LargeAreaEmphasis                    | 3.086956522  |
| wavelet-LHH | glszm | SmallAreaHighGrayLevelEmphasis       | 148.1234903  |
| wavelet-LHH | glszm | ZonePercentage                       | 0.657142857  |
| wavelet-LHH | glszm | LargeAreaLowGrayLevelEmphasis        | 0.070261652  |
| wavelet-LHH | glszm | LargeAreaHighGrayLevelEmphasis       | 631.3043478  |
| wavelet-LHH | glszm | HighGrayLevelZoneEmphasis            | 199.8695652  |
| wavelet-LHH | glszm | SmallAreaEmphasis                    | 0.745471014  |
| wavelet-LHH | glszm | LowGrayLevelZoneEmphasis             | 0.053005579  |
| wavelet-LHH | glszm | ZoneEntropy                          | 4.088779347  |
| wavelet-LHH | glszm | SmallAreaLowGrayLevelEmphasis        | 0.050957166  |
| wavelet-LHH | ngtdm | Coarseness                           | 0.101583084  |
| wavelet-LHH | ngtdm | Complexity                           | 438.461188   |
| wavelet-LHH | ngtdm | Strength                             | 13.95019522  |
| wavelet-LHH | ngtdm | Contrast                             | 0.852891317  |
| wavelet-LHH | ngtdm | Busyness                             | 0.073370007  |
| wavelet-LLH | gldm  | GrayLevelVariance                    | 160.922449   |
| wavelet-LLH | gldm  | HighGrayLevelEmphasis                | 829.5142857  |
| wavelet-LLH | gldm  | DependenceEntropy                    | 4.650571945  |
| wavelet-LLH | gldm  | DependenceNonUniformity              | 17.45714286  |
| wavelet-LLH | gldm  | GrayLevelNonUniformity               | 1.914285714  |
| wavelet-LLH | gldm  | SmallDependenceEmphasis              | 0.694642857  |
| wavelet-LLH | gldm  | SmallDependenceHighGrayLevelEmphasis | 492.2928571  |
| wavelet-LLH | gldm  | DependenceNonUniformityNormalized    | 0.49877551   |
| wavelet-LLH | gldm  | LargeDependenceEmphasis              | 2.542857143  |
| wavelet-LLH | gldm  | LargeDependenceLowGrayLevelEmphasis  | 0.064550498  |
| wavelet-LLH | gldm  | DependenceVariance                   | 0.419591837  |
| wavelet-LLH | gldm  | LargeDependenceHighGrayLevelEmphasis | 2642.542857  |
| wavelet-LLH | gldm  | SmallDependenceLowGrayLevelEmphasis  | 0.039413704  |
| wavelet-LLH | gldm  | LowGrayLevelEmphasis                 | 0.044396544  |
| wavelet-LLH | glcm  | JointAverage                         | 25.84053902  |
| wavelet-LLH | glcm  | SumAverage                           | 51.68107804  |
| wavelet-LLH | glcm  | JointEntropy                         | 4.952406891  |
| wavelet-LLH | glcm  | ClusterShade                         | -3432.652369 |
| wavelet-LLH | glcm  | MaximumProbability                   | 0.048819762  |
| wavelet-LLH | glcm  | Idmn                                 | 0.909017718  |
| wavelet-LLH | glcm  | JointEnergy                          | 0.033448664  |
| wavelet-LLH | glcm  | Contrast                             | 200.9738488  |
| wavelet-LLH | glcm  | DifferenceEntropy                    | 3.375461072  |
| wavelet-LLH | glcm  | InverseVariance                      | 0.084682768  |
| wavelet-LLH | glcm  | DifferenceVariance                   | 41.86688178  |
| wavelet-LLH | glcm  | Idn                                  | 0.804001297  |
| wavelet-LLH | glcm  | Idm                                  | 0.090784139  |

|             |            |                                  |              |
|-------------|------------|----------------------------------|--------------|
| wavelet-LLH | glcm       | Correlation                      | 0.320769716  |
| wavelet-LLH | glcm       | Autocorrelation                  | 712.9393661  |
| wavelet-LLH | glcm       | SumEntropy                       | 3.822654936  |
| wavelet-LLH | glcm       | SumSquares                       | 143.5186285  |
| wavelet-LLH | glcm       | ClusterProminence                | 308530.4993  |
| wavelet-LLH | glcm       | Imc2                             | 0.999401486  |
| wavelet-LLH | glcm       | Imc1                             | -0.814853977 |
| wavelet-LLH | glcm       | DifferenceAverage                | 11.46971234  |
| wavelet-LLH | glcm       | Id                               | 0.167382273  |
| wavelet-LLH | glcm       | ClusterTendency                  | 373.1006654  |
| wavelet-LLH | firstorder | InterquartileRange               | 538.1305358  |
| wavelet-LLH | firstorder | Skewness                         | -0.60009742  |
| wavelet-LLH | firstorder | Uniformity                       | 0.054693878  |
| wavelet-LLH | firstorder | Median                           | 10.05352194  |
| wavelet-LLH | firstorder | Energy                           | 3696325.738  |
| wavelet-LLH | firstorder | RobustMeanAbsoluteDeviation      | 212.3485351  |
| wavelet-LLH | firstorder | MeanAbsoluteDeviation            | 273.9464058  |
| wavelet-LLH | firstorder | TotalEnergy                      | 99800794.91  |
| wavelet-LLH | firstorder | Maximum                          | 326.0549998  |
| wavelet-LLH | firstorder | RootMeanSquared                  | 324.9758557  |
| wavelet-LLH | firstorder | 90Percentile                     | 261.2288013  |
| wavelet-LLH | firstorder | Minimum                          | -699.8842001 |
| wavelet-LLH | firstorder | Entropy                          | 4.400432303  |
| wavelet-LLH | firstorder | Range                            | 1025.9392    |
| wavelet-LLH | firstorder | Variance                         | 101188.0739  |
| wavelet-LLH | firstorder | 10Percentile                     | -610.3744324 |
| wavelet-LLH | firstorder | Kurtosis                         | 2.048082494  |
| wavelet-LLH | firstorder | Mean                             | -66.49235232 |
| wavelet-LLH | glrlm      | ShortRunLowGrayLevelEmphasis     | 0.044730045  |
| wavelet-LLH | glrlm      | GrayLevelVariance                | 160.7144793  |
| wavelet-LLH | glrlm      | LowGrayLevelRunEmphasis          | 0.044934107  |
| wavelet-LLH | glrlm      | GrayLevelNonUniformityNormalized | 0.054023398  |
| wavelet-LLH | glrlm      | RunVariance                      | 0.017554865  |
| wavelet-LLH | glrlm      | GrayLevelNonUniformity           | 1.858012576  |
| wavelet-LLH | glrlm      | LongRunEmphasis                  | 1.054709996  |
| wavelet-LLH | glrlm      | ShortRunHighGrayLevelEmphasis    | 808.3114234  |
| wavelet-LLH | glrlm      | RunLengthNonUniformity           | 33.19964349  |
| wavelet-LLH | glrlm      | ShortRunEmphasis                 | 0.986322501  |
| wavelet-LLH | glrlm      | LongRunHighGrayLevelEmphasis     | 886.1623592  |
| wavelet-LLH | glrlm      | RunPercentage                    | 0.982417582  |
| wavelet-LLH | glrlm      | LongRunLowGrayLevelEmphasis      | 0.045750353  |
| wavelet-LLH | glrlm      | RunEntropy                       | 4.437671403  |
| wavelet-LLH | glrlm      | HighGrayLevelRunEmphasis         | 823.8816105  |
| wavelet-LLH | glrlm      | RunLengthNonUniformityNormalized | 0.96489027   |
| wavelet-LLH | glszm      | GrayLevelVariance                | 155.7283951  |
| wavelet-LLH | glszm      | ZoneVariance                     | 0.430727023  |
| wavelet-LLH | glszm      | GrayLevelNonUniformityNormalized | 0.04526749   |
| wavelet-LLH | glszm      | SizeZoneNonUniformityNormalized  | 0.640603567  |
| wavelet-LLH | glszm      | SizeZoneNonUniformity            | 17.2962963   |
| wavelet-LLH | glszm      | GrayLevelNonUniformity           | 1.222222222  |
| wavelet-LLH | glszm      | LargeAreaEmphasis                | 2.111111111  |
| wavelet-LLH | glszm      | SmallAreaHighGrayLevelEmphasis   | 553.6018519  |
| wavelet-LLH | glszm      | ZonePercentage                   | 0.771428571  |
| wavelet-LLH | glszm      | LargeAreaLowGrayLevelEmphasis    | 0.06636217   |
| wavelet-LLH | glszm      | LargeAreaHighGrayLevelEmphasis   | 2072.62963   |
| wavelet-LLH | glszm      | HighGrayLevelZoneEmphasis        | 737.0740741  |
| wavelet-LLH | glszm      | SmallAreaEmphasis                | 0.826388889  |
| wavelet-LLH | glszm      | LowGrayLevelZoneEmphasis         | 0.053222475  |

|             |            |                                      |              |
|-------------|------------|--------------------------------------|--------------|
| wavelet-LLH | glszm      | ZoneEntropy                          | 4.680813428  |
| wavelet-LLH | glszm      | SmallAreaLowGrayLevelEmphasis        | 0.050009689  |
| wavelet-LLH | ngtdm      | Coarseness                           | 0.070641619  |
| wavelet-LLH | ngtdm      | Complexity                           | 3046.454166  |
| wavelet-LLH | ngtdm      | Strength                             | 62.31415895  |
| wavelet-LLH | ngtdm      | Contrast                             | 4.131625751  |
| wavelet-LLH | ngtdm      | Busyness                             | 0.023831584  |
| wavelet-LLL | gldm       | GrayLevelVariance                    | 390.7706122  |
| wavelet-LLL | gldm       | HighGrayLevelEmphasis                | 1747.114286  |
| wavelet-LLL | gldm       | DependenceEntropy                    | 4.843568731  |
| wavelet-LLL | gldm       | DependenceNonUniformity              | 25.05714286  |
| wavelet-LLL | gldm       | GrayLevelNonUniformity               | 1.514285714  |
| wavelet-LLL | gldm       | SmallDependenceEmphasis              | 0.871428571  |
| wavelet-LLL | gldm       | SmallDependenceHighGrayLevelEmphasis | 1561.885714  |
| wavelet-LLL | gldm       | DependenceNonUniformityNormalized    | 0.715918367  |
| wavelet-LLL | gldm       | LargeDependenceEmphasis              | 1.514285714  |
| wavelet-LLL | gldm       | LargeDependenceLowGrayLevelEmphasis  | 0.033091316  |
| wavelet-LLL | gldm       | DependenceVariance                   | 0.142040816  |
| wavelet-LLL | gldm       | LargeDependenceHighGrayLevelEmphasis | 2488.028571  |
| wavelet-LLL | gldm       | SmallDependenceLowGrayLevelEmphasis  | 0.032281222  |
| wavelet-LLL | gldm       | LowGrayLevelEmphasis                 | 0.032443241  |
| wavelet-LLL | glcm       | JointAverage                         | 42.95685675  |
| wavelet-LLL | glcm       | SumAverage                           | 85.9137135   |
| wavelet-LLL | glcm       | JointEntropy                         | 4.984806535  |
| wavelet-LLL | glcm       | ClusterShade                         | -1877.956941 |
| wavelet-LLL | glcm       | MaximumProbability                   | 0.041823237  |
| wavelet-LLL | glcm       | Idmn                                 | 0.889742836  |
| wavelet-LLL | glcm       | JointEnergy                          | 0.032755231  |
| wavelet-LLL | glcm       | Contrast                             | 871.7783149  |
| wavelet-LLL | glcm       | DifferenceEntropy                    | 3.731417023  |
| wavelet-LLL | glcm       | InverseVariance                      | 0.04465909   |
| wavelet-LLL | glcm       | DifferenceVariance                   | 266.8914463  |
| wavelet-LLL | glcm       | Idn                                  | 0.782707134  |
| wavelet-LLL | glcm       | Idm                                  | 0.045677275  |
| wavelet-LLL | glcm       | Correlation                          | -0.028163926 |
| wavelet-LLL | glcm       | Autocorrelation                      | 1827.003377  |
| wavelet-LLL | glcm       | SumEntropy                           | 3.831640094  |
| wavelet-LLL | glcm       | SumSquares                           | 413.6070336  |
| wavelet-LLL | glcm       | ClusterProminence                    | 1545451.118  |
| wavelet-LLL | glcm       | Imc2                                 | 0.999746773  |
| wavelet-LLL | glcm       | Imc1                                 | -0.872742708 |
| wavelet-LLL | glcm       | DifferenceAverage                    | 24.05887983  |
| wavelet-LLL | glcm       | Id                                   | 0.098736408  |
| wavelet-LLL | glcm       | ClusterTendency                      | 782.6498194  |
| wavelet-LLL | firstorder | InterquartileRange                   | 593.2707237  |
| wavelet-LLL | firstorder | Skewness                             | 0.224972556  |
| wavelet-LLL | firstorder | Uniformity                           | 0.043265306  |
| wavelet-LLL | firstorder | Median                               | -1118.521272 |
| wavelet-LLL | firstorder | Energy                               | 52071712.44  |
| wavelet-LLL | firstorder | RobustMeanAbsoluteDeviation          | 260.763525   |
| wavelet-LLL | firstorder | MeanAbsoluteDeviation                | 393.2657846  |
| wavelet-LLL | firstorder | TotalEnergy                          | 1405936236   |
| wavelet-LLL | firstorder | Maximum                              | -102.2775494 |
| wavelet-LLL | firstorder | RootMeanSquared                      | 1219.738994  |
| wavelet-LLL | firstorder | 90Percentile                         | -405.3981567 |
| wavelet-LLL | firstorder | Minimum                              | -2021.180044 |
| wavelet-LLL | firstorder | Entropy                              | 4.686146588  |
| wavelet-LLL | firstorder | Range                                | 1918.902495  |



|             |            |                                      |              |
|-------------|------------|--------------------------------------|--------------|
| wavelet-LLL | firstorder | Variance                             | 243904.7307  |
| wavelet-LLL | firstorder | 10Percentile                         | -1737.295322 |
| wavelet-LLL | firstorder | Kurtosis                             | 2.44447982   |
| wavelet-LLL | firstorder | Mean                                 | -1115.284036 |
| wavelet-LLL | glrlm      | ShortRunLowGrayLevelEmphasis         | 0.032648476  |
| wavelet-LLL | glrlm      | GrayLevelVariance                    | 392.4073248  |
| wavelet-LLL | glrlm      | LowGrayLevelRunEmphasis              | 0.032654891  |
| wavelet-LLL | glrlm      | GrayLevelNonUniformityNormalized     | 0.042996203  |
| wavelet-LLL | glrlm      | RunVariance                          | 0.006587703  |
| wavelet-LLL | glrlm      | GrayLevelNonUniformity               | 1.495151907  |
| wavelet-LLL | glrlm      | LongRunEmphasis                      | 1.020361991  |
| wavelet-LLL | glrlm      | ShortRunHighGrayLevelEmphasis        | 1741.860537  |
| wavelet-LLL | glrlm      | RunLengthNonUniformity               | 34.32126697  |
| wavelet-LLL | glrlm      | ShortRunEmphasis                     | 0.994909502  |
| wavelet-LLL | glrlm      | LongRunHighGrayLevelEmphasis         | 1778.529089  |
| wavelet-LLL | glrlm      | RunPercentage                        | 0.993406593  |
| wavelet-LLL | glrlm      | LongRunLowGrayLevelEmphasis          | 0.03268055   |
| wavelet-LLL | glrlm      | RunEntropy                           | 4.69952828   |
| wavelet-LLL | glrlm      | HighGrayLevelRunEmphasis             | 1749.194247  |
| wavelet-LLL | glrlm      | RunLengthNonUniformityNormalized     | 0.986824594  |
| wavelet-LLL | glszm      | GrayLevelVariance                    | 413.7724609  |
| wavelet-LLL | glszm      | ZoneVariance                         | 0.084960938  |
| wavelet-LLL | glszm      | GrayLevelNonUniformityNormalized     | 0.0390625    |
| wavelet-LLL | glszm      | SizeZoneNonUniformityNormalized      | 0.830078125  |
| wavelet-LLL | glszm      | SizeZoneNonUniformity                | 26.5625      |
| wavelet-LLL | glszm      | GrayLevelNonUniformity               | 1.25         |
| wavelet-LLL | glszm      | LargeAreaEmphasis                    | 1.28125      |
| wavelet-LLL | glszm      | SmallAreaHighGrayLevelEmphasis       | 1674.546875  |
| wavelet-LLL | glszm      | ZonePercentage                       | 0.914285714  |
| wavelet-LLL | glszm      | LargeAreaLowGrayLevelEmphasis        | 0.035721072  |
| wavelet-LLL | glszm      | LargeAreaHighGrayLevelEmphasis       | 2181.03125   |
| wavelet-LLL | glszm      | HighGrayLevelZoneEmphasis            | 1775.84375   |
| wavelet-LLL | glszm      | SmallAreaEmphasis                    | 0.9296875    |
| wavelet-LLL | glszm      | LowGrayLevelZoneEmphasis             | 0.035366656  |
| wavelet-LLL | glszm      | ZoneEntropy                          | 4.875        |
| wavelet-LLL | glszm      | SmallAreaLowGrayLevelEmphasis        | 0.035278052  |
| wavelet-LLL | ngtdm      | Coarseness                           | 0.044253016  |
| wavelet-LLL | ngtdm      | Complexity                           | 12982.4594   |
| wavelet-LLL | ngtdm      | Strength                             | 80.95550959  |
| wavelet-LLL | ngtdm      | Contrast                             | 17.24181977  |
| wavelet-LLL | ngtdm      | Busyness                             | 0.031258658  |
| wavelet-HHL | gldm       | GrayLevelVariance                    | 11.1477551   |
| wavelet-HHL | gldm       | HighGrayLevelEmphasis                | 85.6         |
| wavelet-HHL | gldm       | DependenceEntropy                    | 4.093149802  |
| wavelet-HHL | gldm       | DependenceNonUniformity              | 10.08571429  |
| wavelet-HHL | gldm       | GrayLevelNonUniformity               | 3.857142857  |
| wavelet-HHL | gldm       | SmallDependenceEmphasis              | 0.457936508  |
| wavelet-HHL | gldm       | SmallDependenceHighGrayLevelEmphasis | 42.96269841  |
| wavelet-HHL | gldm       | DependenceNonUniformityNormalized    | 0.288163265  |
| wavelet-HHL | gldm       | LargeDependenceEmphasis              | 5.342857143  |
| wavelet-HHL | gldm       | LargeDependenceLowGrayLevelEmphasis  | 0.120784004  |
| wavelet-HHL | gldm       | DependenceVariance                   | 0.992653061  |
| wavelet-HHL | gldm       | LargeDependenceHighGrayLevelEmphasis | 405.3714286  |
| wavelet-HHL | gldm       | SmallDependenceLowGrayLevelEmphasis  | 0.038626452  |
| wavelet-HHL | gldm       | LowGrayLevelEmphasis                 | 0.047983723  |
| wavelet-HHL | glcm       | JointAverage                         | 8.519595314  |
| wavelet-HHL | glcm       | SumAverage                           | 17.03919063  |
| wavelet-HHL | glcm       | JointEntropy                         | 4.739521393  |

|             |            |                                  |              |
|-------------|------------|----------------------------------|--------------|
| wavelet-HHL | glcm       | ClusterShade                     | -4.437872855 |
| wavelet-HHL | glcm       | MaximumProbability               | 0.073713972  |
| wavelet-HHL | glcm       | Idmn                             | 0.913326057  |
| wavelet-HHL | glcm       | JointEnergy                      | 0.040179205  |
| wavelet-HHL | glcm       | Contrast                         | 24.35902239  |
| wavelet-HHL | glcm       | DifferenceEntropy                | 2.734668163  |
| wavelet-HHL | glcm       | InverseVariance                  | 0.178489215  |
| wavelet-HHL | glcm       | DifferenceVariance               | 7.882360428  |
| wavelet-HHL | glcm       | Idn                              | 0.805111701  |
| wavelet-HHL | glcm       | Idm                              | 0.199491818  |
| wavelet-HHL | glcm       | Correlation                      | 0.028021494  |
| wavelet-HHL | glcm       | Autocorrelation                  | 73.25087601  |
| wavelet-HHL | glcm       | SumEntropy                       | 3.33128914   |
| wavelet-HHL | glcm       | SumSquares                       | 12.73949956  |
| wavelet-HHL | glcm       | ClusterProminence                | 1605.970001  |
| wavelet-HHL | glcm       | Imc2                             | 0.990368327  |
| wavelet-HHL | glcm       | Imc1                             | -0.595463444 |
| wavelet-HHL | glcm       | DifferenceAverage                | 4.028870718  |
| wavelet-HHL | glcm       | Id                               | 0.301564689  |
| wavelet-HHL | glcm       | ClusterTendency                  | 26.59897584  |
| wavelet-HHL | firstorder | InterquartileRange               | 116.4191328  |
| wavelet-HHL | firstorder | Skewness                         | 0.118053596  |
| wavelet-HHL | firstorder | Uniformity                       | 0.110204082  |
| wavelet-HHL | firstorder | Median                           | -11.9503819  |
| wavelet-HHL | firstorder | Energy                           | 252205.7134  |
| wavelet-HHL | firstorder | RobustMeanAbsoluteDeviation      | 45.91076983  |
| wavelet-HHL | firstorder | MeanAbsoluteDeviation            | 68.49076594  |
| wavelet-HHL | firstorder | TotalEnergy                      | 6809554.261  |
| wavelet-HHL | firstorder | Maximum                          | 170.8669355  |
| wavelet-HHL | firstorder | RootMeanSquared                  | 84.88744033  |
| wavelet-HHL | firstorder | 90Percentile                     | 131.7787057  |
| wavelet-HHL | firstorder | Minimum                          | -196.0482276 |
| wavelet-HHL | firstorder | Entropy                          | 3.414539805  |
| wavelet-HHL | firstorder | Range                            | 366.915163   |
| wavelet-HHL | firstorder | Variance                         | 7200.991019  |
| wavelet-HHL | firstorder | 10Percentile                     | -87.97057898 |
| wavelet-HHL | firstorder | Kurtosis                         | 2.671492678  |
| wavelet-HHL | firstorder | Mean                             | 2.210544357  |
| wavelet-HHL | glrlm      | ShortRunLowGrayLevelEmphasis     | 0.048846055  |
| wavelet-HHL | glrlm      | GrayLevelVariance                | 11.45903079  |
| wavelet-HHL | glrlm      | LowGrayLevelRunEmphasis          | 0.049410327  |
| wavelet-HHL | glrlm      | GrayLevelNonUniformityNormalized | 0.107874916  |
| wavelet-HHL | glrlm      | RunVariance                      | 0.046173458  |
| wavelet-HHL | glrlm      | GrayLevelNonUniformity           | 3.621486941  |
| wavelet-HHL | glrlm      | LongRunEmphasis                  | 1.143169627  |
| wavelet-HHL | glrlm      | ShortRunHighGrayLevelEmphasis    | 83.58442425  |
| wavelet-HHL | glrlm      | RunLengthNonUniformity           | 31.02631528  |
| wavelet-HHL | glrlm      | ShortRunEmphasis                 | 0.966964693  |
| wavelet-HHL | glrlm      | LongRunHighGrayLevelEmphasis     | 96.78240873  |
| wavelet-HHL | glrlm      | RunPercentage                    | 0.958241758  |
| wavelet-HHL | glrlm      | LongRunLowGrayLevelEmphasis      | 0.051839737  |
| wavelet-HHL | glrlm      | RunEntropy                       | 3.550822333  |
| wavelet-HHL | glrlm      | HighGrayLevelRunEmphasis         | 86.08285765  |
| wavelet-HHL | glrlm      | RunLengthNonUniformityNormalized | 0.921100614  |
| wavelet-HHL | glszm      | GrayLevelVariance                | 15.91        |
| wavelet-HHL | glszm      | ZoneVariance                     | 1.5875       |
| wavelet-HHL | glszm      | GrayLevelNonUniformityNormalized | 0.09         |
| wavelet-HHL | glszm      | SizeZoneNonUniformityNormalized  | 0.43         |

|             |            |                                      |              |
|-------------|------------|--------------------------------------|--------------|
| wavelet-HHL | glszm      | SizeZoneNonUniformity                | 8.6          |
| wavelet-HHL | glszm      | GrayLevelNonUniformity               | 1.8          |
| wavelet-HHL | glszm      | LargeAreaEmphasis                    | 4.65         |
| wavelet-HHL | glszm      | SmallAreaHighGrayLevelEmphasis       | 64.50138889  |
| wavelet-HHL | glszm      | ZonePercentage                       | 0.571428571  |
| wavelet-HHL | glszm      | LargeAreaLowGrayLevelEmphasis        | 0.130764735  |
| wavelet-HHL | glszm      | LargeAreaHighGrayLevelEmphasis       | 363.8        |
| wavelet-HHL | glszm      | HighGrayLevelZoneEmphasis            | 91.6         |
| wavelet-HHL | glszm      | SmallAreaEmphasis                    | 0.672569444  |
| wavelet-HHL | glszm      | LowGrayLevelZoneEmphasis             | 0.071276295  |
| wavelet-HHL | glszm      | ZoneEntropy                          | 3.78418372   |
| wavelet-HHL | glszm      | SmallAreaLowGrayLevelEmphasis        | 0.065430033  |
| wavelet-HHL | ngtdm      | Coarseness                           | 0.149935971  |
| wavelet-HHL | ngtdm      | Complexity                           | 169.3802833  |
| wavelet-HHL | ngtdm      | Strength                             | 8.559347444  |
| wavelet-HHL | ngtdm      | Contrast                             | 0.35832212   |
| wavelet-HHL | ngtdm      | Busyness                             | 0.073964822  |
| wavelet-HLH | gldm       | GrayLevelVariance                    | 17.41714286  |
| wavelet-HLH | gldm       | HighGrayLevelEmphasis                | 121.4571429  |
| wavelet-HLH | gldm       | DependenceEntropy                    | 4.307714803  |
| wavelet-HLH | gldm       | DependenceNonUniformity              | 11.57142857  |
| wavelet-HLH | gldm       | GrayLevelNonUniformity               | 3.342857143  |
| wavelet-HLH | gldm       | SmallDependenceEmphasis              | 0.569047619  |
| wavelet-HLH | gldm       | SmallDependenceHighGrayLevelEmphasis | 88.0859127   |
| wavelet-HLH | gldm       | DependenceNonUniformityNormalized    | 0.330612245  |
| wavelet-HLH | gldm       | LargeDependenceEmphasis              | 4.771428571  |
| wavelet-HLH | gldm       | LargeDependenceLowGrayLevelEmphasis  | 0.166874582  |
| wavelet-HLH | gldm       | DependenceVariance                   | 1.106938776  |
| wavelet-HLH | gldm       | LargeDependenceHighGrayLevelEmphasis | 359.6285714  |
| wavelet-HLH | gldm       | SmallDependenceLowGrayLevelEmphasis  | 0.033746323  |
| wavelet-HLH | gldm       | LowGrayLevelEmphasis                 | 0.045013939  |
| wavelet-HLH | glcm       | JointAverage                         | 9.499818414  |
| wavelet-HLH | glcm       | SumAverage                           | 18.99963683  |
| wavelet-HLH | glcm       | JointEntropy                         | 4.752652415  |
| wavelet-HLH | glcm       | ClusterShade                         | 25.94938424  |
| wavelet-HLH | glcm       | MaximumProbability                   | 0.067007411  |
| wavelet-HLH | glcm       | Idmn                                 | 0.905856455  |
| wavelet-HLH | glcm       | JointEnergy                          | 0.039895799  |
| wavelet-HLH | glcm       | Contrast                             | 38.6046308   |
| wavelet-HLH | glcm       | DifferenceEntropy                    | 2.870632968  |
| wavelet-HLH | glcm       | InverseVariance                      | 0.156199526  |
| wavelet-HLH | glcm       | DifferenceVariance                   | 10.52997897  |
| wavelet-HLH | glcm       | Idn                                  | 0.797765834  |
| wavelet-HLH | glcm       | Idm                                  | 0.170681281  |
| wavelet-HLH | glcm       | Correlation                          | -0.050748829 |
| wavelet-HLH | glcm       | Autocorrelation                      | 89.69804898  |
| wavelet-HLH | glcm       | SumEntropy                           | 3.353224293  |
| wavelet-HLH | glcm       | SumSquares                           | 18.60758546  |
| wavelet-HLH | glcm       | ClusterProminence                    | 3128.014522  |
| wavelet-HLH | glcm       | Imc2                                 | 0.992055687  |
| wavelet-HLH | glcm       | Imc1                                 | -0.624605072 |
| wavelet-HLH | glcm       | DifferenceAverage                    | 5.083027904  |
| wavelet-HLH | glcm       | Id                                   | 0.267245879  |
| wavelet-HLH | glcm       | ClusterTendency                      | 35.82571105  |
| wavelet-HLH | firstorder | InterquartileRange                   | 182.8226867  |
| wavelet-HLH | firstorder | Skewness                             | -0.296353029 |
| wavelet-HLH | firstorder | Uniformity                           | 0.095510204  |
| wavelet-HLH | firstorder | Median                               | 13.73102853  |

|             |            |                                  |              |
|-------------|------------|----------------------------------|--------------|
| wavelet-HLH | firstorder | Energy                           | 379584.7173  |
| wavelet-HLH | firstorder | RobustMeanAbsoluteDeviation      | 63.71033124  |
| wavelet-HLH | firstorder | MeanAbsoluteDeviation            | 86.82182482  |
| wavelet-HLH | firstorder | TotalEnergy                      | 10248787.37  |
| wavelet-HLH | firstorder | Maximum                          | 186.9899884  |
| wavelet-HLH | firstorder | RootMeanSquared                  | 104.1406627  |
| wavelet-HLH | firstorder | 90Percentile                     | 115.6717134  |
| wavelet-HLH | firstorder | Minimum                          | -238.7229424 |
| wavelet-HLH | firstorder | Entropy                          | 3.565595704  |
| wavelet-HLH | firstorder | Range                            | 425.7129309  |
| wavelet-HLH | firstorder | Variance                         | 10799.79555  |
| wavelet-HLH | firstorder | 10Percentile                     | -152.7955954 |
| wavelet-HLH | firstorder | Kurtosis                         | 2.19067074   |
| wavelet-HLH | firstorder | Mean                             | -6.744040546 |
| wavelet-HLH | glrlm      | ShortRunLowGrayLevelEmphasis     | 0.044835794  |
| wavelet-HLH | glrlm      | GrayLevelVariance                | 17.37506532  |
| wavelet-HLH | glrlm      | LowGrayLevelRunEmphasis          | 0.045573983  |
| wavelet-HLH | glrlm      | GrayLevelNonUniformityNormalized | 0.094646149  |
| wavelet-HLH | glrlm      | RunVariance                      | 0.044745419  |
| wavelet-HLH | glrlm      | GrayLevelNonUniformity           | 3.197762642  |
| wavelet-HLH | glrlm      | LongRunEmphasis                  | 1.125011611  |
| wavelet-HLH | glrlm      | ShortRunHighGrayLevelEmphasis    | 121.6690756  |
| wavelet-HLH | glrlm      | RunLengthNonUniformity           | 31.74985735  |
| wavelet-HLH | glrlm      | ShortRunEmphasis                 | 0.974261296  |
| wavelet-HLH | glrlm      | LongRunHighGrayLevelEmphasis     | 131.5474186  |
| wavelet-HLH | glrlm      | RunPercentage                    | 0.964835165  |
| wavelet-HLH | glrlm      | LongRunLowGrayLevelEmphasis      | 0.049522357  |
| wavelet-HLH | glrlm      | RunEntropy                       | 3.657239984  |
| wavelet-HLH | glrlm      | HighGrayLevelRunEmphasis         | 123.5300488  |
| wavelet-HLH | glrlm      | RunLengthNonUniformityNormalized | 0.937404223  |
| wavelet-HLH | glszm      | GrayLevelVariance                | 17.09640832  |
| wavelet-HLH | glszm      | ZoneVariance                     | 1.032136106  |
| wavelet-HLH | glszm      | GrayLevelNonUniformityNormalized | 0.092627599  |
| wavelet-HLH | glszm      | SizeZoneNonUniformityNormalized  | 0.580340265  |
| wavelet-HLH | glszm      | SizeZoneNonUniformity            | 13.34782609  |
| wavelet-HLH | glszm      | GrayLevelNonUniformity           | 2.130434783  |
| wavelet-HLH | glszm      | LargeAreaEmphasis                | 3.347826087  |
| wavelet-HLH | glszm      | SmallAreaHighGrayLevelEmphasis   | 126.5244565  |
| wavelet-HLH | glszm      | ZonePercentage                   | 0.657142857  |
| wavelet-HLH | glszm      | LargeAreaLowGrayLevelEmphasis    | 0.122299574  |
| wavelet-HLH | glszm      | LargeAreaHighGrayLevelEmphasis   | 307.8695652  |
| wavelet-HLH | glszm      | HighGrayLevelZoneEmphasis        | 145.8695652  |
| wavelet-HLH | glszm      | SmallAreaEmphasis                | 0.779891304  |
| wavelet-HLH | glszm      | LowGrayLevelZoneEmphasis         | 0.054452758  |
| wavelet-HLH | glszm      | ZoneEntropy                      | 3.882045108  |
| wavelet-HLH | glszm      | SmallAreaLowGrayLevelEmphasis    | 0.049541056  |
| wavelet-HLH | ngtdm      | Coarseness                       | 0.088984603  |
| wavelet-HLH | ngtdm      | Complexity                       | 329.9225504  |
| wavelet-HLH | ngtdm      | Strength                         | 9.072070234  |
| wavelet-HLH | ngtdm      | Contrast                         | 0.706702916  |
| wavelet-HLH | ngtdm      | Busyness                         | 0.119117647  |

| Image type | Feature Class | Feature Name            |                                                                                                                                                                                                                                                                                                                                                                                                                   |
|------------|---------------|-------------------------|-------------------------------------------------------------------------------------------------------------------------------------------------------------------------------------------------------------------------------------------------------------------------------------------------------------------------------------------------------------------------------------------------------------------|
| general    | info          | BoundingBox             | 3: RTSTRUCT: C99-DNU_segment_ITV (MIP) (1, 0, 1, 5, 10, 6)                                                                                                                                                                                                                                                                                                                                                        |
| general    | info          | EnabledImageTypes       | {u'Original': {}, u'Wavelet': {}}                                                                                                                                                                                                                                                                                                                                                                                 |
|            |               |                         | {'distances': [1], 'additionalInfo': True, 'force2D': False, 'interpolator': 'sitkBSpline', 'resampledPixelSpacing': [3.0], 'label': 1, 'normalizeScale': 1, 'normalize': False, 'force2Ddimension': 0, 'removeOutliers': None, 'minimumROISize': None, u'binWidth': 25.0, 'minimumROIDimensions': 1, u'correctMask': True, 'preCrop': False, u'symmetricalGLCM': True, 'resegmentRange': None, 'padDistance': 5} |
| general    | info          | GeneralSettings         | fdd1f7c22699d3a0be1911e556cc                                                                                                                                                                                                                                                                                                                                                                                      |
| general    | info          | ImageHash               | 4ca141eda903 (0.9765624999999998, 0.9765624999999998, 1.9999999999999999)                                                                                                                                                                                                                                                                                                                                         |
| general    | info          | ImageSpacing            | 012a63fc37bb20a328fc38af422b                                                                                                                                                                                                                                                                                                                                                                                      |
| general    | info          | MaskHash                | 3b0f8cb714be                                                                                                                                                                                                                                                                                                                                                                                                      |
| general    | info          | NumpyVersion            | 1.13.1                                                                                                                                                                                                                                                                                                                                                                                                            |
| general    | info          | PyWaveletVersion        | 0.5.2                                                                                                                                                                                                                                                                                                                                                                                                             |
| general    | info          | SimpleITKVersion        | 1.1.0                                                                                                                                                                                                                                                                                                                                                                                                             |
| general    | info          | Version                 | 1.3.0.post102+g1b0eb74                                                                                                                                                                                                                                                                                                                                                                                            |
| general    | info          | VolumeNum               | 1                                                                                                                                                                                                                                                                                                                                                                                                                 |
| general    | info          | VoxelNum                | 146                                                                                                                                                                                                                                                                                                                                                                                                               |
| original   | shape         | Maximum3DDiameter       | 28.61817604                                                                                                                                                                                                                                                                                                                                                                                                       |
| original   | shape         | Maximum2DDiameterSlice  | 26.83281573                                                                                                                                                                                                                                                                                                                                                                                                       |
| original   | shape         | Sphericity              | 0.840373994                                                                                                                                                                                                                                                                                                                                                                                                       |
| original   | shape         | MinorAxis               | 18.11170014                                                                                                                                                                                                                                                                                                                                                                                                       |
| original   | shape         | Elongation              | 0.725581461                                                                                                                                                                                                                                                                                                                                                                                                       |
| original   | shape         | SurfaceVolumeRatio      | 0.364283343                                                                                                                                                                                                                                                                                                                                                                                                       |
| original   | shape         | Volume                  | 3942                                                                                                                                                                                                                                                                                                                                                                                                              |
| original   | shape         | MajorAxis               | 24.96163576                                                                                                                                                                                                                                                                                                                                                                                                       |
| original   | shape         | SurfaceArea             | 1436.004938                                                                                                                                                                                                                                                                                                                                                                                                       |
| original   | shape         | Flatness                | 0.508139701                                                                                                                                                                                                                                                                                                                                                                                                       |
| original   | shape         | LeastAxis               | 12.68399813                                                                                                                                                                                                                                                                                                                                                                                                       |
| original   | shape         | Maximum2DDiameterColumn | 17.49285568                                                                                                                                                                                                                                                                                                                                                                                                       |
| original   | shape         | Maximum2DDiameterRow    | 26.83281573                                                                                                                                                                                                                                                                                                                                                                                                       |

|          |            |                                      |              |
|----------|------------|--------------------------------------|--------------|
| original | gldm       | GrayLevelVariance                    | 88.0597204   |
| original | gldm       | HighGrayLevelEmphasis                | 704.5273973  |
| original | gldm       | DependenceEntropy                    | 5.809706669  |
| original | gldm       | DependenceNonUniformity              | 51.30136986  |
| original | gldm       | GrayLevelNonUniformity               | 6.808219178  |
| original | gldm       | SmallDependenceEmphasis              | 0.611085146  |
| original | gldm       | SmallDependenceHighGrayLevelEmphasis | 357.3881157  |
| original | gldm       | DependenceNonUniformityNormalized    | 0.351379246  |
| original | gldm       | LargeDependenceEmphasis              | 8.095890411  |
| original | gldm       | LargeDependenceLowGrayLevelEmphasis  | 0.024497505  |
| original | gldm       | DependenceVariance                   | 3.29198724   |
| original | gldm       | LargeDependenceHighGrayLevelEmphasis | 8419.19863   |
| original | gldm       | SmallDependenceLowGrayLevelEmphasis  | 0.016349108  |
| original | gldm       | LowGrayLevelEmphasis                 | 0.016989197  |
| original | glcm       | JointAverage                         | 27.24852805  |
| original | glcm       | SumAverage                           | 54.4970561   |
| original | glcm       | JointEntropy                         | 7.008036276  |
| original | glcm       | ClusterShade                         | -1575.47478  |
| original | glcm       | MaximumProbability                   | 0.035892003  |
| original | glcm       | ldmn                                 | 0.945397463  |
| original | glcm       | JointEnergy                          | 0.009576181  |
| original | glcm       | Contrast                             | 119.7637672  |
| original | glcm       | DifferenceEntropy                    | 4.257509826  |
| original | glcm       | InverseVariance                      | 0.134627108  |
| original | glcm       | DifferenceVariance                   | 46.94308841  |
| original | glcm       | ldn                                  | 0.851423944  |
| original | glcm       | ldm                                  | 0.151886226  |
| original | glcm       | Correlation                          | 0.239551688  |
| original | glcm       | Autocorrelation                      | 761.2447666  |
| original | glcm       | SumEntropy                           | 5.117725659  |
| original | glcm       | SumSquares                           | 78.41011331  |
| original | glcm       | ClusterProminence                    | 106726.6511  |
| original | glcm       | lmc2                                 | 0.99431052   |
| original | glcm       | lmc1                                 | -0.487038544 |
| original | glcm       | DifferenceAverage                    | 8.377760665  |
| original | glcm       | ld                                   | 0.231212472  |
| original | glcm       | ClusterTendency                      | 193.876686   |
| original | firstorder | InterquartileRange                   | 375          |
| original | firstorder | Skewness                             | -0.460730965 |
| original | firstorder | Uniformity                           | 0.046631638  |
| original | firstorder | Median                               | -164         |
| original | firstorder | Energy                               | 13477546     |
| original | firstorder | RobustMeanAbsoluteDeviation          | 156.7289064  |
| original | firstorder | MeanAbsoluteDeviation                | 200.8669544  |
| original | firstorder | TotalEnergy                          | 363893742    |

|             |            |                                  |              |
|-------------|------------|----------------------------------|--------------|
| original    | firstorder | Maximum                          | 255          |
| original    | firstorder | RootMeanSquared                  | 303.8288316  |
| original    | firstorder | 90Percentile                     | 49           |
| original    | firstorder | Minimum                          | -799         |
| original    | firstorder | Entropy                          | 4.826449432  |
| original    | firstorder | Range                            | 1054         |
| original    | firstorder | Variance                         | 55195.0334   |
| original    | firstorder | 10Percentile                     | -505.5       |
| original    | firstorder | Kurtosis                         | 2.318968375  |
| original    | firstorder | Mean                             | -192.6575342 |
| original    | glrlm      | ShortRunLowGrayLevelEmphasis     | 0.017713879  |
| original    | glrlm      | GrayLevelVariance                | 88.53134947  |
| original    | glrlm      | LowGrayLevelRunEmphasis          | 0.017756776  |
| original    | glrlm      | GrayLevelNonUniformityNormalized | 0.042909603  |
| original    | glrlm      | RunVariance                      | 0.055881383  |
| original    | glrlm      | GrayLevelNonUniformity           | 5.982332408  |
| original    | glrlm      | LongRunEmphasis                  | 1.156353371  |
| original    | glrlm      | ShortRunHighGrayLevelEmphasis    | 653.5798925  |
| original    | glrlm      | RunLengthNonUniformity           | 127.5311565  |
| original    | glrlm      | ShortRunEmphasis                 | 0.965671379  |
| original    | glrlm      | LongRunHighGrayLevelEmphasis     | 850.9318816  |
| original    | glrlm      | RunPercentage                    | 0.954162276  |
| original    | glrlm      | LongRunLowGrayLevelEmphasis      | 0.017944968  |
| original    | glrlm      | RunEntropy                       | 5.032152344  |
| original    | glrlm      | HighGrayLevelRunEmphasis         | 688.6816969  |
| original    | glrlm      | RunLengthNonUniformityNormalized | 0.914440807  |
| original    | glszm      | GrayLevelVariance                | 91.0921491   |
| original    | glszm      | ZoneVariance                     | 3.943773428  |
| original    | glszm      | GrayLevelNonUniformityNormalized | 0.033111204  |
| original    | glszm      | SizeZoneNonUniformityNormalized  | 0.682632237  |
| original    | glszm      | SizeZoneNonUniformity            | 66.89795918  |
| original    | glszm      | GrayLevelNonUniformity           | 3.244897959  |
| original    | glszm      | LargeAreaEmphasis                | 6.163265306  |
| original    | glszm      | SmallAreaHighGrayLevelEmphasis   | 489.6835273  |
| original    | glszm      | ZonePercentage                   | 0.671232877  |
| original    | glszm      | LargeAreaLowGrayLevelEmphasis    | 0.03010601   |
| original    | glszm      | LargeAreaHighGrayLevelEmphasis   | 6166.255102  |
| original    | glszm      | HighGrayLevelZoneEmphasis        | 591.8469388  |
| original    | glszm      | SmallAreaEmphasis                | 0.850881834  |
| original    | glszm      | LowGrayLevelZoneEmphasis         | 0.024567742  |
| original    | glszm      | ZoneEntropy                      | 5.519217534  |
| original    | glszm      | SmallAreaLowGrayLevelEmphasis    | 0.024226564  |
| original    | ngtdm      | Coarseness                       | 0.027827392  |
| original    | ngtdm      | Complexity                       | 3636.498451  |
| original    | ngtdm      | Strength                         | 18.62495798  |
| original    | ngtdm      | Contrast                         | 0.783121307  |
| original    | ngtdm      | Busyness                         | 0.037584917  |
| wavelet-HHH | gldm       | GrayLevelVariance                | 5.181084631  |

|             |            |                                      |              |
|-------------|------------|--------------------------------------|--------------|
| wavelet-HHH | gldm       | HighGrayLevelEmphasis                | 77.78082192  |
| wavelet-HHH | gldm       | DependenceEntropy                    | 5.148775773  |
| wavelet-HHH | gldm       | DependenceNonUniformity              | 24.34246575  |
| wavelet-HHH | gldm       | GrayLevelNonUniformity               | 20.01369863  |
| wavelet-HHH | gldm       | SmallDependenceEmphasis              | 0.280269607  |
| wavelet-HHH | gldm       | SmallDependenceHighGrayLevelEmphasis | 23.2904714   |
| wavelet-HHH | gldm       | DependenceNonUniformityNormalized    | 0.166729217  |
| wavelet-HHH | gldm       | LargeDependenceEmphasis              | 15.06849315  |
| wavelet-HHH | gldm       | LargeDependenceLowGrayLevelEmphasis  | 0.216371998  |
| wavelet-HHH | gldm       | DependenceVariance                   | 3.804653781  |
| wavelet-HHH | gldm       | LargeDependenceHighGrayLevelEmphasis | 1196.643836  |
| wavelet-HHH | gldm       | SmallDependenceLowGrayLevelEmphasis  | 0.012995358  |
| wavelet-HHH | gldm       | LowGrayLevelEmphasis                 | 0.02405016   |
| wavelet-HHH | glcm       | JointAverage                         | 8.50314618   |
| wavelet-HHH | glcm       | SumAverage                           | 17.00629236  |
| wavelet-HHH | glcm       | JointEntropy                         | 5.665319152  |
| wavelet-HHH | glcm       | ClusterShade                         | -0.861731255 |
| wavelet-HHH | glcm       | MaximumProbability                   | 0.057229651  |
| wavelet-HHH | glcm       | Idmn                                 | 0.965521013  |
| wavelet-HHH | glcm       | JointEnergy                          | 0.025037248  |
| wavelet-HHH | glcm       | Contrast                             | 9.957049096  |
| wavelet-HHH | glcm       | DifferenceEntropy                    | 2.723417491  |
| wavelet-HHH | glcm       | InverseVariance                      | 0.337405975  |
| wavelet-HHH | glcm       | DifferenceVariance                   | 3.972496317  |
| wavelet-HHH | glcm       | Idn                                  | 0.877988523  |
| wavelet-HHH | glcm       | Idm                                  | 0.336348293  |
| wavelet-HHH | glcm       | Correlation                          | -0.019981576 |
| wavelet-HHH | glcm       | Autocorrelation                      | 72.23885545  |
| wavelet-HHH | glcm       | SumEntropy                           | 3.497374285  |
| wavelet-HHH | glcm       | SumSquares                           | 4.905310093  |
| wavelet-HHH | glcm       | ClusterProminence                    | 346.3113896  |
| wavelet-HHH | glcm       | Imc2                                 | 0.799929654  |
| wavelet-HHH | glcm       | Imc1                                 | -0.16699594  |
| wavelet-HHH | glcm       | DifferenceAverage                    | 2.423322479  |
| wavelet-HHH | glcm       | Id                                   | 0.416893354  |
| wavelet-HHH | glcm       | ClusterTendency                      | 9.664191278  |
| wavelet-HHH | firstorder | InterquartileRange                   | 67.2466684   |
| wavelet-HHH | firstorder | Skewness                             | 0.112342681  |
| wavelet-HHH | firstorder | Uniformity                           | 0.137080128  |
| wavelet-HHH | firstorder | Median                               | 4.107656983  |
| wavelet-HHH | firstorder | Energy                               | 476333.707   |
| wavelet-HHH | firstorder | RobustMeanAbsoluteDeviation          | 28.11470771  |
| wavelet-HHH | firstorder | MeanAbsoluteDeviation                | 43.14226777  |
| wavelet-HHH | firstorder | TotalEnergy                          | 12861010.09  |
| wavelet-HHH | firstorder | Maximum                              | 199.9418729  |



|             |            |                                  |              |
|-------------|------------|----------------------------------|--------------|
| wavelet-HHH | firstorder | RootMeanSquared                  | 57.11882034  |
| wavelet-HHH | firstorder | 90Percentile                     | 66.88404289  |
| wavelet-HHH | firstorder | Minimum                          | -184.5360553 |
| wavelet-HHH | firstorder | Entropy                          | 3.12864299   |
| wavelet-HHH | firstorder | Range                            | 384.4779282  |
| wavelet-HHH | firstorder | Variance                         | 3262.557492  |
| wavelet-HHH | firstorder | 10Percentile                     | -70.32704118 |
| wavelet-HHH | firstorder | Kurtosis                         | 4.354739232  |
| wavelet-HHH | firstorder | Mean                             | 0.046316213  |
| wavelet-HHH | grlm       | ShortRunLowGrayLevelEmphasis     | 0.024057532  |
| wavelet-HHH | grlm       | GrayLevelVariance                | 5.521711569  |
| wavelet-HHH | grlm       | LowGrayLevelRunEmphasis          | 0.025041877  |
| wavelet-HHH | grlm       | GrayLevelNonUniformityNormalized | 0.131849979  |
| wavelet-HHH | grlm       | RunVariance                      | 0.116563174  |
| wavelet-HHH | grlm       | GrayLevelNonUniformity           | 17.51175869  |
| wavelet-HHH | grlm       | LongRunEmphasis                  | 1.331752776  |
| wavelet-HHH | grlm       | ShortRunHighGrayLevelEmphasis    | 72.31629168  |
| wavelet-HHH | grlm       | RunLengthNonUniformity           | 111.4555942  |
| wavelet-HHH | grlm       | ShortRunEmphasis                 | 0.931014319  |
| wavelet-HHH | grlm       | LongRunHighGrayLevelEmphasis     | 103.6784871  |
| wavelet-HHH | grlm       | RunPercentage                    | 0.909378293  |
| wavelet-HHH | grlm       | LongRunLowGrayLevelEmphasis      | 0.029771258  |
| wavelet-HHH | grlm       | RunEntropy                       | 3.562600677  |
| wavelet-HHH | grlm       | HighGrayLevelRunEmphasis         | 77.72858934  |
| wavelet-HHH | grlm       | RunLengthNonUniformityNormalized | 0.836987833  |
| wavelet-HHH | glszm      | GrayLevelVariance                | 11.9653867   |
| wavelet-HHH | glszm      | ZoneVariance                     | 34.89021092  |
| wavelet-HHH | glszm      | GrayLevelNonUniformityNormalized | 0.100054083  |
| wavelet-HHH | glszm      | SizeZoneNonUniformityNormalized  | 0.445105462  |
| wavelet-HHH | glszm      | SizeZoneNonUniformity            | 19.13953488  |
| wavelet-HHH | glszm      | GrayLevelNonUniformity           | 4.302325581  |
| wavelet-HHH | glszm      | LargeAreaEmphasis                | 46.41860465  |
| wavelet-HHH | glszm      | SmallAreaHighGrayLevelEmphasis   | 59.77544182  |
| wavelet-HHH | glszm      | ZonePercentage                   | 0.294520548  |
| wavelet-HHH | glszm      | LargeAreaLowGrayLevelEmphasis    | 0.636465104  |
| wavelet-HHH | glszm      | LargeAreaHighGrayLevelEmphasis   | 3818.55814   |
| wavelet-HHH | glszm      | HighGrayLevelZoneEmphasis        | 78.97674419  |
| wavelet-HHH | glszm      | SmallAreaEmphasis                | 0.684302413  |
| wavelet-HHH | glszm      | LowGrayLevelZoneEmphasis         | 0.045894516  |
| wavelet-HHH | glszm      | ZoneEntropy                      | 4.443365627  |
| wavelet-HHH | glszm      | SmallAreaLowGrayLevelEmphasis    | 0.039623421  |
| wavelet-HHH | ngtdm      | Coarseness                       | 0.038105931  |
| wavelet-HHH | ngtdm      | Complexity                       | 143.7568782  |
| wavelet-HHH | ngtdm      | Strength                         | 2.464287543  |
| wavelet-HHH | ngtdm      | Contrast                         | 0.103822936  |
| wavelet-HHH | ngtdm      | Busyness                         | 0.200682203  |
| wavelet-HLL | gldm       | GrayLevelVariance                | 95.89904297  |
| wavelet-HLL | gldm       | HighGrayLevelEmphasis            | 678.4931507  |

|             |            |                                      |              |
|-------------|------------|--------------------------------------|--------------|
| wavelet-HLL | gldm       | DependenceEntropy                    | 5.788670963  |
| wavelet-HLL | gldm       | DependenceNonUniformity              | 67.47945205  |
| wavelet-HLL | gldm       | GrayLevelNonUniformity               | 5.273972603  |
| wavelet-HLL | gldm       | SmallDependenceEmphasis              | 0.683837519  |
| wavelet-HLL | gldm       | SmallDependenceHighGrayLevelEmphasis | 512.6075438  |
| wavelet-HLL | gldm       | DependenceNonUniformityNormalized    | 0.462188028  |
| wavelet-HLL | gldm       | LargeDependenceEmphasis              | 2.863013699  |
| wavelet-HLL | gldm       | LargeDependenceLowGrayLevelEmphasis  | 0.015243946  |
| wavelet-HLL | gldm       | DependenceVariance                   | 0.550947645  |
| wavelet-HLL | gldm       | LargeDependenceHighGrayLevelEmphasis | 1571.739726  |
| wavelet-HLL | gldm       | SmallDependenceLowGrayLevelEmphasis  | 0.00871644   |
| wavelet-HLL | gldm       | LowGrayLevelEmphasis                 | 0.009706288  |
| wavelet-HLL | glcm       | JointAverage                         | 23.37596148  |
| wavelet-HLL | glcm       | SumAverage                           | 46.75192296  |
| wavelet-HLL | glcm       | JointEntropy                         | 7.212428158  |
| wavelet-HLL | glcm       | ClusterShade                         | 2802.416213  |
| wavelet-HLL | glcm       | MaximumProbability                   | 0.016958317  |
| wavelet-HLL | glcm       | ldmn                                 | 0.958932582  |
| wavelet-HLL | glcm       | JointEnergy                          | 0.007366043  |
| wavelet-HLL | glcm       | Contrast                             | 109.2533647  |
| wavelet-HLL | glcm       | DifferenceEntropy                    | 4.063074187  |
| wavelet-HLL | glcm       | InverseVariance                      | 0.14219219   |
| wavelet-HLL | glcm       | DifferenceVariance                   | 38.23500772  |
| wavelet-HLL | glcm       | ldn                                  | 0.867231893  |
| wavelet-HLL | glcm       | ldm                                  | 0.117043518  |
| wavelet-HLL | glcm       | Correlation                          | 0.370989751  |
| wavelet-HLL | glcm       | Autocorrelation                      | 581.7874734  |
| wavelet-HLL | glcm       | SumEntropy                           | 5.168773968  |
| wavelet-HLL | glcm       | SumSquares                           | 89.71815261  |
| wavelet-HLL | glcm       | ClusterProminence                    | 185496.7714  |
| wavelet-HLL | glcm       | lmc2                                 | 0.997595738  |
| wavelet-HLL | glcm       | lmc1                                 | -0.545008499 |
| wavelet-HLL | glcm       | DifferenceAverage                    | 8.050885789  |
| wavelet-HLL | glcm       | ld                                   | 0.203719732  |
| wavelet-HLL | glcm       | ClusterTendency                      | 249.6192457  |
| wavelet-HLL | firstorder | InterquartileRange                   | 367.9579985  |
| wavelet-HLL | firstorder | Skewness                             | 0.495958344  |
| wavelet-HLL | firstorder | Uniformity                           | 0.0361231    |
| wavelet-HLL | firstorder | Median                               | -101.7736496 |
| wavelet-HLL | firstorder | Energy                               | 9264924.376  |
| wavelet-HLL | firstorder | RobustMeanAbsoluteDeviation          | 142.2382921  |
| wavelet-HLL | firstorder | MeanAbsoluteDeviation                | 200.1996404  |
| wavelet-HLL | firstorder | TotalEnergy                          | 250152958.1  |
| wavelet-HLL | firstorder | Maximum                              | 546.365329   |
| wavelet-HLL | firstorder | RootMeanSquared                      | 251.90948    |

|             |            |                                  |              |
|-------------|------------|----------------------------------|--------------|
| wavelet-HLL | firstorder | 90Percentile                     | 314.6322854  |
| wavelet-HLL | firstorder | Minimum                          | -630.0414801 |
| wavelet-HLL | firstorder | Entropy                          | 5.059531173  |
| wavelet-HLL | firstorder | Range                            | 1176.406809  |
| wavelet-HLL | firstorder | Variance                         | 59961.98969  |
| wavelet-HLL | firstorder | 10Percentile                     | -335.76316   |
| wavelet-HLL | firstorder | Kurtosis                         | 2.574549333  |
| wavelet-HLL | firstorder | Mean                             | -59.13033435 |
| wavelet-HLL | gllm       | ShortRunLowGrayLevelEmphasis     | 0.009797721  |
| wavelet-HLL | gllm       | GrayLevelVariance                | 96.75938075  |
| wavelet-HLL | gllm       | LowGrayLevelRunEmphasis          | 0.009844756  |
| wavelet-HLL | gllm       | GrayLevelNonUniformityNormalized | 0.035715663  |
| wavelet-HLL | gllm       | RunVariance                      | 0.019984323  |
| wavelet-HLL | gllm       | GrayLevelNonUniformity           | 5.110781872  |
| wavelet-HLL | gllm       | LongRunEmphasis                  | 1.062180588  |
| wavelet-HLL | gllm       | ShortRunHighGrayLevelEmphasis    | 674.4368201  |
| wavelet-HLL | gllm       | RunLengthNonUniformity           | 137.4368593  |
| wavelet-HLL | gllm       | ShortRunEmphasis                 | 0.984454853  |
| wavelet-HLL | gllm       | LongRunHighGrayLevelEmphasis     | 713.2640309  |
| wavelet-HLL | gllm       | RunPercentage                    | 0.979978925  |
| wavelet-HLL | gllm       | LongRunLowGrayLevelEmphasis      | 0.010032895  |
| wavelet-HLL | gllm       | RunEntropy                       | 5.148173719  |
| wavelet-HLL | gllm       | HighGrayLevelRunEmphasis         | 682.2022622  |
| wavelet-HLL | gllm       | RunLengthNonUniformityNormalized | 0.960031354  |
| wavelet-HLL | glszm      | GrayLevelVariance                | 107.3963152  |
| wavelet-HLL | glszm      | ZoneVariance                     | 0.720396072  |
| wavelet-HLL | glszm      | GrayLevelNonUniformityNormalized | 0.031734437  |
| wavelet-HLL | glszm      | SizeZoneNonUniformityNormalized  | 0.647268891  |
| wavelet-HLL | glszm      | SizeZoneNonUniformity            | 71.84684685  |
| wavelet-HLL | glszm      | GrayLevelNonUniformity           | 3.522522523  |
| wavelet-HLL | glszm      | LargeAreaEmphasis                | 2.45045045   |
| wavelet-HLL | glszm      | SmallAreaHighGrayLevelEmphasis   | 638.3842123  |
| wavelet-HLL | glszm      | ZonePercentage                   | 0.760273973  |
| wavelet-HLL | glszm      | LargeAreaLowGrayLevelEmphasis    | 0.016088506  |
| wavelet-HLL | glszm      | LargeAreaHighGrayLevelEmphasis   | 1398.27027   |
| wavelet-HLL | glszm      | HighGrayLevelZoneEmphasis        | 732.8468468  |
| wavelet-HLL | glszm      | SmallAreaEmphasis                | 0.831096722  |
| wavelet-HLL | glszm      | LowGrayLevelZoneEmphasis         | 0.011794105  |
| wavelet-HLL | glszm      | ZoneEntropy                      | 5.710598186  |
| wavelet-HLL | glszm      | SmallAreaLowGrayLevelEmphasis    | 0.011248894  |
| wavelet-HLL | ngtdm      | Coarseness                       | 0.044983114  |
| wavelet-HLL | ngtdm      | Complexity                       | 3740.012416  |
| wavelet-HLL | ngtdm      | Strength                         | 28.70543692  |
| wavelet-HLL | ngtdm      | Contrast                         | 0.572915532  |
| wavelet-HLL | ngtdm      | Busyness                         | 0.028275276  |
| wavelet-LHL | gldm       | GrayLevelVariance                | 22.80765622  |
| wavelet-LHL | gldm       | HighGrayLevelEmphasis            | 173.7945205  |
| wavelet-LHL | gldm       | DependenceEntropy                | 5.653406538  |

|             |            |                                      |              |
|-------------|------------|--------------------------------------|--------------|
| wavelet-LHL | gldm       | DependenceNonUniformity              | 37.26027397  |
| wavelet-LHL | gldm       | GrayLevelNonUniformity               | 9.246575342  |
| wavelet-LHL | gldm       | SmallDependenceEmphasis              | 0.458452187  |
| wavelet-LHL | gldm       | SmallDependenceHighGrayLevelEmphasis | 89.4406423   |
| wavelet-LHL | gldm       | DependenceNonUniformityNormalized    | 0.255207356  |
| wavelet-LHL | gldm       | LargeDependenceEmphasis              | 6.767123288  |
| wavelet-LHL | gldm       | LargeDependenceLowGrayLevelEmphasis  | 0.077458624  |
| wavelet-LHL | gldm       | DependenceVariance                   | 1.59617189   |
| wavelet-LHL | gldm       | LargeDependenceHighGrayLevelEmphasis | 1030.931507  |
| wavelet-LHL | gldm       | SmallDependenceLowGrayLevelEmphasis  | 0.017572695  |
| wavelet-LHL | gldm       | LowGrayLevelEmphasis                 | 0.02285114   |
| wavelet-LHL | glcm       | JointAverage                         | 11.97947175  |
| wavelet-LHL | glcm       | SumAverage                           | 23.9589435   |
| wavelet-LHL | glcm       | JointEntropy                         | 6.833392357  |
| wavelet-LHL | glcm       | ClusterShade                         | 80.22096456  |
| wavelet-LHL | glcm       | MaximumProbability                   | 0.02484537   |
| wavelet-LHL | glcm       | Idmn                                 | 0.959346076  |
| wavelet-LHL | glcm       | JointEnergy                          | 0.010194571  |
| wavelet-LHL | glcm       | Contrast                             | 29.10368261  |
| wavelet-LHL | glcm       | DifferenceEntropy                    | 3.353193237  |
| wavelet-LHL | glcm       | InverseVariance                      | 0.219982788  |
| wavelet-LHL | glcm       | DifferenceVariance                   | 10.51743329  |
| wavelet-LHL | glcm       | Idn                                  | 0.866735886  |
| wavelet-LHL | glcm       | Idm                                  | 0.209594246  |
| wavelet-LHL | glcm       | Correlation                          | 0.294687651  |
| wavelet-LHL | glcm       | Autocorrelation                      | 149.6320365  |
| wavelet-LHL | glcm       | SumEntropy                           | 4.602180429  |
| wavelet-LHL | glcm       | SumSquares                           | 20.65457951  |
| wavelet-LHL | glcm       | ClusterProminence                    | 8482.354458  |
| wavelet-LHL | glcm       | Imc2                                 | 0.968317006  |
| wavelet-LHL | glcm       | Imc1                                 | -0.343177921 |
| wavelet-LHL | glcm       | DifferenceAverage                    | 4.196580023  |
| wavelet-LHL | glcm       | Id                                   | 0.304592395  |
| wavelet-LHL | glcm       | ClusterTendency                      | 53.51463543  |
| wavelet-LHL | firstorder | InterquartileRange                   | 151.8023572  |
| wavelet-LHL | firstorder | Skewness                             | 0.024954796  |
| wavelet-LHL | firstorder | Uniformity                           | 0.063332708  |
| wavelet-LHL | firstorder | Median                               | -52.6985747  |
| wavelet-LHL | firstorder | Energy                               | 2526310.38   |
| wavelet-LHL | firstorder | RobustMeanAbsoluteDeviation          | 65.48147363  |
| wavelet-LHL | firstorder | MeanAbsoluteDeviation                | 94.82834568  |
| wavelet-LHL | firstorder | TotalEnergy                          | 68210380.27  |
| wavelet-LHL | firstorder | Maximum                              | 271.1098669  |
| wavelet-LHL | firstorder | RootMeanSquared                      | 131.5427526  |
| wavelet-LHL | firstorder | 90Percentile                         | 98.20988172  |

|             |            |                                  |              |
|-------------|------------|----------------------------------|--------------|
| wavelet-LHL | firstorder | Minimum                          | -346.5813042 |
| wavelet-LHL | firstorder | Entropy                          | 4.205309541  |
| wavelet-LHL | firstorder | Range                            | 617.6911711  |
| wavelet-LHL | firstorder | Variance                         | 14223.14975  |
| wavelet-LHL | firstorder | 10Percentile                     | -215.2944703 |
| wavelet-LHL | firstorder | Kurtosis                         | 2.813354001  |
| wavelet-LHL | firstorder | Mean                             | -55.5008649  |
| wavelet-LHL | grlm       | ShortRunLowGrayLevelEmphasis     | 0.023162889  |
| wavelet-LHL | grlm       | GrayLevelVariance                | 23.45241252  |
| wavelet-LHL | grlm       | LowGrayLevelRunEmphasis          | 0.023538765  |
| wavelet-LHL | grlm       | GrayLevelNonUniformityNormalized | 0.062013332  |
| wavelet-LHL | grlm       | RunVariance                      | 0.048784588  |
| wavelet-LHL | grlm       | GrayLevelNonUniformity           | 8.611454586  |
| wavelet-LHL | grlm       | LongRunEmphasis                  | 1.156070009  |
| wavelet-LHL | grlm       | ShortRunHighGrayLevelEmphasis    | 169.0554495  |
| wavelet-LHL | grlm       | RunLengthNonUniformity           | 125.4215834  |
| wavelet-LHL | grlm       | ShortRunEmphasis                 | 0.960982498  |
| wavelet-LHL | grlm       | LongRunHighGrayLevelEmphasis     | 198.5849677  |
| wavelet-LHL | grlm       | RunPercentage                    | 0.951001054  |
| wavelet-LHL | grlm       | LongRunLowGrayLevelEmphasis      | 0.025042267  |
| wavelet-LHL | grlm       | RunEntropy                       | 4.432620123  |
| wavelet-LHL | grlm       | HighGrayLevelRunEmphasis         | 174.9613531  |
| wavelet-LHL | grlm       | RunLengthNonUniformityNormalized | 0.902430824  |
| wavelet-LHL | glszm      | GrayLevelVariance                | 33.2744139   |
| wavelet-LHL | glszm      | ZoneVariance                     | 4.378815989  |
| wavelet-LHL | glszm      | GrayLevelNonUniformityNormalized | 0.051104739  |
| wavelet-LHL | glszm      | SizeZoneNonUniformityNormalized  | 0.500084331  |
| wavelet-LHL | glszm      | SizeZoneNonUniformity            | 38.50649351  |
| wavelet-LHL | glszm      | GrayLevelNonUniformity           | 3.935064935  |
| wavelet-LHL | glszm      | LargeAreaEmphasis                | 7.974025974  |
| wavelet-LHL | glszm      | SmallAreaHighGrayLevelEmphasis   | 148.4791682  |
| wavelet-LHL | glszm      | ZonePercentage                   | 0.52739726   |
| wavelet-LHL | glszm      | LargeAreaLowGrayLevelEmphasis    | 0.100099804  |
| wavelet-LHL | glszm      | LargeAreaHighGrayLevelEmphasis   | 1165.584416  |
| wavelet-LHL | glszm      | HighGrayLevelZoneEmphasis        | 194.5974026  |
| wavelet-LHL | glszm      | SmallAreaEmphasis                | 0.730373697  |
| wavelet-LHL | glszm      | LowGrayLevelZoneEmphasis         | 0.034463523  |
| wavelet-LHL | glszm      | ZoneEntropy                      | 5.251994781  |
| wavelet-LHL | glszm      | SmallAreaLowGrayLevelEmphasis    | 0.031912949  |
| wavelet-LHL | ngtdm      | Coarseness                       | 0.051735266  |
| wavelet-LHL | ngtdm      | Complexity                       | 580.8973715  |
| wavelet-LHL | ngtdm      | Strength                         | 8.515001808  |
| wavelet-LHL | ngtdm      | Contrast                         | 0.229045427  |
| wavelet-LHL | ngtdm      | Busyness                         | 0.074990952  |
| wavelet-LHH | gldm       | GrayLevelVariance                | 15.54625633  |
| wavelet-LHH | gldm       | HighGrayLevelEmphasis            | 116.369863   |
| wavelet-LHH | gldm       | DependenceEntropy                | 5.449965232  |
| wavelet-LHH | gldm       | DependenceNonUniformity          | 35.5890411   |

|             |            |                                      |              |
|-------------|------------|--------------------------------------|--------------|
| wavelet-LHH | gldm       | GrayLevelNonUniformity               | 11.28767123  |
| wavelet-LHH | gldm       | SmallDependenceEmphasis              | 0.409202816  |
| wavelet-LHH | gldm       | SmallDependenceHighGrayLevelEmphasis | 55.0422793   |
| wavelet-LHH | gldm       | DependenceNonUniformityNormalized    | 0.243760555  |
| wavelet-LHH | gldm       | LargeDependenceEmphasis              | 7.178082192  |
| wavelet-LHH | gldm       | LargeDependenceLowGrayLevelEmphasis  | 0.12292472   |
| wavelet-LHH | gldm       | DependenceVariance                   | 1.496716082  |
| wavelet-LHH | gldm       | LargeDependenceHighGrayLevelEmphasis | 664.9315068  |
| wavelet-LHH | gldm       | SmallDependenceLowGrayLevelEmphasis  | 0.01716033   |
| wavelet-LHH | gldm       | LowGrayLevelEmphasis                 | 0.025696277  |
| wavelet-LHH | glcm       | JointAverage                         | 9.959783768  |
| wavelet-LHH | glcm       | SumAverage                           | 19.91956754  |
| wavelet-LHH | glcm       | JointEntropy                         | 6.65816433   |
| wavelet-LHH | glcm       | ClusterShade                         | 32.67520088  |
| wavelet-LHH | glcm       | MaximumProbability                   | 0.028480671  |
| wavelet-LHH | glcm       | ldmn                                 | 0.944506708  |
| wavelet-LHH | glcm       | JointEnergy                          | 0.011474882  |
| wavelet-LHH | glcm       | Contrast                             | 31.9576078   |
| wavelet-LHH | glcm       | DifferenceEntropy                    | 3.449483979  |
| wavelet-LHH | glcm       | InverseVariance                      | 0.217067874  |
| wavelet-LHH | glcm       | DifferenceVariance                   | 11.96441861  |
| wavelet-LHH | glcm       | ldn                                  | 0.847546577  |
| wavelet-LHH | glcm       | ldm                                  | 0.215179721  |
| wavelet-LHH | glcm       | Correlation                          | -0.053186623 |
| wavelet-LHH | glcm       | Autocorrelation                      | 98.4928506   |
| wavelet-LHH | glcm       | SumEntropy                           | 4.205257832  |
| wavelet-LHH | glcm       | SumSquares                           | 15.23988416  |
| wavelet-LHH | glcm       | ClusterProminence                    | 2687.239671  |
| wavelet-LHH | glcm       | lmc2                                 | 0.93475918   |
| wavelet-LHH | glcm       | lmc1                                 | -0.272475156 |
| wavelet-LHH | glcm       | DifferenceAverage                    | 4.390203059  |
| wavelet-LHH | glcm       | ld                                   | 0.306524963  |
| wavelet-LHH | glcm       | ClusterTendency                      | 29.00192883  |
| wavelet-LHH | firstorder | InterquartileRange                   | 141.2740686  |
| wavelet-LHH | firstorder | Skewness                             | 0.30894289   |
| wavelet-LHH | firstorder | Uniformity                           | 0.077312817  |
| wavelet-LHH | firstorder | Median                               | 7.954666942  |
| wavelet-LHH | firstorder | Energy                               | 1447479.367  |
| wavelet-LHH | firstorder | RobustMeanAbsoluteDeviation          | 55.24919172  |
| wavelet-LHH | firstorder | MeanAbsoluteDeviation                | 79.17439912  |
| wavelet-LHH | firstorder | TotalEnergy                          | 39081942.92  |
| wavelet-LHH | firstorder | Maximum                              | 305.0790607  |
| wavelet-LHH | firstorder | RootMeanSquared                      | 99.57028795  |
| wavelet-LHH | firstorder | 90Percentile                         | 132.1755471  |
| wavelet-LHH | firstorder | Minimum                              | -221.8083613 |

|             |            |                                  |              |
|-------------|------------|----------------------------------|--------------|
| wavelet-LHH | firstorder | Entropy                          | 3.908597228  |
| wavelet-LHH | firstorder | Range                            | 526.887422   |
| wavelet-LHH | firstorder | Variance                         | 9734.349034  |
| wavelet-LHH | firstorder | 10Percentile                     | -101.3113933 |
| wavelet-LHH | firstorder | Kurtosis                         | 2.976557229  |
| wavelet-LHH | firstorder | Mean                             | 13.41242737  |
| wavelet-LHH | glrlm      | ShortRunLowGrayLevelEmphasis     | 0.025666429  |
| wavelet-LHH | glrlm      | GrayLevelVariance                | 15.92457949  |
| wavelet-LHH | glrlm      | LowGrayLevelRunEmphasis          | 0.026289065  |
| wavelet-LHH | glrlm      | GrayLevelNonUniformityNormalized | 0.076153619  |
| wavelet-LHH | glrlm      | RunVariance                      | 0.057438275  |
| wavelet-LHH | glrlm      | GrayLevelNonUniformity           | 10.52761724  |
| wavelet-LHH | glrlm      | LongRunEmphasis                  | 1.173959142  |
| wavelet-LHH | glrlm      | ShortRunHighGrayLevelEmphasis    | 113.7084694  |
| wavelet-LHH | glrlm      | RunLengthNonUniformity           | 124.1814859  |
| wavelet-LHH | glrlm      | ShortRunEmphasis                 | 0.958979346  |
| wavelet-LHH | glrlm      | LongRunHighGrayLevelEmphasis     | 133.8881601  |
| wavelet-LHH | glrlm      | RunPercentage                    | 0.946786091  |
| wavelet-LHH | glrlm      | LongRunLowGrayLevelEmphasis      | 0.02893777   |
| wavelet-LHH | glrlm      | RunEntropy                       | 4.158223209  |
| wavelet-LHH | glrlm      | HighGrayLevelRunEmphasis         | 117.6171174  |
| wavelet-LHH | glrlm      | RunLengthNonUniformityNormalized | 0.897823268  |
| wavelet-LHH | glszm      | GrayLevelVariance                | 22.24816327  |
| wavelet-LHH | glszm      | ZoneVariance                     | 4.564081633  |
| wavelet-LHH | glszm      | GrayLevelNonUniformityNormalized | 0.064081633  |
| wavelet-LHH | glszm      | SizeZoneNonUniformityNormalized  | 0.444081633  |
| wavelet-LHH | glszm      | SizeZoneNonUniformity            | 31.08571429  |
| wavelet-LHH | glszm      | GrayLevelNonUniformity           | 4.485714286  |
| wavelet-LHH | glszm      | LargeAreaEmphasis                | 8.914285714  |
| wavelet-LHH | glszm      | SmallAreaHighGrayLevelEmphasis   | 96.58459396  |
| wavelet-LHH | glszm      | ZonePercentage                   | 0.479452055  |
| wavelet-LHH | glszm      | LargeAreaLowGrayLevelEmphasis    | 0.147797132  |
| wavelet-LHH | glszm      | LargeAreaHighGrayLevelEmphasis   | 892.7714286  |
| wavelet-LHH | glszm      | HighGrayLevelZoneEmphasis        | 133.4        |
| wavelet-LHH | glszm      | SmallAreaEmphasis                | 0.686543856  |
| wavelet-LHH | glszm      | LowGrayLevelZoneEmphasis         | 0.037855022  |
| wavelet-LHH | glszm      | ZoneEntropy                      | 5.010158782  |
| wavelet-LHH | glszm      | SmallAreaLowGrayLevelEmphasis    | 0.033452177  |
| wavelet-LHH | ngtdm      | Coarseness                       | 0.035833569  |
| wavelet-LHH | ngtdm      | Complexity                       | 499.377535   |
| wavelet-LHH | ngtdm      | Strength                         | 4.502081152  |
| wavelet-LHH | ngtdm      | Contrast                         | 0.267567777  |
| wavelet-LHH | ngtdm      | Busyness                         | 0.160788945  |
| wavelet-LLH | gldm       | GrayLevelVariance                | 151.7277632  |
| wavelet-LLH | gldm       | HighGrayLevelEmphasis            | 656.130137   |
| wavelet-LLH | gldm       | DependenceEntropy                | 6.033194275  |
| wavelet-LLH | gldm       | DependenceNonUniformity          | 58.2739726   |
| wavelet-LLH | gldm       | GrayLevelNonUniformity           | 4.876712329  |

|             |            |                                      |              |
|-------------|------------|--------------------------------------|--------------|
| wavelet-LLH | gldm       | SmallDependenceEmphasis              | 0.645882801  |
| wavelet-LLH | gldm       | SmallDependenceHighGrayLevelEmphasis | 492.5994787  |
| wavelet-LLH | gldm       | DependenceNonUniformityNormalized    | 0.399136799  |
| wavelet-LLH | gldm       | LargeDependenceEmphasis              | 4.068493151  |
| wavelet-LLH | gldm       | LargeDependenceLowGrayLevelEmphasis  | 0.030125575  |
| wavelet-LLH | gldm       | DependenceVariance                   | 1.089322575  |
| wavelet-LLH | gldm       | LargeDependenceHighGrayLevelEmphasis | 1797.678082  |
| wavelet-LLH | gldm       | SmallDependenceLowGrayLevelEmphasis  | 0.009757365  |
| wavelet-LLH | gldm       | LowGrayLevelEmphasis                 | 0.012329675  |
| wavelet-LLH | glcm       | JointAverage                         | 21.19563076  |
| wavelet-LLH | glcm       | SumAverage                           | 42.39126152  |
| wavelet-LLH | glcm       | JointEntropy                         | 7.288871855  |
| wavelet-LLH | glcm       | ClusterShade                         | 6433.228402  |
| wavelet-LLH | glcm       | MaximumProbability                   | 0.016160177  |
| wavelet-LLH | glcm       | Idmn                                 | 0.951529535  |
| wavelet-LLH | glcm       | JointEnergy                          | 0.006851259  |
| wavelet-LLH | glcm       | Contrast                             | 196.2637505  |
| wavelet-LLH | glcm       | DifferenceEntropy                    | 4.426994879  |
| wavelet-LLH | glcm       | InverseVariance                      | 0.118078394  |
| wavelet-LLH | glcm       | DifferenceVariance                   | 80.41510966  |
| wavelet-LLH | glcm       | Idn                                  | 0.862929196  |
| wavelet-LLH | glcm       | Idm                                  | 0.116177205  |
| wavelet-LLH | glcm       | Correlation                          | 0.302185167  |
| wavelet-LLH | glcm       | Autocorrelation                      | 494.1516462  |
| wavelet-LLH | glcm       | SumEntropy                           | 5.43724152   |
| wavelet-LLH | glcm       | SumSquares                           | 142.837445   |
| wavelet-LLH | glcm       | ClusterProminence                    | 467033.0795  |
| wavelet-LLH | glcm       | Imc2                                 | 0.998065337  |
| wavelet-LLH | glcm       | Imc1                                 | -0.554407742 |
| wavelet-LLH | glcm       | DifferenceAverage                    | 10.34405643  |
| wavelet-LLH | glcm       | Id                                   | 0.196004873  |
| wavelet-LLH | glcm       | ClusterTendency                      | 375.0860294  |
| wavelet-LLH | firstorder | InterquartileRange                   | 466.1587693  |
| wavelet-LLH | firstorder | Skewness                             | 0.735928123  |
| wavelet-LLH | firstorder | Uniformity                           | 0.033402139  |
| wavelet-LLH | firstorder | Median                               | -137.4754163 |
| wavelet-LLH | firstorder | Energy                               | 14188826.17  |
| wavelet-LLH | firstorder | RobustMeanAbsoluteDeviation          | 184.0545763  |
| wavelet-LLH | firstorder | MeanAbsoluteDeviation                | 254.0269821  |
| wavelet-LLH | firstorder | TotalEnergy                          | 383098306.7  |
| wavelet-LLH | firstorder | Maximum                              | 833.4232508  |
| wavelet-LLH | firstorder | RootMeanSquared                      | 311.7430688  |
| wavelet-LLH | firstorder | 90Percentile                         | 374.4484379  |
| wavelet-LLH | firstorder | Minimum                              | -592.1800999 |
| wavelet-LLH | firstorder | Entropy                              | 5.176250696  |



|             |            |                                  |              |
|-------------|------------|----------------------------------|--------------|
| wavelet-LLH | firstorder | Range                            | 1425.603351  |
| wavelet-LLH | firstorder | Variance                         | 94601.5074   |
| wavelet-LLH | firstorder | 10Percentile                     | -380.6154556 |
| wavelet-LLH | firstorder | Kurtosis                         | 2.806007979  |
| wavelet-LLH | firstorder | Mean                             | -50.81568175 |
| wavelet-LLH | gllrm      | ShortRunLowGrayLevelEmphasis     | 0.012364655  |
| wavelet-LLH | gllrm      | GrayLevelVariance                | 153.2147937  |
| wavelet-LLH | gllrm      | LowGrayLevelRunEmphasis          | 0.012502415  |
| wavelet-LLH | gllrm      | GrayLevelNonUniformityNormalized | 0.032701544  |
| wavelet-LLH | gllrm      | RunVariance                      | 0.029001117  |
| wavelet-LLH | gllrm      | GrayLevelNonUniformity           | 4.642158698  |
| wavelet-LLH | gllrm      | LongRunEmphasis                  | 1.088164499  |
| wavelet-LLH | gllrm      | ShortRunHighGrayLevelEmphasis    | 654.9129421  |
| wavelet-LLH | gllrm      | RunLengthNonUniformity           | 134.2099268  |
| wavelet-LLH | gllrm      | ShortRunEmphasis                 | 0.978587332  |
| wavelet-LLH | gllrm      | LongRunHighGrayLevelEmphasis     | 698.8615909  |
| wavelet-LLH | gllrm      | RunPercentage                    | 0.972075869  |
| wavelet-LLH | gllrm      | LongRunLowGrayLevelEmphasis      | 0.01306042   |
| wavelet-LLH | gllrm      | RunEntropy                       | 5.291925349  |
| wavelet-LLH | gllrm      | HighGrayLevelRunEmphasis         | 663.5211737  |
| wavelet-LLH | gllrm      | RunLengthNonUniformityNormalized | 0.94516685   |
| wavelet-LLH | glszm      | GrayLevelVariance                | 161.8590976  |
| wavelet-LLH | glszm      | ZoneVariance                     | 1.009985207  |
| wavelet-LLH | glszm      | GrayLevelNonUniformityNormalized | 0.02829142   |
| wavelet-LLH | glszm      | SizeZoneNonUniformityNormalized  | 0.650517751  |
| wavelet-LLH | glszm      | SizeZoneNonUniformity            | 67.65384615  |
| wavelet-LLH | glszm      | GrayLevelNonUniformity           | 2.942307692  |
| wavelet-LLH | glszm      | LargeAreaEmphasis                | 2.980769231  |
| wavelet-LLH | glszm      | SmallAreaHighGrayLevelEmphasis   | 656.161938   |
| wavelet-LLH | glszm      | ZonePercentage                   | 0.712328767  |
| wavelet-LLH | glszm      | LargeAreaLowGrayLevelEmphasis    | 0.027767545  |
| wavelet-LLH | glszm      | LargeAreaHighGrayLevelEmphasis   | 1438.778846  |
| wavelet-LLH | glszm      | HighGrayLevelZoneEmphasis        | 751.7884615  |
| wavelet-LLH | glszm      | SmallAreaEmphasis                | 0.830791852  |
| wavelet-LLH | glszm      | LowGrayLevelZoneEmphasis         | 0.014403433  |
| wavelet-LLH | glszm      | ZoneEntropy                      | 5.753290743  |
| wavelet-LLH | glszm      | SmallAreaLowGrayLevelEmphasis    | 0.013084117  |
| wavelet-LLH | ngtdm      | Coarseness                       | 0.036795613  |
| wavelet-LLH | ngtdm      | Complexity                       | 6064.642436  |
| wavelet-LLH | ngtdm      | Strength                         | 36.90762095  |
| wavelet-LLH | ngtdm      | Contrast                         | 0.979335565  |
| wavelet-LLH | ngtdm      | Busyness                         | 0.037362892  |
| wavelet-LLL | gldm       | GrayLevelVariance                | 612.179818   |
| wavelet-LLL | gldm       | HighGrayLevelEmphasis            | 3470.034247  |
| wavelet-LLL | gldm       | DependenceEntropy                | 6.102194507  |
| wavelet-LLL | gldm       | DependenceNonUniformity          | 84.56164384  |
| wavelet-LLL | gldm       | GrayLevelNonUniformity           | 2.863013699  |
| wavelet-LLL | gldm       | SmallDependenceEmphasis          | 0.784627093  |

|             |            |                                      |              |
|-------------|------------|--------------------------------------|--------------|
| wavelet-LLL | gldm       | SmallDependenceHighGrayLevelEmphasis | 2266.659817  |
| wavelet-LLL | gldm       | DependenceNonUniformityNormalized    | 0.579189341  |
| wavelet-LLL | gldm       | LargeDependenceEmphasis              | 2.01369863   |
| wavelet-LLL | gldm       | LargeDependenceLowGrayLevelEmphasis  | 0.008345988  |
| wavelet-LLL | gldm       | DependenceVariance                   | 0.284293488  |
| wavelet-LLL | gldm       | LargeDependenceHighGrayLevelEmphasis | 9511.294521  |
| wavelet-LLL | gldm       | SmallDependenceLowGrayLevelEmphasis  | 0.008023617  |
| wavelet-LLL | gldm       | LowGrayLevelEmphasis                 | 0.008082886  |
| wavelet-LLL | glcm       | JointAverage                         | 61.01338369  |
| wavelet-LLL | glcm       | SumAverage                           | 122.0267674  |
| wavelet-LLL | glcm       | JointEntropy                         | 7.460530811  |
| wavelet-LLL | glcm       | ClusterShade                         | -5522.989702 |
| wavelet-LLL | glcm       | MaximumProbability                   | 0.010533976  |
| wavelet-LLL | glcm       | ldmn                                 | 0.930501361  |
| wavelet-LLL | glcm       | JointEnergy                          | 0.005838935  |
| wavelet-LLL | glcm       | Contrast                             | 854.9360486  |
| wavelet-LLL | glcm       | DifferenceEntropy                    | 5.226096756  |
| wavelet-LLL | glcm       | InverseVariance                      | 0.037526245  |
| wavelet-LLL | glcm       | DifferenceVariance                   | 268.9021489  |
| wavelet-LLL | glcm       | ldn                                  | 0.824690841  |
| wavelet-LLL | glcm       | ldm                                  | 0.044055973  |
| wavelet-LLL | glcm       | Correlation                          | 0.309619086  |
| wavelet-LLL | glcm       | Autocorrelation                      | 3909.123575  |
| wavelet-LLL | glcm       | SumEntropy                           | 5.990608157  |
| wavelet-LLL | glcm       | SumSquares                           | 611.7504452  |
| wavelet-LLL | glcm       | ClusterProminence                    | 5693506.094  |
| wavelet-LLL | glcm       | lmc2                                 | 0.999819371  |
| wavelet-LLL | glcm       | lmc1                                 | -0.696495358 |
| wavelet-LLL | glcm       | DifferenceAverage                    | 23.65472088  |
| wavelet-LLL | glcm       | ld                                   | 0.097725578  |
| wavelet-LLL | glcm       | ClusterTendency                      | 1592.065732  |
| wavelet-LLL | firstorder | InterquartileRange                   | 935.3270028  |
| wavelet-LLL | firstorder | Skewness                             | 0.144827562  |
| wavelet-LLL | firstorder | Uniformity                           | 0.019609683  |
| wavelet-LLL | firstorder | Median                               | -777.2651622 |
| wavelet-LLL | firstorder | Energy                               | 122561137.6  |
| wavelet-LLL | firstorder | RobustMeanAbsoluteDeviation          | 411.8451339  |
| wavelet-LLL | firstorder | MeanAbsoluteDeviation                | 533.4582441  |
| wavelet-LLL | firstorder | TotalEnergy                          | 3309150716   |
| wavelet-LLL | firstorder | Maximum                              | 519.8164481  |
| wavelet-LLL | firstorder | RootMeanSquared                      | 916.2204139  |
| wavelet-LLL | firstorder | 90Percentile                         | 179.8833145  |
| wavelet-LLL | firstorder | Minimum                              | -1983.842955 |
| wavelet-LLL | firstorder | Entropy                              | 5.843642412  |
| wavelet-LLL | firstorder | Range                                | 2503.659404  |

|             |            |                                  |              |
|-------------|------------|----------------------------------|--------------|
| wavelet-LLL | firstorder | Variance                         | 382202.0283  |
| wavelet-LLL | firstorder | 10Percentile                     | -1409.284018 |
| wavelet-LLL | firstorder | Kurtosis                         | 2.04052851   |
| wavelet-LLL | firstorder | Mean                             | -676.2084136 |
| wavelet-LLL | glrlm      | ShortRunLowGrayLevelEmphasis     | 0.008176906  |
| wavelet-LLL | glrlm      | GrayLevelVariance                | 609.1153636  |
| wavelet-LLL | glrlm      | LowGrayLevelRunEmphasis          | 0.00817937   |
| wavelet-LLL | glrlm      | GrayLevelNonUniformityNormalized | 0.019592111  |
| wavelet-LLL | glrlm      | RunVariance                      | 0.012112716  |
| wavelet-LLL | glrlm      | GrayLevelNonUniformity           | 2.825853855  |
| wavelet-LLL | glrlm      | LongRunEmphasis                  | 1.037029924  |
| wavelet-LLL | glrlm      | ShortRunHighGrayLevelEmphasis    | 3387.593621  |
| wavelet-LLL | glrlm      | RunLengthNonUniformity           | 140.7580921  |
| wavelet-LLL | glrlm      | ShortRunEmphasis                 | 0.990742519  |
| wavelet-LLL | glrlm      | LongRunHighGrayLevelEmphasis     | 3656.034321  |
| wavelet-LLL | glrlm      | RunPercentage                    | 0.987881981  |
| wavelet-LLL | glrlm      | LongRunLowGrayLevelEmphasis      | 0.008189227  |
| wavelet-LLL | glrlm      | RunEntropy                       | 5.869045253  |
| wavelet-LLL | glrlm      | HighGrayLevelRunEmphasis         | 3441.281761  |
| wavelet-LLL | glrlm      | RunLengthNonUniformityNormalized | 0.975774568  |
| wavelet-LLL | glszm      | GrayLevelVariance                | 567.4575312  |
| wavelet-LLL | glszm      | ZoneVariance                     | 0.194328824  |
| wavelet-LLL | glszm      | GrayLevelNonUniformityNormalized | 0.019380853  |
| wavelet-LLL | glszm      | SizeZoneNonUniformityNormalized  | 0.734261186  |
| wavelet-LLL | glszm      | SizeZoneNonUniformity            | 91.0483871   |
| wavelet-LLL | glszm      | GrayLevelNonUniformity           | 2.403225806  |
| wavelet-LLL | glszm      | LargeAreaEmphasis                | 1.580645161  |
| wavelet-LLL | glszm      | SmallAreaHighGrayLevelEmphasis   | 2440.412186  |
| wavelet-LLL | glszm      | ZonePercentage                   | 0.849315068  |
| wavelet-LLL | glszm      | LargeAreaLowGrayLevelEmphasis    | 0.009624362  |
| wavelet-LLL | glszm      | LargeAreaHighGrayLevelEmphasis   | 6425.685484  |
| wavelet-LLL | glszm      | HighGrayLevelZoneEmphasis        | 3086.040323  |
| wavelet-LLL | glszm      | SmallAreaEmphasis                | 0.88172043   |
| wavelet-LLL | glszm      | LowGrayLevelZoneEmphasis         | 0.009468454  |
| wavelet-LLL | glszm      | ZoneEntropy                      | 6.034526149  |
| wavelet-LLL | glszm      | SmallAreaLowGrayLevelEmphasis    | 0.009435272  |
| wavelet-LLL | ngtdm      | Coarseness                       | 0.024267416  |
| wavelet-LLL | ngtdm      | Complexity                       | 35828.07497  |
| wavelet-LLL | ngtdm      | Strength                         | 78.40611292  |
| wavelet-LLL | ngtdm      | Contrast                         | 4.45868038   |
| wavelet-LLL | ngtdm      | Busyness                         | 0.014674112  |
| wavelet-HHL | gldm       | GrayLevelVariance                | 5.64012948   |
| wavelet-HHL | gldm       | HighGrayLevelEmphasis            | 40.41780822  |
| wavelet-HHL | gldm       | DependenceEntropy                | 5.281602299  |
| wavelet-HHL | gldm       | DependenceNonUniformity          | 28.47945205  |
| wavelet-HHL | gldm       | GrayLevelNonUniformity           | 17.87671233  |
| wavelet-HHL | gldm       | SmallDependenceEmphasis          | 0.255085442  |

|             |            |                                      |              |
|-------------|------------|--------------------------------------|--------------|
| wavelet-HHL | gldm       | SmallDependenceHighGrayLevelEmphasis | 12.60125722  |
| wavelet-HHL | gldm       | DependenceNonUniformityNormalized    | 0.19506474   |
| wavelet-HHL | gldm       | LargeDependenceEmphasis              | 11.97260274  |
| wavelet-HHL | gldm       | LargeDependenceLowGrayLevelEmphasis  | 0.591909371  |
| wavelet-HHL | gldm       | DependenceVariance                   | 2.472696566  |
| wavelet-HHL | gldm       | LargeDependenceHighGrayLevelEmphasis | 407.4452055  |
| wavelet-HHL | gldm       | SmallDependenceLowGrayLevelEmphasis  | 0.016615159  |
| wavelet-HHL | gldm       | LowGrayLevelEmphasis                 | 0.062699977  |
| wavelet-HHL | glcm       | JointAverage                         | 5.809782041  |
| wavelet-HHL | glcm       | SumAverage                           | 11.61956408  |
| wavelet-HHL | glcm       | JointEntropy                         | 5.79120008   |
| wavelet-HHL | glcm       | ClusterShade                         | 7.856772327  |
| wavelet-HHL | glcm       | MaximumProbability                   | 0.050022445  |
| wavelet-HHL | glcm       | ldmn                                 | 0.941259768  |
| wavelet-HHL | glcm       | JointEnergy                          | 0.022255396  |
| wavelet-HHL | glcm       | Contrast                             | 10.05224288  |
| wavelet-HHL | glcm       | DifferenceEntropy                    | 2.729543825  |
| wavelet-HHL | glcm       | InverseVariance                      | 0.319520344  |
| wavelet-HHL | glcm       | DifferenceVariance                   | 3.496932948  |
| wavelet-HHL | glcm       | ldn                                  | 0.840538975  |
| wavelet-HHL | glcm       | ldm                                  | 0.31245236   |
| wavelet-HHL | glcm       | Correlation                          | 0.024245424  |
| wavelet-HHL | glcm       | Autocorrelation                      | 33.8934816   |
| wavelet-HHL | glcm       | SumEntropy                           | 3.550436601  |
| wavelet-HHL | glcm       | SumSquares                           | 5.154311477  |
| wavelet-HHL | glcm       | ClusterProminence                    | 323.7566312  |
| wavelet-HHL | glcm       | lmc2                                 | 0.803498065  |
| wavelet-HHL | glcm       | lmc1                                 | -0.169870434 |
| wavelet-HHL | glcm       | DifferenceAverage                    | 2.51208857   |
| wavelet-HHL | glcm       | ld                                   | 0.398688316  |
| wavelet-HHL | glcm       | ClusterTendency                      | 10.56500303  |
| wavelet-HHL | firstorder | InterquartileRange                   | 78.05557915  |
| wavelet-HHL | firstorder | Skewness                             | 0.365566978  |
| wavelet-HHL | firstorder | Uniformity                           | 0.122443235  |
| wavelet-HHL | firstorder | Median                               | 5.933011956  |
| wavelet-HHL | firstorder | Energy                               | 529036.5158  |
| wavelet-HHL | firstorder | RobustMeanAbsoluteDeviation          | 32.95378691  |
| wavelet-HHL | firstorder | MeanAbsoluteDeviation                | 47.65845649  |
| wavelet-HHL | firstorder | TotalEnergy                          | 14283985.93  |
| wavelet-HHL | firstorder | Maximum                              | 168.9300021  |
| wavelet-HHL | firstorder | RootMeanSquared                      | 60.19582859  |
| wavelet-HHL | firstorder | 90Percentile                         | 88.06453377  |
| wavelet-HHL | firstorder | Minimum                              | -120.087935  |
| wavelet-HHL | firstorder | Entropy                              | 3.23441814   |
| wavelet-HHL | firstorder | Range                                | 289.0179371  |

|             |            |                                  |              |
|-------------|------------|----------------------------------|--------------|
| wavelet-HHL | firstorder | Variance                         | 3531.261306  |
| wavelet-HHL | firstorder | 10Percentile                     | -60.42227728 |
| wavelet-HHL | firstorder | Kurtosis                         | 2.827006398  |
| wavelet-HHL | firstorder | Mean                             | 9.606064396  |
| wavelet-HHL | glrlm      | ShortRunLowGrayLevelEmphasis     | 0.06010334   |
| wavelet-HHL | glrlm      | GrayLevelVariance                | 5.830772749  |
| wavelet-HHL | glrlm      | LowGrayLevelRunEmphasis          | 0.063529959  |
| wavelet-HHL | glrlm      | GrayLevelNonUniformityNormalized | 0.119732118  |
| wavelet-HHL | glrlm      | RunVariance                      | 0.089732687  |
| wavelet-HHL | glrlm      | GrayLevelNonUniformity           | 16.08119169  |
| wavelet-HHL | glrlm      | LongRunEmphasis                  | 1.276007561  |
| wavelet-HHL | glrlm      | ShortRunHighGrayLevelEmphasis    | 38.70962497  |
| wavelet-HHL | glrlm      | RunLengthNonUniformity           | 114.2223549  |
| wavelet-HHL | glrlm      | ShortRunEmphasis                 | 0.936595361  |
| wavelet-HHL | glrlm      | LongRunHighGrayLevelEmphasis     | 50.45556928  |
| wavelet-HHL | glrlm      | RunPercentage                    | 0.919915701  |
| wavelet-HHL | glrlm      | LongRunLowGrayLevelEmphasis      | 0.078068344  |
| wavelet-HHL | glrlm      | RunEntropy                       | 3.604122801  |
| wavelet-HHL | glrlm      | HighGrayLevelRunEmphasis         | 40.9237805   |
| wavelet-HHL | glrlm      | RunLengthNonUniformityNormalized | 0.848346964  |
| wavelet-HHL | glszm      | GrayLevelVariance                | 9.081285444  |
| wavelet-HHL | glszm      | ZoneVariance                     | 19.83931947  |
| wavelet-HHL | glszm      | GrayLevelNonUniformityNormalized | 0.102079395  |
| wavelet-HHL | glszm      | SizeZoneNonUniformityNormalized  | 0.286389414  |
| wavelet-HHL | glszm      | SizeZoneNonUniformity            | 13.17391304  |
| wavelet-HHL | glszm      | GrayLevelNonUniformity           | 4.695652174  |
| wavelet-HHL | glszm      | LargeAreaEmphasis                | 29.91304348  |
| wavelet-HHL | glszm      | SmallAreaHighGrayLevelEmphasis   | 28.59074619  |
| wavelet-HHL | glszm      | ZonePercentage                   | 0.315068493  |
| wavelet-HHL | glszm      | LargeAreaLowGrayLevelEmphasis    | 1.226721395  |
| wavelet-HHL | glszm      | LargeAreaHighGrayLevelEmphasis   | 1038.456522  |
| wavelet-HHL | glszm      | HighGrayLevelZoneEmphasis        | 48.82608696  |
| wavelet-HHL | glszm      | SmallAreaEmphasis                | 0.534110694  |
| wavelet-HHL | glszm      | LowGrayLevelZoneEmphasis         | 0.077791287  |
| wavelet-HHL | glszm      | ZoneEntropy                      | 4.675310869  |
| wavelet-HHL | glszm      | SmallAreaLowGrayLevelEmphasis    | 0.035252691  |
| wavelet-HHL | ngtdm      | Coarseness                       | 0.043293786  |
| wavelet-HHL | ngtdm      | Complexity                       | 92.12385147  |
| wavelet-HHL | ngtdm      | Strength                         | 1.607705722  |
| wavelet-HHL | ngtdm      | Contrast                         | 0.156580323  |
| wavelet-HHL | ngtdm      | Busyness                         | 0.42676644   |
| wavelet-HLH | gldm       | GrayLevelVariance                | 24.49240008  |
| wavelet-HLH | gldm       | HighGrayLevelEmphasis            | 250.3150685  |
| wavelet-HLH | gldm       | DependenceEntropy                | 5.491696672  |
| wavelet-HLH | gldm       | DependenceNonUniformity          | 42.2739726   |
| wavelet-HLH | gldm       | GrayLevelNonUniformity           | 9.136986301  |
| wavelet-HLH | gldm       | SmallDependenceEmphasis          | 0.480294785  |

|             |            |                                      |              |
|-------------|------------|--------------------------------------|--------------|
| wavelet-HLH | gldm       | SmallDependenceHighGrayLevelEmphasis | 127.2870522  |
| wavelet-HLH | gldm       | DependenceNonUniformityNormalized    | 0.289547758  |
| wavelet-HLH | gldm       | LargeDependenceEmphasis              | 6.698630137  |
| wavelet-HLH | gldm       | LargeDependenceLowGrayLevelEmphasis  | 0.045482885  |
| wavelet-HLH | gldm       | DependenceVariance                   | 1.894726966  |
| wavelet-HLH | gldm       | LargeDependenceHighGrayLevelEmphasis | 1558.273973  |
| wavelet-HLH | gldm       | SmallDependenceLowGrayLevelEmphasis  | 0.010999939  |
| wavelet-HLH | gldm       | LowGrayLevelEmphasis                 | 0.014332436  |
| wavelet-HLH | glcm       | JointAverage                         | 15.15329432  |
| wavelet-HLH | glcm       | SumAverage                           | 30.30658863  |
| wavelet-HLH | glcm       | JointEntropy                         | 6.954950013  |
| wavelet-HLH | glcm       | ClusterShade                         | -10.9584997  |
| wavelet-HLH | glcm       | MaximumProbability                   | 0.024838641  |
| wavelet-HLH | glcm       | ldmn                                 | 0.946039884  |
| wavelet-HLH | glcm       | JointEnergy                          | 0.009207132  |
| wavelet-HLH | glcm       | Contrast                             | 54.01812789  |
| wavelet-HLH | glcm       | DifferenceEntropy                    | 3.771830627  |
| wavelet-HLH | glcm       | InverseVariance                      | 0.16734998   |
| wavelet-HLH | glcm       | DifferenceVariance                   | 19.895468    |
| wavelet-HLH | glcm       | ldn                                  | 0.849419974  |
| wavelet-HLH | glcm       | ldm                                  | 0.1746552    |
| wavelet-HLH | glcm       | Correlation                          | -0.003441289 |
| wavelet-HLH | glcm       | Autocorrelation                      | 229.5335618  |
| wavelet-HLH | glcm       | SumEntropy                           | 4.566682069  |
| wavelet-HLH | glcm       | SumSquares                           | 26.81222746  |
| wavelet-HLH | glcm       | ClusterProminence                    | 9417.243654  |
| wavelet-HLH | glcm       | Imc2                                 | 0.977578236  |
| wavelet-HLH | glcm       | Imc1                                 | -0.367665299 |
| wavelet-HLH | glcm       | DifferenceAverage                    | 5.696843301  |
| wavelet-HLH | glcm       | ld                                   | 0.265648522  |
| wavelet-HLH | glcm       | ClusterTendency                      | 53.23078194  |
| wavelet-HLH | firstorder | InterquartileRange                   | 160.6320492  |
| wavelet-HLH | firstorder | Skewness                             | -0.107542773 |
| wavelet-HLH | firstorder | Uniformity                           | 0.062582098  |
| wavelet-HLH | firstorder | Median                               | -10.60658719 |
| wavelet-HLH | firstorder | Energy                               | 2270710.829  |
| wavelet-HLH | firstorder | RobustMeanAbsoluteDeviation          | 66.9620048   |
| wavelet-HLH | firstorder | MeanAbsoluteDeviation                | 98.17143697  |
| wavelet-HLH | firstorder | TotalEnergy                          | 61309192.38  |
| wavelet-HLH | firstorder | Maximum                              | 331.648976   |
| wavelet-HLH | firstorder | RootMeanSquared                      | 124.7109213  |
| wavelet-HLH | firstorder | 90Percentile                         | 140.902847   |
| wavelet-HLH | firstorder | Minimum                              | -363.1282982 |
| wavelet-HLH | firstorder | Entropy                              | 4.246458538  |
| wavelet-HLH | firstorder | Range                                | 694.7772742  |

|             |            |                                  |              |
|-------------|------------|----------------------------------|--------------|
| wavelet-HLH | firstorder | Variance                         | 15427.3784   |
| wavelet-HLH | firstorder | 10Percentile                     | -169.7497681 |
| wavelet-HLH | firstorder | Kurtosis                         | 3.1745076    |
| wavelet-HLH | firstorder | Mean                             | -11.19979898 |
| wavelet-HLH | glrlm      | ShortRunLowGrayLevelEmphasis     | 0.014542395  |
| wavelet-HLH | glrlm      | GrayLevelVariance                | 25.14796293  |
| wavelet-HLH | glrlm      | LowGrayLevelRunEmphasis          | 0.014746735  |
| wavelet-HLH | glrlm      | GrayLevelNonUniformityNormalized | 0.061600326  |
| wavelet-HLH | glrlm      | RunVariance                      | 0.050258097  |
| wavelet-HLH | glrlm      | GrayLevelNonUniformity           | 8.581842947  |
| wavelet-HLH | glrlm      | LongRunEmphasis                  | 1.150027518  |
| wavelet-HLH | glrlm      | ShortRunHighGrayLevelEmphasis    | 243.0236642  |
| wavelet-HLH | glrlm      | RunLengthNonUniformity           | 127.1783976  |
| wavelet-HLH | glrlm      | ShortRunEmphasis                 | 0.965044887  |
| wavelet-HLH | glrlm      | LongRunHighGrayLevelEmphasis     | 286.3579138  |
| wavelet-HLH | glrlm      | RunPercentage                    | 0.954162276  |
| wavelet-HLH | glrlm      | LongRunLowGrayLevelEmphasis      | 0.015608046  |
| wavelet-HLH | glrlm      | RunEntropy                       | 4.448466547  |
| wavelet-HLH | glrlm      | HighGrayLevelRunEmphasis         | 251.1283188  |
| wavelet-HLH | glrlm      | RunLengthNonUniformityNormalized | 0.912283864  |
| wavelet-HLH | glszm      | GrayLevelVariance                | 32.88924372  |
| wavelet-HLH | glszm      | ZoneVariance                     | 3.170852083  |
| wavelet-HLH | glszm      | GrayLevelNonUniformityNormalized | 0.056757149  |
| wavelet-HLH | glszm      | SizeZoneNonUniformityNormalized  | 0.473363333  |
| wavelet-HLH | glszm      | SizeZoneNonUniformity            | 39.28915663  |
| wavelet-HLH | glszm      | GrayLevelNonUniformity           | 4.710843373  |
| wavelet-HLH | glszm      | LargeAreaEmphasis                | 6.265060241  |
| wavelet-HLH | glszm      | SmallAreaHighGrayLevelEmphasis   | 192.5836424  |
| wavelet-HLH | glszm      | ZonePercentage                   | 0.568493151  |
| wavelet-HLH | glszm      | LargeAreaLowGrayLevelEmphasis    | 0.04681715   |
| wavelet-HLH | glszm      | LargeAreaHighGrayLevelEmphasis   | 1622.481928  |
| wavelet-HLH | glszm      | HighGrayLevelZoneEmphasis        | 259.3373494  |
| wavelet-HLH | glszm      | SmallAreaEmphasis                | 0.712966219  |
| wavelet-HLH | glszm      | LowGrayLevelZoneEmphasis         | 0.020551312  |
| wavelet-HLH | glszm      | ZoneEntropy                      | 5.203251709  |
| wavelet-HLH | glszm      | SmallAreaLowGrayLevelEmphasis    | 0.018449246  |
| wavelet-HLH | ngtdm      | Coarseness                       | 0.037556744  |
| wavelet-HLH | ngtdm      | Complexity                       | 1002.735971  |
| wavelet-HLH | ngtdm      | Strength                         | 7.521110093  |
| wavelet-HLH | ngtdm      | Contrast                         | 0.303127798  |
| wavelet-HLH | ngtdm      | Busyness                         | 0.071973839  |

| Image type | Feature Class | Feature Name                         |                                                                                                                                                                                                                                                                                                                                                                                                                                                                                                                                                              |
|------------|---------------|--------------------------------------|--------------------------------------------------------------------------------------------------------------------------------------------------------------------------------------------------------------------------------------------------------------------------------------------------------------------------------------------------------------------------------------------------------------------------------------------------------------------------------------------------------------------------------------------------------------|
| general    | info          | BoundingBox                          | 5: RTSTRUCT: C99-DNU_segment_LLL iGTV<br>(0, 0, 1, 15, 24, 18)                                                                                                                                                                                                                                                                                                                                                                                                                                                                                               |
| general    | info          | EnabledImageTypes                    | {'u'Original': {}, u'Wavelet': {}}                                                                                                                                                                                                                                                                                                                                                                                                                                                                                                                           |
|            |               |                                      | {'distances': [1], 'additionalInfo': True, 'force2D':<br>False, 'interpolator': 'sitkBSpline',<br>'resampledPixelSpacing': [3.0], 'label': 1,<br>'normalizeScale': 1, 'normalize': False,<br>'force2Ddimension': 0, 'removeOutliers': None,<br>'minimumROISize': None, u'binWidth': 25.0,<br>'minimumROIDimensions': 1, u'correctMask':<br>True, 'preCrop': False, u'symmetricalGLCM':<br>True, 'resegmentRange': None, 'padDistance': 5}<br>392b9e79080932d312b8eddf287091097a4a6ec<br>e<br>(0.9765624999999998, 0.9765624999999998,<br>1.9999999999999999) |
| general    | info          | GeneralSettings                      |                                                                                                                                                                                                                                                                                                                                                                                                                                                                                                                                                              |
| general    | info          | ImageHash                            |                                                                                                                                                                                                                                                                                                                                                                                                                                                                                                                                                              |
| general    | info          | ImageSpacing                         |                                                                                                                                                                                                                                                                                                                                                                                                                                                                                                                                                              |
| general    | info          | MaskHash                             | 3de86cc8b7e94478f80814a71f19d3e01da2e01c                                                                                                                                                                                                                                                                                                                                                                                                                                                                                                                     |
| general    | info          | NumpyVersion                         | 1.13.1                                                                                                                                                                                                                                                                                                                                                                                                                                                                                                                                                       |
| general    | info          | PyWaveletVersion                     | 0.5.2                                                                                                                                                                                                                                                                                                                                                                                                                                                                                                                                                        |
| general    | info          | SimpleITKVersion                     | 1.1.0                                                                                                                                                                                                                                                                                                                                                                                                                                                                                                                                                        |
| general    | info          | Version                              | 1.3.0.post102+g1b0eb74                                                                                                                                                                                                                                                                                                                                                                                                                                                                                                                                       |
| general    | info          | VolumeNum                            | 1                                                                                                                                                                                                                                                                                                                                                                                                                                                                                                                                                            |
| general    | info          | VoxelNum                             | 1921                                                                                                                                                                                                                                                                                                                                                                                                                                                                                                                                                         |
| original   | shape         | Maximum3DDiameter                    | 78.57480512                                                                                                                                                                                                                                                                                                                                                                                                                                                                                                                                                  |
| original   | shape         | Maximum2DDiameterSlice               | 67.08203932                                                                                                                                                                                                                                                                                                                                                                                                                                                                                                                                                  |
| original   | shape         | Sphericity                           | 0.656132206                                                                                                                                                                                                                                                                                                                                                                                                                                                                                                                                                  |
| original   | shape         | MinorAxis                            | 42.14249136                                                                                                                                                                                                                                                                                                                                                                                                                                                                                                                                                  |
| original   | shape         | Elongation                           | 0.616534471                                                                                                                                                                                                                                                                                                                                                                                                                                                                                                                                                  |
| original   | shape         | SurfaceVolumeRatio                   | 0.197634333                                                                                                                                                                                                                                                                                                                                                                                                                                                                                                                                                  |
| original   | shape         | Volume                               | 51867                                                                                                                                                                                                                                                                                                                                                                                                                                                                                                                                                        |
| original   | shape         | MajorAxis                            | 68.35382828                                                                                                                                                                                                                                                                                                                                                                                                                                                                                                                                                  |
| original   | shape         | SurfaceArea                          | 10250.69996                                                                                                                                                                                                                                                                                                                                                                                                                                                                                                                                                  |
| original   | shape         | Flatness                             | 0.436951249                                                                                                                                                                                                                                                                                                                                                                                                                                                                                                                                                  |
| original   | shape         | LeastAxis                            | 29.86729061                                                                                                                                                                                                                                                                                                                                                                                                                                                                                                                                                  |
| original   | shape         | Maximum2DDiameterColumn              | 49.47726751                                                                                                                                                                                                                                                                                                                                                                                                                                                                                                                                                  |
| original   | shape         | Maximum2DDiameterRow                 | 65.7951366                                                                                                                                                                                                                                                                                                                                                                                                                                                                                                                                                   |
| original   | gldm          | GrayLevelVariance                    | 91.38391449                                                                                                                                                                                                                                                                                                                                                                                                                                                                                                                                                  |
| original   | gldm          | HighGrayLevelEmphasis                | 1248.48152                                                                                                                                                                                                                                                                                                                                                                                                                                                                                                                                                   |
| original   | gldm          | DependenceEntropy                    | 6.926474817                                                                                                                                                                                                                                                                                                                                                                                                                                                                                                                                                  |
| original   | gldm          | DependenceNonUniformity              | 245.9349297                                                                                                                                                                                                                                                                                                                                                                                                                                                                                                                                                  |
| original   | gldm          | GrayLevelNonUniformity               | 178.6480999                                                                                                                                                                                                                                                                                                                                                                                                                                                                                                                                                  |
| original   | gldm          | SmallDependenceEmphasis              | 0.318360955                                                                                                                                                                                                                                                                                                                                                                                                                                                                                                                                                  |
| original   | gldm          | SmallDependenceHighGrayLevelEmphasis | 287.7134694                                                                                                                                                                                                                                                                                                                                                                                                                                                                                                                                                  |
| original   | gldm          | DependenceNonUniformityNormalized    | 0.12802443                                                                                                                                                                                                                                                                                                                                                                                                                                                                                                                                                   |
| original   | gldm          | LargeDependenceEmphasis              | 40.86465383                                                                                                                                                                                                                                                                                                                                                                                                                                                                                                                                                  |
| original   | gldm          | LargeDependenceLowGrayLevelEmphasis  | 0.03108664                                                                                                                                                                                                                                                                                                                                                                                                                                                                                                                                                   |
| original   | gldm          | DependenceVariance                   | 17.70355811                                                                                                                                                                                                                                                                                                                                                                                                                                                                                                                                                  |
| original   | gldm          | LargeDependenceHighGrayLevelEmphasis | 65461.3748                                                                                                                                                                                                                                                                                                                                                                                                                                                                                                                                                   |
| original   | gldm          | SmallDependenceLowGrayLevelEmphasis  | 0.001437459                                                                                                                                                                                                                                                                                                                                                                                                                                                                                                                                                  |
| original   | gldm          | LowGrayLevelEmphasis                 | 0.002337488                                                                                                                                                                                                                                                                                                                                                                                                                                                                                                                                                  |
| original   | glcm          | JointAverage                         | 34.81735267                                                                                                                                                                                                                                                                                                                                                                                                                                                                                                                                                  |
| original   | glcm          | SumAverage                           | 69.63470534                                                                                                                                                                                                                                                                                                                                                                                                                                                                                                                                                  |



|          |            |                                  |              |
|----------|------------|----------------------------------|--------------|
| original | glcm       | JointEntropy                     | 7.525174135  |
| original | glcm       | ClusterShade                     | -6451.416269 |
| original | glcm       | MaximumProbability               | 0.074283327  |
| original | glcm       | Idmn                             | 0.9779938    |
| original | glcm       | JointEnergy                      | 0.023243329  |
| original | glcm       | Contrast                         | 53.40018589  |
| original | glcm       | DifferenceEntropy                | 3.638017198  |
| original | glcm       | InverseVariance                  | 0.305268066  |
| original | glcm       | DifferenceVariance               | 32.53294579  |
| original | glcm       | Idn                              | 0.920407776  |
| original | glcm       | Idm                              | 0.349317795  |
| original | glcm       | Correlation                      | 0.668554599  |
| original | glcm       | Autocorrelation                  | 1266.51415   |
| original | glcm       | SumEntropy                       | 5.093474115  |
| original | glcm       | SumSquares                       | 80.89734497  |
| original | glcm       | ClusterProminence                | 308039.1151  |
| original | glcm       | Imc2                             | 0.881376354  |
| original | glcm       | Imc1                             | -0.184064562 |
| original | glcm       | DifferenceAverage                | 4.524615277  |
| original | glcm       | Id                               | 0.409287361  |
| original | glcm       | ClusterTendency                  | 270.189194   |
| original | firstorder | InterquartileRange               | 280          |
| original | firstorder | Skewness                         | -1.312338308 |
| original | firstorder | Uniformity                       | 0.092997449  |
| original | firstorder | Median                           | 17           |
| original | firstorder | Energy                           | 133944282    |
| original | firstorder | RobustMeanAbsoluteDeviation      | 134.1715818  |
| original | firstorder | MeanAbsoluteDeviation            | 194.7711876  |
| original | firstorder | TotalEnergy                      | 3616495614   |
| original | firstorder | Maximum                          | 197          |
| original | firstorder | RootMeanSquared                  | 264.057439   |
| original | firstorder | 90Percentile                     | 71           |
| original | firstorder | Minimum                          | -935         |
| original | firstorder | Entropy                          | 4.329628513  |
| original | firstorder | Range                            | 1132         |
| original | firstorder | Variance                         | 57075.05846  |
| original | firstorder | 10Percentile                     | -520         |
| original | firstorder | Kurtosis                         | 3.572345444  |
| original | firstorder | Mean                             | -112.4778761 |
| original | glrlm      | ShortRunLowGrayLevelEmphasis     | 0.002493671  |
| original | glrlm      | GrayLevelVariance                | 96.97818422  |
| original | glrlm      | LowGrayLevelRunEmphasis          | 0.002588297  |
| original | glrlm      | GrayLevelNonUniformityNormalized | 0.071429223  |
| original | glrlm      | RunVariance                      | 0.276449768  |
| original | glrlm      | GrayLevelNonUniformity           | 117.174647   |
| original | glrlm      | LongRunEmphasis                  | 1.651754487  |
| original | glrlm      | ShortRunHighGrayLevelEmphasis    | 1041.710322  |
| original | glrlm      | RunLengthNonUniformity           | 1270.710554  |
| original | glrlm      | ShortRunEmphasis                 | 0.900920237  |
| original | glrlm      | LongRunHighGrayLevelEmphasis     | 2221.798491  |
| original | glrlm      | RunPercentage                    | 0.853361631  |
| original | glrlm      | LongRunLowGrayLevelEmphasis      | 0.00313103   |
| original | glrlm      | RunEntropy                       | 5.124233323  |
| original | glrlm      | HighGrayLevelRunEmphasis         | 1194.411654  |
| original | glrlm      | RunLengthNonUniformityNormalized | 0.774611727  |

|             |       |                                      |              |
|-------------|-------|--------------------------------------|--------------|
| original    | glszm | GrayLevelVariance                    | 95.89317219  |
| original    | glszm | ZoneVariance                         | 394.6129346  |
| original    | glszm | GrayLevelNonUniformityNormalized     | 0.031123045  |
| original    | glszm | SizeZoneNonUniformityNormalized      | 0.527452005  |
| original    | glszm | SizeZoneNonUniformity                | 358.1399116  |
| original    | glszm | GrayLevelNonUniformity               | 21.13254786  |
| original    | glszm | LargeAreaEmphasis                    | 402.6170839  |
| original    | glszm | SmallAreaHighGrayLevelEmphasis       | 643.0194543  |
| original    | glszm | ZonePercentage                       | 0.353461739  |
| original    | glszm | LargeAreaLowGrayLevelEmphasis        | 0.255723191  |
| original    | glszm | LargeAreaHighGrayLevelEmphasis       | 657697.2032  |
| original    | glszm | HighGrayLevelZoneEmphasis            | 883.9396171  |
| original    | glszm | SmallAreaEmphasis                    | 0.754417662  |
| original    | glszm | LowGrayLevelZoneEmphasis             | 0.004355699  |
| original    | glszm | ZoneEntropy                          | 6.325270025  |
| original    | glszm | SmallAreaLowGrayLevelEmphasis        | 0.003779147  |
| original    | ngtdm | Coarseness                           | 0.003055316  |
| original    | ngtdm | Complexity                           | 2894.193489  |
| original    | ngtdm | Strength                             | 5.288931143  |
| original    | ngtdm | Contrast                             | 0.298105207  |
| original    | ngtdm | Busyness                             | 0.147483861  |
| wavelet-HHH | gldm  | GrayLevelVariance                    | 4.823576563  |
| wavelet-HHH | gldm  | HighGrayLevelEmphasis                | 161.3014055  |
| wavelet-HHH | gldm  | DependenceEntropy                    | 6.037889522  |
| wavelet-HHH | gldm  | DependenceNonUniformity              | 184.8865174  |
| wavelet-HHH | gldm  | GrayLevelNonUniformity               | 320.6866216  |
| wavelet-HHH | gldm  | SmallDependenceEmphasis              | 0.19344652   |
| wavelet-HHH | gldm  | SmallDependenceHighGrayLevelEmphasis | 32.86630873  |
| wavelet-HHH | gldm  | DependenceNonUniformityNormalized    | 0.096244934  |
| wavelet-HHH | gldm  | LargeDependenceEmphasis              | 41.3154607   |
| wavelet-HHH | gldm  | LargeDependenceLowGrayLevelEmphasis  | 0.269505681  |
| wavelet-HHH | gldm  | DependenceVariance                   | 13.51330875  |
| wavelet-HHH | gldm  | LargeDependenceHighGrayLevelEmphasis | 6486.935971  |
| wavelet-HHH | gldm  | SmallDependenceLowGrayLevelEmphasis  | 0.002440405  |
| wavelet-HHH | gldm  | LowGrayLevelEmphasis                 | 0.007849398  |
| wavelet-HHH | glcm  | JointAverage                         | 12.50668154  |
| wavelet-HHH | glcm  | SumAverage                           | 25.01336307  |
| wavelet-HHH | glcm  | JointEntropy                         | 5.871829939  |
| wavelet-HHH | glcm  | ClusterShade                         | -1.420253796 |
| wavelet-HHH | glcm  | MaximumProbability                   | 0.088704718  |
| wavelet-HHH | glcm  | Idmn                                 | 0.985767197  |
| wavelet-HHH | glcm  | JointEnergy                          | 0.035478069  |
| wavelet-HHH | glcm  | Contrast                             | 9.653148785  |
| wavelet-HHH | glcm  | DifferenceEntropy                    | 2.751849903  |
| wavelet-HHH | glcm  | InverseVariance                      | 0.376034793  |
| wavelet-HHH | glcm  | DifferenceVariance                   | 4.981419451  |
| wavelet-HHH | glcm  | Idn                                  | 0.926494465  |
| wavelet-HHH | glcm  | Idm                                  | 0.413473822  |
| wavelet-HHH | glcm  | Correlation                          | -0.036032713 |
| wavelet-HHH | glcm  | Autocorrelation                      | 156.2453966  |
| wavelet-HHH | glcm  | SumEntropy                           | 3.487336309  |
| wavelet-HHH | glcm  | SumSquares                           | 4.654840873  |
| wavelet-HHH | glcm  | ClusterProminence                    | 483.6498137  |
| wavelet-HHH | glcm  | Imc2                                 | 0.523778344  |
| wavelet-HHH | glcm  | Imc1                                 | -0.055477443 |

|             |            |                                  |              |
|-------------|------------|----------------------------------|--------------|
| wavelet-HHH | glcm       | DifferenceAverage                | 2.146511095  |
| wavelet-HHH | glcm       | Id                               | 0.477370201  |
| wavelet-HHH | glcm       | ClusterTendency                  | 8.966214707  |
| wavelet-HHH | firstorder | InterquartileRange               | 48.352622    |
| wavelet-HHH | firstorder | Skewness                         | 2.27E-02     |
| wavelet-HHH | firstorder | Uniformity                       | 0.166937336  |
| wavelet-HHH | firstorder | Median                           | 0.188447536  |
| wavelet-HHH | firstorder | Energy                           | 5669331.536  |
| wavelet-HHH | firstorder | RobustMeanAbsoluteDeviation      | 21.43333171  |
| wavelet-HHH | firstorder | MeanAbsoluteDeviation            | 37.46480926  |
| wavelet-HHH | firstorder | TotalEnergy                      | 153071951.5  |
| wavelet-HHH | firstorder | Maximum                          | 305.6365647  |
| wavelet-HHH | firstorder | RootMeanSquared                  | 54.32531397  |
| wavelet-HHH | firstorder | 90Percentile                     | 60.35656165  |
| wavelet-HHH | firstorder | Minimum                          | -278.2175578 |
| wavelet-HHH | firstorder | Entropy                          | 3.042940669  |
| wavelet-HHH | firstorder | Range                            | 583.8541224  |
| wavelet-HHH | firstorder | Variance                         | 2951.163076  |
| wavelet-HHH | firstorder | 10Percentile                     | -60.58964103 |
| wavelet-HHH | firstorder | Kurtosis                         | 6.134961041  |
| wavelet-HHH | firstorder | Mean                             | 0.276879559  |
| wavelet-HHH | glrlm      | ShortRunLowGrayLevelEmphasis     | 0.007322091  |
| wavelet-HHH | glrlm      | GrayLevelVariance                | 5.545575282  |
| wavelet-HHH | glrlm      | LowGrayLevelRunEmphasis          | 0.008107666  |
| wavelet-HHH | glrlm      | GrayLevelNonUniformityNormalized | 0.147232668  |
| wavelet-HHH | glrlm      | RunVariance                      | 0.279452635  |
| wavelet-HHH | glrlm      | GrayLevelNonUniformity           | 236.3794214  |
| wavelet-HHH | glrlm      | LongRunEmphasis                  | 1.713545207  |
| wavelet-HHH | glrlm      | ShortRunHighGrayLevelEmphasis    | 143.0787024  |
| wavelet-HHH | glrlm      | RunLengthNonUniformity           | 1177.29151   |
| wavelet-HHH | glrlm      | ShortRunEmphasis                 | 0.880241828  |
| wavelet-HHH | glrlm      | LongRunHighGrayLevelEmphasis     | 274.4359666  |
| wavelet-HHH | glrlm      | RunPercentage                    | 0.835662516  |
| wavelet-HHH | glrlm      | LongRunLowGrayLevelEmphasis      | 0.012763604  |
| wavelet-HHH | glrlm      | RunEntropy                       | 3.872338453  |
| wavelet-HHH | glrlm      | HighGrayLevelRunEmphasis         | 161.9997083  |
| wavelet-HHH | glrlm      | RunLengthNonUniformityNormalized | 0.732880542  |
| wavelet-HHH | glszm      | GrayLevelVariance                | 16.6069706   |
| wavelet-HHH | glszm      | ZoneVariance                     | 1386.433596  |
| wavelet-HHH | glszm      | GrayLevelNonUniformityNormalized | 0.081751719  |
| wavelet-HHH | glszm      | SizeZoneNonUniformityNormalized  | 0.48726015   |
| wavelet-HHH | glszm      | SizeZoneNonUniformity            | 172.0028329  |
| wavelet-HHH | glszm      | GrayLevelNonUniformity           | 28.85835694  |
| wavelet-HHH | glszm      | LargeAreaEmphasis                | 1416.048159  |
| wavelet-HHH | glszm      | SmallAreaHighGrayLevelEmphasis   | 126.0758757  |
| wavelet-HHH | glszm      | ZonePercentage                   | 0.183758459  |
| wavelet-HHH | glszm      | LargeAreaLowGrayLevelEmphasis    | 9.233899288  |
| wavelet-HHH | glszm      | LargeAreaHighGrayLevelEmphasis   | 219809.2408  |
| wavelet-HHH | glszm      | HighGrayLevelZoneEmphasis        | 170.9858357  |
| wavelet-HHH | glszm      | SmallAreaEmphasis                | 0.724809742  |
| wavelet-HHH | glszm      | LowGrayLevelZoneEmphasis         | 0.013108572  |
| wavelet-HHH | glszm      | ZoneEntropy                      | 5.357645559  |
| wavelet-HHH | glszm      | SmallAreaLowGrayLevelEmphasis    | 0.010965082  |
| wavelet-HHH | ngtdm      | Coarseness                       | 0.003712075  |
| wavelet-HHH | ngtdm      | Complexity                       | 375.1964835  |

|             |            |                                      |              |
|-------------|------------|--------------------------------------|--------------|
| wavelet-HHH | ngtdm      | Strength                             | 0.752143404  |
| wavelet-HHH | ngtdm      | Contrast                             | 0.03100555   |
| wavelet-HHH | ngtdm      | Busyness                             | 0.634266192  |
| wavelet-HLL | gldm       | GrayLevelVariance                    | 18.54774905  |
| wavelet-HLL | gldm       | HighGrayLevelEmphasis                | 306.2571577  |
| wavelet-HLL | gldm       | DependenceEntropy                    | 6.773647097  |
| wavelet-HLL | gldm       | DependenceNonUniformity              | 268.087975   |
| wavelet-HLL | gldm       | GrayLevelNonUniformity               | 168.1150442  |
| wavelet-HLL | gldm       | SmallDependenceEmphasis              | 0.280605843  |
| wavelet-HLL | gldm       | SmallDependenceHighGrayLevelEmphasis | 96.0425983   |
| wavelet-HLL | gldm       | DependenceNonUniformityNormalized    | 0.139556468  |
| wavelet-HLL | gldm       | LargeDependenceEmphasis              | 29.09161895  |
| wavelet-HLL | gldm       | LargeDependenceLowGrayLevelEmphasis  | 0.105405252  |
| wavelet-HLL | gldm       | DependenceVariance                   | 12.06364462  |
| wavelet-HLL | gldm       | LargeDependenceHighGrayLevelEmphasis | 8720.332119  |
| wavelet-HLL | gldm       | SmallDependenceLowGrayLevelEmphasis  | 0.002079883  |
| wavelet-HLL | gldm       | LowGrayLevelEmphasis                 | 0.005176405  |
| wavelet-HLL | glcm       | JointAverage                         | 16.84211018  |
| wavelet-HLL | glcm       | SumAverage                           | 33.68422036  |
| wavelet-HLL | glcm       | JointEntropy                         | 7.485470746  |
| wavelet-HLL | glcm       | ClusterShade                         | 39.63988008  |
| wavelet-HLL | glcm       | MaximumProbability                   | 0.049662171  |
| wavelet-HLL | glcm       | Idmn                                 | 0.987106531  |
| wavelet-HLL | glcm       | JointEnergy                          | 0.013178909  |
| wavelet-HLL | glcm       | Contrast                             | 24.41458251  |
| wavelet-HLL | glcm       | DifferenceEntropy                    | 3.322986944  |
| wavelet-HLL | glcm       | InverseVariance                      | 0.295955696  |
| wavelet-HLL | glcm       | DifferenceVariance                   | 12.352619    |
| wavelet-HLL | glcm       | Idn                                  | 0.930013228  |
| wavelet-HLL | glcm       | Idm                                  | 0.317408942  |
| wavelet-HLL | glcm       | Correlation                          | 0.27238934   |
| wavelet-HLL | glcm       | Autocorrelation                      | 288.4381769  |
| wavelet-HLL | glcm       | SumEntropy                           | 4.602820872  |
| wavelet-HLL | glcm       | SumSquares                           | 16.98729367  |
| wavelet-HLL | glcm       | ClusterProminence                    | 9407.292324  |
| wavelet-HLL | glcm       | Imc2                                 | 0.717556409  |
| wavelet-HLL | glcm       | Imc1                                 | -0.099650781 |
| wavelet-HLL | glcm       | DifferenceAverage                    | 3.409770661  |
| wavelet-HLL | glcm       | Id                                   | 0.39344783   |
| wavelet-HLL | glcm       | ClusterTendency                      | 43.53459216  |
| wavelet-HLL | firstorder | InterquartileRange                   | 99.33640511  |
| wavelet-HLL | firstorder | Skewness                             | 0.396415491  |
| wavelet-HLL | firstorder | Uniformity                           | 0.087514338  |
| wavelet-HLL | firstorder | Median                               | -9.496728895 |
| wavelet-HLL | firstorder | Energy                               | 22583144.94  |
| wavelet-HLL | firstorder | RobustMeanAbsoluteDeviation          | 44.34941718  |
| wavelet-HLL | firstorder | MeanAbsoluteDeviation                | 75.63923258  |
| wavelet-HLL | firstorder | TotalEnergy                          | 609744913.4  |
| wavelet-HLL | firstorder | Maximum                              | 605.2229644  |
| wavelet-HLL | firstorder | RootMeanSquared                      | 108.4247747  |
| wavelet-HLL | firstorder | 90Percentile                         | 112.1889099  |
| wavelet-HLL | firstorder | Minimum                              | -418.7742274 |
| wavelet-HLL | firstorder | Entropy                              | 3.998598972  |
| wavelet-HLL | firstorder | Range                                | 1023.997192  |
| wavelet-HLL | firstorder | Variance                             | 11572.20896  |

|             |            |                                      |              |
|-------------|------------|--------------------------------------|--------------|
| wavelet-HLL | firstorder | 10Percentile                         | -143.0203606 |
| wavelet-HLL | firstorder | Kurtosis                             | 5.468353506  |
| wavelet-HLL | firstorder | Mean                                 | -13.5544389  |
| wavelet-HLL | glrlm      | ShortRunLowGrayLevelEmphasis         | 0.005025555  |
| wavelet-HLL | glrlm      | GrayLevelVariance                    | 20.28201969  |
| wavelet-HLL | glrlm      | LowGrayLevelRunEmphasis              | 0.005359028  |
| wavelet-HLL | glrlm      | GrayLevelNonUniformityNormalized     | 0.07824793   |
| wavelet-HLL | glrlm      | RunVariance                          | 0.200103208  |
| wavelet-HLL | glrlm      | GrayLevelNonUniformity               | 132.2900065  |
| wavelet-HLL | glrlm      | LongRunEmphasis                      | 1.496764104  |
| wavelet-HLL | glrlm      | ShortRunHighGrayLevelEmphasis        | 282.8068561  |
| wavelet-HLL | glrlm      | RunLengthNonUniformity               | 1358.962273  |
| wavelet-HLL | glrlm      | ShortRunEmphasis                     | 0.915110355  |
| wavelet-HLL | glrlm      | LongRunHighGrayLevelEmphasis         | 454.8782322  |
| wavelet-HLL | glrlm      | RunPercentage                        | 0.87975013   |
| wavelet-HLL | glrlm      | LongRunLowGrayLevelEmphasis          | 0.007242652  |
| wavelet-HLL | glrlm      | RunEntropy                           | 4.625622963  |
| wavelet-HLL | glrlm      | HighGrayLevelRunEmphasis             | 307.7827844  |
| wavelet-HLL | glrlm      | RunLengthNonUniformityNormalized     | 0.802879753  |
| wavelet-HLL | glszm      | GrayLevelVariance                    | 36.9552637   |
| wavelet-HLL | glszm      | ZoneVariance                         | 213.5799111  |
| wavelet-HLL | glszm      | GrayLevelNonUniformityNormalized     | 0.048898937  |
| wavelet-HLL | glszm      | SizeZoneNonUniformityNormalized      | 0.407742934  |
| wavelet-HLL | glszm      | SizeZoneNonUniformity                | 249.1309329  |
| wavelet-HLL | glszm      | GrayLevelNonUniformity               | 29.87725041  |
| wavelet-HLL | glszm      | LargeAreaEmphasis                    | 223.4648118  |
| wavelet-HLL | glszm      | SmallAreaHighGrayLevelEmphasis       | 237.9516904  |
| wavelet-HLL | glszm      | ZonePercentage                       | 0.318063509  |
| wavelet-HLL | glszm      | LargeAreaLowGrayLevelEmphasis        | 0.758197327  |
| wavelet-HLL | glszm      | LargeAreaHighGrayLevelEmphasis       | 67462.28805  |
| wavelet-HLL | glszm      | HighGrayLevelZoneEmphasis            | 338.9525368  |
| wavelet-HLL | glszm      | SmallAreaEmphasis                    | 0.663823667  |
| wavelet-HLL | glszm      | LowGrayLevelZoneEmphasis             | 0.007240328  |
| wavelet-HLL | glszm      | ZoneEntropy                          | 6.290687027  |
| wavelet-HLL | glszm      | SmallAreaLowGrayLevelEmphasis        | 0.005525973  |
| wavelet-HLL | ngtdm      | Coarseness                           | 0.004387457  |
| wavelet-HLL | ngtdm      | Complexity                           | 1354.395356  |
| wavelet-HLL | ngtdm      | Strength                             | 2.313267248  |
| wavelet-HLL | ngtdm      | Contrast                             | 0.070031025  |
| wavelet-HLL | ngtdm      | Busyness                             | 0.277906922  |
| wavelet-LHL | gldm       | GrayLevelVariance                    | 35.75954416  |
| wavelet-LHL | gldm       | HighGrayLevelEmphasis                | 3842.86153   |
| wavelet-LHL | gldm       | DependenceEntropy                    | 6.750781425  |
| wavelet-LHL | gldm       | DependenceNonUniformity              | 334.1025508  |
| wavelet-LHL | gldm       | GrayLevelNonUniformity               | 141.4747527  |
| wavelet-LHL | gldm       | SmallDependenceEmphasis              | 0.358289496  |
| wavelet-LHL | gldm       | SmallDependenceHighGrayLevelEmphasis | 1422.294312  |
| wavelet-LHL | gldm       | DependenceNonUniformityNormalized    | 0.173921161  |
| wavelet-LHL | gldm       | LargeDependenceEmphasis              | 20.40031234  |
| wavelet-LHL | gldm       | LargeDependenceLowGrayLevelEmphasis  | 0.005949492  |
| wavelet-LHL | gldm       | DependenceVariance                   | 8.470678202  |
| wavelet-LHL | gldm       | LargeDependenceHighGrayLevelEmphasis | 77179.98178  |
| wavelet-LHL | gldm       | SmallDependenceLowGrayLevelEmphasis  | 0.000624173  |
| wavelet-LHL | gldm       | LowGrayLevelEmphasis                 | 0.000797116  |
| wavelet-LHL | glcm       | JointAverage                         | 61.53750034  |

|             |            |                                  |              |
|-------------|------------|----------------------------------|--------------|
| wavelet-LHL | glcm       | SumAverage                       | 123.0750007  |
| wavelet-LHL | glcm       | JointEntropy                     | 7.988935948  |
| wavelet-LHL | glcm       | ClusterShade                     | 319.8459906  |
| wavelet-LHL | glcm       | MaximumProbability               | 0.041857558  |
| wavelet-LHL | glcm       | Idmn                             | 0.99550689   |
| wavelet-LHL | glcm       | JointEnergy                      | 0.010068601  |
| wavelet-LHL | glcm       | Contrast                         | 54.58794399  |
| wavelet-LHL | glcm       | DifferenceEntropy                | 3.734006758  |
| wavelet-LHL | glcm       | InverseVariance                  | 0.264160059  |
| wavelet-LHL | glcm       | DifferenceVariance               | 31.07968478  |
| wavelet-LHL | glcm       | Idn                              | 0.959663669  |
| wavelet-LHL | glcm       | Idm                              | 0.268557648  |
| wavelet-LHL | glcm       | Correlation                      | 0.108929435  |
| wavelet-LHL | glcm       | Autocorrelation                  | 3790.274666  |
| wavelet-LHL | glcm       | SumEntropy                       | 4.819789323  |
| wavelet-LHL | glcm       | SumSquares                       | 30.69578015  |
| wavelet-LHL | glcm       | ClusterProminence                | 45211.18839  |
| wavelet-LHL | glcm       | Imc2                             | 0.783372779  |
| wavelet-LHL | glcm       | Imc1                             | -0.117160894 |
| wavelet-LHL | glcm       | DifferenceAverage                | 4.747001107  |
| wavelet-LHL | glcm       | Id                               | 0.345598717  |
| wavelet-LHL | glcm       | ClusterTendency                  | 68.19517661  |
| wavelet-LHL | firstorder | InterquartileRange               | 113.2345569  |
| wavelet-LHL | firstorder | Skewness                         | -0.130131111 |
| wavelet-LHL | firstorder | Uniformity                       | 0.07364641   |
| wavelet-LHL | firstorder | Median                           | -3.072786708 |
| wavelet-LHL | firstorder | Energy                           | 42934251.37  |
| wavelet-LHL | firstorder | RobustMeanAbsoluteDeviation      | 53.28171529  |
| wavelet-LHL | firstorder | MeanAbsoluteDeviation            | 96.86161749  |
| wavelet-LHL | firstorder | TotalEnergy                      | 1159224787   |
| wavelet-LHL | firstorder | Maximum                          | 1140.505453  |
| wavelet-LHL | firstorder | RootMeanSquared                  | 149.4989922  |
| wavelet-LHL | firstorder | 90Percentile                     | 173.8604345  |
| wavelet-LHL | firstorder | Minimum                          | -1522.600386 |
| wavelet-LHL | firstorder | Entropy                          | 4.330119418  |
| wavelet-LHL | firstorder | Range                            | 2663.10584   |
| wavelet-LHL | firstorder | Variance                         | 22325.72513  |
| wavelet-LHL | firstorder | 10Percentile                     | -149.518994  |
| wavelet-LHL | firstorder | Kurtosis                         | 15.73949992  |
| wavelet-LHL | firstorder | Mean                             | 4.921739923  |
| wavelet-LHL | glrlm      | ShortRunLowGrayLevelEmphasis     | 0.000834762  |
| wavelet-LHL | glrlm      | GrayLevelVariance                | 38.72225096  |
| wavelet-LHL | glrlm      | LowGrayLevelRunEmphasis          | 0.000852667  |
| wavelet-LHL | glrlm      | GrayLevelNonUniformityNormalized | 0.066047624  |
| wavelet-LHL | glrlm      | RunVariance                      | 0.140229657  |
| wavelet-LHL | glrlm      | GrayLevelNonUniformity           | 114.9299644  |
| wavelet-LHL | glrlm      | LongRunEmphasis                  | 1.361518095  |
| wavelet-LHL | glrlm      | ShortRunHighGrayLevelEmphasis    | 3597.507292  |
| wavelet-LHL | glrlm      | RunLengthNonUniformity           | 1463.303438  |
| wavelet-LHL | glrlm      | ShortRunEmphasis                 | 0.933037814  |
| wavelet-LHL | glrlm      | LongRunHighGrayLevelEmphasis     | 5214.560538  |
| wavelet-LHL | glrlm      | RunPercentage                    | 0.905618068  |
| wavelet-LHL | glrlm      | LongRunLowGrayLevelEmphasis      | 0.000949143  |
| wavelet-LHL | glrlm      | RunEntropy                       | 4.851343229  |
| wavelet-LHL | glrlm      | HighGrayLevelRunEmphasis         | 3850.145851  |

|             |       |                                      |              |
|-------------|-------|--------------------------------------|--------------|
| wavelet-LHL | glrlm | RunLengthNonUniformityNormalized     | 0.840463383  |
| wavelet-LHL | glszm | GrayLevelVariance                    | 69.29943819  |
| wavelet-LHL | glszm | ZoneVariance                         | 137.0699598  |
| wavelet-LHL | glszm | GrayLevelNonUniformityNormalized     | 0.03949097   |
| wavelet-LHL | glszm | SizeZoneNonUniformityNormalized      | 0.479844493  |
| wavelet-LHL | glszm | SizeZoneNonUniformity                | 370.919793   |
| wavelet-LHL | glszm | GrayLevelNonUniformity               | 30.52652005  |
| wavelet-LHL | glszm | LargeAreaEmphasis                    | 143.2457956  |
| wavelet-LHL | glszm | SmallAreaHighGrayLevelEmphasis       | 2892.102539  |
| wavelet-LHL | glszm | ZonePercentage                       | 0.402394586  |
| wavelet-LHL | glszm | LargeAreaLowGrayLevelEmphasis        | 0.039269732  |
| wavelet-LHL | glszm | LargeAreaHighGrayLevelEmphasis       | 541355.2846  |
| wavelet-LHL | glszm | HighGrayLevelZoneEmphasis            | 3956.087969  |
| wavelet-LHL | glszm | SmallAreaEmphasis                    | 0.720121799  |
| wavelet-LHL | glszm | LowGrayLevelZoneEmphasis             | 0.001581251  |
| wavelet-LHL | glszm | ZoneEntropy                          | 6.36259806   |
| wavelet-LHL | glszm | SmallAreaLowGrayLevelEmphasis        | 0.001504902  |
| wavelet-LHL | ngtdm | Coarseness                           | 0.004034634  |
| wavelet-LHL | ngtdm | Complexity                           | 4455.051253  |
| wavelet-LHL | ngtdm | Strength                             | 5.801089599  |
| wavelet-LHL | ngtdm | Contrast                             | 0.105972809  |
| wavelet-LHL | ngtdm | Busyness                             | 0.057856529  |
| wavelet-LHH | gldm  | GrayLevelVariance                    | 20.32664154  |
| wavelet-LHH | gldm  | HighGrayLevelEmphasis                | 621.5590838  |
| wavelet-LHH | gldm  | DependenceEntropy                    | 6.474934137  |
| wavelet-LHH | gldm  | DependenceNonUniformity              | 289.0562207  |
| wavelet-LHH | gldm  | GrayLevelNonUniformity               | 184.9375325  |
| wavelet-LHH | gldm  | SmallDependenceEmphasis              | 0.339004778  |
| wavelet-LHH | gldm  | SmallDependenceHighGrayLevelEmphasis | 217.1537811  |
| wavelet-LHH | gldm  | DependenceNonUniformityNormalized    | 0.150471744  |
| wavelet-LHH | gldm  | LargeDependenceEmphasis              | 25.10411244  |
| wavelet-LHH | gldm  | LargeDependenceLowGrayLevelEmphasis  | 0.043184684  |
| wavelet-LHH | gldm  | DependenceVariance                   | 10.22885606  |
| wavelet-LHH | gldm  | LargeDependenceHighGrayLevelEmphasis | 15085.22697  |
| wavelet-LHH | gldm  | SmallDependenceLowGrayLevelEmphasis  | 0.001292743  |
| wavelet-LHH | gldm  | LowGrayLevelEmphasis                 | 0.002448174  |
| wavelet-LHH | glcm  | JointAverage                         | 24.52943061  |
| wavelet-LHH | glcm  | SumAverage                           | 49.05886123  |
| wavelet-LHH | glcm  | JointEntropy                         | 7.431688845  |
| wavelet-LHH | glcm  | ClusterShade                         | 12.80854926  |
| wavelet-LHH | glcm  | MaximumProbability                   | 0.057338513  |
| wavelet-LHH | glcm  | Idmn                                 | 0.984956329  |
| wavelet-LHH | glcm  | JointEnergy                          | 0.015363361  |
| wavelet-LHH | glcm  | Contrast                             | 40.12129343  |
| wavelet-LHH | glcm  | DifferenceEntropy                    | 3.578755522  |
| wavelet-LHH | glcm  | InverseVariance                      | 0.28242566   |
| wavelet-LHH | glcm  | DifferenceVariance                   | 22.2874997   |
| wavelet-LHH | glcm  | Idn                                  | 0.928250901  |
| wavelet-LHH | glcm  | Idm                                  | 0.297724663  |
| wavelet-LHH | glcm  | Correlation                          | -0.023912277 |
| wavelet-LHH | glcm  | Autocorrelation                      | 601.1974125  |
| wavelet-LHH | glcm  | SumEntropy                           | 4.401597081  |
| wavelet-LHH | glcm  | SumSquares                           | 19.56480883  |
| wavelet-LHH | glcm  | ClusterProminence                    | 10930.85505  |
| wavelet-LHH | glcm  | Imc2                                 | 0.741832238  |

|             |            |                                  |              |
|-------------|------------|----------------------------------|--------------|
| wavelet-LHH | glcm       | Imc1                             | -0.104932807 |
| wavelet-LHH | glcm       | DifferenceAverage                | 4.152689963  |
| wavelet-LHH | glcm       | Id                               | 0.372523105  |
| wavelet-LHH | glcm       | ClusterTendency                  | 38.13794191  |
| wavelet-LHH | firstorder | InterquartileRange               | 83.975253    |
| wavelet-LHH | firstorder | Skewness                         | 0.00350054   |
| wavelet-LHH | firstorder | Uniformity                       | 0.09627149   |
| wavelet-LHH | firstorder | Median                           | -0.932221837 |
| wavelet-LHH | firstorder | Energy                           | 24295126.18  |
| wavelet-LHH | firstorder | RobustMeanAbsoluteDeviation      | 39.22489555  |
| wavelet-LHH | firstorder | MeanAbsoluteDeviation            | 74.11761802  |
| wavelet-LHH | firstorder | TotalEnergy                      | 655968406.9  |
| wavelet-LHH | firstorder | Maximum                          | 603.3867675  |
| wavelet-LHH | firstorder | RootMeanSquared                  | 112.4594349  |
| wavelet-LHH | firstorder | 90Percentile                     | 126.5277943  |
| wavelet-LHH | firstorder | Minimum                          | -591.7592788 |
| wavelet-LHH | firstorder | Entropy                          | 3.974972449  |
| wavelet-LHH | firstorder | Range                            | 1195.146046  |
| wavelet-LHH | firstorder | Variance                         | 12646.71468  |
| wavelet-LHH | firstorder | 10Percentile                     | -117.1472264 |
| wavelet-LHH | firstorder | Kurtosis                         | 6.439852837  |
| wavelet-LHH | firstorder | Mean                             | 0.640180218  |
| wavelet-LHH | glrlm      | ShortRunLowGrayLevelEmphasis     | 0.002408094  |
| wavelet-LHH | glrlm      | GrayLevelVariance                | 22.41017353  |
| wavelet-LHH | glrlm      | LowGrayLevelRunEmphasis          | 0.002540202  |
| wavelet-LHH | glrlm      | GrayLevelNonUniformityNormalized | 0.08467317   |
| wavelet-LHH | glrlm      | RunVariance                      | 0.174425315  |
| wavelet-LHH | glrlm      | GrayLevelNonUniformity           | 144.8459013  |
| wavelet-LHH | glrlm      | LongRunEmphasis                  | 1.438864268  |
| wavelet-LHH | glrlm      | ShortRunHighGrayLevelEmphasis    | 577.1000625  |
| wavelet-LHH | glrlm      | RunLengthNonUniformity           | 1400.842428  |
| wavelet-LHH | glrlm      | ShortRunEmphasis                 | 0.922784214  |
| wavelet-LHH | glrlm      | LongRunHighGrayLevelEmphasis     | 888.1419228  |
| wavelet-LHH | glrlm      | RunPercentage                    | 0.890121331  |
| wavelet-LHH | glrlm      | LongRunLowGrayLevelEmphasis      | 0.003287807  |
| wavelet-LHH | glrlm      | RunEntropy                       | 4.574195647  |
| wavelet-LHH | glrlm      | HighGrayLevelRunEmphasis         | 623.8108338  |
| wavelet-LHH | glrlm      | RunLengthNonUniformityNormalized | 0.818619246  |
| wavelet-LHH | glszm      | GrayLevelVariance                | 44.64923212  |
| wavelet-LHH | glszm      | ZoneVariance                     | 272.0905418  |
| wavelet-LHH | glszm      | GrayLevelNonUniformityNormalized | 0.046487714  |
| wavelet-LHH | glszm      | SizeZoneNonUniformityNormalized  | 0.55050358   |
| wavelet-LHH | glszm      | SizeZoneNonUniformity            | 380.397974   |
| wavelet-LHH | glszm      | GrayLevelNonUniformity           | 32.12301013  |
| wavelet-LHH | glszm      | LargeAreaEmphasis                | 279.8191027  |
| wavelet-LHH | glszm      | SmallAreaHighGrayLevelEmphasis   | 496.527777   |
| wavelet-LHH | glszm      | ZonePercentage                   | 0.359708485  |
| wavelet-LHH | glszm      | LargeAreaLowGrayLevelEmphasis    | 0.471755987  |
| wavelet-LHH | glszm      | LargeAreaHighGrayLevelEmphasis   | 167387.11    |
| wavelet-LHH | glszm      | HighGrayLevelZoneEmphasis        | 645.5730825  |
| wavelet-LHH | glszm      | SmallAreaEmphasis                | 0.769479591  |
| wavelet-LHH | glszm      | LowGrayLevelZoneEmphasis         | 0.003716679  |
| wavelet-LHH | glszm      | ZoneEntropy                      | 5.951567622  |
| wavelet-LHH | glszm      | SmallAreaLowGrayLevelEmphasis    | 0.003283203  |
| wavelet-LHH | ngtdm      | Coarseness                       | 0.004259286  |



|             |            |                                      |              |
|-------------|------------|--------------------------------------|--------------|
| wavelet-LHH | ngtdm      | Complexity                           | 2161.398527  |
| wavelet-LHH | ngtdm      | Strength                             | 2.328560031  |
| wavelet-LHH | ngtdm      | Contrast                             | 0.077282112  |
| wavelet-LHH | ngtdm      | Busyness                             | 0.163115086  |
| wavelet-LLH | gldm       | GrayLevelVariance                    | 50.45118029  |
| wavelet-LLH | gldm       | HighGrayLevelEmphasis                | 740.217595   |
| wavelet-LLH | gldm       | DependenceEntropy                    | 6.942195679  |
| wavelet-LLH | gldm       | DependenceNonUniformity              | 371.5819885  |
| wavelet-LLH | gldm       | GrayLevelNonUniformity               | 120.0557002  |
| wavelet-LLH | gldm       | SmallDependenceEmphasis              | 0.411215288  |
| wavelet-LLH | gldm       | SmallDependenceHighGrayLevelEmphasis | 329.3721702  |
| wavelet-LLH | gldm       | DependenceNonUniformityNormalized    | 0.19343154   |
| wavelet-LLH | gldm       | LargeDependenceEmphasis              | 20.17959396  |
| wavelet-LLH | gldm       | LargeDependenceLowGrayLevelEmphasis  | 0.031991765  |
| wavelet-LLH | gldm       | DependenceVariance                   | 9.04186041   |
| wavelet-LLH | gldm       | LargeDependenceHighGrayLevelEmphasis | 14072.95159  |
| wavelet-LLH | gldm       | SmallDependenceLowGrayLevelEmphasis  | 0.002153575  |
| wavelet-LLH | gldm       | LowGrayLevelEmphasis                 | 0.00318875   |
| wavelet-LLH | glcm       | JointAverage                         | 26.0880159   |
| wavelet-LLH | glcm       | SumAverage                           | 52.17603179  |
| wavelet-LLH | glcm       | JointEntropy                         | 8.500360871  |
| wavelet-LLH | glcm       | ClusterShade                         | 456.2262915  |
| wavelet-LLH | glcm       | MaximumProbability                   | 0.042881832  |
| wavelet-LLH | glcm       | Idmn                                 | 0.982893576  |
| wavelet-LLH | glcm       | JointEnergy                          | 0.008523299  |
| wavelet-LLH | glcm       | Contrast                             | 88.73879987  |
| wavelet-LLH | glcm       | DifferenceEntropy                    | 4.079742089  |
| wavelet-LLH | glcm       | InverseVariance                      | 0.23179748   |
| wavelet-LLH | glcm       | DifferenceVariance                   | 48.78070154  |
| wavelet-LLH | glcm       | Idn                                  | 0.924359993  |
| wavelet-LLH | glcm       | Idm                                  | 0.243437195  |
| wavelet-LLH | glcm       | Correlation                          | 0.100398422  |
| wavelet-LLH | glcm       | Autocorrelation                      | 685.604002   |
| wavelet-LLH | glcm       | SumEntropy                           | 5.171205764  |
| wavelet-LLH | glcm       | SumSquares                           | 49.38412377  |
| wavelet-LLH | glcm       | ClusterProminence                    | 71563.38692  |
| wavelet-LLH | glcm       | Imc2                                 | 0.855642229  |
| wavelet-LLH | glcm       | Imc1                                 | -0.148590079 |
| wavelet-LLH | glcm       | DifferenceAverage                    | 6.14546348   |
| wavelet-LLH | glcm       | Id                                   | 0.317872356  |
| wavelet-LLH | glcm       | ClusterTendency                      | 108.7976952  |
| wavelet-LLH | firstorder | InterquartileRange                   | 145.9880665  |
| wavelet-LLH | firstorder | Skewness                             | 0.530208829  |
| wavelet-LLH | firstorder | Uniformity                           | 0.06249646   |
| wavelet-LLH | firstorder | Median                               | -8.342578152 |
| wavelet-LLH | firstorder | Energy                               | 60505883.16  |
| wavelet-LLH | firstorder | RobustMeanAbsoluteDeviation          | 65.93607043  |
| wavelet-LLH | firstorder | MeanAbsoluteDeviation                | 119.6091613  |
| wavelet-LLH | firstorder | TotalEnergy                          | 1633658845   |
| wavelet-LLH | firstorder | Maximum                              | 1035.503765  |
| wavelet-LLH | firstorder | RootMeanSquared                      | 177.4741561  |
| wavelet-LLH | firstorder | 90Percentile                         | 207.7848793  |
| wavelet-LLH | firstorder | Minimum                              | -648.7848067 |
| wavelet-LLH | firstorder | Entropy                              | 4.629820838  |
| wavelet-LLH | firstorder | Range                                | 1684.288572  |

|             |            |                                      |              |
|-------------|------------|--------------------------------------|--------------|
| wavelet-LLH | firstorder | Variance                             | 31460.57736  |
| wavelet-LLH | firstorder | 10Percentile                         | -213.6469772 |
| wavelet-LLH | firstorder | Kurtosis                             | 6.031387853  |
| wavelet-LLH | firstorder | Mean                                 | -6.041417741 |
| wavelet-LLH | glrlm      | ShortRunLowGrayLevelEmphasis         | 0.003247021  |
| wavelet-LLH | glrlm      | GrayLevelVariance                    | 54.43704675  |
| wavelet-LLH | glrlm      | LowGrayLevelRunEmphasis              | 0.003348572  |
| wavelet-LLH | glrlm      | GrayLevelNonUniformityNormalized     | 0.054758397  |
| wavelet-LLH | glrlm      | RunVariance                          | 0.141408174  |
| wavelet-LLH | glrlm      | GrayLevelNonUniformity               | 95.81826435  |
| wavelet-LLH | glrlm      | LongRunEmphasis                      | 1.352320704  |
| wavelet-LLH | glrlm      | ShortRunHighGrayLevelEmphasis        | 701.6024425  |
| wavelet-LLH | glrlm      | RunLengthNonUniformity               | 1487.972367  |
| wavelet-LLH | glrlm      | ShortRunEmphasis                     | 0.937113499  |
| wavelet-LLH | glrlm      | LongRunHighGrayLevelEmphasis         | 989.3017053  |
| wavelet-LLH | glrlm      | RunPercentage                        | 0.910102911  |
| wavelet-LLH | glrlm      | LongRunLowGrayLevelEmphasis          | 0.003900439  |
| wavelet-LLH | glrlm      | RunEntropy                           | 5.131373475  |
| wavelet-LLH | glrlm      | HighGrayLevelRunEmphasis             | 745.0338893  |
| wavelet-LLH | glrlm      | RunLengthNonUniformityNormalized     | 0.849916817  |
| wavelet-LLH | glszm      | GrayLevelVariance                    | 86.47027355  |
| wavelet-LLH | glszm      | ZoneVariance                         | 98.81043634  |
| wavelet-LLH | glszm      | GrayLevelNonUniformityNormalized     | 0.032995627  |
| wavelet-LLH | glszm      | SizeZoneNonUniformityNormalized      | 0.535653229  |
| wavelet-LLH | glszm      | SizeZoneNonUniformity                | 474.0531073  |
| wavelet-LLH | glszm      | GrayLevelNonUniformity               | 29.20112994  |
| wavelet-LLH | glszm      | LargeAreaEmphasis                    | 103.5220339  |
| wavelet-LLH | glszm      | SmallAreaHighGrayLevelEmphasis       | 620.2205608  |
| wavelet-LLH | glszm      | ZonePercentage                       | 0.460697553  |
| wavelet-LLH | glszm      | LargeAreaLowGrayLevelEmphasis        | 0.154192059  |
| wavelet-LLH | glszm      | LargeAreaHighGrayLevelEmphasis       | 71880.56045  |
| wavelet-LLH | glszm      | HighGrayLevelZoneEmphasis            | 795.1728814  |
| wavelet-LLH | glszm      | SmallAreaEmphasis                    | 0.759904939  |
| wavelet-LLH | glszm      | LowGrayLevelZoneEmphasis             | 0.004929135  |
| wavelet-LLH | glszm      | ZoneEntropy                          | 6.442666887  |
| wavelet-LLH | glszm      | SmallAreaLowGrayLevelEmphasis        | 0.004426945  |
| wavelet-LLH | ngtdm      | Coarseness                           | 0.003978147  |
| wavelet-LLH | ngtdm      | Complexity                           | 6612.965582  |
| wavelet-LLH | ngtdm      | Strength                             | 5.232242467  |
| wavelet-LLH | ngtdm      | Contrast                             | 0.132942655  |
| wavelet-LLH | ngtdm      | Busyness                             | 0.119082262  |
| wavelet-LLL | gldm       | GrayLevelVariance                    | 630.5048326  |
| wavelet-LLL | gldm       | HighGrayLevelEmphasis                | 6901.31442   |
| wavelet-LLL | gldm       | DependenceEntropy                    | 7.763604467  |
| wavelet-LLL | gldm       | DependenceNonUniformity              | 501.9234774  |
| wavelet-LLL | gldm       | GrayLevelNonUniformity               | 54.62831858  |
| wavelet-LLL | gldm       | SmallDependenceEmphasis              | 0.517114837  |
| wavelet-LLL | gldm       | SmallDependenceHighGrayLevelEmphasis | 2845.842512  |
| wavelet-LLL | gldm       | DependenceNonUniformityNormalized    | 0.261282393  |
| wavelet-LLL | gldm       | LargeDependenceEmphasis              | 16.43050495  |
| wavelet-LLL | gldm       | LargeDependenceLowGrayLevelEmphasis  | 0.003571965  |
| wavelet-LLL | gldm       | DependenceVariance                   | 8.14054204   |
| wavelet-LLL | gldm       | LargeDependenceHighGrayLevelEmphasis | 152366.1088  |
| wavelet-LLL | gldm       | SmallDependenceLowGrayLevelEmphasis  | 0.0010675    |
| wavelet-LLL | gldm       | LowGrayLevelEmphasis                 | 0.001257531  |

|             |            |                                  |              |
|-------------|------------|----------------------------------|--------------|
| wavelet-LLL | glcm       | JointAverage                     | 81.533952    |
| wavelet-LLL | glcm       | SumAverage                       | 163.067904   |
| wavelet-LLL | glcm       | JointEntropy                     | 9.649378968  |
| wavelet-LLL | glcm       | ClusterShade                     | -119475.0171 |
| wavelet-LLL | glcm       | MaximumProbability               | 0.023888117  |
| wavelet-LLL | glcm       | Idmn                             | 0.983110851  |
| wavelet-LLL | glcm       | JointEnergy                      | 0.003854757  |
| wavelet-LLL | glcm       | Contrast                         | 221.5727839  |
| wavelet-LLL | glcm       | DifferenceEntropy                | 4.713515889  |
| wavelet-LLL | glcm       | InverseVariance                  | 0.184849682  |
| wavelet-LLL | glcm       | DifferenceVariance               | 117.0090265  |
| wavelet-LLL | glcm       | Idn                              | 0.923522488  |
| wavelet-LLL | glcm       | Idm                              | 0.195522433  |
| wavelet-LLL | glcm       | Correlation                      | 0.797162306  |
| wavelet-LLL | glcm       | Autocorrelation                  | 7089.15324   |
| wavelet-LLL | glcm       | SumEntropy                       | 6.639977941  |
| wavelet-LLL | glcm       | SumSquares                       | 551.545429   |
| wavelet-LLL | glcm       | ClusterProminence                | 15730981.48  |
| wavelet-LLL | glcm       | Imc2                             | 0.987184337  |
| wavelet-LLL | glcm       | Imc1                             | -0.32191141  |
| wavelet-LLL | glcm       | DifferenceAverage                | 10.00825831  |
| wavelet-LLL | glcm       | Id                               | 0.263383323  |
| wavelet-LLL | glcm       | ClusterTendency                  | 1984.608932  |
| wavelet-LLL | firstorder | InterquartileRange               | 832.9822488  |
| wavelet-LLL | firstorder | Skewness                         | -1.167135281 |
| wavelet-LLL | firstorder | Uniformity                       | 0.028437438  |
| wavelet-LLL | firstorder | Median                           | -47.94946557 |
| wavelet-LLL | firstorder | Energy                           | 970338185    |
| wavelet-LLL | firstorder | RobustMeanAbsoluteDeviation      | 368.8410353  |
| wavelet-LLL | firstorder | MeanAbsoluteDeviation            | 515.0606683  |
| wavelet-LLL | firstorder | TotalEnergy                      | 26199130994  |
| wavelet-LLL | firstorder | Maximum                          | 433.6352299  |
| wavelet-LLL | firstorder | RootMeanSquared                  | 710.7189228  |
| wavelet-LLL | firstorder | 90Percentile                     | 201.1709369  |
| wavelet-LLL | firstorder | Minimum                          | -2281.196841 |
| wavelet-LLL | firstorder | Entropy                          | 5.932250143  |
| wavelet-LLL | firstorder | Range                            | 2714.832071  |
| wavelet-LLL | firstorder | Variance                         | 394297.6281  |
| wavelet-LLL | firstorder | 10Percentile                     | -1349.307638 |
| wavelet-LLL | firstorder | Kurtosis                         | 3.333598406  |
| wavelet-LLL | firstorder | Mean                             | -332.9020263 |
| wavelet-LLL | glrlm      | ShortRunLowGrayLevelEmphasis     | 0.001327474  |
| wavelet-LLL | glrlm      | GrayLevelVariance                | 645.1647094  |
| wavelet-LLL | glrlm      | LowGrayLevelRunEmphasis          | 0.001339074  |
| wavelet-LLL | glrlm      | GrayLevelNonUniformityNormalized | 0.024083109  |
| wavelet-LLL | glrlm      | RunVariance                      | 0.110123535  |
| wavelet-LLL | glrlm      | GrayLevelNonUniformity           | 42.94440598  |
| wavelet-LLL | glrlm      | LongRunEmphasis                  | 1.273140271  |
| wavelet-LLL | glrlm      | ShortRunHighGrayLevelEmphasis    | 6276.69554   |
| wavelet-LLL | glrlm      | RunLengthNonUniformity           | 1568.407739  |
| wavelet-LLL | glrlm      | ShortRunEmphasis                 | 0.950518482  |
| wavelet-LLL | glrlm      | LongRunHighGrayLevelEmphasis     | 9240.666872  |
| wavelet-LLL | glrlm      | RunPercentage                    | 0.92772194   |
| wavelet-LLL | glrlm      | LongRunLowGrayLevelEmphasis      | 0.001393968  |
| wavelet-LLL | glrlm      | RunEntropy                       | 6.344189121  |

|             |       |                                      |              |
|-------------|-------|--------------------------------------|--------------|
| wavelet-LLL | glrlm | HighGrayLevelRunEmphasis             | 6725.515062  |
| wavelet-LLL | glrlm | RunLengthNonUniformityNormalized     | 0.879660735  |
| wavelet-LLL | glszm | GrayLevelVariance                    | 666.31382    |
| wavelet-LLL | glszm | ZoneVariance                         | 34.55646376  |
| wavelet-LLL | glszm | GrayLevelNonUniformityNormalized     | 0.013030163  |
| wavelet-LLL | glszm | SizeZoneNonUniformityNormalized      | 0.632164996  |
| wavelet-LLL | glszm | SizeZoneNonUniformity                | 690.3241758  |
| wavelet-LLL | glszm | GrayLevelNonUniformity               | 14.22893773  |
| wavelet-LLL | glszm | LargeAreaEmphasis                    | 37.6510989   |
| wavelet-LLL | glszm | SmallAreaHighGrayLevelEmphasis       | 4336.44125   |
| wavelet-LLL | glszm | ZonePercentage                       | 0.56845393   |
| wavelet-LLL | glszm | LargeAreaLowGrayLevelEmphasis        | 0.006305339  |
| wavelet-LLL | glszm | LargeAreaHighGrayLevelEmphasis       | 358265.7848  |
| wavelet-LLL | glszm | HighGrayLevelZoneEmphasis            | 5582.352564  |
| wavelet-LLL | glszm | SmallAreaEmphasis                    | 0.821492404  |
| wavelet-LLL | glszm | LowGrayLevelZoneEmphasis             | 0.001963532  |
| wavelet-LLL | glszm | ZoneEntropy                          | 7.323803873  |
| wavelet-LLL | glszm | SmallAreaLowGrayLevelEmphasis        | 0.001829287  |
| wavelet-LLL | ngtdm | Coarseness                           | 0.005395485  |
| wavelet-LLL | ngtdm | Complexity                           | 28464.17345  |
| wavelet-LLL | ngtdm | Strength                             | 40.91611581  |
| wavelet-LLL | ngtdm | Contrast                             | 0.638578164  |
| wavelet-LLL | ngtdm | Busyness                             | 0.016013694  |
| wavelet-HHL | gldm  | GrayLevelVariance                    | 5.360703542  |
| wavelet-HHL | gldm  | HighGrayLevelEmphasis                | 347.1197293  |
| wavelet-HHL | gldm  | DependenceEntropy                    | 6.076942263  |
| wavelet-HHL | gldm  | DependenceNonUniformity              | 190.2035398  |
| wavelet-HHL | gldm  | GrayLevelNonUniformity               | 301.5497137  |
| wavelet-HHL | gldm  | SmallDependenceEmphasis              | 0.196994199  |
| wavelet-HHL | gldm  | SmallDependenceHighGrayLevelEmphasis | 68.93226984  |
| wavelet-HHL | gldm  | DependenceNonUniformityNormalized    | 0.099012775  |
| wavelet-HHL | gldm  | LargeDependenceEmphasis              | 38.73347215  |
| wavelet-HHL | gldm  | LargeDependenceLowGrayLevelEmphasis  | 0.115580425  |
| wavelet-HHL | gldm  | DependenceVariance                   | 12.48985256  |
| wavelet-HHL | gldm  | LargeDependenceHighGrayLevelEmphasis | 13190.95836  |
| wavelet-HHL | gldm  | SmallDependenceLowGrayLevelEmphasis  | 0.001224539  |
| wavelet-HHL | gldm  | LowGrayLevelEmphasis                 | 0.003621087  |
| wavelet-HHL | glcm  | JointAverage                         | 18.48665557  |
| wavelet-HHL | glcm  | SumAverage                           | 36.97331115  |
| wavelet-HHL | glcm  | JointEntropy                         | 5.982549372  |
| wavelet-HHL | glcm  | ClusterShade                         | -12.77806327 |
| wavelet-HHL | glcm  | MaximumProbability                   | 0.085334281  |
| wavelet-HHL | glcm  | Idmn                                 | 0.987317159  |
| wavelet-HHL | glcm  | JointEnergy                          | 0.03204141   |
| wavelet-HHL | glcm  | Contrast                             | 9.985298302  |
| wavelet-HHL | glcm  | DifferenceEntropy                    | 2.769114962  |
| wavelet-HHL | glcm  | InverseVariance                      | 0.372625798  |
| wavelet-HHL | glcm  | DifferenceVariance                   | 5.114493056  |
| wavelet-HHL | glcm  | Idn                                  | 0.929907348  |
| wavelet-HHL | glcm  | Idm                                  | 0.404756407  |
| wavelet-HHL | glcm  | Correlation                          | -0.006871714 |
| wavelet-HHL | glcm  | Autocorrelation                      | 341.7352375  |
| wavelet-HHL | glcm  | SumEntropy                           | 3.568201551  |
| wavelet-HHL | glcm  | SumSquares                           | 4.971184479  |
| wavelet-HHL | glcm  | ClusterProminence                    | 690.1652678  |

|             |            |                                  |              |
|-------------|------------|----------------------------------|--------------|
| wavelet-HHL | glcm       | Imc2                             | 0.515661596  |
| wavelet-HHL | glcm       | Imc1                             | -0.053088347 |
| wavelet-HHL | glcm       | DifferenceAverage                | 2.191151158  |
| wavelet-HHL | glcm       | Id                               | 0.470327768  |
| wavelet-HHL | glcm       | ClusterTendency                  | 9.899439613  |
| wavelet-HHL | firstorder | InterquartileRange               | 51.48361918  |
| wavelet-HHL | firstorder | Skewness                         | -0.480826348 |
| wavelet-HHL | firstorder | Uniformity                       | 0.156975385  |
| wavelet-HHL | firstorder | Median                           | -0.49468068  |
| wavelet-HHL | firstorder | Energy                           | 6296386.679  |
| wavelet-HHL | firstorder | RobustMeanAbsoluteDeviation      | 23.24125281  |
| wavelet-HHL | firstorder | MeanAbsoluteDeviation            | 39.65952893  |
| wavelet-HHL | firstorder | TotalEnergy                      | 170002440.3  |
| wavelet-HHL | firstorder | Maximum                          | 224.685072   |
| wavelet-HHL | firstorder | RootMeanSquared                  | 57.25085979  |
| wavelet-HHL | firstorder | 90Percentile                     | 65.31091445  |
| wavelet-HHL | firstorder | Minimum                          | -428.9736925 |
| wavelet-HHL | firstorder | Entropy                          | 3.119727907  |
| wavelet-HHL | firstorder | Range                            | 653.6587645  |
| wavelet-HHL | firstorder | Variance                         | 3277.466323  |
| wavelet-HHL | firstorder | 10Percentile                     | -61.15770808 |
| wavelet-HHL | firstorder | Kurtosis                         | 7.436496535  |
| wavelet-HHL | firstorder | Mean                             | -0.441162127 |
| wavelet-HHL | glrlm      | ShortRunLowGrayLevelEmphasis     | 0.00340413   |
| wavelet-HHL | glrlm      | GrayLevelVariance                | 6.112993582  |
| wavelet-HHL | glrlm      | LowGrayLevelRunEmphasis          | 0.003744468  |
| wavelet-HHL | glrlm      | GrayLevelNonUniformityNormalized | 0.139175795  |
| wavelet-HHL | glrlm      | RunVariance                      | 0.26817649   |
| wavelet-HHL | glrlm      | GrayLevelNonUniformity           | 225.0254912  |
| wavelet-HHL | glrlm      | LongRunEmphasis                  | 1.685133058  |
| wavelet-HHL | glrlm      | ShortRunHighGrayLevelEmphasis    | 308.7326547  |
| wavelet-HHL | glrlm      | RunLengthNonUniformity           | 1203.2196    |
| wavelet-HHL | glrlm      | ShortRunEmphasis                 | 0.885443553  |
| wavelet-HHL | glrlm      | LongRunHighGrayLevelEmphasis     | 582.2278061  |
| wavelet-HHL | glrlm      | RunPercentage                    | 0.841428743  |
| wavelet-HHL | glrlm      | LongRunLowGrayLevelEmphasis      | 0.005779494  |
| wavelet-HHL | glrlm      | RunEntropy                       | 3.920421657  |
| wavelet-HHL | glrlm      | HighGrayLevelRunEmphasis         | 348.0283259  |
| wavelet-HHL | glrlm      | RunLengthNonUniformityNormalized | 0.743377386  |
| wavelet-HHL | glszm      | GrayLevelVariance                | 17.27320194  |
| wavelet-HHL | glszm      | ZoneVariance                     | 1117.214291  |
| wavelet-HHL | glszm      | GrayLevelNonUniformityNormalized | 0.080903085  |
| wavelet-HHL | glszm      | SizeZoneNonUniformityNormalized  | 0.454821395  |
| wavelet-HHL | glszm      | SizeZoneNonUniformity            | 172.3773087  |
| wavelet-HHL | glszm      | GrayLevelNonUniformity           | 30.66226913  |
| wavelet-HHL | glszm      | LargeAreaEmphasis                | 1142.905013  |
| wavelet-HHL | glszm      | SmallAreaHighGrayLevelEmphasis   | 244.7751926  |
| wavelet-HHL | glszm      | ZonePercentage                   | 0.197293077  |
| wavelet-HHL | glszm      | LargeAreaLowGrayLevelEmphasis    | 3.371872217  |
| wavelet-HHL | glszm      | LargeAreaHighGrayLevelEmphasis   | 389583.2955  |
| wavelet-HHL | glszm      | HighGrayLevelZoneEmphasis        | 354.8047493  |
| wavelet-HHL | glszm      | SmallAreaEmphasis                | 0.700825971  |
| wavelet-HHL | glszm      | LowGrayLevelZoneEmphasis         | 0.006218393  |
| wavelet-HHL | glszm      | ZoneEntropy                      | 5.439094996  |
| wavelet-HHL | glszm      | SmallAreaLowGrayLevelEmphasis    | 0.005307161  |

|             |            |                                      |              |
|-------------|------------|--------------------------------------|--------------|
| wavelet-HHL | ngtdm      | Coarseness                           | 0.003716477  |
| wavelet-HHL | ngtdm      | Complexity                           | 407.5994581  |
| wavelet-HHL | ngtdm      | Strength                             | 0.873046084  |
| wavelet-HHL | ngtdm      | Contrast                             | 0.03541068   |
| wavelet-HHL | ngtdm      | Busyness                             | 0.4376663    |
| wavelet-HLH | gldm       | GrayLevelVariance                    | 9.620111532  |
| wavelet-HLH | gldm       | HighGrayLevelEmphasis                | 281.9646018  |
| wavelet-HLH | gldm       | DependenceEntropy                    | 6.334740954  |
| wavelet-HLH | gldm       | DependenceNonUniformity              | 222.5252473  |
| wavelet-HLH | gldm       | GrayLevelNonUniformity               | 238.1608537  |
| wavelet-HLH | gldm       | SmallDependenceEmphasis              | 0.246030539  |
| wavelet-HLH | gldm       | SmallDependenceHighGrayLevelEmphasis | 74.23989317  |
| wavelet-HLH | gldm       | DependenceNonUniformityNormalized    | 0.115838234  |
| wavelet-HLH | gldm       | LargeDependenceEmphasis              | 34.12961999  |
| wavelet-HLH | gldm       | LargeDependenceLowGrayLevelEmphasis  | 0.128458917  |
| wavelet-HLH | gldm       | DependenceVariance                   | 12.65042419  |
| wavelet-HLH | gldm       | LargeDependenceHighGrayLevelEmphasis | 9351.1848    |
| wavelet-HLH | gldm       | SmallDependenceLowGrayLevelEmphasis  | 0.00211926   |
| wavelet-HLH | gldm       | LowGrayLevelEmphasis                 | 0.005109999  |
| wavelet-HLH | glcm       | JointAverage                         | 16.51520909  |
| wavelet-HLH | glcm       | SumAverage                           | 33.03041817  |
| wavelet-HLH | glcm       | JointEntropy                         | 6.681246718  |
| wavelet-HLH | glcm       | ClusterShade                         | -9.669890983 |
| wavelet-HLH | glcm       | MaximumProbability                   | 0.072312327  |
| wavelet-HLH | glcm       | Idmn                                 | 0.979619678  |
| wavelet-HLH | glcm       | JointEnergy                          | 0.023048739  |
| wavelet-HLH | glcm       | Contrast                             | 19.38765023  |
| wavelet-HLH | glcm       | DifferenceEntropy                    | 3.153421232  |
| wavelet-HLH | glcm       | InverseVariance                      | 0.329591642  |
| wavelet-HLH | glcm       | DifferenceVariance                   | 10.44096559  |
| wavelet-HLH | glcm       | Idn                                  | 0.91560218   |
| wavelet-HLH | glcm       | Idm                                  | 0.358642959  |
| wavelet-HLH | glcm       | Correlation                          | -0.027751691 |
| wavelet-HLH | glcm       | Autocorrelation                      | 272.4838623  |
| wavelet-HLH | glcm       | SumEntropy                           | 3.950180149  |
| wavelet-HLH | glcm       | SumSquares                           | 9.42498195   |
| wavelet-HLH | glcm       | ClusterProminence                    | 2192.789366  |
| wavelet-HLH | glcm       | Imc2                                 | 0.659151123  |
| wavelet-HLH | glcm       | Imc1                                 | -0.08513597  |
| wavelet-HLH | glcm       | DifferenceAverage                    | 2.955850331  |
| wavelet-HLH | glcm       | Id                                   | 0.428348613  |
| wavelet-HLH | glcm       | ClusterTendency                      | 18.31227757  |
| wavelet-HLH | firstorder | InterquartileRange                   | 65.8242584   |
| wavelet-HLH | firstorder | Skewness                             | -0.147174076 |
| wavelet-HLH | firstorder | Uniformity                           | 0.12397754   |
| wavelet-HLH | firstorder | Median                               | -0.473496602 |
| wavelet-HLH | firstorder | Energy                               | 11445954.74  |
| wavelet-HLH | firstorder | RobustMeanAbsoluteDeviation          | 29.8466939   |
| wavelet-HLH | firstorder | MeanAbsoluteDeviation                | 52.82246906  |
| wavelet-HLH | firstorder | TotalEnergy                          | 309040777.8  |
| wavelet-HLH | firstorder | Maximum                              | 320.4676847  |
| wavelet-HLH | firstorder | RootMeanSquared                      | 77.19022905  |
| wavelet-HLH | firstorder | 90Percentile                         | 89.90030347  |
| wavelet-HLH | firstorder | Minimum                              | -388.4283558 |
| wavelet-HLH | firstorder | Entropy                              | 3.510677238  |

|             |            |                                  |              |
|-------------|------------|----------------------------------|--------------|
| wavelet-HLH | firstorder | Range                            | 708.8960404  |
| wavelet-HLH | firstorder | Variance                         | 5958.279686  |
| wavelet-HLH | firstorder | 10Percentile                     | -83.93173186 |
| wavelet-HLH | firstorder | Kurtosis                         | 6.048569057  |
| wavelet-HLH | firstorder | Mean                             | 0.22753909   |
| wavelet-HLH | glrlm      | ShortRunLowGrayLevelEmphasis     | 0.004949977  |
| wavelet-HLH | glrlm      | GrayLevelVariance                | 10.84574969  |
| wavelet-HLH | glrlm      | LowGrayLevelRunEmphasis          | 0.005325263  |
| wavelet-HLH | glrlm      | GrayLevelNonUniformityNormalized | 0.109085141  |
| wavelet-HLH | glrlm      | RunVariance                      | 0.242502657  |
| wavelet-HLH | glrlm      | GrayLevelNonUniformity           | 180.319618   |
| wavelet-HLH | glrlm      | LongRunEmphasis                  | 1.596980637  |
| wavelet-HLH | glrlm      | ShortRunHighGrayLevelEmphasis    | 256.2826677  |
| wavelet-HLH | glrlm      | RunLengthNonUniformity           | 1281.938376  |
| wavelet-HLH | glrlm      | ShortRunEmphasis                 | 0.901628669  |
| wavelet-HLH | glrlm      | LongRunHighGrayLevelEmphasis     | 446.7753869  |
| wavelet-HLH | glrlm      | RunPercentage                    | 0.860209026  |
| wavelet-HLH | glrlm      | LongRunLowGrayLevelEmphasis      | 0.007578525  |
| wavelet-HLH | glrlm      | RunEntropy                       | 4.23326445   |
| wavelet-HLH | glrlm      | HighGrayLevelRunEmphasis         | 283.2614145  |
| wavelet-HLH | glrlm      | RunLengthNonUniformityNormalized | 0.7751021    |
| wavelet-HLH | glszm      | GrayLevelVariance                | 25.76287721  |
| wavelet-HLH | glszm      | ZoneVariance                     | 476.2439475  |
| wavelet-HLH | glszm      | GrayLevelNonUniformityNormalized | 0.058996163  |
| wavelet-HLH | glszm      | SizeZoneNonUniformityNormalized  | 0.465815232  |
| wavelet-HLH | glszm      | SizeZoneNonUniformity            | 231.0443548  |
| wavelet-HLH | glszm      | GrayLevelNonUniformity           | 29.26209677  |
| wavelet-HLH | glszm      | LargeAreaEmphasis                | 491.2439516  |
| wavelet-HLH | glszm      | SmallAreaHighGrayLevelEmphasis   | 220.100396   |
| wavelet-HLH | glszm      | ZonePercentage                   | 0.258198855  |
| wavelet-HLH | glszm      | LargeAreaLowGrayLevelEmphasis    | 1.84774272   |
| wavelet-HLH | glszm      | LargeAreaHighGrayLevelEmphasis   | 132137.6895  |
| wavelet-HLH | glszm      | HighGrayLevelZoneEmphasis        | 303.8991935  |
| wavelet-HLH | glszm      | SmallAreaEmphasis                | 0.70932956   |
| wavelet-HLH | glszm      | LowGrayLevelZoneEmphasis         | 0.008509667  |
| wavelet-HLH | glszm      | ZoneEntropy                      | 5.79199082   |
| wavelet-HLH | glszm      | SmallAreaLowGrayLevelEmphasis    | 0.007175806  |
| wavelet-HLH | ngtdm      | Coarseness                       | 0.003903927  |
| wavelet-HLH | ngtdm      | Complexity                       | 787.0013809  |
| wavelet-HLH | ngtdm      | Strength                         | 1.105691375  |
| wavelet-HLH | ngtdm      | Contrast                         | 0.052977537  |
| wavelet-HLH | ngtdm      | Busyness                         | 0.375170152  |

|            |               |                                      |                                                                                                                                                                                                                                                                                                                                                                                                                   |
|------------|---------------|--------------------------------------|-------------------------------------------------------------------------------------------------------------------------------------------------------------------------------------------------------------------------------------------------------------------------------------------------------------------------------------------------------------------------------------------------------------------|
| Image type | Feature Class | Feature Name                         | 24: RTSTRUCT: C99-DNU_segment_LUL_ITV                                                                                                                                                                                                                                                                                                                                                                             |
| general    | info          | BoundingBox                          | (0, 1, 1, 7, 7, 9)                                                                                                                                                                                                                                                                                                                                                                                                |
| general    | info          | EnabledImageTypes                    | {u'Original': {}, u'Wavelet': {}}                                                                                                                                                                                                                                                                                                                                                                                 |
|            |               |                                      | {'distances': [1], 'additionalInfo': True, 'force2D': False, 'interpolator': 'sitkBSpline', 'resampledPixelSpacing': [3.0], 'label': 1, 'normalizeScale': 1, 'normalize': False, 'force2Ddimension': 0, 'removeOutliers': None, 'minimumROISize': None, u'binWidth': 25.0, 'minimumROIDimensions': 1, u'correctMask': True, 'preCrop': False, u'symmetricalGLCM': True, 'resegmentRange': None, 'padDistance': 5} |
| general    | info          | GeneralSettings                      |                                                                                                                                                                                                                                                                                                                                                                                                                   |
| general    | info          | ImageHash                            | 7685394fabda31f31a6b1e6ce9943dc31ec00553<br>(0.9765624999999998, 0.9765624999999998, 1.9999999999999999)                                                                                                                                                                                                                                                                                                          |
| general    | info          | ImageSpacing                         |                                                                                                                                                                                                                                                                                                                                                                                                                   |
| general    | info          | MaskHash                             | ef43ea5a14a32d8899d781b118e1cf8d539fed7d                                                                                                                                                                                                                                                                                                                                                                          |
| general    | info          | NumpyVersion                         | 1.13.1                                                                                                                                                                                                                                                                                                                                                                                                            |
| general    | info          | PyWaveletVersion                     | 0.5.2                                                                                                                                                                                                                                                                                                                                                                                                             |
| general    | info          | SimpleITKVersion                     | 1.1.0                                                                                                                                                                                                                                                                                                                                                                                                             |
| general    | info          | Version                              | 1.3.0.post102+g1b0eb74                                                                                                                                                                                                                                                                                                                                                                                            |
| general    | info          | VolumeNum                            | 1                                                                                                                                                                                                                                                                                                                                                                                                                 |
| general    | info          | VoxelNum                             | 210                                                                                                                                                                                                                                                                                                                                                                                                               |
| original   | shape         | Maximum3DDiameter                    | 26.32489316                                                                                                                                                                                                                                                                                                                                                                                                       |
| original   | shape         | Maximum2DDiameterSlice               | 21.63330765                                                                                                                                                                                                                                                                                                                                                                                                       |
| original   | shape         | Sphericity                           | 0.883970217                                                                                                                                                                                                                                                                                                                                                                                                       |
| original   | shape         | MinorAxis                            | 18.60660817                                                                                                                                                                                                                                                                                                                                                                                                       |
| original   | shape         | Elongation                           | 0.767540475                                                                                                                                                                                                                                                                                                                                                                                                       |
| original   | shape         | SurfaceVolumeRatio                   | 0.306797728                                                                                                                                                                                                                                                                                                                                                                                                       |
| original   | shape         | Volume                               | 5670                                                                                                                                                                                                                                                                                                                                                                                                              |
| original   | shape         | MajorAxis                            | 24.24185925                                                                                                                                                                                                                                                                                                                                                                                                       |
| original   | shape         | SurfaceArea                          | 1739.543115                                                                                                                                                                                                                                                                                                                                                                                                       |
| original   | shape         | Flatness                             | 0.743721896                                                                                                                                                                                                                                                                                                                                                                                                       |
| original   | shape         | LeastAxis                            | 18.02920151                                                                                                                                                                                                                                                                                                                                                                                                       |
| original   | shape         | Maximum2DDiameterColumn              | 25.63201124                                                                                                                                                                                                                                                                                                                                                                                                       |
| original   | shape         | Maximum2DDiameterRow                 | 24.73863375                                                                                                                                                                                                                                                                                                                                                                                                       |
| original   | gldm          | GrayLevelVariance                    | 84.09045351                                                                                                                                                                                                                                                                                                                                                                                                       |
| original   | gldm          | HighGrayLevelEmphasis                | 666.7380952                                                                                                                                                                                                                                                                                                                                                                                                       |
| original   | gldm          | DependenceEntropy                    | 5.990047187                                                                                                                                                                                                                                                                                                                                                                                                       |
| original   | gldm          | DependenceNonUniformity              | 45.93333333                                                                                                                                                                                                                                                                                                                                                                                                       |
| original   | gldm          | GrayLevelNonUniformity               | 17.52380952                                                                                                                                                                                                                                                                                                                                                                                                       |
| original   | gldm          | SmallDependenceEmphasis              | 0.473953361                                                                                                                                                                                                                                                                                                                                                                                                       |
| original   | gldm          | SmallDependenceHighGrayLevelEmphasis | 199.4352658                                                                                                                                                                                                                                                                                                                                                                                                       |
| original   | gldm          | DependenceNonUniformityNormalized    | 0.218730159                                                                                                                                                                                                                                                                                                                                                                                                       |
| original   | gldm          | LargeDependenceEmphasis              | 31.85714286                                                                                                                                                                                                                                                                                                                                                                                                       |
| original   | gldm          | LargeDependenceLowGrayLevelEmphasis  | 0.044929956                                                                                                                                                                                                                                                                                                                                                                                                       |
| original   | gldm          | DependenceVariance                   | 17.1261678                                                                                                                                                                                                                                                                                                                                                                                                        |
| original   | gldm          | LargeDependenceHighGrayLevelEmphasis | 31798.65238                                                                                                                                                                                                                                                                                                                                                                                                       |
| original   | gldm          | SmallDependenceLowGrayLevelEmphasis  | 0.012440919                                                                                                                                                                                                                                                                                                                                                                                                       |
| original   | gldm          | LowGrayLevelEmphasis                 | 0.013218581                                                                                                                                                                                                                                                                                                                                                                                                       |
| original   | glcm          | JointAverage                         | 26.01134749                                                                                                                                                                                                                                                                                                                                                                                                       |
| original   | glcm          | SumAverage                           | 52.02269499                                                                                                                                                                                                                                                                                                                                                                                                       |
| original   | glcm          | JointEntropy                         | 6.637934421                                                                                                                                                                                                                                                                                                                                                                                                       |
| original   | glcm          | ClusterShade                         | -2401.733891                                                                                                                                                                                                                                                                                                                                                                                                      |
| original   | glcm          | MaximumProbability                   | 0.11510331                                                                                                                                                                                                                                                                                                                                                                                                        |
| original   | glcm          | Idmn                                 | 0.931267534                                                                                                                                                                                                                                                                                                                                                                                                       |



|          |            |                                  |              |
|----------|------------|----------------------------------|--------------|
| original | glcm       | JointEnergy                      | 0.023678197  |
| original | glcm       | Contrast                         | 104.1490629  |
| original | glcm       | DifferenceEntropy                | 4.085039426  |
| original | glcm       | InverseVariance                  | 0.209801555  |
| original | glcm       | DifferenceVariance               | 55.23197495  |
| original | glcm       | Idn                              | 0.853936177  |
| original | glcm       | Idm                              | 0.273602369  |
| original | glcm       | Correlation                      | 0.244232544  |
| original | glcm       | Autocorrelation                  | 693.5026791  |
| original | glcm       | SumEntropy                       | 4.842920183  |
| original | glcm       | SumSquares                       | 68.96098136  |
| original | glcm       | ClusterProminence                | 97918.26912  |
| original | glcm       | Imc2                             | 0.960928186  |
| original | glcm       | Imc1                             | -0.325200528 |
| original | glcm       | DifferenceAverage                | 6.972179821  |
| original | glcm       | Id                               | 0.337430806  |
| original | glcm       | ClusterTendency                  | 171.6948625  |
| original | firstorder | InterquartileRange               | 372.5        |
| original | firstorder | Skewness                         | -0.915985968 |
| original | firstorder | Uniformity                       | 0.083446712  |
| original | firstorder | Median                           | -58.5        |
| original | firstorder | Energy                           | 16237884     |
| original | firstorder | RobustMeanAbsoluteDeviation      | 150.0645636  |
| original | firstorder | MeanAbsoluteDeviation            | 194.6266667  |
| original | firstorder | TotalEnergy                      | 438422868    |
| original | firstorder | Maximum                          | 87           |
| original | firstorder | RootMeanSquared                  | 278.0705974  |
| original | firstorder | 90Percentile                     | 46           |
| original | firstorder | Minimum                          | -727         |
| original | firstorder | Entropy                          | 4.329113874  |
| original | firstorder | Range                            | 814          |
| original | firstorder | Variance                         | 52126.98603  |
| original | firstorder | 10Percentile                     | -516.7       |
| original | firstorder | Kurtosis                         | 2.505994083  |
| original | firstorder | Mean                             | -158.7333333 |
| original | glrlm      | ShortRunLowGrayLevelEmphasis     | 0.014618984  |
| original | glrlm      | GrayLevelVariance                | 86.35616293  |
| original | glrlm      | LowGrayLevelRunEmphasis          | 0.014706907  |
| original | glrlm      | GrayLevelNonUniformityNormalized | 0.062048603  |
| original | glrlm      | RunVariance                      | 0.172953104  |
| original | glrlm      | GrayLevelNonUniformity           | 11.61851765  |
| original | glrlm      | LongRunEmphasis                  | 1.435129373  |
| original | glrlm      | ShortRunHighGrayLevelEmphasis    | 555.3123647  |
| original | glrlm      | RunLengthNonUniformity           | 154.2645505  |
| original | glrlm      | ShortRunEmphasis                 | 0.924809726  |
| original | glrlm      | LongRunHighGrayLevelEmphasis     | 1057.379162  |
| original | glrlm      | RunPercentage                    | 0.890842491  |
| original | glrlm      | LongRunLowGrayLevelEmphasis      | 0.015189846  |
| original | glrlm      | RunEntropy                       | 4.861854974  |
| original | glrlm      | HighGrayLevelRunEmphasis         | 628.2067133  |
| original | glrlm      | RunLengthNonUniformityNormalized | 0.823973985  |
| original | glszm      | GrayLevelVariance                | 81.55003788  |
| original | glszm      | ZoneVariance                     | 23.82947563  |
| original | glszm      | GrayLevelNonUniformityNormalized | 0.040484808  |
| original | glszm      | SizeZoneNonUniformityNormalized  | 0.653227843  |
| original | glszm      | SizeZoneNonUniformity            | 71.20183486  |

|             |            |                                      |              |
|-------------|------------|--------------------------------------|--------------|
| original    | glszm      | GrayLevelNonUniformity               | 4.412844037  |
| original    | glszm      | LargeAreaEmphasis                    | 27.5412844   |
| original    | glszm      | SmallAreaHighGrayLevelEmphasis       | 322.0722069  |
| original    | glszm      | ZonePercentage                       | 0.519047619  |
| original    | glszm      | LargeAreaLowGrayLevelEmphasis        | 0.051397879  |
| original    | glszm      | LargeAreaHighGrayLevelEmphasis       | 27226.13761  |
| original    | glszm      | HighGrayLevelZoneEmphasis            | 435.266055   |
| original    | glszm      | SmallAreaEmphasis                    | 0.833304794  |
| original    | glszm      | LowGrayLevelZoneEmphasis             | 0.024203573  |
| original    | glszm      | ZoneEntropy                          | 5.336723032  |
| original    | glszm      | SmallAreaLowGrayLevelEmphasis        | 0.023819732  |
| original    | ngtdm      | Coarseness                           | 0.01295817   |
| original    | ngtdm      | Complexity                           | 2873.231548  |
| original    | ngtdm      | Strength                             | 11.97705866  |
| original    | ngtdm      | Contrast                             | 0.945013997  |
| original    | ngtdm      | Busyness                             | 0.072892269  |
| wavelet-HHH | gldm       | GrayLevelVariance                    | 13.84752834  |
| wavelet-HHH | gldm       | HighGrayLevelEmphasis                | 148.6285714  |
| wavelet-HHH | gldm       | DependenceEntropy                    | 5.789571637  |
| wavelet-HHH | gldm       | DependenceNonUniformity              | 42.95238095  |
| wavelet-HHH | gldm       | GrayLevelNonUniformity               | 17.40952381  |
| wavelet-HHH | gldm       | SmallDependenceEmphasis              | 0.386495208  |
| wavelet-HHH | gldm       | SmallDependenceHighGrayLevelEmphasis | 58.15271531  |
| wavelet-HHH | gldm       | DependenceNonUniformityNormalized    | 0.204535147  |
| wavelet-HHH | gldm       | LargeDependenceEmphasis              | 10.12380952  |
| wavelet-HHH | gldm       | LargeDependenceLowGrayLevelEmphasis  | 0.124528198  |
| wavelet-HHH | gldm       | DependenceVariance                   | 2.704671202  |
| wavelet-HHH | gldm       | LargeDependenceHighGrayLevelEmphasis | 1479.47619   |
| wavelet-HHH | gldm       | SmallDependenceLowGrayLevelEmphasis  | 0.013337986  |
| wavelet-HHH | gldm       | LowGrayLevelEmphasis                 | 0.025540736  |
| wavelet-HHH | glcm       | JointAverage                         | 11.55353155  |
| wavelet-HHH | glcm       | SumAverage                           | 23.10706311  |
| wavelet-HHH | glcm       | JointEntropy                         | 6.860007995  |
| wavelet-HHH | glcm       | ClusterShade                         | -13.72519256 |
| wavelet-HHH | glcm       | MaximumProbability                   | 0.03362766   |
| wavelet-HHH | glcm       | ldmn                                 | 0.947029097  |
| wavelet-HHH | glcm       | JointEnergy                          | 0.011144409  |
| wavelet-HHH | glcm       | Contrast                             | 28.14120172  |
| wavelet-HHH | glcm       | DifferenceEntropy                    | 3.419471959  |
| wavelet-HHH | glcm       | InverseVariance                      | 0.227826544  |
| wavelet-HHH | glcm       | DifferenceVariance                   | 11.45483653  |
| wavelet-HHH | glcm       | ldn                                  | 0.852344605  |
| wavelet-HHH | glcm       | ldm                                  | 0.233448638  |
| wavelet-HHH | glcm       | Correlation                          | -0.023473593 |
| wavelet-HHH | glcm       | Autocorrelation                      | 133.141619   |
| wavelet-HHH | glcm       | SumEntropy                           | 4.209800898  |
| wavelet-HHH | glcm       | SumSquares                           | 13.72490488  |
| wavelet-HHH | glcm       | ClusterProminence                    | 2586.602928  |
| wavelet-HHH | glcm       | lmc2                                 | 0.898909559  |
| wavelet-HHH | glcm       | lmc1                                 | -0.215050159 |
| wavelet-HHH | glcm       | DifferenceAverage                    | 4.049864509  |
| wavelet-HHH | glcm       | ld                                   | 0.324494606  |
| wavelet-HHH | glcm       | ClusterTendency                      | 26.75841779  |
| wavelet-HHH | firstorder | InterquartileRange                   | 105.943905   |
| wavelet-HHH | firstorder | Skewness                             | -0.219382153 |
| wavelet-HHH | firstorder | Uniformity                           | 0.082902494  |

|             |            |                                  |              |
|-------------|------------|----------------------------------|--------------|
| wavelet-HHH | firstorder | Median                           | 6.109212548  |
| wavelet-HHH | firstorder | Energy                           | 1830377.481  |
| wavelet-HHH | firstorder | RobustMeanAbsoluteDeviation      | 47.38846821  |
| wavelet-HHH | firstorder | MeanAbsoluteDeviation            | 71.64643181  |
| wavelet-HHH | firstorder | TotalEnergy                      | 49420191.99  |
| wavelet-HHH | firstorder | Maximum                          | 232.3288104  |
| wavelet-HHH | firstorder | RootMeanSquared                  | 93.35996596  |
| wavelet-HHH | firstorder | 90Percentile                     | 126.1356049  |
| wavelet-HHH | firstorder | Minimum                          | -270.9119907 |
| wavelet-HHH | firstorder | Entropy                          | 3.861308687  |
| wavelet-HHH | firstorder | Range                            | 503.240801   |
| wavelet-HHH | firstorder | Variance                         | 8706.9392    |
| wavelet-HHH | firstorder | 10Percentile                     | -109.546964  |
| wavelet-HHH | firstorder | Kurtosis                         | 3.367004908  |
| wavelet-HHH | firstorder | Mean                             | 3.023911963  |
| wavelet-HHH | glrlm      | ShortRunLowGrayLevelEmphasis     | 0.025699029  |
| wavelet-HHH | glrlm      | GrayLevelVariance                | 14.41193574  |
| wavelet-HHH | glrlm      | LowGrayLevelRunEmphasis          | 0.026399717  |
| wavelet-HHH | glrlm      | GrayLevelNonUniformityNormalized | 0.080350483  |
| wavelet-HHH | glrlm      | RunVariance                      | 0.073037351  |
| wavelet-HHH | glrlm      | GrayLevelNonUniformity           | 15.75648243  |
| wavelet-HHH | glrlm      | LongRunEmphasis                  | 1.220746997  |
| wavelet-HHH | glrlm      | ShortRunHighGrayLevelEmphasis    | 141.2981506  |
| wavelet-HHH | glrlm      | RunLengthNonUniformity           | 171.3808345  |
| wavelet-HHH | glrlm      | ShortRunEmphasis                 | 0.948765419  |
| wavelet-HHH | glrlm      | LongRunHighGrayLevelEmphasis     | 180.9215577  |
| wavelet-HHH | glrlm      | RunPercentage                    | 0.933699634  |
| wavelet-HHH | glrlm      | LongRunLowGrayLevelEmphasis      | 0.029341833  |
| wavelet-HHH | glrlm      | RunEntropy                       | 4.192755142  |
| wavelet-HHH | glrlm      | HighGrayLevelRunEmphasis         | 148.8158848  |
| wavelet-HHH | glrlm      | RunLengthNonUniformityNormalized | 0.873737551  |
| wavelet-HHH | glszm      | GrayLevelVariance                | 22.20358025  |
| wavelet-HHH | glszm      | ZoneVariance                     | 9.911111111  |
| wavelet-HHH | glszm      | GrayLevelNonUniformityNormalized | 0.06         |
| wavelet-HHH | glszm      | SizeZoneNonUniformityNormalized  | 0.492592593  |
| wavelet-HHH | glszm      | SizeZoneNonUniformity            | 44.33333333  |
| wavelet-HHH | glszm      | GrayLevelNonUniformity           | 5.4          |
| wavelet-HHH | glszm      | LargeAreaEmphasis                | 15.35555556  |
| wavelet-HHH | glszm      | SmallAreaHighGrayLevelEmphasis   | 109.2079567  |
| wavelet-HHH | glszm      | ZonePercentage                   | 0.428571429  |
| wavelet-HHH | glszm      | LargeAreaLowGrayLevelEmphasis    | 0.180737168  |
| wavelet-HHH | glszm      | LargeAreaHighGrayLevelEmphasis   | 2252.488889  |
| wavelet-HHH | glszm      | HighGrayLevelZoneEmphasis        | 150.9        |
| wavelet-HHH | glszm      | SmallAreaEmphasis                | 0.725691461  |
| wavelet-HHH | glszm      | LowGrayLevelZoneEmphasis         | 0.037613367  |
| wavelet-HHH | glszm      | ZoneEntropy                      | 5.22687008   |
| wavelet-HHH | glszm      | SmallAreaLowGrayLevelEmphasis    | 0.026860855  |
| wavelet-HHH | ngtdm      | Coarseness                       | 0.029263203  |
| wavelet-HHH | ngtdm      | Complexity                       | 488.5980529  |
| wavelet-HHH | ngtdm      | Strength                         | 3.369561434  |
| wavelet-HHH | ngtdm      | Contrast                         | 0.199161533  |
| wavelet-HHH | ngtdm      | Busyness                         | 0.139670064  |
| wavelet-HLL | gldm       | GrayLevelVariance                | 50.36346939  |
| wavelet-HLL | gldm       | HighGrayLevelEmphasis            | 350.6428571  |
| wavelet-HLL | gldm       | DependenceEntropy                | 6.04931134   |
| wavelet-HLL | gldm       | DependenceNonUniformity          | 54.53333333  |

|             |            |                                      |              |
|-------------|------------|--------------------------------------|--------------|
| wavelet-HLL | gldm       | GrayLevelNonUniformity               | 10.13333333  |
| wavelet-HLL | gldm       | SmallDependenceEmphasis              | 0.429847884  |
| wavelet-HLL | gldm       | SmallDependenceHighGrayLevelEmphasis | 162.5693161  |
| wavelet-HLL | gldm       | DependenceNonUniformityNormalized    | 0.25968254   |
| wavelet-HLL | gldm       | LargeDependenceEmphasis              | 6.59047619   |
| wavelet-HLL | gldm       | LargeDependenceLowGrayLevelEmphasis  | 0.037529886  |
| wavelet-HLL | gldm       | DependenceVariance                   | 1.452698413  |
| wavelet-HLL | gldm       | LargeDependenceHighGrayLevelEmphasis | 2004.919048  |
| wavelet-HLL | gldm       | SmallDependenceLowGrayLevelEmphasis  | 0.008460453  |
| wavelet-HLL | gldm       | LowGrayLevelEmphasis                 | 0.011097886  |
| wavelet-HLL | glcm       | JointAverage                         | 16.6961216   |
| wavelet-HLL | glcm       | SumAverage                           | 33.3922432   |
| wavelet-HLL | glcm       | JointEntropy                         | 7.480114774  |
| wavelet-HLL | glcm       | ClusterShade                         | 1668.489176  |
| wavelet-HLL | glcm       | MaximumProbability                   | 0.020556109  |
| wavelet-HLL | glcm       | Idmn                                 | 0.977160961  |
| wavelet-HLL | glcm       | JointEnergy                          | 0.006614967  |
| wavelet-HLL | glcm       | Contrast                             | 53.83186568  |
| wavelet-HLL | glcm       | DifferenceEntropy                    | 3.762214182  |
| wavelet-HLL | glcm       | InverseVariance                      | 0.179891664  |
| wavelet-HLL | glcm       | DifferenceVariance                   | 23.30345884  |
| wavelet-HLL | glcm       | Idn                                  | 0.901313676  |
| wavelet-HLL | glcm       | Idm                                  | 0.180520682  |
| wavelet-HLL | glcm       | Correlation                          | 0.399165134  |
| wavelet-HLL | glcm       | Autocorrelation                      | 296.9283912  |
| wavelet-HLL | glcm       | SumEntropy                           | 5.029097075  |
| wavelet-HLL | glcm       | SumSquares                           | 45.06034915  |
| wavelet-HLL | glcm       | ClusterProminence                    | 83077.16576  |
| wavelet-HLL | glcm       | Imc2                                 | 0.980159715  |
| wavelet-HLL | glcm       | Imc1                                 | -0.357069869 |
| wavelet-HLL | glcm       | DifferenceAverage                    | 5.445202625  |
| wavelet-HLL | glcm       | Id                                   | 0.273195215  |
| wavelet-HLL | glcm       | ClusterTendency                      | 126.4095309  |
| wavelet-HLL | firstorder | InterquartileRange                   | 233.1717505  |
| wavelet-HLL | firstorder | Skewness                             | 0.82223906   |
| wavelet-HLL | firstorder | Uniformity                           | 0.048253968  |
| wavelet-HLL | firstorder | Median                               | -63.99363827 |
| wavelet-HLL | firstorder | Energy                               | 6795604.338  |
| wavelet-HLL | firstorder | RobustMeanAbsoluteDeviation          | 96.93395171  |
| wavelet-HLL | firstorder | MeanAbsoluteDeviation                | 140.0984297  |
| wavelet-HLL | firstorder | TotalEnergy                          | 183481317.1  |
| wavelet-HLL | firstorder | Maximum                              | 696.5855596  |
| wavelet-HLL | firstorder | RootMeanSquared                      | 179.888912   |
| wavelet-HLL | firstorder | 90Percentile                         | 199.10846    |
| wavelet-HLL | firstorder | Minimum                              | -427.8050832 |
| wavelet-HLL | firstorder | Entropy                              | 4.6379615    |
| wavelet-HLL | firstorder | Range                                | 1124.390643  |
| wavelet-HLL | firstorder | Variance                             | 31520.70977  |
| wavelet-HLL | firstorder | 10Percentile                         | -221.1766434 |
| wavelet-HLL | firstorder | Kurtosis                             | 4.256208971  |
| wavelet-HLL | firstorder | Mean                                 | -28.97086269 |
| wavelet-HLL | glrlm      | ShortRunLowGrayLevelEmphasis         | 0.011264742  |
| wavelet-HLL | glrlm      | GrayLevelVariance                    | 51.42957007  |
| wavelet-HLL | glrlm      | LowGrayLevelRunEmphasis              | 0.011428215  |
| wavelet-HLL | glrlm      | GrayLevelNonUniformityNormalized     | 0.047332918  |
| wavelet-HLL | glrlm      | RunVariance                          | 0.061769083  |

|             |       |                                      |             |
|-------------|-------|--------------------------------------|-------------|
| wavelet-HLL | glrlm | GrayLevelNonUniformity               | 9.456487302 |
| wavelet-HLL | glrlm | LongRunEmphasis                      | 1.167919854 |
| wavelet-HLL | glrlm | ShortRunHighGrayLevelEmphasis        | 341.6542215 |
| wavelet-HLL | glrlm | RunLengthNonUniformity               | 182.4512289 |
| wavelet-HLL | glrlm | ShortRunEmphasis                     | 0.964967442 |
| wavelet-HLL | glrlm | LongRunHighGrayLevelEmphasis         | 403.9544595 |
| wavelet-HLL | glrlm | RunPercentage                        | 0.951282051 |
| wavelet-HLL | glrlm | LongRunLowGrayLevelEmphasis          | 0.012219036 |
| wavelet-HLL | glrlm | RunEntropy                           | 4.846416554 |
| wavelet-HLL | glrlm | HighGrayLevelRunEmphasis             | 352.7352089 |
| wavelet-HLL | glrlm | RunLengthNonUniformityNormalized     | 0.912782715 |
| wavelet-HLL | glszm | GrayLevelVariance                    | 67.60558876 |
| wavelet-HLL | glszm | ZoneVariance                         | 4.123053615 |
| wavelet-HLL | glszm | GrayLevelNonUniformityNormalized     | 0.038969784 |
| wavelet-HLL | glszm | SizeZoneNonUniformityNormalized      | 0.427320933 |
| wavelet-HLL | glszm | SizeZoneNonUniformity                | 46.57798165 |
| wavelet-HLL | glszm | GrayLevelNonUniformity               | 4.247706422 |
| wavelet-HLL | glszm | LargeAreaEmphasis                    | 7.834862385 |
| wavelet-HLL | glszm | SmallAreaHighGrayLevelEmphasis       | 262.7524878 |
| wavelet-HLL | glszm | ZonePercentage                       | 0.519047619 |
| wavelet-HLL | glszm | LargeAreaLowGrayLevelEmphasis        | 0.050069529 |
| wavelet-HLL | glszm | LargeAreaHighGrayLevelEmphasis       | 2232.779817 |
| wavelet-HLL | glszm | HighGrayLevelZoneEmphasis            | 380.7981651 |
| wavelet-HLL | glszm | SmallAreaEmphasis                    | 0.677379816 |
| wavelet-HLL | glszm | LowGrayLevelZoneEmphasis             | 0.017048805 |
| wavelet-HLL | glszm | ZoneEntropy                          | 5.710767986 |
| wavelet-HLL | glszm | SmallAreaLowGrayLevelEmphasis        | 0.015602553 |
| wavelet-HLL | ngtdm | Coarseness                           | 0.037131445 |
| wavelet-HLL | ngtdm | Complexity                           | 1674.402538 |
| wavelet-HLL | ngtdm | Strength                             | 17.22481909 |
| wavelet-HLL | ngtdm | Contrast                             | 0.314736415 |
| wavelet-HLL | ngtdm | Busyness                             | 0.054572668 |
| wavelet-LHL | gldm  | GrayLevelVariance                    | 68.4839229  |
| wavelet-LHL | gldm  | HighGrayLevelEmphasis                | 354.7380952 |
| wavelet-LHL | gldm  | DependenceEntropy                    | 6.08311723  |
| wavelet-LHL | gldm  | DependenceNonUniformity              | 72.7047619  |
| wavelet-LHL | gldm  | GrayLevelNonUniformity               | 7.780952381 |
| wavelet-LHL | gldm  | SmallDependenceEmphasis              | 0.576390212 |
| wavelet-LHL | gldm  | SmallDependenceHighGrayLevelEmphasis | 225.1545608 |
| wavelet-LHL | gldm  | DependenceNonUniformityNormalized    | 0.346213152 |
| wavelet-LHL | gldm  | LargeDependenceEmphasis              | 4.323809524 |
| wavelet-LHL | gldm  | LargeDependenceLowGrayLevelEmphasis  | 0.086228029 |
| wavelet-LHL | gldm  | DependenceVariance                   | 0.980136054 |
| wavelet-LHL | gldm  | LargeDependenceHighGrayLevelEmphasis | 1351.290476 |
| wavelet-LHL | gldm  | SmallDependenceLowGrayLevelEmphasis  | 0.008749176 |
| wavelet-LHL | gldm  | LowGrayLevelEmphasis                 | 0.021676245 |
| wavelet-LHL | glcm  | JointAverage                         | 16.54641736 |
| wavelet-LHL | glcm  | SumAverage                           | 33.09283472 |
| wavelet-LHL | glcm  | JointEntropy                         | 7.77164546  |
| wavelet-LHL | glcm  | ClusterShade                         | 943.9182004 |
| wavelet-LHL | glcm  | MaximumProbability                   | 0.013981852 |
| wavelet-LHL | glcm  | ldmn                                 | 0.942029717 |
| wavelet-LHL | glcm  | JointEnergy                          | 0.005074254 |
| wavelet-LHL | glcm  | Contrast                             | 106.9825225 |
| wavelet-LHL | glcm  | DifferenceEntropy                    | 4.232574384 |
| wavelet-LHL | glcm  | InverseVariance                      | 0.126750301 |

|             |            |                                  |              |
|-------------|------------|----------------------------------|--------------|
| wavelet-LHL | glcm       | DifferenceVariance               | 40.17628109  |
| wavelet-LHL | glcm       | Idn                              | 0.84449001   |
| wavelet-LHL | glcm       | Idm                              | 0.124743413  |
| wavelet-LHL | glcm       | Correlation                      | 0.17919443   |
| wavelet-LHL | glcm       | Autocorrelation                  | 285.8889325  |
| wavelet-LHL | glcm       | SumEntropy                       | 5.26378525   |
| wavelet-LHL | glcm       | SumSquares                       | 65.55473907  |
| wavelet-LHL | glcm       | ClusterProminence                | 74384.39345  |
| wavelet-LHL | glcm       | Imc2                             | 0.989864778  |
| wavelet-LHL | glcm       | Imc1                             | -0.402714186 |
| wavelet-LHL | glcm       | DifferenceAverage                | 7.991491012  |
| wavelet-LHL | glcm       | Id                               | 0.211851528  |
| wavelet-LHL | glcm       | ClusterTendency                  | 155.2364337  |
| wavelet-LHL | firstorder | InterquartileRange               | 282.90021    |
| wavelet-LHL | firstorder | Skewness                         | 0.309252808  |
| wavelet-LHL | firstorder | Uniformity                       | 0.037052154  |
| wavelet-LHL | firstorder | Median                           | -61.67768446 |
| wavelet-LHL | firstorder | Energy                           | 9288895.062  |
| wavelet-LHL | firstorder | RobustMeanAbsoluteDeviation      | 120.3676029  |
| wavelet-LHL | firstorder | MeanAbsoluteDeviation            | 167.861591   |
| wavelet-LHL | firstorder | TotalEnergy                      | 250800166.7  |
| wavelet-LHL | firstorder | Maximum                          | 505.9335063  |
| wavelet-LHL | firstorder | RootMeanSquared                  | 210.3160327  |
| wavelet-LHL | firstorder | 90Percentile                     | 245.4380174  |
| wavelet-LHL | firstorder | Minimum                          | -448.7668519 |
| wavelet-LHL | firstorder | Entropy                          | 4.910492826  |
| wavelet-LHL | firstorder | Range                            | 954.7003582  |
| wavelet-LHL | firstorder | Variance                         | 42733.40997  |
| wavelet-LHL | firstorder | 10Percentile                     | -300.0616956 |
| wavelet-LHL | firstorder | Kurtosis                         | 2.481037015  |
| wavelet-LHL | firstorder | Mean                             | -38.7223922  |
| wavelet-LHL | glrlm      | ShortRunLowGrayLevelEmphasis     | 0.021015727  |
| wavelet-LHL | glrlm      | GrayLevelVariance                | 69.19896479  |
| wavelet-LHL | glrlm      | LowGrayLevelRunEmphasis          | 0.021607399  |
| wavelet-LHL | glrlm      | GrayLevelNonUniformityNormalized | 0.036779916  |
| wavelet-LHL | glrlm      | RunVariance                      | 0.032568148  |
| wavelet-LHL | glrlm      | GrayLevelNonUniformity           | 7.477786846  |
| wavelet-LHL | glrlm      | LongRunEmphasis                  | 1.100598495  |
| wavelet-LHL | glrlm      | ShortRunHighGrayLevelEmphasis    | 348.9954384  |
| wavelet-LHL | glrlm      | RunLengthNonUniformity           | 190.6446706  |
| wavelet-LHL | glrlm      | ShortRunEmphasis                 | 0.975279874  |
| wavelet-LHL | glrlm      | LongRunHighGrayLevelEmphasis     | 386.8623507  |
| wavelet-LHL | glrlm      | RunPercentage                    | 0.968131868  |
| wavelet-LHL | glrlm      | LongRunLowGrayLevelEmphasis      | 0.023980797  |
| wavelet-LHL | glrlm      | RunEntropy                       | 5.046460149  |
| wavelet-LHL | glrlm      | HighGrayLevelRunEmphasis         | 356.4808597  |
| wavelet-LHL | glrlm      | RunLengthNonUniformityNormalized | 0.937066445  |
| wavelet-LHL | glszm      | GrayLevelVariance                | 77.2475      |
| wavelet-LHL | glszm      | ZoneVariance                     | 1.064285714  |
| wavelet-LHL | glszm      | GrayLevelNonUniformityNormalized | 0.034081633  |
| wavelet-LHL | glszm      | SizeZoneNonUniformityNormalized  | 0.55244898   |
| wavelet-LHL | glszm      | SizeZoneNonUniformity            | 77.34285714  |
| wavelet-LHL | glszm      | GrayLevelNonUniformity           | 4.771428571  |
| wavelet-LHL | glszm      | LargeAreaEmphasis                | 3.314285714  |
| wavelet-LHL | glszm      | SmallAreaHighGrayLevelEmphasis   | 310.0334127  |
| wavelet-LHL | glszm      | ZonePercentage                   | 0.666666667  |

|             |            |                                      |              |
|-------------|------------|--------------------------------------|--------------|
| wavelet-LHL | glszm      | LargeAreaLowGrayLevelEmphasis        | 0.067828298  |
| wavelet-LHL | glszm      | LargeAreaHighGrayLevelEmphasis       | 1051.621429  |
| wavelet-LHL | glszm      | HighGrayLevelZoneEmphasis            | 381.75       |
| wavelet-LHL | glszm      | SmallAreaEmphasis                    | 0.771702381  |
| wavelet-LHL | glszm      | LowGrayLevelZoneEmphasis             | 0.018508715  |
| wavelet-LHL | glszm      | ZoneEntropy                          | 5.764483599  |
| wavelet-LHL | glszm      | SmallAreaLowGrayLevelEmphasis        | 0.009780054  |
| wavelet-LHL | ngtdm      | Coarseness                           | 0.02667237   |
| wavelet-LHL | ngtdm      | Complexity                           | 2859.237457  |
| wavelet-LHL | ngtdm      | Strength                             | 10.97952893  |
| wavelet-LHL | ngtdm      | Contrast                             | 0.637117906  |
| wavelet-LHL | ngtdm      | Busyness                             | 0.079920782  |
| wavelet-LHH | gldm       | GrayLevelVariance                    | 32.8829932   |
| wavelet-LHH | gldm       | HighGrayLevelEmphasis                | 415.9238095  |
| wavelet-LHH | gldm       | DependenceEntropy                    | 5.934287635  |
| wavelet-LHH | gldm       | DependenceNonUniformity              | 55.08571429  |
| wavelet-LHH | gldm       | GrayLevelNonUniformity               | 12.51428571  |
| wavelet-LHH | gldm       | SmallDependenceEmphasis              | 0.494067298  |
| wavelet-LHH | gldm       | SmallDependenceHighGrayLevelEmphasis | 213.290759   |
| wavelet-LHH | gldm       | DependenceNonUniformityNormalized    | 0.262312925  |
| wavelet-LHH | gldm       | LargeDependenceEmphasis              | 7.4          |
| wavelet-LHH | gldm       | LargeDependenceLowGrayLevelEmphasis  | 0.025940103  |
| wavelet-LHH | gldm       | DependenceVariance                   | 2.131882086  |
| wavelet-LHH | gldm       | LargeDependenceHighGrayLevelEmphasis | 2899.895238  |
| wavelet-LHH | gldm       | SmallDependenceLowGrayLevelEmphasis  | 0.00697455   |
| wavelet-LHH | gldm       | LowGrayLevelEmphasis                 | 0.008367653  |
| wavelet-LHH | glcm       | JointAverage                         | 19.62778903  |
| wavelet-LHH | glcm       | SumAverage                           | 39.25557807  |
| wavelet-LHH | glcm       | JointEntropy                         | 7.314819248  |
| wavelet-LHH | glcm       | ClusterShade                         | 157.971726   |
| wavelet-LHH | glcm       | MaximumProbability                   | 0.024380176  |
| wavelet-LHH | glcm       | ldmn                                 | 0.970500733  |
| wavelet-LHH | glcm       | JointEnergy                          | 0.007793034  |
| wavelet-LHH | glcm       | Contrast                             | 62.38959487  |
| wavelet-LHH | glcm       | DifferenceEntropy                    | 3.885334496  |
| wavelet-LHH | glcm       | InverseVariance                      | 0.180825498  |
| wavelet-LHH | glcm       | DifferenceVariance                   | 27.88759752  |
| wavelet-LHH | glcm       | ldn                                  | 0.890097214  |
| wavelet-LHH | glcm       | ldm                                  | 0.182068067  |
| wavelet-LHH | glcm       | Correlation                          | -0.019111815 |
| wavelet-LHH | glcm       | Autocorrelation                      | 384.5834409  |
| wavelet-LHH | glcm       | SumEntropy                           | 4.663688022  |
| wavelet-LHH | glcm       | SumSquares                           | 30.50695893  |
| wavelet-LHH | glcm       | ClusterProminence                    | 17188.25129  |
| wavelet-LHH | glcm       | lmc2                                 | 0.96226869   |
| wavelet-LHH | glcm       | lmc1                                 | -0.302732218 |
| wavelet-LHH | glcm       | DifferenceAverage                    | 5.814763963  |
| wavelet-LHH | glcm       | ld                                   | 0.271485108  |
| wavelet-LHH | glcm       | ClusterTendency                      | 59.63824085  |
| wavelet-LHH | firstorder | InterquartileRange                   | 164.3047311  |
| wavelet-LHH | firstorder | Skewness                             | 0.395157271  |
| wavelet-LHH | firstorder | Uniformity                           | 0.059591837  |
| wavelet-LHH | firstorder | Median                               | -3.363613218 |
| wavelet-LHH | firstorder | Energy                               | 4318674.493  |
| wavelet-LHH | firstorder | RobustMeanAbsoluteDeviation          | 67.98607994  |
| wavelet-LHH | firstorder | MeanAbsoluteDeviation                | 106.4210758  |

|             |            |                                      |              |
|-------------|------------|--------------------------------------|--------------|
| wavelet-LHH | firstorder | TotalEnergy                          | 116604211.3  |
| wavelet-LHH | firstorder | Maximum                              | 576.1630627  |
| wavelet-LHH | firstorder | RootMeanSquared                      | 143.4054275  |
| wavelet-LHH | firstorder | 90Percentile                         | 159.7057742  |
| wavelet-LHH | firstorder | Minimum                              | -463.1001066 |
| wavelet-LHH | firstorder | Entropy                              | 4.387102785  |
| wavelet-LHH | firstorder | Range                                | 1039.263169  |
| wavelet-LHH | firstorder | Variance                             | 20561.77379  |
| wavelet-LHH | firstorder | 10Percentile                         | -170.0402592 |
| wavelet-LHH | firstorder | Kurtosis                             | 4.716768816  |
| wavelet-LHH | firstorder | Mean                                 | 1.828343068  |
| wavelet-LHH | grlm       | ShortRunLowGrayLevelEmphasis         | 0.008563198  |
| wavelet-LHH | grlm       | GrayLevelVariance                    | 34.23292334  |
| wavelet-LHH | grlm       | LowGrayLevelRunEmphasis              | 0.008664011  |
| wavelet-LHH | grlm       | GrayLevelNonUniformityNormalized     | 0.05766858   |
| wavelet-LHH | grlm       | RunVariance                          | 0.058150975  |
| wavelet-LHH | grlm       | GrayLevelNonUniformity               | 11.50831373  |
| wavelet-LHH | grlm       | LongRunEmphasis                      | 1.166456121  |
| wavelet-LHH | grlm       | ShortRunHighGrayLevelEmphasis        | 402.3077377  |
| wavelet-LHH | grlm       | RunLengthNonUniformity               | 181.1200134  |
| wavelet-LHH | grlm       | ShortRunEmphasis                     | 0.96291287   |
| wavelet-LHH | grlm       | LongRunHighGrayLevelEmphasis         | 482.2720743  |
| wavelet-LHH | grlm       | RunPercentage                        | 0.95018315   |
| wavelet-LHH | grlm       | LongRunLowGrayLevelEmphasis          | 0.009122422  |
| wavelet-LHH | grlm       | RunEntropy                           | 4.630483317  |
| wavelet-LHH | grlm       | HighGrayLevelRunEmphasis             | 417.0588352  |
| wavelet-LHH | grlm       | RunLengthNonUniformityNormalized     | 0.907321608  |
| wavelet-LHH | glszm      | GrayLevelVariance                    | 52.58026159  |
| wavelet-LHH | glszm      | ZoneVariance                         | 4.274375743  |
| wavelet-LHH | glszm      | GrayLevelNonUniformityNormalized     | 0.042508918  |
| wavelet-LHH | glszm      | SizeZoneNonUniformityNormalized      | 0.566438763  |
| wavelet-LHH | glszm      | SizeZoneNonUniformity                | 65.70689655  |
| wavelet-LHH | glszm      | GrayLevelNonUniformity               | 4.931034483  |
| wavelet-LHH | glszm      | LargeAreaEmphasis                    | 7.551724138  |
| wavelet-LHH | glszm      | SmallAreaHighGrayLevelEmphasis       | 338.8303526  |
| wavelet-LHH | glszm      | ZonePercentage                       | 0.552380952  |
| wavelet-LHH | glszm      | LargeAreaLowGrayLevelEmphasis        | 0.030780233  |
| wavelet-LHH | glszm      | LargeAreaHighGrayLevelEmphasis       | 2997.396552  |
| wavelet-LHH | glszm      | HighGrayLevelZoneEmphasis            | 428.137931   |
| wavelet-LHH | glszm      | SmallAreaEmphasis                    | 0.77733058   |
| wavelet-LHH | glszm      | LowGrayLevelZoneEmphasis             | 0.012934704  |
| wavelet-LHH | glszm      | ZoneEntropy                          | 5.435483315  |
| wavelet-LHH | glszm      | SmallAreaLowGrayLevelEmphasis        | 0.01230195   |
| wavelet-LHH | ngtdm      | Coarseness                           | 0.028835557  |
| wavelet-LHH | ngtdm      | Complexity                           | 1726.717136  |
| wavelet-LHH | ngtdm      | Strength                             | 9.054257274  |
| wavelet-LHH | ngtdm      | Contrast                             | 0.317324714  |
| wavelet-LHH | ngtdm      | Busyness                             | 0.057722047  |
| wavelet-LLH | gldm       | GrayLevelVariance                    | 170.6933333  |
| wavelet-LLH | gldm       | HighGrayLevelEmphasis                | 1000.133333  |
| wavelet-LLH | gldm       | DependenceEntropy                    | 6.307837502  |
| wavelet-LLH | gldm       | DependenceNonUniformity              | 77.55238095  |
| wavelet-LLH | gldm       | GrayLevelNonUniformity               | 6.876190476  |
| wavelet-LLH | gldm       | SmallDependenceEmphasis              | 0.617975489  |
| wavelet-LLH | gldm       | SmallDependenceHighGrayLevelEmphasis | 707.1554144  |
| wavelet-LLH | gldm       | DependenceNonUniformityNormalized    | 0.369297052  |



|             |            |                                      |              |
|-------------|------------|--------------------------------------|--------------|
| wavelet-LLH | gldm       | LargeDependenceEmphasis              | 4.952380952  |
| wavelet-LLH | gldm       | LargeDependenceLowGrayLevelEmphasis  | 0.014083662  |
| wavelet-LLH | gldm       | DependenceVariance                   | 1.467936508  |
| wavelet-LLH | gldm       | LargeDependenceHighGrayLevelEmphasis | 3840.342857  |
| wavelet-LLH | gldm       | SmallDependenceLowGrayLevelEmphasis  | 0.00698557   |
| wavelet-LLH | gldm       | LowGrayLevelEmphasis                 | 0.007672945  |
| wavelet-LLH | glcm       | JointAverage                         | 27.69813843  |
| wavelet-LLH | glcm       | SumAverage                           | 55.39627685  |
| wavelet-LLH | glcm       | JointEntropy                         | 7.777246906  |
| wavelet-LLH | glcm       | ClusterShade                         | 9009.60732   |
| wavelet-LLH | glcm       | MaximumProbability                   | 0.015874199  |
| wavelet-LLH | glcm       | ldmn                                 | 0.961535106  |
| wavelet-LLH | glcm       | JointEnergy                          | 0.005133745  |
| wavelet-LLH | glcm       | Contrast                             | 223.7865241  |
| wavelet-LLH | glcm       | DifferenceEntropy                    | 4.487739175  |
| wavelet-LLH | glcm       | InverseVariance                      | 0.147913368  |
| wavelet-LLH | glcm       | DifferenceVariance                   | 113.6566569  |
| wavelet-LLH | glcm       | ldn                                  | 0.88480782   |
| wavelet-LLH | glcm       | ldm                                  | 0.135344205  |
| wavelet-LLH | glcm       | Correlation                          | 0.200180041  |
| wavelet-LLH | glcm       | Autocorrelation                      | 802.4806047  |
| wavelet-LLH | glcm       | SumEntropy                           | 5.461053226  |
| wavelet-LLH | glcm       | SumSquares                           | 146.8609544  |
| wavelet-LLH | glcm       | ClusterProminence                    | 731105.5715  |
| wavelet-LLH | glcm       | lmc2                                 | 0.996842859  |
| wavelet-LLH | glcm       | lmc1                                 | -0.49268637  |
| wavelet-LLH | glcm       | DifferenceAverage                    | 10.09841826  |
| wavelet-LLH | glcm       | ld                                   | 0.214499863  |
| wavelet-LLH | glcm       | ClusterTendency                      | 363.6572934  |
| wavelet-LLH | firstorder | InterquartileRange                   | 302.6323544  |
| wavelet-LLH | firstorder | Skewness                             | 1.028657976  |
| wavelet-LLH | firstorder | Uniformity                           | 0.032743764  |
| wavelet-LLH | firstorder | Median                               | -50.53377815 |
| wavelet-LLH | firstorder | Energy                               | 22498682.41  |
| wavelet-LLH | firstorder | RobustMeanAbsoluteDeviation          | 137.1515124  |
| wavelet-LLH | firstorder | MeanAbsoluteDeviation                | 237.6235999  |
| wavelet-LLH | firstorder | TotalEnergy                          | 607464425    |
| wavelet-LLH | firstorder | Maximum                              | 988.2204393  |
| wavelet-LLH | firstorder | RootMeanSquared                      | 327.3172511  |
| wavelet-LLH | firstorder | 90Percentile                         | 441.0141829  |
| wavelet-LLH | firstorder | Minimum                              | -676.4914275 |
| wavelet-LLH | firstorder | Entropy                              | 5.318380482  |
| wavelet-LLH | firstorder | Range                                | 1664.711867  |
| wavelet-LLH | firstorder | Variance                             | 107077.7408  |
| wavelet-LLH | firstorder | 10Percentile                         | -350.8387792 |
| wavelet-LLH | firstorder | Kurtosis                             | 4.112662601  |
| wavelet-LLH | firstorder | Mean                                 | 7.670860741  |
| wavelet-LLH | glrlm      | ShortRunLowGrayLevelEmphasis         | 0.007840693  |
| wavelet-LLH | glrlm      | GrayLevelVariance                    | 175.1806283  |
| wavelet-LLH | glrlm      | LowGrayLevelRunEmphasis              | 0.007883021  |
| wavelet-LLH | glrlm      | GrayLevelNonUniformityNormalized     | 0.031809008  |
| wavelet-LLH | glrlm      | RunVariance                          | 0.037905918  |
| wavelet-LLH | glrlm      | GrayLevelNonUniformity               | 6.458780396  |
| wavelet-LLH | glrlm      | LongRunEmphasis                      | 1.110103785  |
| wavelet-LLH | glrlm      | ShortRunHighGrayLevelEmphasis        | 991.0192145  |
| wavelet-LLH | glrlm      | RunLengthNonUniformity               | 190.5042644  |

|             |       |                                      |              |
|-------------|-------|--------------------------------------|--------------|
| wavelet-LLH | glrlm | ShortRunEmphasis                     | 0.975090411  |
| wavelet-LLH | glrlm | LongRunHighGrayLevelEmphasis         | 1089.936151  |
| wavelet-LLH | glrlm | RunPercentage                        | 0.966666667  |
| wavelet-LLH | glrlm | LongRunLowGrayLevelEmphasis          | 0.008068961  |
| wavelet-LLH | glrlm | RunEntropy                           | 5.473828294  |
| wavelet-LLH | glrlm | HighGrayLevelRunEmphasis             | 1009.45367   |
| wavelet-LLH | glrlm | RunLengthNonUniformityNormalized     | 0.937417028  |
| wavelet-LLH | glszm | GrayLevelVariance                    | 226.5257389  |
| wavelet-LLH | glszm | ZoneVariance                         | 2.193215632  |
| wavelet-LLH | glszm | GrayLevelNonUniformityNormalized     | 0.024895854  |
| wavelet-LLH | glszm | SizeZoneNonUniformityNormalized      | 0.658797858  |
| wavelet-LLH | glszm | SizeZoneNonUniformity                | 93.54929577  |
| wavelet-LLH | glszm | GrayLevelNonUniformity               | 3.535211268  |
| wavelet-LLH | glszm | LargeAreaEmphasis                    | 4.38028169   |
| wavelet-LLH | glszm | SmallAreaHighGrayLevelEmphasis       | 985.6781815  |
| wavelet-LLH | glszm | ZonePercentage                       | 0.676190476  |
| wavelet-LLH | glszm | LargeAreaLowGrayLevelEmphasis        | 0.016036938  |
| wavelet-LLH | glszm | LargeAreaHighGrayLevelEmphasis       | 3468.830986  |
| wavelet-LLH | glszm | HighGrayLevelZoneEmphasis            | 1123.570423  |
| wavelet-LLH | glszm | SmallAreaEmphasis                    | 0.836143881  |
| wavelet-LLH | glszm | LowGrayLevelZoneEmphasis             | 0.01050729   |
| wavelet-LLH | glszm | ZoneEntropy                          | 6.116168556  |
| wavelet-LLH | glszm | SmallAreaLowGrayLevelEmphasis        | 0.010184583  |
| wavelet-LLH | ngtdm | Coarseness                           | 0.032860033  |
| wavelet-LLH | ngtdm | Complexity                           | 10274.83801  |
| wavelet-LLH | ngtdm | Strength                             | 42.08828771  |
| wavelet-LLH | ngtdm | Contrast                             | 0.762338945  |
| wavelet-LLH | ngtdm | Busyness                             | 0.021356577  |
| wavelet-LLL | gldm  | GrayLevelVariance                    | 502.6783673  |
| wavelet-LLL | gldm  | HighGrayLevelEmphasis                | 3696.542857  |
| wavelet-LLL | gldm  | DependenceEntropy                    | 6.480094165  |
| wavelet-LLL | gldm  | DependenceNonUniformity              | 115.6095238  |
| wavelet-LLL | gldm  | GrayLevelNonUniformity               | 3.885714286  |
| wavelet-LLL | gldm  | SmallDependenceEmphasis              | 0.767178457  |
| wavelet-LLL | gldm  | SmallDependenceHighGrayLevelEmphasis | 2444.516553  |
| wavelet-LLL | gldm  | DependenceNonUniformityNormalized    | 0.550521542  |
| wavelet-LLL | gldm  | LargeDependenceEmphasis              | 4.171428571  |
| wavelet-LLL | gldm  | LargeDependenceLowGrayLevelEmphasis  | 0.006439459  |
| wavelet-LLL | gldm  | DependenceVariance                   | 1.76154195   |
| wavelet-LLL | gldm  | LargeDependenceHighGrayLevelEmphasis | 24192.91429  |
| wavelet-LLL | gldm  | SmallDependenceLowGrayLevelEmphasis  | 0.005814528  |
| wavelet-LLL | gldm  | LowGrayLevelEmphasis                 | 0.005874243  |
| wavelet-LLL | glcm  | JointAverage                         | 62.12537655  |
| wavelet-LLL | glcm  | SumAverage                           | 124.2507531  |
| wavelet-LLL | glcm  | JointEntropy                         | 8.017297533  |
| wavelet-LLL | glcm  | ClusterShade                         | -28061.76469 |
| wavelet-LLL | glcm  | MaximumProbability                   | 0.016271961  |
| wavelet-LLL | glcm  | ldmn                                 | 0.944619732  |
| wavelet-LLL | glcm  | JointEnergy                          | 0.004182758  |
| wavelet-LLL | glcm  | Contrast                             | 522.6117371  |
| wavelet-LLL | glcm  | DifferenceEntropy                    | 5.191453247  |
| wavelet-LLL | glcm  | InverseVariance                      | 0.090054107  |
| wavelet-LLL | glcm  | DifferenceVariance                   | 209.1199906  |
| wavelet-LLL | glcm  | ldn                                  | 0.849858843  |
| wavelet-LLL | glcm  | ldm                                  | 0.083626987  |
| wavelet-LLL | glcm  | Correlation                          | 0.414929778  |

|             |            |                                  |              |
|-------------|------------|----------------------------------|--------------|
| wavelet-LLL | glcm       | Autocorrelation                  | 4045.209671  |
| wavelet-LLL | glcm       | SumEntropy                       | 6.18402476   |
| wavelet-LLL | glcm       | SumSquares                       | 446.4229258  |
| wavelet-LLL | glcm       | ClusterProminence                | 4229109.438  |
| wavelet-LLL | glcm       | Imc2                             | 0.999565448  |
| wavelet-LLL | glcm       | Imc1                             | -0.611041656 |
| wavelet-LLL | glcm       | DifferenceAverage                | 17.54271905  |
| wavelet-LLL | glcm       | Id                               | 0.144883756  |
| wavelet-LLL | glcm       | ClusterTendency                  | 1263.079966  |
| wavelet-LLL | firstorder | InterquartileRange               | 892.9892609  |
| wavelet-LLL | firstorder | Skewness                         | -0.431476113 |
| wavelet-LLL | firstorder | Uniformity                       | 0.018503401  |
| wavelet-LLL | firstorder | Median                           | -491.1557313 |
| wavelet-LLL | firstorder | Energy                           | 123861308.7  |
| wavelet-LLL | firstorder | RobustMeanAbsoluteDeviation      | 368.3779046  |
| wavelet-LLL | firstorder | MeanAbsoluteDeviation            | 473.407992   |
| wavelet-LLL | firstorder | TotalEnergy                      | 3344255335   |
| wavelet-LLL | firstorder | Maximum                          | 276.9225443  |
| wavelet-LLL | firstorder | RootMeanSquared                  | 767.9946326  |
| wavelet-LLL | firstorder | 90Percentile                     | 167.9482771  |
| wavelet-LLL | firstorder | Minimum                          | -1920.407926 |
| wavelet-LLL | firstorder | Entropy                          | 5.982126291  |
| wavelet-LLL | firstorder | Range                            | 2197.330471  |
| wavelet-LLL | firstorder | Variance                         | 314305.637   |
| wavelet-LLL | firstorder | 10Percentile                     | -1382.514033 |
| wavelet-LLL | firstorder | Kurtosis                         | 2.179244383  |
| wavelet-LLL | firstorder | Mean                             | -524.8905778 |
| wavelet-LLL | glrlm      | ShortRunLowGrayLevelEmphasis     | 0.005994703  |
| wavelet-LLL | glrlm      | GrayLevelVariance                | 500.9332442  |
| wavelet-LLL | glrlm      | LowGrayLevelRunEmphasis          | 0.005998023  |
| wavelet-LLL | glrlm      | GrayLevelNonUniformityNormalized | 0.017845964  |
| wavelet-LLL | glrlm      | RunVariance                      | 0.02350632   |
| wavelet-LLL | glrlm      | GrayLevelNonUniformity           | 3.668722287  |
| wavelet-LLL | glrlm      | LongRunEmphasis                  | 1.067823707  |
| wavelet-LLL | glrlm      | ShortRunHighGrayLevelEmphasis    | 3552.151097  |
| wavelet-LLL | glrlm      | RunLengthNonUniformity           | 197.2841543  |
| wavelet-LLL | glrlm      | ShortRunEmphasis                 | 0.984311367  |
| wavelet-LLL | glrlm      | LongRunHighGrayLevelEmphasis     | 4056.336184  |
| wavelet-LLL | glrlm      | RunPercentage                    | 0.978754579  |
| wavelet-LLL | glrlm      | LongRunLowGrayLevelEmphasis      | 0.00601202   |
| wavelet-LLL | glrlm      | RunEntropy                       | 6.063956615  |
| wavelet-LLL | glrlm      | HighGrayLevelRunEmphasis         | 3645.834493  |
| wavelet-LLL | glrlm      | RunLengthNonUniformityNormalized | 0.959604957  |
| wavelet-LLL | glszm      | GrayLevelVariance                | 491.9014334  |
| wavelet-LLL | glszm      | ZoneVariance                     | 0.746165926  |
| wavelet-LLL | glszm      | GrayLevelNonUniformityNormalized | 0.016472318  |
| wavelet-LLL | glszm      | SizeZoneNonUniformityNormalized  | 0.755354339  |
| wavelet-LLL | glszm      | SizeZoneNonUniformity            | 130.6763006  |
| wavelet-LLL | glszm      | GrayLevelNonUniformity           | 2.849710983  |
| wavelet-LLL | glszm      | LargeAreaEmphasis                | 2.219653179  |
| wavelet-LLL | glszm      | SmallAreaHighGrayLevelEmphasis   | 2765.149736  |
| wavelet-LLL | glszm      | ZonePercentage                   | 0.823809524  |
| wavelet-LLL | glszm      | LargeAreaLowGrayLevelEmphasis    | 0.00731902   |
| wavelet-LLL | glszm      | LargeAreaHighGrayLevelEmphasis   | 10855.36416  |
| wavelet-LLL | glszm      | HighGrayLevelZoneEmphasis        | 3302.739884  |
| wavelet-LLL | glszm      | SmallAreaEmphasis                | 0.891866975  |

|             |            |                                      |              |
|-------------|------------|--------------------------------------|--------------|
| wavelet-LLL | glszm      | LowGrayLevelZoneEmphasis             | 0.007078421  |
| wavelet-LLL | glszm      | ZoneEntropy                          | 6.329589014  |
| wavelet-LLL | glszm      | SmallAreaLowGrayLevelEmphasis        | 0.007047205  |
| wavelet-LLL | ngtdm      | Coarseness                           | 0.025008385  |
| wavelet-LLL | ngtdm      | Complexity                           | 28348.77172  |
| wavelet-LLL | ngtdm      | Strength                             | 67.40401862  |
| wavelet-LLL | ngtdm      | Contrast                             | 2.186133486  |
| wavelet-LLL | ngtdm      | Busyness                             | 0.009854369  |
| wavelet-HHL | gldm       | GrayLevelVariance                    | 16.59863946  |
| wavelet-HHL | gldm       | HighGrayLevelEmphasis                | 157.1904762  |
| wavelet-HHL | gldm       | DependenceEntropy                    | 5.768994712  |
| wavelet-HHL | gldm       | DependenceNonUniformity              | 46.96190476  |
| wavelet-HHL | gldm       | GrayLevelNonUniformity               | 16.23809524  |
| wavelet-HHL | gldm       | SmallDependenceEmphasis              | 0.381110207  |
| wavelet-HHL | gldm       | SmallDependenceHighGrayLevelEmphasis | 68.79564797  |
| wavelet-HHL | gldm       | DependenceNonUniformityNormalized    | 0.223628118  |
| wavelet-HHL | gldm       | LargeDependenceEmphasis              | 9.238095238  |
| wavelet-HHL | gldm       | LargeDependenceLowGrayLevelEmphasis  | 0.089456304  |
| wavelet-HHL | gldm       | DependenceVariance                   | 2.478095238  |
| wavelet-HHL | gldm       | LargeDependenceHighGrayLevelEmphasis | 1302.495238  |
| wavelet-HHL | gldm       | SmallDependenceLowGrayLevelEmphasis  | 0.010606075  |
| wavelet-HHL | gldm       | LowGrayLevelEmphasis                 | 0.017164412  |
| wavelet-HHL | glcm       | JointAverage                         | 11.79448169  |
| wavelet-HHL | glcm       | SumAverage                           | 23.58896338  |
| wavelet-HHL | glcm       | JointEntropy                         | 6.992677433  |
| wavelet-HHL | glcm       | ClusterShade                         | 34.62433601  |
| wavelet-HHL | glcm       | MaximumProbability                   | 0.029179812  |
| wavelet-HHL | glcm       | Idmn                                 | 0.952496424  |
| wavelet-HHL | glcm       | JointEnergy                          | 0.009934892  |
| wavelet-HHL | glcm       | Contrast                             | 31.98159159  |
| wavelet-HHL | glcm       | DifferenceEntropy                    | 3.522894939  |
| wavelet-HHL | glcm       | InverseVariance                      | 0.226707481  |
| wavelet-HHL | glcm       | DifferenceVariance                   | 12.70784313  |
| wavelet-HHL | glcm       | Idn                                  | 0.85895175   |
| wavelet-HHL | glcm       | Idm                                  | 0.223729269  |
| wavelet-HHL | glcm       | Correlation                          | -0.006440891 |
| wavelet-HHL | glcm       | Autocorrelation                      | 139.023979   |
| wavelet-HHL | glcm       | SumEntropy                           | 4.340135459  |
| wavelet-HHL | glcm       | SumSquares                           | 15.89331552  |
| wavelet-HHL | glcm       | ClusterProminence                    | 3358.403279  |
| wavelet-HHL | glcm       | Imc2                                 | 0.913812127  |
| wavelet-HHL | glcm       | Imc1                                 | -0.229070338 |
| wavelet-HHL | glcm       | DifferenceAverage                    | 4.353783176  |
| wavelet-HHL | glcm       | Id                                   | 0.312699573  |
| wavelet-HHL | glcm       | ClusterTendency                      | 31.5916705   |
| wavelet-HHL | firstorder | InterquartileRange                   | 129.6896543  |
| wavelet-HHL | firstorder | Skewness                             | 0.174868834  |
| wavelet-HHL | firstorder | Uniformity                           | 0.077324263  |
| wavelet-HHL | firstorder | Median                               | 3.751168934  |
| wavelet-HHL | firstorder | Energy                               | 2179806.626  |
| wavelet-HHL | firstorder | RobustMeanAbsoluteDeviation          | 53.29637611  |
| wavelet-HHL | firstorder | MeanAbsoluteDeviation                | 78.64326713  |
| wavelet-HHL | firstorder | TotalEnergy                          | 58854778.89  |
| wavelet-HHL | firstorder | Maximum                              | 303.1144229  |
| wavelet-HHL | firstorder | RootMeanSquared                      | 101.8824399  |
| wavelet-HHL | firstorder | 90Percentile                         | 131.7368045  |

|             |            |                                      |              |
|-------------|------------|--------------------------------------|--------------|
| wavelet-HHL | firstorder | Minimum                              | -255.731214  |
| wavelet-HHL | firstorder | Entropy                              | 3.98806193   |
| wavelet-HHL | firstorder | Range                                | 558.845637   |
| wavelet-HHL | firstorder | Variance                             | 10288.08882  |
| wavelet-HHL | firstorder | 10Percentile                         | -121.8264471 |
| wavelet-HHL | firstorder | Kurtosis                             | 3.165336121  |
| wavelet-HHL | firstorder | Mean                                 | 9.588677022  |
| wavelet-HHL | grlm       | ShortRunLowGrayLevelEmphasis         | 0.01724053   |
| wavelet-HHL | grlm       | GrayLevelVariance                    | 17.24931151  |
| wavelet-HHL | grlm       | LowGrayLevelRunEmphasis              | 0.01768082   |
| wavelet-HHL | grlm       | GrayLevelNonUniformityNormalized     | 0.074823116  |
| wavelet-HHL | grlm       | RunVariance                          | 0.067487538  |
| wavelet-HHL | grlm       | GrayLevelNonUniformity               | 14.74611259  |
| wavelet-HHL | grlm       | LongRunEmphasis                      | 1.204205555  |
| wavelet-HHL | grlm       | ShortRunHighGrayLevelEmphasis        | 151.4824636  |
| wavelet-HHL | grlm       | RunLengthNonUniformity               | 174.0708627  |
| wavelet-HHL | grlm       | ShortRunEmphasis                     | 0.952447268  |
| wavelet-HHL | grlm       | LongRunHighGrayLevelEmphasis         | 187.0820341  |
| wavelet-HHL | grlm       | RunPercentage                        | 0.938461538  |
| wavelet-HHL | grlm       | LongRunLowGrayLevelEmphasis          | 0.019599418  |
| wavelet-HHL | grlm       | RunEntropy                           | 4.293469427  |
| wavelet-HHL | grlm       | HighGrayLevelRunEmphasis             | 158.2244689  |
| wavelet-HHL | grlm       | RunLengthNonUniformityNormalized     | 0.882622878  |
| wavelet-HHL | glszm      | GrayLevelVariance                    | 26.6930281   |
| wavelet-HHL | glszm      | ZoneVariance                         | 9.653832813  |
| wavelet-HHL | glszm      | GrayLevelNonUniformityNormalized     | 0.058619494  |
| wavelet-HHL | glszm      | SizeZoneNonUniformityNormalized      | 0.41611747   |
| wavelet-HHL | glszm      | SizeZoneNonUniformity                | 38.69892473  |
| wavelet-HHL | glszm      | GrayLevelNonUniformity               | 5.451612903  |
| wavelet-HHL | glszm      | LargeAreaEmphasis                    | 14.75268817  |
| wavelet-HHL | glszm      | SmallAreaHighGrayLevelEmphasis       | 127.777252   |
| wavelet-HHL | glszm      | ZonePercentage                       | 0.442857143  |
| wavelet-HHL | glszm      | LargeAreaLowGrayLevelEmphasis        | 0.141662397  |
| wavelet-HHL | glszm      | LargeAreaHighGrayLevelEmphasis       | 2088.623656  |
| wavelet-HHL | glszm      | HighGrayLevelZoneEmphasis            | 173.8064516  |
| wavelet-HHL | glszm      | SmallAreaEmphasis                    | 0.670024887  |
| wavelet-HHL | glszm      | LowGrayLevelZoneEmphasis             | 0.026192186  |
| wavelet-HHL | glszm      | ZoneEntropy                          | 5.438044532  |
| wavelet-HHL | glszm      | SmallAreaLowGrayLevelEmphasis        | 0.021758596  |
| wavelet-HHL | ngtdm      | Coarseness                           | 0.029584049  |
| wavelet-HHL | ngtdm      | Complexity                           | 690.8301376  |
| wavelet-HHL | ngtdm      | Strength                             | 4.602817435  |
| wavelet-HHL | ngtdm      | Contrast                             | 0.193908769  |
| wavelet-HHL | ngtdm      | Busyness                             | 0.114876033  |
| wavelet-HLH | gldm       | GrayLevelVariance                    | 19.64646259  |
| wavelet-HLH | gldm       | HighGrayLevelEmphasis                | 198.8238095  |
| wavelet-HLH | gldm       | DependenceEntropy                    | 5.792780892  |
| wavelet-HLH | gldm       | DependenceNonUniformity              | 49.19047619  |
| wavelet-HLH | gldm       | GrayLevelNonUniformity               | 16.0952381   |
| wavelet-HLH | gldm       | SmallDependenceEmphasis              | 0.429309674  |
| wavelet-HLH | gldm       | SmallDependenceHighGrayLevelEmphasis | 98.36922025  |
| wavelet-HLH | gldm       | DependenceNonUniformityNormalized    | 0.234240363  |
| wavelet-HLH | gldm       | LargeDependenceEmphasis              | 10.79047619  |
| wavelet-HLH | gldm       | LargeDependenceLowGrayLevelEmphasis  | 0.086280745  |
| wavelet-HLH | gldm       | DependenceVariance                   | 3.881088435  |
| wavelet-HLH | gldm       | LargeDependenceHighGrayLevelEmphasis | 1820.37619   |

|             |            |                                     |              |
|-------------|------------|-------------------------------------|--------------|
| wavelet-HLH | gldm       | SmallDependenceLowGrayLevelEmphasis | 0.015503409  |
| wavelet-HLH | gldm       | LowGrayLevelEmphasis                | 0.019875544  |
| wavelet-HLH | glcm       | JointAverage                        | 13.41791969  |
| wavelet-HLH | glcm       | SumAverage                          | 26.83583938  |
| wavelet-HLH | glcm       | JointEntropy                        | 6.97448516   |
| wavelet-HLH | glcm       | ClusterShade                        | 47.08969681  |
| wavelet-HLH | glcm       | MaximumProbability                  | 0.037512897  |
| wavelet-HLH | glcm       | ldmn                                | 0.959513505  |
| wavelet-HLH | glcm       | JointEnergy                         | 0.010718994  |
| wavelet-HLH | glcm       | Contrast                            | 40.62428443  |
| wavelet-HLH | glcm       | DifferenceEntropy                   | 3.61275318   |
| wavelet-HLH | glcm       | InverseVariance                     | 0.234799484  |
| wavelet-HLH | glcm       | DifferenceVariance                  | 18.58251657  |
| wavelet-HLH | glcm       | ldn                                 | 0.874547237  |
| wavelet-HLH | glcm       | ldm                                 | 0.227343623  |
| wavelet-HLH | glcm       | Correlation                         | -0.026721096 |
| wavelet-HLH | glcm       | Autocorrelation                     | 179.4574897  |
| wavelet-HLH | glcm       | SumEntropy                          | 4.395361939  |
| wavelet-HLH | glcm       | SumSquares                          | 19.71991002  |
| wavelet-HLH | glcm       | ClusterProminence                   | 6611.82893   |
| wavelet-HLH | glcm       | lmc2                                | 0.93942789   |
| wavelet-HLH | glcm       | lmc1                                | -0.268480202 |
| wavelet-HLH | glcm       | DifferenceAverage                   | 4.643219845  |
| wavelet-HLH | glcm       | ld                                  | 0.313848196  |
| wavelet-HLH | glcm       | ClusterTendency                     | 38.25535566  |
| wavelet-HLH | firstorder | InterquartileRange                  | 116.215026   |
| wavelet-HLH | firstorder | Skewness                            | 0.128979784  |
| wavelet-HLH | firstorder | Uniformity                          | 0.076643991  |
| wavelet-HLH | firstorder | Median                              | -12.68640186 |
| wavelet-HLH | firstorder | Energy                              | 2568103.709  |
| wavelet-HLH | firstorder | RobustMeanAbsoluteDeviation         | 50.71243875  |
| wavelet-HLH | firstorder | MeanAbsoluteDeviation               | 81.5276092   |
| wavelet-HLH | firstorder | TotalEnergy                         | 69338800.15  |
| wavelet-HLH | firstorder | Maximum                             | 375.9231227  |
| wavelet-HLH | firstorder | RootMeanSquared                     | 110.5851043  |
| wavelet-HLH | firstorder | 90Percentile                        | 129.3117253  |
| wavelet-HLH | firstorder | Minimum                             | -316.9200712 |
| wavelet-HLH | firstorder | Entropy                             | 4.056600885  |
| wavelet-HLH | firstorder | Range                               | 692.8431939  |
| wavelet-HLH | firstorder | Variance                            | 12219.72936  |
| wavelet-HLH | firstorder | 10Percentile                        | -142.1731278 |
| wavelet-HLH | firstorder | Kurtosis                            | 4.147942632  |
| wavelet-HLH | firstorder | Mean                                | -3.055474789 |
| wavelet-HLH | gldm       | ShortRunLowGrayLevelEmphasis        | 0.020401247  |
| wavelet-HLH | gldm       | GrayLevelVariance                   | 20.55540602  |
| wavelet-HLH | gldm       | LowGrayLevelRunEmphasis             | 0.020739563  |
| wavelet-HLH | gldm       | GrayLevelNonUniformityNormalized    | 0.073498308  |
| wavelet-HLH | gldm       | RunVariance                         | 0.076795983  |
| wavelet-HLH | gldm       | GrayLevelNonUniformity              | 14.47396507  |
| wavelet-HLH | gldm       | LongRunEmphasis                     | 1.217654138  |
| wavelet-HLH | gldm       | ShortRunHighGrayLevelEmphasis       | 192.9048102  |
| wavelet-HLH | gldm       | RunLengthNonUniformity              | 174.2666448  |
| wavelet-HLH | gldm       | ShortRunEmphasis                    | 0.952865133  |
| wavelet-HLH | gldm       | LongRunHighGrayLevelEmphasis        | 237.5779186  |
| wavelet-HLH | gldm       | RunPercentage                       | 0.937362637  |
| wavelet-HLH | gldm       | LongRunLowGrayLevelEmphasis         | 0.022274858  |

|             |       |                                  |             |
|-------------|-------|----------------------------------|-------------|
| wavelet-HLH | glrlm | RunEntropy                       | 4.359143548 |
| wavelet-HLH | glrlm | HighGrayLevelRunEmphasis         | 200.8538018 |
| wavelet-HLH | glrlm | RunLengthNonUniformityNormalized | 0.8841744   |
| wavelet-HLH | glszm | GrayLevelVariance                | 30.87038549 |
| wavelet-HLH | glszm | ZoneVariance                     | 7.86666667  |
| wavelet-HLH | glszm | GrayLevelNonUniformityNormalized | 0.057414966 |
| wavelet-HLH | glszm | SizeZoneNonUniformityNormalized  | 0.472653061 |
| wavelet-HLH | glszm | SizeZoneNonUniformity            | 49.62857143 |
| wavelet-HLH | glszm | GrayLevelNonUniformity           | 6.028571429 |
| wavelet-HLH | glszm | LargeAreaEmphasis                | 11.86666667 |
| wavelet-HLH | glszm | SmallAreaHighGrayLevelEmphasis   | 170.1818829 |
| wavelet-HLH | glszm | ZonePercentage                   | 0.5         |
| wavelet-HLH | glszm | LargeAreaLowGrayLevelEmphasis    | 0.104384509 |
| wavelet-HLH | glszm | LargeAreaHighGrayLevelEmphasis   | 2033.114286 |
| wavelet-HLH | glszm | HighGrayLevelZoneEmphasis        | 223.4190476 |
| wavelet-HLH | glszm | SmallAreaEmphasis                | 0.713583365 |
| wavelet-HLH | glszm | LowGrayLevelZoneEmphasis         | 0.032351719 |
| wavelet-HLH | glszm | ZoneEntropy                      | 5.443794599 |
| wavelet-HLH | glszm | SmallAreaLowGrayLevelEmphasis    | 0.029866669 |
| wavelet-HLH | ngtdm | Coarseness                       | 0.030564485 |
| wavelet-HLH | ngtdm | Complexity                       | 949.837486  |
| wavelet-HLH | ngtdm | Strength                         | 6.358452658 |
| wavelet-HLH | ngtdm | Contrast                         | 0.192117621 |
| wavelet-HLH | ngtdm | Busyness                         | 0.081825451 |

| Image type | Feature Class | Feature Name                         |                                                                                                                                                                                                                                                                                                                                                                                                                                              |
|------------|---------------|--------------------------------------|----------------------------------------------------------------------------------------------------------------------------------------------------------------------------------------------------------------------------------------------------------------------------------------------------------------------------------------------------------------------------------------------------------------------------------------------|
| general    | info          | BoundingBox                          | 5: RTSTRUCT: C99-DNU-A_segment_ITV<br>(0, 0, 1, 9, 8, 6)                                                                                                                                                                                                                                                                                                                                                                                     |
| general    | info          | EnabledImageTypes                    | {u'Original': {}, u'Wavelet': {}}                                                                                                                                                                                                                                                                                                                                                                                                            |
|            |               |                                      | {'distances': [1], 'additionalInfo': True,<br>'force2D': False, 'interpolator': 'sitkBSpline',<br>'resampledPixelSpacing': [3.0], 'label': 1,<br>'normalizeScale': 1, 'normalize': False,<br>'force2Ddimension': 0, 'removeOutliers':<br>None, 'minimumROISize': None, u'binWidth':<br>25.0, 'minimumROIDimensions': 1,<br>u'correctMask': True, 'preCrop': False,<br>u'symmetricalGLCM': True,<br>'resegmentRange': None, 'padDistance': 5} |
| general    | info          | GeneralSettings                      | efb80e5d019ebd2d4be4bca9ce9052365ca4<br>5038                                                                                                                                                                                                                                                                                                                                                                                                 |
| general    | info          | ImageHash                            | (0.9765625000000002,<br>0.9765625000000002, 2.0)                                                                                                                                                                                                                                                                                                                                                                                             |
| general    | info          | ImageSpacing                         | dd959751e613991d35db854f6573bd869f4d<br>8c0a                                                                                                                                                                                                                                                                                                                                                                                                 |
| general    | info          | MaskHash                             | 1.13.1                                                                                                                                                                                                                                                                                                                                                                                                                                       |
| general    | info          | NumpyVersion                         | 0.5.2                                                                                                                                                                                                                                                                                                                                                                                                                                        |
| general    | info          | PyWaveletVersion                     | 1.1.0                                                                                                                                                                                                                                                                                                                                                                                                                                        |
| general    | info          | SimpleITKVersion                     | 1.3.0.post102+g1b0eb74                                                                                                                                                                                                                                                                                                                                                                                                                       |
| general    | info          | Version                              |                                                                                                                                                                                                                                                                                                                                                                                                                                              |
| general    | info          | VolumeNum                            | 1                                                                                                                                                                                                                                                                                                                                                                                                                                            |
| general    | info          | VoxelNum                             | 156                                                                                                                                                                                                                                                                                                                                                                                                                                          |
| original   | shape         | Maximum3DDiameter                    | 27.16615541                                                                                                                                                                                                                                                                                                                                                                                                                                  |
| original   | shape         | Maximum2DDiameterSlice               | 21.84032967                                                                                                                                                                                                                                                                                                                                                                                                                                  |
| original   | shape         | Sphericity                           | 0.805552506                                                                                                                                                                                                                                                                                                                                                                                                                                  |
| original   | shape         | MinorAxis                            | 18.41043473                                                                                                                                                                                                                                                                                                                                                                                                                                  |
| original   | shape         | Elongation                           | 0.824004434                                                                                                                                                                                                                                                                                                                                                                                                                                  |
| original   | shape         | SurfaceVolumeRatio                   | 0.371729891                                                                                                                                                                                                                                                                                                                                                                                                                                  |
| original   | shape         | Volume                               | 4212                                                                                                                                                                                                                                                                                                                                                                                                                                         |
| original   | shape         | MajorAxis                            | 22.34264038                                                                                                                                                                                                                                                                                                                                                                                                                                  |
| original   | shape         | SurfaceArea                          | 1565.726299                                                                                                                                                                                                                                                                                                                                                                                                                                  |
| original   | shape         | Flatness                             | 0.722888267                                                                                                                                                                                                                                                                                                                                                                                                                                  |
| original   | shape         | LeastAxis                            | 16.15123258                                                                                                                                                                                                                                                                                                                                                                                                                                  |
| original   | shape         | Maximum2DDiameterColumn              | 22.84731932                                                                                                                                                                                                                                                                                                                                                                                                                                  |
| original   | shape         | Maximum2DDiameterRow                 | 21.84032967                                                                                                                                                                                                                                                                                                                                                                                                                                  |
| original   | gldm          | GrayLevelVariance                    | 124.4534845                                                                                                                                                                                                                                                                                                                                                                                                                                  |
| original   | gldm          | HighGrayLevelEmphasis                | 712.2051282                                                                                                                                                                                                                                                                                                                                                                                                                                  |
| original   | gldm          | DependenceEntropy                    | 5.938106927                                                                                                                                                                                                                                                                                                                                                                                                                                  |
| original   | gldm          | DependenceNonUniformity              | 53.51282051                                                                                                                                                                                                                                                                                                                                                                                                                                  |
| original   | gldm          | GrayLevelNonUniformity               | 6.576923077                                                                                                                                                                                                                                                                                                                                                                                                                                  |
| original   | gldm          | SmallDependenceEmphasis              | 0.601594244                                                                                                                                                                                                                                                                                                                                                                                                                                  |
| original   | gldm          | SmallDependenceHighGrayLevelEmphasis | 339.380339                                                                                                                                                                                                                                                                                                                                                                                                                                   |
| original   | gldm          | DependenceNonUniformityNormalized    | 0.343030901                                                                                                                                                                                                                                                                                                                                                                                                                                  |
| original   | gldm          | LargeDependenceEmphasis              | 8.307692308                                                                                                                                                                                                                                                                                                                                                                                                                                  |
| original   | gldm          | LargeDependenceLowGrayLevelEmphasis  | 0.053215296                                                                                                                                                                                                                                                                                                                                                                                                                                  |
| original   | gldm          | DependenceVariance                   | 3.50147929                                                                                                                                                                                                                                                                                                                                                                                                                                   |
| original   | gldm          | LargeDependenceHighGrayLevelEmphasis | 9251.371795                                                                                                                                                                                                                                                                                                                                                                                                                                  |
| original   | gldm          | SmallDependenceLowGrayLevelEmphasis  | 0.019232172                                                                                                                                                                                                                                                                                                                                                                                                                                  |



|          |            |                                  |              |
|----------|------------|----------------------------------|--------------|
| original | gldm       | LowGrayLevelEmphasis             | 0.023227508  |
| original | glcm       | JointAverage                     | 26.27673449  |
| original | glcm       | SumAverage                       | 52.55346898  |
| original | glcm       | JointEntropy                     | 7.16569326   |
| original | glcm       | ClusterShade                     | -3022.640951 |
| original | glcm       | MaximumProbability               | 0.030291139  |
| original | glcm       | ldmn                             | 0.907121087  |
| original | glcm       | JointEnergy                      | 0.008252637  |
| original | glcm       | Contrast                         | 180.6559269  |
| original | glcm       | DifferenceEntropy                | 4.461491931  |
| original | glcm       | InverseVariance                  | 0.12112523   |
| original | glcm       | DifferenceVariance               | 76.15546603  |
| original | glcm       | ldn                              | 0.813669031  |
| original | glcm       | ldm                              | 0.14500377   |
| original | glcm       | Correlation                      | 0.195089756  |
| original | glcm       | Autocorrelation                  | 712.2744824  |
| original | glcm       | SumEntropy                       | 5.277174904  |
| original | glcm       | SumSquares                       | 112.0438682  |
| original | glcm       | ClusterProminence                | 194108.5124  |
| original | glcm       | lmc2                             | 0.992116578  |
| original | glcm       | lmc1                             | -0.450866031 |
| original | glcm       | DifferenceAverage                | 10.13522958  |
| original | glcm       | ld                               | 0.219305879  |
| original | glcm       | ClusterTendency                  | 267.5195461  |
| original | firstorder | InterquartileRange               | 472          |
| original | firstorder | Skewness                         | -0.597365757 |
| original | firstorder | Uniformity                       | 0.042159763  |
| original | firstorder | Median                           | -195.5       |
| original | firstorder | Energy                           | 22362009     |
| original | firstorder | RobustMeanAbsoluteDeviation      | 185.6123829  |
| original | firstorder | MeanAbsoluteDeviation            | 236.9583333  |
| original | firstorder | TotalEnergy                      | 603774243    |
| original | firstorder | Maximum                          | 98           |
| original | firstorder | RootMeanSquared                  | 378.6108973  |
| original | firstorder | 90Percentile                     | 44.5         |
| original | firstorder | Minimum                          | -847         |
| original | firstorder | Entropy                          | 4.849872194  |
| original | firstorder | Range                            | 945          |
| original | firstorder | Variance                         | 77326.86206  |
| original | firstorder | 10Percentile                     | -709         |
| original | firstorder | Kurtosis                         | 2.067592774  |
| original | firstorder | Mean                             | -256.9423077 |
| original | glrlm      | ShortRunLowGrayLevelEmphasis     | 0.023810991  |
| original | glrlm      | GrayLevelVariance                | 123.6579209  |
| original | glrlm      | LowGrayLevelRunEmphasis          | 0.024045556  |
| original | glrlm      | GrayLevelNonUniformityNormalized | 0.039600445  |
| original | glrlm      | RunVariance                      | 0.048892102  |
| original | glrlm      | GrayLevelNonUniformity           | 5.897560712  |
| original | glrlm      | LongRunEmphasis                  | 1.149436578  |
| original | glrlm      | ShortRunHighGrayLevelEmphasis    | 654.7170675  |
| original | glrlm      | RunLengthNonUniformity           | 135.7752876  |
| original | glrlm      | ShortRunEmphasis                 | 0.964446739  |
| original | glrlm      | LongRunHighGrayLevelEmphasis     | 857.8576959  |

|             |       |                                      |              |
|-------------|-------|--------------------------------------|--------------|
| original    | glrlm | RunPercentage                        | 0.954142012  |
| original    | glrlm | LongRunLowGrayLevelEmphasis          | 0.024989506  |
| original    | glrlm | RunEntropy                           | 5.055198784  |
| original    | glrlm | HighGrayLevelRunEmphasis             | 693.5055961  |
| original    | glrlm | RunLengthNonUniformityNormalized     | 0.911119141  |
| original    | glszm | GrayLevelVariance                    | 109.8831361  |
| original    | glszm | ZoneVariance                         | 3.211538462  |
| original    | glszm | GrayLevelNonUniformityNormalized     | 0.033099112  |
| original    | glszm | SizeZoneNonUniformityNormalized      | 0.658468935  |
| original    | glszm | SizeZoneNonUniformity                | 68.48076923  |
| original    | glszm | GrayLevelNonUniformity               | 3.442307692  |
| original    | glszm | LargeAreaEmphasis                    | 5.461538462  |
| original    | glszm | SmallAreaHighGrayLevelEmphasis       | 456.6292059  |
| original    | glszm | ZonePercentage                       | 0.666666667  |
| original    | glszm | LargeAreaLowGrayLevelEmphasis        | 0.047958465  |
| original    | glszm | LargeAreaHighGrayLevelEmphasis       | 5746.115385  |
| original    | glszm | HighGrayLevelZoneEmphasis            | 570.4807692  |
| original    | glszm | SmallAreaEmphasis                    | 0.837045278  |
| original    | glszm | LowGrayLevelZoneEmphasis             | 0.030529062  |
| original    | glszm | ZoneEntropy                          | 5.499537286  |
| original    | glszm | SmallAreaLowGrayLevelEmphasis        | 0.02811229   |
| original    | ngtdm | Coarseness                           | 0.02070546   |
| original    | ngtdm | Complexity                           | 4678.051795  |
| original    | ngtdm | Strength                             | 15.36659202  |
| original    | ngtdm | Contrast                             | 1.578851405  |
| original    | ngtdm | Busyness                             | 0.050208214  |
| wavelet-HHH | gldm  | GrayLevelVariance                    | 21.21383958  |
| wavelet-HHH | gldm  | HighGrayLevelEmphasis                | 200.7051282  |
| wavelet-HHH | gldm  | DependenceEntropy                    | 5.490240082  |
| wavelet-HHH | gldm  | DependenceNonUniformity              | 47.64102564  |
| wavelet-HHH | gldm  | GrayLevelNonUniformity               | 10.69230769  |
| wavelet-HHH | gldm  | SmallDependenceEmphasis              | 0.466937322  |
| wavelet-HHH | gldm  | SmallDependenceHighGrayLevelEmphasis | 93.75685363  |
| wavelet-HHH | gldm  | DependenceNonUniformityNormalized    | 0.30539119   |
| wavelet-HHH | gldm  | LargeDependenceEmphasis              | 5.179487179  |
| wavelet-HHH | gldm  | LargeDependenceLowGrayLevelEmphasis  | 0.041144357  |
| wavelet-HHH | gldm  | DependenceVariance                   | 1.024161736  |
| wavelet-HHH | gldm  | LargeDependenceHighGrayLevelEmphasis | 1036.820513  |
| wavelet-HHH | gldm  | SmallDependenceLowGrayLevelEmphasis  | 0.011876024  |
| wavelet-HHH | gldm  | LowGrayLevelEmphasis                 | 0.015415551  |
| wavelet-HHH | glcm  | JointAverage                         | 13.41583938  |
| wavelet-HHH | glcm  | SumAverage                           | 26.83167876  |
| wavelet-HHH | glcm  | JointEntropy                         | 6.902947417  |
| wavelet-HHH | glcm  | ClusterShade                         | -10.55658303 |
| wavelet-HHH | glcm  | MaximumProbability                   | 0.025748732  |
| wavelet-HHH | glcm  | ldmn                                 | 0.941611216  |
| wavelet-HHH | glcm  | JointEnergy                          | 0.009637062  |
| wavelet-HHH | glcm  | Contrast                             | 43.46964016  |
| wavelet-HHH | glcm  | DifferenceEntropy                    | 3.669979495  |
| wavelet-HHH | glcm  | InverseVariance                      | 0.17853408   |
| wavelet-HHH | glcm  | DifferenceVariance                   | 15.75729975  |
| wavelet-HHH | glcm  | ldn                                  | 0.840911303  |
| wavelet-HHH | glcm  | ldm                                  | 0.173170354  |

|             |            |                                  |              |
|-------------|------------|----------------------------------|--------------|
| wavelet-HHH | glcm       | Correlation                      | -0.025255793 |
| wavelet-HHH | glcm       | Autocorrelation                  | 179.4223549  |
| wavelet-HHH | glcm       | SumEntropy                       | 4.416468354  |
| wavelet-HHH | glcm       | SumSquares                       | 21.16478841  |
| wavelet-HHH | glcm       | ClusterProminence                | 4889.35527   |
| wavelet-HHH | glcm       | Imc2                             | 0.958096326  |
| wavelet-HHH | glcm       | Imc1                             | -0.307523612 |
| wavelet-HHH | glcm       | DifferenceAverage                | 5.216556105  |
| wavelet-HHH | glcm       | Id                               | 0.267344829  |
| wavelet-HHH | glcm       | ClusterTendency                  | 41.18951348  |
| wavelet-HHH | firstorder | InterquartileRange               | 147.7451264  |
| wavelet-HHH | firstorder | Skewness                         | -0.093212154 |
| wavelet-HHH | firstorder | Uniformity                       | 0.068540434  |
| wavelet-HHH | firstorder | Median                           | 6.850849673  |
| wavelet-HHH | firstorder | Energy                           | 2068546.451  |
| wavelet-HHH | firstorder | RobustMeanAbsoluteDeviation      | 61.70838517  |
| wavelet-HHH | firstorder | MeanAbsoluteDeviation            | 90.98766723  |
| wavelet-HHH | firstorder | TotalEnergy                      | 55850754.17  |
| wavelet-HHH | firstorder | Maximum                          | 285.6715207  |
| wavelet-HHH | firstorder | RootMeanSquared                  | 115.1516962  |
| wavelet-HHH | firstorder | 90Percentile                     | 151.7706851  |
| wavelet-HHH | firstorder | Minimum                          | -314.3797303 |
| wavelet-HHH | firstorder | Entropy                          | 4.115901937  |
| wavelet-HHH | firstorder | Range                            | 600.0512511  |
| wavelet-HHH | firstorder | Variance                         | 13257.00743  |
| wavelet-HHH | firstorder | 10Percentile                     | -153.4396507 |
| wavelet-HHH | firstorder | Kurtosis                         | 2.751730698  |
| wavelet-HHH | firstorder | Mean                             | -1.704616515 |
| wavelet-HHH | glrlm      | ShortRunLowGrayLevelEmphasis     | 0.015602006  |
| wavelet-HHH | glrlm      | GrayLevelVariance                | 21.67447895  |
| wavelet-HHH | glrlm      | LowGrayLevelRunEmphasis          | 0.01579572   |
| wavelet-HHH | glrlm      | GrayLevelNonUniformityNormalized | 0.067357351  |
| wavelet-HHH | glrlm      | RunVariance                      | 0.042973479  |
| wavelet-HHH | glrlm      | GrayLevelNonUniformity           | 10.09062967  |
| wavelet-HHH | glrlm      | LongRunEmphasis                  | 1.128879516  |
| wavelet-HHH | glrlm      | ShortRunHighGrayLevelEmphasis    | 194.6462844  |
| wavelet-HHH | glrlm      | RunLengthNonUniformity           | 138.3046377  |
| wavelet-HHH | glrlm      | ShortRunEmphasis                 | 0.969528939  |
| wavelet-HHH | glrlm      | LongRunHighGrayLevelEmphasis     | 226.4231777  |
| wavelet-HHH | glrlm      | RunPercentage                    | 0.960059172  |
| wavelet-HHH | glrlm      | LongRunLowGrayLevelEmphasis      | 0.016612139  |
| wavelet-HHH | glrlm      | RunEntropy                       | 4.304655483  |
| wavelet-HHH | glrlm      | HighGrayLevelRunEmphasis         | 200.7484551  |
| wavelet-HHH | glrlm      | RunLengthNonUniformityNormalized | 0.922953586  |
| wavelet-HHH | glszm      | GrayLevelVariance                | 29.21755003  |
| wavelet-HHH | glszm      | ZoneVariance                     | 2.52352623   |
| wavelet-HHH | glszm      | GrayLevelNonUniformityNormalized | 0.054894538  |
| wavelet-HHH | glszm      | SizeZoneNonUniformityNormalized  | 0.442130882  |
| wavelet-HHH | glszm      | SizeZoneNonUniformity            | 38.02325581  |
| wavelet-HHH | glszm      | GrayLevelNonUniformity           | 4.720930233  |
| wavelet-HHH | glszm      | LargeAreaEmphasis                | 5.813953488  |
| wavelet-HHH | glszm      | SmallAreaHighGrayLevelEmphasis   | 137.9499229  |
| wavelet-HHH | glszm      | ZonePercentage                   | 0.551282051  |

|             |            |                                      |              |
|-------------|------------|--------------------------------------|--------------|
| wavelet-HHH | glszm      | LargeAreaLowGrayLevelEmphasis        | 0.050722572  |
| wavelet-HHH | glszm      | LargeAreaHighGrayLevelEmphasis       | 1199.581395  |
| wavelet-HHH | glszm      | HighGrayLevelZoneEmphasis            | 199.7325581  |
| wavelet-HHH | glszm      | SmallAreaEmphasis                    | 0.689994255  |
| wavelet-HHH | glszm      | LowGrayLevelZoneEmphasis             | 0.022734094  |
| wavelet-HHH | glszm      | ZoneEntropy                          | 5.251919191  |
| wavelet-HHH | glszm      | SmallAreaLowGrayLevelEmphasis        | 0.020498702  |
| wavelet-HHH | ngtdm      | Coarseness                           | 0.037030604  |
| wavelet-HHH | ngtdm      | Complexity                           | 659.361011   |
| wavelet-HHH | ngtdm      | Strength                             | 4.829122932  |
| wavelet-HHH | ngtdm      | Contrast                             | 0.346260821  |
| wavelet-HHH | ngtdm      | Busyness                             | 0.109592395  |
| wavelet-HLL | gldm       | GrayLevelVariance                    | 106.7483563  |
| wavelet-HLL | gldm       | HighGrayLevelEmphasis                | 639.8846154  |
| wavelet-HLL | gldm       | DependenceEntropy                    | 5.877312418  |
| wavelet-HLL | gldm       | DependenceNonUniformity              | 65.62820513  |
| wavelet-HLL | gldm       | GrayLevelNonUniformity               | 5.525641026  |
| wavelet-HLL | gldm       | SmallDependenceEmphasis              | 0.64894943   |
| wavelet-HLL | gldm       | SmallDependenceHighGrayLevelEmphasis | 465.7559206  |
| wavelet-HLL | gldm       | DependenceNonUniformityNormalized    | 0.420693623  |
| wavelet-HLL | gldm       | LargeDependenceEmphasis              | 3.08974359   |
| wavelet-HLL | gldm       | LargeDependenceLowGrayLevelEmphasis  | 0.01741363   |
| wavelet-HLL | gldm       | DependenceVariance                   | 0.562458909  |
| wavelet-HLL | gldm       | LargeDependenceHighGrayLevelEmphasis | 1694.705128  |
| wavelet-HLL | gldm       | SmallDependenceLowGrayLevelEmphasis  | 0.009945249  |
| wavelet-HLL | gldm       | LowGrayLevelEmphasis                 | 0.011159675  |
| wavelet-HLL | glcm       | JointAverage                         | 22.50455115  |
| wavelet-HLL | glcm       | SumAverage                           | 45.0091023   |
| wavelet-HLL | glcm       | JointEntropy                         | 7.386851849  |
| wavelet-HLL | glcm       | ClusterShade                         | 3048.941962  |
| wavelet-HLL | glcm       | MaximumProbability                   | 0.01608498   |
| wavelet-HLL | glcm       | Idmn                                 | 0.963944843  |
| wavelet-HLL | glcm       | JointEnergy                          | 0.006400461  |
| wavelet-HLL | glcm       | Contrast                             | 156.2875324  |
| wavelet-HLL | glcm       | DifferenceEntropy                    | 4.325780377  |
| wavelet-HLL | glcm       | InverseVariance                      | 0.126573613  |
| wavelet-HLL | glcm       | DifferenceVariance                   | 65.68788819  |
| wavelet-HLL | glcm       | Idn                                  | 0.878348771  |
| wavelet-HLL | glcm       | Idm                                  | 0.112361445  |
| wavelet-HLL | glcm       | Correlation                          | 0.210966558  |
| wavelet-HLL | glcm       | Autocorrelation                      | 529.5218493  |
| wavelet-HLL | glcm       | SumEntropy                           | 5.327860516  |
| wavelet-HLL | glcm       | SumSquares                           | 100.778141   |
| wavelet-HLL | glcm       | ClusterProminence                    | 283091.0061  |
| wavelet-HLL | glcm       | Imc2                                 | 0.997734089  |
| wavelet-HLL | glcm       | Imc1                                 | -0.537585919 |
| wavelet-HLL | glcm       | DifferenceAverage                    | 9.302238751  |
| wavelet-HLL | glcm       | Id                                   | 0.195546756  |
| wavelet-HLL | glcm       | ClusterTendency                      | 246.8250316  |
| wavelet-HLL | firstorder | InterquartileRange                   | 291.9878861  |
| wavelet-HLL | firstorder | Skewness                             | 0.801926023  |
| wavelet-HLL | firstorder | Uniformity                           | 0.035420776  |
| wavelet-HLL | firstorder | Median                               | -23.1424615  |

|             |            |                                  |              |
|-------------|------------|----------------------------------|--------------|
| wavelet-HLL | firstorder | Energy                           | 10456763.13  |
| wavelet-HLL | firstorder | RobustMeanAbsoluteDeviation      | 122.8419427  |
| wavelet-HLL | firstorder | MeanAbsoluteDeviation            | 193.0151842  |
| wavelet-HLL | firstorder | TotalEnergy                      | 282332604.6  |
| wavelet-HLL | firstorder | Maximum                          | 941.0667303  |
| wavelet-HLL | firstorder | RootMeanSquared                  | 258.9025549  |
| wavelet-HLL | firstorder | 90Percentile                     | 287.6072248  |
| wavelet-HLL | firstorder | Minimum                          | -567.5990663 |
| wavelet-HLL | firstorder | Entropy                          | 5.098615234  |
| wavelet-HLL | firstorder | Range                            | 1508.665797  |
| wavelet-HLL | firstorder | Variance                         | 66908.84138  |
| wavelet-HLL | firstorder | 10Percentile                     | -328.3297193 |
| wavelet-HLL | firstorder | Kurtosis                         | 4.695648852  |
| wavelet-HLL | firstorder | Mean                             | -11.03138865 |
| wavelet-HLL | grlm       | ShortRunLowGrayLevelEmphasis     | 0.011293318  |
| wavelet-HLL | grlm       | GrayLevelVariance                | 108.4266087  |
| wavelet-HLL | grlm       | LowGrayLevelRunEmphasis          | 0.01134751   |
| wavelet-HLL | grlm       | GrayLevelNonUniformityNormalized | 0.035025733  |
| wavelet-HLL | grlm       | RunVariance                      | 0.02472156   |
| wavelet-HLL | grlm       | GrayLevelNonUniformity           | 5.340904673  |
| wavelet-HLL | grlm       | LongRunEmphasis                  | 1.072489627  |
| wavelet-HLL | grlm       | ShortRunHighGrayLevelEmphasis    | 634.5892351  |
| wavelet-HLL | grlm       | RunLengthNonUniformity           | 145.8984002  |
| wavelet-HLL | grlm       | ShortRunEmphasis                 | 0.983028719  |
| wavelet-HLL | grlm       | LongRunHighGrayLevelEmphasis     | 679.4195228  |
| wavelet-HLL | grlm       | RunPercentage                    | 0.977317554  |
| wavelet-HLL | grlm       | LongRunLowGrayLevelEmphasis      | 0.011574392  |
| wavelet-HLL | grlm       | RunEntropy                       | 5.189452542  |
| wavelet-HLL | grlm       | HighGrayLevelRunEmphasis         | 643.1277345  |
| wavelet-HLL | grlm       | RunLengthNonUniformityNormalized | 0.956500726  |
| wavelet-HLL | glszm      | GrayLevelVariance                | 130.6734216  |
| wavelet-HLL | glszm      | ZoneVariance                     | 0.507674858  |
| wavelet-HLL | glszm      | GrayLevelNonUniformityNormalized | 0.030775047  |
| wavelet-HLL | glszm      | SizeZoneNonUniformityNormalized  | 0.60120983   |
| wavelet-HLL | glszm      | SizeZoneNonUniformity            | 69.13913043  |
| wavelet-HLL | glszm      | GrayLevelNonUniformity           | 3.539130435  |
| wavelet-HLL | glszm      | LargeAreaEmphasis                | 2.347826087  |
| wavelet-HLL | glszm      | SmallAreaHighGrayLevelEmphasis   | 594.3923913  |
| wavelet-HLL | glszm      | ZonePercentage                   | 0.737179487  |
| wavelet-HLL | glszm      | LargeAreaLowGrayLevelEmphasis    | 0.018104736  |
| wavelet-HLL | glszm      | LargeAreaHighGrayLevelEmphasis   | 1360.104348  |
| wavelet-HLL | glszm      | HighGrayLevelZoneEmphasis        | 690.9217391  |
| wavelet-HLL | glszm      | SmallAreaEmphasis                | 0.804045894  |
| wavelet-HLL | glszm      | LowGrayLevelZoneEmphasis         | 0.013956045  |
| wavelet-HLL | glszm      | ZoneEntropy                      | 5.787899538  |
| wavelet-HLL | glszm      | SmallAreaLowGrayLevelEmphasis    | 0.013220776  |
| wavelet-HLL | ngtdm      | Coarseness                       | 0.038356206  |
| wavelet-HLL | ngtdm      | Complexity                       | 5395.998182  |
| wavelet-HLL | ngtdm      | Strength                         | 31.3822517   |
| wavelet-HLL | ngtdm      | Contrast                         | 0.695332033  |
| wavelet-HLL | ngtdm      | Busyness                         | 0.02861361   |
| wavelet-LHL | gldm       | GrayLevelVariance                | 180.0111769  |
| wavelet-LHL | gldm       | HighGrayLevelEmphasis            | 1296.25641   |

|             |            |                                      |              |
|-------------|------------|--------------------------------------|--------------|
| wavelet-LHL | gldm       | DependenceEntropy                    | 6.1577522    |
| wavelet-LHL | gldm       | DependenceNonUniformity              | 60.25641026  |
| wavelet-LHL | gldm       | GrayLevelNonUniformity               | 4.269230769  |
| wavelet-LHL | gldm       | SmallDependenceEmphasis              | 0.614449786  |
| wavelet-LHL | gldm       | SmallDependenceHighGrayLevelEmphasis | 811.5037393  |
| wavelet-LHL | gldm       | DependenceNonUniformityNormalized    | 0.38625904   |
| wavelet-LHL | gldm       | LargeDependenceEmphasis              | 3.730769231  |
| wavelet-LHL | gldm       | LargeDependenceLowGrayLevelEmphasis  | 0.01118196   |
| wavelet-LHL | gldm       | DependenceVariance                   | 0.823307035  |
| wavelet-LHL | gldm       | LargeDependenceHighGrayLevelEmphasis | 4605.448718  |
| wavelet-LHL | gldm       | SmallDependenceLowGrayLevelEmphasis  | 0.007753218  |
| wavelet-LHL | gldm       | LowGrayLevelEmphasis                 | 0.00817392   |
| wavelet-LHL | glcm       | JointAverage                         | 33.68851119  |
| wavelet-LHL | glcm       | SumAverage                           | 67.37702239  |
| wavelet-LHL | glcm       | JointEntropy                         | 7.428550543  |
| wavelet-LHL | glcm       | ClusterShade                         | 970.9966259  |
| wavelet-LHL | glcm       | MaximumProbability                   | 0.015173372  |
| wavelet-LHL | glcm       | ldmn                                 | 0.947997503  |
| wavelet-LHL | glcm       | JointEnergy                          | 0.006134809  |
| wavelet-LHL | glcm       | Contrast                             | 254.2880166  |
| wavelet-LHL | glcm       | DifferenceEntropy                    | 4.569181522  |
| wavelet-LHL | glcm       | InverseVariance                      | 0.088954992  |
| wavelet-LHL | glcm       | DifferenceVariance                   | 103.0306558  |
| wavelet-LHL | glcm       | ldn                                  | 0.856215832  |
| wavelet-LHL | glcm       | ldm                                  | 0.098483969  |
| wavelet-LHL | glcm       | Correlation                          | 0.214557651  |
| wavelet-LHL | glcm       | Autocorrelation                      | 1171.697784  |
| wavelet-LHL | glcm       | SumEntropy                           | 5.581347324  |
| wavelet-LHL | glcm       | SumSquares                           | 163.8548179  |
| wavelet-LHL | glcm       | ClusterProminence                    | 405772.8785  |
| wavelet-LHL | glcm       | lmc2                                 | 0.999129619  |
| wavelet-LHL | glcm       | lmc1                                 | -0.600271423 |
| wavelet-LHL | glcm       | DifferenceAverage                    | 11.86848518  |
| wavelet-LHL | glcm       | ld                                   | 0.175598159  |
| wavelet-LHL | glcm       | ClusterTendency                      | 401.1312552  |
| wavelet-LHL | firstorder | InterquartileRange                   | 505.7676412  |
| wavelet-LHL | firstorder | Skewness                             | 0.048603007  |
| wavelet-LHL | firstorder | Uniformity                           | 0.027366864  |
| wavelet-LHL | firstorder | Median                               | -116.7375615 |
| wavelet-LHL | firstorder | Energy                               | 18464317.56  |
| wavelet-LHL | firstorder | RobustMeanAbsoluteDeviation          | 209.1539672  |
| wavelet-LHL | firstorder | MeanAbsoluteDeviation                | 279.8761409  |
| wavelet-LHL | firstorder | TotalEnergy                          | 498536574.1  |
| wavelet-LHL | firstorder | Maximum                              | 659.2346996  |
| wavelet-LHL | firstorder | RootMeanSquared                      | 344.0363498  |
| wavelet-LHL | firstorder | 90Percentile                         | 372.4591113  |
| wavelet-LHL | firstorder | Minimum                              | -883.8166323 |
| wavelet-LHL | firstorder | Entropy                              | 5.408495572  |
| wavelet-LHL | firstorder | Range                                | 1543.051332  |
| wavelet-LHL | firstorder | Variance                             | 112424.3066  |
| wavelet-LHL | firstorder | 10Percentile                         | -527.9223236 |
| wavelet-LHL | firstorder | Kurtosis                             | 2.195708425  |
| wavelet-LHL | firstorder | Mean                                 | -77.05000569 |

|             |       |                                      |             |
|-------------|-------|--------------------------------------|-------------|
| wavelet-LHL | grlm  | ShortRunLowGrayLevelEmphasis         | 0.008349765 |
| wavelet-LHL | grlm  | GrayLevelVariance                    | 182.7836785 |
| wavelet-LHL | grlm  | LowGrayLevelRunEmphasis              | 0.008372861 |
| wavelet-LHL | grlm  | GrayLevelNonUniformityNormalized     | 0.027140359 |
| wavelet-LHL | grlm  | RunVariance                          | 0.028093225 |
| wavelet-LHL | grlm  | GrayLevelNonUniformity               | 4.119098238 |
| wavelet-LHL | grlm  | LongRunEmphasis                      | 1.085402932 |
| wavelet-LHL | grlm  | ShortRunHighGrayLevelEmphasis        | 1273.212608 |
| wavelet-LHL | grlm  | RunLengthNonUniformity               | 143.7637184 |
| wavelet-LHL | grlm  | ShortRunEmphasis                     | 0.979215294 |
| wavelet-LHL | grlm  | LongRunHighGrayLevelEmphasis         | 1403.890354 |
| wavelet-LHL | grlm  | RunPercentage                        | 0.972879684 |
| wavelet-LHL | grlm  | LongRunLowGrayLevelEmphasis          | 0.008466228 |
| wavelet-LHL | grlm  | RunEntropy                           | 5.498417678 |
| wavelet-LHL | grlm  | HighGrayLevelRunEmphasis             | 1298.304856 |
| wavelet-LHL | grlm  | RunLengthNonUniformityNormalized     | 0.946789127 |
| wavelet-LHL | glszm | GrayLevelVariance                    | 220.1359504 |
| wavelet-LHL | glszm | ZoneVariance                         | 0.734214876 |
| wavelet-LHL | glszm | GrayLevelNonUniformityNormalized     | 0.024793388 |
| wavelet-LHL | glszm | SizeZoneNonUniformityNormalized      | 0.57553719  |
| wavelet-LHL | glszm | SizeZoneNonUniformity                | 63.30909091 |
| wavelet-LHL | glszm | GrayLevelNonUniformity               | 2.727272727 |
| wavelet-LHL | glszm | LargeAreaEmphasis                    | 2.745454545 |
| wavelet-LHL | glszm | SmallAreaHighGrayLevelEmphasis       | 1043.355682 |
| wavelet-LHL | glszm | ZonePercentage                       | 0.705128205 |
| wavelet-LHL | glszm | LargeAreaLowGrayLevelEmphasis        | 0.013001854 |
| wavelet-LHL | glszm | LargeAreaHighGrayLevelEmphasis       | 3483.963636 |
| wavelet-LHL | glszm | HighGrayLevelZoneEmphasis            | 1318.154545 |
| wavelet-LHL | glszm | SmallAreaEmphasis                    | 0.787121212 |
| wavelet-LHL | glszm | LowGrayLevelZoneEmphasis             | 0.011135465 |
| wavelet-LHL | glszm | ZoneEntropy                          | 5.998278209 |
| wavelet-LHL | glszm | SmallAreaLowGrayLevelEmphasis        | 0.010903745 |
| wavelet-LHL | ngtdm | Coarseness                           | 0.033308486 |
| wavelet-LHL | ngtdm | Complexity                           | 9021.065881 |
| wavelet-LHL | ngtdm | Strength                             | 33.16147112 |
| wavelet-LHL | ngtdm | Contrast                             | 1.201104378 |
| wavelet-LHL | ngtdm | Busyness                             | 0.02186463  |
| wavelet-LHH | gldm  | GrayLevelVariance                    | 37.20262163 |
| wavelet-LHH | gldm  | HighGrayLevelEmphasis                | 374.0192308 |
| wavelet-LHH | gldm  | DependenceEntropy                    | 5.616703302 |
| wavelet-LHH | gldm  | DependenceNonUniformity              | 50.94871795 |
| wavelet-LHH | gldm  | GrayLevelNonUniformity               | 8.512820513 |
| wavelet-LHH | gldm  | SmallDependenceEmphasis              | 0.535603632 |
| wavelet-LHH | gldm  | SmallDependenceHighGrayLevelEmphasis | 202.8646296 |
| wavelet-LHH | gldm  | DependenceNonUniformityNormalized    | 0.326594346 |
| wavelet-LHH | gldm  | LargeDependenceEmphasis              | 4.692307692 |
| wavelet-LHH | gldm  | LargeDependenceLowGrayLevelEmphasis  | 0.023805857 |
| wavelet-LHH | gldm  | DependenceVariance                   | 1.043228139 |
| wavelet-LHH | gldm  | LargeDependenceHighGrayLevelEmphasis | 1643.50641  |
| wavelet-LHH | gldm  | SmallDependenceLowGrayLevelEmphasis  | 0.010054279 |
| wavelet-LHH | gldm  | LowGrayLevelEmphasis                 | 0.011573248 |
| wavelet-LHH | glcm  | JointAverage                         | 18.41241595 |
| wavelet-LHH | glcm  | SumAverage                           | 36.8248319  |

|             |            |                                  |              |
|-------------|------------|----------------------------------|--------------|
| wavelet-LHH | glcm       | JointEntropy                     | 7.112920343  |
| wavelet-LHH | glcm       | ClusterShade                     | 9.208231415  |
| wavelet-LHH | glcm       | MaximumProbability               | 0.021078941  |
| wavelet-LHH | glcm       | Idmn                             | 0.955425467  |
| wavelet-LHH | glcm       | JointEnergy                      | 0.008163545  |
| wavelet-LHH | glcm       | Contrast                         | 66.48447561  |
| wavelet-LHH | glcm       | DifferenceEntropy                | 3.940483243  |
| wavelet-LHH | glcm       | InverseVariance                  | 0.156281957  |
| wavelet-LHH | glcm       | DifferenceVariance               | 24.95109964  |
| wavelet-LHH | glcm       | Idn                              | 0.860533423  |
| wavelet-LHH | glcm       | Idm                              | 0.151637969  |
| wavelet-LHH | glcm       | Correlation                      | -0.022262776 |
| wavelet-LHH | glcm       | Autocorrelation                  | 338.2642818  |
| wavelet-LHH | glcm       | SumEntropy                       | 4.690488351  |
| wavelet-LHH | glcm       | SumSquares                       | 32.47114049  |
| wavelet-LHH | glcm       | ClusterProminence                | 13569.6265   |
| wavelet-LHH | glcm       | Imc2                             | 0.979592843  |
| wavelet-LHH | glcm       | Imc1                             | -0.370604927 |
| wavelet-LHH | glcm       | DifferenceAverage                | 6.383925492  |
| wavelet-LHH | glcm       | Id                               | 0.241692022  |
| wavelet-LHH | glcm       | ClusterTendency                  | 63.40008634  |
| wavelet-LHH | firstorder | InterquartileRange               | 175.6038509  |
| wavelet-LHH | firstorder | Skewness                         | -0.062698627 |
| wavelet-LHH | firstorder | Uniformity                       | 0.054569362  |
| wavelet-LHH | firstorder | Median                           | -12.60037301 |
| wavelet-LHH | firstorder | Energy                           | 3606264.533  |
| wavelet-LHH | firstorder | RobustMeanAbsoluteDeviation      | 81.76004214  |
| wavelet-LHH | firstorder | MeanAbsoluteDeviation            | 120.143317   |
| wavelet-LHH | firstorder | TotalEnergy                      | 97369142.4   |
| wavelet-LHH | firstorder | Maximum                          | 431.5080414  |
| wavelet-LHH | firstorder | RootMeanSquared                  | 152.0430214  |
| wavelet-LHH | firstorder | 90Percentile                     | 188.9226418  |
| wavelet-LHH | firstorder | Minimum                          | -437.6513125 |
| wavelet-LHH | firstorder | Entropy                          | 4.485366418  |
| wavelet-LHH | firstorder | Range                            | 869.1593539  |
| wavelet-LHH | firstorder | Variance                         | 23102.25844  |
| wavelet-LHH | firstorder | 10Percentile                     | -198.1202853 |
| wavelet-LHH | firstorder | Kurtosis                         | 3.194252411  |
| wavelet-LHH | firstorder | Mean                             | -3.849922435 |
| wavelet-LHH | grlm       | ShortRunLowGrayLevelEmphasis     | 0.011787033  |
| wavelet-LHH | grlm       | GrayLevelVariance                | 38.05848713  |
| wavelet-LHH | grlm       | LowGrayLevelRunEmphasis          | 0.011874807  |
| wavelet-LHH | grlm       | GrayLevelNonUniformityNormalized | 0.053695941  |
| wavelet-LHH | grlm       | RunVariance                      | 0.036984333  |
| wavelet-LHH | grlm       | GrayLevelNonUniformity           | 8.083268158  |
| wavelet-LHH | grlm       | LongRunEmphasis                  | 1.111297423  |
| wavelet-LHH | grlm       | ShortRunHighGrayLevelEmphasis    | 365.2616359  |
| wavelet-LHH | grlm       | RunLengthNonUniformity           | 140.3385083  |
| wavelet-LHH | grlm       | ShortRunEmphasis                 | 0.973307748  |
| wavelet-LHH | grlm       | LongRunHighGrayLevelEmphasis     | 414.0140484  |
| wavelet-LHH | grlm       | RunPercentage                    | 0.964990138  |
| wavelet-LHH | grlm       | LongRunLowGrayLevelEmphasis      | 0.012241748  |
| wavelet-LHH | grlm       | RunEntropy                       | 4.647912311  |



|             |       |                                      |             |
|-------------|-------|--------------------------------------|-------------|
| wavelet-LHH | grlm  | HighGrayLevelRunEmphasis             | 374.7496742 |
| wavelet-LHH | grlm  | RunLengthNonUniformityNormalized     | 0.931982201 |
| wavelet-LHH | glszm | GrayLevelVariance                    | 50.97873264 |
| wavelet-LHH | glszm | ZoneVariance                         | 2.171875    |
| wavelet-LHH | glszm | GrayLevelNonUniformityNormalized     | 0.044270833 |
| wavelet-LHH | glszm | SizeZoneNonUniformityNormalized      | 0.526041667 |
| wavelet-LHH | glszm | SizeZoneNonUniformity                | 50.5        |
| wavelet-LHH | glszm | GrayLevelNonUniformity               | 4.25        |
| wavelet-LHH | glszm | LargeAreaEmphasis                    | 4.8125      |
| wavelet-LHH | glszm | SmallAreaHighGrayLevelEmphasis       | 285.5568908 |
| wavelet-LHH | glszm | ZonePercentage                       | 0.615384615 |
| wavelet-LHH | glszm | LargeAreaLowGrayLevelEmphasis        | 0.028556253 |
| wavelet-LHH | glszm | LargeAreaHighGrayLevelEmphasis       | 1768.739583 |
| wavelet-LHH | glszm | HighGrayLevelZoneEmphasis            | 380.25      |
| wavelet-LHH | glszm | SmallAreaEmphasis                    | 0.752247369 |
| wavelet-LHH | glszm | LowGrayLevelZoneEmphasis             | 0.016774666 |
| wavelet-LHH | glszm | ZoneEntropy                          | 5.373464974 |
| wavelet-LHH | glszm | SmallAreaLowGrayLevelEmphasis        | 0.015951896 |
| wavelet-LHH | ngtdm | Coarseness                           | 0.030720476 |
| wavelet-LHH | ngtdm | Complexity                           | 1863.708718 |
| wavelet-LHH | ngtdm | Strength                             | 9.665642034 |
| wavelet-LHH | ngtdm | Contrast                             | 0.41213897  |
| wavelet-LHH | ngtdm | Busyness                             | 0.058581127 |
| wavelet-LLH | gldm  | GrayLevelVariance                    | 107.7368097 |
| wavelet-LLH | gldm  | HighGrayLevelEmphasis                | 1101.198718 |
| wavelet-LLH | gldm  | DependenceEntropy                    | 5.830703802 |
| wavelet-LLH | gldm  | DependenceNonUniformity              | 77.73076923 |
| wavelet-LLH | gldm  | GrayLevelNonUniformity               | 5.128205128 |
| wavelet-LLH | gldm  | SmallDependenceEmphasis              | 0.720664174 |
| wavelet-LLH | gldm  | SmallDependenceHighGrayLevelEmphasis | 831.0144676 |
| wavelet-LLH | gldm  | DependenceNonUniformityNormalized    | 0.498274162 |
| wavelet-LLH | gldm  | LargeDependenceEmphasis              | 2.474358974 |
| wavelet-LLH | gldm  | LargeDependenceLowGrayLevelEmphasis  | 0.010091917 |
| wavelet-LLH | gldm  | DependenceVariance                   | 0.412557528 |
| wavelet-LLH | gldm  | LargeDependenceHighGrayLevelEmphasis | 2509.557692 |
| wavelet-LLH | gldm  | SmallDependenceLowGrayLevelEmphasis  | 0.007448318 |
| wavelet-LLH | gldm  | LowGrayLevelEmphasis                 | 0.007887387 |
| wavelet-LLH | glcm  | JointAverage                         | 31.73522219 |
| wavelet-LLH | glcm  | SumAverage                           | 63.47044437 |
| wavelet-LLH | glcm  | JointEntropy                         | 7.423339416 |
| wavelet-LLH | glcm  | ClusterShade                         | -109.944645 |
| wavelet-LLH | glcm  | MaximumProbability                   | 0.013817724 |
| wavelet-LLH | glcm  | ldmn                                 | 0.954302802 |
| wavelet-LLH | glcm  | JointEnergy                          | 0.006175515 |
| wavelet-LLH | glcm  | Contrast                             | 176.9440597 |
| wavelet-LLH | glcm  | DifferenceEntropy                    | 4.444858732 |
| wavelet-LLH | glcm  | InverseVariance                      | 0.085411877 |
| wavelet-LLH | glcm  | DifferenceVariance                   | 59.69104423 |
| wavelet-LLH | glcm  | ldn                                  | 0.856652539 |
| wavelet-LLH | glcm  | ldm                                  | 0.082308068 |
| wavelet-LLH | glcm  | Correlation                          | 0.071122913 |
| wavelet-LLH | glcm  | Autocorrelation                      | 1014.18207  |
| wavelet-LLH | glcm  | SumEntropy                           | 5.322178825 |

|             |            |                                  |              |
|-------------|------------|----------------------------------|--------------|
| wavelet-LLH | glcm       | SumSquares                       | 95.41573117  |
| wavelet-LLH | glcm       | ClusterProminence                | 121010.036   |
| wavelet-LLH | glcm       | Imc2                             | 0.997634806  |
| wavelet-LLH | glcm       | Imc1                             | -0.532674292 |
| wavelet-LLH | glcm       | DifferenceAverage                | 10.56654957  |
| wavelet-LLH | glcm       | Id                               | 0.164119596  |
| wavelet-LLH | glcm       | ClusterTendency                  | 204.718865   |
| wavelet-LLH | firstorder | InterquartileRange               | 380.8714505  |
| wavelet-LLH | firstorder | Skewness                         | -0.037692947 |
| wavelet-LLH | firstorder | Uniformity                       | 0.03287311   |
| wavelet-LLH | firstorder | Median                           | -38.16266053 |
| wavelet-LLH | firstorder | Energy                           | 10929831.27  |
| wavelet-LLH | firstorder | RobustMeanAbsoluteDeviation      | 149.7072764  |
| wavelet-LLH | firstorder | MeanAbsoluteDeviation            | 210.5658081  |
| wavelet-LLH | firstorder | TotalEnergy                      | 295105444.3  |
| wavelet-LLH | firstorder | Maximum                          | 611.4524691  |
| wavelet-LLH | firstorder | RootMeanSquared                  | 264.6942028  |
| wavelet-LLH | firstorder | 90Percentile                     | 270.8211303  |
| wavelet-LLH | firstorder | Minimum                          | -803.5224405 |
| wavelet-LLH | firstorder | Entropy                          | 5.153575525  |
| wavelet-LLH | firstorder | Range                            | 1414.97491   |
| wavelet-LLH | firstorder | Variance                         | 67613.74692  |
| wavelet-LLH | firstorder | 10Percentile                     | -409.1646402 |
| wavelet-LLH | firstorder | Kurtosis                         | 2.699422349  |
| wavelet-LLH | firstorder | Mean                             | -49.49014095 |
| wavelet-LLH | grlm       | ShortRunLowGrayLevelEmphasis     | 0.007977112  |
| wavelet-LLH | grlm       | GrayLevelVariance                | 108.3764112  |
| wavelet-LLH | grlm       | LowGrayLevelRunEmphasis          | 0.007996925  |
| wavelet-LLH | grlm       | GrayLevelNonUniformityNormalized | 0.032718246  |
| wavelet-LLH | grlm       | RunVariance                      | 0.016747985  |
| wavelet-LLH | grlm       | GrayLevelNonUniformity           | 5.018308792  |
| wavelet-LLH | grlm       | LongRunEmphasis                  | 1.051711086  |
| wavelet-LLH | grlm       | ShortRunHighGrayLevelEmphasis    | 1091.279042  |
| wavelet-LLH | grlm       | RunLengthNonUniformity           | 148.3010299  |
| wavelet-LLH | grlm       | ShortRunEmphasis                 | 0.987072228  |
| wavelet-LLH | grlm       | LongRunHighGrayLevelEmphasis     | 1153.209907  |
| wavelet-LLH | grlm       | RunPercentage                    | 0.983234714  |
| wavelet-LLH | grlm       | LongRunLowGrayLevelEmphasis      | 0.008076177  |
| wavelet-LLH | grlm       | RunEntropy                       | 5.21757706   |
| wavelet-LLH | grlm       | HighGrayLevelRunEmphasis         | 1103.665215  |
| wavelet-LLH | grlm       | RunLengthNonUniformityNormalized | 0.966504031  |
| wavelet-LLH | glszm      | GrayLevelVariance                | 116.166784   |
| wavelet-LLH | glszm      | ZoneVariance                     | 0.298496     |
| wavelet-LLH | glszm      | GrayLevelNonUniformityNormalized | 0.030272     |
| wavelet-LLH | glszm      | SizeZoneNonUniformityNormalized  | 0.666688     |
| wavelet-LLH | glszm      | SizeZoneNonUniformity            | 83.336       |
| wavelet-LLH | glszm      | GrayLevelNonUniformity           | 3.784        |
| wavelet-LLH | glszm      | LargeAreaEmphasis                | 1.856        |
| wavelet-LLH | glszm      | SmallAreaHighGrayLevelEmphasis   | 982.8200556  |
| wavelet-LLH | glszm      | ZonePercentage                   | 0.801282051  |
| wavelet-LLH | glszm      | LargeAreaLowGrayLevelEmphasis    | 0.010742928  |
| wavelet-LLH | glszm      | LargeAreaHighGrayLevelEmphasis   | 1962.792     |
| wavelet-LLH | glszm      | HighGrayLevelZoneEmphasis        | 1134.032     |

|             |            |                                      |              |
|-------------|------------|--------------------------------------|--------------|
| wavelet-LLH | glszm      | SmallAreaEmphasis                    | 0.844055556  |
| wavelet-LLH | glszm      | LowGrayLevelZoneEmphasis             | 0.009459948  |
| wavelet-LLH | glszm      | ZoneEntropy                          | 5.722398861  |
| wavelet-LLH | glszm      | SmallAreaLowGrayLevelEmphasis        | 0.009208449  |
| wavelet-LLH | ngtdm      | Coarseness                           | 0.02855173   |
| wavelet-LLH | ngtdm      | Complexity                           | 6204.305549  |
| wavelet-LLH | ngtdm      | Strength                             | 20.2725968   |
| wavelet-LLH | ngtdm      | Contrast                             | 0.935854695  |
| wavelet-LLH | ngtdm      | Busyness                             | 0.032043675  |
| wavelet-LLL | gldm       | GrayLevelVariance                    | 525.9717291  |
| wavelet-LLL | gldm       | HighGrayLevelEmphasis                | 3411.589744  |
| wavelet-LLL | gldm       | DependenceEntropy                    | 6.26265302   |
| wavelet-LLL | gldm       | DependenceNonUniformity              | 116.5        |
| wavelet-LLL | gldm       | GrayLevelNonUniformity               | 2.615384615  |
| wavelet-LLL | gldm       | SmallDependenceEmphasis              | 0.888532764  |
| wavelet-LLL | gldm       | SmallDependenceHighGrayLevelEmphasis | 2940.393875  |
| wavelet-LLL | gldm       | DependenceNonUniformityNormalized    | 0.746794872  |
| wavelet-LLL | gldm       | LargeDependenceEmphasis              | 1.474358974  |
| wavelet-LLL | gldm       | LargeDependenceLowGrayLevelEmphasis  | 0.009115391  |
| wavelet-LLL | gldm       | DependenceVariance                   | 0.142998028  |
| wavelet-LLL | gldm       | LargeDependenceHighGrayLevelEmphasis | 5373.410256  |
| wavelet-LLL | gldm       | SmallDependenceLowGrayLevelEmphasis  | 0.008948395  |
| wavelet-LLL | gldm       | LowGrayLevelEmphasis                 | 0.008979687  |
| wavelet-LLL | glcm       | JointAverage                         | 59.23461054  |
| wavelet-LLL | glcm       | SumAverage                           | 118.4692211  |
| wavelet-LLL | glcm       | JointEntropy                         | 7.573996739  |
| wavelet-LLL | glcm       | ClusterShade                         | -13082.93018 |
| wavelet-LLL | glcm       | MaximumProbability                   | 0.010256385  |
| wavelet-LLL | glcm       | ldmn                                 | 0.938124594  |
| wavelet-LLL | glcm       | JointEnergy                          | 0.005350115  |
| wavelet-LLL | glcm       | Contrast                             | 694.4410406  |
| wavelet-LLL | glcm       | DifferenceEntropy                    | 5.199664444  |
| wavelet-LLL | glcm       | InverseVariance                      | 0.045295417  |
| wavelet-LLL | glcm       | DifferenceVariance                   | 237.9780148  |
| wavelet-LLL | glcm       | ldn                                  | 0.834606612  |
| wavelet-LLL | glcm       | ldm                                  | 0.039217533  |
| wavelet-LLL | glcm       | Correlation                          | 0.334991219  |
| wavelet-LLL | glcm       | Autocorrelation                      | 3684.673043  |
| wavelet-LLL | glcm       | SumEntropy                           | 6.009362033  |
| wavelet-LLL | glcm       | SumSquares                           | 521.8362261  |
| wavelet-LLL | glcm       | ClusterProminence                    | 4812387.66   |
| wavelet-LLL | glcm       | lmc2                                 | 0.999912592  |
| wavelet-LLL | glcm       | lmc1                                 | -0.728824189 |
| wavelet-LLL | glcm       | DifferenceAverage                    | 21.13316156  |
| wavelet-LLL | glcm       | ld                                   | 0.098217635  |
| wavelet-LLL | glcm       | ClusterTendency                      | 1392.903864  |
| wavelet-LLL | firstorder | InterquartileRange                   | 860.4907192  |
| wavelet-LLL | firstorder | Skewness                             | -0.107821232 |
| wavelet-LLL | firstorder | Uniformity                           | 0.016765286  |
| wavelet-LLL | firstorder | Median                               | -798.4070932 |
| wavelet-LLL | firstorder | Energy                               | 149606354.9  |
| wavelet-LLL | firstorder | RobustMeanAbsoluteDeviation          | 344.0888302  |
| wavelet-LLL | firstorder | MeanAbsoluteDeviation                | 471.0332093  |

|             |            |                                  |              |
|-------------|------------|----------------------------------|--------------|
| wavelet-LLL | firstorder | TotalEnergy                      | 4039371583   |
| wavelet-LLL | firstorder | Maximum                          | 281.4539598  |
| wavelet-LLL | firstorder | RootMeanSquared                  | 979.2931612  |
| wavelet-LLL | firstorder | 90Percentile                     | -11.71016121 |
| wavelet-LLL | firstorder | Minimum                          | -2121.269373 |
| wavelet-LLL | firstorder | Entropy                          | 6.073013219  |
| wavelet-LLL | firstorder | Range                            | 2402.723333  |
| wavelet-LLL | firstorder | Variance                         | 328618.7731  |
| wavelet-LLL | firstorder | 10Percentile                     | -1569.24647  |
| wavelet-LLL | firstorder | Kurtosis                         | 2.275295034  |
| wavelet-LLL | firstorder | Mean                             | -793.9750138 |
| wavelet-LLL | grlm       | ShortRunLowGrayLevelEmphasis     | 0.009030373  |
| wavelet-LLL | grlm       | GrayLevelVariance                | 527.4502781  |
| wavelet-LLL | grlm       | LowGrayLevelRunEmphasis          | 0.009031643  |
| wavelet-LLL | grlm       | GrayLevelNonUniformityNormalized | 0.016708783  |
| wavelet-LLL | grlm       | RunVariance                      | 0.005916538  |
| wavelet-LLL | grlm       | GrayLevelNonUniformity           | 2.59117954   |
| wavelet-LLL | grlm       | LongRunEmphasis                  | 1.017924011  |
| wavelet-LLL | grlm       | ShortRunHighGrayLevelEmphasis    | 3388.287869  |
| wavelet-LLL | grlm       | RunLengthNonUniformity           | 153.2487126  |
| wavelet-LLL | grlm       | ShortRunEmphasis                 | 0.995518997  |
| wavelet-LLL | grlm       | LongRunHighGrayLevelEmphasis     | 3481.898581  |
| wavelet-LLL | grlm       | RunPercentage                    | 0.99408284   |
| wavelet-LLL | grlm       | LongRunLowGrayLevelEmphasis      | 0.009036727  |
| wavelet-LLL | grlm       | RunEntropy                       | 6.089325216  |
| wavelet-LLL | grlm       | HighGrayLevelRunEmphasis         | 3407.010012  |
| wavelet-LLL | grlm       | RunLengthNonUniformityNormalized | 0.988166925  |
| wavelet-LLL | glszm      | GrayLevelVariance                | 546.2868441  |
| wavelet-LLL | glszm      | ZoneVariance                     | 0.090277778  |
| wavelet-LLL | glszm      | GrayLevelNonUniformityNormalized | 0.016107253  |
| wavelet-LLL | glszm      | SizeZoneNonUniformityNormalized  | 0.857928241  |
| wavelet-LLL | glszm      | SizeZoneNonUniformity            | 123.5416667  |
| wavelet-LLL | glszm      | GrayLevelNonUniformity           | 2.319444444  |
| wavelet-LLL | glszm      | LargeAreaEmphasis                | 1.263888889  |
| wavelet-LLL | glszm      | SmallAreaHighGrayLevelEmphasis   | 3098.437114  |
| wavelet-LLL | glszm      | ZonePercentage                   | 0.923076923  |
| wavelet-LLL | glszm      | LargeAreaLowGrayLevelEmphasis    | 0.009780423  |
| wavelet-LLL | glszm      | LargeAreaHighGrayLevelEmphasis   | 4429.361111  |
| wavelet-LLL | glszm      | HighGrayLevelZoneEmphasis        | 3347.930556  |
| wavelet-LLL | glszm      | SmallAreaEmphasis                | 0.941743827  |
| wavelet-LLL | glszm      | LowGrayLevelZoneEmphasis         | 0.009704349  |
| wavelet-LLL | glszm      | ZoneEntropy                      | 6.242502258  |
| wavelet-LLL | glszm      | SmallAreaLowGrayLevelEmphasis    | 0.009688183  |
| wavelet-LLL | ngtdm      | Coarseness                       | 0.031072368  |
| wavelet-LLL | ngtdm      | Complexity                       | 36116.89742  |
| wavelet-LLL | ngtdm      | Strength                         | 84.12958019  |
| wavelet-LLL | ngtdm      | Contrast                         | 2.51337904   |
| wavelet-LLL | ngtdm      | Busyness                         | 0.009895727  |
| wavelet-HHL | gldm       | GrayLevelVariance                | 31.14640861  |
| wavelet-HHL | gldm       | HighGrayLevelEmphasis            | 393.3653846  |
| wavelet-HHL | gldm       | DependenceEntropy                | 5.421956248  |
| wavelet-HHL | gldm       | DependenceNonUniformity          | 54.91025641  |
| wavelet-HHL | gldm       | GrayLevelNonUniformity           | 9.230769231  |

|             |            |                                      |              |
|-------------|------------|--------------------------------------|--------------|
| wavelet-HHL | gldm       | SmallDependenceEmphasis              | 0.582644231  |
| wavelet-HHL | gldm       | SmallDependenceHighGrayLevelEmphasis | 241.1555769  |
| wavelet-HHL | gldm       | DependenceNonUniformityNormalized    | 0.351988823  |
| wavelet-HHL | gldm       | LargeDependenceEmphasis              | 4.346153846  |
| wavelet-HHL | gldm       | LargeDependenceLowGrayLevelEmphasis  | 0.022947587  |
| wavelet-HHL | gldm       | DependenceVariance                   | 1.031886917  |
| wavelet-HHL | gldm       | LargeDependenceHighGrayLevelEmphasis | 1518.480769  |
| wavelet-HHL | gldm       | SmallDependenceLowGrayLevelEmphasis  | 0.00972659   |
| wavelet-HHL | gldm       | LowGrayLevelEmphasis                 | 0.011063028  |
| wavelet-HHL | glcm       | JointAverage                         | 18.96215648  |
| wavelet-HHL | glcm       | SumAverage                           | 37.92431295  |
| wavelet-HHL | glcm       | JointEntropy                         | 7.059207095  |
| wavelet-HHL | glcm       | ClusterShade                         | 2.336198774  |
| wavelet-HHL | glcm       | MaximumProbability                   | 0.02134269   |
| wavelet-HHL | glcm       | Idmn                                 | 0.962860502  |
| wavelet-HHL | glcm       | JointEnergy                          | 0.008509103  |
| wavelet-HHL | glcm       | Contrast                             | 58.87013688  |
| wavelet-HHL | glcm       | DifferenceEntropy                    | 3.795604001  |
| wavelet-HHL | glcm       | InverseVariance                      | 0.170876164  |
| wavelet-HHL | glcm       | DifferenceVariance                   | 23.6730715   |
| wavelet-HHL | glcm       | Idn                                  | 0.873155521  |
| wavelet-HHL | glcm       | Idm                                  | 0.154812091  |
| wavelet-HHL | glcm       | Correlation                          | -0.03412462  |
| wavelet-HHL | glcm       | Autocorrelation                      | 358.6068732  |
| wavelet-HHL | glcm       | SumEntropy                           | 4.584718949  |
| wavelet-HHL | glcm       | SumSquares                           | 28.42703351  |
| wavelet-HHL | glcm       | ClusterProminence                    | 11811.13078  |
| wavelet-HHL | glcm       | Imc2                                 | 0.971481063  |
| wavelet-HHL | glcm       | Imc1                                 | -0.342215608 |
| wavelet-HHL | glcm       | DifferenceAverage                    | 5.870399455  |
| wavelet-HHL | glcm       | Id                                   | 0.248708281  |
| wavelet-HHL | glcm       | ClusterTendency                      | 54.83799715  |
| wavelet-HHL | firstorder | InterquartileRange                   | 160.3823958  |
| wavelet-HHL | firstorder | Skewness                             | -0.177041342 |
| wavelet-HHL | firstorder | Uniformity                           | 0.059171598  |
| wavelet-HHL | firstorder | Median                               | 18.98802796  |
| wavelet-HHL | firstorder | Energy                               | 3039262.006  |
| wavelet-HHL | firstorder | RobustMeanAbsoluteDeviation          | 66.90262242  |
| wavelet-HHL | firstorder | MeanAbsoluteDeviation                | 104.7183112  |
| wavelet-HHL | firstorder | TotalEnergy                          | 82060074.15  |
| wavelet-HHL | firstorder | Maximum                              | 468.3967903  |
| wavelet-HHL | firstorder | RootMeanSquared                      | 139.5795428  |
| wavelet-HHL | firstorder | 90Percentile                         | 171.4572076  |
| wavelet-HHL | firstorder | Minimum                              | -438.6366311 |
| wavelet-HHL | firstorder | Entropy                              | 4.327474018  |
| wavelet-HHL | firstorder | Range                                | 907.0334214  |
| wavelet-HHL | firstorder | Variance                             | 19326.16773  |
| wavelet-HHL | firstorder | 10Percentile                         | -146.811614  |
| wavelet-HHL | firstorder | Kurtosis                             | 4.160196684  |
| wavelet-HHL | firstorder | Mean                                 | 12.50124086  |
| wavelet-HHL | grlm       | ShortRunLowGrayLevelEmphasis         | 0.011234647  |
| wavelet-HHL | grlm       | GrayLevelVariance                    | 31.74729568  |
| wavelet-HHL | grlm       | LowGrayLevelRunEmphasis              | 0.011317312  |

|             |       |                                      |             |
|-------------|-------|--------------------------------------|-------------|
| wavelet-HHL | grlm  | GrayLevelNonUniformityNormalized     | 0.058729161 |
| wavelet-HHL | grlm  | RunVariance                          | 0.032542439 |
| wavelet-HHL | grlm  | GrayLevelNonUniformity               | 8.873294102 |
| wavelet-HHL | grlm  | LongRunEmphasis                      | 1.100216966 |
| wavelet-HHL | grlm  | ShortRunHighGrayLevelEmphasis        | 386.2025357 |
| wavelet-HHL | grlm  | RunLengthNonUniformity               | 141.8104074 |
| wavelet-HHL | grlm  | ShortRunEmphasis                     | 0.975543451 |
| wavelet-HHL | grlm  | LongRunHighGrayLevelEmphasis         | 429.9883168 |
| wavelet-HHL | grlm  | RunPercentage                        | 0.968441815 |
| wavelet-HHL | grlm  | LongRunLowGrayLevelEmphasis          | 0.011653952 |
| wavelet-HHL | grlm  | RunEntropy                           | 4.472297882 |
| wavelet-HHL | grlm  | HighGrayLevelRunEmphasis             | 394.7684302 |
| wavelet-HHL | grlm  | RunLengthNonUniformityNormalized     | 0.937871821 |
| wavelet-HHL | glszm | GrayLevelVariance                    | 41.05981879 |
| wavelet-HHL | glszm | ZoneVariance                         | 1.038461538 |
| wavelet-HHL | glszm | GrayLevelNonUniformityNormalized     | 0.053069527 |
| wavelet-HHL | glszm | SizeZoneNonUniformityNormalized      | 0.561945266 |
| wavelet-HHL | glszm | SizeZoneNonUniformity                | 58.44230769 |
| wavelet-HHL | glszm | GrayLevelNonUniformity               | 5.519230769 |
| wavelet-HHL | glszm | LargeAreaEmphasis                    | 3.288461538 |
| wavelet-HHL | glszm | SmallAreaHighGrayLevelEmphasis       | 325.9294311 |
| wavelet-HHL | glszm | ZonePercentage                       | 0.666666667 |
| wavelet-HHL | glszm | LargeAreaLowGrayLevelEmphasis        | 0.022520913 |
| wavelet-HHL | glszm | LargeAreaHighGrayLevelEmphasis       | 1221.009615 |
| wavelet-HHL | glszm | HighGrayLevelZoneEmphasis            | 408.2980769 |
| wavelet-HHL | glszm | SmallAreaEmphasis                    | 0.777545406 |
| wavelet-HHL | glszm | LowGrayLevelZoneEmphasis             | 0.014995448 |
| wavelet-HHL | glszm | ZoneEntropy                          | 5.252914781 |
| wavelet-HHL | glszm | SmallAreaLowGrayLevelEmphasis        | 0.014291942 |
| wavelet-HHL | ngtdm | Coarseness                           | 0.036973552 |
| wavelet-HHL | ngtdm | Complexity                           | 1378.811354 |
| wavelet-HHL | ngtdm | Strength                             | 9.601622924 |
| wavelet-HHL | ngtdm | Contrast                             | 0.358669567 |
| wavelet-HHL | ngtdm | Busyness                             | 0.053580273 |
| wavelet-HLH | gldm  | GrayLevelVariance                    | 35.33908613 |
| wavelet-HLH | gldm  | HighGrayLevelEmphasis                | 308.4358974 |
| wavelet-HLH | gldm  | DependenceEntropy                    | 5.662654165 |
| wavelet-HLH | gldm  | DependenceNonUniformity              | 50.20512821 |
| wavelet-HLH | gldm  | GrayLevelNonUniformity               | 8.615384615 |
| wavelet-HLH | gldm  | SmallDependenceEmphasis              | 0.524784544 |
| wavelet-HLH | gldm  | SmallDependenceHighGrayLevelEmphasis | 178.3663889 |
| wavelet-HLH | gldm  | DependenceNonUniformityNormalized    | 0.321827745 |
| wavelet-HLH | gldm  | LargeDependenceEmphasis              | 4.564102564 |
| wavelet-HLH | gldm  | LargeDependenceLowGrayLevelEmphasis  | 0.034457433 |
| wavelet-HLH | gldm  | DependenceVariance                   | 0.915023011 |
| wavelet-HLH | gldm  | LargeDependenceHighGrayLevelEmphasis | 1296.166667 |
| wavelet-HLH | gldm  | SmallDependenceLowGrayLevelEmphasis  | 0.011203307 |
| wavelet-HLH | gldm  | LowGrayLevelEmphasis                 | 0.014518533 |
| wavelet-HLH | glcm  | JointAverage                         | 16.35920018 |
| wavelet-HLH | glcm  | SumAverage                           | 32.71840036 |
| wavelet-HLH | glcm  | JointEntropy                         | 7.085754672 |
| wavelet-HLH | glcm  | ClusterShade                         | 116.270456  |
| wavelet-HLH | glcm  | MaximumProbability                   | 0.023606543 |

|             |            |                                  |              |
|-------------|------------|----------------------------------|--------------|
| wavelet-HLH | glcm       | Idmn                             | 0.956522168  |
| wavelet-HLH | glcm       | JointEnergy                      | 0.008426398  |
| wavelet-HLH | glcm       | Contrast                         | 69.85041684  |
| wavelet-HLH | glcm       | DifferenceEntropy                | 3.909569179  |
| wavelet-HLH | glcm       | InverseVariance                  | 0.151092226  |
| wavelet-HLH | glcm       | DifferenceVariance               | 27.44804509  |
| wavelet-HLH | glcm       | Idn                              | 0.862947246  |
| wavelet-HLH | glcm       | Idm                              | 0.148532689  |
| wavelet-HLH | glcm       | Correlation                      | -0.010245887 |
| wavelet-HLH | glcm       | Autocorrelation                  | 267.2353648  |
| wavelet-HLH | glcm       | SumEntropy                       | 4.69322828   |
| wavelet-HLH | glcm       | SumSquares                       | 34.52106555  |
| wavelet-HLH | glcm       | ClusterProminence                | 18462.86073  |
| wavelet-HLH | glcm       | Imc2                             | 0.982669084  |
| wavelet-HLH | glcm       | Imc1                             | -0.387097338 |
| wavelet-HLH | glcm       | DifferenceAverage                | 6.44683717   |
| wavelet-HLH | glcm       | Id                               | 0.239807851  |
| wavelet-HLH | glcm       | ClusterTendency                  | 68.23384534  |
| wavelet-HLH | firstorder | InterquartileRange               | 166.7643318  |
| wavelet-HLH | firstorder | Skewness                         | 0.19561634   |
| wavelet-HLH | firstorder | Uniformity                       | 0.055226824  |
| wavelet-HLH | firstorder | Median                           | -1.512352127 |
| wavelet-HLH | firstorder | Energy                           | 3427822.926  |
| wavelet-HLH | firstorder | RobustMeanAbsoluteDeviation      | 78.7861874   |
| wavelet-HLH | firstorder | MeanAbsoluteDeviation            | 115.6638053  |
| wavelet-HLH | firstorder | TotalEnergy                      | 92551219.01  |
| wavelet-HLH | firstorder | Maximum                          | 506.3318501  |
| wavelet-HLH | firstorder | RootMeanSquared                  | 148.23368    |
| wavelet-HLH | firstorder | 90Percentile                     | 178.7951147  |
| wavelet-HLH | firstorder | Minimum                          | -398.0007762 |
| wavelet-HLH | firstorder | Entropy                          | 4.43366308   |
| wavelet-HLH | firstorder | Range                            | 904.3326262  |
| wavelet-HLH | firstorder | Variance                         | 21972.64101  |
| wavelet-HLH | firstorder | 10Percentile                     | -175.7720503 |
| wavelet-HLH | firstorder | Kurtosis                         | 3.82164164   |
| wavelet-HLH | firstorder | Mean                             | 0.76346191   |
| wavelet-HLH | gllm       | ShortRunLowGrayLevelEmphasis     | 0.014661849  |
| wavelet-HLH | gllm       | GrayLevelVariance                | 36.00854021  |
| wavelet-HLH | gllm       | LowGrayLevelRunEmphasis          | 0.014828139  |
| wavelet-HLH | gllm       | GrayLevelNonUniformityNormalized | 0.054594047  |
| wavelet-HLH | gllm       | RunVariance                      | 0.039144197  |
| wavelet-HLH | gllm       | GrayLevelNonUniformity           | 8.220334973  |
| wavelet-HLH | gllm       | LongRunEmphasis                  | 1.115166712  |
| wavelet-HLH | gllm       | ShortRunHighGrayLevelEmphasis    | 302.3889776  |
| wavelet-HLH | gllm       | RunLengthNonUniformity           | 140.7050511  |
| wavelet-HLH | gllm       | ShortRunEmphasis                 | 0.973583522  |
| wavelet-HLH | gllm       | LongRunHighGrayLevelEmphasis     | 341.7119953  |
| wavelet-HLH | gllm       | RunPercentage                    | 0.964990138  |
| wavelet-HLH | gllm       | LongRunLowGrayLevelEmphasis      | 0.015522395  |
| wavelet-HLH | gllm       | RunEntropy                       | 4.574660808  |
| wavelet-HLH | gllm       | HighGrayLevelRunEmphasis         | 309.6162655  |
| wavelet-HLH | gllm       | RunLengthNonUniformityNormalized | 0.933592357  |
| wavelet-HLH | glszm      | GrayLevelVariance                | 45.01009672  |

|             |       |                                  |             |
|-------------|-------|----------------------------------|-------------|
| wavelet-HLH | glszm | ZoneVariance                     | 1.186736104 |
| wavelet-HLH | glszm | GrayLevelNonUniformityNormalized | 0.04878308  |
| wavelet-HLH | glszm | SizeZoneNonUniformityNormalized  | 0.489425019 |
| wavelet-HLH | glszm | SizeZoneNonUniformity            | 47.4742268  |
| wavelet-HLH | glszm | GrayLevelNonUniformity           | 4.731958763 |
| wavelet-HLH | glszm | LargeAreaEmphasis                | 3.773195876 |
| wavelet-HLH | glszm | SmallAreaHighGrayLevelEmphasis   | 254.4491213 |
| wavelet-HLH | glszm | ZonePercentage                   | 0.621794872 |
| wavelet-HLH | glszm | LargeAreaLowGrayLevelEmphasis    | 0.035064942 |
| wavelet-HLH | glszm | LargeAreaHighGrayLevelEmphasis   | 1093.773196 |
| wavelet-HLH | glszm | HighGrayLevelZoneEmphasis        | 329.1237113 |
| wavelet-HLH | glszm | SmallAreaEmphasis                | 0.724938343 |
| wavelet-HLH | glszm | LowGrayLevelZoneEmphasis         | 0.019381264 |
| wavelet-HLH | glszm | ZoneEntropy                      | 5.451458302 |
| wavelet-HLH | glszm | SmallAreaLowGrayLevelEmphasis    | 0.017153374 |
| wavelet-HLH | ngtdm | Coarseness                       | 0.034507196 |
| wavelet-HLH | ngtdm | Complexity                       | 1686.459001 |
| wavelet-HLH | ngtdm | Strength                         | 10.52280376 |
| wavelet-HLH | ngtdm | Contrast                         | 0.382558737 |
| wavelet-HLH | ngtdm | Busyness                         | 0.060623238 |



| Image type | Feature Class | Feature Name                         |                                                                                                                                                                                                                                                                                                                                                                                                                                              |
|------------|---------------|--------------------------------------|----------------------------------------------------------------------------------------------------------------------------------------------------------------------------------------------------------------------------------------------------------------------------------------------------------------------------------------------------------------------------------------------------------------------------------------------|
| general    | info          | BoundingBox                          | 9: RTSTRUCT: C99-DNU-B_segment_GTV<br>(1, 0, 1, 6, 6, 5)                                                                                                                                                                                                                                                                                                                                                                                     |
| general    | info          | EnabledImageTypes                    | {u'Original': {}, u'Wavelet': {}}                                                                                                                                                                                                                                                                                                                                                                                                            |
|            |               |                                      | {'distances': [1], 'additionalInfo': True,<br>'force2D': False, 'interpolator': 'sitkBSpline',<br>'resampledPixelSpacing': [3.0], 'label': 1,<br>'normalizeScale': 1, 'normalize': False,<br>'force2Ddimension': 0, 'removeOutliers':<br>None, 'minimumROISize': None, u'binWidth':<br>25.0, 'minimumROIDimensions': 1,<br>u'correctMask': True, 'preCrop': False,<br>u'symmetricalGLCM': True,<br>'resegmentRange': None, 'padDistance': 5} |
| general    | info          | GeneralSettings                      | 19eb865af05f58ccfc32903dc5945e7317aa7d                                                                                                                                                                                                                                                                                                                                                                                                       |
| general    | info          | ImageHash                            | 5b                                                                                                                                                                                                                                                                                                                                                                                                                                           |
| general    | info          | ImageSpacing                         | (0.9765625000000002,<br>0.9765625000000002, 2.0)                                                                                                                                                                                                                                                                                                                                                                                             |
| general    | info          | MaskHash                             | de213e085fce697afedd7d2feb1403c6fd2ba<br>9a7                                                                                                                                                                                                                                                                                                                                                                                                 |
| general    | info          | NumpyVersion                         | 1.13.1                                                                                                                                                                                                                                                                                                                                                                                                                                       |
| general    | info          | PyWaveletVersion                     | 0.5.2                                                                                                                                                                                                                                                                                                                                                                                                                                        |
| general    | info          | SimpleITKVersion                     | 1.1.0                                                                                                                                                                                                                                                                                                                                                                                                                                        |
| general    | info          | Version                              | 1.3.0.post102+g1b0eb74                                                                                                                                                                                                                                                                                                                                                                                                                       |
| general    | info          | VolumeNum                            | 1                                                                                                                                                                                                                                                                                                                                                                                                                                            |
| general    | info          | VoxelNum                             | 109                                                                                                                                                                                                                                                                                                                                                                                                                                          |
| original   | shape         | Maximum3DDiameter                    | 19.4422221                                                                                                                                                                                                                                                                                                                                                                                                                                   |
| original   | shape         | Maximum2DDiameterSlice               | 19.20937271                                                                                                                                                                                                                                                                                                                                                                                                                                  |
| original   | shape         | Sphericity                           | 0.919042933                                                                                                                                                                                                                                                                                                                                                                                                                                  |
| original   | shape         | MinorAxis                            | 16.47889583                                                                                                                                                                                                                                                                                                                                                                                                                                  |
| original   | shape         | Elongation                           | 0.926770694                                                                                                                                                                                                                                                                                                                                                                                                                                  |
| original   | shape         | SurfaceVolumeRatio                   | 0.367184977                                                                                                                                                                                                                                                                                                                                                                                                                                  |
| original   | shape         | Volume                               | 2943                                                                                                                                                                                                                                                                                                                                                                                                                                         |
| original   | shape         | MajorAxis                            | 17.78098503                                                                                                                                                                                                                                                                                                                                                                                                                                  |
| original   | shape         | SurfaceArea                          | 1080.625387                                                                                                                                                                                                                                                                                                                                                                                                                                  |
| original   | shape         | Flatness                             | 0.790755624                                                                                                                                                                                                                                                                                                                                                                                                                                  |
| original   | shape         | LeastAxis                            | 14.06041391                                                                                                                                                                                                                                                                                                                                                                                                                                  |
| original   | shape         | Maximum2DDiameterColumn              | 17.49285568                                                                                                                                                                                                                                                                                                                                                                                                                                  |
| original   | shape         | Maximum2DDiameterRow                 | 16.15549442                                                                                                                                                                                                                                                                                                                                                                                                                                  |
| original   | gldm          | GrayLevelVariance                    | 63.24551805                                                                                                                                                                                                                                                                                                                                                                                                                                  |
| original   | gldm          | HighGrayLevelEmphasis                | 517.8348624                                                                                                                                                                                                                                                                                                                                                                                                                                  |
| original   | gldm          | DependenceEntropy                    | 5.507421224                                                                                                                                                                                                                                                                                                                                                                                                                                  |
| original   | gldm          | DependenceNonUniformity              | 27.03669725                                                                                                                                                                                                                                                                                                                                                                                                                                  |
| original   | gldm          | GrayLevelNonUniformity               | 7.678899083                                                                                                                                                                                                                                                                                                                                                                                                                                  |
| original   | gldm          | SmallDependenceEmphasis              | 0.49994673                                                                                                                                                                                                                                                                                                                                                                                                                                   |
| original   | gldm          | SmallDependenceHighGrayLevelEmphasis | 185.6060341                                                                                                                                                                                                                                                                                                                                                                                                                                  |
| original   | gldm          | DependenceNonUniformityNormalized    | 0.248043094                                                                                                                                                                                                                                                                                                                                                                                                                                  |
| original   | gldm          | LargeDependenceEmphasis              | 12.57798165                                                                                                                                                                                                                                                                                                                                                                                                                                  |
| original   | gldm          | LargeDependenceLowGrayLevelEmphasis  | 0.034927686                                                                                                                                                                                                                                                                                                                                                                                                                                  |
| original   | gldm          | DependenceVariance                   | 4.850601801                                                                                                                                                                                                                                                                                                                                                                                                                                  |
| original   | gldm          | LargeDependenceHighGrayLevelEmphasis | 9364.990826                                                                                                                                                                                                                                                                                                                                                                                                                                  |
| original   | gldm          | SmallDependenceLowGrayLevelEmphasis  | 0.014425051                                                                                                                                                                                                                                                                                                                                                                                                                                  |

|          |            |                                  |              |
|----------|------------|----------------------------------|--------------|
| original | gldm       | LowGrayLevelEmphasis             | 0.015850191  |
| original | glcm       | JointAverage                     | 23.31808388  |
| original | glcm       | SumAverage                       | 46.63616777  |
| original | glcm       | JointEntropy                     | 6.244894336  |
| original | glcm       | ClusterShade                     | -1337.023022 |
| original | glcm       | MaximumProbability               | 0.058191721  |
| original | glcm       | ldmn                             | 0.931608745  |
| original | glcm       | JointEnergy                      | 0.017415414  |
| original | glcm       | Contrast                         | 83.60032333  |
| original | glcm       | DifferenceEntropy                | 3.890501796  |
| original | glcm       | InverseVariance                  | 0.207150178  |
| original | glcm       | DifferenceVariance               | 38.2281392   |
| original | glcm       | ldn                              | 0.843928315  |
| original | glcm       | ldm                              | 0.225905673  |
| original | glcm       | Correlation                      | 0.181504958  |
| original | glcm       | Autocorrelation                  | 554.0722629  |
| original | glcm       | SumEntropy                       | 4.5946557    |
| original | glcm       | SumSquares                       | 51.92990219  |
| original | glcm       | ClusterProminence                | 52195.51257  |
| original | glcm       | lmc2                             | 0.977774875  |
| original | glcm       | lmc1                             | -0.404242531 |
| original | glcm       | DifferenceAverage                | 6.651184004  |
| original | glcm       | ld                               | 0.297676102  |
| original | glcm       | ClusterTendency                  | 124.1192854  |
| original | firstorder | InterquartileRange               | 325          |
| original | firstorder | Skewness                         | -0.786702653 |
| original | firstorder | Uniformity                       | 0.070448615  |
| original | firstorder | Median                           | -109         |
| original | firstorder | Energy                           | 7792747      |
| original | firstorder | RobustMeanAbsoluteDeviation      | 131.1417625  |
| original | firstorder | MeanAbsoluteDeviation            | 168.6251999  |
| original | firstorder | TotalEnergy                      | 210404169    |
| original | firstorder | Maximum                          | 59           |
| original | firstorder | RootMeanSquared                  | 267.3819211  |
| original | firstorder | 90Percentile                     | 15.8         |
| original | firstorder | Minimum                          | -693         |
| original | firstorder | Entropy                          | 4.254511125  |
| original | firstorder | Range                            | 752          |
| original | firstorder | Variance                         | 39366.64035  |
| original | firstorder | 10Percentile                     | -483.6       |
| original | firstorder | Kurtosis                         | 2.540827079  |
| original | firstorder | Mean                             | -179.2385321 |
| original | glrlm      | ShortRunLowGrayLevelEmphasis     | 0.016777451  |
| original | glrlm      | GrayLevelVariance                | 63.98134993  |
| original | glrlm      | LowGrayLevelRunEmphasis          | 0.016882698  |
| original | glrlm      | GrayLevelNonUniformityNormalized | 0.063477544  |
| original | glrlm      | RunVariance                      | 0.081802754  |
| original | glrlm      | GrayLevelNonUniformity           | 6.452177736  |
| original | glrlm      | LongRunEmphasis                  | 1.237517207  |
| original | glrlm      | ShortRunHighGrayLevelEmphasis    | 464.6112799  |
| original | glrlm      | RunLengthNonUniformity           | 88.97552006  |
| original | glrlm      | ShortRunEmphasis                 | 0.948371349  |
| original | glrlm      | LongRunHighGrayLevelEmphasis     | 675.7500132  |

|             |       |                                      |             |
|-------------|-------|--------------------------------------|-------------|
| original    | glrlm | RunPercentage                        | 0.931545519 |
| original    | glrlm | LongRunLowGrayLevelEmphasis          | 0.017349243 |
| original    | glrlm | RunEntropy                           | 4.561318127 |
| original    | glrlm | HighGrayLevelRunEmphasis             | 502.0970991 |
| original    | glrlm | RunLengthNonUniformityNormalized     | 0.874716185 |
| original    | glszm | GrayLevelVariance                    | 62.6186509  |
| original    | glszm | ZoneVariance                         | 7.249664069 |
| original    | glszm | GrayLevelNonUniformityNormalized     | 0.045955388 |
| original    | glszm | SizeZoneNonUniformityNormalized      | 0.635044343 |
| original    | glszm | SizeZoneNonUniformity                | 38.73770492 |
| original    | glszm | GrayLevelNonUniformity               | 2.803278689 |
| original    | glszm | LargeAreaEmphasis                    | 10.44262295 |
| original    | glszm | SmallAreaHighGrayLevelEmphasis       | 288.7246677 |
| original    | glszm | ZonePercentage                       | 0.559633028 |
| original    | glszm | LargeAreaLowGrayLevelEmphasis        | 0.041473144 |
| original    | glszm | LargeAreaHighGrayLevelEmphasis       | 7691.114754 |
| original    | glszm | HighGrayLevelZoneEmphasis            | 384.2622951 |
| original    | glszm | SmallAreaEmphasis                    | 0.820675833 |
| original    | glszm | LowGrayLevelZoneEmphasis             | 0.026344567 |
| original    | glszm | ZoneEntropy                          | 5.069600862 |
| original    | glszm | SmallAreaLowGrayLevelEmphasis        | 0.025474892 |
| original    | ngtdm | Coarseness                           | 0.028501545 |
| original    | ngtdm | Complexity                           | 1837.533389 |
| original    | ngtdm | Strength                             | 14.63940734 |
| original    | ngtdm | Contrast                             | 0.982888705 |
| original    | ngtdm | Busyness                             | 0.050945197 |
| wavelet-HHH | gldm  | GrayLevelVariance                    | 8.323373453 |
| wavelet-HHH | gldm  | HighGrayLevelEmphasis                | 98.66055046 |
| wavelet-HHH | gldm  | DependenceEntropy                    | 5.206001472 |
| wavelet-HHH | gldm  | DependenceNonUniformity              | 21.05504587 |
| wavelet-HHH | gldm  | GrayLevelNonUniformity               | 11.49541284 |
| wavelet-HHH | gldm  | SmallDependenceEmphasis              | 0.359011057 |
| wavelet-HHH | gldm  | SmallDependenceHighGrayLevelEmphasis | 42.75207176 |
| wavelet-HHH | gldm  | DependenceNonUniformityNormalized    | 0.193165558 |
| wavelet-HHH | gldm  | LargeDependenceEmphasis              | 10.83486239 |
| wavelet-HHH | gldm  | LargeDependenceLowGrayLevelEmphasis  | 0.150348174 |
| wavelet-HHH | gldm  | DependenceVariance                   | 2.694049322 |
| wavelet-HHH | gldm  | LargeDependenceHighGrayLevelEmphasis | 961.6330275 |
| wavelet-HHH | gldm  | SmallDependenceLowGrayLevelEmphasis  | 0.01480082  |
| wavelet-HHH | gldm  | LowGrayLevelEmphasis                 | 0.023768529 |
| wavelet-HHH | glcm  | JointAverage                         | 9.470706895 |
| wavelet-HHH | glcm  | SumAverage                           | 18.94141379 |
| wavelet-HHH | glcm  | JointEntropy                         | 5.986055535 |
| wavelet-HHH | glcm  | ClusterShade                         | 9.654338059 |
| wavelet-HHH | glcm  | MaximumProbability                   | 0.040690289 |
| wavelet-HHH | glcm  | Idmn                                 | 0.952257983 |
| wavelet-HHH | glcm  | JointEnergy                          | 0.018652814 |
| wavelet-HHH | glcm  | Contrast                             | 16.14855838 |
| wavelet-HHH | glcm  | DifferenceEntropy                    | 3.027330886 |
| wavelet-HHH | glcm  | InverseVariance                      | 0.277301884 |
| wavelet-HHH | glcm  | DifferenceVariance                   | 6.21753917  |
| wavelet-HHH | glcm  | Idn                                  | 0.857159857 |
| wavelet-HHH | glcm  | Idm                                  | 0.274878403 |

|             |            |                                  |              |
|-------------|------------|----------------------------------|--------------|
| wavelet-HHH | glcm       | Correlation                      | -0.027831166 |
| wavelet-HHH | glcm       | Autocorrelation                  | 89.48910319  |
| wavelet-HHH | glcm       | SumEntropy                       | 3.731120284  |
| wavelet-HHH | glcm       | SumSquares                       | 7.859560977  |
| wavelet-HHH | glcm       | ClusterProminence                | 801.629096   |
| wavelet-HHH | glcm       | Imc2                             | 0.900259035  |
| wavelet-HHH | glcm       | Imc1                             | -0.246124429 |
| wavelet-HHH | glcm       | DifferenceAverage                | 3.118982586  |
| wavelet-HHH | glcm       | Id                               | 0.364245882  |
| wavelet-HHH | glcm       | ClusterTendency                  | 15.28968553  |
| wavelet-HHH | firstorder | InterquartileRange               | 79.04320849  |
| wavelet-HHH | firstorder | Skewness                         | 0.131256697  |
| wavelet-HHH | firstorder | Uniformity                       | 0.105462503  |
| wavelet-HHH | firstorder | Median                           | -7.818734567 |
| wavelet-HHH | firstorder | Energy                           | 560843.0612  |
| wavelet-HHH | firstorder | RobustMeanAbsoluteDeviation      | 38.38319992  |
| wavelet-HHH | firstorder | MeanAbsoluteDeviation            | 56.32516061  |
| wavelet-HHH | firstorder | TotalEnergy                      | 15142762.65  |
| wavelet-HHH | firstorder | Maximum                          | 188.7467322  |
| wavelet-HHH | firstorder | RootMeanSquared                  | 71.73108939  |
| wavelet-HHH | firstorder | 90Percentile                     | 93.28797287  |
| wavelet-HHH | firstorder | Minimum                          | -211.9889573 |
| wavelet-HHH | firstorder | Entropy                          | 3.46691214   |
| wavelet-HHH | firstorder | Range                            | 400.7356895  |
| wavelet-HHH | firstorder | Variance                         | 5145.07705   |
| wavelet-HHH | firstorder | 10Percentile                     | -78.37932438 |
| wavelet-HHH | firstorder | Kurtosis                         | 3.283976045  |
| wavelet-HHH | firstorder | Mean                             | 0.521665708  |
| wavelet-HHH | glrlm      | ShortRunLowGrayLevelEmphasis     | 0.023829948  |
| wavelet-HHH | glrlm      | GrayLevelVariance                | 8.75128029   |
| wavelet-HHH | glrlm      | LowGrayLevelRunEmphasis          | 0.024582433  |
| wavelet-HHH | glrlm      | GrayLevelNonUniformityNormalized | 0.102292612  |
| wavelet-HHH | glrlm      | RunVariance                      | 0.076820734  |
| wavelet-HHH | glrlm      | GrayLevelNonUniformity           | 10.36045401  |
| wavelet-HHH | glrlm      | LongRunEmphasis                  | 1.239420661  |
| wavelet-HHH | glrlm      | ShortRunHighGrayLevelEmphasis    | 94.66533764  |
| wavelet-HHH | glrlm      | RunLengthNonUniformity           | 87.55930647  |
| wavelet-HHH | glrlm      | ShortRunEmphasis                 | 0.943581781  |
| wavelet-HHH | glrlm      | LongRunHighGrayLevelEmphasis     | 120.385603   |
| wavelet-HHH | glrlm      | RunPercentage                    | 0.928722653  |
| wavelet-HHH | glrlm      | LongRunLowGrayLevelEmphasis      | 0.027759609  |
| wavelet-HHH | glrlm      | RunEntropy                       | 3.796054319  |
| wavelet-HHH | glrlm      | HighGrayLevelRunEmphasis         | 99.57133832  |
| wavelet-HHH | glrlm      | RunLengthNonUniformityNormalized | 0.863321218  |
| wavelet-HHH | glszm      | GrayLevelVariance                | 14.54617284  |
| wavelet-HHH | glszm      | ZoneVariance                     | 7.621728395  |
| wavelet-HHH | glszm      | GrayLevelNonUniformityNormalized | 0.082469136  |
| wavelet-HHH | glszm      | SizeZoneNonUniformityNormalized  | 0.447901235  |
| wavelet-HHH | glszm      | SizeZoneNonUniformity            | 20.15555556  |
| wavelet-HHH | glszm      | GrayLevelNonUniformity           | 3.711111111  |
| wavelet-HHH | glszm      | LargeAreaEmphasis                | 13.48888889  |
| wavelet-HHH | glszm      | SmallAreaHighGrayLevelEmphasis   | 88.3436833   |
| wavelet-HHH | glszm      | ZonePercentage                   | 0.412844037  |

|             |            |                                      |              |
|-------------|------------|--------------------------------------|--------------|
| wavelet-HHH | glszm      | LargeAreaLowGrayLevelEmphasis        | 0.210323041  |
| wavelet-HHH | glszm      | LargeAreaHighGrayLevelEmphasis       | 1152.577778  |
| wavelet-HHH | glszm      | HighGrayLevelZoneEmphasis            | 118.1333333  |
| wavelet-HHH | glszm      | SmallAreaEmphasis                    | 0.689366954  |
| wavelet-HHH | glszm      | LowGrayLevelZoneEmphasis             | 0.037422161  |
| wavelet-HHH | glszm      | ZoneEntropy                          | 4.650201919  |
| wavelet-HHH | glszm      | SmallAreaLowGrayLevelEmphasis        | 0.033064867  |
| wavelet-HHH | ngtdm      | Coarseness                           | 0.053479697  |
| wavelet-HHH | ngtdm      | Complexity                           | 202.8012722  |
| wavelet-HHH | ngtdm      | Strength                             | 3.51363606   |
| wavelet-HHH | ngtdm      | Contrast                             | 0.18651299   |
| wavelet-HHH | ngtdm      | Busyness                             | 0.156781281  |
| wavelet-HLL | gldm       | GrayLevelVariance                    | 82.07103779  |
| wavelet-HLL | gldm       | HighGrayLevelEmphasis                | 416.0550459  |
| wavelet-HLL | gldm       | DependenceEntropy                    | 5.696679852  |
| wavelet-HLL | gldm       | DependenceNonUniformity              | 35.40366972  |
| wavelet-HLL | gldm       | GrayLevelNonUniformity               | 5            |
| wavelet-HLL | gldm       | SmallDependenceEmphasis              | 0.529882773  |
| wavelet-HLL | gldm       | SmallDependenceHighGrayLevelEmphasis | 263.7245566  |
| wavelet-HLL | gldm       | DependenceNonUniformityNormalized    | 0.324804309  |
| wavelet-HLL | gldm       | LargeDependenceEmphasis              | 5.055045872  |
| wavelet-HLL | gldm       | LargeDependenceLowGrayLevelEmphasis  | 0.046900307  |
| wavelet-HLL | gldm       | DependenceVariance                   | 1.23642791   |
| wavelet-HLL | gldm       | LargeDependenceHighGrayLevelEmphasis | 1414.146789  |
| wavelet-HLL | gldm       | SmallDependenceLowGrayLevelEmphasis  | 0.011548349  |
| wavelet-HLL | gldm       | LowGrayLevelEmphasis                 | 0.015367884  |
| wavelet-HLL | glcm       | JointAverage                         | 17.27543613  |
| wavelet-HLL | glcm       | SumAverage                           | 34.55087226  |
| wavelet-HLL | glcm       | JointEntropy                         | 6.749068319  |
| wavelet-HLL | glcm       | ClusterShade                         | 2458.89257   |
| wavelet-HLL | glcm       | MaximumProbability                   | 0.025414853  |
| wavelet-HLL | glcm       | Idmn                                 | 0.955911295  |
| wavelet-HLL | glcm       | JointEnergy                          | 0.010269393  |
| wavelet-HLL | glcm       | Contrast                             | 95.46032483  |
| wavelet-HLL | glcm       | DifferenceEntropy                    | 3.988568047  |
| wavelet-HLL | glcm       | InverseVariance                      | 0.134909948  |
| wavelet-HLL | glcm       | DifferenceVariance                   | 35.40212187  |
| wavelet-HLL | glcm       | Idn                                  | 0.863084398  |
| wavelet-HLL | glcm       | Idm                                  | 0.139460267  |
| wavelet-HLL | glcm       | Correlation                          | 0.295539051  |
| wavelet-HLL | glcm       | Autocorrelation                      | 318.7972145  |
| wavelet-HLL | glcm       | SumEntropy                           | 4.837259296  |
| wavelet-HLL | glcm       | SumSquares                           | 67.97995294  |
| wavelet-HLL | glcm       | ClusterProminence                    | 120206.5974  |
| wavelet-HLL | glcm       | Imc2                                 | 0.995563807  |
| wavelet-HLL | glcm       | Imc1                                 | -0.520792254 |
| wavelet-HLL | glcm       | DifferenceAverage                    | 7.504346844  |
| wavelet-HLL | glcm       | Id                                   | 0.225714269  |
| wavelet-HLL | glcm       | ClusterTendency                      | 176.4594869  |
| wavelet-HLL | firstorder | InterquartileRange                   | 306.2582867  |
| wavelet-HLL | firstorder | Skewness                             | 0.753382052  |
| wavelet-HLL | firstorder | Uniformity                           | 0.04587156   |
| wavelet-HLL | firstorder | Median                               | -117.8756672 |

|             |            |                                  |              |
|-------------|------------|----------------------------------|--------------|
| wavelet-HLL | firstorder | Energy                           | 6192780.775  |
| wavelet-HLL | firstorder | RobustMeanAbsoluteDeviation      | 130.4680487  |
| wavelet-HLL | firstorder | MeanAbsoluteDeviation            | 182.4533389  |
| wavelet-HLL | firstorder | TotalEnergy                      | 167205080.9  |
| wavelet-HLL | firstorder | Maximum                          | 534.7195964  |
| wavelet-HLL | firstorder | RootMeanSquared                  | 238.3579294  |
| wavelet-HLL | firstorder | 90Percentile                     | 254.7248028  |
| wavelet-HLL | firstorder | Minimum                          | -509.3149218 |
| wavelet-HLL | firstorder | Entropy                          | 4.7640783    |
| wavelet-HLL | firstorder | Range                            | 1044.034518  |
| wavelet-HLL | firstorder | Variance                         | 50396.00755  |
| wavelet-HLL | firstorder | 10Percentile                     | -308.3872555 |
| wavelet-HLL | firstorder | Kurtosis                         | 2.884688065  |
| wavelet-HLL | firstorder | Mean                             | -80.11551021 |
| wavelet-HLL | grlm       | ShortRunLowGrayLevelEmphasis     | 0.015430133  |
| wavelet-HLL | grlm       | GrayLevelVariance                | 82.73253007  |
| wavelet-HLL | grlm       | LowGrayLevelRunEmphasis          | 0.015653326  |
| wavelet-HLL | grlm       | GrayLevelNonUniformityNormalized | 0.044787118  |
| wavelet-HLL | grlm       | RunVariance                      | 0.039519431  |
| wavelet-HLL | grlm       | GrayLevelNonUniformity           | 4.703415789  |
| wavelet-HLL | grlm       | LongRunEmphasis                  | 1.119153341  |
| wavelet-HLL | grlm       | ShortRunHighGrayLevelEmphasis    | 413.5883226  |
| wavelet-HLL | grlm       | RunLengthNonUniformity           | 97.70975819  |
| wavelet-HLL | grlm       | ShortRunEmphasis                 | 0.971863607  |
| wavelet-HLL | grlm       | LongRunHighGrayLevelEmphasis     | 453.8019232  |
| wavelet-HLL | grlm       | RunPercentage                    | 0.963302752  |
| wavelet-HLL | grlm       | LongRunLowGrayLevelEmphasis      | 0.016612175  |
| wavelet-HLL | grlm       | RunEntropy                       | 4.897796737  |
| wavelet-HLL | grlm       | HighGrayLevelRunEmphasis         | 421.4988873  |
| wavelet-HLL | grlm       | RunLengthNonUniformityNormalized | 0.929489872  |
| wavelet-HLL | glszm      | GrayLevelVariance                | 86.79059021  |
| wavelet-HLL | glszm      | ZoneVariance                     | 1.258139046  |
| wavelet-HLL | glszm      | GrayLevelNonUniformityNormalized | 0.037597143  |
| wavelet-HLL | glszm      | SizeZoneNonUniformityNormalized  | 0.496324302  |
| wavelet-HLL | glszm      | SizeZoneNonUniformity            | 34.24637681  |
| wavelet-HLL | glszm      | GrayLevelNonUniformity           | 2.594202899  |
| wavelet-HLL | glszm      | LargeAreaEmphasis                | 3.753623188  |
| wavelet-HLL | glszm      | SmallAreaHighGrayLevelEmphasis   | 378.6747059  |
| wavelet-HLL | glszm      | ZonePercentage                   | 0.633027523  |
| wavelet-HLL | glszm      | LargeAreaLowGrayLevelEmphasis    | 0.041530189  |
| wavelet-HLL | glszm      | LargeAreaHighGrayLevelEmphasis   | 1184.811594  |
| wavelet-HLL | glszm      | HighGrayLevelZoneEmphasis        | 481.0144928  |
| wavelet-HLL | glszm      | SmallAreaEmphasis                | 0.729965658  |
| wavelet-HLL | glszm      | LowGrayLevelZoneEmphasis         | 0.019605995  |
| wavelet-HLL | glszm      | ZoneEntropy                      | 5.474112319  |
| wavelet-HLL | glszm      | SmallAreaLowGrayLevelEmphasis    | 0.017379346  |
| wavelet-HLL | ngtdm      | Coarseness                       | 0.042352932  |
| wavelet-HLL | ngtdm      | Complexity                       | 2744.049921  |
| wavelet-HLL | ngtdm      | Strength                         | 25.25668373  |
| wavelet-HLL | ngtdm      | Contrast                         | 0.73408229   |
| wavelet-HLL | ngtdm      | Busyness                         | 0.055836407  |
| wavelet-LHL | gldm       | GrayLevelVariance                | 85.86650955  |
| wavelet-LHL | gldm       | HighGrayLevelEmphasis            | 378.9357798  |

|             |            |                                      |              |
|-------------|------------|--------------------------------------|--------------|
| wavelet-LHL | gldm       | DependenceEntropy                    | 5.501770563  |
| wavelet-LHL | gldm       | DependenceNonUniformity              | 40.41284404  |
| wavelet-LHL | gldm       | GrayLevelNonUniformity               | 4.871559633  |
| wavelet-LHL | gldm       | SmallDependenceEmphasis              | 0.549566769  |
| wavelet-LHL | gldm       | SmallDependenceHighGrayLevelEmphasis | 250.8096967  |
| wavelet-LHL | gldm       | DependenceNonUniformityNormalized    | 0.370760037  |
| wavelet-LHL | gldm       | LargeDependenceEmphasis              | 3.660550459  |
| wavelet-LHL | gldm       | LargeDependenceLowGrayLevelEmphasis  | 0.037944145  |
| wavelet-LHL | gldm       | DependenceVariance                   | 0.590017675  |
| wavelet-LHL | gldm       | LargeDependenceHighGrayLevelEmphasis | 1004.825688  |
| wavelet-LHL | gldm       | SmallDependenceLowGrayLevelEmphasis  | 0.013473837  |
| wavelet-LHL | gldm       | LowGrayLevelEmphasis                 | 0.016987016  |
| wavelet-LHL | glcm       | JointAverage                         | 16.69888447  |
| wavelet-LHL | glcm       | SumAverage                           | 33.39776894  |
| wavelet-LHL | glcm       | JointEntropy                         | 6.819786296  |
| wavelet-LHL | glcm       | ClusterShade                         | 4040.503419  |
| wavelet-LHL | glcm       | MaximumProbability                   | 0.02112274   |
| wavelet-LHL | glcm       | ldmn                                 | 0.962110013  |
| wavelet-LHL | glcm       | JointEnergy                          | 0.009475355  |
| wavelet-LHL | glcm       | Contrast                             | 105.8358741  |
| wavelet-LHL | glcm       | DifferenceEntropy                    | 3.978801301  |
| wavelet-LHL | glcm       | InverseVariance                      | 0.139361351  |
| wavelet-LHL | glcm       | DifferenceVariance                   | 41.91876597  |
| wavelet-LHL | glcm       | ldn                                  | 0.873949094  |
| wavelet-LHL | glcm       | ldm                                  | 0.130106975  |
| wavelet-LHL | glcm       | Correlation                          | 0.320530203  |
| wavelet-LHL | glcm       | Autocorrelation                      | 307.7517306  |
| wavelet-LHL | glcm       | SumEntropy                           | 4.883014436  |
| wavelet-LHL | glcm       | SumSquares                           | 81.61548061  |
| wavelet-LHL | glcm       | ClusterProminence                    | 212295.2631  |
| wavelet-LHL | glcm       | lmc2                                 | 0.996163908  |
| wavelet-LHL | glcm       | lmc1                                 | -0.528937328 |
| wavelet-LHL | glcm       | DifferenceAverage                    | 7.76353248   |
| wavelet-LHL | glcm       | ld                                   | 0.21723723   |
| wavelet-LHL | glcm       | ClusterTendency                      | 220.6260484  |
| wavelet-LHL | firstorder | InterquartileRange                   | 285.9850807  |
| wavelet-LHL | firstorder | Skewness                             | 1.159123236  |
| wavelet-LHL | firstorder | Uniformity                           | 0.044693208  |
| wavelet-LHL | firstorder | Median                               | -119.2836102 |
| wavelet-LHL | firstorder | Energy                               | 6206931.148  |
| wavelet-LHL | firstorder | RobustMeanAbsoluteDeviation          | 114.4953214  |
| wavelet-LHL | firstorder | MeanAbsoluteDeviation                | 178.6133754  |
| wavelet-LHL | firstorder | TotalEnergy                          | 167587141    |
| wavelet-LHL | firstorder | Maximum                              | 741.7841276  |
| wavelet-LHL | firstorder | RootMeanSquared                      | 238.6300955  |
| wavelet-LHL | firstorder | 90Percentile                         | 277.2098856  |
| wavelet-LHL | firstorder | Minimum                              | -465.7474833 |
| wavelet-LHL | firstorder | Entropy                              | 4.736313139  |
| wavelet-LHL | firstorder | Range                                | 1207.531611  |
| wavelet-LHL | firstorder | Variance                             | 53353.04897  |
| wavelet-LHL | firstorder | 10Percentile                         | -291.3490544 |
| wavelet-LHL | firstorder | Kurtosis                             | 4.289131173  |
| wavelet-LHL | firstorder | Mean                                 | -59.92723497 |

|             |       |                                      |             |
|-------------|-------|--------------------------------------|-------------|
| wavelet-LHL | grlm  | ShortRunLowGrayLevelEmphasis         | 0.017079754 |
| wavelet-LHL | grlm  | GrayLevelVariance                    | 86.89517973 |
| wavelet-LHL | grlm  | LowGrayLevelRunEmphasis              | 0.017261481 |
| wavelet-LHL | grlm  | GrayLevelNonUniformityNormalized     | 0.044268144 |
| wavelet-LHL | grlm  | RunVariance                          | 0.028815868 |
| wavelet-LHL | grlm  | GrayLevelNonUniformity               | 4.685953094 |
| wavelet-LHL | grlm  | LongRunEmphasis                      | 1.091263958 |
| wavelet-LHL | grlm  | ShortRunHighGrayLevelEmphasis        | 377.031442  |
| wavelet-LHL | grlm  | RunLengthNonUniformity               | 99.86261683 |
| wavelet-LHL | grlm  | ShortRunEmphasis                     | 0.977184011 |
| wavelet-LHL | grlm  | LongRunHighGrayLevelEmphasis         | 405.8144366 |
| wavelet-LHL | grlm  | RunPercentage                        | 0.971065632 |
| wavelet-LHL | grlm  | LongRunLowGrayLevelEmphasis          | 0.017988389 |
| wavelet-LHL | grlm  | RunEntropy                           | 4.839400721 |
| wavelet-LHL | grlm  | HighGrayLevelRunEmphasis             | 382.7880409 |
| wavelet-LHL | grlm  | RunLengthNonUniformityNormalized     | 0.942368265 |
| wavelet-LHL | glszm | GrayLevelVariance                    | 102.5455267 |
| wavelet-LHL | glszm | ZoneVariance                         | 1.093830589 |
| wavelet-LHL | glszm | GrayLevelNonUniformityNormalized     | 0.039079548 |
| wavelet-LHL | glszm | SizeZoneNonUniformityNormalized      | 0.511208094 |
| wavelet-LHL | glszm | SizeZoneNonUniformity                | 36.29577465 |
| wavelet-LHL | glszm | GrayLevelNonUniformity               | 2.774647887 |
| wavelet-LHL | glszm | LargeAreaEmphasis                    | 3.450704225 |
| wavelet-LHL | glszm | SmallAreaHighGrayLevelEmphasis       | 352.7130243 |
| wavelet-LHL | glszm | ZonePercentage                       | 0.651376147 |
| wavelet-LHL | glszm | LargeAreaLowGrayLevelEmphasis        | 0.040907692 |
| wavelet-LHL | glszm | LargeAreaHighGrayLevelEmphasis       | 981.915493  |
| wavelet-LHL | glszm | HighGrayLevelZoneEmphasis            | 440.3802817 |
| wavelet-LHL | glszm | SmallAreaEmphasis                    | 0.732664319 |
| wavelet-LHL | glszm | LowGrayLevelZoneEmphasis             | 0.021899894 |
| wavelet-LHL | glszm | ZoneEntropy                          | 5.381728457 |
| wavelet-LHL | glszm | SmallAreaLowGrayLevelEmphasis        | 0.019821735 |
| wavelet-LHL | ngtdm | Coarseness                           | 0.053688439 |
| wavelet-LHL | ngtdm | Complexity                           | 2607.055658 |
| wavelet-LHL | ngtdm | Strength                             | 31.23116158 |
| wavelet-LHL | ngtdm | Contrast                             | 0.757562232 |
| wavelet-LHL | ngtdm | Busyness                             | 0.045313638 |
| wavelet-LHH | gldm  | GrayLevelVariance                    | 15.4758017  |
| wavelet-LHH | gldm  | HighGrayLevelEmphasis                | 173.2201835 |
| wavelet-LHH | gldm  | DependenceEntropy                    | 5.287237738 |
| wavelet-LHH | gldm  | DependenceNonUniformity              | 26.19266055 |
| wavelet-LHH | gldm  | GrayLevelNonUniformity               | 9.330275229 |
| wavelet-LHH | gldm  | SmallDependenceEmphasis              | 0.43155438  |
| wavelet-LHH | gldm  | SmallDependenceHighGrayLevelEmphasis | 78.36347074 |
| wavelet-LHH | gldm  | DependenceNonUniformityNormalized    | 0.240299638 |
| wavelet-LHH | gldm  | LargeDependenceEmphasis              | 8.339449541 |
| wavelet-LHH | gldm  | LargeDependenceLowGrayLevelEmphasis  | 0.06824921  |
| wavelet-LHH | gldm  | DependenceVariance                   | 2.339197037 |
| wavelet-LHH | gldm  | LargeDependenceHighGrayLevelEmphasis | 1355.036697 |
| wavelet-LHH | gldm  | SmallDependenceLowGrayLevelEmphasis  | 0.014823232 |
| wavelet-LHH | gldm  | LowGrayLevelEmphasis                 | 0.018874988 |
| wavelet-LHH | glcm  | JointAverage                         | 12.69313929 |
| wavelet-LHH | glcm  | SumAverage                           | 25.38627858 |



|             |            |                                  |              |
|-------------|------------|----------------------------------|--------------|
| wavelet-LHH | glcm       | JointEntropy                     | 6.247166221  |
| wavelet-LHH | glcm       | ClusterShade                     | -27.38686515 |
| wavelet-LHH | glcm       | MaximumProbability               | 0.040592304  |
| wavelet-LHH | glcm       | Idmn                             | 0.945732359  |
| wavelet-LHH | glcm       | JointEnergy                      | 0.015956449  |
| wavelet-LHH | glcm       | Contrast                         | 29.38816819  |
| wavelet-LHH | glcm       | DifferenceEntropy                | 3.31964845   |
| wavelet-LHH | glcm       | InverseVariance                  | 0.241293163  |
| wavelet-LHH | glcm       | DifferenceVariance               | 12.23634771  |
| wavelet-LHH | glcm       | Idn                              | 0.851744552  |
| wavelet-LHH | glcm       | Idm                              | 0.23138445   |
| wavelet-LHH | glcm       | Correlation                      | -0.034287239 |
| wavelet-LHH | glcm       | Autocorrelation                  | 160.6976878  |
| wavelet-LHH | glcm       | SumEntropy                       | 4.062491005  |
| wavelet-LHH | glcm       | SumSquares                       | 14.25303494  |
| wavelet-LHH | glcm       | ClusterProminence                | 2886.86302   |
| wavelet-LHH | glcm       | Imc2                             | 0.958136147  |
| wavelet-LHH | glcm       | Imc1                             | -0.335758493 |
| wavelet-LHH | glcm       | DifferenceAverage                | 4.089890175  |
| wavelet-LHH | glcm       | Id                               | 0.321562207  |
| wavelet-LHH | glcm       | ClusterTendency                  | 27.62397159  |
| wavelet-LHH | firstorder | InterquartileRange               | 101.565048   |
| wavelet-LHH | firstorder | Skewness                         | -0.209515144 |
| wavelet-LHH | firstorder | Uniformity                       | 0.085598855  |
| wavelet-LHH | firstorder | Median                           | 2.113212653  |
| wavelet-LHH | firstorder | Energy                           | 1046393.783  |
| wavelet-LHH | firstorder | RobustMeanAbsoluteDeviation      | 45.54354071  |
| wavelet-LHH | firstorder | MeanAbsoluteDeviation            | 72.46635503  |
| wavelet-LHH | firstorder | TotalEnergy                      | 28252632.14  |
| wavelet-LHH | firstorder | Maximum                          | 218.7788053  |
| wavelet-LHH | firstorder | RootMeanSquared                  | 97.97929865  |
| wavelet-LHH | firstorder | 90Percentile                     | 136.7230761  |
| wavelet-LHH | firstorder | Minimum                          | -292.3033988 |
| wavelet-LHH | firstorder | Entropy                          | 3.84350158   |
| wavelet-LHH | firstorder | Range                            | 511.0822041  |
| wavelet-LHH | firstorder | Variance                         | 9597.756704  |
| wavelet-LHH | firstorder | 10Percentile                     | -121.4005228 |
| wavelet-LHH | firstorder | Kurtosis                         | 3.414135461  |
| wavelet-LHH | firstorder | Mean                             | 1.47860059   |
| wavelet-LHH | gllm       | ShortRunLowGrayLevelEmphasis     | 0.019309154  |
| wavelet-LHH | gllm       | GrayLevelVariance                | 16.14544453  |
| wavelet-LHH | gllm       | LowGrayLevelRunEmphasis          | 0.019593074  |
| wavelet-LHH | gllm       | GrayLevelNonUniformityNormalized | 0.082149267  |
| wavelet-LHH | gllm       | RunVariance                      | 0.066107395  |
| wavelet-LHH | gllm       | GrayLevelNonUniformity           | 8.454896329  |
| wavelet-LHH | gllm       | LongRunEmphasis                  | 1.189936703  |
| wavelet-LHH | gllm       | ShortRunHighGrayLevelEmphasis    | 166.9643482  |
| wavelet-LHH | gllm       | RunLengthNonUniformity           | 92.49619268  |
| wavelet-LHH | gllm       | ShortRunEmphasis                 | 0.958451917  |
| wavelet-LHH | gllm       | LongRunHighGrayLevelEmphasis     | 204.6954791  |
| wavelet-LHH | gllm       | RunPercentage                    | 0.944248412  |
| wavelet-LHH | gllm       | LongRunLowGrayLevelEmphasis      | 0.020898637  |
| wavelet-LHH | gllm       | RunEntropy                       | 4.092291561  |

|             |       |                                      |             |
|-------------|-------|--------------------------------------|-------------|
| wavelet-LHH | grlm  | HighGrayLevelRunEmphasis             | 173.8032664 |
| wavelet-LHH | grlm  | RunLengthNonUniformityNormalized     | 0.897619593 |
| wavelet-LHH | glszm | GrayLevelVariance                    | 25.34082645 |
| wavelet-LHH | glszm | ZoneVariance                         | 7.108760331 |
| wavelet-LHH | glszm | GrayLevelNonUniformityNormalized     | 0.063801653 |
| wavelet-LHH | glszm | SizeZoneNonUniformityNormalized      | 0.475041322 |
| wavelet-LHH | glszm | SizeZoneNonUniformity                | 26.12727273 |
| wavelet-LHH | glszm | GrayLevelNonUniformity               | 3.509090909 |
| wavelet-LHH | glszm | LargeAreaEmphasis                    | 11.03636364 |
| wavelet-LHH | glszm | SmallAreaHighGrayLevelEmphasis       | 131.810967  |
| wavelet-LHH | glszm | ZonePercentage                       | 0.504587156 |
| wavelet-LHH | glszm | LargeAreaLowGrayLevelEmphasis        | 0.096688859 |
| wavelet-LHH | glszm | LargeAreaHighGrayLevelEmphasis       | 1792.2      |
| wavelet-LHH | glszm | HighGrayLevelZoneEmphasis            | 181.3636364 |
| wavelet-LHH | glszm | SmallAreaEmphasis                    | 0.714178939 |
| wavelet-LHH | glszm | LowGrayLevelZoneEmphasis             | 0.030526195 |
| wavelet-LHH | glszm | ZoneEntropy                          | 4.803642668 |
| wavelet-LHH | glszm | SmallAreaLowGrayLevelEmphasis        | 0.028329469 |
| wavelet-LHH | ngtdm | Coarseness                           | 0.057230658 |
| wavelet-LHH | ngtdm | Complexity                           | 419.6197878 |
| wavelet-LHH | ngtdm | Strength                             | 5.661310045 |
| wavelet-LHH | ngtdm | Contrast                             | 0.281760675 |
| wavelet-LHH | ngtdm | Busyness                             | 0.080538463 |
| wavelet-LLH | gldm  | GrayLevelVariance                    | 56.73175659 |
| wavelet-LLH | gldm  | HighGrayLevelEmphasis                | 484.3486239 |
| wavelet-LLH | gldm  | DependenceEntropy                    | 5.507421224 |
| wavelet-LLH | gldm  | DependenceNonUniformity              | 34.59633028 |
| wavelet-LLH | gldm  | GrayLevelNonUniformity               | 5.770642202 |
| wavelet-LLH | gldm  | SmallDependenceEmphasis              | 0.559604995 |
| wavelet-LLH | gldm  | SmallDependenceHighGrayLevelEmphasis | 312.1717788 |
| wavelet-LLH | gldm  | DependenceNonUniformityNormalized    | 0.317397525 |
| wavelet-LLH | gldm  | LargeDependenceEmphasis              | 5.697247706 |
| wavelet-LLH | gldm  | LargeDependenceLowGrayLevelEmphasis  | 0.02999645  |
| wavelet-LLH | gldm  | DependenceVariance                   | 1.511657268 |
| wavelet-LLH | gldm  | LargeDependenceHighGrayLevelEmphasis | 2247.119266 |
| wavelet-LLH | gldm  | SmallDependenceLowGrayLevelEmphasis  | 0.010927674 |
| wavelet-LLH | gldm  | LowGrayLevelEmphasis                 | 0.012563142 |
| wavelet-LLH | glcm  | JointAverage                         | 20.04363708 |
| wavelet-LLH | glcm  | SumAverage                           | 40.08727416 |
| wavelet-LLH | glcm  | JointEntropy                         | 6.733243157 |
| wavelet-LLH | glcm  | ClusterShade                         | 726.4201442 |
| wavelet-LLH | glcm  | MaximumProbability                   | 0.024212187 |
| wavelet-LLH | glcm  | ldmn                                 | 0.958890985 |
| wavelet-LLH | glcm  | JointEnergy                          | 0.01033549  |
| wavelet-LLH | glcm  | Contrast                             | 79.82671033 |
| wavelet-LLH | glcm  | DifferenceEntropy                    | 3.885985193 |
| wavelet-LLH | glcm  | InverseVariance                      | 0.132764629 |
| wavelet-LLH | glcm  | DifferenceVariance                   | 28.12153696 |
| wavelet-LLH | glcm  | ldn                                  | 0.866325108 |
| wavelet-LLH | glcm  | ldm                                  | 0.146432    |
| wavelet-LLH | glcm  | Correlation                          | 0.176879236 |
| wavelet-LLH | glcm  | Autocorrelation                      | 411.1114634 |
| wavelet-LLH | glcm  | SumEntropy                           | 4.789736212 |

|             |            |                                  |              |
|-------------|------------|----------------------------------|--------------|
| wavelet-LLH | glcm       | SumSquares                       | 49.21634478  |
| wavelet-LLH | glcm       | ClusterProminence                | 47040.42067  |
| wavelet-LLH | glcm       | Imc2                             | 0.991377281  |
| wavelet-LLH | glcm       | Imc1                             | -0.468059486 |
| wavelet-LLH | glcm       | DifferenceAverage                | 6.919174389  |
| wavelet-LLH | glcm       | Id                               | 0.235658864  |
| wavelet-LLH | glcm       | ClusterTendency                  | 117.0386688  |
| wavelet-LLH | firstorder | InterquartileRange               | 226.6681512  |
| wavelet-LLH | firstorder | Skewness                         | 0.377768308  |
| wavelet-LLH | firstorder | Uniformity                       | 0.052941672  |
| wavelet-LLH | firstorder | Median                           | -56.23508147 |
| wavelet-LLH | firstorder | Energy                           | 4071333.816  |
| wavelet-LLH | firstorder | RobustMeanAbsoluteDeviation      | 108.308988   |
| wavelet-LLH | firstorder | MeanAbsoluteDeviation            | 151.7413456  |
| wavelet-LLH | firstorder | TotalEnergy                      | 109926013    |
| wavelet-LLH | firstorder | Maximum                          | 458.7437186  |
| wavelet-LLH | firstorder | RootMeanSquared                  | 193.2658438  |
| wavelet-LLH | firstorder | 90Percentile                     | 236.2976642  |
| wavelet-LLH | firstorder | Minimum                          | -535.9325273 |
| wavelet-LLH | firstorder | Entropy                          | 4.50807607   |
| wavelet-LLH | firstorder | Range                            | 994.676246   |
| wavelet-LLH | firstorder | Variance                         | 35421.39339  |
| wavelet-LLH | firstorder | 10Percentile                     | -262.0081074 |
| wavelet-LLH | firstorder | Kurtosis                         | 2.911183527  |
| wavelet-LLH | firstorder | Mean                             | -43.93509985 |
| wavelet-LLH | gllm       | ShortRunLowGrayLevelEmphasis     | 0.012829048  |
| wavelet-LLH | gllm       | GrayLevelVariance                | 57.60461301  |
| wavelet-LLH | gllm       | LowGrayLevelRunEmphasis          | 0.012941023  |
| wavelet-LLH | gllm       | GrayLevelNonUniformityNormalized | 0.051845043  |
| wavelet-LLH | gllm       | RunVariance                      | 0.04459923   |
| wavelet-LLH | gllm       | GrayLevelNonUniformity           | 5.424993955  |
| wavelet-LLH | gllm       | LongRunEmphasis                  | 1.132200049  |
| wavelet-LLH | gllm       | ShortRunHighGrayLevelEmphasis    | 476.7277026  |
| wavelet-LLH | gllm       | RunLengthNonUniformity           | 96.72722323  |
| wavelet-LLH | gllm       | ShortRunEmphasis                 | 0.969474344  |
| wavelet-LLH | gllm       | LongRunHighGrayLevelEmphasis     | 539.2570379  |
| wavelet-LLH | gllm       | RunPercentage                    | 0.959774171  |
| wavelet-LLH | gllm       | LongRunLowGrayLevelEmphasis      | 0.013429321  |
| wavelet-LLH | gllm       | RunEntropy                       | 4.675413737  |
| wavelet-LLH | gllm       | HighGrayLevelRunEmphasis         | 488.5634056  |
| wavelet-LLH | gllm       | RunLengthNonUniformityNormalized | 0.923557863  |
| wavelet-LLH | glszm      | GrayLevelVariance                | 68.00778547  |
| wavelet-LLH | glszm      | ZoneVariance                     | 1.680579585  |
| wavelet-LLH | glszm      | GrayLevelNonUniformityNormalized | 0.044117647  |
| wavelet-LLH | glszm      | SizeZoneNonUniformityNormalized  | 0.619377163  |
| wavelet-LLH | glszm      | SizeZoneNonUniformity            | 42.11764706  |
| wavelet-LLH | glszm      | GrayLevelNonUniformity           | 3            |
| wavelet-LLH | glszm      | LargeAreaEmphasis                | 4.25         |
| wavelet-LLH | glszm      | SmallAreaHighGrayLevelEmphasis   | 465.7853309  |
| wavelet-LLH | glszm      | ZonePercentage                   | 0.623853211  |
| wavelet-LLH | glszm      | LargeAreaLowGrayLevelEmphasis    | 0.029841138  |
| wavelet-LLH | glszm      | LargeAreaHighGrayLevelEmphasis   | 1744.323529  |
| wavelet-LLH | glszm      | HighGrayLevelZoneEmphasis        | 545.5588235  |

|             |            |                                      |              |
|-------------|------------|--------------------------------------|--------------|
| wavelet-LLH | glszm      | SmallAreaEmphasis                    | 0.804207516  |
| wavelet-LLH | glszm      | LowGrayLevelZoneEmphasis             | 0.017914291  |
| wavelet-LLH | glszm      | ZoneEntropy                          | 5.138502179  |
| wavelet-LLH | glszm      | SmallAreaLowGrayLevelEmphasis        | 0.017165075  |
| wavelet-LLH | ngtdm      | Coarseness                           | 0.041421759  |
| wavelet-LLH | ngtdm      | Complexity                           | 1925.666889  |
| wavelet-LLH | ngtdm      | Strength                             | 16.81329764  |
| wavelet-LLH | ngtdm      | Contrast                             | 0.72419633   |
| wavelet-LLH | ngtdm      | Busyness                             | 0.05308374   |
| wavelet-LLL | gldm       | GrayLevelVariance                    | 427.2948405  |
| wavelet-LLL | gldm       | HighGrayLevelEmphasis                | 2410.40367   |
| wavelet-LLL | gldm       | DependenceEntropy                    | 5.816125265  |
| wavelet-LLL | gldm       | DependenceNonUniformity              | 53.25688073  |
| wavelet-LLL | gldm       | GrayLevelNonUniformity               | 2.853211009  |
| wavelet-LLL | gldm       | SmallDependenceEmphasis              | 0.7245158    |
| wavelet-LLL | gldm       | SmallDependenceHighGrayLevelEmphasis | 1601.09684   |
| wavelet-LLL | gldm       | DependenceNonUniformityNormalized    | 0.488595236  |
| wavelet-LLL | gldm       | LargeDependenceEmphasis              | 2.963302752  |
| wavelet-LLL | gldm       | LargeDependenceLowGrayLevelEmphasis  | 0.020254418  |
| wavelet-LLL | gldm       | DependenceVariance                   | 0.671828971  |
| wavelet-LLL | gldm       | LargeDependenceHighGrayLevelEmphasis | 9346.550459  |
| wavelet-LLL | gldm       | SmallDependenceLowGrayLevelEmphasis  | 0.011502673  |
| wavelet-LLL | gldm       | LowGrayLevelEmphasis                 | 0.013179033  |
| wavelet-LLL | glcm       | JointAverage                         | 50.69788602  |
| wavelet-LLL | glcm       | SumAverage                           | 101.395772   |
| wavelet-LLL | glcm       | JointEntropy                         | 6.997088704  |
| wavelet-LLL | glcm       | ClusterShade                         | -9929.663809 |
| wavelet-LLL | glcm       | MaximumProbability                   | 0.016483408  |
| wavelet-LLL | glcm       | ldmn                                 | 0.92273511   |
| wavelet-LLL | glcm       | JointEnergy                          | 0.008105411  |
| wavelet-LLL | glcm       | Contrast                             | 577.9367069  |
| wavelet-LLL | glcm       | DifferenceEntropy                    | 4.881906706  |
| wavelet-LLL | glcm       | InverseVariance                      | 0.048102953  |
| wavelet-LLL | glcm       | DifferenceVariance                   | 194.4112577  |
| wavelet-LLL | glcm       | ldn                                  | 0.818415349  |
| wavelet-LLL | glcm       | ldm                                  | 0.062445552  |
| wavelet-LLL | glcm       | Correlation                          | 0.275028336  |
| wavelet-LLL | glcm       | Autocorrelation                      | 2683.349497  |
| wavelet-LLL | glcm       | SumEntropy                           | 5.581407785  |
| wavelet-LLL | glcm       | SumSquares                           | 400.5224789  |
| wavelet-LLL | glcm       | ClusterProminence                    | 2559680.657  |
| wavelet-LLL | glcm       | lmc2                                 | 0.999730118  |
| wavelet-LLL | glcm       | lmc1                                 | -0.700455732 |
| wavelet-LLL | glcm       | DifferenceAverage                    | 19.27362862  |
| wavelet-LLL | glcm       | ld                                   | 0.122538923  |
| wavelet-LLL | glcm       | ClusterTendency                      | 1024.153208  |
| wavelet-LLL | firstorder | InterquartileRange                   | 846.9949757  |
| wavelet-LLL | firstorder | Skewness                             | -0.095434346 |
| wavelet-LLL | firstorder | Uniformity                           | 0.026176248  |
| wavelet-LLL | firstorder | Median                               | -641.3974933 |
| wavelet-LLL | firstorder | Energy                               | 71376305.72  |
| wavelet-LLL | firstorder | RobustMeanAbsoluteDeviation          | 336.6307434  |
| wavelet-LLL | firstorder | MeanAbsoluteDeviation                | 440.2285116  |

|             |            |                                  |              |
|-------------|------------|----------------------------------|--------------|
| wavelet-LLL | firstorder | TotalEnergy                      | 1927160254   |
| wavelet-LLL | firstorder | Maximum                          | 220.0717301  |
| wavelet-LLL | firstorder | RootMeanSquared                  | 809.2147384  |
| wavelet-LLL | firstorder | 90Percentile                     | 97.12579791  |
| wavelet-LLL | firstorder | Minimum                          | -1711.233019 |
| wavelet-LLL | firstorder | Entropy                          | 5.495972999  |
| wavelet-LLL | firstorder | Range                            | 1931.304749  |
| wavelet-LLL | firstorder | Variance                         | 267222.2107  |
| wavelet-LLL | firstorder | 10Percentile                     | -1257.261768 |
| wavelet-LLL | firstorder | Kurtosis                         | 2.091947547  |
| wavelet-LLL | firstorder | Mean                             | -622.5803419 |
| wavelet-LLL | grlm       | ShortRunLowGrayLevelEmphasis     | 0.013291187  |
| wavelet-LLL | grlm       | GrayLevelVariance                | 424.9838261  |
| wavelet-LLL | grlm       | LowGrayLevelRunEmphasis          | 0.01335823   |
| wavelet-LLL | grlm       | GrayLevelNonUniformityNormalized | 0.025935887  |
| wavelet-LLL | grlm       | RunVariance                      | 0.021215088  |
| wavelet-LLL | grlm       | GrayLevelNonUniformity           | 2.771511522  |
| wavelet-LLL | grlm       | LongRunEmphasis                  | 1.062655083  |
| wavelet-LLL | grlm       | ShortRunHighGrayLevelEmphasis    | 2343.761234  |
| wavelet-LLL | grlm       | RunLengthNonUniformity           | 102.8123049  |
| wavelet-LLL | grlm       | ShortRunEmphasis                 | 0.985158057  |
| wavelet-LLL | grlm       | LongRunHighGrayLevelEmphasis     | 2599.565965  |
| wavelet-LLL | grlm       | RunPercentage                    | 0.980239944  |
| wavelet-LLL | grlm       | LongRunLowGrayLevelEmphasis      | 0.013627261  |
| wavelet-LLL | grlm       | RunEntropy                       | 5.547759244  |
| wavelet-LLL | grlm       | HighGrayLevelRunEmphasis         | 2392.394895  |
| wavelet-LLL | grlm       | RunLengthNonUniformityNormalized | 0.961837006  |
| wavelet-LLL | glszm      | GrayLevelVariance                | 411.7751354  |
| wavelet-LLL | glszm      | ZoneVariance                     | 0.395825076  |
| wavelet-LLL | glszm      | GrayLevelNonUniformityNormalized | 0.024441802  |
| wavelet-LLL | glszm      | SizeZoneNonUniformityNormalized  | 0.699828247  |
| wavelet-LLL | glszm      | SizeZoneNonUniformity            | 60.88505747  |
| wavelet-LLL | glszm      | GrayLevelNonUniformity           | 2.126436782  |
| wavelet-LLL | glszm      | LargeAreaEmphasis                | 1.965517241  |
| wavelet-LLL | glszm      | SmallAreaHighGrayLevelEmphasis   | 1881.912197  |
| wavelet-LLL | glszm      | ZonePercentage                   | 0.798165138  |
| wavelet-LLL | glszm      | LargeAreaLowGrayLevelEmphasis    | 0.019412445  |
| wavelet-LLL | glszm      | LargeAreaHighGrayLevelEmphasis   | 5403.609195  |
| wavelet-LLL | glszm      | HighGrayLevelZoneEmphasis        | 2253.862069  |
| wavelet-LLL | glszm      | SmallAreaEmphasis                | 0.861590038  |
| wavelet-LLL | glszm      | LowGrayLevelZoneEmphasis         | 0.015102263  |
| wavelet-LLL | glszm      | ZoneEntropy                      | 5.781911599  |
| wavelet-LLL | glszm      | SmallAreaLowGrayLevelEmphasis    | 0.014067672  |
| wavelet-LLL | ngtdm      | Coarseness                       | 0.024814667  |
| wavelet-LLL | ngtdm      | Complexity                       | 22568.08122  |
| wavelet-LLL | ngtdm      | Strength                         | 65.65208786  |
| wavelet-LLL | ngtdm      | Contrast                         | 4.104727341  |
| wavelet-LLL | ngtdm      | Busyness                         | 0.01949824   |
| wavelet-HHL | gldm       | GrayLevelVariance                | 16.1664843   |
| wavelet-HHL | gldm       | HighGrayLevelEmphasis            | 132.5688073  |
| wavelet-HHL | gldm       | DependenceEntropy                | 5.26705672   |
| wavelet-HHL | gldm       | DependenceNonUniformity          | 27.3853211   |
| wavelet-HHL | gldm       | GrayLevelNonUniformity           | 8.559633028  |

|             |            |                                      |              |
|-------------|------------|--------------------------------------|--------------|
| wavelet-HHL | gldm       | SmallDependenceEmphasis              | 0.414057085  |
| wavelet-HHL | gldm       | SmallDependenceHighGrayLevelEmphasis | 59.44752294  |
| wavelet-HHL | gldm       | DependenceNonUniformityNormalized    | 0.251241478  |
| wavelet-HHL | gldm       | LargeDependenceEmphasis              | 6.871559633  |
| wavelet-HHL | gldm       | LargeDependenceLowGrayLevelEmphasis  | 0.100887794  |
| wavelet-HHL | gldm       | DependenceVariance                   | 1.484050164  |
| wavelet-HHL | gldm       | LargeDependenceHighGrayLevelEmphasis | 902.2752294  |
| wavelet-HHL | gldm       | SmallDependenceLowGrayLevelEmphasis  | 0.020249218  |
| wavelet-HHL | gldm       | LowGrayLevelEmphasis                 | 0.02976387   |
| wavelet-HHL | glcm       | JointAverage                         | 10.76507439  |
| wavelet-HHL | glcm       | SumAverage                           | 21.53014878  |
| wavelet-HHL | glcm       | JointEntropy                         | 6.399126432  |
| wavelet-HHL | glcm       | ClusterShade                         | -13.371546   |
| wavelet-HHL | glcm       | MaximumProbability                   | 0.038541377  |
| wavelet-HHL | glcm       | Idmn                                 | 0.937918885  |
| wavelet-HHL | glcm       | JointEnergy                          | 0.014178967  |
| wavelet-HHL | glcm       | Contrast                             | 33.26309577  |
| wavelet-HHL | glcm       | DifferenceEntropy                    | 3.431077935  |
| wavelet-HHL | glcm       | InverseVariance                      | 0.210023593  |
| wavelet-HHL | glcm       | DifferenceVariance                   | 12.62486479  |
| wavelet-HHL | glcm       | Idn                                  | 0.839133299  |
| wavelet-HHL | glcm       | Idm                                  | 0.20707629   |
| wavelet-HHL | glcm       | Correlation                          | 0.006809014  |
| wavelet-HHL | glcm       | Autocorrelation                      | 116.0546832  |
| wavelet-HHL | glcm       | SumEntropy                           | 4.170451504  |
| wavelet-HHL | glcm       | SumSquares                           | 16.74589959  |
| wavelet-HHL | glcm       | ClusterProminence                    | 3584.968698  |
| wavelet-HHL | glcm       | Imc2                                 | 0.965200812  |
| wavelet-HHL | glcm       | Imc1                                 | -0.354100744 |
| wavelet-HHL | glcm       | DifferenceAverage                    | 4.486995287  |
| wavelet-HHL | glcm       | Id                                   | 0.299869366  |
| wavelet-HHL | glcm       | ClusterTendency                      | 33.72050258  |
| wavelet-HHL | firstorder | InterquartileRange                   | 121.8160211  |
| wavelet-HHL | firstorder | Skewness                             | -0.108790017 |
| wavelet-HHL | firstorder | Uniformity                           | 0.078528743  |
| wavelet-HHL | firstorder | Median                               | 9.791010715  |
| wavelet-HHL | firstorder | Energy                               | 1117003.395  |
| wavelet-HHL | firstorder | RobustMeanAbsoluteDeviation          | 52.34547277  |
| wavelet-HHL | firstorder | MeanAbsoluteDeviation                | 78.99747978  |
| wavelet-HHL | firstorder | TotalEnergy                          | 30159091.65  |
| wavelet-HHL | firstorder | Maximum                              | 264.9508877  |
| wavelet-HHL | firstorder | RootMeanSquared                      | 101.2311097  |
| wavelet-HHL | firstorder | 90Percentile                         | 119.5364253  |
| wavelet-HHL | firstorder | Minimum                              | -248.8033896 |
| wavelet-HHL | firstorder | Entropy                              | 3.907504917  |
| wavelet-HHL | firstorder | Range                                | 513.7542774  |
| wavelet-HHL | firstorder | Variance                             | 10193.94858  |
| wavelet-HHL | firstorder | 10Percentile                         | -108.1689643 |
| wavelet-HHL | firstorder | Kurtosis                             | 3.159428861  |
| wavelet-HHL | firstorder | Mean                                 | 7.334097554  |
| wavelet-HHL | glrlm      | ShortRunLowGrayLevelEmphasis         | 0.03008914   |
| wavelet-HHL | glrlm      | GrayLevelVariance                    | 16.57640455  |
| wavelet-HHL | glrlm      | LowGrayLevelRunEmphasis              | 0.030644236  |

|             |       |                                      |             |
|-------------|-------|--------------------------------------|-------------|
| wavelet-HHL | gllm  | GrayLevelNonUniformityNormalized     | 0.077084495 |
| wavelet-HHL | gllm  | RunVariance                          | 0.058314431 |
| wavelet-HHL | gllm  | GrayLevelNonUniformity               | 7.978196668 |
| wavelet-HHL | gllm  | LongRunEmphasis                      | 1.172981632 |
| wavelet-HHL | gllm  | ShortRunHighGrayLevelEmphasis        | 127.7806528 |
| wavelet-HHL | gllm  | RunLengthNonUniformity               | 93.73963877 |
| wavelet-HHL | gllm  | ShortRunEmphasis                     | 0.960748624 |
| wavelet-HHL | gllm  | LongRunHighGrayLevelEmphasis         | 155.3562668 |
| wavelet-HHL | gllm  | RunPercentage                        | 0.949188426 |
| wavelet-HHL | gllm  | LongRunLowGrayLevelEmphasis          | 0.032964339 |
| wavelet-HHL | gllm  | RunEntropy                           | 4.127486704 |
| wavelet-HHL | gllm  | HighGrayLevelRunEmphasis             | 132.7699993 |
| wavelet-HHL | gllm  | RunLengthNonUniformityNormalized     | 0.903786414 |
| wavelet-HHL | glszm | GrayLevelVariance                    | 23.74154503 |
| wavelet-HHL | glszm | ZoneVariance                         | 4.996796013 |
| wavelet-HHL | glszm | GrayLevelNonUniformityNormalized     | 0.064435742 |
| wavelet-HHL | glszm | SizeZoneNonUniformityNormalized      | 0.431826273 |
| wavelet-HHL | glszm | SizeZoneNonUniformity                | 22.88679245 |
| wavelet-HHL | glszm | GrayLevelNonUniformity               | 3.41509434  |
| wavelet-HHL | glszm | LargeAreaEmphasis                    | 9.226415094 |
| wavelet-HHL | glszm | SmallAreaHighGrayLevelEmphasis       | 101.8430714 |
| wavelet-HHL | glszm | ZonePercentage                       | 0.486238532 |
| wavelet-HHL | glszm | LargeAreaLowGrayLevelEmphasis        | 0.13355898  |
| wavelet-HHL | glszm | LargeAreaHighGrayLevelEmphasis       | 1247.849057 |
| wavelet-HHL | glszm | HighGrayLevelZoneEmphasis            | 139         |
| wavelet-HHL | glszm | SmallAreaEmphasis                    | 0.681525137 |
| wavelet-HHL | glszm | LowGrayLevelZoneEmphasis             | 0.045781956 |
| wavelet-HHL | glszm | ZoneEntropy                          | 4.930473992 |
| wavelet-HHL | glszm | SmallAreaLowGrayLevelEmphasis        | 0.038657162 |
| wavelet-HHL | ngtdm | Coarseness                           | 0.048832167 |
| wavelet-HHL | ngtdm | Complexity                           | 480.6373893 |
| wavelet-HHL | ngtdm | Strength                             | 5.691596001 |
| wavelet-HHL | ngtdm | Contrast                             | 0.276888035 |
| wavelet-HHL | ngtdm | Busyness                             | 0.101001594 |
| wavelet-HLH | gldm  | GrayLevelVariance                    | 11.38540527 |
| wavelet-HLH | gldm  | HighGrayLevelEmphasis                | 87.02752294 |
| wavelet-HLH | gldm  | DependenceEntropy                    | 5.14272994  |
| wavelet-HLH | gldm  | DependenceNonUniformity              | 25.25688073 |
| wavelet-HLH | gldm  | GrayLevelNonUniformity               | 9.788990826 |
| wavelet-HLH | gldm  | SmallDependenceEmphasis              | 0.37667296  |
| wavelet-HLH | gldm  | SmallDependenceHighGrayLevelEmphasis | 40.89116473 |
| wavelet-HLH | gldm  | DependenceNonUniformityNormalized    | 0.231714502 |
| wavelet-HLH | gldm  | LargeDependenceEmphasis              | 7.844036697 |
| wavelet-HLH | gldm  | LargeDependenceLowGrayLevelEmphasis  | 0.176674775 |
| wavelet-HLH | gldm  | DependenceVariance                   | 1.662654659 |
| wavelet-HLH | gldm  | LargeDependenceHighGrayLevelEmphasis | 537.9633028 |
| wavelet-HLH | gldm  | SmallDependenceLowGrayLevelEmphasis  | 0.019844362 |
| wavelet-HLH | gldm  | LowGrayLevelEmphasis                 | 0.033037277 |
| wavelet-HLH | glcm  | JointAverage                         | 8.72481216  |
| wavelet-HLH | glcm  | SumAverage                           | 17.44962432 |
| wavelet-HLH | glcm  | JointEntropy                         | 6.300629121 |
| wavelet-HLH | glcm  | ClusterShade                         | 23.58940275 |
| wavelet-HLH | glcm  | MaximumProbability                   | 0.036126792 |

|             |            |                                  |              |
|-------------|------------|----------------------------------|--------------|
| wavelet-HLH | glcm       | Idmn                             | 0.936190394  |
| wavelet-HLH | glcm       | JointEnergy                      | 0.014713964  |
| wavelet-HLH | glcm       | Contrast                         | 22.08360333  |
| wavelet-HLH | glcm       | DifferenceEntropy                | 3.173140783  |
| wavelet-HLH | glcm       | InverseVariance                  | 0.23561655   |
| wavelet-HLH | glcm       | DifferenceVariance               | 7.692112014  |
| wavelet-HLH | glcm       | Idn                              | 0.834401937  |
| wavelet-HLH | glcm       | Idm                              | 0.231610733  |
| wavelet-HLH | glcm       | Correlation                      | 0.024364929  |
| wavelet-HLH | glcm       | Autocorrelation                  | 76.42906388  |
| wavelet-HLH | glcm       | SumEntropy                       | 4.011396814  |
| wavelet-HLH | glcm       | SumSquares                       | 11.32633906  |
| wavelet-HLH | glcm       | ClusterProminence                | 1557.463739  |
| wavelet-HLH | glcm       | Imc2                             | 0.935918701  |
| wavelet-HLH | glcm       | Imc1                             | -0.286155132 |
| wavelet-HLH | glcm       | DifferenceAverage                | 3.734214168  |
| wavelet-HLH | glcm       | Id                               | 0.325310542  |
| wavelet-HLH | glcm       | ClusterTendency                  | 23.22175292  |
| wavelet-HLH | firstorder | InterquartileRange               | 124.2693942  |
| wavelet-HLH | firstorder | Skewness                         | 0.208665707  |
| wavelet-HLH | firstorder | Uniformity                       | 0.089807255  |
| wavelet-HLH | firstorder | Median                           | 1.680519004  |
| wavelet-HLH | firstorder | Energy                           | 791466.5905  |
| wavelet-HLH | firstorder | RobustMeanAbsoluteDeviation      | 48.64664429  |
| wavelet-HLH | firstorder | MeanAbsoluteDeviation            | 68.58408274  |
| wavelet-HLH | firstorder | TotalEnergy                      | 21369597.94  |
| wavelet-HLH | firstorder | Maximum                          | 223.4378669  |
| wavelet-HLH | firstorder | RootMeanSquared                  | 85.21244851  |
| wavelet-HLH | firstorder | 90Percentile                     | 115.8743844  |
| wavelet-HLH | firstorder | Minimum                          | -192.363245  |
| wavelet-HLH | firstorder | Entropy                          | 3.693292774  |
| wavelet-HLH | firstorder | Range                            | 415.8011119  |
| wavelet-HLH | firstorder | Variance                         | 7240.928892  |
| wavelet-HLH | firstorder | 10Percentile                     | -100.7511451 |
| wavelet-HLH | firstorder | Kurtosis                         | 2.598933977  |
| wavelet-HLH | firstorder | Mean                             | 4.498053869  |
| wavelet-HLH | grlm       | ShortRunLowGrayLevelEmphasis     | 0.032855469  |
| wavelet-HLH | grlm       | GrayLevelVariance                | 11.71582473  |
| wavelet-HLH | grlm       | LowGrayLevelRunEmphasis          | 0.033768711  |
| wavelet-HLH | grlm       | GrayLevelNonUniformityNormalized | 0.088231214  |
| wavelet-HLH | grlm       | RunVariance                      | 0.067618012  |
| wavelet-HLH | grlm       | GrayLevelNonUniformity           | 9.070009898  |
| wavelet-HLH | grlm       | LongRunEmphasis                  | 1.196844726  |
| wavelet-HLH | grlm       | ShortRunHighGrayLevelEmphasis    | 85.20724882  |
| wavelet-HLH | grlm       | RunLengthNonUniformity           | 92.15713633  |
| wavelet-HLH | grlm       | ShortRunEmphasis                 | 0.956866177  |
| wavelet-HLH | grlm       | LongRunHighGrayLevelEmphasis     | 101.5805418  |
| wavelet-HLH | grlm       | RunPercentage                    | 0.94283698   |
| wavelet-HLH | grlm       | LongRunLowGrayLevelEmphasis      | 0.037957212  |
| wavelet-HLH | grlm       | RunEntropy                       | 3.938639289  |
| wavelet-HLH | grlm       | HighGrayLevelRunEmphasis         | 88.18004993  |
| wavelet-HLH | grlm       | RunLengthNonUniformityNormalized | 0.894752425  |
| wavelet-HLH | glszm      | GrayLevelVariance                | 16.98914931  |



|             |       |                                  |             |
|-------------|-------|----------------------------------|-------------|
| wavelet-HLH | glszm | ZoneVariance                     | 4.114149306 |
| wavelet-HLH | glszm | GrayLevelNonUniformityNormalized | 0.072048611 |
| wavelet-HLH | glszm | SizeZoneNonUniformityNormalized  | 0.400173611 |
| wavelet-HLH | glszm | SizeZoneNonUniformity            | 19.20833333 |
| wavelet-HLH | glszm | GrayLevelNonUniformity           | 3.458333333 |
| wavelet-HLH | glszm | LargeAreaEmphasis                | 9.270833333 |
| wavelet-HLH | glszm | SmallAreaHighGrayLevelEmphasis   | 76.62529538 |
| wavelet-HLH | glszm | ZonePercentage                   | 0.440366972 |
| wavelet-HLH | glszm | LargeAreaLowGrayLevelEmphasis    | 0.215010176 |
| wavelet-HLH | glszm | LargeAreaHighGrayLevelEmphasis   | 680.7916667 |
| wavelet-HLH | glszm | HighGrayLevelZoneEmphasis        | 105.2708333 |
| wavelet-HLH | glszm | SmallAreaEmphasis                | 0.65105705  |
| wavelet-HLH | glszm | LowGrayLevelZoneEmphasis         | 0.048340525 |
| wavelet-HLH | glszm | ZoneEntropy                      | 4.672995053 |
| wavelet-HLH | glszm | SmallAreaLowGrayLevelEmphasis    | 0.040770384 |
| wavelet-HLH | ngtdm | Coarseness                       | 0.045912856 |
| wavelet-HLH | ngtdm | Complexity                       | 300.6258468 |
| wavelet-HLH | ngtdm | Strength                         | 3.879636233 |
| wavelet-HLH | ngtdm | Contrast                         | 0.238791395 |
| wavelet-HLH | ngtdm | Busyness                         | 0.17664157  |

| Image type | Feature Class | Feature Name                         |                                                                                                                                                                                                                                                                                                                                                                                                                   |
|------------|---------------|--------------------------------------|-------------------------------------------------------------------------------------------------------------------------------------------------------------------------------------------------------------------------------------------------------------------------------------------------------------------------------------------------------------------------------------------------------------------|
| general    | info          | BoundingBox                          | 4: RTSTRUCT: C99-DNU_segment_GTV FB nb<br>(1, 1, 1, 5, 5, 6)                                                                                                                                                                                                                                                                                                                                                      |
| general    | info          | EnabledImageTypes                    | {u'Original': {}, u'Wavelet': {}}                                                                                                                                                                                                                                                                                                                                                                                 |
|            |               |                                      | {'distances': [1], 'additionalInfo': True, 'force2D': False, 'interpolator': 'sitkBSpline', 'resampledPixelSpacing': [3.0], 'label': 1, 'normalizeScale': 1, 'normalize': False, 'force2Ddimension': 0, 'removeOutliers': None, 'minimumROISize': None, u'binWidth': 25.0, 'minimumROIDimensions': 1, u'correctMask': True, 'preCrop': False, u'symmetricalGLCM': True, 'resegmentRange': None, 'padDistance': 5} |
| general    | info          | GeneralSettings                      |                                                                                                                                                                                                                                                                                                                                                                                                                   |
| general    | info          | ImageHash                            | 1a8e369842b41aa7b194b56f7757dba84f913c56                                                                                                                                                                                                                                                                                                                                                                          |
| general    | info          | ImageSpacing                         | (0.9765625000000002, 0.9765625000000002, 2.0)                                                                                                                                                                                                                                                                                                                                                                     |
| general    | info          | MaskHash                             | 3b69978a3a8b8f1cfd5b19bbb90b3496b3aeafcd                                                                                                                                                                                                                                                                                                                                                                          |
| general    | info          | NumpyVersion                         | 1.13.1                                                                                                                                                                                                                                                                                                                                                                                                            |
| general    | info          | PyWaveletVersion                     | 0.5.2                                                                                                                                                                                                                                                                                                                                                                                                             |
| general    | info          | SimpleITKVersion                     | 1.1.0                                                                                                                                                                                                                                                                                                                                                                                                             |
| general    | info          | Version                              | 1.3.0.post102+g1b0eb74                                                                                                                                                                                                                                                                                                                                                                                            |
| general    | info          | VolumeNum                            | 1                                                                                                                                                                                                                                                                                                                                                                                                                 |
| general    | info          | VoxelNum                             | 95                                                                                                                                                                                                                                                                                                                                                                                                                |
| original   | shape         | Maximum3DDiameter                    | 19.4422221                                                                                                                                                                                                                                                                                                                                                                                                        |
| original   | shape         | Maximum2DDiameterSlice               | 16.97056275                                                                                                                                                                                                                                                                                                                                                                                                       |
| original   | shape         | Sphericity                           | 0.913110749                                                                                                                                                                                                                                                                                                                                                                                                       |
| original   | shape         | MinorAxis                            | 14.5084849                                                                                                                                                                                                                                                                                                                                                                                                        |
| original   | shape         | Elongation                           | 0.769522787                                                                                                                                                                                                                                                                                                                                                                                                       |
| original   | shape         | SurfaceVolumeRatio                   | 0.38689954                                                                                                                                                                                                                                                                                                                                                                                                        |
| original   | shape         | Volume                               | 2565                                                                                                                                                                                                                                                                                                                                                                                                              |
| original   | shape         | MajorAxis                            | 18.85387301                                                                                                                                                                                                                                                                                                                                                                                                       |
| original   | shape         | SurfaceArea                          | 992.397319                                                                                                                                                                                                                                                                                                                                                                                                        |
| original   | shape         | Flatness                             | 0.701680826                                                                                                                                                                                                                                                                                                                                                                                                       |
| original   | shape         | LeastAxis                            | 13.22940119                                                                                                                                                                                                                                                                                                                                                                                                       |
| original   | shape         | Maximum2DDiameterColumn              | 19.20937271                                                                                                                                                                                                                                                                                                                                                                                                       |
| original   | shape         | Maximum2DDiameterRow                 | 17.49285568                                                                                                                                                                                                                                                                                                                                                                                                       |
| original   | gldm          | GrayLevelVariance                    | 54.77163435                                                                                                                                                                                                                                                                                                                                                                                                       |
| original   | gldm          | HighGrayLevelEmphasis                | 477.8315789                                                                                                                                                                                                                                                                                                                                                                                                       |
| original   | gldm          | DependenceEntropy                    | 5.372501861                                                                                                                                                                                                                                                                                                                                                                                                       |
| original   | gldm          | DependenceNonUniformity              | 23.48421053                                                                                                                                                                                                                                                                                                                                                                                                       |
| original   | gldm          | GrayLevelNonUniformity               | 9.421052632                                                                                                                                                                                                                                                                                                                                                                                                       |
| original   | gldm          | SmallDependenceEmphasis              | 0.502719446                                                                                                                                                                                                                                                                                                                                                                                                       |
| original   | gldm          | SmallDependenceHighGrayLevelEmphasis | 162.534847                                                                                                                                                                                                                                                                                                                                                                                                        |
| original   | gldm          | DependenceNonUniformityNormalized    | 0.247202216                                                                                                                                                                                                                                                                                                                                                                                                       |
| original   | gldm          | LargeDependenceEmphasis              | 22.45263158                                                                                                                                                                                                                                                                                                                                                                                                       |
| original   | gldm          | LargeDependenceLowGrayLevelEmphasis  | 0.058756562                                                                                                                                                                                                                                                                                                                                                                                                       |
| original   | gldm          | DependenceVariance                   | 10.16576177                                                                                                                                                                                                                                                                                                                                                                                                       |
| original   | gldm          | LargeDependenceHighGrayLevelEmphasis | 15277.2                                                                                                                                                                                                                                                                                                                                                                                                           |
| original   | gldm          | SmallDependenceLowGrayLevelEmphasis  | 0.02604456                                                                                                                                                                                                                                                                                                                                                                                                        |
| original   | gldm          | LowGrayLevelEmphasis                 | 0.02698309                                                                                                                                                                                                                                                                                                                                                                                                        |
| original   | glcm          | JointAverage                         | 22.18551841                                                                                                                                                                                                                                                                                                                                                                                                       |
| original   | glcm          | SumAverage                           | 44.37103681                                                                                                                                                                                                                                                                                                                                                                                                       |
| original   | glcm          | JointEntropy                         | 5.695548679                                                                                                                                                                                                                                                                                                                                                                                                       |

|          |            |                                  |              |
|----------|------------|----------------------------------|--------------|
| original | glcm       | ClusterShade                     | -1133.653654 |
| original | glcm       | MaximumProbability               | 0.099372905  |
| original | glcm       | Idmn                             | 0.928065851  |
| original | glcm       | JointEnergy                      | 0.031456582  |
| original | glcm       | Contrast                         | 75.90130783  |
| original | glcm       | DifferenceEntropy                | 3.692358687  |
| original | glcm       | InverseVariance                  | 0.242295078  |
| original | glcm       | DifferenceVariance               | 40.27437248  |
| original | glcm       | Idn                              | 0.850489427  |
| original | glcm       | Idm                              | 0.289653032  |
| original | glcm       | Correlation                      | 0.121271129  |
| original | glcm       | Autocorrelation                  | 497.4602702  |
| original | glcm       | SumEntropy                       | 4.268432676  |
| original | glcm       | SumSquares                       | 43.16576392  |
| original | glcm       | ClusterProminence                | 35056.97532  |
| original | glcm       | Imc2                             | 0.970696655  |
| original | glcm       | Imc1                             | -0.404912402 |
| original | glcm       | DifferenceAverage                | 5.930665537  |
| original | glcm       | Id                               | 0.353467558  |
| original | glcm       | ClusterTendency                  | 96.76174787  |
| original | firstorder | InterquartileRange               | 236.5        |
| original | firstorder | Skewness                         | -1.077450263 |
| original | firstorder | Uniformity                       | 0.099168975  |
| original | firstorder | Median                           | -46          |
| original | firstorder | Energy                           | 4687312      |
| original | firstorder | RobustMeanAbsoluteDeviation      | 111.072      |
| original | firstorder | MeanAbsoluteDeviation            | 153.0905263  |
| original | firstorder | TotalEnergy                      | 126557424    |
| original | firstorder | Maximum                          | 64           |
| original | firstorder | RootMeanSquared                  | 222.1263747  |
| original | firstorder | 90Percentile                     | 39.2         |
| original | firstorder | Minimum                          | -613         |
| original | firstorder | Entropy                          | 4.012159236  |
| original | firstorder | Range                            | 677          |
| original | firstorder | Variance                         | 34161.88632  |
| original | firstorder | 10Percentile                     | -421.8       |
| original | firstorder | Kurtosis                         | 2.986381356  |
| original | firstorder | Mean                             | -123.2       |
| original | glrlm      | ShortRunLowGrayLevelEmphasis     | 0.029615222  |
| original | glrlm      | GrayLevelVariance                | 56.63743049  |
| original | glrlm      | LowGrayLevelRunEmphasis          | 0.029729649  |
| original | glrlm      | GrayLevelNonUniformityNormalized | 0.081697812  |
| original | glrlm      | RunVariance                      | 0.120808213  |
| original | glrlm      | GrayLevelNonUniformity           | 7.030258436  |
| original | glrlm      | LongRunEmphasis                  | 1.350022311  |
| original | glrlm      | ShortRunHighGrayLevelEmphasis    | 406.3250936  |
| original | glrlm      | RunLengthNonUniformity           | 71.15696632  |
| original | glrlm      | ShortRunEmphasis                 | 0.926942565  |
| original | glrlm      | LongRunHighGrayLevelEmphasis     | 694.6566189  |
| original | glrlm      | RunPercentage                    | 0.903643725  |
| original | glrlm      | LongRunLowGrayLevelEmphasis      | 0.030270192  |
| original | glrlm      | RunEntropy                       | 4.473693444  |
| original | glrlm      | HighGrayLevelRunEmphasis         | 455.9161591  |
| original | glrlm      | RunLengthNonUniformityNormalized | 0.827338097  |
| original | glszm      | GrayLevelVariance                | 57.11649408  |

|             |       |                                      |              |
|-------------|-------|--------------------------------------|--------------|
| original    | glszm | ZoneVariance                         | 11.95081361  |
| original    | glszm | GrayLevelNonUniformityNormalized     | 0.047337278  |
| original    | glszm | SizeZoneNonUniformityNormalized      | 0.702662722  |
| original    | glszm | SizeZoneNonUniformity                | 36.53846154  |
| original    | glszm | GrayLevelNonUniformity               | 2.461538462  |
| original    | glszm | LargeAreaEmphasis                    | 15.28846154  |
| original    | glszm | SmallAreaHighGrayLevelEmphasis       | 266.5276923  |
| original    | glszm | ZonePercentage                       | 0.547368421  |
| original    | glszm | LargeAreaLowGrayLevelEmphasis        | 0.069118741  |
| original    | glszm | LargeAreaHighGrayLevelEmphasis       | 10210.46154  |
| original    | glszm | HighGrayLevelZoneEmphasis            | 333.8269231  |
| original    | glszm | SmallAreaEmphasis                    | 0.860684354  |
| original    | glszm | LowGrayLevelZoneEmphasis             | 0.047836896  |
| original    | glszm | ZoneEntropy                          | 4.849196208  |
| original    | glszm | SmallAreaLowGrayLevelEmphasis        | 0.047429593  |
| original    | ngtdm | Coarseness                           | 0.028097939  |
| original    | ngtdm | Complexity                           | 1582.105354  |
| original    | ngtdm | Strength                             | 15.81156443  |
| original    | ngtdm | Contrast                             | 0.867039012  |
| original    | ngtdm | Busyness                             | 0.050836455  |
| wavelet-HHH | gldm  | GrayLevelVariance                    | 21.55457064  |
| wavelet-HHH | gldm  | HighGrayLevelEmphasis                | 364.7789474  |
| wavelet-HHH | gldm  | DependenceEntropy                    | 5.294135088  |
| wavelet-HHH | gldm  | DependenceNonUniformity              | 22.47368421  |
| wavelet-HHH | gldm  | GrayLevelNonUniformity               | 8.347368421  |
| wavelet-HHH | gldm  | SmallDependenceEmphasis              | 0.460430377  |
| wavelet-HHH | gldm  | SmallDependenceHighGrayLevelEmphasis | 170.8065736  |
| wavelet-HHH | gldm  | DependenceNonUniformityNormalized    | 0.236565097  |
| wavelet-HHH | gldm  | LargeDependenceEmphasis              | 8.852631579  |
| wavelet-HHH | gldm  | LargeDependenceLowGrayLevelEmphasis  | 0.038006931  |
| wavelet-HHH | gldm  | DependenceVariance                   | 2.628919668  |
| wavelet-HHH | gldm  | LargeDependenceHighGrayLevelEmphasis | 2993.221053  |
| wavelet-HHH | gldm  | SmallDependenceLowGrayLevelEmphasis  | 0.012316493  |
| wavelet-HHH | gldm  | LowGrayLevelEmphasis                 | 0.013909153  |
| wavelet-HHH | glcm  | JointAverage                         | 18.57900883  |
| wavelet-HHH | glcm  | SumAverage                           | 37.15801766  |
| wavelet-HHH | glcm  | JointEntropy                         | 6.110212002  |
| wavelet-HHH | glcm  | ClusterShade                         | -19.85896851 |
| wavelet-HHH | glcm  | MaximumProbability                   | 0.043699993  |
| wavelet-HHH | glcm  | Idmn                                 | 0.960603054  |
| wavelet-HHH | glcm  | JointEnergy                          | 0.017278564  |
| wavelet-HHH | glcm  | Contrast                             | 49.55903994  |
| wavelet-HHH | glcm  | DifferenceEntropy                    | 3.500134119  |
| wavelet-HHH | glcm  | InverseVariance                      | 0.251619412  |
| wavelet-HHH | glcm  | DifferenceVariance                   | 25.00347324  |
| wavelet-HHH | glcm  | Idn                                  | 0.881416955  |
| wavelet-HHH | glcm  | Idm                                  | 0.23919468   |
| wavelet-HHH | glcm  | Correlation                          | -0.042648912 |
| wavelet-HHH | glcm  | Autocorrelation                      | 344.2157203  |
| wavelet-HHH | glcm  | SumEntropy                           | 4.131457699  |
| wavelet-HHH | glcm  | SumSquares                           | 23.8001861   |
| wavelet-HHH | glcm  | ClusterProminence                    | 11641.24585  |
| wavelet-HHH | glcm  | Imc2                                 | 0.980717602  |
| wavelet-HHH | glcm  | Imc1                                 | -0.423007091 |
| wavelet-HHH | glcm  | DifferenceAverage                    | 4.879722687  |

|             |            |                                  |              |
|-------------|------------|----------------------------------|--------------|
| wavelet-HHH | glcm       | Id                               | 0.321147081  |
| wavelet-HHH | glcm       | ClusterTendency                  | 45.64170448  |
| wavelet-HHH | firstorder | InterquartileRange               | 92.45953093  |
| wavelet-HHH | firstorder | Skewness                         | -0.009900005 |
| wavelet-HHH | firstorder | Uniformity                       | 0.087867036  |
| wavelet-HHH | firstorder | Median                           | -2.199763405 |
| wavelet-HHH | firstorder | Energy                           | 1250170.139  |
| wavelet-HHH | firstorder | RobustMeanAbsoluteDeviation      | 41.73363031  |
| wavelet-HHH | firstorder | MeanAbsoluteDeviation            | 78.61624493  |
| wavelet-HHH | firstorder | TotalEnergy                      | 33754593.75  |
| wavelet-HHH | firstorder | Maximum                          | 336.6903678  |
| wavelet-HHH | firstorder | RootMeanSquared                  | 114.7156732  |
| wavelet-HHH | firstorder | 90Percentile                     | 132.4762286  |
| wavelet-HHH | firstorder | Minimum                          | -426.2033659 |
| wavelet-HHH | firstorder | Entropy                          | 3.925088419  |
| wavelet-HHH | firstorder | Range                            | 762.8937337  |
| wavelet-HHH | firstorder | Variance                         | 13157.57783  |
| wavelet-HHH | firstorder | 10Percentile                     | -122.9396449 |
| wavelet-HHH | firstorder | Kurtosis                         | 5.27680415   |
| wavelet-HHH | firstorder | Mean                             | 1.451841191  |
| wavelet-HHH | glrlm      | ShortRunLowGrayLevelEmphasis     | 0.014446143  |
| wavelet-HHH | glrlm      | GrayLevelVariance                | 22.64078219  |
| wavelet-HHH | glrlm      | LowGrayLevelRunEmphasis          | 0.014579139  |
| wavelet-HHH | glrlm      | GrayLevelNonUniformityNormalized | 0.083958076  |
| wavelet-HHH | glrlm      | RunVariance                      | 0.064093309  |
| wavelet-HHH | glrlm      | GrayLevelNonUniformity           | 7.521244     |
| wavelet-HHH | glrlm      | LongRunEmphasis                  | 1.191751731  |
| wavelet-HHH | glrlm      | ShortRunHighGrayLevelEmphasis    | 350.987477   |
| wavelet-HHH | glrlm      | RunLengthNonUniformity           | 79.90295125  |
| wavelet-HHH | glrlm      | ShortRunEmphasis                 | 0.955915303  |
| wavelet-HHH | glrlm      | LongRunHighGrayLevelEmphasis     | 431.4873095  |
| wavelet-HHH | glrlm      | RunPercentage                    | 0.942510121  |
| wavelet-HHH | glrlm      | LongRunLowGrayLevelEmphasis      | 0.015163286  |
| wavelet-HHH | glrlm      | RunEntropy                       | 4.195667318  |
| wavelet-HHH | glrlm      | HighGrayLevelRunEmphasis         | 366.1678194  |
| wavelet-HHH | glrlm      | RunLengthNonUniformityNormalized | 0.891377872  |
| wavelet-HHH | glszm      | GrayLevelVariance                | 38.24717067  |
| wavelet-HHH | glszm      | ZoneVariance                     | 7.169760072  |
| wavelet-HHH | glszm      | GrayLevelNonUniformityNormalized | 0.058397465  |
| wavelet-HHH | glszm      | SizeZoneNonUniformityNormalized  | 0.601629697  |
| wavelet-HHH | glszm      | SizeZoneNonUniformity            | 28.27659574  |
| wavelet-HHH | glszm      | GrayLevelNonUniformity           | 2.744680851  |
| wavelet-HHH | glszm      | LargeAreaEmphasis                | 11.25531915  |
| wavelet-HHH | glszm      | SmallAreaHighGrayLevelEmphasis   | 295.1150356  |
| wavelet-HHH | glszm      | ZonePercentage                   | 0.494736842  |
| wavelet-HHH | glszm      | LargeAreaLowGrayLevelEmphasis    | 0.05631782   |
| wavelet-HHH | glszm      | LargeAreaHighGrayLevelEmphasis   | 3832.978723  |
| wavelet-HHH | glszm      | HighGrayLevelZoneEmphasis        | 378.5319149  |
| wavelet-HHH | glszm      | SmallAreaEmphasis                | 0.795859145  |
| wavelet-HHH | glszm      | LowGrayLevelZoneEmphasis         | 0.025061427  |
| wavelet-HHH | glszm      | ZoneEntropy                      | 4.796936927  |
| wavelet-HHH | glszm      | SmallAreaLowGrayLevelEmphasis    | 0.024505644  |
| wavelet-HHH | ngtdm      | Coarseness                       | 0.06780018   |
| wavelet-HHH | ngtdm      | Complexity                       | 768.472723   |
| wavelet-HHH | ngtdm      | Strength                         | 12.01426359  |

|             |            |                                      |              |
|-------------|------------|--------------------------------------|--------------|
| wavelet-HHH | ngtdm      | Contrast                             | 0.267042966  |
| wavelet-HHH | ngtdm      | Busyness                             | 0.031176046  |
| wavelet-HLL | gldm       | GrayLevelVariance                    | 59.4032133   |
| wavelet-HLL | gldm       | HighGrayLevelEmphasis                | 765.2842105  |
| wavelet-HLL | gldm       | DependenceEntropy                    | 5.313453014  |
| wavelet-HLL | gldm       | DependenceNonUniformity              | 35.46315789  |
| wavelet-HLL | gldm       | GrayLevelNonUniformity               | 4.978947368  |
| wavelet-HLL | gldm       | SmallDependenceEmphasis              | 0.594590643  |
| wavelet-HLL | gldm       | SmallDependenceHighGrayLevelEmphasis | 474.5122076  |
| wavelet-HLL | gldm       | DependenceNonUniformityNormalized    | 0.373296399  |
| wavelet-HLL | gldm       | LargeDependenceEmphasis              | 3.8          |
| wavelet-HLL | gldm       | LargeDependenceLowGrayLevelEmphasis  | 0.019755465  |
| wavelet-HLL | gldm       | DependenceVariance                   | 0.783379501  |
| wavelet-HLL | gldm       | LargeDependenceHighGrayLevelEmphasis | 2616.926316  |
| wavelet-HLL | gldm       | SmallDependenceLowGrayLevelEmphasis  | 0.01410833   |
| wavelet-HLL | gldm       | LowGrayLevelEmphasis                 | 0.014804548  |
| wavelet-HLL | glcm       | JointAverage                         | 26.52218332  |
| wavelet-HLL | glcm       | SumAverage                           | 53.04436665  |
| wavelet-HLL | glcm       | JointEntropy                         | 6.544491493  |
| wavelet-HLL | glcm       | ClusterShade                         | 263.1215556  |
| wavelet-HLL | glcm       | MaximumProbability                   | 0.023020291  |
| wavelet-HLL | glcm       | Idmn                                 | 0.961146947  |
| wavelet-HLL | glcm       | JointEnergy                          | 0.011623096  |
| wavelet-HLL | glcm       | Contrast                             | 92.48413465  |
| wavelet-HLL | glcm       | DifferenceEntropy                    | 3.842723428  |
| wavelet-HLL | glcm       | InverseVariance                      | 0.160266118  |
| wavelet-HLL | glcm       | DifferenceVariance                   | 40.8105393   |
| wavelet-HLL | glcm       | Idn                                  | 0.87502415   |
| wavelet-HLL | glcm       | Idm                                  | 0.14570086   |
| wavelet-HLL | glcm       | Correlation                          | 0.083126388  |
| wavelet-HLL | glcm       | Autocorrelation                      | 707.4955842  |
| wavelet-HLL | glcm       | SumEntropy                           | 4.647496009  |
| wavelet-HLL | glcm       | SumSquares                           | 50.2179655   |
| wavelet-HLL | glcm       | ClusterProminence                    | 44358.85665  |
| wavelet-HLL | glcm       | Imc2                                 | 0.994935046  |
| wavelet-HLL | glcm       | Imc1                                 | -0.522166906 |
| wavelet-HLL | glcm       | DifferenceAverage                    | 6.98236429   |
| wavelet-HLL | glcm       | Id                                   | 0.234783369  |
| wavelet-HLL | glcm       | ClusterTendency                      | 108.3877273  |
| wavelet-HLL | firstorder | InterquartileRange                   | 262.1813167  |
| wavelet-HLL | firstorder | Skewness                             | -0.299397637 |
| wavelet-HLL | firstorder | Uniformity                           | 0.052409972  |
| wavelet-HLL | firstorder | Median                               | -80.37698082 |
| wavelet-HLL | firstorder | Energy                               | 3979428.251  |
| wavelet-HLL | firstorder | RobustMeanAbsoluteDeviation          | 105.4517863  |
| wavelet-HLL | firstorder | MeanAbsoluteDeviation                | 151.0371902  |
| wavelet-HLL | firstorder | TotalEnergy                          | 107444562.8  |
| wavelet-HLL | firstorder | Maximum                              | 361.2877288  |
| wavelet-HLL | firstorder | RootMeanSquared                      | 204.667336   |
| wavelet-HLL | firstorder | 90Percentile                         | 156.4602919  |
| wavelet-HLL | firstorder | Minimum                              | -702.0905883 |
| wavelet-HLL | firstorder | Entropy                              | 4.527375195  |
| wavelet-HLL | firstorder | Range                                | 1063.378317  |
| wavelet-HLL | firstorder | Variance                             | 36522.59395  |
| wavelet-HLL | firstorder | 10Percentile                         | -255.8820478 |

|             |            |                                      |              |
|-------------|------------|--------------------------------------|--------------|
| wavelet-HLL | firstorder | Kurtosis                             | 4.071769314  |
| wavelet-HLL | firstorder | Mean                                 | -73.25383594 |
| wavelet-HLL | glrlm      | ShortRunLowGrayLevelEmphasis         | 0.015150053  |
| wavelet-HLL | glrlm      | GrayLevelVariance                    | 60.13920578  |
| wavelet-HLL | glrlm      | LowGrayLevelRunEmphasis              | 0.015188498  |
| wavelet-HLL | glrlm      | GrayLevelNonUniformityNormalized     | 0.051643216  |
| wavelet-HLL | glrlm      | RunVariance                          | 0.028295412  |
| wavelet-HLL | glrlm      | GrayLevelNonUniformity               | 4.767166349  |
| wavelet-HLL | glrlm      | LongRunEmphasis                      | 1.088191171  |
| wavelet-HLL | glrlm      | ShortRunHighGrayLevelEmphasis        | 752.5533605  |
| wavelet-HLL | glrlm      | RunLengthNonUniformity               | 87.12390237  |
| wavelet-HLL | glrlm      | ShortRunEmphasis                     | 0.977952207  |
| wavelet-HLL | glrlm      | LongRunHighGrayLevelEmphasis         | 828.0418325  |
| wavelet-HLL | glrlm      | RunPercentage                        | 0.971659919  |
| wavelet-HLL | glrlm      | LongRunLowGrayLevelEmphasis          | 0.015342278  |
| wavelet-HLL | glrlm      | RunEntropy                           | 4.637714038  |
| wavelet-HLL | glrlm      | HighGrayLevelRunEmphasis             | 767.6510549  |
| wavelet-HLL | glrlm      | RunLengthNonUniformityNormalized     | 0.943409175  |
| wavelet-HLL | glszm      | GrayLevelVariance                    | 70.65991211  |
| wavelet-HLL | glszm      | ZoneVariance                         | 1.249755859  |
| wavelet-HLL | glszm      | GrayLevelNonUniformityNormalized     | 0.046875     |
| wavelet-HLL | glszm      | SizeZoneNonUniformityNormalized      | 0.577636719  |
| wavelet-HLL | glszm      | SizeZoneNonUniformity                | 36.96875     |
| wavelet-HLL | glszm      | GrayLevelNonUniformity               | 3            |
| wavelet-HLL | glszm      | LargeAreaEmphasis                    | 3.453125     |
| wavelet-HLL | glszm      | SmallAreaHighGrayLevelEmphasis       | 633.0047743  |
| wavelet-HLL | glszm      | ZonePercentage                       | 0.673684211  |
| wavelet-HLL | glszm      | LargeAreaLowGrayLevelEmphasis        | 0.025354639  |
| wavelet-HLL | glszm      | LargeAreaHighGrayLevelEmphasis       | 2450.90625   |
| wavelet-HLL | glszm      | HighGrayLevelZoneEmphasis            | 793.765625   |
| wavelet-HLL | glszm      | SmallAreaEmphasis                    | 0.786024306  |
| wavelet-HLL | glszm      | LowGrayLevelZoneEmphasis             | 0.021146245  |
| wavelet-HLL | glszm      | ZoneEntropy                          | 5.088457868  |
| wavelet-HLL | glszm      | SmallAreaLowGrayLevelEmphasis        | 0.020779595  |
| wavelet-HLL | ngtdm      | Coarseness                           | 0.046775962  |
| wavelet-HLL | ngtdm      | Complexity                           | 2194.803227  |
| wavelet-HLL | ngtdm      | Strength                             | 20.97316086  |
| wavelet-HLL | ngtdm      | Contrast                             | 0.735483538  |
| wavelet-HLL | ngtdm      | Busyness                             | 0.03321815   |
| wavelet-LHL | gldm       | GrayLevelVariance                    | 65.32786704  |
| wavelet-LHL | gldm       | HighGrayLevelEmphasis                | 263.9894737  |
| wavelet-LHL | gldm       | DependenceEntropy                    | 5.552706235  |
| wavelet-LHL | gldm       | DependenceNonUniformity              | 28.2         |
| wavelet-LHL | gldm       | GrayLevelNonUniformity               | 4.789473684  |
| wavelet-LHL | gldm       | SmallDependenceEmphasis              | 0.472681287  |
| wavelet-LHL | gldm       | SmallDependenceHighGrayLevelEmphasis | 138.4965146  |
| wavelet-LHL | gldm       | DependenceNonUniformityNormalized    | 0.296842105  |
| wavelet-LHL | gldm       | LargeDependenceEmphasis              | 5.273684211  |
| wavelet-LHL | gldm       | LargeDependenceLowGrayLevelEmphasis  | 0.081780567  |
| wavelet-LHL | gldm       | DependenceVariance                   | 1.060387812  |
| wavelet-LHL | gldm       | LargeDependenceHighGrayLevelEmphasis | 1178.747368  |
| wavelet-LHL | gldm       | SmallDependenceLowGrayLevelEmphasis  | 0.020860651  |
| wavelet-LHL | gldm       | LowGrayLevelEmphasis                 | 0.029744833  |
| wavelet-LHL | glcm       | JointAverage                         | 13.48918111  |
| wavelet-LHL | glcm       | SumAverage                           | 26.97836222  |

|             |            |                                  |              |
|-------------|------------|----------------------------------|--------------|
| wavelet-LHL | glcm       | JointEntropy                     | 6.55280314   |
| wavelet-LHL | glcm       | ClusterShade                     | 2133.186611  |
| wavelet-LHL | glcm       | MaximumProbability               | 0.026844234  |
| wavelet-LHL | glcm       | Idmn                             | 0.952713438  |
| wavelet-LHL | glcm       | JointEnergy                      | 0.011543245  |
| wavelet-LHL | glcm       | Contrast                         | 76.69755111  |
| wavelet-LHL | glcm       | DifferenceEntropy                | 3.818849805  |
| wavelet-LHL | glcm       | InverseVariance                  | 0.16824421   |
| wavelet-LHL | glcm       | DifferenceVariance               | 31.22450349  |
| wavelet-LHL | glcm       | Idn                              | 0.862897129  |
| wavelet-LHL | glcm       | Idm                              | 0.167290859  |
| wavelet-LHL | glcm       | Correlation                      | 0.359634299  |
| wavelet-LHL | glcm       | Autocorrelation                  | 204.4020482  |
| wavelet-LHL | glcm       | SumEntropy                       | 4.719163042  |
| wavelet-LHL | glcm       | SumSquares                       | 60.70984132  |
| wavelet-LHL | glcm       | ClusterProminence                | 97853.56882  |
| wavelet-LHL | glcm       | Imc2                             | 0.995086228  |
| wavelet-LHL | glcm       | Imc1                             | -0.523977893 |
| wavelet-LHL | glcm       | DifferenceAverage                | 6.559151223  |
| wavelet-LHL | glcm       | Id                               | 0.25465536   |
| wavelet-LHL | glcm       | ClusterTendency                  | 166.1418142  |
| wavelet-LHL | firstorder | InterquartileRange               | 306.0531403  |
| wavelet-LHL | firstorder | Skewness                         | 0.826476473  |
| wavelet-LHL | firstorder | Uniformity                       | 0.050415512  |
| wavelet-LHL | firstorder | Median                           | -86.01194783 |
| wavelet-LHL | firstorder | Energy                           | 3961072.246  |
| wavelet-LHL | firstorder | RobustMeanAbsoluteDeviation      | 109.7242768  |
| wavelet-LHL | firstorder | MeanAbsoluteDeviation            | 161.4599119  |
| wavelet-LHL | firstorder | TotalEnergy                      | 106948950.6  |
| wavelet-LHL | firstorder | Maximum                          | 532.5904257  |
| wavelet-LHL | firstorder | RootMeanSquared                  | 204.1947534  |
| wavelet-LHL | firstorder | 90Percentile                     | 240.4735948  |
| wavelet-LHL | firstorder | Minimum                          | -351.7685097 |
| wavelet-LHL | firstorder | Entropy                          | 4.540820484  |
| wavelet-LHL | firstorder | Range                            | 884.3589354  |
| wavelet-LHL | firstorder | Variance                         | 40473.31997  |
| wavelet-LHL | firstorder | 10Percentile                     | -243.3354365 |
| wavelet-LHL | firstorder | Kurtosis                         | 3.099530139  |
| wavelet-LHL | firstorder | Mean                             | -34.95965329 |
| wavelet-LHL | glrlm      | ShortRunLowGrayLevelEmphasis     | 0.029996695  |
| wavelet-LHL | glrlm      | GrayLevelVariance                | 66.30294596  |
| wavelet-LHL | glrlm      | LowGrayLevelRunEmphasis          | 0.030428336  |
| wavelet-LHL | glrlm      | GrayLevelNonUniformityNormalized | 0.04947174   |
| wavelet-LHL | glrlm      | RunVariance                      | 0.043845078  |
| wavelet-LHL | glrlm      | GrayLevelNonUniformity           | 4.510748535  |
| wavelet-LHL | glrlm      | LongRunEmphasis                  | 1.131477183  |
| wavelet-LHL | glrlm      | ShortRunHighGrayLevelEmphasis    | 258.6894602  |
| wavelet-LHL | glrlm      | RunLengthNonUniformity           | 84.11927313  |
| wavelet-LHL | glrlm      | ShortRunEmphasis                 | 0.969073457  |
| wavelet-LHL | glrlm      | LongRunHighGrayLevelEmphasis     | 294.8584926  |
| wavelet-LHL | glrlm      | RunPercentage                    | 0.95951417   |
| wavelet-LHL | glrlm      | LongRunLowGrayLevelEmphasis      | 0.032208863  |
| wavelet-LHL | glrlm      | RunEntropy                       | 4.689622637  |
| wavelet-LHL | glrlm      | HighGrayLevelRunEmphasis         | 265.6994615  |
| wavelet-LHL | glrlm      | RunLengthNonUniformityNormalized | 0.922082529  |



|             |       |                                      |              |
|-------------|-------|--------------------------------------|--------------|
| wavelet-LHL | glszm | GrayLevelVariance                    | 77.79966942  |
| wavelet-LHL | glszm | ZoneVariance                         | 1.47107438   |
| wavelet-LHL | glszm | GrayLevelNonUniformityNormalized     | 0.041322314  |
| wavelet-LHL | glszm | SizeZoneNonUniformityNormalized      | 0.434049587  |
| wavelet-LHL | glszm | SizeZoneNonUniformity                | 23.87272727  |
| wavelet-LHL | glszm | GrayLevelNonUniformity               | 2.272727273  |
| wavelet-LHL | glszm | LargeAreaEmphasis                    | 4.454545455  |
| wavelet-LHL | glszm | SmallAreaHighGrayLevelEmphasis       | 204.8125232  |
| wavelet-LHL | glszm | ZonePercentage                       | 0.578947368  |
| wavelet-LHL | glszm | LargeAreaLowGrayLevelEmphasis        | 0.083459954  |
| wavelet-LHL | glszm | LargeAreaHighGrayLevelEmphasis       | 1039         |
| wavelet-LHL | glszm | HighGrayLevelZoneEmphasis            | 284.6363636  |
| wavelet-LHL | glszm | SmallAreaEmphasis                    | 0.682790249  |
| wavelet-LHL | glszm | LowGrayLevelZoneEmphasis             | 0.040245056  |
| wavelet-LHL | glszm | ZoneEntropy                          | 5.33127085   |
| wavelet-LHL | glszm | SmallAreaLowGrayLevelEmphasis        | 0.033627866  |
| wavelet-LHL | ngtdm | Coarseness                           | 0.062608228  |
| wavelet-LHL | ngtdm | Complexity                           | 1580.090453  |
| wavelet-LHL | ngtdm | Strength                             | 25.11749476  |
| wavelet-LHL | ngtdm | Contrast                             | 0.68051828   |
| wavelet-LHL | ngtdm | Busyness                             | 0.050973275  |
| wavelet-LHH | gldm  | GrayLevelVariance                    | 15.88409972  |
| wavelet-LHH | gldm  | HighGrayLevelEmphasis                | 116.0947368  |
| wavelet-LHH | gldm  | DependenceEntropy                    | 5.145811266  |
| wavelet-LHH | gldm  | DependenceNonUniformity              | 29.92631579  |
| wavelet-LHH | gldm  | GrayLevelNonUniformity               | 7.231578947  |
| wavelet-LHH | gldm  | SmallDependenceEmphasis              | 0.487611111  |
| wavelet-LHH | gldm  | SmallDependenceHighGrayLevelEmphasis | 57.9335614   |
| wavelet-LHH | gldm  | DependenceNonUniformityNormalized    | 0.31501385   |
| wavelet-LHH | gldm  | LargeDependenceEmphasis              | 4.957894737  |
| wavelet-LHH | gldm  | LargeDependenceLowGrayLevelEmphasis  | 0.084039709  |
| wavelet-LHH | gldm  | DependenceVariance                   | 0.999889197  |
| wavelet-LHH | gldm  | LargeDependenceHighGrayLevelEmphasis | 517.0210526  |
| wavelet-LHH | gldm  | SmallDependenceLowGrayLevelEmphasis  | 0.021538486  |
| wavelet-LHH | gldm  | LowGrayLevelEmphasis                 | 0.028632489  |
| wavelet-LHH | glcm  | JointAverage                         | 10.16681863  |
| wavelet-LHH | glcm  | SumAverage                           | 20.33363725  |
| wavelet-LHH | glcm  | JointEntropy                         | 6.305763999  |
| wavelet-LHH | glcm  | ClusterShade                         | 23.42688319  |
| wavelet-LHH | glcm  | MaximumProbability                   | 0.03088696   |
| wavelet-LHH | glcm  | Idmn                                 | 0.929515164  |
| wavelet-LHH | glcm  | JointEnergy                          | 0.014080946  |
| wavelet-LHH | glcm  | Contrast                             | 34.343015    |
| wavelet-LHH | glcm  | DifferenceEntropy                    | 3.418901803  |
| wavelet-LHH | glcm  | InverseVariance                      | 0.21246317   |
| wavelet-LHH | glcm  | DifferenceVariance                   | 11.91025859  |
| wavelet-LHH | glcm  | Idn                                  | 0.826213409  |
| wavelet-LHH | glcm  | Idm                                  | 0.189190444  |
| wavelet-LHH | glcm  | Correlation                          | -0.017633132 |
| wavelet-LHH | glcm  | Autocorrelation                      | 103.1057256  |
| wavelet-LHH | glcm  | SumEntropy                           | 4.171644044  |
| wavelet-LHH | glcm  | SumSquares                           | 16.89717679  |
| wavelet-LHH | glcm  | ClusterProminence                    | 3223.151225  |
| wavelet-LHH | glcm  | Imc2                                 | 0.973649707  |
| wavelet-LHH | glcm  | Imc1                                 | -0.383405896 |

|             |            |                                  |              |
|-------------|------------|----------------------------------|--------------|
| wavelet-LHH | glcm       | DifferenceAverage                | 4.671654406  |
| wavelet-LHH | glcm       | Id                               | 0.282371384  |
| wavelet-LHH | glcm       | ClusterTendency                  | 33.24569218  |
| wavelet-LHH | firstorder | InterquartileRange               | 153.9812396  |
| wavelet-LHH | firstorder | Skewness                         | 0.254275148  |
| wavelet-LHH | firstorder | Uniformity                       | 0.076121884  |
| wavelet-LHH | firstorder | Median                           | -30.20458442 |
| wavelet-LHH | firstorder | Energy                           | 973393.5094  |
| wavelet-LHH | firstorder | RobustMeanAbsoluteDeviation      | 59.47079637  |
| wavelet-LHH | firstorder | MeanAbsoluteDeviation            | 82.77595322  |
| wavelet-LHH | firstorder | TotalEnergy                      | 26281624.75  |
| wavelet-LHH | firstorder | Maximum                          | 225.5422617  |
| wavelet-LHH | firstorder | RootMeanSquared                  | 101.2237495  |
| wavelet-LHH | firstorder | 90Percentile                     | 125.8918203  |
| wavelet-LHH | firstorder | Minimum                          | -244.8113871 |
| wavelet-LHH | firstorder | Entropy                          | 3.912683196  |
| wavelet-LHH | firstorder | Range                            | 470.3536488  |
| wavelet-LHH | firstorder | Variance                         | 10083.4391   |
| wavelet-LHH | firstorder | 10Percentile                     | -115.7013961 |
| wavelet-LHH | firstorder | Kurtosis                         | 2.48239987   |
| wavelet-LHH | firstorder | Mean                             | -12.75963832 |
| wavelet-LHH | glrlm      | ShortRunLowGrayLevelEmphasis     | 0.028806951  |
| wavelet-LHH | glrlm      | GrayLevelVariance                | 16.11042489  |
| wavelet-LHH | glrlm      | LowGrayLevelRunEmphasis          | 0.029219014  |
| wavelet-LHH | glrlm      | GrayLevelNonUniformityNormalized | 0.075487488  |
| wavelet-LHH | glrlm      | RunVariance                      | 0.039681135  |
| wavelet-LHH | glrlm      | GrayLevelNonUniformity           | 6.899196602  |
| wavelet-LHH | glrlm      | LongRunEmphasis                  | 1.121486064  |
| wavelet-LHH | glrlm      | ShortRunHighGrayLevelEmphasis    | 113.3636252  |
| wavelet-LHH | glrlm      | RunLengthNonUniformity           | 84.63563282  |
| wavelet-LHH | glrlm      | ShortRunEmphasis                 | 0.970588822  |
| wavelet-LHH | glrlm      | LongRunHighGrayLevelEmphasis     | 129.3800968  |
| wavelet-LHH | glrlm      | RunPercentage                    | 0.96194332   |
| wavelet-LHH | glrlm      | LongRunLowGrayLevelEmphasis      | 0.03090568   |
| wavelet-LHH | glrlm      | RunEntropy                       | 4.074754691  |
| wavelet-LHH | glrlm      | HighGrayLevelRunEmphasis         | 116.4900924  |
| wavelet-LHH | glrlm      | RunLengthNonUniformityNormalized | 0.925532216  |
| wavelet-LHH | glszm      | GrayLevelVariance                | 18.9630102   |
| wavelet-LHH | glszm      | ZoneVariance                     | 1.532844388  |
| wavelet-LHH | glszm      | GrayLevelNonUniformityNormalized | 0.069515306  |
| wavelet-LHH | glszm      | SizeZoneNonUniformityNormalized  | 0.447066327  |
| wavelet-LHH | glszm      | SizeZoneNonUniformity            | 25.03571429  |
| wavelet-LHH | glszm      | GrayLevelNonUniformity           | 3.892857143  |
| wavelet-LHH | glszm      | LargeAreaEmphasis                | 4.410714286  |
| wavelet-LHH | glszm      | SmallAreaHighGrayLevelEmphasis   | 81.68207465  |
| wavelet-LHH | glszm      | ZonePercentage                   | 0.589473684  |
| wavelet-LHH | glszm      | LargeAreaLowGrayLevelEmphasis    | 0.085252859  |
| wavelet-LHH | glszm      | LargeAreaHighGrayLevelEmphasis   | 479.7678571  |
| wavelet-LHH | glszm      | HighGrayLevelZoneEmphasis        | 118.25       |
| wavelet-LHH | glszm      | SmallAreaEmphasis                | 0.69125124   |
| wavelet-LHH | glszm      | LowGrayLevelZoneEmphasis         | 0.039024472  |
| wavelet-LHH | glszm      | ZoneEntropy                      | 4.887537511  |
| wavelet-LHH | glszm      | SmallAreaLowGrayLevelEmphasis    | 0.034712004  |
| wavelet-LHH | ngtdm      | Coarseness                       | 0.048644256  |
| wavelet-LHH | ngtdm      | Complexity                       | 459.8631484  |

|             |            |                                      |              |
|-------------|------------|--------------------------------------|--------------|
| wavelet-LHH | ngtdm      | Strength                             | 5.410281295  |
| wavelet-LHH | ngtdm      | Contrast                             | 0.321975617  |
| wavelet-LHH | ngtdm      | Busyness                             | 0.14831061   |
| wavelet-LLH | gldm       | GrayLevelVariance                    | 130.6688089  |
| wavelet-LLH | gldm       | HighGrayLevelEmphasis                | 634.7894737  |
| wavelet-LLH | gldm       | DependenceEntropy                    | 5.529918898  |
| wavelet-LLH | gldm       | DependenceNonUniformity              | 42.85263158  |
| wavelet-LLH | gldm       | GrayLevelNonUniformity               | 3.884210526  |
| wavelet-LLH | gldm       | SmallDependenceEmphasis              | 0.657675439  |
| wavelet-LLH | gldm       | SmallDependenceHighGrayLevelEmphasis | 438.1717105  |
| wavelet-LLH | gldm       | DependenceNonUniformityNormalized    | 0.451080332  |
| wavelet-LLH | gldm       | LargeDependenceEmphasis              | 2.768421053  |
| wavelet-LLH | gldm       | LargeDependenceLowGrayLevelEmphasis  | 0.021356328  |
| wavelet-LLH | gldm       | DependenceVariance                   | 0.438781163  |
| wavelet-LLH | gldm       | LargeDependenceHighGrayLevelEmphasis | 1544.010526  |
| wavelet-LLH | gldm       | SmallDependenceLowGrayLevelEmphasis  | 0.013205917  |
| wavelet-LLH | gldm       | LowGrayLevelEmphasis                 | 0.014551948  |
| wavelet-LLH | glcm       | JointAverage                         | 21.33611093  |
| wavelet-LLH | glcm       | SumAverage                           | 42.67222186  |
| wavelet-LLH | glcm       | JointEntropy                         | 6.648576036  |
| wavelet-LLH | glcm       | ClusterShade                         | 4519.499011  |
| wavelet-LLH | glcm       | MaximumProbability                   | 0.02380308   |
| wavelet-LLH | glcm       | Idmn                                 | 0.941173617  |
| wavelet-LLH | glcm       | JointEnergy                          | 0.010646678  |
| wavelet-LLH | glcm       | Contrast                             | 216.821238   |
| wavelet-LLH | glcm       | DifferenceEntropy                    | 4.225489317  |
| wavelet-LLH | glcm       | InverseVariance                      | 0.129061728  |
| wavelet-LLH | glcm       | DifferenceVariance                   | 96.96107105  |
| wavelet-LLH | glcm       | Idn                                  | 0.853819101  |
| wavelet-LLH | glcm       | Idm                                  | 0.111285096  |
| wavelet-LLH | glcm       | Correlation                          | 0.110764776  |
| wavelet-LLH | glcm       | Autocorrelation                      | 474.5910634  |
| wavelet-LLH | glcm       | SumEntropy                           | 4.978156724  |
| wavelet-LLH | glcm       | SumSquares                           | 127.1926791  |
| wavelet-LLH | glcm       | ClusterProminence                    | 322801.2609  |
| wavelet-LLH | glcm       | Imc2                                 | 0.998451847  |
| wavelet-LLH | glcm       | Imc1                                 | -0.609035305 |
| wavelet-LLH | glcm       | DifferenceAverage                    | 10.45404294  |
| wavelet-LLH | glcm       | Id                                   | 0.192656032  |
| wavelet-LLH | glcm       | ClusterTendency                      | 291.9494784  |
| wavelet-LLH | firstorder | InterquartileRange                   | 367.3141542  |
| wavelet-LLH | firstorder | Skewness                             | 0.822443158  |
| wavelet-LLH | firstorder | Uniformity                           | 0.040886427  |
| wavelet-LLH | firstorder | Median                               | -126.1600335 |
| wavelet-LLH | firstorder | Energy                               | 7944370.577  |
| wavelet-LLH | firstorder | RobustMeanAbsoluteDeviation          | 148.5746417  |
| wavelet-LLH | firstorder | MeanAbsoluteDeviation                | 225.7899542  |
| wavelet-LLH | firstorder | TotalEnergy                          | 214498005.6  |
| wavelet-LLH | firstorder | Maximum                              | 704.0951431  |
| wavelet-LLH | firstorder | RootMeanSquared                      | 289.1797943  |
| wavelet-LLH | firstorder | 90Percentile                         | 386.2546271  |
| wavelet-LLH | firstorder | Minimum                              | -597.9428074 |
| wavelet-LLH | firstorder | Entropy                              | 4.88768232   |
| wavelet-LLH | firstorder | Range                                | 1302.03795   |
| wavelet-LLH | firstorder | Variance                             | 80953.58066  |

|             |            |                                      |              |
|-------------|------------|--------------------------------------|--------------|
| wavelet-LLH | firstorder | 10Percentile                         | -362.748342  |
| wavelet-LLH | firstorder | Kurtosis                             | 2.95728685   |
| wavelet-LLH | firstorder | Mean                                 | -51.68532465 |
| wavelet-LLH | glrlm      | ShortRunLowGrayLevelEmphasis         | 0.014716587  |
| wavelet-LLH | glrlm      | GrayLevelVariance                    | 131.5245782  |
| wavelet-LLH | glrlm      | LowGrayLevelRunEmphasis              | 0.014774981  |
| wavelet-LLH | glrlm      | GrayLevelNonUniformityNormalized     | 0.04060999   |
| wavelet-LLH | glrlm      | RunVariance                          | 0.023578674  |
| wavelet-LLH | glrlm      | GrayLevelNonUniformity               | 3.780350021  |
| wavelet-LLH | glrlm      | LongRunEmphasis                      | 1.066138341  |
| wavelet-LLH | glrlm      | ShortRunHighGrayLevelEmphasis        | 628.7347958  |
| wavelet-LLH | glrlm      | RunLengthNonUniformity               | 89.64283927  |
| wavelet-LLH | glrlm      | ShortRunEmphasis                     | 0.985333669  |
| wavelet-LLH | glrlm      | LongRunHighGrayLevelEmphasis         | 671.8997149  |
| wavelet-LLH | glrlm      | RunPercentage                        | 0.979757085  |
| wavelet-LLH | glrlm      | LongRunLowGrayLevelEmphasis          | 0.015028244  |
| wavelet-LLH | glrlm      | RunEntropy                           | 4.939508869  |
| wavelet-LLH | glrlm      | HighGrayLevelRunEmphasis             | 636.7989238  |
| wavelet-LLH | glrlm      | RunLengthNonUniformityNormalized     | 0.962654962  |
| wavelet-LLH | glszm      | GrayLevelVariance                    | 142.6232639  |
| wavelet-LLH | glszm      | ZoneVariance                         | 0.35628858   |
| wavelet-LLH | glszm      | GrayLevelNonUniformityNormalized     | 0.037037037  |
| wavelet-LLH | glszm      | SizeZoneNonUniformityNormalized      | 0.59220679   |
| wavelet-LLH | glszm      | SizeZoneNonUniformity                | 42.63888889  |
| wavelet-LLH | glszm      | GrayLevelNonUniformity               | 2.666666667  |
| wavelet-LLH | glszm      | LargeAreaEmphasis                    | 2.097222222  |
| wavelet-LLH | glszm      | SmallAreaHighGrayLevelEmphasis       | 535.4727045  |
| wavelet-LLH | glszm      | ZonePercentage                       | 0.757894737  |
| wavelet-LLH | glszm      | LargeAreaLowGrayLevelEmphasis        | 0.022123376  |
| wavelet-LLH | glszm      | LargeAreaHighGrayLevelEmphasis       | 1242.763889  |
| wavelet-LLH | glszm      | HighGrayLevelZoneEmphasis            | 658.2916667  |
| wavelet-LLH | glszm      | SmallAreaEmphasis                    | 0.795621142  |
| wavelet-LLH | glszm      | LowGrayLevelZoneEmphasis             | 0.017960046  |
| wavelet-LLH | glszm      | ZoneEntropy                          | 5.457644272  |
| wavelet-LLH | glszm      | SmallAreaLowGrayLevelEmphasis        | 0.017144735  |
| wavelet-LLH | ngtdm      | Coarseness                           | 0.044317464  |
| wavelet-LLH | ngtdm      | Complexity                           | 4993.313009  |
| wavelet-LLH | ngtdm      | Strength                             | 35.03879024  |
| wavelet-LLH | ngtdm      | Contrast                             | 1.474679634  |
| wavelet-LLH | ngtdm      | Busyness                             | 0.04198904   |
| wavelet-LLL | gldm       | GrayLevelVariance                    | 328.0272576  |
| wavelet-LLL | gldm       | HighGrayLevelEmphasis                | 1742.578947  |
| wavelet-LLL | gldm       | DependenceEntropy                    | 5.705234919  |
| wavelet-LLL | gldm       | DependenceNonUniformity              | 54.70526316  |
| wavelet-LLL | gldm       | GrayLevelNonUniformity               | 2.431578947  |
| wavelet-LLL | gldm       | SmallDependenceEmphasis              | 0.785964912  |
| wavelet-LLL | gldm       | SmallDependenceHighGrayLevelEmphasis | 1216.892982  |
| wavelet-LLL | gldm       | DependenceNonUniformityNormalized    | 0.575844875  |
| wavelet-LLL | gldm       | LargeDependenceEmphasis              | 2.136842105  |
| wavelet-LLL | gldm       | LargeDependenceLowGrayLevelEmphasis  | 0.036839845  |
| wavelet-LLL | gldm       | DependenceVariance                   | 0.349695291  |
| wavelet-LLL | gldm       | LargeDependenceHighGrayLevelEmphasis | 4743.147368  |
| wavelet-LLL | gldm       | SmallDependenceLowGrayLevelEmphasis  | 0.016225769  |
| wavelet-LLL | gldm       | LowGrayLevelEmphasis                 | 0.020330894  |
| wavelet-LLL | glcm       | JointAverage                         | 42.92614378  |

|             |            |                                  |              |
|-------------|------------|----------------------------------|--------------|
| wavelet-LLL | glcm       | SumAverage                       | 85.85228757  |
| wavelet-LLL | glcm       | JointEntropy                     | 6.807028451  |
| wavelet-LLL | glcm       | ClusterShade                     | -6059.396049 |
| wavelet-LLL | glcm       | MaximumProbability               | 0.015913811  |
| wavelet-LLL | glcm       | Idmn                             | 0.916931847  |
| wavelet-LLL | glcm       | JointEnergy                      | 0.009137405  |
| wavelet-LLL | glcm       | Contrast                         | 512.8216223  |
| wavelet-LLL | glcm       | DifferenceEntropy                | 4.804722237  |
| wavelet-LLL | glcm       | InverseVariance                  | 0.061457268  |
| wavelet-LLL | glcm       | DifferenceVariance               | 175.9705101  |
| wavelet-LLL | glcm       | Idn                              | 0.812874831  |
| wavelet-LLL | glcm       | Idm                              | 0.06035137   |
| wavelet-LLL | glcm       | Correlation                      | 0.207238649  |
| wavelet-LLL | glcm       | Autocorrelation                  | 1906.905639  |
| wavelet-LLL | glcm       | SumEntropy                       | 5.38229433   |
| wavelet-LLL | glcm       | SumSquares                       | 319.7828506  |
| wavelet-LLL | glcm       | ClusterProminence                | 1453130.727  |
| wavelet-LLL | glcm       | Imc2                             | 0.999798702  |
| wavelet-LLL | glcm       | Imc1                             | -0.732720904 |
| wavelet-LLL | glcm       | DifferenceAverage                | 18.05519999  |
| wavelet-LLL | glcm       | Id                               | 0.123013192  |
| wavelet-LLL | glcm       | ClusterTendency                  | 766.3097801  |
| wavelet-LLL | firstorder | InterquartileRange               | 724.2337086  |
| wavelet-LLL | firstorder | Skewness                         | -0.061446683 |
| wavelet-LLL | firstorder | Uniformity                       | 0.025595568  |
| wavelet-LLL | firstorder | Median                           | -494.1103894 |
| wavelet-LLL | firstorder | Energy                           | 40519257.64  |
| wavelet-LLL | firstorder | RobustMeanAbsoluteDeviation      | 281.257463   |
| wavelet-LLL | firstorder | MeanAbsoluteDeviation            | 374.9783934  |
| wavelet-LLL | firstorder | TotalEnergy                      | 1094019956   |
| wavelet-LLL | firstorder | Maximum                          | 330.2639396  |
| wavelet-LLL | firstorder | RootMeanSquared                  | 653.0838396  |
| wavelet-LLL | firstorder | 90Percentile                     | 162.7947216  |
| wavelet-LLL | firstorder | Minimum                          | -1379.789371 |
| wavelet-LLL | firstorder | Entropy                          | 5.470870051  |
| wavelet-LLL | firstorder | Range                            | 1710.05331   |
| wavelet-LLL | firstorder | Variance                         | 203955.7542  |
| wavelet-LLL | firstorder | 10Percentile                     | -1042.58789  |
| wavelet-LLL | firstorder | Kurtosis                         | 2.096351374  |
| wavelet-LLL | firstorder | Mean                             | -471.7655639 |
| wavelet-LLL | glrlm      | ShortRunLowGrayLevelEmphasis     | 0.020225976  |
| wavelet-LLL | glrlm      | GrayLevelVariance                | 326.4724471  |
| wavelet-LLL | glrlm      | LowGrayLevelRunEmphasis          | 0.020386104  |
| wavelet-LLL | glrlm      | GrayLevelNonUniformityNormalized | 0.025552259  |
| wavelet-LLL | glrlm      | RunVariance                      | 0.012949429  |
| wavelet-LLL | glrlm      | GrayLevelNonUniformity           | 2.396012927  |
| wavelet-LLL | glrlm      | LongRunEmphasis                  | 1.039651159  |
| wavelet-LLL | glrlm      | ShortRunHighGrayLevelEmphasis    | 1706.105433  |
| wavelet-LLL | glrlm      | RunLengthNonUniformity           | 91.35739394  |
| wavelet-LLL | glrlm      | ShortRunEmphasis                 | 0.99008721   |
| wavelet-LLL | glrlm      | LongRunHighGrayLevelEmphasis     | 1833.616732  |
| wavelet-LLL | glrlm      | RunPercentage                    | 0.987044534  |
| wavelet-LLL | glrlm      | LongRunLowGrayLevelEmphasis      | 0.021026618  |
| wavelet-LLL | glrlm      | RunEntropy                       | 5.496311517  |
| wavelet-LLL | glrlm      | HighGrayLevelRunEmphasis         | 1731.607693  |

|             |       |                                      |              |
|-------------|-------|--------------------------------------|--------------|
| wavelet-LLL | glrlm | RunLengthNonUniformityNormalized     | 0.974101143  |
| wavelet-LLL | glszm | GrayLevelVariance                    | 304.9239445  |
| wavelet-LLL | glszm | ZoneVariance                         | 0.192348727  |
| wavelet-LLL | glszm | GrayLevelNonUniformityNormalized     | 0.025148605  |
| wavelet-LLL | glszm | SizeZoneNonUniformityNormalized      | 0.74150282   |
| wavelet-LLL | glszm | SizeZoneNonUniformity                | 60.0617284   |
| wavelet-LLL | glszm | GrayLevelNonUniformity               | 2.037037037  |
| wavelet-LLL | glszm | LargeAreaEmphasis                    | 1.567901235  |
| wavelet-LLL | glszm | SmallAreaHighGrayLevelEmphasis       | 1342.012689  |
| wavelet-LLL | glszm | ZonePercentage                       | 0.852631579  |
| wavelet-LLL | glszm | LargeAreaLowGrayLevelEmphasis        | 0.030283432  |
| wavelet-LLL | glszm | LargeAreaHighGrayLevelEmphasis       | 3058.876543  |
| wavelet-LLL | glszm | HighGrayLevelZoneEmphasis            | 1615.185185  |
| wavelet-LLL | glszm | SmallAreaEmphasis                    | 0.885459534  |
| wavelet-LLL | glszm | LowGrayLevelZoneEmphasis             | 0.020633378  |
| wavelet-LLL | glszm | ZoneEntropy                          | 5.690106911  |
| wavelet-LLL | glszm | SmallAreaLowGrayLevelEmphasis        | 0.01822951   |
| wavelet-LLL | ngtdm | Coarseness                           | 0.035630797  |
| wavelet-LLL | ngtdm | Complexity                           | 16948.68162  |
| wavelet-LLL | ngtdm | Strength                             | 58.98653051  |
| wavelet-LLL | ngtdm | Contrast                             | 3.26454452   |
| wavelet-LLL | ngtdm | Busyness                             | 0.018102664  |
| wavelet-HHL | gldm  | GrayLevelVariance                    | 14.33196676  |
| wavelet-HHL | gldm  | HighGrayLevelEmphasis                | 127.8105263  |
| wavelet-HHL | gldm  | DependenceEntropy                    | 4.944554261  |
| wavelet-HHL | gldm  | DependenceNonUniformity              | 25.50526316  |
| wavelet-HHL | gldm  | GrayLevelNonUniformity               | 7.8          |
| wavelet-HHL | gldm  | SmallDependenceEmphasis              | 0.421327485  |
| wavelet-HHL | gldm  | SmallDependenceHighGrayLevelEmphasis | 57.0047193   |
| wavelet-HHL | gldm  | DependenceNonUniformityNormalized    | 0.268476454  |
| wavelet-HHL | gldm  | LargeDependenceEmphasis              | 6.073684211  |
| wavelet-HHL | gldm  | LargeDependenceLowGrayLevelEmphasis  | 0.086540377  |
| wavelet-HHL | gldm  | DependenceVariance                   | 1.140609418  |
| wavelet-HHL | gldm  | LargeDependenceHighGrayLevelEmphasis | 695.9157895  |
| wavelet-HHL | gldm  | SmallDependenceLowGrayLevelEmphasis  | 0.019296397  |
| wavelet-HHL | gldm  | LowGrayLevelEmphasis                 | 0.026324141  |
| wavelet-HHL | glcm  | JointAverage                         | 10.59578341  |
| wavelet-HHL | glcm  | SumAverage                           | 21.19156683  |
| wavelet-HHL | glcm  | JointEntropy                         | 6.24395002   |
| wavelet-HHL | glcm  | ClusterShade                         | -17.18030064 |
| wavelet-HHL | glcm  | MaximumProbability                   | 0.033934649  |
| wavelet-HHL | glcm  | Idmn                                 | 0.928195548  |
| wavelet-HHL | glcm  | JointEnergy                          | 0.015083645  |
| wavelet-HHL | glcm  | Contrast                             | 28.77520018  |
| wavelet-HHL | glcm  | DifferenceEntropy                    | 3.321371233  |
| wavelet-HHL | glcm  | InverseVariance                      | 0.224471416  |
| wavelet-HHL | glcm  | DifferenceVariance                   | 10.47344476  |
| wavelet-HHL | glcm  | Idn                                  | 0.825928534  |
| wavelet-HHL | glcm  | Idm                                  | 0.210763128  |
| wavelet-HHL | glcm  | Correlation                          | 0.002084219  |
| wavelet-HHL | glcm  | Autocorrelation                      | 112.3195293  |
| wavelet-HHL | glcm  | SumEntropy                           | 4.056817592  |
| wavelet-HHL | glcm  | SumSquares                           | 14.40752748  |
| wavelet-HHL | glcm  | ClusterProminence                    | 2418.504439  |
| wavelet-HHL | glcm  | Imc2                                 | 0.965483469  |

|             |            |                                  |              |
|-------------|------------|----------------------------------|--------------|
| wavelet-HHL | glcm       | Imc1                             | -0.36107487  |
| wavelet-HHL | glcm       | DifferenceAverage                | 4.234077606  |
| wavelet-HHL | glcm       | Id                               | 0.303718143  |
| wavelet-HHL | glcm       | ClusterTendency                  | 28.85490974  |
| wavelet-HHL | firstorder | InterquartileRange               | 126.3311624  |
| wavelet-HHL | firstorder | Skewness                         | -0.149140227 |
| wavelet-HHL | firstorder | Uniformity                       | 0.082105263  |
| wavelet-HHL | firstorder | Median                           | 1.156865956  |
| wavelet-HHL | firstorder | Energy                           | 854058.9611  |
| wavelet-HHL | firstorder | RobustMeanAbsoluteDeviation      | 52.21779281  |
| wavelet-HHL | firstorder | MeanAbsoluteDeviation            | 75.25102796  |
| wavelet-HHL | firstorder | TotalEnergy                      | 23059591.95  |
| wavelet-HHL | firstorder | Maximum                          | 198.344386   |
| wavelet-HHL | firstorder | RootMeanSquared                  | 94.81610795  |
| wavelet-HHL | firstorder | 90Percentile                     | 127.8880765  |
| wavelet-HHL | firstorder | Minimum                          | -233.8254609 |
| wavelet-HHL | firstorder | Entropy                          | 3.817266265  |
| wavelet-HHL | firstorder | Range                            | 432.1698469  |
| wavelet-HHL | firstorder | Variance                         | 8973.819306  |
| wavelet-HHL | firstorder | 10Percentile                     | -133.1417274 |
| wavelet-HHL | firstorder | Kurtosis                         | 2.521654721  |
| wavelet-HHL | firstorder | Mean                             | 4.034231209  |
| wavelet-HHL | glrlm      | ShortRunLowGrayLevelEmphasis     | 0.026580572  |
| wavelet-HHL | glrlm      | GrayLevelVariance                | 14.69564681  |
| wavelet-HHL | glrlm      | LowGrayLevelRunEmphasis          | 0.027038199  |
| wavelet-HHL | glrlm      | GrayLevelNonUniformityNormalized | 0.080607946  |
| wavelet-HHL | glrlm      | RunVariance                      | 0.046616469  |
| wavelet-HHL | glrlm      | GrayLevelNonUniformity           | 7.298695284  |
| wavelet-HHL | glrlm      | LongRunEmphasis                  | 1.150914004  |
| wavelet-HHL | glrlm      | ShortRunHighGrayLevelEmphasis    | 124.0923369  |
| wavelet-HHL | glrlm      | RunLengthNonUniformity           | 82.2501946   |
| wavelet-HHL | glrlm      | ShortRunEmphasis                 | 0.962271499  |
| wavelet-HHL | glrlm      | LongRunHighGrayLevelEmphasis     | 145.8373129  |
| wavelet-HHL | glrlm      | RunPercentage                    | 0.953036437  |
| wavelet-HHL | glrlm      | LongRunLowGrayLevelEmphasis      | 0.028868705  |
| wavelet-HHL | glrlm      | RunEntropy                       | 4.023037858  |
| wavelet-HHL | glrlm      | HighGrayLevelRunEmphasis         | 128.4413321  |
| wavelet-HHL | glrlm      | RunLengthNonUniformityNormalized | 0.906767062  |
| wavelet-HHL | glszm      | GrayLevelVariance                | 20.20761246  |
| wavelet-HHL | glszm      | ZoneVariance                     | 2.000768935  |
| wavelet-HHL | glszm      | GrayLevelNonUniformityNormalized | 0.068819685  |
| wavelet-HHL | glszm      | SizeZoneNonUniformityNormalized  | 0.39100346   |
| wavelet-HHL | glszm      | SizeZoneNonUniformity            | 19.94117647  |
| wavelet-HHL | glszm      | GrayLevelNonUniformity           | 3.509803922  |
| wavelet-HHL | glszm      | LargeAreaEmphasis                | 5.470588235  |
| wavelet-HHL | glszm      | SmallAreaHighGrayLevelEmphasis   | 87.74066449  |
| wavelet-HHL | glszm      | ZonePercentage                   | 0.536842105  |
| wavelet-HHL | glszm      | LargeAreaLowGrayLevelEmphasis    | 0.08965287   |
| wavelet-HHL | glszm      | LargeAreaHighGrayLevelEmphasis   | 638.6666667  |
| wavelet-HHL | glszm      | HighGrayLevelZoneEmphasis        | 134.8235294  |
| wavelet-HHL | glszm      | SmallAreaEmphasis                | 0.642430556  |
| wavelet-HHL | glszm      | LowGrayLevelZoneEmphasis         | 0.038764663  |
| wavelet-HHL | glszm      | ZoneEntropy                      | 4.76331695   |
| wavelet-HHL | glszm      | SmallAreaLowGrayLevelEmphasis    | 0.034301466  |
| wavelet-HHL | ngtdm      | Coarseness                       | 0.061074543  |

|             |            |                                      |              |
|-------------|------------|--------------------------------------|--------------|
| wavelet-HHL | ngtdm      | Complexity                           | 318.547634   |
| wavelet-HHL | ngtdm      | Strength                             | 4.812786682  |
| wavelet-HHL | ngtdm      | Contrast                             | 0.319683213  |
| wavelet-HHL | ngtdm      | Busyness                             | 0.112130639  |
| wavelet-HLH | gldm       | GrayLevelVariance                    | 32.16554017  |
| wavelet-HLH | gldm       | HighGrayLevelEmphasis                | 317.2421053  |
| wavelet-HLH | gldm       | DependenceEntropy                    | 5.420818603  |
| wavelet-HLH | gldm       | DependenceNonUniformity              | 26.74736842  |
| wavelet-HLH | gldm       | GrayLevelNonUniformity               | 6.410526316  |
| wavelet-HLH | gldm       | SmallDependenceEmphasis              | 0.46725731   |
| wavelet-HLH | gldm       | SmallDependenceHighGrayLevelEmphasis | 147.7606433  |
| wavelet-HLH | gldm       | DependenceNonUniformityNormalized    | 0.281551247  |
| wavelet-HLH | gldm       | LargeDependenceEmphasis              | 6.515789474  |
| wavelet-HLH | gldm       | LargeDependenceLowGrayLevelEmphasis  | 0.041189321  |
| wavelet-HLH | gldm       | DependenceVariance                   | 1.675789474  |
| wavelet-HLH | gldm       | LargeDependenceHighGrayLevelEmphasis | 1943.326316  |
| wavelet-HLH | gldm       | SmallDependenceLowGrayLevelEmphasis  | 0.018470127  |
| wavelet-HLH | gldm       | LowGrayLevelEmphasis                 | 0.020492376  |
| wavelet-HLH | glcm       | JointAverage                         | 16.76086583  |
| wavelet-HLH | glcm       | SumAverage                           | 33.52173167  |
| wavelet-HLH | glcm       | JointEntropy                         | 6.373069475  |
| wavelet-HLH | glcm       | ClusterShade                         | -8.159122038 |
| wavelet-HLH | glcm       | MaximumProbability                   | 0.034074357  |
| wavelet-HLH | glcm       | Idmn                                 | 0.945700545  |
| wavelet-HLH | glcm       | JointEnergy                          | 0.013698799  |
| wavelet-HLH | glcm       | Contrast                             | 64.9568799   |
| wavelet-HLH | glcm       | DifferenceEntropy                    | 3.71529217   |
| wavelet-HLH | glcm       | InverseVariance                      | 0.166146189  |
| wavelet-HLH | glcm       | DifferenceVariance                   | 28.09217944  |
| wavelet-HLH | glcm       | Idn                                  | 0.854273292  |
| wavelet-HLH | glcm       | Idm                                  | 0.176442715  |
| wavelet-HLH | glcm       | Correlation                          | -0.035109986 |
| wavelet-HLH | glcm       | Autocorrelation                      | 279.6289057  |
| wavelet-HLH | glcm       | SumEntropy                           | 4.363769334  |
| wavelet-HLH | glcm       | SumSquares                           | 31.10498651  |
| wavelet-HLH | glcm       | ClusterProminence                    | 14576.81822  |
| wavelet-HLH | glcm       | Imc2                                 | 0.990111548  |
| wavelet-HLH | glcm       | Imc1                                 | -0.473432258 |
| wavelet-HLH | glcm       | DifferenceAverage                    | 5.96244728   |
| wavelet-HLH | glcm       | Id                                   | 0.267501839  |
| wavelet-HLH | glcm       | ClusterTendency                      | 59.46306614  |
| wavelet-HLH | firstorder | InterquartileRange                   | 149.2059442  |
| wavelet-HLH | firstorder | Skewness                             | -0.211776789 |
| wavelet-HLH | firstorder | Uniformity                           | 0.067479224  |
| wavelet-HLH | firstorder | Median                               | 6.070547202  |
| wavelet-HLH | firstorder | Energy                               | 1915915.901  |
| wavelet-HLH | firstorder | RobustMeanAbsoluteDeviation          | 67.21251695  |
| wavelet-HLH | firstorder | MeanAbsoluteDeviation                | 106.5328934  |
| wavelet-HLH | firstorder | TotalEnergy                          | 51729729.34  |
| wavelet-HLH | firstorder | Maximum                              | 372.010974   |
| wavelet-HLH | firstorder | RootMeanSquared                      | 142.0124495  |
| wavelet-HLH | firstorder | 90Percentile                         | 208.193251   |
| wavelet-HLH | firstorder | Minimum                              | -383.1037724 |
| wavelet-HLH | firstorder | Entropy                              | 4.206169044  |
| wavelet-HLH | firstorder | Range                                | 755.1147464  |



|             |            |                                  |              |
|-------------|------------|----------------------------------|--------------|
| wavelet-HLH | firstorder | Variance                         | 20074.09718  |
| wavelet-HLH | firstorder | 10Percentile                     | -130.6088456 |
| wavelet-HLH | firstorder | Kurtosis                         | 3.66073456   |
| wavelet-HLH | firstorder | Mean                             | 9.666365707  |
| wavelet-HLH | glrlm      | ShortRunLowGrayLevelEmphasis     | 0.021183261  |
| wavelet-HLH | glrlm      | GrayLevelVariance                | 33.22692625  |
| wavelet-HLH | glrlm      | LowGrayLevelRunEmphasis          | 0.021321928  |
| wavelet-HLH | glrlm      | GrayLevelNonUniformityNormalized | 0.066051069  |
| wavelet-HLH | glrlm      | RunVariance                      | 0.047453948  |
| wavelet-HLH | glrlm      | GrayLevelNonUniformity           | 5.989584488  |
| wavelet-HLH | glrlm      | LongRunEmphasis                  | 1.150572172  |
| wavelet-HLH | glrlm      | ShortRunHighGrayLevelEmphasis    | 306.8619897  |
| wavelet-HLH | glrlm      | RunLengthNonUniformity           | 82.63823184  |
| wavelet-HLH | glrlm      | ShortRunEmphasis                 | 0.963306625  |
| wavelet-HLH | glrlm      | LongRunHighGrayLevelEmphasis     | 363.504153   |
| wavelet-HLH | glrlm      | RunPercentage                    | 0.953846154  |
| wavelet-HLH | glrlm      | LongRunLowGrayLevelEmphasis      | 0.021889739  |
| wavelet-HLH | glrlm      | RunEntropy                       | 4.383445976  |
| wavelet-HLH | glrlm      | HighGrayLevelRunEmphasis         | 317.9708592  |
| wavelet-HLH | glrlm      | RunLengthNonUniformityNormalized | 0.909992389  |
| wavelet-HLH | glszm      | GrayLevelVariance                | 45.3368595   |
| wavelet-HLH | glszm      | ZoneVariance                     | 1.907438017  |
| wavelet-HLH | glszm      | GrayLevelNonUniformityNormalized | 0.053884298  |
| wavelet-HLH | glszm      | SizeZoneNonUniformityNormalized  | 0.451900826  |
| wavelet-HLH | glszm      | SizeZoneNonUniformity            | 24.85454545  |
| wavelet-HLH | glszm      | GrayLevelNonUniformity           | 2.963636364  |
| wavelet-HLH | glszm      | LargeAreaEmphasis                | 4.890909091  |
| wavelet-HLH | glszm      | SmallAreaHighGrayLevelEmphasis   | 216.4947285  |
| wavelet-HLH | glszm      | ZonePercentage                   | 0.578947368  |
| wavelet-HLH | glszm      | LargeAreaLowGrayLevelEmphasis    | 0.04695716   |
| wavelet-HLH | glszm      | LargeAreaHighGrayLevelEmphasis   | 1502.872727  |
| wavelet-HLH | glszm      | HighGrayLevelZoneEmphasis        | 319.6909091  |
| wavelet-HLH | glszm      | SmallAreaEmphasis                | 0.690309343  |
| wavelet-HLH | glszm      | LowGrayLevelZoneEmphasis         | 0.032654604  |
| wavelet-HLH | glszm      | ZoneEntropy                      | 5.217367895  |
| wavelet-HLH | glszm      | SmallAreaLowGrayLevelEmphasis    | 0.031464005  |
| wavelet-HLH | ngtdm      | Coarseness                       | 0.053093808  |
| wavelet-HLH | ngtdm      | Complexity                       | 1130.196895  |
| wavelet-HLH | ngtdm      | Strength                         | 11.80024753  |
| wavelet-HLH | ngtdm      | Contrast                         | 0.477864481  |
| wavelet-HLH | ngtdm      | Busyness                         | 0.047734656  |

| Image type | Feature Class | Feature Name                         |                                                                                                                                                                                                                                                                                                                                                                                                                   |
|------------|---------------|--------------------------------------|-------------------------------------------------------------------------------------------------------------------------------------------------------------------------------------------------------------------------------------------------------------------------------------------------------------------------------------------------------------------------------------------------------------------|
| general    | info          | BoundingBox                          | 11: RTSTRUCT: C99-DNU_segment_Tumor<br>(0, 1, 1, 7, 6, 5)                                                                                                                                                                                                                                                                                                                                                         |
| general    | info          | EnabledImageTypes                    | {u'Original': {}, u'Wavelet': {}}                                                                                                                                                                                                                                                                                                                                                                                 |
|            |               |                                      | {'distances': [1], 'additionalInfo': True, 'force2D': False, 'interpolator': 'sitkBSpline', 'resampledPixelSpacing': [3.0], 'label': 1, 'normalizeScale': 1, 'normalize': False, 'force2Ddimension': 0, 'removeOutliers': None, 'minimumROISize': None, u'binWidth': 25.0, 'minimumROIDimensions': 1, u'correctMask': True, 'preCrop': False, u'symmetricalGLCM': True, 'resegmentRange': None, 'padDistance': 5} |
| general    | info          | GeneralSettings                      | 43f5328648bbe53400187dbe142d21bc7eb50bbe                                                                                                                                                                                                                                                                                                                                                                          |
| general    | info          | ImageHash                            | (0.9765625000000002, 0.9765625000000002,                                                                                                                                                                                                                                                                                                                                                                          |
| general    | info          | ImageSpacing                         | 2.0)                                                                                                                                                                                                                                                                                                                                                                                                              |
| general    | info          | MaskHash                             | 4e8a2cc08813748e7dc4b193fdeb6dde80750cf0                                                                                                                                                                                                                                                                                                                                                                          |
| general    | info          | NumpyVersion                         | 1.13.1                                                                                                                                                                                                                                                                                                                                                                                                            |
| general    | info          | PyWaveletVersion                     | 0.5.2                                                                                                                                                                                                                                                                                                                                                                                                             |
| general    | info          | SimpleITKVersion                     | 1.1.0                                                                                                                                                                                                                                                                                                                                                                                                             |
| general    | info          | Version                              | 1.3.0.post102+g1b0eb74                                                                                                                                                                                                                                                                                                                                                                                            |
| general    | info          | VolumeNum                            | 1                                                                                                                                                                                                                                                                                                                                                                                                                 |
| general    | info          | VoxelNum                             | 82                                                                                                                                                                                                                                                                                                                                                                                                                |
| original   | shape         | Maximum3DDiameter                    | 23.43074903                                                                                                                                                                                                                                                                                                                                                                                                       |
| original   | shape         | Maximum2DDiameterSlice               | 16.97056275                                                                                                                                                                                                                                                                                                                                                                                                       |
| original   | shape         | Sphericity                           | 0.821191907                                                                                                                                                                                                                                                                                                                                                                                                       |
| original   | shape         | MinorAxis                            | 16.11012122                                                                                                                                                                                                                                                                                                                                                                                                       |
| original   | shape         | Elongation                           | 0.756822375                                                                                                                                                                                                                                                                                                                                                                                                       |
| original   | shape         | SurfaceVolumeRatio                   | 0.451835405                                                                                                                                                                                                                                                                                                                                                                                                       |
| original   | shape         | Volume                               | 2214                                                                                                                                                                                                                                                                                                                                                                                                              |
| original   | shape         | MajorAxis                            | 21.28652871                                                                                                                                                                                                                                                                                                                                                                                                       |
| original   | shape         | SurfaceArea                          | 1000.363586                                                                                                                                                                                                                                                                                                                                                                                                       |
| original   | shape         | Flatness                             | 0.452701578                                                                                                                                                                                                                                                                                                                                                                                                       |
| original   | shape         | LeastAxis                            | 9.636445133                                                                                                                                                                                                                                                                                                                                                                                                       |
| original   | shape         | Maximum2DDiameterColumn              | 17.49285568                                                                                                                                                                                                                                                                                                                                                                                                       |
| original   | shape         | Maximum2DDiameterRow                 | 19.20937271                                                                                                                                                                                                                                                                                                                                                                                                       |
| original   | gldm          | GrayLevelVariance                    | 139.8631767                                                                                                                                                                                                                                                                                                                                                                                                       |
| original   | gldm          | HighGrayLevelEmphasis                | 987.9512195                                                                                                                                                                                                                                                                                                                                                                                                       |
| original   | gldm          | DependenceEntropy                    | 5.360302767                                                                                                                                                                                                                                                                                                                                                                                                       |
| original   | gldm          | DependenceNonUniformity              | 32.7804878                                                                                                                                                                                                                                                                                                                                                                                                        |
| original   | gldm          | GrayLevelNonUniformity               | 4.292682927                                                                                                                                                                                                                                                                                                                                                                                                       |
| original   | gldm          | SmallDependenceEmphasis              | 0.651372591                                                                                                                                                                                                                                                                                                                                                                                                       |
| original   | gldm          | SmallDependenceHighGrayLevelEmphasis | 496.0082457                                                                                                                                                                                                                                                                                                                                                                                                       |
| original   | gldm          | DependenceNonUniformityNormalized    | 0.399762046                                                                                                                                                                                                                                                                                                                                                                                                       |
| original   | gldm          | LargeDependenceEmphasis              | 6.292682927                                                                                                                                                                                                                                                                                                                                                                                                       |
| original   | gldm          | LargeDependenceLowGrayLevelEmphasis  | 0.045038917                                                                                                                                                                                                                                                                                                                                                                                                       |
| original   | gldm          | DependenceVariance                   | 2.485425342                                                                                                                                                                                                                                                                                                                                                                                                       |
| original   | gldm          | LargeDependenceHighGrayLevelEmphasis | 8849.609756                                                                                                                                                                                                                                                                                                                                                                                                       |
| original   | gldm          | SmallDependenceLowGrayLevelEmphasis  | 0.041078742                                                                                                                                                                                                                                                                                                                                                                                                       |
| original   | gldm          | LowGrayLevelEmphasis                 | 0.041354771                                                                                                                                                                                                                                                                                                                                                                                                       |
| original   | glcm          | JointAverage                         | 31.91233219                                                                                                                                                                                                                                                                                                                                                                                                       |
| original   | glcm          | SumAverage                           | 63.82466437                                                                                                                                                                                                                                                                                                                                                                                                       |

|          |            |                                  |              |
|----------|------------|----------------------------------|--------------|
| original | glcm       | JointEntropy                     | 6.109681585  |
| original | glcm       | ClusterShade                     | -3317.728619 |
| original | glcm       | MaximumProbability               | 0.049025054  |
| original | glcm       | Idmn                             | 0.919291678  |
| original | glcm       | JointEnergy                      | 0.016810128  |
| original | glcm       | Contrast                         | 219.6122262  |
| original | glcm       | DifferenceEntropy                | 4.150284857  |
| original | glcm       | InverseVariance                  | 0.145959214  |
| original | glcm       | DifferenceVariance               | 102.8358708  |
| original | glcm       | Idn                              | 0.832056325  |
| original | glcm       | Idm                              | 0.152362098  |
| original | glcm       | Correlation                      | 0.01702537   |
| original | glcm       | Autocorrelation                  | 1020.747462  |
| original | glcm       | SumEntropy                       | 4.640784564  |
| original | glcm       | SumSquares                       | 111.5926589  |
| original | glcm       | ClusterProminence                | 174999.1919  |
| original | glcm       | Imc2                             | 0.995304482  |
| original | glcm       | Imc1                             | -0.560148698 |
| original | glcm       | DifferenceAverage                | 10.70145984  |
| original | glcm       | Id                               | 0.224190236  |
| original | glcm       | ClusterTendency                  | 226.7584094  |
| original | firstorder | InterquartileRange               | 376          |
| original | firstorder | Skewness                         | -0.993128831 |
| original | firstorder | Uniformity                       | 0.052349792  |
| original | firstorder | Median                           | -103         |
| original | firstorder | Energy                           | 9958496      |
| original | firstorder | RobustMeanAbsoluteDeviation      | 164.5942383  |
| original | firstorder | MeanAbsoluteDeviation            | 238.497323   |
| original | firstorder | TotalEnergy                      | 268879392    |
| original | firstorder | Maximum                          | 218          |
| original | firstorder | RootMeanSquared                  | 348.4897031  |
| original | firstorder | 90Percentile                     | 95.9         |
| original | firstorder | Minimum                          | -900         |
| original | firstorder | Entropy                          | 4.599282913  |
| original | firstorder | Range                            | 1118         |
| original | firstorder | Variance                         | 87057.4414   |
| original | firstorder | 10Percentile                     | -660.6       |
| original | firstorder | Kurtosis                         | 2.88788282   |
| original | firstorder | Mean                             | -185.4390244 |
| original | glrlm      | ShortRunLowGrayLevelEmphasis     | 0.042893405  |
| original | glrlm      | GrayLevelVariance                | 141.5259858  |
| original | glrlm      | LowGrayLevelRunEmphasis          | 0.04291344   |
| original | glrlm      | GrayLevelNonUniformityNormalized | 0.04890289   |
| original | glrlm      | RunVariance                      | 0.040480389  |
| original | glrlm      | GrayLevelNonUniformity           | 3.865226988  |
| original | glrlm      | LongRunEmphasis                  | 1.119084745  |
| original | glrlm      | ShortRunHighGrayLevelEmphasis    | 929.4948459  |
| original | glrlm      | RunLengthNonUniformity           | 73.55105747  |
| original | glrlm      | ShortRunEmphasis                 | 0.97244919   |
| original | glrlm      | LongRunHighGrayLevelEmphasis     | 1143.970632  |
| original | glrlm      | RunPercentage                    | 0.963414634  |
| original | glrlm      | LongRunLowGrayLevelEmphasis      | 0.042999571  |
| original | glrlm      | RunEntropy                       | 4.744641639  |
| original | glrlm      | HighGrayLevelRunEmphasis         | 969.7557482  |
| original | glrlm      | RunLengthNonUniformityNormalized | 0.930402143  |

|             |       |                                      |              |
|-------------|-------|--------------------------------------|--------------|
| original    | glszm | GrayLevelVariance                    | 147.4806778  |
| original    | glszm | ZoneVariance                         | 2.380499405  |
| original    | glszm | GrayLevelNonUniformityNormalized     | 0.040428062  |
| original    | glszm | SizeZoneNonUniformityNormalized      | 0.700356718  |
| original    | glszm | SizeZoneNonUniformity                | 40.62068966  |
| original    | glszm | GrayLevelNonUniformity               | 2.344827586  |
| original    | glszm | LargeAreaEmphasis                    | 4.379310345  |
| original    | glszm | SmallAreaHighGrayLevelEmphasis       | 617.3934914  |
| original    | glszm | ZonePercentage                       | 0.707317073  |
| original    | glszm | LargeAreaLowGrayLevelEmphasis        | 0.060509038  |
| original    | glszm | LargeAreaHighGrayLevelEmphasis       | 5828.482759  |
| original    | glszm | HighGrayLevelZoneEmphasis            | 803.0172414  |
| original    | glszm | SmallAreaEmphasis                    | 0.860483716  |
| original    | glszm | LowGrayLevelZoneEmphasis             | 0.058150985  |
| original    | glszm | ZoneEntropy                          | 5.034283797  |
| original    | glszm | SmallAreaLowGrayLevelEmphasis        | 0.058026499  |
| original    | ngtdm | Coarseness                           | 0.032091599  |
| original    | ngtdm | Complexity                           | 4680.535735  |
| original    | ngtdm | Strength                             | 26.62872116  |
| original    | ngtdm | Contrast                             | 2.895869123  |
| original    | ngtdm | Busyness                             | 0.034709653  |
| wavelet-HHH | gldm  | GrayLevelVariance                    | 71.2797442   |
| wavelet-HHH | gldm  | HighGrayLevelEmphasis                | 548.3292683  |
| wavelet-HHH | gldm  | DependenceEntropy                    | 5.359084895  |
| wavelet-HHH | gldm  | DependenceNonUniformity              | 42.7804878   |
| wavelet-HHH | gldm  | GrayLevelNonUniformity               | 3.463414634  |
| wavelet-HHH | gldm  | SmallDependenceEmphasis              | 0.737127371  |
| wavelet-HHH | gldm  | SmallDependenceHighGrayLevelEmphasis | 411.5257453  |
| wavelet-HHH | gldm  | DependenceNonUniformityNormalized    | 0.521713266  |
| wavelet-HHH | gldm  | LargeDependenceEmphasis              | 2.268292683  |
| wavelet-HHH | gldm  | LargeDependenceLowGrayLevelEmphasis  | 0.021074762  |
| wavelet-HHH | gldm  | DependenceVariance                   | 0.335514575  |
| wavelet-HHH | gldm  | LargeDependenceHighGrayLevelEmphasis | 1231.695122  |
| wavelet-HHH | gldm  | SmallDependenceLowGrayLevelEmphasis  | 0.017243424  |
| wavelet-HHH | gldm  | LowGrayLevelEmphasis                 | 0.017939406  |
| wavelet-HHH | glcm  | JointAverage                         | 21.52487059  |
| wavelet-HHH | glcm  | SumAverage                           | 43.04974118  |
| wavelet-HHH | glcm  | JointEntropy                         | 6.336000438  |
| wavelet-HHH | glcm  | ClusterShade                         | -315.409612  |
| wavelet-HHH | glcm  | MaximumProbability                   | 0.023950406  |
| wavelet-HHH | glcm  | Idmn                                 | 0.926541085  |
| wavelet-HHH | glcm  | JointEnergy                          | 0.013106001  |
| wavelet-HHH | glcm  | Contrast                             | 155.9028428  |
| wavelet-HHH | glcm  | DifferenceEntropy                    | 4.049893505  |
| wavelet-HHH | glcm  | InverseVariance                      | 0.112627747  |
| wavelet-HHH | glcm  | DifferenceVariance                   | 53.44899474  |
| wavelet-HHH | glcm  | Idn                                  | 0.825351046  |
| wavelet-HHH | glcm  | Idm                                  | 0.095614051  |
| wavelet-HHH | glcm  | Correlation                          | -0.044055836 |
| wavelet-HHH | glcm  | Autocorrelation                      | 460.3426728  |
| wavelet-HHH | glcm  | SumEntropy                           | 4.586063246  |
| wavelet-HHH | glcm  | SumSquares                           | 74.92068375  |
| wavelet-HHH | glcm  | ClusterProminence                    | 66202.06301  |
| wavelet-HHH | glcm  | Imc2                                 | 0.998893585  |
| wavelet-HHH | glcm  | Imc1                                 | -0.653951836 |

|             |            |                                  |              |
|-------------|------------|----------------------------------|--------------|
| wavelet-HHH | glcm       | DifferenceAverage                | 9.73846662   |
| wavelet-HHH | glcm       | Id                               | 0.178880107  |
| wavelet-HHH | glcm       | ClusterTendency                  | 143.7798921  |
| wavelet-HHH | firstorder | InterquartileRange               | 274.9316117  |
| wavelet-HHH | firstorder | Skewness                         | -0.411186153 |
| wavelet-HHH | firstorder | Uniformity                       | 0.042236764  |
| wavelet-HHH | firstorder | Median                           | 46.4578475   |
| wavelet-HHH | firstorder | Energy                           | 3657701.346  |
| wavelet-HHH | firstorder | RobustMeanAbsoluteDeviation      | 115.3883277  |
| wavelet-HHH | firstorder | MeanAbsoluteDeviation            | 169.4337064  |
| wavelet-HHH | firstorder | TotalEnergy                      | 98757936.35  |
| wavelet-HHH | firstorder | Maximum                          | 495.248106   |
| wavelet-HHH | firstorder | RootMeanSquared                  | 211.2015956  |
| wavelet-HHH | firstorder | 90Percentile                     | 245.0479384  |
| wavelet-HHH | firstorder | Minimum                          | -514.6882769 |
| wavelet-HHH | firstorder | Entropy                          | 4.797632456  |
| wavelet-HHH | firstorder | Range                            | 1009.936383  |
| wavelet-HHH | firstorder | Variance                         | 44554.81001  |
| wavelet-HHH | firstorder | 10Percentile                     | -287.2281834 |
| wavelet-HHH | firstorder | Kurtosis                         | 2.720837716  |
| wavelet-HHH | firstorder | Mean                             | 7.162679161  |
| wavelet-HHH | glrlm      | ShortRunLowGrayLevelEmphasis     | 0.018149116  |
| wavelet-HHH | glrlm      | GrayLevelVariance                | 71.98611308  |
| wavelet-HHH | glrlm      | LowGrayLevelRunEmphasis          | 0.018177859  |
| wavelet-HHH | glrlm      | GrayLevelNonUniformityNormalized | 0.042007417  |
| wavelet-HHH | glrlm      | RunVariance                      | 0.016914585  |
| wavelet-HHH | glrlm      | GrayLevelNonUniformity           | 3.393192345  |
| wavelet-HHH | glrlm      | LongRunEmphasis                  | 1.048375486  |
| wavelet-HHH | glrlm      | ShortRunHighGrayLevelEmphasis    | 542.8839005  |
| wavelet-HHH | glrlm      | RunLengthNonUniformity           | 78.53362912  |
| wavelet-HHH | glrlm      | ShortRunEmphasis                 | 0.988974505  |
| wavelet-HHH | glrlm      | LongRunHighGrayLevelEmphasis     | 574.7804591  |
| wavelet-HHH | glrlm      | RunPercentage                    | 0.984990619  |
| wavelet-HHH | glrlm      | LongRunLowGrayLevelEmphasis      | 0.018298282  |
| wavelet-HHH | glrlm      | RunEntropy                       | 4.843261397  |
| wavelet-HHH | glrlm      | HighGrayLevelRunEmphasis         | 548.5931267  |
| wavelet-HHH | glrlm      | RunLengthNonUniformityNormalized | 0.971867946  |
| wavelet-HHH | glszm      | GrayLevelVariance                | 81.18823791  |
| wavelet-HHH | glszm      | ZoneVariance                     | 0.233459568  |
| wavelet-HHH | glszm      | GrayLevelNonUniformityNormalized | 0.038984184  |
| wavelet-HHH | glszm      | SizeZoneNonUniformityNormalized  | 0.677433727  |
| wavelet-HHH | glszm      | SizeZoneNonUniformity            | 45.3880597   |
| wavelet-HHH | glszm      | GrayLevelNonUniformity           | 2.611940299  |
| wavelet-HHH | glszm      | LargeAreaEmphasis                | 1.731343284  |
| wavelet-HHH | glszm      | SmallAreaHighGrayLevelEmphasis   | 476.4718076  |
| wavelet-HHH | glszm      | ZonePercentage                   | 0.817073171  |
| wavelet-HHH | glszm      | LargeAreaLowGrayLevelEmphasis    | 0.02320835   |
| wavelet-HHH | glszm      | LargeAreaHighGrayLevelEmphasis   | 948.2835821  |
| wavelet-HHH | glszm      | HighGrayLevelZoneEmphasis        | 552.7910448  |
| wavelet-HHH | glszm      | SmallAreaEmphasis                | 0.850331675  |
| wavelet-HHH | glszm      | LowGrayLevelZoneEmphasis         | 0.021374311  |
| wavelet-HHH | glszm      | ZoneEntropy                      | 5.30311284   |
| wavelet-HHH | glszm      | SmallAreaLowGrayLevelEmphasis    | 0.020965745  |
| wavelet-HHH | ngtdm      | Coarseness                       | 0.051558068  |
| wavelet-HHH | ngtdm      | Complexity                       | 3289.544533  |

|             |            |                                      |              |
|-------------|------------|--------------------------------------|--------------|
| wavelet-HHH | ngtdm      | Strength                             | 21.40343616  |
| wavelet-HHH | ngtdm      | Contrast                             | 0.917825261  |
| wavelet-HHH | ngtdm      | Busyness                             | 0.027392094  |
| wavelet-HLL | gldm       | GrayLevelVariance                    | 131.1832243  |
| wavelet-HLL | gldm       | HighGrayLevelEmphasis                | 1053.268293  |
| wavelet-HLL | gldm       | DependenceEntropy                    | 5.4182892    |
| wavelet-HLL | gldm       | DependenceNonUniformity              | 40.70731707  |
| wavelet-HLL | gldm       | GrayLevelNonUniformity               | 3.097560976  |
| wavelet-HLL | gldm       | SmallDependenceEmphasis              | 0.725718157  |
| wavelet-HLL | gldm       | SmallDependenceHighGrayLevelEmphasis | 779.2246883  |
| wavelet-HLL | gldm       | DependenceNonUniformityNormalized    | 0.496430696  |
| wavelet-HLL | gldm       | LargeDependenceEmphasis              | 3.756097561  |
| wavelet-HLL | gldm       | LargeDependenceLowGrayLevelEmphasis  | 0.017873303  |
| wavelet-HLL | gldm       | DependenceVariance                   | 1.242712671  |
| wavelet-HLL | gldm       | LargeDependenceHighGrayLevelEmphasis | 3332.707317  |
| wavelet-HLL | gldm       | SmallDependenceLowGrayLevelEmphasis  | 0.013452352  |
| wavelet-HLL | gldm       | LowGrayLevelEmphasis                 | 0.013865226  |
| wavelet-HLL | glcm       | JointAverage                         | 30.0403241   |
| wavelet-HLL | glcm       | SumAverage                           | 60.08064819  |
| wavelet-HLL | glcm       | JointEntropy                         | 6.331182113  |
| wavelet-HLL | glcm       | ClusterShade                         | 1836.30156   |
| wavelet-HLL | glcm       | MaximumProbability                   | 0.029642223  |
| wavelet-HLL | glcm       | Idmn                                 | 0.937501772  |
| wavelet-HLL | glcm       | JointEnergy                          | 0.013281951  |
| wavelet-HLL | glcm       | Contrast                             | 221.116243   |
| wavelet-HLL | glcm       | DifferenceEntropy                    | 4.215800921  |
| wavelet-HLL | glcm       | InverseVariance                      | 0.085338831  |
| wavelet-HLL | glcm       | DifferenceVariance                   | 75.04044772  |
| wavelet-HLL | glcm       | Idn                                  | 0.838239755  |
| wavelet-HLL | glcm       | Idm                                  | 0.093436529  |
| wavelet-HLL | glcm       | Correlation                          | 0.099564346  |
| wavelet-HLL | glcm       | Autocorrelation                      | 914.308675   |
| wavelet-HLL | glcm       | SumEntropy                           | 4.806369256  |
| wavelet-HLL | glcm       | SumSquares                           | 122.0171718  |
| wavelet-HLL | glcm       | ClusterProminence                    | 219077.4752  |
| wavelet-HLL | glcm       | Imc2                                 | 0.999108976  |
| wavelet-HLL | glcm       | Imc1                                 | -0.67088723  |
| wavelet-HLL | glcm       | DifferenceAverage                    | 11.60329141  |
| wavelet-HLL | glcm       | Id                                   | 0.170174891  |
| wavelet-HLL | glcm       | ClusterTendency                      | 266.9524442  |
| wavelet-HLL | firstorder | InterquartileRange                   | 395.748088   |
| wavelet-HLL | firstorder | Skewness                             | 0.178073902  |
| wavelet-HLL | firstorder | Uniformity                           | 0.037775134  |
| wavelet-HLL | firstorder | Median                               | -219.7321646 |
| wavelet-HLL | firstorder | Energy                               | 8698488.082  |
| wavelet-HLL | firstorder | RobustMeanAbsoluteDeviation          | 168.5055791  |
| wavelet-HLL | firstorder | MeanAbsoluteDeviation                | 237.0383542  |
| wavelet-HLL | firstorder | TotalEnergy                          | 234859178.2  |
| wavelet-HLL | firstorder | Maximum                              | 442.3890018  |
| wavelet-HLL | firstorder | RootMeanSquared                      | 325.6979014  |
| wavelet-HLL | firstorder | 90Percentile                         | 255.611303   |
| wavelet-HLL | firstorder | Minimum                              | -883.3076153 |
| wavelet-HLL | firstorder | Entropy                              | 4.949015957  |
| wavelet-HLL | firstorder | Range                                | 1325.696617  |
| wavelet-HLL | firstorder | Variance                             | 82656.47506  |

|             |            |                                      |              |
|-------------|------------|--------------------------------------|--------------|
| wavelet-HLL | firstorder | 10Percentile                         | -506.3369168 |
| wavelet-HLL | firstorder | Kurtosis                             | 2.486336618  |
| wavelet-HLL | firstorder | Mean                                 | -153.0445944 |
| wavelet-HLL | glrlm      | ShortRunLowGrayLevelEmphasis         | 0.014129147  |
| wavelet-HLL | glrlm      | GrayLevelVariance                    | 132.4498799  |
| wavelet-HLL | glrlm      | LowGrayLevelRunEmphasis              | 0.014153489  |
| wavelet-HLL | glrlm      | GrayLevelNonUniformityNormalized     | 0.03682845   |
| wavelet-HLL | glrlm      | RunVariance                          | 0.024478774  |
| wavelet-HLL | glrlm      | GrayLevelNonUniformity               | 2.952594633  |
| wavelet-HLL | glrlm      | LongRunEmphasis                      | 1.071831731  |
| wavelet-HLL | glrlm      | ShortRunHighGrayLevelEmphasis        | 1041.769282  |
| wavelet-HLL | glrlm      | RunLengthNonUniformity               | 76.7166781   |
| wavelet-HLL | glrlm      | ShortRunEmphasis                     | 0.983152068  |
| wavelet-HLL | glrlm      | LongRunHighGrayLevelEmphasis         | 1120.02663   |
| wavelet-HLL | glrlm      | RunPercentage                        | 0.977485929  |
| wavelet-HLL | glrlm      | LongRunLowGrayLevelEmphasis          | 0.014261956  |
| wavelet-HLL | glrlm      | RunEntropy                           | 5.018331748  |
| wavelet-HLL | glrlm      | HighGrayLevelRunEmphasis             | 1057.065551  |
| wavelet-HLL | glrlm      | RunLengthNonUniformityNormalized     | 0.956725082  |
| wavelet-HLL | glszm      | GrayLevelVariance                    | 138.6546746  |
| wavelet-HLL | glszm      | ZoneVariance                         | 0.562366864  |
| wavelet-HLL | glszm      | GrayLevelNonUniformityNormalized     | 0.032426036  |
| wavelet-HLL | glszm      | SizeZoneNonUniformityNormalized      | 0.706508876  |
| wavelet-HLL | glszm      | SizeZoneNonUniformity                | 45.92307692  |
| wavelet-HLL | glszm      | GrayLevelNonUniformity               | 2.107692308  |
| wavelet-HLL | glszm      | LargeAreaEmphasis                    | 2.153846154  |
| wavelet-HLL | glszm      | SmallAreaHighGrayLevelEmphasis       | 931.6491453  |
| wavelet-HLL | glszm      | ZonePercentage                       | 0.792682927  |
| wavelet-HLL | glszm      | LargeAreaLowGrayLevelEmphasis        | 0.018841784  |
| wavelet-HLL | glszm      | LargeAreaHighGrayLevelEmphasis       | 2082.984615  |
| wavelet-HLL | glszm      | HighGrayLevelZoneEmphasis            | 1078.784615  |
| wavelet-HLL | glszm      | SmallAreaEmphasis                    | 0.865384615  |
| wavelet-HLL | glszm      | LowGrayLevelZoneEmphasis             | 0.01709259   |
| wavelet-HLL | glszm      | ZoneEntropy                          | 5.279834544  |
| wavelet-HLL | glszm      | SmallAreaLowGrayLevelEmphasis        | 0.016891844  |
| wavelet-HLL | ngtdm      | Coarseness                           | 0.048963101  |
| wavelet-HLL | ngtdm      | Complexity                           | 4871.15885   |
| wavelet-HLL | ngtdm      | Strength                             | 32.5628092   |
| wavelet-HLL | ngtdm      | Contrast                             | 1.678164219  |
| wavelet-HLL | ngtdm      | Busyness                             | 0.028423804  |
| wavelet-LHL | gldm       | GrayLevelVariance                    | 172.9208804  |
| wavelet-LHL | gldm       | HighGrayLevelEmphasis                | 1513.195122  |
| wavelet-LHL | gldm       | DependenceEntropy                    | 5.433473498  |
| wavelet-LHL | gldm       | DependenceNonUniformity              | 45.63414634  |
| wavelet-LHL | gldm       | GrayLevelNonUniformity               | 2.804878049  |
| wavelet-LHL | gldm       | SmallDependenceEmphasis              | 0.766260163  |
| wavelet-LHL | gldm       | SmallDependenceHighGrayLevelEmphasis | 1188.554878  |
| wavelet-LHL | gldm       | DependenceNonUniformityNormalized    | 0.55651398   |
| wavelet-LHL | gldm       | LargeDependenceEmphasis              | 2.097560976  |
| wavelet-LHL | gldm       | LargeDependenceLowGrayLevelEmphasis  | 0.014373849  |
| wavelet-LHL | gldm       | DependenceVariance                   | 0.298036883  |
| wavelet-LHL | gldm       | LargeDependenceHighGrayLevelEmphasis | 2988.829268  |
| wavelet-LHL | gldm       | SmallDependenceLowGrayLevelEmphasis  | 0.013053671  |
| wavelet-LHL | gldm       | LowGrayLevelEmphasis                 | 0.013287844  |
| wavelet-LHL | glcm       | JointAverage                         | 35.80999475  |

|             |            |                                  |              |
|-------------|------------|----------------------------------|--------------|
| wavelet-LHL | glcm       | SumAverage                       | 71.6199895   |
| wavelet-LHL | glcm       | JointEntropy                     | 6.379970533  |
| wavelet-LHL | glcm       | ClusterShade                     | 2745.5862    |
| wavelet-LHL | glcm       | MaximumProbability               | 0.023885947  |
| wavelet-LHL | glcm       | Idmn                             | 0.948427339  |
| wavelet-LHL | glcm       | JointEnergy                      | 0.012603716  |
| wavelet-LHL | glcm       | Contrast                         | 262.9980702  |
| wavelet-LHL | glcm       | DifferenceEntropy                | 4.267824759  |
| wavelet-LHL | glcm       | InverseVariance                  | 0.086522274  |
| wavelet-LHL | glcm       | DifferenceVariance               | 88.49239922  |
| wavelet-LHL | glcm       | Idn                              | 0.852370648  |
| wavelet-LHL | glcm       | Idm                              | 0.081299395  |
| wavelet-LHL | glcm       | Correlation                      | 0.219381641  |
| wavelet-LHL | glcm       | Autocorrelation                  | 1319.687983  |
| wavelet-LHL | glcm       | SumEntropy                       | 4.904437077  |
| wavelet-LHL | glcm       | SumSquares                       | 168.6428186  |
| wavelet-LHL | glcm       | ClusterProminence                | 411997.5069  |
| wavelet-LHL | glcm       | Imc2                             | 0.999521994  |
| wavelet-LHL | glcm       | Imc1                             | -0.70896616  |
| wavelet-LHL | glcm       | DifferenceAverage                | 12.62455831  |
| wavelet-LHL | glcm       | Id                               | 0.156595936  |
| wavelet-LHL | glcm       | ClusterTendency                  | 411.5732042  |
| wavelet-LHL | firstorder | InterquartileRange               | 521.5826466  |
| wavelet-LHL | firstorder | Skewness                         | 0.019682577  |
| wavelet-LHL | firstorder | Uniformity                       | 0.03420583   |
| wavelet-LHL | firstorder | Median                           | -136.2731692 |
| wavelet-LHL | firstorder | Energy                           | 9587495.118  |
| wavelet-LHL | firstorder | RobustMeanAbsoluteDeviation      | 205.091028   |
| wavelet-LHL | firstorder | MeanAbsoluteDeviation            | 275.526833   |
| wavelet-LHL | firstorder | TotalEnergy                      | 258862368.2  |
| wavelet-LHL | firstorder | Maximum                          | 648.2343175  |
| wavelet-LHL | firstorder | RootMeanSquared                  | 341.9366494  |
| wavelet-LHL | firstorder | 90Percentile                     | 329.6683694  |
| wavelet-LHL | firstorder | Minimum                          | -984.6015525 |
| wavelet-LHL | firstorder | Entropy                          | 5.084337029  |
| wavelet-LHL | firstorder | Range                            | 1632.83587   |
| wavelet-LHL | firstorder | Variance                         | 107478.3732  |
| wavelet-LHL | firstorder | 10Percentile                     | -484.540018  |
| wavelet-LHL | firstorder | Kurtosis                         | 2.424527452  |
| wavelet-LHL | firstorder | Mean                             | -97.17149256 |
| wavelet-LHL | glrlm      | ShortRunLowGrayLevelEmphasis     | 0.013442789  |
| wavelet-LHL | glrlm      | GrayLevelVariance                | 173.7665681  |
| wavelet-LHL | glrlm      | LowGrayLevelRunEmphasis          | 0.013452779  |
| wavelet-LHL | glrlm      | GrayLevelNonUniformityNormalized | 0.034082632  |
| wavelet-LHL | glrlm      | RunVariance                      | 0.013125804  |
| wavelet-LHL | glrlm      | GrayLevelNonUniformity           | 2.758169172  |
| wavelet-LHL | glrlm      | LongRunEmphasis                  | 1.04024487   |
| wavelet-LHL | glrlm      | ShortRunHighGrayLevelEmphasis    | 1501.465413  |
| wavelet-LHL | glrlm      | RunLengthNonUniformity           | 78.81543751  |
| wavelet-LHL | glrlm      | ShortRunEmphasis                 | 0.989938783  |
| wavelet-LHL | glrlm      | LongRunHighGrayLevelEmphasis     | 1570.099318  |
| wavelet-LHL | glrlm      | RunPercentage                    | 0.986866792  |
| wavelet-LHL | glrlm      | LongRunLowGrayLevelEmphasis      | 0.013492741  |
| wavelet-LHL | glrlm      | RunEntropy                       | 5.116607266  |
| wavelet-LHL | glrlm      | HighGrayLevelRunEmphasis         | 1515.192194  |



|             |       |                                      |              |
|-------------|-------|--------------------------------------|--------------|
| wavelet-LHL | glrlm | RunLengthNonUniformityNormalized     | 0.973748392  |
| wavelet-LHL | glszm | GrayLevelVariance                    | 183.5530351  |
| wavelet-LHL | glszm | ZoneVariance                         | 0.18189456   |
| wavelet-LHL | glszm | GrayLevelNonUniformityNormalized     | 0.032136106  |
| wavelet-LHL | glszm | SizeZoneNonUniformityNormalized      | 0.708044528  |
| wavelet-LHL | glszm | SizeZoneNonUniformity                | 48.85507246  |
| wavelet-LHL | glszm | GrayLevelNonUniformity               | 2.217391304  |
| wavelet-LHL | glszm | LargeAreaEmphasis                    | 1.594202899  |
| wavelet-LHL | glszm | SmallAreaHighGrayLevelEmphasis       | 1351.692029  |
| wavelet-LHL | glszm | ZonePercentage                       | 0.841463415  |
| wavelet-LHL | glszm | LargeAreaLowGrayLevelEmphasis        | 0.016194939  |
| wavelet-LHL | glszm | LargeAreaHighGrayLevelEmphasis       | 2351.275362  |
| wavelet-LHL | glszm | HighGrayLevelZoneEmphasis            | 1537.57971   |
| wavelet-LHL | glszm | SmallAreaEmphasis                    | 0.867552335  |
| wavelet-LHL | glszm | LowGrayLevelZoneEmphasis             | 0.015602865  |
| wavelet-LHL | glszm | ZoneEntropy                          | 5.427081703  |
| wavelet-LHL | glszm | SmallAreaLowGrayLevelEmphasis        | 0.015469634  |
| wavelet-LHL | ngtdm | Coarseness                           | 0.049075834  |
| wavelet-LHL | ngtdm | Complexity                           | 6636.617987  |
| wavelet-LHL | ngtdm | Strength                             | 47.4444153   |
| wavelet-LHL | ngtdm | Contrast                             | 1.881296141  |
| wavelet-LHL | ngtdm | Busyness                             | 0.019637122  |
| wavelet-LHH | gldm  | GrayLevelVariance                    | 42.30755503  |
| wavelet-LHH | gldm  | HighGrayLevelEmphasis                | 487.4146341  |
| wavelet-LHH | gldm  | DependenceEntropy                    | 5.216712065  |
| wavelet-LHH | gldm  | DependenceNonUniformity              | 37.6097561   |
| wavelet-LHH | gldm  | GrayLevelNonUniformity               | 4.780487805  |
| wavelet-LHH | gldm  | SmallDependenceEmphasis              | 0.690379404  |
| wavelet-LHH | gldm  | SmallDependenceHighGrayLevelEmphasis | 342.0846883  |
| wavelet-LHH | gldm  | DependenceNonUniformityNormalized    | 0.458655562  |
| wavelet-LHH | gldm  | LargeDependenceEmphasis              | 2.780487805  |
| wavelet-LHH | gldm  | LargeDependenceLowGrayLevelEmphasis  | 0.019454285  |
| wavelet-LHH | gldm  | DependenceVariance                   | 0.493753718  |
| wavelet-LHH | gldm  | LargeDependenceHighGrayLevelEmphasis | 1322.609756  |
| wavelet-LHH | gldm  | SmallDependenceLowGrayLevelEmphasis  | 0.014334104  |
| wavelet-LHH | gldm  | LowGrayLevelEmphasis                 | 0.015104316  |
| wavelet-LHH | glcm  | JointAverage                         | 21.24794086  |
| wavelet-LHH | glcm  | SumAverage                           | 42.49588172  |
| wavelet-LHH | glcm  | JointEntropy                         | 6.241342217  |
| wavelet-LHH | glcm  | ClusterShade                         | 34.13819345  |
| wavelet-LHH | glcm  | MaximumProbability                   | 0.026106978  |
| wavelet-LHH | glcm  | Idmn                                 | 0.946526029  |
| wavelet-LHH | glcm  | JointEnergy                          | 0.014144745  |
| wavelet-LHH | glcm  | Contrast                             | 80.11755538  |
| wavelet-LHH | glcm  | DifferenceEntropy                    | 3.854157433  |
| wavelet-LHH | glcm  | InverseVariance                      | 0.122601371  |
| wavelet-LHH | glcm  | DifferenceVariance                   | 25.70207635  |
| wavelet-LHH | glcm  | Idn                                  | 0.843007113  |
| wavelet-LHH | glcm  | Idm                                  | 0.113324676  |
| wavelet-LHH | glcm  | Correlation                          | -0.002987626 |
| wavelet-LHH | glcm  | Autocorrelation                      | 451.5888672  |
| wavelet-LHH | glcm  | SumEntropy                           | 4.496972874  |
| wavelet-LHH | glcm  | SumSquares                           | 40.09217258  |
| wavelet-LHH | glcm  | ClusterProminence                    | 19433.11391  |
| wavelet-LHH | glcm  | Imc2                                 | 0.994961736  |

|             |            |                                  |              |
|-------------|------------|----------------------------------|--------------|
| wavelet-LHH | glcm       | Imc1                             | -0.547075117 |
| wavelet-LHH | glcm       | DifferenceAverage                | 7.28251592   |
| wavelet-LHH | glcm       | Id                               | 0.204637828  |
| wavelet-LHH | glcm       | ClusterTendency                  | 80.25113493  |
| wavelet-LHH | firstorder | InterquartileRange               | 214.6507607  |
| wavelet-LHH | firstorder | Skewness                         | 0.00316424   |
| wavelet-LHH | firstorder | Uniformity                       | 0.058298632  |
| wavelet-LHH | firstorder | Median                           | -10.92218525 |
| wavelet-LHH | firstorder | Energy                           | 2166108.758  |
| wavelet-LHH | firstorder | RobustMeanAbsoluteDeviation      | 88.97162262  |
| wavelet-LHH | firstorder | MeanAbsoluteDeviation            | 129.7841374  |
| wavelet-LHH | firstorder | TotalEnergy                      | 58484936.46  |
| wavelet-LHH | firstorder | Maximum                          | 374.0105055  |
| wavelet-LHH | firstorder | RootMeanSquared                  | 162.5298756  |
| wavelet-LHH | firstorder | 90Percentile                     | 206.634986   |
| wavelet-LHH | firstorder | Minimum                          | -510.7068016 |
| wavelet-LHH | firstorder | Entropy                          | 4.3720642    |
| wavelet-LHH | firstorder | Range                            | 884.7173071  |
| wavelet-LHH | firstorder | Variance                         | 26335.46823  |
| wavelet-LHH | firstorder | 10Percentile                     | -186.0547208 |
| wavelet-LHH | firstorder | Kurtosis                         | 3.215662007  |
| wavelet-LHH | firstorder | Mean                             | -8.971746116 |
| wavelet-LHH | glrlm      | ShortRunLowGrayLevelEmphasis     | 0.015323396  |
| wavelet-LHH | glrlm      | GrayLevelVariance                | 42.8346077   |
| wavelet-LHH | glrlm      | LowGrayLevelRunEmphasis          | 0.015360783  |
| wavelet-LHH | glrlm      | GrayLevelNonUniformityNormalized | 0.057627798  |
| wavelet-LHH | glrlm      | RunVariance                      | 0.019679451  |
| wavelet-LHH | glrlm      | GrayLevelNonUniformity           | 4.633005923  |
| wavelet-LHH | glrlm      | LongRunEmphasis                  | 1.060839873  |
| wavelet-LHH | glrlm      | ShortRunHighGrayLevelEmphasis    | 480.6429789  |
| wavelet-LHH | glrlm      | RunLengthNonUniformity           | 77.24899     |
| wavelet-LHH | glrlm      | ShortRunEmphasis                 | 0.984790032  |
| wavelet-LHH | glrlm      | LongRunHighGrayLevelEmphasis     | 516.335272   |
| wavelet-LHH | glrlm      | RunPercentage                    | 0.980300188  |
| wavelet-LHH | glrlm      | LongRunLowGrayLevelEmphasis      | 0.015510328  |
| wavelet-LHH | glrlm      | RunEntropy                       | 4.456248234  |
| wavelet-LHH | glrlm      | HighGrayLevelRunEmphasis         | 487.7814375  |
| wavelet-LHH | glrlm      | RunLengthNonUniformityNormalized | 0.960641098  |
| wavelet-LHH | glszm      | GrayLevelVariance                | 50.62877211  |
| wavelet-LHH | glszm      | ZoneVariance                     | 0.605619147  |
| wavelet-LHH | glszm      | GrayLevelNonUniformityNormalized | 0.048907388  |
| wavelet-LHH | glszm      | SizeZoneNonUniformityNormalized  | 0.665972945  |
| wavelet-LHH | glszm      | SizeZoneNonUniformity            | 41.29032258  |
| wavelet-LHH | glszm      | GrayLevelNonUniformity           | 3.032258065  |
| wavelet-LHH | glszm      | LargeAreaEmphasis                | 2.35483871   |
| wavelet-LHH | glszm      | SmallAreaHighGrayLevelEmphasis   | 418.2104659  |
| wavelet-LHH | glszm      | ZonePercentage                   | 0.756097561  |
| wavelet-LHH | glszm      | LargeAreaLowGrayLevelEmphasis    | 0.02232993   |
| wavelet-LHH | glszm      | LargeAreaHighGrayLevelEmphasis   | 1155.225806  |
| wavelet-LHH | glszm      | HighGrayLevelZoneEmphasis        | 490.9516129  |
| wavelet-LHH | glszm      | SmallAreaEmphasis                | 0.841706989  |
| wavelet-LHH | glszm      | LowGrayLevelZoneEmphasis         | 0.019193482  |
| wavelet-LHH | glszm      | ZoneEntropy                      | 5.082597923  |
| wavelet-LHH | glszm      | SmallAreaLowGrayLevelEmphasis    | 0.018784493  |
| wavelet-LHH | ngtdm      | Coarseness                       | 0.048753938  |

|             |            |                                      |              |
|-------------|------------|--------------------------------------|--------------|
| wavelet-LHH | ngtdm      | Complexity                           | 1629.433693  |
| wavelet-LHH | ngtdm      | Strength                             | 15.51067336  |
| wavelet-LHH | ngtdm      | Contrast                             | 0.643328968  |
| wavelet-LHH | ngtdm      | Busyness                             | 0.041888708  |
| wavelet-LLH | gldm       | GrayLevelVariance                    | 97.89604402  |
| wavelet-LLH | gldm       | HighGrayLevelEmphasis                | 530.2317073  |
| wavelet-LLH | gldm       | DependenceEntropy                    | 5.451885389  |
| wavelet-LLH | gldm       | DependenceNonUniformity              | 33.12195122  |
| wavelet-LLH | gldm       | GrayLevelNonUniformity               | 3.682926829  |
| wavelet-LLH | gldm       | SmallDependenceEmphasis              | 0.630928184  |
| wavelet-LLH | gldm       | SmallDependenceHighGrayLevelEmphasis | 374.0792683  |
| wavelet-LLH | gldm       | DependenceNonUniformityNormalized    | 0.403926234  |
| wavelet-LLH | gldm       | LargeDependenceEmphasis              | 3.292682927  |
| wavelet-LLH | gldm       | LargeDependenceLowGrayLevelEmphasis  | 0.031407972  |
| wavelet-LLH | gldm       | DependenceVariance                   | 0.622248662  |
| wavelet-LLH | gldm       | LargeDependenceHighGrayLevelEmphasis | 1543.134146  |
| wavelet-LLH | gldm       | SmallDependenceLowGrayLevelEmphasis  | 0.017955363  |
| wavelet-LLH | gldm       | LowGrayLevelEmphasis                 | 0.020156332  |
| wavelet-LLH | glcm       | JointAverage                         | 19.71481188  |
| wavelet-LLH | glcm       | SumAverage                           | 39.42962376  |
| wavelet-LLH | glcm       | JointEntropy                         | 6.316423067  |
| wavelet-LLH | glcm       | ClusterShade                         | 1058.285458  |
| wavelet-LLH | glcm       | MaximumProbability                   | 0.026280988  |
| wavelet-LLH | glcm       | Idmn                                 | 0.939028313  |
| wavelet-LLH | glcm       | JointEnergy                          | 0.013340699  |
| wavelet-LLH | glcm       | Contrast                             | 143.1352695  |
| wavelet-LLH | glcm       | DifferenceEntropy                    | 4.094887982  |
| wavelet-LLH | glcm       | InverseVariance                      | 0.109173049  |
| wavelet-LLH | glcm       | DifferenceVariance                   | 53.36164834  |
| wavelet-LLH | glcm       | Idn                                  | 0.840201175  |
| wavelet-LLH | glcm       | Idm                                  | 0.113724222  |
| wavelet-LLH | glcm       | Correlation                          | 0.211903208  |
| wavelet-LLH | glcm       | Autocorrelation                      | 407.451301   |
| wavelet-LLH | glcm       | SumEntropy                           | 4.764536831  |
| wavelet-LLH | glcm       | SumSquares                           | 90.15632195  |
| wavelet-LLH | glcm       | ClusterProminence                    | 115719.4322  |
| wavelet-LLH | glcm       | Imc2                                 | 0.998416446  |
| wavelet-LLH | glcm       | Imc1                                 | -0.63830732  |
| wavelet-LLH | glcm       | DifferenceAverage                    | 9.313761955  |
| wavelet-LLH | glcm       | Id                                   | 0.195993091  |
| wavelet-LLH | glcm       | ClusterTendency                      | 217.4900183  |
| wavelet-LLH | firstorder | InterquartileRange                   | 421.4209564  |
| wavelet-LLH | firstorder | Skewness                             | 0.153014553  |
| wavelet-LLH | firstorder | Uniformity                           | 0.044913742  |
| wavelet-LLH | firstorder | Median                               | -88.25559377 |
| wavelet-LLH | firstorder | Energy                               | 5444476.294  |
| wavelet-LLH | firstorder | RobustMeanAbsoluteDeviation          | 161.7931387  |
| wavelet-LLH | firstorder | MeanAbsoluteDeviation                | 212.1224392  |
| wavelet-LLH | firstorder | TotalEnergy                          | 147000859.9  |
| wavelet-LLH | firstorder | Maximum                              | 511.6750465  |
| wavelet-LLH | firstorder | RootMeanSquared                      | 257.6743145  |
| wavelet-LLH | firstorder | 90Percentile                         | 248.053632   |
| wavelet-LLH | firstorder | Minimum                              | -574.4623083 |
| wavelet-LLH | firstorder | Entropy                              | 4.750666414  |
| wavelet-LLH | firstorder | Range                                | 1086.137355  |

|             |            |                                      |              |
|-------------|------------|--------------------------------------|--------------|
| wavelet-LLH | firstorder | Variance                             | 61893.27231  |
| wavelet-LLH | firstorder | 10Percentile                         | -349.1833264 |
| wavelet-LLH | firstorder | Kurtosis                             | 2.128954968  |
| wavelet-LLH | firstorder | Mean                                 | -67.10275741 |
| wavelet-LLH | glrlm      | ShortRunLowGrayLevelEmphasis         | 0.020432653  |
| wavelet-LLH | glrlm      | GrayLevelVariance                    | 98.61266997  |
| wavelet-LLH | glrlm      | LowGrayLevelRunEmphasis              | 0.020528817  |
| wavelet-LLH | glrlm      | GrayLevelNonUniformityNormalized     | 0.044515007  |
| wavelet-LLH | glrlm      | RunVariance                          | 0.026316851  |
| wavelet-LLH | glrlm      | GrayLevelNonUniformity               | 3.56124154   |
| wavelet-LLH | glrlm      | LongRunEmphasis                      | 1.077169209  |
| wavelet-LLH | glrlm      | ShortRunHighGrayLevelEmphasis        | 524.4988271  |
| wavelet-LLH | glrlm      | RunLengthNonUniformity               | 76.25428613  |
| wavelet-LLH | glrlm      | ShortRunEmphasis                     | 0.981789598  |
| wavelet-LLH | glrlm      | LongRunHighGrayLevelEmphasis         | 565.7168829  |
| wavelet-LLH | glrlm      | RunPercentage                        | 0.975609756  |
| wavelet-LLH | glrlm      | LongRunLowGrayLevelEmphasis          | 0.02093908   |
| wavelet-LLH | glrlm      | RunEntropy                           | 4.82992896   |
| wavelet-LLH | glrlm      | HighGrayLevelRunEmphasis             | 532.5961654  |
| wavelet-LLH | glrlm      | RunLengthNonUniformityNormalized     | 0.953060651  |
| wavelet-LLH | glszm      | GrayLevelVariance                    | 107.3478885  |
| wavelet-LLH | glszm      | ZoneVariance                         | 0.576845734  |
| wavelet-LLH | glszm      | GrayLevelNonUniformityNormalized     | 0.038781959  |
| wavelet-LLH | glszm      | SizeZoneNonUniformityNormalized      | 0.585176673  |
| wavelet-LLH | glszm      | SizeZoneNonUniformity                | 34.52542373  |
| wavelet-LLH | glszm      | GrayLevelNonUniformity               | 2.288135593  |
| wavelet-LLH | glszm      | LargeAreaEmphasis                    | 2.508474576  |
| wavelet-LLH | glszm      | SmallAreaHighGrayLevelEmphasis       | 487.8612288  |
| wavelet-LLH | glszm      | ZonePercentage                       | 0.719512195  |
| wavelet-LLH | glszm      | LargeAreaLowGrayLevelEmphasis        | 0.03380812   |
| wavelet-LLH | glszm      | LargeAreaHighGrayLevelEmphasis       | 1183.237288  |
| wavelet-LLH | glszm      | HighGrayLevelZoneEmphasis            | 575.8135593  |
| wavelet-LLH | glszm      | SmallAreaEmphasis                    | 0.793549906  |
| wavelet-LLH | glszm      | LowGrayLevelZoneEmphasis             | 0.02577726   |
| wavelet-LLH | glszm      | ZoneEntropy                          | 5.348579066  |
| wavelet-LLH | glszm      | SmallAreaLowGrayLevelEmphasis        | 0.024429123  |
| wavelet-LLH | ngtdm      | Coarseness                           | 0.042467218  |
| wavelet-LLH | ngtdm      | Complexity                           | 3643.663274  |
| wavelet-LLH | ngtdm      | Strength                             | 28.37769724  |
| wavelet-LLH | ngtdm      | Contrast                             | 1.197100015  |
| wavelet-LLH | ngtdm      | Busyness                             | 0.038140504  |
| wavelet-LLL | gldm       | GrayLevelVariance                    | 590.6914039  |
| wavelet-LLL | gldm       | HighGrayLevelEmphasis                | 3719.865854  |
| wavelet-LLL | gldm       | DependenceEntropy                    | 5.686581883  |
| wavelet-LLL | gldm       | DependenceNonUniformity              | 54.02439024  |
| wavelet-LLL | gldm       | GrayLevelNonUniformity               | 1.87804878   |
| wavelet-LLL | gldm       | SmallDependenceEmphasis              | 0.839430894  |
| wavelet-LLL | gldm       | SmallDependenceHighGrayLevelEmphasis | 2846.595528  |
| wavelet-LLL | gldm       | DependenceNonUniformityNormalized    | 0.658834027  |
| wavelet-LLL | gldm       | LargeDependenceEmphasis              | 1.804878049  |
| wavelet-LLL | gldm       | LargeDependenceLowGrayLevelEmphasis  | 0.016494738  |
| wavelet-LLL | gldm       | DependenceVariance                   | 0.257584771  |
| wavelet-LLL | gldm       | LargeDependenceHighGrayLevelEmphasis | 8774.573171  |
| wavelet-LLL | gldm       | SmallDependenceLowGrayLevelEmphasis  | 0.016264421  |
| wavelet-LLL | gldm       | LowGrayLevelEmphasis                 | 0.016307098  |

|             |            |                                  |              |
|-------------|------------|----------------------------------|--------------|
| wavelet-LLL | glcm       | JointAverage                     | 63.27328836  |
| wavelet-LLL | glcm       | SumAverage                       | 126.5465767  |
| wavelet-LLL | glcm       | JointEntropy                     | 6.433501631  |
| wavelet-LLL | glcm       | ClusterShade                     | -6674.869115 |
| wavelet-LLL | glcm       | MaximumProbability               | 0.017921698  |
| wavelet-LLL | glcm       | Idmn                             | 0.927187034  |
| wavelet-LLL | glcm       | JointEnergy                      | 0.012007063  |
| wavelet-LLL | glcm       | Contrast                         | 1004.967226  |
| wavelet-LLL | glcm       | DifferenceEntropy                | 4.756589363  |
| wavelet-LLL | glcm       | InverseVariance                  | 0.031856896  |
| wavelet-LLL | glcm       | DifferenceVariance               | 299.3227322  |
| wavelet-LLL | glcm       | Idn                              | 0.820762281  |
| wavelet-LLL | glcm       | Idm                              | 0.03728303   |
| wavelet-LLL | glcm       | Correlation                      | 0.147839329  |
| wavelet-LLL | glcm       | Autocorrelation                  | 4072.342913  |
| wavelet-LLL | glcm       | SumEntropy                       | 5.142597336  |
| wavelet-LLL | glcm       | SumSquares                       | 568.3906907  |
| wavelet-LLL | glcm       | ClusterProminence                | 4372279.02   |
| wavelet-LLL | glcm       | Imc2                             | 0.999906032  |
| wavelet-LLL | glcm       | Imc1                             | -0.805880684 |
| wavelet-LLL | glcm       | DifferenceAverage                | 25.5697672   |
| wavelet-LLL | glcm       | Id                               | 0.089025784  |
| wavelet-LLL | glcm       | ClusterTendency                  | 1268.595537  |
| wavelet-LLL | firstorder | InterquartileRange               | 841.5512989  |
| wavelet-LLL | firstorder | Skewness                         | -0.070073223 |
| wavelet-LLL | firstorder | Uniformity                       | 0.022903034  |
| wavelet-LLL | firstorder | Median                           | -700.8298462 |
| wavelet-LLL | firstorder | Energy                           | 66146451.05  |
| wavelet-LLL | firstorder | RobustMeanAbsoluteDeviation      | 341.3783547  |
| wavelet-LLL | firstorder | MeanAbsoluteDeviation            | 491.834619   |
| wavelet-LLL | firstorder | TotalEnergy                      | 1785954178   |
| wavelet-LLL | firstorder | Maximum                          | 575.8846011  |
| wavelet-LLL | firstorder | RootMeanSquared                  | 898.1447752  |
| wavelet-LLL | firstorder | 90Percentile                     | 152.1056611  |
| wavelet-LLL | firstorder | Minimum                          | -2046.580287 |
| wavelet-LLL | firstorder | Entropy                          | 5.604205206  |
| wavelet-LLL | firstorder | Range                            | 2622.464888  |
| wavelet-LLL | firstorder | Variance                         | 367469.4533  |
| wavelet-LLL | firstorder | 10Percentile                     | -1371.291833 |
| wavelet-LLL | firstorder | Kurtosis                         | 2.544433579  |
| wavelet-LLL | firstorder | Mean                             | -662.7175748 |
| wavelet-LLL | glrlm      | ShortRunLowGrayLevelEmphasis     | 0.016459009  |
| wavelet-LLL | glrlm      | GrayLevelVariance                | 588.6838726  |
| wavelet-LLL | glrlm      | LowGrayLevelRunEmphasis          | 0.016460772  |
| wavelet-LLL | glrlm      | GrayLevelNonUniformityNormalized | 0.02284677   |
| wavelet-LLL | glrlm      | RunVariance                      | 0.009376773  |
| wavelet-LLL | glrlm      | GrayLevelNonUniformity           | 1.855870567  |
| wavelet-LLL | glrlm      | LongRunEmphasis                  | 1.028703704  |
| wavelet-LLL | glrlm      | ShortRunHighGrayLevelEmphasis    | 3655.769921  |
| wavelet-LLL | glrlm      | RunLengthNonUniformity           | 79.72298196  |
| wavelet-LLL | glrlm      | ShortRunEmphasis                 | 0.992824074  |
| wavelet-LLL | glrlm      | LongRunHighGrayLevelEmphasis     | 3869.385439  |
| wavelet-LLL | glrlm      | RunPercentage                    | 0.990619137  |
| wavelet-LLL | glrlm      | LongRunLowGrayLevelEmphasis      | 0.016467824  |
| wavelet-LLL | glrlm      | RunEntropy                       | 5.616794374  |

|             |       |                                      |             |
|-------------|-------|--------------------------------------|-------------|
| wavelet-LLL | glrlm | HighGrayLevelRunEmphasis             | 3698.493025 |
| wavelet-LLL | glrlm | RunLengthNonUniformityNormalized     | 0.981246453 |
| wavelet-LLL | glszm | GrayLevelVariance                    | 576.3280165 |
| wavelet-LLL | glszm | ZoneVariance                         | 0.135485082 |
| wavelet-LLL | glszm | GrayLevelNonUniformityNormalized     | 0.022330644 |
| wavelet-LLL | glszm | SizeZoneNonUniformityNormalized      | 0.802214299 |
| wavelet-LLL | glszm | SizeZoneNonUniformity                | 58.56164384 |
| wavelet-LLL | glszm | GrayLevelNonUniformity               | 1.630136986 |
| wavelet-LLL | glszm | LargeAreaEmphasis                    | 1.397260274 |
| wavelet-LLL | glszm | SmallAreaHighGrayLevelEmphasis       | 3063.292618 |
| wavelet-LLL | glszm | ZonePercentage                       | 0.890243902 |
| wavelet-LLL | glszm | LargeAreaLowGrayLevelEmphasis        | 0.018384967 |
| wavelet-LLL | glszm | LargeAreaHighGrayLevelEmphasis       | 5807.986301 |
| wavelet-LLL | glszm | HighGrayLevelZoneEmphasis            | 3495.287671 |
| wavelet-LLL | glszm | SmallAreaEmphasis                    | 0.915905632 |
| wavelet-LLL | glszm | LowGrayLevelZoneEmphasis             | 0.018285286 |
| wavelet-LLL | glszm | ZoneEntropy                          | 5.69304836  |
| wavelet-LLL | glszm | SmallAreaLowGrayLevelEmphasis        | 0.01826195  |
| wavelet-LLL | ngtdm | Coarseness                           | 0.03425737  |
| wavelet-LLL | ngtdm | Complexity                           | 31671.18791 |
| wavelet-LLL | ngtdm | Strength                             | 98.7708712  |
| wavelet-LLL | ngtdm | Contrast                             | 7.038763112 |
| wavelet-LLL | ngtdm | Busyness                             | 0.013045669 |
| wavelet-HHL | gldm  | GrayLevelVariance                    | 90.04759072 |
| wavelet-HHL | gldm  | HighGrayLevelEmphasis                | 506.804878  |
| wavelet-HHL | gldm  | DependenceEntropy                    | 5.399877309 |
| wavelet-HHL | gldm  | DependenceNonUniformity              | 38.85365854 |
| wavelet-HHL | gldm  | GrayLevelNonUniformity               | 3.487804878 |
| wavelet-HHL | gldm  | SmallDependenceEmphasis              | 0.712886179 |
| wavelet-HHL | gldm  | SmallDependenceHighGrayLevelEmphasis | 363.0094851 |
| wavelet-HHL | gldm  | DependenceNonUniformityNormalized    | 0.473825104 |
| wavelet-HHL | gldm  | LargeDependenceEmphasis              | 3.268292683 |
| wavelet-HHL | gldm  | LargeDependenceLowGrayLevelEmphasis  | 0.216145552 |
| wavelet-HHL | gldm  | DependenceVariance                   | 0.831647829 |
| wavelet-HHL | gldm  | LargeDependenceHighGrayLevelEmphasis | 1557.414634 |
| wavelet-HHL | gldm  | SmallDependenceLowGrayLevelEmphasis  | 0.011092648 |
| wavelet-HHL | gldm  | LowGrayLevelEmphasis                 | 0.040751634 |
| wavelet-HHL | glcm  | JointAverage                         | 20.75856524 |
| wavelet-HHL | glcm  | SumAverage                           | 41.51713047 |
| wavelet-HHL | glcm  | JointEntropy                         | 6.346537572 |
| wavelet-HHL | glcm  | ClusterShade                         | 1007.809881 |
| wavelet-HHL | glcm  | MaximumProbability                   | 0.024305101 |
| wavelet-HHL | glcm  | Idmn                                 | 0.935292676 |
| wavelet-HHL | glcm  | JointEnergy                          | 0.012989048 |
| wavelet-HHL | glcm  | Contrast                             | 189.0754931 |
| wavelet-HHL | glcm  | DifferenceEntropy                    | 4.175441009 |
| wavelet-HHL | glcm  | InverseVariance                      | 0.097695689 |
| wavelet-HHL | glcm  | DifferenceVariance                   | 72.29396735 |
| wavelet-HHL | glcm  | Idn                                  | 0.836469636 |
| wavelet-HHL | glcm  | Idm                                  | 0.099127372 |
| wavelet-HHL | glcm  | Correlation                          | -0.01931079 |
| wavelet-HHL | glcm  | Autocorrelation                      | 430.1629443 |
| wavelet-HHL | glcm  | SumEntropy                           | 4.691296563 |
| wavelet-HHL | glcm  | SumSquares                           | 93.52123514 |
| wavelet-HHL | glcm  | ClusterProminence                    | 136367.6034 |

|             |            |                                  |              |
|-------------|------------|----------------------------------|--------------|
| wavelet-HHL | glcm       | Imc2                             | 0.998709017  |
| wavelet-HHL | glcm       | Imc1                             | -0.641756971 |
| wavelet-HHL | glcm       | DifferenceAverage                | 10.52653209  |
| wavelet-HHL | glcm       | Id                               | 0.178790423  |
| wavelet-HHL | glcm       | ClusterTendency                  | 185.0094474  |
| wavelet-HHL | firstorder | InterquartileRange               | 299.4857399  |
| wavelet-HHL | firstorder | Skewness                         | 0.338985063  |
| wavelet-HHL | firstorder | Uniformity                       | 0.042534206  |
| wavelet-HHL | firstorder | Median                           | 38.6859448   |
| wavelet-HHL | firstorder | Energy                           | 4851064.021  |
| wavelet-HHL | firstorder | RobustMeanAbsoluteDeviation      | 119.3400993  |
| wavelet-HHL | firstorder | MeanAbsoluteDeviation            | 184.5981345  |
| wavelet-HHL | firstorder | TotalEnergy                      | 130978728.6  |
| wavelet-HHL | firstorder | Maximum                          | 742.3274687  |
| wavelet-HHL | firstorder | RootMeanSquared                  | 243.2268845  |
| wavelet-HHL | firstorder | 90Percentile                     | 327.4518195  |
| wavelet-HHL | firstorder | Minimum                          | -448.49383   |
| wavelet-HHL | firstorder | Entropy                          | 4.76848173   |
| wavelet-HHL | firstorder | Range                            | 1190.821299  |
| wavelet-HHL | firstorder | Variance                         | 56823.99584  |
| wavelet-HHL | firstorder | 10Percentile                     | -215.2100716 |
| wavelet-HHL | firstorder | Kurtosis                         | 3.17160477   |
| wavelet-HHL | firstorder | Mean                             | 48.32516417  |
| wavelet-HHL | glrlm      | ShortRunLowGrayLevelEmphasis     | 0.038177558  |
| wavelet-HHL | glrlm      | GrayLevelVariance                | 90.88019277  |
| wavelet-HHL | glrlm      | LowGrayLevelRunEmphasis          | 0.039668883  |
| wavelet-HHL | glrlm      | GrayLevelNonUniformityNormalized | 0.041869289  |
| wavelet-HHL | glrlm      | RunVariance                      | 0.025442392  |
| wavelet-HHL | glrlm      | GrayLevelNonUniformity           | 3.35944362   |
| wavelet-HHL | glrlm      | LongRunEmphasis                  | 1.070800426  |
| wavelet-HHL | glrlm      | ShortRunHighGrayLevelEmphasis    | 500.1415229  |
| wavelet-HHL | glrlm      | RunLengthNonUniformity           | 77.09548901  |
| wavelet-HHL | glrlm      | ShortRunEmphasis                 | 0.98446404   |
| wavelet-HHL | glrlm      | LongRunHighGrayLevelEmphasis     | 541.4767633  |
| wavelet-HHL | glrlm      | RunPercentage                    | 0.978424015  |
| wavelet-HHL | glrlm      | LongRunLowGrayLevelEmphasis      | 0.045651348  |
| wavelet-HHL | glrlm      | RunEntropy                       | 4.836900887  |
| wavelet-HHL | glrlm      | HighGrayLevelRunEmphasis         | 507.474098   |
| wavelet-HHL | glrlm      | RunLengthNonUniformityNormalized | 0.960501909  |
| wavelet-HHL | glszm      | GrayLevelVariance                | 98.90249433  |
| wavelet-HHL | glszm      | ZoneVariance                     | 0.750314941  |
| wavelet-HHL | glszm      | GrayLevelNonUniformityNormalized | 0.038044848  |
| wavelet-HHL | glszm      | SizeZoneNonUniformityNormalized  | 0.718316956  |
| wavelet-HHL | glszm      | SizeZoneNonUniformity            | 45.25396825  |
| wavelet-HHL | glszm      | GrayLevelNonUniformity           | 2.396825397  |
| wavelet-HHL | glszm      | LargeAreaEmphasis                | 2.444444444  |
| wavelet-HHL | glszm      | SmallAreaHighGrayLevelEmphasis   | 443.7416226  |
| wavelet-HHL | glszm      | ZonePercentage                   | 0.768292683  |
| wavelet-HHL | glszm      | LargeAreaLowGrayLevelEmphasis    | 0.150641982  |
| wavelet-HHL | glszm      | LargeAreaHighGrayLevelEmphasis   | 1172.634921  |
| wavelet-HHL | glszm      | HighGrayLevelZoneEmphasis        | 514.2857143  |
| wavelet-HHL | glszm      | SmallAreaEmphasis                | 0.869268078  |
| wavelet-HHL | glszm      | LowGrayLevelZoneEmphasis         | 0.020728979  |
| wavelet-HHL | glszm      | ZoneEntropy                      | 5.07998905   |
| wavelet-HHL | glszm      | SmallAreaLowGrayLevelEmphasis    | 0.00639988   |

|             |            |                                      |              |
|-------------|------------|--------------------------------------|--------------|
| wavelet-HHL | ngtdm      | Coarseness                           | 0.048927995  |
| wavelet-HHL | ngtdm      | Complexity                           | 3721.962587  |
| wavelet-HHL | ngtdm      | Strength                             | 22.63826025  |
| wavelet-HHL | ngtdm      | Contrast                             | 1.401294583  |
| wavelet-HHL | ngtdm      | Busyness                             | 0.043964642  |
| wavelet-HLH | gldm       | GrayLevelVariance                    | 37.59071981  |
| wavelet-HLH | gldm       | HighGrayLevelEmphasis                | 243.2682927  |
| wavelet-HLH | gldm       | DependenceEntropy                    | 5.2595142    |
| wavelet-HLH | gldm       | DependenceNonUniformity              | 30.34146341  |
| wavelet-HLH | gldm       | GrayLevelNonUniformity               | 4.195121951  |
| wavelet-HLH | gldm       | SmallDependenceEmphasis              | 0.611493902  |
| wavelet-HLH | gldm       | SmallDependenceHighGrayLevelEmphasis | 152.1135569  |
| wavelet-HLH | gldm       | DependenceNonUniformityNormalized    | 0.370017847  |
| wavelet-HLH | gldm       | LargeDependenceEmphasis              | 4.219512195  |
| wavelet-HLH | gldm       | LargeDependenceLowGrayLevelEmphasis  | 0.041891228  |
| wavelet-HLH | gldm       | DependenceVariance                   | 1.049375372  |
| wavelet-HLH | gldm       | LargeDependenceHighGrayLevelEmphasis | 916.3658537  |
| wavelet-HLH | gldm       | SmallDependenceLowGrayLevelEmphasis  | 0.020585119  |
| wavelet-HLH | gldm       | LowGrayLevelEmphasis                 | 0.022940135  |
| wavelet-HLH | glcm       | JointAverage                         | 14.14333899  |
| wavelet-HLH | glcm       | SumAverage                           | 28.28667799  |
| wavelet-HLH | glcm       | JointEntropy                         | 6.276147315  |
| wavelet-HLH | glcm       | ClusterShade                         | -4.010655826 |
| wavelet-HLH | glcm       | MaximumProbability                   | 0.027905579  |
| wavelet-HLH | glcm       | Idmn                                 | 0.919149035  |
| wavelet-HLH | glcm       | JointEnergy                          | 0.013901332  |
| wavelet-HLH | glcm       | Contrast                             | 73.48126467  |
| wavelet-HLH | glcm       | DifferenceEntropy                    | 3.822697763  |
| wavelet-HLH | glcm       | InverseVariance                      | 0.136385923  |
| wavelet-HLH | glcm       | DifferenceVariance                   | 24.89979381  |
| wavelet-HLH | glcm       | Idn                                  | 0.813354336  |
| wavelet-HLH | glcm       | Idm                                  | 0.138732348  |
| wavelet-HLH | glcm       | Correlation                          | -0.032151111 |
| wavelet-HLH | glcm       | Autocorrelation                      | 199.1645716  |
| wavelet-HLH | glcm       | SumEntropy                           | 4.36641915   |
| wavelet-HLH | glcm       | SumSquares                           | 35.79168662  |
| wavelet-HLH | glcm       | ClusterProminence                    | 13383.85197  |
| wavelet-HLH | glcm       | Imc2                                 | 0.995847263  |
| wavelet-HLH | glcm       | Imc1                                 | -0.562687158 |
| wavelet-HLH | glcm       | DifferenceAverage                    | 6.898005037  |
| wavelet-HLH | glcm       | Id                                   | 0.227061243  |
| wavelet-HLH | glcm       | ClusterTendency                      | 69.6854818   |
| wavelet-HLH | firstorder | InterquartileRange                   | 214.0119245  |
| wavelet-HLH | firstorder | Skewness                             | 0.067809682  |
| wavelet-HLH | firstorder | Uniformity                           | 0.051160024  |
| wavelet-HLH | firstorder | Median                               | 42.00181073  |
| wavelet-HLH | firstorder | Energy                               | 2080578.663  |
| wavelet-HLH | firstorder | RobustMeanAbsoluteDeviation          | 85.36215117  |
| wavelet-HLH | firstorder | MeanAbsoluteDeviation                | 123.0321901  |
| wavelet-HLH | firstorder | TotalEnergy                          | 56175623.91  |
| wavelet-HLH | firstorder | Maximum                              | 355.5682688  |
| wavelet-HLH | firstorder | RootMeanSquared                      | 159.2887646  |
| wavelet-HLH | firstorder | 90Percentile                         | 266.9947578  |
| wavelet-HLH | firstorder | Minimum                              | -275.7797044 |
| wavelet-HLH | firstorder | Entropy                              | 4.465690005  |



|             |            |                                  |              |
|-------------|------------|----------------------------------|--------------|
| wavelet-HLH | firstorder | Range                            | 631.3479732  |
| wavelet-HLH | firstorder | Variance                         | 23256.13895  |
| wavelet-HLH | firstorder | 10Percentile                     | -163.2121928 |
| wavelet-HLH | firstorder | Kurtosis                         | 2.356531846  |
| wavelet-HLH | firstorder | Mean                             | 46.00838593  |
| wavelet-HLH | glrlm      | ShortRunLowGrayLevelEmphasis     | 0.023333388  |
| wavelet-HLH | glrlm      | GrayLevelVariance                | 38.31887761  |
| wavelet-HLH | glrlm      | LowGrayLevelRunEmphasis          | 0.023469145  |
| wavelet-HLH | glrlm      | GrayLevelNonUniformityNormalized | 0.050639332  |
| wavelet-HLH | glrlm      | RunVariance                      | 0.031950097  |
| wavelet-HLH | glrlm      | GrayLevelNonUniformity           | 4.028120194  |
| wavelet-HLH | glrlm      | LongRunEmphasis                  | 1.095235896  |
| wavelet-HLH | glrlm      | ShortRunHighGrayLevelEmphasis    | 239.0857097  |
| wavelet-HLH | glrlm      | RunLengthNonUniformity           | 74.92680754  |
| wavelet-HLH | glrlm      | ShortRunEmphasis                 | 0.977286796  |
| wavelet-HLH | glrlm      | LongRunHighGrayLevelEmphasis     | 264.9353969  |
| wavelet-HLH | glrlm      | RunPercentage                    | 0.969981238  |
| wavelet-HLH | glrlm      | LongRunLowGrayLevelEmphasis      | 0.024029297  |
| wavelet-HLH | glrlm      | RunEntropy                       | 4.567156785  |
| wavelet-HLH | glrlm      | HighGrayLevelRunEmphasis         | 244.0312334  |
| wavelet-HLH | glrlm      | RunLengthNonUniformityNormalized | 0.941789382  |
| wavelet-HLH | glszm      | GrayLevelVariance                | 46.62234534  |
| wavelet-HLH | glszm      | ZoneVariance                     | 1.053247153  |
| wavelet-HLH | glszm      | GrayLevelNonUniformityNormalized | 0.047706987  |
| wavelet-HLH | glszm      | SizeZoneNonUniformityNormalized  | 0.601723607  |
| wavelet-HLH | glszm      | SizeZoneNonUniformity            | 34.29824561  |
| wavelet-HLH | glszm      | GrayLevelNonUniformity           | 2.719298246  |
| wavelet-HLH | glszm      | LargeAreaEmphasis                | 3.122807018  |
| wavelet-HLH | glszm      | SmallAreaHighGrayLevelEmphasis   | 199.6013645  |
| wavelet-HLH | glszm      | ZonePercentage                   | 0.695121951  |
| wavelet-HLH | glszm      | LargeAreaLowGrayLevelEmphasis    | 0.042224595  |
| wavelet-HLH | glszm      | LargeAreaHighGrayLevelEmphasis   | 721.8596491  |
| wavelet-HLH | glszm      | HighGrayLevelZoneEmphasis        | 248.5614035  |
| wavelet-HLH | glszm      | SmallAreaEmphasis                | 0.80208577   |
| wavelet-HLH | glszm      | LowGrayLevelZoneEmphasis         | 0.030415814  |
| wavelet-HLH | glszm      | ZoneEntropy                      | 4.981498347  |
| wavelet-HLH | glszm      | SmallAreaLowGrayLevelEmphasis    | 0.029144848  |
| wavelet-HLH | ngtdm      | Coarseness                       | 0.060429501  |
| wavelet-HLH | ngtdm      | Complexity                       | 1268.850253  |
| wavelet-HLH | ngtdm      | Strength                         | 11.64501412  |
| wavelet-HLH | ngtdm      | Contrast                         | 0.597449001  |
| wavelet-HLH | ngtdm      | Busyness                         | 0.056938282  |

|            |               |                                      |                                                                                                                                                                                                                                                                                                                                                                                                                   |
|------------|---------------|--------------------------------------|-------------------------------------------------------------------------------------------------------------------------------------------------------------------------------------------------------------------------------------------------------------------------------------------------------------------------------------------------------------------------------------------------------------------|
| Image type | Feature Class | Feature Name                         | 2: RTSTRUCT: C99-DNU_segment_GTV                                                                                                                                                                                                                                                                                                                                                                                  |
| general    | info          | BoundingBox                          | (0, 0, 1, 7, 7, 6)                                                                                                                                                                                                                                                                                                                                                                                                |
| general    | info          | EnabledImageTypes                    | {u'Original': {}, u'Wavelet': {}}                                                                                                                                                                                                                                                                                                                                                                                 |
|            |               |                                      | {'distances': [1], 'additionalInfo': True, 'force2D': False, 'interpolator': 'sitkBSpline', 'resampledPixelSpacing': [3.0], 'label': 1, 'normalizeScale': 1, 'normalize': False, 'force2Ddimension': 0, 'removeOutliers': None, 'minimumROISize': None, u'binWidth': 25.0, 'minimumROIDimensions': 1, u'correctMask': True, 'preCrop': False, u'symmetricalGLCM': True, 'resegmentRange': None, 'padDistance': 5} |
| general    | info          | GeneralSettings                      | 9af832bc4d45914a2c170a52bd454083f399e79e                                                                                                                                                                                                                                                                                                                                                                          |
| general    | info          | ImageHash                            | (0.9765625000000002,                                                                                                                                                                                                                                                                                                                                                                                              |
| general    | info          | ImageSpacing                         | 0.9765625000000002, 2.0)                                                                                                                                                                                                                                                                                                                                                                                          |
| general    | info          | MaskHash                             | 981627ca9936dfb8cddbc76e703763468090f143                                                                                                                                                                                                                                                                                                                                                                          |
| general    | info          | NumpyVersion                         | 1.13.1                                                                                                                                                                                                                                                                                                                                                                                                            |
| general    | info          | PyWaveletVersion                     | 0.5.2                                                                                                                                                                                                                                                                                                                                                                                                             |
| general    | info          | SimpleITKVersion                     | 1.1.0                                                                                                                                                                                                                                                                                                                                                                                                             |
| general    | info          | Version                              | 1.3.0.post102+g1b0eb74                                                                                                                                                                                                                                                                                                                                                                                            |
| general    | info          | VolumeNum                            | 1                                                                                                                                                                                                                                                                                                                                                                                                                 |
| general    | info          | VoxelNum                             | 149                                                                                                                                                                                                                                                                                                                                                                                                               |
| original   | shape         | Maximum3DDiameter                    | 20.34698995                                                                                                                                                                                                                                                                                                                                                                                                       |
| original   | shape         | Maximum2DDiameterSlice               | 20.1246118                                                                                                                                                                                                                                                                                                                                                                                                        |
| original   | shape         | Sphericity                           | 0.912818821                                                                                                                                                                                                                                                                                                                                                                                                       |
| original   | shape         | MinorAxis                            | 18.38912399                                                                                                                                                                                                                                                                                                                                                                                                       |
| original   | shape         | Elongation                           | 0.979594518                                                                                                                                                                                                                                                                                                                                                                                                       |
| original   | shape         | SurfaceVolumeRatio                   | 0.333106311                                                                                                                                                                                                                                                                                                                                                                                                       |
| original   | shape         | Volume                               | 4023                                                                                                                                                                                                                                                                                                                                                                                                              |
| original   | shape         | MajorAxis                            | 18.77217935                                                                                                                                                                                                                                                                                                                                                                                                       |
| original   | shape         | SurfaceArea                          | 1340.086689                                                                                                                                                                                                                                                                                                                                                                                                       |
| original   | shape         | Flatness                             | 0.870786159                                                                                                                                                                                                                                                                                                                                                                                                       |
| original   | shape         | LeastAxis                            | 16.34655396                                                                                                                                                                                                                                                                                                                                                                                                       |
| original   | shape         | Maximum2DDiameterColumn              | 19.20937271                                                                                                                                                                                                                                                                                                                                                                                                       |
| original   | shape         | Maximum2DDiameterRow                 | 19.20937271                                                                                                                                                                                                                                                                                                                                                                                                       |
| original   | gldm          | GrayLevelVariance                    | 145.4585829                                                                                                                                                                                                                                                                                                                                                                                                       |
| original   | gldm          | HighGrayLevelEmphasis                | 878.0872483                                                                                                                                                                                                                                                                                                                                                                                                       |
| original   | gldm          | DependenceEntropy                    | 5.965255181                                                                                                                                                                                                                                                                                                                                                                                                       |
| original   | gldm          | DependenceNonUniformity              | 53.37583893                                                                                                                                                                                                                                                                                                                                                                                                       |
| original   | gldm          | GrayLevelNonUniformity               | 5.456375839                                                                                                                                                                                                                                                                                                                                                                                                       |
| original   | gldm          | SmallDependenceEmphasis              | 0.619460024                                                                                                                                                                                                                                                                                                                                                                                                       |
| original   | gldm          | SmallDependenceHighGrayLevelEmphasis | 390.4270699                                                                                                                                                                                                                                                                                                                                                                                                       |
| original   | gldm          | DependenceNonUniformityNormalized    | 0.358227107                                                                                                                                                                                                                                                                                                                                                                                                       |
| original   | gldm          | LargeDependenceEmphasis              | 10.85234899                                                                                                                                                                                                                                                                                                                                                                                                       |
| original   | gldm          | LargeDependenceLowGrayLevelEmphasis  | 0.023493179                                                                                                                                                                                                                                                                                                                                                                                                       |
| original   | gldm          | DependenceVariance                   | 5.491104004                                                                                                                                                                                                                                                                                                                                                                                                       |
| original   | gldm          | LargeDependenceHighGrayLevelEmphasis | 17083.09396                                                                                                                                                                                                                                                                                                                                                                                                       |

|          |            |                                     |              |
|----------|------------|-------------------------------------|--------------|
| original | gldm       | SmallDependenceLowGrayLevelEmphasis | 0.010559996  |
| original | gldm       | LowGrayLevelEmphasis                | 0.012131423  |
| original | glcm       | JointAverage                        | 29.77631727  |
| original | glcm       | SumAverage                          | 59.55263454  |
| original | glcm       | JointEntropy                        | 7.196918288  |
| original | glcm       | ClusterShade                        | -3458.989085 |
| original | glcm       | MaximumProbability                  | 0.042131322  |
| original | glcm       | ldmn                                | 0.924893712  |
| original | glcm       | JointEnergy                         | 0.008772085  |
| original | glcm       | Contrast                            | 182.1768344  |
| original | glcm       | DifferenceEntropy                   | 4.50472364   |
| original | glcm       | InverseVariance                     | 0.124685395  |
| original | glcm       | DifferenceVariance                  | 73.01180148  |
| original | glcm       | ldn                                 | 0.829954486  |
| original | glcm       | ldm                                 | 0.148639209  |
| original | glcm       | Correlation                         | 0.320087983  |
| original | glcm       | Autocorrelation                     | 930.8399764  |
| original | glcm       | SumEntropy                          | 5.411058853  |
| original | glcm       | SumSquares                          | 135.0588187  |
| original | glcm       | ClusterProminence                   | 300490.04    |
| original | glcm       | lmc2                                | 0.996692428  |
| original | glcm       | lmc1                                | -0.518983075 |
| original | glcm       | DifferenceAverage                   | 10.29188712  |
| original | glcm       | ld                                  | 0.22023718   |
| original | glcm       | ClusterTendency                     | 358.0584402  |
| original | firstorder | InterquartileRange                  | 544          |
| original | firstorder | Skewness                            | -0.317568562 |
| original | firstorder | Uniformity                          | 0.036619972  |
| original | firstorder | Median                              | -300         |
| original | firstorder | Energy                              | 30452534     |
| original | firstorder | RobustMeanAbsoluteDeviation         | 218.5404986  |
| original | firstorder | MeanAbsoluteDeviation               | 266.2807081  |
| original | firstorder | TotalEnergy                         | 822218418    |
| original | firstorder | Maximum                             | 76           |
| original | firstorder | RootMeanSquared                     | 452.0834246  |
| original | firstorder | 90Percentile                        | 25.4         |
| original | firstorder | Minimum                             | -991         |
| original | firstorder | Entropy                             | 5.103359984  |
| original | firstorder | Range                               | 1067         |
| original | firstorder | Variance                            | 90624.88401  |
| original | firstorder | 10Percentile                        | -764.8       |
| original | firstorder | Kurtosis                            | 1.842518336  |
| original | firstorder | Mean                                | -337.2751678 |
| original | glrlm      | ShortRunLowGrayLevelEmphasis        | 0.012595548  |
| original | glrlm      | GrayLevelVariance                   | 142.9357422  |
| original | glrlm      | LowGrayLevelRunEmphasis             | 0.012675804  |
| original | glrlm      | GrayLevelNonUniformityNormalized    | 0.03303113   |
| original | glrlm      | RunVariance                         | 0.064879204  |
| original | glrlm      | GrayLevelNonUniformity              | 4.67663461   |
| original | glrlm      | LongRunEmphasis                     | 1.176448797  |
| original | glrlm      | ShortRunHighGrayLevelEmphasis       | 788.7091189  |
| original | glrlm      | RunLengthNonUniformity              | 128.8840518  |

|             |       |                                      |              |
|-------------|-------|--------------------------------------|--------------|
| original    | glrlm | ShortRunEmphasis                     | 0.963671985  |
| original    | glrlm | LongRunHighGrayLevelEmphasis         | 1114.607776  |
| original    | glrlm | RunPercentage                        | 0.949406298  |
| original    | glrlm | LongRunLowGrayLevelEmphasis          | 0.013015297  |
| original    | glrlm | RunEntropy                           | 5.308058617  |
| original    | glrlm | HighGrayLevelRunEmphasis             | 843.2984316  |
| original    | glrlm | RunLengthNonUniformityNormalized     | 0.910172108  |
| original    | glszm | GrayLevelVariance                    | 124.2729719  |
| original    | glszm | ZoneVariance                         | 2.777873895  |
| original    | glszm | GrayLevelNonUniformityNormalized     | 0.028835063  |
| original    | glszm | SizeZoneNonUniformityNormalized      | 0.674548251  |
| original    | glszm | SizeZoneNonUniformity                | 68.80392157  |
| original    | glszm | GrayLevelNonUniformity               | 2.941176471  |
| original    | glszm | LargeAreaEmphasis                    | 4.911764706  |
| original    | glszm | SmallAreaHighGrayLevelEmphasis       | 507.9625034  |
| original    | glszm | ZonePercentage                       | 0.684563758  |
| original    | glszm | LargeAreaLowGrayLevelEmphasis        | 0.02256489   |
| original    | glszm | LargeAreaHighGrayLevelEmphasis       | 6786.852941  |
| original    | glszm | HighGrayLevelZoneEmphasis            | 670.5490196  |
| original    | glszm | SmallAreaEmphasis                    | 0.844997447  |
| original    | glszm | LowGrayLevelZoneEmphasis             | 0.016108743  |
| original    | glszm | ZoneEntropy                          | 5.551800219  |
| original    | glszm | SmallAreaLowGrayLevelEmphasis        | 0.015057194  |
| original    | ngtdm | Coarseness                           | 0.026359318  |
| original    | ngtdm | Complexity                           | 5601.278509  |
| original    | ngtdm | Strength                             | 24.33264387  |
| original    | ngtdm | Contrast                             | 1.211972687  |
| original    | ngtdm | Busyness                             | 0.030741641  |
| wavelet-HHH | gldm  | GrayLevelVariance                    | 15.23246701  |
| wavelet-HHH | gldm  | HighGrayLevelEmphasis                | 149.885906   |
| wavelet-HHH | gldm  | DependenceEntropy                    | 5.457981296  |
| wavelet-HHH | gldm  | DependenceNonUniformity              | 36.40939597  |
| wavelet-HHH | gldm  | GrayLevelNonUniformity               | 12.20805369  |
| wavelet-HHH | gldm  | SmallDependenceEmphasis              | 0.44143621   |
| wavelet-HHH | gldm  | SmallDependenceHighGrayLevelEmphasis | 65.66038438  |
| wavelet-HHH | gldm  | DependenceNonUniformityNormalized    | 0.244358362  |
| wavelet-HHH | gldm  | LargeDependenceEmphasis              | 8.181208054  |
| wavelet-HHH | gldm  | LargeDependenceLowGrayLevelEmphasis  | 0.076952512  |
| wavelet-HHH | gldm  | DependenceVariance                   | 2.311157155  |
| wavelet-HHH | gldm  | LargeDependenceHighGrayLevelEmphasis | 1216.57047   |
| wavelet-HHH | gldm  | SmallDependenceLowGrayLevelEmphasis  | 0.014288458  |
| wavelet-HHH | gldm  | LowGrayLevelEmphasis                 | 0.01962617   |
| wavelet-HHH | glcm  | JointAverage                         | 11.52422015  |
| wavelet-HHH | glcm  | SumAverage                           | 23.04844031  |
| wavelet-HHH | glcm  | JointEntropy                         | 6.612747192  |
| wavelet-HHH | glcm  | ClusterShade                         | -23.58843413 |
| wavelet-HHH | glcm  | MaximumProbability                   | 0.03264395   |
| wavelet-HHH | glcm  | ldmn                                 | 0.949292155  |
| wavelet-HHH | glcm  | JointEnergy                          | 0.012356739  |
| wavelet-HHH | glcm  | Contrast                             | 29.06084786  |
| wavelet-HHH | glcm  | DifferenceEntropy                    | 3.390770541  |
| wavelet-HHH | glcm  | InverseVariance                      | 0.232305447  |

|             |            |                                  |              |
|-------------|------------|----------------------------------|--------------|
| wavelet-HHH | glcm       | DifferenceVariance               | 11.31271311  |
| wavelet-HHH | glcm       | Idn                              | 0.853789551  |
| wavelet-HHH | glcm       | Idm                              | 0.220895227  |
| wavelet-HHH | glcm       | Correlation                      | -0.032569255 |
| wavelet-HHH | glcm       | Autocorrelation                  | 132.3751973  |
| wavelet-HHH | glcm       | SumEntropy                       | 4.161218223  |
| wavelet-HHH | glcm       | SumSquares                       | 14.08437369  |
| wavelet-HHH | glcm       | ClusterProminence                | 2633.183478  |
| wavelet-HHH | glcm       | Imc2                             | 0.924746421  |
| wavelet-HHH | glcm       | Imc1                             | -0.258758763 |
| wavelet-HHH | glcm       | DifferenceAverage                | 4.165781167  |
| wavelet-HHH | glcm       | Id                               | 0.312442813  |
| wavelet-HHH | glcm       | ClusterTendency                  | 27.27664689  |
| wavelet-HHH | firstorder | InterquartileRange               | 111.686991   |
| wavelet-HHH | firstorder | Skewness                         | -0.157138315 |
| wavelet-HHH | firstorder | Uniformity                       | 0.081933246  |
| wavelet-HHH | firstorder | Median                           | 9.582767351  |
| wavelet-HHH | firstorder | Energy                           | 1412120.648  |
| wavelet-HHH | firstorder | RobustMeanAbsoluteDeviation      | 49.34062342  |
| wavelet-HHH | firstorder | MeanAbsoluteDeviation            | 74.96983306  |
| wavelet-HHH | firstorder | TotalEnergy                      | 38127257.51  |
| wavelet-HHH | firstorder | Maximum                          | 261.0490638  |
| wavelet-HHH | firstorder | RootMeanSquared                  | 97.35152689  |
| wavelet-HHH | firstorder | 90Percentile                     | 128.3372715  |
| wavelet-HHH | firstorder | Minimum                          | -270.4103252 |
| wavelet-HHH | firstorder | Entropy                          | 3.867380724  |
| wavelet-HHH | firstorder | Range                            | 531.4593889  |
| wavelet-HHH | firstorder | Variance                         | 9472.15626   |
| wavelet-HHH | firstorder | 10Percentile                     | -136.6271798 |
| wavelet-HHH | firstorder | Kurtosis                         | 3.18269216   |
| wavelet-HHH | firstorder | Mean                             | 2.272339714  |
| wavelet-HHH | glrlm      | ShortRunLowGrayLevelEmphasis     | 0.019926941  |
| wavelet-HHH | glrlm      | GrayLevelVariance                | 15.77102452  |
| wavelet-HHH | glrlm      | LowGrayLevelRunEmphasis          | 0.020274479  |
| wavelet-HHH | glrlm      | GrayLevelNonUniformityNormalized | 0.079494705  |
| wavelet-HHH | glrlm      | RunVariance                      | 0.064435782  |
| wavelet-HHH | glrlm      | GrayLevelNonUniformity           | 11.19844879  |
| wavelet-HHH | glrlm      | LongRunEmphasis                  | 1.184088956  |
| wavelet-HHH | glrlm      | ShortRunHighGrayLevelEmphasis    | 143.834165   |
| wavelet-HHH | glrlm      | RunLengthNonUniformity           | 126.6900797  |
| wavelet-HHH | glrlm      | ShortRunEmphasis                 | 0.959491132  |
| wavelet-HHH | glrlm      | LongRunHighGrayLevelEmphasis     | 177.5657786  |
| wavelet-HHH | glrlm      | RunPercentage                    | 0.9452762    |
| wavelet-HHH | glrlm      | LongRunLowGrayLevelEmphasis      | 0.021815738  |
| wavelet-HHH | glrlm      | RunEntropy                       | 4.130343112  |
| wavelet-HHH | glrlm      | HighGrayLevelRunEmphasis         | 149.8830351  |
| wavelet-HHH | glrlm      | RunLengthNonUniformityNormalized | 0.899277496  |
| wavelet-HHH | glszm      | GrayLevelVariance                | 22.92768444  |
| wavelet-HHH | glszm      | ZoneVariance                     | 6.256574142  |
| wavelet-HHH | glszm      | GrayLevelNonUniformityNormalized | 0.065010957  |
| wavelet-HHH | glszm      | SizeZoneNonUniformityNormalized  | 0.508765522  |
| wavelet-HHH | glszm      | SizeZoneNonUniformity            | 37.64864865  |

|             |       |                                      |              |
|-------------|-------|--------------------------------------|--------------|
| wavelet-HHH | glszm | GrayLevelNonUniformity               | 4.810810811  |
| wavelet-HHH | glszm | LargeAreaEmphasis                    | 10.31081081  |
| wavelet-HHH | glszm | SmallAreaHighGrayLevelEmphasis       | 109.1771549  |
| wavelet-HHH | glszm | ZonePercentage                       | 0.496644295  |
| wavelet-HHH | glszm | LargeAreaLowGrayLevelEmphasis        | 0.101729787  |
| wavelet-HHH | glszm | LargeAreaHighGrayLevelEmphasis       | 1577.067568  |
| wavelet-HHH | glszm | HighGrayLevelZoneEmphasis            | 146.9189189  |
| wavelet-HHH | glszm | SmallAreaEmphasis                    | 0.738706618  |
| wavelet-HHH | glszm | LowGrayLevelZoneEmphasis             | 0.030500364  |
| wavelet-HHH | glszm | ZoneEntropy                          | 4.991359237  |
| wavelet-HHH | glszm | SmallAreaLowGrayLevelEmphasis        | 0.027253439  |
| wavelet-HHH | ngtdm | Coarseness                           | 0.040188304  |
| wavelet-HHH | ngtdm | Complexity                           | 473.6696625  |
| wavelet-HHH | ngtdm | Strength                             | 4.388921398  |
| wavelet-HHH | ngtdm | Contrast                             | 0.251971289  |
| wavelet-HHH | ngtdm | Busyness                             | 0.110271441  |
| wavelet-HLL | gldm  | GrayLevelVariance                    | 93.42173776  |
| wavelet-HLL | gldm  | HighGrayLevelEmphasis                | 551.4966443  |
| wavelet-HLL | gldm  | DependenceEntropy                    | 5.935011977  |
| wavelet-HLL | gldm  | DependenceNonUniformity              | 58.32885906  |
| wavelet-HLL | gldm  | GrayLevelNonUniformity               | 4.879194631  |
| wavelet-HLL | gldm  | SmallDependenceEmphasis              | 0.614642058  |
| wavelet-HLL | gldm  | SmallDependenceHighGrayLevelEmphasis | 345.0106898  |
| wavelet-HLL | gldm  | DependenceNonUniformityNormalized    | 0.391468853  |
| wavelet-HLL | gldm  | LargeDependenceEmphasis              | 3.577181208  |
| wavelet-HLL | gldm  | LargeDependenceLowGrayLevelEmphasis  | 0.039915398  |
| wavelet-HLL | gldm  | DependenceVariance                   | 0.739426152  |
| wavelet-HLL | gldm  | LargeDependenceHighGrayLevelEmphasis | 1943.791946  |
| wavelet-HLL | gldm  | SmallDependenceLowGrayLevelEmphasis  | 0.010401132  |
| wavelet-HLL | gldm  | LowGrayLevelEmphasis                 | 0.01538714   |
| wavelet-HLL | glcm  | JointAverage                         | 20.99399265  |
| wavelet-HLL | glcm  | SumAverage                           | 41.98798529  |
| wavelet-HLL | glcm  | JointEntropy                         | 7.392788612  |
| wavelet-HLL | glcm  | ClusterShade                         | 235.5753189  |
| wavelet-HLL | glcm  | MaximumProbability                   | 0.013743205  |
| wavelet-HLL | glcm  | Idmn                                 | 0.934765669  |
| wavelet-HLL | glcm  | JointEnergy                          | 0.006327778  |
| wavelet-HLL | glcm  | Contrast                             | 120.1794915  |
| wavelet-HLL | glcm  | DifferenceEntropy                    | 4.227947111  |
| wavelet-HLL | glcm  | InverseVariance                      | 0.11833659   |
| wavelet-HLL | glcm  | DifferenceVariance                   | 39.73125154  |
| wavelet-HLL | glcm  | Idn                                  | 0.8329165    |
| wavelet-HLL | glcm  | Idm                                  | 0.111872031  |
| wavelet-HLL | glcm  | Correlation                          | 0.379336807  |
| wavelet-HLL | glcm  | Autocorrelation                      | 476.6956718  |
| wavelet-HLL | glcm  | SumEntropy                           | 5.427942286  |
| wavelet-HLL | glcm  | SumSquares                           | 95.92645712  |
| wavelet-HLL | glcm  | ClusterProminence                    | 151736.2765  |
| wavelet-HLL | glcm  | Imc2                                 | 0.99769033   |
| wavelet-HLL | glcm  | Imc1                                 | -0.534296589 |
| wavelet-HLL | glcm  | DifferenceAverage                    | 8.676519571  |
| wavelet-HLL | glcm  | Id                                   | 0.196162521  |

|             |            |                                  |              |
|-------------|------------|----------------------------------|--------------|
| wavelet-HLL | glcm       | ClusterTendency                  | 263.526337   |
| wavelet-HLL | firstorder | InterquartileRange               | 352.507186   |
| wavelet-HLL | firstorder | Skewness                         | -0.049711203 |
| wavelet-HLL | firstorder | Uniformity                       | 0.032746273  |
| wavelet-HLL | firstorder | Median                           | -104.422019  |
| wavelet-HLL | firstorder | Energy                           | 10262033.4   |
| wavelet-HLL | firstorder | RobustMeanAbsoluteDeviation      | 149.8975285  |
| wavelet-HLL | firstorder | MeanAbsoluteDeviation            | 200.204014   |
| wavelet-HLL | firstorder | TotalEnergy                      | 277074901.8  |
| wavelet-HLL | firstorder | Maximum                          | 346.5438709  |
| wavelet-HLL | firstorder | RootMeanSquared                  | 262.4361015  |
| wavelet-HLL | firstorder | 90Percentile                     | 246.1457724  |
| wavelet-HLL | firstorder | Minimum                          | -607.14794   |
| wavelet-HLL | firstorder | Entropy                          | 5.075755058  |
| wavelet-HLL | firstorder | Range                            | 953.6918109  |
| wavelet-HLL | firstorder | Variance                         | 58534.70172  |
| wavelet-HLL | firstorder | 10Percentile                     | -453.1368656 |
| wavelet-HLL | firstorder | Kurtosis                         | 2.122866499  |
| wavelet-HLL | firstorder | Mean                             | -101.6759837 |
| wavelet-HLL | glrlm      | ShortRunLowGrayLevelEmphasis     | 0.015281767  |
| wavelet-HLL | glrlm      | GrayLevelVariance                | 93.08506871  |
| wavelet-HLL | glrlm      | LowGrayLevelRunEmphasis          | 0.01550758   |
| wavelet-HLL | glrlm      | GrayLevelNonUniformityNormalized | 0.032690856  |
| wavelet-HLL | glrlm      | RunVariance                      | 0.027362308  |
| wavelet-HLL | glrlm      | GrayLevelNonUniformity           | 4.742667815  |
| wavelet-HLL | glrlm      | LongRunEmphasis                  | 1.083393727  |
| wavelet-HLL | glrlm      | ShortRunHighGrayLevelEmphasis    | 540.9737539  |
| wavelet-HLL | glrlm      | RunLengthNonUniformity           | 137.6909418  |
| wavelet-HLL | glrlm      | ShortRunEmphasis                 | 0.979757739  |
| wavelet-HLL | glrlm      | LongRunHighGrayLevelEmphasis     | 597.0171428  |
| wavelet-HLL | glrlm      | RunPercentage                    | 0.973670625  |
| wavelet-HLL | glrlm      | LongRunLowGrayLevelEmphasis      | 0.016414158  |
| wavelet-HLL | glrlm      | RunEntropy                       | 5.157231608  |
| wavelet-HLL | glrlm      | HighGrayLevelRunEmphasis         | 551.8289129  |
| wavelet-HLL | glrlm      | RunLengthNonUniformityNormalized | 0.9483862    |
| wavelet-HLL | glszm      | GrayLevelVariance                | 85.31647559  |
| wavelet-HLL | glszm      | ZoneVariance                     | 0.841623521  |
| wavelet-HLL | glszm      | GrayLevelNonUniformityNormalized | 0.033838757  |
| wavelet-HLL | glszm      | SizeZoneNonUniformityNormalized  | 0.578772189  |
| wavelet-HLL | glszm      | SizeZoneNonUniformity            | 60.19230769  |
| wavelet-HLL | glszm      | GrayLevelNonUniformity           | 3.519230769  |
| wavelet-HLL | glszm      | LargeAreaEmphasis                | 2.894230769  |
| wavelet-HLL | glszm      | SmallAreaHighGrayLevelEmphasis   | 446.2772009  |
| wavelet-HLL | glszm      | ZonePercentage                   | 0.697986577  |
| wavelet-HLL | glszm      | LargeAreaLowGrayLevelEmphasis    | 0.035094956  |
| wavelet-HLL | glszm      | LargeAreaHighGrayLevelEmphasis   | 1645.413462  |
| wavelet-HLL | glszm      | HighGrayLevelZoneEmphasis        | 557.125      |
| wavelet-HLL | glszm      | SmallAreaEmphasis                | 0.789297543  |
| wavelet-HLL | glszm      | LowGrayLevelZoneEmphasis         | 0.01686291   |
| wavelet-HLL | glszm      | ZoneEntropy                      | 5.620441882  |
| wavelet-HLL | glszm      | SmallAreaLowGrayLevelEmphasis    | 0.01364816   |
| wavelet-HLL | ngtdm      | Coarseness                       | 0.034902257  |

|             |            |                                      |              |
|-------------|------------|--------------------------------------|--------------|
| wavelet-HLL | ngtdm      | Complexity                           | 3363.868459  |
| wavelet-HLL | ngtdm      | Strength                             | 17.54095248  |
| wavelet-HLL | ngtdm      | Contrast                             | 0.836725044  |
| wavelet-HLL | ngtdm      | Busyness                             | 0.045345154  |
| wavelet-LHL | gldm       | GrayLevelVariance                    | 130.443944   |
| wavelet-LHL | gldm       | HighGrayLevelEmphasis                | 1131.805369  |
| wavelet-LHL | gldm       | DependenceEntropy                    | 5.946531548  |
| wavelet-LHL | gldm       | DependenceNonUniformity              | 65.25503356  |
| wavelet-LHL | gldm       | GrayLevelNonUniformity               | 4.798657718  |
| wavelet-LHL | gldm       | SmallDependenceEmphasis              | 0.676780388  |
| wavelet-LHL | gldm       | SmallDependenceHighGrayLevelEmphasis | 843.6334359  |
| wavelet-LHL | gldm       | DependenceNonUniformityNormalized    | 0.437953245  |
| wavelet-LHL | gldm       | LargeDependenceEmphasis              | 3.147651007  |
| wavelet-LHL | gldm       | LargeDependenceLowGrayLevelEmphasis  | 0.01152968   |
| wavelet-LHL | gldm       | DependenceVariance                   | 0.660150444  |
| wavelet-LHL | gldm       | LargeDependenceHighGrayLevelEmphasis | 3028.66443   |
| wavelet-LHL | gldm       | SmallDependenceLowGrayLevelEmphasis  | 0.007711997  |
| wavelet-LHL | gldm       | LowGrayLevelEmphasis                 | 0.00824232   |
| wavelet-LHL | glcm       | JointAverage                         | 30.64163823  |
| wavelet-LHL | glcm       | SumAverage                           | 61.28327646  |
| wavelet-LHL | glcm       | JointEntropy                         | 7.408791602  |
| wavelet-LHL | glcm       | ClusterShade                         | 5337.823258  |
| wavelet-LHL | glcm       | MaximumProbability                   | 0.015012335  |
| wavelet-LHL | glcm       | ldmn                                 | 0.964146441  |
| wavelet-LHL | glcm       | JointEnergy                          | 0.006270541  |
| wavelet-LHL | glcm       | Contrast                             | 162.8351072  |
| wavelet-LHL | glcm       | DifferenceEntropy                    | 4.375184034  |
| wavelet-LHL | glcm       | InverseVariance                      | 0.11606392   |
| wavelet-LHL | glcm       | DifferenceVariance                   | 64.26395309  |
| wavelet-LHL | glcm       | ldn                                  | 0.877575418  |
| wavelet-LHL | glcm       | ldm                                  | 0.105881735  |
| wavelet-LHL | glcm       | Correlation                          | 0.323646208  |
| wavelet-LHL | glcm       | Autocorrelation                      | 979.7114672  |
| wavelet-LHL | glcm       | SumEntropy                           | 5.32077116   |
| wavelet-LHL | glcm       | SumSquares                           | 122.0815817  |
| wavelet-LHL | glcm       | ClusterProminence                    | 413298.3815  |
| wavelet-LHL | glcm       | lmc2                                 | 0.998305651  |
| wavelet-LHL | glcm       | lmc1                                 | -0.556707428 |
| wavelet-LHL | glcm       | DifferenceAverage                    | 9.637291841  |
| wavelet-LHL | glcm       | ld                                   | 0.189182037  |
| wavelet-LHL | glcm       | ClusterTendency                      | 325.4912197  |
| wavelet-LHL | firstorder | InterquartileRange                   | 342.4822233  |
| wavelet-LHL | firstorder | Skewness                             | 0.441806799  |
| wavelet-LHL | firstorder | Uniformity                           | 0.032205756  |
| wavelet-LHL | firstorder | Median                               | -90.48871576 |
| wavelet-LHL | firstorder | Energy                               | 12503164.69  |
| wavelet-LHL | firstorder | RobustMeanAbsoluteDeviation          | 148.6051081  |
| wavelet-LHL | firstorder | MeanAbsoluteDeviation                | 222.172779   |
| wavelet-LHL | firstorder | TotalEnergy                          | 337585446.7  |
| wavelet-LHL | firstorder | Maximum                              | 725.2456262  |
| wavelet-LHL | firstorder | RootMeanSquared                      | 289.678886   |
| wavelet-LHL | firstorder | 90Percentile                         | 378.4879747  |



|             |            |                                      |              |
|-------------|------------|--------------------------------------|--------------|
| wavelet-LHL | firstorder | Minimum                              | -815.4174234 |
| wavelet-LHL | firstorder | Entropy                              | 5.223435133  |
| wavelet-LHL | firstorder | Range                                | 1540.66305   |
| wavelet-LHL | firstorder | Variance                             | 81690.08389  |
| wavelet-LHL | firstorder | 10Percentile                         | -386.3403736 |
| wavelet-LHL | firstorder | Kurtosis                             | 3.117328123  |
| wavelet-LHL | firstorder | Mean                                 | -47.15689882 |
| wavelet-LHL | glrlm      | ShortRunLowGrayLevelEmphasis         | 0.008367415  |
| wavelet-LHL | glrlm      | GrayLevelVariance                    | 131.7058914  |
| wavelet-LHL | glrlm      | LowGrayLevelRunEmphasis              | 0.008394326  |
| wavelet-LHL | glrlm      | GrayLevelNonUniformityNormalized     | 0.031755577  |
| wavelet-LHL | glrlm      | RunVariance                          | 0.022181244  |
| wavelet-LHL | glrlm      | GrayLevelNonUniformity               | 4.626685507  |
| wavelet-LHL | glrlm      | LongRunEmphasis                      | 1.068386099  |
| wavelet-LHL | glrlm      | ShortRunHighGrayLevelEmphasis        | 1122.204031  |
| wavelet-LHL | glrlm      | RunLengthNonUniformity               | 139.2545577  |
| wavelet-LHL | glrlm      | ShortRunEmphasis                     | 0.982903475  |
| wavelet-LHL | glrlm      | LongRunHighGrayLevelEmphasis         | 1198.063866  |
| wavelet-LHL | glrlm      | RunPercentage                        | 0.977800723  |
| wavelet-LHL | glrlm      | LongRunLowGrayLevelEmphasis          | 0.008501968  |
| wavelet-LHL | glrlm      | RunEntropy                           | 5.314543641  |
| wavelet-LHL | glrlm      | HighGrayLevelRunEmphasis             | 1137.375998  |
| wavelet-LHL | glrlm      | RunLengthNonUniformityNormalized     | 0.955637512  |
| wavelet-LHL | glszm      | GrayLevelVariance                    | 146.8304959  |
| wavelet-LHL | glszm      | ZoneVariance                         | 0.901570248  |
| wavelet-LHL | glszm      | GrayLevelNonUniformityNormalized     | 0.028429752  |
| wavelet-LHL | glszm      | SizeZoneNonUniformityNormalized      | 0.671900826  |
| wavelet-LHL | glszm      | SizeZoneNonUniformity                | 73.90909091  |
| wavelet-LHL | glszm      | GrayLevelNonUniformity               | 3.127272727  |
| wavelet-LHL | glszm      | LargeAreaEmphasis                    | 2.736363636  |
| wavelet-LHL | glszm      | SmallAreaHighGrayLevelEmphasis       | 1077.238598  |
| wavelet-LHL | glszm      | ZonePercentage                       | 0.738255034  |
| wavelet-LHL | glszm      | LargeAreaLowGrayLevelEmphasis        | 0.013325406  |
| wavelet-LHL | glszm      | LargeAreaHighGrayLevelEmphasis       | 2701.645455  |
| wavelet-LHL | glszm      | HighGrayLevelZoneEmphasis            | 1218.5       |
| wavelet-LHL | glszm      | SmallAreaEmphasis                    | 0.844729798  |
| wavelet-LHL | glszm      | LowGrayLevelZoneEmphasis             | 0.010591981  |
| wavelet-LHL | glszm      | ZoneEntropy                          | 5.762149405  |
| wavelet-LHL | glszm      | SmallAreaLowGrayLevelEmphasis        | 0.010326764  |
| wavelet-LHL | ngtdm      | Coarseness                           | 0.041161667  |
| wavelet-LHL | ngtdm      | Complexity                           | 6274.159217  |
| wavelet-LHL | ngtdm      | Strength                             | 37.50134894  |
| wavelet-LHL | ngtdm      | Contrast                             | 0.726459097  |
| wavelet-LHL | ngtdm      | Busyness                             | 0.019053968  |
| wavelet-LHH | gldm       | GrayLevelVariance                    | 25.57389307  |
| wavelet-LHH | gldm       | HighGrayLevelEmphasis                | 159.4496644  |
| wavelet-LHH | gldm       | DependenceEntropy                    | 5.545360826  |
| wavelet-LHH | gldm       | DependenceNonUniformity              | 41.05369128  |
| wavelet-LHH | gldm       | GrayLevelNonUniformity               | 9.416107383  |
| wavelet-LHH | gldm       | SmallDependenceEmphasis              | 0.473051827  |
| wavelet-LHH | gldm       | SmallDependenceHighGrayLevelEmphasis | 80.35786353  |
| wavelet-LHH | gldm       | DependenceNonUniformityNormalized    | 0.275528129  |

|             |            |                                      |              |
|-------------|------------|--------------------------------------|--------------|
| wavelet-LHH | gldm       | LargeDependenceEmphasis              | 5.899328859  |
| wavelet-LHH | gldm       | LargeDependenceLowGrayLevelEmphasis  | 0.081790486  |
| wavelet-LHH | gldm       | DependenceVariance                   | 1.3157065    |
| wavelet-LHH | gldm       | LargeDependenceHighGrayLevelEmphasis | 840.0268456  |
| wavelet-LHH | gldm       | SmallDependenceLowGrayLevelEmphasis  | 0.024025698  |
| wavelet-LHH | gldm       | LowGrayLevelEmphasis                 | 0.029813554  |
| wavelet-LHH | glcm       | JointAverage                         | 11.61061868  |
| wavelet-LHH | glcm       | SumAverage                           | 23.22123736  |
| wavelet-LHH | glcm       | JointEntropy                         | 6.984334475  |
| wavelet-LHH | glcm       | ClusterShade                         | 97.15439942  |
| wavelet-LHH | glcm       | MaximumProbability                   | 0.026246822  |
| wavelet-LHH | glcm       | ldmn                                 | 0.934518576  |
| wavelet-LHH | glcm       | JointEnergy                          | 0.009211237  |
| wavelet-LHH | glcm       | Contrast                             | 50.40840625  |
| wavelet-LHH | glcm       | DifferenceEntropy                    | 3.74995477   |
| wavelet-LHH | glcm       | InverseVariance                      | 0.173892654  |
| wavelet-LHH | glcm       | DifferenceVariance                   | 18.84239279  |
| wavelet-LHH | glcm       | ldn                                  | 0.834192068  |
| wavelet-LHH | glcm       | ldm                                  | 0.172574973  |
| wavelet-LHH | glcm       | Correlation                          | -0.010409369 |
| wavelet-LHH | glcm       | Autocorrelation                      | 134.5012319  |
| wavelet-LHH | glcm       | SumEntropy                           | 4.527169403  |
| wavelet-LHH | glcm       | SumSquares                           | 24.88514472  |
| wavelet-LHH | glcm       | ClusterProminence                    | 8101.828907  |
| wavelet-LHH | glcm       | lmc2                                 | 0.971412818  |
| wavelet-LHH | glcm       | lmc1                                 | -0.343298031 |
| wavelet-LHH | glcm       | DifferenceAverage                    | 5.542215215  |
| wavelet-LHH | glcm       | ld                                   | 0.264419754  |
| wavelet-LHH | glcm       | ClusterTendency                      | 49.13217264  |
| wavelet-LHH | firstorder | InterquartileRange                   | 144.219821   |
| wavelet-LHH | firstorder | Skewness                             | 0.279394285  |
| wavelet-LHH | firstorder | Uniformity                           | 0.063195352  |
| wavelet-LHH | firstorder | Median                               | -10.84165709 |
| wavelet-LHH | firstorder | Energy                               | 2392165.069  |
| wavelet-LHH | firstorder | RobustMeanAbsoluteDeviation          | 68.24056373  |
| wavelet-LHH | firstorder | MeanAbsoluteDeviation                | 99.78284812  |
| wavelet-LHH | firstorder | TotalEnergy                          | 64588456.87  |
| wavelet-LHH | firstorder | Maximum                              | 339.6489768  |
| wavelet-LHH | firstorder | RootMeanSquared                      | 126.7075338  |
| wavelet-LHH | firstorder | 90Percentile                         | 181.367973   |
| wavelet-LHH | firstorder | Minimum                              | -272.5298032 |
| wavelet-LHH | firstorder | Entropy                              | 4.245786911  |
| wavelet-LHH | firstorder | Range                                | 612.1787799  |
| wavelet-LHH | firstorder | Variance                             | 16054.12858  |
| wavelet-LHH | firstorder | 10Percentile                         | -167.1084993 |
| wavelet-LHH | firstorder | Kurtosis                             | 2.78707997   |
| wavelet-LHH | firstorder | Mean                                 | 0.818867862  |
| wavelet-LHH | glrlm      | ShortRunLowGrayLevelEmphasis         | 0.030323057  |
| wavelet-LHH | glrlm      | GrayLevelVariance                    | 26.26079961  |
| wavelet-LHH | glrlm      | LowGrayLevelRunEmphasis              | 0.030686516  |
| wavelet-LHH | glrlm      | GrayLevelNonUniformityNormalized     | 0.061739967  |
| wavelet-LHH | glrlm      | RunVariance                          | 0.048133951  |

|             |       |                                      |             |
|-------------|-------|--------------------------------------|-------------|
| wavelet-LHH | glrlm | GrayLevelNonUniformity               | 8.796493783 |
| wavelet-LHH | glrlm | LongRunEmphasis                      | 1.142670697 |
| wavelet-LHH | glrlm | ShortRunHighGrayLevelEmphasis        | 155.5184897 |
| wavelet-LHH | glrlm | RunLengthNonUniformity               | 130.5721586 |
| wavelet-LHH | glrlm | ShortRunEmphasis                     | 0.966761339 |
| wavelet-LHH | glrlm | LongRunHighGrayLevelEmphasis         | 180.391442  |
| wavelet-LHH | glrlm | RunPercentage                        | 0.956117708 |
| wavelet-LHH | glrlm | LongRunLowGrayLevelEmphasis          | 0.032232074 |
| wavelet-LHH | glrlm | RunEntropy                           | 4.449188135 |
| wavelet-LHH | glrlm | HighGrayLevelRunEmphasis             | 160.2632064 |
| wavelet-LHH | glrlm | RunLengthNonUniformityNormalized     | 0.916219299 |
| wavelet-LHH | glszm | GrayLevelVariance                    | 36.73007164 |
| wavelet-LHH | glszm | ZoneVariance                         | 2.801402225 |
| wavelet-LHH | glszm | GrayLevelNonUniformityNormalized     | 0.048620637 |
| wavelet-LHH | glszm | SizeZoneNonUniformityNormalized      | 0.486663618 |
| wavelet-LHH | glszm | SizeZoneNonUniformity                | 39.41975309 |
| wavelet-LHH | glszm | GrayLevelNonUniformity               | 3.938271605 |
| wavelet-LHH | glszm | LargeAreaEmphasis                    | 6.185185185 |
| wavelet-LHH | glszm | SmallAreaHighGrayLevelEmphasis       | 124.8330281 |
| wavelet-LHH | glszm | ZonePercentage                       | 0.543624161 |
| wavelet-LHH | glszm | LargeAreaLowGrayLevelEmphasis        | 0.105385054 |
| wavelet-LHH | glszm | LargeAreaHighGrayLevelEmphasis       | 862.5679012 |
| wavelet-LHH | glszm | HighGrayLevelZoneEmphasis            | 171.691358  |
| wavelet-LHH | glszm | SmallAreaEmphasis                    | 0.723505658 |
| wavelet-LHH | glszm | LowGrayLevelZoneEmphasis             | 0.045252411 |
| wavelet-LHH | glszm | ZoneEntropy                          | 5.303131874 |
| wavelet-LHH | glszm | SmallAreaLowGrayLevelEmphasis        | 0.04251347  |
| wavelet-LHH | ngtdm | Coarseness                           | 0.038368156 |
| wavelet-LHH | ngtdm | Complexity                           | 926.7234326 |
| wavelet-LHH | ngtdm | Strength                             | 6.501387632 |
| wavelet-LHH | ngtdm | Contrast                             | 0.350317254 |
| wavelet-LHH | ngtdm | Busyness                             | 0.104787608 |
| wavelet-LLH | gldm  | GrayLevelVariance                    | 86.15233548 |
| wavelet-LLH | gldm  | HighGrayLevelEmphasis                | 433.261745  |
| wavelet-LLH | gldm  | DependenceEntropy                    | 5.732329219 |
| wavelet-LLH | gldm  | DependenceNonUniformity              | 48.3557047  |
| wavelet-LLH | gldm  | GrayLevelNonUniformity               | 7.161073826 |
| wavelet-LLH | gldm  | SmallDependenceEmphasis              | 0.548519761 |
| wavelet-LLH | gldm  | SmallDependenceHighGrayLevelEmphasis | 257.2949888 |
| wavelet-LLH | gldm  | DependenceNonUniformityNormalized    | 0.324534931 |
| wavelet-LLH | gldm  | LargeDependenceEmphasis              | 4.758389262 |
| wavelet-LLH | gldm  | LargeDependenceLowGrayLevelEmphasis  | 0.031358502 |
| wavelet-LLH | gldm  | DependenceVariance                   | 1.099770281 |
| wavelet-LLH | gldm  | LargeDependenceHighGrayLevelEmphasis | 1748.067114 |
| wavelet-LLH | gldm  | SmallDependenceLowGrayLevelEmphasis  | 0.013596439 |
| wavelet-LLH | gldm  | LowGrayLevelEmphasis                 | 0.01562605  |
| wavelet-LLH | glcm  | JointAverage                         | 17.83676206 |
| wavelet-LLH | glcm  | SumAverage                           | 35.67352411 |
| wavelet-LLH | glcm  | JointEntropy                         | 7.160316345 |
| wavelet-LLH | glcm  | ClusterShade                         | 3666.70886  |
| wavelet-LLH | glcm  | MaximumProbability                   | 0.023776757 |
| wavelet-LLH | glcm  | ldmn                                 | 0.957313171 |

|             |            |                                  |              |
|-------------|------------|----------------------------------|--------------|
| wavelet-LLH | glcm       | JointEnergy                      | 0.007999561  |
| wavelet-LLH | glcm       | Contrast                         | 126.2462968  |
| wavelet-LLH | glcm       | DifferenceEntropy                | 4.149955832  |
| wavelet-LLH | glcm       | InverseVariance                  | 0.160034976  |
| wavelet-LLH | glcm       | DifferenceVariance               | 59.40152744  |
| wavelet-LLH | glcm       | Idn                              | 0.874105578  |
| wavelet-LLH | glcm       | Idm                              | 0.150194547  |
| wavelet-LLH | glcm       | Correlation                      | 0.180273842  |
| wavelet-LLH | glcm       | Autocorrelation                  | 334.4415389  |
| wavelet-LLH | glcm       | SumEntropy                       | 5.016241397  |
| wavelet-LLH | glcm       | SumSquares                       | 79.32718954  |
| wavelet-LLH | glcm       | ClusterProminence                | 220688.6087  |
| wavelet-LLH | glcm       | Imc2                             | 0.992540673  |
| wavelet-LLH | glcm       | Imc1                             | -0.457185741 |
| wavelet-LLH | glcm       | DifferenceAverage                | 7.968421198  |
| wavelet-LLH | glcm       | Id                               | 0.234316608  |
| wavelet-LLH | glcm       | ClusterTendency                  | 191.0624614  |
| wavelet-LLH | firstorder | InterquartileRange               | 220.035016   |
| wavelet-LLH | firstorder | Skewness                         | 1.25824378   |
| wavelet-LLH | firstorder | Uniformity                       | 0.048060898  |
| wavelet-LLH | firstorder | Median                           | -36.99857347 |
| wavelet-LLH | firstorder | Energy                           | 7990530.862  |
| wavelet-LLH | firstorder | RobustMeanAbsoluteDeviation      | 92.40259545  |
| wavelet-LLH | firstorder | MeanAbsoluteDeviation            | 164.384542   |
| wavelet-LLH | firstorder | TotalEnergy                      | 215744333.3  |
| wavelet-LLH | firstorder | Maximum                          | 750.1939961  |
| wavelet-LLH | firstorder | RootMeanSquared                  | 231.5766048  |
| wavelet-LLH | firstorder | 90Percentile                     | 255.3323691  |
| wavelet-LLH | firstorder | Minimum                          | -425.8231088 |
| wavelet-LLH | firstorder | Entropy                          | 4.699271419  |
| wavelet-LLH | firstorder | Range                            | 1176.017105  |
| wavelet-LLH | firstorder | Variance                         | 53616.38206  |
| wavelet-LLH | firstorder | 10Percentile                     | -234.60549   |
| wavelet-LLH | firstorder | Kurtosis                         | 5.126506215  |
| wavelet-LLH | firstorder | Mean                             | 3.367766573  |
| wavelet-LLH | glrlm      | ShortRunLowGrayLevelEmphasis     | 0.015923232  |
| wavelet-LLH | glrlm      | GrayLevelVariance                | 87.45801355  |
| wavelet-LLH | glrlm      | LowGrayLevelRunEmphasis          | 0.016039904  |
| wavelet-LLH | glrlm      | GrayLevelNonUniformityNormalized | 0.047043751  |
| wavelet-LLH | glrlm      | RunVariance                      | 0.03612649   |
| wavelet-LLH | glrlm      | GrayLevelNonUniformity           | 6.763502367  |
| wavelet-LLH | glrlm      | LongRunEmphasis                  | 1.110697215  |
| wavelet-LLH | glrlm      | ShortRunHighGrayLevelEmphasis    | 425.823872   |
| wavelet-LLH | glrlm      | RunLengthNonUniformity           | 133.8688016  |
| wavelet-LLH | glrlm      | ShortRunEmphasis                 | 0.972927598  |
| wavelet-LLH | glrlm      | LongRunHighGrayLevelEmphasis     | 476.1070935  |
| wavelet-LLH | glrlm      | RunPercentage                    | 0.964894166  |
| wavelet-LLH | glrlm      | LongRunLowGrayLevelEmphasis      | 0.016514923  |
| wavelet-LLH | glrlm      | RunEntropy                       | 4.849854091  |
| wavelet-LLH | glrlm      | HighGrayLevelRunEmphasis         | 435.7413566  |
| wavelet-LLH | glrlm      | RunLengthNonUniformityNormalized | 0.930859955  |
| wavelet-LLH | glszm      | GrayLevelVariance                | 102.2969129  |

|             |       |                                      |             |
|-------------|-------|--------------------------------------|-------------|
| wavelet-LLH | glszm | ZoneVariance                         | 1.916984622 |
| wavelet-LLH | glszm | GrayLevelNonUniformityNormalized     | 0.041045208 |
| wavelet-LLH | glszm | SizeZoneNonUniformityNormalized      | 0.546768413 |
| wavelet-LLH | glszm | SizeZoneNonUniformity                | 50.84946237 |
| wavelet-LLH | glszm | GrayLevelNonUniformity               | 3.817204301 |
| wavelet-LLH | glszm | LargeAreaEmphasis                    | 4.483870968 |
| wavelet-LLH | glszm | SmallAreaHighGrayLevelEmphasis       | 366.5447392 |
| wavelet-LLH | glszm | ZonePercentage                       | 0.624161074 |
| wavelet-LLH | glszm | LargeAreaLowGrayLevelEmphasis        | 0.037072429 |
| wavelet-LLH | glszm | LargeAreaHighGrayLevelEmphasis       | 1646.817204 |
| wavelet-LLH | glszm | HighGrayLevelZoneEmphasis            | 465.7526882 |
| wavelet-LLH | glszm | SmallAreaEmphasis                    | 0.766798578 |
| wavelet-LLH | glszm | LowGrayLevelZoneEmphasis             | 0.022361395 |
| wavelet-LLH | glszm | ZoneEntropy                          | 5.423582403 |
| wavelet-LLH | glszm | SmallAreaLowGrayLevelEmphasis        | 0.021257019 |
| wavelet-LLH | ngtdm | Coarseness                           | 0.035226033 |
| wavelet-LLH | ngtdm | Complexity                           | 3396.308012 |
| wavelet-LLH | ngtdm | Strength                             | 23.29249415 |
| wavelet-LLH | ngtdm | Contrast                             | 0.835684145 |
| wavelet-LLH | ngtdm | Busyness                             | 0.051380233 |
| wavelet-LLL | gldm  | GrayLevelVariance                    | 819.2739066 |
| wavelet-LLL | gldm  | HighGrayLevelEmphasis                | 4819.624161 |
| wavelet-LLL | gldm  | DependenceEntropy                    | 6.338066423 |
| wavelet-LLL | gldm  | DependenceNonUniformity              | 92.89261745 |
| wavelet-LLL | gldm  | GrayLevelNonUniformity               | 2.315436242 |
| wavelet-LLL | gldm  | SmallDependenceEmphasis              | 0.812826249 |
| wavelet-LLL | gldm  | SmallDependenceHighGrayLevelEmphasis | 3414.020134 |
| wavelet-LLL | gldm  | DependenceNonUniformityNormalized    | 0.623440386 |
| wavelet-LLL | gldm  | LargeDependenceEmphasis              | 1.77852349  |
| wavelet-LLL | gldm  | LargeDependenceLowGrayLevelEmphasis  | 0.007935812 |
| wavelet-LLL | gldm  | DependenceVariance                   | 0.203414261 |
| wavelet-LLL | gldm  | LargeDependenceHighGrayLevelEmphasis | 10809.55705 |
| wavelet-LLL | gldm  | SmallDependenceLowGrayLevelEmphasis  | 0.007698038 |
| wavelet-LLL | gldm  | LowGrayLevelEmphasis                 | 0.007745109 |
| wavelet-LLL | glcm  | JointAverage                         | 70.55057044 |
| wavelet-LLL | glcm  | SumAverage                           | 141.1011409 |
| wavelet-LLL | glcm  | JointEntropy                         | 7.591995945 |
| wavelet-LLL | glcm  | ClusterShade                         | -18483.5205 |
| wavelet-LLL | glcm  | MaximumProbability                   | 0.009722812 |
| wavelet-LLL | glcm  | Idmn                                 | 0.938670183 |
| wavelet-LLL | glcm  | JointEnergy                          | 0.005266537 |
| wavelet-LLL | glcm  | Contrast                             | 930.9547821 |
| wavelet-LLL | glcm  | DifferenceEntropy                    | 5.297452858 |
| wavelet-LLL | glcm  | InverseVariance                      | 0.048715148 |
| wavelet-LLL | glcm  | DifferenceVariance                   | 285.6162221 |
| wavelet-LLL | glcm  | Idn                                  | 0.834035752 |
| wavelet-LLL | glcm  | Idm                                  | 0.044424015 |
| wavelet-LLL | glcm  | Correlation                          | 0.412994768 |
| wavelet-LLL | glcm  | Autocorrelation                      | 5309.085202 |
| wavelet-LLL | glcm  | SumEntropy                           | 6.094060066 |
| wavelet-LLL | glcm  | SumSquares                           | 795.6940394 |
| wavelet-LLL | glcm  | ClusterProminence                    | 11074267.25 |

|             |            |                                  |              |
|-------------|------------|----------------------------------|--------------|
| wavelet-LLL | glcm       | Imc2                             | 0.999936069  |
| wavelet-LLL | glcm       | Imc1                             | -0.74297389  |
| wavelet-LLL | glcm       | DifferenceAverage                | 24.82095075  |
| wavelet-LLL | glcm       | Id                               | 0.095987809  |
| wavelet-LLL | glcm       | ClusterTendency                  | 2251.821375  |
| wavelet-LLL | firstorder | InterquartileRange               | 1215.6382    |
| wavelet-LLL | firstorder | Skewness                         | 0.017816808  |
| wavelet-LLL | firstorder | Uniformity                       | 0.015539841  |
| wavelet-LLL | firstorder | Median                           | -1031.670406 |
| wavelet-LLL | firstorder | Energy                           | 226897621.1  |
| wavelet-LLL | firstorder | RobustMeanAbsoluteDeviation      | 469.6054457  |
| wavelet-LLL | firstorder | MeanAbsoluteDeviation            | 606.9666768  |
| wavelet-LLL | firstorder | TotalEnergy                      | 6126235769   |
| wavelet-LLL | firstorder | Maximum                          | 262.2318234  |
| wavelet-LLL | firstorder | RootMeanSquared                  | 1234.018973  |
| wavelet-LLL | firstorder | 90Percentile                     | -34.74463319 |
| wavelet-LLL | firstorder | Minimum                          | -2570.373625 |
| wavelet-LLL | firstorder | Entropy                          | 6.136461725  |
| wavelet-LLL | firstorder | Range                            | 2832.605449  |
| wavelet-LLL | firstorder | Variance                         | 511924.2422  |
| wavelet-LLL | firstorder | 10Percentile                     | -1888.585201 |
| wavelet-LLL | firstorder | Kurtosis                         | 1.992497117  |
| wavelet-LLL | firstorder | Mean                             | -1005.424579 |
| wavelet-LLL | glrlm      | ShortRunLowGrayLevelEmphasis     | 0.007818098  |
| wavelet-LLL | glrlm      | GrayLevelVariance                | 816.1556949  |
| wavelet-LLL | glrlm      | LowGrayLevelRunEmphasis          | 0.007819953  |
| wavelet-LLL | glrlm      | GrayLevelNonUniformityNormalized | 0.015554624  |
| wavelet-LLL | glrlm      | RunVariance                      | 0.00980467   |
| wavelet-LLL | glrlm      | GrayLevelNonUniformity           | 2.294916303  |
| wavelet-LLL | glrlm      | LongRunEmphasis                  | 1.02994885   |
| wavelet-LLL | glrlm      | ShortRunHighGrayLevelEmphasis    | 4734.614255  |
| wavelet-LLL | glrlm      | RunLengthNonUniformity           | 144.6672268  |
| wavelet-LLL | glrlm      | ShortRunEmphasis                 | 0.992512788  |
| wavelet-LLL | glrlm      | LongRunHighGrayLevelEmphasis     | 5019.879911  |
| wavelet-LLL | glrlm      | RunPercentage                    | 0.990191017  |
| wavelet-LLL | glrlm      | LongRunLowGrayLevelEmphasis      | 0.007827376  |
| wavelet-LLL | glrlm      | RunEntropy                       | 6.148592875  |
| wavelet-LLL | glrlm      | HighGrayLevelRunEmphasis         | 4791.667386  |
| wavelet-LLL | glrlm      | RunLengthNonUniformityNormalized | 0.980390661  |
| wavelet-LLL | glszm      | GrayLevelVariance                | 767.8769822  |
| wavelet-LLL | glszm      | ZoneVariance                     | 0.140177515  |
| wavelet-LLL | glszm      | GrayLevelNonUniformityNormalized | 0.015621302  |
| wavelet-LLL | glszm      | SizeZoneNonUniformityNormalized  | 0.759408284  |
| wavelet-LLL | glszm      | SizeZoneNonUniformity            | 98.72307692  |
| wavelet-LLL | glszm      | GrayLevelNonUniformity           | 2.030769231  |
| wavelet-LLL | glszm      | LargeAreaEmphasis                | 1.453846154  |
| wavelet-LLL | glszm      | SmallAreaHighGrayLevelEmphasis   | 3634.832692  |
| wavelet-LLL | glszm      | ZonePercentage                   | 0.872483221  |
| wavelet-LLL | glszm      | LargeAreaLowGrayLevelEmphasis    | 0.008950777  |
| wavelet-LLL | glszm      | LargeAreaHighGrayLevelEmphasis   | 7938.861538  |
| wavelet-LLL | glszm      | HighGrayLevelZoneEmphasis        | 4411.392308  |
| wavelet-LLL | glszm      | SmallAreaEmphasis                | 0.89508547   |

|             |            |                                      |              |
|-------------|------------|--------------------------------------|--------------|
| wavelet-LLL | glszm      | LowGrayLevelZoneEmphasis             | 0.008840865  |
| wavelet-LLL | glszm      | ZoneEntropy                          | 6.289412332  |
| wavelet-LLL | glszm      | SmallAreaLowGrayLevelEmphasis        | 0.008814081  |
| wavelet-LLL | ngtdm      | Coarseness                           | 0.027930062  |
| wavelet-LLL | ngtdm      | Complexity                           | 48326.65152  |
| wavelet-LLL | ngtdm      | Strength                             | 118.0882831  |
| wavelet-LLL | ngtdm      | Contrast                             | 4.241022219  |
| wavelet-LLL | ngtdm      | Busyness                             | 0.009678787  |
| wavelet-HHL | gldm       | GrayLevelVariance                    | 32.20422503  |
| wavelet-HHL | gldm       | HighGrayLevelEmphasis                | 309.0134228  |
| wavelet-HHL | gldm       | DependenceEntropy                    | 5.627566531  |
| wavelet-HHL | gldm       | DependenceNonUniformity              | 47.6442953   |
| wavelet-HHL | gldm       | GrayLevelNonUniformity               | 8.543624161  |
| wavelet-HHL | gldm       | SmallDependenceEmphasis              | 0.457795431  |
| wavelet-HHL | gldm       | SmallDependenceHighGrayLevelEmphasis | 146.3215904  |
| wavelet-HHL | gldm       | DependenceNonUniformityNormalized    | 0.319760371  |
| wavelet-HHL | gldm       | LargeDependenceEmphasis              | 5.44295302   |
| wavelet-HHL | gldm       | LargeDependenceLowGrayLevelEmphasis  | 0.036493695  |
| wavelet-HHL | gldm       | DependenceVariance                   | 1.197693798  |
| wavelet-HHL | gldm       | LargeDependenceHighGrayLevelEmphasis | 1577.738255  |
| wavelet-HHL | gldm       | SmallDependenceLowGrayLevelEmphasis  | 0.009340078  |
| wavelet-HHL | gldm       | LowGrayLevelEmphasis                 | 0.012369492  |
| wavelet-HHL | glcm       | JointAverage                         | 16.64523892  |
| wavelet-HHL | glcm       | SumAverage                           | 33.29047784  |
| wavelet-HHL | glcm       | JointEntropy                         | 7.055039448  |
| wavelet-HHL | glcm       | ClusterShade                         | 15.97570781  |
| wavelet-HHL | glcm       | MaximumProbability                   | 0.021641554  |
| wavelet-HHL | glcm       | ldmn                                 | 0.948523071  |
| wavelet-HHL | glcm       | JointEnergy                          | 0.008597498  |
| wavelet-HHL | glcm       | Contrast                             | 58.7417352   |
| wavelet-HHL | glcm       | DifferenceEntropy                    | 3.824588243  |
| wavelet-HHL | glcm       | InverseVariance                      | 0.157706328  |
| wavelet-HHL | glcm       | DifferenceVariance                   | 22.21158546  |
| wavelet-HHL | glcm       | ldn                                  | 0.851684368  |
| wavelet-HHL | glcm       | ldm                                  | 0.159438073  |
| wavelet-HHL | glcm       | Correlation                          | -0.023537676 |
| wavelet-HHL | glcm       | Autocorrelation                      | 276.690348   |
| wavelet-HHL | glcm       | SumEntropy                           | 4.628317589  |
| wavelet-HHL | glcm       | SumSquares                           | 28.96021776  |
| wavelet-HHL | glcm       | ClusterProminence                    | 11299.98936  |
| wavelet-HHL | glcm       | lmc2                                 | 0.975455246  |
| wavelet-HHL | glcm       | lmc1                                 | -0.354649007 |
| wavelet-HHL | glcm       | DifferenceAverage                    | 5.956789359  |
| wavelet-HHL | glcm       | ld                                   | 0.251989972  |
| wavelet-HHL | glcm       | ClusterTendency                      | 57.09913586  |
| wavelet-HHL | firstorder | InterquartileRange                   | 178.967969   |
| wavelet-HHL | firstorder | Skewness                             | 0.160785413  |
| wavelet-HHL | firstorder | Uniformity                           | 0.057339759  |
| wavelet-HHL | firstorder | Median                               | 2.287661099  |
| wavelet-HHL | firstorder | Energy                               | 2997243.78   |
| wavelet-HHL | firstorder | RobustMeanAbsoluteDeviation          | 73.71230089  |
| wavelet-HHL | firstorder | MeanAbsoluteDeviation                | 110.5383241  |

|             |            |                                  |              |
|-------------|------------|----------------------------------|--------------|
| wavelet-HHL | firstorder | TotalEnergy                      | 80925582.05  |
| wavelet-HHL | firstorder | Maximum                          | 354.8960513  |
| wavelet-HHL | firstorder | RootMeanSquared                  | 141.8299336  |
| wavelet-HHL | firstorder | 90Percentile                     | 188.8155846  |
| wavelet-HHL | firstorder | Minimum                          | -376.4187202 |
| wavelet-HHL | firstorder | Entropy                          | 4.361730224  |
| wavelet-HHL | firstorder | Range                            | 731.3147715  |
| wavelet-HHL | firstorder | Variance                         | 20100.82392  |
| wavelet-HHL | firstorder | 10Percentile                     | -158.7687225 |
| wavelet-HHL | firstorder | Kurtosis                         | 3.01848083   |
| wavelet-HHL | firstorder | Mean                             | 3.860847863  |
| wavelet-HHL | glrlm      | ShortRunLowGrayLevelEmphasis     | 0.012476959  |
| wavelet-HHL | glrlm      | GrayLevelVariance                | 32.72514963  |
| wavelet-HHL | glrlm      | LowGrayLevelRunEmphasis          | 0.01265714   |
| wavelet-HHL | glrlm      | GrayLevelNonUniformityNormalized | 0.056660937  |
| wavelet-HHL | glrlm      | RunVariance                      | 0.041796438  |
| wavelet-HHL | glrlm      | GrayLevelNonUniformity           | 8.098582915  |
| wavelet-HHL | glrlm      | LongRunEmphasis                  | 1.12954796   |
| wavelet-HHL | glrlm      | ShortRunHighGrayLevelEmphasis    | 300.7411941  |
| wavelet-HHL | glrlm      | RunLengthNonUniformity           | 131.4845694  |
| wavelet-HHL | glrlm      | ShortRunEmphasis                 | 0.968241467  |
| wavelet-HHL | glrlm      | LongRunHighGrayLevelEmphasis     | 347.253125   |
| wavelet-HHL | glrlm      | RunPercentage                    | 0.959215281  |
| wavelet-HHL | glrlm      | LongRunLowGrayLevelEmphasis      | 0.01338656   |
| wavelet-HHL | glrlm      | RunEntropy                       | 4.535408558  |
| wavelet-HHL | glrlm      | HighGrayLevelRunEmphasis         | 309.8982811  |
| wavelet-HHL | glrlm      | RunLengthNonUniformityNormalized | 0.919501348  |
| wavelet-HHL | glszm      | GrayLevelVariance                | 40.58408304  |
| wavelet-HHL | glszm      | ZoneVariance                     | 2.044844291  |
| wavelet-HHL | glszm      | GrayLevelNonUniformityNormalized | 0.049411765  |
| wavelet-HHL | glszm      | SizeZoneNonUniformityNormalized  | 0.417577855  |
| wavelet-HHL | glszm      | SizeZoneNonUniformity            | 35.49411765  |
| wavelet-HHL | glszm      | GrayLevelNonUniformity           | 4.2          |
| wavelet-HHL | glszm      | LargeAreaEmphasis                | 5.117647059  |
| wavelet-HHL | glszm      | SmallAreaHighGrayLevelEmphasis   | 212.0331158  |
| wavelet-HHL | glszm      | ZonePercentage                   | 0.570469799  |
| wavelet-HHL | glszm      | LargeAreaLowGrayLevelEmphasis    | 0.037437621  |
| wavelet-HHL | glszm      | LargeAreaHighGrayLevelEmphasis   | 1521.870588  |
| wavelet-HHL | glszm      | HighGrayLevelZoneEmphasis        | 319.6705882  |
| wavelet-HHL | glszm      | SmallAreaEmphasis                | 0.657615832  |
| wavelet-HHL | glszm      | LowGrayLevelZoneEmphasis         | 0.017576242  |
| wavelet-HHL | glszm      | ZoneEntropy                      | 5.466579577  |
| wavelet-HHL | glszm      | SmallAreaLowGrayLevelEmphasis    | 0.015639398  |
| wavelet-HHL | ngtdm      | Coarseness                       | 0.038884194  |
| wavelet-HHL | ngtdm      | Complexity                       | 1118.208983  |
| wavelet-HHL | ngtdm      | Strength                         | 7.425974378  |
| wavelet-HHL | ngtdm      | Contrast                         | 0.444913986  |
| wavelet-HHL | ngtdm      | Busyness                         | 0.072030738  |
| wavelet-HLH | gldm       | GrayLevelVariance                | 19.64983559  |
| wavelet-HLH | gldm       | HighGrayLevelEmphasis            | 212.2818792  |
| wavelet-HLH | gldm       | DependenceEntropy                | 5.412477925  |
| wavelet-HLH | gldm       | DependenceNonUniformity          | 41.22818792  |



|             |            |                                      |              |
|-------------|------------|--------------------------------------|--------------|
| wavelet-HLH | gldm       | GrayLevelNonUniformity               | 11.17449664  |
| wavelet-HLH | gldm       | SmallDependenceEmphasis              | 0.444166667  |
| wavelet-HLH | gldm       | SmallDependenceHighGrayLevelEmphasis | 94.5383352   |
| wavelet-HLH | gldm       | DependenceNonUniformityNormalized    | 0.276699248  |
| wavelet-HLH | gldm       | LargeDependenceEmphasis              | 5.791946309  |
| wavelet-HLH | gldm       | LargeDependenceLowGrayLevelEmphasis  | 0.042494543  |
| wavelet-HLH | gldm       | DependenceVariance                   | 1.150668889  |
| wavelet-HLH | gldm       | LargeDependenceHighGrayLevelEmphasis | 1243.167785  |
| wavelet-HLH | gldm       | SmallDependenceLowGrayLevelEmphasis  | 0.012090445  |
| wavelet-HLH | gldm       | LowGrayLevelEmphasis                 | 0.015540112  |
| wavelet-HLH | glcm       | JointAverage                         | 13.75091978  |
| wavelet-HLH | glcm       | SumAverage                           | 27.50183955  |
| wavelet-HLH | glcm       | JointEntropy                         | 6.802275469  |
| wavelet-HLH | glcm       | ClusterShade                         | 0.945431775  |
| wavelet-HLH | glcm       | MaximumProbability                   | 0.026820463  |
| wavelet-HLH | glcm       | Idmn                                 | 0.950879429  |
| wavelet-HLH | glcm       | JointEnergy                          | 0.010510204  |
| wavelet-HLH | glcm       | Contrast                             | 38.9167184   |
| wavelet-HLH | glcm       | DifferenceEntropy                    | 3.587575403  |
| wavelet-HLH | glcm       | InverseVariance                      | 0.183714981  |
| wavelet-HLH | glcm       | DifferenceVariance                   | 14.43090454  |
| wavelet-HLH | glcm       | Idn                                  | 0.853185705  |
| wavelet-HLH | glcm       | Idm                                  | 0.180289865  |
| wavelet-HLH | glcm       | Correlation                          | -0.056856104 |
| wavelet-HLH | glcm       | Autocorrelation                      | 188.0798853  |
| wavelet-HLH | glcm       | SumEntropy                           | 4.339873107  |
| wavelet-HLH | glcm       | SumSquares                           | 18.4162526   |
| wavelet-HLH | glcm       | ClusterProminence                    | 3870.303239  |
| wavelet-HLH | glcm       | Imc2                                 | 0.946223533  |
| wavelet-HLH | glcm       | Imc1                                 | -0.286936523 |
| wavelet-HLH | glcm       | DifferenceAverage                    | 4.904219007  |
| wavelet-HLH | glcm       | Id                                   | 0.276174229  |
| wavelet-HLH | glcm       | ClusterTendency                      | 34.748292    |
| wavelet-HLH | firstorder | InterquartileRange                   | 144.4870492  |
| wavelet-HLH | firstorder | Skewness                             | 0.012364642  |
| wavelet-HLH | firstorder | Uniformity                           | 0.074996622  |
| wavelet-HLH | firstorder | Median                               | 9.217551647  |
| wavelet-HLH | firstorder | Energy                               | 1836733.685  |
| wavelet-HLH | firstorder | RobustMeanAbsoluteDeviation          | 58.74901491  |
| wavelet-HLH | firstorder | MeanAbsoluteDeviation                | 86.20946293  |
| wavelet-HLH | firstorder | TotalEnergy                          | 49591809.5   |
| wavelet-HLH | firstorder | Maximum                              | 322.6886832  |
| wavelet-HLH | firstorder | RootMeanSquared                      | 111.0273467  |
| wavelet-HLH | firstorder | 90Percentile                         | 140.0444309  |
| wavelet-HLH | firstorder | Minimum                              | -310.9465404 |
| wavelet-HLH | firstorder | Entropy                              | 4.036796272  |
| wavelet-HLH | firstorder | Range                                | 633.6352235  |
| wavelet-HLH | firstorder | Variance                             | 12230.49754  |
| wavelet-HLH | firstorder | 10Percentile                         | -136.6578611 |
| wavelet-HLH | firstorder | Kurtosis                             | 3.280119563  |
| wavelet-HLH | firstorder | Mean                                 | 9.827215668  |
| wavelet-HLH | grlm       | ShortRunLowGrayLevelEmphasis         | 0.015795314  |

|             |       |                                  |             |
|-------------|-------|----------------------------------|-------------|
| wavelet-HLH | glrlm | GrayLevelVariance                | 20.09001    |
| wavelet-HLH | glrlm | LowGrayLevelRunEmphasis          | 0.015996991 |
| wavelet-HLH | glrlm | GrayLevelNonUniformityNormalized | 0.073416274 |
| wavelet-HLH | glrlm | RunVariance                      | 0.047518334 |
| wavelet-HLH | glrlm | GrayLevelNonUniformity           | 10.45515315 |
| wavelet-HLH | glrlm | LongRunEmphasis                  | 1.144641552 |
| wavelet-HLH | glrlm | ShortRunHighGrayLevelEmphasis    | 204.8636464 |
| wavelet-HLH | glrlm | RunLengthNonUniformity           | 130.3220894 |
| wavelet-HLH | glrlm | ShortRunEmphasis                 | 0.965695306 |
| wavelet-HLH | glrlm | LongRunHighGrayLevelEmphasis     | 243.214917  |
| wavelet-HLH | glrlm | RunPercentage                    | 0.955601446 |
| wavelet-HLH | glrlm | LongRunLowGrayLevelEmphasis      | 0.016837321 |
| wavelet-HLH | glrlm | RunEntropy                       | 4.248196672 |
| wavelet-HLH | glrlm | HighGrayLevelRunEmphasis         | 212.1947536 |
| wavelet-HLH | glrlm | RunLengthNonUniformityNormalized | 0.914259028 |
| wavelet-HLH | glszm | GrayLevelVariance                | 27.460881   |
| wavelet-HLH | glszm | ZoneVariance                     | 4.979125575 |
| wavelet-HLH | glszm | GrayLevelNonUniformityNormalized | 0.056541749 |
| wavelet-HLH | glszm | SizeZoneNonUniformityNormalized  | 0.449375411 |
| wavelet-HLH | glszm | SizeZoneNonUniformity            | 35.05128205 |
| wavelet-HLH | glszm | GrayLevelNonUniformity           | 4.41025641  |
| wavelet-HLH | glszm | LargeAreaEmphasis                | 8.628205128 |
| wavelet-HLH | glszm | SmallAreaHighGrayLevelEmphasis   | 148.6403188 |
| wavelet-HLH | glszm | ZonePercentage                   | 0.523489933 |
| wavelet-HLH | glszm | LargeAreaLowGrayLevelEmphasis    | 0.065498442 |
| wavelet-HLH | glszm | LargeAreaHighGrayLevelEmphasis   | 1825.076923 |
| wavelet-HLH | glszm | HighGrayLevelZoneEmphasis        | 213.5384615 |
| wavelet-HLH | glszm | SmallAreaEmphasis                | 0.693438236 |
| wavelet-HLH | glszm | LowGrayLevelZoneEmphasis         | 0.024164738 |
| wavelet-HLH | glszm | ZoneEntropy                      | 5.221380187 |
| wavelet-HLH | glszm | SmallAreaLowGrayLevelEmphasis    | 0.022077225 |
| wavelet-HLH | ngtdm | Coarseness                       | 0.035980905 |
| wavelet-HLH | ngtdm | Complexity                       | 803.5415195 |
| wavelet-HLH | ngtdm | Strength                         | 6.184487199 |
| wavelet-HLH | ngtdm | Contrast                         | 0.262038966 |
| wavelet-HLH | ngtdm | Busyness                         | 0.081949763 |

| Image type | Feature Class | Feature Name                         |                                                                                                                                                                                                                                                                                                                                                                                                                   |
|------------|---------------|--------------------------------------|-------------------------------------------------------------------------------------------------------------------------------------------------------------------------------------------------------------------------------------------------------------------------------------------------------------------------------------------------------------------------------------------------------------------|
| general    | info          | BoundingBox                          | 512: RTSTRUCT: C99-DNU_segment_ITV<br>(0, 0, 1, 13, 13, 12)                                                                                                                                                                                                                                                                                                                                                       |
| general    | info          | EnabledImageTypes                    | {u'Original': {}, u'Wavelet': {}}                                                                                                                                                                                                                                                                                                                                                                                 |
|            |               |                                      | {'distances': [1], 'additionalInfo': True, 'force2D': False, 'interpolator': 'sitkBSpline', 'resampledPixelSpacing': [3.0], 'label': 1, 'normalizeScale': 1, 'normalize': False, 'force2Ddimension': 0, 'removeOutliers': None, 'minimumROISize': None, u'binWidth': 25.0, 'minimumROIDimensions': 1, u'correctMask': True, 'preCrop': False, u'symmetricalGLCM': True, 'resegmentRange': None, 'padDistance': 5} |
| general    | info          | GeneralSettings                      | 078546734976d8882dbec71324f0e3ff79605                                                                                                                                                                                                                                                                                                                                                                             |
| general    | info          | ImageHash                            | fbcb                                                                                                                                                                                                                                                                                                                                                                                                              |
| general    | info          | ImageSpacing                         | (0.9726562500000001, 0.9726562500000001, 2.0000000000000001)                                                                                                                                                                                                                                                                                                                                                      |
| general    | info          | MaskHash                             | 4c6e7ce502cf13410ed237249375f54a09871347                                                                                                                                                                                                                                                                                                                                                                          |
| general    | info          | NumpyVersion                         | 1.13.1                                                                                                                                                                                                                                                                                                                                                                                                            |
| general    | info          | PyWaveletVersion                     | 0.5.2                                                                                                                                                                                                                                                                                                                                                                                                             |
| general    | info          | SimpleITKVersion                     | 1.1.0                                                                                                                                                                                                                                                                                                                                                                                                             |
| general    | info          | Version                              | 1.3.0.post102+g1b0eb74                                                                                                                                                                                                                                                                                                                                                                                            |
| general    | info          | VolumeNum                            | 1                                                                                                                                                                                                                                                                                                                                                                                                                 |
| general    | info          | VoxelNum                             | 752                                                                                                                                                                                                                                                                                                                                                                                                               |
| original   | shape         | Maximum3DDiameter                    | 40.91454509                                                                                                                                                                                                                                                                                                                                                                                                       |
| original   | shape         | Maximum2DDiameterSlice               | 39.11521443                                                                                                                                                                                                                                                                                                                                                                                                       |
| original   | shape         | Sphericity                           | 0.816899893                                                                                                                                                                                                                                                                                                                                                                                                       |
| original   | shape         | MinorAxis                            | 33.25166737                                                                                                                                                                                                                                                                                                                                                                                                       |
| original   | shape         | Elongation                           | 0.903912534                                                                                                                                                                                                                                                                                                                                                                                                       |
| original   | shape         | SurfaceVolumeRatio                   | 0.21699751                                                                                                                                                                                                                                                                                                                                                                                                        |
| original   | shape         | Volume                               | 20304                                                                                                                                                                                                                                                                                                                                                                                                             |
| original   | shape         | MajorAxis                            | 36.78637713                                                                                                                                                                                                                                                                                                                                                                                                       |
| original   | shape         | SurfaceArea                          | 4405.917445                                                                                                                                                                                                                                                                                                                                                                                                       |
| original   | shape         | Flatness                             | 0.650297074                                                                                                                                                                                                                                                                                                                                                                                                       |
| original   | shape         | LeastAxis                            | 23.92207342                                                                                                                                                                                                                                                                                                                                                                                                       |
| original   | shape         | Maximum2DDiameterColumn              | 36.61966685                                                                                                                                                                                                                                                                                                                                                                                                       |
| original   | shape         | Maximum2DDiameterRow                 | 39                                                                                                                                                                                                                                                                                                                                                                                                                |
| original   | gldm          | GrayLevelVariance                    | 111.5326629                                                                                                                                                                                                                                                                                                                                                                                                       |
| original   | gldm          | HighGrayLevelEmphasis                | 1123.567819                                                                                                                                                                                                                                                                                                                                                                                                       |
| original   | gldm          | DependenceEntropy                    | 6.475225617                                                                                                                                                                                                                                                                                                                                                                                                       |
| original   | gldm          | DependenceNonUniformity              | 102.412234                                                                                                                                                                                                                                                                                                                                                                                                        |
| original   | gldm          | GrayLevelNonUniformity               | 106.2074468                                                                                                                                                                                                                                                                                                                                                                                                       |
| original   | gldm          | SmallDependenceEmphasis              | 0.361655736                                                                                                                                                                                                                                                                                                                                                                                                       |
| original   | gldm          | SmallDependenceHighGrayLevelEmphasis | 255.0625061                                                                                                                                                                                                                                                                                                                                                                                                       |
| original   | gldm          | DependenceNonUniformityNormalized    | 0.136186481                                                                                                                                                                                                                                                                                                                                                                                                       |
| original   | gldm          | LargeDependenceEmphasis              | 86.31914894                                                                                                                                                                                                                                                                                                                                                                                                       |
| original   | gldm          | LargeDependenceLowGrayLevelEmphasis  | 0.077987254                                                                                                                                                                                                                                                                                                                                                                                                       |
| original   | gldm          | DependenceVariance                   | 42.92048863                                                                                                                                                                                                                                                                                                                                                                                                       |
| original   | gldm          | LargeDependenceHighGrayLevelEmphasis | 129669.6609                                                                                                                                                                                                                                                                                                                                                                                                       |

|          |            |                                     |              |
|----------|------------|-------------------------------------|--------------|
| original | gldm       | SmallDependenceLowGrayLevelEmphasis | 0.003469408  |
| original | gldm       | LowGrayLevelEmphasis                | 0.006860315  |
| original | glcm       | JointAverage                        | 33.98145736  |
| original | glcm       | SumAverage                          | 67.96291472  |
| original | glcm       | JointEntropy                        | 6.227770774  |
| original | glcm       | ClusterShade                        | -5562.947657 |
| original | glcm       | MaximumProbability                  | 0.209482995  |
| original | glcm       | Idmn                                | 0.952577063  |
| original | glcm       | JointEnergy                         | 0.061693129  |
| original | glcm       | Contrast                            | 105.5335137  |
| original | glcm       | DifferenceEntropy                   | 3.735928918  |
| original | glcm       | InverseVariance                     | 0.271711684  |
| original | glcm       | DifferenceVariance                  | 70.05807618  |
| original | glcm       | Idn                                 | 0.896454963  |
| original | glcm       | Idm                                 | 0.416952449  |
| original | glcm       | Correlation                         | 0.349098964  |
| original | glcm       | Autocorrelation                     | 1183.188372  |
| original | glcm       | SumEntropy                          | 4.505984609  |
| original | glcm       | SumSquares                          | 81.19327371  |
| original | glcm       | ClusterProminence                   | 260525.6689  |
| original | glcm       | Imc2                                | 0.873460131  |
| original | glcm       | Imc1                                | -0.21015855  |
| original | glcm       | DifferenceAverage                   | 5.921796566  |
| original | glcm       | Id                                  | 0.459974181  |
| original | glcm       | ClusterTendency                     | 219.2395812  |
| original | firstorder | InterquartileRange                  | 308          |
| original | firstorder | Skewness                            | -1.377684082 |
| original | firstorder | Uniformity                          | 0.141233307  |
| original | firstorder | Median                              | 13           |
| original | firstorder | Energy                              | 67462435     |
| original | firstorder | RobustMeanAbsoluteDeviation         | 145.8692772  |
| original | firstorder | MeanAbsoluteDeviation               | 214.5642259  |
| original | firstorder | TotalEnergy                         | 1821485745   |
| original | firstorder | Maximum                             | 88           |
| original | firstorder | RootMeanSquared                     | 299.5174199  |
| original | firstorder | 90Percentile                        | 44           |
| original | firstorder | Minimum                             | -907         |
| original | firstorder | Entropy                             | 3.975588463  |
| original | firstorder | Range                               | 995          |
| original | firstorder | Variance                            | 69373.7251   |
| original | firstorder | 10Percentile                        | -614.3       |
| original | firstorder | Kurtosis                            | 3.598555178  |
| original | firstorder | Mean                                | -142.6077128 |
| original | glrlm      | ShortRunLowGrayLevelEmphasis        | 0.008094461  |
| original | glrlm      | GrayLevelVariance                   | 123.7544962  |
| original | glrlm      | LowGrayLevelRunEmphasis             | 0.008341422  |
| original | glrlm      | GrayLevelNonUniformityNormalized    | 0.081992406  |
| original | glrlm      | RunVariance                         | 0.606606948  |
| original | glrlm      | GrayLevelNonUniformity              | 48.49257096  |
| original | glrlm      | LongRunEmphasis                     | 2.2335768    |
| original | glrlm      | ShortRunHighGrayLevelEmphasis       | 837.6053434  |
| original | glrlm      | RunLengthNonUniformity              | 426.8371584  |
| original | glrlm      | ShortRunEmphasis                    | 0.872007224  |

|             |       |                                      |              |
|-------------|-------|--------------------------------------|--------------|
| original    | glrlm | LongRunHighGrayLevelEmphasis         | 2866.087281  |
| original    | glrlm | RunPercentage                        | 0.785085925  |
| original    | glrlm | LongRunLowGrayLevelEmphasis          | 0.009843295  |
| original    | glrlm | RunEntropy                           | 5.075050443  |
| original    | glrlm | HighGrayLevelRunEmphasis             | 1025.005068  |
| original    | glrlm | RunLengthNonUniformityNormalized     | 0.722580707  |
| original    | glszm | GrayLevelVariance                    | 116.2337105  |
| original    | glszm | ZoneVariance                         | 242.233051   |
| original    | glszm | GrayLevelNonUniformityNormalized     | 0.032787265  |
| original    | glszm | SizeZoneNonUniformityNormalized      | 0.652066269  |
| original    | glszm | SizeZoneNonUniformity                | 191.707483   |
| original    | glszm | GrayLevelNonUniformity               | 9.639455782  |
| original    | glszm | LargeAreaEmphasis                    | 248.7755102  |
| original    | glszm | SmallAreaHighGrayLevelEmphasis       | 551.951114   |
| original    | glszm | ZonePercentage                       | 0.390957447  |
| original    | glszm | LargeAreaLowGrayLevelEmphasis        | 0.193112275  |
| original    | glszm | LargeAreaHighGrayLevelEmphasis       | 373492.3776  |
| original    | glszm | HighGrayLevelZoneEmphasis            | 701.2482993  |
| original    | glszm | SmallAreaEmphasis                    | 0.833833461  |
| original    | glszm | LowGrayLevelZoneEmphasis             | 0.011289845  |
| original    | glszm | ZoneEntropy                          | 5.831168979  |
| original    | glszm | SmallAreaLowGrayLevelEmphasis        | 0.007617363  |
| original    | ngtdm | Coarseness                           | 0.00341542   |
| original    | ngtdm | Complexity                           | 4152.083364  |
| original    | ngtdm | Strength                             | 7.487589976  |
| original    | ngtdm | Contrast                             | 0.72981414   |
| original    | ngtdm | Busyness                             | 0.145391433  |
| wavelet-HHH | gldm  | GrayLevelVariance                    | 6.431584922  |
| wavelet-HHH | gldm  | HighGrayLevelEmphasis                | 137.6742021  |
| wavelet-HHH | gldm  | DependenceEntropy                    | 5.959922103  |
| wavelet-HHH | gldm  | DependenceNonUniformity              | 91.07978723  |
| wavelet-HHH | gldm  | GrayLevelNonUniformity               | 103.6170213  |
| wavelet-HHH | gldm  | SmallDependenceEmphasis              | 0.257711249  |
| wavelet-HHH | gldm  | SmallDependenceHighGrayLevelEmphasis | 38.27712439  |
| wavelet-HHH | gldm  | DependenceNonUniformityNormalized    | 0.121116738  |
| wavelet-HHH | gldm  | LargeDependenceEmphasis              | 36.19414894  |
| wavelet-HHH | gldm  | LargeDependenceLowGrayLevelEmphasis  | 0.282797917  |
| wavelet-HHH | gldm  | DependenceVariance                   | 14.13413875  |
| wavelet-HHH | gldm  | LargeDependenceHighGrayLevelEmphasis | 4810.472074  |
| wavelet-HHH | gldm  | SmallDependenceLowGrayLevelEmphasis  | 0.004690125  |
| wavelet-HHH | gldm  | LowGrayLevelEmphasis                 | 0.010956706  |
| wavelet-HHH | glcm  | JointAverage                         | 11.47103269  |
| wavelet-HHH | glcm  | SumAverage                           | 22.94206538  |
| wavelet-HHH | glcm  | JointEntropy                         | 6.085463509  |
| wavelet-HHH | glcm  | ClusterShade                         | -5.807369551 |
| wavelet-HHH | glcm  | MaximumProbability                   | 0.083454368  |
| wavelet-HHH | glcm  | Idmn                                 | 0.976713574  |
| wavelet-HHH | glcm  | JointEnergy                          | 0.029967874  |
| wavelet-HHH | glcm  | Contrast                             | 11.38871277  |
| wavelet-HHH | glcm  | DifferenceEntropy                    | 2.883820479  |
| wavelet-HHH | glcm  | InverseVariance                      | 0.351826094  |
| wavelet-HHH | glcm  | DifferenceVariance                   | 5.514668466  |
| wavelet-HHH | glcm  | Idn                                  | 0.905111331  |

|             |            |                                  |              |
|-------------|------------|----------------------------------|--------------|
| wavelet-HHH | glcm       | Idm                              | 0.378635561  |
| wavelet-HHH | glcm       | Correlation                      | -0.023406864 |
| wavelet-HHH | glcm       | Autocorrelation                  | 131.4475722  |
| wavelet-HHH | glcm       | SumEntropy                       | 3.637417952  |
| wavelet-HHH | glcm       | SumSquares                       | 5.556801625  |
| wavelet-HHH | glcm       | ClusterProminence                | 547.4514722  |
| wavelet-HHH | glcm       | Imc2                             | 0.607743098  |
| wavelet-HHH | glcm       | Imc1                             | -0.073685698 |
| wavelet-HHH | glcm       | DifferenceAverage                | 2.411863756  |
| wavelet-HHH | glcm       | Id                               | 0.448381695  |
| wavelet-HHH | glcm       | ClusterTendency                  | 10.83849373  |
| wavelet-HHH | firstorder | InterquartileRange               | 58.68807302  |
| wavelet-HHH | firstorder | Skewness                         | -0.160973875 |
| wavelet-HHH | firstorder | Uniformity                       | 0.137788592  |
| wavelet-HHH | firstorder | Median                           | 0.443603974  |
| wavelet-HHH | firstorder | Energy                           | 2976819.476  |
| wavelet-HHH | firstorder | RobustMeanAbsoluteDeviation      | 26.93110044  |
| wavelet-HHH | firstorder | MeanAbsoluteDeviation            | 45.14920197  |
| wavelet-HHH | firstorder | TotalEnergy                      | 80374125.86  |
| wavelet-HHH | firstorder | Maximum                          | 225.6785985  |
| wavelet-HHH | firstorder | RootMeanSquared                  | 62.91690184  |
| wavelet-HHH | firstorder | 90Percentile                     | 73.94178465  |
| wavelet-HHH | firstorder | Minimum                          | -258.6867885 |
| wavelet-HHH | firstorder | Entropy                          | 3.289691049  |
| wavelet-HHH | firstorder | Range                            | 484.365387   |
| wavelet-HHH | firstorder | Variance                         | 3957.50598   |
| wavelet-HHH | firstorder | 10Percentile                     | -77.93600456 |
| wavelet-HHH | firstorder | Kurtosis                         | 4.420461131  |
| wavelet-HHH | firstorder | Mean                             | -1.015163765 |
| wavelet-HHH | glrlm      | ShortRunLowGrayLevelEmphasis     | 0.010675313  |
| wavelet-HHH | glrlm      | GrayLevelVariance                | 7.278045718  |
| wavelet-HHH | glrlm      | LowGrayLevelRunEmphasis          | 0.011469198  |
| wavelet-HHH | glrlm      | GrayLevelNonUniformityNormalized | 0.1206389    |
| wavelet-HHH | glrlm      | RunVariance                      | 0.241871321  |
| wavelet-HHH | glrlm      | GrayLevelNonUniformity           | 77.85092239  |
| wavelet-HHH | glrlm      | LongRunEmphasis                  | 1.603371845  |
| wavelet-HHH | glrlm      | ShortRunHighGrayLevelEmphasis    | 124.9961391  |
| wavelet-HHH | glrlm      | RunLengthNonUniformity           | 498.4356013  |
| wavelet-HHH | glrlm      | ShortRunEmphasis                 | 0.900024538  |
| wavelet-HHH | glrlm      | LongRunHighGrayLevelEmphasis     | 218.8989416  |
| wavelet-HHH | glrlm      | RunPercentage                    | 0.857815057  |
| wavelet-HHH | glrlm      | LongRunLowGrayLevelEmphasis      | 0.016193307  |
| wavelet-HHH | glrlm      | RunEntropy                       | 3.996703305  |
| wavelet-HHH | glrlm      | HighGrayLevelRunEmphasis         | 138.3641649  |
| wavelet-HHH | glrlm      | RunLengthNonUniformityNormalized | 0.772158023  |
| wavelet-HHH | glszm      | GrayLevelVariance                | 16.34037682  |
| wavelet-HHH | glszm      | ZoneVariance                     | 241.2738719  |
| wavelet-HHH | glszm      | GrayLevelNonUniformityNormalized | 0.076577917  |
| wavelet-HHH | glszm      | SizeZoneNonUniformityNormalized  | 0.445342369  |
| wavelet-HHH | glszm      | SizeZoneNonUniformity            | 93.07655502  |
| wavelet-HHH | glszm      | GrayLevelNonUniformity           | 16.00478469  |
| wavelet-HHH | glszm      | LargeAreaEmphasis                | 254.2200957  |
| wavelet-HHH | glszm      | SmallAreaHighGrayLevelEmphasis   | 106.6898418  |

|             |            |                                      |              |
|-------------|------------|--------------------------------------|--------------|
| wavelet-HHH | glszm      | ZonePercentage                       | 0.277925532  |
| wavelet-HHH | glszm      | LargeAreaLowGrayLevelEmphasis        | 1.932620139  |
| wavelet-HHH | glszm      | LargeAreaHighGrayLevelEmphasis       | 34138.68421  |
| wavelet-HHH | glszm      | HighGrayLevelZoneEmphasis            | 145.7990431  |
| wavelet-HHH | glszm      | SmallAreaEmphasis                    | 0.693815564  |
| wavelet-HHH | glszm      | LowGrayLevelZoneEmphasis             | 0.018046529  |
| wavelet-HHH | glszm      | ZoneEntropy                          | 5.264677265  |
| wavelet-HHH | glszm      | SmallAreaLowGrayLevelEmphasis        | 0.014711146  |
| wavelet-HHH | ngtdm      | Coarseness                           | 0.009543233  |
| wavelet-HHH | ngtdm      | Complexity                           | 312.3846505  |
| wavelet-HHH | ngtdm      | Strength                             | 1.149812951  |
| wavelet-HHH | ngtdm      | Contrast                             | 0.064987353  |
| wavelet-HHH | ngtdm      | Busyness                             | 0.352642099  |
| wavelet-HLL | gldm       | GrayLevelVariance                    | 47.0250679   |
| wavelet-HLL | gldm       | HighGrayLevelEmphasis                | 401.9867021  |
| wavelet-HLL | gldm       | DependenceEntropy                    | 6.809233783  |
| wavelet-HLL | gldm       | DependenceNonUniformity              | 147.4494681  |
| wavelet-HLL | gldm       | GrayLevelNonUniformity               | 40.23404255  |
| wavelet-HLL | gldm       | SmallDependenceEmphasis              | 0.400727407  |
| wavelet-HLL | gldm       | SmallDependenceHighGrayLevelEmphasis | 183.9551141  |
| wavelet-HLL | gldm       | DependenceNonUniformityNormalized    | 0.19607642   |
| wavelet-HLL | gldm       | LargeDependenceEmphasis              | 22.4893617   |
| wavelet-HLL | gldm       | LargeDependenceLowGrayLevelEmphasis  | 0.065658429  |
| wavelet-HLL | gldm       | DependenceVariance                   | 11.02681502  |
| wavelet-HLL | gldm       | LargeDependenceHighGrayLevelEmphasis | 9206.797872  |
| wavelet-HLL | gldm       | SmallDependenceLowGrayLevelEmphasis  | 0.004415794  |
| wavelet-HLL | gldm       | LowGrayLevelEmphasis                 | 0.006936358  |
| wavelet-HLL | glcm       | JointAverage                         | 18.43197363  |
| wavelet-HLL | glcm       | SumAverage                           | 36.86394726  |
| wavelet-HLL | glcm       | JointEntropy                         | 8.071258175  |
| wavelet-HLL | glcm       | ClusterShade                         | 519.7536876  |
| wavelet-HLL | glcm       | MaximumProbability                   | 0.043982962  |
| wavelet-HLL | glcm       | Idmn                                 | 0.970029772  |
| wavelet-HLL | glcm       | JointEnergy                          | 0.008002055  |
| wavelet-HLL | glcm       | Contrast                             | 62.50818245  |
| wavelet-HLL | glcm       | DifferenceEntropy                    | 3.89304633   |
| wavelet-HLL | glcm       | InverseVariance                      | 0.218787806  |
| wavelet-HLL | glcm       | DifferenceVariance                   | 31.69458885  |
| wavelet-HLL | glcm       | Idn                                  | 0.897161166  |
| wavelet-HLL | glcm       | Idm                                  | 0.243615826  |
| wavelet-HLL | glcm       | Correlation                          | 0.223677819  |
| wavelet-HLL | glcm       | Autocorrelation                      | 349.2841472  |
| wavelet-HLL | glcm       | SumEntropy                           | 5.090497842  |
| wavelet-HLL | glcm       | SumSquares                           | 40.77912745  |
| wavelet-HLL | glcm       | ClusterProminence                    | 48413.92711  |
| wavelet-HLL | glcm       | Imc2                                 | 0.915681868  |
| wavelet-HLL | glcm       | Imc1                                 | -0.206662777 |
| wavelet-HLL | glcm       | DifferenceAverage                    | 5.400503109  |
| wavelet-HLL | glcm       | Id                                   | 0.323000546  |
| wavelet-HLL | glcm       | ClusterTendency                      | 100.6083273  |
| wavelet-HLL | firstorder | InterquartileRange                   | 170.6615347  |
| wavelet-HLL | firstorder | Skewness                             | 0.390403135  |
| wavelet-HLL | firstorder | Uniformity                           | 0.053502716  |

|             |            |                                  |              |
|-------------|------------|----------------------------------|--------------|
| wavelet-HLL | firstorder | Median                           | -38.87825464 |
| wavelet-HLL | firstorder | Energy                           | 23367509.26  |
| wavelet-HLL | firstorder | RobustMeanAbsoluteDeviation      | 78.69642953  |
| wavelet-HLL | firstorder | MeanAbsoluteDeviation            | 126.9629856  |
| wavelet-HLL | firstorder | TotalEnergy                      | 630922749.9  |
| wavelet-HLL | firstorder | Maximum                          | 546.7794299  |
| wavelet-HLL | firstorder | RootMeanSquared                  | 176.2776659  |
| wavelet-HLL | firstorder | 90Percentile                     | 190.0265878  |
| wavelet-HLL | firstorder | Minimum                          | -482.7610312 |
| wavelet-HLL | firstorder | Entropy                          | 4.663374181  |
| wavelet-HLL | firstorder | Range                            | 1029.540461  |
| wavelet-HLL | firstorder | Variance                         | 29344.03725  |
| wavelet-HLL | firstorder | 10Percentile                     | -257.0470297 |
| wavelet-HLL | firstorder | Kurtosis                         | 3.632526768  |
| wavelet-HLL | firstorder | Mean                             | -41.59060287 |
| wavelet-HLL | glrlm      | ShortRunLowGrayLevelEmphasis     | 0.007097496  |
| wavelet-HLL | glrlm      | GrayLevelVariance                | 50.41112279  |
| wavelet-HLL | glrlm      | LowGrayLevelRunEmphasis          | 0.007312503  |
| wavelet-HLL | glrlm      | GrayLevelNonUniformityNormalized | 0.047602552  |
| wavelet-HLL | glrlm      | RunVariance                      | 0.144989306  |
| wavelet-HLL | glrlm      | GrayLevelNonUniformity           | 32.5239025   |
| wavelet-HLL | glrlm      | LongRunEmphasis                  | 1.359431761  |
| wavelet-HLL | glrlm      | ShortRunHighGrayLevelEmphasis    | 379.0097692  |
| wavelet-HLL | glrlm      | RunLengthNonUniformity           | 580.5235504  |
| wavelet-HLL | glrlm      | ShortRunEmphasis                 | 0.936784664  |
| wavelet-HLL | glrlm      | LongRunHighGrayLevelEmphasis     | 545.1904443  |
| wavelet-HLL | glrlm      | RunPercentage                    | 0.908244681  |
| wavelet-HLL | glrlm      | LongRunLowGrayLevelEmphasis      | 0.008431452  |
| wavelet-HLL | glrlm      | RunEntropy                       | 5.124058419  |
| wavelet-HLL | glrlm      | HighGrayLevelRunEmphasis         | 403.2289614  |
| wavelet-HLL | glrlm      | RunLengthNonUniformityNormalized | 0.849235191  |
| wavelet-HLL | glszm      | GrayLevelVariance                | 75.38931475  |
| wavelet-HLL | glszm      | ZoneVariance                     | 33.29194662  |
| wavelet-HLL | glszm      | GrayLevelNonUniformityNormalized | 0.033095533  |
| wavelet-HLL | glszm      | SizeZoneNonUniformityNormalized  | 0.493277081  |
| wavelet-HLL | glszm      | SizeZoneNonUniformity            | 171.167147   |
| wavelet-HLL | glszm      | GrayLevelNonUniformity           | 11.48414986  |
| wavelet-HLL | glszm      | LargeAreaEmphasis                | 37.98847262  |
| wavelet-HLL | glszm      | SmallAreaHighGrayLevelEmphasis   | 350.3877446  |
| wavelet-HLL | glszm      | ZonePercentage                   | 0.46143617   |
| wavelet-HLL | glszm      | LargeAreaLowGrayLevelEmphasis    | 0.108949477  |
| wavelet-HLL | glszm      | LargeAreaHighGrayLevelEmphasis   | 15358.24207  |
| wavelet-HLL | glszm      | HighGrayLevelZoneEmphasis        | 445.314121   |
| wavelet-HLL | glszm      | SmallAreaEmphasis                | 0.729857752  |
| wavelet-HLL | glszm      | LowGrayLevelZoneEmphasis         | 0.010415185  |
| wavelet-HLL | glszm      | ZoneEntropy                      | 6.22352104   |
| wavelet-HLL | glszm      | SmallAreaLowGrayLevelEmphasis    | 0.008887933  |
| wavelet-HLL | ngtdm      | Coarseness                       | 0.010681858  |
| wavelet-HLL | ngtdm      | Complexity                       | 2342.141054  |
| wavelet-HLL | ngtdm      | Strength                         | 4.955721272  |
| wavelet-HLL | ngtdm      | Contrast                         | 0.239743641  |
| wavelet-HLL | ngtdm      | Busyness                         | 0.119504693  |
| wavelet-LHL | gldm       | GrayLevelVariance                | 79.33281462  |



|             |            |                                      |              |
|-------------|------------|--------------------------------------|--------------|
| wavelet-LHL | gldm       | HighGrayLevelEmphasis                | 1272.888298  |
| wavelet-LHL | gldm       | DependenceEntropy                    | 6.857214657  |
| wavelet-LHL | gldm       | DependenceNonUniformity              | 180.6781915  |
| wavelet-LHL | gldm       | GrayLevelNonUniformity               | 35.1037234   |
| wavelet-LHL | gldm       | SmallDependenceEmphasis              | 0.486490587  |
| wavelet-LHL | gldm       | SmallDependenceHighGrayLevelEmphasis | 621.6786849  |
| wavelet-LHL | gldm       | DependenceNonUniformityNormalized    | 0.240263553  |
| wavelet-LHL | gldm       | LargeDependenceEmphasis              | 21.48670213  |
| wavelet-LHL | gldm       | LargeDependenceLowGrayLevelEmphasis  | 0.018295885  |
| wavelet-LHL | gldm       | DependenceVariance                   | 11.75429352  |
| wavelet-LHL | gldm       | LargeDependenceHighGrayLevelEmphasis | 28726.34574  |
| wavelet-LHL | gldm       | SmallDependenceLowGrayLevelEmphasis  | 0.002242724  |
| wavelet-LHL | gldm       | LowGrayLevelEmphasis                 | 0.002694982  |
| wavelet-LHL | glcm       | JointAverage                         | 34.38171073  |
| wavelet-LHL | glcm       | SumAverage                           | 68.76342146  |
| wavelet-LHL | glcm       | JointEntropy                         | 8.369932635  |
| wavelet-LHL | glcm       | ClusterShade                         | 26.44464404  |
| wavelet-LHL | glcm       | MaximumProbability                   | 0.050486553  |
| wavelet-LHL | glcm       | Idmn                                 | 0.977703608  |
| wavelet-LHL | glcm       | JointEnergy                          | 0.007417992  |
| wavelet-LHL | glcm       | Contrast                             | 103.2409477  |
| wavelet-LHL | glcm       | DifferenceEntropy                    | 4.221433175  |
| wavelet-LHL | glcm       | InverseVariance                      | 0.199299025  |
| wavelet-LHL | glcm       | DifferenceVariance                   | 53.25215432  |
| wavelet-LHL | glcm       | Idn                                  | 0.911088149  |
| wavelet-LHL | glcm       | Idm                                  | 0.218339237  |
| wavelet-LHL | glcm       | Correlation                          | 0.210261246  |
| wavelet-LHL | glcm       | Autocorrelation                      | 1196.467795  |
| wavelet-LHL | glcm       | SumEntropy                           | 5.410764807  |
| wavelet-LHL | glcm       | SumSquares                           | 65.96734719  |
| wavelet-LHL | glcm       | ClusterProminence                    | 113420.8672  |
| wavelet-LHL | glcm       | Imc2                                 | 0.949789922  |
| wavelet-LHL | glcm       | Imc1                                 | -0.246505664 |
| wavelet-LHL | glcm       | DifferenceAverage                    | 6.914627884  |
| wavelet-LHL | glcm       | Id                                   | 0.293665498  |
| wavelet-LHL | glcm       | ClusterTendency                      | 160.6284411  |
| wavelet-LHL | firstorder | InterquartileRange                   | 203.677331   |
| wavelet-LHL | firstorder | Skewness                             | -0.076392619 |
| wavelet-LHL | firstorder | Uniformity                           | 0.046680483  |
| wavelet-LHL | firstorder | Median                               | -29.82212217 |
| wavelet-LHL | firstorder | Energy                               | 39009877.03  |
| wavelet-LHL | firstorder | RobustMeanAbsoluteDeviation          | 98.89588321  |
| wavelet-LHL | firstorder | MeanAbsoluteDeviation                | 162.0373433  |
| wavelet-LHL | firstorder | TotalEnergy                          | 1053266680   |
| wavelet-LHL | firstorder | Maximum                              | 679.4550416  |
| wavelet-LHL | firstorder | RootMeanSquared                      | 227.7604805  |
| wavelet-LHL | firstorder | 90Percentile                         | 235.7317805  |
| wavelet-LHL | firstorder | Minimum                              | -892.7755565 |
| wavelet-LHL | firstorder | Entropy                              | 4.966976058  |
| wavelet-LHL | firstorder | Range                                | 1572.230598  |
| wavelet-LHL | firstorder | Variance                             | 49466.99663  |
| wavelet-LHL | firstorder | 10Percentile                         | -322.2597811 |
| wavelet-LHL | firstorder | Kurtosis                             | 4.103824879  |

|             |            |                                      |              |
|-------------|------------|--------------------------------------|--------------|
| wavelet-LHL | firstorder | Mean                                 | -49.06974469 |
| wavelet-LHL | glrlm      | ShortRunLowGrayLevelEmphasis         | 0.002820124  |
| wavelet-LHL | glrlm      | GrayLevelVariance                    | 84.92878743  |
| wavelet-LHL | glrlm      | LowGrayLevelRunEmphasis              | 0.002864181  |
| wavelet-LHL | glrlm      | GrayLevelNonUniformityNormalized     | 0.040291435  |
| wavelet-LHL | glrlm      | RunVariance                          | 0.134758846  |
| wavelet-LHL | glrlm      | GrayLevelNonUniformity               | 27.84344721  |
| wavelet-LHL | glrlm      | LongRunEmphasis                      | 1.322193774  |
| wavelet-LHL | glrlm      | ShortRunHighGrayLevelEmphasis        | 1198.764728  |
| wavelet-LHL | glrlm      | RunLengthNonUniformity               | 601.3974899  |
| wavelet-LHL | glrlm      | ShortRunEmphasis                     | 0.945899387  |
| wavelet-LHL | glrlm      | LongRunHighGrayLevelEmphasis         | 1693.965256  |
| wavelet-LHL | glrlm      | RunPercentage                        | 0.918473813  |
| wavelet-LHL | glrlm      | LongRunLowGrayLevelEmphasis          | 0.003119617  |
| wavelet-LHL | glrlm      | RunEntropy                           | 5.383419713  |
| wavelet-LHL | glrlm      | HighGrayLevelRunEmphasis             | 1269.371636  |
| wavelet-LHL | glrlm      | RunLengthNonUniformityNormalized     | 0.870080703  |
| wavelet-LHL | glszm      | GrayLevelVariance                    | 122.6190063  |
| wavelet-LHL | glszm      | ZoneVariance                         | 23.97884996  |
| wavelet-LHL | glszm      | GrayLevelNonUniformityNormalized     | 0.027779604  |
| wavelet-LHL | glszm      | SizeZoneNonUniformityNormalized      | 0.589971366  |
| wavelet-LHL | glszm      | SizeZoneNonUniformity                | 241.2982885  |
| wavelet-LHL | glszm      | GrayLevelNonUniformity               | 11.36185819  |
| wavelet-LHL | glszm      | LargeAreaEmphasis                    | 27.3594132   |
| wavelet-LHL | glszm      | SmallAreaHighGrayLevelEmphasis       | 1021.667053  |
| wavelet-LHL | glszm      | ZonePercentage                       | 0.543882979  |
| wavelet-LHL | glszm      | LargeAreaLowGrayLevelEmphasis        | 0.024329414  |
| wavelet-LHL | glszm      | LargeAreaHighGrayLevelEmphasis       | 36307.72616  |
| wavelet-LHL | glszm      | HighGrayLevelZoneEmphasis            | 1272.973105  |
| wavelet-LHL | glszm      | SmallAreaEmphasis                    | 0.795787026  |
| wavelet-LHL | glszm      | LowGrayLevelZoneEmphasis             | 0.004231972  |
| wavelet-LHL | glszm      | ZoneEntropy                          | 6.331109938  |
| wavelet-LHL | glszm      | SmallAreaLowGrayLevelEmphasis        | 0.004030362  |
| wavelet-LHL | ngtdm      | Coarseness                           | 0.00956635   |
| wavelet-LHL | ngtdm      | Complexity                           | 7439.240169  |
| wavelet-LHL | ngtdm      | Strength                             | 11.40408749  |
| wavelet-LHL | ngtdm      | Contrast                             | 0.24888911   |
| wavelet-LHL | ngtdm      | Busyness                             | 0.041994972  |
| wavelet-LHH | gldm       | GrayLevelVariance                    | 27.34771814  |
| wavelet-LHH | gldm       | HighGrayLevelEmphasis                | 788.7260638  |
| wavelet-LHH | gldm       | DependenceEntropy                    | 6.492158352  |
| wavelet-LHH | gldm       | DependenceNonUniformity              | 135.8909574  |
| wavelet-LHH | gldm       | GrayLevelNonUniformity               | 59.70478723  |
| wavelet-LHH | gldm       | SmallDependenceEmphasis              | 0.403567152  |
| wavelet-LHH | gldm       | SmallDependenceHighGrayLevelEmphasis | 346.1815617  |
| wavelet-LHH | gldm       | DependenceNonUniformityNormalized    | 0.18070606   |
| wavelet-LHH | gldm       | LargeDependenceEmphasis              | 26.61170213  |
| wavelet-LHH | gldm       | LargeDependenceLowGrayLevelEmphasis  | 0.037870246  |
| wavelet-LHH | gldm       | DependenceVariance                   | 12.50928022  |
| wavelet-LHH | gldm       | LargeDependenceHighGrayLevelEmphasis | 19732.26596  |
| wavelet-LHH | gldm       | SmallDependenceLowGrayLevelEmphasis  | 0.001960969  |
| wavelet-LHH | gldm       | LowGrayLevelEmphasis                 | 0.002831052  |
| wavelet-LHH | glcm       | JointAverage                         | 27.58766671  |

|             |            |                                  |              |
|-------------|------------|----------------------------------|--------------|
| wavelet-LHH | glcm       | SumAverage                       | 55.17533341  |
| wavelet-LHH | glcm       | JointEntropy                     | 7.513895936  |
| wavelet-LHH | glcm       | ClusterShade                     | 23.67486101  |
| wavelet-LHH | glcm       | MaximumProbability               | 0.067640601  |
| wavelet-LHH | glcm       | Idmn                             | 0.980101714  |
| wavelet-LHH | glcm       | JointEnergy                      | 0.014051178  |
| wavelet-LHH | glcm       | Contrast                         | 51.09272099  |
| wavelet-LHH | glcm       | DifferenceEntropy                | 3.759947574  |
| wavelet-LHH | glcm       | InverseVariance                  | 0.257722449  |
| wavelet-LHH | glcm       | DifferenceVariance               | 27.1730165   |
| wavelet-LHH | glcm       | Idn                              | 0.916694764  |
| wavelet-LHH | glcm       | Idm                              | 0.281313261  |
| wavelet-LHH | glcm       | Correlation                      | -0.009041713 |
| wavelet-LHH | glcm       | Autocorrelation                  | 760.8603054  |
| wavelet-LHH | glcm       | SumEntropy                       | 4.605282631  |
| wavelet-LHH | glcm       | SumSquares                       | 25.32140808  |
| wavelet-LHH | glcm       | ClusterProminence                | 14348.75712  |
| wavelet-LHH | glcm       | Imc2                             | 0.858636357  |
| wavelet-LHH | glcm       | Imc1                             | -0.165262784 |
| wavelet-LHH | glcm       | DifferenceAverage                | 4.818420432  |
| wavelet-LHH | glcm       | Id                               | 0.354654434  |
| wavelet-LHH | glcm       | ClusterTendency                  | 50.19291131  |
| wavelet-LHH | firstorder | InterquartileRange               | 113.3486683  |
| wavelet-LHH | firstorder | Skewness                         | -0.053465732 |
| wavelet-LHH | firstorder | Uniformity                       | 0.079394664  |
| wavelet-LHH | firstorder | Median                           | -5.459321907 |
| wavelet-LHH | firstorder | Energy                           | 12877207.13  |
| wavelet-LHH | firstorder | RobustMeanAbsoluteDeviation      | 50.97987281  |
| wavelet-LHH | firstorder | MeanAbsoluteDeviation            | 90.45692149  |
| wavelet-LHH | firstorder | TotalEnergy                      | 347684592.4  |
| wavelet-LHH | firstorder | Maximum                          | 516.6995442  |
| wavelet-LHH | firstorder | RootMeanSquared                  | 130.8584947  |
| wavelet-LHH | firstorder | 90Percentile                     | 164.2774771  |
| wavelet-LHH | firstorder | Minimum                          | -671.1256865 |
| wavelet-LHH | firstorder | Entropy                          | 4.211548305  |
| wavelet-LHH | firstorder | Range                            | 1187.825231  |
| wavelet-LHH | firstorder | Variance                         | 17119.49462  |
| wavelet-LHH | firstorder | 10Percentile                     | -140.0027607 |
| wavelet-LHH | firstorder | Kurtosis                         | 5.265237721  |
| wavelet-LHH | firstorder | Mean                             | 2.109746383  |
| wavelet-LHH | glrlm      | ShortRunLowGrayLevelEmphasis     | 0.002900683  |
| wavelet-LHH | glrlm      | GrayLevelVariance                | 30.07137802  |
| wavelet-LHH | glrlm      | LowGrayLevelRunEmphasis          | 0.003002342  |
| wavelet-LHH | glrlm      | GrayLevelNonUniformityNormalized | 0.067587595  |
| wavelet-LHH | glrlm      | RunVariance                      | 0.172982179  |
| wavelet-LHH | glrlm      | GrayLevelNonUniformity           | 45.45142183  |
| wavelet-LHH | glrlm      | LongRunEmphasis                  | 1.425539779  |
| wavelet-LHH | glrlm      | ShortRunHighGrayLevelEmphasis    | 740.488659   |
| wavelet-LHH | glrlm      | RunLengthNonUniformity           | 557.1309106  |
| wavelet-LHH | glrlm      | ShortRunEmphasis                 | 0.927180759  |
| wavelet-LHH | glrlm      | LongRunHighGrayLevelEmphasis     | 1109.225579  |
| wavelet-LHH | glrlm      | RunPercentage                    | 0.894026187  |
| wavelet-LHH | glrlm      | LongRunLowGrayLevelEmphasis      | 0.003592687  |

|             |       |                                      |             |
|-------------|-------|--------------------------------------|-------------|
| wavelet-LHH | glrlm | RunEntropy                           | 4.759826442 |
| wavelet-LHH | glrlm | HighGrayLevelRunEmphasis             | 794.4794531 |
| wavelet-LHH | glrlm | RunLengthNonUniformityNormalized     | 0.828307152 |
| wavelet-LHH | glszm | GrayLevelVariance                    | 50.06324775 |
| wavelet-LHH | glszm | ZoneVariance                         | 67.82718194 |
| wavelet-LHH | glszm | GrayLevelNonUniformityNormalized     | 0.04324609  |
| wavelet-LHH | glszm | SizeZoneNonUniformityNormalized      | 0.578052679 |
| wavelet-LHH | glszm | SizeZoneNonUniformity                | 190.1793313 |
| wavelet-LHH | glszm | GrayLevelNonUniformity               | 14.22796353 |
| wavelet-LHH | glszm | LargeAreaEmphasis                    | 73.05167173 |
| wavelet-LHH | glszm | SmallAreaHighGrayLevelEmphasis       | 691.0018396 |
| wavelet-LHH | glszm | ZonePercentage                       | 0.4375      |
| wavelet-LHH | glszm | LargeAreaLowGrayLevelEmphasis        | 0.102629503 |
| wavelet-LHH | glszm | LargeAreaHighGrayLevelEmphasis       | 54142.15805 |
| wavelet-LHH | glszm | HighGrayLevelZoneEmphasis            | 850.8328267 |
| wavelet-LHH | glszm | SmallAreaEmphasis                    | 0.786916163 |
| wavelet-LHH | glszm | LowGrayLevelZoneEmphasis             | 0.004620316 |
| wavelet-LHH | glszm | ZoneEntropy                          | 5.816262472 |
| wavelet-LHH | glszm | SmallAreaLowGrayLevelEmphasis        | 0.00427329  |
| wavelet-LHH | ngtdm | Coarseness                           | 0.010167768 |
| wavelet-LHH | ngtdm | Complexity                           | 2060.839577 |
| wavelet-LHH | ngtdm | Strength                             | 4.175597391 |
| wavelet-LHH | ngtdm | Contrast                             | 0.153753427 |
| wavelet-LHH | ngtdm | Busyness                             | 0.076953298 |
| wavelet-LLH | gldm  | GrayLevelVariance                    | 76.27116165 |
| wavelet-LLH | gldm  | HighGrayLevelEmphasis                | 1086.107713 |
| wavelet-LLH | gldm  | DependenceEntropy                    | 6.871673426 |
| wavelet-LLH | gldm  | DependenceNonUniformity              | 173.1941489 |
| wavelet-LLH | gldm  | GrayLevelNonUniformity               | 37.58776596 |
| wavelet-LLH | gldm  | SmallDependenceEmphasis              | 0.46935657  |
| wavelet-LLH | gldm  | SmallDependenceHighGrayLevelEmphasis | 525.0849342 |
| wavelet-LLH | gldm  | DependenceNonUniformityNormalized    | 0.230311368 |
| wavelet-LLH | gldm  | LargeDependenceEmphasis              | 18.76861702 |
| wavelet-LLH | gldm  | LargeDependenceLowGrayLevelEmphasis  | 0.019549195 |
| wavelet-LLH | gldm  | DependenceVariance                   | 9.135518051 |
| wavelet-LLH | gldm  | LargeDependenceHighGrayLevelEmphasis | 20661.34707 |
| wavelet-LLH | gldm  | SmallDependenceLowGrayLevelEmphasis  | 0.002129315 |
| wavelet-LLH | gldm  | LowGrayLevelEmphasis                 | 0.002761727 |
| wavelet-LLH | glcm  | JointAverage                         | 31.47821963 |
| wavelet-LLH | glcm  | SumAverage                           | 62.95643926 |
| wavelet-LLH | glcm  | JointEntropy                         | 8.227537952 |
| wavelet-LLH | glcm  | ClusterShade                         | 1298.021137 |
| wavelet-LLH | glcm  | MaximumProbability                   | 0.043561398 |
| wavelet-LLH | glcm  | Idmn                                 | 0.97508993  |
| wavelet-LLH | glcm  | JointEnergy                          | 0.008209902 |
| wavelet-LLH | glcm  | Contrast                             | 115.2922458 |
| wavelet-LLH | glcm  | DifferenceEntropy                    | 4.194395276 |
| wavelet-LLH | glcm  | InverseVariance                      | 0.216485142 |
| wavelet-LLH | glcm  | DifferenceVariance                   | 65.35940152 |
| wavelet-LLH | glcm  | Idn                                  | 0.910382896 |
| wavelet-LLH | glcm  | Idm                                  | 0.226464074 |
| wavelet-LLH | glcm  | Correlation                          | 0.163959765 |
| wavelet-LLH | glcm  | Autocorrelation                      | 1003.184909 |

|             |            |                                  |              |
|-------------|------------|----------------------------------|--------------|
| wavelet-LLH | glcm       | SumEntropy                       | 5.292286503  |
| wavelet-LLH | glcm       | SumSquares                       | 69.93467079  |
| wavelet-LLH | glcm       | ClusterProminence                | 164480.0527  |
| wavelet-LLH | glcm       | Imc2                             | 0.958276515  |
| wavelet-LLH | glcm       | Imc1                             | -0.267196735 |
| wavelet-LLH | glcm       | DifferenceAverage                | 6.892585014  |
| wavelet-LLH | glcm       | Id                               | 0.300995412  |
| wavelet-LLH | glcm       | ClusterTendency                  | 164.4464374  |
| wavelet-LLH | firstorder | InterquartileRange               | 186.9464009  |
| wavelet-LLH | firstorder | Skewness                         | 0.332506265  |
| wavelet-LLH | firstorder | Uniformity                       | 0.049983731  |
| wavelet-LLH | firstorder | Median                           | -29.35163162 |
| wavelet-LLH | firstorder | Energy                           | 37201302.58  |
| wavelet-LLH | firstorder | RobustMeanAbsoluteDeviation      | 88.09302417  |
| wavelet-LLH | firstorder | MeanAbsoluteDeviation            | 153.5313706  |
| wavelet-LLH | firstorder | TotalEnergy                      | 1004435170   |
| wavelet-LLH | firstorder | Maximum                          | 724.1689015  |
| wavelet-LLH | firstorder | RootMeanSquared                  | 222.4181136  |
| wavelet-LLH | firstorder | 90Percentile                     | 219.7899988  |
| wavelet-LLH | firstorder | Minimum                          | -800.2015953 |
| wavelet-LLH | firstorder | Entropy                          | 4.912797722  |
| wavelet-LLH | firstorder | Range                            | 1524.370497  |
| wavelet-LLH | firstorder | Variance                         | 47634.86583  |
| wavelet-LLH | firstorder | 10Percentile                     | -305.3631529 |
| wavelet-LLH | firstorder | Kurtosis                         | 4.620843902  |
| wavelet-LLH | firstorder | Mean                             | -42.83633316 |
| wavelet-LLH | glrlm      | ShortRunLowGrayLevelEmphasis     | 0.002860007  |
| wavelet-LLH | glrlm      | GrayLevelVariance                | 81.43172865  |
| wavelet-LLH | glrlm      | LowGrayLevelRunEmphasis          | 0.002917224  |
| wavelet-LLH | glrlm      | GrayLevelNonUniformityNormalized | 0.043793214  |
| wavelet-LLH | glrlm      | RunVariance                      | 0.129329007  |
| wavelet-LLH | glrlm      | GrayLevelNonUniformity           | 30.29492189  |
| wavelet-LLH | glrlm      | LongRunEmphasis                  | 1.316678804  |
| wavelet-LLH | glrlm      | ShortRunHighGrayLevelEmphasis    | 1026.897317  |
| wavelet-LLH | glrlm      | RunLengthNonUniformity           | 600.8272207  |
| wavelet-LLH | glrlm      | ShortRunEmphasis                 | 0.945031441  |
| wavelet-LLH | glrlm      | LongRunHighGrayLevelEmphasis     | 1431.397008  |
| wavelet-LLH | glrlm      | RunPercentage                    | 0.919087561  |
| wavelet-LLH | glrlm      | LongRunLowGrayLevelEmphasis      | 0.00323346   |
| wavelet-LLH | glrlm      | RunEntropy                       | 5.336961864  |
| wavelet-LLH | glrlm      | HighGrayLevelRunEmphasis         | 1086.188882  |
| wavelet-LLH | glrlm      | RunLengthNonUniformityNormalized | 0.868149567  |
| wavelet-LLH | glszm      | GrayLevelVariance                | 115.0014194  |
| wavelet-LLH | glszm      | ZoneVariance                     | 30.62838417  |
| wavelet-LLH | glszm      | GrayLevelNonUniformityNormalized | 0.029611266  |
| wavelet-LLH | glszm      | SizeZoneNonUniformityNormalized  | 0.583728521  |
| wavelet-LLH | glszm      | SizeZoneNonUniformity            | 228.2378517  |
| wavelet-LLH | glszm      | GrayLevelNonUniformity           | 11.57800512  |
| wavelet-LLH | glszm      | LargeAreaEmphasis                | 34.32736573  |
| wavelet-LLH | glszm      | SmallAreaHighGrayLevelEmphasis   | 895.488011   |
| wavelet-LLH | glszm      | ZonePercentage                   | 0.519946809  |
| wavelet-LLH | glszm      | LargeAreaLowGrayLevelEmphasis    | 0.034935729  |
| wavelet-LLH | glszm      | LargeAreaHighGrayLevelEmphasis   | 38165.03581  |

|             |            |                                      |              |
|-------------|------------|--------------------------------------|--------------|
| wavelet-LLH | glszm      | HighGrayLevelZoneEmphasis            | 1113.787724  |
| wavelet-LLH | glszm      | SmallAreaEmphasis                    | 0.791547259  |
| wavelet-LLH | glszm      | LowGrayLevelZoneEmphasis             | 0.004257419  |
| wavelet-LLH | glszm      | ZoneEntropy                          | 6.335788794  |
| wavelet-LLH | glszm      | SmallAreaLowGrayLevelEmphasis        | 0.003944559  |
| wavelet-LLH | ngtdm      | Coarseness                           | 0.009886778  |
| wavelet-LLH | ngtdm      | Complexity                           | 6709.645802  |
| wavelet-LLH | ngtdm      | Strength                             | 10.47033695  |
| wavelet-LLH | ngtdm      | Contrast                             | 0.245465194  |
| wavelet-LLH | ngtdm      | Busyness                             | 0.045053482  |
| wavelet-LLL | gldm       | GrayLevelVariance                    | 661.8051844  |
| wavelet-LLL | gldm       | HighGrayLevelEmphasis                | 6119.517287  |
| wavelet-LLL | gldm       | DependenceEntropy                    | 7.290686721  |
| wavelet-LLL | gldm       | DependenceNonUniformity              | 278.6914894  |
| wavelet-LLL | gldm       | GrayLevelNonUniformity               | 17.81914894  |
| wavelet-LLL | gldm       | SmallDependenceEmphasis              | 0.632338684  |
| wavelet-LLL | gldm       | SmallDependenceHighGrayLevelEmphasis | 2970.917475  |
| wavelet-LLL | gldm       | DependenceNonUniformityNormalized    | 0.370600385  |
| wavelet-LLL | gldm       | LargeDependenceEmphasis              | 14.87234043  |
| wavelet-LLL | gldm       | LargeDependenceLowGrayLevelEmphasis  | 0.003746342  |
| wavelet-LLL | gldm       | DependenceVariance                   | 8.60903548   |
| wavelet-LLL | gldm       | LargeDependenceHighGrayLevelEmphasis | 132413.6476  |
| wavelet-LLL | gldm       | SmallDependenceLowGrayLevelEmphasis  | 0.002110338  |
| wavelet-LLL | gldm       | LowGrayLevelEmphasis                 | 0.002166524  |
| wavelet-LLL | glcm       | JointAverage                         | 79.9172852   |
| wavelet-LLL | glcm       | SumAverage                           | 159.8345704  |
| wavelet-LLL | glcm       | JointEntropy                         | 9.103740906  |
| wavelet-LLL | glcm       | ClusterShade                         | -67747.87586 |
| wavelet-LLL | glcm       | MaximumProbability                   | 0.0238468    |
| wavelet-LLL | glcm       | Idmn                                 | 0.959996794  |
| wavelet-LLL | glcm       | JointEnergy                          | 0.003746789  |
| wavelet-LLL | glcm       | Contrast                             | 518.307683   |
| wavelet-LLL | glcm       | DifferenceEntropy                    | 5.243723986  |
| wavelet-LLL | glcm       | InverseVariance                      | 0.143654461  |
| wavelet-LLL | glcm       | DifferenceVariance                   | 266.5037266  |
| wavelet-LLL | glcm       | Idn                                  | 0.884291808  |
| wavelet-LLL | glcm       | Idm                                  | 0.156446984  |
| wavelet-LLL | glcm       | Correlation                          | 0.497859539  |
| wavelet-LLL | glcm       | Autocorrelation                      | 6643.576444  |
| wavelet-LLL | glcm       | SumEntropy                           | 6.483496539  |
| wavelet-LLL | glcm       | SumSquares                           | 515.6358792  |
| wavelet-LLL | glcm       | ClusterProminence                    | 8372915.901  |
| wavelet-LLL | glcm       | Imc2                                 | 0.9949179    |
| wavelet-LLL | glcm       | Imc1                                 | -0.4036912   |
| wavelet-LLL | glcm       | DifferenceAverage                    | 15.70708495  |
| wavelet-LLL | glcm       | Id                                   | 0.217343407  |
| wavelet-LLL | glcm       | ClusterTendency                      | 1544.235834  |
| wavelet-LLL | firstorder | InterquartileRange                   | 1015.003734  |
| wavelet-LLL | firstorder | Skewness                             | -0.868762649 |
| wavelet-LLL | firstorder | Uniformity                           | 0.023695677  |
| wavelet-LLL | firstorder | Median                               | -227.8013048 |
| wavelet-LLL | firstorder | Energy                               | 456860448.5  |
| wavelet-LLL | firstorder | RobustMeanAbsoluteDeviation          | 415.8188831  |

|             |            |                                  |              |
|-------------|------------|----------------------------------|--------------|
| wavelet-LLL | firstorder | MeanAbsoluteDeviation            | 543.7638613  |
| wavelet-LLL | firstorder | TotalEnergy                      | 12335232109  |
| wavelet-LLL | firstorder | Maximum                          | 335.3680888  |
| wavelet-LLL | firstorder | RootMeanSquared                  | 779.440307   |
| wavelet-LLL | firstorder | 90Percentile                     | 169.5940756  |
| wavelet-LLL | firstorder | Minimum                          | -2254.594011 |
| wavelet-LLL | firstorder | Entropy                          | 6.039968891  |
| wavelet-LLL | firstorder | Range                            | 2589.9621    |
| wavelet-LLL | firstorder | Variance                         | 413333.3221  |
| wavelet-LLL | firstorder | 10Percentile                     | -1421.984497 |
| wavelet-LLL | firstorder | Kurtosis                         | 2.665961181  |
| wavelet-LLL | firstorder | Mean                             | -440.6743355 |
| wavelet-LLL | glrlm      | ShortRunLowGrayLevelEmphasis     | 0.002287496  |
| wavelet-LLL | glrlm      | GrayLevelVariance                | 669.9358191  |
| wavelet-LLL | glrlm      | LowGrayLevelRunEmphasis          | 0.002292376  |
| wavelet-LLL | glrlm      | GrayLevelNonUniformityNormalized | 0.020347181  |
| wavelet-LLL | glrlm      | RunVariance                      | 0.085641534  |
| wavelet-LLL | glrlm      | GrayLevelNonUniformity           | 14.42527533  |
| wavelet-LLL | glrlm      | LongRunEmphasis                  | 1.212892247  |
| wavelet-LLL | glrlm      | ShortRunHighGrayLevelEmphasis    | 5594.764649  |
| wavelet-LLL | glrlm      | RunLengthNonUniformity           | 641.3870966  |
| wavelet-LLL | glrlm      | ShortRunEmphasis                 | 0.961286168  |
| wavelet-LLL | glrlm      | LongRunHighGrayLevelEmphasis     | 7864.182061  |
| wavelet-LLL | glrlm      | RunPercentage                    | 0.942205401  |
| wavelet-LLL | glrlm      | LongRunLowGrayLevelEmphasis      | 0.002318209  |
| wavelet-LLL | glrlm      | RunEntropy                       | 6.347040583  |
| wavelet-LLL | glrlm      | HighGrayLevelRunEmphasis         | 5941.869999  |
| wavelet-LLL | glrlm      | RunLengthNonUniformityNormalized | 0.904978832  |
| wavelet-LLL | glszm      | GrayLevelVariance                | 642.798124   |
| wavelet-LLL | glszm      | ZoneVariance                     | 12.801984    |
| wavelet-LLL | glszm      | GrayLevelNonUniformityNormalized | 0.012968     |
| wavelet-LLL | glszm      | SizeZoneNonUniformityNormalized  | 0.761488     |
| wavelet-LLL | glszm      | SizeZoneNonUniformity            | 380.744      |
| wavelet-LLL | glszm      | GrayLevelNonUniformity           | 6.484        |
| wavelet-LLL | glszm      | LargeAreaEmphasis                | 15.064       |
| wavelet-LLL | glszm      | SmallAreaHighGrayLevelEmphasis   | 3990.935939  |
| wavelet-LLL | glszm      | ZonePercentage                   | 0.664893617  |
| wavelet-LLL | glszm      | LargeAreaLowGrayLevelEmphasis    | 0.004756981  |
| wavelet-LLL | glszm      | LargeAreaHighGrayLevelEmphasis   | 134349.23    |
| wavelet-LLL | glszm      | HighGrayLevelZoneEmphasis        | 4786.81      |
| wavelet-LLL | glszm      | SmallAreaEmphasis                | 0.892352912  |
| wavelet-LLL | glszm      | LowGrayLevelZoneEmphasis         | 0.003187333  |
| wavelet-LLL | glszm      | ZoneEntropy                      | 6.860021522  |
| wavelet-LLL | glszm      | SmallAreaLowGrayLevelEmphasis    | 0.003163409  |
| wavelet-LLL | ngtdm      | Coarseness                       | 0.00785797   |
| wavelet-LLL | ngtdm      | Complexity                       | 46170.31023  |
| wavelet-LLL | ngtdm      | Strength                         | 45.60725885  |
| wavelet-LLL | ngtdm      | Contrast                         | 1.484025108  |
| wavelet-LLL | ngtdm      | Busyness                         | 0.013605081  |
| wavelet-HHL | gldm       | GrayLevelVariance                | 13.07286774  |
| wavelet-HHL | gldm       | HighGrayLevelEmphasis            | 231.5385638  |
| wavelet-HHL | gldm       | DependenceEntropy                | 6.335281536  |
| wavelet-HHL | gldm       | DependenceNonUniformity          | 106.3404255  |

|             |            |                                      |              |
|-------------|------------|--------------------------------------|--------------|
| wavelet-HHL | gldm       | GrayLevelNonUniformity               | 77.99202128  |
| wavelet-HHL | gldm       | SmallDependenceEmphasis              | 0.339821198  |
| wavelet-HHL | gldm       | SmallDependenceHighGrayLevelEmphasis | 85.56130097  |
| wavelet-HHL | gldm       | DependenceNonUniformityNormalized    | 0.14141014   |
| wavelet-HHL | gldm       | LargeDependenceEmphasis              | 33.57712766  |
| wavelet-HHL | gldm       | LargeDependenceLowGrayLevelEmphasis  | 0.170941528  |
| wavelet-HHL | gldm       | DependenceVariance                   | 14.99093906  |
| wavelet-HHL | gldm       | LargeDependenceHighGrayLevelEmphasis | 6884.235372  |
| wavelet-HHL | gldm       | SmallDependenceLowGrayLevelEmphasis  | 0.003947779  |
| wavelet-HHL | gldm       | LowGrayLevelEmphasis                 | 0.007398583  |
| wavelet-HHL | glcm       | JointAverage                         | 14.75059075  |
| wavelet-HHL | glcm       | SumAverage                           | 29.50118151  |
| wavelet-HHL | glcm       | JointEntropy                         | 6.786218449  |
| wavelet-HHL | glcm       | ClusterShade                         | 47.25215134  |
| wavelet-HHL | glcm       | MaximumProbability                   | 0.083028802  |
| wavelet-HHL | glcm       | Idmn                                 | 0.976592949  |
| wavelet-HHL | glcm       | JointEnergy                          | 0.02059272   |
| wavelet-HHL | glcm       | Contrast                             | 22.05805582  |
| wavelet-HHL | glcm       | DifferenceEntropy                    | 3.270556995  |
| wavelet-HHL | glcm       | InverseVariance                      | 0.298865389  |
| wavelet-HHL | glcm       | DifferenceVariance                   | 11.1286445   |
| wavelet-HHL | glcm       | Idn                                  | 0.907314182  |
| wavelet-HHL | glcm       | Idm                                  | 0.331428541  |
| wavelet-HHL | glcm       | Correlation                          | 0.014565184  |
| wavelet-HHL | glcm       | Autocorrelation                      | 217.7679178  |
| wavelet-HHL | glcm       | SumEntropy                           | 4.108006693  |
| wavelet-HHL | glcm       | SumSquares                           | 11.20318096  |
| wavelet-HHL | glcm       | ClusterProminence                    | 2555.921597  |
| wavelet-HHL | glcm       | Imc2                                 | 0.73423917   |
| wavelet-HHL | glcm       | Imc1                                 | -0.110429354 |
| wavelet-HHL | glcm       | DifferenceAverage                    | 3.269220891  |
| wavelet-HHL | glcm       | Id                                   | 0.405384828  |
| wavelet-HHL | glcm       | ClusterTendency                      | 22.75466801  |
| wavelet-HHL | firstorder | InterquartileRange                   | 86.60724966  |
| wavelet-HHL | firstorder | Skewness                             | 0.233606783  |
| wavelet-HHL | firstorder | Uniformity                           | 0.103712794  |
| wavelet-HHL | firstorder | Median                               | -1.824035271 |
| wavelet-HHL | firstorder | Energy                               | 6130259.171  |
| wavelet-HHL | firstorder | RobustMeanAbsoluteDeviation          | 38.40218524  |
| wavelet-HHL | firstorder | MeanAbsoluteDeviation                | 64.73907634  |
| wavelet-HHL | firstorder | TotalEnergy                          | 165516997.6  |
| wavelet-HHL | firstorder | Maximum                              | 353.0871088  |
| wavelet-HHL | firstorder | RootMeanSquared                      | 90.2880966   |
| wavelet-HHL | firstorder | 90Percentile                         | 124.2458052  |
| wavelet-HHL | firstorder | Minimum                              | -339.7239818 |
| wavelet-HHL | firstorder | Entropy                              | 3.753318881  |
| wavelet-HHL | firstorder | Range                                | 692.8110906  |
| wavelet-HHL | firstorder | Variance                             | 8102.113203  |
| wavelet-HHL | firstorder | 10Percentile                         | -87.75289378 |
| wavelet-HHL | firstorder | Kurtosis                             | 4.419984924  |
| wavelet-HHL | firstorder | Mean                                 | 7.058837336  |
| wavelet-HHL | glrlm      | ShortRunLowGrayLevelEmphasis         | 0.007293862  |
| wavelet-HHL | glrlm      | GrayLevelVariance                    | 14.56014599  |



|             |       |                                      |              |
|-------------|-------|--------------------------------------|--------------|
| wavelet-HHL | glrlm | LowGrayLevelRunEmphasis              | 0.00774116   |
| wavelet-HHL | glrlm | GrayLevelNonUniformityNormalized     | 0.089019136  |
| wavelet-HHL | glrlm | RunVariance                          | 0.222948469  |
| wavelet-HHL | glrlm | GrayLevelNonUniformity               | 58.43495975  |
| wavelet-HHL | glrlm | LongRunEmphasis                      | 1.539044166  |
| wavelet-HHL | glrlm | ShortRunHighGrayLevelEmphasis        | 216.3026205  |
| wavelet-HHL | glrlm | RunLengthNonUniformity               | 523.2924758  |
| wavelet-HHL | glrlm | ShortRunEmphasis                     | 0.912059852  |
| wavelet-HHL | glrlm | LongRunHighGrayLevelEmphasis         | 347.0099254  |
| wavelet-HHL | glrlm | RunPercentage                        | 0.8726473    |
| wavelet-HHL | glrlm | LongRunLowGrayLevelEmphasis          | 0.010463271  |
| wavelet-HHL | glrlm | RunEntropy                           | 4.391766094  |
| wavelet-HHL | glrlm | HighGrayLevelRunEmphasis             | 234.8137778  |
| wavelet-HHL | glrlm | RunLengthNonUniformityNormalized     | 0.796651987  |
| wavelet-HHL | glszm | GrayLevelVariance                    | 25.78492461  |
| wavelet-HHL | glszm | ZoneVariance                         | 122.8617401  |
| wavelet-HHL | glszm | GrayLevelNonUniformityNormalized     | 0.058900314  |
| wavelet-HHL | glszm | SizeZoneNonUniformityNormalized      | 0.563775374  |
| wavelet-HHL | glszm | SizeZoneNonUniformity                | 154.4744526  |
| wavelet-HHL | glszm | GrayLevelNonUniformity               | 16.13868613  |
| wavelet-HHL | glszm | LargeAreaEmphasis                    | 130.3941606  |
| wavelet-HHL | glszm | SmallAreaHighGrayLevelEmphasis       | 197.7974385  |
| wavelet-HHL | glszm | ZonePercentage                       | 0.364361702  |
| wavelet-HHL | glszm | LargeAreaLowGrayLevelEmphasis        | 0.653039764  |
| wavelet-HHL | glszm | LargeAreaHighGrayLevelEmphasis       | 26740.5      |
| wavelet-HHL | glszm | HighGrayLevelZoneEmphasis            | 253.310219   |
| wavelet-HHL | glszm | SmallAreaEmphasis                    | 0.777740229  |
| wavelet-HHL | glszm | LowGrayLevelZoneEmphasis             | 0.011298929  |
| wavelet-HHL | glszm | ZoneEntropy                          | 5.412554165  |
| wavelet-HHL | glszm | SmallAreaLowGrayLevelEmphasis        | 0.009984976  |
| wavelet-HHL | ngtdm | Coarseness                           | 0.009700232  |
| wavelet-HHL | ngtdm | Complexity                           | 759.9341206  |
| wavelet-HHL | ngtdm | Strength                             | 2.096527826  |
| wavelet-HHL | ngtdm | Contrast                             | 0.097840666  |
| wavelet-HHL | ngtdm | Busyness                             | 0.206292563  |
| wavelet-HLH | gldm  | GrayLevelVariance                    | 14.56201901  |
| wavelet-HLH | gldm  | HighGrayLevelEmphasis                | 355.2393617  |
| wavelet-HLH | gldm  | DependenceEntropy                    | 6.30948509   |
| wavelet-HLH | gldm  | DependenceNonUniformity              | 101.8191489  |
| wavelet-HLH | gldm  | GrayLevelNonUniformity               | 77.49734043  |
| wavelet-HLH | gldm  | SmallDependenceEmphasis              | 0.302890031  |
| wavelet-HLH | gldm  | SmallDependenceHighGrayLevelEmphasis | 113.7991472  |
| wavelet-HLH | gldm  | DependenceNonUniformityNormalized    | 0.135397804  |
| wavelet-HLH | gldm  | LargeDependenceEmphasis              | 31.0106383   |
| wavelet-HLH | gldm  | LargeDependenceLowGrayLevelEmphasis  | 0.097353382  |
| wavelet-HLH | gldm  | DependenceVariance                   | 12.83492955  |
| wavelet-HLH | gldm  | LargeDependenceHighGrayLevelEmphasis | 10487.15426  |
| wavelet-HLH | gldm  | SmallDependenceLowGrayLevelEmphasis  | 0.002968685  |
| wavelet-HLH | gldm  | LowGrayLevelEmphasis                 | 0.005340939  |
| wavelet-HLH | glcm  | JointAverage                         | 18.52862823  |
| wavelet-HLH | glcm  | SumAverage                           | 37.05725647  |
| wavelet-HLH | glcm  | JointEntropy                         | 6.808136619  |
| wavelet-HLH | glcm  | ClusterShade                         | -100.6096236 |

|             |            |                                  |              |
|-------------|------------|----------------------------------|--------------|
| wavelet-HLH | glcm       | MaximumProbability               | 0.070086266  |
| wavelet-HLH | glcm       | Idmn                             | 0.975061127  |
| wavelet-HLH | glcm       | JointEnergy                      | 0.020320659  |
| wavelet-HLH | glcm       | Contrast                         | 24.20762352  |
| wavelet-HLH | glcm       | DifferenceEntropy                | 3.296366652  |
| wavelet-HLH | glcm       | InverseVariance                  | 0.306573097  |
| wavelet-HLH | glcm       | DifferenceVariance               | 12.87992159  |
| wavelet-HLH | glcm       | Idn                              | 0.906382225  |
| wavelet-HLH | glcm       | Idm                              | 0.332648118  |
| wavelet-HLH | glcm       | Correlation                      | 0.029670884  |
| wavelet-HLH | glcm       | Autocorrelation                  | 343.7295889  |
| wavelet-HLH | glcm       | SumEntropy                       | 4.13501351   |
| wavelet-HLH | glcm       | SumSquares                       | 12.51788639  |
| wavelet-HLH | glcm       | ClusterProminence                | 5066.253     |
| wavelet-HLH | glcm       | Imc2                             | 0.756674896  |
| wavelet-HLH | glcm       | Imc1                             | -0.119186416 |
| wavelet-HLH | glcm       | DifferenceAverage                | 3.336186575  |
| wavelet-HLH | glcm       | Id                               | 0.405356521  |
| wavelet-HLH | glcm       | ClusterTendency                  | 25.86392204  |
| wavelet-HLH | firstorder | InterquartileRange               | 81.40271786  |
| wavelet-HLH | firstorder | Skewness                         | -0.664716759 |
| wavelet-HLH | firstorder | Uniformity                       | 0.103054974  |
| wavelet-HLH | firstorder | Median                           | -0.280169572 |
| wavelet-HLH | firstorder | Energy                           | 6783059.678  |
| wavelet-HLH | firstorder | RobustMeanAbsoluteDeviation      | 36.58420985  |
| wavelet-HLH | firstorder | MeanAbsoluteDeviation            | 64.89390108  |
| wavelet-HLH | firstorder | TotalEnergy                      | 183142611.3  |
| wavelet-HLH | firstorder | Maximum                          | 272.9680832  |
| wavelet-HLH | firstorder | RootMeanSquared                  | 94.97381833  |
| wavelet-HLH | firstorder | 90Percentile                     | 116.5991283  |
| wavelet-HLH | firstorder | Minimum                          | -426.7516284 |
| wavelet-HLH | firstorder | Entropy                          | 3.774925969  |
| wavelet-HLH | firstorder | Range                            | 699.7197116  |
| wavelet-HLH | firstorder | Variance                         | 9019.049739  |
| wavelet-HLH | firstorder | 10Percentile                     | -108.0547246 |
| wavelet-HLH | firstorder | Kurtosis                         | 5.807163268  |
| wavelet-HLH | firstorder | Mean                             | -0.988144466 |
| wavelet-HLH | glrlm      | ShortRunLowGrayLevelEmphasis     | 0.005372659  |
| wavelet-HLH | glrlm      | GrayLevelVariance                | 16.22296404  |
| wavelet-HLH | glrlm      | LowGrayLevelRunEmphasis          | 0.005653404  |
| wavelet-HLH | glrlm      | GrayLevelNonUniformityNormalized | 0.08935985   |
| wavelet-HLH | glrlm      | RunVariance                      | 0.20793737   |
| wavelet-HLH | glrlm      | GrayLevelNonUniformity           | 58.7771855   |
| wavelet-HLH | glrlm      | LongRunEmphasis                  | 1.517730102  |
| wavelet-HLH | glrlm      | ShortRunHighGrayLevelEmphasis    | 327.4466914  |
| wavelet-HLH | glrlm      | RunLengthNonUniformity           | 524.9280704  |
| wavelet-HLH | glrlm      | ShortRunEmphasis                 | 0.912521805  |
| wavelet-HLH | glrlm      | LongRunHighGrayLevelEmphasis     | 533.1460259  |
| wavelet-HLH | glrlm      | RunPercentage                    | 0.874488543  |
| wavelet-HLH | glrlm      | LongRunLowGrayLevelEmphasis      | 0.007283037  |
| wavelet-HLH | glrlm      | RunEntropy                       | 4.412448453  |
| wavelet-HLH | glrlm      | HighGrayLevelRunEmphasis         | 357.3554296  |
| wavelet-HLH | glrlm      | RunLengthNonUniformityNormalized | 0.79763437   |

|             |       |                                  |             |
|-------------|-------|----------------------------------|-------------|
| wavelet-HLH | glszm | GrayLevelVariance                | 31.78777715 |
| wavelet-HLH | glszm | ZoneVariance                     | 134.4600655 |
| wavelet-HLH | glszm | GrayLevelNonUniformityNormalized | 0.056846813 |
| wavelet-HLH | glszm | SizeZoneNonUniformityNormalized  | 0.473418997 |
| wavelet-HLH | glszm | SizeZoneNonUniformity            | 119.3015873 |
| wavelet-HLH | glszm | GrayLevelNonUniformity           | 14.32539683 |
| wavelet-HLH | glszm | LargeAreaEmphasis                | 143.3650794 |
| wavelet-HLH | glszm | SmallAreaHighGrayLevelEmphasis   | 273.7021368 |
| wavelet-HLH | glszm | ZonePercentage                   | 0.335106383 |
| wavelet-HLH | glszm | LargeAreaLowGrayLevelEmphasis    | 0.431772658 |
| wavelet-HLH | glszm | LargeAreaHighGrayLevelEmphasis   | 48926.11905 |
| wavelet-HLH | glszm | HighGrayLevelZoneEmphasis        | 375.6547619 |
| wavelet-HLH | glszm | SmallAreaEmphasis                | 0.71497925  |
| wavelet-HLH | glszm | LowGrayLevelZoneEmphasis         | 0.009353897 |
| wavelet-HLH | glszm | ZoneEntropy                      | 5.732801055 |
| wavelet-HLH | glszm | SmallAreaLowGrayLevelEmphasis    | 0.008189911 |
| wavelet-HLH | ngtdm | Coarseness                       | 0.010021338 |
| wavelet-HLH | ngtdm | Complexity                       | 863.2733443 |
| wavelet-HLH | ngtdm | Strength                         | 2.503504162 |
| wavelet-HLH | ngtdm | Contrast                         | 0.102868335 |
| wavelet-HLH | ngtdm | Busyness                         | 0.147892147 |

| Image type | Feature Class | Feature Name                         | Value                                                                                                                                                                                                                                                                                                                                                                                                             |
|------------|---------------|--------------------------------------|-------------------------------------------------------------------------------------------------------------------------------------------------------------------------------------------------------------------------------------------------------------------------------------------------------------------------------------------------------------------------------------------------------------------|
| general    | info          | BoundingBox                          | 511: RTSTRUCT: C99-DNU-A_segment_ITV lateral<br>(0, 0, 1, 5, 5, 6)                                                                                                                                                                                                                                                                                                                                                |
| general    | info          | EnabledImageTypes                    | {u'Original': {}, u'Wavelet': {}}                                                                                                                                                                                                                                                                                                                                                                                 |
| general    | info          | GeneralSettings                      | {'distances': [1], 'additionalInfo': True, 'force2D': False, 'interpolator': 'sitkBSpline', 'resampledPixelSpacing': [3.0], 'label': 1, 'normalizeScale': 1, 'normalize': False, 'force2Ddimension': 0, 'removeOutliers': None, 'minimumROISize': None, u'binWidth': 25.0, 'minimumROIDimensions': 1, u'correctMask': True, 'preCrop': False, u'symmetricalGLCM': True, 'resegmentRange': None, 'padDistance': 5} |
| general    | info          | ImageHash                            | b8d9640307bf5b7a55a3543377fbbfbb1c3229d7<br>(0.9765624999999998, 0.9765624999999998, 1.9999999999999999)                                                                                                                                                                                                                                                                                                          |
| general    | info          | ImageSpacing                         | 1.9999999999999999                                                                                                                                                                                                                                                                                                                                                                                                |
| general    | info          | MaskHash                             | 1eeab1277acfd14ccaa6383913e4cf63e6f26415                                                                                                                                                                                                                                                                                                                                                                          |
| general    | info          | NumpyVersion                         | 1.13.1                                                                                                                                                                                                                                                                                                                                                                                                            |
| general    | info          | PyWaveletVersion                     | 0.5.2                                                                                                                                                                                                                                                                                                                                                                                                             |
| general    | info          | SimpleITKVersion                     | 1.1.0                                                                                                                                                                                                                                                                                                                                                                                                             |
| general    | info          | Version                              | 1.3.0.post102+g1b0eb74                                                                                                                                                                                                                                                                                                                                                                                            |
| general    | info          | VolumeNum                            | 1                                                                                                                                                                                                                                                                                                                                                                                                                 |
| general    | info          | VoxelNum                             | 76                                                                                                                                                                                                                                                                                                                                                                                                                |
| original   | shape         | Maximum3DDiameter                    | 17.49285568                                                                                                                                                                                                                                                                                                                                                                                                       |
| original   | shape         | Maximum2DDiameterSlice               | 13.41640786                                                                                                                                                                                                                                                                                                                                                                                                       |
| original   | shape         | Sphericity                           | 0.916184329                                                                                                                                                                                                                                                                                                                                                                                                       |
| original   | shape         | MinorAxis                            | 13.23977008                                                                                                                                                                                                                                                                                                                                                                                                       |
| original   | shape         | Elongation                           | 0.755224989                                                                                                                                                                                                                                                                                                                                                                                                       |
| original   | shape         | SurfaceVolumeRatio                   | 0.415376714                                                                                                                                                                                                                                                                                                                                                                                                       |
| original   | shape         | Volume                               | 2052                                                                                                                                                                                                                                                                                                                                                                                                              |
| original   | shape         | MajorAxis                            | 17.53089513                                                                                                                                                                                                                                                                                                                                                                                                       |
| original   | shape         | SurfaceArea                          | 852.3530176                                                                                                                                                                                                                                                                                                                                                                                                       |
| original   | shape         | Flatness                             | 0.697909665                                                                                                                                                                                                                                                                                                                                                                                                       |
| original   | shape         | LeastAxis                            | 12.23498115                                                                                                                                                                                                                                                                                                                                                                                                       |
| original   | shape         | Maximum2DDiameterColumn              | 16.15549442                                                                                                                                                                                                                                                                                                                                                                                                       |
| original   | shape         | Maximum2DDiameterRow                 | 17.49285568                                                                                                                                                                                                                                                                                                                                                                                                       |
| original   | gldm          | GrayLevelVariance                    | 89.10526316                                                                                                                                                                                                                                                                                                                                                                                                       |
| original   | gldm          | HighGrayLevelEmphasis                | 573.1052632                                                                                                                                                                                                                                                                                                                                                                                                       |
| original   | gldm          | DependenceEntropy                    | 5.435105967                                                                                                                                                                                                                                                                                                                                                                                                       |
| original   | gldm          | DependenceNonUniformity              | 24.81578947                                                                                                                                                                                                                                                                                                                                                                                                       |
| original   | gldm          | GrayLevelNonUniformity               | 3.868421053                                                                                                                                                                                                                                                                                                                                                                                                       |
| original   | gldm          | SmallDependenceEmphasis              | 0.563047931                                                                                                                                                                                                                                                                                                                                                                                                       |
| original   | gldm          | SmallDependenceHighGrayLevelEmphasis | 247.4760481                                                                                                                                                                                                                                                                                                                                                                                                       |
| original   | gldm          | DependenceNonUniformityNormalized    | 0.326523546                                                                                                                                                                                                                                                                                                                                                                                                       |
| original   | gldm          | LargeDependenceEmphasis              | 7.236842105                                                                                                                                                                                                                                                                                                                                                                                                       |
| original   | gldm          | LargeDependenceLowGrayLevelEmphasis  | 0.042884176                                                                                                                                                                                                                                                                                                                                                                                                       |
| original   | gldm          | DependenceVariance                   | 2.693213296                                                                                                                                                                                                                                                                                                                                                                                                       |
| original   | gldm          | LargeDependenceHighGrayLevelEmphasis | 6482.710526                                                                                                                                                                                                                                                                                                                                                                                                       |
| original   | gldm          | SmallDependenceLowGrayLevelEmphasis  | 0.032611268                                                                                                                                                                                                                                                                                                                                                                                                       |
| original   | gldm          | LowGrayLevelEmphasis                 | 0.033789137                                                                                                                                                                                                                                                                                                                                                                                                       |
| original   | glcm          | JointAverage                         | 24.62166416                                                                                                                                                                                                                                                                                                                                                                                                       |
| original   | glcm          | SumAverage                           | 49.24332833                                                                                                                                                                                                                                                                                                                                                                                                       |
| original   | glcm          | JointEntropy                         | 6.124452839                                                                                                                                                                                                                                                                                                                                                                                                       |
| original   | glcm          | ClusterShade                         | -1333.38296                                                                                                                                                                                                                                                                                                                                                                                                       |
| original   | glcm          | MaximumProbability                   | 0.044832394                                                                                                                                                                                                                                                                                                                                                                                                       |
| original   | glcm          | Idmn                                 | 0.909392965                                                                                                                                                                                                                                                                                                                                                                                                       |
| original   | glcm          | JointEnergy                          | 0.016104767                                                                                                                                                                                                                                                                                                                                                                                                       |
| original   | glcm          | Contrast                             | 141.104655                                                                                                                                                                                                                                                                                                                                                                                                        |
| original   | glcm          | DifferenceEntropy                    | 4.02898767                                                                                                                                                                                                                                                                                                                                                                                                        |

|          |            |                                  |              |
|----------|------------|----------------------------------|--------------|
| original | glcm       | InverseVariance                  | 0.175312059  |
| original | glcm       | DifferenceVariance               | 62.60795347  |
| original | glcm       | Idn                              | 0.819552397  |
| original | glcm       | Idm                              | 0.17310234   |
| original | glcm       | Correlation                      | 0.095007797  |
| original | glcm       | Autocorrelation                  | 613.3577813  |
| original | glcm       | SumEntropy                       | 4.631296778  |
| original | glcm       | SumSquares                       | 77.61016235  |
| original | glcm       | ClusterProminence                | 73067.72831  |
| original | glcm       | Imc2                             | 0.995599003  |
| original | glcm       | Imc1                             | -0.559183183 |
| original | glcm       | DifferenceAverage                | 8.799165384  |
| original | glcm       | Id                               | 0.245455885  |
| original | glcm       | ClusterTendency                  | 169.3359944  |
| original | firstorder | InterquartileRange               | 428.5        |
| original | firstorder | Skewness                         | -0.508014499 |
| original | firstorder | Uniformity                       | 0.050900277  |
| original | firstorder | Median                           | -211.5       |
| original | firstorder | Energy                           | 8486500      |
| original | firstorder | RobustMeanAbsoluteDeviation      | 164.6804622  |
| original | firstorder | MeanAbsoluteDeviation            | 204.8033241  |
| original | firstorder | TotalEnergy                      | 229135500    |
| original | firstorder | Maximum                          | 55           |
| original | firstorder | RootMeanSquared                  | 334.1623463  |
| original | firstorder | 90Percentile                     | 23           |
| original | firstorder | Minimum                          | -770         |
| original | firstorder | Entropy                          | 4.56651033   |
| original | firstorder | Range                            | 825          |
| original | firstorder | Variance                         | 55433.08795  |
| original | firstorder | 10Percentile                     | -546.5       |
| original | firstorder | Kurtosis                         | 2.060449577  |
| original | firstorder | Mean                             | -237.1315789 |
| original | glrlm      | ShortRunLowGrayLevelEmphasis     | 0.035205457  |
| original | glrlm      | GrayLevelVariance                | 88.8116707   |
| original | glrlm      | LowGrayLevelRunEmphasis          | 0.035268952  |
| original | glrlm      | GrayLevelNonUniformityNormalized | 0.048286374  |
| original | glrlm      | RunVariance                      | 0.047631151  |
| original | glrlm      | GrayLevelNonUniformity           | 3.512890361  |
| original | glrlm      | LongRunEmphasis                  | 1.143390137  |
| original | glrlm      | ShortRunHighGrayLevelEmphasis    | 529.5505852  |
| original | glrlm      | RunLengthNonUniformity           | 66.76275285  |
| original | glrlm      | ShortRunEmphasis                 | 0.966560074  |
| original | glrlm      | LongRunHighGrayLevelEmphasis     | 685.7936859  |
| original | glrlm      | RunPercentage                    | 0.956477733  |
| original | glrlm      | LongRunLowGrayLevelEmphasis      | 0.035532336  |
| original | glrlm      | RunEntropy                       | 4.724548515  |
| original | glrlm      | HighGrayLevelRunEmphasis         | 558.8268929  |
| original | glrlm      | RunLengthNonUniformityNormalized | 0.917006327  |
| original | glszm      | GrayLevelVariance                | 84.02165764  |
| original | glszm      | ZoneVariance                     | 1.920866306  |
| original | glszm      | GrayLevelNonUniformityNormalized | 0.04123282   |
| original | glszm      | SizeZoneNonUniformityNormalized  | 0.576009996  |
| original | glszm      | SizeZoneNonUniformity            | 28.2244898   |
| original | glszm      | GrayLevelNonUniformity           | 2.020408163  |
| original | glszm      | LargeAreaEmphasis                | 4.326530612  |
| original | glszm      | SmallAreaHighGrayLevelEmphasis   | 325.8380222  |
| original | glszm      | ZonePercentage                   | 0.644736842  |
| original | glszm      | LargeAreaLowGrayLevelEmphasis    | 0.056711733  |

|             |            |                                      |              |
|-------------|------------|--------------------------------------|--------------|
| original    | glszm      | LargeAreaHighGrayLevelEmphasis       | 3447.306122  |
| original    | glszm      | HighGrayLevelZoneEmphasis            | 454.3877551  |
| original    | glszm      | SmallAreaEmphasis                    | 0.784764424  |
| original    | glszm      | LowGrayLevelZoneEmphasis             | 0.051088158  |
| original    | glszm      | ZoneEntropy                          | 5.134918517  |
| original    | glszm      | SmallAreaLowGrayLevelEmphasis        | 0.050298837  |
| original    | ngtdm      | Coarseness                           | 0.039365204  |
| original    | ngtdm      | Complexity                           | 2828.76697   |
| original    | ngtdm      | Strength                             | 20.03503867  |
| original    | ngtdm      | Contrast                             | 1.621549208  |
| original    | ngtdm      | Busyness                             | 0.038495754  |
| wavelet-HHH | gldm       | GrayLevelVariance                    | 4.738919668  |
| wavelet-HHH | gldm       | HighGrayLevelEmphasis                | 45.63157895  |
| wavelet-HHH | gldm       | DependenceEntropy                    | 4.66880556   |
| wavelet-HHH | gldm       | DependenceNonUniformity              | 17.78947368  |
| wavelet-HHH | gldm       | GrayLevelNonUniformity               | 10.23684211  |
| wavelet-HHH | gldm       | SmallDependenceEmphasis              | 0.365727339  |
| wavelet-HHH | gldm       | SmallDependenceHighGrayLevelEmphasis | 16.32112573  |
| wavelet-HHH | gldm       | DependenceNonUniformityNormalized    | 0.234072022  |
| wavelet-HHH | gldm       | LargeDependenceEmphasis              | 8.210526316  |
| wavelet-HHH | gldm       | LargeDependenceLowGrayLevelEmphasis  | 0.259069505  |
| wavelet-HHH | gldm       | DependenceVariance                   | 1.828254848  |
| wavelet-HHH | gldm       | LargeDependenceHighGrayLevelEmphasis | 370.4736842  |
| wavelet-HHH | gldm       | SmallDependenceLowGrayLevelEmphasis  | 0.033189437  |
| wavelet-HHH | gldm       | LowGrayLevelEmphasis                 | 0.051726917  |
| wavelet-HHH | glcm       | JointAverage                         | 6.460000011  |
| wavelet-HHH | glcm       | SumAverage                           | 12.92000002  |
| wavelet-HHH | glcm       | JointEntropy                         | 5.382478905  |
| wavelet-HHH | glcm       | ClusterShade                         | -2.156945264 |
| wavelet-HHH | glcm       | MaximumProbability                   | 0.060158768  |
| wavelet-HHH | glcm       | Idmn                                 | 0.929887234  |
| wavelet-HHH | glcm       | JointEnergy                          | 0.02836938   |
| wavelet-HHH | glcm       | Contrast                             | 10.11227558  |
| wavelet-HHH | glcm       | DifferenceEntropy                    | 2.622612566  |
| wavelet-HHH | glcm       | InverseVariance                      | 0.322773222  |
| wavelet-HHH | glcm       | DifferenceVariance                   | 3.172961824  |
| wavelet-HHH | glcm       | Idn                                  | 0.823172786  |
| wavelet-HHH | glcm       | Idm                                  | 0.290144123  |
| wavelet-HHH | glcm       | Correlation                          | -0.025261517 |
| wavelet-HHH | glcm       | Autocorrelation                      | 41.60431006  |
| wavelet-HHH | glcm       | SumEntropy                           | 3.370980217  |
| wavelet-HHH | glcm       | SumSquares                           | 4.921157618  |
| wavelet-HHH | glcm       | ClusterProminence                    | 236.0908095  |
| wavelet-HHH | glcm       | Imc2                                 | 0.888475643  |
| wavelet-HHH | glcm       | Imc1                                 | -0.25616303  |
| wavelet-HHH | glcm       | DifferenceAverage                    | 2.596728567  |
| wavelet-HHH | glcm       | Id                                   | 0.379376234  |
| wavelet-HHH | glcm       | ClusterTendency                      | 9.572354891  |
| wavelet-HHH | firstorder | InterquartileRange                   | 75.96651831  |
| wavelet-HHH | firstorder | Skewness                             | -0.154916026 |
| wavelet-HHH | firstorder | Uniformity                           | 0.134695291  |
| wavelet-HHH | firstorder | Median                               | 5.842076465  |
| wavelet-HHH | firstorder | Energy                               | 223256.2452  |
| wavelet-HHH | firstorder | RobustMeanAbsoluteDeviation          | 31.69096576  |
| wavelet-HHH | firstorder | MeanAbsoluteDeviation                | 44.62519436  |
| wavelet-HHH | firstorder | TotalEnergy                          | 6027918.621  |
| wavelet-HHH | firstorder | Maximum                              | 102.6614962  |
| wavelet-HHH | firstorder | RootMeanSquared                      | 54.19946655  |

|             |            |                                      |              |
|-------------|------------|--------------------------------------|--------------|
| wavelet-HHH | firstorder | 90Percentile                         | 68.57061767  |
| wavelet-HHH | firstorder | Minimum                              | -140.6519001 |
| wavelet-HHH | firstorder | Entropy                              | 3.080872161  |
| wavelet-HHH | firstorder | Range                                | 243.3133963  |
| wavelet-HHH | firstorder | Variance                             | 2924.262737  |
| wavelet-HHH | firstorder | 10Percentile                         | -67.54557376 |
| wavelet-HHH | firstorder | Kurtosis                             | 2.625389435  |
| wavelet-HHH | firstorder | Mean                                 | -3.649580318 |
| wavelet-HHH | glrlm      | ShortRunLowGrayLevelEmphasis         | 0.05186587   |
| wavelet-HHH | glrlm      | GrayLevelVariance                    | 4.870260616  |
| wavelet-HHH | glrlm      | LowGrayLevelRunEmphasis              | 0.053175441  |
| wavelet-HHH | glrlm      | GrayLevelNonUniformityNormalized     | 0.132194554  |
| wavelet-HHH | glrlm      | RunVariance                          | 0.067267656  |
| wavelet-HHH | glrlm      | GrayLevelNonUniformity               | 9.459516483  |
| wavelet-HHH | glrlm      | LongRunEmphasis                      | 1.200782395  |
| wavelet-HHH | glrlm      | ShortRunHighGrayLevelEmphasis        | 43.5834267   |
| wavelet-HHH | glrlm      | RunLengthNonUniformity               | 63.84083448  |
| wavelet-HHH | glrlm      | ShortRunEmphasis                     | 0.954869573  |
| wavelet-HHH | glrlm      | LongRunHighGrayLevelEmphasis         | 54.76794709  |
| wavelet-HHH | glrlm      | RunPercentage                        | 0.941295547  |
| wavelet-HHH | glrlm      | LongRunLowGrayLevelEmphasis          | 0.059014427  |
| wavelet-HHH | glrlm      | RunEntropy                           | 3.346308393  |
| wavelet-HHH | glrlm      | HighGrayLevelRunEmphasis             | 45.63965047  |
| wavelet-HHH | glrlm      | RunLengthNonUniformityNormalized     | 0.890179436  |
| wavelet-HHH | glszm      | GrayLevelVariance                    | 7.529656608  |
| wavelet-HHH | glszm      | ZoneVariance                         | 6.570239334  |
| wavelet-HHH | glszm      | GrayLevelNonUniformityNormalized     | 0.107180021  |
| wavelet-HHH | glszm      | SizeZoneNonUniformityNormalized      | 0.411030177  |
| wavelet-HHH | glszm      | SizeZoneNonUniformity                | 12.74193548  |
| wavelet-HHH | glszm      | GrayLevelNonUniformity               | 3.322580645  |
| wavelet-HHH | glszm      | LargeAreaEmphasis                    | 12.58064516  |
| wavelet-HHH | glszm      | SmallAreaHighGrayLevelEmphasis       | 29.31304879  |
| wavelet-HHH | glszm      | ZonePercentage                       | 0.407894737  |
| wavelet-HHH | glszm      | LargeAreaLowGrayLevelEmphasis        | 0.411785697  |
| wavelet-HHH | glszm      | LargeAreaHighGrayLevelEmphasis       | 575.0322581  |
| wavelet-HHH | glszm      | HighGrayLevelZoneEmphasis            | 46.29032258  |
| wavelet-HHH | glszm      | SmallAreaEmphasis                    | 0.654685831  |
| wavelet-HHH | glszm      | LowGrayLevelZoneEmphasis             | 0.083926914  |
| wavelet-HHH | glszm      | ZoneEntropy                          | 4.155651552  |
| wavelet-HHH | glszm      | SmallAreaLowGrayLevelEmphasis        | 0.074010192  |
| wavelet-HHH | ngtdm      | Coarseness                           | 0.068357624  |
| wavelet-HHH | ngtdm      | Complexity                           | 81.52594227  |
| wavelet-HHH | ngtdm      | Strength                             | 2.333397129  |
| wavelet-HHH | ngtdm      | Contrast                             | 0.159209846  |
| wavelet-HHH | ngtdm      | Busyness                             | 0.235750618  |
| wavelet-HLL | gldm       | GrayLevelVariance                    | 41.07825485  |
| wavelet-HLL | gldm       | HighGrayLevelEmphasis                | 162.6578947  |
| wavelet-HLL | gldm       | DependenceEntropy                    | 5.31859606   |
| wavelet-HLL | gldm       | DependenceNonUniformity              | 23.63157895  |
| wavelet-HLL | gldm       | GrayLevelNonUniformity               | 4.552631579  |
| wavelet-HLL | gldm       | SmallDependenceEmphasis              | 0.540844298  |
| wavelet-HLL | gldm       | SmallDependenceHighGrayLevelEmphasis | 114.8269371  |
| wavelet-HLL | gldm       | DependenceNonUniformityNormalized    | 0.310941828  |
| wavelet-HLL | gldm       | LargeDependenceEmphasis              | 5.342105263  |
| wavelet-HLL | gldm       | LargeDependenceLowGrayLevelEmphasis  | 0.12838334   |
| wavelet-HLL | gldm       | DependenceVariance                   | 1.236149584  |
| wavelet-HLL | gldm       | LargeDependenceHighGrayLevelEmphasis | 521.7631579  |
| wavelet-HLL | gldm       | SmallDependenceLowGrayLevelEmphasis  | 0.027324634  |

|             |            |                                  |              |
|-------------|------------|----------------------------------|--------------|
| wavelet-HLL | gldm       | LowGrayLevelEmphasis             | 0.035839201  |
| wavelet-HLL | glcm       | JointAverage                     | 10.3572154   |
| wavelet-HLL | glcm       | SumAverage                       | 20.71443079  |
| wavelet-HLL | glcm       | JointEntropy                     | 6.112106529  |
| wavelet-HLL | glcm       | ClusterShade                     | 1424.075659  |
| wavelet-HLL | glcm       | MaximumProbability               | 0.037020898  |
| wavelet-HLL | glcm       | Idmn                             | 0.961887371  |
| wavelet-HLL | glcm       | JointEnergy                      | 0.015851623  |
| wavelet-HLL | glcm       | Contrast                         | 39.17853195  |
| wavelet-HLL | glcm       | DifferenceEntropy                | 3.393744881  |
| wavelet-HLL | glcm       | InverseVariance                  | 0.198025313  |
| wavelet-HLL | glcm       | DifferenceVariance               | 14.61951595  |
| wavelet-HLL | glcm       | Idn                              | 0.872146093  |
| wavelet-HLL | glcm       | Idm                              | 0.187737255  |
| wavelet-HLL | glcm       | Correlation                      | 0.437476941  |
| wavelet-HLL | glcm       | Autocorrelation                  | 123.3710103  |
| wavelet-HLL | glcm       | SumEntropy                       | 4.292588676  |
| wavelet-HLL | glcm       | SumSquares                       | 35.65107636  |
| wavelet-HLL | glcm       | ClusterProminence                | 48760.13771  |
| wavelet-HLL | glcm       | Imc2                             | 0.994338746  |
| wavelet-HLL | glcm       | Imc1                             | -0.540687622 |
| wavelet-HLL | glcm       | DifferenceAverage                | 4.808361527  |
| wavelet-HLL | glcm       | Id                               | 0.283197904  |
| wavelet-HLL | glcm       | ClusterTendency                  | 103.4257735  |
| wavelet-HLL | firstorder | InterquartileRange               | 194.3913444  |
| wavelet-HLL | firstorder | Skewness                         | 1.037307662  |
| wavelet-HLL | firstorder | Uniformity                       | 0.059903047  |
| wavelet-HLL | firstorder | Median                           | -95.35569252 |
| wavelet-HLL | firstorder | Energy                           | 2224054.243  |
| wavelet-HLL | firstorder | RobustMeanAbsoluteDeviation      | 81.56385021  |
| wavelet-HLL | firstorder | MeanAbsoluteDeviation            | 123.9657296  |
| wavelet-HLL | firstorder | TotalEnergy                      | 60049464.57  |
| wavelet-HLL | firstorder | Maximum                          | 402.0716511  |
| wavelet-HLL | firstorder | RootMeanSquared                  | 171.066863   |
| wavelet-HLL | firstorder | 90Percentile                     | 177.2932406  |
| wavelet-HLL | firstorder | Minimum                          | -312.5525939 |
| wavelet-HLL | firstorder | Entropy                          | 4.331589812  |
| wavelet-HLL | firstorder | Range                            | 714.624245   |
| wavelet-HLL | firstorder | Variance                         | 25342.112    |
| wavelet-HLL | firstorder | 10Percentile                     | -214.2053557 |
| wavelet-HLL | firstorder | Kurtosis                         | 3.589063439  |
| wavelet-HLL | firstorder | Mean                             | -62.62395404 |
| wavelet-HLL | glrlm      | ShortRunLowGrayLevelEmphasis     | 0.035855956  |
| wavelet-HLL | glrlm      | GrayLevelVariance                | 41.93672037  |
| wavelet-HLL | glrlm      | LowGrayLevelRunEmphasis          | 0.036489619  |
| wavelet-HLL | glrlm      | GrayLevelNonUniformityNormalized | 0.058651467  |
| wavelet-HLL | glrlm      | RunVariance                      | 0.03930095   |
| wavelet-HLL | glrlm      | GrayLevelNonUniformity           | 4.282319561  |
| wavelet-HLL | glrlm      | LongRunEmphasis                  | 1.125167543  |
| wavelet-HLL | glrlm      | ShortRunHighGrayLevelEmphasis    | 162.8119894  |
| wavelet-HLL | glrlm      | RunLengthNonUniformity           | 67.34182215  |
| wavelet-HLL | glrlm      | ShortRunEmphasis                 | 0.968708114  |
| wavelet-HLL | glrlm      | LongRunHighGrayLevelEmphasis     | 177.0242786  |
| wavelet-HLL | glrlm      | RunPercentage                    | 0.960526316  |
| wavelet-HLL | glrlm      | LongRunLowGrayLevelEmphasis      | 0.039024271  |
| wavelet-HLL | glrlm      | RunEntropy                       | 4.483798126  |
| wavelet-HLL | glrlm      | HighGrayLevelRunEmphasis         | 165.6544473  |
| wavelet-HLL | glrlm      | RunLengthNonUniformityNormalized | 0.9213981    |



|             |       |                                      |              |
|-------------|-------|--------------------------------------|--------------|
| wavelet-HLL | glszm | GrayLevelVariance                    | 51.81901042  |
| wavelet-HLL | glszm | ZoneVariance                         | 1.201388889  |
| wavelet-HLL | glszm | GrayLevelNonUniformityNormalized     | 0.047743056  |
| wavelet-HLL | glszm | SizeZoneNonUniformityNormalized      | 0.555555556  |
| wavelet-HLL | glszm | SizeZoneNonUniformity                | 26.66666667  |
| wavelet-HLL | glszm | GrayLevelNonUniformity               | 2.291666667  |
| wavelet-HLL | glszm | LargeAreaEmphasis                    | 3.708333333  |
| wavelet-HLL | glszm | SmallAreaHighGrayLevelEmphasis       | 171.6803183  |
| wavelet-HLL | glszm | ZonePercentage                       | 0.631578947  |
| wavelet-HLL | glszm | LargeAreaLowGrayLevelEmphasis        | 0.101005066  |
| wavelet-HLL | glszm | LargeAreaHighGrayLevelEmphasis       | 434.3333333  |
| wavelet-HLL | glszm | HighGrayLevelZoneEmphasis            | 200.3541667  |
| wavelet-HLL | glszm | SmallAreaEmphasis                    | 0.767181713  |
| wavelet-HLL | glszm | LowGrayLevelZoneEmphasis             | 0.045569378  |
| wavelet-HLL | glszm | ZoneEntropy                          | 5.011842188  |
| wavelet-HLL | glszm | SmallAreaLowGrayLevelEmphasis        | 0.041704216  |
| wavelet-HLL | ngtdm | Coarseness                           | 0.088485426  |
| wavelet-HLL | ngtdm | Complexity                           | 851.2163147  |
| wavelet-HLL | ngtdm | Strength                             | 27.77465064  |
| wavelet-HLL | ngtdm | Contrast                             | 0.379468196  |
| wavelet-HLL | ngtdm | Busyness                             | 0.06658128   |
| wavelet-LHL | gldm  | GrayLevelVariance                    | 125.632964   |
| wavelet-LHL | gldm  | HighGrayLevelEmphasis                | 742.7631579  |
| wavelet-LHL | gldm  | DependenceEntropy                    | 5.343257941  |
| wavelet-LHL | gldm  | DependenceNonUniformity              | 32.5         |
| wavelet-LHL | gldm  | GrayLevelNonUniformity               | 2.973684211  |
| wavelet-LHL | gldm  | SmallDependenceEmphasis              | 0.622076023  |
| wavelet-LHL | gldm  | SmallDependenceHighGrayLevelEmphasis | 515.623538   |
| wavelet-LHL | gldm  | DependenceNonUniformityNormalized    | 0.427631579  |
| wavelet-LHL | gldm  | LargeDependenceEmphasis              | 2.921052632  |
| wavelet-LHL | gldm  | LargeDependenceLowGrayLevelEmphasis  | 0.022388211  |
| wavelet-LHL | gldm  | DependenceVariance                   | 0.427977839  |
| wavelet-LHL | gldm  | LargeDependenceHighGrayLevelEmphasis | 1790.210526  |
| wavelet-LHL | gldm  | SmallDependenceLowGrayLevelEmphasis  | 0.015102865  |
| wavelet-LHL | gldm  | LowGrayLevelEmphasis                 | 0.016261475  |
| wavelet-LHL | glcm  | JointAverage                         | 24.21521342  |
| wavelet-LHL | glcm  | SumAverage                           | 48.43042684  |
| wavelet-LHL | glcm  | JointEntropy                         | 6.312673598  |
| wavelet-LHL | glcm  | ClusterShade                         | 3033.347934  |
| wavelet-LHL | glcm  | MaximumProbability                   | 0.029758418  |
| wavelet-LHL | glcm  | Idmn                                 | 0.955275908  |
| wavelet-LHL | glcm  | JointEnergy                          | 0.01339277   |
| wavelet-LHL | glcm  | Contrast                             | 138.7566251  |
| wavelet-LHL | glcm  | DifferenceEntropy                    | 4.002388479  |
| wavelet-LHL | glcm  | InverseVariance                      | 0.111212324  |
| wavelet-LHL | glcm  | DifferenceVariance                   | 47.11686069  |
| wavelet-LHL | glcm  | Idn                                  | 0.860548086  |
| wavelet-LHL | glcm  | Idm                                  | 0.106019072  |
| wavelet-LHL | glcm  | Correlation                          | 0.422590787  |
| wavelet-LHL | glcm  | Autocorrelation                      | 639.0366245  |
| wavelet-LHL | glcm  | SumEntropy                           | 4.899416817  |
| wavelet-LHL | glcm  | SumSquares                           | 121.8431078  |
| wavelet-LHL | glcm  | ClusterProminence                    | 291294.8877  |
| wavelet-LHL | glcm  | Imc2                                 | 0.999309761  |
| wavelet-LHL | glcm  | Imc1                                 | -0.689591722 |
| wavelet-LHL | glcm  | DifferenceAverage                    | 9.223175248  |
| wavelet-LHL | glcm  | Id                                   | 0.18985021   |
| wavelet-LHL | glcm  | ClusterTendency                      | 348.6158062  |

|             |            |                                  |              |
|-------------|------------|----------------------------------|--------------|
| wavelet-LHL | firstorder | InterquartileRange               | 445.140261   |
| wavelet-LHL | firstorder | Skewness                         | 0.383192303  |
| wavelet-LHL | firstorder | Uniformity                       | 0.039127424  |
| wavelet-LHL | firstorder | Median                           | -90.32782841 |
| wavelet-LHL | firstorder | Energy                           | 6137784.891  |
| wavelet-LHL | firstorder | RobustMeanAbsoluteDeviation      | 176.5156136  |
| wavelet-LHL | firstorder | MeanAbsoluteDeviation            | 236.5970942  |
| wavelet-LHL | firstorder | TotalEnergy                      | 165720192    |
| wavelet-LHL | firstorder | Maximum                          | 642.0058532  |
| wavelet-LHL | firstorder | RootMeanSquared                  | 284.1836158  |
| wavelet-LHL | firstorder | 90Percentile                     | 349.3236326  |
| wavelet-LHL | firstorder | Minimum                          | -644.4625406 |
| wavelet-LHL | firstorder | Entropy                          | 4.892747007  |
| wavelet-LHL | firstorder | Range                            | 1286.468394  |
| wavelet-LHL | firstorder | Variance                         | 79000.68517  |
| wavelet-LHL | firstorder | 10Percentile                     | -345.5117564 |
| wavelet-LHL | firstorder | Kurtosis                         | 2.463706151  |
| wavelet-LHL | firstorder | Mean                             | -41.94809097 |
| wavelet-LHL | glrlm      | ShortRunLowGrayLevelEmphasis     | 0.016516478  |
| wavelet-LHL | glrlm      | GrayLevelVariance                | 126.5506056  |
| wavelet-LHL | glrlm      | LowGrayLevelRunEmphasis          | 0.016569019  |
| wavelet-LHL | glrlm      | GrayLevelNonUniformityNormalized | 0.038990444  |
| wavelet-LHL | glrlm      | RunVariance                      | 0.026639483  |
| wavelet-LHL | glrlm      | GrayLevelNonUniformity           | 2.898112907  |
| wavelet-LHL | glrlm      | LongRunEmphasis                  | 1.074696642  |
| wavelet-LHL | glrlm      | ShortRunHighGrayLevelEmphasis    | 737.8385713  |
| wavelet-LHL | glrlm      | RunLengthNonUniformity           | 71.33795576  |
| wavelet-LHL | glrlm      | ShortRunEmphasis                 | 0.983803233  |
| wavelet-LHL | glrlm      | LongRunHighGrayLevelEmphasis     | 789.3043548  |
| wavelet-LHL | glrlm      | RunPercentage                    | 0.977732794  |
| wavelet-LHL | glrlm      | LongRunLowGrayLevelEmphasis      | 0.016796216  |
| wavelet-LHL | glrlm      | RunEntropy                       | 4.934534066  |
| wavelet-LHL | glrlm      | HighGrayLevelRunEmphasis         | 746.9296965  |
| wavelet-LHL | glrlm      | RunLengthNonUniformityNormalized | 0.959129545  |
| wavelet-LHL | glszm      | GrayLevelVariance                | 139.4796694  |
| wavelet-LHL | glszm      | ZoneVariance                     | 0.41785124   |
| wavelet-LHL | glszm      | GrayLevelNonUniformityNormalized | 0.035371901  |
| wavelet-LHL | glszm      | SizeZoneNonUniformityNormalized  | 0.55107438   |
| wavelet-LHL | glszm      | SizeZoneNonUniformity            | 30.30909091  |
| wavelet-LHL | glszm      | GrayLevelNonUniformity           | 1.945454545  |
| wavelet-LHL | glszm      | LargeAreaEmphasis                | 2.327272727  |
| wavelet-LHL | glszm      | SmallAreaHighGrayLevelEmphasis   | 658.2454545  |
| wavelet-LHL | glszm      | ZonePercentage                   | 0.723684211  |
| wavelet-LHL | glszm      | LargeAreaLowGrayLevelEmphasis    | 0.025484901  |
| wavelet-LHL | glszm      | LargeAreaHighGrayLevelEmphasis   | 1538.472727  |
| wavelet-LHL | glszm      | HighGrayLevelZoneEmphasis        | 804.1818182  |
| wavelet-LHL | glszm      | SmallAreaEmphasis                | 0.769191919  |
| wavelet-LHL | glszm      | LowGrayLevelZoneEmphasis         | 0.021285075  |
| wavelet-LHL | glszm      | ZoneEntropy                      | 5.308632441  |
| wavelet-LHL | glszm      | SmallAreaLowGrayLevelEmphasis    | 0.02059281   |
| wavelet-LHL | ngtdm      | Coarseness                       | 0.06991132   |
| wavelet-LHL | ngtdm      | Complexity                       | 3211.067872  |
| wavelet-LHL | ngtdm      | Strength                         | 50.07705871  |
| wavelet-LHL | ngtdm      | Contrast                         | 1.165912088  |
| wavelet-LHL | ngtdm      | Busyness                         | 0.025087498  |
| wavelet-LHH | gldm       | GrayLevelVariance                | 33.35509003  |
| wavelet-LHH | gldm       | HighGrayLevelEmphasis            | 257.9605263  |
| wavelet-LHH | gldm       | DependenceEntropy                | 5.136039442  |

|             |            |                                      |              |
|-------------|------------|--------------------------------------|--------------|
| wavelet-LHH | gldm       | DependenceNonUniformity              | 32.73684211  |
| wavelet-LHH | gldm       | GrayLevelNonUniformity               | 4.657894737  |
| wavelet-LHH | gldm       | SmallDependenceEmphasis              | 0.664656433  |
| wavelet-LHH | gldm       | SmallDependenceHighGrayLevelEmphasis | 196.5316155  |
| wavelet-LHH | gldm       | DependenceNonUniformityNormalized    | 0.430747922  |
| wavelet-LHH | gldm       | LargeDependenceEmphasis              | 3.105263158  |
| wavelet-LHH | gldm       | LargeDependenceLowGrayLevelEmphasis  | 0.036833229  |
| wavelet-LHH | gldm       | DependenceVariance                   | 0.612188366  |
| wavelet-LHH | gldm       | LargeDependenceHighGrayLevelEmphasis | 625.9605263  |
| wavelet-LHH | gldm       | SmallDependenceLowGrayLevelEmphasis  | 0.018538599  |
| wavelet-LHH | gldm       | LowGrayLevelEmphasis                 | 0.021038964  |
| wavelet-LHH | glcm       | JointAverage                         | 15.11135316  |
| wavelet-LHH | glcm       | SumAverage                           | 30.22270632  |
| wavelet-LHH | glcm       | JointEntropy                         | 6.239541433  |
| wavelet-LHH | glcm       | ClusterShade                         | 108.9627508  |
| wavelet-LHH | glcm       | MaximumProbability                   | 0.027436961  |
| wavelet-LHH | glcm       | Idmn                                 | 0.940538259  |
| wavelet-LHH | glcm       | JointEnergy                          | 0.01414935   |
| wavelet-LHH | glcm       | Contrast                             | 64.70796546  |
| wavelet-LHH | glcm       | DifferenceEntropy                    | 3.66750031   |
| wavelet-LHH | glcm       | InverseVariance                      | 0.167661238  |
| wavelet-LHH | glcm       | DifferenceVariance                   | 23.61371896  |
| wavelet-LHH | glcm       | Idn                                  | 0.840841904  |
| wavelet-LHH | glcm       | Idm                                  | 0.140567764  |
| wavelet-LHH | glcm       | Correlation                          | -0.004904355 |
| wavelet-LHH | glcm       | Autocorrelation                      | 228.5943752  |
| wavelet-LHH | glcm       | SumEntropy                           | 4.370331501  |
| wavelet-LHH | glcm       | SumSquares                           | 32.45529028  |
| wavelet-LHH | glcm       | ClusterProminence                    | 13437.82949  |
| wavelet-LHH | glcm       | Imc2                                 | 0.991029784  |
| wavelet-LHH | glcm       | Imc1                                 | -0.492662668 |
| wavelet-LHH | glcm       | DifferenceAverage                    | 6.293112299  |
| wavelet-LHH | glcm       | Id                                   | 0.233320023  |
| wavelet-LHH | glcm       | ClusterTendency                      | 65.11319567  |
| wavelet-LHH | firstorder | InterquartileRange                   | 177.9380134  |
| wavelet-LHH | firstorder | Skewness                             | 0.313782684  |
| wavelet-LHH | firstorder | Uniformity                           | 0.061288089  |
| wavelet-LHH | firstorder | Median                               | -0.485376922 |
| wavelet-LHH | firstorder | Energy                               | 1606674.699  |
| wavelet-LHH | firstorder | RobustMeanAbsoluteDeviation          | 78.96893273  |
| wavelet-LHH | firstorder | MeanAbsoluteDeviation                | 115.0662421  |
| wavelet-LHH | firstorder | TotalEnergy                          | 43380216.88  |
| wavelet-LHH | firstorder | Maximum                              | 387.0227937  |
| wavelet-LHH | firstorder | RootMeanSquared                      | 145.397581   |
| wavelet-LHH | firstorder | 90Percentile                         | 207.731865   |
| wavelet-LHH | firstorder | Minimum                              | -345.1555847 |
| wavelet-LHH | firstorder | Entropy                              | 4.196104911  |
| wavelet-LHH | firstorder | Range                                | 732.1783784  |
| wavelet-LHH | firstorder | Variance                             | 20996.73531  |
| wavelet-LHH | firstorder | 10Percentile                         | -144.2417363 |
| wavelet-LHH | firstorder | Kurtosis                             | 3.012959312  |
| wavelet-LHH | firstorder | Mean                                 | 11.98837996  |
| wavelet-LHH | glrlm      | ShortRunLowGrayLevelEmphasis         | 0.021223065  |
| wavelet-LHH | glrlm      | GrayLevelVariance                    | 33.72536844  |
| wavelet-LHH | glrlm      | LowGrayLevelRunEmphasis              | 0.021352831  |
| wavelet-LHH | glrlm      | GrayLevelNonUniformityNormalized     | 0.060807608  |
| wavelet-LHH | glrlm      | RunVariance                          | 0.022214116  |
| wavelet-LHH | glrlm      | GrayLevelNonUniformity               | 4.519348996  |

|             |       |                                      |             |
|-------------|-------|--------------------------------------|-------------|
| wavelet-LHH | glrlm | LongRunEmphasis                      | 1.069426789 |
| wavelet-LHH | glrlm | ShortRunHighGrayLevelEmphasis        | 256.7251088 |
| wavelet-LHH | glrlm | RunLengthNonUniformity               | 71.05608554 |
| wavelet-LHH | glrlm | ShortRunEmphasis                     | 0.982643303 |
| wavelet-LHH | glrlm | LongRunHighGrayLevelEmphasis         | 272.16484   |
| wavelet-LHH | glrlm | RunPercentage                        | 0.977732794 |
| wavelet-LHH | glrlm | LongRunLowGrayLevelEmphasis          | 0.021871898 |
| wavelet-LHH | glrlm | RunEntropy                           | 4.280922356 |
| wavelet-LHH | glrlm | HighGrayLevelRunEmphasis             | 259.813055  |
| wavelet-LHH | glrlm | RunLengthNonUniformityNormalized     | 0.955571767 |
| wavelet-LHH | glszm | GrayLevelVariance                    | 38.63272727 |
| wavelet-LHH | glszm | ZoneVariance                         | 0.781487603 |
| wavelet-LHH | glszm | GrayLevelNonUniformityNormalized     | 0.055867769 |
| wavelet-LHH | glszm | SizeZoneNonUniformityNormalized      | 0.652892562 |
| wavelet-LHH | glszm | SizeZoneNonUniformity                | 35.90909091 |
| wavelet-LHH | glszm | GrayLevelNonUniformity               | 3.072727273 |
| wavelet-LHH | glszm | LargeAreaEmphasis                    | 2.690909091 |
| wavelet-LHH | glszm | SmallAreaHighGrayLevelEmphasis       | 255.7401465 |
| wavelet-LHH | glszm | ZonePercentage                       | 0.723684211 |
| wavelet-LHH | glszm | LargeAreaLowGrayLevelEmphasis        | 0.039433217 |
| wavelet-LHH | glszm | LargeAreaHighGrayLevelEmphasis       | 572.6363636 |
| wavelet-LHH | glszm | HighGrayLevelZoneEmphasis            | 288.2727273 |
| wavelet-LHH | glszm | SmallAreaEmphasis                    | 0.831787879 |
| wavelet-LHH | glszm | LowGrayLevelZoneEmphasis             | 0.026182775 |
| wavelet-LHH | glszm | ZoneEntropy                          | 4.819653296 |
| wavelet-LHH | glszm | SmallAreaLowGrayLevelEmphasis        | 0.024967681 |
| wavelet-LHH | ngtdm | Coarseness                           | 0.05327749  |
| wavelet-LHH | ngtdm | Complexity                           | 1010.791927 |
| wavelet-LHH | ngtdm | Strength                             | 11.47477331 |
| wavelet-LHH | ngtdm | Contrast                             | 0.680204589 |
| wavelet-LHH | ngtdm | Busyness                             | 0.082427691 |
| wavelet-LLH | gldm  | GrayLevelVariance                    | 168.7359765 |
| wavelet-LLH | gldm  | HighGrayLevelEmphasis                | 726.5657895 |
| wavelet-LLH | gldm  | DependenceEntropy                    | 5.553784257 |
| wavelet-LLH | gldm  | DependenceNonUniformity              | 36.10526316 |
| wavelet-LLH | gldm  | GrayLevelNonUniformity               | 2.973684211 |
| wavelet-LLH | gldm  | SmallDependenceEmphasis              | 0.707785088 |
| wavelet-LLH | gldm  | SmallDependenceHighGrayLevelEmphasis | 625.4076206 |
| wavelet-LLH | gldm  | DependenceNonUniformityNormalized    | 0.475069252 |
| wavelet-LLH | gldm  | LargeDependenceEmphasis              | 2.815789474 |
| wavelet-LLH | gldm  | LargeDependenceLowGrayLevelEmphasis  | 0.029639859 |
| wavelet-LLH | gldm  | DependenceVariance                   | 0.565789474 |
| wavelet-LLH | gldm  | LargeDependenceHighGrayLevelEmphasis | 1340.776316 |
| wavelet-LLH | gldm  | SmallDependenceLowGrayLevelEmphasis  | 0.019684728 |
| wavelet-LLH | gldm  | LowGrayLevelEmphasis                 | 0.021106128 |
| wavelet-LLH | glcm  | JointAverage                         | 22.69088539 |
| wavelet-LLH | glcm  | SumAverage                           | 45.38177078 |
| wavelet-LLH | glcm  | JointEntropy                         | 6.34038174  |
| wavelet-LLH | glcm  | ClusterShade                         | 8453.843073 |
| wavelet-LLH | glcm  | MaximumProbability                   | 0.024615833 |
| wavelet-LLH | glcm  | Idmn                                 | 0.953896571 |
| wavelet-LLH | glcm  | JointEnergy                          | 0.012871107 |
| wavelet-LLH | glcm  | Contrast                             | 187.509674  |
| wavelet-LLH | glcm  | DifferenceEntropy                    | 4.108253301 |
| wavelet-LLH | glcm  | InverseVariance                      | 0.089933257 |
| wavelet-LLH | glcm  | DifferenceVariance                   | 49.37344431 |
| wavelet-LLH | glcm  | Idn                                  | 0.85667929  |
| wavelet-LLH | glcm  | Idm                                  | 0.089091353 |

|             |            |                                  |              |
|-------------|------------|----------------------------------|--------------|
| wavelet-LLH | glcm       | Correlation                      | 0.411633854  |
| wavelet-LLH | glcm       | Autocorrelation                  | 579.5401105  |
| wavelet-LLH | glcm       | SumEntropy                       | 4.90047196   |
| wavelet-LLH | glcm       | SumSquares                       | 158.2027943  |
| wavelet-LLH | glcm       | ClusterProminence                | 616242.919   |
| wavelet-LLH | glcm       | Imc2                             | 0.999361057  |
| wavelet-LLH | glcm       | Imc1                             | -0.692650328 |
| wavelet-LLH | glcm       | DifferenceAverage                | 10.93596075  |
| wavelet-LLH | glcm       | Id                               | 0.168760414  |
| wavelet-LLH | glcm       | ClusterTendency                  | 445.3015031  |
| wavelet-LLH | firstorder | InterquartileRange               | 520.693993   |
| wavelet-LLH | firstorder | Skewness                         | 0.696879429  |
| wavelet-LLH | firstorder | Uniformity                       | 0.039127424  |
| wavelet-LLH | firstorder | Median                           | -191.6256683 |
| wavelet-LLH | firstorder | Energy                           | 8450144.989  |
| wavelet-LLH | firstorder | RobustMeanAbsoluteDeviation      | 198.0925448  |
| wavelet-LLH | firstorder | MeanAbsoluteDeviation            | 271.9418566  |
| wavelet-LLH | firstorder | TotalEnergy                      | 228153914.7  |
| wavelet-LLH | firstorder | Maximum                          | 842.8394602  |
| wavelet-LLH | firstorder | RootMeanSquared                  | 333.4458251  |
| wavelet-LLH | firstorder | 90Percentile                     | 371.4136977  |
| wavelet-LLH | firstorder | Minimum                          | -647.0102862 |
| wavelet-LLH | firstorder | Entropy                          | 4.958243139  |
| wavelet-LLH | firstorder | Range                            | 1489.849746  |
| wavelet-LLH | firstorder | Variance                         | 105997.5119  |
| wavelet-LLH | firstorder | 10Percentile                     | -389.4042133 |
| wavelet-LLH | firstorder | Kurtosis                         | 2.757417338  |
| wavelet-LLH | firstorder | Mean                             | -72.03198188 |
| wavelet-LLH | glrlm      | ShortRunLowGrayLevelEmphasis     | 0.021369665  |
| wavelet-LLH | glrlm      | GrayLevelVariance                | 170.0984279  |
| wavelet-LLH | glrlm      | LowGrayLevelRunEmphasis          | 0.021435283  |
| wavelet-LLH | glrlm      | GrayLevelNonUniformityNormalized | 0.038449301  |
| wavelet-LLH | glrlm      | RunVariance                      | 0.023451986  |
| wavelet-LLH | glrlm      | GrayLevelNonUniformity           | 2.867237299  |
| wavelet-LLH | glrlm      | LongRunEmphasis                  | 1.064710583  |
| wavelet-LLH | glrlm      | ShortRunHighGrayLevelEmphasis    | 729.3748568  |
| wavelet-LLH | glrlm      | RunLengthNonUniformity           | 72.02368377  |
| wavelet-LLH | glrlm      | ShortRunEmphasis                 | 0.986196523  |
| wavelet-LLH | glrlm      | LongRunHighGrayLevelEmphasis     | 755.9460345  |
| wavelet-LLH | glrlm      | RunPercentage                    | 0.980769231  |
| wavelet-LLH | glrlm      | LongRunLowGrayLevelEmphasis      | 0.021744402  |
| wavelet-LLH | glrlm      | RunEntropy                       | 5.022830798  |
| wavelet-LLH | glrlm      | HighGrayLevelRunEmphasis         | 734.2854836  |
| wavelet-LLH | glrlm      | RunLengthNonUniformityNormalized | 0.965382353  |
| wavelet-LLH | glszm      | GrayLevelVariance                | 187.0324019  |
| wavelet-LLH | glszm      | ZoneVariance                     | 0.731272295  |
| wavelet-LLH | glszm      | GrayLevelNonUniformityNormalized | 0.030915577  |
| wavelet-LLH | glszm      | SizeZoneNonUniformityNormalized  | 0.697384067  |
| wavelet-LLH | glszm      | SizeZoneNonUniformity            | 40.44827586  |
| wavelet-LLH | glszm      | GrayLevelNonUniformity           | 1.793103448  |
| wavelet-LLH | glszm      | LargeAreaEmphasis                | 2.448275862  |
| wavelet-LLH | glszm      | SmallAreaHighGrayLevelEmphasis   | 794.0111351  |
| wavelet-LLH | glszm      | ZonePercentage                   | 0.763157895  |
| wavelet-LLH | glszm      | LargeAreaLowGrayLevelEmphasis    | 0.032670519  |
| wavelet-LLH | glszm      | LargeAreaHighGrayLevelEmphasis   | 1333.948276  |
| wavelet-LLH | glszm      | HighGrayLevelZoneEmphasis        | 842.5689655  |
| wavelet-LLH | glszm      | SmallAreaEmphasis                | 0.858836207  |
| wavelet-LLH | glszm      | LowGrayLevelZoneEmphasis         | 0.026201004  |

|             |            |                                      |              |
|-------------|------------|--------------------------------------|--------------|
| wavelet-LLH | glszm      | ZoneEntropy                          | 5.409705133  |
| wavelet-LLH | glszm      | SmallAreaLowGrayLevelEmphasis        | 0.025474664  |
| wavelet-LLH | ngtdm      | Coarseness                           | 0.055375641  |
| wavelet-LLH | ngtdm      | Complexity                           | 5047.359912  |
| wavelet-LLH | ngtdm      | Strength                             | 55.86321224  |
| wavelet-LLH | ngtdm      | Contrast                             | 1.641875321  |
| wavelet-LLH | ngtdm      | Busyness                             | 0.028212897  |
| wavelet-LLL | gldm       | GrayLevelVariance                    | 538.9465028  |
| wavelet-LLL | gldm       | HighGrayLevelEmphasis                | 2030.328947  |
| wavelet-LLL | gldm       | DependenceEntropy                    | 5.728062053  |
| wavelet-LLL | gldm       | DependenceNonUniformity              | 58.63157895  |
| wavelet-LLL | gldm       | GrayLevelNonUniformity               | 1.605263158  |
| wavelet-LLL | gldm       | SmallDependenceEmphasis              | 0.901315789  |
| wavelet-LLL | gldm       | SmallDependenceHighGrayLevelEmphasis | 1716.276316  |
| wavelet-LLL | gldm       | DependenceNonUniformityNormalized    | 0.771468144  |
| wavelet-LLL | gldm       | LargeDependenceEmphasis              | 1.394736842  |
| wavelet-LLL | gldm       | LargeDependenceLowGrayLevelEmphasis  | 0.021259731  |
| wavelet-LLL | gldm       | DependenceVariance                   | 0.114265928  |
| wavelet-LLL | gldm       | LargeDependenceHighGrayLevelEmphasis | 3286.539474  |
| wavelet-LLL | gldm       | SmallDependenceLowGrayLevelEmphasis  | 0.020898454  |
| wavelet-LLL | gldm       | LowGrayLevelEmphasis                 | 0.020970709  |
| wavelet-LLL | glcm       | JointAverage                         | 46.02508793  |
| wavelet-LLL | glcm       | SumAverage                           | 92.05017585  |
| wavelet-LLL | glcm       | JointEntropy                         | 6.454754355  |
| wavelet-LLL | glcm       | ClusterShade                         | 3734.331681  |
| wavelet-LLL | glcm       | MaximumProbability                   | 0.015506147  |
| wavelet-LLL | glcm       | Idmn                                 | 0.905211281  |
| wavelet-LLL | glcm       | JointEnergy                          | 0.011569592  |
| wavelet-LLL | glcm       | Contrast                             | 944.9291594  |
| wavelet-LLL | glcm       | DifferenceEntropy                    | 4.739283182  |
| wavelet-LLL | glcm       | InverseVariance                      | 0.024450289  |
| wavelet-LLL | glcm       | DifferenceVariance                   | 279.1057655  |
| wavelet-LLL | glcm       | Idn                                  | 0.793775382  |
| wavelet-LLL | glcm       | Idm                                  | 0.026357523  |
| wavelet-LLL | glcm       | Correlation                          | 0.169230746  |
| wavelet-LLL | glcm       | Autocorrelation                      | 2209.898227  |
| wavelet-LLL | glcm       | SumEntropy                           | 5.132088691  |
| wavelet-LLL | glcm       | SumSquares                           | 563.5991403  |
| wavelet-LLL | glcm       | ClusterProminence                    | 3730317.197  |
| wavelet-LLL | glcm       | Imc2                                 | 0.999954336  |
| wavelet-LLL | glcm       | Imc1                                 | -0.840200394 |
| wavelet-LLL | glcm       | DifferenceAverage                    | 25.52632942  |
| wavelet-LLL | glcm       | Id                                   | 0.078228812  |
| wavelet-LLL | glcm       | ClusterTendency                      | 1309.467402  |
| wavelet-LLL | firstorder | InterquartileRange                   | 893.0706671  |
| wavelet-LLL | firstorder | Skewness                             | 0.354937795  |
| wavelet-LLL | firstorder | Uniformity                           | 0.021121884  |
| wavelet-LLL | firstorder | Median                               | -923.7816697 |
| wavelet-LLL | firstorder | Energy                               | 76740628.18  |
| wavelet-LLL | firstorder | RobustMeanAbsoluteDeviation          | 372.4851575  |
| wavelet-LLL | firstorder | MeanAbsoluteDeviation                | 492.4726167  |
| wavelet-LLL | firstorder | TotalEnergy                          | 2071996961   |
| wavelet-LLL | firstorder | Maximum                              | 425.3057696  |
| wavelet-LLL | firstorder | RootMeanSquared                      | 1004.86074   |
| wavelet-LLL | firstorder | 90Percentile                         | 5.220078448  |
| wavelet-LLL | firstorder | Minimum                              | -1761.956229 |
| wavelet-LLL | firstorder | Entropy                              | 5.691813533  |
| wavelet-LLL | firstorder | Range                                | 2187.261998  |

|             |            |                                      |              |
|-------------|------------|--------------------------------------|--------------|
| wavelet-LLL | firstorder | Variance                             | 334965.1144  |
| wavelet-LLL | firstorder | 10Percentile                         | -1500.663174 |
| wavelet-LLL | firstorder | Kurtosis                             | 2.103730339  |
| wavelet-LLL | firstorder | Mean                                 | -821.4499335 |
| wavelet-LLL | glrlm      | ShortRunLowGrayLevelEmphasis         | 0.021072809  |
| wavelet-LLL | glrlm      | GrayLevelVariance                    | 538.4259518  |
| wavelet-LLL | glrlm      | LowGrayLevelRunEmphasis              | 0.02107564   |
| wavelet-LLL | glrlm      | GrayLevelNonUniformityNormalized     | 0.021106579  |
| wavelet-LLL | glrlm      | RunVariance                          | 0.005057591  |
| wavelet-LLL | glrlm      | GrayLevelNonUniformity               | 1.595982055  |
| wavelet-LLL | glrlm      | LongRunEmphasis                      | 1.015550936  |
| wavelet-LLL | glrlm      | ShortRunHighGrayLevelEmphasis        | 2011.918203  |
| wavelet-LLL | glrlm      | RunLengthNonUniformity               | 74.86483714  |
| wavelet-LLL | glrlm      | ShortRunEmphasis                     | 0.996112266  |
| wavelet-LLL | glrlm      | LongRunHighGrayLevelEmphasis         | 2073.922309  |
| wavelet-LLL | glrlm      | RunPercentage                        | 0.994939271  |
| wavelet-LLL | glrlm      | LongRunLowGrayLevelEmphasis          | 0.021086962  |
| wavelet-LLL | glrlm      | RunEntropy                           | 5.694734642  |
| wavelet-LLL | glrlm      | HighGrayLevelRunEmphasis             | 2024.319024  |
| wavelet-LLL | glrlm      | RunLengthNonUniformityNormalized     | 0.989884817  |
| wavelet-LLL | glszm      | GrayLevelVariance                    | 531.8337631  |
| wavelet-LLL | glszm      | ZoneVariance                         | 0.065463202  |
| wavelet-LLL | glszm      | GrayLevelNonUniformityNormalized     | 0.020829201  |
| wavelet-LLL | glszm      | SizeZoneNonUniformityNormalized      | 0.869073597  |
| wavelet-LLL | glszm      | SizeZoneNonUniformity                | 61.70422535  |
| wavelet-LLL | glszm      | GrayLevelNonUniformity               | 1.478873239  |
| wavelet-LLL | glszm      | LargeAreaEmphasis                    | 1.211267606  |
| wavelet-LLL | glszm      | SmallAreaHighGrayLevelEmphasis       | 1781.112676  |
| wavelet-LLL | glszm      | ZonePercentage                       | 0.934210526  |
| wavelet-LLL | glszm      | LargeAreaLowGrayLevelEmphasis        | 0.022550645  |
| wavelet-LLL | glszm      | LargeAreaHighGrayLevelEmphasis       | 2621.535211  |
| wavelet-LLL | glszm      | HighGrayLevelZoneEmphasis            | 1949.197183  |
| wavelet-LLL | glszm      | SmallAreaEmphasis                    | 0.947183099  |
| wavelet-LLL | glszm      | LowGrayLevelZoneEmphasis             | 0.022395957  |
| wavelet-LLL | glszm      | ZoneEntropy                          | 5.734116486  |
| wavelet-LLL | glszm      | SmallAreaLowGrayLevelEmphasis        | 0.022357285  |
| wavelet-LLL | ngtdm      | Coarseness                           | 0.036181422  |
| wavelet-LLL | ngtdm      | Complexity                           | 31346.89182  |
| wavelet-LLL | ngtdm      | Strength                             | 95.93182178  |
| wavelet-LLL | ngtdm      | Contrast                             | 6.083330821  |
| wavelet-LLL | ngtdm      | Busyness                             | 0.01748369   |
| wavelet-HHL | gldm       | GrayLevelVariance                    | 8.530990305  |
| wavelet-HHL | gldm       | HighGrayLevelEmphasis                | 51.98684211  |
| wavelet-HHL | gldm       | DependenceEntropy                    | 4.909130067  |
| wavelet-HHL | gldm       | DependenceNonUniformity              | 18.86842105  |
| wavelet-HHL | gldm       | GrayLevelNonUniformity               | 8.605263158  |
| wavelet-HHL | gldm       | SmallDependenceEmphasis              | 0.326304489  |
| wavelet-HHL | gldm       | SmallDependenceHighGrayLevelEmphasis | 23.0539894   |
| wavelet-HHL | gldm       | DependenceNonUniformityNormalized    | 0.248268698  |
| wavelet-HHL | gldm       | LargeDependenceEmphasis              | 9.842105263  |
| wavelet-HHL | gldm       | LargeDependenceLowGrayLevelEmphasis  | 0.425086582  |
| wavelet-HHL | gldm       | DependenceVariance                   | 2.637119114  |
| wavelet-HHL | gldm       | LargeDependenceHighGrayLevelEmphasis | 428.9078947  |
| wavelet-HHL | gldm       | SmallDependenceLowGrayLevelEmphasis  | 0.028288274  |
| wavelet-HHL | gldm       | LowGrayLevelEmphasis                 | 0.072427197  |
| wavelet-HHL | glcm       | JointAverage                         | 6.623130619  |
| wavelet-HHL | glcm       | SumAverage                           | 13.24626124  |
| wavelet-HHL | glcm       | JointEntropy                         | 5.505087696  |

|             |            |                                  |              |
|-------------|------------|----------------------------------|--------------|
| wavelet-HHL | glcm       | ClusterShade                     | 35.7817005   |
| wavelet-HHL | glcm       | MaximumProbability               | 0.053918059  |
| wavelet-HHL | glcm       | Idmn                             | 0.946015848  |
| wavelet-HHL | glcm       | JointEnergy                      | 0.025597293  |
| wavelet-HHL | glcm       | Contrast                         | 16.84275672  |
| wavelet-HHL | glcm       | DifferenceEntropy                | 2.927441924  |
| wavelet-HHL | glcm       | InverseVariance                  | 0.287775881  |
| wavelet-HHL | glcm       | DifferenceVariance               | 6.852295449  |
| wavelet-HHL | glcm       | Idn                              | 0.851087847  |
| wavelet-HHL | glcm       | Idm                              | 0.27849022   |
| wavelet-HHL | glcm       | Correlation                      | -0.035104435 |
| wavelet-HHL | glcm       | Autocorrelation                  | 43.69816127  |
| wavelet-HHL | glcm       | SumEntropy                       | 3.621896984  |
| wavelet-HHL | glcm       | SumSquares                       | 8.242733912  |
| wavelet-HHL | glcm       | ClusterProminence                | 970.8420758  |
| wavelet-HHL | glcm       | Imc2                             | 0.926433991  |
| wavelet-HHL | glcm       | Imc1                             | -0.30673377  |
| wavelet-HHL | glcm       | DifferenceAverage                | 3.121709224  |
| wavelet-HHL | glcm       | Id                               | 0.366607736  |
| wavelet-HHL | glcm       | ClusterTendency                  | 16.12817893  |
| wavelet-HHL | firstorder | InterquartileRange               | 93.66123003  |
| wavelet-HHL | firstorder | Skewness                         | 0.74432336   |
| wavelet-HHL | firstorder | Uniformity                       | 0.113227147  |
| wavelet-HHL | firstorder | Median                           | -0.877154214 |
| wavelet-HHL | firstorder | Energy                           | 412695.6479  |
| wavelet-HHL | firstorder | RobustMeanAbsoluteDeviation      | 35.52348497  |
| wavelet-HHL | firstorder | MeanAbsoluteDeviation            | 55.58208858  |
| wavelet-HHL | firstorder | TotalEnergy                      | 11142782.49  |
| wavelet-HHL | firstorder | Maximum                          | 247.1987848  |
| wavelet-HHL | firstorder | RootMeanSquared                  | 73.68993075  |
| wavelet-HHL | firstorder | 90Percentile                     | 83.73222907  |
| wavelet-HHL | firstorder | Minimum                          | -149.5646685 |
| wavelet-HHL | firstorder | Entropy                          | 3.330827786  |
| wavelet-HHL | firstorder | Range                            | 396.7634532  |
| wavelet-HHL | firstorder | Variance                         | 5420.328917  |
| wavelet-HHL | firstorder | 10Percentile                     | -78.63361676 |
| wavelet-HHL | firstorder | Kurtosis                         | 4.143704879  |
| wavelet-HHL | firstorder | Mean                             | 3.142765742  |
| wavelet-HHL | glrlm      | ShortRunLowGrayLevelEmphasis     | 0.071317179  |
| wavelet-HHL | glrlm      | GrayLevelVariance                | 8.851836574  |
| wavelet-HHL | glrlm      | LowGrayLevelRunEmphasis          | 0.073961526  |
| wavelet-HHL | glrlm      | GrayLevelNonUniformityNormalized | 0.11121857   |
| wavelet-HHL | glrlm      | RunVariance                      | 0.073292418  |
| wavelet-HHL | glrlm      | GrayLevelNonUniformity           | 7.904659837  |
| wavelet-HHL | glrlm      | LongRunEmphasis                  | 1.221633274  |
| wavelet-HHL | glrlm      | ShortRunHighGrayLevelEmphasis    | 50.64995702  |
| wavelet-HHL | glrlm      | RunLengthNonUniformity           | 62.55530225  |
| wavelet-HHL | glrlm      | ShortRunEmphasis                 | 0.949699444  |
| wavelet-HHL | glrlm      | LongRunHighGrayLevelEmphasis     | 62.11332898  |
| wavelet-HHL | glrlm      | RunPercentage                    | 0.935222672  |
| wavelet-HHL | glrlm      | LongRunLowGrayLevelEmphasis      | 0.08491347   |
| wavelet-HHL | glrlm      | RunEntropy                       | 3.601414551  |
| wavelet-HHL | glrlm      | HighGrayLevelRunEmphasis         | 52.70874503  |
| wavelet-HHL | glrlm      | RunLengthNonUniformityNormalized | 0.877861113  |
| wavelet-HHL | glszm      | GrayLevelVariance                | 12.88964844  |
| wavelet-HHL | glszm      | ZoneVariance                     | 4.734375     |
| wavelet-HHL | glszm      | GrayLevelNonUniformityNormalized | 0.091796875  |
| wavelet-HHL | glszm      | SizeZoneNonUniformityNormalized  | 0.3125       |



|             |            |                                      |              |
|-------------|------------|--------------------------------------|--------------|
| wavelet-HHL | glszm      | SizeZoneNonUniformity                | 10           |
| wavelet-HHL | glszm      | GrayLevelNonUniformity               | 2.9375       |
| wavelet-HHL | glszm      | LargeAreaEmphasis                    | 10.375       |
| wavelet-HHL | glszm      | SmallAreaHighGrayLevelEmphasis       | 44.80701389  |
| wavelet-HHL | glszm      | ZonePercentage                       | 0.421052632  |
| wavelet-HHL | glszm      | LargeAreaLowGrayLevelEmphasis        | 0.487990321  |
| wavelet-HHL | glszm      | LargeAreaHighGrayLevelEmphasis       | 447.84375    |
| wavelet-HHL | glszm      | HighGrayLevelZoneEmphasis            | 65.90625     |
| wavelet-HHL | glszm      | SmallAreaEmphasis                    | 0.553111497  |
| wavelet-HHL | glszm      | LowGrayLevelZoneEmphasis             | 0.09169246   |
| wavelet-HHL | glszm      | ZoneEntropy                          | 4.663909766  |
| wavelet-HHL | glszm      | SmallAreaLowGrayLevelEmphasis        | 0.051571728  |
| wavelet-HHL | ngtdm      | Coarseness                           | 0.067743801  |
| wavelet-HHL | ngtdm      | Complexity                           | 169.2824787  |
| wavelet-HHL | ngtdm      | Strength                             | 4.383089988  |
| wavelet-HHL | ngtdm      | Contrast                             | 0.254862018  |
| wavelet-HHL | ngtdm      | Busyness                             | 0.228953851  |
| wavelet-HLH | gldm       | GrayLevelVariance                    | 7.404951524  |
| wavelet-HLH | gldm       | HighGrayLevelEmphasis                | 82.59210526  |
| wavelet-HLH | gldm       | DependenceEntropy                    | 5.055438165  |
| wavelet-HLH | gldm       | DependenceNonUniformity              | 14.78947368  |
| wavelet-HLH | gldm       | GrayLevelNonUniformity               | 8.947368421  |
| wavelet-HLH | gldm       | SmallDependenceEmphasis              | 0.317317028  |
| wavelet-HLH | gldm       | SmallDependenceHighGrayLevelEmphasis | 29.68844313  |
| wavelet-HLH | gldm       | DependenceNonUniformityNormalized    | 0.194598338  |
| wavelet-HLH | gldm       | LargeDependenceEmphasis              | 10.89473684  |
| wavelet-HLH | gldm       | LargeDependenceLowGrayLevelEmphasis  | 0.200859826  |
| wavelet-HLH | gldm       | DependenceVariance                   | 2.515235457  |
| wavelet-HLH | gldm       | LargeDependenceHighGrayLevelEmphasis | 774.3026316  |
| wavelet-HLH | gldm       | SmallDependenceLowGrayLevelEmphasis  | 0.021276306  |
| wavelet-HLH | gldm       | LowGrayLevelEmphasis                 | 0.032686945  |
| wavelet-HLH | glcm       | JointAverage                         | 8.696517163  |
| wavelet-HLH | glcm       | SumAverage                           | 17.39303433  |
| wavelet-HLH | glcm       | JointEntropy                         | 5.564779949  |
| wavelet-HLH | glcm       | ClusterShade                         | -1.178368938 |
| wavelet-HLH | glcm       | MaximumProbability                   | 0.059628305  |
| wavelet-HLH | glcm       | Idmn                                 | 0.943008878  |
| wavelet-HLH | glcm       | JointEnergy                          | 0.024929758  |
| wavelet-HLH | glcm       | Contrast                             | 15.1401411   |
| wavelet-HLH | glcm       | DifferenceEntropy                    | 2.919686362  |
| wavelet-HLH | glcm       | InverseVariance                      | 0.251616432  |
| wavelet-HLH | glcm       | DifferenceVariance                   | 5.515489526  |
| wavelet-HLH | glcm       | Idn                                  | 0.842970719  |
| wavelet-HLH | glcm       | Idm                                  | 0.273841779  |
| wavelet-HLH | glcm       | Correlation                          | 0.014890432  |
| wavelet-HLH | glcm       | Autocorrelation                      | 75.81228377  |
| wavelet-HLH | glcm       | SumEntropy                           | 3.650719437  |
| wavelet-HLH | glcm       | SumSquares                           | 7.706178645  |
| wavelet-HLH | glcm       | ClusterProminence                    | 725.4997925  |
| wavelet-HLH | glcm       | Imc2                                 | 0.928779575  |
| wavelet-HLH | glcm       | Imc1                                 | -0.30643402  |
| wavelet-HLH | glcm       | DifferenceAverage                    | 3.080878662  |
| wavelet-HLH | glcm       | Id                                   | 0.366078519  |
| wavelet-HLH | glcm       | ClusterTendency                      | 15.68457348  |
| wavelet-HLH | firstorder | InterquartileRange                   | 87.56611386  |
| wavelet-HLH | firstorder | Skewness                             | -0.139807501 |
| wavelet-HLH | firstorder | Uniformity                           | 0.117728532  |
| wavelet-HLH | firstorder | Median                               | 9.388146146  |

|             |            |                                  |              |
|-------------|------------|----------------------------------|--------------|
| wavelet-HLH | firstorder | Energy                           | 356649.0501  |
| wavelet-HLH | firstorder | RobustMeanAbsoluteDeviation      | 35.27198198  |
| wavelet-HLH | firstorder | MeanAbsoluteDeviation            | 53.26146321  |
| wavelet-HLH | firstorder | TotalEnergy                      | 9629524.353  |
| wavelet-HLH | firstorder | Maximum                          | 167.0239963  |
| wavelet-HLH | firstorder | RootMeanSquared                  | 68.50365435  |
| wavelet-HLH | firstorder | 90Percentile                     | 89.4430563   |
| wavelet-HLH | firstorder | Minimum                          | -187.988286  |
| wavelet-HLH | firstorder | Entropy                          | 3.322583654  |
| wavelet-HLH | firstorder | Range                            | 355.0122823  |
| wavelet-HLH | firstorder | Variance                         | 4677.976107  |
| wavelet-HLH | firstorder | 10Percentile                     | -70.97516299 |
| wavelet-HLH | firstorder | Kurtosis                         | 3.284800032  |
| wavelet-HLH | firstorder | Mean                             | 3.843767942  |
| wavelet-HLH | glrlm      | ShortRunLowGrayLevelEmphasis     | 0.032980299  |
| wavelet-HLH | glrlm      | GrayLevelVariance                | 7.718498902  |
| wavelet-HLH | glrlm      | LowGrayLevelRunEmphasis          | 0.033951197  |
| wavelet-HLH | glrlm      | GrayLevelNonUniformityNormalized | 0.114618103  |
| wavelet-HLH | glrlm      | RunVariance                      | 0.083391559  |
| wavelet-HLH | glrlm      | GrayLevelNonUniformity           | 8.077743041  |
| wavelet-HLH | glrlm      | LongRunEmphasis                  | 1.252416747  |
| wavelet-HLH | glrlm      | ShortRunHighGrayLevelEmphasis    | 79.33280792  |
| wavelet-HLH | glrlm      | RunLengthNonUniformity           | 61.02419546  |
| wavelet-HLH | glrlm      | ShortRunEmphasis                 | 0.943272651  |
| wavelet-HLH | glrlm      | LongRunHighGrayLevelEmphasis     | 101.6914684  |
| wavelet-HLH | glrlm      | RunPercentage                    | 0.927125506  |
| wavelet-HLH | glrlm      | LongRunLowGrayLevelEmphasis      | 0.038196964  |
| wavelet-HLH | glrlm      | RunEntropy                       | 3.634307779  |
| wavelet-HLH | glrlm      | HighGrayLevelRunEmphasis         | 83.42227653  |
| wavelet-HLH | glrlm      | RunLengthNonUniformityNormalized | 0.863674686  |
| wavelet-HLH | glszm      | GrayLevelVariance                | 12.71592092  |
| wavelet-HLH | glszm      | ZoneVariance                     | 7.408949011  |
| wavelet-HLH | glszm      | GrayLevelNonUniformityNormalized | 0.090530697  |
| wavelet-HLH | glszm      | SizeZoneNonUniformityNormalized  | 0.33194589   |
| wavelet-HLH | glszm      | SizeZoneNonUniformity            | 10.29032258  |
| wavelet-HLH | glszm      | GrayLevelNonUniformity           | 2.806451613  |
| wavelet-HLH | glszm      | LargeAreaEmphasis                | 13.41935484  |
| wavelet-HLH | glszm      | SmallAreaHighGrayLevelEmphasis   | 56.83223118  |
| wavelet-HLH | glszm      | ZonePercentage                   | 0.407894737  |
| wavelet-HLH | glszm      | LargeAreaLowGrayLevelEmphasis    | 0.241240659  |
| wavelet-HLH | glszm      | LargeAreaHighGrayLevelEmphasis   | 1038.548387  |
| wavelet-HLH | glszm      | HighGrayLevelZoneEmphasis        | 90.83870968  |
| wavelet-HLH | glszm      | SmallAreaEmphasis                | 0.587007168  |
| wavelet-HLH | glszm      | LowGrayLevelZoneEmphasis         | 0.056467133  |
| wavelet-HLH | glszm      | ZoneEntropy                      | 4.567099536  |
| wavelet-HLH | glszm      | SmallAreaLowGrayLevelEmphasis    | 0.049071454  |
| wavelet-HLH | ngtdm      | Coarseness                       | 0.073294068  |
| wavelet-HLH | ngtdm      | Complexity                       | 159.9339809  |
| wavelet-HLH | ngtdm      | Strength                         | 4.478356967  |
| wavelet-HLH | ngtdm      | Contrast                         | 0.171309194  |
| wavelet-HLH | ngtdm      | Busyness                         | 0.121675527  |

| Image type | Feature Class | Feature Name                         | Value                                                                                                                                                                                                                                                                                                                                                                                                             |
|------------|---------------|--------------------------------------|-------------------------------------------------------------------------------------------------------------------------------------------------------------------------------------------------------------------------------------------------------------------------------------------------------------------------------------------------------------------------------------------------------------------|
| general    | info          | BoundingBox                          | (0, 0, 1, 7, 6, 6)                                                                                                                                                                                                                                                                                                                                                                                                |
| general    | info          | EnabledImageTypes                    | {u'Original': {}, u'Wavelet': {}}                                                                                                                                                                                                                                                                                                                                                                                 |
| general    | info          | GeneralSettings                      | {'distances': [1], 'additionalInfo': True, 'force2D': False, 'interpolator': 'sitkBSpline', 'resampledPixelSpacing': [3.0], 'label': 1, 'normalizeScale': 1, 'normalize': False, 'force2Ddimension': 0, 'removeOutliers': None, 'minimumROISize': None, u'binWidth': 25.0, 'minimumROIDimensions': 1, u'correctMask': True, 'preCrop': False, u'symmetricalGLCM': True, 'resegmentRange': None, 'padDistance': 5} |
| general    | info          | ImageHash                            | b8d9640307bf5b7a55a3543377fbbfbb1c3229d7                                                                                                                                                                                                                                                                                                                                                                          |
| general    | info          | ImageSpacing                         | (0.9765624999999998, 0.9765624999999998, 1.9999999999999999)                                                                                                                                                                                                                                                                                                                                                      |
| general    | info          | MaskHash                             | 493f405786d7309c8df8f4e864536717b4137bf4                                                                                                                                                                                                                                                                                                                                                                          |
| general    | info          | NumpyVersion                         | 1.13.1                                                                                                                                                                                                                                                                                                                                                                                                            |
| general    | info          | PyWaveletVersion                     | 0.5.2                                                                                                                                                                                                                                                                                                                                                                                                             |
| general    | info          | SimpleITKVersion                     | 1.1.0                                                                                                                                                                                                                                                                                                                                                                                                             |
| general    | info          | Version                              | 1.3.0.post102+g1b0eb74                                                                                                                                                                                                                                                                                                                                                                                            |
| general    | info          | VolumeNum                            | 1                                                                                                                                                                                                                                                                                                                                                                                                                 |
| general    | info          | VoxelNum                             | 113                                                                                                                                                                                                                                                                                                                                                                                                               |
| original   | shape         | Maximum3DDiameter                    | 20.34698995                                                                                                                                                                                                                                                                                                                                                                                                       |
| original   | shape         | Maximum2DDiameterSlice               | 16.15549442                                                                                                                                                                                                                                                                                                                                                                                                       |
| original   | shape         | Sphericity                           | 0.88932731                                                                                                                                                                                                                                                                                                                                                                                                        |
| original   | shape         | MinorAxis                            | 16.41205335                                                                                                                                                                                                                                                                                                                                                                                                       |
| original   | shape         | Elongation                           | 0.868426589                                                                                                                                                                                                                                                                                                                                                                                                       |
| original   | shape         | SurfaceVolumeRatio                   | 0.37492272                                                                                                                                                                                                                                                                                                                                                                                                        |
| original   | shape         | Volume                               | 3051                                                                                                                                                                                                                                                                                                                                                                                                              |
| original   | shape         | MajorAxis                            | 18.8986076                                                                                                                                                                                                                                                                                                                                                                                                        |
| original   | shape         | SurfaceArea                          | 1143.889219                                                                                                                                                                                                                                                                                                                                                                                                       |
| original   | shape         | Flatness                             | 0.745444028                                                                                                                                                                                                                                                                                                                                                                                                       |
| original   | shape         | LeastAxis                            | 14.08785418                                                                                                                                                                                                                                                                                                                                                                                                       |
| original   | shape         | Maximum2DDiameterColumn              | 20.1246118                                                                                                                                                                                                                                                                                                                                                                                                        |
| original   | shape         | Maximum2DDiameterRow                 | 17.49285568                                                                                                                                                                                                                                                                                                                                                                                                       |
| original   | gldm          | GrayLevelVariance                    | 111.355157                                                                                                                                                                                                                                                                                                                                                                                                        |
| original   | gldm          | HighGrayLevelEmphasis                | 633.0530973                                                                                                                                                                                                                                                                                                                                                                                                       |
| original   | gldm          | DependenceEntropy                    | 5.729168232                                                                                                                                                                                                                                                                                                                                                                                                       |
| original   | gldm          | DependenceNonUniformity              | 30.45132743                                                                                                                                                                                                                                                                                                                                                                                                       |
| original   | gldm          | GrayLevelNonUniformity               | 8.415929204                                                                                                                                                                                                                                                                                                                                                                                                       |
| original   | gldm          | SmallDependenceEmphasis              | 0.530042212                                                                                                                                                                                                                                                                                                                                                                                                       |
| original   | gldm          | SmallDependenceHighGrayLevelEmphasis | 202.7923672                                                                                                                                                                                                                                                                                                                                                                                                       |
| original   | gldm          | DependenceNonUniformityNormalized    | 0.269480774                                                                                                                                                                                                                                                                                                                                                                                                       |
| original   | gldm          | LargeDependenceEmphasis              | 17.2300885                                                                                                                                                                                                                                                                                                                                                                                                        |
| original   | gldm          | LargeDependenceLowGrayLevelEmphasis  | 0.046952336                                                                                                                                                                                                                                                                                                                                                                                                       |
| original   | gldm          | DependenceVariance                   | 7.800297596                                                                                                                                                                                                                                                                                                                                                                                                       |

|          |            |                                      |              |
|----------|------------|--------------------------------------|--------------|
| original | gldm       | LargeDependenceHighGrayLevelEmphasis | 17402.43363  |
| original | gldm       | SmallDependenceLowGrayLevelEmphasis  | 0.017055091  |
| original | gldm       | LowGrayLevelEmphasis                 | 0.018883462  |
| original | glcm       | JointAverage                         | 25.34396926  |
| original | glcm       | SumAverage                           | 50.68793852  |
| original | glcm       | JointEntropy                         | 6.202344726  |
| original | glcm       | ClusterShade                         | -3288.459124 |
| original | glcm       | MaximumProbability                   | 0.074809265  |
| original | glcm       | ldmn                                 | 0.918612663  |
| original | glcm       | JointEnergy                          | 0.022153176  |
| original | glcm       | Contrast                             | 128.0133263  |
| original | glcm       | DifferenceEntropy                    | 4.028435273  |
| original | glcm       | InverseVariance                      | 0.226331914  |
| original | glcm       | DifferenceVariance                   | 64.34778068  |
| original | glcm       | ldn                                  | 0.839610002  |
| original | glcm       | ldm                                  | 0.250775647  |
| original | glcm       | Correlation                          | 0.308246319  |
| original | glcm       | Autocorrelation                      | 670.6766601  |
| original | glcm       | SumEntropy                           | 4.693364585  |
| original | glcm       | SumSquares                           | 92.25574843  |
| original | glcm       | ClusterProminence                    | 163082.9988  |
| original | glcm       | lmc2                                 | 0.987916222  |
| original | glcm       | lmc1                                 | -0.468020588 |
| original | glcm       | DifferenceAverage                    | 7.852021327  |
| original | glcm       | ld                                   | 0.311780956  |
| original | glcm       | ClusterTendency                      | 241.0096674  |
| original | firstorder | InterquartileRange                   | 512          |
| original | firstorder | Skewness                             | -0.596087179 |
| original | firstorder | Uniformity                           | 0.07447725   |
| original | firstorder | Median                               | -128         |
| original | firstorder | Energy                               | 13263574     |
| original | firstorder | RobustMeanAbsoluteDeviation          | 192.1651307  |
| original | firstorder | MeanAbsoluteDeviation                | 233.9263842  |
| original | firstorder | TotalEnergy                          | 358116498    |
| original | firstorder | Maximum                              | 67           |
| original | firstorder | RootMeanSquared                      | 342.6029204  |
| original | firstorder | 90Percentile                         | 40.6         |
| original | firstorder | Minimum                              | -767         |
| original | firstorder | Entropy                              | 4.390146036  |
| original | firstorder | Range                                | 834          |
| original | firstorder | Variance                             | 69814.16916  |
| original | firstorder | 10Percentile                         | -643.4       |
| original | firstorder | Kurtosis                             | 1.857425085  |
| original | firstorder | Mean                                 | -218.0884956 |
| original | gllm       | ShortRunLowGrayLevelEmphasis         | 0.020164586  |
| original | gllm       | GrayLevelVariance                    | 111.600196   |
| original | gllm       | LowGrayLevelRunEmphasis              | 0.02031733   |
| original | gllm       | GrayLevelNonUniformityNormalized     | 0.062899416  |
| original | gllm       | RunVariance                          | 0.100021482  |
| original | gllm       | GrayLevelNonUniformity               | 6.548532253  |
| original | gllm       | LongRunEmphasis                      | 1.282618609  |
| original | gllm       | ShortRunHighGrayLevelEmphasis        | 542.5103355  |
| original | gllm       | RunLengthNonUniformity               | 89.2844092   |

|             |       |                                      |              |
|-------------|-------|--------------------------------------|--------------|
| original    | glrlm | ShortRunEmphasis                     | 0.94108873   |
| original    | glrlm | LongRunHighGrayLevelEmphasis         | 884.584891   |
| original    | glrlm | RunPercentage                        | 0.920353982  |
| original    | glrlm | LongRunLowGrayLevelEmphasis          | 0.020973907  |
| original    | glrlm | RunEntropy                           | 4.78843205   |
| original    | glrlm | HighGrayLevelRunEmphasis             | 601.1028847  |
| original    | glrlm | RunLengthNonUniformityNormalized     | 0.857784328  |
| original    | glszm | GrayLevelVariance                    | 89.71875     |
| original    | glszm | ZoneVariance                         | 9.523193359  |
| original    | glszm | GrayLevelNonUniformityNormalized     | 0.038574219  |
| original    | glszm | SizeZoneNonUniformityNormalized      | 0.718261719  |
| original    | glszm | SizeZoneNonUniformity                | 45.96875     |
| original    | glszm | GrayLevelNonUniformity               | 2.46875      |
| original    | glszm | LargeAreaEmphasis                    | 12.640625    |
| original    | glszm | SmallAreaHighGrayLevelEmphasis       | 303.4513095  |
| original    | glszm | ZonePercentage                       | 0.566371681  |
| original    | glszm | LargeAreaLowGrayLevelEmphasis        | 0.051691826  |
| original    | glszm | LargeAreaHighGrayLevelEmphasis       | 12338.60938  |
| original    | glszm | HighGrayLevelZoneEmphasis            | 404.78125    |
| original    | glszm | SmallAreaEmphasis                    | 0.864893475  |
| original    | glszm | LowGrayLevelZoneEmphasis             | 0.030518119  |
| original    | glszm | ZoneEntropy                          | 5.097274414  |
| original    | glszm | SmallAreaLowGrayLevelEmphasis        | 0.029690013  |
| original    | ngtdm | Coarseness                           | 0.022997204  |
| original    | ngtdm | Complexity                           | 3350.695114  |
| original    | ngtdm | Strength                             | 21.76461408  |
| original    | ngtdm | Contrast                             | 1.351956348  |
| original    | ngtdm | Busyness                             | 0.043940843  |
| wavelet-HHH | gldm  | GrayLevelVariance                    | 6.223196805  |
| wavelet-HHH | gldm  | HighGrayLevelEmphasis                | 75.71681416  |
| wavelet-HHH | gldm  | DependenceEntropy                    | 5.116979985  |
| wavelet-HHH | gldm  | DependenceNonUniformity              | 21.99115044  |
| wavelet-HHH | gldm  | GrayLevelNonUniformity               | 14.57522124  |
| wavelet-HHH | gldm  | SmallDependenceEmphasis              | 0.339679743  |
| wavelet-HHH | gldm  | SmallDependenceHighGrayLevelEmphasis | 24.92229172  |
| wavelet-HHH | gldm  | DependenceNonUniformityNormalized    | 0.194611951  |
| wavelet-HHH | gldm  | LargeDependenceEmphasis              | 10.68141593  |
| wavelet-HHH | gldm  | LargeDependenceLowGrayLevelEmphasis  | 0.170893839  |
| wavelet-HHH | gldm  | DependenceVariance                   | 2.611794189  |
| wavelet-HHH | gldm  | LargeDependenceHighGrayLevelEmphasis | 833.4336283  |
| wavelet-HHH | gldm  | SmallDependenceLowGrayLevelEmphasis  | 0.018988181  |
| wavelet-HHH | gldm  | LowGrayLevelEmphasis                 | 0.030176751  |
| wavelet-HHH | glcm  | JointAverage                         | 8.401740323  |
| wavelet-HHH | glcm  | SumAverage                           | 16.80348065  |
| wavelet-HHH | glcm  | JointEntropy                         | 5.849466049  |
| wavelet-HHH | glcm  | ClusterShade                         | -5.665368203 |
| wavelet-HHH | glcm  | MaximumProbability                   | 0.065221058  |
| wavelet-HHH | glcm  | ldmn                                 | 0.950106495  |
| wavelet-HHH | glcm  | JointEnergy                          | 0.023167432  |
| wavelet-HHH | glcm  | Contrast                             | 13.08515356  |
| wavelet-HHH | glcm  | DifferenceEntropy                    | 2.891205938  |
| wavelet-HHH | glcm  | InverseVariance                      | 0.29103153   |
| wavelet-HHH | glcm  | DifferenceVariance                   | 4.884657508  |

|             |            |                                  |              |
|-------------|------------|----------------------------------|--------------|
| wavelet-HHH | glcm       | Idn                              | 0.852349468  |
| wavelet-HHH | glcm       | Idm                              | 0.284804048  |
| wavelet-HHH | glcm       | Correlation                      | -0.047678045 |
| wavelet-HHH | glcm       | Autocorrelation                  | 70.33631531  |
| wavelet-HHH | glcm       | SumEntropy                       | 3.638655859  |
| wavelet-HHH | glcm       | SumSquares                       | 6.28452916   |
| wavelet-HHH | glcm       | ClusterProminence                | 459.5452804  |
| wavelet-HHH | glcm       | Imc2                             | 0.881720046  |
| wavelet-HHH | glcm       | Imc1                             | -0.229179951 |
| wavelet-HHH | glcm       | DifferenceAverage                | 2.85060997   |
| wavelet-HHH | glcm       | Id                               | 0.374666064  |
| wavelet-HHH | glcm       | ClusterTendency                  | 12.05296309  |
| wavelet-HHH | firstorder | InterquartileRange               | 81.59577785  |
| wavelet-HHH | firstorder | Skewness                         | -0.194209391 |
| wavelet-HHH | firstorder | Uniformity                       | 0.128984259  |
| wavelet-HHH | firstorder | Median                           | 0.767785939  |
| wavelet-HHH | firstorder | Energy                           | 434547.9054  |
| wavelet-HHH | firstorder | RobustMeanAbsoluteDeviation      | 29.95739218  |
| wavelet-HHH | firstorder | MeanAbsoluteDeviation            | 47.10707985  |
| wavelet-HHH | firstorder | TotalEnergy                      | 11732793.44  |
| wavelet-HHH | firstorder | Maximum                          | 167.5827509  |
| wavelet-HHH | firstorder | RootMeanSquared                  | 62.01255264  |
| wavelet-HHH | firstorder | 90Percentile                     | 67.34718041  |
| wavelet-HHH | firstorder | Minimum                          | -187.5015173 |
| wavelet-HHH | firstorder | Entropy                          | 3.284590446  |
| wavelet-HHH | firstorder | Range                            | 355.0842682  |
| wavelet-HHH | firstorder | Variance                         | 3830.902372  |
| wavelet-HHH | firstorder | 10Percentile                     | -83.17634311 |
| wavelet-HHH | firstorder | Kurtosis                         | 3.479500614  |
| wavelet-HHH | firstorder | Mean                             | -3.828095147 |
| wavelet-HHH | grlm       | ShortRunLowGrayLevelEmphasis     | 0.030524327  |
| wavelet-HHH | grlm       | GrayLevelVariance                | 6.511560579  |
| wavelet-HHH | grlm       | LowGrayLevelRunEmphasis          | 0.03131452   |
| wavelet-HHH | grlm       | GrayLevelNonUniformityNormalized | 0.123996225  |
| wavelet-HHH | grlm       | RunVariance                      | 0.094025063  |
| wavelet-HHH | grlm       | GrayLevelNonUniformity           | 13.02527301  |
| wavelet-HHH | grlm       | LongRunEmphasis                  | 1.25445568   |
| wavelet-HHH | grlm       | ShortRunHighGrayLevelEmphasis    | 71.59344055  |
| wavelet-HHH | grlm       | RunLengthNonUniformity           | 92.07766946  |
| wavelet-HHH | grlm       | ShortRunEmphasis                 | 0.948817982  |
| wavelet-HHH | grlm       | LongRunHighGrayLevelEmphasis     | 95.22765738  |
| wavelet-HHH | grlm       | RunPercentage                    | 0.92920354   |
| wavelet-HHH | grlm       | LongRunLowGrayLevelEmphasis      | 0.035209973  |
| wavelet-HHH | grlm       | RunEntropy                       | 3.611266533  |
| wavelet-HHH | grlm       | HighGrayLevelRunEmphasis         | 75.58191075  |
| wavelet-HHH | grlm       | RunLengthNonUniformityNormalized | 0.875920874  |
| wavelet-HHH | glszm      | GrayLevelVariance                | 10.64395062  |
| wavelet-HHH | glszm      | ZoneVariance                     | 8.427654321  |
| wavelet-HHH | glszm      | GrayLevelNonUniformityNormalized | 0.09037037   |
| wavelet-HHH | glszm      | SizeZoneNonUniformityNormalized  | 0.394567901  |
| wavelet-HHH | glszm      | SizeZoneNonUniformity            | 17.75555556  |
| wavelet-HHH | glszm      | GrayLevelNonUniformity           | 4.066666667  |
| wavelet-HHH | glszm      | LargeAreaEmphasis                | 14.73333333  |

|             |            |                                      |              |
|-------------|------------|--------------------------------------|--------------|
| wavelet-HHH | glszm      | SmallAreaHighGrayLevelEmphasis       | 47.13904955  |
| wavelet-HHH | glszm      | ZonePercentage                       | 0.398230088  |
| wavelet-HHH | glszm      | LargeAreaLowGrayLevelEmphasis        | 0.262033322  |
| wavelet-HHH | glszm      | LargeAreaHighGrayLevelEmphasis       | 1131.244444  |
| wavelet-HHH | glszm      | HighGrayLevelZoneEmphasis            | 74.28888889  |
| wavelet-HHH | glszm      | SmallAreaEmphasis                    | 0.648745027  |
| wavelet-HHH | glszm      | LowGrayLevelZoneEmphasis             | 0.050842151  |
| wavelet-HHH | glszm      | ZoneEntropy                          | 4.685971707  |
| wavelet-HHH | glszm      | SmallAreaLowGrayLevelEmphasis        | 0.043891605  |
| wavelet-HHH | ngtdm      | Coarseness                           | 0.05585941   |
| wavelet-HHH | ngtdm      | Complexity                           | 165.0044803  |
| wavelet-HHH | ngtdm      | Strength                             | 3.284265767  |
| wavelet-HHH | ngtdm      | Contrast                             | 0.119789845  |
| wavelet-HHH | ngtdm      | Busyness                             | 0.130781988  |
| wavelet-HLL | gldm       | GrayLevelVariance                    | 71.24113086  |
| wavelet-HLL | gldm       | HighGrayLevelEmphasis                | 451.3185841  |
| wavelet-HLL | gldm       | DependenceEntropy                    | 5.604619259  |
| wavelet-HLL | gldm       | DependenceNonUniformity              | 40.61061947  |
| wavelet-HLL | gldm       | GrayLevelNonUniformity               | 4.504424779  |
| wavelet-HLL | gldm       | SmallDependenceEmphasis              | 0.60072763   |
| wavelet-HLL | gldm       | SmallDependenceHighGrayLevelEmphasis | 282.0623033  |
| wavelet-HLL | gldm       | DependenceNonUniformityNormalized    | 0.359386013  |
| wavelet-HLL | gldm       | LargeDependenceEmphasis              | 4.539823009  |
| wavelet-HLL | gldm       | LargeDependenceLowGrayLevelEmphasis  | 0.035633102  |
| wavelet-HLL | gldm       | DependenceVariance                   | 1.184117785  |
| wavelet-HLL | gldm       | LargeDependenceHighGrayLevelEmphasis | 1657.814159  |
| wavelet-HLL | gldm       | SmallDependenceLowGrayLevelEmphasis  | 0.014019904  |
| wavelet-HLL | gldm       | LowGrayLevelEmphasis                 | 0.016209516  |
| wavelet-HLL | glcm       | JointAverage                         | 19.12085701  |
| wavelet-HLL | glcm       | SumAverage                           | 38.24171403  |
| wavelet-HLL | glcm       | JointEntropy                         | 6.903626135  |
| wavelet-HLL | glcm       | ClusterShade                         | 1529.879183  |
| wavelet-HLL | glcm       | MaximumProbability                   | 0.022903036  |
| wavelet-HLL | glcm       | ldmn                                 | 0.964523303  |
| wavelet-HLL | glcm       | JointEnergy                          | 0.009026367  |
| wavelet-HLL | glcm       | Contrast                             | 70.05202372  |
| wavelet-HLL | glcm       | DifferenceEntropy                    | 3.871084651  |
| wavelet-HLL | glcm       | InverseVariance                      | 0.143971347  |
| wavelet-HLL | glcm       | DifferenceVariance                   | 24.52512944  |
| wavelet-HLL | glcm       | ldn                                  | 0.873412889  |
| wavelet-HLL | glcm       | ldm                                  | 0.140789127  |
| wavelet-HLL | glcm       | Correlation                          | 0.483564472  |
| wavelet-HLL | glcm       | Autocorrelation                      | 399.0706245  |
| wavelet-HLL | glcm       | SumEntropy                           | 5.01704327   |
| wavelet-HLL | glcm       | SumSquares                           | 68.40301375  |
| wavelet-HLL | glcm       | ClusterProminence                    | 119821.5803  |
| wavelet-HLL | glcm       | lmc2                                 | 0.997081947  |
| wavelet-HLL | glcm       | lmc1                                 | -0.545834484 |
| wavelet-HLL | glcm       | DifferenceAverage                    | 6.586439445  |
| wavelet-HLL | glcm       | ld                                   | 0.23213883   |
| wavelet-HLL | glcm       | ClusterTendency                      | 203.5600313  |
| wavelet-HLL | firstorder | InterquartileRange                   | 299.2557435  |
| wavelet-HLL | firstorder | Skewness                             | 0.305247815  |

|             |            |                                  |              |
|-------------|------------|----------------------------------|--------------|
| wavelet-HLL | firstorder | Uniformity                       | 0.039862166  |
| wavelet-HLL | firstorder | Median                           | -38.90752348 |
| wavelet-HLL | firstorder | Energy                           | 5117027.927  |
| wavelet-HLL | firstorder | RobustMeanAbsoluteDeviation      | 118.177827   |
| wavelet-HLL | firstorder | MeanAbsoluteDeviation            | 170.6360761  |
| wavelet-HLL | firstorder | TotalEnergy                      | 138159754    |
| wavelet-HLL | firstorder | Maximum                          | 527.0825863  |
| wavelet-HLL | firstorder | RootMeanSquared                  | 212.7990437  |
| wavelet-HLL | firstorder | 90Percentile                     | 248.5679974  |
| wavelet-HLL | firstorder | Minimum                          | -486.505679  |
| wavelet-HLL | firstorder | Entropy                          | 4.852629906  |
| wavelet-HLL | firstorder | Range                            | 1013.588265  |
| wavelet-HLL | firstorder | Variance                         | 44653.43731  |
| wavelet-HLL | firstorder | 10Percentile                     | -270.2179976 |
| wavelet-HLL | firstorder | Kurtosis                         | 2.678170743  |
| wavelet-HLL | firstorder | Mean                             | -25.09971447 |
| wavelet-HLL | grlm       | ShortRunLowGrayLevelEmphasis     | 0.016439475  |
| wavelet-HLL | grlm       | GrayLevelVariance                | 71.39669122  |
| wavelet-HLL | grlm       | LowGrayLevelRunEmphasis          | 0.016569248  |
| wavelet-HLL | grlm       | GrayLevelNonUniformityNormalized | 0.039541971  |
| wavelet-HLL | grlm       | RunVariance                      | 0.034812002  |
| wavelet-HLL | grlm       | GrayLevelNonUniformity           | 4.325816464  |
| wavelet-HLL | grlm       | LongRunEmphasis                  | 1.10303441   |
| wavelet-HLL | grlm       | ShortRunHighGrayLevelEmphasis    | 444.6632209  |
| wavelet-HLL | grlm       | RunLengthNonUniformity           | 102.7273502  |
| wavelet-HLL | grlm       | ShortRunEmphasis                 | 0.975846505  |
| wavelet-HLL | grlm       | LongRunHighGrayLevelEmphasis     | 491.7742351  |
| wavelet-HLL | grlm       | RunPercentage                    | 0.968005446  |
| wavelet-HLL | grlm       | LongRunLowGrayLevelEmphasis      | 0.01713383   |
| wavelet-HLL | grlm       | RunEntropy                       | 4.950720991  |
| wavelet-HLL | grlm       | HighGrayLevelRunEmphasis         | 453.8990866  |
| wavelet-HLL | grlm       | RunLengthNonUniformityNormalized | 0.938595553  |
| wavelet-HLL | glszm      | GrayLevelVariance                | 72.67932281  |
| wavelet-HLL | glszm      | ZoneVariance                     | 0.965318869  |
| wavelet-HLL | glszm      | GrayLevelNonUniformityNormalized | 0.038132807  |
| wavelet-HLL | glszm      | SizeZoneNonUniformityNormalized  | 0.583168968  |
| wavelet-HLL | glszm      | SizeZoneNonUniformity            | 45.48717949  |
| wavelet-HLL | glszm      | GrayLevelNonUniformity           | 2.974358974  |
| wavelet-HLL | glszm      | LargeAreaEmphasis                | 3.064102564  |
| wavelet-HLL | glszm      | SmallAreaHighGrayLevelEmphasis   | 374.7759544  |
| wavelet-HLL | glszm      | ZonePercentage                   | 0.690265487  |
| wavelet-HLL | glszm      | LargeAreaLowGrayLevelEmphasis    | 0.032130414  |
| wavelet-HLL | glszm      | LargeAreaHighGrayLevelEmphasis   | 1194.525641  |
| wavelet-HLL | glszm      | HighGrayLevelZoneEmphasis        | 473.1923077  |
| wavelet-HLL | glszm      | SmallAreaEmphasis                | 0.791712963  |
| wavelet-HLL | glszm      | LowGrayLevelZoneEmphasis         | 0.021056734  |
| wavelet-HLL | glszm      | ZoneEntropy                      | 5.368941405  |
| wavelet-HLL | glszm      | SmallAreaLowGrayLevelEmphasis    | 0.019873172  |
| wavelet-HLL | ngtdm      | Coarseness                       | 0.062475948  |
| wavelet-HLL | ngtdm      | Complexity                       | 1973.133228  |
| wavelet-HLL | ngtdm      | Strength                         | 28.98634116  |
| wavelet-HLL | ngtdm      | Contrast                         | 0.490867416  |
| wavelet-HLL | ngtdm      | Busyness                         | 0.030556427  |



|             |            |                                      |              |
|-------------|------------|--------------------------------------|--------------|
| wavelet-LHL | gldm       | GrayLevelVariance                    | 112.6576866  |
| wavelet-LHL | gldm       | HighGrayLevelEmphasis                | 678.9292035  |
| wavelet-LHL | gldm       | DependenceEntropy                    | 5.815321661  |
| wavelet-LHL | gldm       | DependenceNonUniformity              | 48.02654867  |
| wavelet-LHL | gldm       | GrayLevelNonUniformity               | 4.132743363  |
| wavelet-LHL | gldm       | SmallDependenceEmphasis              | 0.67270649   |
| wavelet-LHL | gldm       | SmallDependenceHighGrayLevelEmphasis | 470.4922714  |
| wavelet-LHL | gldm       | DependenceNonUniformityNormalized    | 0.425013705  |
| wavelet-LHL | gldm       | LargeDependenceEmphasis              | 3.814159292  |
| wavelet-LHL | gldm       | LargeDependenceLowGrayLevelEmphasis  | 0.024730852  |
| wavelet-LHL | gldm       | DependenceVariance                   | 1.016681024  |
| wavelet-LHL | gldm       | LargeDependenceHighGrayLevelEmphasis | 2094.769912  |
| wavelet-LHL | gldm       | SmallDependenceLowGrayLevelEmphasis  | 0.012039255  |
| wavelet-LHL | gldm       | LowGrayLevelEmphasis                 | 0.013674147  |
| wavelet-LHL | glcm       | JointAverage                         | 23.26560655  |
| wavelet-LHL | glcm       | SumAverage                           | 46.5312131   |
| wavelet-LHL | glcm       | JointEntropy                         | 6.971137167  |
| wavelet-LHL | glcm       | ClusterShade                         | 3317.079238  |
| wavelet-LHL | glcm       | MaximumProbability                   | 0.019111089  |
| wavelet-LHL | glcm       | ldmn                                 | 0.946428223  |
| wavelet-LHL | glcm       | JointEnergy                          | 0.008433285  |
| wavelet-LHL | glcm       | Contrast                             | 166.9314388  |
| wavelet-LHL | glcm       | DifferenceEntropy                    | 4.273569322  |
| wavelet-LHL | glcm       | InverseVariance                      | 0.135400168  |
| wavelet-LHL | glcm       | DifferenceVariance                   | 62.29127501  |
| wavelet-LHL | glcm       | ldn                                  | 0.854486992  |
| wavelet-LHL | glcm       | ldm                                  | 0.12148692   |
| wavelet-LHL | glcm       | Correlation                          | 0.272109872  |
| wavelet-LHL | glcm       | Autocorrelation                      | 573.9256389  |
| wavelet-LHL | glcm       | SumEntropy                           | 5.099744228  |
| wavelet-LHL | glcm       | SumSquares                           | 115.8894918  |
| wavelet-LHL | glcm       | ClusterProminence                    | 270125.322   |
| wavelet-LHL | glcm       | lmc2                                 | 0.998768388  |
| wavelet-LHL | glcm       | lmc1                                 | -0.605869885 |
| wavelet-LHL | glcm       | DifferenceAverage                    | 9.739096224  |
| wavelet-LHL | glcm       | ld                                   | 0.200923715  |
| wavelet-LHL | glcm       | ClusterTendency                      | 296.6265282  |
| wavelet-LHL | firstorder | InterquartileRange                   | 345.3977269  |
| wavelet-LHL | firstorder | Skewness                             | 0.315620449  |
| wavelet-LHL | firstorder | Uniformity                           | 0.03657295   |
| wavelet-LHL | firstorder | Median                               | -85.40444592 |
| wavelet-LHL | firstorder | Energy                               | 8159152.977  |
| wavelet-LHL | firstorder | RobustMeanAbsoluteDeviation          | 145.2213846  |
| wavelet-LHL | firstorder | MeanAbsoluteDeviation                | 211.7881756  |
| wavelet-LHL | firstorder | TotalEnergy                          | 220297130.4  |
| wavelet-LHL | firstorder | Maximum                              | 627.0115035  |
| wavelet-LHL | firstorder | RootMeanSquared                      | 268.7096827  |
| wavelet-LHL | firstorder | 90Percentile                         | 329.4114958  |
| wavelet-LHL | firstorder | Minimum                              | -624.8384074 |
| wavelet-LHL | firstorder | Entropy                              | 5.061336179  |
| wavelet-LHL | firstorder | Range                                | 1251.849911  |
| wavelet-LHL | firstorder | Variance                             | 70373.87543  |
| wavelet-LHL | firstorder | 10Percentile                         | -350.4271414 |

|             |            |                                      |              |
|-------------|------------|--------------------------------------|--------------|
| wavelet-LHL | firstorder | Kurtosis                             | 2.737743634  |
| wavelet-LHL | firstorder | Mean                                 | -42.79039808 |
| wavelet-LHL | glrlm      | ShortRunLowGrayLevelEmphasis         | 0.013842079  |
| wavelet-LHL | glrlm      | GrayLevelVariance                    | 113.6598476  |
| wavelet-LHL | glrlm      | LowGrayLevelRunEmphasis              | 0.013925093  |
| wavelet-LHL | glrlm      | GrayLevelNonUniformityNormalized     | 0.035800103  |
| wavelet-LHL | glrlm      | RunVariance                          | 0.033015851  |
| wavelet-LHL | glrlm      | GrayLevelNonUniformity               | 3.94157212   |
| wavelet-LHL | glrlm      | LongRunEmphasis                      | 1.087657825  |
| wavelet-LHL | glrlm      | ShortRunHighGrayLevelEmphasis        | 672.3124721  |
| wavelet-LHL | glrlm      | RunLengthNonUniformity               | 104.9972777  |
| wavelet-LHL | glrlm      | ShortRunEmphasis                     | 0.981705042  |
| wavelet-LHL | glrlm      | LongRunHighGrayLevelEmphasis         | 730.3683658  |
| wavelet-LHL | glrlm      | RunPercentage                        | 0.974132063  |
| wavelet-LHL | glrlm      | LongRunLowGrayLevelEmphasis          | 0.014287195  |
| wavelet-LHL | glrlm      | RunEntropy                           | 5.15662298   |
| wavelet-LHL | glrlm      | HighGrayLevelRunEmphasis             | 682.4238306  |
| wavelet-LHL | glrlm      | RunLengthNonUniformityNormalized     | 0.953493014  |
| wavelet-LHL | glszm      | GrayLevelVariance                    | 121.5185658  |
| wavelet-LHL | glszm      | ZoneVariance                         | 0.797477324  |
| wavelet-LHL | glszm      | GrayLevelNonUniformityNormalized     | 0.030045351  |
| wavelet-LHL | glszm      | SizeZoneNonUniformityNormalized      | 0.670918367  |
| wavelet-LHL | glszm      | SizeZoneNonUniformity                | 56.35714286  |
| wavelet-LHL | glszm      | GrayLevelNonUniformity               | 2.523809524  |
| wavelet-LHL | glszm      | LargeAreaEmphasis                    | 2.607142857  |
| wavelet-LHL | glszm      | SmallAreaHighGrayLevelEmphasis       | 589.9792493  |
| wavelet-LHL | glszm      | ZonePercentage                       | 0.743362832  |
| wavelet-LHL | glszm      | LargeAreaLowGrayLevelEmphasis        | 0.023183874  |
| wavelet-LHL | glszm      | LargeAreaHighGrayLevelEmphasis       | 1565.77381   |
| wavelet-LHL | glszm      | HighGrayLevelZoneEmphasis            | 703.8214286  |
| wavelet-LHL | glszm      | SmallAreaEmphasis                    | 0.84422619   |
| wavelet-LHL | glszm      | LowGrayLevelZoneEmphasis             | 0.016791068  |
| wavelet-LHL | glszm      | ZoneEntropy                          | 5.606137661  |
| wavelet-LHL | glszm      | SmallAreaLowGrayLevelEmphasis        | 0.015879659  |
| wavelet-LHL | ngtdm      | Coarseness                           | 0.047096486  |
| wavelet-LHL | ngtdm      | Complexity                           | 4674.772507  |
| wavelet-LHL | ngtdm      | Strength                             | 32.27553834  |
| wavelet-LHL | ngtdm      | Contrast                             | 0.85963555   |
| wavelet-LHL | ngtdm      | Busyness                             | 0.02682074   |
| wavelet-LHH | gldm       | GrayLevelVariance                    | 19.73576631  |
| wavelet-LHH | gldm       | HighGrayLevelEmphasis                | 259.0265487  |
| wavelet-LHH | gldm       | DependenceEntropy                    | 5.357140798  |
| wavelet-LHH | gldm       | DependenceNonUniformity              | 28.62831858  |
| wavelet-LHH | gldm       | GrayLevelNonUniformity               | 8.787610619  |
| wavelet-LHH | gldm       | SmallDependenceEmphasis              | 0.453477063  |
| wavelet-LHH | gldm       | SmallDependenceHighGrayLevelEmphasis | 120.9158382  |
| wavelet-LHH | gldm       | DependenceNonUniformityNormalized    | 0.253347952  |
| wavelet-LHH | gldm       | LargeDependenceEmphasis              | 7            |
| wavelet-LHH | gldm       | LargeDependenceLowGrayLevelEmphasis  | 0.044877616  |
| wavelet-LHH | gldm       | DependenceVariance                   | 1.746573733  |
| wavelet-LHH | gldm       | LargeDependenceHighGrayLevelEmphasis | 1754.548673  |
| wavelet-LHH | gldm       | SmallDependenceLowGrayLevelEmphasis  | 0.011391425  |
| wavelet-LHH | gldm       | LowGrayLevelEmphasis                 | 0.014313145  |

|             |            |                                  |              |
|-------------|------------|----------------------------------|--------------|
| wavelet-LHH | glcm       | JointAverage                     | 15.46951976  |
| wavelet-LHH | glcm       | SumAverage                       | 30.93903952  |
| wavelet-LHH | glcm       | JointEntropy                     | 6.48602206   |
| wavelet-LHH | glcm       | ClusterShade                     | -14.42702492 |
| wavelet-LHH | glcm       | MaximumProbability               | 0.032877298  |
| wavelet-LHH | glcm       | Idmn                             | 0.956993128  |
| wavelet-LHH | glcm       | JointEnergy                      | 0.012887411  |
| wavelet-LHH | glcm       | Contrast                         | 42.37973486  |
| wavelet-LHH | glcm       | DifferenceEntropy                | 3.570925319  |
| wavelet-LHH | glcm       | InverseVariance                  | 0.21257082   |
| wavelet-LHH | glcm       | DifferenceVariance               | 17.30973992  |
| wavelet-LHH | glcm       | Idn                              | 0.86666509   |
| wavelet-LHH | glcm       | Idm                              | 0.204610411  |
| wavelet-LHH | glcm       | Correlation                      | -0.030083674 |
| wavelet-LHH | glcm       | Autocorrelation                  | 238.6446317  |
| wavelet-LHH | glcm       | SumEntropy                       | 4.283879382  |
| wavelet-LHH | glcm       | SumSquares                       | 20.49220559  |
| wavelet-LHH | glcm       | ClusterProminence                | 5586.112907  |
| wavelet-LHH | glcm       | Imc2                             | 0.969116091  |
| wavelet-LHH | glcm       | Imc1                             | -0.35726365  |
| wavelet-LHH | glcm       | DifferenceAverage                | 4.93022046   |
| wavelet-LHH | glcm       | Id                               | 0.293401288  |
| wavelet-LHH | glcm       | ClusterTendency                  | 39.58908751  |
| wavelet-LHH | firstorder | InterquartileRange               | 125.8754348  |
| wavelet-LHH | firstorder | Skewness                         | -0.067645764 |
| wavelet-LHH | firstorder | Uniformity                       | 0.077766466  |
| wavelet-LHH | firstorder | Median                           | 6.562501349  |
| wavelet-LHH | firstorder | Energy                           | 1399034.71   |
| wavelet-LHH | firstorder | RobustMeanAbsoluteDeviation      | 54.40297074  |
| wavelet-LHH | firstorder | MeanAbsoluteDeviation            | 84.58267273  |
| wavelet-LHH | firstorder | TotalEnergy                      | 37773937.17  |
| wavelet-LHH | firstorder | Maximum                          | 340.1733901  |
| wavelet-LHH | firstorder | RootMeanSquared                  | 111.2692147  |
| wavelet-LHH | firstorder | 90Percentile                     | 117.7459896  |
| wavelet-LHH | firstorder | Minimum                          | -362.9421897 |
| wavelet-LHH | firstorder | Entropy                          | 3.952856393  |
| wavelet-LHH | firstorder | Range                            | 703.1155798  |
| wavelet-LHH | firstorder | Variance                         | 12380.72877  |
| wavelet-LHH | firstorder | 10Percentile                     | -131.719943  |
| wavelet-LHH | firstorder | Kurtosis                         | 3.914222096  |
| wavelet-LHH | firstorder | Mean                             | 0.330712711  |
| wavelet-LHH | glrlm      | ShortRunLowGrayLevelEmphasis     | 0.014599836  |
| wavelet-LHH | glrlm      | GrayLevelVariance                | 20.24567538  |
| wavelet-LHH | glrlm      | LowGrayLevelRunEmphasis          | 0.014796992  |
| wavelet-LHH | glrlm      | GrayLevelNonUniformityNormalized | 0.076667651  |
| wavelet-LHH | glrlm      | RunVariance                      | 0.058472165  |
| wavelet-LHH | glrlm      | GrayLevelNonUniformity           | 8.234115352  |
| wavelet-LHH | glrlm      | LongRunEmphasis                  | 1.168813282  |
| wavelet-LHH | glrlm      | ShortRunHighGrayLevelEmphasis    | 249.8360119  |
| wavelet-LHH | glrlm      | RunLengthNonUniformity           | 97.52758569  |
| wavelet-LHH | glrlm      | ShortRunEmphasis                 | 0.962459216  |
| wavelet-LHH | glrlm      | LongRunHighGrayLevelEmphasis     | 301.5941131  |
| wavelet-LHH | glrlm      | RunPercentage                    | 0.950306331  |

|             |       |                                      |             |
|-------------|-------|--------------------------------------|-------------|
| wavelet-LHH | grlm  | LongRunLowGrayLevelEmphasis          | 0.01567504  |
| wavelet-LHH | grlm  | RunEntropy                           | 4.155512061 |
| wavelet-LHH | grlm  | HighGrayLevelRunEmphasis             | 259.3916588 |
| wavelet-LHH | grlm  | RunLengthNonUniformityNormalized     | 0.906920633 |
| wavelet-LHH | glszm | GrayLevelVariance                    | 28.34       |
| wavelet-LHH | glszm | ZoneVariance                         | 4.069722222 |
| wavelet-LHH | glszm | GrayLevelNonUniformityNormalized     | 0.068333333 |
| wavelet-LHH | glszm | SizeZoneNonUniformityNormalized      | 0.48        |
| wavelet-LHH | glszm | SizeZoneNonUniformity                | 28.8        |
| wavelet-LHH | glszm | GrayLevelNonUniformity               | 4.1         |
| wavelet-LHH | glszm | LargeAreaEmphasis                    | 7.616666667 |
| wavelet-LHH | glszm | SmallAreaHighGrayLevelEmphasis       | 194.0663827 |
| wavelet-LHH | glszm | ZonePercentage                       | 0.530973451 |
| wavelet-LHH | glszm | LargeAreaLowGrayLevelEmphasis        | 0.053558539 |
| wavelet-LHH | glszm | LargeAreaHighGrayLevelEmphasis       | 1904.9      |
| wavelet-LHH | glszm | HighGrayLevelZoneEmphasis            | 265.5       |
| wavelet-LHH | glszm | SmallAreaEmphasis                    | 0.719488284 |
| wavelet-LHH | glszm | LowGrayLevelZoneEmphasis             | 0.022372282 |
| wavelet-LHH | glszm | ZoneEntropy                          | 4.918820387 |
| wavelet-LHH | glszm | SmallAreaLowGrayLevelEmphasis        | 0.020763059 |
| wavelet-LHH | ngtdm | Coarseness                           | 0.045506953 |
| wavelet-LHH | ngtdm | Complexity                           | 705.0327456 |
| wavelet-LHH | ngtdm | Strength                             | 7.788488201 |
| wavelet-LHH | ngtdm | Contrast                             | 0.305197321 |
| wavelet-LHH | ngtdm | Busyness                             | 0.065949671 |
| wavelet-LLH | gldm  | GrayLevelVariance                    | 150.9723549 |
| wavelet-LLH | gldm  | HighGrayLevelEmphasis                | 804.159292  |
| wavelet-LLH | gldm  | DependenceEntropy                    | 5.714923626 |
| wavelet-LLH | gldm  | DependenceNonUniformity              | 38.34513274 |
| wavelet-LLH | gldm  | GrayLevelNonUniformity               | 4.840707965 |
| wavelet-LLH | gldm  | SmallDependenceEmphasis              | 0.580939036 |
| wavelet-LLH | gldm  | SmallDependenceHighGrayLevelEmphasis | 563.853734  |
| wavelet-LLH | gldm  | DependenceNonUniformityNormalized    | 0.339337458 |
| wavelet-LLH | gldm  | LargeDependenceEmphasis              | 4.734513274 |
| wavelet-LLH | gldm  | LargeDependenceLowGrayLevelEmphasis  | 0.021895471 |
| wavelet-LLH | gldm  | DependenceVariance                   | 1.181455087 |
| wavelet-LLH | gldm  | LargeDependenceHighGrayLevelEmphasis | 2580.548673 |
| wavelet-LLH | gldm  | SmallDependenceLowGrayLevelEmphasis  | 0.010276659 |
| wavelet-LLH | gldm  | LowGrayLevelEmphasis                 | 0.011488701 |
| wavelet-LLH | glcm  | JointAverage                         | 24.73121199 |
| wavelet-LLH | glcm  | SumAverage                           | 49.46242399 |
| wavelet-LLH | glcm  | JointEntropy                         | 6.787880669 |
| wavelet-LLH | glcm  | ClusterShade                         | 10228.91156 |
| wavelet-LLH | glcm  | MaximumProbability                   | 0.027939712 |
| wavelet-LLH | glcm  | ldmn                                 | 0.960962723 |
| wavelet-LLH | glcm  | JointEnergy                          | 0.010147204 |
| wavelet-LLH | glcm  | Contrast                             | 199.0571577 |
| wavelet-LLH | glcm  | DifferenceEntropy                    | 4.163137718 |
| wavelet-LLH | glcm  | InverseVariance                      | 0.131183538 |
| wavelet-LLH | glcm  | DifferenceVariance                   | 95.58313268 |
| wavelet-LLH | glcm  | ldn                                  | 0.88295858  |
| wavelet-LLH | glcm  | ldm                                  | 0.134270037 |
| wavelet-LLH | glcm  | Correlation                          | 0.301531727 |

|             |            |                                  |              |
|-------------|------------|----------------------------------|--------------|
| wavelet-LLH | glcm       | Autocorrelation                  | 658.3893511  |
| wavelet-LLH | glcm       | SumEntropy                       | 5.016890448  |
| wavelet-LLH | glcm       | SumSquares                       | 145.899545   |
| wavelet-LLH | glcm       | ClusterProminence                | 661742.8769  |
| wavelet-LLH | glcm       | Imc2                             | 0.998160974  |
| wavelet-LLH | glcm       | Imc1                             | -0.587374994 |
| wavelet-LLH | glcm       | DifferenceAverage                | 9.646404328  |
| wavelet-LLH | glcm       | Id                               | 0.21692659   |
| wavelet-LLH | glcm       | ClusterTendency                  | 384.5410221  |
| wavelet-LLH | firstorder | InterquartileRange               | 314.5789239  |
| wavelet-LLH | firstorder | Skewness                         | 1.205346543  |
| wavelet-LLH | firstorder | Uniformity                       | 0.042838124  |
| wavelet-LLH | firstorder | Median                           | -64.55766758 |
| wavelet-LLH | firstorder | Energy                           | 10747775.69  |
| wavelet-LLH | firstorder | RobustMeanAbsoluteDeviation      | 138.0134851  |
| wavelet-LLH | firstorder | MeanAbsoluteDeviation            | 233.1459763  |
| wavelet-LLH | firstorder | TotalEnergy                      | 290189943.7  |
| wavelet-LLH | firstorder | Maximum                          | 988.0015049  |
| wavelet-LLH | firstorder | RootMeanSquared                  | 308.4040519  |
| wavelet-LLH | firstorder | 90Percentile                     | 476.6548799  |
| wavelet-LLH | firstorder | Minimum                          | -598.6160863 |
| wavelet-LLH | firstorder | Entropy                          | 4.94825089   |
| wavelet-LLH | firstorder | Range                            | 1586.617591  |
| wavelet-LLH | firstorder | Variance                         | 94389.99033  |
| wavelet-LLH | firstorder | 10Percentile                     | -248.1305703 |
| wavelet-LLH | firstorder | Kurtosis                         | 4.137807637  |
| wavelet-LLH | firstorder | Mean                             | 26.88994033  |
| wavelet-LLH | glrlm      | ShortRunLowGrayLevelEmphasis     | 0.011726842  |
| wavelet-LLH | glrlm      | GrayLevelVariance                | 153.4268711  |
| wavelet-LLH | glrlm      | LowGrayLevelRunEmphasis          | 0.011800571  |
| wavelet-LLH | glrlm      | GrayLevelNonUniformityNormalized | 0.041316465  |
| wavelet-LLH | glrlm      | RunVariance                      | 0.03682179   |
| wavelet-LLH | glrlm      | GrayLevelNonUniformity           | 4.511640286  |
| wavelet-LLH | glrlm      | LongRunEmphasis                  | 1.110908895  |
| wavelet-LLH | glrlm      | ShortRunHighGrayLevelEmphasis    | 801.3821249  |
| wavelet-LLH | glrlm      | RunLengthNonUniformity           | 102.1487796  |
| wavelet-LLH | glrlm      | ShortRunEmphasis                 | 0.973902108  |
| wavelet-LLH | glrlm      | LongRunHighGrayLevelEmphasis     | 870.872951   |
| wavelet-LLH | glrlm      | RunPercentage                    | 0.96596324   |
| wavelet-LLH | glrlm      | LongRunLowGrayLevelEmphasis      | 0.012113628  |
| wavelet-LLH | glrlm      | RunEntropy                       | 5.084487372  |
| wavelet-LLH | glrlm      | HighGrayLevelRunEmphasis         | 814.7801319  |
| wavelet-LLH | glrlm      | RunLengthNonUniformityNormalized | 0.934552916  |
| wavelet-LLH | glszm      | GrayLevelVariance                | 177.2629657  |
| wavelet-LLH | glszm      | ZoneVariance                     | 2.168188459  |
| wavelet-LLH | glszm      | GrayLevelNonUniformityNormalized | 0.031044558  |
| wavelet-LLH | glszm      | SizeZoneNonUniformityNormalized  | 0.598246896  |
| wavelet-LLH | glszm      | SizeZoneNonUniformity            | 44.27027027  |
| wavelet-LLH | glszm      | GrayLevelNonUniformity           | 2.297297297  |
| wavelet-LLH | glszm      | LargeAreaEmphasis                | 4.5          |
| wavelet-LLH | glszm      | SmallAreaHighGrayLevelEmphasis   | 808.5718473  |
| wavelet-LLH | glszm      | ZonePercentage                   | 0.654867257  |
| wavelet-LLH | glszm      | LargeAreaLowGrayLevelEmphasis    | 0.025988461  |

|             |            |                                      |              |
|-------------|------------|--------------------------------------|--------------|
| wavelet-LLH | glszm      | LargeAreaHighGrayLevelEmphasis       | 2521         |
| wavelet-LLH | glszm      | HighGrayLevelZoneEmphasis            | 944.7027027  |
| wavelet-LLH | glszm      | SmallAreaEmphasis                    | 0.801071488  |
| wavelet-LLH | glszm      | LowGrayLevelZoneEmphasis             | 0.01602924   |
| wavelet-LLH | glszm      | ZoneEntropy                          | 5.58290569   |
| wavelet-LLH | glszm      | SmallAreaLowGrayLevelEmphasis        | 0.015435335  |
| wavelet-LLH | ngtdm      | Coarseness                           | 0.051268208  |
| wavelet-LLH | ngtdm      | Complexity                           | 5412.504287  |
| wavelet-LLH | ngtdm      | Strength                             | 49.30644265  |
| wavelet-LLH | ngtdm      | Contrast                             | 1.092602559  |
| wavelet-LLH | ngtdm      | Busyness                             | 0.024470368  |
| wavelet-LLL | gldm       | GrayLevelVariance                    | 678.100556   |
| wavelet-LLL | gldm       | HighGrayLevelEmphasis                | 3960.477876  |
| wavelet-LLL | gldm       | DependenceEntropy                    | 6.12757133   |
| wavelet-LLL | gldm       | DependenceNonUniformity              | 62.73451327  |
| wavelet-LLL | gldm       | GrayLevelNonUniformity               | 2.132743363  |
| wavelet-LLL | gldm       | SmallDependenceEmphasis              | 0.758603736  |
| wavelet-LLL | gldm       | SmallDependenceHighGrayLevelEmphasis | 2590.133235  |
| wavelet-LLL | gldm       | DependenceNonUniformityNormalized    | 0.555172684  |
| wavelet-LLL | gldm       | LargeDependenceEmphasis              | 2.044247788  |
| wavelet-LLL | gldm       | LargeDependenceLowGrayLevelEmphasis  | 0.010443115  |
| wavelet-LLL | gldm       | DependenceVariance                   | 0.258595035  |
| wavelet-LLL | gldm       | LargeDependenceHighGrayLevelEmphasis | 10080.99115  |
| wavelet-LLL | gldm       | SmallDependenceLowGrayLevelEmphasis  | 0.009633154  |
| wavelet-LLL | gldm       | LowGrayLevelEmphasis                 | 0.009793186  |
| wavelet-LLL | glcm       | JointAverage                         | 63.61036506  |
| wavelet-LLL | glcm       | SumAverage                           | 127.2207301  |
| wavelet-LLL | glcm       | JointEntropy                         | 7.103929495  |
| wavelet-LLL | glcm       | ClusterShade                         | -31108.09899 |
| wavelet-LLL | glcm       | MaximumProbability                   | 0.014125002  |
| wavelet-LLL | glcm       | Idmn                                 | 0.93838528   |
| wavelet-LLL | glcm       | JointEnergy                          | 0.007413014  |
| wavelet-LLL | glcm       | Contrast                             | 711.5383073  |
| wavelet-LLL | glcm       | DifferenceEntropy                    | 5.064520127  |
| wavelet-LLL | glcm       | InverseVariance                      | 0.057177968  |
| wavelet-LLL | glcm       | DifferenceVariance                   | 260.7915699  |
| wavelet-LLL | glcm       | Idn                                  | 0.839197087  |
| wavelet-LLL | glcm       | Idm                                  | 0.056444677  |
| wavelet-LLL | glcm       | Correlation                          | 0.434738241  |
| wavelet-LLL | glcm       | Autocorrelation                      | 4317.76089   |
| wavelet-LLL | glcm       | SumEntropy                           | 5.754238515  |
| wavelet-LLL | glcm       | SumSquares                           | 626.5807421  |
| wavelet-LLL | glcm       | ClusterProminence                    | 7116993.61   |
| wavelet-LLL | glcm       | Imc2                                 | 0.9999165    |
| wavelet-LLL | glcm       | Imc1                                 | -0.760721623 |
| wavelet-LLL | glcm       | DifferenceAverage                    | 20.8802998   |
| wavelet-LLL | glcm       | Id                                   | 0.11564466   |
| wavelet-LLL | glcm       | ClusterTendency                      | 1794.784661  |
| wavelet-LLL | firstorder | InterquartileRange                   | 1119.434234  |
| wavelet-LLL | firstorder | Skewness                             | -0.206917431 |
| wavelet-LLL | firstorder | Uniformity                           | 0.018873835  |
| wavelet-LLL | firstorder | Median                               | -609.9679881 |
| wavelet-LLL | firstorder | Energy                               | 99883036.32  |

|             |            |                                  |              |
|-------------|------------|----------------------------------|--------------|
| wavelet-LLL | firstorder | RobustMeanAbsoluteDeviation      | 446.7307209  |
| wavelet-LLL | firstorder | MeanAbsoluteDeviation            | 565.0779493  |
| wavelet-LLL | firstorder | TotalEnergy                      | 2696841981   |
| wavelet-LLL | firstorder | Maximum                          | 342.2983863  |
| wavelet-LLL | firstorder | RootMeanSquared                  | 940.1705566  |
| wavelet-LLL | firstorder | 90Percentile                     | 147.5220373  |
| wavelet-LLL | firstorder | Minimum                          | -2091.581535 |
| wavelet-LLL | firstorder | Entropy                          | 5.906159383  |
| wavelet-LLL | firstorder | Range                            | 2433.879922  |
| wavelet-LLL | firstorder | Variance                         | 422749.9476  |
| wavelet-LLL | firstorder | 10Percentile                     | -1526.847803 |
| wavelet-LLL | firstorder | Kurtosis                         | 1.840771052  |
| wavelet-LLL | firstorder | Mean                             | -679.0955219 |
| wavelet-LLL | grlm       | ShortRunLowGrayLevelEmphasis     | 0.009908809  |
| wavelet-LLL | grlm       | GrayLevelVariance                | 676.0719224  |
| wavelet-LLL | grlm       | LowGrayLevelRunEmphasis          | 0.009915147  |
| wavelet-LLL | grlm       | GrayLevelNonUniformityNormalized | 0.018804038  |
| wavelet-LLL | grlm       | RunVariance                      | 0.012918064  |
| wavelet-LLL | grlm       | GrayLevelNonUniformity           | 2.097436875  |
| wavelet-LLL | grlm       | LongRunEmphasis                  | 1.039949808  |
| wavelet-LLL | grlm       | ShortRunHighGrayLevelEmphasis    | 3877.97389   |
| wavelet-LLL | grlm       | RunLengthNonUniformity           | 108.7018599  |
| wavelet-LLL | grlm       | ShortRunEmphasis                 | 0.990012548  |
| wavelet-LLL | grlm       | LongRunHighGrayLevelEmphasis     | 4167.782667  |
| wavelet-LLL | grlm       | RunPercentage                    | 0.987066031  |
| wavelet-LLL | grlm       | LongRunLowGrayLevelEmphasis      | 0.009940499  |
| wavelet-LLL | grlm       | RunEntropy                       | 5.928106033  |
| wavelet-LLL | grlm       | HighGrayLevelRunEmphasis         | 3935.935646  |
| wavelet-LLL | grlm       | RunLengthNonUniformityNormalized | 0.974163873  |
| wavelet-LLL | glszm      | GrayLevelVariance                | 642.9367361  |
| wavelet-LLL | glszm      | ZoneVariance                     | 0.20382526   |
| wavelet-LLL | glszm      | GrayLevelNonUniformityNormalized | 0.017655048  |
| wavelet-LLL | glszm      | SizeZoneNonUniformityNormalized  | 0.696921684  |
| wavelet-LLL | glszm      | SizeZoneNonUniformity            | 65.5106383   |
| wavelet-LLL | glszm      | GrayLevelNonUniformity           | 1.659574468  |
| wavelet-LLL | glszm      | LargeAreaEmphasis                | 1.64893617   |
| wavelet-LLL | glszm      | SmallAreaHighGrayLevelEmphasis   | 2821.50857   |
| wavelet-LLL | glszm      | ZonePercentage                   | 0.831858407  |
| wavelet-LLL | glszm      | LargeAreaLowGrayLevelEmphasis    | 0.012036627  |
| wavelet-LLL | glszm      | LargeAreaHighGrayLevelEmphasis   | 7444.042553  |
| wavelet-LLL | glszm      | HighGrayLevelZoneEmphasis        | 3592.351064  |
| wavelet-LLL | glszm      | SmallAreaEmphasis                | 0.861406619  |
| wavelet-LLL | glszm      | LowGrayLevelZoneEmphasis         | 0.011643327  |
| wavelet-LLL | glszm      | ZoneEntropy                      | 6.104964782  |
| wavelet-LLL | glszm      | SmallAreaLowGrayLevelEmphasis    | 0.011547947  |
| wavelet-LLL | ngtdm      | Coarseness                       | 0.036487455  |
| wavelet-LLL | ngtdm      | Complexity                       | 31505.5531   |
| wavelet-LLL | ngtdm      | Strength                         | 125.8514497  |
| wavelet-LLL | ngtdm      | Contrast                         | 3.933050042  |
| wavelet-LLL | ngtdm      | Busyness                         | 0.007940828  |
| wavelet-HHL | gldm       | GrayLevelVariance                | 11.90508262  |
| wavelet-HHL | gldm       | HighGrayLevelEmphasis            | 82.5840708   |
| wavelet-HHL | gldm       | DependenceEntropy                | 5.180069096  |

|             |            |                                      |              |
|-------------|------------|--------------------------------------|--------------|
| wavelet-HHL | gldm       | DependenceNonUniformity              | 30.04424779  |
| wavelet-HHL | gldm       | GrayLevelNonUniformity               | 10.45132743  |
| wavelet-HHL | gldm       | SmallDependenceEmphasis              | 0.478008398  |
| wavelet-HHL | gldm       | SmallDependenceHighGrayLevelEmphasis | 44.4661087   |
| wavelet-HHL | gldm       | DependenceNonUniformityNormalized    | 0.265878299  |
| wavelet-HHL | gldm       | LargeDependenceEmphasis              | 7.743362832  |
| wavelet-HHL | gldm       | LargeDependenceLowGrayLevelEmphasis  | 0.178532531  |
| wavelet-HHL | gldm       | DependenceVariance                   | 2.40848931   |
| wavelet-HHL | gldm       | LargeDependenceHighGrayLevelEmphasis | 519.7699115  |
| wavelet-HHL | gldm       | SmallDependenceLowGrayLevelEmphasis  | 0.031564704  |
| wavelet-HHL | gldm       | LowGrayLevelEmphasis                 | 0.043340003  |
| wavelet-HHL | glcm       | JointAverage                         | 8.422572536  |
| wavelet-HHL | glcm       | SumAverage                           | 16.84514507  |
| wavelet-HHL | glcm       | JointEntropy                         | 6.201830825  |
| wavelet-HHL | glcm       | ClusterShade                         | 16.67045773  |
| wavelet-HHL | glcm       | MaximumProbability                   | 0.043989744  |
| wavelet-HHL | glcm       | Idmn                                 | 0.962181716  |
| wavelet-HHL | glcm       | JointEnergy                          | 0.016664211  |
| wavelet-HHL | glcm       | Contrast                             | 21.01934856  |
| wavelet-HHL | glcm       | DifferenceEntropy                    | 3.11996175   |
| wavelet-HHL | glcm       | InverseVariance                      | 0.266245909  |
| wavelet-HHL | glcm       | DifferenceVariance                   | 8.225518519  |
| wavelet-HHL | glcm       | Idn                                  | 0.871185836  |
| wavelet-HHL | glcm       | Idm                                  | 0.23656241   |
| wavelet-HHL | glcm       | Correlation                          | 0.022163905  |
| wavelet-HHL | glcm       | Autocorrelation                      | 71.18575286  |
| wavelet-HHL | glcm       | SumEntropy                           | 3.940305791  |
| wavelet-HHL | glcm       | SumSquares                           | 10.74442542  |
| wavelet-HHL | glcm       | ClusterProminence                    | 1855.632783  |
| wavelet-HHL | glcm       | Imc2                                 | 0.935840327  |
| wavelet-HHL | glcm       | Imc1                                 | -0.290258018 |
| wavelet-HHL | glcm       | DifferenceAverage                    | 3.544949663  |
| wavelet-HHL | glcm       | Id                                   | 0.329978808  |
| wavelet-HHL | glcm       | ClusterTendency                      | 21.95835314  |
| wavelet-HHL | firstorder | InterquartileRange                   | 88.62174665  |
| wavelet-HHL | firstorder | Skewness                             | 0.618191139  |
| wavelet-HHL | firstorder | Uniformity                           | 0.092489623  |
| wavelet-HHL | firstorder | Median                               | -5.402249134 |
| wavelet-HHL | firstorder | Energy                               | 832620.508   |
| wavelet-HHL | firstorder | RobustMeanAbsoluteDeviation          | 41.7212731   |
| wavelet-HHL | firstorder | MeanAbsoluteDeviation                | 64.97699771  |
| wavelet-HHL | firstorder | TotalEnergy                          | 22480753.72  |
| wavelet-HHL | firstorder | Maximum                              | 339.1735649  |
| wavelet-HHL | firstorder | RootMeanSquared                      | 85.83893685  |
| wavelet-HHL | firstorder | 90Percentile                         | 101.902374   |
| wavelet-HHL | firstorder | Minimum                              | -182.7383816 |
| wavelet-HHL | firstorder | Entropy                              | 3.683897218  |
| wavelet-HHL | firstorder | Range                                | 521.9119465  |
| wavelet-HHL | firstorder | Variance                             | 7366.394891  |
| wavelet-HHL | firstorder | 10Percentile                         | -106.7952191 |
| wavelet-HHL | firstorder | Kurtosis                             | 4.637764074  |
| wavelet-HHL | firstorder | Mean                                 | -1.388592598 |
| wavelet-HHL | glrlm      | ShortRunLowGrayLevelEmphasis         | 0.04377343   |



|             |       |                                      |             |
|-------------|-------|--------------------------------------|-------------|
| wavelet-HHL | glrlm | GrayLevelVariance                    | 12.31239292 |
| wavelet-HHL | glrlm | LowGrayLevelRunEmphasis              | 0.044549481 |
| wavelet-HHL | glrlm | GrayLevelNonUniformityNormalized     | 0.0900224   |
| wavelet-HHL | glrlm | RunVariance                          | 0.063404581 |
| wavelet-HHL | glrlm | GrayLevelNonUniformity               | 9.665615748 |
| wavelet-HHL | glrlm | LongRunEmphasis                      | 1.175378914 |
| wavelet-HHL | glrlm | ShortRunHighGrayLevelEmphasis        | 80.84317299 |
| wavelet-HHL | glrlm | RunLengthNonUniformity               | 97.83991884 |
| wavelet-HHL | glrlm | ShortRunEmphasis                     | 0.963575951 |
| wavelet-HHL | glrlm | LongRunHighGrayLevelEmphasis         | 95.20602058 |
| wavelet-HHL | glrlm | RunPercentage                        | 0.949625596 |
| wavelet-HHL | glrlm | LongRunLowGrayLevelEmphasis          | 0.048179836 |
| wavelet-HHL | glrlm | RunEntropy                           | 3.909628443 |
| wavelet-HHL | glrlm | HighGrayLevelRunEmphasis             | 83.36165253 |
| wavelet-HHL | glrlm | RunLengthNonUniformityNormalized     | 0.910435652 |
| wavelet-HHL | glszm | GrayLevelVariance                    | 17.20080625 |
| wavelet-HHL | glszm | ZoneVariance                         | 3.084404132 |
| wavelet-HHL | glszm | GrayLevelNonUniformityNormalized     | 0.073822121 |
| wavelet-HHL | glszm | SizeZoneNonUniformityNormalized      | 0.498110355 |
| wavelet-HHL | glszm | SizeZoneNonUniformity                | 31.38095238 |
| wavelet-HHL | glszm | GrayLevelNonUniformity               | 4.650793651 |
| wavelet-HHL | glszm | LargeAreaEmphasis                    | 6.301587302 |
| wavelet-HHL | glszm | SmallAreaHighGrayLevelEmphasis       | 69.96614118 |
| wavelet-HHL | glszm | ZonePercentage                       | 0.557522124 |
| wavelet-HHL | glszm | LargeAreaLowGrayLevelEmphasis        | 0.160993309 |
| wavelet-HHL | glszm | LargeAreaHighGrayLevelEmphasis       | 464.8253968 |
| wavelet-HHL | glszm | HighGrayLevelZoneEmphasis            | 90.12698413 |
| wavelet-HHL | glszm | SmallAreaEmphasis                    | 0.732931719 |
| wavelet-HHL | glszm | LowGrayLevelZoneEmphasis             | 0.060689014 |
| wavelet-HHL | glszm | ZoneEntropy                          | 4.678097837 |
| wavelet-HHL | glszm | SmallAreaLowGrayLevelEmphasis        | 0.053754759 |
| wavelet-HHL | ngtdm | Coarseness                           | 0.055937674 |
| wavelet-HHL | ngtdm | Complexity                           | 293.2472962 |
| wavelet-HHL | ngtdm | Strength                             | 5.368495761 |
| wavelet-HHL | ngtdm | Contrast                             | 0.225639764 |
| wavelet-HHL | ngtdm | Busyness                             | 0.144417033 |
| wavelet-HLH | gldm  | GrayLevelVariance                    | 16.52298536 |
| wavelet-HLH | gldm  | HighGrayLevelEmphasis                | 266.6106195 |
| wavelet-HLH | gldm  | DependenceEntropy                    | 5.280751998 |
| wavelet-HLH | gldm  | DependenceNonUniformity              | 28.71681416 |
| wavelet-HLH | gldm  | GrayLevelNonUniformity               | 9.460176991 |
| wavelet-HLH | gldm  | SmallDependenceEmphasis              | 0.400459685 |
| wavelet-HLH | gldm  | SmallDependenceHighGrayLevelEmphasis | 104.7375811 |
| wavelet-HLH | gldm  | DependenceNonUniformityNormalized    | 0.254131099 |
| wavelet-HLH | gldm  | LargeDependenceEmphasis              | 6.646017699 |
| wavelet-HLH | gldm  | LargeDependenceLowGrayLevelEmphasis  | 0.038667059 |
| wavelet-HLH | gldm  | DependenceVariance                   | 1.229070405 |
| wavelet-HLH | gldm  | LargeDependenceHighGrayLevelEmphasis | 1800.59292  |
| wavelet-HLH | gldm  | SmallDependenceLowGrayLevelEmphasis  | 0.013187883 |
| wavelet-HLH | gldm  | LowGrayLevelEmphasis                 | 0.015692035 |
| wavelet-HLH | glcm  | JointAverage                         | 15.75246982 |
| wavelet-HLH | glcm  | SumAverage                           | 31.50493965 |
| wavelet-HLH | glcm  | JointEntropy                         | 6.432300057 |

|             |            |                                  |              |
|-------------|------------|----------------------------------|--------------|
| wavelet-HLH | glcm       | ClusterShade                     | -101.7802883 |
| wavelet-HLH | glcm       | MaximumProbability               | 0.031770861  |
| wavelet-HLH | glcm       | Idmn                             | 0.95259201   |
| wavelet-HLH | glcm       | JointEnergy                      | 0.013240256  |
| wavelet-HLH | glcm       | Contrast                         | 38.82802257  |
| wavelet-HLH | glcm       | DifferenceEntropy                | 3.484098801  |
| wavelet-HLH | glcm       | InverseVariance                  | 0.211312008  |
| wavelet-HLH | glcm       | DifferenceVariance               | 16.36862033  |
| wavelet-HLH | glcm       | Idn                              | 0.861044781  |
| wavelet-HLH | glcm       | Idm                              | 0.207694924  |
| wavelet-HLH | glcm       | Correlation                      | -0.03571649  |
| wavelet-HLH | glcm       | Autocorrelation                  | 247.5377005  |
| wavelet-HLH | glcm       | SumEntropy                       | 4.220446396  |
| wavelet-HLH | glcm       | SumSquares                       | 18.79079536  |
| wavelet-HLH | glcm       | ClusterProminence                | 5671.368315  |
| wavelet-HLH | glcm       | Imc2                             | 0.962293483  |
| wavelet-HLH | glcm       | Imc1                             | -0.339334196 |
| wavelet-HLH | glcm       | DifferenceAverage                | 4.669889037  |
| wavelet-HLH | glcm       | Id                               | 0.299387202  |
| wavelet-HLH | glcm       | ClusterTendency                  | 36.33515888  |
| wavelet-HLH | firstorder | InterquartileRange               | 125.9903766  |
| wavelet-HLH | firstorder | Skewness                         | -0.749740701 |
| wavelet-HLH | firstorder | Uniformity                       | 0.08371838   |
| wavelet-HLH | firstorder | Median                           | 11.86019235  |
| wavelet-HLH | firstorder | Energy                           | 1144123.518  |
| wavelet-HLH | firstorder | RobustMeanAbsoluteDeviation      | 49.29140523  |
| wavelet-HLH | firstorder | MeanAbsoluteDeviation            | 75.59673046  |
| wavelet-HLH | firstorder | TotalEnergy                      | 30891335     |
| wavelet-HLH | firstorder | Maximum                          | 250.0508954  |
| wavelet-HLH | firstorder | RootMeanSquared                  | 100.6229938  |
| wavelet-HLH | firstorder | 90Percentile                     | 116.3712992  |
| wavelet-HLH | firstorder | Minimum                          | -373.7049796 |
| wavelet-HLH | firstorder | Entropy                          | 3.845738745  |
| wavelet-HLH | firstorder | Range                            | 623.755875   |
| wavelet-HLH | firstorder | Variance                         | 10060.68923  |
| wavelet-HLH | firstorder | 10Percentile                     | -90.75086427 |
| wavelet-HLH | firstorder | Kurtosis                         | 4.961509008  |
| wavelet-HLH | firstorder | Mean                             | 8.018582299  |
| wavelet-HLH | grlm       | ShortRunLowGrayLevelEmphasis     | 0.016159557  |
| wavelet-HLH | grlm       | GrayLevelVariance                | 17.03335961  |
| wavelet-HLH | grlm       | LowGrayLevelRunEmphasis          | 0.01632487   |
| wavelet-HLH | grlm       | GrayLevelNonUniformityNormalized | 0.081950112  |
| wavelet-HLH | grlm       | RunVariance                      | 0.05360592   |
| wavelet-HLH | grlm       | GrayLevelNonUniformity           | 8.790616728  |
| wavelet-HLH | grlm       | LongRunEmphasis                  | 1.166835847  |
| wavelet-HLH | grlm       | ShortRunHighGrayLevelEmphasis    | 255.5648478  |
| wavelet-HLH | grlm       | RunLengthNonUniformity           | 96.77554989  |
| wavelet-HLH | grlm       | ShortRunEmphasis                 | 0.959881214  |
| wavelet-HLH | grlm       | LongRunHighGrayLevelEmphasis     | 311.6098481  |
| wavelet-HLH | grlm       | RunPercentage                    | 0.94894486   |
| wavelet-HLH | grlm       | LongRunLowGrayLevelEmphasis      | 0.017010339  |
| wavelet-HLH | grlm       | RunEntropy                       | 4.083911184  |
| wavelet-HLH | grlm       | HighGrayLevelRunEmphasis         | 266.3953536  |

|             |       |                                  |             |
|-------------|-------|----------------------------------|-------------|
| wavelet-HLH | g1rlm | RunLengthNonUniformityNormalized | 0.901015266 |
| wavelet-HLH | glszm | GrayLevelVariance                | 25.78284439 |
| wavelet-HLH | glszm | ZoneVariance                     | 3.303252551 |
| wavelet-HLH | glszm | GrayLevelNonUniformityNormalized | 0.06505102  |
| wavelet-HLH | glszm | SizeZoneNonUniformityNormalized  | 0.394132653 |
| wavelet-HLH | glszm | SizeZoneNonUniformity            | 22.07142857 |
| wavelet-HLH | glszm | GrayLevelNonUniformity           | 3.642857143 |
| wavelet-HLH | glszm | LargeAreaEmphasis                | 7.375       |
| wavelet-HLH | glszm | SmallAreaHighGrayLevelEmphasis   | 168.4620012 |
| wavelet-HLH | glszm | ZonePercentage                   | 0.495575221 |
| wavelet-HLH | glszm | LargeAreaLowGrayLevelEmphasis    | 0.054096608 |
| wavelet-HLH | glszm | LargeAreaHighGrayLevelEmphasis   | 1926.625    |
| wavelet-HLH | glszm | HighGrayLevelZoneEmphasis        | 264.375     |
| wavelet-HLH | glszm | SmallAreaEmphasis                | 0.650141093 |
| wavelet-HLH | glszm | LowGrayLevelZoneEmphasis         | 0.027430875 |
| wavelet-HLH | glszm | ZoneEntropy                      | 5.101823226 |
| wavelet-HLH | glszm | SmallAreaLowGrayLevelEmphasis    | 0.025948844 |
| wavelet-HLH | ngtdm | Coarseness                       | 0.044254623 |
| wavelet-HLH | ngtdm | Complexity                       | 594.1505856 |
| wavelet-HLH | ngtdm | Strength                         | 7.393715585 |
| wavelet-HLH | ngtdm | Contrast                         | 0.257268269 |
| wavelet-HLH | ngtdm | Busyness                         | 0.066308444 |

| Image type | Feature Class | Feature Name                         |                                                                                                                                                                                                                                                                                                                                                                                                                   |
|------------|---------------|--------------------------------------|-------------------------------------------------------------------------------------------------------------------------------------------------------------------------------------------------------------------------------------------------------------------------------------------------------------------------------------------------------------------------------------------------------------------|
| general    | info          | BoundingBox                          | 14: RTSTRUCT: C99-DNU_segment_ITV<br>(0, 0, 2, 14, 15, 11)                                                                                                                                                                                                                                                                                                                                                        |
| general    | info          | EnabledImageTypes                    | {u'Original': {}, u'Wavelet': {}}                                                                                                                                                                                                                                                                                                                                                                                 |
|            |               |                                      | {'distances': [1], 'additionalInfo': True, 'force2D': False, 'interpolator': 'sitkBSpline', 'resampledPixelSpacing': [3.0], 'label': 1, 'normalizeScale': 1, 'normalize': False, 'force2Ddimension': 0, 'removeOutliers': None, 'minimumROISize': None, u'binWidth': 25.0, 'minimumROIDimensions': 1, u'correctMask': True, 'preCrop': False, u'symmetricalGLCM': True, 'resegmentRange': None, 'padDistance': 5} |
| general    | info          | GeneralSettings                      |                                                                                                                                                                                                                                                                                                                                                                                                                   |
| general    | info          | ImageHash                            | 61a9d69b3f00ca67344f049e6b6dba2855522e85<br>(0.9765624999999998, 0.9765624999999998, 1.9999999999999999)                                                                                                                                                                                                                                                                                                          |
| general    | info          | ImageSpacing                         |                                                                                                                                                                                                                                                                                                                                                                                                                   |
| general    | info          | MaskHash                             | 0acbe7931ea48e47e05b539c8c750430dfe11391                                                                                                                                                                                                                                                                                                                                                                          |
| general    | info          | NumpyVersion                         | 1.13.1                                                                                                                                                                                                                                                                                                                                                                                                            |
| general    | info          | PyWaveletVersion                     | 0.5.2                                                                                                                                                                                                                                                                                                                                                                                                             |
| general    | info          | SimpleITKVersion                     | 1.1.0                                                                                                                                                                                                                                                                                                                                                                                                             |
| general    | info          | Version                              | 1.3.0.post102+g1b0eb74                                                                                                                                                                                                                                                                                                                                                                                            |
| general    | info          | VolumeNum                            | 1                                                                                                                                                                                                                                                                                                                                                                                                                 |
| general    | info          | VoxelNum                             | 878                                                                                                                                                                                                                                                                                                                                                                                                               |
| original   | shape         | Maximum3DDiameter                    | 42.53234064                                                                                                                                                                                                                                                                                                                                                                                                       |
| original   | shape         | Maximum2DDiameterSlice               | 40.80441153                                                                                                                                                                                                                                                                                                                                                                                                       |
| original   | shape         | Sphericity                           | 0.820831218                                                                                                                                                                                                                                                                                                                                                                                                       |
| original   | shape         | MinorAxis                            | 33.70893456                                                                                                                                                                                                                                                                                                                                                                                                       |
| original   | shape         | Elongation                           | 0.975412135                                                                                                                                                                                                                                                                                                                                                                                                       |
| original   | shape         | SurfaceVolumeRatio                   | 0.205089849                                                                                                                                                                                                                                                                                                                                                                                                       |
| original   | shape         | Volume                               | 23706                                                                                                                                                                                                                                                                                                                                                                                                             |
| original   | shape         | MajorAxis                            | 34.55865817                                                                                                                                                                                                                                                                                                                                                                                                       |
| original   | shape         | SurfaceArea                          | 4861.859965                                                                                                                                                                                                                                                                                                                                                                                                       |
| original   | shape         | Flatness                             | 0.853844424                                                                                                                                                                                                                                                                                                                                                                                                       |
| original   | shape         | LeastAxis                            | 29.50771757                                                                                                                                                                                                                                                                                                                                                                                                       |
| original   | shape         | Maximum2DDiameterColumn              | 39.11521443                                                                                                                                                                                                                                                                                                                                                                                                       |
| original   | shape         | Maximum2DDiameterRow                 | 40.36087214                                                                                                                                                                                                                                                                                                                                                                                                       |
| original   | gldm          | GrayLevelVariance                    | 73.65104996                                                                                                                                                                                                                                                                                                                                                                                                       |
| original   | gldm          | HighGrayLevelEmphasis                | 1224.854214                                                                                                                                                                                                                                                                                                                                                                                                       |
| original   | gldm          | DependenceEntropy                    | 6.676710113                                                                                                                                                                                                                                                                                                                                                                                                       |
| original   | gldm          | DependenceNonUniformity              | 114.1116173                                                                                                                                                                                                                                                                                                                                                                                                       |
| original   | gldm          | GrayLevelNonUniformity               | 104.2551253                                                                                                                                                                                                                                                                                                                                                                                                       |
| original   | gldm          | SmallDependenceEmphasis              | 0.338506112                                                                                                                                                                                                                                                                                                                                                                                                       |
| original   | gldm          | SmallDependenceHighGrayLevelEmphasis | 346.3028851                                                                                                                                                                                                                                                                                                                                                                                                       |
| original   | gldm          | DependenceNonUniformityNormalized    | 0.129967673                                                                                                                                                                                                                                                                                                                                                                                                       |
| original   | gldm          | LargeDependenceEmphasis              | 51.0022779                                                                                                                                                                                                                                                                                                                                                                                                        |
| original   | gldm          | LargeDependenceLowGrayLevelEmphasis  | 0.038104592                                                                                                                                                                                                                                                                                                                                                                                                       |
| original   | gldm          | DependenceVariance                   | 22.95331074                                                                                                                                                                                                                                                                                                                                                                                                       |
| original   | gldm          | LargeDependenceHighGrayLevelEmphasis | 72206.72437                                                                                                                                                                                                                                                                                                                                                                                                       |
| original   | gldm          | SmallDependenceLowGrayLevelEmphasis  | 0.001888294                                                                                                                                                                                                                                                                                                                                                                                                       |
| original   | gldm          | LowGrayLevelEmphasis                 | 0.002469925                                                                                                                                                                                                                                                                                                                                                                                                       |
| original   | glcm          | JointAverage                         | 35.15249755                                                                                                                                                                                                                                                                                                                                                                                                       |
| original   | glcm          | SumAverage                           | 70.3049951                                                                                                                                                                                                                                                                                                                                                                                                        |

|          |            |                                  |              |
|----------|------------|----------------------------------|--------------|
| original | glcm       | JointEntropy                     | 6.889133193  |
| original | glcm       | ClusterShade                     | -1966.779367 |
| original | glcm       | MaximumProbability               | 0.122845725  |
| original | glcm       | Idmn                             | 0.986666387  |
| original | glcm       | JointEnergy                      | 0.036524869  |
| original | glcm       | Contrast                         | 65.16484508  |
| original | glcm       | DifferenceEntropy                | 3.669782213  |
| original | glcm       | InverseVariance                  | 0.298676396  |
| original | glcm       | DifferenceVariance               | 41.21609175  |
| original | glcm       | Idn                              | 0.938923644  |
| original | glcm       | Idm                              | 0.369095155  |
| original | glcm       | Correlation                      | 0.442951562  |
| original | glcm       | Autocorrelation                  | 1262.052389  |
| original | glcm       | SumEntropy                       | 4.863701539  |
| original | glcm       | SumSquares                       | 58.8757693   |
| original | glcm       | ClusterProminence                | 144817.8414  |
| original | glcm       | Imc2                             | 0.921158143  |
| original | glcm       | Imc1                             | -0.243827071 |
| original | glcm       | DifferenceAverage                | 4.859304178  |
| original | glcm       | Id                               | 0.423932936  |
| original | glcm       | ClusterTendency                  | 170.3382321  |
| original | firstorder | InterquartileRange               | 171          |
| original | firstorder | Skewness                         | -0.826702861 |
| original | firstorder | Uniformity                       | 0.118741601  |
| original | firstorder | Median                           | 14           |
| original | firstorder | Energy                           | 44060837     |
| original | firstorder | RobustMeanAbsoluteDeviation      | 90.74406172  |
| original | firstorder | MeanAbsoluteDeviation            | 157.3986722  |
| original | firstorder | TotalEnergy                      | 1189642599   |
| original | firstorder | Maximum                          | 751          |
| original | firstorder | RootMeanSquared                  | 224.0160388  |
| original | firstorder | 90Percentile                     | 61           |
| original | firstorder | Minimum                          | -877         |
| original | firstorder | Entropy                          | 4.205402542  |
| original | firstorder | Range                            | 1628         |
| original | firstorder | Variance                         | 45947.96307  |
| original | firstorder | 10Percentile                     | -416.5       |
| original | firstorder | Kurtosis                         | 4.720465468  |
| original | firstorder | Mean                             | -65.0785877  |
| original | glrlm      | ShortRunLowGrayLevelEmphasis     | 0.002729428  |
| original | glrlm      | GrayLevelVariance                | 84.188073    |
| original | glrlm      | LowGrayLevelRunEmphasis          | 0.002812561  |
| original | glrlm      | GrayLevelNonUniformityNormalized | 0.085002141  |
| original | glrlm      | RunVariance                      | 0.334575731  |
| original | glrlm      | GrayLevelNonUniformity           | 62.32804163  |
| original | glrlm      | LongRunEmphasis                  | 1.771456997  |
| original | glrlm      | ShortRunHighGrayLevelEmphasis    | 1037.140873  |
| original | glrlm      | RunLengthNonUniformity           | 552.6373205  |
| original | glrlm      | ShortRunEmphasis                 | 0.890045785  |
| original | glrlm      | LongRunHighGrayLevelEmphasis     | 2275.169296  |
| original | glrlm      | RunPercentage                    | 0.834764325  |
| original | glrlm      | LongRunLowGrayLevelEmphasis      | 0.003379114  |
| original | glrlm      | RunEntropy                       | 5.111915164  |
| original | glrlm      | HighGrayLevelRunEmphasis         | 1190.094712  |
| original | glrlm      | RunLengthNonUniformityNormalized | 0.753588561  |

|             |       |                                      |              |
|-------------|-------|--------------------------------------|--------------|
| original    | glszm | GrayLevelVariance                    | 134.7475724  |
| original    | glszm | ZoneVariance                         | 246.0838195  |
| original    | glszm | GrayLevelNonUniformityNormalized     | 0.029583349  |
| original    | glszm | SizeZoneNonUniformityNormalized      | 0.584986262  |
| original    | glszm | SizeZoneNonUniformity                | 190.7055215  |
| original    | glszm | GrayLevelNonUniformity               | 9.644171779  |
| original    | glszm | LargeAreaEmphasis                    | 253.3374233  |
| original    | glszm | SmallAreaHighGrayLevelEmphasis       | 792.033448   |
| original    | glszm | ZonePercentage                       | 0.371298405  |
| original    | glszm | LargeAreaLowGrayLevelEmphasis        | 0.184455225  |
| original    | glszm | LargeAreaHighGrayLevelEmphasis       | 357643.3436  |
| original    | glszm | HighGrayLevelZoneEmphasis            | 1016.254601  |
| original    | glszm | SmallAreaEmphasis                    | 0.792900491  |
| original    | glszm | LowGrayLevelZoneEmphasis             | 0.005234408  |
| original    | glszm | ZoneEntropy                          | 6.268951019  |
| original    | glszm | SmallAreaLowGrayLevelEmphasis        | 0.004947631  |
| original    | ngtdm | Coarseness                           | 0.005023258  |
| original    | ngtdm | Complexity                           | 5446.702688  |
| original    | ngtdm | Strength                             | 13.32302264  |
| original    | ngtdm | Contrast                             | 0.169272279  |
| original    | ngtdm | Busyness                             | 0.067862195  |
| wavelet-HHH | gldm  | GrayLevelVariance                    | 5.810110211  |
| wavelet-HHH | gldm  | HighGrayLevelEmphasis                | 162.4589977  |
| wavelet-HHH | gldm  | DependenceEntropy                    | 5.93715452   |
| wavelet-HHH | gldm  | DependenceNonUniformity              | 98.6833713   |
| wavelet-HHH | gldm  | GrayLevelNonUniformity               | 129.9134396  |
| wavelet-HHH | gldm  | SmallDependenceEmphasis              | 0.232973115  |
| wavelet-HHH | gldm  | SmallDependenceHighGrayLevelEmphasis | 39.43303941  |
| wavelet-HHH | gldm  | DependenceNonUniformityNormalized    | 0.112395639  |
| wavelet-HHH | gldm  | LargeDependenceEmphasis              | 37.69703872  |
| wavelet-HHH | gldm  | LargeDependenceLowGrayLevelEmphasis  | 0.244203862  |
| wavelet-HHH | gldm  | DependenceVariance                   | 13.82301877  |
| wavelet-HHH | gldm  | LargeDependenceHighGrayLevelEmphasis | 5989.982916  |
| wavelet-HHH | gldm  | SmallDependenceLowGrayLevelEmphasis  | 0.003302906  |
| wavelet-HHH | gldm  | LowGrayLevelEmphasis                 | 0.008542632  |
| wavelet-HHH | glcm  | JointAverage                         | 12.51346022  |
| wavelet-HHH | glcm  | SumAverage                           | 25.02692044  |
| wavelet-HHH | glcm  | JointEntropy                         | 6.029253624  |
| wavelet-HHH | glcm  | ClusterShade                         | -4.231465871 |
| wavelet-HHH | glcm  | MaximumProbability                   | 0.08453219   |
| wavelet-HHH | glcm  | Idmn                                 | 0.979092648  |
| wavelet-HHH | glcm  | JointEnergy                          | 0.031420847  |
| wavelet-HHH | glcm  | Contrast                             | 11.25664836  |
| wavelet-HHH | glcm  | DifferenceEntropy                    | 2.854756461  |
| wavelet-HHH | glcm  | InverseVariance                      | 0.359343193  |
| wavelet-HHH | glcm  | DifferenceVariance                   | 5.693329183  |
| wavelet-HHH | glcm  | Idn                                  | 0.911265169  |
| wavelet-HHH | glcm  | Idm                                  | 0.389220484  |
| wavelet-HHH | glcm  | Correlation                          | -0.030258734 |
| wavelet-HHH | glcm  | Autocorrelation                      | 156.4129853  |
| wavelet-HHH | glcm  | SumEntropy                           | 3.60189568   |
| wavelet-HHH | glcm  | SumSquares                           | 5.45411674   |
| wavelet-HHH | glcm  | ClusterProminence                    | 604.8622731  |
| wavelet-HHH | glcm  | Imc2                                 | 0.593945338  |
| wavelet-HHH | glcm  | Imc1                                 | -0.070647634 |

|             |            |                                  |              |
|-------------|------------|----------------------------------|--------------|
| wavelet-HHH | glcm       | DifferenceAverage                | 2.347612169  |
| wavelet-HHH | glcm       | Id                               | 0.457154569  |
| wavelet-HHH | glcm       | ClusterTendency                  | 10.5598186   |
| wavelet-HHH | firstorder | InterquartileRange               | 54.95640622  |
| wavelet-HHH | firstorder | Skewness                         | -0.102968335 |
| wavelet-HHH | firstorder | Uniformity                       | 0.147965193  |
| wavelet-HHH | firstorder | Median                           | 1.005994963  |
| wavelet-HHH | firstorder | Energy                           | 3161834.007  |
| wavelet-HHH | firstorder | RobustMeanAbsoluteDeviation      | 25.21864939  |
| wavelet-HHH | firstorder | MeanAbsoluteDeviation            | 42.5408638   |
| wavelet-HHH | firstorder | TotalEnergy                      | 85369518.19  |
| wavelet-HHH | firstorder | Maximum                          | 242.3169592  |
| wavelet-HHH | firstorder | RootMeanSquared                  | 60.00981323  |
| wavelet-HHH | firstorder | 90Percentile                     | 70.70032184  |
| wavelet-HHH | firstorder | Minimum                          | -288.5785081 |
| wavelet-HHH | firstorder | Entropy                          | 3.198563508  |
| wavelet-HHH | firstorder | Range                            | 530.8954673  |
| wavelet-HHH | firstorder | Variance                         | 3601.143945  |
| wavelet-HHH | firstorder | 10Percentile                     | -72.52400286 |
| wavelet-HHH | firstorder | Kurtosis                         | 4.990282258  |
| wavelet-HHH | firstorder | Mean                             | 0.183683615  |
| wavelet-HHH | glrlm      | ShortRunLowGrayLevelEmphasis     | 0.008192842  |
| wavelet-HHH | glrlm      | GrayLevelVariance                | 6.592055759  |
| wavelet-HHH | glrlm      | LowGrayLevelRunEmphasis          | 0.008895116  |
| wavelet-HHH | glrlm      | GrayLevelNonUniformityNormalized | 0.128732897  |
| wavelet-HHH | glrlm      | RunVariance                      | 0.24900294   |
| wavelet-HHH | glrlm      | GrayLevelNonUniformity           | 96.1355704   |
| wavelet-HHH | glrlm      | LongRunEmphasis                  | 1.631843179  |
| wavelet-HHH | glrlm      | ShortRunHighGrayLevelEmphasis    | 146.1563621  |
| wavelet-HHH | glrlm      | RunLengthNonUniformity           | 566.5624258  |
| wavelet-HHH | glrlm      | ShortRunEmphasis                 | 0.893412035  |
| wavelet-HHH | glrlm      | LongRunHighGrayLevelEmphasis     | 263.598871   |
| wavelet-HHH | glrlm      | RunPercentage                    | 0.850534431  |
| wavelet-HHH | glrlm      | LongRunLowGrayLevelEmphasis      | 0.013002764  |
| wavelet-HHH | glrlm      | RunEntropy                       | 3.942948303  |
| wavelet-HHH | glrlm      | HighGrayLevelRunEmphasis         | 163.0789251  |
| wavelet-HHH | glrlm      | RunLengthNonUniformityNormalized | 0.758554599  |
| wavelet-HHH | glszm      | GrayLevelVariance                | 14.61855775  |
| wavelet-HHH | glszm      | ZoneVariance                     | 342.015989   |
| wavelet-HHH | glszm      | GrayLevelNonUniformityNormalized | 0.084246409  |
| wavelet-HHH | glszm      | SizeZoneNonUniformityNormalized  | 0.407272137  |
| wavelet-HHH | glszm      | SizeZoneNonUniformity            | 90.41441441  |
| wavelet-HHH | glszm      | GrayLevelNonUniformity           | 18.7027027   |
| wavelet-HHH | glszm      | LargeAreaEmphasis                | 357.6576577  |
| wavelet-HHH | glszm      | SmallAreaHighGrayLevelEmphasis   | 113.4321667  |
| wavelet-HHH | glszm      | ZonePercentage                   | 0.25284738   |
| wavelet-HHH | glszm      | LargeAreaLowGrayLevelEmphasis    | 2.293733161  |
| wavelet-HHH | glszm      | LargeAreaHighGrayLevelEmphasis   | 56556.19369  |
| wavelet-HHH | glszm      | HighGrayLevelZoneEmphasis        | 168.4009009  |
| wavelet-HHH | glszm      | SmallAreaEmphasis                | 0.663270136  |
| wavelet-HHH | glszm      | LowGrayLevelZoneEmphasis         | 0.013849735  |
| wavelet-HHH | glszm      | ZoneEntropy                      | 5.430208089  |
| wavelet-HHH | glszm      | SmallAreaLowGrayLevelEmphasis    | 0.011213472  |
| wavelet-HHH | ngtdm      | Coarseness                       | 0.008214799  |
| wavelet-HHH | ngtdm      | Complexity                       | 305.4728485  |

|             |            |                                      |              |
|-------------|------------|--------------------------------------|--------------|
| wavelet-HHH | ngtdm      | Strength                             | 1.054393529  |
| wavelet-HHH | ngtdm      | Contrast                             | 0.055615482  |
| wavelet-HHH | ngtdm      | Busyness                             | 0.365770294  |
| wavelet-HLL | gldm       | GrayLevelVariance                    | 25.90488322  |
| wavelet-HLL | gldm       | HighGrayLevelEmphasis                | 694.5808656  |
| wavelet-HLL | gldm       | DependenceEntropy                    | 6.633492354  |
| wavelet-HLL | gldm       | DependenceNonUniformity              | 149.5079727  |
| wavelet-HLL | gldm       | GrayLevelNonUniformity               | 61.9453303   |
| wavelet-HLL | gldm       | SmallDependenceEmphasis              | 0.320168767  |
| wavelet-HLL | gldm       | SmallDependenceHighGrayLevelEmphasis | 229.7178748  |
| wavelet-HLL | gldm       | DependenceNonUniformityNormalized    | 0.170282429  |
| wavelet-HLL | gldm       | LargeDependenceEmphasis              | 22.63781321  |
| wavelet-HLL | gldm       | LargeDependenceLowGrayLevelEmphasis  | 0.033534368  |
| wavelet-HLL | gldm       | DependenceVariance                   | 9.47033795   |
| wavelet-HLL | gldm       | LargeDependenceHighGrayLevelEmphasis | 16439.45786  |
| wavelet-HLL | gldm       | SmallDependenceLowGrayLevelEmphasis  | 0.001813357  |
| wavelet-HLL | gldm       | LowGrayLevelEmphasis                 | 0.002914966  |
| wavelet-HLL | glcm       | JointAverage                         | 25.76659626  |
| wavelet-HLL | glcm       | SumAverage                           | 51.53319252  |
| wavelet-HLL | glcm       | JointEntropy                         | 7.67095795   |
| wavelet-HLL | glcm       | ClusterShade                         | -109.822662  |
| wavelet-HLL | glcm       | MaximumProbability                   | 0.041399699  |
| wavelet-HLL | glcm       | Idmn                                 | 0.986527724  |
| wavelet-HLL | glcm       | JointEnergy                          | 0.009768359  |
| wavelet-HLL | glcm       | Contrast                             | 36.71090967  |
| wavelet-HLL | glcm       | DifferenceEntropy                    | 3.562658336  |
| wavelet-HLL | glcm       | InverseVariance                      | 0.258084654  |
| wavelet-HLL | glcm       | DifferenceVariance                   | 19.04622699  |
| wavelet-HLL | glcm       | Idn                                  | 0.929007782  |
| wavelet-HLL | glcm       | Idm                                  | 0.275932789  |
| wavelet-HLL | glcm       | Correlation                          | 0.227560053  |
| wavelet-HLL | glcm       | Autocorrelation                      | 669.4992329  |
| wavelet-HLL | glcm       | SumEntropy                           | 4.803154861  |
| wavelet-HLL | glcm       | SumSquares                           | 23.93584756  |
| wavelet-HLL | glcm       | ClusterProminence                    | 17959.91803  |
| wavelet-HLL | glcm       | Imc2                                 | 0.839317391  |
| wavelet-HLL | glcm       | Imc1                                 | -0.151773807 |
| wavelet-HLL | glcm       | DifferenceAverage                    | 4.13425729   |
| wavelet-HLL | glcm       | Id                                   | 0.356823901  |
| wavelet-HLL | glcm       | ClusterTendency                      | 59.03248057  |
| wavelet-HLL | firstorder | InterquartileRange                   | 132.4048726  |
| wavelet-HLL | firstorder | Skewness                             | -0.09187591  |
| wavelet-HLL | firstorder | Uniformity                           | 0.070552768  |
| wavelet-HLL | firstorder | Median                               | -28.08844881 |
| wavelet-HLL | firstorder | Energy                               | 15647832.41  |
| wavelet-HLL | firstorder | RobustMeanAbsoluteDeviation          | 58.38680387  |
| wavelet-HLL | firstorder | MeanAbsoluteDeviation                | 93.08843169  |
| wavelet-HLL | firstorder | TotalEnergy                          | 422491475    |
| wavelet-HLL | firstorder | Maximum                              | 570.2897113  |
| wavelet-HLL | firstorder | RootMeanSquared                      | 133.4995602  |
| wavelet-HLL | firstorder | 90Percentile                         | 99.9868111   |
| wavelet-HLL | firstorder | Minimum                              | -655.5563739 |
| wavelet-HLL | firstorder | Entropy                              | 4.245996987  |
| wavelet-HLL | firstorder | Range                                | 1225.846085  |
| wavelet-HLL | firstorder | Variance                             | 16114.54696  |



|             |            |                                      |              |
|-------------|------------|--------------------------------------|--------------|
| wavelet-HLL | firstorder | 10Percentile                         | -204.5945854 |
| wavelet-HLL | firstorder | Kurtosis                             | 5.366453227  |
| wavelet-HLL | firstorder | Mean                                 | -41.32294301 |
| wavelet-HLL | glrlm      | ShortRunLowGrayLevelEmphasis         | 0.002967361  |
| wavelet-HLL | glrlm      | GrayLevelVariance                    | 27.89637123  |
| wavelet-HLL | glrlm      | LowGrayLevelRunEmphasis              | 0.003076803  |
| wavelet-HLL | glrlm      | GrayLevelNonUniformityNormalized     | 0.064309716  |
| wavelet-HLL | glrlm      | RunVariance                          | 0.150525706  |
| wavelet-HLL | glrlm      | GrayLevelNonUniformity               | 50.7833395   |
| wavelet-HLL | glrlm      | LongRunEmphasis                      | 1.391714608  |
| wavelet-HLL | glrlm      | ShortRunHighGrayLevelEmphasis        | 641.5737348  |
| wavelet-HLL | glrlm      | RunLengthNonUniformity               | 654.5716136  |
| wavelet-HLL | glrlm      | ShortRunEmphasis                     | 0.927426984  |
| wavelet-HLL | glrlm      | LongRunHighGrayLevelEmphasis         | 972.2907401  |
| wavelet-HLL | glrlm      | RunPercentage                        | 0.898896093  |
| wavelet-HLL | glrlm      | LongRunLowGrayLevelEmphasis          | 0.003654526  |
| wavelet-HLL | glrlm      | RunEntropy                           | 4.762319776  |
| wavelet-HLL | glrlm      | HighGrayLevelRunEmphasis             | 692.8125761  |
| wavelet-HLL | glrlm      | RunLengthNonUniformityNormalized     | 0.828352867  |
| wavelet-HLL | glszm      | GrayLevelVariance                    | 48.2941391   |
| wavelet-HLL | glszm      | ZoneVariance                         | 63.38396506  |
| wavelet-HLL | glszm      | GrayLevelNonUniformityNormalized     | 0.043327816  |
| wavelet-HLL | glszm      | SizeZoneNonUniformityNormalized      | 0.405680405  |
| wavelet-HLL | glszm      | SizeZoneNonUniformity                | 132.6574924  |
| wavelet-HLL | glszm      | GrayLevelNonUniformity               | 14.16819572  |
| wavelet-HLL | glszm      | LargeAreaEmphasis                    | 70.59327217  |
| wavelet-HLL | glszm      | SmallAreaHighGrayLevelEmphasis       | 483.7465334  |
| wavelet-HLL | glszm      | ZonePercentage                       | 0.372437358  |
| wavelet-HLL | glszm      | LargeAreaLowGrayLevelEmphasis        | 0.101079329  |
| wavelet-HLL | glszm      | LargeAreaHighGrayLevelEmphasis       | 51974.12844  |
| wavelet-HLL | glszm      | HighGrayLevelZoneEmphasis            | 708.1712538  |
| wavelet-HLL | glszm      | SmallAreaEmphasis                    | 0.658999676  |
| wavelet-HLL | glszm      | LowGrayLevelZoneEmphasis             | 0.005145175  |
| wavelet-HLL | glszm      | ZoneEntropy                          | 6.244029078  |
| wavelet-HLL | glszm      | SmallAreaLowGrayLevelEmphasis        | 0.004524323  |
| wavelet-HLL | ngtdm      | Coarseness                           | 0.009417915  |
| wavelet-HLL | ngtdm      | Complexity                           | 1786.094011  |
| wavelet-HLL | ngtdm      | Strength                             | 5.227052005  |
| wavelet-HLL | ngtdm      | Contrast                             | 0.106012546  |
| wavelet-HLL | ngtdm      | Busyness                             | 0.084666157  |
| wavelet-LHL | gldm       | GrayLevelVariance                    | 51.78954681  |
| wavelet-LHL | gldm       | HighGrayLevelEmphasis                | 1033.591116  |
| wavelet-LHL | gldm       | DependenceEntropy                    | 6.705601963  |
| wavelet-LHL | gldm       | DependenceNonUniformity              | 182.6241458  |
| wavelet-LHL | gldm       | GrayLevelNonUniformity               | 56.37357631  |
| wavelet-LHL | gldm       | SmallDependenceEmphasis              | 0.446746029  |
| wavelet-LHL | gldm       | SmallDependenceHighGrayLevelEmphasis | 465.3764707  |
| wavelet-LHL | gldm       | DependenceNonUniformityNormalized    | 0.208000166  |
| wavelet-LHL | gldm       | LargeDependenceEmphasis              | 21.22095672  |
| wavelet-LHL | gldm       | LargeDependenceLowGrayLevelEmphasis  | 0.030412769  |
| wavelet-LHL | gldm       | DependenceVariance                   | 9.993114399  |
| wavelet-LHL | gldm       | LargeDependenceHighGrayLevelEmphasis | 22377.66629  |
| wavelet-LHL | gldm       | SmallDependenceLowGrayLevelEmphasis  | 0.001667656  |
| wavelet-LHL | gldm       | LowGrayLevelEmphasis                 | 0.003994983  |
| wavelet-LHL | glcm       | JointAverage                         | 31.16699343  |

|             |            |                                  |              |
|-------------|------------|----------------------------------|--------------|
| wavelet-LHL | glcm       | SumAverage                       | 62.33398687  |
| wavelet-LHL | glcm       | JointEntropy                     | 7.998590497  |
| wavelet-LHL | glcm       | ClusterShade                     | -539.976797  |
| wavelet-LHL | glcm       | MaximumProbability               | 0.049454192  |
| wavelet-LHL | glcm       | Idmn                             | 0.982490892  |
| wavelet-LHL | glcm       | JointEnergy                      | 0.010390668  |
| wavelet-LHL | glcm       | Contrast                         | 84.20292406  |
| wavelet-LHL | glcm       | DifferenceEntropy                | 4.000918304  |
| wavelet-LHL | glcm       | InverseVariance                  | 0.237468341  |
| wavelet-LHL | glcm       | DifferenceVariance               | 47.29979229  |
| wavelet-LHL | glcm       | Idn                              | 0.92399612   |
| wavelet-LHL | glcm       | Idm                              | 0.24874656   |
| wavelet-LHL | glcm       | Correlation                      | 0.096572599  |
| wavelet-LHL | glcm       | Autocorrelation                  | 976.1410383  |
| wavelet-LHL | glcm       | SumEntropy                       | 5.030131916  |
| wavelet-LHL | glcm       | SumSquares                       | 46.85862982  |
| wavelet-LHL | glcm       | ClusterProminence                | 71201.11452  |
| wavelet-LHL | glcm       | Imc2                             | 0.911463658  |
| wavelet-LHL | glcm       | Imc1                             | -0.203777159 |
| wavelet-LHL | glcm       | DifferenceAverage                | 5.922702783  |
| wavelet-LHL | glcm       | Id                               | 0.32339685   |
| wavelet-LHL | glcm       | ClusterTendency                  | 103.2315952  |
| wavelet-LHL | firstorder | InterquartileRange               | 145.4589221  |
| wavelet-LHL | firstorder | Skewness                         | -0.259749869 |
| wavelet-LHL | firstorder | Uniformity                       | 0.064206807  |
| wavelet-LHL | firstorder | Median                           | -10.01189388 |
| wavelet-LHL | firstorder | Energy                           | 29089870.66  |
| wavelet-LHL | firstorder | RobustMeanAbsoluteDeviation      | 68.21581595  |
| wavelet-LHL | firstorder | MeanAbsoluteDeviation            | 122.6618262  |
| wavelet-LHL | firstorder | TotalEnergy                      | 785426507.9  |
| wavelet-LHL | firstorder | Maximum                          | 808.3338569  |
| wavelet-LHL | firstorder | RootMeanSquared                  | 182.0218974  |
| wavelet-LHL | firstorder | 90Percentile                     | 146.6271977  |
| wavelet-LHL | firstorder | Minimum                          | -798.5220744 |
| wavelet-LHL | firstorder | Entropy                          | 4.596413643  |
| wavelet-LHL | firstorder | Range                            | 1606.855931  |
| wavelet-LHL | firstorder | Variance                         | 32281.14058  |
| wavelet-LHL | firstorder | 10Percentile                     | -247.0054169 |
| wavelet-LHL | firstorder | Kurtosis                         | 5.948695172  |
| wavelet-LHL | firstorder | Mean                             | -29.16899997 |
| wavelet-LHL | glrlm      | ShortRunLowGrayLevelEmphasis     | 0.004052139  |
| wavelet-LHL | glrlm      | GrayLevelVariance                | 56.09257744  |
| wavelet-LHL | glrlm      | LowGrayLevelRunEmphasis          | 0.004192664  |
| wavelet-LHL | glrlm      | GrayLevelNonUniformityNormalized | 0.055288262  |
| wavelet-LHL | glrlm      | RunVariance                      | 0.138673307  |
| wavelet-LHL | glrlm      | GrayLevelNonUniformity           | 44.19616308  |
| wavelet-LHL | glrlm      | LongRunEmphasis                  | 1.350329756  |
| wavelet-LHL | glrlm      | ShortRunHighGrayLevelEmphasis    | 966.6080732  |
| wavelet-LHL | glrlm      | RunLengthNonUniformity           | 679.5690827  |
| wavelet-LHL | glrlm      | ShortRunEmphasis                 | 0.937122728  |
| wavelet-LHL | glrlm      | LongRunHighGrayLevelEmphasis     | 1399.48631   |
| wavelet-LHL | glrlm      | RunPercentage                    | 0.909584721  |
| wavelet-LHL | glrlm      | LongRunLowGrayLevelEmphasis      | 0.004848536  |
| wavelet-LHL | glrlm      | RunEntropy                       | 5.086113709  |
| wavelet-LHL | glrlm      | HighGrayLevelRunEmphasis         | 1032.291134  |

|             |       |                                      |              |
|-------------|-------|--------------------------------------|--------------|
| wavelet-LHL | glrlm | RunLengthNonUniformityNormalized     | 0.850030889  |
| wavelet-LHL | glszm | GrayLevelVariance                    | 88.46294153  |
| wavelet-LHL | glszm | ZoneVariance                         | 54.15172754  |
| wavelet-LHL | glszm | GrayLevelNonUniformityNormalized     | 0.03377915   |
| wavelet-LHL | glszm | SizeZoneNonUniformityNormalized      | 0.593514232  |
| wavelet-LHL | glszm | SizeZoneNonUniformity                | 256.3981481  |
| wavelet-LHL | glszm | GrayLevelNonUniformity               | 14.59259259  |
| wavelet-LHL | glszm | LargeAreaEmphasis                    | 58.28240741  |
| wavelet-LHL | glszm | SmallAreaHighGrayLevelEmphasis       | 834.3339014  |
| wavelet-LHL | glszm | ZonePercentage                       | 0.492027335  |
| wavelet-LHL | glszm | LargeAreaLowGrayLevelEmphasis        | 0.066161448  |
| wavelet-LHL | glszm | LargeAreaHighGrayLevelEmphasis       | 61717.5625   |
| wavelet-LHL | glszm | HighGrayLevelZoneEmphasis            | 1034.310185  |
| wavelet-LHL | glszm | SmallAreaEmphasis                    | 0.797444453  |
| wavelet-LHL | glszm | LowGrayLevelZoneEmphasis             | 0.004690717  |
| wavelet-LHL | glszm | ZoneEntropy                          | 6.152935307  |
| wavelet-LHL | glszm | SmallAreaLowGrayLevelEmphasis        | 0.002675489  |
| wavelet-LHL | ngtdm | Coarseness                           | 0.008293067  |
| wavelet-LHL | ngtdm | Complexity                           | 5208.78876   |
| wavelet-LHL | ngtdm | Strength                             | 8.558465896  |
| wavelet-LHL | ngtdm | Contrast                             | 0.170099032  |
| wavelet-LHL | ngtdm | Busyness                             | 0.054230818  |
| wavelet-LHH | gldm  | GrayLevelVariance                    | 30.50530041  |
| wavelet-LHH | gldm  | HighGrayLevelEmphasis                | 737.7744875  |
| wavelet-LHH | gldm  | DependenceEntropy                    | 6.479368109  |
| wavelet-LHH | gldm  | DependenceNonUniformity              | 150.1776765  |
| wavelet-LHH | gldm  | GrayLevelNonUniformity               | 75.56036446  |
| wavelet-LHH | gldm  | SmallDependenceEmphasis              | 0.387519929  |
| wavelet-LHH | gldm  | SmallDependenceHighGrayLevelEmphasis | 296.7767715  |
| wavelet-LHH | gldm  | DependenceNonUniformityNormalized    | 0.17104519   |
| wavelet-LHH | gldm  | LargeDependenceEmphasis              | 26.90432802  |
| wavelet-LHH | gldm  | LargeDependenceLowGrayLevelEmphasis  | 0.041327144  |
| wavelet-LHH | gldm  | DependenceVariance                   | 12.36374344  |
| wavelet-LHH | gldm  | LargeDependenceHighGrayLevelEmphasis | 18882.59909  |
| wavelet-LHH | gldm  | SmallDependenceLowGrayLevelEmphasis  | 0.003068704  |
| wavelet-LHH | gldm  | LowGrayLevelEmphasis                 | 0.003976679  |
| wavelet-LHH | glcm  | JointAverage                         | 26.55187379  |
| wavelet-LHH | glcm  | SumAverage                           | 53.10374758  |
| wavelet-LHH | glcm  | JointEntropy                         | 7.433564021  |
| wavelet-LHH | glcm  | ClusterShade                         | 207.215502   |
| wavelet-LHH | glcm  | MaximumProbability                   | 0.058069935  |
| wavelet-LHH | glcm  | Idmn                                 | 0.985425185  |
| wavelet-LHH | glcm  | JointEnergy                          | 0.015268427  |
| wavelet-LHH | glcm  | Contrast                             | 60.01056005  |
| wavelet-LHH | glcm  | DifferenceEntropy                    | 3.745172335  |
| wavelet-LHH | glcm  | InverseVariance                      | 0.269073395  |
| wavelet-LHH | glcm  | DifferenceVariance                   | 35.96457438  |
| wavelet-LHH | glcm  | Idn                                  | 0.932203075  |
| wavelet-LHH | glcm  | Idm                                  | 0.2885926    |
| wavelet-LHH | glcm  | Correlation                          | -0.020572745 |
| wavelet-LHH | glcm  | Autocorrelation                      | 704.4000625  |
| wavelet-LHH | glcm  | SumEntropy                           | 4.568185928  |
| wavelet-LHH | glcm  | SumSquares                           | 29.40047411  |
| wavelet-LHH | glcm  | ClusterProminence                    | 34362.61747  |
| wavelet-LHH | glcm  | Imc2                                 | 0.85746401   |

|             |            |                                  |              |
|-------------|------------|----------------------------------|--------------|
| wavelet-LHH | glcm       | Imc1                             | -0.166367032 |
| wavelet-LHH | glcm       | DifferenceAverage                | 4.826928407  |
| wavelet-LHH | glcm       | Id                               | 0.361797802  |
| wavelet-LHH | glcm       | ClusterTendency                  | 57.5913364   |
| wavelet-LHH | firstorder | InterquartileRange               | 101.2326389  |
| wavelet-LHH | firstorder | Skewness                         | 0.465939275  |
| wavelet-LHH | firstorder | Uniformity                       | 0.086059641  |
| wavelet-LHH | firstorder | Median                           | -0.933942438 |
| wavelet-LHH | firstorder | Energy                           | 16663834.52  |
| wavelet-LHH | firstorder | RobustMeanAbsoluteDeviation      | 45.28759434  |
| wavelet-LHH | firstorder | MeanAbsoluteDeviation            | 87.79743247  |
| wavelet-LHH | firstorder | TotalEnergy                      | 449923532.1  |
| wavelet-LHH | firstorder | Maximum                          | 844.4101755  |
| wavelet-LHH | firstorder | RootMeanSquared                  | 137.765418   |
| wavelet-LHH | firstorder | 90Percentile                     | 147.5688357  |
| wavelet-LHH | firstorder | Minimum                          | -633.6950558 |
| wavelet-LHH | firstorder | Entropy                          | 4.16650013   |
| wavelet-LHH | firstorder | Range                            | 1478.105231  |
| wavelet-LHH | firstorder | Variance                         | 18972.17565  |
| wavelet-LHH | firstorder | 10Percentile                     | -128.5819375 |
| wavelet-LHH | firstorder | Kurtosis                         | 8.826500484  |
| wavelet-LHH | firstorder | Mean                             | 2.671093543  |
| wavelet-LHH | glrlm      | ShortRunLowGrayLevelEmphasis     | 0.004174782  |
| wavelet-LHH | glrlm      | GrayLevelVariance                | 33.65907547  |
| wavelet-LHH | glrlm      | LowGrayLevelRunEmphasis          | 0.004284265  |
| wavelet-LHH | glrlm      | GrayLevelNonUniformityNormalized | 0.073790802  |
| wavelet-LHH | glrlm      | RunVariance                      | 0.1733062    |
| wavelet-LHH | glrlm      | GrayLevelNonUniformity           | 57.80100181  |
| wavelet-LHH | glrlm      | LongRunEmphasis                  | 1.43259418   |
| wavelet-LHH | glrlm      | ShortRunHighGrayLevelEmphasis    | 688.6121851  |
| wavelet-LHH | glrlm      | RunLengthNonUniformity           | 644.857262   |
| wavelet-LHH | glrlm      | ShortRunEmphasis                 | 0.924781064  |
| wavelet-LHH | glrlm      | LongRunHighGrayLevelEmphasis     | 1046.193157  |
| wavelet-LHH | glrlm      | RunPercentage                    | 0.891799544  |
| wavelet-LHH | glrlm      | LongRunLowGrayLevelEmphasis      | 0.004911924  |
| wavelet-LHH | glrlm      | RunEntropy                       | 4.742572605  |
| wavelet-LHH | glrlm      | HighGrayLevelRunEmphasis         | 741.7803115  |
| wavelet-LHH | glrlm      | RunLengthNonUniformityNormalized | 0.823092784  |
| wavelet-LHH | glszm      | GrayLevelVariance                | 59.10738071  |
| wavelet-LHH | glszm      | ZoneVariance                     | 102.3201598  |
| wavelet-LHH | glszm      | GrayLevelNonUniformityNormalized | 0.04170348   |
| wavelet-LHH | glszm      | SizeZoneNonUniformityNormalized  | 0.577174083  |
| wavelet-LHH | glszm      | SizeZoneNonUniformity            | 211.8228883  |
| wavelet-LHH | glszm      | GrayLevelNonUniformity           | 15.30517711  |
| wavelet-LHH | glszm      | LargeAreaEmphasis                | 108.0435967  |
| wavelet-LHH | glszm      | SmallAreaHighGrayLevelEmphasis   | 606.0726144  |
| wavelet-LHH | glszm      | ZonePercentage                   | 0.417995444  |
| wavelet-LHH | glszm      | LargeAreaLowGrayLevelEmphasis    | 0.161052986  |
| wavelet-LHH | glszm      | LargeAreaHighGrayLevelEmphasis   | 75724.29973  |
| wavelet-LHH | glszm      | HighGrayLevelZoneEmphasis        | 774.1961853  |
| wavelet-LHH | glszm      | SmallAreaEmphasis                | 0.786307293  |
| wavelet-LHH | glszm      | LowGrayLevelZoneEmphasis         | 0.007454224  |
| wavelet-LHH | glszm      | ZoneEntropy                      | 5.874182173  |
| wavelet-LHH | glszm      | SmallAreaLowGrayLevelEmphasis    | 0.007128577  |
| wavelet-LHH | ngtdm      | Coarseness                       | 0.009108294  |

|             |            |                                      |              |
|-------------|------------|--------------------------------------|--------------|
| wavelet-LHH | ngtdm      | Complexity                           | 2984.146522  |
| wavelet-LHH | ngtdm      | Strength                             | 5.897792804  |
| wavelet-LHH | ngtdm      | Contrast                             | 0.119498637  |
| wavelet-LHH | ngtdm      | Busyness                             | 0.067739056  |
| wavelet-LLH | gldm       | GrayLevelVariance                    | 73.4297871   |
| wavelet-LLH | gldm       | HighGrayLevelEmphasis                | 1468.341686  |
| wavelet-LLH | gldm       | DependenceEntropy                    | 6.842430059  |
| wavelet-LLH | gldm       | DependenceNonUniformity              | 187.667426   |
| wavelet-LLH | gldm       | GrayLevelNonUniformity               | 50.27562642  |
| wavelet-LLH | gldm       | SmallDependenceEmphasis              | 0.44279644   |
| wavelet-LLH | gldm       | SmallDependenceHighGrayLevelEmphasis | 722.3325341  |
| wavelet-LLH | gldm       | DependenceNonUniformityNormalized    | 0.213744221  |
| wavelet-LLH | gldm       | LargeDependenceEmphasis              | 19.41002278  |
| wavelet-LLH | gldm       | LargeDependenceLowGrayLevelEmphasis  | 0.015482165  |
| wavelet-LLH | gldm       | DependenceVariance                   | 9.064787958  |
| wavelet-LLH | gldm       | LargeDependenceHighGrayLevelEmphasis | 27018.46925  |
| wavelet-LLH | gldm       | SmallDependenceLowGrayLevelEmphasis  | 0.001556519  |
| wavelet-LLH | gldm       | LowGrayLevelEmphasis                 | 0.002005564  |
| wavelet-LLH | glcm       | JointAverage                         | 37.06916247  |
| wavelet-LLH | glcm       | SumAverage                           | 74.13832494  |
| wavelet-LLH | glcm       | JointEntropy                         | 8.233434038  |
| wavelet-LLH | glcm       | ClusterShade                         | 1621.614134  |
| wavelet-LLH | glcm       | MaximumProbability                   | 0.041604732  |
| wavelet-LLH | glcm       | Idmn                                 | 0.985211375  |
| wavelet-LLH | glcm       | JointEnergy                          | 0.008564226  |
| wavelet-LLH | glcm       | Contrast                             | 124.7347749  |
| wavelet-LLH | glcm       | DifferenceEntropy                    | 4.200452754  |
| wavelet-LLH | glcm       | InverseVariance                      | 0.22238898   |
| wavelet-LLH | glcm       | DifferenceVariance                   | 73.59522994  |
| wavelet-LLH | glcm       | Idn                                  | 0.93188518   |
| wavelet-LLH | glcm       | Idm                                  | 0.234326963  |
| wavelet-LLH | glcm       | Correlation                          | 0.073677949  |
| wavelet-LLH | glcm       | Autocorrelation                      | 1379.324204  |
| wavelet-LLH | glcm       | SumEntropy                           | 5.198090491  |
| wavelet-LLH | glcm       | SumSquares                           | 67.55964023  |
| wavelet-LLH | glcm       | ClusterProminence                    | 198270.4551  |
| wavelet-LLH | glcm       | Imc2                                 | 0.94170619   |
| wavelet-LLH | glcm       | Imc1                                 | -0.236013536 |
| wavelet-LLH | glcm       | DifferenceAverage                    | 6.9596684    |
| wavelet-LLH | glcm       | Id                                   | 0.307827743  |
| wavelet-LLH | glcm       | ClusterTendency                      | 145.5037861  |
| wavelet-LLH | firstorder | InterquartileRange                   | 165.5922026  |
| wavelet-LLH | firstorder | Skewness                             | 0.867671818  |
| wavelet-LLH | firstorder | Uniformity                           | 0.057261534  |
| wavelet-LLH | firstorder | Median                               | -10.81148146 |
| wavelet-LLH | firstorder | Energy                               | 40141841.04  |
| wavelet-LLH | firstorder | RobustMeanAbsoluteDeviation          | 72.60986673  |
| wavelet-LLH | firstorder | MeanAbsoluteDeviation                | 138.3806079  |
| wavelet-LLH | firstorder | TotalEnergy                          | 1083829708   |
| wavelet-LLH | firstorder | Maximum                              | 1204.995088  |
| wavelet-LLH | firstorder | RootMeanSquared                      | 213.8215067  |
| wavelet-LLH | firstorder | 90Percentile                         | 211.445447   |
| wavelet-LLH | firstorder | Minimum                              | -911.6526409 |
| wavelet-LLH | firstorder | Entropy                              | 4.793006897  |
| wavelet-LLH | firstorder | Range                                | 2116.647729  |

|             |            |                                      |              |
|-------------|------------|--------------------------------------|--------------|
| wavelet-LLH | firstorder | Variance                             | 45702.89171  |
| wavelet-LLH | firstorder | 10Percentile                         | -233.6111306 |
| wavelet-LLH | firstorder | Kurtosis                             | 7.771780431  |
| wavelet-LLH | firstorder | Mean                                 | -4.092067504 |
| wavelet-LLH | glrlm      | ShortRunLowGrayLevelEmphasis         | 0.002077388  |
| wavelet-LLH | glrlm      | GrayLevelVariance                    | 79.41923221  |
| wavelet-LLH | glrlm      | LowGrayLevelRunEmphasis              | 0.002122821  |
| wavelet-LLH | glrlm      | GrayLevelNonUniformityNormalized     | 0.049773956  |
| wavelet-LLH | glrlm      | RunVariance                          | 0.127673981  |
| wavelet-LLH | glrlm      | GrayLevelNonUniformity               | 39.99441711  |
| wavelet-LLH | glrlm      | LongRunEmphasis                      | 1.324736217  |
| wavelet-LLH | glrlm      | ShortRunHighGrayLevelEmphasis        | 1395.968881  |
| wavelet-LLH | glrlm      | RunLengthNonUniformity               | 688.6465109  |
| wavelet-LLH | glrlm      | ShortRunEmphasis                     | 0.940334383  |
| wavelet-LLH | glrlm      | LongRunHighGrayLevelEmphasis         | 1923.633941  |
| wavelet-LLH | glrlm      | RunPercentage                        | 0.914753811  |
| wavelet-LLH | glrlm      | LongRunLowGrayLevelEmphasis          | 0.002366588  |
| wavelet-LLH | glrlm      | RunEntropy                           | 5.261401302  |
| wavelet-LLH | glrlm      | HighGrayLevelRunEmphasis             | 1477.514101  |
| wavelet-LLH | glrlm      | RunLengthNonUniformityNormalized     | 0.856741184  |
| wavelet-LLH | glszm      | GrayLevelVariance                    | 129.0195003  |
| wavelet-LLH | glszm      | ZoneVariance                         | 44.3589161   |
| wavelet-LLH | glszm      | GrayLevelNonUniformityNormalized     | 0.030314936  |
| wavelet-LLH | glszm      | SizeZoneNonUniformityNormalized      | 0.558538087  |
| wavelet-LLH | glszm      | SizeZoneNonUniformity                | 242.40553    |
| wavelet-LLH | glszm      | GrayLevelNonUniformity               | 13.15668203  |
| wavelet-LLH | glszm      | LargeAreaEmphasis                    | 48.4516129   |
| wavelet-LLH | glszm      | SmallAreaHighGrayLevelEmphasis       | 1304.957032  |
| wavelet-LLH | glszm      | ZonePercentage                       | 0.494305239  |
| wavelet-LLH | glszm      | LargeAreaLowGrayLevelEmphasis        | 0.037715764  |
| wavelet-LLH | glszm      | LargeAreaHighGrayLevelEmphasis       | 67392.63134  |
| wavelet-LLH | glszm      | HighGrayLevelZoneEmphasis            | 1599.582949  |
| wavelet-LLH | glszm      | SmallAreaEmphasis                    | 0.775480989  |
| wavelet-LLH | glszm      | LowGrayLevelZoneEmphasis             | 0.003242875  |
| wavelet-LLH | glszm      | ZoneEntropy                          | 6.429821775  |
| wavelet-LLH | glszm      | SmallAreaLowGrayLevelEmphasis        | 0.003045313  |
| wavelet-LLH | ngtdm      | Coarseness                           | 0.008676574  |
| wavelet-LLH | ngtdm      | Complexity                           | 9233.717605  |
| wavelet-LLH | ngtdm      | Strength                             | 13.62640398  |
| wavelet-LLH | ngtdm      | Contrast                             | 0.196484823  |
| wavelet-LLH | ngtdm      | Busyness                             | 0.03637415   |
| wavelet-LLL | gldm       | GrayLevelVariance                    | 444.1079644  |
| wavelet-LLL | gldm       | HighGrayLevelEmphasis                | 4573.414579  |
| wavelet-LLL | gldm       | DependenceEntropy                    | 7.448818366  |
| wavelet-LLL | gldm       | DependenceNonUniformity              | 251.2164009  |
| wavelet-LLL | gldm       | GrayLevelNonUniformity               | 27.69476082  |
| wavelet-LLL | gldm       | SmallDependenceEmphasis              | 0.541292205  |
| wavelet-LLL | gldm       | SmallDependenceHighGrayLevelEmphasis | 2032.886173  |
| wavelet-LLL | gldm       | DependenceNonUniformityNormalized    | 0.286123463  |
| wavelet-LLL | gldm       | LargeDependenceEmphasis              | 18.73348519  |
| wavelet-LLL | gldm       | LargeDependenceLowGrayLevelEmphasis  | 0.00550854   |
| wavelet-LLL | gldm       | DependenceVariance                   | 10.12547673  |
| wavelet-LLL | gldm       | LargeDependenceHighGrayLevelEmphasis | 107077.0273  |
| wavelet-LLL | gldm       | SmallDependenceLowGrayLevelEmphasis  | 0.002075132  |
| wavelet-LLL | gldm       | LowGrayLevelEmphasis                 | 0.002213035  |

|             |            |                                  |              |
|-------------|------------|----------------------------------|--------------|
| wavelet-LLL | glcm       | JointAverage                     | 67.8510815   |
| wavelet-LLL | glcm       | SumAverage                       | 135.702163   |
| wavelet-LLL | glcm       | JointEntropy                     | 9.018114593  |
| wavelet-LLL | glcm       | ClusterShade                     | -36641.31476 |
| wavelet-LLL | glcm       | MaximumProbability               | 0.041559264  |
| wavelet-LLL | glcm       | Idmn                             | 0.981208093  |
| wavelet-LLL | glcm       | JointEnergy                      | 0.005704473  |
| wavelet-LLL | glcm       | Contrast                         | 260.7235591  |
| wavelet-LLL | glcm       | DifferenceEntropy                | 4.819014199  |
| wavelet-LLL | glcm       | InverseVariance                  | 0.172685386  |
| wavelet-LLL | glcm       | DifferenceVariance               | 133.787848   |
| wavelet-LLL | glcm       | Idn                              | 0.918144183  |
| wavelet-LLL | glcm       | Idm                              | 0.19129317   |
| wavelet-LLL | glcm       | Correlation                      | 0.6287911    |
| wavelet-LLL | glcm       | Autocorrelation                  | 4828.933318  |
| wavelet-LLL | glcm       | SumEntropy                       | 6.454270207  |
| wavelet-LLL | glcm       | SumSquares                       | 355.0961175  |
| wavelet-LLL | glcm       | ClusterProminence                | 4966293.766  |
| wavelet-LLL | glcm       | Imc2                             | 0.994214787  |
| wavelet-LLL | glcm       | Imc1                             | -0.398902371 |
| wavelet-LLL | glcm       | DifferenceAverage                | 11.07112393  |
| wavelet-LLL | glcm       | Id                               | 0.255261263  |
| wavelet-LLL | glcm       | ClusterTendency                  | 1159.660911  |
| wavelet-LLL | firstorder | InterquartileRange               | 609.0395956  |
| wavelet-LLL | firstorder | Skewness                         | -0.8512359   |
| wavelet-LLL | firstorder | Uniformity                       | 0.031543008  |
| wavelet-LLL | firstorder | Median                           | 17.95546052  |
| wavelet-LLL | firstorder | Energy                           | 280947933.8  |
| wavelet-LLL | firstorder | RobustMeanAbsoluteDeviation      | 287.4731537  |
| wavelet-LLL | firstorder | MeanAbsoluteDeviation            | 423.5103232  |
| wavelet-LLL | firstorder | TotalEnergy                      | 7585594213   |
| wavelet-LLL | firstorder | Maximum                          | 1015.744821  |
| wavelet-LLL | firstorder | RootMeanSquared                  | 565.6732778  |
| wavelet-LLL | firstorder | 90Percentile                     | 245.9980349  |
| wavelet-LLL | firstorder | Minimum                          | -1778.805972 |
| wavelet-LLL | firstorder | Entropy                          | 5.871390117  |
| wavelet-LLL | firstorder | Range                            | 2794.550793  |
| wavelet-LLL | firstorder | Variance                         | 277467.2331  |
| wavelet-LLL | firstorder | 10Percentile                     | -1059.381468 |
| wavelet-LLL | firstorder | Kurtosis                         | 3.207353422  |
| wavelet-LLL | firstorder | Mean                             | -206.2014164 |
| wavelet-LLL | glrlm      | ShortRunLowGrayLevelEmphasis     | 0.002363449  |
| wavelet-LLL | glrlm      | GrayLevelVariance                | 464.4219535  |
| wavelet-LLL | glrlm      | LowGrayLevelRunEmphasis          | 0.002374363  |
| wavelet-LLL | glrlm      | GrayLevelNonUniformityNormalized | 0.025243676  |
| wavelet-LLL | glrlm      | RunVariance                      | 0.12042658   |
| wavelet-LLL | glrlm      | GrayLevelNonUniformity           | 20.52979098  |
| wavelet-LLL | glrlm      | LongRunEmphasis                  | 1.288588666  |
| wavelet-LLL | glrlm      | ShortRunHighGrayLevelEmphasis    | 4199.723098  |
| wavelet-LLL | glrlm      | RunLengthNonUniformity           | 716.5210971  |
| wavelet-LLL | glrlm      | ShortRunEmphasis                 | 0.950930577  |
| wavelet-LLL | glrlm      | LongRunHighGrayLevelEmphasis     | 6137.068641  |
| wavelet-LLL | glrlm      | RunPercentage                    | 0.925617663  |
| wavelet-LLL | glrlm      | LongRunLowGrayLevelEmphasis      | 0.002433959  |
| wavelet-LLL | glrlm      | RunEntropy                       | 6.280867037  |

|             |       |                                      |              |
|-------------|-------|--------------------------------------|--------------|
| wavelet-LLL | glrlm | HighGrayLevelRunEmphasis             | 4480.100703  |
| wavelet-LLL | glrlm | RunLengthNonUniformityNormalized     | 0.881362739  |
| wavelet-LLL | glszm | GrayLevelVariance                    | 545.8603159  |
| wavelet-LLL | glszm | ZoneVariance                         | 25.73200806  |
| wavelet-LLL | glszm | GrayLevelNonUniformityNormalized     | 0.01359043   |
| wavelet-LLL | glszm | SizeZoneNonUniformityNormalized      | 0.645543599  |
| wavelet-LLL | glszm | SizeZoneNonUniformity                | 336.328215   |
| wavelet-LLL | glszm | GrayLevelNonUniformity               | 7.080614203  |
| wavelet-LLL | glszm | LargeAreaEmphasis                    | 28.57197697  |
| wavelet-LLL | glszm | SmallAreaHighGrayLevelEmphasis       | 2992.403505  |
| wavelet-LLL | glszm | ZonePercentage                       | 0.593394077  |
| wavelet-LLL | glszm | LargeAreaLowGrayLevelEmphasis        | 0.008487949  |
| wavelet-LLL | glszm | LargeAreaHighGrayLevelEmphasis       | 163924.2495  |
| wavelet-LLL | glszm | HighGrayLevelZoneEmphasis            | 3865.477927  |
| wavelet-LLL | glszm | SmallAreaEmphasis                    | 0.830680327  |
| wavelet-LLL | glszm | LowGrayLevelZoneEmphasis             | 0.003544516  |
| wavelet-LLL | glszm | ZoneEntropy                          | 7.059514595  |
| wavelet-LLL | glszm | SmallAreaLowGrayLevelEmphasis        | 0.003466164  |
| wavelet-LLL | ngtdm | Coarseness                           | 0.009553169  |
| wavelet-LLL | ngtdm | Complexity                           | 31921.15779  |
| wavelet-LLL | ngtdm | Strength                             | 51.5965473   |
| wavelet-LLL | ngtdm | Contrast                             | 0.55169749   |
| wavelet-LLL | ngtdm | Busyness                             | 0.01173832   |
| wavelet-HHL | gldm  | GrayLevelVariance                    | 12.06308212  |
| wavelet-HHL | gldm  | HighGrayLevelEmphasis                | 318.7118451  |
| wavelet-HHL | gldm  | DependenceEntropy                    | 6.24200557   |
| wavelet-HHL | gldm  | DependenceNonUniformity              | 109.8542141  |
| wavelet-HHL | gldm  | GrayLevelNonUniformity               | 104.1275626  |
| wavelet-HHL | gldm  | SmallDependenceEmphasis              | 0.296052781  |
| wavelet-HHL | gldm  | SmallDependenceHighGrayLevelEmphasis | 104.2371302  |
| wavelet-HHL | gldm  | DependenceNonUniformityNormalized    | 0.125118695  |
| wavelet-HHL | gldm  | LargeDependenceEmphasis              | 30.70387244  |
| wavelet-HHL | gldm  | LargeDependenceLowGrayLevelEmphasis  | 0.105577537  |
| wavelet-HHL | gldm  | DependenceVariance                   | 11.55577233  |
| wavelet-HHL | gldm  | LargeDependenceHighGrayLevelEmphasis | 9299.616173  |
| wavelet-HHL | gldm  | SmallDependenceLowGrayLevelEmphasis  | 0.002474055  |
| wavelet-HHL | gldm  | LowGrayLevelEmphasis                 | 0.005111138  |
| wavelet-HHL | glcm  | JointAverage                         | 17.50655937  |
| wavelet-HHL | glcm  | SumAverage                           | 35.01311873  |
| wavelet-HHL | glcm  | JointEntropy                         | 6.643321447  |
| wavelet-HHL | glcm  | ClusterShade                         | 28.67819593  |
| wavelet-HHL | glcm  | MaximumProbability                   | 0.073496562  |
| wavelet-HHL | glcm  | Idmn                                 | 0.981739204  |
| wavelet-HHL | glcm  | JointEnergy                          | 0.022436118  |
| wavelet-HHL | glcm  | Contrast                             | 22.6239466   |
| wavelet-HHL | glcm  | DifferenceEntropy                    | 3.196776292  |
| wavelet-HHL | glcm  | InverseVariance                      | 0.328201621  |
| wavelet-HHL | glcm  | DifferenceVariance                   | 12.69286754  |
| wavelet-HHL | glcm  | Idn                                  | 0.92127331   |
| wavelet-HHL | glcm  | Idm                                  | 0.347721481  |
| wavelet-HHL | glcm  | Correlation                          | -0.022086884 |
| wavelet-HHL | glcm  | Autocorrelation                      | 306.2411813  |
| wavelet-HHL | glcm  | SumEntropy                           | 4.009108373  |
| wavelet-HHL | glcm  | SumSquares                           | 11.07208346  |
| wavelet-HHL | glcm  | ClusterProminence                    | 3454.422345  |



|             |            |                                  |              |
|-------------|------------|----------------------------------|--------------|
| wavelet-HHL | glcm       | Imc2                             | 0.742472389  |
| wavelet-HHL | glcm       | Imc1                             | -0.115880784 |
| wavelet-HHL | glcm       | DifferenceAverage                | 3.117736589  |
| wavelet-HHL | glcm       | Id                               | 0.418710955  |
| wavelet-HHL | glcm       | ClusterTendency                  | 21.66438724  |
| wavelet-HHL | firstorder | InterquartileRange               | 68.14237289  |
| wavelet-HHL | firstorder | Skewness                         | 0.237754232  |
| wavelet-HHL | firstorder | Uniformity                       | 0.118596313  |
| wavelet-HHL | firstorder | Median                           | -2.994675861 |
| wavelet-HHL | firstorder | Energy                           | 6575101.566  |
| wavelet-HHL | firstorder | RobustMeanAbsoluteDeviation      | 31.20232998  |
| wavelet-HHL | firstorder | MeanAbsoluteDeviation            | 57.63713386  |
| wavelet-HHL | firstorder | TotalEnergy                      | 177527742.3  |
| wavelet-HHL | firstorder | Maximum                          | 391.2677983  |
| wavelet-HHL | firstorder | RootMeanSquared                  | 86.53742634  |
| wavelet-HHL | firstorder | 90Percentile                     | 91.29818912  |
| wavelet-HHL | firstorder | Minimum                          | -402.138359  |
| wavelet-HHL | firstorder | Entropy                          | 3.615279711  |
| wavelet-HHL | firstorder | Range                            | 793.4061572  |
| wavelet-HHL | firstorder | Variance                         | 7488.570881  |
| wavelet-HHL | firstorder | 10Percentile                     | -92.06281429 |
| wavelet-HHL | firstorder | Kurtosis                         | 6.758047391  |
| wavelet-HHL | firstorder | Mean                             | 0.394050399  |
| wavelet-HHL | glrlm      | ShortRunLowGrayLevelEmphasis     | 0.005039242  |
| wavelet-HHL | glrlm      | GrayLevelVariance                | 13.5591387   |
| wavelet-HHL | glrlm      | LowGrayLevelRunEmphasis          | 0.0053573    |
| wavelet-HHL | glrlm      | GrayLevelNonUniformityNormalized | 0.104146662  |
| wavelet-HHL | glrlm      | RunVariance                      | 0.22836498   |
| wavelet-HHL | glrlm      | GrayLevelNonUniformity           | 79.60493687  |
| wavelet-HHL | glrlm      | LongRunEmphasis                  | 1.553086194  |
| wavelet-HHL | glrlm      | ShortRunHighGrayLevelEmphasis    | 293.6423667  |
| wavelet-HHL | glrlm      | RunLengthNonUniformity           | 605.3360847  |
| wavelet-HHL | glrlm      | ShortRunEmphasis                 | 0.909414727  |
| wavelet-HHL | glrlm      | LongRunHighGrayLevelEmphasis     | 488.7030616  |
| wavelet-HHL | glrlm      | RunPercentage                    | 0.870159453  |
| wavelet-HHL | glrlm      | LongRunLowGrayLevelEmphasis      | 0.00726212   |
| wavelet-HHL | glrlm      | RunEntropy                       | 4.285015626  |
| wavelet-HHL | glrlm      | HighGrayLevelRunEmphasis         | 321.0844687  |
| wavelet-HHL | glrlm      | RunLengthNonUniformityNormalized | 0.791362761  |
| wavelet-HHL | glszm      | GrayLevelVariance                | 29.87086484  |
| wavelet-HHL | glszm      | ZoneVariance                     | 197.6845726  |
| wavelet-HHL | glszm      | GrayLevelNonUniformityNormalized | 0.057918505  |
| wavelet-HHL | glszm      | SizeZoneNonUniformityNormalized  | 0.538778618  |
| wavelet-HHL | glszm      | SizeZoneNonUniformity            | 148.7028986  |
| wavelet-HHL | glszm      | GrayLevelNonUniformity           | 15.98550725  |
| wavelet-HHL | glszm      | LargeAreaEmphasis                | 207.8043478  |
| wavelet-HHL | glszm      | SmallAreaHighGrayLevelEmphasis   | 275.4968623  |
| wavelet-HHL | glszm      | ZonePercentage                   | 0.314350797  |
| wavelet-HHL | glszm      | LargeAreaLowGrayLevelEmphasis    | 0.703435262  |
| wavelet-HHL | glszm      | LargeAreaHighGrayLevelEmphasis   | 62426.44565  |
| wavelet-HHL | glszm      | HighGrayLevelZoneEmphasis        | 350.3586957  |
| wavelet-HHL | glszm      | SmallAreaEmphasis                | 0.760886549  |
| wavelet-HHL | glszm      | LowGrayLevelZoneEmphasis         | 0.00833444   |
| wavelet-HHL | glszm      | ZoneEntropy                      | 5.556423869  |
| wavelet-HHL | glszm      | SmallAreaLowGrayLevelEmphasis    | 0.007126167  |

|             |            |                                      |              |
|-------------|------------|--------------------------------------|--------------|
| wavelet-HHL | ngtdm      | Coarseness                           | 0.008723508  |
| wavelet-HHL | ngtdm      | Complexity                           | 900.7824194  |
| wavelet-HHL | ngtdm      | Strength                             | 2.6678656    |
| wavelet-HHL | ngtdm      | Contrast                             | 0.067076065  |
| wavelet-HHL | ngtdm      | Busyness                             | 0.156778283  |
| wavelet-HLH | gldm       | GrayLevelVariance                    | 12.93302235  |
| wavelet-HLH | gldm       | HighGrayLevelEmphasis                | 477.3895216  |
| wavelet-HLH | gldm       | DependenceEntropy                    | 6.247742045  |
| wavelet-HLH | gldm       | DependenceNonUniformity              | 121.6537585  |
| wavelet-HLH | gldm       | GrayLevelNonUniformity               | 97.56719818  |
| wavelet-HLH | gldm       | SmallDependenceEmphasis              | 0.30449831   |
| wavelet-HLH | gldm       | SmallDependenceHighGrayLevelEmphasis | 154.5097007  |
| wavelet-HLH | gldm       | DependenceNonUniformityNormalized    | 0.138557812  |
| wavelet-HLH | gldm       | LargeDependenceEmphasis              | 27.9453303   |
| wavelet-HLH | gldm       | LargeDependenceLowGrayLevelEmphasis  | 0.062581042  |
| wavelet-HLH | gldm       | DependenceVariance                   | 11.02119644  |
| wavelet-HLH | gldm       | LargeDependenceHighGrayLevelEmphasis | 12927.48064  |
| wavelet-HLH | gldm       | SmallDependenceLowGrayLevelEmphasis  | 0.002047743  |
| wavelet-HLH | gldm       | LowGrayLevelEmphasis                 | 0.00362237   |
| wavelet-HLH | glcm       | JointAverage                         | 21.56486666  |
| wavelet-HLH | glcm       | SumAverage                           | 43.12973332  |
| wavelet-HLH | glcm       | JointEntropy                         | 6.863928508  |
| wavelet-HLH | glcm       | ClusterShade                         | -2.174696183 |
| wavelet-HLH | glcm       | MaximumProbability                   | 0.061037397  |
| wavelet-HLH | glcm       | Idmn                                 | 0.982712558  |
| wavelet-HLH | glcm       | JointEnergy                          | 0.018167651  |
| wavelet-HLH | glcm       | Contrast                             | 26.72234537  |
| wavelet-HLH | glcm       | DifferenceEntropy                    | 3.330973508  |
| wavelet-HLH | glcm       | InverseVariance                      | 0.299735283  |
| wavelet-HLH | glcm       | DifferenceVariance                   | 14.65903829  |
| wavelet-HLH | glcm       | Idn                                  | 0.92208725   |
| wavelet-HLH | glcm       | Idm                                  | 0.321352775  |
| wavelet-HLH | glcm       | Correlation                          | -0.039572173 |
| wavelet-HLH | glcm       | Autocorrelation                      | 464.5335903  |
| wavelet-HLH | glcm       | SumEntropy                           | 4.132772899  |
| wavelet-HLH | glcm       | SumSquares                           | 12.84988106  |
| wavelet-HLH | glcm       | ClusterProminence                    | 4333.438709  |
| wavelet-HLH | glcm       | Imc2                                 | 0.738467047  |
| wavelet-HLH | glcm       | Imc1                                 | -0.111150619 |
| wavelet-HLH | glcm       | DifferenceAverage                    | 3.435808187  |
| wavelet-HLH | glcm       | Id                                   | 0.396868922  |
| wavelet-HLH | glcm       | ClusterTendency                      | 24.67717886  |
| wavelet-HLH | firstorder | InterquartileRange                   | 73.42789608  |
| wavelet-HLH | firstorder | Skewness                             | -0.043484753 |
| wavelet-HLH | firstorder | Uniformity                           | 0.111124372  |
| wavelet-HLH | firstorder | Median                               | -1.405671093 |
| wavelet-HLH | firstorder | Energy                               | 7084176.688  |
| wavelet-HLH | firstorder | RobustMeanAbsoluteDeviation          | 33.43631822  |
| wavelet-HLH | firstorder | MeanAbsoluteDeviation                | 60.33662588  |
| wavelet-HLH | firstorder | TotalEnergy                          | 191272770.6  |
| wavelet-HLH | firstorder | Maximum                              | 396.471682   |
| wavelet-HLH | firstorder | RootMeanSquared                      | 89.8250431   |
| wavelet-HLH | firstorder | 90Percentile                         | 105.304714   |
| wavelet-HLH | firstorder | Minimum                              | -505.7931264 |
| wavelet-HLH | firstorder | Entropy                              | 3.680802346  |

|             |            |                                  |              |
|-------------|------------|----------------------------------|--------------|
| wavelet-HLH | firstorder | Range                            | 902.2648084  |
| wavelet-HLH | firstorder | Variance                         | 8067.887659  |
| wavelet-HLH | firstorder | 10Percentile                     | -95.00870788 |
| wavelet-HLH | firstorder | Kurtosis                         | 7.178373105  |
| wavelet-HLH | firstorder | Mean                             | 0.806665486  |
| wavelet-HLH | glrlm      | ShortRunLowGrayLevelEmphasis     | 0.003628654  |
| wavelet-HLH | glrlm      | GrayLevelVariance                | 14.37956906  |
| wavelet-HLH | glrlm      | LowGrayLevelRunEmphasis          | 0.003815838  |
| wavelet-HLH | glrlm      | GrayLevelNonUniformityNormalized | 0.098734045  |
| wavelet-HLH | glrlm      | RunVariance                      | 0.187972789  |
| wavelet-HLH | glrlm      | GrayLevelNonUniformity           | 76.32084887  |
| wavelet-HLH | glrlm      | LongRunEmphasis                  | 1.480726405  |
| wavelet-HLH | glrlm      | ShortRunHighGrayLevelEmphasis    | 440.0700753  |
| wavelet-HLH | glrlm      | RunLengthNonUniformity           | 621.1026387  |
| wavelet-HLH | glrlm      | ShortRunEmphasis                 | 0.91532081   |
| wavelet-HLH | glrlm      | LongRunHighGrayLevelEmphasis     | 701.7319118  |
| wavelet-HLH | glrlm      | RunPercentage                    | 0.880234799  |
| wavelet-HLH | glrlm      | LongRunLowGrayLevelEmphasis      | 0.004875206  |
| wavelet-HLH | glrlm      | RunEntropy                       | 4.307505435  |
| wavelet-HLH | glrlm      | HighGrayLevelRunEmphasis         | 479.3473262  |
| wavelet-HLH | glrlm      | RunLengthNonUniformityNormalized | 0.803052009  |
| wavelet-HLH | glszm      | GrayLevelVariance                | 30.20308665  |
| wavelet-HLH | glszm      | ZoneVariance                     | 156.7909388  |
| wavelet-HLH | glszm      | GrayLevelNonUniformityNormalized | 0.05705152   |
| wavelet-HLH | glszm      | SizeZoneNonUniformityNormalized  | 0.496557752  |
| wavelet-HLH | glszm      | SizeZoneNonUniformity            | 143.5051903  |
| wavelet-HLH | glszm      | GrayLevelNonUniformity           | 16.48788927  |
| wavelet-HLH | glszm      | LargeAreaEmphasis                | 166.0207612  |
| wavelet-HLH | glszm      | SmallAreaHighGrayLevelEmphasis   | 380.0092721  |
| wavelet-HLH | glszm      | ZonePercentage                   | 0.329157175  |
| wavelet-HLH | glszm      | LargeAreaLowGrayLevelEmphasis    | 0.368331588  |
| wavelet-HLH | glszm      | LargeAreaHighGrayLevelEmphasis   | 76155.77855  |
| wavelet-HLH | glszm      | HighGrayLevelZoneEmphasis        | 506.7716263  |
| wavelet-HLH | glszm      | SmallAreaEmphasis                | 0.731853026  |
| wavelet-HLH | glszm      | LowGrayLevelZoneEmphasis         | 0.006418299  |
| wavelet-HLH | glszm      | ZoneEntropy                      | 5.639792561  |
| wavelet-HLH | glszm      | SmallAreaLowGrayLevelEmphasis    | 0.005767088  |
| wavelet-HLH | ngtdm      | Coarseness                       | 0.008776321  |
| wavelet-HLH | ngtdm      | Complexity                       | 986.3140069  |
| wavelet-HLH | ngtdm      | Strength                         | 2.874358185  |
| wavelet-HLH | ngtdm      | Contrast                         | 0.075364107  |
| wavelet-HLH | ngtdm      | Busyness                         | 0.128731547  |

| Image type | Feature Class | Feature Name                         |                                                                                                                                                                                                                                                                                                                                                                                                                   |
|------------|---------------|--------------------------------------|-------------------------------------------------------------------------------------------------------------------------------------------------------------------------------------------------------------------------------------------------------------------------------------------------------------------------------------------------------------------------------------------------------------------|
| general    | info          | BoundingBox                          | 4: RTSTRUCT: C99-DNU-A_segment_LLL GTV<br>(1, 0, 1, 7, 7, 4)                                                                                                                                                                                                                                                                                                                                                      |
| general    | info          | EnabledImageTypes                    | {u'Original': {}, u'Wavelet': {}}                                                                                                                                                                                                                                                                                                                                                                                 |
|            |               |                                      | {'distances': [1], 'additionalInfo': True, 'force2D': False, 'interpolator': 'sitkBSpline', 'resampledPixelSpacing': [3.0], 'label': 1, 'normalizeScale': 1, 'normalize': False, 'force2Ddimension': 0, 'removeOutliers': None, 'minimumROISize': None, u'binWidth': 25.0, 'minimumROIDimensions': 1, u'correctMask': True, 'preCrop': False, u'symmetricalGLCM': True, 'resegmentRange': None, 'padDistance': 5} |
| general    | info          | GeneralSettings                      |                                                                                                                                                                                                                                                                                                                                                                                                                   |
| general    | info          | ImageHash                            | bd9c6cc9bcb9d8fc4b77cf121c35d10d88411f48                                                                                                                                                                                                                                                                                                                                                                          |
| general    | info          | ImageSpacing                         | (0.9765625000000002, 0.9765625000000002, 2.0)                                                                                                                                                                                                                                                                                                                                                                     |
| general    | info          | MaskHash                             | df82c0bf07b0607104b15497d9fa3357e5b9c15b                                                                                                                                                                                                                                                                                                                                                                          |
| general    | info          | NumpyVersion                         | 1.13.1                                                                                                                                                                                                                                                                                                                                                                                                            |
| general    | info          | PyWaveletVersion                     | 0.5.2                                                                                                                                                                                                                                                                                                                                                                                                             |
| general    | info          | SimpleITKVersion                     | 1.1.0                                                                                                                                                                                                                                                                                                                                                                                                             |
| general    | info          | Version                              | 1.3.0.post102+g1b0eb74                                                                                                                                                                                                                                                                                                                                                                                            |
| general    | info          | VolumeNum                            | 1                                                                                                                                                                                                                                                                                                                                                                                                                 |
| general    | info          | VoxelNum                             | 101                                                                                                                                                                                                                                                                                                                                                                                                               |
| original   | shape         | Maximum3DDiameter                    | 20.34698995                                                                                                                                                                                                                                                                                                                                                                                                       |
| original   | shape         | Maximum2DDiameterSlice               | 18.97366596                                                                                                                                                                                                                                                                                                                                                                                                       |
| original   | shape         | Sphericity                           | 0.86821225                                                                                                                                                                                                                                                                                                                                                                                                        |
| original   | shape         | MinorAxis                            | 17.39718039                                                                                                                                                                                                                                                                                                                                                                                                       |
| original   | shape         | Elongation                           | 0.921616956                                                                                                                                                                                                                                                                                                                                                                                                       |
| original   | shape         | SurfaceVolumeRatio                   | 0.398684945                                                                                                                                                                                                                                                                                                                                                                                                       |
| original   | shape         | Volume                               | 2727                                                                                                                                                                                                                                                                                                                                                                                                              |
| original   | shape         | MajorAxis                            | 18.87680155                                                                                                                                                                                                                                                                                                                                                                                                       |
| original   | shape         | SurfaceArea                          | 1087.213844                                                                                                                                                                                                                                                                                                                                                                                                       |
| original   | shape         | Flatness                             | 0.632125492                                                                                                                                                                                                                                                                                                                                                                                                       |
| original   | shape         | LeastAxis                            | 11.93250746                                                                                                                                                                                                                                                                                                                                                                                                       |
| original   | shape         | Maximum2DDiameterColumn              | 18.97366596                                                                                                                                                                                                                                                                                                                                                                                                       |
| original   | shape         | Maximum2DDiameterRow                 | 18.24828759                                                                                                                                                                                                                                                                                                                                                                                                       |
| original   | gldm          | GrayLevelVariance                    | 22.79776493                                                                                                                                                                                                                                                                                                                                                                                                       |
| original   | gldm          | HighGrayLevelEmphasis                | 501.5841584                                                                                                                                                                                                                                                                                                                                                                                                       |
| original   | gldm          | DependenceEntropy                    | 5.306691745                                                                                                                                                                                                                                                                                                                                                                                                       |
| original   | gldm          | DependenceNonUniformity              | 14.78217822                                                                                                                                                                                                                                                                                                                                                                                                       |
| original   | gldm          | GrayLevelNonUniformity               | 13.17821782                                                                                                                                                                                                                                                                                                                                                                                                       |
| original   | gldm          | SmallDependenceEmphasis              | 0.330344108                                                                                                                                                                                                                                                                                                                                                                                                       |
| original   | gldm          | SmallDependenceHighGrayLevelEmphasis | 139.6226588                                                                                                                                                                                                                                                                                                                                                                                                       |
| original   | gldm          | DependenceNonUniformityNormalized    | 0.1463582                                                                                                                                                                                                                                                                                                                                                                                                         |
| original   | gldm          | LargeDependenceEmphasis              | 22.62376238                                                                                                                                                                                                                                                                                                                                                                                                       |
| original   | gldm          | LargeDependenceLowGrayLevelEmphasis  | 0.052838253                                                                                                                                                                                                                                                                                                                                                                                                       |
| original   | gldm          | DependenceVariance                   | 7.789824527                                                                                                                                                                                                                                                                                                                                                                                                       |
| original   | gldm          | LargeDependenceHighGrayLevelEmphasis | 13093.30693                                                                                                                                                                                                                                                                                                                                                                                                       |
| original   | gldm          | SmallDependenceLowGrayLevelEmphasis  | 0.013286066                                                                                                                                                                                                                                                                                                                                                                                                       |
| original   | gldm          | LowGrayLevelEmphasis                 | 0.014731742                                                                                                                                                                                                                                                                                                                                                                                                       |
| original   | glcm          | JointAverage                         | 22.48660888                                                                                                                                                                                                                                                                                                                                                                                                       |
| original   | glcm          | SumAverage                           | 44.97321776                                                                                                                                                                                                                                                                                                                                                                                                       |
| original   | glcm          | JointEntropy                         | 5.400386893                                                                                                                                                                                                                                                                                                                                                                                                       |
| original   | glcm          | ClusterShade                         | -674.3941608                                                                                                                                                                                                                                                                                                                                                                                                      |
| original   | glcm          | MaximumProbability                   | 0.08796175                                                                                                                                                                                                                                                                                                                                                                                                        |

|          |            |                                  |              |
|----------|------------|----------------------------------|--------------|
| original | glcm       | Idmn                             | 0.982417817  |
| original | glcm       | JointEnergy                      | 0.034275528  |
| original | glcm       | Contrast                         | 29.45992133  |
| original | glcm       | DifferenceEntropy                | 3.045081113  |
| original | glcm       | InverseVariance                  | 0.313191922  |
| original | glcm       | DifferenceVariance               | 18.25877277  |
| original | glcm       | Idn                              | 0.927793755  |
| original | glcm       | Idm                              | 0.357688588  |
| original | glcm       | Correlation                      | 0.199129801  |
| original | glcm       | Autocorrelation                  | 509.2281986  |
| original | glcm       | SumEntropy                       | 3.698314382  |
| original | glcm       | SumSquares                       | 18.28464676  |
| original | glcm       | ClusterProminence                | 21565.26926  |
| original | glcm       | Imc2                             | 0.905154726  |
| original | glcm       | Imc1                             | -0.278604486 |
| original | glcm       | DifferenceAverage                | 3.317753521  |
| original | glcm       | Id                               | 0.427454546  |
| original | glcm       | ClusterTendency                  | 43.67866569  |
| original | firstorder | InterquartileRange               | 92           |
| original | firstorder | Skewness                         | -1.81754218  |
| original | firstorder | Uniformity                       | 0.130477404  |
| original | firstorder | Median                           | -4           |
| original | firstorder | Energy                           | 1624997      |
| original | firstorder | RobustMeanAbsoluteDeviation      | 41.49154092  |
| original | firstorder | MeanAbsoluteDeviation            | 77.70865601  |
| original | firstorder | TotalEnergy                      | 43874919     |
| original | firstorder | Maximum                          | 373          |
| original | firstorder | RootMeanSquared                  | 126.8427342  |
| original | firstorder | 90Percentile                     | 39           |
| original | firstorder | Minimum                          | -560         |
| original | firstorder | Entropy                          | 3.373274781  |
| original | firstorder | Range                            | 933          |
| original | firstorder | Variance                         | 14406.45505  |
| original | firstorder | 10Percentile                     | -148         |
| original | firstorder | Kurtosis                         | 9.987299034  |
| original | firstorder | Mean                             | -41.01980198 |
| original | glrlm      | ShortRunLowGrayLevelEmphasis     | 0.016181651  |
| original | glrlm      | GrayLevelVariance                | 24.71507628  |
| original | glrlm      | LowGrayLevelRunEmphasis          | 0.016337372  |
| original | glrlm      | GrayLevelNonUniformityNormalized | 0.117943417  |
| original | glrlm      | RunVariance                      | 0.142774042  |
| original | glrlm      | GrayLevelNonUniformity           | 10.61394185  |
| original | glrlm      | LongRunEmphasis                  | 1.409467285  |
| original | glrlm      | ShortRunHighGrayLevelEmphasis    | 445.5929956  |
| original | glrlm      | RunLengthNonUniformity           | 72.64405708  |
| original | glrlm      | ShortRunEmphasis                 | 0.916809314  |
| original | glrlm      | LongRunHighGrayLevelEmphasis     | 727.1387515  |
| original | glrlm      | RunPercentage                    | 0.890327494  |
| original | glrlm      | LongRunLowGrayLevelEmphasis      | 0.017092266  |
| original | glrlm      | RunEntropy                       | 3.883290083  |
| original | glrlm      | HighGrayLevelRunEmphasis         | 492.9476029  |
| original | glrlm      | RunLengthNonUniformityNormalized | 0.806207713  |
| original | glszm      | GrayLevelVariance                | 41.19459834  |
| original | glszm      | ZoneVariance                     | 21.17243767  |
| original | glszm      | GrayLevelNonUniformityNormalized | 0.081717452  |
| original | glszm      | SizeZoneNonUniformityNormalized  | 0.494459834  |

|             |            |                                      |              |
|-------------|------------|--------------------------------------|--------------|
| original    | glszm      | SizeZoneNonUniformity                | 18.78947368  |
| original    | glszm      | GrayLevelNonUniformity               | 3.105263158  |
| original    | glszm      | LargeAreaEmphasis                    | 28.23684211  |
| original    | glszm      | SmallAreaHighGrayLevelEmphasis       | 295.9367931  |
| original    | glszm      | ZonePercentage                       | 0.376237624  |
| original    | glszm      | LargeAreaLowGrayLevelEmphasis        | 0.083744541  |
| original    | glszm      | LargeAreaHighGrayLevelEmphasis       | 16307.26316  |
| original    | glszm      | HighGrayLevelZoneEmphasis            | 419.3947368  |
| original    | glszm      | SmallAreaEmphasis                    | 0.727905249  |
| original    | glszm      | LowGrayLevelZoneEmphasis             | 0.035772928  |
| original    | glszm      | ZoneEntropy                          | 4.448860988  |
| original    | glszm      | SmallAreaLowGrayLevelEmphasis        | 0.034926035  |
| original    | ngtdm      | Coarseness                           | 0.046673373  |
| original    | ngtdm      | Complexity                           | 519.9347882  |
| original    | ngtdm      | Strength                             | 15.66228017  |
| original    | ngtdm      | Contrast                             | 0.389529673  |
| original    | ngtdm      | Busyness                             | 0.04318966   |
| wavelet-HHH | gldm       | GrayLevelVariance                    | 15.93294775  |
| wavelet-HHH | gldm       | HighGrayLevelEmphasis                | 147.8415842  |
| wavelet-HHH | gldm       | DependenceEntropy                    | 5.211132493  |
| wavelet-HHH | gldm       | DependenceNonUniformity              | 24.96039604  |
| wavelet-HHH | gldm       | GrayLevelNonUniformity               | 8.940594059  |
| wavelet-HHH | gldm       | SmallDependenceEmphasis              | 0.431945735  |
| wavelet-HHH | gldm       | SmallDependenceHighGrayLevelEmphasis | 66.14590153  |
| wavelet-HHH | gldm       | DependenceNonUniformityNormalized    | 0.247132634  |
| wavelet-HHH | gldm       | LargeDependenceEmphasis              | 7.495049505  |
| wavelet-HHH | gldm       | LargeDependenceLowGrayLevelEmphasis  | 0.076722427  |
| wavelet-HHH | gldm       | DependenceVariance                   | 1.895500441  |
| wavelet-HHH | gldm       | LargeDependenceHighGrayLevelEmphasis | 1036.49505   |
| wavelet-HHH | gldm       | SmallDependenceLowGrayLevelEmphasis  | 0.019407259  |
| wavelet-HHH | gldm       | LowGrayLevelEmphasis                 | 0.024222062  |
| wavelet-HHH | glcm       | JointAverage                         | 11.42800398  |
| wavelet-HHH | glcm       | SumAverage                           | 22.85600795  |
| wavelet-HHH | glcm       | JointEntropy                         | 6.122071431  |
| wavelet-HHH | glcm       | ClusterShade                         | -3.40827449  |
| wavelet-HHH | glcm       | MaximumProbability                   | 0.042888158  |
| wavelet-HHH | glcm       | ldmn                                 | 0.950070476  |
| wavelet-HHH | glcm       | JointEnergy                          | 0.017195431  |
| wavelet-HHH | glcm       | Contrast                             | 29.31331007  |
| wavelet-HHH | glcm       | DifferenceEntropy                    | 3.330138705  |
| wavelet-HHH | glcm       | InverseVariance                      | 0.261620385  |
| wavelet-HHH | glcm       | DifferenceVariance                   | 12.77651971  |
| wavelet-HHH | glcm       | ldn                                  | 0.859521856  |
| wavelet-HHH | glcm       | ldm                                  | 0.241542914  |
| wavelet-HHH | glcm       | Correlation                          | -0.054424177 |
| wavelet-HHH | glcm       | Autocorrelation                      | 129.7929498  |
| wavelet-HHH | glcm       | SumEntropy                           | 3.981047714  |
| wavelet-HHH | glcm       | SumSquares                           | 13.84350246  |
| wavelet-HHH | glcm       | ClusterProminence                    | 2586.321855  |
| wavelet-HHH | glcm       | lmc2                                 | 0.963220612  |
| wavelet-HHH | glcm       | lmc1                                 | -0.35536532  |
| wavelet-HHH | glcm       | DifferenceAverage                    | 4.028986346  |
| wavelet-HHH | glcm       | ld                                   | 0.328751703  |
| wavelet-HHH | glcm       | ClusterTendency                      | 26.06069976  |
| wavelet-HHH | firstorder | InterquartileRange                   | 89.28304803  |
| wavelet-HHH | firstorder | Skewness                             | -0.001945794 |

|             |            |                                  |              |
|-------------|------------|----------------------------------|--------------|
| wavelet-HHH | firstorder | Uniformity                       | 0.088520733  |
| wavelet-HHH | firstorder | Median                           | -1.79197814  |
| wavelet-HHH | firstorder | Energy                           | 1014873.04   |
| wavelet-HHH | firstorder | RobustMeanAbsoluteDeviation      | 45.23080797  |
| wavelet-HHH | firstorder | MeanAbsoluteDeviation            | 73.42218776  |
| wavelet-HHH | firstorder | TotalEnergy                      | 27401572.08  |
| wavelet-HHH | firstorder | Maximum                          | 271.8886135  |
| wavelet-HHH | firstorder | RootMeanSquared                  | 100.2409493  |
| wavelet-HHH | firstorder | 90Percentile                     | 125.6850479  |
| wavelet-HHH | firstorder | Minimum                          | -269.4267715 |
| wavelet-HHH | firstorder | Entropy                          | 3.864609962  |
| wavelet-HHH | firstorder | Range                            | 541.315385   |
| wavelet-HHH | firstorder | Variance                         | 10047.75079  |
| wavelet-HHH | firstorder | 10Percentile                     | -128.2911064 |
| wavelet-HHH | firstorder | Kurtosis                         | 3.564873792  |
| wavelet-HHH | firstorder | Mean                             | -0.705072502 |
| wavelet-HHH | glrlm      | ShortRunLowGrayLevelEmphasis     | 0.024792276  |
| wavelet-HHH | glrlm      | GrayLevelVariance                | 16.60725348  |
| wavelet-HHH | glrlm      | LowGrayLevelRunEmphasis          | 0.025119384  |
| wavelet-HHH | glrlm      | GrayLevelNonUniformityNormalized | 0.085115353  |
| wavelet-HHH | glrlm      | RunVariance                      | 0.057225832  |
| wavelet-HHH | glrlm      | GrayLevelNonUniformity           | 8.146598468  |
| wavelet-HHH | glrlm      | LongRunEmphasis                  | 1.172373545  |
| wavelet-HHH | glrlm      | ShortRunHighGrayLevelEmphasis    | 142.5515424  |
| wavelet-HHH | glrlm      | RunLengthNonUniformity           | 86.11610124  |
| wavelet-HHH | glrlm      | ShortRunEmphasis                 | 0.959626028  |
| wavelet-HHH | glrlm      | LongRunHighGrayLevelEmphasis     | 172.281085   |
| wavelet-HHH | glrlm      | RunPercentage                    | 0.947448591  |
| wavelet-HHH | glrlm      | LongRunLowGrayLevelEmphasis      | 0.026530142  |
| wavelet-HHH | glrlm      | RunEntropy                       | 4.119331397  |
| wavelet-HHH | glrlm      | HighGrayLevelRunEmphasis         | 148.2642902  |
| wavelet-HHH | glrlm      | RunLengthNonUniformityNormalized | 0.899336373  |
| wavelet-HHH | glszm      | GrayLevelVariance                | 27.4116      |
| wavelet-HHH | glszm      | ZoneVariance                     | 5.3796       |
| wavelet-HHH | glszm      | GrayLevelNonUniformityNormalized | 0.056        |
| wavelet-HHH | glszm      | SizeZoneNonUniformityNormalized  | 0.4728       |
| wavelet-HHH | glszm      | SizeZoneNonUniformity            | 23.64        |
| wavelet-HHH | glszm      | GrayLevelNonUniformity           | 2.8          |
| wavelet-HHH | glszm      | LargeAreaEmphasis                | 9.46         |
| wavelet-HHH | glszm      | SmallAreaHighGrayLevelEmphasis   | 110.2079939  |
| wavelet-HHH | glszm      | ZonePercentage                   | 0.495049505  |
| wavelet-HHH | glszm      | LargeAreaLowGrayLevelEmphasis    | 0.109983474  |
| wavelet-HHH | glszm      | LargeAreaHighGrayLevelEmphasis   | 1272.56      |
| wavelet-HHH | glszm      | HighGrayLevelZoneEmphasis        | 153.3        |
| wavelet-HHH | glszm      | SmallAreaEmphasis                | 0.712226732  |
| wavelet-HHH | glszm      | LowGrayLevelZoneEmphasis         | 0.040484794  |
| wavelet-HHH | glszm      | ZoneEntropy                      | 4.89366069   |
| wavelet-HHH | glszm      | SmallAreaLowGrayLevelEmphasis    | 0.037820903  |
| wavelet-HHH | ngtdm      | Coarseness                       | 0.066138332  |
| wavelet-HHH | ngtdm      | Complexity                       | 499.0229228  |
| wavelet-HHH | ngtdm      | Strength                         | 7.153774023  |
| wavelet-HHH | ngtdm      | Contrast                         | 0.241011926  |
| wavelet-HHH | ngtdm      | Busyness                         | 0.060976774  |
| wavelet-HLL | gldm       | GrayLevelVariance                | 40.64817175  |
| wavelet-HLL | gldm       | HighGrayLevelEmphasis            | 232.2376238  |
| wavelet-HLL | gldm       | DependenceEntropy                | 5.581043289  |

|             |            |                                      |              |
|-------------|------------|--------------------------------------|--------------|
| wavelet-HLL | gldm       | DependenceNonUniformity              | 28.08910891  |
| wavelet-HLL | gldm       | GrayLevelNonUniformity               | 7.158415842  |
| wavelet-HLL | gldm       | SmallDependenceEmphasis              | 0.501742734  |
| wavelet-HLL | gldm       | SmallDependenceHighGrayLevelEmphasis | 149.5570586  |
| wavelet-HLL | gldm       | DependenceNonUniformityNormalized    | 0.278109989  |
| wavelet-HLL | gldm       | LargeDependenceEmphasis              | 7.891089109  |
| wavelet-HLL | gldm       | LargeDependenceLowGrayLevelEmphasis  | 0.074953494  |
| wavelet-HLL | gldm       | DependenceVariance                   | 2.66013136   |
| wavelet-HLL | gldm       | LargeDependenceHighGrayLevelEmphasis | 1333.60396   |
| wavelet-HLL | gldm       | SmallDependenceLowGrayLevelEmphasis  | 0.017355937  |
| wavelet-HLL | gldm       | LowGrayLevelEmphasis                 | 0.02245703   |
| wavelet-HLL | glcm       | JointAverage                         | 13.37273794  |
| wavelet-HLL | glcm       | SumAverage                           | 26.74547588  |
| wavelet-HLL | glcm       | JointEntropy                         | 6.281900526  |
| wavelet-HLL | glcm       | ClusterShade                         | 926.3088419  |
| wavelet-HLL | glcm       | MaximumProbability                   | 0.046715418  |
| wavelet-HLL | glcm       | ldmn                                 | 0.96363704   |
| wavelet-HLL | glcm       | JointEnergy                          | 0.015751699  |
| wavelet-HLL | glcm       | Contrast                             | 58.35635545  |
| wavelet-HLL | glcm       | DifferenceEntropy                    | 3.549479219  |
| wavelet-HLL | glcm       | InverseVariance                      | 0.220654446  |
| wavelet-HLL | glcm       | DifferenceVariance                   | 29.22501252  |
| wavelet-HLL | glcm       | ldn                                  | 0.885047455  |
| wavelet-HLL | glcm       | ldm                                  | 0.213031863  |
| wavelet-HLL | glcm       | Correlation                          | 0.141158806  |
| wavelet-HLL | glcm       | Autocorrelation                      | 184.2161594  |
| wavelet-HLL | glcm       | SumEntropy                           | 4.340286932  |
| wavelet-HLL | glcm       | SumSquares                           | 34.48642343  |
| wavelet-HLL | glcm       | ClusterProminence                    | 36283.97246  |
| wavelet-HLL | glcm       | lmc2                                 | 0.988247392  |
| wavelet-HLL | glcm       | lmc1                                 | -0.463879429 |
| wavelet-HLL | glcm       | DifferenceAverage                    | 5.272192254  |
| wavelet-HLL | glcm       | ld                                   | 0.299997399  |
| wavelet-HLL | glcm       | ClusterTendency                      | 79.58933826  |
| wavelet-HLL | firstorder | InterquartileRange                   | 151.1457622  |
| wavelet-HLL | firstorder | Skewness                             | 1.157811972  |
| wavelet-HLL | firstorder | Uniformity                           | 0.070875404  |
| wavelet-HLL | firstorder | Median                               | -40.70899906 |
| wavelet-HLL | firstorder | Energy                               | 2563693.982  |
| wavelet-HLL | firstorder | RobustMeanAbsoluteDeviation          | 63.49470954  |
| wavelet-HLL | firstorder | MeanAbsoluteDeviation                | 112.52448    |
| wavelet-HLL | firstorder | TotalEnergy                          | 69219737.52  |
| wavelet-HLL | firstorder | Maximum                              | 526.8258516  |
| wavelet-HLL | firstorder | RootMeanSquared                      | 159.3207731  |
| wavelet-HLL | firstorder | 90Percentile                         | 213.1526288  |
| wavelet-HLL | firstorder | Minimum                              | -332.9773157 |
| wavelet-HLL | firstorder | Entropy                              | 4.240460457  |
| wavelet-HLL | firstorder | Range                                | 859.8031673  |
| wavelet-HLL | firstorder | Variance                             | 25078.07788  |
| wavelet-HLL | firstorder | 10Percentile                         | -163.046744  |
| wavelet-HLL | firstorder | Kurtosis                             | 4.977000579  |
| wavelet-HLL | firstorder | Mean                                 | -17.4651325  |
| wavelet-HLL | glrlm      | ShortRunLowGrayLevelEmphasis         | 0.022869587  |
| wavelet-HLL | glrlm      | GrayLevelVariance                    | 42.33578225  |
| wavelet-HLL | glrlm      | LowGrayLevelRunEmphasis              | 0.023195276  |
| wavelet-HLL | glrlm      | GrayLevelNonUniformityNormalized     | 0.067350812  |



|             |       |                                      |              |
|-------------|-------|--------------------------------------|--------------|
| wavelet-HLL | glrlm | RunVariance                          | 0.052548064  |
| wavelet-HLL | glrlm | GrayLevelNonUniformity               | 6.468874632  |
| wavelet-HLL | glrlm | LongRunEmphasis                      | 1.161412567  |
| wavelet-HLL | glrlm | ShortRunHighGrayLevelEmphasis        | 229.6304047  |
| wavelet-HLL | glrlm | RunLengthNonUniformity               | 86.8966789   |
| wavelet-HLL | glrlm | ShortRunEmphasis                     | 0.961465576  |
| wavelet-HLL | glrlm | LongRunHighGrayLevelEmphasis         | 261.9899084  |
| wavelet-HLL | glrlm | RunPercentage                        | 0.95049505   |
| wavelet-HLL | glrlm | LongRunLowGrayLevelEmphasis          | 0.02455955   |
| wavelet-HLL | glrlm | RunEntropy                           | 4.468642017  |
| wavelet-HLL | glrlm | HighGrayLevelRunEmphasis             | 235.924458   |
| wavelet-HLL | glrlm | RunLengthNonUniformityNormalized     | 0.904095708  |
| wavelet-HLL | glszm | GrayLevelVariance                    | 61.04429251  |
| wavelet-HLL | glszm | ZoneVariance                         | 3.502080856  |
| wavelet-HLL | glszm | GrayLevelNonUniformityNormalized     | 0.047562426  |
| wavelet-HLL | glszm | SizeZoneNonUniformityNormalized      | 0.529726516  |
| wavelet-HLL | glszm | SizeZoneNonUniformity                | 30.72413793  |
| wavelet-HLL | glszm | GrayLevelNonUniformity               | 2.75862069   |
| wavelet-HLL | glszm | LargeAreaEmphasis                    | 6.534482759  |
| wavelet-HLL | glszm | SmallAreaHighGrayLevelEmphasis       | 241.2430508  |
| wavelet-HLL | glszm | ZonePercentage                       | 0.574257426  |
| wavelet-HLL | glszm | LargeAreaLowGrayLevelEmphasis        | 0.074620189  |
| wavelet-HLL | glszm | LargeAreaHighGrayLevelEmphasis       | 1175.551724  |
| wavelet-HLL | glszm | HighGrayLevelZoneEmphasis            | 283.4655172  |
| wavelet-HLL | glszm | SmallAreaEmphasis                    | 0.75545232   |
| wavelet-HLL | glszm | LowGrayLevelZoneEmphasis             | 0.03202718   |
| wavelet-HLL | glszm | ZoneEntropy                          | 5.310145866  |
| wavelet-HLL | glszm | SmallAreaLowGrayLevelEmphasis        | 0.028873182  |
| wavelet-HLL | ngtdm | Coarseness                           | 0.062179791  |
| wavelet-HLL | ngtdm | Complexity                           | 1356.321837  |
| wavelet-HLL | ngtdm | Strength                             | 22.3603531   |
| wavelet-HLL | ngtdm | Contrast                             | 0.376953376  |
| wavelet-HLL | ngtdm | Busyness                             | 0.043375399  |
| wavelet-LHL | gldm  | GrayLevelVariance                    | 98.23801588  |
| wavelet-LHL | gldm  | HighGrayLevelEmphasis                | 2479.871287  |
| wavelet-LHL | gldm  | DependenceEntropy                    | 5.512760151  |
| wavelet-LHL | gldm  | DependenceNonUniformity              | 32.30693069  |
| wavelet-LHL | gldm  | GrayLevelNonUniformity               | 5.237623762  |
| wavelet-LHL | gldm  | SmallDependenceEmphasis              | 0.547065457  |
| wavelet-LHL | gldm  | SmallDependenceHighGrayLevelEmphasis | 1292.396023  |
| wavelet-LHL | gldm  | DependenceNonUniformityNormalized    | 0.319870601  |
| wavelet-LHL | gldm  | LargeDependenceEmphasis              | 5            |
| wavelet-LHL | gldm  | LargeDependenceLowGrayLevelEmphasis  | 0.011924659  |
| wavelet-LHL | gldm  | DependenceVariance                   | 1.195569062  |
| wavelet-LHL | gldm  | LargeDependenceHighGrayLevelEmphasis | 13207.15842  |
| wavelet-LHL | gldm  | SmallDependenceLowGrayLevelEmphasis  | 0.01022884   |
| wavelet-LHL | gldm  | LowGrayLevelEmphasis                 | 0.010406845  |
| wavelet-LHL | glcm  | JointAverage                         | 49.47953321  |
| wavelet-LHL | glcm  | SumAverage                           | 98.95906641  |
| wavelet-LHL | glcm  | JointEntropy                         | 6.508826137  |
| wavelet-LHL | glcm  | ClusterShade                         | -4956.577453 |
| wavelet-LHL | glcm  | MaximumProbability                   | 0.029374182  |
| wavelet-LHL | glcm  | ldmn                                 | 0.977230755  |
| wavelet-LHL | glcm  | JointEnergy                          | 0.012354924  |
| wavelet-LHL | glcm  | Contrast                             | 139.8178792  |
| wavelet-LHL | glcm  | DifferenceEntropy                    | 3.832746676  |

|             |            |                                  |              |
|-------------|------------|----------------------------------|--------------|
| wavelet-LHL | glcm       | InverseVariance                  | 0.186559976  |
| wavelet-LHL | glcm       | DifferenceVariance               | 79.27580321  |
| wavelet-LHL | glcm       | Idn                              | 0.91430729   |
| wavelet-LHL | glcm       | Idm                              | 0.172660344  |
| wavelet-LHL | glcm       | Correlation                      | 0.120164938  |
| wavelet-LHL | glcm       | Autocorrelation                  | 2460.011875  |
| wavelet-LHL | glcm       | SumEntropy                       | 4.71337488   |
| wavelet-LHL | glcm       | SumSquares                       | 81.47622065  |
| wavelet-LHL | glcm       | ClusterProminence                | 336300.9668  |
| wavelet-LHL | glcm       | Imc2                             | 0.995609482  |
| wavelet-LHL | glcm       | Imc1                             | -0.541316534 |
| wavelet-LHL | glcm       | DifferenceAverage                | 7.48710348   |
| wavelet-LHL | glcm       | Id                               | 0.257797823  |
| wavelet-LHL | glcm       | ClusterTendency                  | 186.0870034  |
| wavelet-LHL | firstorder | InterquartileRange               | 193.6786399  |
| wavelet-LHL | firstorder | Skewness                         | -1.782985845 |
| wavelet-LHL | firstorder | Uniformity                       | 0.051857661  |
| wavelet-LHL | firstorder | Median                           | -57.54616308 |
| wavelet-LHL | firstorder | Energy                           | 7068629.001  |
| wavelet-LHL | firstorder | RobustMeanAbsoluteDeviation      | 88.64613513  |
| wavelet-LHL | firstorder | MeanAbsoluteDeviation            | 163.5685865  |
| wavelet-LHL | firstorder | TotalEnergy                      | 190852983    |
| wavelet-LHL | firstorder | Maximum                          | 457.6748146  |
| wavelet-LHL | firstorder | RootMeanSquared                  | 264.5494769  |
| wavelet-LHL | firstorder | 90Percentile                     | 134.2598541  |
| wavelet-LHL | firstorder | Minimum                          | -1282.198889 |
| wavelet-LHL | firstorder | Entropy                          | 4.62719481   |
| wavelet-LHL | firstorder | Range                            | 1739.873704  |
| wavelet-LHL | firstorder | Variance                         | 61372.84133  |
| wavelet-LHL | firstorder | 10Percentile                     | -330.5856565 |
| wavelet-LHL | firstorder | Kurtosis                         | 8.89884818   |
| wavelet-LHL | firstorder | Mean                             | -92.80939835 |
| wavelet-LHL | glrlm      | ShortRunLowGrayLevelEmphasis     | 0.010783234  |
| wavelet-LHL | glrlm      | GrayLevelVariance                | 101.2277827  |
| wavelet-LHL | glrlm      | LowGrayLevelRunEmphasis          | 0.010793998  |
| wavelet-LHL | glrlm      | GrayLevelNonUniformityNormalized | 0.050715106  |
| wavelet-LHL | glrlm      | RunVariance                      | 0.039613333  |
| wavelet-LHL | glrlm      | GrayLevelNonUniformity           | 4.936618728  |
| wavelet-LHL | glrlm      | LongRunEmphasis                  | 1.119073044  |
| wavelet-LHL | glrlm      | ShortRunHighGrayLevelEmphasis    | 2398.410431  |
| wavelet-LHL | glrlm      | RunLengthNonUniformity           | 90.61528253  |
| wavelet-LHL | glrlm      | ShortRunEmphasis                 | 0.972003568  |
| wavelet-LHL | glrlm      | LongRunHighGrayLevelEmphasis     | 2789.648842  |
| wavelet-LHL | glrlm      | RunPercentage                    | 0.963442498  |
| wavelet-LHL | glrlm      | LongRunLowGrayLevelEmphasis      | 0.010839727  |
| wavelet-LHL | glrlm      | RunEntropy                       | 4.775154815  |
| wavelet-LHL | glrlm      | HighGrayLevelRunEmphasis         | 2472.899427  |
| wavelet-LHL | glrlm      | RunLengthNonUniformityNormalized | 0.929989396  |
| wavelet-LHL | glszm      | GrayLevelVariance                | 143.4532628  |
| wavelet-LHL | glszm      | ZoneVariance                     | 1.66792643   |
| wavelet-LHL | glszm      | GrayLevelNonUniformityNormalized | 0.037540942  |
| wavelet-LHL | glszm      | SizeZoneNonUniformityNormalized  | 0.559082892  |
| wavelet-LHL | glszm      | SizeZoneNonUniformity            | 35.22222222  |
| wavelet-LHL | glszm      | GrayLevelNonUniformity           | 2.365079365  |
| wavelet-LHL | glszm      | LargeAreaEmphasis                | 4.238095238  |
| wavelet-LHL | glszm      | SmallAreaHighGrayLevelEmphasis   | 1805.999118  |

|             |            |                                      |              |
|-------------|------------|--------------------------------------|--------------|
| wavelet-LHL | glszm      | ZonePercentage                       | 0.623762376  |
| wavelet-LHL | glszm      | LargeAreaLowGrayLevelEmphasis        | 0.017702112  |
| wavelet-LHL | glszm      | LargeAreaHighGrayLevelEmphasis       | 10894.84127  |
| wavelet-LHL | glszm      | HighGrayLevelZoneEmphasis            | 2394.428571  |
| wavelet-LHL | glszm      | SmallAreaEmphasis                    | 0.773756614  |
| wavelet-LHL | glszm      | LowGrayLevelZoneEmphasis             | 0.016448051  |
| wavelet-LHL | glszm      | ZoneEntropy                          | 5.42141405   |
| wavelet-LHL | glszm      | SmallAreaLowGrayLevelEmphasis        | 0.016357196  |
| wavelet-LHL | ngtdm      | Coarseness                           | 0.059812416  |
| wavelet-LHL | ngtdm      | Complexity                           | 3441.205937  |
| wavelet-LHL | ngtdm      | Strength                             | 41.37572146  |
| wavelet-LHL | ngtdm      | Contrast                             | 0.975984427  |
| wavelet-LHL | ngtdm      | Busyness                             | 0.010471756  |
| wavelet-LHH | gldm       | GrayLevelVariance                    | 65.13086952  |
| wavelet-LHH | gldm       | HighGrayLevelEmphasis                | 625.5544554  |
| wavelet-LHH | gldm       | DependenceEntropy                    | 5.489507522  |
| wavelet-LHH | gldm       | DependenceNonUniformity              | 35.17821782  |
| wavelet-LHH | gldm       | GrayLevelNonUniformity               | 5.356435644  |
| wavelet-LHH | gldm       | SmallDependenceEmphasis              | 0.591082149  |
| wavelet-LHH | gldm       | SmallDependenceHighGrayLevelEmphasis | 395.9484664  |
| wavelet-LHH | gldm       | DependenceNonUniformityNormalized    | 0.348299186  |
| wavelet-LHH | gldm       | LargeDependenceEmphasis              | 5.257425743  |
| wavelet-LHH | gldm       | LargeDependenceLowGrayLevelEmphasis  | 0.020704131  |
| wavelet-LHH | gldm       | DependenceVariance                   | 1.605920988  |
| wavelet-LHH | gldm       | LargeDependenceHighGrayLevelEmphasis | 3128.029703  |
| wavelet-LHH | gldm       | SmallDependenceLowGrayLevelEmphasis  | 0.012055506  |
| wavelet-LHH | gldm       | LowGrayLevelEmphasis                 | 0.01291097   |
| wavelet-LHH | glcm       | JointAverage                         | 23.5715838   |
| wavelet-LHH | glcm       | SumAverage                           | 47.14316761  |
| wavelet-LHH | glcm       | JointEntropy                         | 6.476651702  |
| wavelet-LHH | glcm       | ClusterShade                         | 269.1138432  |
| wavelet-LHH | glcm       | MaximumProbability                   | 0.034225674  |
| wavelet-LHH | glcm       | ldmn                                 | 0.966284793  |
| wavelet-LHH | glcm       | JointEnergy                          | 0.012921954  |
| wavelet-LHH | glcm       | Contrast                             | 131.4787359  |
| wavelet-LHH | glcm       | DifferenceEntropy                    | 3.980725078  |
| wavelet-LHH | glcm       | InverseVariance                      | 0.188279558  |
| wavelet-LHH | glcm       | DifferenceVariance                   | 66.20616205  |
| wavelet-LHH | glcm       | ldn                                  | 0.891191306  |
| wavelet-LHH | glcm       | ldm                                  | 0.171377104  |
| wavelet-LHH | glcm       | Correlation                          | -0.004626957 |
| wavelet-LHH | glcm       | Autocorrelation                      | 554.9520632  |
| wavelet-LHH | glcm       | SumEntropy                           | 4.567530027  |
| wavelet-LHH | glcm       | SumSquares                           | 64.97145517  |
| wavelet-LHH | glcm       | ClusterProminence                    | 91886.02038  |
| wavelet-LHH | glcm       | lmc2                                 | 0.99666606   |
| wavelet-LHH | glcm       | lmc1                                 | -0.562083717 |
| wavelet-LHH | glcm       | DifferenceAverage                    | 7.852565375  |
| wavelet-LHH | glcm       | ld                                   | 0.252451429  |
| wavelet-LHH | glcm       | ClusterTendency                      | 128.4070848  |
| wavelet-LHH | firstorder | InterquartileRange                   | 170.9541735  |
| wavelet-LHH | firstorder | Skewness                             | 0.330920066  |
| wavelet-LHH | firstorder | Uniformity                           | 0.053034016  |
| wavelet-LHH | firstorder | Median                               | 14.33054491  |
| wavelet-LHH | firstorder | Energy                               | 4102262.531  |
| wavelet-LHH | firstorder | RobustMeanAbsoluteDeviation          | 79.02429841  |

|             |            |                                      |              |
|-------------|------------|--------------------------------------|--------------|
| wavelet-LHH | firstorder | MeanAbsoluteDeviation                | 138.4061583  |
| wavelet-LHH | firstorder | TotalEnergy                          | 110761088.3  |
| wavelet-LHH | firstorder | Maximum                              | 834.1474774  |
| wavelet-LHH | firstorder | RootMeanSquared                      | 201.5352592  |
| wavelet-LHH | firstorder | 90Percentile                         | 207.0890439  |
| wavelet-LHH | firstorder | Minimum                              | -554.4678267 |
| wavelet-LHH | firstorder | Entropy                              | 4.594878707  |
| wavelet-LHH | firstorder | Range                                | 1388.615304  |
| wavelet-LHH | firstorder | Variance                             | 40597.8566   |
| wavelet-LHH | firstorder | 10Percentile                         | -302.8099848 |
| wavelet-LHH | firstorder | Kurtosis                             | 5.682252714  |
| wavelet-LHH | firstorder | Mean                                 | 4.313247154  |
| wavelet-LHH | grlm       | ShortRunLowGrayLevelEmphasis         | 0.01326305   |
| wavelet-LHH | grlm       | GrayLevelVariance                    | 67.15645968  |
| wavelet-LHH | grlm       | LowGrayLevelRunEmphasis              | 0.013314043  |
| wavelet-LHH | grlm       | GrayLevelNonUniformityNormalized     | 0.051403377  |
| wavelet-LHH | grlm       | RunVariance                          | 0.038184986  |
| wavelet-LHH | grlm       | GrayLevelNonUniformity               | 5.010353845  |
| wavelet-LHH | grlm       | LongRunEmphasis                      | 1.113251703  |
| wavelet-LHH | grlm       | ShortRunHighGrayLevelEmphasis        | 611.8052419  |
| wavelet-LHH | grlm       | RunLengthNonUniformity               | 90.98404922  |
| wavelet-LHH | grlm       | ShortRunEmphasis                     | 0.973486444  |
| wavelet-LHH | grlm       | LongRunHighGrayLevelEmphasis         | 692.8386546  |
| wavelet-LHH | grlm       | RunPercentage                        | 0.964965727  |
| wavelet-LHH | grlm       | LongRunLowGrayLevelEmphasis          | 0.013531068  |
| wavelet-LHH | grlm       | RunEntropy                           | 4.737761347  |
| wavelet-LHH | grlm       | HighGrayLevelRunEmphasis             | 627.2166028  |
| wavelet-LHH | grlm       | RunLengthNonUniformityNormalized     | 0.932937507  |
| wavelet-LHH | glszm      | GrayLevelVariance                    | 91.93450657  |
| wavelet-LHH | glszm      | ZoneVariance                         | 1.682780129  |
| wavelet-LHH | glszm      | GrayLevelNonUniformityNormalized     | 0.040320784  |
| wavelet-LHH | glszm      | SizeZoneNonUniformityNormalized      | 0.601693027  |
| wavelet-LHH | glszm      | SizeZoneNonUniformity                | 40.31343284  |
| wavelet-LHH | glszm      | GrayLevelNonUniformity               | 2.701492537  |
| wavelet-LHH | glszm      | LargeAreaEmphasis                    | 3.955223881  |
| wavelet-LHH | glszm      | SmallAreaHighGrayLevelEmphasis       | 548.8167496  |
| wavelet-LHH | glszm      | ZonePercentage                       | 0.663366337  |
| wavelet-LHH | glszm      | LargeAreaLowGrayLevelEmphasis        | 0.023902224  |
| wavelet-LHH | glszm      | LargeAreaHighGrayLevelEmphasis       | 2383.149254  |
| wavelet-LHH | glszm      | HighGrayLevelZoneEmphasis            | 654.4029851  |
| wavelet-LHH | glszm      | SmallAreaEmphasis                    | 0.802605491  |
| wavelet-LHH | glszm      | LowGrayLevelZoneEmphasis             | 0.018440448  |
| wavelet-LHH | glszm      | ZoneEntropy                          | 5.256168855  |
| wavelet-LHH | glszm      | SmallAreaLowGrayLevelEmphasis        | 0.017979448  |
| wavelet-LHH | ngtdm      | Coarseness                           | 0.057604746  |
| wavelet-LHH | ngtdm      | Complexity                           | 2883.516874  |
| wavelet-LHH | ngtdm      | Strength                             | 23.71770235  |
| wavelet-LHH | ngtdm      | Contrast                             | 0.735908283  |
| wavelet-LHH | ngtdm      | Busyness                             | 0.02359414   |
| wavelet-LLH | gldm       | GrayLevelVariance                    | 33.12910499  |
| wavelet-LLH | gldm       | HighGrayLevelEmphasis                | 465.8514851  |
| wavelet-LLH | gldm       | DependenceEntropy                    | 5.500846602  |
| wavelet-LLH | gldm       | DependenceNonUniformity              | 29.99009901  |
| wavelet-LLH | gldm       | GrayLevelNonUniformity               | 6.089108911  |
| wavelet-LLH | gldm       | SmallDependenceEmphasis              | 0.521564738  |
| wavelet-LLH | gldm       | SmallDependenceHighGrayLevelEmphasis | 244.8476802  |

|             |            |                                      |              |
|-------------|------------|--------------------------------------|--------------|
| wavelet-LLH | gldm       | DependenceNonUniformityNormalized    | 0.296931673  |
| wavelet-LLH | gldm       | LargeDependenceEmphasis              | 6.326732673  |
| wavelet-LLH | gldm       | LargeDependenceLowGrayLevelEmphasis  | 0.026501     |
| wavelet-LLH | gldm       | DependenceVariance                   | 1.879227527  |
| wavelet-LLH | gldm       | LargeDependenceHighGrayLevelEmphasis | 2709.316832  |
| wavelet-LLH | gldm       | SmallDependenceLowGrayLevelEmphasis  | 0.011577533  |
| wavelet-LLH | gldm       | LowGrayLevelEmphasis                 | 0.012757944  |
| wavelet-LLH | glcm       | JointAverage                         | 21.00475155  |
| wavelet-LLH | glcm       | SumAverage                           | 42.0095031   |
| wavelet-LLH | glcm       | JointEntropy                         | 6.476741867  |
| wavelet-LLH | glcm       | ClusterShade                         | 7.165838432  |
| wavelet-LLH | glcm       | MaximumProbability                   | 0.035202923  |
| wavelet-LLH | glcm       | Idmn                                 | 0.961125975  |
| wavelet-LLH | glcm       | JointEnergy                          | 0.012722528  |
| wavelet-LLH | glcm       | Contrast                             | 58.92922165  |
| wavelet-LLH | glcm       | DifferenceEntropy                    | 3.716924319  |
| wavelet-LLH | glcm       | InverseVariance                      | 0.174489007  |
| wavelet-LLH | glcm       | DifferenceVariance                   | 24.76879022  |
| wavelet-LLH | glcm       | Idn                                  | 0.873152316  |
| wavelet-LLH | glcm       | Idm                                  | 0.176815459  |
| wavelet-LLH | glcm       | Correlation                          | -0.004386263 |
| wavelet-LLH | glcm       | Autocorrelation                      | 440.8711222  |
| wavelet-LLH | glcm       | SumEntropy                           | 4.440209264  |
| wavelet-LLH | glcm       | SumSquares                           | 29.12274923  |
| wavelet-LLH | glcm       | ClusterProminence                    | 11140.80649  |
| wavelet-LLH | glcm       | Imc2                                 | 0.98871934   |
| wavelet-LLH | glcm       | Imc1                                 | -0.459493035 |
| wavelet-LLH | glcm       | DifferenceAverage                    | 5.763663074  |
| wavelet-LLH | glcm       | Id                                   | 0.267466371  |
| wavelet-LLH | glcm       | ClusterTendency                      | 57.56177526  |
| wavelet-LLH | firstorder | InterquartileRange                   | 195.720134   |
| wavelet-LLH | firstorder | Skewness                             | -0.030485621 |
| wavelet-LLH | firstorder | Uniformity                           | 0.060288207  |
| wavelet-LLH | firstorder | Median                               | -34.06212447 |
| wavelet-LLH | firstorder | Energy                               | 2115067.44   |
| wavelet-LLH | firstorder | RobustMeanAbsoluteDeviation          | 76.55538685  |
| wavelet-LLH | firstorder | MeanAbsoluteDeviation                | 111.6432866  |
| wavelet-LLH | firstorder | TotalEnergy                          | 57106820.88  |
| wavelet-LLH | firstorder | Maximum                              | 361.0303777  |
| wavelet-LLH | firstorder | RootMeanSquared                      | 144.7109594  |
| wavelet-LLH | firstorder | 90Percentile                         | 161.7278941  |
| wavelet-LLH | firstorder | Minimum                              | -504.124114  |
| wavelet-LLH | firstorder | Entropy                              | 4.328990064  |
| wavelet-LLH | firstorder | Range                                | 865.1544917  |
| wavelet-LLH | firstorder | Variance                             | 20650.07645  |
| wavelet-LLH | firstorder | 10Percentile                         | -163.0803682 |
| wavelet-LLH | firstorder | Kurtosis                             | 3.811178175  |
| wavelet-LLH | firstorder | Mean                                 | -17.06415335 |
| wavelet-LLH | grlm       | ShortRunLowGrayLevelEmphasis         | 0.01313644   |
| wavelet-LLH | grlm       | GrayLevelVariance                    | 34.0790582   |
| wavelet-LLH | grlm       | LowGrayLevelRunEmphasis              | 0.013217489  |
| wavelet-LLH | grlm       | GrayLevelNonUniformityNormalized     | 0.059210521  |
| wavelet-LLH | grlm       | RunVariance                          | 0.0473543    |
| wavelet-LLH | grlm       | GrayLevelNonUniformity               | 5.726463344  |
| wavelet-LLH | grlm       | LongRunEmphasis                      | 1.139941319  |
| wavelet-LLH | grlm       | ShortRunHighGrayLevelEmphasis        | 453.0012374  |

|             |       |                                      |              |
|-------------|-------|--------------------------------------|--------------|
| wavelet-LLH | glrlm | RunLengthNonUniformity               | 88.95522089  |
| wavelet-LLH | glrlm | ShortRunEmphasis                     | 0.967714318  |
| wavelet-LLH | glrlm | LongRunHighGrayLevelEmphasis         | 527.4890686  |
| wavelet-LLH | glrlm | RunPercentage                        | 0.957349581  |
| wavelet-LLH | glrlm | LongRunLowGrayLevelEmphasis          | 0.013579026  |
| wavelet-LLH | glrlm | RunEntropy                           | 4.492938347  |
| wavelet-LLH | glrlm | HighGrayLevelRunEmphasis             | 467.2390173  |
| wavelet-LLH | glrlm | RunLengthNonUniformityNormalized     | 0.919199999  |
| wavelet-LLH | glszm | GrayLevelVariance                    | 45.7275      |
| wavelet-LLH | glszm | ZoneVariance                         | 1.949722222  |
| wavelet-LLH | glszm | GrayLevelNonUniformityNormalized     | 0.049444444  |
| wavelet-LLH | glszm | SizeZoneNonUniformityNormalized      | 0.535555556  |
| wavelet-LLH | glszm | SizeZoneNonUniformity                | 32.13333333  |
| wavelet-LLH | glszm | GrayLevelNonUniformity               | 2.966666667  |
| wavelet-LLH | glszm | LargeAreaEmphasis                    | 4.783333333  |
| wavelet-LLH | glszm | SmallAreaHighGrayLevelEmphasis       | 352.4656111  |
| wavelet-LLH | glszm | ZonePercentage                       | 0.594059406  |
| wavelet-LLH | glszm | LargeAreaLowGrayLevelEmphasis        | 0.029315432  |
| wavelet-LLH | glszm | LargeAreaHighGrayLevelEmphasis       | 2134.05      |
| wavelet-LLH | glszm | HighGrayLevelZoneEmphasis            | 472.15       |
| wavelet-LLH | glszm | SmallAreaEmphasis                    | 0.755876157  |
| wavelet-LLH | glszm | LowGrayLevelZoneEmphasis             | 0.01977672   |
| wavelet-LLH | glszm | ZoneEntropy                          | 5.056564762  |
| wavelet-LLH | glszm | SmallAreaLowGrayLevelEmphasis        | 0.019199074  |
| wavelet-LLH | ngtdm | Coarseness                           | 0.052258698  |
| wavelet-LLH | ngtdm | Complexity                           | 1318.343786  |
| wavelet-LLH | ngtdm | Strength                             | 12.7939438   |
| wavelet-LLH | ngtdm | Contrast                             | 0.436497345  |
| wavelet-LLH | ngtdm | Busyness                             | 0.038818443  |
| wavelet-LLL | gldm  | GrayLevelVariance                    | 189.1310656  |
| wavelet-LLL | gldm  | HighGrayLevelEmphasis                | 2279.70297   |
| wavelet-LLL | gldm  | DependenceEntropy                    | 5.769355666  |
| wavelet-LLL | gldm  | DependenceNonUniformity              | 35.2970297   |
| wavelet-LLL | gldm  | GrayLevelNonUniformity               | 3.772277228  |
| wavelet-LLL | gldm  | SmallDependenceEmphasis              | 0.580464796  |
| wavelet-LLL | gldm  | SmallDependenceHighGrayLevelEmphasis | 1278.380421  |
| wavelet-LLL | gldm  | DependenceNonUniformityNormalized    | 0.349475542  |
| wavelet-LLL | gldm  | LargeDependenceEmphasis              | 4.405940594  |
| wavelet-LLL | gldm  | LargeDependenceLowGrayLevelEmphasis  | 0.016831967  |
| wavelet-LLL | gldm  | DependenceVariance                   | 1.050877365  |
| wavelet-LLL | gldm  | LargeDependenceHighGrayLevelEmphasis | 11223.74257  |
| wavelet-LLL | gldm  | SmallDependenceLowGrayLevelEmphasis  | 0.010624197  |
| wavelet-LLL | gldm  | LowGrayLevelEmphasis                 | 0.011740819  |
| wavelet-LLL | glcm  | JointAverage                         | 47.75087195  |
| wavelet-LLL | glcm  | SumAverage                           | 95.5017439   |
| wavelet-LLL | glcm  | JointEntropy                         | 6.683605157  |
| wavelet-LLL | glcm  | ClusterShade                         | -9388.398714 |
| wavelet-LLL | glcm  | MaximumProbability                   | 0.022502539  |
| wavelet-LLL | glcm  | Idmn                                 | 0.979527501  |
| wavelet-LLL | glcm  | JointEnergy                          | 0.010413276  |
| wavelet-LLL | glcm  | Contrast                             | 164.8422293  |
| wavelet-LLL | glcm  | DifferenceEntropy                    | 4.183598475  |
| wavelet-LLL | glcm  | InverseVariance                      | 0.106798326  |
| wavelet-LLL | glcm  | DifferenceVariance                   | 71.06052394  |
| wavelet-LLL | glcm  | Idn                                  | 0.907692701  |
| wavelet-LLL | glcm  | Idm                                  | 0.121334317  |

|             |            |                                  |              |
|-------------|------------|----------------------------------|--------------|
| wavelet-LLL | glcm       | Correlation                      | 0.431094104  |
| wavelet-LLL | glcm       | Autocorrelation                  | 2341.464654  |
| wavelet-LLL | glcm       | SumEntropy                       | 5.033613565  |
| wavelet-LLL | glcm       | SumSquares                       | 143.3419142  |
| wavelet-LLL | glcm       | ClusterProminence                | 936338.213   |
| wavelet-LLL | glcm       | Imc2                             | 0.997789673  |
| wavelet-LLL | glcm       | Imc1                             | -0.579105955 |
| wavelet-LLL | glcm       | DifferenceAverage                | 9.451774888  |
| wavelet-LLL | glcm       | Id                               | 0.20544616   |
| wavelet-LLL | glcm       | ClusterTendency                  | 408.5254277  |
| wavelet-LLL | firstorder | InterquartileRange               | 344.5462788  |
| wavelet-LLL | firstorder | Skewness                         | -0.850894726 |
| wavelet-LLL | firstorder | Uniformity                       | 0.037349279  |
| wavelet-LLL | firstorder | Median                           | -77.23221153 |
| wavelet-LLL | firstorder | Energy                           | 13941818.31  |
| wavelet-LLL | firstorder | RobustMeanAbsoluteDeviation      | 158.6620322  |
| wavelet-LLL | firstorder | MeanAbsoluteDeviation            | 252.192277   |
| wavelet-LLL | firstorder | TotalEnergy                      | 376429094.4  |
| wavelet-LLL | firstorder | Maximum                          | 850.2205691  |
| wavelet-LLL | firstorder | RootMeanSquared                  | 371.5343928  |
| wavelet-LLL | firstorder | 90Percentile                     | 159.9059377  |
| wavelet-LLL | firstorder | Minimum                          | -1272.746169 |
| wavelet-LLL | firstorder | Entropy                          | 4.957571697  |
| wavelet-LLL | firstorder | Range                            | 2122.966738  |
| wavelet-LLL | firstorder | Variance                         | 117619.5049  |
| wavelet-LLL | firstorder | 10Percentile                     | -582.382342  |
| wavelet-LLL | firstorder | Kurtosis                         | 4.925273097  |
| wavelet-LLL | firstorder | Mean                             | -142.8926175 |
| wavelet-LLL | glrlm      | ShortRunLowGrayLevelEmphasis     | 0.012019464  |
| wavelet-LLL | glrlm      | GrayLevelVariance                | 191.4907264  |
| wavelet-LLL | glrlm      | LowGrayLevelRunEmphasis          | 0.01206984   |
| wavelet-LLL | glrlm      | GrayLevelNonUniformityNormalzied | 0.036785446  |
| wavelet-LLL | glrlm      | RunVariance                      | 0.035130038  |
| wavelet-LLL | glrlm      | GrayLevelNonUniformity           | 3.597598383  |
| wavelet-LLL | glrlm      | LongRunEmphasis                  | 1.104651467  |
| wavelet-LLL | glrlm      | ShortRunHighGrayLevelEmphasis    | 2209.761605  |
| wavelet-LLL | glrlm      | RunLengthNonUniformity           | 91.91292856  |
| wavelet-LLL | glrlm      | ShortRunEmphasis                 | 0.975667936  |
| wavelet-LLL | glrlm      | LongRunHighGrayLevelEmphasis     | 2537.16945   |
| wavelet-LLL | glrlm      | RunPercentage                    | 0.968012186  |
| wavelet-LLL | glrlm      | LongRunLowGrayLevelEmphasis      | 0.012273953  |
| wavelet-LLL | glrlm      | RunEntropy                       | 5.061369762  |
| wavelet-LLL | glrlm      | HighGrayLevelRunEmphasis         | 2271.128995  |
| wavelet-LLL | glrlm      | RunLengthNonUniformityNormalzied | 0.938909299  |
| wavelet-LLL | glszm      | GrayLevelVariance                | 220.1309869  |
| wavelet-LLL | glszm      | ZoneVariance                     | 1.235018935  |
| wavelet-LLL | glszm      | GrayLevelNonUniformityNormalzied | 0.033637781  |
| wavelet-LLL | glszm      | SizeZoneNonUniformityNormalzied  | 0.563377144  |
| wavelet-LLL | glszm      | SizeZoneNonUniformity            | 37.74626866  |
| wavelet-LLL | glszm      | GrayLevelNonUniformity           | 2.253731343  |
| wavelet-LLL | glszm      | LargeAreaEmphasis                | 3.507462687  |
| wavelet-LLL | glszm      | SmallAreaHighGrayLevelEmphasis   | 1700.507338  |
| wavelet-LLL | glszm      | ZonePercentage                   | 0.663366337  |
| wavelet-LLL | glszm      | LargeAreaLowGrayLevelEmphasis    | 0.020350021  |
| wavelet-LLL | glszm      | LargeAreaHighGrayLevelEmphasis   | 8799.402985  |
| wavelet-LLL | glszm      | HighGrayLevelZoneEmphasis        | 2185.134328  |

|             |            |                                      |              |
|-------------|------------|--------------------------------------|--------------|
| wavelet-LLL | glszm      | SmallAreaEmphasis                    | 0.778600619  |
| wavelet-LLL | glszm      | LowGrayLevelZoneEmphasis             | 0.016545861  |
| wavelet-LLL | glszm      | ZoneEntropy                          | 5.506241802  |
| wavelet-LLL | glszm      | SmallAreaLowGrayLevelEmphasis        | 0.015738638  |
| wavelet-LLL | ngtdm      | Coarseness                           | 0.056504354  |
| wavelet-LLL | ngtdm      | Complexity                           | 5430.885972  |
| wavelet-LLL | ngtdm      | Strength                             | 63.44192548  |
| wavelet-LLL | ngtdm      | Contrast                             | 1.700177775  |
| wavelet-LLL | ngtdm      | Busyness                             | 0.011535655  |
| wavelet-HHL | gldm       | GrayLevelVariance                    | 13.92432114  |
| wavelet-HHL | gldm       | HighGrayLevelEmphasis                | 122.2079208  |
| wavelet-HHL | gldm       | DependenceEntropy                    | 5.380403067  |
| wavelet-HHL | gldm       | DependenceNonUniformity              | 20.74257426  |
| wavelet-HHL | gldm       | GrayLevelNonUniformity               | 9.376237624  |
| wavelet-HHL | gldm       | SmallDependenceEmphasis              | 0.351398515  |
| wavelet-HHL | gldm       | SmallDependenceHighGrayLevelEmphasis | 47.14413985  |
| wavelet-HHL | gldm       | DependenceNonUniformityNormalized    | 0.205372022  |
| wavelet-HHL | gldm       | LargeDependenceEmphasis              | 10.86138614  |
| wavelet-HHL | gldm       | LargeDependenceLowGrayLevelEmphasis  | 0.153242101  |
| wavelet-HHL | gldm       | DependenceVariance                   | 2.898931477  |
| wavelet-HHL | gldm       | LargeDependenceHighGrayLevelEmphasis | 1127         |
| wavelet-HHL | gldm       | SmallDependenceLowGrayLevelEmphasis  | 0.017689473  |
| wavelet-HHL | gldm       | LowGrayLevelEmphasis                 | 0.026224878  |
| wavelet-HHL | glcm       | JointAverage                         | 10.25164811  |
| wavelet-HHL | glcm       | SumAverage                           | 20.50329622  |
| wavelet-HHL | glcm       | JointEntropy                         | 5.908052183  |
| wavelet-HHL | glcm       | ClusterShade                         | 35.24995709  |
| wavelet-HHL | glcm       | MaximumProbability                   | 0.055786093  |
| wavelet-HHL | glcm       | Idmn                                 | 0.951641867  |
| wavelet-HHL | glcm       | JointEnergy                          | 0.021105273  |
| wavelet-HHL | glcm       | Contrast                             | 23.65210537  |
| wavelet-HHL | glcm       | DifferenceEntropy                    | 3.1692752    |
| wavelet-HHL | glcm       | InverseVariance                      | 0.280979943  |
| wavelet-HHL | glcm       | DifferenceVariance                   | 10.78147569  |
| wavelet-HHL | glcm       | Idn                                  | 0.864308264  |
| wavelet-HHL | glcm       | Idm                                  | 0.281087226  |
| wavelet-HHL | glcm       | Correlation                          | -0.024680574 |
| wavelet-HHL | glcm       | Autocorrelation                      | 104.9171647  |
| wavelet-HHL | glcm       | SumEntropy                           | 3.873857753  |
| wavelet-HHL | glcm       | SumSquares                           | 11.62562654  |
| wavelet-HHL | glcm       | ClusterProminence                    | 2171.108645  |
| wavelet-HHL | glcm       | Imc2                                 | 0.950983769  |
| wavelet-HHL | glcm       | Imc1                                 | -0.339053723 |
| wavelet-HHL | glcm       | DifferenceAverage                    | 3.541938678  |
| wavelet-HHL | glcm       | Id                                   | 0.364137535  |
| wavelet-HHL | glcm       | ClusterTendency                      | 22.85040078  |
| wavelet-HHL | firstorder | InterquartileRange                   | 102.4122581  |
| wavelet-HHL | firstorder | Skewness                             | 0.156332185  |
| wavelet-HHL | firstorder | Uniformity                           | 0.092834036  |
| wavelet-HHL | firstorder | Median                               | 10.93283337  |
| wavelet-HHL | firstorder | Energy                               | 921123.9922  |
| wavelet-HHL | firstorder | RobustMeanAbsoluteDeviation          | 43.53299201  |
| wavelet-HHL | firstorder | MeanAbsoluteDeviation                | 69.74854315  |
| wavelet-HHL | firstorder | TotalEnergy                          | 24870347.79  |
| wavelet-HHL | firstorder | Maximum                              | 265.6609239  |
| wavelet-HHL | firstorder | RootMeanSquared                      | 95.49889804  |



|             |            |                                      |              |
|-------------|------------|--------------------------------------|--------------|
| wavelet-HHL | firstorder | 90Percentile                         | 136.8780603  |
| wavelet-HHL | firstorder | Minimum                              | -216.9962661 |
| wavelet-HHL | firstorder | Entropy                              | 3.771311338  |
| wavelet-HHL | firstorder | Range                                | 482.65719    |
| wavelet-HHL | firstorder | Variance                             | 8669.981997  |
| wavelet-HHL | firstorder | 10Percentile                         | -91.23679005 |
| wavelet-HHL | firstorder | Kurtosis                             | 3.401591446  |
| wavelet-HHL | firstorder | Mean                                 | 21.21455938  |
| wavelet-HHL | grlm       | ShortRunLowGrayLevelEmphasis         | 0.026478187  |
| wavelet-HHL | grlm       | GrayLevelVariance                    | 14.44563381  |
| wavelet-HHL | grlm       | LowGrayLevelRunEmphasis              | 0.027214152  |
| wavelet-HHL | grlm       | GrayLevelNonUniformityNormalized     | 0.088494223  |
| wavelet-HHL | grlm       | RunVariance                          | 0.076145754  |
| wavelet-HHL | grlm       | GrayLevelNonUniformity               | 8.311778558  |
| wavelet-HHL | grlm       | LongRunEmphasis                      | 1.235475905  |
| wavelet-HHL | grlm       | ShortRunHighGrayLevelEmphasis        | 117.447635   |
| wavelet-HHL | grlm       | RunLengthNonUniformity               | 81.45864515  |
| wavelet-HHL | grlm       | ShortRunEmphasis                     | 0.944872185  |
| wavelet-HHL | grlm       | LongRunHighGrayLevelEmphasis         | 148.4815951  |
| wavelet-HHL | grlm       | RunPercentage                        | 0.929931455  |
| wavelet-HHL | grlm       | LongRunLowGrayLevelEmphasis          | 0.030316279  |
| wavelet-HHL | grlm       | RunEntropy                           | 4.091050063  |
| wavelet-HHL | grlm       | HighGrayLevelRunEmphasis             | 123.3691035  |
| wavelet-HHL | grlm       | RunLengthNonUniformityNormalized     | 0.865976619  |
| wavelet-HHL | glszm      | GrayLevelVariance                    | 22.72099941  |
| wavelet-HHL | glszm      | ZoneVariance                         | 10.59012493  |
| wavelet-HHL | glszm      | GrayLevelNonUniformityNormalized     | 0.066032124  |
| wavelet-HHL | glszm      | SizeZoneNonUniformityNormalized      | 0.431290898  |
| wavelet-HHL | glszm      | SizeZoneNonUniformity                | 17.68292683  |
| wavelet-HHL | glszm      | GrayLevelNonUniformity               | 2.707317073  |
| wavelet-HHL | glszm      | LargeAreaEmphasis                    | 16.65853659  |
| wavelet-HHL | glszm      | SmallAreaHighGrayLevelEmphasis       | 93.56489549  |
| wavelet-HHL | glszm      | ZonePercentage                       | 0.405940594  |
| wavelet-HHL | glszm      | LargeAreaLowGrayLevelEmphasis        | 0.234021187  |
| wavelet-HHL | glszm      | LargeAreaHighGrayLevelEmphasis       | 1679.487805  |
| wavelet-HHL | glszm      | HighGrayLevelZoneEmphasis            | 138.4146341  |
| wavelet-HHL | glszm      | SmallAreaEmphasis                    | 0.679721371  |
| wavelet-HHL | glszm      | LowGrayLevelZoneEmphasis             | 0.045638032  |
| wavelet-HHL | glszm      | ZoneEntropy                          | 4.851335236  |
| wavelet-HHL | glszm      | SmallAreaLowGrayLevelEmphasis        | 0.041288949  |
| wavelet-HHL | ngtdm      | Coarseness                           | 0.062052308  |
| wavelet-HHL | ngtdm      | Complexity                           | 421.0485949  |
| wavelet-HHL | ngtdm      | Strength                             | 6.424297707  |
| wavelet-HHL | ngtdm      | Contrast                             | 0.213167253  |
| wavelet-HHL | ngtdm      | Busyness                             | 0.077885877  |
| wavelet-HLH | gldm       | GrayLevelVariance                    | 10.46701304  |
| wavelet-HLH | gldm       | HighGrayLevelEmphasis                | 146.039604   |
| wavelet-HLH | gldm       | DependenceEntropy                    | 5.290754711  |
| wavelet-HLH | gldm       | DependenceNonUniformity              | 20.34653465  |
| wavelet-HLH | gldm       | GrayLevelNonUniformity               | 11.23762376  |
| wavelet-HLH | gldm       | SmallDependenceEmphasis              | 0.396901829  |
| wavelet-HLH | gldm       | SmallDependenceHighGrayLevelEmphasis | 61.95795381  |
| wavelet-HLH | gldm       | DependenceNonUniformityNormalized    | 0.201450838  |
| wavelet-HLH | gldm       | LargeDependenceEmphasis              | 14.5049505   |
| wavelet-HLH | gldm       | LargeDependenceLowGrayLevelEmphasis  | 0.123738673  |
| wavelet-HLH | gldm       | DependenceVariance                   | 5.023429076  |

|             |            |                                      |              |
|-------------|------------|--------------------------------------|--------------|
| wavelet-HLH | gldm       | LargeDependenceHighGrayLevelEmphasis | 1996.079208  |
| wavelet-HLH | gldm       | SmallDependenceLowGrayLevelEmphasis  | 0.014637409  |
| wavelet-HLH | gldm       | LowGrayLevelEmphasis                 | 0.019932861  |
| wavelet-HLH | glcm       | JointAverage                         | 11.61861565  |
| wavelet-HLH | glcm       | SumAverage                           | 23.2372313   |
| wavelet-HLH | glcm       | JointEntropy                         | 5.734824781  |
| wavelet-HLH | glcm       | ClusterShade                         | -27.57145198 |
| wavelet-HLH | glcm       | MaximumProbability                   | 0.069906499  |
| wavelet-HLH | glcm       | ldmn                                 | 0.969236677  |
| wavelet-HLH | glcm       | JointEnergy                          | 0.024615292  |
| wavelet-HLH | glcm       | Contrast                             | 18.71269327  |
| wavelet-HLH | glcm       | DifferenceEntropy                    | 3.051105618  |
| wavelet-HLH | glcm       | InverseVariance                      | 0.291713058  |
| wavelet-HLH | glcm       | DifferenceVariance                   | 8.67028162   |
| wavelet-HLH | glcm       | ldn                                  | 0.889107912  |
| wavelet-HLH | glcm       | ldm                                  | 0.301139238  |
| wavelet-HLH | glcm       | Correlation                          | -0.025090108 |
| wavelet-HLH | glcm       | Autocorrelation                      | 134.7905836  |
| wavelet-HLH | glcm       | SumEntropy                           | 3.710358694  |
| wavelet-HLH | glcm       | SumSquares                           | 9.13796493   |
| wavelet-HLH | glcm       | ClusterProminence                    | 1523.180244  |
| wavelet-HLH | glcm       | lmc2                                 | 0.935183294  |
| wavelet-HLH | glcm       | lmc1                                 | -0.310988957 |
| wavelet-HLH | glcm       | DifferenceAverage                    | 3.157465675  |
| wavelet-HLH | glcm       | ld                                   | 0.383594332  |
| wavelet-HLH | glcm       | ClusterTendency                      | 17.83916645  |
| wavelet-HLH | firstorder | InterquartileRange                   | 77.88891124  |
| wavelet-HLH | firstorder | Skewness                             | -0.165720972 |
| wavelet-HLH | firstorder | Uniformity                           | 0.111263602  |
| wavelet-HLH | firstorder | Median                               | 8.162195144  |
| wavelet-HLH | firstorder | Energy                               | 650977.8786  |
| wavelet-HLH | firstorder | RobustMeanAbsoluteDeviation          | 35.39187871  |
| wavelet-HLH | firstorder | MeanAbsoluteDeviation                | 57.71842204  |
| wavelet-HLH | firstorder | TotalEnergy                          | 17576402.72  |
| wavelet-HLH | firstorder | Maximum                              | 291.632      |
| wavelet-HLH | firstorder | RootMeanSquared                      | 80.28278477  |
| wavelet-HLH | firstorder | 90Percentile                         | 88.90198594  |
| wavelet-HLH | firstorder | Minimum                              | -254.3979863 |
| wavelet-HLH | firstorder | Entropy                              | 3.53252798   |
| wavelet-HLH | firstorder | Range                                | 546.0299863  |
| wavelet-HLH | firstorder | Variance                             | 6433.810488  |
| wavelet-HLH | firstorder | 10Percentile                         | -95.48323259 |
| wavelet-HLH | firstorder | Kurtosis                             | 4.816149251  |
| wavelet-HLH | firstorder | Mean                                 | 3.393382231  |
| wavelet-HLH | glrlm      | ShortRunLowGrayLevelEmphasis         | 0.020495837  |
| wavelet-HLH | glrlm      | GrayLevelVariance                    | 11.18836076  |
| wavelet-HLH | glrlm      | LowGrayLevelRunEmphasis              | 0.020982905  |
| wavelet-HLH | glrlm      | GrayLevelNonUniformityNormalized     | 0.103329117  |
| wavelet-HLH | glrlm      | RunVariance                          | 0.094192952  |
| wavelet-HLH | glrlm      | GrayLevelNonUniformity               | 9.603082417  |
| wavelet-HLH | glrlm      | LongRunEmphasis                      | 1.277304984  |
| wavelet-HLH | glrlm      | ShortRunHighGrayLevelEmphasis        | 138.2447294  |
| wavelet-HLH | glrlm      | RunLengthNonUniformity               | 79.34998552  |
| wavelet-HLH | glrlm      | ShortRunEmphasis                     | 0.938985443  |
| wavelet-HLH | glrlm      | LongRunHighGrayLevelEmphasis         | 185.1779434  |
| wavelet-HLH | glrlm      | RunPercentage                        | 0.920030465  |

|             |       |                                  |             |
|-------------|-------|----------------------------------|-------------|
| wavelet-HLH | glrlm | LongRunLowGrayLevelEmphasis      | 0.02316911  |
| wavelet-HLH | glrlm | RunEntropy                       | 3.890539032 |
| wavelet-HLH | glrlm | HighGrayLevelRunEmphasis         | 146.6880145 |
| wavelet-HLH | glrlm | RunLengthNonUniformityNormalized | 0.853095105 |
| wavelet-HLH | glszm | GrayLevelVariance                | 18.9017284  |
| wavelet-HLH | glszm | ZoneVariance                     | 13.69580247 |
| wavelet-HLH | glszm | GrayLevelNonUniformityNormalized | 0.081481481 |
| wavelet-HLH | glszm | SizeZoneNonUniformityNormalized  | 0.512098765 |
| wavelet-HLH | glszm | SizeZoneNonUniformity            | 23.04444444 |
| wavelet-HLH | glszm | GrayLevelNonUniformity           | 3.666666667 |
| wavelet-HLH | glszm | LargeAreaEmphasis                | 18.73333333 |
| wavelet-HLH | glszm | SmallAreaHighGrayLevelEmphasis   | 118.2290711 |
| wavelet-HLH | glszm | ZonePercentage                   | 0.445544554 |
| wavelet-HLH | glszm | LargeAreaLowGrayLevelEmphasis    | 0.169147495 |
| wavelet-HLH | glszm | LargeAreaHighGrayLevelEmphasis   | 2594.4      |
| wavelet-HLH | glszm | HighGrayLevelZoneEmphasis        | 153.9777778 |
| wavelet-HLH | glszm | SmallAreaEmphasis                | 0.741220412 |
| wavelet-HLH | glszm | LowGrayLevelZoneEmphasis         | 0.034281714 |
| wavelet-HLH | glszm | ZoneEntropy                      | 4.505974697 |
| wavelet-HLH | glszm | SmallAreaLowGrayLevelEmphasis    | 0.031408059 |
| wavelet-HLH | ngtdm | Coarseness                       | 0.064191529 |
| wavelet-HLH | ngtdm | Complexity                       | 282.5878407 |
| wavelet-HLH | ngtdm | Strength                         | 5.739926705 |
| wavelet-HLH | ngtdm | Contrast                         | 0.191884556 |
| wavelet-HLH | ngtdm | Busyness                         | 0.075703249 |

| Image type | Feature Class | Feature Name                         |                                                                                                                                                                                                                                                                                                                                                                                                                   |
|------------|---------------|--------------------------------------|-------------------------------------------------------------------------------------------------------------------------------------------------------------------------------------------------------------------------------------------------------------------------------------------------------------------------------------------------------------------------------------------------------------------|
| general    | info          | BoundingBox                          | 12: RTSTRUCT: C99-DNU-B_segment_RLL GTV<br>(1, 0, 1, 7, 8, 8)                                                                                                                                                                                                                                                                                                                                                     |
| general    | info          | EnabledImageTypes                    | {u'Original': {}, u'Wavelet': {}}                                                                                                                                                                                                                                                                                                                                                                                 |
|            |               |                                      | {'distances': [1], 'additionalInfo': True, 'force2D': False, 'interpolator': 'sitkBSpline', 'resampledPixelSpacing': [3.0], 'label': 1, 'normalizeScale': 1, 'normalize': False, 'force2Ddimension': 0, 'removeOutliers': None, 'minimumROISize': None, u'binWidth': 25.0, 'minimumROIDimensions': 1, u'correctMask': True, 'preCrop': False, u'symmetricalGLCM': True, 'resegmentRange': None, 'padDistance': 5} |
| general    | info          | GeneralSettings                      |                                                                                                                                                                                                                                                                                                                                                                                                                   |
| general    | info          | ImageHash                            | d73f56b59ce21ff5f13d74dae2f0b7639442b079                                                                                                                                                                                                                                                                                                                                                                          |
| general    | info          | ImageSpacing                         | (0.9765625000000002, 0.9765625000000002, 2.0)                                                                                                                                                                                                                                                                                                                                                                     |
| general    | info          | MaskHash                             | 010916be5a8eafb1f667b99718660d945b71b34                                                                                                                                                                                                                                                                                                                                                                           |
| general    | info          | NumpyVersion                         | 3                                                                                                                                                                                                                                                                                                                                                                                                                 |
| general    | info          | PyWaveletVersion                     | 1.13.1                                                                                                                                                                                                                                                                                                                                                                                                            |
| general    | info          | SimpleITKVersion                     | 0.5.2                                                                                                                                                                                                                                                                                                                                                                                                             |
| general    | info          | Version                              | 1.1.0                                                                                                                                                                                                                                                                                                                                                                                                             |
| general    | info          | VolumeNum                            | 1.3.0.post102+g1b0eb74                                                                                                                                                                                                                                                                                                                                                                                            |
| general    | info          | VoxelNum                             | 1                                                                                                                                                                                                                                                                                                                                                                                                                 |
| original   | shape         | Maximum3DDiameter                    | 156                                                                                                                                                                                                                                                                                                                                                                                                               |
| original   | shape         | Maximum2DDiameterSlice               | 26.4952826                                                                                                                                                                                                                                                                                                                                                                                                        |
| original   | shape         | Sphericity                           | 23.43074903                                                                                                                                                                                                                                                                                                                                                                                                       |
| original   | shape         | MinorAxis                            | 0.8257838                                                                                                                                                                                                                                                                                                                                                                                                         |
| original   | shape         | Elongation                           | 19.61068494                                                                                                                                                                                                                                                                                                                                                                                                       |
| original   | shape         | SurfaceVolumeRatio                   | 0.812602696                                                                                                                                                                                                                                                                                                                                                                                                       |
| original   | shape         | Volume                               | 0.362622692                                                                                                                                                                                                                                                                                                                                                                                                       |
| original   | shape         | MajorAxis                            | 4212                                                                                                                                                                                                                                                                                                                                                                                                              |
| original   | shape         | SurfaceArea                          | 24.1331773                                                                                                                                                                                                                                                                                                                                                                                                        |
| original   | shape         | Flatness                             | 1527.36678                                                                                                                                                                                                                                                                                                                                                                                                        |
| original   | shape         | LeastAxis                            | 0.544313972                                                                                                                                                                                                                                                                                                                                                                                                       |
| original   | shape         | Maximum2DDiameterColumn              | 13.13602559                                                                                                                                                                                                                                                                                                                                                                                                       |
| original   | shape         | Maximum2DDiameterRow                 | 21.84032967                                                                                                                                                                                                                                                                                                                                                                                                       |
| original   | gldm          | GrayLevelVariance                    | 25.8069758                                                                                                                                                                                                                                                                                                                                                                                                        |
| original   | gldm          | HighGrayLevelEmphasis                | 21.3091716                                                                                                                                                                                                                                                                                                                                                                                                        |
| original   | gldm          | DependenceEntropy                    | 252.1153846                                                                                                                                                                                                                                                                                                                                                                                                       |
| original   | gldm          | DependenceNonUniformity              | 5.419319289                                                                                                                                                                                                                                                                                                                                                                                                       |
| original   | gldm          | GrayLevelNonUniformity               | 19.91025641                                                                                                                                                                                                                                                                                                                                                                                                       |
| original   | gldm          | SmallDependenceEmphasis              | 22.62820513                                                                                                                                                                                                                                                                                                                                                                                                       |
| original   | gldm          | SmallDependenceHighGrayLevelEmphasis | 0.307899624                                                                                                                                                                                                                                                                                                                                                                                                       |
| original   | gldm          | DependenceNonUniformityNormalized    | 45.70158859                                                                                                                                                                                                                                                                                                                                                                                                       |
| original   | gldm          | LargeDependenceEmphasis              | 0.127629849                                                                                                                                                                                                                                                                                                                                                                                                       |
| original   | gldm          | LargeDependenceLowGrayLevelEmphasis  | 31.79487179                                                                                                                                                                                                                                                                                                                                                                                                       |
| original   | gldm          | DependenceVariance                   | 0.155811352                                                                                                                                                                                                                                                                                                                                                                                                       |
| original   | gldm          | LargeDependenceHighGrayLevelEmphasis | 11.77498356                                                                                                                                                                                                                                                                                                                                                                                                       |
| original   | gldm          | SmallDependenceLowGrayLevelEmphasis  | 10350.44872                                                                                                                                                                                                                                                                                                                                                                                                       |
| original   | gldm          | LowGrayLevelEmphasis                 | 0.008619192                                                                                                                                                                                                                                                                                                                                                                                                       |
| original   | glcm          | JointAverage                         | 0.020871398                                                                                                                                                                                                                                                                                                                                                                                                       |
|            |               |                                      | 16.0520746                                                                                                                                                                                                                                                                                                                                                                                                        |

|          |            |                                  |              |
|----------|------------|----------------------------------|--------------|
| original | glcm       | SumAverage                       | 32.10414921  |
| original | glcm       | JointEntropy                     | 5.370418562  |
| original | glcm       | ClusterShade                     | -361.7753917 |
| original | glcm       | MaximumProbability               | 0.123339709  |
| original | glcm       | Idmn                             | 0.952316072  |
| original | glcm       | JointEnergy                      | 0.04529002   |
| original | glcm       | Contrast                         | 24.41944462  |
| original | glcm       | DifferenceEntropy                | 3.079625379  |
| original | glcm       | InverseVariance                  | 0.353321428  |
| original | glcm       | DifferenceVariance               | 14.33314858  |
| original | glcm       | Idn                              | 0.882882602  |
| original | glcm       | Idm                              | 0.397602599  |
| original | glcm       | Correlation                      | 0.23457385   |
| original | glcm       | Autocorrelation                  | 261.4352649  |
| original | glcm       | SumEntropy                       | 3.813936066  |
| original | glcm       | SumSquares                       | 15.96448467  |
| original | glcm       | ClusterProminence                | 7463.171875  |
| original | glcm       | Imc2                             | 0.881643935  |
| original | glcm       | Imc1                             | -0.24709845  |
| original | glcm       | DifferenceAverage                | 3.160141184  |
| original | glcm       | Id                               | 0.454359556  |
| original | glcm       | ClusterTendency                  | 39.43849405  |
| original | firstorder | InterquartileRange               | 121          |
| original | firstorder | Skewness                         | -1.336302187 |
| original | firstorder | Uniformity                       | 0.145052597  |
| original | firstorder | Median                           | -1           |
| original | firstorder | Energy                           | 2610732      |
| original | firstorder | RobustMeanAbsoluteDeviation      | 62.71616     |
| original | firstorder | MeanAbsoluteDeviation            | 93.19395135  |
| original | firstorder | TotalEnergy                      | 70489764     |
| original | firstorder | Maximum                          | 67           |
| original | firstorder | RootMeanSquared                  | 129.3656119  |
| original | firstorder | 90Percentile                     | 36           |
| original | firstorder | Minimum                          | -425         |
| original | firstorder | Entropy                          | 3.377707211  |
| original | firstorder | Range                            | 492          |
| original | firstorder | Variance                         | 13314.71137  |
| original | firstorder | 10Percentile                     | -243         |
| original | firstorder | Kurtosis                         | 3.723779635  |
| original | firstorder | Mean                             | -58.48717949 |
| original | glrlm      | ShortRunLowGrayLevelEmphasis     | 0.022238251  |
| original | glrlm      | GrayLevelVariance                | 22.78790206  |
| original | glrlm      | LowGrayLevelRunEmphasis          | 0.023016461  |
| original | glrlm      | GrayLevelNonUniformityNormalized | 0.121930616  |
| original | glrlm      | RunVariance                      | 0.19021239   |
| original | glrlm      | GrayLevelNonUniformity           | 16.4972124   |
| original | glrlm      | LongRunEmphasis                  | 1.526777141  |
| original | glrlm      | ShortRunHighGrayLevelEmphasis    | 209.0337348  |
| original | glrlm      | RunLengthNonUniformity           | 104.2317881  |
| original | glrlm      | ShortRunEmphasis                 | 0.898988008  |
| original | glrlm      | LongRunHighGrayLevelEmphasis     | 411.3360806  |
| original | glrlm      | RunPercentage                    | 0.866370809  |
| original | glrlm      | LongRunLowGrayLevelEmphasis      | 0.026499145  |
| original | glrlm      | RunEntropy                       | 4.015967554  |
| original | glrlm      | HighGrayLevelRunEmphasis         | 241.3320217  |

|             |       |                                      |              |
|-------------|-------|--------------------------------------|--------------|
| original    | glrlm | RunLengthNonUniformityNormalized     | 0.769830105  |
| original    | glszm | GrayLevelVariance                    | 23.18278464  |
| original    | glszm | ZoneVariance                         | 48.54320988  |
| original    | glszm | GrayLevelNonUniformityNormalized     | 0.067901235  |
| original    | glszm | SizeZoneNonUniformityNormalized      | 0.517832647  |
| original    | glszm | SizeZoneNonUniformity                | 27.96296296  |
| original    | glszm | GrayLevelNonUniformity               | 3.666666667  |
| original    | glszm | LargeAreaEmphasis                    | 56.88888889  |
| original    | glszm | SmallAreaHighGrayLevelEmphasis       | 94.83152583  |
| original    | glszm | ZonePercentage                       | 0.346153846  |
| original    | glszm | LargeAreaLowGrayLevelEmphasis        | 0.261701572  |
| original    | glszm | LargeAreaHighGrayLevelEmphasis       | 18732.7037   |
| original    | glszm | HighGrayLevelZoneEmphasis            | 149.537037   |
| original    | glszm | SmallAreaEmphasis                    | 0.745745535  |
| original    | glszm | LowGrayLevelZoneEmphasis             | 0.034928544  |
| original    | glszm | ZoneEntropy                          | 4.720178188  |
| original    | glszm | SmallAreaLowGrayLevelEmphasis        | 0.019623746  |
| original    | ngtdm | Coarseness                           | 0.024578764  |
| original    | ngtdm | Complexity                           | 423.2616973  |
| original    | ngtdm | Strength                             | 6.348947646  |
| original    | ngtdm | Contrast                             | 0.336235121  |
| original    | ngtdm | Busyness                             | 0.101779065  |
| wavelet-HHH | gldm  | GrayLevelVariance                    | 14.1283284   |
| wavelet-HHH | gldm  | HighGrayLevelEmphasis                | 151.2884615  |
| wavelet-HHH | gldm  | DependenceEntropy                    | 5.61792528   |
| wavelet-HHH | gldm  | DependenceNonUniformity              | 29.01282051  |
| wavelet-HHH | gldm  | GrayLevelNonUniformity               | 16.98717949  |
| wavelet-HHH | gldm  | SmallDependenceEmphasis              | 0.359507132  |
| wavelet-HHH | gldm  | SmallDependenceHighGrayLevelEmphasis | 58.63308979  |
| wavelet-HHH | gldm  | DependenceNonUniformityNormalized    | 0.185979619  |
| wavelet-HHH | gldm  | LargeDependenceEmphasis              | 17.87179487  |
| wavelet-HHH | gldm  | LargeDependenceLowGrayLevelEmphasis  | 0.15534113   |
| wavelet-HHH | gldm  | DependenceVariance                   | 6.845989481  |
| wavelet-HHH | gldm  | LargeDependenceHighGrayLevelEmphasis | 2479.326923  |
| wavelet-HHH | gldm  | SmallDependenceLowGrayLevelEmphasis  | 0.018213458  |
| wavelet-HHH | gldm  | LowGrayLevelEmphasis                 | 0.024417972  |
| wavelet-HHH | glcm  | JointAverage                         | 11.65693855  |
| wavelet-HHH | glcm  | SumAverage                           | 23.31387709  |
| wavelet-HHH | glcm  | JointEntropy                         | 6.07348619   |
| wavelet-HHH | glcm  | ClusterShade                         | 34.34078209  |
| wavelet-HHH | glcm  | MaximumProbability                   | 0.072790618  |
| wavelet-HHH | glcm  | Idmn                                 | 0.970673154  |
| wavelet-HHH | glcm  | JointEnergy                          | 0.023433612  |
| wavelet-HHH | glcm  | Contrast                             | 25.0024012   |
| wavelet-HHH | glcm  | DifferenceEntropy                    | 3.239031891  |
| wavelet-HHH | glcm  | InverseVariance                      | 0.290651195  |
| wavelet-HHH | glcm  | DifferenceVariance                   | 12.43900093  |
| wavelet-HHH | glcm  | Idn                                  | 0.895902505  |
| wavelet-HHH | glcm  | Idm                                  | 0.304582187  |
| wavelet-HHH | glcm  | Correlation                          | -0.038118439 |
| wavelet-HHH | glcm  | Autocorrelation                      | 135.3739484  |
| wavelet-HHH | glcm  | SumEntropy                           | 3.893467633  |
| wavelet-HHH | glcm  | SumSquares                           | 11.97880348  |
| wavelet-HHH | glcm  | ClusterProminence                    | 3072.121504  |
| wavelet-HHH | glcm  | Imc2                                 | 0.931156174  |

|             |            |                                  |              |
|-------------|------------|----------------------------------|--------------|
| wavelet-HHH | glcm       | Imc1                             | -0.286991543 |
| wavelet-HHH | glcm       | DifferenceAverage                | 3.491195223  |
| wavelet-HHH | glcm       | Id                               | 0.382674666  |
| wavelet-HHH | glcm       | ClusterTendency                  | 22.91281274  |
| wavelet-HHH | firstorder | InterquartileRange               | 84.61732199  |
| wavelet-HHH | firstorder | Skewness                         | 0.307041021  |
| wavelet-HHH | firstorder | Uniformity                       | 0.108892176  |
| wavelet-HHH | firstorder | Median                           | 1.919429461  |
| wavelet-HHH | firstorder | Energy                           | 1343330.089  |
| wavelet-HHH | firstorder | RobustMeanAbsoluteDeviation      | 36.0516223   |
| wavelet-HHH | firstorder | MeanAbsoluteDeviation            | 63.80227357  |
| wavelet-HHH | firstorder | TotalEnergy                      | 36269912.4   |
| wavelet-HHH | firstorder | Maximum                          | 385.8119182  |
| wavelet-HHH | firstorder | RootMeanSquared                  | 92.79596065  |
| wavelet-HHH | firstorder | 90Percentile                     | 117.9180793  |
| wavelet-HHH | firstorder | Minimum                          | -271.8209938 |
| wavelet-HHH | firstorder | Entropy                          | 3.679319157  |
| wavelet-HHH | firstorder | Range                            | 657.632912   |
| wavelet-HHH | firstorder | Variance                         | 8587.085185  |
| wavelet-HHH | firstorder | 10Percentile                     | -98.60068683 |
| wavelet-HHH | firstorder | Kurtosis                         | 5.443800844  |
| wavelet-HHH | firstorder | Mean                             | 4.899502855  |
| wavelet-HHH | glrlm      | ShortRunLowGrayLevelEmphasis     | 0.025456375  |
| wavelet-HHH | glrlm      | GrayLevelVariance                | 15.24954379  |
| wavelet-HHH | glrlm      | LowGrayLevelRunEmphasis          | 0.026007203  |
| wavelet-HHH | glrlm      | GrayLevelNonUniformityNormalized | 0.098769763  |
| wavelet-HHH | glrlm      | RunVariance                      | 0.117820797  |
| wavelet-HHH | glrlm      | GrayLevelNonUniformity           | 14.04246179  |
| wavelet-HHH | glrlm      | LongRunEmphasis                  | 1.326060209  |
| wavelet-HHH | glrlm      | ShortRunHighGrayLevelEmphasis    | 143.2986208  |
| wavelet-HHH | glrlm      | RunLengthNonUniformity           | 120.0141735  |
| wavelet-HHH | glrlm      | ShortRunEmphasis                 | 0.934381719  |
| wavelet-HHH | glrlm      | LongRunHighGrayLevelEmphasis     | 197.595578   |
| wavelet-HHH | glrlm      | RunPercentage                    | 0.910749507  |
| wavelet-HHH | glrlm      | LongRunLowGrayLevelEmphasis      | 0.028709282  |
| wavelet-HHH | glrlm      | RunEntropy                       | 4.110863901  |
| wavelet-HHH | glrlm      | HighGrayLevelRunEmphasis         | 152.49546    |
| wavelet-HHH | glrlm      | RunLengthNonUniformityNormalized | 0.843640024  |
| wavelet-HHH | glszm      | GrayLevelVariance                | 27.57823129  |
| wavelet-HHH | glszm      | ZoneVariance                     | 22.47165533  |
| wavelet-HHH | glszm      | GrayLevelNonUniformityNormalized | 0.0622323    |
| wavelet-HHH | glszm      | SizeZoneNonUniformityNormalized  | 0.471403376  |
| wavelet-HHH | glszm      | SizeZoneNonUniformity            | 29.6984127   |
| wavelet-HHH | glszm      | GrayLevelNonUniformity           | 3.920634921  |
| wavelet-HHH | glszm      | LargeAreaEmphasis                | 28.6031746   |
| wavelet-HHH | glszm      | SmallAreaHighGrayLevelEmphasis   | 118.6607556  |
| wavelet-HHH | glszm      | ZonePercentage                   | 0.403846154  |
| wavelet-HHH | glszm      | LargeAreaLowGrayLevelEmphasis    | 0.26424025   |
| wavelet-HHH | glszm      | LargeAreaHighGrayLevelEmphasis   | 3899.920635  |
| wavelet-HHH | glszm      | HighGrayLevelZoneEmphasis        | 165.9206349  |
| wavelet-HHH | glszm      | SmallAreaEmphasis                | 0.710827577  |
| wavelet-HHH | glszm      | LowGrayLevelZoneEmphasis         | 0.046909617  |
| wavelet-HHH | glszm      | ZoneEntropy                      | 5.038876503  |
| wavelet-HHH | glszm      | SmallAreaLowGrayLevelEmphasis    | 0.043153354  |
| wavelet-HHH | ngtdm      | Coarseness                       | 0.041927235  |

|             |            |                                      |              |
|-------------|------------|--------------------------------------|--------------|
| wavelet-HHH | ngtdm      | Complexity                           | 546.8848051  |
| wavelet-HHH | ngtdm      | Strength                             | 6.383618754  |
| wavelet-HHH | ngtdm      | Contrast                             | 0.174022171  |
| wavelet-HHH | ngtdm      | Busyness                             | 0.080874927  |
| wavelet-HLL | gldm       | GrayLevelVariance                    | 46.49802761  |
| wavelet-HLL | gldm       | HighGrayLevelEmphasis                | 196.0897436  |
| wavelet-HLL | gldm       | DependenceEntropy                    | 5.755540223  |
| wavelet-HLL | gldm       | DependenceNonUniformity              | 26.96153846  |
| wavelet-HLL | gldm       | GrayLevelNonUniformity               | 12.05128205  |
| wavelet-HLL | gldm       | SmallDependenceEmphasis              | 0.351108118  |
| wavelet-HLL | gldm       | SmallDependenceHighGrayLevelEmphasis | 115.0972333  |
| wavelet-HLL | gldm       | DependenceNonUniformityNormalized    | 0.172830375  |
| wavelet-HLL | gldm       | LargeDependenceEmphasis              | 15.51282051  |
| wavelet-HLL | gldm       | LargeDependenceLowGrayLevelEmphasis  | 0.154141353  |
| wavelet-HLL | gldm       | DependenceVariance                   | 5.157626561  |
| wavelet-HLL | gldm       | LargeDependenceHighGrayLevelEmphasis | 2328.75641   |
| wavelet-HLL | gldm       | SmallDependenceLowGrayLevelEmphasis  | 0.010144364  |
| wavelet-HLL | gldm       | LowGrayLevelEmphasis                 | 0.017970531  |
| wavelet-HLL | glcm       | JointAverage                         | 11.39801502  |
| wavelet-HLL | glcm       | SumAverage                           | 22.79603003  |
| wavelet-HLL | glcm       | JointEntropy                         | 6.50139762   |
| wavelet-HLL | glcm       | ClusterShade                         | 1687.550757  |
| wavelet-HLL | glcm       | MaximumProbability                   | 0.043268891  |
| wavelet-HLL | glcm       | Idmn                                 | 0.985771861  |
| wavelet-HLL | glcm       | JointEnergy                          | 0.014287441  |
| wavelet-HLL | glcm       | Contrast                             | 41.21040788  |
| wavelet-HLL | glcm       | DifferenceEntropy                    | 3.362957402  |
| wavelet-HLL | glcm       | InverseVariance                      | 0.270480412  |
| wavelet-HLL | glcm       | DifferenceVariance                   | 23.62662886  |
| wavelet-HLL | glcm       | Idn                                  | 0.930905692  |
| wavelet-HLL | glcm       | Idm                                  | 0.286928907  |
| wavelet-HLL | glcm       | Correlation                          | 0.259885464  |
| wavelet-HLL | glcm       | Autocorrelation                      | 137.5339764  |
| wavelet-HLL | glcm       | SumEntropy                           | 4.388581554  |
| wavelet-HLL | glcm       | SumSquares                           | 28.16089945  |
| wavelet-HLL | glcm       | ClusterProminence                    | 97051.03865  |
| wavelet-HLL | glcm       | Imc2                                 | 0.951769563  |
| wavelet-HLL | glcm       | Imc1                                 | -0.309008109 |
| wavelet-HLL | glcm       | DifferenceAverage                    | 4.07579408   |
| wavelet-HLL | glcm       | Id                                   | 0.366695116  |
| wavelet-HLL | glcm       | ClusterTendency                      | 71.43318991  |
| wavelet-HLL | firstorder | InterquartileRange                   | 126.7108383  |
| wavelet-HLL | firstorder | Skewness                             | 2.849670474  |
| wavelet-HLL | firstorder | Uniformity                           | 0.077251808  |
| wavelet-HLL | firstorder | Median                               | -56.29130141 |
| wavelet-HLL | firstorder | Energy                               | 4663954.024  |
| wavelet-HLL | firstorder | RobustMeanAbsoluteDeviation          | 55.91625252  |
| wavelet-HLL | firstorder | MeanAbsoluteDeviation                | 104.4225469  |
| wavelet-HLL | firstorder | TotalEnergy                          | 125926758.6  |
| wavelet-HLL | firstorder | Maximum                              | 913.8572885  |
| wavelet-HLL | firstorder | RootMeanSquared                      | 172.907898   |
| wavelet-HLL | firstorder | 90Percentile                         | 104.0764346  |
| wavelet-HLL | firstorder | Minimum                              | -322.6094621 |
| wavelet-HLL | firstorder | Entropy                              | 4.011972453  |
| wavelet-HLL | firstorder | Range                                | 1236.466751  |



|             |            |                                      |              |
|-------------|------------|--------------------------------------|--------------|
| wavelet-HLL | firstorder | Variance                             | 28965.65175  |
| wavelet-HLL | firstorder | 10Percentile                         | -175.5488952 |
| wavelet-HLL | firstorder | Kurtosis                             | 14.27020248  |
| wavelet-HLL | firstorder | Mean                                 | -30.52031175 |
| wavelet-HLL | glrlm      | ShortRunLowGrayLevelEmphasis         | 0.017952927  |
| wavelet-HLL | glrlm      | GrayLevelVariance                    | 49.98771782  |
| wavelet-HLL | glrlm      | LowGrayLevelRunEmphasis              | 0.018658948  |
| wavelet-HLL | glrlm      | GrayLevelNonUniformityNormalized     | 0.074246333  |
| wavelet-HLL | glrlm      | RunVariance                          | 0.105247685  |
| wavelet-HLL | glrlm      | GrayLevelNonUniformity               | 10.59566933  |
| wavelet-HLL | glrlm      | LongRunEmphasis                      | 1.303323702  |
| wavelet-HLL | glrlm      | ShortRunHighGrayLevelEmphasis        | 193.0235502  |
| wavelet-HLL | glrlm      | RunLengthNonUniformity               | 120.7160639  |
| wavelet-HLL | glrlm      | ShortRunEmphasis                     | 0.935210665  |
| wavelet-HLL | glrlm      | LongRunHighGrayLevelEmphasis         | 243.3399066  |
| wavelet-HLL | glrlm      | RunPercentage                        | 0.91469428   |
| wavelet-HLL | glrlm      | LongRunLowGrayLevelEmphasis          | 0.021837614  |
| wavelet-HLL | glrlm      | RunEntropy                           | 4.392825119  |
| wavelet-HLL | glrlm      | HighGrayLevelRunEmphasis             | 201.7366331  |
| wavelet-HLL | glrlm      | RunLengthNonUniformityNormalized     | 0.844806923  |
| wavelet-HLL | glszm      | GrayLevelVariance                    | 89.74916462  |
| wavelet-HLL | glszm      | ZoneVariance                         | 8.698151036  |
| wavelet-HLL | glszm      | GrayLevelNonUniformityNormalized     | 0.057696592  |
| wavelet-HLL | glszm      | SizeZoneNonUniformityNormalized      | 0.41501448   |
| wavelet-HLL | glszm      | SizeZoneNonUniformity                | 27.80597015  |
| wavelet-HLL | glszm      | GrayLevelNonUniformity               | 3.865671642  |
| wavelet-HLL | glszm      | LargeAreaEmphasis                    | 14.11940299  |
| wavelet-HLL | glszm      | SmallAreaHighGrayLevelEmphasis       | 250.2459578  |
| wavelet-HLL | glszm      | ZonePercentage                       | 0.429487179  |
| wavelet-HLL | glszm      | LargeAreaLowGrayLevelEmphasis        | 0.151830196  |
| wavelet-HLL | glszm      | LargeAreaHighGrayLevelEmphasis       | 2150.119403  |
| wavelet-HLL | glszm      | HighGrayLevelZoneEmphasis            | 290.3731343  |
| wavelet-HLL | glszm      | SmallAreaEmphasis                    | 0.667981876  |
| wavelet-HLL | glszm      | LowGrayLevelZoneEmphasis             | 0.026195088  |
| wavelet-HLL | glszm      | ZoneEntropy                          | 5.250728138  |
| wavelet-HLL | glszm      | SmallAreaLowGrayLevelEmphasis        | 0.021768993  |
| wavelet-HLL | ngtdm      | Coarseness                           | 0.040550615  |
| wavelet-HLL | ngtdm      | Complexity                           | 1315.813463  |
| wavelet-HLL | ngtdm      | Strength                             | 26.06598169  |
| wavelet-HLL | ngtdm      | Contrast                             | 0.464644077  |
| wavelet-HLL | ngtdm      | Busyness                             | 0.084033289  |
| wavelet-LHL | gldm       | GrayLevelVariance                    | 19.98767258  |
| wavelet-LHL | gldm       | HighGrayLevelEmphasis                | 289.7051282  |
| wavelet-LHL | gldm       | DependenceEntropy                    | 5.63281428   |
| wavelet-LHL | gldm       | DependenceNonUniformity              | 27.94871795  |
| wavelet-LHL | gldm       | GrayLevelNonUniformity               | 14.71794872  |
| wavelet-LHL | gldm       | SmallDependenceEmphasis              | 0.375307449  |
| wavelet-LHL | gldm       | SmallDependenceHighGrayLevelEmphasis | 109.5875519  |
| wavelet-LHL | gldm       | DependenceNonUniformityNormalized    | 0.179158448  |
| wavelet-LHL | gldm       | LargeDependenceEmphasis              | 14.1025641   |
| wavelet-LHL | gldm       | LargeDependenceLowGrayLevelEmphasis  | 0.06230483   |
| wavelet-LHL | gldm       | DependenceVariance                   | 4.316896778  |
| wavelet-LHL | gldm       | LargeDependenceHighGrayLevelEmphasis | 4274.230769  |
| wavelet-LHL | gldm       | SmallDependenceLowGrayLevelEmphasis  | 0.014909541  |
| wavelet-LHL | gldm       | LowGrayLevelEmphasis                 | 0.017339499  |

|             |            |                                  |              |
|-------------|------------|----------------------------------|--------------|
| wavelet-LHL | glcm       | JointAverage                     | 16.79818669  |
| wavelet-LHL | glcm       | SumAverage                       | 33.59637338  |
| wavelet-LHL | glcm       | JointEntropy                     | 6.19181058   |
| wavelet-LHL | glcm       | ClusterShade                     | -29.41549837 |
| wavelet-LHL | glcm       | MaximumProbability               | 0.051786887  |
| wavelet-LHL | glcm       | Idmn                             | 0.980873336  |
| wavelet-LHL | glcm       | JointEnergy                      | 0.018499054  |
| wavelet-LHL | glcm       | Contrast                         | 26.66637803  |
| wavelet-LHL | glcm       | DifferenceEntropy                | 3.205786055  |
| wavelet-LHL | glcm       | InverseVariance                  | 0.281356652  |
| wavelet-LHL | glcm       | DifferenceVariance               | 13.59376557  |
| wavelet-LHL | glcm       | Idn                              | 0.915537299  |
| wavelet-LHL | glcm       | Idm                              | 0.290664981  |
| wavelet-LHL | glcm       | Correlation                      | 0.068132495  |
| wavelet-LHL | glcm       | Autocorrelation                  | 282.9901121  |
| wavelet-LHL | glcm       | SumEntropy                       | 4.0868155    |
| wavelet-LHL | glcm       | SumSquares                       | 14.12543257  |
| wavelet-LHL | glcm       | ClusterProminence                | 5144.257928  |
| wavelet-LHL | glcm       | Imc2                             | 0.925902081  |
| wavelet-LHL | glcm       | Imc1                             | -0.27488967  |
| wavelet-LHL | glcm       | DifferenceAverage                | 3.535721567  |
| wavelet-LHL | glcm       | Id                               | 0.373266074  |
| wavelet-LHL | glcm       | ClusterTendency                  | 29.83535226  |
| wavelet-LHL | firstorder | InterquartileRange               | 100.755274   |
| wavelet-LHL | firstorder | Skewness                         | -0.01162061  |
| wavelet-LHL | firstorder | Uniformity                       | 0.094345825  |
| wavelet-LHL | firstorder | Median                           | -41.36663902 |
| wavelet-LHL | firstorder | Energy                           | 2398507.368  |
| wavelet-LHL | firstorder | RobustMeanAbsoluteDeviation      | 43.58605038  |
| wavelet-LHL | firstorder | MeanAbsoluteDeviation            | 77.30383261  |
| wavelet-LHL | firstorder | TotalEnergy                      | 64759698.93  |
| wavelet-LHL | firstorder | Maximum                          | 419.850749   |
| wavelet-LHL | firstorder | RootMeanSquared                  | 123.9961581  |
| wavelet-LHL | firstorder | 90Percentile                     | 40.20210684  |
| wavelet-LHL | firstorder | Minimum                          | -448.1349109 |
| wavelet-LHL | firstorder | Entropy                          | 3.834926766  |
| wavelet-LHL | firstorder | Range                            | 867.98566    |
| wavelet-LHL | firstorder | Variance                         | 12739.54705  |
| wavelet-LHL | firstorder | 10Percentile                     | -188.3881296 |
| wavelet-LHL | firstorder | Kurtosis                         | 6.164177514  |
| wavelet-LHL | firstorder | Mean                             | -51.33712282 |
| wavelet-LHL | glrlm      | ShortRunLowGrayLevelEmphasis     | 0.018360899  |
| wavelet-LHL | glrlm      | GrayLevelVariance                | 21.41760366  |
| wavelet-LHL | glrlm      | LowGrayLevelRunEmphasis          | 0.018586112  |
| wavelet-LHL | glrlm      | GrayLevelNonUniformityNormalized | 0.088069576  |
| wavelet-LHL | glrlm      | RunVariance                      | 0.09941536   |
| wavelet-LHL | glrlm      | GrayLevelNonUniformity           | 12.6209805   |
| wavelet-LHL | glrlm      | LongRunEmphasis                  | 1.290168021  |
| wavelet-LHL | glrlm      | ShortRunHighGrayLevelEmphasis    | 269.9403001  |
| wavelet-LHL | glrlm      | RunLengthNonUniformity           | 121.9065189  |
| wavelet-LHL | glrlm      | ShortRunEmphasis                 | 0.936952626  |
| wavelet-LHL | glrlm      | LongRunHighGrayLevelEmphasis     | 375.7413627  |
| wavelet-LHL | glrlm      | RunPercentage                    | 0.918145957  |
| wavelet-LHL | glrlm      | LongRunLowGrayLevelEmphasis      | 0.019619288  |
| wavelet-LHL | glrlm      | RunEntropy                       | 4.233927473  |

|             |       |                                      |              |
|-------------|-------|--------------------------------------|--------------|
| wavelet-LHL | glrlm | HighGrayLevelRunEmphasis             | 288.8143731  |
| wavelet-LHL | glrlm | RunLengthNonUniformityNormalized     | 0.849233572  |
| wavelet-LHL | glszm | GrayLevelVariance                    | 40.77514648  |
| wavelet-LHL | glszm | ZoneVariance                         | 21.62109375  |
| wavelet-LHL | glszm | GrayLevelNonUniformityNormalized     | 0.064941406  |
| wavelet-LHL | glszm | SizeZoneNonUniformityNormalized      | 0.548339844  |
| wavelet-LHL | glszm | SizeZoneNonUniformity                | 35.09375     |
| wavelet-LHL | glszm | GrayLevelNonUniformity               | 4.15625      |
| wavelet-LHL | glszm | LargeAreaEmphasis                    | 27.5625      |
| wavelet-LHL | glszm | SmallAreaHighGrayLevelEmphasis       | 225.9423457  |
| wavelet-LHL | glszm | ZonePercentage                       | 0.41025641   |
| wavelet-LHL | glszm | LargeAreaLowGrayLevelEmphasis        | 0.125753594  |
| wavelet-LHL | glszm | LargeAreaHighGrayLevelEmphasis       | 8465.46875   |
| wavelet-LHL | glszm | HighGrayLevelZoneEmphasis            | 283.453125   |
| wavelet-LHL | glszm | SmallAreaEmphasis                    | 0.765632374  |
| wavelet-LHL | glszm | LowGrayLevelZoneEmphasis             | 0.036899478  |
| wavelet-LHL | glszm | ZoneEntropy                          | 4.935328664  |
| wavelet-LHL | glszm | SmallAreaLowGrayLevelEmphasis        | 0.03570792   |
| wavelet-LHL | ngtdm | Coarseness                           | 0.03861244   |
| wavelet-LHL | ngtdm | Complexity                           | 764.3199524  |
| wavelet-LHL | ngtdm | Strength                             | 8.756766242  |
| wavelet-LHL | ngtdm | Contrast                             | 0.221448763  |
| wavelet-LHL | ngtdm | Busyness                             | 0.057424366  |
| wavelet-LHH | gldm  | GrayLevelVariance                    | 18.22386588  |
| wavelet-LHH | gldm  | HighGrayLevelEmphasis                | 231.8333333  |
| wavelet-LHH | gldm  | DependenceEntropy                    | 5.66926568   |
| wavelet-LHH | gldm  | DependenceNonUniformity              | 31.6025641   |
| wavelet-LHH | gldm  | GrayLevelNonUniformity               | 13.14102564  |
| wavelet-LHH | gldm  | SmallDependenceEmphasis              | 0.357784346  |
| wavelet-LHH | gldm  | SmallDependenceHighGrayLevelEmphasis | 89.97810842  |
| wavelet-LHH | gldm  | DependenceNonUniformityNormalized    | 0.202580539  |
| wavelet-LHH | gldm  | LargeDependenceEmphasis              | 10.23076923  |
| wavelet-LHH | gldm  | LargeDependenceLowGrayLevelEmphasis  | 0.070408948  |
| wavelet-LHH | gldm  | DependenceVariance                   | 2.632971729  |
| wavelet-LHH | gldm  | LargeDependenceHighGrayLevelEmphasis | 2239.897436  |
| wavelet-LHH | gldm  | SmallDependenceLowGrayLevelEmphasis  | 0.015311813  |
| wavelet-LHH | gldm  | LowGrayLevelEmphasis                 | 0.019738808  |
| wavelet-LHH | glcm  | JointAverage                         | 14.52997234  |
| wavelet-LHH | glcm  | SumAverage                           | 29.05994468  |
| wavelet-LHH | glcm  | JointEntropy                         | 6.371853513  |
| wavelet-LHH | glcm  | ClusterShade                         | -46.98388398 |
| wavelet-LHH | glcm  | MaximumProbability                   | 0.041095837  |
| wavelet-LHH | glcm  | Idmn                                 | 0.970182545  |
| wavelet-LHH | glcm  | JointEnergy                          | 0.015507847  |
| wavelet-LHH | glcm  | Contrast                             | 29.80048801  |
| wavelet-LHH | glcm  | DifferenceEntropy                    | 3.287373838  |
| wavelet-LHH | glcm  | InverseVariance                      | 0.273745294  |
| wavelet-LHH | glcm  | DifferenceVariance                   | 14.55423416  |
| wavelet-LHH | glcm  | Idn                                  | 0.893494021  |
| wavelet-LHH | glcm  | Idm                                  | 0.262239894  |
| wavelet-LHH | glcm  | Correlation                          | -0.020353427 |
| wavelet-LHH | glcm  | Autocorrelation                      | 210.6810014  |
| wavelet-LHH | glcm  | SumEntropy                           | 4.072763973  |
| wavelet-LHH | glcm  | SumSquares                           | 14.44455622  |
| wavelet-LHH | glcm  | ClusterProminence                    | 4288.181011  |

|             |            |                                  |              |
|-------------|------------|----------------------------------|--------------|
| wavelet-LHH | glcm       | Imc2                             | 0.934973403  |
| wavelet-LHH | glcm       | Imc1                             | -0.281335655 |
| wavelet-LHH | glcm       | DifferenceAverage                | 3.835285825  |
| wavelet-LHH | glcm       | Id                               | 0.34763363   |
| wavelet-LHH | glcm       | ClusterTendency                  | 27.97773686  |
| wavelet-LHH | firstorder | InterquartileRange               | 114.7607872  |
| wavelet-LHH | firstorder | Skewness                         | -0.207009013 |
| wavelet-LHH | firstorder | Uniformity                       | 0.084237344  |
| wavelet-LHH | firstorder | Median                           | 12.23545743  |
| wavelet-LHH | firstorder | Energy                           | 1744772.818  |
| wavelet-LHH | firstorder | RobustMeanAbsoluteDeviation      | 48.56241628  |
| wavelet-LHH | firstorder | MeanAbsoluteDeviation            | 77.91593975  |
| wavelet-LHH | firstorder | TotalEnergy                      | 47108866.09  |
| wavelet-LHH | firstorder | Maximum                          | 370.0416255  |
| wavelet-LHH | firstorder | RootMeanSquared                  | 105.7565182  |
| wavelet-LHH | firstorder | 90Percentile                     | 110.7029206  |
| wavelet-LHH | firstorder | Minimum                          | -339.9670946 |
| wavelet-LHH | firstorder | Entropy                          | 3.864893625  |
| wavelet-LHH | firstorder | Range                            | 710.00872    |
| wavelet-LHH | firstorder | Variance                         | 11175.90329  |
| wavelet-LHH | firstorder | 10Percentile                     | -107.0999901 |
| wavelet-LHH | firstorder | Kurtosis                         | 4.948093518  |
| wavelet-LHH | firstorder | Mean                             | 2.921960904  |
| wavelet-LHH | glrlm      | ShortRunLowGrayLevelEmphasis     | 0.020464607  |
| wavelet-LHH | glrlm      | GrayLevelVariance                | 19.07590793  |
| wavelet-LHH | glrlm      | LowGrayLevelRunEmphasis          | 0.020766408  |
| wavelet-LHH | glrlm      | GrayLevelNonUniformityNormalized | 0.08203453   |
| wavelet-LHH | glrlm      | RunVariance                      | 0.083599452  |
| wavelet-LHH | glrlm      | GrayLevelNonUniformity           | 11.94061467  |
| wavelet-LHH | glrlm      | LongRunEmphasis                  | 1.238919782  |
| wavelet-LHH | glrlm      | ShortRunHighGrayLevelEmphasis    | 221.5832413  |
| wavelet-LHH | glrlm      | RunLengthNonUniformity           | 127.9113877  |
| wavelet-LHH | glrlm      | ShortRunEmphasis                 | 0.949306371  |
| wavelet-LHH | glrlm      | LongRunHighGrayLevelEmphasis     | 285.2985791  |
| wavelet-LHH | glrlm      | RunPercentage                    | 0.932445759  |
| wavelet-LHH | glrlm      | LongRunLowGrayLevelEmphasis      | 0.022149237  |
| wavelet-LHH | glrlm      | RunEntropy                       | 4.175889517  |
| wavelet-LHH | glrlm      | HighGrayLevelRunEmphasis         | 232.7216592  |
| wavelet-LHH | glrlm      | RunLengthNonUniformityNormalized | 0.877304434  |
| wavelet-LHH | glszm      | GrayLevelVariance                | 31.70792899  |
| wavelet-LHH | glszm      | ZoneVariance                     | 8.701538462  |
| wavelet-LHH | glszm      | GrayLevelNonUniformityNormalized | 0.062248521  |
| wavelet-LHH | glszm      | SizeZoneNonUniformityNormalized  | 0.412544379  |
| wavelet-LHH | glszm      | SizeZoneNonUniformity            | 26.81538462  |
| wavelet-LHH | glszm      | GrayLevelNonUniformity           | 4.046153846  |
| wavelet-LHH | glszm      | LargeAreaEmphasis                | 14.46153846  |
| wavelet-LHH | glszm      | SmallAreaHighGrayLevelEmphasis   | 172.713518   |
| wavelet-LHH | glszm      | ZonePercentage                   | 0.416666667  |
| wavelet-LHH | glszm      | LargeAreaLowGrayLevelEmphasis    | 0.110833589  |
| wavelet-LHH | glszm      | LargeAreaHighGrayLevelEmphasis   | 3177.661538  |
| wavelet-LHH | glszm      | HighGrayLevelZoneEmphasis        | 248.4769231  |
| wavelet-LHH | glszm      | SmallAreaEmphasis                | 0.661693085  |
| wavelet-LHH | glszm      | LowGrayLevelZoneEmphasis         | 0.038346893  |
| wavelet-LHH | glszm      | ZoneEntropy                      | 5.164299544  |
| wavelet-LHH | glszm      | SmallAreaLowGrayLevelEmphasis    | 0.035231547  |

|             |            |                                      |              |
|-------------|------------|--------------------------------------|--------------|
| wavelet-LHH | ngtdm      | Coarseness                           | 0.035871126  |
| wavelet-LHH | ngtdm      | Complexity                           | 670.4410102  |
| wavelet-LHH | ngtdm      | Strength                             | 6.422032634  |
| wavelet-LHH | ngtdm      | Contrast                             | 0.256015064  |
| wavelet-LHH | ngtdm      | Busyness                             | 0.081813938  |
| wavelet-LLH | gldm       | GrayLevelVariance                    | 56.77843524  |
| wavelet-LLH | gldm       | HighGrayLevelEmphasis                | 373.4358974  |
| wavelet-LLH | gldm       | DependenceEntropy                    | 5.751489361  |
| wavelet-LLH | gldm       | DependenceNonUniformity              | 36.8974359   |
| wavelet-LLH | gldm       | GrayLevelNonUniformity               | 11.05128205  |
| wavelet-LLH | gldm       | SmallDependenceEmphasis              | 0.451520546  |
| wavelet-LLH | gldm       | SmallDependenceHighGrayLevelEmphasis | 231.0121729  |
| wavelet-LLH | gldm       | DependenceNonUniformityNormalized    | 0.236522025  |
| wavelet-LLH | gldm       | LargeDependenceEmphasis              | 8.217948718  |
| wavelet-LLH | gldm       | LargeDependenceLowGrayLevelEmphasis  | 0.041096614  |
| wavelet-LLH | gldm       | DependenceVariance                   | 2.221729126  |
| wavelet-LLH | gldm       | LargeDependenceHighGrayLevelEmphasis | 2274.128205  |
| wavelet-LLH | gldm       | SmallDependenceLowGrayLevelEmphasis  | 0.008692416  |
| wavelet-LLH | gldm       | LowGrayLevelEmphasis                 | 0.011162817  |
| wavelet-LLH | glcm       | JointAverage                         | 17.04265378  |
| wavelet-LLH | glcm       | SumAverage                           | 34.08530756  |
| wavelet-LLH | glcm       | JointEntropy                         | 6.649903267  |
| wavelet-LLH | glcm       | ClusterShade                         | 1877.598065  |
| wavelet-LLH | glcm       | MaximumProbability                   | 0.035771965  |
| wavelet-LLH | glcm       | Idmn                                 | 0.976095194  |
| wavelet-LLH | glcm       | JointEnergy                          | 0.012609586  |
| wavelet-LLH | glcm       | Contrast                             | 66.39925435  |
| wavelet-LLH | glcm       | DifferenceEntropy                    | 3.639740936  |
| wavelet-LLH | glcm       | InverseVariance                      | 0.24903262   |
| wavelet-LLH | glcm       | DifferenceVariance                   | 35.93402565  |
| wavelet-LLH | glcm       | Idn                                  | 0.910674851  |
| wavelet-LLH | glcm       | Idm                                  | 0.231528473  |
| wavelet-LLH | glcm       | Correlation                          | 0.146360753  |
| wavelet-LLH | glcm       | Autocorrelation                      | 297.7193275  |
| wavelet-LLH | glcm       | SumEntropy                           | 4.453978425  |
| wavelet-LLH | glcm       | SumSquares                           | 40.36303468  |
| wavelet-LLH | glcm       | ClusterProminence                    | 89023.75323  |
| wavelet-LLH | glcm       | Imc2                                 | 0.975813211  |
| wavelet-LLH | glcm       | Imc1                                 | -0.374710095 |
| wavelet-LLH | glcm       | DifferenceAverage                    | 5.378542321  |
| wavelet-LLH | glcm       | Id                                   | 0.313634951  |
| wavelet-LLH | glcm       | ClusterTendency                      | 95.05288438  |
| wavelet-LLH | firstorder | InterquartileRange                   | 129.2280236  |
| wavelet-LLH | firstorder | Skewness                             | 1.641631791  |
| wavelet-LLH | firstorder | Uniformity                           | 0.070841552  |
| wavelet-LLH | firstorder | Median                               | -24.36185596 |
| wavelet-LLH | firstorder | Energy                               | 5482976.275  |
| wavelet-LLH | firstorder | RobustMeanAbsoluteDeviation          | 59.08919518  |
| wavelet-LLH | firstorder | MeanAbsoluteDeviation                | 124.3301883  |
| wavelet-LLH | firstorder | TotalEnergy                          | 148040359.4  |
| wavelet-LLH | firstorder | Maximum                              | 778.4187734  |
| wavelet-LLH | firstorder | RootMeanSquared                      | 187.4760887  |
| wavelet-LLH | firstorder | 90Percentile                         | 245.7174983  |
| wavelet-LLH | firstorder | Minimum                              | -403.4016233 |
| wavelet-LLH | firstorder | Entropy                              | 4.309758935  |

|             |            |                                      |              |
|-------------|------------|--------------------------------------|--------------|
| wavelet-LLH | firstorder | Range                                | 1181.820397  |
| wavelet-LLH | firstorder | Variance                             | 35097.29415  |
| wavelet-LLH | firstorder | 10Percentile                         | -195.1064731 |
| wavelet-LLH | firstorder | Kurtosis                             | 6.672992413  |
| wavelet-LLH | firstorder | Mean                                 | 7.07033694   |
| wavelet-LLH | glrlm      | ShortRunLowGrayLevelEmphasis         | 0.011391591  |
| wavelet-LLH | glrlm      | GrayLevelVariance                    | 59.61497241  |
| wavelet-LLH | glrlm      | LowGrayLevelRunEmphasis              | 0.011572307  |
| wavelet-LLH | glrlm      | GrayLevelNonUniformityNormalized     | 0.068083424  |
| wavelet-LLH | glrlm      | RunVariance                          | 0.063862078  |
| wavelet-LLH | glrlm      | GrayLevelNonUniformity               | 10.03047823  |
| wavelet-LLH | glrlm      | LongRunEmphasis                      | 1.186855888  |
| wavelet-LLH | glrlm      | ShortRunHighGrayLevelEmphasis        | 369.0574361  |
| wavelet-LLH | glrlm      | RunLengthNonUniformity               | 132.0958892  |
| wavelet-LLH | glrlm      | ShortRunEmphasis                     | 0.957971306  |
| wavelet-LLH | glrlm      | LongRunHighGrayLevelEmphasis         | 429.1211185  |
| wavelet-LLH | glrlm      | RunPercentage                        | 0.944280079  |
| wavelet-LLH | glrlm      | LongRunLowGrayLevelEmphasis          | 0.012368552  |
| wavelet-LLH | glrlm      | RunEntropy                           | 4.587909587  |
| wavelet-LLH | glrlm      | HighGrayLevelRunEmphasis             | 380.0526557  |
| wavelet-LLH | glrlm      | RunLengthNonUniformityNormalized     | 0.895993577  |
| wavelet-LLH | glszm      | GrayLevelVariance                    | 100.3136095  |
| wavelet-LLH | glszm      | ZoneVariance                         | 8.58974359   |
| wavelet-LLH | glszm      | GrayLevelNonUniformityNormalized     | 0.046351085  |
| wavelet-LLH | glszm      | SizeZoneNonUniformityNormalized      | 0.560486522  |
| wavelet-LLH | glszm      | SizeZoneNonUniformity                | 43.71794872  |
| wavelet-LLH | glszm      | GrayLevelNonUniformity               | 3.615384615  |
| wavelet-LLH | glszm      | LargeAreaEmphasis                    | 12.58974359  |
| wavelet-LLH | glszm      | SmallAreaHighGrayLevelEmphasis       | 428.4675073  |
| wavelet-LLH | glszm      | ZonePercentage                       | 0.5          |
| wavelet-LLH | glszm      | LargeAreaLowGrayLevelEmphasis        | 0.06473938   |
| wavelet-LLH | glszm      | LargeAreaHighGrayLevelEmphasis       | 3519.692308  |
| wavelet-LLH | glszm      | HighGrayLevelZoneEmphasis            | 485.0769231  |
| wavelet-LLH | glszm      | SmallAreaEmphasis                    | 0.773974804  |
| wavelet-LLH | glszm      | LowGrayLevelZoneEmphasis             | 0.017968079  |
| wavelet-LLH | glszm      | ZoneEntropy                          | 5.415218847  |
| wavelet-LLH | glszm      | SmallAreaLowGrayLevelEmphasis        | 0.016789503  |
| wavelet-LLH | ngtdm      | Coarseness                           | 0.036522457  |
| wavelet-LLH | ngtdm      | Complexity                           | 2503.838726  |
| wavelet-LLH | ngtdm      | Strength                             | 24.46689957  |
| wavelet-LLH | ngtdm      | Contrast                             | 0.420614493  |
| wavelet-LLH | ngtdm      | Busyness                             | 0.043415033  |
| wavelet-LLL | gldm       | GrayLevelVariance                    | 155.4204471  |
| wavelet-LLL | gldm       | HighGrayLevelEmphasis                | 1895.807692  |
| wavelet-LLL | gldm       | DependenceEntropy                    | 5.955126299  |
| wavelet-LLL | gldm       | DependenceNonUniformity              | 38.38461538  |
| wavelet-LLL | gldm       | GrayLevelNonUniformity               | 7.564102564  |
| wavelet-LLL | gldm       | SmallDependenceEmphasis              | 0.485910236  |
| wavelet-LLL | gldm       | SmallDependenceHighGrayLevelEmphasis | 682.4818473  |
| wavelet-LLL | gldm       | DependenceNonUniformityNormalized    | 0.246055227  |
| wavelet-LLL | gldm       | LargeDependenceEmphasis              | 9.025641026  |
| wavelet-LLL | gldm       | LargeDependenceLowGrayLevelEmphasis  | 0.011393091  |
| wavelet-LLL | gldm       | DependenceVariance                   | 2.839579224  |
| wavelet-LLL | gldm       | LargeDependenceHighGrayLevelEmphasis | 22638.76923  |
| wavelet-LLL | gldm       | SmallDependenceLowGrayLevelEmphasis  | 0.007795002  |

|             |            |                                  |              |
|-------------|------------|----------------------------------|--------------|
| wavelet-LLL | gldm       | LowGrayLevelEmphasis             | 0.008048622  |
| wavelet-LLL | glcm       | JointAverage                     | 44.50126244  |
| wavelet-LLL | glcm       | SumAverage                       | 89.00252488  |
| wavelet-LLL | glcm       | JointEntropy                     | 6.867369406  |
| wavelet-LLL | glcm       | ClusterShade                     | -6548.152894 |
| wavelet-LLL | glcm       | MaximumProbability               | 0.036793968  |
| wavelet-LLL | glcm       | Idmn                             | 0.963364906  |
| wavelet-LLL | glcm       | JointEnergy                      | 0.011185307  |
| wavelet-LLL | glcm       | Contrast                         | 136.2684861  |
| wavelet-LLL | glcm       | DifferenceEntropy                | 4.165277192  |
| wavelet-LLL | glcm       | InverseVariance                  | 0.199539524  |
| wavelet-LLL | glcm       | DifferenceVariance               | 70.03492766  |
| wavelet-LLL | glcm       | Idn                              | 0.888271267  |
| wavelet-LLL | glcm       | Idm                              | 0.202400112  |
| wavelet-LLL | glcm       | Correlation                      | 0.395631439  |
| wavelet-LLL | glcm       | Autocorrelation                  | 2024.608387  |
| wavelet-LLL | glcm       | SumEntropy                       | 5.101582737  |
| wavelet-LLL | glcm       | SumSquares                       | 112.2176347  |
| wavelet-LLL | glcm       | ClusterProminence                | 389407.2275  |
| wavelet-LLL | glcm       | Imc2                             | 0.992187051  |
| wavelet-LLL | glcm       | Imc1                             | -0.467833712 |
| wavelet-LLL | glcm       | DifferenceAverage                | 8.004452827  |
| wavelet-LLL | glcm       | Id                               | 0.275236309  |
| wavelet-LLL | glcm       | ClusterTendency                  | 312.6020526  |
| wavelet-LLL | firstorder | InterquartileRange               | 443.8232643  |
| wavelet-LLL | firstorder | Skewness                         | -1.130552247 |
| wavelet-LLL | firstorder | Uniformity                       | 0.048487837  |
| wavelet-LLL | firstorder | Median                           | -87.46520652 |
| wavelet-LLL | firstorder | Energy                           | 21078549.19  |
| wavelet-LLL | firstorder | RobustMeanAbsoluteDeviation      | 182.5538688  |
| wavelet-LLL | firstorder | MeanAbsoluteDeviation            | 255.2163815  |
| wavelet-LLL | firstorder | TotalEnergy                      | 569120828.2  |
| wavelet-LLL | firstorder | Maximum                          | 161.7569955  |
| wavelet-LLL | firstorder | RootMeanSquared                  | 367.5852351  |
| wavelet-LLL | firstorder | 90Percentile                     | 93.73090417  |
| wavelet-LLL | firstorder | Minimum                          | -1206.676064 |
| wavelet-LLL | firstorder | Entropy                          | 4.80365989   |
| wavelet-LLL | firstorder | Range                            | 1368.433059  |
| wavelet-LLL | firstorder | Variance                         | 97147.30526  |
| wavelet-LLL | firstorder | 10Percentile                     | -682.2439371 |
| wavelet-LLL | firstorder | Kurtosis                         | 3.498409732  |
| wavelet-LLL | firstorder | Mean                             | -194.8630283 |
| wavelet-LLL | glrlm      | ShortRunLowGrayLevelEmphasis     | 0.008495911  |
| wavelet-LLL | glrlm      | GrayLevelVariance                | 158.3378886  |
| wavelet-LLL | glrlm      | LowGrayLevelRunEmphasis          | 0.008515084  |
| wavelet-LLL | glrlm      | GrayLevelNonUniformityNormalized | 0.045387849  |
| wavelet-LLL | glrlm      | RunVariance                      | 0.068629139  |
| wavelet-LLL | glrlm      | GrayLevelNonUniformity           | 6.68029501   |
| wavelet-LLL | glrlm      | LongRunEmphasis                  | 1.19574396   |
| wavelet-LLL | glrlm      | ShortRunHighGrayLevelEmphasis    | 1751.958088  |
| wavelet-LLL | glrlm      | RunLengthNonUniformity           | 131.7405137  |
| wavelet-LLL | glrlm      | ShortRunEmphasis                 | 0.957312023  |
| wavelet-LLL | glrlm      | LongRunHighGrayLevelEmphasis     | 2352.535863  |
| wavelet-LLL | glrlm      | RunPercentage                    | 0.942800789  |
| wavelet-LLL | glrlm      | LongRunLowGrayLevelEmphasis      | 0.008600796  |

|             |       |                                      |              |
|-------------|-------|--------------------------------------|--------------|
| wavelet-LLL | glrlm | RunEntropy                           | 5.065649596  |
| wavelet-LLL | glrlm | HighGrayLevelRunEmphasis             | 1858.198322  |
| wavelet-LLL | glrlm | RunLengthNonUniformityNormalized     | 0.894714735  |
| wavelet-LLL | glszm | GrayLevelVariance                    | 169.0471972  |
| wavelet-LLL | glszm | ZoneVariance                         | 6.678754325  |
| wavelet-LLL | glszm | GrayLevelNonUniformityNormalized     | 0.033079585  |
| wavelet-LLL | glszm | SizeZoneNonUniformityNormalized      | 0.589757785  |
| wavelet-LLL | glszm | SizeZoneNonUniformity                | 50.12941176  |
| wavelet-LLL | glszm | GrayLevelNonUniformity               | 2.811764706  |
| wavelet-LLL | glszm | LargeAreaEmphasis                    | 10.04705882  |
| wavelet-LLL | glszm | SmallAreaHighGrayLevelEmphasis       | 1036.434151  |
| wavelet-LLL | glszm | ZonePercentage                       | 0.544871795  |
| wavelet-LLL | glszm | LargeAreaLowGrayLevelEmphasis        | 0.018013045  |
| wavelet-LLL | glszm | LargeAreaHighGrayLevelEmphasis       | 25183.2      |
| wavelet-LLL | glszm | HighGrayLevelZoneEmphasis            | 1454.058824  |
| wavelet-LLL | glszm | SmallAreaEmphasis                    | 0.794498919  |
| wavelet-LLL | glszm | LowGrayLevelZoneEmphasis             | 0.014379106  |
| wavelet-LLL | glszm | ZoneEntropy                          | 5.507871048  |
| wavelet-LLL | glszm | SmallAreaLowGrayLevelEmphasis        | 0.014253988  |
| wavelet-LLL | ngtdm | Coarseness                           | 0.032267734  |
| wavelet-LLL | ngtdm | Complexity                           | 4719.12268   |
| wavelet-LLL | ngtdm | Strength                             | 40.12096049  |
| wavelet-LLL | ngtdm | Contrast                             | 1.098985073  |
| wavelet-LLL | ngtdm | Busyness                             | 0.015321903  |
| wavelet-HHL | gldm  | GrayLevelVariance                    | 9.822813938  |
| wavelet-HHL | gldm  | HighGrayLevelEmphasis                | 176.1666667  |
| wavelet-HHL | gldm  | DependenceEntropy                    | 5.281884355  |
| wavelet-HHL | gldm  | DependenceNonUniformity              | 24.26923077  |
| wavelet-HHL | gldm  | GrayLevelNonUniformity               | 22.07692308  |
| wavelet-HHL | gldm  | SmallDependenceEmphasis              | 0.289355595  |
| wavelet-HHL | gldm  | SmallDependenceHighGrayLevelEmphasis | 57.60152746  |
| wavelet-HHL | gldm  | DependenceNonUniformityNormalized    | 0.155571992  |
| wavelet-HHL | gldm  | LargeDependenceEmphasis              | 16.38461538  |
| wavelet-HHL | gldm  | LargeDependenceLowGrayLevelEmphasis  | 0.115238312  |
| wavelet-HHL | gldm  | DependenceVariance                   | 4.402366864  |
| wavelet-HHL | gldm  | LargeDependenceHighGrayLevelEmphasis | 2577.025641  |
| wavelet-HHL | gldm  | SmallDependenceLowGrayLevelEmphasis  | 0.008778707  |
| wavelet-HHL | gldm  | LowGrayLevelEmphasis                 | 0.013359183  |
| wavelet-HHL | glcm  | JointAverage                         | 12.77777837  |
| wavelet-HHL | glcm  | SumAverage                           | 25.55555675  |
| wavelet-HHL | glcm  | JointEntropy                         | 5.546503696  |
| wavelet-HHL | glcm  | ClusterShade                         | 47.4316905   |
| wavelet-HHL | glcm  | MaximumProbability                   | 0.07726315   |
| wavelet-HHL | glcm  | Idmn                                 | 0.988442757  |
| wavelet-HHL | glcm  | JointEnergy                          | 0.030559812  |
| wavelet-HHL | glcm  | Contrast                             | 13.12477712  |
| wavelet-HHL | glcm  | DifferenceEntropy                    | 2.733355765  |
| wavelet-HHL | glcm  | InverseVariance                      | 0.375432171  |
| wavelet-HHL | glcm  | DifferenceVariance                   | 6.913518411  |
| wavelet-HHL | glcm  | Idn                                  | 0.932846065  |
| wavelet-HHL | glcm  | Idm                                  | 0.359138133  |
| wavelet-HHL | glcm  | Correlation                          | -0.009863996 |
| wavelet-HHL | glcm  | Autocorrelation                      | 163.1994118  |
| wavelet-HHL | glcm  | SumEntropy                           | 3.516424361  |
| wavelet-HHL | glcm  | SumSquares                           | 6.481729893  |



|             |            |                                  |              |
|-------------|------------|----------------------------------|--------------|
| wavelet-HHL | glcm       | ClusterProminence                | 1593.95536   |
| wavelet-HHL | glcm       | Imc2                             | 0.822760034  |
| wavelet-HHL | glcm       | Imc1                             | -0.188269359 |
| wavelet-HHL | glcm       | DifferenceAverage                | 2.473903073  |
| wavelet-HHL | glcm       | Id                               | 0.431197561  |
| wavelet-HHL | glcm       | ClusterTendency                  | 12.80214245  |
| wavelet-HHL | firstorder | InterquartileRange               | 57.68073424  |
| wavelet-HHL | firstorder | Skewness                         | 1.611233643  |
| wavelet-HHL | firstorder | Uniformity                       | 0.141518738  |
| wavelet-HHL | firstorder | Median                           | 1.793957859  |
| wavelet-HHL | firstorder | Energy                           | 933387.9391  |
| wavelet-HHL | firstorder | RobustMeanAbsoluteDeviation      | 26.06808846  |
| wavelet-HHL | firstorder | MeanAbsoluteDeviation            | 48.74978363  |
| wavelet-HHL | firstorder | TotalEnergy                      | 25201474.35  |
| wavelet-HHL | firstorder | Maximum                          | 477.1743631  |
| wavelet-HHL | firstorder | RootMeanSquared                  | 77.35150948  |
| wavelet-HHL | firstorder | 90Percentile                     | 93.89102857  |
| wavelet-HHL | firstorder | Minimum                          | -275.2442068 |
| wavelet-HHL | firstorder | Entropy                          | 3.208931822  |
| wavelet-HHL | firstorder | Range                            | 752.4185699  |
| wavelet-HHL | firstorder | Variance                         | 5892.969248  |
| wavelet-HHL | firstorder | 10Percentile                     | -58.13414168 |
| wavelet-HHL | firstorder | Kurtosis                         | 13.07957013  |
| wavelet-HHL | firstorder | Mean                             | 9.501935139  |
| wavelet-HHL | glrlm      | ShortRunLowGrayLevelEmphasis     | 0.01361328   |
| wavelet-HHL | glrlm      | GrayLevelVariance                | 10.64829125  |
| wavelet-HHL | glrlm      | LowGrayLevelRunEmphasis          | 0.014087517  |
| wavelet-HHL | glrlm      | GrayLevelNonUniformityNormalized | 0.133088181  |
| wavelet-HHL | glrlm      | RunVariance                      | 0.12209435   |
| wavelet-HHL | glrlm      | GrayLevelNonUniformity           | 18.81818113  |
| wavelet-HHL | glrlm      | LongRunEmphasis                  | 1.351369122  |
| wavelet-HHL | glrlm      | ShortRunHighGrayLevelEmphasis    | 166.369699   |
| wavelet-HHL | glrlm      | RunLengthNonUniformity           | 117.8984003  |
| wavelet-HHL | glrlm      | ShortRunEmphasis                 | 0.927627424  |
| wavelet-HHL | glrlm      | LongRunHighGrayLevelEmphasis     | 233.744466   |
| wavelet-HHL | glrlm      | RunPercentage                    | 0.905325444  |
| wavelet-HHL | glrlm      | LongRunLowGrayLevelEmphasis      | 0.016401476  |
| wavelet-HHL | glrlm      | RunEntropy                       | 3.666045765  |
| wavelet-HHL | glrlm      | HighGrayLevelRunEmphasis         | 177.9674374  |
| wavelet-HHL | glrlm      | RunLengthNonUniformityNormalized | 0.831134116  |
| wavelet-HHL | glszm      | GrayLevelVariance                | 25.38888889  |
| wavelet-HHL | glszm      | ZoneVariance                     | 46.27083333  |
| wavelet-HHL | glszm      | GrayLevelNonUniformityNormalized | 0.098958333  |
| wavelet-HHL | glszm      | SizeZoneNonUniformityNormalized  | 0.4453125    |
| wavelet-HHL | glszm      | SizeZoneNonUniformity            | 21.375       |
| wavelet-HHL | glszm      | GrayLevelNonUniformity           | 4.75         |
| wavelet-HHL | glszm      | LargeAreaEmphasis                | 56.83333333  |
| wavelet-HHL | glszm      | SmallAreaHighGrayLevelEmphasis   | 143.1481913  |
| wavelet-HHL | glszm      | ZonePercentage                   | 0.307692308  |
| wavelet-HHL | glszm      | LargeAreaLowGrayLevelEmphasis    | 0.398768639  |
| wavelet-HHL | glszm      | LargeAreaHighGrayLevelEmphasis   | 8792.958333  |
| wavelet-HHL | glszm      | HighGrayLevelZoneEmphasis        | 203.1666667  |
| wavelet-HHL | glszm      | SmallAreaEmphasis                | 0.690817881  |
| wavelet-HHL | glszm      | LowGrayLevelZoneEmphasis         | 0.028805316  |
| wavelet-HHL | glszm      | ZoneEntropy                      | 4.530187699  |

|             |            |                                      |              |
|-------------|------------|--------------------------------------|--------------|
| wavelet-HHL | glszm      | SmallAreaLowGrayLevelEmphasis        | 0.026961668  |
| wavelet-HHL | ngtdm      | Coarseness                           | 0.041790313  |
| wavelet-HHL | ngtdm      | Complexity                           | 324.0136758  |
| wavelet-HHL | ngtdm      | Strength                             | 7.110181324  |
| wavelet-HHL | ngtdm      | Contrast                             | 0.149355781  |
| wavelet-HHL | ngtdm      | Busyness                             | 0.093267102  |
| wavelet-HLH | gldm       | GrayLevelVariance                    | 16.79236522  |
| wavelet-HLH | gldm       | HighGrayLevelEmphasis                | 177.724359   |
| wavelet-HLH | gldm       | DependenceEntropy                    | 5.763149781  |
| wavelet-HLH | gldm       | DependenceNonUniformity              | 31.6025641   |
| wavelet-HLH | gldm       | GrayLevelNonUniformity               | 13.73076923  |
| wavelet-HLH | gldm       | SmallDependenceEmphasis              | 0.422021377  |
| wavelet-HLH | gldm       | SmallDependenceHighGrayLevelEmphasis | 83.49814735  |
| wavelet-HLH | gldm       | DependenceNonUniformityNormalized    | 0.202580539  |
| wavelet-HLH | gldm       | LargeDependenceEmphasis              | 12.19230769  |
| wavelet-HLH | gldm       | LargeDependenceLowGrayLevelEmphasis  | 0.096295524  |
| wavelet-HLH | gldm       | DependenceVariance                   | 3.945101907  |
| wavelet-HLH | gldm       | LargeDependenceHighGrayLevelEmphasis | 1901.096154  |
| wavelet-HLH | gldm       | SmallDependenceLowGrayLevelEmphasis  | 0.013639646  |
| wavelet-HLH | gldm       | LowGrayLevelEmphasis                 | 0.017801029  |
| wavelet-HLH | glcm       | JointAverage                         | 12.59365721  |
| wavelet-HLH | glcm       | SumAverage                           | 25.18731442  |
| wavelet-HLH | glcm       | JointEntropy                         | 6.35933969   |
| wavelet-HLH | glcm       | ClusterShade                         | -4.10322126  |
| wavelet-HLH | glcm       | MaximumProbability                   | 0.044326843  |
| wavelet-HLH | glcm       | Idmn                                 | 0.9655173    |
| wavelet-HLH | glcm       | JointEnergy                          | 0.015858667  |
| wavelet-HLH | glcm       | Contrast                             | 27.82412511  |
| wavelet-HLH | glcm       | DifferenceEntropy                    | 3.294387826  |
| wavelet-HLH | glcm       | InverseVariance                      | 0.254717913  |
| wavelet-HLH | glcm       | DifferenceVariance                   | 13.4363694   |
| wavelet-HLH | glcm       | Idn                                  | 0.885431761  |
| wavelet-HLH | glcm       | Idm                                  | 0.265083237  |
| wavelet-HLH | glcm       | Correlation                          | -0.04823417  |
| wavelet-HLH | glcm       | Autocorrelation                      | 158.0049374  |
| wavelet-HLH | glcm       | SumEntropy                           | 4.005697331  |
| wavelet-HLH | glcm       | SumSquares                           | 13.30297451  |
| wavelet-HLH | glcm       | ClusterProminence                    | 3018.285418  |
| wavelet-HLH | glcm       | Imc2                                 | 0.935219082  |
| wavelet-HLH | glcm       | Imc1                                 | -0.283463727 |
| wavelet-HLH | glcm       | DifferenceAverage                    | 3.749493236  |
| wavelet-HLH | glcm       | Id                                   | 0.352828752  |
| wavelet-HLH | glcm       | ClusterTendency                      | 25.38777292  |
| wavelet-HLH | firstorder | InterquartileRange                   | 97.69590361  |
| wavelet-HLH | firstorder | Skewness                             | 0.351228798  |
| wavelet-HLH | firstorder | Uniformity                           | 0.088017751  |
| wavelet-HLH | firstorder | Median                               | 2.487586366  |
| wavelet-HLH | firstorder | Energy                               | 1630743.202  |
| wavelet-HLH | firstorder | RobustMeanAbsoluteDeviation          | 44.8800553   |
| wavelet-HLH | firstorder | MeanAbsoluteDeviation                | 74.34856357  |
| wavelet-HLH | firstorder | TotalEnergy                          | 44030066.45  |
| wavelet-HLH | firstorder | Maximum                              | 345.1369671  |
| wavelet-HLH | firstorder | RootMeanSquared                      | 102.2422714  |
| wavelet-HLH | firstorder | 90Percentile                         | 124.6563533  |
| wavelet-HLH | firstorder | Minimum                              | -280.1819052 |

|             |            |                                  |              |
|-------------|------------|----------------------------------|--------------|
| wavelet-HLH | firstorder | Entropy                          | 3.882611652  |
| wavelet-HLH | firstorder | Range                            | 625.3188723  |
| wavelet-HLH | firstorder | Variance                         | 10433.78564  |
| wavelet-HLH | firstorder | 10Percentile                     | -115.5654753 |
| wavelet-HLH | firstorder | Kurtosis                         | 4.448845952  |
| wavelet-HLH | firstorder | Mean                             | 4.438064801  |
| wavelet-HLH | glrlm      | ShortRunLowGrayLevelEmphasis     | 0.018253113  |
| wavelet-HLH | glrlm      | GrayLevelVariance                | 17.79225011  |
| wavelet-HLH | glrlm      | LowGrayLevelRunEmphasis          | 0.018640924  |
| wavelet-HLH | glrlm      | GrayLevelNonUniformityNormalized | 0.083622202  |
| wavelet-HLH | glrlm      | RunVariance                      | 0.083214076  |
| wavelet-HLH | glrlm      | GrayLevelNonUniformity           | 12.10881103  |
| wavelet-HLH | glrlm      | LongRunEmphasis                  | 1.246260813  |
| wavelet-HLH | glrlm      | ShortRunHighGrayLevelEmphasis    | 170.6024425  |
| wavelet-HLH | glrlm      | RunLengthNonUniformity           | 125.5232788  |
| wavelet-HLH | glrlm      | ShortRunEmphasis                 | 0.944992299  |
| wavelet-HLH | glrlm      | LongRunHighGrayLevelEmphasis     | 217.9315708  |
| wavelet-HLH | glrlm      | RunPercentage                    | 0.92800789   |
| wavelet-HLH | glrlm      | LongRunLowGrayLevelEmphasis      | 0.020378809  |
| wavelet-HLH | glrlm      | RunEntropy                       | 4.237190423  |
| wavelet-HLH | glrlm      | HighGrayLevelRunEmphasis         | 179.3091493  |
| wavelet-HLH | glrlm      | RunLengthNonUniformityNormalized | 0.866179955  |
| wavelet-HLH | glszm      | GrayLevelVariance                | 30.38715278  |
| wavelet-HLH | glszm      | ZoneVariance                     | 11.38888889  |
| wavelet-HLH | glszm      | GrayLevelNonUniformityNormalized | 0.055941358  |
| wavelet-HLH | glszm      | SizeZoneNonUniformityNormalized  | 0.574845679  |
| wavelet-HLH | glszm      | SizeZoneNonUniformity            | 41.38888889  |
| wavelet-HLH | glszm      | GrayLevelNonUniformity           | 4.027777778  |
| wavelet-HLH | glszm      | LargeAreaEmphasis                | 16.08333333  |
| wavelet-HLH | glszm      | SmallAreaHighGrayLevelEmphasis   | 157.8379992  |
| wavelet-HLH | glszm      | ZonePercentage                   | 0.461538462  |
| wavelet-HLH | glszm      | LargeAreaLowGrayLevelEmphasis    | 0.137660547  |
| wavelet-HLH | glszm      | LargeAreaHighGrayLevelEmphasis   | 2454.652778  |
| wavelet-HLH | glszm      | HighGrayLevelZoneEmphasis        | 196.1527778  |
| wavelet-HLH | glszm      | SmallAreaEmphasis                | 0.778948268  |
| wavelet-HLH | glszm      | LowGrayLevelZoneEmphasis         | 0.030295274  |
| wavelet-HLH | glszm      | ZoneEntropy                      | 5.08833746   |
| wavelet-HLH | glszm      | SmallAreaLowGrayLevelEmphasis    | 0.028571531  |
| wavelet-HLH | ngtdm      | Coarseness                       | 0.040101479  |
| wavelet-HLH | ngtdm      | Complexity                       | 692.3713919  |
| wavelet-HLH | ngtdm      | Strength                         | 7.070228139  |
| wavelet-HLH | ngtdm      | Contrast                         | 0.191462328  |
| wavelet-HLH | ngtdm      | Busyness                         | 0.074830355  |

| Image type | Feature Class | Feature Name                         |                                                                                                                                                                                                                                                                                                                                                                                                                                                 |
|------------|---------------|--------------------------------------|-------------------------------------------------------------------------------------------------------------------------------------------------------------------------------------------------------------------------------------------------------------------------------------------------------------------------------------------------------------------------------------------------------------------------------------------------|
| general    | info          | BoundingBox                          | 7: RTSTRUCT: C99-DNU_segment_RLL GTV<br>(0, 0, 1, 10, 8, 8)                                                                                                                                                                                                                                                                                                                                                                                     |
| general    | info          | EnabledImageTypes                    | {u'Original': {}, u'Wavelet': {}}                                                                                                                                                                                                                                                                                                                                                                                                               |
|            |               |                                      | {'distances': [1], 'additionalInfo': True,<br>'force2D': False, 'interpolator': 'sitkBSpline',<br>'resampledPixelSpacing': [3.0], 'label': 1,<br>'normalizeScale': 1, 'normalize': False,<br>'force2Ddimension': 0, 'removeOutliers':<br>None, 'minimumROISize': None,<br>u'binWidth': 25.0,<br>'minimumROIDimensions': 1,<br>u'correctMask': True, 'preCrop': False,<br>u'symmetricalGLCM': True,<br>'resegmentRange': None, 'padDistance': 5} |
| general    | info          | GeneralSettings                      | a84149becb81495041d28804cb78b49005e<br>d2f75                                                                                                                                                                                                                                                                                                                                                                                                    |
| general    | info          | ImageHash                            | (0.9765625000000002,<br>0.9765625000000002, 2.0)                                                                                                                                                                                                                                                                                                                                                                                                |
| general    | info          | ImageSpacing                         | 11e966551a2fff4485190074a123c7b1ba0a9<br>a66                                                                                                                                                                                                                                                                                                                                                                                                    |
| general    | info          | MaskHash                             |                                                                                                                                                                                                                                                                                                                                                                                                                                                 |
| general    | info          | NumpyVersion                         | 1.13.1                                                                                                                                                                                                                                                                                                                                                                                                                                          |
| general    | info          | PyWaveletVersion                     | 0.5.2                                                                                                                                                                                                                                                                                                                                                                                                                                           |
| general    | info          | SimpleITKVersion                     | 1.1.0                                                                                                                                                                                                                                                                                                                                                                                                                                           |
| general    | info          | Version                              | 1.3.0.post102+g1b0eb74                                                                                                                                                                                                                                                                                                                                                                                                                          |
| general    | info          | VolumeNum                            | 1                                                                                                                                                                                                                                                                                                                                                                                                                                               |
| general    | info          | VoxelNum                             | 200                                                                                                                                                                                                                                                                                                                                                                                                                                             |
| original   | shape         | Maximum3DDiameter                    | 30.14962686                                                                                                                                                                                                                                                                                                                                                                                                                                     |
| original   | shape         | Maximum2DDiameterSlice               | 22.84731932                                                                                                                                                                                                                                                                                                                                                                                                                                     |
| original   | shape         | Sphericity                           | 0.789034057                                                                                                                                                                                                                                                                                                                                                                                                                                     |
| original   | shape         | MinorAxis                            | 17.71844273                                                                                                                                                                                                                                                                                                                                                                                                                                     |
| original   | shape         | Elongation                           | 0.633956179                                                                                                                                                                                                                                                                                                                                                                                                                                     |
| original   | shape         | SurfaceVolumeRatio                   | 0.349347084                                                                                                                                                                                                                                                                                                                                                                                                                                     |
| original   | shape         | Volume                               | 5400                                                                                                                                                                                                                                                                                                                                                                                                                                            |
| original   | shape         | MajorAxis                            | 27.94900235                                                                                                                                                                                                                                                                                                                                                                                                                                     |
| original   | shape         | SurfaceArea                          | 1886.474253                                                                                                                                                                                                                                                                                                                                                                                                                                     |
| original   | shape         | Flatness                             | 0.604010204                                                                                                                                                                                                                                                                                                                                                                                                                                     |
| original   | shape         | LeastAxis                            | 16.8814826                                                                                                                                                                                                                                                                                                                                                                                                                                      |
| original   | shape         | Maximum2DDiameterColumn              | 25.8069758                                                                                                                                                                                                                                                                                                                                                                                                                                      |
| original   | shape         | Maximum2DDiameterRow                 | 24.18677324                                                                                                                                                                                                                                                                                                                                                                                                                                     |
| original   | gldm          | GrayLevelVariance                    | 16.0744                                                                                                                                                                                                                                                                                                                                                                                                                                         |
| original   | gldm          | HighGrayLevelEmphasis                | 310.54                                                                                                                                                                                                                                                                                                                                                                                                                                          |
| original   | gldm          | DependenceEntropy                    | 5.644414806                                                                                                                                                                                                                                                                                                                                                                                                                                     |
| original   | gldm          | DependenceNonUniformity              | 29.95                                                                                                                                                                                                                                                                                                                                                                                                                                           |
| original   | gldm          | GrayLevelNonUniformity               | 26.23                                                                                                                                                                                                                                                                                                                                                                                                                                           |
| original   | gldm          | SmallDependenceEmphasis              | 0.348330567                                                                                                                                                                                                                                                                                                                                                                                                                                     |
| original   | gldm          | SmallDependenceHighGrayLevelEmphasis | 78.6497901                                                                                                                                                                                                                                                                                                                                                                                                                                      |
| original   | gldm          | DependenceNonUniformityNormalized    | 0.14975                                                                                                                                                                                                                                                                                                                                                                                                                                         |
| original   | gldm          | LargeDependenceEmphasis              | 23.75                                                                                                                                                                                                                                                                                                                                                                                                                                           |
| original   | gldm          | LargeDependenceLowGrayLevelEmphasis  | 0.073582662                                                                                                                                                                                                                                                                                                                                                                                                                                     |
| original   | gldm          | DependenceVariance                   | 8.54                                                                                                                                                                                                                                                                                                                                                                                                                                            |

|          |            |                                      |              |
|----------|------------|--------------------------------------|--------------|
| original | gldm       | LargeDependenceHighGrayLevelEmphasis | 8709.47      |
| original | gldm       | SmallDependenceLowGrayLevelEmphasis  | 0.009227807  |
| original | gldm       | LowGrayLevelEmphasis                 | 0.011171933  |
| original | glcm       | JointAverage                         | 17.88270243  |
| original | glcm       | SumAverage                           | 35.76540487  |
| original | glcm       | JointEntropy                         | 5.667364067  |
| original | glcm       | ClusterShade                         | -227.4125644 |
| original | glcm       | MaximumProbability                   | 0.086184886  |
| original | glcm       | ldmn                                 | 0.968308475  |
| original | glcm       | JointEnergy                          | 0.031895775  |
| original | glcm       | Contrast                             | 19.06624702  |
| original | glcm       | DifferenceEntropy                    | 2.943188495  |
| original | glcm       | InverseVariance                      | 0.369182743  |
| original | glcm       | DifferenceVariance                   | 11.19356729  |
| original | glcm       | ldn                                  | 0.900073668  |
| original | glcm       | ldm                                  | 0.375395432  |
| original | glcm       | Correlation                          | 0.14281622   |
| original | glcm       | Autocorrelation                      | 321.4824294  |
| original | glcm       | SumEntropy                           | 3.780007797  |
| original | glcm       | SumSquares                           | 11.20490765  |
| original | glcm       | ClusterProminence                    | 4193.027988  |
| original | glcm       | lmc2                                 | 0.807570659  |
| original | glcm       | lmc1                                 | -0.171966536 |
| original | glcm       | DifferenceAverage                    | 2.800724521  |
| original | glcm       | ld                                   | 0.440825428  |
| original | glcm       | ClusterTendency                      | 25.7533836   |
| original | firstorder | InterquartileRange                   | 86.25        |
| original | firstorder | Skewness                             | -1.896410879 |
| original | firstorder | Uniformity                           | 0.13115      |
| original | firstorder | Median                               | 3            |
| original | firstorder | Energy                               | 2228211      |
| original | firstorder | RobustMeanAbsoluteDeviation          | 41.71703125  |
| original | firstorder | MeanAbsoluteDeviation                | 72.46615     |
| original | firstorder | TotalEnergy                          | 60161697     |
| original | firstorder | Maximum                              | 89           |
| original | firstorder | RootMeanSquared                      | 105.5511961  |
| original | firstorder | 90Percentile                         | 46.2         |
| original | firstorder | Minimum                              | -429         |
| original | firstorder | Entropy                              | 3.392466343  |
| original | firstorder | Range                                | 518          |
| original | firstorder | Variance                             | 9992.183975  |
| original | firstorder | 10Percentile                         | -166.6       |
| original | firstorder | Kurtosis                             | 6.553512409  |
| original | firstorder | Mean                                 | -33.895      |
| original | glrlm      | ShortRunLowGrayLevelEmphasis         | 0.01199586   |
| original | glrlm      | GrayLevelVariance                    | 17.35293646  |
| original | glrlm      | LowGrayLevelRunEmphasis              | 0.01223086   |
| original | glrlm      | GrayLevelNonUniformityNormalized     | 0.11769587   |
| original | glrlm      | RunVariance                          | 0.151636589  |
| original | glrlm      | GrayLevelNonUniformity               | 20.92399718  |
| original | glrlm      | LongRunEmphasis                      | 1.421362686  |
| original | glrlm      | ShortRunHighGrayLevelEmphasis        | 272.7604442  |

|             |       |                                      |             |
|-------------|-------|--------------------------------------|-------------|
| original    | glrlm | RunLengthNonUniformity               | 143.0910326 |
| original    | glrlm | ShortRunEmphasis                     | 0.916219244 |
| original    | glrlm | LongRunHighGrayLevelEmphasis         | 458.0560648 |
| original    | glrlm | RunPercentage                        | 0.888461538 |
| original    | glrlm | LongRunLowGrayLevelEmphasis          | 0.013404966 |
| original    | glrlm | RunEntropy                           | 3.944958162 |
| original    | glrlm | HighGrayLevelRunEmphasis             | 303.445275  |
| original    | glrlm | RunLengthNonUniformityNormalized     | 0.80424834  |
| original    | glszm | GrayLevelVariance                    | 24.19886779 |
| original    | glszm | ZoneVariance                         | 46.64134405 |
| original    | glszm | GrayLevelNonUniformityNormalized     | 0.07706355  |
| original    | glszm | SizeZoneNonUniformityNormalized      | 0.6165084   |
| original    | glszm | SizeZoneNonUniformity                | 45.62162162 |
| original    | glszm | GrayLevelNonUniformity               | 5.702702703 |
| original    | glszm | LargeAreaEmphasis                    | 53.94594595 |
| original    | glszm | SmallAreaHighGrayLevelEmphasis       | 167.9840305 |
| original    | glszm | ZonePercentage                       | 0.37        |
| original    | glszm | LargeAreaLowGrayLevelEmphasis        | 0.1693578   |
| original    | glszm | LargeAreaHighGrayLevelEmphasis       | 19868.08108 |
| original    | glszm | HighGrayLevelZoneEmphasis            | 225.1486486 |
| original    | glszm | SmallAreaEmphasis                    | 0.809458004 |
| original    | glszm | LowGrayLevelZoneEmphasis             | 0.025249898 |
| original    | glszm | ZoneEntropy                          | 4.689135886 |
| original    | glszm | SmallAreaLowGrayLevelEmphasis        | 0.024504409 |
| original    | ngtdm | Coarseness                           | 0.025484745 |
| original    | ngtdm | Complexity                           | 405.4152631 |
| original    | ngtdm | Strength                             | 6.086943126 |
| original    | ngtdm | Contrast                             | 0.225073385 |
| original    | ngtdm | Busyness                             | 0.089927948 |
| wavelet-HHH | gldm  | GrayLevelVariance                    | 6.77        |
| wavelet-HHH | gldm  | HighGrayLevelEmphasis                | 79.02       |
| wavelet-HHH | gldm  | DependenceEntropy                    | 5.577757909 |
| wavelet-HHH | gldm  | DependenceNonUniformity              | 32.44       |
| wavelet-HHH | gldm  | GrayLevelNonUniformity               | 23.44       |
| wavelet-HHH | gldm  | SmallDependenceEmphasis              | 0.305553484 |
| wavelet-HHH | gldm  | SmallDependenceHighGrayLevelEmphasis | 24.53059196 |
| wavelet-HHH | gldm  | DependenceNonUniformityNormalized    | 0.1622      |
| wavelet-HHH | gldm  | LargeDependenceEmphasis              | 17.44       |
| wavelet-HHH | gldm  | LargeDependenceLowGrayLevelEmphasis  | 0.27166736  |
| wavelet-HHH | gldm  | DependenceVariance                   | 5.6751      |
| wavelet-HHH | gldm  | LargeDependenceHighGrayLevelEmphasis | 1286.81     |
| wavelet-HHH | gldm  | SmallDependenceLowGrayLevelEmphasis  | 0.013417323 |
| wavelet-HHH | gldm  | LowGrayLevelEmphasis                 | 0.024395779 |
| wavelet-HHH | glcm  | JointAverage                         | 8.490990123 |
| wavelet-HHH | glcm  | SumAverage                           | 16.98198025 |
| wavelet-HHH | glcm  | JointEntropy                         | 6.022030456 |
| wavelet-HHH | glcm  | ClusterShade                         | 10.97165163 |
| wavelet-HHH | glcm  | MaximumProbability                   | 0.050650475 |
| wavelet-HHH | glcm  | ldmn                                 | 0.961765336 |
| wavelet-HHH | glcm  | JointEnergy                          | 0.020692299 |
| wavelet-HHH | glcm  | Contrast                             | 12.6837438  |
| wavelet-HHH | glcm  | DifferenceEntropy                    | 2.919461545 |

|             |            |                                  |              |
|-------------|------------|----------------------------------|--------------|
| wavelet-HHH | glcm       | InverseVariance                  | 0.317324596  |
| wavelet-HHH | glcm       | DifferenceVariance               | 5.259742194  |
| wavelet-HHH | glcm       | Idn                              | 0.874208662  |
| wavelet-HHH | glcm       | Idm                              | 0.325401564  |
| wavelet-HHH | glcm       | Correlation                      | -0.029949295 |
| wavelet-HHH | glcm       | Autocorrelation                  | 71.88837259  |
| wavelet-HHH | glcm       | SumEntropy                       | 3.669340175  |
| wavelet-HHH | glcm       | SumSquares                       | 6.130003027  |
| wavelet-HHH | glcm       | ClusterProminence                | 536.2014518  |
| wavelet-HHH | glcm       | Imc2                             | 0.777383303  |
| wavelet-HHH | glcm       | Imc1                             | -0.145628815 |
| wavelet-HHH | glcm       | DifferenceAverage                | 2.692518785  |
| wavelet-HHH | glcm       | Id                               | 0.405938018  |
| wavelet-HHH | glcm       | ClusterTendency                  | 11.83626831  |
| wavelet-HHH | firstorder | InterquartileRange               | 76.61067176  |
| wavelet-HHH | firstorder | Skewness                         | 0.149400834  |
| wavelet-HHH | firstorder | Uniformity                       | 0.1172       |
| wavelet-HHH | firstorder | Median                           | 0.242201395  |
| wavelet-HHH | firstorder | Energy                           | 841184.0914  |
| wavelet-HHH | firstorder | RobustMeanAbsoluteDeviation      | 33.14817319  |
| wavelet-HHH | firstorder | MeanAbsoluteDeviation            | 49.65349461  |
| wavelet-HHH | firstorder | TotalEnergy                      | 22711970.47  |
| wavelet-HHH | firstorder | Maximum                          | 212.6055164  |
| wavelet-HHH | firstorder | RootMeanSquared                  | 64.85306822  |
| wavelet-HHH | firstorder | 90Percentile                     | 79.50358633  |
| wavelet-HHH | firstorder | Minimum                          | -177.0752646 |
| wavelet-HHH | firstorder | Entropy                          | 3.341428467  |
| wavelet-HHH | firstorder | Range                            | 389.6807811  |
| wavelet-HHH | firstorder | Variance                         | 4205.918099  |
| wavelet-HHH | firstorder | 10Percentile                     | -85.47677164 |
| wavelet-HHH | firstorder | Kurtosis                         | 3.432389587  |
| wavelet-HHH | firstorder | Mean                             | 0.048561176  |
| wavelet-HHH | glrlm      | ShortRunLowGrayLevelEmphasis     | 0.024236252  |
| wavelet-HHH | glrlm      | GrayLevelVariance                | 7.220567591  |
| wavelet-HHH | glrlm      | LowGrayLevelRunEmphasis          | 0.025330072  |
| wavelet-HHH | glrlm      | GrayLevelNonUniformityNormalized | 0.1119201    |
| wavelet-HHH | glrlm      | RunVariance                      | 0.118021098  |
| wavelet-HHH | glrlm      | GrayLevelNonUniformity           | 20.29656233  |
| wavelet-HHH | glrlm      | LongRunEmphasis                  | 1.338219467  |
| wavelet-HHH | glrlm      | ShortRunHighGrayLevelEmphasis    | 74.10269172  |
| wavelet-HHH | glrlm      | RunLengthNonUniformity           | 151.0940212  |
| wavelet-HHH | glrlm      | ShortRunEmphasis                 | 0.929133234  |
| wavelet-HHH | glrlm      | LongRunHighGrayLevelEmphasis     | 104.6694717  |
| wavelet-HHH | glrlm      | RunPercentage                    | 0.906538462  |
| wavelet-HHH | glrlm      | LongRunLowGrayLevelEmphasis      | 0.030547336  |
| wavelet-HHH | glrlm      | RunEntropy                       | 3.794653776  |
| wavelet-HHH | glrlm      | HighGrayLevelRunEmphasis         | 79.44270356  |
| wavelet-HHH | glrlm      | RunLengthNonUniformityNormalized | 0.831921199  |
| wavelet-HHH | glszm      | GrayLevelVariance                | 13.59375     |
| wavelet-HHH | glszm      | ZoneVariance                     | 33.703125    |
| wavelet-HHH | glszm      | GrayLevelNonUniformityNormalized | 0.089355469  |
| wavelet-HHH | glszm      | SizeZoneNonUniformityNormalized  | 0.469726563  |

|             |       |                                      |              |
|-------------|-------|--------------------------------------|--------------|
| wavelet-HHH | glszm | SizeZoneNonUniformity                | 30.0625      |
| wavelet-HHH | glszm | GrayLevelNonUniformity               | 5.71875      |
| wavelet-HHH | glszm | LargeAreaEmphasis                    | 43.46875     |
| wavelet-HHH | glszm | SmallAreaHighGrayLevelEmphasis       | 56.240167    |
| wavelet-HHH | glszm | ZonePercentage                       | 0.32         |
| wavelet-HHH | glszm | LargeAreaLowGrayLevelEmphasis        | 0.700966964  |
| wavelet-HHH | glszm | LargeAreaHighGrayLevelEmphasis       | 3109.375     |
| wavelet-HHH | glszm | HighGrayLevelZoneEmphasis            | 81.65625     |
| wavelet-HHH | glszm | SmallAreaEmphasis                    | 0.707570164  |
| wavelet-HHH | glszm | LowGrayLevelZoneEmphasis             | 0.042706164  |
| wavelet-HHH | glszm | ZoneEntropy                          | 4.590924852  |
| wavelet-HHH | glszm | SmallAreaLowGrayLevelEmphasis        | 0.037926825  |
| wavelet-HHH | ngtdm | Coarseness                           | 0.029940522  |
| wavelet-HHH | ngtdm | Complexity                           | 186.509941   |
| wavelet-HHH | ngtdm | Strength                             | 1.956300738  |
| wavelet-HHH | ngtdm | Contrast                             | 0.136875488  |
| wavelet-HHH | ngtdm | Busyness                             | 0.26427877   |
| wavelet-HLL | gldm  | GrayLevelVariance                    | 101.478975   |
| wavelet-HLL | gldm  | HighGrayLevelEmphasis                | 601.225      |
| wavelet-HLL | gldm  | DependenceEntropy                    | 6.128625755  |
| wavelet-HLL | gldm  | DependenceNonUniformity              | 51.95        |
| wavelet-HLL | gldm  | GrayLevelNonUniformity               | 11.18        |
| wavelet-HLL | gldm  | SmallDependenceEmphasis              | 0.451501107  |
| wavelet-HLL | gldm  | SmallDependenceHighGrayLevelEmphasis | 323.8787838  |
| wavelet-HLL | gldm  | DependenceNonUniformityNormalized    | 0.25975      |
| wavelet-HLL | gldm  | LargeDependenceEmphasis              | 8.87         |
| wavelet-HLL | gldm  | LargeDependenceLowGrayLevelEmphasis  | 0.033175765  |
| wavelet-HLL | gldm  | DependenceVariance                   | 2.9164       |
| wavelet-HLL | gldm  | LargeDependenceHighGrayLevelEmphasis | 4280.785     |
| wavelet-HLL | gldm  | SmallDependenceLowGrayLevelEmphasis  | 0.006703901  |
| wavelet-HLL | gldm  | LowGrayLevelEmphasis                 | 0.009187408  |
| wavelet-HLL | glcm  | JointAverage                         | 21.33833569  |
| wavelet-HLL | glcm  | SumAverage                           | 42.67667138  |
| wavelet-HLL | glcm  | JointEntropy                         | 7.1355026    |
| wavelet-HLL | glcm  | ClusterShade                         | 5009.513392  |
| wavelet-HLL | glcm  | MaximumProbability                   | 0.028314421  |
| wavelet-HLL | glcm  | ldmn                                 | 0.969199248  |
| wavelet-HLL | glcm  | JointEnergy                          | 0.00891255   |
| wavelet-HLL | glcm  | Contrast                             | 129.2868745  |
| wavelet-HLL | glcm  | DifferenceEntropy                    | 3.911428793  |
| wavelet-HLL | glcm  | InverseVariance                      | 0.212525534  |
| wavelet-HLL | glcm  | DifferenceVariance                   | 77.19571333  |
| wavelet-HLL | glcm  | ldn                                  | 0.905517637  |
| wavelet-HLL | glcm  | ldm                                  | 0.207792934  |
| wavelet-HLL | glcm  | Correlation                          | 0.131728304  |
| wavelet-HLL | glcm  | Autocorrelation                      | 470.5758548  |
| wavelet-HLL | glcm  | SumEntropy                           | 4.900560722  |
| wavelet-HLL | glcm  | SumSquares                           | 79.59139071  |
| wavelet-HLL | glcm  | ClusterProminence                    | 316189.8469  |
| wavelet-HLL | glcm  | lmc2                                 | 0.984929377  |
| wavelet-HLL | glcm  | lmc1                                 | -0.398896513 |
| wavelet-HLL | glcm  | DifferenceAverage                    | 6.913913621  |



|             |            |                                  |              |
|-------------|------------|----------------------------------|--------------|
| wavelet-HLL | glcm       | Id                               | 0.290071061  |
| wavelet-HLL | glcm       | ClusterTendency                  | 189.0786883  |
| wavelet-HLL | firstorder | InterquartileRange               | 161.8906715  |
| wavelet-HLL | firstorder | Skewness                         | 1.636192535  |
| wavelet-HLL | firstorder | Uniformity                       | 0.0559       |
| wavelet-HLL | firstorder | Median                           | -22.73848405 |
| wavelet-HLL | firstorder | Energy                           | 12730548.66  |
| wavelet-HLL | firstorder | RobustMeanAbsoluteDeviation      | 79.35608697  |
| wavelet-HLL | firstorder | MeanAbsoluteDeviation            | 165.943768   |
| wavelet-HLL | firstorder | TotalEnergy                      | 343724813.8  |
| wavelet-HLL | firstorder | Maximum                          | 884.617356   |
| wavelet-HLL | firstorder | RootMeanSquared                  | 252.294953   |
| wavelet-HLL | firstorder | 90Percentile                     | 357.8440513  |
| wavelet-HLL | firstorder | Minimum                          | -509.4554603 |
| wavelet-HLL | firstorder | Entropy                          | 4.655538412  |
| wavelet-HLL | firstorder | Range                            | 1394.072816  |
| wavelet-HLL | firstorder | Variance                         | 63227.92903  |
| wavelet-HLL | firstorder | 10Percentile                     | -196.4098107 |
| wavelet-HLL | firstorder | Kurtosis                         | 6.164506335  |
| wavelet-HLL | firstorder | Mean                             | 20.61102299  |
| wavelet-HLL | glrlm      | ShortRunLowGrayLevelEmphasis     | 0.009364398  |
| wavelet-HLL | glrlm      | GrayLevelVariance                | 104.5139088  |
| wavelet-HLL | glrlm      | LowGrayLevelRunEmphasis          | 0.009520191  |
| wavelet-HLL | glrlm      | GrayLevelNonUniformityNormalized | 0.053453177  |
| wavelet-HLL | glrlm      | RunVariance                      | 0.061792184  |
| wavelet-HLL | glrlm      | GrayLevelNonUniformity           | 10.10010594  |
| wavelet-HLL | glrlm      | LongRunEmphasis                  | 1.185383025  |
| wavelet-HLL | glrlm      | ShortRunHighGrayLevelEmphasis    | 587.2459162  |
| wavelet-HLL | glrlm      | RunLengthNonUniformity           | 169.328274   |
| wavelet-HLL | glrlm      | ShortRunEmphasis                 | 0.957426929  |
| wavelet-HLL | glrlm      | LongRunHighGrayLevelEmphasis     | 697.9513677  |
| wavelet-HLL | glrlm      | RunPercentage                    | 0.944615385  |
| wavelet-HLL | glrlm      | LongRunLowGrayLevelEmphasis      | 0.010178415  |
| wavelet-HLL | glrlm      | RunEntropy                       | 4.919194006  |
| wavelet-HLL | glrlm      | HighGrayLevelRunEmphasis         | 608.0514087  |
| wavelet-HLL | glrlm      | RunLengthNonUniformityNormalized | 0.894940885  |
| wavelet-HLL | glszm      | GrayLevelVariance                | 137.4522072  |
| wavelet-HLL | glszm      | ZoneVariance                     | 5.006051976  |
| wavelet-HLL | glszm      | GrayLevelNonUniformityNormalized | 0.038625845  |
| wavelet-HLL | glszm      | SizeZoneNonUniformityNormalized  | 0.472054112  |
| wavelet-HLL | glszm      | SizeZoneNonUniformity            | 50.03773585  |
| wavelet-HLL | glszm      | GrayLevelNonUniformity           | 4.094339623  |
| wavelet-HLL | glszm      | LargeAreaEmphasis                | 8.566037736  |
| wavelet-HLL | glszm      | SmallAreaHighGrayLevelEmphasis   | 543.1241022  |
| wavelet-HLL | glszm      | ZonePercentage                   | 0.53         |
| wavelet-HLL | glszm      | LargeAreaLowGrayLevelEmphasis    | 0.036818942  |
| wavelet-HLL | glszm      | LargeAreaHighGrayLevelEmphasis   | 4118.424528  |
| wavelet-HLL | glszm      | HighGrayLevelZoneEmphasis        | 699.5        |
| wavelet-HLL | glszm      | SmallAreaEmphasis                | 0.712349543  |
| wavelet-HLL | glszm      | LowGrayLevelZoneEmphasis         | 0.013689879  |
| wavelet-HLL | glszm      | ZoneEntropy                      | 5.776335347  |
| wavelet-HLL | glszm      | SmallAreaLowGrayLevelEmphasis    | 0.011947424  |

|             |            |                                      |              |
|-------------|------------|--------------------------------------|--------------|
| wavelet-HLL | ngtdm      | Coarseness                           | 0.03222147   |
| wavelet-HLL | ngtdm      | Complexity                           | 4989.19279   |
| wavelet-HLL | ngtdm      | Strength                             | 31.88609341  |
| wavelet-HLL | ngtdm      | Contrast                             | 0.586025568  |
| wavelet-HLL | ngtdm      | Busyness                             | 0.031374998  |
| wavelet-LHL | gldm       | GrayLevelVariance                    | 54.94        |
| wavelet-LHL | gldm       | HighGrayLevelEmphasis                | 337.18       |
| wavelet-LHL | gldm       | DependenceEntropy                    | 6.021900865  |
| wavelet-LHL | gldm       | DependenceNonUniformity              | 52.86        |
| wavelet-LHL | gldm       | GrayLevelNonUniformity               | 11.98        |
| wavelet-LHL | gldm       | SmallDependenceEmphasis              | 0.497136763  |
| wavelet-LHL | gldm       | SmallDependenceHighGrayLevelEmphasis | 212.8232391  |
| wavelet-LHL | gldm       | DependenceNonUniformityNormalized    | 0.2643       |
| wavelet-LHL | gldm       | LargeDependenceEmphasis              | 7.31         |
| wavelet-LHL | gldm       | LargeDependenceLowGrayLevelEmphasis  | 0.046519018  |
| wavelet-LHL | gldm       | DependenceVariance                   | 2.1116       |
| wavelet-LHL | gldm       | LargeDependenceHighGrayLevelEmphasis | 1864         |
| wavelet-LHL | gldm       | SmallDependenceLowGrayLevelEmphasis  | 0.01424963   |
| wavelet-LHL | gldm       | LowGrayLevelEmphasis                 | 0.01686473   |
| wavelet-LHL | glcm       | JointAverage                         | 16.25026272  |
| wavelet-LHL | glcm       | SumAverage                           | 32.50052545  |
| wavelet-LHL | glcm       | JointEntropy                         | 7.153852608  |
| wavelet-LHL | glcm       | ClusterShade                         | 1752.272531  |
| wavelet-LHL | glcm       | MaximumProbability                   | 0.029557691  |
| wavelet-LHL | glcm       | ldmn                                 | 0.965403386  |
| wavelet-LHL | glcm       | JointEnergy                          | 0.008956148  |
| wavelet-LHL | glcm       | Contrast                             | 89.61936736  |
| wavelet-LHL | glcm       | DifferenceEntropy                    | 3.877633919  |
| wavelet-LHL | glcm       | InverseVariance                      | 0.211458841  |
| wavelet-LHL | glcm       | DifferenceVariance                   | 48.62530529  |
| wavelet-LHL | glcm       | ldn                                  | 0.892530347  |
| wavelet-LHL | glcm       | ldm                                  | 0.198782427  |
| wavelet-LHL | glcm       | Correlation                          | 0.063183877  |
| wavelet-LHL | glcm       | Autocorrelation                      | 269.5703611  |
| wavelet-LHL | glcm       | SumEntropy                           | 4.807843267  |
| wavelet-LHL | glcm       | SumSquares                           | 50.21368314  |
| wavelet-LHL | glcm       | ClusterProminence                    | 93810.77387  |
| wavelet-LHL | glcm       | lmc2                                 | 0.981773659  |
| wavelet-LHL | glcm       | lmc1                                 | -0.379090067 |
| wavelet-LHL | glcm       | DifferenceAverage                    | 6.194181898  |
| wavelet-LHL | glcm       | ld                                   | 0.284216375  |
| wavelet-LHL | glcm       | ClusterTendency                      | 111.2353652  |
| wavelet-LHL | firstorder | InterquartileRange                   | 153.9986686  |
| wavelet-LHL | firstorder | Skewness                             | 1.352921831  |
| wavelet-LHL | firstorder | Uniformity                           | 0.0599       |
| wavelet-LHL | firstorder | Median                               | -22.16645646 |
| wavelet-LHL | firstorder | Energy                               | 6882286.082  |
| wavelet-LHL | firstorder | RobustMeanAbsoluteDeviation          | 69.58007114  |
| wavelet-LHL | firstorder | MeanAbsoluteDeviation                | 128.9848372  |
| wavelet-LHL | firstorder | TotalEnergy                          | 185821724.2  |
| wavelet-LHL | firstorder | Maximum                              | 721.8169536  |
| wavelet-LHL | firstorder | RootMeanSquared                      | 185.5031817  |

|             |            |                                      |              |
|-------------|------------|--------------------------------------|--------------|
| wavelet-LHL | firstorder | 90Percentile                         | 253.0570289  |
| wavelet-LHL | firstorder | Minimum                              | -378.1285256 |
| wavelet-LHL | firstorder | Entropy                              | 4.555608242  |
| wavelet-LHL | firstorder | Range                                | 1099.945479  |
| wavelet-LHL | firstorder | Variance                             | 34355.86915  |
| wavelet-LHL | firstorder | 10Percentile                         | -177.3160858 |
| wavelet-LHL | firstorder | Kurtosis                             | 5.727261625  |
| wavelet-LHL | firstorder | Mean                                 | 7.453942317  |
| wavelet-LHL | glrlm      | ShortRunLowGrayLevelEmphasis         | 0.017321557  |
| wavelet-LHL | glrlm      | GrayLevelVariance                    | 57.22134919  |
| wavelet-LHL | glrlm      | LowGrayLevelRunEmphasis              | 0.017495367  |
| wavelet-LHL | glrlm      | GrayLevelNonUniformityNormalized     | 0.057675223  |
| wavelet-LHL | glrlm      | RunVariance                          | 0.064989287  |
| wavelet-LHL | glrlm      | GrayLevelNonUniformity               | 10.9716266   |
| wavelet-LHL | glrlm      | LongRunEmphasis                      | 1.173691381  |
| wavelet-LHL | glrlm      | ShortRunHighGrayLevelEmphasis        | 333.4660358  |
| wavelet-LHL | glrlm      | RunLengthNonUniformity               | 173.6103806  |
| wavelet-LHL | glrlm      | ShortRunEmphasis                     | 0.964563456  |
| wavelet-LHL | glrlm      | LongRunHighGrayLevelEmphasis         | 384.1826798  |
| wavelet-LHL | glrlm      | RunPercentage                        | 0.950769231  |
| wavelet-LHL | glrlm      | LongRunLowGrayLevelEmphasis          | 0.018337033  |
| wavelet-LHL | glrlm      | RunEntropy                           | 4.798978746  |
| wavelet-LHL | glrlm      | HighGrayLevelRunEmphasis             | 342.1093602  |
| wavelet-LHL | glrlm      | RunLengthNonUniformityNormalized     | 0.912013976  |
| wavelet-LHL | glszm      | GrayLevelVariance                    | 85.83027742  |
| wavelet-LHL | glszm      | ZoneVariance                         | 5.096938776  |
| wavelet-LHL | glszm      | GrayLevelNonUniformityNormalized     | 0.038265306  |
| wavelet-LHL | glszm      | SizeZoneNonUniformityNormalized      | 0.559789541  |
| wavelet-LHL | glszm      | SizeZoneNonUniformity                | 62.69642857  |
| wavelet-LHL | glszm      | GrayLevelNonUniformity               | 4.285714286  |
| wavelet-LHL | glszm      | LargeAreaEmphasis                    | 8.285714286  |
| wavelet-LHL | glszm      | SmallAreaHighGrayLevelEmphasis       | 351.9857334  |
| wavelet-LHL | glszm      | ZonePercentage                       | 0.56         |
| wavelet-LHL | glszm      | LargeAreaLowGrayLevelEmphasis        | 0.060596825  |
| wavelet-LHL | glszm      | LargeAreaHighGrayLevelEmphasis       | 2123.125     |
| wavelet-LHL | glszm      | HighGrayLevelZoneEmphasis            | 410.1517857  |
| wavelet-LHL | glszm      | SmallAreaEmphasis                    | 0.775331147  |
| wavelet-LHL | glszm      | LowGrayLevelZoneEmphasis             | 0.02614258   |
| wavelet-LHL | glszm      | ZoneEntropy                          | 5.698971302  |
| wavelet-LHL | glszm      | SmallAreaLowGrayLevelEmphasis        | 0.024832638  |
| wavelet-LHL | ngtdm      | Coarseness                           | 0.033166563  |
| wavelet-LHL | ngtdm      | Complexity                           | 3071.375642  |
| wavelet-LHL | ngtdm      | Strength                             | 21.25522414  |
| wavelet-LHL | ngtdm      | Contrast                             | 0.308047968  |
| wavelet-LHL | ngtdm      | Busyness                             | 0.043070179  |
| wavelet-LHH | gldm       | GrayLevelVariance                    | 12.9099      |
| wavelet-LHH | gldm       | HighGrayLevelEmphasis                | 168.91       |
| wavelet-LHH | gldm       | DependenceEntropy                    | 5.738871176  |
| wavelet-LHH | gldm       | DependenceNonUniformity              | 42.44        |
| wavelet-LHH | gldm       | GrayLevelNonUniformity               | 18.1         |
| wavelet-LHH | gldm       | SmallDependenceEmphasis              | 0.424228891  |
| wavelet-LHH | gldm       | SmallDependenceHighGrayLevelEmphasis | 75.37181563  |

|             |            |                                      |              |
|-------------|------------|--------------------------------------|--------------|
| wavelet-LHH | gldm       | DependenceNonUniformityNormalized    | 0.2122       |
| wavelet-LHH | gldm       | LargeDependenceEmphasis              | 12.54        |
| wavelet-LHH | gldm       | LargeDependenceLowGrayLevelEmphasis  | 0.097842694  |
| wavelet-LHH | gldm       | DependenceVariance                   | 4.5876       |
| wavelet-LHH | gldm       | LargeDependenceHighGrayLevelEmphasis | 1992.08      |
| wavelet-LHH | gldm       | SmallDependenceLowGrayLevelEmphasis  | 0.016128187  |
| wavelet-LHH | gldm       | LowGrayLevelEmphasis                 | 0.020283413  |
| wavelet-LHH | glcm       | JointAverage                         | 12.47145812  |
| wavelet-LHH | glcm       | SumAverage                           | 24.94291624  |
| wavelet-LHH | glcm       | JointEntropy                         | 6.553325424  |
| wavelet-LHH | glcm       | ClusterShade                         | -58.68036432 |
| wavelet-LHH | glcm       | MaximumProbability                   | 0.041820422  |
| wavelet-LHH | glcm       | ldmn                                 | 0.952494759  |
| wavelet-LHH | glcm       | JointEnergy                          | 0.014540448  |
| wavelet-LHH | glcm       | Contrast                             | 22.84729086  |
| wavelet-LHH | glcm       | DifferenceEntropy                    | 3.249812775  |
| wavelet-LHH | glcm       | InverseVariance                      | 0.278800198  |
| wavelet-LHH | glcm       | DifferenceVariance                   | 9.949294217  |
| wavelet-LHH | glcm       | ldn                                  | 0.863078762  |
| wavelet-LHH | glcm       | ldm                                  | 0.270031802  |
| wavelet-LHH | glcm       | Correlation                          | -0.005145468 |
| wavelet-LHH | glcm       | Autocorrelation                      | 155.5392275  |
| wavelet-LHH | glcm       | SumEntropy                           | 4.048756031  |
| wavelet-LHH | glcm       | SumSquares                           | 11.41872452  |
| wavelet-LHH | glcm       | ClusterProminence                    | 2219.40597   |
| wavelet-LHH | glcm       | lmc2                                 | 0.895059481  |
| wavelet-LHH | glcm       | lmc1                                 | -0.221045444 |
| wavelet-LHH | glcm       | DifferenceAverage                    | 3.549515952  |
| wavelet-LHH | glcm       | ld                                   | 0.355184378  |
| wavelet-LHH | glcm       | ClusterTendency                      | 22.82760723  |
| wavelet-LHH | firstorder | InterquartileRange                   | 97.82121273  |
| wavelet-LHH | firstorder | Skewness                             | -0.505268034 |
| wavelet-LHH | firstorder | Uniformity                           | 0.0905       |
| wavelet-LHH | firstorder | Median                               | 2.413130145  |
| wavelet-LHH | firstorder | Energy                               | 1630786.151  |
| wavelet-LHH | firstorder | RobustMeanAbsoluteDeviation          | 42.28359825  |
| wavelet-LHH | firstorder | MeanAbsoluteDeviation                | 67.13328227  |
| wavelet-LHH | firstorder | TotalEnergy                          | 44031226.07  |
| wavelet-LHH | firstorder | Maximum                              | 199.4960699  |
| wavelet-LHH | firstorder | RootMeanSquared                      | 90.29911823  |
| wavelet-LHH | firstorder | 90Percentile                         | 111.9083428  |
| wavelet-LHH | firstorder | Minimum                              | -294.0401006 |
| wavelet-LHH | firstorder | Entropy                              | 3.777120882  |
| wavelet-LHH | firstorder | Range                                | 493.5361705  |
| wavelet-LHH | firstorder | Variance                             | 8153.626627  |
| wavelet-LHH | firstorder | 10Percentile                         | -109.8940484 |
| wavelet-LHH | firstorder | Kurtosis                             | 3.882044924  |
| wavelet-LHH | firstorder | Mean                                 | -0.551476165 |
| wavelet-LHH | glrlm      | ShortRunLowGrayLevelEmphasis         | 0.020940899  |
| wavelet-LHH | glrlm      | GrayLevelVariance                    | 13.6151993   |
| wavelet-LHH | glrlm      | LowGrayLevelRunEmphasis              | 0.021296437  |
| wavelet-LHH | glrlm      | GrayLevelNonUniformityNormalzied     | 0.085994396  |

|             |       |                                      |             |
|-------------|-------|--------------------------------------|-------------|
| wavelet-LHH | glrlm | RunVariance                          | 0.087046327 |
| wavelet-LHH | glrlm | GrayLevelNonUniformity               | 15.99873436 |
| wavelet-LHH | glrlm | LongRunEmphasis                      | 1.24451129  |
| wavelet-LHH | glrlm | ShortRunHighGrayLevelEmphasis        | 161.3677015 |
| wavelet-LHH | glrlm | RunLengthNonUniformity               | 162.7947671 |
| wavelet-LHH | glrlm | ShortRunEmphasis                     | 0.948613499 |
| wavelet-LHH | glrlm | LongRunHighGrayLevelEmphasis         | 208.5267087 |
| wavelet-LHH | glrlm | RunPercentage                        | 0.93        |
| wavelet-LHH | glrlm | LongRunLowGrayLevelEmphasis          | 0.022977934 |
| wavelet-LHH | glrlm | RunEntropy                           | 4.119839045 |
| wavelet-LHH | glrlm | HighGrayLevelRunEmphasis             | 169.6096101 |
| wavelet-LHH | glrlm | RunLengthNonUniformityNormalized     | 0.87469455  |
| wavelet-LHH | glszm | GrayLevelVariance                    | 21.57606648 |
| wavelet-LHH | glszm | ZoneVariance                         | 13.67313019 |
| wavelet-LHH | glszm | GrayLevelNonUniformityNormalized     | 0.068365651 |
| wavelet-LHH | glszm | SizeZoneNonUniformityNormalized      | 0.528642659 |
| wavelet-LHH | glszm | SizeZoneNonUniformity                | 50.22105263 |
| wavelet-LHH | glszm | GrayLevelNonUniformity               | 6.494736842 |
| wavelet-LHH | glszm | LargeAreaEmphasis                    | 18.10526316 |
| wavelet-LHH | glszm | SmallAreaHighGrayLevelEmphasis       | 136.1731462 |
| wavelet-LHH | glszm | ZonePercentage                       | 0.475       |
| wavelet-LHH | glszm | LargeAreaLowGrayLevelEmphasis        | 0.149859387 |
| wavelet-LHH | glszm | LargeAreaHighGrayLevelEmphasis       | 2849.368421 |
| wavelet-LHH | glszm | HighGrayLevelZoneEmphasis            | 178.2210526 |
| wavelet-LHH | glszm | SmallAreaEmphasis                    | 0.754347443 |
| wavelet-LHH | glszm | LowGrayLevelZoneEmphasis             | 0.034782192 |
| wavelet-LHH | glszm | ZoneEntropy                          | 4.961329293 |
| wavelet-LHH | glszm | SmallAreaLowGrayLevelEmphasis        | 0.032897764 |
| wavelet-LHH | ngtdm | Coarseness                           | 0.033185176 |
| wavelet-LHH | ngtdm | Complexity                           | 415.9844165 |
| wavelet-LHH | ngtdm | Strength                             | 3.635951448 |
| wavelet-LHH | ngtdm | Contrast                             | 0.187323498 |
| wavelet-LHH | ngtdm | Busyness                             | 0.114717288 |
| wavelet-LLH | gldm  | GrayLevelVariance                    | 31.966775   |
| wavelet-LLH | gldm  | HighGrayLevelEmphasis                | 316.395     |
| wavelet-LLH | gldm  | DependenceEntropy                    | 6.030448395 |
| wavelet-LLH | gldm  | DependenceNonUniformity              | 46.21       |
| wavelet-LLH | gldm  | GrayLevelNonUniformity               | 12.39       |
| wavelet-LLH | gldm  | SmallDependenceEmphasis              | 0.439843545 |
| wavelet-LLH | gldm  | SmallDependenceHighGrayLevelEmphasis | 147.033952  |
| wavelet-LLH | gldm  | DependenceNonUniformityNormalized    | 0.23105     |
| wavelet-LLH | gldm  | LargeDependenceEmphasis              | 9.55        |
| wavelet-LLH | gldm  | LargeDependenceLowGrayLevelEmphasis  | 0.045935654 |
| wavelet-LLH | gldm  | DependenceVariance                   | 2.9964      |
| wavelet-LLH | gldm  | LargeDependenceHighGrayLevelEmphasis | 2689.315    |
| wavelet-LLH | gldm  | SmallDependenceLowGrayLevelEmphasis  | 0.007499823 |
| wavelet-LLH | gldm  | LowGrayLevelEmphasis                 | 0.010100023 |
| wavelet-LLH | glcm  | JointAverage                         | 16.56324555 |
| wavelet-LLH | glcm  | SumAverage                           | 33.1264911  |
| wavelet-LLH | glcm  | JointEntropy                         | 7.02621135  |
| wavelet-LLH | glcm  | ClusterShade                         | 331.2443477 |
| wavelet-LLH | glcm  | MaximumProbability                   | 0.025290926 |

|             |            |                                  |              |
|-------------|------------|----------------------------------|--------------|
| wavelet-LLH | glcm       | Idmn                             | 0.967423335  |
| wavelet-LLH | glcm       | JointEnergy                      | 0.009484062  |
| wavelet-LLH | glcm       | Contrast                         | 50.3216874   |
| wavelet-LLH | glcm       | DifferenceEntropy                | 3.64748262   |
| wavelet-LLH | glcm       | InverseVariance                  | 0.226153115  |
| wavelet-LLH | glcm       | DifferenceVariance               | 24.41763177  |
| wavelet-LLH | glcm       | Idn                              | 0.890635597  |
| wavelet-LLH | glcm       | Idm                              | 0.225100083  |
| wavelet-LLH | glcm       | Correlation                      | 0.056482034  |
| wavelet-LLH | glcm       | Autocorrelation                  | 276.3288615  |
| wavelet-LLH | glcm       | SumEntropy                       | 4.561301213  |
| wavelet-LLH | glcm       | SumSquares                       | 27.12748545  |
| wavelet-LLH | glcm       | ClusterProminence                | 19003.00314  |
| wavelet-LLH | glcm       | Imc2                             | 0.960901124  |
| wavelet-LLH | glcm       | Imc1                             | -0.310697763 |
| wavelet-LLH | glcm       | DifferenceAverage                | 4.944202603  |
| wavelet-LLH | glcm       | Id                               | 0.311788747  |
| wavelet-LLH | glcm       | ClusterTendency                  | 58.18825439  |
| wavelet-LLH | firstorder | InterquartileRange               | 140.3770552  |
| wavelet-LLH | firstorder | Skewness                         | 0.589103645  |
| wavelet-LLH | firstorder | Uniformity                       | 0.06195      |
| wavelet-LLH | firstorder | Median                           | -19.84126041 |
| wavelet-LLH | firstorder | Energy                           | 3942696.722  |
| wavelet-LLH | firstorder | RobustMeanAbsoluteDeviation      | 64.36174131  |
| wavelet-LLH | firstorder | MeanAbsoluteDeviation            | 103.3631721  |
| wavelet-LLH | firstorder | TotalEnergy                      | 106452811.5  |
| wavelet-LLH | firstorder | Maximum                          | 452.6604914  |
| wavelet-LLH | firstorder | RootMeanSquared                  | 140.4047136  |
| wavelet-LLH | firstorder | 90Percentile                     | 169.3898188  |
| wavelet-LLH | firstorder | Minimum                          | -404.9329521 |
| wavelet-LLH | firstorder | Entropy                          | 4.328981278  |
| wavelet-LLH | firstorder | Range                            | 857.5934435  |
| wavelet-LLH | firstorder | Variance                         | 19513.95063  |
| wavelet-LLH | firstorder | 10Percentile                     | -179.0095315 |
| wavelet-LLH | firstorder | Kurtosis                         | 4.152284904  |
| wavelet-LLH | firstorder | Mean                             | -14.12561435 |
| wavelet-LLH | glrlm      | ShortRunLowGrayLevelEmphasis     | 0.010273424  |
| wavelet-LLH | glrlm      | GrayLevelVariance                | 33.16654359  |
| wavelet-LLH | glrlm      | LowGrayLevelRunEmphasis          | 0.010470717  |
| wavelet-LLH | glrlm      | GrayLevelNonUniformityNormalized | 0.059796576  |
| wavelet-LLH | glrlm      | RunVariance                      | 0.071272791  |
| wavelet-LLH | glrlm      | GrayLevelNonUniformity           | 11.24324229  |
| wavelet-LLH | glrlm      | LongRunEmphasis                  | 1.204718439  |
| wavelet-LLH | glrlm      | ShortRunHighGrayLevelEmphasis    | 305.5456085  |
| wavelet-LLH | glrlm      | RunLengthNonUniformity           | 167.3481072  |
| wavelet-LLH | glrlm      | ShortRunEmphasis                 | 0.955056887  |
| wavelet-LLH | glrlm      | LongRunHighGrayLevelEmphasis     | 376.7651687  |
| wavelet-LLH | glrlm      | RunPercentage                    | 0.94         |
| wavelet-LLH | glrlm      | LongRunLowGrayLevelEmphasis      | 0.011351541  |
| wavelet-LLH | glrlm      | RunEntropy                       | 4.611987696  |
| wavelet-LLH | glrlm      | HighGrayLevelRunEmphasis         | 318.3895515  |
| wavelet-LLH | glrlm      | RunLengthNonUniformityNormalized | 0.889314267  |

|             |       |                                      |              |
|-------------|-------|--------------------------------------|--------------|
| wavelet-LLH | glszm | GrayLevelVariance                    | 46.5699      |
| wavelet-LLH | glszm | ZoneVariance                         | 7.54         |
| wavelet-LLH | glszm | GrayLevelNonUniformityNormalized     | 0.0452       |
| wavelet-LLH | glszm | SizeZoneNonUniformityNormalized      | 0.5184       |
| wavelet-LLH | glszm | SizeZoneNonUniformity                | 51.84        |
| wavelet-LLH | glszm | GrayLevelNonUniformity               | 4.52         |
| wavelet-LLH | glszm | LargeAreaEmphasis                    | 11.54        |
| wavelet-LLH | glszm | SmallAreaHighGrayLevelEmphasis       | 250.866711   |
| wavelet-LLH | glszm | ZonePercentage                       | 0.5          |
| wavelet-LLH | glszm | LargeAreaLowGrayLevelEmphasis        | 0.057098975  |
| wavelet-LLH | glszm | LargeAreaHighGrayLevelEmphasis       | 3370.31      |
| wavelet-LLH | glszm | HighGrayLevelZoneEmphasis            | 335.23       |
| wavelet-LLH | glszm | SmallAreaEmphasis                    | 0.744917788  |
| wavelet-LLH | glszm | LowGrayLevelZoneEmphasis             | 0.015768495  |
| wavelet-LLH | glszm | ZoneEntropy                          | 5.42107688   |
| wavelet-LLH | glszm | SmallAreaLowGrayLevelEmphasis        | 0.014363391  |
| wavelet-LLH | ngtdm | Coarseness                           | 0.035441343  |
| wavelet-LLH | ngtdm | Complexity                           | 1146.235074  |
| wavelet-LLH | ngtdm | Strength                             | 8.451494728  |
| wavelet-LLH | ngtdm | Contrast                             | 0.323257509  |
| wavelet-LLH | ngtdm | Busyness                             | 0.067938733  |
| wavelet-LLL | gldm  | GrayLevelVariance                    | 120.2836     |
| wavelet-LLL | gldm  | HighGrayLevelEmphasis                | 1247.9       |
| wavelet-LLL | gldm  | DependenceEntropy                    | 6.158741193  |
| wavelet-LLL | gldm  | DependenceNonUniformity              | 68.98        |
| wavelet-LLL | gldm  | GrayLevelNonUniformity               | 7.12         |
| wavelet-LLL | gldm  | SmallDependenceEmphasis              | 0.597773136  |
| wavelet-LLL | gldm  | SmallDependenceHighGrayLevelEmphasis | 630.1203803  |
| wavelet-LLL | gldm  | DependenceNonUniformityNormalized    | 0.3449       |
| wavelet-LLL | gldm  | LargeDependenceEmphasis              | 5.9          |
| wavelet-LLL | gldm  | LargeDependenceLowGrayLevelEmphasis  | 0.011249273  |
| wavelet-LLL | gldm  | DependenceVariance                   | 1.9796       |
| wavelet-LLL | gldm  | LargeDependenceHighGrayLevelEmphasis | 10110.11     |
| wavelet-LLL | gldm  | SmallDependenceLowGrayLevelEmphasis  | 7.77E-03     |
| wavelet-LLL | gldm  | LowGrayLevelEmphasis                 | 0.008119181  |
| wavelet-LLL | glcm  | JointAverage                         | 36.41480414  |
| wavelet-LLL | glcm  | SumAverage                           | 72.82960827  |
| wavelet-LLL | glcm  | JointEntropy                         | 7.513982304  |
| wavelet-LLL | glcm  | ClusterShade                         | -4919.624176 |
| wavelet-LLL | glcm  | MaximumProbability                   | 0.02085529   |
| wavelet-LLL | glcm  | Idmn                                 | 0.958271284  |
| wavelet-LLL | glcm  | JointEnergy                          | 0.006408497  |
| wavelet-LLL | glcm  | Contrast                             | 114.972819   |
| wavelet-LLL | glcm  | DifferenceEntropy                    | 4.205443443  |
| wavelet-LLL | glcm  | InverseVariance                      | 0.164273357  |
| wavelet-LLL | glcm  | DifferenceVariance                   | 53.15623112  |
| wavelet-LLL | glcm  | Idn                                  | 0.873404081  |
| wavelet-LLL | glcm  | Idm                                  | 0.157185236  |
| wavelet-LLL | glcm  | Correlation                          | 0.393025919  |
| wavelet-LLL | glcm  | Autocorrelation                      | 1365.327534  |
| wavelet-LLL | glcm  | SumEntropy                           | 5.299279848  |
| wavelet-LLL | glcm  | SumSquares                           | 96.33380525  |

|             |            |                                  |              |
|-------------|------------|----------------------------------|--------------|
| wavelet-LLL | glcm       | ClusterProminence                | 278187.2621  |
| wavelet-LLL | glcm       | Imc2                             | 0.991484747  |
| wavelet-LLL | glcm       | Imc1                             | -0.429095878 |
| wavelet-LLL | glcm       | DifferenceAverage                | 7.790150041  |
| wavelet-LLL | glcm       | Id                               | 0.239740894  |
| wavelet-LLL | glcm       | ClusterTendency                  | 270.362402   |
| wavelet-LLL | firstorder | InterquartileRange               | 390.0764918  |
| wavelet-LLL | firstorder | Skewness                         | -0.918387801 |
| wavelet-LLL | firstorder | Uniformity                       | 0.0356       |
| wavelet-LLL | firstorder | Median                           | -119.9418178 |
| wavelet-LLL | firstorder | Energy                           | 21052787.82  |
| wavelet-LLL | firstorder | RobustMeanAbsoluteDeviation      | 161.3566946  |
| wavelet-LLL | firstorder | MeanAbsoluteDeviation            | 221.3441828  |
| wavelet-LLL | firstorder | TotalEnergy                      | 568425271.1  |
| wavelet-LLL | firstorder | Maximum                          | 182.5843345  |
| wavelet-LLL | firstorder | RootMeanSquared                  | 324.4440462  |
| wavelet-LLL | firstorder | 90Percentile                     | 112.0055651  |
| wavelet-LLL | firstorder | Minimum                          | -986.0711411 |
| wavelet-LLL | firstorder | Entropy                          | 5.043574326  |
| wavelet-LLL | firstorder | Range                            | 1168.655476  |
| wavelet-LLL | firstorder | Variance                         | 75088.57084  |
| wavelet-LLL | firstorder | 10Percentile                     | -589.4117215 |
| wavelet-LLL | firstorder | Kurtosis                         | 3.181399187  |
| wavelet-LLL | firstorder | Mean                             | -173.7105876 |
| wavelet-LLL | glrlm      | ShortRunLowGrayLevelEmphasis     | 0.008390039  |
| wavelet-LLL | glrlm      | GrayLevelVariance                | 120.9679874  |
| wavelet-LLL | glrlm      | LowGrayLevelRunEmphasis          | 0.008410464  |
| wavelet-LLL | glrlm      | GrayLevelNonUniformityNormalized | 0.034637578  |
| wavelet-LLL | glrlm      | RunVariance                      | 0.04166632   |
| wavelet-LLL | glrlm      | GrayLevelNonUniformity           | 6.667158925  |
| wavelet-LLL | glrlm      | LongRunEmphasis                  | 1.12209817   |
| wavelet-LLL | glrlm      | ShortRunHighGrayLevelEmphasis    | 1181.349735  |
| wavelet-LLL | glrlm      | RunLengthNonUniformity           | 178.7140054  |
| wavelet-LLL | glrlm      | ShortRunEmphasis                 | 0.971727176  |
| wavelet-LLL | glrlm      | LongRunHighGrayLevelEmphasis     | 1439.232021  |
| wavelet-LLL | glrlm      | RunPercentage                    | 0.962307692  |
| wavelet-LLL | glrlm      | LongRunLowGrayLevelEmphasis      | 0.008497397  |
| wavelet-LLL | glrlm      | RunEntropy                       | 5.209269091  |
| wavelet-LLL | glrlm      | HighGrayLevelRunEmphasis         | 1229.614203  |
| wavelet-LLL | glrlm      | RunLengthNonUniformityNormalized | 0.928287137  |
| wavelet-LLL | glszm      | GrayLevelVariance                | 127.538605   |
| wavelet-LLL | glszm      | ZoneVariance                     | 2.661499913  |
| wavelet-LLL | glszm      | GrayLevelNonUniformityNormalized | 0.030476079  |
| wavelet-LLL | glszm      | SizeZoneNonUniformityNormalized  | 0.648039159  |
| wavelet-LLL | glszm      | SizeZoneNonUniformity            | 84.89312977  |
| wavelet-LLL | glszm      | GrayLevelNonUniformity           | 3.992366412  |
| wavelet-LLL | glszm      | LargeAreaEmphasis                | 4.992366412  |
| wavelet-LLL | glszm      | SmallAreaHighGrayLevelEmphasis   | 846.7716094  |
| wavelet-LLL | glszm      | ZonePercentage                   | 0.655        |
| wavelet-LLL | glszm      | LargeAreaLowGrayLevelEmphasis    | 0.014549008  |
| wavelet-LLL | glszm      | LargeAreaHighGrayLevelEmphasis   | 8130.931298  |
| wavelet-LLL | glszm      | HighGrayLevelZoneEmphasis        | 1063.618321  |



|             |            |                                      |              |
|-------------|------------|--------------------------------------|--------------|
| wavelet-LLL | glszm      | SmallAreaEmphasis                    | 0.830266055  |
| wavelet-LLL | glszm      | LowGrayLevelZoneEmphasis             | 0.01197289   |
| wavelet-LLL | glszm      | ZoneEntropy                          | 5.768044235  |
| wavelet-LLL | glszm      | SmallAreaLowGrayLevelEmphasis        | 0.011783204  |
| wavelet-LLL | ngtdm      | Coarseness                           | 0.030620793  |
| wavelet-LLL | ngtdm      | Complexity                           | 4186.668253  |
| wavelet-LLL | ngtdm      | Strength                             | 24.87822864  |
| wavelet-LLL | ngtdm      | Contrast                             | 0.808508843  |
| wavelet-LLL | ngtdm      | Busyness                             | 0.022184026  |
| wavelet-HHL | gldm       | GrayLevelVariance                    | 12.53        |
| wavelet-HHL | gldm       | HighGrayLevelEmphasis                | 122.78       |
| wavelet-HHL | gldm       | DependenceEntropy                    | 5.73232013   |
| wavelet-HHL | gldm       | DependenceNonUniformity              | 43.97        |
| wavelet-HHL | gldm       | GrayLevelNonUniformity               | 17.81        |
| wavelet-HHL | gldm       | SmallDependenceEmphasis              | 0.342665868  |
| wavelet-HHL | gldm       | SmallDependenceHighGrayLevelEmphasis | 46.90463908  |
| wavelet-HHL | gldm       | DependenceNonUniformityNormalized    | 0.21985      |
| wavelet-HHL | gldm       | LargeDependenceEmphasis              | 12.51        |
| wavelet-HHL | gldm       | LargeDependenceLowGrayLevelEmphasis  | 0.177675532  |
| wavelet-HHL | gldm       | DependenceVariance                   | 4.1          |
| wavelet-HHL | gldm       | LargeDependenceHighGrayLevelEmphasis | 1322.91      |
| wavelet-HHL | gldm       | SmallDependenceLowGrayLevelEmphasis  | 0.009428984  |
| wavelet-HHL | gldm       | LowGrayLevelEmphasis                 | 0.0241354    |
| wavelet-HHL | glcm       | JointAverage                         | 10.5375624   |
| wavelet-HHL | glcm       | SumAverage                           | 21.0751248   |
| wavelet-HHL | glcm       | JointEntropy                         | 6.606170456  |
| wavelet-HHL | glcm       | ClusterShade                         | 3.478528791  |
| wavelet-HHL | glcm       | MaximumProbability                   | 0.04311096   |
| wavelet-HHL | glcm       | ldmn                                 | 0.95303887   |
| wavelet-HHL | glcm       | JointEnergy                          | 0.013925538  |
| wavelet-HHL | glcm       | Contrast                             | 24.51572818  |
| wavelet-HHL | glcm       | DifferenceEntropy                    | 3.310039247  |
| wavelet-HHL | glcm       | InverseVariance                      | 0.264952718  |
| wavelet-HHL | glcm       | DifferenceVariance                   | 10.24926721  |
| wavelet-HHL | glcm       | ldn                                  | 0.862826766  |
| wavelet-HHL | glcm       | ldm                                  | 0.265748628  |
| wavelet-HHL | glcm       | Correlation                          | -0.042025483 |
| wavelet-HHL | glcm       | Autocorrelation                      | 110.5896127  |
| wavelet-HHL | glcm       | SumEntropy                           | 4.075823701  |
| wavelet-HHL | glcm       | SumSquares                           | 11.79599634  |
| wavelet-HHL | glcm       | ClusterProminence                    | 2027.852195  |
| wavelet-HHL | glcm       | lmc2                                 | 0.907078821  |
| wavelet-HHL | glcm       | lmc1                                 | -0.233269298 |
| wavelet-HHL | glcm       | DifferenceAverage                    | 3.720173336  |
| wavelet-HHL | glcm       | ld                                   | 0.350173306  |
| wavelet-HHL | glcm       | ClusterTendency                      | 22.66825719  |
| wavelet-HHL | firstorder | InterquartileRange                   | 100.3665326  |
| wavelet-HHL | firstorder | Skewness                             | 0.071882067  |
| wavelet-HHL | firstorder | Uniformity                           | 0.08905      |
| wavelet-HHL | firstorder | Median                               | -3.883139685 |
| wavelet-HHL | firstorder | Energy                               | 1551160.451  |
| wavelet-HHL | firstorder | RobustMeanAbsoluteDeviation          | 44.57627128  |

|             |            |                                  |              |
|-------------|------------|----------------------------------|--------------|
| wavelet-HHL | firstorder | MeanAbsoluteDeviation            | 67.31930748  |
| wavelet-HHL | firstorder | TotalEnergy                      | 41881332.18  |
| wavelet-HHL | firstorder | Maximum                          | 255.427621   |
| wavelet-HHL | firstorder | RootMeanSquared                  | 88.06703274  |
| wavelet-HHL | firstorder | 90Percentile                     | 113.9010785  |
| wavelet-HHL | firstorder | Minimum                          | -242.1735724 |
| wavelet-HHL | firstorder | Entropy                          | 3.791570658  |
| wavelet-HHL | firstorder | Range                            | 497.6011934  |
| wavelet-HHL | firstorder | Variance                         | 7755.770957  |
| wavelet-HHL | firstorder | 10Percentile                     | -111.0444113 |
| wavelet-HHL | firstorder | Kurtosis                         | 3.210286356  |
| wavelet-HHL | firstorder | Mean                             | 0.176915801  |
| wavelet-HHL | gllm       | ShortRunLowGrayLevelEmphasis     | 0.023885877  |
| wavelet-HHL | gllm       | GrayLevelVariance                | 13.14428263  |
| wavelet-HHL | gllm       | LowGrayLevelRunEmphasis          | 0.024772497  |
| wavelet-HHL | gllm       | GrayLevelNonUniformityNormalized | 0.085039382  |
| wavelet-HHL | gllm       | RunVariance                      | 0.09280953   |
| wavelet-HHL | gllm       | GrayLevelNonUniformity           | 15.76689258  |
| wavelet-HHL | gllm       | LongRunEmphasis                  | 1.258476542  |
| wavelet-HHL | gllm       | ShortRunHighGrayLevelEmphasis    | 118.1237514  |
| wavelet-HHL | gllm       | RunLengthNonUniformity           | 161.1562949  |
| wavelet-HHL | gllm       | ShortRunEmphasis                 | 0.946001607  |
| wavelet-HHL | gllm       | LongRunHighGrayLevelEmphasis     | 151.5170978  |
| wavelet-HHL | gllm       | RunPercentage                    | 0.926923077  |
| wavelet-HHL | gllm       | LongRunLowGrayLevelEmphasis      | 0.028881488  |
| wavelet-HHL | gllm       | RunEntropy                       | 4.14539356   |
| wavelet-HHL | gllm       | HighGrayLevelRunEmphasis         | 123.9915394  |
| wavelet-HHL | gllm       | RunLengthNonUniformityNormalized | 0.868625877  |
| wavelet-HHL | glszm      | GrayLevelVariance                | 20.57279721  |
| wavelet-HHL | glszm      | ZoneVariance                     | 13.27797939  |
| wavelet-HHL | glszm      | GrayLevelNonUniformityNormalized | 0.065466686  |
| wavelet-HHL | glszm      | SizeZoneNonUniformityNormalized  | 0.372623022  |
| wavelet-HHL | glszm      | SizeZoneNonUniformity            | 30.92771084  |
| wavelet-HHL | glszm      | GrayLevelNonUniformity           | 5.43373494   |
| wavelet-HHL | glszm      | LargeAreaEmphasis                | 19.08433735  |
| wavelet-HHL | glszm      | SmallAreaHighGrayLevelEmphasis   | 88.4636345   |
| wavelet-HHL | glszm      | ZonePercentage                   | 0.415        |
| wavelet-HHL | glszm      | LargeAreaLowGrayLevelEmphasis    | 0.258802849  |
| wavelet-HHL | glszm      | LargeAreaHighGrayLevelEmphasis   | 2007.759036  |
| wavelet-HHL | glszm      | HighGrayLevelZoneEmphasis        | 138.6746988  |
| wavelet-HHL | glszm      | SmallAreaEmphasis                | 0.62052512   |
| wavelet-HHL | glszm      | LowGrayLevelZoneEmphasis         | 0.030372867  |
| wavelet-HHL | glszm      | ZoneEntropy                      | 5.330111046  |
| wavelet-HHL | glszm      | SmallAreaLowGrayLevelEmphasis    | 0.017405575  |
| wavelet-HHL | ngtdm      | Coarseness                       | 0.030827684  |
| wavelet-HHL | ngtdm      | Complexity                       | 474.7570832  |
| wavelet-HHL | ngtdm      | Strength                         | 3.590615205  |
| wavelet-HHL | ngtdm      | Contrast                         | 0.172551693  |
| wavelet-HHL | ngtdm      | Busyness                         | 0.143329693  |
| wavelet-HHL | gldm       | GrayLevelVariance                | 10.209775    |
| wavelet-HHL | gldm       | HighGrayLevelEmphasis            | 148.625      |
| wavelet-HHL | gldm       | DependenceEntropy                | 5.628385569  |

|             |            |                                      |              |
|-------------|------------|--------------------------------------|--------------|
| wavelet-HLH | gldm       | DependenceNonUniformity              | 34.44        |
| wavelet-HLH | gldm       | GrayLevelNonUniformity               | 21.29        |
| wavelet-HLH | gldm       | SmallDependenceEmphasis              | 0.358505254  |
| wavelet-HLH | gldm       | SmallDependenceHighGrayLevelEmphasis | 55.68258679  |
| wavelet-HLH | gldm       | DependenceNonUniformityNormalized    | 0.1722       |
| wavelet-HLH | gldm       | LargeDependenceEmphasis              | 15.15        |
| wavelet-HLH | gldm       | LargeDependenceLowGrayLevelEmphasis  | 0.1223806    |
| wavelet-HLH | gldm       | DependenceVariance                   | 4.8459       |
| wavelet-HLH | gldm       | LargeDependenceHighGrayLevelEmphasis | 2128.395     |
| wavelet-HLH | gldm       | SmallDependenceLowGrayLevelEmphasis  | 0.01053419   |
| wavelet-HLH | gldm       | LowGrayLevelEmphasis                 | 0.015609846  |
| wavelet-HLH | glcm       | JointAverage                         | 11.73768536  |
| wavelet-HLH | glcm       | SumAverage                           | 23.47537071  |
| wavelet-HLH | glcm       | JointEntropy                         | 6.164786886  |
| wavelet-HLH | glcm       | ClusterShade                         | 10.05628112  |
| wavelet-HLH | glcm       | MaximumProbability                   | 0.046724975  |
| wavelet-HLH | glcm       | Idmn                                 | 0.969601948  |
| wavelet-HLH | glcm       | JointEnergy                          | 0.018923855  |
| wavelet-HLH | glcm       | Contrast                             | 17.05114098  |
| wavelet-HLH | glcm       | DifferenceEntropy                    | 3.033845675  |
| wavelet-HLH | glcm       | InverseVariance                      | 0.311809238  |
| wavelet-HLH | glcm       | DifferenceVariance                   | 7.895203148  |
| wavelet-HLH | glcm       | Idn                                  | 0.89050036   |
| wavelet-HLH | glcm       | Idm                                  | 0.3096184    |
| wavelet-HLH | glcm       | Correlation                          | 0.029068124  |
| wavelet-HLH | glcm       | Autocorrelation                      | 138.0411716  |
| wavelet-HLH | glcm       | SumEntropy                           | 3.878441612  |
| wavelet-HLH | glcm       | SumSquares                           | 8.771640003  |
| wavelet-HLH | glcm       | ClusterProminence                    | 1561.350737  |
| wavelet-HLH | glcm       | Imc2                                 | 0.874354396  |
| wavelet-HLH | glcm       | Imc1                                 | -0.211836812 |
| wavelet-HLH | glcm       | DifferenceAverage                    | 2.983170672  |
| wavelet-HLH | glcm       | Id                                   | 0.391134655  |
| wavelet-HLH | glcm       | ClusterTendency                      | 18.03541903  |
| wavelet-HLH | firstorder | InterquartileRange                   | 89.10614184  |
| wavelet-HLH | firstorder | Skewness                             | -0.004206062 |
| wavelet-HLH | firstorder | Uniformity                           | 0.10645      |
| wavelet-HLH | firstorder | Median                               | 8.785036566  |
| wavelet-HLH | firstorder | Energy                               | 1301832.418  |
| wavelet-HLH | firstorder | RobustMeanAbsoluteDeviation          | 36.44192956  |
| wavelet-HLH | firstorder | MeanAbsoluteDeviation                | 59.01358901  |
| wavelet-HLH | firstorder | TotalEnergy                          | 35149475.28  |
| wavelet-HLH | firstorder | Maximum                              | 266.7364305  |
| wavelet-HLH | firstorder | RootMeanSquared                      | 80.67937834  |
| wavelet-HLH | firstorder | 90Percentile                         | 99.40393676  |
| wavelet-HLH | firstorder | Minimum                              | -271.1720027 |
| wavelet-HLH | firstorder | Entropy                              | 3.570271643  |
| wavelet-HLH | firstorder | Range                                | 537.9084331  |
| wavelet-HLH | firstorder | Variance                             | 6457.526045  |
| wavelet-HLH | firstorder | 10Percentile                         | -79.32075969 |
| wavelet-HLH | firstorder | Kurtosis                             | 4.446057689  |
| wavelet-HLH | firstorder | Mean                                 | 7.185822435  |

|             |       |                                  |             |
|-------------|-------|----------------------------------|-------------|
| wavelet-HLH | gllm  | ShortRunLowGrayLevelEmphasis     | 0.015871692 |
| wavelet-HLH | gllm  | GrayLevelVariance                | 10.93461286 |
| wavelet-HLH | gllm  | LowGrayLevelRunEmphasis          | 0.01636093  |
| wavelet-HLH | gllm  | GrayLevelNonUniformityNormalized | 0.101465935 |
| wavelet-HLH | gllm  | RunVariance                      | 0.104769789 |
| wavelet-HLH | gllm  | GrayLevelNonUniformity           | 18.5741843  |
| wavelet-HLH | gllm  | LongRunEmphasis                  | 1.302383409 |
| wavelet-HLH | gllm  | ShortRunHighGrayLevelEmphasis    | 140.1109872 |
| wavelet-HLH | gllm  | RunLengthNonUniformity           | 155.1053336 |
| wavelet-HLH | gllm  | ShortRunEmphasis                 | 0.93596781  |
| wavelet-HLH | gllm  | LongRunHighGrayLevelEmphasis     | 192.2971404 |
| wavelet-HLH | gllm  | RunPercentage                    | 0.915       |
| wavelet-HLH | gllm  | LongRunLowGrayLevelEmphasis      | 0.01865432  |
| wavelet-HLH | gllm  | RunEntropy                       | 3.986652296 |
| wavelet-HLH | gllm  | HighGrayLevelRunEmphasis         | 149.2140035 |
| wavelet-HLH | gllm  | RunLengthNonUniformityNormalized | 0.846466954 |
| wavelet-HLH | glszm | GrayLevelVariance                | 21.10676337 |
| wavelet-HLH | glszm | ZoneVariance                     | 29.35739585 |
| wavelet-HLH | glszm | GrayLevelNonUniformityNormalized | 0.082475966 |
| wavelet-HLH | glszm | SizeZoneNonUniformityNormalized  | 0.550008433 |
| wavelet-HLH | glszm | SizeZoneNonUniformity            | 42.35064935 |
| wavelet-HLH | glszm | GrayLevelNonUniformity           | 6.350649351 |
| wavelet-HLH | glszm | LargeAreaEmphasis                | 36.1038961  |
| wavelet-HLH | glszm | SmallAreaHighGrayLevelEmphasis   | 120.2544002 |
| wavelet-HLH | glszm | ZonePercentage                   | 0.385       |
| wavelet-HLH | glszm | LargeAreaLowGrayLevelEmphasis    | 0.282032554 |
| wavelet-HLH | glszm | LargeAreaHighGrayLevelEmphasis   | 5204.168831 |
| wavelet-HLH | glszm | HighGrayLevelZoneEmphasis        | 153.8051948 |
| wavelet-HLH | glszm | SmallAreaEmphasis                | 0.767488571 |
| wavelet-HLH | glszm | LowGrayLevelZoneEmphasis         | 0.028251767 |
| wavelet-HLH | glszm | ZoneEntropy                      | 4.742145678 |
| wavelet-HLH | glszm | SmallAreaLowGrayLevelEmphasis    | 0.026019714 |
| wavelet-HLH | ngtdm | Coarseness                       | 0.032695677 |
| wavelet-HLH | ngtdm | Complexity                       | 417.2767035 |
| wavelet-HLH | ngtdm | Strength                         | 4.518966042 |
| wavelet-HLH | ngtdm | Contrast                         | 0.114925518 |
| wavelet-HLH | ngtdm | Busyness                         | 0.104336097 |

|            |               |                                      |                                                                                                                                                                                                                                                                                                                                                                                                                   |
|------------|---------------|--------------------------------------|-------------------------------------------------------------------------------------------------------------------------------------------------------------------------------------------------------------------------------------------------------------------------------------------------------------------------------------------------------------------------------------------------------------------|
| Image type | Feature Class | Feature Name                         | 2: RTSTRUCT: C99-Dnu-B_segment_ITV                                                                                                                                                                                                                                                                                                                                                                                |
| general    | info          | BoundingBox                          | (1, 0, 3, 15, 13, 14)                                                                                                                                                                                                                                                                                                                                                                                             |
| general    | info          | EnabledImageTypes                    | {u'Original': {}, u'Wavelet': {}}                                                                                                                                                                                                                                                                                                                                                                                 |
|            |               |                                      | {'distances': [1], 'additionalInfo': True, 'force2D': False, 'interpolator': 'sitkBSpline', 'resampledPixelSpacing': [3.0], 'label': 1, 'normalizeScale': 1, 'normalize': False, 'force2Ddimension': 0, 'removeOutliers': None, 'minimumROISize': None, u'binWidth': 25.0, 'minimumROIDimensions': 1, u'correctMask': True, 'preCrop': False, u'symmetricalGLCM': True, 'resegmentRange': None, 'padDistance': 5} |
| general    | info          | GeneralSettings                      | 1d096944131e4e1a0c9a38bc8ad9d42d520                                                                                                                                                                                                                                                                                                                                                                               |
| general    | info          | ImageHash                            | 2ee5c                                                                                                                                                                                                                                                                                                                                                                                                             |
| general    | info          | ImageSpacing                         | (0.9765625000000002, 0.9765625000000002, 2.0)                                                                                                                                                                                                                                                                                                                                                                     |
| general    | info          | MaskHash                             | a7426d3f791e249534fae605229875e87312                                                                                                                                                                                                                                                                                                                                                                              |
| general    | info          | NumpyVersion                         | c255                                                                                                                                                                                                                                                                                                                                                                                                              |
| general    | info          | PyWaveletVersion                     | 1.13.1                                                                                                                                                                                                                                                                                                                                                                                                            |
| general    | info          | SimpleITKVersion                     | 0.5.2                                                                                                                                                                                                                                                                                                                                                                                                             |
| general    | info          | Version                              | 1.1.0                                                                                                                                                                                                                                                                                                                                                                                                             |
| general    | info          | VolumeNum                            | 1.3.0.post102+g1b0eb74                                                                                                                                                                                                                                                                                                                                                                                            |
| general    | info          | VoxelNum                             | 1                                                                                                                                                                                                                                                                                                                                                                                                                 |
| original   | shape         | Maximum3DDiameter                    | 688                                                                                                                                                                                                                                                                                                                                                                                                               |
| original   | shape         | Maximum2DDiameterSlice               | 50.28916384                                                                                                                                                                                                                                                                                                                                                                                                       |
| original   | shape         | Sphericity                           | 44.59820624                                                                                                                                                                                                                                                                                                                                                                                                       |
| original   | shape         | MinorAxis                            | 0.699592721                                                                                                                                                                                                                                                                                                                                                                                                       |
| original   | shape         | Elongation                           | 34.04193959                                                                                                                                                                                                                                                                                                                                                                                                       |
| original   | shape         | SurfaceVolumeRatio                   | 0.86312351                                                                                                                                                                                                                                                                                                                                                                                                        |
| original   | shape         | Volume                               | 0.261008574                                                                                                                                                                                                                                                                                                                                                                                                       |
| original   | shape         | MajorAxis                            | 18576                                                                                                                                                                                                                                                                                                                                                                                                             |
| original   | shape         | SurfaceArea                          | 39.44040362                                                                                                                                                                                                                                                                                                                                                                                                       |
| original   | shape         | Flatness                             | 4848.495279                                                                                                                                                                                                                                                                                                                                                                                                       |
| original   | shape         | LeastAxis                            | 0.681583351                                                                                                                                                                                                                                                                                                                                                                                                       |
| original   | shape         | Maximum2DDiameterColumn              | 26.88192246                                                                                                                                                                                                                                                                                                                                                                                                       |
| original   | shape         | Maximum2DDiameterRow                 | 40.80441153                                                                                                                                                                                                                                                                                                                                                                                                       |
| original   | gldm          | GrayLevelVariance                    | 45.79301257                                                                                                                                                                                                                                                                                                                                                                                                       |
| original   | gldm          | HighGrayLevelEmphasis                | 165.1370483                                                                                                                                                                                                                                                                                                                                                                                                       |
| original   | gldm          | DependenceEntropy                    | 1242.178779                                                                                                                                                                                                                                                                                                                                                                                                       |
| original   | gldm          | DependenceNonUniformity              | 6.659780213                                                                                                                                                                                                                                                                                                                                                                                                       |
| original   | gldm          | GrayLevelNonUniformity               | 149.2877907                                                                                                                                                                                                                                                                                                                                                                                                       |
| original   | gldm          | SmallDependenceEmphasis              | 56.60755814                                                                                                                                                                                                                                                                                                                                                                                                       |
| original   | gldm          | SmallDependenceHighGrayLevelEmphasis | 0.474978518                                                                                                                                                                                                                                                                                                                                                                                                       |
| original   | gldm          | DependenceNonUniformityNormalized    | 389.7137091                                                                                                                                                                                                                                                                                                                                                                                                       |
| original   | gldm          | LargeDependenceEmphasis              | 0.216988068                                                                                                                                                                                                                                                                                                                                                                                                       |
| original   | gldm          | LargeDependenceLowGrayLevelEmphasis  | 32.48546512                                                                                                                                                                                                                                                                                                                                                                                                       |
| original   | gldm          | DependenceVariance                   | 0.038954679                                                                                                                                                                                                                                                                                                                                                                                                       |
| original   | gldm          | LargeDependenceHighGrayLevelEmphasis | 16.57835316                                                                                                                                                                                                                                                                                                                                                                                                       |
| original   | gldm          |                                      | 58501.29506                                                                                                                                                                                                                                                                                                                                                                                                       |

|          |            |                                     |              |
|----------|------------|-------------------------------------|--------------|
| original | gldm       | SmallDependenceLowGrayLevelEmphasis | 0.007197101  |
| original | gldm       | LowGrayLevelEmphasis                | 0.010194441  |
| original | glcm       | JointAverage                        | 34.72490243  |
| original | glcm       | SumAverage                          | 69.44980487  |
| original | glcm       | JointEntropy                        | 7.504284724  |
| original | glcm       | ClusterShade                        | -7771.291707 |
| original | glcm       | MaximumProbability                  | 0.094534925  |
| original | glcm       | ldmn                                | 0.929981757  |
| original | glcm       | JointEnergy                         | 0.020507693  |
| original | glcm       | Contrast                            | 200.5254135  |
| original | glcm       | DifferenceEntropy                   | 4.381129951  |
| original | glcm       | InverseVariance                     | 0.244485317  |
| original | glcm       | DifferenceVariance                  | 115.0786914  |
| original | glcm       | ldn                                 | 0.861089505  |
| original | glcm       | ldm                                 | 0.286987469  |
| original | glcm       | Correlation                         | 0.307836365  |
| original | glcm       | Autocorrelation                     | 1250.609985  |
| original | glcm       | SumEntropy                          | 5.303332192  |
| original | glcm       | SumSquares                          | 144.8670955  |
| original | glcm       | ClusterProminence                   | 450671.8274  |
| original | glcm       | lmc2                                | 0.939383121  |
| original | glcm       | lmc1                                | -0.251629067 |
| original | glcm       | DifferenceAverage                   | 9.174433722  |
| original | glcm       | ld                                  | 0.338842814  |
| original | glcm       | ClusterTendency                     | 378.9429686  |
| original | firstorder | InterquartileRange                  | 479.75       |
| original | firstorder | Skewness                            | -0.970513925 |
| original | firstorder | Uniformity                          | 0.082278428  |
| original | firstorder | Median                              | -31.5        |
| original | firstorder | Energy                              | 103590872    |
| original | firstorder | RobustMeanAbsoluteDeviation         | 212.6137295  |
| original | firstorder | MeanAbsoluteDeviation               | 275.2077643  |
| original | firstorder | TotalEnergy                         | 2796953544   |
| original | firstorder | Maximum                             | 104          |
| original | firstorder | RootMeanSquared                     | 388.0310914  |
| original | firstorder | 90Percentile                        | 49           |
| original | firstorder | Minimum                             | -1020        |
| original | firstorder | Entropy                             | 4.586612813  |
| original | firstorder | Range                               | 1124         |
| original | firstorder | Variance                            | 103239.1135  |
| original | firstorder | 10Percentile                        | -762.6       |
| original | firstorder | Kurtosis                            | 2.493420593  |
| original | firstorder | Mean                                | -217.5523256 |
| original | glrlm      | ShortRunLowGrayLevelEmphasis        | 0.01111478   |
| original | glrlm      | GrayLevelVariance                   | 171.349303   |
| original | glrlm      | LowGrayLevelRunEmphasis             | 0.011283356  |
| original | glrlm      | GrayLevelNonUniformityNormalized    | 0.061551526  |
| original | glrlm      | RunVariance                         | 0.19766371   |
| original | glrlm      | GrayLevelNonUniformity              | 37.51311884  |
| original | glrlm      | LongRunEmphasis                     | 1.475904704  |
| original | glrlm      | ShortRunHighGrayLevelEmphasis       | 1036.756742  |
| original | glrlm      | RunLengthNonUniformity              | 499.8483276  |

|             |       |                                      |             |
|-------------|-------|--------------------------------------|-------------|
| original    | glrlm | ShortRunEmphasis                     | 0.923008297 |
| original    | glrlm | LongRunHighGrayLevelEmphasis         | 2022.963071 |
| original    | glrlm | RunPercentage                        | 0.885062612 |
| original    | glrlm | LongRunLowGrayLevelEmphasis          | 0.012049574 |
| original    | glrlm | RunEntropy                           | 5.225062914 |
| original    | glrlm | HighGrayLevelRunEmphasis             | 1172.440629 |
| original    | glrlm | RunLengthNonUniformityNormalized     | 0.82045303  |
| original    | glszm | GrayLevelVariance                    | 159.3437981 |
| original    | glszm | ZoneVariance                         | 84.6255942  |
| original    | glszm | GrayLevelNonUniformityNormalized     | 0.025700215 |
| original    | glszm | SizeZoneNonUniformityNormalized      | 0.730275982 |
| original    | glszm | SizeZoneNonUniformity                | 249.754386  |
| original    | glszm | GrayLevelNonUniformity               | 8.789473684 |
| original    | glszm | LargeAreaEmphasis                    | 88.67251462 |
| original    | glszm | SmallAreaHighGrayLevelEmphasis       | 675.5192492 |
| original    | glszm | ZonePercentage                       | 0.497093023 |
| original    | glszm | LargeAreaLowGrayLevelEmphasis        | 0.075384201 |
| original    | glszm | LargeAreaHighGrayLevelEmphasis       | 161398.6871 |
| original    | glszm | HighGrayLevelZoneEmphasis            | 802.9005848 |
| original    | glszm | SmallAreaEmphasis                    | 0.877021337 |
| original    | glszm | LowGrayLevelZoneEmphasis             | 0.01627145  |
| original    | glszm | ZoneEntropy                          | 5.975339245 |
| original    | glszm | SmallAreaLowGrayLevelEmphasis        | 0.01354055  |
| original    | ngtdm | Coarseness                           | 0.003654249 |
| original    | ngtdm | Complexity                           | 7188.973889 |
| original    | ngtdm | Strength                             | 7.552206742 |
| original    | ngtdm | Contrast                             | 1.20974721  |
| original    | ngtdm | Busyness                             | 0.128455928 |
| wavelet-HHH | gldm  | GrayLevelVariance                    | 22.95641014 |
| wavelet-HHH | gldm  | HighGrayLevelEmphasis                | 441.0043605 |
| wavelet-HHH | gldm  | DependenceEntropy                    | 6.206621174 |
| wavelet-HHH | gldm  | DependenceNonUniformity              | 158.3953488 |
| wavelet-HHH | gldm  | GrayLevelNonUniformity               | 48.86627907 |
| wavelet-HHH | gldm  | SmallDependenceEmphasis              | 0.444377109 |
| wavelet-HHH | gldm  | SmallDependenceHighGrayLevelEmphasis | 202.8364574 |
| wavelet-HHH | gldm  | DependenceNonUniformityNormalized    | 0.230225798 |
| wavelet-HHH | gldm  | LargeDependenceEmphasis              | 10.76453488 |
| wavelet-HHH | gldm  | LargeDependenceLowGrayLevelEmphasis  | 0.028096705 |
| wavelet-HHH | gldm  | DependenceVariance                   | 3.858639805 |
| wavelet-HHH | gldm  | LargeDependenceHighGrayLevelEmphasis | 4622.443314 |
| wavelet-HHH | gldm  | SmallDependenceLowGrayLevelEmphasis  | 0.003032203 |
| wavelet-HHH | gldm  | LowGrayLevelEmphasis                 | 0.004455463 |
| wavelet-HHH | glcm  | JointAverage                         | 20.43436251 |
| wavelet-HHH | glcm  | SumAverage                           | 40.86872501 |
| wavelet-HHH | glcm  | JointEntropy                         | 7.689528828 |
| wavelet-HHH | glcm  | ClusterShade                         | 15.61238113 |
| wavelet-HHH | glcm  | MaximumProbability                   | 0.029039705 |
| wavelet-HHH | glcm  | ldmn                                 | 0.979948562 |
| wavelet-HHH | glcm  | JointEnergy                          | 0.007582828 |
| wavelet-HHH | glcm  | Contrast                             | 42.85325181 |
| wavelet-HHH | glcm  | DifferenceEntropy                    | 3.7237518   |
| wavelet-HHH | glcm  | InverseVariance                      | 0.228305738 |

|             |            |                                  |              |
|-------------|------------|----------------------------------|--------------|
| wavelet-HHH | glcm       | DifferenceVariance               | 20.02372575  |
| wavelet-HHH | glcm       | Idn                              | 0.909298199  |
| wavelet-HHH | glcm       | Idm                              | 0.220129192  |
| wavelet-HHH | glcm       | Correlation                      | -0.03728522  |
| wavelet-HHH | glcm       | Autocorrelation                  | 416.7494577  |
| wavelet-HHH | glcm       | SumEntropy                       | 4.557036536  |
| wavelet-HHH | glcm       | SumSquares                       | 20.61039079  |
| wavelet-HHH | glcm       | ClusterProminence                | 7901.94063   |
| wavelet-HHH | glcm       | Imc2                             | 0.80486553   |
| wavelet-HHH | glcm       | Imc1                             | -0.127396849 |
| wavelet-HHH | glcm       | DifferenceAverage                | 4.752324129  |
| wavelet-HHH | glcm       | Id                               | 0.307606032  |
| wavelet-HHH | glcm       | ClusterTendency                  | 39.58831133  |
| wavelet-HHH | firstorder | InterquartileRange               | 120.698204   |
| wavelet-HHH | firstorder | Skewness                         | 0.17317451   |
| wavelet-HHH | firstorder | Uniformity                       | 0.071026568  |
| wavelet-HHH | firstorder | Median                           | 0.618667368  |
| wavelet-HHH | firstorder | Energy                           | 9756527.574  |
| wavelet-HHH | firstorder | RobustMeanAbsoluteDeviation      | 52.87116595  |
| wavelet-HHH | firstorder | MeanAbsoluteDeviation            | 86.08480275  |
| wavelet-HHH | firstorder | TotalEnergy                      | 263426244.5  |
| wavelet-HHH | firstorder | Maximum                          | 577.1334812  |
| wavelet-HHH | firstorder | RootMeanSquared                  | 119.0840014  |
| wavelet-HHH | firstorder | 90Percentile                     | 135.6444107  |
| wavelet-HHH | firstorder | Minimum                          | -479.9298527 |
| wavelet-HHH | firstorder | Entropy                          | 4.202792289  |
| wavelet-HHH | firstorder | Range                            | 1057.063334  |
| wavelet-HHH | firstorder | Variance                         | 14178.02556  |
| wavelet-HHH | firstorder | 10Percentile                     | -143.2588623 |
| wavelet-HHH | firstorder | Kurtosis                         | 5.13456101   |
| wavelet-HHH | firstorder | Mean                             | -1.724478444 |
| wavelet-HHH | glrlm      | ShortRunLowGrayLevelEmphasis     | 0.004474134  |
| wavelet-HHH | glrlm      | GrayLevelVariance                | 24.13191255  |
| wavelet-HHH | glrlm      | LowGrayLevelRunEmphasis          | 0.00458818   |
| wavelet-HHH | glrlm      | GrayLevelNonUniformityNormalized | 0.067485936  |
| wavelet-HHH | glrlm      | RunVariance                      | 0.07762119   |
| wavelet-HHH | glrlm      | GrayLevelNonUniformity           | 43.5252346   |
| wavelet-HHH | glrlm      | LongRunEmphasis                  | 1.215984117  |
| wavelet-HHH | glrlm      | ShortRunHighGrayLevelEmphasis    | 422.1968698  |
| wavelet-HHH | glrlm      | RunLengthNonUniformity           | 571.8668491  |
| wavelet-HHH | glrlm      | ShortRunEmphasis                 | 0.954071954  |
| wavelet-HHH | glrlm      | LongRunHighGrayLevelEmphasis     | 534.3730076  |
| wavelet-HHH | glrlm      | RunPercentage                    | 0.937388193  |
| wavelet-HHH | glrlm      | LongRunLowGrayLevelEmphasis      | 0.005120056  |
| wavelet-HHH | glrlm      | RunEntropy                       | 4.556268949  |
| wavelet-HHH | glrlm      | HighGrayLevelRunEmphasis         | 441.8574547  |
| wavelet-HHH | glrlm      | RunLengthNonUniformityNormalized | 0.886576736  |
| wavelet-HHH | glszm      | GrayLevelVariance                | 39.65781619  |
| wavelet-HHH | glszm      | ZoneVariance                     | 29.96966074  |
| wavelet-HHH | glszm      | GrayLevelNonUniformityNormalized | 0.047562545  |
| wavelet-HHH | glszm      | SizeZoneNonUniformityNormalized  | 0.557817106  |
| wavelet-HHH | glszm      | SizeZoneNonUniformity            | 184.6374622  |



|             |       |                                      |              |
|-------------|-------|--------------------------------------|--------------|
| wavelet-HHH | glszm | GrayLevelNonUniformity               | 15.74320242  |
| wavelet-HHH | glszm | LargeAreaEmphasis                    | 34.29003021  |
| wavelet-HHH | glszm | SmallAreaHighGrayLevelEmphasis       | 357.4156062  |
| wavelet-HHH | glszm | ZonePercentage                       | 0.481104651  |
| wavelet-HHH | glszm | LargeAreaLowGrayLevelEmphasis        | 0.085433886  |
| wavelet-HHH | glszm | LargeAreaHighGrayLevelEmphasis       | 14711.08459  |
| wavelet-HHH | glszm | HighGrayLevelZoneEmphasis            | 453.5528701  |
| wavelet-HHH | glszm | SmallAreaEmphasis                    | 0.774398695  |
| wavelet-HHH | glszm | LowGrayLevelZoneEmphasis             | 0.006543449  |
| wavelet-HHH | glszm | ZoneEntropy                          | 5.739886651  |
| wavelet-HHH | glszm | SmallAreaLowGrayLevelEmphasis        | 0.005911951  |
| wavelet-HHH | ngtdm | Coarseness                           | 0.01019009   |
| wavelet-HHH | ngtdm | Complexity                           | 1935.894621  |
| wavelet-HHH | ngtdm | Strength                             | 4.037421682  |
| wavelet-HHH | ngtdm | Contrast                             | 0.133954926  |
| wavelet-HHH | ngtdm | Busyness                             | 0.106301542  |
| wavelet-HLL | gldm  | GrayLevelVariance                    | 89.60829967  |
| wavelet-HLL | gldm  | HighGrayLevelEmphasis                | 1165.696221  |
| wavelet-HLL | gldm  | DependenceEntropy                    | 6.732762642  |
| wavelet-HLL | gldm  | DependenceNonUniformity              | 218.7296512  |
| wavelet-HLL | gldm  | GrayLevelNonUniformity               | 23.59593023  |
| wavelet-HLL | gldm  | SmallDependenceEmphasis              | 0.547529657  |
| wavelet-HLL | gldm  | SmallDependenceHighGrayLevelEmphasis | 636.1253224  |
| wavelet-HLL | gldm  | DependenceNonUniformityNormalized    | 0.317921005  |
| wavelet-HLL | gldm  | LargeDependenceEmphasis              | 7.212209302  |
| wavelet-HLL | gldm  | LargeDependenceLowGrayLevelEmphasis  | 0.008964148  |
| wavelet-HLL | gldm  | DependenceVariance                   | 2.770407991  |
| wavelet-HLL | gldm  | LargeDependenceHighGrayLevelEmphasis | 8553.75436   |
| wavelet-HLL | gldm  | SmallDependenceLowGrayLevelEmphasis  | 0.00238463   |
| wavelet-HLL | gldm  | LowGrayLevelEmphasis                 | 0.002931125  |
| wavelet-HLL | glcm  | JointAverage                         | 32.40308435  |
| wavelet-HLL | glcm  | SumAverage                           | 64.8061687   |
| wavelet-HLL | glcm  | JointEntropy                         | 8.881690168  |
| wavelet-HLL | glcm  | ClusterShade                         | -547.2447622 |
| wavelet-HLL | glcm  | MaximumProbability                   | 0.018090279  |
| wavelet-HLL | glcm  | ldmn                                 | 0.966567558  |
| wavelet-HLL | glcm  | JointEnergy                          | 0.00301932   |
| wavelet-HLL | glcm  | Contrast                             | 127.2423908  |
| wavelet-HLL | glcm  | DifferenceEntropy                    | 4.40371927   |
| wavelet-HLL | glcm  | InverseVariance                      | 0.158746337  |
| wavelet-HLL | glcm  | DifferenceVariance                   | 59.70860485  |
| wavelet-HLL | glcm  | ldn                                  | 0.887266365  |
| wavelet-HLL | glcm  | ldm                                  | 0.152924515  |
| wavelet-HLL | glcm  | Correlation                          | 0.209246749  |
| wavelet-HLL | glcm  | Autocorrelation                      | 1068.102779  |
| wavelet-HLL | glcm  | SumEntropy                           | 5.664199266  |
| wavelet-HLL | glcm  | SumSquares                           | 81.71884363  |
| wavelet-HLL | glcm  | ClusterProminence                    | 144837.5155  |
| wavelet-HLL | glcm  | lmc2                                 | 0.963056252  |
| wavelet-HLL | glcm  | lmc1                                 | -0.258509453 |
| wavelet-HLL | glcm  | DifferenceAverage                    | 8.056440105  |
| wavelet-HLL | glcm  | ld                                   | 0.23564152   |

|             |            |                                  |              |
|-------------|------------|----------------------------------|--------------|
| wavelet-HLL | glcm       | ClusterTendency                  | 199.6329837  |
| wavelet-HLL | firstorder | InterquartileRange               | 285.6655496  |
| wavelet-HLL | firstorder | Skewness                         | -0.262819608 |
| wavelet-HLL | firstorder | Uniformity                       | 0.03429641   |
| wavelet-HLL | firstorder | Median                           | -26.18652819 |
| wavelet-HLL | firstorder | Energy                           | 39766737.69  |
| wavelet-HLL | firstorder | RobustMeanAbsoluteDeviation      | 121.0781227  |
| wavelet-HLL | firstorder | MeanAbsoluteDeviation            | 182.5793777  |
| wavelet-HLL | firstorder | TotalEnergy                      | 1073701918   |
| wavelet-HLL | firstorder | Maximum                          | 553.5307785  |
| wavelet-HLL | firstorder | RootMeanSquared                  | 240.4173264  |
| wavelet-HLL | firstorder | 90Percentile                     | 256.6845998  |
| wavelet-HLL | firstorder | Minimum                          | -832.3926514 |
| wavelet-HLL | firstorder | Entropy                          | 5.178235877  |
| wavelet-HLL | firstorder | Range                            | 1385.92343   |
| wavelet-HLL | firstorder | Variance                         | 55972.22999  |
| wavelet-HLL | firstorder | 10Percentile                     | -343.4260794 |
| wavelet-HLL | firstorder | Kurtosis                         | 3.170600452  |
| wavelet-HLL | firstorder | Mean                             | -42.75816688 |
| wavelet-HLL | glrlm      | ShortRunLowGrayLevelEmphasis     | 0.002980621  |
| wavelet-HLL | glrlm      | GrayLevelVariance                | 91.81876061  |
| wavelet-HLL | glrlm      | LowGrayLevelRunEmphasis          | 0.00301445   |
| wavelet-HLL | glrlm      | GrayLevelNonUniformityNormalized | 0.033104346  |
| wavelet-HLL | glrlm      | RunVariance                      | 0.050261299  |
| wavelet-HLL | glrlm      | GrayLevelNonUniformity           | 21.80779499  |
| wavelet-HLL | glrlm      | LongRunEmphasis                  | 1.141828634  |
| wavelet-HLL | glrlm      | ShortRunHighGrayLevelEmphasis    | 1128.330653  |
| wavelet-HLL | glrlm      | RunLengthNonUniformity           | 607.0461423  |
| wavelet-HLL | glrlm      | ShortRunEmphasis                 | 0.968739102  |
| wavelet-HLL | glrlm      | LongRunHighGrayLevelEmphasis     | 1332.393648  |
| wavelet-HLL | glrlm      | RunPercentage                    | 0.95740161   |
| wavelet-HLL | glrlm      | LongRunLowGrayLevelEmphasis      | 0.003163984  |
| wavelet-HLL | glrlm      | RunEntropy                       | 5.402778578  |
| wavelet-HLL | glrlm      | HighGrayLevelRunEmphasis         | 1165.130519  |
| wavelet-HLL | glrlm      | RunLengthNonUniformityNormalized | 0.921297229  |
| wavelet-HLL | glszm      | GrayLevelVariance                | 113.0811006  |
| wavelet-HLL | glszm      | ZoneVariance                     | 6.186103143  |
| wavelet-HLL | glszm      | GrayLevelNonUniformityNormalized | 0.027538132  |
| wavelet-HLL | glszm      | SizeZoneNonUniformityNormalized  | 0.565861712  |
| wavelet-HLL | glszm      | SizeZoneNonUniformity            | 241.6229508  |
| wavelet-HLL | glszm      | GrayLevelNonUniformity           | 11.7587822   |
| wavelet-HLL | glszm      | LargeAreaEmphasis                | 8.782201405  |
| wavelet-HLL | glszm      | SmallAreaHighGrayLevelEmphasis   | 906.5602853  |
| wavelet-HLL | glszm      | ZonePercentage                   | 0.620639535  |
| wavelet-HLL | glszm      | LargeAreaLowGrayLevelEmphasis    | 0.011239526  |
| wavelet-HLL | glszm      | LargeAreaHighGrayLevelEmphasis   | 10355.0281   |
| wavelet-HLL | glszm      | HighGrayLevelZoneEmphasis        | 1163.782201  |
| wavelet-HLL | glszm      | SmallAreaEmphasis                | 0.780544391  |
| wavelet-HLL | glszm      | LowGrayLevelZoneEmphasis         | 0.004018995  |
| wavelet-HLL | glszm      | ZoneEntropy                      | 6.338160304  |
| wavelet-HLL | glszm      | SmallAreaLowGrayLevelEmphasis    | 0.003713428  |
| wavelet-HLL | ngtdm      | Coarseness                       | 0.010844496  |

|             |            |                                      |              |
|-------------|------------|--------------------------------------|--------------|
| wavelet-HLL | ngtdm      | Complexity                           | 5769.136086  |
| wavelet-HLL | ngtdm      | Strength                             | 8.609393416  |
| wavelet-HLL | ngtdm      | Contrast                             | 0.387442349  |
| wavelet-HLL | ngtdm      | Busyness                             | 0.052875562  |
| wavelet-LHL | gldm       | GrayLevelVariance                    | 141.9944227  |
| wavelet-LHL | gldm       | HighGrayLevelEmphasis                | 1724.831395  |
| wavelet-LHL | gldm       | DependenceEntropy                    | 6.814849561  |
| wavelet-LHL | gldm       | DependenceNonUniformity              | 262.2761628  |
| wavelet-LHL | gldm       | GrayLevelNonUniformity               | 21.05813953  |
| wavelet-LHL | gldm       | SmallDependenceEmphasis              | 0.631869268  |
| wavelet-LHL | gldm       | SmallDependenceHighGrayLevelEmphasis | 1123.702455  |
| wavelet-LHL | gldm       | DependenceNonUniformityNormalized    | 0.381215353  |
| wavelet-LHL | gldm       | LargeDependenceEmphasis              | 5.75872093   |
| wavelet-LHL | gldm       | LargeDependenceLowGrayLevelEmphasis  | 0.008781003  |
| wavelet-LHL | gldm       | DependenceVariance                   | 2.188378853  |
| wavelet-LHL | gldm       | LargeDependenceHighGrayLevelEmphasis | 9759.607558  |
| wavelet-LHL | gldm       | SmallDependenceLowGrayLevelEmphasis  | 0.005480158  |
| wavelet-LHL | gldm       | LowGrayLevelEmphasis                 | 0.005747524  |
| wavelet-LHL | glcm       | JointAverage                         | 39.82821663  |
| wavelet-LHL | glcm       | SumAverage                           | 79.65643325  |
| wavelet-LHL | glcm       | JointEntropy                         | 9.027676434  |
| wavelet-LHL | glcm       | ClusterShade                         | 2217.944823  |
| wavelet-LHL | glcm       | MaximumProbability                   | 0.013738818  |
| wavelet-LHL | glcm       | ldmn                                 | 0.975143566  |
| wavelet-LHL | glcm       | JointEnergy                          | 0.0026797    |
| wavelet-LHL | glcm       | Contrast                             | 230.4413753  |
| wavelet-LHL | glcm       | DifferenceEntropy                    | 4.745197759  |
| wavelet-LHL | glcm       | InverseVariance                      | 0.140417709  |
| wavelet-LHL | glcm       | DifferenceVariance                   | 115.7704303  |
| wavelet-LHL | glcm       | ldn                                  | 0.904739693  |
| wavelet-LHL | glcm       | ldm                                  | 0.130955642  |
| wavelet-LHL | glcm       | Correlation                          | 0.117466129  |
| wavelet-LHL | glcm       | Autocorrelation                      | 1603.365017  |
| wavelet-LHL | glcm       | SumEntropy                           | 5.847386423  |
| wavelet-LHL | glcm       | SumSquares                           | 132.2593879  |
| wavelet-LHL | glcm       | ClusterProminence                    | 476372.7915  |
| wavelet-LHL | glcm       | lmc2                                 | 0.98111265   |
| wavelet-LHL | glcm       | lmc1                                 | -0.30913184  |
| wavelet-LHL | glcm       | DifferenceAverage                    | 10.49090099  |
| wavelet-LHL | glcm       | ld                                   | 0.208967038  |
| wavelet-LHL | glcm       | ClusterTendency                      | 298.5961765  |
| wavelet-LHL | firstorder | InterquartileRange                   | 293.0515419  |
| wavelet-LHL | firstorder | Skewness                             | 0.23734304   |
| wavelet-LHL | firstorder | Uniformity                           | 0.030607761  |
| wavelet-LHL | firstorder | Median                               | -26.98051922 |
| wavelet-LHL | firstorder | Energy                               | 62241606.78  |
| wavelet-LHL | firstorder | RobustMeanAbsoluteDeviation          | 135.1904459  |
| wavelet-LHL | firstorder | MeanAbsoluteDeviation                | 218.0864985  |
| wavelet-LHL | firstorder | TotalEnergy                          | 1680523383   |
| wavelet-LHL | firstorder | Maximum                              | 1216.559916  |
| wavelet-LHL | firstorder | RootMeanSquared                      | 300.7780772  |
| wavelet-LHL | firstorder | 90Percentile                         | 306.5403253  |

|             |            |                                      |              |
|-------------|------------|--------------------------------------|--------------|
| wavelet-LHL | firstorder | Minimum                              | -1017.035666 |
| wavelet-LHL | firstorder | Entropy                              | 5.43780966   |
| wavelet-LHL | firstorder | Range                                | 2233.595582  |
| wavelet-LHL | firstorder | Variance                             | 88655.92976  |
| wavelet-LHL | firstorder | 10Percentile                         | -409.5932289 |
| wavelet-LHL | firstorder | Kurtosis                             | 4.489853013  |
| wavelet-LHL | firstorder | Mean                                 | -42.56197777 |
| wavelet-LHL | glrlm      | ShortRunLowGrayLevelEmphasis         | 0.005911226  |
| wavelet-LHL | glrlm      | GrayLevelVariance                    | 145.8187803  |
| wavelet-LHL | glrlm      | LowGrayLevelRunEmphasis              | 0.00592787   |
| wavelet-LHL | glrlm      | GrayLevelNonUniformityNormalized     | 0.029410127  |
| wavelet-LHL | glrlm      | RunVariance                          | 0.041604278  |
| wavelet-LHL | glrlm      | GrayLevelNonUniformity               | 19.54334401  |
| wavelet-LHL | glrlm      | LongRunEmphasis                      | 1.114089582  |
| wavelet-LHL | glrlm      | ShortRunHighGrayLevelEmphasis        | 1686.27587   |
| wavelet-LHL | glrlm      | RunLengthNonUniformity               | 623.207696   |
| wavelet-LHL | glrlm      | ShortRunEmphasis                     | 0.975433936  |
| wavelet-LHL | glrlm      | LongRunHighGrayLevelEmphasis         | 1916.401771  |
| wavelet-LHL | glrlm      | RunPercentage                        | 0.96578712   |
| wavelet-LHL | glrlm      | LongRunLowGrayLevelEmphasis          | 0.00600447   |
| wavelet-LHL | glrlm      | RunEntropy                           | 5.630633342  |
| wavelet-LHL | glrlm      | HighGrayLevelRunEmphasis             | 1727.117458  |
| wavelet-LHL | glrlm      | RunLengthNonUniformityNormalized     | 0.937718179  |
| wavelet-LHL | glszm      | GrayLevelVariance                    | 186.8594334  |
| wavelet-LHL | glszm      | ZoneVariance                         | 4.015153691  |
| wavelet-LHL | glszm      | GrayLevelNonUniformityNormalized     | 0.023125539  |
| wavelet-LHL | glszm      | SizeZoneNonUniformityNormalized      | 0.672050057  |
| wavelet-LHL | glszm      | SizeZoneNonUniformity                | 317.2076271  |
| wavelet-LHL | glszm      | GrayLevelNonUniformity               | 10.91525424  |
| wavelet-LHL | glszm      | LargeAreaEmphasis                    | 6.139830508  |
| wavelet-LHL | glszm      | SmallAreaHighGrayLevelEmphasis       | 1515.689299  |
| wavelet-LHL | glszm      | ZonePercentage                       | 0.686046512  |
| wavelet-LHL | glszm      | LargeAreaLowGrayLevelEmphasis        | 0.011210679  |
| wavelet-LHL | glszm      | LargeAreaHighGrayLevelEmphasis       | 10563.41949  |
| wavelet-LHL | glszm      | HighGrayLevelZoneEmphasis            | 1763.555085  |
| wavelet-LHL | glszm      | SmallAreaEmphasis                    | 0.845148903  |
| wavelet-LHL | glszm      | LowGrayLevelZoneEmphasis             | 0.008055703  |
| wavelet-LHL | glszm      | ZoneEntropy                          | 6.435990297  |
| wavelet-LHL | glszm      | SmallAreaLowGrayLevelEmphasis        | 0.00793092   |
| wavelet-LHL | ngtdm      | Coarseness                           | 0.010911921  |
| wavelet-LHL | ngtdm      | Complexity                           | 15462.33745  |
| wavelet-LHL | ngtdm      | Strength                             | 17.27344513  |
| wavelet-LHL | ngtdm      | Contrast                             | 0.440148988  |
| wavelet-LHL | ngtdm      | Busyness                             | 0.029332437  |
| wavelet-LHH | gldm       | GrayLevelVariance                    | 59.85275825  |
| wavelet-LHH | gldm       | HighGrayLevelEmphasis                | 1059.44186   |
| wavelet-LHH | gldm       | DependenceEntropy                    | 6.404701498  |
| wavelet-LHH | gldm       | DependenceNonUniformity              | 198.4331395  |
| wavelet-LHH | gldm       | GrayLevelNonUniformity               | 32.77325581  |
| wavelet-LHH | gldm       | SmallDependenceEmphasis              | 0.525247565  |
| wavelet-LHH | gldm       | SmallDependenceHighGrayLevelEmphasis | 601.5946386  |
| wavelet-LHH | gldm       | DependenceNonUniformityNormalized    | 0.288420261  |

|             |            |                                      |              |
|-------------|------------|--------------------------------------|--------------|
| wavelet-LHH | gldm       | LargeDependenceEmphasis              | 6.965116279  |
| wavelet-LHH | gldm       | LargeDependenceLowGrayLevelEmphasis  | 0.00931343   |
| wavelet-LHH | gldm       | DependenceVariance                   | 2.19901805   |
| wavelet-LHH | gldm       | LargeDependenceHighGrayLevelEmphasis | 6843.921512  |
| wavelet-LHH | gldm       | SmallDependenceLowGrayLevelEmphasis  | 0.002254471  |
| wavelet-LHH | gldm       | LowGrayLevelEmphasis                 | 0.002813671  |
| wavelet-LHH | glcm       | JointAverage                         | 31.55303179  |
| wavelet-LHH | glcm       | SumAverage                           | 63.10606359  |
| wavelet-LHH | glcm       | JointEntropy                         | 8.444834618  |
| wavelet-LHH | glcm       | ClusterShade                         | 126.6298118  |
| wavelet-LHH | glcm       | MaximumProbability                   | 0.019074644  |
| wavelet-LHH | glcm       | ldmn                                 | 0.979586717  |
| wavelet-LHH | glcm       | JointEnergy                          | 0.004314229  |
| wavelet-LHH | glcm       | Contrast                             | 105.5593936  |
| wavelet-LHH | glcm       | DifferenceEntropy                    | 4.279128868  |
| wavelet-LHH | glcm       | InverseVariance                      | 0.177295508  |
| wavelet-LHH | glcm       | DifferenceVariance                   | 51.7131544   |
| wavelet-LHH | glcm       | ldn                                  | 0.910910135  |
| wavelet-LHH | glcm       | ldm                                  | 0.167527215  |
| wavelet-LHH | glcm       | Correlation                          | 0.001005133  |
| wavelet-LHH | glcm       | Autocorrelation                      | 995.7097494  |
| wavelet-LHH | glcm       | SumEntropy                           | 5.170260695  |
| wavelet-LHH | glcm       | SumSquares                           | 52.88713573  |
| wavelet-LHH | glcm       | ClusterProminence                    | 66363.52679  |
| wavelet-LHH | glcm       | lmc2                                 | 0.925737082  |
| wavelet-LHH | glcm       | lmc1                                 | -0.206870151 |
| wavelet-LHH | glcm       | DifferenceAverage                    | 7.255056762  |
| wavelet-LHH | glcm       | ld                                   | 0.251132485  |
| wavelet-LHH | glcm       | ClusterTendency                      | 105.9891494  |
| wavelet-LHH | firstorder | InterquartileRange                   | 180.6859106  |
| wavelet-LHH | firstorder | Skewness                             | 0.155448954  |
| wavelet-LHH | firstorder | Uniformity                           | 0.047635546  |
| wavelet-LHH | firstorder | Median                               | -5.247357554 |
| wavelet-LHH | firstorder | Energy                               | 25770202.53  |
| wavelet-LHH | firstorder | RobustMeanAbsoluteDeviation          | 80.57998324  |
| wavelet-LHH | firstorder | MeanAbsoluteDeviation                | 136.8110336  |
| wavelet-LHH | firstorder | TotalEnergy                          | 695795468.2  |
| wavelet-LHH | firstorder | Maximum                              | 907.4676395  |
| wavelet-LHH | firstorder | RootMeanSquared                      | 193.5373083  |
| wavelet-LHH | firstorder | 90Percentile                         | 230.723806   |
| wavelet-LHH | firstorder | Minimum                              | -772.5918958 |
| wavelet-LHH | firstorder | Entropy                              | 4.81332802   |
| wavelet-LHH | firstorder | Range                                | 1680.059535  |
| wavelet-LHH | firstorder | Variance                             | 37446.69402  |
| wavelet-LHH | firstorder | 10Percentile                         | -218.6208859 |
| wavelet-LHH | firstorder | Kurtosis                             | 5.244701343  |
| wavelet-LHH | firstorder | Mean                                 | 3.161597153  |
| wavelet-LHH | glrlm      | ShortRunLowGrayLevelEmphasis         | 0.002856931  |
| wavelet-LHH | glrlm      | GrayLevelVariance                    | 61.93056063  |
| wavelet-LHH | glrlm      | LowGrayLevelRunEmphasis              | 0.002894768  |
| wavelet-LHH | glrlm      | GrayLevelNonUniformityNormalized     | 0.045748604  |
| wavelet-LHH | glrlm      | RunVariance                          | 0.054644811  |

|             |       |                                      |             |
|-------------|-------|--------------------------------------|-------------|
| wavelet-LHH | glrlm | GrayLevelNonUniformity               | 30.04728528 |
| wavelet-LHH | glrlm | LongRunEmphasis                      | 1.152959327 |
| wavelet-LHH | glrlm | ShortRunHighGrayLevelEmphasis        | 1031.33231  |
| wavelet-LHH | glrlm | RunLengthNonUniformity               | 601.4039257 |
| wavelet-LHH | glrlm | ShortRunEmphasis                     | 0.966400162 |
| wavelet-LHH | glrlm | LongRunHighGrayLevelEmphasis         | 1211.908457 |
| wavelet-LHH | glrlm | RunPercentage                        | 0.954494633 |
| wavelet-LHH | glrlm | LongRunLowGrayLevelEmphasis          | 0.003065332 |
| wavelet-LHH | glrlm | RunEntropy                           | 5.073721177 |
| wavelet-LHH | glrlm | HighGrayLevelRunEmphasis             | 1063.837109 |
| wavelet-LHH | glrlm | RunLengthNonUniformityNormalized     | 0.915502256 |
| wavelet-LHH | glszm | GrayLevelVariance                    | 87.46173076 |
| wavelet-LHH | glszm | ZoneVariance                         | 12.50928007 |
| wavelet-LHH | glszm | GrayLevelNonUniformityNormalized     | 0.034026919 |
| wavelet-LHH | glszm | SizeZoneNonUniformityNormalized      | 0.592586046 |
| wavelet-LHH | glszm | SizeZoneNonUniformity                | 235.8492462 |
| wavelet-LHH | glszm | GrayLevelNonUniformity               | 13.54271357 |
| wavelet-LHH | glszm | LargeAreaEmphasis                    | 15.49748744 |
| wavelet-LHH | glszm | SmallAreaHighGrayLevelEmphasis       | 934.1804735 |
| wavelet-LHH | glszm | ZonePercentage                       | 0.578488372 |
| wavelet-LHH | glszm | LargeAreaLowGrayLevelEmphasis        | 0.019303865 |
| wavelet-LHH | glszm | LargeAreaHighGrayLevelEmphasis       | 15177.63819 |
| wavelet-LHH | glszm | HighGrayLevelZoneEmphasis            | 1128.577889 |
| wavelet-LHH | glszm | SmallAreaEmphasis                    | 0.797530072 |
| wavelet-LHH | glszm | LowGrayLevelZoneEmphasis             | 0.004025166 |
| wavelet-LHH | glszm | ZoneEntropy                          | 6.068238024 |
| wavelet-LHH | glszm | SmallAreaLowGrayLevelEmphasis        | 0.003762281 |
| wavelet-LHH | ngtdm | Coarseness                           | 0.010438203 |
| wavelet-LHH | ngtdm | Complexity                           | 5878.041734 |
| wavelet-LHH | ngtdm | Strength                             | 8.396151829 |
| wavelet-LHH | ngtdm | Contrast                             | 0.262772743 |
| wavelet-LHH | ngtdm | Busyness                             | 0.049724134 |
| wavelet-LLH | gldm  | GrayLevelVariance                    | 139.7643912 |
| wavelet-LLH | gldm  | HighGrayLevelEmphasis                | 2720.936047 |
| wavelet-LLH | gldm  | DependenceEntropy                    | 6.844033012 |
| wavelet-LLH | gldm  | DependenceNonUniformity              | 243.5901163 |
| wavelet-LLH | gldm  | GrayLevelNonUniformity               | 21.10755814 |
| wavelet-LLH | gldm  | SmallDependenceEmphasis              | 0.605038747 |
| wavelet-LLH | gldm  | SmallDependenceHighGrayLevelEmphasis | 1658.645493 |
| wavelet-LLH | gldm  | DependenceNonUniformityNormalized    | 0.354055402 |
| wavelet-LLH | gldm  | LargeDependenceEmphasis              | 5.098837209 |
| wavelet-LLH | gldm  | LargeDependenceLowGrayLevelEmphasis  | 0.003859152 |
| wavelet-LLH | gldm  | DependenceVariance                   | 1.495462074 |
| wavelet-LLH | gldm  | LargeDependenceHighGrayLevelEmphasis | 13936.125   |
| wavelet-LLH | gldm  | SmallDependenceLowGrayLevelEmphasis  | 0.002127905 |
| wavelet-LLH | gldm  | LowGrayLevelEmphasis                 | 0.002287633 |
| wavelet-LLH | glcm  | JointAverage                         | 50.8294092  |
| wavelet-LLH | glcm  | SumAverage                           | 101.6588184 |
| wavelet-LLH | glcm  | JointEntropy                         | 9.067416464 |
| wavelet-LLH | glcm  | ClusterShade                         | 714.4870104 |
| wavelet-LLH | glcm  | MaximumProbability                   | 0.010973052 |
| wavelet-LLH | glcm  | ldmn                                 | 0.978472555 |

|             |            |                                  |              |
|-------------|------------|----------------------------------|--------------|
| wavelet-LLH | glcm       | JointEnergy                      | 0.00246499   |
| wavelet-LLH | glcm       | Contrast                         | 214.8747359  |
| wavelet-LLH | glcm       | DifferenceEntropy                | 4.720546343  |
| wavelet-LLH | glcm       | InverseVariance                  | 0.132635701  |
| wavelet-LLH | glcm       | DifferenceVariance               | 105.5797828  |
| wavelet-LLH | glcm       | Idn                              | 0.909500698  |
| wavelet-LLH | glcm       | Idm                              | 0.127129954  |
| wavelet-LLH | glcm       | Correlation                      | 0.133957297  |
| wavelet-LLH | glcm       | Autocorrelation                  | 2601.523223  |
| wavelet-LLH | glcm       | SumEntropy                       | 5.850752069  |
| wavelet-LLH | glcm       | SumSquares                       | 125.3013617  |
| wavelet-LLH | glcm       | ClusterProminence                | 409240.3738  |
| wavelet-LLH | glcm       | Imc2                             | 0.977445443  |
| wavelet-LLH | glcm       | Imc1                             | -0.293964722 |
| wavelet-LLH | glcm       | DifferenceAverage                | 10.24993366  |
| wavelet-LLH | glcm       | Id                               | 0.206498285  |
| wavelet-LLH | glcm       | ClusterTendency                  | 286.3307109  |
| wavelet-LLH | firstorder | InterquartileRange               | 294.0494826  |
| wavelet-LLH | firstorder | Skewness                         | 0.049198306  |
| wavelet-LLH | firstorder | Uniformity                       | 0.03067959   |
| wavelet-LLH | firstorder | Median                           | -31.95347876 |
| wavelet-LLH | firstorder | Energy                           | 61270285.44  |
| wavelet-LLH | firstorder | RobustMeanAbsoluteDeviation      | 128.8357071  |
| wavelet-LLH | firstorder | MeanAbsoluteDeviation            | 212.4208445  |
| wavelet-LLH | firstorder | TotalEnergy                      | 1654297707   |
| wavelet-LLH | firstorder | Maximum                          | 1028.306903  |
| wavelet-LLH | firstorder | RootMeanSquared                  | 298.4219286  |
| wavelet-LLH | firstorder | 90Percentile                     | 283.0095648  |
| wavelet-LLH | firstorder | Minimum                          | -1293.384378 |
| wavelet-LLH | firstorder | Entropy                          | 5.408447765  |
| wavelet-LLH | firstorder | Range                            | 2321.691281  |
| wavelet-LLH | firstorder | Variance                         | 87277.39196  |
| wavelet-LLH | firstorder | 10Percentile                     | -387.1273936 |
| wavelet-LLH | firstorder | Kurtosis                         | 4.935686822  |
| wavelet-LLH | firstorder | Mean                             | -42.16936666 |
| wavelet-LLH | glrlm      | ShortRunLowGrayLevelEmphasis     | 0.002345813  |
| wavelet-LLH | glrlm      | GrayLevelVariance                | 143.4194453  |
| wavelet-LLH | glrlm      | LowGrayLevelRunEmphasis          | 0.002355916  |
| wavelet-LLH | glrlm      | GrayLevelNonUniformityNormalized | 0.029882327  |
| wavelet-LLH | glrlm      | RunVariance                      | 0.039422903  |
| wavelet-LLH | glrlm      | GrayLevelNonUniformity           | 19.85234425  |
| wavelet-LLH | glrlm      | LongRunEmphasis                  | 1.112984449  |
| wavelet-LLH | glrlm      | ShortRunHighGrayLevelEmphasis    | 2651.785636  |
| wavelet-LLH | glrlm      | RunLengthNonUniformity           | 621.2392761  |
| wavelet-LLH | glrlm      | ShortRunEmphasis                 | 0.974378665  |
| wavelet-LLH | glrlm      | LongRunHighGrayLevelEmphasis     | 3029.299607  |
| wavelet-LLH | glrlm      | RunPercentage                    | 0.965451699  |
| wavelet-LLH | glrlm      | LongRunLowGrayLevelEmphasis      | 0.002399898  |
| wavelet-LLH | glrlm      | RunEntropy                       | 5.600052574  |
| wavelet-LLH | glrlm      | HighGrayLevelRunEmphasis         | 2721.06325   |
| wavelet-LLH | glrlm      | RunLengthNonUniformityNormalized | 0.934919554  |
| wavelet-LLH | glszm      | GrayLevelVariance                | 187.6343287  |

|             |       |                                      |              |
|-------------|-------|--------------------------------------|--------------|
| wavelet-LLH | glszm | ZoneVariance                         | 3.043027136  |
| wavelet-LLH | glszm | GrayLevelNonUniformityNormalized     | 0.023870211  |
| wavelet-LLH | glszm | SizeZoneNonUniformityNormalized      | 0.644087507  |
| wavelet-LLH | glszm | SizeZoneNonUniformity                | 295.6361656  |
| wavelet-LLH | glszm | GrayLevelNonUniformity               | 10.95642702  |
| wavelet-LLH | glszm | LargeAreaEmphasis                    | 5.289760349  |
| wavelet-LLH | glszm | SmallAreaHighGrayLevelEmphasis       | 2274.323653  |
| wavelet-LLH | glszm | ZonePercentage                       | 0.667151163  |
| wavelet-LLH | glszm | LargeAreaLowGrayLevelEmphasis        | 0.004848316  |
| wavelet-LLH | glszm | LargeAreaHighGrayLevelEmphasis       | 14475.878    |
| wavelet-LLH | glszm | HighGrayLevelZoneEmphasis            | 2730.298475  |
| wavelet-LLH | glszm | SmallAreaEmphasis                    | 0.827827535  |
| wavelet-LLH | glszm | LowGrayLevelZoneEmphasis             | 0.003230499  |
| wavelet-LLH | glszm | ZoneEntropy                          | 6.450267903  |
| wavelet-LLH | glszm | SmallAreaLowGrayLevelEmphasis        | 0.003157128  |
| wavelet-LLH | ngtdm | Coarseness                           | 0.010125148  |
| wavelet-LLH | ngtdm | Complexity                           | 15861.49462  |
| wavelet-LLH | ngtdm | Strength                             | 17.60789545  |
| wavelet-LLH | ngtdm | Contrast                             | 0.432354785  |
| wavelet-LLH | ngtdm | Busyness                             | 0.024255629  |
| wavelet-LLL | gldm  | GrayLevelVariance                    | 813.2438797  |
| wavelet-LLL | gldm  | HighGrayLevelEmphasis                | 5513.263081  |
| wavelet-LLL | gldm  | DependenceEntropy                    | 7.320737082  |
| wavelet-LLL | gldm  | DependenceNonUniformity              | 341.6976744  |
| wavelet-LLL | gldm  | GrayLevelNonUniformity               | 9.488372093  |
| wavelet-LLL | gldm  | SmallDependenceEmphasis              | 0.732235068  |
| wavelet-LLL | gldm  | SmallDependenceHighGrayLevelEmphasis | 3403.824456  |
| wavelet-LLL | gldm  | DependenceNonUniformityNormalized    | 0.496653597  |
| wavelet-LLL | gldm  | LargeDependenceEmphasis              | 3.845930233  |
| wavelet-LLL | gldm  | LargeDependenceLowGrayLevelEmphasis  | 0.003323177  |
| wavelet-LLL | gldm  | DependenceVariance                   | 1.280345795  |
| wavelet-LLL | gldm  | LargeDependenceHighGrayLevelEmphasis | 31091.71948  |
| wavelet-LLL | gldm  | SmallDependenceLowGrayLevelEmphasis  | 0.002784187  |
| wavelet-LLL | gldm  | LowGrayLevelEmphasis                 | 0.002854917  |
| wavelet-LLL | glcm  | JointAverage                         | 73.59266163  |
| wavelet-LLL | glcm  | SumAverage                           | 147.1853233  |
| wavelet-LLL | glcm  | JointEntropy                         | 9.592210303  |
| wavelet-LLL | glcm  | ClusterShade                         | -61863.34041 |
| wavelet-LLL | glcm  | MaximumProbability                   | 0.007961585  |
| wavelet-LLL | glcm  | Idmn                                 | 0.963234432  |
| wavelet-LLL | glcm  | JointEnergy                          | 0.001541344  |
| wavelet-LLL | glcm  | Contrast                             | 694.8736185  |
| wavelet-LLL | glcm  | DifferenceEntropy                    | 5.556734363  |
| wavelet-LLL | glcm  | InverseVariance                      | 0.090469267  |
| wavelet-LLL | glcm  | DifferenceVariance                   | 302.2778322  |
| wavelet-LLL | glcm  | Idn                                  | 0.88011872   |
| wavelet-LLL | glcm  | Idm                                  | 0.086526128  |
| wavelet-LLL | glcm  | Correlation                          | 0.524938583  |
| wavelet-LLL | glcm  | Autocorrelation                      | 5798.867526  |
| wavelet-LLL | glcm  | SumEntropy                           | 6.978389247  |
| wavelet-LLL | glcm  | SumSquares                           | 729.1128031  |
| wavelet-LLL | glcm  | ClusterProminence                    | 11649761.24  |



|             |            |                                  |              |
|-------------|------------|----------------------------------|--------------|
| wavelet-LLL | glcm       | Imc2                             | 0.998715851  |
| wavelet-LLL | glcm       | Imc1                             | -0.474615037 |
| wavelet-LLL | glcm       | DifferenceAverage                | 19.48567837  |
| wavelet-LLL | glcm       | Id                               | 0.148218969  |
| wavelet-LLL | glcm       | ClusterTendency                  | 2221.577594  |
| wavelet-LLL | firstorder | InterquartileRange               | 1235.655174  |
| wavelet-LLL | firstorder | Skewness                         | -0.467658894 |
| wavelet-LLL | firstorder | Uniformity                       | 0.013791239  |
| wavelet-LLL | firstorder | Median                           | -550.5167871 |
| wavelet-LLL | firstorder | Energy                           | 638591195.4  |
| wavelet-LLL | firstorder | RobustMeanAbsoluteDeviation      | 491.6736575  |
| wavelet-LLL | firstorder | MeanAbsoluteDeviation            | 614.9668677  |
| wavelet-LLL | firstorder | TotalEnergy                      | 17241962276  |
| wavelet-LLL | firstorder | Maximum                          | 853.0418305  |
| wavelet-LLL | firstorder | RootMeanSquared                  | 963.423519   |
| wavelet-LLL | firstorder | 90Percentile                     | 150.7951918  |
| wavelet-LLL | firstorder | Minimum                          | -2338.867749 |
| wavelet-LLL | firstorder | Entropy                          | 6.447156024  |
| wavelet-LLL | firstorder | Range                            | 3191.90958   |
| wavelet-LLL | firstorder | Variance                         | 507832.8574  |
| wavelet-LLL | firstorder | 10Percentile                     | -1703.893047 |
| wavelet-LLL | firstorder | Kurtosis                         | 2.053137249  |
| wavelet-LLL | firstorder | Mean                             | -648.345602  |
| wavelet-LLL | glrlm      | ShortRunLowGrayLevelEmphasis     | 0.002914485  |
| wavelet-LLL | glrlm      | GrayLevelVariance                | 812.2207715  |
| wavelet-LLL | glrlm      | LowGrayLevelRunEmphasis          | 0.002917943  |
| wavelet-LLL | glrlm      | GrayLevelNonUniformityNormalized | 0.013362887  |
| wavelet-LLL | glrlm      | RunVariance                      | 0.026106431  |
| wavelet-LLL | glrlm      | GrayLevelNonUniformity           | 8.981332131  |
| wavelet-LLL | glrlm      | LongRunEmphasis                  | 1.074181165  |
| wavelet-LLL | glrlm      | ShortRunHighGrayLevelEmphasis    | 5296.041352  |
| wavelet-LLL | glrlm      | RunLengthNonUniformity           | 642.9073886  |
| wavelet-LLL | glrlm      | ShortRunEmphasis                 | 0.983109338  |
| wavelet-LLL | glrlm      | LongRunHighGrayLevelEmphasis     | 6081.804861  |
| wavelet-LLL | glrlm      | RunPercentage                    | 0.976855993  |
| wavelet-LLL | glrlm      | LongRunLowGrayLevelEmphasis      | 0.002932444  |
| wavelet-LLL | glrlm      | RunEntropy                       | 6.562309569  |
| wavelet-LLL | glrlm      | HighGrayLevelRunEmphasis         | 5440.054342  |
| wavelet-LLL | glrlm      | RunLengthNonUniformityNormalized | 0.95651992   |
| wavelet-LLL | glszm      | GrayLevelVariance                | 774.5045804  |
| wavelet-LLL | glszm      | ZoneVariance                     | 1.654576342  |
| wavelet-LLL | glszm      | GrayLevelNonUniformityNormalized | 0.011600895  |
| wavelet-LLL | glszm      | SizeZoneNonUniformityNormalized  | 0.77044343   |
| wavelet-LLL | glszm      | SizeZoneNonUniformity            | 409.1054614  |
| wavelet-LLL | glszm      | GrayLevelNonUniformity           | 6.16007533   |
| wavelet-LLL | glszm      | LargeAreaEmphasis                | 3.333333333  |
| wavelet-LLL | glszm      | SmallAreaHighGrayLevelEmphasis   | 4015.131947  |
| wavelet-LLL | glszm      | ZonePercentage                   | 0.771802326  |
| wavelet-LLL | glszm      | LargeAreaLowGrayLevelEmphasis    | 0.003984214  |
| wavelet-LLL | glszm      | LargeAreaHighGrayLevelEmphasis   | 26126.25424  |
| wavelet-LLL | glszm      | HighGrayLevelZoneEmphasis        | 4703.032015  |
| wavelet-LLL | glszm      | SmallAreaEmphasis                | 0.896857813  |

|             |            |                                      |              |
|-------------|------------|--------------------------------------|--------------|
| wavelet-LLL | glszm      | LowGrayLevelZoneEmphasis             | 0.00363107   |
| wavelet-LLL | glszm      | ZoneEntropy                          | 7.005930477  |
| wavelet-LLL | glszm      | SmallAreaLowGrayLevelEmphasis        | 0.003592662  |
| wavelet-LLL | ngtdm      | Coarseness                           | 0.009897309  |
| wavelet-LLL | ngtdm      | Complexity                           | 59978.8186   |
| wavelet-LLL | ngtdm      | Strength                             | 48.42167828  |
| wavelet-LLL | ngtdm      | Contrast                             | 1.765971575  |
| wavelet-LLL | ngtdm      | Busyness                             | 0.012488443  |
| wavelet-HHL | gldm       | GrayLevelVariance                    | 42.63060269  |
| wavelet-HHL | gldm       | HighGrayLevelEmphasis                | 758.9709302  |
| wavelet-HHL | gldm       | DependenceEntropy                    | 6.501432194  |
| wavelet-HHL | gldm       | DependenceNonUniformity              | 169.0261628  |
| wavelet-HHL | gldm       | GrayLevelNonUniformity               | 36.95348837  |
| wavelet-HHL | gldm       | SmallDependenceEmphasis              | 0.455748768  |
| wavelet-HHL | gldm       | SmallDependenceHighGrayLevelEmphasis | 347.1130399  |
| wavelet-HHL | gldm       | DependenceNonUniformityNormalized    | 0.245677562  |
| wavelet-HHL | gldm       | LargeDependenceEmphasis              | 9.281976744  |
| wavelet-HHL | gldm       | LargeDependenceLowGrayLevelEmphasis  | 0.01560574   |
| wavelet-HHL | gldm       | DependenceVariance                   | 3.118881828  |
| wavelet-HHL | gldm       | LargeDependenceHighGrayLevelEmphasis | 6606.276163  |
| wavelet-HHL | gldm       | SmallDependenceLowGrayLevelEmphasis  | 0.002415306  |
| wavelet-HHL | gldm       | LowGrayLevelEmphasis                 | 0.003230089  |
| wavelet-HHL | glcm       | JointAverage                         | 26.79812262  |
| wavelet-HHL | glcm       | SumAverage                           | 53.59624524  |
| wavelet-HHL | glcm       | JointEntropy                         | 8.240095466  |
| wavelet-HHL | glcm       | ClusterShade                         | 191.7654564  |
| wavelet-HHL | glcm       | MaximumProbability                   | 0.019494959  |
| wavelet-HHL | glcm       | ldmn                                 | 0.968070464  |
| wavelet-HHL | glcm       | JointEnergy                          | 0.005101804  |
| wavelet-HHL | glcm       | Contrast                             | 81.79678034  |
| wavelet-HHL | glcm       | DifferenceEntropy                    | 4.126389088  |
| wavelet-HHL | glcm       | InverseVariance                      | 0.194577813  |
| wavelet-HHL | glcm       | DifferenceVariance                   | 39.36762859  |
| wavelet-HHL | glcm       | ldn                                  | 0.890446689  |
| wavelet-HHL | glcm       | ldm                                  | 0.192688363  |
| wavelet-HHL | glcm       | Correlation                          | -0.029731644 |
| wavelet-HHL | glcm       | Autocorrelation                      | 717.0756104  |
| wavelet-HHL | glcm       | SumEntropy                           | 4.970120184  |
| wavelet-HHL | glcm       | SumSquares                           | 39.80915183  |
| wavelet-HHL | glcm       | ClusterProminence                    | 28843.9975   |
| wavelet-HHL | glcm       | lmc2                                 | 0.899017728  |
| wavelet-HHL | glcm       | lmc1                                 | -0.183092705 |
| wavelet-HHL | glcm       | DifferenceAverage                    | 6.431619094  |
| wavelet-HHL | glcm       | ld                                   | 0.275675423  |
| wavelet-HHL | glcm       | ClusterTendency                      | 77.43982697  |
| wavelet-HHL | firstorder | InterquartileRange                   | 162.0632824  |
| wavelet-HHL | firstorder | Skewness                             | 0.101766871  |
| wavelet-HHL | firstorder | Uniformity                           | 0.053711466  |
| wavelet-HHL | firstorder | Median                               | -2.109107525 |
| wavelet-HHL | firstorder | Energy                               | 18342109.93  |
| wavelet-HHL | firstorder | RobustMeanAbsoluteDeviation          | 70.75709956  |
| wavelet-HHL | firstorder | MeanAbsoluteDeviation                | 118.4808324  |

|             |            |                                  |              |
|-------------|------------|----------------------------------|--------------|
| wavelet-HHL | firstorder | TotalEnergy                      | 495236968.1  |
| wavelet-HHL | firstorder | Maximum                          | 519.1388679  |
| wavelet-HHL | firstorder | RootMeanSquared                  | 163.2790357  |
| wavelet-HHL | firstorder | 90Percentile                     | 204.0423845  |
| wavelet-HHL | firstorder | Minimum                          | -632.0131387 |
| wavelet-HHL | firstorder | Entropy                          | 4.620493688  |
| wavelet-HHL | firstorder | Range                            | 1151.152007  |
| wavelet-HHL | firstorder | Variance                         | 26617.15722  |
| wavelet-HHL | firstorder | 10Percentile                     | -182.0074158 |
| wavelet-HHL | firstorder | Kurtosis                         | 4.091233163  |
| wavelet-HHL | firstorder | Mean                             | 6.548762216  |
| wavelet-HHL | glrlm      | ShortRunLowGrayLevelEmphasis     | 0.003272418  |
| wavelet-HHL | glrlm      | GrayLevelVariance                | 44.36053424  |
| wavelet-HHL | glrlm      | LowGrayLevelRunEmphasis          | 0.003335266  |
| wavelet-HHL | glrlm      | GrayLevelNonUniformityNormalized | 0.051348696  |
| wavelet-HHL | glrlm      | RunVariance                      | 0.070380932  |
| wavelet-HHL | glrlm      | GrayLevelNonUniformity           | 33.31268721  |
| wavelet-HHL | glrlm      | LongRunEmphasis                  | 1.19559918   |
| wavelet-HHL | glrlm      | ShortRunHighGrayLevelEmphasis    | 730.7115414  |
| wavelet-HHL | glrlm      | RunLengthNonUniformity           | 581.4428249  |
| wavelet-HHL | glrlm      | ShortRunEmphasis                 | 0.958091729  |
| wavelet-HHL | glrlm      | LongRunHighGrayLevelEmphasis     | 902.4075792  |
| wavelet-HHL | glrlm      | RunPercentage                    | 0.942978533  |
| wavelet-HHL | glrlm      | LongRunLowGrayLevelEmphasis      | 0.003627623  |
| wavelet-HHL | glrlm      | RunEntropy                       | 4.936347405  |
| wavelet-HHL | glrlm      | HighGrayLevelRunEmphasis         | 761.0948472  |
| wavelet-HHL | glrlm      | RunLengthNonUniformityNormalized | 0.895942767  |
| wavelet-HHL | glszm      | GrayLevelVariance                | 65.94902639  |
| wavelet-HHL | glszm      | ZoneVariance                     | 18.64228375  |
| wavelet-HHL | glszm      | GrayLevelNonUniformityNormalized | 0.037150672  |
| wavelet-HHL | glszm      | SizeZoneNonUniformityNormalized  | 0.531302506  |
| wavelet-HHL | glszm      | SizeZoneNonUniformity            | 186.4871795  |
| wavelet-HHL | glszm      | GrayLevelNonUniformity           | 13.03988604  |
| wavelet-HHL | glszm      | LargeAreaEmphasis                | 22.48433048  |
| wavelet-HHL | glszm      | SmallAreaHighGrayLevelEmphasis   | 573.1968347  |
| wavelet-HHL | glszm      | ZonePercentage                   | 0.510174419  |
| wavelet-HHL | glszm      | LargeAreaLowGrayLevelEmphasis    | 0.037243798  |
| wavelet-HHL | glszm      | LargeAreaHighGrayLevelEmphasis   | 15367.7037   |
| wavelet-HHL | glszm      | HighGrayLevelZoneEmphasis        | 774.9344729  |
| wavelet-HHL | glszm      | SmallAreaEmphasis                | 0.756009823  |
| wavelet-HHL | glszm      | LowGrayLevelZoneEmphasis         | 0.004896778  |
| wavelet-HHL | glszm      | ZoneEntropy                      | 6.035387442  |
| wavelet-HHL | glszm      | SmallAreaLowGrayLevelEmphasis    | 0.004529853  |
| wavelet-HHL | ngtdm      | Coarseness                       | 0.010095415  |
| wavelet-HHL | ngtdm      | Complexity                       | 3133.168995  |
| wavelet-HHL | ngtdm      | Strength                         | 4.579226835  |
| wavelet-HHL | ngtdm      | Contrast                         | 0.259302692  |
| wavelet-HHL | ngtdm      | Busyness                         | 0.080589932  |
| wavelet-HLH | gldm       | GrayLevelVariance                | 33.42313413  |
| wavelet-HLH | gldm       | HighGrayLevelEmphasis            | 504.2122093  |
| wavelet-HLH | gldm       | DependenceEntropy                | 6.36513909   |
| wavelet-HLH | gldm       | DependenceNonUniformity          | 167.1133721  |

|             |            |                                      |              |
|-------------|------------|--------------------------------------|--------------|
| wavelet-HLH | gldm       | GrayLevelNonUniformity               | 41.6627907   |
| wavelet-HLH | gldm       | SmallDependenceEmphasis              | 0.466273419  |
| wavelet-HLH | gldm       | SmallDependenceHighGrayLevelEmphasis | 250.4180394  |
| wavelet-HLH | gldm       | DependenceNonUniformityNormalized    | 0.242897343  |
| wavelet-HLH | gldm       | LargeDependenceEmphasis              | 10.34593023  |
| wavelet-HLH | gldm       | LargeDependenceLowGrayLevelEmphasis  | 0.026303563  |
| wavelet-HLH | gldm       | DependenceVariance                   | 3.801852353  |
| wavelet-HLH | gldm       | LargeDependenceHighGrayLevelEmphasis | 4785.005814  |
| wavelet-HLH | gldm       | SmallDependenceLowGrayLevelEmphasis  | 0.003488374  |
| wavelet-HLH | gldm       | LowGrayLevelEmphasis                 | 0.00480066   |
| wavelet-HLH | glcm       | JointAverage                         | 21.72844304  |
| wavelet-HLH | glcm       | SumAverage                           | 43.45688608  |
| wavelet-HLH | glcm       | JointEntropy                         | 7.990613855  |
| wavelet-HLH | glcm       | ClusterShade                         | 36.62919175  |
| wavelet-HLH | glcm       | MaximumProbability                   | 0.021434003  |
| wavelet-HLH | glcm       | ldmn                                 | 0.97375523   |
| wavelet-HLH | glcm       | JointEnergy                          | 0.006077257  |
| wavelet-HLH | glcm       | Contrast                             | 60.87751838  |
| wavelet-HLH | glcm       | DifferenceEntropy                    | 3.930821015  |
| wavelet-HLH | glcm       | InverseVariance                      | 0.206881222  |
| wavelet-HLH | glcm       | DifferenceVariance                   | 29.27101155  |
| wavelet-HLH | glcm       | ldn                                  | 0.898990855  |
| wavelet-HLH | glcm       | ldm                                  | 0.203936451  |
| wavelet-HLH | glcm       | Correlation                          | -0.013655844 |
| wavelet-HLH | glcm       | Autocorrelation                      | 471.6904925  |
| wavelet-HLH | glcm       | SumEntropy                           | 4.811160576  |
| wavelet-HLH | glcm       | SumSquares                           | 29.98929046  |
| wavelet-HLH | glcm       | ClusterProminence                    | 18088.37043  |
| wavelet-HLH | glcm       | lmc2                                 | 0.86606405   |
| wavelet-HLH | glcm       | lmc1                                 | -0.160737554 |
| wavelet-HLH | glcm       | DifferenceAverage                    | 5.560862487  |
| wavelet-HLH | glcm       | ld                                   | 0.289903376  |
| wavelet-HLH | glcm       | ClusterTendency                      | 59.07964347  |
| wavelet-HLH | firstorder | InterquartileRange                   | 145.7991438  |
| wavelet-HLH | firstorder | Skewness                             | 0.073244215  |
| wavelet-HLH | firstorder | Uniformity                           | 0.060556382  |
| wavelet-HLH | firstorder | Median                               | 0.47423188   |
| wavelet-HLH | firstorder | Energy                               | 14520103.33  |
| wavelet-HLH | firstorder | RobustMeanAbsoluteDeviation          | 62.51266467  |
| wavelet-HLH | firstorder | MeanAbsoluteDeviation                | 104.2456245  |
| wavelet-HLH | firstorder | TotalEnergy                          | 392042789.9  |
| wavelet-HLH | firstorder | Maximum                              | 577.1614622  |
| wavelet-HLH | firstorder | RootMeanSquared                      | 145.2749164  |
| wavelet-HLH | firstorder | 90Percentile                         | 176.6247856  |
| wavelet-HLH | firstorder | Minimum                              | -506.5502279 |
| wavelet-HLH | firstorder | Entropy                              | 4.444517625  |
| wavelet-HLH | firstorder | Range                                | 1083.71169   |
| wavelet-HLH | firstorder | Variance                             | 21084.88296  |
| wavelet-HLH | firstorder | 10Percentile                         | -164.7128295 |
| wavelet-HLH | firstorder | Kurtosis                             | 4.651506618  |
| wavelet-HLH | firstorder | Mean                                 | 4.463001888  |
| wavelet-HLH | gllm       | ShortRunLowGrayLevelEmphasis         | 0.004854493  |

|             |       |                                  |             |
|-------------|-------|----------------------------------|-------------|
| wavelet-HLH | glrlm | GrayLevelVariance                | 35.07923601 |
| wavelet-HLH | glrlm | LowGrayLevelRunEmphasis          | 0.004958064 |
| wavelet-HLH | glrlm | GrayLevelNonUniformityNormalized | 0.05760049  |
| wavelet-HLH | glrlm | RunVariance                      | 0.073497184 |
| wavelet-HLH | glrlm | GrayLevelNonUniformity           | 37.25624045 |
| wavelet-HLH | glrlm | LongRunEmphasis                  | 1.205955613 |
| wavelet-HLH | glrlm | ShortRunHighGrayLevelEmphasis    | 486.0178354 |
| wavelet-HLH | glrlm | RunLengthNonUniformity           | 576.6539372 |
| wavelet-HLH | glrlm | ShortRunEmphasis                 | 0.955904579 |
| wavelet-HLH | glrlm | LongRunHighGrayLevelEmphasis     | 602.3503876 |
| wavelet-HLH | glrlm | RunPercentage                    | 0.940071556 |
| wavelet-HLH | glrlm | LongRunLowGrayLevelEmphasis      | 0.005439567 |
| wavelet-HLH | glrlm | RunEntropy                       | 4.78173554  |
| wavelet-HLH | glrlm | HighGrayLevelRunEmphasis         | 506.6509088 |
| wavelet-HLH | glrlm | RunLengthNonUniformityNormalized | 0.891157526 |
| wavelet-HLH | glszm | GrayLevelVariance                | 54.9252926  |
| wavelet-HLH | glszm | ZoneVariance                     | 16.42432851 |
| wavelet-HLH | glszm | GrayLevelNonUniformityNormalized | 0.040761754 |
| wavelet-HLH | glszm | SizeZoneNonUniformityNormalized  | 0.556437215 |
| wavelet-HLH | glszm | SizeZoneNonUniformity            | 197.5352113 |
| wavelet-HLH | glszm | GrayLevelNonUniformity           | 14.47042254 |
| wavelet-HLH | glszm | LargeAreaEmphasis                | 20.18028169 |
| wavelet-HLH | glszm | SmallAreaHighGrayLevelEmphasis   | 422.3289841 |
| wavelet-HLH | glszm | ZonePercentage                   | 0.515988372 |
| wavelet-HLH | glszm | LargeAreaLowGrayLevelEmphasis    | 0.05129116  |
| wavelet-HLH | glszm | LargeAreaHighGrayLevelEmphasis   | 9098.090141 |
| wavelet-HLH | glszm | HighGrayLevelZoneEmphasis        | 532.1323944 |
| wavelet-HLH | glszm | SmallAreaEmphasis                | 0.773295228 |
| wavelet-HLH | glszm | LowGrayLevelZoneEmphasis         | 0.007059332 |
| wavelet-HLH | glszm | ZoneEntropy                      | 5.89341006  |
| wavelet-HLH | glszm | SmallAreaLowGrayLevelEmphasis    | 0.006430898 |
| wavelet-HLH | ngtdm | Coarseness                       | 0.010423797 |
| wavelet-HLH | ngtdm | Complexity                       | 2809.607661 |
| wavelet-HLH | ngtdm | Strength                         | 5.00231429  |
| wavelet-HLH | ngtdm | Contrast                         | 0.174393409 |
| wavelet-HLH | ngtdm | Busyness                         | 0.087386695 |

| Image type | Feature Class | Feature Name                         |                                                                                                                                                                                                                                                                                                                                                                                                                                              |
|------------|---------------|--------------------------------------|----------------------------------------------------------------------------------------------------------------------------------------------------------------------------------------------------------------------------------------------------------------------------------------------------------------------------------------------------------------------------------------------------------------------------------------------|
| general    | info          | BoundingBox                          | 4: RTSTRUCT: C99-DNU_segment_ITV LLL<br>(0, 0, 1, 11, 11, 15)                                                                                                                                                                                                                                                                                                                                                                                |
| general    | info          | EnabledImageTypes                    | {u'Original': {}, u'Wavelet': {}}                                                                                                                                                                                                                                                                                                                                                                                                            |
|            |               |                                      | {'distances': [1], 'additionalInfo': True,<br>'force2D': False, 'interpolator': 'sitkBSpline',<br>'resampledPixelSpacing': [3.0], 'label': 1,<br>'normalizeScale': 1, 'normalize': False,<br>'force2Ddimension': 0, 'removeOutliers':<br>None, 'minimumROISize': None, u'binWidth':<br>25.0, 'minimumROIDimensions': 1,<br>u'correctMask': True, 'preCrop': False,<br>u'symmetricalGLCM': True,<br>'resegmentRange': None, 'padDistance': 5} |
| general    | info          | GeneralSettings                      | 7d056ecdf753683e4591c2739b84a4a1960cf                                                                                                                                                                                                                                                                                                                                                                                                        |
| general    | info          | ImageHash                            | 72f                                                                                                                                                                                                                                                                                                                                                                                                                                          |
| general    | info          | ImageSpacing                         | (0.9765624999999998,<br>0.9765624999999998, 1.9999999999999999)<br>e600e7fa0749f8f470a9739f8f55c260581b67                                                                                                                                                                                                                                                                                                                                    |
| general    | info          | MaskHash                             | b2                                                                                                                                                                                                                                                                                                                                                                                                                                           |
| general    | info          | NumpyVersion                         | 1.13.1                                                                                                                                                                                                                                                                                                                                                                                                                                       |
| general    | info          | PyWaveletVersion                     | 0.5.2                                                                                                                                                                                                                                                                                                                                                                                                                                        |
| general    | info          | SimpleITKVersion                     | 1.1.0                                                                                                                                                                                                                                                                                                                                                                                                                                        |
| general    | info          | Version                              | 1.3.0.post102+g1b0eb74                                                                                                                                                                                                                                                                                                                                                                                                                       |
| general    | info          | VolumeNum                            | 1                                                                                                                                                                                                                                                                                                                                                                                                                                            |
| general    | info          | VoxelNum                             | 831                                                                                                                                                                                                                                                                                                                                                                                                                                          |
| original   | shape         | Maximum3DDiameter                    | 45.49725266                                                                                                                                                                                                                                                                                                                                                                                                                                  |
| original   | shape         | Maximum2DDiameterSlice               | 33.54101966                                                                                                                                                                                                                                                                                                                                                                                                                                  |
| original   | shape         | Sphericity                           | 0.848076773                                                                                                                                                                                                                                                                                                                                                                                                                                  |
| original   | shape         | MinorAxis                            | 30.60951668                                                                                                                                                                                                                                                                                                                                                                                                                                  |
| original   | shape         | Elongation                           | 0.736131379                                                                                                                                                                                                                                                                                                                                                                                                                                  |
| original   | shape         | SurfaceVolumeRatio                   | 0.202174957                                                                                                                                                                                                                                                                                                                                                                                                                                  |
| original   | shape         | Volume                               | 22437                                                                                                                                                                                                                                                                                                                                                                                                                                        |
| original   | shape         | MajorAxis                            | 41.58159474                                                                                                                                                                                                                                                                                                                                                                                                                                  |
| original   | shape         | SurfaceArea                          | 4536.199509                                                                                                                                                                                                                                                                                                                                                                                                                                  |
| original   | shape         | Flatness                             | 0.598152217                                                                                                                                                                                                                                                                                                                                                                                                                                  |
| original   | shape         | LeastAxis                            | 24.87212308                                                                                                                                                                                                                                                                                                                                                                                                                                  |
| original   | shape         | Maximum2DDiameterColumn              | 44.59820624                                                                                                                                                                                                                                                                                                                                                                                                                                  |
| original   | shape         | Maximum2DDiameterRow                 | 42.95346319                                                                                                                                                                                                                                                                                                                                                                                                                                  |
| original   | gldm          | GrayLevelVariance                    | 34.02313771                                                                                                                                                                                                                                                                                                                                                                                                                                  |
| original   | gldm          | HighGrayLevelEmphasis                | 560.3694344                                                                                                                                                                                                                                                                                                                                                                                                                                  |
| original   | gldm          | DependenceEntropy                    | 6.366118964                                                                                                                                                                                                                                                                                                                                                                                                                                  |
| original   | gldm          | DependenceNonUniformity              | 79.27196149                                                                                                                                                                                                                                                                                                                                                                                                                                  |
| original   | gldm          | GrayLevelNonUniformity               | 118.9157641                                                                                                                                                                                                                                                                                                                                                                                                                                  |
| original   | gldm          | SmallDependenceEmphasis              | 0.261018736                                                                                                                                                                                                                                                                                                                                                                                                                                  |
| original   | gldm          | SmallDependenceHighGrayLevelEmphasis | 93.60497842                                                                                                                                                                                                                                                                                                                                                                                                                                  |
| original   | gldm          | DependenceNonUniformityNormalized    | 0.095393455                                                                                                                                                                                                                                                                                                                                                                                                                                  |
| original   | gldm          | LargeDependenceEmphasis              | 64.04452467                                                                                                                                                                                                                                                                                                                                                                                                                                  |
| original   | gldm          | LargeDependenceLowGrayLevelEmphasis  | 0.098950981                                                                                                                                                                                                                                                                                                                                                                                                                                  |
| original   | gldm          | DependenceVariance                   | 25.53286676                                                                                                                                                                                                                                                                                                                                                                                                                                  |

|          |            |                                      |              |
|----------|------------|--------------------------------------|--------------|
| original | gldm       | LargeDependenceHighGrayLevelEmphasis | 45088.71119  |
| original | gldm       | SmallDependenceLowGrayLevelEmphasis  | 0.00583525   |
| original | gldm       | LowGrayLevelEmphasis                 | 0.007353739  |
| original | glcm       | JointAverage                         | 23.8794799   |
| original | glcm       | SumAverage                           | 47.7589598   |
| original | glcm       | JointEntropy                         | 5.998118654  |
| original | glcm       | ClusterShade                         | -1282.63291  |
| original | glcm       | MaximumProbability                   | 0.140615316  |
| original | glcm       | Idmn                                 | 0.973305262  |
| original | glcm       | JointEnergy                          | 0.051301045  |
| original | glcm       | Contrast                             | 25.46144871  |
| original | glcm       | DifferenceEntropy                    | 3.066138361  |
| original | glcm       | InverseVariance                      | 0.362655767  |
| original | glcm       | DifferenceVariance                   | 16.61294261  |
| original | glcm       | Idn                                  | 0.917340702  |
| original | glcm       | Idm                                  | 0.443803507  |
| original | glcm       | Correlation                          | 0.500039632  |
| original | glcm       | Autocorrelation                      | 583.2645505  |
| original | glcm       | SumEntropy                           | 4.150888289  |
| original | glcm       | SumSquares                           | 25.74778432  |
| original | glcm       | ClusterProminence                    | 37724.36496  |
| original | glcm       | Imc2                                 | 0.818675422  |
| original | glcm       | Imc1                                 | -0.171903016 |
| original | glcm       | DifferenceAverage                    | 2.953998056  |
| original | glcm       | Id                                   | 0.493365817  |
| original | glcm       | ClusterTendency                      | 77.52968857  |
| original | firstorder | InterquartileRange                   | 132          |
| original | firstorder | Skewness                             | -1.687937209 |
| original | firstorder | Uniformity                           | 0.143099596  |
| original | firstorder | Median                               | 7            |
| original | firstorder | Energy                               | 21062553     |
| original | firstorder | RobustMeanAbsoluteDeviation          | 68.48682458  |
| original | firstorder | MeanAbsoluteDeviation                | 111.3857429  |
| original | firstorder | TotalEnergy                          | 568688931    |
| original | firstorder | Maximum                              | 69           |
| original | firstorder | RootMeanSquared                      | 159.2043733  |
| original | firstorder | 90Percentile                         | 42           |
| original | firstorder | Minimum                              | -621         |
| original | firstorder | Entropy                              | 3.597830474  |
| original | firstorder | Range                                | 690          |
| original | firstorder | Variance                             | 21183.68656  |
| original | firstorder | 10Percentile                         | -293         |
| original | firstorder | Kurtosis                             | 5.059374657  |
| original | firstorder | Mean                                 | -64.51624549 |
| original | glrlm      | ShortRunLowGrayLevelEmphasis         | 0.008588658  |
| original | glrlm      | GrayLevelVariance                    | 38.12023683  |
| original | glrlm      | LowGrayLevelRunEmphasis              | 0.008807354  |
| original | glrlm      | GrayLevelNonUniformityNormalized     | 0.105051902  |
| original | glrlm      | RunVariance                          | 0.439224242  |
| original | glrlm      | GrayLevelNonUniformity               | 69.89652808  |
| original | glrlm      | LongRunEmphasis                      | 2.00644338   |
| original | glrlm      | ShortRunHighGrayLevelEmphasis        | 436.7211359  |
| original | glrlm      | RunLengthNonUniformity               | 471.2922929  |

|             |       |                                      |             |
|-------------|-------|--------------------------------------|-------------|
| original    | glrlm | ShortRunEmphasis                     | 0.866138281 |
| original    | glrlm | LongRunHighGrayLevelEmphasis         | 1227.107527 |
| original    | glrlm | RunPercentage                        | 0.799777839 |
| original    | glrlm | LongRunLowGrayLevelEmphasis          | 0.010348517 |
| original    | glrlm | RunEntropy                           | 4.594537742 |
| original    | glrlm | HighGrayLevelRunEmphasis             | 527.9314205 |
| original    | glrlm | RunLengthNonUniformityNormalized     | 0.708623893 |
| original    | glszm | GrayLevelVariance                    | 45.45992515 |
| original    | glszm | ZoneVariance                         | 359.0902655 |
| original    | glszm | GrayLevelNonUniformityNormalized     | 0.0509851   |
| original    | glszm | SizeZoneNonUniformityNormalized      | 0.526234023 |
| original    | glszm | SizeZoneNonUniformity                | 125.2436975 |
| original    | glszm | GrayLevelNonUniformity               | 12.13445378 |
| original    | glszm | LargeAreaEmphasis                    | 371.2815126 |
| original    | glszm | SmallAreaHighGrayLevelEmphasis       | 245.8173869 |
| original    | glszm | ZonePercentage                       | 0.286401925 |
| original    | glszm | LargeAreaLowGrayLevelEmphasis        | 0.55269718  |
| original    | glszm | LargeAreaHighGrayLevelEmphasis       | 260974.2815 |
| original    | glszm | HighGrayLevelZoneEmphasis            | 356.2857143 |
| original    | glszm | SmallAreaEmphasis                    | 0.7524766   |
| original    | glszm | LowGrayLevelZoneEmphasis             | 0.020775505 |
| original    | glszm | ZoneEntropy                          | 5.598656827 |
| original    | glszm | SmallAreaLowGrayLevelEmphasis        | 0.019858051 |
| original    | ngtdm | Coarseness                           | 0.00648284  |
| original    | ngtdm | Complexity                           | 842.5318526 |
| original    | ngtdm | Strength                             | 4.88908452  |
| original    | ngtdm | Contrast                             | 0.211582528 |
| original    | ngtdm | Busyness                             | 0.160906923 |
| wavelet-HHH | gldm  | GrayLevelVariance                    | 3.239951286 |
| wavelet-HHH | gldm  | HighGrayLevelEmphasis                | 94.25752106 |
| wavelet-HHH | gldm  | DependenceEntropy                    | 5.815164191 |
| wavelet-HHH | gldm  | DependenceNonUniformity              | 61.01684717 |
| wavelet-HHH | gldm  | GrayLevelNonUniformity               | 186.179302  |
| wavelet-HHH | gldm  | SmallDependenceEmphasis              | 0.150879871 |
| wavelet-HHH | gldm  | SmallDependenceHighGrayLevelEmphasis | 15.51520375 |
| wavelet-HHH | gldm  | DependenceNonUniformityNormalized    | 0.073425809 |
| wavelet-HHH | gldm  | LargeDependenceEmphasis              | 66.02286402 |
| wavelet-HHH | gldm  | LargeDependenceLowGrayLevelEmphasis  | 0.734566807 |
| wavelet-HHH | gldm  | DependenceVariance                   | 19.25438303 |
| wavelet-HHH | gldm  | LargeDependenceHighGrayLevelEmphasis | 6073.032491 |
| wavelet-HHH | gldm  | SmallDependenceLowGrayLevelEmphasis  | 0.003571757 |
| wavelet-HHH | gldm  | LowGrayLevelEmphasis                 | 0.013522581 |
| wavelet-HHH | glcm  | JointAverage                         | 9.516986289 |
| wavelet-HHH | glcm  | SumAverage                           | 19.03397258 |
| wavelet-HHH | glcm  | JointEntropy                         | 4.813631373 |
| wavelet-HHH | glcm  | ClusterShade                         | 9.993460244 |
| wavelet-HHH | glcm  | MaximumProbability                   | 0.146968868 |
| wavelet-HHH | glcm  | Idmn                                 | 0.987651492 |
| wavelet-HHH | glcm  | JointEnergy                          | 0.07231073  |
| wavelet-HHH | glcm  | Contrast                             | 5.412329661 |
| wavelet-HHH | glcm  | DifferenceEntropy                    | 2.336574862 |
| wavelet-HHH | glcm  | InverseVariance                      | 0.430492914 |
| wavelet-HHH | glcm  | DifferenceVariance                   | 3.086946628 |



|             |            |                                  |              |
|-------------|------------|----------------------------------|--------------|
| wavelet-HHH | glcm       | Idn                              | 0.934884363  |
| wavelet-HHH | glcm       | Idm                              | 0.512845913  |
| wavelet-HHH | glcm       | Correlation                      | -0.00954689  |
| wavelet-HHH | glcm       | Autocorrelation                  | 90.55124226  |
| wavelet-HHH | glcm       | SumEntropy                       | 3.01154039   |
| wavelet-HHH | glcm       | SumSquares                       | 2.684228701  |
| wavelet-HHH | glcm       | ClusterProminence                | 245.7231919  |
| wavelet-HHH | glcm       | Imc2                             | 0.531461686  |
| wavelet-HHH | glcm       | Imc1                             | -0.069288526 |
| wavelet-HHH | glcm       | DifferenceAverage                | 1.516869653  |
| wavelet-HHH | glcm       | Id                               | 0.558690442  |
| wavelet-HHH | glcm       | ClusterTendency                  | 5.324585143  |
| wavelet-HHH | firstorder | InterquartileRange               | 32.27483578  |
| wavelet-HHH | firstorder | Skewness                         | 0.812063946  |
| wavelet-HHH | firstorder | Uniformity                       | 0.224042481  |
| wavelet-HHH | firstorder | Median                           | 0.470432738  |
| wavelet-HHH | firstorder | Energy                           | 1645572.699  |
| wavelet-HHH | firstorder | RobustMeanAbsoluteDeviation      | 15.07544947  |
| wavelet-HHH | firstorder | MeanAbsoluteDeviation            | 28.55916095  |
| wavelet-HHH | firstorder | TotalEnergy                      | 44430462.88  |
| wavelet-HHH | firstorder | Maximum                          | 259.6182621  |
| wavelet-HHH | firstorder | RootMeanSquared                  | 44.4997965   |
| wavelet-HHH | firstorder | 90Percentile                     | 44.97277152  |
| wavelet-HHH | firstorder | Minimum                          | -223.4901099 |
| wavelet-HHH | firstorder | Entropy                          | 2.653742906  |
| wavelet-HHH | firstorder | Range                            | 483.108372   |
| wavelet-HHH | firstorder | Variance                         | 1978.237886  |
| wavelet-HHH | firstorder | 10Percentile                     | -45.42395131 |
| wavelet-HHH | firstorder | Kurtosis                         | 9.029735743  |
| wavelet-HHH | firstorder | Mean                             | 1.412091633  |
| wavelet-HHH | glrlm      | ShortRunLowGrayLevelEmphasis     | 0.01232122   |
| wavelet-HHH | glrlm      | GrayLevelVariance                | 3.969617038  |
| wavelet-HHH | glrlm      | LowGrayLevelRunEmphasis          | 0.014182757  |
| wavelet-HHH | glrlm      | GrayLevelNonUniformityNormalized | 0.188536783  |
| wavelet-HHH | glrlm      | RunVariance                      | 0.431822962  |
| wavelet-HHH | glrlm      | GrayLevelNonUniformity           | 121.5518757  |
| wavelet-HHH | glrlm      | LongRunEmphasis                  | 2.100817398  |
| wavelet-HHH | glrlm      | ShortRunHighGrayLevelEmphasis    | 79.89105542  |
| wavelet-HHH | glrlm      | RunLengthNonUniformity           | 421.7571305  |
| wavelet-HHH | glrlm      | ShortRunEmphasis                 | 0.835750503  |
| wavelet-HHH | glrlm      | LongRunHighGrayLevelEmphasis     | 196.1834017  |
| wavelet-HHH | glrlm      | RunPercentage                    | 0.77543275   |
| wavelet-HHH | glrlm      | LongRunLowGrayLevelEmphasis      | 0.026510283  |
| wavelet-HHH | glrlm      | RunEntropy                       | 3.719937734  |
| wavelet-HHH | glrlm      | HighGrayLevelRunEmphasis         | 94.95923699  |
| wavelet-HHH | glrlm      | RunLengthNonUniformityNormalized | 0.653700076  |
| wavelet-HHH | glszm      | GrayLevelVariance                | 12.79886311  |
| wavelet-HHH | glszm      | ZoneVariance                     | 1078.851081  |
| wavelet-HHH | glszm      | GrayLevelNonUniformityNormalized | 0.101592967  |
| wavelet-HHH | glszm      | SizeZoneNonUniformityNormalized  | 0.452574526  |
| wavelet-HHH | glszm      | SizeZoneNonUniformity            | 55.66666667  |
| wavelet-HHH | glszm      | GrayLevelNonUniformity           | 12.49593496  |
| wavelet-HHH | glszm      | LargeAreaEmphasis                | 1124.495935  |

|             |            |                                      |              |
|-------------|------------|--------------------------------------|--------------|
| wavelet-HHH | glszm      | SmallAreaHighGrayLevelEmphasis       | 74.09990914  |
| wavelet-HHH | glszm      | ZonePercentage                       | 0.14801444   |
| wavelet-HHH | glszm      | LargeAreaLowGrayLevelEmphasis        | 12.49177457  |
| wavelet-HHH | glszm      | LargeAreaHighGrayLevelEmphasis       | 102743.7073  |
| wavelet-HHH | glszm      | HighGrayLevelZoneEmphasis            | 105.7723577  |
| wavelet-HHH | glszm      | SmallAreaEmphasis                    | 0.696716688  |
| wavelet-HHH | glszm      | LowGrayLevelZoneEmphasis             | 0.02435983   |
| wavelet-HHH | glszm      | ZoneEntropy                          | 4.924203026  |
| wavelet-HHH | glszm      | SmallAreaLowGrayLevelEmphasis        | 0.020001133  |
| wavelet-HHH | ngtdm      | Coarseness                           | 0.008019775  |
| wavelet-HHH | ngtdm      | Complexity                           | 180.3181069  |
| wavelet-HHH | ngtdm      | Strength                             | 1.16910552   |
| wavelet-HHH | ngtdm      | Contrast                             | 0.026736647  |
| wavelet-HHH | ngtdm      | Busyness                             | 0.495831488  |
| wavelet-HLL | gldm       | GrayLevelVariance                    | 9.455297939  |
| wavelet-HLL | gldm       | HighGrayLevelEmphasis                | 131.4368231  |
| wavelet-HLL | gldm       | DependenceEntropy                    | 6.444425788  |
| wavelet-HLL | gldm       | DependenceNonUniformity              | 77.15643803  |
| wavelet-HLL | gldm       | GrayLevelNonUniformity               | 110.6726835  |
| wavelet-HLL | gldm       | SmallDependenceEmphasis              | 0.185254416  |
| wavelet-HLL | gldm       | SmallDependenceHighGrayLevelEmphasis | 31.48213055  |
| wavelet-HLL | gldm       | DependenceNonUniformityNormalized    | 0.092847699  |
| wavelet-HLL | gldm       | LargeDependenceEmphasis              | 46.91817088  |
| wavelet-HLL | gldm       | LargeDependenceLowGrayLevelEmphasis  | 0.399720747  |
| wavelet-HLL | gldm       | DependenceVariance                   | 16.022767    |
| wavelet-HLL | gldm       | LargeDependenceHighGrayLevelEmphasis | 5898.873646  |
| wavelet-HLL | gldm       | SmallDependenceLowGrayLevelEmphasis  | 0.004901927  |
| wavelet-HLL | gldm       | LowGrayLevelEmphasis                 | 0.012814867  |
| wavelet-HLL | glcm       | JointAverage                         | 10.88742279  |
| wavelet-HLL | glcm       | SumAverage                           | 21.77484558  |
| wavelet-HLL | glcm       | JointEntropy                         | 6.021809825  |
| wavelet-HLL | glcm       | ClusterShade                         | 142.7249919  |
| wavelet-HLL | glcm       | MaximumProbability                   | 0.074500358  |
| wavelet-HLL | glcm       | Idmn                                 | 0.99151121   |
| wavelet-HLL | glcm       | JointEnergy                          | 0.029432786  |
| wavelet-HLL | glcm       | Contrast                             | 10.05082123  |
| wavelet-HLL | glcm       | DifferenceEntropy                    | 2.672432655  |
| wavelet-HLL | glcm       | InverseVariance                      | 0.382873678  |
| wavelet-HLL | glcm       | DifferenceVariance                   | 5.677951746  |
| wavelet-HLL | glcm       | Idn                                  | 0.945054296  |
| wavelet-HLL | glcm       | Idm                                  | 0.430611435  |
| wavelet-HLL | glcm       | Correlation                          | 0.299945751  |
| wavelet-HLL | glcm       | Autocorrelation                      | 120.8303616  |
| wavelet-HLL | glcm       | SumEntropy                           | 3.885668229  |
| wavelet-HLL | glcm       | SumSquares                           | 7.317145912  |
| wavelet-HLL | glcm       | ClusterProminence                    | 4801.972833  |
| wavelet-HLL | glcm       | Imc2                                 | 0.700402662  |
| wavelet-HLL | glcm       | Imc1                                 | -0.113630445 |
| wavelet-HLL | glcm       | DifferenceAverage                    | 2.059363077  |
| wavelet-HLL | glcm       | Id                                   | 0.49209836   |
| wavelet-HLL | glcm       | ClusterTendency                      | 19.21776242  |
| wavelet-HLL | firstorder | InterquartileRange                   | 60.43656696  |
| wavelet-HLL | firstorder | Skewness                             | 1.72368314   |

|             |            |                                  |              |
|-------------|------------|----------------------------------|--------------|
| wavelet-HLL | firstorder | Uniformity                       | 0.133180125  |
| wavelet-HLL | firstorder | Median                           | -13.60312996 |
| wavelet-HLL | firstorder | Energy                           | 4935466.746  |
| wavelet-HLL | firstorder | RobustMeanAbsoluteDeviation      | 28.11683487  |
| wavelet-HLL | firstorder | MeanAbsoluteDeviation            | 49.56922727  |
| wavelet-HLL | firstorder | TotalEnergy                      | 133257602.1  |
| wavelet-HLL | firstorder | Maximum                          | 526.0041925  |
| wavelet-HLL | firstorder | RootMeanSquared                  | 77.0661393   |
| wavelet-HLL | firstorder | 90Percentile                     | 61.8253466   |
| wavelet-HLL | firstorder | Minimum                          | -252.5628852 |
| wavelet-HLL | firstorder | Entropy                          | 3.370217085  |
| wavelet-HLL | firstorder | Range                            | 778.5670777  |
| wavelet-HLL | firstorder | Variance                         | 5795.030652  |
| wavelet-HLL | firstorder | 10Percentile                     | -92.77100682 |
| wavelet-HLL | firstorder | Kurtosis                         | 11.8699555   |
| wavelet-HLL | firstorder | Mean                             | -12.00663043 |
| wavelet-HLL | glrlm      | ShortRunLowGrayLevelEmphasis     | 0.012509588  |
| wavelet-HLL | glrlm      | GrayLevelVariance                | 10.92399497  |
| wavelet-HLL | glrlm      | LowGrayLevelRunEmphasis          | 0.013655712  |
| wavelet-HLL | glrlm      | GrayLevelNonUniformityNormalized | 0.118021829  |
| wavelet-HLL | glrlm      | RunVariance                      | 0.322403748  |
| wavelet-HLL | glrlm      | GrayLevelNonUniformity           | 80.95157498  |
| wavelet-HLL | glrlm      | LongRunEmphasis                  | 1.803277362  |
| wavelet-HLL | glrlm      | ShortRunHighGrayLevelEmphasis    | 117.6526925  |
| wavelet-HLL | glrlm      | RunLengthNonUniformity           | 496.0954878  |
| wavelet-HLL | glrlm      | ShortRunEmphasis                 | 0.873668878  |
| wavelet-HLL | glrlm      | LongRunHighGrayLevelEmphasis     | 232.9387585  |
| wavelet-HLL | glrlm      | RunPercentage                    | 0.82467833   |
| wavelet-HLL | glrlm      | LongRunLowGrayLevelEmphasis      | 0.020702802  |
| wavelet-HLL | glrlm      | RunEntropy                       | 4.221668614  |
| wavelet-HLL | glrlm      | HighGrayLevelRunEmphasis         | 133.1558175  |
| wavelet-HLL | glrlm      | RunLengthNonUniformityNormalized | 0.721812263  |
| wavelet-HLL | glszm      | GrayLevelVariance                | 28.01412743  |
| wavelet-HLL | glszm      | ZoneVariance                     | 384.1910431  |
| wavelet-HLL | glszm      | GrayLevelNonUniformityNormalized | 0.069095342  |
| wavelet-HLL | glszm      | SizeZoneNonUniformityNormalized  | 0.384990498  |
| wavelet-HLL | glszm      | SizeZoneNonUniformity            | 64.29341317  |
| wavelet-HLL | glszm      | GrayLevelNonUniformity           | 11.53892216  |
| wavelet-HLL | glszm      | LargeAreaEmphasis                | 408.9520958  |
| wavelet-HLL | glszm      | SmallAreaHighGrayLevelEmphasis   | 121.1523494  |
| wavelet-HLL | glszm      | ZonePercentage                   | 0.200962696  |
| wavelet-HLL | glszm      | LargeAreaLowGrayLevelEmphasis    | 3.477309714  |
| wavelet-HLL | glszm      | LargeAreaHighGrayLevelEmphasis   | 49792.35928  |
| wavelet-HLL | glszm      | HighGrayLevelZoneEmphasis        | 169.011976   |
| wavelet-HLL | glszm      | SmallAreaEmphasis                | 0.644612512  |
| wavelet-HLL | glszm      | LowGrayLevelZoneEmphasis         | 0.025640635  |
| wavelet-HLL | glszm      | ZoneEntropy                      | 5.737386701  |
| wavelet-HLL | glszm      | SmallAreaLowGrayLevelEmphasis    | 0.021480917  |
| wavelet-HLL | ngtdm      | Coarseness                       | 0.009181949  |
| wavelet-HLL | ngtdm      | Complexity                       | 607.2269076  |
| wavelet-HLL | ngtdm      | Strength                         | 4.49393827   |
| wavelet-HLL | ngtdm      | Contrast                         | 0.039742202  |
| wavelet-HLL | ngtdm      | Busyness                         | 0.248202748  |

|             |            |                                      |              |
|-------------|------------|--------------------------------------|--------------|
| wavelet-LHL | gldm       | GrayLevelVariance                    | 43.3021413   |
| wavelet-LHL | gldm       | HighGrayLevelEmphasis                | 2775.534296  |
| wavelet-LHL | gldm       | DependenceEntropy                    | 6.721251598  |
| wavelet-LHL | gldm       | DependenceNonUniformity              | 120.8098676  |
| wavelet-LHL | gldm       | GrayLevelNonUniformity               | 70.52587244  |
| wavelet-LHL | gldm       | SmallDependenceEmphasis              | 0.337915118  |
| wavelet-LHL | gldm       | SmallDependenceHighGrayLevelEmphasis | 963.5027751  |
| wavelet-LHL | gldm       | DependenceNonUniformityNormalized    | 0.145378902  |
| wavelet-LHL | gldm       | LargeDependenceEmphasis              | 30.02045728  |
| wavelet-LHL | gldm       | LargeDependenceLowGrayLevelEmphasis  | 0.012209062  |
| wavelet-LHL | gldm       | DependenceVariance                   | 13.01351799  |
| wavelet-LHL | gldm       | LargeDependenceHighGrayLevelEmphasis | 82412.3213   |
| wavelet-LHL | gldm       | SmallDependenceLowGrayLevelEmphasis  | 0.001345837  |
| wavelet-LHL | gldm       | LowGrayLevelEmphasis                 | 0.001593322  |
| wavelet-LHL | glcm       | JointAverage                         | 52.41601554  |
| wavelet-LHL | glcm       | SumAverage                           | 104.8320311  |
| wavelet-LHL | glcm       | JointEntropy                         | 7.249439914  |
| wavelet-LHL | glcm       | ClusterShade                         | 190.7663031  |
| wavelet-LHL | glcm       | MaximumProbability                   | 0.062172202  |
| wavelet-LHL | glcm       | Idmn                                 | 0.993190779  |
| wavelet-LHL | glcm       | JointEnergy                          | 0.016995934  |
| wavelet-LHL | glcm       | Contrast                             | 59.49320155  |
| wavelet-LHL | glcm       | DifferenceEntropy                    | 3.556239926  |
| wavelet-LHL | glcm       | InverseVariance                      | 0.301719303  |
| wavelet-LHL | glcm       | DifferenceVariance                   | 39.18289432  |
| wavelet-LHL | glcm       | Idn                                  | 0.956608282  |
| wavelet-LHL | glcm       | Idm                                  | 0.31883793   |
| wavelet-LHL | glcm       | Correlation                          | 0.127625415  |
| wavelet-LHL | glcm       | Autocorrelation                      | 2752.714701  |
| wavelet-LHL | glcm       | SumEntropy                           | 4.640839858  |
| wavelet-LHL | glcm       | SumSquares                           | 35.01581297  |
| wavelet-LHL | glcm       | ClusterProminence                    | 97201.50107  |
| wavelet-LHL | glcm       | Imc2                                 | 0.901354392  |
| wavelet-LHL | glcm       | Imc1                                 | -0.212670295 |
| wavelet-LHL | glcm       | DifferenceAverage                    | 4.391922178  |
| wavelet-LHL | glcm       | Id                                   | 0.389118103  |
| wavelet-LHL | glcm       | ClusterTendency                      | 80.57005033  |
| wavelet-LHL | firstorder | InterquartileRange                   | 91.69879845  |
| wavelet-LHL | firstorder | Skewness                             | -0.328045893 |
| wavelet-LHL | firstorder | Uniformity                           | 0.084868679  |
| wavelet-LHL | firstorder | Median                               | -9.989506063 |
| wavelet-LHL | firstorder | Energy                               | 22485262.72  |
| wavelet-LHL | firstorder | RobustMeanAbsoluteDeviation          | 46.77801987  |
| wavelet-LHL | firstorder | MeanAbsoluteDeviation                | 98.07570062  |
| wavelet-LHL | firstorder | TotalEnergy                          | 607102093.6  |
| wavelet-LHL | firstorder | Maximum                              | 923.8999533  |
| wavelet-LHL | firstorder | RootMeanSquared                      | 164.4933977  |
| wavelet-LHL | firstorder | 90Percentile                         | 164.6594386  |
| wavelet-LHL | firstorder | Minimum                              | -1277.770631 |
| wavelet-LHL | firstorder | Entropy                              | 4.242707597  |
| wavelet-LHL | firstorder | Range                                | 2201.670584  |
| wavelet-LHL | firstorder | Variance                             | 27023.45519  |
| wavelet-LHL | firstorder | 10Percentile                         | -159.2783443 |

|             |            |                                      |              |
|-------------|------------|--------------------------------------|--------------|
| wavelet-LHL | firstorder | Kurtosis                             | 13.02596124  |
| wavelet-LHL | firstorder | Mean                                 | -5.884105862 |
| wavelet-LHL | glrlm      | ShortRunLowGrayLevelEmphasis         | 0.001732575  |
| wavelet-LHL | glrlm      | GrayLevelVariance                    | 48.45905312  |
| wavelet-LHL | glrlm      | LowGrayLevelRunEmphasis              | 0.001763402  |
| wavelet-LHL | glrlm      | GrayLevelNonUniformityNormalized     | 0.072365804  |
| wavelet-LHL | glrlm      | RunVariance                          | 0.205675306  |
| wavelet-LHL | glrlm      | GrayLevelNonUniformity               | 52.99470934  |
| wavelet-LHL | glrlm      | LongRunEmphasis                      | 1.505433097  |
| wavelet-LHL | glrlm      | ShortRunHighGrayLevelEmphasis        | 2552.254736  |
| wavelet-LHL | glrlm      | RunLengthNonUniformity               | 591.4182185  |
| wavelet-LHL | glrlm      | ShortRunEmphasis                     | 0.916543456  |
| wavelet-LHL | glrlm      | LongRunHighGrayLevelEmphasis         | 4166.370338  |
| wavelet-LHL | glrlm      | RunPercentage                        | 0.87984819   |
| wavelet-LHL | glrlm      | LongRunLowGrayLevelEmphasis          | 0.001949178  |
| wavelet-LHL | glrlm      | RunEntropy                           | 4.871721994  |
| wavelet-LHL | glrlm      | HighGrayLevelRunEmphasis             | 2780.579651  |
| wavelet-LHL | glrlm      | RunLengthNonUniformityNormalized     | 0.806877225  |
| wavelet-LHL | glszm      | GrayLevelVariance                    | 95.68132983  |
| wavelet-LHL | glszm      | ZoneVariance                         | 109.4910611  |
| wavelet-LHL | glszm      | GrayLevelNonUniformityNormalized     | 0.037891409  |
| wavelet-LHL | glszm      | SizeZoneNonUniformityNormalized      | 0.530949635  |
| wavelet-LHL | glszm      | SizeZoneNonUniformity                | 162.4705882  |
| wavelet-LHL | glszm      | GrayLevelNonUniformity               | 11.59477124  |
| wavelet-LHL | glszm      | LargeAreaEmphasis                    | 116.8660131  |
| wavelet-LHL | glszm      | SmallAreaHighGrayLevelEmphasis       | 2175.601045  |
| wavelet-LHL | glszm      | ZonePercentage                       | 0.368231047  |
| wavelet-LHL | glszm      | LargeAreaLowGrayLevelEmphasis        | 0.045963276  |
| wavelet-LHL | glszm      | LargeAreaHighGrayLevelEmphasis       | 320944.2124  |
| wavelet-LHL | glszm      | HighGrayLevelZoneEmphasis            | 2852.617647  |
| wavelet-LHL | glszm      | SmallAreaEmphasis                    | 0.755993219  |
| wavelet-LHL | glszm      | LowGrayLevelZoneEmphasis             | 0.003687003  |
| wavelet-LHL | glszm      | ZoneEntropy                          | 6.145514055  |
| wavelet-LHL | glszm      | SmallAreaLowGrayLevelEmphasis        | 0.003593132  |
| wavelet-LHL | ngtdm      | Coarseness                           | 0.00954999   |
| wavelet-LHL | ngtdm      | Complexity                           | 3967.510448  |
| wavelet-LHL | ngtdm      | Strength                             | 12.89297454  |
| wavelet-LHL | ngtdm      | Contrast                             | 0.12798101   |
| wavelet-LHL | ngtdm      | Busyness                             | 0.029231833  |
| wavelet-LHH | gldm       | GrayLevelVariance                    | 12.71252793  |
| wavelet-LHH | gldm       | HighGrayLevelEmphasis                | 499.3104693  |
| wavelet-LHH | gldm       | DependenceEntropy                    | 6.305523888  |
| wavelet-LHH | gldm       | DependenceNonUniformity              | 88.22984356  |
| wavelet-LHH | gldm       | GrayLevelNonUniformity               | 109.4163658  |
| wavelet-LHH | gldm       | SmallDependenceEmphasis              | 0.251524483  |
| wavelet-LHH | gldm       | SmallDependenceHighGrayLevelEmphasis | 122.0033942  |
| wavelet-LHH | gldm       | DependenceNonUniformityNormalized    | 0.106173097  |
| wavelet-LHH | gldm       | LargeDependenceEmphasis              | 42.5354994   |
| wavelet-LHH | gldm       | LargeDependenceLowGrayLevelEmphasis  | 0.087771008  |
| wavelet-LHH | gldm       | DependenceVariance                   | 16.36691907  |
| wavelet-LHH | gldm       | LargeDependenceHighGrayLevelEmphasis | 21260.95427  |
| wavelet-LHH | gldm       | SmallDependenceLowGrayLevelEmphasis  | 0.00241492   |
| wavelet-LHH | gldm       | LowGrayLevelEmphasis                 | 0.003977913  |

|             |            |                                  |              |
|-------------|------------|----------------------------------|--------------|
| wavelet-LHH | glcm       | JointAverage                     | 22.23197621  |
| wavelet-LHH | glcm       | SumAverage                       | 44.46395242  |
| wavelet-LHH | glcm       | JointEntropy                     | 6.34946259   |
| wavelet-LHH | glcm       | ClusterShade                     | -159.5095611 |
| wavelet-LHH | glcm       | MaximumProbability               | 0.095010963  |
| wavelet-LHH | glcm       | Idmn                             | 0.982249018  |
| wavelet-LHH | glcm       | JointEnergy                      | 0.030179666  |
| wavelet-LHH | glcm       | Contrast                         | 20.54790733  |
| wavelet-LHH | glcm       | DifferenceEntropy                | 3.10399966   |
| wavelet-LHH | glcm       | InverseVariance                  | 0.346915256  |
| wavelet-LHH | glcm       | DifferenceVariance               | 11.93407698  |
| wavelet-LHH | glcm       | Idn                              | 0.924719372  |
| wavelet-LHH | glcm       | Idm                              | 0.389081553  |
| wavelet-LHH | glcm       | Correlation                      | 0.038823653  |
| wavelet-LHH | glcm       | Autocorrelation                  | 494.8122588  |
| wavelet-LHH | glcm       | SumEntropy                       | 3.929258256  |
| wavelet-LHH | glcm       | SumSquares                       | 10.82319486  |
| wavelet-LHH | glcm       | ClusterProminence                | 5458.494862  |
| wavelet-LHH | glcm       | Imc2                             | 0.742868759  |
| wavelet-LHH | glcm       | Imc1                             | -0.12222793  |
| wavelet-LHH | glcm       | DifferenceAverage                | 2.897523185  |
| wavelet-LHH | glcm       | Id                               | 0.451683455  |
| wavelet-LHH | glcm       | ClusterTendency                  | 22.74487212  |
| wavelet-LHH | firstorder | InterquartileRange               | 61.9784296   |
| wavelet-LHH | firstorder | Skewness                         | -1.474962241 |
| wavelet-LHH | firstorder | Uniformity                       | 0.13166831   |
| wavelet-LHH | firstorder | Median                           | -4.153480296 |
| wavelet-LHH | firstorder | Energy                           | 6706737.337  |
| wavelet-LHH | firstorder | RobustMeanAbsoluteDeviation      | 28.1424098   |
| wavelet-LHH | firstorder | MeanAbsoluteDeviation            | 56.19044015  |
| wavelet-LHH | firstorder | TotalEnergy                      | 181081908.1  |
| wavelet-LHH | firstorder | Maximum                          | 226.9794512  |
| wavelet-LHH | firstorder | RootMeanSquared                  | 89.83697855  |
| wavelet-LHH | firstorder | 90Percentile                     | 75.65832486  |
| wavelet-LHH | firstorder | Minimum                          | -548.7390199 |
| wavelet-LHH | firstorder | Entropy                          | 3.514668067  |
| wavelet-LHH | firstorder | Range                            | 775.718471   |
| wavelet-LHH | firstorder | Variance                         | 7951.325152  |
| wavelet-LHH | firstorder | 10Percentile                     | -97.60508934 |
| wavelet-LHH | firstorder | Kurtosis                         | 9.450276969  |
| wavelet-LHH | firstorder | Mean                             | -10.92508874 |
| wavelet-LHH | glrlm      | ShortRunLowGrayLevelEmphasis     | 0.004118724  |
| wavelet-LHH | glrlm      | GrayLevelVariance                | 14.72258751  |
| wavelet-LHH | glrlm      | LowGrayLevelRunEmphasis          | 0.004347626  |
| wavelet-LHH | glrlm      | GrayLevelNonUniformityNormalized | 0.110914968  |
| wavelet-LHH | glrlm      | RunVariance                      | 0.276422988  |
| wavelet-LHH | glrlm      | GrayLevelNonUniformity           | 77.61415073  |
| wavelet-LHH | glrlm      | LongRunEmphasis                  | 1.693479838  |
| wavelet-LHH | glrlm      | ShortRunHighGrayLevelEmphasis    | 442.069828   |
| wavelet-LHH | glrlm      | RunLengthNonUniformity           | 524.0613485  |
| wavelet-LHH | glrlm      | ShortRunEmphasis                 | 0.887437917  |
| wavelet-LHH | glrlm      | LongRunHighGrayLevelEmphasis     | 846.868989   |
| wavelet-LHH | glrlm      | RunPercentage                    | 0.841710636  |

|             |       |                                      |             |
|-------------|-------|--------------------------------------|-------------|
| wavelet-LHH | glrlm | LongRunLowGrayLevelEmphasis          | 0.005751232 |
| wavelet-LHH | glrlm | RunEntropy                           | 4.316299542 |
| wavelet-LHH | glrlm | HighGrayLevelRunEmphasis             | 498.6982257 |
| wavelet-LHH | glrlm | RunLengthNonUniformityNormalized     | 0.747937712 |
| wavelet-LHH | glszm | GrayLevelVariance                    | 35.3942794  |
| wavelet-LHH | glszm | ZoneVariance                         | 298.7433918 |
| wavelet-LHH | glszm | GrayLevelNonUniformityNormalized     | 0.059847259 |
| wavelet-LHH | glszm | SizeZoneNonUniformityNormalized      | 0.488216867 |
| wavelet-LHH | glszm | SizeZoneNonUniformity                | 107.8959276 |
| wavelet-LHH | glszm | GrayLevelNonUniformity               | 13.22624434 |
| wavelet-LHH | glszm | LargeAreaEmphasis                    | 312.8823529 |
| wavelet-LHH | glszm | SmallAreaHighGrayLevelEmphasis       | 348.0113829 |
| wavelet-LHH | glszm | ZonePercentage                       | 0.265944645 |
| wavelet-LHH | glszm | LargeAreaLowGrayLevelEmphasis        | 0.633551941 |
| wavelet-LHH | glszm | LargeAreaHighGrayLevelEmphasis       | 157027.9321 |
| wavelet-LHH | glszm | HighGrayLevelZoneEmphasis            | 485.7556561 |
| wavelet-LHH | glszm | SmallAreaEmphasis                    | 0.725356316 |
| wavelet-LHH | glszm | LowGrayLevelZoneEmphasis             | 0.009254759 |
| wavelet-LHH | glszm | ZoneEntropy                          | 5.583076535 |
| wavelet-LHH | glszm | SmallAreaLowGrayLevelEmphasis        | 0.008596165 |
| wavelet-LHH | ngtdm | Coarseness                           | 0.008774468 |
| wavelet-LHH | ngtdm | Complexity                           | 940.1237268 |
| wavelet-LHH | ngtdm | Strength                             | 3.661973666 |
| wavelet-LHH | ngtdm | Contrast                             | 0.067497259 |
| wavelet-LHH | ngtdm | Busyness                             | 0.117519766 |
| wavelet-LLH | gldm  | GrayLevelVariance                    | 61.71477103 |
| wavelet-LLH | gldm  | HighGrayLevelEmphasis                | 428.6377858 |
| wavelet-LLH | gldm  | DependenceEntropy                    | 6.850554282 |
| wavelet-LLH | gldm  | DependenceNonUniformity              | 133.746089  |
| wavelet-LLH | gldm  | GrayLevelNonUniformity               | 59.40192539 |
| wavelet-LLH | gldm  | SmallDependenceEmphasis              | 0.328274541 |
| wavelet-LLH | gldm  | SmallDependenceHighGrayLevelEmphasis | 175.9272144 |
| wavelet-LLH | gldm  | DependenceNonUniformityNormalized    | 0.160945956 |
| wavelet-LLH | gldm  | LargeDependenceEmphasis              | 30.52587244 |
| wavelet-LLH | gldm  | LargeDependenceLowGrayLevelEmphasis  | 0.106346994 |
| wavelet-LLH | gldm  | DependenceVariance                   | 14.18715508 |
| wavelet-LLH | gldm  | LargeDependenceHighGrayLevelEmphasis | 10556.31288 |
| wavelet-LLH | gldm  | SmallDependenceLowGrayLevelEmphasis  | 0.002741698 |
| wavelet-LLH | gldm  | LowGrayLevelEmphasis                 | 0.00717214  |
| wavelet-LLH | glcm  | JointAverage                         | 18.50087868 |
| wavelet-LLH | glcm  | SumAverage                           | 37.00175736 |
| wavelet-LLH | glcm  | JointEntropy                         | 7.653325206 |
| wavelet-LLH | glcm  | ClusterShade                         | 3835.817592 |
| wavelet-LLH | glcm  | MaximumProbability                   | 0.058054815 |
| wavelet-LLH | glcm  | Idmn                                 | 0.983711746 |
| wavelet-LLH | glcm  | JointEnergy                          | 0.014253229 |
| wavelet-LLH | glcm  | Contrast                             | 62.32040509 |
| wavelet-LLH | glcm  | DifferenceEntropy                    | 3.73813519  |
| wavelet-LLH | glcm  | InverseVariance                      | 0.266865819 |
| wavelet-LLH | glcm  | DifferenceVariance                   | 36.38109497 |
| wavelet-LLH | glcm  | Idn                                  | 0.929454149 |
| wavelet-LLH | glcm  | Idm                                  | 0.296644853 |
| wavelet-LLH | glcm  | Correlation                          | 0.369894005 |

|             |            |                                  |              |
|-------------|------------|----------------------------------|--------------|
| wavelet-LLH | glcm       | Autocorrelation                  | 362.6107127  |
| wavelet-LLH | glcm       | SumEntropy                       | 4.921008875  |
| wavelet-LLH | glcm       | SumSquares                       | 51.45159098  |
| wavelet-LLH | glcm       | ClusterProminence                | 237574.4461  |
| wavelet-LLH | glcm       | Imc2                             | 0.925017483  |
| wavelet-LLH | glcm       | Imc1                             | -0.230368317 |
| wavelet-LLH | glcm       | DifferenceAverage                | 4.904936641  |
| wavelet-LLH | glcm       | Id                               | 0.368145577  |
| wavelet-LLH | glcm       | ClusterTendency                  | 143.4859589  |
| wavelet-LLH | firstorder | InterquartileRange               | 125.0265284  |
| wavelet-LLH | firstorder | Skewness                         | 1.964426042  |
| wavelet-LLH | firstorder | Uniformity                       | 0.071482461  |
| wavelet-LLH | firstorder | Median                           | -10.34758749 |
| wavelet-LLH | firstorder | Energy                           | 32203055.33  |
| wavelet-LLH | firstorder | RobustMeanAbsoluteDeviation      | 59.87284646  |
| wavelet-LLH | firstorder | MeanAbsoluteDeviation            | 124.1535019  |
| wavelet-LLH | firstorder | TotalEnergy                      | 869482494    |
| wavelet-LLH | firstorder | Maximum                          | 984.7363967  |
| wavelet-LLH | firstorder | RootMeanSquared                  | 196.8557149  |
| wavelet-LLH | firstorder | 90Percentile                     | 245.0098297  |
| wavelet-LLH | firstorder | Minimum                          | -448.1435784 |
| wavelet-LLH | firstorder | Entropy                          | 4.474274202  |
| wavelet-LLH | firstorder | Range                            | 1432.879975  |
| wavelet-LLH | firstorder | Variance                         | 38480.07897  |
| wavelet-LLH | firstorder | 10Percentile                     | -168.4606054 |
| wavelet-LLH | firstorder | Kurtosis                         | 9.241247784  |
| wavelet-LLH | firstorder | Mean                             | 16.49525725  |
| wavelet-LLH | glrlm      | ShortRunLowGrayLevelEmphasis     | 0.007205922  |
| wavelet-LLH | glrlm      | GrayLevelVariance                | 67.76138862  |
| wavelet-LLH | glrlm      | LowGrayLevelRunEmphasis          | 0.007567148  |
| wavelet-LLH | glrlm      | GrayLevelNonUniformityNormalized | 0.060071665  |
| wavelet-LLH | glrlm      | RunVariance                      | 0.217892699  |
| wavelet-LLH | glrlm      | GrayLevelNonUniformity           | 44.1324825   |
| wavelet-LLH | glrlm      | LongRunEmphasis                  | 1.506841077  |
| wavelet-LLH | glrlm      | ShortRunHighGrayLevelEmphasis    | 411.0510252  |
| wavelet-LLH | glrlm      | RunLengthNonUniformity           | 599.4196272  |
| wavelet-LLH | glrlm      | ShortRunEmphasis                 | 0.92084108   |
| wavelet-LLH | glrlm      | LongRunHighGrayLevelEmphasis     | 615.7253194  |
| wavelet-LLH | glrlm      | RunPercentage                    | 0.882995464  |
| wavelet-LLH | glrlm      | LongRunLowGrayLevelEmphasis      | 0.009582927  |
| wavelet-LLH | glrlm      | RunEntropy                       | 5.072112119  |
| wavelet-LLH | glrlm      | HighGrayLevelRunEmphasis         | 439.0979664  |
| wavelet-LLH | glrlm      | RunLengthNonUniformityNormalized | 0.815533669  |
| wavelet-LLH | glszm      | GrayLevelVariance                | 104.5125921  |
| wavelet-LLH | glszm      | ZoneVariance                     | 79.07700818  |
| wavelet-LLH | glszm      | GrayLevelNonUniformityNormalized | 0.036597083  |
| wavelet-LLH | glszm      | SizeZoneNonUniformityNormalized  | 0.422229986  |
| wavelet-LLH | glszm      | SizeZoneNonUniformity            | 135.5358255  |
| wavelet-LLH | glszm      | GrayLevelNonUniformity           | 11.74766355  |
| wavelet-LLH | glszm      | LargeAreaEmphasis                | 85.7788162   |
| wavelet-LLH | glszm      | SmallAreaHighGrayLevelEmphasis   | 385.4197239  |
| wavelet-LLH | glszm      | ZonePercentage                   | 0.386281588  |
| wavelet-LLH | glszm      | LargeAreaLowGrayLevelEmphasis    | 0.277767131  |



|             |            |                                      |              |
|-------------|------------|--------------------------------------|--------------|
| wavelet-LLH | glszm      | LargeAreaHighGrayLevelEmphasis       | 29178.96573  |
| wavelet-LLH | glszm      | HighGrayLevelZoneEmphasis            | 529.1806854  |
| wavelet-LLH | glszm      | SmallAreaEmphasis                    | 0.673786665  |
| wavelet-LLH | glszm      | LowGrayLevelZoneEmphasis             | 0.009403773  |
| wavelet-LLH | glszm      | ZoneEntropy                          | 6.439678601  |
| wavelet-LLH | glszm      | SmallAreaLowGrayLevelEmphasis        | 0.005532739  |
| wavelet-LLH | ngtdm      | Coarseness                           | 0.010413585  |
| wavelet-LLH | ngtdm      | Complexity                           | 3803.906777  |
| wavelet-LLH | ngtdm      | Strength                             | 12.51027934  |
| wavelet-LLH | ngtdm      | Contrast                             | 0.183060241  |
| wavelet-LLH | ngtdm      | Busyness                             | 0.084836162  |
| wavelet-LLL | gldm       | GrayLevelVariance                    | 257.4365306  |
| wavelet-LLL | gldm       | HighGrayLevelEmphasis                | 4448.090253  |
| wavelet-LLL | gldm       | DependenceEntropy                    | 7.209619982  |
| wavelet-LLL | gldm       | DependenceNonUniformity              | 180.8243081  |
| wavelet-LLL | gldm       | GrayLevelNonUniformity               | 37.09145608  |
| wavelet-LLL | gldm       | SmallDependenceEmphasis              | 0.458356248  |
| wavelet-LLL | gldm       | SmallDependenceHighGrayLevelEmphasis | 1620.033855  |
| wavelet-LLL | gldm       | DependenceNonUniformityNormalized    | 0.217598445  |
| wavelet-LLL | gldm       | LargeDependenceEmphasis              | 24.9133574   |
| wavelet-LLL | gldm       | LargeDependenceLowGrayLevelEmphasis  | 0.005894659  |
| wavelet-LLL | gldm       | DependenceVariance                   | 12.82706669  |
| wavelet-LLL | gldm       | LargeDependenceHighGrayLevelEmphasis | 141591.8881  |
| wavelet-LLL | gldm       | SmallDependenceLowGrayLevelEmphasis  | 0.00147624   |
| wavelet-LLL | gldm       | LowGrayLevelEmphasis                 | 0.001605338  |
| wavelet-LLL | glcm       | JointAverage                         | 67.25995875  |
| wavelet-LLL | glcm       | SumAverage                           | 134.5199175  |
| wavelet-LLL | glcm       | JointEntropy                         | 8.367380007  |
| wavelet-LLL | glcm       | ClusterShade                         | -26184.65315 |
| wavelet-LLL | glcm       | MaximumProbability                   | 0.0523503    |
| wavelet-LLL | glcm       | Idmn                                 | 0.984499265  |
| wavelet-LLL | glcm       | JointEnergy                          | 0.009023135  |
| wavelet-LLL | glcm       | Contrast                             | 152.8008369  |
| wavelet-LLL | glcm       | DifferenceEntropy                    | 4.360156602  |
| wavelet-LLL | glcm       | InverseVariance                      | 0.222633294  |
| wavelet-LLL | glcm       | DifferenceVariance                   | 87.60893356  |
| wavelet-LLL | glcm       | Idn                                  | 0.929464297  |
| wavelet-LLL | glcm       | Idm                                  | 0.244678813  |
| wavelet-LLL | glcm       | Correlation                          | 0.613692438  |
| wavelet-LLL | glcm       | Autocorrelation                      | 4648.337932  |
| wavelet-LLL | glcm       | SumEntropy                           | 5.804779331  |
| wavelet-LLL | glcm       | SumSquares                           | 200.6631193  |
| wavelet-LLL | glcm       | ClusterProminence                    | 2207032.686  |
| wavelet-LLL | glcm       | Imc2                                 | 0.979714382  |
| wavelet-LLL | glcm       | Imc1                                 | -0.324286384 |
| wavelet-LLL | glcm       | DifferenceAverage                    | 7.966123977  |
| wavelet-LLL | glcm       | Id                                   | 0.310817344  |
| wavelet-LLL | glcm       | ClusterTendency                      | 649.8516403  |
| wavelet-LLL | firstorder | InterquartileRange                   | 473.2580176  |
| wavelet-LLL | firstorder | Skewness                             | -1.349985824 |
| wavelet-LLL | firstorder | Uniformity                           | 0.044634725  |
| wavelet-LLL | firstorder | Median                               | -17.1748457  |
| wavelet-LLL | firstorder | Energy                               | 164828840.5  |

|             |            |                                  |              |
|-------------|------------|----------------------------------|--------------|
| wavelet-LLL | firstorder | RobustMeanAbsoluteDeviation      | 212.1827841  |
| wavelet-LLL | firstorder | MeanAbsoluteDeviation            | 315.8090001  |
| wavelet-LLL | firstorder | TotalEnergy                      | 4450378693   |
| wavelet-LLL | firstorder | Maximum                          | 559.6374281  |
| wavelet-LLL | firstorder | RootMeanSquared                  | 445.365006   |
| wavelet-LLL | firstorder | 90Percentile                     | 125.9316404  |
| wavelet-LLL | firstorder | Minimum                          | -1798.708461 |
| wavelet-LLL | firstorder | Entropy                          | 5.318574458  |
| wavelet-LLL | firstorder | Range                            | 2358.345889  |
| wavelet-LLL | firstorder | Variance                         | 160580.4662  |
| wavelet-LLL | firstorder | 10Percentile                     | -802.24962   |
| wavelet-LLL | firstorder | Kurtosis                         | 4.303606955  |
| wavelet-LLL | firstorder | Mean                             | -194.343825  |
| wavelet-LLL | glrlm      | ShortRunLowGrayLevelEmphasis     | 0.001741912  |
| wavelet-LLL | glrlm      | GrayLevelVariance                | 268.9845341  |
| wavelet-LLL | glrlm      | LowGrayLevelRunEmphasis          | 0.001754452  |
| wavelet-LLL | glrlm      | GrayLevelNonUniformityNormalized | 0.03563165   |
| wavelet-LLL | glrlm      | RunVariance                      | 0.159398051  |
| wavelet-LLL | glrlm      | GrayLevelNonUniformity           | 26.8011776   |
| wavelet-LLL | glrlm      | LongRunEmphasis                  | 1.382122885  |
| wavelet-LLL | glrlm      | ShortRunHighGrayLevelEmphasis    | 3968.584575  |
| wavelet-LLL | glrlm      | RunLengthNonUniformity           | 637.8094397  |
| wavelet-LLL | glrlm      | ShortRunEmphasis                 | 0.936114057  |
| wavelet-LLL | glrlm      | LongRunHighGrayLevelEmphasis     | 6480.264257  |
| wavelet-LLL | glrlm      | RunPercentage                    | 0.904748681  |
| wavelet-LLL | glrlm      | LongRunLowGrayLevelEmphasis      | 0.001827404  |
| wavelet-LLL | glrlm      | RunEntropy                       | 5.829781632  |
| wavelet-LLL | glrlm      | HighGrayLevelRunEmphasis         | 4324.951351  |
| wavelet-LLL | glrlm      | RunLengthNonUniformityNormalized | 0.848036067  |
| wavelet-LLL | glszm      | GrayLevelVariance                | 306.8420148  |
| wavelet-LLL | glszm      | ZoneVariance                     | 51.87710263  |
| wavelet-LLL | glszm      | GrayLevelNonUniformityNormalized | 0.019282915  |
| wavelet-LLL | glszm      | SizeZoneNonUniformityNormalized  | 0.616942953  |
| wavelet-LLL | glszm      | SizeZoneNonUniformity            | 256.0313253  |
| wavelet-LLL | glszm      | GrayLevelNonUniformity           | 8.002409639  |
| wavelet-LLL | glszm      | LargeAreaEmphasis                | 55.88674699  |
| wavelet-LLL | glszm      | SmallAreaHighGrayLevelEmphasis   | 2742.79365   |
| wavelet-LLL | glszm      | ZonePercentage                   | 0.499398315  |
| wavelet-LLL | glszm      | LargeAreaLowGrayLevelEmphasis    | 0.012637031  |
| wavelet-LLL | glszm      | LargeAreaHighGrayLevelEmphasis   | 319981.7952  |
| wavelet-LLL | glszm      | HighGrayLevelZoneEmphasis        | 3538.559036  |
| wavelet-LLL | glszm      | SmallAreaEmphasis                | 0.813072656  |
| wavelet-LLL | glszm      | LowGrayLevelZoneEmphasis         | 0.002991218  |
| wavelet-LLL | glszm      | ZoneEntropy                      | 6.694523887  |
| wavelet-LLL | glszm      | SmallAreaLowGrayLevelEmphasis    | 0.00292565   |
| wavelet-LLL | ngtdm      | Coarseness                       | 0.009286397  |
| wavelet-LLL | ngtdm      | Complexity                       | 16140.78501  |
| wavelet-LLL | ngtdm      | Strength                         | 38.86632663  |
| wavelet-LLL | ngtdm      | Contrast                         | 0.406628429  |
| wavelet-LLL | ngtdm      | Busyness                         | 0.014190042  |
| wavelet-HHL | gldm       | GrayLevelVariance                | 4.117020799  |
| wavelet-HHL | gldm       | HighGrayLevelEmphasis            | 136.9350181  |
| wavelet-HHL | gldm       | DependenceEntropy                | 5.973417256  |

|             |            |                                      |              |
|-------------|------------|--------------------------------------|--------------|
| wavelet-HHL | gldm       | DependenceNonUniformity              | 60.99759326  |
| wavelet-HHL | gldm       | GrayLevelNonUniformity               | 173.6474128  |
| wavelet-HHL | gldm       | SmallDependenceEmphasis              | 0.145673929  |
| wavelet-HHL | gldm       | SmallDependenceHighGrayLevelEmphasis | 22.25586175  |
| wavelet-HHL | gldm       | DependenceNonUniformityNormalized    | 0.073402639  |
| wavelet-HHL | gldm       | LargeDependenceEmphasis              | 64.40072202  |
| wavelet-HHL | gldm       | LargeDependenceLowGrayLevelEmphasis  | 0.498291231  |
| wavelet-HHL | gldm       | DependenceVariance                   | 19.81175595  |
| wavelet-HHL | gldm       | LargeDependenceHighGrayLevelEmphasis | 8493.53911   |
| wavelet-HHL | gldm       | SmallDependenceLowGrayLevelEmphasis  | 0.003100612  |
| wavelet-HHL | gldm       | LowGrayLevelEmphasis                 | 0.009806164  |
| wavelet-HHL | glcm       | JointAverage                         | 11.52380295  |
| wavelet-HHL | glcm       | SumAverage                           | 23.04760589  |
| wavelet-HHL | glcm       | JointEntropy                         | 4.969802092  |
| wavelet-HHL | glcm       | ClusterShade                         | 10.84078141  |
| wavelet-HHL | glcm       | MaximumProbability                   | 0.12366296   |
| wavelet-HHL | glcm       | Idmn                                 | 0.992745665  |
| wavelet-HHL | glcm       | JointEnergy                          | 0.062407438  |
| wavelet-HHL | glcm       | Contrast                             | 6.646281068  |
| wavelet-HHL | glcm       | DifferenceEntropy                    | 2.373841297  |
| wavelet-HHL | glcm       | InverseVariance                      | 0.434059919  |
| wavelet-HHL | glcm       | DifferenceVariance                   | 4.072957651  |
| wavelet-HHL | glcm       | Idn                                  | 0.951320203  |
| wavelet-HHL | glcm       | Idm                                  | 0.506021482  |
| wavelet-HHL | glcm       | Correlation                          | -0.005582186 |
| wavelet-HHL | glcm       | Autocorrelation                      | 132.790436   |
| wavelet-HHL | glcm       | SumEntropy                           | 3.1433021    |
| wavelet-HHL | glcm       | SumSquares                           | 3.315155036  |
| wavelet-HHL | glcm       | ClusterProminence                    | 555.9280343  |
| wavelet-HHL | glcm       | Imc2                                 | 0.56003538   |
| wavelet-HHL | glcm       | Imc1                                 | -0.075117909 |
| wavelet-HHL | glcm       | DifferenceAverage                    | 1.596687026  |
| wavelet-HHL | glcm       | Id                                   | 0.552221469  |
| wavelet-HHL | glcm       | ClusterTendency                      | 6.614339075  |
| wavelet-HHL | firstorder | InterquartileRange                   | 38.66084516  |
| wavelet-HHL | firstorder | Skewness                             | 0.979338214  |
| wavelet-HHL | firstorder | Uniformity                           | 0.208961989  |
| wavelet-HHL | firstorder | Median                               | 1.025734328  |
| wavelet-HHL | firstorder | Energy                               | 2102633.963  |
| wavelet-HHL | firstorder | RobustMeanAbsoluteDeviation          | 16.74580019  |
| wavelet-HHL | firstorder | MeanAbsoluteDeviation                | 31.21002964  |
| wavelet-HHL | firstorder | TotalEnergy                          | 56771116.99  |
| wavelet-HHL | firstorder | Maximum                              | 429.0623774  |
| wavelet-HHL | firstorder | RootMeanSquared                      | 50.30154513  |
| wavelet-HHL | firstorder | 90Percentile                         | 44.41022348  |
| wavelet-HHL | firstorder | Minimum                              | -263.9506035 |
| wavelet-HHL | firstorder | Entropy                              | 2.72990001   |
| wavelet-HHL | firstorder | Range                                | 693.0129809  |
| wavelet-HHL | firstorder | Variance                             | 2530.065067  |
| wavelet-HHL | firstorder | 10Percentile                         | -47.85139552 |
| wavelet-HHL | firstorder | Kurtosis                             | 15.01495378  |
| wavelet-HHL | firstorder | Mean                                 | 0.424706899  |
| wavelet-HHL | glrlm      | ShortRunLowGrayLevelEmphasis         | 0.009177748  |

|             |       |                                      |             |
|-------------|-------|--------------------------------------|-------------|
| wavelet-HHL | glrlm | GrayLevelVariance                    | 5.056854929 |
| wavelet-HHL | glrlm | LowGrayLevelRunEmphasis              | 0.010391723 |
| wavelet-HHL | glrlm | GrayLevelNonUniformityNormalized     | 0.179850882 |
| wavelet-HHL | glrlm | RunVariance                          | 0.438066936 |
| wavelet-HHL | glrlm | GrayLevelNonUniformity               | 116.8592462 |
| wavelet-HHL | glrlm | LongRunEmphasis                      | 2.082985538 |
| wavelet-HHL | glrlm | ShortRunHighGrayLevelEmphasis        | 117.1769334 |
| wavelet-HHL | glrlm | RunLengthNonUniformity               | 433.6540201 |
| wavelet-HHL | glrlm | ShortRunEmphasis                     | 0.842861091 |
| wavelet-HHL | glrlm | LongRunHighGrayLevelEmphasis         | 281.3802379 |
| wavelet-HHL | glrlm | RunPercentage                        | 0.781634731 |
| wavelet-HHL | glrlm | LongRunLowGrayLevelEmphasis          | 0.0187618   |
| wavelet-HHL | glrlm | RunEntropy                           | 3.769232463 |
| wavelet-HHL | glrlm | HighGrayLevelRunEmphasis             | 138.1212715 |
| wavelet-HHL | glrlm | RunLengthNonUniformityNormalized     | 0.666315553 |
| wavelet-HHL | glszm | GrayLevelVariance                    | 19.59230617 |
| wavelet-HHL | glszm | ZoneVariance                         | 945.5340075 |
| wavelet-HHL | glszm | GrayLevelNonUniformityNormalized     | 0.096040717 |
| wavelet-HHL | glszm | SizeZoneNonUniformityNormalized      | 0.401546698 |
| wavelet-HHL | glszm | SizeZoneNonUniformity                | 49.3902439  |
| wavelet-HHL | glszm | GrayLevelNonUniformity               | 11.81300813 |
| wavelet-HHL | glszm | LargeAreaEmphasis                    | 991.1788618 |
| wavelet-HHL | glszm | SmallAreaHighGrayLevelEmphasis       | 106.2284802 |
| wavelet-HHL | glszm | ZonePercentage                       | 0.14801444  |
| wavelet-HHL | glszm | LargeAreaLowGrayLevelEmphasis        | 7.492251957 |
| wavelet-HHL | glszm | LargeAreaHighGrayLevelEmphasis       | 132710.6098 |
| wavelet-HHL | glszm | HighGrayLevelZoneEmphasis            | 153.8130081 |
| wavelet-HHL | glszm | SmallAreaEmphasis                    | 0.658445746 |
| wavelet-HHL | glszm | LowGrayLevelZoneEmphasis             | 0.021247446 |
| wavelet-HHL | glszm | ZoneEntropy                          | 5.173246213 |
| wavelet-HHL | glszm | SmallAreaLowGrayLevelEmphasis        | 0.018264777 |
| wavelet-HHL | ngtdm | Coarseness                           | 0.008444007 |
| wavelet-HHL | ngtdm | Complexity                           | 270.0970933 |
| wavelet-HHL | ngtdm | Strength                             | 2.185562936 |
| wavelet-HHL | ngtdm | Contrast                             | 0.028409629 |
| wavelet-HHL | ngtdm | Busyness                             | 0.34093758  |
| wavelet-HLH | gldm  | GrayLevelVariance                    | 4.370293138 |
| wavelet-HLH | gldm  | HighGrayLevelEmphasis                | 114.4813478 |
| wavelet-HLH | gldm  | DependenceEntropy                    | 6.001745029 |
| wavelet-HLH | gldm  | DependenceNonUniformity              | 75.67870036 |
| wavelet-HLH | gldm  | GrayLevelNonUniformity               | 140.990373  |
| wavelet-HLH | gldm  | SmallDependenceEmphasis              | 0.195174096 |
| wavelet-HLH | gldm  | SmallDependenceHighGrayLevelEmphasis | 21.8666295  |
| wavelet-HLH | gldm  | DependenceNonUniformityNormalized    | 0.091069435 |
| wavelet-HLH | gldm  | LargeDependenceEmphasis              | 51.12274368 |
| wavelet-HLH | gldm  | LargeDependenceLowGrayLevelEmphasis  | 0.48233428  |
| wavelet-HLH | gldm  | DependenceVariance                   | 17.77246615 |
| wavelet-HLH | gldm  | LargeDependenceHighGrayLevelEmphasis | 5582.10349  |
| wavelet-HLH | gldm  | SmallDependenceLowGrayLevelEmphasis  | 0.004475966 |
| wavelet-HLH | gldm  | LowGrayLevelEmphasis                 | 0.012169533 |
| wavelet-HLH | glcm  | JointAverage                         | 10.52864252 |
| wavelet-HLH | glcm  | SumAverage                           | 21.05728505 |
| wavelet-HLH | glcm  | JointEntropy                         | 5.533964132 |

|             |            |                                  |              |
|-------------|------------|----------------------------------|--------------|
| wavelet-HLH | glcm       | ClusterShade                     | -6.131524711 |
| wavelet-HLH | glcm       | MaximumProbability               | 0.116364529  |
| wavelet-HLH | glcm       | Idmn                             | 0.976485438  |
| wavelet-HLH | glcm       | JointEnergy                      | 0.045742679  |
| wavelet-HLH | glcm       | Contrast                         | 7.640888214  |
| wavelet-HLH | glcm       | DifferenceEntropy                | 2.590827836  |
| wavelet-HLH | glcm       | InverseVariance                  | 0.399142045  |
| wavelet-HLH | glcm       | DifferenceVariance               | 3.908135759  |
| wavelet-HLH | glcm       | Idn                              | 0.907802005  |
| wavelet-HLH | glcm       | Idm                              | 0.447619016  |
| wavelet-HLH | glcm       | Correlation                      | 0.006045556  |
| wavelet-HLH | glcm       | Autocorrelation                  | 110.8664752  |
| wavelet-HLH | glcm       | SumEntropy                       | 3.366662225  |
| wavelet-HLH | glcm       | SumSquares                       | 3.834331344  |
| wavelet-HLH | glcm       | ClusterProminence                | 313.2849175  |
| wavelet-HLH | glcm       | Imc2                             | 0.588506177  |
| wavelet-HLH | glcm       | Imc1                             | -0.07747142  |
| wavelet-HLH | glcm       | DifferenceAverage                | 1.909887598  |
| wavelet-HLH | glcm       | Id                               | 0.5047971    |
| wavelet-HLH | glcm       | ClusterTendency                  | 7.696437162  |
| wavelet-HLH | firstorder | InterquartileRange               | 48.4770761   |
| wavelet-HLH | firstorder | Skewness                         | -0.384833426 |
| wavelet-HLH | firstorder | Uniformity                       | 0.169663505  |
| wavelet-HLH | firstorder | Median                           | -0.983742391 |
| wavelet-HLH | firstorder | Energy                           | 2219934.378  |
| wavelet-HLH | firstorder | RobustMeanAbsoluteDeviation      | 21.71176668  |
| wavelet-HLH | firstorder | MeanAbsoluteDeviation            | 36.72407103  |
| wavelet-HLH | firstorder | TotalEnergy                      | 59938228.21  |
| wavelet-HLH | firstorder | Maximum                          | 163.5553837  |
| wavelet-HLH | firstorder | RootMeanSquared                  | 51.68559932  |
| wavelet-HLH | firstorder | 90Percentile                     | 64.73937289  |
| wavelet-HLH | firstorder | Minimum                          | -240.0669153 |
| wavelet-HLH | firstorder | Entropy                          | 2.999221511  |
| wavelet-HLH | firstorder | Range                            | 403.622299   |
| wavelet-HLH | firstorder | Variance                         | 2671.045489  |
| wavelet-HLH | firstorder | 10Percentile                     | -64.41554113 |
| wavelet-HLH | firstorder | Kurtosis                         | 4.671835355  |
| wavelet-HLH | firstorder | Mean                             | -0.59639611  |
| wavelet-HLH | glrlm      | ShortRunLowGrayLevelEmphasis     | 0.011569018  |
| wavelet-HLH | glrlm      | GrayLevelVariance                | 5.106720652  |
| wavelet-HLH | glrlm      | LowGrayLevelRunEmphasis          | 0.012800383  |
| wavelet-HLH | glrlm      | GrayLevelNonUniformityNormalized | 0.144185498  |
| wavelet-HLH | glrlm      | RunVariance                      | 0.351603623  |
| wavelet-HLH | glrlm      | GrayLevelNonUniformity           | 97.85109317  |
| wavelet-HLH | glrlm      | LongRunEmphasis                  | 1.85874538   |
| wavelet-HLH | glrlm      | ShortRunHighGrayLevelEmphasis    | 100.5927062  |
| wavelet-HLH | glrlm      | RunLengthNonUniformity           | 485.0932521  |
| wavelet-HLH | glrlm      | ShortRunEmphasis                 | 0.869109806  |
| wavelet-HLH | glrlm      | LongRunHighGrayLevelEmphasis     | 210.2507373  |
| wavelet-HLH | glrlm      | RunPercentage                    | 0.816347311  |
| wavelet-HLH | glrlm      | LongRunLowGrayLevelEmphasis      | 0.020851855  |
| wavelet-HLH | glrlm      | RunEntropy                       | 3.881890333  |
| wavelet-HLH | glrlm      | HighGrayLevelRunEmphasis         | 115.2297772  |

|             |       |                                  |             |
|-------------|-------|----------------------------------|-------------|
| wavelet-HLH | glrlm | RunLengthNonUniformityNormalized | 0.713592001 |
| wavelet-HLH | glszm | GrayLevelVariance                | 12.42157923 |
| wavelet-HLH | glszm | ZoneVariance                     | 489.6285492 |
| wavelet-HLH | glszm | GrayLevelNonUniformityNormalized | 0.087479719 |
| wavelet-HLH | glszm | SizeZoneNonUniformityNormalized  | 0.42286371  |
| wavelet-HLH | glszm | SizeZoneNonUniformity            | 72.73255814 |
| wavelet-HLH | glszm | GrayLevelNonUniformity           | 15.04651163 |
| wavelet-HLH | glszm | LargeAreaEmphasis                | 512.9709302 |
| wavelet-HLH | glszm | SmallAreaHighGrayLevelEmphasis   | 73.85874209 |
| wavelet-HLH | glszm | ZonePercentage                   | 0.206979543 |
| wavelet-HLH | glszm | LargeAreaLowGrayLevelEmphasis    | 4.828749977 |
| wavelet-HLH | glszm | LargeAreaHighGrayLevelEmphasis   | 55399.82558 |
| wavelet-HLH | glszm | HighGrayLevelZoneEmphasis        | 114.2906977 |
| wavelet-HLH | glszm | SmallAreaEmphasis                | 0.675671923 |
| wavelet-HLH | glszm | LowGrayLevelZoneEmphasis         | 0.022347076 |
| wavelet-HLH | glszm | ZoneEntropy                      | 5.231770488 |
| wavelet-HLH | glszm | SmallAreaLowGrayLevelEmphasis    | 0.018922244 |
| wavelet-HLH | ngtdm | Coarseness                       | 0.008464689 |
| wavelet-HLH | ngtdm | Complexity                       | 187.3950415 |
| wavelet-HLH | ngtdm | Strength                         | 0.808079171 |
| wavelet-HLH | ngtdm | Contrast                         | 0.04978791  |
| wavelet-HLH | ngtdm | Busyness                         | 0.500277896 |

| Image type | Feature Class | Feature Name                         |                                                                                                                                                                                                                                                                                                                                                                                                                   |
|------------|---------------|--------------------------------------|-------------------------------------------------------------------------------------------------------------------------------------------------------------------------------------------------------------------------------------------------------------------------------------------------------------------------------------------------------------------------------------------------------------------|
| general    | info          | BoundingBox                          | 2: RTSTRUCT: C99-DNU_segment_LUL GTV<br>(0, 0, 1, 5, 7, 6)                                                                                                                                                                                                                                                                                                                                                        |
| general    | info          | EnabledImageTypes                    | {u'Original': {}, u'Wavelet': {}}                                                                                                                                                                                                                                                                                                                                                                                 |
|            |               |                                      | {'distances': [1], 'additionalInfo': True, 'force2D': False, 'interpolator': 'sitkBSpline', 'resampledPixelSpacing': [3.0], 'label': 1, 'normalizeScale': 1, 'normalize': False, 'force2Ddimension': 0, 'removeOutliers': None, 'minimumROISize': None, u'binWidth': 25.0, 'minimumROIDimensions': 1, u'correctMask': True, 'preCrop': False, u'symmetricalGLCM': True, 'resegmentRange': None, 'padDistance': 5} |
| general    | info          | GeneralSettings                      |                                                                                                                                                                                                                                                                                                                                                                                                                   |
| general    | info          | ImageHash                            | 0332990805cf4ea4bf9e4a3082d00aa854f1e4be                                                                                                                                                                                                                                                                                                                                                                          |
| general    | info          | ImageSpacing                         | (0.96679688, 0.96679688, 2.0)                                                                                                                                                                                                                                                                                                                                                                                     |
|            |               |                                      | b789175023d4c1f2d3d6e9cbd684a26c203c805                                                                                                                                                                                                                                                                                                                                                                           |
| general    | info          | MaskHash                             | 4                                                                                                                                                                                                                                                                                                                                                                                                                 |
| general    | info          | NumpyVersion                         | 1.13.1                                                                                                                                                                                                                                                                                                                                                                                                            |
| general    | info          | PyWaveletVersion                     | 0.5.2                                                                                                                                                                                                                                                                                                                                                                                                             |
| general    | info          | SimpleITKVersion                     | 1.1.0                                                                                                                                                                                                                                                                                                                                                                                                             |
| general    | info          | Version                              | 1.3.0.post102+g1b0eb74                                                                                                                                                                                                                                                                                                                                                                                            |
| general    | info          | VolumeNum                            | 1                                                                                                                                                                                                                                                                                                                                                                                                                 |
| general    | info          | VoxelNum                             | 71                                                                                                                                                                                                                                                                                                                                                                                                                |
| original   | shape         | Maximum3DDiameter                    | 18.49324201                                                                                                                                                                                                                                                                                                                                                                                                       |
| original   | shape         | Maximum2DDiameterSlice               | 18.24828759                                                                                                                                                                                                                                                                                                                                                                                                       |
| original   | shape         | Sphericity                           | 0.863718387                                                                                                                                                                                                                                                                                                                                                                                                       |
| original   | shape         | MinorAxis                            | 13.97268604                                                                                                                                                                                                                                                                                                                                                                                                       |
| original   | shape         | Elongation                           | 0.764038835                                                                                                                                                                                                                                                                                                                                                                                                       |
| original   | shape         | SurfaceVolumeRatio                   | 0.450717674                                                                                                                                                                                                                                                                                                                                                                                                       |
| original   | shape         | Volume                               | 1917                                                                                                                                                                                                                                                                                                                                                                                                              |
| original   | shape         | MajorAxis                            | 18.28792647                                                                                                                                                                                                                                                                                                                                                                                                       |
| original   | shape         | SurfaceArea                          | 864.0257812                                                                                                                                                                                                                                                                                                                                                                                                       |
| original   | shape         | Flatness                             | 0.613130022                                                                                                                                                                                                                                                                                                                                                                                                       |
| original   | shape         | LeastAxis                            | 11.21287676                                                                                                                                                                                                                                                                                                                                                                                                       |
| original   | shape         | Maximum2DDiameterColumn              | 16.15549442                                                                                                                                                                                                                                                                                                                                                                                                       |
| original   | shape         | Maximum2DDiameterRow                 | 16.15549442                                                                                                                                                                                                                                                                                                                                                                                                       |
| original   | gldm          | GrayLevelVariance                    | 50.42174172                                                                                                                                                                                                                                                                                                                                                                                                       |
| original   | gldm          | HighGrayLevelEmphasis                | 627.7746479                                                                                                                                                                                                                                                                                                                                                                                                       |
| original   | gldm          | DependenceEntropy                    | 5.086229162                                                                                                                                                                                                                                                                                                                                                                                                       |
| original   | gldm          | DependenceNonUniformity              | 14.49295775                                                                                                                                                                                                                                                                                                                                                                                                       |
| original   | gldm          | GrayLevelNonUniformity               | 9                                                                                                                                                                                                                                                                                                                                                                                                                 |
| original   | gldm          | SmallDependenceEmphasis              | 0.446618052                                                                                                                                                                                                                                                                                                                                                                                                       |
| original   | gldm          | SmallDependenceHighGrayLevelEmphasis | 195.7591882                                                                                                                                                                                                                                                                                                                                                                                                       |
| original   | gldm          | DependenceNonUniformityNormalized    | 0.204126165                                                                                                                                                                                                                                                                                                                                                                                                       |
| original   | gldm          | LargeDependenceEmphasis              | 19.08450704                                                                                                                                                                                                                                                                                                                                                                                                       |
| original   | gldm          | LargeDependenceLowGrayLevelEmphasis  | 0.044129362                                                                                                                                                                                                                                                                                                                                                                                                       |
| original   | gldm          | DependenceVariance                   | 7.562785162                                                                                                                                                                                                                                                                                                                                                                                                       |
| original   | gldm          | LargeDependenceHighGrayLevelEmphasis | 14629.26761                                                                                                                                                                                                                                                                                                                                                                                                       |
| original   | gldm          | SmallDependenceLowGrayLevelEmphasis  | 0.020008183                                                                                                                                                                                                                                                                                                                                                                                                       |
| original   | gldm          | LowGrayLevelEmphasis                 | 0.020722004                                                                                                                                                                                                                                                                                                                                                                                                       |
| original   | glcm          | JointAverage                         | 25.29751704                                                                                                                                                                                                                                                                                                                                                                                                       |

|          |            |                                  |              |
|----------|------------|----------------------------------|--------------|
| original | glcm       | SumAverage                       | 50.59503409  |
| original | glcm       | JointEntropy                     | 5.039134752  |
| original | glcm       | ClusterShade                     | -1242.603965 |
| original | glcm       | MaximumProbability               | 0.111827218  |
| original | glcm       | Idmn                             | 0.96096827   |
| original | glcm       | JointEnergy                      | 0.044620237  |
| original | glcm       | Contrast                         | 63.30928531  |
| original | glcm       | DifferenceEntropy                | 3.151805616  |
| original | glcm       | InverseVariance                  | 0.342509624  |
| original | glcm       | DifferenceVariance               | 39.19683774  |
| original | glcm       | Idn                              | 0.89767742   |
| original | glcm       | Idm                              | 0.346941568  |
| original | glcm       | Correlation                      | 0.1061898    |
| original | glcm       | Autocorrelation                  | 644.290433   |
| original | glcm       | SumEntropy                       | 3.713328005  |
| original | glcm       | SumSquares                       | 35.90618482  |
| original | glcm       | ClusterProminence                | 39597.64881  |
| original | glcm       | Imc2                             | 0.961734216  |
| original | glcm       | Imc1                             | -0.421228835 |
| original | glcm       | DifferenceAverage                | 4.88440035   |
| original | glcm       | Id                               | 0.401656029  |
| original | glcm       | ClusterTendency                  | 80.31545397  |
| original | firstorder | InterquartileRange               | 169.5        |
| original | firstorder | Skewness                         | -1.656525222 |
| original | firstorder | Uniformity                       | 0.126760563  |
| original | firstorder | Median                           | 13           |
| original | firstorder | Energy                           | 2472051      |
| original | firstorder | RobustMeanAbsoluteDeviation      | 80.43767313  |
| original | firstorder | MeanAbsoluteDeviation            | 133.5044634  |
| original | firstorder | TotalEnergy                      | 66745377     |
| original | firstorder | Maximum                          | 225          |
| original | firstorder | RootMeanSquared                  | 186.5948009  |
| original | firstorder | 90Percentile                     | 67           |
| original | firstorder | Minimum                          | -640         |
| original | firstorder | Entropy                          | 3.603219365  |
| original | firstorder | Range                            | 865          |
| original | firstorder | Variance                         | 30992.80698  |
| original | firstorder | 10Percentile                     | -318         |
| original | firstorder | Kurtosis                         | 5.188840022  |
| original | firstorder | Mean                             | -61.84507042 |
| original | glrlm      | ShortRunLowGrayLevelEmphasis     | 0.022674502  |
| original | glrlm      | GrayLevelVariance                | 53.90759653  |
| original | glrlm      | LowGrayLevelRunEmphasis          | 0.022765113  |
| original | glrlm      | GrayLevelNonUniformityNormalized | 0.110753697  |
| original | glrlm      | RunVariance                      | 0.120745416  |
| original | glrlm      | GrayLevelNonUniformity           | 7.171764713  |
| original | glrlm      | LongRunEmphasis                  | 1.346372989  |
| original | glrlm      | ShortRunHighGrayLevelEmphasis    | 557.8057313  |
| original | glrlm      | RunLengthNonUniformity           | 54.20738008  |
| original | glrlm      | ShortRunEmphasis                 | 0.929899977  |
| original | glrlm      | LongRunHighGrayLevelEmphasis     | 880.7006909  |
| original | glrlm      | RunPercentage                    | 0.907908992  |
| original | glrlm      | LongRunLowGrayLevelEmphasis      | 0.023213383  |
| original | glrlm      | RunEntropy                       | 4.044101009  |



|             |       |                                      |              |
|-------------|-------|--------------------------------------|--------------|
| original    | glrlm | HighGrayLevelRunEmphasis             | 612.231431   |
| original    | glrlm | RunLengthNonUniformityNormalized     | 0.836386794  |
| original    | glszm | GrayLevelVariance                    | 69.14285714  |
| original    | glszm | ZoneVariance                         | 8.999183673  |
| original    | glszm | GrayLevelNonUniformityNormalized     | 0.06122449   |
| original    | glszm | SizeZoneNonUniformityNormalized      | 0.648979592  |
| original    | glszm | SizeZoneNonUniformity                | 22.71428571  |
| original    | glszm | GrayLevelNonUniformity               | 2.142857143  |
| original    | glszm | LargeAreaEmphasis                    | 13.11428571  |
| original    | glszm | SmallAreaHighGrayLevelEmphasis       | 329.5393393  |
| original    | glszm | ZonePercentage                       | 0.492957746  |
| original    | glszm | LargeAreaLowGrayLevelEmphasis        | 0.056312918  |
| original    | glszm | LargeAreaHighGrayLevelEmphasis       | 9902.914286  |
| original    | glszm | HighGrayLevelZoneEmphasis            | 469.1428571  |
| original    | glszm | SmallAreaEmphasis                    | 0.821615332  |
| original    | glszm | LowGrayLevelZoneEmphasis             | 0.04071289   |
| original    | glszm | ZoneEntropy                          | 4.443568731  |
| original    | glszm | SmallAreaLowGrayLevelEmphasis        | 0.040481214  |
| original    | ngtdm | Coarseness                           | 0.052074025  |
| original    | ngtdm | Complexity                           | 1077.913685  |
| original    | ngtdm | Strength                             | 24.09221403  |
| original    | ngtdm | Contrast                             | 1.023121572  |
| original    | ngtdm | Busyness                             | 0.028788929  |
| wavelet-HHH | gldm  | GrayLevelVariance                    | 19.12041262  |
| wavelet-HHH | gldm  | HighGrayLevelEmphasis                | 155.4507042  |
| wavelet-HHH | gldm  | DependenceEntropy                    | 5.082501521  |
| wavelet-HHH | gldm  | DependenceNonUniformity              | 25.73239437  |
| wavelet-HHH | gldm  | GrayLevelNonUniformity               | 4.915492958  |
| wavelet-HHH | gldm  | SmallDependenceEmphasis              | 0.530492958  |
| wavelet-HHH | gldm  | SmallDependenceHighGrayLevelEmphasis | 83.55799687  |
| wavelet-HHH | gldm  | DependenceNonUniformityNormalized    | 0.36242809   |
| wavelet-HHH | gldm  | LargeDependenceEmphasis              | 4.042253521  |
| wavelet-HHH | gldm  | LargeDependenceLowGrayLevelEmphasis  | 0.056015908  |
| wavelet-HHH | gldm  | DependenceVariance                   | 0.741122793  |
| wavelet-HHH | gldm  | LargeDependenceHighGrayLevelEmphasis | 627.9577465  |
| wavelet-HHH | gldm  | SmallDependenceLowGrayLevelEmphasis  | 0.021245423  |
| wavelet-HHH | gldm  | LowGrayLevelEmphasis                 | 0.026267778  |
| wavelet-HHH | glcm  | JointAverage                         | 11.60241002  |
| wavelet-HHH | glcm  | SumAverage                           | 23.20482005  |
| wavelet-HHH | glcm  | JointEntropy                         | 5.943199038  |
| wavelet-HHH | glcm  | ClusterShade                         | -5.170875403 |
| wavelet-HHH | glcm  | MaximumProbability                   | 0.032289173  |
| wavelet-HHH | glcm  | Idmn                                 | 0.936777788  |
| wavelet-HHH | glcm  | JointEnergy                          | 0.017621751  |
| wavelet-HHH | glcm  | Contrast                             | 36.86762724  |
| wavelet-HHH | glcm  | DifferenceEntropy                    | 3.353800194  |
| wavelet-HHH | glcm  | InverseVariance                      | 0.201374989  |
| wavelet-HHH | glcm  | DifferenceVariance                   | 12.79664443  |
| wavelet-HHH | glcm  | Idn                                  | 0.834229948  |
| wavelet-HHH | glcm  | Idm                                  | 0.179613064  |
| wavelet-HHH | glcm  | Correlation                          | -0.042982561 |
| wavelet-HHH | glcm  | Autocorrelation                      | 133.9369494  |
| wavelet-HHH | glcm  | SumEntropy                           | 3.949894979  |
| wavelet-HHH | glcm  | SumSquares                           | 17.72397837  |

|             |            |                                  |              |
|-------------|------------|----------------------------------|--------------|
| wavelet-HHH | glcm       | ClusterProminence                | 3356.277253  |
| wavelet-HHH | glcm       | Imc2                             | 0.988311853  |
| wavelet-HHH | glcm       | Imc1                             | -0.488227829 |
| wavelet-HHH | glcm       | DifferenceAverage                | 4.828700848  |
| wavelet-HHH | glcm       | Id                               | 0.274268717  |
| wavelet-HHH | glcm       | ClusterTendency                  | 34.02828623  |
| wavelet-HHH | firstorder | InterquartileRange               | 148.4506498  |
| wavelet-HHH | firstorder | Skewness                         | -0.073818482 |
| wavelet-HHH | firstorder | Uniformity                       | 0.069232295  |
| wavelet-HHH | firstorder | Median                           | 11.66931426  |
| wavelet-HHH | firstorder | Energy                           | 845459.1588  |
| wavelet-HHH | firstorder | RobustMeanAbsoluteDeviation      | 61.43442235  |
| wavelet-HHH | firstorder | MeanAbsoluteDeviation            | 86.9380588   |
| wavelet-HHH | firstorder | TotalEnergy                      | 22827397.29  |
| wavelet-HHH | firstorder | Maximum                          | 267.3079812  |
| wavelet-HHH | firstorder | RootMeanSquared                  | 109.1232124  |
| wavelet-HHH | firstorder | 90Percentile                     | 138.4024816  |
| wavelet-HHH | firstorder | Minimum                          | -256.5603651 |
| wavelet-HHH | firstorder | Entropy                          | 4.021670798  |
| wavelet-HHH | firstorder | Range                            | 523.8683463  |
| wavelet-HHH | firstorder | Variance                         | 11891.88722  |
| wavelet-HHH | firstorder | 10Percentile                     | -142.4887982 |
| wavelet-HHH | firstorder | Kurtosis                         | 2.623080152  |
| wavelet-HHH | firstorder | Mean                             | 3.998531888  |
| wavelet-HHH | glrlm      | ShortRunLowGrayLevelEmphasis     | 0.026552061  |
| wavelet-HHH | glrlm      | GrayLevelVariance                | 19.36608165  |
| wavelet-HHH | glrlm      | LowGrayLevelRunEmphasis          | 0.026797127  |
| wavelet-HHH | glrlm      | GrayLevelNonUniformityNormalized | 0.069094903  |
| wavelet-HHH | glrlm      | RunVariance                      | 0.033603983  |
| wavelet-HHH | glrlm      | GrayLevelNonUniformity           | 4.751740407  |
| wavelet-HHH | glrlm      | LongRunEmphasis                  | 1.100906507  |
| wavelet-HHH | glrlm      | ShortRunHighGrayLevelEmphasis    | 151.7480333  |
| wavelet-HHH | glrlm      | RunLengthNonUniformity           | 64.65557766  |
| wavelet-HHH | glrlm      | ShortRunEmphasis                 | 0.976030286  |
| wavelet-HHH | glrlm      | LongRunHighGrayLevelEmphasis     | 171.0047446  |
| wavelet-HHH | glrlm      | RunPercentage                    | 0.968580715  |
| wavelet-HHH | glrlm      | LongRunLowGrayLevelEmphasis      | 0.027818939  |
| wavelet-HHH | glrlm      | RunEntropy                       | 4.126296124  |
| wavelet-HHH | glrlm      | HighGrayLevelRunEmphasis         | 155.4777064  |
| wavelet-HHH | glrlm      | RunLengthNonUniformityNormalized | 0.939379736  |
| wavelet-HHH | glszm      | GrayLevelVariance                | 23.78474851  |
| wavelet-HHH | glszm      | ZoneVariance                     | 1.250405625  |
| wavelet-HHH | glszm      | GrayLevelNonUniformityNormalized | 0.065440779  |
| wavelet-HHH | glszm      | SizeZoneNonUniformityNormalized  | 0.487290427  |
| wavelet-HHH | glszm      | SizeZoneNonUniformity            | 20.95348837  |
| wavelet-HHH | glszm      | GrayLevelNonUniformity           | 2.813953488  |
| wavelet-HHH | glszm      | LargeAreaEmphasis                | 3.976744186  |
| wavelet-HHH | glszm      | SmallAreaHighGrayLevelEmphasis   | 114.7678295  |
| wavelet-HHH | glszm      | ZonePercentage                   | 0.605633803  |
| wavelet-HHH | glszm      | LargeAreaLowGrayLevelEmphasis    | 0.065120341  |
| wavelet-HHH | glszm      | LargeAreaHighGrayLevelEmphasis   | 618.5813953  |
| wavelet-HHH | glszm      | HighGrayLevelZoneEmphasis        | 156.3023256  |
| wavelet-HHH | glszm      | SmallAreaEmphasis                | 0.724405685  |
| wavelet-HHH | glszm      | LowGrayLevelZoneEmphasis         | 0.036652813  |

|             |            |                                      |              |
|-------------|------------|--------------------------------------|--------------|
| wavelet-HHH | glszm      | ZoneEntropy                          | 4.786502545  |
| wavelet-HHH | glszm      | SmallAreaLowGrayLevelEmphasis        | 0.033467493  |
| wavelet-HHH | ngtdm      | Coarseness                           | 0.076581723  |
| wavelet-HHH | ngtdm      | Complexity                           | 480.247095   |
| wavelet-HHH | ngtdm      | Strength                             | 7.595434216  |
| wavelet-HHH | ngtdm      | Contrast                             | 0.412046802  |
| wavelet-HHH | ngtdm      | Busyness                             | 0.08081539   |
| wavelet-HLL | gldm       | GrayLevelVariance                    | 52.3221583   |
| wavelet-HLL | gldm       | HighGrayLevelEmphasis                | 675.2112676  |
| wavelet-HLL | gldm       | DependenceEntropy                    | 4.980457683  |
| wavelet-HLL | gldm       | DependenceNonUniformity              | 22.74647887  |
| wavelet-HLL | gldm       | GrayLevelNonUniformity               | 4.718309859  |
| wavelet-HLL | gldm       | SmallDependenceEmphasis              | 0.526999218  |
| wavelet-HLL | gldm       | SmallDependenceHighGrayLevelEmphasis | 382.0298474  |
| wavelet-HLL | gldm       | DependenceNonUniformityNormalized    | 0.320372942  |
| wavelet-HLL | gldm       | LargeDependenceEmphasis              | 5            |
| wavelet-HLL | gldm       | LargeDependenceLowGrayLevelEmphasis  | 0.121492607  |
| wavelet-HLL | gldm       | DependenceVariance                   | 1.167228724  |
| wavelet-HLL | gldm       | LargeDependenceHighGrayLevelEmphasis | 3148.732394  |
| wavelet-HLL | gldm       | SmallDependenceLowGrayLevelEmphasis  | 0.008185419  |
| wavelet-HLL | gldm       | LowGrayLevelEmphasis                 | 0.030139142  |
| wavelet-HLL | glcm       | JointAverage                         | 25.7074923   |
| wavelet-HLL | glcm       | SumAverage                           | 51.4149846   |
| wavelet-HLL | glcm       | JointEntropy                         | 5.965154737  |
| wavelet-HLL | glcm       | ClusterShade                         | -876.5183566 |
| wavelet-HLL | glcm       | MaximumProbability                   | 0.035146458  |
| wavelet-HLL | glcm       | Idmn                                 | 0.970709849  |
| wavelet-HLL | glcm       | JointEnergy                          | 0.017348618  |
| wavelet-HLL | glcm       | Contrast                             | 62.23456862  |
| wavelet-HLL | glcm       | DifferenceEntropy                    | 3.537837314  |
| wavelet-HLL | glcm       | InverseVariance                      | 0.191064445  |
| wavelet-HLL | glcm       | DifferenceVariance                   | 27.6266925   |
| wavelet-HLL | glcm       | Idn                                  | 0.891513025  |
| wavelet-HLL | glcm       | Idm                                  | 0.1808453    |
| wavelet-HLL | glcm       | Correlation                          | 0.202869358  |
| wavelet-HLL | glcm       | Autocorrelation                      | 669.3676191  |
| wavelet-HLL | glcm       | SumEntropy                           | 4.308947635  |
| wavelet-HLL | glcm       | SumSquares                           | 39.52115863  |
| wavelet-HLL | glcm       | ClusterProminence                    | 54725.75263  |
| wavelet-HLL | glcm       | Imc2                                 | 0.992700999  |
| wavelet-HLL | glcm       | Imc1                                 | -0.528345397 |
| wavelet-HLL | glcm       | DifferenceAverage                    | 5.744911702  |
| wavelet-HLL | glcm       | Id                                   | 0.270656739  |
| wavelet-HLL | glcm       | ClusterTendency                      | 95.8500659   |
| wavelet-HLL | firstorder | InterquartileRange                   | 148.9364429  |
| wavelet-HLL | firstorder | Skewness                             | -0.898047607 |
| wavelet-HLL | firstorder | Uniformity                           | 0.066455068  |
| wavelet-HLL | firstorder | Median                               | -90.40688225 |
| wavelet-HLL | firstorder | Energy                               | 3185223.4    |
| wavelet-HLL | firstorder | RobustMeanAbsoluteDeviation          | 74.12026555  |
| wavelet-HLL | firstorder | MeanAbsoluteDeviation                | 127.194647   |
| wavelet-HLL | firstorder | TotalEnergy                          | 86001031.8   |
| wavelet-HLL | firstorder | Maximum                              | 328.1636295  |
| wavelet-HLL | firstorder | RootMeanSquared                      | 211.807227   |

|             |            |                                      |              |
|-------------|------------|--------------------------------------|--------------|
| wavelet-HLL | firstorder | 90Percentile                         | 48.53639348  |
| wavelet-HLL | firstorder | Minimum                              | -707.3622742 |
| wavelet-HLL | firstorder | Entropy                              | 4.236390692  |
| wavelet-HLL | firstorder | Range                                | 1035.525904  |
| wavelet-HLL | firstorder | Variance                             | 32270.27054  |
| wavelet-HLL | firstorder | 10Percentile                         | -329.9720129 |
| wavelet-HLL | firstorder | Kurtosis                             | 5.326239784  |
| wavelet-HLL | firstorder | Mean                                 | -112.2142186 |
| wavelet-HLL | glrlm      | ShortRunLowGrayLevelEmphasis         | 0.02912342   |
| wavelet-HLL | glrlm      | GrayLevelVariance                    | 53.0661179   |
| wavelet-HLL | glrlm      | LowGrayLevelRunEmphasis              | 0.030061011  |
| wavelet-HLL | glrlm      | GrayLevelNonUniformityNormalized     | 0.065545575  |
| wavelet-HLL | glrlm      | RunVariance                          | 0.036700254  |
| wavelet-HLL | glrlm      | GrayLevelNonUniformity               | 4.481041823  |
| wavelet-HLL | glrlm      | LongRunEmphasis                      | 1.116657818  |
| wavelet-HLL | glrlm      | ShortRunHighGrayLevelEmphasis        | 659.0928574  |
| wavelet-HLL | glrlm      | RunLengthNonUniformity               | 63.44488031  |
| wavelet-HLL | glrlm      | ShortRunEmphasis                     | 0.970835545  |
| wavelet-HLL | glrlm      | LongRunHighGrayLevelEmphasis         | 749.8956459  |
| wavelet-HLL | glrlm      | RunPercentage                        | 0.963163597  |
| wavelet-HLL | glrlm      | LongRunLowGrayLevelEmphasis          | 0.033811373  |
| wavelet-HLL | glrlm      | RunEntropy                           | 4.361099306  |
| wavelet-HLL | glrlm      | HighGrayLevelRunEmphasis             | 677.2534151  |
| wavelet-HLL | glrlm      | RunLengthNonUniformityNormalized     | 0.926599493  |
| wavelet-HLL | glszm      | GrayLevelVariance                    | 59.66222222  |
| wavelet-HLL | glszm      | ZoneVariance                         | 1.043950617  |
| wavelet-HLL | glszm      | GrayLevelNonUniformityNormalized     | 0.055802469  |
| wavelet-HLL | glszm      | SizeZoneNonUniformityNormalized      | 0.489382716  |
| wavelet-HLL | glszm      | SizeZoneNonUniformity                | 22.02222222  |
| wavelet-HLL | glszm      | GrayLevelNonUniformity               | 2.511111111  |
| wavelet-HLL | glszm      | LargeAreaEmphasis                    | 3.533333333  |
| wavelet-HLL | glszm      | SmallAreaHighGrayLevelEmphasis       | 537.9186728  |
| wavelet-HLL | glszm      | ZonePercentage                       | 0.633802817  |
| wavelet-HLL | glszm      | LargeAreaLowGrayLevelEmphasis        | 0.095334505  |
| wavelet-HLL | glszm      | LargeAreaHighGrayLevelEmphasis       | 2276.933333  |
| wavelet-HLL | glszm      | HighGrayLevelZoneEmphasis            | 704.8222222  |
| wavelet-HLL | glszm      | SmallAreaEmphasis                    | 0.725462963  |
| wavelet-HLL | glszm      | LowGrayLevelZoneEmphasis             | 0.024333534  |
| wavelet-HLL | glszm      | ZoneEntropy                          | 4.880524763  |
| wavelet-HLL | glszm      | SmallAreaLowGrayLevelEmphasis        | 0.007170839  |
| wavelet-HLL | ngtdm      | Coarseness                           | 0.063954717  |
| wavelet-HLL | ngtdm      | Complexity                           | 1426.76404   |
| wavelet-HLL | ngtdm      | Strength                             | 23.3833748   |
| wavelet-HLL | ngtdm      | Contrast                             | 0.77809409   |
| wavelet-HLL | ngtdm      | Busyness                             | 0.026883003  |
| wavelet-LHL | gldm       | GrayLevelVariance                    | 161.4850228  |
| wavelet-LHL | gldm       | HighGrayLevelEmphasis                | 773.8732394  |
| wavelet-LHL | gldm       | DependenceEntropy                    | 5.396088317  |
| wavelet-LHL | gldm       | DependenceNonUniformity              | 35.56338028  |
| wavelet-LHL | gldm       | GrayLevelNonUniformity               | 2.690140845  |
| wavelet-LHL | gldm       | SmallDependenceEmphasis              | 0.717527387  |
| wavelet-LHL | gldm       | SmallDependenceHighGrayLevelEmphasis | 612.2480438  |
| wavelet-LHL | gldm       | DependenceNonUniformityNormalized    | 0.50089268   |
| wavelet-LHL | gldm       | LargeDependenceEmphasis              | 2.38028169   |

|             |            |                                      |              |
|-------------|------------|--------------------------------------|--------------|
| wavelet-LHL | gldm       | LargeDependenceLowGrayLevelEmphasis  | 0.025636543  |
| wavelet-LHL | gldm       | DependenceVariance                   | 0.356675263  |
| wavelet-LHL | gldm       | LargeDependenceHighGrayLevelEmphasis | 1563.535211  |
| wavelet-LHL | gldm       | SmallDependenceLowGrayLevelEmphasis  | 0.017259563  |
| wavelet-LHL | gldm       | LowGrayLevelEmphasis                 | 0.018841696  |
| wavelet-LHL | glcm       | JointAverage                         | 23.33653507  |
| wavelet-LHL | glcm       | SumAverage                           | 46.67307013  |
| wavelet-LHL | glcm       | JointEntropy                         | 6.210947631  |
| wavelet-LHL | glcm       | ClusterShade                         | 6890.943998  |
| wavelet-LHL | glcm       | MaximumProbability                   | 0.0237283    |
| wavelet-LHL | glcm       | Idmn                                 | 0.946280868  |
| wavelet-LHL | glcm       | JointEnergy                          | 0.013950857  |
| wavelet-LHL | glcm       | Contrast                             | 261.1594043  |
| wavelet-LHL | glcm       | DifferenceEntropy                    | 4.105726895  |
| wavelet-LHL | glcm       | InverseVariance                      | 0.117490553  |
| wavelet-LHL | glcm       | DifferenceVariance                   | 115.8154662  |
| wavelet-LHL | glcm       | Idn                                  | 0.861076183  |
| wavelet-LHL | glcm       | Idm                                  | 0.103944929  |
| wavelet-LHL | glcm       | Correlation                          | 0.16544264   |
| wavelet-LHL | glcm       | Autocorrelation                      | 569.7826599  |
| wavelet-LHL | glcm       | SumEntropy                           | 4.721573557  |
| wavelet-LHL | glcm       | SumSquares                           | 155.6469323  |
| wavelet-LHL | glcm       | ClusterProminence                    | 578857.4149  |
| wavelet-LHL | glcm       | Imc2                                 | 0.999357794  |
| wavelet-LHL | glcm       | Imc1                                 | -0.70490831  |
| wavelet-LHL | glcm       | DifferenceAverage                    | 11.47225691  |
| wavelet-LHL | glcm       | Id                                   | 0.184580276  |
| wavelet-LHL | glcm       | ClusterTendency                      | 361.4283249  |
| wavelet-LHL | firstorder | InterquartileRange                   | 302.458106   |
| wavelet-LHL | firstorder | Skewness                             | 0.679282934  |
| wavelet-LHL | firstorder | Uniformity                           | 0.037889308  |
| wavelet-LHL | firstorder | Median                               | -102.9665191 |
| wavelet-LHL | firstorder | Energy                               | 7250086.11   |
| wavelet-LHL | firstorder | RobustMeanAbsoluteDeviation          | 160.261282   |
| wavelet-LHL | firstorder | MeanAbsoluteDeviation                | 241.0935378  |
| wavelet-LHL | firstorder | TotalEnergy                          | 195752325    |
| wavelet-LHL | firstorder | Maximum                              | 879.4434422  |
| wavelet-LHL | firstorder | RootMeanSquared                      | 319.5526387  |
| wavelet-LHL | firstorder | 90Percentile                         | 467.0383757  |
| wavelet-LHL | firstorder | Minimum                              | -638.3924239 |
| wavelet-LHL | firstorder | Entropy                              | 4.913851261  |
| wavelet-LHL | firstorder | Range                                | 1517.835866  |
| wavelet-LHL | firstorder | Variance                             | 100159.498   |
| wavelet-LHL | firstorder | 10Percentile                         | -411.1312106 |
| wavelet-LHL | firstorder | Kurtosis                             | 3.107220273  |
| wavelet-LHL | firstorder | Mean                                 | -44.20849351 |
| wavelet-LHL | glrlm      | ShortRunLowGrayLevelEmphasis         | 0.019003482  |
| wavelet-LHL | glrlm      | GrayLevelVariance                    | 162.5563931  |
| wavelet-LHL | glrlm      | LowGrayLevelRunEmphasis              | 0.019068536  |
| wavelet-LHL | glrlm      | GrayLevelNonUniformityNormalized     | 0.037581282  |
| wavelet-LHL | glrlm      | RunVariance                          | 0.016241146  |
| wavelet-LHL | glrlm      | GrayLevelNonUniformity               | 2.625069929  |
| wavelet-LHL | glrlm      | LongRunEmphasis                      | 1.049928333  |
| wavelet-LHL | glrlm      | ShortRunHighGrayLevelEmphasis        | 770.136168   |

|             |       |                                      |              |
|-------------|-------|--------------------------------------|--------------|
| wavelet-LHL | glrlm | RunLengthNonUniformity               | 67.59404364  |
| wavelet-LHL | glrlm | ShortRunEmphasis                     | 0.987517917  |
| wavelet-LHL | glrlm | LongRunHighGrayLevelEmphasis         | 805.7428928  |
| wavelet-LHL | glrlm | RunPercentage                        | 0.983748646  |
| wavelet-LHL | glrlm | LongRunLowGrayLevelEmphasis          | 0.019328751  |
| wavelet-LHL | glrlm | RunEntropy                           | 4.959763366  |
| wavelet-LHL | glrlm | HighGrayLevelRunEmphasis             | 777.257513   |
| wavelet-LHL | glrlm | RunLengthNonUniformityNormalized     | 0.967517707  |
| wavelet-LHL | glszm | GrayLevelVariance                    | 178.5711097  |
| wavelet-LHL | glszm | ZoneVariance                         | 0.374681122  |
| wavelet-LHL | glszm | GrayLevelNonUniformityNormalized     | 0.033163265  |
| wavelet-LHL | glszm | SizeZoneNonUniformityNormalized      | 0.667729592  |
| wavelet-LHL | glszm | SizeZoneNonUniformity                | 37.39285714  |
| wavelet-LHL | glszm | GrayLevelNonUniformity               | 1.857142857  |
| wavelet-LHL | glszm | LargeAreaEmphasis                    | 1.982142857  |
| wavelet-LHL | glszm | SmallAreaHighGrayLevelEmphasis       | 738.93812    |
| wavelet-LHL | glszm | ZonePercentage                       | 0.788732394  |
| wavelet-LHL | glszm | LargeAreaLowGrayLevelEmphasis        | 0.026994719  |
| wavelet-LHL | glszm | LargeAreaHighGrayLevelEmphasis       | 1391.660714  |
| wavelet-LHL | glszm | HighGrayLevelZoneEmphasis            | 827.9107143  |
| wavelet-LHL | glszm | SmallAreaEmphasis                    | 0.84437004   |
| wavelet-LHL | glszm | LowGrayLevelZoneEmphasis             | 0.022497104  |
| wavelet-LHL | glszm | ZoneEntropy                          | 5.31610894   |
| wavelet-LHL | glszm | SmallAreaLowGrayLevelEmphasis        | 0.021537371  |
| wavelet-LHL | ngtdm | Coarseness                           | 0.057841115  |
| wavelet-LHL | ngtdm | Complexity                           | 5440.648359  |
| wavelet-LHL | ngtdm | Strength                             | 47.10385526  |
| wavelet-LHL | ngtdm | Contrast                             | 2.223991837  |
| wavelet-LHL | ngtdm | Busyness                             | 0.028020009  |
| wavelet-LHH | gldm  | GrayLevelVariance                    | 31.16524499  |
| wavelet-LHH | gldm  | HighGrayLevelEmphasis                | 267.7183099  |
| wavelet-LHH | gldm  | DependenceEntropy                    | 4.918985458  |
| wavelet-LHH | gldm  | DependenceNonUniformity              | 23.61971831  |
| wavelet-LHH | gldm  | GrayLevelNonUniformity               | 5.535211268  |
| wavelet-LHH | gldm  | SmallDependenceEmphasis              | 0.589099059  |
| wavelet-LHH | gldm  | SmallDependenceHighGrayLevelEmphasis | 162.7703404  |
| wavelet-LHH | gldm  | DependenceNonUniformityNormalized    | 0.332672089  |
| wavelet-LHH | gldm  | LargeDependenceEmphasis              | 7.338028169  |
| wavelet-LHH | gldm  | LargeDependenceLowGrayLevelEmphasis  | 0.053769607  |
| wavelet-LHH | gldm  | DependenceVariance                   | 2.694306685  |
| wavelet-LHH | gldm  | LargeDependenceHighGrayLevelEmphasis | 1691.830986  |
| wavelet-LHH | gldm  | SmallDependenceLowGrayLevelEmphasis  | 0.019728931  |
| wavelet-LHH | gldm  | LowGrayLevelEmphasis                 | 0.021998281  |
| wavelet-LHH | glcm  | JointAverage                         | 15.54808041  |
| wavelet-LHH | glcm  | SumAverage                           | 31.09616083  |
| wavelet-LHH | glcm  | JointEntropy                         | 5.868219688  |
| wavelet-LHH | glcm  | ClusterShade                         | -115.5749834 |
| wavelet-LHH | glcm  | MaximumProbability                   | 0.054868405  |
| wavelet-LHH | glcm  | Idmn                                 | 0.935649684  |
| wavelet-LHH | glcm  | JointEnergy                          | 0.019968595  |
| wavelet-LHH | glcm  | Contrast                             | 63.95796441  |
| wavelet-LHH | glcm  | DifferenceEntropy                    | 3.563977952  |
| wavelet-LHH | glcm  | InverseVariance                      | 0.177772406  |
| wavelet-LHH | glcm  | DifferenceVariance                   | 27.50510331  |

|             |            |                                  |              |
|-------------|------------|----------------------------------|--------------|
| wavelet-LHH | glcm       | Idn                              | 0.841985601  |
| wavelet-LHH | glcm       | Idm                              | 0.188421741  |
| wavelet-LHH | glcm       | Correlation                      | -0.051661387 |
| wavelet-LHH | glcm       | Autocorrelation                  | 240.2774598  |
| wavelet-LHH | glcm       | SumEntropy                       | 4.166431338  |
| wavelet-LHH | glcm       | SumSquares                       | 30.44023933  |
| wavelet-LHH | glcm       | ClusterProminence                | 12510.6307   |
| wavelet-LHH | glcm       | Imc2                             | 0.993381042  |
| wavelet-LHH | glcm       | Imc1                             | -0.545841684 |
| wavelet-LHH | glcm       | DifferenceAverage                | 5.97184612   |
| wavelet-LHH | glcm       | Id                               | 0.274881226  |
| wavelet-LHH | glcm       | ClusterTendency                  | 57.80299293  |
| wavelet-LHH | firstorder | InterquartileRange               | 147.5905706  |
| wavelet-LHH | firstorder | Skewness                         | -0.087182929 |
| wavelet-LHH | firstorder | Uniformity                       | 0.077960722  |
| wavelet-LHH | firstorder | Median                           | -28.5893687  |
| wavelet-LHH | firstorder | Energy                           | 1367507.423  |
| wavelet-LHH | firstorder | RobustMeanAbsoluteDeviation      | 68.78812182  |
| wavelet-LHH | firstorder | MeanAbsoluteDeviation            | 106.2287247  |
| wavelet-LHH | firstorder | TotalEnergy                      | 36922700.41  |
| wavelet-LHH | firstorder | Maximum                          | 303.8963168  |
| wavelet-LHH | firstorder | RootMeanSquared                  | 138.7828085  |
| wavelet-LHH | firstorder | 90Percentile                     | 166.8593027  |
| wavelet-LHH | firstorder | Minimum                          | -357.0488907 |
| wavelet-LHH | firstorder | Entropy                          | 4.13352965   |
| wavelet-LHH | firstorder | Range                            | 660.9452075  |
| wavelet-LHH | firstorder | Variance                         | 19253.00568  |
| wavelet-LHH | firstorder | 10Percentile                     | -183.5315165 |
| wavelet-LHH | firstorder | Kurtosis                         | 3.080762699  |
| wavelet-LHH | firstorder | Mean                             | -2.76807573  |
| wavelet-LHH | glrlm      | ShortRunLowGrayLevelEmphasis     | 0.022626554  |
| wavelet-LHH | glrlm      | GrayLevelVariance                | 32.19541698  |
| wavelet-LHH | glrlm      | LowGrayLevelRunEmphasis          | 0.022796679  |
| wavelet-LHH | glrlm      | GrayLevelNonUniformityNormalized | 0.072222794  |
| wavelet-LHH | glrlm      | RunVariance                      | 0.051192668  |
| wavelet-LHH | glrlm      | GrayLevelNonUniformity           | 4.904043692  |
| wavelet-LHH | glrlm      | LongRunEmphasis                  | 1.148794699  |
| wavelet-LHH | glrlm      | ShortRunHighGrayLevelEmphasis    | 261.2026378  |
| wavelet-LHH | glrlm      | RunLengthNonUniformity           | 62.31949903  |
| wavelet-LHH | glrlm      | ShortRunEmphasis                 | 0.966688141  |
| wavelet-LHH | glrlm      | LongRunHighGrayLevelEmphasis     | 304.1306567  |
| wavelet-LHH | glrlm      | RunPercentage                    | 0.955579632  |
| wavelet-LHH | glrlm      | LongRunLowGrayLevelEmphasis      | 0.023556503  |
| wavelet-LHH | glrlm      | RunEntropy                       | 4.331830911  |
| wavelet-LHH | glrlm      | HighGrayLevelRunEmphasis         | 269.1787889  |
| wavelet-LHH | glrlm      | RunLengthNonUniformityNormalized | 0.917310496  |
| wavelet-LHH | glszm      | GrayLevelVariance                | 41.02504726  |
| wavelet-LHH | glszm      | ZoneVariance                     | 3.856805293  |
| wavelet-LHH | glszm      | GrayLevelNonUniformityNormalized | 0.056710775  |
| wavelet-LHH | glszm      | SizeZoneNonUniformityNormalized  | 0.661625709  |
| wavelet-LHH | glszm      | SizeZoneNonUniformity            | 30.43478261  |
| wavelet-LHH | glszm      | GrayLevelNonUniformity           | 2.608695652  |
| wavelet-LHH | glszm      | LargeAreaEmphasis                | 6.239130435  |
| wavelet-LHH | glszm      | SmallAreaHighGrayLevelEmphasis   | 232.0472524  |

|             |            |                                      |              |
|-------------|------------|--------------------------------------|--------------|
| wavelet-LHH | glszm      | ZonePercentage                       | 0.647887324  |
| wavelet-LHH | glszm      | LargeAreaLowGrayLevelEmphasis        | 0.057770289  |
| wavelet-LHH | glszm      | LargeAreaHighGrayLevelEmphasis       | 1416.608696  |
| wavelet-LHH | glszm      | HighGrayLevelZoneEmphasis            | 278.5869565  |
| wavelet-LHH | glszm      | SmallAreaEmphasis                    | 0.837822267  |
| wavelet-LHH | glszm      | LowGrayLevelZoneEmphasis             | 0.031049443  |
| wavelet-LHH | glszm      | ZoneEntropy                          | 4.602593957  |
| wavelet-LHH | glszm      | SmallAreaLowGrayLevelEmphasis        | 0.030026238  |
| wavelet-LHH | ngtdm      | Coarseness                           | 0.064794339  |
| wavelet-LHH | ngtdm      | Complexity                           | 1051.17563   |
| wavelet-LHH | ngtdm      | Strength                             | 13.55675703  |
| wavelet-LHH | ngtdm      | Contrast                             | 0.520025135  |
| wavelet-LHH | ngtdm      | Busyness                             | 0.045718239  |
| wavelet-LLH | gldm       | GrayLevelVariance                    | 150.3503273  |
| wavelet-LLH | gldm       | HighGrayLevelEmphasis                | 824.1549296  |
| wavelet-LLH | gldm       | DependenceEntropy                    | 5.381728457  |
| wavelet-LLH | gldm       | DependenceNonUniformity              | 38.66197183  |
| wavelet-LLH | gldm       | GrayLevelNonUniformity               | 2.521126761  |
| wavelet-LLH | gldm       | SmallDependenceEmphasis              | 0.764475743  |
| wavelet-LLH | gldm       | SmallDependenceHighGrayLevelEmphasis | 628.2175274  |
| wavelet-LLH | gldm       | DependenceNonUniformityNormalized    | 0.544534815  |
| wavelet-LLH | gldm       | LargeDependenceEmphasis              | 2.38028169   |
| wavelet-LLH | gldm       | LargeDependenceLowGrayLevelEmphasis  | 0.023114035  |
| wavelet-LLH | gldm       | DependenceVariance                   | 0.436024598  |
| wavelet-LLH | gldm       | LargeDependenceHighGrayLevelEmphasis | 1787.309859  |
| wavelet-LLH | gldm       | SmallDependenceLowGrayLevelEmphasis  | 0.01847142   |
| wavelet-LLH | gldm       | LowGrayLevelEmphasis                 | 0.019091741  |
| wavelet-LLH | glcm       | JointAverage                         | 25.68822193  |
| wavelet-LLH | glcm       | SumAverage                           | 51.37644385  |
| wavelet-LLH | glcm       | JointEntropy                         | 6.206454843  |
| wavelet-LLH | glcm       | ClusterShade                         | 1401.268215  |
| wavelet-LLH | glcm       | MaximumProbability                   | 0.023554378  |
| wavelet-LLH | glcm       | Idmn                                 | 0.93610182   |
| wavelet-LLH | glcm       | JointEnergy                          | 0.013945758  |
| wavelet-LLH | glcm       | Contrast                             | 226.6487127  |
| wavelet-LLH | glcm       | DifferenceEntropy                    | 4.182734734  |
| wavelet-LLH | glcm       | InverseVariance                      | 0.097812084  |
| wavelet-LLH | glcm       | DifferenceVariance                   | 80.14573904  |
| wavelet-LLH | glcm       | Idn                                  | 0.836099348  |
| wavelet-LLH | glcm       | Idm                                  | 0.085264058  |
| wavelet-LLH | glcm       | Correlation                          | 0.139644006  |
| wavelet-LLH | glcm       | Autocorrelation                      | 678.6950396  |
| wavelet-LLH | glcm       | SumEntropy                           | 4.781298794  |
| wavelet-LLH | glcm       | SumSquares                           | 131.6776279  |
| wavelet-LLH | glcm       | ClusterProminence                    | 267439.1489  |
| wavelet-LLH | glcm       | Imc2                                 | 0.999581354  |
| wavelet-LLH | glcm       | Imc1                                 | -0.733555279 |
| wavelet-LLH | glcm       | DifferenceAverage                    | 11.78386353  |
| wavelet-LLH | glcm       | Id                                   | 0.161705488  |
| wavelet-LLH | glcm       | ClusterTendency                      | 300.0617989  |
| wavelet-LLH | firstorder | InterquartileRange                   | 435.4610513  |
| wavelet-LLH | firstorder | Skewness                             | 0.232545232  |
| wavelet-LLH | firstorder | Uniformity                           | 0.035508828  |
| wavelet-LLH | firstorder | Median                               | -93.06445552 |



|             |            |                                  |              |
|-------------|------------|----------------------------------|--------------|
| wavelet-LLH | firstorder | Energy                           | 6935256.469  |
| wavelet-LLH | firstorder | RobustMeanAbsoluteDeviation      | 180.8554017  |
| wavelet-LLH | firstorder | MeanAbsoluteDeviation            | 248.953624   |
| wavelet-LLH | firstorder | TotalEnergy                      | 187251924.7  |
| wavelet-LLH | firstorder | Maximum                          | 627.6459082  |
| wavelet-LLH | firstorder | RootMeanSquared                  | 312.5374675  |
| wavelet-LLH | firstorder | 90Percentile                     | 383.5985633  |
| wavelet-LLH | firstorder | Minimum                          | -679.871098  |
| wavelet-LLH | firstorder | Entropy                          | 5.042293732  |
| wavelet-LLH | firstorder | Range                            | 1307.517006  |
| wavelet-LLH | firstorder | Variance                         | 93784.55185  |
| wavelet-LLH | firstorder | 10Percentile                     | -438.0927072 |
| wavelet-LLH | firstorder | Kurtosis                         | 2.406740566  |
| wavelet-LLH | firstorder | Mean                             | -62.41087026 |
| wavelet-LLH | glrlm      | ShortRunLowGrayLevelEmphasis     | 0.019316237  |
| wavelet-LLH | glrlm      | GrayLevelVariance                | 150.9016292  |
| wavelet-LLH | glrlm      | LowGrayLevelRunEmphasis          | 0.019349411  |
| wavelet-LLH | glrlm      | GrayLevelNonUniformityNormalized | 0.035229637  |
| wavelet-LLH | glrlm      | RunVariance                      | 0.015130716  |
| wavelet-LLH | glrlm      | GrayLevelNonUniformity           | 2.463882188  |
| wavelet-LLH | glrlm      | LongRunEmphasis                  | 1.047439517  |
| wavelet-LLH | glrlm      | ShortRunHighGrayLevelEmphasis    | 816.4302682  |
| wavelet-LLH | glrlm      | RunLengthNonUniformity           | 67.86085509  |
| wavelet-LLH | glrlm      | ShortRunEmphasis                 | 0.988140121  |
| wavelet-LLH | glrlm      | LongRunHighGrayLevelEmphasis     | 860.9099081  |
| wavelet-LLH | glrlm      | RunPercentage                    | 0.984832069  |
| wavelet-LLH | glrlm      | LongRunLowGrayLevelEmphasis      | 0.019482106  |
| wavelet-LLH | glrlm      | RunEntropy                       | 5.083285344  |
| wavelet-LLH | glrlm      | HighGrayLevelRunEmphasis         | 825.3261962  |
| wavelet-LLH | glrlm      | RunLengthNonUniformityNormalized | 0.969738568  |
| wavelet-LLH | glszm      | GrayLevelVariance                | 156.6538351  |
| wavelet-LLH | glszm      | ZoneVariance                     | 0.263717323  |
| wavelet-LLH | glszm      | GrayLevelNonUniformityNormalized | 0.032461936  |
| wavelet-LLH | glszm      | SizeZoneNonUniformityNormalized  | 0.731111749  |
| wavelet-LLH | glszm      | SizeZoneNonUniformity            | 43.13559322  |
| wavelet-LLH | glszm      | GrayLevelNonUniformity           | 1.915254237  |
| wavelet-LLH | glszm      | LargeAreaEmphasis                | 1.711864407  |
| wavelet-LLH | glszm      | SmallAreaHighGrayLevelEmphasis   | 718.8474576  |
| wavelet-LLH | glszm      | ZonePercentage                   | 0.830985915  |
| wavelet-LLH | glszm      | LargeAreaLowGrayLevelEmphasis    | 0.024380143  |
| wavelet-LLH | glszm      | LargeAreaHighGrayLevelEmphasis   | 1362.152542  |
| wavelet-LLH | glszm      | HighGrayLevelZoneEmphasis        | 828.2542373  |
| wavelet-LLH | glszm      | SmallAreaEmphasis                | 0.878531073  |
| wavelet-LLH | glszm      | LowGrayLevelZoneEmphasis         | 0.022434568  |
| wavelet-LLH | glszm      | ZoneEntropy                      | 5.356887964  |
| wavelet-LLH | glszm      | SmallAreaLowGrayLevelEmphasis    | 0.022128651  |
| wavelet-LLH | ngtdm      | Coarseness                       | 0.052120713  |
| wavelet-LLH | ngtdm      | Complexity                       | 6408.818981  |
| wavelet-LLH | ngtdm      | Strength                         | 43.38824418  |
| wavelet-LLH | ngtdm      | Contrast                         | 1.822963925  |
| wavelet-LLH | ngtdm      | Busyness                         | 0.024159732  |
| wavelet-LLL | gldm       | GrayLevelVariance                | 478.2638365  |
| wavelet-LLL | gldm       | HighGrayLevelEmphasis            | 3221.957746  |
| wavelet-LLL | gldm       | DependenceEntropy                | 5.593271415  |

|             |            |                                      |              |
|-------------|------------|--------------------------------------|--------------|
| wavelet-LLL | gldm       | DependenceNonUniformity              | 39.16901408  |
| wavelet-LLL | gldm       | GrayLevelNonUniformity               | 1.873239437  |
| wavelet-LLL | gldm       | SmallDependenceEmphasis              | 0.768388106  |
| wavelet-LLL | gldm       | SmallDependenceHighGrayLevelEmphasis | 2371.801252  |
| wavelet-LLL | gldm       | DependenceNonUniformityNormalized    | 0.551676255  |
| wavelet-LLL | gldm       | LargeDependenceEmphasis              | 2.23943662   |
| wavelet-LLL | gldm       | LargeDependenceLowGrayLevelEmphasis  | 0.018535845  |
| wavelet-LLL | gldm       | DependenceVariance                   | 0.372941877  |
| wavelet-LLL | gldm       | LargeDependenceHighGrayLevelEmphasis | 8005.619718  |
| wavelet-LLL | gldm       | SmallDependenceLowGrayLevelEmphasis  | 0.016181604  |
| wavelet-LLL | gldm       | LowGrayLevelEmphasis                 | 0.016623079  |
| wavelet-LLL | glcm       | JointAverage                         | 57.18079731  |
| wavelet-LLL | glcm       | SumAverage                           | 114.3615946  |
| wavelet-LLL | glcm       | JointEntropy                         | 6.225370529  |
| wavelet-LLL | glcm       | ClusterShade                         | -22065.12569 |
| wavelet-LLL | glcm       | MaximumProbability                   | 0.024415364  |
| wavelet-LLL | glcm       | Idmn                                 | 0.942855397  |
| wavelet-LLL | glcm       | JointEnergy                          | 0.013733135  |
| wavelet-LLL | glcm       | Contrast                             | 561.1408995  |
| wavelet-LLL | glcm       | DifferenceEntropy                    | 4.450510635  |
| wavelet-LLL | glcm       | InverseVariance                      | 0.048977329  |
| wavelet-LLL | glcm       | DifferenceVariance                   | 214.0667362  |
| wavelet-LLL | glcm       | Idn                                  | 0.845391199  |
| wavelet-LLL | glcm       | Idm                                  | 0.059471547  |
| wavelet-LLL | glcm       | Correlation                          | 0.289445267  |
| wavelet-LLL | glcm       | Autocorrelation                      | 3384.491652  |
| wavelet-LLL | glcm       | SumEntropy                           | 4.986786152  |
| wavelet-LLL | glcm       | SumSquares                           | 394.6596225  |
| wavelet-LLL | glcm       | ClusterProminence                    | 2994677.5    |
| wavelet-LLL | glcm       | Imc2                                 | 0.999845886  |
| wavelet-LLL | glcm       | Imc1                                 | -0.790392968 |
| wavelet-LLL | glcm       | DifferenceAverage                    | 18.47129966  |
| wavelet-LLL | glcm       | Id                                   | 0.125467156  |
| wavelet-LLL | glcm       | ClusterTendency                      | 1017.497591  |
| wavelet-LLL | firstorder | InterquartileRange                   | 941.708469   |
| wavelet-LLL | firstorder | Skewness                             | -0.485920568 |
| wavelet-LLL | firstorder | Uniformity                           | 0.026383654  |
| wavelet-LLL | firstorder | Median                               | -216.2930672 |
| wavelet-LLL | firstorder | Energy                               | 28826559.08  |
| wavelet-LLL | firstorder | RobustMeanAbsoluteDeviation          | 348.4840316  |
| wavelet-LLL | firstorder | MeanAbsoluteDeviation                | 459.6220885  |
| wavelet-LLL | firstorder | TotalEnergy                          | 778317095.3  |
| wavelet-LLL | firstorder | Maximum                              | 630.7945309  |
| wavelet-LLL | firstorder | RootMeanSquared                      | 637.187472   |
| wavelet-LLL | firstorder | 90Percentile                         | 284.0117715  |
| wavelet-LLL | firstorder | Minimum                              | -1619.167772 |
| wavelet-LLL | firstorder | Entropy                              | 5.42052969   |
| wavelet-LLL | firstorder | Range                                | 2249.962303  |
| wavelet-LLL | firstorder | Variance                             | 298716.2473  |
| wavelet-LLL | firstorder | 10Percentile                         | -1021.237479 |
| wavelet-LLL | firstorder | Kurtosis                             | 2.322410726  |
| wavelet-LLL | firstorder | Mean                                 | -327.5540065 |
| wavelet-LLL | glrlm      | ShortRunLowGrayLevelEmphasis         | 0.016822646  |
| wavelet-LLL | glrlm      | GrayLevelVariance                    | 476.3835751  |

|             |       |                                      |              |
|-------------|-------|--------------------------------------|--------------|
| wavelet-LLL | glrlm | LowGrayLevelRunEmphasis              | 0.016840747  |
| wavelet-LLL | glrlm | GrayLevelNonUniformityNormalized     | 0.026198764  |
| wavelet-LLL | glrlm | RunVariance                          | 0.014064314  |
| wavelet-LLL | glrlm | GrayLevelNonUniformity               | 1.834315539  |
| wavelet-LLL | glrlm | LongRunEmphasis                      | 1.04363871   |
| wavelet-LLL | glrlm | ShortRunHighGrayLevelEmphasis        | 3172.177253  |
| wavelet-LLL | glrlm | RunLengthNonUniformity               | 68.06556563  |
| wavelet-LLL | glrlm | ShortRunEmphasis                     | 0.989090322  |
| wavelet-LLL | glrlm | LongRunHighGrayLevelEmphasis         | 3379.279797  |
| wavelet-LLL | glrlm | RunPercentage                        | 0.985915493  |
| wavelet-LLL | glrlm | LongRunLowGrayLevelEmphasis          | 0.016913152  |
| wavelet-LLL | glrlm | RunEntropy                           | 5.447672434  |
| wavelet-LLL | glrlm | HighGrayLevelRunEmphasis             | 3213.597762  |
| wavelet-LLL | glrlm | RunLengthNonUniformityNormalized     | 0.971871372  |
| wavelet-LLL | glszm | GrayLevelVariance                    | 450.8296467  |
| wavelet-LLL | glszm | ZoneVariance                         | 0.263717323  |
| wavelet-LLL | glszm | GrayLevelNonUniformityNormalized     | 0.024418271  |
| wavelet-LLL | glszm | SizeZoneNonUniformityNormalized      | 0.731111749  |
| wavelet-LLL | glszm | SizeZoneNonUniformity                | 43.13559322  |
| wavelet-LLL | glszm | GrayLevelNonUniformity               | 1.440677966  |
| wavelet-LLL | glszm | LargeAreaEmphasis                    | 1.711864407  |
| wavelet-LLL | glszm | SmallAreaHighGrayLevelEmphasis       | 2694.533898  |
| wavelet-LLL | glszm | ZonePercentage                       | 0.830985915  |
| wavelet-LLL | glszm | LargeAreaLowGrayLevelEmphasis        | 0.020805762  |
| wavelet-LLL | glszm | LargeAreaHighGrayLevelEmphasis       | 5738.559322  |
| wavelet-LLL | glszm | HighGrayLevelZoneEmphasis            | 3135.474576  |
| wavelet-LLL | glszm | SmallAreaEmphasis                    | 0.878531073  |
| wavelet-LLL | glszm | LowGrayLevelZoneEmphasis             | 0.01963676   |
| wavelet-LLL | glszm | ZoneEntropy                          | 5.5647636    |
| wavelet-LLL | glszm | SmallAreaLowGrayLevelEmphasis        | 0.019381817  |
| wavelet-LLL | ngtdm | Coarseness                           | 0.04238031   |
| wavelet-LLL | ngtdm | Complexity                           | 20048.58628  |
| wavelet-LLL | ngtdm | Strength                             | 99.366711    |
| wavelet-LLL | ngtdm | Contrast                             | 5.688985879  |
| wavelet-LLL | ngtdm | Busyness                             | 0.012029543  |
| wavelet-HHL | gldm  | GrayLevelVariance                    | 13.84130133  |
| wavelet-HHL | gldm  | HighGrayLevelEmphasis                | 101.8309859  |
| wavelet-HHL | gldm  | DependenceEntropy                    | 4.864053985  |
| wavelet-HHL | gldm  | DependenceNonUniformity              | 22.23943662  |
| wavelet-HHL | gldm  | GrayLevelNonUniformity               | 5.647887324  |
| wavelet-HHL | gldm  | SmallDependenceEmphasis              | 0.503595462  |
| wavelet-HHL | gldm  | SmallDependenceHighGrayLevelEmphasis | 47.13562598  |
| wavelet-HHL | gldm  | DependenceNonUniformityNormalized    | 0.313231502  |
| wavelet-HHL | gldm  | LargeDependenceEmphasis              | 4.746478873  |
| wavelet-HHL | gldm  | LargeDependenceLowGrayLevelEmphasis  | 0.095859532  |
| wavelet-HHL | gldm  | DependenceVariance                   | 0.913707598  |
| wavelet-HHL | gldm  | LargeDependenceHighGrayLevelEmphasis | 491.1830986  |
| wavelet-HHL | gldm  | SmallDependenceLowGrayLevelEmphasis  | 0.041827103  |
| wavelet-HHL | gldm  | LowGrayLevelEmphasis                 | 0.048504919  |
| wavelet-HHL | glcm  | JointAverage                         | 9.563991458  |
| wavelet-HHL | glcm  | SumAverage                           | 19.12798292  |
| wavelet-HHL | glcm  | JointEntropy                         | 5.830497388  |
| wavelet-HHL | glcm  | ClusterShade                         | -12.47196617 |
| wavelet-HHL | glcm  | MaximumProbability                   | 0.038344568  |

|             |            |                                  |              |
|-------------|------------|----------------------------------|--------------|
| wavelet-HHL | glcm       | Idmn                             | 0.941584472  |
| wavelet-HHL | glcm       | JointEnergy                      | 0.019521097  |
| wavelet-HHL | glcm       | Contrast                         | 27.43316916  |
| wavelet-HHL | glcm       | DifferenceEntropy                | 3.171242402  |
| wavelet-HHL | glcm       | InverseVariance                  | 0.233539718  |
| wavelet-HHL | glcm       | DifferenceVariance               | 9.410035439  |
| wavelet-HHL | glcm       | Idn                              | 0.839964109  |
| wavelet-HHL | glcm       | Idm                              | 0.208048506  |
| wavelet-HHL | glcm       | Correlation                      | -0.029140636 |
| wavelet-HHL | glcm       | Autocorrelation                  | 91.08689592  |
| wavelet-HHL | glcm       | SumEntropy                       | 3.856904824  |
| wavelet-HHL | glcm       | SumSquares                       | 13.30140088  |
| wavelet-HHL | glcm       | ClusterProminence                | 2086.73222   |
| wavelet-HHL | glcm       | Imc2                             | 0.9802353    |
| wavelet-HHL | glcm       | Imc1                             | -0.443572215 |
| wavelet-HHL | glcm       | DifferenceAverage                | 4.188885892  |
| wavelet-HHL | glcm       | Id                               | 0.300633081  |
| wavelet-HHL | glcm       | ClusterTendency                  | 25.77243437  |
| wavelet-HHL | firstorder | InterquartileRange               | 119.1686032  |
| wavelet-HHL | firstorder | Skewness                         | -0.107732412 |
| wavelet-HHL | firstorder | Uniformity                       | 0.079547709  |
| wavelet-HHL | firstorder | Median                           | 1.309383514  |
| wavelet-HHL | firstorder | Energy                           | 585248.8758  |
| wavelet-HHL | firstorder | RobustMeanAbsoluteDeviation      | 52.78942131  |
| wavelet-HHL | firstorder | MeanAbsoluteDeviation            | 73.27139869  |
| wavelet-HHL | firstorder | TotalEnergy                      | 15801719.65  |
| wavelet-HHL | firstorder | Maximum                          | 262.5515873  |
| wavelet-HHL | firstorder | RootMeanSquared                  | 90.79064882  |
| wavelet-HHL | firstorder | 90Percentile                     | 100.6106348  |
| wavelet-HHL | firstorder | Minimum                          | -220.881478  |
| wavelet-HHL | firstorder | Entropy                          | 3.811859573  |
| wavelet-HHL | firstorder | Range                            | 483.4330653  |
| wavelet-HHL | firstorder | Variance                         | 8238.017405  |
| wavelet-HHL | firstorder | 10Percentile                     | -122.8785854 |
| wavelet-HHL | firstorder | Kurtosis                         | 3.118275858  |
| wavelet-HHL | firstorder | Mean                             | -2.219123328 |
| wavelet-HHL | glrlm      | ShortRunLowGrayLevelEmphasis     | 0.049512369  |
| wavelet-HHL | glrlm      | GrayLevelVariance                | 14.10934805  |
| wavelet-HHL | glrlm      | LowGrayLevelRunEmphasis          | 0.049878974  |
| wavelet-HHL | glrlm      | GrayLevelNonUniformityNormalized | 0.079523546  |
| wavelet-HHL | glrlm      | RunVariance                      | 0.039028064  |
| wavelet-HHL | glrlm      | GrayLevelNonUniformity           | 5.438534775  |
| wavelet-HHL | glrlm      | LongRunEmphasis                  | 1.118227463  |
| wavelet-HHL | glrlm      | ShortRunHighGrayLevelEmphasis    | 98.64863835  |
| wavelet-HHL | glrlm      | RunLengthNonUniformity           | 63.54366975  |
| wavelet-HHL | glrlm      | ShortRunEmphasis                 | 0.971718807  |
| wavelet-HHL | glrlm      | LongRunHighGrayLevelEmphasis     | 114.1513217  |
| wavelet-HHL | glrlm      | RunPercentage                    | 0.963163597  |
| wavelet-HHL | glrlm      | LongRunLowGrayLevelEmphasis      | 0.051408393  |
| wavelet-HHL | glrlm      | RunEntropy                       | 3.934375526  |
| wavelet-HHL | glrlm      | HighGrayLevelRunEmphasis         | 101.6665114  |
| wavelet-HHL | glrlm      | RunLengthNonUniformityNormalized | 0.92852406   |
| wavelet-HHL | glszm      | GrayLevelVariance                | 18.02498513  |
| wavelet-HHL | glszm      | ZoneVariance                     | 1.708506841  |

|             |       |                                      |              |
|-------------|-------|--------------------------------------|--------------|
| wavelet-HHL | glszm | GrayLevelNonUniformityNormalized     | 0.076740036  |
| wavelet-HHL | glszm | SizeZoneNonUniformityNormalized      | 0.500297442  |
| wavelet-HHL | glszm | SizeZoneNonUniformity                | 20.51219512  |
| wavelet-HHL | glszm | GrayLevelNonUniformity               | 3.146341463  |
| wavelet-HHL | glszm | LargeAreaEmphasis                    | 4.707317073  |
| wavelet-HHL | glszm | SmallAreaHighGrayLevelEmphasis       | 65.13779133  |
| wavelet-HHL | glszm | ZonePercentage                       | 0.577464789  |
| wavelet-HHL | glszm | LargeAreaLowGrayLevelEmphasis        | 0.117902951  |
| wavelet-HHL | glszm | LargeAreaHighGrayLevelEmphasis       | 510.3414634  |
| wavelet-HHL | glszm | HighGrayLevelZoneEmphasis            | 95.12195122  |
| wavelet-HHL | glszm | SmallAreaEmphasis                    | 0.729173442  |
| wavelet-HHL | glszm | LowGrayLevelZoneEmphasis             | 0.074681015  |
| wavelet-HHL | glszm | ZoneEntropy                          | 4.454636151  |
| wavelet-HHL | glszm | SmallAreaLowGrayLevelEmphasis        | 0.07057344   |
| wavelet-HHL | ngtdm | Coarseness                           | 0.065377428  |
| wavelet-HHL | ngtdm | Complexity                           | 351.433948   |
| wavelet-HHL | ngtdm | Strength                             | 6.000867469  |
| wavelet-HHL | ngtdm | Contrast                             | 0.334649876  |
| wavelet-HHL | ngtdm | Busyness                             | 0.111866681  |
| wavelet-HLH | gldm  | GrayLevelVariance                    | 62.1019639   |
| wavelet-HLH | gldm  | HighGrayLevelEmphasis                | 415.6478873  |
| wavelet-HLH | gldm  | DependenceEntropy                    | 5.188273     |
| wavelet-HLH | gldm  | DependenceNonUniformity              | 30.18309859  |
| wavelet-HLH | gldm  | GrayLevelNonUniformity               | 3.732394366  |
| wavelet-HLH | gldm  | SmallDependenceEmphasis              | 0.596733177  |
| wavelet-HLH | gldm  | SmallDependenceHighGrayLevelEmphasis | 258.586561   |
| wavelet-HLH | gldm  | DependenceNonUniformityNormalized    | 0.425114065  |
| wavelet-HLH | gldm  | LargeDependenceEmphasis              | 3.084507042  |
| wavelet-HLH | gldm  | LargeDependenceLowGrayLevelEmphasis  | 0.031095278  |
| wavelet-HLH | gldm  | DependenceVariance                   | 0.461019639  |
| wavelet-HLH | gldm  | LargeDependenceHighGrayLevelEmphasis | 1198.183099  |
| wavelet-HLH | gldm  | SmallDependenceLowGrayLevelEmphasis  | 0.021565875  |
| wavelet-HLH | gldm  | LowGrayLevelEmphasis                 | 0.023154349  |
| wavelet-HLH | glcm  | JointAverage                         | 18.65196326  |
| wavelet-HLH | glcm  | SumAverage                           | 37.30392652  |
| wavelet-HLH | glcm  | JointEntropy                         | 6.108576771  |
| wavelet-HLH | glcm  | ClusterShade                         | 474.5581918  |
| wavelet-HLH | glcm  | MaximumProbability                   | 0.028447862  |
| wavelet-HLH | glcm  | Idmn                                 | 0.944150769  |
| wavelet-HLH | glcm  | JointEnergy                          | 0.015212181  |
| wavelet-HLH | glcm  | Contrast                             | 123.1241172  |
| wavelet-HLH | glcm  | DifferenceEntropy                    | 3.875894966  |
| wavelet-HLH | glcm  | InverseVariance                      | 0.14027032   |
| wavelet-HLH | glcm  | DifferenceVariance                   | 52.2238699   |
| wavelet-HLH | glcm  | Idn                                  | 0.852363852  |
| wavelet-HLH | glcm  | Idm                                  | 0.130988314  |
| wavelet-HLH | glcm  | Correlation                          | -0.069911548 |
| wavelet-HLH | glcm  | Autocorrelation                      | 344.066233   |
| wavelet-HLH | glcm  | SumEntropy                           | 4.347835815  |
| wavelet-HLH | glcm  | SumSquares                           | 57.62247533  |
| wavelet-HLH | glcm  | ClusterProminence                    | 48410.94429  |
| wavelet-HLH | glcm  | Imc2                                 | 0.998109248  |
| wavelet-HLH | glcm  | Imc1                                 | -0.631420482 |
| wavelet-HLH | glcm  | DifferenceAverage                    | 8.214688602  |

|             |            |                                  |              |
|-------------|------------|----------------------------------|--------------|
| wavelet-HLH | glcm       | Id                               | 0.217251834  |
| wavelet-HLH | glcm       | ClusterTendency                  | 107.3657841  |
| wavelet-HLH | firstorder | InterquartileRange               | 188.0114966  |
| wavelet-HLH | firstorder | Skewness                         | 0.354162973  |
| wavelet-HLH | firstorder | Uniformity                       | 0.052568935  |
| wavelet-HLH | firstorder | Median                           | -0.95304272  |
| wavelet-HLH | firstorder | Energy                           | 2736684.217  |
| wavelet-HLH | firstorder | RobustMeanAbsoluteDeviation      | 89.05461686  |
| wavelet-HLH | firstorder | MeanAbsoluteDeviation            | 143.7737016  |
| wavelet-HLH | firstorder | TotalEnergy                      | 73890473.86  |
| wavelet-HLH | firstorder | Maximum                          | 580.9575225  |
| wavelet-HLH | firstorder | RootMeanSquared                  | 196.3284191  |
| wavelet-HLH | firstorder | 90Percentile                     | 259.0909417  |
| wavelet-HLH | firstorder | Minimum                          | -442.725173  |
| wavelet-HLH | firstorder | Entropy                          | 4.559692852  |
| wavelet-HLH | firstorder | Range                            | 1023.682696  |
| wavelet-HLH | firstorder | Variance                         | 38479.33418  |
| wavelet-HLH | firstorder | 10Percentile                     | -237.6666084 |
| wavelet-HLH | firstorder | Kurtosis                         | 3.703039916  |
| wavelet-HLH | firstorder | Mean                             | 8.094068562  |
| wavelet-HLH | glrlm      | ShortRunLowGrayLevelEmphasis     | 0.02355879   |
| wavelet-HLH | glrlm      | GrayLevelVariance                | 62.88041365  |
| wavelet-HLH | glrlm      | LowGrayLevelRunEmphasis          | 0.023630475  |
| wavelet-HLH | glrlm      | GrayLevelNonUniformityNormalized | 0.051913014  |
| wavelet-HLH | glrlm      | RunVariance                      | 0.023802291  |
| wavelet-HLH | glrlm      | GrayLevelNonUniformity           | 3.598165411  |
| wavelet-HLH | glrlm      | LongRunEmphasis                  | 1.074073241  |
| wavelet-HLH | glrlm      | ShortRunHighGrayLevelEmphasis    | 409.4261346  |
| wavelet-HLH | glrlm      | RunLengthNonUniformity           | 66.04459496  |
| wavelet-HLH | glrlm      | ShortRunEmphasis                 | 0.98148169   |
| wavelet-HLH | glrlm      | LongRunHighGrayLevelEmphasis     | 444.7501664  |
| wavelet-HLH | glrlm      | RunPercentage                    | 0.97616468   |
| wavelet-HLH | glrlm      | LongRunLowGrayLevelEmphasis      | 0.023917214  |
| wavelet-HLH | glrlm      | RunEntropy                       | 4.63505535   |
| wavelet-HLH | glrlm      | HighGrayLevelRunEmphasis         | 416.4909409  |
| wavelet-HLH | glrlm      | RunLengthNonUniformityNormalized | 0.952395419  |
| wavelet-HLH | glszm      | GrayLevelVariance                | 74.8544      |
| wavelet-HLH | glszm      | ZoneVariance                     | 0.5636       |
| wavelet-HLH | glszm      | GrayLevelNonUniformityNormalized | 0.0432       |
| wavelet-HLH | glszm      | SizeZoneNonUniformityNormalized  | 0.532        |
| wavelet-HLH | glszm      | SizeZoneNonUniformity            | 26.6         |
| wavelet-HLH | glszm      | GrayLevelNonUniformity           | 2.16         |
| wavelet-HLH | glszm      | LargeAreaEmphasis                | 2.58         |
| wavelet-HLH | glszm      | SmallAreaHighGrayLevelEmphasis   | 329.9338     |
| wavelet-HLH | glszm      | ZonePercentage                   | 0.704225352  |
| wavelet-HLH | glszm      | LargeAreaLowGrayLevelEmphasis    | 0.037237782  |
| wavelet-HLH | glszm      | LargeAreaHighGrayLevelEmphasis   | 1016.42      |
| wavelet-HLH | glszm      | HighGrayLevelZoneEmphasis        | 429.8        |
| wavelet-HLH | glszm      | SmallAreaEmphasis                | 0.750244444  |
| wavelet-HLH | glszm      | LowGrayLevelZoneEmphasis         | 0.031232899  |
| wavelet-HLH | glszm      | ZoneEntropy                      | 5.18875844   |
| wavelet-HLH | glszm      | SmallAreaLowGrayLevelEmphasis    | 0.030233811  |
| wavelet-HLH | ngtdm      | Coarseness                       | 0.070094755  |
| wavelet-HLH | ngtdm      | Complexity                       | 2418.600126  |

|             |       |          |             |
|-------------|-------|----------|-------------|
| wavelet-HLH | ngtdm | Strength | 23.39818883 |
| wavelet-HLH | ngtdm | Contrast | 0.900096815 |
| wavelet-HLH | ngtdm | Busyness | 0.028793979 |

| Image type | Feature Class | Feature Name                         |                                                                                                                                                                                                                                                                                                                                                                                                                   |
|------------|---------------|--------------------------------------|-------------------------------------------------------------------------------------------------------------------------------------------------------------------------------------------------------------------------------------------------------------------------------------------------------------------------------------------------------------------------------------------------------------------|
| general    | info          | BoundingBox                          | 6: RTSTRUCT: C99-DNU_segment_RLL GTV/ITV<br>(0, 0, 1, 9, 10, 10)                                                                                                                                                                                                                                                                                                                                                  |
| general    | info          | EnabledImageTypes                    | {u'Original': {}, u'Wavelet': {}}                                                                                                                                                                                                                                                                                                                                                                                 |
|            |               |                                      | {'distances': [1], 'additionalInfo': True, 'force2D': False, 'interpolator': 'sitkBSpline', 'resampledPixelSpacing': [3.0], 'label': 1, 'normalizeScale': 1, 'normalize': False, 'force2Ddimension': 0, 'removeOutliers': None, 'minimumROISize': None, u'binWidth': 25.0, 'minimumROIDimensions': 1, u'correctMask': True, 'preCrop': False, u'symmetricalGLCM': True, 'resegmentRange': None, 'padDistance': 5} |
| general    | info          | GeneralSettings                      |                                                                                                                                                                                                                                                                                                                                                                                                                   |
| general    | info          | ImageHash                            | 27ff01fe97683dbdf43202c4b164ed5f3db2edd1                                                                                                                                                                                                                                                                                                                                                                          |
| general    | info          | ImageSpacing                         | (0.9765625000000002, 0.9765625000000002, 2.0)                                                                                                                                                                                                                                                                                                                                                                     |
| general    | info          | MaskHash                             | be322508a9b9916f699d1a00b4aaeca060a65422                                                                                                                                                                                                                                                                                                                                                                          |
| general    | info          | NumpyVersion                         | 1.13.1                                                                                                                                                                                                                                                                                                                                                                                                            |
| general    | info          | PyWaveletVersion                     | 0.5.2                                                                                                                                                                                                                                                                                                                                                                                                             |
| general    | info          | SimpleITKVersion                     | 1.1.0                                                                                                                                                                                                                                                                                                                                                                                                             |
| general    | info          | Version                              | 1.3.0.post102+g1b0eb74                                                                                                                                                                                                                                                                                                                                                                                            |
| general    | info          | VolumeNum                            | 1                                                                                                                                                                                                                                                                                                                                                                                                                 |
| general    | info          | VoxelNum                             | 272                                                                                                                                                                                                                                                                                                                                                                                                               |
| original   | shape         | Maximum3DDiameter                    | 32.17141588                                                                                                                                                                                                                                                                                                                                                                                                       |
| original   | shape         | Maximum2DDiameterSlice               | 28.46049894                                                                                                                                                                                                                                                                                                                                                                                                       |
| original   | shape         | Sphericity                           | 0.765923668                                                                                                                                                                                                                                                                                                                                                                                                       |
| original   | shape         | MinorAxis                            | 24.88714544                                                                                                                                                                                                                                                                                                                                                                                                       |
| original   | shape         | Elongation                           | 0.819696503                                                                                                                                                                                                                                                                                                                                                                                                       |
| original   | shape         | SurfaceVolumeRatio                   | 0.324828713                                                                                                                                                                                                                                                                                                                                                                                                       |
| original   | shape         | Volume                               | 7344                                                                                                                                                                                                                                                                                                                                                                                                              |
| original   | shape         | MajorAxis                            | 30.36141468                                                                                                                                                                                                                                                                                                                                                                                                       |
| original   | shape         | SurfaceArea                          | 2385.542069                                                                                                                                                                                                                                                                                                                                                                                                       |
| original   | shape         | Flatness                             | 0.530007084                                                                                                                                                                                                                                                                                                                                                                                                       |
| original   | shape         | LeastAxis                            | 16.09176488                                                                                                                                                                                                                                                                                                                                                                                                       |
| original   | shape         | Maximum2DDiameterColumn              | 30.88689042                                                                                                                                                                                                                                                                                                                                                                                                       |
| original   | shape         | Maximum2DDiameterRow                 | 30.88689042                                                                                                                                                                                                                                                                                                                                                                                                       |
| original   | gldm          | GrayLevelVariance                    | 88.89224697                                                                                                                                                                                                                                                                                                                                                                                                       |
| original   | gldm          | HighGrayLevelEmphasis                | 694.5588235                                                                                                                                                                                                                                                                                                                                                                                                       |
| original   | gldm          | DependenceEntropy                    | 6.000101022                                                                                                                                                                                                                                                                                                                                                                                                       |
| original   | gldm          | DependenceNonUniformity              | 65.85294118                                                                                                                                                                                                                                                                                                                                                                                                       |
| original   | gldm          | GrayLevelNonUniformity               | 16.71323529                                                                                                                                                                                                                                                                                                                                                                                                       |
| original   | gldm          | SmallDependenceEmphasis              | 0.489107807                                                                                                                                                                                                                                                                                                                                                                                                       |
| original   | gldm          | SmallDependenceHighGrayLevelEmphasis | 225.0925189                                                                                                                                                                                                                                                                                                                                                                                                       |
| original   | gldm          | DependenceNonUniformityNormalized    | 0.242106401                                                                                                                                                                                                                                                                                                                                                                                                       |
| original   | gldm          | LargeDependenceEmphasis              | 12.99264706                                                                                                                                                                                                                                                                                                                                                                                                       |
| original   | gldm          | LargeDependenceLowGrayLevelEmphasis  | 0.04820122                                                                                                                                                                                                                                                                                                                                                                                                        |
| original   | gldm          | DependenceVariance                   | 5.349048443                                                                                                                                                                                                                                                                                                                                                                                                       |
| original   | gldm          | LargeDependenceHighGrayLevelEmphasis | 13008.69118                                                                                                                                                                                                                                                                                                                                                                                                       |
| original   | gldm          | SmallDependenceLowGrayLevelEmphasis  | 0.006009638                                                                                                                                                                                                                                                                                                                                                                                                       |
| original   | gldm          | LowGrayLevelEmphasis                 | 0.012474062                                                                                                                                                                                                                                                                                                                                                                                                       |
| original   | glcm          | JointAverage                         | 26.3639189                                                                                                                                                                                                                                                                                                                                                                                                        |
| original   | glcm          | SumAverage                           | 52.7278378                                                                                                                                                                                                                                                                                                                                                                                                        |
| original   | glcm          | JointEntropy                         | 7.224470367                                                                                                                                                                                                                                                                                                                                                                                                       |
| original   | glcm          | ClusterShade                         | -2484.991595                                                                                                                                                                                                                                                                                                                                                                                                      |



|          |            |                                  |              |
|----------|------------|----------------------------------|--------------|
| original | glcm       | MaximumProbability               | 0.047401507  |
| original | glcm       | Idmn                             | 0.923683831  |
| original | glcm       | JointEnergy                      | 0.011254619  |
| original | glcm       | Contrast                         | 123.4162196  |
| original | glcm       | DifferenceEntropy                | 4.280615621  |
| original | glcm       | InverseVariance                  | 0.199444272  |
| original | glcm       | DifferenceVariance               | 59.99574111  |
| original | glcm       | Idn                              | 0.839399533  |
| original | glcm       | Idm                              | 0.212964272  |
| original | glcm       | Correlation                      | 0.184523104  |
| original | glcm       | Autocorrelation                  | 709.5063214  |
| original | glcm       | SumEntropy                       | 5.067641392  |
| original | glcm       | SumSquares                       | 76.07703728  |
| original | glcm       | ClusterProminence                | 109856.9813  |
| original | glcm       | Imc2                             | 0.963427742  |
| original | glcm       | Imc1                             | -0.309338434 |
| original | glcm       | DifferenceAverage                | 7.920334988  |
| original | glcm       | Id                               | 0.282416803  |
| original | glcm       | ClusterTendency                  | 180.8919295  |
| original | firstorder | InterquartileRange               | 365          |
| original | firstorder | Skewness                         | -0.850995418 |
| original | firstorder | Uniformity                       | 0.061445718  |
| original | firstorder | Median                           | -74          |
| original | firstorder | Energy                           | 23198518     |
| original | firstorder | RobustMeanAbsoluteDeviation      | 156.4637601  |
| original | firstorder | MeanAbsoluteDeviation            | 202.2132353  |
| original | firstorder | TotalEnergy                      | 626359986    |
| original | firstorder | Maximum                          | 83           |
| original | firstorder | RootMeanSquared                  | 292.0422386  |
| original | firstorder | 90Percentile                     | 42           |
| original | firstorder | Minimum                          | -763         |
| original | firstorder | Entropy                          | 4.550910091  |
| original | firstorder | Range                            | 846          |
| original | firstorder | Variance                         | 55273.10662  |
| original | firstorder | 10Percentile                     | -568.5       |
| original | firstorder | Kurtosis                         | 2.37647555   |
| original | firstorder | Mean                             | -173.25      |
| original | glrlm      | ShortRunLowGrayLevelEmphasis     | 0.012691911  |
| original | glrlm      | GrayLevelVariance                | 90.34737372  |
| original | glrlm      | LowGrayLevelRunEmphasis          | 0.012987165  |
| original | glrlm      | GrayLevelNonUniformityNormalized | 0.054648929  |
| original | glrlm      | RunVariance                      | 0.092639107  |
| original | glrlm      | GrayLevelNonUniformity           | 13.86578882  |
| original | glrlm      | LongRunEmphasis                  | 1.245278221  |
| original | glrlm      | ShortRunHighGrayLevelEmphasis    | 624.6138463  |
| original | glrlm      | RunLengthNonUniformity           | 223.6062556  |
| original | glrlm      | ShortRunEmphasis                 | 0.951422945  |
| original | glrlm      | LongRunHighGrayLevelEmphasis     | 918.023062   |
| original | glrlm      | RunPercentage                    | 0.932126697  |
| original | glrlm      | LongRunLowGrayLevelEmphasis      | 0.014216594  |
| original | glrlm      | RunEntropy                       | 4.894543169  |
| original | glrlm      | HighGrayLevelRunEmphasis         | 672.5442939  |
| original | glrlm      | RunLengthNonUniformityNormalized | 0.881257922  |
| original | glszm      | GrayLevelVariance                | 84.8288897   |
| original | glszm      | ZoneVariance                     | 15.35208181  |
| original | glszm      | GrayLevelNonUniformityNormalized | 0.035336012  |

|             |            |                                      |              |
|-------------|------------|--------------------------------------|--------------|
| original    | glszm      | SizeZoneNonUniformityNormalized      | 0.604090577  |
| original    | glszm      | SizeZoneNonUniformity                | 89.40540541  |
| original    | glszm      | GrayLevelNonUniformity               | 5.22972973   |
| original    | glszm      | LargeAreaEmphasis                    | 18.72972973  |
| original    | glszm      | SmallAreaHighGrayLevelEmphasis       | 333.4344029  |
| original    | glszm      | ZonePercentage                       | 0.544117647  |
| original    | glszm      | LargeAreaLowGrayLevelEmphasis        | 0.053625642  |
| original    | glszm      | LargeAreaHighGrayLevelEmphasis       | 19052.09459  |
| original    | glszm      | HighGrayLevelZoneEmphasis            | 481.0540541  |
| original    | glszm      | SmallAreaEmphasis                    | 0.80432554   |
| original    | glszm      | LowGrayLevelZoneEmphasis             | 0.014788722  |
| original    | glszm      | ZoneEntropy                          | 5.588657742  |
| original    | glszm      | SmallAreaLowGrayLevelEmphasis        | 0.009136076  |
| original    | ngtdm      | Coarseness                           | 0.011966739  |
| original    | ngtdm      | Complexity                           | 3154.055796  |
| original    | ngtdm      | Strength                             | 8.666666358  |
| original    | ngtdm      | Contrast                             | 1.023108161  |
| original    | ngtdm      | Busyness                             | 0.079620238  |
| wavelet-HHH | gldm       | GrayLevelVariance                    | 14.15429012  |
| wavelet-HHH | gldm       | HighGrayLevelEmphasis                | 170.6801471  |
| wavelet-HHH | gldm       | DependenceEntropy                    | 5.651613322  |
| wavelet-HHH | gldm       | DependenceNonUniformity              | 66.55147059  |
| wavelet-HHH | gldm       | GrayLevelNonUniformity               | 21.88970588  |
| wavelet-HHH | gldm       | SmallDependenceEmphasis              | 0.447051805  |
| wavelet-HHH | gldm       | SmallDependenceHighGrayLevelEmphasis | 78.86710241  |
| wavelet-HHH | gldm       | DependenceNonUniformityNormalized    | 0.244674524  |
| wavelet-HHH | gldm       | LargeDependenceEmphasis              | 7.75         |
| wavelet-HHH | gldm       | LargeDependenceLowGrayLevelEmphasis  | 0.057212738  |
| wavelet-HHH | gldm       | DependenceVariance                   | 2.109375     |
| wavelet-HHH | gldm       | LargeDependenceHighGrayLevelEmphasis | 1351.628676  |
| wavelet-HHH | gldm       | SmallDependenceLowGrayLevelEmphasis  | 0.008921108  |
| wavelet-HHH | gldm       | LowGrayLevelEmphasis                 | 0.01301528   |
| wavelet-HHH | glcm       | JointAverage                         | 12.49245942  |
| wavelet-HHH | glcm       | SumAverage                           | 24.98491884  |
| wavelet-HHH | glcm       | JointEntropy                         | 7.038319328  |
| wavelet-HHH | glcm       | ClusterShade                         | -1.238873634 |
| wavelet-HHH | glcm       | MaximumProbability                   | 0.026928835  |
| wavelet-HHH | glcm       | ldmn                                 | 0.95714206   |
| wavelet-HHH | glcm       | JointEnergy                          | 0.009432476  |
| wavelet-HHH | glcm       | Contrast                             | 28.3473405   |
| wavelet-HHH | glcm       | DifferenceEntropy                    | 3.429444745  |
| wavelet-HHH | glcm       | InverseVariance                      | 0.216444288  |
| wavelet-HHH | glcm       | DifferenceVariance                   | 10.38275459  |
| wavelet-HHH | glcm       | ldn                                  | 0.861854346  |
| wavelet-HHH | glcm       | ldm                                  | 0.209661551  |
| wavelet-HHH | glcm       | Correlation                          | -0.033973523 |
| wavelet-HHH | glcm       | Autocorrelation                      | 155.5988507  |
| wavelet-HHH | glcm       | SumEntropy                           | 4.22689099   |
| wavelet-HHH | glcm       | SumSquares                           | 13.70494562  |
| wavelet-HHH | glcm       | ClusterProminence                    | 2309.798055  |
| wavelet-HHH | glcm       | lmc2                                 | 0.86635639   |
| wavelet-HHH | glcm       | lmc1                                 | -0.180307847 |
| wavelet-HHH | glcm       | DifferenceAverage                    | 4.191788617  |
| wavelet-HHH | glcm       | ld                                   | 0.304161259  |
| wavelet-HHH | glcm       | ClusterTendency                      | 26.47244198  |
| wavelet-HHH | firstorder | InterquartileRange                   | 113.5482204  |

|             |            |                                  |              |
|-------------|------------|----------------------------------|--------------|
| wavelet-HHH | firstorder | Skewness                         | 0.016531436  |
| wavelet-HHH | firstorder | Uniformity                       | 0.08047686   |
| wavelet-HHH | firstorder | Median                           | 0.538218723  |
| wavelet-HHH | firstorder | Energy                           | 2366460.237  |
| wavelet-HHH | firstorder | RobustMeanAbsoluteDeviation      | 49.02252791  |
| wavelet-HHH | firstorder | MeanAbsoluteDeviation            | 72.64352997  |
| wavelet-HHH | firstorder | TotalEnergy                      | 63894426.4   |
| wavelet-HHH | firstorder | Maximum                          | 289.6552972  |
| wavelet-HHH | firstorder | RootMeanSquared                  | 93.27497767  |
| wavelet-HHH | firstorder | 90Percentile                     | 104.0932367  |
| wavelet-HHH | firstorder | Minimum                          | -285.7346407 |
| wavelet-HHH | firstorder | Entropy                          | 3.891127841  |
| wavelet-HHH | firstorder | Range                            | 575.3899379  |
| wavelet-HHH | firstorder | Variance                         | 8700.204559  |
| wavelet-HHH | firstorder | 10Percentile                     | -123.266337  |
| wavelet-HHH | firstorder | Kurtosis                         | 3.424077358  |
| wavelet-HHH | firstorder | Mean                             | 0.130000248  |
| wavelet-HHH | grlm       | ShortRunLowGrayLevelEmphasis     | 0.013081487  |
| wavelet-HHH | grlm       | GrayLevelVariance                | 14.64471229  |
| wavelet-HHH | grlm       | LowGrayLevelRunEmphasis          | 0.013361053  |
| wavelet-HHH | grlm       | GrayLevelNonUniformityNormalized | 0.078550747  |
| wavelet-HHH | grlm       | RunVariance                      | 0.05809685   |
| wavelet-HHH | grlm       | GrayLevelNonUniformity           | 20.23903411  |
| wavelet-HHH | grlm       | LongRunEmphasis                  | 1.174077858  |
| wavelet-HHH | grlm       | ShortRunHighGrayLevelEmphasis    | 163.7052813  |
| wavelet-HHH | grlm       | RunLengthNonUniformity           | 231.7782544  |
| wavelet-HHH | grlm       | ShortRunEmphasis                 | 0.959503582  |
| wavelet-HHH | grlm       | LongRunHighGrayLevelEmphasis     | 200.5388156  |
| wavelet-HHH | grlm       | RunPercentage                    | 0.947115385  |
| wavelet-HHH | grlm       | LongRunLowGrayLevelEmphasis      | 0.014550714  |
| wavelet-HHH | grlm       | RunEntropy                       | 4.173363499  |
| wavelet-HHH | grlm       | HighGrayLevelRunEmphasis         | 170.6344659  |
| wavelet-HHH | grlm       | RunLengthNonUniformityNormalized | 0.899092202  |
| wavelet-HHH | glszm      | GrayLevelVariance                | 22.35041212  |
| wavelet-HHH | glszm      | ZoneVariance                     | 7.417019381  |
| wavelet-HHH | glszm      | GrayLevelNonUniformityNormalized | 0.061706393  |
| wavelet-HHH | glszm      | SizeZoneNonUniformityNormalized  | 0.525506794  |
| wavelet-HHH | glszm      | SizeZoneNonUniformity            | 70.41791045  |
| wavelet-HHH | glszm      | GrayLevelNonUniformity           | 8.268656716  |
| wavelet-HHH | glszm      | LargeAreaEmphasis                | 11.53731343  |
| wavelet-HHH | glszm      | SmallAreaHighGrayLevelEmphasis   | 134.6152782  |
| wavelet-HHH | glszm      | ZonePercentage                   | 0.492647059  |
| wavelet-HHH | glszm      | LargeAreaLowGrayLevelEmphasis    | 0.082537678  |
| wavelet-HHH | glszm      | LargeAreaHighGrayLevelEmphasis   | 2156.231343  |
| wavelet-HHH | glszm      | HighGrayLevelZoneEmphasis        | 171.0447761  |
| wavelet-HHH | glszm      | SmallAreaEmphasis                | 0.75169532   |
| wavelet-HHH | glszm      | LowGrayLevelZoneEmphasis         | 0.019106127  |
| wavelet-HHH | glszm      | ZoneEntropy                      | 5.203424434  |
| wavelet-HHH | glszm      | SmallAreaLowGrayLevelEmphasis    | 0.016897408  |
| wavelet-HHH | ngtdm      | Coarseness                       | 0.02125864   |
| wavelet-HHH | ngtdm      | Complexity                       | 628.8283847  |
| wavelet-HHH | ngtdm      | Strength                         | 3.24437397   |
| wavelet-HHH | ngtdm      | Contrast                         | 0.173082289  |
| wavelet-HHH | ngtdm      | Busyness                         | 0.154556406  |
| wavelet-HLL | gldm       | GrayLevelVariance                | 65.84265517  |
| wavelet-HLL | gldm       | HighGrayLevelEmphasis            | 673.8639706  |

|             |            |                                      |              |
|-------------|------------|--------------------------------------|--------------|
| wavelet-HLL | gldm       | DependenceEntropy                    | 6.156114452  |
| wavelet-HLL | gldm       | DependenceNonUniformity              | 96.30882353  |
| wavelet-HLL | gldm       | GrayLevelNonUniformity               | 10.69852941  |
| wavelet-HLL | gldm       | SmallDependenceEmphasis              | 0.588872486  |
| wavelet-HLL | gldm       | SmallDependenceHighGrayLevelEmphasis | 419.7380392  |
| wavelet-HLL | gldm       | DependenceNonUniformityNormalized    | 0.354076557  |
| wavelet-HLL | gldm       | LargeDependenceEmphasis              | 4.816176471  |
| wavelet-HLL | gldm       | LargeDependenceLowGrayLevelEmphasis  | 0.013742772  |
| wavelet-HLL | gldm       | DependenceVariance                   | 1.355482266  |
| wavelet-HLL | gldm       | LargeDependenceHighGrayLevelEmphasis | 3072.761029  |
| wavelet-HLL | gldm       | SmallDependenceLowGrayLevelEmphasis  | 0.005207015  |
| wavelet-HLL | gldm       | LowGrayLevelEmphasis                 | 0.006137794  |
| wavelet-HLL | glcm       | JointAverage                         | 24.48866821  |
| wavelet-HLL | glcm       | SumAverage                           | 48.97733643  |
| wavelet-HLL | glcm       | JointEntropy                         | 7.94371009   |
| wavelet-HLL | glcm       | ClusterShade                         | 460.1501799  |
| wavelet-HLL | glcm       | MaximumProbability                   | 0.014883484  |
| wavelet-HLL | glcm       | Idmn                                 | 0.961490389  |
| wavelet-HLL | glcm       | JointEnergy                          | 0.004747969  |
| wavelet-HLL | glcm       | Contrast                             | 93.3508254   |
| wavelet-HLL | glcm       | DifferenceEntropy                    | 4.170523106  |
| wavelet-HLL | glcm       | InverseVariance                      | 0.139457885  |
| wavelet-HLL | glcm       | DifferenceVariance                   | 35.53308678  |
| wavelet-HLL | glcm       | Idn                                  | 0.870434801  |
| wavelet-HLL | glcm       | Idm                                  | 0.134114278  |
| wavelet-HLL | glcm       | Correlation                          | 0.222219416  |
| wavelet-HLL | glcm       | Autocorrelation                      | 613.7080881  |
| wavelet-HLL | glcm       | SumEntropy                           | 5.339608152  |
| wavelet-HLL | glcm       | SumSquares                           | 60.63216974  |
| wavelet-HLL | glcm       | ClusterProminence                    | 70009.81447  |
| wavelet-HLL | glcm       | Imc2                                 | 0.983635398  |
| wavelet-HLL | glcm       | Imc1                                 | -0.35665218  |
| wavelet-HLL | glcm       | DifferenceAverage                    | 7.471402694  |
| wavelet-HLL | glcm       | Id                                   | 0.220910657  |
| wavelet-HLL | glcm       | ClusterTendency                      | 149.1778536  |
| wavelet-HLL | firstorder | InterquartileRange                   | 251.1638744  |
| wavelet-HLL | firstorder | Skewness                             | 0.168318438  |
| wavelet-HLL | firstorder | Uniformity                           | 0.039332829  |
| wavelet-HLL | firstorder | Median                               | -74.68075425 |
| wavelet-HLL | firstorder | Energy                               | 12575180.03  |
| wavelet-HLL | firstorder | RobustMeanAbsoluteDeviation          | 110.9520365  |
| wavelet-HLL | firstorder | MeanAbsoluteDeviation                | 162.104719   |
| wavelet-HLL | firstorder | TotalEnergy                          | 339529860.8  |
| wavelet-HLL | firstorder | Maximum                              | 468.5521661  |
| wavelet-HLL | firstorder | RootMeanSquared                      | 215.0169284  |
| wavelet-HLL | firstorder | 90Percentile                         | 203.5798438  |
| wavelet-HLL | firstorder | Minimum                              | -657.9910184 |
| wavelet-HLL | firstorder | Entropy                              | 4.921705032  |
| wavelet-HLL | firstorder | Range                                | 1126.543184  |
| wavelet-HLL | firstorder | Variance                             | 41135.65937  |
| wavelet-HLL | firstorder | 10Percentile                         | -326.790727  |
| wavelet-HLL | firstorder | Kurtosis                             | 2.889890857  |
| wavelet-HLL | firstorder | Mean                                 | -71.39061664 |
| wavelet-HLL | glrlm      | ShortRunLowGrayLevelEmphasis         | 0.006222677  |
| wavelet-HLL | glrlm      | GrayLevelVariance                    | 67.01719802  |
| wavelet-HLL | glrlm      | LowGrayLevelRunEmphasis              | 0.006276319  |

|             |       |                                      |             |
|-------------|-------|--------------------------------------|-------------|
| wavelet-HLL | glrlm | GrayLevelNonUniformityNormalized     | 0.038427395 |
| wavelet-HLL | glrlm | RunVariance                          | 0.034217213 |
| wavelet-HLL | glrlm | GrayLevelNonUniformity               | 10.1071199  |
| wavelet-HLL | glrlm | LongRunEmphasis                      | 1.104229821 |
| wavelet-HLL | glrlm | ShortRunHighGrayLevelEmphasis        | 659.7913633 |
| wavelet-HLL | glrlm | RunLengthNonUniformity               | 245.9566038 |
| wavelet-HLL | glrlm | ShortRunEmphasis                     | 0.974598767 |
| wavelet-HLL | glrlm | LongRunHighGrayLevelEmphasis         | 740.6049406 |
| wavelet-HLL | glrlm | RunPercentage                        | 0.966911765 |
| wavelet-HLL | glrlm | LongRunLowGrayLevelEmphasis          | 0.006495153 |
| wavelet-HLL | glrlm | RunEntropy                           | 5.083013838 |
| wavelet-HLL | glrlm | HighGrayLevelRunEmphasis             | 675.6057415 |
| wavelet-HLL | glrlm | RunLengthNonUniformityNormalized     | 0.934966097 |
| wavelet-HLL | glszm | GrayLevelVariance                    | 81.11638839 |
| wavelet-HLL | glszm | ZoneVariance                         | 1.763804524 |
| wavelet-HLL | glszm | GrayLevelNonUniformityNormalized     | 0.033912274 |
| wavelet-HLL | glszm | SizeZoneNonUniformityNormalized      | 0.583712341 |
| wavelet-HLL | glszm | SizeZoneNonUniformity                | 105.6519337 |
| wavelet-HLL | glszm | GrayLevelNonUniformity               | 6.138121547 |
| wavelet-HLL | glszm | LargeAreaEmphasis                    | 4.022099448 |
| wavelet-HLL | glszm | SmallAreaHighGrayLevelEmphasis       | 573.8367001 |
| wavelet-HLL | glszm | ZonePercentage                       | 0.665441176 |
| wavelet-HLL | glszm | LargeAreaLowGrayLevelEmphasis        | 0.013980381 |
| wavelet-HLL | glszm | LargeAreaHighGrayLevelEmphasis       | 2639.176796 |
| wavelet-HLL | glszm | HighGrayLevelZoneEmphasis            | 702.5303867 |
| wavelet-HLL | glszm | SmallAreaEmphasis                    | 0.792311266 |
| wavelet-HLL | glszm | LowGrayLevelZoneEmphasis             | 0.008120778 |
| wavelet-HLL | glszm | ZoneEntropy                          | 5.844111962 |
| wavelet-HLL | glszm | SmallAreaLowGrayLevelEmphasis        | 0.007611466 |
| wavelet-HLL | ngtdm | Coarseness                           | 0.022891387 |
| wavelet-HLL | ngtdm | Complexity                           | 3143.984496 |
| wavelet-HLL | ngtdm | Strength                             | 11.54962257 |
| wavelet-HLL | ngtdm | Contrast                             | 0.445244877 |
| wavelet-HLL | ngtdm | Busyness                             | 0.051712544 |
| wavelet-LHL | gldm  | GrayLevelVariance                    | 123.0274654 |
| wavelet-LHL | gldm  | HighGrayLevelEmphasis                | 1149.852941 |
| wavelet-LHL | gldm  | DependenceEntropy                    | 6.356839326 |
| wavelet-LHL | gldm  | DependenceNonUniformity              | 108.4191176 |
| wavelet-LHL | gldm  | GrayLevelNonUniformity               | 8.007352941 |
| wavelet-LHL | gldm  | SmallDependenceEmphasis              | 0.627024101 |
| wavelet-LHL | gldm  | SmallDependenceHighGrayLevelEmphasis | 771.6590339 |
| wavelet-LHL | gldm  | DependenceNonUniformityNormalized    | 0.398599697 |
| wavelet-LHL | gldm  | LargeDependenceEmphasis              | 3.485294118 |
| wavelet-LHL | gldm  | LargeDependenceLowGrayLevelEmphasis  | 0.008599918 |
| wavelet-LHL | gldm  | DependenceVariance                   | 0.72383218  |
| wavelet-LHL | gldm  | LargeDependenceHighGrayLevelEmphasis | 3443.588235 |
| wavelet-LHL | gldm  | SmallDependenceLowGrayLevelEmphasis  | 0.004791264 |
| wavelet-LHL | gldm  | LowGrayLevelEmphasis                 | 0.005263919 |
| wavelet-LHL | glcm  | JointAverage                         | 31.42395595 |
| wavelet-LHL | glcm  | SumAverage                           | 62.8479119  |
| wavelet-LHL | glcm  | JointEntropy                         | 8.165541331 |
| wavelet-LHL | glcm  | ClusterShade                         | 3634.039228 |
| wavelet-LHL | glcm  | MaximumProbability                   | 0.011115792 |
| wavelet-LHL | glcm  | Idmn                                 | 0.974161505 |
| wavelet-LHL | glcm  | JointEnergy                          | 0.003813006 |
| wavelet-LHL | glcm  | Contrast                             | 152.3579166 |

|             |            |                                  |              |
|-------------|------------|----------------------------------|--------------|
| wavelet-LHL | glcm       | DifferenceEntropy                | 4.465643973  |
| wavelet-LHL | glcm       | InverseVariance                  | 0.118473467  |
| wavelet-LHL | glcm       | DifferenceVariance               | 59.47627056  |
| wavelet-LHL | glcm       | Idn                              | 0.893331945  |
| wavelet-LHL | glcm       | Idm                              | 0.110729988  |
| wavelet-LHL | glcm       | Correlation                      | 0.286678228  |
| wavelet-LHL | glcm       | Autocorrelation                  | 1019.042653  |
| wavelet-LHL | glcm       | SumEntropy                       | 5.597207819  |
| wavelet-LHL | glcm       | SumSquares                       | 107.5934239  |
| wavelet-LHL | glcm       | ClusterProminence                | 297925.5493  |
| wavelet-LHL | glcm       | Imc2                             | 0.994144211  |
| wavelet-LHL | glcm       | Imc1                             | -0.429473635 |
| wavelet-LHL | glcm       | DifferenceAverage                | 9.407829574  |
| wavelet-LHL | glcm       | Id                               | 0.193028513  |
| wavelet-LHL | glcm       | ClusterTendency                  | 278.0157789  |
| wavelet-LHL | firstorder | InterquartileRange               | 373.0491304  |
| wavelet-LHL | firstorder | Skewness                         | 0.578810771  |
| wavelet-LHL | firstorder | Uniformity                       | 0.029438798  |
| wavelet-LHL | firstorder | Median                           | -35.23291821 |
| wavelet-LHL | firstorder | Energy                           | 20926556.83  |
| wavelet-LHL | firstorder | RobustMeanAbsoluteDeviation      | 150.1797364  |
| wavelet-LHL | firstorder | MeanAbsoluteDeviation            | 218.7265277  |
| wavelet-LHL | firstorder | TotalEnergy                      | 565017034.3  |
| wavelet-LHL | firstorder | Maximum                          | 1044.815832  |
| wavelet-LHL | firstorder | RootMeanSquared                  | 277.3731614  |
| wavelet-LHL | firstorder | 90Percentile                     | 388.0418288  |
| wavelet-LHL | firstorder | Minimum                          | -774.4845095 |
| wavelet-LHL | firstorder | Entropy                          | 5.313436245  |
| wavelet-LHL | firstorder | Range                            | 1819.300342  |
| wavelet-LHL | firstorder | Variance                         | 76761.55194  |
| wavelet-LHL | firstorder | 10Percentile                     | -284.4969166 |
| wavelet-LHL | firstorder | Kurtosis                         | 3.606199254  |
| wavelet-LHL | firstorder | Mean                             | 13.20298249  |
| wavelet-LHL | glrlm      | ShortRunLowGrayLevelEmphasis     | 0.005342445  |
| wavelet-LHL | glrlm      | GrayLevelVariance                | 124.5978942  |
| wavelet-LHL | glrlm      | LowGrayLevelRunEmphasis          | 0.005367506  |
| wavelet-LHL | glrlm      | GrayLevelNonUniformityNormalized | 0.029206423  |
| wavelet-LHL | glrlm      | RunVariance                      | 0.027183798  |
| wavelet-LHL | glrlm      | GrayLevelNonUniformity           | 7.741683044  |
| wavelet-LHL | glrlm      | LongRunEmphasis                  | 1.080469506  |
| wavelet-LHL | glrlm      | ShortRunHighGrayLevelEmphasis    | 1136.420266  |
| wavelet-LHL | glrlm      | RunLengthNonUniformity           | 252.0729059  |
| wavelet-LHL | glrlm      | ShortRunEmphasis                 | 0.9808602    |
| wavelet-LHL | glrlm      | LongRunHighGrayLevelEmphasis     | 1231.778077  |
| wavelet-LHL | glrlm      | RunPercentage                    | 0.974547511  |
| wavelet-LHL | glrlm      | LongRunLowGrayLevelEmphasis      | 0.005473784  |
| wavelet-LHL | glrlm      | RunEntropy                       | 5.425132123  |
| wavelet-LHL | glrlm      | HighGrayLevelRunEmphasis         | 1154.856972  |
| wavelet-LHL | glrlm      | RunLengthNonUniformityNormalized | 0.950735183  |
| wavelet-LHL | glszm      | GrayLevelVariance                | 146.3739161  |
| wavelet-LHL | glszm      | ZoneVariance                     | 0.749550323  |
| wavelet-LHL | glszm      | GrayLevelNonUniformityNormalized | 0.026497356  |
| wavelet-LHL | glszm      | SizeZoneNonUniformityNormalized  | 0.591398427  |
| wavelet-LHL | glszm      | SizeZoneNonUniformity            | 114.1398964  |
| wavelet-LHL | glszm      | GrayLevelNonUniformity           | 5.113989637  |
| wavelet-LHL | glszm      | LargeAreaEmphasis                | 2.735751295  |

|             |            |                                      |              |
|-------------|------------|--------------------------------------|--------------|
| wavelet-LHL | glszm      | SmallAreaHighGrayLevelEmphasis       | 998.2610204  |
| wavelet-LHL | glszm      | ZonePercentage                       | 0.709558824  |
| wavelet-LHL | glszm      | LargeAreaLowGrayLevelEmphasis        | 0.009201356  |
| wavelet-LHL | glszm      | LargeAreaHighGrayLevelEmphasis       | 2842.414508  |
| wavelet-LHL | glszm      | HighGrayLevelZoneEmphasis            | 1215.968912  |
| wavelet-LHL | glszm      | SmallAreaEmphasis                    | 0.797505757  |
| wavelet-LHL | glszm      | LowGrayLevelZoneEmphasis             | 0.006890514  |
| wavelet-LHL | glszm      | ZoneEntropy                          | 6.139219976  |
| wavelet-LHL | glszm      | SmallAreaLowGrayLevelEmphasis        | 0.006645357  |
| wavelet-LHL | ngtdm      | Coarseness                           | 0.023079433  |
| wavelet-LHL | ngtdm      | Complexity                           | 7705.326206  |
| wavelet-LHL | ngtdm      | Strength                             | 24.20819589  |
| wavelet-LHL | ngtdm      | Contrast                             | 0.604923853  |
| wavelet-LHL | ngtdm      | Busyness                             | 0.03280863   |
| wavelet-LHH | gldm       | GrayLevelVariance                    | 44.34602076  |
| wavelet-LHH | gldm       | HighGrayLevelEmphasis                | 557.2352941  |
| wavelet-LHH | gldm       | DependenceEntropy                    | 5.889737129  |
| wavelet-LHH | gldm       | DependenceNonUniformity              | 93.80882353  |
| wavelet-LHH | gldm       | GrayLevelNonUniformity               | 12.97058824  |
| wavelet-LHH | gldm       | SmallDependenceEmphasis              | 0.571001838  |
| wavelet-LHH | gldm       | SmallDependenceHighGrayLevelEmphasis | 310.7342729  |
| wavelet-LHH | gldm       | DependenceNonUniformityNormalized    | 0.344885381  |
| wavelet-LHH | gldm       | LargeDependenceEmphasis              | 4.154411765  |
| wavelet-LHH | gldm       | LargeDependenceLowGrayLevelEmphasis  | 0.013203825  |
| wavelet-LHH | gldm       | DependenceVariance                   | 0.855914792  |
| wavelet-LHH | gldm       | LargeDependenceHighGrayLevelEmphasis | 2346.948529  |
| wavelet-LHH | gldm       | SmallDependenceLowGrayLevelEmphasis  | 0.005624983  |
| wavelet-LHH | gldm       | LowGrayLevelEmphasis                 | 0.0065522    |
| wavelet-LHH | glcm       | JointAverage                         | 22.65914965  |
| wavelet-LHH | glcm       | SumAverage                           | 45.31829931  |
| wavelet-LHH | glcm       | JointEntropy                         | 7.886399708  |
| wavelet-LHH | glcm       | ClusterShade                         | 69.62648638  |
| wavelet-LHH | glcm       | MaximumProbability                   | 0.01383455   |
| wavelet-LHH | glcm       | ldmn                                 | 0.955003148  |
| wavelet-LHH | glcm       | JointEnergy                          | 0.004857842  |
| wavelet-LHH | glcm       | Contrast                             | 98.32477839  |
| wavelet-LHH | glcm       | DifferenceEntropy                    | 4.175653631  |
| wavelet-LHH | glcm       | InverseVariance                      | 0.139210203  |
| wavelet-LHH | glcm       | DifferenceVariance                   | 37.12315954  |
| wavelet-LHH | glcm       | ldn                                  | 0.861959813  |
| wavelet-LHH | glcm       | ldm                                  | 0.131887723  |
| wavelet-LHH | glcm       | Correlation                          | 0.019775422  |
| wavelet-LHH | glcm       | Autocorrelation                      | 514.3198017  |
| wavelet-LHH | glcm       | SumEntropy                           | 5.062360295  |
| wavelet-LHH | glcm       | SumSquares                           | 49.97266441  |
| wavelet-LHH | glcm       | ClusterProminence                    | 40744.06011  |
| wavelet-LHH | glcm       | lmc2                                 | 0.97585259   |
| wavelet-LHH | glcm       | lmc1                                 | -0.324137878 |
| wavelet-LHH | glcm       | DifferenceAverage                    | 7.589188745  |
| wavelet-LHH | glcm       | ld                                   | 0.219258888  |
| wavelet-LHH | glcm       | ClusterTendency                      | 101.5658793  |
| wavelet-LHH | firstorder | InterquartileRange                   | 209.0484048  |
| wavelet-LHH | firstorder | Skewness                             | 0.115001825  |
| wavelet-LHH | firstorder | Uniformity                           | 0.047685986  |
| wavelet-LHH | firstorder | Median                               | -3.400353137 |
| wavelet-LHH | firstorder | Energy                               | 7558404.138  |

|             |            |                                  |              |
|-------------|------------|----------------------------------|--------------|
| wavelet-LHH | firstorder | RobustMeanAbsoluteDeviation      | 84.35442972  |
| wavelet-LHH | firstorder | MeanAbsoluteDeviation            | 128.4142338  |
| wavelet-LHH | firstorder | TotalEnergy                      | 204076911.7  |
| wavelet-LHH | firstorder | Maximum                          | 519.441931   |
| wavelet-LHH | firstorder | RootMeanSquared                  | 166.6980819  |
| wavelet-LHH | firstorder | 90Percentile                     | 216.2146653  |
| wavelet-LHH | firstorder | Minimum                          | -543.2752838 |
| wavelet-LHH | firstorder | Entropy                          | 4.661430732  |
| wavelet-LHH | firstorder | Range                            | 1062.717215  |
| wavelet-LHH | firstorder | Variance                         | 27772.41095  |
| wavelet-LHH | firstorder | 10Percentile                     | -199.2981895 |
| wavelet-LHH | firstorder | Kurtosis                         | 3.519858267  |
| wavelet-LHH | firstorder | Mean                             | 3.979893865  |
| wavelet-LHH | grlm       | ShortRunLowGrayLevelEmphasis     | 0.006647944  |
| wavelet-LHH | grlm       | GrayLevelVariance                | 44.98596489  |
| wavelet-LHH | grlm       | LowGrayLevelRunEmphasis          | 0.006696746  |
| wavelet-LHH | grlm       | GrayLevelNonUniformityNormalized | 0.047109207  |
| wavelet-LHH | grlm       | RunVariance                      | 0.034286803  |
| wavelet-LHH | grlm       | GrayLevelNonUniformity           | 12.41195921  |
| wavelet-LHH | grlm       | LongRunEmphasis                  | 1.10094663   |
| wavelet-LHH | grlm       | ShortRunHighGrayLevelEmphasis    | 543.1543083  |
| wavelet-LHH | grlm       | RunLengthNonUniformity           | 247.7528947  |
| wavelet-LHH | grlm       | ShortRunEmphasis                 | 0.976406137  |
| wavelet-LHH | grlm       | LongRunHighGrayLevelEmphasis     | 614.0477975  |
| wavelet-LHH | grlm       | RunPercentage                    | 0.968608597  |
| wavelet-LHH | grlm       | LongRunLowGrayLevelEmphasis      | 0.006915958  |
| wavelet-LHH | grlm       | RunEntropy                       | 4.816882204  |
| wavelet-LHH | grlm       | HighGrayLevelRunEmphasis         | 556.7672029  |
| wavelet-LHH | grlm       | RunLengthNonUniformityNormalized | 0.939938506  |
| wavelet-LHH | glszm      | GrayLevelVariance                | 54.39720364  |
| wavelet-LHH | glszm      | ZoneVariance                     | 1.417750284  |
| wavelet-LHH | glszm      | GrayLevelNonUniformityNormalized | 0.040335816  |
| wavelet-LHH | glszm      | SizeZoneNonUniformityNormalized  | 0.553591718  |
| wavelet-LHH | glszm      | SizeZoneNonUniformity            | 98.53932584  |
| wavelet-LHH | glszm      | GrayLevelNonUniformity           | 7.179775281  |
| wavelet-LHH | glszm      | LargeAreaEmphasis                | 3.752808989  |
| wavelet-LHH | glszm      | SmallAreaHighGrayLevelEmphasis   | 419.0124299  |
| wavelet-LHH | glszm      | ZonePercentage                   | 0.654411765  |
| wavelet-LHH | glszm      | LargeAreaLowGrayLevelEmphasis    | 0.014924373  |
| wavelet-LHH | glszm      | LargeAreaHighGrayLevelEmphasis   | 2020.089888  |
| wavelet-LHH | glszm      | HighGrayLevelZoneEmphasis        | 554.0955056  |
| wavelet-LHH | glszm      | SmallAreaEmphasis                | 0.772214765  |
| wavelet-LHH | glszm      | LowGrayLevelZoneEmphasis         | 0.008858182  |
| wavelet-LHH | glszm      | ZoneEntropy                      | 5.658113701  |
| wavelet-LHH | glszm      | SmallAreaLowGrayLevelEmphasis    | 0.00836681   |
| wavelet-LHH | ngtdm      | Coarseness                       | 0.021401013  |
| wavelet-LHH | ngtdm      | Complexity                       | 2599.012749  |
| wavelet-LHH | ngtdm      | Strength                         | 8.26368434   |
| wavelet-LHH | ngtdm      | Contrast                         | 0.370999567  |
| wavelet-LHH | ngtdm      | Busyness                         | 0.059368828  |
| wavelet-LLH | gldm       | GrayLevelVariance                | 105.350292   |
| wavelet-LLH | gldm       | HighGrayLevelEmphasis            | 636.7205882  |
| wavelet-LLH | gldm       | DependenceEntropy                | 6.312721679  |
| wavelet-LLH | gldm       | DependenceNonUniformity          | 107.6911765  |
| wavelet-LLH | gldm       | GrayLevelNonUniformity           | 8.5          |
| wavelet-LLH | gldm       | SmallDependenceEmphasis          | 0.636432802  |



|             |            |                                      |              |
|-------------|------------|--------------------------------------|--------------|
| wavelet-LLH | gldm       | SmallDependenceHighGrayLevelEmphasis | 438.166781   |
| wavelet-LLH | gldm       | DependenceNonUniformityNormalized    | 0.395923443  |
| wavelet-LLH | gldm       | LargeDependenceEmphasis              | 3.882352941  |
| wavelet-LLH | gldm       | LargeDependenceLowGrayLevelEmphasis  | 0.016926414  |
| wavelet-LLH | gldm       | DependenceVariance                   | 0.972318339  |
| wavelet-LLH | gldm       | LargeDependenceHighGrayLevelEmphasis | 2044.058824  |
| wavelet-LLH | gldm       | SmallDependenceLowGrayLevelEmphasis  | 0.006166755  |
| wavelet-LLH | gldm       | LowGrayLevelEmphasis                 | 0.007534162  |
| wavelet-LLH | glcm       | JointAverage                         | 22.30971544  |
| wavelet-LLH | glcm       | SumAverage                           | 44.61943088  |
| wavelet-LLH | glcm       | JointEntropy                         | 8.137249122  |
| wavelet-LLH | glcm       | ClusterShade                         | 1825.685119  |
| wavelet-LLH | glcm       | MaximumProbability                   | 0.010630048  |
| wavelet-LLH | glcm       | ldmn                                 | 0.942644791  |
| wavelet-LLH | glcm       | JointEnergy                          | 0.003896354  |
| wavelet-LLH | glcm       | Contrast                             | 160.282233   |
| wavelet-LLH | glcm       | DifferenceEntropy                    | 4.508481954  |
| wavelet-LLH | glcm       | InverseVariance                      | 0.112218633  |
| wavelet-LLH | glcm       | DifferenceVariance                   | 60.00324795  |
| wavelet-LLH | glcm       | ldn                                  | 0.845813163  |
| wavelet-LLH | glcm       | ldm                                  | 0.109327007  |
| wavelet-LLH | glcm       | Correlation                          | 0.142405511  |
| wavelet-LLH | glcm       | Autocorrelation                      | 512.2034978  |
| wavelet-LLH | glcm       | SumEntropy                           | 5.526847797  |
| wavelet-LLH | glcm       | SumSquares                           | 94.58143341  |
| wavelet-LLH | glcm       | ClusterProminence                    | 154428.7766  |
| wavelet-LLH | glcm       | lmc2                                 | 0.992289527  |
| wavelet-LLH | glcm       | lmc1                                 | -0.409558406 |
| wavelet-LLH | glcm       | DifferenceAverage                    | 9.747176291  |
| wavelet-LLH | glcm       | ld                                   | 0.190288784  |
| wavelet-LLH | glcm       | ClusterTendency                      | 218.0435007  |
| wavelet-LLH | firstorder | InterquartileRange                   | 353.0738006  |
| wavelet-LLH | firstorder | Skewness                             | 0.485567534  |
| wavelet-LLH | firstorder | Uniformity                           | 0.03125      |
| wavelet-LLH | firstorder | Median                               | -103.6760228 |
| wavelet-LLH | firstorder | Energy                               | 18898776.09  |
| wavelet-LLH | firstorder | RobustMeanAbsoluteDeviation          | 151.6035909  |
| wavelet-LLH | firstorder | MeanAbsoluteDeviation                | 211.1920291  |
| wavelet-LLH | firstorder | TotalEnergy                          | 510266954.4  |
| wavelet-LLH | firstorder | Maximum                              | 557.2298343  |
| wavelet-LLH | firstorder | RootMeanSquared                      | 263.5920986  |
| wavelet-LLH | firstorder | 90Percentile                         | 338.5653026  |
| wavelet-LLH | firstorder | Minimum                              | -614.0128523 |
| wavelet-LLH | firstorder | Entropy                              | 5.185307541  |
| wavelet-LLH | firstorder | Range                                | 1171.242687  |
| wavelet-LLH | firstorder | Variance                             | 65722.55782  |
| wavelet-LLH | firstorder | 10Percentile                         | -355.8819987 |
| wavelet-LLH | firstorder | Kurtosis                             | 2.479027848  |
| wavelet-LLH | firstorder | Mean                                 | -61.3044584  |
| wavelet-LLH | glrlm      | ShortRunLowGrayLevelEmphasis         | 0.007576477  |
| wavelet-LLH | glrlm      | GrayLevelVariance                    | 106.5437752  |
| wavelet-LLH | glrlm      | LowGrayLevelRunEmphasis              | 0.007647925  |
| wavelet-LLH | glrlm      | GrayLevelNonUniformityNormalized     | 0.031023841  |
| wavelet-LLH | glrlm      | RunVariance                          | 0.02945417   |
| wavelet-LLH | glrlm      | GrayLevelNonUniformity               | 8.209106533  |
| wavelet-LLH | glrlm      | LongRunEmphasis                      | 1.086458541  |

|             |       |                                      |              |
|-------------|-------|--------------------------------------|--------------|
| wavelet-LLH | glrlm | ShortRunHighGrayLevelEmphasis        | 629.9883241  |
| wavelet-LLH | glrlm | RunLengthNonUniformity               | 250.8913691  |
| wavelet-LLH | glrlm | ShortRunEmphasis                     | 0.979684341  |
| wavelet-LLH | glrlm | LongRunHighGrayLevelEmphasis         | 684.1834268  |
| wavelet-LLH | glrlm | RunPercentage                        | 0.972850679  |
| wavelet-LLH | glrlm | LongRunLowGrayLevelEmphasis          | 0.00794589   |
| wavelet-LLH | glrlm | RunEntropy                           | 5.301745952  |
| wavelet-LLH | glrlm | HighGrayLevelRunEmphasis             | 640.3296573  |
| wavelet-LLH | glrlm | RunLengthNonUniformityNormalized     | 0.947896447  |
| wavelet-LLH | glszm | GrayLevelVariance                    | 118.0821272  |
| wavelet-LLH | glszm | ZoneVariance                         | 0.788421491  |
| wavelet-LLH | glszm | GrayLevelNonUniformityNormalized     | 0.029466889  |
| wavelet-LLH | glszm | SizeZoneNonUniformityNormalized      | 0.611516035  |
| wavelet-LLH | glszm | SizeZoneNonUniformity                | 119.8571429  |
| wavelet-LLH | glszm | GrayLevelNonUniformity               | 5.775510204  |
| wavelet-LLH | glszm | LargeAreaEmphasis                    | 2.714285714  |
| wavelet-LLH | glszm | SmallAreaHighGrayLevelEmphasis       | 566.5654044  |
| wavelet-LLH | glszm | ZonePercentage                       | 0.720588235  |
| wavelet-LLH | glszm | LargeAreaLowGrayLevelEmphasis        | 0.014699332  |
| wavelet-LLH | glszm | LargeAreaHighGrayLevelEmphasis       | 1539.112245  |
| wavelet-LLH | glszm | HighGrayLevelZoneEmphasis            | 677.7908163  |
| wavelet-LLH | glszm | SmallAreaEmphasis                    | 0.810150892  |
| wavelet-LLH | glszm | LowGrayLevelZoneEmphasis             | 0.00904901   |
| wavelet-LLH | glszm | ZoneEntropy                          | 5.9305241    |
| wavelet-LLH | glszm | SmallAreaLowGrayLevelEmphasis        | 0.008276883  |
| wavelet-LLH | ngtdm | Coarseness                           | 0.019150415  |
| wavelet-LLH | ngtdm | Complexity                           | 5262.241926  |
| wavelet-LLH | ngtdm | Strength                             | 12.22997479  |
| wavelet-LLH | ngtdm | Contrast                             | 0.814596703  |
| wavelet-LLH | ngtdm | Busyness                             | 0.07797525   |
| wavelet-LLL | gldm  | GrayLevelVariance                    | 460.9017625  |
| wavelet-LLL | gldm  | HighGrayLevelEmphasis                | 2916.25      |
| wavelet-LLL | gldm  | DependenceEntropy                    | 6.598145601  |
| wavelet-LLL | gldm  | DependenceNonUniformity              | 151.5        |
| wavelet-LLL | gldm  | GrayLevelNonUniformity               | 4.830882353  |
| wavelet-LLL | gldm  | SmallDependenceEmphasis              | 0.773284314  |
| wavelet-LLL | gldm  | SmallDependenceHighGrayLevelEmphasis | 1915.251328  |
| wavelet-LLL | gldm  | DependenceNonUniformityNormalized    | 0.556985294  |
| wavelet-LLL | gldm  | LargeDependenceEmphasis              | 2.433823529  |
| wavelet-LLL | gldm  | LargeDependenceLowGrayLevelEmphasis  | 0.006798474  |
| wavelet-LLL | gldm  | DependenceVariance                   | 0.50254109   |
| wavelet-LLL | gldm  | LargeDependenceHighGrayLevelEmphasis | 9566.860294  |
| wavelet-LLL | gldm  | SmallDependenceLowGrayLevelEmphasis  | 0.00637304   |
| wavelet-LLL | gldm  | LowGrayLevelEmphasis                 | 0.006436074  |
| wavelet-LLL | glcm  | JointAverage                         | 54.73908777  |
| wavelet-LLL | glcm  | SumAverage                           | 109.4781755  |
| wavelet-LLL | glcm  | JointEntropy                         | 8.366485198  |
| wavelet-LLL | glcm  | ClusterShade                         | -22071.01369 |
| wavelet-LLL | glcm  | MaximumProbability                   | 0.008455756  |
| wavelet-LLL | glcm  | ldmn                                 | 0.933755781  |
| wavelet-LLL | glcm  | JointEnergy                          | 0.003194936  |
| wavelet-LLL | glcm  | Contrast                             | 560.4180185  |
| wavelet-LLL | glcm  | DifferenceEntropy                    | 5.292627684  |
| wavelet-LLL | glcm  | InverseVariance                      | 0.064567848  |
| wavelet-LLL | glcm  | DifferenceVariance                   | 210.6001993  |
| wavelet-LLL | glcm  | ldn                                  | 0.834293459  |

|             |            |                                  |              |
|-------------|------------|----------------------------------|--------------|
| wavelet-LLL | glcm       | Idm                              | 0.062267025  |
| wavelet-LLL | glcm       | Correlation                      | 0.325317044  |
| wavelet-LLL | glcm       | Autocorrelation                  | 3132.741035  |
| wavelet-LLL | glcm       | SumEntropy                       | 6.292364785  |
| wavelet-LLL | glcm       | SumSquares                       | 416.0536818  |
| wavelet-LLL | glcm       | ClusterProminence                | 3239574.575  |
| wavelet-LLL | glcm       | Imc2                             | 0.999329822  |
| wavelet-LLL | glcm       | Imc1                             | -0.567560969 |
| wavelet-LLL | glcm       | DifferenceAverage                | 18.4338401   |
| wavelet-LLL | glcm       | Id                               | 0.125232402  |
| wavelet-LLL | glcm       | ClusterTendency                  | 1103.796709  |
| wavelet-LLL | firstorder | InterquartileRange               | 836.5020466  |
| wavelet-LLL | firstorder | Skewness                         | -0.404250607 |
| wavelet-LLL | firstorder | Uniformity                       | 0.017760597  |
| wavelet-LLL | firstorder | Median                           | -519.5006345 |
| wavelet-LLL | firstorder | Energy                           | 168067711.6  |
| wavelet-LLL | firstorder | RobustMeanAbsoluteDeviation      | 345.9459495  |
| wavelet-LLL | firstorder | MeanAbsoluteDeviation            | 453.8091362  |
| wavelet-LLL | firstorder | TotalEnergy                      | 4537828215   |
| wavelet-LLL | firstorder | Maximum                          | 273.2130756  |
| wavelet-LLL | firstorder | RootMeanSquared                  | 786.0636098  |
| wavelet-LLL | firstorder | 90Percentile                     | 56.28959894  |
| wavelet-LLL | firstorder | Minimum                          | -1793.390585 |
| wavelet-LLL | firstorder | Entropy                          | 5.997292236  |
| wavelet-LLL | firstorder | Range                            | 2066.60366   |
| wavelet-LLL | firstorder | Variance                         | 287874.2919  |
| wavelet-LLL | firstorder | 10Percentile                     | -1374.66724  |
| wavelet-LLL | firstorder | Kurtosis                         | 2.156553957  |
| wavelet-LLL | firstorder | Mean                             | -574.4751577 |
| wavelet-LLL | glrlm      | ShortRunLowGrayLevelEmphasis     | 0.006527504  |
| wavelet-LLL | glrlm      | GrayLevelVariance                | 461.2802107  |
| wavelet-LLL | glrlm      | LowGrayLevelRunEmphasis          | 0.006530383  |
| wavelet-LLL | glrlm      | GrayLevelNonUniformityNormalized | 0.0176114    |
| wavelet-LLL | glrlm      | RunVariance                      | 0.017302391  |
| wavelet-LLL | glrlm      | GrayLevelNonUniformity           | 4.718715444  |
| wavelet-LLL | glrlm      | LongRunEmphasis                  | 1.048150094  |
| wavelet-LLL | glrlm      | ShortRunHighGrayLevelEmphasis    | 2843.027991  |
| wavelet-LLL | glrlm      | RunLengthNonUniformity           | 260.5047106  |
| wavelet-LLL | glrlm      | ShortRunEmphasis                 | 0.989251406  |
| wavelet-LLL | glrlm      | LongRunHighGrayLevelEmphasis     | 3112.764253  |
| wavelet-LLL | glrlm      | RunPercentage                    | 0.985011312  |
| wavelet-LLL | glrlm      | LongRunLowGrayLevelEmphasis      | 0.006542851  |
| wavelet-LLL | glrlm      | RunEntropy                       | 6.052615825  |
| wavelet-LLL | glrlm      | HighGrayLevelRunEmphasis         | 2891.254551  |
| wavelet-LLL | glrlm      | RunLengthNonUniformityNormalized | 0.97221746   |
| wavelet-LLL | glszm      | GrayLevelVariance                | 457.5465825  |
| wavelet-LLL | glszm      | ZoneVariance                     | 0.539162259  |
| wavelet-LLL | glszm      | GrayLevelNonUniformityNormalized | 0.016630135  |
| wavelet-LLL | glszm      | SizeZoneNonUniformityNormalized  | 0.765328078  |
| wavelet-LLL | glszm      | SizeZoneNonUniformity            | 170.6681614  |
| wavelet-LLL | glszm      | GrayLevelNonUniformity           | 3.708520179  |
| wavelet-LLL | glszm      | LargeAreaEmphasis                | 2.02690583   |
| wavelet-LLL | glszm      | SmallAreaHighGrayLevelEmphasis   | 2126.868047  |
| wavelet-LLL | glszm      | ZonePercentage                   | 0.819852941  |
| wavelet-LLL | glszm      | LargeAreaLowGrayLevelEmphasis    | 0.008044794  |
| wavelet-LLL | glszm      | LargeAreaHighGrayLevelEmphasis   | 7373.363229  |

|             |            |                                      |              |
|-------------|------------|--------------------------------------|--------------|
| wavelet-LLL | glszm      | HighGrayLevelZoneEmphasis            | 2571.484305  |
| wavelet-LLL | glszm      | SmallAreaEmphasis                    | 0.895325697  |
| wavelet-LLL | glszm      | LowGrayLevelZoneEmphasis             | 0.007791198  |
| wavelet-LLL | glszm      | ZoneEntropy                          | 6.374555777  |
| wavelet-LLL | glszm      | SmallAreaLowGrayLevelEmphasis        | 0.007759974  |
| wavelet-LLL | ngtdm      | Coarseness                           | 0.017472692  |
| wavelet-LLL | ngtdm      | Complexity                           | 30200.73526  |
| wavelet-LLL | ngtdm      | Strength                             | 44.8114139   |
| wavelet-LLL | ngtdm      | Contrast                             | 2.061729748  |
| wavelet-LLL | ngtdm      | Busyness                             | 0.015946876  |
| wavelet-HHL | gldm       | GrayLevelVariance                    | 20.11851211  |
| wavelet-HHL | gldm       | HighGrayLevelEmphasis                | 226.9705882  |
| wavelet-HHL | gldm       | DependenceEntropy                    | 5.771088083  |
| wavelet-HHL | gldm       | DependenceNonUniformity              | 69.51470588  |
| wavelet-HHL | gldm       | GrayLevelNonUniformity               | 17.88235294  |
| wavelet-HHL | gldm       | SmallDependenceEmphasis              | 0.467893178  |
| wavelet-HHL | gldm       | SmallDependenceHighGrayLevelEmphasis | 106.8590502  |
| wavelet-HHL | gldm       | DependenceNonUniformityNormalized    | 0.255568772  |
| wavelet-HHL | gldm       | LargeDependenceEmphasis              | 6.830882353  |
| wavelet-HHL | gldm       | LargeDependenceLowGrayLevelEmphasis  | 0.042122034  |
| wavelet-HHL | gldm       | DependenceVariance                   | 1.668631055  |
| wavelet-HHL | gldm       | LargeDependenceHighGrayLevelEmphasis | 1507.242647  |
| wavelet-HHL | gldm       | SmallDependenceLowGrayLevelEmphasis  | 0.008902901  |
| wavelet-HHL | gldm       | LowGrayLevelEmphasis                 | 0.011812256  |
| wavelet-HHL | glcm       | JointAverage                         | 14.44624431  |
| wavelet-HHL | glcm       | SumAverage                           | 28.89248863  |
| wavelet-HHL | glcm       | JointEntropy                         | 7.369517388  |
| wavelet-HHL | glcm       | ClusterShade                         | -69.23216485 |
| wavelet-HHL | glcm       | MaximumProbability                   | 0.020632752  |
| wavelet-HHL | glcm       | Idmn                                 | 0.944449138  |
| wavelet-HHL | glcm       | JointEnergy                          | 0.007328077  |
| wavelet-HHL | glcm       | Contrast                             | 38.22849296  |
| wavelet-HHL | glcm       | DifferenceEntropy                    | 3.643666285  |
| wavelet-HHL | glcm       | InverseVariance                      | 0.202451078  |
| wavelet-HHL | glcm       | DifferenceVariance                   | 14.50057147  |
| wavelet-HHL | glcm       | Idn                                  | 0.846471498  |
| wavelet-HHL | glcm       | Idm                                  | 0.194429824  |
| wavelet-HHL | glcm       | Correlation                          | 0.003276937  |
| wavelet-HHL | glcm       | Autocorrelation                      | 208.7781604  |
| wavelet-HHL | glcm       | SumEntropy                           | 4.500045867  |
| wavelet-HHL | glcm       | SumSquares                           | 19.18307411  |
| wavelet-HHL | glcm       | ClusterProminence                    | 4780.990911  |
| wavelet-HHL | glcm       | Imc2                                 | 0.900290268  |
| wavelet-HHL | glcm       | Imc1                                 | -0.204735612 |
| wavelet-HHL | glcm       | DifferenceAverage                    | 4.818741338  |
| wavelet-HHL | glcm       | Id                                   | 0.286537036  |
| wavelet-HHL | glcm       | ClusterTendency                      | 38.50380346  |
| wavelet-HHL | firstorder | InterquartileRange                   | 145.358725   |
| wavelet-HHL | firstorder | Skewness                             | -0.383526023 |
| wavelet-HHL | firstorder | Uniformity                           | 0.065743945  |
| wavelet-HHL | firstorder | Median                               | 8.464548757  |
| wavelet-HHL | firstorder | Energy                               | 3371325.609  |
| wavelet-HHL | firstorder | RobustMeanAbsoluteDeviation          | 62.59622551  |
| wavelet-HHL | firstorder | MeanAbsoluteDeviation                | 89.6659568   |
| wavelet-HHL | firstorder | TotalEnergy                          | 91025791.43  |
| wavelet-HHL | firstorder | Maximum                              | 243.6800583  |

|             |            |                                      |              |
|-------------|------------|--------------------------------------|--------------|
| wavelet-HHL | firstorder | RootMeanSquared                      | 111.3309456  |
| wavelet-HHL | firstorder | 90Percentile                         | 126.489022   |
| wavelet-HHL | firstorder | Minimum                              | -327.1105443 |
| wavelet-HHL | firstorder | Entropy                              | 4.126572405  |
| wavelet-HHL | firstorder | Range                                | 570.7906026  |
| wavelet-HHL | firstorder | Variance                             | 12385.6356   |
| wavelet-HHL | firstorder | 10Percentile                         | -162.3354586 |
| wavelet-HHL | firstorder | Kurtosis                             | 2.788317366  |
| wavelet-HHL | firstorder | Mean                                 | -2.990625854 |
| wavelet-HHL | grlm       | ShortRunLowGrayLevelEmphasis         | 0.011958251  |
| wavelet-HHL | grlm       | GrayLevelVariance                    | 20.77458923  |
| wavelet-HHL | grlm       | LowGrayLevelRunEmphasis              | 0.012154287  |
| wavelet-HHL | grlm       | GrayLevelNonUniformityNormalized     | 0.064678226  |
| wavelet-HHL | grlm       | RunVariance                          | 0.057844445  |
| wavelet-HHL | grlm       | GrayLevelNonUniformity               | 16.73590609  |
| wavelet-HHL | grlm       | LongRunEmphasis                      | 1.1655995    |
| wavelet-HHL | grlm       | ShortRunHighGrayLevelEmphasis        | 219.0727682  |
| wavelet-HHL | grlm       | RunLengthNonUniformity               | 235.2855732  |
| wavelet-HHL | grlm       | ShortRunEmphasis                     | 0.963202927  |
| wavelet-HHL | grlm       | LongRunHighGrayLevelEmphasis         | 264.3971885  |
| wavelet-HHL | grlm       | RunPercentage                        | 0.951074661  |
| wavelet-HHL | grlm       | LongRunLowGrayLevelEmphasis          | 0.013013779  |
| wavelet-HHL | grlm       | RunEntropy                           | 4.365939185  |
| wavelet-HHL | grlm       | HighGrayLevelRunEmphasis             | 227.1831281  |
| wavelet-HHL | grlm       | RunLengthNonUniformityNormalized     | 0.908461613  |
| wavelet-HHL | glszm      | GrayLevelVariance                    | 30.57429082  |
| wavelet-HHL | glszm      | ZoneVariance                         | 6.75342194   |
| wavelet-HHL | glszm      | GrayLevelNonUniformityNormalized     | 0.056536402  |
| wavelet-HHL | glszm      | SizeZoneNonUniformityNormalized      | 0.537095814  |
| wavelet-HHL | glszm      | SizeZoneNonUniformity                | 76.26760563  |
| wavelet-HHL | glszm      | GrayLevelNonUniformity               | 8.028169014  |
| wavelet-HHL | glszm      | LargeAreaEmphasis                    | 10.42253521  |
| wavelet-HHL | glszm      | SmallAreaHighGrayLevelEmphasis       | 173.0729102  |
| wavelet-HHL | glszm      | ZonePercentage                       | 0.522058824  |
| wavelet-HHL | glszm      | LargeAreaLowGrayLevelEmphasis        | 0.065542805  |
| wavelet-HHL | glszm      | LargeAreaHighGrayLevelEmphasis       | 2289.084507  |
| wavelet-HHL | glszm      | HighGrayLevelZoneEmphasis            | 228.1549296  |
| wavelet-HHL | glszm      | SmallAreaEmphasis                    | 0.759249859  |
| wavelet-HHL | glszm      | LowGrayLevelZoneEmphasis             | 0.017753613  |
| wavelet-HHL | glszm      | ZoneEntropy                          | 5.292867104  |
| wavelet-HHL | glszm      | SmallAreaLowGrayLevelEmphasis        | 0.016294295  |
| wavelet-HHL | ngtdm      | Coarseness                           | 0.020093105  |
| wavelet-HHL | ngtdm      | Complexity                           | 716.121556   |
| wavelet-HHL | ngtdm      | Strength                             | 3.086337462  |
| wavelet-HHL | ngtdm      | Contrast                             | 0.292593309  |
| wavelet-HHL | ngtdm      | Busyness                             | 0.158482979  |
| wavelet-HLH | gldm       | GrayLevelVariance                    | 28.4111024   |
| wavelet-HLH | gldm       | HighGrayLevelEmphasis                | 214.7536765  |
| wavelet-HLH | gldm       | DependenceEntropy                    | 5.745872803  |
| wavelet-HLH | gldm       | DependenceNonUniformity              | 88.36029412  |
| wavelet-HLH | gldm       | GrayLevelNonUniformity               | 14.91176471  |
| wavelet-HLH | gldm       | SmallDependenceEmphasis              | 0.527793096  |
| wavelet-HLH | gldm       | SmallDependenceHighGrayLevelEmphasis | 112.5063766  |
| wavelet-HLH | gldm       | DependenceNonUniformityNormalized    | 0.324854022  |
| wavelet-HLH | gldm       | LargeDependenceEmphasis              | 4.852941176  |
| wavelet-HLH | gldm       | LargeDependenceLowGrayLevelEmphasis  | 0.051913415  |

|             |            |                                      |              |
|-------------|------------|--------------------------------------|--------------|
| wavelet-HLH | gldm       | DependenceVariance                   | 1.113267734  |
| wavelet-HLH | gldm       | LargeDependenceHighGrayLevelEmphasis | 1080.040441  |
| wavelet-HLH | gldm       | SmallDependenceLowGrayLevelEmphasis  | 0.018468581  |
| wavelet-HLH | gldm       | LowGrayLevelEmphasis                 | 0.022919936  |
| wavelet-HLH | glcm       | JointAverage                         | 13.72123688  |
| wavelet-HLH | glcm       | SumAverage                           | 27.44247376  |
| wavelet-HLH | glcm       | JointEntropy                         | 7.645099663  |
| wavelet-HLH | glcm       | ClusterShade                         | -17.45326744 |
| wavelet-HLH | glcm       | MaximumProbability                   | 0.015503567  |
| wavelet-HLH | glcm       | ldmn                                 | 0.949869567  |
| wavelet-HLH | glcm       | JointEnergy                          | 0.005894317  |
| wavelet-HLH | glcm       | Contrast                             | 56.24759455  |
| wavelet-HLH | glcm       | DifferenceEntropy                    | 3.867896512  |
| wavelet-HLH | glcm       | InverseVariance                      | 0.153439997  |
| wavelet-HLH | glcm       | DifferenceVariance                   | 19.68131255  |
| wavelet-HLH | glcm       | ldn                                  | 0.850635316  |
| wavelet-HLH | glcm       | ldm                                  | 0.148839175  |
| wavelet-HLH | glcm       | Correlation                          | -0.000199096 |
| wavelet-HLH | glcm       | Autocorrelation                      | 188.3195826  |
| wavelet-HLH | glcm       | SumEntropy                           | 4.751159883  |
| wavelet-HLH | glcm       | SumSquares                           | 28.10389979  |
| wavelet-HLH | glcm       | ClusterProminence                    | 10164.67242  |
| wavelet-HLH | glcm       | lmc2                                 | 0.936919459  |
| wavelet-HLH | glcm       | lmc1                                 | -0.242874274 |
| wavelet-HLH | glcm       | DifferenceAverage                    | 5.951543047  |
| wavelet-HLH | glcm       | ld                                   | 0.242898625  |
| wavelet-HLH | glcm       | ClusterTendency                      | 56.16800461  |
| wavelet-HLH | firstorder | InterquartileRange                   | 186.5268718  |
| wavelet-HLH | firstorder | Skewness                             | 0.051466676  |
| wavelet-HLH | firstorder | Uniformity                           | 0.054822664  |
| wavelet-HLH | firstorder | Median                               | 3.457732421  |
| wavelet-HLH | firstorder | Energy                               | 4806932.944  |
| wavelet-HLH | firstorder | RobustMeanAbsoluteDeviation          | 73.86123486  |
| wavelet-HLH | firstorder | MeanAbsoluteDeviation                | 106.0905669  |
| wavelet-HLH | firstorder | TotalEnergy                          | 129787189.5  |
| wavelet-HLH | firstorder | Maximum                              | 431.3731797  |
| wavelet-HLH | firstorder | RootMeanSquared                      | 132.9381344  |
| wavelet-HLH | firstorder | 90Percentile                         | 173.3308662  |
| wavelet-HLH | firstorder | Minimum                              | -322.2567923 |
| wavelet-HLH | firstorder | Entropy                              | 4.377100653  |
| wavelet-HLH | firstorder | Range                                | 753.629972   |
| wavelet-HLH | firstorder | Variance                             | 17653.66685  |
| wavelet-HLH | firstorder | 10Percentile                         | -166.4076788 |
| wavelet-HLH | firstorder | Kurtosis                             | 3.033509684  |
| wavelet-HLH | firstorder | Mean                                 | 4.345196432  |
| wavelet-HLH | glrlm      | ShortRunLowGrayLevelEmphasis         | 0.023234133  |
| wavelet-HLH | glrlm      | GrayLevelVariance                    | 28.90600145  |
| wavelet-HLH | glrlm      | LowGrayLevelRunEmphasis              | 0.023465975  |
| wavelet-HLH | glrlm      | GrayLevelNonUniformityNormalized     | 0.0542008    |
| wavelet-HLH | glrlm      | RunVariance                          | 0.03821902   |
| wavelet-HLH | glrlm      | GrayLevelNonUniformity               | 14.21232352  |
| wavelet-HLH | glrlm      | LongRunEmphasis                      | 1.114784669  |
| wavelet-HLH | glrlm      | ShortRunHighGrayLevelEmphasis        | 208.5295434  |
| wavelet-HLH | glrlm      | RunLengthNonUniformity               | 244.0620326  |
| wavelet-HLH | glrlm      | ShortRunEmphasis                     | 0.972626684  |
| wavelet-HLH | glrlm      | LongRunHighGrayLevelEmphasis         | 240.024476   |

|             |       |                                  |             |
|-------------|-------|----------------------------------|-------------|
| wavelet-HLH | glrlm | RunPercentage                    | 0.96408371  |
| wavelet-HLH | glrlm | LongRunLowGrayLevelEmphasis      | 0.024412969 |
| wavelet-HLH | glrlm | RunEntropy                       | 4.559302672 |
| wavelet-HLH | glrlm | HighGrayLevelRunEmphasis         | 214.5270161 |
| wavelet-HLH | glrlm | RunLengthNonUniformityNormalized | 0.930356548 |
| wavelet-HLH | glszm | GrayLevelVariance                | 36.3537205  |
| wavelet-HLH | glszm | ZoneVariance                     | 2.503744966 |
| wavelet-HLH | glszm | GrayLevelNonUniformityNormalized | 0.050622906 |
| wavelet-HLH | glszm | SizeZoneNonUniformityNormalized  | 0.524784523 |
| wavelet-HLH | glszm | SizeZoneNonUniformity            | 85.5398773  |
| wavelet-HLH | glszm | GrayLevelNonUniformity           | 8.251533742 |
| wavelet-HLH | glszm | LargeAreaEmphasis                | 5.288343558 |
| wavelet-HLH | glszm | SmallAreaHighGrayLevelEmphasis   | 160.1509236 |
| wavelet-HLH | glszm | ZonePercentage                   | 0.599264706 |
| wavelet-HLH | glszm | LargeAreaLowGrayLevelEmphasis    | 0.061655228 |
| wavelet-HLH | glszm | LargeAreaHighGrayLevelEmphasis   | 1218.116564 |
| wavelet-HLH | glszm | HighGrayLevelZoneEmphasis        | 212.2822086 |
| wavelet-HLH | glszm | SmallAreaEmphasis                | 0.752205558 |
| wavelet-HLH | glszm | LowGrayLevelZoneEmphasis         | 0.032305256 |
| wavelet-HLH | glszm | ZoneEntropy                      | 5.424906163 |
| wavelet-HLH | glszm | SmallAreaLowGrayLevelEmphasis    | 0.029523303 |
| wavelet-HLH | ngtdm | Coarseness                       | 0.020012055 |
| wavelet-HLH | ngtdm | Complexity                       | 1334.368325 |
| wavelet-HLH | ngtdm | Strength                         | 4.704925028 |
| wavelet-HLH | ngtdm | Contrast                         | 0.332058547 |
| wavelet-HLH | ngtdm | Busyness                         | 0.139663859 |

| Image type | Feature Class | Feature Name                         |                                                                                                                                                                                                                                                                                                                                                                                                                                              |
|------------|---------------|--------------------------------------|----------------------------------------------------------------------------------------------------------------------------------------------------------------------------------------------------------------------------------------------------------------------------------------------------------------------------------------------------------------------------------------------------------------------------------------------|
| general    | info          | BoundingBox                          | 2: RTSTRUCT: C99-DNU_segment_ITV<br>(1, 1, 0, 22, 11, 10)                                                                                                                                                                                                                                                                                                                                                                                    |
| general    | info          | EnabledImageTypes                    | {u'Original': {}, u'Wavelet': {}}                                                                                                                                                                                                                                                                                                                                                                                                            |
|            |               |                                      | {'distances': [1], 'additionalInfo': True,<br>'force2D': False, 'interpolator': 'sitkBSpline',<br>'resampledPixelSpacing': [3.0], 'label': 1,<br>'normalizeScale': 1, 'normalize': False,<br>'force2Ddimension': 0, 'removeOutliers':<br>None, 'minimumROISize': None, u'binWidth':<br>25.0, 'minimumROIDimensions': 1,<br>u'correctMask': True, 'preCrop': False,<br>u'symmetricalGLCM': True,<br>'resegmentRange': None, 'padDistance': 5} |
| general    | info          | GeneralSettings                      | 5f39f0ddb6f2e48c5164972188a19b5346a464<br>e6                                                                                                                                                                                                                                                                                                                                                                                                 |
| general    | info          | ImageHash                            | (0.9765624999999998, 0.9765624999999998,<br>1.9999999999999996)                                                                                                                                                                                                                                                                                                                                                                              |
| general    | info          | ImageSpacing                         | 10118e1ddaa5a36415faf6408eb295a84a2f64<br>95                                                                                                                                                                                                                                                                                                                                                                                                 |
| general    | info          | MaskHash                             | 95                                                                                                                                                                                                                                                                                                                                                                                                                                           |
| general    | info          | NumpyVersion                         | 1.13.1                                                                                                                                                                                                                                                                                                                                                                                                                                       |
| general    | info          | PyWaveletVersion                     | 0.5.2                                                                                                                                                                                                                                                                                                                                                                                                                                        |
| general    | info          | SimpleITKVersion                     | 1.1.0                                                                                                                                                                                                                                                                                                                                                                                                                                        |
| general    | info          | Version                              | 1.3.0.post102+g1b0eb74                                                                                                                                                                                                                                                                                                                                                                                                                       |
| general    | info          | VolumeNum                            | 1                                                                                                                                                                                                                                                                                                                                                                                                                                            |
| general    | info          | VoxelNum                             | 917                                                                                                                                                                                                                                                                                                                                                                                                                                          |
| original   | shape         | Maximum3DDiameter                    | 65.03845017                                                                                                                                                                                                                                                                                                                                                                                                                                  |
| original   | shape         | Maximum2DDiameterSlice               | 64.13267498                                                                                                                                                                                                                                                                                                                                                                                                                                  |
| original   | shape         | Sphericity                           | 0.673864048                                                                                                                                                                                                                                                                                                                                                                                                                                  |
| original   | shape         | MinorAxis                            | 30.6498512                                                                                                                                                                                                                                                                                                                                                                                                                                   |
| original   | shape         | Elongation                           | 0.541222694                                                                                                                                                                                                                                                                                                                                                                                                                                  |
| original   | shape         | SurfaceVolumeRatio                   | 0.246226129                                                                                                                                                                                                                                                                                                                                                                                                                                  |
| original   | shape         | Volume                               | 24759                                                                                                                                                                                                                                                                                                                                                                                                                                        |
| original   | shape         | MajorAxis                            | 56.63075767                                                                                                                                                                                                                                                                                                                                                                                                                                  |
| original   | shape         | SurfaceArea                          | 6096.312734                                                                                                                                                                                                                                                                                                                                                                                                                                  |
| original   | shape         | Flatness                             | 0.417036379                                                                                                                                                                                                                                                                                                                                                                                                                                  |
| original   | shape         | LeastAxis                            | 23.61708612                                                                                                                                                                                                                                                                                                                                                                                                                                  |
| original   | shape         | Maximum2DDiameterColumn              | 63.07138812                                                                                                                                                                                                                                                                                                                                                                                                                                  |
| original   | shape         | Maximum2DDiameterRow                 | 34.98571137                                                                                                                                                                                                                                                                                                                                                                                                                                  |
| original   | gldm          | GrayLevelVariance                    | 162.173973                                                                                                                                                                                                                                                                                                                                                                                                                                   |
| original   | gldm          | HighGrayLevelEmphasis                | 1015.55289                                                                                                                                                                                                                                                                                                                                                                                                                                   |
| original   | gldm          | DependenceEntropy                    | 6.834116189                                                                                                                                                                                                                                                                                                                                                                                                                                  |
| original   | gldm          | DependenceNonUniformity              | 248.5027263                                                                                                                                                                                                                                                                                                                                                                                                                                  |
| original   | gldm          | GrayLevelNonUniformity               | 37.56052345                                                                                                                                                                                                                                                                                                                                                                                                                                  |
| original   | gldm          | SmallDependenceEmphasis              | 0.524911936                                                                                                                                                                                                                                                                                                                                                                                                                                  |
| original   | gldm          | SmallDependenceHighGrayLevelEmphasis | 388.1276012                                                                                                                                                                                                                                                                                                                                                                                                                                  |
| original   | gldm          | DependenceNonUniformityNormalized    | 0.270995339                                                                                                                                                                                                                                                                                                                                                                                                                                  |
| original   | gldm          | LargeDependenceEmphasis              | 16.53980371                                                                                                                                                                                                                                                                                                                                                                                                                                  |
| original   | gldm          | LargeDependenceLowGrayLevelEmphasis  | 0.027189976                                                                                                                                                                                                                                                                                                                                                                                                                                  |
| original   | gldm          | DependenceVariance                   | 8.395222199                                                                                                                                                                                                                                                                                                                                                                                                                                  |
| original   | gldm          | LargeDependenceHighGrayLevelEmphasis | 27605.19738                                                                                                                                                                                                                                                                                                                                                                                                                                  |



|          |            |                                     |              |
|----------|------------|-------------------------------------|--------------|
| original | gldm       | SmallDependenceLowGrayLevelEmphasis | 0.005028476  |
| original | gldm       | LowGrayLevelEmphasis                | 0.007148151  |
| original | glcm       | JointAverage                        | 31.01346942  |
| original | glcm       | SumAverage                          | 62.02693883  |
| original | glcm       | JointEntropy                        | 8.671422661  |
| original | glcm       | ClusterShade                        | -6421.348887 |
| original | glcm       | MaximumProbability                  | 0.035861375  |
| original | glcm       | ldmn                                | 0.945664133  |
| original | glcm       | JointEnergy                         | 0.006539755  |
| original | glcm       | Contrast                            | 153.8521539  |
| original | glcm       | DifferenceEntropy                   | 4.521645343  |
| original | glcm       | InverseVariance                     | 0.196507869  |
| original | glcm       | DifferenceVariance                  | 76.50609644  |
| original | glcm       | ldn                                 | 0.863973662  |
| original | glcm       | ldm                                 | 0.20553732   |
| original | glcm       | Correlation                         | 0.49638316   |
| original | glcm       | Autocorrelation                     | 1038.239377  |
| original | glcm       | SumEntropy                          | 5.860909122  |
| original | glcm       | SumSquares                          | 153.0444978  |
| original | glcm       | ClusterProminence                   | 486818.1129  |
| original | glcm       | lmc2                                | 0.946757823  |
| original | glcm       | lmc1                                | -0.231902541 |
| original | glcm       | DifferenceAverage                   | 8.745311404  |
| original | glcm       | ld                                  | 0.272986124  |
| original | glcm       | ClusterTendency                     | 458.3258373  |
| original | firstorder | InterquartileRange                  | 569          |
| original | firstorder | Skewness                            | -0.525551036 |
| original | firstorder | Uniformity                          | 0.040960222  |
| original | firstorder | Median                              | -233         |
| original | firstorder | Energy                              | 179806490    |
| original | firstorder | RobustMeanAbsoluteDeviation         | 230.7474562  |
| original | firstorder | MeanAbsoluteDeviation               | 280.0477923  |
| original | firstorder | TotalEnergy                         | 4854775230   |
| original | firstorder | Maximum                             | 165          |
| original | firstorder | RootMeanSquared                     | 442.8106054  |
| original | firstorder | 90Percentile                        | 28.4         |
| original | firstorder | Minimum                             | -1012        |
| original | firstorder | Entropy                             | 5.090114879  |
| original | firstorder | Range                               | 1177         |
| original | firstorder | Variance                            | 101313.9404  |
| original | firstorder | 10Percentile                        | -790.8       |
| original | firstorder | Kurtosis                            | 1.901457997  |
| original | firstorder | Mean                                | -307.8429662 |
| original | gllm       | ShortRunLowGrayLevelEmphasis        | 0.007403123  |
| original | gllm       | GrayLevelVariance                   | 160.6129879  |
| original | gllm       | LowGrayLevelRunEmphasis             | 0.007526045  |
| original | gllm       | GrayLevelNonUniformityNormalized    | 0.035247321  |
| original | gllm       | RunVariance                         | 0.103539068  |
| original | gllm       | GrayLevelNonUniformity              | 30.02485674  |
| original | gllm       | LongRunEmphasis                     | 1.263689177  |
| original | gllm       | ShortRunHighGrayLevelEmphasis       | 894.5557668  |
| original | gllm       | RunLengthNonUniformity              | 749.3034296  |
| original | gllm       | ShortRunEmphasis                    | 0.950561778  |

|             |       |                                      |              |
|-------------|-------|--------------------------------------|--------------|
| original    | glrlm | LongRunHighGrayLevelEmphasis         | 1396.400909  |
| original    | glrlm | RunPercentage                        | 0.928697257  |
| original    | glrlm | LongRunLowGrayLevelEmphasis          | 0.008067538  |
| original    | glrlm | RunEntropy                           | 5.464847345  |
| original    | glrlm | HighGrayLevelRunEmphasis             | 971.5148666  |
| original    | glrlm | RunLengthNonUniformityNormalized     | 0.879587127  |
| original    | glszm | GrayLevelVariance                    | 132.5725581  |
| original    | glszm | ZoneVariance                         | 31.64589222  |
| original    | glszm | GrayLevelNonUniformityNormalized     | 0.025121611  |
| original    | glszm | SizeZoneNonUniformityNormalized      | 0.635335165  |
| original    | glszm | SizeZoneNonUniformity                | 334.8216319  |
| original    | glszm | GrayLevelNonUniformity               | 13.23908918  |
| original    | glszm | LargeAreaEmphasis                    | 34.67362429  |
| original    | glszm | SmallAreaHighGrayLevelEmphasis       | 576.2663986  |
| original    | glszm | ZonePercentage                       | 0.574700109  |
| original    | glszm | LargeAreaLowGrayLevelEmphasis        | 0.037257118  |
| original    | glszm | LargeAreaHighGrayLevelEmphasis       | 60064.83112  |
| original    | glszm | HighGrayLevelZoneEmphasis            | 733.0550285  |
| original    | glszm | SmallAreaEmphasis                    | 0.824001658  |
| original    | glszm | LowGrayLevelZoneEmphasis             | 0.009673247  |
| original    | glszm | ZoneEntropy                          | 6.231194063  |
| original    | glszm | SmallAreaLowGrayLevelEmphasis        | 0.008191858  |
| original    | ngtdm | Coarseness                           | 0.005018136  |
| original    | ngtdm | Complexity                           | 5899.153032  |
| original    | ngtdm | Strength                             | 5.882041834  |
| original    | ngtdm | Contrast                             | 0.978140629  |
| original    | ngtdm | Busyness                             | 0.121567379  |
| wavelet-HHH | gldm  | GrayLevelVariance                    | 21.80452117  |
| wavelet-HHH | gldm  | HighGrayLevelEmphasis                | 483.046892   |
| wavelet-HHH | gldm  | DependenceEntropy                    | 6.277870413  |
| wavelet-HHH | gldm  | DependenceNonUniformity              | 191.1504907  |
| wavelet-HHH | gldm  | GrayLevelNonUniformity               | 65.89640131  |
| wavelet-HHH | gldm  | SmallDependenceEmphasis              | 0.409418175  |
| wavelet-HHH | gldm  | SmallDependenceHighGrayLevelEmphasis | 203.2454144  |
| wavelet-HHH | gldm  | DependenceNonUniformityNormalized    | 0.208452007  |
| wavelet-HHH | gldm  | LargeDependenceEmphasis              | 11.34460196  |
| wavelet-HHH | gldm  | LargeDependenceLowGrayLevelEmphasis  | 0.026681199  |
| wavelet-HHH | gldm  | DependenceVariance                   | 3.714475989  |
| wavelet-HHH | gldm  | LargeDependenceHighGrayLevelEmphasis | 5315.304253  |
| wavelet-HHH | gldm  | SmallDependenceLowGrayLevelEmphasis  | 0.002343189  |
| wavelet-HHH | gldm  | LowGrayLevelEmphasis                 | 0.00370288   |
| wavelet-HHH | glcm  | JointAverage                         | 21.50261179  |
| wavelet-HHH | glcm  | SumAverage                           | 43.00522358  |
| wavelet-HHH | glcm  | JointEntropy                         | 7.708533332  |
| wavelet-HHH | glcm  | ClusterShade                         | -3.522978517 |
| wavelet-HHH | glcm  | MaximumProbability                   | 0.02550878   |
| wavelet-HHH | glcm  | Idmn                                 | 0.97916087   |
| wavelet-HHH | glcm  | JointEnergy                          | 0.007592293  |
| wavelet-HHH | glcm  | Contrast                             | 40.60973763  |
| wavelet-HHH | glcm  | DifferenceEntropy                    | 3.701348684  |
| wavelet-HHH | glcm  | InverseVariance                      | 0.221989616  |
| wavelet-HHH | glcm  | DifferenceVariance                   | 18.67981267  |
| wavelet-HHH | glcm  | Idn                                  | 0.907535814  |

|             |            |                                  |              |
|-------------|------------|----------------------------------|--------------|
| wavelet-HHH | glcm       | Idm                              | 0.223007783  |
| wavelet-HHH | glcm       | Correlation                      | -0.03848965  |
| wavelet-HHH | glcm       | Autocorrelation                  | 461.5467236  |
| wavelet-HHH | glcm       | SumEntropy                       | 4.52618394   |
| wavelet-HHH | glcm       | SumSquares                       | 19.48721194  |
| wavelet-HHH | glcm       | ClusterProminence                | 6901.284377  |
| wavelet-HHH | glcm       | Imc2                             | 0.760925389  |
| wavelet-HHH | glcm       | Imc1                             | -0.106820147 |
| wavelet-HHH | glcm       | DifferenceAverage                | 4.63784714   |
| wavelet-HHH | glcm       | Id                               | 0.311822912  |
| wavelet-HHH | glcm       | ClusterTendency                  | 37.33911014  |
| wavelet-HHH | firstorder | InterquartileRange               | 127.3414916  |
| wavelet-HHH | firstorder | Skewness                         | 0.00413267   |
| wavelet-HHH | firstorder | Uniformity                       | 0.071860852  |
| wavelet-HHH | firstorder | Median                           | -1.141010919 |
| wavelet-HHH | firstorder | Energy                           | 12406369.2   |
| wavelet-HHH | firstorder | RobustMeanAbsoluteDeviation      | 52.27219341  |
| wavelet-HHH | firstorder | MeanAbsoluteDeviation            | 84.98230599  |
| wavelet-HHH | firstorder | TotalEnergy                      | 334971968.4  |
| wavelet-HHH | firstorder | Maximum                          | 521.7396989  |
| wavelet-HHH | firstorder | RootMeanSquared                  | 116.3155243  |
| wavelet-HHH | firstorder | 90Percentile                     | 134.9514148  |
| wavelet-HHH | firstorder | Minimum                          | -508.8195833 |
| wavelet-HHH | firstorder | Entropy                          | 4.168586022  |
| wavelet-HHH | firstorder | Range                            | 1030.559282  |
| wavelet-HHH | firstorder | Variance                         | 13528.49128  |
| wavelet-HHH | firstorder | 10Percentile                     | -131.384253  |
| wavelet-HHH | firstorder | Kurtosis                         | 4.584957565  |
| wavelet-HHH | firstorder | Mean                             | -0.89995815  |
| wavelet-HHH | glrlm      | ShortRunLowGrayLevelEmphasis     | 0.003695605  |
| wavelet-HHH | glrlm      | GrayLevelVariance                | 22.97044848  |
| wavelet-HHH | glrlm      | LowGrayLevelRunEmphasis          | 0.003808731  |
| wavelet-HHH | glrlm      | GrayLevelNonUniformityNormalized | 0.068561961  |
| wavelet-HHH | glrlm      | RunVariance                      | 0.084569877  |
| wavelet-HHH | glrlm      | GrayLevelNonUniformity           | 58.6132803   |
| wavelet-HHH | glrlm      | LongRunEmphasis                  | 1.235613416  |
| wavelet-HHH | glrlm      | ShortRunHighGrayLevelEmphasis    | 460.4671476  |
| wavelet-HHH | glrlm      | RunLengthNonUniformity           | 749.4595613  |
| wavelet-HHH | glrlm      | ShortRunEmphasis                 | 0.949820039  |
| wavelet-HHH | glrlm      | LongRunHighGrayLevelEmphasis     | 594.5396556  |
| wavelet-HHH | glrlm      | RunPercentage                    | 0.932220451  |
| wavelet-HHH | glrlm      | LongRunLowGrayLevelEmphasis      | 0.004337778  |
| wavelet-HHH | glrlm      | RunEntropy                       | 4.546341375  |
| wavelet-HHH | glrlm      | HighGrayLevelRunEmphasis         | 484.0394242  |
| wavelet-HHH | glrlm      | RunLengthNonUniformityNormalized | 0.876570083  |
| wavelet-HHH | glszm      | GrayLevelVariance                | 38.70510397  |
| wavelet-HHH | glszm      | ZoneVariance                     | 33.78711872  |
| wavelet-HHH | glszm      | GrayLevelNonUniformityNormalized | 0.048542556  |
| wavelet-HHH | glszm      | SizeZoneNonUniformityNormalized  | 0.522590959  |
| wavelet-HHH | glszm      | SizeZoneNonUniformity            | 216.352657   |
| wavelet-HHH | glszm      | GrayLevelNonUniformity           | 20.09661836  |
| wavelet-HHH | glszm      | LargeAreaEmphasis                | 38.69323671  |
| wavelet-HHH | glszm      | SmallAreaHighGrayLevelEmphasis   | 375.1576078  |

|             |            |                                      |              |
|-------------|------------|--------------------------------------|--------------|
| wavelet-HHH | glszm      | ZonePercentage                       | 0.451472192  |
| wavelet-HHH | glszm      | LargeAreaLowGrayLevelEmphasis        | 0.087150132  |
| wavelet-HHH | glszm      | LargeAreaHighGrayLevelEmphasis       | 18146.04831  |
| wavelet-HHH | glszm      | HighGrayLevelZoneEmphasis            | 494.4347826  |
| wavelet-HHH | glszm      | SmallAreaEmphasis                    | 0.750526312  |
| wavelet-HHH | glszm      | LowGrayLevelZoneEmphasis             | 0.005439914  |
| wavelet-HHH | glszm      | ZoneEntropy                          | 5.822603799  |
| wavelet-HHH | glszm      | SmallAreaLowGrayLevelEmphasis        | 0.004824822  |
| wavelet-HHH | ngtdm      | Coarseness                           | 0.00759307   |
| wavelet-HHH | ngtdm      | Complexity                           | 1682.083429  |
| wavelet-HHH | ngtdm      | Strength                             | 2.636200438  |
| wavelet-HHH | ngtdm      | Contrast                             | 0.139666757  |
| wavelet-HHH | ngtdm      | Busyness                             | 0.146689885  |
| wavelet-HLL | gldm       | GrayLevelVariance                    | 64.85778266  |
| wavelet-HLL | gldm       | HighGrayLevelEmphasis                | 1347.778626  |
| wavelet-HLL | gldm       | DependenceEntropy                    | 6.626206288  |
| wavelet-HLL | gldm       | DependenceNonUniformity              | 275.697928   |
| wavelet-HLL | gldm       | GrayLevelNonUniformity               | 36.51799346  |
| wavelet-HLL | gldm       | SmallDependenceEmphasis              | 0.533819823  |
| wavelet-HLL | gldm       | SmallDependenceHighGrayLevelEmphasis | 714.9863575  |
| wavelet-HLL | gldm       | DependenceNonUniformityNormalized    | 0.300652048  |
| wavelet-HLL | gldm       | LargeDependenceEmphasis              | 5.92257361   |
| wavelet-HLL | gldm       | LargeDependenceLowGrayLevelEmphasis  | 0.006003539  |
| wavelet-HLL | gldm       | DependenceVariance                   | 1.661072983  |
| wavelet-HLL | gldm       | LargeDependenceHighGrayLevelEmphasis | 8022.029444  |
| wavelet-HLL | gldm       | SmallDependenceLowGrayLevelEmphasis  | 0.001772328  |
| wavelet-HLL | gldm       | LowGrayLevelEmphasis                 | 0.002150377  |
| wavelet-HLL | glcm       | JointAverage                         | 35.80753141  |
| wavelet-HLL | glcm       | SumAverage                           | 71.61506283  |
| wavelet-HLL | glcm       | JointEntropy                         | 8.897882493  |
| wavelet-HLL | glcm       | ClusterShade                         | -309.3793647 |
| wavelet-HLL | glcm       | MaximumProbability                   | 0.009725183  |
| wavelet-HLL | glcm       | ldmn                                 | 0.977203471  |
| wavelet-HLL | glcm       | JointEnergy                          | 0.00280366   |
| wavelet-HLL | glcm       | Contrast                             | 104.9776755  |
| wavelet-HLL | glcm       | DifferenceEntropy                    | 4.291698133  |
| wavelet-HLL | glcm       | InverseVariance                      | 0.158362389  |
| wavelet-HLL | glcm       | DifferenceVariance                   | 48.19965165  |
| wavelet-HLL | glcm       | ldn                                  | 0.904192649  |
| wavelet-HLL | glcm       | ldm                                  | 0.150543706  |
| wavelet-HLL | glcm       | Correlation                          | 0.101575531  |
| wavelet-HLL | glcm       | Autocorrelation                      | 1288.191716  |
| wavelet-HLL | glcm       | SumEntropy                           | 5.416602834  |
| wavelet-HLL | glcm       | SumSquares                           | 58.49238097  |
| wavelet-HLL | glcm       | ClusterProminence                    | 71278.22016  |
| wavelet-HLL | glcm       | lmc2                                 | 0.904370328  |
| wavelet-HLL | glcm       | lmc1                                 | -0.176354623 |
| wavelet-HLL | glcm       | DifferenceAverage                    | 7.387948003  |
| wavelet-HLL | glcm       | ld                                   | 0.23708808   |
| wavelet-HLL | glcm       | ClusterTendency                      | 128.9918484  |
| wavelet-HLL | firstorder | InterquartileRange                   | 228.4377203  |
| wavelet-HLL | firstorder | Skewness                             | -0.303106526 |
| wavelet-HLL | firstorder | Uniformity                           | 0.03982333   |

|             |            |                                  |              |
|-------------|------------|----------------------------------|--------------|
| wavelet-HLL | firstorder | Median                           | -36.94609742 |
| wavelet-HLL | firstorder | Energy                           | 38778053.75  |
| wavelet-HLL | firstorder | RobustMeanAbsoluteDeviation      | 96.66958071  |
| wavelet-HLL | firstorder | MeanAbsoluteDeviation            | 150.2186662  |
| wavelet-HLL | firstorder | TotalEnergy                      | 1047007451   |
| wavelet-HLL | firstorder | Maximum                          | 668.6295768  |
| wavelet-HLL | firstorder | RootMeanSquared                  | 205.6403509  |
| wavelet-HLL | firstorder | 90Percentile                     | 205.0488141  |
| wavelet-HLL | firstorder | Minimum                          | -912.6354233 |
| wavelet-HLL | firstorder | Entropy                          | 4.962359215  |
| wavelet-HLL | firstorder | Range                            | 1581.265     |
| wavelet-HLL | firstorder | Variance                         | 40505.87043  |
| wavelet-HLL | firstorder | 10Percentile                     | -291.0793379 |
| wavelet-HLL | firstorder | Kurtosis                         | 4.407724266  |
| wavelet-HLL | firstorder | Mean                             | -42.21473078 |
| wavelet-HLL | grlm       | ShortRunLowGrayLevelEmphasis     | 0.002184282  |
| wavelet-HLL | grlm       | GrayLevelVariance                | 66.67166337  |
| wavelet-HLL | grlm       | LowGrayLevelRunEmphasis          | 0.002208516  |
| wavelet-HLL | grlm       | GrayLevelNonUniformityNormalized | 0.038976273  |
| wavelet-HLL | grlm       | RunVariance                      | 0.046667398  |
| wavelet-HLL | grlm       | GrayLevelNonUniformity           | 34.27865141  |
| wavelet-HLL | grlm       | LongRunEmphasis                  | 1.134393269  |
| wavelet-HLL | grlm       | ShortRunHighGrayLevelEmphasis    | 1306.094831  |
| wavelet-HLL | grlm       | RunLengthNonUniformity           | 812.0006338  |
| wavelet-HLL | grlm       | ShortRunEmphasis                 | 0.969548261  |
| wavelet-HLL | grlm       | LongRunHighGrayLevelEmphasis     | 1529.681786  |
| wavelet-HLL | grlm       | RunPercentage                    | 0.959063837  |
| wavelet-HLL | grlm       | LongRunLowGrayLevelEmphasis      | 0.002314982  |
| wavelet-HLL | grlm       | RunEntropy                       | 5.202805444  |
| wavelet-HLL | grlm       | HighGrayLevelRunEmphasis         | 1347.406323  |
| wavelet-HLL | grlm       | RunLengthNonUniformityNormalized | 0.923027199  |
| wavelet-HLL | glszm      | GrayLevelVariance                | 91.77836113  |
| wavelet-HLL | glszm      | ZoneVariance                     | 5.40773752   |
| wavelet-HLL | glszm      | GrayLevelNonUniformityNormalized | 0.031321117  |
| wavelet-HLL | glszm      | SizeZoneNonUniformityNormalized  | 0.578923449  |
| wavelet-HLL | glszm      | SizeZoneNonUniformity            | 314.3554328  |
| wavelet-HLL | glszm      | GrayLevelNonUniformity           | 17.00736648  |
| wavelet-HLL | glszm      | LargeAreaEmphasis                | 8.259668508  |
| wavelet-HLL | glszm      | SmallAreaHighGrayLevelEmphasis   | 1052.758425  |
| wavelet-HLL | glszm      | ZonePercentage                   | 0.59214831   |
| wavelet-HLL | glszm      | LargeAreaLowGrayLevelEmphasis    | 0.008674301  |
| wavelet-HLL | glszm      | LargeAreaHighGrayLevelEmphasis   | 11103.34991  |
| wavelet-HLL | glszm      | HighGrayLevelZoneEmphasis        | 1340.61326   |
| wavelet-HLL | glszm      | SmallAreaEmphasis                | 0.788436544  |
| wavelet-HLL | glszm      | LowGrayLevelZoneEmphasis         | 0.003079805  |
| wavelet-HLL | glszm      | ZoneEntropy                      | 6.275667065  |
| wavelet-HLL | glszm      | SmallAreaLowGrayLevelEmphasis    | 0.002900966  |
| wavelet-HLL | ngtdm      | Coarseness                       | 0.007953174  |
| wavelet-HLL | ngtdm      | Complexity                       | 6662.18755   |
| wavelet-HLL | ngtdm      | Strength                         | 7.782387093  |
| wavelet-HLL | ngtdm      | Contrast                         | 0.234859109  |
| wavelet-HLL | ngtdm      | Busyness                         | 0.053946411  |
| wavelet-LHL | gldm       | GrayLevelVariance                | 109.7814646  |

|             |            |                                      |              |
|-------------|------------|--------------------------------------|--------------|
| wavelet-LHL | gldm       | HighGrayLevelEmphasis                | 1889.848419  |
| wavelet-LHL | gldm       | DependenceEntropy                    | 6.937072109  |
| wavelet-LHL | gldm       | DependenceNonUniformity              | 307.2006543  |
| wavelet-LHL | gldm       | GrayLevelNonUniformity               | 27.97055616  |
| wavelet-LHL | gldm       | SmallDependenceEmphasis              | 0.575890151  |
| wavelet-LHL | gldm       | SmallDependenceHighGrayLevelEmphasis | 1115.108107  |
| wavelet-LHL | gldm       | DependenceNonUniformityNormalized    | 0.335006166  |
| wavelet-LHL | gldm       | LargeDependenceEmphasis              | 6.051254089  |
| wavelet-LHL | gldm       | LargeDependenceLowGrayLevelEmphasis  | 0.004891861  |
| wavelet-LHL | gldm       | DependenceVariance                   | 2.090416214  |
| wavelet-LHL | gldm       | LargeDependenceHighGrayLevelEmphasis | 11094.37186  |
| wavelet-LHL | gldm       | SmallDependenceLowGrayLevelEmphasis  | 0.001568845  |
| wavelet-LHL | gldm       | LowGrayLevelEmphasis                 | 0.00185531   |
| wavelet-LHL | glcm       | JointAverage                         | 42.30018305  |
| wavelet-LHL | glcm       | SumAverage                           | 84.6003661   |
| wavelet-LHL | glcm       | JointEntropy                         | 9.349235071  |
| wavelet-LHL | glcm       | ClusterShade                         | -375.1757025 |
| wavelet-LHL | glcm       | MaximumProbability                   | 0.010345451  |
| wavelet-LHL | glcm       | ldmn                                 | 0.97089425   |
| wavelet-LHL | glcm       | JointEnergy                          | 0.002072843  |
| wavelet-LHL | glcm       | Contrast                             | 175.4488662  |
| wavelet-LHL | glcm       | DifferenceEntropy                    | 4.655477894  |
| wavelet-LHL | glcm       | InverseVariance                      | 0.128659894  |
| wavelet-LHL | glcm       | DifferenceVariance                   | 76.38965483  |
| wavelet-LHL | glcm       | ldn                                  | 0.891924729  |
| wavelet-LHL | glcm       | ldm                                  | 0.12873728   |
| wavelet-LHL | glcm       | Correlation                          | 0.156599479  |
| wavelet-LHL | glcm       | Autocorrelation                      | 1805.807861  |
| wavelet-LHL | glcm       | SumEntropy                           | 5.85153325   |
| wavelet-LHL | glcm       | SumSquares                           | 104.2157122  |
| wavelet-LHL | glcm       | ClusterProminence                    | 204513.0817  |
| wavelet-LHL | glcm       | lmc2                                 | 0.95718959   |
| wavelet-LHL | glcm       | lmc1                                 | -0.235637429 |
| wavelet-LHL | glcm       | DifferenceAverage                    | 9.705998209  |
| wavelet-LHL | glcm       | ld                                   | 0.208177553  |
| wavelet-LHL | glcm       | ClusterTendency                      | 241.4139825  |
| wavelet-LHL | firstorder | InterquartileRange                   | 300.0123997  |
| wavelet-LHL | firstorder | Skewness                             | -0.266399012 |
| wavelet-LHL | firstorder | Uniformity                           | 0.030502242  |
| wavelet-LHL | firstorder | Median                               | -27.96010848 |
| wavelet-LHL | firstorder | Energy                               | 63951682.38  |
| wavelet-LHL | firstorder | RobustMeanAbsoluteDeviation          | 130.4907572  |
| wavelet-LHL | firstorder | MeanAbsoluteDeviation                | 198.9648962  |
| wavelet-LHL | firstorder | TotalEnergy                          | 1726695424   |
| wavelet-LHL | firstorder | Maximum                              | 747.1422281  |
| wavelet-LHL | firstorder | RootMeanSquared                      | 264.0835316  |
| wavelet-LHL | firstorder | 90Percentile                         | 297.8674723  |
| wavelet-LHL | firstorder | Minimum                              | -1068.622617 |
| wavelet-LHL | firstorder | Entropy                              | 5.347591754  |
| wavelet-LHL | firstorder | Range                                | 1815.764845  |
| wavelet-LHL | firstorder | Variance                             | 68692.65656  |
| wavelet-LHL | firstorder | 10Percentile                         | -372.7415268 |
| wavelet-LHL | firstorder | Kurtosis                             | 3.577849311  |

|             |            |                                      |              |
|-------------|------------|--------------------------------------|--------------|
| wavelet-LHL | firstorder | Mean                                 | -32.36441077 |
| wavelet-LHL | glrlm      | ShortRunLowGrayLevelEmphasis         | 0.001886656  |
| wavelet-LHL | glrlm      | GrayLevelVariance                    | 112.4507532  |
| wavelet-LHL | glrlm      | LowGrayLevelRunEmphasis              | 0.001904102  |
| wavelet-LHL | glrlm      | GrayLevelNonUniformityNormalized     | 0.029607306  |
| wavelet-LHL | glrlm      | RunVariance                          | 0.04609328   |
| wavelet-LHL | glrlm      | GrayLevelNonUniformity               | 26.11647255  |
| wavelet-LHL | glrlm      | LongRunEmphasis                      | 1.127449629  |
| wavelet-LHL | glrlm      | ShortRunHighGrayLevelEmphasis        | 1841.955011  |
| wavelet-LHL | glrlm      | RunLengthNonUniformity               | 821.1310997  |
| wavelet-LHL | glrlm      | ShortRunEmphasis                     | 0.97249681   |
| wavelet-LHL | glrlm      | LongRunHighGrayLevelEmphasis         | 2125.104925  |
| wavelet-LHL | glrlm      | RunPercentage                        | 0.961915947  |
| wavelet-LHL | glrlm      | LongRunLowGrayLevelEmphasis          | 0.001983747  |
| wavelet-LHL | glrlm      | RunEntropy                           | 5.55869715   |
| wavelet-LHL | glrlm      | HighGrayLevelRunEmphasis             | 1892.295837  |
| wavelet-LHL | glrlm      | RunLengthNonUniformityNormalized     | 0.93060914   |
| wavelet-LHL | glszm      | GrayLevelVariance                    | 139.7924123  |
| wavelet-LHL | glszm      | ZoneVariance                         | 4.456955657  |
| wavelet-LHL | glszm      | GrayLevelNonUniformityNormalized     | 0.024601236  |
| wavelet-LHL | glszm      | SizeZoneNonUniformityNormalized      | 0.593634562  |
| wavelet-LHL | glszm      | SizeZoneNonUniformity                | 352.0252951  |
| wavelet-LHL | glszm      | GrayLevelNonUniformity               | 14.58853288  |
| wavelet-LHL | glszm      | LargeAreaEmphasis                    | 6.848229342  |
| wavelet-LHL | glszm      | SmallAreaHighGrayLevelEmphasis       | 1556.293105  |
| wavelet-LHL | glszm      | ZonePercentage                       | 0.646673937  |
| wavelet-LHL | glszm      | LargeAreaLowGrayLevelEmphasis        | 0.005956761  |
| wavelet-LHL | glszm      | LargeAreaHighGrayLevelEmphasis       | 12476.8887   |
| wavelet-LHL | glszm      | HighGrayLevelZoneEmphasis            | 1921.116358  |
| wavelet-LHL | glszm      | SmallAreaEmphasis                    | 0.798645144  |
| wavelet-LHL | glszm      | LowGrayLevelZoneEmphasis             | 0.002511482  |
| wavelet-LHL | glszm      | ZoneEntropy                          | 6.549773711  |
| wavelet-LHL | glszm      | SmallAreaLowGrayLevelEmphasis        | 0.002361672  |
| wavelet-LHL | ngtdm      | Coarseness                           | 0.007940008  |
| wavelet-LHL | ngtdm      | Complexity                           | 11471.53367  |
| wavelet-LHL | ngtdm      | Strength                             | 9.823355106  |
| wavelet-LHL | ngtdm      | Contrast                             | 0.367951595  |
| wavelet-LHL | ngtdm      | Busyness                             | 0.041763003  |
| wavelet-LHH | gldm       | GrayLevelVariance                    | 39.94005868  |
| wavelet-LHH | gldm       | HighGrayLevelEmphasis                | 588.3271538  |
| wavelet-LHH | gldm       | DependenceEntropy                    | 6.461167329  |
| wavelet-LHH | gldm       | DependenceNonUniformity              | 228.0490731  |
| wavelet-LHH | gldm       | GrayLevelNonUniformity               | 50.49182116  |
| wavelet-LHH | gldm       | SmallDependenceEmphasis              | 0.465987931  |
| wavelet-LHH | gldm       | SmallDependenceHighGrayLevelEmphasis | 285.7892056  |
| wavelet-LHH | gldm       | DependenceNonUniformityNormalized    | 0.248690374  |
| wavelet-LHH | gldm       | LargeDependenceEmphasis              | 8.690294438  |
| wavelet-LHH | gldm       | LargeDependenceLowGrayLevelEmphasis  | 0.018521262  |
| wavelet-LHH | gldm       | DependenceVariance                   | 2.85572531   |
| wavelet-LHH | gldm       | LargeDependenceHighGrayLevelEmphasis | 4866.434024  |
| wavelet-LHH | gldm       | SmallDependenceLowGrayLevelEmphasis  | 0.002766089  |
| wavelet-LHH | gldm       | LowGrayLevelEmphasis                 | 0.003863396  |
| wavelet-LHH | glcm       | JointAverage                         | 23.45045824  |

|             |            |                                  |              |
|-------------|------------|----------------------------------|--------------|
| wavelet-LHH | glcm       | SumAverage                       | 46.90091649  |
| wavelet-LHH | glcm       | JointEntropy                     | 8.314724836  |
| wavelet-LHH | glcm       | ClusterShade                     | 133.8078048  |
| wavelet-LHH | glcm       | MaximumProbability               | 0.018803476  |
| wavelet-LHH | glcm       | Idmn                             | 0.976182743  |
| wavelet-LHH | glcm       | JointEnergy                      | 0.004921211  |
| wavelet-LHH | glcm       | Contrast                         | 75.98915338  |
| wavelet-LHH | glcm       | DifferenceEntropy                | 4.074078769  |
| wavelet-LHH | glcm       | InverseVariance                  | 0.193155346  |
| wavelet-LHH | glcm       | DifferenceVariance               | 36.72212512  |
| wavelet-LHH | glcm       | Idn                              | 0.903936115  |
| wavelet-LHH | glcm       | Idm                              | 0.187847975  |
| wavelet-LHH | glcm       | Correlation                      | -0.029190479 |
| wavelet-LHH | glcm       | Autocorrelation                  | 548.7584068  |
| wavelet-LHH | glcm       | SumEntropy                       | 4.933309097  |
| wavelet-LHH | glcm       | SumSquares                       | 36.82177632  |
| wavelet-LHH | glcm       | ClusterProminence                | 28529.08527  |
| wavelet-LHH | glcm       | Imc2                             | 0.863844259  |
| wavelet-LHH | glcm       | Imc1                             | -0.153213429 |
| wavelet-LHH | glcm       | DifferenceAverage                | 6.177511533  |
| wavelet-LHH | glcm       | Id                               | 0.273579939  |
| wavelet-LHH | glcm       | ClusterTendency                  | 71.29795191  |
| wavelet-LHH | firstorder | InterquartileRange               | 154.6566362  |
| wavelet-LHH | firstorder | Skewness                         | 0.29215311   |
| wavelet-LHH | firstorder | Uniformity                       | 0.055061964  |
| wavelet-LHH | firstorder | Median                           | -4.276177436 |
| wavelet-LHH | firstorder | Energy                           | 22810969.84  |
| wavelet-LHH | firstorder | RobustMeanAbsoluteDeviation      | 68.15139847  |
| wavelet-LHH | firstorder | MeanAbsoluteDeviation            | 113.0231511  |
| wavelet-LHH | firstorder | TotalEnergy                      | 615896185.6  |
| wavelet-LHH | firstorder | Maximum                          | 742.9971303  |
| wavelet-LHH | firstorder | RootMeanSquared                  | 157.7201594  |
| wavelet-LHH | firstorder | 90Percentile                     | 184.666107   |
| wavelet-LHH | firstorder | Minimum                          | -552.2861383 |
| wavelet-LHH | firstorder | Entropy                          | 4.588053025  |
| wavelet-LHH | firstorder | Range                            | 1295.283269  |
| wavelet-LHH | firstorder | Variance                         | 24871.97731  |
| wavelet-LHH | firstorder | 10Percentile                     | -184.3969058 |
| wavelet-LHH | firstorder | Kurtosis                         | 5.025063245  |
| wavelet-LHH | firstorder | Mean                             | -1.916080791 |
| wavelet-LHH | grlm       | ShortRunLowGrayLevelEmphasis     | 0.003895406  |
| wavelet-LHH | grlm       | GrayLevelVariance                | 41.67432341  |
| wavelet-LHH | grlm       | LowGrayLevelRunEmphasis          | 0.003973629  |
| wavelet-LHH | grlm       | GrayLevelNonUniformityNormalized | 0.052704688  |
| wavelet-LHH | grlm       | RunVariance                      | 0.065985048  |
| wavelet-LHH | grlm       | GrayLevelNonUniformity           | 45.69914094  |
| wavelet-LHH | grlm       | LongRunEmphasis                  | 1.184801816  |
| wavelet-LHH | grlm       | ShortRunHighGrayLevelEmphasis    | 567.4176261  |
| wavelet-LHH | grlm       | RunLengthNonUniformity           | 780.9664059  |
| wavelet-LHH | grlm       | ShortRunEmphasis                 | 0.960045552  |
| wavelet-LHH | grlm       | LongRunHighGrayLevelEmphasis     | 693.3709328  |
| wavelet-LHH | grlm       | RunPercentage                    | 0.945558259  |
| wavelet-LHH | grlm       | LongRunLowGrayLevelEmphasis      | 0.004333683  |



|             |       |                                      |             |
|-------------|-------|--------------------------------------|-------------|
| wavelet-LHH | grlm  | RunEntropy                           | 4.902104606 |
| wavelet-LHH | grlm  | HighGrayLevelRunEmphasis             | 589.8971663 |
| wavelet-LHH | grlm  | RunLengthNonUniformityNormalized     | 0.900516979 |
| wavelet-LHH | glszm | GrayLevelVariance                    | 65.41142598 |
| wavelet-LHH | glszm | ZoneVariance                         | 16.83377546 |
| wavelet-LHH | glszm | GrayLevelNonUniformityNormalized     | 0.0370756   |
| wavelet-LHH | glszm | SizeZoneNonUniformityNormalized      | 0.550212766 |
| wavelet-LHH | glszm | SizeZoneNonUniformity                | 258.6       |
| wavelet-LHH | glszm | GrayLevelNonUniformity               | 17.42553191 |
| wavelet-LHH | glszm | LargeAreaEmphasis                    | 20.64042553 |
| wavelet-LHH | glszm | SmallAreaHighGrayLevelEmphasis       | 478.2202958 |
| wavelet-LHH | glszm | ZonePercentage                       | 0.512540894 |
| wavelet-LHH | glszm | LargeAreaLowGrayLevelEmphasis        | 0.042366753 |
| wavelet-LHH | glszm | LargeAreaHighGrayLevelEmphasis       | 11396.83404 |
| wavelet-LHH | glszm | HighGrayLevelZoneEmphasis            | 610.7829787 |
| wavelet-LHH | glszm | SmallAreaEmphasis                    | 0.769360833 |
| wavelet-LHH | glszm | LowGrayLevelZoneEmphasis             | 0.005632899 |
| wavelet-LHH | glszm | ZoneEntropy                          | 6.102786024 |
| wavelet-LHH | glszm | SmallAreaLowGrayLevelEmphasis        | 0.005099837 |
| wavelet-LHH | ngtdm | Coarseness                           | 0.007986032 |
| wavelet-LHH | ngtdm | Complexity                           | 4078.426977 |
| wavelet-LHH | ngtdm | Strength                             | 5.063770563 |
| wavelet-LHH | ngtdm | Contrast                             | 0.183193267 |
| wavelet-LHH | ngtdm | Busyness                             | 0.093876407 |
| wavelet-LLH | gldm  | GrayLevelVariance                    | 74.39404725 |
| wavelet-LLH | gldm  | HighGrayLevelEmphasis                | 2186.483097 |
| wavelet-LLH | gldm  | DependenceEntropy                    | 6.706164625 |
| wavelet-LLH | gldm  | DependenceNonUniformity              | 262.648855  |
| wavelet-LLH | gldm  | GrayLevelNonUniformity               | 38.81897492 |
| wavelet-LLH | gldm  | SmallDependenceEmphasis              | 0.498064301 |
| wavelet-LLH | gldm  | SmallDependenceHighGrayLevelEmphasis | 1092.213586 |
| wavelet-LLH | gldm  | DependenceNonUniformityNormalized    | 0.28642187  |
| wavelet-LLH | gldm  | LargeDependenceEmphasis              | 6.99563795  |
| wavelet-LLH | gldm  | LargeDependenceLowGrayLevelEmphasis  | 0.012158563 |
| wavelet-LLH | gldm  | DependenceVariance                   | 2.205411178 |
| wavelet-LLH | gldm  | LargeDependenceHighGrayLevelEmphasis | 15081.45365 |
| wavelet-LLH | gldm  | SmallDependenceLowGrayLevelEmphasis  | 0.000862242 |
| wavelet-LLH | gldm  | LowGrayLevelEmphasis                 | 0.002742987 |
| wavelet-LLH | glcm  | JointAverage                         | 46.16599296 |
| wavelet-LLH | glcm  | SumAverage                           | 92.33198593 |
| wavelet-LLH | glcm  | JointEntropy                         | 8.858771473 |
| wavelet-LLH | glcm  | ClusterShade                         | -287.523839 |
| wavelet-LLH | glcm  | MaximumProbability                   | 0.01247466  |
| wavelet-LLH | glcm  | ldmn                                 | 0.980639525 |
| wavelet-LLH | glcm  | JointEnergy                          | 0.003196917 |
| wavelet-LLH | glcm  | Contrast                             | 117.4274783 |
| wavelet-LLH | glcm  | DifferenceEntropy                    | 4.345085509 |
| wavelet-LLH | glcm  | InverseVariance                      | 0.159988175 |
| wavelet-LLH | glcm  | DifferenceVariance                   | 56.1061709  |
| wavelet-LLH | glcm  | ldn                                  | 0.913184775 |
| wavelet-LLH | glcm  | ldm                                  | 0.158077108 |
| wavelet-LLH | glcm  | Correlation                          | 0.105809485 |
| wavelet-LLH | glcm  | Autocorrelation                      | 2137.855773 |

|             |            |                                  |              |
|-------------|------------|----------------------------------|--------------|
| wavelet-LLH | glcm       | SumEntropy                       | 5.455233089  |
| wavelet-LLH | glcm       | SumSquares                       | 65.26398855  |
| wavelet-LLH | glcm       | ClusterProminence                | 105654.7476  |
| wavelet-LLH | glcm       | Imc2                             | 0.920280801  |
| wavelet-LLH | glcm       | Imc1                             | -0.192778527 |
| wavelet-LLH | glcm       | DifferenceAverage                | 7.658168375  |
| wavelet-LLH | glcm       | Id                               | 0.242629641  |
| wavelet-LLH | glcm       | ClusterTendency                  | 143.6284759  |
| wavelet-LLH | firstorder | InterquartileRange               | 214.5634275  |
| wavelet-LLH | firstorder | Skewness                         | -0.56633687  |
| wavelet-LLH | firstorder | Uniformity                       | 0.042332579  |
| wavelet-LLH | firstorder | Median                           | -8.642994324 |
| wavelet-LLH | firstorder | Energy                           | 42658124.97  |
| wavelet-LLH | firstorder | RobustMeanAbsoluteDeviation      | 91.82616956  |
| wavelet-LLH | firstorder | MeanAbsoluteDeviation            | 152.7144676  |
| wavelet-LLH | firstorder | TotalEnergy                      | 1151769374   |
| wavelet-LLH | firstorder | Maximum                          | 680.6700151  |
| wavelet-LLH | firstorder | RootMeanSquared                  | 215.6831478  |
| wavelet-LLH | firstorder | 90Percentile                     | 246.0744665  |
| wavelet-LLH | firstorder | Minimum                          | -1126.893918 |
| wavelet-LLH | firstorder | Entropy                          | 4.973427817  |
| wavelet-LLH | firstorder | Range                            | 1807.563933  |
| wavelet-LLH | firstorder | Variance                         | 46329.74692  |
| wavelet-LLH | firstorder | 10Percentile                     | -255.6823664 |
| wavelet-LLH | firstorder | Kurtosis                         | 5.917082534  |
| wavelet-LLH | firstorder | Mean                             | -13.76493094 |
| wavelet-LLH | glrlm      | ShortRunLowGrayLevelEmphasis     | 0.002676538  |
| wavelet-LLH | glrlm      | GrayLevelVariance                | 76.67740835  |
| wavelet-LLH | glrlm      | LowGrayLevelRunEmphasis          | 0.002761044  |
| wavelet-LLH | glrlm      | GrayLevelNonUniformityNormalized | 0.040944266  |
| wavelet-LLH | glrlm      | RunVariance                      | 0.051765289  |
| wavelet-LLH | glrlm      | GrayLevelNonUniformity           | 35.83100064  |
| wavelet-LLH | glrlm      | LongRunEmphasis                  | 1.15039916   |
| wavelet-LLH | glrlm      | ShortRunHighGrayLevelEmphasis    | 2113.482259  |
| wavelet-LLH | glrlm      | RunLengthNonUniformity           | 799.9256475  |
| wavelet-LLH | glrlm      | ShortRunEmphasis                 | 0.96573948   |
| wavelet-LLH | glrlm      | LongRunHighGrayLevelEmphasis     | 2512.548055  |
| wavelet-LLH | glrlm      | RunPercentage                    | 0.954282359  |
| wavelet-LLH | glrlm      | LongRunLowGrayLevelEmphasis      | 0.003105405  |
| wavelet-LLH | glrlm      | RunEntropy                       | 5.239458108  |
| wavelet-LLH | glrlm      | HighGrayLevelRunEmphasis         | 2187.64517   |
| wavelet-LLH | glrlm      | RunLengthNonUniformityNormalized | 0.913839333  |
| wavelet-LLH | glszm      | GrayLevelVariance                | 105.2139171  |
| wavelet-LLH | glszm      | ZoneVariance                     | 5.80096079   |
| wavelet-LLH | glszm      | GrayLevelNonUniformityNormalized | 0.030673361  |
| wavelet-LLH | glszm      | SizeZoneNonUniformityNormalized  | 0.520647084  |
| wavelet-LLH | glszm      | SizeZoneNonUniformity            | 271.7777778  |
| wavelet-LLH | glszm      | GrayLevelNonUniformity           | 16.01149425  |
| wavelet-LLH | glszm      | LargeAreaEmphasis                | 8.88697318   |
| wavelet-LLH | glszm      | SmallAreaHighGrayLevelEmphasis   | 1645.000935  |
| wavelet-LLH | glszm      | ZonePercentage                   | 0.569247546  |
| wavelet-LLH | glszm      | LargeAreaLowGrayLevelEmphasis    | 0.012065645  |
| wavelet-LLH | glszm      | LargeAreaHighGrayLevelEmphasis   | 18991.83333  |

|             |            |                                      |              |
|-------------|------------|--------------------------------------|--------------|
| wavelet-LLH | glszm      | HighGrayLevelZoneEmphasis            | 2200.994253  |
| wavelet-LLH | glszm      | SmallAreaEmphasis                    | 0.749555605  |
| wavelet-LLH | glszm      | LowGrayLevelZoneEmphasis             | 0.00253466   |
| wavelet-LLH | glszm      | ZoneEntropy                          | 6.447195093  |
| wavelet-LLH | glszm      | SmallAreaLowGrayLevelEmphasis        | 0.000974176  |
| wavelet-LLH | ngtdm      | Coarseness                           | 0.00792727   |
| wavelet-LLH | ngtdm      | Complexity                           | 7803.608236  |
| wavelet-LLH | ngtdm      | Strength                             | 8.850674893  |
| wavelet-LLH | ngtdm      | Contrast                             | 0.268649814  |
| wavelet-LLH | ngtdm      | Busyness                             | 0.040032671  |
| wavelet-LLL | gldm       | GrayLevelVariance                    | 922.4692676  |
| wavelet-LLL | gldm       | HighGrayLevelEmphasis                | 5906.644493  |
| wavelet-LLL | gldm       | DependenceEntropy                    | 7.613523576  |
| wavelet-LLL | gldm       | DependenceNonUniformity              | 394.3347874  |
| wavelet-LLL | gldm       | GrayLevelNonUniformity               | 11.06324973  |
| wavelet-LLL | gldm       | SmallDependenceEmphasis              | 0.670867822  |
| wavelet-LLL | gldm       | SmallDependenceHighGrayLevelEmphasis | 3393.623643  |
| wavelet-LLL | gldm       | DependenceNonUniformityNormalized    | 0.430027031  |
| wavelet-LLL | gldm       | LargeDependenceEmphasis              | 3.924754635  |
| wavelet-LLL | gldm       | LargeDependenceLowGrayLevelEmphasis  | 0.003501793  |
| wavelet-LLL | gldm       | DependenceVariance                   | 1.16632992   |
| wavelet-LLL | gldm       | LargeDependenceHighGrayLevelEmphasis | 33647.61505  |
| wavelet-LLL | gldm       | SmallDependenceLowGrayLevelEmphasis  | 0.002181094  |
| wavelet-LLL | gldm       | LowGrayLevelEmphasis                 | 0.002352922  |
| wavelet-LLL | glcm       | JointAverage                         | 75.32217388  |
| wavelet-LLL | glcm       | SumAverage                           | 150.6443478  |
| wavelet-LLL | glcm       | JointEntropy                         | 10.00929593  |
| wavelet-LLL | glcm       | ClusterShade                         | -77565.51303 |
| wavelet-LLL | glcm       | MaximumProbability                   | 0.006967676  |
| wavelet-LLL | glcm       | Idmn                                 | 0.970206186  |
| wavelet-LLL | glcm       | JointEnergy                          | 0.001153072  |
| wavelet-LLL | glcm       | Contrast                             | 483.8911814  |
| wavelet-LLL | glcm       | DifferenceEntropy                    | 5.375553595  |
| wavelet-LLL | glcm       | InverseVariance                      | 0.086331586  |
| wavelet-LLL | glcm       | DifferenceVariance                   | 201.0775988  |
| wavelet-LLL | glcm       | Idn                                  | 0.888972744  |
| wavelet-LLL | glcm       | Idm                                  | 0.086427988  |
| wavelet-LLL | glcm       | Correlation                          | 0.717296416  |
| wavelet-LLL | glcm       | Autocorrelation                      | 6293.004404  |
| wavelet-LLL | glcm       | SumEntropy                           | 7.250256534  |
| wavelet-LLL | glcm       | SumSquares                           | 858.9735345  |
| wavelet-LLL | glcm       | ClusterProminence                    | 18545380.09  |
| wavelet-LLL | glcm       | Imc2                                 | 0.998509575  |
| wavelet-LLL | glcm       | Imc1                                 | -0.450435401 |
| wavelet-LLL | glcm       | DifferenceAverage                    | 16.50600353  |
| wavelet-LLL | glcm       | Id                                   | 0.152237629  |
| wavelet-LLL | glcm       | ClusterTendency                      | 2952.002957  |
| wavelet-LLL | firstorder | InterquartileRange                   | 1357.156829  |
| wavelet-LLL | firstorder | Skewness                             | -0.302644765 |
| wavelet-LLL | firstorder | Uniformity                           | 0.012064613  |
| wavelet-LLL | firstorder | Median                               | -779.4296621 |
| wavelet-LLL | firstorder | Energy                               | 1228045709   |
| wavelet-LLL | firstorder | RobustMeanAbsoluteDeviation          | 538.9619842  |

|             |            |                                  |              |
|-------------|------------|----------------------------------|--------------|
| wavelet-LLL | firstorder | MeanAbsoluteDeviation            | 664.3128245  |
| wavelet-LLL | firstorder | TotalEnergy                      | 33157234156  |
| wavelet-LLL | firstorder | Maximum                          | 375.2525117  |
| wavelet-LLL | firstorder | RootMeanSquared                  | 1157.237766  |
| wavelet-LLL | firstorder | 90Percentile                     | 53.37806024  |
| wavelet-LLL | firstorder | Minimum                          | -2620.341263 |
| wavelet-LLL | firstorder | Entropy                          | 6.582498226  |
| wavelet-LLL | firstorder | Range                            | 2995.593774  |
| wavelet-LLL | firstorder | Variance                         | 576984.2475  |
| wavelet-LLL | firstorder | 10Percentile                     | -1958.601286 |
| wavelet-LLL | firstorder | Kurtosis                         | 1.865320497  |
| wavelet-LLL | firstorder | Mean                             | -873.0492537 |
| wavelet-LLL | grlm       | ShortRunLowGrayLevelEmphasis     | 0.002393267  |
| wavelet-LLL | grlm       | GrayLevelVariance                | 917.7271622  |
| wavelet-LLL | grlm       | LowGrayLevelRunEmphasis          | 0.002402303  |
| wavelet-LLL | grlm       | GrayLevelNonUniformityNormalized | 0.011786215  |
| wavelet-LLL | grlm       | RunVariance                      | 0.028514176  |
| wavelet-LLL | grlm       | GrayLevelNonUniformity           | 10.53382482  |
| wavelet-LLL | grlm       | LongRunEmphasis                  | 1.08165712   |
| wavelet-LLL | grlm       | ShortRunHighGrayLevelEmphasis    | 5674.061873  |
| wavelet-LLL | grlm       | RunLengthNonUniformity           | 850.9829322  |
| wavelet-LLL | grlm       | ShortRunEmphasis                 | 0.981321038  |
| wavelet-LLL | grlm       | LongRunHighGrayLevelEmphasis     | 6549.005385  |
| wavelet-LLL | grlm       | RunPercentage                    | 0.974582669  |
| wavelet-LLL | grlm       | LongRunLowGrayLevelEmphasis      | 0.00243935   |
| wavelet-LLL | grlm       | RunEntropy                       | 6.706681354  |
| wavelet-LLL | grlm       | HighGrayLevelRunEmphasis         | 5834.155679  |
| wavelet-LLL | grlm       | RunLengthNonUniformityNormalized | 0.952049732  |
| wavelet-LLL | glszm      | GrayLevelVariance                | 868.3654296  |
| wavelet-LLL | glszm      | ZoneVariance                     | 1.580344186  |
| wavelet-LLL | glszm      | GrayLevelNonUniformityNormalized | 0.010537755  |
| wavelet-LLL | glszm      | SizeZoneNonUniformityNormalized  | 0.65785825   |
| wavelet-LLL | glszm      | SizeZoneNonUniformity            | 448.0014684  |
| wavelet-LLL | glszm      | GrayLevelNonUniformity           | 7.176211454  |
| wavelet-LLL | glszm      | LargeAreaEmphasis                | 3.393538913  |
| wavelet-LLL | glszm      | SmallAreaHighGrayLevelEmphasis   | 4105.87965   |
| wavelet-LLL | glszm      | ZonePercentage                   | 0.74263904   |
| wavelet-LLL | glszm      | LargeAreaLowGrayLevelEmphasis    | 0.003689635  |
| wavelet-LLL | glszm      | LargeAreaHighGrayLevelEmphasis   | 28962.95301  |
| wavelet-LLL | glszm      | HighGrayLevelZoneEmphasis        | 5177.005874  |
| wavelet-LLL | glszm      | SmallAreaEmphasis                | 0.838273254  |
| wavelet-LLL | glszm      | LowGrayLevelZoneEmphasis         | 0.003001047  |
| wavelet-LLL | glszm      | ZoneEntropy                      | 7.36711688   |
| wavelet-LLL | glszm      | SmallAreaLowGrayLevelEmphasis    | 0.002905725  |
| wavelet-LLL | ngtdm      | Coarseness                       | 0.01039028   |
| wavelet-LLL | ngtdm      | Complexity                       | 49313.57438  |
| wavelet-LLL | ngtdm      | Strength                         | 56.26786127  |
| wavelet-LLL | ngtdm      | Contrast                         | 1.352949706  |
| wavelet-LLL | ngtdm      | Busyness                         | 0.011601244  |
| wavelet-HHL | gldm       | GrayLevelVariance                | 33.96894715  |
| wavelet-HHL | gldm       | HighGrayLevelEmphasis            | 386.1962923  |
| wavelet-HHL | gldm       | DependenceEntropy                | 6.429090478  |
| wavelet-HHL | gldm       | DependenceNonUniformity          | 236.7251908  |

|             |            |                                      |              |
|-------------|------------|--------------------------------------|--------------|
| wavelet-HHL | gldm       | GrayLevelNonUniformity               | 50.72082879  |
| wavelet-HHL | gldm       | SmallDependenceEmphasis              | 0.478549733  |
| wavelet-HHL | gldm       | SmallDependenceHighGrayLevelEmphasis | 194.2058243  |
| wavelet-HHL | gldm       | DependenceNonUniformityNormalized    | 0.258151789  |
| wavelet-HHL | gldm       | LargeDependenceEmphasis              | 9.087241003  |
| wavelet-HHL | gldm       | LargeDependenceLowGrayLevelEmphasis  | 0.033212075  |
| wavelet-HHL | gldm       | DependenceVariance                   | 3.315719435  |
| wavelet-HHL | gldm       | LargeDependenceHighGrayLevelEmphasis | 3217.059978  |
| wavelet-HHL | gldm       | SmallDependenceLowGrayLevelEmphasis  | 0.005273438  |
| wavelet-HHL | gldm       | LowGrayLevelEmphasis                 | 0.007208141  |
| wavelet-HHL | glcm       | JointAverage                         | 18.73572679  |
| wavelet-HHL | glcm       | SumAverage                           | 37.47145358  |
| wavelet-HHL | glcm       | JointEntropy                         | 8.329213608  |
| wavelet-HHL | glcm       | ClusterShade                         | 24.11784128  |
| wavelet-HHL | glcm       | MaximumProbability                   | 0.020885829  |
| wavelet-HHL | glcm       | Idmn                                 | 0.970705783  |
| wavelet-HHL | glcm       | JointEnergy                          | 0.004689562  |
| wavelet-HHL | glcm       | Contrast                             | 63.67305724  |
| wavelet-HHL | glcm       | DifferenceEntropy                    | 4.018001279  |
| wavelet-HHL | glcm       | InverseVariance                      | 0.188677678  |
| wavelet-HHL | glcm       | DifferenceVariance                   | 27.8542186   |
| wavelet-HHL | glcm       | Idn                                  | 0.890368098  |
| wavelet-HHL | glcm       | Idm                                  | 0.184501322  |
| wavelet-HHL | glcm       | Correlation                          | -0.026080331 |
| wavelet-HHL | glcm       | Autocorrelation                      | 350.2573969  |
| wavelet-HHL | glcm       | SumEntropy                           | 4.887824167  |
| wavelet-HHL | glcm       | SumSquares                           | 31.06308333  |
| wavelet-HHL | glcm       | ClusterProminence                    | 14925.79749  |
| wavelet-HHL | glcm       | Imc2                                 | 0.823193313  |
| wavelet-HHL | glcm       | Imc1                                 | -0.128001274 |
| wavelet-HHL | glcm       | DifferenceAverage                    | 5.924838717  |
| wavelet-HHL | glcm       | Id                                   | 0.271544421  |
| wavelet-HHL | glcm       | ClusterTendency                      | 60.57927606  |
| wavelet-HHL | firstorder | InterquartileRange                   | 159.8906851  |
| wavelet-HHL | firstorder | Skewness                             | 0.022823024  |
| wavelet-HHL | firstorder | Uniformity                           | 0.0553117    |
| wavelet-HHL | firstorder | Median                               | 1.737939246  |
| wavelet-HHL | firstorder | Energy                               | 19581772.6   |
| wavelet-HHL | firstorder | RobustMeanAbsoluteDeviation          | 70.01506317  |
| wavelet-HHL | firstorder | MeanAbsoluteDeviation                | 109.9233389  |
| wavelet-HHL | firstorder | TotalEnergy                          | 528707860.1  |
| wavelet-HHL | firstorder | Maximum                              | 629.020968   |
| wavelet-HHL | firstorder | RootMeanSquared                      | 146.1306559  |
| wavelet-HHL | firstorder | 90Percentile                         | 186.9467503  |
| wavelet-HHL | firstorder | Minimum                              | -426.9569772 |
| wavelet-HHL | firstorder | Entropy                              | 4.517134063  |
| wavelet-HHL | firstorder | Range                                | 1055.977945  |
| wavelet-HHL | firstorder | Variance                             | 21304.99259  |
| wavelet-HHL | firstorder | 10Percentile                         | -174.1834909 |
| wavelet-HHL | firstorder | Kurtosis                             | 3.68756727   |
| wavelet-HHL | firstorder | Mean                                 | 7.012560151  |
| wavelet-HHL | glrlm      | ShortRunLowGrayLevelEmphasis         | 0.007294048  |
| wavelet-HHL | glrlm      | GrayLevelVariance                    | 35.22264769  |

|             |       |                                      |              |
|-------------|-------|--------------------------------------|--------------|
| wavelet-HHL | glrlm | LowGrayLevelRunEmphasis              | 0.007427482  |
| wavelet-HHL | glrlm | GrayLevelNonUniformityNormalized     | 0.053165136  |
| wavelet-HHL | glrlm | RunVariance                          | 0.069188435  |
| wavelet-HHL | glrlm | GrayLevelNonUniformity               | 46.12604537  |
| wavelet-HHL | glrlm | LongRunEmphasis                      | 1.187484986  |
| wavelet-HHL | glrlm | ShortRunHighGrayLevelEmphasis        | 373.6747476  |
| wavelet-HHL | glrlm | RunLengthNonUniformity               | 783.5409284  |
| wavelet-HHL | glrlm | ShortRunEmphasis                     | 0.960832732  |
| wavelet-HHL | glrlm | LongRunHighGrayLevelEmphasis         | 454.7264502  |
| wavelet-HHL | glrlm | RunPercentage                        | 0.946061572  |
| wavelet-HHL | glrlm | LongRunLowGrayLevelEmphasis          | 0.008057309  |
| wavelet-HHL | glrlm | RunEntropy                           | 4.81677986   |
| wavelet-HHL | glrlm | HighGrayLevelRunEmphasis             | 387.7819873  |
| wavelet-HHL | glrlm | RunLengthNonUniformityNormalized     | 0.902730069  |
| wavelet-HHL | glszm | GrayLevelVariance                    | 49.90350492  |
| wavelet-HHL | glszm | ZoneVariance                         | 13.76971491  |
| wavelet-HHL | glszm | GrayLevelNonUniformityNormalized     | 0.040795246  |
| wavelet-HHL | glszm | SizeZoneNonUniformityNormalized      | 0.541186261  |
| wavelet-HHL | glszm | SizeZoneNonUniformity                | 264.6400818  |
| wavelet-HHL | glszm | GrayLevelNonUniformity               | 19.94887526  |
| wavelet-HHL | glszm | LargeAreaEmphasis                    | 17.28629857  |
| wavelet-HHL | glszm | SmallAreaHighGrayLevelEmphasis       | 314.8180829  |
| wavelet-HHL | glszm | ZonePercentage                       | 0.533260632  |
| wavelet-HHL | glszm | LargeAreaLowGrayLevelEmphasis        | 0.060817227  |
| wavelet-HHL | glszm | LargeAreaHighGrayLevelEmphasis       | 5995.496933  |
| wavelet-HHL | glszm | HighGrayLevelZoneEmphasis            | 406.6421268  |
| wavelet-HHL | glszm | SmallAreaEmphasis                    | 0.763081957  |
| wavelet-HHL | glszm | LowGrayLevelZoneEmphasis             | 0.010387652  |
| wavelet-HHL | glszm | ZoneEntropy                          | 6.018533392  |
| wavelet-HHL | glszm | SmallAreaLowGrayLevelEmphasis        | 0.009359877  |
| wavelet-HHL | ngtdm | Coarseness                           | 0.007390393  |
| wavelet-HHL | ngtdm | Complexity                           | 2539.263484  |
| wavelet-HHL | ngtdm | Strength                             | 2.959059321  |
| wavelet-HHL | ngtdm | Contrast                             | 0.218943053  |
| wavelet-HHL | ngtdm | Busyness                             | 0.166567346  |
| wavelet-HLH | gldm  | GrayLevelVariance                    | 24.62222243  |
| wavelet-HLH | gldm  | HighGrayLevelEmphasis                | 489.1962923  |
| wavelet-HLH | gldm  | DependenceEntropy                    | 6.266648378  |
| wavelet-HLH | gldm  | DependenceNonUniformity              | 206.4351145  |
| wavelet-HLH | gldm  | GrayLevelNonUniformity               | 59.97491821  |
| wavelet-HLH | gldm  | SmallDependenceEmphasis              | 0.447960208  |
| wavelet-HLH | gldm  | SmallDependenceHighGrayLevelEmphasis | 228.7533304  |
| wavelet-HLH | gldm  | DependenceNonUniformityNormalized    | 0.225120081  |
| wavelet-HLH | gldm  | LargeDependenceEmphasis              | 10.18647764  |
| wavelet-HLH | gldm  | LargeDependenceLowGrayLevelEmphasis  | 0.023890682  |
| wavelet-HLH | gldm  | DependenceVariance                   | 3.308013305  |
| wavelet-HLH | gldm  | LargeDependenceHighGrayLevelEmphasis | 4845.004362  |
| wavelet-HLH | gldm  | SmallDependenceLowGrayLevelEmphasis  | 0.002434207  |
| wavelet-HLH | gldm  | LowGrayLevelEmphasis                 | 0.003722968  |
| wavelet-HLH | glcm  | JointAverage                         | 21.56375362  |
| wavelet-HLH | glcm  | SumAverage                           | 43.12750723  |
| wavelet-HLH | glcm  | JointEntropy                         | 7.98744338   |
| wavelet-HLH | glcm  | ClusterShade                         | -3.251508844 |

|             |            |                                  |              |
|-------------|------------|----------------------------------|--------------|
| wavelet-HLH | glcm       | MaximumProbability               | 0.023633111  |
| wavelet-HLH | glcm       | Idmn                             | 0.972182769  |
| wavelet-HLH | glcm       | JointEnergy                      | 0.006189954  |
| wavelet-HLH | glcm       | Contrast                         | 47.45679577  |
| wavelet-HLH | glcm       | DifferenceEntropy                | 3.824593479  |
| wavelet-HLH | glcm       | InverseVariance                  | 0.202450194  |
| wavelet-HLH | glcm       | DifferenceVariance               | 20.90295897  |
| wavelet-HLH | glcm       | Idn                              | 0.892841337  |
| wavelet-HLH | glcm       | Idm                              | 0.20474757   |
| wavelet-HLH | glcm       | Correlation                      | -0.026658386 |
| wavelet-HLH | glcm       | Autocorrelation                  | 464.3674471  |
| wavelet-HLH | glcm       | SumEntropy                       | 4.669788333  |
| wavelet-HLH | glcm       | SumSquares                       | 23.09891531  |
| wavelet-HLH | glcm       | ClusterProminence                | 8645.359051  |
| wavelet-HLH | glcm       | Imc2                             | 0.785150512  |
| wavelet-HLH | glcm       | Imc1                             | -0.113928868 |
| wavelet-HLH | glcm       | DifferenceAverage                | 5.107919553  |
| wavelet-HLH | glcm       | Id                               | 0.293801338  |
| wavelet-HLH | glcm       | ClusterTendency                  | 44.93886548  |
| wavelet-HLH | firstorder | InterquartileRange               | 133.9728605  |
| wavelet-HLH | firstorder | Skewness                         | 0.039813481  |
| wavelet-HLH | firstorder | Uniformity                       | 0.0654034    |
| wavelet-HLH | firstorder | Median                           | 2.523556288  |
| wavelet-HLH | firstorder | Energy                           | 14173567.7   |
| wavelet-HLH | firstorder | RobustMeanAbsoluteDeviation      | 57.99608271  |
| wavelet-HLH | firstorder | MeanAbsoluteDeviation            | 92.46876827  |
| wavelet-HLH | firstorder | TotalEnergy                      | 382686327.8  |
| wavelet-HLH | firstorder | Maximum                          | 447.6101208  |
| wavelet-HLH | firstorder | RootMeanSquared                  | 124.3239853  |
| wavelet-HLH | firstorder | 90Percentile                     | 154.4801871  |
| wavelet-HLH | firstorder | Minimum                          | -509.9805207 |
| wavelet-HLH | firstorder | Entropy                          | 4.290988491  |
| wavelet-HLH | firstorder | Range                            | 957.5906416  |
| wavelet-HLH | firstorder | Variance                         | 15455.07809  |
| wavelet-HLH | firstorder | 10Percentile                     | -147.2469397 |
| wavelet-HLH | firstorder | Kurtosis                         | 3.924795783  |
| wavelet-HLH | firstorder | Mean                             | 1.172702167  |
| wavelet-HLH | glrlm      | ShortRunLowGrayLevelEmphasis     | 0.003717524  |
| wavelet-HLH | glrlm      | GrayLevelVariance                | 25.85608334  |
| wavelet-HLH | glrlm      | LowGrayLevelRunEmphasis          | 0.003821706  |
| wavelet-HLH | glrlm      | GrayLevelNonUniformityNormalized | 0.062391472  |
| wavelet-HLH | glrlm      | RunVariance                      | 0.075733469  |
| wavelet-HLH | glrlm      | GrayLevelNonUniformity           | 53.64471334  |
| wavelet-HLH | glrlm      | LongRunEmphasis                  | 1.213704545  |
| wavelet-HLH | glrlm      | ShortRunHighGrayLevelEmphasis    | 468.4161604  |
| wavelet-HLH | glrlm      | RunLengthNonUniformity           | 761.6278893  |
| wavelet-HLH | glrlm      | ShortRunEmphasis                 | 0.953724256  |
| wavelet-HLH | glrlm      | LongRunHighGrayLevelEmphasis     | 591.4259164  |
| wavelet-HLH | glrlm      | RunPercentage                    | 0.937589128  |
| wavelet-HLH | glrlm      | LongRunLowGrayLevelEmphasis      | 0.004299551  |
| wavelet-HLH | glrlm      | RunEntropy                       | 4.641684977  |
| wavelet-HLH | glrlm      | HighGrayLevelRunEmphasis         | 490.2786307  |
| wavelet-HLH | glrlm      | RunLengthNonUniformityNormalized | 0.885650114  |

|             |       |                                  |             |
|-------------|-------|----------------------------------|-------------|
| wavelet-HLH | glszm | GrayLevelVariance                | 41.88759074 |
| wavelet-HLH | glszm | ZoneVariance                     | 30.63587142 |
| wavelet-HLH | glszm | GrayLevelNonUniformityNormalized | 0.043727    |
| wavelet-HLH | glszm | SizeZoneNonUniformityNormalized  | 0.578626154 |
| wavelet-HLH | glszm | SizeZoneNonUniformity            | 258.0672646 |
| wavelet-HLH | glszm | GrayLevelNonUniformity           | 19.50224215 |
| wavelet-HLH | glszm | LargeAreaEmphasis                | 34.8632287  |
| wavelet-HLH | glszm | SmallAreaHighGrayLevelEmphasis   | 407.4091297 |
| wavelet-HLH | glszm | ZonePercentage                   | 0.486368593 |
| wavelet-HLH | glszm | LargeAreaLowGrayLevelEmphasis    | 0.078509734 |
| wavelet-HLH | glszm | LargeAreaHighGrayLevelEmphasis   | 16403.1009  |
| wavelet-HLH | glszm | HighGrayLevelZoneEmphasis        | 506.7443946 |
| wavelet-HLH | glszm | SmallAreaEmphasis                | 0.787612044 |
| wavelet-HLH | glszm | LowGrayLevelZoneEmphasis         | 0.005232614 |
| wavelet-HLH | glszm | ZoneEntropy                      | 5.782431972 |
| wavelet-HLH | glszm | SmallAreaLowGrayLevelEmphasis    | 0.004682827 |
| wavelet-HLH | ngtdm | Coarseness                       | 0.007456192 |
| wavelet-HLH | ngtdm | Complexity                       | 1634.65759  |
| wavelet-HLH | ngtdm | Strength                         | 2.256554955 |
| wavelet-HLH | ngtdm | Contrast                         | 0.181439207 |
| wavelet-HLH | ngtdm | Busyness                         | 0.16681275  |



| Image type | Feature Class | Feature Name                         |                                                                                                                                                                                                                                                                                                                                                                                                                   |
|------------|---------------|--------------------------------------|-------------------------------------------------------------------------------------------------------------------------------------------------------------------------------------------------------------------------------------------------------------------------------------------------------------------------------------------------------------------------------------------------------------------|
| general    | info          | BoundingBox                          | 11: RTSTRUCT: C99-Research_segment_ITV<br>(1, 1, 3, 6, 4, 6)                                                                                                                                                                                                                                                                                                                                                      |
| general    | info          | EnabledImageTypes                    | {u'Original': {}, u'Wavelet': {}}                                                                                                                                                                                                                                                                                                                                                                                 |
|            |               |                                      | {'distances': [1], 'additionalInfo': True, 'force2D': False, 'interpolator': 'sitkBSpline', 'resampledPixelSpacing': [3.0], 'label': 1, 'normalizeScale': 1, 'normalize': False, 'force2Ddimension': 0, 'removeOutliers': None, 'minimumROISize': None, u'binWidth': 25.0, 'minimumROIDimensions': 1, u'correctMask': True, 'preCrop': False, u'symmetricalGLCM': True, 'resegmentRange': None, 'padDistance': 5} |
| general    | info          | GeneralSettings                      |                                                                                                                                                                                                                                                                                                                                                                                                                   |
| general    | info          | ImageHash                            | fda1d2783f50554648300245723f799d675a3cc9                                                                                                                                                                                                                                                                                                                                                                          |
| general    | info          | ImageSpacing                         | (0.9765625000000002, 0.9765625000000002, 2.0)                                                                                                                                                                                                                                                                                                                                                                     |
| general    | info          | MaskHash                             | 75eeccaeada32939317b93a0a5d67eae2b048632                                                                                                                                                                                                                                                                                                                                                                          |
| general    | info          | NumpyVersion                         | 1.13.1                                                                                                                                                                                                                                                                                                                                                                                                            |
| general    | info          | PyWaveletVersion                     | 0.5.2                                                                                                                                                                                                                                                                                                                                                                                                             |
| general    | info          | SimpleITKVersion                     | 1.1.0                                                                                                                                                                                                                                                                                                                                                                                                             |
| general    | info          | Version                              | 1.3.0.post102+g1b0eb74                                                                                                                                                                                                                                                                                                                                                                                            |
| general    | info          | VolumeNum                            | 1                                                                                                                                                                                                                                                                                                                                                                                                                 |
| general    | info          | VoxelNum                             | 74                                                                                                                                                                                                                                                                                                                                                                                                                |
| original   | shape         | Maximum3DDiameter                    | 19.4422221                                                                                                                                                                                                                                                                                                                                                                                                        |
| original   | shape         | Maximum2DDiameterSlice               | 16.15549442                                                                                                                                                                                                                                                                                                                                                                                                       |
| original   | shape         | Sphericity                           | 0.824348808                                                                                                                                                                                                                                                                                                                                                                                                       |
| original   | shape         | MinorAxis                            | 16.48129265                                                                                                                                                                                                                                                                                                                                                                                                       |
| original   | shape         | Elongation                           | 0.91244621                                                                                                                                                                                                                                                                                                                                                                                                        |
| original   | shape         | SurfaceVolumeRatio                   | 0.465773328                                                                                                                                                                                                                                                                                                                                                                                                       |
| original   | shape         | Volume                               | 1998                                                                                                                                                                                                                                                                                                                                                                                                              |
| original   | shape         | MajorAxis                            | 18.06275535                                                                                                                                                                                                                                                                                                                                                                                                       |
| original   | shape         | SurfaceArea                          | 930.6151091                                                                                                                                                                                                                                                                                                                                                                                                       |
| original   | shape         | Flatness                             | 0.571643844                                                                                                                                                                                                                                                                                                                                                                                                       |
| original   | shape         | LeastAxis                            | 10.32546289                                                                                                                                                                                                                                                                                                                                                                                                       |
| original   | shape         | Maximum2DDiameterColumn              | 17.49285568                                                                                                                                                                                                                                                                                                                                                                                                       |
| original   | shape         | Maximum2DDiameterRow                 | 16.15549442                                                                                                                                                                                                                                                                                                                                                                                                       |
| original   | gldm          | GrayLevelVariance                    | 62.89791819                                                                                                                                                                                                                                                                                                                                                                                                       |
| original   | gldm          | HighGrayLevelEmphasis                | 334.2567568                                                                                                                                                                                                                                                                                                                                                                                                       |
| original   | gldm          | DependenceEntropy                    | 5.104393399                                                                                                                                                                                                                                                                                                                                                                                                       |
| original   | gldm          | DependenceNonUniformity              | 26.40540541                                                                                                                                                                                                                                                                                                                                                                                                       |
| original   | gldm          | GrayLevelNonUniformity               | 3.72972973                                                                                                                                                                                                                                                                                                                                                                                                        |
| original   | gldm          | SmallDependenceEmphasis              | 0.58256006                                                                                                                                                                                                                                                                                                                                                                                                        |
| original   | gldm          | SmallDependenceHighGrayLevelEmphasis | 153.9233333                                                                                                                                                                                                                                                                                                                                                                                                       |
| original   | gldm          | DependenceNonUniformityNormalized    | 0.356829803                                                                                                                                                                                                                                                                                                                                                                                                       |
| original   | gldm          | LargeDependenceEmphasis              | 4.027027027                                                                                                                                                                                                                                                                                                                                                                                                       |
| original   | gldm          | LargeDependenceLowGrayLevelEmphasis  | 0.034291594                                                                                                                                                                                                                                                                                                                                                                                                       |
| original   | gldm          | DependenceVariance                   | 0.84514244                                                                                                                                                                                                                                                                                                                                                                                                        |
| original   | gldm          | LargeDependenceHighGrayLevelEmphasis | 1976.716216                                                                                                                                                                                                                                                                                                                                                                                                       |
| original   | gldm          | SmallDependenceLowGrayLevelEmphasis  | 0.01948887                                                                                                                                                                                                                                                                                                                                                                                                        |
| original   | gldm          | LowGrayLevelEmphasis                 | 0.022023579                                                                                                                                                                                                                                                                                                                                                                                                       |
| original   | glcm          | JointAverage                         | 17.92646321                                                                                                                                                                                                                                                                                                                                                                                                       |
| original   | glcm          | SumAverage                           | 35.85292643                                                                                                                                                                                                                                                                                                                                                                                                       |
| original   | glcm          | JointEntropy                         | 6.146004757                                                                                                                                                                                                                                                                                                                                                                                                       |
| original   | glcm          | ClusterShade                         | -301.9985161                                                                                                                                                                                                                                                                                                                                                                                                      |
| original   | glcm          | MaximumProbability                   | 0.027515019                                                                                                                                                                                                                                                                                                                                                                                                       |

|          |            |                                  |              |
|----------|------------|----------------------------------|--------------|
| original | glcm       | Idmn                             | 0.893395729  |
| original | glcm       | JointEnergy                      | 0.014899638  |
| original | glcm       | Contrast                         | 117.2416431  |
| original | glcm       | DifferenceEntropy                | 3.958486874  |
| original | glcm       | InverseVariance                  | 0.14678919   |
| original | glcm       | DifferenceVariance               | 41.00660177  |
| original | glcm       | Idn                              | 0.79224087   |
| original | glcm       | Idm                              | 0.139582456  |
| original | glcm       | Correlation                      | 0.085222329  |
| original | glcm       | Autocorrelation                  | 327.2546469  |
| original | glcm       | SumEntropy                       | 4.591872673  |
| original | glcm       | SumSquares                       | 64.19654366  |
| original | glcm       | ClusterProminence                | 43936.51367  |
| original | glcm       | Imc2                             | 0.996261093  |
| original | glcm       | Imc1                             | -0.576330902 |
| original | glcm       | DifferenceAverage                | 8.667119857  |
| original | glcm       | Id                               | 0.215258613  |
| original | glcm       | ClusterTendency                  | 139.5445316  |
| original | firstorder | InterquartileRange               | 383.25       |
| original | firstorder | Skewness                         | 0.023002542  |
| original | firstorder | Uniformity                       | 0.050401753  |
| original | firstorder | Median                           | -233         |
| original | firstorder | Energy                           | 6744402      |
| original | firstorder | RobustMeanAbsoluteDeviation      | 144.0951249  |
| original | firstorder | MeanAbsoluteDeviation            | 175.7165814  |
| original | firstorder | TotalEnergy                      | 182098854    |
| original | firstorder | Maximum                          | 94           |
| original | firstorder | RootMeanSquared                  | 301.8949611  |
| original | firstorder | 90Percentile                     | 47.8         |
| original | firstorder | Minimum                          | -622         |
| original | firstorder | Entropy                          | 4.448940785  |
| original | firstorder | Range                            | 716          |
| original | firstorder | Variance                         | 39844.43901  |
| original | firstorder | 10Percentile                     | -485.1       |
| original | firstorder | Kurtosis                         | 1.682896144  |
| original | firstorder | Mean                             | -226.4864865 |
| original | glrlm      | ShortRunLowGrayLevelEmphasis     | 0.022454283  |
| original | glrlm      | GrayLevelVariance                | 62.46811785  |
| original | glrlm      | LowGrayLevelRunEmphasis          | 0.022568749  |
| original | glrlm      | GrayLevelNonUniformityNormalized | 0.050291293  |
| original | glrlm      | RunVariance                      | 0.030047579  |
| original | glrlm      | GrayLevelNonUniformity           | 3.609111845  |
| original | glrlm      | LongRunEmphasis                  | 1.095051273  |
| original | glrlm      | ShortRunHighGrayLevelEmphasis    | 317.1326703  |
| original | glrlm      | RunLengthNonUniformity           | 67.53534998  |
| original | glrlm      | ShortRunEmphasis                 | 0.976237182  |
| original | glrlm      | LongRunHighGrayLevelEmphasis     | 376.5210914  |
| original | glrlm      | RunPercentage                    | 0.96985447   |
| original | glrlm      | LongRunLowGrayLevelEmphasis      | 0.02302661   |
| original | glrlm      | RunEntropy                       | 4.53496154   |
| original | glrlm      | HighGrayLevelRunEmphasis         | 329.0103545  |
| original | glrlm      | RunLengthNonUniformityNormalized | 0.939904841  |
| original | glszm      | GrayLevelVariance                | 57.3316      |
| original | glszm      | ZoneVariance                     | 0.8496       |
| original | glszm      | GrayLevelNonUniformityNormalized | 0.052        |
| original | glszm      | SizeZoneNonUniformityNormalized  | 0.5496       |

|             |            |                                      |              |
|-------------|------------|--------------------------------------|--------------|
| original    | glszm      | SizeZoneNonUniformity                | 27.48        |
| original    | glszm      | GrayLevelNonUniformity               | 2.6          |
| original    | glszm      | LargeAreaEmphasis                    | 3.04         |
| original    | glszm      | SmallAreaHighGrayLevelEmphasis       | 192.2348667  |
| original    | glszm      | ZonePercentage                       | 0.675675676  |
| original    | glszm      | LargeAreaLowGrayLevelEmphasis        | 0.038910104  |
| original    | glszm      | LargeAreaHighGrayLevelEmphasis       | 1311.86      |
| original    | glszm      | HighGrayLevelZoneEmphasis            | 275.78       |
| original    | glszm      | SmallAreaEmphasis                    | 0.769966667  |
| original    | glszm      | LowGrayLevelZoneEmphasis             | 0.029966527  |
| original    | glszm      | ZoneEntropy                          | 4.83856294   |
| original    | glszm      | SmallAreaLowGrayLevelEmphasis        | 0.028228606  |
| original    | ngtdm      | Coarseness                           | 0.037403591  |
| original    | ngtdm      | Complexity                           | 1922.964675  |
| original    | ngtdm      | Strength                             | 12.55422007  |
| original    | ngtdm      | Contrast                             | 1.404944965  |
| original    | ngtdm      | Busyness                             | 0.082585559  |
| wavelet-HHH | gldm       | GrayLevelVariance                    | 11.27629657  |
| wavelet-HHH | gldm       | HighGrayLevelEmphasis                | 101.0135135  |
| wavelet-HHH | gldm       | DependenceEntropy                    | 4.913854677  |
| wavelet-HHH | gldm       | DependenceNonUniformity              | 19.72972973  |
| wavelet-HHH | gldm       | GrayLevelNonUniformity               | 6.621621622  |
| wavelet-HHH | gldm       | SmallDependenceEmphasis              | 0.394804805  |
| wavelet-HHH | gldm       | SmallDependenceHighGrayLevelEmphasis | 40.86269144  |
| wavelet-HHH | gldm       | DependenceNonUniformityNormalized    | 0.266617969  |
| wavelet-HHH | gldm       | LargeDependenceEmphasis              | 6.567567568  |
| wavelet-HHH | gldm       | LargeDependenceLowGrayLevelEmphasis  | 0.101148208  |
| wavelet-HHH | gldm       | DependenceVariance                   | 1.289992695  |
| wavelet-HHH | gldm       | LargeDependenceHighGrayLevelEmphasis | 653.5810811  |
| wavelet-HHH | gldm       | SmallDependenceLowGrayLevelEmphasis  | 0.027478172  |
| wavelet-HHH | gldm       | LowGrayLevelEmphasis                 | 0.035092834  |
| wavelet-HHH | glcm       | JointAverage                         | 9.506961194  |
| wavelet-HHH | glcm       | SumAverage                           | 19.01392239  |
| wavelet-HHH | glcm       | JointEntropy                         | 5.724402639  |
| wavelet-HHH | glcm       | ClusterShade                         | -21.23693517 |
| wavelet-HHH | glcm       | MaximumProbability                   | 0.053083076  |
| wavelet-HHH | glcm       | ldmn                                 | 0.938065948  |
| wavelet-HHH | glcm       | JointEnergy                          | 0.021879388  |
| wavelet-HHH | glcm       | Contrast                             | 21.64265548  |
| wavelet-HHH | glcm       | DifferenceEntropy                    | 3.026425283  |
| wavelet-HHH | glcm       | InverseVariance                      | 0.2375147    |
| wavelet-HHH | glcm       | DifferenceVariance                   | 7.953130497  |
| wavelet-HHH | glcm       | ldn                                  | 0.837214941  |
| wavelet-HHH | glcm       | ldm                                  | 0.236780243  |
| wavelet-HHH | glcm       | Correlation                          | -0.037096101 |
| wavelet-HHH | glcm       | Autocorrelation                      | 90.04186836  |
| wavelet-HHH | glcm       | SumEntropy                           | 3.736280976  |
| wavelet-HHH | glcm       | SumSquares                           | 10.45928207  |
| wavelet-HHH | glcm       | ClusterProminence                    | 1293.27716   |
| wavelet-HHH | glcm       | lmc2                                 | 0.976934601  |
| wavelet-HHH | glcm       | lmc1                                 | -0.428401312 |
| wavelet-HHH | glcm       | DifferenceAverage                    | 3.663577863  |
| wavelet-HHH | glcm       | ld                                   | 0.330338739  |
| wavelet-HHH | glcm       | ClusterTendency                      | 20.1944728   |
| wavelet-HHH | firstorder | InterquartileRange                   | 105.0058926  |
| wavelet-HHH | firstorder | Skewness                             | -0.26080151  |

|             |            |                                  |              |
|-------------|------------|----------------------------------|--------------|
| wavelet-HHH | firstorder | Uniformity                       | 0.089481373  |
| wavelet-HHH | firstorder | Median                           | 7.570218808  |
| wavelet-HHH | firstorder | Energy                           | 525945.4674  |
| wavelet-HHH | firstorder | RobustMeanAbsoluteDeviation      | 45.43585361  |
| wavelet-HHH | firstorder | MeanAbsoluteDeviation            | 67.46283011  |
| wavelet-HHH | firstorder | TotalEnergy                      | 14200527.62  |
| wavelet-HHH | firstorder | Maximum                          | 193.2161664  |
| wavelet-HHH | firstorder | RootMeanSquared                  | 84.3052263   |
| wavelet-HHH | firstorder | 90Percentile                     | 103.8420404  |
| wavelet-HHH | firstorder | Minimum                          | -220.788112  |
| wavelet-HHH | firstorder | Entropy                          | 3.712682003  |
| wavelet-HHH | firstorder | Range                            | 414.0042784  |
| wavelet-HHH | firstorder | Variance                         | 7105.312701  |
| wavelet-HHH | firstorder | 10Percentile                     | -115.8060463 |
| wavelet-HHH | firstorder | Kurtosis                         | 2.924948535  |
| wavelet-HHH | firstorder | Mean                             | -1.434740264 |
| wavelet-HHH | glrlm      | ShortRunLowGrayLevelEmphasis     | 0.035847224  |
| wavelet-HHH | glrlm      | GrayLevelVariance                | 11.65452747  |
| wavelet-HHH | glrlm      | LowGrayLevelRunEmphasis          | 0.036327415  |
| wavelet-HHH | glrlm      | GrayLevelNonUniformityNormalized | 0.087387391  |
| wavelet-HHH | glrlm      | RunVariance                      | 0.054016999  |
| wavelet-HHH | glrlm      | GrayLevelNonUniformity           | 6.146890001  |
| wavelet-HHH | glrlm      | LongRunEmphasis                  | 1.166060289  |
| wavelet-HHH | glrlm      | ShortRunHighGrayLevelEmphasis    | 97.2871525   |
| wavelet-HHH | glrlm      | RunLengthNonUniformity           | 63.75615876  |
| wavelet-HHH | glrlm      | ShortRunEmphasis                 | 0.960980538  |
| wavelet-HHH | glrlm      | LongRunHighGrayLevelEmphasis     | 117.6631151  |
| wavelet-HHH | glrlm      | RunPercentage                    | 0.95010395   |
| wavelet-HHH | glrlm      | LongRunLowGrayLevelEmphasis      | 0.038330681  |
| wavelet-HHH | glrlm      | RunEntropy                       | 3.920228825  |
| wavelet-HHH | glrlm      | HighGrayLevelRunEmphasis         | 101.12077    |
| wavelet-HHH | glrlm      | RunLengthNonUniformityNormalized | 0.904555462  |
| wavelet-HHH | glszm      | GrayLevelVariance                | 18.60408163  |
| wavelet-HHH | glszm      | ZoneVariance                     | 3.644081633  |
| wavelet-HHH | glszm      | GrayLevelNonUniformityNormalized | 0.071020408  |
| wavelet-HHH | glszm      | SizeZoneNonUniformityNormalized  | 0.377959184  |
| wavelet-HHH | glszm      | SizeZoneNonUniformity            | 13.22857143  |
| wavelet-HHH | glszm      | GrayLevelNonUniformity           | 2.485714286  |
| wavelet-HHH | glszm      | LargeAreaEmphasis                | 8.114285714  |
| wavelet-HHH | glszm      | SmallAreaHighGrayLevelEmphasis   | 67.09546032  |
| wavelet-HHH | glszm      | ZonePercentage                   | 0.472972973  |
| wavelet-HHH | glszm      | LargeAreaLowGrayLevelEmphasis    | 0.144090232  |
| wavelet-HHH | glszm      | LargeAreaHighGrayLevelEmphasis   | 812.5428571  |
| wavelet-HHH | glszm      | HighGrayLevelZoneEmphasis        | 104.8285714  |
| wavelet-HHH | glszm      | SmallAreaEmphasis                | 0.634714286  |
| wavelet-HHH | glszm      | LowGrayLevelZoneEmphasis         | 0.060146801  |
| wavelet-HHH | glszm      | ZoneEntropy                      | 4.629003731  |
| wavelet-HHH | glszm      | SmallAreaLowGrayLevelEmphasis    | 0.055443066  |
| wavelet-HHH | ngtdm      | Coarseness                       | 0.071861127  |
| wavelet-HHH | ngtdm      | Complexity                       | 291.7815499  |
| wavelet-HHH | ngtdm      | Strength                         | 5.690517311  |
| wavelet-HHH | ngtdm      | Contrast                         | 0.237657422  |
| wavelet-HHH | ngtdm      | Busyness                         | 0.0951371    |
| wavelet-HLL | gldm       | GrayLevelVariance                | 77.76406136  |
| wavelet-HLL | gldm       | HighGrayLevelEmphasis            | 469.1621622  |
| wavelet-HLL | gldm       | DependenceEntropy                | 5.411891879  |

|             |            |                                      |              |
|-------------|------------|--------------------------------------|--------------|
| wavelet-HLL | gldm       | DependenceNonUniformity              | 35.27027027  |
| wavelet-HLL | gldm       | GrayLevelNonUniformity               | 3.189189189  |
| wavelet-HLL | gldm       | SmallDependenceEmphasis              | 0.669388138  |
| wavelet-HLL | gldm       | SmallDependenceHighGrayLevelEmphasis | 339.5057245  |
| wavelet-HLL | gldm       | DependenceNonUniformityNormalized    | 0.476625274  |
| wavelet-HLL | gldm       | LargeDependenceEmphasis              | 2.594594595  |
| wavelet-HLL | gldm       | LargeDependenceLowGrayLevelEmphasis  | 0.02745616   |
| wavelet-HLL | gldm       | DependenceVariance                   | 0.38495252   |
| wavelet-HLL | gldm       | LargeDependenceHighGrayLevelEmphasis | 1093.675676  |
| wavelet-HLL | gldm       | SmallDependenceLowGrayLevelEmphasis  | 0.018167249  |
| wavelet-HLL | gldm       | LowGrayLevelEmphasis                 | 0.019707966  |
| wavelet-HLL | glcm       | JointAverage                         | 19.57533078  |
| wavelet-HLL | glcm       | SumAverage                           | 39.15066156  |
| wavelet-HLL | glcm       | JointEntropy                         | 6.188353434  |
| wavelet-HLL | glcm       | ClusterShade                         | 665.4306542  |
| wavelet-HLL | glcm       | MaximumProbability                   | 0.025314444  |
| wavelet-HLL | glcm       | ldmn                                 | 0.924740955  |
| wavelet-HLL | glcm       | JointEnergy                          | 0.014362444  |
| wavelet-HLL | glcm       | Contrast                             | 152.715312   |
| wavelet-HLL | glcm       | DifferenceEntropy                    | 4.06053299   |
| wavelet-HLL | glcm       | InverseVariance                      | 0.122629882  |
| wavelet-HLL | glcm       | DifferenceVariance                   | 56.44015503  |
| wavelet-HLL | glcm       | ldn                                  | 0.826629988  |
| wavelet-HLL | glcm       | ldm                                  | 0.109341101  |
| wavelet-HLL | glcm       | Correlation                          | 0.069158061  |
| wavelet-HLL | glcm       | Autocorrelation                      | 389.6252496  |
| wavelet-HLL | glcm       | SumEntropy                           | 4.63339632   |
| wavelet-HLL | glcm       | SumSquares                           | 82.75447974  |
| wavelet-HLL | glcm       | ClusterProminence                    | 78172.64926  |
| wavelet-HLL | glcm       | lmc2                                 | 0.99895314   |
| wavelet-HLL | glcm       | lmc1                                 | -0.671085209 |
| wavelet-HLL | glcm       | DifferenceAverage                    | 9.506623552  |
| wavelet-HLL | glcm       | ld                                   | 0.192073385  |
| wavelet-HLL | glcm       | ClusterTendency                      | 178.302607   |
| wavelet-HLL | firstorder | InterquartileRange                   | 316.8887015  |
| wavelet-HLL | firstorder | Skewness                             | 0.223657618  |
| wavelet-HLL | firstorder | Uniformity                           | 0.043097151  |
| wavelet-HLL | firstorder | Median                               | -89.25076238 |
| wavelet-HLL | firstorder | Energy                               | 3746496.507  |
| wavelet-HLL | firstorder | RobustMeanAbsoluteDeviation          | 135.5422779  |
| wavelet-HLL | firstorder | MeanAbsoluteDeviation                | 185.0909891  |
| wavelet-HLL | firstorder | TotalEnergy                          | 101155405.7  |
| wavelet-HLL | firstorder | Maximum                              | 462.4374454  |
| wavelet-HLL | firstorder | RootMeanSquared                      | 225.0074025  |
| wavelet-HLL | firstorder | 90Percentile                         | 271.4786839  |
| wavelet-HLL | firstorder | Minimum                              | -511.4436781 |
| wavelet-HLL | firstorder | Entropy                              | 4.717512447  |
| wavelet-HLL | firstorder | Range                                | 973.8811234  |
| wavelet-HLL | firstorder | Variance                             | 48775.7066   |
| wavelet-HLL | firstorder | 10Percentile                         | -306.6995757 |
| wavelet-HLL | firstorder | Kurtosis                             | 2.332609239  |
| wavelet-HLL | firstorder | Mean                                 | -43.04212561 |
| wavelet-HLL | glrlm      | ShortRunLowGrayLevelEmphasis         | 0.019925337  |
| wavelet-HLL | glrlm      | GrayLevelVariance                    | 78.21026266  |
| wavelet-HLL | glrlm      | LowGrayLevelRunEmphasis              | 0.019995132  |
| wavelet-HLL | glrlm      | GrayLevelNonUniformityNormalized     | 0.042965075  |

|             |       |                                      |              |
|-------------|-------|--------------------------------------|--------------|
| wavelet-HLL | glrlm | RunVariance                          | 0.018690132  |
| wavelet-HLL | glrlm | GrayLevelNonUniformity               | 3.120000832  |
| wavelet-HLL | glrlm | LongRunEmphasis                      | 1.057879062  |
| wavelet-HLL | glrlm | ShortRunHighGrayLevelEmphasis        | 465.1247366  |
| wavelet-HLL | glrlm | RunLengthNonUniformity               | 69.93229015  |
| wavelet-HLL | glrlm | ShortRunEmphasis                     | 0.985530234  |
| wavelet-HLL | glrlm | LongRunHighGrayLevelEmphasis         | 493.1725527  |
| wavelet-HLL | glrlm | RunPercentage                        | 0.981288981  |
| wavelet-HLL | glrlm | LongRunLowGrayLevelEmphasis          | 0.020274312  |
| wavelet-HLL | glrlm | RunEntropy                           | 4.767660846  |
| wavelet-HLL | glrlm | HighGrayLevelRunEmphasis             | 470.7342999  |
| wavelet-HLL | glrlm | RunLengthNonUniformityNormalized     | 0.962619736  |
| wavelet-HLL | glszm | GrayLevelVariance                    | 85.32110969  |
| wavelet-HLL | glszm | ZoneVariance                         | 0.396683673  |
| wavelet-HLL | glszm | GrayLevelNonUniformityNormalized     | 0.039540816  |
| wavelet-HLL | glszm | SizeZoneNonUniformityNormalized      | 0.602678571  |
| wavelet-HLL | glszm | SizeZoneNonUniformity                | 33.75        |
| wavelet-HLL | glszm | GrayLevelNonUniformity               | 2.214285714  |
| wavelet-HLL | glszm | LargeAreaEmphasis                    | 2.142857143  |
| wavelet-HLL | glszm | SmallAreaHighGrayLevelEmphasis       | 417.3066716  |
| wavelet-HLL | glszm | ZonePercentage                       | 0.756756757  |
| wavelet-HLL | glszm | LargeAreaLowGrayLevelEmphasis        | 0.03010189   |
| wavelet-HLL | glszm | LargeAreaHighGrayLevelEmphasis       | 944          |
| wavelet-HLL | glszm | HighGrayLevelZoneEmphasis            | 494.6607143  |
| wavelet-HLL | glszm | SmallAreaEmphasis                    | 0.804191468  |
| wavelet-HLL | glszm | LowGrayLevelZoneEmphasis             | 0.024497803  |
| wavelet-HLL | glszm | ZoneEntropy                          | 5.302628806  |
| wavelet-HLL | glszm | SmallAreaLowGrayLevelEmphasis        | 0.023620505  |
| wavelet-HLL | ngtdm | Coarseness                           | 0.056691926  |
| wavelet-HLL | ngtdm | Complexity                           | 2746.394037  |
| wavelet-HLL | ngtdm | Strength                             | 24.20059776  |
| wavelet-HLL | ngtdm | Contrast                             | 1.098810875  |
| wavelet-HLL | ngtdm | Busyness                             | 0.040227457  |
| wavelet-LHL | gldm  | GrayLevelVariance                    | 374.9612856  |
| wavelet-LHL | gldm  | HighGrayLevelEmphasis                | 3868.72973   |
| wavelet-LHL | gldm  | DependenceEntropy                    | 5.49297296   |
| wavelet-LHL | gldm  | DependenceNonUniformity              | 47.2972973   |
| wavelet-LHL | gldm  | GrayLevelNonUniformity               | 2.189189189  |
| wavelet-LHL | gldm  | SmallDependenceEmphasis              | 0.826576577  |
| wavelet-LHL | gldm  | SmallDependenceHighGrayLevelEmphasis | 3276.056306  |
| wavelet-LHL | gldm  | DependenceNonUniformityNormalized    | 0.639152666  |
| wavelet-LHL | gldm  | LargeDependenceEmphasis              | 2.054054054  |
| wavelet-LHL | gldm  | LargeDependenceLowGrayLevelEmphasis  | 0.014686617  |
| wavelet-LHL | gldm  | DependenceVariance                   | 0.371073776  |
| wavelet-LHL | gldm  | LargeDependenceHighGrayLevelEmphasis | 7254.918919  |
| wavelet-LHL | gldm  | SmallDependenceLowGrayLevelEmphasis  | 0.014292287  |
| wavelet-LHL | gldm  | LowGrayLevelEmphasis                 | 0.014345248  |
| wavelet-LHL | glcm  | JointAverage                         | 61.28016125  |
| wavelet-LHL | glcm  | SumAverage                           | 122.5603225  |
| wavelet-LHL | glcm  | JointEntropy                         | 6.281496672  |
| wavelet-LHL | glcm  | ClusterShade                         | -17517.00758 |
| wavelet-LHL | glcm  | MaximumProbability                   | 0.019745845  |
| wavelet-LHL | glcm  | ldmn                                 | 0.926909491  |
| wavelet-LHL | glcm  | JointEnergy                          | 0.013108091  |
| wavelet-LHL | glcm  | Contrast                             | 818.0662469  |
| wavelet-LHL | glcm  | DifferenceEntropy                    | 4.456692426  |

|             |            |                                  |              |
|-------------|------------|----------------------------------|--------------|
| wavelet-LHL | glcm       | InverseVariance                  | 0.058903669  |
| wavelet-LHL | glcm       | DifferenceVariance               | 319.2828955  |
| wavelet-LHL | glcm       | Idn                              | 0.833196841  |
| wavelet-LHL | glcm       | Idm                              | 0.055475313  |
| wavelet-LHL | glcm       | Correlation                      | -0.110292394 |
| wavelet-LHL | glcm       | Autocorrelation                  | 3710.101361  |
| wavelet-LHL | glcm       | SumEntropy                       | 4.916789647  |
| wavelet-LHL | glcm       | SumSquares                       | 363.0648007  |
| wavelet-LHL | glcm       | ClusterProminence                | 2542730.172  |
| wavelet-LHL | glcm       | Imc2                             | 0.999814761  |
| wavelet-LHL | glcm       | Imc1                             | -0.775709312 |
| wavelet-LHL | glcm       | DifferenceAverage                | 20.81260784  |
| wavelet-LHL | glcm       | Id                               | 0.11664833   |
| wavelet-LHL | glcm       | ClusterTendency                  | 634.1929559  |
| wavelet-LHL | firstorder | InterquartileRange               | 514.1085223  |
| wavelet-LHL | firstorder | Skewness                         | -0.98533325  |
| wavelet-LHL | firstorder | Uniformity                       | 0.029583638  |
| wavelet-LHL | firstorder | Median                           | -34.92489167 |
| wavelet-LHL | firstorder | Energy                           | 17765845.29  |
| wavelet-LHL | firstorder | RobustMeanAbsoluteDeviation      | 216.4670734  |
| wavelet-LHL | firstorder | MeanAbsoluteDeviation            | 358.8347904  |
| wavelet-LHL | firstorder | TotalEnergy                      | 479677822.7  |
| wavelet-LHL | firstorder | Maximum                          | 687.4492323  |
| wavelet-LHL | firstorder | RootMeanSquared                  | 489.9785611  |
| wavelet-LHL | firstorder | 90Percentile                     | 492.3210407  |
| wavelet-LHL | firstorder | Minimum                          | -1534.796649 |
| wavelet-LHL | firstorder | Entropy                          | 5.266555561  |
| wavelet-LHL | firstorder | Range                            | 2222.245882  |
| wavelet-LHL | firstorder | Variance                         | 233162.4893  |
| wavelet-LHL | firstorder | 10Percentile                     | -693.9423743 |
| wavelet-LHL | firstorder | Kurtosis                         | 4.025394186  |
| wavelet-LHL | firstorder | Mean                             | -83.16550378 |
| wavelet-LHL | glrlm      | ShortRunLowGrayLevelEmphasis     | 0.014508355  |
| wavelet-LHL | glrlm      | GrayLevelVariance                | 378.9199514  |
| wavelet-LHL | glrlm      | LowGrayLevelRunEmphasis          | 0.014511169  |
| wavelet-LHL | glrlm      | GrayLevelNonUniformityNormalized | 0.029347556  |
| wavelet-LHL | glrlm      | RunVariance                      | 0.011419973  |
| wavelet-LHL | glrlm      | GrayLevelNonUniformity           | 2.147306224  |
| wavelet-LHL | glrlm      | LongRunEmphasis                  | 1.03548336   |
| wavelet-LHL | glrlm      | ShortRunHighGrayLevelEmphasis    | 3846.460953  |
| wavelet-LHL | glrlm      | RunLengthNonUniformity           | 71.51974321  |
| wavelet-LHL | glrlm      | ShortRunEmphasis                 | 0.99112916   |
| wavelet-LHL | glrlm      | LongRunHighGrayLevelEmphasis     | 3992.233711  |
| wavelet-LHL | glrlm      | RunPercentage                    | 0.988565489  |
| wavelet-LHL | glrlm      | LongRunLowGrayLevelEmphasis      | 0.014522423  |
| wavelet-LHL | glrlm      | RunEntropy                       | 5.298630385  |
| wavelet-LHL | glrlm      | HighGrayLevelRunEmphasis         | 3875.615505  |
| wavelet-LHL | glrlm      | RunLengthNonUniformityNormalized | 0.977160055  |
| wavelet-LHL | glszm      | GrayLevelVariance                | 421.5540828  |
| wavelet-LHL | glszm      | ZoneVariance                     | 0.180828402  |
| wavelet-LHL | glszm      | GrayLevelNonUniformityNormalized | 0.027218935  |
| wavelet-LHL | glszm      | SizeZoneNonUniformityNormalized  | 0.803076923  |
| wavelet-LHL | glszm      | SizeZoneNonUniformity            | 52.2         |
| wavelet-LHL | glszm      | GrayLevelNonUniformity           | 1.769230769  |
| wavelet-LHL | glszm      | LargeAreaEmphasis                | 1.476923077  |
| wavelet-LHL | glszm      | SmallAreaHighGrayLevelEmphasis   | 3636.476496  |

|             |            |                                      |              |
|-------------|------------|--------------------------------------|--------------|
| wavelet-LHL | glszm      | ZonePercentage                       | 0.878378378  |
| wavelet-LHL | glszm      | LargeAreaLowGrayLevelEmphasis        | 0.016438939  |
| wavelet-LHL | glszm      | LargeAreaHighGrayLevelEmphasis       | 5516         |
| wavelet-LHL | glszm      | HighGrayLevelZoneEmphasis            | 3935.307692  |
| wavelet-LHL | glszm      | SmallAreaEmphasis                    | 0.914957265  |
| wavelet-LHL | glszm      | LowGrayLevelZoneEmphasis             | 0.016288859  |
| wavelet-LHL | glszm      | ZoneEntropy                          | 5.506832813  |
| wavelet-LHL | glszm      | SmallAreaLowGrayLevelEmphasis        | 0.016263628  |
| wavelet-LHL | ngtdm      | Coarseness                           | 0.034603668  |
| wavelet-LHL | ngtdm      | Complexity                           | 20657.80939  |
| wavelet-LHL | ngtdm      | Strength                             | 67.66412821  |
| wavelet-LHL | ngtdm      | Contrast                             | 6.340213664  |
| wavelet-LHL | ngtdm      | Busyness                             | 0.014133808  |
| wavelet-LHH | gldm       | GrayLevelVariance                    | 21.54656684  |
| wavelet-LHH | gldm       | HighGrayLevelEmphasis                | 178.472973   |
| wavelet-LHH | gldm       | DependenceEntropy                    | 4.883251129  |
| wavelet-LHH | gldm       | DependenceNonUniformity              | 23.27027027  |
| wavelet-LHH | gldm       | GrayLevelNonUniformity               | 5.378378378  |
| wavelet-LHH | gldm       | SmallDependenceEmphasis              | 0.540142643  |
| wavelet-LHH | gldm       | SmallDependenceHighGrayLevelEmphasis | 90.71081456  |
| wavelet-LHH | gldm       | DependenceNonUniformityNormalized    | 0.314463112  |
| wavelet-LHH | gldm       | LargeDependenceEmphasis              | 4.864864865  |
| wavelet-LHH | gldm       | LargeDependenceLowGrayLevelEmphasis  | 0.050221115  |
| wavelet-LHH | gldm       | DependenceVariance                   | 1.07815924   |
| wavelet-LHH | gldm       | LargeDependenceHighGrayLevelEmphasis | 954.1216216  |
| wavelet-LHH | gldm       | SmallDependenceLowGrayLevelEmphasis  | 0.024326007  |
| wavelet-LHH | gldm       | LowGrayLevelEmphasis                 | 0.027356271  |
| wavelet-LHH | glcm       | JointAverage                         | 12.76979935  |
| wavelet-LHH | glcm       | SumAverage                           | 25.53959869  |
| wavelet-LHH | glcm       | JointEntropy                         | 5.867519616  |
| wavelet-LHH | glcm       | ClusterShade                         | -91.56692315 |
| wavelet-LHH | glcm       | MaximumProbability                   | 0.043882727  |
| wavelet-LHH | glcm       | ldmn                                 | 0.944062928  |
| wavelet-LHH | glcm       | JointEnergy                          | 0.019367562  |
| wavelet-LHH | glcm       | Contrast                             | 42.53697313  |
| wavelet-LHH | glcm       | DifferenceEntropy                    | 3.337582683  |
| wavelet-LHH | glcm       | InverseVariance                      | 0.18862771   |
| wavelet-LHH | glcm       | DifferenceVariance                   | 16.58840818  |
| wavelet-LHH | glcm       | ldn                                  | 0.846868628  |
| wavelet-LHH | glcm       | ldm                                  | 0.181888215  |
| wavelet-LHH | glcm       | Correlation                          | -0.039327287 |
| wavelet-LHH | glcm       | Autocorrelation                      | 162.3753077  |
| wavelet-LHH | glcm       | SumEntropy                           | 4.023072102  |
| wavelet-LHH | glcm       | SumSquares                           | 20.47654529  |
| wavelet-LHH | glcm       | ClusterProminence                    | 5396.117853  |
| wavelet-LHH | glcm       | lmc2                                 | 0.989900318  |
| wavelet-LHH | glcm       | lmc1                                 | -0.507274613 |
| wavelet-LHH | glcm       | DifferenceAverage                    | 5.023095134  |
| wavelet-LHH | glcm       | ld                                   | 0.276799409  |
| wavelet-LHH | glcm       | ClusterTendency                      | 39.36920802  |
| wavelet-LHH | firstorder | InterquartileRange                   | 156.9012733  |
| wavelet-LHH | firstorder | Skewness                             | -0.203542054 |
| wavelet-LHH | firstorder | Uniformity                           | 0.072680789  |
| wavelet-LHH | firstorder | Median                               | -22.5403036  |
| wavelet-LHH | firstorder | Energy                               | 1055342.286  |
| wavelet-LHH | firstorder | RobustMeanAbsoluteDeviation          | 61.2996421   |



|             |            |                                      |              |
|-------------|------------|--------------------------------------|--------------|
| wavelet-LHH | firstorder | MeanAbsoluteDeviation                | 90.9398941   |
| wavelet-LHH | firstorder | TotalEnergy                          | 28494241.73  |
| wavelet-LHH | firstorder | Maximum                              | 290.4915363  |
| wavelet-LHH | firstorder | RootMeanSquared                      | 119.4210293  |
| wavelet-LHH | firstorder | 90Percentile                         | 107.3155112  |
| wavelet-LHH | firstorder | Minimum                              | -305.1454925 |
| wavelet-LHH | firstorder | Entropy                              | 4.072789393  |
| wavelet-LHH | firstorder | Range                                | 595.6370288  |
| wavelet-LHH | firstorder | Variance                             | 13667.77886  |
| wavelet-LHH | firstorder | 10Percentile                         | -178.3663175 |
| wavelet-LHH | firstorder | Kurtosis                             | 2.985765525  |
| wavelet-LHH | firstorder | Mean                                 | -24.36397734 |
| wavelet-LHH | grlm       | ShortRunLowGrayLevelEmphasis         | 0.027998025  |
| wavelet-LHH | grlm       | GrayLevelVariance                    | 21.99031752  |
| wavelet-LHH | grlm       | LowGrayLevelRunEmphasis              | 0.028174606  |
| wavelet-LHH | grlm       | GrayLevelNonUniformityNormalized     | 0.070957056  |
| wavelet-LHH | grlm       | RunVariance                          | 0.03620969   |
| wavelet-LHH | grlm       | GrayLevelNonUniformity               | 5.062686182  |
| wavelet-LHH | grlm       | LongRunEmphasis                      | 1.115561562  |
| wavelet-LHH | grlm       | ShortRunHighGrayLevelEmphasis        | 171.973977   |
| wavelet-LHH | grlm       | RunLengthNonUniformity               | 66.23949862  |
| wavelet-LHH | grlm       | ShortRunEmphasis                     | 0.971109609  |
| wavelet-LHH | grlm       | LongRunHighGrayLevelEmphasis         | 200.6322652  |
| wavelet-LHH | grlm       | RunPercentage                        | 0.963617464  |
| wavelet-LHH | grlm       | LongRunLowGrayLevelEmphasis          | 0.028880932  |
| wavelet-LHH | grlm       | RunEntropy                           | 4.221486409  |
| wavelet-LHH | grlm       | HighGrayLevelRunEmphasis             | 177.7056347  |
| wavelet-LHH | grlm       | RunLengthNonUniformityNormalized     | 0.927580619  |
| wavelet-LHH | glszm      | GrayLevelVariance                    | 28.01323251  |
| wavelet-LHH | glszm      | ZoneVariance                         | 1.49905482   |
| wavelet-LHH | glszm      | GrayLevelNonUniformityNormalized     | 0.058601134  |
| wavelet-LHH | glszm      | SizeZoneNonUniformityNormalized      | 0.542533081  |
| wavelet-LHH | glszm      | SizeZoneNonUniformity                | 24.95652174  |
| wavelet-LHH | glszm      | GrayLevelNonUniformity               | 2.695652174  |
| wavelet-LHH | glszm      | LargeAreaEmphasis                    | 4.086956522  |
| wavelet-LHH | glszm      | SmallAreaHighGrayLevelEmphasis       | 126.3410024  |
| wavelet-LHH | glszm      | ZonePercentage                       | 0.621621622  |
| wavelet-LHH | glszm      | LargeAreaLowGrayLevelEmphasis        | 0.058219684  |
| wavelet-LHH | glszm      | LargeAreaHighGrayLevelEmphasis       | 796.1521739  |
| wavelet-LHH | glszm      | HighGrayLevelZoneEmphasis            | 167.8695652  |
| wavelet-LHH | glszm      | SmallAreaEmphasis                    | 0.762910628  |
| wavelet-LHH | glszm      | LowGrayLevelZoneEmphasis             | 0.040170803  |
| wavelet-LHH | glszm      | ZoneEntropy                          | 4.567040217  |
| wavelet-LHH | glszm      | SmallAreaLowGrayLevelEmphasis        | 0.038406063  |
| wavelet-LHH | ngtdm      | Coarseness                           | 0.071187864  |
| wavelet-LHH | ngtdm      | Complexity                           | 663.7396297  |
| wavelet-LHH | ngtdm      | Strength                             | 10.42546792  |
| wavelet-LHH | ngtdm      | Contrast                             | 0.350273739  |
| wavelet-LHH | ngtdm      | Busyness                             | 0.051783552  |
| wavelet-LLH | gldm       | GrayLevelVariance                    | 97.68462381  |
| wavelet-LLH | gldm       | HighGrayLevelEmphasis                | 500.3918919  |
| wavelet-LLH | gldm       | DependenceEntropy                    | 5.195675663  |
| wavelet-LLH | gldm       | DependenceNonUniformity              | 31.27027027  |
| wavelet-LLH | gldm       | GrayLevelNonUniformity               | 3            |
| wavelet-LLH | gldm       | SmallDependenceEmphasis              | 0.662537538  |
| wavelet-LLH | gldm       | SmallDependenceHighGrayLevelEmphasis | 327.5510511  |

|             |            |                                      |              |
|-------------|------------|--------------------------------------|--------------|
| wavelet-LLH | gldm       | DependenceNonUniformityNormalized    | 0.42257122   |
| wavelet-LLH | gldm       | LargeDependenceEmphasis              | 3.378378378  |
| wavelet-LLH | gldm       | LargeDependenceLowGrayLevelEmphasis  | 0.056547663  |
| wavelet-LLH | gldm       | DependenceVariance                   | 0.748721695  |
| wavelet-LLH | gldm       | LargeDependenceHighGrayLevelEmphasis | 1500.554054  |
| wavelet-LLH | gldm       | SmallDependenceLowGrayLevelEmphasis  | 0.023615849  |
| wavelet-LLH | gldm       | LowGrayLevelEmphasis                 | 0.026677974  |
| wavelet-LLH | glcm       | JointAverage                         | 18.69917359  |
| wavelet-LLH | glcm       | SumAverage                           | 37.39834718  |
| wavelet-LLH | glcm       | JointEntropy                         | 6.211996995  |
| wavelet-LLH | glcm       | ClusterShade                         | 887.6895185  |
| wavelet-LLH | glcm       | MaximumProbability                   | 0.024083646  |
| wavelet-LLH | glcm       | ldmn                                 | 0.9307105    |
| wavelet-LLH | glcm       | JointEnergy                          | 0.014033709  |
| wavelet-LLH | glcm       | Contrast                             | 149.0524203  |
| wavelet-LLH | glcm       | DifferenceEntropy                    | 3.98409544   |
| wavelet-LLH | glcm       | InverseVariance                      | 0.095127888  |
| wavelet-LLH | glcm       | DifferenceVariance                   | 45.31894228  |
| wavelet-LLH | glcm       | ldn                                  | 0.828636787  |
| wavelet-LLH | glcm       | ldm                                  | 0.103643944  |
| wavelet-LLH | glcm       | Correlation                          | 0.295898104  |
| wavelet-LLH | glcm       | Autocorrelation                      | 379.7830223  |
| wavelet-LLH | glcm       | SumEntropy                           | 4.711866555  |
| wavelet-LLH | glcm       | SumSquares                           | 104.5859452  |
| wavelet-LLH | glcm       | ClusterProminence                    | 174694.5723  |
| wavelet-LLH | glcm       | lmc2                                 | 0.999245363  |
| wavelet-LLH | glcm       | lmc1                                 | -0.691383119 |
| wavelet-LLH | glcm       | DifferenceAverage                    | 9.666163661  |
| wavelet-LLH | glcm       | ld                                   | 0.186272662  |
| wavelet-LLH | glcm       | ClusterTendency                      | 269.2913607  |
| wavelet-LLH | firstorder | InterquartileRange                   | 344.6373658  |
| wavelet-LLH | firstorder | Skewness                             | -0.036773975 |
| wavelet-LLH | firstorder | Uniformity                           | 0.040540541  |
| wavelet-LLH | firstorder | Median                               | 85.21458165  |
| wavelet-LLH | firstorder | Energy                               | 4663306.039  |
| wavelet-LLH | firstorder | RobustMeanAbsoluteDeviation          | 149.2883794  |
| wavelet-LLH | firstorder | MeanAbsoluteDeviation                | 206.2241142  |
| wavelet-LLH | firstorder | TotalEnergy                          | 125909263.1  |
| wavelet-LLH | firstorder | Maximum                              | 577.9283256  |
| wavelet-LLH | firstorder | RootMeanSquared                      | 251.0331635  |
| wavelet-LLH | firstorder | 90Percentile                         | 331.8714808  |
| wavelet-LLH | firstorder | Minimum                              | -426.6656247 |
| wavelet-LLH | firstorder | Entropy                              | 4.805746569  |
| wavelet-LLH | firstorder | Range                                | 1004.59395   |
| wavelet-LLH | firstorder | Variance                             | 61435.97743  |
| wavelet-LLH | firstorder | 10Percentile                         | -314.7890673 |
| wavelet-LLH | firstorder | Kurtosis                             | 2.286630687  |
| wavelet-LLH | firstorder | Mean                                 | 39.77023703  |
| wavelet-LLH | glrlm      | ShortRunLowGrayLevelEmphasis         | 0.026862792  |
| wavelet-LLH | glrlm      | GrayLevelVariance                    | 97.41370542  |
| wavelet-LLH | glrlm      | LowGrayLevelRunEmphasis              | 0.027069356  |
| wavelet-LLH | glrlm      | GrayLevelNonUniformityNormalized     | 0.040453068  |
| wavelet-LLH | glrlm      | RunVariance                          | 0.023843993  |
| wavelet-LLH | glrlm      | GrayLevelNonUniformity               | 2.921944351  |
| wavelet-LLH | glrlm      | LongRunEmphasis                      | 1.074983475  |
| wavelet-LLH | glrlm      | ShortRunHighGrayLevelEmphasis        | 492.7603434  |

|             |       |                                      |              |
|-------------|-------|--------------------------------------|--------------|
| wavelet-LLH | glrlm | RunLengthNonUniformity               | 68.85303094  |
| wavelet-LLH | glrlm | ShortRunEmphasis                     | 0.981254131  |
| wavelet-LLH | glrlm | LongRunHighGrayLevelEmphasis         | 535.9144638  |
| wavelet-LLH | glrlm | RunPercentage                        | 0.976091476  |
| wavelet-LLH | glrlm | LongRunLowGrayLevelEmphasis          | 0.027895615  |
| wavelet-LLH | glrlm | RunEntropy                           | 4.864693309  |
| wavelet-LLH | glrlm | HighGrayLevelRunEmphasis             | 501.3911675  |
| wavelet-LLH | glrlm | RunLengthNonUniformityNormalized     | 0.952312013  |
| wavelet-LLH | glszm | GrayLevelVariance                    | 96.4630102   |
| wavelet-LLH | glszm | ZoneVariance                         | 0.432397959  |
| wavelet-LLH | glszm | GrayLevelNonUniformityNormalized     | 0.040816327  |
| wavelet-LLH | glszm | SizeZoneNonUniformityNormalized      | 0.618622449  |
| wavelet-LLH | glszm | SizeZoneNonUniformity                | 34.64285714  |
| wavelet-LLH | glszm | GrayLevelNonUniformity               | 2.285714286  |
| wavelet-LLH | glszm | LargeAreaEmphasis                    | 2.178571429  |
| wavelet-LLH | glszm | SmallAreaHighGrayLevelEmphasis       | 397.5208333  |
| wavelet-LLH | glszm | ZonePercentage                       | 0.756756757  |
| wavelet-LLH | glszm | LargeAreaLowGrayLevelEmphasis        | 0.044326266  |
| wavelet-LLH | glszm | LargeAreaHighGrayLevelEmphasis       | 1083.517857  |
| wavelet-LLH | glszm | HighGrayLevelZoneEmphasis            | 495.0357143  |
| wavelet-LLH | glszm | SmallAreaEmphasis                    | 0.815104167  |
| wavelet-LLH | glszm | LowGrayLevelZoneEmphasis             | 0.032286514  |
| wavelet-LLH | glszm | ZoneEntropy                          | 5.137537511  |
| wavelet-LLH | glszm | SmallAreaLowGrayLevelEmphasis        | 0.030762773  |
| wavelet-LLH | ngtdm | Coarseness                           | 0.064409676  |
| wavelet-LLH | ngtdm | Complexity                           | 2926.218037  |
| wavelet-LLH | ngtdm | Strength                             | 34.736984    |
| wavelet-LLH | ngtdm | Contrast                             | 1.100337822  |
| wavelet-LLH | ngtdm | Busyness                             | 0.027446147  |
| wavelet-LLL | gldm  | GrayLevelVariance                    | 335.6546749  |
| wavelet-LLL | gldm  | HighGrayLevelEmphasis                | 2060.148649  |
| wavelet-LLL | gldm  | DependenceEntropy                    | 5.574054041  |
| wavelet-LLL | gldm  | DependenceNonUniformity              | 49.10810811  |
| wavelet-LLL | gldm  | GrayLevelNonUniformity               | 2.135135135  |
| wavelet-LLL | gldm  | SmallDependenceEmphasis              | 0.842342342  |
| wavelet-LLL | gldm  | SmallDependenceHighGrayLevelEmphasis | 1694.403153  |
| wavelet-LLL | gldm  | DependenceNonUniformityNormalized    | 0.663623083  |
| wavelet-LLL | gldm  | LargeDependenceEmphasis              | 1.810810811  |
| wavelet-LLL | gldm  | LargeDependenceLowGrayLevelEmphasis  | 0.01515083   |
| wavelet-LLL | gldm  | DependenceVariance                   | 0.265157049  |
| wavelet-LLL | gldm  | LargeDependenceHighGrayLevelEmphasis | 3955.743243  |
| wavelet-LLL | gldm  | SmallDependenceLowGrayLevelEmphasis  | 0.014482656  |
| wavelet-LLL | gldm  | LowGrayLevelEmphasis                 | 0.014601282  |
| wavelet-LLL | glcm  | JointAverage                         | 44.7148408   |
| wavelet-LLL | glcm  | SumAverage                           | 89.42968159  |
| wavelet-LLL | glcm  | JointEntropy                         | 6.291849892  |
| wavelet-LLL | glcm  | ClusterShade                         | -3057.503937 |
| wavelet-LLL | glcm  | MaximumProbability                   | 0.022069451  |
| wavelet-LLL | glcm  | Idmn                                 | 0.942040918  |
| wavelet-LLL | glcm  | JointEnergy                          | 0.013035311  |
| wavelet-LLL | glcm  | Contrast                             | 429.4926596  |
| wavelet-LLL | glcm  | DifferenceEntropy                    | 4.50430692   |
| wavelet-LLL | glcm  | InverseVariance                      | 0.04474155   |
| wavelet-LLL | glcm  | DifferenceVariance                   | 127.3346899  |
| wavelet-LLL | glcm  | Idn                                  | 0.83623496   |
| wavelet-LLL | glcm  | Idm                                  | 0.046060006  |

|             |            |                                  |              |
|-------------|------------|----------------------------------|--------------|
| wavelet-LLL | glcm       | Correlation                      | 0.308376522  |
| wavelet-LLL | glcm       | Autocorrelation                  | 2095.35253   |
| wavelet-LLL | glcm       | SumEntropy                       | 4.980737634  |
| wavelet-LLL | glcm       | SumSquares                       | 308.2837948  |
| wavelet-LLL | glcm       | ClusterProminence                | 1509708.598  |
| wavelet-LLL | glcm       | Imc2                             | 0.999823715  |
| wavelet-LLL | glcm       | Imc1                             | -0.778092891 |
| wavelet-LLL | glcm       | DifferenceAverage                | 17.01827259  |
| wavelet-LLL | glcm       | Id                               | 0.111640949  |
| wavelet-LLL | glcm       | ClusterTendency                  | 803.6425196  |
| wavelet-LLL | firstorder | InterquartileRange               | 802.3116546  |
| wavelet-LLL | firstorder | Skewness                         | 0.124166053  |
| wavelet-LLL | firstorder | Uniformity                       | 0.028853178  |
| wavelet-LLL | firstorder | Median                           | -677.4175649 |
| wavelet-LLL | firstorder | Energy                           | 49013434.73  |
| wavelet-LLL | firstorder | RobustMeanAbsoluteDeviation      | 295.3303468  |
| wavelet-LLL | firstorder | MeanAbsoluteDeviation            | 388.7784251  |
| wavelet-LLL | firstorder | TotalEnergy                      | 1323362738   |
| wavelet-LLL | firstorder | Maximum                          | 279.4836806  |
| wavelet-LLL | firstorder | RootMeanSquared                  | 813.8450175  |
| wavelet-LLL | firstorder | 90Percentile                     | -81.96140886 |
| wavelet-LLL | firstorder | Minimum                          | -1683.043489 |
| wavelet-LLL | firstorder | Entropy                          | 5.342710589  |
| wavelet-LLL | firstorder | Range                            | 1962.527169  |
| wavelet-LLL | firstorder | Variance                         | 209584.5863  |
| wavelet-LLL | firstorder | 10Percentile                     | -1222.83974  |
| wavelet-LLL | firstorder | Kurtosis                         | 2.093822388  |
| wavelet-LLL | firstorder | Mean                             | -672.8737818 |
| wavelet-LLL | glrlm      | ShortRunLowGrayLevelEmphasis     | 0.014728426  |
| wavelet-LLL | glrlm      | GrayLevelVariance                | 336.7664381  |
| wavelet-LLL | glrlm      | LowGrayLevelRunEmphasis          | 0.014733465  |
| wavelet-LLL | glrlm      | GrayLevelNonUniformityNormalized | 0.028696227  |
| wavelet-LLL | glrlm      | RunVariance                      | 0.00935254   |
| wavelet-LLL | glrlm      | GrayLevelNonUniformity           | 2.103696162  |
| wavelet-LLL | glrlm      | LongRunEmphasis                  | 1.028538813  |
| wavelet-LLL | glrlm      | ShortRunHighGrayLevelEmphasis    | 2040.959837  |
| wavelet-LLL | glrlm      | RunLengthNonUniformity           | 71.9463763   |
| wavelet-LLL | glrlm      | ShortRunEmphasis                 | 0.992865297  |
| wavelet-LLL | glrlm      | LongRunHighGrayLevelEmphasis     | 2124.074574  |
| wavelet-LLL | glrlm      | RunPercentage                    | 0.990644491  |
| wavelet-LLL | glrlm      | LongRunLowGrayLevelEmphasis      | 0.01475362   |
| wavelet-LLL | glrlm      | RunEntropy                       | 5.36666975   |
| wavelet-LLL | glrlm      | HighGrayLevelRunEmphasis         | 2057.582784  |
| wavelet-LLL | glrlm      | RunLengthNonUniformityNormalized | 0.981294921  |
| wavelet-LLL | glszm      | GrayLevelVariance                | 347.3939394  |
| wavelet-LLL | glszm      | ZoneVariance                     | 0.136822773  |
| wavelet-LLL | glszm      | GrayLevelNonUniformityNormalized | 0.026629936  |
| wavelet-LLL | glszm      | SizeZoneNonUniformityNormalized  | 0.807621671  |
| wavelet-LLL | glszm      | SizeZoneNonUniformity            | 53.3030303   |
| wavelet-LLL | glszm      | GrayLevelNonUniformity           | 1.757575758  |
| wavelet-LLL | glszm      | LargeAreaEmphasis                | 1.393939394  |
| wavelet-LLL | glszm      | SmallAreaHighGrayLevelEmphasis   | 1839.523148  |
| wavelet-LLL | glszm      | ZonePercentage                   | 0.891891892  |
| wavelet-LLL | glszm      | LargeAreaLowGrayLevelEmphasis    | 0.0165639    |
| wavelet-LLL | glszm      | LargeAreaHighGrayLevelEmphasis   | 2945.560606  |
| wavelet-LLL | glszm      | HighGrayLevelZoneEmphasis        | 2028.393939  |

|             |            |                                      |              |
|-------------|------------|--------------------------------------|--------------|
| wavelet-LLL | glszm      | SmallAreaEmphasis                    | 0.918350168  |
| wavelet-LLL | glszm      | LowGrayLevelZoneEmphasis             | 0.016281062  |
| wavelet-LLL | glszm      | ZoneEntropy                          | 5.585838627  |
| wavelet-LLL | glszm      | SmallAreaLowGrayLevelEmphasis        | 0.016217364  |
| wavelet-LLL | ngtdm      | Coarseness                           | 0.041099842  |
| wavelet-LLL | ngtdm      | Complexity                           | 14207.70332  |
| wavelet-LLL | ngtdm      | Strength                             | 83.4223427   |
| wavelet-LLL | ngtdm      | Contrast                             | 3.508339882  |
| wavelet-LLL | ngtdm      | Busyness                             | 0.017345127  |
| wavelet-HHL | gldm       | GrayLevelVariance                    | 28.1638057   |
| wavelet-HHL | gldm       | HighGrayLevelEmphasis                | 154.8783784  |
| wavelet-HHL | gldm       | DependenceEntropy                    | 4.957707548  |
| wavelet-HHL | gldm       | DependenceNonUniformity              | 30.05405405  |
| wavelet-HHL | gldm       | GrayLevelNonUniformity               | 4.594594595  |
| wavelet-HHL | gldm       | SmallDependenceEmphasis              | 0.616625375  |
| wavelet-HHL | gldm       | SmallDependenceHighGrayLevelEmphasis | 95.48620495  |
| wavelet-HHL | gldm       | DependenceNonUniformityNormalized    | 0.406135866  |
| wavelet-HHL | gldm       | LargeDependenceEmphasis              | 3.378378378  |
| wavelet-HHL | gldm       | LargeDependenceLowGrayLevelEmphasis  | 0.182229586  |
| wavelet-HHL | gldm       | DependenceVariance                   | 0.660336012  |
| wavelet-HHL | gldm       | LargeDependenceHighGrayLevelEmphasis | 442.8783784  |
| wavelet-HHL | gldm       | SmallDependenceLowGrayLevelEmphasis  | 0.029473566  |
| wavelet-HHL | gldm       | LowGrayLevelEmphasis                 | 0.055153279  |
| wavelet-HHL | glcm       | JointAverage                         | 10.7669084   |
| wavelet-HHL | glcm       | SumAverage                           | 21.5338168   |
| wavelet-HHL | glcm       | JointEntropy                         | 6.065794699  |
| wavelet-HHL | glcm       | ClusterShade                         | 25.58722007  |
| wavelet-HHL | glcm       | MaximumProbability                   | 0.029617252  |
| wavelet-HHL | glcm       | Idmn                                 | 0.921558463  |
| wavelet-HHL | glcm       | JointEnergy                          | 0.015950949  |
| wavelet-HHL | glcm       | Contrast                             | 62.98829058  |
| wavelet-HHL | glcm       | DifferenceEntropy                    | 3.655537374  |
| wavelet-HHL | glcm       | InverseVariance                      | 0.167094011  |
| wavelet-HHL | glcm       | DifferenceVariance                   | 24.01336435  |
| wavelet-HHL | glcm       | Idn                                  | 0.820170722  |
| wavelet-HHL | glcm       | Idm                                  | 0.148106103  |
| wavelet-HHL | glcm       | Correlation                          | -0.10028326  |
| wavelet-HHL | glcm       | Autocorrelation                      | 113.0722017  |
| wavelet-HHL | glcm       | SumEntropy                           | 4.171653422  |
| wavelet-HHL | glcm       | SumSquares                           | 28.57362592  |
| wavelet-HHL | glcm       | ClusterProminence                    | 8694.834022  |
| wavelet-HHL | glcm       | Imc2                                 | 0.993457189  |
| wavelet-HHL | glcm       | Imc1                                 | -0.531845669 |
| wavelet-HHL | glcm       | DifferenceAverage                    | 6.179902659  |
| wavelet-HHL | glcm       | Id                                   | 0.240618484  |
| wavelet-HHL | glcm       | ClusterTendency                      | 51.3062131   |
| wavelet-HHL | firstorder | InterquartileRange                   | 169.6340484  |
| wavelet-HHL | firstorder | Skewness                             | 0.19708142   |
| wavelet-HHL | firstorder | Uniformity                           | 0.062089116  |
| wavelet-HHL | firstorder | Median                               | 28.86833371  |
| wavelet-HHL | firstorder | Energy                               | 1306398.157  |
| wavelet-HHL | firstorder | RobustMeanAbsoluteDeviation          | 71.90724964  |
| wavelet-HHL | firstorder | MeanAbsoluteDeviation                | 104.9346436  |
| wavelet-HHL | firstorder | TotalEnergy                          | 35272750.23  |
| wavelet-HHL | firstorder | Maximum                              | 357.7783485  |
| wavelet-HHL | firstorder | RootMeanSquared                      | 132.8684656  |

|             |            |                                      |              |
|-------------|------------|--------------------------------------|--------------|
| wavelet-HHL | firstorder | 90Percentile                         | 186.0271785  |
| wavelet-HHL | firstorder | Minimum                              | -236.4230248 |
| wavelet-HHL | firstorder | Entropy                              | 4.170696319  |
| wavelet-HHL | firstorder | Range                                | 594.2013733  |
| wavelet-HHL | firstorder | Variance                             | 17264.93465  |
| wavelet-HHL | firstorder | 10Percentile                         | -149.681438  |
| wavelet-HHL | firstorder | Kurtosis                             | 2.698835318  |
| wavelet-HHL | firstorder | Mean                                 | 19.72547835  |
| wavelet-HHL | grlm       | ShortRunLowGrayLevelEmphasis         | 0.053919121  |
| wavelet-HHL | grlm       | GrayLevelVariance                    | 28.15976536  |
| wavelet-HHL | grlm       | LowGrayLevelRunEmphasis              | 0.055058454  |
| wavelet-HHL | grlm       | GrayLevelNonUniformityNormalized     | 0.062042329  |
| wavelet-HHL | grlm       | RunVariance                          | 0.024913297  |
| wavelet-HHL | grlm       | GrayLevelNonUniformity               | 4.476583658  |
| wavelet-HHL | grlm       | LongRunEmphasis                      | 1.077472421  |
| wavelet-HHL | grlm       | ShortRunHighGrayLevelEmphasis        | 152.7346722  |
| wavelet-HHL | grlm       | RunLengthNonUniformity               | 68.59120356  |
| wavelet-HHL | grlm       | ShortRunEmphasis                     | 0.980631895  |
| wavelet-HHL | grlm       | LongRunHighGrayLevelEmphasis         | 165.8989019  |
| wavelet-HHL | grlm       | RunPercentage                        | 0.975051975  |
| wavelet-HHL | grlm       | LongRunLowGrayLevelEmphasis          | 0.059615788  |
| wavelet-HHL | grlm       | RunEntropy                           | 4.245575205  |
| wavelet-HHL | grlm       | HighGrayLevelRunEmphasis             | 155.3675181  |
| wavelet-HHL | grlm       | RunLengthNonUniformityNormalized     | 0.950173405  |
| wavelet-HHL | glszm      | GrayLevelVariance                    | 28.19722321  |
| wavelet-HHL | glszm      | ZoneVariance                         | 0.578853685  |
| wavelet-HHL | glszm      | GrayLevelNonUniformityNormalized     | 0.062299751  |
| wavelet-HHL | glszm      | SizeZoneNonUniformityNormalized      | 0.560697757  |
| wavelet-HHL | glszm      | SizeZoneNonUniformity                | 29.71698113  |
| wavelet-HHL | glszm      | GrayLevelNonUniformity               | 3.301886792  |
| wavelet-HHL | glszm      | LargeAreaEmphasis                    | 2.528301887  |
| wavelet-HHL | glszm      | SmallAreaHighGrayLevelEmphasis       | 119.4129979  |
| wavelet-HHL | glszm      | ZonePercentage                       | 0.716216216  |
| wavelet-HHL | glszm      | LargeAreaLowGrayLevelEmphasis        | 0.136598246  |
| wavelet-HHL | glszm      | LargeAreaHighGrayLevelEmphasis       | 354.6981132  |
| wavelet-HHL | glszm      | HighGrayLevelZoneEmphasis            | 157.6415094  |
| wavelet-HHL | glszm      | SmallAreaEmphasis                    | 0.77591195   |
| wavelet-HHL | glszm      | LowGrayLevelZoneEmphasis             | 0.052170228  |
| wavelet-HHL | glszm      | ZoneEntropy                          | 4.711424172  |
| wavelet-HHL | glszm      | SmallAreaLowGrayLevelEmphasis        | 0.035346276  |
| wavelet-HHL | ngtdm      | Coarseness                           | 0.060961134  |
| wavelet-HHL | ngtdm      | Complexity                           | 787.8079759  |
| wavelet-HHL | ngtdm      | Strength                             | 9.033174767  |
| wavelet-HHL | ngtdm      | Contrast                             | 0.610511923  |
| wavelet-HHL | ngtdm      | Busyness                             | 0.093751017  |
| wavelet-HLH | gldm       | GrayLevelVariance                    | 38.75693937  |
| wavelet-HLH | gldm       | HighGrayLevelEmphasis                | 246.6621622  |
| wavelet-HLH | gldm       | DependenceEntropy                    | 5.148246271  |
| wavelet-HLH | gldm       | DependenceNonUniformity              | 25.67567568  |
| wavelet-HLH | gldm       | GrayLevelNonUniformity               | 4.432432432  |
| wavelet-HLH | gldm       | SmallDependenceEmphasis              | 0.568975225  |
| wavelet-HLH | gldm       | SmallDependenceHighGrayLevelEmphasis | 160.9961524  |
| wavelet-HLH | gldm       | DependenceNonUniformityNormalized    | 0.34696859   |
| wavelet-HLH | gldm       | LargeDependenceEmphasis              | 4.081081081  |
| wavelet-HLH | gldm       | LargeDependenceLowGrayLevelEmphasis  | 0.053822133  |
| wavelet-HLH | gldm       | DependenceVariance                   | 0.802045289  |

|             |            |                                      |              |
|-------------|------------|--------------------------------------|--------------|
| wavelet-HLH | gldm       | LargeDependenceHighGrayLevelEmphasis | 885.2027027  |
| wavelet-HLH | gldm       | SmallDependenceLowGrayLevelEmphasis  | 0.02122797   |
| wavelet-HLH | gldm       | LowGrayLevelEmphasis                 | 0.02628869   |
| wavelet-HLH | glcm       | JointAverage                         | 14.36936916  |
| wavelet-HLH | glcm       | SumAverage                           | 28.73873832  |
| wavelet-HLH | glcm       | JointEntropy                         | 6.071442081  |
| wavelet-HLH | glcm       | ClusterShade                         | 36.79473468  |
| wavelet-HLH | glcm       | MaximumProbability                   | 0.031532199  |
| wavelet-HLH | glcm       | ldmn                                 | 0.929230544  |
| wavelet-HLH | glcm       | JointEnergy                          | 0.015900789  |
| wavelet-HLH | glcm       | Contrast                             | 81.10999568  |
| wavelet-HLH | glcm       | DifferenceEntropy                    | 3.772671525  |
| wavelet-HLH | glcm       | InverseVariance                      | 0.147772938  |
| wavelet-HLH | glcm       | DifferenceVariance                   | 31.03382395  |
| wavelet-HLH | glcm       | ldn                                  | 0.830470268  |
| wavelet-HLH | glcm       | ldm                                  | 0.147249013  |
| wavelet-HLH | glcm       | Correlation                          | -0.007758236 |
| wavelet-HLH | glcm       | Autocorrelation                      | 206.1848182  |
| wavelet-HLH | glcm       | SumEntropy                           | 4.360479245  |
| wavelet-HLH | glcm       | SumSquares                           | 40.21724627  |
| wavelet-HLH | glcm       | ClusterProminence                    | 20764.68129  |
| wavelet-HLH | glcm       | lmc2                                 | 0.995838088  |
| wavelet-HLH | glcm       | lmc1                                 | -0.571366648 |
| wavelet-HLH | glcm       | DifferenceAverage                    | 6.910227329  |
| wavelet-HLH | glcm       | ld                                   | 0.23615397   |
| wavelet-HLH | glcm       | ClusterTendency                      | 79.75898941  |
| wavelet-HLH | firstorder | InterquartileRange                   | 186.776562   |
| wavelet-HLH | firstorder | Skewness                             | 0.144960175  |
| wavelet-HLH | firstorder | Uniformity                           | 0.059897736  |
| wavelet-HLH | firstorder | Median                               | -7.083501321 |
| wavelet-HLH | firstorder | Energy                               | 1793561.762  |
| wavelet-HLH | firstorder | RobustMeanAbsoluteDeviation          | 77.8325183   |
| wavelet-HLH | firstorder | MeanAbsoluteDeviation                | 121.0970057  |
| wavelet-HLH | firstorder | TotalEnergy                          | 48426167.57  |
| wavelet-HLH | firstorder | Maximum                              | 384.8071573  |
| wavelet-HLH | firstorder | RootMeanSquared                      | 155.6834002  |
| wavelet-HLH | firstorder | 90Percentile                         | 190.7092948  |
| wavelet-HLH | firstorder | Minimum                              | -342.9876373 |
| wavelet-HLH | firstorder | Entropy                              | 4.310541124  |
| wavelet-HLH | firstorder | Range                                | 727.7947946  |
| wavelet-HLH | firstorder | Variance                             | 24231.18722  |
| wavelet-HLH | firstorder | 10Percentile                         | -207.290573  |
| wavelet-HLH | firstorder | Kurtosis                             | 2.917741135  |
| wavelet-HLH | firstorder | Mean                                 | -2.476667475 |
| wavelet-HLH | glrlm      | ShortRunLowGrayLevelEmphasis         | 0.026576483  |
| wavelet-HLH | glrlm      | GrayLevelVariance                    | 39.38642198  |
| wavelet-HLH | glrlm      | LowGrayLevelRunEmphasis              | 0.026820114  |
| wavelet-HLH | glrlm      | GrayLevelNonUniformityNormalized     | 0.059413464  |
| wavelet-HLH | glrlm      | RunVariance                          | 0.03111528   |
| wavelet-HLH | glrlm      | GrayLevelNonUniformity               | 4.259853487  |
| wavelet-HLH | glrlm      | LongRunEmphasis                      | 1.097714719  |
| wavelet-HLH | glrlm      | ShortRunHighGrayLevelEmphasis        | 243.0379871  |
| wavelet-HLH | glrlm      | RunLengthNonUniformity               | 67.28213129  |
| wavelet-HLH | glrlm      | ShortRunEmphasis                     | 0.97557132   |
| wavelet-HLH | glrlm      | LongRunHighGrayLevelEmphasis         | 268.020165   |
| wavelet-HLH | glrlm      | RunPercentage                        | 0.968814969  |

|             |       |                                  |             |
|-------------|-------|----------------------------------|-------------|
| wavelet-HLH | glrlm | LongRunLowGrayLevelEmphasis      | 0.027794636 |
| wavelet-HLH | glrlm | RunEntropy                       | 4.421956654 |
| wavelet-HLH | glrlm | HighGrayLevelRunEmphasis         | 248.0344227 |
| wavelet-HLH | glrlm | RunLengthNonUniformityNormalized | 0.937769441 |
| wavelet-HLH | glszm | GrayLevelVariance                | 46.98958767 |
| wavelet-HLH | glszm | ZoneVariance                     | 0.862140775 |
| wavelet-HLH | glszm | GrayLevelNonUniformityNormalized | 0.052894627 |
| wavelet-HLH | glszm | SizeZoneNonUniformityNormalized  | 0.541024573 |
| wavelet-HLH | glszm | SizeZoneNonUniformity            | 26.51020408 |
| wavelet-HLH | glszm | GrayLevelNonUniformity           | 2.591836735 |
| wavelet-HLH | glszm | LargeAreaEmphasis                | 3.142857143 |
| wavelet-HLH | glszm | SmallAreaHighGrayLevelEmphasis   | 223.7365986 |
| wavelet-HLH | glszm | ZonePercentage                   | 0.662162162 |
| wavelet-HLH | glszm | LargeAreaLowGrayLevelEmphasis    | 0.054241274 |
| wavelet-HLH | glszm | LargeAreaHighGrayLevelEmphasis   | 715.5714286 |
| wavelet-HLH | glszm | HighGrayLevelZoneEmphasis        | 268.9387755 |
| wavelet-HLH | glszm | SmallAreaEmphasis                | 0.760595238 |
| wavelet-HLH | glszm | LowGrayLevelZoneEmphasis         | 0.03414945  |
| wavelet-HLH | glszm | ZoneEntropy                      | 4.971653211 |
| wavelet-HLH | glszm | SmallAreaLowGrayLevelEmphasis    | 0.030806317 |
| wavelet-HLH | ngtdm | Coarseness                       | 0.056505496 |
| wavelet-HLH | ngtdm | Complexity                       | 1425.712492 |
| wavelet-HLH | ngtdm | Strength                         | 14.92055455 |
| wavelet-HLH | ngtdm | Contrast                         | 0.603498809 |
| wavelet-HLH | ngtdm | Busyness                         | 0.052204701 |



| Image type | Feature Class | Feature Name                         |                                                                                                                                                                                                                                                                                                                                                                                                                   |
|------------|---------------|--------------------------------------|-------------------------------------------------------------------------------------------------------------------------------------------------------------------------------------------------------------------------------------------------------------------------------------------------------------------------------------------------------------------------------------------------------------------|
| general    | info          | BoundingBox                          | 26: RTSTRUCT: C99-DNU_A_segment_ITV<br>(1, 1, 1, 5, 5, 4)                                                                                                                                                                                                                                                                                                                                                         |
| general    | info          | EnabledImageTypes                    | {u'Original': {}, u'Wavelet': {}}                                                                                                                                                                                                                                                                                                                                                                                 |
|            |               |                                      | {'distances': [1], 'additionalInfo': True, 'force2D': False, 'interpolator': 'sitkBSpline', 'resampledPixelSpacing': [3.0], 'label': 1, 'normalizeScale': 1, 'normalize': False, 'force2Ddimension': 0, 'removeOutliers': None, 'minimumROISize': None, u'binWidth': 25.0, 'minimumROIDimensions': 1, u'correctMask': True, 'preCrop': False, u'symmetricalGLCM': True, 'resegmentRange': None, 'padDistance': 5} |
| general    | info          | GeneralSettings                      |                                                                                                                                                                                                                                                                                                                                                                                                                   |
| general    | info          | ImageHash                            | da8b268a824d4b0ed7c7673532aa4bbbba8e19d5                                                                                                                                                                                                                                                                                                                                                                          |
| general    | info          | ImageSpacing                         | (0.9765625000000002, 0.9765625000000002, 2.0)                                                                                                                                                                                                                                                                                                                                                                     |
| general    | info          | MaskHash                             | 4b637127c3d8d15ca87470d25f92b04acde15de7                                                                                                                                                                                                                                                                                                                                                                          |
| general    | info          | NumpyVersion                         | 1.13.1                                                                                                                                                                                                                                                                                                                                                                                                            |
| general    | info          | PyWaveletVersion                     | 0.5.2                                                                                                                                                                                                                                                                                                                                                                                                             |
| general    | info          | SimpleITKVersion                     | 1.1.0                                                                                                                                                                                                                                                                                                                                                                                                             |
| general    | info          | Version                              | 1.3.0.post102+g1b0eb74                                                                                                                                                                                                                                                                                                                                                                                            |
| general    | info          | VolumeNum                            | 1                                                                                                                                                                                                                                                                                                                                                                                                                 |
| general    | info          | VoxelNum                             | 70                                                                                                                                                                                                                                                                                                                                                                                                                |
| original   | shape         | Maximum3DDiameter                    | 16.15549442                                                                                                                                                                                                                                                                                                                                                                                                       |
| original   | shape         | Maximum2DDiameterSlice               | 15                                                                                                                                                                                                                                                                                                                                                                                                                |
| original   | shape         | Sphericity                           | 0.886654392                                                                                                                                                                                                                                                                                                                                                                                                       |
| original   | shape         | MinorAxis                            | 14.51989822                                                                                                                                                                                                                                                                                                                                                                                                       |
| original   | shape         | Elongation                           | 0.925406967                                                                                                                                                                                                                                                                                                                                                                                                       |
| original   | shape         | SurfaceVolumeRatio                   | 0.441139372                                                                                                                                                                                                                                                                                                                                                                                                       |
| original   | shape         | Volume                               | 1890                                                                                                                                                                                                                                                                                                                                                                                                              |
| original   | shape         | MajorAxis                            | 15.6902841                                                                                                                                                                                                                                                                                                                                                                                                        |
| original   | shape         | SurfaceArea                          | 833.7534122                                                                                                                                                                                                                                                                                                                                                                                                       |
| original   | shape         | Flatness                             | 0.762450405                                                                                                                                                                                                                                                                                                                                                                                                       |
| original   | shape         | LeastAxis                            | 11.96306347                                                                                                                                                                                                                                                                                                                                                                                                       |
| original   | shape         | Maximum2DDiameterColumn              | 15                                                                                                                                                                                                                                                                                                                                                                                                                |
| original   | shape         | Maximum2DDiameterRow                 | 15                                                                                                                                                                                                                                                                                                                                                                                                                |
| original   | gldm          | GrayLevelVariance                    | 87.63265306                                                                                                                                                                                                                                                                                                                                                                                                       |
| original   | gldm          | HighGrayLevelEmphasis                | 603.5714286                                                                                                                                                                                                                                                                                                                                                                                                       |
| original   | gldm          | DependenceEntropy                    | 5.114718017                                                                                                                                                                                                                                                                                                                                                                                                       |
| original   | gldm          | DependenceNonUniformity              | 18.45714286                                                                                                                                                                                                                                                                                                                                                                                                       |
| original   | gldm          | GrayLevelNonUniformity               | 4.571428571                                                                                                                                                                                                                                                                                                                                                                                                       |
| original   | gldm          | SmallDependenceEmphasis              | 0.48160119                                                                                                                                                                                                                                                                                                                                                                                                        |
| original   | gldm          | SmallDependenceHighGrayLevelEmphasis | 191.5629663                                                                                                                                                                                                                                                                                                                                                                                                       |
| original   | gldm          | DependenceNonUniformityNormalized    | 0.263673469                                                                                                                                                                                                                                                                                                                                                                                                       |
| original   | gldm          | LargeDependenceEmphasis              | 8.371428571                                                                                                                                                                                                                                                                                                                                                                                                       |
| original   | gldm          | LargeDependenceLowGrayLevelEmphasis  | 0.032661739                                                                                                                                                                                                                                                                                                                                                                                                       |
| original   | gldm          | DependenceVariance                   | 2.747755102                                                                                                                                                                                                                                                                                                                                                                                                       |
| original   | gldm          | LargeDependenceHighGrayLevelEmphasis | 7353.714286                                                                                                                                                                                                                                                                                                                                                                                                       |
| original   | gldm          | SmallDependenceLowGrayLevelEmphasis  | 0.022341884                                                                                                                                                                                                                                                                                                                                                                                                       |
| original   | gldm          | LowGrayLevelEmphasis                 | 0.023303469                                                                                                                                                                                                                                                                                                                                                                                                       |
| original   | glcm          | JointAverage                         | 24.74317309                                                                                                                                                                                                                                                                                                                                                                                                       |
| original   | glcm          | SumAverage                           | 49.48634619                                                                                                                                                                                                                                                                                                                                                                                                       |
| original   | glcm          | JointEntropy                         | 5.823707364                                                                                                                                                                                                                                                                                                                                                                                                       |
| original   | glcm          | ClusterShade                         | -1823.942977                                                                                                                                                                                                                                                                                                                                                                                                      |
| original   | glcm          | MaximumProbability                   | 0.048988506                                                                                                                                                                                                                                                                                                                                                                                                       |

|          |            |                                  |              |
|----------|------------|----------------------------------|--------------|
| original | glcm       | Idmn                             | 0.913108307  |
| original | glcm       | JointEnergy                      | 0.020151593  |
| original | glcm       | Contrast                         | 128.8593015  |
| original | glcm       | DifferenceEntropy                | 3.830401986  |
| original | glcm       | InverseVariance                  | 0.219487175  |
| original | glcm       | DifferenceVariance               | 63.18281626  |
| original | glcm       | Idn                              | 0.830934858  |
| original | glcm       | Idm                              | 0.21950571   |
| original | glcm       | Correlation                      | 0.125491439  |
| original | glcm       | Autocorrelation                  | 622.4640038  |
| original | glcm       | SumEntropy                       | 4.375074485  |
| original | glcm       | SumSquares                       | 74.37541113  |
| original | glcm       | ClusterProminence                | 79957.64474  |
| original | glcm       | Imc2                             | 0.9916619    |
| original | glcm       | Imc1                             | -0.525478143 |
| original | glcm       | DifferenceAverage                | 8.062969141  |
| original | glcm       | Id                               | 0.285623682  |
| original | glcm       | ClusterTendency                  | 168.642343   |
| original | firstorder | InterquartileRange               | 364.75       |
| original | firstorder | Skewness                         | -0.764721249 |
| original | firstorder | Uniformity                       | 0.065306122  |
| original | firstorder | Median                           | -72.5        |
| original | firstorder | Energy                           | 6527932      |
| original | firstorder | RobustMeanAbsoluteDeviation      | 160.2142857  |
| original | firstorder | MeanAbsoluteDeviation            | 203.1126531  |
| original | firstorder | TotalEnergy                      | 176254164    |
| original | firstorder | Maximum                          | 68           |
| original | firstorder | RootMeanSquared                  | 305.3787344  |
| original | firstorder | 90Percentile                     | 29.3         |
| original | firstorder | Minimum                          | -747         |
| original | firstorder | Entropy                          | 4.260529532  |
| original | firstorder | Range                            | 815          |
| original | firstorder | Variance                         | 54582.13959  |
| original | firstorder | 10Percentile                     | -528.5       |
| original | firstorder | Kurtosis                         | 2.295310357  |
| original | firstorder | Mean                             | -196.6571429 |
| original | glrlm      | ShortRunLowGrayLevelEmphasis     | 0.024470941  |
| original | glrlm      | GrayLevelVariance                | 88.57834089  |
| original | glrlm      | LowGrayLevelRunEmphasis          | 0.024531226  |
| original | glrlm      | GrayLevelNonUniformityNormalized | 0.062155523  |
| original | glrlm      | RunVariance                      | 0.054904708  |
| original | glrlm      | GrayLevelNonUniformity           | 4.123548406  |
| original | glrlm      | LongRunEmphasis                  | 1.17093967   |
| original | glrlm      | ShortRunHighGrayLevelEmphasis    | 551.8018539  |
| original | glrlm      | RunLengthNonUniformity           | 59.5212551   |
| original | glrlm      | ShortRunEmphasis                 | 0.958600553  |
| original | glrlm      | LongRunHighGrayLevelEmphasis     | 738.5130301  |
| original | glrlm      | RunPercentage                    | 0.947252747  |
| original | glrlm      | LongRunLowGrayLevelEmphasis      | 0.024777925  |
| original | glrlm      | RunEntropy                       | 4.473476642  |
| original | glrlm      | HighGrayLevelRunEmphasis         | 588.1173797  |
| original | glrlm      | RunLengthNonUniformityNormalized | 0.896838722  |
| original | glszm      | GrayLevelVariance                | 86.6469428   |
| original | glszm      | ZoneVariance                     | 3.239973702  |
| original | glszm      | GrayLevelNonUniformityNormalized | 0.04799474   |
| original | glszm      | SizeZoneNonUniformityNormalized  | 0.525312295  |

|             |            |                                      |              |
|-------------|------------|--------------------------------------|--------------|
| original    | glszm      | SizeZoneNonUniformity                | 20.48717949  |
| original    | glszm      | GrayLevelNonUniformity               | 1.871794872  |
| original    | glszm      | LargeAreaEmphasis                    | 6.461538462  |
| original    | glszm      | SmallAreaHighGrayLevelEmphasis       | 257.2742429  |
| original    | glszm      | ZonePercentage                       | 0.557142857  |
| original    | glszm      | LargeAreaLowGrayLevelEmphasis        | 0.047707373  |
| original    | glszm      | LargeAreaHighGrayLevelEmphasis       | 5360.102564  |
| original    | glszm      | HighGrayLevelZoneEmphasis            | 424.6410256  |
| original    | glszm      | SmallAreaEmphasis                    | 0.746516876  |
| original    | glszm      | LowGrayLevelZoneEmphasis             | 0.040491393  |
| original    | glszm      | ZoneEntropy                          | 4.753225616  |
| original    | glszm      | SmallAreaLowGrayLevelEmphasis        | 0.039850822  |
| original    | ngtdm      | Coarseness                           | 0.042448214  |
| original    | ngtdm      | Complexity                           | 2197.299203  |
| original    | ngtdm      | Strength                             | 22.03364205  |
| original    | ngtdm      | Contrast                             | 1.932063378  |
| original    | ngtdm      | Busyness                             | 0.036075171  |
| wavelet-HHH | gldm       | GrayLevelVariance                    | 15.36836735  |
| wavelet-HHH | gldm       | HighGrayLevelEmphasis                | 189.9857143  |
| wavelet-HHH | gldm       | DependenceEntropy                    | 5.05757516   |
| wavelet-HHH | gldm       | DependenceNonUniformity              | 21.14285714  |
| wavelet-HHH | gldm       | GrayLevelNonUniformity               | 6.6          |
| wavelet-HHH | gldm       | SmallDependenceEmphasis              | 0.543946307  |
| wavelet-HHH | gldm       | SmallDependenceHighGrayLevelEmphasis | 101.8573254  |
| wavelet-HHH | gldm       | DependenceNonUniformityNormalized    | 0.302040816  |
| wavelet-HHH | gldm       | LargeDependenceEmphasis              | 6.742857143  |
| wavelet-HHH | gldm       | LargeDependenceLowGrayLevelEmphasis  | 0.054840772  |
| wavelet-HHH | gldm       | DependenceVariance                   | 2.151020408  |
| wavelet-HHH | gldm       | LargeDependenceHighGrayLevelEmphasis | 1265.128571  |
| wavelet-HHH | gldm       | SmallDependenceLowGrayLevelEmphasis  | 0.019835929  |
| wavelet-HHH | gldm       | LowGrayLevelEmphasis                 | 0.022393743  |
| wavelet-HHH | glcm       | JointAverage                         | 13.33556335  |
| wavelet-HHH | glcm       | SumAverage                           | 26.67112671  |
| wavelet-HHH | glcm       | JointEntropy                         | 5.778559224  |
| wavelet-HHH | glcm       | ClusterShade                         | -80.87985341 |
| wavelet-HHH | glcm       | MaximumProbability                   | 0.053648177  |
| wavelet-HHH | glcm       | ldmn                                 | 0.937450789  |
| wavelet-HHH | glcm       | JointEnergy                          | 0.020986188  |
| wavelet-HHH | glcm       | Contrast                             | 33.64751892  |
| wavelet-HHH | glcm       | DifferenceEntropy                    | 3.277781493  |
| wavelet-HHH | glcm       | InverseVariance                      | 0.221590318  |
| wavelet-HHH | glcm       | DifferenceVariance                   | 13.09504946  |
| wavelet-HHH | glcm       | ldn                                  | 0.839151168  |
| wavelet-HHH | glcm       | ldm                                  | 0.211863845  |
| wavelet-HHH | glcm       | Correlation                          | -0.039436388 |
| wavelet-HHH | glcm       | Autocorrelation                      | 177.2777358  |
| wavelet-HHH | glcm       | SumEntropy                           | 3.918664587  |
| wavelet-HHH | glcm       | SumSquares                           | 16.2528194   |
| wavelet-HHH | glcm       | ClusterProminence                    | 3287.145053  |
| wavelet-HHH | glcm       | lmc2                                 | 0.984065742  |
| wavelet-HHH | glcm       | lmc1                                 | -0.464863544 |
| wavelet-HHH | glcm       | DifferenceAverage                    | 4.496007575  |
| wavelet-HHH | glcm       | ld                                   | 0.302206428  |
| wavelet-HHH | glcm       | ClusterTendency                      | 31.3637587   |
| wavelet-HHH | firstorder | InterquartileRange                   | 119.6136984  |
| wavelet-HHH | firstorder | Skewness                             | -0.657170721 |

|             |            |                                  |              |
|-------------|------------|----------------------------------|--------------|
| wavelet-HHH | firstorder | Uniformity                       | 0.094285714  |
| wavelet-HHH | firstorder | Median                           | 6.819768503  |
| wavelet-HHH | firstorder | Energy                           | 687584.0427  |
| wavelet-HHH | firstorder | RobustMeanAbsoluteDeviation      | 49.57939847  |
| wavelet-HHH | firstorder | MeanAbsoluteDeviation            | 75.84963426  |
| wavelet-HHH | firstorder | TotalEnergy                      | 18564769.15  |
| wavelet-HHH | firstorder | Maximum                          | 179.0794705  |
| wavelet-HHH | firstorder | RootMeanSquared                  | 99.10917809  |
| wavelet-HHH | firstorder | 90Percentile                     | 105.5053999  |
| wavelet-HHH | firstorder | Minimum                          | -322.7409107 |
| wavelet-HHH | firstorder | Entropy                          | 3.750204184  |
| wavelet-HHH | firstorder | Range                            | 501.8203811  |
| wavelet-HHH | firstorder | Variance                         | 9775.900699  |
| wavelet-HHH | firstorder | 10Percentile                     | -141.2917221 |
| wavelet-HHH | firstorder | Kurtosis                         | 3.622687784  |
| wavelet-HHH | firstorder | Mean                             | -6.835823501 |
| wavelet-HHH | grlm       | ShortRunLowGrayLevelEmphasis     | 0.022986921  |
| wavelet-HHH | grlm       | GrayLevelVariance                | 15.9381733   |
| wavelet-HHH | grlm       | LowGrayLevelRunEmphasis          | 0.023179473  |
| wavelet-HHH | grlm       | GrayLevelNonUniformityNormalized | 0.089962433  |
| wavelet-HHH | grlm       | RunVariance                      | 0.046053735  |
| wavelet-HHH | grlm       | GrayLevelNonUniformity           | 6.026061217  |
| wavelet-HHH | grlm       | LongRunEmphasis                  | 1.143037376  |
| wavelet-HHH | grlm       | ShortRunHighGrayLevelEmphasis    | 183.4490174  |
| wavelet-HHH | grlm       | RunLengthNonUniformity           | 61.31454917  |
| wavelet-HHH | grlm       | ShortRunEmphasis                 | 0.965535657  |
| wavelet-HHH | grlm       | LongRunHighGrayLevelEmphasis     | 216.9311995  |
| wavelet-HHH | grlm       | RunPercentage                    | 0.956043956  |
| wavelet-HHH | grlm       | LongRunLowGrayLevelEmphasis      | 0.023992491  |
| wavelet-HHH | grlm       | RunEntropy                       | 3.951320697  |
| wavelet-HHH | grlm       | HighGrayLevelRunEmphasis         | 190.0200977  |
| wavelet-HHH | grlm       | RunLengthNonUniformityNormalized | 0.914567673  |
| wavelet-HHH | glszm      | GrayLevelVariance                | 22.43699297  |
| wavelet-HHH | glszm      | ZoneVariance                     | 2.79177934   |
| wavelet-HHH | glszm      | GrayLevelNonUniformityNormalized | 0.065440779  |
| wavelet-HHH | glszm      | SizeZoneNonUniformityNormalized  | 0.582477015  |
| wavelet-HHH | glszm      | SizeZoneNonUniformity            | 25.04651163  |
| wavelet-HHH | glszm      | GrayLevelNonUniformity           | 2.813953488  |
| wavelet-HHH | glszm      | LargeAreaEmphasis                | 5.441860465  |
| wavelet-HHH | glszm      | SmallAreaHighGrayLevelEmphasis   | 147.0256511  |
| wavelet-HHH | glszm      | ZonePercentage                   | 0.614285714  |
| wavelet-HHH | glszm      | LargeAreaLowGrayLevelEmphasis    | 0.058687989  |
| wavelet-HHH | glszm      | LargeAreaHighGrayLevelEmphasis   | 1006.023256  |
| wavelet-HHH | glszm      | HighGrayLevelZoneEmphasis        | 189.627907   |
| wavelet-HHH | glszm      | SmallAreaEmphasis                | 0.789628355  |
| wavelet-HHH | glszm      | LowGrayLevelZoneEmphasis         | 0.032883377  |
| wavelet-HHH | glszm      | ZoneEntropy                      | 4.646967662  |
| wavelet-HHH | glszm      | SmallAreaLowGrayLevelEmphasis    | 0.031749594  |
| wavelet-HHH | ngtdm      | Coarseness                       | 0.07982269   |
| wavelet-HHH | ngtdm      | Complexity                       | 383.7298171  |
| wavelet-HHH | ngtdm      | Strength                         | 7.878718041  |
| wavelet-HHH | ngtdm      | Contrast                         | 0.315980824  |
| wavelet-HHH | ngtdm      | Busyness                         | 0.056106439  |
| wavelet-HLL | gldm       | GrayLevelVariance                | 57.31836735  |
| wavelet-HLL | gldm       | HighGrayLevelEmphasis            | 208.2571429  |
| wavelet-HLL | gldm       | DependenceEntropy                | 5.114718017  |

|             |            |                                      |              |
|-------------|------------|--------------------------------------|--------------|
| wavelet-HLL | gldm       | DependenceNonUniformity              | 28.94285714  |
| wavelet-HLL | gldm       | GrayLevelNonUniformity               | 3.228571429  |
| wavelet-HLL | gldm       | SmallDependenceEmphasis              | 0.628571429  |
| wavelet-HLL | gldm       | SmallDependenceHighGrayLevelEmphasis | 152.3873016  |
| wavelet-HLL | gldm       | DependenceNonUniformityNormalized    | 0.413469388  |
| wavelet-HLL | gldm       | LargeDependenceEmphasis              | 3.057142857  |
| wavelet-HLL | gldm       | LargeDependenceLowGrayLevelEmphasis  | 0.187252218  |
| wavelet-HLL | gldm       | DependenceVariance                   | 0.497142857  |
| wavelet-HLL | gldm       | LargeDependenceHighGrayLevelEmphasis | 504.9428571  |
| wavelet-HLL | gldm       | SmallDependenceLowGrayLevelEmphasis  | 0.034712211  |
| wavelet-HLL | gldm       | LowGrayLevelEmphasis                 | 0.064263945  |
| wavelet-HLL | glcm       | JointAverage                         | 11.2526225   |
| wavelet-HLL | glcm       | SumAverage                           | 22.50524501  |
| wavelet-HLL | glcm       | JointEntropy                         | 6.144478087  |
| wavelet-HLL | glcm       | ClusterShade                         | 778.9735212  |
| wavelet-HLL | glcm       | MaximumProbability                   | 0.024508175  |
| wavelet-HLL | glcm       | ldmn                                 | 0.941759071  |
| wavelet-HLL | glcm       | JointEnergy                          | 0.014712382  |
| wavelet-HLL | glcm       | Contrast                             | 80.90233657  |
| wavelet-HLL | glcm       | DifferenceEntropy                    | 3.707777413  |
| wavelet-HLL | glcm       | InverseVariance                      | 0.139821715  |
| wavelet-HLL | glcm       | DifferenceVariance                   | 27.88145656  |
| wavelet-HLL | glcm       | ldn                                  | 0.840659487  |
| wavelet-HLL | glcm       | ldm                                  | 0.125819263  |
| wavelet-HLL | glcm       | Correlation                          | 0.085351623  |
| wavelet-HLL | glcm       | Autocorrelation                      | 131.3811203  |
| wavelet-HLL | glcm       | SumEntropy                           | 4.375482959  |
| wavelet-HLL | glcm       | SumSquares                           | 44.95620838  |
| wavelet-HLL | glcm       | ClusterProminence                    | 36061.19477  |
| wavelet-HLL | glcm       | lmc2                                 | 0.997259264  |
| wavelet-HLL | glcm       | lmc1                                 | -0.598119571 |
| wavelet-HLL | glcm       | DifferenceAverage                    | 7.104150356  |
| wavelet-HLL | glcm       | ld                                   | 0.216137486  |
| wavelet-HLL | glcm       | ClusterTendency                      | 98.92249694  |
| wavelet-HLL | firstorder | InterquartileRange                   | 230.5518176  |
| wavelet-HLL | firstorder | Skewness                             | 0.728584784  |
| wavelet-HLL | firstorder | Uniformity                           | 0.046122449  |
| wavelet-HLL | firstorder | Median                               | -149.8982286 |
| wavelet-HLL | firstorder | Energy                               | 3641851.34   |
| wavelet-HLL | firstorder | RobustMeanAbsoluteDeviation          | 106.3216463  |
| wavelet-HLL | firstorder | MeanAbsoluteDeviation                | 149.6375843  |
| wavelet-HLL | firstorder | TotalEnergy                          | 98329986.18  |
| wavelet-HLL | firstorder | Maximum                              | 412.1281458  |
| wavelet-HLL | firstorder | RootMeanSquared                      | 228.0930681  |
| wavelet-HLL | firstorder | 90Percentile                         | 107.0923084  |
| wavelet-HLL | firstorder | Minimum                              | -412.4466326 |
| wavelet-HLL | firstorder | Entropy                              | 4.592870517  |
| wavelet-HLL | firstorder | Range                                | 824.5747784  |
| wavelet-HLL | firstorder | Variance                             | 35125.42794  |
| wavelet-HLL | firstorder | 10Percentile                         | -350.933555  |
| wavelet-HLL | firstorder | Kurtosis                             | 3.15734348   |
| wavelet-HLL | firstorder | Mean                                 | -130.0039221 |
| wavelet-HLL | glrlm      | ShortRunLowGrayLevelEmphasis         | 0.062916255  |
| wavelet-HLL | glrlm      | GrayLevelVariance                    | 57.79947149  |
| wavelet-HLL | glrlm      | LowGrayLevelRunEmphasis              | 0.064159031  |
| wavelet-HLL | glrlm      | GrayLevelNonUniformityNormalized     | 0.046083983  |

|             |       |                                      |             |
|-------------|-------|--------------------------------------|-------------|
| wavelet-HLL | glrlm | RunVariance                          | 0.023018648 |
| wavelet-HLL | glrlm | GrayLevelNonUniformity               | 3.151401448 |
| wavelet-HLL | glrlm | LongRunEmphasis                      | 1.072456804 |
| wavelet-HLL | glrlm | ShortRunHighGrayLevelEmphasis        | 207.0615398 |
| wavelet-HLL | glrlm | RunLengthNonUniformity               | 65.30439443 |
| wavelet-HLL | glrlm | ShortRunEmphasis                     | 0.981885799 |
| wavelet-HLL | glrlm | LongRunHighGrayLevelEmphasis         | 220.4018656 |
| wavelet-HLL | glrlm | RunPercentage                        | 0.976923077 |
| wavelet-HLL | glrlm | LongRunLowGrayLevelEmphasis          | 0.069130134 |
| wavelet-HLL | glrlm | RunEntropy                           | 4.6527909   |
| wavelet-HLL | glrlm | HighGrayLevelRunEmphasis             | 209.729605  |
| wavelet-HLL | glrlm | RunLengthNonUniformityNormalized     | 0.953962704 |
| wavelet-HLL | glszm | GrayLevelVariance                    | 63.31026528 |
| wavelet-HLL | glszm | ZoneVariance                         | 0.429834679 |
| wavelet-HLL | glszm | GrayLevelNonUniformityNormalized     | 0.046520569 |
| wavelet-HLL | glszm | SizeZoneNonUniformityNormalized      | 0.567089581 |
| wavelet-HLL | glszm | SizeZoneNonUniformity                | 28.92156863 |
| wavelet-HLL | glszm | GrayLevelNonUniformity               | 2.37254902  |
| wavelet-HLL | glszm | LargeAreaEmphasis                    | 2.31372549  |
| wavelet-HLL | glszm | SmallAreaHighGrayLevelEmphasis       | 196.8594771 |
| wavelet-HLL | glszm | ZonePercentage                       | 0.728571429 |
| wavelet-HLL | glszm | LargeAreaLowGrayLevelEmphasis        | 0.144570738 |
| wavelet-HLL | glszm | LargeAreaHighGrayLevelEmphasis       | 420.0784314 |
| wavelet-HLL | glszm | HighGrayLevelZoneEmphasis            | 230.7843137 |
| wavelet-HLL | glszm | SmallAreaEmphasis                    | 0.780501089 |
| wavelet-HLL | glszm | LowGrayLevelZoneEmphasis             | 0.06087514  |
| wavelet-HLL | glszm | ZoneEntropy                          | 4.976155244 |
| wavelet-HLL | glszm | SmallAreaLowGrayLevelEmphasis        | 0.040898338 |
| wavelet-HLL | ngtdm | Coarseness                           | 0.066947365 |
| wavelet-HLL | ngtdm | Complexity                           | 1750.717354 |
| wavelet-HLL | ngtdm | Strength                             | 21.52471814 |
| wavelet-HLL | ngtdm | Contrast                             | 0.815417782 |
| wavelet-HLL | ngtdm | Busyness                             | 0.067094298 |
| wavelet-LHL | gldm  | GrayLevelVariance                    | 66.81816327 |
| wavelet-LHL | gldm  | HighGrayLevelEmphasis                | 411.1857143 |
| wavelet-LHL | gldm  | DependenceEntropy                    | 5.189648195 |
| wavelet-LHL | gldm  | DependenceNonUniformity              | 26.91428571 |
| wavelet-LHL | gldm  | GrayLevelNonUniformity               | 3.4         |
| wavelet-LHL | gldm  | SmallDependenceEmphasis              | 0.617757937 |
| wavelet-LHL | gldm  | SmallDependenceHighGrayLevelEmphasis | 256.3022817 |
| wavelet-LHL | gldm  | DependenceNonUniformityNormalized    | 0.384489796 |
| wavelet-LHL | gldm  | LargeDependenceEmphasis              | 3.971428571 |
| wavelet-LHL | gldm  | LargeDependenceLowGrayLevelEmphasis  | 0.032752386 |
| wavelet-LHL | gldm  | DependenceVariance                   | 0.933877551 |
| wavelet-LHL | gldm  | LargeDependenceHighGrayLevelEmphasis | 1733.042857 |
| wavelet-LHL | gldm  | SmallDependenceLowGrayLevelEmphasis  | 0.019501249 |
| wavelet-LHL | gldm  | LowGrayLevelEmphasis                 | 0.021333356 |
| wavelet-LHL | glcm  | JointAverage                         | 18.03207847 |
| wavelet-LHL | glcm  | SumAverage                           | 36.06415694 |
| wavelet-LHL | glcm  | JointEntropy                         | 6.086169097 |
| wavelet-LHL | glcm  | ClusterShade                         | 755.0825388 |
| wavelet-LHL | glcm  | MaximumProbability                   | 0.032584855 |
| wavelet-LHL | glcm  | ldmn                                 | 0.933870517 |
| wavelet-LHL | glcm  | JointEnergy                          | 0.015763591 |
| wavelet-LHL | glcm  | Contrast                             | 99.8476206  |
| wavelet-LHL | glcm  | DifferenceEntropy                    | 3.866051678 |

|             |            |                                  |              |
|-------------|------------|----------------------------------|--------------|
| wavelet-LHL | glcm       | InverseVariance                  | 0.145763716  |
| wavelet-LHL | glcm       | DifferenceVariance               | 36.1889388   |
| wavelet-LHL | glcm       | Idn                              | 0.835102821  |
| wavelet-LHL | glcm       | Idm                              | 0.137366368  |
| wavelet-LHL | glcm       | Correlation                      | 0.211384494  |
| wavelet-LHL | glcm       | Autocorrelation                  | 338.6866136  |
| wavelet-LHL | glcm       | SumEntropy                       | 4.534351701  |
| wavelet-LHL | glcm       | SumSquares                       | 63.33148099  |
| wavelet-LHL | glcm       | ClusterProminence                | 59564.123    |
| wavelet-LHL | glcm       | Imc2                             | 0.997972434  |
| wavelet-LHL | glcm       | Imc1                             | -0.629433089 |
| wavelet-LHL | glcm       | DifferenceAverage                | 7.742899842  |
| wavelet-LHL | glcm       | Id                               | 0.221413893  |
| wavelet-LHL | glcm       | ClusterTendency                  | 153.4783033  |
| wavelet-LHL | firstorder | InterquartileRange               | 291.1606061  |
| wavelet-LHL | firstorder | Skewness                         | 0.102504299  |
| wavelet-LHL | firstorder | Uniformity                       | 0.048571429  |
| wavelet-LHL | firstorder | Median                           | -93.00626139 |
| wavelet-LHL | firstorder | Energy                           | 3115255.863  |
| wavelet-LHL | firstorder | RobustMeanAbsoluteDeviation      | 128.2369972  |
| wavelet-LHL | firstorder | MeanAbsoluteDeviation            | 171.837451   |
| wavelet-LHL | firstorder | TotalEnergy                      | 84111908.3   |
| wavelet-LHL | firstorder | Maximum                          | 356.1539608  |
| wavelet-LHL | firstorder | RootMeanSquared                  | 210.9588945  |
| wavelet-LHL | firstorder | 90Percentile                     | 220.749445   |
| wavelet-LHL | firstorder | Minimum                          | -482.3450207 |
| wavelet-LHL | firstorder | Entropy                          | 4.602227974  |
| wavelet-LHL | firstorder | Range                            | 838.4989815  |
| wavelet-LHL | firstorder | Variance                         | 42109.45679  |
| wavelet-LHL | firstorder | 10Percentile                     | -311.2335651 |
| wavelet-LHL | firstorder | Kurtosis                         | 2.245802142  |
| wavelet-LHL | firstorder | Mean                             | -48.93054662 |
| wavelet-LHL | glrlm      | ShortRunLowGrayLevelEmphasis     | 0.021749698  |
| wavelet-LHL | glrlm      | GrayLevelVariance                | 67.33113671  |
| wavelet-LHL | glrlm      | LowGrayLevelRunEmphasis          | 0.021843621  |
| wavelet-LHL | glrlm      | GrayLevelNonUniformityNormalized | 0.047809964  |
| wavelet-LHL | glrlm      | RunVariance                      | 0.028512913  |
| wavelet-LHL | glrlm      | GrayLevelNonUniformity           | 3.251645907  |
| wavelet-LHL | glrlm      | LongRunEmphasis                  | 1.089366316  |
| wavelet-LHL | glrlm      | ShortRunHighGrayLevelEmphasis    | 401.1242423  |
| wavelet-LHL | glrlm      | RunLengthNonUniformity           | 64.17042806  |
| wavelet-LHL | glrlm      | ShortRunEmphasis                 | 0.977658421  |
| wavelet-LHL | glrlm      | LongRunHighGrayLevelEmphasis     | 448.931791   |
| wavelet-LHL | glrlm      | RunPercentage                    | 0.971428571  |
| wavelet-LHL | glrlm      | LongRunLowGrayLevelEmphasis      | 0.02221931   |
| wavelet-LHL | glrlm      | RunEntropy                       | 4.691370236  |
| wavelet-LHL | glrlm      | HighGrayLevelRunEmphasis         | 410.6857521  |
| wavelet-LHL | glrlm      | RunLengthNonUniformityNormalized | 0.942974174  |
| wavelet-LHL | glszm      | GrayLevelVariance                | 75.39192003  |
| wavelet-LHL | glszm      | ZoneVariance                     | 1.102040816  |
| wavelet-LHL | glszm      | GrayLevelNonUniformityNormalized | 0.042898792  |
| wavelet-LHL | glszm      | SizeZoneNonUniformityNormalized  | 0.605997501  |
| wavelet-LHL | glszm      | SizeZoneNonUniformity            | 29.69387755  |
| wavelet-LHL | glszm      | GrayLevelNonUniformity           | 2.102040816  |
| wavelet-LHL | glszm      | LargeAreaEmphasis                | 3.142857143  |
| wavelet-LHL | glszm      | SmallAreaHighGrayLevelEmphasis   | 337.2072314  |

|             |            |                                      |              |
|-------------|------------|--------------------------------------|--------------|
| wavelet-LHL | glszm      | ZonePercentage                       | 0.7          |
| wavelet-LHL | glszm      | LargeAreaLowGrayLevelEmphasis        | 0.037748152  |
| wavelet-LHL | glszm      | LargeAreaHighGrayLevelEmphasis       | 1193.816327  |
| wavelet-LHL | glszm      | HighGrayLevelZoneEmphasis            | 418.7755102  |
| wavelet-LHL | glszm      | SmallAreaEmphasis                    | 0.803987922  |
| wavelet-LHL | glszm      | LowGrayLevelZoneEmphasis             | 0.028490745  |
| wavelet-LHL | glszm      | ZoneEntropy                          | 5.02247413   |
| wavelet-LHL | glszm      | SmallAreaLowGrayLevelEmphasis        | 0.027447797  |
| wavelet-LHL | ngtdm      | Coarseness                           | 0.06382321   |
| wavelet-LHL | ngtdm      | Complexity                           | 1975.626257  |
| wavelet-LHL | ngtdm      | Strength                             | 23.98701128  |
| wavelet-LHL | ngtdm      | Contrast                             | 0.90748539   |
| wavelet-LHL | ngtdm      | Busyness                             | 0.038386521  |
| wavelet-LHH | gldm       | GrayLevelVariance                    | 40.49061224  |
| wavelet-LHH | gldm       | HighGrayLevelEmphasis                | 230.1428571  |
| wavelet-LHH | gldm       | DependenceEntropy                    | 5.136286231  |
| wavelet-LHH | gldm       | DependenceNonUniformity              | 23.77142857  |
| wavelet-LHH | gldm       | GrayLevelNonUniformity               | 4.028571429  |
| wavelet-LHH | gldm       | SmallDependenceEmphasis              | 0.528821429  |
| wavelet-LHH | gldm       | SmallDependenceHighGrayLevelEmphasis | 143.3165675  |
| wavelet-LHH | gldm       | DependenceNonUniformityNormalized    | 0.339591837  |
| wavelet-LHH | gldm       | LargeDependenceEmphasis              | 4.514285714  |
| wavelet-LHH | gldm       | LargeDependenceLowGrayLevelEmphasis  | 0.179972823  |
| wavelet-LHH | gldm       | DependenceVariance                   | 0.958367347  |
| wavelet-LHH | gldm       | LargeDependenceHighGrayLevelEmphasis | 797.6285714  |
| wavelet-LHH | gldm       | SmallDependenceLowGrayLevelEmphasis  | 0.014829938  |
| wavelet-LHH | gldm       | LowGrayLevelEmphasis                 | 0.044907889  |
| wavelet-LHH | glcm       | JointAverage                         | 13.72787699  |
| wavelet-LHH | glcm       | SumAverage                           | 27.45575398  |
| wavelet-LHH | glcm       | JointEntropy                         | 6.042271137  |
| wavelet-LHH | glcm       | ClusterShade                         | -42.36827487 |
| wavelet-LHH | glcm       | MaximumProbability                   | 0.037310521  |
| wavelet-LHH | glcm       | ldmn                                 | 0.916378649  |
| wavelet-LHH | glcm       | JointEnergy                          | 0.016585057  |
| wavelet-LHH | glcm       | Contrast                             | 77.5553164   |
| wavelet-LHH | glcm       | DifferenceEntropy                    | 3.765684148  |
| wavelet-LHH | glcm       | InverseVariance                      | 0.117870914  |
| wavelet-LHH | glcm       | DifferenceVariance                   | 26.82811096  |
| wavelet-LHH | glcm       | ldn                                  | 0.811150352  |
| wavelet-LHH | glcm       | ldm                                  | 0.13497215   |
| wavelet-LHH | glcm       | Correlation                          | -0.049253205 |
| wavelet-LHH | glcm       | Autocorrelation                      | 186.7374506  |
| wavelet-LHH | glcm       | SumEntropy                           | 4.313467189  |
| wavelet-LHH | glcm       | SumSquares                           | 37.02212793  |
| wavelet-LHH | glcm       | ClusterProminence                    | 14891.03058  |
| wavelet-LHH | glcm       | lmc2                                 | 0.995377603  |
| wavelet-LHH | glcm       | lmc1                                 | -0.564597877 |
| wavelet-LHH | glcm       | DifferenceAverage                    | 7.031628164  |
| wavelet-LHH | glcm       | ld                                   | 0.225449117  |
| wavelet-LHH | glcm       | ClusterTendency                      | 70.53319532  |
| wavelet-LHH | firstorder | InterquartileRange                   | 214.802725   |
| wavelet-LHH | firstorder | Skewness                             | 0.040128235  |
| wavelet-LHH | firstorder | Uniformity                           | 0.05755102   |
| wavelet-LHH | firstorder | Median                               | -2.738377751 |
| wavelet-LHH | firstorder | Energy                               | 1773165.121  |
| wavelet-LHH | firstorder | RobustMeanAbsoluteDeviation          | 94.2996779   |



|             |            |                                      |              |
|-------------|------------|--------------------------------------|--------------|
| wavelet-LHH | firstorder | MeanAbsoluteDeviation                | 131.1325724  |
| wavelet-LHH | firstorder | TotalEnergy                          | 47875458.25  |
| wavelet-LHH | firstorder | Maximum                              | 341.0261087  |
| wavelet-LHH | firstorder | RootMeanSquared                      | 159.1569361  |
| wavelet-LHH | firstorder | 90Percentile                         | 217.2356763  |
| wavelet-LHH | firstorder | Minimum                              | -324.6546298 |
| wavelet-LHH | firstorder | Entropy                              | 4.371671324  |
| wavelet-LHH | firstorder | Range                                | 665.6807385  |
| wavelet-LHH | firstorder | Variance                             | 25278.46365  |
| wavelet-LHH | firstorder | 10Percentile                         | -199.4321913 |
| wavelet-LHH | firstorder | Kurtosis                             | 2.464849667  |
| wavelet-LHH | firstorder | Mean                                 | 7.243386131  |
| wavelet-LHH | grlm       | ShortRunLowGrayLevelEmphasis         | 0.043504732  |
| wavelet-LHH | grlm       | GrayLevelVariance                    | 41.01269692  |
| wavelet-LHH | grlm       | LowGrayLevelRunEmphasis              | 0.044789523  |
| wavelet-LHH | grlm       | GrayLevelNonUniformityNormalized     | 0.056244497  |
| wavelet-LHH | grlm       | RunVariance                          | 0.038604214  |
| wavelet-LHH | grlm       | GrayLevelNonUniformity               | 3.804570633  |
| wavelet-LHH | grlm       | LongRunEmphasis                      | 1.111747102  |
| wavelet-LHH | grlm       | ShortRunHighGrayLevelEmphasis        | 228.0106185  |
| wavelet-LHH | grlm       | RunLengthNonUniformity               | 63.34825612  |
| wavelet-LHH | grlm       | ShortRunEmphasis                     | 0.974635062  |
| wavelet-LHH | grlm       | LongRunHighGrayLevelEmphasis         | 251.6273173  |
| wavelet-LHH | grlm       | RunPercentage                        | 0.965934066  |
| wavelet-LHH | grlm       | LongRunLowGrayLevelEmphasis          | 0.049976634  |
| wavelet-LHH | grlm       | RunEntropy                           | 4.481128547  |
| wavelet-LHH | grlm       | HighGrayLevelRunEmphasis             | 232.2600131  |
| wavelet-LHH | grlm       | RunLengthNonUniformityNormalized     | 0.936142721  |
| wavelet-LHH | glszm      | GrayLevelVariance                    | 47.89399676  |
| wavelet-LHH | glszm      | ZoneVariance                         | 2.001081666  |
| wavelet-LHH | glszm      | GrayLevelNonUniformityNormalized     | 0.047052461  |
| wavelet-LHH | glszm      | SizeZoneNonUniformityNormalized      | 0.511087074  |
| wavelet-LHH | glszm      | SizeZoneNonUniformity                | 21.97674419  |
| wavelet-LHH | glszm      | GrayLevelNonUniformity               | 2.023255814  |
| wavelet-LHH | glszm      | LargeAreaEmphasis                    | 4.651162791  |
| wavelet-LHH | glszm      | SmallAreaHighGrayLevelEmphasis       | 209.5876034  |
| wavelet-LHH | glszm      | ZonePercentage                       | 0.614285714  |
| wavelet-LHH | glszm      | LargeAreaLowGrayLevelEmphasis        | 0.15885247   |
| wavelet-LHH | glszm      | LargeAreaHighGrayLevelEmphasis       | 802.372093   |
| wavelet-LHH | glszm      | HighGrayLevelZoneEmphasis            | 263.2325581  |
| wavelet-LHH | glszm      | SmallAreaEmphasis                    | 0.737812949  |
| wavelet-LHH | glszm      | LowGrayLevelZoneEmphasis             | 0.039429515  |
| wavelet-LHH | glszm      | ZoneEntropy                          | 4.879525801  |
| wavelet-LHH | glszm      | SmallAreaLowGrayLevelEmphasis        | 0.016053193  |
| wavelet-LHH | ngtdm      | Coarseness                           | 0.051271621  |
| wavelet-LHH | ngtdm      | Complexity                           | 1383.093122  |
| wavelet-LHH | ngtdm      | Strength                             | 12.57738176  |
| wavelet-LHH | ngtdm      | Contrast                             | 0.748239967  |
| wavelet-LHH | ngtdm      | Busyness                             | 0.064963727  |
| wavelet-LLH | gldm       | GrayLevelVariance                    | 91.61816327  |
| wavelet-LLH | gldm       | HighGrayLevelEmphasis                | 568.7285714  |
| wavelet-LLH | gldm       | DependenceEntropy                    | 5.189648195  |
| wavelet-LLH | gldm       | DependenceNonUniformity              | 32.82857143  |
| wavelet-LLH | gldm       | GrayLevelNonUniformity               | 2.8          |
| wavelet-LLH | gldm       | SmallDependenceEmphasis              | 0.696825397  |
| wavelet-LLH | gldm       | SmallDependenceHighGrayLevelEmphasis | 410.8333333  |

|             |            |                                      |              |
|-------------|------------|--------------------------------------|--------------|
| wavelet-LLH | gldm       | DependenceNonUniformityNormalized    | 0.468979592  |
| wavelet-LLH | gldm       | LargeDependenceEmphasis              | 2.657142857  |
| wavelet-LLH | gldm       | LargeDependenceLowGrayLevelEmphasis  | 0.02498051   |
| wavelet-LLH | gldm       | DependenceVariance                   | 0.449795918  |
| wavelet-LLH | gldm       | LargeDependenceHighGrayLevelEmphasis | 1347.357143  |
| wavelet-LLH | gldm       | SmallDependenceLowGrayLevelEmphasis  | 0.017599304  |
| wavelet-LLH | gldm       | LowGrayLevelEmphasis                 | 0.0187822    |
| wavelet-LLH | glcm       | JointAverage                         | 21.86743455  |
| wavelet-LLH | glcm       | SumAverage                           | 43.7348691   |
| wavelet-LLH | glcm       | JointEntropy                         | 6.163867164  |
| wavelet-LLH | glcm       | ClusterShade                         | 1149.289388  |
| wavelet-LLH | glcm       | MaximumProbability                   | 0.025555523  |
| wavelet-LLH | glcm       | ldmn                                 | 0.92906487   |
| wavelet-LLH | glcm       | JointEnergy                          | 0.014514432  |
| wavelet-LLH | glcm       | Contrast                             | 142.8500785  |
| wavelet-LLH | glcm       | DifferenceEntropy                    | 4.027891864  |
| wavelet-LLH | glcm       | InverseVariance                      | 0.126310466  |
| wavelet-LLH | glcm       | DifferenceVariance                   | 50.79976679  |
| wavelet-LLH | glcm       | ldn                                  | 0.8289448    |
| wavelet-LLH | glcm       | ldm                                  | 0.108289595  |
| wavelet-LLH | glcm       | Correlation                          | 0.19434218   |
| wavelet-LLH | glcm       | Autocorrelation                      | 495.3431622  |
| wavelet-LLH | glcm       | SumEntropy                           | 4.64217084   |
| wavelet-LLH | glcm       | SumSquares                           | 88.37121617  |
| wavelet-LLH | glcm       | ClusterProminence                    | 105859.5528  |
| wavelet-LLH | glcm       | lmc2                                 | 0.999158688  |
| wavelet-LLH | glcm       | lmc1                                 | -0.688240274 |
| wavelet-LLH | glcm       | DifferenceAverage                    | 9.270929309  |
| wavelet-LLH | glcm       | ld                                   | 0.190406034  |
| wavelet-LLH | glcm       | ClusterTendency                      | 210.6347861  |
| wavelet-LLH | firstorder | InterquartileRange                   | 376.1919458  |
| wavelet-LLH | firstorder | Skewness                             | 0.144050781  |
| wavelet-LLH | firstorder | Uniformity                           | 0.04         |
| wavelet-LLH | firstorder | Median                               | -107.7146538 |
| wavelet-LLH | firstorder | Energy                               | 4343309.018  |
| wavelet-LLH | firstorder | RobustMeanAbsoluteDeviation          | 146.2160477  |
| wavelet-LLH | firstorder | MeanAbsoluteDeviation                | 198.4921499  |
| wavelet-LLH | firstorder | TotalEnergy                          | 117269343.5  |
| wavelet-LLH | firstorder | Maximum                              | 397.2988429  |
| wavelet-LLH | firstorder | RootMeanSquared                      | 249.0928977  |
| wavelet-LLH | firstorder | 90Percentile                         | 267.7951766  |
| wavelet-LLH | firstorder | Minimum                              | -584.6909976 |
| wavelet-LLH | firstorder | Entropy                              | 4.864947396  |
| wavelet-LLH | firstorder | Range                                | 981.9898405  |
| wavelet-LLH | firstorder | Variance                             | 57643.2176   |
| wavelet-LLH | firstorder | 10Percentile                         | -366.8172949 |
| wavelet-LLH | firstorder | Kurtosis                             | 2.239283396  |
| wavelet-LLH | firstorder | Mean                                 | -66.36304757 |
| wavelet-LLH | gllm       | ShortRunLowGrayLevelEmphasis         | 0.019015045  |
| wavelet-LLH | gllm       | GrayLevelVariance                    | 92.17239219  |
| wavelet-LLH | gllm       | LowGrayLevelRunEmphasis              | 0.019070834  |
| wavelet-LLH | gllm       | GrayLevelNonUniformityNormalized     | 0.039570261  |
| wavelet-LLH | gllm       | RunVariance                          | 0.018644597  |
| wavelet-LLH | gllm       | GrayLevelNonUniformity               | 2.718751293  |
| wavelet-LLH | gllm       | LongRunEmphasis                      | 1.057983626  |
| wavelet-LLH | gllm       | ShortRunHighGrayLevelEmphasis        | 563.2979784  |

|             |       |                                      |              |
|-------------|-------|--------------------------------------|--------------|
| wavelet-LLH | glrlm | RunLengthNonUniformity               | 66.16744099  |
| wavelet-LLH | glrlm | ShortRunEmphasis                     | 0.985504094  |
| wavelet-LLH | glrlm | LongRunHighGrayLevelEmphasis         | 598.4899239  |
| wavelet-LLH | glrlm | RunPercentage                        | 0.981318681  |
| wavelet-LLH | glrlm | LongRunLowGrayLevelEmphasis          | 0.019293992  |
| wavelet-LLH | glrlm | RunEntropy                           | 4.916265862  |
| wavelet-LLH | glrlm | HighGrayLevelRunEmphasis             | 570.3363675  |
| wavelet-LLH | glrlm | RunLengthNonUniformityNormalized     | 0.962710805  |
| wavelet-LLH | glszm | GrayLevelVariance                    | 98.47140496  |
| wavelet-LLH | glszm | ZoneVariance                         | 0.307438017  |
| wavelet-LLH | glszm | GrayLevelNonUniformityNormalized     | 0.036033058  |
| wavelet-LLH | glszm | SizeZoneNonUniformityNormalized      | 0.640991736  |
| wavelet-LLH | glszm | SizeZoneNonUniformity                | 35.25454545  |
| wavelet-LLH | glszm | GrayLevelNonUniformity               | 1.981818182  |
| wavelet-LLH | glszm | LargeAreaEmphasis                    | 1.927272727  |
| wavelet-LLH | glszm | SmallAreaHighGrayLevelEmphasis       | 491.0944444  |
| wavelet-LLH | glszm | ZonePercentage                       | 0.785714286  |
| wavelet-LLH | glszm | LargeAreaLowGrayLevelEmphasis        | 0.026336651  |
| wavelet-LLH | glszm | LargeAreaHighGrayLevelEmphasis       | 1042.127273  |
| wavelet-LLH | glszm | HighGrayLevelZoneEmphasis            | 584.0727273  |
| wavelet-LLH | glszm | SmallAreaEmphasis                    | 0.828787879  |
| wavelet-LLH | glszm | LowGrayLevelZoneEmphasis             | 0.022856093  |
| wavelet-LLH | glszm | ZoneEntropy                          | 5.15836585   |
| wavelet-LLH | glszm | SmallAreaLowGrayLevelEmphasis        | 0.022172055  |
| wavelet-LLH | ngtdm | Coarseness                           | 0.066348182  |
| wavelet-LLH | ngtdm | Complexity                           | 3158.173715  |
| wavelet-LLH | ngtdm | Strength                             | 30.60647868  |
| wavelet-LLH | ngtdm | Contrast                             | 1.096118658  |
| wavelet-LLH | ngtdm | Busyness                             | 0.027439277  |
| wavelet-LLL | gldm  | GrayLevelVariance                    | 450.362449   |
| wavelet-LLL | gldm  | HighGrayLevelEmphasis                | 1935.914286  |
| wavelet-LLL | gldm  | DependenceEntropy                    | 5.500711588  |
| wavelet-LLL | gldm  | DependenceNonUniformity              | 59.02857143  |
| wavelet-LLL | gldm  | GrayLevelNonUniformity               | 1.742857143  |
| wavelet-LLL | gldm  | SmallDependenceEmphasis              | 0.935714286  |
| wavelet-LLL | gldm  | SmallDependenceHighGrayLevelEmphasis | 1711.985714  |
| wavelet-LLL | gldm  | DependenceNonUniformityNormalized    | 0.843265306  |
| wavelet-LLL | gldm  | LargeDependenceEmphasis              | 1.257142857  |
| wavelet-LLL | gldm  | LargeDependenceLowGrayLevelEmphasis  | 0.022137864  |
| wavelet-LLL | gldm  | DependenceVariance                   | 0.078367347  |
| wavelet-LLL | gldm  | LargeDependenceHighGrayLevelEmphasis | 2831.628571  |
| wavelet-LLL | gldm  | SmallDependenceLowGrayLevelEmphasis  | 0.022001591  |
| wavelet-LLL | gldm  | LowGrayLevelEmphasis                 | 0.022028846  |
| wavelet-LLL | glcm  | JointAverage                         | 44.7285918   |
| wavelet-LLL | glcm  | SumAverage                           | 89.45718361  |
| wavelet-LLL | glcm  | JointEntropy                         | 6.257829762  |
| wavelet-LLL | glcm  | ClusterShade                         | -3517.846659 |
| wavelet-LLL | glcm  | MaximumProbability                   | 0.019575478  |
| wavelet-LLL | glcm  | Idmn                                 | 0.912506529  |
| wavelet-LLL | glcm  | JointEnergy                          | 0.013333802  |
| wavelet-LLL | glcm  | Contrast                             | 671.8041235  |
| wavelet-LLL | glcm  | DifferenceEntropy                    | 4.55618441   |
| wavelet-LLL | glcm  | InverseVariance                      | 0.047064692  |
| wavelet-LLL | glcm  | DifferenceVariance                   | 212.5873573  |
| wavelet-LLL | glcm  | Idn                                  | 0.805131858  |
| wavelet-LLL | glcm  | Idm                                  | 0.036205995  |

|             |            |                                  |              |
|-------------|------------|----------------------------------|--------------|
| wavelet-LLL | glcm       | Correlation                      | 0.237897276  |
| wavelet-LLL | glcm       | Autocorrelation                  | 2108.169597  |
| wavelet-LLL | glcm       | SumEntropy                       | 4.990877275  |
| wavelet-LLL | glcm       | SumSquares                       | 441.3003472  |
| wavelet-LLL | glcm       | ClusterProminence                | 2529596.711  |
| wavelet-LLL | glcm       | Imc2                             | 0.999884967  |
| wavelet-LLL | glcm       | Imc1                             | -0.80461568  |
| wavelet-LLL | glcm       | DifferenceAverage                | 21.01717544  |
| wavelet-LLL | glcm       | Id                               | 0.095931664  |
| wavelet-LLL | glcm       | ClusterTendency                  | 1093.397265  |
| wavelet-LLL | firstorder | InterquartileRange               | 878.1570384  |
| wavelet-LLL | firstorder | Skewness                         | 0.096050164  |
| wavelet-LLL | firstorder | Uniformity                       | 0.024897959  |
| wavelet-LLL | firstorder | Median                           | -673.2175414 |
| wavelet-LLL | firstorder | Energy                           | 51389001.07  |
| wavelet-LLL | firstorder | RobustMeanAbsoluteDeviation      | 342.4451541  |
| wavelet-LLL | firstorder | MeanAbsoluteDeviation            | 445.2778359  |
| wavelet-LLL | firstorder | TotalEnergy                      | 1387503029   |
| wavelet-LLL | firstorder | Maximum                          | 302.1645747  |
| wavelet-LLL | firstorder | RootMeanSquared                  | 856.8130407  |
| wavelet-LLL | firstorder | 90Percentile                     | 79.95099182  |
| wavelet-LLL | firstorder | Minimum                          | -1604.478963 |
| wavelet-LLL | firstorder | Entropy                          | 5.461356053  |
| wavelet-LLL | firstorder | Range                            | 1906.643538  |
| wavelet-LLL | firstorder | Variance                         | 280484.1378  |
| wavelet-LLL | firstorder | 10Percentile                     | -1331.335157 |
| wavelet-LLL | firstorder | Kurtosis                         | 1.95020607   |
| wavelet-LLL | firstorder | Mean                             | -673.5313274 |
| wavelet-LLL | glrlm      | ShortRunLowGrayLevelEmphasis     | 0.022100733  |
| wavelet-LLL | glrlm      | GrayLevelVariance                | 449.8269754  |
| wavelet-LLL | glrlm      | LowGrayLevelRunEmphasis          | 0.022101809  |
| wavelet-LLL | glrlm      | GrayLevelNonUniformityNormalized | 0.024886637  |
| wavelet-LLL | glrlm      | RunVariance                      | 0.003294571  |
| wavelet-LLL | glrlm      | GrayLevelNonUniformity           | 1.736348988  |
| wavelet-LLL | glrlm      | LongRunEmphasis                  | 1.010131812  |
| wavelet-LLL | glrlm      | ShortRunHighGrayLevelEmphasis    | 1921.86846   |
| wavelet-LLL | glrlm      | RunLengthNonUniformity           | 69.31897174  |
| wavelet-LLL | glrlm      | ShortRunEmphasis                 | 0.997467047  |
| wavelet-LLL | glrlm      | LongRunHighGrayLevelEmphasis     | 1965.976886  |
| wavelet-LLL | glrlm      | RunPercentage                    | 0.996703297  |
| wavelet-LLL | glrlm      | LongRunLowGrayLevelEmphasis      | 0.022106112  |
| wavelet-LLL | glrlm      | RunEntropy                       | 5.464157463  |
| wavelet-LLL | glrlm      | HighGrayLevelRunEmphasis         | 1930.690145  |
| wavelet-LLL | glrlm      | RunLengthNonUniformityNormalized | 0.993410857  |
| wavelet-LLL | glszm      | GrayLevelVariance                | 442.9725997  |
| wavelet-LLL | glszm      | ZoneVariance                     | 0.042771219  |
| wavelet-LLL | glszm      | GrayLevelNonUniformityNormalized | 0.024727111  |
| wavelet-LLL | glszm      | SizeZoneNonUniformityNormalized  | 0.914457563  |
| wavelet-LLL | glszm      | SizeZoneNonUniformity            | 61.26865672  |
| wavelet-LLL | glszm      | GrayLevelNonUniformity           | 1.656716418  |
| wavelet-LLL | glszm      | LargeAreaEmphasis                | 1.134328358  |
| wavelet-LLL | glszm      | SmallAreaHighGrayLevelEmphasis   | 1749.649254  |
| wavelet-LLL | glszm      | ZonePercentage                   | 0.957142857  |
| wavelet-LLL | glszm      | LargeAreaLowGrayLevelEmphasis    | 0.023053179  |
| wavelet-LLL | glszm      | LargeAreaHighGrayLevelEmphasis   | 2334.537313  |
| wavelet-LLL | glszm      | HighGrayLevelZoneEmphasis        | 1866.626866  |

|             |            |                                      |              |
|-------------|------------|--------------------------------------|--------------|
| wavelet-LLL | glszm      | SmallAreaEmphasis                    | 0.96641791   |
| wavelet-LLL | glszm      | LowGrayLevelZoneEmphasis             | 0.022996229  |
| wavelet-LLL | glszm      | ZoneEntropy                          | 5.498925011  |
| wavelet-LLL | glszm      | SmallAreaLowGrayLevelEmphasis        | 0.022981991  |
| wavelet-LLL | ngtdm      | Coarseness                           | 0.045796496  |
| wavelet-LLL | ngtdm      | Complexity                           | 19108.21379  |
| wavelet-LLL | ngtdm      | Strength                             | 94.53704308  |
| wavelet-LLL | ngtdm      | Contrast                             | 5.54888789   |
| wavelet-LLL | ngtdm      | Busyness                             | 0.01463633   |
| wavelet-HHL | gldm       | GrayLevelVariance                    | 30.81714286  |
| wavelet-HHL | gldm       | HighGrayLevelEmphasis                | 194.6571429  |
| wavelet-HHL | gldm       | DependenceEntropy                    | 5.045364403  |
| wavelet-HHL | gldm       | DependenceNonUniformity              | 24.6         |
| wavelet-HHL | gldm       | GrayLevelNonUniformity               | 4.342857143  |
| wavelet-HHL | gldm       | SmallDependenceEmphasis              | 0.570611111  |
| wavelet-HHL | gldm       | SmallDependenceHighGrayLevelEmphasis | 133.2393413  |
| wavelet-HHL | gldm       | DependenceNonUniformityNormalized    | 0.351428571  |
| wavelet-HHL | gldm       | LargeDependenceEmphasis              | 5.485714286  |
| wavelet-HHL | gldm       | LargeDependenceLowGrayLevelEmphasis  | 0.183586383  |
| wavelet-HHL | gldm       | DependenceVariance                   | 1.711020408  |
| wavelet-HHL | gldm       | LargeDependenceHighGrayLevelEmphasis | 696.9142857  |
| wavelet-HHL | gldm       | SmallDependenceLowGrayLevelEmphasis  | 0.016559165  |
| wavelet-HHL | gldm       | LowGrayLevelEmphasis                 | 0.043036839  |
| wavelet-HHL | glcm       | JointAverage                         | 12.63237891  |
| wavelet-HHL | glcm       | SumAverage                           | 25.26475782  |
| wavelet-HHL | glcm       | JointEntropy                         | 6.033181459  |
| wavelet-HHL | glcm       | ClusterShade                         | -12.82866884 |
| wavelet-HHL | glcm       | MaximumProbability                   | 0.032850246  |
| wavelet-HHL | glcm       | Idmn                                 | 0.925277198  |
| wavelet-HHL | glcm       | JointEnergy                          | 0.016411158  |
| wavelet-HHL | glcm       | Contrast                             | 59.27653558  |
| wavelet-HHL | glcm       | DifferenceEntropy                    | 3.646653215  |
| wavelet-HHL | glcm       | InverseVariance                      | 0.169205509  |
| wavelet-HHL | glcm       | DifferenceVariance                   | 22.67312847  |
| wavelet-HHL | glcm       | Idn                                  | 0.824856238  |
| wavelet-HHL | glcm       | Idm                                  | 0.167491838  |
| wavelet-HHL | glcm       | Correlation                          | -0.009202405 |
| wavelet-HHL | glcm       | Autocorrelation                      | 159.3322469  |
| wavelet-HHL | glcm       | SumEntropy                           | 4.231377491  |
| wavelet-HHL | glcm       | SumSquares                           | 29.36856211  |
| wavelet-HHL | glcm       | ClusterProminence                    | 10355.75188  |
| wavelet-HHL | glcm       | Imc2                                 | 0.9940822    |
| wavelet-HHL | glcm       | Imc1                                 | -0.542550106 |
| wavelet-HHL | glcm       | DifferenceAverage                    | 5.979761042  |
| wavelet-HHL | glcm       | Id                                   | 0.256986272  |
| wavelet-HHL | glcm       | ClusterTendency                      | 58.19771287  |
| wavelet-HHL | firstorder | InterquartileRange                   | 172.6471215  |
| wavelet-HHL | firstorder | Skewness                             | 0.006780498  |
| wavelet-HHL | firstorder | Uniformity                           | 0.062040816  |
| wavelet-HHL | firstorder | Median                               | 10.93929184  |
| wavelet-HHL | firstorder | Energy                               | 1341715.286  |
| wavelet-HHL | firstorder | RobustMeanAbsoluteDeviation          | 74.33074421  |
| wavelet-HHL | firstorder | MeanAbsoluteDeviation                | 109.4182189  |
| wavelet-HHL | firstorder | TotalEnergy                          | 36226312.72  |
| wavelet-HHL | firstorder | Maximum                              | 323.1589273  |
| wavelet-HHL | firstorder | RootMeanSquared                      | 138.4462395  |

|             |            |                                      |              |
|-------------|------------|--------------------------------------|--------------|
| wavelet-HHL | firstorder | 90Percentile                         | 193.7649268  |
| wavelet-HHL | firstorder | Minimum                              | -291.9645798 |
| wavelet-HHL | firstorder | Entropy                              | 4.24015686   |
| wavelet-HHL | firstorder | Range                                | 615.1235071  |
| wavelet-HHL | firstorder | Variance                             | 19112.14742  |
| wavelet-HHL | firstorder | 10Percentile                         | -188.0648686 |
| wavelet-HHL | firstorder | Kurtosis                             | 2.716905697  |
| wavelet-HHL | firstorder | Mean                                 | 7.430599386  |
| wavelet-HHL | grlm       | ShortRunLowGrayLevelEmphasis         | 0.041855831  |
| wavelet-HHL | grlm       | GrayLevelVariance                    | 31.27213284  |
| wavelet-HHL | grlm       | LowGrayLevelRunEmphasis              | 0.04305958   |
| wavelet-HHL | grlm       | GrayLevelNonUniformityNormalized     | 0.060471396  |
| wavelet-HHL | grlm       | RunVariance                          | 0.036193719  |
| wavelet-HHL | grlm       | GrayLevelNonUniformity               | 4.079831143  |
| wavelet-HHL | grlm       | LongRunEmphasis                      | 1.11346599   |
| wavelet-HHL | grlm       | ShortRunHighGrayLevelEmphasis        | 193.7572274  |
| wavelet-HHL | grlm       | RunLengthNonUniformity               | 62.60277183  |
| wavelet-HHL | grlm       | ShortRunEmphasis                     | 0.971633503  |
| wavelet-HHL | grlm       | LongRunHighGrayLevelEmphasis         | 211.4620215  |
| wavelet-HHL | grlm       | RunPercentage                        | 0.963736264  |
| wavelet-HHL | grlm       | LongRunLowGrayLevelEmphasis          | 0.047874575  |
| wavelet-HHL | grlm       | RunEntropy                           | 4.379760252  |
| wavelet-HHL | grlm       | HighGrayLevelRunEmphasis             | 197.2981862  |
| wavelet-HHL | grlm       | RunLengthNonUniformityNormalized     | 0.927612562  |
| wavelet-HHL | glszm      | GrayLevelVariance                    | 35.42013233  |
| wavelet-HHL | glszm      | ZoneVariance                         | 1.293005671  |
| wavelet-HHL | glszm      | GrayLevelNonUniformityNormalized     | 0.052930057  |
| wavelet-HHL | glszm      | SizeZoneNonUniformityNormalized      | 0.550094518  |
| wavelet-HHL | glszm      | SizeZoneNonUniformity                | 25.30434783  |
| wavelet-HHL | glszm      | GrayLevelNonUniformity               | 2.434782609  |
| wavelet-HHL | glszm      | LargeAreaEmphasis                    | 3.608695652  |
| wavelet-HHL | glszm      | SmallAreaHighGrayLevelEmphasis       | 187.6170714  |
| wavelet-HHL | glszm      | ZonePercentage                       | 0.657142857  |
| wavelet-HHL | glszm      | LargeAreaLowGrayLevelEmphasis        | 0.134555926  |
| wavelet-HHL | glszm      | LargeAreaHighGrayLevelEmphasis       | 554.1304348  |
| wavelet-HHL | glszm      | HighGrayLevelZoneEmphasis            | 223.5869565  |
| wavelet-HHL | glszm      | SmallAreaEmphasis                    | 0.769429163  |
| wavelet-HHL | glszm      | LowGrayLevelZoneEmphasis             | 0.037390845  |
| wavelet-HHL | glszm      | ZoneEntropy                          | 4.882045108  |
| wavelet-HHL | glszm      | SmallAreaLowGrayLevelEmphasis        | 0.018522235  |
| wavelet-HHL | ngtdm      | Coarseness                           | 0.067268402  |
| wavelet-HHL | ngtdm      | Complexity                           | 922.145799   |
| wavelet-HHL | ngtdm      | Strength                             | 11.67372029  |
| wavelet-HHL | ngtdm      | Contrast                             | 0.554362752  |
| wavelet-HHL | ngtdm      | Busyness                             | 0.064505793  |
| wavelet-HLH | gldm       | GrayLevelVariance                    | 28.1355102   |
| wavelet-HLH | gldm       | HighGrayLevelEmphasis                | 299.9142857  |
| wavelet-HLH | gldm       | DependenceEntropy                    | 4.938081903  |
| wavelet-HLH | gldm       | DependenceNonUniformity              | 22.62857143  |
| wavelet-HLH | gldm       | GrayLevelNonUniformity               | 4.828571429  |
| wavelet-HLH | gldm       | SmallDependenceEmphasis              | 0.552753968  |
| wavelet-HLH | gldm       | SmallDependenceHighGrayLevelEmphasis | 174.1971667  |
| wavelet-HLH | gldm       | DependenceNonUniformityNormalized    | 0.323265306  |
| wavelet-HLH | gldm       | LargeDependenceEmphasis              | 5.057142857  |
| wavelet-HLH | gldm       | LargeDependenceLowGrayLevelEmphasis  | 0.041255928  |
| wavelet-HLH | gldm       | DependenceVariance                   | 1.28244898   |

|             |            |                                      |              |
|-------------|------------|--------------------------------------|--------------|
| wavelet-HLH | gldm       | LargeDependenceHighGrayLevelEmphasis | 1287.514286  |
| wavelet-HLH | gldm       | SmallDependenceLowGrayLevelEmphasis  | 0.02047254   |
| wavelet-HLH | gldm       | LowGrayLevelEmphasis                 | 0.022324594  |
| wavelet-HLH | glcm       | JointAverage                         | 16.89604022  |
| wavelet-HLH | glcm       | SumAverage                           | 33.79208045  |
| wavelet-HLH | glcm       | JointEntropy                         | 5.963364599  |
| wavelet-HLH | glcm       | ClusterShade                         | -69.29889677 |
| wavelet-HLH | glcm       | MaximumProbability                   | 0.03411297   |
| wavelet-HLH | glcm       | ldmn                                 | 0.941541266  |
| wavelet-HLH | glcm       | JointEnergy                          | 0.017368351  |
| wavelet-HLH | glcm       | Contrast                             | 60.8054358   |
| wavelet-HLH | glcm       | DifferenceEntropy                    | 3.611128718  |
| wavelet-HLH | glcm       | InverseVariance                      | 0.167225243  |
| wavelet-HLH | glcm       | DifferenceVariance                   | 23.51877644  |
| wavelet-HLH | glcm       | ldn                                  | 0.844661766  |
| wavelet-HLH | glcm       | ldm                                  | 0.166178273  |
| wavelet-HLH | glcm       | Correlation                          | -0.039915219 |
| wavelet-HLH | glcm       | Autocorrelation                      | 283.7060468  |
| wavelet-HLH | glcm       | SumEntropy                           | 4.20402048   |
| wavelet-HLH | glcm       | SumSquares                           | 28.58590504  |
| wavelet-HLH | glcm       | ClusterProminence                    | 10011.4421   |
| wavelet-HLH | glcm       | lmc2                                 | 0.990251588  |
| wavelet-HLH | glcm       | lmc1                                 | -0.503021841 |
| wavelet-HLH | glcm       | DifferenceAverage                    | 5.95853143   |
| wavelet-HLH | glcm       | ld                                   | 0.257046845  |
| wavelet-HLH | glcm       | ClusterTendency                      | 53.53818437  |
| wavelet-HLH | firstorder | InterquartileRange                   | 179.3158175  |
| wavelet-HLH | firstorder | Skewness                             | -0.33258504  |
| wavelet-HLH | firstorder | Uniformity                           | 0.068979592  |
| wavelet-HLH | firstorder | Median                               | -9.381978078 |
| wavelet-HLH | firstorder | Energy                               | 1215660.458  |
| wavelet-HLH | firstorder | RobustMeanAbsoluteDeviation          | 73.32617077  |
| wavelet-HLH | firstorder | MeanAbsoluteDeviation                | 104.680241   |
| wavelet-HLH | firstorder | TotalEnergy                          | 32822832.35  |
| wavelet-HLH | firstorder | Maximum                              | 301.0487487  |
| wavelet-HLH | firstorder | RootMeanSquared                      | 131.7823128  |
| wavelet-HLH | firstorder | 90Percentile                         | 155.9159189  |
| wavelet-HLH | firstorder | Minimum                              | -388.5427403 |
| wavelet-HLH | firstorder | Entropy                              | 4.072282791  |
| wavelet-HLH | firstorder | Range                                | 689.591489   |
| wavelet-HLH | firstorder | Variance                             | 17366.57583  |
| wavelet-HLH | firstorder | 10Percentile                         | -136.387707  |
| wavelet-HLH | firstorder | Kurtosis                             | 3.555763134  |
| wavelet-HLH | firstorder | Mean                                 | 0.046250641  |
| wavelet-HLH | glrlm      | ShortRunLowGrayLevelEmphasis         | 0.022886628  |
| wavelet-HLH | glrlm      | GrayLevelVariance                    | 28.82313103  |
| wavelet-HLH | glrlm      | LowGrayLevelRunEmphasis              | 0.023007297  |
| wavelet-HLH | glrlm      | GrayLevelNonUniformityNormalized     | 0.06792446   |
| wavelet-HLH | glrlm      | RunVariance                          | 0.041011429  |
| wavelet-HLH | glrlm      | GrayLevelNonUniformity               | 4.583653964  |
| wavelet-HLH | glrlm      | LongRunEmphasis                      | 1.11937255   |
| wavelet-HLH | glrlm      | ShortRunHighGrayLevelEmphasis        | 294.4624786  |
| wavelet-HLH | glrlm      | RunLengthNonUniformity               | 62.8849233   |
| wavelet-HLH | glrlm      | ShortRunEmphasis                     | 0.972870199  |
| wavelet-HLH | glrlm      | LongRunHighGrayLevelEmphasis         | 332.5458939  |
| wavelet-HLH | glrlm      | RunPercentage                        | 0.963736264  |

|             |       |                                  |             |
|-------------|-------|----------------------------------|-------------|
| wavelet-HLH | glrlm | LongRunLowGrayLevelEmphasis      | 0.023535653 |
| wavelet-HLH | glrlm | RunEntropy                       | 4.208894174 |
| wavelet-HLH | glrlm | HighGrayLevelRunEmphasis         | 301.4616064 |
| wavelet-HLH | glrlm | RunLengthNonUniformityNormalized | 0.931466298 |
| wavelet-HLH | glszm | GrayLevelVariance                | 38.70247934 |
| wavelet-HLH | glszm | ZoneVariance                     | 1.51446281  |
| wavelet-HLH | glszm | GrayLevelNonUniformityNormalized | 0.061983471 |
| wavelet-HLH | glszm | SizeZoneNonUniformityNormalized  | 0.553719008 |
| wavelet-HLH | glszm | SizeZoneNonUniformity            | 24.36363636 |
| wavelet-HLH | glszm | GrayLevelNonUniformity           | 2.727272727 |
| wavelet-HLH | glszm | LargeAreaEmphasis                | 4.045454545 |
| wavelet-HLH | glszm | SmallAreaHighGrayLevelEmphasis   | 243.9294508 |
| wavelet-HLH | glszm | ZonePercentage                   | 0.628571429 |
| wavelet-HLH | glszm | LargeAreaLowGrayLevelEmphasis    | 0.046378112 |
| wavelet-HLH | glszm | LargeAreaHighGrayLevelEmphasis   | 1108.818182 |
| wavelet-HLH | glszm | HighGrayLevelZoneEmphasis        | 312.4545455 |
| wavelet-HLH | glszm | SmallAreaEmphasis                | 0.770517677 |
| wavelet-HLH | glszm | LowGrayLevelZoneEmphasis         | 0.033056564 |
| wavelet-HLH | glszm | ZoneEntropy                      | 4.55319746  |
| wavelet-HLH | glszm | SmallAreaLowGrayLevelEmphasis    | 0.032155105 |
| wavelet-HLH | ngtdm | Coarseness                       | 0.058049255 |
| wavelet-HLH | ngtdm | Complexity                       | 861.655619  |
| wavelet-HLH | ngtdm | Strength                         | 11.85220574 |
| wavelet-HLH | ngtdm | Contrast                         | 0.590951111 |
| wavelet-HLH | ngtdm | Busyness                         | 0.057248029 |



| Image type | Feature Class | Feature Name                         |                                                                                                                                                                                                                                                                                                                                                                                                                   |
|------------|---------------|--------------------------------------|-------------------------------------------------------------------------------------------------------------------------------------------------------------------------------------------------------------------------------------------------------------------------------------------------------------------------------------------------------------------------------------------------------------------|
| general    | info          | BoundingBox                          | 6: RTSTRUCT: C99-DNU_segment_RUL GTV<br>(0, 1, 1, 7, 6, 6)                                                                                                                                                                                                                                                                                                                                                        |
| general    | info          | EnabledImageTypes                    | {u'Original': {}, u'Wavelet': {}}                                                                                                                                                                                                                                                                                                                                                                                 |
|            |               |                                      | {'distances': [1], 'additionalInfo': True, 'force2D': False, 'interpolator': 'sitkBSpline', 'resampledPixelSpacing': [3.0], 'label': 1, 'normalizeScale': 1, 'normalize': False, 'force2Ddimension': 0, 'removeOutliers': None, 'minimumROISize': None, u'binWidth': 25.0, 'minimumROIDimensions': 1, u'correctMask': True, 'preCrop': False, u'symmetricalGLCM': True, 'resegmentRange': None, 'padDistance': 5} |
| general    | info          | GeneralSettings                      |                                                                                                                                                                                                                                                                                                                                                                                                                   |
| general    | info          | ImageHash                            | 7cee3453f5d735e39c8891dfbb8c98ceaa534248                                                                                                                                                                                                                                                                                                                                                                          |
| general    | info          | ImageSpacing                         | (0.96679688, 0.96679688, 2.0)                                                                                                                                                                                                                                                                                                                                                                                     |
| general    | info          | MaskHash                             | 7130265476c6ab80a81856a71866ce66d9de1f91                                                                                                                                                                                                                                                                                                                                                                          |
| general    | info          | NumpyVersion                         | 1.13.1                                                                                                                                                                                                                                                                                                                                                                                                            |
| general    | info          | PyWaveletVersion                     | 0.5.2                                                                                                                                                                                                                                                                                                                                                                                                             |
| general    | info          | SimpleITKVersion                     | 1.1.0                                                                                                                                                                                                                                                                                                                                                                                                             |
| general    | info          | Version                              | 1.3.0.post102+g1b0eb74                                                                                                                                                                                                                                                                                                                                                                                            |
| general    | info          | VolumeNum                            | 1                                                                                                                                                                                                                                                                                                                                                                                                                 |
| general    | info          | VoxelNum                             | 142                                                                                                                                                                                                                                                                                                                                                                                                               |
| original   | shape         | Maximum3DDiameter                    | 21.42428529                                                                                                                                                                                                                                                                                                                                                                                                       |
| original   | shape         | Maximum2DDiameterSlice               | 20.1246118                                                                                                                                                                                                                                                                                                                                                                                                        |
| original   | shape         | Sphericity                           | 0.907787334                                                                                                                                                                                                                                                                                                                                                                                                       |
| original   | shape         | MinorAxis                            | 16.70510621                                                                                                                                                                                                                                                                                                                                                                                                       |
| original   | shape         | Elongation                           | 0.834406141                                                                                                                                                                                                                                                                                                                                                                                                       |
| original   | shape         | SurfaceVolumeRatio                   | 0.340368455                                                                                                                                                                                                                                                                                                                                                                                                       |
| original   | shape         | Volume                               | 3834                                                                                                                                                                                                                                                                                                                                                                                                              |
| original   | shape         | MajorAxis                            | 20.02035387                                                                                                                                                                                                                                                                                                                                                                                                       |
| original   | shape         | SurfaceArea                          | 1304.972655                                                                                                                                                                                                                                                                                                                                                                                                       |
| original   | shape         | Flatness                             | 0.801640669                                                                                                                                                                                                                                                                                                                                                                                                       |
| original   | shape         | LeastAxis                            | 16.04912988                                                                                                                                                                                                                                                                                                                                                                                                       |
| original   | shape         | Maximum2DDiameterColumn              | 21.21320344                                                                                                                                                                                                                                                                                                                                                                                                       |
| original   | shape         | Maximum2DDiameterRow                 | 17.49285568                                                                                                                                                                                                                                                                                                                                                                                                       |
| original   | gldm          | GrayLevelVariance                    | 33.57731601                                                                                                                                                                                                                                                                                                                                                                                                       |
| original   | gldm          | HighGrayLevelEmphasis                | 445.7816901                                                                                                                                                                                                                                                                                                                                                                                                       |
| original   | gldm          | DependenceEntropy                    | 5.468871747                                                                                                                                                                                                                                                                                                                                                                                                       |
| original   | gldm          | DependenceNonUniformity              | 21.22535211                                                                                                                                                                                                                                                                                                                                                                                                       |
| original   | gldm          | GrayLevelNonUniformity               | 21.84507042                                                                                                                                                                                                                                                                                                                                                                                                       |
| original   | gldm          | SmallDependenceEmphasis              | 0.366817003                                                                                                                                                                                                                                                                                                                                                                                                       |
| original   | gldm          | SmallDependenceHighGrayLevelEmphasis | 102.4141479                                                                                                                                                                                                                                                                                                                                                                                                       |
| original   | gldm          | DependenceNonUniformityNormalized    | 0.149474311                                                                                                                                                                                                                                                                                                                                                                                                       |
| original   | gldm          | LargeDependenceEmphasis              | 48.57746479                                                                                                                                                                                                                                                                                                                                                                                                       |
| original   | gldm          | LargeDependenceLowGrayLevelEmphasis  | 0.09884118                                                                                                                                                                                                                                                                                                                                                                                                        |
| original   | gldm          | DependenceVariance                   | 19.78139258                                                                                                                                                                                                                                                                                                                                                                                                       |
| original   | gldm          | LargeDependenceHighGrayLevelEmphasis | 27041.90845                                                                                                                                                                                                                                                                                                                                                                                                       |
| original   | gldm          | SmallDependenceLowGrayLevelEmphasis  | 0.012099525                                                                                                                                                                                                                                                                                                                                                                                                       |
| original   | gldm          | LowGrayLevelEmphasis                 | 0.013325375                                                                                                                                                                                                                                                                                                                                                                                                       |
| original   | glcm          | JointAverage                         | 21.45460136                                                                                                                                                                                                                                                                                                                                                                                                       |
| original   | glcm          | SumAverage                           | 42.90920272                                                                                                                                                                                                                                                                                                                                                                                                       |
| original   | glcm          | JointEntropy                         | 5.167580695                                                                                                                                                                                                                                                                                                                                                                                                       |

|          |            |                                  |              |
|----------|------------|----------------------------------|--------------|
| original | glcm       | ClusterShade                     | -646.003639  |
| original | glcm       | MaximumProbability               | 0.14657636   |
| original | glcm       | Idmn                             | 0.953215155  |
| original | glcm       | JointEnergy                      | 0.053889575  |
| original | glcm       | Contrast                         | 39.51563172  |
| original | glcm       | DifferenceEntropy                | 3.157819558  |
| original | glcm       | InverseVariance                  | 0.317141159  |
| original | glcm       | DifferenceVariance               | 25.59948648  |
| original | glcm       | Idn                              | 0.892976705  |
| original | glcm       | Idm                              | 0.423332358  |
| original | glcm       | Correlation                      | 0.116100977  |
| original | glcm       | Autocorrelation                  | 463.3519292  |
| original | glcm       | SumEntropy                       | 3.781588267  |
| original | glcm       | SumSquares                       | 22.73637251  |
| original | glcm       | ClusterProminence                | 15618.42367  |
| original | glcm       | Imc2                             | 0.862246442  |
| original | glcm       | Imc1                             | -0.251626033 |
| original | glcm       | DifferenceAverage                | 3.693157402  |
| original | glcm       | Id                               | 0.47484941   |
| original | glcm       | ClusterTendency                  | 51.42985833  |
| original | firstorder | InterquartileRange               | 122.25       |
| original | firstorder | Skewness                         | -1.675722293 |
| original | firstorder | Uniformity                       | 0.153838524  |
| original | firstorder | Median                           | 10           |
| original | firstorder | Energy                           | 3402496      |
| original | firstorder | RobustMeanAbsoluteDeviation      | 63.1973852   |
| original | firstorder | MeanAbsoluteDeviation            | 110.4167824  |
| original | firstorder | TotalEnergy                      | 91867392     |
| original | firstorder | Maximum                          | 73           |
| original | firstorder | RootMeanSquared                  | 154.7941841  |
| original | firstorder | 90Percentile                     | 48.9         |
| original | firstorder | Minimum                          | -543         |
| original | firstorder | Entropy                          | 3.408337683  |
| original | firstorder | Range                            | 616          |
| original | firstorder | Variance                         | 20878.64392  |
| original | firstorder | 10Percentile                     | -279.4       |
| original | firstorder | Kurtosis                         | 4.813517235  |
| original | firstorder | Mean                             | -55.52112676 |
| original | glrlm      | ShortRunLowGrayLevelEmphasis     | 0.015450313  |
| original | glrlm      | GrayLevelVariance                | 37.59599001  |
| original | glrlm      | LowGrayLevelRunEmphasis          | 0.015679026  |
| original | glrlm      | GrayLevelNonUniformityNormalized | 0.119521692  |
| original | glrlm      | RunVariance                      | 0.260820674  |
| original | glrlm      | GrayLevelNonUniformity           | 14.16092849  |
| original | glrlm      | LongRunEmphasis                  | 1.71525427   |
| original | glrlm      | ShortRunHighGrayLevelEmphasis    | 353.3911481  |
| original | glrlm      | RunLengthNonUniformity           | 85.90444941  |
| original | glrlm      | ShortRunEmphasis                 | 0.874371846  |
| original | glrlm      | LongRunHighGrayLevelEmphasis     | 820.4864882  |
| original | glrlm      | RunPercentage                    | 0.832069339  |
| original | glrlm      | LongRunLowGrayLevelEmphasis      | 0.016981811  |
| original | glrlm      | RunEntropy                       | 4.204007465  |
| original | glrlm      | HighGrayLevelRunEmphasis         | 423.2830203  |
| original | glrlm      | RunLengthNonUniformityNormalized | 0.724445087  |
| original | glszm      | GrayLevelVariance                | 45.14668367  |

|             |       |                                      |              |
|-------------|-------|--------------------------------------|--------------|
| original    | glszm | ZoneVariance                         | 44.14158163  |
| original    | glszm | GrayLevelNonUniformityNormalized     | 0.0625       |
| original    | glszm | SizeZoneNonUniformityNormalized      | 0.6875       |
| original    | glszm | SizeZoneNonUniformity                | 38.5         |
| original    | glszm | GrayLevelNonUniformity               | 3.5          |
| original    | glszm | LargeAreaEmphasis                    | 50.57142857  |
| original    | glszm | SmallAreaHighGrayLevelEmphasis       | 220.0218304  |
| original    | glszm | ZonePercentage                       | 0.394366197  |
| original    | glszm | LargeAreaLowGrayLevelEmphasis        | 0.120377462  |
| original    | glszm | LargeAreaHighGrayLevelEmphasis       | 27902.55357  |
| original    | glszm | HighGrayLevelZoneEmphasis            | 290.9642857  |
| original    | glszm | SmallAreaEmphasis                    | 0.850504989  |
| original    | glszm | LowGrayLevelZoneEmphasis             | 0.030872726  |
| original    | glszm | ZoneEntropy                          | 4.583616975  |
| original    | glszm | SmallAreaLowGrayLevelEmphasis        | 0.030497152  |
| original    | ngtdm | Coarseness                           | 0.021993121  |
| original    | ngtdm | Complexity                           | 895.4338294  |
| original    | ngtdm | Strength                             | 12.1562955   |
| original    | ngtdm | Contrast                             | 0.461307136  |
| original    | ngtdm | Busyness                             | 0.065899449  |
| wavelet-HHH | gldm  | GrayLevelVariance                    | 9.765125967  |
| wavelet-HHH | gldm  | HighGrayLevelEmphasis                | 101.4929577  |
| wavelet-HHH | gldm  | DependenceEntropy                    | 5.527978109  |
| wavelet-HHH | gldm  | DependenceNonUniformity              | 27.4084507   |
| wavelet-HHH | gldm  | GrayLevelNonUniformity               | 14.36619718  |
| wavelet-HHH | gldm  | SmallDependenceEmphasis              | 0.344613964  |
| wavelet-HHH | gldm  | SmallDependenceHighGrayLevelEmphasis | 36.94192729  |
| wavelet-HHH | gldm  | DependenceNonUniformityNormalized    | 0.193017258  |
| wavelet-HHH | gldm  | LargeDependenceEmphasis              | 10.76056338  |
| wavelet-HHH | gldm  | LargeDependenceLowGrayLevelEmphasis  | 0.156836222  |
| wavelet-HHH | gldm  | DependenceVariance                   | 2.666137671  |
| wavelet-HHH | gldm  | LargeDependenceHighGrayLevelEmphasis | 998.4647887  |
| wavelet-HHH | gldm  | SmallDependenceLowGrayLevelEmphasis  | 0.02755038   |
| wavelet-HHH | gldm  | LowGrayLevelEmphasis                 | 0.036025217  |
| wavelet-HHH | glcm  | JointAverage                         | 9.59804258   |
| wavelet-HHH | glcm  | SumAverage                           | 19.19608516  |
| wavelet-HHH | glcm  | JointEntropy                         | 6.165656419  |
| wavelet-HHH | glcm  | ClusterShade                         | -1.587486068 |
| wavelet-HHH | glcm  | MaximumProbability                   | 0.042877268  |
| wavelet-HHH | glcm  | Idmn                                 | 0.957406229  |
| wavelet-HHH | glcm  | JointEnergy                          | 0.017453395  |
| wavelet-HHH | glcm  | Contrast                             | 18.24140205  |
| wavelet-HHH | glcm  | DifferenceEntropy                    | 3.088643428  |
| wavelet-HHH | glcm  | InverseVariance                      | 0.274776657  |
| wavelet-HHH | glcm  | DifferenceVariance                   | 7.779665367  |
| wavelet-HHH | glcm  | Idn                                  | 0.867213068  |
| wavelet-HHH | glcm  | Idm                                  | 0.272643754  |
| wavelet-HHH | glcm  | Correlation                          | -0.032723838 |
| wavelet-HHH | glcm  | Autocorrelation                      | 91.8253373   |
| wavelet-HHH | glcm  | SumEntropy                           | 3.822318827  |
| wavelet-HHH | glcm  | SumSquares                           | 8.817673279  |
| wavelet-HHH | glcm  | ClusterProminence                    | 1238.190249  |
| wavelet-HHH | glcm  | Imc2                                 | 0.88913354   |
| wavelet-HHH | glcm  | Imc1                                 | -0.226940841 |
| wavelet-HHH | glcm  | DifferenceAverage                    | 3.215918629  |

|             |            |                                  |              |
|-------------|------------|----------------------------------|--------------|
| wavelet-HHH | glcm       | Id                               | 0.362369029  |
| wavelet-HHH | glcm       | ClusterTendency                  | 17.02929107  |
| wavelet-HHH | firstorder | InterquartileRange               | 86.44936374  |
| wavelet-HHH | firstorder | Skewness                         | 0.084319439  |
| wavelet-HHH | firstorder | Uniformity                       | 0.101170403  |
| wavelet-HHH | firstorder | Median                           | -1.048875621 |
| wavelet-HHH | firstorder | Energy                           | 866881.1922  |
| wavelet-HHH | firstorder | RobustMeanAbsoluteDeviation      | 36.58742904  |
| wavelet-HHH | firstorder | MeanAbsoluteDeviation            | 58.52846026  |
| wavelet-HHH | firstorder | TotalEnergy                      | 23405792.19  |
| wavelet-HHH | firstorder | Maximum                          | 241.9201265  |
| wavelet-HHH | firstorder | RootMeanSquared                  | 78.13320119  |
| wavelet-HHH | firstorder | 90Percentile                     | 97.49187914  |
| wavelet-HHH | firstorder | Minimum                          | -222.8565875 |
| wavelet-HHH | firstorder | Entropy                          | 3.565273017  |
| wavelet-HHH | firstorder | Range                            | 464.7767141  |
| wavelet-HHH | firstorder | Variance                         | 6100.322533  |
| wavelet-HHH | firstorder | 10Percentile                     | -86.50097804 |
| wavelet-HHH | firstorder | Kurtosis                         | 4.031453617  |
| wavelet-HHH | firstorder | Mean                             | 2.115323801  |
| wavelet-HHH | glrlm      | ShortRunLowGrayLevelEmphasis     | 0.03712571   |
| wavelet-HHH | glrlm      | GrayLevelVariance                | 10.23029168  |
| wavelet-HHH | glrlm      | LowGrayLevelRunEmphasis          | 0.03782955   |
| wavelet-HHH | glrlm      | GrayLevelNonUniformityNormalized | 0.098277257  |
| wavelet-HHH | glrlm      | RunVariance                      | 0.075164349  |
| wavelet-HHH | glrlm      | GrayLevelNonUniformity           | 12.96790244  |
| wavelet-HHH | glrlm      | LongRunEmphasis                  | 1.235348741  |
| wavelet-HHH | glrlm      | ShortRunHighGrayLevelEmphasis    | 96.75890938  |
| wavelet-HHH | glrlm      | RunLengthNonUniformity           | 113.9099266  |
| wavelet-HHH | glrlm      | ShortRunEmphasis                 | 0.943788568  |
| wavelet-HHH | glrlm      | LongRunHighGrayLevelEmphasis     | 124.1168208  |
| wavelet-HHH | glrlm      | RunPercentage                    | 0.929035753  |
| wavelet-HHH | glrlm      | LongRunLowGrayLevelEmphasis      | 0.040790113  |
| wavelet-HHH | glrlm      | RunEntropy                       | 3.901581397  |
| wavelet-HHH | glrlm      | HighGrayLevelRunEmphasis         | 102.067578   |
| wavelet-HHH | glrlm      | RunLengthNonUniformityNormalized | 0.86266901   |
| wavelet-HHH | glszm      | GrayLevelVariance                | 17.94513032  |
| wavelet-HHH | glszm      | ZoneVariance                     | 14.19615912  |
| wavelet-HHH | glszm      | GrayLevelNonUniformityNormalized | 0.074759945  |
| wavelet-HHH | glszm      | SizeZoneNonUniformityNormalized  | 0.450617284  |
| wavelet-HHH | glszm      | SizeZoneNonUniformity            | 24.33333333  |
| wavelet-HHH | glszm      | GrayLevelNonUniformity           | 4.037037037  |
| wavelet-HHH | glszm      | LargeAreaEmphasis                | 21.11111111  |
| wavelet-HHH | glszm      | SmallAreaHighGrayLevelEmphasis   | 75.70553933  |
| wavelet-HHH | glszm      | ZonePercentage                   | 0.38028169   |
| wavelet-HHH | glszm      | LargeAreaLowGrayLevelEmphasis    | 0.318909418  |
| wavelet-HHH | glszm      | LargeAreaHighGrayLevelEmphasis   | 1936.259259  |
| wavelet-HHH | glszm      | HighGrayLevelZoneEmphasis        | 109.962963   |
| wavelet-HHH | glszm      | SmallAreaEmphasis                | 0.694933448  |
| wavelet-HHH | glszm      | LowGrayLevelZoneEmphasis         | 0.073861309  |
| wavelet-HHH | glszm      | ZoneEntropy                      | 4.803330502  |
| wavelet-HHH | glszm      | SmallAreaLowGrayLevelEmphasis    | 0.069585029  |
| wavelet-HHH | ngtdm      | Coarseness                       | 0.042790253  |
| wavelet-HHH | ngtdm      | Complexity                       | 272.8439015  |
| wavelet-HHH | ngtdm      | Strength                         | 3.536400501  |

|             |            |                                      |              |
|-------------|------------|--------------------------------------|--------------|
| wavelet-HHH | ngtdm      | Contrast                             | 0.178787093  |
| wavelet-HHH | ngtdm      | Busyness                             | 0.150704485  |
| wavelet-HLL | gldm       | GrayLevelVariance                    | 102.8127852  |
| wavelet-HLL | gldm       | HighGrayLevelEmphasis                | 683.8943662  |
| wavelet-HLL | gldm       | DependenceEntropy                    | 5.829752821  |
| wavelet-HLL | gldm       | DependenceNonUniformity              | 51.92957746  |
| wavelet-HLL | gldm       | GrayLevelNonUniformity               | 6.253521127  |
| wavelet-HLL | gldm       | SmallDependenceEmphasis              | 0.614645692  |
| wavelet-HLL | gldm       | SmallDependenceHighGrayLevelEmphasis | 482.71982    |
| wavelet-HLL | gldm       | DependenceNonUniformityNormalized    | 0.36570125   |
| wavelet-HLL | gldm       | LargeDependenceEmphasis              | 5.464788732  |
| wavelet-HLL | gldm       | LargeDependenceLowGrayLevelEmphasis  | 0.018185216  |
| wavelet-HLL | gldm       | DependenceVariance                   | 1.849434636  |
| wavelet-HLL | gldm       | LargeDependenceHighGrayLevelEmphasis | 3478.471831  |
| wavelet-HLL | gldm       | SmallDependenceLowGrayLevelEmphasis  | 0.008816031  |
| wavelet-HLL | gldm       | LowGrayLevelEmphasis                 | 0.009745594  |
| wavelet-HLL | glcm       | JointAverage                         | 23.48239904  |
| wavelet-HLL | glcm       | SumAverage                           | 46.96479809  |
| wavelet-HLL | glcm       | JointEntropy                         | 7.12093606   |
| wavelet-HLL | glcm       | ClusterShade                         | 4415.397742  |
| wavelet-HLL | glcm       | MaximumProbability                   | 0.023022817  |
| wavelet-HLL | glcm       | Idmn                                 | 0.962107764  |
| wavelet-HLL | glcm       | JointEnergy                          | 0.008058277  |
| wavelet-HLL | glcm       | Contrast                             | 145.6682484  |
| wavelet-HLL | glcm       | DifferenceEntropy                    | 4.155192065  |
| wavelet-HLL | glcm       | InverseVariance                      | 0.148519832  |
| wavelet-HLL | glcm       | DifferenceVariance                   | 67.49179998  |
| wavelet-HLL | glcm       | Idn                                  | 0.881088898  |
| wavelet-HLL | glcm       | Idm                                  | 0.14113612   |
| wavelet-HLL | glcm       | Correlation                          | 0.140794841  |
| wavelet-HLL | glcm       | Autocorrelation                      | 567.1922111  |
| wavelet-HLL | glcm       | SumEntropy                           | 4.98406842   |
| wavelet-HLL | glcm       | SumSquares                           | 88.48795336  |
| wavelet-HLL | glcm       | ClusterProminence                    | 276574.8376  |
| wavelet-HLL | glcm       | Imc2                                 | 0.994259504  |
| wavelet-HLL | glcm       | Imc1                                 | -0.480323434 |
| wavelet-HLL | glcm       | DifferenceAverage                    | 8.489268429  |
| wavelet-HLL | glcm       | Id                                   | 0.224260374  |
| wavelet-HLL | glcm       | ClusterTendency                      | 208.283565   |
| wavelet-HLL | firstorder | InterquartileRange                   | 269.0853272  |
| wavelet-HLL | firstorder | Skewness                             | 1.176304231  |
| wavelet-HLL | firstorder | Uniformity                           | 0.044038881  |
| wavelet-HLL | firstorder | Median                               | -132.8075523 |
| wavelet-HLL | firstorder | Energy                               | 10204304.97  |
| wavelet-HLL | firstorder | RobustMeanAbsoluteDeviation          | 108.914527   |
| wavelet-HLL | firstorder | MeanAbsoluteDeviation                | 185.7188707  |
| wavelet-HLL | firstorder | TotalEnergy                          | 275516234.1  |
| wavelet-HLL | firstorder | Maximum                              | 721.6291732  |
| wavelet-HLL | firstorder | RootMeanSquared                      | 268.0695853  |
| wavelet-HLL | firstorder | 90Percentile                         | 295.0236781  |
| wavelet-HLL | firstorder | Minimum                              | -668.3239584 |
| wavelet-HLL | firstorder | Entropy                              | 4.820351051  |
| wavelet-HLL | firstorder | Range                                | 1389.953132  |
| wavelet-HLL | firstorder | Variance                             | 64441.74248  |
| wavelet-HLL | firstorder | 10Percentile                         | -325.2335631 |

|             |            |                                      |              |
|-------------|------------|--------------------------------------|--------------|
| wavelet-HLL | firstorder | Kurtosis                             | 4.538023887  |
| wavelet-HLL | firstorder | Mean                                 | -86.13686837 |
| wavelet-HLL | glrlm      | ShortRunLowGrayLevelEmphasis         | 0.009964736  |
| wavelet-HLL | glrlm      | GrayLevelVariance                    | 105.6051133  |
| wavelet-HLL | glrlm      | LowGrayLevelRunEmphasis              | 0.01002205   |
| wavelet-HLL | glrlm      | GrayLevelNonUniformityNormalized     | 0.042999757  |
| wavelet-HLL | glrlm      | RunVariance                          | 0.034591237  |
| wavelet-HLL | glrlm      | GrayLevelNonUniformity               | 5.895803157  |
| wavelet-HLL | glrlm      | LongRunEmphasis                      | 1.108626127  |
| wavelet-HLL | glrlm      | ShortRunHighGrayLevelEmphasis        | 671.9749173  |
| wavelet-HLL | glrlm      | RunLengthNonUniformity               | 127.6678887  |
| wavelet-HLL | glrlm      | ShortRunEmphasis                     | 0.972843468  |
| wavelet-HLL | glrlm      | LongRunHighGrayLevelEmphasis         | 750.5800193  |
| wavelet-HLL | glrlm      | RunPercentage                        | 0.965330444  |
| wavelet-HLL | glrlm      | LongRunLowGrayLevelEmphasis          | 0.010251308  |
| wavelet-HLL | glrlm      | RunEntropy                           | 4.973583207  |
| wavelet-HLL | glrlm      | HighGrayLevelRunEmphasis             | 687.6959377  |
| wavelet-HLL | glrlm      | RunLengthNonUniformityNormalized     | 0.930817526  |
| wavelet-HLL | glszm      | GrayLevelVariance                    | 133.5224977  |
| wavelet-HLL | glszm      | ZoneVariance                         | 1.013365983  |
| wavelet-HLL | glszm      | GrayLevelNonUniformityNormalized     | 0.036628915  |
| wavelet-HLL | glszm      | SizeZoneNonUniformityNormalized      | 0.60963167   |
| wavelet-HLL | glszm      | SizeZoneNonUniformity                | 60.35353535  |
| wavelet-HLL | glszm      | GrayLevelNonUniformity               | 3.626262626  |
| wavelet-HLL | glszm      | LargeAreaEmphasis                    | 3.070707071  |
| wavelet-HLL | glszm      | SmallAreaHighGrayLevelEmphasis       | 656.1016414  |
| wavelet-HLL | glszm      | ZonePercentage                       | 0.697183099  |
| wavelet-HLL | glszm      | LargeAreaLowGrayLevelEmphasis        | 0.017402019  |
| wavelet-HLL | glszm      | LargeAreaHighGrayLevelEmphasis       | 1918.939394  |
| wavelet-HLL | glszm      | HighGrayLevelZoneEmphasis            | 750.969697   |
| wavelet-HLL | glszm      | SmallAreaEmphasis                    | 0.807585492  |
| wavelet-HLL | glszm      | LowGrayLevelZoneEmphasis             | 0.012955711  |
| wavelet-HLL | glszm      | ZoneEntropy                          | 5.654573858  |
| wavelet-HLL | glszm      | SmallAreaLowGrayLevelEmphasis        | 0.012452845  |
| wavelet-HLL | ngtdm      | Coarseness                           | 0.03453892   |
| wavelet-HLL | ngtdm      | Complexity                           | 4684.800008  |
| wavelet-HLL | ngtdm      | Strength                             | 31.98424423  |
| wavelet-HLL | ngtdm      | Contrast                             | 0.804708684  |
| wavelet-HLL | ngtdm      | Busyness                             | 0.037015432  |
| wavelet-LHL | gldm       | GrayLevelVariance                    | 146.547312   |
| wavelet-LHL | gldm       | HighGrayLevelEmphasis                | 716.4788732  |
| wavelet-LHL | gldm       | DependenceEntropy                    | 5.919688736  |
| wavelet-LHL | gldm       | DependenceNonUniformity              | 52.47887324  |
| wavelet-LHL | gldm       | GrayLevelNonUniformity               | 6.352112676  |
| wavelet-LHL | gldm       | SmallDependenceEmphasis              | 0.620092799  |
| wavelet-LHL | gldm       | SmallDependenceHighGrayLevelEmphasis | 550.5106956  |
| wavelet-LHL | gldm       | DependenceNonUniformityNormalized    | 0.36956953   |
| wavelet-LHL | gldm       | LargeDependenceEmphasis              | 5.873239437  |
| wavelet-LHL | gldm       | LargeDependenceLowGrayLevelEmphasis  | 0.07041723   |
| wavelet-LHL | gldm       | DependenceVariance                   | 2.149970244  |
| wavelet-LHL | gldm       | LargeDependenceHighGrayLevelEmphasis | 3325.816901  |
| wavelet-LHL | gldm       | SmallDependenceLowGrayLevelEmphasis  | 0.005841176  |
| wavelet-LHL | gldm       | LowGrayLevelEmphasis                 | 0.017442285  |
| wavelet-LHL | glcm       | JointAverage                         | 22.64869488  |
| wavelet-LHL | glcm       | SumAverage                           | 45.29738975  |

|             |            |                                  |              |
|-------------|------------|----------------------------------|--------------|
| wavelet-LHL | glcm       | JointEntropy                     | 7.162841001  |
| wavelet-LHL | glcm       | ClusterShade                     | 9382.647786  |
| wavelet-LHL | glcm       | MaximumProbability               | 0.023390919  |
| wavelet-LHL | glcm       | Idmn                             | 0.965425241  |
| wavelet-LHL | glcm       | JointEnergy                      | 0.00781815   |
| wavelet-LHL | glcm       | Contrast                         | 221.9142821  |
| wavelet-LHL | glcm       | DifferenceEntropy                | 4.276536012  |
| wavelet-LHL | glcm       | InverseVariance                  | 0.134997184  |
| wavelet-LHL | glcm       | DifferenceVariance               | 123.6679435  |
| wavelet-LHL | glcm       | Idn                              | 0.893323913  |
| wavelet-LHL | glcm       | Idm                              | 0.136965837  |
| wavelet-LHL | glcm       | Correlation                      | 0.130774077  |
| wavelet-LHL | glcm       | Autocorrelation                  | 531.6046579  |
| wavelet-LHL | glcm       | SumEntropy                       | 5.128307789  |
| wavelet-LHL | glcm       | SumSquares                       | 129.4846753  |
| wavelet-LHL | glcm       | ClusterProminence                | 788165.3991  |
| wavelet-LHL | glcm       | Imc2                             | 0.995749497  |
| wavelet-LHL | glcm       | Imc1                             | -0.50275631  |
| wavelet-LHL | glcm       | DifferenceAverage                | 9.594507423  |
| wavelet-LHL | glcm       | Id                               | 0.220952127  |
| wavelet-LHL | glcm       | ClusterTendency                  | 296.024419   |
| wavelet-LHL | firstorder | InterquartileRange               | 213.4149249  |
| wavelet-LHL | firstorder | Skewness                         | 1.657649932  |
| wavelet-LHL | firstorder | Uniformity                       | 0.044733188  |
| wavelet-LHL | firstorder | Median                           | -103.044247  |
| wavelet-LHL | firstorder | Energy                           | 13245756.82  |
| wavelet-LHL | firstorder | RobustMeanAbsoluteDeviation      | 102.9620737  |
| wavelet-LHL | firstorder | MeanAbsoluteDeviation            | 203.4830017  |
| wavelet-LHL | firstorder | TotalEnergy                      | 357635434.2  |
| wavelet-LHL | firstorder | Maximum                          | 1102.674889  |
| wavelet-LHL | firstorder | RootMeanSquared                  | 305.4177101  |
| wavelet-LHL | firstorder | 90Percentile                     | 286.0246497  |
| wavelet-LHL | firstorder | Minimum                          | -610.3007574 |
| wavelet-LHL | firstorder | Entropy                          | 4.89332882   |
| wavelet-LHL | firstorder | Range                            | 1712.975647  |
| wavelet-LHL | firstorder | Variance                         | 91619.18509  |
| wavelet-LHL | firstorder | 10Percentile                     | -302.0100055 |
| wavelet-LHL | firstorder | Kurtosis                         | 6.541385278  |
| wavelet-LHL | firstorder | Mean                             | -40.75282228 |
| wavelet-LHL | glrlm      | ShortRunLowGrayLevelEmphasis     | 0.016954131  |
| wavelet-LHL | glrlm      | GrayLevelVariance                | 150.84765    |
| wavelet-LHL | glrlm      | LowGrayLevelRunEmphasis          | 0.017441598  |
| wavelet-LHL | glrlm      | GrayLevelNonUniformityNormalized | 0.043225031  |
| wavelet-LHL | glrlm      | RunVariance                      | 0.041403771  |
| wavelet-LHL | glrlm      | GrayLevelNonUniformity           | 5.918962735  |
| wavelet-LHL | glrlm      | LongRunEmphasis                  | 1.118007664  |
| wavelet-LHL | glrlm      | ShortRunHighGrayLevelEmphasis    | 712.1098628  |
| wavelet-LHL | glrlm      | RunLengthNonUniformity           | 127.7851524  |
| wavelet-LHL | glrlm      | ShortRunEmphasis                 | 0.973383951  |
| wavelet-LHL | glrlm      | LongRunHighGrayLevelEmphasis     | 783.4612798  |
| wavelet-LHL | glrlm      | RunPercentage                    | 0.964247021  |
| wavelet-LHL | glrlm      | LongRunLowGrayLevelEmphasis      | 0.019411694  |
| wavelet-LHL | glrlm      | RunEntropy                       | 5.050726761  |
| wavelet-LHL | glrlm      | HighGrayLevelRunEmphasis         | 724.9733154  |
| wavelet-LHL | glrlm      | RunLengthNonUniformityNormalized | 0.932701018  |

|             |       |                                      |              |
|-------------|-------|--------------------------------------|--------------|
| wavelet-LHL | glszm | GrayLevelVariance                    | 190.8113458  |
| wavelet-LHL | glszm | ZoneVariance                         | 1.457810428  |
| wavelet-LHL | glszm | GrayLevelNonUniformityNormalized     | 0.035404551  |
| wavelet-LHL | glszm | SizeZoneNonUniformityNormalized      | 0.626160596  |
| wavelet-LHL | glszm | SizeZoneNonUniformity                | 61.98989899  |
| wavelet-LHL | glszm | GrayLevelNonUniformity               | 3.505050505  |
| wavelet-LHL | glszm | LargeAreaEmphasis                    | 3.515151515  |
| wavelet-LHL | glszm | SmallAreaHighGrayLevelEmphasis       | 760.0167184  |
| wavelet-LHL | glszm | ZonePercentage                       | 0.697183099  |
| wavelet-LHL | glszm | LargeAreaLowGrayLevelEmphasis        | 0.049978402  |
| wavelet-LHL | glszm | LargeAreaHighGrayLevelEmphasis       | 2092.424242  |
| wavelet-LHL | glszm | HighGrayLevelZoneEmphasis            | 833.1010101  |
| wavelet-LHL | glszm | SmallAreaEmphasis                    | 0.818278534  |
| wavelet-LHL | glszm | LowGrayLevelZoneEmphasis             | 0.013761907  |
| wavelet-LHL | glszm | ZoneEntropy                          | 5.659264701  |
| wavelet-LHL | glszm | SmallAreaLowGrayLevelEmphasis        | 0.005653722  |
| wavelet-LHL | ngtdm | Coarseness                           | 0.039477484  |
| wavelet-LHL | ngtdm | Complexity                           | 6912.981707  |
| wavelet-LHL | ngtdm | Strength                             | 46.75374525  |
| wavelet-LHL | ngtdm | Contrast                             | 1.080718912  |
| wavelet-LHL | ngtdm | Busyness                             | 0.027359339  |
| wavelet-LHH | gldm  | GrayLevelVariance                    | 34.18984329  |
| wavelet-LHH | gldm  | HighGrayLevelEmphasis                | 419.6760563  |
| wavelet-LHH | gldm  | DependenceEntropy                    | 5.780707486  |
| wavelet-LHH | gldm  | DependenceNonUniformity              | 40.1971831   |
| wavelet-LHH | gldm  | GrayLevelNonUniformity               | 9.028169014  |
| wavelet-LHH | gldm  | SmallDependenceEmphasis              | 0.505314885  |
| wavelet-LHH | gldm  | SmallDependenceHighGrayLevelEmphasis | 226.6872886  |
| wavelet-LHH | gldm  | DependenceNonUniformityNormalized    | 0.283078754  |
| wavelet-LHH | gldm  | LargeDependenceEmphasis              | 7.61971831   |
| wavelet-LHH | gldm  | LargeDependenceLowGrayLevelEmphasis  | 0.02968177   |
| wavelet-LHH | gldm  | DependenceVariance                   | 2.604641936  |
| wavelet-LHH | gldm  | LargeDependenceHighGrayLevelEmphasis | 2938.816901  |
| wavelet-LHH | gldm  | SmallDependenceLowGrayLevelEmphasis  | 0.010007855  |
| wavelet-LHH | gldm  | LowGrayLevelEmphasis                 | 0.011414573  |
| wavelet-LHH | glcm  | JointAverage                         | 19.54085293  |
| wavelet-LHH | glcm  | SumAverage                           | 39.08170586  |
| wavelet-LHH | glcm  | JointEntropy                         | 6.807154743  |
| wavelet-LHH | glcm  | ClusterShade                         | -92.9665152  |
| wavelet-LHH | glcm  | MaximumProbability                   | 0.038595473  |
| wavelet-LHH | glcm  | Idmn                                 | 0.955574057  |
| wavelet-LHH | glcm  | JointEnergy                          | 0.011331545  |
| wavelet-LHH | glcm  | Contrast                             | 65.21376527  |
| wavelet-LHH | glcm  | DifferenceEntropy                    | 3.79660884   |
| wavelet-LHH | glcm  | InverseVariance                      | 0.208005165  |
| wavelet-LHH | glcm  | DifferenceVariance                   | 28.98286709  |
| wavelet-LHH | glcm  | Idn                                  | 0.870028085  |
| wavelet-LHH | glcm  | Idm                                  | 0.194750454  |
| wavelet-LHH | glcm  | Correlation                          | 0.002568876  |
| wavelet-LHH | glcm  | Autocorrelation                      | 381.9910665  |
| wavelet-LHH | glcm  | SumEntropy                           | 4.536841409  |
| wavelet-LHH | glcm  | SumSquares                           | 32.71820814  |
| wavelet-LHH | glcm  | ClusterProminence                    | 17927.3928   |
| wavelet-LHH | glcm  | Imc2                                 | 0.983380408  |
| wavelet-LHH | glcm  | Imc1                                 | -0.405638868 |



|             |            |                                  |              |
|-------------|------------|----------------------------------|--------------|
| wavelet-LHH | glcm       | DifferenceAverage                | 5.87511575   |
| wavelet-LHH | glcm       | Id                               | 0.279700077  |
| wavelet-LHH | glcm       | ClusterTendency                  | 65.65906728  |
| wavelet-LHH | firstorder | InterquartileRange               | 159.2828371  |
| wavelet-LHH | firstorder | Skewness                         | -0.161815894 |
| wavelet-LHH | firstorder | Uniformity                       | 0.063578655  |
| wavelet-LHH | firstorder | Median                           | -13.36099872 |
| wavelet-LHH | firstorder | Energy                           | 3027173.072  |
| wavelet-LHH | firstorder | RobustMeanAbsoluteDeviation      | 66.96977019  |
| wavelet-LHH | firstorder | MeanAbsoluteDeviation            | 108.4251013  |
| wavelet-LHH | firstorder | TotalEnergy                      | 81733672.94  |
| wavelet-LHH | firstorder | Maximum                          | 390.5361489  |
| wavelet-LHH | firstorder | RootMeanSquared                  | 146.0072609  |
| wavelet-LHH | firstorder | 90Percentile                     | 189.130061   |
| wavelet-LHH | firstorder | Minimum                          | -450.178154  |
| wavelet-LHH | firstorder | Entropy                          | 4.383720631  |
| wavelet-LHH | firstorder | Range                            | 840.7143029  |
| wavelet-LHH | firstorder | Variance                         | 21311.34694  |
| wavelet-LHH | firstorder | 10Percentile                     | -155.3728392 |
| wavelet-LHH | firstorder | Kurtosis                         | 3.764461496  |
| wavelet-LHH | firstorder | Mean                             | 2.602554166  |
| wavelet-LHH | glrlm      | ShortRunLowGrayLevelEmphasis     | 0.011752703  |
| wavelet-LHH | glrlm      | GrayLevelVariance                | 35.56348274  |
| wavelet-LHH | glrlm      | LowGrayLevelRunEmphasis          | 0.011852312  |
| wavelet-LHH | glrlm      | GrayLevelNonUniformityNormalized | 0.060073701  |
| wavelet-LHH | glrlm      | RunVariance                      | 0.055603777  |
| wavelet-LHH | glrlm      | GrayLevelNonUniformity           | 8.128765651  |
| wavelet-LHH | glrlm      | LongRunEmphasis                  | 1.160407553  |
| wavelet-LHH | glrlm      | ShortRunHighGrayLevelEmphasis    | 407.7233655  |
| wavelet-LHH | glrlm      | RunLengthNonUniformity           | 123.4230017  |
| wavelet-LHH | glrlm      | ShortRunEmphasis                 | 0.964438843  |
| wavelet-LHH | glrlm      | LongRunHighGrayLevelEmphasis     | 483.277291   |
| wavelet-LHH | glrlm      | RunPercentage                    | 0.952329361  |
| wavelet-LHH | glrlm      | LongRunLowGrayLevelEmphasis      | 0.012298088  |
| wavelet-LHH | glrlm      | RunEntropy                       | 4.619135042  |
| wavelet-LHH | glrlm      | HighGrayLevelRunEmphasis         | 421.4157132  |
| wavelet-LHH | glrlm      | RunLengthNonUniformityNormalized | 0.911631085  |
| wavelet-LHH | glszm      | GrayLevelVariance                | 53.38302088  |
| wavelet-LHH | glszm      | ZoneVariance                     | 4.827922573  |
| wavelet-LHH | glszm      | GrayLevelNonUniformityNormalized | 0.042524005  |
| wavelet-LHH | glszm      | SizeZoneNonUniformityNormalized  | 0.542142966  |
| wavelet-LHH | glszm      | SizeZoneNonUniformity            | 43.91358025  |
| wavelet-LHH | glszm      | GrayLevelNonUniformity           | 3.444444444  |
| wavelet-LHH | glszm      | LargeAreaEmphasis                | 7.901234568  |
| wavelet-LHH | glszm      | SmallAreaHighGrayLevelEmphasis   | 349.6540507  |
| wavelet-LHH | glszm      | ZonePercentage                   | 0.570422535  |
| wavelet-LHH | glszm      | LargeAreaLowGrayLevelEmphasis    | 0.036984375  |
| wavelet-LHH | glszm      | LargeAreaHighGrayLevelEmphasis   | 3038.320988  |
| wavelet-LHH | glszm      | HighGrayLevelZoneEmphasis        | 442.5925926  |
| wavelet-LHH | glszm      | SmallAreaEmphasis                | 0.764179803  |
| wavelet-LHH | glszm      | LowGrayLevelZoneEmphasis         | 0.017894019  |
| wavelet-LHH | glszm      | ZoneEntropy                      | 5.526587003  |
| wavelet-LHH | glszm      | SmallAreaLowGrayLevelEmphasis    | 0.017196446  |
| wavelet-LHH | ngtdm      | Coarseness                       | 0.042604667  |
| wavelet-LHH | ngtdm      | Complexity                       | 1692.985303  |

|             |            |                                      |              |
|-------------|------------|--------------------------------------|--------------|
| wavelet-LHH | ngtdm      | Strength                             | 12.71678349  |
| wavelet-LHH | ngtdm      | Contrast                             | 0.305054709  |
| wavelet-LHH | ngtdm      | Busyness                             | 0.034838903  |
| wavelet-LLH | gldm       | GrayLevelVariance                    | 44.82999405  |
| wavelet-LLH | gldm       | HighGrayLevelEmphasis                | 435.3098592  |
| wavelet-LLH | gldm       | DependenceEntropy                    | 5.707899764  |
| wavelet-LLH | gldm       | DependenceNonUniformity              | 37.92957746  |
| wavelet-LLH | gldm       | GrayLevelNonUniformity               | 8.85915493   |
| wavelet-LLH | gldm       | SmallDependenceEmphasis              | 0.507303545  |
| wavelet-LLH | gldm       | SmallDependenceHighGrayLevelEmphasis | 242.8186497  |
| wavelet-LLH | gldm       | DependenceNonUniformityNormalized    | 0.2671097    |
| wavelet-LLH | gldm       | LargeDependenceEmphasis              | 8.577464789  |
| wavelet-LLH | gldm       | LargeDependenceLowGrayLevelEmphasis  | 0.030893981  |
| wavelet-LLH | gldm       | DependenceVariance                   | 2.978575679  |
| wavelet-LLH | gldm       | LargeDependenceHighGrayLevelEmphasis | 3751.830986  |
| wavelet-LLH | gldm       | SmallDependenceLowGrayLevelEmphasis  | 0.009540023  |
| wavelet-LLH | gldm       | LowGrayLevelEmphasis                 | 0.011255192  |
| wavelet-LLH | glcm       | JointAverage                         | 19.7540646   |
| wavelet-LLH | glcm       | SumAverage                           | 39.5081292   |
| wavelet-LLH | glcm       | JointEntropy                         | 6.795733544  |
| wavelet-LLH | glcm       | ClusterShade                         | -60.24978013 |
| wavelet-LLH | glcm       | MaximumProbability                   | 0.029961288  |
| wavelet-LLH | glcm       | Idmn                                 | 0.965216011  |
| wavelet-LLH | glcm       | JointEnergy                          | 0.010822799  |
| wavelet-LLH | glcm       | Contrast                             | 61.42072957  |
| wavelet-LLH | glcm       | DifferenceEntropy                    | 3.788463294  |
| wavelet-LLH | glcm       | InverseVariance                      | 0.212086123  |
| wavelet-LLH | glcm       | DifferenceVariance                   | 28.12006032  |
| wavelet-LLH | glcm       | Idn                                  | 0.884082905  |
| wavelet-LLH | glcm       | Idm                                  | 0.204957286  |
| wavelet-LLH | glcm       | Correlation                          | 0.068733191  |
| wavelet-LLH | glcm       | Autocorrelation                      | 392.7082453  |
| wavelet-LLH | glcm       | SumEntropy                           | 4.608312533  |
| wavelet-LLH | glcm       | SumSquares                           | 33.16344853  |
| wavelet-LLH | glcm       | ClusterProminence                    | 23224.9976   |
| wavelet-LLH | glcm       | Imc2                                 | 0.977498658  |
| wavelet-LLH | glcm       | Imc1                                 | -0.373942297 |
| wavelet-LLH | glcm       | DifferenceAverage                    | 5.678850017  |
| wavelet-LLH | glcm       | Id                                   | 0.288686379  |
| wavelet-LLH | glcm       | ClusterTendency                      | 71.23306453  |
| wavelet-LLH | firstorder | InterquartileRange                   | 154.3383726  |
| wavelet-LLH | firstorder | Skewness                             | 0.232978053  |
| wavelet-LLH | firstorder | Uniformity                           | 0.062388415  |
| wavelet-LLH | firstorder | Median                               | -67.65723035 |
| wavelet-LLH | firstorder | Energy                               | 4670211.72   |
| wavelet-LLH | firstorder | RobustMeanAbsoluteDeviation          | 68.81903127  |
| wavelet-LLH | firstorder | MeanAbsoluteDeviation                | 121.2912716  |
| wavelet-LLH | firstorder | TotalEnergy                          | 126095716.4  |
| wavelet-LLH | firstorder | Maximum                              | 409.9780712  |
| wavelet-LLH | firstorder | RootMeanSquared                      | 181.3527362  |
| wavelet-LLH | firstorder | 90Percentile                         | 124.4567265  |
| wavelet-LLH | firstorder | Minimum                              | -534.1597587 |
| wavelet-LLH | firstorder | Entropy                              | 4.41178135   |
| wavelet-LLH | firstorder | Range                                | 944.1378299  |
| wavelet-LLH | firstorder | Variance                             | 28069.0626   |

|             |            |                                      |              |
|-------------|------------|--------------------------------------|--------------|
| wavelet-LLH | firstorder | 10Percentile                         | -280.5033701 |
| wavelet-LLH | firstorder | Kurtosis                             | 3.955249344  |
| wavelet-LLH | firstorder | Mean                                 | -69.42443608 |
| wavelet-LLH | glrlm      | ShortRunLowGrayLevelEmphasis         | 0.011609108  |
| wavelet-LLH | glrlm      | GrayLevelVariance                    | 46.79043773  |
| wavelet-LLH | glrlm      | LowGrayLevelRunEmphasis              | 0.011721866  |
| wavelet-LLH | glrlm      | GrayLevelNonUniformityNormalized     | 0.059165216  |
| wavelet-LLH | glrlm      | RunVariance                          | 0.062701408  |
| wavelet-LLH | glrlm      | GrayLevelNonUniformity               | 7.960616573  |
| wavelet-LLH | glrlm      | LongRunEmphasis                      | 1.177366275  |
| wavelet-LLH | glrlm      | ShortRunHighGrayLevelEmphasis        | 419.8572345  |
| wavelet-LLH | glrlm      | RunLengthNonUniformity               | 121.6627578  |
| wavelet-LLH | glrlm      | ShortRunEmphasis                     | 0.961409328  |
| wavelet-LLH | glrlm      | LongRunHighGrayLevelEmphasis         | 511.2392932  |
| wavelet-LLH | glrlm      | RunPercentage                        | 0.947453954  |
| wavelet-LLH | glrlm      | LongRunLowGrayLevelEmphasis          | 0.012225136  |
| wavelet-LLH | glrlm      | RunEntropy                           | 4.664714597  |
| wavelet-LLH | glrlm      | HighGrayLevelRunEmphasis             | 436.0456745  |
| wavelet-LLH | glrlm      | RunLengthNonUniformityNormalized     | 0.903966043  |
| wavelet-LLH | glszm      | GrayLevelVariance                    | 70.56        |
| wavelet-LLH | glszm      | ZoneVariance                         | 4.699375     |
| wavelet-LLH | glszm      | GrayLevelNonUniformityNormalized     | 0.040625     |
| wavelet-LLH | glszm      | SizeZoneNonUniformityNormalized      | 0.581875     |
| wavelet-LLH | glszm      | SizeZoneNonUniformity                | 46.55        |
| wavelet-LLH | glszm      | GrayLevelNonUniformity               | 3.25         |
| wavelet-LLH | glszm      | LargeAreaEmphasis                    | 7.85         |
| wavelet-LLH | glszm      | SmallAreaHighGrayLevelEmphasis       | 390.5584136  |
| wavelet-LLH | glszm      | ZonePercentage                       | 0.563380282  |
| wavelet-LLH | glszm      | LargeAreaLowGrayLevelEmphasis        | 0.035442903  |
| wavelet-LLH | glszm      | LargeAreaHighGrayLevelEmphasis       | 3418.65      |
| wavelet-LLH | glszm      | HighGrayLevelZoneEmphasis            | 462.6        |
| wavelet-LLH | glszm      | SmallAreaEmphasis                    | 0.788487654  |
| wavelet-LLH | glszm      | LowGrayLevelZoneEmphasis             | 0.017477444  |
| wavelet-LLH | glszm      | ZoneEntropy                          | 5.27962712   |
| wavelet-LLH | glszm      | SmallAreaLowGrayLevelEmphasis        | 0.016495044  |
| wavelet-LLH | ngtdm      | Coarseness                           | 0.039581739  |
| wavelet-LLH | ngtdm      | Complexity                           | 1904.867221  |
| wavelet-LLH | ngtdm      | Strength                             | 14.59113557  |
| wavelet-LLH | ngtdm      | Contrast                             | 0.418825432  |
| wavelet-LLH | ngtdm      | Busyness                             | 0.038397047  |
| wavelet-LLL | gldm       | GrayLevelVariance                    | 334.6271077  |
| wavelet-LLL | gldm       | HighGrayLevelEmphasis                | 2502.119718  |
| wavelet-LLL | gldm       | DependenceEntropy                    | 6.05824206   |
| wavelet-LLL | gldm       | DependenceNonUniformity              | 55.46478873  |
| wavelet-LLL | gldm       | GrayLevelNonUniformity               | 3.802816901  |
| wavelet-LLL | gldm       | SmallDependenceEmphasis              | 0.635369718  |
| wavelet-LLL | gldm       | SmallDependenceHighGrayLevelEmphasis | 1268.166698  |
| wavelet-LLL | gldm       | DependenceNonUniformityNormalized    | 0.390597104  |
| wavelet-LLL | gldm       | LargeDependenceEmphasis              | 4.338028169  |
| wavelet-LLL | gldm       | LargeDependenceLowGrayLevelEmphasis  | 0.058862348  |
| wavelet-LLL | gldm       | DependenceVariance                   | 1.188653045  |
| wavelet-LLL | gldm       | LargeDependenceHighGrayLevelEmphasis | 15484.19014  |
| wavelet-LLL | gldm       | SmallDependenceLowGrayLevelEmphasis  | 0.004627339  |
| wavelet-LLL | gldm       | LowGrayLevelEmphasis                 | 0.015385965  |
| wavelet-LLL | glcm       | JointAverage                         | 51.62775895  |

|             |            |                                  |              |
|-------------|------------|----------------------------------|--------------|
| wavelet-LLL | glcm       | SumAverage                       | 103.2555179  |
| wavelet-LLL | glcm       | JointEntropy                     | 7.316277785  |
| wavelet-LLL | glcm       | ClusterShade                     | -14232.68371 |
| wavelet-LLL | glcm       | MaximumProbability               | 0.016314777  |
| wavelet-LLL | glcm       | Idmn                             | 0.935852548  |
| wavelet-LLL | glcm       | JointEnergy                      | 0.006722043  |
| wavelet-LLL | glcm       | Contrast                         | 416.6237056  |
| wavelet-LLL | glcm       | DifferenceEntropy                | 4.870270123  |
| wavelet-LLL | glcm       | InverseVariance                  | 0.107999182  |
| wavelet-LLL | glcm       | DifferenceVariance               | 183.3396355  |
| wavelet-LLL | glcm       | Idn                              | 0.845248707  |
| wavelet-LLL | glcm       | Idm                              | 0.109816734  |
| wavelet-LLL | glcm       | Correlation                      | 0.238048651  |
| wavelet-LLL | glcm       | Autocorrelation                  | 2734.980884  |
| wavelet-LLL | glcm       | SumEntropy                       | 5.579573294  |
| wavelet-LLL | glcm       | SumSquares                       | 277.1410552  |
| wavelet-LLL | glcm       | ClusterProminence                | 1403353.11   |
| wavelet-LLL | glcm       | Imc2                             | 0.99896723   |
| wavelet-LLL | glcm       | Imc1                             | -0.594912576 |
| wavelet-LLL | glcm       | DifferenceAverage                | 15.08610987  |
| wavelet-LLL | glcm       | Id                               | 0.176029778  |
| wavelet-LLL | glcm       | ClusterTendency                  | 691.9405152  |
| wavelet-LLL | firstorder | InterquartileRange               | 782.339541   |
| wavelet-LLL | firstorder | Skewness                         | -0.623308331 |
| wavelet-LLL | firstorder | Uniformity                       | 0.026780401  |
| wavelet-LLL | firstorder | Median                           | -206.4998741 |
| wavelet-LLL | firstorder | Energy                           | 42361438.1   |
| wavelet-LLL | firstorder | RobustMeanAbsoluteDeviation      | 294.5753976  |
| wavelet-LLL | firstorder | MeanAbsoluteDeviation            | 387.0578046  |
| wavelet-LLL | firstorder | TotalEnergy                      | 1143758829   |
| wavelet-LLL | firstorder | Maximum                          | 329.0801948  |
| wavelet-LLL | firstorder | RootMeanSquared                  | 546.186769   |
| wavelet-LLL | firstorder | 90Percentile                     | 205.1211964  |
| wavelet-LLL | firstorder | Minimum                          | -1436.715602 |
| wavelet-LLL | firstorder | Entropy                          | 5.489634141  |
| wavelet-LLL | firstorder | Range                            | 1765.795797  |
| wavelet-LLL | firstorder | Variance                         | 209423.8678  |
| wavelet-LLL | firstorder | 10Percentile                     | -1035.641813 |
| wavelet-LLL | firstorder | Kurtosis                         | 2.371536765  |
| wavelet-LLL | firstorder | Mean                             | -298.1545218 |
| wavelet-LLL | glrlm      | ShortRunLowGrayLevelEmphasis     | 0.014863242  |
| wavelet-LLL | glrlm      | GrayLevelVariance                | 333.2058459  |
| wavelet-LLL | glrlm      | LowGrayLevelRunEmphasis          | 0.015291157  |
| wavelet-LLL | glrlm      | GrayLevelNonUniformityNormalized | 0.025995196  |
| wavelet-LLL | glrlm      | RunVariance                      | 0.029744904  |
| wavelet-LLL | glrlm      | GrayLevelNonUniformity           | 3.581763619  |
| wavelet-LLL | glrlm      | LongRunEmphasis                  | 1.092762236  |
| wavelet-LLL | glrlm      | ShortRunHighGrayLevelEmphasis    | 2378.53914   |
| wavelet-LLL | glrlm      | RunLengthNonUniformity           | 129.6276455  |
| wavelet-LLL | glrlm      | ShortRunEmphasis                 | 0.976809441  |
| wavelet-LLL | glrlm      | LongRunHighGrayLevelEmphasis     | 2809.141965  |
| wavelet-LLL | glrlm      | RunPercentage                    | 0.97020585   |
| wavelet-LLL | glrlm      | LongRunLowGrayLevelEmphasis      | 0.017002818  |
| wavelet-LLL | glrlm      | RunEntropy                       | 5.604400112  |
| wavelet-LLL | glrlm      | HighGrayLevelRunEmphasis         | 2464.659705  |

|             |       |                                      |              |
|-------------|-------|--------------------------------------|--------------|
| wavelet-LLL | glrlm | RunLengthNonUniformityNormalized     | 0.940510193  |
| wavelet-LLL | glszm | GrayLevelVariance                    | 300.4411332  |
| wavelet-LLL | glszm | ZoneVariance                         | 1.270855798  |
| wavelet-LLL | glszm | GrayLevelNonUniformityNormalized     | 0.022644839  |
| wavelet-LLL | glszm | SizeZoneNonUniformityNormalized      | 0.633173218  |
| wavelet-LLL | glszm | SizeZoneNonUniformity                | 63.95049505  |
| wavelet-LLL | glszm | GrayLevelNonUniformity               | 2.287128713  |
| wavelet-LLL | glszm | LargeAreaEmphasis                    | 3.247524752  |
| wavelet-LLL | glszm | SmallAreaHighGrayLevelEmphasis       | 1560.208993  |
| wavelet-LLL | glszm | ZonePercentage                       | 0.711267606  |
| wavelet-LLL | glszm | LargeAreaLowGrayLevelEmphasis        | 0.042078116  |
| wavelet-LLL | glszm | LargeAreaHighGrayLevelEmphasis       | 10671.55446  |
| wavelet-LLL | glszm | HighGrayLevelZoneEmphasis            | 2092.831683  |
| wavelet-LLL | glszm | SmallAreaEmphasis                    | 0.822964796  |
| wavelet-LLL | glszm | LowGrayLevelZoneEmphasis             | 0.011532287  |
| wavelet-LLL | glszm | ZoneEntropy                          | 5.892032493  |
| wavelet-LLL | glszm | SmallAreaLowGrayLevelEmphasis        | 0.003988205  |
| wavelet-LLL | ngtdm | Coarseness                           | 0.02548629   |
| wavelet-LLL | ngtdm | Complexity                           | 17102.23707  |
| wavelet-LLL | ngtdm | Strength                             | 48.12712717  |
| wavelet-LLL | ngtdm | Contrast                             | 2.647077879  |
| wavelet-LLL | ngtdm | Busyness                             | 0.015355761  |
| wavelet-HHL | gldm  | GrayLevelVariance                    | 24.64714342  |
| wavelet-HHL | gldm  | HighGrayLevelEmphasis                | 189.8239437  |
| wavelet-HHL | gldm  | DependenceEntropy                    | 5.642793338  |
| wavelet-HHL | gldm  | DependenceNonUniformity              | 36.76056338  |
| wavelet-HHL | gldm  | GrayLevelNonUniformity               | 9.732394366  |
| wavelet-HHL | gldm  | SmallDependenceEmphasis              | 0.47126553   |
| wavelet-HHL | gldm  | SmallDependenceHighGrayLevelEmphasis | 103.4129556  |
| wavelet-HHL | gldm  | DependenceNonUniformityNormalized    | 0.258877207  |
| wavelet-HHL | gldm  | LargeDependenceEmphasis              | 9.309859155  |
| wavelet-HHL | gldm  | LargeDependenceLowGrayLevelEmphasis  | 0.105981027  |
| wavelet-HHL | gldm  | DependenceVariance                   | 3.23467566   |
| wavelet-HHL | gldm  | LargeDependenceHighGrayLevelEmphasis | 1263.767606  |
| wavelet-HHL | gldm  | SmallDependenceLowGrayLevelEmphasis  | 0.026115644  |
| wavelet-HHL | gldm  | LowGrayLevelEmphasis                 | 0.031061545  |
| wavelet-HHL | glcm  | JointAverage                         | 12.8039597   |
| wavelet-HHL | glcm  | SumAverage                           | 25.60791941  |
| wavelet-HHL | glcm  | JointEntropy                         | 6.667703614  |
| wavelet-HHL | glcm  | ClusterShade                         | 48.52183707  |
| wavelet-HHL | glcm  | MaximumProbability                   | 0.044571772  |
| wavelet-HHL | glcm  | Idmn                                 | 0.945014226  |
| wavelet-HHL | glcm  | JointEnergy                          | 0.012835334  |
| wavelet-HHL | glcm  | Contrast                             | 44.42770953  |
| wavelet-HHL | glcm  | DifferenceEntropy                    | 3.64381337   |
| wavelet-HHL | glcm  | InverseVariance                      | 0.195341199  |
| wavelet-HHL | glcm  | DifferenceVariance                   | 17.51934523  |
| wavelet-HHL | glcm  | Idn                                  | 0.850481333  |
| wavelet-HHL | glcm  | Idm                                  | 0.204678727  |
| wavelet-HHL | glcm  | Correlation                          | -0.010621639 |
| wavelet-HHL | glcm  | Autocorrelation                      | 163.823881   |
| wavelet-HHL | glcm  | SumEntropy                           | 4.424786796  |
| wavelet-HHL | glcm  | SumSquares                           | 22.0442599   |
| wavelet-HHL | glcm  | ClusterProminence                    | 6114.635417  |
| wavelet-HHL | glcm  | Imc2                                 | 0.969234624  |

|             |            |                                  |              |
|-------------|------------|----------------------------------|--------------|
| wavelet-HHL | glcm       | Imc1                             | -0.350294913 |
| wavelet-HHL | glcm       | DifferenceAverage                | 5.10123477   |
| wavelet-HHL | glcm       | Id                               | 0.293033791  |
| wavelet-HHL | glcm       | ClusterTendency                  | 43.74933006  |
| wavelet-HHL | firstorder | InterquartileRange               | 166.5482556  |
| wavelet-HHL | firstorder | Skewness                         | 0.152980786  |
| wavelet-HHL | firstorder | Uniformity                       | 0.068537988  |
| wavelet-HHL | firstorder | Median                           | -13.49681834 |
| wavelet-HHL | firstorder | Energy                           | 2193983.237  |
| wavelet-HHL | firstorder | RobustMeanAbsoluteDeviation      | 68.36161587  |
| wavelet-HHL | firstorder | MeanAbsoluteDeviation            | 99.81984756  |
| wavelet-HHL | firstorder | TotalEnergy                      | 59237547.4   |
| wavelet-HHL | firstorder | Maximum                          | 328.9745145  |
| wavelet-HHL | firstorder | RootMeanSquared                  | 124.3003869  |
| wavelet-HHL | firstorder | 90Percentile                     | 176.612022   |
| wavelet-HHL | firstorder | Minimum                          | -298.4676359 |
| wavelet-HHL | firstorder | Entropy                          | 4.175735713  |
| wavelet-HHL | firstorder | Range                            | 627.4421504  |
| wavelet-HHL | firstorder | Variance                         | 15373.76041  |
| wavelet-HHL | firstorder | 10Percentile                     | -128.667349  |
| wavelet-HHL | firstorder | Kurtosis                         | 2.904864641  |
| wavelet-HHL | firstorder | Mean                             | 8.765031115  |
| wavelet-HHL | glrlm      | ShortRunLowGrayLevelEmphasis     | 0.032025561  |
| wavelet-HHL | glrlm      | GrayLevelVariance                | 25.49771873  |
| wavelet-HHL | glrlm      | LowGrayLevelRunEmphasis          | 0.032400325  |
| wavelet-HHL | glrlm      | GrayLevelNonUniformityNormalized | 0.064909814  |
| wavelet-HHL | glrlm      | RunVariance                      | 0.071693131  |
| wavelet-HHL | glrlm      | GrayLevelNonUniformity           | 8.707470854  |
| wavelet-HHL | glrlm      | LongRunEmphasis                  | 1.198786457  |
| wavelet-HHL | glrlm      | ShortRunHighGrayLevelEmphasis    | 186.9636036  |
| wavelet-HHL | glrlm      | RunLengthNonUniformity           | 120.7782854  |
| wavelet-HHL | glrlm      | ShortRunEmphasis                 | 0.959106916  |
| wavelet-HHL | glrlm      | LongRunHighGrayLevelEmphasis     | 220.4244827  |
| wavelet-HHL | glrlm      | RunPercentage                    | 0.943661972  |
| wavelet-HHL | glrlm      | LongRunLowGrayLevelEmphasis      | 0.034203034  |
| wavelet-HHL | glrlm      | RunEntropy                       | 4.420764092  |
| wavelet-HHL | glrlm      | HighGrayLevelRunEmphasis         | 192.8233562  |
| wavelet-HHL | glrlm      | RunLengthNonUniformityNormalized | 0.899851844  |
| wavelet-HHL | glszm      | GrayLevelVariance                | 34.17706667  |
| wavelet-HHL | glszm      | ZoneVariance                     | 7.295288889  |
| wavelet-HHL | glszm      | GrayLevelNonUniformityNormalized | 0.052444444  |
| wavelet-HHL | glszm      | SizeZoneNonUniformityNormalized  | 0.530311111  |
| wavelet-HHL | glszm      | SizeZoneNonUniformity            | 39.77333333  |
| wavelet-HHL | glszm      | GrayLevelNonUniformity           | 3.933333333  |
| wavelet-HHL | glszm      | LargeAreaEmphasis                | 10.88        |
| wavelet-HHL | glszm      | SmallAreaHighGrayLevelEmphasis   | 171.0026593  |
| wavelet-HHL | glszm      | ZonePercentage                   | 0.528169014  |
| wavelet-HHL | glszm      | LargeAreaLowGrayLevelEmphasis    | 0.140452586  |
| wavelet-HHL | glszm      | LargeAreaHighGrayLevelEmphasis   | 1468.253333  |
| wavelet-HHL | glszm      | HighGrayLevelZoneEmphasis        | 220.2266667  |
| wavelet-HHL | glszm      | SmallAreaEmphasis                | 0.755806085  |
| wavelet-HHL | glszm      | LowGrayLevelZoneEmphasis         | 0.050598909  |
| wavelet-HHL | glszm      | ZoneEntropy                      | 5.122235778  |
| wavelet-HHL | glszm      | SmallAreaLowGrayLevelEmphasis    | 0.048176821  |
| wavelet-HHL | ngtdm      | Coarseness                       | 0.03367119   |

|             |            |                                      |              |
|-------------|------------|--------------------------------------|--------------|
| wavelet-HHL | ngtdm      | Complexity                           | 871.0157644  |
| wavelet-HHL | ngtdm      | Strength                             | 6.141761193  |
| wavelet-HHL | ngtdm      | Contrast                             | 0.368539107  |
| wavelet-HHL | ngtdm      | Busyness                             | 0.11228647   |
| wavelet-HLH | gldm       | GrayLevelVariance                    | 16.52251537  |
| wavelet-HLH | gldm       | HighGrayLevelEmphasis                | 238.1549296  |
| wavelet-HLH | gldm       | DependenceEntropy                    | 5.600785831  |
| wavelet-HLH | gldm       | DependenceNonUniformity              | 29.54929577  |
| wavelet-HLH | gldm       | GrayLevelNonUniformity               | 11.87323944  |
| wavelet-HLH | gldm       | SmallDependenceEmphasis              | 0.394381819  |
| wavelet-HLH | gldm       | SmallDependenceHighGrayLevelEmphasis | 95.79932034  |
| wavelet-HLH | gldm       | DependenceNonUniformityNormalized    | 0.208093632  |
| wavelet-HLH | gldm       | LargeDependenceEmphasis              | 11.47887324  |
| wavelet-HLH | gldm       | LargeDependenceLowGrayLevelEmphasis  | 0.06337668   |
| wavelet-HLH | gldm       | DependenceVariance                   | 3.701844872  |
| wavelet-HLH | gldm       | LargeDependenceHighGrayLevelEmphasis | 2556.450704  |
| wavelet-HLH | gldm       | SmallDependenceLowGrayLevelEmphasis  | 0.010447381  |
| wavelet-HLH | gldm       | LowGrayLevelEmphasis                 | 0.013300688  |
| wavelet-HLH | glcm       | JointAverage                         | 14.77740459  |
| wavelet-HLH | glcm       | SumAverage                           | 29.55480918  |
| wavelet-HLH | glcm       | JointEntropy                         | 6.458460815  |
| wavelet-HLH | glcm       | ClusterShade                         | 21.75375108  |
| wavelet-HLH | glcm       | MaximumProbability                   | 0.039891692  |
| wavelet-HLH | glcm       | Idmn                                 | 0.967845753  |
| wavelet-HLH | glcm       | JointEnergy                          | 0.014179817  |
| wavelet-HLH | glcm       | Contrast                             | 29.27513596  |
| wavelet-HLH | glcm       | DifferenceEntropy                    | 3.359599494  |
| wavelet-HLH | glcm       | InverseVariance                      | 0.261780118  |
| wavelet-HLH | glcm       | DifferenceVariance                   | 13.6496545   |
| wavelet-HLH | glcm       | Idn                                  | 0.887691535  |
| wavelet-HLH | glcm       | Idm                                  | 0.257597115  |
| wavelet-HLH | glcm       | Correlation                          | -0.03640635  |
| wavelet-HLH | glcm       | Autocorrelation                      | 217.7971519  |
| wavelet-HLH | glcm       | SumEntropy                           | 4.122953133  |
| wavelet-HLH | glcm       | SumSquares                           | 14.05160377  |
| wavelet-HLH | glcm       | ClusterProminence                    | 3012.837781  |
| wavelet-HLH | glcm       | Imc2                                 | 0.937584951  |
| wavelet-HLH | glcm       | Imc1                                 | -0.283578246 |
| wavelet-HLH | glcm       | DifferenceAverage                    | 3.916163659  |
| wavelet-HLH | glcm       | Id                                   | 0.343322565  |
| wavelet-HLH | glcm       | ClusterTendency                      | 26.93127911  |
| wavelet-HLH | firstorder | InterquartileRange                   | 111.4766482  |
| wavelet-HLH | firstorder | Skewness                             | -0.016178515 |
| wavelet-HLH | firstorder | Uniformity                           | 0.083614362  |
| wavelet-HLH | firstorder | Median                               | 8.833050833  |
| wavelet-HLH | firstorder | Energy                               | 1476809.715  |
| wavelet-HLH | firstorder | RobustMeanAbsoluteDeviation          | 45.66945476  |
| wavelet-HLH | firstorder | MeanAbsoluteDeviation                | 74.41655261  |
| wavelet-HLH | firstorder | TotalEnergy                          | 39873862.3   |
| wavelet-HLH | firstorder | Maximum                              | 339.3801529  |
| wavelet-HLH | firstorder | RootMeanSquared                      | 101.9807257  |
| wavelet-HLH | firstorder | 90Percentile                         | 122.0937637  |
| wavelet-HLH | firstorder | Minimum                              | -331.2974612 |
| wavelet-HLH | firstorder | Entropy                              | 3.885337611  |
| wavelet-HLH | firstorder | Range                                | 670.6776141  |

|             |            |                                  |              |
|-------------|------------|----------------------------------|--------------|
| wavelet-HLH | firstorder | Variance                         | 10283.06894  |
| wavelet-HLH | firstorder | 10Percentile                     | -107.7897357 |
| wavelet-HLH | firstorder | Kurtosis                         | 4.504381263  |
| wavelet-HLH | firstorder | Mean                             | 10.8166294   |
| wavelet-HLH | glrlm      | ShortRunLowGrayLevelEmphasis     | 0.013684827  |
| wavelet-HLH | glrlm      | GrayLevelVariance                | 17.4302317   |
| wavelet-HLH | glrlm      | LowGrayLevelRunEmphasis          | 0.013937816  |
| wavelet-HLH | glrlm      | GrayLevelNonUniformityNormalized | 0.08029037   |
| wavelet-HLH | glrlm      | RunVariance                      | 0.077547664  |
| wavelet-HLH | glrlm      | GrayLevelNonUniformity           | 10.61986607  |
| wavelet-HLH | glrlm      | LongRunEmphasis                  | 1.233099684  |
| wavelet-HLH | glrlm      | ShortRunHighGrayLevelEmphasis    | 226.969906   |
| wavelet-HLH | glrlm      | RunLengthNonUniformity           | 115.3409625  |
| wavelet-HLH | glrlm      | ShortRunEmphasis                 | 0.946886722  |
| wavelet-HLH | glrlm      | LongRunHighGrayLevelEmphasis     | 291.69579    |
| wavelet-HLH | glrlm      | RunPercentage                    | 0.9312026    |
| wavelet-HLH | glrlm      | LongRunLowGrayLevelEmphasis      | 0.015046993  |
| wavelet-HLH | glrlm      | RunEntropy                       | 4.206656001  |
| wavelet-HLH | glrlm      | HighGrayLevelRunEmphasis         | 239.0303733  |
| wavelet-HLH | glrlm      | RunLengthNonUniformityNormalized | 0.871027201  |
| wavelet-HLH | glszm      | GrayLevelVariance                | 29.31864096  |
| wavelet-HLH | glszm      | ZoneVariance                     | 6.431588613  |
| wavelet-HLH | glszm      | GrayLevelNonUniformityNormalized | 0.061065197  |
| wavelet-HLH | glszm      | SizeZoneNonUniformityNormalized  | 0.441230487  |
| wavelet-HLH | glszm      | SizeZoneNonUniformity            | 29.12121212  |
| wavelet-HLH | glszm      | GrayLevelNonUniformity           | 4.03030303   |
| wavelet-HLH | glszm      | LargeAreaEmphasis                | 11.06060606  |
| wavelet-HLH | glszm      | SmallAreaHighGrayLevelEmphasis   | 168.3954419  |
| wavelet-HLH | glszm      | ZonePercentage                   | 0.464788732  |
| wavelet-HLH | glszm      | LargeAreaLowGrayLevelEmphasis    | 0.072399147  |
| wavelet-HLH | glszm      | LargeAreaHighGrayLevelEmphasis   | 2424.818182  |
| wavelet-HLH | glszm      | HighGrayLevelZoneEmphasis        | 248          |
| wavelet-HLH | glszm      | SmallAreaEmphasis                | 0.688567512  |
| wavelet-HLH | glszm      | LowGrayLevelZoneEmphasis         | 0.023116343  |
| wavelet-HLH | glszm      | ZoneEntropy                      | 5.096980104  |
| wavelet-HLH | glszm      | SmallAreaLowGrayLevelEmphasis    | 0.021718574  |
| wavelet-HLH | ngtdm      | Coarseness                       | 0.045498978  |
| wavelet-HLH | ngtdm      | Complexity                       | 605.2773497  |
| wavelet-HLH | ngtdm      | Strength                         | 6.943245676  |
| wavelet-HLH | ngtdm      | Contrast                         | 0.223314896  |
| wavelet-HLH | ngtdm      | Busyness                         | 0.066414479  |



| Image type | Feature Class | Feature Name                         |                                                                                                                                                                                                                                                                                                                                                                                                                   |
|------------|---------------|--------------------------------------|-------------------------------------------------------------------------------------------------------------------------------------------------------------------------------------------------------------------------------------------------------------------------------------------------------------------------------------------------------------------------------------------------------------------|
| general    | info          | BoundingBox                          | 6: RTSTRUCT: C99-DNU_segment_RLL staple ITV<br>(1, 1, 1, 6, 3, 10)                                                                                                                                                                                                                                                                                                                                                |
| general    | info          | EnabledImageTypes                    | {u'Original': {}, u'Wavelet': {}}                                                                                                                                                                                                                                                                                                                                                                                 |
|            |               |                                      | {'distances': [1], 'additionalInfo': True, 'force2D': False, 'interpolator': 'sitkBSpline', 'resampledPixelSpacing': [3.0], 'label': 1, 'normalizeScale': 1, 'normalize': False, 'force2Ddimension': 0, 'removeOutliers': None, 'minimumROISize': None, u'binWidth': 25.0, 'minimumROIDimensions': 1, u'correctMask': True, 'preCrop': False, u'symmetricalGLCM': True, 'resegmentRange': None, 'padDistance': 5} |
| general    | info          | GeneralSettings                      |                                                                                                                                                                                                                                                                                                                                                                                                                   |
| general    | info          | ImageHash                            | 32011997084efa79d5f12288f3ee97edf632b1b7                                                                                                                                                                                                                                                                                                                                                                          |
| general    | info          | ImageSpacing                         | (0.9765625000000002, 0.9765625000000002, 2.0)                                                                                                                                                                                                                                                                                                                                                                     |
| general    | info          | MaskHash                             | fe6c8e1a3712998565dc8d9edb9d2921130926cc                                                                                                                                                                                                                                                                                                                                                                          |
| general    | info          | NumpyVersion                         | 1.13.1                                                                                                                                                                                                                                                                                                                                                                                                            |
| general    | info          | PyWaveletVersion                     | 0.5.2                                                                                                                                                                                                                                                                                                                                                                                                             |
| general    | info          | SimpleITKVersion                     | 1.1.0                                                                                                                                                                                                                                                                                                                                                                                                             |
| general    | info          | Version                              | 1.3.0.post102+g1b0eb74                                                                                                                                                                                                                                                                                                                                                                                            |
| general    | info          | VolumeNum                            | 1                                                                                                                                                                                                                                                                                                                                                                                                                 |
| general    | info          | VoxelNum                             | 25                                                                                                                                                                                                                                                                                                                                                                                                                |
| original   | shape         | Maximum3DDiameter                    | 31.46426545                                                                                                                                                                                                                                                                                                                                                                                                       |
| original   | shape         | Maximum2DDiameterSlice               | 6.708203932                                                                                                                                                                                                                                                                                                                                                                                                       |
| original   | shape         | Sphericity                           | 0.715021621                                                                                                                                                                                                                                                                                                                                                                                                       |
| original   | shape         | MinorAxis                            | 6.480622306                                                                                                                                                                                                                                                                                                                                                                                                       |
| original   | shape         | Elongation                           | 0.183318176                                                                                                                                                                                                                                                                                                                                                                                                       |
| original   | shape         | SurfaceVolumeRatio                   | 0.771016537                                                                                                                                                                                                                                                                                                                                                                                                       |
| original   | shape         | Volume                               | 675                                                                                                                                                                                                                                                                                                                                                                                                               |
| original   | shape         | MajorAxis                            | 35.35177169                                                                                                                                                                                                                                                                                                                                                                                                       |
| original   | shape         | SurfaceArea                          | 520.4361623                                                                                                                                                                                                                                                                                                                                                                                                       |
| original   | shape         | Flatness                             | 0.161491921                                                                                                                                                                                                                                                                                                                                                                                                       |
| original   | shape         | LeastAxis                            | 5.709025537                                                                                                                                                                                                                                                                                                                                                                                                       |
| original   | shape         | Maximum2DDiameterColumn              | 22.84731932                                                                                                                                                                                                                                                                                                                                                                                                       |
| original   | shape         | Maximum2DDiameterRow                 | 9.486832981                                                                                                                                                                                                                                                                                                                                                                                                       |
| original   | gldm          | GrayLevelVariance                    | 195.9456                                                                                                                                                                                                                                                                                                                                                                                                          |
| original   | gldm          | HighGrayLevelEmphasis                | 719.44                                                                                                                                                                                                                                                                                                                                                                                                            |
| original   | gldm          | DependenceEntropy                    | 4.16385619                                                                                                                                                                                                                                                                                                                                                                                                        |
| original   | gldm          | DependenceNonUniformity              | 15.88                                                                                                                                                                                                                                                                                                                                                                                                             |
| original   | gldm          | GrayLevelNonUniformity               | 1.64                                                                                                                                                                                                                                                                                                                                                                                                              |
| original   | gldm          | SmallDependenceEmphasis              | 0.82                                                                                                                                                                                                                                                                                                                                                                                                              |
| original   | gldm          | SmallDependenceHighGrayLevelEmphasis | 642.1                                                                                                                                                                                                                                                                                                                                                                                                             |
| original   | gldm          | DependenceNonUniformityNormalized    | 0.6352                                                                                                                                                                                                                                                                                                                                                                                                            |
| original   | gldm          | LargeDependenceEmphasis              | 1.72                                                                                                                                                                                                                                                                                                                                                                                                              |
| original   | gldm          | LargeDependenceLowGrayLevelEmphasis  | 0.050286665                                                                                                                                                                                                                                                                                                                                                                                                       |
| original   | gldm          | DependenceVariance                   | 0.1824                                                                                                                                                                                                                                                                                                                                                                                                            |
| original   | gldm          | LargeDependenceHighGrayLevelEmphasis | 1028.8                                                                                                                                                                                                                                                                                                                                                                                                            |
| original   | gldm          | SmallDependenceLowGrayLevelEmphasis  | 0.044011183                                                                                                                                                                                                                                                                                                                                                                                                       |
| original   | gldm          | LowGrayLevelEmphasis                 | 0.045266279                                                                                                                                                                                                                                                                                                                                                                                                       |
| original   | glcm          | JointAverage                         | 20.24194139                                                                                                                                                                                                                                                                                                                                                                                                       |
| original   | glcm          | SumAverage                           | 40.48388278                                                                                                                                                                                                                                                                                                                                                                                                       |
| original   | glcm          | JointEntropy                         | 3.003885349                                                                                                                                                                                                                                                                                                                                                                                                       |
| original   | glcm          | ClusterShade                         | 759.2640299                                                                                                                                                                                                                                                                                                                                                                                                       |
| original   | glcm          | MaximumProbability                   | 0.211278999                                                                                                                                                                                                                                                                                                                                                                                                       |
| original   | glcm          | Idmn                                 | 0.904960908                                                                                                                                                                                                                                                                                                                                                                                                       |
| original   | glcm          | JointEnergy                          | 0.186962759                                                                                                                                                                                                                                                                                                                                                                                                       |
| original   | glcm          | Contrast                             | 396.9973138                                                                                                                                                                                                                                                                                                                                                                                                       |
| original   | glcm          | DifferenceEntropy                    | 2.031479976                                                                                                                                                                                                                                                                                                                                                                                                       |
| original   | glcm          | InverseVariance                      | 0.130586838                                                                                                                                                                                                                                                                                                                                                                                                       |

|          |            |                                  |              |
|----------|------------|----------------------------------|--------------|
| original | glcm       | DifferenceVariance               | 114.4102526  |
| original | glcm       | Idn                              | 0.809541416  |
| original | glcm       | Idm                              | 0.150619023  |
| original | glcm       | Correlation                      | -0.478432068 |
| original | glcm       | Autocorrelation                  | 394.5843712  |
| original | glcm       | SumEntropy                       | 2.037584982  |
| original | glcm       | SumSquares                       | 143.539306   |
| original | glcm       | ClusterProminence                | 144325.4008  |
| original | glcm       | Imc2                             | 0.98488787   |
| original | glcm       | Imc1                             | -0.90991932  |
| original | glcm       | DifferenceAverage                | 15.26111111  |
| original | glcm       | Id                               | 0.201782361  |
| original | glcm       | ClusterTendency                  | 177.1599102  |
| original | firstorder | InterquartileRange               | 561          |
| original | firstorder | Skewness                         | 0.57293136   |
| original | firstorder | Uniformity                       | 0.0656       |
| original | firstorder | Median                           | -362         |
| original | firstorder | Energy                           | 5198160      |
| original | firstorder | RobustMeanAbsoluteDeviation      | 208.9750693  |
| original | firstorder | MeanAbsoluteDeviation            | 298.384      |
| original | firstorder | TotalEnergy                      | 140350320    |
| original | firstorder | Maximum                          | 529          |
| original | firstorder | RootMeanSquared                  | 455.9894736  |
| original | firstorder | 90Percentile                     | 174.8        |
| original | firstorder | Minimum                          | -828         |
| original | firstorder | Entropy                          | 4.16385619   |
| original | firstorder | Range                            | 1357         |
| original | firstorder | Variance                         | 123361.76    |
| original | firstorder | 10Percentile                     | -637         |
| original | firstorder | Kurtosis                         | 2.524253367  |
| original | firstorder | Mean                             | -290.8       |
| original | glrlm      | ShortRunLowGrayLevelEmphasis     | 0.045584202  |
| original | glrlm      | GrayLevelVariance                | 196.3800288  |
| original | glrlm      | LowGrayLevelRunEmphasis          | 0.045634486  |
| original | glrlm      | GrayLevelNonUniformityNormalized | 0.064617521  |
| original | glrlm      | RunVariance                      | 0.009214744  |
| original | glrlm      | GrayLevelNonUniformity           | 1.601282051  |
| original | glrlm      | LongRunEmphasis                  | 1.028846154  |
| original | glrlm      | ShortRunHighGrayLevelEmphasis    | 719.1277244  |
| original | glrlm      | RunLengthNonUniformity           | 24.32692308  |
| original | glrlm      | ShortRunEmphasis                 | 0.992788462  |
| original | glrlm      | LongRunHighGrayLevelEmphasis     | 734.6205128  |
| original | glrlm      | RunPercentage                    | 0.990769231  |
| original | glrlm      | LongRunLowGrayLevelEmphasis      | 0.045835623  |
| original | glrlm      | RunEntropy                       | 4.190521749  |
| original | glrlm      | HighGrayLevelRunEmphasis         | 722.2262821  |
| original | glrlm      | RunLengthNonUniformityNormalized | 0.981570513  |
| original | glszm      | GrayLevelVariance                | 202.4235537  |
| original | glszm      | ZoneVariance                     | 0.117768595  |
| original | glszm      | GrayLevelNonUniformityNormalized | 0.053719008  |
| original | glszm      | SizeZoneNonUniformityNormalized  | 0.76446281   |
| original | glszm      | SizeZoneNonUniformity            | 16.81818182  |
| original | glszm      | GrayLevelNonUniformity           | 1.181818182  |
| original | glszm      | LargeAreaEmphasis                | 1.409090909  |
| original | glszm      | SmallAreaHighGrayLevelEmphasis   | 715.0113636  |
| original | glszm      | ZonePercentage                   | 0.88         |
| original | glszm      | LargeAreaLowGrayLevelEmphasis    | 0.053340615  |
| original | glszm      | LargeAreaHighGrayLevelEmphasis   | 934.7272727  |

|             |            |                                      |              |
|-------------|------------|--------------------------------------|--------------|
| original    | glszm      | HighGrayLevelZoneEmphasis            | 758.9545455  |
| original    | glszm      | SmallAreaEmphasis                    | 0.897727273  |
| original    | glszm      | LowGrayLevelZoneEmphasis             | 0.050488123  |
| original    | glszm      | ZoneEntropy                          | 4.277613437  |
| original    | glszm      | SmallAreaLowGrayLevelEmphasis        | 0.049775     |
| original    | ngtdm      | Coarseness                           | 0.043278445  |
| original    | ngtdm      | Complexity                           | 5597.507698  |
| original    | ngtdm      | Strength                             | 45.56678395  |
| original    | ngtdm      | Contrast                             | 14.65466829  |
| original    | ngtdm      | Busyness                             | 0.067641073  |
| wavelet-HHH | gldm       | GrayLevelVariance                    | 102.6464     |
| wavelet-HHH | gldm       | HighGrayLevelEmphasis                | 611.6        |
| wavelet-HHH | gldm       | DependenceEntropy                    | 4.21366069   |
| wavelet-HHH | gldm       | DependenceNonUniformity              | 21.32        |
| wavelet-HHH | gldm       | GrayLevelNonUniformity               | 1.48         |
| wavelet-HHH | gldm       | SmallDependenceEmphasis              | 0.94         |
| wavelet-HHH | gldm       | SmallDependenceHighGrayLevelEmphasis | 561.14       |
| wavelet-HHH | gldm       | DependenceNonUniformityNormalized    | 0.8528       |
| wavelet-HHH | gldm       | LargeDependenceEmphasis              | 1.24         |
| wavelet-HHH | gldm       | LargeDependenceLowGrayLevelEmphasis  | 0.044129629  |
| wavelet-HHH | gldm       | DependenceVariance                   | 0.0736       |
| wavelet-HHH | gldm       | LargeDependenceHighGrayLevelEmphasis | 813.44       |
| wavelet-HHH | gldm       | SmallDependenceLowGrayLevelEmphasis  | 0.043772911  |
| wavelet-HHH | gldm       | LowGrayLevelEmphasis                 | 0.043844255  |
| wavelet-HHH | glcm       | JointAverage                         | 21.96422466  |
| wavelet-HHH | glcm       | SumAverage                           | 43.92844933  |
| wavelet-HHH | glcm       | JointEntropy                         | 3.065973261  |
| wavelet-HHH | glcm       | ClusterShade                         | -171.8240425 |
| wavelet-HHH | glcm       | MaximumProbability                   | 0.17748779   |
| wavelet-HHH | glcm       | Idmn                                 | 0.917409405  |
| wavelet-HHH | glcm       | JointEnergy                          | 0.172194968  |
| wavelet-HHH | glcm       | Contrast                             | 182.9313187  |
| wavelet-HHH | glcm       | DifferenceEntropy                    | 1.874581319  |
| wavelet-HHH | glcm       | InverseVariance                      | 0.070932077  |
| wavelet-HHH | glcm       | DifferenceVariance                   | 36.50704818  |
| wavelet-HHH | glcm       | Idn                                  | 0.807613019  |
| wavelet-HHH | glcm       | Idm                                  | 0.055568732  |
| wavelet-HHH | glcm       | Correlation                          | -0.337476268 |
| wavelet-HHH | glcm       | Autocorrelation                      | 482.9087912  |
| wavelet-HHH | glcm       | SumEntropy                           | 1.95277038   |
| wavelet-HHH | glcm       | SumSquares                           | 68.10033827  |
| wavelet-HHH | glcm       | ClusterProminence                    | 35299.09522  |
| wavelet-HHH | glcm       | Imc2                                 | 0.986761196  |
| wavelet-HHH | glcm       | Imc1                                 | -0.932888596 |
| wavelet-HHH | glcm       | DifferenceAverage                    | 11.04346764  |
| wavelet-HHH | glcm       | Id                                   | 0.140014446  |
| wavelet-HHH | glcm       | ClusterTendency                      | 89.4700344   |
| wavelet-HHH | firstorder | InterquartileRange                   | 306.4282473  |
| wavelet-HHH | firstorder | Skewness                             | -0.1436948   |
| wavelet-HHH | firstorder | Uniformity                           | 0.0592       |
| wavelet-HHH | firstorder | Median                               | 59.86760539  |
| wavelet-HHH | firstorder | Energy                               | 1665481.47   |
| wavelet-HHH | firstorder | RobustMeanAbsoluteDeviation          | 132.9631625  |
| wavelet-HHH | firstorder | MeanAbsoluteDeviation                | 203.7127434  |
| wavelet-HHH | firstorder | TotalEnergy                          | 44967999.69  |
| wavelet-HHH | firstorder | Maximum                              | 518.2946495  |
| wavelet-HHH | firstorder | RootMeanSquared                      | 258.1070685  |
| wavelet-HHH | firstorder | 90Percentile                         | 372.2929582  |

|             |            |                                      |              |
|-------------|------------|--------------------------------------|--------------|
| wavelet-HHH | firstorder | Minimum                              | -516.8517343 |
| wavelet-HHH | firstorder | Entropy                              | 4.21366069   |
| wavelet-HHH | firstorder | Range                                | 1035.146384  |
| wavelet-HHH | firstorder | Variance                             | 65924.97793  |
| wavelet-HHH | firstorder | 10Percentile                         | -321.376704  |
| wavelet-HHH | firstorder | Kurtosis                             | 2.494923131  |
| wavelet-HHH | firstorder | Mean                                 | 26.34921006  |
| wavelet-HHH | glrlm      | ShortRunLowGrayLevelEmphasis         | 0.043978112  |
| wavelet-HHH | glrlm      | GrayLevelVariance                    | 102.836928   |
| wavelet-HHH | glrlm      | LowGrayLevelRunEmphasis              | 0.04398097   |
| wavelet-HHH | glrlm      | GrayLevelNonUniformityNormalized     | 0.059186752  |
| wavelet-HHH | glrlm      | RunVariance                          | 0.003071581  |
| wavelet-HHH | glrlm      | GrayLevelNonUniformity               | 1.475128205  |
| wavelet-HHH | glrlm      | LongRunEmphasis                      | 1.009615385  |
| wavelet-HHH | glrlm      | ShortRunHighGrayLevelEmphasis        | 608.843109   |
| wavelet-HHH | glrlm      | RunLengthNonUniformity               | 24.77564103  |
| wavelet-HHH | glrlm      | ShortRunEmphasis                     | 0.997596154  |
| wavelet-HHH | glrlm      | LongRunHighGrayLevelEmphasis         | 618.9512821  |
| wavelet-HHH | glrlm      | RunPercentage                        | 0.996923077  |
| wavelet-HHH | glrlm      | LongRunLowGrayLevelEmphasis          | 0.043992403  |
| wavelet-HHH | glrlm      | RunEntropy                           | 4.214161831  |
| wavelet-HHH | glrlm      | HighGrayLevelRunEmphasis             | 610.8647436  |
| wavelet-HHH | glrlm      | RunLengthNonUniformityNormalized     | 0.993856838  |
| wavelet-HHH | glszm      | GrayLevelVariance                    | 105.1232639  |
| wavelet-HHH | glszm      | ZoneVariance                         | 0.039930556  |
| wavelet-HHH | glszm      | GrayLevelNonUniformityNormalized     | 0.059027778  |
| wavelet-HHH | glszm      | SizeZoneNonUniformityNormalized      | 0.920138889  |
| wavelet-HHH | glszm      | SizeZoneNonUniformity                | 22.08333333  |
| wavelet-HHH | glszm      | GrayLevelNonUniformity               | 1.416666667  |
| wavelet-HHH | glszm      | LargeAreaEmphasis                    | 1.125        |
| wavelet-HHH | glszm      | SmallAreaHighGrayLevelEmphasis       | 575.7604167  |
| wavelet-HHH | glszm      | ZonePercentage                       | 0.96         |
| wavelet-HHH | glszm      | LargeAreaLowGrayLevelEmphasis        | 0.045770187  |
| wavelet-HHH | glszm      | LargeAreaHighGrayLevelEmphasis       | 707.1666667  |
| wavelet-HHH | glszm      | HighGrayLevelZoneEmphasis            | 602.0416667  |
| wavelet-HHH | glszm      | SmallAreaEmphasis                    | 0.96875      |
| wavelet-HHH | glszm      | LowGrayLevelZoneEmphasis             | 0.045621555  |
| wavelet-HHH | glszm      | ZoneEntropy                          | 4.220175521  |
| wavelet-HHH | glszm      | SmallAreaLowGrayLevelEmphasis        | 0.045584396  |
| wavelet-HHH | ngtdm      | Coarseness                           | 0.083991601  |
| wavelet-HHH | ngtdm      | Complexity                           | 2822.911976  |
| wavelet-HHH | ngtdm      | Strength                             | 37.25811319  |
| wavelet-HHH | ngtdm      | Contrast                             | 5.084341169  |
| wavelet-HHH | ngtdm      | Busyness                             | 0.04129423   |
| wavelet-HLL | gldm       | GrayLevelVariance                    | 94.9824      |
| wavelet-HLL | gldm       | HighGrayLevelEmphasis                | 613          |
| wavelet-HLL | gldm       | DependenceEntropy                    | 3.97366069   |
| wavelet-HLL | gldm       | DependenceNonUniformity              | 21.32        |
| wavelet-HLL | gldm       | GrayLevelNonUniformity               | 1.72         |
| wavelet-HLL | gldm       | SmallDependenceEmphasis              | 0.94         |
| wavelet-HLL | gldm       | SmallDependenceHighGrayLevelEmphasis | 597.64       |
| wavelet-HLL | gldm       | DependenceNonUniformityNormalized    | 0.8528       |
| wavelet-HLL | gldm       | LargeDependenceEmphasis              | 1.24         |
| wavelet-HLL | gldm       | LargeDependenceLowGrayLevelEmphasis  | 0.043887557  |
| wavelet-HLL | gldm       | DependenceVariance                   | 0.0736       |
| wavelet-HLL | gldm       | LargeDependenceHighGrayLevelEmphasis | 674.44       |
| wavelet-HLL | gldm       | SmallDependenceLowGrayLevelEmphasis  | 0.042715682  |
| wavelet-HLL | gldm       | LowGrayLevelEmphasis                 | 0.042950057  |

|             |            |                                  |              |
|-------------|------------|----------------------------------|--------------|
| wavelet-HLL | glcm       | JointAverage                     | 20.98722527  |
| wavelet-HLL | glcm       | SumAverage                       | 41.97445055  |
| wavelet-HLL | glcm       | JointEntropy                     | 2.978366423  |
| wavelet-HLL | glcm       | ClusterShade                     | 15.50448831  |
| wavelet-HLL | glcm       | MaximumProbability               | 0.20740232   |
| wavelet-HLL | glcm       | Idmn                             | 0.938687044  |
| wavelet-HLL | glcm       | JointEnergy                      | 0.187300618  |
| wavelet-HLL | glcm       | Contrast                         | 136.6337302  |
| wavelet-HLL | glcm       | DifferenceEntropy                | 1.786929949  |
| wavelet-HLL | glcm       | InverseVariance                  | 0.21996438   |
| wavelet-HLL | glcm       | DifferenceVariance               | 40.20146315  |
| wavelet-HLL | glcm       | Idn                              | 0.848594498  |
| wavelet-HLL | glcm       | Idm                              | 0.160229267  |
| wavelet-HLL | glcm       | Correlation                      | -0.151997186 |
| wavelet-HLL | glcm       | Autocorrelation                  | 443.0392857  |
| wavelet-HLL | glcm       | SumEntropy                       | 1.884217585  |
| wavelet-HLL | glcm       | SumSquares                       | 67.67371247  |
| wavelet-HLL | glcm       | ClusterProminence                | 78518.94471  |
| wavelet-HLL | glcm       | Imc2                             | 0.984979123  |
| wavelet-HLL | glcm       | Imc1                             | -0.907696474 |
| wavelet-HLL | glcm       | DifferenceAverage                | 8.569078144  |
| wavelet-HLL | glcm       | Id                               | 0.231165373  |
| wavelet-HLL | glcm       | ClusterTendency                  | 134.0611197  |
| wavelet-HLL | firstorder | InterquartileRange               | 399.2390117  |
| wavelet-HLL | firstorder | Skewness                         | 0.048330446  |
| wavelet-HLL | firstorder | Uniformity                       | 0.0688       |
| wavelet-HLL | firstorder | Median                           | -145.1677212 |
| wavelet-HLL | firstorder | Energy                           | 1675870.648  |
| wavelet-HLL | firstorder | RobustMeanAbsoluteDeviation      | 137.7366583  |
| wavelet-HLL | firstorder | MeanAbsoluteDeviation            | 197.0051824  |
| wavelet-HLL | firstorder | TotalEnergy                      | 45248507.5   |
| wavelet-HLL | firstorder | Maximum                          | 390.5022937  |
| wavelet-HLL | firstorder | RootMeanSquared                  | 258.9108455  |
| wavelet-HLL | firstorder | 90Percentile                     | 225.4302785  |
| wavelet-HLL | firstorder | Minimum                          | -626.0703573 |
| wavelet-HLL | firstorder | Entropy                          | 3.97366069   |
| wavelet-HLL | firstorder | Range                            | 1016.572651  |
| wavelet-HLL | firstorder | Variance                         | 58825.2439   |
| wavelet-HLL | firstorder | 10Percentile                     | -324.3592025 |
| wavelet-HLL | firstorder | Kurtosis                         | 2.492513192  |
| wavelet-HLL | firstorder | Mean                             | -90.60674382 |
| wavelet-HLL | glrlm      | ShortRunLowGrayLevelEmphasis     | 0.043065807  |
| wavelet-HLL | glrlm      | GrayLevelVariance                | 95.13426132  |
| wavelet-HLL | glrlm      | LowGrayLevelRunEmphasis          | 0.043075197  |
| wavelet-HLL | glrlm      | GrayLevelNonUniformityNormalized | 0.068849573  |
| wavelet-HLL | glrlm      | RunVariance                      | 0.003071581  |
| wavelet-HLL | glrlm      | GrayLevelNonUniformity           | 1.715897436  |
| wavelet-HLL | glrlm      | LongRunEmphasis                  | 1.009615385  |
| wavelet-HLL | glrlm      | ShortRunHighGrayLevelEmphasis    | 613.5288462  |
| wavelet-HLL | glrlm      | RunLengthNonUniformity           | 24.77564103  |
| wavelet-HLL | glrlm      | ShortRunEmphasis                 | 0.997596154  |
| wavelet-HLL | glrlm      | LongRunHighGrayLevelEmphasis     | 616.6057692  |
| wavelet-HLL | glrlm      | RunPercentage                    | 0.996923077  |
| wavelet-HLL | glrlm      | LongRunLowGrayLevelEmphasis      | 0.043112757  |
| wavelet-HLL | glrlm      | RunEntropy                       | 3.9733926    |
| wavelet-HLL | glrlm      | HighGrayLevelRunEmphasis         | 614.1442308  |
| wavelet-HLL | glrlm      | RunLengthNonUniformityNormalized | 0.993856838  |
| wavelet-HLL | glszm      | GrayLevelVariance                | 96.95659722  |

|             |            |                                      |              |
|-------------|------------|--------------------------------------|--------------|
| wavelet-HLL | glszm      | ZoneVariance                         | 0.039930556  |
| wavelet-HLL | glszm      | GrayLevelNonUniformityNormalized     | 0.069444444  |
| wavelet-HLL | glszm      | SizeZoneNonUniformityNormalized      | 0.920138889  |
| wavelet-HLL | glszm      | SizeZoneNonUniformity                | 22.08333333  |
| wavelet-HLL | glszm      | GrayLevelNonUniformity               | 1.666666667  |
| wavelet-HLL | glszm      | LargeAreaEmphasis                    | 1.125        |
| wavelet-HLL | glszm      | SmallAreaHighGrayLevelEmphasis       | 619.875      |
| wavelet-HLL | glszm      | ZonePercentage                       | 0.96         |
| wavelet-HLL | glszm      | LargeAreaLowGrayLevelEmphasis        | 0.045065163  |
| wavelet-HLL | glszm      | LargeAreaHighGrayLevelEmphasis       | 659.875      |
| wavelet-HLL | glszm      | HighGrayLevelZoneEmphasis            | 627.875      |
| wavelet-HLL | glszm      | SmallAreaEmphasis                    | 0.96875      |
| wavelet-HLL | glszm      | LowGrayLevelZoneEmphasis             | 0.044576882  |
| wavelet-HLL | glszm      | ZoneEntropy                          | 3.970175521  |
| wavelet-HLL | glszm      | SmallAreaLowGrayLevelEmphasis        | 0.044454812  |
| wavelet-HLL | ngtdm      | Coarseness                           | 0.080756807  |
| wavelet-HLL | ngtdm      | Complexity                           | 1775.847333  |
| wavelet-HLL | ngtdm      | Strength                             | 39.42603039  |
| wavelet-HLL | ngtdm      | Contrast                             | 4.989901714  |
| wavelet-HLL | ngtdm      | Busyness                             | 0.043626188  |
| wavelet-LHL | gldm       | GrayLevelVariance                    | 179.9776     |
| wavelet-LHL | gldm       | HighGrayLevelEmphasis                | 1060.88      |
| wavelet-LHL | gldm       | DependenceEntropy                    | 4.40385619   |
| wavelet-LHL | gldm       | DependenceNonUniformity              | 18.28        |
| wavelet-LHL | gldm       | GrayLevelNonUniformity               | 1.24         |
| wavelet-LHL | gldm       | SmallDependenceEmphasis              | 0.88         |
| wavelet-LHL | gldm       | SmallDependenceHighGrayLevelEmphasis | 946.1        |
| wavelet-LHL | gldm       | DependenceNonUniformityNormalized    | 0.7312       |
| wavelet-LHL | gldm       | LargeDependenceEmphasis              | 1.48         |
| wavelet-LHL | gldm       | LargeDependenceLowGrayLevelEmphasis  | 0.046404131  |
| wavelet-LHL | gldm       | DependenceVariance                   | 0.1344       |
| wavelet-LHL | gldm       | LargeDependenceHighGrayLevelEmphasis | 1520         |
| wavelet-LHL | gldm       | SmallDependenceLowGrayLevelEmphasis  | 0.041554381  |
| wavelet-LHL | gldm       | LowGrayLevelEmphasis                 | 0.042524331  |
| wavelet-LHL | glcm       | JointAverage                         | 28.05216728  |
| wavelet-LHL | glcm       | SumAverage                           | 56.10433455  |
| wavelet-LHL | glcm       | JointEntropy                         | 3.061394506  |
| wavelet-LHL | glcm       | ClusterShade                         | -2859.748036 |
| wavelet-LHL | glcm       | MaximumProbability                   | 0.18252442   |
| wavelet-LHL | glcm       | Idmn                                 | 0.860507097  |
| wavelet-LHL | glcm       | JointEnergy                          | 0.173105268  |
| wavelet-LHL | glcm       | Contrast                             | 471.4686813  |
| wavelet-LHL | glcm       | DifferenceEntropy                    | 1.902635883  |
| wavelet-LHL | glcm       | InverseVariance                      | 0.034340904  |
| wavelet-LHL | glcm       | DifferenceVariance                   | 68.2006122   |
| wavelet-LHL | glcm       | Idn                                  | 0.751013762  |
| wavelet-LHL | glcm       | Idm                                  | 0.04588978   |
| wavelet-LHL | glcm       | Correlation                          | -0.35883939  |
| wavelet-LHL | glcm       | Autocorrelation                      | 733.6505189  |
| wavelet-LHL | glcm       | SumEntropy                           | 2.052603297  |
| wavelet-LHL | glcm       | SumSquares                           | 174.3126214  |
| wavelet-LHL | glcm       | ClusterProminence                    | 236078.3973  |
| wavelet-LHL | glcm       | Imc2                                 | 0.982342167  |
| wavelet-LHL | glcm       | Imc1                                 | -0.929755417 |
| wavelet-LHL | glcm       | DifferenceAverage                    | 18.45573871  |
| wavelet-LHL | glcm       | Id                                   | 0.106341704  |
| wavelet-LHL | glcm       | ClusterTendency                      | 225.7818041  |
| wavelet-LHL | firstorder | InterquartileRange                   | 507.5079126  |

|             |            |                                  |              |
|-------------|------------|----------------------------------|--------------|
| wavelet-LHL | firstorder | Skewness                         | -0.396558515 |
| wavelet-LHL | firstorder | Uniformity                       | 0.0496       |
| wavelet-LHL | firstorder | Median                           | -53.11332301 |
| wavelet-LHL | firstorder | Energy                           | 3144150.356  |
| wavelet-LHL | firstorder | RobustMeanAbsoluteDeviation      | 197.7112346  |
| wavelet-LHL | firstorder | MeanAbsoluteDeviation            | 278.6495102  |
| wavelet-LHL | firstorder | TotalEnergy                      | 84892059.61  |
| wavelet-LHL | firstorder | Maximum                          | 393.8097043  |
| wavelet-LHL | firstorder | RootMeanSquared                  | 354.6350437  |
| wavelet-LHL | firstorder | 90Percentile                     | 266.836715   |
| wavelet-LHL | firstorder | Minimum                          | -832.8581121 |
| wavelet-LHL | firstorder | Entropy                          | 4.40385619   |
| wavelet-LHL | firstorder | Range                            | 1226.667816  |
| wavelet-LHL | firstorder | Variance                         | 111088.0399  |
| wavelet-LHL | firstorder | 10Percentile                     | -617.5786008 |
| wavelet-LHL | firstorder | Kurtosis                         | 2.208142619  |
| wavelet-LHL | firstorder | Mean                             | -121.15269   |
| wavelet-LHL | glrlm      | ShortRunLowGrayLevelEmphasis     | 0.042706249  |
| wavelet-LHL | glrlm      | GrayLevelVariance                | 178.9696947  |
| wavelet-LHL | glrlm      | LowGrayLevelRunEmphasis          | 0.042745109  |
| wavelet-LHL | glrlm      | GrayLevelNonUniformityNormalized | 0.049447863  |
| wavelet-LHL | glrlm      | RunVariance                      | 0.006143162  |
| wavelet-LHL | glrlm      | GrayLevelNonUniformity           | 1.228717949  |
| wavelet-LHL | glrlm      | LongRunEmphasis                  | 1.019230769  |
| wavelet-LHL | glrlm      | ShortRunHighGrayLevelEmphasis    | 1056.950545  |
| wavelet-LHL | glrlm      | RunLengthNonUniformity           | 24.55128205  |
| wavelet-LHL | glrlm      | ShortRunEmphasis                 | 0.995192308  |
| wavelet-LHL | glrlm      | LongRunHighGrayLevelEmphasis     | 1079.943333  |
| wavelet-LHL | glrlm      | RunPercentage                    | 0.993846154  |
| wavelet-LHL | glrlm      | LongRunLowGrayLevelEmphasis      | 0.04290055   |
| wavelet-LHL | glrlm      | RunEntropy                       | 4.406077674  |
| wavelet-LHL | glrlm      | HighGrayLevelRunEmphasis         | 1061.549103  |
| wavelet-LHL | glrlm      | RunLengthNonUniformityNormalized | 0.987713675  |
| wavelet-LHL | glszm      | GrayLevelVariance                | 167.3459357  |
| wavelet-LHL | glszm      | ZoneVariance                     | 0.079395085  |
| wavelet-LHL | glszm      | GrayLevelNonUniformityNormalized | 0.047258979  |
| wavelet-LHL | glszm      | SizeZoneNonUniformityNormalized  | 0.84120983   |
| wavelet-LHL | glszm      | SizeZoneNonUniformity            | 19.34782609  |
| wavelet-LHL | glszm      | GrayLevelNonUniformity           | 1.086956522  |
| wavelet-LHL | glszm      | LargeAreaEmphasis                | 1.260869565  |
| wavelet-LHL | glszm      | SmallAreaHighGrayLevelEmphasis   | 1007.576087  |
| wavelet-LHL | glszm      | ZonePercentage                   | 0.92         |
| wavelet-LHL | glszm      | LargeAreaLowGrayLevelEmphasis    | 0.047627823  |
| wavelet-LHL | glszm      | LargeAreaHighGrayLevelEmphasis   | 1319.478261  |
| wavelet-LHL | glszm      | HighGrayLevelZoneEmphasis        | 1069.956522  |
| wavelet-LHL | glszm      | SmallAreaEmphasis                | 0.934782609  |
| wavelet-LHL | glszm      | LowGrayLevelZoneEmphasis         | 0.045519237  |
| wavelet-LHL | glszm      | ZoneEntropy                      | 4.436605434  |
| wavelet-LHL | glszm      | SmallAreaLowGrayLevelEmphasis    | 0.04499209   |
| wavelet-LHL | ngtdm      | Coarseness                       | 0.064689031  |
| wavelet-LHL | ngtdm      | Complexity                       | 4975.345159  |
| wavelet-LHL | ngtdm      | Strength                         | 49.72283038  |
| wavelet-LHL | ngtdm      | Contrast                         | 9.74201571   |
| wavelet-LHL | ngtdm      | Busyness                         | 0.039179267  |
| wavelet-LHH | gldm       | GrayLevelVariance                | 70.1664      |
| wavelet-LHH | gldm       | HighGrayLevelEmphasis            | 378.52       |
| wavelet-LHH | gldm       | DependenceEntropy                | 4.24385619   |
| wavelet-LHH | gldm       | DependenceNonUniformity          | 14.44        |

|             |            |                                      |              |
|-------------|------------|--------------------------------------|--------------|
| wavelet-LHH | gldm       | GrayLevelNonUniformity               | 1.8          |
| wavelet-LHH | gldm       | SmallDependenceEmphasis              | 0.784444444  |
| wavelet-LHH | gldm       | SmallDependenceHighGrayLevelEmphasis | 325.5911111  |
| wavelet-LHH | gldm       | DependenceNonUniformityNormalized    | 0.5776       |
| wavelet-LHH | gldm       | LargeDependenceEmphasis              | 2.04         |
| wavelet-LHH | gldm       | LargeDependenceLowGrayLevelEmphasis  | 0.051951628  |
| wavelet-LHH | gldm       | DependenceVariance                   | 0.2976       |
| wavelet-LHH | gldm       | LargeDependenceHighGrayLevelEmphasis | 620.28       |
| wavelet-LHH | gldm       | SmallDependenceLowGrayLevelEmphasis  | 0.046108613  |
| wavelet-LHH | gldm       | LowGrayLevelEmphasis                 | 0.047066828  |
| wavelet-LHH | glcm       | JointAverage                         | 17.88630952  |
| wavelet-LHH | glcm       | SumAverage                           | 35.77261905  |
| wavelet-LHH | glcm       | JointEntropy                         | 2.998665568  |
| wavelet-LHH | glcm       | ClusterShade                         | 149.4663314  |
| wavelet-LHH | glcm       | MaximumProbability                   | 0.213888889  |
| wavelet-LHH | glcm       | Idmn                                 | 0.905243875  |
| wavelet-LHH | glcm       | JointEnergy                          | 0.186810189  |
| wavelet-LHH | glcm       | Contrast                             | 143.8368437  |
| wavelet-LHH | glcm       | DifferenceEntropy                    | 1.947482433  |
| wavelet-LHH | glcm       | InverseVariance                      | 0.150607824  |
| wavelet-LHH | glcm       | DifferenceVariance                   | 40.55761453  |
| wavelet-LHH | glcm       | Idn                                  | 0.8112192    |
| wavelet-LHH | glcm       | Idm                                  | 0.170267783  |
| wavelet-LHH | glcm       | Correlation                          | -0.222608878 |
| wavelet-LHH | glcm       | Autocorrelation                      | 317.4945055  |
| wavelet-LHH | glcm       | SumEntropy                           | 2.018659463  |
| wavelet-LHH | glcm       | SumSquares                           | 61.51646092  |
| wavelet-LHH | glcm       | ClusterProminence                    | 33106.78032  |
| wavelet-LHH | glcm       | Imc2                                 | 0.985281253  |
| wavelet-LHH | glcm       | Imc1                                 | -0.925794768 |
| wavelet-LHH | glcm       | DifferenceAverage                    | 9.178235653  |
| wavelet-LHH | glcm       | Id                                   | 0.239923462  |
| wavelet-LHH | glcm       | ClusterTendency                      | 102.229      |
| wavelet-LHH | firstorder | InterquartileRange                   | 247.7965688  |
| wavelet-LHH | firstorder | Skewness                             | 0.140661561  |
| wavelet-LHH | firstorder | Uniformity                           | 0.072        |
| wavelet-LHH | firstorder | Median                               | -35.33482955 |
| wavelet-LHH | firstorder | Energy                               | 1108295.008  |
| wavelet-LHH | firstorder | RobustMeanAbsoluteDeviation          | 113.3231334  |
| wavelet-LHH | firstorder | MeanAbsoluteDeviation                | 169.4966521  |
| wavelet-LHH | firstorder | TotalEnergy                          | 29923965.21  |
| wavelet-LHH | firstorder | Maximum                              | 399.2971102  |
| wavelet-LHH | firstorder | RootMeanSquared                      | 210.5511822  |
| wavelet-LHH | firstorder | 90Percentile                         | 250.1937456  |
| wavelet-LHH | firstorder | Minimum                              | -425.4346352 |
| wavelet-LHH | firstorder | Entropy                              | 4.00385619   |
| wavelet-LHH | firstorder | Range                                | 824.7317453  |
| wavelet-LHH | firstorder | Variance                             | 43867.8627   |
| wavelet-LHH | firstorder | 10Percentile                         | -282.5833523 |
| wavelet-LHH | firstorder | Kurtosis                             | 2.3686173    |
| wavelet-LHH | firstorder | Mean                                 | -21.53921096 |
| wavelet-LHH | glrlm      | ShortRunLowGrayLevelEmphasis         | 0.047567151  |
| wavelet-LHH | glrlm      | GrayLevelVariance                    | 70.9254297   |
| wavelet-LHH | glrlm      | LowGrayLevelRunEmphasis              | 0.047611336  |
| wavelet-LHH | glrlm      | GrayLevelNonUniformityNormalized     | 0.071213675  |
| wavelet-LHH | glrlm      | RunVariance                          | 0.012286325  |
| wavelet-LHH | glrlm      | GrayLevelNonUniformity               | 1.758974359  |
| wavelet-LHH | glrlm      | LongRunEmphasis                      | 1.038461538  |



|             |       |                                      |              |
|-------------|-------|--------------------------------------|--------------|
| wavelet-LHH | glrlm | ShortRunHighGrayLevelEmphasis        | 378.0386859  |
| wavelet-LHH | glrlm | RunLengthNonUniformity               | 24.1025641   |
| wavelet-LHH | glrlm | ShortRunEmphasis                     | 0.990384615  |
| wavelet-LHH | glrlm | LongRunHighGrayLevelEmphasis         | 389.4689744  |
| wavelet-LHH | glrlm | RunPercentage                        | 0.987692308  |
| wavelet-LHH | glrlm | LongRunLowGrayLevelEmphasis          | 0.047788075  |
| wavelet-LHH | glrlm | RunEntropy                           | 4.028811978  |
| wavelet-LHH | glrlm | HighGrayLevelRunEmphasis             | 380.3247436  |
| wavelet-LHH | glrlm | RunLengthNonUniformityNormalized     | 0.97542735   |
| wavelet-LHH | glszm | GrayLevelVariance                    | 81.33333333  |
| wavelet-LHH | glszm | ZoneVariance                         | 0.249433107  |
| wavelet-LHH | glszm | GrayLevelNonUniformityNormalized     | 0.06122449   |
| wavelet-LHH | glszm | SizeZoneNonUniformityNormalized      | 0.746031746  |
| wavelet-LHH | glszm | SizeZoneNonUniformity                | 15.66666667  |
| wavelet-LHH | glszm | GrayLevelNonUniformity               | 1.285714286  |
| wavelet-LHH | glszm | LargeAreaEmphasis                    | 1.666666667  |
| wavelet-LHH | glszm | SmallAreaHighGrayLevelEmphasis       | 376.287037   |
| wavelet-LHH | glszm | ZonePercentage                       | 0.84         |
| wavelet-LHH | glszm | LargeAreaLowGrayLevelEmphasis        | 0.058346043  |
| wavelet-LHH | glszm | LargeAreaHighGrayLevelEmphasis       | 557.2857143  |
| wavelet-LHH | glszm | HighGrayLevelZoneEmphasis            | 405.3333333  |
| wavelet-LHH | glszm | SmallAreaEmphasis                    | 0.886243386  |
| wavelet-LHH | glszm | LowGrayLevelZoneEmphasis             | 0.055156655  |
| wavelet-LHH | glszm | ZoneEntropy                          | 4.201841232  |
| wavelet-LHH | glszm | SmallAreaLowGrayLevelEmphasis        | 0.054672385  |
| wavelet-LHH | ngtdm | Coarseness                           | 0.092885419  |
| wavelet-LHH | ngtdm | Complexity                           | 1556.617603  |
| wavelet-LHH | ngtdm | Strength                             | 31.44037647  |
| wavelet-LHH | ngtdm | Contrast                             | 3.341257143  |
| wavelet-LHH | ngtdm | Busyness                             | 0.046971869  |
| wavelet-LLH | gldm  | GrayLevelVariance                    | 491.2384     |
| wavelet-LLH | gldm  | HighGrayLevelEmphasis                | 3191.08      |
| wavelet-LLH | gldm  | DependenceEntropy                    | 4.48385619   |
| wavelet-LLH | gldm  | DependenceNonUniformity              | 25           |
| wavelet-LLH | gldm  | GrayLevelNonUniformity               | 1.16         |
| wavelet-LLH | gldm  | SmallDependenceEmphasis              | 1            |
| wavelet-LLH | gldm  | SmallDependenceHighGrayLevelEmphasis | 3191.08      |
| wavelet-LLH | gldm  | DependenceNonUniformityNormalized    | 1            |
| wavelet-LLH | gldm  | LargeDependenceEmphasis              | 1            |
| wavelet-LLH | gldm  | LargeDependenceLowGrayLevelEmphasis  | 0.040696974  |
| wavelet-LLH | gldm  | DependenceVariance                   | 0            |
| wavelet-LLH | gldm  | LargeDependenceHighGrayLevelEmphasis | 3191.08      |
| wavelet-LLH | gldm  | SmallDependenceLowGrayLevelEmphasis  | 0.040696974  |
| wavelet-LLH | gldm  | LowGrayLevelEmphasis                 | 0.040696974  |
| wavelet-LLH | glcm  | JointAverage                         | 48.6207265   |
| wavelet-LLH | glcm  | SumAverage                           | 97.24145299  |
| wavelet-LLH | glcm  | JointEntropy                         | 3.083372528  |
| wavelet-LLH | glcm  | ClusterShade                         | -3501.759415 |
| wavelet-LLH | glcm  | MaximumProbability                   | 0.171535409  |
| wavelet-LLH | glcm  | Idmn                                 | 0.869780031  |
| wavelet-LLH | glcm  | JointEnergy                          | 0.171535409  |
| wavelet-LLH | glcm  | Contrast                             | 1425.219841  |
| wavelet-LLH | glcm  | DifferenceEntropy                    | 1.95389269   |
| wavelet-LLH | glcm  | InverseVariance                      | 0.038320796  |
| wavelet-LLH | glcm  | DifferenceVariance                   | 212.6650132  |
| wavelet-LLH | glcm  | Idn                                  | 0.772851812  |
| wavelet-LLH | glcm  | Idm                                  | 0.026519292  |
| wavelet-LLH | glcm  | Correlation                          | -0.223652385 |

|             |            |                                  |              |
|-------------|------------|----------------------------------|--------------|
| wavelet-LLH | glcm       | Autocorrelation                  | 2287.152076  |
| wavelet-LLH | glcm       | SumEntropy                       | 2.072383517  |
| wavelet-LLH | glcm       | SumSquares                       | 528.4823849  |
| wavelet-LLH | glcm       | ClusterProminence                | 1503412.039  |
| wavelet-LLH | glcm       | Imc2                             | 0.987241288  |
| wavelet-LLH | glcm       | Imc1                             | -0.967208563 |
| wavelet-LLH | glcm       | DifferenceAverage                | 29.9979243   |
| wavelet-LLH | glcm       | Id                               | 0.078987411  |
| wavelet-LLH | glcm       | ClusterTendency                  | 688.7096985  |
| wavelet-LLH | firstorder | InterquartileRange               | 750.5127585  |
| wavelet-LLH | firstorder | Skewness                         | -0.244842491 |
| wavelet-LLH | firstorder | Uniformity                       | 0.0464       |
| wavelet-LLH | firstorder | Median                           | 319.8663816  |
| wavelet-LLH | firstorder | Energy                           | 10530135.55  |
| wavelet-LLH | firstorder | RobustMeanAbsoluteDeviation      | 286.2072826  |
| wavelet-LLH | firstorder | MeanAbsoluteDeviation            | 433.1428102  |
| wavelet-LLH | firstorder | TotalEnergy                      | 284313659.8  |
| wavelet-LLH | firstorder | Maximum                          | 1247.235529  |
| wavelet-LLH | firstorder | RootMeanSquared                  | 649.0034068  |
| wavelet-LLH | firstorder | 90Percentile                     | 1077.669358  |
| wavelet-LLH | firstorder | Minimum                          | -944.1619884 |
| wavelet-LLH | firstorder | Entropy                          | 4.48385619   |
| wavelet-LLH | firstorder | Range                            | 2191.397518  |
| wavelet-LLH | firstorder | Variance                         | 309097.2699  |
| wavelet-LLH | firstorder | 10Percentile                     | -271.6668913 |
| wavelet-LLH | firstorder | Kurtosis                         | 2.572600013  |
| wavelet-LLH | firstorder | Mean                             | 334.8255548  |
| wavelet-LLH | glrlm      | ShortRunLowGrayLevelEmphasis     | 0.040696974  |
| wavelet-LLH | glrlm      | GrayLevelVariance                | 491.2384     |
| wavelet-LLH | glrlm      | LowGrayLevelRunEmphasis          | 0.040696974  |
| wavelet-LLH | glrlm      | GrayLevelNonUniformityNormalized | 0.0464       |
| wavelet-LLH | glrlm      | RunVariance                      | 0            |
| wavelet-LLH | glrlm      | GrayLevelNonUniformity           | 1.16         |
| wavelet-LLH | glrlm      | LongRunEmphasis                  | 1            |
| wavelet-LLH | glrlm      | ShortRunHighGrayLevelEmphasis    | 3191.08      |
| wavelet-LLH | glrlm      | RunLengthNonUniformity           | 25           |
| wavelet-LLH | glrlm      | ShortRunEmphasis                 | 1            |
| wavelet-LLH | glrlm      | LongRunHighGrayLevelEmphasis     | 3191.08      |
| wavelet-LLH | glrlm      | RunPercentage                    | 1            |
| wavelet-LLH | glrlm      | LongRunLowGrayLevelEmphasis      | 0.040696974  |
| wavelet-LLH | glrlm      | RunEntropy                       | 4.48385619   |
| wavelet-LLH | glrlm      | HighGrayLevelRunEmphasis         | 3191.08      |
| wavelet-LLH | glrlm      | RunLengthNonUniformityNormalized | 1            |
| wavelet-LLH | glszm      | GrayLevelVariance                | 491.2384     |
| wavelet-LLH | glszm      | ZoneVariance                     | 0            |
| wavelet-LLH | glszm      | GrayLevelNonUniformityNormalized | 0.0464       |
| wavelet-LLH | glszm      | SizeZoneNonUniformityNormalized  | 1            |
| wavelet-LLH | glszm      | SizeZoneNonUniformity            | 25           |
| wavelet-LLH | glszm      | GrayLevelNonUniformity           | 1.16         |
| wavelet-LLH | glszm      | LargeAreaEmphasis                | 1            |
| wavelet-LLH | glszm      | SmallAreaHighGrayLevelEmphasis   | 3191.08      |
| wavelet-LLH | glszm      | ZonePercentage                   | 1            |
| wavelet-LLH | glszm      | LargeAreaLowGrayLevelEmphasis    | 0.040696974  |
| wavelet-LLH | glszm      | LargeAreaHighGrayLevelEmphasis   | 3191.08      |
| wavelet-LLH | glszm      | HighGrayLevelZoneEmphasis        | 3191.08      |
| wavelet-LLH | glszm      | SmallAreaEmphasis                | 1            |
| wavelet-LLH | glszm      | LowGrayLevelZoneEmphasis         | 0.040696974  |
| wavelet-LLH | glszm      | ZoneEntropy                      | 4.48385619   |

|             |            |                                      |              |
|-------------|------------|--------------------------------------|--------------|
| wavelet-LLH | glszm      | SmallAreaLowGrayLevelEmphasis        | 0.040696974  |
| wavelet-LLH | ngtdm      | Coarseness                           | 0.057678839  |
| wavelet-LLH | ngtdm      | Complexity                           | 11120.55     |
| wavelet-LLH | ngtdm      | Strength                             | 122.7857587  |
| wavelet-LLH | ngtdm      | Contrast                             | 29.82842466  |
| wavelet-LLH | ngtdm      | Busyness                             | 0.026383889  |
| wavelet-LLL | gldm       | GrayLevelVariance                    | 178.3744     |
| wavelet-LLL | gldm       | HighGrayLevelEmphasis                | 811.4        |
| wavelet-LLL | gldm       | DependenceEntropy                    | 4.40385619   |
| wavelet-LLL | gldm       | DependenceNonUniformity              | 19.56        |
| wavelet-LLL | gldm       | GrayLevelNonUniformity               | 1.4          |
| wavelet-LLL | gldm       | SmallDependenceEmphasis              | 0.904444444  |
| wavelet-LLL | gldm       | SmallDependenceHighGrayLevelEmphasis | 789.9        |
| wavelet-LLL | gldm       | DependenceNonUniformityNormalized    | 0.7824       |
| wavelet-LLL | gldm       | LargeDependenceEmphasis              | 1.56         |
| wavelet-LLL | gldm       | LargeDependenceLowGrayLevelEmphasis  | 0.049348988  |
| wavelet-LLL | gldm       | DependenceVariance                   | 0.2144       |
| wavelet-LLL | gldm       | LargeDependenceHighGrayLevelEmphasis | 937.4        |
| wavelet-LLL | gldm       | SmallDependenceLowGrayLevelEmphasis  | 0.046435407  |
| wavelet-LLL | gldm       | LowGrayLevelEmphasis                 | 0.046860099  |
| wavelet-LLL | glcm       | JointAverage                         | 24.80422772  |
| wavelet-LLL | glcm       | SumAverage                           | 49.60845543  |
| wavelet-LLL | glcm       | JointEntropy                         | 3.035295605  |
| wavelet-LLL | glcm       | ClusterShade                         | 1022.111803  |
| wavelet-LLL | glcm       | MaximumProbability                   | 0.192368742  |
| wavelet-LLL | glcm       | Idmn                                 | 0.851362809  |
| wavelet-LLL | glcm       | JointEnergy                          | 0.176944063  |
| wavelet-LLL | glcm       | Contrast                             | 502.6688339  |
| wavelet-LLL | glcm       | DifferenceEntropy                    | 1.93514665   |
| wavelet-LLL | glcm       | InverseVariance                      | 0.054181742  |
| wavelet-LLL | glcm       | DifferenceVariance                   | 99.97581535  |
| wavelet-LLL | glcm       | Idn                                  | 0.751208457  |
| wavelet-LLL | glcm       | Idm                                  | 0.070486725  |
| wavelet-LLL | glcm       | Correlation                          | -0.353267067 |
| wavelet-LLL | glcm       | Autocorrelation                      | 557.9506716  |
| wavelet-LLL | glcm       | SumEntropy                           | 2.026595971  |
| wavelet-LLL | glcm       | SumSquares                           | 178.6301673  |
| wavelet-LLL | glcm       | ClusterProminence                    | 138863.5104  |
| wavelet-LLL | glcm       | Imc2                                 | 0.986940187  |
| wavelet-LLL | glcm       | Imc1                                 | -0.957229076 |
| wavelet-LLL | glcm       | DifferenceAverage                    | 18.53653846  |
| wavelet-LLL | glcm       | Id                                   | 0.129095097  |
| wavelet-LLL | glcm       | ClusterTendency                      | 211.8518353  |
| wavelet-LLL | firstorder | InterquartileRange                   | 544.1320477  |
| wavelet-LLL | firstorder | Skewness                             | 0.041306476  |
| wavelet-LLL | firstorder | Uniformity                           | 0.056        |
| wavelet-LLL | firstorder | Median                               | -1180.600041 |
| wavelet-LLL | firstorder | Energy                               | 37885461.01  |
| wavelet-LLL | firstorder | RobustMeanAbsoluteDeviation          | 227.040835   |
| wavelet-LLL | firstorder | MeanAbsoluteDeviation                | 296.2076991  |
| wavelet-LLL | firstorder | TotalEnergy                          | 1022907447   |
| wavelet-LLL | firstorder | Maximum                              | -591.7449143 |
| wavelet-LLL | firstorder | RootMeanSquared                      | 1231.023331  |
| wavelet-LLL | firstorder | 90Percentile                         | -775.9442363 |
| wavelet-LLL | firstorder | Minimum                              | -1775.530844 |
| wavelet-LLL | firstorder | Entropy                              | 4.29366069   |
| wavelet-LLL | firstorder | Range                                | 1183.78593   |
| wavelet-LLL | firstorder | Variance                             | 111873.726   |

|             |            |                                      |              |
|-------------|------------|--------------------------------------|--------------|
| wavelet-LLL | firstorder | 10Percentile                         | -1549.539017 |
| wavelet-LLL | firstorder | Kurtosis                             | 1.858384636  |
| wavelet-LLL | firstorder | Mean                                 | -1184.712925 |
| wavelet-LLL | glrlm      | ShortRunLowGrayLevelEmphasis         | 0.047110626  |
| wavelet-LLL | glrlm      | GrayLevelVariance                    | 178.8285521  |
| wavelet-LLL | glrlm      | LowGrayLevelRunEmphasis              | 0.047131994  |
| wavelet-LLL | glrlm      | GrayLevelNonUniformityNormalized     | 0.055397436  |
| wavelet-LLL | glrlm      | RunVariance                          | 0.006143162  |
| wavelet-LLL | glrlm      | GrayLevelNonUniformity               | 1.376923077  |
| wavelet-LLL | glrlm      | LongRunEmphasis                      | 1.019230769  |
| wavelet-LLL | glrlm      | ShortRunHighGrayLevelEmphasis        | 814.0772436  |
| wavelet-LLL | glrlm      | RunLengthNonUniformity               | 24.55128205  |
| wavelet-LLL | glrlm      | ShortRunEmphasis                     | 0.995192308  |
| wavelet-LLL | glrlm      | LongRunHighGrayLevelEmphasis         | 819.4858974  |
| wavelet-LLL | glrlm      | RunPercentage                        | 0.993846154  |
| wavelet-LLL | glrlm      | LongRunLowGrayLevelEmphasis          | 0.047217464  |
| wavelet-LLL | glrlm      | RunEntropy                           | 4.312835327  |
| wavelet-LLL | glrlm      | HighGrayLevelRunEmphasis             | 815.1589744  |
| wavelet-LLL | glrlm      | RunLengthNonUniformityNormalized     | 0.987713675  |
| wavelet-LLL | glszm      | GrayLevelVariance                    | 184.1285444  |
| wavelet-LLL | glszm      | ZoneVariance                         | 0.166351607  |
| wavelet-LLL | glszm      | GrayLevelNonUniformityNormalized     | 0.051039698  |
| wavelet-LLL | glszm      | SizeZoneNonUniformityNormalized      | 0.916824197  |
| wavelet-LLL | glszm      | SizeZoneNonUniformity                | 21.08695652  |
| wavelet-LLL | glszm      | GrayLevelNonUniformity               | 1.173913043  |
| wavelet-LLL | glszm      | LargeAreaEmphasis                    | 1.347826087  |
| wavelet-LLL | glszm      | SmallAreaHighGrayLevelEmphasis       | 853.6956522  |
| wavelet-LLL | glszm      | ZonePercentage                       | 0.92         |
| wavelet-LLL | glszm      | LargeAreaLowGrayLevelEmphasis        | 0.05209431   |
| wavelet-LLL | glszm      | LargeAreaHighGrayLevelEmphasis       | 940.6521739  |
| wavelet-LLL | glszm      | HighGrayLevelZoneEmphasis            | 862.3913043  |
| wavelet-LLL | glszm      | SmallAreaEmphasis                    | 0.961352657  |
| wavelet-LLL | glszm      | LowGrayLevelZoneEmphasis             | 0.050548416  |
| wavelet-LLL | glszm      | ZoneEntropy                          | 4.349648913  |
| wavelet-LLL | glszm      | SmallAreaLowGrayLevelEmphasis        | 0.05037665   |
| wavelet-LLL | ngtdm      | Coarseness                           | 0.060140902  |
| wavelet-LLL | ngtdm      | Complexity                           | 4734.464611  |
| wavelet-LLL | ngtdm      | Strength                             | 48.56288766  |
| wavelet-LLL | ngtdm      | Contrast                             | 10.79104448  |
| wavelet-LLL | ngtdm      | Busyness                             | 0.048950833  |
| wavelet-HHL | gldm       | GrayLevelVariance                    | 59.6224      |
| wavelet-HHL | gldm       | HighGrayLevelEmphasis                | 222.44       |
| wavelet-HHL | gldm       | DependenceEntropy                    | 3.81366069   |
| wavelet-HHL | gldm       | DependenceNonUniformity              | 25           |
| wavelet-HHL | gldm       | GrayLevelNonUniformity               | 2.04         |
| wavelet-HHL | gldm       | SmallDependenceEmphasis              | 1            |
| wavelet-HHL | gldm       | SmallDependenceHighGrayLevelEmphasis | 222.44       |
| wavelet-HHL | gldm       | DependenceNonUniformityNormalized    | 1            |
| wavelet-HHL | gldm       | LargeDependenceEmphasis              | 1            |
| wavelet-HHL | gldm       | LargeDependenceLowGrayLevelEmphasis  | 0.074361345  |
| wavelet-HHL | gldm       | DependenceVariance                   | 0            |
| wavelet-HHL | gldm       | LargeDependenceHighGrayLevelEmphasis | 222.44       |
| wavelet-HHL | gldm       | SmallDependenceLowGrayLevelEmphasis  | 0.074361345  |
| wavelet-HHL | gldm       | LowGrayLevelEmphasis                 | 0.074361345  |
| wavelet-HHL | glcm       | JointAverage                         | 13.45111416  |
| wavelet-HHL | glcm       | SumAverage                           | 26.90222833  |
| wavelet-HHL | glcm       | JointEntropy                         | 3.061394506  |
| wavelet-HHL | glcm       | ClusterShade                         | -11.93576854 |

|             |            |                                  |              |
|-------------|------------|----------------------------------|--------------|
| wavelet-HHL | glcm       | MaximumProbability               | 0.177029915  |
| wavelet-HHL | glcm       | Idmn                             | 0.868222382  |
| wavelet-HHL | glcm       | JointEnergy                      | 0.173105268  |
| wavelet-HHL | glcm       | Contrast                         | 135.7964896  |
| wavelet-HHL | glcm       | DifferenceEntropy                | 1.816933994  |
| wavelet-HHL | glcm       | InverseVariance                  | 0.084174636  |
| wavelet-HHL | glcm       | DifferenceVariance               | 26.38375839  |
| wavelet-HHL | glcm       | Idn                              | 0.752865829  |
| wavelet-HHL | glcm       | Idm                              | 0.054219021  |
| wavelet-HHL | glcm       | Correlation                      | -0.371698914 |
| wavelet-HHL | glcm       | Autocorrelation                  | 170.6391026  |
| wavelet-HHL | glcm       | SumEntropy                       | 2.016217461  |
| wavelet-HHL | glcm       | SumSquares                       | 51.16981114  |
| wavelet-HHL | glcm       | ClusterProminence                | 15722.40785  |
| wavelet-HHL | glcm       | Imc2                             | 0.985937831  |
| wavelet-HHL | glcm       | Imc1                             | -0.896448357 |
| wavelet-HHL | glcm       | DifferenceAverage                | 10.0742674   |
| wavelet-HHL | glcm       | Id                               | 0.137545569  |
| wavelet-HHL | glcm       | ClusterTendency                  | 68.88275494  |
| wavelet-HHL | firstorder | InterquartileRange               | 341.5162441  |
| wavelet-HHL | firstorder | Skewness                         | 0.041307905  |
| wavelet-HHL | firstorder | Uniformity                       | 0.0816       |
| wavelet-HHL | firstorder | Median                           | 85.69310661  |
| wavelet-HHL | firstorder | Energy                           | 997800.9973  |
| wavelet-HHL | firstorder | RobustMeanAbsoluteDeviation      | 138.3268041  |
| wavelet-HHL | firstorder | MeanAbsoluteDeviation            | 172.0263288  |
| wavelet-HHL | firstorder | TotalEnergy                      | 26940626.93  |
| wavelet-HHL | firstorder | Maximum                          | 446.4563012  |
| wavelet-HHL | firstorder | RootMeanSquared                  | 199.7799787  |
| wavelet-HHL | firstorder | 90Percentile                     | 256.2268022  |
| wavelet-HHL | firstorder | Minimum                          | -239.2283033 |
| wavelet-HHL | firstorder | Entropy                          | 3.81366069   |
| wavelet-HHL | firstorder | Range                            | 685.6846045  |
| wavelet-HHL | firstorder | Variance                         | 37106.21227  |
| wavelet-HHL | firstorder | 10Percentile                     | -197.4859974 |
| wavelet-HHL | firstorder | Kurtosis                         | 1.819094949  |
| wavelet-HHL | firstorder | Mean                             | 52.97006347  |
| wavelet-HHL | glrlm      | ShortRunLowGrayLevelEmphasis     | 0.074361345  |
| wavelet-HHL | glrlm      | GrayLevelVariance                | 59.6224      |
| wavelet-HHL | glrlm      | LowGrayLevelRunEmphasis          | 0.074361345  |
| wavelet-HHL | glrlm      | GrayLevelNonUniformityNormalized | 0.0816       |
| wavelet-HHL | glrlm      | RunVariance                      | 0            |
| wavelet-HHL | glrlm      | GrayLevelNonUniformity           | 2.04         |
| wavelet-HHL | glrlm      | LongRunEmphasis                  | 1            |
| wavelet-HHL | glrlm      | ShortRunHighGrayLevelEmphasis    | 222.44       |
| wavelet-HHL | glrlm      | RunLengthNonUniformity           | 25           |
| wavelet-HHL | glrlm      | ShortRunEmphasis                 | 1            |
| wavelet-HHL | glrlm      | LongRunHighGrayLevelEmphasis     | 222.44       |
| wavelet-HHL | glrlm      | RunPercentage                    | 1            |
| wavelet-HHL | glrlm      | LongRunLowGrayLevelEmphasis      | 0.074361345  |
| wavelet-HHL | glrlm      | RunEntropy                       | 3.81366069   |
| wavelet-HHL | glrlm      | HighGrayLevelRunEmphasis         | 222.44       |
| wavelet-HHL | glrlm      | RunLengthNonUniformityNormalized | 1            |
| wavelet-HHL | glszm      | GrayLevelVariance                | 59.6224      |
| wavelet-HHL | glszm      | ZoneVariance                     | 0            |
| wavelet-HHL | glszm      | GrayLevelNonUniformityNormalized | 0.0816       |
| wavelet-HHL | glszm      | SizeZoneNonUniformityNormalized  | 1            |
| wavelet-HHL | glszm      | SizeZoneNonUniformity            | 25           |

|             |            |                                      |              |
|-------------|------------|--------------------------------------|--------------|
| wavelet-HHL | glszm      | GrayLevelNonUniformity               | 2.04         |
| wavelet-HHL | glszm      | LargeAreaEmphasis                    | 1            |
| wavelet-HHL | glszm      | SmallAreaHighGrayLevelEmphasis       | 222.44       |
| wavelet-HHL | glszm      | ZonePercentage                       | 1            |
| wavelet-HHL | glszm      | LargeAreaLowGrayLevelEmphasis        | 0.074361345  |
| wavelet-HHL | glszm      | LargeAreaHighGrayLevelEmphasis       | 222.44       |
| wavelet-HHL | glszm      | HighGrayLevelZoneEmphasis            | 222.44       |
| wavelet-HHL | glszm      | SmallAreaEmphasis                    | 1            |
| wavelet-HHL | glszm      | LowGrayLevelZoneEmphasis             | 0.074361345  |
| wavelet-HHL | glszm      | ZoneEntropy                          | 3.81366069   |
| wavelet-HHL | glszm      | SmallAreaLowGrayLevelEmphasis        | 0.074361345  |
| wavelet-HHL | ngtdm      | Coarseness                           | 0.071348486  |
| wavelet-HHL | ngtdm      | Complexity                           | 1259.16111   |
| wavelet-HHL | ngtdm      | Strength                             | 21.93309105  |
| wavelet-HHL | ngtdm      | Contrast                             | 3.691265371  |
| wavelet-HHL | ngtdm      | Busyness                             | 0.066186788  |
| wavelet-HLH | gldm       | GrayLevelVariance                    | 120.1344     |
| wavelet-HLH | gldm       | HighGrayLevelEmphasis                | 438.4        |
| wavelet-HLH | gldm       | DependenceEntropy                    | 3.94346519   |
| wavelet-HLH | gldm       | DependenceNonUniformity              | 21.32        |
| wavelet-HLH | gldm       | GrayLevelNonUniformity               | 1.96         |
| wavelet-HLH | gldm       | SmallDependenceEmphasis              | 0.94         |
| wavelet-HLH | gldm       | SmallDependenceHighGrayLevelEmphasis | 433.54       |
| wavelet-HLH | gldm       | DependenceNonUniformityNormalized    | 0.8528       |
| wavelet-HLH | gldm       | LargeDependenceEmphasis              | 1.24         |
| wavelet-HLH | gldm       | LargeDependenceLowGrayLevelEmphasis  | 0.055558137  |
| wavelet-HLH | gldm       | DependenceVariance                   | 0.0736       |
| wavelet-HLH | gldm       | LargeDependenceHighGrayLevelEmphasis | 457.84       |
| wavelet-HLH | gldm       | SmallDependenceLowGrayLevelEmphasis  | 0.051854434  |
| wavelet-HLH | gldm       | LowGrayLevelEmphasis                 | 0.052595174  |
| wavelet-HLH | glcm       | JointAverage                         | 17.60318987  |
| wavelet-HLH | glcm       | SumAverage                           | 35.20637973  |
| wavelet-HLH | glcm       | JointEntropy                         | 2.997291942  |
| wavelet-HLH | glcm       | ClusterShade                         | 914.0642401  |
| wavelet-HLH | glcm       | MaximumProbability                   | 0.190918803  |
| wavelet-HLH | glcm       | Idmn                                 | 0.788141223  |
| wavelet-HLH | glcm       | JointEnergy                          | 0.179337461  |
| wavelet-HLH | glcm       | Contrast                             | 367.1781136  |
| wavelet-HLH | glcm       | DifferenceEntropy                    | 1.900306342  |
| wavelet-HLH | glcm       | InverseVariance                      | 0.07101911   |
| wavelet-HLH | glcm       | DifferenceVariance                   | 33.33069116  |
| wavelet-HLH | glcm       | Idn                                  | 0.696172644  |
| wavelet-HLH | glcm       | Idm                                  | 0.050828669  |
| wavelet-HLH | glcm       | Correlation                          | -0.278784034 |
| wavelet-HLH | glcm       | Autocorrelation                      | 265.2963675  |
| wavelet-HLH | glcm       | SumEntropy                           | 1.896450088  |
| wavelet-HLH | glcm       | SumSquares                           | 133.8428697  |
| wavelet-HLH | glcm       | ClusterProminence                    | 88522.42005  |
| wavelet-HLH | glcm       | Imc2                                 | 0.981347835  |
| wavelet-HLH | glcm       | Imc1                                 | -0.885044055 |
| wavelet-HLH | glcm       | DifferenceAverage                    | 16.70985958  |
| wavelet-HLH | glcm       | Id                                   | 0.11030639   |
| wavelet-HLH | glcm       | ClusterTendency                      | 168.1933652  |
| wavelet-HLH | firstorder | InterquartileRange                   | 497.0391071  |
| wavelet-HLH | firstorder | Skewness                             | 0.008146521  |
| wavelet-HLH | firstorder | Uniformity                           | 0.0784       |
| wavelet-HLH | firstorder | Median                               | 191.922688   |
| wavelet-HLH | firstorder | Energy                               | 2022782.546  |

|             |            |                                  |              |
|-------------|------------|----------------------------------|--------------|
| wavelet-HLH | firstorder | RobustMeanAbsoluteDeviation      | 211.8255942  |
| wavelet-HLH | firstorder | MeanAbsoluteDeviation            | 252.5510673  |
| wavelet-HLH | firstorder | TotalEnergy                      | 54615128.73  |
| wavelet-HLH | firstorder | Maximum                          | 490.2876419  |
| wavelet-HLH | firstorder | RootMeanSquared                  | 284.4491199  |
| wavelet-HLH | firstorder | 90Percentile                     | 438.2032575  |
| wavelet-HLH | firstorder | Minimum                          | -335.8435486 |
| wavelet-HLH | firstorder | Entropy                          | 3.83326969   |
| wavelet-HLH | firstorder | Range                            | 826.1311905  |
| wavelet-HLH | firstorder | Variance                         | 73922.02288  |
| wavelet-HLH | firstorder | 10Percentile                     | -249.7472167 |
| wavelet-HLH | firstorder | Kurtosis                         | 1.480142441  |
| wavelet-HLH | firstorder | Mean                             | 83.60190752  |
| wavelet-HLH | glrlm      | ShortRunLowGrayLevelEmphasis     | 0.052694502  |
| wavelet-HLH | glrlm      | GrayLevelVariance                | 120.2585434  |
| wavelet-HLH | glrlm      | LowGrayLevelRunEmphasis          | 0.052724179  |
| wavelet-HLH | glrlm      | GrayLevelNonUniformityNormalized | 0.078245299  |
| wavelet-HLH | glrlm      | RunVariance                      | 0.003071581  |
| wavelet-HLH | glrlm      | GrayLevelNonUniformity           | 1.95025641   |
| wavelet-HLH | glrlm      | LongRunEmphasis                  | 1.009615385  |
| wavelet-HLH | glrlm      | ShortRunHighGrayLevelEmphasis    | 439.3508013  |
| wavelet-HLH | glrlm      | RunLengthNonUniformity           | 24.77564103  |
| wavelet-HLH | glrlm      | ShortRunEmphasis                 | 0.997596154  |
| wavelet-HLH | glrlm      | LongRunHighGrayLevelEmphasis     | 440.324359   |
| wavelet-HLH | glrlm      | RunPercentage                    | 0.996923077  |
| wavelet-HLH | glrlm      | LongRunLowGrayLevelEmphasis      | 0.052842888  |
| wavelet-HLH | glrlm      | RunEntropy                       | 3.841381396  |
| wavelet-HLH | glrlm      | HighGrayLevelRunEmphasis         | 439.5455128  |
| wavelet-HLH | glrlm      | RunLengthNonUniformityNormalized | 0.993856838  |
| wavelet-HLH | glszm      | GrayLevelVariance                | 121.7482639  |
| wavelet-HLH | glszm      | ZoneVariance                     | 0.039930556  |
| wavelet-HLH | glszm      | GrayLevelNonUniformityNormalized | 0.076388889  |
| wavelet-HLH | glszm      | SizeZoneNonUniformityNormalized  | 0.920138889  |
| wavelet-HLH | glszm      | SizeZoneNonUniformity            | 22.08333333  |
| wavelet-HLH | glszm      | GrayLevelNonUniformity           | 1.833333333  |
| wavelet-HLH | glszm      | LargeAreaEmphasis                | 1.125        |
| wavelet-HLH | glszm      | SmallAreaHighGrayLevelEmphasis   | 450.7604167  |
| wavelet-HLH | glszm      | ZonePercentage                   | 0.96         |
| wavelet-HLH | glszm      | LargeAreaLowGrayLevelEmphasis    | 0.055815447  |
| wavelet-HLH | glszm      | LargeAreaHighGrayLevelEmphasis   | 463.4166667  |
| wavelet-HLH | glszm      | HighGrayLevelZoneEmphasis        | 453.2916667  |
| wavelet-HLH | glszm      | SmallAreaEmphasis                | 0.96875      |
| wavelet-HLH | glszm      | LowGrayLevelZoneEmphasis         | 0.054272237  |
| wavelet-HLH | glszm      | ZoneEntropy                      | 3.938721876  |
| wavelet-HLH | glszm      | SmallAreaLowGrayLevelEmphasis    | 0.053886434  |
| wavelet-HLH | ngtdm      | Coarseness                       | 0.047503252  |
| wavelet-HLH | ngtdm      | Complexity                       | 2464.277437  |
| wavelet-HLH | ngtdm      | Strength                         | 29.2151037   |
| wavelet-HLH | ngtdm      | Contrast                         | 10.22906278  |
| wavelet-HLH | ngtdm      | Busyness                         | 0.080225573  |

| Image type | Feature Class | Feature Name                         | Value                                                                                                                                                                                                                                                                                                                                                                                                             |
|------------|---------------|--------------------------------------|-------------------------------------------------------------------------------------------------------------------------------------------------------------------------------------------------------------------------------------------------------------------------------------------------------------------------------------------------------------------------------------------------------------------|
| general    | info          | BoundingBox                          | 502: RTSTRUCT: C99-Research_segment_GTV<br>(0, 0, 1, 9, 11, 8)                                                                                                                                                                                                                                                                                                                                                    |
| general    | info          | EnabledImageTypes                    | {u'Original': {}, u'Wavelet': {}}                                                                                                                                                                                                                                                                                                                                                                                 |
|            |               |                                      | {'distances': [1], 'additionalInfo': True, 'force2D': False, 'interpolator': 'sitkBSpline', 'resampledPixelSpacing': [3.0], 'label': 1, 'normalizeScale': 1, 'normalize': False, 'force2Ddimension': 0, 'removeOutliers': None, 'minimumROISize': None, u'binWidth': 25.0, 'minimumROIDimensions': 1, u'correctMask': True, 'preCrop': False, u'symmetricalGLCM': True, 'resegmentRange': None, 'padDistance': 5} |
| general    | info          | GeneralSettings                      |                                                                                                                                                                                                                                                                                                                                                                                                                   |
| general    | info          | ImageHash                            | ac820a5624f740e9f75d0a10270c0c7f0497a2bc                                                                                                                                                                                                                                                                                                                                                                          |
| general    | info          | ImageSpacing                         | (1.26953125, 1.26953125, 2.0)                                                                                                                                                                                                                                                                                                                                                                                     |
| general    | info          | MaskHash                             | aec6c9f3847b87af1d6a50b180dd18e251dce766                                                                                                                                                                                                                                                                                                                                                                          |
| general    | info          | NumpyVersion                         | 1.13.1                                                                                                                                                                                                                                                                                                                                                                                                            |
| general    | info          | PyWaveletVersion                     | 0.5.2                                                                                                                                                                                                                                                                                                                                                                                                             |
| general    | info          | SimpleITKVersion                     | 1.1.0                                                                                                                                                                                                                                                                                                                                                                                                             |
| general    | info          | Version                              | 1.3.0.post102+g1b0eb74                                                                                                                                                                                                                                                                                                                                                                                            |
| general    | info          | VolumeNum                            | 1                                                                                                                                                                                                                                                                                                                                                                                                                 |
| general    | info          | VoxelNum                             | 363                                                                                                                                                                                                                                                                                                                                                                                                               |
| original   | shape         | Maximum3DDiameter                    | 31.0322413                                                                                                                                                                                                                                                                                                                                                                                                        |
| original   | shape         | Maximum2DDiameterSlice               | 27.65863337                                                                                                                                                                                                                                                                                                                                                                                                       |
| original   | shape         | Sphericity                           | 0.864000127                                                                                                                                                                                                                                                                                                                                                                                                       |
| original   | shape         | MinorAxis                            | 26.34957172                                                                                                                                                                                                                                                                                                                                                                                                       |
| original   | shape         | Elongation                           | 0.98544768                                                                                                                                                                                                                                                                                                                                                                                                        |
| original   | shape         | SurfaceVolumeRatio                   | 0.261545261                                                                                                                                                                                                                                                                                                                                                                                                       |
| original   | shape         | Volume                               | 9801                                                                                                                                                                                                                                                                                                                                                                                                              |
| original   | shape         | MajorAxis                            | 26.73868156                                                                                                                                                                                                                                                                                                                                                                                                       |
| original   | shape         | SurfaceArea                          | 2563.405103                                                                                                                                                                                                                                                                                                                                                                                                       |
| original   | shape         | Flatness                             | 0.743740739                                                                                                                                                                                                                                                                                                                                                                                                       |
| original   | shape         | LeastAxis                            | 19.88664679                                                                                                                                                                                                                                                                                                                                                                                                       |
| original   | shape         | Maximum2DDiameterColumn              | 30                                                                                                                                                                                                                                                                                                                                                                                                                |
| original   | shape         | Maximum2DDiameterRow                 | 30.59411708                                                                                                                                                                                                                                                                                                                                                                                                       |
| original   | gldm          | GrayLevelVariance                    | 58.23046392                                                                                                                                                                                                                                                                                                                                                                                                       |
| original   | gldm          | HighGrayLevelEmphasis                | 1311.936639                                                                                                                                                                                                                                                                                                                                                                                                       |
| original   | gldm          | DependenceEntropy                    | 6.119934651                                                                                                                                                                                                                                                                                                                                                                                                       |
| original   | gldm          | DependenceNonUniformity              | 42.12396694                                                                                                                                                                                                                                                                                                                                                                                                       |
| original   | gldm          | GrayLevelNonUniformity               | 52.91735537                                                                                                                                                                                                                                                                                                                                                                                                       |
| original   | gldm          | SmallDependenceEmphasis              | 0.300526475                                                                                                                                                                                                                                                                                                                                                                                                       |
| original   | gldm          | SmallDependenceHighGrayLevelEmphasis | 406.088045                                                                                                                                                                                                                                                                                                                                                                                                        |
| original   | gldm          | DependenceNonUniformityNormalized    | 0.116043986                                                                                                                                                                                                                                                                                                                                                                                                       |
| original   | gldm          | LargeDependenceEmphasis              | 39.25895317                                                                                                                                                                                                                                                                                                                                                                                                       |
| original   | gldm          | LargeDependenceLowGrayLevelEmphasis  | 0.033779718                                                                                                                                                                                                                                                                                                                                                                                                       |
| original   | gldm          | DependenceVariance                   | 14.20382639                                                                                                                                                                                                                                                                                                                                                                                                       |
| original   | gldm          | LargeDependenceHighGrayLevelEmphasis | 50937.83747                                                                                                                                                                                                                                                                                                                                                                                                       |
| original   | gldm          | SmallDependenceLowGrayLevelEmphasis  | 0.003609223                                                                                                                                                                                                                                                                                                                                                                                                       |
| original   | gldm          | LowGrayLevelEmphasis                 | 0.004169599                                                                                                                                                                                                                                                                                                                                                                                                       |
| original   | glcm          | JointAverage                         | 35.80191794                                                                                                                                                                                                                                                                                                                                                                                                       |
| original   | glcm          | SumAverage                           | 71.60383588                                                                                                                                                                                                                                                                                                                                                                                                       |
| original   | glcm          | JointEntropy                         | 5.967488456                                                                                                                                                                                                                                                                                                                                                                                                       |
| original   | glcm          | ClusterShade                         | -1075.802383                                                                                                                                                                                                                                                                                                                                                                                                      |
| original   | glcm          | MaximumProbability                   | 0.109918481                                                                                                                                                                                                                                                                                                                                                                                                       |
| original   | glcm          | Idmn                                 | 0.988637046                                                                                                                                                                                                                                                                                                                                                                                                       |



|          |            |                                  |              |
|----------|------------|----------------------------------|--------------|
| original | glcm       | JointEnergy                      | 0.037075339  |
| original | glcm       | Contrast                         | 70.7672692   |
| original | glcm       | DifferenceEntropy                | 3.35347002   |
| original | glcm       | InverseVariance                  | 0.360147249  |
| original | glcm       | DifferenceVariance               | 50.20219072  |
| original | glcm       | Idn                              | 0.949720512  |
| original | glcm       | Idm                              | 0.401895473  |
| original | glcm       | Correlation                      | 0.225010905  |
| original | glcm       | Autocorrelation                  | 1292.19761   |
| original | glcm       | SumEntropy                       | 4.273679454  |
| original | glcm       | SumSquares                       | 45.79069394  |
| original | glcm       | ClusterProminence                | 130491.674   |
| original | glcm       | Imc2                             | 0.898663064  |
| original | glcm       | Imc1                             | -0.245328835 |
| original | glcm       | DifferenceAverage                | 4.499895811  |
| original | glcm       | Id                               | 0.452007474  |
| original | glcm       | ClusterTendency                  | 112.3955066  |
| original | firstorder | InterquartileRange               | 50           |
| original | firstorder | Skewness                         | -0.649391658 |
| original | firstorder | Uniformity                       | 0.145777838  |
| original | firstorder | Median                           | 33           |
| original | firstorder | Energy                           | 13353444     |
| original | firstorder | RobustMeanAbsoluteDeviation      | 24.51005136  |
| original | firstorder | MeanAbsoluteDeviation            | 94.87507684  |
| original | firstorder | TotalEnergy                      | 360542988    |
| original | firstorder | Maximum                          | 1012         |
| original | firstorder | RootMeanSquared                  | 191.7976723  |
| original | firstorder | 90Percentile                     | 114.6        |
| original | firstorder | Minimum                          | -838         |
| original | firstorder | Entropy                          | 3.678797827  |
| original | firstorder | Range                            | 1850         |
| original | firstorder | Variance                         | 36312.23547  |
| original | firstorder | 10Percentile                     | -68          |
| original | firstorder | Kurtosis                         | 10.32560122  |
| original | firstorder | Mean                             | 21.77410468  |
| original | glrlm      | ShortRunLowGrayLevelEmphasis     | 0.004704316  |
| original | glrlm      | GrayLevelVariance                | 68.31656436  |
| original | glrlm      | LowGrayLevelRunEmphasis          | 0.004791646  |
| original | glrlm      | GrayLevelNonUniformityNormalized | 0.121139498  |
| original | glrlm      | RunVariance                      | 0.250321349  |
| original | glrlm      | GrayLevelNonUniformity           | 37.24528366  |
| original | glrlm      | LongRunEmphasis                  | 1.652542298  |
| original | glrlm      | ShortRunHighGrayLevelEmphasis    | 1169.788871  |
| original | glrlm      | RunLengthNonUniformity           | 230.1972453  |
| original | glrlm      | ShortRunEmphasis                 | 0.888126475  |
| original | glrlm      | LongRunHighGrayLevelEmphasis     | 2160.624359  |
| original | glrlm      | RunPercentage                    | 0.845941937  |
| original | glrlm      | LongRunLowGrayLevelEmphasis      | 0.005299388  |
| original | glrlm      | RunEntropy                       | 4.504323043  |
| original | glrlm      | HighGrayLevelRunEmphasis         | 1314.824851  |
| original | glrlm      | RunLengthNonUniformityNormalized | 0.748564646  |
| original | glszm      | GrayLevelVariance                | 167.7301477  |
| original | glszm      | ZoneVariance                     | 133.3081717  |
| original | glszm      | GrayLevelNonUniformityNormalized | 0.04170514   |
| original | glszm      | SizeZoneNonUniformityNormalized  | 0.651585103  |
| original | glszm      | SizeZoneNonUniformity            | 74.28070175  |

|             |            |                                      |              |
|-------------|------------|--------------------------------------|--------------|
| original    | glszm      | GrayLevelNonUniformity               | 4.754385965  |
| original    | glszm      | LargeAreaEmphasis                    | 143.4473684  |
| original    | glszm      | SmallAreaHighGrayLevelEmphasis       | 1127.959443  |
| original    | glszm      | ZonePercentage                       | 0.314049587  |
| original    | glszm      | LargeAreaLowGrayLevelEmphasis        | 0.122123743  |
| original    | glszm      | LargeAreaHighGrayLevelEmphasis       | 185282.6228  |
| original    | glszm      | HighGrayLevelZoneEmphasis            | 1350.72807   |
| original    | glszm      | SmallAreaEmphasis                    | 0.829381358  |
| original    | glszm      | LowGrayLevelZoneEmphasis             | 0.011544699  |
| original    | glszm      | ZoneEntropy                          | 5.606290945  |
| original    | glszm      | SmallAreaLowGrayLevelEmphasis        | 0.011383542  |
| original    | ngtdm      | Coarseness                           | 0.011470068  |
| original    | ngtdm      | Complexity                           | 3970.151292  |
| original    | ngtdm      | Strength                             | 26.47483706  |
| original    | ngtdm      | Contrast                             | 0.193542445  |
| original    | ngtdm      | Busyness                             | 0.033876383  |
| wavelet-HHH | gldm       | GrayLevelVariance                    | 8.170844432  |
| wavelet-HHH | gldm       | HighGrayLevelEmphasis                | 166.5977961  |
| wavelet-HHH | gldm       | DependenceEntropy                    | 5.874634983  |
| wavelet-HHH | gldm       | DependenceNonUniformity              | 54.77410468  |
| wavelet-HHH | gldm       | GrayLevelNonUniformity               | 42.11294766  |
| wavelet-HHH | gldm       | SmallDependenceEmphasis              | 0.320098934  |
| wavelet-HHH | gldm       | SmallDependenceHighGrayLevelEmphasis | 54.73612932  |
| wavelet-HHH | gldm       | DependenceNonUniformityNormalized    | 0.15089285   |
| wavelet-HHH | gldm       | LargeDependenceEmphasis              | 23.3415978   |
| wavelet-HHH | gldm       | LargeDependenceLowGrayLevelEmphasis  | 0.157082536  |
| wavelet-HHH | gldm       | DependenceVariance                   | 9.035281439  |
| wavelet-HHH | gldm       | LargeDependenceHighGrayLevelEmphasis | 3667.644628  |
| wavelet-HHH | gldm       | SmallDependenceLowGrayLevelEmphasis  | 0.005908146  |
| wavelet-HHH | gldm       | LowGrayLevelEmphasis                 | 0.010478215  |
| wavelet-HHH | glcm       | JointAverage                         | 12.50688606  |
| wavelet-HHH | glcm       | SumAverage                           | 25.01377212  |
| wavelet-HHH | glcm       | JointEntropy                         | 6.379059585  |
| wavelet-HHH | glcm       | ClusterShade                         | -7.115700892 |
| wavelet-HHH | glcm       | MaximumProbability                   | 0.061643749  |
| wavelet-HHH | glcm       | ldmn                                 | 0.969603108  |
| wavelet-HHH | glcm       | JointEnergy                          | 0.02013302   |
| wavelet-HHH | glcm       | Contrast                             | 15.15554688  |
| wavelet-HHH | glcm       | DifferenceEntropy                    | 3.050380282  |
| wavelet-HHH | glcm       | InverseVariance                      | 0.311543111  |
| wavelet-HHH | glcm       | DifferenceVariance                   | 6.805222527  |
| wavelet-HHH | glcm       | ldn                                  | 0.889363672  |
| wavelet-HHH | glcm       | ldm                                  | 0.323585096  |
| wavelet-HHH | glcm       | Correlation                          | -0.034691847 |
| wavelet-HHH | glcm       | Autocorrelation                      | 156.1623133  |
| wavelet-HHH | glcm       | SumEntropy                           | 3.827156617  |
| wavelet-HHH | glcm       | SumSquares                           | 7.316773452  |
| wavelet-HHH | glcm       | ClusterProminence                    | 797.726376   |
| wavelet-HHH | glcm       | lmc2                                 | 0.736083701  |
| wavelet-HHH | glcm       | lmc1                                 | -0.116414495 |
| wavelet-HHH | glcm       | DifferenceAverage                    | 2.868907927  |
| wavelet-HHH | glcm       | ld                                   | 0.402752754  |
| wavelet-HHH | glcm       | ClusterTendency                      | 14.11154692  |
| wavelet-HHH | firstorder | InterquartileRange                   | 77.8016016   |
| wavelet-HHH | firstorder | Skewness                             | -0.300665834 |
| wavelet-HHH | firstorder | Uniformity                           | 0.11601363   |

|             |            |                                  |              |
|-------------|------------|----------------------------------|--------------|
| wavelet-HHH | firstorder | Median                           | 1.674303392  |
| wavelet-HHH | firstorder | Energy                           | 1852629.674  |
| wavelet-HHH | firstorder | RobustMeanAbsoluteDeviation      | 32.2503784   |
| wavelet-HHH | firstorder | MeanAbsoluteDeviation            | 52.50227951  |
| wavelet-HHH | firstorder | TotalEnergy                      | 50021001.19  |
| wavelet-HHH | firstorder | Maximum                          | 213.0605281  |
| wavelet-HHH | firstorder | RootMeanSquared                  | 71.4399259   |
| wavelet-HHH | firstorder | 90Percentile                     | 90.35069976  |
| wavelet-HHH | firstorder | Minimum                          | -289.6791239 |
| wavelet-HHH | firstorder | Entropy                          | 3.474730341  |
| wavelet-HHH | firstorder | Range                            | 502.739652   |
| wavelet-HHH | firstorder | Variance                         | 5098.473456  |
| wavelet-HHH | firstorder | 10Percentile                     | -90.41650747 |
| wavelet-HHH | firstorder | Kurtosis                         | 4.026060447  |
| wavelet-HHH | firstorder | Mean                             | 2.278059834  |
| wavelet-HHH | grlm       | ShortRunLowGrayLevelEmphasis     | 0.010435014  |
| wavelet-HHH | grlm       | GrayLevelVariance                | 8.930896427  |
| wavelet-HHH | grlm       | LowGrayLevelRunEmphasis          | 0.010946018  |
| wavelet-HHH | grlm       | GrayLevelNonUniformityNormalized | 0.10614392   |
| wavelet-HHH | grlm       | RunVariance                      | 0.156123005  |
| wavelet-HHH | grlm       | GrayLevelNonUniformity           | 34.41472835  |
| wavelet-HHH | grlm       | LongRunEmphasis                  | 1.41208932   |
| wavelet-HHH | grlm       | ShortRunHighGrayLevelEmphasis    | 155.067391   |
| wavelet-HHH | grlm       | RunLengthNonUniformity           | 265.2864595  |
| wavelet-HHH | grlm       | ShortRunEmphasis                 | 0.922516426  |
| wavelet-HHH | grlm       | LongRunHighGrayLevelEmphasis     | 232.895626   |
| wavelet-HHH | grlm       | RunPercentage                    | 0.892985802  |
| wavelet-HHH | grlm       | LongRunLowGrayLevelEmphasis      | 0.013661164  |
| wavelet-HHH | grlm       | RunEntropy                       | 4.008806671  |
| wavelet-HHH | grlm       | HighGrayLevelRunEmphasis         | 167.4743099  |
| wavelet-HHH | grlm       | RunLengthNonUniformityNormalized | 0.817741041  |
| wavelet-HHH | glszm      | GrayLevelVariance                | 18.10004031  |
| wavelet-HHH | glszm      | ZoneVariance                     | 63.89283795  |
| wavelet-HHH | glszm      | GrayLevelNonUniformityNormalized | 0.070142435  |
| wavelet-HHH | glszm      | SizeZoneNonUniformityNormalized  | 0.51518409   |
| wavelet-HHH | glszm      | SizeZoneNonUniformity            | 62.85245902  |
| wavelet-HHH | glszm      | GrayLevelNonUniformity           | 8.557377049  |
| wavelet-HHH | glszm      | LargeAreaEmphasis                | 72.74590164  |
| wavelet-HHH | glszm      | SmallAreaHighGrayLevelEmphasis   | 127.3468953  |
| wavelet-HHH | glszm      | ZonePercentage                   | 0.336088154  |
| wavelet-HHH | glszm      | LargeAreaLowGrayLevelEmphasis    | 0.477332349  |
| wavelet-HHH | glszm      | LargeAreaHighGrayLevelEmphasis   | 11656.72951  |
| wavelet-HHH | glszm      | HighGrayLevelZoneEmphasis        | 173.1229508  |
| wavelet-HHH | glszm      | SmallAreaEmphasis                | 0.744492666  |
| wavelet-HHH | glszm      | LowGrayLevelZoneEmphasis         | 0.018017321  |
| wavelet-HHH | glszm      | ZoneEntropy                      | 5.049956986  |
| wavelet-HHH | glszm      | SmallAreaLowGrayLevelEmphasis    | 0.016161234  |
| wavelet-HHH | ngtdm      | Coarseness                       | 0.019677142  |
| wavelet-HHH | ngtdm      | Complexity                       | 312.7199295  |
| wavelet-HHH | ngtdm      | Strength                         | 1.92110706   |
| wavelet-HHH | ngtdm      | Contrast                         | 0.106086307  |
| wavelet-HHH | ngtdm      | Busyness                         | 0.183494479  |
| wavelet-HLL | gldm       | GrayLevelVariance                | 69.58861341  |
| wavelet-HLL | gldm       | HighGrayLevelEmphasis            | 1049.46832   |
| wavelet-HLL | gldm       | DependenceEntropy                | 6.239657313  |
| wavelet-HLL | gldm       | DependenceNonUniformity          | 70.29476584  |

|             |            |                                      |              |
|-------------|------------|--------------------------------------|--------------|
| wavelet-HLL | gldm       | GrayLevelNonUniformity               | 26.47107438  |
| wavelet-HLL | gldm       | SmallDependenceEmphasis              | 0.376069656  |
| wavelet-HLL | gldm       | SmallDependenceHighGrayLevelEmphasis | 335.2707539  |
| wavelet-HLL | gldm       | DependenceNonUniformityNormalized    | 0.193649493  |
| wavelet-HLL | gldm       | LargeDependenceEmphasis              | 13.14876033  |
| wavelet-HLL | gldm       | LargeDependenceLowGrayLevelEmphasis  | 0.019141478  |
| wavelet-HLL | gldm       | DependenceVariance                   | 4.411280347  |
| wavelet-HLL | gldm       | LargeDependenceHighGrayLevelEmphasis | 15852.97245  |
| wavelet-HLL | gldm       | SmallDependenceLowGrayLevelEmphasis  | 0.003833479  |
| wavelet-HLL | gldm       | LowGrayLevelEmphasis                 | 0.004951406  |
| wavelet-HLL | glcm       | JointAverage                         | 32.20520126  |
| wavelet-HLL | glcm       | SumAverage                           | 64.41040252  |
| wavelet-HLL | glcm       | JointEntropy                         | 7.183210624  |
| wavelet-HLL | glcm       | ClusterShade                         | -3493.855092 |
| wavelet-HLL | glcm       | MaximumProbability                   | 0.039254735  |
| wavelet-HLL | glcm       | Idmn                                 | 0.97577402   |
| wavelet-HLL | glcm       | JointEnergy                          | 0.011244465  |
| wavelet-HLL | glcm       | Contrast                             | 65.76930878  |
| wavelet-HLL | glcm       | DifferenceEntropy                    | 3.676089164  |
| wavelet-HLL | glcm       | InverseVariance                      | 0.261364614  |
| wavelet-HLL | glcm       | DifferenceVariance                   | 37.67437996  |
| wavelet-HLL | glcm       | Idn                                  | 0.913867604  |
| wavelet-HLL | glcm       | Idm                                  | 0.252928784  |
| wavelet-HLL | glcm       | Correlation                          | 0.336916433  |
| wavelet-HLL | glcm       | Autocorrelation                      | 1059.653152  |
| wavelet-HLL | glcm       | SumEntropy                           | 4.819106902  |
| wavelet-HLL | glcm       | SumSquares                           | 55.01260412  |
| wavelet-HLL | glcm       | ClusterProminence                    | 150616.5072  |
| wavelet-HLL | glcm       | Imc2                                 | 0.92676098   |
| wavelet-HLL | glcm       | Imc1                                 | -0.249509367 |
| wavelet-HLL | glcm       | DifferenceAverage                    | 5.127199197  |
| wavelet-HLL | glcm       | Id                                   | 0.333370584  |
| wavelet-HLL | glcm       | ClusterTendency                      | 154.2811077  |
| wavelet-HLL | firstorder | InterquartileRange                   | 147.3366292  |
| wavelet-HLL | firstorder | Skewness                             | -1.718857529 |
| wavelet-HLL | firstorder | Uniformity                           | 0.07292307   |
| wavelet-HLL | firstorder | Median                               | -34.59312551 |
| wavelet-HLL | firstorder | Energy                               | 19804219.22  |
| wavelet-HLL | firstorder | RobustMeanAbsoluteDeviation          | 73.428793    |
| wavelet-HLL | firstorder | MeanAbsoluteDeviation                | 146.1890007  |
| wavelet-HLL | firstorder | TotalEnergy                          | 534713919    |
| wavelet-HLL | firstorder | Maximum                              | 317.9158561  |
| wavelet-HLL | firstorder | RootMeanSquared                      | 233.5745657  |
| wavelet-HLL | firstorder | 90Percentile                         | 55.96447071  |
| wavelet-HLL | firstorder | Minimum                              | -855.3756718 |
| wavelet-HLL | firstorder | Entropy                              | 4.305845242  |
| wavelet-HLL | firstorder | Range                                | 1173.291528  |
| wavelet-HLL | firstorder | Variance                             | 43430.59068  |
| wavelet-HLL | firstorder | 10Percentile                         | -473.0235107 |
| wavelet-HLL | firstorder | Kurtosis                             | 5.435177163  |
| wavelet-HLL | firstorder | Mean                                 | -105.4821647 |
| wavelet-HLL | glrlm      | ShortRunLowGrayLevelEmphasis         | 0.005161249  |
| wavelet-HLL | glrlm      | GrayLevelVariance                    | 72.09325451  |
| wavelet-HLL | glrlm      | LowGrayLevelRunEmphasis              | 0.005241025  |
| wavelet-HLL | glrlm      | GrayLevelNonUniformityNormalized     | 0.067585123  |
| wavelet-HLL | glrlm      | RunVariance                          | 0.09785622   |

|             |       |                                      |              |
|-------------|-------|--------------------------------------|--------------|
| wavelet-HLL | glrlm | GrayLevelNonUniformity               | 22.68819583  |
| wavelet-HLL | glrlm | LongRunEmphasis                      | 1.269416899  |
| wavelet-HLL | glrlm | ShortRunHighGrayLevelEmphasis        | 972.6269171  |
| wavelet-HLL | glrlm | RunLengthNonUniformity               | 291.2618444  |
| wavelet-HLL | glrlm | ShortRunEmphasis                     | 0.944986459  |
| wavelet-HLL | glrlm | LongRunHighGrayLevelEmphasis         | 1359.070758  |
| wavelet-HLL | glrlm | RunPercentage                        | 0.924772197  |
| wavelet-HLL | glrlm | LongRunLowGrayLevelEmphasis          | 0.005617299  |
| wavelet-HLL | glrlm | RunEntropy                           | 4.699273038  |
| wavelet-HLL | glrlm | HighGrayLevelRunEmphasis             | 1037.953556  |
| wavelet-HLL | glrlm | RunLengthNonUniformityNormalized     | 0.866757555  |
| wavelet-HLL | glszm | GrayLevelVariance                    | 90.8745552   |
| wavelet-HLL | glszm | ZoneVariance                         | 29.76271339  |
| wavelet-HLL | glszm | GrayLevelNonUniformityNormalized     | 0.044997973  |
| wavelet-HLL | glszm | SizeZoneNonUniformityNormalized      | 0.494257015  |
| wavelet-HLL | glszm | SizeZoneNonUniformity                | 73.6442953   |
| wavelet-HLL | glszm | GrayLevelNonUniformity               | 6.704697987  |
| wavelet-HLL | glszm | LargeAreaEmphasis                    | 35.69798658  |
| wavelet-HLL | glszm | SmallAreaHighGrayLevelEmphasis       | 611.6125488  |
| wavelet-HLL | glszm | ZonePercentage                       | 0.41046832   |
| wavelet-HLL | glszm | LargeAreaLowGrayLevelEmphasis        | 0.043304243  |
| wavelet-HLL | glszm | LargeAreaHighGrayLevelEmphasis       | 43969.52349  |
| wavelet-HLL | glszm | HighGrayLevelZoneEmphasis            | 889.2214765  |
| wavelet-HLL | glszm | SmallAreaEmphasis                    | 0.730207219  |
| wavelet-HLL | glszm | LowGrayLevelZoneEmphasis             | 0.009618786  |
| wavelet-HLL | glszm | ZoneEntropy                          | 5.77385826   |
| wavelet-HLL | glszm | SmallAreaLowGrayLevelEmphasis        | 0.008922091  |
| wavelet-HLL | ngtdm | Coarseness                           | 0.017671047  |
| wavelet-HLL | ngtdm | Complexity                           | 2518.287414  |
| wavelet-HLL | ngtdm | Strength                             | 15.48781195  |
| wavelet-HLL | ngtdm | Contrast                             | 0.370668875  |
| wavelet-HLL | ngtdm | Busyness                             | 0.034706138  |
| wavelet-LHL | gldm  | GrayLevelVariance                    | 58.3055954   |
| wavelet-LHL | gldm  | HighGrayLevelEmphasis                | 977.5812672  |
| wavelet-LHL | gldm  | DependenceEntropy                    | 6.276761254  |
| wavelet-LHL | gldm  | DependenceNonUniformity              | 103.7548209  |
| wavelet-LHL | gldm  | GrayLevelNonUniformity               | 17.61707989  |
| wavelet-LHL | gldm  | SmallDependenceEmphasis              | 0.494570022  |
| wavelet-LHL | gldm  | SmallDependenceHighGrayLevelEmphasis | 481.1516664  |
| wavelet-LHL | gldm  | DependenceNonUniformityNormalized    | 0.285825953  |
| wavelet-LHL | gldm  | LargeDependenceEmphasis              | 6.55922865   |
| wavelet-LHL | gldm  | LargeDependenceLowGrayLevelEmphasis  | 0.011094458  |
| wavelet-LHL | gldm  | DependenceVariance                   | 1.930211203  |
| wavelet-LHL | gldm  | LargeDependenceHighGrayLevelEmphasis | 6455.151515  |
| wavelet-LHL | gldm  | SmallDependenceLowGrayLevelEmphasis  | 0.003983868  |
| wavelet-LHL | gldm  | LowGrayLevelEmphasis                 | 0.004665518  |
| wavelet-LHL | glcm  | JointAverage                         | 30.12286244  |
| wavelet-LHL | glcm  | SumAverage                           | 60.24572488  |
| wavelet-LHL | glcm  | JointEntropy                         | 8.049156987  |
| wavelet-LHL | glcm  | ClusterShade                         | -21.32186117 |
| wavelet-LHL | glcm  | MaximumProbability                   | 0.01620971   |
| wavelet-LHL | glcm  | ldmn                                 | 0.971079374  |
| wavelet-LHL | glcm  | JointEnergy                          | 0.004791261  |
| wavelet-LHL | glcm  | Contrast                             | 103.762604   |
| wavelet-LHL | glcm  | DifferenceEntropy                    | 4.16591738   |
| wavelet-LHL | glcm  | InverseVariance                      | 0.187183808  |

|             |            |                                  |              |
|-------------|------------|----------------------------------|--------------|
| wavelet-LHL | glcm       | DifferenceVariance               | 52.07226015  |
| wavelet-LHL | glcm       | Idn                              | 0.896926188  |
| wavelet-LHL | glcm       | Idm                              | 0.171461774  |
| wavelet-LHL | glcm       | Correlation                      | 0.080722945  |
| wavelet-LHL | glcm       | Autocorrelation                  | 912.1807332  |
| wavelet-LHL | glcm       | SumEntropy                       | 5.194988802  |
| wavelet-LHL | glcm       | SumSquares                       | 56.6667952   |
| wavelet-LHL | glcm       | ClusterProminence                | 77888.44528  |
| wavelet-LHL | glcm       | Imc2                             | 0.969049304  |
| wavelet-LHL | glcm       | Imc1                             | -0.297773858 |
| wavelet-LHL | glcm       | DifferenceAverage                | 7.040559038  |
| wavelet-LHL | glcm       | Id                               | 0.256135215  |
| wavelet-LHL | glcm       | ClusterTendency                  | 122.9045769  |
| wavelet-LHL | firstorder | InterquartileRange               | 187.9469927  |
| wavelet-LHL | firstorder | Skewness                         | -0.175588798 |
| wavelet-LHL | firstorder | Uniformity                       | 0.048531901  |
| wavelet-LHL | firstorder | Median                           | 7.636263226  |
| wavelet-LHL | firstorder | Energy                           | 13172247.9   |
| wavelet-LHL | firstorder | RobustMeanAbsoluteDeviation      | 79.82868168  |
| wavelet-LHL | firstorder | MeanAbsoluteDeviation            | 135.5968455  |
| wavelet-LHL | firstorder | TotalEnergy                      | 355650693.2  |
| wavelet-LHL | firstorder | Maximum                          | 624.5392537  |
| wavelet-LHL | firstorder | RootMeanSquared                  | 190.4919533  |
| wavelet-LHL | firstorder | 90Percentile                     | 187.5720949  |
| wavelet-LHL | firstorder | Minimum                          | -733.4363006 |
| wavelet-LHL | firstorder | Entropy                          | 4.759066242  |
| wavelet-LHL | firstorder | Range                            | 1357.975554  |
| wavelet-LHL | firstorder | Variance                         | 36265.113    |
| wavelet-LHL | firstorder | 10Percentile                     | -216.2466188 |
| wavelet-LHL | firstorder | Kurtosis                         | 5.262760893  |
| wavelet-LHL | firstorder | Mean                             | -4.698008088 |
| wavelet-LHL | glrlm      | ShortRunLowGrayLevelEmphasis     | 0.004785997  |
| wavelet-LHL | glrlm      | GrayLevelVariance                | 60.01561646  |
| wavelet-LHL | glrlm      | LowGrayLevelRunEmphasis          | 0.004826138  |
| wavelet-LHL | glrlm      | GrayLevelNonUniformityNormalized | 0.047264592  |
| wavelet-LHL | glrlm      | RunVariance                      | 0.054515772  |
| wavelet-LHL | glrlm      | GrayLevelNonUniformity           | 16.39942321  |
| wavelet-LHL | glrlm      | LongRunEmphasis                  | 1.150478144  |
| wavelet-LHL | glrlm      | ShortRunHighGrayLevelEmphasis    | 945.5364871  |
| wavelet-LHL | glrlm      | RunLengthNonUniformity           | 319.1245247  |
| wavelet-LHL | glrlm      | ShortRunEmphasis                 | 0.967787954  |
| wavelet-LHL | glrlm      | LongRunHighGrayLevelEmphasis     | 1125.851328  |
| wavelet-LHL | glrlm      | RunPercentage                    | 0.955710956  |
| wavelet-LHL | glrlm      | LongRunLowGrayLevelEmphasis      | 0.005008187  |
| wavelet-LHL | glrlm      | RunEntropy                       | 4.989392413  |
| wavelet-LHL | glrlm      | HighGrayLevelRunEmphasis         | 977.2092353  |
| wavelet-LHL | glrlm      | RunLengthNonUniformityNormalized | 0.919339192  |
| wavelet-LHL | glszm      | GrayLevelVariance                | 84.3226965   |
| wavelet-LHL | glszm      | ZoneVariance                     | 3.950205052  |
| wavelet-LHL | glszm      | GrayLevelNonUniformityNormalized | 0.036424082  |
| wavelet-LHL | glszm      | SizeZoneNonUniformityNormalized  | 0.518017909  |
| wavelet-LHL | glszm      | SizeZoneNonUniformity            | 105.1576355  |
| wavelet-LHL | glszm      | GrayLevelNonUniformity           | 7.39408867   |
| wavelet-LHL | glszm      | LargeAreaEmphasis                | 7.147783251  |
| wavelet-LHL | glszm      | SmallAreaHighGrayLevelEmphasis   | 726.564227   |
| wavelet-LHL | glszm      | ZonePercentage                   | 0.55922865   |

|             |            |                                      |              |
|-------------|------------|--------------------------------------|--------------|
| wavelet-LHL | glszm      | LargeAreaLowGrayLevelEmphasis        | 0.014243065  |
| wavelet-LHL | glszm      | LargeAreaHighGrayLevelEmphasis       | 7081.438424  |
| wavelet-LHL | glszm      | HighGrayLevelZoneEmphasis            | 972.8325123  |
| wavelet-LHL | glszm      | SmallAreaEmphasis                    | 0.747374955  |
| wavelet-LHL | glszm      | LowGrayLevelZoneEmphasis             | 0.007333757  |
| wavelet-LHL | glszm      | ZoneEntropy                          | 6.05833102   |
| wavelet-LHL | glszm      | SmallAreaLowGrayLevelEmphasis        | 0.006934764  |
| wavelet-LHL | ngtdm      | Coarseness                           | 0.019675095  |
| wavelet-LHL | ngtdm      | Complexity                           | 4310.741542  |
| wavelet-LHL | ngtdm      | Strength                             | 14.39497778  |
| wavelet-LHL | ngtdm      | Contrast                             | 0.267339922  |
| wavelet-LHL | ngtdm      | Busyness                             | 0.03018606   |
| wavelet-LHH | gldm       | GrayLevelVariance                    | 45.31276704  |
| wavelet-LHH | gldm       | HighGrayLevelEmphasis                | 501.953168   |
| wavelet-LHH | gldm       | DependenceEntropy                    | 6.27274052   |
| wavelet-LHH | gldm       | DependenceNonUniformity              | 80.70798898  |
| wavelet-LHH | gldm       | GrayLevelNonUniformity               | 24.54269972  |
| wavelet-LHH | gldm       | SmallDependenceEmphasis              | 0.451662175  |
| wavelet-LHH | gldm       | SmallDependenceHighGrayLevelEmphasis | 245.2772189  |
| wavelet-LHH | gldm       | DependenceNonUniformityNormalized    | 0.222336058  |
| wavelet-LHH | gldm       | LargeDependenceEmphasis              | 12.38292011  |
| wavelet-LHH | gldm       | LargeDependenceLowGrayLevelEmphasis  | 0.032397994  |
| wavelet-LHH | gldm       | DependenceVariance                   | 4.717801607  |
| wavelet-LHH | gldm       | LargeDependenceHighGrayLevelEmphasis | 5884.134986  |
| wavelet-LHH | gldm       | SmallDependenceLowGrayLevelEmphasis  | 0.005529655  |
| wavelet-LHH | gldm       | LowGrayLevelEmphasis                 | 0.006882807  |
| wavelet-LHH | glcm       | JointAverage                         | 21.3308572   |
| wavelet-LHH | glcm       | SumAverage                           | 42.6617144   |
| wavelet-LHH | glcm       | JointEntropy                         | 7.604955405  |
| wavelet-LHH | glcm       | ClusterShade                         | 231.2347897  |
| wavelet-LHH | glcm       | MaximumProbability                   | 0.038842211  |
| wavelet-LHH | glcm       | ldmn                                 | 0.974874884  |
| wavelet-LHH | glcm       | JointEnergy                          | 0.008481627  |
| wavelet-LHH | glcm       | Contrast                             | 82.33763083  |
| wavelet-LHH | glcm       | DifferenceEntropy                    | 3.993313465  |
| wavelet-LHH | glcm       | InverseVariance                      | 0.217753976  |
| wavelet-LHH | glcm       | DifferenceVariance                   | 43.15424056  |
| wavelet-LHH | glcm       | ldn                                  | 0.906058914  |
| wavelet-LHH | glcm       | ldm                                  | 0.218248525  |
| wavelet-LHH | glcm       | Correlation                          | -0.019687994 |
| wavelet-LHH | glcm       | Autocorrelation                      | 454.0968114  |
| wavelet-LHH | glcm       | SumEntropy                           | 4.843494014  |
| wavelet-LHH | glcm       | SumSquares                           | 40.24896022  |
| wavelet-LHH | glcm       | ClusterProminence                    | 39787.23618  |
| wavelet-LHH | glcm       | lmc2                                 | 0.948191006  |
| wavelet-LHH | glcm       | lmc1                                 | -0.265178172 |
| wavelet-LHH | glcm       | DifferenceAverage                    | 6.124680784  |
| wavelet-LHH | glcm       | ld                                   | 0.297853031  |
| wavelet-LHH | glcm       | ClusterTendency                      | 78.65821003  |
| wavelet-LHH | firstorder | InterquartileRange                   | 129.3232147  |
| wavelet-LHH | firstorder | Skewness                             | 0.765393969  |
| wavelet-LHH | firstorder | Uniformity                           | 0.067610743  |
| wavelet-LHH | firstorder | Median                               | 2.145929463  |
| wavelet-LHH | firstorder | Energy                               | 10247051.47  |
| wavelet-LHH | firstorder | RobustMeanAbsoluteDeviation          | 60.92650537  |
| wavelet-LHH | firstorder | MeanAbsoluteDeviation                | 111.822419   |

|             |            |                                      |              |
|-------------|------------|--------------------------------------|--------------|
| wavelet-LHH | firstorder | TotalEnergy                          | 276670389.6  |
| wavelet-LHH | firstorder | Maximum                              | 780.4212492  |
| wavelet-LHH | firstorder | RootMeanSquared                      | 168.0142611  |
| wavelet-LHH | firstorder | 90Percentile                         | 171.0610259  |
| wavelet-LHH | firstorder | Minimum                              | -512.7005275 |
| wavelet-LHH | firstorder | Entropy                              | 4.437932291  |
| wavelet-LHH | firstorder | Range                                | 1293.121777  |
| wavelet-LHH | firstorder | Variance                             | 28216.97533  |
| wavelet-LHH | firstorder | 10Percentile                         | -193.8556908 |
| wavelet-LHH | firstorder | Kurtosis                             | 6.554256026  |
| wavelet-LHH | firstorder | Mean                                 | -3.437527846 |
| wavelet-LHH | glrlm      | ShortRunLowGrayLevelEmphasis         | 0.007100209  |
| wavelet-LHH | glrlm      | GrayLevelVariance                    | 48.16250021  |
| wavelet-LHH | glrlm      | LowGrayLevelRunEmphasis              | 0.007218004  |
| wavelet-LHH | glrlm      | GrayLevelNonUniformityNormalized     | 0.062154451  |
| wavelet-LHH | glrlm      | RunVariance                          | 0.086369683  |
| wavelet-LHH | glrlm      | GrayLevelNonUniformity               | 21.03836871  |
| wavelet-LHH | glrlm      | LongRunEmphasis                      | 1.240012275  |
| wavelet-LHH | glrlm      | ShortRunHighGrayLevelEmphasis        | 480.8407426  |
| wavelet-LHH | glrlm      | RunLengthNonUniformity               | 297.5027625  |
| wavelet-LHH | glrlm      | ShortRunEmphasis                     | 0.950009925  |
| wavelet-LHH | glrlm      | LongRunHighGrayLevelEmphasis         | 617.1171481  |
| wavelet-LHH | glrlm      | RunPercentage                        | 0.931977114  |
| wavelet-LHH | glrlm      | LongRunLowGrayLevelEmphasis          | 0.007774872  |
| wavelet-LHH | glrlm      | RunEntropy                           | 4.803589686  |
| wavelet-LHH | glrlm      | HighGrayLevelRunEmphasis             | 504.31423    |
| wavelet-LHH | glrlm      | RunLengthNonUniformityNormalized     | 0.878337457  |
| wavelet-LHH | glszm      | GrayLevelVariance                    | 80.81780582  |
| wavelet-LHH | glszm      | ZoneVariance                         | 17.73073904  |
| wavelet-LHH | glszm      | GrayLevelNonUniformityNormalized     | 0.03689168   |
| wavelet-LHH | glszm      | SizeZoneNonUniformityNormalized      | 0.567020891  |
| wavelet-LHH | glszm      | SizeZoneNonUniformity                | 103.1978022  |
| wavelet-LHH | glszm      | GrayLevelNonUniformity               | 6.714285714  |
| wavelet-LHH | glszm      | LargeAreaEmphasis                    | 21.70879121  |
| wavelet-LHH | glszm      | SmallAreaHighGrayLevelEmphasis       | 433.0286937  |
| wavelet-LHH | glszm      | ZonePercentage                       | 0.50137741   |
| wavelet-LHH | glszm      | LargeAreaLowGrayLevelEmphasis        | 0.056759491  |
| wavelet-LHH | glszm      | LargeAreaHighGrayLevelEmphasis       | 10282.33516  |
| wavelet-LHH | glszm      | HighGrayLevelZoneEmphasis            | 537.8846154  |
| wavelet-LHH | glszm      | SmallAreaEmphasis                    | 0.780524766  |
| wavelet-LHH | glszm      | LowGrayLevelZoneEmphasis             | 0.011310829  |
| wavelet-LHH | glszm      | ZoneEntropy                          | 5.851182524  |
| wavelet-LHH | glszm      | SmallAreaLowGrayLevelEmphasis        | 0.010724983  |
| wavelet-LHH | ngtdm      | Coarseness                           | 0.019601525  |
| wavelet-LHH | ngtdm      | Complexity                           | 3159.785946  |
| wavelet-LHH | ngtdm      | Strength                             | 10.95078787  |
| wavelet-LHH | ngtdm      | Contrast                             | 0.273192037  |
| wavelet-LHH | ngtdm      | Busyness                             | 0.050145861  |
| wavelet-LLH | gldm       | GrayLevelVariance                    | 117.6583718  |
| wavelet-LLH | gldm       | HighGrayLevelEmphasis                | 1058.440771  |
| wavelet-LLH | gldm       | DependenceEntropy                    | 6.507710569  |
| wavelet-LLH | gldm       | DependenceNonUniformity              | 107.1487603  |
| wavelet-LLH | gldm       | GrayLevelNonUniformity               | 15.2369146   |
| wavelet-LLH | gldm       | SmallDependenceEmphasis              | 0.537435806  |
| wavelet-LLH | gldm       | SmallDependenceHighGrayLevelEmphasis | 589.9910174  |
| wavelet-LLH | gldm       | DependenceNonUniformityNormalized    | 0.295175648  |



|             |            |                                      |              |
|-------------|------------|--------------------------------------|--------------|
| wavelet-LLH | gldm       | LargeDependenceEmphasis              | 8.796143251  |
| wavelet-LLH | gldm       | LargeDependenceLowGrayLevelEmphasis  | 0.03353632   |
| wavelet-LLH | gldm       | DependenceVariance                   | 3.605779812  |
| wavelet-LLH | gldm       | LargeDependenceHighGrayLevelEmphasis | 8734.165289  |
| wavelet-LLH | gldm       | SmallDependenceLowGrayLevelEmphasis  | 0.004137774  |
| wavelet-LLH | gldm       | LowGrayLevelEmphasis                 | 0.008781064  |
| wavelet-LLH | glcm       | JointAverage                         | 29.92622355  |
| wavelet-LLH | glcm       | SumAverage                           | 59.8524471   |
| wavelet-LLH | glcm       | JointEntropy                         | 8.137307551  |
| wavelet-LLH | glcm       | ClusterShade                         | 772.0591535  |
| wavelet-LLH | glcm       | MaximumProbability                   | 0.023636358  |
| wavelet-LLH | glcm       | ldmn                                 | 0.964656481  |
| wavelet-LLH | glcm       | JointEnergy                          | 0.005042924  |
| wavelet-LLH | glcm       | Contrast                             | 196.1417691  |
| wavelet-LLH | glcm       | DifferenceEntropy                    | 4.45571873   |
| wavelet-LLH | glcm       | InverseVariance                      | 0.169055464  |
| wavelet-LLH | glcm       | DifferenceVariance                   | 108.5624371  |
| wavelet-LLH | glcm       | ldn                                  | 0.892970683  |
| wavelet-LLH | glcm       | ldm                                  | 0.167075628  |
| wavelet-LLH | glcm       | Correlation                          | 0.045199219  |
| wavelet-LLH | glcm       | Autocorrelation                      | 902.4877615  |
| wavelet-LLH | glcm       | SumEntropy                           | 5.464868157  |
| wavelet-LLH | glcm       | SumSquares                           | 104.9196485  |
| wavelet-LLH | glcm       | ClusterProminence                    | 296600.8528  |
| wavelet-LLH | glcm       | lmc2                                 | 0.987313483  |
| wavelet-LLH | glcm       | lmc1                                 | -0.370987966 |
| wavelet-LLH | glcm       | DifferenceAverage                    | 9.094257143  |
| wavelet-LLH | glcm       | ld                                   | 0.24579434   |
| wavelet-LLH | glcm       | ClusterTendency                      | 223.5368249  |
| wavelet-LLH | firstorder | InterquartileRange                   | 209.5061381  |
| wavelet-LLH | firstorder | Skewness                             | 0.254159561  |
| wavelet-LLH | firstorder | Uniformity                           | 0.041974971  |
| wavelet-LLH | firstorder | Median                               | -18.99154213 |
| wavelet-LLH | firstorder | Energy                               | 26714426.66  |
| wavelet-LLH | firstorder | RobustMeanAbsoluteDeviation          | 98.0975825   |
| wavelet-LLH | firstorder | MeanAbsoluteDeviation                | 184.4352708  |
| wavelet-LLH | firstorder | TotalEnergy                          | 721289519.7  |
| wavelet-LLH | firstorder | Maximum                              | 855.3758264  |
| wavelet-LLH | firstorder | RootMeanSquared                      | 271.2811491  |
| wavelet-LLH | firstorder | 90Percentile                         | 291.9054017  |
| wavelet-LLH | firstorder | Minimum                              | -772.5940801 |
| wavelet-LLH | firstorder | Entropy                              | 5.117225646  |
| wavelet-LLH | firstorder | Range                                | 1627.969907  |
| wavelet-LLH | firstorder | Variance                             | 73158.68576  |
| wavelet-LLH | firstorder | 10Percentile                         | -330.7988261 |
| wavelet-LLH | firstorder | Kurtosis                             | 4.448447708  |
| wavelet-LLH | firstorder | Mean                                 | -20.85128553 |
| wavelet-LLH | glrlm      | ShortRunLowGrayLevelEmphasis         | 0.008729841  |
| wavelet-LLH | glrlm      | GrayLevelVariance                    | 122.5464189  |
| wavelet-LLH | glrlm      | LowGrayLevelRunEmphasis              | 0.008946145  |
| wavelet-LLH | glrlm      | GrayLevelNonUniformityNormalized     | 0.039307785  |
| wavelet-LLH | glrlm      | RunVariance                          | 0.062258294  |
| wavelet-LLH | glrlm      | GrayLevelNonUniformity               | 13.5716696   |
| wavelet-LLH | glrlm      | LongRunEmphasis                      | 1.169943852  |
| wavelet-LLH | glrlm      | ShortRunHighGrayLevelEmphasis        | 1026.214892  |
| wavelet-LLH | glrlm      | RunLengthNonUniformity               | 314.7866102  |

|             |       |                                      |             |
|-------------|-------|--------------------------------------|-------------|
| wavelet-LLH | glrlm | ShortRunEmphasis                     | 0.964431686 |
| wavelet-LLH | glrlm | LongRunHighGrayLevelEmphasis         | 1231.493717 |
| wavelet-LLH | glrlm | RunPercentage                        | 0.950837042 |
| wavelet-LLH | glrlm | LongRunLowGrayLevelEmphasis          | 0.009840047 |
| wavelet-LLH | glrlm | RunEntropy                           | 5.377875372 |
| wavelet-LLH | glrlm | HighGrayLevelRunEmphasis             | 1061.590176 |
| wavelet-LLH | glrlm | RunLengthNonUniformityNormalized     | 0.911393702 |
| wavelet-LLH | glszm | GrayLevelVariance                    | 172.8620542 |
| wavelet-LLH | glszm | ZoneVariance                         | 6.291473765 |
| wavelet-LLH | glszm | GrayLevelNonUniformityNormalized     | 0.0260631   |
| wavelet-LLH | glszm | SizeZoneNonUniformityNormalized      | 0.596664952 |
| wavelet-LLH | glszm | SizeZoneNonUniformity                | 128.8796296 |
| wavelet-LLH | glszm | GrayLevelNonUniformity               | 5.62962963  |
| wavelet-LLH | glszm | LargeAreaEmphasis                    | 9.115740741 |
| wavelet-LLH | glszm | SmallAreaHighGrayLevelEmphasis       | 885.3818204 |
| wavelet-LLH | glszm | ZonePercentage                       | 0.595041322 |
| wavelet-LLH | glszm | LargeAreaLowGrayLevelEmphasis        | 0.031686018 |
| wavelet-LLH | glszm | LargeAreaHighGrayLevelEmphasis       | 9208.981481 |
| wavelet-LLH | glszm | HighGrayLevelZoneEmphasis            | 1090.166667 |
| wavelet-LLH | glszm | SmallAreaEmphasis                    | 0.79925334  |
| wavelet-LLH | glszm | LowGrayLevelZoneEmphasis             | 0.009382534 |
| wavelet-LLH | glszm | ZoneEntropy                          | 6.260368089 |
| wavelet-LLH | glszm | SmallAreaLowGrayLevelEmphasis        | 0.00567758  |
| wavelet-LLH | ngtdm | Coarseness                           | 0.020228896 |
| wavelet-LLH | ngtdm | Complexity                           | 9816.056269 |
| wavelet-LLH | ngtdm | Strength                             | 22.1240405  |
| wavelet-LLH | ngtdm | Contrast                             | 0.462149799 |
| wavelet-LLH | ngtdm | Busyness                             | 0.022971651 |
| wavelet-LLL | gldm  | GrayLevelVariance                    | 352.1067019 |
| wavelet-LLL | gldm  | HighGrayLevelEmphasis                | 6001.099174 |
| wavelet-LLL | gldm  | DependenceEntropy                    | 6.732403311 |
| wavelet-LLL | gldm  | DependenceNonUniformity              | 128.9834711 |
| wavelet-LLL | gldm  | GrayLevelNonUniformity               | 10.59779614 |
| wavelet-LLL | gldm  | SmallDependenceEmphasis              | 0.608528923 |
| wavelet-LLL | gldm  | SmallDependenceHighGrayLevelEmphasis | 3547.244316 |
| wavelet-LLL | gldm  | DependenceNonUniformityNormalized    | 0.355326367 |
| wavelet-LLL | gldm  | LargeDependenceEmphasis              | 5.710743802 |
| wavelet-LLL | gldm  | LargeDependenceLowGrayLevelEmphasis  | 0.004637962 |
| wavelet-LLL | gldm  | DependenceVariance                   | 1.91737055  |
| wavelet-LLL | gldm  | LargeDependenceHighGrayLevelEmphasis | 35110.28926 |
| wavelet-LLL | gldm  | SmallDependenceLowGrayLevelEmphasis  | 0.003751957 |
| wavelet-LLL | gldm  | LowGrayLevelEmphasis                 | 0.003826293 |
| wavelet-LLL | glcm  | JointAverage                         | 76.65476253 |
| wavelet-LLL | glcm  | SumAverage                           | 153.3095251 |
| wavelet-LLL | glcm  | JointEntropy                         | 8.406163128 |
| wavelet-LLL | glcm  | ClusterShade                         | -33407.9966 |
| wavelet-LLL | glcm  | MaximumProbability                   | 0.01313652  |
| wavelet-LLL | glcm  | ldmn                                 | 0.983351276 |
| wavelet-LLL | glcm  | JointEnergy                          | 0.003613034 |
| wavelet-LLL | glcm  | Contrast                             | 303.302543  |
| wavelet-LLL | glcm  | DifferenceEntropy                    | 4.743339736 |
| wavelet-LLL | glcm  | InverseVariance                      | 0.130502636 |
| wavelet-LLL | glcm  | DifferenceVariance                   | 166.7132192 |
| wavelet-LLL | glcm  | ldn                                  | 0.925313757 |
| wavelet-LLL | glcm  | ldm                                  | 0.129688909 |
| wavelet-LLL | glcm  | Correlation                          | 0.430735327 |

|             |            |                                  |              |
|-------------|------------|----------------------------------|--------------|
| wavelet-LLL | glcm       | Autocorrelation                  | 5994.081004  |
| wavelet-LLL | glcm       | SumEntropy                       | 5.972617298  |
| wavelet-LLL | glcm       | SumSquares                       | 269.7093713  |
| wavelet-LLL | glcm       | ClusterProminence                | 4203125.098  |
| wavelet-LLL | glcm       | Imc2                             | 0.995739509  |
| wavelet-LLL | glcm       | Imc1                             | -0.442884969 |
| wavelet-LLL | glcm       | DifferenceAverage                | 11.38832612  |
| wavelet-LLL | glcm       | Id                               | 0.209191394  |
| wavelet-LLL | glcm       | ClusterTendency                  | 775.5349423  |
| wavelet-LLL | firstorder | InterquartileRange               | 315.5720389  |
| wavelet-LLL | firstorder | Skewness                         | -1.399811892 |
| wavelet-LLL | firstorder | Uniformity                       | 0.029195031  |
| wavelet-LLL | firstorder | Median                           | 140.6350733  |
| wavelet-LLL | firstorder | Energy                           | 80526297.43  |
| wavelet-LLL | firstorder | RobustMeanAbsoluteDeviation      | 158.4096508  |
| wavelet-LLL | firstorder | MeanAbsoluteDeviation            | 319.0069312  |
| wavelet-LLL | firstorder | TotalEnergy                      | 2174210031   |
| wavelet-LLL | firstorder | Maximum                          | 1365.413967  |
| wavelet-LLL | firstorder | RootMeanSquared                  | 470.9941933  |
| wavelet-LLL | firstorder | 90Percentile                     | 460.3723443  |
| wavelet-LLL | firstorder | Minimum                          | -1819.350486 |
| wavelet-LLL | firstorder | Entropy                          | 5.630667051  |
| wavelet-LLL | firstorder | Range                            | 3184.764453  |
| wavelet-LLL | firstorder | Variance                         | 220123.4319  |
| wavelet-LLL | firstorder | 10Percentile                     | -563.4847051 |
| wavelet-LLL | firstorder | Kurtosis                         | 6.010386665  |
| wavelet-LLL | firstorder | Mean                             | 41.3775086   |
| wavelet-LLL | glrlm      | ShortRunLowGrayLevelEmphasis     | 0.003960826  |
| wavelet-LLL | glrlm      | GrayLevelVariance                | 363.4172947  |
| wavelet-LLL | glrlm      | LowGrayLevelRunEmphasis          | 0.003965606  |
| wavelet-LLL | glrlm      | GrayLevelNonUniformityNormalized | 0.027936733  |
| wavelet-LLL | glrlm      | RunVariance                      | 0.043061724  |
| wavelet-LLL | glrlm      | GrayLevelNonUniformity           | 9.774230387  |
| wavelet-LLL | glrlm      | LongRunEmphasis                  | 1.121268953  |
| wavelet-LLL | glrlm      | ShortRunHighGrayLevelEmphasis    | 5826.9142    |
| wavelet-LLL | glrlm      | RunLengthNonUniformity           | 326.418424   |
| wavelet-LLL | glrlm      | ShortRunEmphasis                 | 0.973295216  |
| wavelet-LLL | glrlm      | LongRunHighGrayLevelEmphasis     | 6746.003845  |
| wavelet-LLL | glrlm      | RunPercentage                    | 0.9635516    |
| wavelet-LLL | glrlm      | LongRunLowGrayLevelEmphasis      | 0.003987085  |
| wavelet-LLL | glrlm      | RunEntropy                       | 5.821562376  |
| wavelet-LLL | glrlm      | HighGrayLevelRunEmphasis         | 5992.961542  |
| wavelet-LLL | glrlm      | RunLengthNonUniformityNormalized | 0.932678874  |
| wavelet-LLL | glszm      | GrayLevelVariance                | 486.9484665  |
| wavelet-LLL | glszm      | ZoneVariance                     | 2.431031855  |
| wavelet-LLL | glszm      | GrayLevelNonUniformityNormalized | 0.019051974  |
| wavelet-LLL | glszm      | SizeZoneNonUniformityNormalized  | 0.646937289  |
| wavelet-LLL | glszm      | SizeZoneNonUniformity            | 157.2057613  |
| wavelet-LLL | glszm      | GrayLevelNonUniformity           | 4.62962963   |
| wavelet-LLL | glszm      | LargeAreaEmphasis                | 4.66255144   |
| wavelet-LLL | glszm      | SmallAreaHighGrayLevelEmphasis   | 4798.409409  |
| wavelet-LLL | glszm      | ZonePercentage                   | 0.669421488  |
| wavelet-LLL | glszm      | LargeAreaLowGrayLevelEmphasis    | 0.006251392  |
| wavelet-LLL | glszm      | LargeAreaHighGrayLevelEmphasis   | 28619.99588  |
| wavelet-LLL | glszm      | HighGrayLevelZoneEmphasis        | 5874.99177   |
| wavelet-LLL | glszm      | SmallAreaEmphasis                | 0.829898607  |

|             |            |                                      |              |
|-------------|------------|--------------------------------------|--------------|
| wavelet-LLL | glszm      | LowGrayLevelZoneEmphasis             | 0.005624967  |
| wavelet-LLL | glszm      | ZoneEntropy                          | 6.559549272  |
| wavelet-LLL | glszm      | SmallAreaLowGrayLevelEmphasis        | 0.00558932   |
| wavelet-LLL | ngtdm      | Coarseness                           | 0.020721446  |
| wavelet-LLL | ngtdm      | Complexity                           | 24588.76814  |
| wavelet-LLL | ngtdm      | Strength                             | 77.50487769  |
| wavelet-LLL | ngtdm      | Contrast                             | 0.840217953  |
| wavelet-LLL | ngtdm      | Busyness                             | 0.006494389  |
| wavelet-HHL | gldm       | GrayLevelVariance                    | 9.044297217  |
| wavelet-HHL | gldm       | HighGrayLevelEmphasis                | 194.0192837  |
| wavelet-HHL | gldm       | DependenceEntropy                    | 5.950309335  |
| wavelet-HHL | gldm       | DependenceNonUniformity              | 49.78787879  |
| wavelet-HHL | gldm       | GrayLevelNonUniformity               | 42.21212121  |
| wavelet-HHL | gldm       | SmallDependenceEmphasis              | 0.288045964  |
| wavelet-HHL | gldm       | SmallDependenceHighGrayLevelEmphasis | 59.74924921  |
| wavelet-HHL | gldm       | DependenceNonUniformityNormalized    | 0.137156691  |
| wavelet-HHL | gldm       | LargeDependenceEmphasis              | 22.67493113  |
| wavelet-HHL | gldm       | LargeDependenceLowGrayLevelEmphasis  | 0.131229118  |
| wavelet-HHL | gldm       | DependenceVariance                   | 7.565755223  |
| wavelet-HHL | gldm       | LargeDependenceHighGrayLevelEmphasis | 4171.991736  |
| wavelet-HHL | gldm       | SmallDependenceLowGrayLevelEmphasis  | 0.004899906  |
| wavelet-HHL | gldm       | LowGrayLevelEmphasis                 | 0.009110026  |
| wavelet-HHL | glcm       | JointAverage                         | 13.6227874   |
| wavelet-HHL | glcm       | SumAverage                           | 27.2455748   |
| wavelet-HHL | glcm       | JointEntropy                         | 6.352062626  |
| wavelet-HHL | glcm       | ClusterShade                         | 29.52228095  |
| wavelet-HHL | glcm       | MaximumProbability                   | 0.063638049  |
| wavelet-HHL | glcm       | Idmn                                 | 0.980157879  |
| wavelet-HHL | glcm       | JointEnergy                          | 0.0203027    |
| wavelet-HHL | glcm       | Contrast                             | 16.16991789  |
| wavelet-HHL | glcm       | DifferenceEntropy                    | 3.05214127   |
| wavelet-HHL | glcm       | InverseVariance                      | 0.319099263  |
| wavelet-HHL | glcm       | DifferenceVariance                   | 7.921527153  |
| wavelet-HHL | glcm       | Idn                                  | 0.911891587  |
| wavelet-HHL | glcm       | Idm                                  | 0.333577056  |
| wavelet-HHL | glcm       | Correlation                          | -0.001362956 |
| wavelet-HHL | glcm       | Autocorrelation                      | 185.5587029  |
| wavelet-HHL | glcm       | SumEntropy                           | 3.845508345  |
| wavelet-HHL | glcm       | SumSquares                           | 8.061308346  |
| wavelet-HHL | glcm       | ClusterProminence                    | 1585.86086   |
| wavelet-HHL | glcm       | Imc2                                 | 0.775583115  |
| wavelet-HHL | glcm       | Imc1                                 | -0.13649419  |
| wavelet-HHL | glcm       | DifferenceAverage                    | 2.842004945  |
| wavelet-HHL | glcm       | Id                                   | 0.411029116  |
| wavelet-HHL | glcm       | ClusterTendency                      | 16.0753155   |
| wavelet-HHL | firstorder | InterquartileRange                   | 68.25697931  |
| wavelet-HHL | firstorder | Skewness                             | 0.235058059  |
| wavelet-HHL | firstorder | Uniformity                           | 0.116286835  |
| wavelet-HHL | firstorder | Median                               | 1.326344506  |
| wavelet-HHL | firstorder | Energy                               | 2026323.508  |
| wavelet-HHL | firstorder | RobustMeanAbsoluteDeviation          | 31.86369398  |
| wavelet-HHL | firstorder | MeanAbsoluteDeviation                | 53.28002126  |
| wavelet-HHL | firstorder | TotalEnergy                          | 54710734.73  |
| wavelet-HHL | firstorder | Maximum                              | 339.1013965  |
| wavelet-HHL | firstorder | RootMeanSquared                      | 74.7138436   |
| wavelet-HHL | firstorder | 90Percentile                         | 91.31023542  |

|             |            |                                      |              |
|-------------|------------|--------------------------------------|--------------|
| wavelet-HHL | firstorder | Minimum                              | -315.8233547 |
| wavelet-HHL | firstorder | Entropy                              | 3.512818835  |
| wavelet-HHL | firstorder | Range                                | 654.9247512  |
| wavelet-HHL | firstorder | Variance                             | 5576.658794  |
| wavelet-HHL | firstorder | 10Percentile                         | -75.71458365 |
| wavelet-HHL | firstorder | Kurtosis                             | 5.476837232  |
| wavelet-HHL | firstorder | Mean                                 | 2.345129303  |
| wavelet-HHL | grlm       | ShortRunLowGrayLevelEmphasis         | 0.009045879  |
| wavelet-HHL | grlm       | GrayLevelVariance                    | 9.897384401  |
| wavelet-HHL | grlm       | LowGrayLevelRunEmphasis              | 0.00953222   |
| wavelet-HHL | grlm       | GrayLevelNonUniformityNormalized     | 0.106656413  |
| wavelet-HHL | grlm       | RunVariance                          | 0.144638914  |
| wavelet-HHL | grlm       | GrayLevelNonUniformity               | 34.42682741  |
| wavelet-HHL | grlm       | LongRunEmphasis                      | 1.411538531  |
| wavelet-HHL | grlm       | ShortRunHighGrayLevelEmphasis        | 179.6423817  |
| wavelet-HHL | grlm       | RunLengthNonUniformity               | 258.913852   |
| wavelet-HHL | grlm       | ShortRunEmphasis                     | 0.915331546  |
| wavelet-HHL | grlm       | LongRunHighGrayLevelEmphasis         | 270.7898612  |
| wavelet-HHL | grlm       | RunPercentage                        | 0.888959525  |
| wavelet-HHL | grlm       | LongRunLowGrayLevelEmphasis          | 0.011893916  |
| wavelet-HHL | grlm       | RunEntropy                           | 4.076795578  |
| wavelet-HHL | grlm       | HighGrayLevelRunEmphasis             | 195.2771435  |
| wavelet-HHL | grlm       | RunLengthNonUniformityNormalized     | 0.801787787  |
| wavelet-HHL | glszm      | GrayLevelVariance                    | 21.2269611   |
| wavelet-HHL | glszm      | ZoneVariance                         | 82.18295599  |
| wavelet-HHL | glszm      | GrayLevelNonUniformityNormalized     | 0.065529337  |
| wavelet-HHL | glszm      | SizeZoneNonUniformityNormalized      | 0.482940051  |
| wavelet-HHL | glszm      | SizeZoneNonUniformity                | 54.08928571  |
| wavelet-HHL | glszm      | GrayLevelNonUniformity               | 7.339285714  |
| wavelet-HHL | glszm      | LargeAreaEmphasis                    | 92.6875      |
| wavelet-HHL | glszm      | SmallAreaHighGrayLevelEmphasis       | 151.7989458  |
| wavelet-HHL | glszm      | ZonePercentage                       | 0.308539945  |
| wavelet-HHL | glszm      | LargeAreaLowGrayLevelEmphasis        | 0.530396957  |
| wavelet-HHL | glszm      | LargeAreaHighGrayLevelEmphasis       | 16988.09821  |
| wavelet-HHL | glszm      | HighGrayLevelZoneEmphasis            | 211.0267857  |
| wavelet-HHL | glszm      | SmallAreaEmphasis                    | 0.721891154  |
| wavelet-HHL | glszm      | LowGrayLevelZoneEmphasis             | 0.016371109  |
| wavelet-HHL | glszm      | ZoneEntropy                          | 5.243527276  |
| wavelet-HHL | glszm      | SmallAreaLowGrayLevelEmphasis        | 0.014604928  |
| wavelet-HHL | ngtdm      | Coarseness                           | 0.018819225  |
| wavelet-HHL | ngtdm      | Complexity                           | 441.6865264  |
| wavelet-HHL | ngtdm      | Strength                             | 2.999373647  |
| wavelet-HHL | ngtdm      | Contrast                             | 0.087633842  |
| wavelet-HHL | ngtdm      | Busyness                             | 0.144569755  |
| wavelet-HLH | gldm       | GrayLevelVariance                    | 20.49677845  |
| wavelet-HLH | gldm       | HighGrayLevelEmphasis                | 407.3829201  |
| wavelet-HLH | gldm       | DependenceEntropy                    | 6.113321487  |
| wavelet-HLH | gldm       | DependenceNonUniformity              | 63.40220386  |
| wavelet-HLH | gldm       | GrayLevelNonUniformity               | 34.29476584  |
| wavelet-HLH | gldm       | SmallDependenceEmphasis              | 0.366794467  |
| wavelet-HLH | gldm       | SmallDependenceHighGrayLevelEmphasis | 158.2983908  |
| wavelet-HLH | gldm       | DependenceNonUniformityNormalized    | 0.174661719  |
| wavelet-HLH | gldm       | LargeDependenceEmphasis              | 24.15702479  |
| wavelet-HLH | gldm       | LargeDependenceLowGrayLevelEmphasis  | 0.069475684  |
| wavelet-HLH | gldm       | DependenceVariance                   | 11.11358514  |
| wavelet-HLH | gldm       | LargeDependenceHighGrayLevelEmphasis | 9020.077135  |

|             |            |                                     |              |
|-------------|------------|-------------------------------------|--------------|
| wavelet-HLH | gldm       | SmallDependenceLowGrayLevelEmphasis | 0.004476018  |
| wavelet-HLH | gldm       | LowGrayLevelEmphasis                | 0.006239025  |
| wavelet-HLH | glcm       | JointAverage                        | 19.68943293  |
| wavelet-HLH | glcm       | SumAverage                          | 39.37886587  |
| wavelet-HLH | glcm       | JointEntropy                        | 6.775749885  |
| wavelet-HLH | glcm       | ClusterShade                        | 3.707635537  |
| wavelet-HLH | glcm       | MaximumProbability                  | 0.063950801  |
| wavelet-HLH | glcm       | ldmn                                | 0.981725264  |
| wavelet-HLH | glcm       | JointEnergy                         | 0.016641636  |
| wavelet-HLH | glcm       | Contrast                            | 32.58626461  |
| wavelet-HLH | glcm       | DifferenceEntropy                   | 3.447688965  |
| wavelet-HLH | glcm       | InverseVariance                     | 0.284757562  |
| wavelet-HLH | glcm       | DifferenceVariance                  | 17.3525353   |
| wavelet-HLH | glcm       | ldn                                 | 0.919199244  |
| wavelet-HLH | glcm       | ldm                                 | 0.298283477  |
| wavelet-HLH | glcm       | Correlation                         | -0.018235133 |
| wavelet-HLH | glcm       | Autocorrelation                     | 387.384816   |
| wavelet-HLH | glcm       | SumEntropy                          | 4.241123749  |
| wavelet-HLH | glcm       | SumSquares                          | 15.99841649  |
| wavelet-HLH | glcm       | ClusterProminence                   | 6133.49617   |
| wavelet-HLH | glcm       | lmc2                                | 0.87169849   |
| wavelet-HLH | glcm       | lmc1                                | -0.191624231 |
| wavelet-HLH | glcm       | DifferenceAverage                   | 3.861167598  |
| wavelet-HLH | glcm       | ld                                  | 0.375074816  |
| wavelet-HLH | glcm       | ClusterTendency                     | 31.40740135  |
| wavelet-HLH | firstorder | InterquartileRange                  | 89.45656162  |
| wavelet-HLH | firstorder | Skewness                            | 0.207190692  |
| wavelet-HLH | firstorder | Uniformity                          | 0.094475939  |
| wavelet-HLH | firstorder | Median                              | -2.249744885 |
| wavelet-HLH | firstorder | Energy                              | 4638309.915  |
| wavelet-HLH | firstorder | RobustMeanAbsoluteDeviation         | 39.40329452  |
| wavelet-HLH | firstorder | MeanAbsoluteDeviation               | 74.72902919  |
| wavelet-HLH | firstorder | TotalEnergy                         | 125234367.7  |
| wavelet-HLH | firstorder | Maximum                             | 524.0496644  |
| wavelet-HLH | firstorder | RootMeanSquared                     | 113.0385477  |
| wavelet-HLH | firstorder | 90Percentile                        | 133.5135343  |
| wavelet-HLH | firstorder | Minimum                             | -458.9114423 |
| wavelet-HLH | firstorder | Entropy                             | 3.926334327  |
| wavelet-HLH | firstorder | Range                               | 982.9611067  |
| wavelet-HLH | firstorder | Variance                            | 12756.281    |
| wavelet-HLH | firstorder | 10Percentile                        | -105.0520232 |
| wavelet-HLH | firstorder | Kurtosis                            | 6.715556394  |
| wavelet-HLH | firstorder | Mean                                | 4.629499364  |
| wavelet-HLH | gldm       | ShortRunLowGrayLevelEmphasis        | 0.006442478  |
| wavelet-HLH | gldm       | GrayLevelVariance                   | 22.42000276  |
| wavelet-HLH | gldm       | LowGrayLevelRunEmphasis             | 0.006632167  |
| wavelet-HLH | gldm       | GrayLevelNonUniformityNormalized    | 0.084062677  |
| wavelet-HLH | gldm       | RunVariance                         | 0.159853534  |
| wavelet-HLH | gldm       | GrayLevelNonUniformity              | 27.46168092  |
| wavelet-HLH | gldm       | LongRunEmphasis                     | 1.398183788  |
| wavelet-HLH | gldm       | ShortRunHighGrayLevelEmphasis       | 384.3690866  |
| wavelet-HLH | gldm       | RunLengthNonUniformity              | 273.4560379  |
| wavelet-HLH | gldm       | ShortRunEmphasis                    | 0.930936135  |
| wavelet-HLH | gldm       | LongRunHighGrayLevelEmphasis        | 560.7725202  |
| wavelet-HLH | gldm       | RunPercentage                       | 0.89955499   |
| wavelet-HLH | gldm       | LongRunLowGrayLevelEmphasis         | 0.007722528  |

|             |       |                                  |             |
|-------------|-------|----------------------------------|-------------|
| wavelet-HLH | glrlm | RunEntropy                       | 4.436565895 |
| wavelet-HLH | glrlm | HighGrayLevelRunEmphasis         | 410.6405737 |
| wavelet-HLH | glrlm | RunLengthNonUniformityNormalized | 0.8367623   |
| wavelet-HLH | glszm | GrayLevelVariance                | 40.8968225  |
| wavelet-HLH | glszm | ZoneVariance                     | 42.1801954  |
| wavelet-HLH | glszm | GrayLevelNonUniformityNormalized | 0.053962747 |
| wavelet-HLH | glszm | SizeZoneNonUniformityNormalized  | 0.499817385 |
| wavelet-HLH | glszm | SizeZoneNonUniformity            | 73.97297297 |
| wavelet-HLH | glszm | GrayLevelNonUniformity           | 7.986486486 |
| wavelet-HLH | glszm | LargeAreaEmphasis                | 48.19594595 |
| wavelet-HLH | glszm | SmallAreaHighGrayLevelEmphasis   | 320.9854893 |
| wavelet-HLH | glszm | ZonePercentage                   | 0.407713499 |
| wavelet-HLH | glszm | LargeAreaLowGrayLevelEmphasis    | 0.1392431   |
| wavelet-HLH | glszm | LargeAreaHighGrayLevelEmphasis   | 18044.04054 |
| wavelet-HLH | glszm | HighGrayLevelZoneEmphasis        | 434.972973  |
| wavelet-HLH | glszm | SmallAreaEmphasis                | 0.733850372 |
| wavelet-HLH | glszm | LowGrayLevelZoneEmphasis         | 0.011281815 |
| wavelet-HLH | glszm | ZoneEntropy                      | 5.538808285 |
| wavelet-HLH | glszm | SmallAreaLowGrayLevelEmphasis    | 0.010507857 |
| wavelet-HLH | ngtdm | Coarseness                       | 0.018828642 |
| wavelet-HLH | ngtdm | Complexity                       | 1283.799475 |
| wavelet-HLH | ngtdm | Strength                         | 6.539757082 |
| wavelet-HLH | ngtdm | Contrast                         | 0.14052004  |
| wavelet-HLH | ngtdm | Busyness                         | 0.067760222 |

| Image type | Feature Class | Feature Name                         |                                                                                                                                                                                                                                                                                                                                                                                                                                              |
|------------|---------------|--------------------------------------|----------------------------------------------------------------------------------------------------------------------------------------------------------------------------------------------------------------------------------------------------------------------------------------------------------------------------------------------------------------------------------------------------------------------------------------------|
| general    | info          | BoundingBox                          | 5: RTSTRUCT: C99-DNU_segment_RUL GTV<br>(1, 0, 1, 4, 5, 3)                                                                                                                                                                                                                                                                                                                                                                                   |
| general    | info          | EnabledImageTypes                    | {u'Original': {}, u'Wavelet': {}}                                                                                                                                                                                                                                                                                                                                                                                                            |
|            |               |                                      | {'distances': [1], 'additionalInfo': True,<br>'force2D': False, 'interpolator': 'sitkBSpline',<br>'resampledPixelSpacing': [3.0], 'label': 1,<br>'normalizeScale': 1, 'normalize': False,<br>'force2Ddimension': 0, 'removeOutliers': None,<br>'minimumROISize': None, u'binWidth': 25.0,<br>'minimumROIDimensions': 1, u'correctMask':<br>True, 'preCrop': False, u'symmetricalGLCM':<br>True, 'resegmentRange': None, 'padDistance':<br>5} |
| general    | info          | GeneralSettings                      | 75628e020597827a45e8fa186dc9265ae7d74b                                                                                                                                                                                                                                                                                                                                                                                                       |
| general    | info          | ImageHash                            | 61                                                                                                                                                                                                                                                                                                                                                                                                                                           |
| general    | info          | ImageSpacing                         | (0.9765625000000002, 0.9765625000000002,<br>2.0)                                                                                                                                                                                                                                                                                                                                                                                             |
| general    | info          | MaskHash                             | 1f223ed5844073ab24e98cab0eed07de07eadd                                                                                                                                                                                                                                                                                                                                                                                                       |
| general    | info          | NumpyVersion                         | 13                                                                                                                                                                                                                                                                                                                                                                                                                                           |
| general    | info          | PyWaveletVersion                     | 1.13.1                                                                                                                                                                                                                                                                                                                                                                                                                                       |
| general    | info          | SimpleITKVersion                     | 0.5.2                                                                                                                                                                                                                                                                                                                                                                                                                                        |
| general    | info          | Version                              | 1.1.0                                                                                                                                                                                                                                                                                                                                                                                                                                        |
| general    | info          | VolumeNum                            | 1.3.0.post102+g1b0eb74                                                                                                                                                                                                                                                                                                                                                                                                                       |
| general    | info          | VoxelNum                             | 1                                                                                                                                                                                                                                                                                                                                                                                                                                            |
| original   | shape         | Maximum3DDiameter                    | 28                                                                                                                                                                                                                                                                                                                                                                                                                                           |
| original   | shape         | Maximum2DDiameterSlice               | 12.72792206                                                                                                                                                                                                                                                                                                                                                                                                                                  |
| original   | shape         | Sphericity                           | 12.36931688                                                                                                                                                                                                                                                                                                                                                                                                                                  |
| original   | shape         | MinorAxis                            | 0.91369905                                                                                                                                                                                                                                                                                                                                                                                                                                   |
| original   | shape         | Elongation                           | 11.22819167                                                                                                                                                                                                                                                                                                                                                                                                                                  |
| original   | shape         | SurfaceVolumeRatio                   | 0.850332087                                                                                                                                                                                                                                                                                                                                                                                                                                  |
| original   | shape         | Volume                               | 0.580996727                                                                                                                                                                                                                                                                                                                                                                                                                                  |
| original   | shape         | MajorAxis                            | 756                                                                                                                                                                                                                                                                                                                                                                                                                                          |
| original   | shape         | SurfaceArea                          | 13.20447839                                                                                                                                                                                                                                                                                                                                                                                                                                  |
| original   | shape         | Flatness                             | 439.2335257                                                                                                                                                                                                                                                                                                                                                                                                                                  |
| original   | shape         | LeastAxis                            | 0.542444144                                                                                                                                                                                                                                                                                                                                                                                                                                  |
| original   | shape         | Maximum2DDiameterColumn              | 7.162691973                                                                                                                                                                                                                                                                                                                                                                                                                                  |
| original   | shape         | Maximum2DDiameterRow                 | 9.486832981                                                                                                                                                                                                                                                                                                                                                                                                                                  |
| original   | gldm          | GrayLevelVariance                    | 12.36931688                                                                                                                                                                                                                                                                                                                                                                                                                                  |
| original   | gldm          | HighGrayLevelEmphasis                | 36.47321429                                                                                                                                                                                                                                                                                                                                                                                                                                  |
| original   | gldm          | DependenceEntropy                    | 351.5357143                                                                                                                                                                                                                                                                                                                                                                                                                                  |
| original   | gldm          | DependenceNonUniformity              | 4.06610894                                                                                                                                                                                                                                                                                                                                                                                                                                   |
| original   | gldm          | GrayLevelNonUniformity               | 9.428571429                                                                                                                                                                                                                                                                                                                                                                                                                                  |
| original   | gldm          | SmallDependenceEmphasis              | 2.642857143                                                                                                                                                                                                                                                                                                                                                                                                                                  |
| original   | gldm          | SmallDependenceHighGrayLevelEmphasis | 0.568452381                                                                                                                                                                                                                                                                                                                                                                                                                                  |
| original   | gldm          | DependenceNonUniformityNormalized    | 157.1428571                                                                                                                                                                                                                                                                                                                                                                                                                                  |
| original   | gldm          | LargeDependenceEmphasis              | 0.336734694                                                                                                                                                                                                                                                                                                                                                                                                                                  |
| original   | gldm          | LargeDependenceLowGrayLevelEmphasis  | 5.285714286                                                                                                                                                                                                                                                                                                                                                                                                                                  |
| original   | gldm          | DependenceVariance                   | 0.051360981                                                                                                                                                                                                                                                                                                                                                                                                                                  |
| original   | gldm          | LargeDependenceHighGrayLevelEmphasis | 1.285714286                                                                                                                                                                                                                                                                                                                                                                                                                                  |
| original   | gldm          | SmallDependenceLowGrayLevelEmphasis  | 2266.607143                                                                                                                                                                                                                                                                                                                                                                                                                                  |
| original   | gldm          |                                      | 0.040721894                                                                                                                                                                                                                                                                                                                                                                                                                                  |



|          |            |                                  |              |
|----------|------------|----------------------------------|--------------|
| original | gldm       | LowGrayLevelEmphasis             | 0.041689365  |
| original | glcm       | JointAverage                     | 18.98793909  |
| original | glcm       | SumAverage                       | 37.97587818  |
| original | glcm       | JointEntropy                     | 4.344321105  |
| original | glcm       | ClusterShade                     | -442.7019107 |
| original | glcm       | MaximumProbability               | 0.08099582   |
| original | glcm       | Idmn                             | 0.931057009  |
| original | glcm       | JointEnergy                      | 0.05267712   |
| original | glcm       | Contrast                         | 62.01945853  |
| original | glcm       | DifferenceEntropy                | 2.902229933  |
| original | glcm       | InverseVariance                  | 0.228869447  |
| original | glcm       | DifferenceVariance               | 29.22812191  |
| original | glcm       | Idn                              | 0.843800922  |
| original | glcm       | Idm                              | 0.222598764  |
| original | glcm       | Correlation                      | -0.017962924 |
| original | glcm       | Autocorrelation                  | 359.5384592  |
| original | glcm       | SumEntropy                       | 3.090830618  |
| original | glcm       | SumSquares                       | 29.64375566  |
| original | glcm       | ClusterProminence                | 10964.44583  |
| original | glcm       | Imc2                             | 0.993877525  |
| original | glcm       | Imc1                             | -0.696820498 |
| original | glcm       | DifferenceAverage                | 5.616391941  |
| original | glcm       | Id                               | 0.302196479  |
| original | glcm       | ClusterTendency                  | 56.55556411  |
| original | firstorder | InterquartileRange               | 150          |
| original | firstorder | Skewness                         | -1.320490849 |
| original | firstorder | Uniformity                       | 0.094387755  |
| original | firstorder | Median                           | -31.5        |
| original | firstorder | Energy                           | 887807       |
| original | firstorder | RobustMeanAbsoluteDeviation      | 70.34710744  |
| original | firstorder | MeanAbsoluteDeviation            | 117.0892857  |
| original | firstorder | TotalEnergy                      | 23970789     |
| original | firstorder | Maximum                          | 100          |
| original | firstorder | RootMeanSquared                  | 178.0656981  |
| original | firstorder | 90Percentile                     | 29           |
| original | firstorder | Minimum                          | -504         |
| original | firstorder | Entropy                          | 3.651478923  |
| original | firstorder | Range                            | 604          |
| original | firstorder | Variance                         | 22918.33036  |
| original | firstorder | 10Percentile                     | -299.4       |
| original | firstorder | Kurtosis                         | 3.85589385   |
| original | firstorder | Mean                             | -93.75       |
| original | glrlm      | ShortRunLowGrayLevelEmphasis     | 0.04322803   |
| original | glrlm      | GrayLevelVariance                | 37.42485773  |
| original | glrlm      | LowGrayLevelRunEmphasis          | 0.043296903  |
| original | glrlm      | GrayLevelNonUniformityNormalized | 0.091510245  |
| original | glrlm      | RunVariance                      | 0.03830888   |
| original | glrlm      | GrayLevelNonUniformity           | 2.465248427  |
| original | glrlm      | LongRunEmphasis                  | 1.122287968  |
| original | glrlm      | ShortRunHighGrayLevelEmphasis    | 333.925155   |
| original | glrlm      | RunLengthNonUniformity           | 24.89809336  |
| original | glrlm      | ShortRunEmphasis                 | 0.969428008  |
| original | glrlm      | LongRunHighGrayLevelEmphasis     | 402.3682023  |

|             |       |                                      |             |
|-------------|-------|--------------------------------------|-------------|
| original    | glrlm | RunPercentage                        | 0.961538462 |
| original    | glrlm | LongRunLowGrayLevelEmphasis          | 0.043572396 |
| original    | glrlm | RunEntropy                           | 3.781835212 |
| original    | glrlm | HighGrayLevelRunEmphasis             | 347.6137644 |
| original    | glrlm | RunLengthNonUniformityNormalized     | 0.92338224  |
| original    | glszm | GrayLevelVariance                    | 46.43209877 |
| original    | glszm | ZoneVariance                         | 1.358024691 |
| original    | glszm | GrayLevelNonUniformityNormalized     | 0.074074074 |
| original    | glszm | SizeZoneNonUniformityNormalized      | 0.617283951 |
| original    | glszm | SizeZoneNonUniformity                | 11.11111111 |
| original    | glszm | GrayLevelNonUniformity               | 1.333333333 |
| original    | glszm | LargeAreaEmphasis                    | 3.777777778 |
| original    | glszm | SmallAreaHighGrayLevelEmphasis       | 208.5277778 |
| original    | glszm | ZonePercentage                       | 0.642857143 |
| original    | glszm | LargeAreaLowGrayLevelEmphasis        | 0.069971209 |
| original    | glszm | LargeAreaHighGrayLevelEmphasis       | 1519.722222 |
| original    | glszm | HighGrayLevelZoneEmphasis            | 298.8888889 |
| original    | glszm | SmallAreaEmphasis                    | 0.803533951 |
| original    | glszm | LowGrayLevelZoneEmphasis             | 0.063593242 |
| original    | glszm | ZoneEntropy                          | 3.836591668 |
| original    | glszm | SmallAreaLowGrayLevelEmphasis        | 0.063161555 |
| original    | ngtdm | Coarseness                           | 0.118900725 |
| original    | ngtdm | Complexity                           | 609.1015295 |
| original    | ngtdm | Strength                             | 22.11837084 |
| original    | ngtdm | Contrast                             | 1.583417496 |
| original    | ngtdm | Busyness                             | 0.034288086 |
| wavelet-HHH | gldm  | GrayLevelVariance                    | 16.10586735 |
| wavelet-HHH | gldm  | HighGrayLevelEmphasis                | 105.6785714 |
| wavelet-HHH | gldm  | DependenceEntropy                    | 4.093069208 |
| wavelet-HHH | gldm  | DependenceNonUniformity              | 13.21428571 |
| wavelet-HHH | gldm  | GrayLevelNonUniformity               | 2.785714286 |
| wavelet-HHH | gldm  | SmallDependenceEmphasis              | 0.646825397 |
| wavelet-HHH | gldm  | SmallDependenceHighGrayLevelEmphasis | 74.08134921 |
| wavelet-HHH | gldm  | DependenceNonUniformityNormalized    | 0.471938776 |
| wavelet-HHH | gldm  | LargeDependenceEmphasis              | 2.571428571 |
| wavelet-HHH | gldm  | LargeDependenceLowGrayLevelEmphasis  | 0.08898584  |
| wavelet-HHH | gldm  | DependenceVariance                   | 0.321428571 |
| wavelet-HHH | gldm  | LargeDependenceHighGrayLevelEmphasis | 236.0357143 |
| wavelet-HHH | gldm  | SmallDependenceLowGrayLevelEmphasis  | 0.052421792 |
| wavelet-HHH | gldm  | LowGrayLevelEmphasis                 | 0.058464761 |
| wavelet-HHH | glcm  | JointAverage                         | 9.480645957 |
| wavelet-HHH | glcm  | SumAverage                           | 18.96129191 |
| wavelet-HHH | glcm  | JointEntropy                         | 4.32204201  |
| wavelet-HHH | glcm  | ClusterShade                         | 0.400625506 |
| wavelet-HHH | glcm  | MaximumProbability                   | 0.076722316 |
| wavelet-HHH | glcm  | ldmn                                 | 0.919072734 |
| wavelet-HHH | glcm  | JointEnergy                          | 0.053766203 |
| wavelet-HHH | glcm  | Contrast                             | 33.13842162 |
| wavelet-HHH | glcm  | DifferenceEntropy                    | 2.726416387 |
| wavelet-HHH | glcm  | InverseVariance                      | 0.230313124 |
| wavelet-HHH | glcm  | DifferenceVariance                   | 10.88832945 |
| wavelet-HHH | glcm  | ldn                                  | 0.815923528 |
| wavelet-HHH | glcm  | ldm                                  | 0.196745103 |

|             |            |                                  |              |
|-------------|------------|----------------------------------|--------------|
| wavelet-HHH | glcm       | Correlation                      | -0.001065042 |
| wavelet-HHH | glcm       | Autocorrelation                  | 89.695966    |
| wavelet-HHH | glcm       | SumEntropy                       | 3.097359466  |
| wavelet-HHH | glcm       | SumSquares                       | 16.19016008  |
| wavelet-HHH | glcm       | ClusterProminence                | 2644.858136  |
| wavelet-HHH | glcm       | Imc2                             | 0.996177571  |
| wavelet-HHH | glcm       | Imc1                             | -0.741638185 |
| wavelet-HHH | glcm       | DifferenceAverage                | 4.557098244  |
| wavelet-HHH | glcm       | Id                               | 0.288076347  |
| wavelet-HHH | glcm       | ClusterTendency                  | 31.62221872  |
| wavelet-HHH | firstorder | InterquartileRange               | 130.2256015  |
| wavelet-HHH | firstorder | Skewness                         | -0.087713269 |
| wavelet-HHH | firstorder | Uniformity                       | 0.099489796  |
| wavelet-HHH | firstorder | Median                           | 14.2988553   |
| wavelet-HHH | firstorder | Energy                           | 280846.3743  |
| wavelet-HHH | firstorder | RobustMeanAbsoluteDeviation      | 56.83540767  |
| wavelet-HHH | firstorder | MeanAbsoluteDeviation            | 81.5700934   |
| wavelet-HHH | firstorder | TotalEnergy                      | 7582852.106  |
| wavelet-HHH | firstorder | Maximum                          | 204.1023049  |
| wavelet-HHH | firstorder | RootMeanSquared                  | 100.1510242  |
| wavelet-HHH | firstorder | 90Percentile                     | 116.9338378  |
| wavelet-HHH | firstorder | Minimum                          | -203.3209151 |
| wavelet-HHH | firstorder | Entropy                          | 3.553090084  |
| wavelet-HHH | firstorder | Range                            | 407.42322    |
| wavelet-HHH | firstorder | Variance                         | 10030.14068  |
| wavelet-HHH | firstorder | 10Percentile                     | -114.8770489 |
| wavelet-HHH | firstorder | Kurtosis                         | 2.638594219  |
| wavelet-HHH | firstorder | Mean                             | -0.294919078 |
| wavelet-HHH | glrlm      | ShortRunLowGrayLevelEmphasis     | 0.059031486  |
| wavelet-HHH | glrlm      | GrayLevelVariance                | 16.28212103  |
| wavelet-HHH | glrlm      | LowGrayLevelRunEmphasis          | 0.059322567  |
| wavelet-HHH | glrlm      | GrayLevelNonUniformityNormalized | 0.098545511  |
| wavelet-HHH | glrlm      | RunVariance                      | 0.018989638  |
| wavelet-HHH | glrlm      | GrayLevelNonUniformity           | 2.708213268  |
| wavelet-HHH | glrlm      | LongRunEmphasis                  | 1.063931624  |
| wavelet-HHH | glrlm      | ShortRunHighGrayLevelEmphasis    | 104.7098413  |
| wavelet-HHH | glrlm      | RunLengthNonUniformity           | 26.50108262  |
| wavelet-HHH | glrlm      | ShortRunEmphasis                 | 0.984017094  |
| wavelet-HHH | glrlm      | LongRunHighGrayLevelEmphasis     | 111.6115507  |
| wavelet-HHH | glrlm      | RunPercentage                    | 0.980769231  |
| wavelet-HHH | glrlm      | LongRunLowGrayLevelEmphasis      | 0.060486894  |
| wavelet-HHH | glrlm      | RunEntropy                       | 3.610324757  |
| wavelet-HHH | glrlm      | HighGrayLevelRunEmphasis         | 106.0901832  |
| wavelet-HHH | glrlm      | RunLengthNonUniformityNormalized | 0.962020724  |
| wavelet-HHH | glszm      | GrayLevelVariance                | 18.88888889  |
| wavelet-HHH | glszm      | ZoneVariance                     | 0.317460317  |
| wavelet-HHH | glszm      | GrayLevelNonUniformityNormalized | 0.083900227  |
| wavelet-HHH | glszm      | SizeZoneNonUniformityNormalized  | 0.569160998  |
| wavelet-HHH | glszm      | SizeZoneNonUniformity            | 11.95238095  |
| wavelet-HHH | glszm      | GrayLevelNonUniformity           | 1.761904762  |
| wavelet-HHH | glszm      | LargeAreaEmphasis                | 2.095238095  |
| wavelet-HHH | glszm      | SmallAreaHighGrayLevelEmphasis   | 91.63227513  |
| wavelet-HHH | glszm      | ZonePercentage                   | 0.75         |

|             |            |                                      |              |
|-------------|------------|--------------------------------------|--------------|
| wavelet-HHH | glszm      | LargeAreaLowGrayLevelEmphasis        | 0.094057621  |
| wavelet-HHH | glszm      | LargeAreaHighGrayLevelEmphasis       | 200.4285714  |
| wavelet-HHH | glszm      | HighGrayLevelZoneEmphasis            | 112.3333333  |
| wavelet-HHH | glszm      | SmallAreaEmphasis                    | 0.779100529  |
| wavelet-HHH | glszm      | LowGrayLevelZoneEmphasis             | 0.071805473  |
| wavelet-HHH | glszm      | ZoneEntropy                          | 4.106603137  |
| wavelet-HHH | glszm      | SmallAreaLowGrayLevelEmphasis        | 0.068358838  |
| wavelet-HHH | ngtdm      | Coarseness                           | 0.122317002  |
| wavelet-HHH | ngtdm      | Complexity                           | 307.9463984  |
| wavelet-HHH | ngtdm      | Strength                             | 11.39669035  |
| wavelet-HHH | ngtdm      | Contrast                             | 0.626735636  |
| wavelet-HHH | ngtdm      | Busyness                             | 0.077703121  |
| wavelet-HLL | gldm       | GrayLevelVariance                    | 163.8520408  |
| wavelet-HLL | gldm       | HighGrayLevelEmphasis                | 689.5714286  |
| wavelet-HLL | gldm       | DependenceEntropy                    | 4.521640636  |
| wavelet-HLL | gldm       | DependenceNonUniformity              | 24.28571429  |
| wavelet-HLL | gldm       | GrayLevelNonUniformity               | 1.285714286  |
| wavelet-HLL | gldm       | SmallDependenceEmphasis              | 0.946428571  |
| wavelet-HLL | gldm       | SmallDependenceHighGrayLevelEmphasis | 689.0892857  |
| wavelet-HLL | gldm       | DependenceNonUniformityNormalized    | 0.867346939  |
| wavelet-HLL | gldm       | LargeDependenceEmphasis              | 1.214285714  |
| wavelet-HLL | gldm       | LargeDependenceLowGrayLevelEmphasis  | 0.0726926    |
| wavelet-HLL | gldm       | DependenceVariance                   | 0.066326531  |
| wavelet-HLL | gldm       | LargeDependenceHighGrayLevelEmphasis | 691.5        |
| wavelet-HLL | gldm       | SmallDependenceLowGrayLevelEmphasis  | 0.042930695  |
| wavelet-HLL | gldm       | LowGrayLevelEmphasis                 | 0.048883076  |
| wavelet-HLL | glcm       | JointAverage                         | 21.75774279  |
| wavelet-HLL | glcm       | SumAverage                           | 43.51548558  |
| wavelet-HLL | glcm       | JointEntropy                         | 4.518583043  |
| wavelet-HLL | glcm       | ClusterShade                         | 2551.522941  |
| wavelet-HLL | glcm       | MaximumProbability                   | 0.047158824  |
| wavelet-HLL | glcm       | Idmn                                 | 0.876479736  |
| wavelet-HLL | glcm       | JointEnergy                          | 0.04514078   |
| wavelet-HLL | glcm       | Contrast                             | 355.4839462  |
| wavelet-HLL | glcm       | DifferenceEntropy                    | 3.211038613  |
| wavelet-HLL | glcm       | InverseVariance                      | 0.063672628  |
| wavelet-HLL | glcm       | DifferenceVariance                   | 99.27015598  |
| wavelet-HLL | glcm       | Idn                                  | 0.774476138  |
| wavelet-HLL | glcm       | Idm                                  | 0.047303015  |
| wavelet-HLL | glcm       | Correlation                          | -0.084430548 |
| wavelet-HLL | glcm       | Autocorrelation                      | 461.0521743  |
| wavelet-HLL | glcm       | SumEntropy                           | 3.26973864   |
| wavelet-HLL | glcm       | SumSquares                           | 163.2711168  |
| wavelet-HLL | glcm       | ClusterProminence                    | 316196.8133  |
| wavelet-HLL | glcm       | Imc2                                 | 0.999713252  |
| wavelet-HLL | glcm       | Imc1                                 | -0.910758572 |
| wavelet-HLL | glcm       | DifferenceAverage                    | 15.03475392  |
| wavelet-HLL | glcm       | Id                                   | 0.120861414  |
| wavelet-HLL | glcm       | ClusterTendency                      | 297.6005211  |
| wavelet-HLL | firstorder | InterquartileRange                   | 412.0492724  |
| wavelet-HLL | firstorder | Skewness                             | -0.088120229 |
| wavelet-HLL | firstorder | Uniformity                           | 0.045918367  |
| wavelet-HLL | firstorder | Median                               | 9.072070236  |

|             |            |                                  |              |
|-------------|------------|----------------------------------|--------------|
| wavelet-HLL | firstorder | Energy                           | 2871315.962  |
| wavelet-HLL | firstorder | RobustMeanAbsoluteDeviation      | 194.6864297  |
| wavelet-HLL | firstorder | MeanAbsoluteDeviation            | 262.7575701  |
| wavelet-HLL | firstorder | TotalEnergy                      | 77525530.96  |
| wavelet-HLL | firstorder | Maximum                          | 530.2813513  |
| wavelet-HLL | firstorder | RootMeanSquared                  | 320.229603   |
| wavelet-HLL | firstorder | 90Percentile                     | 424.0125752  |
| wavelet-HLL | firstorder | Minimum                          | -555.5936865 |
| wavelet-HLL | firstorder | Entropy                          | 4.521640636  |
| wavelet-HLL | firstorder | Range                            | 1085.875038  |
| wavelet-HLL | firstorder | Variance                         | 102364.456   |
| wavelet-HLL | firstorder | 10Percentile                     | -487.5849688 |
| wavelet-HLL | firstorder | Kurtosis                         | 2.05364296   |
| wavelet-HLL | firstorder | Mean                             | -13.51083263 |
| wavelet-HLL | grlm       | ShortRunLowGrayLevelEmphasis     | 0.048468372  |
| wavelet-HLL | grlm       | GrayLevelVariance                | 163.1454736  |
| wavelet-HLL | grlm       | LowGrayLevelRunEmphasis          | 0.048705788  |
| wavelet-HLL | grlm       | GrayLevelNonUniformityNormalized | 0.0458683    |
| wavelet-HLL | grlm       | RunVariance                      | 0.002743484  |
| wavelet-HLL | grlm       | GrayLevelNonUniformity           | 1.280830281  |
| wavelet-HLL | grlm       | LongRunEmphasis                  | 1.008547009  |
| wavelet-HLL | grlm       | ShortRunHighGrayLevelEmphasis    | 691.4911477  |
| wavelet-HLL | grlm       | RunLengthNonUniformity           | 27.77492877  |
| wavelet-HLL | grlm       | ShortRunEmphasis                 | 0.997863248  |
| wavelet-HLL | grlm       | LongRunHighGrayLevelEmphasis     | 691.5873016  |
| wavelet-HLL | grlm       | RunPercentage                    | 0.997252747  |
| wavelet-HLL | grlm       | LongRunLowGrayLevelEmphasis      | 0.049655456  |
| wavelet-HLL | grlm       | RunEntropy                       | 4.522488686  |
| wavelet-HLL | grlm       | HighGrayLevelRunEmphasis         | 691.5103785  |
| wavelet-HLL | grlm       | RunLengthNonUniformityNormalized | 0.994513032  |
| wavelet-HLL | glszm      | GrayLevelVariance                | 154.6666667  |
| wavelet-HLL | glszm      | ZoneVariance                     | 0.035665295  |
| wavelet-HLL | glszm      | GrayLevelNonUniformityNormalized | 0.04526749   |
| wavelet-HLL | glszm      | SizeZoneNonUniformityNormalized  | 0.92866941   |
| wavelet-HLL | glszm      | SizeZoneNonUniformity            | 25.07407407  |
| wavelet-HLL | glszm      | GrayLevelNonUniformity           | 1.222222222  |
| wavelet-HLL | glszm      | LargeAreaEmphasis                | 1.111111111  |
| wavelet-HLL | glszm      | SmallAreaHighGrayLevelEmphasis   | 714.5277778  |
| wavelet-HLL | glszm      | ZonePercentage                   | 0.964285714  |
| wavelet-HLL | glszm      | LargeAreaLowGrayLevelEmphasis    | 0.058924013  |
| wavelet-HLL | glszm      | LargeAreaHighGrayLevelEmphasis   | 715.7777778  |
| wavelet-HLL | glszm      | HighGrayLevelZoneEmphasis        | 714.7777778  |
| wavelet-HLL | glszm      | SmallAreaEmphasis                | 0.972222222  |
| wavelet-HLL | glszm      | LowGrayLevelZoneEmphasis         | 0.046578334  |
| wavelet-HLL | glszm      | ZoneEntropy                      | 4.53266528   |
| wavelet-HLL | glszm      | SmallAreaLowGrayLevelEmphasis    | 0.043491914  |
| wavelet-HLL | ngtdm      | Coarseness                       | 0.076857043  |
| wavelet-HLL | ngtdm      | Complexity                       | 4472.536242  |
| wavelet-HLL | ngtdm      | Strength                         | 55.17037604  |
| wavelet-HLL | ngtdm      | Contrast                         | 6.197012446  |
| wavelet-HLL | ngtdm      | Busyness                         | 0.033620592  |
| wavelet-LHL | gldm       | GrayLevelVariance                | 103.8010204  |
| wavelet-LHL | gldm       | HighGrayLevelEmphasis            | 217.0714286  |

|             |            |                                      |              |
|-------------|------------|--------------------------------------|--------------|
| wavelet-LHL | gldm       | DependenceEntropy                    | 4.235926351  |
| wavelet-LHL | gldm       | DependenceNonUniformity              | 8.928571429  |
| wavelet-LHL | gldm       | GrayLevelNonUniformity               | 2.214285714  |
| wavelet-LHL | gldm       | SmallDependenceEmphasis              | 0.531498016  |
| wavelet-LHL | gldm       | SmallDependenceHighGrayLevelEmphasis | 205.5434028  |
| wavelet-LHL | gldm       | DependenceNonUniformityNormalized    | 0.318877551  |
| wavelet-LHL | gldm       | LargeDependenceEmphasis              | 4.714285714  |
| wavelet-LHL | gldm       | LargeDependenceLowGrayLevelEmphasis  | 1.917887739  |
| wavelet-LHL | gldm       | DependenceVariance                   | 0.994897959  |
| wavelet-LHL | gldm       | LargeDependenceHighGrayLevelEmphasis | 282.2857143  |
| wavelet-LHL | gldm       | SmallDependenceLowGrayLevelEmphasis  | 0.035776094  |
| wavelet-LHL | gldm       | LowGrayLevelEmphasis                 | 0.182238106  |
| wavelet-LHL | glcm       | JointAverage                         | 9.627990279  |
| wavelet-LHL | glcm       | SumAverage                           | 19.25598056  |
| wavelet-LHL | glcm       | JointEntropy                         | 4.364837857  |
| wavelet-LHL | glcm       | ClusterShade                         | 4728.733279  |
| wavelet-LHL | glcm       | MaximumProbability                   | 0.080962947  |
| wavelet-LHL | glcm       | ldmn                                 | 0.92483688   |
| wavelet-LHL | glcm       | JointEnergy                          | 0.051409299  |
| wavelet-LHL | glcm       | Contrast                             | 127.9635555  |
| wavelet-LHL | glcm       | DifferenceEntropy                    | 2.912801431  |
| wavelet-LHL | glcm       | InverseVariance                      | 0.154125694  |
| wavelet-LHL | glcm       | DifferenceVariance                   | 59.64211077  |
| wavelet-LHL | glcm       | ldn                                  | 0.8414871    |
| wavelet-LHL | glcm       | ldm                                  | 0.183298582  |
| wavelet-LHL | glcm       | Correlation                          | 0.355980468  |
| wavelet-LHL | glcm       | Autocorrelation                      | 127.581321   |
| wavelet-LHL | glcm       | SumEntropy                           | 3.258304532  |
| wavelet-LHL | glcm       | SumSquares                           | 98.26439324  |
| wavelet-LHL | glcm       | ClusterProminence                    | 234082.1738  |
| wavelet-LHL | glcm       | lmc2                                 | 0.996817831  |
| wavelet-LHL | glcm       | lmc1                                 | -0.751225402 |
| wavelet-LHL | glcm       | DifferenceAverage                    | 7.855407627  |
| wavelet-LHL | glcm       | ld                                   | 0.2655333    |
| wavelet-LHL | glcm       | ClusterTendency                      | 265.0940175  |
| wavelet-LHL | firstorder | InterquartileRange                   | 288.6843886  |
| wavelet-LHL | firstorder | Skewness                             | 1.090175118  |
| wavelet-LHL | firstorder | Uniformity                           | 0.079081633  |
| wavelet-LHL | firstorder | Median                               | -162.4771758 |
| wavelet-LHL | firstorder | Energy                               | 1875781.625  |
| wavelet-LHL | firstorder | RobustMeanAbsoluteDeviation          | 144.9311212  |
| wavelet-LHL | firstorder | MeanAbsoluteDeviation                | 210.0661708  |
| wavelet-LHL | firstorder | TotalEnergy                          | 50646103.88  |
| wavelet-LHL | firstorder | Maximum                              | 552.1998596  |
| wavelet-LHL | firstorder | RootMeanSquared                      | 258.8285164  |
| wavelet-LHL | firstorder | 90Percentile                         | 409.9136708  |
| wavelet-LHL | firstorder | Minimum                              | -299.7714953 |
| wavelet-LHL | firstorder | Entropy                              | 3.878783493  |
| wavelet-LHL | firstorder | Range                                | 851.9713549  |
| wavelet-LHL | firstorder | Variance                             | 65098.69799  |
| wavelet-LHL | firstorder | 10Percentile                         | -277.8087593 |
| wavelet-LHL | firstorder | Kurtosis                             | 2.893003989  |
| wavelet-LHL | firstorder | Mean                                 | -43.51439884 |

|             |       |                                      |             |
|-------------|-------|--------------------------------------|-------------|
| wavelet-LHL | grlm  | ShortRunLowGrayLevelEmphasis         | 0.161601467 |
| wavelet-LHL | grlm  | GrayLevelVariance                    | 105.5566377 |
| wavelet-LHL | grlm  | LowGrayLevelRunEmphasis              | 0.173445215 |
| wavelet-LHL | grlm  | GrayLevelNonUniformityNormalized     | 0.077019019 |
| wavelet-LHL | grlm  | RunVariance                          | 0.035450543 |
| wavelet-LHL | grlm  | GrayLevelNonUniformity               | 2.07972324  |
| wavelet-LHL | grlm  | LongRunEmphasis                      | 1.115213675 |
| wavelet-LHL | grlm  | ShortRunHighGrayLevelEmphasis        | 224.0490435 |
| wavelet-LHL | grlm  | RunLengthNonUniformity               | 25.15065527 |
| wavelet-LHL | grlm  | ShortRunEmphasis                     | 0.971196581 |
| wavelet-LHL | grlm  | LongRunHighGrayLevelEmphasis         | 226.9610094 |
| wavelet-LHL | grlm  | RunPercentage                        | 0.964285714 |
| wavelet-LHL | grlm  | LongRunLowGrayLevelEmphasis          | 0.220820208 |
| wavelet-LHL | grlm  | RunEntropy                           | 3.97091336  |
| wavelet-LHL | grlm  | HighGrayLevelRunEmphasis             | 224.6314367 |
| wavelet-LHL | grlm  | RunLengthNonUniformityNormalized     | 0.929098913 |
| wavelet-LHL | glszm | GrayLevelVariance                    | 120.867284  |
| wavelet-LHL | glszm | ZoneVariance                         | 0.913580247 |
| wavelet-LHL | glszm | GrayLevelNonUniformityNormalized     | 0.061728395 |
| wavelet-LHL | glszm | SizeZoneNonUniformityNormalized      | 0.50617284  |
| wavelet-LHL | glszm | SizeZoneNonUniformity                | 9.111111111 |
| wavelet-LHL | glszm | GrayLevelNonUniformity               | 1.111111111 |
| wavelet-LHL | glszm | LargeAreaEmphasis                    | 3.333333333 |
| wavelet-LHL | glszm | SmallAreaHighGrayLevelEmphasis       | 316.9097222 |
| wavelet-LHL | glszm | ZonePercentage                       | 0.642857143 |
| wavelet-LHL | glszm | LargeAreaLowGrayLevelEmphasis        | 0.99974427  |
| wavelet-LHL | glszm | LargeAreaHighGrayLevelEmphasis       | 372.2222222 |
| wavelet-LHL | glszm | HighGrayLevelZoneEmphasis            | 324.7222222 |
| wavelet-LHL | glszm | SmallAreaEmphasis                    | 0.729166667 |
| wavelet-LHL | glszm | LowGrayLevelZoneEmphasis             | 0.098683445 |
| wavelet-LHL | glszm | ZoneEntropy                          | 4.05881389  |
| wavelet-LHL | glszm | SmallAreaLowGrayLevelEmphasis        | 0.035918238 |
| wavelet-LHL | ngtdm | Coarseness                           | 0.104078803 |
| wavelet-LHL | ngtdm | Complexity                           | 1180.75457  |
| wavelet-LHL | ngtdm | Strength                             | 61.76997559 |
| wavelet-LHL | ngtdm | Contrast                             | 3.621567359 |
| wavelet-LHL | ngtdm | Busyness                             | 0.087573868 |
| wavelet-LHH | gldm  | GrayLevelVariance                    | 39.6875     |
| wavelet-LHH | gldm  | HighGrayLevelEmphasis                | 189.75      |
| wavelet-LHH | gldm  | DependenceEntropy                    | 4.280394654 |
| wavelet-LHH | gldm  | DependenceNonUniformity              | 16.64285714 |
| wavelet-LHH | gldm  | GrayLevelNonUniformity               | 1.857142857 |
| wavelet-LHH | gldm  | SmallDependenceEmphasis              | 0.797619048 |
| wavelet-LHH | gldm  | SmallDependenceHighGrayLevelEmphasis | 173.5119048 |
| wavelet-LHH | gldm  | DependenceNonUniformityNormalized    | 0.594387755 |
| wavelet-LHH | gldm  | LargeDependenceEmphasis              | 2.285714286 |
| wavelet-LHH | gldm  | LargeDependenceLowGrayLevelEmphasis  | 0.28717542  |
| wavelet-LHH | gldm  | DependenceVariance                   | 0.443877551 |
| wavelet-LHH | gldm  | LargeDependenceHighGrayLevelEmphasis | 256.6071429 |
| wavelet-LHH | gldm  | SmallDependenceLowGrayLevelEmphasis  | 0.045034992 |
| wavelet-LHH | gldm  | LowGrayLevelEmphasis                 | 0.069653554 |
| wavelet-LHH | glcm  | JointAverage                         | 12.42690312 |
| wavelet-LHH | glcm  | SumAverage                           | 24.85380624 |

|             |            |                                  |              |
|-------------|------------|----------------------------------|--------------|
| wavelet-LHH | glcm       | JointEntropy                     | 4.476463197  |
| wavelet-LHH | glcm       | ClusterShade                     | -182.8828597 |
| wavelet-LHH | glcm       | MaximumProbability               | 0.062907392  |
| wavelet-LHH | glcm       | Idmn                             | 0.872235846  |
| wavelet-LHH | glcm       | JointEnergy                      | 0.047185923  |
| wavelet-LHH | glcm       | Contrast                         | 94.95247722  |
| wavelet-LHH | glcm       | DifferenceEntropy                | 3.07678917   |
| wavelet-LHH | glcm       | InverseVariance                  | 0.123793014  |
| wavelet-LHH | glcm       | DifferenceVariance               | 25.42939103  |
| wavelet-LHH | glcm       | Idn                              | 0.768991544  |
| wavelet-LHH | glcm       | Idm                              | 0.113457063  |
| wavelet-LHH | glcm       | Correlation                      | -0.00739974  |
| wavelet-LHH | glcm       | Autocorrelation                  | 153.5656734  |
| wavelet-LHH | glcm       | SumEntropy                       | 3.244783158  |
| wavelet-LHH | glcm       | SumSquares                       | 46.34593128  |
| wavelet-LHH | glcm       | ClusterProminence                | 21878.40406  |
| wavelet-LHH | glcm       | Imc2                             | 0.998914092  |
| wavelet-LHH | glcm       | Imc1                             | -0.829272322 |
| wavelet-LHH | glcm       | DifferenceAverage                | 7.884096459  |
| wavelet-LHH | glcm       | Id                               | 0.200999862  |
| wavelet-LHH | glcm       | ClusterTendency                  | 90.43124788  |
| wavelet-LHH | firstorder | InterquartileRange               | 247.174811   |
| wavelet-LHH | firstorder | Skewness                         | -0.160196142 |
| wavelet-LHH | firstorder | Uniformity                       | 0.066326531  |
| wavelet-LHH | firstorder | Median                           | -6.380499104 |
| wavelet-LHH | firstorder | Energy                           | 711356.7116  |
| wavelet-LHH | firstorder | RobustMeanAbsoluteDeviation      | 98.38762555  |
| wavelet-LHH | firstorder | MeanAbsoluteDeviation            | 131.9134059  |
| wavelet-LHH | firstorder | TotalEnergy                      | 19206631.21  |
| wavelet-LHH | firstorder | Maximum                          | 270.2754356  |
| wavelet-LHH | firstorder | RootMeanSquared                  | 159.3913324  |
| wavelet-LHH | firstorder | 90Percentile                     | 199.4639429  |
| wavelet-LHH | firstorder | Minimum                          | -286.6272032 |
| wavelet-LHH | firstorder | Entropy                          | 4.083616975  |
| wavelet-LHH | firstorder | Range                            | 556.9026388  |
| wavelet-LHH | firstorder | Variance                         | 25363.81367  |
| wavelet-LHH | firstorder | 10Percentile                     | -264.3884961 |
| wavelet-LHH | firstorder | Kurtosis                         | 2.085541755  |
| wavelet-LHH | firstorder | Mean                             | -6.463990444 |
| wavelet-LHH | grlm       | ShortRunLowGrayLevelEmphasis     | 0.066796566  |
| wavelet-LHH | grlm       | GrayLevelVariance                | 39.2880861   |
| wavelet-LHH | grlm       | LowGrayLevelRunEmphasis          | 0.068452767  |
| wavelet-LHH | grlm       | GrayLevelNonUniformityNormalized | 0.065575738  |
| wavelet-LHH | grlm       | RunVariance                      | 0.013692446  |
| wavelet-LHH | grlm       | GrayLevelNonUniformity           | 1.811684042  |
| wavelet-LHH | grlm       | LongRunEmphasis                  | 1.043392505  |
| wavelet-LHH | grlm       | ShortRunHighGrayLevelEmphasis    | 190.9390204  |
| wavelet-LHH | grlm       | RunLengthNonUniformity           | 26.8869165   |
| wavelet-LHH | grlm       | ShortRunEmphasis                 | 0.989151874  |
| wavelet-LHH | grlm       | LongRunHighGrayLevelEmphasis     | 194.2723537  |
| wavelet-LHH | grlm       | RunPercentage                    | 0.986263736  |
| wavelet-LHH | grlm       | LongRunLowGrayLevelEmphasis      | 0.075077571  |
| wavelet-LHH | grlm       | RunEntropy                       | 4.121592088  |



|             |       |                                      |             |
|-------------|-------|--------------------------------------|-------------|
| wavelet-LHH | grlm  | HighGrayLevelRunEmphasis             | 191.605687  |
| wavelet-LHH | grlm  | RunLengthNonUniformityNormalized     | 0.972615107 |
| wavelet-LHH | glszm | GrayLevelVariance                    | 36.44270833 |
| wavelet-LHH | glszm | ZoneVariance                         | 0.222222222 |
| wavelet-LHH | glszm | GrayLevelNonUniformityNormalized     | 0.059027778 |
| wavelet-LHH | glszm | SizeZoneNonUniformityNormalized      | 0.774305556 |
| wavelet-LHH | glszm | SizeZoneNonUniformity                | 18.58333333 |
| wavelet-LHH | glszm | GrayLevelNonUniformity               | 1.416666667 |
| wavelet-LHH | glszm | LargeAreaEmphasis                    | 1.583333333 |
| wavelet-LHH | glszm | SmallAreaHighGrayLevelEmphasis       | 199.3101852 |
| wavelet-LHH | glszm | ZonePercentage                       | 0.857142857 |
| wavelet-LHH | glszm | LargeAreaLowGrayLevelEmphasis        | 0.145020983 |
| wavelet-LHH | glszm | LargeAreaHighGrayLevelEmphasis       | 247.0416667 |
| wavelet-LHH | glszm | HighGrayLevelZoneEmphasis            | 208.7083333 |
| wavelet-LHH | glszm | SmallAreaEmphasis                    | 0.900462963 |
| wavelet-LHH | glszm | LowGrayLevelZoneEmphasis             | 0.059799895 |
| wavelet-LHH | glszm | ZoneEntropy                          | 4.334962501 |
| wavelet-LHH | glszm | SmallAreaLowGrayLevelEmphasis        | 0.050068697 |
| wavelet-LHH | ngtdm | Coarseness                           | 0.100697631 |
| wavelet-LHH | ngtdm | Complexity                           | 998.6164998 |
| wavelet-LHH | ngtdm | Strength                             | 19.98412707 |
| wavelet-LHH | ngtdm | Contrast                             | 1.297629104 |
| wavelet-LHH | ngtdm | Busyness                             | 0.068826774 |
| wavelet-LLH | gldm  | GrayLevelVariance                    | 108.1772959 |
| wavelet-LLH | gldm  | HighGrayLevelEmphasis                | 303.1785714 |
| wavelet-LLH | gldm  | DependenceEntropy                    | 4.093069208 |
| wavelet-LLH | gldm  | DependenceNonUniformity              | 10.21428571 |
| wavelet-LLH | gldm  | GrayLevelNonUniformity               | 2.428571429 |
| wavelet-LLH | gldm  | SmallDependenceEmphasis              | 0.59672619  |
| wavelet-LLH | gldm  | SmallDependenceHighGrayLevelEmphasis | 248.343254  |
| wavelet-LLH | gldm  | DependenceNonUniformityNormalized    | 0.364795918 |
| wavelet-LLH | gldm  | LargeDependenceEmphasis              | 5.5         |
| wavelet-LLH | gldm  | LargeDependenceLowGrayLevelEmphasis  | 0.171742785 |
| wavelet-LLH | gldm  | DependenceVariance                   | 1.5         |
| wavelet-LLH | gldm  | LargeDependenceHighGrayLevelEmphasis | 675.8928571 |
| wavelet-LLH | gldm  | SmallDependenceLowGrayLevelEmphasis  | 0.051819647 |
| wavelet-LLH | gldm  | LowGrayLevelEmphasis                 | 0.064057967 |
| wavelet-LLH | glcm  | JointAverage                         | 13.29971236 |
| wavelet-LLH | glcm  | SumAverage                           | 26.59942472 |
| wavelet-LLH | glcm  | JointEntropy                         | 4.24440359  |
| wavelet-LLH | glcm  | ClusterShade                         | 2466.919223 |
| wavelet-LLH | glcm  | MaximumProbability                   | 0.11262797  |
| wavelet-LLH | glcm  | ldmn                                 | 0.903659035 |
| wavelet-LLH | glcm  | JointEnergy                          | 0.060002727 |
| wavelet-LLH | glcm  | Contrast                             | 184.8920424 |
| wavelet-LLH | glcm  | DifferenceEntropy                    | 2.97115887  |
| wavelet-LLH | glcm  | InverseVariance                      | 0.105877641 |
| wavelet-LLH | glcm  | DifferenceVariance                   | 73.30964143 |
| wavelet-LLH | glcm  | ldn                                  | 0.8169494   |
| wavelet-LLH | glcm  | ldm                                  | 0.171137043 |
| wavelet-LLH | glcm  | Correlation                          | 0.176429922 |
| wavelet-LLH | glcm  | Autocorrelation                      | 195.4430332 |
| wavelet-LLH | glcm  | SumEntropy                           | 3.159598776 |

|             |            |                                  |              |
|-------------|------------|----------------------------------|--------------|
| wavelet-LLH | glcm       | SumSquares                       | 110.6468176  |
| wavelet-LLH | glcm       | ClusterProminence                | 150891.2944  |
| wavelet-LLH | glcm       | Imc2                             | 0.99846024   |
| wavelet-LLH | glcm       | Imc1                             | -0.81818274  |
| wavelet-LLH | glcm       | DifferenceAverage                | 9.893662534  |
| wavelet-LLH | glcm       | Id                               | 0.246937195  |
| wavelet-LLH | glcm       | ClusterTendency                  | 257.6952281  |
| wavelet-LLH | firstorder | InterquartileRange               | 402.9045278  |
| wavelet-LLH | firstorder | Skewness                         | 0.633969295  |
| wavelet-LLH | firstorder | Uniformity                       | 0.086734694  |
| wavelet-LLH | firstorder | Median                           | -158.8561951 |
| wavelet-LLH | firstorder | Energy                           | 1874635.115  |
| wavelet-LLH | firstorder | RobustMeanAbsoluteDeviation      | 180.5660149  |
| wavelet-LLH | firstorder | MeanAbsoluteDeviation            | 226.5596763  |
| wavelet-LLH | firstorder | TotalEnergy                      | 50615148.1   |
| wavelet-LLH | firstorder | Maximum                          | 550.7651889  |
| wavelet-LLH | firstorder | RootMeanSquared                  | 258.7494041  |
| wavelet-LLH | firstorder | 90Percentile                     | 332.2119097  |
| wavelet-LLH | firstorder | Minimum                          | -345.0222739 |
| wavelet-LLH | firstorder | Entropy                          | 3.821296334  |
| wavelet-LLH | firstorder | Range                            | 895.7874627  |
| wavelet-LLH | firstorder | Variance                         | 66698.25631  |
| wavelet-LLH | firstorder | 10Percentile                     | -281.9252069 |
| wavelet-LLH | firstorder | Kurtosis                         | 2.149202549  |
| wavelet-LLH | firstorder | Mean                             | -15.90590449 |
| wavelet-LLH | glrlm      | ShortRunLowGrayLevelEmphasis     | 0.064864647  |
| wavelet-LLH | glrlm      | GrayLevelVariance                | 109.9991478  |
| wavelet-LLH | glrlm      | LowGrayLevelRunEmphasis          | 0.065704183  |
| wavelet-LLH | glrlm      | GrayLevelNonUniformityNormalized | 0.0824178    |
| wavelet-LLH | glrlm      | RunVariance                      | 0.037778477  |
| wavelet-LLH | glrlm      | GrayLevelNonUniformity           | 2.226495726  |
| wavelet-LLH | glrlm      | LongRunEmphasis                  | 1.129520053  |
| wavelet-LLH | glrlm      | ShortRunHighGrayLevelEmphasis    | 308.7545611  |
| wavelet-LLH | glrlm      | RunLengthNonUniformity           | 25.03309226  |
| wavelet-LLH | glrlm      | ShortRunEmphasis                 | 0.967619987  |
| wavelet-LLH | glrlm      | LongRunHighGrayLevelEmphasis     | 324.8543721  |
| wavelet-LLH | glrlm      | RunPercentage                    | 0.961538462  |
| wavelet-LLH | glrlm      | LongRunLowGrayLevelEmphasis      | 0.069062326  |
| wavelet-LLH | glrlm      | RunEntropy                       | 3.945559424  |
| wavelet-LLH | glrlm      | HighGrayLevelRunEmphasis         | 311.9745233  |
| wavelet-LLH | glrlm      | RunLengthNonUniformityNormalized | 0.924443046  |
| wavelet-LLH | glszm      | GrayLevelVariance                | 120.8642659  |
| wavelet-LLH | glszm      | ZoneVariance                     | 1.1966759    |
| wavelet-LLH | glszm      | GrayLevelNonUniformityNormalized | 0.063711911  |
| wavelet-LLH | glszm      | SizeZoneNonUniformityNormalized  | 0.639889197  |
| wavelet-LLH | glszm      | SizeZoneNonUniformity            | 12.15789474  |
| wavelet-LLH | glszm      | GrayLevelNonUniformity           | 1.210526316  |
| wavelet-LLH | glszm      | LargeAreaEmphasis                | 3.368421053  |
| wavelet-LLH | glszm      | SmallAreaHighGrayLevelEmphasis   | 354.6478947  |
| wavelet-LLH | glszm      | ZonePercentage                   | 0.678571429  |
| wavelet-LLH | glszm      | LargeAreaLowGrayLevelEmphasis    | 0.140232743  |
| wavelet-LLH | glszm      | LargeAreaHighGrayLevelEmphasis   | 614.5789474  |
| wavelet-LLH | glszm      | HighGrayLevelZoneEmphasis        | 388.7894737  |

|             |            |                                      |              |
|-------------|------------|--------------------------------------|--------------|
| wavelet-LLH | glszm      | SmallAreaEmphasis                    | 0.821184211  |
| wavelet-LLH | glszm      | LowGrayLevelZoneEmphasis             | 0.080805626  |
| wavelet-LLH | glszm      | ZoneEntropy                          | 4.037401198  |
| wavelet-LLH | glszm      | SmallAreaLowGrayLevelEmphasis        | 0.074205426  |
| wavelet-LLH | ngtdm      | Coarseness                           | 0.078882454  |
| wavelet-LLH | ngtdm      | Complexity                           | 1768.937392  |
| wavelet-LLH | ngtdm      | Strength                             | 39.67880499  |
| wavelet-LLH | ngtdm      | Contrast                             | 5.790729072  |
| wavelet-LLH | ngtdm      | Busyness                             | 0.065106114  |
| wavelet-LLL | gldm       | GrayLevelVariance                    | 235.809949   |
| wavelet-LLL | gldm       | HighGrayLevelEmphasis                | 1331.892857  |
| wavelet-LLL | gldm       | DependenceEntropy                    | 4.450212065  |
| wavelet-LLL | gldm       | DependenceNonUniformity              | 18.57142857  |
| wavelet-LLL | gldm       | GrayLevelNonUniformity               | 1.357142857  |
| wavelet-LLL | gldm       | SmallDependenceEmphasis              | 0.839285714  |
| wavelet-LLL | gldm       | SmallDependenceHighGrayLevelEmphasis | 1116.857143  |
| wavelet-LLL | gldm       | DependenceNonUniformityNormalized    | 0.663265306  |
| wavelet-LLL | gldm       | LargeDependenceEmphasis              | 1.642857143  |
| wavelet-LLL | gldm       | LargeDependenceLowGrayLevelEmphasis  | 0.03994906   |
| wavelet-LLL | gldm       | DependenceVariance                   | 0.168367347  |
| wavelet-LLL | gldm       | LargeDependenceHighGrayLevelEmphasis | 2192.035714  |
| wavelet-LLL | gldm       | SmallDependenceLowGrayLevelEmphasis  | 0.038067049  |
| wavelet-LLL | gldm       | LowGrayLevelEmphasis                 | 0.038443452  |
| wavelet-LLL | glcm       | JointAverage                         | 37.31240373  |
| wavelet-LLL | glcm       | SumAverage                           | 74.62480746  |
| wavelet-LLL | glcm       | JointEntropy                         | 4.503198428  |
| wavelet-LLL | glcm       | ClusterShade                         | -3683.865174 |
| wavelet-LLL | glcm       | MaximumProbability                   | 0.054851132  |
| wavelet-LLL | glcm       | ldmn                                 | 0.91382938   |
| wavelet-LLL | glcm       | JointEnergy                          | 0.045910011  |
| wavelet-LLL | glcm       | Contrast                             | 407.4936437  |
| wavelet-LLL | glcm       | DifferenceEntropy                    | 3.266526126  |
| wavelet-LLL | glcm       | InverseVariance                      | 0.06287231   |
| wavelet-LLL | glcm       | DifferenceVariance                   | 115.8269931  |
| wavelet-LLL | glcm       | ldn                                  | 0.802457503  |
| wavelet-LLL | glcm       | ldm                                  | 0.057208495  |
| wavelet-LLL | glcm       | Correlation                          | 0.079830853  |
| wavelet-LLL | glcm       | Autocorrelation                      | 1409.232326  |
| wavelet-LLL | glcm       | SumEntropy                           | 3.443745061  |
| wavelet-LLL | glcm       | SumSquares                           | 217.719619   |
| wavelet-LLL | glcm       | ClusterProminence                    | 533919.7599  |
| wavelet-LLL | glcm       | lmc2                                 | 0.999585352  |
| wavelet-LLL | glcm       | lmc1                                 | -0.890733997 |
| wavelet-LLL | glcm       | DifferenceAverage                    | 16.77539917  |
| wavelet-LLL | glcm       | ld                                   | 0.118226956  |
| wavelet-LLL | glcm       | ClusterTendency                      | 463.3848323  |
| wavelet-LLL | firstorder | InterquartileRange                   | 590.4392581  |
| wavelet-LLL | firstorder | Skewness                             | -0.16437778  |
| wavelet-LLL | firstorder | Uniformity                           | 0.048469388  |
| wavelet-LLL | firstorder | Median                               | -492.8583833 |
| wavelet-LLL | firstorder | Energy                               | 11353862.07  |
| wavelet-LLL | firstorder | RobustMeanAbsoluteDeviation          | 232.9126608  |
| wavelet-LLL | firstorder | MeanAbsoluteDeviation                | 320.67165    |

|             |            |                                  |              |
|-------------|------------|----------------------------------|--------------|
| wavelet-LLL | firstorder | TotalEnergy                      | 306554275.8  |
| wavelet-LLL | firstorder | Maximum                          | 214.2802679  |
| wavelet-LLL | firstorder | RootMeanSquared                  | 636.784951   |
| wavelet-LLL | firstorder | 90Percentile                     | -84.56045986 |
| wavelet-LLL | firstorder | Minimum                          | -1316.09224  |
| wavelet-LLL | firstorder | Entropy                          | 4.450212065  |
| wavelet-LLL | firstorder | Range                            | 1530.372508  |
| wavelet-LLL | firstorder | Variance                         | 147651.1982  |
| wavelet-LLL | firstorder | 10Percentile                     | -1007.592136 |
| wavelet-LLL | firstorder | Kurtosis                         | 2.333799856  |
| wavelet-LLL | firstorder | Mean                             | -507.7832959 |
| wavelet-LLL | grlm       | ShortRunLowGrayLevelEmphasis     | 0.038736997  |
| wavelet-LLL | grlm       | GrayLevelVariance                | 235.8139209  |
| wavelet-LLL | grlm       | LowGrayLevelRunEmphasis          | 0.03875201   |
| wavelet-LLL | grlm       | GrayLevelNonUniformityNormalized | 0.0483636    |
| wavelet-LLL | grlm       | RunVariance                      | 0.008230453  |
| wavelet-LLL | grlm       | GrayLevelNonUniformity           | 1.343101343  |
| wavelet-LLL | grlm       | LongRunEmphasis                  | 1.025641026  |
| wavelet-LLL | grlm       | ShortRunHighGrayLevelEmphasis    | 1323.263736  |
| wavelet-LLL | grlm       | RunLengthNonUniformity           | 27.32478632  |
| wavelet-LLL | grlm       | ShortRunEmphasis                 | 0.993589744  |
| wavelet-LLL | grlm       | LongRunHighGrayLevelEmphasis     | 1366.148352  |
| wavelet-LLL | grlm       | RunPercentage                    | 0.991758242  |
| wavelet-LLL | grlm       | LongRunLowGrayLevelEmphasis      | 0.038812063  |
| wavelet-LLL | grlm       | RunEntropy                       | 4.452145713  |
| wavelet-LLL | grlm       | HighGrayLevelRunEmphasis         | 1331.840659  |
| wavelet-LLL | grlm       | RunLengthNonUniformityNormalized | 0.983539095  |
| wavelet-LLL | glszm      | GrayLevelVariance                | 236.8736     |
| wavelet-LLL | glszm      | ZoneVariance                     | 0.1056       |
| wavelet-LLL | glszm      | GrayLevelNonUniformityNormalized | 0.0464       |
| wavelet-LLL | glszm      | SizeZoneNonUniformityNormalized  | 0.7888       |
| wavelet-LLL | glszm      | SizeZoneNonUniformity            | 19.72        |
| wavelet-LLL | glszm      | GrayLevelNonUniformity           | 1.16         |
| wavelet-LLL | glszm      | LargeAreaEmphasis                | 1.36         |
| wavelet-LLL | glszm      | SmallAreaHighGrayLevelEmphasis   | 1210.74      |
| wavelet-LLL | glszm      | ZonePercentage                   | 0.892857143  |
| wavelet-LLL | glszm      | LargeAreaLowGrayLevelEmphasis    | 0.04361876   |
| wavelet-LLL | glszm      | LargeAreaHighGrayLevelEmphasis   | 1812.84      |
| wavelet-LLL | glszm      | HighGrayLevelZoneEmphasis        | 1331.16      |
| wavelet-LLL | glszm      | SmallAreaEmphasis                | 0.91         |
| wavelet-LLL | glszm      | LowGrayLevelZoneEmphasis         | 0.042775619  |
| wavelet-LLL | glszm      | ZoneEntropy                      | 4.48385619   |
| wavelet-LLL | glszm      | SmallAreaLowGrayLevelEmphasis    | 0.042564834  |
| wavelet-LLL | ngtdm      | Coarseness                       | 0.059967167  |
| wavelet-LLL | ngtdm      | Complexity                       | 5954.720802  |
| wavelet-LLL | ngtdm      | Strength                         | 64.28138949  |
| wavelet-LLL | ngtdm      | Contrast                         | 11.31454202  |
| wavelet-LLL | ngtdm      | Busyness                         | 0.034433789  |
| wavelet-HHL | gldm       | GrayLevelVariance                | 25.85714286  |
| wavelet-HHL | gldm       | HighGrayLevelEmphasis            | 194.8571429  |
| wavelet-HHL | gldm       | DependenceEntropy                | 4.137537511  |
| wavelet-HHL | gldm       | DependenceNonUniformity          | 10.5         |
| wavelet-HHL | gldm       | GrayLevelNonUniformity           | 2.5          |

|             |            |                                      |              |
|-------------|------------|--------------------------------------|--------------|
| wavelet-HHL | gldm       | SmallDependenceEmphasis              | 0.598462302  |
| wavelet-HHL | gldm       | SmallDependenceHighGrayLevelEmphasis | 121.7569444  |
| wavelet-HHL | gldm       | DependenceNonUniformityNormalized    | 0.375        |
| wavelet-HHL | gldm       | LargeDependenceEmphasis              | 3.642857143  |
| wavelet-HHL | gldm       | LargeDependenceLowGrayLevelEmphasis  | 0.071692098  |
| wavelet-HHL | gldm       | DependenceVariance                   | 0.704081633  |
| wavelet-HHL | gldm       | LargeDependenceHighGrayLevelEmphasis | 620.9285714  |
| wavelet-HHL | gldm       | SmallDependenceLowGrayLevelEmphasis  | 0.04848635   |
| wavelet-HHL | gldm       | LowGrayLevelEmphasis                 | 0.0512617    |
| wavelet-HHL | glcm       | JointAverage                         | 12.55882643  |
| wavelet-HHL | glcm       | SumAverage                           | 25.11765286  |
| wavelet-HHL | glcm       | JointEntropy                         | 4.393754699  |
| wavelet-HHL | glcm       | ClusterShade                         | -114.373316  |
| wavelet-HHL | glcm       | MaximumProbability                   | 0.077650981  |
| wavelet-HHL | glcm       | Idmn                                 | 0.894387777  |
| wavelet-HHL | glcm       | JointEnergy                          | 0.050550014  |
| wavelet-HHL | glcm       | Contrast                             | 68.41595755  |
| wavelet-HHL | glcm       | DifferenceEntropy                    | 2.865988695  |
| wavelet-HHL | glcm       | InverseVariance                      | 0.127256704  |
| wavelet-HHL | glcm       | DifferenceVariance                   | 21.81752751  |
| wavelet-HHL | glcm       | Idn                                  | 0.788068413  |
| wavelet-HHL | glcm       | Idm                                  | 0.13493477   |
| wavelet-HHL | glcm       | Correlation                          | -0.166605292 |
| wavelet-HHL | glcm       | Autocorrelation                      | 152.8164483  |
| wavelet-HHL | glcm       | SumEntropy                           | 3.203909618  |
| wavelet-HHL | glcm       | SumSquares                           | 28.9517626   |
| wavelet-HHL | glcm       | ClusterProminence                    | 6067.271908  |
| wavelet-HHL | glcm       | Imc2                                 | 0.997383197  |
| wavelet-HHL | glcm       | Imc1                                 | -0.763876674 |
| wavelet-HHL | glcm       | DifferenceAverage                    | 6.672165868  |
| wavelet-HHL | glcm       | Id                                   | 0.22688274   |
| wavelet-HHL | glcm       | ClusterTendency                      | 47.39109286  |
| wavelet-HHL | firstorder | InterquartileRange                   | 181.1369666  |
| wavelet-HHL | firstorder | Skewness                             | -0.41454188  |
| wavelet-HHL | firstorder | Uniformity                           | 0.089285714  |
| wavelet-HHL | firstorder | Median                               | 37.58279359  |
| wavelet-HHL | firstorder | Energy                               | 497863.2163  |
| wavelet-HHL | firstorder | RobustMeanAbsoluteDeviation          | 70.79081837  |
| wavelet-HHL | firstorder | MeanAbsoluteDeviation                | 103.0654684  |
| wavelet-HHL | firstorder | TotalEnergy                          | 13442306.84  |
| wavelet-HHL | firstorder | Maximum                              | 256.8760578  |
| wavelet-HHL | firstorder | RootMeanSquared                      | 133.3447755  |
| wavelet-HHL | firstorder | 90Percentile                         | 178.5193056  |
| wavelet-HHL | firstorder | Minimum                              | -253.9631433 |
| wavelet-HHL | firstorder | Entropy                              | 3.695947226  |
| wavelet-HHL | firstorder | Range                                | 510.8392012  |
| wavelet-HHL | firstorder | Variance                             | 16406.84239  |
| wavelet-HHL | firstorder | 10Percentile                         | -122.1881787 |
| wavelet-HHL | firstorder | Kurtosis                             | 2.827249754  |
| wavelet-HHL | firstorder | Mean                                 | 37.06732741  |
| wavelet-HHL | glrlm      | ShortRunLowGrayLevelEmphasis         | 0.052496734  |
| wavelet-HHL | glrlm      | GrayLevelVariance                    | 26.32140113  |
| wavelet-HHL | glrlm      | LowGrayLevelRunEmphasis              | 0.052627498  |

|             |       |                                      |              |
|-------------|-------|--------------------------------------|--------------|
| wavelet-HHL | glrlm | GrayLevelNonUniformityNormalized     | 0.087757256  |
| wavelet-HHL | glrlm | RunVariance                          | 0.046846438  |
| wavelet-HHL | glrlm | GrayLevelNonUniformity               | 2.392552573  |
| wavelet-HHL | glrlm | LongRunEmphasis                      | 1.113626619  |
| wavelet-HHL | glrlm | ShortRunHighGrayLevelEmphasis        | 192.2033294  |
| wavelet-HHL | glrlm | RunLengthNonUniformity               | 26.0875854   |
| wavelet-HHL | glrlm | ShortRunEmphasis                     | 0.9809997    |
| wavelet-HHL | glrlm | LongRunHighGrayLevelEmphasis         | 213.4204205  |
| wavelet-HHL | glrlm | RunPercentage                        | 0.972527473  |
| wavelet-HHL | glrlm | LongRunLowGrayLevelEmphasis          | 0.053526804  |
| wavelet-HHL | glrlm | RunEntropy                           | 3.752070579  |
| wavelet-HHL | glrlm | HighGrayLevelRunEmphasis             | 195.6942392  |
| wavelet-HHL | glrlm | RunLengthNonUniformityNormalized     | 0.954583989  |
| wavelet-HHL | glszm | GrayLevelVariance                    | 32.99722992  |
| wavelet-HHL | glszm | ZoneVariance                         | 0.986149584  |
| wavelet-HHL | glszm | GrayLevelNonUniformityNormalized     | 0.074792244  |
| wavelet-HHL | glszm | SizeZoneNonUniformityNormalized      | 0.573407202  |
| wavelet-HHL | glszm | SizeZoneNonUniformity                | 10.89473684  |
| wavelet-HHL | glszm | GrayLevelNonUniformity               | 1.421052632  |
| wavelet-HHL | glszm | LargeAreaEmphasis                    | 3.157894737  |
| wavelet-HHL | glszm | SmallAreaHighGrayLevelEmphasis       | 160.5584795  |
| wavelet-HHL | glszm | ZonePercentage                       | 0.678571429  |
| wavelet-HHL | glszm | LargeAreaLowGrayLevelEmphasis        | 0.088980259  |
| wavelet-HHL | glszm | LargeAreaHighGrayLevelEmphasis       | 548.3157895  |
| wavelet-HHL | glszm | HighGrayLevelZoneEmphasis            | 203.3684211  |
| wavelet-HHL | glszm | SmallAreaEmphasis                    | 0.784269006  |
| wavelet-HHL | glszm | LowGrayLevelZoneEmphasis             | 0.072165218  |
| wavelet-HHL | glszm | ZoneEntropy                          | 3.93213804   |
| wavelet-HHL | glszm | SmallAreaLowGrayLevelEmphasis        | 0.07081644   |
| wavelet-HHL | ngtdm | Coarseness                           | 0.110006673  |
| wavelet-HHL | ngtdm | Complexity                           | 521.4845881  |
| wavelet-HHL | ngtdm | Strength                             | 14.80622708  |
| wavelet-HHL | ngtdm | Contrast                             | 1.097548234  |
| wavelet-HHL | ngtdm | Busyness                             | 0.059414102  |
| wavelet-HLH | gldm  | GrayLevelVariance                    | 32.55102041  |
| wavelet-HLH | gldm  | HighGrayLevelEmphasis                | 156.7142857  |
| wavelet-HLH | gldm  | DependenceEntropy                    | 4.280394654  |
| wavelet-HLH | gldm  | DependenceNonUniformity              | 14.14285714  |
| wavelet-HLH | gldm  | GrayLevelNonUniformity               | 2.071428571  |
| wavelet-HLH | gldm  | SmallDependenceEmphasis              | 0.733878968  |
| wavelet-HLH | gldm  | SmallDependenceHighGrayLevelEmphasis | 122.7688492  |
| wavelet-HLH | gldm  | DependenceNonUniformityNormalized    | 0.505102041  |
| wavelet-HLH | gldm  | LargeDependenceEmphasis              | 3.428571429  |
| wavelet-HLH | gldm  | LargeDependenceLowGrayLevelEmphasis  | 0.090736373  |
| wavelet-HLH | gldm  | DependenceVariance                   | 0.959183673  |
| wavelet-HLH | gldm  | LargeDependenceHighGrayLevelEmphasis | 559.8571429  |
| wavelet-HLH | gldm  | SmallDependenceLowGrayLevelEmphasis  | 0.055539631  |
| wavelet-HLH | gldm  | LowGrayLevelEmphasis                 | 0.061187054  |
| wavelet-HLH | glcm  | JointAverage                         | 11.09628769  |
| wavelet-HLH | glcm  | SumAverage                           | 22.19257537  |
| wavelet-HLH | glcm  | JointEntropy                         | 4.459155505  |
| wavelet-HLH | glcm  | ClusterShade                         | -99.01494974 |
| wavelet-HLH | glcm  | MaximumProbability                   | 0.069851836  |

|             |            |                                  |              |
|-------------|------------|----------------------------------|--------------|
| wavelet-HLH | glcm       | Idmn                             | 0.900499283  |
| wavelet-HLH | glcm       | JointEnergy                      | 0.047630783  |
| wavelet-HLH | glcm       | Contrast                         | 69.72896591  |
| wavelet-HLH | glcm       | DifferenceEntropy                | 2.908208455  |
| wavelet-HLH | glcm       | InverseVariance                  | 0.182837653  |
| wavelet-HLH | glcm       | DifferenceVariance               | 23.52587984  |
| wavelet-HLH | glcm       | Idn                              | 0.79881567   |
| wavelet-HLH | glcm       | Idm                              | 0.154670727  |
| wavelet-HLH | glcm       | Correlation                      | -0.025669457 |
| wavelet-HLH | glcm       | Autocorrelation                  | 122.5622452  |
| wavelet-HLH | glcm       | SumEntropy                       | 3.180141868  |
| wavelet-HLH | glcm       | SumSquares                       | 33.66484881  |
| wavelet-HLH | glcm       | ClusterProminence                | 10479.88739  |
| wavelet-HLH | glcm       | Imc2                             | 0.998783166  |
| wavelet-HLH | glcm       | Imc1                             | -0.812659163 |
| wavelet-HLH | glcm       | DifferenceAverage                | 6.598088663  |
| wavelet-HLH | glcm       | Id                               | 0.239124661  |
| wavelet-HLH | glcm       | ClusterTendency                  | 64.93042934  |
| wavelet-HLH | firstorder | InterquartileRange               | 213.5667703  |
| wavelet-HLH | firstorder | Skewness                         | -0.042807476 |
| wavelet-HLH | firstorder | Uniformity                       | 0.073979592  |
| wavelet-HLH | firstorder | Median                           | 3.718138799  |
| wavelet-HLH | firstorder | Energy                           | 588944.2203  |
| wavelet-HLH | firstorder | RobustMeanAbsoluteDeviation      | 93.01015103  |
| wavelet-HLH | firstorder | MeanAbsoluteDeviation            | 120.5805752  |
| wavelet-HLH | firstorder | TotalEnergy                      | 15901493.95  |
| wavelet-HLH | firstorder | Maximum                          | 251.7576068  |
| wavelet-HLH | firstorder | RootMeanSquared                  | 145.0300733  |
| wavelet-HLH | firstorder | 90Percentile                     | 134.8793209  |
| wavelet-HLH | firstorder | Minimum                          | -278.2688728 |
| wavelet-HLH | firstorder | Entropy                          | 4.035582048  |
| wavelet-HLH | firstorder | Range                            | 530.0264796  |
| wavelet-HLH | firstorder | Variance                         | 19880.08773  |
| wavelet-HLH | firstorder | 10Percentile                     | -223.4517442 |
| wavelet-HLH | firstorder | Kurtosis                         | 2.039842777  |
| wavelet-HLH | firstorder | Mean                             | -33.96519423 |
| wavelet-HLH | grlm       | ShortRunLowGrayLevelEmphasis     | 0.061997459  |
| wavelet-HLH | grlm       | GrayLevelVariance                | 32.92907828  |
| wavelet-HLH | grlm       | LowGrayLevelRunEmphasis          | 0.062259312  |
| wavelet-HLH | grlm       | GrayLevelNonUniformityNormalized | 0.071163582  |
| wavelet-HLH | grlm       | RunVariance                      | 0.021897924  |
| wavelet-HLH | grlm       | GrayLevelNonUniformity           | 1.95123822   |
| wavelet-HLH | grlm       | LongRunEmphasis                  | 1.069690993  |
| wavelet-HLH | grlm       | ShortRunHighGrayLevelEmphasis    | 154.1126452  |
| wavelet-HLH | grlm       | RunLengthNonUniformity           | 26.22397545  |
| wavelet-HLH | grlm       | ShortRunEmphasis                 | 0.982577252  |
| wavelet-HLH | grlm       | LongRunHighGrayLevelEmphasis     | 167.4887136  |
| wavelet-HLH | grlm       | RunPercentage                    | 0.978021978  |
| wavelet-HLH | grlm       | LongRunLowGrayLevelEmphasis      | 0.063306723  |
| wavelet-HLH | grlm       | RunEntropy                       | 4.103975215  |
| wavelet-HLH | grlm       | HighGrayLevelRunEmphasis         | 156.7878589  |
| wavelet-HLH | grlm       | RunLengthNonUniformityNormalized | 0.956204152  |
| wavelet-HLH | glszm      | GrayLevelVariance                | 36.4214876   |

|             |       |                                  |             |
|-------------|-------|----------------------------------|-------------|
| wavelet-HLH | glszm | ZoneVariance                     | 0.743801653 |
| wavelet-HLH | glszm | GrayLevelNonUniformityNormalized | 0.05785124  |
| wavelet-HLH | glszm | SizeZoneNonUniformityNormalized  | 0.756198347 |
| wavelet-HLH | glszm | SizeZoneNonUniformity            | 16.63636364 |
| wavelet-HLH | glszm | GrayLevelNonUniformity           | 1.272727273 |
| wavelet-HLH | glszm | LargeAreaEmphasis                | 2.363636364 |
| wavelet-HLH | glszm | SmallAreaHighGrayLevelEmphasis   | 151.1290909 |
| wavelet-HLH | glszm | ZonePercentage                   | 0.785714286 |
| wavelet-HLH | glszm | LargeAreaLowGrayLevelEmphasis    | 0.090719722 |
| wavelet-HLH | glszm | LargeAreaHighGrayLevelEmphasis   | 382.3636364 |
| wavelet-HLH | glszm | HighGrayLevelZoneEmphasis        | 161.4545455 |
| wavelet-HLH | glszm | SmallAreaEmphasis                | 0.888181818 |
| wavelet-HLH | glszm | LowGrayLevelZoneEmphasis         | 0.072843253 |
| wavelet-HLH | glszm | ZoneEntropy                      | 4.186704346 |
| wavelet-HLH | glszm | SmallAreaLowGrayLevelEmphasis    | 0.069542967 |
| wavelet-HLH | ngtdm | Coarseness                       | 0.129117216 |
| wavelet-HLH | ngtdm | Complexity                       | 717.3568165 |
| wavelet-HLH | ngtdm | Strength                         | 20.86720133 |
| wavelet-HLH | ngtdm | Contrast                         | 0.892216668 |
| wavelet-HLH | ngtdm | Busyness                         | 0.040793306 |



| Image type | Feature Class | Feature Name                         |                                                                                                                                                                                                                                                                                                                                                                                                                   |
|------------|---------------|--------------------------------------|-------------------------------------------------------------------------------------------------------------------------------------------------------------------------------------------------------------------------------------------------------------------------------------------------------------------------------------------------------------------------------------------------------------------|
| general    | info          | BoundingBox                          | 4: RTSTRUCT: C99-Research-DNU_segment_GTV_ITV<br>(0, 1, 1, 9, 7, 8)                                                                                                                                                                                                                                                                                                                                               |
| general    | info          | EnabledImageTypes                    | {'Original': {}, u'Wavelet': {}}                                                                                                                                                                                                                                                                                                                                                                                  |
|            |               |                                      | {'distances': [1], 'additionalInfo': True, 'force2D': False, 'interpolator': 'sitkBSpline', 'resampledPixelSpacing': [3.0], 'label': 1, 'normalizeScale': 1, 'normalize': False, 'force2Ddimension': 0, 'removeOutliers': None, 'minimumROISize': None, u'binWidth': 25.0, 'minimumROIDimensions': 1, u'correctMask': True, 'preCrop': False, u'symmetricalGLCM': True, 'resegmentRange': None, 'padDistance': 5} |
| general    | info          | GeneralSettings                      |                                                                                                                                                                                                                                                                                                                                                                                                                   |
| general    | info          | ImageHash                            | 8b1d8cdc49a4515e46067e319d601ae4d18251a5                                                                                                                                                                                                                                                                                                                                                                          |
| general    | info          | ImageSpacing                         | (0.9765625000000002, 0.9765625000000002, 2.0)                                                                                                                                                                                                                                                                                                                                                                     |
| general    | info          | MaskHash                             | 460e25023018c49d2fefc10a6a49534a3f864dd3                                                                                                                                                                                                                                                                                                                                                                          |
| general    | info          | NumpyVersion                         | 1.13.1                                                                                                                                                                                                                                                                                                                                                                                                            |
| general    | info          | PyWaveletVersion                     | 0.5.2                                                                                                                                                                                                                                                                                                                                                                                                             |
| general    | info          | SimpleITKVersion                     | 1.1.0                                                                                                                                                                                                                                                                                                                                                                                                             |
| general    | info          | Version                              | 1.3.0.post102+g1b0eb74                                                                                                                                                                                                                                                                                                                                                                                            |
| general    | info          | VolumeNum                            | 1                                                                                                                                                                                                                                                                                                                                                                                                                 |
| general    | info          | VoxelNum                             | 189                                                                                                                                                                                                                                                                                                                                                                                                               |
| original   | shape         | Maximum3DDiameter                    | 27                                                                                                                                                                                                                                                                                                                                                                                                                |
| original   | shape         | Maximum2DDiameterSlice               | 22.84731932                                                                                                                                                                                                                                                                                                                                                                                                       |
| original   | shape         | Sphericity                           | 0.78566248                                                                                                                                                                                                                                                                                                                                                                                                        |
| original   | shape         | MinorAxis                            | 20.12753801                                                                                                                                                                                                                                                                                                                                                                                                       |
| original   | shape         | Elongation                           | 0.872168267                                                                                                                                                                                                                                                                                                                                                                                                       |
| original   | shape         | SurfaceVolumeRatio                   | 0.357524868                                                                                                                                                                                                                                                                                                                                                                                                       |
| original   | shape         | Volume                               | 5103                                                                                                                                                                                                                                                                                                                                                                                                              |
| original   | shape         | MajorAxis                            | 23.07758579                                                                                                                                                                                                                                                                                                                                                                                                       |
| original   | shape         | SurfaceArea                          | 1824.449402                                                                                                                                                                                                                                                                                                                                                                                                       |
| original   | shape         | Flatness                             | 0.782212958                                                                                                                                                                                                                                                                                                                                                                                                       |
| original   | shape         | LeastAxis                            | 18.05158664                                                                                                                                                                                                                                                                                                                                                                                                       |
| original   | shape         | Maximum2DDiameterColumn              | 24.18677324                                                                                                                                                                                                                                                                                                                                                                                                       |
| original   | shape         | Maximum2DDiameterRow                 | 24.18677324                                                                                                                                                                                                                                                                                                                                                                                                       |
| original   | gldm          | GrayLevelVariance                    | 18.18398141                                                                                                                                                                                                                                                                                                                                                                                                       |
| original   | gldm          | HighGrayLevelEmphasis                | 535.0846561                                                                                                                                                                                                                                                                                                                                                                                                       |
| original   | gldm          | DependenceEntropy                    | 5.596409063                                                                                                                                                                                                                                                                                                                                                                                                       |
| original   | gldm          | DependenceNonUniformity              | 16.55555556                                                                                                                                                                                                                                                                                                                                                                                                       |
| original   | gldm          | GrayLevelNonUniformity               | 42.69312169                                                                                                                                                                                                                                                                                                                                                                                                       |
| original   | gldm          | SmallDependenceEmphasis              | 0.24697787                                                                                                                                                                                                                                                                                                                                                                                                        |
| original   | gldm          | SmallDependenceHighGrayLevelEmphasis | 89.91281528                                                                                                                                                                                                                                                                                                                                                                                                       |
| original   | gldm          | DependenceNonUniformityNormalized    | 0.087595532                                                                                                                                                                                                                                                                                                                                                                                                       |
| original   | gldm          | LargeDependenceEmphasis              | 66.15343915                                                                                                                                                                                                                                                                                                                                                                                                       |
| original   | gldm          | LargeDependenceLowGrayLevelEmphasis  | 0.115191968                                                                                                                                                                                                                                                                                                                                                                                                       |
| original   | gldm          | DependenceVariance                   | 23.59334845                                                                                                                                                                                                                                                                                                                                                                                                       |
| original   | gldm          | LargeDependenceHighGrayLevelEmphasis | 40281.97354                                                                                                                                                                                                                                                                                                                                                                                                       |
| original   | gldm          | SmallDependenceLowGrayLevelEmphasis  | 0.006859572                                                                                                                                                                                                                                                                                                                                                                                                       |
| original   | gldm          | LowGrayLevelEmphasis                 | 0.008149848                                                                                                                                                                                                                                                                                                                                                                                                       |
| original   | glcm          | JointAverage                         | 23.35304288                                                                                                                                                                                                                                                                                                                                                                                                       |
| original   | glcm          | SumAverage                           | 46.70608576                                                                                                                                                                                                                                                                                                                                                                                                       |
| original   | glcm          | JointEntropy                         | 4.504931365                                                                                                                                                                                                                                                                                                                                                                                                       |
| original   | glcm          | ClusterShade                         | -384.2533807                                                                                                                                                                                                                                                                                                                                                                                                      |
| original   | glcm          | MaximumProbability                   | 0.196884331                                                                                                                                                                                                                                                                                                                                                                                                       |
| original   | glcm          | Idmn                                 | 0.976010458                                                                                                                                                                                                                                                                                                                                                                                                       |
| original   | glcm          | JointEnergy                          | 0.089359012                                                                                                                                                                                                                                                                                                                                                                                                       |
| original   | glcm          | Contrast                             | 21.14283398                                                                                                                                                                                                                                                                                                                                                                                                       |
| original   | glcm          | DifferenceEntropy                    | 2.652542459                                                                                                                                                                                                                                                                                                                                                                                                       |
| original   | glcm          | InverseVariance                      | 0.373851557                                                                                                                                                                                                                                                                                                                                                                                                       |
| original   | glcm          | DifferenceVariance                   | 15.43026164                                                                                                                                                                                                                                                                                                                                                                                                       |

|          |            |                                  |              |
|----------|------------|----------------------------------|--------------|
| original | glcm       | Idn                              | 0.929143327  |
| original | glcm       | Idm                              | 0.521862109  |
| original | glcm       | Correlation                      | 0.126082158  |
| original | glcm       | Autocorrelation                  | 547.1151819  |
| original | glcm       | SumEntropy                       | 3.328059507  |
| original | glcm       | SumSquares                       | 12.30160678  |
| original | glcm       | ClusterProminence                | 8454.526449  |
| original | glcm       | Imc2                             | 0.757517726  |
| original | glcm       | Imc1                             | -0.175332473 |
| original | glcm       | DifferenceAverage                | 2.385236982  |
| original | glcm       | Id                               | 0.561036824  |
| original | glcm       | ClusterTendency                  | 28.06359312  |
| original | firstorder | InterquartileRange               | 62           |
| original | firstorder | Skewness                         | -2.858291183 |
| original | firstorder | Uniformity                       | 0.225889533  |
| original | firstorder | Median                           | 19           |
| original | firstorder | Energy                           | 2214898      |
| original | firstorder | RobustMeanAbsoluteDeviation      | 30.16585873  |
| original | firstorder | MeanAbsoluteDeviation            | 68.96374682  |
| original | firstorder | TotalEnergy                      | 59802246     |
| original | firstorder | Maximum                          | 68           |
| original | firstorder | RootMeanSquared                  | 108.2545012  |
| original | firstorder | 90Percentile                     | 45           |
| original | firstorder | Minimum                          | -561         |
| original | firstorder | Entropy                          | 2.835341982  |
| original | firstorder | Range                            | 629          |
| original | firstorder | Variance                         | 11354.20683  |
| original | firstorder | 10Percentile                     | -110.6       |
| original | firstorder | Kurtosis                         | 11.69119449  |
| original | firstorder | Mean                             | -19.1005291  |
| original | glrlm      | ShortRunLowGrayLevelEmphasis     | 0.009658211  |
| original | glrlm      | GrayLevelVariance                | 21.78521143  |
| original | glrlm      | LowGrayLevelRunEmphasis          | 0.009922698  |
| original | glrlm      | GrayLevelNonUniformityNormalized | 0.18143717   |
| original | glrlm      | RunVariance                      | 0.370551157  |
| original | glrlm      | GrayLevelNonUniformity           | 27.06960272  |
| original | glrlm      | LongRunEmphasis                  | 1.995911718  |
| original | glrlm      | ShortRunHighGrayLevelEmphasis    | 420.0642862  |
| original | glrlm      | RunLengthNonUniformity           | 99.48524274  |
| original | glrlm      | ShortRunEmphasis                 | 0.841152166  |
| original | glrlm      | LongRunHighGrayLevelEmphasis     | 1119.476296  |
| original | glrlm      | RunPercentage                    | 0.787545788  |
| original | glrlm      | LongRunLowGrayLevelEmphasis      | 0.011572646  |
| original | glrlm      | RunEntropy                       | 3.852486852  |
| original | glrlm      | HighGrayLevelRunEmphasis         | 515.9581478  |
| original | glrlm      | RunLengthNonUniformityNormalized | 0.665706232  |
| original | glszm      | GrayLevelVariance                | 37.49521033  |
| original | glszm      | ZoneVariance                     | 141.6326531  |
| original | glszm      | GrayLevelNonUniformityNormalized | 0.07455227   |
| original | glszm      | SizeZoneNonUniformityNormalized  | 0.643481883  |
| original | glszm      | SizeZoneNonUniformity            | 31.53061224  |
| original | glszm      | GrayLevelNonUniformity           | 3.653061224  |
| original | glszm      | LargeAreaEmphasis                | 156.5102041  |
| original | glszm      | SmallAreaHighGrayLevelEmphasis   | 275.4254376  |
| original | glszm      | ZonePercentage                   | 0.259259259  |
| original | glszm      | LargeAreaLowGrayLevelEmphasis    | 0.284508025  |
| original | glszm      | LargeAreaHighGrayLevelEmphasis   | 94345.08163  |
| original | glszm      | HighGrayLevelZoneEmphasis        | 365.9183673  |
| original | glszm      | SmallAreaEmphasis                | 0.82140827   |

|             |            |                                      |              |
|-------------|------------|--------------------------------------|--------------|
| original    | glszm      | LowGrayLevelZoneEmphasis             | 0.026575916  |
| original    | glszm      | ZoneEntropy                          | 4.517272344  |
| original    | glszm      | SmallAreaLowGrayLevelEmphasis        | 0.026208646  |
| original    | ngtdm      | Coarseness                           | 0.019574595  |
| original    | ngtdm      | Complexity                           | 444.5679699  |
| original    | ngtdm      | Strength                             | 11.76654891  |
| original    | ngtdm      | Contrast                             | 0.228772021  |
| original    | ngtdm      | Busyness                             | 0.078214084  |
| wavelet-HHH | gldm       | GrayLevelVariance                    | 10.49181154  |
| wavelet-HHH | gldm       | HighGrayLevelEmphasis                | 123.9312169  |
| wavelet-HHH | gldm       | DependenceEntropy                    | 5.595743999  |
| wavelet-HHH | gldm       | DependenceNonUniformity              | 31.79365079  |
| wavelet-HHH | gldm       | GrayLevelNonUniformity               | 20.85185185  |
| wavelet-HHH | gldm       | SmallDependenceEmphasis              | 0.354750734  |
| wavelet-HHH | gldm       | SmallDependenceHighGrayLevelEmphasis | 50.97069427  |
| wavelet-HHH | gldm       | DependenceNonUniformityNormalized    | 0.168220375  |
| wavelet-HHH | gldm       | LargeDependenceEmphasis              | 17.79365079  |
| wavelet-HHH | gldm       | LargeDependenceLowGrayLevelEmphasis  | 0.220579767  |
| wavelet-HHH | gldm       | DependenceVariance                   | 6.362811791  |
| wavelet-HHH | gldm       | LargeDependenceHighGrayLevelEmphasis | 1964.439153  |
| wavelet-HHH | gldm       | SmallDependenceLowGrayLevelEmphasis  | 0.008954122  |
| wavelet-HHH | gldm       | LowGrayLevelEmphasis                 | 0.02381373   |
| wavelet-HHH | glcm       | JointAverage                         | 10.57691616  |
| wavelet-HHH | glcm       | SumAverage                           | 21.15383232  |
| wavelet-HHH | glcm       | JointEntropy                         | 6.156758213  |
| wavelet-HHH | glcm       | ClusterShade                         | -7.273977302 |
| wavelet-HHH | glcm       | MaximumProbability                   | 0.072668253  |
| wavelet-HHH | glcm       | Idmn                                 | 0.959524138  |
| wavelet-HHH | glcm       | JointEnergy                          | 0.022784292  |
| wavelet-HHH | glcm       | Contrast                             | 21.06750821  |
| wavelet-HHH | glcm       | DifferenceEntropy                    | 3.161218411  |
| wavelet-HHH | glcm       | InverseVariance                      | 0.293897255  |
| wavelet-HHH | glcm       | DifferenceVariance                   | 9.601569917  |
| wavelet-HHH | glcm       | Idn                                  | 0.87665446   |
| wavelet-HHH | glcm       | Idm                                  | 0.310469106  |
| wavelet-HHH | glcm       | Correlation                          | -0.047868329 |
| wavelet-HHH | glcm       | Autocorrelation                      | 111.376909   |
| wavelet-HHH | glcm       | SumEntropy                           | 3.866161687  |
| wavelet-HHH | glcm       | SumSquares                           | 10.03599588  |
| wavelet-HHH | glcm       | ClusterProminence                    | 1585.746662  |
| wavelet-HHH | glcm       | Imc2                                 | 0.911805069  |
| wavelet-HHH | glcm       | Imc1                                 | -0.257648389 |
| wavelet-HHH | glcm       | DifferenceAverage                    | 3.314600315  |
| wavelet-HHH | glcm       | Id                                   | 0.388331981  |
| wavelet-HHH | glcm       | ClusterTendency                      | 19.07647529  |
| wavelet-HHH | firstorder | InterquartileRange                   | 77.93234345  |
| wavelet-HHH | firstorder | Skewness                             | -0.147486233 |
| wavelet-HHH | firstorder | Uniformity                           | 0.110327258  |
| wavelet-HHH | firstorder | Median                               | 1.93783568   |
| wavelet-HHH | firstorder | Energy                               | 1222971.073  |
| wavelet-HHH | firstorder | RobustMeanAbsoluteDeviation          | 35.37391924  |
| wavelet-HHH | firstorder | MeanAbsoluteDeviation                | 58.30492808  |
| wavelet-HHH | firstorder | TotalEnergy                          | 33020218.98  |
| wavelet-HHH | firstorder | Maximum                              | 251.8510773  |
| wavelet-HHH | firstorder | RootMeanSquared                      | 80.4409499   |
| wavelet-HHH | firstorder | 90Percentile                         | 100.2201343  |
| wavelet-HHH | firstorder | Minimum                              | -241.349636  |
| wavelet-HHH | firstorder | Entropy                              | 3.579980713  |
| wavelet-HHH | firstorder | Range                                | 493.2007133  |

|             |            |                                      |              |
|-------------|------------|--------------------------------------|--------------|
| wavelet-HHH | firstorder | Variance                             | 6452.768218  |
| wavelet-HHH | firstorder | 10Percentile                         | -95.19911721 |
| wavelet-HHH | firstorder | Kurtosis                             | 3.92633069   |
| wavelet-HHH | firstorder | Mean                                 | 4.240071016  |
| wavelet-HHH | gllm       | ShortRunLowGrayLevelEmphasis         | 0.023644654  |
| wavelet-HHH | gllm       | GrayLevelVariance                    | 11.25118282  |
| wavelet-HHH | gllm       | LowGrayLevelRunEmphasis              | 0.024727527  |
| wavelet-HHH | gllm       | GrayLevelNonUniformityNormalized     | 0.101682472  |
| wavelet-HHH | gllm       | RunVariance                          | 0.108583929  |
| wavelet-HHH | gllm       | GrayLevelNonUniformity               | 17.46881255  |
| wavelet-HHH | gllm       | LongRunEmphasis                      | 1.32347849   |
| wavelet-HHH | gllm       | ShortRunHighGrayLevelEmphasis        | 117.4808131  |
| wavelet-HHH | gllm       | RunLengthNonUniformity               | 142.9238501  |
| wavelet-HHH | gllm       | ShortRunEmphasis                     | 0.929027251  |
| wavelet-HHH | gllm       | LongRunHighGrayLevelEmphasis         | 161.0246229  |
| wavelet-HHH | gllm       | RunPercentage                        | 0.908424908  |
| wavelet-HHH | gllm       | LongRunLowGrayLevelEmphasis          | 0.029423431  |
| wavelet-HHH | gllm       | RunEntropy                           | 4.024184272  |
| wavelet-HHH | gllm       | HighGrayLevelRunEmphasis             | 125.3098908  |
| wavelet-HHH | gllm       | RunLengthNonUniformityNormalized     | 0.831131558  |
| wavelet-HHH | glszm      | GrayLevelVariance                    | 18.56146122  |
| wavelet-HHH | glszm      | ZoneVariance                         | 26.32877424  |
| wavelet-HHH | glszm      | GrayLevelNonUniformityNormalized     | 0.075138504  |
| wavelet-HHH | glszm      | SizeZoneNonUniformityNormalized      | 0.484418283  |
| wavelet-HHH | glszm      | SizeZoneNonUniformity                | 36.81578947  |
| wavelet-HHH | glszm      | GrayLevelNonUniformity               | 5.710526316  |
| wavelet-HHH | glszm      | LargeAreaEmphasis                    | 32.51315789  |
| wavelet-HHH | glszm      | SmallAreaHighGrayLevelEmphasis       | 107.8493855  |
| wavelet-HHH | glszm      | ZonePercentage                       | 0.402116402  |
| wavelet-HHH | glszm      | LargeAreaLowGrayLevelEmphasis        | 0.371378925  |
| wavelet-HHH | glszm      | LargeAreaHighGrayLevelEmphasis       | 3600.25      |
| wavelet-HHH | glszm      | HighGrayLevelZoneEmphasis            | 141.0131579  |
| wavelet-HHH | glszm      | SmallAreaEmphasis                    | 0.721517503  |
| wavelet-HHH | glszm      | LowGrayLevelZoneEmphasis             | 0.030295445  |
| wavelet-HHH | glszm      | ZoneEntropy                          | 4.977594126  |
| wavelet-HHH | glszm      | SmallAreaLowGrayLevelEmphasis        | 0.017196464  |
| wavelet-HHH | ngtdm      | Coarseness                           | 0.034810937  |
| wavelet-HHH | ngtdm      | Complexity                           | 381.7491453  |
| wavelet-HHH | ngtdm      | Strength                             | 3.688447668  |
| wavelet-HHH | ngtdm      | Contrast                             | 0.141787957  |
| wavelet-HHH | ngtdm      | Busyness                             | 0.117299577  |
| wavelet-HLL | gldm       | GrayLevelVariance                    | 41.21144425  |
| wavelet-HLL | gldm       | HighGrayLevelEmphasis                | 1060.47619   |
| wavelet-HLL | gldm       | DependenceEntropy                    | 5.924927827  |
| wavelet-HLL | gldm       | DependenceNonUniformity              | 40.01587302  |
| wavelet-HLL | gldm       | GrayLevelNonUniformity               | 13.66666667  |
| wavelet-HLL | gldm       | SmallDependenceEmphasis              | 0.429695403  |
| wavelet-HLL | gldm       | SmallDependenceHighGrayLevelEmphasis | 448.5875833  |
| wavelet-HLL | gldm       | DependenceNonUniformityNormalized    | 0.211724196  |
| wavelet-HLL | gldm       | LargeDependenceEmphasis              | 12.75661376  |
| wavelet-HLL | gldm       | LargeDependenceLowGrayLevelEmphasis  | 0.018500424  |
| wavelet-HLL | gldm       | DependenceVariance                   | 4.56308614   |
| wavelet-HLL | gldm       | LargeDependenceHighGrayLevelEmphasis | 13433.4709   |
| wavelet-HLL | gldm       | SmallDependenceLowGrayLevelEmphasis  | 0.005932457  |
| wavelet-HLL | gldm       | LowGrayLevelEmphasis                 | 0.006629467  |
| wavelet-HLL | glcm       | JointAverage                         | 32.38211529  |
| wavelet-HLL | glcm       | SumAverage                           | 64.76423057  |
| wavelet-HLL | glcm       | JointEntropy                         | 6.69419806   |
| wavelet-HLL | glcm       | ClusterShade                         | -833.6013815 |

|             |            |                                  |              |
|-------------|------------|----------------------------------|--------------|
| wavelet-HLL | glcm       | MaximumProbability               | 0.04386892   |
| wavelet-HLL | glcm       | Idmn                             | 0.982619372  |
| wavelet-HLL | glcm       | JointEnergy                      | 0.01377782   |
| wavelet-HLL | glcm       | Contrast                         | 45.23387288  |
| wavelet-HLL | glcm       | DifferenceEntropy                | 3.476842401  |
| wavelet-HLL | glcm       | InverseVariance                  | 0.261993751  |
| wavelet-HLL | glcm       | DifferenceVariance               | 24.44141657  |
| wavelet-HLL | glcm       | Idn                              | 0.922441686  |
| wavelet-HLL | glcm       | Idm                              | 0.263817316  |
| wavelet-HLL | glcm       | Correlation                      | 0.191369794  |
| wavelet-HLL | glcm       | Autocorrelation                  | 1054.511465  |
| wavelet-HLL | glcm       | SumEntropy                       | 4.472862802  |
| wavelet-HLL | glcm       | SumSquares                       | 28.49440624  |
| wavelet-HLL | glcm       | ClusterProminence                | 51577.91275  |
| wavelet-HLL | glcm       | Imc2                             | 0.961122586  |
| wavelet-HLL | glcm       | Imc1                             | -0.324806184 |
| wavelet-HLL | glcm       | DifferenceAverage                | 4.44158769   |
| wavelet-HLL | glcm       | Id                               | 0.345341226  |
| wavelet-HLL | glcm       | ClusterTendency                  | 68.74375208  |
| wavelet-HLL | firstorder | InterquartileRange               | 118.5095486  |
| wavelet-HLL | firstorder | Skewness                         | -1.395628351 |
| wavelet-HLL | firstorder | Uniformity                       | 0.072310406  |
| wavelet-HLL | firstorder | Median                           | -10.10710284 |
| wavelet-HLL | firstorder | Energy                           | 4882339.777  |
| wavelet-HLL | firstorder | RobustMeanAbsoluteDeviation      | 54.17453886  |
| wavelet-HLL | firstorder | MeanAbsoluteDeviation            | 101.832617   |
| wavelet-HLL | firstorder | TotalEnergy                      | 131823174    |
| wavelet-HLL | firstorder | Maximum                          | 395.4923703  |
| wavelet-HLL | firstorder | RootMeanSquared                  | 160.7248755  |
| wavelet-HLL | firstorder | 90Percentile                     | 161.8994008  |
| wavelet-HLL | firstorder | Minimum                          | -787.9912794 |
| wavelet-HLL | firstorder | Entropy                          | 4.245729525  |
| wavelet-HLL | firstorder | Range                            | 1183.48365   |
| wavelet-HLL | firstorder | Variance                         | 25613.21912  |
| wavelet-HLL | firstorder | 10Percentile                     | -157.110806  |
| wavelet-HLL | firstorder | Kurtosis                         | 8.66143374   |
| wavelet-HLL | firstorder | Mean                             | -14.80764909 |
| wavelet-HLL | glrlm      | ShortRunLowGrayLevelEmphasis     | 0.007003273  |
| wavelet-HLL | glrlm      | GrayLevelVariance                | 43.73573209  |
| wavelet-HLL | glrlm      | LowGrayLevelRunEmphasis          | 0.007060149  |
| wavelet-HLL | glrlm      | GrayLevelNonUniformityNormalized | 0.066954609  |
| wavelet-HLL | glrlm      | RunVariance                      | 0.089774305  |
| wavelet-HLL | glrlm      | GrayLevelNonUniformity           | 11.75046702  |
| wavelet-HLL | glrlm      | LongRunEmphasis                  | 1.250864113  |
| wavelet-HLL | glrlm      | ShortRunHighGrayLevelEmphasis    | 1004.363754  |
| wavelet-HLL | glrlm      | RunLengthNonUniformity           | 152.8855868  |
| wavelet-HLL | glrlm      | ShortRunEmphasis                 | 0.947166692  |
| wavelet-HLL | glrlm      | LongRunHighGrayLevelEmphasis     | 1326.189602  |
| wavelet-HLL | glrlm      | RunPercentage                    | 0.928367928  |
| wavelet-HLL | glrlm      | LongRunLowGrayLevelEmphasis      | 0.007325633  |
| wavelet-HLL | glrlm      | RunEntropy                       | 4.600084897  |
| wavelet-HLL | glrlm      | HighGrayLevelRunEmphasis         | 1060.475121  |
| wavelet-HLL | glrlm      | RunLengthNonUniformityNormalized | 0.871042698  |
| wavelet-HLL | glszm      | GrayLevelVariance                | 71.1465724   |
| wavelet-HLL | glszm      | ZoneVariance                     | 14.37798258  |
| wavelet-HLL | glszm      | GrayLevelNonUniformityNormalized | 0.048604974  |
| wavelet-HLL | glszm      | SizeZoneNonUniformityNormalized  | 0.560661533  |
| wavelet-HLL | glszm      | SizeZoneNonUniformity            | 49.8988764   |
| wavelet-HLL | glszm      | GrayLevelNonUniformity           | 4.325842697  |

|             |            |                                      |              |
|-------------|------------|--------------------------------------|--------------|
| wavelet-HLL | glszm      | LargeAreaEmphasis                    | 18.88764045  |
| wavelet-HLL | glszm      | SmallAreaHighGrayLevelEmphasis       | 802.8946869  |
| wavelet-HLL | glszm      | ZonePercentage                       | 0.470899471  |
| wavelet-HLL | glszm      | LargeAreaLowGrayLevelEmphasis        | 0.030636324  |
| wavelet-HLL | glszm      | LargeAreaHighGrayLevelEmphasis       | 19783.68539  |
| wavelet-HLL | glszm      | HighGrayLevelZoneEmphasis            | 1046.831461  |
| wavelet-HLL | glszm      | SmallAreaEmphasis                    | 0.775292707  |
| wavelet-HLL | glszm      | LowGrayLevelZoneEmphasis             | 0.01279411   |
| wavelet-HLL | glszm      | ZoneEntropy                          | 5.208675499  |
| wavelet-HLL | glszm      | SmallAreaLowGrayLevelEmphasis        | 0.012414015  |
| wavelet-HLL | ngtdm      | Coarseness                           | 0.038427488  |
| wavelet-HLL | ngtdm      | Complexity                           | 1569.539151  |
| wavelet-HLL | ngtdm      | Strength                             | 17.79844539  |
| wavelet-HLL | ngtdm      | Contrast                             | 0.310917713  |
| wavelet-HLL | ngtdm      | Busyness                             | 0.023798795  |
| wavelet-LHL | gldm       | GrayLevelVariance                    | 78.60670194  |
| wavelet-LHL | gldm       | HighGrayLevelEmphasis                | 628.2486772  |
| wavelet-LHL | gldm       | DependenceEntropy                    | 6.054590459  |
| wavelet-LHL | gldm       | DependenceNonUniformity              | 49.4021164   |
| wavelet-LHL | gldm       | GrayLevelNonUniformity               | 9.962962963  |
| wavelet-LHL | gldm       | SmallDependenceEmphasis              | 0.490925799  |
| wavelet-LHL | gldm       | SmallDependenceHighGrayLevelEmphasis | 365.8372717  |
| wavelet-LHL | gldm       | DependenceNonUniformityNormalized    | 0.261386859  |
| wavelet-LHL | gldm       | LargeDependenceEmphasis              | 8.301587302  |
| wavelet-LHL | gldm       | LargeDependenceLowGrayLevelEmphasis  | 0.022761776  |
| wavelet-LHL | gldm       | DependenceVariance                   | 2.757929509  |
| wavelet-LHL | gldm       | LargeDependenceHighGrayLevelEmphasis | 4626.079365  |
| wavelet-LHL | gldm       | SmallDependenceLowGrayLevelEmphasis  | 0.00674009   |
| wavelet-LHL | gldm       | LowGrayLevelEmphasis                 | 0.007928793  |
| wavelet-LHL | glcm       | JointAverage                         | 22.66022391  |
| wavelet-LHL | glcm       | SumAverage                           | 45.32044783  |
| wavelet-LHL | glcm       | JointEntropy                         | 7.172529422  |
| wavelet-LHL | glcm       | ClusterShade                         | 3715.997513  |
| wavelet-LHL | glcm       | MaximumProbability                   | 0.0311339    |
| wavelet-LHL | glcm       | Idmn                                 | 0.979134481  |
| wavelet-LHL | glcm       | JointEnergy                          | 0.008669373  |
| wavelet-LHL | glcm       | Contrast                             | 99.58685547  |
| wavelet-LHL | glcm       | DifferenceEntropy                    | 4.01134931   |
| wavelet-LHL | glcm       | InverseVariance                      | 0.193349112  |
| wavelet-LHL | glcm       | DifferenceVariance                   | 48.91401938  |
| wavelet-LHL | glcm       | Idn                                  | 0.912449678  |
| wavelet-LHL | glcm       | Idm                                  | 0.19257352   |
| wavelet-LHL | glcm       | Correlation                          | 0.219573604  |
| wavelet-LHL | glcm       | Autocorrelation                      | 526.8920217  |
| wavelet-LHL | glcm       | SumEntropy                           | 4.894940853  |
| wavelet-LHL | glcm       | SumSquares                           | 63.1684083   |
| wavelet-LHL | glcm       | ClusterProminence                    | 245548.6858  |
| wavelet-LHL | glcm       | Imc2                                 | 0.986221738  |
| wavelet-LHL | glcm       | Imc1                                 | -0.402781417 |
| wavelet-LHL | glcm       | DifferenceAverage                    | 6.857107047  |
| wavelet-LHL | glcm       | Id                                   | 0.273174111  |
| wavelet-LHL | glcm       | ClusterTendency                      | 153.0867777  |
| wavelet-LHL | firstorder | InterquartileRange                   | 169.5677365  |
| wavelet-LHL | firstorder | Skewness                             | 1.687000567  |
| wavelet-LHL | firstorder | Uniformity                           | 0.05271409   |
| wavelet-LHL | firstorder | Median                               | -47.17111785 |
| wavelet-LHL | firstorder | Energy                               | 9411683.197  |
| wavelet-LHL | firstorder | RobustMeanAbsoluteDeviation          | 82.36308513  |
| wavelet-LHL | firstorder | MeanAbsoluteDeviation                | 146.5652278  |

|             |            |                                      |              |
|-------------|------------|--------------------------------------|--------------|
| wavelet-LHL | firstorder | TotalEnergy                          | 254115446.3  |
| wavelet-LHL | firstorder | Maximum                              | 1015.959432  |
| wavelet-LHL | firstorder | RootMeanSquared                      | 223.1530094  |
| wavelet-LHL | firstorder | 90Percentile                         | 238.5568286  |
| wavelet-LHL | firstorder | Minimum                              | -579.616069  |
| wavelet-LHL | firstorder | Entropy                              | 4.640037808  |
| wavelet-LHL | firstorder | Range                                | 1595.575501  |
| wavelet-LHL | firstorder | Variance                             | 49042.20213  |
| wavelet-LHL | firstorder | 10Percentile                         | -251.7302282 |
| wavelet-LHL | firstorder | Kurtosis                             | 8.25839168   |
| wavelet-LHL | firstorder | Mean                                 | -27.4784181  |
| wavelet-LHL | glrlm      | ShortRunLowGrayLevelEmphasis         | 0.00816726   |
| wavelet-LHL | glrlm      | GrayLevelVariance                    | 82.13402418  |
| wavelet-LHL | glrlm      | LowGrayLevelRunEmphasis              | 0.008252065  |
| wavelet-LHL | glrlm      | GrayLevelNonUniformityNormalized     | 0.050653647  |
| wavelet-LHL | glrlm      | RunVariance                          | 0.065164961  |
| wavelet-LHL | glrlm      | GrayLevelNonUniformity               | 9.076886256  |
| wavelet-LHL | glrlm      | LongRunEmphasis                      | 1.181720662  |
| wavelet-LHL | glrlm      | ShortRunHighGrayLevelEmphasis        | 613.3906737  |
| wavelet-LHL | glrlm      | RunLengthNonUniformity               | 162.4999093  |
| wavelet-LHL | glrlm      | ShortRunEmphasis                     | 0.961564016  |
| wavelet-LHL | glrlm      | LongRunHighGrayLevelEmphasis         | 731.0091211  |
| wavelet-LHL | glrlm      | RunPercentage                        | 0.947903948  |
| wavelet-LHL | glrlm      | LongRunLowGrayLevelEmphasis          | 0.008639638  |
| wavelet-LHL | glrlm      | RunEntropy                           | 4.879098941  |
| wavelet-LHL | glrlm      | HighGrayLevelRunEmphasis             | 633.6533688  |
| wavelet-LHL | glrlm      | RunLengthNonUniformityNormalized     | 0.905421295  |
| wavelet-LHL | glszm      | GrayLevelVariance                    | 124.2068027  |
| wavelet-LHL | glszm      | ZoneVariance                         | 4.826666667  |
| wavelet-LHL | glszm      | GrayLevelNonUniformityNormalized     | 0.040362812  |
| wavelet-LHL | glszm      | SizeZoneNonUniformityNormalized      | 0.546666667  |
| wavelet-LHL | glszm      | SizeZoneNonUniformity                | 57.4         |
| wavelet-LHL | glszm      | GrayLevelNonUniformity               | 4.238095238  |
| wavelet-LHL | glszm      | LargeAreaEmphasis                    | 8.066666667  |
| wavelet-LHL | glszm      | SmallAreaHighGrayLevelEmphasis       | 600.5538227  |
| wavelet-LHL | glszm      | ZonePercentage                       | 0.555555556  |
| wavelet-LHL | glszm      | LargeAreaLowGrayLevelEmphasis        | 0.026931785  |
| wavelet-LHL | glszm      | LargeAreaHighGrayLevelEmphasis       | 4520.580952  |
| wavelet-LHL | glszm      | HighGrayLevelZoneEmphasis            | 720.9619048  |
| wavelet-LHL | glszm      | SmallAreaEmphasis                    | 0.766148045  |
| wavelet-LHL | glszm      | LowGrayLevelZoneEmphasis             | 0.012420507  |
| wavelet-LHL | glszm      | ZoneEntropy                          | 5.571262008  |
| wavelet-LHL | glszm      | SmallAreaLowGrayLevelEmphasis        | 0.01183726   |
| wavelet-LHL | ngtdm      | Coarseness                           | 0.031893677  |
| wavelet-LHL | ngtdm      | Complexity                           | 3879.074776  |
| wavelet-LHL | ngtdm      | Strength                             | 27.87707592  |
| wavelet-LHL | ngtdm      | Contrast                             | 0.509743198  |
| wavelet-LHL | ngtdm      | Busyness                             | 0.033311632  |
| wavelet-LHH | gldm       | GrayLevelVariance                    | 19.09101089  |
| wavelet-LHH | gldm       | HighGrayLevelEmphasis                | 303.968254   |
| wavelet-LHH | gldm       | DependenceEntropy                    | 5.770313938  |
| wavelet-LHH | gldm       | DependenceNonUniformity              | 41.50793651  |
| wavelet-LHH | gldm       | GrayLevelNonUniformity               | 15.33862434  |
| wavelet-LHH | gldm       | SmallDependenceEmphasis              | 0.445031084  |
| wavelet-LHH | gldm       | SmallDependenceHighGrayLevelEmphasis | 139.0804814  |
| wavelet-LHH | gldm       | DependenceNonUniformityNormalized    | 0.219618712  |
| wavelet-LHH | gldm       | LargeDependenceEmphasis              | 12.1957672   |
| wavelet-LHH | gldm       | LargeDependenceLowGrayLevelEmphasis  | 0.052668591  |
| wavelet-LHH | gldm       | DependenceVariance                   | 4.479717813  |

|             |            |                                      |              |
|-------------|------------|--------------------------------------|--------------|
| wavelet-LHH | gldm       | LargeDependenceHighGrayLevelEmphasis | 3356.296296  |
| wavelet-LHH | gldm       | SmallDependenceLowGrayLevelEmphasis  | 0.007773673  |
| wavelet-LHH | gldm       | LowGrayLevelEmphasis                 | 0.00984305   |
| wavelet-LHH | glcm       | JointAverage                         | 16.82546869  |
| wavelet-LHH | glcm       | SumAverage                           | 33.65093738  |
| wavelet-LHH | glcm       | JointEntropy                         | 6.705110049  |
| wavelet-LHH | glcm       | ClusterShade                         | -11.89943303 |
| wavelet-LHH | glcm       | MaximumProbability                   | 0.042948797  |
| wavelet-LHH | glcm       | ldmn                                 | 0.9617401    |
| wavelet-LHH | glcm       | JointEnergy                          | 0.013162948  |
| wavelet-LHH | glcm       | Contrast                             | 35.98175784  |
| wavelet-LHH | glcm       | DifferenceEntropy                    | 3.497593233  |
| wavelet-LHH | glcm       | InverseVariance                      | 0.261369815  |
| wavelet-LHH | glcm       | DifferenceVariance                   | 17.23389673  |
| wavelet-LHH | glcm       | ldn                                  | 0.880611471  |
| wavelet-LHH | glcm       | ldm                                  | 0.257542586  |
| wavelet-LHH | glcm       | Correlation                          | -0.005609655 |
| wavelet-LHH | glcm       | Autocorrelation                      | 283.0464925  |
| wavelet-LHH | glcm       | SumEntropy                           | 4.268148251  |
| wavelet-LHH | glcm       | SumSquares                           | 17.9292126   |
| wavelet-LHH | glcm       | ClusterProminence                    | 6065.666388  |
| wavelet-LHH | glcm       | lmc2                                 | 0.938452597  |
| wavelet-LHH | glcm       | lmc1                                 | -0.276262515 |
| wavelet-LHH | glcm       | DifferenceAverage                    | 4.261388522  |
| wavelet-LHH | glcm       | ld                                   | 0.339686762  |
| wavelet-LHH | glcm       | ClusterTendency                      | 35.73509256  |
| wavelet-LHH | firstorder | InterquartileRange                   | 100.4347313  |
| wavelet-LHH | firstorder | Skewness                             | -0.085356796 |
| wavelet-LHH | firstorder | Uniformity                           | 0.081156743  |
| wavelet-LHH | firstorder | Median                               | 0.710021911  |
| wavelet-LHH | firstorder | Energy                               | 2233327.405  |
| wavelet-LHH | firstorder | RobustMeanAbsoluteDeviation          | 47.76311031  |
| wavelet-LHH | firstorder | MeanAbsoluteDeviation                | 78.91278527  |
| wavelet-LHH | firstorder | TotalEnergy                          | 60299839.93  |
| wavelet-LHH | firstorder | Maximum                              | 299.0851733  |
| wavelet-LHH | firstorder | RootMeanSquared                      | 108.7039425  |
| wavelet-LHH | firstorder | 90Percentile                         | 157.4371582  |
| wavelet-LHH | firstorder | Minimum                              | -387.1518355 |
| wavelet-LHH | firstorder | Entropy                              | 4.002043391  |
| wavelet-LHH | firstorder | Range                                | 686.2370088  |
| wavelet-LHH | firstorder | Variance                             | 11733.10101  |
| wavelet-LHH | firstorder | 10Percentile                         | -100.3872207 |
| wavelet-LHH | firstorder | Kurtosis                             | 4.047803985  |
| wavelet-LHH | firstorder | Mean                                 | 9.134884124  |
| wavelet-LHH | glrlm      | ShortRunLowGrayLevelEmphasis         | 0.010106654  |
| wavelet-LHH | glrlm      | GrayLevelVariance                    | 20.11309844  |
| wavelet-LHH | glrlm      | LowGrayLevelRunEmphasis              | 0.010289101  |
| wavelet-LHH | glrlm      | GrayLevelNonUniformityNormalized     | 0.076738193  |
| wavelet-LHH | glrlm      | RunVariance                          | 0.09428514   |
| wavelet-LHH | glrlm      | GrayLevelNonUniformity               | 13.51179335  |
| wavelet-LHH | glrlm      | LongRunEmphasis                      | 1.247188209  |
| wavelet-LHH | glrlm      | ShortRunHighGrayLevelEmphasis        | 291.7526299  |
| wavelet-LHH | glrlm      | RunLengthNonUniformity               | 155.2387767  |
| wavelet-LHH | glrlm      | ShortRunEmphasis                     | 0.951429682  |
| wavelet-LHH | glrlm      | LongRunHighGrayLevelEmphasis         | 374.4483215  |
| wavelet-LHH | glrlm      | RunPercentage                        | 0.931623932  |
| wavelet-LHH | glrlm      | LongRunLowGrayLevelEmphasis          | 0.011231184  |
| wavelet-LHH | glrlm      | RunEntropy                           | 4.337125521  |
| wavelet-LHH | glrlm      | HighGrayLevelRunEmphasis             | 305.609348   |



|             |       |                                      |              |
|-------------|-------|--------------------------------------|--------------|
| wavelet-LHH | glrlm | RunLengthNonUniformityNormalized     | 0.881333751  |
| wavelet-LHH | glszm | GrayLevelVariance                    | 31.30419032  |
| wavelet-LHH | glszm | ZoneVariance                         | 13.58748943  |
| wavelet-LHH | glszm | GrayLevelNonUniformityNormalized     | 0.055911122  |
| wavelet-LHH | glszm | SizeZoneNonUniformityNormalized      | 0.583866683  |
| wavelet-LHH | glszm | SizeZoneNonUniformity                | 53.13186813  |
| wavelet-LHH | glszm | GrayLevelNonUniformity               | 5.087912088  |
| wavelet-LHH | glszm | LargeAreaEmphasis                    | 17.9010989   |
| wavelet-LHH | glszm | SmallAreaHighGrayLevelEmphasis       | 246.2471283  |
| wavelet-LHH | glszm | ZonePercentage                       | 0.481481481  |
| wavelet-LHH | glszm | LargeAreaLowGrayLevelEmphasis        | 0.079867086  |
| wavelet-LHH | glszm | LargeAreaHighGrayLevelEmphasis       | 5000.725275  |
| wavelet-LHH | glszm | HighGrayLevelZoneEmphasis            | 312.1428571  |
| wavelet-LHH | glszm | SmallAreaEmphasis                    | 0.790285335  |
| wavelet-LHH | glszm | LowGrayLevelZoneEmphasis             | 0.016449801  |
| wavelet-LHH | glszm | ZoneEntropy                          | 4.990705492  |
| wavelet-LHH | glszm | SmallAreaLowGrayLevelEmphasis        | 0.015658411  |
| wavelet-LHH | ngtdm | Coarseness                           | 0.035774124  |
| wavelet-LHH | ngtdm | Complexity                           | 768.5264403  |
| wavelet-LHH | ngtdm | Strength                             | 6.057545312  |
| wavelet-LHH | ngtdm | Contrast                             | 0.209310232  |
| wavelet-LHH | ngtdm | Busyness                             | 0.062807888  |
| wavelet-LLH | gldm  | GrayLevelVariance                    | 28.57294029  |
| wavelet-LLH | gldm  | HighGrayLevelEmphasis                | 227.2486772  |
| wavelet-LLH | gldm  | DependenceEntropy                    | 5.859591766  |
| wavelet-LLH | gldm  | DependenceNonUniformity              | 43.41269841  |
| wavelet-LLH | gldm  | GrayLevelNonUniformity               | 14.78835979  |
| wavelet-LLH | gldm  | SmallDependenceEmphasis              | 0.422124731  |
| wavelet-LLH | gldm  | SmallDependenceHighGrayLevelEmphasis | 108.0262616  |
| wavelet-LLH | gldm  | DependenceNonUniformityNormalized    | 0.229696817  |
| wavelet-LLH | gldm  | LargeDependenceEmphasis              | 12.77777778  |
| wavelet-LLH | gldm  | LargeDependenceLowGrayLevelEmphasis  | 0.077501652  |
| wavelet-LLH | gldm  | DependenceVariance                   | 5.002827468  |
| wavelet-LLH | gldm  | LargeDependenceHighGrayLevelEmphasis | 2601.94709   |
| wavelet-LLH | gldm  | SmallDependenceLowGrayLevelEmphasis  | 0.00984947   |
| wavelet-LLH | gldm  | LowGrayLevelEmphasis                 | 0.013545416  |
| wavelet-LLH | glcm  | JointAverage                         | 13.76296063  |
| wavelet-LLH | glcm  | SumAverage                           | 27.52592126  |
| wavelet-LLH | glcm  | JointEntropy                         | 6.689059574  |
| wavelet-LLH | glcm  | ClusterShade                         | 397.2133164  |
| wavelet-LLH | glcm  | MaximumProbability                   | 0.04899435   |
| wavelet-LLH | glcm  | Idmn                                 | 0.973628657  |
| wavelet-LLH | glcm  | JointEnergy                          | 0.0138111    |
| wavelet-LLH | glcm  | Contrast                             | 34.92505234  |
| wavelet-LLH | glcm  | DifferenceEntropy                    | 3.467637199  |
| wavelet-LLH | glcm  | InverseVariance                      | 0.253145634  |
| wavelet-LLH | glcm  | DifferenceVariance                   | 16.79100435  |
| wavelet-LLH | glcm  | Idn                                  | 0.899063603  |
| wavelet-LLH | glcm  | Idm                                  | 0.253416145  |
| wavelet-LLH | glcm  | Correlation                          | 0.224192501  |
| wavelet-LLH | glcm  | Autocorrelation                      | 194.5424411  |
| wavelet-LLH | glcm  | SumEntropy                           | 4.523713083  |
| wavelet-LLH | glcm  | SumSquares                           | 22.5719323   |
| wavelet-LLH | glcm  | ClusterProminence                    | 16240.83133  |
| wavelet-LLH | glcm  | Imc2                                 | 0.952029488  |
| wavelet-LLH | glcm  | Imc1                                 | -0.302580749 |
| wavelet-LLH | glcm  | DifferenceAverage                    | 4.202095795  |
| wavelet-LLH | glcm  | Id                                   | 0.337813419  |
| wavelet-LLH | glcm  | ClusterTendency                      | 55.36267686  |

|             |            |                                  |              |
|-------------|------------|----------------------------------|--------------|
| wavelet-LLH | firstorder | InterquartileRange               | 114.8924916  |
| wavelet-LLH | firstorder | Skewness                         | 0.963125354  |
| wavelet-LLH | firstorder | Uniformity                       | 0.07824529   |
| wavelet-LLH | firstorder | Median                           | -20.31033487 |
| wavelet-LLH | firstorder | Energy                           | 3320249.85   |
| wavelet-LLH | firstorder | RobustMeanAbsoluteDeviation      | 53.29476062  |
| wavelet-LLH | firstorder | MeanAbsoluteDeviation            | 92.15172844  |
| wavelet-LLH | firstorder | TotalEnergy                      | 89646745.96  |
| wavelet-LLH | firstorder | Maximum                          | 477.1396886  |
| wavelet-LLH | firstorder | RootMeanSquared                  | 132.5422933  |
| wavelet-LLH | firstorder | 90Percentile                     | 164.2252966  |
| wavelet-LLH | firstorder | Minimum                          | -343.113015  |
| wavelet-LLH | firstorder | Entropy                          | 4.1419369    |
| wavelet-LLH | firstorder | Range                            | 820.2527037  |
| wavelet-LLH | firstorder | Variance                         | 17462.03934  |
| wavelet-LLH | firstorder | 10Percentile                     | -152.027084  |
| wavelet-LLH | firstorder | Kurtosis                         | 4.816726573  |
| wavelet-LLH | firstorder | Mean                             | -10.26743347 |
| wavelet-LLH | glrlm      | ShortRunLowGrayLevelEmphasis     | 0.013827544  |
| wavelet-LLH | glrlm      | GrayLevelVariance                | 30.12979562  |
| wavelet-LLH | glrlm      | LowGrayLevelRunEmphasis          | 0.014122603  |
| wavelet-LLH | glrlm      | GrayLevelNonUniformityNormalized | 0.072571652  |
| wavelet-LLH | glrlm      | RunVariance                      | 0.085155949  |
| wavelet-LLH | glrlm      | GrayLevelNonUniformity           | 12.77570303  |
| wavelet-LLH | glrlm      | LongRunEmphasis                  | 1.240265896  |
| wavelet-LLH | glrlm      | ShortRunHighGrayLevelEmphasis    | 218.6912818  |
| wavelet-LLH | glrlm      | RunLengthNonUniformity           | 154.2900755  |
| wavelet-LLH | glrlm      | ShortRunEmphasis                 | 0.949085393  |
| wavelet-LLH | glrlm      | LongRunHighGrayLevelEmphasis     | 277.5109447  |
| wavelet-LLH | glrlm      | RunPercentage                    | 0.931216931  |
| wavelet-LLH | glrlm      | LongRunLowGrayLevelEmphasis      | 0.015513833  |
| wavelet-LLH | glrlm      | RunEntropy                       | 4.474699858  |
| wavelet-LLH | glrlm      | HighGrayLevelRunEmphasis         | 229.0830238  |
| wavelet-LLH | glrlm      | RunLengthNonUniformityNormalized | 0.875835262  |
| wavelet-LLH | glszm      | GrayLevelVariance                | 44.86419194  |
| wavelet-LLH | glszm      | ZoneVariance                     | 8.904142146  |
| wavelet-LLH | glszm      | GrayLevelNonUniformityNormalized | 0.052512449  |
| wavelet-LLH | glszm      | SizeZoneNonUniformityNormalized  | 0.459710276  |
| wavelet-LLH | glszm      | SizeZoneNonUniformity            | 43.21276596  |
| wavelet-LLH | glszm      | GrayLevelNonUniformity           | 4.936170213  |
| wavelet-LLH | glszm      | LargeAreaEmphasis                | 12.94680851  |
| wavelet-LLH | glszm      | SmallAreaHighGrayLevelEmphasis   | 187.9106544  |
| wavelet-LLH | glszm      | ZonePercentage                   | 0.497354497  |
| wavelet-LLH | glszm      | LargeAreaLowGrayLevelEmphasis    | 0.087415926  |
| wavelet-LLH | glszm      | LargeAreaHighGrayLevelEmphasis   | 2619.893617  |
| wavelet-LLH | glszm      | HighGrayLevelZoneEmphasis        | 253.5744681  |
| wavelet-LLH | glszm      | SmallAreaEmphasis                | 0.703861385  |
| wavelet-LLH | glszm      | LowGrayLevelZoneEmphasis         | 0.020803361  |
| wavelet-LLH | glszm      | ZoneEntropy                      | 5.445939922  |
| wavelet-LLH | glszm      | SmallAreaLowGrayLevelEmphasis    | 0.018784767  |
| wavelet-LLH | ngtdm      | Coarseness                       | 0.034210889  |
| wavelet-LLH | ngtdm      | Complexity                       | 1104.56252   |
| wavelet-LLH | ngtdm      | Strength                         | 11.12578282  |
| wavelet-LLH | ngtdm      | Contrast                         | 0.226618364  |
| wavelet-LLH | ngtdm      | Busyness                         | 0.070019732  |
| wavelet-LLL | gldm       | GrayLevelVariance                | 167.9105288  |
| wavelet-LLL | gldm       | HighGrayLevelEmphasis            | 2235.513228  |
| wavelet-LLL | gldm       | DependenceEntropy                | 6.297433795  |
| wavelet-LLL | gldm       | DependenceNonUniformity          | 55.27513228  |

|             |            |                                      |              |
|-------------|------------|--------------------------------------|--------------|
| wavelet-LLL | gldm       | GrayLevelNonUniformity               | 8.80952381   |
| wavelet-LLL | gldm       | SmallDependenceEmphasis              | 0.543252972  |
| wavelet-LLL | gldm       | SmallDependenceHighGrayLevelEmphasis | 992.3637655  |
| wavelet-LLL | gldm       | DependenceNonUniformityNormalized    | 0.292461017  |
| wavelet-LLL | gldm       | LargeDependenceEmphasis              | 7.677248677  |
| wavelet-LLL | gldm       | LargeDependenceLowGrayLevelEmphasis  | 0.008985544  |
| wavelet-LLL | gldm       | DependenceVariance                   | 2.620699309  |
| wavelet-LLL | gldm       | LargeDependenceHighGrayLevelEmphasis | 21738.46561  |
| wavelet-LLL | gldm       | SmallDependenceLowGrayLevelEmphasis  | 0.006362925  |
| wavelet-LLL | gldm       | LowGrayLevelEmphasis                 | 0.006562399  |
| wavelet-LLL | glcm       | JointAverage                         | 47.90672579  |
| wavelet-LLL | glcm       | SumAverage                           | 95.81345158  |
| wavelet-LLL | glcm       | JointEntropy                         | 7.160374693  |
| wavelet-LLL | glcm       | ClusterShade                         | -8766.476096 |
| wavelet-LLL | glcm       | MaximumProbability                   | 0.029553387  |
| wavelet-LLL | glcm       | Idmn                                 | 0.962533343  |
| wavelet-LLL | glcm       | JointEnergy                          | 0.008960819  |
| wavelet-LLL | glcm       | Contrast                             | 166.678412   |
| wavelet-LLL | glcm       | DifferenceEntropy                    | 4.319925628  |
| wavelet-LLL | glcm       | InverseVariance                      | 0.192691939  |
| wavelet-LLL | glcm       | DifferenceVariance                   | 88.12291749  |
| wavelet-LLL | glcm       | Idn                                  | 0.888444489  |
| wavelet-LLL | glcm       | Idm                                  | 0.185722877  |
| wavelet-LLL | glcm       | Correlation                          | 0.324201742  |
| wavelet-LLL | glcm       | Autocorrelation                      | 2336.476992  |
| wavelet-LLL | glcm       | SumEntropy                           | 5.163534665  |
| wavelet-LLL | glcm       | SumSquares                           | 124.5379382  |
| wavelet-LLL | glcm       | ClusterProminence                    | 535354.1742  |
| wavelet-LLL | glcm       | Imc2                                 | 0.991540148  |
| wavelet-LLL | glcm       | Imc1                                 | -0.44667083  |
| wavelet-LLL | glcm       | DifferenceAverage                    | 8.751551822  |
| wavelet-LLL | glcm       | Id                                   | 0.260355238  |
| wavelet-LLL | glcm       | ClusterTendency                      | 331.4733409  |
| wavelet-LLL | firstorder | InterquartileRange                   | 374.2609626  |
| wavelet-LLL | firstorder | Skewness                             | -1.333628344 |
| wavelet-LLL | firstorder | Uniformity                           | 0.046611237  |
| wavelet-LLL | firstorder | Median                               | 10.10878467  |
| wavelet-LLL | firstorder | Energy                               | 22820013.05  |
| wavelet-LLL | firstorder | RobustMeanAbsoluteDeviation          | 174.4957854  |
| wavelet-LLL | firstorder | MeanAbsoluteDeviation                | 258.3266916  |
| wavelet-LLL | firstorder | TotalEnergy                          | 616140352.3  |
| wavelet-LLL | firstorder | Maximum                              | 272.5602611  |
| wavelet-LLL | firstorder | RootMeanSquared                      | 347.4777831  |
| wavelet-LLL | firstorder | 90Percentile                         | 155.4365864  |
| wavelet-LLL | firstorder | Minimum                              | -1227.815415 |
| wavelet-LLL | firstorder | Entropy                              | 4.948394689  |
| wavelet-LLL | firstorder | Range                                | 1500.375676  |
| wavelet-LLL | firstorder | Variance                             | 104996.138   |
| wavelet-LLL | firstorder | 10Percentile                         | -635.7837426 |
| wavelet-LLL | firstorder | Kurtosis                             | 4.011911957  |
| wavelet-LLL | firstorder | Mean                                 | -125.4777742 |
| wavelet-LLL | glrlm      | ShortRunLowGrayLevelEmphasis         | 0.00686501   |
| wavelet-LLL | glrlm      | GrayLevelVariance                    | 171.6603101  |
| wavelet-LLL | glrlm      | LowGrayLevelRunEmphasis              | 0.00687875   |
| wavelet-LLL | glrlm      | GrayLevelNonUniformityNormalized     | 0.044013309  |
| wavelet-LLL | glrlm      | RunVariance                          | 0.060170047  |
| wavelet-LLL | glrlm      | GrayLevelNonUniformity               | 7.923937873  |
| wavelet-LLL | glrlm      | LongRunEmphasis                      | 1.166072164  |
| wavelet-LLL | glrlm      | ShortRunHighGrayLevelEmphasis        | 2104.055142  |

|             |       |                                      |              |
|-------------|-------|--------------------------------------|--------------|
| wavelet-LLL | glrlm | RunLengthNonUniformity               | 164.4480477  |
| wavelet-LLL | glrlm | ShortRunEmphasis                     | 0.964907378  |
| wavelet-LLL | glrlm | LongRunHighGrayLevelEmphasis         | 2679.946091  |
| wavelet-LLL | glrlm | RunPercentage                        | 0.951973952  |
| wavelet-LLL | glrlm | LongRunLowGrayLevelEmphasis          | 0.006942296  |
| wavelet-LLL | glrlm | RunEntropy                           | 5.186152605  |
| wavelet-LLL | glrlm | HighGrayLevelRunEmphasis             | 2203.749324  |
| wavelet-LLL | glrlm | RunLengthNonUniformityNormalized     | 0.912904109  |
| wavelet-LLL | glszm | GrayLevelVariance                    | 198.1226446  |
| wavelet-LLL | glszm | ZoneVariance                         | 5.420578512  |
| wavelet-LLL | glszm | GrayLevelNonUniformityNormalized     | 0.02677686   |
| wavelet-LLL | glszm | SizeZoneNonUniformityNormalized      | 0.653057851  |
| wavelet-LLL | glszm | SizeZoneNonUniformity                | 71.83636364  |
| wavelet-LLL | glszm | GrayLevelNonUniformity               | 2.945454545  |
| wavelet-LLL | glszm | LargeAreaEmphasis                    | 8.372727273  |
| wavelet-LLL | glszm | SmallAreaHighGrayLevelEmphasis       | 1436.403476  |
| wavelet-LLL | glszm | ZonePercentage                       | 0.582010582  |
| wavelet-LLL | glszm | LargeAreaLowGrayLevelEmphasis        | 0.013598143  |
| wavelet-LLL | glszm | LargeAreaHighGrayLevelEmphasis       | 23614.69091  |
| wavelet-LLL | glszm | HighGrayLevelZoneEmphasis            | 1839.109091  |
| wavelet-LLL | glszm | SmallAreaEmphasis                    | 0.831197126  |
| wavelet-LLL | glszm | LowGrayLevelZoneEmphasis             | 0.010980696  |
| wavelet-LLL | glszm | ZoneEntropy                          | 5.893643891  |
| wavelet-LLL | glszm | SmallAreaLowGrayLevelEmphasis        | 0.010884904  |
| wavelet-LLL | ngtdm | Coarseness                           | 0.025080827  |
| wavelet-LLL | ngtdm | Complexity                           | 7343.345032  |
| wavelet-LLL | ngtdm | Strength                             | 42.78363436  |
| wavelet-LLL | ngtdm | Contrast                             | 0.911836333  |
| wavelet-LLL | ngtdm | Busyness                             | 0.013706341  |
| wavelet-HHL | gldm  | GrayLevelVariance                    | 14.78849976  |
| wavelet-HHL | gldm  | HighGrayLevelEmphasis                | 224.042328   |
| wavelet-HHL | gldm  | DependenceEntropy                    | 5.763725737  |
| wavelet-HHL | gldm  | DependenceNonUniformity              | 34.42857143  |
| wavelet-HHL | gldm  | GrayLevelNonUniformity               | 17.56084656  |
| wavelet-HHL | gldm  | SmallDependenceEmphasis              | 0.363284189  |
| wavelet-HHL | gldm  | SmallDependenceHighGrayLevelEmphasis | 82.42623379  |
| wavelet-HHL | gldm  | DependenceNonUniformityNormalized    | 0.182161754  |
| wavelet-HHL | gldm  | LargeDependenceEmphasis              | 16.83068783  |
| wavelet-HHL | gldm  | LargeDependenceLowGrayLevelEmphasis  | 0.088898393  |
| wavelet-HHL | gldm  | DependenceVariance                   | 6.311133507  |
| wavelet-HHL | gldm  | LargeDependenceHighGrayLevelEmphasis | 3639.619048  |
| wavelet-HHL | gldm  | SmallDependenceLowGrayLevelEmphasis  | 0.009873172  |
| wavelet-HHL | gldm  | LowGrayLevelEmphasis                 | 0.013033465  |
| wavelet-HHL | glcm  | JointAverage                         | 14.51483252  |
| wavelet-HHL | glcm  | SumAverage                           | 29.02966504  |
| wavelet-HHL | glcm  | JointEntropy                         | 6.381259978  |
| wavelet-HHL | glcm  | ClusterShade                         | -18.42799347 |
| wavelet-HHL | glcm  | MaximumProbability                   | 0.051675612  |
| wavelet-HHL | glcm  | Idmn                                 | 0.973323885  |
| wavelet-HHL | glcm  | JointEnergy                          | 0.016749527  |
| wavelet-HHL | glcm  | Contrast                             | 26.17558527  |
| wavelet-HHL | glcm  | DifferenceEntropy                    | 3.259804592  |
| wavelet-HHL | glcm  | InverseVariance                      | 0.276268923  |
| wavelet-HHL | glcm  | DifferenceVariance                   | 13.153191    |
| wavelet-HHL | glcm  | Idn                                  | 0.900143811  |
| wavelet-HHL | glcm  | Idm                                  | 0.293004586  |
| wavelet-HHL | glcm  | Correlation                          | -0.028306605 |
| wavelet-HHL | glcm  | Autocorrelation                      | 210.3315577  |
| wavelet-HHL | glcm  | SumEntropy                           | 4.00788202   |

|             |            |                                  |              |
|-------------|------------|----------------------------------|--------------|
| wavelet-HHL | glcm       | SumSquares                       | 12.71779239  |
| wavelet-HHL | glcm       | ClusterProminence                | 3697.849932  |
| wavelet-HHL | glcm       | Imc2                             | 0.90592676   |
| wavelet-HHL | glcm       | Imc1                             | -0.238605124 |
| wavelet-HHL | glcm       | DifferenceAverage                | 3.562704607  |
| wavelet-HHL | glcm       | Id                               | 0.374508718  |
| wavelet-HHL | glcm       | ClusterTendency                  | 24.6955843   |
| wavelet-HHL | firstorder | InterquartileRange               | 96.3683812   |
| wavelet-HHL | firstorder | Skewness                         | -0.077215366 |
| wavelet-HHL | firstorder | Uniformity                       | 0.092914532  |
| wavelet-HHL | firstorder | Median                           | 1.223105717  |
| wavelet-HHL | firstorder | Energy                           | 1776562.747  |
| wavelet-HHL | firstorder | RobustMeanAbsoluteDeviation      | 41.58332218  |
| wavelet-HHL | firstorder | MeanAbsoluteDeviation            | 69.06199358  |
| wavelet-HHL | firstorder | TotalEnergy                      | 47967194.17  |
| wavelet-HHL | firstorder | Maximum                          | 366.2052575  |
| wavelet-HHL | firstorder | RootMeanSquared                  | 96.95258065  |
| wavelet-HHL | firstorder | 90Percentile                     | 104.2490269  |
| wavelet-HHL | firstorder | Minimum                          | -331.7045516 |
| wavelet-HHL | firstorder | Entropy                          | 3.759858219  |
| wavelet-HHL | firstorder | Range                            | 697.9098091  |
| wavelet-HHL | firstorder | Variance                         | 9397.65763   |
| wavelet-HHL | firstorder | 10Percentile                     | -103.8173701 |
| wavelet-HHL | firstorder | Kurtosis                         | 5.234604274  |
| wavelet-HHL | firstorder | Mean                             | -1.464671811 |
| wavelet-HHL | glrlm      | ShortRunLowGrayLevelEmphasis     | 0.01349188   |
| wavelet-HHL | glrlm      | GrayLevelVariance                | 15.91383955  |
| wavelet-HHL | glrlm      | LowGrayLevelRunEmphasis          | 0.013809679  |
| wavelet-HHL | glrlm      | GrayLevelNonUniformityNormalized | 0.087738616  |
| wavelet-HHL | glrlm      | RunVariance                      | 0.107042096  |
| wavelet-HHL | glrlm      | GrayLevelNonUniformity           | 15.15814076  |
| wavelet-HHL | glrlm      | LongRunEmphasis                  | 1.306818794  |
| wavelet-HHL | glrlm      | ShortRunHighGrayLevelEmphasis    | 210.6343915  |
| wavelet-HHL | glrlm      | RunLengthNonUniformity           | 145.965763   |
| wavelet-HHL | glrlm      | ShortRunEmphasis                 | 0.935108787  |
| wavelet-HHL | glrlm      | LongRunHighGrayLevelEmphasis     | 291.4328471  |
| wavelet-HHL | glrlm      | RunPercentage                    | 0.913715914  |
| wavelet-HHL | glrlm      | LongRunLowGrayLevelEmphasis      | 0.01529626   |
| wavelet-HHL | glrlm      | RunEntropy                       | 4.178270469  |
| wavelet-HHL | glrlm      | HighGrayLevelRunEmphasis         | 224.6929097  |
| wavelet-HHL | glrlm      | RunLengthNonUniformityNormalized | 0.844439971  |
| wavelet-HHL | glszm      | GrayLevelVariance                | 28.80179458  |
| wavelet-HHL | glszm      | ZoneVariance                     | 15.20044865  |
| wavelet-HHL | glszm      | GrayLevelNonUniformityNormalized | 0.062970678  |
| wavelet-HHL | glszm      | SizeZoneNonUniformityNormalized  | 0.454574587  |
| wavelet-HHL | glszm      | SizeZoneNonUniformity            | 35.91139241  |
| wavelet-HHL | glszm      | GrayLevelNonUniformity           | 4.974683544  |
| wavelet-HHL | glszm      | LargeAreaEmphasis                | 20.92405063  |
| wavelet-HHL | glszm      | SmallAreaHighGrayLevelEmphasis   | 158.8574122  |
| wavelet-HHL | glszm      | ZonePercentage                   | 0.417989418  |
| wavelet-HHL | glszm      | LargeAreaLowGrayLevelEmphasis    | 0.121721735  |
| wavelet-HHL | glszm      | LargeAreaHighGrayLevelEmphasis   | 4444.708861  |
| wavelet-HHL | glszm      | HighGrayLevelZoneEmphasis        | 230.8734177  |
| wavelet-HHL | glszm      | SmallAreaEmphasis                | 0.699806435  |
| wavelet-HHL | glszm      | LowGrayLevelZoneEmphasis         | 0.024246597  |
| wavelet-HHL | glszm      | ZoneEntropy                      | 5.225824856  |
| wavelet-HHL | glszm      | SmallAreaLowGrayLevelEmphasis    | 0.022762339  |
| wavelet-HHL | ngtdm      | Coarseness                       | 0.034664292  |
| wavelet-HHL | ngtdm      | Complexity                       | 655.6108235  |

|             |            |                                      |              |
|-------------|------------|--------------------------------------|--------------|
| wavelet-HHL | ngtdm      | Strength                             | 6.532698174  |
| wavelet-HHL | ngtdm      | Contrast                             | 0.167142808  |
| wavelet-HHL | ngtdm      | Busyness                             | 0.074906531  |
| wavelet-HLH | gldm       | GrayLevelVariance                    | 9.369670502  |
| wavelet-HLH | gldm       | HighGrayLevelEmphasis                | 140.5873016  |
| wavelet-HLH | gldm       | DependenceEntropy                    | 5.519220911  |
| wavelet-HLH | gldm       | DependenceNonUniformity              | 33.53968254  |
| wavelet-HLH | gldm       | GrayLevelNonUniformity               | 21.23280423  |
| wavelet-HLH | gldm       | SmallDependenceEmphasis              | 0.37503026   |
| wavelet-HLH | gldm       | SmallDependenceHighGrayLevelEmphasis | 57.67441674  |
| wavelet-HLH | gldm       | DependenceNonUniformityNormalized    | 0.177458638  |
| wavelet-HLH | gldm       | LargeDependenceEmphasis              | 17.64550265  |
| wavelet-HLH | gldm       | LargeDependenceLowGrayLevelEmphasis  | 0.149068073  |
| wavelet-HLH | gldm       | DependenceVariance                   | 6.779933373  |
| wavelet-HLH | gldm       | LargeDependenceHighGrayLevelEmphasis | 2294.619048  |
| wavelet-HLH | gldm       | SmallDependenceLowGrayLevelEmphasis  | 0.011044444  |
| wavelet-HLH | gldm       | LowGrayLevelEmphasis                 | 0.016331988  |
| wavelet-HLH | glcm       | JointAverage                         | 11.44563614  |
| wavelet-HLH | glcm       | SumAverage                           | 22.89127228  |
| wavelet-HLH | glcm       | JointEntropy                         | 6.129758942  |
| wavelet-HLH | glcm       | ClusterShade                         | -9.300014572 |
| wavelet-HLH | glcm       | MaximumProbability                   | 0.064964062  |
| wavelet-HLH | glcm       | Idmn                                 | 0.963249957  |
| wavelet-HLH | glcm       | JointEnergy                          | 0.021825896  |
| wavelet-HLH | glcm       | Contrast                             | 17.0765551   |
| wavelet-HLH | glcm       | DifferenceEntropy                    | 3.065454379  |
| wavelet-HLH | glcm       | InverseVariance                      | 0.318449675  |
| wavelet-HLH | glcm       | DifferenceVariance                   | 7.833047483  |
| wavelet-HLH | glcm       | Idn                                  | 0.880868092  |
| wavelet-HLH | glcm       | Idm                                  | 0.317877602  |
| wavelet-HLH | glcm       | Correlation                          | -0.054225057 |
| wavelet-HLH | glcm       | Autocorrelation                      | 130.5279215  |
| wavelet-HLH | glcm       | SumEntropy                           | 3.780345648  |
| wavelet-HLH | glcm       | SumSquares                           | 8.057242176  |
| wavelet-HLH | glcm       | ClusterProminence                    | 1017.424606  |
| wavelet-HLH | glcm       | Imc2                                 | 0.862655711  |
| wavelet-HLH | glcm       | Imc1                                 | -0.203026743 |
| wavelet-HLH | glcm       | DifferenceAverage                    | 3.008860407  |
| wavelet-HLH | glcm       | Id                                   | 0.395928354  |
| wavelet-HLH | glcm       | ClusterTendency                      | 15.15241361  |
| wavelet-HLH | firstorder | InterquartileRange                   | 80.83910869  |
| wavelet-HLH | firstorder | Skewness                             | -0.248629073 |
| wavelet-HLH | firstorder | Uniformity                           | 0.11234288   |
| wavelet-HLH | firstorder | Median                               | -0.682458476 |
| wavelet-HLH | firstorder | Energy                               | 1099270.088  |
| wavelet-HLH | firstorder | RobustMeanAbsoluteDeviation          | 34.28208641  |
| wavelet-HLH | firstorder | MeanAbsoluteDeviation                | 56.08919844  |
| wavelet-HLH | firstorder | TotalEnergy                          | 29680292.38  |
| wavelet-HLH | firstorder | Maximum                              | 219.6326281  |
| wavelet-HLH | firstorder | RootMeanSquared                      | 76.26430261  |
| wavelet-HLH | firstorder | 90Percentile                         | 78.35636721  |
| wavelet-HLH | firstorder | Minimum                              | -251.415079  |
| wavelet-HLH | firstorder | Entropy                              | 3.542110027  |
| wavelet-HLH | firstorder | Range                                | 471.0477071  |
| wavelet-HLH | firstorder | Variance                             | 5813.256955  |
| wavelet-HLH | firstorder | 10Percentile                         | -95.28107234 |
| wavelet-HLH | firstorder | Kurtosis                             | 4.026140746  |
| wavelet-HLH | firstorder | Mean                                 | -1.728264226 |
| wavelet-HLH | gllm       | ShortRunLowGrayLevelEmphasis         | 0.016608548  |

|             |       |                                  |             |
|-------------|-------|----------------------------------|-------------|
| wavelet-HLH | glrlm | GrayLevelVariance                | 10.13804461 |
| wavelet-HLH | glrlm | LowGrayLevelRunEmphasis          | 0.017137387 |
| wavelet-HLH | glrlm | GrayLevelNonUniformityNormalized | 0.10362278  |
| wavelet-HLH | glrlm | RunVariance                      | 0.114438887 |
| wavelet-HLH | glrlm | GrayLevelNonUniformity           | 17.86382452 |
| wavelet-HLH | glrlm | LongRunEmphasis                  | 1.319888181 |
| wavelet-HLH | glrlm | ShortRunHighGrayLevelEmphasis    | 132.9155739 |
| wavelet-HLH | glrlm | RunLengthNonUniformity           | 145.5770806 |
| wavelet-HLH | glrlm | ShortRunEmphasis                 | 0.934642227 |
| wavelet-HLH | glrlm | LongRunHighGrayLevelEmphasis     | 183.3222827 |
| wavelet-HLH | glrlm | RunPercentage                    | 0.911680912 |
| wavelet-HLH | glrlm | LongRunLowGrayLevelEmphasis      | 0.019718824 |
| wavelet-HLH | glrlm | RunEntropy                       | 3.976501915 |
| wavelet-HLH | glrlm | HighGrayLevelRunEmphasis         | 141.5152768 |
| wavelet-HLH | glrlm | RunLengthNonUniformityNormalized | 0.84395082  |
| wavelet-HLH | glszm | GrayLevelVariance                | 19.69459834 |
| wavelet-HLH | glszm | ZoneVariance                     | 24.74982687 |
| wavelet-HLH | glszm | GrayLevelNonUniformityNormalized | 0.067520776 |
| wavelet-HLH | glszm | SizeZoneNonUniformityNormalized  | 0.538088643 |
| wavelet-HLH | glszm | SizeZoneNonUniformity            | 40.89473684 |
| wavelet-HLH | glszm | GrayLevelNonUniformity           | 5.131578947 |
| wavelet-HLH | glszm | LargeAreaEmphasis                | 30.93421053 |
| wavelet-HLH | glszm | SmallAreaHighGrayLevelEmphasis   | 119.2416709 |
| wavelet-HLH | glszm | ZonePercentage                   | 0.402116402 |
| wavelet-HLH | glszm | LargeAreaLowGrayLevelEmphasis    | 0.263444603 |
| wavelet-HLH | glszm | LargeAreaHighGrayLevelEmphasis   | 4068.197368 |
| wavelet-HLH | glszm | HighGrayLevelZoneEmphasis        | 150.7368421 |
| wavelet-HLH | glszm | SmallAreaEmphasis                | 0.755903953 |
| wavelet-HLH | glszm | LowGrayLevelZoneEmphasis         | 0.028385422 |
| wavelet-HLH | glszm | ZoneEntropy                      | 4.896018719 |
| wavelet-HLH | glszm | SmallAreaLowGrayLevelEmphasis    | 0.025944138 |
| wavelet-HLH | ngtdm | Coarseness                       | 0.036484189 |
| wavelet-HLH | ngtdm | Complexity                       | 320.3647054 |
| wavelet-HLH | ngtdm | Strength                         | 3.477680163 |
| wavelet-HLH | ngtdm | Contrast                         | 0.13167753  |
| wavelet-HLH | ngtdm | Busyness                         | 0.111165797 |

| Image type | Feature Class | Feature Name                         |                                                                                                                                                                                                                                                                                                                                                                                                                   |
|------------|---------------|--------------------------------------|-------------------------------------------------------------------------------------------------------------------------------------------------------------------------------------------------------------------------------------------------------------------------------------------------------------------------------------------------------------------------------------------------------------------|
| general    | info          | BoundingBox                          | 4: RTSTRUCT: C99-Research-DNU_segment_GTV<br>(0, 0, 1, 14, 11, 10)                                                                                                                                                                                                                                                                                                                                                |
| general    | info          | EnabledImageTypes                    | {u'Original': {}, u'Wavelet': {}}                                                                                                                                                                                                                                                                                                                                                                                 |
|            |               |                                      | {'distances': [1], 'additionalInfo': True, 'force2D': False, 'interpolator': 'sitkBSpline', 'resampledPixelSpacing': [3.0], 'label': 1, 'normalizeScale': 1, 'normalize': False, 'force2Ddimension': 0, 'removeOutliers': None, 'minimumROISize': None, u'binWidth': 25.0, 'minimumROIDimensions': 1, u'correctMask': True, 'preCrop': False, u'symmetricalGLCM': True, 'resegmentRange': None, 'padDistance': 5} |
| general    | info          | GeneralSettings                      |                                                                                                                                                                                                                                                                                                                                                                                                                   |
| general    | info          | ImageHash                            | 945c551811453ebc42717875480c912514081dc2                                                                                                                                                                                                                                                                                                                                                                          |
| general    | info          | ImageSpacing                         | (0.9765625000000002, 0.9765625000000002, 2.0)                                                                                                                                                                                                                                                                                                                                                                     |
| general    | info          | MaskHash                             | 5c4229d1670c6fc53d8ded91bac606710c9dd1b3                                                                                                                                                                                                                                                                                                                                                                          |
| general    | info          | NumpyVersion                         | 1.13.1                                                                                                                                                                                                                                                                                                                                                                                                            |
| general    | info          | PyWaveletVersion                     | 0.5.2                                                                                                                                                                                                                                                                                                                                                                                                             |
| general    | info          | SimpleITKVersion                     | 1.1.0                                                                                                                                                                                                                                                                                                                                                                                                             |
| general    | info          | Version                              | 1.3.0.post102+g1b0eb74                                                                                                                                                                                                                                                                                                                                                                                            |
| general    | info          | VolumeNum                            | 1                                                                                                                                                                                                                                                                                                                                                                                                                 |
| general    | info          | VoxelNum                             | 355                                                                                                                                                                                                                                                                                                                                                                                                               |
| original   | shape         | Maximum3DDiameter                    | 43.37049688                                                                                                                                                                                                                                                                                                                                                                                                       |
| original   | shape         | Maximum2DDiameterSlice               | 32.31098884                                                                                                                                                                                                                                                                                                                                                                                                       |
| original   | shape         | Sphericity                           | 0.725442421                                                                                                                                                                                                                                                                                                                                                                                                       |
| original   | shape         | MinorAxis                            | 23.89089058                                                                                                                                                                                                                                                                                                                                                                                                       |
| original   | shape         | Elongation                           | 0.597124263                                                                                                                                                                                                                                                                                                                                                                                                       |
| original   | shape         | SurfaceVolumeRatio                   | 0.313822302                                                                                                                                                                                                                                                                                                                                                                                                       |
| original   | shape         | Volume                               | 9585                                                                                                                                                                                                                                                                                                                                                                                                              |
| original   | shape         | MajorAxis                            | 40.00991429                                                                                                                                                                                                                                                                                                                                                                                                       |
| original   | shape         | SurfaceArea                          | 3007.986768                                                                                                                                                                                                                                                                                                                                                                                                       |
| original   | shape         | Flatness                             | 0.445706496                                                                                                                                                                                                                                                                                                                                                                                                       |
| original   | shape         | LeastAxis                            | 17.83267868                                                                                                                                                                                                                                                                                                                                                                                                       |
| original   | shape         | Maximum2DDiameterColumn              | 43.26661531                                                                                                                                                                                                                                                                                                                                                                                                       |
| original   | shape         | Maximum2DDiameterRow                 | 33.54101966                                                                                                                                                                                                                                                                                                                                                                                                       |
| original   | gldm          | GrayLevelVariance                    | 68.8246459                                                                                                                                                                                                                                                                                                                                                                                                        |
| original   | gldm          | HighGrayLevelEmphasis                | 489.1323944                                                                                                                                                                                                                                                                                                                                                                                                       |
| original   | gldm          | DependenceEntropy                    | 6.156507648                                                                                                                                                                                                                                                                                                                                                                                                       |
| original   | gldm          | DependenceNonUniformity              | 109.1915493                                                                                                                                                                                                                                                                                                                                                                                                       |
| original   | gldm          | GrayLevelNonUniformity               | 15.1915493                                                                                                                                                                                                                                                                                                                                                                                                        |
| original   | gldm          | SmallDependenceEmphasis              | 0.550722221                                                                                                                                                                                                                                                                                                                                                                                                       |
| original   | gldm          | SmallDependenceHighGrayLevelEmphasis | 200.351688                                                                                                                                                                                                                                                                                                                                                                                                        |
| original   | gldm          | DependenceNonUniformityNormalized    | 0.307581829                                                                                                                                                                                                                                                                                                                                                                                                       |
| original   | gldm          | LargeDependenceEmphasis              | 9.687323944                                                                                                                                                                                                                                                                                                                                                                                                       |
| original   | gldm          | LargeDependenceLowGrayLevelEmphasis  | 0.023450601                                                                                                                                                                                                                                                                                                                                                                                                       |
| original   | gldm          | DependenceVariance                   | 4.442578853                                                                                                                                                                                                                                                                                                                                                                                                       |
| original   | gldm          | LargeDependenceHighGrayLevelEmphasis | 8057.921127                                                                                                                                                                                                                                                                                                                                                                                                       |
| original   | gldm          | SmallDependenceLowGrayLevelEmphasis  | 0.007713327                                                                                                                                                                                                                                                                                                                                                                                                       |
| original   | gldm          | LowGrayLevelEmphasis                 | 0.009099541                                                                                                                                                                                                                                                                                                                                                                                                       |
| original   | glcm          | JointAverage                         | 22.42523046                                                                                                                                                                                                                                                                                                                                                                                                       |
| original   | glcm          | SumAverage                           | 44.85046093                                                                                                                                                                                                                                                                                                                                                                                                       |
| original   | glcm          | JointEntropy                         | 7.891519928                                                                                                                                                                                                                                                                                                                                                                                                       |
| original   | glcm          | ClusterShade                         | -1021.957157                                                                                                                                                                                                                                                                                                                                                                                                      |
| original   | glcm          | MaximumProbability                   | 0.031117682                                                                                                                                                                                                                                                                                                                                                                                                       |
| original   | glcm          | Idmn                                 | 0.939372461                                                                                                                                                                                                                                                                                                                                                                                                       |
| original   | glcm          | JointEnergy                          | 0.006225109                                                                                                                                                                                                                                                                                                                                                                                                       |
| original   | glcm          | Contrast                             | 78.69531799                                                                                                                                                                                                                                                                                                                                                                                                       |
| original   | glcm          | DifferenceEntropy                    | 4.131442449                                                                                                                                                                                                                                                                                                                                                                                                       |
| original   | glcm          | InverseVariance                      | 0.177069302                                                                                                                                                                                                                                                                                                                                                                                                       |



|          |            |                                  |              |
|----------|------------|----------------------------------|--------------|
| original | glcm       | DifferenceVariance               | 30.91495289  |
| original | glcm       | Idn                              | 0.843466528  |
| original | glcm       | Idm                              | 0.174356969  |
| original | glcm       | Correlation                      | 0.386734762  |
| original | glcm       | Autocorrelation                  | 527.7368901  |
| original | glcm       | SumEntropy                       | 5.361358144  |
| original | glcm       | SumSquares                       | 64.09286017  |
| original | glcm       | ClusterProminence                | 72763.92853  |
| original | glcm       | Imc2                             | 0.954538293  |
| original | glcm       | Imc1                             | -0.266420037 |
| original | glcm       | DifferenceAverage                | 6.855740338  |
| original | glcm       | Id                               | 0.254754692  |
| original | glcm       | ClusterTendency                  | 177.6761227  |
| original | firstorder | InterquartileRange               | 381.5        |
| original | firstorder | Skewness                         | -0.167603102 |
| original | firstorder | Uniformity                       | 0.042793097  |
| original | firstorder | Median                           | -252         |
| original | firstorder | Energy                           | 37669878     |
| original | firstorder | RobustMeanAbsoluteDeviation      | 151.5539462  |
| original | firstorder | MeanAbsoluteDeviation            | 183.6660186  |
| original | firstorder | TotalEnergy                      | 1017086706   |
| original | firstorder | Maximum                          | 58           |
| original | firstorder | RootMeanSquared                  | 325.7488793  |
| original | firstorder | 90Percentile                     | 17.6         |
| original | firstorder | Minimum                          | -742         |
| original | firstorder | Entropy                          | 4.717694794  |
| original | firstorder | Range                            | 800          |
| original | firstorder | Variance                         | 43330.32486  |
| original | firstorder | 10Percentile                     | -534.6       |
| original | firstorder | Kurtosis                         | 1.780963142  |
| original | firstorder | Mean                             | -250.5633803 |
| original | glrlm      | ShortRunLowGrayLevelEmphasis     | 0.009378864  |
| original | glrlm      | GrayLevelVariance                | 67.46103153  |
| original | glrlm      | LowGrayLevelRunEmphasis          | 0.009461651  |
| original | glrlm      | GrayLevelNonUniformityNormalized | 0.040876597  |
| original | glrlm      | RunVariance                      | 0.065698663  |
| original | glrlm      | GrayLevelNonUniformity           | 13.79447807  |
| original | glrlm      | LongRunEmphasis                  | 1.174002831  |
| original | glrlm      | ShortRunHighGrayLevelEmphasis    | 446.986283   |
| original | glrlm      | RunLengthNonUniformity           | 308.0975085  |
| original | glrlm      | ShortRunEmphasis                 | 0.964913774  |
| original | glrlm      | LongRunHighGrayLevelEmphasis     | 613.1359492  |
| original | glrlm      | RunPercentage                    | 0.950379198  |
| original | glrlm      | LongRunLowGrayLevelEmphasis      | 0.009827289  |
| original | glrlm      | RunEntropy                       | 4.948209444  |
| original | glrlm      | HighGrayLevelRunEmphasis         | 473.6426416  |
| original | glrlm      | RunLengthNonUniformityNormalized | 0.912744417  |
| original | glszm      | GrayLevelVariance                | 55.53215536  |
| original | glszm      | ZoneVariance                     | 4.691181589  |
| original | glszm      | GrayLevelNonUniformityNormalized | 0.039086014  |
| original | glszm      | SizeZoneNonUniformityNormalized  | 0.583341864  |
| original | glszm      | SizeZoneNonUniformity            | 128.918552   |
| original | glszm      | GrayLevelNonUniformity           | 8.63800905   |
| original | glszm      | LargeAreaEmphasis                | 7.271493213  |
| original | glszm      | SmallAreaHighGrayLevelEmphasis   | 271.1618591  |
| original | glszm      | ZonePercentage                   | 0.622535211  |
| original | glszm      | LargeAreaLowGrayLevelEmphasis    | 0.023688312  |
| original | glszm      | LargeAreaHighGrayLevelEmphasis   | 5781.61086   |

|             |            |                                      |              |
|-------------|------------|--------------------------------------|--------------|
| original    | glszm      | HighGrayLevelZoneEmphasis            | 375.7963801  |
| original    | glszm      | SmallAreaEmphasis                    | 0.791875152  |
| original    | glszm      | LowGrayLevelZoneEmphasis             | 0.012875054  |
| original    | glszm      | ZoneEntropy                          | 5.627560638  |
| original    | glszm      | SmallAreaLowGrayLevelEmphasis        | 0.012051173  |
| original    | ngtdm      | Coarseness                           | 0.013431193  |
| original    | ngtdm      | Complexity                           | 2241.589794  |
| original    | ngtdm      | Strength                             | 6.32387309   |
| original    | ngtdm      | Contrast                             | 0.65817626   |
| original    | ngtdm      | Busyness                             | 0.111052797  |
| wavelet-HHH | gldm       | GrayLevelVariance                    | 4.795429478  |
| wavelet-HHH | gldm       | HighGrayLevelEmphasis                | 77.5971831   |
| wavelet-HHH | gldm       | DependenceEntropy                    | 5.608261376  |
| wavelet-HHH | gldm       | DependenceNonUniformity              | 53.53521127  |
| wavelet-HHH | gldm       | GrayLevelNonUniformity               | 48.45915493  |
| wavelet-HHH | gldm       | SmallDependenceEmphasis              | 0.269840175  |
| wavelet-HHH | gldm       | SmallDependenceHighGrayLevelEmphasis | 22.54181104  |
| wavelet-HHH | gldm       | DependenceNonUniformityNormalized    | 0.150803412  |
| wavelet-HHH | gldm       | LargeDependenceEmphasis              | 19.38873239  |
| wavelet-HHH | gldm       | LargeDependenceLowGrayLevelEmphasis  | 0.277061753  |
| wavelet-HHH | gldm       | DependenceVariance                   | 6.163729419  |
| wavelet-HHH | gldm       | LargeDependenceHighGrayLevelEmphasis | 1494.678873  |
| wavelet-HHH | gldm       | SmallDependenceLowGrayLevelEmphasis  | 0.008592142  |
| wavelet-HHH | gldm       | LowGrayLevelEmphasis                 | 0.020180292  |
| wavelet-HHH | glcm       | JointAverage                         | 8.517788419  |
| wavelet-HHH | glcm       | SumAverage                           | 17.03557684  |
| wavelet-HHH | glcm       | JointEntropy                         | 5.94663281   |
| wavelet-HHH | glcm       | ClusterShade                         | 2.101783776  |
| wavelet-HHH | glcm       | MaximumProbability                   | 0.056099429  |
| wavelet-HHH | glcm       | Idmn                                 | 0.97032974   |
| wavelet-HHH | glcm       | JointEnergy                          | 0.022540577  |
| wavelet-HHH | glcm       | Contrast                             | 9.522148656  |
| wavelet-HHH | glcm       | DifferenceEntropy                    | 2.763185071  |
| wavelet-HHH | glcm       | InverseVariance                      | 0.343933866  |
| wavelet-HHH | glcm       | DifferenceVariance                   | 3.877125232  |
| wavelet-HHH | glcm       | Idn                                  | 0.886719156  |
| wavelet-HHH | glcm       | Idm                                  | 0.344523215  |
| wavelet-HHH | glcm       | Correlation                          | -0.039927562 |
| wavelet-HHH | glcm       | Autocorrelation                      | 72.36621935  |
| wavelet-HHH | glcm       | SumEntropy                           | 3.516623766  |
| wavelet-HHH | glcm       | SumSquares                           | 4.573151963  |
| wavelet-HHH | glcm       | ClusterProminence                    | 277.2250354  |
| wavelet-HHH | glcm       | Imc2                                 | 0.648894829  |
| wavelet-HHH | glcm       | Imc1                                 | -0.089315478 |
| wavelet-HHH | glcm       | DifferenceAverage                    | 2.357163147  |
| wavelet-HHH | glcm       | Id                                   | 0.423764876  |
| wavelet-HHH | glcm       | ClusterTendency                      | 8.770459197  |
| wavelet-HHH | firstorder | InterquartileRange                   | 65.77435616  |
| wavelet-HHH | firstorder | Skewness                             | 0.084216367  |
| wavelet-HHH | firstorder | Uniformity                           | 0.136504662  |
| wavelet-HHH | firstorder | Median                               | 2.745969936  |
| wavelet-HHH | firstorder | Energy                               | 1056148.528  |
| wavelet-HHH | firstorder | RobustMeanAbsoluteDeviation          | 27.77780338  |
| wavelet-HHH | firstorder | MeanAbsoluteDeviation                | 41.9290691   |
| wavelet-HHH | firstorder | TotalEnergy                          | 28516010.27  |
| wavelet-HHH | firstorder | Maximum                              | 216.5722612  |
| wavelet-HHH | firstorder | RootMeanSquared                      | 54.54416813  |
| wavelet-HHH | firstorder | 90Percentile                         | 67.33486554  |

|             |            |                                      |              |
|-------------|------------|--------------------------------------|--------------|
| wavelet-HHH | firstorder | Minimum                              | -191.7827097 |
| wavelet-HHH | firstorder | Entropy                              | 3.146107386  |
| wavelet-HHH | firstorder | Range                                | 408.354971   |
| wavelet-HHH | firstorder | Variance                             | 2974.736785  |
| wavelet-HHH | firstorder | 10Percentile                         | -70.1148498  |
| wavelet-HHH | firstorder | Kurtosis                             | 3.747951419  |
| wavelet-HHH | firstorder | Mean                                 | 0.574014339  |
| wavelet-HHH | glrlm      | ShortRunLowGrayLevelEmphasis         | 0.019695821  |
| wavelet-HHH | glrlm      | GrayLevelVariance                    | 5.137328921  |
| wavelet-HHH | glrlm      | LowGrayLevelRunEmphasis              | 0.020810763  |
| wavelet-HHH | glrlm      | GrayLevelNonUniformityNormalized     | 0.129609811  |
| wavelet-HHH | glrlm      | RunVariance                          | 0.135049534  |
| wavelet-HHH | glrlm      | GrayLevelNonUniformity               | 41.35166791  |
| wavelet-HHH | glrlm      | LongRunEmphasis                      | 1.375026896  |
| wavelet-HHH | glrlm      | ShortRunHighGrayLevelEmphasis        | 71.98626743  |
| wavelet-HHH | glrlm      | RunLengthNonUniformity               | 262.2140171  |
| wavelet-HHH | glrlm      | ShortRunEmphasis                     | 0.924571488  |
| wavelet-HHH | glrlm      | LongRunHighGrayLevelEmphasis         | 106.471404   |
| wavelet-HHH | glrlm      | RunPercentage                        | 0.898591549  |
| wavelet-HHH | glrlm      | LongRunLowGrayLevelEmphasis          | 0.026245632  |
| wavelet-HHH | glrlm      | RunEntropy                           | 3.659089534  |
| wavelet-HHH | glrlm      | HighGrayLevelRunEmphasis             | 77.72893697  |
| wavelet-HHH | glrlm      | RunLengthNonUniformityNormalized     | 0.82145353   |
| wavelet-HHH | glszm      | GrayLevelVariance                    | 10.59320478  |
| wavelet-HHH | glszm      | ZoneVariance                         | 77.15171921  |
| wavelet-HHH | glszm      | GrayLevelNonUniformityNormalized     | 0.097439037  |
| wavelet-HHH | glszm      | SizeZoneNonUniformityNormalized      | 0.445974901  |
| wavelet-HHH | glszm      | SizeZoneNonUniformity                | 44.15151515  |
| wavelet-HHH | glszm      | GrayLevelNonUniformity               | 9.646464646  |
| wavelet-HHH | glszm      | LargeAreaEmphasis                    | 90.01010101  |
| wavelet-HHH | glszm      | SmallAreaHighGrayLevelEmphasis       | 60.09203026  |
| wavelet-HHH | glszm      | ZonePercentage                       | 0.278873239  |
| wavelet-HHH | glszm      | LargeAreaLowGrayLevelEmphasis        | 1.257156437  |
| wavelet-HHH | glszm      | LargeAreaHighGrayLevelEmphasis       | 6951.343434  |
| wavelet-HHH | glszm      | HighGrayLevelZoneEmphasis            | 82.58585859  |
| wavelet-HHH | glszm      | SmallAreaEmphasis                    | 0.6918941    |
| wavelet-HHH | glszm      | LowGrayLevelZoneEmphasis             | 0.032265571  |
| wavelet-HHH | glszm      | ZoneEntropy                          | 4.790282065  |
| wavelet-HHH | glszm      | SmallAreaLowGrayLevelEmphasis        | 0.026070722  |
| wavelet-HHH | ngtdm      | Coarseness                           | 0.017183759  |
| wavelet-HHH | ngtdm      | Complexity                           | 167.2082741  |
| wavelet-HHH | ngtdm      | Strength                             | 1.198342246  |
| wavelet-HHH | ngtdm      | Contrast                             | 0.082709989  |
| wavelet-HHH | ngtdm      | Busyness                             | 0.402647578  |
| wavelet-HLL | gldm       | GrayLevelVariance                    | 23.26914501  |
| wavelet-HLL | gldm       | HighGrayLevelEmphasis                | 252.0028169  |
| wavelet-HLL | gldm       | DependenceEntropy                    | 6.041662865  |
| wavelet-HLL | gldm       | DependenceNonUniformity              | 85.35492958  |
| wavelet-HLL | gldm       | GrayLevelNonUniformity               | 22.94366197  |
| wavelet-HLL | gldm       | SmallDependenceEmphasis              | 0.440778708  |
| wavelet-HLL | gldm       | SmallDependenceHighGrayLevelEmphasis | 123.2719319  |
| wavelet-HLL | gldm       | DependenceNonUniformityNormalized    | 0.240436421  |
| wavelet-HLL | gldm       | LargeDependenceEmphasis              | 8.014084507  |
| wavelet-HLL | gldm       | LargeDependenceLowGrayLevelEmphasis  | 0.05028172   |
| wavelet-HLL | gldm       | DependenceVariance                   | 2.1862805    |
| wavelet-HLL | gldm       | LargeDependenceHighGrayLevelEmphasis | 1725.625352  |
| wavelet-HLL | gldm       | SmallDependenceLowGrayLevelEmphasis  | 0.006034297  |
| wavelet-HLL | gldm       | LowGrayLevelEmphasis                 | 0.009355069  |

|             |            |                                  |              |
|-------------|------------|----------------------------------|--------------|
| wavelet-HLL | glcm       | JointAverage                     | 14.95591817  |
| wavelet-HLL | glcm       | SumAverage                       | 29.91183634  |
| wavelet-HLL | glcm       | JointEntropy                     | 7.480255882  |
| wavelet-HLL | glcm       | ClusterShade                     | 148.5552231  |
| wavelet-HLL | glcm       | MaximumProbability               | 0.022507502  |
| wavelet-HLL | glcm       | Idmn                             | 0.963147207  |
| wavelet-HLL | glcm       | JointEnergy                      | 0.007313442  |
| wavelet-HLL | glcm       | Contrast                         | 33.01445949  |
| wavelet-HLL | glcm       | DifferenceEntropy                | 3.527467226  |
| wavelet-HLL | glcm       | InverseVariance                  | 0.230604407  |
| wavelet-HLL | glcm       | DifferenceVariance               | 13.18635332  |
| wavelet-HLL | glcm       | Idn                              | 0.87509191   |
| wavelet-HLL | glcm       | Idm                              | 0.216036752  |
| wavelet-HLL | glcm       | Correlation                      | 0.218257478  |
| wavelet-HLL | glcm       | Autocorrelation                  | 228.3561603  |
| wavelet-HLL | glcm       | SumEntropy                       | 4.716843392  |
| wavelet-HLL | glcm       | SumSquares                       | 21.17975192  |
| wavelet-HLL | glcm       | ClusterProminence                | 9143.652958  |
| wavelet-HLL | glcm       | Imc2                             | 0.892274052  |
| wavelet-HLL | glcm       | Imc1                             | -0.194716062 |
| wavelet-HLL | glcm       | DifferenceAverage                | 4.376916432  |
| wavelet-HLL | glcm       | Id                               | 0.306836522  |
| wavelet-HLL | glcm       | ClusterTendency                  | 51.7045482   |
| wavelet-HLL | firstorder | InterquartileRange               | 143.2283686  |
| wavelet-HLL | firstorder | Skewness                         | 0.271028521  |
| wavelet-HLL | firstorder | Uniformity                       | 0.064630034  |
| wavelet-HLL | firstorder | Median                           | -70.22466126 |
| wavelet-HLL | firstorder | Energy                           | 6437676.219  |
| wavelet-HLL | firstorder | RobustMeanAbsoluteDeviation      | 62.16293934  |
| wavelet-HLL | firstorder | MeanAbsoluteDeviation            | 93.72290506  |
| wavelet-HLL | firstorder | TotalEnergy                      | 173817257.9  |
| wavelet-HLL | firstorder | Maximum                          | 273.3562595  |
| wavelet-HLL | firstorder | RootMeanSquared                  | 134.6636521  |
| wavelet-HLL | firstorder | 90Percentile                     | 118.8061042  |
| wavelet-HLL | firstorder | Minimum                          | -404.3353667 |
| wavelet-HLL | firstorder | Entropy                          | 4.231806716  |
| wavelet-HLL | firstorder | Range                            | 677.6916263  |
| wavelet-HLL | firstorder | Variance                         | 14577.88314  |
| wavelet-HLL | firstorder | 10Percentile                     | -204.4739548 |
| wavelet-HLL | firstorder | Kurtosis                         | 3.033282203  |
| wavelet-HLL | firstorder | Mean                             | -59.63569459 |
| wavelet-HLL | glrlm      | ShortRunLowGrayLevelEmphasis     | 0.009311114  |
| wavelet-HLL | glrlm      | GrayLevelVariance                | 23.83938433  |
| wavelet-HLL | glrlm      | LowGrayLevelRunEmphasis          | 0.009555112  |
| wavelet-HLL | glrlm      | GrayLevelNonUniformityNormalized | 0.063074397  |
| wavelet-HLL | glrlm      | RunVariance                      | 0.061160318  |
| wavelet-HLL | glrlm      | GrayLevelNonUniformity           | 21.1749065   |
| wavelet-HLL | glrlm      | LongRunEmphasis                  | 1.180184492  |
| wavelet-HLL | glrlm      | ShortRunHighGrayLevelEmphasis    | 244.9901575  |
| wavelet-HLL | glrlm      | RunLengthNonUniformity           | 300.953349   |
| wavelet-HLL | glrlm      | ShortRunEmphasis                 | 0.958454331  |
| wavelet-HLL | glrlm      | LongRunHighGrayLevelEmphasis     | 292.9128275  |
| wavelet-HLL | glrlm      | RunPercentage                    | 0.945612134  |
| wavelet-HLL | glrlm      | LongRunLowGrayLevelEmphasis      | 0.01062004   |
| wavelet-HLL | glrlm      | RunEntropy                       | 4.513424055  |
| wavelet-HLL | glrlm      | HighGrayLevelRunEmphasis         | 254.0314035  |
| wavelet-HLL | glrlm      | RunLengthNonUniformityNormalized | 0.896196959  |
| wavelet-HLL | glszm      | GrayLevelVariance                | 31.33079788  |

|             |            |                                      |              |
|-------------|------------|--------------------------------------|--------------|
| wavelet-HLL | glszm      | ZoneVariance                         | 9.016822371  |
| wavelet-HLL | glszm      | GrayLevelNonUniformityNormalized     | 0.052960485  |
| wavelet-HLL | glszm      | SizeZoneNonUniformityNormalized      | 0.493435172  |
| wavelet-HLL | glszm      | SizeZoneNonUniformity                | 87.83146067  |
| wavelet-HLL | glszm      | GrayLevelNonUniformity               | 9.426966292  |
| wavelet-HLL | glszm      | LargeAreaEmphasis                    | 12.99438202  |
| wavelet-HLL | glszm      | SmallAreaHighGrayLevelEmphasis       | 210.7686389  |
| wavelet-HLL | glszm      | ZonePercentage                       | 0.501408451  |
| wavelet-HLL | glszm      | LargeAreaLowGrayLevelEmphasis        | 0.080376193  |
| wavelet-HLL | glszm      | LargeAreaHighGrayLevelEmphasis       | 2739.646067  |
| wavelet-HLL | glszm      | HighGrayLevelZoneEmphasis            | 281.4325843  |
| wavelet-HLL | glszm      | SmallAreaEmphasis                    | 0.730034007  |
| wavelet-HLL | glszm      | LowGrayLevelZoneEmphasis             | 0.012743749  |
| wavelet-HLL | glszm      | ZoneEntropy                          | 5.507640845  |
| wavelet-HLL | glszm      | SmallAreaLowGrayLevelEmphasis        | 0.011141027  |
| wavelet-HLL | ngtdm      | Coarseness                           | 0.018737917  |
| wavelet-HLL | ngtdm      | Complexity                           | 860.7357568  |
| wavelet-HLL | ngtdm      | Strength                             | 4.085987536  |
| wavelet-HLL | ngtdm      | Contrast                             | 0.209680477  |
| wavelet-HLL | ngtdm      | Busyness                             | 0.139564066  |
| wavelet-LHL | gldm       | GrayLevelVariance                    | 43.78420155  |
| wavelet-LHL | gldm       | HighGrayLevelEmphasis                | 635.3014085  |
| wavelet-LHL | gldm       | DependenceEntropy                    | 6.358270051  |
| wavelet-LHL | gldm       | DependenceNonUniformity              | 100.9323944  |
| wavelet-LHL | gldm       | GrayLevelNonUniformity               | 16.21126761  |
| wavelet-LHL | gldm       | SmallDependenceEmphasis              | 0.486224522  |
| wavelet-LHL | gldm       | SmallDependenceHighGrayLevelEmphasis | 338.6122158  |
| wavelet-LHL | gldm       | DependenceNonUniformityNormalized    | 0.284316604  |
| wavelet-LHL | gldm       | LargeDependenceEmphasis              | 6.791549296  |
| wavelet-LHL | gldm       | LargeDependenceLowGrayLevelEmphasis  | 0.017027121  |
| wavelet-LHL | gldm       | DependenceVariance                   | 1.951549296  |
| wavelet-LHL | gldm       | LargeDependenceHighGrayLevelEmphasis | 3878.591549  |
| wavelet-LHL | gldm       | SmallDependenceLowGrayLevelEmphasis  | 0.003849347  |
| wavelet-LHL | gldm       | LowGrayLevelEmphasis                 | 0.004975056  |
| wavelet-LHL | glcm       | JointAverage                         | 24.14303501  |
| wavelet-LHL | glcm       | SumAverage                           | 48.28607001  |
| wavelet-LHL | glcm       | JointEntropy                         | 7.91359439   |
| wavelet-LHL | glcm       | ClusterShade                         | 517.2137313  |
| wavelet-LHL | glcm       | MaximumProbability                   | 0.015963254  |
| wavelet-LHL | glcm       | Idmn                                 | 0.976695493  |
| wavelet-LHL | glcm       | JointEnergy                          | 0.005077096  |
| wavelet-LHL | glcm       | Contrast                             | 51.4178287   |
| wavelet-LHL | glcm       | DifferenceEntropy                    | 3.704676293  |
| wavelet-LHL | glcm       | InverseVariance                      | 0.218901044  |
| wavelet-LHL | glcm       | DifferenceVariance                   | 23.34326461  |
| wavelet-LHL | glcm       | Idn                                  | 0.903017451  |
| wavelet-LHL | glcm       | Idm                                  | 0.1968066    |
| wavelet-LHL | glcm       | Correlation                          | 0.331172307  |
| wavelet-LHL | glcm       | Autocorrelation                      | 596.1451974  |
| wavelet-LHL | glcm       | SumEntropy                           | 5.145141178  |
| wavelet-LHL | glcm       | SumSquares                           | 38.94477435  |
| wavelet-LHL | glcm       | ClusterProminence                    | 37793.10265  |
| wavelet-LHL | glcm       | Imc2                                 | 0.95526451   |
| wavelet-LHL | glcm       | Imc1                                 | -0.271083063 |
| wavelet-LHL | glcm       | DifferenceAverage                    | 5.152981872  |
| wavelet-LHL | glcm       | Id                                   | 0.286527345  |
| wavelet-LHL | glcm       | ClusterTendency                      | 104.3612687  |
| wavelet-LHL | firstorder | InterquartileRange                   | 215.5529469  |

|             |            |                                  |              |
|-------------|------------|----------------------------------|--------------|
| wavelet-LHL | firstorder | Skewness                         | 0.284466556  |
| wavelet-LHL | firstorder | Uniformity                       | 0.045665543  |
| wavelet-LHL | firstorder | Median                           | -30.82849722 |
| wavelet-LHL | firstorder | Energy                           | 10023482.83  |
| wavelet-LHL | firstorder | RobustMeanAbsoluteDeviation      | 89.21638333  |
| wavelet-LHL | firstorder | MeanAbsoluteDeviation            | 129.9245171  |
| wavelet-LHL | firstorder | TotalEnergy                      | 270634036.5  |
| wavelet-LHL | firstorder | Maximum                          | 474.5823057  |
| wavelet-LHL | firstorder | RootMeanSquared                  | 168.0332197  |
| wavelet-LHL | firstorder | 90Percentile                     | 190.8492297  |
| wavelet-LHL | firstorder | Minimum                          | -605.4984345 |
| wavelet-LHL | firstorder | Entropy                          | 4.673257533  |
| wavelet-LHL | firstorder | Range                            | 1080.08074   |
| wavelet-LHL | firstorder | Variance                         | 27393.98314  |
| wavelet-LHL | firstorder | 10Percentile                     | -230.8328425 |
| wavelet-LHL | firstorder | Kurtosis                         | 3.292748486  |
| wavelet-LHL | firstorder | Mean                             | -29.00309919 |
| wavelet-LHL | glrlm      | ShortRunLowGrayLevelEmphasis     | 0.005040074  |
| wavelet-LHL | glrlm      | GrayLevelVariance                | 44.71395125  |
| wavelet-LHL | glrlm      | LowGrayLevelRunEmphasis          | 0.005114348  |
| wavelet-LHL | glrlm      | GrayLevelNonUniformityNormalized | 0.044887208  |
| wavelet-LHL | glrlm      | RunVariance                      | 0.053414789  |
| wavelet-LHL | glrlm      | GrayLevelNonUniformity           | 15.20182975  |
| wavelet-LHL | glrlm      | LongRunEmphasis                  | 1.154437104  |
| wavelet-LHL | glrlm      | ShortRunHighGrayLevelEmphasis    | 619.2469896  |
| wavelet-LHL | glrlm      | RunLengthNonUniformity           | 309.70202    |
| wavelet-LHL | glrlm      | ShortRunEmphasis                 | 0.965421138  |
| wavelet-LHL | glrlm      | LongRunHighGrayLevelEmphasis     | 726.0684836  |
| wavelet-LHL | glrlm      | RunPercentage                    | 0.953846154  |
| wavelet-LHL | glrlm      | LongRunLowGrayLevelEmphasis      | 0.005441458  |
| wavelet-LHL | glrlm      | RunEntropy                       | 4.899230448  |
| wavelet-LHL | glrlm      | HighGrayLevelRunEmphasis         | 638.7588568  |
| wavelet-LHL | glrlm      | RunLengthNonUniformityNormalized | 0.913700942  |
| wavelet-LHL | glszm      | GrayLevelVariance                | 55.01435234  |
| wavelet-LHL | glszm      | ZoneVariance                     | 4.615630395  |
| wavelet-LHL | glszm      | GrayLevelNonUniformityNormalized | 0.039964957  |
| wavelet-LHL | glszm      | SizeZoneNonUniformityNormalized  | 0.50588781   |
| wavelet-LHL | glszm      | SizeZoneNonUniformity            | 99.65989848  |
| wavelet-LHL | glszm      | GrayLevelNonUniformity           | 7.873096447  |
| wavelet-LHL | glszm      | LargeAreaEmphasis                | 7.862944162  |
| wavelet-LHL | glszm      | SmallAreaHighGrayLevelEmphasis   | 529.2712332  |
| wavelet-LHL | glszm      | ZonePercentage                   | 0.554929577  |
| wavelet-LHL | glszm      | LargeAreaLowGrayLevelEmphasis    | 0.020861598  |
| wavelet-LHL | glszm      | LargeAreaHighGrayLevelEmphasis   | 4628.142132  |
| wavelet-LHL | glszm      | HighGrayLevelZoneEmphasis        | 686.3756345  |
| wavelet-LHL | glszm      | SmallAreaEmphasis                | 0.738477712  |
| wavelet-LHL | glszm      | LowGrayLevelZoneEmphasis         | 0.007225663  |
| wavelet-LHL | glszm      | ZoneEntropy                      | 5.864395511  |
| wavelet-LHL | glszm      | SmallAreaLowGrayLevelEmphasis    | 0.006632195  |
| wavelet-LHL | ngtdm      | Coarseness                       | 0.023489176  |
| wavelet-LHL | ngtdm      | Complexity                       | 1681.46728   |
| wavelet-LHL | ngtdm      | Strength                         | 9.026360372  |
| wavelet-LHL | ngtdm      | Contrast                         | 0.262109356  |
| wavelet-LHL | ngtdm      | Busyness                         | 0.058547084  |
| wavelet-LHH | gldm       | GrayLevelVariance                | 10.40901408  |
| wavelet-LHH | gldm       | HighGrayLevelEmphasis            | 164.1690141  |
| wavelet-LHH | gldm       | DependenceEntropy                | 5.840795801  |
| wavelet-LHH | gldm       | DependenceNonUniformity          | 66.50422535  |

|             |            |                                      |              |
|-------------|------------|--------------------------------------|--------------|
| wavelet-LHH | gldm       | GrayLevelNonUniformity               | 35.8056338   |
| wavelet-LHH | gldm       | SmallDependenceEmphasis              | 0.346410539  |
| wavelet-LHH | gldm       | SmallDependenceHighGrayLevelEmphasis | 60.60884354  |
| wavelet-LHH | gldm       | DependenceNonUniformityNormalized    | 0.187335846  |
| wavelet-LHH | gldm       | LargeDependenceEmphasis              | 15.66478873  |
| wavelet-LHH | gldm       | LargeDependenceLowGrayLevelEmphasis  | 0.117663358  |
| wavelet-LHH | gldm       | DependenceVariance                   | 5.72897441   |
| wavelet-LHH | gldm       | LargeDependenceHighGrayLevelEmphasis | 2420.664789  |
| wavelet-LHH | gldm       | SmallDependenceLowGrayLevelEmphasis  | 0.006396078  |
| wavelet-LHH | gldm       | LowGrayLevelEmphasis                 | 0.01239387   |
| wavelet-LHH | glcm       | JointAverage                         | 12.49030756  |
| wavelet-LHH | glcm       | SumAverage                           | 24.98061512  |
| wavelet-LHH | glcm       | JointEntropy                         | 6.66238304   |
| wavelet-LHH | glcm       | ClusterShade                         | -9.154341514 |
| wavelet-LHH | glcm       | MaximumProbability                   | 0.041769884  |
| wavelet-LHH | glcm       | Idmn                                 | 0.96757372   |
| wavelet-LHH | glcm       | JointEnergy                          | 0.014469539  |
| wavelet-LHH | glcm       | Contrast                             | 19.64784719  |
| wavelet-LHH | glcm       | DifferenceEntropy                    | 3.18884498   |
| wavelet-LHH | glcm       | InverseVariance                      | 0.288797468  |
| wavelet-LHH | glcm       | DifferenceVariance                   | 8.606561152  |
| wavelet-LHH | glcm       | Idn                                  | 0.885391259  |
| wavelet-LHH | glcm       | Idm                                  | 0.287570702  |
| wavelet-LHH | glcm       | Correlation                          | 0.004413886  |
| wavelet-LHH | glcm       | Autocorrelation                      | 156.0378417  |
| wavelet-LHH | glcm       | SumEntropy                           | 4.040208203  |
| wavelet-LHH | glcm       | SumSquares                           | 9.844538598  |
| wavelet-LHH | glcm       | ClusterProminence                    | 1750.582629  |
| wavelet-LHH | glcm       | Imc2                                 | 0.792117754  |
| wavelet-LHH | glcm       | Imc1                                 | -0.140516596 |
| wavelet-LHH | glcm       | DifferenceAverage                    | 3.273856604  |
| wavelet-LHH | glcm       | Id                                   | 0.371558521  |
| wavelet-LHH | glcm       | ClusterTendency                      | 19.73030721  |
| wavelet-LHH | firstorder | InterquartileRange                   | 86.84472279  |
| wavelet-LHH | firstorder | Skewness                             | -0.081090065 |
| wavelet-LHH | firstorder | Uniformity                           | 0.10086094   |
| wavelet-LHH | firstorder | Median                               | -3.412997403 |
| wavelet-LHH | firstorder | Energy                               | 2291191.843  |
| wavelet-LHH | firstorder | RobustMeanAbsoluteDeviation          | 38.07104801  |
| wavelet-LHH | firstorder | MeanAbsoluteDeviation                | 59.98191067  |
| wavelet-LHH | firstorder | TotalEnergy                          | 61862179.75  |
| wavelet-LHH | firstorder | Maximum                              | 262.3254258  |
| wavelet-LHH | firstorder | RootMeanSquared                      | 80.33717401  |
| wavelet-LHH | firstorder | 90Percentile                         | 102.3015675  |
| wavelet-LHH | firstorder | Minimum                              | -292.3887445 |
| wavelet-LHH | firstorder | Entropy                              | 3.651808043  |
| wavelet-LHH | firstorder | Range                                | 554.7141702  |
| wavelet-LHH | firstorder | Variance                             | 6447.172742  |
| wavelet-LHH | firstorder | 10Percentile                         | -98.22148583 |
| wavelet-LHH | firstorder | Kurtosis                             | 4.122323694  |
| wavelet-LHH | firstorder | Mean                                 | -2.624649722 |
| wavelet-LHH | glrlm      | ShortRunLowGrayLevelEmphasis         | 0.012335421  |
| wavelet-LHH | glrlm      | GrayLevelVariance                    | 11.0435954   |
| wavelet-LHH | glrlm      | LowGrayLevelRunEmphasis              | 0.012820831  |
| wavelet-LHH | glrlm      | GrayLevelNonUniformityNormalized     | 0.095451471  |
| wavelet-LHH | glrlm      | RunVariance                          | 0.10492843   |
| wavelet-LHH | glrlm      | GrayLevelNonUniformity               | 31.08969944  |
| wavelet-LHH | glrlm      | LongRunEmphasis                      | 1.297015127  |

|             |       |                                      |             |
|-------------|-------|--------------------------------------|-------------|
| wavelet-LHH | glrlm | ShortRunHighGrayLevelEmphasis        | 155.2582147 |
| wavelet-LHH | glrlm | RunLengthNonUniformity               | 277.7295593 |
| wavelet-LHH | glrlm | ShortRunEmphasis                     | 0.938110789 |
| wavelet-LHH | glrlm | LongRunHighGrayLevelEmphasis         | 211.3012166 |
| wavelet-LHH | glrlm | RunPercentage                        | 0.917226436 |
| wavelet-LHH | glrlm | LongRunLowGrayLevelEmphasis          | 0.015085562 |
| wavelet-LHH | glrlm | RunEntropy                           | 4.077893511 |
| wavelet-LHH | glrlm | HighGrayLevelRunEmphasis             | 164.9061931 |
| wavelet-LHH | glrlm | RunLengthNonUniformityNormalized     | 0.851580801 |
| wavelet-LHH | glszm | GrayLevelVariance                    | 18.02303707 |
| wavelet-LHH | glszm | ZoneVariance                         | 27.24259343 |
| wavelet-LHH | glszm | GrayLevelNonUniformityNormalized     | 0.072883658 |
| wavelet-LHH | glszm | SizeZoneNonUniformityNormalized      | 0.430008551 |
| wavelet-LHH | glszm | SizeZoneNonUniformity                | 60.63120567 |
| wavelet-LHH | glszm | GrayLevelNonUniformity               | 10.27659574 |
| wavelet-LHH | glszm | LargeAreaEmphasis                    | 33.58156028 |
| wavelet-LHH | glszm | SmallAreaHighGrayLevelEmphasis       | 121.7745675 |
| wavelet-LHH | glszm | ZonePercentage                       | 0.397183099 |
| wavelet-LHH | glszm | LargeAreaLowGrayLevelEmphasis        | 0.240154275 |
| wavelet-LHH | glszm | LargeAreaHighGrayLevelEmphasis       | 5303.929078 |
| wavelet-LHH | glszm | HighGrayLevelZoneEmphasis            | 174.1843972 |
| wavelet-LHH | glszm | SmallAreaEmphasis                    | 0.679511437 |
| wavelet-LHH | glszm | LowGrayLevelZoneEmphasis             | 0.018164125 |
| wavelet-LHH | glszm | ZoneEntropy                          | 5.281801821 |
| wavelet-LHH | glszm | SmallAreaLowGrayLevelEmphasis        | 0.014112896 |
| wavelet-LHH | ngtdm | Coarseness                           | 0.019113336 |
| wavelet-LHH | ngtdm | Complexity                           | 478.0526291 |
| wavelet-LHH | ngtdm | Strength                             | 2.706721595 |
| wavelet-LHH | ngtdm | Contrast                             | 0.111602216 |
| wavelet-LHH | ngtdm | Busyness                             | 0.165067715 |
| wavelet-LLH | gldm  | GrayLevelVariance                    | 97.25733783 |
| wavelet-LLH | gldm  | HighGrayLevelEmphasis                | 816.1014085 |
| wavelet-LLH | gldm  | DependenceEntropy                    | 6.400794918 |
| wavelet-LLH | gldm  | DependenceNonUniformity              | 117.5183099 |
| wavelet-LLH | gldm  | GrayLevelNonUniformity               | 12.73521127 |
| wavelet-LLH | gldm  | SmallDependenceEmphasis              | 0.534066877 |
| wavelet-LLH | gldm  | SmallDependenceHighGrayLevelEmphasis | 481.6790801 |
| wavelet-LLH | gldm  | DependenceNonUniformityNormalized    | 0.331037493 |
| wavelet-LLH | gldm  | LargeDependenceEmphasis              | 4.549295775 |
| wavelet-LLH | gldm  | LargeDependenceLowGrayLevelEmphasis  | 0.012598099 |
| wavelet-LLH | gldm  | DependenceVariance                   | 0.97666336  |
| wavelet-LLH | gldm  | LargeDependenceHighGrayLevelEmphasis | 3182.535211 |
| wavelet-LLH | gldm  | SmallDependenceLowGrayLevelEmphasis  | 0.003989947 |
| wavelet-LLH | gldm  | LowGrayLevelEmphasis                 | 0.004981766 |
| wavelet-LLH | glcm  | JointAverage                         | 26.07185787 |
| wavelet-LLH | glcm  | SumAverage                           | 52.14371574 |
| wavelet-LLH | glcm  | JointEntropy                         | 8.250996791 |
| wavelet-LLH | glcm  | ClusterShade                         | 3500.527363 |
| wavelet-LLH | glcm  | MaximumProbability                   | 0.011785781 |
| wavelet-LLH | glcm  | Idmn                                 | 0.969281741 |
| wavelet-LLH | glcm  | JointEnergy                          | 0.003852231 |
| wavelet-LLH | glcm  | Contrast                             | 129.4975796 |
| wavelet-LLH | glcm  | DifferenceEntropy                    | 4.312836712 |
| wavelet-LLH | glcm  | InverseVariance                      | 0.146392263 |
| wavelet-LLH | glcm  | DifferenceVariance                   | 51.92038657 |
| wavelet-LLH | glcm  | Idn                                  | 0.888974928 |
| wavelet-LLH | glcm  | Idm                                  | 0.137768585 |
| wavelet-LLH | glcm  | Correlation                          | 0.251412849 |



|             |            |                                  |              |
|-------------|------------|----------------------------------|--------------|
| wavelet-LLH | glcm       | Autocorrelation                  | 702.7342959  |
| wavelet-LLH | glcm       | SumEntropy                       | 5.453865927  |
| wavelet-LLH | glcm       | SumSquares                       | 87.69349845  |
| wavelet-LLH | glcm       | ClusterProminence                | 245107.8533  |
| wavelet-LLH | glcm       | Imc2                             | 0.985184669  |
| wavelet-LLH | glcm       | Imc1                             | -0.355056178 |
| wavelet-LLH | glcm       | DifferenceAverage                | 8.371269396  |
| wavelet-LLH | glcm       | Id                               | 0.221546925  |
| wavelet-LLH | glcm       | ClusterTendency                  | 221.2764141  |
| wavelet-LLH | firstorder | InterquartileRange               | 293.8940632  |
| wavelet-LLH | firstorder | Skewness                         | 0.827537308  |
| wavelet-LLH | firstorder | Uniformity                       | 0.035873835  |
| wavelet-LLH | firstorder | Median                           | -42.62925546 |
| wavelet-LLH | firstorder | Energy                           | 21738033.25  |
| wavelet-LLH | firstorder | RobustMeanAbsoluteDeviation      | 126.0227778  |
| wavelet-LLH | firstorder | MeanAbsoluteDeviation            | 189.4478876  |
| wavelet-LLH | firstorder | TotalEnergy                      | 586926897.8  |
| wavelet-LLH | firstorder | Maximum                          | 839.8220837  |
| wavelet-LLH | firstorder | RootMeanSquared                  | 247.4548373  |
| wavelet-LLH | firstorder | 90Percentile                     | 291.0969345  |
| wavelet-LLH | firstorder | Minimum                          | -661.5252844 |
| wavelet-LLH | firstorder | Entropy                          | 5.095783688  |
| wavelet-LLH | firstorder | Range                            | 1501.347368  |
| wavelet-LLH | firstorder | Variance                         | 60961.95145  |
| wavelet-LLH | firstorder | 10Percentile                     | -282.9990227 |
| wavelet-LLH | firstorder | Kurtosis                         | 3.995336862  |
| wavelet-LLH | firstorder | Mean                             | -16.4907562  |
| wavelet-LLH | glrlm      | ShortRunLowGrayLevelEmphasis     | 0.005026789  |
| wavelet-LLH | glrlm      | GrayLevelVariance                | 98.39553527  |
| wavelet-LLH | glrlm      | LowGrayLevelRunEmphasis          | 0.005083589  |
| wavelet-LLH | glrlm      | GrayLevelNonUniformityNormalized | 0.035422018  |
| wavelet-LLH | glrlm      | RunVariance                      | 0.0373688    |
| wavelet-LLH | glrlm      | GrayLevelNonUniformity           | 12.14562682  |
| wavelet-LLH | glrlm      | LongRunEmphasis                  | 1.11125949   |
| wavelet-LLH | glrlm      | ShortRunHighGrayLevelEmphasis    | 802.8312516  |
| wavelet-LLH | glrlm      | RunLengthNonUniformity           | 320.5519329  |
| wavelet-LLH | glrlm      | ShortRunEmphasis                 | 0.973867805  |
| wavelet-LLH | glrlm      | LongRunHighGrayLevelEmphasis     | 897.0771174  |
| wavelet-LLH | glrlm      | RunPercentage                    | 0.965763814  |
| wavelet-LLH | glrlm      | LongRunLowGrayLevelEmphasis      | 0.005321171  |
| wavelet-LLH | glrlm      | RunEntropy                       | 5.259114225  |
| wavelet-LLH | glrlm      | HighGrayLevelRunEmphasis         | 820.7802349  |
| wavelet-LLH | glrlm      | RunLengthNonUniformityNormalized | 0.934041478  |
| wavelet-LLH | glszm      | GrayLevelVariance                | 112.0137834  |
| wavelet-LLH | glszm      | ZoneVariance                     | 1.368881667  |
| wavelet-LLH | glszm      | GrayLevelNonUniformityNormalized | 0.031208395  |
| wavelet-LLH | glszm      | SizeZoneNonUniformityNormalized  | 0.498512021  |
| wavelet-LLH | glszm      | SizeZoneNonUniformity            | 112.6637168  |
| wavelet-LLH | glszm      | GrayLevelNonUniformity           | 7.053097345  |
| wavelet-LLH | glszm      | LargeAreaEmphasis                | 3.836283186  |
| wavelet-LLH | glszm      | SmallAreaHighGrayLevelEmphasis   | 677.8831235  |
| wavelet-LLH | glszm      | ZonePercentage                   | 0.636619718  |
| wavelet-LLH | glszm      | LargeAreaLowGrayLevelEmphasis    | 0.012549652  |
| wavelet-LLH | glszm      | LargeAreaHighGrayLevelEmphasis   | 2767.867257  |
| wavelet-LLH | glszm      | HighGrayLevelZoneEmphasis        | 881.7079646  |
| wavelet-LLH | glszm      | SmallAreaEmphasis                | 0.731796572  |
| wavelet-LLH | glszm      | LowGrayLevelZoneEmphasis         | 0.006602495  |
| wavelet-LLH | glszm      | ZoneEntropy                      | 6.216793705  |

|             |            |                                      |              |
|-------------|------------|--------------------------------------|--------------|
| wavelet-LLH | glszm      | SmallAreaLowGrayLevelEmphasis        | 0.006042299  |
| wavelet-LLH | ngtdm      | Coarseness                           | 0.016851587  |
| wavelet-LLH | ngtdm      | Complexity                           | 6580.890964  |
| wavelet-LLH | ngtdm      | Strength                             | 17.42137644  |
| wavelet-LLH | ngtdm      | Contrast                             | 0.46936464   |
| wavelet-LLH | ngtdm      | Busyness                             | 0.046658395  |
| wavelet-LLL | gldm       | GrayLevelVariance                    | 436.2124499  |
| wavelet-LLL | gldm       | HighGrayLevelEmphasis                | 3642.323944  |
| wavelet-LLL | gldm       | DependenceEntropy                    | 6.813134004  |
| wavelet-LLL | gldm       | DependenceNonUniformity              | 179.6591549  |
| wavelet-LLL | gldm       | GrayLevelNonUniformity               | 5.676056338  |
| wavelet-LLL | gldm       | SmallDependenceEmphasis              | 0.733767973  |
| wavelet-LLL | gldm       | SmallDependenceHighGrayLevelEmphasis | 2385.597372  |
| wavelet-LLL | gldm       | DependenceNonUniformityNormalized    | 0.506082127  |
| wavelet-LLL | gldm       | LargeDependenceEmphasis              | 3.03943662   |
| wavelet-LLL | gldm       | LargeDependenceLowGrayLevelEmphasis  | 0.003987826  |
| wavelet-LLL | gldm       | DependenceVariance                   | 0.802094822  |
| wavelet-LLL | gldm       | LargeDependenceHighGrayLevelEmphasis | 15756.36901  |
| wavelet-LLL | gldm       | SmallDependenceLowGrayLevelEmphasis  | 0.003405526  |
| wavelet-LLL | gldm       | LowGrayLevelEmphasis                 | 0.003491142  |
| wavelet-LLL | glcm       | JointAverage                         | 62.0215881   |
| wavelet-LLL | glcm       | SumAverage                           | 124.0431762  |
| wavelet-LLL | glcm       | JointEntropy                         | 8.756642999  |
| wavelet-LLL | glcm       | ClusterShade                         | -12190.85721 |
| wavelet-LLL | glcm       | MaximumProbability                   | 0.008002585  |
| wavelet-LLL | glcm       | Idmn                                 | 0.959792765  |
| wavelet-LLL | glcm       | JointEnergy                          | 0.002453909  |
| wavelet-LLL | glcm       | Contrast                             | 414.9444369  |
| wavelet-LLL | glcm       | DifferenceEntropy                    | 5.192573217  |
| wavelet-LLL | glcm       | InverseVariance                      | 0.071484112  |
| wavelet-LLL | glcm       | DifferenceVariance                   | 146.4350938  |
| wavelet-LLL | glcm       | Idn                                  | 0.865634341  |
| wavelet-LLL | glcm       | Idm                                  | 0.071771259  |
| wavelet-LLL | glcm       | Correlation                          | 0.497592115  |
| wavelet-LLL | glcm       | Autocorrelation                      | 4050.988306  |
| wavelet-LLL | glcm       | SumEntropy                           | 6.58966076   |
| wavelet-LLL | glcm       | SumSquares                           | 410.9579559  |
| wavelet-LLL | glcm       | ClusterProminence                    | 3774949.257  |
| wavelet-LLL | glcm       | Imc2                                 | 0.999294397  |
| wavelet-LLL | glcm       | Imc1                                 | -0.54646568  |
| wavelet-LLL | glcm       | DifferenceAverage                    | 16.17320661  |
| wavelet-LLL | glcm       | Id                                   | 0.136619963  |
| wavelet-LLL | glcm       | ClusterTendency                      | 1228.887387  |
| wavelet-LLL | firstorder | InterquartileRange                   | 806.2457745  |
| wavelet-LLL | firstorder | Skewness                             | -0.063286534 |
| wavelet-LLL | firstorder | Uniformity                           | 0.015988891  |
| wavelet-LLL | firstorder | Median                               | -753.0788568 |
| wavelet-LLL | firstorder | Energy                               | 295313641.4  |
| wavelet-LLL | firstorder | RobustMeanAbsoluteDeviation          | 336.5417621  |
| wavelet-LLL | firstorder | MeanAbsoluteDeviation                | 442.9482639  |
| wavelet-LLL | firstorder | TotalEnergy                          | 7973468317   |
| wavelet-LLL | firstorder | Maximum                              | 248.4098497  |
| wavelet-LLL | firstorder | RootMeanSquared                      | 912.0687542  |
| wavelet-LLL | firstorder | 90Percentile                         | -27.29674812 |
| wavelet-LLL | firstorder | Minimum                              | -2133.545208 |
| wavelet-LLL | firstorder | Entropy                              | 6.143707098  |
| wavelet-LLL | firstorder | Range                                | 2381.955058  |
| wavelet-LLL | firstorder | Variance                             | 273053.0468  |

|             |            |                                      |              |
|-------------|------------|--------------------------------------|--------------|
| wavelet-LLL | firstorder | 10Percentile                         | -1428.624304 |
| wavelet-LLL | firstorder | Kurtosis                             | 2.168182187  |
| wavelet-LLL | firstorder | Mean                                 | -747.54021   |
| wavelet-LLL | glrlm      | ShortRunLowGrayLevelEmphasis         | 0.003550151  |
| wavelet-LLL | glrlm      | GrayLevelVariance                    | 433.3248642  |
| wavelet-LLL | glrlm      | LowGrayLevelRunEmphasis              | 0.003554165  |
| wavelet-LLL | glrlm      | GrayLevelNonUniformityNormalized     | 0.01587893   |
| wavelet-LLL | glrlm      | RunVariance                          | 0.020412356  |
| wavelet-LLL | glrlm      | GrayLevelNonUniformity               | 5.529837681  |
| wavelet-LLL | glrlm      | LongRunEmphasis                      | 1.060186857  |
| wavelet-LLL | glrlm      | ShortRunHighGrayLevelEmphasis        | 3531.777272  |
| wavelet-LLL | glrlm      | RunLengthNonUniformity               | 335.4753269  |
| wavelet-LLL | glrlm      | ShortRunEmphasis                     | 0.985711172  |
| wavelet-LLL | glrlm      | LongRunHighGrayLevelEmphasis         | 3935.492641  |
| wavelet-LLL | glrlm      | RunPercentage                        | 0.980931744  |
| wavelet-LLL | glrlm      | LongRunLowGrayLevelEmphasis          | 0.003570639  |
| wavelet-LLL | glrlm      | RunEntropy                           | 6.215820998  |
| wavelet-LLL | glrlm      | HighGrayLevelRunEmphasis             | 3607.976743  |
| wavelet-LLL | glrlm      | RunLengthNonUniformityNormalized     | 0.963086229  |
| wavelet-LLL | glszm      | GrayLevelVariance                    | 412.5667526  |
| wavelet-LLL | glszm      | ZoneVariance                         | 0.581866197  |
| wavelet-LLL | glszm      | GrayLevelNonUniformityNormalized     | 0.015373934  |
| wavelet-LLL | glszm      | SizeZoneNonUniformityNormalized      | 0.709680619  |
| wavelet-LLL | glszm      | SizeZoneNonUniformity                | 201.5492958  |
| wavelet-LLL | glszm      | GrayLevelNonUniformity               | 4.366197183  |
| wavelet-LLL | glszm      | LargeAreaEmphasis                    | 2.144366197  |
| wavelet-LLL | glszm      | SmallAreaHighGrayLevelEmphasis       | 2760.647816  |
| wavelet-LLL | glszm      | ZonePercentage                       | 0.8          |
| wavelet-LLL | glszm      | LargeAreaLowGrayLevelEmphasis        | 0.004573041  |
| wavelet-LLL | glszm      | LargeAreaHighGrayLevelEmphasis       | 10051.83451  |
| wavelet-LLL | glszm      | HighGrayLevelZoneEmphasis            | 3307.309859  |
| wavelet-LLL | glszm      | SmallAreaEmphasis                    | 0.867546674  |
| wavelet-LLL | glszm      | LowGrayLevelZoneEmphasis             | 0.004287883  |
| wavelet-LLL | glszm      | ZoneEntropy                          | 6.612271189  |
| wavelet-LLL | glszm      | SmallAreaLowGrayLevelEmphasis        | 0.004240051  |
| wavelet-LLL | ngtdm      | Coarseness                           | 0.018272369  |
| wavelet-LLL | ngtdm      | Complexity                           | 28830.95594  |
| wavelet-LLL | ngtdm      | Strength                             | 48.88393505  |
| wavelet-LLL | ngtdm      | Contrast                             | 1.290364948  |
| wavelet-LLL | ngtdm      | Busyness                             | 0.01350673   |
| wavelet-HHL | gldm       | GrayLevelVariance                    | 10.67692918  |
| wavelet-HHL | gldm       | HighGrayLevelEmphasis                | 166.0478873  |
| wavelet-HHL | gldm       | DependenceEntropy                    | 5.858019886  |
| wavelet-HHL | gldm       | DependenceNonUniformity              | 66.44225352  |
| wavelet-HHL | gldm       | GrayLevelNonUniformity               | 36.10422535  |
| wavelet-HHL | gldm       | SmallDependenceEmphasis              | 0.341782175  |
| wavelet-HHL | gldm       | SmallDependenceHighGrayLevelEmphasis | 60.86784461  |
| wavelet-HHL | gldm       | DependenceNonUniformityNormalized    | 0.187161278  |
| wavelet-HHL | gldm       | LargeDependenceEmphasis              | 12.1943662   |
| wavelet-HHL | gldm       | LargeDependenceLowGrayLevelEmphasis  | 0.090977119  |
| wavelet-HHL | gldm       | DependenceVariance                   | 3.429430669  |
| wavelet-HHL | gldm       | LargeDependenceHighGrayLevelEmphasis | 1966.397183  |
| wavelet-HHL | gldm       | SmallDependenceLowGrayLevelEmphasis  | 0.006610864  |
| wavelet-HHL | gldm       | LowGrayLevelEmphasis                 | 0.012056902  |
| wavelet-HHL | glcm       | JointAverage                         | 12.49584852  |
| wavelet-HHL | glcm       | SumAverage                           | 24.99169703  |
| wavelet-HHL | glcm       | JointEntropy                         | 6.700424665  |
| wavelet-HHL | glcm       | ClusterShade                         | -42.73857179 |

|             |            |                                  |              |
|-------------|------------|----------------------------------|--------------|
| wavelet-HHL | glcm       | MaximumProbability               | 0.035568932  |
| wavelet-HHL | glcm       | Idmn                             | 0.97239405   |
| wavelet-HHL | glcm       | JointEnergy                      | 0.013678687  |
| wavelet-HHL | glcm       | Contrast                         | 19.65323849  |
| wavelet-HHL | glcm       | DifferenceEntropy                | 3.154167897  |
| wavelet-HHL | glcm       | InverseVariance                  | 0.290000828  |
| wavelet-HHL | glcm       | DifferenceVariance               | 8.652860613  |
| wavelet-HHL | glcm       | Idn                              | 0.893597338  |
| wavelet-HHL | glcm       | Idm                              | 0.280473925  |
| wavelet-HHL | glcm       | Correlation                      | 0.034899123  |
| wavelet-HHL | glcm       | Autocorrelation                  | 156.5173027  |
| wavelet-HHL | glcm       | SumEntropy                       | 4.070365159  |
| wavelet-HHL | glcm       | SumSquares                       | 10.18463913  |
| wavelet-HHL | glcm       | ClusterProminence                | 2313.214464  |
| wavelet-HHL | glcm       | Imc2                             | 0.799154688  |
| wavelet-HHL | glcm       | Imc1                             | -0.143928526 |
| wavelet-HHL | glcm       | DifferenceAverage                | 3.253225986  |
| wavelet-HHL | glcm       | Id                               | 0.366762333  |
| wavelet-HHL | glcm       | ClusterTendency                  | 21.08531803  |
| wavelet-HHL | firstorder | InterquartileRange               | 83.28415149  |
| wavelet-HHL | firstorder | Skewness                         | -0.186751976 |
| wavelet-HHL | firstorder | Uniformity                       | 0.101702043  |
| wavelet-HHL | firstorder | Median                           | 2.500437022  |
| wavelet-HHL | firstorder | Energy                           | 2346840.832  |
| wavelet-HHL | firstorder | RobustMeanAbsoluteDeviation      | 37.229085    |
| wavelet-HHL | firstorder | MeanAbsoluteDeviation            | 60.00750571  |
| wavelet-HHL | firstorder | TotalEnergy                      | 63364702.46  |
| wavelet-HHL | firstorder | Maximum                          | 303.4051083  |
| wavelet-HHL | firstorder | RootMeanSquared                  | 81.30694463  |
| wavelet-HHL | firstorder | 90Percentile                     | 90.82263797  |
| wavelet-HHL | firstorder | Minimum                          | -290.995096  |
| wavelet-HHL | firstorder | Entropy                          | 3.650639765  |
| wavelet-HHL | firstorder | Range                            | 594.4002043  |
| wavelet-HHL | firstorder | Variance                         | 6609.272394  |
| wavelet-HHL | firstorder | 10Percentile                     | -110.5342523 |
| wavelet-HHL | firstorder | Kurtosis                         | 4.497170906  |
| wavelet-HHL | firstorder | Mean                             | -1.243724449 |
| wavelet-HHL | glrlm      | ShortRunLowGrayLevelEmphasis     | 0.012011812  |
| wavelet-HHL | glrlm      | GrayLevelVariance                | 11.199739    |
| wavelet-HHL | glrlm      | LowGrayLevelRunEmphasis          | 0.012433295  |
| wavelet-HHL | glrlm      | GrayLevelNonUniformityNormalized | 0.098107574  |
| wavelet-HHL | glrlm      | RunVariance                      | 0.092657393  |
| wavelet-HHL | glrlm      | GrayLevelNonUniformity           | 32.19839024  |
| wavelet-HHL | glrlm      | LongRunEmphasis                  | 1.263397683  |
| wavelet-HHL | glrlm      | ShortRunHighGrayLevelEmphasis    | 157.3905393  |
| wavelet-HHL | glrlm      | RunLengthNonUniformity           | 283.6204314  |
| wavelet-HHL | glrlm      | ShortRunEmphasis                 | 0.943816194  |
| wavelet-HHL | glrlm      | LongRunHighGrayLevelEmphasis     | 208.7659295  |
| wavelet-HHL | glrlm      | RunPercentage                    | 0.924593716  |
| wavelet-HHL | glrlm      | LongRunLowGrayLevelEmphasis      | 0.01438838   |
| wavelet-HHL | glrlm      | RunEntropy                       | 4.048600592  |
| wavelet-HHL | glrlm      | HighGrayLevelRunEmphasis         | 166.4659284  |
| wavelet-HHL | glrlm      | RunLengthNonUniformityNormalized | 0.863606696  |
| wavelet-HHL | glszm      | GrayLevelVariance                | 19.56661258  |
| wavelet-HHL | glszm      | ZoneVariance                     | 34.20203113  |
| wavelet-HHL | glszm      | GrayLevelNonUniformityNormalized | 0.06760411   |
| wavelet-HHL | glszm      | SizeZoneNonUniformityNormalized  | 0.473228772  |
| wavelet-HHL | glszm      | SizeZoneNonUniformity            | 61.04651163  |

|             |            |                                      |              |
|-------------|------------|--------------------------------------|--------------|
| wavelet-HHL | glszm      | GrayLevelNonUniformity               | 8.720930233  |
| wavelet-HHL | glszm      | LargeAreaEmphasis                    | 41.7751938   |
| wavelet-HHL | glszm      | SmallAreaHighGrayLevelEmphasis       | 131.8989532  |
| wavelet-HHL | glszm      | ZonePercentage                       | 0.363380282  |
| wavelet-HHL | glszm      | LargeAreaLowGrayLevelEmphasis        | 0.300353632  |
| wavelet-HHL | glszm      | LargeAreaHighGrayLevelEmphasis       | 6500.023256  |
| wavelet-HHL | glszm      | HighGrayLevelZoneEmphasis            | 176.6899225  |
| wavelet-HHL | glszm      | SmallAreaEmphasis                    | 0.714254688  |
| wavelet-HHL | glszm      | LowGrayLevelZoneEmphasis             | 0.019158066  |
| wavelet-HHL | glszm      | ZoneEntropy                          | 5.304801044  |
| wavelet-HHL | glszm      | SmallAreaLowGrayLevelEmphasis        | 0.016100163  |
| wavelet-HHL | ngtdm      | Coarseness                           | 0.018515613  |
| wavelet-HHL | ngtdm      | Complexity                           | 522.7314179  |
| wavelet-HHL | ngtdm      | Strength                             | 3.134616954  |
| wavelet-HHL | ngtdm      | Contrast                             | 0.102558194  |
| wavelet-HHL | ngtdm      | Busyness                             | 0.153634796  |
| wavelet-HLH | gldm       | GrayLevelVariance                    | 8.289434636  |
| wavelet-HLH | gldm       | HighGrayLevelEmphasis                | 80.51549296  |
| wavelet-HLH | gldm       | DependenceEntropy                    | 5.792195761  |
| wavelet-HLH | gldm       | DependenceNonUniformity              | 70.8084507   |
| wavelet-HLH | gldm       | GrayLevelNonUniformity               | 34.41408451  |
| wavelet-HLH | gldm       | SmallDependenceEmphasis              | 0.342800052  |
| wavelet-HLH | gldm       | SmallDependenceHighGrayLevelEmphasis | 28.91090186  |
| wavelet-HLH | gldm       | DependenceNonUniformityNormalized    | 0.199460425  |
| wavelet-HLH | gldm       | LargeDependenceEmphasis              | 13           |
| wavelet-HLH | gldm       | LargeDependenceLowGrayLevelEmphasis  | 0.230825614  |
| wavelet-HLH | gldm       | DependenceVariance                   | 4.334854196  |
| wavelet-HLH | gldm       | LargeDependenceHighGrayLevelEmphasis | 940.9267606  |
| wavelet-HLH | gldm       | SmallDependenceLowGrayLevelEmphasis  | 0.012869634  |
| wavelet-HLH | gldm       | LowGrayLevelEmphasis                 | 0.024972529  |
| wavelet-HLH | glcm       | JointAverage                         | 8.579138204  |
| wavelet-HLH | glcm       | SumAverage                           | 17.15827641  |
| wavelet-HLH | glcm       | JointEntropy                         | 6.641719427  |
| wavelet-HLH | glcm       | ClusterShade                         | 5.528265278  |
| wavelet-HLH | glcm       | MaximumProbability                   | 0.034635742  |
| wavelet-HLH | glcm       | Idmn                                 | 0.93867991   |
| wavelet-HLH | glcm       | JointEnergy                          | 0.012607975  |
| wavelet-HLH | glcm       | Contrast                             | 16.51019105  |
| wavelet-HLH | glcm       | DifferenceEntropy                    | 3.111178893  |
| wavelet-HLH | glcm       | InverseVariance                      | 0.269078158  |
| wavelet-HLH | glcm       | DifferenceVariance                   | 6.030281307  |
| wavelet-HLH | glcm       | Idn                                  | 0.838399807  |
| wavelet-HLH | glcm       | Idm                                  | 0.266860459  |
| wavelet-HLH | glcm       | Correlation                          | -0.036306396 |
| wavelet-HLH | glcm       | Autocorrelation                      | 73.30423664  |
| wavelet-HLH | glcm       | SumEntropy                           | 3.921195061  |
| wavelet-HLH | glcm       | SumSquares                           | 7.956190951  |
| wavelet-HLH | glcm       | ClusterProminence                    | 710.9609794  |
| wavelet-HLH | glcm       | Imc2                                 | 0.701340553  |
| wavelet-HLH | glcm       | Imc1                                 | -0.099196467 |
| wavelet-HLH | glcm       | DifferenceAverage                    | 3.204344944  |
| wavelet-HLH | glcm       | Id                                   | 0.357057732  |
| wavelet-HLH | glcm       | ClusterTendency                      | 15.31457275  |
| wavelet-HLH | firstorder | InterquartileRange                   | 103.9738281  |
| wavelet-HLH | firstorder | Skewness                             | 0.10509049   |
| wavelet-HLH | firstorder | Uniformity                           | 0.096941083  |
| wavelet-HLH | firstorder | Median                               | -6.177977711 |
| wavelet-HLH | firstorder | Energy                               | 1830679.407  |

|             |            |                                  |              |
|-------------|------------|----------------------------------|--------------|
| wavelet-HLH | firstorder | RobustMeanAbsoluteDeviation      | 42.93069452  |
| wavelet-HLH | firstorder | MeanAbsoluteDeviation            | 59.07339807  |
| wavelet-HLH | firstorder | TotalEnergy                      | 49428343.99  |
| wavelet-HLH | firstorder | Maximum                          | 166.275838   |
| wavelet-HLH | firstorder | RootMeanSquared                  | 71.81116487  |
| wavelet-HLH | firstorder | 90Percentile                     | 97.96275211  |
| wavelet-HLH | firstorder | Minimum                          | -196.1814772 |
| wavelet-HLH | firstorder | Entropy                          | 3.528643876  |
| wavelet-HLH | firstorder | Range                            | 362.4573152  |
| wavelet-HLH | firstorder | Variance                         | 5156.671225  |
| wavelet-HLH | firstorder | 10Percentile                     | -91.20231305 |
| wavelet-HLH | firstorder | Kurtosis                         | 2.451648161  |
| wavelet-HLH | firstorder | Mean                             | 0.414940602  |
| wavelet-HLH | glrlm      | ShortRunLowGrayLevelEmphasis     | 0.024531359  |
| wavelet-HLH | glrlm      | GrayLevelVariance                | 8.59015108   |
| wavelet-HLH | glrlm      | LowGrayLevelRunEmphasis          | 0.025554256  |
| wavelet-HLH | glrlm      | GrayLevelNonUniformityNormalized | 0.094933936  |
| wavelet-HLH | glrlm      | RunVariance                      | 0.090529846  |
| wavelet-HLH | glrlm      | GrayLevelNonUniformity           | 31.18158477  |
| wavelet-HLH | glrlm      | LongRunEmphasis                  | 1.261685224  |
| wavelet-HLH | glrlm      | ShortRunHighGrayLevelEmphasis    | 76.75149335  |
| wavelet-HLH | glrlm      | RunLengthNonUniformity           | 283.9739811  |
| wavelet-HLH | glrlm      | ShortRunEmphasis                 | 0.943264446  |
| wavelet-HLH | glrlm      | LongRunHighGrayLevelEmphasis     | 100.3653749  |
| wavelet-HLH | glrlm      | RunPercentage                    | 0.92524377   |
| wavelet-HLH | glrlm      | LongRunLowGrayLevelEmphasis      | 0.030189826  |
| wavelet-HLH | glrlm      | RunEntropy                       | 3.899437098  |
| wavelet-HLH | glrlm      | HighGrayLevelRunEmphasis         | 81.01035545  |
| wavelet-HLH | glrlm      | RunLengthNonUniformityNormalized | 0.863207318  |
| wavelet-HLH | glszm      | GrayLevelVariance                | 12.15851659  |
| wavelet-HLH | glszm      | ZoneVariance                     | 15.91546103  |
| wavelet-HLH | glszm      | GrayLevelNonUniformityNormalized | 0.080343364  |
| wavelet-HLH | glszm      | SizeZoneNonUniformityNormalized  | 0.397569444  |
| wavelet-HLH | glszm      | SizeZoneNonUniformity            | 57.25        |
| wavelet-HLH | glszm      | GrayLevelNonUniformity           | 11.56944444  |
| wavelet-HLH | glszm      | LargeAreaEmphasis                | 21.99305556  |
| wavelet-HLH | glszm      | SmallAreaHighGrayLevelEmphasis   | 55.31592357  |
| wavelet-HLH | glszm      | ZonePercentage                   | 0.405633803  |
| wavelet-HLH | glszm      | LargeAreaLowGrayLevelEmphasis    | 0.401207245  |
| wavelet-HLH | glszm      | LargeAreaHighGrayLevelEmphasis   | 1498.326389  |
| wavelet-HLH | glszm      | HighGrayLevelZoneEmphasis        | 85.95138889  |
| wavelet-HLH | glszm      | SmallAreaEmphasis                | 0.649678131  |
| wavelet-HLH | glszm      | LowGrayLevelZoneEmphasis         | 0.034654739  |
| wavelet-HLH | glszm      | ZoneEntropy                      | 5.232173142  |
| wavelet-HLH | glszm      | SmallAreaLowGrayLevelEmphasis    | 0.028092676  |
| wavelet-HLH | ngtdm      | Coarseness                       | 0.01483127   |
| wavelet-HLH | ngtdm      | Complexity                       | 208.5986375  |
| wavelet-HLH | ngtdm      | Strength                         | 0.918765795  |
| wavelet-HLH | ngtdm      | Contrast                         | 0.197545688  |
| wavelet-HLH | ngtdm      | Busyness                         | 0.664443534  |

| Image type | Feature Class | Feature Name                         |                                                                                                                                                                                                                                                                                                                                                                                                                   |
|------------|---------------|--------------------------------------|-------------------------------------------------------------------------------------------------------------------------------------------------------------------------------------------------------------------------------------------------------------------------------------------------------------------------------------------------------------------------------------------------------------------|
| general    | info          | BoundingBox                          | 3: RTSTRUCT: C99-Research-DNU_segment_GTVp<br>(0, 0, 1, 19, 19, 18)                                                                                                                                                                                                                                                                                                                                               |
| general    | info          | EnabledImageTypes                    | {u'Original': {}, u'Wavelet': {}}                                                                                                                                                                                                                                                                                                                                                                                 |
|            |               |                                      | {'distances': [1], 'additionalInfo': True, 'force2D': False, 'interpolator': 'sitkBSpline', 'resampledPixelSpacing': [3.0], 'label': 1, 'normalizeScale': 1, 'normalize': False, 'force2Ddimension': 0, 'removeOutliers': None, 'minimumROISize': None, u'binWidth': 25.0, 'minimumROIDimensions': 1, u'correctMask': True, 'preCrop': False, u'symmetricalGLCM': True, 'resegmentRange': None, 'padDistance': 5} |
| general    | info          | GeneralSettings                      |                                                                                                                                                                                                                                                                                                                                                                                                                   |
| general    | info          | ImageHash                            | badc0dbe3ed4a196fedba28ebe565c618eb05a04                                                                                                                                                                                                                                                                                                                                                                          |
| general    | info          | ImageSpacing                         | (1.26953125, 1.26953125, 2.0)                                                                                                                                                                                                                                                                                                                                                                                     |
| general    | info          | MaskHash                             | b9f2d940a5b09ee854ead24cbbcc3558cb1d1bc6                                                                                                                                                                                                                                                                                                                                                                          |
| general    | info          | NumpyVersion                         | 1.13.1                                                                                                                                                                                                                                                                                                                                                                                                            |
| general    | info          | PyWaveletVersion                     | 0.5.2                                                                                                                                                                                                                                                                                                                                                                                                             |
| general    | info          | SimpleITKVersion                     | 1.1.0                                                                                                                                                                                                                                                                                                                                                                                                             |
| general    | info          | Version                              | 1.3.0.post102+g1b0eb74                                                                                                                                                                                                                                                                                                                                                                                            |
| general    | info          | VolumeNum                            | 1                                                                                                                                                                                                                                                                                                                                                                                                                 |
| general    | info          | VoxelNum                             | 2531                                                                                                                                                                                                                                                                                                                                                                                                              |
| original   | shape         | Maximum3DDiameter                    | 60.37383539                                                                                                                                                                                                                                                                                                                                                                                                       |
| original   | shape         | Maximum2DDiameterSlice               | 56.60388679                                                                                                                                                                                                                                                                                                                                                                                                       |
| original   | shape         | Sphericity                           | 0.794172944                                                                                                                                                                                                                                                                                                                                                                                                       |
| original   | shape         | MinorAxis                            | 46.52830646                                                                                                                                                                                                                                                                                                                                                                                                       |
| original   | shape         | Elongation                           | 0.984674031                                                                                                                                                                                                                                                                                                                                                                                                       |
| original   | shape         | SurfaceVolumeRatio                   | 0.148941961                                                                                                                                                                                                                                                                                                                                                                                                       |
| original   | shape         | Volume                               | 68337                                                                                                                                                                                                                                                                                                                                                                                                             |
| original   | shape         | MajorAxis                            | 47.25249676                                                                                                                                                                                                                                                                                                                                                                                                       |
| original   | shape         | SurfaceArea                          | 10178.24678                                                                                                                                                                                                                                                                                                                                                                                                       |
| original   | shape         | Flatness                             | 0.94573999                                                                                                                                                                                                                                                                                                                                                                                                        |
| original   | shape         | LeastAxis                            | 44.68857581                                                                                                                                                                                                                                                                                                                                                                                                       |
| original   | shape         | Maximum2DDiameterColumn              | 55.15432893                                                                                                                                                                                                                                                                                                                                                                                                       |
| original   | shape         | Maximum2DDiameterRow                 | 55.15432893                                                                                                                                                                                                                                                                                                                                                                                                       |
| original   | gldm          | GrayLevelVariance                    | 55.2865442                                                                                                                                                                                                                                                                                                                                                                                                        |
| original   | gldm          | HighGrayLevelEmphasis                | 1083.463058                                                                                                                                                                                                                                                                                                                                                                                                       |
| original   | gldm          | DependenceEntropy                    | 6.499105515                                                                                                                                                                                                                                                                                                                                                                                                       |
| original   | gldm          | DependenceNonUniformity              | 196.384433                                                                                                                                                                                                                                                                                                                                                                                                        |
| original   | gldm          | GrayLevelNonUniformity               | 501.2054524                                                                                                                                                                                                                                                                                                                                                                                                       |
| original   | gldm          | SmallDependenceEmphasis              | 0.233371288                                                                                                                                                                                                                                                                                                                                                                                                       |
| original   | gldm          | SmallDependenceHighGrayLevelEmphasis | 157.6685687                                                                                                                                                                                                                                                                                                                                                                                                       |
| original   | gldm          | DependenceNonUniformityNormalized    | 0.077591637                                                                                                                                                                                                                                                                                                                                                                                                       |
| original   | gldm          | LargeDependenceEmphasis              | 101.5570921                                                                                                                                                                                                                                                                                                                                                                                                       |
| original   | gldm          | LargeDependenceLowGrayLevelEmphasis  | 0.084255006                                                                                                                                                                                                                                                                                                                                                                                                       |
| original   | gldm          | DependenceVariance                   | 35.66580346                                                                                                                                                                                                                                                                                                                                                                                                       |
| original   | gldm          | LargeDependenceHighGrayLevelEmphasis | 128275.9546                                                                                                                                                                                                                                                                                                                                                                                                       |
| original   | gldm          | SmallDependenceLowGrayLevelEmphasis  | 0.002416154                                                                                                                                                                                                                                                                                                                                                                                                       |
| original   | gldm          | LowGrayLevelEmphasis                 | 0.003329138                                                                                                                                                                                                                                                                                                                                                                                                       |
| original   | glcm          | JointAverage                         | 33.19661001                                                                                                                                                                                                                                                                                                                                                                                                       |
| original   | glcm          | SumAverage                           | 66.39322002                                                                                                                                                                                                                                                                                                                                                                                                       |
| original   | glcm          | JointEntropy                         | 5.535550989                                                                                                                                                                                                                                                                                                                                                                                                       |
| original   | glcm          | ClusterShade                         | -2958.884708                                                                                                                                                                                                                                                                                                                                                                                                      |
| original   | glcm          | MaximumProbability                   | 0.168253323                                                                                                                                                                                                                                                                                                                                                                                                       |
| original   | glcm          | Idmn                                 | 0.978826496                                                                                                                                                                                                                                                                                                                                                                                                       |
| original   | glcm          | JointEnergy                          | 0.075095179                                                                                                                                                                                                                                                                                                                                                                                                       |
| original   | glcm          | Contrast                             | 41.63196308                                                                                                                                                                                                                                                                                                                                                                                                       |
| original   | glcm          | DifferenceEntropy                    | 2.942433762                                                                                                                                                                                                                                                                                                                                                                                                       |
| original   | glcm          | InverseVariance                      | 0.37722271                                                                                                                                                                                                                                                                                                                                                                                                        |

|          |            |                                  |              |
|----------|------------|----------------------------------|--------------|
| original | glcm       | DifferenceVariance               | 31.27588711  |
| original | glcm       | Idn                              | 0.938005545  |
| original | glcm       | Idm                              | 0.517713756  |
| original | glcm       | Correlation                      | 0.442061353  |
| original | glcm       | Autocorrelation                  | 1118.939226  |
| original | glcm       | SumEntropy                       | 3.913506972  |
| original | glcm       | SumSquares                       | 37.70720979  |
| original | glcm       | ClusterProminence                | 119142.2323  |
| original | glcm       | Imc2                             | 0.726120203  |
| original | glcm       | Imc1                             | -0.129442661 |
| original | glcm       | DifferenceAverage                | 3.201865742  |
| original | glcm       | Id                               | 0.551458396  |
| original | glcm       | ClusterTendency                  | 109.1968761  |
| original | firstorder | InterquartileRange               | 69           |
| original | firstorder | Skewness                         | -2.204009393 |
| original | firstorder | Uniformity                       | 0.19802665   |
| original | firstorder | Median                           | 18           |
| original | firstorder | Energy                           | 96776220     |
| original | firstorder | RobustMeanAbsoluteDeviation      | 59.21006859  |
| original | firstorder | MeanAbsoluteDeviation            | 130.987987   |
| original | firstorder | TotalEnergy                      | 2612957940   |
| original | firstorder | Maximum                          | 143          |
| original | firstorder | RootMeanSquared                  | 195.5411905  |
| original | firstorder | 90Percentile                     | 46           |
| original | firstorder | Minimum                          | -843         |
| original | firstorder | Entropy                          | 3.334867036  |
| original | firstorder | Range                            | 986          |
| original | firstorder | Variance                         | 34468.8906   |
| original | firstorder | 10Percentile                     | -357         |
| original | firstorder | Kurtosis                         | 7.027282138  |
| original | firstorder | Mean                             | -61.37969182 |
| original | glrlm      | ShortRunLowGrayLevelEmphasis     | 0.00410403   |
| original | glrlm      | GrayLevelVariance                | 69.04223486  |
| original | glrlm      | LowGrayLevelRunEmphasis          | 0.004263885  |
| original | glrlm      | GrayLevelNonUniformityNormalized | 0.136304397  |
| original | glrlm      | RunVariance                      | 0.753490736  |
| original | glrlm      | GrayLevelNonUniformity           | 250.725487   |
| original | glrlm      | LongRunEmphasis                  | 2.653216501  |
| original | glrlm      | ShortRunHighGrayLevelEmphasis    | 788.8894809  |
| original | glrlm      | RunLengthNonUniformity           | 1147.551837  |
| original | glrlm      | ShortRunEmphasis                 | 0.817362825  |
| original | glrlm      | LongRunHighGrayLevelEmphasis     | 3101.989148  |
| original | glrlm      | RunPercentage                    | 0.726255965  |
| original | glrlm      | LongRunLowGrayLevelEmphasis      | 0.00565313   |
| original | glrlm      | RunEntropy                       | 4.763744868  |
| original | glrlm      | HighGrayLevelRunEmphasis         | 1017.648004  |
| original | glrlm      | RunLengthNonUniformityNormalized | 0.623925895  |
| original | glszm      | GrayLevelVariance                | 89.21339658  |
| original | glszm      | ZoneVariance                     | 1899.172261  |
| original | glszm      | GrayLevelNonUniformityNormalized | 0.036981086  |
| original | glszm      | SizeZoneNonUniformityNormalized  | 0.630281007  |
| original | glszm      | SizeZoneNonUniformity            | 394.5559105  |
| original | glszm      | GrayLevelNonUniformity           | 23.15015974  |
| original | glszm      | LargeAreaEmphasis                | 1915.519169  |
| original | glszm      | SmallAreaHighGrayLevelEmphasis   | 514.7601576  |
| original | glszm      | ZonePercentage                   | 0.24733307   |
| original | glszm      | LargeAreaLowGrayLevelEmphasis    | 1.524474804  |
| original | glszm      | LargeAreaHighGrayLevelEmphasis   | 2427855.149  |



|             |            |                                      |              |
|-------------|------------|--------------------------------------|--------------|
| original    | glszm      | HighGrayLevelZoneEmphasis            | 655.2124601  |
| original    | glszm      | SmallAreaEmphasis                    | 0.821424981  |
| original    | glszm      | LowGrayLevelZoneEmphasis             | 0.010134182  |
| original    | glszm      | ZoneEntropy                          | 5.913214657  |
| original    | glszm      | SmallAreaLowGrayLevelEmphasis        | 0.009442711  |
| original    | ngtdm      | Coarseness                           | 0.001481656  |
| original    | ngtdm      | Complexity                           | 2101.839192  |
| original    | ngtdm      | Strength                             | 3.57904159   |
| original    | ngtdm      | Contrast                             | 0.201745121  |
| original    | ngtdm      | Busyness                             | 0.316074511  |
| wavelet-HHH | gldm       | GrayLevelVariance                    | 5.460158437  |
| wavelet-HHH | gldm       | HighGrayLevelEmphasis                | 278.3951008  |
| wavelet-HHH | gldm       | DependenceEntropy                    | 6.08957608   |
| wavelet-HHH | gldm       | DependenceNonUniformity              | 201.0679573  |
| wavelet-HHH | gldm       | GrayLevelNonUniformity               | 480.1165547  |
| wavelet-HHH | gldm       | SmallDependenceEmphasis              | 0.185283785  |
| wavelet-HHH | gldm       | SmallDependenceHighGrayLevelEmphasis | 53.9642198   |
| wavelet-HHH | gldm       | DependenceNonUniformityNormalized    | 0.079442101  |
| wavelet-HHH | gldm       | LargeDependenceEmphasis              | 68.79691821  |
| wavelet-HHH | gldm       | LargeDependenceLowGrayLevelEmphasis  | 0.254068307  |
| wavelet-HHH | gldm       | DependenceVariance                   | 22.69544726  |
| wavelet-HHH | gldm       | LargeDependenceHighGrayLevelEmphasis | 18825.63256  |
| wavelet-HHH | gldm       | SmallDependenceLowGrayLevelEmphasis  | 0.001239467  |
| wavelet-HHH | gldm       | LowGrayLevelEmphasis                 | 0.004334251  |
| wavelet-HHH | glcm       | JointAverage                         | 16.50785172  |
| wavelet-HHH | glcm       | SumAverage                           | 33.01570344  |
| wavelet-HHH | glcm       | JointEntropy                         | 5.486219134  |
| wavelet-HHH | glcm       | ClusterShade                         | 2.303925077  |
| wavelet-HHH | glcm       | MaximumProbability                   | 0.133409483  |
| wavelet-HHH | glcm       | Idmn                                 | 0.992791512  |
| wavelet-HHH | glcm       | JointEnergy                          | 0.060969739  |
| wavelet-HHH | glcm       | Contrast                             | 9.907467781  |
| wavelet-HHH | glcm       | DifferenceEntropy                    | 2.662435159  |
| wavelet-HHH | glcm       | InverseVariance                      | 0.3952282    |
| wavelet-HHH | glcm       | DifferenceVariance                   | 5.915826803  |
| wavelet-HHH | glcm       | Idn                                  | 0.95130267   |
| wavelet-HHH | glcm       | Idm                                  | 0.474793861  |
| wavelet-HHH | glcm       | Correlation                          | -0.036841218 |
| wavelet-HHH | glcm       | Autocorrelation                      | 272.3229089  |
| wavelet-HHH | glcm       | SumEntropy                           | 3.342419783  |
| wavelet-HHH | glcm       | SumSquares                           | 4.767403135  |
| wavelet-HHH | glcm       | ClusterProminence                    | 710.317647   |
| wavelet-HHH | glcm       | Imc2                                 | 0.601523959  |
| wavelet-HHH | glcm       | Imc1                                 | -0.080615529 |
| wavelet-HHH | glcm       | DifferenceAverage                    | 1.981262406  |
| wavelet-HHH | glcm       | Id                                   | 0.525436463  |
| wavelet-HHH | glcm       | ClusterTendency                      | 9.162144759  |
| wavelet-HHH | firstorder | InterquartileRange                   | 37.40090033  |
| wavelet-HHH | firstorder | Skewness                             | 0.250072533  |
| wavelet-HHH | firstorder | Uniformity                           | 0.189694411  |
| wavelet-HHH | firstorder | Median                               | 0.63188117   |
| wavelet-HHH | firstorder | Energy                               | 8552886.097  |
| wavelet-HHH | firstorder | RobustMeanAbsoluteDeviation          | 18.58653995  |
| wavelet-HHH | firstorder | MeanAbsoluteDeviation                | 36.77399318  |
| wavelet-HHH | firstorder | TotalEnergy                          | 230927924.6  |
| wavelet-HHH | firstorder | Maximum                              | 498.9343561  |
| wavelet-HHH | firstorder | RootMeanSquared                      | 58.13133163  |
| wavelet-HHH | firstorder | 90Percentile                         | 60.93440416  |

|             |            |                                      |              |
|-------------|------------|--------------------------------------|--------------|
| wavelet-HHH | firstorder | Minimum                              | -390.3137535 |
| wavelet-HHH | firstorder | Entropy                              | 2.985571112  |
| wavelet-HHH | firstorder | Range                                | 889.2481096  |
| wavelet-HHH | firstorder | Variance                             | 3379.151127  |
| wavelet-HHH | firstorder | 10Percentile                         | -65.72433286 |
| wavelet-HHH | firstorder | Kurtosis                             | 9.770574332  |
| wavelet-HHH | firstorder | Mean                                 | 0.317159967  |
| wavelet-HHH | glrlm      | ShortRunLowGrayLevelEmphasis         | 0.003945973  |
| wavelet-HHH | glrlm      | GrayLevelVariance                    | 6.7711145    |
| wavelet-HHH | glrlm      | LowGrayLevelRunEmphasis              | 0.004516636  |
| wavelet-HHH | glrlm      | GrayLevelNonUniformityNormalized     | 0.151701996  |
| wavelet-HHH | glrlm      | RunVariance                          | 0.510086662  |
| wavelet-HHH | glrlm      | GrayLevelNonUniformity               | 298.8640362  |
| wavelet-HHH | glrlm      | LongRunEmphasis                      | 2.174222087  |
| wavelet-HHH | glrlm      | ShortRunHighGrayLevelEmphasis        | 237.3739345  |
| wavelet-HHH | glrlm      | RunLengthNonUniformity               | 1324.923305  |
| wavelet-HHH | glrlm      | ShortRunEmphasis                     | 0.846260053  |
| wavelet-HHH | glrlm      | LongRunHighGrayLevelEmphasis         | 601.2546082  |
| wavelet-HHH | glrlm      | RunPercentage                        | 0.777315138  |
| wavelet-HHH | glrlm      | LongRunLowGrayLevelEmphasis          | 0.008857843  |
| wavelet-HHH | glrlm      | RunEntropy                           | 4.073988851  |
| wavelet-HHH | glrlm      | HighGrayLevelRunEmphasis             | 279.5985968  |
| wavelet-HHH | glrlm      | RunLengthNonUniformityNormalized     | 0.672337614  |
| wavelet-HHH | glszm      | GrayLevelVariance                    | 19.40626039  |
| wavelet-HHH | glszm      | ZoneVariance                         | 2180.136837  |
| wavelet-HHH | glszm      | GrayLevelNonUniformityNormalized     | 0.07861382   |
| wavelet-HHH | glszm      | SizeZoneNonUniformityNormalized      | 0.483657499  |
| wavelet-HHH | glszm      | SizeZoneNonUniformity                | 231.1882845  |
| wavelet-HHH | glszm      | GrayLevelNonUniformity               | 37.57740586  |
| wavelet-HHH | glszm      | LargeAreaEmphasis                    | 2208.17364   |
| wavelet-HHH | glszm      | SmallAreaHighGrayLevelEmphasis       | 214.0246067  |
| wavelet-HHH | glszm      | ZonePercentage                       | 0.188858159  |
| wavelet-HHH | glszm      | LargeAreaLowGrayLevelEmphasis        | 8.10359014   |
| wavelet-HHH | glszm      | LargeAreaHighGrayLevelEmphasis       | 604646.7029  |
| wavelet-HHH | glszm      | HighGrayLevelZoneEmphasis            | 289.9330544  |
| wavelet-HHH | glszm      | SmallAreaEmphasis                    | 0.721918658  |
| wavelet-HHH | glszm      | LowGrayLevelZoneEmphasis             | 0.006764589  |
| wavelet-HHH | glszm      | ZoneEntropy                          | 5.462978335  |
| wavelet-HHH | glszm      | SmallAreaLowGrayLevelEmphasis        | 0.005518341  |
| wavelet-HHH | ngtdm      | Coarseness                           | 0.00293029   |
| wavelet-HHH | ngtdm      | Complexity                           | 517.7833256  |
| wavelet-HHH | ngtdm      | Strength                             | 1.018903985  |
| wavelet-HHH | ngtdm      | Contrast                             | 0.027023351  |
| wavelet-HHH | ngtdm      | Busyness                             | 0.516279076  |
| wavelet-HLL | gldm       | GrayLevelVariance                    | 22.94829987  |
| wavelet-HLL | gldm       | HighGrayLevelEmphasis                | 582.2493086  |
| wavelet-HLL | gldm       | DependenceEntropy                    | 6.730662735  |
| wavelet-HLL | gldm       | DependenceNonUniformity              | 272.9312525  |
| wavelet-HLL | gldm       | GrayLevelNonUniformity               | 304.458712   |
| wavelet-HLL | gldm       | SmallDependenceEmphasis              | 0.266858574  |
| wavelet-HLL | gldm       | SmallDependenceHighGrayLevelEmphasis | 160.3939105  |
| wavelet-HLL | gldm       | DependenceNonUniformityNormalized    | 0.107835343  |
| wavelet-HLL | gldm       | LargeDependenceEmphasis              | 54.27854603  |
| wavelet-HLL | gldm       | LargeDependenceLowGrayLevelEmphasis  | 0.093105864  |
| wavelet-HLL | gldm       | DependenceVariance                   | 22.74395364  |
| wavelet-HLL | gldm       | LargeDependenceHighGrayLevelEmphasis | 32377.08771  |
| wavelet-HLL | gldm       | SmallDependenceLowGrayLevelEmphasis  | 0.001103384  |
| wavelet-HLL | gldm       | LowGrayLevelEmphasis                 | 0.0025513    |

|             |            |                                  |              |
|-------------|------------|----------------------------------|--------------|
| wavelet-HLL | glcm       | JointAverage                     | 23.55677414  |
| wavelet-HLL | glcm       | SumAverage                       | 47.11354828  |
| wavelet-HLL | glcm       | JointEntropy                     | 6.794617202  |
| wavelet-HLL | glcm       | ClusterShade                     | -39.9043362  |
| wavelet-HLL | glcm       | MaximumProbability               | 0.104535649  |
| wavelet-HLL | glcm       | Idmn                             | 0.98918409   |
| wavelet-HLL | glcm       | JointEnergy                      | 0.036325677  |
| wavelet-HLL | glcm       | Contrast                         | 28.5029362   |
| wavelet-HLL | glcm       | DifferenceEntropy                | 3.243012653  |
| wavelet-HLL | glcm       | InverseVariance                  | 0.337387146  |
| wavelet-HLL | glcm       | DifferenceVariance               | 17.68390244  |
| wavelet-HLL | glcm       | Idn                              | 0.943338312  |
| wavelet-HLL | glcm       | Idm                              | 0.392058495  |
| wavelet-HLL | glcm       | Correlation                      | 0.235043483  |
| wavelet-HLL | glcm       | Autocorrelation                  | 559.6851127  |
| wavelet-HLL | glcm       | SumEntropy                       | 4.311262544  |
| wavelet-HLL | glcm       | SumSquares                       | 19.01311561  |
| wavelet-HLL | glcm       | ClusterProminence                | 16032.52836  |
| wavelet-HLL | glcm       | Imc2                             | 0.784545462  |
| wavelet-HLL | glcm       | Imc1                             | -0.136217319 |
| wavelet-HLL | glcm       | DifferenceAverage                | 3.235354366  |
| wavelet-HLL | glcm       | Id                               | 0.451918224  |
| wavelet-HLL | glcm       | ClusterTendency                  | 47.54952623  |
| wavelet-HLL | firstorder | InterquartileRange               | 78.21470055  |
| wavelet-HLL | firstorder | Skewness                         | 0.0983678    |
| wavelet-HLL | firstorder | Uniformity                       | 0.120291866  |
| wavelet-HLL | firstorder | Median                           | -7.148936127 |
| wavelet-HLL | firstorder | Energy                           | 37366971.68  |
| wavelet-HLL | firstorder | RobustMeanAbsoluteDeviation      | 38.93156402  |
| wavelet-HLL | firstorder | MeanAbsoluteDeviation            | 77.66572771  |
| wavelet-HLL | firstorder | TotalEnergy                      | 1008908235   |
| wavelet-HLL | firstorder | Maximum                          | 606.9567619  |
| wavelet-HLL | firstorder | RootMeanSquared                  | 121.5060433  |
| wavelet-HLL | firstorder | 90Percentile                     | 87.39772322  |
| wavelet-HLL | firstorder | Minimum                          | -595.0429943 |
| wavelet-HLL | firstorder | Entropy                          | 3.868015679  |
| wavelet-HLL | firstorder | Range                            | 1201.999756  |
| wavelet-HLL | firstorder | Variance                         | 14308.11358  |
| wavelet-HLL | firstorder | 10Percentile                     | -167.1664359 |
| wavelet-HLL | firstorder | Kurtosis                         | 6.042266219  |
| wavelet-HLL | firstorder | Mean                             | -21.34490545 |
| wavelet-HLL | glrlm      | ShortRunLowGrayLevelEmphasis     | 0.002513584  |
| wavelet-HLL | glrlm      | GrayLevelVariance                | 27.04067501  |
| wavelet-HLL | glrlm      | LowGrayLevelRunEmphasis          | 0.002724495  |
| wavelet-HLL | glrlm      | GrayLevelNonUniformityNormalized | 0.0913301    |
| wavelet-HLL | glrlm      | RunVariance                      | 0.418788475  |
| wavelet-HLL | glrlm      | GrayLevelNonUniformity           | 190.8332698  |
| wavelet-HLL | glrlm      | LongRunEmphasis                  | 1.910797206  |
| wavelet-HLL | glrlm      | ShortRunHighGrayLevelEmphasis    | 511.4015042  |
| wavelet-HLL | glrlm      | RunLengthNonUniformity           | 1543.089282  |
| wavelet-HLL | glrlm      | ShortRunEmphasis                 | 0.882596603  |
| wavelet-HLL | glrlm      | LongRunHighGrayLevelEmphasis     | 1120.535963  |
| wavelet-HLL | glrlm      | RunPercentage                    | 0.822478193  |
| wavelet-HLL | glrlm      | LongRunLowGrayLevelEmphasis      | 0.004307601  |
| wavelet-HLL | glrlm      | RunEntropy                       | 4.788386768  |
| wavelet-HLL | glrlm      | HighGrayLevelRunEmphasis         | 580.378397   |
| wavelet-HLL | glrlm      | RunLengthNonUniformityNormalized | 0.739469295  |
| wavelet-HLL | glszm      | GrayLevelVariance                | 52.76472693  |

|             |            |                                      |              |
|-------------|------------|--------------------------------------|--------------|
| wavelet-HLL | glszm      | ZoneVariance                         | 782.9388377  |
| wavelet-HLL | glszm      | GrayLevelNonUniformityNormalized     | 0.041802708  |
| wavelet-HLL | glszm      | SizeZoneNonUniformityNormalized      | 0.46837356   |
| wavelet-HLL | glszm      | SizeZoneNonUniformity                | 354.5587847  |
| wavelet-HLL | glszm      | GrayLevelNonUniformity               | 31.64464993  |
| wavelet-HLL | glszm      | LargeAreaEmphasis                    | 794.1175694  |
| wavelet-HLL | glszm      | SmallAreaHighGrayLevelEmphasis       | 435.7485435  |
| wavelet-HLL | glszm      | ZonePercentage                       | 0.299091268  |
| wavelet-HLL | glszm      | LargeAreaLowGrayLevelEmphasis        | 1.336481574  |
| wavelet-HLL | glszm      | LargeAreaHighGrayLevelEmphasis       | 474180.041   |
| wavelet-HLL | glszm      | HighGrayLevelZoneEmphasis            | 595.9564069  |
| wavelet-HLL | glszm      | SmallAreaEmphasis                    | 0.71155631   |
| wavelet-HLL | glszm      | LowGrayLevelZoneEmphasis             | 0.004016967  |
| wavelet-HLL | glszm      | ZoneEntropy                          | 6.294668577  |
| wavelet-HLL | glszm      | SmallAreaLowGrayLevelEmphasis        | 0.003270367  |
| wavelet-HLL | ngtdm      | Coarseness                           | 0.00291721   |
| wavelet-HLL | ngtdm      | Complexity                           | 1937.249289  |
| wavelet-HLL | ngtdm      | Strength                             | 2.482476045  |
| wavelet-HLL | ngtdm      | Contrast                             | 0.064142041  |
| wavelet-HLL | ngtdm      | Busyness                             | 0.230432512  |
| wavelet-LHL | gldm       | GrayLevelVariance                    | 35.04039847  |
| wavelet-LHL | gldm       | HighGrayLevelEmphasis                | 508.94113    |
| wavelet-LHL | gldm       | DependenceEntropy                    | 6.88503432   |
| wavelet-LHL | gldm       | DependenceNonUniformity              | 308.5788226  |
| wavelet-LHL | gldm       | GrayLevelNonUniformity               | 257.3421573  |
| wavelet-LHL | gldm       | SmallDependenceEmphasis              | 0.301559703  |
| wavelet-LHL | gldm       | SmallDependenceHighGrayLevelEmphasis | 167.9126555  |
| wavelet-LHL | gldm       | DependenceNonUniformityNormalized    | 0.121919724  |
| wavelet-LHL | gldm       | LargeDependenceEmphasis              | 47.10825761  |
| wavelet-LHL | gldm       | LargeDependenceLowGrayLevelEmphasis  | 0.098709575  |
| wavelet-LHL | gldm       | DependenceVariance                   | 20.51917893  |
| wavelet-LHL | gldm       | LargeDependenceHighGrayLevelEmphasis | 23731.77558  |
| wavelet-LHL | gldm       | SmallDependenceLowGrayLevelEmphasis  | 0.001823327  |
| wavelet-LHL | gldm       | LowGrayLevelEmphasis                 | 0.003794038  |
| wavelet-LHL | glcm       | JointAverage                         | 21.57400759  |
| wavelet-LHL | glcm       | SumAverage                           | 43.14801518  |
| wavelet-LHL | glcm       | JointEntropy                         | 7.272012042  |
| wavelet-LHL | glcm       | ClusterShade                         | 371.2451613  |
| wavelet-LHL | glcm       | MaximumProbability                   | 0.088085633  |
| wavelet-LHL | glcm       | Idmn                                 | 0.989100981  |
| wavelet-LHL | glcm       | JointEnergy                          | 0.027693392  |
| wavelet-LHL | glcm       | Contrast                             | 44.28983086  |
| wavelet-LHL | glcm       | DifferenceEntropy                    | 3.509283287  |
| wavelet-LHL | glcm       | InverseVariance                      | 0.308019232  |
| wavelet-LHL | glcm       | DifferenceVariance                   | 27.47391731  |
| wavelet-LHL | glcm       | Idn                                  | 0.943503987  |
| wavelet-LHL | glcm       | Idm                                  | 0.357321609  |
| wavelet-LHL | glcm       | Correlation                          | 0.21506102   |
| wavelet-LHL | glcm       | Autocorrelation                      | 471.7573621  |
| wavelet-LHL | glcm       | SumEntropy                           | 4.564835134  |
| wavelet-LHL | glcm       | SumSquares                           | 28.46259227  |
| wavelet-LHL | glcm       | ClusterProminence                    | 45080.07924  |
| wavelet-LHL | glcm       | Imc2                                 | 0.818366769  |
| wavelet-LHL | glcm       | Imc1                                 | -0.146005099 |
| wavelet-LHL | glcm       | DifferenceAverage                    | 4.020803737  |
| wavelet-LHL | glcm       | Id                                   | 0.420240172  |
| wavelet-LHL | glcm       | ClusterTendency                      | 69.56053824  |
| wavelet-LHL | firstorder | InterquartileRange                   | 89.45328266  |

|             |            |                                  |              |
|-------------|------------|----------------------------------|--------------|
| wavelet-LHL | firstorder | Skewness                         | 0.70617725   |
| wavelet-LHL | firstorder | Uniformity                       | 0.10167608   |
| wavelet-LHL | firstorder | Median                           | -8.215304102 |
| wavelet-LHL | firstorder | Energy                           | 56251765.01  |
| wavelet-LHL | firstorder | RobustMeanAbsoluteDeviation      | 46.90570412  |
| wavelet-LHL | firstorder | MeanAbsoluteDeviation            | 93.76550059  |
| wavelet-LHL | firstorder | TotalEnergy                      | 1518797655   |
| wavelet-LHL | firstorder | Maximum                          | 958.1422991  |
| wavelet-LHL | firstorder | RootMeanSquared                  | 149.0808995  |
| wavelet-LHL | firstorder | 90Percentile                     | 136.7936476  |
| wavelet-LHL | firstorder | Minimum                          | -541.8945712 |
| wavelet-LHL | firstorder | Entropy                          | 4.137871319  |
| wavelet-LHL | firstorder | Range                            | 1500.03687   |
| wavelet-LHL | firstorder | Variance                         | 21894.04743  |
| wavelet-LHL | firstorder | 10Percentile                     | -194.5660056 |
| wavelet-LHL | firstorder | Kurtosis                         | 7.787587025  |
| wavelet-LHL | firstorder | Mean                             | -18.19525079 |
| wavelet-LHL | glrlm      | ShortRunLowGrayLevelEmphasis     | 0.003850172  |
| wavelet-LHL | glrlm      | GrayLevelVariance                | 40.6651343   |
| wavelet-LHL | glrlm      | LowGrayLevelRunEmphasis          | 0.00409632   |
| wavelet-LHL | glrlm      | GrayLevelNonUniformityNormalized | 0.077685735  |
| wavelet-LHL | glrlm      | RunVariance                      | 0.336673698  |
| wavelet-LHL | glrlm      | GrayLevelNonUniformity           | 165.6296798  |
| wavelet-LHL | glrlm      | LongRunEmphasis                  | 1.764497496  |
| wavelet-LHL | glrlm      | ShortRunHighGrayLevelEmphasis    | 458.264073   |
| wavelet-LHL | glrlm      | RunLengthNonUniformity           | 1622.373394  |
| wavelet-LHL | glrlm      | ShortRunEmphasis                 | 0.893380515  |
| wavelet-LHL | glrlm      | LongRunHighGrayLevelEmphasis     | 893.1544053  |
| wavelet-LHL | glrlm      | RunPercentage                    | 0.840136158  |
| wavelet-LHL | glrlm      | LongRunLowGrayLevelEmphasis      | 0.005759425  |
| wavelet-LHL | glrlm      | RunEntropy                       | 4.98327678   |
| wavelet-LHL | glrlm      | HighGrayLevelRunEmphasis         | 511.0654361  |
| wavelet-LHL | glrlm      | RunLengthNonUniformityNormalized | 0.760834573  |
| wavelet-LHL | glszm      | GrayLevelVariance                | 75.05045295  |
| wavelet-LHL | glszm      | ZoneVariance                     | 546.8955909  |
| wavelet-LHL | glszm      | GrayLevelNonUniformityNormalized | 0.036684694  |
| wavelet-LHL | glszm      | SizeZoneNonUniformityNormalized  | 0.493171985  |
| wavelet-LHL | glszm      | SizeZoneNonUniformity            | 424.127907   |
| wavelet-LHL | glszm      | GrayLevelNonUniformity           | 31.54883721  |
| wavelet-LHL | glszm      | LargeAreaEmphasis                | 555.5569767  |
| wavelet-LHL | glszm      | SmallAreaHighGrayLevelEmphasis   | 418.1157194  |
| wavelet-LHL | glszm      | ZonePercentage                   | 0.339786646  |
| wavelet-LHL | glszm      | LargeAreaLowGrayLevelEmphasis    | 1.110187108  |
| wavelet-LHL | glszm      | LargeAreaHighGrayLevelEmphasis   | 280796.8605  |
| wavelet-LHL | glszm      | HighGrayLevelZoneEmphasis        | 550.1383721  |
| wavelet-LHL | glszm      | SmallAreaEmphasis                | 0.729943603  |
| wavelet-LHL | glszm      | LowGrayLevelZoneEmphasis         | 0.006016288  |
| wavelet-LHL | glszm      | ZoneEntropy                      | 6.447509441  |
| wavelet-LHL | glszm      | SmallAreaLowGrayLevelEmphasis    | 0.004785798  |
| wavelet-LHL | ngtdm      | Coarseness                       | 0.003028883  |
| wavelet-LHL | ngtdm      | Complexity                       | 3802.579177  |
| wavelet-LHL | ngtdm      | Strength                         | 4.252550222  |
| wavelet-LHL | ngtdm      | Contrast                         | 0.083404875  |
| wavelet-LHL | ngtdm      | Busyness                         | 0.201427779  |
| wavelet-LHH | gldm       | GrayLevelVariance                | 16.36670251  |
| wavelet-LHH | gldm       | HighGrayLevelEmphasis            | 360.5124457  |
| wavelet-LHH | gldm       | DependenceEntropy                | 6.467681187  |
| wavelet-LHH | gldm       | DependenceNonUniformity          | 253.2323192  |

|             |            |                                      |              |
|-------------|------------|--------------------------------------|--------------|
| wavelet-LHH | gldm       | GrayLevelNonUniformity               | 372.1631766  |
| wavelet-LHH | gldm       | SmallDependenceEmphasis              | 0.26336147   |
| wavelet-LHH | gldm       | SmallDependenceHighGrayLevelEmphasis | 104.846554   |
| wavelet-LHH | gldm       | DependenceNonUniformityNormalized    | 0.100052279  |
| wavelet-LHH | gldm       | LargeDependenceEmphasis              | 61.87870407  |
| wavelet-LHH | gldm       | LargeDependenceLowGrayLevelEmphasis  | 0.186309721  |
| wavelet-LHH | gldm       | DependenceVariance                   | 24.39876546  |
| wavelet-LHH | gldm       | LargeDependenceHighGrayLevelEmphasis | 20977.855    |
| wavelet-LHH | gldm       | SmallDependenceLowGrayLevelEmphasis  | 0.002277283  |
| wavelet-LHH | gldm       | LowGrayLevelEmphasis                 | 0.004629023  |
| wavelet-LHH | glcm       | JointAverage                         | 18.55560795  |
| wavelet-LHH | glcm       | SumAverage                           | 37.1112159   |
| wavelet-LHH | glcm       | JointEntropy                         | 6.412091433  |
| wavelet-LHH | glcm       | ClusterShade                         | 62.48484425  |
| wavelet-LHH | glcm       | MaximumProbability                   | 0.122261427  |
| wavelet-LHH | glcm       | Idmn                                 | 0.986883412  |
| wavelet-LHH | glcm       | JointEnergy                          | 0.045852706  |
| wavelet-LHH | glcm       | Contrast                             | 28.74451887  |
| wavelet-LHH | glcm       | DifferenceEntropy                    | 3.175580225  |
| wavelet-LHH | glcm       | InverseVariance                      | 0.348703853  |
| wavelet-LHH | glcm       | DifferenceVariance                   | 18.72376099  |
| wavelet-LHH | glcm       | Idn                                  | 0.940379331  |
| wavelet-LHH | glcm       | Idm                                  | 0.420202563  |
| wavelet-LHH | glcm       | Correlation                          | -0.008696414 |
| wavelet-LHH | glcm       | Autocorrelation                      | 344.1718219  |
| wavelet-LHH | glcm       | SumEntropy                           | 3.954373997  |
| wavelet-LHH | glcm       | SumSquares                           | 14.23200233  |
| wavelet-LHH | glcm       | ClusterProminence                    | 7817.839981  |
| wavelet-LHH | glcm       | Imc2                                 | 0.743456077  |
| wavelet-LHH | glcm       | Imc1                                 | -0.120464114 |
| wavelet-LHH | glcm       | DifferenceAverage                    | 3.12117026   |
| wavelet-LHH | glcm       | Id                                   | 0.474694693  |
| wavelet-LHH | glcm       | ClusterTendency                      | 28.18349047  |
| wavelet-LHH | firstorder | InterquartileRange                   | 49.09813644  |
| wavelet-LHH | firstorder | Skewness                             | 0.526358035  |
| wavelet-LHH | firstorder | Uniformity                           | 0.14704195   |
| wavelet-LHH | firstorder | Median                               | -1.820076458 |
| wavelet-LHH | firstorder | Energy                               | 25572056.31  |
| wavelet-LHH | firstorder | RobustMeanAbsoluteDeviation          | 26.53685874  |
| wavelet-LHH | firstorder | MeanAbsoluteDeviation                | 59.86937283  |
| wavelet-LHH | firstorder | TotalEnergy                          | 690445520.3  |
| wavelet-LHH | firstorder | Maximum                              | 635.9490201  |
| wavelet-LHH | firstorder | RootMeanSquared                      | 100.5163601  |
| wavelet-LHH | firstorder | 90Percentile                         | 105.344328   |
| wavelet-LHH | firstorder | Minimum                              | -445.5375242 |
| wavelet-LHH | firstorder | Entropy                              | 3.572919296  |
| wavelet-LHH | firstorder | Range                                | 1081.486544  |
| wavelet-LHH | firstorder | Variance                             | 10102.38638  |
| wavelet-LHH | firstorder | 10Percentile                         | -94.7670574  |
| wavelet-LHH | firstorder | Kurtosis                             | 9.063611688  |
| wavelet-LHH | firstorder | Mean                                 | 1.073434474  |
| wavelet-LHH | glrlm      | ShortRunLowGrayLevelEmphasis         | 0.004626142  |
| wavelet-LHH | glrlm      | GrayLevelVariance                    | 19.94217365  |
| wavelet-LHH | glrlm      | LowGrayLevelRunEmphasis              | 0.005026195  |
| wavelet-LHH | glrlm      | GrayLevelNonUniformityNormalized     | 0.110821064  |
| wavelet-LHH | glrlm      | RunVariance                          | 0.455876684  |
| wavelet-LHH | glrlm      | GrayLevelNonUniformity               | 225.6359975  |
| wavelet-LHH | glrlm      | LongRunEmphasis                      | 2.015719815  |

|             |       |                                      |             |
|-------------|-------|--------------------------------------|-------------|
| wavelet-LHH | glrlm | ShortRunHighGrayLevelEmphasis        | 320.7779201 |
| wavelet-LHH | glrlm | RunLengthNonUniformity               | 1453.204625 |
| wavelet-LHH | glrlm | ShortRunEmphasis                     | 0.86874647  |
| wavelet-LHH | glrlm | LongRunHighGrayLevelEmphasis         | 710.4471806 |
| wavelet-LHH | glrlm | RunPercentage                        | 0.802996687 |
| wavelet-LHH | glrlm | LongRunLowGrayLevelEmphasis          | 0.008084142 |
| wavelet-LHH | glrlm | RunEntropy                           | 4.590241123 |
| wavelet-LHH | glrlm | HighGrayLevelRunEmphasis             | 365.5497075 |
| wavelet-LHH | glrlm | RunLengthNonUniformityNormalized     | 0.713662424 |
| wavelet-LHH | glszm | GrayLevelVariance                    | 43.77023772 |
| wavelet-LHH | glszm | ZoneVariance                         | 1028.918899 |
| wavelet-LHH | glszm | GrayLevelNonUniformityNormalized     | 0.047711191 |
| wavelet-LHH | glszm | SizeZoneNonUniformityNormalized      | 0.519437234 |
| wavelet-LHH | glszm | SizeZoneNonUniformity                | 379.7086183 |
| wavelet-LHH | glszm | GrayLevelNonUniformity               | 34.87688098 |
| wavelet-LHH | glszm | LargeAreaEmphasis                    | 1040.906977 |
| wavelet-LHH | glszm | SmallAreaHighGrayLevelEmphasis       | 303.9510088 |
| wavelet-LHH | glszm | ZonePercentage                       | 0.288818649 |
| wavelet-LHH | glszm | LargeAreaLowGrayLevelEmphasis        | 3.090915148 |
| wavelet-LHH | glszm | LargeAreaHighGrayLevelEmphasis       | 352519.5472 |
| wavelet-LHH | glszm | HighGrayLevelZoneEmphasis            | 399.1778386 |
| wavelet-LHH | glszm | SmallAreaEmphasis                    | 0.748624336 |
| wavelet-LHH | glszm | LowGrayLevelZoneEmphasis             | 0.008290616 |
| wavelet-LHH | glszm | ZoneEntropy                          | 5.989469466 |
| wavelet-LHH | glszm | SmallAreaLowGrayLevelEmphasis        | 0.007313332 |
| wavelet-LHH | ngtdm | Coarseness                           | 0.003223367 |
| wavelet-LHH | ngtdm | Complexity                           | 1753.133763 |
| wavelet-LHH | ngtdm | Strength                             | 2.147249045 |
| wavelet-LHH | ngtdm | Contrast                             | 0.053409353 |
| wavelet-LHH | ngtdm | Busyness                             | 0.274293746 |
| wavelet-LLH | gldm  | GrayLevelVariance                    | 35.70212557 |
| wavelet-LLH | gldm  | HighGrayLevelEmphasis                | 1456.494666 |
| wavelet-LLH | gldm  | DependenceEntropy                    | 6.828934865 |
| wavelet-LLH | gldm  | DependenceNonUniformity              | 297.9205847 |
| wavelet-LLH | gldm  | GrayLevelNonUniformity               | 285.8723825 |
| wavelet-LLH | gldm  | SmallDependenceEmphasis              | 0.308016715 |
| wavelet-LLH | gldm  | SmallDependenceHighGrayLevelEmphasis | 470.6773141 |
| wavelet-LLH | gldm  | DependenceNonUniformityNormalized    | 0.117708647 |
| wavelet-LLH | gldm  | LargeDependenceEmphasis              | 57.00474121 |
| wavelet-LLH | gldm  | LargeDependenceLowGrayLevelEmphasis  | 0.039142047 |
| wavelet-LLH | gldm  | DependenceVariance                   | 25.37244982 |
| wavelet-LLH | gldm  | LargeDependenceHighGrayLevelEmphasis | 84445.83564 |
| wavelet-LLH | gldm  | SmallDependenceLowGrayLevelEmphasis  | 0.000676233 |
| wavelet-LLH | gldm  | LowGrayLevelEmphasis                 | 0.001184236 |
| wavelet-LLH | glcm  | JointAverage                         | 37.61847208 |
| wavelet-LLH | glcm  | SumAverage                           | 75.23694417 |
| wavelet-LLH | glcm  | JointEntropy                         | 7.054694447 |
| wavelet-LLH | glcm  | ClusterShade                         | 125.839429  |
| wavelet-LLH | glcm  | MaximumProbability                   | 0.105523875 |
| wavelet-LLH | glcm  | Idmn                                 | 0.991740533 |
| wavelet-LLH | glcm  | JointEnergy                          | 0.035286756 |
| wavelet-LLH | glcm  | Contrast                             | 52.16584829 |
| wavelet-LLH | glcm  | DifferenceEntropy                    | 3.501581931 |
| wavelet-LLH | glcm  | InverseVariance                      | 0.315926907 |
| wavelet-LLH | glcm  | DifferenceVariance                   | 34.6624933  |
| wavelet-LLH | glcm  | Idn                                  | 0.953117833 |
| wavelet-LLH | glcm  | Idm                                  | 0.380727125 |
| wavelet-LLH | glcm  | Correlation                          | 0.120619241 |

|             |            |                                  |              |
|-------------|------------|----------------------------------|--------------|
| wavelet-LLH | glcm       | Autocorrelation                  | 1418.874976  |
| wavelet-LLH | glcm       | SumEntropy                       | 4.474492208  |
| wavelet-LLH | glcm       | SumSquares                       | 29.80762861  |
| wavelet-LLH | glcm       | ClusterProminence                | 40749.91476  |
| wavelet-LLH | glcm       | Imc2                             | 0.834122196  |
| wavelet-LLH | glcm       | Imc1                             | -0.159071997 |
| wavelet-LLH | glcm       | DifferenceAverage                | 4.10876261   |
| wavelet-LLH | glcm       | Id                               | 0.438407062  |
| wavelet-LLH | glcm       | ClusterTendency                  | 67.06466613  |
| wavelet-LLH | firstorder | InterquartileRange               | 87.55512327  |
| wavelet-LLH | firstorder | Skewness                         | 0.442998547  |
| wavelet-LLH | firstorder | Uniformity                       | 0.112948393  |
| wavelet-LLH | firstorder | Median                           | -7.426633159 |
| wavelet-LLH | firstorder | Energy                           | 57454035     |
| wavelet-LLH | firstorder | RobustMeanAbsoluteDeviation      | 44.20456632  |
| wavelet-LLH | firstorder | MeanAbsoluteDeviation            | 91.98640073  |
| wavelet-LLH | firstorder | TotalEnergy                      | 1551258945   |
| wavelet-LLH | firstorder | Maximum                          | 936.8019378  |
| wavelet-LLH | firstorder | RootMeanSquared                  | 150.665631   |
| wavelet-LLH | firstorder | 90Percentile                     | 130.0181019  |
| wavelet-LLH | firstorder | Minimum                          | -928.1560972 |
| wavelet-LLH | firstorder | Entropy                          | 4.055911218  |
| wavelet-LLH | firstorder | Range                            | 1864.958035  |
| wavelet-LLH | firstorder | Variance                         | 22298.18184  |
| wavelet-LLH | firstorder | 10Percentile                     | -188.0927399 |
| wavelet-LLH | firstorder | Kurtosis                         | 8.334727133  |
| wavelet-LLH | firstorder | Mean                             | -20.04870367 |
| wavelet-LLH | glrlm      | ShortRunLowGrayLevelEmphasis     | 0.001212089  |
| wavelet-LLH | glrlm      | GrayLevelVariance                | 42.63617246  |
| wavelet-LLH | glrlm      | LowGrayLevelRunEmphasis          | 0.001292512  |
| wavelet-LLH | glrlm      | GrayLevelNonUniformityNormalized | 0.082841056  |
| wavelet-LLH | glrlm      | RunVariance                      | 0.42984522   |
| wavelet-LLH | glrlm      | GrayLevelNonUniformity           | 172.9515481  |
| wavelet-LLH | glrlm      | LongRunEmphasis                  | 1.920265203  |
| wavelet-LLH | glrlm      | ShortRunHighGrayLevelEmphasis    | 1285.95938   |
| wavelet-LLH | glrlm      | RunLengthNonUniformity           | 1550.485383  |
| wavelet-LLH | glrlm      | ShortRunEmphasis                 | 0.884682725  |
| wavelet-LLH | glrlm      | LongRunHighGrayLevelEmphasis     | 2809.361076  |
| wavelet-LLH | glrlm      | RunPercentage                    | 0.822143877  |
| wavelet-LLH | glrlm      | LongRunLowGrayLevelEmphasis      | 0.001923433  |
| wavelet-LLH | glrlm      | RunEntropy                       | 4.995172581  |
| wavelet-LLH | glrlm      | HighGrayLevelRunEmphasis         | 1454.207429  |
| wavelet-LLH | glrlm      | RunLengthNonUniformityNormalized | 0.743755984  |
| wavelet-LLH | glszm      | GrayLevelVariance                | 86.11772736  |
| wavelet-LLH | glszm      | ZoneVariance                     | 648.7087143  |
| wavelet-LLH | glszm      | GrayLevelNonUniformityNormalized | 0.034912549  |
| wavelet-LLH | glszm      | SizeZoneNonUniformityNormalized  | 0.55165434   |
| wavelet-LLH | glszm      | SizeZoneNonUniformity            | 468.3545347  |
| wavelet-LLH | glszm      | GrayLevelNonUniformity           | 29.64075383  |
| wavelet-LLH | glszm      | LargeAreaEmphasis                | 657.5959953  |
| wavelet-LLH | glszm      | SmallAreaHighGrayLevelEmphasis   | 1203.327391  |
| wavelet-LLH | glszm      | ZonePercentage                   | 0.335440537  |
| wavelet-LLH | glszm      | LargeAreaLowGrayLevelEmphasis    | 0.445341032  |
| wavelet-LLH | glszm      | LargeAreaHighGrayLevelEmphasis   | 975325.0789  |
| wavelet-LLH | glszm      | HighGrayLevelZoneEmphasis        | 1510.31331   |
| wavelet-LLH | glszm      | SmallAreaEmphasis                | 0.77077442   |
| wavelet-LLH | glszm      | LowGrayLevelZoneEmphasis         | 0.002094172  |
| wavelet-LLH | glszm      | ZoneEntropy                      | 6.358607678  |



|             |            |                                      |              |
|-------------|------------|--------------------------------------|--------------|
| wavelet-LLH | glszm      | SmallAreaLowGrayLevelEmphasis        | 0.001896852  |
| wavelet-LLH | ngtdm      | Coarseness                           | 0.002900545  |
| wavelet-LLH | ngtdm      | Complexity                           | 4834.637013  |
| wavelet-LLH | ngtdm      | Strength                             | 5.028495267  |
| wavelet-LLH | ngtdm      | Contrast                             | 0.071711339  |
| wavelet-LLH | ngtdm      | Busyness                             | 0.103801467  |
| wavelet-LLL | gldm       | GrayLevelVariance                    | 365.0513929  |
| wavelet-LLL | gldm       | HighGrayLevelEmphasis                | 7896.698933  |
| wavelet-LLL | gldm       | DependenceEntropy                    | 7.559140741  |
| wavelet-LLL | gldm       | DependenceNonUniformity              | 415.8289214  |
| wavelet-LLL | gldm       | GrayLevelNonUniformity               | 156.4168313  |
| wavelet-LLL | gldm       | SmallDependenceEmphasis              | 0.403589894  |
| wavelet-LLL | gldm       | SmallDependenceHighGrayLevelEmphasis | 2367.180784  |
| wavelet-LLL | gldm       | DependenceNonUniformityNormalized    | 0.164294319  |
| wavelet-LLL | gldm       | LargeDependenceEmphasis              | 44.6317661   |
| wavelet-LLL | gldm       | LargeDependenceLowGrayLevelEmphasis  | 0.005316494  |
| wavelet-LLL | gldm       | DependenceVariance                   | 21.60617712  |
| wavelet-LLL | gldm       | LargeDependenceHighGrayLevelEmphasis | 424702.5938  |
| wavelet-LLL | gldm       | SmallDependenceLowGrayLevelEmphasis  | 0.000657458  |
| wavelet-LLL | gldm       | LowGrayLevelEmphasis                 | 0.000726707  |
| wavelet-LLL | glcm       | JointAverage                         | 90.11253176  |
| wavelet-LLL | glcm       | SumAverage                           | 180.2250635  |
| wavelet-LLL | glcm       | JointEntropy                         | 8.269223837  |
| wavelet-LLL | glcm       | ClusterShade                         | -49423.55849 |
| wavelet-LLL | glcm       | MaximumProbability                   | 0.051968346  |
| wavelet-LLL | glcm       | Idmn                                 | 0.983423736  |
| wavelet-LLL | glcm       | JointEnergy                          | 0.013410386  |
| wavelet-LLL | glcm       | Contrast                             | 210.1338595  |
| wavelet-LLL | glcm       | DifferenceEntropy                    | 4.251446028  |
| wavelet-LLL | glcm       | InverseVariance                      | 0.271155051  |
| wavelet-LLL | glcm       | DifferenceVariance                   | 141.1538628  |
| wavelet-LLL | glcm       | Idn                                  | 0.936676834  |
| wavelet-LLL | glcm       | Idm                                  | 0.319531389  |
| wavelet-LLL | glcm       | Correlation                          | 0.582751712  |
| wavelet-LLL | glcm       | Autocorrelation                      | 8270.62899   |
| wavelet-LLL | glcm       | SumEntropy                           | 5.593404013  |
| wavelet-LLL | glcm       | SumSquares                           | 255.1412152  |
| wavelet-LLL | glcm       | ClusterProminence                    | 4997786.718  |
| wavelet-LLL | glcm       | Imc2                                 | 0.941436472  |
| wavelet-LLL | glcm       | Imc1                                 | -0.235801657 |
| wavelet-LLL | glcm       | DifferenceAverage                    | 8.209276856  |
| wavelet-LLL | glcm       | Id                                   | 0.373768033  |
| wavelet-LLL | glcm       | ClusterTendency                      | 810.4310015  |
| wavelet-LLL | firstorder | InterquartileRange                   | 429.6804683  |
| wavelet-LLL | firstorder | Skewness                             | -1.808271926 |
| wavelet-LLL | firstorder | Uniformity                           | 0.061800407  |
| wavelet-LLL | firstorder | Median                               | 51.59760638  |
| wavelet-LLL | firstorder | Energy                               | 671373501.1  |
| wavelet-LLL | firstorder | RobustMeanAbsoluteDeviation          | 217.4694723  |
| wavelet-LLL | firstorder | MeanAbsoluteDeviation                | 362.6852642  |
| wavelet-LLL | firstorder | TotalEnergy                          | 18127084531  |
| wavelet-LLL | firstorder | Maximum                              | 295.3640661  |
| wavelet-LLL | firstorder | RootMeanSquared                      | 515.0341487  |
| wavelet-LLL | firstorder | 90Percentile                         | 133.671328   |
| wavelet-LLL | firstorder | Minimum                              | -2336.390953 |
| wavelet-LLL | firstorder | Entropy                              | 5.067534052  |
| wavelet-LLL | firstorder | Range                                | 2631.755019  |
| wavelet-LLL | firstorder | Variance                             | 228083.2403  |

|             |            |                                      |              |
|-------------|------------|--------------------------------------|--------------|
| wavelet-LLL | firstorder | 10Percentile                         | -960.9178362 |
| wavelet-LLL | firstorder | Kurtosis                             | 5.639750332  |
| wavelet-LLL | firstorder | Mean                                 | -192.8132102 |
| wavelet-LLL | glrlm      | ShortRunLowGrayLevelEmphasis         | 0.000823124  |
| wavelet-LLL | glrlm      | GrayLevelVariance                    | 401.9518716  |
| wavelet-LLL | glrlm      | LowGrayLevelRunEmphasis              | 0.000833315  |
| wavelet-LLL | glrlm      | GrayLevelNonUniformityNormalized     | 0.046806294  |
| wavelet-LLL | glrlm      | RunVariance                          | 0.303144871  |
| wavelet-LLL | glrlm      | GrayLevelNonUniformity               | 101.2839205  |
| wavelet-LLL | glrlm      | LongRunEmphasis                      | 1.67786206   |
| wavelet-LLL | glrlm      | ShortRunHighGrayLevelEmphasis        | 6722.494331  |
| wavelet-LLL | glrlm      | RunLengthNonUniformity               | 1697.237185  |
| wavelet-LLL | glrlm      | ShortRunEmphasis                     | 0.905499752  |
| wavelet-LLL | glrlm      | LongRunHighGrayLevelEmphasis         | 14076.33103  |
| wavelet-LLL | glrlm      | RunPercentage                        | 0.853903899  |
| wavelet-LLL | glrlm      | LongRunLowGrayLevelEmphasis          | 0.000905409  |
| wavelet-LLL | glrlm      | RunEntropy                           | 5.886494353  |
| wavelet-LLL | glrlm      | HighGrayLevelRunEmphasis             | 7619.014383  |
| wavelet-LLL | glrlm      | RunLengthNonUniformityNormalized     | 0.784741761  |
| wavelet-LLL | glszm      | GrayLevelVariance                    | 487.5175981  |
| wavelet-LLL | glszm      | ZoneVariance                         | 266.8440413  |
| wavelet-LLL | glszm      | GrayLevelNonUniformityNormalized     | 0.016065639  |
| wavelet-LLL | glszm      | SizeZoneNonUniformityNormalized      | 0.687663641  |
| wavelet-LLL | glszm      | SizeZoneNonUniformity                | 740.6137419  |
| wavelet-LLL | glszm      | GrayLevelNonUniformity               | 17.30269266  |
| wavelet-LLL | glszm      | LargeAreaEmphasis                    | 272.3667595  |
| wavelet-LLL | glszm      | SmallAreaHighGrayLevelEmphasis       | 4736.842045  |
| wavelet-LLL | glszm      | ZonePercentage                       | 0.425523508  |
| wavelet-LLL | glszm      | LargeAreaLowGrayLevelEmphasis        | 0.029903711  |
| wavelet-LLL | glszm      | LargeAreaHighGrayLevelEmphasis       | 2606805.236  |
| wavelet-LLL | glszm      | HighGrayLevelZoneEmphasis            | 5908.141133  |
| wavelet-LLL | glszm      | SmallAreaEmphasis                    | 0.854249074  |
| wavelet-LLL | glszm      | LowGrayLevelZoneEmphasis             | 0.001555864  |
| wavelet-LLL | glszm      | ZoneEntropy                          | 6.924086998  |
| wavelet-LLL | glszm      | SmallAreaLowGrayLevelEmphasis        | 0.001532441  |
| wavelet-LLL | ngtdm      | Coarseness                           | 0.002512331  |
| wavelet-LLL | ngtdm      | Complexity                           | 25639.87462  |
| wavelet-LLL | ngtdm      | Strength                             | 25.11468157  |
| wavelet-LLL | ngtdm      | Contrast                             | 0.490997574  |
| wavelet-LLL | ngtdm      | Busyness                             | 0.030996383  |
| wavelet-HHL | gldm       | GrayLevelVariance                    | 6.759672124  |
| wavelet-HHL | gldm       | HighGrayLevelEmphasis                | 189.7732122  |
| wavelet-HHL | gldm       | DependenceEntropy                    | 6.256018252  |
| wavelet-HHL | gldm       | DependenceNonUniformity              | 214.898064   |
| wavelet-HHL | gldm       | GrayLevelNonUniformity               | 417.7657053  |
| wavelet-HHL | gldm       | SmallDependenceEmphasis              | 0.197097425  |
| wavelet-HHL | gldm       | SmallDependenceHighGrayLevelEmphasis | 40.4606081   |
| wavelet-HHL | gldm       | DependenceNonUniformityNormalized    | 0.084906386  |
| wavelet-HHL | gldm       | LargeDependenceEmphasis              | 59.08850257  |
| wavelet-HHL | gldm       | LargeDependenceLowGrayLevelEmphasis  | 0.335644295  |
| wavelet-HHL | gldm       | DependenceVariance                   | 20.42870289  |
| wavelet-HHL | gldm       | LargeDependenceHighGrayLevelEmphasis | 10711.4034   |
| wavelet-HHL | gldm       | SmallDependenceLowGrayLevelEmphasis  | 0.002414348  |
| wavelet-HHL | gldm       | LowGrayLevelEmphasis                 | 0.007735978  |
| wavelet-HHL | glcm       | JointAverage                         | 13.53540109  |
| wavelet-HHL | glcm       | SumAverage                           | 27.07080218  |
| wavelet-HHL | glcm       | JointEntropy                         | 5.8655139    |
| wavelet-HHL | glcm       | ClusterShade                         | 4.785096771  |

|             |            |                                  |              |
|-------------|------------|----------------------------------|--------------|
| wavelet-HHL | glcm       | MaximumProbability               | 0.118010326  |
| wavelet-HHL | glcm       | Idmn                             | 0.98307755   |
| wavelet-HHL | glcm       | JointEnergy                      | 0.047234164  |
| wavelet-HHL | glcm       | Contrast                         | 11.91299684  |
| wavelet-HHL | glcm       | DifferenceEntropy                | 2.782799569  |
| wavelet-HHL | glcm       | InverseVariance                  | 0.388324651  |
| wavelet-HHL | glcm       | DifferenceVariance               | 6.977721256  |
| wavelet-HHL | glcm       | Idn                              | 0.926564526  |
| wavelet-HHL | glcm       | Idm                              | 0.446305664  |
| wavelet-HHL | glcm       | Correlation                      | 0.01096959   |
| wavelet-HHL | glcm       | Autocorrelation                  | 183.2703683  |
| wavelet-HHL | glcm       | SumEntropy                       | 3.565334     |
| wavelet-HHL | glcm       | SumSquares                       | 6.018603643  |
| wavelet-HHL | glcm       | ClusterProminence                | 1156.710693  |
| wavelet-HHL | glcm       | Imc2                             | 0.614965533  |
| wavelet-HHL | glcm       | Imc1                             | -0.080111633 |
| wavelet-HHL | glcm       | DifferenceAverage                | 2.199969797  |
| wavelet-HHL | glcm       | Id                               | 0.501025135  |
| wavelet-HHL | glcm       | ClusterTendency                  | 12.16141773  |
| wavelet-HHL | firstorder | InterquartileRange               | 46.0396054   |
| wavelet-HHL | firstorder | Skewness                         | 0.046754204  |
| wavelet-HHL | firstorder | Uniformity                       | 0.165059544  |
| wavelet-HHL | firstorder | Median                           | -1.80040543  |
| wavelet-HHL | firstorder | Energy                           | 10629566.13  |
| wavelet-HHL | firstorder | RobustMeanAbsoluteDeviation      | 22.32440664  |
| wavelet-HHL | firstorder | MeanAbsoluteDeviation            | 42.52180068  |
| wavelet-HHL | firstorder | TotalEnergy                      | 286998285.6  |
| wavelet-HHL | firstorder | Maximum                          | 298.3977295  |
| wavelet-HHL | firstorder | RootMeanSquared                  | 64.80547476  |
| wavelet-HHL | firstorder | 90Percentile                     | 74.16217748  |
| wavelet-HHL | firstorder | Minimum                          | -321.4312544 |
| wavelet-HHL | firstorder | Entropy                          | 3.182127595  |
| wavelet-HHL | firstorder | Range                            | 619.8289839  |
| wavelet-HHL | firstorder | Variance                         | 4199.152429  |
| wavelet-HHL | firstorder | 10Percentile                     | -63.57718014 |
| wavelet-HHL | firstorder | Kurtosis                         | 6.583148685  |
| wavelet-HHL | firstorder | Mean                             | 0.772741825  |
| wavelet-HHL | glrlm      | ShortRunLowGrayLevelEmphasis     | 0.007387053  |
| wavelet-HHL | glrlm      | GrayLevelVariance                | 8.148513498  |
| wavelet-HHL | glrlm      | LowGrayLevelRunEmphasis          | 0.008217829  |
| wavelet-HHL | glrlm      | GrayLevelNonUniformityNormalized | 0.134567352  |
| wavelet-HHL | glrlm      | RunVariance                      | 0.433167035  |
| wavelet-HHL | glrlm      | GrayLevelNonUniformity           | 272.6751026  |
| wavelet-HHL | glrlm      | LongRunEmphasis                  | 2.0086491    |
| wavelet-HHL | glrlm      | ShortRunHighGrayLevelEmphasis    | 166.0913259  |
| wavelet-HHL | glrlm      | RunLengthNonUniformity           | 1410.949937  |
| wavelet-HHL | glrlm      | ShortRunEmphasis                 | 0.859769893  |
| wavelet-HHL | glrlm      | LongRunHighGrayLevelEmphasis     | 375.1233606  |
| wavelet-HHL | glrlm      | RunPercentage                    | 0.799319211  |
| wavelet-HHL | glrlm      | LongRunLowGrayLevelEmphasis      | 0.014041141  |
| wavelet-HHL | glrlm      | RunEntropy                       | 4.176633572  |
| wavelet-HHL | glrlm      | HighGrayLevelRunEmphasis         | 191.7068377  |
| wavelet-HHL | glrlm      | RunLengthNonUniformityNormalized | 0.696119382  |
| wavelet-HHL | glszm      | GrayLevelVariance                | 20.97856796  |
| wavelet-HHL | glszm      | ZoneVariance                     | 1572.510439  |
| wavelet-HHL | glszm      | GrayLevelNonUniformityNormalized | 0.069389029  |
| wavelet-HHL | glszm      | SizeZoneNonUniformityNormalized  | 0.445597086  |
| wavelet-HHL | glszm      | SizeZoneNonUniformity            | 236.6120527  |

|             |            |                                      |              |
|-------------|------------|--------------------------------------|--------------|
| wavelet-HHL | glszm      | GrayLevelNonUniformity               | 36.84557439  |
| wavelet-HHL | glszm      | LargeAreaEmphasis                    | 1595.229755  |
| wavelet-HHL | glszm      | SmallAreaHighGrayLevelEmphasis       | 145.3578889  |
| wavelet-HHL | glszm      | ZonePercentage                       | 0.209798499  |
| wavelet-HHL | glszm      | LargeAreaLowGrayLevelEmphasis        | 8.912341079  |
| wavelet-HHL | glszm      | LargeAreaHighGrayLevelEmphasis       | 288041.3974  |
| wavelet-HHL | glszm      | HighGrayLevelZoneEmphasis            | 207.4990584  |
| wavelet-HHL | glszm      | SmallAreaEmphasis                    | 0.693438601  |
| wavelet-HHL | glszm      | LowGrayLevelZoneEmphasis             | 0.013060683  |
| wavelet-HHL | glszm      | ZoneEntropy                          | 5.644818987  |
| wavelet-HHL | glszm      | SmallAreaLowGrayLevelEmphasis        | 0.009471624  |
| wavelet-HHL | ngtdm      | Coarseness                           | 0.002940635  |
| wavelet-HHL | ngtdm      | Complexity                           | 455.2470715  |
| wavelet-HHL | ngtdm      | Strength                             | 0.655571374  |
| wavelet-HHL | ngtdm      | Contrast                             | 0.040086597  |
| wavelet-HHL | ngtdm      | Busyness                             | 0.691095439  |
| wavelet-HLH | gldm       | GrayLevelVariance                    | 10.93147929  |
| wavelet-HLH | gldm       | HighGrayLevelEmphasis                | 320.0715132  |
| wavelet-HLH | gldm       | DependenceEntropy                    | 6.296972096  |
| wavelet-HLH | gldm       | DependenceNonUniformity              | 236.4721454  |
| wavelet-HLH | gldm       | GrayLevelNonUniformity               | 393.3524299  |
| wavelet-HLH | gldm       | SmallDependenceEmphasis              | 0.228604729  |
| wavelet-HLH | gldm       | SmallDependenceHighGrayLevelEmphasis | 78.29686565  |
| wavelet-HLH | gldm       | DependenceNonUniformityNormalized    | 0.093430322  |
| wavelet-HLH | gldm       | LargeDependenceEmphasis              | 61.14302647  |
| wavelet-HLH | gldm       | LargeDependenceLowGrayLevelEmphasis  | 0.204397891  |
| wavelet-HLH | gldm       | DependenceVariance                   | 22.59124244  |
| wavelet-HLH | gldm       | LargeDependenceHighGrayLevelEmphasis | 18657.8226   |
| wavelet-HLH | gldm       | SmallDependenceLowGrayLevelEmphasis  | 0.002129724  |
| wavelet-HLH | gldm       | LowGrayLevelEmphasis                 | 0.004826705  |
| wavelet-HLH | glcm       | JointAverage                         | 17.55296867  |
| wavelet-HLH | glcm       | SumAverage                           | 35.10593733  |
| wavelet-HLH | glcm       | JointEntropy                         | 6.129867962  |
| wavelet-HLH | glcm       | ClusterShade                         | -7.649798305 |
| wavelet-HLH | glcm       | MaximumProbability                   | 0.121629677  |
| wavelet-HLH | glcm       | Idmn                                 | 0.985493004  |
| wavelet-HLH | glcm       | JointEnergy                          | 0.048336212  |
| wavelet-HLH | glcm       | Contrast                             | 20.09349084  |
| wavelet-HLH | glcm       | DifferenceEntropy                    | 2.999121712  |
| wavelet-HLH | glcm       | InverseVariance                      | 0.368838003  |
| wavelet-HLH | glcm       | DifferenceVariance                   | 12.69154142  |
| wavelet-HLH | glcm       | Idn                                  | 0.935893647  |
| wavelet-HLH | glcm       | Idm                                  | 0.434733531  |
| wavelet-HLH | glcm       | Correlation                          | -0.013404751 |
| wavelet-HLH | glcm       | Autocorrelation                      | 307.9505867  |
| wavelet-HLH | glcm       | SumEntropy                           | 3.758714782  |
| wavelet-HLH | glcm       | SumSquares                           | 9.889948723  |
| wavelet-HLH | glcm       | ClusterProminence                    | 3372.415322  |
| wavelet-HLH | glcm       | Imc2                                 | 0.710472442  |
| wavelet-HLH | glcm       | Imc1                                 | -0.111144774 |
| wavelet-HLH | glcm       | DifferenceAverage                    | 2.680641519  |
| wavelet-HLH | glcm       | Id                                   | 0.488539947  |
| wavelet-HLH | glcm       | ClusterTendency                      | 19.46630406  |
| wavelet-HLH | firstorder | InterquartileRange                   | 47.57513405  |
| wavelet-HLH | firstorder | Skewness                             | -0.064755505 |
| wavelet-HLH | firstorder | Uniformity                           | 0.15541384   |
| wavelet-HLH | firstorder | Median                               | -0.186874668 |
| wavelet-HLH | firstorder | Energy                               | 17174177.18  |

|             |            |                                  |              |
|-------------|------------|----------------------------------|--------------|
| wavelet-HLH | firstorder | RobustMeanAbsoluteDeviation      | 23.66313947  |
| wavelet-HLH | firstorder | MeanAbsoluteDeviation            | 50.47189584  |
| wavelet-HLH | firstorder | TotalEnergy                      | 463702783.7  |
| wavelet-HLH | firstorder | Maximum                          | 435.0607781  |
| wavelet-HLH | firstorder | RootMeanSquared                  | 82.37433031  |
| wavelet-HLH | firstorder | 90Percentile                     | 85.53263037  |
| wavelet-HLH | firstorder | Minimum                          | -408.1444051 |
| wavelet-HLH | firstorder | Entropy                          | 3.388165349  |
| wavelet-HLH | firstorder | Range                            | 843.2051832  |
| wavelet-HLH | firstorder | Variance                         | 6781.847309  |
| wavelet-HLH | firstorder | 10Percentile                     | -76.03819329 |
| wavelet-HLH | firstorder | Kurtosis                         | 7.772156799  |
| wavelet-HLH | firstorder | Mean                             | 1.919110637  |
| wavelet-HLH | glrlm      | ShortRunLowGrayLevelEmphasis     | 0.004736671  |
| wavelet-HLH | glrlm      | GrayLevelVariance                | 13.30772227  |
| wavelet-HLH | glrlm      | LowGrayLevelRunEmphasis          | 0.005198584  |
| wavelet-HLH | glrlm      | GrayLevelNonUniformityNormalized | 0.121523478  |
| wavelet-HLH | glrlm      | RunVariance                      | 0.447738287  |
| wavelet-HLH | glrlm      | GrayLevelNonUniformity           | 246.4094109  |
| wavelet-HLH | glrlm      | LongRunEmphasis                  | 2.022680605  |
| wavelet-HLH | glrlm      | ShortRunHighGrayLevelEmphasis    | 281.5084164  |
| wavelet-HLH | glrlm      | RunLengthNonUniformity           | 1426.728426  |
| wavelet-HLH | glrlm      | ShortRunEmphasis                 | 0.863363526  |
| wavelet-HLH | glrlm      | LongRunHighGrayLevelEmphasis     | 636.2051815  |
| wavelet-HLH | glrlm      | RunPercentage                    | 0.799653527  |
| wavelet-HLH | glrlm      | LongRunLowGrayLevelEmphasis      | 0.008621502  |
| wavelet-HLH | glrlm      | RunEntropy                       | 4.397084069  |
| wavelet-HLH | glrlm      | HighGrayLevelRunEmphasis         | 323.5062788  |
| wavelet-HLH | glrlm      | RunLengthNonUniformityNormalized | 0.70337384   |
| wavelet-HLH | glszm      | GrayLevelVariance                | 31.47678624  |
| wavelet-HLH | glszm      | ZoneVariance                     | 1221.240124  |
| wavelet-HLH | glszm      | GrayLevelNonUniformityNormalized | 0.056515153  |
| wavelet-HLH | glszm      | SizeZoneNonUniformityNormalized  | 0.468290869  |
| wavelet-HLH | glszm      | SizeZoneNonUniformity            | 296.4281201  |
| wavelet-HLH | glszm      | GrayLevelNonUniformity           | 35.77409163  |
| wavelet-HLH | glszm      | LargeAreaEmphasis                | 1237.227488  |
| wavelet-HLH | glszm      | SmallAreaHighGrayLevelEmphasis   | 246.968507   |
| wavelet-HLH | glszm      | ZonePercentage                   | 0.250098775  |
| wavelet-HLH | glszm      | LargeAreaLowGrayLevelEmphasis    | 4.085304384  |
| wavelet-HLH | glszm      | LargeAreaHighGrayLevelEmphasis   | 376873.9763  |
| wavelet-HLH | glszm      | HighGrayLevelZoneEmphasis        | 345.8246445  |
| wavelet-HLH | glszm      | SmallAreaEmphasis                | 0.711092356  |
| wavelet-HLH | glszm      | LowGrayLevelZoneEmphasis         | 0.008923634  |
| wavelet-HLH | glszm      | ZoneEntropy                      | 5.894757803  |
| wavelet-HLH | glszm      | SmallAreaLowGrayLevelEmphasis    | 0.007759201  |
| wavelet-HLH | ngtdm      | Coarseness                       | 0.003134563  |
| wavelet-HLH | ngtdm      | Complexity                       | 1019.078129  |
| wavelet-HLH | ngtdm      | Strength                         | 1.365279633  |
| wavelet-HLH | ngtdm      | Contrast                         | 0.041842208  |
| wavelet-HLH | ngtdm      | Busyness                         | 0.34900451   |

| Image type | Feature Class | Feature Name                         |                                                                                                                                                                                                                                                                                                                                                                                                                   |
|------------|---------------|--------------------------------------|-------------------------------------------------------------------------------------------------------------------------------------------------------------------------------------------------------------------------------------------------------------------------------------------------------------------------------------------------------------------------------------------------------------------|
| general    | info          | BoundingBox                          | 11: RTSTRUCT: C99-DNU_segment_ITV-RUL-final<br>(0, 0, 5, 16, 28, 6)                                                                                                                                                                                                                                                                                                                                               |
| general    | info          | EnabledImageTypes                    | {u'Original': {}, u'Wavelet': {}}                                                                                                                                                                                                                                                                                                                                                                                 |
|            |               |                                      | {'distances': [1], 'additionalInfo': True, 'force2D': False, 'interpolator': 'sitkBSpline', 'resampledPixelSpacing': [3.0], 'label': 1, 'normalizeScale': 1, 'normalize': False, 'force2Ddimension': 0, 'removeOutliers': None, 'minimumROISize': None, u'binWidth': 25.0, 'minimumROIDimensions': 1, u'correctMask': True, 'preCrop': False, u'symmetricalGLCM': True, 'resegmentRange': None, 'padDistance': 5} |
| general    | info          | GeneralSettings                      |                                                                                                                                                                                                                                                                                                                                                                                                                   |
| general    | info          | ImageHash                            | d7d1f3095a650ab4f7aa00ead8c0bf282d1a161c<br>(0.9765624999999998, 0.9765624999999998,                                                                                                                                                                                                                                                                                                                              |
| general    | info          | ImageSpacing                         | 1.9999999999999999)                                                                                                                                                                                                                                                                                                                                                                                               |
| general    | info          | MaskHash                             | 24f946a5930e5a3c04b9a76a5f039d1479fd941a                                                                                                                                                                                                                                                                                                                                                                          |
| general    | info          | NumpyVersion                         | 1.13.1                                                                                                                                                                                                                                                                                                                                                                                                            |
| general    | info          | PyWaveletVersion                     | 0.5.2                                                                                                                                                                                                                                                                                                                                                                                                             |
| general    | info          | SimpleITKVersion                     | 1.1.0                                                                                                                                                                                                                                                                                                                                                                                                             |
| general    | info          | Version                              | 1.3.0.post102+g1b0eb74                                                                                                                                                                                                                                                                                                                                                                                            |
| general    | info          | VolumeNum                            | 2                                                                                                                                                                                                                                                                                                                                                                                                                 |
| general    | info          | VoxelNum                             | 231                                                                                                                                                                                                                                                                                                                                                                                                               |
| original   | shape         | Maximum3DDiameter                    | 87.25823743                                                                                                                                                                                                                                                                                                                                                                                                       |
| original   | shape         | Maximum2DDiameterSlice               | 85.38149682                                                                                                                                                                                                                                                                                                                                                                                                       |
| original   | shape         | Sphericity                           | 0.730380611                                                                                                                                                                                                                                                                                                                                                                                                       |
| original   | shape         | MinorAxis                            | 28.65980925                                                                                                                                                                                                                                                                                                                                                                                                       |
| original   | shape         | Elongation                           | 0.757026827                                                                                                                                                                                                                                                                                                                                                                                                       |
| original   | shape         | SurfaceVolumeRatio                   | 0.359702101                                                                                                                                                                                                                                                                                                                                                                                                       |
| original   | shape         | Volume                               | 6237                                                                                                                                                                                                                                                                                                                                                                                                              |
| original   | shape         | MajorAxis                            | 37.85837997                                                                                                                                                                                                                                                                                                                                                                                                       |
| original   | shape         | SurfaceArea                          | 2243.462003                                                                                                                                                                                                                                                                                                                                                                                                       |
| original   | shape         | Flatness                             | 0.3885498                                                                                                                                                                                                                                                                                                                                                                                                         |
| original   | shape         | LeastAxis                            | 14.70986598                                                                                                                                                                                                                                                                                                                                                                                                       |
| original   | shape         | Maximum2DDiameterColumn              | 25.63201124                                                                                                                                                                                                                                                                                                                                                                                                       |
| original   | shape         | Maximum2DDiameterRow                 | 27.65863337                                                                                                                                                                                                                                                                                                                                                                                                       |
| original   | gldm          | GrayLevelVariance                    | 39.92994884                                                                                                                                                                                                                                                                                                                                                                                                       |
| original   | gldm          | HighGrayLevelEmphasis                | 536.004329                                                                                                                                                                                                                                                                                                                                                                                                        |
| original   | gldm          | DependenceEntropy                    | 5.899111139                                                                                                                                                                                                                                                                                                                                                                                                       |
| original   | gldm          | DependenceNonUniformity              | 49.66666667                                                                                                                                                                                                                                                                                                                                                                                                       |
| original   | gldm          | GrayLevelNonUniformity               | 16.78354978                                                                                                                                                                                                                                                                                                                                                                                                       |
| original   | gldm          | SmallDependenceEmphasis              | 0.440562238                                                                                                                                                                                                                                                                                                                                                                                                       |
| original   | gldm          | SmallDependenceHighGrayLevelEmphasis | 179.8177115                                                                                                                                                                                                                                                                                                                                                                                                       |
| original   | gldm          | DependenceNonUniformityNormalized    | 0.215007215                                                                                                                                                                                                                                                                                                                                                                                                       |
| original   | gldm          | LargeDependenceEmphasis              | 13.97835498                                                                                                                                                                                                                                                                                                                                                                                                       |
| original   | gldm          | LargeDependenceLowGrayLevelEmphasis  | 0.027361085                                                                                                                                                                                                                                                                                                                                                                                                       |
| original   | gldm          | DependenceVariance                   | 5.439815596                                                                                                                                                                                                                                                                                                                                                                                                       |
| original   | gldm          | LargeDependenceHighGrayLevelEmphasis | 9783.900433                                                                                                                                                                                                                                                                                                                                                                                                       |
| original   | gldm          | SmallDependenceLowGrayLevelEmphasis  | 0.006820135                                                                                                                                                                                                                                                                                                                                                                                                       |
| original   | gldm          | LowGrayLevelEmphasis                 | 0.007960278                                                                                                                                                                                                                                                                                                                                                                                                       |
| original   | glcm          | JointAverage                         | 23.36885782                                                                                                                                                                                                                                                                                                                                                                                                       |
| original   | glcm          | SumAverage                           | 46.73771563                                                                                                                                                                                                                                                                                                                                                                                                       |
| original   | glcm          | JointEntropy                         | 6.829213298                                                                                                                                                                                                                                                                                                                                                                                                       |
| original   | glcm          | ClusterShade                         | -707.7741831                                                                                                                                                                                                                                                                                                                                                                                                      |
| original   | glcm          | MaximumProbability                   | 0.038561633                                                                                                                                                                                                                                                                                                                                                                                                       |

|          |            |                                  |              |
|----------|------------|----------------------------------|--------------|
| original | glcm       | Idmn                             | 0.966750073  |
| original | glcm       | JointEnergy                      | 0.01266987   |
| original | glcm       | Contrast                         | 55.5647072   |
| original | glcm       | DifferenceEntropy                | 3.774176502  |
| original | glcm       | InverseVariance                  | 0.245712226  |
| original | glcm       | DifferenceVariance               | 28.46146734  |
| original | glcm       | Idn                              | 0.891993254  |
| original | glcm       | Idm                              | 0.253336969  |
| original | glcm       | Correlation                      | 0.117996562  |
| original | glcm       | Autocorrelation                  | 549.8557938  |
| original | glcm       | SumEntropy                       | 4.595953803  |
| original | glcm       | SumSquares                       | 31.50141282  |
| original | glcm       | ClusterProminence                | 20650.09574  |
| original | glcm       | Imc2                             | 0.927297897  |
| original | glcm       | Imc1                             | -0.252103552 |
| original | glcm       | DifferenceAverage                | 5.177209448  |
| original | glcm       | Id                               | 0.330173062  |
| original | glcm       | ClusterTendency                  | 70.44094407  |
| original | firstorder | InterquartileRange               | 198.5        |
| original | firstorder | Skewness                         | -1.150867795 |
| original | firstorder | Uniformity                       | 0.07265606   |
| original | firstorder | Median                           | -75          |
| original | firstorder | Energy                           | 9744937      |
| original | firstorder | RobustMeanAbsoluteDeviation      | 84.85189189  |
| original | firstorder | MeanAbsoluteDeviation            | 125.297427   |
| original | firstorder | TotalEnergy                      | 263113299    |
| original | firstorder | Maximum                          | 263          |
| original | firstorder | RootMeanSquared                  | 205.3920019  |
| original | firstorder | 90Percentile                     | 11           |
| original | firstorder | Minimum                          | -652         |
| original | firstorder | Entropy                          | 4.189863505  |
| original | firstorder | Range                            | 915          |
| original | firstorder | Variance                         | 25129.06216  |
| original | firstorder | 10Percentile                     | -393         |
| original | firstorder | Kurtosis                         | 3.724481865  |
| original | firstorder | Mean                             | -130.6017316 |
| original | glrlm      | ShortRunLowGrayLevelEmphasis     | 0.008377236  |
| original | glrlm      | GrayLevelVariance                | 41.19669533  |
| original | glrlm      | LowGrayLevelRunEmphasis          | 0.008468815  |
| original | glrlm      | GrayLevelNonUniformityNormalized | 0.067589472  |
| original | glrlm      | RunVariance                      | 0.094465342  |
| original | glrlm      | GrayLevelNonUniformity           | 14.46918714  |
| original | glrlm      | LongRunEmphasis                  | 1.262848853  |
| original | glrlm      | ShortRunHighGrayLevelEmphasis    | 486.1953036  |
| original | glrlm      | RunLengthNonUniformity           | 185.7979348  |
| original | glrlm      | ShortRunEmphasis                 | 0.945288373  |
| original | glrlm      | LongRunHighGrayLevelEmphasis     | 705.3879413  |
| original | glrlm      | RunPercentage                    | 0.926073926  |
| original | glrlm      | LongRunLowGrayLevelEmphasis      | 0.008896588  |
| original | glrlm      | RunEntropy                       | 4.560632468  |
| original | glrlm      | HighGrayLevelRunEmphasis         | 523.6956526  |
| original | glrlm      | RunLengthNonUniformityNormalized | 0.867475478  |
| original | glszm      | GrayLevelVariance                | 48.1382283   |
| original | glszm      | ZoneVariance                     | 9.939580856  |
| original | glszm      | GrayLevelNonUniformityNormalized | 0.047116528  |
| original | glszm      | SizeZoneNonUniformityNormalized  | 0.544292509  |

|             |            |                                      |              |
|-------------|------------|--------------------------------------|--------------|
| original    | glszm      | SizeZoneNonUniformity                | 63.13793103  |
| original    | glszm      | GrayLevelNonUniformity               | 5.465517241  |
| original    | glszm      | LargeAreaEmphasis                    | 13.90517241  |
| original    | glszm      | SmallAreaHighGrayLevelEmphasis       | 292.8655895  |
| original    | glszm      | ZonePercentage                       | 0.502164502  |
| original    | glszm      | LargeAreaLowGrayLevelEmphasis        | 0.033722274  |
| original    | glszm      | LargeAreaHighGrayLevelEmphasis       | 9385.146552  |
| original    | glszm      | HighGrayLevelZoneEmphasis            | 420.362069   |
| original    | glszm      | SmallAreaEmphasis                    | 0.764770705  |
| original    | glszm      | LowGrayLevelZoneEmphasis             | 0.01397957   |
| original    | glszm      | ZoneEntropy                          | 5.343653332  |
| original    | glszm      | SmallAreaLowGrayLevelEmphasis        | 0.013304306  |
| original    | ngtdm      | Coarseness                           | 0.019599176  |
| original    | ngtdm      | Complexity                           | 1413.551256  |
| original    | ngtdm      | Strength                             | 7.997365647  |
| original    | ngtdm      | Contrast                             | 0.450783413  |
| original    | ngtdm      | Busyness                             | 0.06683874   |
| wavelet-HHH | gldm       | GrayLevelVariance                    | 9.764921947  |
| wavelet-HHH | gldm       | HighGrayLevelEmphasis                | 120.3333333  |
| wavelet-HHH | gldm       | DependenceEntropy                    | 5.525287245  |
| wavelet-HHH | gldm       | DependenceNonUniformity              | 42.74025974  |
| wavelet-HHH | gldm       | GrayLevelNonUniformity               | 26.22943723  |
| wavelet-HHH | gldm       | SmallDependenceEmphasis              | 0.365093739  |
| wavelet-HHH | gldm       | SmallDependenceHighGrayLevelEmphasis | 47.17499865  |
| wavelet-HHH | gldm       | DependenceNonUniformityNormalized    | 0.185022769  |
| wavelet-HHH | gldm       | LargeDependenceEmphasis              | 13.5974026   |
| wavelet-HHH | gldm       | LargeDependenceLowGrayLevelEmphasis  | 0.144743599  |
| wavelet-HHH | gldm       | DependenceVariance                   | 4.388411012  |
| wavelet-HHH | gldm       | LargeDependenceHighGrayLevelEmphasis | 1523.623377  |
| wavelet-HHH | gldm       | SmallDependenceLowGrayLevelEmphasis  | 0.020279961  |
| wavelet-HHH | gldm       | LowGrayLevelEmphasis                 | 0.026428478  |
| wavelet-HHH | glcm       | JointAverage                         | 10.50570447  |
| wavelet-HHH | glcm       | SumAverage                           | 21.01140893  |
| wavelet-HHH | glcm       | JointEntropy                         | 6.337864383  |
| wavelet-HHH | glcm       | ClusterShade                         | -8.185762534 |
| wavelet-HHH | glcm       | MaximumProbability                   | 0.051982383  |
| wavelet-HHH | glcm       | ldmn                                 | 0.95965251   |
| wavelet-HHH | glcm       | JointEnergy                          | 0.017810216  |
| wavelet-HHH | glcm       | Contrast                             | 19.00418331  |
| wavelet-HHH | glcm       | DifferenceEntropy                    | 3.148914668  |
| wavelet-HHH | glcm       | InverseVariance                      | 0.293036575  |
| wavelet-HHH | glcm       | DifferenceVariance                   | 8.471413138  |
| wavelet-HHH | glcm       | ldn                                  | 0.87336907   |
| wavelet-HHH | glcm       | ldm                                  | 0.291565227  |
| wavelet-HHH | glcm       | Correlation                          | -0.056824937 |
| wavelet-HHH | glcm       | Autocorrelation                      | 109.8352357  |
| wavelet-HHH | glcm       | SumEntropy                           | 3.904453389  |
| wavelet-HHH | glcm       | SumSquares                           | 8.963717213  |
| wavelet-HHH | glcm       | ClusterProminence                    | 1158.620506  |
| wavelet-HHH | glcm       | lmc2                                 | 0.843192064  |
| wavelet-HHH | glcm       | lmc1                                 | -0.179843038 |
| wavelet-HHH | glcm       | DifferenceAverage                    | 3.221770198  |
| wavelet-HHH | glcm       | ld                                   | 0.375008542  |
| wavelet-HHH | glcm       | ClusterTendency                      | 16.85068554  |
| wavelet-HHH | firstorder | InterquartileRange                   | 73.38277688  |
| wavelet-HHH | firstorder | Skewness                             | -0.217291551 |



|             |            |                                  |              |
|-------------|------------|----------------------------------|--------------|
| wavelet-HHH | firstorder | Uniformity                       | 0.113547347  |
| wavelet-HHH | firstorder | Median                           | 0.464792106  |
| wavelet-HHH | firstorder | Energy                           | 1400400.514  |
| wavelet-HHH | firstorder | RobustMeanAbsoluteDeviation      | 33.12357195  |
| wavelet-HHH | firstorder | MeanAbsoluteDeviation            | 55.89501861  |
| wavelet-HHH | firstorder | TotalEnergy                      | 37810813.89  |
| wavelet-HHH | firstorder | Maximum                          | 230.8307358  |
| wavelet-HHH | firstorder | RootMeanSquared                  | 77.86102934  |
| wavelet-HHH | firstorder | 90Percentile                     | 90.60094135  |
| wavelet-HHH | firstorder | Minimum                          | -248.4796741 |
| wavelet-HHH | firstorder | Entropy                          | 3.547740268  |
| wavelet-HHH | firstorder | Range                            | 479.3104099  |
| wavelet-HHH | firstorder | Variance                         | 6062.319849  |
| wavelet-HHH | firstorder | 10Percentile                     | -78.8965424  |
| wavelet-HHH | firstorder | Kurtosis                         | 4.18918579   |
| wavelet-HHH | firstorder | Mean                             | 0.141562613  |
| wavelet-HHH | glrlm      | ShortRunLowGrayLevelEmphasis     | 0.027310577  |
| wavelet-HHH | glrlm      | GrayLevelVariance                | 10.43393668  |
| wavelet-HHH | glrlm      | LowGrayLevelRunEmphasis          | 0.027872075  |
| wavelet-HHH | glrlm      | GrayLevelNonUniformityNormalized | 0.106420415  |
| wavelet-HHH | glrlm      | RunVariance                      | 0.095146537  |
| wavelet-HHH | glrlm      | GrayLevelNonUniformity           | 22.66675116  |
| wavelet-HHH | glrlm      | LongRunEmphasis                  | 1.27331362   |
| wavelet-HHH | glrlm      | ShortRunHighGrayLevelEmphasis    | 114.3443888  |
| wavelet-HHH | glrlm      | RunLengthNonUniformity           | 182.5437597  |
| wavelet-HHH | glrlm      | ShortRunEmphasis                 | 0.941038462  |
| wavelet-HHH | glrlm      | LongRunHighGrayLevelEmphasis     | 151.7484764  |
| wavelet-HHH | glrlm      | RunPercentage                    | 0.921744922  |
| wavelet-HHH | glrlm      | LongRunLowGrayLevelEmphasis      | 0.030460516  |
| wavelet-HHH | glrlm      | RunEntropy                       | 3.960189128  |
| wavelet-HHH | glrlm      | HighGrayLevelRunEmphasis         | 120.9926056  |
| wavelet-HHH | glrlm      | RunLengthNonUniformityNormalized | 0.8568647    |
| wavelet-HHH | glszm      | GrayLevelVariance                | 20.60089361  |
| wavelet-HHH | glszm      | ZoneVariance                     | 31.0397295   |
| wavelet-HHH | glszm      | GrayLevelNonUniformityNormalized | 0.068953025  |
| wavelet-HHH | glszm      | SizeZoneNonUniformityNormalized  | 0.5191402    |
| wavelet-HHH | glszm      | SizeZoneNonUniformity            | 47.24175824  |
| wavelet-HHH | glszm      | GrayLevelNonUniformity           | 6.274725275  |
| wavelet-HHH | glszm      | LargeAreaEmphasis                | 37.48351648  |
| wavelet-HHH | glszm      | SmallAreaHighGrayLevelEmphasis   | 98.57636591  |
| wavelet-HHH | glszm      | ZonePercentage                   | 0.393939394  |
| wavelet-HHH | glszm      | LargeAreaLowGrayLevelEmphasis    | 0.397531055  |
| wavelet-HHH | glszm      | LargeAreaHighGrayLevelEmphasis   | 4099.197802  |
| wavelet-HHH | glszm      | HighGrayLevelZoneEmphasis        | 130.2747253  |
| wavelet-HHH | glszm      | SmallAreaEmphasis                | 0.74722801   |
| wavelet-HHH | glszm      | LowGrayLevelZoneEmphasis         | 0.052251368  |
| wavelet-HHH | glszm      | ZoneEntropy                      | 4.923244333  |
| wavelet-HHH | glszm      | SmallAreaLowGrayLevelEmphasis    | 0.049703144  |
| wavelet-HHH | ngtdm      | Coarseness                       | 0.030778904  |
| wavelet-HHH | ngtdm      | Complexity                       | 356.8155891  |
| wavelet-HHH | ngtdm      | Strength                         | 3.072002323  |
| wavelet-HHH | ngtdm      | Contrast                         | 0.124612929  |
| wavelet-HHH | ngtdm      | Busyness                         | 0.131858823  |
| wavelet-HLL | gldm       | GrayLevelVariance                | 52.02567418  |
| wavelet-HLL | gldm       | HighGrayLevelEmphasis            | 214.4502165  |
| wavelet-HLL | gldm       | DependenceEntropy                | 5.985178426  |

|             |            |                                      |              |
|-------------|------------|--------------------------------------|--------------|
| wavelet-HLL | gldm       | DependenceNonUniformity              | 72.68831169  |
| wavelet-HLL | gldm       | GrayLevelNonUniformity               | 10.35930736  |
| wavelet-HLL | gldm       | SmallDependenceEmphasis              | 0.506254209  |
| wavelet-HLL | gldm       | SmallDependenceHighGrayLevelEmphasis | 135.9850758  |
| wavelet-HLL | gldm       | DependenceNonUniformityNormalized    | 0.314668016  |
| wavelet-HLL | gldm       | LargeDependenceEmphasis              | 4.861471861  |
| wavelet-HLL | gldm       | LargeDependenceLowGrayLevelEmphasis  | 0.118526457  |
| wavelet-HLL | gldm       | DependenceVariance                   | 1.015798055  |
| wavelet-HLL | gldm       | LargeDependenceHighGrayLevelEmphasis | 750.8138528  |
| wavelet-HLL | gldm       | SmallDependenceLowGrayLevelEmphasis  | 0.017591592  |
| wavelet-HLL | gldm       | LowGrayLevelEmphasis                 | 0.031673195  |
| wavelet-HLL | glcm       | JointAverage                         | 12.43321909  |
| wavelet-HLL | glcm       | SumAverage                           | 24.86643818  |
| wavelet-HLL | glcm       | JointEntropy                         | 7.574347204  |
| wavelet-HLL | glcm       | ClusterShade                         | 997.6205107  |
| wavelet-HLL | glcm       | MaximumProbability                   | 0.016742192  |
| wavelet-HLL | glcm       | ldmn                                 | 0.943824012  |
| wavelet-HLL | glcm       | JointEnergy                          | 0.006027018  |
| wavelet-HLL | glcm       | Contrast                             | 74.51988594  |
| wavelet-HLL | glcm       | DifferenceEntropy                    | 3.982247531  |
| wavelet-HLL | glcm       | InverseVariance                      | 0.165799324  |
| wavelet-HLL | glcm       | DifferenceVariance                   | 28.86021441  |
| wavelet-HLL | glcm       | ldn                                  | 0.849218737  |
| wavelet-HLL | glcm       | ldm                                  | 0.157336101  |
| wavelet-HLL | glcm       | Correlation                          | 0.250315357  |
| wavelet-HLL | glcm       | Autocorrelation                      | 167.7378907  |
| wavelet-HLL | glcm       | SumEntropy                           | 5.072320372  |
| wavelet-HLL | glcm       | SumSquares                           | 50.31284764  |
| wavelet-HLL | glcm       | ClusterProminence                    | 47114.03804  |
| wavelet-HLL | glcm       | lmc2                                 | 0.981188318  |
| wavelet-HLL | glcm       | lmc1                                 | -0.358416935 |
| wavelet-HLL | glcm       | DifferenceAverage                    | 6.556346257  |
| wavelet-HLL | glcm       | ld                                   | 0.245873584  |
| wavelet-HLL | glcm       | ClusterTendency                      | 126.7315046  |
| wavelet-HLL | firstorder | InterquartileRange                   | 267.2817062  |
| wavelet-HLL | firstorder | Skewness                             | 0.570531555  |
| wavelet-HLL | firstorder | Uniformity                           | 0.044845486  |
| wavelet-HLL | firstorder | Median                               | -75.39027158 |
| wavelet-HLL | firstorder | Energy                               | 7965697.007  |
| wavelet-HLL | firstorder | RobustMeanAbsoluteDeviation          | 109.0193872  |
| wavelet-HLL | firstorder | MeanAbsoluteDeviation                | 149.2229899  |
| wavelet-HLL | firstorder | TotalEnergy                          | 215073819.2  |
| wavelet-HLL | firstorder | Maximum                              | 460.9962984  |
| wavelet-HLL | firstorder | RootMeanSquared                      | 185.6974336  |
| wavelet-HLL | firstorder | 90Percentile                         | 210.524325   |
| wavelet-HLL | firstorder | Minimum                              | -343.2493148 |
| wavelet-HLL | firstorder | Entropy                              | 4.681572994  |
| wavelet-HLL | firstorder | Range                                | 804.2456131  |
| wavelet-HLL | firstorder | Variance                             | 32617.18391  |
| wavelet-HLL | firstorder | 10Percentile                         | -254.1164518 |
| wavelet-HLL | firstorder | Kurtosis                             | 2.53537665   |
| wavelet-HLL | firstorder | Mean                                 | -43.20130688 |
| wavelet-HLL | glrlm      | ShortRunLowGrayLevelEmphasis         | 0.031249135  |
| wavelet-HLL | glrlm      | GrayLevelVariance                    | 52.54487476  |
| wavelet-HLL | glrlm      | LowGrayLevelRunEmphasis              | 0.031932302  |
| wavelet-HLL | glrlm      | GrayLevelNonUniformityNormalized     | 0.044356763  |

|             |       |                                      |              |
|-------------|-------|--------------------------------------|--------------|
| wavelet-HLL | glrlm | RunVariance                          | 0.040371649  |
| wavelet-HLL | glrlm | GrayLevelNonUniformity               | 9.86712053   |
| wavelet-HLL | glrlm | LongRunEmphasis                      | 1.119292103  |
| wavelet-HLL | glrlm | ShortRunHighGrayLevelEmphasis        | 212.8909022  |
| wavelet-HLL | glrlm | RunLengthNonUniformity               | 206.8105519  |
| wavelet-HLL | glrlm | ShortRunEmphasis                     | 0.972118275  |
| wavelet-HLL | glrlm | LongRunHighGrayLevelEmphasis         | 234.2672973  |
| wavelet-HLL | glrlm | RunPercentage                        | 0.963036963  |
| wavelet-HLL | glrlm | LongRunLowGrayLevelEmphasis          | 0.034951694  |
| wavelet-HLL | glrlm | RunEntropy                           | 4.843504822  |
| wavelet-HLL | glrlm | HighGrayLevelRunEmphasis             | 217.0682623  |
| wavelet-HLL | glrlm | RunLengthNonUniformityNormalized     | 0.929285654  |
| wavelet-HLL | glszm | GrayLevelVariance                    | 56.88510817  |
| wavelet-HLL | glszm | ZoneVariance                         | 1.524102079  |
| wavelet-HLL | glszm | GrayLevelNonUniformityNormalized     | 0.039802562  |
| wavelet-HLL | glszm | SizeZoneNonUniformityNormalized      | 0.474690191  |
| wavelet-HLL | glszm | SizeZoneNonUniformity                | 65.50724638  |
| wavelet-HLL | glszm | GrayLevelNonUniformity               | 5.492753623  |
| wavelet-HLL | glszm | LargeAreaEmphasis                    | 4.326086957  |
| wavelet-HLL | glszm | SmallAreaHighGrayLevelEmphasis       | 206.1480641  |
| wavelet-HLL | glszm | ZonePercentage                       | 0.597402597  |
| wavelet-HLL | glszm | LargeAreaLowGrayLevelEmphasis        | 0.11006804   |
| wavelet-HLL | glszm | LargeAreaHighGrayLevelEmphasis       | 705.4347826  |
| wavelet-HLL | glszm | HighGrayLevelZoneEmphasis            | 256.1449275  |
| wavelet-HLL | glszm | SmallAreaEmphasis                    | 0.716121679  |
| wavelet-HLL | glszm | LowGrayLevelZoneEmphasis             | 0.035038538  |
| wavelet-HLL | glszm | ZoneEntropy                          | 5.725003603  |
| wavelet-HLL | glszm | SmallAreaLowGrayLevelEmphasis        | 0.025508074  |
| wavelet-HLL | ngtdm | Coarseness                           | 0.024680144  |
| wavelet-HLL | ngtdm | Complexity                           | 1875.839662  |
| wavelet-HLL | ngtdm | Strength                             | 9.000172807  |
| wavelet-HLL | ngtdm | Contrast                             | 0.492772135  |
| wavelet-HLL | ngtdm | Busyness                             | 0.150691506  |
| wavelet-LHL | gldm  | GrayLevelVariance                    | 122.2489459  |
| wavelet-LHL | gldm  | HighGrayLevelEmphasis                | 2099.61039   |
| wavelet-LHL | gldm  | DependenceEntropy                    | 6.249371011  |
| wavelet-LHL | gldm  | DependenceNonUniformity              | 65.84848485  |
| wavelet-LHL | gldm  | GrayLevelNonUniformity               | 9.12987013   |
| wavelet-LHL | gldm  | SmallDependenceEmphasis              | 0.49204305   |
| wavelet-LHL | gldm  | SmallDependenceHighGrayLevelEmphasis | 995.2944108  |
| wavelet-LHL | gldm  | DependenceNonUniformityNormalized    | 0.285058376  |
| wavelet-LHL | gldm  | LargeDependenceEmphasis              | 5.683982684  |
| wavelet-LHL | gldm  | LargeDependenceLowGrayLevelEmphasis  | 0.007927826  |
| wavelet-LHL | gldm  | DependenceVariance                   | 1.312081858  |
| wavelet-LHL | gldm  | LargeDependenceHighGrayLevelEmphasis | 12279.88745  |
| wavelet-LHL | gldm  | SmallDependenceLowGrayLevelEmphasis  | 0.005291971  |
| wavelet-LHL | gldm  | LowGrayLevelEmphasis                 | 0.005571509  |
| wavelet-LHL | glcm  | JointAverage                         | 45.00061053  |
| wavelet-LHL | glcm  | SumAverage                           | 90.00122106  |
| wavelet-LHL | glcm  | JointEntropy                         | 7.589247801  |
| wavelet-LHL | glcm  | ClusterShade                         | -4805.350286 |
| wavelet-LHL | glcm  | MaximumProbability                   | 0.017389536  |
| wavelet-LHL | glcm  | ldmn                                 | 0.974748719  |
| wavelet-LHL | glcm  | JointEnergy                          | 0.006134743  |
| wavelet-LHL | glcm  | Contrast                             | 187.6272037  |
| wavelet-LHL | glcm  | DifferenceEntropy                    | 4.234428478  |

|             |            |                                  |              |
|-------------|------------|----------------------------------|--------------|
| wavelet-LHL | glcm       | InverseVariance                  | 0.159704943  |
| wavelet-LHL | glcm       | DifferenceVariance               | 109.9957524  |
| wavelet-LHL | glcm       | Idn                              | 0.911722933  |
| wavelet-LHL | glcm       | Idm                              | 0.162640522  |
| wavelet-LHL | glcm       | Correlation                      | 0.093691108  |
| wavelet-LHL | glcm       | Autocorrelation                  | 2035.695992  |
| wavelet-LHL | glcm       | SumEntropy                       | 5.215252561  |
| wavelet-LHL | glcm       | SumSquares                       | 104.3320516  |
| wavelet-LHL | glcm       | ClusterProminence                | 414281.1762  |
| wavelet-LHL | glcm       | Imc2                             | 0.990734623  |
| wavelet-LHL | glcm       | Imc1                             | -0.4207672   |
| wavelet-LHL | glcm       | DifferenceAverage                | 8.490825915  |
| wavelet-LHL | glcm       | Id                               | 0.247843359  |
| wavelet-LHL | glcm       | ClusterTendency                  | 229.7010026  |
| wavelet-LHL | firstorder | InterquartileRange               | 248.497517   |
| wavelet-LHL | firstorder | Skewness                         | -0.881440982 |
| wavelet-LHL | firstorder | Uniformity                       | 0.039523247  |
| wavelet-LHL | firstorder | Median                           | -36.19114232 |
| wavelet-LHL | firstorder | Energy                           | 18991860.27  |
| wavelet-LHL | firstorder | RobustMeanAbsoluteDeviation      | 108.768558   |
| wavelet-LHL | firstorder | MeanAbsoluteDeviation            | 191.8987659  |
| wavelet-LHL | firstorder | TotalEnergy                      | 512780227.2  |
| wavelet-LHL | firstorder | Maximum                          | 746.8211551  |
| wavelet-LHL | firstorder | RootMeanSquared                  | 286.7330558  |
| wavelet-LHL | firstorder | 90Percentile                     | 173.9739295  |
| wavelet-LHL | firstorder | Minimum                          | -1152.731397 |
| wavelet-LHL | firstorder | Entropy                          | 5.014402024  |
| wavelet-LHL | firstorder | Range                            | 1899.552552  |
| wavelet-LHL | firstorder | Variance                         | 76524.25844  |
| wavelet-LHL | firstorder | 10Percentile                     | -366.3238497 |
| wavelet-LHL | firstorder | Kurtosis                         | 5.838466627  |
| wavelet-LHL | firstorder | Mean                             | -75.44260646 |
| wavelet-LHL | glrlm      | ShortRunLowGrayLevelEmphasis     | 0.005777651  |
| wavelet-LHL | glrlm      | GrayLevelVariance                | 125.6689677  |
| wavelet-LHL | glrlm      | LowGrayLevelRunEmphasis          | 0.005794226  |
| wavelet-LHL | glrlm      | GrayLevelNonUniformityNormalized | 0.038347962  |
| wavelet-LHL | glrlm      | RunVariance                      | 0.045332866  |
| wavelet-LHL | glrlm      | GrayLevelNonUniformity           | 8.486712926  |
| wavelet-LHL | glrlm      | LongRunEmphasis                  | 1.135759511  |
| wavelet-LHL | glrlm      | ShortRunHighGrayLevelEmphasis    | 2026.258341  |
| wavelet-LHL | glrlm      | RunLengthNonUniformity           | 203.567157   |
| wavelet-LHL | glrlm      | ShortRunEmphasis                 | 0.968005351  |
| wavelet-LHL | glrlm      | LongRunHighGrayLevelEmphasis     | 2390.737333  |
| wavelet-LHL | glrlm      | RunPercentage                    | 0.958041958  |
| wavelet-LHL | glrlm      | LongRunLowGrayLevelEmphasis      | 0.005864933  |
| wavelet-LHL | glrlm      | RunEntropy                       | 5.211888939  |
| wavelet-LHL | glrlm      | HighGrayLevelRunEmphasis         | 2096.207324  |
| wavelet-LHL | glrlm      | RunLengthNonUniformityNormalized | 0.919340083  |
| wavelet-LHL | glszm      | GrayLevelVariance                | 171.2555135  |
| wavelet-LHL | glszm      | ZoneVariance                     | 2.871519269  |
| wavelet-LHL | glszm      | GrayLevelNonUniformityNormalized | 0.028625529  |
| wavelet-LHL | glszm      | SizeZoneNonUniformityNormalized  | 0.49342838   |
| wavelet-LHL | glszm      | SizeZoneNonUniformity            | 66.11940299  |
| wavelet-LHL | glszm      | GrayLevelNonUniformity           | 3.835820896  |
| wavelet-LHL | glszm      | LargeAreaEmphasis                | 5.843283582  |
| wavelet-LHL | glszm      | SmallAreaHighGrayLevelEmphasis   | 1461.71709   |

|             |            |                                      |              |
|-------------|------------|--------------------------------------|--------------|
| wavelet-LHL | glszm      | ZonePercentage                       | 0.58008658   |
| wavelet-LHL | glszm      | LargeAreaLowGrayLevelEmphasis        | 0.011646612  |
| wavelet-LHL | glszm      | LargeAreaHighGrayLevelEmphasis       | 12458.31343  |
| wavelet-LHL | glszm      | HighGrayLevelZoneEmphasis            | 2055.074627  |
| wavelet-LHL | glszm      | SmallAreaEmphasis                    | 0.729141321  |
| wavelet-LHL | glszm      | LowGrayLevelZoneEmphasis             | 0.009215084  |
| wavelet-LHL | glszm      | ZoneEntropy                          | 6.112256821  |
| wavelet-LHL | glszm      | SmallAreaLowGrayLevelEmphasis        | 0.009053543  |
| wavelet-LHL | ngtdm      | Coarseness                           | 0.026443213  |
| wavelet-LHL | ngtdm      | Complexity                           | 7240.873959  |
| wavelet-LHL | ngtdm      | Strength                             | 27.39910542  |
| wavelet-LHL | ngtdm      | Contrast                             | 0.780805194  |
| wavelet-LHL | ngtdm      | Busyness                             | 0.017016185  |
| wavelet-LHH | gldm       | GrayLevelVariance                    | 22.10277169  |
| wavelet-LHH | gldm       | HighGrayLevelEmphasis                | 328.5800866  |
| wavelet-LHH | gldm       | DependenceEntropy                    | 5.773486096  |
| wavelet-LHH | gldm       | DependenceNonUniformity              | 63.5974026   |
| wavelet-LHH | gldm       | GrayLevelNonUniformity               | 15.77056277  |
| wavelet-LHH | gldm       | SmallDependenceEmphasis              | 0.50772953   |
| wavelet-LHH | gldm       | SmallDependenceHighGrayLevelEmphasis | 175.4841903  |
| wavelet-LHH | gldm       | DependenceNonUniformityNormalized    | 0.275313431  |
| wavelet-LHH | gldm       | LargeDependenceEmphasis              | 6.783549784  |
| wavelet-LHH | gldm       | LargeDependenceLowGrayLevelEmphasis  | 0.029774771  |
| wavelet-LHH | gldm       | DependenceVariance                   | 1.928299695  |
| wavelet-LHH | gldm       | LargeDependenceHighGrayLevelEmphasis | 2050.614719  |
| wavelet-LHH | gldm       | SmallDependenceLowGrayLevelEmphasis  | 0.00717377   |
| wavelet-LHH | gldm       | LowGrayLevelEmphasis                 | 0.008986897  |
| wavelet-LHH | glcm       | JointAverage                         | 17.51600939  |
| wavelet-LHH | glcm       | SumAverage                           | 35.03201879  |
| wavelet-LHH | glcm       | JointEntropy                         | 7.139629405  |
| wavelet-LHH | glcm       | ClusterShade                         | -43.18132772 |
| wavelet-LHH | glcm       | MaximumProbability                   | 0.027627926  |
| wavelet-LHH | glcm       | ldmn                                 | 0.961251725  |
| wavelet-LHH | glcm       | JointEnergy                          | 0.008874517  |
| wavelet-LHH | glcm       | Contrast                             | 43.62798712  |
| wavelet-LHH | glcm       | DifferenceEntropy                    | 3.665915909  |
| wavelet-LHH | glcm       | InverseVariance                      | 0.208811615  |
| wavelet-LHH | glcm       | DifferenceVariance                   | 18.55239388  |
| wavelet-LHH | glcm       | ldn                                  | 0.873860116  |
| wavelet-LHH | glcm       | ldm                                  | 0.197985156  |
| wavelet-LHH | glcm       | Correlation                          | -0.03230919  |
| wavelet-LHH | glcm       | Autocorrelation                      | 306.2690276  |
| wavelet-LHH | glcm       | SumEntropy                           | 4.457502247  |
| wavelet-LHH | glcm       | SumSquares                           | 21.25433004  |
| wavelet-LHH | glcm       | ClusterProminence                    | 7249.135584  |
| wavelet-LHH | glcm       | lmc2                                 | 0.94470603   |
| wavelet-LHH | glcm       | lmc1                                 | -0.271943274 |
| wavelet-LHH | glcm       | DifferenceAverage                    | 4.937446717  |
| wavelet-LHH | glcm       | ld                                   | 0.289406753  |
| wavelet-LHH | glcm       | ClusterTendency                      | 41.38933304  |
| wavelet-LHH | firstorder | InterquartileRange                   | 133.5949234  |
| wavelet-LHH | firstorder | Skewness                             | -0.168282111 |
| wavelet-LHH | firstorder | Uniformity                           | 0.068270835  |
| wavelet-LHH | firstorder | Median                               | -7.776567769 |
| wavelet-LHH | firstorder | Energy                               | 3156404.432  |
| wavelet-LHH | firstorder | RobustMeanAbsoluteDeviation          | 58.02945163  |

|             |            |                                      |              |
|-------------|------------|--------------------------------------|--------------|
| wavelet-LHH | firstorder | MeanAbsoluteDeviation                | 88.68307028  |
| wavelet-LHH | firstorder | TotalEnergy                          | 85222919.66  |
| wavelet-LHH | firstorder | Maximum                              | 337.9863221  |
| wavelet-LHH | firstorder | RootMeanSquared                      | 116.8934919  |
| wavelet-LHH | firstorder | 90Percentile                         | 152.7866388  |
| wavelet-LHH | firstorder | Minimum                              | -416.8484019 |
| wavelet-LHH | firstorder | Entropy                              | 4.182288252  |
| wavelet-LHH | firstorder | Range                                | 754.834724   |
| wavelet-LHH | firstorder | Variance                             | 13663.80682  |
| wavelet-LHH | firstorder | 10Percentile                         | -130.9381913 |
| wavelet-LHH | firstorder | Kurtosis                             | 3.918134513  |
| wavelet-LHH | firstorder | Mean                                 | 0.530687062  |
| wavelet-LHH | grlm       | ShortRunLowGrayLevelEmphasis         | 0.009119706  |
| wavelet-LHH | grlm       | GrayLevelVariance                    | 22.84419434  |
| wavelet-LHH | grlm       | LowGrayLevelRunEmphasis              | 0.009248258  |
| wavelet-LHH | grlm       | GrayLevelNonUniformityNormalized     | 0.066324564  |
| wavelet-LHH | grlm       | RunVariance                          | 0.050401586  |
| wavelet-LHH | grlm       | GrayLevelNonUniformity               | 14.6134682   |
| wavelet-LHH | grlm       | LongRunEmphasis                      | 1.150631696  |
| wavelet-LHH | grlm       | ShortRunHighGrayLevelEmphasis        | 319.2244489  |
| wavelet-LHH | grlm       | RunLengthNonUniformity               | 200.8405595  |
| wavelet-LHH | grlm       | ShortRunEmphasis                     | 0.964709137  |
| wavelet-LHH | grlm       | LongRunHighGrayLevelEmphasis         | 375.4363042  |
| wavelet-LHH | grlm       | RunPercentage                        | 0.953712954  |
| wavelet-LHH | grlm       | LongRunLowGrayLevelEmphasis          | 0.009793609  |
| wavelet-LHH | grlm       | RunEntropy                           | 4.425335768  |
| wavelet-LHH | grlm       | HighGrayLevelRunEmphasis             | 329.8703275  |
| wavelet-LHH | grlm       | RunLengthNonUniformityNormalized     | 0.911229681  |
| wavelet-LHH | glszm      | GrayLevelVariance                    | 32.57881137  |
| wavelet-LHH | glszm      | ZoneVariance                         | 5.436812692  |
| wavelet-LHH | glszm      | GrayLevelNonUniformityNormalized     | 0.05294153   |
| wavelet-LHH | glszm      | SizeZoneNonUniformityNormalized      | 0.580193498  |
| wavelet-LHH | glszm      | SizeZoneNonUniformity                | 74.84496124  |
| wavelet-LHH | glszm      | GrayLevelNonUniformity               | 6.829457364  |
| wavelet-LHH | glszm      | LargeAreaEmphasis                    | 8.643410853  |
| wavelet-LHH | glszm      | SmallAreaHighGrayLevelEmphasis       | 274.8334017  |
| wavelet-LHH | glszm      | ZonePercentage                       | 0.558441558  |
| wavelet-LHH | glszm      | LargeAreaLowGrayLevelEmphasis        | 0.039862334  |
| wavelet-LHH | glszm      | LargeAreaHighGrayLevelEmphasis       | 2659.44186   |
| wavelet-LHH | glszm      | HighGrayLevelZoneEmphasis            | 344.6899225  |
| wavelet-LHH | glszm      | SmallAreaEmphasis                    | 0.784746786  |
| wavelet-LHH | glszm      | LowGrayLevelZoneEmphasis             | 0.013201969  |
| wavelet-LHH | glszm      | ZoneEntropy                          | 5.325349035  |
| wavelet-LHH | glszm      | SmallAreaLowGrayLevelEmphasis        | 0.012379054  |
| wavelet-LHH | ngtdm      | Coarseness                           | 0.026341222  |
| wavelet-LHH | ngtdm      | Complexity                           | 1205.887531  |
| wavelet-LHH | ngtdm      | Strength                             | 6.362867719  |
| wavelet-LHH | ngtdm      | Contrast                             | 0.20508028   |
| wavelet-LHH | ngtdm      | Busyness                             | 0.069094902  |
| wavelet-LLH | gldm       | GrayLevelVariance                    | 54.31869718  |
| wavelet-LLH | gldm       | HighGrayLevelEmphasis                | 811.8787879  |
| wavelet-LLH | gldm       | DependenceEntropy                    | 6.087828144  |
| wavelet-LLH | gldm       | DependenceNonUniformity              | 72.11688312  |
| wavelet-LLH | gldm       | GrayLevelNonUniformity               | 11.1038961   |
| wavelet-LLH | gldm       | SmallDependenceEmphasis              | 0.518264791  |
| wavelet-LLH | gldm       | SmallDependenceHighGrayLevelEmphasis | 450.1711857  |

|             |            |                                      |              |
|-------------|------------|--------------------------------------|--------------|
| wavelet-LLH | gldm       | DependenceNonUniformityNormalized    | 0.312194299  |
| wavelet-LLH | gldm       | LargeDependenceEmphasis              | 5.25974026   |
| wavelet-LLH | gldm       | LargeDependenceLowGrayLevelEmphasis  | 0.012313187  |
| wavelet-LLH | gldm       | DependenceVariance                   | 1.277037537  |
| wavelet-LLH | gldm       | LargeDependenceHighGrayLevelEmphasis | 3997.142857  |
| wavelet-LLH | gldm       | SmallDependenceLowGrayLevelEmphasis  | 0.005473544  |
| wavelet-LLH | gldm       | LowGrayLevelEmphasis                 | 0.00619799   |
| wavelet-LLH | glcm       | JointAverage                         | 27.33511902  |
| wavelet-LLH | glcm       | SumAverage                           | 54.67023805  |
| wavelet-LLH | glcm       | JointEntropy                         | 7.529088582  |
| wavelet-LLH | glcm       | ClusterShade                         | 176.4928483  |
| wavelet-LLH | glcm       | MaximumProbability                   | 0.020098019  |
| wavelet-LLH | glcm       | ldmn                                 | 0.970221623  |
| wavelet-LLH | glcm       | JointEnergy                          | 0.00636837   |
| wavelet-LLH | glcm       | Contrast                             | 80.4585563   |
| wavelet-LLH | glcm       | DifferenceEntropy                    | 4.023832384  |
| wavelet-LLH | glcm       | InverseVariance                      | 0.176498932  |
| wavelet-LLH | glcm       | DifferenceVariance                   | 34.6271192   |
| wavelet-LLH | glcm       | ldn                                  | 0.890404723  |
| wavelet-LLH | glcm       | ldm                                  | 0.165562729  |
| wavelet-LLH | glcm       | Correlation                          | 0.069200701  |
| wavelet-LLH | glcm       | Autocorrelation                      | 750.1179825  |
| wavelet-LLH | glcm       | SumEntropy                           | 4.996201267  |
| wavelet-LLH | glcm       | SumSquares                           | 43.12053327  |
| wavelet-LLH | glcm       | ClusterProminence                    | 34505.89428  |
| wavelet-LLH | glcm       | lmc2                                 | 0.979161817  |
| wavelet-LLH | glcm       | lmc1                                 | -0.35153151  |
| wavelet-LLH | glcm       | DifferenceAverage                    | 6.613836382  |
| wavelet-LLH | glcm       | ld                                   | 0.25273141   |
| wavelet-LLH | glcm       | ClusterTendency                      | 92.02357678  |
| wavelet-LLH | firstorder | InterquartileRange                   | 178.3523727  |
| wavelet-LLH | firstorder | Skewness                             | -0.130918653 |
| wavelet-LLH | firstorder | Uniformity                           | 0.048068814  |
| wavelet-LLH | firstorder | Median                               | -50.58388762 |
| wavelet-LLH | firstorder | Energy                               | 8430661.069  |
| wavelet-LLH | firstorder | RobustMeanAbsoluteDeviation          | 84.50380299  |
| wavelet-LLH | firstorder | MeanAbsoluteDeviation                | 136.0440814  |
| wavelet-LLH | firstorder | TotalEnergy                          | 227627848.9  |
| wavelet-LLH | firstorder | Maximum                              | 482.4594179  |
| wavelet-LLH | firstorder | RootMeanSquared                      | 191.0402268  |
| wavelet-LLH | firstorder | 90Percentile                         | 186.4373662  |
| wavelet-LLH | firstorder | Minimum                              | -724.9519836 |
| wavelet-LLH | firstorder | Entropy                              | 4.733262898  |
| wavelet-LLH | firstorder | Range                                | 1207.411401  |
| wavelet-LLH | firstorder | Variance                             | 34140.40485  |
| wavelet-LLH | firstorder | 10Percentile                         | -261.4921578 |
| wavelet-LLH | firstorder | Kurtosis                             | 4.077282534  |
| wavelet-LLH | firstorder | Mean                                 | -48.53826755 |
| wavelet-LLH | grlm       | ShortRunLowGrayLevelEmphasis         | 0.00634605   |
| wavelet-LLH | grlm       | GrayLevelVariance                    | 55.87769664  |
| wavelet-LLH | grlm       | LowGrayLevelRunEmphasis              | 0.006388376  |
| wavelet-LLH | grlm       | GrayLevelNonUniformityNormalized     | 0.046861394  |
| wavelet-LLH | grlm       | RunVariance                          | 0.042434206  |
| wavelet-LLH | grlm       | GrayLevelNonUniformity               | 10.4120435   |
| wavelet-LLH | grlm       | LongRunEmphasis                      | 1.124700716  |
| wavelet-LLH | grlm       | ShortRunHighGrayLevelEmphasis        | 792.8603362  |

|             |       |                                      |              |
|-------------|-------|--------------------------------------|--------------|
| wavelet-LLH | glrlm | RunLengthNonUniformity               | 206.0910891  |
| wavelet-LLH | glrlm | ShortRunEmphasis                     | 0.971183214  |
| wavelet-LLH | glrlm | LongRunHighGrayLevelEmphasis         | 908.6819253  |
| wavelet-LLH | glrlm | RunPercentage                        | 0.961704962  |
| wavelet-LLH | glrlm | LongRunLowGrayLevelEmphasis          | 0.006568808  |
| wavelet-LLH | glrlm | RunEntropy                           | 4.923235904  |
| wavelet-LLH | glrlm | HighGrayLevelRunEmphasis             | 814.3071209  |
| wavelet-LLH | glrlm | RunLengthNonUniformityNormalized     | 0.927167398  |
| wavelet-LLH | glszm | GrayLevelVariance                    | 77.65811224  |
| wavelet-LLH | glszm | ZoneVariance                         | 2.413214286  |
| wavelet-LLH | glszm | GrayLevelNonUniformityNormalized     | 0.035918367  |
| wavelet-LLH | glszm | SizeZoneNonUniformityNormalized      | 0.504387755  |
| wavelet-LLH | glszm | SizeZoneNonUniformity                | 70.61428571  |
| wavelet-LLH | glszm | GrayLevelNonUniformity               | 5.028571429  |
| wavelet-LLH | glszm | LargeAreaEmphasis                    | 5.135714286  |
| wavelet-LLH | glszm | SmallAreaHighGrayLevelEmphasis       | 652.9672787  |
| wavelet-LLH | glszm | ZonePercentage                       | 0.606060606  |
| wavelet-LLH | glszm | LargeAreaLowGrayLevelEmphasis        | 0.015227895  |
| wavelet-LLH | glszm | LargeAreaHighGrayLevelEmphasis       | 3902.857143  |
| wavelet-LLH | glszm | HighGrayLevelZoneEmphasis            | 849.3071429  |
| wavelet-LLH | glszm | SmallAreaEmphasis                    | 0.737145773  |
| wavelet-LLH | glszm | LowGrayLevelZoneEmphasis             | 0.009266944  |
| wavelet-LLH | glszm | ZoneEntropy                          | 5.882550206  |
| wavelet-LLH | glszm | SmallAreaLowGrayLevelEmphasis        | 0.008853207  |
| wavelet-LLH | ngtdm | Coarseness                           | 0.027529078  |
| wavelet-LLH | ngtdm | Complexity                           | 3052.714214  |
| wavelet-LLH | ngtdm | Strength                             | 13.43199533  |
| wavelet-LLH | ngtdm | Contrast                             | 0.380532101  |
| wavelet-LLH | ngtdm | Busyness                             | 0.033418537  |
| wavelet-LLL | gldm  | GrayLevelVariance                    | 251.6175859  |
| wavelet-LLL | gldm  | HighGrayLevelEmphasis                | 2230.134199  |
| wavelet-LLL | gldm  | DependenceEntropy                    | 6.304798746  |
| wavelet-LLL | gldm  | DependenceNonUniformity              | 112.5151515  |
| wavelet-LLL | gldm  | GrayLevelNonUniformity               | 5.277056277  |
| wavelet-LLL | gldm  | SmallDependenceEmphasis              | 0.720328283  |
| wavelet-LLL | gldm  | SmallDependenceHighGrayLevelEmphasis | 1435.44718   |
| wavelet-LLL | gldm  | DependenceNonUniformityNormalized    | 0.487078578  |
| wavelet-LLL | gldm  | LargeDependenceEmphasis              | 2.766233766  |
| wavelet-LLL | gldm  | LargeDependenceLowGrayLevelEmphasis  | 0.00631917   |
| wavelet-LLL | gldm  | DependenceVariance                   | 0.561458743  |
| wavelet-LLL | gldm  | LargeDependenceHighGrayLevelEmphasis | 7689.415584  |
| wavelet-LLL | gldm  | SmallDependenceLowGrayLevelEmphasis  | 0.00512495   |
| wavelet-LLL | gldm  | LowGrayLevelEmphasis                 | 0.005324473  |
| wavelet-LLL | glcm  | JointAverage                         | 47.75744321  |
| wavelet-LLL | glcm  | SumAverage                           | 95.51488642  |
| wavelet-LLL | glcm  | JointEntropy                         | 7.991381045  |
| wavelet-LLL | glcm  | ClusterShade                         | -6272.702775 |
| wavelet-LLL | glcm  | MaximumProbability                   | 0.010868173  |
| wavelet-LLL | glcm  | Idmn                                 | 0.960349625  |
| wavelet-LLL | glcm  | JointEnergy                          | 0.004203616  |
| wavelet-LLL | glcm  | Contrast                             | 306.0198437  |
| wavelet-LLL | glcm  | DifferenceEntropy                    | 4.914155215  |
| wavelet-LLL | glcm  | InverseVariance                      | 0.087556644  |
| wavelet-LLL | glcm  | DifferenceVariance                   | 109.2212464  |
| wavelet-LLL | glcm  | Idn                                  | 0.867890662  |
| wavelet-LLL | glcm  | Idm                                  | 0.082236096  |



|             |            |                                  |              |
|-------------|------------|----------------------------------|--------------|
| wavelet-LLL | glcm       | Correlation                      | 0.272242135  |
| wavelet-LLL | glcm       | Autocorrelation                  | 2337.227908  |
| wavelet-LLL | glcm       | SumEntropy                       | 5.895638265  |
| wavelet-LLL | glcm       | SumSquares                       | 209.0614259  |
| wavelet-LLL | glcm       | ClusterProminence                | 756619.4066  |
| wavelet-LLL | glcm       | Imc2                             | 0.998729605  |
| wavelet-LLL | glcm       | Imc1                             | -0.546303107 |
| wavelet-LLL | glcm       | DifferenceAverage                | 13.75479402  |
| wavelet-LLL | glcm       | Id                               | 0.152739808  |
| wavelet-LLL | glcm       | ClusterTendency                  | 530.2258597  |
| wavelet-LLL | firstorder | InterquartileRange               | 602.5466147  |
| wavelet-LLL | firstorder | Skewness                         | -0.320453233 |
| wavelet-LLL | firstorder | Uniformity                       | 0.022844399  |
| wavelet-LLL | firstorder | Median                           | -348.6354148 |
| wavelet-LLL | firstorder | Energy                           | 78175014.12  |
| wavelet-LLL | firstorder | RobustMeanAbsoluteDeviation      | 250.1279107  |
| wavelet-LLL | firstorder | MeanAbsoluteDeviation            | 332.9098958  |
| wavelet-LLL | firstorder | TotalEnergy                      | 2110725381   |
| wavelet-LLL | firstorder | Maximum                          | 525.6252689  |
| wavelet-LLL | firstorder | RootMeanSquared                  | 581.7387511  |
| wavelet-LLL | firstorder | 90Percentile                     | 22.95753934  |
| wavelet-LLL | firstorder | Minimum                          | -1511.927388 |
| wavelet-LLL | firstorder | Entropy                          | 5.701897795  |
| wavelet-LLL | firstorder | Range                            | 2037.552657  |
| wavelet-LLL | firstorder | Variance                         | 157426.3674  |
| wavelet-LLL | firstorder | 10Percentile                     | -972.4165224 |
| wavelet-LLL | firstorder | Kurtosis                         | 2.42144086   |
| wavelet-LLL | firstorder | Mean                             | -425.4334344 |
| wavelet-LLL | glrlm      | ShortRunLowGrayLevelEmphasis     | 0.005405754  |
| wavelet-LLL | glrlm      | GrayLevelVariance                | 251.7229985  |
| wavelet-LLL | glrlm      | LowGrayLevelRunEmphasis          | 0.00541446   |
| wavelet-LLL | glrlm      | GrayLevelNonUniformityNormalized | 0.022619827  |
| wavelet-LLL | glrlm      | RunVariance                      | 0.01932626   |
| wavelet-LLL | glrlm      | GrayLevelNonUniformity           | 5.128017208  |
| wavelet-LLL | glrlm      | LongRunEmphasis                  | 1.058089761  |
| wavelet-LLL | glrlm      | ShortRunHighGrayLevelEmphasis    | 2172.768747  |
| wavelet-LLL | glrlm      | RunLengthNonUniformity           | 218.4378537  |
| wavelet-LLL | glrlm      | ShortRunEmphasis                 | 0.98586256   |
| wavelet-LLL | glrlm      | LongRunHighGrayLevelEmphasis     | 2388.082498  |
| wavelet-LLL | glrlm      | RunPercentage                    | 0.981351981  |
| wavelet-LLL | glrlm      | LongRunLowGrayLevelEmphasis      | 0.005450784  |
| wavelet-LLL | glrlm      | RunEntropy                       | 5.776636545  |
| wavelet-LLL | glrlm      | HighGrayLevelRunEmphasis         | 2215.516105  |
| wavelet-LLL | glrlm      | RunLengthNonUniformityNormalized | 0.963351563  |
| wavelet-LLL | glszm      | GrayLevelVariance                | 250.911999   |
| wavelet-LLL | glszm      | ZoneVariance                     | 0.553524007  |
| wavelet-LLL | glszm      | GrayLevelNonUniformityNormalized | 0.021580538  |
| wavelet-LLL | glszm      | SizeZoneNonUniformityNormalized  | 0.700070205  |
| wavelet-LLL | glszm      | SizeZoneNonUniformity            | 126.7127072  |
| wavelet-LLL | glszm      | GrayLevelNonUniformity           | 3.906077348  |
| wavelet-LLL | glszm      | LargeAreaEmphasis                | 2.182320442  |
| wavelet-LLL | glszm      | SmallAreaHighGrayLevelEmphasis   | 1671.993561  |
| wavelet-LLL | glszm      | ZonePercentage                   | 0.783549784  |
| wavelet-LLL | glszm      | LargeAreaLowGrayLevelEmphasis    | 0.00726917   |
| wavelet-LLL | glszm      | LargeAreaHighGrayLevelEmphasis   | 5687.39779   |
| wavelet-LLL | glszm      | HighGrayLevelZoneEmphasis        | 2044.270718  |

|             |            |                                      |              |
|-------------|------------|--------------------------------------|--------------|
| wavelet-LLL | glszm      | SmallAreaEmphasis                    | 0.861032028  |
| wavelet-LLL | glszm      | LowGrayLevelZoneEmphasis             | 0.006612528  |
| wavelet-LLL | glszm      | ZoneEntropy                          | 6.120857421  |
| wavelet-LLL | glszm      | SmallAreaLowGrayLevelEmphasis        | 0.006497855  |
| wavelet-LLL | ngtdm      | Coarseness                           | 0.022751204  |
| wavelet-LLL | ngtdm      | Complexity                           | 17155.09372  |
| wavelet-LLL | ngtdm      | Strength                             | 39.54325373  |
| wavelet-LLL | ngtdm      | Contrast                             | 1.117455649  |
| wavelet-LLL | ngtdm      | Busyness                             | 0.015378023  |
| wavelet-HHL | gldm       | GrayLevelVariance                    | 21.48809055  |
| wavelet-HHL | gldm       | HighGrayLevelEmphasis                | 244.2857143  |
| wavelet-HHL | gldm       | DependenceEntropy                    | 5.756369722  |
| wavelet-HHL | gldm       | DependenceNonUniformity              | 56.62770563  |
| wavelet-HHL | gldm       | GrayLevelNonUniformity               | 17.06060606  |
| wavelet-HHL | gldm       | SmallDependenceEmphasis              | 0.446636728  |
| wavelet-HHL | gldm       | SmallDependenceHighGrayLevelEmphasis | 112.5601913  |
| wavelet-HHL | gldm       | DependenceNonUniformityNormalized    | 0.245141583  |
| wavelet-HHL | gldm       | LargeDependenceEmphasis              | 8.220779221  |
| wavelet-HHL | gldm       | LargeDependenceLowGrayLevelEmphasis  | 0.046010714  |
| wavelet-HHL | gldm       | DependenceVariance                   | 2.406626562  |
| wavelet-HHL | gldm       | LargeDependenceHighGrayLevelEmphasis | 1933.428571  |
| wavelet-HHL | gldm       | SmallDependenceLowGrayLevelEmphasis  | 0.007521375  |
| wavelet-HHL | gldm       | LowGrayLevelEmphasis                 | 0.010750468  |
| wavelet-HHL | glcm       | JointAverage                         | 14.80629136  |
| wavelet-HHL | glcm       | SumAverage                           | 29.61258272  |
| wavelet-HHL | glcm       | JointEntropy                         | 6.968625125  |
| wavelet-HHL | glcm       | ClusterShade                         | 136.8799987  |
| wavelet-HHL | glcm       | MaximumProbability                   | 0.029876867  |
| wavelet-HHL | glcm       | Idmn                                 | 0.969048869  |
| wavelet-HHL | glcm       | JointEnergy                          | 0.010483391  |
| wavelet-HHL | glcm       | Contrast                             | 39.67469834  |
| wavelet-HHL | glcm       | DifferenceEntropy                    | 3.559312048  |
| wavelet-HHL | glcm       | InverseVariance                      | 0.237495149  |
| wavelet-HHL | glcm       | DifferenceVariance                   | 18.97274645  |
| wavelet-HHL | glcm       | Idn                                  | 0.89011244   |
| wavelet-HHL | glcm       | Idm                                  | 0.225556904  |
| wavelet-HHL | glcm       | Correlation                          | -0.00668302  |
| wavelet-HHL | glcm       | Autocorrelation                      | 219.173446   |
| wavelet-HHL | glcm       | SumEntropy                           | 4.366414575  |
| wavelet-HHL | glcm       | SumSquares                           | 19.76479545  |
| wavelet-HHL | glcm       | ClusterProminence                    | 9273.141535  |
| wavelet-HHL | glcm       | Imc2                                 | 0.934358361  |
| wavelet-HHL | glcm       | Imc1                                 | -0.260507646 |
| wavelet-HHL | glcm       | DifferenceAverage                    | 4.505566206  |
| wavelet-HHL | glcm       | Id                                   | 0.31441465   |
| wavelet-HHL | glcm       | ClusterTendency                      | 39.38448345  |
| wavelet-HHL | firstorder | InterquartileRange                   | 117.5983139  |
| wavelet-HHL | firstorder | Skewness                             | 0.580665673  |
| wavelet-HHL | firstorder | Uniformity                           | 0.073855437  |
| wavelet-HHL | firstorder | Median                               | 4.955052973  |
| wavelet-HHL | firstorder | Energy                               | 3123840.897  |
| wavelet-HHL | firstorder | RobustMeanAbsoluteDeviation          | 52.26815226  |
| wavelet-HHL | firstorder | MeanAbsoluteDeviation                | 83.94241273  |
| wavelet-HHL | firstorder | TotalEnergy                          | 84343704.23  |
| wavelet-HHL | firstorder | Maximum                              | 467.6571907  |
| wavelet-HHL | firstorder | RootMeanSquared                      | 116.2889538  |

|             |            |                                      |              |
|-------------|------------|--------------------------------------|--------------|
| wavelet-HHL | firstorder | 90Percentile                         | 139.2976918  |
| wavelet-HHL | firstorder | Minimum                              | -337.2540406 |
| wavelet-HHL | firstorder | Entropy                              | 4.089185461  |
| wavelet-HHL | firstorder | Range                                | 804.9112313  |
| wavelet-HHL | firstorder | Variance                             | 13432.89137  |
| wavelet-HHL | firstorder | 10Percentile                         | -125.3067145 |
| wavelet-HHL | firstorder | Kurtosis                             | 5.27393404   |
| wavelet-HHL | firstorder | Mean                                 | 9.498915628  |
| wavelet-HHL | glrlm      | ShortRunLowGrayLevelEmphasis         | 0.010851173  |
| wavelet-HHL | glrlm      | GrayLevelVariance                    | 22.2661719   |
| wavelet-HHL | glrlm      | LowGrayLevelRunEmphasis              | 0.011070908  |
| wavelet-HHL | glrlm      | GrayLevelNonUniformityNormalized     | 0.071219962  |
| wavelet-HHL | glrlm      | RunVariance                          | 0.058948486  |
| wavelet-HHL | glrlm      | GrayLevelNonUniformity               | 15.56054381  |
| wavelet-HHL | glrlm      | LongRunEmphasis                      | 1.178478311  |
| wavelet-HHL | glrlm      | ShortRunHighGrayLevelEmphasis        | 235.073751   |
| wavelet-HHL | glrlm      | RunLengthNonUniformity               | 195.9463286  |
| wavelet-HHL | glrlm      | ShortRunEmphasis                     | 0.958117977  |
| wavelet-HHL | glrlm      | LongRunHighGrayLevelEmphasis         | 286.6821862  |
| wavelet-HHL | glrlm      | RunPercentage                        | 0.945720946  |
| wavelet-HHL | glrlm      | LongRunLowGrayLevelEmphasis          | 0.011996193  |
| wavelet-HHL | glrlm      | RunEntropy                           | 4.364891008  |
| wavelet-HHL | glrlm      | HighGrayLevelRunEmphasis             | 244.8730946  |
| wavelet-HHL | glrlm      | RunLengthNonUniformityNormalized     | 0.896128608  |
| wavelet-HHL | glszm      | GrayLevelVariance                    | 31.98568193  |
| wavelet-HHL | glszm      | ZoneVariance                         | 9.272846811  |
| wavelet-HHL | glszm      | GrayLevelNonUniformityNormalized     | 0.056907006  |
| wavelet-HHL | glszm      | SizeZoneNonUniformityNormalized      | 0.50135145   |
| wavelet-HHL | glszm      | SizeZoneNonUniformity                | 58.65811966  |
| wavelet-HHL | glszm      | GrayLevelNonUniformity               | 6.658119658  |
| wavelet-HHL | glszm      | LargeAreaEmphasis                    | 13.17094017  |
| wavelet-HHL | glszm      | SmallAreaHighGrayLevelEmphasis       | 187.0233149  |
| wavelet-HHL | glszm      | ZonePercentage                       | 0.506493506  |
| wavelet-HHL | glszm      | LargeAreaLowGrayLevelEmphasis        | 0.0732915    |
| wavelet-HHL | glszm      | LargeAreaHighGrayLevelEmphasis       | 3056.820513  |
| wavelet-HHL | glszm      | HighGrayLevelZoneEmphasis            | 253.4102564  |
| wavelet-HHL | glszm      | SmallAreaEmphasis                    | 0.735158755  |
| wavelet-HHL | glszm      | LowGrayLevelZoneEmphasis             | 0.015828257  |
| wavelet-HHL | glszm      | ZoneEntropy                          | 5.353593113  |
| wavelet-HHL | glszm      | SmallAreaLowGrayLevelEmphasis        | 0.01394356   |
| wavelet-HHL | ngtdm      | Coarseness                           | 0.027614279  |
| wavelet-HHL | ngtdm      | Complexity                           | 1031.739542  |
| wavelet-HHL | ngtdm      | Strength                             | 6.477405402  |
| wavelet-HHL | ngtdm      | Contrast                             | 0.214197701  |
| wavelet-HHL | ngtdm      | Busyness                             | 0.084347397  |
| wavelet-HLH | gldm       | GrayLevelVariance                    | 14.67082701  |
| wavelet-HLH | gldm       | HighGrayLevelEmphasis                | 256.7359307  |
| wavelet-HLH | gldm       | DependenceEntropy                    | 5.745029987  |
| wavelet-HLH | gldm       | DependenceNonUniformity              | 50.98268398  |
| wavelet-HLH | gldm       | GrayLevelNonUniformity               | 18.82683983  |
| wavelet-HLH | gldm       | SmallDependenceEmphasis              | 0.405051634  |
| wavelet-HLH | gldm       | SmallDependenceHighGrayLevelEmphasis | 103.348462   |
| wavelet-HLH | gldm       | DependenceNonUniformityNormalized    | 0.22070426   |
| wavelet-HLH | gldm       | LargeDependenceEmphasis              | 8.722943723  |
| wavelet-HLH | gldm       | LargeDependenceLowGrayLevelEmphasis  | 0.043580006  |
| wavelet-HLH | gldm       | DependenceVariance                   | 2.177320515  |

|             |            |                                      |              |
|-------------|------------|--------------------------------------|--------------|
| wavelet-HLH | gldm       | LargeDependenceHighGrayLevelEmphasis | 2180.069264  |
| wavelet-HLH | gldm       | SmallDependenceLowGrayLevelEmphasis  | 0.007301684  |
| wavelet-HLH | gldm       | LowGrayLevelEmphasis                 | 0.009885097  |
| wavelet-HLH | glcm       | JointAverage                         | 15.55001908  |
| wavelet-HLH | glcm       | SumAverage                           | 31.10003816  |
| wavelet-HLH | glcm       | JointEntropy                         | 6.961891671  |
| wavelet-HLH | glcm       | ClusterShade                         | -58.99124796 |
| wavelet-HLH | glcm       | MaximumProbability                   | 0.027789619  |
| wavelet-HLH | glcm       | ldmn                                 | 0.962907816  |
| wavelet-HLH | glcm       | JointEnergy                          | 0.009985644  |
| wavelet-HLH | glcm       | Contrast                             | 31.25074709  |
| wavelet-HLH | glcm       | DifferenceEntropy                    | 3.463658331  |
| wavelet-HLH | glcm       | InverseVariance                      | 0.226674492  |
| wavelet-HLH | glcm       | DifferenceVariance                   | 13.00932904  |
| wavelet-HLH | glcm       | ldn                                  | 0.875746991  |
| wavelet-HLH | glcm       | ldm                                  | 0.228309343  |
| wavelet-HLH | glcm       | Correlation                          | -0.046510139 |
| wavelet-HLH | glcm       | Autocorrelation                      | 241.1176663  |
| wavelet-HLH | glcm       | SumEntropy                           | 4.236711132  |
| wavelet-HLH | glcm       | SumSquares                           | 14.91260475  |
| wavelet-HLH | glcm       | ClusterProminence                    | 3336.333259  |
| wavelet-HLH | glcm       | lmc2                                 | 0.892157422  |
| wavelet-HLH | glcm       | lmc1                                 | -0.206580391 |
| wavelet-HLH | glcm       | DifferenceAverage                    | 4.210475305  |
| wavelet-HLH | glcm       | ld                                   | 0.319129884  |
| wavelet-HLH | glcm       | ClusterTendency                      | 28.39967192  |
| wavelet-HLH | firstorder | InterquartileRange                   | 113.4235701  |
| wavelet-HLH | firstorder | Skewness                             | -0.370351809 |
| wavelet-HLH | firstorder | Uniformity                           | 0.081501471  |
| wavelet-HLH | firstorder | Median                               | 5.247223953  |
| wavelet-HLH | firstorder | Energy                               | 2096097.389  |
| wavelet-HLH | firstorder | RobustMeanAbsoluteDeviation          | 47.24420053  |
| wavelet-HLH | firstorder | MeanAbsoluteDeviation                | 72.0571906   |
| wavelet-HLH | firstorder | TotalEnergy                          | 56594629.49  |
| wavelet-HLH | firstorder | Maximum                              | 290.4920464  |
| wavelet-HLH | firstorder | RootMeanSquared                      | 95.25762263  |
| wavelet-HLH | firstorder | 90Percentile                         | 110.6465062  |
| wavelet-HLH | firstorder | Minimum                              | -358.6315289 |
| wavelet-HLH | firstorder | Entropy                              | 3.883735056  |
| wavelet-HLH | firstorder | Range                                | 649.1235753  |
| wavelet-HLH | firstorder | Variance                             | 9071.233768  |
| wavelet-HLH | firstorder | 10Percentile                         | -122.301715  |
| wavelet-HLH | firstorder | Kurtosis                             | 4.0041231    |
| wavelet-HLH | firstorder | Mean                                 | 1.667603439  |
| wavelet-HLH | glrlm      | ShortRunLowGrayLevelEmphasis         | 0.010040968  |
| wavelet-HLH | glrlm      | GrayLevelVariance                    | 15.24920393  |
| wavelet-HLH | glrlm      | LowGrayLevelRunEmphasis              | 0.010240217  |
| wavelet-HLH | glrlm      | GrayLevelNonUniformityNormalized     | 0.079520253  |
| wavelet-HLH | glrlm      | RunVariance                          | 0.066834323  |
| wavelet-HLH | glrlm      | GrayLevelNonUniformity               | 17.27041463  |
| wavelet-HLH | glrlm      | LongRunEmphasis                      | 1.199857245  |
| wavelet-HLH | glrlm      | ShortRunHighGrayLevelEmphasis        | 245.3851663  |
| wavelet-HLH | glrlm      | RunLengthNonUniformity               | 192.6241543  |
| wavelet-HLH | glrlm      | ShortRunEmphasis                     | 0.954052871  |
| wavelet-HLH | glrlm      | LongRunHighGrayLevelEmphasis         | 307.3399108  |
| wavelet-HLH | glrlm      | RunPercentage                        | 0.94005994   |

|             |       |                                  |             |
|-------------|-------|----------------------------------|-------------|
| wavelet-HLH | glrlm | LongRunLowGrayLevelEmphasis      | 0.011113164 |
| wavelet-HLH | glrlm | RunEntropy                       | 4.192371156 |
| wavelet-HLH | glrlm | HighGrayLevelRunEmphasis         | 257.0160558 |
| wavelet-HLH | glrlm | RunLengthNonUniformityNormalized | 0.886383943 |
| wavelet-HLH | glszm | GrayLevelVariance                | 24.11843829 |
| wavelet-HLH | glszm | ZoneVariance                     | 6.937374443 |
| wavelet-HLH | glszm | GrayLevelNonUniformityNormalized | 0.061926806 |
| wavelet-HLH | glszm | SizeZoneNonUniformityNormalized  | 0.465630186 |
| wavelet-HLH | glszm | SizeZoneNonUniformity            | 49.82242991 |
| wavelet-HLH | glszm | GrayLevelNonUniformity           | 6.626168224 |
| wavelet-HLH | glszm | LargeAreaEmphasis                | 11.59813084 |
| wavelet-HLH | glszm | SmallAreaHighGrayLevelEmphasis   | 178.8218952 |
| wavelet-HLH | glszm | ZonePercentage                   | 0.463203463 |
| wavelet-HLH | glszm | LargeAreaLowGrayLevelEmphasis    | 0.062749409 |
| wavelet-HLH | glszm | LargeAreaHighGrayLevelEmphasis   | 2846.280374 |
| wavelet-HLH | glszm | HighGrayLevelZoneEmphasis        | 257.0373832 |
| wavelet-HLH | glszm | SmallAreaEmphasis                | 0.708478376 |
| wavelet-HLH | glszm | LowGrayLevelZoneEmphasis         | 0.016316466 |
| wavelet-HLH | glszm | ZoneEntropy                      | 5.351351805 |
| wavelet-HLH | glszm | SmallAreaLowGrayLevelEmphasis    | 0.015055768 |
| wavelet-HLH | ngtdm | Coarseness                       | 0.027096054 |
| wavelet-HLH | ngtdm | Complexity                       | 601.3381572 |
| wavelet-HLH | ngtdm | Strength                         | 4.038445389 |
| wavelet-HLH | ngtdm | Contrast                         | 0.195695289 |
| wavelet-HLH | ngtdm | Busyness                         | 0.103723313 |

| Image type | Feature Class | Feature Name                         |                                                                                                                                                                                                                                                                                                                                                                                                                                                 |
|------------|---------------|--------------------------------------|-------------------------------------------------------------------------------------------------------------------------------------------------------------------------------------------------------------------------------------------------------------------------------------------------------------------------------------------------------------------------------------------------------------------------------------------------|
| general    | info          | BoundingBox                          | 3: RTSTRUCT: C99_DNU_segment_ITV<br>(1, 1, 1, 7, 8, 9)                                                                                                                                                                                                                                                                                                                                                                                          |
| general    | info          | EnabledImageTypes                    | {u'Original': {}, u'Wavelet': {}}                                                                                                                                                                                                                                                                                                                                                                                                               |
|            |               |                                      | {'distances': [1], 'additionalInfo': True,<br>'force2D': False, 'interpolator': 'sitkBSpline',<br>'resampledPixelSpacing': [3.0], 'label': 1,<br>'normalizeScale': 1, 'normalize': False,<br>'force2Ddimension': 0, 'removeOutliers':<br>None, 'minimumROISize': None,<br>u'binWidth': 25.0,<br>'minimumROIDimensions': 1,<br>u'correctMask': True, 'preCrop': False,<br>u'symmetricalGLCM': True,<br>'resegmentRange': None, 'padDistance': 5} |
| general    | info          | GeneralSettings                      | fd019e8a87fdab0b1cbf2cdf4c305a34228b                                                                                                                                                                                                                                                                                                                                                                                                            |
| general    | info          | ImageHash                            | 970                                                                                                                                                                                                                                                                                                                                                                                                                                             |
| general    | info          | ImageSpacing                         | (0.9765625000000002,<br>0.9765625000000002, 2.0)                                                                                                                                                                                                                                                                                                                                                                                                |
| general    | info          | MaskHash                             | 7c06c0089203ba37e960f70b24f69f4b7dfde                                                                                                                                                                                                                                                                                                                                                                                                           |
| general    | info          | NumpyVersion                         | c82                                                                                                                                                                                                                                                                                                                                                                                                                                             |
| general    | info          | PyWaveletVersion                     | 1.13.1                                                                                                                                                                                                                                                                                                                                                                                                                                          |
| general    | info          | SimpleITKVersion                     | 0.5.2                                                                                                                                                                                                                                                                                                                                                                                                                                           |
| general    | info          | Version                              | 1.1.0                                                                                                                                                                                                                                                                                                                                                                                                                                           |
| general    | info          | VolumeNum                            | 1.3.0.post102+g1b0eb74                                                                                                                                                                                                                                                                                                                                                                                                                          |
| general    | info          | VoxelNum                             | 1                                                                                                                                                                                                                                                                                                                                                                                                                                               |
| original   | shape         | Maximum3DDiameter                    | 215                                                                                                                                                                                                                                                                                                                                                                                                                                             |
| original   | shape         | Maximum2DDiameterSlice               | 29.69848481                                                                                                                                                                                                                                                                                                                                                                                                                                     |
| original   | shape         | Sphericity                           | 21.63330765                                                                                                                                                                                                                                                                                                                                                                                                                                     |
| original   | shape         | MinorAxis                            | 0.786689359                                                                                                                                                                                                                                                                                                                                                                                                                                     |
| original   | shape         | Elongation                           | 18.8755446                                                                                                                                                                                                                                                                                                                                                                                                                                      |
| original   | shape         | SurfaceVolumeRatio                   | 0.694312721                                                                                                                                                                                                                                                                                                                                                                                                                                     |
| original   | shape         | Volume                               | 0.342042528                                                                                                                                                                                                                                                                                                                                                                                                                                     |
| original   | shape         | MajorAxis                            | 5805                                                                                                                                                                                                                                                                                                                                                                                                                                            |
| original   | shape         | SurfaceArea                          | 27.18594092                                                                                                                                                                                                                                                                                                                                                                                                                                     |
| original   | shape         | Flatness                             | 1985.556875                                                                                                                                                                                                                                                                                                                                                                                                                                     |
| original   | shape         | LeastAxis                            | 0.660102037                                                                                                                                                                                                                                                                                                                                                                                                                                     |
| original   | shape         | Maximum2DDiameterColumn              | 17.94549499                                                                                                                                                                                                                                                                                                                                                                                                                                     |
| original   | shape         | Maximum2DDiameterRow                 | 28.3019434                                                                                                                                                                                                                                                                                                                                                                                                                                      |
| original   | gldm          | GrayLevelVariance                    | 24.18677324                                                                                                                                                                                                                                                                                                                                                                                                                                     |
| original   | gldm          | HighGrayLevelEmphasis                | 107.5557382                                                                                                                                                                                                                                                                                                                                                                                                                                     |
| original   | gldm          | DependenceEntropy                    | 805.744186                                                                                                                                                                                                                                                                                                                                                                                                                                      |
| original   | gldm          | DependenceNonUniformity              | 6.015602418                                                                                                                                                                                                                                                                                                                                                                                                                                     |
| original   | gldm          | GrayLevelNonUniformity               | 61.45581395                                                                                                                                                                                                                                                                                                                                                                                                                                     |
| original   | gldm          | SmallDependenceEmphasis              | 12.35813953                                                                                                                                                                                                                                                                                                                                                                                                                                     |
| original   | gldm          | SmallDependenceHighGrayLevelEmphasis | 0.54425527                                                                                                                                                                                                                                                                                                                                                                                                                                      |
| original   | gldm          | DependenceNonUniformityNormalized    | 313.4854314                                                                                                                                                                                                                                                                                                                                                                                                                                     |
| original   | gldm          | LargeDependenceEmphasis              | 0.285840995                                                                                                                                                                                                                                                                                                                                                                                                                                     |
| original   | gldm          | LargeDependenceLowGrayLevelEmphasis  | 14.88837209                                                                                                                                                                                                                                                                                                                                                                                                                                     |
| original   | gldm          | DependenceVariance                   | 0.026141991                                                                                                                                                                                                                                                                                                                                                                                                                                     |
| original   | gldm          | LargeDependenceHighGrayLevelEmphasis | 7.434202271                                                                                                                                                                                                                                                                                                                                                                                                                                     |
|            |               |                                      | 17735.27907                                                                                                                                                                                                                                                                                                                                                                                                                                     |

|          |            |                                     |              |
|----------|------------|-------------------------------------|--------------|
| original | gldm       | SmallDependenceLowGrayLevelEmphasis | 0.011666214  |
| original | gldm       | LowGrayLevelEmphasis                | 0.012605287  |
| original | glcm       | JointAverage                        | 28.15505632  |
| original | glcm       | SumAverage                          | 56.31011265  |
| original | glcm       | JointEntropy                        | 7.138833135  |
| original | glcm       | ClusterShade                        | -3312.961699 |
| original | glcm       | MaximumProbability                  | 0.052450563  |
| original | glcm       | ldmn                                | 0.927254848  |
| original | glcm       | JointEnergy                         | 0.011596924  |
| original | glcm       | Contrast                            | 146.6558781  |
| original | glcm       | DifferenceEntropy                   | 4.306767469  |
| original | glcm       | InverseVariance                     | 0.197309904  |
| original | glcm       | DifferenceVariance                  | 74.21802336  |
| original | glcm       | ldn                                 | 0.845687062  |
| original | glcm       | ldm                                 | 0.212451054  |
| original | glcm       | Correlation                         | 0.221047242  |
| original | glcm       | Autocorrelation                     | 814.5517165  |
| original | glcm       | SumEntropy                          | 5.16196004   |
| original | glcm       | SumSquares                          | 94.98540785  |
| original | glcm       | ClusterProminence                   | 165834.0624  |
| original | glcm       | lmc2                                | 0.978307585  |
| original | glcm       | lmc1                                | -0.362628031 |
| original | glcm       | DifferenceAverage                   | 8.463862746  |
| original | glcm       | ld                                  | 0.280667636  |
| original | glcm       | ClusterTendency                     | 233.2857533  |
| original | firstorder | InterquartileRange                  | 379.5        |
| original | firstorder | Skewness                            | -0.909745935 |
| original | firstorder | Uniformity                          | 0.057479719  |
| original | firstorder | Median                              | -108         |
| original | firstorder | Energy                              | 23400458     |
| original | firstorder | RobustMeanAbsoluteDeviation         | 163.5686194  |
| original | firstorder | MeanAbsoluteDeviation               | 218.0704813  |
| original | firstorder | TotalEnergy                         | 631812366    |
| original | firstorder | Maximum                             | 114          |
| original | firstorder | RootMeanSquared                     | 329.9080774  |
| original | firstorder | 90Percentile                        | 36.6         |
| original | firstorder | Minimum                             | -836         |
| original | firstorder | Entropy                             | 4.63829808   |
| original | firstorder | Range                               | 950          |
| original | firstorder | Variance                            | 67246.10851  |
| original | firstorder | 10Percentile                        | -642.8       |
| original | firstorder | Kurtosis                            | 2.576949405  |
| original | firstorder | Mean                                | -203.944186  |
| original | glrlm      | ShortRunLowGrayLevelEmphasis        | 0.013355234  |
| original | glrlm      | GrayLevelVariance                   | 109.3667378  |
| original | glrlm      | LowGrayLevelRunEmphasis             | 0.013417957  |
| original | glrlm      | GrayLevelNonUniformityNormalized    | 0.050254428  |
| original | glrlm      | RunVariance                         | 0.085412617  |
| original | glrlm      | GrayLevelNonUniformity              | 10.09032239  |
| original | glrlm      | LongRunEmphasis                     | 1.234056097  |
| original | glrlm      | ShortRunHighGrayLevelEmphasis       | 721.9713603  |
| original | glrlm      | RunLengthNonUniformity              | 177.2168781  |

|             |       |                                      |             |
|-------------|-------|--------------------------------------|-------------|
| original    | glrlm | ShortRunEmphasis                     | 0.951995037 |
| original    | glrlm | LongRunHighGrayLevelEmphasis         | 1056.933665 |
| original    | glrlm | RunPercentage                        | 0.933452594 |
| original    | glrlm | LongRunLowGrayLevelEmphasis          | 0.013703048 |
| original    | glrlm | RunEntropy                           | 4.974626358 |
| original    | glrlm | HighGrayLevelRunEmphasis             | 778.5797797 |
| original    | glrlm | RunLengthNonUniformityNormalized     | 0.88259126  |
| original    | glszm | GrayLevelVariance                    | 109.7686155 |
| original    | glszm | ZoneVariance                         | 9.031682063 |
| original    | glszm | GrayLevelNonUniformityNormalized     | 0.034410069 |
| original    | glszm | SizeZoneNonUniformityNormalized      | 0.657759316 |
| original    | glszm | SizeZoneNonUniformity                | 83.53543307 |
| original    | glszm | GrayLevelNonUniformity               | 4.37007874  |
| original    | glszm | LargeAreaEmphasis                    | 11.8976378  |
| original    | glszm | SmallAreaHighGrayLevelEmphasis       | 446.7719287 |
| original    | glszm | ZonePercentage                       | 0.590697674 |
| original    | glszm | LargeAreaLowGrayLevelEmphasis        | 0.030810645 |
| original    | glszm | LargeAreaHighGrayLevelEmphasis       | 14012.51181 |
| original    | glszm | HighGrayLevelZoneEmphasis            | 591.3464567 |
| original    | glszm | SmallAreaEmphasis                    | 0.834559229 |
| original    | glszm | LowGrayLevelZoneEmphasis             | 0.020126311 |
| original    | glszm | ZoneEntropy                          | 5.536104672 |
| original    | glszm | SmallAreaLowGrayLevelEmphasis        | 0.019514999 |
| original    | ngtdm | Coarseness                           | 0.015321535 |
| original    | ngtdm | Complexity                           | 4169.292972 |
| original    | ngtdm | Strength                             | 13.47948911 |
| original    | ngtdm | Contrast                             | 1.101302878 |
| original    | ngtdm | Busyness                             | 0.052858024 |
| wavelet-HHH | gldm  | GrayLevelVariance                    | 20.78213088 |
| wavelet-HHH | gldm  | HighGrayLevelEmphasis                | 263.7069767 |
| wavelet-HHH | gldm  | DependenceEntropy                    | 5.624450434 |
| wavelet-HHH | gldm  | DependenceNonUniformity              | 54.91627907 |
| wavelet-HHH | gldm  | GrayLevelNonUniformity               | 16.46046512 |
| wavelet-HHH | gldm  | SmallDependenceEmphasis              | 0.44020801  |
| wavelet-HHH | gldm  | SmallDependenceHighGrayLevelEmphasis | 118.9374599 |
| wavelet-HHH | gldm  | DependenceNonUniformityNormalized    | 0.255424554 |
| wavelet-HHH | gldm  | LargeDependenceEmphasis              | 6.711627907 |
| wavelet-HHH | gldm  | LargeDependenceLowGrayLevelEmphasis  | 0.035901593 |
| wavelet-HHH | gldm  | DependenceVariance                   | 1.538647918 |
| wavelet-HHH | gldm  | LargeDependenceHighGrayLevelEmphasis | 1718.376744 |
| wavelet-HHH | gldm  | SmallDependenceLowGrayLevelEmphasis  | 0.008892259 |
| wavelet-HHH | gldm  | LowGrayLevelEmphasis                 | 0.011374722 |
| wavelet-HHH | glcm  | JointAverage                         | 15.52732593 |
| wavelet-HHH | glcm  | SumAverage                           | 31.05465186 |
| wavelet-HHH | glcm  | JointEntropy                         | 7.051325141 |
| wavelet-HHH | glcm  | ClusterShade                         | 13.52916679 |
| wavelet-HHH | glcm  | MaximumProbability                   | 0.026339388 |
| wavelet-HHH | glcm  | ldmn                                 | 0.967886495 |
| wavelet-HHH | glcm  | JointEnergy                          | 0.009388143 |
| wavelet-HHH | glcm  | Contrast                             | 39.59468066 |
| wavelet-HHH | glcm  | DifferenceEntropy                    | 3.637515718 |
| wavelet-HHH | glcm  | InverseVariance                      | 0.204741753 |



|             |            |                                  |              |
|-------------|------------|----------------------------------|--------------|
| wavelet-HHH | glcm       | DifferenceVariance               | 16.34940349  |
| wavelet-HHH | glcm       | Idn                              | 0.882503861  |
| wavelet-HHH | glcm       | Idm                              | 0.199174162  |
| wavelet-HHH | glcm       | Correlation                      | -0.029318328 |
| wavelet-HHH | glcm       | Autocorrelation                  | 240.531986   |
| wavelet-HHH | glcm       | SumEntropy                       | 4.424649647  |
| wavelet-HHH | glcm       | SumSquares                       | 19.22491626  |
| wavelet-HHH | glcm       | ClusterProminence                | 5510.922962  |
| wavelet-HHH | glcm       | Imc2                             | 0.932659387  |
| wavelet-HHH | glcm       | Imc1                             | -0.25360785  |
| wavelet-HHH | glcm       | DifferenceAverage                | 4.784318995  |
| wavelet-HHH | glcm       | Id                               | 0.291523803  |
| wavelet-HHH | glcm       | ClusterTendency                  | 37.30498438  |
| wavelet-HHH | firstorder | InterquartileRange               | 122.7310155  |
| wavelet-HHH | firstorder | Skewness                         | 0.115217072  |
| wavelet-HHH | firstorder | Uniformity                       | 0.076560303  |
| wavelet-HHH | firstorder | Median                           | -2.676254479 |
| wavelet-HHH | firstorder | Energy                           | 2729972.158  |
| wavelet-HHH | firstorder | RobustMeanAbsoluteDeviation      | 51.5133165   |
| wavelet-HHH | firstorder | MeanAbsoluteDeviation            | 82.83121687  |
| wavelet-HHH | firstorder | TotalEnergy                      | 73709248.26  |
| wavelet-HHH | firstorder | Maximum                          | 431.1727787  |
| wavelet-HHH | firstorder | RootMeanSquared                  | 112.6833835  |
| wavelet-HHH | firstorder | 90Percentile                     | 133.0017573  |
| wavelet-HHH | firstorder | Minimum                          | -352.4444428 |
| wavelet-HHH | firstorder | Entropy                          | 4.079556201  |
| wavelet-HHH | firstorder | Range                            | 783.6172215  |
| wavelet-HHH | firstorder | Variance                         | 12694.7986   |
| wavelet-HHH | firstorder | 10Percentile                     | -126.0723077 |
| wavelet-HHH | firstorder | Kurtosis                         | 4.338109872  |
| wavelet-HHH | firstorder | Mean                             | 1.657203509  |
| wavelet-HHH | glrlm      | ShortRunLowGrayLevelEmphasis     | 0.011582752  |
| wavelet-HHH | glrlm      | GrayLevelVariance                | 21.50437523  |
| wavelet-HHH | glrlm      | LowGrayLevelRunEmphasis          | 0.01173883   |
| wavelet-HHH | glrlm      | GrayLevelNonUniformityNormalized | 0.074525955  |
| wavelet-HHH | glrlm      | RunVariance                      | 0.060090044  |
| wavelet-HHH | glrlm      | GrayLevelNonUniformity           | 15.23754115  |
| wavelet-HHH | glrlm      | LongRunEmphasis                  | 1.166402692  |
| wavelet-HHH | glrlm      | ShortRunHighGrayLevelEmphasis    | 254.7823905  |
| wavelet-HHH | glrlm      | RunLengthNonUniformity           | 186.1727909  |
| wavelet-HHH | glrlm      | ShortRunEmphasis                 | 0.964035204  |
| wavelet-HHH | glrlm      | LongRunHighGrayLevelEmphasis     | 306.8320626  |
| wavelet-HHH | glrlm      | RunPercentage                    | 0.9509839    |
| wavelet-HHH | glrlm      | LongRunLowGrayLevelEmphasis      | 0.012457207  |
| wavelet-HHH | glrlm      | RunEntropy                       | 4.325344977  |
| wavelet-HHH | glrlm      | HighGrayLevelRunEmphasis         | 264.0573074  |
| wavelet-HHH | glrlm      | RunLengthNonUniformityNormalized | 0.910201213  |
| wavelet-HHH | glszm      | GrayLevelVariance                | 33.98200716  |
| wavelet-HHH | glszm      | ZoneVariance                     | 5.186828544  |
| wavelet-HHH | glszm      | GrayLevelNonUniformityNormalized | 0.054939296  |
| wavelet-HHH | glszm      | SizeZoneNonUniformityNormalized  | 0.481002708  |
| wavelet-HHH | glszm      | SizeZoneNonUniformity            | 51.46728972  |

|             |       |                                      |              |
|-------------|-------|--------------------------------------|--------------|
| wavelet-HHH | glszm | GrayLevelNonUniformity               | 5.878504673  |
| wavelet-HHH | glszm | LargeAreaEmphasis                    | 9.224299065  |
| wavelet-HHH | glszm | SmallAreaHighGrayLevelEmphasis       | 197.2610109  |
| wavelet-HHH | glszm | ZonePercentage                       | 0.497674419  |
| wavelet-HHH | glszm | LargeAreaLowGrayLevelEmphasis        | 0.054346368  |
| wavelet-HHH | glszm | LargeAreaHighGrayLevelEmphasis       | 2295.523364  |
| wavelet-HHH | glszm | HighGrayLevelZoneEmphasis            | 271.7757009  |
| wavelet-HHH | glszm | SmallAreaEmphasis                    | 0.719882589  |
| wavelet-HHH | glszm | LowGrayLevelZoneEmphasis             | 0.018387678  |
| wavelet-HHH | glszm | ZoneEntropy                          | 5.423012197  |
| wavelet-HHH | glszm | SmallAreaLowGrayLevelEmphasis        | 0.017104975  |
| wavelet-HHH | ngtdm | Coarseness                           | 0.030134098  |
| wavelet-HHH | ngtdm | Complexity                           | 1049.749248  |
| wavelet-HHH | ngtdm | Strength                             | 6.850878037  |
| wavelet-HHH | ngtdm | Contrast                             | 0.193107962  |
| wavelet-HHH | ngtdm | Busyness                             | 0.067660262  |
| wavelet-HLL | gldm  | GrayLevelVariance                    | 113.0889346  |
| wavelet-HLL | gldm  | HighGrayLevelEmphasis                | 723.7534884  |
| wavelet-HLL | gldm  | DependenceEntropy                    | 6.135840629  |
| wavelet-HLL | gldm  | DependenceNonUniformity              | 98.80465116  |
| wavelet-HLL | gldm  | GrayLevelNonUniformity               | 6.36744186   |
| wavelet-HLL | gldm  | SmallDependenceEmphasis              | 0.701127828  |
| wavelet-HLL | gldm  | SmallDependenceHighGrayLevelEmphasis | 536.7599     |
| wavelet-HLL | gldm  | DependenceNonUniformityNormalized    | 0.459556517  |
| wavelet-HLL | gldm  | LargeDependenceEmphasis              | 3.790697674  |
| wavelet-HLL | gldm  | LargeDependenceLowGrayLevelEmphasis  | 0.016247813  |
| wavelet-HLL | gldm  | DependenceVariance                   | 1.155738237  |
| wavelet-HLL | gldm  | LargeDependenceHighGrayLevelEmphasis | 2456.44186   |
| wavelet-HLL | gldm  | SmallDependenceLowGrayLevelEmphasis  | 0.008855518  |
| wavelet-HLL | gldm  | LowGrayLevelEmphasis                 | 0.009747347  |
| wavelet-HLL | glcm  | JointAverage                         | 24.32477996  |
| wavelet-HLL | glcm  | SumAverage                           | 48.64955992  |
| wavelet-HLL | glcm  | JointEntropy                         | 7.874408203  |
| wavelet-HLL | glcm  | ClusterShade                         | 944.7787182  |
| wavelet-HLL | glcm  | MaximumProbability                   | 0.012852383  |
| wavelet-HLL | glcm  | ldmn                                 | 0.937749709  |
| wavelet-HLL | glcm  | JointEnergy                          | 0.004610557  |
| wavelet-HLL | glcm  | Contrast                             | 190.3324231  |
| wavelet-HLL | glcm  | DifferenceEntropy                    | 4.585796109  |
| wavelet-HLL | glcm  | InverseVariance                      | 0.095221559  |
| wavelet-HLL | glcm  | DifferenceVariance                   | 70.43050494  |
| wavelet-HLL | glcm  | ldn                                  | 0.838988435  |
| wavelet-HLL | glcm  | ldm                                  | 0.096166201  |
| wavelet-HLL | glcm  | Correlation                          | 0.112099168  |
| wavelet-HLL | glcm  | Autocorrelation                      | 604.2531746  |
| wavelet-HLL | glcm  | SumEntropy                           | 5.513700059  |
| wavelet-HLL | glcm  | SumSquares                           | 107.643218   |
| wavelet-HLL | glcm  | ClusterProminence                    | 164550.4024  |
| wavelet-HLL | glcm  | lmc2                                 | 0.996701721  |
| wavelet-HLL | glcm  | lmc1                                 | -0.484675501 |
| wavelet-HLL | glcm  | DifferenceAverage                    | 10.70206181  |
| wavelet-HLL | glcm  | ld                                   | 0.175875544  |

|             |            |                                  |              |
|-------------|------------|----------------------------------|--------------|
| wavelet-HLL | glcm       | ClusterTendency                  | 240.2404487  |
| wavelet-HLL | firstorder | InterquartileRange               | 376.8260685  |
| wavelet-HLL | firstorder | Skewness                         | 0.171464127  |
| wavelet-HLL | firstorder | Uniformity                       | 0.029616009  |
| wavelet-HLL | firstorder | Median                           | -70.68592052 |
| wavelet-HLL | firstorder | Energy                           | 15641568.17  |
| wavelet-HLL | firstorder | RobustMeanAbsoluteDeviation      | 156.0559017  |
| wavelet-HLL | firstorder | MeanAbsoluteDeviation            | 217.3652411  |
| wavelet-HLL | firstorder | TotalEnergy                      | 422322340.6  |
| wavelet-HLL | firstorder | Maximum                          | 578.9192523  |
| wavelet-HLL | firstorder | RootMeanSquared                  | 269.7248225  |
| wavelet-HLL | firstorder | 90Percentile                     | 350.5108479  |
| wavelet-HLL | firstorder | Minimum                          | -631.5115236 |
| wavelet-HLL | firstorder | Entropy                          | 5.257523319  |
| wavelet-HLL | firstorder | Range                            | 1210.430776  |
| wavelet-HLL | firstorder | Variance                         | 70738.16444  |
| wavelet-HLL | firstorder | 10Percentile                     | -372.7635856 |
| wavelet-HLL | firstorder | Kurtosis                         | 2.423672285  |
| wavelet-HLL | firstorder | Mean                             | -44.86998342 |
| wavelet-HLL | glrlm      | ShortRunLowGrayLevelEmphasis     | 0.009876403  |
| wavelet-HLL | glrlm      | GrayLevelVariance                | 114.4765111  |
| wavelet-HLL | glrlm      | LowGrayLevelRunEmphasis          | 0.009923682  |
| wavelet-HLL | glrlm      | GrayLevelNonUniformityNormalized | 0.029267706  |
| wavelet-HLL | glrlm      | RunVariance                      | 0.024690801  |
| wavelet-HLL | glrlm      | GrayLevelNonUniformity           | 6.141748733  |
| wavelet-HLL | glrlm      | LongRunEmphasis                  | 1.074644531  |
| wavelet-HLL | glrlm      | ShortRunHighGrayLevelEmphasis    | 714.8585316  |
| wavelet-HLL | glrlm      | RunLengthNonUniformity           | 199.9643354  |
| wavelet-HLL | glrlm      | ShortRunEmphasis                 | 0.981749781  |
| wavelet-HLL | glrlm      | LongRunHighGrayLevelEmphasis     | 772.5246974  |
| wavelet-HLL | glrlm      | RunPercentage                    | 0.976028623  |
| wavelet-HLL | glrlm      | LongRunLowGrayLevelEmphasis      | 0.010116904  |
| wavelet-HLL | glrlm      | RunEntropy                       | 5.359303003  |
| wavelet-HLL | glrlm      | HighGrayLevelRunEmphasis         | 726.2602723  |
| wavelet-HLL | glrlm      | RunLengthNonUniformityNormalized | 0.952773324  |
| wavelet-HLL | glszm      | GrayLevelVariance                | 127.3977915  |
| wavelet-HLL | glszm      | ZoneVariance                     | 0.933781975  |
| wavelet-HLL | glszm      | GrayLevelNonUniformityNormalized | 0.027439024  |
| wavelet-HLL | glszm      | SizeZoneNonUniformityNormalized  | 0.70233492   |
| wavelet-HLL | glszm      | SizeZoneNonUniformity            | 115.1829268  |
| wavelet-HLL | glszm      | GrayLevelNonUniformity           | 4.5          |
| wavelet-HLL | glszm      | LargeAreaEmphasis                | 2.652439024  |
| wavelet-HLL | glszm      | SmallAreaHighGrayLevelEmphasis   | 668.7718598  |
| wavelet-HLL | glszm      | ZonePercentage                   | 0.762790698  |
| wavelet-HLL | glszm      | LargeAreaLowGrayLevelEmphasis    | 0.015988196  |
| wavelet-HLL | glszm      | LargeAreaHighGrayLevelEmphasis   | 1731.823171  |
| wavelet-HLL | glszm      | HighGrayLevelZoneEmphasis        | 757.5914634  |
| wavelet-HLL | glszm      | SmallAreaEmphasis                | 0.862297595  |
| wavelet-HLL | glszm      | LowGrayLevelZoneEmphasis         | 0.011893064  |
| wavelet-HLL | glszm      | ZoneEntropy                      | 5.81559292   |
| wavelet-HLL | glszm      | SmallAreaLowGrayLevelEmphasis    | 0.011427942  |
| wavelet-HLL | ngtdm      | Coarseness                       | 0.024444374  |

|             |            |                                      |              |
|-------------|------------|--------------------------------------|--------------|
| wavelet-HLL | ngtdm      | Complexity                           | 6529.121883  |
| wavelet-HLL | ngtdm      | Strength                             | 16.98621509  |
| wavelet-HLL | ngtdm      | Contrast                             | 0.816301536  |
| wavelet-HLL | ngtdm      | Busyness                             | 0.043853732  |
| wavelet-LHL | gldm       | GrayLevelVariance                    | 119.8125257  |
| wavelet-LHL | gldm       | HighGrayLevelEmphasis                | 1125.734884  |
| wavelet-LHL | gldm       | DependenceEntropy                    | 6.172270671  |
| wavelet-LHL | gldm       | DependenceNonUniformity              | 103.4465116  |
| wavelet-LHL | gldm       | GrayLevelNonUniformity               | 6.181395349  |
| wavelet-LHL | gldm       | SmallDependenceEmphasis              | 0.714640827  |
| wavelet-LHL | gldm       | SmallDependenceHighGrayLevelEmphasis | 821.8632933  |
| wavelet-LHL | gldm       | DependenceNonUniformityNormalized    | 0.481146566  |
| wavelet-LHL | gldm       | LargeDependenceEmphasis              | 2.962790698  |
| wavelet-LHL | gldm       | LargeDependenceLowGrayLevelEmphasis  | 0.008784824  |
| wavelet-LHL | gldm       | DependenceVariance                   | 0.677771769  |
| wavelet-LHL | gldm       | LargeDependenceHighGrayLevelEmphasis | 3121.297674  |
| wavelet-LHL | gldm       | SmallDependenceLowGrayLevelEmphasis  | 0.00619859   |
| wavelet-LHL | gldm       | LowGrayLevelEmphasis                 | 0.006535293  |
| wavelet-LHL | glcm       | JointAverage                         | 31.17436469  |
| wavelet-LHL | glcm       | SumAverage                           | 62.34872937  |
| wavelet-LHL | glcm       | JointEntropy                         | 7.893134933  |
| wavelet-LHL | glcm       | ClusterShade                         | 59.21729754  |
| wavelet-LHL | glcm       | MaximumProbability                   | 0.011715871  |
| wavelet-LHL | glcm       | ldmn                                 | 0.94780255   |
| wavelet-LHL | glcm       | JointEnergy                          | 0.004537953  |
| wavelet-LHL | glcm       | Contrast                             | 218.984701   |
| wavelet-LHL | glcm       | DifferenceEntropy                    | 4.640371927  |
| wavelet-LHL | glcm       | InverseVariance                      | 0.106221318  |
| wavelet-LHL | glcm       | DifferenceVariance                   | 83.8249802   |
| wavelet-LHL | glcm       | ldn                                  | 0.853562922  |
| wavelet-LHL | glcm       | ldm                                  | 0.095020268  |
| wavelet-LHL | glcm       | Correlation                          | 0.028209606  |
| wavelet-LHL | glcm       | Autocorrelation                      | 974.6575488  |
| wavelet-LHL | glcm       | SumEntropy                           | 5.506018838  |
| wavelet-LHL | glcm       | SumSquares                           | 112.211356   |
| wavelet-LHL | glcm       | ClusterProminence                    | 177864.4169  |
| wavelet-LHL | glcm       | lmc2                                 | 0.99736349   |
| wavelet-LHL | glcm       | lmc1                                 | -0.500420644 |
| wavelet-LHL | glcm       | DifferenceAverage                    | 11.26664968  |
| wavelet-LHL | glcm       | ld                                   | 0.172684587  |
| wavelet-LHL | glcm       | ClusterTendency                      | 229.8607231  |
| wavelet-LHL | firstorder | InterquartileRange                   | 358.4749068  |
| wavelet-LHL | firstorder | Skewness                             | -0.072898436 |
| wavelet-LHL | firstorder | Uniformity                           | 0.028750676  |
| wavelet-LHL | firstorder | Median                               | -50.30404012 |
| wavelet-LHL | firstorder | Energy                               | 16462346.45  |
| wavelet-LHL | firstorder | RobustMeanAbsoluteDeviation          | 147.3707932  |
| wavelet-LHL | firstorder | MeanAbsoluteDeviation                | 215.4565655  |
| wavelet-LHL | firstorder | TotalEnergy                          | 444483354.1  |
| wavelet-LHL | firstorder | Maximum                              | 630.4834123  |
| wavelet-LHL | firstorder | RootMeanSquared                      | 276.7111368  |
| wavelet-LHL | firstorder | 90Percentile                         | 310.1602137  |

|             |            |                                      |              |
|-------------|------------|--------------------------------------|--------------|
| wavelet-LHL | firstorder | Minimum                              | -805.1336516 |
| wavelet-LHL | firstorder | Entropy                              | 5.352620726  |
| wavelet-LHL | firstorder | Range                                | 1435.617064  |
| wavelet-LHL | firstorder | Variance                             | 74616.82315  |
| wavelet-LHL | firstorder | 10Percentile                         | -427.4046958 |
| wavelet-LHL | firstorder | Kurtosis                             | 2.77716261   |
| wavelet-LHL | firstorder | Mean                                 | -44.1840481  |
| wavelet-LHL | grlm       | ShortRunLowGrayLevelEmphasis         | 0.006626624  |
| wavelet-LHL | grlm       | GrayLevelVariance                    | 121.4404008  |
| wavelet-LHL | grlm       | LowGrayLevelRunEmphasis              | 0.006643865  |
| wavelet-LHL | grlm       | GrayLevelNonUniformityNormalized     | 0.02841005   |
| wavelet-LHL | grlm       | RunVariance                          | 0.020399036  |
| wavelet-LHL | grlm       | GrayLevelNonUniformity               | 5.988151885  |
| wavelet-LHL | grlm       | LongRunEmphasis                      | 1.061316615  |
| wavelet-LHL | grlm       | ShortRunHighGrayLevelEmphasis        | 1111.97155   |
| wavelet-LHL | grlm       | RunLengthNonUniformity               | 202.6721647  |
| wavelet-LHL | grlm       | ShortRunEmphasis                     | 0.985079794  |
| wavelet-LHL | grlm       | LongRunHighGrayLevelEmphasis         | 1190.900987  |
| wavelet-LHL | grlm       | RunPercentage                        | 0.980322004  |
| wavelet-LHL | grlm       | LongRunLowGrayLevelEmphasis          | 0.006715071  |
| wavelet-LHL | grlm       | RunEntropy                           | 5.437765019  |
| wavelet-LHL | grlm       | HighGrayLevelRunEmphasis             | 1127.518939  |
| wavelet-LHL | grlm       | RunLengthNonUniformityNormalized     | 0.961357416  |
| wavelet-LHL | glszm      | GrayLevelVariance                    | 141.5845674  |
| wavelet-LHL | glszm      | ZoneVariance                         | 0.659901753  |
| wavelet-LHL | glszm      | GrayLevelNonUniformityNormalized     | 0.025350497  |
| wavelet-LHL | glszm      | SizeZoneNonUniformityNormalized      | 0.697658575  |
| wavelet-LHL | glszm      | SizeZoneNonUniformity                | 116.508982   |
| wavelet-LHL | glszm      | GrayLevelNonUniformity               | 4.233532934  |
| wavelet-LHL | glszm      | LargeAreaEmphasis                    | 2.317365269  |
| wavelet-LHL | glszm      | SmallAreaHighGrayLevelEmphasis       | 993.5432745  |
| wavelet-LHL | glszm      | ZonePercentage                       | 0.776744186  |
| wavelet-LHL | glszm      | LargeAreaLowGrayLevelEmphasis        | 0.009578936  |
| wavelet-LHL | glszm      | LargeAreaHighGrayLevelEmphasis       | 2493.39521   |
| wavelet-LHL | glszm      | HighGrayLevelZoneEmphasis            | 1146.892216  |
| wavelet-LHL | glszm      | SmallAreaEmphasis                    | 0.859975831  |
| wavelet-LHL | glszm      | LowGrayLevelZoneEmphasis             | 0.008077394  |
| wavelet-LHL | glszm      | ZoneEntropy                          | 5.940298119  |
| wavelet-LHL | glszm      | SmallAreaLowGrayLevelEmphasis        | 0.0079088    |
| wavelet-LHL | ngtdm      | Coarseness                           | 0.026835272  |
| wavelet-LHL | ngtdm      | Complexity                           | 8193.238746  |
| wavelet-LHL | ngtdm      | Strength                             | 20.63470102  |
| wavelet-LHL | ngtdm      | Contrast                             | 0.757130995  |
| wavelet-LHL | ngtdm      | Busyness                             | 0.02694959   |
| wavelet-LHH | gldm       | GrayLevelVariance                    | 43.82572201  |
| wavelet-LHH | gldm       | HighGrayLevelEmphasis                | 380.3348837  |
| wavelet-LHH | gldm       | DependenceEntropy                    | 5.701994246  |
| wavelet-LHH | gldm       | DependenceNonUniformity              | 83.41860465  |
| wavelet-LHH | gldm       | GrayLevelNonUniformity               | 10.98139535  |
| wavelet-LHH | gldm       | SmallDependenceEmphasis              | 0.607332041  |
| wavelet-LHH | gldm       | SmallDependenceHighGrayLevelEmphasis | 244.8072997  |
| wavelet-LHH | gldm       | DependenceNonUniformityNormalized    | 0.38799351   |

|             |            |                                      |              |
|-------------|------------|--------------------------------------|--------------|
| wavelet-LHH | gldm       | LargeDependenceEmphasis              | 3.474418605  |
| wavelet-LHH | gldm       | LargeDependenceLowGrayLevelEmphasis  | 0.023986764  |
| wavelet-LHH | gldm       | DependenceVariance                   | 0.655143321  |
| wavelet-LHH | gldm       | LargeDependenceHighGrayLevelEmphasis | 1217.469767  |
| wavelet-LHH | gldm       | SmallDependenceLowGrayLevelEmphasis  | 0.01328973   |
| wavelet-LHH | gldm       | LowGrayLevelEmphasis                 | 0.014774855  |
| wavelet-LHH | glcm       | JointAverage                         | 18.37913523  |
| wavelet-LHH | glcm       | SumAverage                           | 36.75827046  |
| wavelet-LHH | glcm       | JointEntropy                         | 7.535307301  |
| wavelet-LHH | glcm       | ClusterShade                         | 57.03221783  |
| wavelet-LHH | glcm       | MaximumProbability                   | 0.017603085  |
| wavelet-LHH | glcm       | ldmn                                 | 0.947232944  |
| wavelet-LHH | glcm       | JointEnergy                          | 0.00621776   |
| wavelet-LHH | glcm       | Contrast                             | 91.61016028  |
| wavelet-LHH | glcm       | DifferenceEntropy                    | 4.142796117  |
| wavelet-LHH | glcm       | InverseVariance                      | 0.134764727  |
| wavelet-LHH | glcm       | DifferenceVariance                   | 35.2358875   |
| wavelet-LHH | glcm       | ldn                                  | 0.850242461  |
| wavelet-LHH | glcm       | ldm                                  | 0.12438984   |
| wavelet-LHH | glcm       | Correlation                          | -0.010267023 |
| wavelet-LHH | glcm       | Autocorrelation                      | 337.205365   |
| wavelet-LHH | glcm       | SumEntropy                           | 4.934870373  |
| wavelet-LHH | glcm       | SumSquares                           | 45.18605316  |
| wavelet-LHH | glcm       | ClusterProminence                    | 28739.45682  |
| wavelet-LHH | glcm       | lmc2                                 | 0.977553712  |
| wavelet-LHH | glcm       | lmc1                                 | -0.343507139 |
| wavelet-LHH | glcm       | DifferenceAverage                    | 7.402599431  |
| wavelet-LHH | glcm       | ld                                   | 0.21487048   |
| wavelet-LHH | glcm       | ClusterTendency                      | 89.13405237  |
| wavelet-LHH | firstorder | InterquartileRange                   | 198.6300516  |
| wavelet-LHH | firstorder | Skewness                             | 0.140765569  |
| wavelet-LHH | firstorder | Uniformity                           | 0.051076257  |
| wavelet-LHH | firstorder | Median                               | -13.57546297 |
| wavelet-LHH | firstorder | Energy                               | 5822614.748  |
| wavelet-LHH | firstorder | RobustMeanAbsoluteDeviation          | 82.07519423  |
| wavelet-LHH | firstorder | MeanAbsoluteDeviation                | 126.522259   |
| wavelet-LHH | firstorder | TotalEnergy                          | 157210598.2  |
| wavelet-LHH | firstorder | Maximum                              | 479.4173641  |
| wavelet-LHH | firstorder | RootMeanSquared                      | 164.5658806  |
| wavelet-LHH | firstorder | 90Percentile                         | 176.8118275  |
| wavelet-LHH | firstorder | Minimum                              | -441.9608533 |
| wavelet-LHH | firstorder | Entropy                              | 4.575422052  |
| wavelet-LHH | firstorder | Range                                | 921.3782174  |
| wavelet-LHH | firstorder | Variance                             | 27069.54967  |
| wavelet-LHH | firstorder | 10Percentile                         | -201.4000813 |
| wavelet-LHH | firstorder | Kurtosis                             | 3.44021899   |
| wavelet-LHH | firstorder | Mean                                 | -3.51843481  |
| wavelet-LHH | glrlm      | ShortRunLowGrayLevelEmphasis         | 0.014998451  |
| wavelet-LHH | glrlm      | GrayLevelVariance                    | 44.53901894  |
| wavelet-LHH | glrlm      | LowGrayLevelRunEmphasis              | 0.015072878  |
| wavelet-LHH | glrlm      | GrayLevelNonUniformityNormalized     | 0.050399833  |
| wavelet-LHH | glrlm      | RunVariance                          | 0.027553376  |

|             |       |                                      |             |
|-------------|-------|--------------------------------------|-------------|
| wavelet-LHH | glrlm | GrayLevelNonUniformity               | 10.55281172 |
| wavelet-LHH | glrlm | LongRunEmphasis                      | 1.082533385 |
| wavelet-LHH | glrlm | ShortRunHighGrayLevelEmphasis        | 374.5995517 |
| wavelet-LHH | glrlm | RunLengthNonUniformity               | 198.8274277 |
| wavelet-LHH | glrlm | ShortRunEmphasis                     | 0.980184568 |
| wavelet-LHH | glrlm | LongRunHighGrayLevelEmphasis         | 409.5199022 |
| wavelet-LHH | glrlm | RunPercentage                        | 0.973881932 |
| wavelet-LHH | glrlm | LongRunLowGrayLevelEmphasis          | 0.015381298 |
| wavelet-LHH | glrlm | RunEntropy                           | 4.707702263 |
| wavelet-LHH | glrlm | HighGrayLevelRunEmphasis             | 381.383124  |
| wavelet-LHH | glrlm | RunLengthNonUniformityNormalized     | 0.949204114 |
| wavelet-LHH | glszm | GrayLevelVariance                    | 55.66887327 |
| wavelet-LHH | glszm | ZoneVariance                         | 1.234249452 |
| wavelet-LHH | glszm | GrayLevelNonUniformityNormalized     | 0.042823229 |
| wavelet-LHH | glszm | SizeZoneNonUniformityNormalized      | 0.581994156 |
| wavelet-LHH | glszm | SizeZoneNonUniformity                | 86.13513514 |
| wavelet-LHH | glszm | GrayLevelNonUniformity               | 6.337837838 |
| wavelet-LHH | glszm | LargeAreaEmphasis                    | 3.344594595 |
| wavelet-LHH | glszm | SmallAreaHighGrayLevelEmphasis       | 323.642197  |
| wavelet-LHH | glszm | ZonePercentage                       | 0.688372093 |
| wavelet-LHH | glszm | LargeAreaLowGrayLevelEmphasis        | 0.028446843 |
| wavelet-LHH | glszm | LargeAreaHighGrayLevelEmphasis       | 1165.040541 |
| wavelet-LHH | glszm | HighGrayLevelZoneEmphasis            | 397.6689189 |
| wavelet-LHH | glszm | SmallAreaEmphasis                    | 0.789939882 |
| wavelet-LHH | glszm | LowGrayLevelZoneEmphasis             | 0.019758082 |
| wavelet-LHH | glszm | ZoneEntropy                          | 5.562853516 |
| wavelet-LHH | glszm | SmallAreaLowGrayLevelEmphasis        | 0.018951337 |
| wavelet-LHH | ngtdm | Coarseness                           | 0.024746028 |
| wavelet-LHH | ngtdm | Complexity                           | 2330.996315 |
| wavelet-LHH | ngtdm | Strength                             | 8.827960586 |
| wavelet-LHH | ngtdm | Contrast                             | 0.414166505 |
| wavelet-LHH | ngtdm | Busyness                             | 0.064818434 |
| wavelet-LLH | gldm  | GrayLevelVariance                    | 76.09921038 |
| wavelet-LLH | gldm  | HighGrayLevelEmphasis                | 458.0744186 |
| wavelet-LLH | gldm  | DependenceEntropy                    | 5.968054425 |
| wavelet-LLH | gldm  | DependenceNonUniformity              | 87.15813953 |
| wavelet-LLH | gldm  | GrayLevelNonUniformity               | 8.28372093  |
| wavelet-LLH | gldm  | SmallDependenceEmphasis              | 0.645316537 |
| wavelet-LLH | gldm  | SmallDependenceHighGrayLevelEmphasis | 339.5194767 |
| wavelet-LLH | gldm  | DependenceNonUniformityNormalized    | 0.405386696 |
| wavelet-LLH | gldm  | LargeDependenceEmphasis              | 3.446511628 |
| wavelet-LLH | gldm  | LargeDependenceLowGrayLevelEmphasis  | 0.038650427 |
| wavelet-LLH | gldm  | DependenceVariance                   | 0.720173067 |
| wavelet-LLH | gldm  | LargeDependenceHighGrayLevelEmphasis | 1241.451163 |
| wavelet-LLH | gldm  | SmallDependenceLowGrayLevelEmphasis  | 0.012728691 |
| wavelet-LLH | gldm  | LowGrayLevelEmphasis                 | 0.016713347 |
| wavelet-LLH | glcm  | JointAverage                         | 19.01223428 |
| wavelet-LLH | glcm  | SumAverage                           | 38.02446856 |
| wavelet-LLH | glcm  | JointEntropy                         | 7.753255783 |
| wavelet-LLH | glcm  | ClusterShade                         | 1044.217519 |
| wavelet-LLH | glcm  | MaximumProbability                   | 0.014023812 |
| wavelet-LLH | glcm  | ldmn                                 | 0.950084488 |

|             |            |                                  |              |
|-------------|------------|----------------------------------|--------------|
| wavelet-LLH | glcm       | JointEnergy                      | 0.00515141   |
| wavelet-LLH | glcm       | Contrast                         | 132.895039   |
| wavelet-LLH | glcm       | DifferenceEntropy                | 4.371773338  |
| wavelet-LLH | glcm       | InverseVariance                  | 0.123627666  |
| wavelet-LLH | glcm       | DifferenceVariance               | 53.07516389  |
| wavelet-LLH | glcm       | Idn                              | 0.855763861  |
| wavelet-LLH | glcm       | Idm                              | 0.114335483  |
| wavelet-LLH | glcm       | Correlation                      | 0.107819515  |
| wavelet-LLH | glcm       | Autocorrelation                  | 370.0670065  |
| wavelet-LLH | glcm       | SumEntropy                       | 5.290215239  |
| wavelet-LLH | glcm       | SumSquares                       | 74.99596595  |
| wavelet-LLH | glcm       | ClusterProminence                | 98932.31963  |
| wavelet-LLH | glcm       | Imc2                             | 0.991226488  |
| wavelet-LLH | glcm       | Imc1                             | -0.415908342 |
| wavelet-LLH | glcm       | DifferenceAverage                | 8.786041891  |
| wavelet-LLH | glcm       | Id                               | 0.199170143  |
| wavelet-LLH | glcm       | ClusterTendency                  | 167.0888248  |
| wavelet-LLH | firstorder | InterquartileRange               | 273.4884155  |
| wavelet-LLH | firstorder | Skewness                         | 0.478963882  |
| wavelet-LLH | firstorder | Uniformity                       | 0.038528935  |
| wavelet-LLH | firstorder | Median                           | -75.39507236 |
| wavelet-LLH | firstorder | Energy                           | 10747989.04  |
| wavelet-LLH | firstorder | RobustMeanAbsoluteDeviation      | 114.1751581  |
| wavelet-LLH | firstorder | MeanAbsoluteDeviation            | 170.2291122  |
| wavelet-LLH | firstorder | TotalEnergy                      | 290195704    |
| wavelet-LLH | firstorder | Maximum                          | 640.5281444  |
| wavelet-LLH | firstorder | RootMeanSquared                  | 223.5858821  |
| wavelet-LLH | firstorder | 90Percentile                     | 232.3826761  |
| wavelet-LLH | firstorder | Minimum                          | -523.9063858 |
| wavelet-LLH | firstorder | Entropy                          | 4.967302666  |
| wavelet-LLH | firstorder | Range                            | 1164.43453   |
| wavelet-LLH | firstorder | Variance                         | 47596.02695  |
| wavelet-LLH | firstorder | 10Percentile                     | -315.9786464 |
| wavelet-LLH | firstorder | Kurtosis                         | 3.108438155  |
| wavelet-LLH | firstorder | Mean                             | -48.93485181 |
| wavelet-LLH | glrlm      | ShortRunLowGrayLevelEmphasis     | 0.016703884  |
| wavelet-LLH | glrlm      | GrayLevelVariance                | 77.0392759   |
| wavelet-LLH | glrlm      | LowGrayLevelRunEmphasis          | 0.016893066  |
| wavelet-LLH | glrlm      | GrayLevelNonUniformityNormalized | 0.038001486  |
| wavelet-LLH | glrlm      | RunVariance                      | 0.025015048  |
| wavelet-LLH | glrlm      | GrayLevelNonUniformity           | 7.966282008  |
| wavelet-LLH | glrlm      | LongRunEmphasis                  | 1.077536111  |
| wavelet-LLH | glrlm      | ShortRunHighGrayLevelEmphasis    | 455.2211587  |
| wavelet-LLH | glrlm      | RunLengthNonUniformity           | 199.1904324  |
| wavelet-LLH | glrlm      | ShortRunEmphasis                 | 0.980615972  |
| wavelet-LLH | glrlm      | LongRunHighGrayLevelEmphasis     | 486.7047937  |
| wavelet-LLH | glrlm      | RunPercentage                    | 0.974955277  |
| wavelet-LLH | glrlm      | LongRunLowGrayLevelEmphasis      | 0.017649796  |
| wavelet-LLH | glrlm      | RunEntropy                       | 5.085493052  |
| wavelet-LLH | glrlm      | HighGrayLevelRunEmphasis         | 461.5178857  |
| wavelet-LLH | glrlm      | RunLengthNonUniformityNormalized | 0.949969905  |
| wavelet-LLH | glszm      | GrayLevelVariance                | 89.51246537  |



|             |       |                                      |              |
|-------------|-------|--------------------------------------|--------------|
| wavelet-LLH | glszm | ZoneVariance                         | 1.097948407  |
| wavelet-LLH | glszm | GrayLevelNonUniformityNormalized     | 0.032635042  |
| wavelet-LLH | glszm | SizeZoneNonUniformityNormalized      | 0.64776662   |
| wavelet-LLH | glszm | SizeZoneNonUniformity                | 98.46052632  |
| wavelet-LLH | glszm | GrayLevelNonUniformity               | 4.960526316  |
| wavelet-LLH | glszm | LargeAreaEmphasis                    | 3.098684211  |
| wavelet-LLH | glszm | SmallAreaHighGrayLevelEmphasis       | 452.1669248  |
| wavelet-LLH | glszm | ZonePercentage                       | 0.706976744  |
| wavelet-LLH | glszm | LargeAreaLowGrayLevelEmphasis        | 0.037001034  |
| wavelet-LLH | glszm | LargeAreaHighGrayLevelEmphasis       | 1203.776316  |
| wavelet-LLH | glszm | HighGrayLevelZoneEmphasis            | 510.8421053  |
| wavelet-LLH | glszm | SmallAreaEmphasis                    | 0.829793951  |
| wavelet-LLH | glszm | LowGrayLevelZoneEmphasis             | 0.019334151  |
| wavelet-LLH | glszm | ZoneEntropy                          | 5.70953338   |
| wavelet-LLH | glszm | SmallAreaLowGrayLevelEmphasis        | 0.017029035  |
| wavelet-LLH | ngtdm | Coarseness                           | 0.027533801  |
| wavelet-LLH | ngtdm | Complexity                           | 3920.750385  |
| wavelet-LLH | ngtdm | Strength                             | 14.80846115  |
| wavelet-LLH | ngtdm | Contrast                             | 0.574667228  |
| wavelet-LLH | ngtdm | Busyness                             | 0.056879055  |
| wavelet-LLL | gldm  | GrayLevelVariance                    | 546.4325365  |
| wavelet-LLL | gldm  | HighGrayLevelEmphasis                | 3570.92093   |
| wavelet-LLL | gldm  | DependenceEntropy                    | 6.550995889  |
| wavelet-LLL | gldm  | DependenceNonUniformity              | 122.7674419  |
| wavelet-LLL | gldm  | GrayLevelNonUniformity               | 3.753488372  |
| wavelet-LLL | gldm  | SmallDependenceEmphasis              | 0.784149871  |
| wavelet-LLL | gldm  | SmallDependenceHighGrayLevelEmphasis | 2475.443306  |
| wavelet-LLL | gldm  | DependenceNonUniformityNormalized    | 0.571011357  |
| wavelet-LLL | gldm  | LargeDependenceEmphasis              | 2.581395349  |
| wavelet-LLL | gldm  | LargeDependenceLowGrayLevelEmphasis  | 0.006088227  |
| wavelet-LLL | gldm  | DependenceVariance                   | 0.621395349  |
| wavelet-LLL | gldm  | LargeDependenceHighGrayLevelEmphasis | 12201.57209  |
| wavelet-LLL | gldm  | SmallDependenceLowGrayLevelEmphasis  | 0.005668362  |
| wavelet-LLL | gldm  | LowGrayLevelEmphasis                 | 0.005726806  |
| wavelet-LLL | glcm  | JointAverage                         | 60.95334829  |
| wavelet-LLL | glcm  | SumAverage                           | 121.9066966  |
| wavelet-LLL | glcm  | JointEntropy                         | 8.032296955  |
| wavelet-LLL | glcm  | ClusterShade                         | -20539.82081 |
| wavelet-LLL | glcm  | MaximumProbability                   | 0.009614778  |
| wavelet-LLL | glcm  | Idmn                                 | 0.947193038  |
| wavelet-LLL | glcm  | JointEnergy                          | 0.003985154  |
| wavelet-LLL | glcm  | Contrast                             | 560.1619529  |
| wavelet-LLL | glcm  | DifferenceEntropy                    | 5.217384418  |
| wavelet-LLL | glcm  | InverseVariance                      | 0.058255772  |
| wavelet-LLL | glcm  | DifferenceVariance                   | 203.5078649  |
| wavelet-LLL | glcm  | Idn                                  | 0.848733743  |
| wavelet-LLL | glcm  | Idm                                  | 0.05990204   |
| wavelet-LLL | glcm  | Correlation                          | 0.42350419   |
| wavelet-LLL | glcm  | Autocorrelation                      | 3923.507335  |
| wavelet-LLL | glcm  | SumEntropy                           | 6.27879122   |
| wavelet-LLL | glcm  | SumSquares                           | 487.0748919  |
| wavelet-LLL | glcm  | ClusterProminence                    | 4491693.002  |

|             |            |                                  |              |
|-------------|------------|----------------------------------|--------------|
| wavelet-LLL | glcm       | Imc2                             | 0.999704737  |
| wavelet-LLL | glcm       | Imc1                             | -0.634021498 |
| wavelet-LLL | glcm       | DifferenceAverage                | 18.62867452  |
| wavelet-LLL | glcm       | Id                               | 0.12184617   |
| wavelet-LLL | glcm       | ClusterTendency                  | 1388.137615  |
| wavelet-LLL | firstorder | InterquartileRange               | 923.5033181  |
| wavelet-LLL | firstorder | Skewness                         | -0.256166207 |
| wavelet-LLL | firstorder | Uniformity                       | 0.017458085  |
| wavelet-LLL | firstorder | Median                           | -663.1547275 |
| wavelet-LLL | firstorder | Energy                           | 175071178.5  |
| wavelet-LLL | firstorder | RobustMeanAbsoluteDeviation      | 375.8043684  |
| wavelet-LLL | firstorder | MeanAbsoluteDeviation            | 492.4018264  |
| wavelet-LLL | firstorder | TotalEnergy                      | 4726921820   |
| wavelet-LLL | firstorder | Maximum                          | 300.3550565  |
| wavelet-LLL | firstorder | RootMeanSquared                  | 902.3771669  |
| wavelet-LLL | firstorder | 90Percentile                     | 87.67440784  |
| wavelet-LLL | firstorder | Minimum                          | -2049.096864 |
| wavelet-LLL | firstorder | Entropy                          | 6.048446879  |
| wavelet-LLL | firstorder | Range                            | 2349.451921  |
| wavelet-LLL | firstorder | Variance                         | 341387.715   |
| wavelet-LLL | firstorder | 10Percentile                     | -1510.664998 |
| wavelet-LLL | firstorder | Kurtosis                         | 2.066462042  |
| wavelet-LLL | firstorder | Mean                             | -687.6749496 |
| wavelet-LLL | glrlm      | ShortRunLowGrayLevelEmphasis     | 0.005810357  |
| wavelet-LLL | glrlm      | GrayLevelVariance                | 547.2704803  |
| wavelet-LLL | glrlm      | LowGrayLevelRunEmphasis          | 0.005813181  |
| wavelet-LLL | glrlm      | GrayLevelNonUniformityNormalized | 0.017279188  |
| wavelet-LLL | glrlm      | RunVariance                      | 0.016120201  |
| wavelet-LLL | glrlm      | GrayLevelNonUniformity           | 3.658281571  |
| wavelet-LLL | glrlm      | LongRunEmphasis                  | 1.048016597  |
| wavelet-LLL | glrlm      | ShortRunHighGrayLevelEmphasis    | 3481.384348  |
| wavelet-LLL | glrlm      | RunLengthNonUniformity           | 205.3727946  |
| wavelet-LLL | glrlm      | ShortRunEmphasis                 | 0.988410754  |
| wavelet-LLL | glrlm      | LongRunHighGrayLevelEmphasis     | 3797.091228  |
| wavelet-LLL | glrlm      | RunPercentage                    | 0.984615385  |
| wavelet-LLL | glrlm      | LongRunLowGrayLevelEmphasis      | 0.005824989  |
| wavelet-LLL | glrlm      | RunEntropy                       | 6.100843772  |
| wavelet-LLL | glrlm      | HighGrayLevelRunEmphasis         | 3543.447307  |
| wavelet-LLL | glrlm      | RunLengthNonUniformityNormalized | 0.969913067  |
| wavelet-LLL | glszm      | GrayLevelVariance                | 551.7145532  |
| wavelet-LLL | glszm      | ZoneVariance                     | 0.428825567  |
| wavelet-LLL | glszm      | GrayLevelNonUniformityNormalized | 0.016197996  |
| wavelet-LLL | glszm      | SizeZoneNonUniformityNormalized  | 0.776286633  |
| wavelet-LLL | glszm      | SizeZoneNonUniformity            | 138.9553073  |
| wavelet-LLL | glszm      | GrayLevelNonUniformity           | 2.899441341  |
| wavelet-LLL | glszm      | LargeAreaEmphasis                | 1.87150838   |
| wavelet-LLL | glszm      | SmallAreaHighGrayLevelEmphasis   | 2767.620323  |
| wavelet-LLL | glszm      | ZonePercentage                   | 0.83255814   |
| wavelet-LLL | glszm      | LargeAreaLowGrayLevelEmphasis    | 0.007030689  |
| wavelet-LLL | glszm      | LargeAreaHighGrayLevelEmphasis   | 7956.223464  |
| wavelet-LLL | glszm      | HighGrayLevelZoneEmphasis        | 3247.586592  |
| wavelet-LLL | glszm      | SmallAreaEmphasis                | 0.900479516  |

|             |            |                                      |              |
|-------------|------------|--------------------------------------|--------------|
| wavelet-LLL | glszm      | LowGrayLevelZoneEmphasis             | 0.006826527  |
| wavelet-LLL | glszm      | ZoneEntropy                          | 6.378298618  |
| wavelet-LLL | glszm      | SmallAreaLowGrayLevelEmphasis        | 0.006796857  |
| wavelet-LLL | ngtdm      | Coarseness                           | 0.024882569  |
| wavelet-LLL | ngtdm      | Complexity                           | 32923.02451  |
| wavelet-LLL | ngtdm      | Strength                             | 74.41276185  |
| wavelet-LLL | ngtdm      | Contrast                             | 2.172956681  |
| wavelet-LLL | ngtdm      | Busyness                             | 0.010052665  |
| wavelet-HHL | gldm       | GrayLevelVariance                    | 45.52956193  |
| wavelet-HHL | gldm       | HighGrayLevelEmphasis                | 534.8651163  |
| wavelet-HHL | gldm       | DependenceEntropy                    | 5.884753083  |
| wavelet-HHL | gldm       | DependenceNonUniformity              | 74.10697674  |
| wavelet-HHL | gldm       | GrayLevelNonUniformity               | 10.2         |
| wavelet-HHL | gldm       | SmallDependenceEmphasis              | 0.571431525  |
| wavelet-HHL | gldm       | SmallDependenceHighGrayLevelEmphasis | 303.2948669  |
| wavelet-HHL | gldm       | DependenceNonUniformityNormalized    | 0.344683613  |
| wavelet-HHL | gldm       | LargeDependenceEmphasis              | 4.581395349  |
| wavelet-HHL | gldm       | LargeDependenceLowGrayLevelEmphasis  | 0.016629134  |
| wavelet-HHL | gldm       | DependenceVariance                   | 1.137349919  |
| wavelet-HHL | gldm       | LargeDependenceHighGrayLevelEmphasis | 2390.837209  |
| wavelet-HHL | gldm       | SmallDependenceLowGrayLevelEmphasis  | 0.007940207  |
| wavelet-HHL | gldm       | LowGrayLevelEmphasis                 | 0.008871869  |
| wavelet-HHL | glcm       | JointAverage                         | 21.96642124  |
| wavelet-HHL | glcm       | SumAverage                           | 43.93284248  |
| wavelet-HHL | glcm       | JointEntropy                         | 7.603227257  |
| wavelet-HHL | glcm       | ClusterShade                         | -18.67915172 |
| wavelet-HHL | glcm       | MaximumProbability                   | 0.01774745   |
| wavelet-HHL | glcm       | ldmn                                 | 0.956992388  |
| wavelet-HHL | glcm       | JointEnergy                          | 0.005878163  |
| wavelet-HHL | glcm       | Contrast                             | 88.28937854  |
| wavelet-HHL | glcm       | DifferenceEntropy                    | 4.137944632  |
| wavelet-HHL | glcm       | InverseVariance                      | 0.137117582  |
| wavelet-HHL | glcm       | DifferenceVariance                   | 34.43910267  |
| wavelet-HHL | glcm       | ldn                                  | 0.86429236   |
| wavelet-HHL | glcm       | ldm                                  | 0.135474385  |
| wavelet-HHL | glcm       | Correlation                          | 0.003043615  |
| wavelet-HHL | glcm       | Autocorrelation                      | 482.618522   |
| wavelet-HHL | glcm       | SumEntropy                           | 4.967122016  |
| wavelet-HHL | glcm       | SumSquares                           | 44.14626308  |
| wavelet-HHL | glcm       | ClusterProminence                    | 28748.62106  |
| wavelet-HHL | glcm       | lmc2                                 | 0.977727292  |
| wavelet-HHL | glcm       | lmc1                                 | -0.344283482 |
| wavelet-HHL | glcm       | DifferenceAverage                    | 7.239182551  |
| wavelet-HHL | glcm       | ld                                   | 0.22467776   |
| wavelet-HHL | glcm       | ClusterTendency                      | 88.29567377  |
| wavelet-HHL | firstorder | InterquartileRange                   | 199.6082965  |
| wavelet-HHL | firstorder | Skewness                             | -0.106136486 |
| wavelet-HHL | firstorder | Uniformity                           | 0.04744186   |
| wavelet-HHL | firstorder | Median                               | 24.22300848  |
| wavelet-HHL | firstorder | Energy                               | 6163098.206  |
| wavelet-HHL | firstorder | RobustMeanAbsoluteDeviation          | 88.17661164  |
| wavelet-HHL | firstorder | MeanAbsoluteDeviation                | 130.8709399  |

|             |            |                                  |              |
|-------------|------------|----------------------------------|--------------|
| wavelet-HHL | firstorder | TotalEnergy                      | 166403651.6  |
| wavelet-HHL | firstorder | Maximum                          | 501.4544334  |
| wavelet-HHL | firstorder | RootMeanSquared                  | 169.309105   |
| wavelet-HHL | firstorder | 90Percentile                     | 220.2757279  |
| wavelet-HHL | firstorder | Minimum                          | -503.7626281 |
| wavelet-HHL | firstorder | Entropy                          | 4.642889115  |
| wavelet-HHL | firstorder | Range                            | 1005.217061  |
| wavelet-HHL | firstorder | Variance                         | 28423.85486  |
| wavelet-HHL | firstorder | 10Percentile                     | -200.9440375 |
| wavelet-HHL | firstorder | Kurtosis                         | 3.416095109  |
| wavelet-HHL | firstorder | Mean                             | 15.54728906  |
| wavelet-HHL | gllm       | ShortRunLowGrayLevelEmphasis     | 0.009047197  |
| wavelet-HHL | gllm       | GrayLevelVariance                | 46.48362721  |
| wavelet-HHL | gllm       | LowGrayLevelRunEmphasis          | 0.009101438  |
| wavelet-HHL | gllm       | GrayLevelNonUniformityNormalized | 0.046527941  |
| wavelet-HHL | gllm       | RunVariance                      | 0.03663197   |
| wavelet-HHL | gllm       | GrayLevelNonUniformity           | 9.675505542  |
| wavelet-HHL | gllm       | LongRunEmphasis                  | 1.106681605  |
| wavelet-HHL | gllm       | ShortRunHighGrayLevelEmphasis    | 522.1880865  |
| wavelet-HHL | gllm       | RunLengthNonUniformity           | 194.9003481  |
| wavelet-HHL | gllm       | ShortRunEmphasis                 | 0.975233305  |
| wavelet-HHL | gllm       | LongRunHighGrayLevelEmphasis     | 591.3718612  |
| wavelet-HHL | gllm       | RunPercentage                    | 0.967084079  |
| wavelet-HHL | gllm       | LongRunLowGrayLevelEmphasis      | 0.009332794  |
| wavelet-HHL | gllm       | RunEntropy                       | 4.798772804  |
| wavelet-HHL | gllm       | HighGrayLevelRunEmphasis         | 535.1775904  |
| wavelet-HHL | gllm       | RunLengthNonUniformityNormalized | 0.936933916  |
| wavelet-HHL | glszm      | GrayLevelVariance                | 58.79852041  |
| wavelet-HHL | glszm      | ZoneVariance                     | 1.305867347  |
| wavelet-HHL | glszm      | GrayLevelNonUniformityNormalized | 0.040612245  |
| wavelet-HHL | glszm      | SizeZoneNonUniformityNormalized  | 0.556632653  |
| wavelet-HHL | glszm      | SizeZoneNonUniformity            | 77.92857143  |
| wavelet-HHL | glszm      | GrayLevelNonUniformity           | 5.685714286  |
| wavelet-HHL | glszm      | LargeAreaEmphasis                | 3.664285714  |
| wavelet-HHL | glszm      | SmallAreaHighGrayLevelEmphasis   | 408.6900595  |
| wavelet-HHL | glszm      | ZonePercentage                   | 0.651162791  |
| wavelet-HHL | glszm      | LargeAreaLowGrayLevelEmphasis    | 0.018298086  |
| wavelet-HHL | glszm      | LargeAreaHighGrayLevelEmphasis   | 1926.728571  |
| wavelet-HHL | glszm      | HighGrayLevelZoneEmphasis        | 534.35       |
| wavelet-HHL | glszm      | SmallAreaEmphasis                | 0.7741423    |
| wavelet-HHL | glszm      | LowGrayLevelZoneEmphasis         | 0.012458042  |
| wavelet-HHL | glszm      | ZoneEntropy                      | 5.670569378  |
| wavelet-HHL | glszm      | SmallAreaLowGrayLevelEmphasis    | 0.011971521  |
| wavelet-HHL | ngtdm      | Coarseness                       | 0.026145889  |
| wavelet-HHL | ngtdm      | Complexity                       | 2457.299742  |
| wavelet-HHL | ngtdm      | Strength                         | 9.685975769  |
| wavelet-HHL | ngtdm      | Contrast                         | 0.435690337  |
| wavelet-HHL | ngtdm      | Busyness                         | 0.054147724  |
| wavelet-HHL | gldm       | GrayLevelVariance                | 35.79418064  |
| wavelet-HHL | gldm       | HighGrayLevelEmphasis            | 587.9348837  |
| wavelet-HHL | gldm       | DependenceEntropy                | 5.774489073  |
| wavelet-HHL | gldm       | DependenceNonUniformity          | 71.17674419  |

|             |            |                                      |              |
|-------------|------------|--------------------------------------|--------------|
| wavelet-HLH | gldm       | GrayLevelNonUniformity               | 11.8         |
| wavelet-HLH | gldm       | SmallDependenceEmphasis              | 0.542127907  |
| wavelet-HLH | gldm       | SmallDependenceHighGrayLevelEmphasis | 335.2666279  |
| wavelet-HLH | gldm       | DependenceNonUniformityNormalized    | 0.331054624  |
| wavelet-HLH | gldm       | LargeDependenceEmphasis              | 4.43255814   |
| wavelet-HLH | gldm       | LargeDependenceLowGrayLevelEmphasis  | 0.014414325  |
| wavelet-HLH | gldm       | DependenceVariance                   | 0.919113034  |
| wavelet-HLH | gldm       | LargeDependenceHighGrayLevelEmphasis | 2449.134884  |
| wavelet-HLH | gldm       | SmallDependenceLowGrayLevelEmphasis  | 0.006159549  |
| wavelet-HLH | gldm       | LowGrayLevelEmphasis                 | 0.007177996  |
| wavelet-HLH | glcm       | JointAverage                         | 23.59751037  |
| wavelet-HLH | glcm       | SumAverage                           | 47.19502073  |
| wavelet-HLH | glcm       | JointEntropy                         | 7.470376305  |
| wavelet-HLH | glcm       | ClusterShade                         | -146.1843613 |
| wavelet-HLH | glcm       | MaximumProbability                   | 0.017417174  |
| wavelet-HLH | glcm       | ldmn                                 | 0.961367265  |
| wavelet-HLH | glcm       | JointEnergy                          | 0.006497857  |
| wavelet-HLH | glcm       | Contrast                             | 66.91982358  |
| wavelet-HLH | glcm       | DifferenceEntropy                    | 3.95993159   |
| wavelet-HLH | glcm       | InverseVariance                      | 0.156000534  |
| wavelet-HLH | glcm       | DifferenceVariance                   | 25.1896264   |
| wavelet-HLH | glcm       | ldn                                  | 0.869284713  |
| wavelet-HLH | glcm       | ldm                                  | 0.14672961   |
| wavelet-HLH | glcm       | Correlation                          | -0.020375148 |
| wavelet-HLH | glcm       | Autocorrelation                      | 556.1592062  |
| wavelet-HLH | glcm       | SumEntropy                           | 4.759659583  |
| wavelet-HLH | glcm       | SumSquares                           | 32.75469345  |
| wavelet-HLH | glcm       | ClusterProminence                    | 15961.88295  |
| wavelet-HLH | glcm       | lmc2                                 | 0.963590304  |
| wavelet-HLH | glcm       | lmc1                                 | -0.301595781 |
| wavelet-HLH | glcm       | DifferenceAverage                    | 6.382105358  |
| wavelet-HLH | glcm       | ld                                   | 0.237912871  |
| wavelet-HLH | glcm       | ClusterTendency                      | 64.09895022  |
| wavelet-HLH | firstorder | InterquartileRange                   | 164.4261878  |
| wavelet-HLH | firstorder | Skewness                             | -0.344303728 |
| wavelet-HLH | firstorder | Uniformity                           | 0.054883721  |
| wavelet-HLH | firstorder | Median                               | 2.698646191  |
| wavelet-HLH | firstorder | Energy                               | 4786867.893  |
| wavelet-HLH | firstorder | RobustMeanAbsoluteDeviation          | 72.4911358   |
| wavelet-HLH | firstorder | MeanAbsoluteDeviation                | 112.2881116  |
| wavelet-HLH | firstorder | TotalEnergy                          | 129245433.1  |
| wavelet-HLH | firstorder | Maximum                              | 393.8161654  |
| wavelet-HLH | firstorder | RootMeanSquared                      | 149.2129412  |
| wavelet-HLH | firstorder | 90Percentile                         | 186.3142756  |
| wavelet-HLH | firstorder | Minimum                              | -551.2640112 |
| wavelet-HLH | firstorder | Entropy                              | 4.465450111  |
| wavelet-HLH | firstorder | Range                                | 945.0801766  |
| wavelet-HLH | firstorder | Variance                             | 22264.50183  |
| wavelet-HLH | firstorder | 10Percentile                         | -175.4925199 |
| wavelet-HLH | firstorder | Kurtosis                             | 3.899343764  |
| wavelet-HLH | firstorder | Mean                                 | 0.00203488   |
| wavelet-HLH | gllm       | ShortRunLowGrayLevelEmphasis         | 0.007298269  |

|             |       |                                  |             |
|-------------|-------|----------------------------------|-------------|
| wavelet-HLH | glrlm | GrayLevelVariance                | 36.48457091 |
| wavelet-HLH | glrlm | LowGrayLevelRunEmphasis          | 0.007353683 |
| wavelet-HLH | glrlm | GrayLevelNonUniformityNormalized | 0.053978614 |
| wavelet-HLH | glrlm | RunVariance                      | 0.035081571 |
| wavelet-HLH | glrlm | GrayLevelNonUniformity           | 11.21487785 |
| wavelet-HLH | glrlm | LongRunEmphasis                  | 1.106344436 |
| wavelet-HLH | glrlm | ShortRunHighGrayLevelEmphasis    | 575.329501  |
| wavelet-HLH | glrlm | RunLengthNonUniformity           | 194.1348546 |
| wavelet-HLH | glrlm | ShortRunEmphasis                 | 0.974252014 |
| wavelet-HLH | glrlm | LongRunHighGrayLevelEmphasis     | 647.406998  |
| wavelet-HLH | glrlm | RunPercentage                    | 0.966368515 |
| wavelet-HLH | glrlm | LongRunLowGrayLevelEmphasis      | 0.007582236 |
| wavelet-HLH | glrlm | RunEntropy                       | 4.633178157 |
| wavelet-HLH | glrlm | HighGrayLevelRunEmphasis         | 589.4024792 |
| wavelet-HLH | glrlm | RunLengthNonUniformityNormalized | 0.934138814 |
| wavelet-HLH | glszm | GrayLevelVariance                | 46.27487024 |
| wavelet-HLH | glszm | ZoneVariance                     | 1.390516869 |
| wavelet-HLH | glszm | GrayLevelNonUniformityNormalized | 0.045198962 |
| wavelet-HLH | glszm | SizeZoneNonUniformityNormalized  | 0.518274221 |
| wavelet-HLH | glszm | SizeZoneNonUniformity            | 70.48529412 |
| wavelet-HLH | glszm | GrayLevelNonUniformity           | 6.147058824 |
| wavelet-HLH | glszm | LargeAreaEmphasis                | 3.889705882 |
| wavelet-HLH | glszm | SmallAreaHighGrayLevelEmphasis   | 469.7555254 |
| wavelet-HLH | glszm | ZonePercentage                   | 0.63255814  |
| wavelet-HLH | glszm | LargeAreaLowGrayLevelEmphasis    | 0.016102636 |
| wavelet-HLH | glszm | LargeAreaHighGrayLevelEmphasis   | 2175.573529 |
| wavelet-HLH | glszm | HighGrayLevelZoneEmphasis        | 611.7352941 |
| wavelet-HLH | glszm | SmallAreaEmphasis                | 0.747308517 |
| wavelet-HLH | glszm | LowGrayLevelZoneEmphasis         | 0.010078973 |
| wavelet-HLH | glszm | ZoneEntropy                      | 5.56596921  |
| wavelet-HLH | glszm | SmallAreaLowGrayLevelEmphasis    | 0.009489917 |
| wavelet-HLH | ngtdm | Coarseness                       | 0.028611991 |
| wavelet-HLH | ngtdm | Complexity                       | 1801.449217 |
| wavelet-HLH | ngtdm | Strength                         | 8.385202136 |
| wavelet-HLH | ngtdm | Contrast                         | 0.362856692 |
| wavelet-HLH | ngtdm | Busyness                         | 0.050064841 |

| Image type | Feature Class | Feature Name                         |                                                                                                                                                                                                                                                                                                                                                                                                                   |
|------------|---------------|--------------------------------------|-------------------------------------------------------------------------------------------------------------------------------------------------------------------------------------------------------------------------------------------------------------------------------------------------------------------------------------------------------------------------------------------------------------------|
| general    | info          | BoundingBox                          | 502: RTSTRUCT: C99_DNU_segment_ITV_RUL<br>(0, 0, 2, 22, 20, 17)                                                                                                                                                                                                                                                                                                                                                   |
| general    | info          | EnabledImageTypes                    | {u'Original': {}, u'Wavelet': {}}                                                                                                                                                                                                                                                                                                                                                                                 |
|            |               |                                      | {'distances': [1], 'additionalInfo': True, 'force2D': False, 'interpolator': 'sitkBSpline', 'resampledPixelSpacing': [3.0], 'label': 1, 'normalizeScale': 1, 'normalize': False, 'force2Ddimension': 0, 'removeOutliers': None, 'minimumROISize': None, u'binWidth': 25.0, 'minimumROIDimensions': 1, u'correctMask': True, 'preCrop': False, u'symmetricalGLCM': True, 'resegmentRange': None, 'padDistance': 5} |
| general    | info          | GeneralSettings                      |                                                                                                                                                                                                                                                                                                                                                                                                                   |
| general    | info          | ImageHash                            | 3882593fc7fe3c6c5d737340c7f8eb90bba93eca                                                                                                                                                                                                                                                                                                                                                                          |
| general    | info          | ImageSpacing                         | (0.9765625000000002, 0.9765625000000002, 2.0)                                                                                                                                                                                                                                                                                                                                                                     |
| general    | info          | MaskHash                             | c3752f902a48a806622b51738d3869d32ecb87ff                                                                                                                                                                                                                                                                                                                                                                          |
| general    | info          | NumpyVersion                         | 1.13.1                                                                                                                                                                                                                                                                                                                                                                                                            |
| general    | info          | PyWaveletVersion                     | 0.5.2                                                                                                                                                                                                                                                                                                                                                                                                             |
| general    | info          | SimpleITKVersion                     | 1.1.0                                                                                                                                                                                                                                                                                                                                                                                                             |
| general    | info          | Version                              | 1.3.0.post102+g1b0eb74                                                                                                                                                                                                                                                                                                                                                                                            |
| general    | info          | VolumeNum                            | 1                                                                                                                                                                                                                                                                                                                                                                                                                 |
| general    | info          | VoxelNum                             | 3387                                                                                                                                                                                                                                                                                                                                                                                                              |
| original   | shape         | Maximum3DDiameter                    | 71.30918594                                                                                                                                                                                                                                                                                                                                                                                                       |
| original   | shape         | Maximum2DDiameterSlice               | 63.63961031                                                                                                                                                                                                                                                                                                                                                                                                       |
| original   | shape         | Sphericity                           | 0.730439281                                                                                                                                                                                                                                                                                                                                                                                                       |
| original   | shape         | MinorAxis                            | 54.40701829                                                                                                                                                                                                                                                                                                                                                                                                       |
| original   | shape         | Elongation                           | 0.965470212                                                                                                                                                                                                                                                                                                                                                                                                       |
| original   | shape         | SurfaceVolumeRatio                   | 0.146951385                                                                                                                                                                                                                                                                                                                                                                                                       |
| original   | shape         | Volume                               | 91449                                                                                                                                                                                                                                                                                                                                                                                                             |
| original   | shape         | MajorAxis                            | 56.352871                                                                                                                                                                                                                                                                                                                                                                                                         |
| original   | shape         | SurfaceArea                          | 13438.55722                                                                                                                                                                                                                                                                                                                                                                                                       |
| original   | shape         | Flatness                             | 0.768767191                                                                                                                                                                                                                                                                                                                                                                                                       |
| original   | shape         | LeastAxis                            | 43.32223834                                                                                                                                                                                                                                                                                                                                                                                                       |
| original   | shape         | Maximum2DDiameterColumn              | 63.07138812                                                                                                                                                                                                                                                                                                                                                                                                       |
| original   | shape         | Maximum2DDiameterRow                 | 66.06814664                                                                                                                                                                                                                                                                                                                                                                                                       |
| original   | gldm          | GrayLevelVariance                    | 41.9772994                                                                                                                                                                                                                                                                                                                                                                                                        |
| original   | gldm          | HighGrayLevelEmphasis                | 1534.965751                                                                                                                                                                                                                                                                                                                                                                                                       |
| original   | gldm          | DependenceEntropy                    | 6.353080651                                                                                                                                                                                                                                                                                                                                                                                                       |
| original   | gldm          | DependenceNonUniformity              | 246.5134337                                                                                                                                                                                                                                                                                                                                                                                                       |
| original   | gldm          | GrayLevelNonUniformity               | 700.447889                                                                                                                                                                                                                                                                                                                                                                                                        |
| original   | gldm          | SmallDependenceEmphasis              | 0.219606551                                                                                                                                                                                                                                                                                                                                                                                                       |
| original   | gldm          | SmallDependenceHighGrayLevelEmphasis | 234.7032074                                                                                                                                                                                                                                                                                                                                                                                                       |
| original   | gldm          | DependenceNonUniformityNormalized    | 0.072782236                                                                                                                                                                                                                                                                                                                                                                                                       |
| original   | gldm          | LargeDependenceEmphasis              | 91.12341305                                                                                                                                                                                                                                                                                                                                                                                                       |
| original   | gldm          | LargeDependenceLowGrayLevelEmphasis  | 0.054638649                                                                                                                                                                                                                                                                                                                                                                                                       |
| original   | gldm          | DependenceVariance                   | 31.48233686                                                                                                                                                                                                                                                                                                                                                                                                       |
| original   | gldm          | LargeDependenceHighGrayLevelEmphasis | 154339.1022                                                                                                                                                                                                                                                                                                                                                                                                       |
| original   | gldm          | SmallDependenceLowGrayLevelEmphasis  | 0.000816904                                                                                                                                                                                                                                                                                                                                                                                                       |
| original   | gldm          | LowGrayLevelEmphasis                 | 0.001313834                                                                                                                                                                                                                                                                                                                                                                                                       |
| original   | glcm          | JointAverage                         | 39.49319198                                                                                                                                                                                                                                                                                                                                                                                                       |

|          |            |                                  |              |
|----------|------------|----------------------------------|--------------|
| original | glcm       | SumAverage                       | 78.98638395  |
| original | glcm       | JointEntropy                     | 5.41549531   |
| original | glcm       | ClusterShade                     | -1935.02457  |
| original | glcm       | MaximumProbability               | 0.189718732  |
| original | glcm       | Idmn                             | 0.982946443  |
| original | glcm       | JointEnergy                      | 0.074102576  |
| original | glcm       | Contrast                         | 42.47947923  |
| original | glcm       | DifferenceEntropy                | 2.882789488  |
| original | glcm       | InverseVariance                  | 0.400137689  |
| original | glcm       | DifferenceVariance               | 32.92541009  |
| original | glcm       | Idn                              | 0.946080475  |
| original | glcm       | Idm                              | 0.512418442  |
| original | glcm       | Correlation                      | 0.273144648  |
| original | glcm       | Autocorrelation                  | 1567.930471  |
| original | glcm       | SumEntropy                       | 3.706249836  |
| original | glcm       | SumSquares                       | 29.44539177  |
| original | glcm       | ClusterProminence                | 74205.6153   |
| original | glcm       | Imc2                             | 0.621964566  |
| original | glcm       | Imc1                             | -0.088735868 |
| original | glcm       | DifferenceAverage                | 3.0825426    |
| original | glcm       | Id                               | 0.547650005  |
| original | glcm       | ClusterTendency                  | 75.30208786  |
| original | firstorder | InterquartileRange               | 43           |
| original | firstorder | Skewness                         | -2.717774935 |
| original | firstorder | Uniformity                       | 0.206804809  |
| original | firstorder | Median                           | 12           |
| original | firstorder | Energy                           | 96329667     |
| original | firstorder | RobustMeanAbsoluteDeviation      | 37.14522133  |
| original | firstorder | MeanAbsoluteDeviation            | 105.0672595  |
| original | firstorder | TotalEnergy                      | 2600901009   |
| original | firstorder | Maximum                          | 112          |
| original | firstorder | RootMeanSquared                  | 168.6445967  |
| original | firstorder | 90Percentile                     | 43.4         |
| original | firstorder | Minimum                          | -987         |
| original | firstorder | Entropy                          | 3.189455436  |
| original | firstorder | Range                            | 1099         |
| original | firstorder | Variance                         | 26216.15237  |
| original | firstorder | 10Percentile                     | -255.4       |
| original | firstorder | Kurtosis                         | 10.36422743  |
| original | firstorder | Mean                             | -47.16829052 |
| original | glrlm      | ShortRunLowGrayLevelEmphasis     | 0.001461612  |
| original | glrlm      | GrayLevelVariance                | 53.05618208  |
| original | glrlm      | LowGrayLevelRunEmphasis          | 0.001564577  |
| original | glrlm      | GrayLevelNonUniformityNormalized | 0.150573004  |
| original | glrlm      | RunVariance                      | 0.70860985   |
| original | glrlm      | GrayLevelNonUniformity           | 378.3662793  |
| original | glrlm      | LongRunEmphasis                  | 2.53273478   |
| original | glrlm      | ShortRunHighGrayLevelEmphasis    | 1189.870396  |
| original | glrlm      | RunLengthNonUniformity           | 1616.973737  |
| original | glrlm      | ShortRunEmphasis                 | 0.828782947  |
| original | glrlm      | LongRunHighGrayLevelEmphasis     | 4075.222631  |
| original | glrlm      | RunPercentage                    | 0.741432173  |
| original | glrlm      | LongRunLowGrayLevelEmphasis      | 0.002476951  |
| original | glrlm      | RunEntropy                       | 4.526851644  |
| original | glrlm      | HighGrayLevelRunEmphasis         | 1479.530332  |



|             |       |                                      |              |
|-------------|-------|--------------------------------------|--------------|
| original    | glrlm | RunLengthNonUniformityNormalized     | 0.643159411  |
| original    | glszm | GrayLevelVariance                    | 88.1726519   |
| original    | glszm | ZoneVariance                         | 2884.265188  |
| original    | glszm | GrayLevelNonUniformityNormalized     | 0.038284684  |
| original    | glszm | SizeZoneNonUniformityNormalized      | 0.67012245   |
| original    | glszm | SizeZoneNonUniformity                | 507.2826948  |
| original    | glszm | GrayLevelNonUniformity               | 28.98150594  |
| original    | glszm | LargeAreaEmphasis                    | 2904.284016  |
| original    | glszm | SmallAreaHighGrayLevelEmphasis       | 834.658628   |
| original    | glszm | ZonePercentage                       | 0.223501624  |
| original    | glszm | LargeAreaLowGrayLevelEmphasis        | 1.709814641  |
| original    | glszm | LargeAreaHighGrayLevelEmphasis       | 4945436.361  |
| original    | glszm | HighGrayLevelZoneEmphasis            | 1045.081902  |
| original    | glszm | SmallAreaEmphasis                    | 0.843406567  |
| original    | glszm | LowGrayLevelZoneEmphasis             | 0.003715638  |
| original    | glszm | ZoneEntropy                          | 5.826826053  |
| original    | glszm | SmallAreaLowGrayLevelEmphasis        | 0.003545373  |
| original    | ngtdm | Coarseness                           | 0.001099115  |
| original    | ngtdm | Complexity                           | 2832.972176  |
| original    | ngtdm | Strength                             | 3.97924093   |
| original    | ngtdm | Contrast                             | 0.126712873  |
| original    | ngtdm | Busyness                             | 0.313695569  |
| wavelet-HHH | gldm  | GrayLevelVariance                    | 11.94589239  |
| wavelet-HHH | gldm  | HighGrayLevelEmphasis                | 662.2937703  |
| wavelet-HHH | gldm  | DependenceEntropy                    | 6.243927591  |
| wavelet-HHH | gldm  | DependenceNonUniformity              | 309.173605   |
| wavelet-HHH | gldm  | GrayLevelNonUniformity               | 581.3625627  |
| wavelet-HHH | gldm  | SmallDependenceEmphasis              | 0.229806161  |
| wavelet-HHH | gldm  | SmallDependenceHighGrayLevelEmphasis | 156.843297   |
| wavelet-HHH | gldm  | DependenceNonUniformityNormalized    | 0.091282434  |
| wavelet-HHH | gldm  | LargeDependenceEmphasis              | 65.05845881  |
| wavelet-HHH | gldm  | LargeDependenceLowGrayLevelEmphasis  | 0.100758682  |
| wavelet-HHH | gldm  | DependenceVariance                   | 23.20095898  |
| wavelet-HHH | gldm  | LargeDependenceHighGrayLevelEmphasis | 42348.6274   |
| wavelet-HHH | gldm  | SmallDependenceLowGrayLevelEmphasis  | 0.000776613  |
| wavelet-HHH | gldm  | LowGrayLevelEmphasis                 | 0.001981236  |
| wavelet-HHH | glcm  | JointAverage                         | 25.50798408  |
| wavelet-HHH | glcm  | SumAverage                           | 51.01596817  |
| wavelet-HHH | glcm  | JointEntropy                         | 5.957313643  |
| wavelet-HHH | glcm  | ClusterShade                         | 8.580378585  |
| wavelet-HHH | glcm  | MaximumProbability                   | 0.130386238  |
| wavelet-HHH | glcm  | Idmn                                 | 0.992932084  |
| wavelet-HHH | glcm  | JointEnergy                          | 0.056978869  |
| wavelet-HHH | glcm  | Contrast                             | 21.49967347  |
| wavelet-HHH | glcm  | DifferenceEntropy                    | 2.960579759  |
| wavelet-HHH | glcm  | InverseVariance                      | 0.380184394  |
| wavelet-HHH | glcm  | DifferenceVariance                   | 14.40778287  |
| wavelet-HHH | glcm  | Idn                                  | 0.956378183  |
| wavelet-HHH | glcm  | Idm                                  | 0.451184689  |
| wavelet-HHH | glcm  | Correlation                          | -0.037195028 |
| wavelet-HHH | glcm  | Autocorrelation                      | 650.2428928  |
| wavelet-HHH | glcm  | SumEntropy                           | 3.662782058  |
| wavelet-HHH | glcm  | SumSquares                           | 10.33504974  |
| wavelet-HHH | glcm  | ClusterProminence                    | 4783.74671   |
| wavelet-HHH | glcm  | Imc2                                 | 0.696016379  |

|             |            |                                  |              |
|-------------|------------|----------------------------------|--------------|
| wavelet-HHH | glcm       | Imc1                             | -0.107126687 |
| wavelet-HHH | glcm       | DifferenceAverage                | 2.638644961  |
| wavelet-HHH | glcm       | Id                               | 0.501476113  |
| wavelet-HHH | glcm       | ClusterTendency                  | 19.84052548  |
| wavelet-HHH | firstorder | InterquartileRange               | 42.12141121  |
| wavelet-HHH | firstorder | Skewness                         | 0.099524435  |
| wavelet-HHH | firstorder | Uniformity                       | 0.17164528   |
| wavelet-HHH | firstorder | Median                           | 0.626881317  |
| wavelet-HHH | firstorder | Energy                           | 25116469.74  |
| wavelet-HHH | firstorder | RobustMeanAbsoluteDeviation      | 21.74399085  |
| wavelet-HHH | firstorder | MeanAbsoluteDeviation            | 50.03491332  |
| wavelet-HHH | firstorder | TotalEnergy                      | 678144683    |
| wavelet-HHH | firstorder | Maximum                          | 680.0676569  |
| wavelet-HHH | firstorder | RootMeanSquared                  | 86.11359102  |
| wavelet-HHH | firstorder | 90Percentile                     | 74.87828398  |
| wavelet-HHH | firstorder | Minimum                          | -618.5746834 |
| wavelet-HHH | firstorder | Entropy                          | 3.324006761  |
| wavelet-HHH | firstorder | Range                            | 1298.64234   |
| wavelet-HHH | firstorder | Variance                         | 7415.55054   |
| wavelet-HHH | firstorder | 10Percentile                     | -83.60160565 |
| wavelet-HHH | firstorder | Kurtosis                         | 10.75279043  |
| wavelet-HHH | firstorder | Mean                             | -0.004230586 |
| wavelet-HHH | glrlm      | ShortRunLowGrayLevelEmphasis     | 0.001877028  |
| wavelet-HHH | glrlm      | GrayLevelVariance                | 14.84102442  |
| wavelet-HHH | glrlm      | LowGrayLevelRunEmphasis          | 0.002098525  |
| wavelet-HHH | glrlm      | GrayLevelNonUniformityNormalized | 0.131865963  |
| wavelet-HHH | glrlm      | RunVariance                      | 0.476258764  |
| wavelet-HHH | glrlm      | GrayLevelNonUniformity           | 353.4323161  |
| wavelet-HHH | glrlm      | LongRunEmphasis                  | 2.088767069  |
| wavelet-HHH | glrlm      | ShortRunHighGrayLevelEmphasis    | 571.494213   |
| wavelet-HHH | glrlm      | RunLengthNonUniformity           | 1852.077641  |
| wavelet-HHH | glrlm      | ShortRunEmphasis                 | 0.856805424  |
| wavelet-HHH | glrlm      | LongRunHighGrayLevelEmphasis     | 1374.598039  |
| wavelet-HHH | glrlm      | RunPercentage                    | 0.789625491  |
| wavelet-HHH | glrlm      | LongRunLowGrayLevelEmphasis      | 0.003779264  |
| wavelet-HHH | glrlm      | RunEntropy                       | 4.404026608  |
| wavelet-HHH | glrlm      | HighGrayLevelRunEmphasis         | 664.982807   |
| wavelet-HHH | glrlm      | RunLengthNonUniformityNormalized | 0.691349948  |
| wavelet-HHH | glszm      | GrayLevelVariance                | 38.7162814   |
| wavelet-HHH | glszm      | ZoneVariance                     | 1998.214469  |
| wavelet-HHH | glszm      | GrayLevelNonUniformityNormalized | 0.053665064  |
| wavelet-HHH | glszm      | SizeZoneNonUniformityNormalized  | 0.509865168  |
| wavelet-HHH | glszm      | SizeZoneNonUniformity            | 423.6979543  |
| wavelet-HHH | glszm      | GrayLevelNonUniformity           | 44.59566787  |
| wavelet-HHH | glszm      | LargeAreaEmphasis                | 2014.826715  |
| wavelet-HHH | glszm      | SmallAreaHighGrayLevelEmphasis   | 510.3392859  |
| wavelet-HHH | glszm      | ZonePercentage                   | 0.245349867  |
| wavelet-HHH | glszm      | LargeAreaLowGrayLevelEmphasis    | 3.102555698  |
| wavelet-HHH | glszm      | LargeAreaHighGrayLevelEmphasis   | 1311453.32   |
| wavelet-HHH | glszm      | HighGrayLevelZoneEmphasis        | 683.2406739  |
| wavelet-HHH | glszm      | SmallAreaEmphasis                | 0.741754393  |
| wavelet-HHH | glszm      | LowGrayLevelZoneEmphasis         | 0.00328235   |
| wavelet-HHH | glszm      | ZoneEntropy                      | 5.969026677  |
| wavelet-HHH | glszm      | SmallAreaLowGrayLevelEmphasis    | 0.002850744  |
| wavelet-HHH | ngtdm      | Coarseness                       | 2.38E-03     |

|             |            |                                      |              |
|-------------|------------|--------------------------------------|--------------|
| wavelet-HHH | ngtdm      | Complexity                           | 1761.128533  |
| wavelet-HHH | ngtdm      | Strength                             | 2.141909787  |
| wavelet-HHH | ngtdm      | Contrast                             | 0.028535986  |
| wavelet-HHH | ngtdm      | Busyness                             | 0.235417652  |
| wavelet-HLL | gldm       | GrayLevelVariance                    | 42.25191564  |
| wavelet-HLL | gldm       | HighGrayLevelEmphasis                | 727.7732507  |
| wavelet-HLL | gldm       | DependenceEntropy                    | 6.90440662   |
| wavelet-HLL | gldm       | DependenceNonUniformity              | 414.7354591  |
| wavelet-HLL | gldm       | GrayLevelNonUniformity               | 330.4809566  |
| wavelet-HLL | gldm       | SmallDependenceEmphasis              | 0.31062792   |
| wavelet-HLL | gldm       | SmallDependenceHighGrayLevelEmphasis | 233.4537133  |
| wavelet-HLL | gldm       | DependenceNonUniformityNormalized    | 0.122449206  |
| wavelet-HLL | gldm       | LargeDependenceEmphasis              | 46.00974314  |
| wavelet-HLL | gldm       | LargeDependenceLowGrayLevelEmphasis  | 0.062913713  |
| wavelet-HLL | gldm       | DependenceVariance                   | 20.00185115  |
| wavelet-HLL | gldm       | LargeDependenceHighGrayLevelEmphasis | 34791.57721  |
| wavelet-HLL | gldm       | SmallDependenceLowGrayLevelEmphasis  | 0.001269879  |
| wavelet-HLL | gldm       | LowGrayLevelEmphasis                 | 0.002402509  |
| wavelet-HLL | glcm       | JointAverage                         | 26.12279736  |
| wavelet-HLL | glcm       | SumAverage                           | 52.24559471  |
| wavelet-HLL | glcm       | JointEntropy                         | 7.397961535  |
| wavelet-HLL | glcm       | ClusterShade                         | 112.3044372  |
| wavelet-HLL | glcm       | MaximumProbability                   | 0.088925502  |
| wavelet-HLL | glcm       | Idmn                                 | 0.98548874   |
| wavelet-HLL | glcm       | JointEnergy                          | 0.026930273  |
| wavelet-HLL | glcm       | Contrast                             | 59.86094801  |
| wavelet-HLL | glcm       | DifferenceEntropy                    | 3.617017006  |
| wavelet-HLL | glcm       | InverseVariance                      | 0.308767753  |
| wavelet-HLL | glcm       | DifferenceVariance                   | 38.89792091  |
| wavelet-HLL | glcm       | Idn                                  | 0.937740468  |
| wavelet-HLL | glcm       | Idm                                  | 0.353620939  |
| wavelet-HLL | glcm       | Correlation                          | 0.151738627  |
| wavelet-HLL | glcm       | Autocorrelation                      | 688.3527408  |
| wavelet-HLL | glcm       | SumEntropy                           | 4.630253275  |
| wavelet-HLL | glcm       | SumSquares                           | 35.87923615  |
| wavelet-HLL | glcm       | ClusterProminence                    | 56388.39568  |
| wavelet-HLL | glcm       | Imc2                                 | 0.828266335  |
| wavelet-HLL | glcm       | Imc1                                 | -0.15003987  |
| wavelet-HLL | glcm       | DifferenceAverage                    | 4.485481103  |
| wavelet-HLL | glcm       | Id                                   | 0.41466518   |
| wavelet-HLL | glcm       | ClusterTendency                      | 83.65599658  |
| wavelet-HLL | firstorder | InterquartileRange                   | 105.7699378  |
| wavelet-HLL | firstorder | Skewness                             | 0.333522709  |
| wavelet-HLL | firstorder | Uniformity                           | 0.097573356  |
| wavelet-HLL | firstorder | Median                               | -10.99607914 |
| wavelet-HLL | firstorder | Energy                               | 93019065.63  |
| wavelet-HLL | firstorder | RobustMeanAbsoluteDeviation          | 52.34287121  |
| wavelet-HLL | firstorder | MeanAbsoluteDeviation                | 104.6108369  |
| wavelet-HLL | firstorder | TotalEnergy                          | 2511514772   |
| wavelet-HLL | firstorder | Maximum                              | 813.6536791  |
| wavelet-HLL | firstorder | RootMeanSquared                      | 165.7213216  |
| wavelet-HLL | firstorder | 90Percentile                         | 109.2668735  |
| wavelet-HLL | firstorder | Minimum                              | -650.5280281 |
| wavelet-HLL | firstorder | Entropy                              | 4.231643449  |
| wavelet-HLL | firstorder | Range                                | 1464.181707  |

|             |            |                                      |              |
|-------------|------------|--------------------------------------|--------------|
| wavelet-HLL | firstorder | Variance                             | 26385.4203   |
| wavelet-HLL | firstorder | 10Percentile                         | -231.4408947 |
| wavelet-HLL | firstorder | Kurtosis                             | 6.652872837  |
| wavelet-HLL | firstorder | Mean                                 | -32.83498329 |
| wavelet-HLL | glrlm      | ShortRunLowGrayLevelEmphasis         | 0.002439755  |
| wavelet-HLL | glrlm      | GrayLevelVariance                    | 49.03559852  |
| wavelet-HLL | glrlm      | LowGrayLevelRunEmphasis              | 0.002590734  |
| wavelet-HLL | glrlm      | GrayLevelNonUniformityNormalized     | 0.074512449  |
| wavelet-HLL | glrlm      | RunVariance                          | 0.341896685  |
| wavelet-HLL | glrlm      | GrayLevelNonUniformity               | 213.2005521  |
| wavelet-HLL | glrlm      | LongRunEmphasis                      | 1.762975944  |
| wavelet-HLL | glrlm      | ShortRunHighGrayLevelEmphasis        | 647.7018926  |
| wavelet-HLL | glrlm      | RunLengthNonUniformity               | 2190.285215  |
| wavelet-HLL | glrlm      | ShortRunEmphasis                     | 0.89569618   |
| wavelet-HLL | glrlm      | LongRunHighGrayLevelEmphasis         | 1296.019983  |
| wavelet-HLL | glrlm      | RunPercentage                        | 0.842315641  |
| wavelet-HLL | glrlm      | LongRunLowGrayLevelEmphasis          | 0.00365088   |
| wavelet-HLL | glrlm      | RunEntropy                           | 5.076134088  |
| wavelet-HLL | glrlm      | HighGrayLevelRunEmphasis             | 724.6725603  |
| wavelet-HLL | glrlm      | RunLengthNonUniformityNormalized     | 0.765501877  |
| wavelet-HLL | glszm      | GrayLevelVariance                    | 96.01390141  |
| wavelet-HLL | glszm      | ZoneVariance                         | 698.7390715  |
| wavelet-HLL | glszm      | GrayLevelNonUniformityNormalized     | 0.031385371  |
| wavelet-HLL | glszm      | SizeZoneNonUniformityNormalized      | 0.530367136  |
| wavelet-HLL | glszm      | SizeZoneNonUniformity                | 615.7562446  |
| wavelet-HLL | glszm      | GrayLevelNonUniformity               | 36.43841516  |
| wavelet-HLL | glszm      | LargeAreaEmphasis                    | 707.2497847  |
| wavelet-HLL | glszm      | SmallAreaHighGrayLevelEmphasis       | 579.0181848  |
| wavelet-HLL | glszm      | ZonePercentage                       | 0.342781222  |
| wavelet-HLL | glszm      | LargeAreaLowGrayLevelEmphasis        | 0.939813779  |
| wavelet-HLL | glszm      | LargeAreaHighGrayLevelEmphasis       | 535358.9027  |
| wavelet-HLL | glszm      | HighGrayLevelZoneEmphasis            | 744.0913006  |
| wavelet-HLL | glszm      | SmallAreaEmphasis                    | 0.756510296  |
| wavelet-HLL | glszm      | LowGrayLevelZoneEmphasis             | 0.003977746  |
| wavelet-HLL | glszm      | ZoneEntropy                          | 6.537630237  |
| wavelet-HLL | glszm      | SmallAreaLowGrayLevelEmphasis        | 0.00340332   |
| wavelet-HLL | ngtdm      | Coarseness                           | 0.002168649  |
| wavelet-HLL | ngtdm      | Complexity                           | 4533.852791  |
| wavelet-HLL | ngtdm      | Strength                             | 2.946121428  |
| wavelet-HLL | ngtdm      | Contrast                             | 0.098189969  |
| wavelet-HLL | ngtdm      | Busyness                             | 0.215206173  |
| wavelet-LHL | gldm       | GrayLevelVariance                    | 65.59687961  |
| wavelet-LHL | gldm       | HighGrayLevelEmphasis                | 1146.971656  |
| wavelet-LHL | gldm       | DependenceEntropy                    | 6.937772415  |
| wavelet-LHL | gldm       | DependenceNonUniformity              | 435.8928255  |
| wavelet-LHL | gldm       | GrayLevelNonUniformity               | 338.3303809  |
| wavelet-LHL | gldm       | SmallDependenceEmphasis              | 0.330838092  |
| wavelet-LHL | gldm       | SmallDependenceHighGrayLevelEmphasis | 412.1627438  |
| wavelet-LHL | gldm       | DependenceNonUniformityNormalized    | 0.128695845  |
| wavelet-LHL | gldm       | LargeDependenceEmphasis              | 43.64363744  |
| wavelet-LHL | gldm       | LargeDependenceLowGrayLevelEmphasis  | 0.040016811  |
| wavelet-LHL | gldm       | DependenceVariance                   | 18.86164252  |
| wavelet-LHL | gldm       | LargeDependenceHighGrayLevelEmphasis | 49106.95394  |
| wavelet-LHL | gldm       | SmallDependenceLowGrayLevelEmphasis  | 0.000864904  |
| wavelet-LHL | gldm       | LowGrayLevelEmphasis                 | 0.001563598  |

|             |            |                                  |              |
|-------------|------------|----------------------------------|--------------|
| wavelet-LHL | glcm       | JointAverage                     | 32.72927284  |
| wavelet-LHL | glcm       | SumAverage                       | 65.45854567  |
| wavelet-LHL | glcm       | JointEntropy                     | 7.423841909  |
| wavelet-LHL | glcm       | ClusterShade                     | 1908.561608  |
| wavelet-LHL | glcm       | MaximumProbability               | 0.087243837  |
| wavelet-LHL | glcm       | Idmn                             | 0.987502454  |
| wavelet-LHL | glcm       | JointEnergy                      | 0.027032818  |
| wavelet-LHL | glcm       | Contrast                         | 94.35097149  |
| wavelet-LHL | glcm       | DifferenceEntropy                | 3.699159163  |
| wavelet-LHL | glcm       | InverseVariance                  | 0.315874852  |
| wavelet-LHL | glcm       | DifferenceVariance               | 67.17813989  |
| wavelet-LHL | glcm       | Idn                              | 0.947127716  |
| wavelet-LHL | glcm       | Idm                              | 0.352370327  |
| wavelet-LHL | glcm       | Correlation                      | 0.142307532  |
| wavelet-LHL | glcm       | Autocorrelation                  | 1079.955999  |
| wavelet-LHL | glcm       | SumEntropy                       | 4.680863989  |
| wavelet-LHL | glcm       | SumSquares                       | 55.91675911  |
| wavelet-LHL | glcm       | ClusterProminence                | 217200.3853  |
| wavelet-LHL | glcm       | Imc2                             | 0.874625284  |
| wavelet-LHL | glcm       | Imc1                             | -0.180994078 |
| wavelet-LHL | glcm       | DifferenceAverage                | 5.092709773  |
| wavelet-LHL | glcm       | Id                               | 0.412080942  |
| wavelet-LHL | glcm       | ClusterTendency                  | 129.3160649  |
| wavelet-LHL | firstorder | InterquartileRange               | 93.12726237  |
| wavelet-LHL | firstorder | Skewness                         | 0.982819546  |
| wavelet-LHL | firstorder | Uniformity                       | 0.099890871  |
| wavelet-LHL | firstorder | Median                           | -7.04469002  |
| wavelet-LHL | firstorder | Energy                           | 139351598.3  |
| wavelet-LHL | firstorder | RobustMeanAbsoluteDeviation      | 48.97438066  |
| wavelet-LHL | firstorder | MeanAbsoluteDeviation            | 115.9636438  |
| wavelet-LHL | firstorder | TotalEnergy                      | 3762493155   |
| wavelet-LHL | firstorder | Maximum                          | 1171.784186  |
| wavelet-LHL | firstorder | RootMeanSquared                  | 202.8375606  |
| wavelet-LHL | firstorder | 90Percentile                     | 139.6954138  |
| wavelet-LHL | firstorder | Minimum                          | -809.2380154 |
| wavelet-LHL | firstorder | Entropy                          | 4.328797757  |
| wavelet-LHL | firstorder | Range                            | 1981.022202  |
| wavelet-LHL | firstorder | Variance                         | 40903.73762  |
| wavelet-LHL | firstorder | 10Percentile                     | -225.941476  |
| wavelet-LHL | firstorder | Kurtosis                         | 8.727693904  |
| wavelet-LHL | firstorder | Mean                             | -15.47056413 |
| wavelet-LHL | glrlm      | ShortRunLowGrayLevelEmphasis     | 0.001582883  |
| wavelet-LHL | glrlm      | GrayLevelVariance                | 76.39086178  |
| wavelet-LHL | glrlm      | LowGrayLevelRunEmphasis          | 0.001678927  |
| wavelet-LHL | glrlm      | GrayLevelNonUniformityNormalized | 0.076317576  |
| wavelet-LHL | glrlm      | RunVariance                      | 0.321224773  |
| wavelet-LHL | glrlm      | GrayLevelNonUniformity           | 219.5079653  |
| wavelet-LHL | glrlm      | LongRunEmphasis                  | 1.724692038  |
| wavelet-LHL | glrlm      | ShortRunHighGrayLevelEmphasis    | 1040.158909  |
| wavelet-LHL | glrlm      | RunLengthNonUniformity           | 2217.700345  |
| wavelet-LHL | glrlm      | ShortRunEmphasis                 | 0.898674359  |
| wavelet-LHL | glrlm      | LongRunHighGrayLevelEmphasis     | 1963.332035  |
| wavelet-LHL | glrlm      | RunPercentage                    | 0.846994163  |
| wavelet-LHL | glrlm      | LongRunLowGrayLevelEmphasis      | 0.002348679  |
| wavelet-LHL | glrlm      | RunEntropy                       | 5.176045436  |

|             |       |                                      |              |
|-------------|-------|--------------------------------------|--------------|
| wavelet-LHL | glrlm | HighGrayLevelRunEmphasis             | 1152.772759  |
| wavelet-LHL | glrlm | RunLengthNonUniformityNormalized     | 0.771215843  |
| wavelet-LHL | glszm | GrayLevelVariance                    | 152.1494388  |
| wavelet-LHL | glszm | ZoneVariance                         | 697.6752631  |
| wavelet-LHL | glszm | GrayLevelNonUniformityNormalized     | 0.028143798  |
| wavelet-LHL | glszm | SizeZoneNonUniformityNormalized      | 0.577086721  |
| wavelet-LHL | glszm | SizeZoneNonUniformity                | 702.8916256  |
| wavelet-LHL | glszm | GrayLevelNonUniformity               | 34.27914614  |
| wavelet-LHL | glszm | LargeAreaEmphasis                    | 705.408046   |
| wavelet-LHL | glszm | SmallAreaHighGrayLevelEmphasis       | 1003.674551  |
| wavelet-LHL | glszm | ZonePercentage                       | 0.359610275  |
| wavelet-LHL | glszm | LargeAreaLowGrayLevelEmphasis        | 0.630159863  |
| wavelet-LHL | glszm | LargeAreaHighGrayLevelEmphasis       | 793478.0846  |
| wavelet-LHL | glszm | HighGrayLevelZoneEmphasis            | 1233.144499  |
| wavelet-LHL | glszm | SmallAreaEmphasis                    | 0.787685964  |
| wavelet-LHL | glszm | LowGrayLevelZoneEmphasis             | 0.00254784   |
| wavelet-LHL | glszm | ZoneEntropy                          | 6.617694907  |
| wavelet-LHL | glszm | SmallAreaLowGrayLevelEmphasis        | 0.002242734  |
| wavelet-LHL | ngtdm | Coarseness                           | 0.002259507  |
| wavelet-LHL | ngtdm | Complexity                           | 9574.289835  |
| wavelet-LHL | ngtdm | Strength                             | 6.026189407  |
| wavelet-LHL | ngtdm | Contrast                             | 0.102724777  |
| wavelet-LHL | ngtdm | Busyness                             | 0.120154936  |
| wavelet-LHH | gldm  | GrayLevelVariance                    | 24.10514438  |
| wavelet-LHH | gldm  | HighGrayLevelEmphasis                | 1444.306761  |
| wavelet-LHH | gldm  | DependenceEntropy                    | 6.53148251   |
| wavelet-LHH | gldm  | DependenceNonUniformity              | 347.2639504  |
| wavelet-LHH | gldm  | GrayLevelNonUniformity               | 462.742545   |
| wavelet-LHH | gldm  | SmallDependenceEmphasis              | 0.277061672  |
| wavelet-LHH | gldm  | SmallDependenceHighGrayLevelEmphasis | 414.7837753  |
| wavelet-LHH | gldm  | DependenceNonUniformityNormalized    | 0.102528477  |
| wavelet-LHH | gldm  | LargeDependenceEmphasis              | 57.61883673  |
| wavelet-LHH | gldm  | LargeDependenceLowGrayLevelEmphasis  | 0.041486308  |
| wavelet-LHH | gldm  | DependenceVariance                   | 22.13776794  |
| wavelet-LHH | gldm  | LargeDependenceHighGrayLevelEmphasis | 80938.91084  |
| wavelet-LHH | gldm  | SmallDependenceLowGrayLevelEmphasis  | 0.000526399  |
| wavelet-LHH | gldm  | LowGrayLevelEmphasis                 | 0.001047363  |
| wavelet-LHH | glcm  | JointAverage                         | 37.60264938  |
| wavelet-LHH | glcm  | SumAverage                           | 75.20529876  |
| wavelet-LHH | glcm  | JointEntropy                         | 6.571544631  |
| wavelet-LHH | glcm  | ClusterShade                         | 101.3614747  |
| wavelet-LHH | glcm  | MaximumProbability                   | 0.111951946  |
| wavelet-LHH | glcm  | Idmn                                 | 0.991010618  |
| wavelet-LHH | glcm  | JointEnergy                          | 0.042794032  |
| wavelet-LHH | glcm  | Contrast                             | 40.7989638   |
| wavelet-LHH | glcm  | DifferenceEntropy                    | 3.280170455  |
| wavelet-LHH | glcm  | InverseVariance                      | 0.349777065  |
| wavelet-LHH | glcm  | DifferenceVariance                   | 28.1528361   |
| wavelet-LHH | glcm  | Idn                                  | 0.952873534  |
| wavelet-LHH | glcm  | Idm                                  | 0.413189172  |
| wavelet-LHH | glcm  | Correlation                          | -0.005016356 |
| wavelet-LHH | glcm  | Autocorrelation                      | 1413.936649  |
| wavelet-LHH | glcm  | SumEntropy                           | 4.066869693  |
| wavelet-LHH | glcm  | SumSquares                           | 20.36955418  |
| wavelet-LHH | glcm  | ClusterProminence                    | 20859.80237  |

|             |            |                                  |              |
|-------------|------------|----------------------------------|--------------|
| wavelet-LHH | glcm       | Imc2                             | 0.775946331  |
| wavelet-LHH | glcm       | Imc1                             | -0.133244585 |
| wavelet-LHH | glcm       | DifferenceAverage                | 3.513708668  |
| wavelet-LHH | glcm       | Id                               | 0.46702759   |
| wavelet-LHH | glcm       | ClusterTendency                  | 40.67925292  |
| wavelet-LHH | firstorder | InterquartileRange               | 53.72072574  |
| wavelet-LHH | firstorder | Skewness                         | 0.199415587  |
| wavelet-LHH | firstorder | Uniformity                       | 0.136623131  |
| wavelet-LHH | firstorder | Median                           | -0.858458463 |
| wavelet-LHH | firstorder | Energy                           | 50903451.52  |
| wavelet-LHH | firstorder | RobustMeanAbsoluteDeviation      | 28.9739357   |
| wavelet-LHH | firstorder | MeanAbsoluteDeviation            | 70.03692286  |
| wavelet-LHH | firstorder | TotalEnergy                      | 1374393191   |
| wavelet-LHH | firstorder | Maximum                          | 659.3048208  |
| wavelet-LHH | firstorder | RootMeanSquared                  | 122.5930972  |
| wavelet-LHH | firstorder | 90Percentile                     | 126.3575604  |
| wavelet-LHH | firstorder | Minimum                          | -912.9234771 |
| wavelet-LHH | firstorder | Entropy                          | 3.74113608   |
| wavelet-LHH | firstorder | Range                            | 1572.228298  |
| wavelet-LHH | firstorder | Variance                         | 15006.04594  |
| wavelet-LHH | firstorder | 10Percentile                     | -95.83008074 |
| wavelet-LHH | firstorder | Kurtosis                         | 9.890702688  |
| wavelet-LHH | firstorder | Mean                             | 4.798075539  |
| wavelet-LHH | glrlm      | ShortRunLowGrayLevelEmphasis     | 0.001034118  |
| wavelet-LHH | glrlm      | GrayLevelVariance                | 29.28354173  |
| wavelet-LHH | glrlm      | LowGrayLevelRunEmphasis          | 0.00112617   |
| wavelet-LHH | glrlm      | GrayLevelNonUniformityNormalized | 0.103602291  |
| wavelet-LHH | glrlm      | RunVariance                      | 0.422271847  |
| wavelet-LHH | glrlm      | GrayLevelNonUniformity           | 284.5587921  |
| wavelet-LHH | glrlm      | LongRunEmphasis                  | 1.956980245  |
| wavelet-LHH | glrlm      | ShortRunHighGrayLevelEmphasis    | 1272.344771  |
| wavelet-LHH | glrlm      | RunLengthNonUniformity           | 1973.137494  |
| wavelet-LHH | glrlm      | ShortRunEmphasis                 | 0.871590295  |
| wavelet-LHH | glrlm      | LongRunHighGrayLevelEmphasis     | 2798.767821  |
| wavelet-LHH | glrlm      | RunPercentage                    | 0.809361586  |
| wavelet-LHH | glrlm      | LongRunLowGrayLevelEmphasis      | 0.001810607  |
| wavelet-LHH | glrlm      | RunEntropy                       | 4.746174901  |
| wavelet-LHH | glrlm      | HighGrayLevelRunEmphasis         | 1453.175379  |
| wavelet-LHH | glrlm      | RunLengthNonUniformityNormalized | 0.718502812  |
| wavelet-LHH | glszm      | GrayLevelVariance                | 66.41024333  |
| wavelet-LHH | glszm      | ZoneVariance                     | 1284.641525  |
| wavelet-LHH | glszm      | GrayLevelNonUniformityNormalized | 0.040989795  |
| wavelet-LHH | glszm      | SizeZoneNonUniformityNormalized  | 0.581953486  |
| wavelet-LHH | glszm      | SizeZoneNonUniformity            | 580.7895792  |
| wavelet-LHH | glszm      | GrayLevelNonUniformity           | 40.90781563  |
| wavelet-LHH | glszm      | LargeAreaEmphasis                | 1296.159319  |
| wavelet-LHH | glszm      | SmallAreaHighGrayLevelEmphasis   | 1188.168982  |
| wavelet-LHH | glszm      | ZonePercentage                   | 0.294656038  |
| wavelet-LHH | glszm      | LargeAreaLowGrayLevelEmphasis    | 0.926285139  |
| wavelet-LHH | glszm      | LargeAreaHighGrayLevelEmphasis   | 1817878.414  |
| wavelet-LHH | glszm      | HighGrayLevelZoneEmphasis        | 1508.583166  |
| wavelet-LHH | glszm      | SmallAreaEmphasis                | 0.790569098  |
| wavelet-LHH | glszm      | LowGrayLevelZoneEmphasis         | 0.001830309  |
| wavelet-LHH | glszm      | ZoneEntropy                      | 6.089010656  |
| wavelet-LHH | glszm      | SmallAreaLowGrayLevelEmphasis    | 0.001676888  |

|             |            |                                      |              |
|-------------|------------|--------------------------------------|--------------|
| wavelet-LHH | ngtdm      | Coarseness                           | 0.002475947  |
| wavelet-LHH | ngtdm      | Complexity                           | 3597.623017  |
| wavelet-LHH | ngtdm      | Strength                             | 3.073807461  |
| wavelet-LHH | ngtdm      | Contrast                             | 0.049577444  |
| wavelet-LHH | ngtdm      | Busyness                             | 0.125104449  |
| wavelet-LLH | gldm       | GrayLevelVariance                    | 51.46536999  |
| wavelet-LLH | gldm       | HighGrayLevelEmphasis                | 1127.003248  |
| wavelet-LLH | gldm       | DependenceEntropy                    | 6.826530948  |
| wavelet-LLH | gldm       | DependenceNonUniformity              | 396.3947446  |
| wavelet-LLH | gldm       | GrayLevelNonUniformity               | 395.2314733  |
| wavelet-LLH | gldm       | SmallDependenceEmphasis              | 0.30915077   |
| wavelet-LLH | gldm       | SmallDependenceHighGrayLevelEmphasis | 376.127822   |
| wavelet-LLH | gldm       | DependenceNonUniformityNormalized    | 0.117034173  |
| wavelet-LLH | gldm       | LargeDependenceEmphasis              | 56.45084145  |
| wavelet-LLH | gldm       | LargeDependenceLowGrayLevelEmphasis  | 0.050992186  |
| wavelet-LLH | gldm       | DependenceVariance                   | 24.27947181  |
| wavelet-LLH | gldm       | LargeDependenceHighGrayLevelEmphasis | 63579.86123  |
| wavelet-LLH | gldm       | SmallDependenceLowGrayLevelEmphasis  | 0.000768321  |
| wavelet-LLH | gldm       | LowGrayLevelEmphasis                 | 0.00145152   |
| wavelet-LLH | glcm       | JointAverage                         | 32.67962151  |
| wavelet-LLH | glcm       | SumAverage                           | 65.35924302  |
| wavelet-LLH | glcm       | JointEntropy                         | 7.109145404  |
| wavelet-LLH | glcm       | ClusterShade                         | 1166.020048  |
| wavelet-LLH | glcm       | MaximumProbability                   | 0.110999563  |
| wavelet-LLH | glcm       | Idmn                                 | 0.991580203  |
| wavelet-LLH | glcm       | JointEnergy                          | 0.037472151  |
| wavelet-LLH | glcm       | Contrast                             | 74.00955982  |
| wavelet-LLH | glcm       | DifferenceEntropy                    | 3.572441237  |
| wavelet-LLH | glcm       | InverseVariance                      | 0.319931781  |
| wavelet-LLH | glcm       | DifferenceVariance                   | 52.80185729  |
| wavelet-LLH | glcm       | Idn                                  | 0.95582761   |
| wavelet-LLH | glcm       | Idm                                  | 0.383959341  |
| wavelet-LLH | glcm       | Correlation                          | 0.105448399  |
| wavelet-LLH | glcm       | Autocorrelation                      | 1073.400943  |
| wavelet-LLH | glcm       | SumEntropy                           | 4.510161931  |
| wavelet-LLH | glcm       | SumSquares                           | 42.43745953  |
| wavelet-LLH | glcm       | ClusterProminence                    | 143178.8424  |
| wavelet-LLH | glcm       | Imc2                                 | 0.850694142  |
| wavelet-LLH | glcm       | Imc1                                 | -0.168643213 |
| wavelet-LLH | glcm       | DifferenceAverage                    | 4.531000463  |
| wavelet-LLH | glcm       | Id                                   | 0.439245131  |
| wavelet-LLH | glcm       | ClusterTendency                      | 95.74027829  |
| wavelet-LLH | firstorder | InterquartileRange                   | 87.12718891  |
| wavelet-LLH | firstorder | Skewness                             | 1.321966226  |
| wavelet-LLH | firstorder | Uniformity                           | 0.116690721  |
| wavelet-LLH | firstorder | Median                               | -4.861102928 |
| wavelet-LLH | firstorder | Energy                               | 109835653.3  |
| wavelet-LLH | firstorder | RobustMeanAbsoluteDeviation          | 45.64527719  |
| wavelet-LLH | firstorder | MeanAbsoluteDeviation                | 101.9594518  |
| wavelet-LLH | firstorder | TotalEnergy                          | 2965562639   |
| wavelet-LLH | firstorder | Maximum                              | 1372.284926  |
| wavelet-LLH | firstorder | RootMeanSquared                      | 180.0794147  |
| wavelet-LLH | firstorder | 90Percentile                         | 115.2764117  |
| wavelet-LLH | firstorder | Minimum                              | -804.1978066 |
| wavelet-LLH | firstorder | Entropy                              | 4.129194626  |



|             |            |                                      |              |
|-------------|------------|--------------------------------------|--------------|
| wavelet-LLH | firstorder | Range                                | 2176.482733  |
| wavelet-LLH | firstorder | Variance                             | 32122.18059  |
| wavelet-LLH | firstorder | 10Percentile                         | -206.1431315 |
| wavelet-LLH | firstorder | Kurtosis                             | 12.43662964  |
| wavelet-LLH | firstorder | Mean                                 | -17.50471381 |
| wavelet-LLH | glrlm      | ShortRunLowGrayLevelEmphasis         | 0.001461227  |
| wavelet-LLH | glrlm      | GrayLevelVariance                    | 61.98290965  |
| wavelet-LLH | glrlm      | LowGrayLevelRunEmphasis              | 0.001570447  |
| wavelet-LLH | glrlm      | GrayLevelNonUniformityNormalized     | 0.08352414   |
| wavelet-LLH | glrlm      | RunVariance                          | 0.406552785  |
| wavelet-LLH | glrlm      | GrayLevelNonUniformity               | 232.6026245  |
| wavelet-LLH | glrlm      | LongRunEmphasis                      | 1.9001902    |
| wavelet-LLH | glrlm      | ShortRunHighGrayLevelEmphasis        | 998.1993027  |
| wavelet-LLH | glrlm      | RunLengthNonUniformity               | 2053.666989  |
| wavelet-LLH | glrlm      | ShortRunEmphasis                     | 0.881789038  |
| wavelet-LLH | glrlm      | LongRunHighGrayLevelEmphasis         | 2137.349411  |
| wavelet-LLH | glrlm      | RunPercentage                        | 0.820308419  |
| wavelet-LLH | glrlm      | LongRunLowGrayLevelEmphasis          | 0.002386359  |
| wavelet-LLH | glrlm      | RunEntropy                           | 5.109034215  |
| wavelet-LLH | glrlm      | HighGrayLevelRunEmphasis             | 1129.481635  |
| wavelet-LLH | glrlm      | RunLengthNonUniformityNormalized     | 0.73804701   |
| wavelet-LLH | glszm      | GrayLevelVariance                    | 131.6542072  |
| wavelet-LLH | glszm      | ZoneVariance                         | 942.0535206  |
| wavelet-LLH | glszm      | GrayLevelNonUniformityNormalized     | 0.031115312  |
| wavelet-LLH | glszm      | SizeZoneNonUniformityNormalized      | 0.556620038  |
| wavelet-LLH | glszm      | SizeZoneNonUniformity                | 640.1130435  |
| wavelet-LLH | glszm      | GrayLevelNonUniformity               | 35.7826087   |
| wavelet-LLH | glszm      | LargeAreaEmphasis                    | 950.7278261  |
| wavelet-LLH | glszm      | SmallAreaHighGrayLevelEmphasis       | 966.1506314  |
| wavelet-LLH | glszm      | ZonePercentage                       | 0.33953351   |
| wavelet-LLH | glszm      | LargeAreaLowGrayLevelEmphasis        | 0.845007574  |
| wavelet-LLH | glszm      | LargeAreaHighGrayLevelEmphasis       | 1073110.69   |
| wavelet-LLH | glszm      | HighGrayLevelZoneEmphasis            | 1196.74      |
| wavelet-LLH | glszm      | SmallAreaEmphasis                    | 0.774260204  |
| wavelet-LLH | glszm      | LowGrayLevelZoneEmphasis             | 0.002388782  |
| wavelet-LLH | glszm      | ZoneEntropy                          | 6.524581498  |
| wavelet-LLH | glszm      | SmallAreaLowGrayLevelEmphasis        | 0.002108736  |
| wavelet-LLH | ngtdm      | Coarseness                           | 0.002152261  |
| wavelet-LLH | ngtdm      | Complexity                           | 8427.391996  |
| wavelet-LLH | ngtdm      | Strength                             | 6.816260292  |
| wavelet-LLH | ngtdm      | Contrast                             | 0.074422433  |
| wavelet-LLH | ngtdm      | Busyness                             | 0.125828906  |
| wavelet-LLL | gldm       | GrayLevelVariance                    | 290.1797756  |
| wavelet-LLL | gldm       | HighGrayLevelEmphasis                | 5637.817833  |
| wavelet-LLL | gldm       | DependenceEntropy                    | 7.556554262  |
| wavelet-LLL | gldm       | DependenceNonUniformity              | 571.979628   |
| wavelet-LLL | gldm       | GrayLevelNonUniformity               | 196.7685267  |
| wavelet-LLL | gldm       | SmallDependenceEmphasis              | 0.411215521  |
| wavelet-LLL | gldm       | SmallDependenceHighGrayLevelEmphasis | 1716.23508   |
| wavelet-LLL | gldm       | DependenceNonUniformityNormalized    | 0.168875001  |
| wavelet-LLL | gldm       | LargeDependenceEmphasis              | 46.63802775  |
| wavelet-LLL | gldm       | LargeDependenceLowGrayLevelEmphasis  | 0.009801123  |
| wavelet-LLL | gldm       | DependenceVariance                   | 23.93858454  |
| wavelet-LLL | gldm       | LargeDependenceHighGrayLevelEmphasis | 314262.8051  |
| wavelet-LLL | gldm       | SmallDependenceLowGrayLevelEmphasis  | 6.95E-04     |

|             |            |                                  |              |
|-------------|------------|----------------------------------|--------------|
| wavelet-LLL | gldm       | LowGrayLevelEmphasis             | 0.00123607   |
| wavelet-LLL | glcm       | JointAverage                     | 76.19547971  |
| wavelet-LLL | glcm       | SumAverage                       | 152.3909594  |
| wavelet-LLL | glcm       | JointEntropy                     | 8.505298933  |
| wavelet-LLL | glcm       | ClusterShade                     | -29106.2823  |
| wavelet-LLL | glcm       | MaximumProbability               | 0.060836658  |
| wavelet-LLL | glcm       | Idmn                             | 0.978134363  |
| wavelet-LLL | glcm       | JointEnergy                      | 0.012717903  |
| wavelet-LLL | glcm       | Contrast                         | 214.339058   |
| wavelet-LLL | glcm       | DifferenceEntropy                | 4.322502298  |
| wavelet-LLL | glcm       | InverseVariance                  | 0.25573616   |
| wavelet-LLL | glcm       | DifferenceVariance               | 141.7676466  |
| wavelet-LLL | glcm       | Idn                              | 0.926798987  |
| wavelet-LLL | glcm       | Idm                              | 0.309735226  |
| wavelet-LLL | glcm       | Correlation                      | 0.474130348  |
| wavelet-LLL | glcm       | Autocorrelation                  | 5905.120818  |
| wavelet-LLL | glcm       | SumEntropy                       | 5.613188613  |
| wavelet-LLL | glcm       | SumSquares                       | 206.3673458  |
| wavelet-LLL | glcm       | ClusterProminence                | 2453088.993  |
| wavelet-LLL | glcm       | Imc2                             | 0.920051797  |
| wavelet-LLL | glcm       | Imc1                             | -0.202043374 |
| wavelet-LLL | glcm       | DifferenceAverage                | 8.443458591  |
| wavelet-LLL | glcm       | Id                               | 0.365839698  |
| wavelet-LLL | glcm       | ClusterTendency                  | 611.1303253  |
| wavelet-LLL | firstorder | InterquartileRange               | 418.4341219  |
| wavelet-LLL | firstorder | Skewness                         | -1.627360151 |
| wavelet-LLL | firstorder | Uniformity                       | 0.058095225  |
| wavelet-LLL | firstorder | Median                           | 28.16457104  |
| wavelet-LLL | firstorder | Energy                           | 729272500.2  |
| wavelet-LLL | firstorder | RobustMeanAbsoluteDeviation      | 209.3696297  |
| wavelet-LLL | firstorder | MeanAbsoluteDeviation            | 333.0097605  |
| wavelet-LLL | firstorder | TotalEnergy                      | 19690357505  |
| wavelet-LLL | firstorder | Maximum                          | 283.4495992  |
| wavelet-LLL | firstorder | RootMeanSquared                  | 464.020663   |
| wavelet-LLL | firstorder | 90Percentile                     | 135.3660257  |
| wavelet-LLL | firstorder | Minimum                          | -1994.908261 |
| wavelet-LLL | firstorder | Entropy                          | 5.080130277  |
| wavelet-LLL | firstorder | Range                            | 2278.35786   |
| wavelet-LLL | firstorder | Variance                         | 181359.7687  |
| wavelet-LLL | firstorder | 10Percentile                     | -874.972436  |
| wavelet-LLL | firstorder | Kurtosis                         | 4.921301084  |
| wavelet-LLL | firstorder | Mean                             | -184.2699298 |
| wavelet-LLL | glrlm      | ShortRunLowGrayLevelEmphasis     | 0.001357216  |
| wavelet-LLL | glrlm      | GrayLevelVariance                | 320.4484998  |
| wavelet-LLL | glrlm      | LowGrayLevelRunEmphasis          | 0.001392464  |
| wavelet-LLL | glrlm      | GrayLevelNonUniformityNormalized | 0.04370864   |
| wavelet-LLL | glrlm      | RunVariance                      | 0.320417236  |
| wavelet-LLL | glrlm      | GrayLevelNonUniformity           | 126.7684875  |
| wavelet-LLL | glrlm      | LongRunEmphasis                  | 1.691685809  |
| wavelet-LLL | glrlm      | ShortRunHighGrayLevelEmphasis    | 4830.418613  |
| wavelet-LLL | glrlm      | RunLengthNonUniformity           | 2299.390015  |
| wavelet-LLL | glrlm      | ShortRunEmphasis                 | 0.909135703  |
| wavelet-LLL | glrlm      | LongRunHighGrayLevelEmphasis     | 10127.03796  |
| wavelet-LLL | glrlm      | RunPercentage                    | 0.855215644  |
| wavelet-LLL | glrlm      | LongRunLowGrayLevelEmphasis      | 0.001581948  |

|             |       |                                      |             |
|-------------|-------|--------------------------------------|-------------|
| wavelet-LLL | glrlm | RunEntropy                           | 5.870460754 |
| wavelet-LLL | glrlm | HighGrayLevelRunEmphasis             | 5445.078059 |
| wavelet-LLL | glrlm | RunLengthNonUniformityNormalized     | 0.792953074 |
| wavelet-LLL | glszm | GrayLevelVariance                    | 383.481841  |
| wavelet-LLL | glszm | ZoneVariance                         | 298.1583402 |
| wavelet-LLL | glszm | GrayLevelNonUniformityNormalized     | 0.016207708 |
| wavelet-LLL | glszm | SizeZoneNonUniformityNormalized      | 0.68772784  |
| wavelet-LLL | glszm | SizeZoneNonUniformity                | 1009.584469 |
| wavelet-LLL | glszm | GrayLevelNonUniformity               | 23.79291553 |
| wavelet-LLL | glszm | LargeAreaEmphasis                    | 303.4816076 |
| wavelet-LLL | glszm | SmallAreaHighGrayLevelEmphasis       | 3351.269227 |
| wavelet-LLL | glszm | ZonePercentage                       | 0.433421907 |
| wavelet-LLL | glszm | LargeAreaLowGrayLevelEmphasis        | 0.048563461 |
| wavelet-LLL | glszm | LargeAreaHighGrayLevelEmphasis       | 2060666.243 |
| wavelet-LLL | glszm | HighGrayLevelZoneEmphasis            | 4213.894414 |
| wavelet-LLL | glszm | SmallAreaEmphasis                    | 0.853587174 |
| wavelet-LLL | glszm | LowGrayLevelZoneEmphasis             | 0.001961252 |
| wavelet-LLL | glszm | ZoneEntropy                          | 6.883248678 |
| wavelet-LLL | glszm | SmallAreaLowGrayLevelEmphasis        | 0.001415269 |
| wavelet-LLL | ngtdm | Coarseness                           | 0.001891231 |
| wavelet-LLL | ngtdm | Complexity                           | 21072.59629 |
| wavelet-LLL | ngtdm | Strength                             | 11.02724378 |
| wavelet-LLL | ngtdm | Contrast                             | 0.544101941 |
| wavelet-LLL | ngtdm | Busyness                             | 0.057112184 |
| wavelet-HHL | gldm  | GrayLevelVariance                    | 15.42571542 |
| wavelet-HHL | gldm  | HighGrayLevelEmphasis                | 621.1349277 |
| wavelet-HHL | gldm  | DependenceEntropy                    | 6.461595289 |
| wavelet-HHL | gldm  | DependenceNonUniformity              | 335.7818128 |
| wavelet-HHL | gldm  | GrayLevelNonUniformity               | 475.0401535 |
| wavelet-HHL | gldm  | SmallDependenceEmphasis              | 0.254002618 |
| wavelet-HHL | gldm  | SmallDependenceHighGrayLevelEmphasis | 171.6662793 |
| wavelet-HHL | gldm  | DependenceNonUniformityNormalized    | 0.099138415 |
| wavelet-HHL | gldm  | LargeDependenceEmphasis              | 54.38116327 |
| wavelet-HHL | gldm  | LargeDependenceLowGrayLevelEmphasis  | 0.092244191 |
| wavelet-HHL | gldm  | DependenceVariance                   | 20.77403389 |
| wavelet-HHL | gldm  | LargeDependenceHighGrayLevelEmphasis | 32437.739   |
| wavelet-HHL | gldm  | SmallDependenceLowGrayLevelEmphasis  | 0.000857077 |
| wavelet-HHL | gldm  | LowGrayLevelEmphasis                 | 0.002151196 |
| wavelet-HHL | glcm  | JointAverage                         | 24.57517638 |
| wavelet-HHL | glcm  | SumAverage                           | 49.15035276 |
| wavelet-HHL | glcm  | JointEntropy                         | 6.438118693 |
| wavelet-HHL | glcm  | ClusterShade                         | 15.12499239 |
| wavelet-HHL | glcm  | MaximumProbability                   | 0.108839941 |
| wavelet-HHL | glcm  | Idmn                                 | 0.991450942 |
| wavelet-HHL | glcm  | JointEnergy                          | 0.040630733 |
| wavelet-HHL | glcm  | Contrast                             | 25.0853139  |
| wavelet-HHL | glcm  | DifferenceEntropy                    | 3.133707015 |
| wavelet-HHL | glcm  | InverseVariance                      | 0.358006092 |
| wavelet-HHL | glcm  | DifferenceVariance                   | 16.08524258 |
| wavelet-HHL | glcm  | Idn                                  | 0.950224341 |
| wavelet-HHL | glcm  | Idm                                  | 0.411032698 |
| wavelet-HHL | glcm  | Correlation                          | 0.003949365 |
| wavelet-HHL | glcm  | Autocorrelation                      | 604.0185753 |
| wavelet-HHL | glcm  | SumEntropy                           | 3.92324497  |
| wavelet-HHL | glcm  | SumSquares                           | 12.61589756 |

|             |            |                                  |              |
|-------------|------------|----------------------------------|--------------|
| wavelet-HHL | glcm       | ClusterProminence                | 6291.085357  |
| wavelet-HHL | glcm       | Imc2                             | 0.703597199  |
| wavelet-HHL | glcm       | Imc1                             | -0.102851904 |
| wavelet-HHL | glcm       | DifferenceAverage                | 2.975072175  |
| wavelet-HHL | glcm       | Id                               | 0.468059053  |
| wavelet-HHL | glcm       | ClusterTendency                  | 25.37827633  |
| wavelet-HHL | firstorder | InterquartileRange               | 52.96089877  |
| wavelet-HHL | firstorder | Skewness                         | 0.150144586  |
| wavelet-HHL | firstorder | Uniformity                       | 0.140253957  |
| wavelet-HHL | firstorder | Median                           | -1.502610561 |
| wavelet-HHL | firstorder | Energy                           | 32381159.49  |
| wavelet-HHL | firstorder | RobustMeanAbsoluteDeviation      | 27.67341118  |
| wavelet-HHL | firstorder | MeanAbsoluteDeviation            | 59.68682477  |
| wavelet-HHL | firstorder | TotalEnergy                      | 874291306.2  |
| wavelet-HHL | firstorder | Maximum                          | 677.5274491  |
| wavelet-HHL | firstorder | RootMeanSquared                  | 97.77742584  |
| wavelet-HHL | firstorder | 90Percentile                     | 110.6262502  |
| wavelet-HHL | firstorder | Minimum                          | -580.1360879 |
| wavelet-HHL | firstorder | Entropy                          | 3.592024184  |
| wavelet-HHL | firstorder | Range                            | 1257.663537  |
| wavelet-HHL | firstorder | Variance                         | 9552.721757  |
| wavelet-HHL | firstorder | 10Percentile                     | -85.25868388 |
| wavelet-HHL | firstorder | Kurtosis                         | 8.359645308  |
| wavelet-HHL | firstorder | Mean                             | 2.775472442  |
| wavelet-HHL | glrlm      | ShortRunLowGrayLevelEmphasis     | 0.002040772  |
| wavelet-HHL | glrlm      | GrayLevelVariance                | 18.5233991   |
| wavelet-HHL | glrlm      | LowGrayLevelRunEmphasis          | 0.002254565  |
| wavelet-HHL | glrlm      | GrayLevelNonUniformityNormalized | 0.109614664  |
| wavelet-HHL | glrlm      | RunVariance                      | 0.395438807  |
| wavelet-HHL | glrlm      | GrayLevelNonUniformity           | 303.2661504  |
| wavelet-HHL | glrlm      | LongRunEmphasis                  | 1.908005407  |
| wavelet-HHL | glrlm      | ShortRunHighGrayLevelEmphasis    | 551.6911961  |
| wavelet-HHL | glrlm      | RunLengthNonUniformity           | 2003.173653  |
| wavelet-HHL | glrlm      | ShortRunEmphasis                 | 0.874539872  |
| wavelet-HHL | glrlm      | LongRunHighGrayLevelEmphasis     | 1168.259408  |
| wavelet-HHL | glrlm      | RunPercentage                    | 0.815493629  |
| wavelet-HHL | glrlm      | LongRunLowGrayLevelEmphasis      | 0.003794091  |
| wavelet-HHL | glrlm      | RunEntropy                       | 4.550567877  |
| wavelet-HHL | glrlm      | HighGrayLevelRunEmphasis         | 626.6688728  |
| wavelet-HHL | glrlm      | RunLengthNonUniformityNormalized | 0.723875623  |
| wavelet-HHL | glszm      | GrayLevelVariance                | 43.50223879  |
| wavelet-HHL | glszm      | ZoneVariance                     | 1342.155762  |
| wavelet-HHL | glszm      | GrayLevelNonUniformityNormalized | 0.048503567  |
| wavelet-HHL | glszm      | SizeZoneNonUniformityNormalized  | 0.511551627  |
| wavelet-HHL | glszm      | SizeZoneNonUniformity            | 476.254565   |
| wavelet-HHL | glszm      | GrayLevelNonUniformity           | 45.15682062  |
| wavelet-HHL | glszm      | LargeAreaEmphasis                | 1355.390977  |
| wavelet-HHL | glszm      | SmallAreaHighGrayLevelEmphasis   | 513.0661525  |
| wavelet-HHL | glszm      | ZonePercentage                   | 0.27487452   |
| wavelet-HHL | glszm      | LargeAreaLowGrayLevelEmphasis    | 2.279951501  |
| wavelet-HHL | glszm      | LargeAreaHighGrayLevelEmphasis   | 808110.3222  |
| wavelet-HHL | glszm      | HighGrayLevelZoneEmphasis        | 678.1525242  |
| wavelet-HHL | glszm      | SmallAreaEmphasis                | 0.743292139  |
| wavelet-HHL | glszm      | LowGrayLevelZoneEmphasis         | 0.003266915  |
| wavelet-HHL | glszm      | ZoneEntropy                      | 6.049437577  |

|             |            |                                      |              |
|-------------|------------|--------------------------------------|--------------|
| wavelet-HHL | glszm      | SmallAreaLowGrayLevelEmphasis        | 0.002795246  |
| wavelet-HHL | ngtdm      | Coarseness                           | 0.002371657  |
| wavelet-HHL | ngtdm      | Complexity                           | 2055.035832  |
| wavelet-HHL | ngtdm      | Strength                             | 1.96358225   |
| wavelet-HHL | ngtdm      | Contrast                             | 0.040205867  |
| wavelet-HHL | ngtdm      | Busyness                             | 0.248192636  |
| wavelet-HLH | gldm       | GrayLevelVariance                    | 16.89662946  |
| wavelet-HLH | gldm       | HighGrayLevelEmphasis                | 615.9970475  |
| wavelet-HLH | gldm       | DependenceEntropy                    | 6.415731002  |
| wavelet-HLH | gldm       | DependenceNonUniformity              | 340.702982   |
| wavelet-HLH | gldm       | GrayLevelNonUniformity               | 497.7103632  |
| wavelet-HLH | gldm       | SmallDependenceEmphasis              | 0.26342793   |
| wavelet-HLH | gldm       | SmallDependenceHighGrayLevelEmphasis | 171.3192673  |
| wavelet-HLH | gldm       | DependenceNonUniformityNormalized    | 0.100591373  |
| wavelet-HLH | gldm       | LargeDependenceEmphasis              | 59.86920579  |
| wavelet-HLH | gldm       | LargeDependenceLowGrayLevelEmphasis  | 0.101025051  |
| wavelet-HLH | gldm       | DependenceVariance                   | 23.13207823  |
| wavelet-HLH | gldm       | LargeDependenceHighGrayLevelEmphasis | 35892.71154  |
| wavelet-HLH | gldm       | SmallDependenceLowGrayLevelEmphasis  | 0.00104149   |
| wavelet-HLH | gldm       | LowGrayLevelEmphasis                 | 0.002314142  |
| wavelet-HLH | glcm       | JointAverage                         | 24.49644091  |
| wavelet-HLH | glcm       | SumAverage                           | 48.99288181  |
| wavelet-HLH | glcm       | JointEntropy                         | 6.405780674  |
| wavelet-HLH | glcm       | ClusterShade                         | -6.554634201 |
| wavelet-HLH | glcm       | MaximumProbability                   | 0.113821297  |
| wavelet-HLH | glcm       | Idmn                                 | 0.988520311  |
| wavelet-HLH | glcm       | JointEnergy                          | 0.045306254  |
| wavelet-HLH | glcm       | Contrast                             | 29.51678085  |
| wavelet-HLH | glcm       | DifferenceEntropy                    | 3.166995838  |
| wavelet-HLH | glcm       | InverseVariance                      | 0.357402625  |
| wavelet-HLH | glcm       | DifferenceVariance                   | 19.60781091  |
| wavelet-HLH | glcm       | Idn                                  | 0.944940237  |
| wavelet-HLH | glcm       | Idm                                  | 0.421752682  |
| wavelet-HLH | glcm       | Correlation                          | -0.023566007 |
| wavelet-HLH | glcm       | Autocorrelation                      | 599.7272398  |
| wavelet-HLH | glcm       | SumEntropy                           | 3.937378835  |
| wavelet-HLH | glcm       | SumSquares                           | 14.40759487  |
| wavelet-HLH | glcm       | ClusterProminence                    | 7930.085191  |
| wavelet-HLH | glcm       | Imc2                                 | 0.721648081  |
| wavelet-HLH | glcm       | Imc1                                 | -0.110676955 |
| wavelet-HLH | glcm       | DifferenceAverage                    | 3.117689954  |
| wavelet-HLH | glcm       | Id                                   | 0.475718816  |
| wavelet-HLH | glcm       | ClusterTendency                      | 28.11359863  |
| wavelet-HLH | firstorder | InterquartileRange                   | 49.01705679  |
| wavelet-HLH | firstorder | Skewness                             | -0.059942729 |
| wavelet-HLH | firstorder | Uniformity                           | 0.146947258  |
| wavelet-HLH | firstorder | Median                               | -1.097503706 |
| wavelet-HLH | firstorder | Energy                               | 35563302.77  |
| wavelet-HLH | firstorder | RobustMeanAbsoluteDeviation          | 25.91694865  |
| wavelet-HLH | firstorder | MeanAbsoluteDeviation                | 59.86845612  |
| wavelet-HLH | firstorder | TotalEnergy                          | 960209174.9  |
| wavelet-HLH | firstorder | Maximum                              | 592.7503408  |
| wavelet-HLH | firstorder | RootMeanSquared                      | 102.4692235  |
| wavelet-HLH | firstorder | 90Percentile                         | 100.3326905  |
| wavelet-HLH | firstorder | Minimum                              | -581.4151806 |

|             |            |                                  |              |
|-------------|------------|----------------------------------|--------------|
| wavelet-HLH | firstorder | Entropy                          | 3.577398203  |
| wavelet-HLH | firstorder | Range                            | 1174.165521  |
| wavelet-HLH | firstorder | Variance                         | 10499.65824  |
| wavelet-HLH | firstorder | 10Percentile                     | -92.10397526 |
| wavelet-HLH | firstorder | Kurtosis                         | 8.970431046  |
| wavelet-HLH | firstorder | Mean                             | -0.532472189 |
| wavelet-HLH | glrlm      | ShortRunLowGrayLevelEmphasis     | 0.002244167  |
| wavelet-HLH | glrlm      | GrayLevelVariance                | 20.6405739   |
| wavelet-HLH | glrlm      | LowGrayLevelRunEmphasis          | 0.002466504  |
| wavelet-HLH | glrlm      | GrayLevelNonUniformityNormalized | 0.112055825  |
| wavelet-HLH | glrlm      | RunVariance                      | 0.428830774  |
| wavelet-HLH | glrlm      | GrayLevelNonUniformity           | 306.0160754  |
| wavelet-HLH | glrlm      | LongRunEmphasis                  | 1.976375853  |
| wavelet-HLH | glrlm      | ShortRunHighGrayLevelEmphasis    | 541.2283531  |
| wavelet-HLH | glrlm      | RunLengthNonUniformity           | 1946.931609  |
| wavelet-HLH | glrlm      | ShortRunEmphasis                 | 0.868670234  |
| wavelet-HLH | glrlm      | LongRunHighGrayLevelEmphasis     | 1205.241402  |
| wavelet-HLH | glrlm      | RunPercentage                    | 0.805341691  |
| wavelet-HLH | glrlm      | LongRunLowGrayLevelEmphasis      | 0.004110713  |
| wavelet-HLH | glrlm      | RunEntropy                       | 4.590657732  |
| wavelet-HLH | glrlm      | HighGrayLevelRunEmphasis         | 620.0034205  |
| wavelet-HLH | glrlm      | RunLengthNonUniformityNormalized | 0.712938918  |
| wavelet-HLH | glszm      | GrayLevelVariance                | 48.03431272  |
| wavelet-HLH | glszm      | ZoneVariance                     | 1356.73127   |
| wavelet-HLH | glszm      | GrayLevelNonUniformityNormalized | 0.047667934  |
| wavelet-HLH | glszm      | SizeZoneNonUniformityNormalized  | 0.520066978  |
| wavelet-HLH | glszm      | SizeZoneNonUniformity            | 511.2258393  |
| wavelet-HLH | glszm      | GrayLevelNonUniformity           | 46.85757884  |
| wavelet-HLH | glszm      | LargeAreaEmphasis                | 1368.603255  |
| wavelet-HLH | glszm      | SmallAreaHighGrayLevelEmphasis   | 492.0583743  |
| wavelet-HLH | glszm      | ZonePercentage                   | 0.29022734   |
| wavelet-HLH | glszm      | LargeAreaLowGrayLevelEmphasis    | 2.293735409  |
| wavelet-HLH | glszm      | LargeAreaHighGrayLevelEmphasis   | 818985.5015  |
| wavelet-HLH | glszm      | HighGrayLevelZoneEmphasis        | 648.0600203  |
| wavelet-HLH | glszm      | SmallAreaEmphasis                | 0.749048271  |
| wavelet-HLH | glszm      | LowGrayLevelZoneEmphasis         | 0.003781021  |
| wavelet-HLH | glszm      | ZoneEntropy                      | 6.056747006  |
| wavelet-HLH | glszm      | SmallAreaLowGrayLevelEmphasis    | 0.00330456   |
| wavelet-HLH | ngtdm      | Coarseness                       | 0.002431016  |
| wavelet-HLH | ngtdm      | Complexity                       | 2241.612006  |
| wavelet-HLH | ngtdm      | Strength                         | 2.116322061  |
| wavelet-HLH | ngtdm      | Contrast                         | 0.041481544  |
| wavelet-HLH | ngtdm      | Busyness                         | 0.230130771  |

| Image type | Feature Class | Feature Name                         |                                                                                                                                                                                                                                                                                                                                                                                                                   |
|------------|---------------|--------------------------------------|-------------------------------------------------------------------------------------------------------------------------------------------------------------------------------------------------------------------------------------------------------------------------------------------------------------------------------------------------------------------------------------------------------------------|
| general    | info          | BoundingBox                          | 15: RTSTRUCT: C99-DNU_segment_LLL GTV<br>(1, 1, 1, 13, 12, 13)                                                                                                                                                                                                                                                                                                                                                    |
| general    | info          | EnabledImageTypes                    | {u'Original': {}, u'Wavelet': {}}                                                                                                                                                                                                                                                                                                                                                                                 |
|            |               |                                      | {'distances': [1], 'additionalInfo': True, 'force2D': False, 'interpolator': 'sitkBSpline', 'resampledPixelSpacing': [3.0], 'label': 1, 'normalizeScale': 1, 'normalize': False, 'force2Ddimension': 0, 'removeOutliers': None, 'minimumROISize': None, u'binWidth': 25.0, 'minimumROIDimensions': 1, u'correctMask': True, 'preCrop': False, u'symmetricalGLCM': True, 'resegmentRange': None, 'padDistance': 5} |
| general    | info          | GeneralSettings                      |                                                                                                                                                                                                                                                                                                                                                                                                                   |
| general    | info          | ImageHash                            | e9840a87572ad107ee2235d13294e2c7eb1b13f4                                                                                                                                                                                                                                                                                                                                                                          |
| general    | info          | ImageSpacing                         | (1.26953125, 1.26953125, 2.0)                                                                                                                                                                                                                                                                                                                                                                                     |
| general    | info          | MaskHash                             | 2af89edbb5bed0988ae50843f22adfb542152cd5                                                                                                                                                                                                                                                                                                                                                                          |
| general    | info          | NumpyVersion                         | 1.13.1                                                                                                                                                                                                                                                                                                                                                                                                            |
| general    | info          | PyWaveletVersion                     | 0.5.2                                                                                                                                                                                                                                                                                                                                                                                                             |
| general    | info          | SimpleITKVersion                     | 1.1.0                                                                                                                                                                                                                                                                                                                                                                                                             |
| general    | info          | Version                              | 1.3.0.post102+g1b0eb74                                                                                                                                                                                                                                                                                                                                                                                            |
| general    | info          | VolumeNum                            | 1                                                                                                                                                                                                                                                                                                                                                                                                                 |
| general    | info          | VoxelNum                             | 878                                                                                                                                                                                                                                                                                                                                                                                                               |
| original   | shape         | Maximum3DDiameter                    | 43.05810028                                                                                                                                                                                                                                                                                                                                                                                                       |
| original   | shape         | Maximum2DDiameterSlice               | 37.10795063                                                                                                                                                                                                                                                                                                                                                                                                       |
| original   | shape         | Sphericity                           | 0.823371704                                                                                                                                                                                                                                                                                                                                                                                                       |
| original   | shape         | MinorAxis                            | 33.71638343                                                                                                                                                                                                                                                                                                                                                                                                       |
| original   | shape         | Elongation                           | 0.941660392                                                                                                                                                                                                                                                                                                                                                                                                       |
| original   | shape         | SurfaceVolumeRatio                   | 0.204457051                                                                                                                                                                                                                                                                                                                                                                                                       |
| original   | shape         | Volume                               | 23706                                                                                                                                                                                                                                                                                                                                                                                                             |
| original   | shape         | MajorAxis                            | 35.80524754                                                                                                                                                                                                                                                                                                                                                                                                       |
| original   | shape         | SurfaceArea                          | 4846.85886                                                                                                                                                                                                                                                                                                                                                                                                        |
| original   | shape         | Flatness                             | 0.80558607                                                                                                                                                                                                                                                                                                                                                                                                        |
| original   | shape         | LeastAxis                            | 28.84420866                                                                                                                                                                                                                                                                                                                                                                                                       |
| original   | shape         | Maximum2DDiameterColumn              | 39                                                                                                                                                                                                                                                                                                                                                                                                                |
| original   | shape         | Maximum2DDiameterRow                 | 41.67733197                                                                                                                                                                                                                                                                                                                                                                                                       |
| original   | gldm          | GrayLevelVariance                    | 26.72587445                                                                                                                                                                                                                                                                                                                                                                                                       |
| original   | gldm          | HighGrayLevelEmphasis                | 713.2494305                                                                                                                                                                                                                                                                                                                                                                                                       |
| original   | gldm          | DependenceEntropy                    | 6.159095086                                                                                                                                                                                                                                                                                                                                                                                                       |
| original   | gldm          | DependenceNonUniformity              | 72.0022779                                                                                                                                                                                                                                                                                                                                                                                                        |
| original   | gldm          | GrayLevelNonUniformity               | 179.284738                                                                                                                                                                                                                                                                                                                                                                                                        |
| original   | gldm          | SmallDependenceEmphasis              | 0.23186201                                                                                                                                                                                                                                                                                                                                                                                                        |
| original   | gldm          | SmallDependenceHighGrayLevelEmphasis | 112.1926355                                                                                                                                                                                                                                                                                                                                                                                                       |
| original   | gldm          | DependenceNonUniformityNormalized    | 0.08200715                                                                                                                                                                                                                                                                                                                                                                                                        |
| original   | gldm          | LargeDependenceEmphasis              | 75.6332574                                                                                                                                                                                                                                                                                                                                                                                                        |
| original   | gldm          | LargeDependenceLowGrayLevelEmphasis  | 0.096780748                                                                                                                                                                                                                                                                                                                                                                                                       |
| original   | gldm          | DependenceVariance                   | 24.63609051                                                                                                                                                                                                                                                                                                                                                                                                       |
| original   | gldm          | LargeDependenceHighGrayLevelEmphasis | 61078.58656                                                                                                                                                                                                                                                                                                                                                                                                       |
| original   | gldm          | SmallDependenceLowGrayLevelEmphasis  | 0.002729327                                                                                                                                                                                                                                                                                                                                                                                                       |
| original   | gldm          | LowGrayLevelEmphasis                 | 0.003832819                                                                                                                                                                                                                                                                                                                                                                                                       |
| original   | glcm          | JointAverage                         | 27.01999092                                                                                                                                                                                                                                                                                                                                                                                                       |
| original   | glcm          | SumAverage                           | 54.03998185                                                                                                                                                                                                                                                                                                                                                                                                       |
| original   | glcm          | JointEntropy                         | 5.148791923                                                                                                                                                                                                                                                                                                                                                                                                       |

|          |            |                                  |              |
|----------|------------|----------------------------------|--------------|
| original | glcm       | ClusterShade                     | -1010.391043 |
| original | glcm       | MaximumProbability               | 0.148151558  |
| original | glcm       | Idmn                             | 0.983172294  |
| original | glcm       | JointEnergy                      | 0.071781382  |
| original | glcm       | Contrast                         | 19.15728347  |
| original | glcm       | DifferenceEntropy                | 2.711392398  |
| original | glcm       | InverseVariance                  | 0.406342811  |
| original | glcm       | DifferenceVariance               | 13.67169102  |
| original | glcm       | Idn                              | 0.939022111  |
| original | glcm       | Idm                              | 0.510228702  |
| original | glcm       | Correlation                      | 0.443005676  |
| original | glcm       | Autocorrelation                  | 737.9120809  |
| original | glcm       | SumEntropy                       | 3.638545825  |
| original | glcm       | SumSquares                       | 17.40030656  |
| original | glcm       | ClusterProminence                | 30394.2358   |
| original | glcm       | Imc2                             | 0.727209649  |
| original | glcm       | Imc1                             | -0.13776233  |
| original | glcm       | DifferenceAverage                | 2.336353187  |
| original | glcm       | Id                               | 0.549155679  |
| original | glcm       | ClusterTendency                  | 50.44394278  |
| original | firstorder | InterquartileRange               | 51           |
| original | firstorder | Skewness                         | -2.41647881  |
| original | firstorder | Uniformity                       | 0.20419674   |
| original | firstorder | Median                           | 17           |
| original | firstorder | Energy                           | 15550139     |
| original | firstorder | RobustMeanAbsoluteDeviation      | 37.33190234  |
| original | firstorder | MeanAbsoluteDeviation            | 87.88457407  |
| original | firstorder | TotalEnergy                      | 419853753    |
| original | firstorder | Maximum                          | 96           |
| original | firstorder | RootMeanSquared                  | 133.0821719  |
| original | firstorder | 90Percentile                     | 47           |
| original | firstorder | Minimum                          | -667         |
| original | firstorder | Entropy                          | 3.129854448  |
| original | firstorder | Range                            | 763          |
| original | firstorder | Variance                         | 16623.29224  |
| original | firstorder | 10Percentile                     | -211.6       |
| original | firstorder | Kurtosis                         | 8.589000634  |
| original | firstorder | Mean                             | -32.97835991 |
| original | glrlm      | ShortRunLowGrayLevelEmphasis     | 0.004408619  |
| original | glrlm      | GrayLevelVariance                | 32.57145555  |
| original | glrlm      | LowGrayLevelRunEmphasis          | 0.004626384  |
| original | glrlm      | GrayLevelNonUniformityNormalized | 0.156208058  |
| original | glrlm      | RunVariance                      | 0.486068283  |
| original | glrlm      | GrayLevelNonUniformity           | 104.7946414  |
| original | glrlm      | LongRunEmphasis                  | 2.202405901  |
| original | glrlm      | ShortRunHighGrayLevelEmphasis    | 548.2779036  |
| original | glrlm      | RunLengthNonUniformity           | 432.3634726  |
| original | glrlm      | ShortRunEmphasis                 | 0.830404973  |
| original | glrlm      | LongRunHighGrayLevelEmphasis     | 1654.158268  |
| original | glrlm      | RunPercentage                    | 0.763798844  |
| original | glrlm      | LongRunLowGrayLevelEmphasis      | 0.006145966  |
| original | glrlm      | RunEntropy                       | 4.335473997  |
| original | glrlm      | HighGrayLevelRunEmphasis         | 684.649253   |
| original | glrlm      | RunLengthNonUniformityNormalized | 0.64446479   |
| original | glszm      | GrayLevelVariance                | 49.00362674  |



|             |       |                                      |              |
|-------------|-------|--------------------------------------|--------------|
| original    | glszm | ZoneVariance                         | 685.6780883  |
| original    | glszm | GrayLevelNonUniformityNormalized     | 0.0499733    |
| original    | glszm | SizeZoneNonUniformityNormalized      | 0.652278391  |
| original    | glszm | SizeZoneNonUniformity                | 138.2830189  |
| original    | glszm | GrayLevelNonUniformity               | 10.59433962  |
| original    | glszm | LargeAreaEmphasis                    | 702.8301887  |
| original    | glszm | SmallAreaHighGrayLevelEmphasis       | 376.5048651  |
| original    | glszm | ZonePercentage                       | 0.241457859  |
| original    | glszm | LargeAreaLowGrayLevelEmphasis        | 0.880719315  |
| original    | glszm | LargeAreaHighGrayLevelEmphasis       | 568686.5047  |
| original    | glszm | HighGrayLevelZoneEmphasis            | 467.9009434  |
| original    | glszm | SmallAreaEmphasis                    | 0.833237109  |
| original    | glszm | LowGrayLevelZoneEmphasis             | 0.011552681  |
| original    | glszm | ZoneEntropy                          | 5.335024687  |
| original    | glszm | SmallAreaLowGrayLevelEmphasis        | 0.011039169  |
| original    | ngtdm | Coarseness                           | 0.005092209  |
| original    | ngtdm | Complexity                           | 922.6229032  |
| original    | ngtdm | Strength                             | 6.480477594  |
| original    | ngtdm | Contrast                             | 0.128921224  |
| original    | ngtdm | Busyness                             | 0.15438362   |
| wavelet-HHH | gldm  | GrayLevelVariance                    | 5.306375538  |
| wavelet-HHH | gldm  | HighGrayLevelEmphasis                | 246.2984055  |
| wavelet-HHH | gldm  | DependenceEntropy                    | 5.880635623  |
| wavelet-HHH | gldm  | DependenceNonUniformity              | 73.98177677  |
| wavelet-HHH | gldm  | GrayLevelNonUniformity               | 160.9476082  |
| wavelet-HHH | gldm  | SmallDependenceEmphasis              | 0.204385191  |
| wavelet-HHH | gldm  | SmallDependenceHighGrayLevelEmphasis | 52.11464221  |
| wavelet-HHH | gldm  | DependenceNonUniformityNormalized    | 0.084261705  |
| wavelet-HHH | gldm  | LargeDependenceEmphasis              | 51.77904328  |
| wavelet-HHH | gldm  | LargeDependenceLowGrayLevelEmphasis  | 0.217145     |
| wavelet-HHH | gldm  | DependenceVariance                   | 16.59441887  |
| wavelet-HHH | gldm  | LargeDependenceHighGrayLevelEmphasis | 12611.76082  |
| wavelet-HHH | gldm  | SmallDependenceLowGrayLevelEmphasis  | 0.003356072  |
| wavelet-HHH | gldm  | LowGrayLevelEmphasis                 | 0.006740396  |
| wavelet-HHH | glcm  | JointAverage                         | 15.54552985  |
| wavelet-HHH | glcm  | SumAverage                           | 31.09105971  |
| wavelet-HHH | glcm  | JointEntropy                         | 5.300269564  |
| wavelet-HHH | glcm  | ClusterShade                         | -3.847466299 |
| wavelet-HHH | glcm  | MaximumProbability                   | 0.111889551  |
| wavelet-HHH | glcm  | Idmn                                 | 0.988899883  |
| wavelet-HHH | glcm  | JointEnergy                          | 0.051804754  |
| wavelet-HHH | glcm  | Contrast                             | 8.246184556  |
| wavelet-HHH | glcm  | DifferenceEntropy                    | 2.555898911  |
| wavelet-HHH | glcm  | InverseVariance                      | 0.413913879  |
| wavelet-HHH | glcm  | DifferenceVariance                   | 4.762884744  |
| wavelet-HHH | glcm  | Idn                                  | 0.938415037  |
| wavelet-HHH | glcm  | Idm                                  | 0.463976809  |
| wavelet-HHH | glcm  | Correlation                          | -0.029312197 |
| wavelet-HHH | glcm  | Autocorrelation                      | 241.5241206  |
| wavelet-HHH | glcm  | SumEntropy                           | 3.267895797  |
| wavelet-HHH | glcm  | SumSquares                           | 3.983479085  |
| wavelet-HHH | glcm  | ClusterProminence                    | 495.5351466  |
| wavelet-HHH | glcm  | Imc2                                 | 0.580621012  |
| wavelet-HHH | glcm  | Imc1                                 | -0.07657137  |
| wavelet-HHH | glcm  | DifferenceAverage                    | 1.852689043  |

|             |            |                                  |              |
|-------------|------------|----------------------------------|--------------|
| wavelet-HHH | glcm       | Id                               | 0.517662094  |
| wavelet-HHH | glcm       | ClusterTendency                  | 7.687731784  |
| wavelet-HHH | firstorder | InterquartileRange               | 43.25114685  |
| wavelet-HHH | firstorder | Skewness                         | -0.465058855 |
| wavelet-HHH | firstorder | Uniformity                       | 0.183311627  |
| wavelet-HHH | firstorder | Median                           | 1.19252456   |
| wavelet-HHH | firstorder | Energy                           | 2884125.161  |
| wavelet-HHH | firstorder | RobustMeanAbsoluteDeviation      | 18.78407646  |
| wavelet-HHH | firstorder | MeanAbsoluteDeviation            | 36.5562896   |
| wavelet-HHH | firstorder | TotalEnergy                      | 77871379.34  |
| wavelet-HHH | firstorder | Maximum                          | 250.8891749  |
| wavelet-HHH | firstorder | RootMeanSquared                  | 57.31387784  |
| wavelet-HHH | firstorder | 90Percentile                     | 57.94316056  |
| wavelet-HHH | firstorder | Minimum                          | -356.5538615 |
| wavelet-HHH | firstorder | Entropy                          | 2.962814997  |
| wavelet-HHH | firstorder | Range                            | 607.4430365  |
| wavelet-HHH | firstorder | Variance                         | 3284.738479  |
| wavelet-HHH | firstorder | 10Percentile                     | -51.00636004 |
| wavelet-HHH | firstorder | Kurtosis                         | 9.105383122  |
| wavelet-HHH | firstorder | Mean                             | 0.376980209  |
| wavelet-HHH | glrlm      | ShortRunLowGrayLevelEmphasis     | 0.006768107  |
| wavelet-HHH | glrlm      | GrayLevelVariance                | 6.349236004  |
| wavelet-HHH | glrlm      | LowGrayLevelRunEmphasis          | 0.007345336  |
| wavelet-HHH | glrlm      | GrayLevelNonUniformityNormalized | 0.15614403   |
| wavelet-HHH | glrlm      | RunVariance                      | 0.342895531  |
| wavelet-HHH | glrlm      | GrayLevelNonUniformity           | 111.1324849  |
| wavelet-HHH | glrlm      | LongRunEmphasis                  | 1.869735843  |
| wavelet-HHH | glrlm      | ShortRunHighGrayLevelEmphasis    | 213.169357   |
| wavelet-HHH | glrlm      | RunLengthNonUniformity           | 497.8377439  |
| wavelet-HHH | glrlm      | ShortRunEmphasis                 | 0.861736465  |
| wavelet-HHH | glrlm      | LongRunHighGrayLevelEmphasis     | 458.8473949  |
| wavelet-HHH | glrlm      | RunPercentage                    | 0.810320659  |
| wavelet-HHH | glrlm      | LongRunLowGrayLevelEmphasis      | 0.010964567  |
| wavelet-HHH | glrlm      | RunEntropy                       | 3.889088702  |
| wavelet-HHH | glrlm      | HighGrayLevelRunEmphasis         | 246.8932776  |
| wavelet-HHH | glrlm      | RunLengthNonUniformityNormalized | 0.699064094  |
| wavelet-HHH | glszm      | GrayLevelVariance                | 19.10728395  |
| wavelet-HHH | glszm      | ZoneVariance                     | 635.3739506  |
| wavelet-HHH | glszm      | GrayLevelNonUniformityNormalized | 0.080864198  |
| wavelet-HHH | glszm      | SizeZoneNonUniformityNormalized  | 0.546851852  |
| wavelet-HHH | glszm      | SizeZoneNonUniformity            | 98.43333333  |
| wavelet-HHH | glszm      | GrayLevelNonUniformity           | 14.55555556  |
| wavelet-HHH | glszm      | LargeAreaEmphasis                | 659.1666667  |
| wavelet-HHH | glszm      | SmallAreaHighGrayLevelEmphasis   | 197.8709367  |
| wavelet-HHH | glszm      | ZonePercentage                   | 0.20501139   |
| wavelet-HHH | glszm      | LargeAreaLowGrayLevelEmphasis    | 2.753782313  |
| wavelet-HHH | glszm      | LargeAreaHighGrayLevelEmphasis   | 159522.6222  |
| wavelet-HHH | glszm      | HighGrayLevelZoneEmphasis        | 253.8777778  |
| wavelet-HHH | glszm      | SmallAreaEmphasis                | 0.764222522  |
| wavelet-HHH | glszm      | LowGrayLevelZoneEmphasis         | 0.016487967  |
| wavelet-HHH | glszm      | ZoneEntropy                      | 5.044849635  |
| wavelet-HHH | glszm      | SmallAreaLowGrayLevelEmphasis    | 0.015327258  |
| wavelet-HHH | ngtdm      | Coarseness                       | 0.008109775  |
| wavelet-HHH | ngtdm      | Complexity                       | 306.5536541  |
| wavelet-HHH | ngtdm      | Strength                         | 1.49637738   |

|             |            |                                      |              |
|-------------|------------|--------------------------------------|--------------|
| wavelet-HHH | ngtdm      | Contrast                             | 0.040213424  |
| wavelet-HHH | ngtdm      | Busyness                             | 0.260599291  |
| wavelet-HLL | gldm       | GrayLevelVariance                    | 27.53648539  |
| wavelet-HLL | gldm       | HighGrayLevelEmphasis                | 288.738041   |
| wavelet-HLL | gldm       | DependenceEntropy                    | 6.64144143   |
| wavelet-HLL | gldm       | DependenceNonUniformity              | 112.3166287  |
| wavelet-HLL | gldm       | GrayLevelNonUniformity               | 85.91571754  |
| wavelet-HLL | gldm       | SmallDependenceEmphasis              | 0.295812026  |
| wavelet-HLL | gldm       | SmallDependenceHighGrayLevelEmphasis | 91.16287597  |
| wavelet-HLL | gldm       | DependenceNonUniformityNormalized    | 0.127923267  |
| wavelet-HLL | gldm       | LargeDependenceEmphasis              | 37.26879271  |
| wavelet-HLL | gldm       | LargeDependenceLowGrayLevelEmphasis  | 0.140841809  |
| wavelet-HLL | gldm       | DependenceVariance                   | 15.71720259  |
| wavelet-HLL | gldm       | LargeDependenceHighGrayLevelEmphasis | 10973.28702  |
| wavelet-HLL | gldm       | SmallDependenceLowGrayLevelEmphasis  | 0.004090197  |
| wavelet-HLL | gldm       | LowGrayLevelEmphasis                 | 0.007878733  |
| wavelet-HLL | glcm       | JointAverage                         | 15.94914605  |
| wavelet-HLL | glcm       | SumAverage                           | 31.8982921   |
| wavelet-HLL | glcm       | JointEntropy                         | 6.914640996  |
| wavelet-HLL | glcm       | ClusterShade                         | 301.3111696  |
| wavelet-HLL | glcm       | MaximumProbability                   | 0.084424934  |
| wavelet-HLL | glcm       | Idmn                                 | 0.984150576  |
| wavelet-HLL | glcm       | JointEnergy                          | 0.022665015  |
| wavelet-HLL | glcm       | Contrast                             | 36.13074715  |
| wavelet-HLL | glcm       | DifferenceEntropy                    | 3.359232941  |
| wavelet-HLL | glcm       | InverseVariance                      | 0.31526069   |
| wavelet-HLL | glcm       | DifferenceVariance                   | 22.46252942  |
| wavelet-HLL | glcm       | Idn                                  | 0.931454465  |
| wavelet-HLL | glcm       | Idm                                  | 0.350949521  |
| wavelet-HLL | glcm       | Correlation                          | 0.198808726  |
| wavelet-HLL | glcm       | Autocorrelation                      | 259.4576237  |
| wavelet-HLL | glcm       | SumEntropy                           | 4.462049731  |
| wavelet-HLL | glcm       | SumSquares                           | 23.13585699  |
| wavelet-HLL | glcm       | ClusterProminence                    | 29185.19545  |
| wavelet-HLL | glcm       | Imc2                                 | 0.858844982  |
| wavelet-HLL | glcm       | Imc1                                 | -0.180948223 |
| wavelet-HLL | glcm       | DifferenceAverage                    | 3.621998807  |
| wavelet-HLL | glcm       | Id                                   | 0.418266058  |
| wavelet-HLL | glcm       | ClusterTendency                      | 56.41268082  |
| wavelet-HLL | firstorder | InterquartileRange                   | 106.5605076  |
| wavelet-HLL | firstorder | Skewness                             | 0.918517484  |
| wavelet-HLL | firstorder | Uniformity                           | 0.097853892  |
| wavelet-HLL | firstorder | Median                               | -17.59761238 |
| wavelet-HLL | firstorder | Energy                               | 16097842.62  |
| wavelet-HLL | firstorder | RobustMeanAbsoluteDeviation          | 49.23603731  |
| wavelet-HLL | firstorder | MeanAbsoluteDeviation                | 87.44304995  |
| wavelet-HLL | firstorder | TotalEnergy                          | 434641750.8  |
| wavelet-HLL | firstorder | Maximum                              | 674.9991912  |
| wavelet-HLL | firstorder | RootMeanSquared                      | 135.4055859  |
| wavelet-HLL | firstorder | 90Percentile                         | 73.2855888   |
| wavelet-HLL | firstorder | Minimum                              | -418.5070148 |
| wavelet-HLL | firstorder | Entropy                              | 4.021049921  |
| wavelet-HLL | firstorder | Range                                | 1093.506206  |
| wavelet-HLL | firstorder | Variance                             | 17203.94353  |
| wavelet-HLL | firstorder | 10Percentile                         | -197.4723708 |

|             |            |                                      |              |
|-------------|------------|--------------------------------------|--------------|
| wavelet-HLL | firstorder | Kurtosis                             | 7.417621645  |
| wavelet-HLL | firstorder | Mean                                 | -33.62631644 |
| wavelet-HLL | glrlm      | ShortRunLowGrayLevelEmphasis         | 0.008082401  |
| wavelet-HLL | glrlm      | GrayLevelVariance                    | 30.92451133  |
| wavelet-HLL | glrlm      | LowGrayLevelRunEmphasis              | 0.008498713  |
| wavelet-HLL | glrlm      | GrayLevelNonUniformityNormalized     | 0.080207342  |
| wavelet-HLL | glrlm      | RunVariance                          | 0.246098953  |
| wavelet-HLL | glrlm      | GrayLevelNonUniformity               | 60.63350016  |
| wavelet-HLL | glrlm      | LongRunEmphasis                      | 1.605540848  |
| wavelet-HLL | glrlm      | ShortRunHighGrayLevelEmphasis        | 260.5096925  |
| wavelet-HLL | glrlm      | RunLengthNonUniformity               | 589.3194412  |
| wavelet-HLL | glrlm      | ShortRunEmphasis                     | 0.902695409  |
| wavelet-HLL | glrlm      | LongRunHighGrayLevelEmphasis         | 464.9455796  |
| wavelet-HLL | glrlm      | RunPercentage                        | 0.859908884  |
| wavelet-HLL | glrlm      | LongRunLowGrayLevelEmphasis          | 0.010923649  |
| wavelet-HLL | glrlm      | RunEntropy                           | 4.734419016  |
| wavelet-HLL | glrlm      | HighGrayLevelRunEmphasis             | 288.5405313  |
| wavelet-HLL | glrlm      | RunLengthNonUniformityNormalized     | 0.778733379  |
| wavelet-HLL | glszm      | GrayLevelVariance                    | 54.40298576  |
| wavelet-HLL | glszm      | ZoneVariance                         | 167.3096695  |
| wavelet-HLL | glszm      | GrayLevelNonUniformityNormalized     | 0.046018992  |
| wavelet-HLL | glszm      | SizeZoneNonUniformityNormalized      | 0.455145179  |
| wavelet-HLL | glszm      | SizeZoneNonUniformity                | 134.722973   |
| wavelet-HLL | glszm      | GrayLevelNonUniformity               | 13.62162162  |
| wavelet-HLL | glszm      | LargeAreaEmphasis                    | 176.1081081  |
| wavelet-HLL | glszm      | SmallAreaHighGrayLevelEmphasis       | 222.4983427  |
| wavelet-HLL | glszm      | ZonePercentage                       | 0.337129841  |
| wavelet-HLL | glszm      | LargeAreaLowGrayLevelEmphasis        | 0.614873333  |
| wavelet-HLL | glszm      | LargeAreaHighGrayLevelEmphasis       | 52629.18919  |
| wavelet-HLL | glszm      | HighGrayLevelZoneEmphasis            | 303.3175676  |
| wavelet-HLL | glszm      | SmallAreaEmphasis                    | 0.701078532  |
| wavelet-HLL | glszm      | LowGrayLevelZoneEmphasis             | 0.013394854  |
| wavelet-HLL | glszm      | ZoneEntropy                          | 6.03608475   |
| wavelet-HLL | glszm      | SmallAreaLowGrayLevelEmphasis        | 0.010866919  |
| wavelet-HLL | ngtdm      | Coarseness                           | 0.008557207  |
| wavelet-HLL | ngtdm      | Complexity                           | 1904.608109  |
| wavelet-HLL | ngtdm      | Strength                             | 6.164815651  |
| wavelet-HLL | ngtdm      | Contrast                             | 0.098795483  |
| wavelet-HLL | ngtdm      | Busyness                             | 0.131829012  |
| wavelet-LHL | gldm       | GrayLevelVariance                    | 30.32969422  |
| wavelet-LHL | gldm       | HighGrayLevelEmphasis                | 450.8132118  |
| wavelet-LHL | gldm       | DependenceEntropy                    | 6.571937399  |
| wavelet-LHL | gldm       | DependenceNonUniformity              | 114.7084282  |
| wavelet-LHL | gldm       | GrayLevelNonUniformity               | 88.15034169  |
| wavelet-LHL | gldm       | SmallDependenceEmphasis              | 0.31321319   |
| wavelet-LHL | gldm       | SmallDependenceHighGrayLevelEmphasis | 156.3507567  |
| wavelet-LHL | gldm       | DependenceNonUniformityNormalized    | 0.130647413  |
| wavelet-LHL | gldm       | LargeDependenceEmphasis              | 36.11617312  |
| wavelet-LHL | gldm       | LargeDependenceLowGrayLevelEmphasis  | 0.084425274  |
| wavelet-LHL | gldm       | DependenceVariance                   | 15.38153081  |
| wavelet-LHL | gldm       | LargeDependenceHighGrayLevelEmphasis | 16324.40319  |
| wavelet-LHL | gldm       | SmallDependenceLowGrayLevelEmphasis  | 0.002649104  |
| wavelet-LHL | gldm       | LowGrayLevelEmphasis                 | 0.004526799  |
| wavelet-LHL | glcm       | JointAverage                         | 20.35844627  |
| wavelet-LHL | glcm       | SumAverage                           | 40.71689253  |

|             |            |                                  |              |
|-------------|------------|----------------------------------|--------------|
| wavelet-LHL | glcm       | JointEntropy                     | 6.927616451  |
| wavelet-LHL | glcm       | ClusterShade                     | 269.6967633  |
| wavelet-LHL | glcm       | MaximumProbability               | 0.077834448  |
| wavelet-LHL | glcm       | Idmn                             | 0.986029795  |
| wavelet-LHL | glcm       | JointEnergy                      | 0.02295396   |
| wavelet-LHL | glcm       | Contrast                         | 41.07222095  |
| wavelet-LHL | glcm       | DifferenceEntropy                | 3.397406099  |
| wavelet-LHL | glcm       | InverseVariance                  | 0.314013779  |
| wavelet-LHL | glcm       | DifferenceVariance               | 26.42801213  |
| wavelet-LHL | glcm       | Idn                              | 0.936945834  |
| wavelet-LHL | glcm       | Idm                              | 0.346806025  |
| wavelet-LHL | glcm       | Correlation                      | 0.15895937   |
| wavelet-LHL | glcm       | Autocorrelation                  | 419.0507918  |
| wavelet-LHL | glcm       | SumEntropy                       | 4.468938572  |
| wavelet-LHL | glcm       | SumSquares                       | 25.11253094  |
| wavelet-LHL | glcm       | ClusterProminence                | 32678.89542  |
| wavelet-LHL | glcm       | Imc2                             | 0.865855665  |
| wavelet-LHL | glcm       | Imc1                             | -0.185589368 |
| wavelet-LHL | glcm       | DifferenceAverage                | 3.760129302  |
| wavelet-LHL | glcm       | Id                               | 0.414592469  |
| wavelet-LHL | glcm       | ClusterTendency                  | 59.37790283  |
| wavelet-LHL | firstorder | InterquartileRange               | 96.45505365  |
| wavelet-LHL | firstorder | Skewness                         | 0.896802372  |
| wavelet-LHL | firstorder | Uniformity                       | 0.100399022  |
| wavelet-LHL | firstorder | Median                           | -13.03011706 |
| wavelet-LHL | firstorder | Energy                           | 17087207.94  |
| wavelet-LHL | firstorder | RobustMeanAbsoluteDeviation      | 44.65153989  |
| wavelet-LHL | firstorder | MeanAbsoluteDeviation            | 86.95128975  |
| wavelet-LHL | firstorder | TotalEnergy                      | 461354614.4  |
| wavelet-LHL | firstorder | Maximum                          | 705.0457969  |
| wavelet-LHL | firstorder | RootMeanSquared                  | 139.5045249  |
| wavelet-LHL | firstorder | 90Percentile                     | 83.67902978  |
| wavelet-LHL | firstorder | Minimum                          | -512.0702756 |
| wavelet-LHL | firstorder | Entropy                          | 4.046560969  |
| wavelet-LHL | firstorder | Range                            | 1217.116072  |
| wavelet-LHL | firstorder | Variance                         | 18860.41997  |
| wavelet-LHL | firstorder | 10Percentile                     | -190.5849752 |
| wavelet-LHL | firstorder | Kurtosis                         | 8.019777099  |
| wavelet-LHL | firstorder | Mean                             | -24.51718767 |
| wavelet-LHL | glrlm      | ShortRunLowGrayLevelEmphasis     | 0.004631981  |
| wavelet-LHL | glrlm      | GrayLevelVariance                | 34.37204619  |
| wavelet-LHL | glrlm      | LowGrayLevelRunEmphasis          | 0.004866689  |
| wavelet-LHL | glrlm      | GrayLevelNonUniformityNormalized | 0.08248079   |
| wavelet-LHL | glrlm      | RunVariance                      | 0.235481543  |
| wavelet-LHL | glrlm      | GrayLevelNonUniformity           | 62.5980551   |
| wavelet-LHL | glrlm      | LongRunEmphasis                  | 1.581918826  |
| wavelet-LHL | glrlm      | ShortRunHighGrayLevelEmphasis    | 409.4655727  |
| wavelet-LHL | glrlm      | RunLengthNonUniformity           | 592.3939504  |
| wavelet-LHL | glrlm      | ShortRunEmphasis                 | 0.904127894  |
| wavelet-LHL | glrlm      | LongRunHighGrayLevelEmphasis     | 711.8866087  |
| wavelet-LHL | glrlm      | RunPercentage                    | 0.86332574   |
| wavelet-LHL | glrlm      | LongRunLowGrayLevelEmphasis      | 0.006240956  |
| wavelet-LHL | glrlm      | RunEntropy                       | 4.759537802  |
| wavelet-LHL | glrlm      | HighGrayLevelRunEmphasis         | 451.7983414  |
| wavelet-LHL | glrlm      | RunLengthNonUniformityNormalized | 0.780494582  |

|             |       |                                      |              |
|-------------|-------|--------------------------------------|--------------|
| wavelet-LHL | glszm | GrayLevelVariance                    | 69.34356439  |
| wavelet-LHL | glszm | ZoneVariance                         | 178.5411125  |
| wavelet-LHL | glszm | GrayLevelNonUniformityNormalized     | 0.04025682   |
| wavelet-LHL | glszm | SizeZoneNonUniformityNormalized      | 0.520944956  |
| wavelet-LHL | glszm | SizeZoneNonUniformity                | 155.7625418  |
| wavelet-LHL | glszm | GrayLevelNonUniformity               | 12.0367893   |
| wavelet-LHL | glszm | LargeAreaEmphasis                    | 187.1638796  |
| wavelet-LHL | glszm | SmallAreaHighGrayLevelEmphasis       | 390.4147627  |
| wavelet-LHL | glszm | ZonePercentage                       | 0.340546697  |
| wavelet-LHL | glszm | LargeAreaLowGrayLevelEmphasis        | 0.423883995  |
| wavelet-LHL | glszm | LargeAreaHighGrayLevelEmphasis       | 84722.13378  |
| wavelet-LHL | glszm | HighGrayLevelZoneEmphasis            | 491.9966555  |
| wavelet-LHL | glszm | SmallAreaEmphasis                    | 0.749558424  |
| wavelet-LHL | glszm | LowGrayLevelZoneEmphasis             | 0.008146781  |
| wavelet-LHL | glszm | ZoneEntropy                          | 6.06994285   |
| wavelet-LHL | glszm | SmallAreaLowGrayLevelEmphasis        | 0.007232269  |
| wavelet-LHL | ngtdm | Coarseness                           | 0.008507263  |
| wavelet-LHL | ngtdm | Complexity                           | 2430.102304  |
| wavelet-LHL | ngtdm | Strength                             | 7.82503369   |
| wavelet-LHL | ngtdm | Contrast                             | 0.089113466  |
| wavelet-LHL | ngtdm | Busyness                             | 0.089821145  |
| wavelet-LHH | gldm  | GrayLevelVariance                    | 10.76546406  |
| wavelet-LHH | gldm  | HighGrayLevelEmphasis                | 476.4009112  |
| wavelet-LHH | gldm  | DependenceEntropy                    | 6.127401115  |
| wavelet-LHH | gldm  | DependenceNonUniformity              | 87.92710706  |
| wavelet-LHH | gldm  | GrayLevelNonUniformity               | 129.0865604  |
| wavelet-LHH | gldm  | SmallDependenceEmphasis              | 0.230346123  |
| wavelet-LHH | gldm  | SmallDependenceHighGrayLevelEmphasis | 114.9302899  |
| wavelet-LHH | gldm  | DependenceNonUniformityNormalized    | 0.100144769  |
| wavelet-LHH | gldm  | LargeDependenceEmphasis              | 41.81548975  |
| wavelet-LHH | gldm  | LargeDependenceLowGrayLevelEmphasis  | 0.092225229  |
| wavelet-LHH | gldm  | DependenceVariance                   | 14.84178164  |
| wavelet-LHH | gldm  | LargeDependenceHighGrayLevelEmphasis | 19420.66059  |
| wavelet-LHH | gldm  | SmallDependenceLowGrayLevelEmphasis  | 0.001963151  |
| wavelet-LHH | gldm  | LowGrayLevelEmphasis                 | 0.003666535  |
| wavelet-LHH | glcm  | JointAverage                         | 21.5211953   |
| wavelet-LHH | glcm  | SumAverage                           | 43.0423906   |
| wavelet-LHH | glcm  | JointEntropy                         | 5.868790638  |
| wavelet-LHH | glcm  | ClusterShade                         | -61.06949229 |
| wavelet-LHH | glcm  | MaximumProbability                   | 0.091488348  |
| wavelet-LHH | glcm  | Idmn                                 | 0.991294205  |
| wavelet-LHH | glcm  | JointEnergy                          | 0.037330467  |
| wavelet-LHH | glcm  | Contrast                             | 15.58170709  |
| wavelet-LHH | glcm  | DifferenceEntropy                    | 2.813025472  |
| wavelet-LHH | glcm  | InverseVariance                      | 0.393340427  |
| wavelet-LHH | glcm  | DifferenceVariance                   | 9.916840401  |
| wavelet-LHH | glcm  | Idn                                  | 0.948580625  |
| wavelet-LHH | glcm  | Idm                                  | 0.418718111  |
| wavelet-LHH | glcm  | Correlation                          | 0.03353654   |
| wavelet-LHH | glcm  | Autocorrelation                      | 463.4620273  |
| wavelet-LHH | glcm  | SumEntropy                           | 3.661518598  |
| wavelet-LHH | glcm  | SumSquares                           | 8.087805128  |
| wavelet-LHH | glcm  | ClusterProminence                    | 3791.03639   |
| wavelet-LHH | glcm  | Imc2                                 | 0.705734028  |
| wavelet-LHH | glcm  | Imc1                                 | -0.112305796 |

|             |            |                                  |              |
|-------------|------------|----------------------------------|--------------|
| wavelet-LHH | glcm       | DifferenceAverage                | 2.360720727  |
| wavelet-LHH | glcm       | Id                               | 0.478612278  |
| wavelet-LHH | glcm       | ClusterTendency                  | 16.76951342  |
| wavelet-LHH | firstorder | InterquartileRange               | 55.97726518  |
| wavelet-LHH | firstorder | Skewness                         | -0.685364915 |
| wavelet-LHH | firstorder | Uniformity                       | 0.147023417  |
| wavelet-LHH | firstorder | Median                           | -0.061354359 |
| wavelet-LHH | firstorder | Energy                           | 5828813.462  |
| wavelet-LHH | firstorder | RobustMeanAbsoluteDeviation      | 24.86953183  |
| wavelet-LHH | firstorder | MeanAbsoluteDeviation            | 49.07652249  |
| wavelet-LHH | firstorder | TotalEnergy                      | 157377963.5  |
| wavelet-LHH | firstorder | Maximum                          | 465.4963563  |
| wavelet-LHH | firstorder | RootMeanSquared                  | 81.47846161  |
| wavelet-LHH | firstorder | 90Percentile                     | 76.27139808  |
| wavelet-LHH | firstorder | Minimum                          | -512.7585348 |
| wavelet-LHH | firstorder | Entropy                          | 3.334694331  |
| wavelet-LHH | firstorder | Range                            | 978.2548912  |
| wavelet-LHH | firstorder | Variance                         | 6635.618099  |
| wavelet-LHH | firstorder | 10Percentile                     | -64.77108127 |
| wavelet-LHH | firstorder | Kurtosis                         | 11.86090901  |
| wavelet-LHH | firstorder | Mean                             | 1.766807233  |
| wavelet-LHH | glrlm      | ShortRunLowGrayLevelEmphasis     | 0.003703488  |
| wavelet-LHH | glrlm      | GrayLevelVariance                | 12.58219548  |
| wavelet-LHH | glrlm      | LowGrayLevelRunEmphasis          | 0.003955124  |
| wavelet-LHH | glrlm      | GrayLevelNonUniformityNormalized | 0.126770056  |
| wavelet-LHH | glrlm      | RunVariance                      | 0.288063408  |
| wavelet-LHH | glrlm      | GrayLevelNonUniformity           | 93.4245296   |
| wavelet-LHH | glrlm      | LongRunEmphasis                  | 1.716526475  |
| wavelet-LHH | glrlm      | ShortRunHighGrayLevelEmphasis    | 424.9488321  |
| wavelet-LHH | glrlm      | RunLengthNonUniformity           | 547.6690898  |
| wavelet-LHH | glrlm      | ShortRunEmphasis                 | 0.884803243  |
| wavelet-LHH | glrlm      | LongRunHighGrayLevelEmphasis     | 811.880851   |
| wavelet-LHH | glrlm      | RunPercentage                    | 0.838706851  |
| wavelet-LHH | glrlm      | LongRunLowGrayLevelEmphasis      | 0.005514708  |
| wavelet-LHH | glrlm      | RunEntropy                       | 4.149602558  |
| wavelet-LHH | glrlm      | HighGrayLevelRunEmphasis         | 478.5684602  |
| wavelet-LHH | glrlm      | RunLengthNonUniformityNormalized | 0.742415472  |
| wavelet-LHH | glszm      | GrayLevelVariance                | 36.03246263  |
| wavelet-LHH | glszm      | ZoneVariance                     | 380.0457407  |
| wavelet-LHH | glszm      | GrayLevelNonUniformityNormalized | 0.062658822  |
| wavelet-LHH | glszm      | SizeZoneNonUniformityNormalized  | 0.494700213  |
| wavelet-LHH | glszm      | SizeZoneNonUniformity            | 103.3923445  |
| wavelet-LHH | glszm      | GrayLevelNonUniformity           | 13.09569378  |
| wavelet-LHH | glszm      | LargeAreaEmphasis                | 397.6937799  |
| wavelet-LHH | glszm      | SmallAreaHighGrayLevelEmphasis   | 369.1933252  |
| wavelet-LHH | glszm      | ZonePercentage                   | 0.238041002  |
| wavelet-LHH | glszm      | LargeAreaLowGrayLevelEmphasis    | 0.876208701  |
| wavelet-LHH | glszm      | LargeAreaHighGrayLevelEmphasis   | 182549.7129  |
| wavelet-LHH | glszm      | HighGrayLevelZoneEmphasis        | 501.8899522  |
| wavelet-LHH | glszm      | SmallAreaEmphasis                | 0.730380591  |
| wavelet-LHH | glszm      | LowGrayLevelZoneEmphasis         | 0.008356025  |
| wavelet-LHH | glszm      | ZoneEntropy                      | 5.605252982  |
| wavelet-LHH | glszm      | SmallAreaLowGrayLevelEmphasis    | 0.007710585  |
| wavelet-LHH | ngtdm      | Coarseness                       | 0.008232749  |
| wavelet-LHH | ngtdm      | Complexity                       | 964.7740149  |

|             |            |                                      |              |
|-------------|------------|--------------------------------------|--------------|
| wavelet-LHH | ngtdm      | Strength                             | 4.441452751  |
| wavelet-LHH | ngtdm      | Contrast                             | 0.040865802  |
| wavelet-LHH | ngtdm      | Busyness                             | 0.110101805  |
| wavelet-LLH | gldm       | GrayLevelVariance                    | 24.62647688  |
| wavelet-LLH | gldm       | HighGrayLevelEmphasis                | 1557.1082    |
| wavelet-LLH | gldm       | DependenceEntropy                    | 6.450555092  |
| wavelet-LLH | gldm       | DependenceNonUniformity              | 106.022779   |
| wavelet-LLH | gldm       | GrayLevelNonUniformity               | 94.85649203  |
| wavelet-LLH | gldm       | SmallDependenceEmphasis              | 0.299666636  |
| wavelet-LLH | gldm       | SmallDependenceHighGrayLevelEmphasis | 464.2467745  |
| wavelet-LLH | gldm       | DependenceNonUniformityNormalized    | 0.120754874  |
| wavelet-LLH | gldm       | LargeDependenceEmphasis              | 36.13895216  |
| wavelet-LLH | gldm       | LargeDependenceLowGrayLevelEmphasis  | 0.023509198  |
| wavelet-LLH | gldm       | DependenceVariance                   | 14.2902486   |
| wavelet-LLH | gldm       | LargeDependenceHighGrayLevelEmphasis | 58785.15148  |
| wavelet-LLH | gldm       | SmallDependenceLowGrayLevelEmphasis  | 0.001369342  |
| wavelet-LLH | gldm       | LowGrayLevelEmphasis                 | 0.001829098  |
| wavelet-LLH | glcm       | JointAverage                         | 39.25080981  |
| wavelet-LLH | glcm       | SumAverage                           | 78.50161962  |
| wavelet-LLH | glcm       | JointEntropy                         | 6.617841506  |
| wavelet-LLH | glcm       | ClusterShade                         | -176.3416445 |
| wavelet-LLH | glcm       | MaximumProbability                   | 0.082708325  |
| wavelet-LLH | glcm       | Idmn                                 | 0.993237123  |
| wavelet-LLH | glcm       | JointEnergy                          | 0.027324251  |
| wavelet-LLH | glcm       | Contrast                             | 27.89641549  |
| wavelet-LLH | glcm       | DifferenceEntropy                    | 3.225456052  |
| wavelet-LLH | glcm       | InverseVariance                      | 0.339271189  |
| wavelet-LLH | glcm       | DifferenceVariance                   | 17.20464141  |
| wavelet-LLH | glcm       | Idn                                  | 0.953769054  |
| wavelet-LLH | glcm       | Idm                                  | 0.365744385  |
| wavelet-LLH | glcm       | Correlation                          | 0.209546976  |
| wavelet-LLH | glcm       | Autocorrelation                      | 1544.370916  |
| wavelet-LLH | glcm       | SumEntropy                           | 4.252361628  |
| wavelet-LLH | glcm       | SumSquares                           | 17.68416234  |
| wavelet-LLH | glcm       | ClusterProminence                    | 17120.17071  |
| wavelet-LLH | glcm       | Imc2                                 | 0.82034636   |
| wavelet-LLH | glcm       | Imc1                                 | -0.158144591 |
| wavelet-LLH | glcm       | DifferenceAverage                    | 3.234557341  |
| wavelet-LLH | glcm       | Id                                   | 0.431411984  |
| wavelet-LLH | glcm       | ClusterTendency                      | 42.84023388  |
| wavelet-LLH | firstorder | InterquartileRange                   | 88.73798296  |
| wavelet-LLH | firstorder | Skewness                             | -0.769344289 |
| wavelet-LLH | firstorder | Uniformity                           | 0.108037007  |
| wavelet-LLH | firstorder | Median                               | -13.7370033  |
| wavelet-LLH | firstorder | Energy                               | 14473928.22  |
| wavelet-LLH | firstorder | RobustMeanAbsoluteDeviation          | 42.58307062  |
| wavelet-LLH | firstorder | MeanAbsoluteDeviation                | 80.31395791  |
| wavelet-LLH | firstorder | TotalEnergy                          | 390796062    |
| wavelet-LLH | firstorder | Maximum                              | 531.7601322  |
| wavelet-LLH | firstorder | RootMeanSquared                      | 128.3943607  |
| wavelet-LLH | firstorder | 90Percentile                         | 58.91036388  |
| wavelet-LLH | firstorder | Minimum                              | -976.7104414 |
| wavelet-LLH | firstorder | Entropy                              | 3.892582455  |
| wavelet-LLH | firstorder | Range                                | 1508.470574  |
| wavelet-LLH | firstorder | Variance                             | 15339.18493  |



|             |            |                                      |              |
|-------------|------------|--------------------------------------|--------------|
| wavelet-LLH | firstorder | 10Percentile                         | -179.3510361 |
| wavelet-LLH | firstorder | Kurtosis                             | 10.43505168  |
| wavelet-LLH | firstorder | Mean                                 | -33.85154264 |
| wavelet-LLH | glrlm      | ShortRunLowGrayLevelEmphasis         | 0.001966337  |
| wavelet-LLH | glrlm      | GrayLevelVariance                    | 27.96958317  |
| wavelet-LLH | glrlm      | LowGrayLevelRunEmphasis              | 0.002028158  |
| wavelet-LLH | glrlm      | GrayLevelNonUniformityNormalized     | 0.089796277  |
| wavelet-LLH | glrlm      | RunVariance                          | 0.253644797  |
| wavelet-LLH | glrlm      | GrayLevelNonUniformity               | 67.75562453  |
| wavelet-LLH | glrlm      | LongRunEmphasis                      | 1.614336844  |
| wavelet-LLH | glrlm      | ShortRunHighGrayLevelEmphasis        | 1392.868968  |
| wavelet-LLH | glrlm      | RunLengthNonUniformity               | 587.0251991  |
| wavelet-LLH | glrlm      | ShortRunEmphasis                     | 0.902385911  |
| wavelet-LLH | glrlm      | LongRunHighGrayLevelEmphasis         | 2540.093555  |
| wavelet-LLH | glrlm      | RunPercentage                        | 0.85868232   |
| wavelet-LLH | glrlm      | LongRunLowGrayLevelEmphasis          | 0.00241225   |
| wavelet-LLH | glrlm      | RunEntropy                           | 4.626650729  |
| wavelet-LLH | glrlm      | HighGrayLevelRunEmphasis             | 1548.883302  |
| wavelet-LLH | glrlm      | RunLengthNonUniformityNormalized     | 0.777521414  |
| wavelet-LLH | glszm      | GrayLevelVariance                    | 60.26342435  |
| wavelet-LLH | glszm      | ZoneVariance                         | 213.7142614  |
| wavelet-LLH | glszm      | GrayLevelNonUniformityNormalized     | 0.046753026  |
| wavelet-LLH | glszm      | SizeZoneNonUniformityNormalized      | 0.534242251  |
| wavelet-LLH | glszm      | SizeZoneNonUniformity                | 153.3275261  |
| wavelet-LLH | glszm      | GrayLevelNonUniformity               | 13.41811847  |
| wavelet-LLH | glszm      | LargeAreaEmphasis                    | 223.0731707  |
| wavelet-LLH | glszm      | SmallAreaHighGrayLevelEmphasis       | 1182.462091  |
| wavelet-LLH | glszm      | ZonePercentage                       | 0.326879271  |
| wavelet-LLH | glszm      | LargeAreaLowGrayLevelEmphasis        | 0.140589647  |
| wavelet-LLH | glszm      | LargeAreaHighGrayLevelEmphasis       | 363968.9373  |
| wavelet-LLH | glszm      | HighGrayLevelZoneEmphasis            | 1533.271777  |
| wavelet-LLH | glszm      | SmallAreaEmphasis                    | 0.758195144  |
| wavelet-LLH | glszm      | LowGrayLevelZoneEmphasis             | 0.004256587  |
| wavelet-LLH | glszm      | ZoneEntropy                          | 5.878264961  |
| wavelet-LLH | glszm      | SmallAreaLowGrayLevelEmphasis        | 0.004078755  |
| wavelet-LLH | ngtdm      | Coarseness                           | 0.008246022  |
| wavelet-LLH | ngtdm      | Complexity                           | 2067.68736   |
| wavelet-LLH | ngtdm      | Strength                             | 8.043787983  |
| wavelet-LLH | ngtdm      | Contrast                             | 0.074931863  |
| wavelet-LLH | ngtdm      | Busyness                             | 0.050117998  |
| wavelet-LLL | gldm       | GrayLevelVariance                    | 236.7875647  |
| wavelet-LLL | gldm       | HighGrayLevelEmphasis                | 4526.440774  |
| wavelet-LLL | gldm       | DependenceEntropy                    | 7.023623419  |
| wavelet-LLL | gldm       | DependenceNonUniformity              | 173.0273349  |
| wavelet-LLL | gldm       | GrayLevelNonUniformity               | 51.90432802  |
| wavelet-LLL | gldm       | SmallDependenceEmphasis              | 0.44507113   |
| wavelet-LLL | gldm       | SmallDependenceHighGrayLevelEmphasis | 1514.730644  |
| wavelet-LLL | gldm       | DependenceNonUniformityNormalized    | 0.197069857  |
| wavelet-LLL | gldm       | LargeDependenceEmphasis              | 26.84510251  |
| wavelet-LLL | gldm       | LargeDependenceLowGrayLevelEmphasis  | 0.006486188  |
| wavelet-LLL | gldm       | DependenceVariance                   | 12.52948044  |
| wavelet-LLL | gldm       | LargeDependenceHighGrayLevelEmphasis | 149561.2699  |
| wavelet-LLL | gldm       | SmallDependenceLowGrayLevelEmphasis  | 0.001740468  |
| wavelet-LLL | gldm       | LowGrayLevelEmphasis                 | 0.001849348  |
| wavelet-LLL | glcm       | JointAverage                         | 68.56995745  |

|             |            |                                  |              |
|-------------|------------|----------------------------------|--------------|
| wavelet-LLL | glcm       | SumAverage                       | 137.1399149  |
| wavelet-LLL | glcm       | JointEntropy                     | 7.852882506  |
| wavelet-LLL | glcm       | ClusterShade                     | -22416.83159 |
| wavelet-LLL | glcm       | MaximumProbability               | 0.045034933  |
| wavelet-LLL | glcm       | Idmn                             | 0.978922855  |
| wavelet-LLL | glcm       | JointEnergy                      | 0.011823404  |
| wavelet-LLL | glcm       | Contrast                         | 161.4618211  |
| wavelet-LLL | glcm       | DifferenceEntropy                | 4.200493421  |
| wavelet-LLL | glcm       | InverseVariance                  | 0.266547971  |
| wavelet-LLL | glcm       | DifferenceVariance               | 102.4007105  |
| wavelet-LLL | glcm       | Idn                              | 0.92465794   |
| wavelet-LLL | glcm       | Idm                              | 0.282367892  |
| wavelet-LLL | glcm       | Correlation                      | 0.505684773  |
| wavelet-LLL | glcm       | Autocorrelation                  | 4786.4889    |
| wavelet-LLL | glcm       | SumEntropy                       | 5.384185854  |
| wavelet-LLL | glcm       | SumSquares                       | 165.2364023  |
| wavelet-LLL | glcm       | ClusterProminence                | 1801553.42   |
| wavelet-LLL | glcm       | Imc2                             | 0.955885372  |
| wavelet-LLL | glcm       | Imc1                             | -0.271759895 |
| wavelet-LLL | glcm       | DifferenceAverage                | 7.647703745  |
| wavelet-LLL | glcm       | Id                               | 0.344078678  |
| wavelet-LLL | glcm       | ClusterTendency                  | 499.483788   |
| wavelet-LLL | firstorder | InterquartileRange               | 422.534283   |
| wavelet-LLL | firstorder | Skewness                         | -1.634246521 |
| wavelet-LLL | firstorder | Uniformity                       | 0.059116547  |
| wavelet-LLL | firstorder | Median                           | 47.24395733  |
| wavelet-LLL | firstorder | Energy                           | 149619932.8  |
| wavelet-LLL | firstorder | RobustMeanAbsoluteDeviation      | 194.926948   |
| wavelet-LLL | firstorder | MeanAbsoluteDeviation            | 302.2045232  |
| wavelet-LLL | firstorder | TotalEnergy                      | 4039738187   |
| wavelet-LLL | firstorder | Maximum                          | 270.6545692  |
| wavelet-LLL | firstorder | RootMeanSquared                  | 412.8073961  |
| wavelet-LLL | firstorder | 90Percentile                     | 134.4939095  |
| wavelet-LLL | firstorder | Minimum                          | -1762.058667 |
| wavelet-LLL | firstorder | Entropy                          | 4.946587683  |
| wavelet-LLL | firstorder | Range                            | 2032.713236  |
| wavelet-LLL | firstorder | Variance                         | 147984.6437  |
| wavelet-LLL | firstorder | 10Percentile                     | -743.901637  |
| wavelet-LLL | firstorder | Kurtosis                         | 5.11801437   |
| wavelet-LLL | firstorder | Mean                             | -149.7508015 |
| wavelet-LLL | glrlm      | ShortRunLowGrayLevelEmphasis     | 0.002036779  |
| wavelet-LLL | glrlm      | GrayLevelVariance                | 252.4341454  |
| wavelet-LLL | glrlm      | LowGrayLevelRunEmphasis          | 0.002050331  |
| wavelet-LLL | glrlm      | GrayLevelNonUniformityNormalized | 0.048424477  |
| wavelet-LLL | glrlm      | RunVariance                      | 0.176512182  |
| wavelet-LLL | glrlm      | GrayLevelNonUniformity           | 38.00351808  |
| wavelet-LLL | glrlm      | LongRunEmphasis                  | 1.433026255  |
| wavelet-LLL | glrlm      | ShortRunHighGrayLevelEmphasis    | 3988.887144  |
| wavelet-LLL | glrlm      | RunLengthNonUniformity           | 648.4871713  |
| wavelet-LLL | glrlm      | ShortRunEmphasis                 | 0.926257798  |
| wavelet-LLL | glrlm      | LongRunHighGrayLevelEmphasis     | 6817.848374  |
| wavelet-LLL | glrlm      | RunPercentage                    | 0.892938497  |
| wavelet-LLL | glrlm      | LongRunLowGrayLevelEmphasis      | 0.002129127  |
| wavelet-LLL | glrlm      | RunEntropy                       | 5.537375738  |
| wavelet-LLL | glrlm      | HighGrayLevelRunEmphasis         | 4399.549906  |

|             |       |                                      |             |
|-------------|-------|--------------------------------------|-------------|
| wavelet-LLL | glrlm | RunLengthNonUniformityNormalized     | 0.826511271 |
| wavelet-LLL | glszm | GrayLevelVariance                    | 299.8557314 |
| wavelet-LLL | glszm | ZoneVariance                         | 76.59943997 |
| wavelet-LLL | glszm | GrayLevelNonUniformityNormalized     | 0.02110454  |
| wavelet-LLL | glszm | SizeZoneNonUniformityNormalized      | 0.68908543  |
| wavelet-LLL | glszm | SizeZoneNonUniformity                | 283.2141119 |
| wavelet-LLL | glszm | GrayLevelNonUniformity               | 8.673965937 |
| wavelet-LLL | glszm | LargeAreaEmphasis                    | 81.16301703 |
| wavelet-LLL | glszm | SmallAreaHighGrayLevelEmphasis       | 2735.743178 |
| wavelet-LLL | glszm | ZonePercentage                       | 0.468109339 |
| wavelet-LLL | glszm | LargeAreaLowGrayLevelEmphasis        | 0.017996988 |
| wavelet-LLL | glszm | LargeAreaHighGrayLevelEmphasis       | 455188.9173 |
| wavelet-LLL | glszm | HighGrayLevelZoneEmphasis            | 3438.854015 |
| wavelet-LLL | glszm | SmallAreaEmphasis                    | 0.853828412 |
| wavelet-LLL | glszm | LowGrayLevelZoneEmphasis             | 0.003733587 |
| wavelet-LLL | glszm | ZoneEntropy                          | 6.431379145 |
| wavelet-LLL | glszm | SmallAreaLowGrayLevelEmphasis        | 0.003696948 |
| wavelet-LLL | ngtdm | Coarseness                           | 0.006508183 |
| wavelet-LLL | ngtdm | Complexity                           | 14425.21147 |
| wavelet-LLL | ngtdm | Strength                             | 29.61541428 |
| wavelet-LLL | ngtdm | Contrast                             | 0.569511535 |
| wavelet-LLL | ngtdm | Busyness                             | 0.022200898 |
| wavelet-HHL | gldm  | GrayLevelVariance                    | 5.662705414 |
| wavelet-HHL | gldm  | HighGrayLevelEmphasis                | 189.0831435 |
| wavelet-HHL | gldm  | DependenceEntropy                    | 5.988770365 |
| wavelet-HHL | gldm  | DependenceNonUniformity              | 80.5284738  |
| wavelet-HHL | gldm  | GrayLevelNonUniformity               | 143.0113895 |
| wavelet-HHL | gldm  | SmallDependenceEmphasis              | 0.204633022 |
| wavelet-HHL | gldm  | SmallDependenceHighGrayLevelEmphasis | 43.97856594 |
| wavelet-HHL | gldm  | DependenceNonUniformityNormalized    | 0.09171808  |
| wavelet-HHL | gldm  | LargeDependenceEmphasis              | 46.45558087 |
| wavelet-HHL | gldm  | LargeDependenceLowGrayLevelEmphasis  | 0.262856978 |
| wavelet-HHL | gldm  | DependenceVariance                   | 15.43651704 |
| wavelet-HHL | gldm  | LargeDependenceHighGrayLevelEmphasis | 8390.023918 |
| wavelet-HHL | gldm  | SmallDependenceLowGrayLevelEmphasis  | 0.002532373 |
| wavelet-HHL | gldm  | LowGrayLevelEmphasis                 | 0.007155781 |
| wavelet-HHL | glcm  | JointAverage                         | 13.54229171 |
| wavelet-HHL | glcm  | SumAverage                           | 27.08458341 |
| wavelet-HHL | glcm  | JointEntropy                         | 5.702941676 |
| wavelet-HHL | glcm  | ClusterShade                         | 18.57183447 |
| wavelet-HHL | glcm  | MaximumProbability                   | 0.101064138 |
| wavelet-HHL | glcm  | Idmn                                 | 0.984759255 |
| wavelet-HHL | glcm  | JointEnergy                          | 0.041099269 |
| wavelet-HHL | glcm  | Contrast                             | 9.682058698 |
| wavelet-HHL | glcm  | DifferenceEntropy                    | 2.70181577  |
| wavelet-HHL | glcm  | InverseVariance                      | 0.390925862 |
| wavelet-HHL | glcm  | DifferenceVariance                   | 5.32981474  |
| wavelet-HHL | glcm  | Idn                                  | 0.926832502 |
| wavelet-HHL | glcm  | Idm                                  | 0.43549971  |
| wavelet-HHL | glcm  | Correlation                          | 0.039015069 |
| wavelet-HHL | glcm  | Autocorrelation                      | 183.6064193 |
| wavelet-HHL | glcm  | SumEntropy                           | 3.507241965 |
| wavelet-HHL | glcm  | SumSquares                           | 5.049901296 |
| wavelet-HHL | glcm  | ClusterProminence                    | 798.6871751 |
| wavelet-HHL | glcm  | Imc2                                 | 0.641214527 |

|             |            |                                  |              |
|-------------|------------|----------------------------------|--------------|
| wavelet-HHL | glcm       | Imc1                             | -0.089844411 |
| wavelet-HHL | glcm       | DifferenceAverage                | 2.072107211  |
| wavelet-HHL | glcm       | Id                               | 0.4942559    |
| wavelet-HHL | glcm       | ClusterTendency                  | 10.51754649  |
| wavelet-HHL | firstorder | InterquartileRange               | 49.06032216  |
| wavelet-HHL | firstorder | Skewness                         | 0.389077804  |
| wavelet-HHL | firstorder | Uniformity                       | 0.162883132  |
| wavelet-HHL | firstorder | Median                           | -2.370078351 |
| wavelet-HHL | firstorder | Energy                           | 3043436.878  |
| wavelet-HHL | firstorder | RobustMeanAbsoluteDeviation      | 23.08743814  |
| wavelet-HHL | firstorder | MeanAbsoluteDeviation            | 40.52123423  |
| wavelet-HHL | firstorder | TotalEnergy                      | 82172795.71  |
| wavelet-HHL | firstorder | Maximum                          | 253.2255379  |
| wavelet-HHL | firstorder | RootMeanSquared                  | 58.87553837  |
| wavelet-HHL | firstorder | 90Percentile                     | 77.08871269  |
| wavelet-HHL | firstorder | Minimum                          | -305.7976832 |
| wavelet-HHL | firstorder | Entropy                          | 3.105062208  |
| wavelet-HHL | firstorder | Range                            | 559.023221   |
| wavelet-HHL | firstorder | Variance                         | 3465.301758  |
| wavelet-HHL | firstorder | 10Percentile                     | -59.85097312 |
| wavelet-HHL | firstorder | Kurtosis                         | 6.180539272  |
| wavelet-HHL | firstorder | Mean                             | 1.013538564  |
| wavelet-HHL | glrlm      | ShortRunLowGrayLevelEmphasis     | 0.006739487  |
| wavelet-HHL | glrlm      | GrayLevelVariance                | 6.61943561   |
| wavelet-HHL | glrlm      | LowGrayLevelRunEmphasis          | 0.007472035  |
| wavelet-HHL | glrlm      | GrayLevelNonUniformityNormalized | 0.140004597  |
| wavelet-HHL | glrlm      | RunVariance                      | 0.308821335  |
| wavelet-HHL | glrlm      | GrayLevelNonUniformity           | 101.3903108  |
| wavelet-HHL | glrlm      | LongRunEmphasis                  | 1.787207998  |
| wavelet-HHL | glrlm      | ShortRunHighGrayLevelEmphasis    | 167.7808344  |
| wavelet-HHL | glrlm      | RunLengthNonUniformity           | 520.4966732  |
| wavelet-HHL | glrlm      | ShortRunEmphasis                 | 0.871789099  |
| wavelet-HHL | glrlm      | LongRunHighGrayLevelEmphasis     | 333.2571668  |
| wavelet-HHL | glrlm      | RunPercentage                    | 0.82425092   |
| wavelet-HHL | glrlm      | LongRunLowGrayLevelEmphasis      | 0.011928698  |
| wavelet-HHL | glrlm      | RunEntropy                       | 3.967254785  |
| wavelet-HHL | glrlm      | HighGrayLevelRunEmphasis         | 190.907152   |
| wavelet-HHL | glrlm      | RunLengthNonUniformityNormalized | 0.717856328  |
| wavelet-HHL | glszm      | GrayLevelVariance                | 17.62901701  |
| wavelet-HHL | glszm      | ZoneVariance                     | 493.1000709  |
| wavelet-HHL | glszm      | GrayLevelNonUniformityNormalized | 0.077859168  |
| wavelet-HHL | glszm      | SizeZoneNonUniformityNormalized  | 0.476724953  |
| wavelet-HHL | glszm      | SizeZoneNonUniformity            | 87.7173913   |
| wavelet-HHL | glszm      | GrayLevelNonUniformity           | 14.32608696  |
| wavelet-HHL | glszm      | LargeAreaEmphasis                | 515.8695652  |
| wavelet-HHL | glszm      | SmallAreaHighGrayLevelEmphasis   | 160.8783815  |
| wavelet-HHL | glszm      | ZonePercentage                   | 0.209567198  |
| wavelet-HHL | glszm      | LargeAreaLowGrayLevelEmphasis    | 2.908281143  |
| wavelet-HHL | glszm      | LargeAreaHighGrayLevelEmphasis   | 92665.96196  |
| wavelet-HHL | glszm      | HighGrayLevelZoneEmphasis        | 217.9130435  |
| wavelet-HHL | glszm      | SmallAreaEmphasis                | 0.716393499  |
| wavelet-HHL | glszm      | LowGrayLevelZoneEmphasis         | 0.012246086  |
| wavelet-HHL | glszm      | ZoneEntropy                      | 5.279032715  |
| wavelet-HHL | glszm      | SmallAreaLowGrayLevelEmphasis    | 0.010528605  |
| wavelet-HHL | ngtdm      | Coarseness                       | 0.008196192  |

|             |            |                                      |              |
|-------------|------------|--------------------------------------|--------------|
| wavelet-HHL | ngtdm      | Complexity                           | 303.4907229  |
| wavelet-HHL | ngtdm      | Strength                             | 1.334474149  |
| wavelet-HHL | ngtdm      | Contrast                             | 0.044167289  |
| wavelet-HHL | ngtdm      | Busyness                             | 0.311541472  |
| wavelet-HLH | gldm       | GrayLevelVariance                    | 7.155142667  |
| wavelet-HLH | gldm       | HighGrayLevelEmphasis                | 120.0034169  |
| wavelet-HLH | gldm       | DependenceEntropy                    | 6.053471731  |
| wavelet-HLH | gldm       | DependenceNonUniformity              | 81.3166287   |
| wavelet-HLH | gldm       | GrayLevelNonUniformity               | 142.3963554  |
| wavelet-HLH | gldm       | SmallDependenceEmphasis              | 0.215993794  |
| wavelet-HLH | gldm       | SmallDependenceHighGrayLevelEmphasis | 28.95917519  |
| wavelet-HLH | gldm       | DependenceNonUniformityNormalized    | 0.09261575   |
| wavelet-HLH | gldm       | LargeDependenceEmphasis              | 48.71298405  |
| wavelet-HLH | gldm       | LargeDependenceLowGrayLevelEmphasis  | 0.460041744  |
| wavelet-HLH | gldm       | DependenceVariance                   | 16.67067938  |
| wavelet-HLH | gldm       | LargeDependenceHighGrayLevelEmphasis | 5337.468109  |
| wavelet-HLH | gldm       | SmallDependenceLowGrayLevelEmphasis  | 0.005166139  |
| wavelet-HLH | gldm       | LowGrayLevelEmphasis                 | 0.012745273  |
| wavelet-HLH | glcm       | JointAverage                         | 10.61569242  |
| wavelet-HLH | glcm       | SumAverage                           | 21.23138484  |
| wavelet-HLH | glcm       | JointEntropy                         | 5.681900031  |
| wavelet-HLH | glcm       | ClusterShade                         | 49.52411366  |
| wavelet-HLH | glcm       | MaximumProbability                   | 0.106906353  |
| wavelet-HLH | glcm       | Idmn                                 | 0.983349404  |
| wavelet-HLH | glcm       | JointEnergy                          | 0.044005251  |
| wavelet-HLH | glcm       | Contrast                             | 10.79202836  |
| wavelet-HLH | glcm       | DifferenceEntropy                    | 2.712090903  |
| wavelet-HLH | glcm       | InverseVariance                      | 0.399099697  |
| wavelet-HLH | glcm       | DifferenceVariance                   | 6.259754808  |
| wavelet-HLH | glcm       | Idn                                  | 0.926395203  |
| wavelet-HLH | glcm       | Idm                                  | 0.442929605  |
| wavelet-HLH | glcm       | Correlation                          | 0.058525039  |
| wavelet-HLH | glcm       | Autocorrelation                      | 113.1054279  |
| wavelet-HLH | glcm       | SumEntropy                           | 3.553920124  |
| wavelet-HLH | glcm       | SumSquares                           | 5.802812269  |
| wavelet-HLH | glcm       | ClusterProminence                    | 1289.677571  |
| wavelet-HLH | glcm       | Imc2                                 | 0.668091292  |
| wavelet-HLH | glcm       | Imc1                                 | -0.10181189  |
| wavelet-HLH | glcm       | DifferenceAverage                    | 2.110357579  |
| wavelet-HLH | glcm       | Id                                   | 0.498980862  |
| wavelet-HLH | glcm       | ClusterTendency                      | 12.41922072  |
| wavelet-HLH | firstorder | InterquartileRange                   | 48.17829458  |
| wavelet-HLH | firstorder | Skewness                             | 0.852754026  |
| wavelet-HLH | firstorder | Uniformity                           | 0.162182637  |
| wavelet-HLH | firstorder | Median                               | -2.507348994 |
| wavelet-HLH | firstorder | Energy                               | 3911300.06   |
| wavelet-HLH | firstorder | RobustMeanAbsoluteDeviation          | 22.84901746  |
| wavelet-HLH | firstorder | MeanAbsoluteDeviation                | 43.80648527  |
| wavelet-HLH | firstorder | TotalEnergy                          | 105605101.6  |
| wavelet-HLH | firstorder | Maximum                              | 329.8158111  |
| wavelet-HLH | firstorder | RootMeanSquared                      | 66.74416579  |
| wavelet-HLH | firstorder | 90Percentile                         | 72.10446214  |
| wavelet-HLH | firstorder | Minimum                              | -248.6688483 |
| wavelet-HLH | firstorder | Entropy                              | 3.190364164  |
| wavelet-HLH | firstorder | Range                                | 578.4846595  |

|             |            |                                  |              |
|-------------|------------|----------------------------------|--------------|
| wavelet-HLH | firstorder | Variance                         | 4448.496391  |
| wavelet-HLH | firstorder | 10Percentile                     | -62.31595696 |
| wavelet-HLH | firstorder | Kurtosis                         | 6.75675324   |
| wavelet-HLH | firstorder | Mean                             | 2.507444165  |
| wavelet-HLH | glrlm      | ShortRunLowGrayLevelEmphasis     | 0.012245575  |
| wavelet-HLH | glrlm      | GrayLevelVariance                | 8.413865755  |
| wavelet-HLH | glrlm      | LowGrayLevelRunEmphasis          | 0.013464672  |
| wavelet-HLH | glrlm      | GrayLevelNonUniformityNormalized | 0.136318596  |
| wavelet-HLH | glrlm      | RunVariance                      | 0.32779538   |
| wavelet-HLH | glrlm      | GrayLevelNonUniformity           | 98.29406442  |
| wavelet-HLH | glrlm      | LongRunEmphasis                  | 1.817765329  |
| wavelet-HLH | glrlm      | ShortRunHighGrayLevelEmphasis    | 107.777803   |
| wavelet-HLH | glrlm      | RunLengthNonUniformity           | 518.0183499  |
| wavelet-HLH | glrlm      | ShortRunEmphasis                 | 0.871643848  |
| wavelet-HLH | glrlm      | LongRunHighGrayLevelEmphasis     | 212.1211834  |
| wavelet-HLH | glrlm      | RunPercentage                    | 0.820746452  |
| wavelet-HLH | glrlm      | LongRunLowGrayLevelEmphasis      | 0.02119875   |
| wavelet-HLH | glrlm      | RunEntropy                       | 4.078640573  |
| wavelet-HLH | glrlm      | HighGrayLevelRunEmphasis         | 122.0648061  |
| wavelet-HLH | glrlm      | RunLengthNonUniformityNormalized | 0.717722259  |
| wavelet-HLH | glszm      | GrayLevelVariance                | 20.70751634  |
| wavelet-HLH | glszm      | ZoneVariance                     | 468.8488082  |
| wavelet-HLH | glszm      | GrayLevelNonUniformityNormalized | 0.07175125   |
| wavelet-HLH | glszm      | SizeZoneNonUniformityNormalized  | 0.460111496  |
| wavelet-HLH | glszm      | SizeZoneNonUniformity            | 93.8627451   |
| wavelet-HLH | glszm      | GrayLevelNonUniformity           | 14.6372549   |
| wavelet-HLH | glszm      | LargeAreaEmphasis                | 487.372549   |
| wavelet-HLH | glszm      | SmallAreaHighGrayLevelEmphasis   | 95.44641664  |
| wavelet-HLH | glszm      | ZonePercentage                   | 0.232346241  |
| wavelet-HLH | glszm      | LargeAreaLowGrayLevelEmphasis    | 4.559254885  |
| wavelet-HLH | glszm      | LargeAreaHighGrayLevelEmphasis   | 53027.66176  |
| wavelet-HLH | glszm      | HighGrayLevelZoneEmphasis        | 138.0686275  |
| wavelet-HLH | glszm      | SmallAreaEmphasis                | 0.705005995  |
| wavelet-HLH | glszm      | LowGrayLevelZoneEmphasis         | 0.023010004  |
| wavelet-HLH | glszm      | ZoneEntropy                      | 5.41371128   |
| wavelet-HLH | glszm      | SmallAreaLowGrayLevelEmphasis    | 0.02003993   |
| wavelet-HLH | ngtdm      | Coarseness                       | 0.008681338  |
| wavelet-HLH | ngtdm      | Complexity                       | 409.7495204  |
| wavelet-HLH | ngtdm      | Strength                         | 1.85682105   |
| wavelet-HLH | ngtdm      | Contrast                         | 0.044724531  |
| wavelet-HLH | ngtdm      | Busyness                         | 0.321682992  |

| Image type | Feature Class | Feature Name                         |                                                                                                                                                                                                                                                                                                                                                                                                                   |
|------------|---------------|--------------------------------------|-------------------------------------------------------------------------------------------------------------------------------------------------------------------------------------------------------------------------------------------------------------------------------------------------------------------------------------------------------------------------------------------------------------------|
| general    | info          | BoundingBox                          | 4: RTSTRUCT: C99-DNU_segment_LUL GTV<br>(0, 0, 1, 8, 8, 10)                                                                                                                                                                                                                                                                                                                                                       |
| general    | info          | EnabledImageTypes                    | {u'Original': {}, u'Wavelet': {}}                                                                                                                                                                                                                                                                                                                                                                                 |
|            |               |                                      | {'distances': [1], 'additionalInfo': True, 'force2D': False, 'interpolator': 'sitkBSpline', 'resampledPixelSpacing': [3.0], 'label': 1, 'normalizeScale': 1, 'normalize': False, 'force2Ddimension': 0, 'removeOutliers': None, 'minimumROISize': None, u'binWidth': 25.0, 'minimumROIDimensions': 1, u'correctMask': True, 'preCrop': False, u'symmetricalGLCM': True, 'resegmentRange': None, 'padDistance': 5} |
| general    | info          | GeneralSettings                      |                                                                                                                                                                                                                                                                                                                                                                                                                   |
| general    | info          | ImageHash                            | 1ac776edf2058e3bfb9729457508315b1014f283<br>(0.9765625000000002, 0.9765625000000002,                                                                                                                                                                                                                                                                                                                              |
| general    | info          | ImageSpacing                         | 2.0)<br>24ca15b66518ca926831a4d730370e68938e219                                                                                                                                                                                                                                                                                                                                                                   |
| general    | info          | MaskHash                             | 2                                                                                                                                                                                                                                                                                                                                                                                                                 |
| general    | info          | NumpyVersion                         | 1.13.1                                                                                                                                                                                                                                                                                                                                                                                                            |
| general    | info          | PyWaveletVersion                     | 0.5.2                                                                                                                                                                                                                                                                                                                                                                                                             |
| general    | info          | SimpleITKVersion                     | 1.1.0                                                                                                                                                                                                                                                                                                                                                                                                             |
| general    | info          | Version                              | 1.3.0.post102+g1b0eb74                                                                                                                                                                                                                                                                                                                                                                                            |
| general    | info          | VolumeNum                            | 1                                                                                                                                                                                                                                                                                                                                                                                                                 |
| general    | info          | VoxelNum                             | 138                                                                                                                                                                                                                                                                                                                                                                                                               |
| original   | shape         | Maximum3DDiameter                    | 33                                                                                                                                                                                                                                                                                                                                                                                                                |
| original   | shape         | Maximum2DDiameterSlice               | 18.97366596                                                                                                                                                                                                                                                                                                                                                                                                       |
| original   | shape         | Sphericity                           | 0.693907211                                                                                                                                                                                                                                                                                                                                                                                                       |
| original   | shape         | MinorAxis                            | 18.68011568                                                                                                                                                                                                                                                                                                                                                                                                       |
| original   | shape         | Elongation                           | 0.597802393                                                                                                                                                                                                                                                                                                                                                                                                       |
| original   | shape         | SurfaceVolumeRatio                   | 0.449540102                                                                                                                                                                                                                                                                                                                                                                                                       |
| original   | shape         | Volume                               | 3726                                                                                                                                                                                                                                                                                                                                                                                                              |
| original   | shape         | MajorAxis                            | 31.24797742                                                                                                                                                                                                                                                                                                                                                                                                       |
| original   | shape         | SurfaceArea                          | 1674.986422                                                                                                                                                                                                                                                                                                                                                                                                       |
| original   | shape         | Flatness                             | 0.374573325                                                                                                                                                                                                                                                                                                                                                                                                       |
| original   | shape         | LeastAxis                            | 11.70465881                                                                                                                                                                                                                                                                                                                                                                                                       |
| original   | shape         | Maximum2DDiameterColumn              | 21.21320344                                                                                                                                                                                                                                                                                                                                                                                                       |
| original   | shape         | Maximum2DDiameterRow                 | 32.44996148                                                                                                                                                                                                                                                                                                                                                                                                       |
| original   | gldm          | GrayLevelVariance                    | 76.80996639                                                                                                                                                                                                                                                                                                                                                                                                       |
| original   | gldm          | HighGrayLevelEmphasis                | 1031.978261                                                                                                                                                                                                                                                                                                                                                                                                       |
| original   | gldm          | DependenceEntropy                    | 5.601809446                                                                                                                                                                                                                                                                                                                                                                                                       |
| original   | gldm          | DependenceNonUniformity              | 30.05797101                                                                                                                                                                                                                                                                                                                                                                                                       |
| original   | gldm          | GrayLevelNonUniformity               | 13.66666667                                                                                                                                                                                                                                                                                                                                                                                                       |
| original   | gldm          | SmallDependenceEmphasis              | 0.468629124                                                                                                                                                                                                                                                                                                                                                                                                       |
| original   | gldm          | SmallDependenceHighGrayLevelEmphasis | 348.2682711                                                                                                                                                                                                                                                                                                                                                                                                       |
| original   | gldm          | DependenceNonUniformityNormalized    | 0.217811384                                                                                                                                                                                                                                                                                                                                                                                                       |
| original   | gldm          | LargeDependenceEmphasis              | 18.91304348                                                                                                                                                                                                                                                                                                                                                                                                       |
| original   | gldm          | LargeDependenceLowGrayLevelEmphasis  | 0.024868207                                                                                                                                                                                                                                                                                                                                                                                                       |
| original   | gldm          | DependenceVariance                   | 7.898340685                                                                                                                                                                                                                                                                                                                                                                                                       |
| original   | gldm          | LargeDependenceHighGrayLevelEmphasis | 25190.81884                                                                                                                                                                                                                                                                                                                                                                                                       |
| original   | gldm          | SmallDependenceLowGrayLevelEmphasis  | 0.010763432                                                                                                                                                                                                                                                                                                                                                                                                       |
| original   | gldm          | LowGrayLevelEmphasis                 | 0.011256022                                                                                                                                                                                                                                                                                                                                                                                                       |
| original   | glcm          | JointAverage                         | 32.6227014                                                                                                                                                                                                                                                                                                                                                                                                        |
| original   | glcm          | SumAverage                           | 65.2454028                                                                                                                                                                                                                                                                                                                                                                                                        |

|          |            |                                  |              |
|----------|------------|----------------------------------|--------------|
| original | glcm       | JointEntropy                     | 6.031813266  |
| original | glcm       | ClusterShade                     | -2410.569881 |
| original | glcm       | MaximumProbability               | 0.101572722  |
| original | glcm       | Idmn                             | 0.958245894  |
| original | glcm       | JointEnergy                      | 0.027057581  |
| original | glcm       | Contrast                         | 91.59981379  |
| original | glcm       | DifferenceEntropy                | 3.79864043   |
| original | glcm       | InverseVariance                  | 0.232347906  |
| original | glcm       | DifferenceVariance               | 51.39427369  |
| original | glcm       | Idn                              | 0.886961243  |
| original | glcm       | Idm                              | 0.283500798  |
| original | glcm       | Correlation                      | 0.163649666  |
| original | glcm       | Autocorrelation                  | 1073.719258  |
| original | glcm       | SumEntropy                       | 4.469703476  |
| original | glcm       | SumSquares                       | 54.95213739  |
| original | glcm       | ClusterProminence                | 98332.87771  |
| original | glcm       | Imc2                             | 0.970836834  |
| original | glcm       | Imc1                             | -0.387179586 |
| original | glcm       | DifferenceAverage                | 6.250368743  |
| original | glcm       | Id                               | 0.349070332  |
| original | glcm       | ClusterTendency                  | 128.2087358  |
| original | firstorder | InterquartileRange               | 210.75       |
| original | firstorder | Skewness                         | -1.604944125 |
| original | firstorder | Uniformity                       | 0.099033816  |
| original | firstorder | Median                           | -13.5        |
| original | firstorder | Energy                           | 8446171      |
| original | firstorder | RobustMeanAbsoluteDeviation      | 105.8013148  |
| original | firstorder | MeanAbsoluteDeviation            | 167.3655745  |
| original | firstorder | TotalEnergy                      | 228046617    |
| original | firstorder | Maximum                          | 160          |
| original | firstorder | RootMeanSquared                  | 247.3947002  |
| original | firstorder | 90Percentile                     | 47           |
| original | firstorder | Minimum                          | -866         |
| original | firstorder | Entropy                          | 4.16086944   |
| original | firstorder | Range                            | 1026         |
| original | firstorder | Variance                         | 47877.27562  |
| original | firstorder | 10Percentile                     | -423.6       |
| original | firstorder | Kurtosis                         | 4.972227675  |
| original | firstorder | Mean                             | -115.442029  |
| original | glrlm      | ShortRunLowGrayLevelEmphasis     | 0.012244073  |
| original | glrlm      | GrayLevelVariance                | 80.49138441  |
| original | glrlm      | LowGrayLevelRunEmphasis          | 0.012295534  |
| original | glrlm      | GrayLevelNonUniformityNormalized | 0.081311868  |
| original | glrlm      | RunVariance                      | 0.129345938  |
| original | glrlm      | GrayLevelNonUniformity           | 10.24417416  |
| original | glrlm      | LongRunEmphasis                  | 1.339596695  |
| original | glrlm      | ShortRunHighGrayLevelEmphasis    | 917.1690825  |
| original | glrlm      | RunLengthNonUniformity           | 106.8951342  |
| original | glrlm      | ShortRunEmphasis                 | 0.936160851  |
| original | glrlm      | LongRunHighGrayLevelEmphasis     | 1456.090766  |
| original | glrlm      | RunPercentage                    | 0.910813824  |
| original | glrlm      | LongRunLowGrayLevelEmphasis      | 0.012563256  |
| original | glrlm      | RunEntropy                       | 4.622071632  |
| original | glrlm      | HighGrayLevelRunEmphasis         | 1002.005372  |
| original | glrlm      | RunLengthNonUniformityNormalized | 0.84866822   |



|             |       |                                      |              |
|-------------|-------|--------------------------------------|--------------|
| original    | glszm | GrayLevelVariance                    | 90.75693878  |
| original    | glszm | ZoneVariance                         | 19.77061224  |
| original    | glszm | GrayLevelNonUniformityNormalized     | 0.042040816  |
| original    | glszm | SizeZoneNonUniformityNormalized      | 0.674285714  |
| original    | glszm | SizeZoneNonUniformity                | 47.2         |
| original    | glszm | GrayLevelNonUniformity               | 2.942857143  |
| original    | glszm | LargeAreaEmphasis                    | 23.65714286  |
| original    | glszm | SmallAreaHighGrayLevelEmphasis       | 588.3273934  |
| original    | glszm | ZonePercentage                       | 0.507246377  |
| original    | glszm | LargeAreaLowGrayLevelEmphasis        | 0.038451562  |
| original    | glszm | LargeAreaHighGrayLevelEmphasis       | 31353.32857  |
| original    | glszm | HighGrayLevelZoneEmphasis            | 767.5        |
| original    | glszm | SmallAreaEmphasis                    | 0.842696014  |
| original    | glszm | LowGrayLevelZoneEmphasis             | 0.021340176  |
| original    | glszm | ZoneEntropy                          | 5.162872438  |
| original    | glszm | SmallAreaLowGrayLevelEmphasis        | 0.021126547  |
| original    | ngtdm | Coarseness                           | 0.021436414  |
| original    | ngtdm | Complexity                           | 2825.868721  |
| original    | ngtdm | Strength                             | 24.55784918  |
| original    | ngtdm | Contrast                             | 0.773680366  |
| original    | ngtdm | Busyness                             | 0.03413023   |
| wavelet-HHH | gldm  | GrayLevelVariance                    | 24.334226    |
| wavelet-HHH | gldm  | HighGrayLevelEmphasis                | 213.2971014  |
| wavelet-HHH | gldm  | DependenceEntropy                    | 5.450197645  |
| wavelet-HHH | gldm  | DependenceNonUniformity              | 39.91304348  |
| wavelet-HHH | gldm  | GrayLevelNonUniformity               | 9.492753623  |
| wavelet-HHH | gldm  | SmallDependenceEmphasis              | 0.519112319  |
| wavelet-HHH | gldm  | SmallDependenceHighGrayLevelEmphasis | 113.9917814  |
| wavelet-HHH | gldm  | DependenceNonUniformityNormalized    | 0.289224953  |
| wavelet-HHH | gldm  | LargeDependenceEmphasis              | 6            |
| wavelet-HHH | gldm  | LargeDependenceLowGrayLevelEmphasis  | 0.044897264  |
| wavelet-HHH | gldm  | DependenceVariance                   | 1.583910943  |
| wavelet-HHH | gldm  | LargeDependenceHighGrayLevelEmphasis | 1310.775362  |
| wavelet-HHH | gldm  | SmallDependenceLowGrayLevelEmphasis  | 0.014467063  |
| wavelet-HHH | gldm  | LowGrayLevelEmphasis                 | 0.017625032  |
| wavelet-HHH | glcm  | JointAverage                         | 13.56109142  |
| wavelet-HHH | glcm  | SumAverage                           | 27.12218285  |
| wavelet-HHH | glcm  | JointEntropy                         | 6.550519767  |
| wavelet-HHH | glcm  | ClusterShade                         | -8.796480801 |
| wavelet-HHH | glcm  | MaximumProbability                   | 0.034604441  |
| wavelet-HHH | glcm  | Idmn                                 | 0.972551117  |
| wavelet-HHH | glcm  | JointEnergy                          | 0.012694833  |
| wavelet-HHH | glcm  | Contrast                             | 41.78821327  |
| wavelet-HHH | glcm  | DifferenceEntropy                    | 3.569087804  |
| wavelet-HHH | glcm  | InverseVariance                      | 0.211249137  |
| wavelet-HHH | glcm  | DifferenceVariance                   | 17.14334407  |
| wavelet-HHH | glcm  | Idn                                  | 0.891794816  |
| wavelet-HHH | glcm  | Idm                                  | 0.20146604   |
| wavelet-HHH | glcm  | Correlation                          | -0.024951286 |
| wavelet-HHH | glcm  | Autocorrelation                      | 183.4028954  |
| wavelet-HHH | glcm  | SumEntropy                           | 4.273740198  |
| wavelet-HHH | glcm  | SumSquares                           | 20.35925314  |
| wavelet-HHH | glcm  | ClusterProminence                    | 6986.250485  |
| wavelet-HHH | glcm  | Imc2                                 | 0.972232619  |
| wavelet-HHH | glcm  | Imc1                                 | -0.367466708 |

|             |            |                                  |              |
|-------------|------------|----------------------------------|--------------|
| wavelet-HHH | glcm       | DifferenceAverage                | 4.873142195  |
| wavelet-HHH | glcm       | Id                               | 0.292154373  |
| wavelet-HHH | glcm       | ClusterTendency                  | 39.64879929  |
| wavelet-HHH | firstorder | InterquartileRange               | 136.6619643  |
| wavelet-HHH | firstorder | Skewness                         | 0.507551435  |
| wavelet-HHH | firstorder | Uniformity                       | 0.06878807   |
| wavelet-HHH | firstorder | Median                           | 5.899753426  |
| wavelet-HHH | firstorder | Energy                           | 2120195.377  |
| wavelet-HHH | firstorder | RobustMeanAbsoluteDeviation      | 57.07821291  |
| wavelet-HHH | firstorder | MeanAbsoluteDeviation            | 90.93167838  |
| wavelet-HHH | firstorder | TotalEnergy                      | 57245275.18  |
| wavelet-HHH | firstorder | Maximum                          | 594.4514286  |
| wavelet-HHH | firstorder | RootMeanSquared                  | 123.9505329  |
| wavelet-HHH | firstorder | 90Percentile                     | 147.9193639  |
| wavelet-HHH | firstorder | Minimum                          | -302.5664729 |
| wavelet-HHH | firstorder | Entropy                          | 4.155071883  |
| wavelet-HHH | firstorder | Range                            | 897.0179015  |
| wavelet-HHH | firstorder | Variance                         | 15319.98532  |
| wavelet-HHH | firstorder | 10Percentile                     | -133.6972172 |
| wavelet-HHH | firstorder | Kurtosis                         | 5.893207323  |
| wavelet-HHH | firstorder | Mean                             | 6.614324655  |
| wavelet-HHH | glrlm      | ShortRunLowGrayLevelEmphasis     | 0.017971271  |
| wavelet-HHH | glrlm      | GrayLevelVariance                | 24.99954284  |
| wavelet-HHH | glrlm      | LowGrayLevelRunEmphasis          | 0.01815407   |
| wavelet-HHH | glrlm      | GrayLevelNonUniformityNormalized | 0.067241059  |
| wavelet-HHH | glrlm      | RunVariance                      | 0.05181182   |
| wavelet-HHH | glrlm      | GrayLevelNonUniformity           | 8.885854161  |
| wavelet-HHH | glrlm      | LongRunEmphasis                  | 1.144117601  |
| wavelet-HHH | glrlm      | ShortRunHighGrayLevelEmphasis    | 206.4503718  |
| wavelet-HHH | glrlm      | RunLengthNonUniformity           | 122.0318739  |
| wavelet-HHH | glrlm      | ShortRunEmphasis                 | 0.968996736  |
| wavelet-HHH | glrlm      | LongRunHighGrayLevelEmphasis     | 244.3089999  |
| wavelet-HHH | glrlm      | RunPercentage                    | 0.957636566  |
| wavelet-HHH | glrlm      | LongRunLowGrayLevelEmphasis      | 0.01898553   |
| wavelet-HHH | glrlm      | RunEntropy                       | 4.343191098  |
| wavelet-HHH | glrlm      | HighGrayLevelRunEmphasis         | 213.1605369  |
| wavelet-HHH | glrlm      | RunLengthNonUniformityNormalized | 0.922538665  |
| wavelet-HHH | glszm      | GrayLevelVariance                | 34.669375    |
| wavelet-HHH | glszm      | ZoneVariance                     | 3.799375     |
| wavelet-HHH | glszm      | GrayLevelNonUniformityNormalized | 0.05625      |
| wavelet-HHH | glszm      | SizeZoneNonUniformityNormalized  | 0.5678125    |
| wavelet-HHH | glszm      | SizeZoneNonUniformity            | 45.425       |
| wavelet-HHH | glszm      | GrayLevelNonUniformity           | 4.5          |
| wavelet-HHH | glszm      | LargeAreaEmphasis                | 6.775        |
| wavelet-HHH | glszm      | SmallAreaHighGrayLevelEmphasis   | 174.1561699  |
| wavelet-HHH | glszm      | ZonePercentage                   | 0.579710145  |
| wavelet-HHH | glszm      | LargeAreaLowGrayLevelEmphasis    | 0.055420487  |
| wavelet-HHH | glszm      | LargeAreaHighGrayLevelEmphasis   | 1522.0875    |
| wavelet-HHH | glszm      | HighGrayLevelZoneEmphasis        | 214.9        |
| wavelet-HHH | glszm      | SmallAreaEmphasis                | 0.780279528  |
| wavelet-HHH | glszm      | LowGrayLevelZoneEmphasis         | 0.025941808  |
| wavelet-HHH | glszm      | ZoneEntropy                      | 5.05410407   |
| wavelet-HHH | glszm      | SmallAreaLowGrayLevelEmphasis    | 0.024147042  |
| wavelet-HHH | ngtdm      | Coarseness                       | 0.043867762  |
| wavelet-HHH | ngtdm      | Complexity                       | 944.0688576  |

|             |            |                                      |              |
|-------------|------------|--------------------------------------|--------------|
| wavelet-HHH | ngtdm      | Strength                             | 8.819699977  |
| wavelet-HHH | ngtdm      | Contrast                             | 0.311411696  |
| wavelet-HHH | ngtdm      | Busyness                             | 0.067189622  |
| wavelet-HLL | gldm       | GrayLevelVariance                    | 40.98829028  |
| wavelet-HLL | gldm       | HighGrayLevelEmphasis                | 476.2246377  |
| wavelet-HLL | gldm       | DependenceEntropy                    | 5.663428964  |
| wavelet-HLL | gldm       | DependenceNonUniformity              | 35.50724638  |
| wavelet-HLL | gldm       | GrayLevelNonUniformity               | 8.652173913  |
| wavelet-HLL | gldm       | SmallDependenceEmphasis              | 0.491238744  |
| wavelet-HLL | gldm       | SmallDependenceHighGrayLevelEmphasis | 210.0153098  |
| wavelet-HLL | gldm       | DependenceNonUniformityNormalized    | 0.257298887  |
| wavelet-HLL | gldm       | LargeDependenceEmphasis              | 7.898550725  |
| wavelet-HLL | gldm       | LargeDependenceLowGrayLevelEmphasis  | 0.024403653  |
| wavelet-HLL | gldm       | DependenceVariance                   | 2.38626339   |
| wavelet-HLL | gldm       | LargeDependenceHighGrayLevelEmphasis | 4312.615942  |
| wavelet-HLL | gldm       | SmallDependenceLowGrayLevelEmphasis  | 0.009560951  |
| wavelet-HLL | gldm       | LowGrayLevelEmphasis                 | 0.01079237   |
| wavelet-HLL | glcm       | JointAverage                         | 21.45071136  |
| wavelet-HLL | glcm       | SumAverage                           | 42.90142272  |
| wavelet-HLL | glcm       | JointEntropy                         | 6.594868917  |
| wavelet-HLL | glcm       | ClusterShade                         | -456.7418373 |
| wavelet-HLL | glcm       | MaximumProbability                   | 0.033965665  |
| wavelet-HLL | glcm       | Idmn                                 | 0.974781818  |
| wavelet-HLL | glcm       | JointEnergy                          | 0.012418663  |
| wavelet-HLL | glcm       | Contrast                             | 55.52630288  |
| wavelet-HLL | glcm       | DifferenceEntropy                    | 3.672651814  |
| wavelet-HLL | glcm       | InverseVariance                      | 0.219790201  |
| wavelet-HLL | glcm       | DifferenceVariance                   | 26.61326147  |
| wavelet-HLL | glcm       | Idn                                  | 0.901810553  |
| wavelet-HLL | glcm       | Idm                                  | 0.218698901  |
| wavelet-HLL | glcm       | Correlation                          | 0.207267854  |
| wavelet-HLL | glcm       | Autocorrelation                      | 467.8669493  |
| wavelet-HLL | glcm       | SumEntropy                           | 4.611197097  |
| wavelet-HLL | glcm       | SumSquares                           | 35.40862606  |
| wavelet-HLL | glcm       | ClusterProminence                    | 28414.16602  |
| wavelet-HLL | glcm       | Imc2                                 | 0.982282052  |
| wavelet-HLL | glcm       | Imc1                                 | -0.412490432 |
| wavelet-HLL | glcm       | DifferenceAverage                    | 5.273167503  |
| wavelet-HLL | glcm       | Id                                   | 0.303568955  |
| wavelet-HLL | glcm       | ClusterTendency                      | 86.10820136  |
| wavelet-HLL | firstorder | InterquartileRange                   | 194.0270206  |
| wavelet-HLL | firstorder | Skewness                             | -0.373077401 |
| wavelet-HLL | firstorder | Uniformity                           | 0.062696912  |
| wavelet-HLL | firstorder | Median                               | -5.315785686 |
| wavelet-HLL | firstorder | Energy                               | 3760412.786  |
| wavelet-HLL | firstorder | RobustMeanAbsoluteDeviation          | 81.83984553  |
| wavelet-HLL | firstorder | MeanAbsoluteDeviation                | 123.1219893  |
| wavelet-HLL | firstorder | TotalEnergy                          | 101531145.2  |
| wavelet-HLL | firstorder | Maximum                              | 529.1109397  |
| wavelet-HLL | firstorder | RootMeanSquared                      | 165.0738259  |
| wavelet-HLL | firstorder | 90Percentile                         | 117.5061422  |
| wavelet-HLL | firstorder | Minimum                              | -544.9481465 |
| wavelet-HLL | firstorder | Entropy                              | 4.305789267  |
| wavelet-HLL | firstorder | Range                                | 1074.059086  |
| wavelet-HLL | firstorder | Variance                             | 25584.03744  |

|             |            |                                      |              |
|-------------|------------|--------------------------------------|--------------|
| wavelet-HLL | firstorder | 10Percentile                         | -287.3526492 |
| wavelet-HLL | firstorder | Kurtosis                             | 3.930211796  |
| wavelet-HLL | firstorder | Mean                                 | -40.808462   |
| wavelet-HLL | glrlm      | ShortRunLowGrayLevelEmphasis         | 0.011192832  |
| wavelet-HLL | glrlm      | GrayLevelVariance                    | 42.36115267  |
| wavelet-HLL | glrlm      | LowGrayLevelRunEmphasis              | 0.01127529   |
| wavelet-HLL | glrlm      | GrayLevelNonUniformityNormalized     | 0.060562247  |
| wavelet-HLL | glrlm      | RunVariance                          | 0.062534897  |
| wavelet-HLL | glrlm      | GrayLevelNonUniformity               | 7.927278104  |
| wavelet-HLL | glrlm      | LongRunEmphasis                      | 1.177838095  |
| wavelet-HLL | glrlm      | ShortRunHighGrayLevelEmphasis        | 451.2768059  |
| wavelet-HLL | glrlm      | RunLengthNonUniformity               | 118.5150599  |
| wavelet-HLL | glrlm      | ShortRunEmphasis                     | 0.961339687  |
| wavelet-HLL | glrlm      | LongRunHighGrayLevelEmphasis         | 569.6744291  |
| wavelet-HLL | glrlm      | RunPercentage                        | 0.948160535  |
| wavelet-HLL | glrlm      | LongRunLowGrayLevelEmphasis          | 0.011646886  |
| wavelet-HLL | glrlm      | RunEntropy                           | 4.532515297  |
| wavelet-HLL | glrlm      | HighGrayLevelRunEmphasis             | 472.3236526  |
| wavelet-HLL | glrlm      | RunLengthNonUniformityNormalized     | 0.904412934  |
| wavelet-HLL | glszm      | GrayLevelVariance                    | 56.72120088  |
| wavelet-HLL | glszm      | ZoneVariance                         | 4.554224996  |
| wavelet-HLL | glszm      | GrayLevelNonUniformityNormalized     | 0.048406139  |
| wavelet-HLL | glszm      | SizeZoneNonUniformityNormalized      | 0.555742958  |
| wavelet-HLL | glszm      | SizeZoneNonUniformity                | 42.79220779  |
| wavelet-HLL | glszm      | GrayLevelNonUniformity               | 3.727272727  |
| wavelet-HLL | glszm      | LargeAreaEmphasis                    | 7.766233766  |
| wavelet-HLL | glszm      | SmallAreaHighGrayLevelEmphasis       | 322.0986226  |
| wavelet-HLL | glszm      | ZonePercentage                       | 0.557971014  |
| wavelet-HLL | glszm      | LargeAreaLowGrayLevelEmphasis        | 0.030961249  |
| wavelet-HLL | glszm      | LargeAreaHighGrayLevelEmphasis       | 4146.896104  |
| wavelet-HLL | glszm      | HighGrayLevelZoneEmphasis            | 431.1688312  |
| wavelet-HLL | glszm      | SmallAreaEmphasis                    | 0.772528936  |
| wavelet-HLL | glszm      | LowGrayLevelZoneEmphasis             | 0.017536517  |
| wavelet-HLL | glszm      | ZoneEntropy                          | 5.216217021  |
| wavelet-HLL | glszm      | SmallAreaLowGrayLevelEmphasis        | 0.016845539  |
| wavelet-HLL | ngtdm      | Coarseness                           | 0.040558573  |
| wavelet-HLL | ngtdm      | Complexity                           | 1363.211293  |
| wavelet-HLL | ngtdm      | Strength                             | 14.1045202   |
| wavelet-HLL | ngtdm      | Contrast                             | 0.427498259  |
| wavelet-HLL | ngtdm      | Busyness                             | 0.04014544   |
| wavelet-LHL | gldm       | GrayLevelVariance                    | 312.2696912  |
| wavelet-LHL | gldm       | HighGrayLevelEmphasis                | 1658.84058   |
| wavelet-LHL | gldm       | DependenceEntropy                    | 5.946179326  |
| wavelet-LHL | gldm       | DependenceNonUniformity              | 78.13043478  |
| wavelet-LHL | gldm       | GrayLevelNonUniformity               | 3.492753623  |
| wavelet-LHL | gldm       | SmallDependenceEmphasis              | 0.778985507  |
| wavelet-LHL | gldm       | SmallDependenceHighGrayLevelEmphasis | 1384.657407  |
| wavelet-LHL | gldm       | DependenceNonUniformityNormalized    | 0.566162571  |
| wavelet-LHL | gldm       | LargeDependenceEmphasis              | 2.173913043  |
| wavelet-LHL | gldm       | LargeDependenceLowGrayLevelEmphasis  | 0.011497217  |
| wavelet-LHL | gldm       | DependenceVariance                   | 0.357277883  |
| wavelet-LHL | gldm       | LargeDependenceHighGrayLevelEmphasis | 3087.521739  |
| wavelet-LHL | gldm       | SmallDependenceLowGrayLevelEmphasis  | 0.008714342  |
| wavelet-LHL | gldm       | LowGrayLevelEmphasis                 | 0.009151059  |
| wavelet-LHL | glcm       | JointAverage                         | 33.76854753  |

|             |            |                                  |              |
|-------------|------------|----------------------------------|--------------|
| wavelet-LHL | glcm       | SumAverage                       | 67.53709507  |
| wavelet-LHL | glcm       | JointEntropy                     | 7.156074675  |
| wavelet-LHL | glcm       | ClusterShade                     | 12678.33039  |
| wavelet-LHL | glcm       | MaximumProbability               | 0.014620774  |
| wavelet-LHL | glcm       | Idmn                             | 0.962455928  |
| wavelet-LHL | glcm       | JointEnergy                      | 0.00731565   |
| wavelet-LHL | glcm       | Contrast                         | 461.0334273  |
| wavelet-LHL | glcm       | DifferenceEntropy                | 4.649487977  |
| wavelet-LHL | glcm       | InverseVariance                  | 0.086633657  |
| wavelet-LHL | glcm       | DifferenceVariance               | 211.3108569  |
| wavelet-LHL | glcm       | Idn                              | 0.883274809  |
| wavelet-LHL | glcm       | Idm                              | 0.078120643  |
| wavelet-LHL | glcm       | Correlation                      | 0.056296197  |
| wavelet-LHL | glcm       | Autocorrelation                  | 1167.081808  |
| wavelet-LHL | glcm       | SumEntropy                       | 5.430287901  |
| wavelet-LHL | glcm       | SumSquares                       | 256.332978   |
| wavelet-LHL | glcm       | ClusterProminence                | 1635822.116  |
| wavelet-LHL | glcm       | Imc2                             | 0.999609479  |
| wavelet-LHL | glcm       | Imc1                             | -0.668895745 |
| wavelet-LHL | glcm       | DifferenceAverage                | 15.02904776  |
| wavelet-LHL | glcm       | Id                               | 0.151466835  |
| wavelet-LHL | glcm       | ClusterTendency                  | 564.2984846  |
| wavelet-LHL | firstorder | InterquartileRange               | 458.3078156  |
| wavelet-LHL | firstorder | Skewness                         | 1.028767785  |
| wavelet-LHL | firstorder | Uniformity                       | 0.025309809  |
| wavelet-LHL | firstorder | Median                           | 9.534803001  |
| wavelet-LHL | firstorder | Energy                           | 27297773.4   |
| wavelet-LHL | firstorder | RobustMeanAbsoluteDeviation      | 195.4388424  |
| wavelet-LHL | firstorder | MeanAbsoluteDeviation            | 322.6925828  |
| wavelet-LHL | firstorder | TotalEnergy                      | 737039881.7  |
| wavelet-LHL | firstorder | Maximum                          | 1663.644607  |
| wavelet-LHL | firstorder | RootMeanSquared                  | 444.7583076  |
| wavelet-LHL | firstorder | 90Percentile                     | 664.6069857  |
| wavelet-LHL | firstorder | Minimum                          | -827.5434551 |
| wavelet-LHL | firstorder | Entropy                          | 5.543094885  |
| wavelet-LHL | firstorder | Range                            | 2491.188062  |
| wavelet-LHL | firstorder | Variance                         | 194689.7864  |
| wavelet-LHL | firstorder | 10Percentile                     | -395.7842429 |
| wavelet-LHL | firstorder | Kurtosis                         | 4.537507934  |
| wavelet-LHL | firstorder | Mean                             | 55.85844383  |
| wavelet-LHL | glrlm      | ShortRunLowGrayLevelEmphasis     | 0.009228543  |
| wavelet-LHL | glrlm      | GrayLevelVariance                | 314.1082848  |
| wavelet-LHL | glrlm      | LowGrayLevelRunEmphasis          | 0.009248906  |
| wavelet-LHL | glrlm      | GrayLevelNonUniformityNormalized | 0.025115687  |
| wavelet-LHL | glrlm      | RunVariance                      | 0.013371086  |
| wavelet-LHL | glrlm      | GrayLevelNonUniformity           | 3.419800151  |
| wavelet-LHL | glrlm      | LongRunEmphasis                  | 1.040977783  |
| wavelet-LHL | glrlm      | ShortRunHighGrayLevelEmphasis    | 1652.137427  |
| wavelet-LHL | glrlm      | RunLengthNonUniformity           | 132.5391868  |
| wavelet-LHL | glrlm      | ShortRunEmphasis                 | 0.989755554  |
| wavelet-LHL | glrlm      | LongRunHighGrayLevelEmphasis     | 1715.055332  |
| wavelet-LHL | glrlm      | RunPercentage                    | 0.986622074  |
| wavelet-LHL | glrlm      | LongRunLowGrayLevelEmphasis      | 0.009330356  |
| wavelet-LHL | glrlm      | RunEntropy                       | 5.58533859   |
| wavelet-LHL | glrlm      | HighGrayLevelRunEmphasis         | 1664.721008  |

|             |       |                                      |             |
|-------------|-------|--------------------------------------|-------------|
| wavelet-LHL | glrlm | RunLengthNonUniformityNormalized     | 0.973257828 |
| wavelet-LHL | glszm | GrayLevelVariance                    | 334.5945303 |
| wavelet-LHL | glszm | ZoneVariance                         | 0.257134364 |
| wavelet-LHL | glszm | GrayLevelNonUniformityNormalized     | 0.023781213 |
| wavelet-LHL | glszm | SizeZoneNonUniformityNormalized      | 0.741676576 |
| wavelet-LHL | glszm | SizeZoneNonUniformity                | 86.03448276 |
| wavelet-LHL | glszm | GrayLevelNonUniformity               | 2.75862069  |
| wavelet-LHL | glszm | LargeAreaEmphasis                    | 1.672413793 |
| wavelet-LHL | glszm | SmallAreaHighGrayLevelEmphasis       | 1596.597522 |
| wavelet-LHL | glszm | ZonePercentage                       | 0.84057971  |
| wavelet-LHL | glszm | LargeAreaLowGrayLevelEmphasis        | 0.011965116 |
| wavelet-LHL | glszm | LargeAreaHighGrayLevelEmphasis       | 2545.517241 |
| wavelet-LHL | glszm | HighGrayLevelZoneEmphasis            | 1742.137931 |
| wavelet-LHL | glszm | SmallAreaEmphasis                    | 0.884877874 |
| wavelet-LHL | glszm | LowGrayLevelZoneEmphasis             | 0.010488193 |
| wavelet-LHL | glszm | ZoneEntropy                          | 5.867516745 |
| wavelet-LHL | glszm | SmallAreaLowGrayLevelEmphasis        | 0.01027179  |
| wavelet-LHL | ngtdm | Coarseness                           | 0.035367812 |
| wavelet-LHL | ngtdm | Complexity                           | 18063.4093  |
| wavelet-LHL | ngtdm | Strength                             | 64.95159426 |
| wavelet-LHL | ngtdm | Contrast                             | 2.17236082  |
| wavelet-LHL | ngtdm | Busyness                             | 0.018914223 |
| wavelet-LHH | gldm  | GrayLevelVariance                    | 31.37707414 |
| wavelet-LHH | gldm  | HighGrayLevelEmphasis                | 301.7173913 |
| wavelet-LHH | gldm  | DependenceEntropy                    | 5.417239338 |
| wavelet-LHH | gldm  | DependenceNonUniformity              | 53.30434783 |
| wavelet-LHH | gldm  | GrayLevelNonUniformity               | 8           |
| wavelet-LHH | gldm  | SmallDependenceEmphasis              | 0.59180153  |
| wavelet-LHH | gldm  | SmallDependenceHighGrayLevelEmphasis | 184.0928502 |
| wavelet-LHH | gldm  | DependenceNonUniformityNormalized    | 0.38626339  |
| wavelet-LHH | gldm  | LargeDependenceEmphasis              | 3.927536232 |
| wavelet-LHH | gldm  | LargeDependenceLowGrayLevelEmphasis  | 0.027105513 |
| wavelet-LHH | gldm  | DependenceVariance                   | 0.902961563 |
| wavelet-LHH | gldm  | LargeDependenceHighGrayLevelEmphasis | 1099.108696 |
| wavelet-LHH | gldm  | SmallDependenceLowGrayLevelEmphasis  | 0.010891568 |
| wavelet-LHH | gldm  | LowGrayLevelEmphasis                 | 0.01306202  |
| wavelet-LHH | glcm  | JointAverage                         | 16.75736202 |
| wavelet-LHH | glcm  | SumAverage                           | 33.51472404 |
| wavelet-LHH | glcm  | JointEntropy                         | 6.879299316 |
| wavelet-LHH | glcm  | ClusterShade                         | 88.68314923 |
| wavelet-LHH | glcm  | MaximumProbability                   | 0.021320736 |
| wavelet-LHH | glcm  | Idmn                                 | 0.946852198 |
| wavelet-LHH | glcm  | JointEnergy                          | 0.009382992 |
| wavelet-LHH | glcm  | Contrast                             | 68.27888018 |
| wavelet-LHH | glcm  | DifferenceEntropy                    | 3.88679638  |
| wavelet-LHH | glcm  | InverseVariance                      | 0.149132826 |
| wavelet-LHH | glcm  | DifferenceVariance                   | 24.77443076 |
| wavelet-LHH | glcm  | Idn                                  | 0.84780835  |
| wavelet-LHH | glcm  | Idm                                  | 0.142091335 |
| wavelet-LHH | glcm  | Correlation                          | 0.003484262 |
| wavelet-LHH | glcm  | Autocorrelation                      | 281.0614664 |
| wavelet-LHH | glcm  | SumEntropy                           | 4.617167062 |
| wavelet-LHH | glcm  | SumSquares                           | 34.17935773 |
| wavelet-LHH | glcm  | ClusterProminence                    | 15353.54823 |
| wavelet-LHH | glcm  | Imc2                                 | 0.982947776 |

|             |            |                                  |              |
|-------------|------------|----------------------------------|--------------|
| wavelet-LHH | glcm       | Imc1                             | -0.400215835 |
| wavelet-LHH | glcm       | DifferenceAverage                | 6.512508376  |
| wavelet-LHH | glcm       | Id                               | 0.233250673  |
| wavelet-LHH | glcm       | ClusterTendency                  | 68.43855075  |
| wavelet-LHH | firstorder | InterquartileRange               | 173.9386317  |
| wavelet-LHH | firstorder | Skewness                         | 0.146631284  |
| wavelet-LHH | firstorder | Uniformity                       | 0.057971014  |
| wavelet-LHH | firstorder | Median                           | -10.79384974 |
| wavelet-LHH | firstorder | Energy                           | 2763550.272  |
| wavelet-LHH | firstorder | RobustMeanAbsoluteDeviation      | 73.39771653  |
| wavelet-LHH | firstorder | MeanAbsoluteDeviation            | 110.2442524  |
| wavelet-LHH | firstorder | TotalEnergy                      | 74615857.35  |
| wavelet-LHH | firstorder | Maximum                          | 423.8667213  |
| wavelet-LHH | firstorder | RootMeanSquared                  | 141.5122843  |
| wavelet-LHH | firstorder | 90Percentile                     | 168.21495    |
| wavelet-LHH | firstorder | Minimum                          | -395.8248394 |
| wavelet-LHH | firstorder | Entropy                          | 4.308053922  |
| wavelet-LHH | firstorder | Range                            | 819.6915607  |
| wavelet-LHH | firstorder | Variance                         | 20020.8834   |
| wavelet-LHH | firstorder | 10Percentile                     | -168.1698159 |
| wavelet-LHH | firstorder | Kurtosis                         | 3.215194695  |
| wavelet-LHH | firstorder | Mean                             | -2.20073039  |
| wavelet-LHH | glrlm      | ShortRunLowGrayLevelEmphasis     | 0.013191062  |
| wavelet-LHH | glrlm      | GrayLevelVariance                | 31.78904134  |
| wavelet-LHH | glrlm      | LowGrayLevelRunEmphasis          | 0.013299266  |
| wavelet-LHH | glrlm      | GrayLevelNonUniformityNormalized | 0.057219949  |
| wavelet-LHH | glrlm      | RunVariance                      | 0.030726364  |
| wavelet-LHH | glrlm      | GrayLevelNonUniformity           | 7.672353744  |
| wavelet-LHH | glrlm      | LongRunEmphasis                  | 1.090891876  |
| wavelet-LHH | glrlm      | ShortRunHighGrayLevelEmphasis    | 296.3960096  |
| wavelet-LHH | glrlm      | RunLengthNonUniformity           | 126.7959239  |
| wavelet-LHH | glrlm      | ShortRunEmphasis                 | 0.978581994  |
| wavelet-LHH | glrlm      | LongRunHighGrayLevelEmphasis     | 327.6428911  |
| wavelet-LHH | glrlm      | RunPercentage                    | 0.971571906  |
| wavelet-LHH | glrlm      | LongRunLowGrayLevelEmphasis      | 0.013753889  |
| wavelet-LHH | glrlm      | RunEntropy                       | 4.431210663  |
| wavelet-LHH | glrlm      | HighGrayLevelRunEmphasis         | 302.3944346  |
| wavelet-LHH | glrlm      | RunLengthNonUniformityNormalized | 0.945270459  |
| wavelet-LHH | glszm      | GrayLevelVariance                | 37.10671754  |
| wavelet-LHH | glszm      | ZoneVariance                     | 1.195976413  |
| wavelet-LHH | glszm      | GrayLevelNonUniformityNormalized | 0.051682275  |
| wavelet-LHH | glszm      | SizeZoneNonUniformityNormalized  | 0.558792924  |
| wavelet-LHH | glszm      | SizeZoneNonUniformity            | 51.96774194  |
| wavelet-LHH | glszm      | GrayLevelNonUniformity           | 4.806451613  |
| wavelet-LHH | glszm      | LargeAreaEmphasis                | 3.397849462  |
| wavelet-LHH | glszm      | SmallAreaHighGrayLevelEmphasis   | 243.6661895  |
| wavelet-LHH | glszm      | ZonePercentage                   | 0.673913043  |
| wavelet-LHH | glszm      | LargeAreaLowGrayLevelEmphasis    | 0.028426307  |
| wavelet-LHH | glszm      | LargeAreaHighGrayLevelEmphasis   | 955.0860215  |
| wavelet-LHH | glszm      | HighGrayLevelZoneEmphasis        | 311.311828   |
| wavelet-LHH | glszm      | SmallAreaEmphasis                | 0.775165024  |
| wavelet-LHH | glszm      | LowGrayLevelZoneEmphasis         | 0.016883957  |
| wavelet-LHH | glszm      | ZoneEntropy                      | 5.156326995  |
| wavelet-LHH | glszm      | SmallAreaLowGrayLevelEmphasis    | 0.015609995  |
| wavelet-LHH | ngtdm      | Coarseness                       | 0.036441446  |

|             |            |                                      |              |
|-------------|------------|--------------------------------------|--------------|
| wavelet-LHH | ngtdm      | Complexity                           | 1145.435346  |
| wavelet-LHH | ngtdm      | Strength                             | 7.607186316  |
| wavelet-LHH | ngtdm      | Contrast                             | 0.478529261  |
| wavelet-LHH | ngtdm      | Busyness                             | 0.082230889  |
| wavelet-LLH | gldm       | GrayLevelVariance                    | 68.31973325  |
| wavelet-LLH | gldm       | HighGrayLevelEmphasis                | 801.6304348  |
| wavelet-LLH | gldm       | DependenceEntropy                    | 5.676474392  |
| wavelet-LLH | gldm       | DependenceNonUniformity              | 55.15942029  |
| wavelet-LLH | gldm       | GrayLevelNonUniformity               | 5.942028986  |
| wavelet-LLH | gldm       | SmallDependenceEmphasis              | 0.632437601  |
| wavelet-LLH | gldm       | SmallDependenceHighGrayLevelEmphasis | 517.5944948  |
| wavelet-LLH | gldm       | DependenceNonUniformityNormalized    | 0.399705944  |
| wavelet-LLH | gldm       | LargeDependenceEmphasis              | 4.028985507  |
| wavelet-LLH | gldm       | LargeDependenceLowGrayLevelEmphasis  | 0.013596501  |
| wavelet-LLH | gldm       | DependenceVariance                   | 1.054610376  |
| wavelet-LLH | gldm       | LargeDependenceHighGrayLevelEmphasis | 3221.688406  |
| wavelet-LLH | gldm       | SmallDependenceLowGrayLevelEmphasis  | 0.008771115  |
| wavelet-LLH | gldm       | LowGrayLevelEmphasis                 | 0.009351286  |
| wavelet-LLH | glcm       | JointAverage                         | 27.20791514  |
| wavelet-LLH | glcm       | SumAverage                           | 54.41583027  |
| wavelet-LLH | glcm       | JointEntropy                         | 6.943254303  |
| wavelet-LLH | glcm       | ClusterShade                         | -29.85881234 |
| wavelet-LLH | glcm       | MaximumProbability                   | 0.023709276  |
| wavelet-LLH | glcm       | Idmn                                 | 0.95851454   |
| wavelet-LLH | glcm       | JointEnergy                          | 0.008984736  |
| wavelet-LLH | glcm       | Contrast                             | 114.6064101  |
| wavelet-LLH | glcm       | DifferenceEntropy                    | 4.130577249  |
| wavelet-LLH | glcm       | InverseVariance                      | 0.128956603  |
| wavelet-LLH | glcm       | DifferenceVariance                   | 42.46795607  |
| wavelet-LLH | glcm       | Idn                                  | 0.8669286    |
| wavelet-LLH | glcm       | Idm                                  | 0.127651702  |
| wavelet-LLH | glcm       | Correlation                          | 0.104350211  |
| wavelet-LLH | glcm       | Autocorrelation                      | 746.8747024  |
| wavelet-LLH | glcm       | SumEntropy                           | 4.947040027  |
| wavelet-LLH | glcm       | SumSquares                           | 63.75486402  |
| wavelet-LLH | glcm       | ClusterProminence                    | 72595.83612  |
| wavelet-LLH | glcm       | Imc2                                 | 0.996272957  |
| wavelet-LLH | glcm       | Imc1                                 | -0.529952483 |
| wavelet-LLH | glcm       | DifferenceAverage                    | 8.249482096  |
| wavelet-LLH | glcm       | Id                                   | 0.212248605  |
| wavelet-LLH | glcm       | ClusterTendency                      | 140.413046   |
| wavelet-LLH | firstorder | InterquartileRange                   | 235.5439086  |
| wavelet-LLH | firstorder | Skewness                             | -0.215985665 |
| wavelet-LLH | firstorder | Uniformity                           | 0.043058181  |
| wavelet-LLH | firstorder | Median                               | -56.26971066 |
| wavelet-LLH | firstorder | Energy                               | 6409555.937  |
| wavelet-LLH | firstorder | RobustMeanAbsoluteDeviation          | 106.0471123  |
| wavelet-LLH | firstorder | MeanAbsoluteDeviation                | 159.6408347  |
| wavelet-LLH | firstorder | TotalEnergy                          | 173058010.3  |
| wavelet-LLH | firstorder | Maximum                              | 479.776669   |
| wavelet-LLH | firstorder | RootMeanSquared                      | 215.5134741  |
| wavelet-LLH | firstorder | 90Percentile                         | 190.188068   |
| wavelet-LLH | firstorder | Minimum                              | -708.0119548 |
| wavelet-LLH | firstorder | Entropy                              | 4.803386771  |
| wavelet-LLH | firstorder | Range                                | 1187.788624  |



|             |            |                                      |              |
|-------------|------------|--------------------------------------|--------------|
| wavelet-LLH | firstorder | Variance                             | 42703.12366  |
| wavelet-LLH | firstorder | 10Percentile                         | -336.8547574 |
| wavelet-LLH | firstorder | Kurtosis                             | 3.39335411   |
| wavelet-LLH | firstorder | Mean                                 | -61.17952151 |
| wavelet-LLH | glrlm      | ShortRunLowGrayLevelEmphasis         | 0.009548401  |
| wavelet-LLH | glrlm      | GrayLevelVariance                    | 69.71700944  |
| wavelet-LLH | glrlm      | LowGrayLevelRunEmphasis              | 0.009579529  |
| wavelet-LLH | glrlm      | GrayLevelNonUniformityNormalized     | 0.042120282  |
| wavelet-LLH | glrlm      | RunVariance                          | 0.030150062  |
| wavelet-LLH | glrlm      | GrayLevelNonUniformity               | 5.652503199  |
| wavelet-LLH | glrlm      | LongRunEmphasis                      | 1.08922083   |
| wavelet-LLH | glrlm      | ShortRunHighGrayLevelEmphasis        | 785.5520007  |
| wavelet-LLH | glrlm      | RunLengthNonUniformity               | 127.0352163  |
| wavelet-LLH | glrlm      | ShortRunEmphasis                     | 0.978990463  |
| wavelet-LLH | glrlm      | LongRunHighGrayLevelEmphasis         | 872.4946503  |
| wavelet-LLH | glrlm      | RunPercentage                        | 0.97212932   |
| wavelet-LLH | glrlm      | LongRunLowGrayLevelEmphasis          | 0.009710004  |
| wavelet-LLH | glrlm      | RunEntropy                           | 4.921062443  |
| wavelet-LLH | glrlm      | HighGrayLevelRunEmphasis             | 802.0389206  |
| wavelet-LLH | glrlm      | RunLengthNonUniformityNormalized     | 0.946423968  |
| wavelet-LLH | glszm      | GrayLevelVariance                    | 86.52019992  |
| wavelet-LLH | glszm      | ZoneVariance                         | 1.261974177  |
| wavelet-LLH | glszm      | GrayLevelNonUniformityNormalized     | 0.036234902  |
| wavelet-LLH | glszm      | SizeZoneNonUniformityNormalized      | 0.616826322  |
| wavelet-LLH | glszm      | SizeZoneNonUniformity                | 60.44897959  |
| wavelet-LLH | glszm      | GrayLevelNonUniformity               | 3.551020408  |
| wavelet-LLH | glszm      | LargeAreaEmphasis                    | 3.244897959  |
| wavelet-LLH | glszm      | SmallAreaHighGrayLevelEmphasis       | 668.910788   |
| wavelet-LLH | glszm      | ZonePercentage                       | 0.710144928  |
| wavelet-LLH | glszm      | LargeAreaLowGrayLevelEmphasis        | 0.015641632  |
| wavelet-LLH | glszm      | LargeAreaHighGrayLevelEmphasis       | 2621.540816  |
| wavelet-LLH | glszm      | HighGrayLevelZoneEmphasis            | 810.0204082  |
| wavelet-LLH | glszm      | SmallAreaEmphasis                    | 0.812726757  |
| wavelet-LLH | glszm      | LowGrayLevelZoneEmphasis             | 0.012545677  |
| wavelet-LLH | glszm      | ZoneEntropy                          | 5.49482611   |
| wavelet-LLH | glszm      | SmallAreaLowGrayLevelEmphasis        | 0.012225923  |
| wavelet-LLH | ngtdm      | Coarseness                           | 0.038987294  |
| wavelet-LLH | ngtdm      | Complexity                           | 3136.168394  |
| wavelet-LLH | ngtdm      | Strength                             | 18.35212656  |
| wavelet-LLH | ngtdm      | Contrast                             | 0.650660592  |
| wavelet-LLH | ngtdm      | Busyness                             | 0.030539721  |
| wavelet-LLL | gldm       | GrayLevelVariance                    | 591.4274837  |
| wavelet-LLL | gldm       | HighGrayLevelEmphasis                | 5584.181159  |
| wavelet-LLL | gldm       | DependenceEntropy                    | 6.213242754  |
| wavelet-LLL | gldm       | DependenceNonUniformity              | 77.31884058  |
| wavelet-LLL | gldm       | GrayLevelNonUniformity               | 2.884057971  |
| wavelet-LLL | gldm       | SmallDependenceEmphasis              | 0.776268116  |
| wavelet-LLL | gldm       | SmallDependenceHighGrayLevelEmphasis | 3872.856783  |
| wavelet-LLL | gldm       | DependenceNonUniformityNormalized    | 0.560281453  |
| wavelet-LLL | gldm       | LargeDependenceEmphasis              | 2.347826087  |
| wavelet-LLL | gldm       | LargeDependenceLowGrayLevelEmphasis  | 0.007860084  |
| wavelet-LLL | gldm       | DependenceVariance                   | 0.452215921  |
| wavelet-LLL | gldm       | LargeDependenceHighGrayLevelEmphasis | 16380.1087   |
| wavelet-LLL | gldm       | SmallDependenceLowGrayLevelEmphasis  | 0.007643414  |
| wavelet-LLL | gldm       | LowGrayLevelEmphasis                 | 0.007675989  |

|             |            |                                  |              |
|-------------|------------|----------------------------------|--------------|
| wavelet-LLL | glcm       | JointAverage                     | 76.15745618  |
| wavelet-LLL | glcm       | SumAverage                       | 152.3149124  |
| wavelet-LLL | glcm       | JointEntropy                     | 7.184841478  |
| wavelet-LLL | glcm       | ClusterShade                     | -32514.67442 |
| wavelet-LLL | glcm       | MaximumProbability               | 0.014092122  |
| wavelet-LLL | glcm       | Idmn                             | 0.96080038   |
| wavelet-LLL | glcm       | JointEnergy                      | 0.007138841  |
| wavelet-LLL | glcm       | Contrast                         | 628.8088555  |
| wavelet-LLL | glcm       | DifferenceEntropy                | 4.952876166  |
| wavelet-LLL | glcm       | InverseVariance                  | 0.090143967  |
| wavelet-LLL | glcm       | DifferenceVariance               | 246.5809399  |
| wavelet-LLL | glcm       | Idn                              | 0.873044313  |
| wavelet-LLL | glcm       | Idm                              | 0.079696015  |
| wavelet-LLL | glcm       | Correlation                      | 0.33118944   |
| wavelet-LLL | glcm       | Autocorrelation                  | 5956.536893  |
| wavelet-LLL | glcm       | SumEntropy                       | 5.730847947  |
| wavelet-LLL | glcm       | SumSquares                       | 468.1888414  |
| wavelet-LLL | glcm       | ClusterProminence                | 4815348.877  |
| wavelet-LLL | glcm       | Imc2                             | 0.9997547    |
| wavelet-LLL | glcm       | Imc1                             | -0.696409135 |
| wavelet-LLL | glcm       | DifferenceAverage                | 19.064022    |
| wavelet-LLL | glcm       | Id                               | 0.141249114  |
| wavelet-LLL | glcm       | ClusterTendency                  | 1243.94651   |
| wavelet-LLL | firstorder | InterquartileRange               | 849.3108079  |
| wavelet-LLL | firstorder | Skewness                         | -0.557600092 |
| wavelet-LLL | firstorder | Uniformity                       | 0.020898971  |
| wavelet-LLL | firstorder | Median                           | -416.2344074 |
| wavelet-LLL | firstorder | Energy                           | 81610701.23  |
| wavelet-LLL | firstorder | RobustMeanAbsoluteDeviation      | 373.7077309  |
| wavelet-LLL | firstorder | MeanAbsoluteDeviation            | 499.0643228  |
| wavelet-LLL | firstorder | TotalEnergy                      | 2203488933   |
| wavelet-LLL | firstorder | Maximum                          | 749.4133612  |
| wavelet-LLL | firstorder | RootMeanSquared                  | 769.0135844  |
| wavelet-LLL | firstorder | 90Percentile                     | 193.2619131  |
| wavelet-LLL | firstorder | Minimum                          | -2207.619241 |
| wavelet-LLL | firstorder | Entropy                          | 5.785028377  |
| wavelet-LLL | firstorder | Range                            | 2957.032602  |
| wavelet-LLL | firstorder | Variance                         | 369368.6942  |
| wavelet-LLL | firstorder | 10Percentile                     | -1335.719415 |
| wavelet-LLL | firstorder | Kurtosis                         | 2.650102021  |
| wavelet-LLL | firstorder | Mean                             | -471.1827657 |
| wavelet-LLL | glrlm      | ShortRunLowGrayLevelEmphasis     | 0.007785842  |
| wavelet-LLL | glrlm      | GrayLevelVariance                | 593.451166   |
| wavelet-LLL | glrlm      | LowGrayLevelRunEmphasis          | 0.007787318  |
| wavelet-LLL | glrlm      | GrayLevelNonUniformityNormalized | 0.020692115  |
| wavelet-LLL | glrlm      | RunVariance                      | 0.016765824  |
| wavelet-LLL | glrlm      | GrayLevelNonUniformity           | 2.814209825  |
| wavelet-LLL | glrlm      | LongRunEmphasis                  | 1.04659944   |
| wavelet-LLL | glrlm      | ShortRunHighGrayLevelEmphasis    | 5469.695658  |
| wavelet-LLL | glrlm      | RunLengthNonUniformity           | 132.3714789  |
| wavelet-LLL | glrlm      | ShortRunEmphasis                 | 0.989616364  |
| wavelet-LLL | glrlm      | LongRunHighGrayLevelEmphasis     | 5919.567107  |
| wavelet-LLL | glrlm      | RunPercentage                    | 0.985507246  |
| wavelet-LLL | glrlm      | LongRunLowGrayLevelEmphasis      | 0.007793786  |
| wavelet-LLL | glrlm      | RunEntropy                       | 5.827805216  |

|             |       |                                      |              |
|-------------|-------|--------------------------------------|--------------|
| wavelet-LLL | glrlm | HighGrayLevelRunEmphasis             | 5550.523762  |
| wavelet-LLL | glrlm | RunLengthNonUniformityNormalized     | 0.973204661  |
| wavelet-LLL | glszm | GrayLevelVariance                    | 612.4660665  |
| wavelet-LLL | glszm | ZoneVariance                         | 0.446906741  |
| wavelet-LLL | glszm | GrayLevelNonUniformityNormalized     | 0.019082795  |
| wavelet-LLL | glszm | SizeZoneNonUniformityNormalized      | 0.762696214  |
| wavelet-LLL | glszm | SizeZoneNonUniformity                | 86.94736842  |
| wavelet-LLL | glszm | GrayLevelNonUniformity               | 2.175438596  |
| wavelet-LLL | glszm | LargeAreaEmphasis                    | 1.912280702  |
| wavelet-LLL | glszm | SmallAreaHighGrayLevelEmphasis       | 4343.706932  |
| wavelet-LLL | glszm | ZonePercentage                       | 0.826086957  |
| wavelet-LLL | glszm | LargeAreaLowGrayLevelEmphasis        | 0.009384909  |
| wavelet-LLL | glszm | LargeAreaHighGrayLevelEmphasis       | 12505.67544  |
| wavelet-LLL | glszm | HighGrayLevelZoneEmphasis            | 5126.184211  |
| wavelet-LLL | glszm | SmallAreaEmphasis                    | 0.894066764  |
| wavelet-LLL | glszm | LowGrayLevelZoneEmphasis             | 0.009261945  |
| wavelet-LLL | glszm | ZoneEntropy                          | 6.089083106  |
| wavelet-LLL | glszm | SmallAreaLowGrayLevelEmphasis        | 0.009245812  |
| wavelet-LLL | ngtdm | Coarseness                           | 0.029578549  |
| wavelet-LLL | ngtdm | Complexity                           | 31342.99488  |
| wavelet-LLL | ngtdm | Strength                             | 94.24117257  |
| wavelet-LLL | ngtdm | Contrast                             | 3.921815163  |
| wavelet-LLL | ngtdm | Busyness                             | 0.008361428  |
| wavelet-HHL | gldm  | GrayLevelVariance                    | 34.26065953  |
| wavelet-HHL | gldm  | HighGrayLevelEmphasis                | 764.0434783  |
| wavelet-HHL | gldm  | DependenceEntropy                    | 5.515020226  |
| wavelet-HHL | gldm  | DependenceNonUniformity              | 45.39130435  |
| wavelet-HHL | gldm  | GrayLevelNonUniformity               | 8.202898551  |
| wavelet-HHL | gldm  | SmallDependenceEmphasis              | 0.543226651  |
| wavelet-HHL | gldm  | SmallDependenceHighGrayLevelEmphasis | 406.2854771  |
| wavelet-HHL | gldm  | DependenceNonUniformityNormalized    | 0.328922495  |
| wavelet-HHL | gldm  | LargeDependenceEmphasis              | 4.492753623  |
| wavelet-HHL | gldm  | LargeDependenceLowGrayLevelEmphasis  | 0.013717543  |
| wavelet-HHL | gldm  | DependenceVariance                   | 0.943079185  |
| wavelet-HHL | gldm  | LargeDependenceHighGrayLevelEmphasis | 3463.478261  |
| wavelet-HHL | gldm  | SmallDependenceLowGrayLevelEmphasis  | 0.008151176  |
| wavelet-HHL | gldm  | LowGrayLevelEmphasis                 | 0.008812429  |
| wavelet-HHL | glcm  | JointAverage                         | 27.52547154  |
| wavelet-HHL | glcm  | SumAverage                           | 55.05094309  |
| wavelet-HHL | glcm  | JointEntropy                         | 6.735921767  |
| wavelet-HHL | glcm  | ClusterShade                         | -102.5326243 |
| wavelet-HHL | glcm  | MaximumProbability                   | 0.021703395  |
| wavelet-HHL | glcm  | Idmn                                 | 0.967252574  |
| wavelet-HHL | glcm  | JointEnergy                          | 0.01042174   |
| wavelet-HHL | glcm  | Contrast                             | 53.44478868  |
| wavelet-HHL | glcm  | DifferenceEntropy                    | 3.690535309  |
| wavelet-HHL | glcm  | InverseVariance                      | 0.184273526  |
| wavelet-HHL | glcm  | DifferenceVariance                   | 21.54907793  |
| wavelet-HHL | glcm  | Idn                                  | 0.881051882  |
| wavelet-HHL | glcm  | Idm                                  | 0.169418473  |
| wavelet-HHL | glcm  | Correlation                          | -0.041754229 |
| wavelet-HHL | glcm  | Autocorrelation                      | 756.927623   |
| wavelet-HHL | glcm  | SumEntropy                           | 4.44916454   |
| wavelet-HHL | glcm  | SumSquares                           | 25.88937995  |
| wavelet-HHL | glcm  | ClusterProminence                    | 10154.67609  |

|             |            |                                  |              |
|-------------|------------|----------------------------------|--------------|
| wavelet-HHL | glcm       | Imc2                             | 0.976997235  |
| wavelet-HHL | glcm       | Imc1                             | -0.378785053 |
| wavelet-HHL | glcm       | DifferenceAverage                | 5.583486896  |
| wavelet-HHL | glcm       | Id                               | 0.261937491  |
| wavelet-HHL | glcm       | ClusterTendency                  | 50.11273112  |
| wavelet-HHL | firstorder | InterquartileRange               | 180.212258   |
| wavelet-HHL | firstorder | Skewness                         | -0.737764106 |
| wavelet-HHL | firstorder | Uniformity                       | 0.059441294  |
| wavelet-HHL | firstorder | Median                           | -13.18406283 |
| wavelet-HHL | firstorder | Energy                           | 2973909.722  |
| wavelet-HHL | firstorder | RobustMeanAbsoluteDeviation      | 72.19117033  |
| wavelet-HHL | firstorder | MeanAbsoluteDeviation            | 110.4917008  |
| wavelet-HHL | firstorder | TotalEnergy                      | 80295562.5   |
| wavelet-HHL | firstorder | Maximum                          | 269.8494361  |
| wavelet-HHL | firstorder | RootMeanSquared                  | 146.7994225  |
| wavelet-HHL | firstorder | 90Percentile                     | 162.5543996  |
| wavelet-HHL | firstorder | Minimum                          | -653.9937578 |
| wavelet-HHL | firstorder | Entropy                          | 4.324575334  |
| wavelet-HHL | firstorder | Range                            | 923.8431939  |
| wavelet-HHL | firstorder | Variance                         | 21402.92088  |
| wavelet-HHL | firstorder | 10Percentile                     | -193.687453  |
| wavelet-HHL | firstorder | Kurtosis                         | 4.891230434  |
| wavelet-HHL | firstorder | Mean                             | -12.13052243 |
| wavelet-HHL | glrlm      | ShortRunLowGrayLevelEmphasis     | 0.009041559  |
| wavelet-HHL | glrlm      | GrayLevelVariance                | 34.91604872  |
| wavelet-HHL | glrlm      | LowGrayLevelRunEmphasis          | 0.009079797  |
| wavelet-HHL | glrlm      | GrayLevelNonUniformityNormalized | 0.058619836  |
| wavelet-HHL | glrlm      | RunVariance                      | 0.035051944  |
| wavelet-HHL | glrlm      | GrayLevelNonUniformity           | 7.816360215  |
| wavelet-HHL | glrlm      | LongRunEmphasis                  | 1.109843896  |
| wavelet-HHL | glrlm      | ShortRunHighGrayLevelEmphasis    | 742.8762518  |
| wavelet-HHL | glrlm      | RunLengthNonUniformity           | 124.6199423  |
| wavelet-HHL | glrlm      | ShortRunEmphasis                 | 0.97324539   |
| wavelet-HHL | glrlm      | LongRunHighGrayLevelEmphasis     | 849.0314081  |
| wavelet-HHL | glrlm      | RunPercentage                    | 0.96599777   |
| wavelet-HHL | glrlm      | LongRunLowGrayLevelEmphasis      | 0.00923589   |
| wavelet-HHL | glrlm      | RunEntropy                       | 4.476097193  |
| wavelet-HHL | glrlm      | HighGrayLevelRunEmphasis         | 763.5987007  |
| wavelet-HHL | glrlm      | RunLengthNonUniformityNormalized | 0.933206101  |
| wavelet-HHL | glszm      | GrayLevelVariance                | 43.33832645  |
| wavelet-HHL | glszm      | ZoneVariance                     | 1.063533058  |
| wavelet-HHL | glszm      | GrayLevelNonUniformityNormalized | 0.050878099  |
| wavelet-HHL | glszm      | SizeZoneNonUniformityNormalized  | 0.512913223  |
| wavelet-HHL | glszm      | SizeZoneNonUniformity            | 45.13636364  |
| wavelet-HHL | glszm      | GrayLevelNonUniformity           | 4.477272727  |
| wavelet-HHL | glszm      | LargeAreaEmphasis                | 3.522727273  |
| wavelet-HHL | glszm      | SmallAreaHighGrayLevelEmphasis   | 551.9124053  |
| wavelet-HHL | glszm      | ZonePercentage                   | 0.637681159  |
| wavelet-HHL | glszm      | LargeAreaLowGrayLevelEmphasis    | 0.016543084  |
| wavelet-HHL | glszm      | LargeAreaHighGrayLevelEmphasis   | 2719.318182  |
| wavelet-HHL | glszm      | HighGrayLevelZoneEmphasis        | 754.0454545  |
| wavelet-HHL | glszm      | SmallAreaEmphasis                | 0.743825758  |
| wavelet-HHL | glszm      | LowGrayLevelZoneEmphasis         | 0.013005457  |
| wavelet-HHL | glszm      | ZoneEntropy                      | 5.286040926  |
| wavelet-HHL | glszm      | SmallAreaLowGrayLevelEmphasis    | 0.012625086  |

|             |            |                                      |              |
|-------------|------------|--------------------------------------|--------------|
| wavelet-HHL | ngtdm      | Coarseness                           | 0.038730629  |
| wavelet-HHL | ngtdm      | Complexity                           | 1243.093864  |
| wavelet-HHL | ngtdm      | Strength                             | 9.536055333  |
| wavelet-HHL | ngtdm      | Contrast                             | 0.48021514   |
| wavelet-HHL | ngtdm      | Busyness                             | 0.041790658  |
| wavelet-HLH | gldm       | GrayLevelVariance                    | 14.86704474  |
| wavelet-HLH | gldm       | HighGrayLevelEmphasis                | 308.3188406  |
| wavelet-HLH | gldm       | DependenceEntropy                    | 5.339913001  |
| wavelet-HLH | gldm       | DependenceNonUniformity              | 29.05797101  |
| wavelet-HLH | gldm       | GrayLevelNonUniformity               | 14.30434783  |
| wavelet-HLH | gldm       | SmallDependenceEmphasis              | 0.388738868  |
| wavelet-HLH | gldm       | SmallDependenceHighGrayLevelEmphasis | 129.8847195  |
| wavelet-HLH | gldm       | DependenceNonUniformityNormalized    | 0.210565007  |
| wavelet-HLH | gldm       | LargeDependenceEmphasis              | 9.333333333  |
| wavelet-HLH | gldm       | LargeDependenceLowGrayLevelEmphasis  | 0.041322963  |
| wavelet-HLH | gldm       | DependenceVariance                   | 2.299306868  |
| wavelet-HLH | gldm       | LargeDependenceHighGrayLevelEmphasis | 2701.797101  |
| wavelet-HLH | gldm       | SmallDependenceLowGrayLevelEmphasis  | 0.009249006  |
| wavelet-HLH | gldm       | LowGrayLevelEmphasis                 | 0.011443469  |
| wavelet-HLH | glcm       | JointAverage                         | 17.01644001  |
| wavelet-HLH | glcm       | SumAverage                           | 34.03288002  |
| wavelet-HLH | glcm       | JointEntropy                         | 6.044292406  |
| wavelet-HLH | glcm       | ClusterShade                         | 23.11706927  |
| wavelet-HLH | glcm       | MaximumProbability                   | 0.047791566  |
| wavelet-HLH | glcm       | Idmn                                 | 0.972945663  |
| wavelet-HLH | glcm       | JointEnergy                          | 0.019374022  |
| wavelet-HLH | glcm       | Contrast                             | 24.78138348  |
| wavelet-HLH | glcm       | DifferenceEntropy                    | 3.136211585  |
| wavelet-HLH | glcm       | InverseVariance                      | 0.298032368  |
| wavelet-HLH | glcm       | DifferenceVariance                   | 12.49800243  |
| wavelet-HLH | glcm       | Idn                                  | 0.899136784  |
| wavelet-HLH | glcm       | Idm                                  | 0.28522554   |
| wavelet-HLH | glcm       | Correlation                          | 0.006341745  |
| wavelet-HLH | glcm       | Autocorrelation                      | 289.6258735  |
| wavelet-HLH | glcm       | SumEntropy                           | 3.945074029  |
| wavelet-HLH | glcm       | SumSquares                           | 12.41471126  |
| wavelet-HLH | glcm       | ClusterProminence                    | 2969.270655  |
| wavelet-HLH | glcm       | Imc2                                 | 0.935310493  |
| wavelet-HLH | glcm       | Imc1                                 | -0.296659591 |
| wavelet-HLH | glcm       | DifferenceAverage                    | 3.476360905  |
| wavelet-HLH | glcm       | Id                                   | 0.367823258  |
| wavelet-HLH | glcm       | ClusterTendency                      | 24.87746155  |
| wavelet-HLH | firstorder | InterquartileRange                   | 78.71220143  |
| wavelet-HLH | firstorder | Skewness                             | -0.543859849 |
| wavelet-HLH | firstorder | Uniformity                           | 0.103654694  |
| wavelet-HLH | firstorder | Median                               | 17.82923595  |
| wavelet-HLH | firstorder | Energy                               | 1291966.495  |
| wavelet-HLH | firstorder | RobustMeanAbsoluteDeviation          | 34.89137228  |
| wavelet-HLH | firstorder | MeanAbsoluteDeviation                | 64.01162656  |
| wavelet-HLH | firstorder | TotalEnergy                          | 34883095.35  |
| wavelet-HLH | firstorder | Maximum                              | 298.336261   |
| wavelet-HLH | firstorder | RootMeanSquared                      | 96.75782164  |
| wavelet-HLH | firstorder | 90Percentile                         | 108.6965778  |
| wavelet-HLH | firstorder | Minimum                              | -392.5817594 |
| wavelet-HLH | firstorder | Entropy                              | 3.680028552  |

|             |            |                                  |              |
|-------------|------------|----------------------------------|--------------|
| wavelet-HLH | firstorder | Range                            | 690.9180204  |
| wavelet-HLH | firstorder | Variance                         | 9128.333243  |
| wavelet-HLH | firstorder | 10Percentile                     | -71.67373985 |
| wavelet-HLH | firstorder | Kurtosis                         | 6.459835551  |
| wavelet-HLH | firstorder | Mean                             | 15.28864954  |
| wavelet-HLH | glrlm      | ShortRunLowGrayLevelEmphasis     | 0.011802939  |
| wavelet-HLH | glrlm      | GrayLevelVariance                | 15.70960718  |
| wavelet-HLH | glrlm      | LowGrayLevelRunEmphasis          | 0.011980512  |
| wavelet-HLH | glrlm      | GrayLevelNonUniformityNormalized | 0.099877366  |
| wavelet-HLH | glrlm      | RunVariance                      | 0.069128479  |
| wavelet-HLH | glrlm      | GrayLevelNonUniformity           | 12.90935679  |
| wavelet-HLH | glrlm      | LongRunEmphasis                  | 1.211118573  |
| wavelet-HLH | glrlm      | ShortRunHighGrayLevelEmphasis    | 295.3708829  |
| wavelet-HLH | glrlm      | RunLengthNonUniformity           | 113.6592683  |
| wavelet-HLH | glrlm      | ShortRunEmphasis                 | 0.950543503  |
| wavelet-HLH | glrlm      | LongRunHighGrayLevelEmphasis     | 370.5754232  |
| wavelet-HLH | glrlm      | RunPercentage                    | 0.936454849  |
| wavelet-HLH | glrlm      | LongRunLowGrayLevelEmphasis      | 0.012738182  |
| wavelet-HLH | glrlm      | RunEntropy                       | 4.000104916  |
| wavelet-HLH | glrlm      | HighGrayLevelRunEmphasis         | 309.6600476  |
| wavelet-HLH | glrlm      | RunLengthNonUniformityNormalized | 0.878627142  |
| wavelet-HLH | glszm      | GrayLevelVariance                | 30.62280954  |
| wavelet-HLH | glszm      | ZoneVariance                     | 11.78339558  |
| wavelet-HLH | glszm      | GrayLevelNonUniformityNormalized | 0.064636599  |
| wavelet-HLH | glszm      | SizeZoneNonUniformityNormalized  | 0.503016375  |
| wavelet-HLH | glszm      | SizeZoneNonUniformity            | 29.6779661   |
| wavelet-HLH | glszm      | GrayLevelNonUniformity           | 3.813559322  |
| wavelet-HLH | glszm      | LargeAreaEmphasis                | 17.25423729  |
| wavelet-HLH | glszm      | SmallAreaHighGrayLevelEmphasis   | 252.7901255  |
| wavelet-HLH | glszm      | ZonePercentage                   | 0.427536232  |
| wavelet-HLH | glszm      | LargeAreaLowGrayLevelEmphasis    | 0.082152651  |
| wavelet-HLH | glszm      | LargeAreaHighGrayLevelEmphasis   | 4830.610169  |
| wavelet-HLH | glszm      | HighGrayLevelZoneEmphasis        | 336.5762712  |
| wavelet-HLH | glszm      | SmallAreaEmphasis                | 0.732760675  |
| wavelet-HLH | glszm      | LowGrayLevelZoneEmphasis         | 0.021901397  |
| wavelet-HLH | glszm      | ZoneEntropy                      | 5.009596015  |
| wavelet-HLH | glszm      | SmallAreaLowGrayLevelEmphasis    | 0.020986713  |
| wavelet-HLH | ngtdm      | Coarseness                       | 0.050575968  |
| wavelet-HLH | ngtdm      | Complexity                       | 515.6882041  |
| wavelet-HLH | ngtdm      | Strength                         | 8.249552576  |
| wavelet-HLH | ngtdm      | Contrast                         | 0.169001347  |
| wavelet-HLH | ngtdm      | Busyness                         | 0.045418614  |

| Image type | Feature Class | Feature Name                         |                                                                                                                                                                                                                                                                                                                                                                                                                   |
|------------|---------------|--------------------------------------|-------------------------------------------------------------------------------------------------------------------------------------------------------------------------------------------------------------------------------------------------------------------------------------------------------------------------------------------------------------------------------------------------------------------|
| general    | info          | BoundingBox                          | 12: RTSTRUCT: C99-DNU_segment_LUL GTV<br>(0, 0, 1, 7, 5, 6)                                                                                                                                                                                                                                                                                                                                                       |
| general    | info          | EnabledImageTypes                    | {u'Original': {}, u'Wavelet': {}}                                                                                                                                                                                                                                                                                                                                                                                 |
|            |               |                                      | {'distances': [1], 'additionalInfo': True, 'force2D': False, 'interpolator': 'sitkBSpline', 'resampledPixelSpacing': [3.0], 'label': 1, 'normalizeScale': 1, 'normalize': False, 'force2Ddimension': 0, 'removeOutliers': None, 'minimumROISize': None, u'binWidth': 25.0, 'minimumROIDimensions': 1, u'correctMask': True, 'preCrop': False, u'symmetricalGLCM': True, 'resegmentRange': None, 'padDistance': 5} |
| general    | info          | GeneralSettings                      |                                                                                                                                                                                                                                                                                                                                                                                                                   |
| general    | info          | ImageHash                            | 3df20f491d4569dd0103348a16c7c1f6831bce37                                                                                                                                                                                                                                                                                                                                                                          |
| general    | info          | ImageSpacing                         | (0.73046875, 0.73046875, 2.0)                                                                                                                                                                                                                                                                                                                                                                                     |
| general    | info          | MaskHash                             | b7fc32fa6be65cbcecffacedffdd732d6381043                                                                                                                                                                                                                                                                                                                                                                           |
| general    | info          | NumpyVersion                         | 1.13.1                                                                                                                                                                                                                                                                                                                                                                                                            |
| general    | info          | PyWaveletVersion                     | 0.5.2                                                                                                                                                                                                                                                                                                                                                                                                             |
| general    | info          | SimpleITKVersion                     | 1.1.0                                                                                                                                                                                                                                                                                                                                                                                                             |
| general    | info          | Version                              | 1.3.0.post102+g1b0eb74                                                                                                                                                                                                                                                                                                                                                                                            |
| general    | info          | VolumeNum                            | 1                                                                                                                                                                                                                                                                                                                                                                                                                 |
| general    | info          | VoxelNum                             | 84                                                                                                                                                                                                                                                                                                                                                                                                                |
| original   | shape         | Maximum3DDiameter                    | 22.04540769                                                                                                                                                                                                                                                                                                                                                                                                       |
| original   | shape         | Maximum2DDiameterSlice               | 16.15549442                                                                                                                                                                                                                                                                                                                                                                                                       |
| original   | shape         | Sphericity                           | 0.832880247                                                                                                                                                                                                                                                                                                                                                                                                       |
| original   | shape         | MinorAxis                            | 13.4406965                                                                                                                                                                                                                                                                                                                                                                                                        |
| original   | shape         | Elongation                           | 0.584258423                                                                                                                                                                                                                                                                                                                                                                                                       |
| original   | shape         | SurfaceVolumeRatio                   | 0.441930401                                                                                                                                                                                                                                                                                                                                                                                                       |
| original   | shape         | Volume                               | 2268                                                                                                                                                                                                                                                                                                                                                                                                              |
| original   | shape         | MajorAxis                            | 23.00471158                                                                                                                                                                                                                                                                                                                                                                                                       |
| original   | shape         | SurfaceArea                          | 1002.29815                                                                                                                                                                                                                                                                                                                                                                                                        |
| original   | shape         | Flatness                             | 0.486573745                                                                                                                                                                                                                                                                                                                                                                                                       |
| original   | shape         | LeastAxis                            | 11.19348865                                                                                                                                                                                                                                                                                                                                                                                                       |
| original   | shape         | Maximum2DDiameterColumn              | 21.63330765                                                                                                                                                                                                                                                                                                                                                                                                       |
| original   | shape         | Maximum2DDiameterRow                 | 17.49285568                                                                                                                                                                                                                                                                                                                                                                                                       |
| original   | gldm          | GrayLevelVariance                    | 71.15646259                                                                                                                                                                                                                                                                                                                                                                                                       |
| original   | gldm          | HighGrayLevelEmphasis                | 613.3809524                                                                                                                                                                                                                                                                                                                                                                                                       |
| original   | gldm          | DependenceEntropy                    | 5.421497482                                                                                                                                                                                                                                                                                                                                                                                                       |
| original   | gldm          | DependenceNonUniformity              | 16.9047619                                                                                                                                                                                                                                                                                                                                                                                                        |
| original   | gldm          | GrayLevelNonUniformity               | 8.047619048                                                                                                                                                                                                                                                                                                                                                                                                       |
| original   | gldm          | SmallDependenceEmphasis              | 0.432804452                                                                                                                                                                                                                                                                                                                                                                                                       |
| original   | gldm          | SmallDependenceHighGrayLevelEmphasis | 180.3642758                                                                                                                                                                                                                                                                                                                                                                                                       |
| original   | gldm          | DependenceNonUniformityNormalized    | 0.201247166                                                                                                                                                                                                                                                                                                                                                                                                       |
| original   | gldm          | LargeDependenceEmphasis              | 14.85714286                                                                                                                                                                                                                                                                                                                                                                                                       |
| original   | gldm          | LargeDependenceLowGrayLevelEmphasis  | 0.058023038                                                                                                                                                                                                                                                                                                                                                                                                       |
| original   | gldm          | DependenceVariance                   | 5.128684807                                                                                                                                                                                                                                                                                                                                                                                                       |
| original   | gldm          | LargeDependenceHighGrayLevelEmphasis | 11810.80952                                                                                                                                                                                                                                                                                                                                                                                                       |
| original   | gldm          | SmallDependenceLowGrayLevelEmphasis  | 0.03032443                                                                                                                                                                                                                                                                                                                                                                                                        |
| original   | gldm          | LowGrayLevelEmphasis                 | 0.033019453                                                                                                                                                                                                                                                                                                                                                                                                       |

|          |            |                                  |              |
|----------|------------|----------------------------------|--------------|
| original | glcm       | JointAverage                     | 24.64812795  |
| original | glcm       | SumAverage                       | 49.2962559   |
| original | glcm       | JointEntropy                     | 5.614190136  |
| original | glcm       | ClusterShade                     | -1926.872035 |
| original | glcm       | MaximumProbability               | 0.082174081  |
| original | glcm       | Idmn                             | 0.923016718  |
| original | glcm       | JointEnergy                      | 0.028428916  |
| original | glcm       | Contrast                         | 107.1339297  |
| original | glcm       | DifferenceEntropy                | 3.610253985  |
| original | glcm       | InverseVariance                  | 0.264267882  |
| original | glcm       | DifferenceVariance               | 62.44069739  |
| original | glcm       | Idn                              | 0.854526613  |
| original | glcm       | Idm                              | 0.289479414  |
| original | glcm       | Correlation                      | 0.068545191  |
| original | glcm       | Autocorrelation                  | 611.3905822  |
| original | glcm       | SumEntropy                       | 4.100695194  |
| original | glcm       | SumSquares                       | 57.32996265  |
| original | glcm       | ClusterProminence                | 66632.36456  |
| original | glcm       | Imc2                             | 0.97707678   |
| original | glcm       | Imc1                             | -0.434866844 |
| original | glcm       | DifferenceAverage                | 6.619948957  |
| original | glcm       | Id                               | 0.352161208  |
| original | glcm       | ClusterTendency                  | 122.1859209  |
| original | firstorder | InterquartileRange               | 190.25       |
| original | firstorder | Skewness                         | -1.46716133  |
| original | firstorder | Uniformity                       | 0.095804989  |
| original | firstorder | Median                           | -7           |
| original | firstorder | Energy                           | 4667556      |
| original | firstorder | RobustMeanAbsoluteDeviation      | 97.79522498  |
| original | firstorder | MeanAbsoluteDeviation            | 164.8344671  |
| original | firstorder | TotalEnergy                      | 126024012    |
| original | firstorder | Maximum                          | 82           |
| original | firstorder | RootMeanSquared                  | 235.7247184  |
| original | firstorder | 90Percentile                     | 56.4         |
| original | firstorder | Minimum                          | -669         |
| original | firstorder | Entropy                          | 3.999344436  |
| original | firstorder | Range                            | 751          |
| original | firstorder | Variance                         | 44491.08617  |
| original | firstorder | 10Percentile                     | -510.6       |
| original | firstorder | Kurtosis                         | 3.837672868  |
| original | firstorder | Mean                             | -105.2380952 |
| original | glrlm      | ShortRunLowGrayLevelEmphasis     | 0.035611381  |
| original | glrlm      | GrayLevelVariance                | 74.46693579  |
| original | glrlm      | LowGrayLevelRunEmphasis          | 0.035778924  |
| original | glrlm      | GrayLevelNonUniformityNormalized | 0.085329442  |
| original | glrlm      | RunVariance                      | 0.103505724  |
| original | glrlm      | GrayLevelNonUniformity           | 6.598649289  |
| original | glrlm      | LongRunEmphasis                  | 1.295203386  |
| original | glrlm      | ShortRunHighGrayLevelEmphasis    | 547.8150388  |
| original | glrlm      | RunLengthNonUniformity           | 66.01342182  |
| original | glrlm      | ShortRunEmphasis                 | 0.938526791  |
| original | glrlm      | LongRunHighGrayLevelEmphasis     | 832.4710974  |
| original | glrlm      | RunPercentage                    | 0.918498168  |
| original | glrlm      | LongRunLowGrayLevelEmphasis      | 0.036509795  |



|             |       |                                      |              |
|-------------|-------|--------------------------------------|--------------|
| original    | glrlm | RunEntropy                           | 4.385036759  |
| original    | glrlm | HighGrayLevelRunEmphasis             | 596.7168674  |
| original    | glrlm | RunLengthNonUniformityNormalized     | 0.853206657  |
| original    | glszm | GrayLevelVariance                    | 88.2975      |
| original    | glszm | ZoneVariance                         | 10.64        |
| original    | glszm | GrayLevelNonUniformityNormalized     | 0.0475       |
| original    | glszm | SizeZoneNonUniformityNormalized      | 0.61375      |
| original    | glszm | SizeZoneNonUniformity                | 24.55        |
| original    | glszm | GrayLevelNonUniformity               | 1.9          |
| original    | glszm | LargeAreaEmphasis                    | 15.05        |
| original    | glszm | SmallAreaHighGrayLevelEmphasis       | 305.0284237  |
| original    | glszm | ZonePercentage                       | 0.476190476  |
| original    | glszm | LargeAreaLowGrayLevelEmphasis        | 0.090810756  |
| original    | glszm | LargeAreaHighGrayLevelEmphasis       | 11794.8      |
| original    | glszm | HighGrayLevelZoneEmphasis            | 432.4        |
| original    | glszm | SmallAreaEmphasis                    | 0.805059249  |
| original    | glszm | LowGrayLevelZoneEmphasis             | 0.065190874  |
| original    | glszm | ZoneEntropy                          | 4.853055907  |
| original    | glszm | SmallAreaLowGrayLevelEmphasis        | 0.062853566  |
| original    | ngtdm | Coarseness                           | 0.031319033  |
| original    | ngtdm | Complexity                           | 2200.316726  |
| original    | ngtdm | Strength                             | 22.20943351  |
| original    | ngtdm | Contrast                             | 1.205407491  |
| original    | ngtdm | Busyness                             | 0.036819438  |
| wavelet-HHH | gldm  | GrayLevelVariance                    | 29.29535147  |
| wavelet-HHH | gldm  | HighGrayLevelEmphasis                | 210.2619048  |
| wavelet-HHH | gldm  | DependenceEntropy                    | 5.2045265    |
| wavelet-HHH | gldm  | DependenceNonUniformity              | 27.64285714  |
| wavelet-HHH | gldm  | GrayLevelNonUniformity               | 5.261904762  |
| wavelet-HHH | gldm  | SmallDependenceEmphasis              | 0.548363095  |
| wavelet-HHH | gldm  | SmallDependenceHighGrayLevelEmphasis | 127.8480489  |
| wavelet-HHH | gldm  | DependenceNonUniformityNormalized    | 0.329081633  |
| wavelet-HHH | gldm  | LargeDependenceEmphasis              | 4.428571429  |
| wavelet-HHH | gldm  | LargeDependenceLowGrayLevelEmphasis  | 0.053265749  |
| wavelet-HHH | gldm  | DependenceVariance                   | 0.890589569  |
| wavelet-HHH | gldm  | LargeDependenceHighGrayLevelEmphasis | 817.1428571  |
| wavelet-HHH | gldm  | SmallDependenceLowGrayLevelEmphasis  | 0.023052081  |
| wavelet-HHH | gldm  | LowGrayLevelEmphasis                 | 0.026840331  |
| wavelet-HHH | glcm  | JointAverage                         | 13.5484903   |
| wavelet-HHH | glcm  | SumAverage                           | 27.0969806   |
| wavelet-HHH | glcm  | JointEntropy                         | 6.166735729  |
| wavelet-HHH | glcm  | ClusterShade                         | 21.37805205  |
| wavelet-HHH | glcm  | MaximumProbability                   | 0.033075191  |
| wavelet-HHH | glcm  | Idmn                                 | 0.935835906  |
| wavelet-HHH | glcm  | JointEnergy                          | 0.015359364  |
| wavelet-HHH | glcm  | Contrast                             | 52.25027001  |
| wavelet-HHH | glcm  | DifferenceEntropy                    | 3.634202672  |
| wavelet-HHH | glcm  | InverseVariance                      | 0.140318868  |
| wavelet-HHH | glcm  | DifferenceVariance                   | 18.13389572  |
| wavelet-HHH | glcm  | Idn                                  | 0.83145525   |
| wavelet-HHH | glcm  | Idm                                  | 0.151506114  |
| wavelet-HHH | glcm  | Correlation                          | -0.028195614 |
| wavelet-HHH | glcm  | Autocorrelation                      | 182.8667012  |
| wavelet-HHH | glcm  | SumEntropy                           | 4.232485651  |

|             |            |                                  |              |
|-------------|------------|----------------------------------|--------------|
| wavelet-HHH | glcm       | SumSquares                       | 25.3514693   |
| wavelet-HHH | glcm       | ClusterProminence                | 6756.312644  |
| wavelet-HHH | glcm       | Imc2                             | 0.988976002  |
| wavelet-HHH | glcm       | Imc1                             | -0.48020697  |
| wavelet-HHH | glcm       | DifferenceAverage                | 5.800783568  |
| wavelet-HHH | glcm       | Id                               | 0.247113657  |
| wavelet-HHH | glcm       | ClusterTendency                  | 49.15560718  |
| wavelet-HHH | firstorder | InterquartileRange               | 160.9322291  |
| wavelet-HHH | firstorder | Skewness                         | 0.086643687  |
| wavelet-HHH | firstorder | Uniformity                       | 0.062641723  |
| wavelet-HHH | firstorder | Median                           | 4.994133971  |
| wavelet-HHH | firstorder | Energy                           | 1548987.143  |
| wavelet-HHH | firstorder | RobustMeanAbsoluteDeviation      | 71.97063722  |
| wavelet-HHH | firstorder | MeanAbsoluteDeviation            | 107.9306994  |
| wavelet-HHH | firstorder | TotalEnergy                      | 41822652.85  |
| wavelet-HHH | firstorder | Maximum                          | 317.5171711  |
| wavelet-HHH | firstorder | RootMeanSquared                  | 135.7951513  |
| wavelet-HHH | firstorder | 90Percentile                     | 168.5630004  |
| wavelet-HHH | firstorder | Minimum                          | -305.8506005 |
| wavelet-HHH | firstorder | Entropy                          | 4.148037591  |
| wavelet-HHH | firstorder | Range                            | 623.3677716  |
| wavelet-HHH | firstorder | Variance                         | 18438.95146  |
| wavelet-HHH | firstorder | 10Percentile                     | -151.6313537 |
| wavelet-HHH | firstorder | Kurtosis                         | 2.857235301  |
| wavelet-HHH | firstorder | Mean                             | -1.171183125 |
| wavelet-HHH | glrlm      | ShortRunLowGrayLevelEmphasis     | 0.027299432  |
| wavelet-HHH | glrlm      | GrayLevelVariance                | 29.84804211  |
| wavelet-HHH | glrlm      | LowGrayLevelRunEmphasis          | 0.02751027   |
| wavelet-HHH | glrlm      | GrayLevelNonUniformityNormalized | 0.062179282  |
| wavelet-HHH | glrlm      | RunVariance                      | 0.033798643  |
| wavelet-HHH | glrlm      | GrayLevelNonUniformity           | 5.046820967  |
| wavelet-HHH | glrlm      | LongRunEmphasis                  | 1.106301686  |
| wavelet-HHH | glrlm      | ShortRunHighGrayLevelEmphasis    | 206.6069323  |
| wavelet-HHH | glrlm      | RunLengthNonUniformity           | 75.72212516  |
| wavelet-HHH | glrlm      | ShortRunEmphasis                 | 0.973424579  |
| wavelet-HHH | glrlm      | LongRunHighGrayLevelEmphasis     | 230.4041554  |
| wavelet-HHH | glrlm      | RunPercentage                    | 0.966117216  |
| wavelet-HHH | glrlm      | LongRunLowGrayLevelEmphasis      | 0.028353624  |
| wavelet-HHH | glrlm      | RunEntropy                       | 4.267661463  |
| wavelet-HHH | glrlm      | HighGrayLevelRunEmphasis         | 211.3663769  |
| wavelet-HHH | glrlm      | RunLengthNonUniformityNormalized | 0.932402715  |
| wavelet-HHH | glszm      | GrayLevelVariance                | 37.52367391  |
| wavelet-HHH | glszm      | ZoneVariance                     | 1.525809897  |
| wavelet-HHH | glszm      | GrayLevelNonUniformityNormalized | 0.060163759  |
| wavelet-HHH | glszm      | SizeZoneNonUniformityNormalized  | 0.54503382   |
| wavelet-HHH | glszm      | SizeZoneNonUniformity            | 28.88679245  |
| wavelet-HHH | glszm      | GrayLevelNonUniformity           | 3.188679245  |
| wavelet-HHH | glszm      | LargeAreaEmphasis                | 4.037735849  |
| wavelet-HHH | glszm      | SmallAreaHighGrayLevelEmphasis   | 182.1121187  |
| wavelet-HHH | glszm      | ZonePercentage                   | 0.630952381  |
| wavelet-HHH | glszm      | LargeAreaLowGrayLevelEmphasis    | 0.059404213  |
| wavelet-HHH | glszm      | LargeAreaHighGrayLevelEmphasis   | 803.3207547  |
| wavelet-HHH | glszm      | HighGrayLevelZoneEmphasis        | 225.6792453  |
| wavelet-HHH | glszm      | SmallAreaEmphasis                | 0.7610076    |

|             |            |                                      |              |
|-------------|------------|--------------------------------------|--------------|
| wavelet-HHH | glszm      | LowGrayLevelZoneEmphasis             | 0.037817694  |
| wavelet-HHH | glszm      | ZoneEntropy                          | 4.831509605  |
| wavelet-HHH | glszm      | SmallAreaLowGrayLevelEmphasis        | 0.035612474  |
| wavelet-HHH | ngtdm      | Coarseness                           | 0.051910047  |
| wavelet-HHH | ngtdm      | Complexity                           | 851.1987495  |
| wavelet-HHH | ngtdm      | Strength                             | 8.7183551    |
| wavelet-HHH | ngtdm      | Contrast                             | 0.637560336  |
| wavelet-HHH | ngtdm      | Busyness                             | 0.088040471  |
| wavelet-HLL | gldm       | GrayLevelVariance                    | 108.709042   |
| wavelet-HLL | gldm       | HighGrayLevelEmphasis                | 667.1309524  |
| wavelet-HLL | gldm       | DependenceEntropy                    | 5.280602209  |
| wavelet-HLL | gldm       | DependenceNonUniformity              | 44.73809524  |
| wavelet-HLL | gldm       | GrayLevelNonUniformity               | 3.380952381  |
| wavelet-HLL | gldm       | SmallDependenceEmphasis              | 0.750661376  |
| wavelet-HLL | gldm       | SmallDependenceHighGrayLevelEmphasis | 545.2804233  |
| wavelet-HLL | gldm       | DependenceNonUniformityNormalized    | 0.532596372  |
| wavelet-HLL | gldm       | LargeDependenceEmphasis              | 2.261904762  |
| wavelet-HLL | gldm       | LargeDependenceLowGrayLevelEmphasis  | 0.019129457  |
| wavelet-HLL | gldm       | DependenceVariance                   | 0.354875283  |
| wavelet-HLL | gldm       | LargeDependenceHighGrayLevelEmphasis | 1262.892857  |
| wavelet-HLL | gldm       | SmallDependenceLowGrayLevelEmphasis  | 0.01466396   |
| wavelet-HLL | gldm       | LowGrayLevelEmphasis                 | 0.015411023  |
| wavelet-HLL | glcm       | JointAverage                         | 22.53515712  |
| wavelet-HLL | glcm       | SumAverage                           | 45.07031423  |
| wavelet-HLL | glcm       | JointEntropy                         | 6.389524639  |
| wavelet-HLL | glcm       | ClusterShade                         | 1869.53557   |
| wavelet-HLL | glcm       | MaximumProbability                   | 0.022261316  |
| wavelet-HLL | glcm       | Idmn                                 | 0.949144887  |
| wavelet-HLL | glcm       | JointEnergy                          | 0.012530963  |
| wavelet-HLL | glcm       | Contrast                             | 154.5845119  |
| wavelet-HLL | glcm       | DifferenceEntropy                    | 4.069120531  |
| wavelet-HLL | glcm       | InverseVariance                      | 0.12778813   |
| wavelet-HLL | glcm       | DifferenceVariance                   | 62.32768743  |
| wavelet-HLL | glcm       | Idn                                  | 0.854282962  |
| wavelet-HLL | glcm       | Idm                                  | 0.103529788  |
| wavelet-HLL | glcm       | Correlation                          | 0.126461318  |
| wavelet-HLL | glcm       | Autocorrelation                      | 520.1984264  |
| wavelet-HLL | glcm       | SumEntropy                           | 4.724840356  |
| wavelet-HLL | glcm       | SumSquares                           | 89.36480316  |
| wavelet-HLL | glcm       | ClusterProminence                    | 143570.8297  |
| wavelet-HLL | glcm       | Imc2                                 | 0.998657116  |
| wavelet-HLL | glcm       | Imc1                                 | -0.639024083 |
| wavelet-HLL | glcm       | DifferenceAverage                    | 9.465864365  |
| wavelet-HLL | glcm       | Id                                   | 0.185660726  |
| wavelet-HLL | glcm       | ClusterTendency                      | 202.8747008  |
| wavelet-HLL | firstorder | InterquartileRange                   | 359.484957   |
| wavelet-HLL | firstorder | Skewness                             | 0.561707033  |
| wavelet-HLL | firstorder | Uniformity                           | 0.040249433  |
| wavelet-HLL | firstorder | Median                               | -103.5125704 |
| wavelet-HLL | firstorder | Energy                               | 6117891.677  |
| wavelet-HLL | firstorder | RobustMeanAbsoluteDeviation          | 132.340944   |
| wavelet-HLL | firstorder | MeanAbsoluteDeviation                | 202.357096   |
| wavelet-HLL | firstorder | TotalEnergy                          | 165183075.3  |
| wavelet-HLL | firstorder | Maximum                              | 586.0929372  |

|             |            |                                      |              |
|-------------|------------|--------------------------------------|--------------|
| wavelet-HLL | firstorder | RootMeanSquared                      | 269.8741258  |
| wavelet-HLL | firstorder | 90Percentile                         | 283.4993003  |
| wavelet-HLL | firstorder | Minimum                              | -632.0718901 |
| wavelet-HLL | firstorder | Entropy                              | 4.862821448  |
| wavelet-HLL | firstorder | Range                                | 1218.164827  |
| wavelet-HLL | firstorder | Variance                             | 67499.47735  |
| wavelet-HLL | firstorder | 10Percentile                         | -351.2847893 |
| wavelet-HLL | firstorder | Kurtosis                             | 3.064914198  |
| wavelet-HLL | firstorder | Mean                                 | -73.02442351 |
| wavelet-HLL | glrlm      | ShortRunLowGrayLevelEmphasis         | 0.015564778  |
| wavelet-HLL | glrlm      | GrayLevelVariance                    | 109.5786436  |
| wavelet-HLL | glrlm      | LowGrayLevelRunEmphasis              | 0.015598176  |
| wavelet-HLL | glrlm      | GrayLevelNonUniformityNormalizd      | 0.039890701  |
| wavelet-HLL | glrlm      | RunVariance                          | 0.014640677  |
| wavelet-HLL | glrlm      | GrayLevelNonUniformity               | 3.302084002  |
| wavelet-HLL | glrlm      | LongRunEmphasis                      | 1.045100979  |
| wavelet-HLL | glrlm      | ShortRunHighGrayLevelEmphasis        | 664.556773   |
| wavelet-HLL | glrlm      | RunLengthNonUniformity               | 80.37180869  |
| wavelet-HLL | glrlm      | ShortRunEmphasis                     | 0.988724755  |
| wavelet-HLL | glrlm      | LongRunHighGrayLevelEmphasis         | 691.5644854  |
| wavelet-HLL | glrlm      | RunPercentage                        | 0.985347985  |
| wavelet-HLL | glrlm      | LongRunLowGrayLevelEmphasis          | 0.01573177   |
| wavelet-HLL | glrlm      | RunEntropy                           | 4.912743337  |
| wavelet-HLL | glrlm      | HighGrayLevelRunEmphasis             | 669.9583155  |
| wavelet-HLL | glrlm      | RunLengthNonUniformityNormalized     | 0.970718645  |
| wavelet-HLL | glszm      | GrayLevelVariance                    | 120.3016173  |
| wavelet-HLL | glszm      | ZoneVariance                         | 0.257088847  |
| wavelet-HLL | glszm      | GrayLevelNonUniformityNormalized     | 0.036756984  |
| wavelet-HLL | glszm      | SizeZoneNonUniformityNormalized      | 0.701323251  |
| wavelet-HLL | glszm      | SizeZoneNonUniformity                | 48.39130435  |
| wavelet-HLL | glszm      | GrayLevelNonUniformity               | 2.536231884  |
| wavelet-HLL | glszm      | LargeAreaEmphasis                    | 1.739130435  |
| wavelet-HLL | glszm      | SmallAreaHighGrayLevelEmphasis       | 639.7753623  |
| wavelet-HLL | glszm      | ZonePercentage                       | 0.821428571  |
| wavelet-HLL | glszm      | LargeAreaLowGrayLevelEmphasis        | 0.020357187  |
| wavelet-HLL | glszm      | LargeAreaHighGrayLevelEmphasis       | 1051.405797  |
| wavelet-HLL | glszm      | HighGrayLevelZoneEmphasis            | 708.1884058  |
| wavelet-HLL | glszm      | SmallAreaEmphasis                    | 0.86352657   |
| wavelet-HLL | glszm      | LowGrayLevelZoneEmphasis             | 0.018103393  |
| wavelet-HLL | glszm      | ZoneEntropy                          | 5.258826044  |
| wavelet-HLL | glszm      | SmallAreaLowGrayLevelEmphasis        | 0.017695632  |
| wavelet-HLL | ngtdm      | Coarseness                           | 0.054078875  |
| wavelet-HLL | ngtdm      | Complexity                           | 4033.205506  |
| wavelet-HLL | ngtdm      | Strength                             | 32.34631015  |
| wavelet-HLL | ngtdm      | Contrast                             | 1.281681289  |
| wavelet-HLL | ngtdm      | Busyness                             | 0.028802973  |
| wavelet-LHL | gldm       | GrayLevelVariance                    | 310.7120181  |
| wavelet-LHL | gldm       | HighGrayLevelEmphasis                | 1073.52381   |
| wavelet-LHL | gldm       | DependenceEntropy                    | 5.636248673  |
| wavelet-LHL | gldm       | DependenceNonUniformity              | 45.11904762  |
| wavelet-LHL | gldm       | GrayLevelNonUniformity               | 2.619047619  |
| wavelet-LHL | gldm       | SmallDependenceEmphasis              | 0.758475529  |
| wavelet-LHL | gldm       | SmallDependenceHighGrayLevelEmphasis | 805.4193122  |
| wavelet-LHL | gldm       | DependenceNonUniformityNormalized    | 0.537131519  |

|             |            |                                      |              |
|-------------|------------|--------------------------------------|--------------|
| wavelet-LHL | gldm       | LargeDependenceEmphasis              | 3.595238095  |
| wavelet-LHL | gldm       | LargeDependenceLowGrayLevelEmphasis  | 0.02946326   |
| wavelet-LHL | gldm       | DependenceVariance                   | 1.12585034   |
| wavelet-LHL | gldm       | LargeDependenceHighGrayLevelEmphasis | 2875.428571  |
| wavelet-LHL | gldm       | SmallDependenceLowGrayLevelEmphasis  | 0.018986097  |
| wavelet-LHL | gldm       | LowGrayLevelEmphasis                 | 0.019927278  |
| wavelet-LHL | glcm       | JointAverage                         | 26.25679986  |
| wavelet-LHL | glcm       | SumAverage                           | 52.51359971  |
| wavelet-LHL | glcm       | JointEntropy                         | 6.45647313   |
| wavelet-LHL | glcm       | ClusterShade                         | 13315.11627  |
| wavelet-LHL | glcm       | MaximumProbability                   | 0.023558168  |
| wavelet-LHL | glcm       | Idmn                                 | 0.924852043  |
| wavelet-LHL | glcm       | JointEnergy                          | 0.011773218  |
| wavelet-LHL | glcm       | Contrast                             | 479.6670428  |
| wavelet-LHL | glcm       | DifferenceEntropy                    | 4.534204188  |
| wavelet-LHL | glcm       | InverseVariance                      | 0.072176761  |
| wavelet-LHL | glcm       | DifferenceVariance                   | 199.9139814  |
| wavelet-LHL | glcm       | Idn                                  | 0.833045158  |
| wavelet-LHL | glcm       | Idm                                  | 0.083960612  |
| wavelet-LHL | glcm       | Correlation                          | 0.135092894  |
| wavelet-LHL | glcm       | Autocorrelation                      | 728.6606906  |
| wavelet-LHL | glcm       | SumEntropy                           | 5.055555003  |
| wavelet-LHL | glcm       | SumSquares                           | 278.6726598  |
| wavelet-LHL | glcm       | ClusterProminence                    | 1442790.53   |
| wavelet-LHL | glcm       | Imc2                                 | 0.999701732  |
| wavelet-LHL | glcm       | Imc1                                 | -0.732245185 |
| wavelet-LHL | glcm       | DifferenceAverage                    | 16.02700387  |
| wavelet-LHL | glcm       | Id                                   | 0.153605096  |
| wavelet-LHL | glcm       | ClusterTendency                      | 635.0235965  |
| wavelet-LHL | firstorder | InterquartileRange                   | 599.6856835  |
| wavelet-LHL | firstorder | Skewness                             | 0.737188474  |
| wavelet-LHL | firstorder | Uniformity                           | 0.031179138  |
| wavelet-LHL | firstorder | Median                               | -230.3509248 |
| wavelet-LHL | firstorder | Energy                               | 17508821.01  |
| wavelet-LHL | firstorder | RobustMeanAbsoluteDeviation          | 259.4630257  |
| wavelet-LHL | firstorder | MeanAbsoluteDeviation                | 363.2893853  |
| wavelet-LHL | firstorder | TotalEnergy                          | 472738167.2  |
| wavelet-LHL | firstorder | Maximum                              | 901.3504899  |
| wavelet-LHL | firstorder | RootMeanSquared                      | 456.550485   |
| wavelet-LHL | firstorder | 90Percentile                         | 529.8757865  |
| wavelet-LHL | firstorder | Minimum                              | -791.155365  |
| wavelet-LHL | firstorder | Entropy                              | 5.247805929  |
| wavelet-LHL | firstorder | Range                                | 1692.505855  |
| wavelet-LHL | firstorder | Variance                             | 193561.1609  |
| wavelet-LHL | firstorder | 10Percentile                         | -592.3289742 |
| wavelet-LHL | firstorder | Kurtosis                             | 2.610761205  |
| wavelet-LHL | firstorder | Mean                                 | -121.9720639 |
| wavelet-LHL | glrlm      | ShortRunLowGrayLevelEmphasis         | 0.020232348  |
| wavelet-LHL | glrlm      | GrayLevelVariance                    | 310.4403474  |
| wavelet-LHL | glrlm      | LowGrayLevelRunEmphasis              | 0.02029508   |
| wavelet-LHL | glrlm      | GrayLevelNonUniformityNormalized     | 0.030427847  |
| wavelet-LHL | glrlm      | RunVariance                          | 0.023865765  |
| wavelet-LHL | glrlm      | GrayLevelNonUniformity               | 2.500486616  |
| wavelet-LHL | glrlm      | LongRunEmphasis                      | 1.070181861  |

|             |       |                                      |             |
|-------------|-------|--------------------------------------|-------------|
| wavelet-LHL | glrlm | ShortRunHighGrayLevelEmphasis        | 1064.889461 |
| wavelet-LHL | glrlm | RunLengthNonUniformity               | 78.72826114 |
| wavelet-LHL | glrlm | ShortRunEmphasis                     | 0.983522911 |
| wavelet-LHL | glrlm | LongRunHighGrayLevelEmphasis         | 1136.770509 |
| wavelet-LHL | glrlm | RunPercentage                        | 0.978021978 |
| wavelet-LHL | glrlm | LongRunLowGrayLevelEmphasis          | 0.020556693 |
| wavelet-LHL | glrlm | RunEntropy                           | 5.326873785 |
| wavelet-LHL | glrlm | HighGrayLevelRunEmphasis             | 1078.92379  |
| wavelet-LHL | glrlm | RunLengthNonUniformityNormalized     | 0.957821354 |
| wavelet-LHL | glszm | GrayLevelVariance                    | 285.1027249 |
| wavelet-LHL | glszm | ZoneVariance                         | 0.562283737 |
| wavelet-LHL | glszm | GrayLevelNonUniformityNormalized     | 0.026816609 |
| wavelet-LHL | glszm | SizeZoneNonUniformityNormalized      | 0.783304498 |
| wavelet-LHL | glszm | SizeZoneNonUniformity                | 53.26470588 |
| wavelet-LHL | glszm | GrayLevelNonUniformity               | 1.823529412 |
| wavelet-LHL | glszm | LargeAreaEmphasis                    | 2.088235294 |
| wavelet-LHL | glszm | SmallAreaHighGrayLevelEmphasis       | 937.8459967 |
| wavelet-LHL | glszm | ZonePercentage                       | 0.80952381  |
| wavelet-LHL | glszm | LargeAreaLowGrayLevelEmphasis        | 0.027836894 |
| wavelet-LHL | glszm | LargeAreaHighGrayLevelEmphasis       | 2076.411765 |
| wavelet-LHL | glszm | HighGrayLevelZoneEmphasis            | 1069.926471 |
| wavelet-LHL | glszm | SmallAreaEmphasis                    | 0.901119281 |
| wavelet-LHL | glszm | LowGrayLevelZoneEmphasis             | 0.023708198 |
| wavelet-LHL | glszm | ZoneEntropy                          | 5.506436738 |
| wavelet-LHL | glszm | SmallAreaLowGrayLevelEmphasis        | 0.023313745 |
| wavelet-LHL | ngtdm | Coarseness                           | 0.037204012 |
| wavelet-LHL | ngtdm | Complexity                           | 13701.08542 |
| wavelet-LHL | ngtdm | Strength                             | 60.85566171 |
| wavelet-LHL | ngtdm | Contrast                             | 3.551545193 |
| wavelet-LHL | ngtdm | Busyness                             | 0.028806086 |
| wavelet-LHH | gldm  | GrayLevelVariance                    | 38.22902494 |
| wavelet-LHH | gldm  | HighGrayLevelEmphasis                | 365.6666667 |
| wavelet-LHH | gldm  | DependenceEntropy                    | 5.12875831  |
| wavelet-LHH | gldm  | DependenceNonUniformity              | 34.80952381 |
| wavelet-LHH | gldm  | GrayLevelNonUniformity               | 4.642857143 |
| wavelet-LHH | gldm  | SmallDependenceEmphasis              | 0.633515212 |
| wavelet-LHH | gldm  | SmallDependenceHighGrayLevelEmphasis | 243.0236442 |
| wavelet-LHH | gldm  | DependenceNonUniformityNormalized    | 0.414399093 |
| wavelet-LHH | gldm  | LargeDependenceEmphasis              | 3.238095238 |
| wavelet-LHH | gldm  | LargeDependenceLowGrayLevelEmphasis  | 0.023613484 |
| wavelet-LHH | gldm  | DependenceVariance                   | 0.616780045 |
| wavelet-LHH | gldm  | LargeDependenceHighGrayLevelEmphasis | 1143.047619 |
| wavelet-LHH | gldm  | SmallDependenceLowGrayLevelEmphasis  | 0.015443383 |
| wavelet-LHH | gldm  | LowGrayLevelEmphasis                 | 0.016643635 |
| wavelet-LHH | glcm  | JointAverage                         | 17.99307384 |
| wavelet-LHH | glcm  | SumAverage                           | 35.98614767 |
| wavelet-LHH | glcm  | JointEntropy                         | 6.260794787 |
| wavelet-LHH | glcm  | ClusterShade                         | -11.2416817 |
| wavelet-LHH | glcm  | MaximumProbability                   | 0.030912156 |
| wavelet-LHH | glcm  | Idmn                                 | 0.955185309 |
| wavelet-LHH | glcm  | JointEnergy                          | 0.014192822 |
| wavelet-LHH | glcm  | Contrast                             | 66.85056527 |
| wavelet-LHH | glcm  | DifferenceEntropy                    | 3.701484795 |
| wavelet-LHH | glcm  | InverseVariance                      | 0.167613947 |

|             |            |                                  |              |
|-------------|------------|----------------------------------|--------------|
| wavelet-LHH | glcm       | DifferenceVariance               | 25.20089521  |
| wavelet-LHH | glcm       | Idn                              | 0.859701828  |
| wavelet-LHH | glcm       | Idm                              | 0.143083988  |
| wavelet-LHH | glcm       | Correlation                      | -0.010835401 |
| wavelet-LHH | glcm       | Autocorrelation                  | 323.5193775  |
| wavelet-LHH | glcm       | SumEntropy                       | 4.332183101  |
| wavelet-LHH | glcm       | SumSquares                       | 33.11026047  |
| wavelet-LHH | glcm       | ClusterProminence                | 15164.5794   |
| wavelet-LHH | glcm       | Imc2                             | 0.993056154  |
| wavelet-LHH | glcm       | Imc1                             | -0.516225616 |
| wavelet-LHH | glcm       | DifferenceAverage                | 6.420625927  |
| wavelet-LHH | glcm       | Id                               | 0.233300027  |
| wavelet-LHH | glcm       | ClusterTendency                  | 65.5904766   |
| wavelet-LHH | firstorder | InterquartileRange               | 165.1803401  |
| wavelet-LHH | firstorder | Skewness                         | 0.080637782  |
| wavelet-LHH | firstorder | Uniformity                       | 0.055272109  |
| wavelet-LHH | firstorder | Median                           | 14.65131104  |
| wavelet-LHH | firstorder | Energy                           | 2052541.678  |
| wavelet-LHH | firstorder | RobustMeanAbsoluteDeviation      | 75.73071661  |
| wavelet-LHH | firstorder | MeanAbsoluteDeviation            | 118.4617282  |
| wavelet-LHH | firstorder | TotalEnergy                      | 55418625.32  |
| wavelet-LHH | firstorder | Maximum                          | 461.8915791  |
| wavelet-LHH | firstorder | RootMeanSquared                  | 156.3170496  |
| wavelet-LHH | firstorder | 90Percentile                     | 198.0650971  |
| wavelet-LHH | firstorder | Minimum                          | -420.6230714 |
| wavelet-LHH | firstorder | Entropy                          | 4.363321555  |
| wavelet-LHH | firstorder | Range                            | 882.5146505  |
| wavelet-LHH | firstorder | Variance                         | 24210.0728   |
| wavelet-LHH | firstorder | 10Percentile                     | -176.9870159 |
| wavelet-LHH | firstorder | Kurtosis                         | 3.589632464  |
| wavelet-LHH | firstorder | Mean                             | 14.99823939  |
| wavelet-LHH | glrlm      | ShortRunLowGrayLevelEmphasis     | 0.01692124   |
| wavelet-LHH | glrlm      | GrayLevelVariance                | 39.00310409  |
| wavelet-LHH | glrlm      | LowGrayLevelRunEmphasis          | 0.016974803  |
| wavelet-LHH | glrlm      | GrayLevelNonUniformityNormalized | 0.054804413  |
| wavelet-LHH | glrlm      | RunVariance                      | 0.029524271  |
| wavelet-LHH | glrlm      | GrayLevelNonUniformity           | 4.494172715  |
| wavelet-LHH | glrlm      | LongRunEmphasis                  | 1.079551909  |
| wavelet-LHH | glrlm      | ShortRunHighGrayLevelEmphasis    | 360.5681757  |
| wavelet-LHH | glrlm      | RunLengthNonUniformity           | 78.5486866   |
| wavelet-LHH | glrlm      | ShortRunEmphasis                 | 0.983303961  |
| wavelet-LHH | glrlm      | LongRunHighGrayLevelEmphasis     | 393.4916587  |
| wavelet-LHH | glrlm      | RunPercentage                    | 0.976190476  |
| wavelet-LHH | glrlm      | LongRunLowGrayLevelEmphasis      | 0.017226602  |
| wavelet-LHH | glrlm      | RunEntropy                       | 4.446820125  |
| wavelet-LHH | glrlm      | HighGrayLevelRunEmphasis         | 366.256671   |
| wavelet-LHH | glrlm      | RunLengthNonUniformityNormalized | 0.957614541  |
| wavelet-LHH | glszm      | GrayLevelVariance                | 50.7475      |
| wavelet-LHH | glszm      | ZoneVariance                     | 0.84         |
| wavelet-LHH | glszm      | GrayLevelNonUniformityNormalized | 0.049444444  |
| wavelet-LHH | glszm      | SizeZoneNonUniformityNormalized  | 0.597777778  |
| wavelet-LHH | glszm      | SizeZoneNonUniformity            | 35.86666667  |
| wavelet-LHH | glszm      | GrayLevelNonUniformity           | 2.966666667  |
| wavelet-LHH | glszm      | LargeAreaEmphasis                | 2.8          |

|             |            |                                      |              |
|-------------|------------|--------------------------------------|--------------|
| wavelet-LHH | glszm      | SmallAreaHighGrayLevelEmphasis       | 311.6803519  |
| wavelet-LHH | glszm      | ZonePercentage                       | 0.714285714  |
| wavelet-LHH | glszm      | LargeAreaLowGrayLevelEmphasis        | 0.027516696  |
| wavelet-LHH | glszm      | LargeAreaHighGrayLevelEmphasis       | 1011.633333  |
| wavelet-LHH | glszm      | HighGrayLevelZoneEmphasis            | 376.55       |
| wavelet-LHH | glszm      | SmallAreaEmphasis                    | 0.800666667  |
| wavelet-LHH | glszm      | LowGrayLevelZoneEmphasis             | 0.0220116    |
| wavelet-LHH | glszm      | ZoneEntropy                          | 4.996404088  |
| wavelet-LHH | glszm      | SmallAreaLowGrayLevelEmphasis        | 0.021334912  |
| wavelet-LHH | ngtdm      | Coarseness                           | 0.060472078  |
| wavelet-LHH | ngtdm      | Complexity                           | 1262.912123  |
| wavelet-LHH | ngtdm      | Strength                             | 13.1481914   |
| wavelet-LHH | ngtdm      | Contrast                             | 0.633936023  |
| wavelet-LHH | ngtdm      | Busyness                             | 0.046852092  |
| wavelet-LLH | gldm       | GrayLevelVariance                    | 113.8893141  |
| wavelet-LLH | gldm       | HighGrayLevelEmphasis                | 761.1071429  |
| wavelet-LLH | gldm       | DependenceEntropy                    | 5.271615453  |
| wavelet-LLH | gldm       | DependenceNonUniformity              | 39.14285714  |
| wavelet-LLH | gldm       | GrayLevelNonUniformity               | 3.571428571  |
| wavelet-LLH | gldm       | SmallDependenceEmphasis              | 0.706679894  |
| wavelet-LLH | gldm       | SmallDependenceHighGrayLevelEmphasis | 584.8687996  |
| wavelet-LLH | gldm       | DependenceNonUniformityNormalized    | 0.465986395  |
| wavelet-LLH | gldm       | LargeDependenceEmphasis              | 3.238095238  |
| wavelet-LLH | gldm       | LargeDependenceLowGrayLevelEmphasis  | 0.02526001   |
| wavelet-LLH | gldm       | DependenceVariance                   | 0.768707483  |
| wavelet-LLH | gldm       | LargeDependenceHighGrayLevelEmphasis | 1933.178571  |
| wavelet-LLH | gldm       | SmallDependenceLowGrayLevelEmphasis  | 0.019760114  |
| wavelet-LLH | gldm       | LowGrayLevelEmphasis                 | 0.020361492  |
| wavelet-LLH | glcm       | JointAverage                         | 24.53547606  |
| wavelet-LLH | glcm       | SumAverage                           | 49.07095212  |
| wavelet-LLH | glcm       | JointEntropy                         | 6.330179979  |
| wavelet-LLH | glcm       | ClusterShade                         | 1630.52868   |
| wavelet-LLH | glcm       | MaximumProbability                   | 0.029098362  |
| wavelet-LLH | glcm       | Idmn                                 | 0.939628381  |
| wavelet-LLH | glcm       | JointEnergy                          | 0.013381855  |
| wavelet-LLH | glcm       | Contrast                             | 219.3615367  |
| wavelet-LLH | glcm       | DifferenceEntropy                    | 4.14274922   |
| wavelet-LLH | glcm       | InverseVariance                      | 0.10575613   |
| wavelet-LLH | glcm       | DifferenceVariance                   | 93.54834765  |
| wavelet-LLH | glcm       | Idn                                  | 0.845923688  |
| wavelet-LLH | glcm       | Idm                                  | 0.103907128  |
| wavelet-LLH | glcm       | Correlation                          | -0.011486753 |
| wavelet-LLH | glcm       | Autocorrelation                      | 602.2472733  |
| wavelet-LLH | glcm       | SumEntropy                           | 4.753542558  |
| wavelet-LLH | glcm       | SumSquares                           | 109.82873    |
| wavelet-LLH | glcm       | ClusterProminence                    | 208264.6482  |
| wavelet-LLH | glcm       | Imc2                                 | 0.998465142  |
| wavelet-LLH | glcm       | Imc1                                 | -0.634837424 |
| wavelet-LLH | glcm       | DifferenceAverage                    | 10.94299095  |
| wavelet-LLH | glcm       | Id                                   | 0.182548863  |
| wavelet-LLH | glcm       | ClusterTendency                      | 219.9533834  |
| wavelet-LLH | firstorder | InterquartileRange                   | 296.4542398  |
| wavelet-LLH | firstorder | Skewness                             | 0.2440529    |
| wavelet-LLH | firstorder | Uniformity                           | 0.042517007  |



|             |            |                                  |              |
|-------------|------------|----------------------------------|--------------|
| wavelet-LLH | firstorder | Median                           | -99.10384337 |
| wavelet-LLH | firstorder | Energy                           | 6469844.987  |
| wavelet-LLH | firstorder | RobustMeanAbsoluteDeviation      | 127.1051736  |
| wavelet-LLH | firstorder | MeanAbsoluteDeviation            | 203.1285995  |
| wavelet-LLH | firstorder | TotalEnergy                      | 174685814.7  |
| wavelet-LLH | firstorder | Maximum                          | 605.6842893  |
| wavelet-LLH | firstorder | RootMeanSquared                  | 277.5283123  |
| wavelet-LLH | firstorder | 90Percentile                     | 289.3298355  |
| wavelet-LLH | firstorder | Minimum                          | -676.5924794 |
| wavelet-LLH | firstorder | Entropy                          | 4.790089072  |
| wavelet-LLH | firstorder | Range                            | 1282.276769  |
| wavelet-LLH | firstorder | Variance                         | 71196.79791  |
| wavelet-LLH | firstorder | 10Percentile                     | -394.4295678 |
| wavelet-LLH | firstorder | Kurtosis                         | 3.168854817  |
| wavelet-LLH | firstorder | Mean                             | -76.32277658 |
| wavelet-LLH | glrlm      | ShortRunLowGrayLevelEmphasis     | 0.020743916  |
| wavelet-LLH | glrlm      | GrayLevelVariance                | 115.5743016  |
| wavelet-LLH | glrlm      | LowGrayLevelRunEmphasis          | 0.020779581  |
| wavelet-LLH | glrlm      | GrayLevelNonUniformityNormalized | 0.041799525  |
| wavelet-LLH | glrlm      | RunVariance                      | 0.023897668  |
| wavelet-LLH | glrlm      | GrayLevelNonUniformity           | 3.435334806  |
| wavelet-LLH | glrlm      | LongRunEmphasis                  | 1.070802602  |
| wavelet-LLH | glrlm      | ShortRunHighGrayLevelEmphasis    | 756.7147728  |
| wavelet-LLH | glrlm      | RunLengthNonUniformity           | 78.74798321  |
| wavelet-LLH | glrlm      | ShortRunEmphasis                 | 0.98339512   |
| wavelet-LLH | glrlm      | LongRunHighGrayLevelEmphasis     | 804.9541524  |
| wavelet-LLH | glrlm      | RunPercentage                    | 0.978021978  |
| wavelet-LLH | glrlm      | LongRunLowGrayLevelEmphasis      | 0.020930529  |
| wavelet-LLH | glrlm      | RunEntropy                       | 4.864354744  |
| wavelet-LLH | glrlm      | HighGrayLevelRunEmphasis         | 765.8989188  |
| wavelet-LLH | glrlm      | RunLengthNonUniformityNormalized | 0.957742519  |
| wavelet-LLH | glszm      | GrayLevelVariance                | 133.8991716  |
| wavelet-LLH | glszm      | ZoneVariance                     | 0.576094675  |
| wavelet-LLH | glszm      | GrayLevelNonUniformityNormalized | 0.037633136  |
| wavelet-LLH | glszm      | SizeZoneNonUniformityNormalized  | 0.701301775  |
| wavelet-LLH | glszm      | SizeZoneNonUniformity            | 45.58461538  |
| wavelet-LLH | glszm      | GrayLevelNonUniformity           | 2.446153846  |
| wavelet-LLH | glszm      | LargeAreaEmphasis                | 2.246153846  |
| wavelet-LLH | glszm      | SmallAreaHighGrayLevelEmphasis   | 722.6992521  |
| wavelet-LLH | glszm      | ZonePercentage                   | 0.773809524  |
| wavelet-LLH | glszm      | LargeAreaLowGrayLevelEmphasis    | 0.028414027  |
| wavelet-LLH | glszm      | LargeAreaHighGrayLevelEmphasis   | 1481.369231  |
| wavelet-LLH | glszm      | HighGrayLevelZoneEmphasis        | 814.7076923  |
| wavelet-LLH | glszm      | SmallAreaEmphasis                | 0.860551282  |
| wavelet-LLH | glszm      | LowGrayLevelZoneEmphasis         | 0.025700155  |
| wavelet-LLH | glszm      | ZoneEntropy                      | 5.145143967  |
| wavelet-LLH | glszm      | SmallAreaLowGrayLevelEmphasis    | 0.025429753  |
| wavelet-LLH | ngtdm      | Coarseness                       | 0.044663129  |
| wavelet-LLH | ngtdm      | Complexity                       | 4534.949951  |
| wavelet-LLH | ngtdm      | Strength                         | 27.68534018  |
| wavelet-LLH | ngtdm      | Contrast                         | 1.735166625  |
| wavelet-LLH | ngtdm      | Busyness                         | 0.037292711  |
| wavelet-LLL | gldm       | GrayLevelVariance                | 451.6405896  |
| wavelet-LLL | gldm       | HighGrayLevelEmphasis            | 2665.119048  |

|             |            |                                      |              |
|-------------|------------|--------------------------------------|--------------|
| wavelet-LLL | gldm       | DependenceEntropy                    | 5.612439149  |
| wavelet-LLL | gldm       | DependenceNonUniformity              | 61.30952381  |
| wavelet-LLL | gldm       | GrayLevelNonUniformity               | 2.047619048  |
| wavelet-LLL | gldm       | SmallDependenceEmphasis              | 0.878968254  |
| wavelet-LLL | gldm       | SmallDependenceHighGrayLevelEmphasis | 2144.654762  |
| wavelet-LLL | gldm       | DependenceNonUniformityNormalized    | 0.729875283  |
| wavelet-LLL | gldm       | LargeDependenceEmphasis              | 1.642857143  |
| wavelet-LLL | gldm       | LargeDependenceLowGrayLevelEmphasis  | 0.025397009  |
| wavelet-LLL | gldm       | DependenceVariance                   | 0.225623583  |
| wavelet-LLL | gldm       | LargeDependenceHighGrayLevelEmphasis | 5502.690476  |
| wavelet-LLL | gldm       | SmallDependenceLowGrayLevelEmphasis  | 0.025187255  |
| wavelet-LLL | gldm       | LowGrayLevelEmphasis                 | 0.025222538  |
| wavelet-LLL | glcm       | JointAverage                         | 52.84103788  |
| wavelet-LLL | glcm       | SumAverage                           | 105.6820758  |
| wavelet-LLL | glcm       | JointEntropy                         | 6.513720884  |
| wavelet-LLL | glcm       | ClusterShade                         | -10164.50493 |
| wavelet-LLL | glcm       | MaximumProbability                   | 0.018553847  |
| wavelet-LLL | glcm       | Idmn                                 | 0.917239435  |
| wavelet-LLL | glcm       | JointEnergy                          | 0.011238257  |
| wavelet-LLL | glcm       | Contrast                             | 755.4927566  |
| wavelet-LLL | glcm       | DifferenceEntropy                    | 4.760881339  |
| wavelet-LLL | glcm       | InverseVariance                      | 0.050868195  |
| wavelet-LLL | glcm       | DifferenceVariance                   | 238.3672169  |
| wavelet-LLL | glcm       | Idn                                  | 0.810739086  |
| wavelet-LLL | glcm       | Idm                                  | 0.04395886   |
| wavelet-LLL | glcm       | Correlation                          | 0.13235838   |
| wavelet-LLL | glcm       | Autocorrelation                      | 2849.085638  |
| wavelet-LLL | glcm       | SumEntropy                           | 5.222900164  |
| wavelet-LLL | glcm       | SumSquares                           | 433.225156   |
| wavelet-LLL | glcm       | ClusterProminence                    | 2650560.594  |
| wavelet-LLL | glcm       | Imc2                                 | 0.999877222  |
| wavelet-LLL | glcm       | Imc1                                 | -0.782212699 |
| wavelet-LLL | glcm       | DifferenceAverage                    | 22.30697711  |
| wavelet-LLL | glcm       | Id                                   | 0.099941839  |
| wavelet-LLL | glcm       | ClusterTendency                      | 977.4078676  |
| wavelet-LLL | firstorder | InterquartileRange                   | 781.6354493  |
| wavelet-LLL | firstorder | Skewness                             | -0.153087004 |
| wavelet-LLL | firstorder | Uniformity                           | 0.024376417  |
| wavelet-LLL | firstorder | Median                               | -578.2983577 |
| wavelet-LLL | firstorder | Energy                               | 47631016.78  |
| wavelet-LLL | firstorder | RobustMeanAbsoluteDeviation          | 325.7207324  |
| wavelet-LLL | firstorder | MeanAbsoluteDeviation                | 440.6675506  |
| wavelet-LLL | firstorder | TotalEnergy                          | 1286037453   |
| wavelet-LLL | firstorder | Maximum                              | 433.4450209  |
| wavelet-LLL | firstorder | RootMeanSquared                      | 753.017871   |
| wavelet-LLL | firstorder | 90Percentile                         | 164.358449   |
| wavelet-LLL | firstorder | Minimum                              | -1692.967892 |
| wavelet-LLL | firstorder | Entropy                              | 5.554644471  |
| wavelet-LLL | firstorder | Range                                | 2126.412913  |
| wavelet-LLL | firstorder | Variance                             | 279829.559   |
| wavelet-LLL | firstorder | 10Percentile                         | -1271.61258  |
| wavelet-LLL | firstorder | Kurtosis                             | 2.216309145  |
| wavelet-LLL | firstorder | Mean                                 | -535.9163695 |
| wavelet-LLL | glrlm      | ShortRunLowGrayLevelEmphasis         | 0.025407607  |

|             |       |                                      |              |
|-------------|-------|--------------------------------------|--------------|
| wavelet-LLL | glrlm | GrayLevelVariance                    | 451.3545394  |
| wavelet-LLL | glrlm | LowGrayLevelRunEmphasis              | 0.02540917   |
| wavelet-LLL | glrlm | GrayLevelNonUniformityNormalized     | 0.024222125  |
| wavelet-LLL | glrlm | RunVariance                          | 0.007322473  |
| wavelet-LLL | glrlm | GrayLevelNonUniformity               | 2.019923166  |
| wavelet-LLL | glrlm | LongRunEmphasis                      | 1.022446258  |
| wavelet-LLL | glrlm | ShortRunHighGrayLevelEmphasis        | 2627.785183  |
| wavelet-LLL | glrlm | RunLengthNonUniformity               | 82.18006736  |
| wavelet-LLL | glrlm | ShortRunEmphasis                     | 0.994388436  |
| wavelet-LLL | glrlm | LongRunHighGrayLevelEmphasis         | 2750.516285  |
| wavelet-LLL | glrlm | RunPercentage                        | 0.992673993  |
| wavelet-LLL | glrlm | LongRunLowGrayLevelEmphasis          | 0.025415425  |
| wavelet-LLL | glrlm | RunEntropy                           | 5.566975972  |
| wavelet-LLL | glrlm | HighGrayLevelRunEmphasis             | 2652.331403  |
| wavelet-LLL | glrlm | RunLengthNonUniformityNormalized     | 0.985355054  |
| wavelet-LLL | glszm | GrayLevelVariance                    | 446.6652049  |
| wavelet-LLL | glszm | ZoneVariance                         | 0.108618654  |
| wavelet-LLL | glszm | GrayLevelNonUniformityNormalized     | 0.023444088  |
| wavelet-LLL | glszm | SizeZoneNonUniformityNormalized      | 0.85461292   |
| wavelet-LLL | glszm | SizeZoneNonUniformity                | 65.80519481  |
| wavelet-LLL | glszm | GrayLevelNonUniformity               | 1.805194805  |
| wavelet-LLL | glszm | LargeAreaEmphasis                    | 1.298701299  |
| wavelet-LLL | glszm | SmallAreaHighGrayLevelEmphasis       | 2258.733766  |
| wavelet-LLL | glszm | ZonePercentage                       | 0.916666667  |
| wavelet-LLL | glszm | LargeAreaLowGrayLevelEmphasis        | 0.027573484  |
| wavelet-LLL | glszm | LargeAreaHighGrayLevelEmphasis       | 3815.584416  |
| wavelet-LLL | glszm | HighGrayLevelZoneEmphasis            | 2515.142857  |
| wavelet-LLL | glszm | SmallAreaEmphasis                    | 0.93975469   |
| wavelet-LLL | glszm | LowGrayLevelZoneEmphasis             | 0.02748923   |
| wavelet-LLL | glszm | ZoneEntropy                          | 5.607632158  |
| wavelet-LLL | glszm | SmallAreaLowGrayLevelEmphasis        | 0.027471197  |
| wavelet-LLL | ngtdm | Coarseness                           | 0.031298011  |
| wavelet-LLL | ngtdm | Complexity                           | 26213.52875  |
| wavelet-LLL | ngtdm | Strength                             | 71.13566854  |
| wavelet-LLL | ngtdm | Contrast                             | 5.485289911  |
| wavelet-LLL | ngtdm | Busyness                             | 0.016159365  |
| wavelet-HHL | gldm  | GrayLevelVariance                    | 62.6614229   |
| wavelet-HHL | gldm  | HighGrayLevelEmphasis                | 585.6547619  |
| wavelet-HHL | gldm  | DependenceEntropy                    | 5.350841905  |
| wavelet-HHL | gldm  | DependenceNonUniformity              | 40.07142857  |
| wavelet-HHL | gldm  | GrayLevelNonUniformity               | 3.880952381  |
| wavelet-HHL | gldm  | SmallDependenceEmphasis              | 0.702132937  |
| wavelet-HHL | gldm  | SmallDependenceHighGrayLevelEmphasis | 411.4107143  |
| wavelet-HHL | gldm  | DependenceNonUniformityNormalized    | 0.477040816  |
| wavelet-HHL | gldm  | LargeDependenceEmphasis              | 2.642857143  |
| wavelet-HHL | gldm  | LargeDependenceLowGrayLevelEmphasis  | 0.019474073  |
| wavelet-HHL | gldm  | DependenceVariance                   | 0.463718821  |
| wavelet-HHL | gldm  | LargeDependenceHighGrayLevelEmphasis | 1520.72619   |
| wavelet-HHL | gldm  | SmallDependenceLowGrayLevelEmphasis  | 0.015613834  |
| wavelet-HHL | gldm  | LowGrayLevelEmphasis                 | 0.016205897  |
| wavelet-HHL | glcm  | JointAverage                         | 22.5981057   |
| wavelet-HHL | glcm  | SumAverage                           | 45.19621141  |
| wavelet-HHL | glcm  | JointEntropy                         | 6.38296103   |
| wavelet-HHL | glcm  | ClusterShade                         | -79.61361367 |

|             |            |                                  |              |
|-------------|------------|----------------------------------|--------------|
| wavelet-HHL | glcm       | MaximumProbability               | 0.024605335  |
| wavelet-HHL | glcm       | Idmn                             | 0.937017029  |
| wavelet-HHL | glcm       | JointEnergy                      | 0.012672042  |
| wavelet-HHL | glcm       | Contrast                         | 134.8670387  |
| wavelet-HHL | glcm       | DifferenceEntropy                | 4.083022515  |
| wavelet-HHL | glcm       | InverseVariance                  | 0.120714822  |
| wavelet-HHL | glcm       | DifferenceVariance               | 50.8454466   |
| wavelet-HHL | glcm       | Idn                              | 0.837321396  |
| wavelet-HHL | glcm       | Idm                              | 0.108799072  |
| wavelet-HHL | glcm       | Correlation                      | -0.040277747 |
| wavelet-HHL | glcm       | Autocorrelation                  | 509.0666197  |
| wavelet-HHL | glcm       | SumEntropy                       | 4.677024482  |
| wavelet-HHL | glcm       | SumSquares                       | 65.44575928  |
| wavelet-HHL | glcm       | ClusterProminence                | 48090.45503  |
| wavelet-HHL | glcm       | Imc2                             | 0.998329261  |
| wavelet-HHL | glcm       | Imc1                             | -0.626232036 |
| wavelet-HHL | glcm       | DifferenceAverage                | 9.080716609  |
| wavelet-HHL | glcm       | Id                               | 0.192242343  |
| wavelet-HHL | glcm       | ClusterTendency                  | 126.9159984  |
| wavelet-HHL | firstorder | InterquartileRange               | 208.1906665  |
| wavelet-HHL | firstorder | Skewness                         | -0.159069518 |
| wavelet-HHL | firstorder | Uniformity                       | 0.046201814  |
| wavelet-HHL | firstorder | Median                           | 27.35467812  |
| wavelet-HHL | firstorder | Energy                           | 3377983.427  |
| wavelet-HHL | firstorder | RobustMeanAbsoluteDeviation      | 94.34836802  |
| wavelet-HHL | firstorder | MeanAbsoluteDeviation            | 149.7688445  |
| wavelet-HHL | firstorder | TotalEnergy                      | 91205552.54  |
| wavelet-HHL | firstorder | Maximum                          | 511.1977029  |
| wavelet-HHL | firstorder | RootMeanSquared                  | 200.5345068  |
| wavelet-HHL | firstorder | 90Percentile                     | 308.2974888  |
| wavelet-HHL | firstorder | Minimum                          | -502.8394164 |
| wavelet-HHL | firstorder | Entropy                          | 4.668588009  |
| wavelet-HHL | firstorder | Range                            | 1014.037119  |
| wavelet-HHL | firstorder | Variance                         | 38988.42786  |
| wavelet-HHL | firstorder | 10Percentile                     | -169.1192275 |
| wavelet-HHL | firstorder | Kurtosis                         | 3.336180409  |
| wavelet-HHL | firstorder | Mean                             | 35.0094354   |
| wavelet-HHL | glrlm      | ShortRunLowGrayLevelEmphasis     | 0.016445843  |
| wavelet-HHL | glrlm      | GrayLevelVariance                | 63.44621234  |
| wavelet-HHL | glrlm      | LowGrayLevelRunEmphasis          | 0.016473974  |
| wavelet-HHL | glrlm      | GrayLevelNonUniformityNormalized | 0.046073929  |
| wavelet-HHL | glrlm      | RunVariance                      | 0.018296246  |
| wavelet-HHL | glrlm      | GrayLevelNonUniformity           | 3.799481421  |
| wavelet-HHL | glrlm      | LongRunEmphasis                  | 1.056569116  |
| wavelet-HHL | glrlm      | ShortRunHighGrayLevelEmphasis    | 577.7180247  |
| wavelet-HHL | glrlm      | RunLengthNonUniformity           | 79.47556279  |
| wavelet-HHL | glrlm      | ShortRunEmphasis                 | 0.985857721  |
| wavelet-HHL | glrlm      | LongRunHighGrayLevelEmphasis     | 618.3895845  |
| wavelet-HHL | glrlm      | RunPercentage                    | 0.981684982  |
| wavelet-HHL | glrlm      | LongRunLowGrayLevelEmphasis      | 0.016586497  |
| wavelet-HHL | glrlm      | RunEntropy                       | 4.7257267    |
| wavelet-HHL | glrlm      | HighGrayLevelRunEmphasis         | 585.8523366  |
| wavelet-HHL | glrlm      | RunLengthNonUniformityNormalized | 0.963407508  |
| wavelet-HHL | glszm      | GrayLevelVariance                | 74.52639053  |

|             |       |                                      |              |
|-------------|-------|--------------------------------------|--------------|
| wavelet-HHL | glszm | ZoneVariance                         | 0.453017751  |
| wavelet-HHL | glszm | GrayLevelNonUniformityNormalized     | 0.044733728  |
| wavelet-HHL | glszm | SizeZoneNonUniformityNormalized      | 0.661065089  |
| wavelet-HHL | glszm | SizeZoneNonUniformity                | 42.96923077  |
| wavelet-HHL | glszm | GrayLevelNonUniformity               | 2.907692308  |
| wavelet-HHL | glszm | LargeAreaEmphasis                    | 2.123076923  |
| wavelet-HHL | glszm | SmallAreaHighGrayLevelEmphasis       | 492.667094   |
| wavelet-HHL | glszm | ZonePercentage                       | 0.773809524  |
| wavelet-HHL | glszm | LargeAreaLowGrayLevelEmphasis        | 0.022633089  |
| wavelet-HHL | glszm | LargeAreaHighGrayLevelEmphasis       | 1216.630769  |
| wavelet-HHL | glszm | HighGrayLevelZoneEmphasis            | 588.7692308  |
| wavelet-HHL | glszm | SmallAreaEmphasis                    | 0.839957265  |
| wavelet-HHL | glszm | LowGrayLevelZoneEmphasis             | 0.020357197  |
| wavelet-HHL | glszm | ZoneEntropy                          | 5.137999452  |
| wavelet-HHL | glszm | SmallAreaLowGrayLevelEmphasis        | 0.020042317  |
| wavelet-HHL | ngtdm | Coarseness                           | 0.060665208  |
| wavelet-HHL | ngtdm | Complexity                           | 2621.095334  |
| wavelet-HHL | ngtdm | Strength                             | 22.41001513  |
| wavelet-HHL | ngtdm | Contrast                             | 0.777640473  |
| wavelet-HHL | ngtdm | Busyness                             | 0.027000676  |
| wavelet-HLH | gldm  | GrayLevelVariance                    | 38.60359977  |
| wavelet-HLH | gldm  | HighGrayLevelEmphasis                | 352.8214286  |
| wavelet-HLH | gldm  | DependenceEntropy                    | 5.261132304  |
| wavelet-HLH | gldm  | DependenceNonUniformity              | 30.69047619  |
| wavelet-HLH | gldm  | GrayLevelNonUniformity               | 4.952380952  |
| wavelet-HLH | gldm  | SmallDependenceEmphasis              | 0.535859788  |
| wavelet-HLH | gldm  | SmallDependenceHighGrayLevelEmphasis | 188.4883069  |
| wavelet-HLH | gldm  | DependenceNonUniformityNormalized    | 0.365362812  |
| wavelet-HLH | gldm  | LargeDependenceEmphasis              | 4.69047619   |
| wavelet-HLH | gldm  | LargeDependenceLowGrayLevelEmphasis  | 0.031877828  |
| wavelet-HLH | gldm  | DependenceVariance                   | 1.152494331  |
| wavelet-HLH | gldm  | LargeDependenceHighGrayLevelEmphasis | 1603.988095  |
| wavelet-HLH | gldm  | SmallDependenceLowGrayLevelEmphasis  | 0.015536881  |
| wavelet-HLH | gldm  | LowGrayLevelEmphasis                 | 0.017579209  |
| wavelet-HLH | glcm  | JointAverage                         | 17.27852623  |
| wavelet-HLH | glcm  | SumAverage                           | 34.55705245  |
| wavelet-HLH | glcm  | JointEntropy                         | 6.277827615  |
| wavelet-HLH | glcm  | ClusterShade                         | -171.4532713 |
| wavelet-HLH | glcm  | MaximumProbability                   | 0.030253179  |
| wavelet-HLH | glcm  | Idmn                                 | 0.937564492  |
| wavelet-HLH | glcm  | JointEnergy                          | 0.013945168  |
| wavelet-HLH | glcm  | Contrast                             | 71.99343636  |
| wavelet-HLH | glcm  | DifferenceEntropy                    | 3.737212355  |
| wavelet-HLH | glcm  | InverseVariance                      | 0.138128854  |
| wavelet-HLH | glcm  | DifferenceVariance                   | 25.80025694  |
| wavelet-HLH | glcm  | Idn                                  | 0.836559917  |
| wavelet-HLH | glcm  | Idm                                  | 0.146559996  |
| wavelet-HLH | glcm  | Correlation                          | 0.034938069  |
| wavelet-HLH | glcm  | Autocorrelation                      | 300.0712341  |
| wavelet-HLH | glcm  | SumEntropy                           | 4.489936386  |
| wavelet-HLH | glcm  | SumSquares                           | 37.40883921  |
| wavelet-HLH | glcm  | ClusterProminence                    | 18456.65741  |
| wavelet-HLH | glcm  | Imc2                                 | 0.993792776  |
| wavelet-HLH | glcm  | Imc1                                 | -0.52376769  |

|             |            |                                  |              |
|-------------|------------|----------------------------------|--------------|
| wavelet-HLH | glcm       | DifferenceAverage                | 6.70855973   |
| wavelet-HLH | glcm       | Id                               | 0.236257324  |
| wavelet-HLH | glcm       | ClusterTendency                  | 77.64192047  |
| wavelet-HLH | firstorder | InterquartileRange               | 184.452723   |
| wavelet-HLH | firstorder | Skewness                         | -0.300645553 |
| wavelet-HLH | firstorder | Uniformity                       | 0.058956916  |
| wavelet-HLH | firstorder | Median                           | 26.03898319  |
| wavelet-HLH | firstorder | Energy                           | 2076430.16   |
| wavelet-HLH | firstorder | RobustMeanAbsoluteDeviation      | 84.52548047  |
| wavelet-HLH | firstorder | MeanAbsoluteDeviation            | 123.4699098  |
| wavelet-HLH | firstorder | TotalEnergy                      | 56063614.33  |
| wavelet-HLH | firstorder | Maximum                          | 361.497514   |
| wavelet-HLH | firstorder | RootMeanSquared                  | 157.2240652  |
| wavelet-HLH | firstorder | 90Percentile                     | 219.0111711  |
| wavelet-HLH | firstorder | Minimum                          | -377.7604252 |
| wavelet-HLH | firstorder | Entropy                          | 4.352871073  |
| wavelet-HLH | firstorder | Range                            | 739.2579392  |
| wavelet-HLH | firstorder | Variance                         | 23824.08591  |
| wavelet-HLH | firstorder | 10Percentile                     | -168.9111132 |
| wavelet-HLH | firstorder | Kurtosis                         | 2.818647627  |
| wavelet-HLH | firstorder | Mean                             | 29.92191109  |
| wavelet-HLH | glrlm      | ShortRunLowGrayLevelEmphasis     | 0.017957644  |
| wavelet-HLH | glrlm      | GrayLevelVariance                | 39.24969863  |
| wavelet-HLH | glrlm      | LowGrayLevelRunEmphasis          | 0.01806052   |
| wavelet-HLH | glrlm      | GrayLevelNonUniformityNormalized | 0.057859911  |
| wavelet-HLH | glrlm      | RunVariance                      | 0.03768008   |
| wavelet-HLH | glrlm      | GrayLevelNonUniformity           | 4.696997151  |
| wavelet-HLH | glrlm      | LongRunEmphasis                  | 1.110502925  |
| wavelet-HLH | glrlm      | ShortRunHighGrayLevelEmphasis    | 343.9281657  |
| wavelet-HLH | glrlm      | RunLengthNonUniformity           | 75.99947594  |
| wavelet-HLH | glrlm      | ShortRunEmphasis                 | 0.974539456  |
| wavelet-HLH | glrlm      | LongRunHighGrayLevelEmphasis     | 391.1975253  |
| wavelet-HLH | glrlm      | RunPercentage                    | 0.966117216  |
| wavelet-HLH | glrlm      | LongRunLowGrayLevelEmphasis      | 0.018505854  |
| wavelet-HLH | glrlm      | RunEntropy                       | 4.476910715  |
| wavelet-HLH | glrlm      | HighGrayLevelRunEmphasis         | 352.9386072  |
| wavelet-HLH | glrlm      | RunLengthNonUniformityNormalized | 0.935724095  |
| wavelet-HLH | glszm      | GrayLevelVariance                | 46.50446281  |
| wavelet-HLH | glszm      | ZoneVariance                     | 0.976528926  |
| wavelet-HLH | glszm      | GrayLevelNonUniformityNormalized | 0.050578512  |
| wavelet-HLH | glszm      | SizeZoneNonUniformityNormalized  | 0.491570248  |
| wavelet-HLH | glszm      | SizeZoneNonUniformity            | 27.03636364  |
| wavelet-HLH | glszm      | GrayLevelNonUniformity           | 2.781818182  |
| wavelet-HLH | glszm      | LargeAreaEmphasis                | 3.309090909  |
| wavelet-HLH | glszm      | SmallAreaHighGrayLevelEmphasis   | 251.4722635  |
| wavelet-HLH | glszm      | ZonePercentage                   | 0.654761905  |
| wavelet-HLH | glszm      | LargeAreaLowGrayLevelEmphasis    | 0.033880142  |
| wavelet-HLH | glszm      | LargeAreaHighGrayLevelEmphasis   | 1134.927273  |
| wavelet-HLH | glszm      | HighGrayLevelZoneEmphasis        | 353.0727273  |
| wavelet-HLH | glszm      | SmallAreaEmphasis                | 0.714638734  |
| wavelet-HLH | glszm      | LowGrayLevelZoneEmphasis         | 0.024592795  |
| wavelet-HLH | glszm      | ZoneEntropy                      | 5.07191335   |
| wavelet-HLH | glszm      | SmallAreaLowGrayLevelEmphasis    | 0.02325093   |
| wavelet-HLH | ngtdm      | Coarseness                       | 0.052093208  |

|             |       |            |             |
|-------------|-------|------------|-------------|
| wavelet-HLH | ngtdm | Complexity | 1346.564372 |
| wavelet-HLH | ngtdm | Strength   | 13.58559551 |
| wavelet-HLH | ngtdm | Contrast   | 0.588231638 |
| wavelet-HLH | ngtdm | Busyness   | 0.04384399  |

| Image type | Feature Class | Feature Name                         |                                                                                                                                                                                                                                                                                                                                                                                                                   |
|------------|---------------|--------------------------------------|-------------------------------------------------------------------------------------------------------------------------------------------------------------------------------------------------------------------------------------------------------------------------------------------------------------------------------------------------------------------------------------------------------------------|
| general    | info          | BoundingBox                          | 4: RTSTRUCT: C99-DNU_segment_LUL GTV<br>(1, 1, 1, 6, 6, 8)                                                                                                                                                                                                                                                                                                                                                        |
| general    | info          | EnabledImageTypes                    | {u'Original': {}, u'Wavelet': {}}                                                                                                                                                                                                                                                                                                                                                                                 |
|            |               |                                      | {'distances': [1], 'additionalInfo': True, 'force2D': False, 'interpolator': 'sitkBSpline', 'resampledPixelSpacing': [3.0], 'label': 1, 'normalizeScale': 1, 'normalize': False, 'force2Ddimension': 0, 'removeOutliers': None, 'minimumROISize': None, u'binWidth': 25.0, 'minimumROIDimensions': 1, u'correctMask': True, 'preCrop': False, u'symmetricalGLCM': True, 'resegmentRange': None, 'padDistance': 5} |
| general    | info          | GeneralSettings                      | e82c627916ce175d6ede2e019a2d171470e229a                                                                                                                                                                                                                                                                                                                                                                           |
| general    | info          | ImageHash                            | c                                                                                                                                                                                                                                                                                                                                                                                                                 |
| general    | info          | ImageSpacing                         | (0.9765625000000002, 0.9765625000000002, 2.0)                                                                                                                                                                                                                                                                                                                                                                     |
| general    | info          | MaskHash                             | 9a620efbe0bbb0f48986edfac2c50840dd22a41a                                                                                                                                                                                                                                                                                                                                                                          |
| general    | info          | NumpyVersion                         | 1.13.1                                                                                                                                                                                                                                                                                                                                                                                                            |
| general    | info          | PyWaveletVersion                     | 0.5.2                                                                                                                                                                                                                                                                                                                                                                                                             |
| general    | info          | SimpleITKVersion                     | 1.1.0                                                                                                                                                                                                                                                                                                                                                                                                             |
| general    | info          | Version                              | 1.3.0.post102+g1b0eb74                                                                                                                                                                                                                                                                                                                                                                                            |
| general    | info          | VolumeNum                            | 1                                                                                                                                                                                                                                                                                                                                                                                                                 |
| general    | info          | VoxelNum                             | 153                                                                                                                                                                                                                                                                                                                                                                                                               |
| original   | shape         | Maximum3DDiameter                    | 25.98076211                                                                                                                                                                                                                                                                                                                                                                                                       |
| original   | shape         | Maximum2DDiameterSlice               | 19.20937271                                                                                                                                                                                                                                                                                                                                                                                                       |
| original   | shape         | Sphericity                           | 0.824880264                                                                                                                                                                                                                                                                                                                                                                                                       |
| original   | shape         | MinorAxis                            | 16.91944405                                                                                                                                                                                                                                                                                                                                                                                                       |
| original   | shape         | Elongation                           | 0.716079294                                                                                                                                                                                                                                                                                                                                                                                                       |
| original   | shape         | SurfaceVolumeRatio                   | 0.365377231                                                                                                                                                                                                                                                                                                                                                                                                       |
| original   | shape         | Volume                               | 4131                                                                                                                                                                                                                                                                                                                                                                                                              |
| original   | shape         | MajorAxis                            | 23.62789175                                                                                                                                                                                                                                                                                                                                                                                                       |
| original   | shape         | SurfaceArea                          | 1509.373341                                                                                                                                                                                                                                                                                                                                                                                                       |
| original   | shape         | Flatness                             | 0.659631117                                                                                                                                                                                                                                                                                                                                                                                                       |
| original   | shape         | LeastAxis                            | 15.58569262                                                                                                                                                                                                                                                                                                                                                                                                       |
| original   | shape         | Maximum2DDiameterColumn              | 25.8069758                                                                                                                                                                                                                                                                                                                                                                                                        |
| original   | shape         | Maximum2DDiameterRow                 | 22.84731932                                                                                                                                                                                                                                                                                                                                                                                                       |
| original   | gldm          | GrayLevelVariance                    | 58.03229527                                                                                                                                                                                                                                                                                                                                                                                                       |
| original   | gldm          | HighGrayLevelEmphasis                | 717.8169935                                                                                                                                                                                                                                                                                                                                                                                                       |
| original   | gldm          | DependenceEntropy                    | 5.726310435                                                                                                                                                                                                                                                                                                                                                                                                       |
| original   | gldm          | DependenceNonUniformity              | 47.45751634                                                                                                                                                                                                                                                                                                                                                                                                       |
| original   | gldm          | GrayLevelNonUniformity               | 9.549019608                                                                                                                                                                                                                                                                                                                                                                                                       |
| original   | gldm          | SmallDependenceEmphasis              | 0.555017081                                                                                                                                                                                                                                                                                                                                                                                                       |
| original   | gldm          | SmallDependenceHighGrayLevelEmphasis | 323.8455174                                                                                                                                                                                                                                                                                                                                                                                                       |
| original   | gldm          | DependenceNonUniformityNormalized    | 0.310179845                                                                                                                                                                                                                                                                                                                                                                                                       |
| original   | gldm          | LargeDependenceEmphasis              | 7.14379085                                                                                                                                                                                                                                                                                                                                                                                                        |
| original   | gldm          | LargeDependenceLowGrayLevelEmphasis  | 0.017902134                                                                                                                                                                                                                                                                                                                                                                                                       |
| original   | gldm          | DependenceVariance                   | 2.463496946                                                                                                                                                                                                                                                                                                                                                                                                       |
| original   | gldm          | LargeDependenceHighGrayLevelEmphasis | 6860.196078                                                                                                                                                                                                                                                                                                                                                                                                       |
| original   | gldm          | SmallDependenceLowGrayLevelEmphasis  | 0.010791227                                                                                                                                                                                                                                                                                                                                                                                                       |
| original   | gldm          | LowGrayLevelEmphasis                 | 0.0113663                                                                                                                                                                                                                                                                                                                                                                                                         |
| original   | glcm          | JointAverage                         | 26.99930928                                                                                                                                                                                                                                                                                                                                                                                                       |
| original   | glcm          | SumAverage                           | 53.99861856                                                                                                                                                                                                                                                                                                                                                                                                       |



|          |            |                                  |              |
|----------|------------|----------------------------------|--------------|
| original | glcm       | JointEntropy                     | 6.824951981  |
| original | glcm       | ClusterShade                     | -1269.853002 |
| original | glcm       | MaximumProbability               | 0.038559617  |
| original | glcm       | Idmn                             | 0.948899148  |
| original | glcm       | JointEnergy                      | 0.011267481  |
| original | glcm       | Contrast                         | 77.54984235  |
| original | glcm       | DifferenceEntropy                | 3.938801063  |
| original | glcm       | InverseVariance                  | 0.20612608   |
| original | glcm       | DifferenceVariance               | 36.33613554  |
| original | glcm       | Idn                              | 0.860919456  |
| original | glcm       | Idm                              | 0.189341419  |
| original | glcm       | Correlation                      | 0.176730387  |
| original | glcm       | Autocorrelation                  | 737.5339497  |
| original | glcm       | SumEntropy                       | 4.784625054  |
| original | glcm       | SumSquares                       | 47.2989192   |
| original | glcm       | ClusterProminence                | 47045.82583  |
| original | glcm       | Imc2                             | 0.975396378  |
| original | glcm       | Imc1                             | -0.364684352 |
| original | glcm       | DifferenceAverage                | 6.403429748  |
| original | glcm       | Id                               | 0.270509013  |
| original | glcm       | ClusterTendency                  | 111.6458345  |
| original | firstorder | InterquartileRange               | 266          |
| original | firstorder | Skewness                         | -1.198354726 |
| original | firstorder | Uniformity                       | 0.063009953  |
| original | firstorder | Median                           | -87          |
| original | firstorder | Energy                           | 8680939      |
| original | firstorder | RobustMeanAbsoluteDeviation      | 107.9587476  |
| original | firstorder | MeanAbsoluteDeviation            | 152.4487163  |
| original | firstorder | TotalEnergy                      | 234385353    |
| original | firstorder | Maximum                          | 75           |
| original | firstorder | RootMeanSquared                  | 238.1977401  |
| original | firstorder | 90Percentile                     | 30           |
| original | firstorder | Minimum                          | -769         |
| original | firstorder | Entropy                          | 4.378723994  |
| original | firstorder | Range                            | 844          |
| original | firstorder | Variance                         | 35686.61908  |
| original | firstorder | 10Percentile                     | -375.2       |
| original | firstorder | Kurtosis                         | 3.976275938  |
| original | firstorder | Mean                             | -145.0915033 |
| original | glrlm      | ShortRunLowGrayLevelEmphasis     | 0.011811439  |
| original | glrlm      | GrayLevelVariance                | 58.79373111  |
| original | glrlm      | LowGrayLevelRunEmphasis          | 0.011849485  |
| original | glrlm      | GrayLevelNonUniformityNormalized | 0.058859417  |
| original | glrlm      | RunVariance                      | 0.053228746  |
| original | glrlm      | GrayLevelNonUniformity           | 8.607007959  |
| original | glrlm      | LongRunEmphasis                  | 1.150369011  |
| original | glrlm      | ShortRunHighGrayLevelEmphasis    | 674.5765806  |
| original | glrlm      | RunLengthNonUniformity           | 134.1186383  |
| original | glrlm      | ShortRunEmphasis                 | 0.966921653  |
| original | glrlm      | LongRunHighGrayLevelEmphasis     | 851.5049508  |
| original | glrlm      | RunPercentage                    | 0.955253896  |
| original | glrlm      | LongRunLowGrayLevelEmphasis      | 0.012019301  |
| original | glrlm      | RunEntropy                       | 4.624943331  |
| original | glrlm      | HighGrayLevelRunEmphasis         | 706.2644627  |
| original | glrlm      | RunLengthNonUniformityNormalized | 0.917071089  |

|             |       |                                      |              |
|-------------|-------|--------------------------------------|--------------|
| original    | glszm | GrayLevelVariance                    | 64.51844726  |
| original    | glszm | ZoneVariance                         | 5.85072431   |
| original    | glszm | GrayLevelNonUniformityNormalized     | 0.044590312  |
| original    | glszm | SizeZoneNonUniformityNormalized      | 0.610230874  |
| original    | glszm | SizeZoneNonUniformity                | 57.36170213  |
| original    | glszm | GrayLevelNonUniformity               | 4.191489362  |
| original    | glszm | LargeAreaEmphasis                    | 8.5          |
| original    | glszm | SmallAreaHighGrayLevelEmphasis       | 449.4261718  |
| original    | glszm | ZonePercentage                       | 0.614379085  |
| original    | glszm | LargeAreaLowGrayLevelEmphasis        | 0.025550359  |
| original    | glszm | LargeAreaHighGrayLevelEmphasis       | 8104.765957  |
| original    | glszm | HighGrayLevelZoneEmphasis            | 595.9680851  |
| original    | glszm | SmallAreaEmphasis                    | 0.808398907  |
| original    | glszm | LowGrayLevelZoneEmphasis             | 0.017722872  |
| original    | glszm | ZoneEntropy                          | 5.377512225  |
| original    | glszm | SmallAreaLowGrayLevelEmphasis        | 0.017428762  |
| original    | ngtdm | Coarseness                           | 0.024647295  |
| original    | ngtdm | Complexity                           | 2233.461089  |
| original    | ngtdm | Strength                             | 15.39780773  |
| original    | ngtdm | Contrast                             | 0.644041919  |
| original    | ngtdm | Busyness                             | 0.042894896  |
| wavelet-HHH | gldm  | GrayLevelVariance                    | 11.33025759  |
| wavelet-HHH | gldm  | HighGrayLevelEmphasis                | 100.2810458  |
| wavelet-HHH | gldm  | DependenceEntropy                    | 5.309548223  |
| wavelet-HHH | gldm  | DependenceNonUniformity              | 40.66013072  |
| wavelet-HHH | gldm  | GrayLevelNonUniformity               | 14.7124183   |
| wavelet-HHH | gldm  | SmallDependenceEmphasis              | 0.414534258  |
| wavelet-HHH | gldm  | SmallDependenceHighGrayLevelEmphasis | 43.50127558  |
| wavelet-HHH | gldm  | DependenceNonUniformityNormalized    | 0.265752488  |
| wavelet-HHH | gldm  | LargeDependenceEmphasis              | 6.960784314  |
| wavelet-HHH | gldm  | LargeDependenceLowGrayLevelEmphasis  | 0.11821524   |
| wavelet-HHH | gldm  | DependenceVariance                   | 1.637660729  |
| wavelet-HHH | gldm  | LargeDependenceHighGrayLevelEmphasis | 717.6013072  |
| wavelet-HHH | gldm  | SmallDependenceLowGrayLevelEmphasis  | 0.029137664  |
| wavelet-HHH | gldm  | LowGrayLevelEmphasis                 | 0.037943111  |
| wavelet-HHH | glcm  | JointAverage                         | 9.394992152  |
| wavelet-HHH | glcm  | SumAverage                           | 18.7899843   |
| wavelet-HHH | glcm  | JointEntropy                         | 6.398483223  |
| wavelet-HHH | glcm  | ClusterShade                         | -5.666599343 |
| wavelet-HHH | glcm  | MaximumProbability                   | 0.038807039  |
| wavelet-HHH | glcm  | Idmn                                 | 0.930400731  |
| wavelet-HHH | glcm  | JointEnergy                          | 0.014572785  |
| wavelet-HHH | glcm  | Contrast                             | 24.52387848  |
| wavelet-HHH | glcm  | DifferenceEntropy                    | 3.281547145  |
| wavelet-HHH | glcm  | InverseVariance                      | 0.222944238  |
| wavelet-HHH | glcm  | DifferenceVariance                   | 8.338194663  |
| wavelet-HHH | glcm  | Idn                                  | 0.825996348  |
| wavelet-HHH | glcm  | Idm                                  | 0.213996528  |
| wavelet-HHH | glcm  | Correlation                          | -0.031567252 |
| wavelet-HHH | glcm  | Autocorrelation                      | 87.92142022  |
| wavelet-HHH | glcm  | SumEntropy                           | 4.052352765  |
| wavelet-HHH | glcm  | SumSquares                           | 11.90571343  |
| wavelet-HHH | glcm  | ClusterProminence                    | 1564.845666  |
| wavelet-HHH | glcm  | Imc2                                 | 0.900220532  |
| wavelet-HHH | glcm  | Imc1                                 | -0.232018281 |

|             |            |                                  |              |
|-------------|------------|----------------------------------|--------------|
| wavelet-HHH | glcm       | DifferenceAverage                | 3.964195651  |
| wavelet-HHH | glcm       | Id                               | 0.309462263  |
| wavelet-HHH | glcm       | ClusterTendency                  | 23.09897522  |
| wavelet-HHH | firstorder | InterquartileRange               | 113.667559   |
| wavelet-HHH | firstorder | Skewness                         | -0.089748031 |
| wavelet-HHH | firstorder | Uniformity                       | 0.096159597  |
| wavelet-HHH | firstorder | Median                           | -3.5535207   |
| wavelet-HHH | firstorder | Energy                           | 1112205.112  |
| wavelet-HHH | firstorder | RobustMeanAbsoluteDeviation      | 44.54142639  |
| wavelet-HHH | firstorder | MeanAbsoluteDeviation            | 66.97635928  |
| wavelet-HHH | firstorder | TotalEnergy                      | 30029538.03  |
| wavelet-HHH | firstorder | Maximum                          | 192.1052851  |
| wavelet-HHH | firstorder | RootMeanSquared                  | 85.2602748   |
| wavelet-HHH | firstorder | 90Percentile                     | 97.4838912   |
| wavelet-HHH | firstorder | Minimum                          | -224.0506418 |
| wavelet-HHH | firstorder | Entropy                          | 3.629517908  |
| wavelet-HHH | firstorder | Range                            | 416.1559269  |
| wavelet-HHH | firstorder | Variance                         | 7268.03412   |
| wavelet-HHH | firstorder | 10Percentile                     | -116.0266698 |
| wavelet-HHH | firstorder | Kurtosis                         | 2.993120196  |
| wavelet-HHH | firstorder | Mean                             | -1.13152069  |
| wavelet-HHH | glrlm      | ShortRunLowGrayLevelEmphasis     | 0.038654891  |
| wavelet-HHH | glrlm      | GrayLevelVariance                | 11.57017918  |
| wavelet-HHH | glrlm      | LowGrayLevelRunEmphasis          | 0.039207783  |
| wavelet-HHH | glrlm      | GrayLevelNonUniformityNormalized | 0.094347314  |
| wavelet-HHH | glrlm      | RunVariance                      | 0.054415386  |
| wavelet-HHH | glrlm      | GrayLevelNonUniformity           | 13.71111271  |
| wavelet-HHH | glrlm      | LongRunEmphasis                  | 1.164042314  |
| wavelet-HHH | glrlm      | ShortRunHighGrayLevelEmphasis    | 96.44962448  |
| wavelet-HHH | glrlm      | RunLengthNonUniformity           | 131.3248427  |
| wavelet-HHH | glrlm      | ShortRunEmphasis                 | 0.96139282   |
| wavelet-HHH | glrlm      | LongRunHighGrayLevelEmphasis     | 116.8018107  |
| wavelet-HHH | glrlm      | RunPercentage                    | 0.949723479  |
| wavelet-HHH | glrlm      | LongRunLowGrayLevelEmphasis      | 0.041518527  |
| wavelet-HHH | glrlm      | RunEntropy                       | 3.880818657  |
| wavelet-HHH | glrlm      | HighGrayLevelRunEmphasis         | 100.2889347  |
| wavelet-HHH | glrlm      | RunLengthNonUniformityNormalized | 0.903303551  |
| wavelet-HHH | glszm      | GrayLevelVariance                | 16.01899196  |
| wavelet-HHH | glszm      | ZoneVariance                     | 5.063002191  |
| wavelet-HHH | glszm      | GrayLevelNonUniformityNormalized | 0.07633309   |
| wavelet-HHH | glszm      | SizeZoneNonUniformityNormalized  | 0.410883857  |
| wavelet-HHH | glszm      | SizeZoneNonUniformity            | 30.40540541  |
| wavelet-HHH | glszm      | GrayLevelNonUniformity           | 5.648648649  |
| wavelet-HHH | glszm      | LargeAreaEmphasis                | 9.337837838  |
| wavelet-HHH | glszm      | SmallAreaHighGrayLevelEmphasis   | 71.98029094  |
| wavelet-HHH | glszm      | ZonePercentage                   | 0.483660131  |
| wavelet-HHH | glszm      | LargeAreaLowGrayLevelEmphasis    | 0.16916888   |
| wavelet-HHH | glszm      | LargeAreaHighGrayLevelEmphasis   | 1014.608108  |
| wavelet-HHH | glszm      | HighGrayLevelZoneEmphasis        | 103.972973   |
| wavelet-HHH | glszm      | SmallAreaEmphasis                | 0.665607831  |
| wavelet-HHH | glszm      | LowGrayLevelZoneEmphasis         | 0.062604409  |
| wavelet-HHH | glszm      | ZoneEntropy                      | 5.044063758  |
| wavelet-HHH | glszm      | SmallAreaLowGrayLevelEmphasis    | 0.057285433  |
| wavelet-HHH | ngtdm      | Coarseness                       | 0.033353762  |
| wavelet-HHH | ngtdm      | Complexity                       | 297.6327363  |

|             |            |                                      |              |
|-------------|------------|--------------------------------------|--------------|
| wavelet-HHH | ngtdm      | Strength                             | 2.818918397  |
| wavelet-HHH | ngtdm      | Contrast                             | 0.233256664  |
| wavelet-HHH | ngtdm      | Busyness                             | 0.191643913  |
| wavelet-HLL | gldm       | GrayLevelVariance                    | 35.14340638  |
| wavelet-HLL | gldm       | HighGrayLevelEmphasis                | 281.2026144  |
| wavelet-HLL | gldm       | DependenceEntropy                    | 5.635857042  |
| wavelet-HLL | gldm       | DependenceNonUniformity              | 51.71895425  |
| wavelet-HLL | gldm       | GrayLevelNonUniformity               | 8.176470588  |
| wavelet-HLL | gldm       | SmallDependenceEmphasis              | 0.540566449  |
| wavelet-HLL | gldm       | SmallDependenceHighGrayLevelEmphasis | 161.8070824  |
| wavelet-HLL | gldm       | DependenceNonUniformityNormalized    | 0.338032381  |
| wavelet-HLL | gldm       | LargeDependenceEmphasis              | 4.254901961  |
| wavelet-HLL | gldm       | LargeDependenceLowGrayLevelEmphasis  | 0.030507254  |
| wavelet-HLL | gldm       | DependenceVariance                   | 0.833611004  |
| wavelet-HLL | gldm       | LargeDependenceHighGrayLevelEmphasis | 1157.686275  |
| wavelet-HLL | gldm       | SmallDependenceLowGrayLevelEmphasis  | 0.012240548  |
| wavelet-HLL | gldm       | LowGrayLevelEmphasis                 | 0.014724211  |
| wavelet-HLL | glcm       | JointAverage                         | 15.62942447  |
| wavelet-HLL | glcm       | SumAverage                           | 31.25884893  |
| wavelet-HLL | glcm       | JointEntropy                         | 7.093772101  |
| wavelet-HLL | glcm       | ClusterShade                         | 182.1655441  |
| wavelet-HLL | glcm       | MaximumProbability                   | 0.018247352  |
| wavelet-HLL | glcm       | Idmn                                 | 0.964159505  |
| wavelet-HLL | glcm       | JointEnergy                          | 0.008100499  |
| wavelet-HLL | glcm       | Contrast                             | 52.66672346  |
| wavelet-HLL | glcm       | DifferenceEntropy                    | 3.740337373  |
| wavelet-HLL | glcm       | InverseVariance                      | 0.17456479   |
| wavelet-HLL | glcm       | DifferenceVariance                   | 19.71270092  |
| wavelet-HLL | glcm       | Idn                                  | 0.873315176  |
| wavelet-HLL | glcm       | Idm                                  | 0.157809528  |
| wavelet-HLL | glcm       | Correlation                          | 0.106891825  |
| wavelet-HLL | glcm       | Autocorrelation                      | 247.6957965  |
| wavelet-HLL | glcm       | SumEntropy                           | 4.683468842  |
| wavelet-HLL | glcm       | SumSquares                           | 29.72777739  |
| wavelet-HLL | glcm       | ClusterProminence                    | 16260.1836   |
| wavelet-HLL | glcm       | Imc2                                 | 0.974601462  |
| wavelet-HLL | glcm       | Imc1                                 | -0.352953742 |
| wavelet-HLL | glcm       | DifferenceAverage                    | 5.663379077  |
| wavelet-HLL | glcm       | Id                                   | 0.251569737  |
| wavelet-HLL | glcm       | ClusterTendency                      | 66.24438611  |
| wavelet-HLL | firstorder | InterquartileRange                   | 194.9080249  |
| wavelet-HLL | firstorder | Skewness                             | 0.28531165   |
| wavelet-HLL | firstorder | Uniformity                           | 0.053440984  |
| wavelet-HLL | firstorder | Median                               | -58.80026252 |
| wavelet-HLL | firstorder | Energy                               | 3692747.992  |
| wavelet-HLL | firstorder | RobustMeanAbsoluteDeviation          | 82.17513945  |
| wavelet-HLL | firstorder | MeanAbsoluteDeviation                | 117.8563667  |
| wavelet-HLL | firstorder | TotalEnergy                          | 99704195.79  |
| wavelet-HLL | firstorder | Maximum                              | 453.5779314  |
| wavelet-HLL | firstorder | RootMeanSquared                      | 155.3563896  |
| wavelet-HLL | firstorder | 90Percentile                         | 143.1358764  |
| wavelet-HLL | firstorder | Minimum                              | -404.8703182 |
| wavelet-HLL | firstorder | Entropy                              | 4.434448122  |
| wavelet-HLL | firstorder | Range                                | 858.4482497  |
| wavelet-HLL | firstorder | Variance                             | 22027.79895  |

|             |            |                                      |              |
|-------------|------------|--------------------------------------|--------------|
| wavelet-HLL | firstorder | 10Percentile                         | -230.6267872 |
| wavelet-HLL | firstorder | Kurtosis                             | 3.262131226  |
| wavelet-HLL | firstorder | Mean                                 | -45.91087933 |
| wavelet-HLL | glrlm      | ShortRunLowGrayLevelEmphasis         | 0.01493289   |
| wavelet-HLL | glrlm      | GrayLevelVariance                    | 35.78195367  |
| wavelet-HLL | glrlm      | LowGrayLevelRunEmphasis              | 0.015053033  |
| wavelet-HLL | glrlm      | GrayLevelNonUniformityNormalized     | 0.053046641  |
| wavelet-HLL | glrlm      | RunVariance                          | 0.038888284  |
| wavelet-HLL | glrlm      | GrayLevelNonUniformity               | 7.851147716  |
| wavelet-HLL | glrlm      | LongRunEmphasis                      | 1.108431647  |
| wavelet-HLL | glrlm      | ShortRunHighGrayLevelEmphasis        | 275.4549121  |
| wavelet-HLL | glrlm      | RunLengthNonUniformity               | 139.2580382  |
| wavelet-HLL | glrlm      | ShortRunEmphasis                     | 0.976377373  |
| wavelet-HLL | glrlm      | LongRunHighGrayLevelEmphasis         | 310.6108252  |
| wavelet-HLL | glrlm      | RunPercentage                        | 0.967320261  |
| wavelet-HLL | glrlm      | LongRunLowGrayLevelEmphasis          | 0.015601173  |
| wavelet-HLL | glrlm      | RunEntropy                           | 4.571332976  |
| wavelet-HLL | glrlm      | HighGrayLevelRunEmphasis             | 281.7218507  |
| wavelet-HLL | glrlm      | RunLengthNonUniformityNormalized     | 0.94046182   |
| wavelet-HLL | glszm      | GrayLevelVariance                    | 46.22891967  |
| wavelet-HLL | glszm      | ZoneVariance                         | 1.437783934  |
| wavelet-HLL | glszm      | GrayLevelNonUniformityNormalized     | 0.047313019  |
| wavelet-HLL | glszm      | SizeZoneNonUniformityNormalized      | 0.51468144   |
| wavelet-HLL | glszm      | SizeZoneNonUniformity                | 48.89473684  |
| wavelet-HLL | glszm      | GrayLevelNonUniformity               | 4.494736842  |
| wavelet-HLL | glszm      | LargeAreaEmphasis                    | 4.031578947  |
| wavelet-HLL | glszm      | SmallAreaHighGrayLevelEmphasis       | 228.7389844  |
| wavelet-HLL | glszm      | ZonePercentage                       | 0.620915033  |
| wavelet-HLL | glszm      | LargeAreaLowGrayLevelEmphasis        | 0.034994126  |
| wavelet-HLL | glszm      | LargeAreaHighGrayLevelEmphasis       | 1106.336842  |
| wavelet-HLL | glszm      | HighGrayLevelZoneEmphasis            | 292.8842105  |
| wavelet-HLL | glszm      | SmallAreaEmphasis                    | 0.745592016  |
| wavelet-HLL | glszm      | LowGrayLevelZoneEmphasis             | 0.020525602  |
| wavelet-HLL | glszm      | ZoneEntropy                          | 5.404926235  |
| wavelet-HLL | glszm      | SmallAreaLowGrayLevelEmphasis        | 0.019020861  |
| wavelet-HLL | ngtdm      | Coarseness                           | 0.036879137  |
| wavelet-HLL | ngtdm      | Complexity                           | 1329.852593  |
| wavelet-HLL | ngtdm      | Strength                             | 10.07788001  |
| wavelet-HLL | ngtdm      | Contrast                             | 0.396472134  |
| wavelet-HLL | ngtdm      | Busyness                             | 0.072549787  |
| wavelet-LHL | gldm       | GrayLevelVariance                    | 85.43713956  |
| wavelet-LHL | gldm       | HighGrayLevelEmphasis                | 507.6993464  |
| wavelet-LHL | gldm       | DependenceEntropy                    | 5.85432712   |
| wavelet-LHL | gldm       | DependenceNonUniformity              | 60.29411765  |
| wavelet-LHL | gldm       | GrayLevelNonUniformity               | 5.339869281  |
| wavelet-LHL | gldm       | SmallDependenceEmphasis              | 0.623366013  |
| wavelet-LHL | gldm       | SmallDependenceHighGrayLevelEmphasis | 349.8247095  |
| wavelet-LHL | gldm       | DependenceNonUniformityNormalized    | 0.3940792    |
| wavelet-LHL | gldm       | LargeDependenceEmphasis              | 3.470588235  |
| wavelet-LHL | gldm       | LargeDependenceLowGrayLevelEmphasis  | 0.03343051   |
| wavelet-LHL | gldm       | DependenceVariance                   | 0.692810458  |
| wavelet-LHL | gldm       | LargeDependenceHighGrayLevelEmphasis | 1408.901961  |
| wavelet-LHL | gldm       | SmallDependenceLowGrayLevelEmphasis  | 0.0114013    |
| wavelet-LHL | gldm       | LowGrayLevelEmphasis                 | 0.013990776  |
| wavelet-LHL | glcm       | JointAverage                         | 19.52016483  |

|             |            |                                  |              |
|-------------|------------|----------------------------------|--------------|
| wavelet-LHL | glcm       | SumAverage                       | 39.04032966  |
| wavelet-LHL | glcm       | JointEntropy                     | 7.345948926  |
| wavelet-LHL | glcm       | ClusterShade                     | 978.0207274  |
| wavelet-LHL | glcm       | MaximumProbability               | 0.014979897  |
| wavelet-LHL | glcm       | Idmn                             | 0.939188716  |
| wavelet-LHL | glcm       | JointEnergy                      | 0.006570469  |
| wavelet-LHL | glcm       | Contrast                         | 132.0043144  |
| wavelet-LHL | glcm       | DifferenceEntropy                | 4.26517582   |
| wavelet-LHL | glcm       | InverseVariance                  | 0.112793749  |
| wavelet-LHL | glcm       | DifferenceVariance               | 48.05900097  |
| wavelet-LHL | glcm       | Idn                              | 0.840754095  |
| wavelet-LHL | glcm       | Idm                              | 0.109925076  |
| wavelet-LHL | glcm       | Correlation                      | 0.132191135  |
| wavelet-LHL | glcm       | Autocorrelation                  | 392.754678   |
| wavelet-LHL | glcm       | SumEntropy                       | 5.180423863  |
| wavelet-LHL | glcm       | SumSquares                       | 77.54478671  |
| wavelet-LHL | glcm       | ClusterProminence                | 104162.1218  |
| wavelet-LHL | glcm       | Imc2                             | 0.996593628  |
| wavelet-LHL | glcm       | Imc1                             | -0.508883034 |
| wavelet-LHL | glcm       | DifferenceAverage                | 8.871065324  |
| wavelet-LHL | glcm       | Id                               | 0.195475827  |
| wavelet-LHL | glcm       | ClusterTendency                  | 178.1748325  |
| wavelet-LHL | firstorder | InterquartileRange               | 313.8477223  |
| wavelet-LHL | firstorder | Skewness                         | 0.302361239  |
| wavelet-LHL | firstorder | Uniformity                       | 0.034901106  |
| wavelet-LHL | firstorder | Median                           | -39.45220152 |
| wavelet-LHL | firstorder | Energy                           | 8179589.612  |
| wavelet-LHL | firstorder | RobustMeanAbsoluteDeviation      | 128.2995176  |
| wavelet-LHL | firstorder | MeanAbsoluteDeviation            | 184.5179301  |
| wavelet-LHL | firstorder | TotalEnergy                      | 220848919.5  |
| wavelet-LHL | firstorder | Maximum                          | 506.611173   |
| wavelet-LHL | firstorder | RootMeanSquared                  | 231.217149   |
| wavelet-LHL | firstorder | 90Percentile                     | 319.4691882  |
| wavelet-LHL | firstorder | Minimum                          | -500.4710065 |
| wavelet-LHL | firstorder | Entropy                          | 5.026644873  |
| wavelet-LHL | firstorder | Range                            | 1007.082179  |
| wavelet-LHL | firstorder | Variance                         | 52867.28055  |
| wavelet-LHL | firstorder | 10Percentile                     | -304.6720147 |
| wavelet-LHL | firstorder | Kurtosis                         | 2.532091199  |
| wavelet-LHL | firstorder | Mean                             | -24.37395037 |
| wavelet-LHL | glrlm      | ShortRunLowGrayLevelEmphasis     | 0.01400631   |
| wavelet-LHL | glrlm      | GrayLevelVariance                | 85.8696054   |
| wavelet-LHL | glrlm      | LowGrayLevelRunEmphasis          | 0.014159825  |
| wavelet-LHL | glrlm      | GrayLevelNonUniformityNormalized | 0.03473408   |
| wavelet-LHL | glrlm      | RunVariance                      | 0.02663056   |
| wavelet-LHL | glrlm      | GrayLevelNonUniformity           | 5.17817102   |
| wavelet-LHL | glrlm      | LongRunEmphasis                  | 1.081401448  |
| wavelet-LHL | glrlm      | ShortRunHighGrayLevelEmphasis    | 503.4338789  |
| wavelet-LHL | glrlm      | RunLengthNonUniformity           | 141.7149604  |
| wavelet-LHL | glrlm      | ShortRunEmphasis                 | 0.98023505   |
| wavelet-LHL | glrlm      | LongRunHighGrayLevelEmphasis     | 542.3386268  |
| wavelet-LHL | glrlm      | RunPercentage                    | 0.974358974  |
| wavelet-LHL | glrlm      | LongRunLowGrayLevelEmphasis      | 0.014779195  |
| wavelet-LHL | glrlm      | RunEntropy                       | 5.115370794  |
| wavelet-LHL | glrlm      | HighGrayLevelRunEmphasis         | 511.0082953  |

|             |       |                                      |             |
|-------------|-------|--------------------------------------|-------------|
| wavelet-LHL | glrlm | RunLengthNonUniformityNormalized     | 0.949770189 |
| wavelet-LHL | glszm | GrayLevelVariance                    | 92.38134431 |
| wavelet-LHL | glszm | ZoneVariance                         | 0.761574074 |
| wavelet-LHL | glszm | GrayLevelNonUniformityNormalized     | 0.034636488 |
| wavelet-LHL | glszm | SizeZoneNonUniformityNormalized      | 0.58899177  |
| wavelet-LHL | glszm | SizeZoneNonUniformity                | 63.61111111 |
| wavelet-LHL | glszm | GrayLevelNonUniformity               | 3.740740741 |
| wavelet-LHL | glszm | LargeAreaEmphasis                    | 2.768518519 |
| wavelet-LHL | glszm | SmallAreaHighGrayLevelEmphasis       | 456.5276492 |
| wavelet-LHL | glszm | ZonePercentage                       | 0.705882353 |
| wavelet-LHL | glszm | LargeAreaLowGrayLevelEmphasis        | 0.028512404 |
| wavelet-LHL | glszm | LargeAreaHighGrayLevelEmphasis       | 1221.592593 |
| wavelet-LHL | glszm | HighGrayLevelZoneEmphasis            | 549.0740741 |
| wavelet-LHL | glszm | SmallAreaEmphasis                    | 0.795781893 |
| wavelet-LHL | glszm | LowGrayLevelZoneEmphasis             | 0.017021187 |
| wavelet-LHL | glszm | ZoneEntropy                          | 5.606377317 |
| wavelet-LHL | glszm | SmallAreaLowGrayLevelEmphasis        | 0.01568053  |
| wavelet-LHL | ngtdm | Coarseness                           | 0.038079757 |
| wavelet-LHL | ngtdm | Complexity                           | 3586.961639 |
| wavelet-LHL | ngtdm | Strength                             | 18.3231001  |
| wavelet-LHL | ngtdm | Contrast                             | 0.726600369 |
| wavelet-LHL | ngtdm | Busyness                             | 0.044824432 |
| wavelet-LHH | gldm  | GrayLevelVariance                    | 29.68841044 |
| wavelet-LHH | gldm  | HighGrayLevelEmphasis                | 216.2875817 |
| wavelet-LHH | gldm  | DependenceEntropy                    | 5.686355311 |
| wavelet-LHH | gldm  | DependenceNonUniformity              | 45.53594771 |
| wavelet-LHH | gldm  | GrayLevelNonUniformity               | 9.366013072 |
| wavelet-LHH | gldm  | SmallDependenceEmphasis              | 0.526214597 |
| wavelet-LHH | gldm  | SmallDependenceHighGrayLevelEmphasis | 121.7844245 |
| wavelet-LHH | gldm  | DependenceNonUniformityNormalized    | 0.297620573 |
| wavelet-LHH | gldm  | LargeDependenceEmphasis              | 5.62745098  |
| wavelet-LHH | gldm  | LargeDependenceLowGrayLevelEmphasis  | 0.049963797 |
| wavelet-LHH | gldm  | DependenceVariance                   | 1.388696655 |
| wavelet-LHH | gldm  | LargeDependenceHighGrayLevelEmphasis | 1092.614379 |
| wavelet-LHH | gldm  | SmallDependenceLowGrayLevelEmphasis  | 0.0157462   |
| wavelet-LHH | gldm  | LowGrayLevelEmphasis                 | 0.018866666 |
| wavelet-LHH | glcm  | JointAverage                         | 13.77756139 |
| wavelet-LHH | glcm  | SumAverage                           | 27.55512278 |
| wavelet-LHH | glcm  | JointEntropy                         | 6.983279695 |
| wavelet-LHH | glcm  | ClusterShade                         | 189.8608074 |
| wavelet-LHH | glcm  | MaximumProbability                   | 0.022581207 |
| wavelet-LHH | glcm  | Idmn                                 | 0.951593878 |
| wavelet-LHH | glcm  | JointEnergy                          | 0.009070589 |
| wavelet-LHH | glcm  | Contrast                             | 58.78880675 |
| wavelet-LHH | glcm  | DifferenceEntropy                    | 3.800891408 |
| wavelet-LHH | glcm  | InverseVariance                      | 0.167894324 |
| wavelet-LHH | glcm  | DifferenceVariance                   | 22.99441795 |
| wavelet-LHH | glcm  | Idn                                  | 0.857688163 |
| wavelet-LHH | glcm  | Idm                                  | 0.167736516 |
| wavelet-LHH | glcm  | Correlation                          | -0.00669855 |
| wavelet-LHH | glcm  | Autocorrelation                      | 189.6524343 |
| wavelet-LHH | glcm  | SumEntropy                           | 4.582269663 |
| wavelet-LHH | glcm  | SumSquares                           | 29.2029963  |
| wavelet-LHH | glcm  | ClusterProminence                    | 11899.72559 |
| wavelet-LHH | glcm  | Imc2                                 | 0.968938427 |

|             |            |                                  |              |
|-------------|------------|----------------------------------|--------------|
| wavelet-LHH | glcm       | Imc1                             | -0.335674667 |
| wavelet-LHH | glcm       | DifferenceAverage                | 5.873995018  |
| wavelet-LHH | glcm       | Id                               | 0.25917601   |
| wavelet-LHH | glcm       | ClusterTendency                  | 58.02317846  |
| wavelet-LHH | firstorder | InterquartileRange               | 173.1829437  |
| wavelet-LHH | firstorder | Skewness                         | 0.470566606  |
| wavelet-LHH | firstorder | Uniformity                       | 0.061215772  |
| wavelet-LHH | firstorder | Median                           | -4.620861937 |
| wavelet-LHH | firstorder | Energy                           | 2839901.248  |
| wavelet-LHH | firstorder | RobustMeanAbsoluteDeviation      | 70.81886459  |
| wavelet-LHH | firstorder | MeanAbsoluteDeviation            | 106.5869793  |
| wavelet-LHH | firstorder | TotalEnergy                      | 76677333.68  |
| wavelet-LHH | firstorder | Maximum                          | 472.6027619  |
| wavelet-LHH | firstorder | RootMeanSquared                  | 136.2403981  |
| wavelet-LHH | firstorder | 90Percentile                     | 182.2465036  |
| wavelet-LHH | firstorder | Minimum                          | -322.085076  |
| wavelet-LHH | firstorder | Entropy                          | 4.275580678  |
| wavelet-LHH | firstorder | Range                            | 794.6878379  |
| wavelet-LHH | firstorder | Variance                         | 18541.43835  |
| wavelet-LHH | firstorder | 10Percentile                     | -144.6319533 |
| wavelet-LHH | firstorder | Kurtosis                         | 3.609817021  |
| wavelet-LHH | firstorder | Mean                             | 4.472998387  |
| wavelet-LHH | glrlm      | ShortRunLowGrayLevelEmphasis     | 0.019182238  |
| wavelet-LHH | glrlm      | GrayLevelVariance                | 30.43884738  |
| wavelet-LHH | glrlm      | LowGrayLevelRunEmphasis          | 0.019386248  |
| wavelet-LHH | glrlm      | GrayLevelNonUniformityNormalized | 0.060205201  |
| wavelet-LHH | glrlm      | RunVariance                      | 0.044887084  |
| wavelet-LHH | glrlm      | GrayLevelNonUniformity           | 8.836693936  |
| wavelet-LHH | glrlm      | LongRunEmphasis                  | 1.132136463  |
| wavelet-LHH | glrlm      | ShortRunHighGrayLevelEmphasis    | 211.3511138  |
| wavelet-LHH | glrlm      | RunLengthNonUniformity           | 135.415404   |
| wavelet-LHH | glrlm      | ShortRunEmphasis                 | 0.969332091  |
| wavelet-LHH | glrlm      | LongRunHighGrayLevelEmphasis     | 242.6202405  |
| wavelet-LHH | glrlm      | RunPercentage                    | 0.959276018  |
| wavelet-LHH | glrlm      | LongRunLowGrayLevelEmphasis      | 0.020271075  |
| wavelet-LHH | glrlm      | RunEntropy                       | 4.471165799  |
| wavelet-LHH | glrlm      | HighGrayLevelRunEmphasis         | 217.2969148  |
| wavelet-LHH | glrlm      | RunLengthNonUniformityNormalized | 0.922381813  |
| wavelet-LHH | glszm      | GrayLevelVariance                | 41.04064272  |
| wavelet-LHH | glszm      | ZoneVariance                     | 2.02776465   |
| wavelet-LHH | glszm      | GrayLevelNonUniformityNormalized | 0.049858223  |
| wavelet-LHH | glszm      | SizeZoneNonUniformityNormalized  | 0.549149338  |
| wavelet-LHH | glszm      | SizeZoneNonUniformity            | 50.52173913  |
| wavelet-LHH | glszm      | GrayLevelNonUniformity           | 4.586956522  |
| wavelet-LHH | glszm      | LargeAreaEmphasis                | 4.793478261  |
| wavelet-LHH | glszm      | SmallAreaHighGrayLevelEmphasis   | 180.862795   |
| wavelet-LHH | glszm      | ZonePercentage                   | 0.60130719   |
| wavelet-LHH | glszm      | LargeAreaLowGrayLevelEmphasis    | 0.051424563  |
| wavelet-LHH | glszm      | LargeAreaHighGrayLevelEmphasis   | 969.8478261  |
| wavelet-LHH | glszm      | HighGrayLevelZoneEmphasis        | 229.8043478  |
| wavelet-LHH | glszm      | SmallAreaEmphasis                | 0.766926068  |
| wavelet-LHH | glszm      | LowGrayLevelZoneEmphasis         | 0.026989832  |
| wavelet-LHH | glszm      | ZoneEntropy                      | 5.298526908  |
| wavelet-LHH | glszm      | SmallAreaLowGrayLevelEmphasis    | 0.025469451  |
| wavelet-LHH | ngtdm      | Coarseness                       | 0.032113701  |



|             |            |                                      |              |
|-------------|------------|--------------------------------------|--------------|
| wavelet-LHH | ngtdm      | Complexity                           | 1284.113762  |
| wavelet-LHH | ngtdm      | Strength                             | 8.302391412  |
| wavelet-LHH | ngtdm      | Contrast                             | 0.372539735  |
| wavelet-LHH | ngtdm      | Busyness                             | 0.094688005  |
| wavelet-LLH | gldm       | GrayLevelVariance                    | 150.7287795  |
| wavelet-LLH | gldm       | HighGrayLevelEmphasis                | 558.3464052  |
| wavelet-LLH | gldm       | DependenceEntropy                    | 5.883401506  |
| wavelet-LLH | gldm       | DependenceNonUniformity              | 66.58169935  |
| wavelet-LLH | gldm       | GrayLevelNonUniformity               | 5.62745098   |
| wavelet-LLH | gldm       | SmallDependenceEmphasis              | 0.664079521  |
| wavelet-LLH | gldm       | SmallDependenceHighGrayLevelEmphasis | 426.7391068  |
| wavelet-LLH | gldm       | DependenceNonUniformityNormalized    | 0.435174506  |
| wavelet-LLH | gldm       | LargeDependenceEmphasis              | 3            |
| wavelet-LLH | gldm       | LargeDependenceLowGrayLevelEmphasis  | 0.026564688  |
| wavelet-LLH | gldm       | DependenceVariance                   | 0.559870135  |
| wavelet-LLH | gldm       | LargeDependenceHighGrayLevelEmphasis | 1362.346405  |
| wavelet-LLH | gldm       | SmallDependenceLowGrayLevelEmphasis  | 0.011167211  |
| wavelet-LLH | gldm       | LowGrayLevelEmphasis                 | 0.013538144  |
| wavelet-LLH | glcm       | JointAverage                         | 18.76688517  |
| wavelet-LLH | glcm       | SumAverage                           | 37.53377033  |
| wavelet-LLH | glcm       | JointEntropy                         | 7.314485088  |
| wavelet-LLH | glcm       | ClusterShade                         | 7422.689308  |
| wavelet-LLH | glcm       | MaximumProbability                   | 0.016657749  |
| wavelet-LLH | glcm       | Idmn                                 | 0.956030641  |
| wavelet-LLH | glcm       | JointEnergy                          | 0.006782928  |
| wavelet-LLH | glcm       | Contrast                             | 210.0840392  |
| wavelet-LLH | glcm       | DifferenceEntropy                    | 4.3637964    |
| wavelet-LLH | glcm       | InverseVariance                      | 0.108317026  |
| wavelet-LLH | glcm       | DifferenceVariance                   | 90.86332071  |
| wavelet-LLH | glcm       | Idn                                  | 0.868900249  |
| wavelet-LLH | glcm       | Idm                                  | 0.100050038  |
| wavelet-LLH | glcm       | Correlation                          | 0.123290312  |
| wavelet-LLH | glcm       | Autocorrelation                      | 371.3504388  |
| wavelet-LLH | glcm       | SumEntropy                           | 5.191572182  |
| wavelet-LLH | glcm       | SumSquares                           | 123.9952646  |
| wavelet-LLH | glcm       | ClusterProminence                    | 551191.1116  |
| wavelet-LLH | glcm       | Imc2                                 | 0.997060245  |
| wavelet-LLH | glcm       | Imc1                                 | -0.52102584  |
| wavelet-LLH | glcm       | DifferenceAverage                    | 10.48349872  |
| wavelet-LLH | glcm       | Id                                   | 0.181832467  |
| wavelet-LLH | glcm       | ClusterTendency                      | 285.8970191  |
| wavelet-LLH | firstorder | InterquartileRange                   | 316.3206666  |
| wavelet-LLH | firstorder | Skewness                             | 1.319014894  |
| wavelet-LLH | firstorder | Uniformity                           | 0.036780725  |
| wavelet-LLH | firstorder | Median                               | -118.2007332 |
| wavelet-LLH | firstorder | Energy                               | 14934461.4   |
| wavelet-LLH | firstorder | RobustMeanAbsoluteDeviation          | 142.2514573  |
| wavelet-LLH | firstorder | MeanAbsoluteDeviation                | 230.4813709  |
| wavelet-LLH | firstorder | TotalEnergy                          | 403230457.8  |
| wavelet-LLH | firstorder | Maximum                              | 979.9608824  |
| wavelet-LLH | firstorder | RootMeanSquared                      | 312.4273657  |
| wavelet-LLH | firstorder | 90Percentile                         | 426.6969271  |
| wavelet-LLH | firstorder | Minimum                              | -533.4608159 |
| wavelet-LLH | firstorder | Entropy                              | 5.076742377  |
| wavelet-LLH | firstorder | Range                                | 1513.421698  |

|             |            |                                      |              |
|-------------|------------|--------------------------------------|--------------|
| wavelet-LLH | firstorder | Variance                             | 94316.86829  |
| wavelet-LLH | firstorder | 10Percentile                         | -362.3127331 |
| wavelet-LLH | firstorder | Kurtosis                             | 4.602878865  |
| wavelet-LLH | firstorder | Mean                                 | -57.39329689 |
| wavelet-LLH | glrlm      | ShortRunLowGrayLevelEmphasis         | 0.013589479  |
| wavelet-LLH | glrlm      | GrayLevelVariance                    | 151.8993539  |
| wavelet-LLH | glrlm      | LowGrayLevelRunEmphasis              | 0.013691867  |
| wavelet-LLH | glrlm      | GrayLevelNonUniformityNormalized     | 0.036483467  |
| wavelet-LLH | glrlm      | RunVariance                          | 0.027991173  |
| wavelet-LLH | glrlm      | GrayLevelNonUniformity               | 5.461080256  |
| wavelet-LLH | glrlm      | LongRunEmphasis                      | 1.074235569  |
| wavelet-LLH | glrlm      | ShortRunHighGrayLevelEmphasis        | 555.4372135  |
| wavelet-LLH | glrlm      | RunLengthNonUniformity               | 144.0285893  |
| wavelet-LLH | glrlm      | ShortRunEmphasis                     | 0.984741443  |
| wavelet-LLH | glrlm      | LongRunHighGrayLevelEmphasis         | 590.9257648  |
| wavelet-LLH | glrlm      | RunPercentage                        | 0.978381096  |
| wavelet-LLH | glrlm      | LongRunLowGrayLevelEmphasis          | 0.014191786  |
| wavelet-LLH | glrlm      | RunEntropy                           | 5.153303958  |
| wavelet-LLH | glrlm      | HighGrayLevelRunEmphasis             | 561.8283059  |
| wavelet-LLH | glrlm      | RunLengthNonUniformityNormalized     | 0.961438654  |
| wavelet-LLH | glszm      | GrayLevelVariance                    | 167.9110775  |
| wavelet-LLH | glszm      | ZoneVariance                         | 0.499508507  |
| wavelet-LLH | glszm      | GrayLevelNonUniformityNormalized     | 0.032741021  |
| wavelet-LLH | glszm      | SizeZoneNonUniformityNormalized      | 0.617391304  |
| wavelet-LLH | glszm      | SizeZoneNonUniformity                | 71           |
| wavelet-LLH | glszm      | GrayLevelNonUniformity               | 3.765217391  |
| wavelet-LLH | glszm      | LargeAreaEmphasis                    | 2.269565217  |
| wavelet-LLH | glszm      | SmallAreaHighGrayLevelEmphasis       | 542.106942   |
| wavelet-LLH | glszm      | ZonePercentage                       | 0.751633987  |
| wavelet-LLH | glszm      | LargeAreaLowGrayLevelEmphasis        | 0.024601796  |
| wavelet-LLH | glszm      | LargeAreaHighGrayLevelEmphasis       | 1093.156522  |
| wavelet-LLH | glszm      | HighGrayLevelZoneEmphasis            | 614.773913   |
| wavelet-LLH | glszm      | SmallAreaEmphasis                    | 0.813995169  |
| wavelet-LLH | glszm      | LowGrayLevelZoneEmphasis             | 0.015676071  |
| wavelet-LLH | glszm      | ZoneEntropy                          | 5.769919751  |
| wavelet-LLH | glszm      | SmallAreaLowGrayLevelEmphasis        | 0.01433764   |
| wavelet-LLH | ngtdm      | Coarseness                           | 0.02925015   |
| wavelet-LLH | ngtdm      | Complexity                           | 7820.505323  |
| wavelet-LLH | ngtdm      | Strength                             | 35.56739889  |
| wavelet-LLH | ngtdm      | Contrast                             | 1.230594259  |
| wavelet-LLH | ngtdm      | Busyness                             | 0.054947083  |
| wavelet-LLL | gldm       | GrayLevelVariance                    | 341.7588962  |
| wavelet-LLL | gldm       | HighGrayLevelEmphasis                | 2635.104575  |
| wavelet-LLL | gldm       | DependenceEntropy                    | 6.128836924  |
| wavelet-LLL | gldm       | DependenceNonUniformity              | 83.5620915   |
| wavelet-LLL | gldm       | GrayLevelNonUniformity               | 3.31372549   |
| wavelet-LLL | gldm       | SmallDependenceEmphasis              | 0.766339869  |
| wavelet-LLL | gldm       | SmallDependenceHighGrayLevelEmphasis | 1835.939497  |
| wavelet-LLL | gldm       | DependenceNonUniformityNormalized    | 0.546157461  |
| wavelet-LLL | gldm       | LargeDependenceEmphasis              | 2.490196078  |
| wavelet-LLL | gldm       | LargeDependenceLowGrayLevelEmphasis  | 0.008395533  |
| wavelet-LLL | gldm       | DependenceVariance                   | 0.515528216  |
| wavelet-LLL | gldm       | LargeDependenceHighGrayLevelEmphasis | 8134.385621  |
| wavelet-LLL | gldm       | SmallDependenceLowGrayLevelEmphasis  | 0.007775034  |
| wavelet-LLL | gldm       | LowGrayLevelEmphasis                 | 0.00787219   |

|             |            |                                  |              |
|-------------|------------|----------------------------------|--------------|
| wavelet-LLL | glcm       | JointAverage                     | 52.68387732  |
| wavelet-LLL | glcm       | SumAverage                       | 105.3677546  |
| wavelet-LLL | glcm       | JointEntropy                     | 7.507283572  |
| wavelet-LLL | glcm       | ClusterShade                     | -12490.55407 |
| wavelet-LLL | glcm       | MaximumProbability               | 0.012975578  |
| wavelet-LLL | glcm       | Idmn                             | 0.94652629   |
| wavelet-LLL | glcm       | JointEnergy                      | 0.005695513  |
| wavelet-LLL | glcm       | Contrast                         | 414.082403   |
| wavelet-LLL | glcm       | DifferenceEntropy                | 4.934050613  |
| wavelet-LLL | glcm       | InverseVariance                  | 0.069015823  |
| wavelet-LLL | glcm       | DifferenceVariance               | 157.8103767  |
| wavelet-LLL | glcm       | Idn                              | 0.850079625  |
| wavelet-LLL | glcm       | Idm                              | 0.068595668  |
| wavelet-LLL | glcm       | Correlation                      | 0.318973596  |
| wavelet-LLL | glcm       | Autocorrelation                  | 2873.132883  |
| wavelet-LLL | glcm       | SumEntropy                       | 5.790952836  |
| wavelet-LLL | glcm       | SumSquares                       | 304.0528042  |
| wavelet-LLL | glcm       | ClusterProminence                | 1729827.475  |
| wavelet-LLL | glcm       | Imc2                             | 0.999692169  |
| wavelet-LLL | glcm       | Imc1                             | -0.660925497 |
| wavelet-LLL | glcm       | DifferenceAverage                | 15.8139399   |
| wavelet-LLL | glcm       | Id                               | 0.13716263   |
| wavelet-LLL | glcm       | ClusterTendency                  | 802.1288137  |
| wavelet-LLL | firstorder | InterquartileRange               | 738.4170563  |
| wavelet-LLL | firstorder | Skewness                         | -0.39618183  |
| wavelet-LLL | firstorder | Uniformity                       | 0.021658337  |
| wavelet-LLL | firstorder | Median                           | -452.3473616 |
| wavelet-LLL | firstorder | Energy                           | 73241186.4   |
| wavelet-LLL | firstorder | RobustMeanAbsoluteDeviation      | 289.423273   |
| wavelet-LLL | firstorder | MeanAbsoluteDeviation            | 387.0327519  |
| wavelet-LLL | firstorder | TotalEnergy                      | 1977512033   |
| wavelet-LLL | firstorder | Maximum                          | 305.7368042  |
| wavelet-LLL | firstorder | RootMeanSquared                  | 691.8819008  |
| wavelet-LLL | firstorder | 90Percentile                     | 31.60303639  |
| wavelet-LLL | firstorder | Minimum                          | -1685.101577 |
| wavelet-LLL | firstorder | Entropy                          | 5.756981676  |
| wavelet-LLL | firstorder | Range                            | 1990.838382  |
| wavelet-LLL | firstorder | Variance                         | 212886.9151  |
| wavelet-LLL | firstorder | 10Percentile                     | -1154.437827 |
| wavelet-LLL | firstorder | Kurtosis                         | 2.291705003  |
| wavelet-LLL | firstorder | Mean                             | -515.5711877 |
| wavelet-LLL | glrlm      | ShortRunLowGrayLevelEmphasis     | 0.007987286  |
| wavelet-LLL | glrlm      | GrayLevelVariance                | 342.7310911  |
| wavelet-LLL | glrlm      | LowGrayLevelRunEmphasis          | 0.007991691  |
| wavelet-LLL | glrlm      | GrayLevelNonUniformityNormalized | 0.021453618  |
| wavelet-LLL | glrlm      | RunVariance                      | 0.016608344  |
| wavelet-LLL | glrlm      | GrayLevelNonUniformity           | 3.231386965  |
| wavelet-LLL | glrlm      | LongRunEmphasis                  | 1.048853581  |
| wavelet-LLL | glrlm      | ShortRunHighGrayLevelEmphasis    | 2578.184655  |
| wavelet-LLL | glrlm      | RunLengthNonUniformity           | 146.0992242  |
| wavelet-LLL | glrlm      | ShortRunEmphasis                 | 0.98836023   |
| wavelet-LLL | glrlm      | LongRunHighGrayLevelEmphasis     | 2795.520577  |
| wavelet-LLL | glrlm      | RunPercentage                    | 0.984414279  |
| wavelet-LLL | glrlm      | LongRunLowGrayLevelEmphasis      | 0.008009912  |
| wavelet-LLL | glrlm      | RunEntropy                       | 5.801695041  |

|             |       |                                      |              |
|-------------|-------|--------------------------------------|--------------|
| wavelet-LLL | glrlm | HighGrayLevelRunEmphasis             | 2619.887828  |
| wavelet-LLL | glrlm | RunLengthNonUniformityNormalized     | 0.969818518  |
| wavelet-LLL | glszm | GrayLevelVariance                    | 352.239355   |
| wavelet-LLL | glszm | ZoneVariance                         | 0.422335601  |
| wavelet-LLL | glszm | GrayLevelNonUniformityNormalized     | 0.019904258  |
| wavelet-LLL | glszm | SizeZoneNonUniformityNormalized      | 0.746031746  |
| wavelet-LLL | glszm | SizeZoneNonUniformity                | 94           |
| wavelet-LLL | glszm | GrayLevelNonUniformity               | 2.507936508  |
| wavelet-LLL | glszm | LargeAreaEmphasis                    | 1.896825397  |
| wavelet-LLL | glszm | SmallAreaHighGrayLevelEmphasis       | 2082.115079  |
| wavelet-LLL | glszm | ZonePercentage                       | 0.823529412  |
| wavelet-LLL | glszm | LargeAreaLowGrayLevelEmphasis        | 0.009791302  |
| wavelet-LLL | glszm | LargeAreaHighGrayLevelEmphasis       | 5736.420635  |
| wavelet-LLL | glszm | HighGrayLevelZoneEmphasis            | 2452.206349  |
| wavelet-LLL | glszm | SmallAreaEmphasis                    | 0.886298501  |
| wavelet-LLL | glszm | LowGrayLevelZoneEmphasis             | 0.009474108  |
| wavelet-LLL | glszm | ZoneEntropy                          | 6.043559761  |
| wavelet-LLL | glszm | SmallAreaLowGrayLevelEmphasis        | 0.009422058  |
| wavelet-LLL | ngtdm | Coarseness                           | 0.031080586  |
| wavelet-LLL | ngtdm | Complexity                           | 19529.0307   |
| wavelet-LLL | ngtdm | Strength                             | 58.04963038  |
| wavelet-LLL | ngtdm | Contrast                             | 1.912267151  |
| wavelet-LLL | ngtdm | Busyness                             | 0.01247469   |
| wavelet-HHL | gldm  | GrayLevelVariance                    | 19.12888205  |
| wavelet-HHL | gldm  | HighGrayLevelEmphasis                | 168.0326797  |
| wavelet-HHL | gldm  | DependenceEntropy                    | 5.46398219   |
| wavelet-HHL | gldm  | DependenceNonUniformity              | 43.09150327  |
| wavelet-HHL | gldm  | GrayLevelNonUniformity               | 10.96078431  |
| wavelet-HHL | gldm  | SmallDependenceEmphasis              | 0.45008533   |
| wavelet-HHL | gldm  | SmallDependenceHighGrayLevelEmphasis | 72.82026144  |
| wavelet-HHL | gldm  | DependenceNonUniformityNormalized    | 0.281643812  |
| wavelet-HHL | gldm  | LargeDependenceEmphasis              | 5.888888889  |
| wavelet-HHL | gldm  | LargeDependenceLowGrayLevelEmphasis  | 0.063838958  |
| wavelet-HHL | gldm  | DependenceVariance                   | 1.264983553  |
| wavelet-HHL | gldm  | LargeDependenceHighGrayLevelEmphasis | 1040.895425  |
| wavelet-HHL | gldm  | SmallDependenceLowGrayLevelEmphasis  | 0.015042052  |
| wavelet-HHL | gldm  | LowGrayLevelEmphasis                 | 0.021551447  |
| wavelet-HHL | glcm  | JointAverage                         | 12.39702963  |
| wavelet-HHL | glcm  | SumAverage                           | 24.79405925  |
| wavelet-HHL | glcm  | JointEntropy                         | 6.761737404  |
| wavelet-HHL | glcm  | ClusterShade                         | -1.807782659 |
| wavelet-HHL | glcm  | MaximumProbability                   | 0.02754004   |
| wavelet-HHL | glcm  | Idmn                                 | 0.945761347  |
| wavelet-HHL | glcm  | JointEnergy                          | 0.010895703  |
| wavelet-HHL | glcm  | Contrast                             | 34.89000654  |
| wavelet-HHL | glcm  | DifferenceEntropy                    | 3.494624022  |
| wavelet-HHL | glcm  | InverseVariance                      | 0.215934867  |
| wavelet-HHL | glcm  | DifferenceVariance                   | 13.82117546  |
| wavelet-HHL | glcm  | Idn                                  | 0.848946913  |
| wavelet-HHL | glcm  | Idm                                  | 0.199332493  |
| wavelet-HHL | glcm  | Correlation                          | -0.015872638 |
| wavelet-HHL | glcm  | Autocorrelation                      | 153.4953039  |
| wavelet-HHL | glcm  | SumEntropy                           | 4.270521754  |
| wavelet-HHL | glcm  | SumSquares                           | 17.22219021  |
| wavelet-HHL | glcm  | ClusterProminence                    | 4223.888517  |

|             |            |                                  |              |
|-------------|------------|----------------------------------|--------------|
| wavelet-HHL | glcm       | Imc2                             | 0.955780846  |
| wavelet-HHL | glcm       | Imc1                             | -0.307414557 |
| wavelet-HHL | glcm       | DifferenceAverage                | 4.54206748   |
| wavelet-HHL | glcm       | Id                               | 0.293024785  |
| wavelet-HHL | glcm       | ClusterTendency                  | 33.99875431  |
| wavelet-HHL | firstorder | InterquartileRange               | 142.1805705  |
| wavelet-HHL | firstorder | Skewness                         | -0.091358471 |
| wavelet-HHL | firstorder | Uniformity                       | 0.071639113  |
| wavelet-HHL | firstorder | Median                           | 1.047364414  |
| wavelet-HHL | firstorder | Energy                           | 1826120.446  |
| wavelet-HHL | firstorder | RobustMeanAbsoluteDeviation      | 57.42060374  |
| wavelet-HHL | firstorder | MeanAbsoluteDeviation            | 85.87680946  |
| wavelet-HHL | firstorder | TotalEnergy                      | 49305252.05  |
| wavelet-HHL | firstorder | Maximum                          | 257.6379011  |
| wavelet-HHL | firstorder | RootMeanSquared                  | 109.2493833  |
| wavelet-HHL | firstorder | 90Percentile                     | 116.1036591  |
| wavelet-HHL | firstorder | Minimum                          | -287.1625344 |
| wavelet-HHL | firstorder | Entropy                          | 4.071221574  |
| wavelet-HHL | firstorder | Range                            | 544.8004355  |
| wavelet-HHL | firstorder | Variance                         | 11882.2088   |
| wavelet-HHL | firstorder | 10Percentile                     | -154.6289521 |
| wavelet-HHL | firstorder | Kurtosis                         | 3.016762615  |
| wavelet-HHL | firstorder | Mean                             | -7.295132271 |
| wavelet-HHL | glrlm      | ShortRunLowGrayLevelEmphasis     | 0.021760815  |
| wavelet-HHL | glrlm      | GrayLevelVariance                | 19.54555282  |
| wavelet-HHL | glrlm      | LowGrayLevelRunEmphasis          | 0.022097626  |
| wavelet-HHL | glrlm      | GrayLevelNonUniformityNormalized | 0.070336765  |
| wavelet-HHL | glrlm      | RunVariance                      | 0.048330762  |
| wavelet-HHL | glrlm      | GrayLevelNonUniformity           | 10.28538126  |
| wavelet-HHL | glrlm      | LongRunEmphasis                  | 1.144172727  |
| wavelet-HHL | glrlm      | ShortRunHighGrayLevelEmphasis    | 161.7266197  |
| wavelet-HHL | glrlm      | RunLengthNonUniformity           | 133.9562025  |
| wavelet-HHL | glrlm      | ShortRunEmphasis                 | 0.966311259  |
| wavelet-HHL | glrlm      | LongRunHighGrayLevelEmphasis     | 193.0888562  |
| wavelet-HHL | glrlm      | RunPercentage                    | 0.955756662  |
| wavelet-HHL | glrlm      | LongRunLowGrayLevelEmphasis      | 0.02349944   |
| wavelet-HHL | glrlm      | RunEntropy                       | 4.280948161  |
| wavelet-HHL | glrlm      | HighGrayLevelRunEmphasis         | 167.6519275  |
| wavelet-HHL | glrlm      | RunLengthNonUniformityNormalized | 0.915453591  |
| wavelet-HHL | glszm      | GrayLevelVariance                | 25.92592593  |
| wavelet-HHL | glszm      | ZoneVariance                     | 3.185185185  |
| wavelet-HHL | glszm      | GrayLevelNonUniformityNormalized | 0.057460753  |
| wavelet-HHL | glszm      | SizeZoneNonUniformityNormalized  | 0.442767871  |
| wavelet-HHL | glszm      | SizeZoneNonUniformity            | 35.86419753  |
| wavelet-HHL | glszm      | GrayLevelNonUniformity           | 4.654320988  |
| wavelet-HHL | glszm      | LargeAreaEmphasis                | 6.75308642   |
| wavelet-HHL | glszm      | SmallAreaHighGrayLevelEmphasis   | 110.0339584  |
| wavelet-HHL | glszm      | ZonePercentage                   | 0.529411765  |
| wavelet-HHL | glszm      | LargeAreaLowGrayLevelEmphasis    | 0.077454443  |
| wavelet-HHL | glszm      | LargeAreaHighGrayLevelEmphasis   | 1209.444444  |
| wavelet-HHL | glszm      | HighGrayLevelZoneEmphasis        | 162.037037   |
| wavelet-HHL | glszm      | SmallAreaEmphasis                | 0.690149746  |
| wavelet-HHL | glszm      | LowGrayLevelZoneEmphasis         | 0.031307722  |
| wavelet-HHL | glszm      | ZoneEntropy                      | 5.188193058  |
| wavelet-HHL | glszm      | SmallAreaLowGrayLevelEmphasis    | 0.026438147  |

|             |            |                                      |              |
|-------------|------------|--------------------------------------|--------------|
| wavelet-HHL | ngtdm      | Coarseness                           | 0.037034711  |
| wavelet-HHL | ngtdm      | Complexity                           | 666.9928596  |
| wavelet-HHL | ngtdm      | Strength                             | 5.371247206  |
| wavelet-HHL | ngtdm      | Contrast                             | 0.267344193  |
| wavelet-HHL | ngtdm      | Busyness                             | 0.098504041  |
| wavelet-HLH | gldm       | GrayLevelVariance                    | 18.75816993  |
| wavelet-HLH | gldm       | HighGrayLevelEmphasis                | 154.869281   |
| wavelet-HLH | gldm       | DependenceEntropy                    | 5.531724203  |
| wavelet-HLH | gldm       | DependenceNonUniformity              | 46.08496732  |
| wavelet-HLH | gldm       | GrayLevelNonUniformity               | 10.73856209  |
| wavelet-HLH | gldm       | SmallDependenceEmphasis              | 0.465757081  |
| wavelet-HLH | gldm       | SmallDependenceHighGrayLevelEmphasis | 74.55947531  |
| wavelet-HLH | gldm       | DependenceNonUniformityNormalized    | 0.301208937  |
| wavelet-HLH | gldm       | LargeDependenceEmphasis              | 5.901960784  |
| wavelet-HLH | gldm       | LargeDependenceLowGrayLevelEmphasis  | 0.068996593  |
| wavelet-HLH | gldm       | DependenceVariance                   | 1.389807339  |
| wavelet-HLH | gldm       | LargeDependenceHighGrayLevelEmphasis | 813.0522876  |
| wavelet-HLH | gldm       | SmallDependenceLowGrayLevelEmphasis  | 0.016849017  |
| wavelet-HLH | gldm       | LowGrayLevelEmphasis                 | 0.022069978  |
| wavelet-HLH | glcm       | JointAverage                         | 11.69085583  |
| wavelet-HLH | glcm       | SumAverage                           | 23.38171166  |
| wavelet-HLH | glcm       | JointEntropy                         | 6.819758533  |
| wavelet-HLH | glcm       | ClusterShade                         | 52.03357793  |
| wavelet-HLH | glcm       | MaximumProbability                   | 0.028494195  |
| wavelet-HLH | glcm       | Idmn                                 | 0.945266419  |
| wavelet-HLH | glcm       | JointEnergy                          | 0.01042566   |
| wavelet-HLH | glcm       | Contrast                             | 37.65240438  |
| wavelet-HLH | glcm       | DifferenceEntropy                    | 3.538445642  |
| wavelet-HLH | glcm       | InverseVariance                      | 0.202677956  |
| wavelet-HLH | glcm       | DifferenceVariance                   | 13.96427339  |
| wavelet-HLH | glcm       | Idn                                  | 0.847311263  |
| wavelet-HLH | glcm       | Idm                                  | 0.191215702  |
| wavelet-HLH | glcm       | Correlation                          | 0.001354594  |
| wavelet-HLH | glcm       | Autocorrelation                      | 136.7483094  |
| wavelet-HLH | glcm       | SumEntropy                           | 4.339340939  |
| wavelet-HLH | glcm       | SumSquares                           | 18.87552805  |
| wavelet-HLH | glcm       | ClusterProminence                    | 5056.873943  |
| wavelet-HLH | glcm       | Imc2                                 | 0.962997967  |
| wavelet-HLH | glcm       | Imc1                                 | -0.325230414 |
| wavelet-HLH | glcm       | DifferenceAverage                    | 4.782532803  |
| wavelet-HLH | glcm       | Id                                   | 0.284617707  |
| wavelet-HLH | glcm       | ClusterTendency                      | 37.84970782  |
| wavelet-HLH | firstorder | InterquartileRange                   | 135.1943063  |
| wavelet-HLH | firstorder | Skewness                             | 0.1863219    |
| wavelet-HLH | firstorder | Uniformity                           | 0.07018668   |
| wavelet-HLH | firstorder | Median                               | 1.879609171  |
| wavelet-HLH | firstorder | Energy                               | 1781530.37   |
| wavelet-HLH | firstorder | RobustMeanAbsoluteDeviation          | 55.73431331  |
| wavelet-HLH | firstorder | MeanAbsoluteDeviation                | 83.88865875  |
| wavelet-HLH | firstorder | TotalEnergy                          | 48101319.99  |
| wavelet-HLH | firstorder | Maximum                              | 315.9738011  |
| wavelet-HLH | firstorder | RootMeanSquared                      | 107.9073183  |
| wavelet-HLH | firstorder | 90Percentile                         | 153.9933254  |
| wavelet-HLH | firstorder | Minimum                              | -268.3598298 |
| wavelet-HLH | firstorder | Entropy                              | 4.074738438  |

|             |            |                                  |              |
|-------------|------------|----------------------------------|--------------|
| wavelet-HLH | firstorder | Range                            | 584.3336309  |
| wavelet-HLH | firstorder | Variance                         | 11623.19148  |
| wavelet-HLH | firstorder | 10Percentile                     | -128.7598828 |
| wavelet-HLH | firstorder | Kurtosis                         | 3.123775481  |
| wavelet-HLH | firstorder | Mean                             | 4.560467831  |
| wavelet-HLH | glrlm      | ShortRunLowGrayLevelEmphasis     | 0.022325076  |
| wavelet-HLH | glrlm      | GrayLevelVariance                | 19.18680385  |
| wavelet-HLH | glrlm      | LowGrayLevelRunEmphasis          | 0.022634658  |
| wavelet-HLH | glrlm      | GrayLevelNonUniformityNormalized | 0.069231188  |
| wavelet-HLH | glrlm      | RunVariance                      | 0.047394423  |
| wavelet-HLH | glrlm      | GrayLevelNonUniformity           | 10.1345268   |
| wavelet-HLH | glrlm      | LongRunEmphasis                  | 1.140968449  |
| wavelet-HLH | glrlm      | ShortRunHighGrayLevelEmphasis    | 150.8495182  |
| wavelet-HLH | glrlm      | RunLengthNonUniformity           | 134.3853284  |
| wavelet-HLH | glrlm      | ShortRunEmphasis                 | 0.967144685  |
| wavelet-HLH | glrlm      | LongRunHighGrayLevelEmphasis     | 175.0954447  |
| wavelet-HLH | glrlm      | RunPercentage                    | 0.956762192  |
| wavelet-HLH | glrlm      | LongRunLowGrayLevelEmphasis      | 0.024025682  |
| wavelet-HLH | glrlm      | RunEntropy                       | 4.268422224  |
| wavelet-HLH | glrlm      | HighGrayLevelRunEmphasis         | 155.529602   |
| wavelet-HLH | glrlm      | RunLengthNonUniformityNormalized | 0.917443854  |
| wavelet-HLH | glszm      | GrayLevelVariance                | 25.19430272  |
| wavelet-HLH | glszm      | ZoneVariance                     | 3.099064626  |
| wavelet-HLH | glszm      | GrayLevelNonUniformityNormalized | 0.060657596  |
| wavelet-HLH | glszm      | SizeZoneNonUniformityNormalized  | 0.451814059  |
| wavelet-HLH | glszm      | SizeZoneNonUniformity            | 37.95238095  |
| wavelet-HLH | glszm      | GrayLevelNonUniformity           | 5.095238095  |
| wavelet-HLH | glszm      | LargeAreaEmphasis                | 6.416666667  |
| wavelet-HLH | glszm      | SmallAreaHighGrayLevelEmphasis   | 112.0435572  |
| wavelet-HLH | glszm      | ZonePercentage                   | 0.549019608  |
| wavelet-HLH | glszm      | LargeAreaLowGrayLevelEmphasis    | 0.081946637  |
| wavelet-HLH | glszm      | LargeAreaHighGrayLevelEmphasis   | 909.1309524  |
| wavelet-HLH | glszm      | HighGrayLevelZoneEmphasis        | 161.5833333  |
| wavelet-HLH | glszm      | SmallAreaEmphasis                | 0.695806593  |
| wavelet-HLH | glszm      | LowGrayLevelZoneEmphasis         | 0.032194849  |
| wavelet-HLH | glszm      | ZoneEntropy                      | 5.207519286  |
| wavelet-HLH | glszm      | SmallAreaLowGrayLevelEmphasis    | 0.02918051   |
| wavelet-HLH | ngtdm      | Coarseness                       | 0.038854242  |
| wavelet-HLH | ngtdm      | Complexity                       | 673.2029031  |
| wavelet-HLH | ngtdm      | Strength                         | 5.484103872  |
| wavelet-HLH | ngtdm      | Contrast                         | 0.259728586  |
| wavelet-HLH | ngtdm      | Busyness                         | 0.105957217  |

| Image type | Feature Class | Feature Name                         |                                                                                                                                                                                                                                                                                                                                                                                                                   |
|------------|---------------|--------------------------------------|-------------------------------------------------------------------------------------------------------------------------------------------------------------------------------------------------------------------------------------------------------------------------------------------------------------------------------------------------------------------------------------------------------------------|
| general    | info          | BoundingBox                          | 4: RTSTRUCT: C99-DNU-B_segment_tumor-RUL<br>(0, 0, 1, 8, 8, 8)                                                                                                                                                                                                                                                                                                                                                    |
| general    | info          | EnabledImageTypes                    | {u'Original': {}, u'Wavelet': {}}                                                                                                                                                                                                                                                                                                                                                                                 |
|            |               |                                      | {'distances': [1], 'additionalInfo': True, 'force2D': False, 'interpolator': 'sitkBSpline', 'resampledPixelSpacing': [3.0], 'label': 1, 'normalizeScale': 1, 'normalize': False, 'force2Ddimension': 0, 'removeOutliers': None, 'minimumROISize': None, u'binWidth': 25.0, 'minimumROIDimensions': 1, u'correctMask': True, 'preCrop': False, u'symmetricalGLCM': True, 'resegmentRange': None, 'padDistance': 5} |
| general    | info          | GeneralSettings                      |                                                                                                                                                                                                                                                                                                                                                                                                                   |
| general    | info          | ImageHash                            | a6d2a89e7f1f5da3bd219fbe6177013b072fa715                                                                                                                                                                                                                                                                                                                                                                          |
| general    | info          | ImageSpacing                         | (0.9765625000000002, 0.9765625000000002, 2.0)                                                                                                                                                                                                                                                                                                                                                                     |
| general    | info          | MaskHash                             | 42eacaea74c4f4757490c49e9ea2280e8128638b                                                                                                                                                                                                                                                                                                                                                                          |
| general    | info          | NumpyVersion                         | 1.13.1                                                                                                                                                                                                                                                                                                                                                                                                            |
| general    | info          | PyWaveletVersion                     | 0.5.2                                                                                                                                                                                                                                                                                                                                                                                                             |
| general    | info          | SimpleITKVersion                     | 1.1.0                                                                                                                                                                                                                                                                                                                                                                                                             |
| general    | info          | Version                              | 1.3.0.post102+g1b0eb74                                                                                                                                                                                                                                                                                                                                                                                            |
| general    | info          | VolumeNum                            | 1                                                                                                                                                                                                                                                                                                                                                                                                                 |
| general    | info          | VoxelNum                             | 156                                                                                                                                                                                                                                                                                                                                                                                                               |
| original   | shape         | Maximum3DDiameter                    | 27.33130074                                                                                                                                                                                                                                                                                                                                                                                                       |
| original   | shape         | Maximum2DDiameterSlice               | 21.84032967                                                                                                                                                                                                                                                                                                                                                                                                       |
| original   | shape         | Sphericity                           | 0.80209884                                                                                                                                                                                                                                                                                                                                                                                                        |
| original   | shape         | MinorAxis                            | 17.87035217                                                                                                                                                                                                                                                                                                                                                                                                       |
| original   | shape         | Elongation                           | 0.750085979                                                                                                                                                                                                                                                                                                                                                                                                       |
| original   | shape         | SurfaceVolumeRatio                   | 0.37333048                                                                                                                                                                                                                                                                                                                                                                                                        |
| original   | shape         | Volume                               | 4212                                                                                                                                                                                                                                                                                                                                                                                                              |
| original   | shape         | MajorAxis                            | 23.82440504                                                                                                                                                                                                                                                                                                                                                                                                       |
| original   | shape         | SurfaceArea                          | 1572.467981                                                                                                                                                                                                                                                                                                                                                                                                       |
| original   | shape         | Flatness                             | 0.722909772                                                                                                                                                                                                                                                                                                                                                                                                       |
| original   | shape         | LeastAxis                            | 17.22289521                                                                                                                                                                                                                                                                                                                                                                                                       |
| original   | shape         | Maximum2DDiameterColumn              | 23.43074903                                                                                                                                                                                                                                                                                                                                                                                                       |
| original   | shape         | Maximum2DDiameterRow                 | 22.84731932                                                                                                                                                                                                                                                                                                                                                                                                       |
| original   | gldm          | GrayLevelVariance                    | 116.7784352                                                                                                                                                                                                                                                                                                                                                                                                       |
| original   | gldm          | HighGrayLevelEmphasis                | 289.1282051                                                                                                                                                                                                                                                                                                                                                                                                       |
| original   | gldm          | DependenceEntropy                    | 5.832565944                                                                                                                                                                                                                                                                                                                                                                                                       |
| original   | gldm          | DependenceNonUniformity              | 48.87179487                                                                                                                                                                                                                                                                                                                                                                                                       |
| original   | gldm          | GrayLevelNonUniformity               | 7.564102564                                                                                                                                                                                                                                                                                                                                                                                                       |
| original   | gldm          | SmallDependenceEmphasis              | 0.52235933                                                                                                                                                                                                                                                                                                                                                                                                        |
| original   | gldm          | SmallDependenceHighGrayLevelEmphasis | 161.8851514                                                                                                                                                                                                                                                                                                                                                                                                       |
| original   | gldm          | DependenceNonUniformityNormalized    | 0.313280736                                                                                                                                                                                                                                                                                                                                                                                                       |
| original   | gldm          | LargeDependenceEmphasis              | 5.371794872                                                                                                                                                                                                                                                                                                                                                                                                       |
| original   | gldm          | LargeDependenceLowGrayLevelEmphasis  | 0.437821688                                                                                                                                                                                                                                                                                                                                                                                                       |
| original   | gldm          | DependenceVariance                   | 1.371794872                                                                                                                                                                                                                                                                                                                                                                                                       |
| original   | gldm          | LargeDependenceHighGrayLevelEmphasis | 1692.294872                                                                                                                                                                                                                                                                                                                                                                                                       |
| original   | gldm          | SmallDependenceLowGrayLevelEmphasis  | 0.027599137                                                                                                                                                                                                                                                                                                                                                                                                       |
| original   | gldm          | LowGrayLevelEmphasis                 | 0.055355362                                                                                                                                                                                                                                                                                                                                                                                                       |
| original   | glcm          | JointAverage                         | 14.19241079                                                                                                                                                                                                                                                                                                                                                                                                       |
| original   | glcm          | SumAverage                           | 28.38482158                                                                                                                                                                                                                                                                                                                                                                                                       |
| original   | glcm          | JointEntropy                         | 7.277178387                                                                                                                                                                                                                                                                                                                                                                                                       |
| original   | glcm          | ClusterShade                         | 4313.534445                                                                                                                                                                                                                                                                                                                                                                                                       |
| original   | glcm          | MaximumProbability                   | 0.020002799                                                                                                                                                                                                                                                                                                                                                                                                       |
| original   | glcm          | Idmn                                 | 0.934421015                                                                                                                                                                                                                                                                                                                                                                                                       |



|          |            |                                  |              |
|----------|------------|----------------------------------|--------------|
| original | glcm       | JointEnergy                      | 0.007144131  |
| original | glcm       | Contrast                         | 130.573287   |
| original | glcm       | DifferenceEntropy                | 4.316994138  |
| original | glcm       | InverseVariance                  | 0.131985857  |
| original | glcm       | DifferenceVariance               | 53.81798455  |
| original | glcm       | Idn                              | 0.838804644  |
| original | glcm       | Idm                              | 0.14124751   |
| original | glcm       | Correlation                      | 0.428878172  |
| original | glcm       | Autocorrelation                  | 250.5663895  |
| original | glcm       | SumEntropy                       | 5.375689789  |
| original | glcm       | SumSquares                       | 114.318565   |
| original | glcm       | ClusterProminence                | 267607.6424  |
| original | glcm       | Imc2                             | 0.995391192  |
| original | glcm       | Imc1                             | -0.489122427 |
| original | glcm       | DifferenceAverage                | 8.68699394   |
| original | glcm       | Id                               | 0.221416302  |
| original | glcm       | ClusterTendency                  | 326.700973   |
| original | firstorder | InterquartileRange               | 377.75       |
| original | firstorder | Skewness                         | 0.922607069  |
| original | firstorder | Uniformity                       | 0.048487837  |
| original | firstorder | Median                           | -671.5       |
| original | firstorder | Energy                           | 60201378     |
| original | firstorder | RobustMeanAbsoluteDeviation      | 167.6251301  |
| original | firstorder | MeanAbsoluteDeviation            | 226.4138725  |
| original | firstorder | TotalEnergy                      | 1625437206   |
| original | firstorder | Maximum                          | 113          |
| original | firstorder | RootMeanSquared                  | 621.2135456  |
| original | firstorder | 90Percentile                     | -72.5        |
| original | firstorder | Minimum                          | -861         |
| original | firstorder | Entropy                          | 4.744059659  |
| original | firstorder | Range                            | 974          |
| original | firstorder | Variance                         | 72937.74589  |
| original | firstorder | 10Percentile                     | -819         |
| original | firstorder | Kurtosis                         | 2.584877185  |
| original | firstorder | Mean                             | -559.4358974 |
| original | glrlm      | ShortRunLowGrayLevelEmphasis     | 0.05236619   |
| original | glrlm      | GrayLevelVariance                | 115.3319703  |
| original | glrlm      | LowGrayLevelRunEmphasis          | 0.054543597  |
| original | glrlm      | GrayLevelNonUniformityNormalized | 0.047457595  |
| original | glrlm      | RunVariance                      | 0.042526692  |
| original | glrlm      | GrayLevelNonUniformity           | 7.119640641  |
| original | glrlm      | LongRunEmphasis                  | 1.1247694    |
| original | glrlm      | ShortRunHighGrayLevelEmphasis    | 280.4404155  |
| original | glrlm      | RunLengthNonUniformity           | 139.0754604  |
| original | glrlm      | ShortRunEmphasis                 | 0.971113934  |
| original | glrlm      | LongRunHighGrayLevelEmphasis     | 324.1609424  |
| original | glrlm      | RunPercentage                    | 0.961538462  |
| original | glrlm      | LongRunLowGrayLevelEmphasis      | 0.063985089  |
| original | glrlm      | RunEntropy                       | 4.906405181  |
| original | glrlm      | HighGrayLevelRunEmphasis         | 289.120691   |
| original | glrlm      | RunLengthNonUniformityNormalized | 0.926831512  |
| original | glszm      | GrayLevelVariance                | 106.1180556  |
| original | glszm      | ZoneVariance                     | 1.630208333  |
| original | glszm      | GrayLevelNonUniformityNormalized | 0.038628472  |
| original | glszm      | SizeZoneNonUniformityNormalized  | 0.500434028  |
| original | glszm      | SizeZoneNonUniformity            | 48.04166667  |

|             |            |                                      |              |
|-------------|------------|--------------------------------------|--------------|
| original    | glszm      | GrayLevelNonUniformity               | 3.708333333  |
| original    | glszm      | LargeAreaEmphasis                    | 4.270833333  |
| original    | glszm      | SmallAreaHighGrayLevelEmphasis       | 234.3848129  |
| original    | glszm      | ZonePercentage                       | 0.615384615  |
| original    | glszm      | LargeAreaLowGrayLevelEmphasis        | 0.298680974  |
| original    | glszm      | LargeAreaHighGrayLevelEmphasis       | 1239.1875    |
| original    | glszm      | HighGrayLevelZoneEmphasis            | 304.4583333  |
| original    | glszm      | SmallAreaEmphasis                    | 0.734601241  |
| original    | glszm      | LowGrayLevelZoneEmphasis             | 0.051929116  |
| original    | glszm      | ZoneEntropy                          | 5.587581189  |
| original    | glszm      | SmallAreaLowGrayLevelEmphasis        | 0.039917398  |
| original    | ngtdm      | Coarseness                           | 0.024001213  |
| original    | ngtdm      | Complexity                           | 3918.530735  |
| original    | ngtdm      | Strength                             | 22.85607191  |
| original    | ngtdm      | Contrast                             | 1.014562325  |
| original    | ngtdm      | Busyness                             | 0.138538484  |
| wavelet-HHH | gldm       | GrayLevelVariance                    | 11.60092045  |
| wavelet-HHH | gldm       | HighGrayLevelEmphasis                | 145.9230769  |
| wavelet-HHH | gldm       | DependenceEntropy                    | 5.499667486  |
| wavelet-HHH | gldm       | DependenceNonUniformity              | 34.23076923  |
| wavelet-HHH | gldm       | GrayLevelNonUniformity               | 15.26923077  |
| wavelet-HHH | gldm       | SmallDependenceEmphasis              | 0.403108766  |
| wavelet-HHH | gldm       | SmallDependenceHighGrayLevelEmphasis | 66.47283461  |
| wavelet-HHH | gldm       | DependenceNonUniformityNormalized    | 0.219428008  |
| wavelet-HHH | gldm       | LargeDependenceEmphasis              | 12           |
| wavelet-HHH | gldm       | LargeDependenceLowGrayLevelEmphasis  | 0.100900175  |
| wavelet-HHH | gldm       | DependenceVariance                   | 4.331360947  |
| wavelet-HHH | gldm       | LargeDependenceHighGrayLevelEmphasis | 1685.307692  |
| wavelet-HHH | gldm       | SmallDependenceLowGrayLevelEmphasis  | 0.01060535   |
| wavelet-HHH | gldm       | LowGrayLevelEmphasis                 | 0.01621423   |
| wavelet-HHH | glcm       | JointAverage                         | 11.57275095  |
| wavelet-HHH | glcm       | SumAverage                           | 23.1455019   |
| wavelet-HHH | glcm       | JointEntropy                         | 6.328545448  |
| wavelet-HHH | glcm       | ClusterShade                         | 20.53587109  |
| wavelet-HHH | glcm       | MaximumProbability                   | 0.05174374   |
| wavelet-HHH | glcm       | ldmn                                 | 0.957591486  |
| wavelet-HHH | glcm       | JointEnergy                          | 0.016201396  |
| wavelet-HHH | glcm       | Contrast                             | 24.4543602   |
| wavelet-HHH | glcm       | DifferenceEntropy                    | 3.257591429  |
| wavelet-HHH | glcm       | InverseVariance                      | 0.26622001   |
| wavelet-HHH | glcm       | DifferenceVariance                   | 10.57725429  |
| wavelet-HHH | glcm       | ldn                                  | 0.869564102  |
| wavelet-HHH | glcm       | ldm                                  | 0.262464916  |
| wavelet-HHH | glcm       | Correlation                          | -0.037171034 |
| wavelet-HHH | glcm       | Autocorrelation                      | 133.5037588  |
| wavelet-HHH | glcm       | SumEntropy                           | 3.954779458  |
| wavelet-HHH | glcm       | SumSquares                           | 11.79886806  |
| wavelet-HHH | glcm       | ClusterProminence                    | 2253.322676  |
| wavelet-HHH | glcm       | lmc2                                 | 0.925405122  |
| wavelet-HHH | glcm       | lmc1                                 | -0.267488525 |
| wavelet-HHH | glcm       | DifferenceAverage                    | 3.668499474  |
| wavelet-HHH | glcm       | ld                                   | 0.348862176  |
| wavelet-HHH | glcm       | ClusterTendency                      | 22.74111202  |
| wavelet-HHH | firstorder | InterquartileRange                   | 93.72440404  |
| wavelet-HHH | firstorder | Skewness                             | 0.349278826  |
| wavelet-HHH | firstorder | Uniformity                           | 0.097879684  |

|             |            |                                  |              |
|-------------|------------|----------------------------------|--------------|
| wavelet-HHH | firstorder | Median                           | 2.274604167  |
| wavelet-HHH | firstorder | Energy                           | 1129547.862  |
| wavelet-HHH | firstorder | RobustMeanAbsoluteDeviation      | 38.84365195  |
| wavelet-HHH | firstorder | MeanAbsoluteDeviation            | 62.81273496  |
| wavelet-HHH | firstorder | TotalEnergy                      | 30497792.26  |
| wavelet-HHH | firstorder | Maximum                          | 270.9615794  |
| wavelet-HHH | firstorder | RootMeanSquared                  | 85.09225241  |
| wavelet-HHH | firstorder | 90Percentile                     | 101.0077717  |
| wavelet-HHH | firstorder | Minimum                          | -258.9635669 |
| wavelet-HHH | firstorder | Entropy                          | 3.673836846  |
| wavelet-HHH | firstorder | Range                            | 529.9251463  |
| wavelet-HHH | firstorder | Variance                         | 7239.050268  |
| wavelet-HHH | firstorder | 10Percentile                     | -96.97503333 |
| wavelet-HHH | firstorder | Kurtosis                         | 4.009895433  |
| wavelet-HHH | firstorder | Mean                             | 1.28107476   |
| wavelet-HHH | grlm       | ShortRunLowGrayLevelEmphasis     | 0.016369323  |
| wavelet-HHH | grlm       | GrayLevelVariance                | 12.24698756  |
| wavelet-HHH | grlm       | LowGrayLevelRunEmphasis          | 0.016798238  |
| wavelet-HHH | grlm       | GrayLevelNonUniformityNormalized | 0.09356579   |
| wavelet-HHH | grlm       | RunVariance                      | 0.082622412  |
| wavelet-HHH | grlm       | GrayLevelNonUniformity           | 13.60791638  |
| wavelet-HHH | grlm       | LongRunEmphasis                  | 1.235548466  |
| wavelet-HHH | grlm       | ShortRunHighGrayLevelEmphasis    | 139.6113107  |
| wavelet-HHH | grlm       | RunLengthNonUniformity           | 127.304914   |
| wavelet-HHH | grlm       | ShortRunEmphasis                 | 0.948907384  |
| wavelet-HHH | grlm       | LongRunHighGrayLevelEmphasis     | 179.1018252  |
| wavelet-HHH | grlm       | RunPercentage                    | 0.931952663  |
| wavelet-HHH | grlm       | LongRunLowGrayLevelEmphasis      | 0.018722413  |
| wavelet-HHH | grlm       | RunEntropy                       | 3.996265827  |
| wavelet-HHH | grlm       | HighGrayLevelRunEmphasis         | 146.5614779  |
| wavelet-HHH | grlm       | RunLengthNonUniformityNormalized | 0.874946591  |
| wavelet-HHH | glszm      | GrayLevelVariance                | 19.98686433  |
| wavelet-HHH | glszm      | ZoneVariance                     | 7.022330644  |
| wavelet-HHH | glszm      | GrayLevelNonUniformityNormalized | 0.07299681   |
| wavelet-HHH | glszm      | SizeZoneNonUniformityNormalized  | 0.452054795  |
| wavelet-HHH | glszm      | SizeZoneNonUniformity            | 33           |
| wavelet-HHH | glszm      | GrayLevelNonUniformity           | 5.328767123  |
| wavelet-HHH | glszm      | LargeAreaEmphasis                | 11.5890411   |
| wavelet-HHH | glszm      | SmallAreaHighGrayLevelEmphasis   | 120.3782651  |
| wavelet-HHH | glszm      | ZonePercentage                   | 0.467948718  |
| wavelet-HHH | glszm      | LargeAreaLowGrayLevelEmphasis    | 0.107584826  |
| wavelet-HHH | glszm      | LargeAreaHighGrayLevelEmphasis   | 1637.205479  |
| wavelet-HHH | glszm      | HighGrayLevelZoneEmphasis        | 158.4520548  |
| wavelet-HHH | glszm      | SmallAreaEmphasis                | 0.698198708  |
| wavelet-HHH | glszm      | LowGrayLevelZoneEmphasis         | 0.024464357  |
| wavelet-HHH | glszm      | ZoneEntropy                      | 5.035294765  |
| wavelet-HHH | glszm      | SmallAreaLowGrayLevelEmphasis    | 0.02103388   |
| wavelet-HHH | ngtdm      | Coarseness                       | 0.040408532  |
| wavelet-HHH | ngtdm      | Complexity                       | 403.7752474  |
| wavelet-HHH | ngtdm      | Strength                         | 4.55873453   |
| wavelet-HHH | ngtdm      | Contrast                         | 0.163460753  |
| wavelet-HHH | ngtdm      | Busyness                         | 0.102218037  |
| wavelet-HLL | gldm       | GrayLevelVariance                | 116.3203485  |
| wavelet-HLL | gldm       | HighGrayLevelEmphasis            | 3139.910256  |
| wavelet-HLL | gldm       | DependenceEntropy                | 5.937466764  |
| wavelet-HLL | gldm       | DependenceNonUniformity          | 59.43589744  |

|             |            |                                      |              |
|-------------|------------|--------------------------------------|--------------|
| wavelet-HLL | gldm       | GrayLevelNonUniformity               | 5.666666667  |
| wavelet-HLL | gldm       | SmallDependenceEmphasis              | 0.622574786  |
| wavelet-HLL | gldm       | SmallDependenceHighGrayLevelEmphasis | 1862.002715  |
| wavelet-HLL | gldm       | DependenceNonUniformityNormalized    | 0.380999343  |
| wavelet-HLL | gldm       | LargeDependenceEmphasis              | 3.884615385  |
| wavelet-HLL | gldm       | LargeDependenceLowGrayLevelEmphasis  | 0.007730873  |
| wavelet-HLL | gldm       | DependenceVariance                   | 0.889053254  |
| wavelet-HLL | gldm       | LargeDependenceHighGrayLevelEmphasis | 12601.19231  |
| wavelet-HLL | gldm       | SmallDependenceLowGrayLevelEmphasis  | 0.006668566  |
| wavelet-HLL | gldm       | LowGrayLevelEmphasis                 | 0.006789607  |
| wavelet-HLL | glcm       | JointAverage                         | 55.9843191   |
| wavelet-HLL | glcm       | SumAverage                           | 111.9686382  |
| wavelet-HLL | glcm       | JointEntropy                         | 7.373260178  |
| wavelet-HLL | glcm       | ClusterShade                         | -1517.212056 |
| wavelet-HLL | glcm       | MaximumProbability                   | 0.015044559  |
| wavelet-HLL | glcm       | Idmn                                 | 0.973404071  |
| wavelet-HLL | glcm       | JointEnergy                          | 0.006444855  |
| wavelet-HLL | glcm       | Contrast                             | 180.3000748  |
| wavelet-HLL | glcm       | DifferenceEntropy                    | 4.408054141  |
| wavelet-HLL | glcm       | InverseVariance                      | 0.102133327  |
| wavelet-HLL | glcm       | DifferenceVariance                   | 77.02686382  |
| wavelet-HLL | glcm       | Idn                                  | 0.894483173  |
| wavelet-HLL | glcm       | Idm                                  | 0.108443065  |
| wavelet-HLL | glcm       | Correlation                          | 0.193179003  |
| wavelet-HLL | glcm       | Autocorrelation                      | 3155.213816  |
| wavelet-HLL | glcm       | SumEntropy                           | 5.374998843  |
| wavelet-HLL | glcm       | SumSquares                           | 110.9843306  |
| wavelet-HLL | glcm       | ClusterProminence                    | 338499.2579  |
| wavelet-HLL | glcm       | Imc2                                 | 0.997450747  |
| wavelet-HLL | glcm       | Imc1                                 | -0.529444995 |
| wavelet-HLL | glcm       | DifferenceAverage                    | 9.890830253  |
| wavelet-HLL | glcm       | Id                                   | 0.191054657  |
| wavelet-HLL | glcm       | ClusterTendency                      | 263.6372476  |
| wavelet-HLL | firstorder | InterquartileRange                   | 289.1534138  |
| wavelet-HLL | firstorder | Skewness                             | -1.041158437 |
| wavelet-HLL | firstorder | Uniformity                           | 0.036324786  |
| wavelet-HLL | firstorder | Median                               | -25.09445366 |
| wavelet-HLL | firstorder | Energy                               | 11576204.1   |
| wavelet-HLL | firstorder | RobustMeanAbsoluteDeviation          | 121.3548355  |
| wavelet-HLL | firstorder | MeanAbsoluteDeviation                | 194.6600609  |
| wavelet-HLL | firstorder | TotalEnergy                          | 312557510.6  |
| wavelet-HLL | firstorder | Maximum                              | 516.2124566  |
| wavelet-HLL | firstorder | RootMeanSquared                      | 272.4085838  |
| wavelet-HLL | firstorder | 90Percentile                         | 291.0710751  |
| wavelet-HLL | firstorder | Minimum                              | -1385.931534 |
| wavelet-HLL | firstorder | Entropy                              | 5.042520866  |
| wavelet-HLL | firstorder | Range                                | 1902.14399   |
| wavelet-HLL | firstorder | Variance                             | 72777.80865  |
| wavelet-HLL | firstorder | 10Percentile                         | -334.7428389 |
| wavelet-HLL | firstorder | Kurtosis                             | 6.991460056  |
| wavelet-HLL | firstorder | Mean                                 | -37.7971939  |
| wavelet-HLL | glrlm      | ShortRunLowGrayLevelEmphasis         | 0.006972063  |
| wavelet-HLL | glrlm      | GrayLevelVariance                    | 117.72234    |
| wavelet-HLL | glrlm      | LowGrayLevelRunEmphasis              | 0.006978963  |
| wavelet-HLL | glrlm      | GrayLevelNonUniformityNormalized     | 0.036015263  |
| wavelet-HLL | glrlm      | RunVariance                          | 0.030124582  |

|             |       |                                      |             |
|-------------|-------|--------------------------------------|-------------|
| wavelet-HLL | glrlm | GrayLevelNonUniformity               | 5.460128818 |
| wavelet-HLL | glrlm | LongRunEmphasis                      | 1.089921624 |
| wavelet-HLL | glrlm | ShortRunHighGrayLevelEmphasis        | 3063.319066 |
| wavelet-HLL | glrlm | RunLengthNonUniformity               | 143.4761028 |
| wavelet-HLL | glrlm | ShortRunEmphasis                     | 0.97867507  |
| wavelet-HLL | glrlm | LongRunHighGrayLevelEmphasis         | 3435.311535 |
| wavelet-HLL | glrlm | RunPercentage                        | 0.971893491 |
| wavelet-HLL | glrlm | LongRunLowGrayLevelEmphasis          | 0.00700792  |
| wavelet-HLL | glrlm | RunEntropy                           | 5.148306968 |
| wavelet-HLL | glrlm | HighGrayLevelRunEmphasis             | 3134.140944 |
| wavelet-HLL | glrlm | RunLengthNonUniformityNormalized     | 0.945689919 |
| wavelet-HLL | glszm | GrayLevelVariance                    | 133.1421151 |
| wavelet-HLL | glszm | ZoneVariance                         | 0.745556367 |
| wavelet-HLL | glszm | GrayLevelNonUniformityNormalized     | 0.032708384 |
| wavelet-HLL | glszm | SizeZoneNonUniformityNormalized      | 0.597759922 |
| wavelet-HLL | glszm | SizeZoneNonUniformity                | 66.35135135 |
| wavelet-HLL | glszm | GrayLevelNonUniformity               | 3.630630631 |
| wavelet-HLL | glszm | LargeAreaEmphasis                    | 2.720720721 |
| wavelet-HLL | glszm | SmallAreaHighGrayLevelEmphasis       | 2361.723926 |
| wavelet-HLL | glszm | ZonePercentage                       | 0.711538462 |
| wavelet-HLL | glszm | LargeAreaLowGrayLevelEmphasis        | 0.009971721 |
| wavelet-HLL | glszm | LargeAreaHighGrayLevelEmphasis       | 8720.036036 |
| wavelet-HLL | glszm | HighGrayLevelZoneEmphasis            | 3044.279279 |
| wavelet-HLL | glszm | SmallAreaEmphasis                    | 0.800723223 |
| wavelet-HLL | glszm | LowGrayLevelZoneEmphasis             | 0.009412239 |
| wavelet-HLL | glszm | ZoneEntropy                          | 5.708798808 |
| wavelet-HLL | glszm | SmallAreaLowGrayLevelEmphasis        | 0.00934848  |
| wavelet-HLL | ngtdm | Coarseness                           | 0.036118434 |
| wavelet-HLL | ngtdm | Complexity                           | 5434.45843  |
| wavelet-HLL | ngtdm | Strength                             | 29.15279621 |
| wavelet-HLL | ngtdm | Contrast                             | 0.929706382 |
| wavelet-HLL | ngtdm | Busyness                             | 0.014355545 |
| wavelet-LHL | gldm  | GrayLevelVariance                    | 44.92882972 |
| wavelet-LHL | gldm  | HighGrayLevelEmphasis                | 439.3076923 |
| wavelet-LHL | gldm  | DependenceEntropy                    | 5.871027482 |
| wavelet-LHL | gldm  | DependenceNonUniformity              | 48.83333333 |
| wavelet-LHL | gldm  | GrayLevelNonUniformity               | 7.807692308 |
| wavelet-LHL | gldm  | SmallDependenceEmphasis              | 0.49357906  |
| wavelet-LHL | gldm  | SmallDependenceHighGrayLevelEmphasis | 230.4006125 |
| wavelet-LHL | gldm  | DependenceNonUniformityNormalized    | 0.313034188 |
| wavelet-LHL | gldm  | LargeDependenceEmphasis              | 4.730769231 |
| wavelet-LHL | gldm  | LargeDependenceLowGrayLevelEmphasis  | 0.025178934 |
| wavelet-LHL | gldm  | DependenceVariance                   | 0.883136095 |
| wavelet-LHL | gldm  | LargeDependenceHighGrayLevelEmphasis | 1931.602564 |
| wavelet-LHL | gldm  | SmallDependenceLowGrayLevelEmphasis  | 0.008883838 |
| wavelet-LHL | gldm  | LowGrayLevelEmphasis                 | 0.010790096 |
| wavelet-LHL | glcm  | JointAverage                         | 19.47082358 |
| wavelet-LHL | glcm  | SumAverage                           | 38.94164716 |
| wavelet-LHL | glcm  | JointEntropy                         | 7.177120121 |
| wavelet-LHL | glcm  | ClusterShade                         | 375.6363185 |
| wavelet-LHL | glcm  | MaximumProbability                   | 0.018851335 |
| wavelet-LHL | glcm  | ldmn                                 | 0.967504501 |
| wavelet-LHL | glcm  | JointEnergy                          | 0.007678944 |
| wavelet-LHL | glcm  | Contrast                             | 67.64487769 |
| wavelet-LHL | glcm  | DifferenceEntropy                    | 3.849902146 |
| wavelet-LHL | glcm  | InverseVariance                      | 0.157722419 |

|             |            |                                  |              |
|-------------|------------|----------------------------------|--------------|
| wavelet-LHL | glcm       | DifferenceVariance               | 25.86667491  |
| wavelet-LHL | glcm       | Idn                              | 0.881433005  |
| wavelet-LHL | glcm       | Idm                              | 0.155413572  |
| wavelet-LHL | glcm       | Correlation                      | 0.278464264  |
| wavelet-LHL | glcm       | Autocorrelation                  | 392.3939803  |
| wavelet-LHL | glcm       | SumEntropy                       | 5.012424391  |
| wavelet-LHL | glcm       | SumSquares                       | 47.06840662  |
| wavelet-LHL | glcm       | ClusterProminence                | 53111.16943  |
| wavelet-LHL | glcm       | Imc2                             | 0.98986253   |
| wavelet-LHL | glcm       | Imc1                             | -0.430172776 |
| wavelet-LHL | glcm       | DifferenceAverage                | 6.291631555  |
| wavelet-LHL | glcm       | Id                               | 0.246765412  |
| wavelet-LHL | glcm       | ClusterTendency                  | 120.6287488  |
| wavelet-LHL | firstorder | InterquartileRange               | 188.280108   |
| wavelet-LHL | firstorder | Skewness                         | 0.243210869  |
| wavelet-LHL | firstorder | Uniformity                       | 0.05004931   |
| wavelet-LHL | firstorder | Median                           | 17.39307336  |
| wavelet-LHL | firstorder | Energy                           | 4359810.612  |
| wavelet-LHL | firstorder | RobustMeanAbsoluteDeviation      | 80.97714623  |
| wavelet-LHL | firstorder | MeanAbsoluteDeviation            | 125.3517199  |
| wavelet-LHL | firstorder | TotalEnergy                      | 117714886.5  |
| wavelet-LHL | firstorder | Maximum                          | 575.5119258  |
| wavelet-LHL | firstorder | RootMeanSquared                  | 167.1750697  |
| wavelet-LHL | firstorder | 90Percentile                     | 187.8727354  |
| wavelet-LHL | firstorder | Minimum                          | -456.759671  |
| wavelet-LHL | firstorder | Entropy                          | 4.564534737  |
| wavelet-LHL | firstorder | Range                            | 1032.271597  |
| wavelet-LHL | firstorder | Variance                         | 27862.69805  |
| wavelet-LHL | firstorder | 10Percentile                     | -213.1671335 |
| wavelet-LHL | firstorder | Kurtosis                         | 4.123480394  |
| wavelet-LHL | firstorder | Mean                             | 9.209010402  |
| wavelet-LHL | glrlm      | ShortRunLowGrayLevelEmphasis     | 0.010951987  |
| wavelet-LHL | glrlm      | GrayLevelVariance                | 45.5634105   |
| wavelet-LHL | glrlm      | LowGrayLevelRunEmphasis          | 0.01105914   |
| wavelet-LHL | glrlm      | GrayLevelNonUniformityNormalized | 0.04985206   |
| wavelet-LHL | glrlm      | RunVariance                      | 0.041045716  |
| wavelet-LHL | glrlm      | GrayLevelNonUniformity           | 7.48917373   |
| wavelet-LHL | glrlm      | LongRunEmphasis                  | 1.120441795  |
| wavelet-LHL | glrlm      | ShortRunHighGrayLevelEmphasis    | 429.3539703  |
| wavelet-LHL | glrlm      | RunLengthNonUniformity           | 139.7700585  |
| wavelet-LHL | glrlm      | ShortRunEmphasis                 | 0.972204795  |
| wavelet-LHL | glrlm      | LongRunHighGrayLevelEmphasis     | 489.4509978  |
| wavelet-LHL | glrlm      | RunPercentage                    | 0.963017751  |
| wavelet-LHL | glrlm      | LongRunLowGrayLevelEmphasis      | 0.011522057  |
| wavelet-LHL | glrlm      | RunEntropy                       | 4.713049456  |
| wavelet-LHL | glrlm      | HighGrayLevelRunEmphasis         | 440.6217397  |
| wavelet-LHL | glrlm      | RunLengthNonUniformityNormalized | 0.929782362  |
| wavelet-LHL | glszm      | GrayLevelVariance                | 56.48806711  |
| wavelet-LHL | glszm      | ZoneVariance                     | 1.342155009  |
| wavelet-LHL | glszm      | GrayLevelNonUniformityNormalized | 0.0463138    |
| wavelet-LHL | glszm      | SizeZoneNonUniformityNormalized  | 0.460775047  |
| wavelet-LHL | glszm      | SizeZoneNonUniformity            | 42.39130435  |
| wavelet-LHL | glszm      | GrayLevelNonUniformity           | 4.260869565  |
| wavelet-LHL | glszm      | LargeAreaEmphasis                | 4.217391304  |
| wavelet-LHL | glszm      | SmallAreaHighGrayLevelEmphasis   | 333.5985145  |
| wavelet-LHL | glszm      | ZonePercentage                   | 0.58974359   |

|             |            |                                      |              |
|-------------|------------|--------------------------------------|--------------|
| wavelet-LHL | glszm      | LargeAreaLowGrayLevelEmphasis        | 0.0272253    |
| wavelet-LHL | glszm      | LargeAreaHighGrayLevelEmphasis       | 1788.913043  |
| wavelet-LHL | glszm      | HighGrayLevelZoneEmphasis            | 457.7934783  |
| wavelet-LHL | glszm      | SmallAreaEmphasis                    | 0.701126208  |
| wavelet-LHL | glszm      | LowGrayLevelZoneEmphasis             | 0.015716068  |
| wavelet-LHL | glszm      | ZoneEntropy                          | 5.553362163  |
| wavelet-LHL | glszm      | SmallAreaLowGrayLevelEmphasis        | 0.014581267  |
| wavelet-LHL | ngtdm      | Coarseness                           | 0.040266041  |
| wavelet-LHL | ngtdm      | Complexity                           | 1768.317939  |
| wavelet-LHL | ngtdm      | Strength                             | 15.93718879  |
| wavelet-LHL | ngtdm      | Contrast                             | 0.377172468  |
| wavelet-LHL | ngtdm      | Busyness                             | 0.042675277  |
| wavelet-LHH | gldm       | GrayLevelVariance                    | 10.46100427  |
| wavelet-LHH | gldm       | HighGrayLevelEmphasis                | 140.8012821  |
| wavelet-LHH | gldm       | DependenceEntropy                    | 5.4647017    |
| wavelet-LHH | gldm       | DependenceNonUniformity              | 32.53846154  |
| wavelet-LHH | gldm       | GrayLevelNonUniformity               | 16.29487179  |
| wavelet-LHH | gldm       | SmallDependenceEmphasis              | 0.388626919  |
| wavelet-LHH | gldm       | SmallDependenceHighGrayLevelEmphasis | 58.00515168  |
| wavelet-LHH | gldm       | DependenceNonUniformityNormalized    | 0.208579882  |
| wavelet-LHH | gldm       | LargeDependenceEmphasis              | 9.653846154  |
| wavelet-LHH | gldm       | LargeDependenceLowGrayLevelEmphasis  | 0.088582069  |
| wavelet-LHH | gldm       | DependenceVariance                   | 2.405325444  |
| wavelet-LHH | gldm       | LargeDependenceHighGrayLevelEmphasis | 1277.737179  |
| wavelet-LHH | gldm       | SmallDependenceLowGrayLevelEmphasis  | 0.011215845  |
| wavelet-LHH | gldm       | LowGrayLevelEmphasis                 | 0.016555816  |
| wavelet-LHH | glcm       | JointAverage                         | 11.43769048  |
| wavelet-LHH | glcm       | SumAverage                           | 22.87538095  |
| wavelet-LHH | glcm       | JointEntropy                         | 6.31086295   |
| wavelet-LHH | glcm       | ClusterShade                         | 7.544795772  |
| wavelet-LHH | glcm       | MaximumProbability                   | 0.046829567  |
| wavelet-LHH | glcm       | ldmn                                 | 0.962702593  |
| wavelet-LHH | glcm       | JointEnergy                          | 0.016493799  |
| wavelet-LHH | glcm       | Contrast                             | 20.71151021  |
| wavelet-LHH | glcm       | DifferenceEntropy                    | 3.158386444  |
| wavelet-LHH | glcm       | InverseVariance                      | 0.269631723  |
| wavelet-LHH | glcm       | DifferenceVariance                   | 8.209051713  |
| wavelet-LHH | glcm       | ldn                                  | 0.875022449  |
| wavelet-LHH | glcm       | ldm                                  | 0.264208175  |
| wavelet-LHH | glcm       | Correlation                          | 0.009593358  |
| wavelet-LHH | glcm       | Autocorrelation                      | 130.863984   |
| wavelet-LHH | glcm       | SumEntropy                           | 3.955970293  |
| wavelet-LHH | glcm       | SumSquares                           | 10.39018303  |
| wavelet-LHH | glcm       | ClusterProminence                    | 1682.997447  |
| wavelet-LHH | glcm       | lmc2                                 | 0.907689701  |
| wavelet-LHH | glcm       | lmc1                                 | -0.244279326 |
| wavelet-LHH | glcm       | DifferenceAverage                    | 3.449103521  |
| wavelet-LHH | glcm       | ld                                   | 0.352496596  |
| wavelet-LHH | glcm       | ClusterTendency                      | 20.84922192  |
| wavelet-LHH | firstorder | InterquartileRange                   | 92.47727588  |
| wavelet-LHH | firstorder | Skewness                             | 0.01821796   |
| wavelet-LHH | firstorder | Uniformity                           | 0.104454306  |
| wavelet-LHH | firstorder | Median                               | -2.774900692 |
| wavelet-LHH | firstorder | Energy                               | 1026275.692  |
| wavelet-LHH | firstorder | RobustMeanAbsoluteDeviation          | 37.2392474   |
| wavelet-LHH | firstorder | MeanAbsoluteDeviation                | 59.65163501  |

|             |            |                                      |              |
|-------------|------------|--------------------------------------|--------------|
| wavelet-LHH | firstorder | TotalEnergy                          | 27709443.67  |
| wavelet-LHH | firstorder | Maximum                              | 255.7868906  |
| wavelet-LHH | firstorder | RootMeanSquared                      | 81.10912606  |
| wavelet-LHH | firstorder | 90Percentile                         | 105.6601406  |
| wavelet-LHH | firstorder | Minimum                              | -273.6284409 |
| wavelet-LHH | firstorder | Entropy                              | 3.597271668  |
| wavelet-LHH | firstorder | Range                                | 529.4153314  |
| wavelet-LHH | firstorder | Variance                             | 6575.203061  |
| wavelet-LHH | firstorder | 10Percentile                         | -97.89101694 |
| wavelet-LHH | firstorder | Kurtosis                             | 3.901228515  |
| wavelet-LHH | firstorder | Mean                                 | -1.867423243 |
| wavelet-LHH | grlm       | ShortRunLowGrayLevelEmphasis         | 0.01671921   |
| wavelet-LHH | grlm       | GrayLevelVariance                    | 10.96477239  |
| wavelet-LHH | grlm       | LowGrayLevelRunEmphasis              | 0.017134801  |
| wavelet-LHH | grlm       | GrayLevelNonUniformityNormalized     | 0.100251816  |
| wavelet-LHH | grlm       | RunVariance                          | 0.078766961  |
| wavelet-LHH | grlm       | GrayLevelNonUniformity               | 14.63141741  |
| wavelet-LHH | grlm       | LongRunEmphasis                      | 1.227827812  |
| wavelet-LHH | grlm       | ShortRunHighGrayLevelEmphasis        | 134.5954705  |
| wavelet-LHH | grlm       | RunLengthNonUniformity               | 128.5766196  |
| wavelet-LHH | grlm       | ShortRunEmphasis                     | 0.950080606  |
| wavelet-LHH | grlm       | LongRunHighGrayLevelEmphasis         | 171.2572055  |
| wavelet-LHH | grlm       | RunPercentage                        | 0.934911243  |
| wavelet-LHH | grlm       | LongRunLowGrayLevelEmphasis          | 0.019080458  |
| wavelet-LHH | grlm       | RunEntropy                           | 3.919492328  |
| wavelet-LHH | grlm       | HighGrayLevelRunEmphasis             | 141.336304   |
| wavelet-LHH | grlm       | RunLengthNonUniformityNormalized     | 0.879216377  |
| wavelet-LHH | glszm      | GrayLevelVariance                    | 19.68615385  |
| wavelet-LHH | glszm      | ZoneVariance                         | 18.82461538  |
| wavelet-LHH | glszm      | GrayLevelNonUniformityNormalized     | 0.070295858  |
| wavelet-LHH | glszm      | SizeZoneNonUniformityNormalized      | 0.545088757  |
| wavelet-LHH | glszm      | SizeZoneNonUniformity                | 35.43076923  |
| wavelet-LHH | glszm      | GrayLevelNonUniformity               | 4.569230769  |
| wavelet-LHH | glszm      | LargeAreaEmphasis                    | 24.58461538  |
| wavelet-LHH | glszm      | SmallAreaHighGrayLevelEmphasis       | 116.2035803  |
| wavelet-LHH | glszm      | ZonePercentage                       | 0.416666667  |
| wavelet-LHH | glszm      | LargeAreaLowGrayLevelEmphasis        | 0.219091541  |
| wavelet-LHH | glszm      | LargeAreaHighGrayLevelEmphasis       | 3188.938462  |
| wavelet-LHH | glszm      | HighGrayLevelZoneEmphasis            | 149.6461538  |
| wavelet-LHH | glszm      | SmallAreaEmphasis                    | 0.762444129  |
| wavelet-LHH | glszm      | LowGrayLevelZoneEmphasis             | 0.027803302  |
| wavelet-LHH | glszm      | ZoneEntropy                          | 4.879834544  |
| wavelet-LHH | glszm      | SmallAreaLowGrayLevelEmphasis        | 0.025359944  |
| wavelet-LHH | ngtdm      | Coarseness                           | 0.039999794  |
| wavelet-LHH | ngtdm      | Complexity                           | 352.0592997  |
| wavelet-LHH | ngtdm      | Strength                             | 4.236822206  |
| wavelet-LHH | ngtdm      | Contrast                             | 0.154211764  |
| wavelet-LHH | ngtdm      | Busyness                             | 0.108987819  |
| wavelet-LLH | gldm       | GrayLevelVariance                    | 78.98861769  |
| wavelet-LLH | gldm       | HighGrayLevelEmphasis                | 573.4807692  |
| wavelet-LLH | gldm       | DependenceEntropy                    | 5.718775239  |
| wavelet-LLH | gldm       | DependenceNonUniformity              | 54.43589744  |
| wavelet-LLH | gldm       | GrayLevelNonUniformity               | 7.692307692  |
| wavelet-LLH | gldm       | SmallDependenceEmphasis              | 0.560632123  |
| wavelet-LLH | gldm       | SmallDependenceHighGrayLevelEmphasis | 318.4125516  |
| wavelet-LLH | gldm       | DependenceNonUniformityNormalized    | 0.34894806   |



|             |            |                                      |              |
|-------------|------------|--------------------------------------|--------------|
| wavelet-LLH | gldm       | LargeDependenceEmphasis              | 4.320512821  |
| wavelet-LLH | gldm       | LargeDependenceLowGrayLevelEmphasis  | 0.019474817  |
| wavelet-LLH | gldm       | DependenceVariance                   | 0.959401709  |
| wavelet-LLH | gldm       | LargeDependenceHighGrayLevelEmphasis | 2266.583333  |
| wavelet-LLH | gldm       | SmallDependenceLowGrayLevelEmphasis  | 0.010491815  |
| wavelet-LLH | gldm       | LowGrayLevelEmphasis                 | 0.011524341  |
| wavelet-LLH | glcm       | JointAverage                         | 21.30729117  |
| wavelet-LLH | glcm       | SumAverage                           | 42.61458235  |
| wavelet-LLH | glcm       | JointEntropy                         | 7.198572281  |
| wavelet-LLH | glcm       | ClusterShade                         | 1329.764259  |
| wavelet-LLH | glcm       | MaximumProbability                   | 0.022816044  |
| wavelet-LLH | glcm       | ldmn                                 | 0.969908088  |
| wavelet-LLH | glcm       | JointEnergy                          | 0.007680093  |
| wavelet-LLH | glcm       | Contrast                             | 97.57204019  |
| wavelet-LLH | glcm       | DifferenceEntropy                    | 4.04187353   |
| wavelet-LLH | glcm       | InverseVariance                      | 0.147330268  |
| wavelet-LLH | glcm       | DifferenceVariance                   | 41.60652401  |
| wavelet-LLH | glcm       | ldn                                  | 0.888723271  |
| wavelet-LLH | glcm       | ldm                                  | 0.141645655  |
| wavelet-LLH | glcm       | Correlation                          | 0.280318006  |
| wavelet-LLH | glcm       | Autocorrelation                      | 473.2041427  |
| wavelet-LLH | glcm       | SumEntropy                           | 5.127823085  |
| wavelet-LLH | glcm       | SumSquares                           | 67.93864136  |
| wavelet-LLH | glcm       | ClusterProminence                    | 166353.4116  |
| wavelet-LLH | glcm       | lmc2                                 | 0.99425322   |
| wavelet-LLH | glcm       | lmc1                                 | -0.475271461 |
| wavelet-LLH | glcm       | DifferenceAverage                    | 7.268304536  |
| wavelet-LLH | glcm       | ld                                   | 0.23056541   |
| wavelet-LLH | glcm       | ClusterTendency                      | 174.1825252  |
| wavelet-LLH | firstorder | InterquartileRange                   | 204.1043308  |
| wavelet-LLH | firstorder | Skewness                             | 1.066253195  |
| wavelet-LLH | firstorder | Uniformity                           | 0.049309665  |
| wavelet-LLH | firstorder | Median                               | 38.44152007  |
| wavelet-LLH | firstorder | Energy                               | 8495243.129  |
| wavelet-LLH | firstorder | RobustMeanAbsoluteDeviation          | 88.52188198  |
| wavelet-LLH | firstorder | MeanAbsoluteDeviation                | 155.538574   |
| wavelet-LLH | firstorder | TotalEnergy                          | 229371564.5  |
| wavelet-LLH | firstorder | Maximum                              | 840.9438088  |
| wavelet-LLH | firstorder | RootMeanSquared                      | 233.3595653  |
| wavelet-LLH | firstorder | 90Percentile                         | 304.1512709  |
| wavelet-LLH | firstorder | Minimum                              | -450.3447469 |
| wavelet-LLH | firstorder | Entropy                              | 4.736608209  |
| wavelet-LLH | firstorder | Range                                | 1291.288556  |
| wavelet-LLH | firstorder | Variance                             | 49726.07664  |
| wavelet-LLH | firstorder | 10Percentile                         | -159.5848245 |
| wavelet-LLH | firstorder | Kurtosis                             | 5.702188973  |
| wavelet-LLH | firstorder | Mean                                 | 68.77943065  |
| wavelet-LLH | glrlm      | ShortRunLowGrayLevelEmphasis         | 0.01177218   |
| wavelet-LLH | glrlm      | GrayLevelVariance                    | 80.14144106  |
| wavelet-LLH | glrlm      | LowGrayLevelRunEmphasis              | 0.011830545  |
| wavelet-LLH | glrlm      | GrayLevelNonUniformityNormalized     | 0.048336889  |
| wavelet-LLH | glrlm      | RunVariance                          | 0.034034195  |
| wavelet-LLH | glrlm      | GrayLevelNonUniformity               | 7.30006052   |
| wavelet-LLH | glrlm      | LongRunEmphasis                      | 1.102397473  |
| wavelet-LLH | glrlm      | ShortRunHighGrayLevelEmphasis        | 561.5864544  |
| wavelet-LLH | glrlm      | RunLengthNonUniformity               | 141.7120963  |

|             |       |                                      |             |
|-------------|-------|--------------------------------------|-------------|
| wavelet-LLH | glrlm | ShortRunEmphasis                     | 0.975541044 |
| wavelet-LLH | glrlm | LongRunHighGrayLevelEmphasis         | 629.8490941 |
| wavelet-LLH | glrlm | RunPercentage                        | 0.967948718 |
| wavelet-LLH | glrlm | LongRunLowGrayLevelEmphasis          | 0.012071888 |
| wavelet-LLH | glrlm | RunEntropy                           | 4.880028082 |
| wavelet-LLH | glrlm | HighGrayLevelRunEmphasis             | 574.6886347 |
| wavelet-LLH | glrlm | RunLengthNonUniformityNormalized     | 0.937875504 |
| wavelet-LLH | glszm | GrayLevelVariance                    | 94.23723164 |
| wavelet-LLH | glszm | ZoneVariance                         | 1.416331732 |
| wavelet-LLH | glszm | GrayLevelNonUniformityNormalized     | 0.037937457 |
| wavelet-LLH | glszm | SizeZoneNonUniformityNormalized      | 0.542985982 |
| wavelet-LLH | glszm | SizeZoneNonUniformity                | 54.84158416 |
| wavelet-LLH | glszm | GrayLevelNonUniformity               | 3.831683168 |
| wavelet-LLH | glszm | LargeAreaEmphasis                    | 3.801980198 |
| wavelet-LLH | glszm | SmallAreaHighGrayLevelEmphasis       | 429.1281148 |
| wavelet-LLH | glszm | ZonePercentage                       | 0.647435897 |
| wavelet-LLH | glszm | LargeAreaLowGrayLevelEmphasis        | 0.022929478 |
| wavelet-LLH | glszm | LargeAreaHighGrayLevelEmphasis       | 2053.49505  |
| wavelet-LLH | glszm | HighGrayLevelZoneEmphasis            | 579.1089109 |
| wavelet-LLH | glszm | SmallAreaEmphasis                    | 0.761234705 |
| wavelet-LLH | glszm | LowGrayLevelZoneEmphasis             | 0.016532547 |
| wavelet-LLH | glszm | ZoneEntropy                          | 5.622278904 |
| wavelet-LLH | glszm | SmallAreaLowGrayLevelEmphasis        | 0.015962513 |
| wavelet-LLH | ngtdm | Coarseness                           | 0.041395502 |
| wavelet-LLH | ngtdm | Complexity                           | 3278.502847 |
| wavelet-LLH | ngtdm | Strength                             | 27.38215051 |
| wavelet-LLH | ngtdm | Contrast                             | 0.523540579 |
| wavelet-LLH | ngtdm | Busyness                             | 0.028408254 |
| wavelet-LLL | gldm  | GrayLevelVariance                    | 729.6868425 |
| wavelet-LLL | gldm  | HighGrayLevelEmphasis                | 2181.980769 |
| wavelet-LLL | gldm  | DependenceEntropy                    | 6.254031366 |
| wavelet-LLL | gldm  | DependenceNonUniformity              | 90          |
| wavelet-LLL | gldm  | GrayLevelNonUniformity               | 3.166666667 |
| wavelet-LLL | gldm  | SmallDependenceEmphasis              | 0.777065527 |
| wavelet-LLL | gldm  | SmallDependenceHighGrayLevelEmphasis | 1782.201567 |
| wavelet-LLL | gldm  | DependenceNonUniformityNormalized    | 0.576923077 |
| wavelet-LLL | gldm  | LargeDependenceEmphasis              | 1.948717949 |
| wavelet-LLL | gldm  | LargeDependenceLowGrayLevelEmphasis  | 0.014889747 |
| wavelet-LLL | gldm  | DependenceVariance                   | 0.238658777 |
| wavelet-LLL | gldm  | LargeDependenceHighGrayLevelEmphasis | 3797.108974 |
| wavelet-LLL | gldm  | SmallDependenceLowGrayLevelEmphasis  | 0.009183948 |
| wavelet-LLL | gldm  | LowGrayLevelEmphasis                 | 0.010265096 |
| wavelet-LLL | glcm  | JointAverage                         | 40.62015315 |
| wavelet-LLL | glcm  | SumAverage                           | 81.24030631 |
| wavelet-LLL | glcm  | JointEntropy                         | 7.551583813 |
| wavelet-LLL | glcm  | ClusterShade                         | 63422.37521 |
| wavelet-LLL | glcm  | MaximumProbability                   | 0.010531307 |
| wavelet-LLL | glcm  | ldmn                                 | 0.957529898 |
| wavelet-LLL | glcm  | JointEnergy                          | 0.005466629 |
| wavelet-LLL | glcm  | Contrast                             | 573.5775043 |
| wavelet-LLL | glcm  | DifferenceEntropy                    | 5.095727344 |
| wavelet-LLL | glcm  | InverseVariance                      | 0.051540187 |
| wavelet-LLL | glcm  | DifferenceVariance                   | 205.703836  |
| wavelet-LLL | glcm  | ldn                                  | 0.863106758 |
| wavelet-LLL | glcm  | ldm                                  | 0.052055292 |
| wavelet-LLL | glcm  | Correlation                          | 0.581288997 |

|             |            |                                  |              |
|-------------|------------|----------------------------------|--------------|
| wavelet-LLL | glcm       | Autocorrelation                  | 2050.381468  |
| wavelet-LLL | glcm       | SumEntropy                       | 6.084370221  |
| wavelet-LLL | glcm       | SumSquares                       | 686.1905643  |
| wavelet-LLL | glcm       | ClusterProminence                | 11154429.21  |
| wavelet-LLL | glcm       | Imc2                             | 0.999882681  |
| wavelet-LLL | glcm       | Imc1                             | -0.714253814 |
| wavelet-LLL | glcm       | DifferenceAverage                | 18.84841318  |
| wavelet-LLL | glcm       | Id                               | 0.115428863  |
| wavelet-LLL | glcm       | ClusterTendency                  | 2171.184753  |
| wavelet-LLL | firstorder | InterquartileRange               | 966.2657178  |
| wavelet-LLL | firstorder | Skewness                         | 0.832114338  |
| wavelet-LLL | firstorder | Uniformity                       | 0.020299145  |
| wavelet-LLL | firstorder | Median                           | -1811.5109   |
| wavelet-LLL | firstorder | Energy                           | 462430685.3  |
| wavelet-LLL | firstorder | RobustMeanAbsoluteDeviation      | 418.2399996  |
| wavelet-LLL | firstorder | MeanAbsoluteDeviation            | 564.9723081  |
| wavelet-LLL | firstorder | TotalEnergy                      | 12485628503  |
| wavelet-LLL | firstorder | Maximum                          | 176.948859   |
| wavelet-LLL | firstorder | RootMeanSquared                  | 1721.714048  |
| wavelet-LLL | firstorder | 90Percentile                     | -452.1595014 |
| wavelet-LLL | firstorder | Minimum                          | -2504.82998  |
| wavelet-LLL | firstorder | Entropy                          | 5.900330906  |
| wavelet-LLL | firstorder | Range                            | 2681.778839  |
| wavelet-LLL | firstorder | Variance                         | 455671.8848  |
| wavelet-LLL | firstorder | 10Percentile                     | -2285.617699 |
| wavelet-LLL | firstorder | Kurtosis                         | 2.571678163  |
| wavelet-LLL | firstorder | Mean                             | -1583.864697 |
| wavelet-LLL | glrlm      | ShortRunLowGrayLevelEmphasis     | 0.01028605   |
| wavelet-LLL | glrlm      | GrayLevelVariance                | 730.3363024  |
| wavelet-LLL | glrlm      | LowGrayLevelRunEmphasis          | 0.010330126  |
| wavelet-LLL | glrlm      | GrayLevelNonUniformityNormalized | 0.020248778  |
| wavelet-LLL | glrlm      | RunVariance                      | 0.011829757  |
| wavelet-LLL | glrlm      | GrayLevelNonUniformity           | 3.121461767  |
| wavelet-LLL | glrlm      | LongRunEmphasis                  | 1.036180149  |
| wavelet-LLL | glrlm      | ShortRunHighGrayLevelEmphasis    | 2171.516805  |
| wavelet-LLL | glrlm      | RunLengthNonUniformity           | 150.5319662  |
| wavelet-LLL | glrlm      | ShortRunEmphasis                 | 0.990954963  |
| wavelet-LLL | glrlm      | LongRunHighGrayLevelEmphasis     | 2250.328434  |
| wavelet-LLL | glrlm      | RunPercentage                    | 0.98816568   |
| wavelet-LLL | glrlm      | LongRunLowGrayLevelEmphasis      | 0.010506429  |
| wavelet-LLL | glrlm      | RunEntropy                       | 5.929629881  |
| wavelet-LLL | glrlm      | HighGrayLevelRunEmphasis         | 2187.279131  |
| wavelet-LLL | glrlm      | RunLengthNonUniformityNormalized | 0.976340487  |
| wavelet-LLL | glszm      | GrayLevelVariance                | 739.2191804  |
| wavelet-LLL | glszm      | ZoneVariance                     | 0.179063361  |
| wavelet-LLL | glszm      | GrayLevelNonUniformityNormalized | 0.019398531  |
| wavelet-LLL | glszm      | SizeZoneNonUniformityNormalized  | 0.717630854  |
| wavelet-LLL | glszm      | SizeZoneNonUniformity            | 94.72727273  |
| wavelet-LLL | glszm      | GrayLevelNonUniformity           | 2.560606061  |
| wavelet-LLL | glszm      | LargeAreaEmphasis                | 1.575757576  |
| wavelet-LLL | glszm      | SmallAreaHighGrayLevelEmphasis   | 2027.060185  |
| wavelet-LLL | glszm      | ZonePercentage                   | 0.846153846  |
| wavelet-LLL | glszm      | LargeAreaLowGrayLevelEmphasis    | 0.014059694  |
| wavelet-LLL | glszm      | LargeAreaHighGrayLevelEmphasis   | 3220.643939  |
| wavelet-LLL | glszm      | HighGrayLevelZoneEmphasis        | 2261.992424  |
| wavelet-LLL | glszm      | SmallAreaEmphasis                | 0.872895623  |

|             |            |                                      |              |
|-------------|------------|--------------------------------------|--------------|
| wavelet-LLL | glszm      | LowGrayLevelZoneEmphasis             | 0.011247157  |
| wavelet-LLL | glszm      | ZoneEntropy                          | 6.204289172  |
| wavelet-LLL | glszm      | SmallAreaLowGrayLevelEmphasis        | 0.010632676  |
| wavelet-LLL | ngtdm      | Coarseness                           | 0.030844089  |
| wavelet-LLL | ngtdm      | Complexity                           | 31849.54556  |
| wavelet-LLL | ngtdm      | Strength                             | 147.399202   |
| wavelet-LLL | ngtdm      | Contrast                             | 2.985590387  |
| wavelet-LLL | ngtdm      | Busyness                             | 0.017633199  |
| wavelet-HHL | gldm       | GrayLevelVariance                    | 11.48553583  |
| wavelet-HHL | gldm       | HighGrayLevelEmphasis                | 97.16666667  |
| wavelet-HHL | gldm       | DependenceEntropy                    | 5.435730509  |
| wavelet-HHL | gldm       | DependenceNonUniformity              | 34.74358974  |
| wavelet-HHL | gldm       | GrayLevelNonUniformity               | 14.58974359  |
| wavelet-HHL | gldm       | SmallDependenceEmphasis              | 0.426334416  |
| wavelet-HHL | gldm       | SmallDependenceHighGrayLevelEmphasis | 45.3675886   |
| wavelet-HHL | gldm       | DependenceNonUniformityNormalized    | 0.222715319  |
| wavelet-HHL | gldm       | LargeDependenceEmphasis              | 9.243589744  |
| wavelet-HHL | gldm       | LargeDependenceLowGrayLevelEmphasis  | 0.133162269  |
| wavelet-HHL | gldm       | DependenceVariance                   | 2.603057199  |
| wavelet-HHL | gldm       | LargeDependenceHighGrayLevelEmphasis | 883.0769231  |
| wavelet-HHL | gldm       | SmallDependenceLowGrayLevelEmphasis  | 0.016759878  |
| wavelet-HHL | gldm       | LowGrayLevelEmphasis                 | 0.026416276  |
| wavelet-HHL | glcm       | JointAverage                         | 9.230158824  |
| wavelet-HHL | glcm       | SumAverage                           | 18.46031765  |
| wavelet-HHL | glcm       | JointEntropy                         | 6.472909401  |
| wavelet-HHL | glcm       | ClusterShade                         | 12.58096032  |
| wavelet-HHL | glcm       | MaximumProbability                   | 0.037035367  |
| wavelet-HHL | glcm       | Idmn                                 | 0.959412739  |
| wavelet-HHL | glcm       | JointEnergy                          | 0.013952174  |
| wavelet-HHL | glcm       | Contrast                             | 20.71566481  |
| wavelet-HHL | glcm       | DifferenceEntropy                    | 3.166846116  |
| wavelet-HHL | glcm       | InverseVariance                      | 0.269225952  |
| wavelet-HHL | glcm       | DifferenceVariance                   | 8.224741377  |
| wavelet-HHL | glcm       | Idn                                  | 0.868123548  |
| wavelet-HHL | glcm       | Idm                                  | 0.254624862  |
| wavelet-HHL | glcm       | Correlation                          | 0.041552094  |
| wavelet-HHL | glcm       | Autocorrelation                      | 85.66496604  |
| wavelet-HHL | glcm       | SumEntropy                           | 4.078812698  |
| wavelet-HHL | glcm       | SumSquares                           | 10.82439488  |
| wavelet-HHL | glcm       | ClusterProminence                    | 1641.495312  |
| wavelet-HHL | glcm       | Imc2                                 | 0.906316801  |
| wavelet-HHL | glcm       | Imc1                                 | -0.237798833 |
| wavelet-HHL | glcm       | DifferenceAverage                    | 3.497131985  |
| wavelet-HHL | glcm       | Id                                   | 0.343906236  |
| wavelet-HHL | glcm       | ClusterTendency                      | 22.5819147   |
| wavelet-HHL | firstorder | InterquartileRange                   | 94.00615712  |
| wavelet-HHL | firstorder | Skewness                             | 0.425033053  |
| wavelet-HHL | firstorder | Uniformity                           | 0.093523997  |
| wavelet-HHL | firstorder | Median                               | -3.761754357 |
| wavelet-HHL | firstorder | Energy                               | 1144210.415  |
| wavelet-HHL | firstorder | RobustMeanAbsoluteDeviation          | 41.3261436   |
| wavelet-HHL | firstorder | MeanAbsoluteDeviation                | 64.21662902  |
| wavelet-HHL | firstorder | TotalEnergy                          | 30893681.2   |
| wavelet-HHL | firstorder | Maximum                              | 299.3212089  |
| wavelet-HHL | firstorder | RootMeanSquared                      | 85.64275887  |
| wavelet-HHL | firstorder | 90Percentile                         | 94.0599085   |

|             |            |                                      |              |
|-------------|------------|--------------------------------------|--------------|
| wavelet-HHL | firstorder | Minimum                              | -222.7593593 |
| wavelet-HHL | firstorder | Entropy                              | 3.697677561  |
| wavelet-HHL | firstorder | Range                                | 522.0805682  |
| wavelet-HHL | firstorder | Variance                             | 7298.844501  |
| wavelet-HHL | firstorder | 10Percentile                         | -119.0209936 |
| wavelet-HHL | firstorder | Kurtosis                             | 4.104665171  |
| wavelet-HHL | firstorder | Mean                                 | -5.986455216 |
| wavelet-HHL | grlm       | ShortRunLowGrayLevelEmphasis         | 0.026541161  |
| wavelet-HHL | grlm       | GrayLevelVariance                    | 11.97378262  |
| wavelet-HHL | grlm       | LowGrayLevelRunEmphasis              | 0.027216415  |
| wavelet-HHL | grlm       | GrayLevelNonUniformityNormalized     | 0.090572387  |
| wavelet-HHL | grlm       | RunVariance                          | 0.066672962  |
| wavelet-HHL | grlm       | GrayLevelNonUniformity               | 13.27831917  |
| wavelet-HHL | grlm       | LongRunEmphasis                      | 1.20258406   |
| wavelet-HHL | grlm       | ShortRunHighGrayLevelEmphasis        | 92.9671883   |
| wavelet-HHL | grlm       | RunLengthNonUniformity               | 129.7935842  |
| wavelet-HHL | grlm       | ShortRunEmphasis                     | 0.952939817  |
| wavelet-HHL | grlm       | LongRunHighGrayLevelEmphasis         | 116.4534017  |
| wavelet-HHL | grlm       | RunPercentage                        | 0.939349112  |
| wavelet-HHL | grlm       | LongRunLowGrayLevelEmphasis          | 0.030062124  |
| wavelet-HHL | grlm       | RunEntropy                           | 3.993496523  |
| wavelet-HHL | grlm       | HighGrayLevelRunEmphasis             | 97.37619382  |
| wavelet-HHL | grlm       | RunLengthNonUniformityNormalized     | 0.884461521  |
| wavelet-HHL | glszm      | GrayLevelVariance                    | 18.5399927   |
| wavelet-HHL | glszm      | ZoneVariance                         | 9.853177502  |
| wavelet-HHL | glszm      | GrayLevelNonUniformityNormalized     | 0.073411249  |
| wavelet-HHL | glszm      | SizeZoneNonUniformityNormalized      | 0.515339664  |
| wavelet-HHL | glszm      | SizeZoneNonUniformity                | 38.13513514  |
| wavelet-HHL | glszm      | GrayLevelNonUniformity               | 5.432432432  |
| wavelet-HHL | glszm      | LargeAreaEmphasis                    | 14.2972973   |
| wavelet-HHL | glszm      | SmallAreaHighGrayLevelEmphasis       | 82.19028126  |
| wavelet-HHL | glszm      | ZonePercentage                       | 0.474358974  |
| wavelet-HHL | glszm      | LargeAreaLowGrayLevelEmphasis        | 0.205675641  |
| wavelet-HHL | glszm      | LargeAreaHighGrayLevelEmphasis       | 1338         |
| wavelet-HHL | glszm      | HighGrayLevelZoneEmphasis            | 103.2297297  |
| wavelet-HHL | glszm      | SmallAreaEmphasis                    | 0.742191462  |
| wavelet-HHL | glszm      | LowGrayLevelZoneEmphasis             | 0.038025528  |
| wavelet-HHL | glszm      | ZoneEntropy                          | 4.925189008  |
| wavelet-HHL | glszm      | SmallAreaLowGrayLevelEmphasis        | 0.032221155  |
| wavelet-HHL | ngtdm      | Coarseness                           | 0.04145301   |
| wavelet-HHL | ngtdm      | Complexity                           | 348.1212161  |
| wavelet-HHL | ngtdm      | Strength                             | 4.274032922  |
| wavelet-HHL | ngtdm      | Contrast                             | 0.169583134  |
| wavelet-HHL | ngtdm      | Busyness                             | 0.137849718  |
| wavelet-HLH | gldm       | GrayLevelVariance                    | 61.68425378  |
| wavelet-HLH | gldm       | HighGrayLevelEmphasis                | 535.025641   |
| wavelet-HLH | gldm       | DependenceEntropy                    | 5.920698033  |
| wavelet-HLH | gldm       | DependenceNonUniformity              | 48.12820513  |
| wavelet-HLH | gldm       | GrayLevelNonUniformity               | 7.423076923  |
| wavelet-HLH | gldm       | SmallDependenceEmphasis              | 0.537794639  |
| wavelet-HLH | gldm       | SmallDependenceHighGrayLevelEmphasis | 296.1786882  |
| wavelet-HLH | gldm       | DependenceNonUniformityNormalized    | 0.308514135  |
| wavelet-HLH | gldm       | LargeDependenceEmphasis              | 5.91025641   |
| wavelet-HLH | gldm       | LargeDependenceLowGrayLevelEmphasis  | 0.026319021  |
| wavelet-HLH | gldm       | DependenceVariance                   | 1.702498356  |
| wavelet-HLH | gldm       | LargeDependenceHighGrayLevelEmphasis | 3186.461538  |

|             |            |                                     |              |
|-------------|------------|-------------------------------------|--------------|
| wavelet-HLH | gldm       | SmallDependenceLowGrayLevelEmphasis | 0.010775436  |
| wavelet-HLH | gldm       | LowGrayLevelEmphasis                | 0.01242499   |
| wavelet-HLH | glcm       | JointAverage                        | 21.86575547  |
| wavelet-HLH | glcm       | SumAverage                          | 43.73151094  |
| wavelet-HLH | glcm       | JointEntropy                        | 7.187631899  |
| wavelet-HLH | glcm       | ClusterShade                        | -677.210506  |
| wavelet-HLH | glcm       | MaximumProbability                  | 0.023767008  |
| wavelet-HLH | glcm       | Idmn                                | 0.946018662  |
| wavelet-HLH | glcm       | JointEnergy                         | 0.007740928  |
| wavelet-HLH | glcm       | Contrast                            | 111.69414    |
| wavelet-HLH | glcm       | DifferenceEntropy                   | 4.113674098  |
| wavelet-HLH | glcm       | InverseVariance                     | 0.153562101  |
| wavelet-HLH | glcm       | DifferenceVariance                  | 47.02795168  |
| wavelet-HLH | glcm       | Idn                                 | 0.857309404  |
| wavelet-HLH | glcm       | Idm                                 | 0.156370817  |
| wavelet-HLH | glcm       | Correlation                         | 0.013439119  |
| wavelet-HLH | glcm       | Autocorrelation                     | 479.8550258  |
| wavelet-HLH | glcm       | SumEntropy                          | 4.893670887  |
| wavelet-HLH | glcm       | SumSquares                          | 57.50996693  |
| wavelet-HLH | glcm       | ClusterProminence                   | 55299.08968  |
| wavelet-HLH | glcm       | Imc2                                | 0.992872356  |
| wavelet-HLH | glcm       | Imc1                                | -0.459900838 |
| wavelet-HLH | glcm       | DifferenceAverage                   | 7.738883378  |
| wavelet-HLH | glcm       | Id                                  | 0.240461455  |
| wavelet-HLH | glcm       | ClusterTendency                     | 118.3457277  |
| wavelet-HLH | firstorder | InterquartileRange                  | 216.7688637  |
| wavelet-HLH | firstorder | Skewness                            | -0.47499502  |
| wavelet-HLH | firstorder | Uniformity                          | 0.047583826  |
| wavelet-HLH | firstorder | Median                              | -1.806333933 |
| wavelet-HLH | firstorder | Energy                              | 6094659.177  |
| wavelet-HLH | firstorder | RobustMeanAbsoluteDeviation         | 91.69733837  |
| wavelet-HLH | firstorder | MeanAbsoluteDeviation               | 148.0885078  |
| wavelet-HLH | firstorder | TotalEnergy                         | 164555797.8  |
| wavelet-HLH | firstorder | Maximum                             | 457.4189552  |
| wavelet-HLH | firstorder | RootMeanSquared                     | 197.6570972  |
| wavelet-HLH | firstorder | 90Percentile                        | 217.0570022  |
| wavelet-HLH | firstorder | Minimum                             | -539.1390827 |
| wavelet-HLH | firstorder | Entropy                             | 4.734532932  |
| wavelet-HLH | firstorder | Range                               | 996.5580378  |
| wavelet-HLH | firstorder | Variance                            | 38670.87283  |
| wavelet-HLH | firstorder | 10Percentile                        | -352.7463097 |
| wavelet-HLH | firstorder | Kurtosis                            | 3.199134057  |
| wavelet-HLH | firstorder | Mean                                | -19.93627904 |
| wavelet-HLH | gldm       | ShortRunLowGrayLevelEmphasis        | 0.012725442  |
| wavelet-HLH | gldm       | GrayLevelVariance                   | 63.06688523  |
| wavelet-HLH | gldm       | LowGrayLevelRunEmphasis             | 0.012821675  |
| wavelet-HLH | gldm       | GrayLevelNonUniformityNormalized    | 0.046301329  |
| wavelet-HLH | gldm       | RunVariance                         | 0.047641338  |
| wavelet-HLH | gldm       | GrayLevelNonUniformity              | 6.931808733  |
| wavelet-HLH | gldm       | LongRunEmphasis                     | 1.135382459  |
| wavelet-HLH | gldm       | ShortRunHighGrayLevelEmphasis       | 519.44576    |
| wavelet-HLH | gldm       | RunLengthNonUniformity              | 138.6738651  |
| wavelet-HLH | gldm       | ShortRunEmphasis                    | 0.970237091  |
| wavelet-HLH | gldm       | LongRunHighGrayLevelEmphasis        | 607.5090281  |
| wavelet-HLH | gldm       | RunPercentage                       | 0.959566075  |
| wavelet-HLH | gldm       | LongRunLowGrayLevelEmphasis         | 0.01323539   |

|             |       |                                  |             |
|-------------|-------|----------------------------------|-------------|
| wavelet-HLH | glrlm | RunEntropy                       | 4.907515665 |
| wavelet-HLH | glrlm | HighGrayLevelRunEmphasis         | 535.164842  |
| wavelet-HLH | glrlm | RunLengthNonUniformityNormalized | 0.925530929 |
| wavelet-HLH | glszm | GrayLevelVariance                | 78.40660142 |
| wavelet-HLH | glszm | ZoneVariance                     | 1.670137443 |
| wavelet-HLH | glszm | GrayLevelNonUniformityNormalized | 0.039150354 |
| wavelet-HLH | glszm | SizeZoneNonUniformityNormalized  | 0.532902957 |
| wavelet-HLH | glszm | SizeZoneNonUniformity            | 52.2244898  |
| wavelet-HLH | glszm | GrayLevelNonUniformity           | 3.836734694 |
| wavelet-HLH | glszm | LargeAreaEmphasis                | 4.204081633 |
| wavelet-HLH | glszm | SmallAreaHighGrayLevelEmphasis   | 422.4806981 |
| wavelet-HLH | glszm | ZonePercentage                   | 0.628205128 |
| wavelet-HLH | glszm | LargeAreaLowGrayLevelEmphasis    | 0.027260671 |
| wavelet-HLH | glszm | LargeAreaHighGrayLevelEmphasis   | 2259.163265 |
| wavelet-HLH | glszm | HighGrayLevelZoneEmphasis        | 544.1734694 |
| wavelet-HLH | glszm | SmallAreaEmphasis                | 0.757649431 |
| wavelet-HLH | glszm | LowGrayLevelZoneEmphasis         | 0.017742909 |
| wavelet-HLH | glszm | ZoneEntropy                      | 5.63241737  |
| wavelet-HLH | glszm | SmallAreaLowGrayLevelEmphasis    | 0.016769979 |
| wavelet-HLH | ngtdm | Coarseness                       | 0.037145828 |
| wavelet-HLH | ngtdm | Complexity                       | 2880.101261 |
| wavelet-HLH | ngtdm | Strength                         | 14.79406096 |
| wavelet-HLH | ngtdm | Contrast                         | 0.57044426  |
| wavelet-HLH | ngtdm | Busyness                         | 0.033839877 |

| Image type | Feature Class | Feature Name                         |                                                                                                                                                                                                                                                                                                                                                                                                                   |
|------------|---------------|--------------------------------------|-------------------------------------------------------------------------------------------------------------------------------------------------------------------------------------------------------------------------------------------------------------------------------------------------------------------------------------------------------------------------------------------------------------------|
| general    | info          | BoundingBox                          | 502: RTSTRUCT: C99-DNU_segment_ITV_LUL<br>(1, 0, 1, 9, 8, 12)                                                                                                                                                                                                                                                                                                                                                     |
| general    | info          | EnabledImageTypes                    | {u'Original': {}, u'Wavelet': {}}                                                                                                                                                                                                                                                                                                                                                                                 |
|            |               |                                      | {'distances': [1], 'additionalInfo': True, 'force2D': False, 'interpolator': 'sitkBSpline', 'resampledPixelSpacing': [3.0], 'label': 1, 'normalizeScale': 1, 'normalize': False, 'force2Ddimension': 0, 'removeOutliers': None, 'minimumROISize': None, u'binWidth': 25.0, 'minimumROIDimensions': 1, u'correctMask': True, 'preCrop': False, u'symmetricalGLCM': True, 'resegmentRange': None, 'padDistance': 5} |
| general    | info          | GeneralSettings                      |                                                                                                                                                                                                                                                                                                                                                                                                                   |
| general    | info          | ImageHash                            | 4f4c46504f3d93946a092195db7601cbfee944f0<br>(0.9765625000000002, 0.9765625000000002, 2.0)                                                                                                                                                                                                                                                                                                                         |
| general    | info          | ImageSpacing                         |                                                                                                                                                                                                                                                                                                                                                                                                                   |
| general    | info          | MaskHash                             | 56584101390d68e63974896381ea56ea505c54cc                                                                                                                                                                                                                                                                                                                                                                          |
| general    | info          | NumpyVersion                         | 1.13.1                                                                                                                                                                                                                                                                                                                                                                                                            |
| general    | info          | PyWaveletVersion                     | 0.5.2                                                                                                                                                                                                                                                                                                                                                                                                             |
| general    | info          | SimpleITKVersion                     | 1.1.0                                                                                                                                                                                                                                                                                                                                                                                                             |
| general    | info          | Version                              | 1.3.0.post102+g1b0eb74                                                                                                                                                                                                                                                                                                                                                                                            |
| general    | info          | VolumeNum                            | 1                                                                                                                                                                                                                                                                                                                                                                                                                 |
| general    | info          | VoxelNum                             | 229                                                                                                                                                                                                                                                                                                                                                                                                               |
| original   | shape         | Maximum3DDiameter                    | 36.98648402                                                                                                                                                                                                                                                                                                                                                                                                       |
| original   | shape         | Maximum2DDiameterSlice               | 22.84731932                                                                                                                                                                                                                                                                                                                                                                                                       |
| original   | shape         | Sphericity                           | 0.669115985                                                                                                                                                                                                                                                                                                                                                                                                       |
| original   | shape         | MinorAxis                            | 23.1193185                                                                                                                                                                                                                                                                                                                                                                                                        |
| original   | shape         | Elongation                           | 0.635611251                                                                                                                                                                                                                                                                                                                                                                                                       |
| original   | shape         | SurfaceVolumeRatio                   | 0.393776357                                                                                                                                                                                                                                                                                                                                                                                                       |
| original   | shape         | Volume                               | 6183                                                                                                                                                                                                                                                                                                                                                                                                              |
| original   | shape         | MajorAxis                            | 36.37336258                                                                                                                                                                                                                                                                                                                                                                                                       |
| original   | shape         | SurfaceArea                          | 2434.719218                                                                                                                                                                                                                                                                                                                                                                                                       |
| original   | shape         | Flatness                             | 0.353131772                                                                                                                                                                                                                                                                                                                                                                                                       |
| original   | shape         | LeastAxis                            | 12.84458999                                                                                                                                                                                                                                                                                                                                                                                                       |
| original   | shape         | Maximum2DDiameterColumn              | 32.31098884                                                                                                                                                                                                                                                                                                                                                                                                       |
| original   | shape         | Maximum2DDiameterRow                 | 36.24913792                                                                                                                                                                                                                                                                                                                                                                                                       |
| original   | gldm          | GrayLevelVariance                    | 124.3459888                                                                                                                                                                                                                                                                                                                                                                                                       |
| original   | gldm          | HighGrayLevelEmphasis                | 1110.689956                                                                                                                                                                                                                                                                                                                                                                                                       |
| original   | gldm          | DependenceEntropy                    | 6.222211651                                                                                                                                                                                                                                                                                                                                                                                                       |
| original   | gldm          | DependenceNonUniformity              | 82.18777293                                                                                                                                                                                                                                                                                                                                                                                                       |
| original   | gldm          | GrayLevelNonUniformity               | 8.720524017                                                                                                                                                                                                                                                                                                                                                                                                       |
| original   | gldm          | SmallDependenceEmphasis              | 0.608685674                                                                                                                                                                                                                                                                                                                                                                                                       |
| original   | gldm          | SmallDependenceHighGrayLevelEmphasis | 547.0034895                                                                                                                                                                                                                                                                                                                                                                                                       |
| original   | gldm          | DependenceNonUniformityNormalized    | 0.358898572                                                                                                                                                                                                                                                                                                                                                                                                       |
| original   | gldm          | LargeDependenceEmphasis              | 5.069868996                                                                                                                                                                                                                                                                                                                                                                                                       |
| original   | gldm          | LargeDependenceLowGrayLevelEmphasis  | 0.010355626                                                                                                                                                                                                                                                                                                                                                                                                       |
| original   | gldm          | DependenceVariance                   | 1.527583379                                                                                                                                                                                                                                                                                                                                                                                                       |
| original   | gldm          | LargeDependenceHighGrayLevelEmphasis | 7858.401747                                                                                                                                                                                                                                                                                                                                                                                                       |
| original   | gldm          | SmallDependenceLowGrayLevelEmphasis  | 0.006758904                                                                                                                                                                                                                                                                                                                                                                                                       |
| original   | gldm          | LowGrayLevelEmphasis                 | 0.007188917                                                                                                                                                                                                                                                                                                                                                                                                       |
| original   | glcm          | JointAverage                         | 33.28445047                                                                                                                                                                                                                                                                                                                                                                                                       |
| original   | glcm          | SumAverage                           | 66.56890094                                                                                                                                                                                                                                                                                                                                                                                                       |



|          |            |                                  |              |
|----------|------------|----------------------------------|--------------|
| original | glcm       | JointEntropy                     | 7.660709492  |
| original | glcm       | ClusterShade                     | -2782.234125 |
| original | glcm       | MaximumProbability               | 0.020965269  |
| original | glcm       | Idmn                             | 0.927469416  |
| original | glcm       | JointEnergy                      | 0.005871556  |
| original | glcm       | Contrast                         | 198.4286695  |
| original | glcm       | DifferenceEntropy                | 4.599826339  |
| original | glcm       | InverseVariance                  | 0.133137588  |
| original | glcm       | DifferenceVariance               | 88.32471493  |
| original | glcm       | Idn                              | 0.83623757   |
| original | glcm       | Idm                              | 0.134430584  |
| original | glcm       | Correlation                      | 0.149353732  |
| original | glcm       | Autocorrelation                  | 1125.623921  |
| original | glcm       | SumEntropy                       | 5.477174263  |
| original | glcm       | SumSquares                       | 116.6647036  |
| original | glcm       | ClusterProminence                | 198190.799   |
| original | glcm       | Imc2                             | 0.991775447  |
| original | glcm       | Imc1                             | -0.427822821 |
| original | glcm       | DifferenceAverage                | 10.39818759  |
| original | glcm       | Id                               | 0.210307931  |
| original | glcm       | ClusterTendency                  | 268.230145   |
| original | firstorder | InterquartileRange               | 450          |
| original | firstorder | Skewness                         | -0.657393241 |
| original | firstorder | Uniformity                       | 0.038080891  |
| original | firstorder | Median                           | -202         |
| original | firstorder | Energy                           | 32398653     |
| original | firstorder | RobustMeanAbsoluteDeviation      | 184.3771267  |
| original | firstorder | MeanAbsoluteDeviation            | 235.9623958  |
| original | firstorder | TotalEnergy                      | 874763631    |
| original | firstorder | Maximum                          | 114          |
| original | firstorder | RootMeanSquared                  | 376.1367226  |
| original | firstorder | 90Percentile                     | 52           |
| original | firstorder | Minimum                          | -1014        |
| original | firstorder | Entropy                          | 5.039602841  |
| original | firstorder | Range                            | 1128         |
| original | firstorder | Variance                         | 77527.27095  |
| original | firstorder | 10Percentile                     | -678.2       |
| original | firstorder | Kurtosis                         | 2.425280061  |
| original | firstorder | Mean                             | -252.8864629 |
| original | glrlm      | ShortRunLowGrayLevelEmphasis     | 0.007388638  |
| original | glrlm      | GrayLevelVariance                | 124.578626   |
| original | glrlm      | LowGrayLevelRunEmphasis          | 0.007411887  |
| original | glrlm      | GrayLevelNonUniformityNormalized | 0.036827913  |
| original | glrlm      | RunVariance                      | 0.035997549  |
| original | glrlm      | GrayLevelNonUniformity           | 8.149505412  |
| original | glrlm      | LongRunEmphasis                  | 1.108324132  |
| original | glrlm      | ShortRunHighGrayLevelEmphasis    | 1053.581945  |
| original | glrlm      | RunLengthNonUniformity           | 206.7484848  |
| original | glrlm      | ShortRunEmphasis                 | 0.974109732  |
| original | glrlm      | LongRunHighGrayLevelEmphasis     | 1265.547204  |
| original | glrlm      | RunPercentage                    | 0.966073228  |
| original | glrlm      | LongRunLowGrayLevelEmphasis      | 0.007507466  |
| original | glrlm      | RunEntropy                       | 5.202085749  |
| original | glrlm      | HighGrayLevelRunEmphasis         | 1094.211837  |
| original | glrlm      | RunLengthNonUniformityNormalized | 0.934076696  |

|             |       |                                      |              |
|-------------|-------|--------------------------------------|--------------|
| original    | glszm | GrayLevelVariance                    | 122.9506241  |
| original    | glszm | ZoneVariance                         | 1.925156013  |
| original    | glszm | GrayLevelNonUniformityNormalized     | 0.029937595  |
| original    | glszm | SizeZoneNonUniformityNormalized      | 0.635098668  |
| original    | glszm | SizeZoneNonUniformity                | 97.80519481  |
| original    | glszm | GrayLevelNonUniformity               | 4.61038961   |
| original    | glszm | LargeAreaEmphasis                    | 4.136363636  |
| original    | glszm | SmallAreaHighGrayLevelEmphasis       | 702.9483987  |
| original    | glszm | ZonePercentage                       | 0.672489083  |
| original    | glszm | LargeAreaLowGrayLevelEmphasis        | 0.01267474   |
| original    | glszm | LargeAreaHighGrayLevelEmphasis       | 6049.818182  |
| original    | glszm | HighGrayLevelZoneEmphasis            | 928.5519481  |
| original    | glszm | SmallAreaEmphasis                    | 0.822866613  |
| original    | glszm | LowGrayLevelZoneEmphasis             | 0.010198323  |
| original    | glszm | ZoneEntropy                          | 5.857482525  |
| original    | glszm | SmallAreaLowGrayLevelEmphasis        | 0.009950639  |
| original    | ngtdm | Coarseness                           | 0.016870828  |
| original    | ngtdm | Complexity                           | 6321.515848  |
| original    | ngtdm | Strength                             | 16.85750971  |
| original    | ngtdm | Contrast                             | 1.033261676  |
| original    | ngtdm | Busyness                             | 0.037984614  |
| wavelet-HHH | gldm  | GrayLevelVariance                    | 23.55210618  |
| wavelet-HHH | gldm  | HighGrayLevelEmphasis                | 175.8427948  |
| wavelet-HHH | gldm  | DependenceEntropy                    | 5.50878766   |
| wavelet-HHH | gldm  | DependenceNonUniformity              | 83.08733624  |
| wavelet-HHH | gldm  | GrayLevelNonUniformity               | 13.7860262   |
| wavelet-HHH | gldm  | SmallDependenceEmphasis              | 0.584713731  |
| wavelet-HHH | gldm  | SmallDependenceHighGrayLevelEmphasis | 104.3177426  |
| wavelet-HHH | gldm  | DependenceNonUniformityNormalized    | 0.362826796  |
| wavelet-HHH | gldm  | LargeDependenceEmphasis              | 4.126637555  |
| wavelet-HHH | gldm  | LargeDependenceLowGrayLevelEmphasis  | 0.046468234  |
| wavelet-HHH | gldm  | DependenceVariance                   | 0.936747964  |
| wavelet-HHH | gldm  | LargeDependenceHighGrayLevelEmphasis | 730.349345   |
| wavelet-HHH | gldm  | SmallDependenceLowGrayLevelEmphasis  | 0.01611611   |
| wavelet-HHH | gldm  | LowGrayLevelEmphasis                 | 0.020068368  |
| wavelet-HHH | glcm  | JointAverage                         | 12.35602391  |
| wavelet-HHH | glcm  | SumAverage                           | 24.71204782  |
| wavelet-HHH | glcm  | JointEntropy                         | 7.309996017  |
| wavelet-HHH | glcm  | ClusterShade                         | -19.96851055 |
| wavelet-HHH | glcm  | MaximumProbability                   | 0.018677395  |
| wavelet-HHH | glcm  | Idmn                                 | 0.929927147  |
| wavelet-HHH | glcm  | JointEnergy                          | 0.007245723  |
| wavelet-HHH | glcm  | Contrast                             | 48.45131481  |
| wavelet-HHH | glcm  | DifferenceEntropy                    | 3.735027395  |
| wavelet-HHH | glcm  | InverseVariance                      | 0.162558926  |
| wavelet-HHH | glcm  | DifferenceVariance                   | 15.48721549  |
| wavelet-HHH | glcm  | Idn                                  | 0.823402954  |
| wavelet-HHH | glcm  | Idm                                  | 0.150303271  |
| wavelet-HHH | glcm  | Correlation                          | -0.03842058  |
| wavelet-HHH | glcm  | Autocorrelation                      | 151.7684958  |
| wavelet-HHH | glcm  | SumEntropy                           | 4.551973218  |
| wavelet-HHH | glcm  | SumSquares                           | 23.29915454  |
| wavelet-HHH | glcm  | ClusterProminence                    | 5338.050772  |
| wavelet-HHH | glcm  | Imc2                                 | 0.940857844  |
| wavelet-HHH | glcm  | Imc1                                 | -0.260042715 |

|             |            |                                  |              |
|-------------|------------|----------------------------------|--------------|
| wavelet-HHH | glcm       | DifferenceAverage                | 5.661632955  |
| wavelet-HHH | glcm       | Id                               | 0.24487308   |
| wavelet-HHH | glcm       | ClusterTendency                  | 44.74530337  |
| wavelet-HHH | firstorder | InterquartileRange               | 196.4605748  |
| wavelet-HHH | firstorder | Skewness                         | -0.142739201 |
| wavelet-HHH | firstorder | Uniformity                       | 0.060200988  |
| wavelet-HHH | firstorder | Median                           | 8.143461031  |
| wavelet-HHH | firstorder | Energy                           | 3344313.28   |
| wavelet-HHH | firstorder | RobustMeanAbsoluteDeviation      | 76.24228545  |
| wavelet-HHH | firstorder | MeanAbsoluteDeviation            | 101.0137383  |
| wavelet-HHH | firstorder | TotalEnergy                      | 90296458.56  |
| wavelet-HHH | firstorder | Maximum                          | 282.7454072  |
| wavelet-HHH | firstorder | RootMeanSquared                  | 120.8469616  |
| wavelet-HHH | firstorder | 90Percentile                     | 144.4079137  |
| wavelet-HHH | firstorder | Minimum                          | -293.7806799 |
| wavelet-HHH | firstorder | Entropy                          | 4.216351809  |
| wavelet-HHH | firstorder | Range                            | 576.5260871  |
| wavelet-HHH | firstorder | Variance                         | 14588.9249   |
| wavelet-HHH | firstorder | 10Percentile                     | -161.6253971 |
| wavelet-HHH | firstorder | Kurtosis                         | 2.275019301  |
| wavelet-HHH | firstorder | Mean                             | -3.88E+00    |
| wavelet-HHH | glrlm      | ShortRunLowGrayLevelEmphasis     | 0.020217097  |
| wavelet-HHH | glrlm      | GrayLevelVariance                | 23.86803449  |
| wavelet-HHH | glrlm      | LowGrayLevelRunEmphasis          | 0.020418694  |
| wavelet-HHH | glrlm      | GrayLevelNonUniformityNormalized | 0.059574557  |
| wavelet-HHH | glrlm      | RunVariance                      | 0.032271953  |
| wavelet-HHH | glrlm      | GrayLevelNonUniformity           | 13.23049714  |
| wavelet-HHH | glrlm      | LongRunEmphasis                  | 1.095887567  |
| wavelet-HHH | glrlm      | ShortRunHighGrayLevelEmphasis    | 171.8447883  |
| wavelet-HHH | glrlm      | RunLengthNonUniformity           | 209.1301492  |
| wavelet-HHH | glrlm      | ShortRunEmphasis                 | 0.977183125  |
| wavelet-HHH | glrlm      | LongRunHighGrayLevelEmphasis     | 192.6690441  |
| wavelet-HHH | glrlm      | RunPercentage                    | 0.969768223  |
| wavelet-HHH | glrlm      | LongRunLowGrayLevelEmphasis      | 0.021270934  |
| wavelet-HHH | glrlm      | RunEntropy                       | 4.373658226  |
| wavelet-HHH | glrlm      | HighGrayLevelRunEmphasis         | 175.853314   |
| wavelet-HHH | glrlm      | RunLengthNonUniformityNormalized | 0.941524441  |
| wavelet-HHH | glszm      | GrayLevelVariance                | 28.21117555  |
| wavelet-HHH | glszm      | ZoneVariance                     | 1.605219875  |
| wavelet-HHH | glszm      | GrayLevelNonUniformityNormalized | 0.05315097   |
| wavelet-HHH | glszm      | SizeZoneNonUniformityNormalized  | 0.565876039  |
| wavelet-HHH | glszm      | SizeZoneNonUniformity            | 86.01315789  |
| wavelet-HHH | glszm      | GrayLevelNonUniformity           | 8.078947368  |
| wavelet-HHH | glszm      | LargeAreaEmphasis                | 3.875        |
| wavelet-HHH | glszm      | SmallAreaHighGrayLevelEmphasis   | 139.6605394  |
| wavelet-HHH | glszm      | ZonePercentage                   | 0.663755459  |
| wavelet-HHH | glszm      | LargeAreaLowGrayLevelEmphasis    | 0.047646     |
| wavelet-HHH | glszm      | LargeAreaHighGrayLevelEmphasis   | 707.8684211  |
| wavelet-HHH | glszm      | HighGrayLevelZoneEmphasis        | 175.5460526  |
| wavelet-HHH | glszm      | SmallAreaEmphasis                | 0.780733679  |
| wavelet-HHH | glszm      | LowGrayLevelZoneEmphasis         | 0.025644032  |
| wavelet-HHH | glszm      | ZoneEntropy                      | 5.273182966  |
| wavelet-HHH | glszm      | SmallAreaLowGrayLevelEmphasis    | 0.023318396  |
| wavelet-HHH | ngtdm      | Coarseness                       | 0.019962508  |
| wavelet-HHH | ngtdm      | Complexity                       | 936.3846406  |

|             |            |                                      |              |
|-------------|------------|--------------------------------------|--------------|
| wavelet-HHH | ngtdm      | Strength                             | 3.47009526   |
| wavelet-HHH | ngtdm      | Contrast                             | 0.368515451  |
| wavelet-HHH | ngtdm      | Busyness                             | 0.184654956  |
| wavelet-HLL | gldm       | GrayLevelVariance                    | 52.18714365  |
| wavelet-HLL | gldm       | HighGrayLevelEmphasis                | 704.5545852  |
| wavelet-HLL | gldm       | DependenceEntropy                    | 5.826186363  |
| wavelet-HLL | gldm       | DependenceNonUniformity              | 81.66375546  |
| wavelet-HLL | gldm       | GrayLevelNonUniformity               | 10.84279476  |
| wavelet-HLL | gldm       | SmallDependenceEmphasis              | 0.571051977  |
| wavelet-HLL | gldm       | SmallDependenceHighGrayLevelEmphasis | 418.7202741  |
| wavelet-HLL | gldm       | DependenceNonUniformityNormalized    | 0.356610286  |
| wavelet-HLL | gldm       | LargeDependenceEmphasis              | 4.283842795  |
| wavelet-HLL | gldm       | LargeDependenceLowGrayLevelEmphasis  | 0.012678063  |
| wavelet-HLL | gldm       | DependenceVariance                   | 0.999675826  |
| wavelet-HLL | gldm       | LargeDependenceHighGrayLevelEmphasis | 2885.235808  |
| wavelet-HLL | gldm       | SmallDependenceLowGrayLevelEmphasis  | 0.005612326  |
| wavelet-HLL | gldm       | LowGrayLevelEmphasis                 | 0.006537379  |
| wavelet-HLL | glcm       | JointAverage                         | 24.99171467  |
| wavelet-HLL | glcm       | SumAverage                           | 49.98342934  |
| wavelet-HLL | glcm       | JointEntropy                         | 7.545062839  |
| wavelet-HLL | glcm       | ClusterShade                         | -19.25909767 |
| wavelet-HLL | glcm       | MaximumProbability                   | 0.016515045  |
| wavelet-HLL | glcm       | Idmn                                 | 0.970530041  |
| wavelet-HLL | glcm       | JointEnergy                          | 0.006075167  |
| wavelet-HLL | glcm       | Contrast                             | 84.71402011  |
| wavelet-HLL | glcm       | DifferenceEntropy                    | 4.034746006  |
| wavelet-HLL | glcm       | InverseVariance                      | 0.155691085  |
| wavelet-HLL | glcm       | DifferenceVariance                   | 35.58244962  |
| wavelet-HLL | glcm       | Idn                                  | 0.887926451  |
| wavelet-HLL | glcm       | Idm                                  | 0.144628244  |
| wavelet-HLL | glcm       | Correlation                          | 0.109788718  |
| wavelet-HLL | glcm       | Autocorrelation                      | 630.5174537  |
| wavelet-HLL | glcm       | SumEntropy                           | 5.034840781  |
| wavelet-HLL | glcm       | SumSquares                           | 48.21472064  |
| wavelet-HLL | glcm       | ClusterProminence                    | 51308.35845  |
| wavelet-HLL | glcm       | Imc2                                 | 0.981696672  |
| wavelet-HLL | glcm       | Imc1                                 | -0.364576004 |
| wavelet-HLL | glcm       | DifferenceAverage                    | 6.873987371  |
| wavelet-HLL | glcm       | Id                                   | 0.234015798  |
| wavelet-HLL | glcm       | ClusterTendency                      | 108.1448625  |
| wavelet-HLL | firstorder | InterquartileRange                   | 188.5250976  |
| wavelet-HLL | firstorder | Skewness                             | -0.020761896 |
| wavelet-HLL | firstorder | Uniformity                           | 0.047348449  |
| wavelet-HLL | firstorder | Median                               | -22.94844437 |
| wavelet-HLL | firstorder | Energy                               | 7572696.352  |
| wavelet-HLL | firstorder | RobustMeanAbsoluteDeviation          | 84.9212297   |
| wavelet-HLL | firstorder | MeanAbsoluteDeviation                | 134.2569865  |
| wavelet-HLL | firstorder | TotalEnergy                          | 204462801.5  |
| wavelet-HLL | firstorder | Maximum                              | 583.8214906  |
| wavelet-HLL | firstorder | RootMeanSquared                      | 181.8475818  |
| wavelet-HLL | firstorder | 90Percentile                         | 182.4242449  |
| wavelet-HLL | firstorder | Minimum                              | -639.3974347 |
| wavelet-HLL | firstorder | Entropy                              | 4.692356755  |
| wavelet-HLL | firstorder | Range                                | 1223.218925  |
| wavelet-HLL | firstorder | Variance                             | 32455.44689  |

|             |            |                                      |              |
|-------------|------------|--------------------------------------|--------------|
| wavelet-HLL | firstorder | 10Percentile                         | -245.948319  |
| wavelet-HLL | firstorder | Kurtosis                             | 4.093646538  |
| wavelet-HLL | firstorder | Mean                                 | -24.76077799 |
| wavelet-HLL | glrlm      | ShortRunLowGrayLevelEmphasis         | 0.006637973  |
| wavelet-HLL | glrlm      | GrayLevelVariance                    | 53.0190368   |
| wavelet-HLL | glrlm      | LowGrayLevelRunEmphasis              | 0.00668564   |
| wavelet-HLL | glrlm      | GrayLevelNonUniformityNormalized     | 0.04662868   |
| wavelet-HLL | glrlm      | RunVariance                          | 0.032579157  |
| wavelet-HLL | glrlm      | GrayLevelNonUniformity               | 10.34500281  |
| wavelet-HLL | glrlm      | LongRunEmphasis                      | 1.099108197  |
| wavelet-HLL | glrlm      | ShortRunHighGrayLevelEmphasis        | 689.8206727  |
| wavelet-HLL | glrlm      | RunLengthNonUniformity               | 208.4163295  |
| wavelet-HLL | glrlm      | ShortRunEmphasis                     | 0.976003646  |
| wavelet-HLL | glrlm      | LongRunHighGrayLevelEmphasis         | 771.5663413  |
| wavelet-HLL | glrlm      | RunPercentage                        | 0.968760497  |
| wavelet-HLL | glrlm      | LongRunLowGrayLevelEmphasis          | 0.006882254  |
| wavelet-HLL | glrlm      | RunEntropy                           | 4.838513418  |
| wavelet-HLL | glrlm      | HighGrayLevelRunEmphasis             | 705.8391852  |
| wavelet-HLL | glrlm      | RunLengthNonUniformityNormalized     | 0.938882542  |
| wavelet-HLL | glszm      | GrayLevelVariance                    | 63.00328947  |
| wavelet-HLL | glszm      | ZoneVariance                         | 1.249956717  |
| wavelet-HLL | glszm      | GrayLevelNonUniformityNormalized     | 0.041118421  |
| wavelet-HLL | glszm      | SizeZoneNonUniformityNormalized      | 0.539646814  |
| wavelet-HLL | glszm      | SizeZoneNonUniformity                | 82.02631579  |
| wavelet-HLL | glszm      | GrayLevelNonUniformity               | 6.25         |
| wavelet-HLL | glszm      | LargeAreaEmphasis                    | 3.519736842  |
| wavelet-HLL | glszm      | SmallAreaHighGrayLevelEmphasis       | 565.9995121  |
| wavelet-HLL | glszm      | ZonePercentage                       | 0.663755459  |
| wavelet-HLL | glszm      | LargeAreaLowGrayLevelEmphasis        | 0.013542082  |
| wavelet-HLL | glszm      | LargeAreaHighGrayLevelEmphasis       | 2378.611842  |
| wavelet-HLL | glszm      | HighGrayLevelZoneEmphasis            | 726.0657895  |
| wavelet-HLL | glszm      | SmallAreaEmphasis                    | 0.761739766  |
| wavelet-HLL | glszm      | LowGrayLevelZoneEmphasis             | 0.008796899  |
| wavelet-HLL | glszm      | ZoneEntropy                          | 5.662079942  |
| wavelet-HLL | glszm      | SmallAreaLowGrayLevelEmphasis        | 0.008235072  |
| wavelet-HLL | ngtdm      | Coarseness                           | 0.027694143  |
| wavelet-HLL | ngtdm      | Complexity                           | 2726.256053  |
| wavelet-HLL | ngtdm      | Strength                             | 13.34386988  |
| wavelet-HLL | ngtdm      | Contrast                             | 0.382932079  |
| wavelet-HLL | ngtdm      | Busyness                             | 0.039432781  |
| wavelet-LHL | gldm       | GrayLevelVariance                    | 284.2854255  |
| wavelet-LHL | gldm       | HighGrayLevelEmphasis                | 2463.829694  |
| wavelet-LHL | gldm       | DependenceEntropy                    | 6.417098945  |
| wavelet-LHL | gldm       | DependenceNonUniformity              | 123.9781659  |
| wavelet-LHL | gldm       | GrayLevelNonUniformity               | 5            |
| wavelet-LHL | gldm       | SmallDependenceEmphasis              | 0.761917758  |
| wavelet-LHL | gldm       | SmallDependenceHighGrayLevelEmphasis | 1956.202723  |
| wavelet-LHL | gldm       | DependenceNonUniformityNormalized    | 0.541389371  |
| wavelet-LHL | gldm       | LargeDependenceEmphasis              | 2.467248908  |
| wavelet-LHL | gldm       | LargeDependenceLowGrayLevelEmphasis  | 0.006600497  |
| wavelet-LHL | gldm       | DependenceVariance                   | 0.502355028  |
| wavelet-LHL | gldm       | LargeDependenceHighGrayLevelEmphasis | 5522.790393  |
| wavelet-LHL | gldm       | SmallDependenceLowGrayLevelEmphasis  | 0.005141681  |
| wavelet-LHL | gldm       | LowGrayLevelEmphasis                 | 0.005366936  |
| wavelet-LHL | glcm       | JointAverage                         | 45.65463911  |

|             |            |                                  |              |
|-------------|------------|----------------------------------|--------------|
| wavelet-LHL | glcm       | SumAverage                       | 91.30927821  |
| wavelet-LHL | glcm       | JointEntropy                     | 7.975305263  |
| wavelet-LHL | glcm       | ClusterShade                     | 1969.137293  |
| wavelet-LHL | glcm       | MaximumProbability               | 0.009932211  |
| wavelet-LHL | glcm       | Idmn                             | 0.94236138   |
| wavelet-LHL | glcm       | JointEnergy                      | 0.004171588  |
| wavelet-LHL | glcm       | Contrast                         | 554.8458059  |
| wavelet-LHL | glcm       | DifferenceEntropy                | 5.056207224  |
| wavelet-LHL | glcm       | InverseVariance                  | 0.067515581  |
| wavelet-LHL | glcm       | DifferenceVariance               | 222.8835694  |
| wavelet-LHL | glcm       | Idn                              | 0.850726773  |
| wavelet-LHL | glcm       | Idm                              | 0.06795877   |
| wavelet-LHL | glcm       | Correlation                      | 0.056728296  |
| wavelet-LHL | glcm       | Autocorrelation                  | 2107.264338  |
| wavelet-LHL | glcm       | SumEntropy                       | 5.930133284  |
| wavelet-LHL | glcm       | SumSquares                       | 300.0265581  |
| wavelet-LHL | glcm       | ClusterProminence                | 1411717.795  |
| wavelet-LHL | glcm       | Imc2                             | 0.999438249  |
| wavelet-LHL | glcm       | Imc1                             | -0.600189491 |
| wavelet-LHL | glcm       | DifferenceAverage                | 17.31236879  |
| wavelet-LHL | glcm       | Id                               | 0.135703834  |
| wavelet-LHL | glcm       | ClusterTendency                  | 645.2604264  |
| wavelet-LHL | firstorder | InterquartileRange               | 550.2627659  |
| wavelet-LHL | firstorder | Skewness                         | 0.104270767  |
| wavelet-LHL | firstorder | Uniformity                       | 0.021834061  |
| wavelet-LHL | firstorder | Median                           | -121.5746126 |
| wavelet-LHL | firstorder | Energy                           | 41660204.22  |
| wavelet-LHL | firstorder | RobustMeanAbsoluteDeviation      | 240.210853   |
| wavelet-LHL | firstorder | MeanAbsoluteDeviation            | 339.3921954  |
| wavelet-LHL | firstorder | TotalEnergy                      | 1124825514   |
| wavelet-LHL | firstorder | Maximum                          | 944.9131106  |
| wavelet-LHL | firstorder | RootMeanSquared                  | 426.5234919  |
| wavelet-LHL | firstorder | 90Percentile                     | 533.6424114  |
| wavelet-LHL | firstorder | Minimum                          | -1218.028981 |
| wavelet-LHL | firstorder | Entropy                          | 5.783728833  |
| wavelet-LHL | firstorder | Range                            | 2162.942091  |
| wavelet-LHL | firstorder | Variance                         | 177105.9764  |
| wavelet-LHL | firstorder | 10Percentile                     | -569.8033968 |
| wavelet-LHL | firstorder | Kurtosis                         | 2.742009644  |
| wavelet-LHL | firstorder | Mean                             | -69.39965961 |
| wavelet-LHL | glrlm      | ShortRunLowGrayLevelEmphasis     | 0.005427397  |
| wavelet-LHL | glrlm      | GrayLevelVariance                | 285.1642235  |
| wavelet-LHL | glrlm      | LowGrayLevelRunEmphasis          | 0.005437845  |
| wavelet-LHL | glrlm      | GrayLevelNonUniformityNormalized | 0.021606201  |
| wavelet-LHL | glrlm      | RunVariance                      | 0.01544175   |
| wavelet-LHL | glrlm      | GrayLevelNonUniformity           | 4.871613221  |
| wavelet-LHL | glrlm      | LongRunEmphasis                  | 1.047423139  |
| wavelet-LHL | glrlm      | ShortRunHighGrayLevelEmphasis    | 2444.160207  |
| wavelet-LHL | glrlm      | RunLengthNonUniformity           | 218.5476248  |
| wavelet-LHL | glrlm      | ShortRunEmphasis                 | 0.988144215  |
| wavelet-LHL | glrlm      | LongRunHighGrayLevelEmphasis     | 2569.768064  |
| wavelet-LHL | glrlm      | RunPercentage                    | 0.984548203  |
| wavelet-LHL | glrlm      | LongRunLowGrayLevelEmphasis      | 0.005479636  |
| wavelet-LHL | glrlm      | RunEntropy                       | 5.845281815  |
| wavelet-LHL | glrlm      | HighGrayLevelRunEmphasis         | 2469.281778  |

|             |       |                                      |              |
|-------------|-------|--------------------------------------|--------------|
| wavelet-LHL | glrlm | RunLengthNonUniformityNormalized     | 0.969116499  |
| wavelet-LHL | glszm | GrayLevelVariance                    | 298.292602   |
| wavelet-LHL | glszm | ZoneVariance                         | 0.473619492  |
| wavelet-LHL | glszm | GrayLevelNonUniformityNormalized     | 0.019302811  |
| wavelet-LHL | glszm | SizeZoneNonUniformityNormalized      | 0.743258315  |
| wavelet-LHL | glszm | SizeZoneNonUniformity                | 138.9893048  |
| wavelet-LHL | glszm | GrayLevelNonUniformity               | 3.609625668  |
| wavelet-LHL | glszm | LargeAreaEmphasis                    | 1.973262032  |
| wavelet-LHL | glszm | SmallAreaHighGrayLevelEmphasis       | 2297.841986  |
| wavelet-LHL | glszm | ZonePercentage                       | 0.816593886  |
| wavelet-LHL | glszm | LargeAreaLowGrayLevelEmphasis        | 0.007190675  |
| wavelet-LHL | glszm | LargeAreaHighGrayLevelEmphasis       | 4429.57754   |
| wavelet-LHL | glszm | HighGrayLevelZoneEmphasis            | 2553.272727  |
| wavelet-LHL | glszm | SmallAreaEmphasis                    | 0.884618241  |
| wavelet-LHL | glszm | LowGrayLevelZoneEmphasis             | 0.006367149  |
| wavelet-LHL | glszm | ZoneEntropy                          | 6.262657915  |
| wavelet-LHL | glszm | SmallAreaLowGrayLevelEmphasis        | 0.006249828  |
| wavelet-LHL | ngtdm | Coarseness                           | 0.021154984  |
| wavelet-LHL | ngtdm | Complexity                           | 23404.20505  |
| wavelet-LHL | ngtdm | Strength                             | 36.67600574  |
| wavelet-LHL | ngtdm | Contrast                             | 1.494589625  |
| wavelet-LHL | ngtdm | Busyness                             | 0.01855175   |
| wavelet-LHH | gldm  | GrayLevelVariance                    | 112.8015103  |
| wavelet-LHH | gldm  | HighGrayLevelEmphasis                | 1189.157205  |
| wavelet-LHH | gldm  | DependenceEntropy                    | 5.941946107  |
| wavelet-LHH | gldm  | DependenceNonUniformity              | 121.1135371  |
| wavelet-LHH | gldm  | GrayLevelNonUniformity               | 6.930131004  |
| wavelet-LHH | gldm  | SmallDependenceEmphasis              | 0.744207909  |
| wavelet-LHH | gldm  | SmallDependenceHighGrayLevelEmphasis | 881.9164544  |
| wavelet-LHH | gldm  | DependenceNonUniformityNormalized    | 0.528880075  |
| wavelet-LHH | gldm  | LargeDependenceEmphasis              | 2.266375546  |
| wavelet-LHH | gldm  | LargeDependenceLowGrayLevelEmphasis  | 0.00850831   |
| wavelet-LHH | gldm  | DependenceVariance                   | 0.350145878  |
| wavelet-LHH | gldm  | LargeDependenceHighGrayLevelEmphasis | 2645.471616  |
| wavelet-LHH | gldm  | SmallDependenceLowGrayLevelEmphasis  | 0.00674597   |
| wavelet-LHH | gldm  | LowGrayLevelEmphasis                 | 0.007038767  |
| wavelet-LHH | glcm  | JointAverage                         | 32.93835229  |
| wavelet-LHH | glcm  | SumAverage                           | 65.87670458  |
| wavelet-LHH | glcm  | JointEntropy                         | 7.881431566  |
| wavelet-LHH | glcm  | ClusterShade                         | -167.4921957 |
| wavelet-LHH | glcm  | MaximumProbability                   | 0.011056178  |
| wavelet-LHH | glcm  | Idmn                                 | 0.944695274  |
| wavelet-LHH | glcm  | JointEnergy                          | 0.004556787  |
| wavelet-LHH | glcm  | Contrast                             | 231.8781458  |
| wavelet-LHH | glcm  | DifferenceEntropy                    | 4.68534504   |
| wavelet-LHH | glcm  | InverseVariance                      | 0.09280335   |
| wavelet-LHH | glcm  | DifferenceVariance                   | 84.741347    |
| wavelet-LHH | glcm  | Idn                                  | 0.846694546  |
| wavelet-LHH | glcm  | Idm                                  | 0.08210201   |
| wavelet-LHH | glcm  | Correlation                          | -0.053395996 |
| wavelet-LHH | glcm  | Autocorrelation                      | 1078.967897  |
| wavelet-LHH | glcm  | SumEntropy                           | 5.395076542  |
| wavelet-LHH | glcm  | SumSquares                           | 109.8787048  |
| wavelet-LHH | glcm  | ClusterProminence                    | 144296.5639  |
| wavelet-LHH | glcm  | lmc2                                 | 0.997218775  |

|             |            |                                  |              |
|-------------|------------|----------------------------------|--------------|
| wavelet-LHH | glcm       | Imc1                             | -0.499224867 |
| wavelet-LHH | glcm       | DifferenceAverage                | 11.82667639  |
| wavelet-LHH | glcm       | Id                               | 0.158771137  |
| wavelet-LHH | glcm       | ClusterTendency                  | 207.6366735  |
| wavelet-LHH | firstorder | InterquartileRange               | 349.9476913  |
| wavelet-LHH | firstorder | Skewness                         | -0.084175037 |
| wavelet-LHH | firstorder | Uniformity                       | 0.030262581  |
| wavelet-LHH | firstorder | Median                           | 5.936245045  |
| wavelet-LHH | firstorder | Energy                           | 16170743.92  |
| wavelet-LHH | firstorder | RobustMeanAbsoluteDeviation      | 141.5680658  |
| wavelet-LHH | firstorder | MeanAbsoluteDeviation            | 208.173053   |
| wavelet-LHH | firstorder | TotalEnergy                      | 436610085.8  |
| wavelet-LHH | firstorder | Maximum                          | 673.1167038  |
| wavelet-LHH | firstorder | RootMeanSquared                  | 265.7340819  |
| wavelet-LHH | firstorder | 90Percentile                     | 358.1598634  |
| wavelet-LHH | firstorder | Minimum                          | -794.1927272 |
| wavelet-LHH | firstorder | Entropy                          | 5.297895429  |
| wavelet-LHH | firstorder | Range                            | 1467.309431  |
| wavelet-LHH | firstorder | Variance                         | 70562.24043  |
| wavelet-LHH | firstorder | 10Percentile                     | -330.2358655 |
| wavelet-LHH | firstorder | Kurtosis                         | 3.173891777  |
| wavelet-LHH | firstorder | Mean                             | 7.236147607  |
| wavelet-LHH | glrlm      | ShortRunLowGrayLevelEmphasis     | 0.007114505  |
| wavelet-LHH | glrlm      | GrayLevelVariance                | 113.3281602  |
| wavelet-LHH | glrlm      | LowGrayLevelRunEmphasis          | 0.007127589  |
| wavelet-LHH | glrlm      | GrayLevelNonUniformityNormalized | 0.030144711  |
| wavelet-LHH | glrlm      | RunVariance                      | 0.014770407  |
| wavelet-LHH | glrlm      | GrayLevelNonUniformity           | 6.801024045  |
| wavelet-LHH | glrlm      | LongRunEmphasis                  | 1.04529173   |
| wavelet-LHH | glrlm      | ShortRunHighGrayLevelEmphasis    | 1176.113211  |
| wavelet-LHH | glrlm      | RunLengthNonUniformity           | 218.9914605  |
| wavelet-LHH | glrlm      | ShortRunEmphasis                 | 0.988677068  |
| wavelet-LHH | glrlm      | LongRunHighGrayLevelEmphasis     | 1242.535332  |
| wavelet-LHH | glrlm      | RunPercentage                    | 0.98522002   |
| wavelet-LHH | glrlm      | LongRunLowGrayLevelEmphasis      | 0.007179923  |
| wavelet-LHH | glrlm      | RunEntropy                       | 5.3585367    |
| wavelet-LHH | glrlm      | HighGrayLevelRunEmphasis         | 1189.397635  |
| wavelet-LHH | glrlm      | RunLengthNonUniformityNormalized | 0.970459187  |
| wavelet-LHH | glszm      | GrayLevelVariance                | 120.3676399  |
| wavelet-LHH | glszm      | ZoneVariance                     | 0.281106123  |
| wavelet-LHH | glszm      | GrayLevelNonUniformityNormalized | 0.028854128  |
| wavelet-LHH | glszm      | SizeZoneNonUniformityNormalized  | 0.69241328   |
| wavelet-LHH | glszm      | SizeZoneNonUniformity            | 129.4812834  |
| wavelet-LHH | glszm      | GrayLevelNonUniformity           | 5.395721925  |
| wavelet-LHH | glszm      | LargeAreaEmphasis                | 1.780748663  |
| wavelet-LHH | glszm      | SmallAreaHighGrayLevelEmphasis   | 1016.024695  |
| wavelet-LHH | glszm      | ZonePercentage                   | 0.816593886  |
| wavelet-LHH | glszm      | LargeAreaLowGrayLevelEmphasis    | 0.009251764  |
| wavelet-LHH | glszm      | LargeAreaHighGrayLevelEmphasis   | 2108.754011  |
| wavelet-LHH | glszm      | HighGrayLevelZoneEmphasis        | 1188.294118  |
| wavelet-LHH | glszm      | SmallAreaEmphasis                | 0.858660131  |
| wavelet-LHH | glszm      | LowGrayLevelZoneEmphasis         | 0.008362953  |
| wavelet-LHH | glszm      | ZoneEntropy                      | 5.832468225  |
| wavelet-LHH | glszm      | SmallAreaLowGrayLevelEmphasis    | 0.008201278  |
| wavelet-LHH | ngtdm      | Coarseness                       | 0.023432145  |



|             |            |                                      |              |
|-------------|------------|--------------------------------------|--------------|
| wavelet-LHH | ngtdm      | Complexity                           | 8573.90575   |
| wavelet-LHH | ngtdm      | Strength                             | 17.76502713  |
| wavelet-LHH | ngtdm      | Contrast                             | 0.790567553  |
| wavelet-LHH | ngtdm      | Busyness                             | 0.029228325  |
| wavelet-LLH | gldm       | GrayLevelVariance                    | 156.5739021  |
| wavelet-LLH | gldm       | HighGrayLevelEmphasis                | 1175.270742  |
| wavelet-LLH | gldm       | DependenceEntropy                    | 6.187856944  |
| wavelet-LLH | gldm       | DependenceNonUniformity              | 114.9912664  |
| wavelet-LLH | gldm       | GrayLevelNonUniformity               | 6.013100437  |
| wavelet-LLH | gldm       | SmallDependenceEmphasis              | 0.728697234  |
| wavelet-LLH | gldm       | SmallDependenceHighGrayLevelEmphasis | 829.8375934  |
| wavelet-LLH | gldm       | DependenceNonUniformityNormalized    | 0.502145268  |
| wavelet-LLH | gldm       | LargeDependenceEmphasis              | 2.650655022  |
| wavelet-LLH | gldm       | LargeDependenceLowGrayLevelEmphasis  | 0.008490551  |
| wavelet-LLH | gldm       | DependenceVariance                   | 0.536107244  |
| wavelet-LLH | gldm       | LargeDependenceHighGrayLevelEmphasis | 3164.877729  |
| wavelet-LLH | gldm       | SmallDependenceLowGrayLevelEmphasis  | 0.005998025  |
| wavelet-LLH | gldm       | LowGrayLevelEmphasis                 | 0.006379842  |
| wavelet-LLH | glcm       | JointAverage                         | 31.3478882   |
| wavelet-LLH | glcm       | SumAverage                           | 62.69577641  |
| wavelet-LLH | glcm       | JointEntropy                         | 7.955820113  |
| wavelet-LLH | glcm       | ClusterShade                         | 1261.509341  |
| wavelet-LLH | glcm       | MaximumProbability                   | 0.009701234  |
| wavelet-LLH | glcm       | Idmn                                 | 0.947761748  |
| wavelet-LLH | glcm       | JointEnergy                          | 0.004255153  |
| wavelet-LLH | glcm       | Contrast                             | 302.0904807  |
| wavelet-LLH | glcm       | DifferenceEntropy                    | 4.834596681  |
| wavelet-LLH | glcm       | InverseVariance                      | 0.082098343  |
| wavelet-LLH | glcm       | DifferenceVariance                   | 106.1171615  |
| wavelet-LLH | glcm       | Idn                                  | 0.850286945  |
| wavelet-LLH | glcm       | Idm                                  | 0.078897333  |
| wavelet-LLH | glcm       | Correlation                          | 0.083202438  |
| wavelet-LLH | glcm       | Autocorrelation                      | 997.1630517  |
| wavelet-LLH | glcm       | SumEntropy                           | 5.721498559  |
| wavelet-LLH | glcm       | SumSquares                           | 165.2388891  |
| wavelet-LLH | glcm       | ClusterProminence                    | 398298.5882  |
| wavelet-LLH | glcm       | Imc2                                 | 0.998397997  |
| wavelet-LLH | glcm       | Imc1                                 | -0.536239961 |
| wavelet-LLH | glcm       | DifferenceAverage                    | 13.5855822   |
| wavelet-LLH | glcm       | Id                                   | 0.149863585  |
| wavelet-LLH | glcm       | ClusterTendency                      | 358.8650758  |
| wavelet-LLH | firstorder | InterquartileRange                   | 418.6348968  |
| wavelet-LLH | firstorder | Skewness                             | 0.147010565  |
| wavelet-LLH | firstorder | Uniformity                           | 0.026258081  |
| wavelet-LLH | firstorder | Median                               | -64.71036719 |
| wavelet-LLH | firstorder | Energy                               | 23358075.98  |
| wavelet-LLH | firstorder | RobustMeanAbsoluteDeviation          | 170.4947903  |
| wavelet-LLH | firstorder | MeanAbsoluteDeviation                | 247.1367908  |
| wavelet-LLH | firstorder | TotalEnergy                          | 630668051.5  |
| wavelet-LLH | firstorder | Maximum                              | 876.0222784  |
| wavelet-LLH | firstorder | RootMeanSquared                      | 319.3749079  |
| wavelet-LLH | firstorder | 90Percentile                         | 347.1502292  |
| wavelet-LLH | firstorder | Minimum                              | -843.9945741 |
| wavelet-LLH | firstorder | Entropy                              | 5.470222157  |
| wavelet-LLH | firstorder | Range                                | 1720.016853  |

|             |            |                                      |              |
|-------------|------------|--------------------------------------|--------------|
| wavelet-LLH | firstorder | Variance                             | 97824.46013  |
| wavelet-LLH | firstorder | 10Percentile                         | -490.255685  |
| wavelet-LLH | firstorder | Kurtosis                             | 2.805065246  |
| wavelet-LLH | firstorder | Mean                                 | -64.62098475 |
| wavelet-LLH | glrlm      | ShortRunLowGrayLevelEmphasis         | 0.006453374  |
| wavelet-LLH | glrlm      | GrayLevelVariance                    | 157.783895   |
| wavelet-LLH | glrlm      | LowGrayLevelRunEmphasis              | 0.006470738  |
| wavelet-LLH | glrlm      | GrayLevelNonUniformityNormalized     | 0.025986049  |
| wavelet-LLH | glrlm      | RunVariance                          | 0.019543964  |
| wavelet-LLH | glrlm      | GrayLevelNonUniformity               | 5.847401496  |
| wavelet-LLH | glrlm      | LongRunEmphasis                      | 1.05611905   |
| wavelet-LLH | glrlm      | ShortRunHighGrayLevelEmphasis        | 1158.163769  |
| wavelet-LLH | glrlm      | RunLengthNonUniformity               | 217.6582472  |
| wavelet-LLH | glrlm      | ShortRunEmphasis                     | 0.987135852  |
| wavelet-LLH | glrlm      | LongRunHighGrayLevelEmphasis         | 1243.06974   |
| wavelet-LLH | glrlm      | RunPercentage                        | 0.982532751  |
| wavelet-LLH | glrlm      | LongRunLowGrayLevelEmphasis          | 0.006544744  |
| wavelet-LLH | glrlm      | RunEntropy                           | 5.540998173  |
| wavelet-LLH | glrlm      | HighGrayLevelRunEmphasis             | 1174.190092  |
| wavelet-LLH | glrlm      | RunLengthNonUniformityNormalized     | 0.966976235  |
| wavelet-LLH | glszm      | GrayLevelVariance                    | 171.8723584  |
| wavelet-LLH | glszm      | ZoneVariance                         | 0.664080425  |
| wavelet-LLH | glszm      | GrayLevelNonUniformityNormalized     | 0.024091293  |
| wavelet-LLH | glszm      | SizeZoneNonUniformityNormalized      | 0.698164473  |
| wavelet-LLH | glszm      | SizeZoneNonUniformity                | 127.0659341  |
| wavelet-LLH | glszm      | GrayLevelNonUniformity               | 4.384615385  |
| wavelet-LLH | glszm      | LargeAreaEmphasis                    | 2.247252747  |
| wavelet-LLH | glszm      | SmallAreaHighGrayLevelEmphasis       | 971.2050733  |
| wavelet-LLH | glszm      | ZonePercentage                       | 0.794759825  |
| wavelet-LLH | glszm      | LargeAreaLowGrayLevelEmphasis        | 0.009181947  |
| wavelet-LLH | glszm      | LargeAreaHighGrayLevelEmphasis       | 2641.412088  |
| wavelet-LLH | glszm      | HighGrayLevelZoneEmphasis            | 1152.043956  |
| wavelet-LLH | glszm      | SmallAreaEmphasis                    | 0.861471306  |
| wavelet-LLH | glszm      | LowGrayLevelZoneEmphasis             | 0.007678927  |
| wavelet-LLH | glszm      | ZoneEntropy                          | 5.996042567  |
| wavelet-LLH | glszm      | SmallAreaLowGrayLevelEmphasis        | 0.007470284  |
| wavelet-LLH | ngtdm      | Coarseness                           | 0.023396818  |
| wavelet-LLH | ngtdm      | Complexity                           | 10847.14795  |
| wavelet-LLH | ngtdm      | Strength                             | 23.02192665  |
| wavelet-LLH | ngtdm      | Contrast                             | 0.985162322  |
| wavelet-LLH | ngtdm      | Busyness                             | 0.030726614  |
| wavelet-LLL | gldm       | GrayLevelVariance                    | 475.603707   |
| wavelet-LLL | gldm       | HighGrayLevelEmphasis                | 3446.091703  |
| wavelet-LLL | gldm       | DependenceEntropy                    | 6.589996885  |
| wavelet-LLL | gldm       | DependenceNonUniformity              | 138.1877729  |
| wavelet-LLL | gldm       | GrayLevelNonUniformity               | 3.593886463  |
| wavelet-LLL | gldm       | SmallDependenceEmphasis              | 0.803978651  |
| wavelet-LLL | gldm       | SmallDependenceHighGrayLevelEmphasis | 2660.711548  |
| wavelet-LLL | gldm       | DependenceNonUniformityNormalized    | 0.603440056  |
| wavelet-LLL | gldm       | LargeDependenceEmphasis              | 1.978165939  |
| wavelet-LLL | gldm       | LargeDependenceLowGrayLevelEmphasis  | 0.005557544  |
| wavelet-LLL | gldm       | DependenceVariance                   | 0.296104193  |
| wavelet-LLL | gldm       | LargeDependenceHighGrayLevelEmphasis | 7460.179039  |
| wavelet-LLL | gldm       | SmallDependenceLowGrayLevelEmphasis  | 0.005054493  |
| wavelet-LLL | gldm       | LowGrayLevelEmphasis                 | 0.005145149  |

|             |            |                                  |              |
|-------------|------------|----------------------------------|--------------|
| wavelet-LLL | glcm       | JointAverage                     | 60.11777686  |
| wavelet-LLL | glcm       | SumAverage                       | 120.2355537  |
| wavelet-LLL | glcm       | JointEntropy                     | 8.050064399  |
| wavelet-LLL | glcm       | ClusterShade                     | -7261.135056 |
| wavelet-LLL | glcm       | MaximumProbability               | 0.007442811  |
| wavelet-LLL | glcm       | Idmn                             | 0.949216116  |
| wavelet-LLL | glcm       | JointEnergy                      | 0.003888764  |
| wavelet-LLL | glcm       | Contrast                         | 595.3657595  |
| wavelet-LLL | glcm       | DifferenceEntropy                | 5.223971408  |
| wavelet-LLL | glcm       | InverseVariance                  | 0.047929247  |
| wavelet-LLL | glcm       | DifferenceVariance               | 188.3215512  |
| wavelet-LLL | glcm       | Idn                              | 0.848088449  |
| wavelet-LLL | glcm       | Idm                              | 0.048835962  |
| wavelet-LLL | glcm       | Correlation                      | 0.340803642  |
| wavelet-LLL | glcm       | Autocorrelation                  | 3762.915293  |
| wavelet-LLL | glcm       | SumEntropy                       | 6.243250246  |
| wavelet-LLL | glcm       | SumSquares                       | 445.1451586  |
| wavelet-LLL | glcm       | ClusterProminence                | 3318858.333  |
| wavelet-LLL | glcm       | Imc2                             | 0.999844717  |
| wavelet-LLL | glcm       | Imc1                             | -0.672858015 |
| wavelet-LLL | glcm       | DifferenceAverage                | 19.68529636  |
| wavelet-LLL | glcm       | Id                               | 0.108589344  |
| wavelet-LLL | glcm       | ClusterTendency                  | 1185.214875  |
| wavelet-LLL | firstorder | InterquartileRange               | 841.1918538  |
| wavelet-LLL | firstorder | Skewness                         | -0.022058388 |
| wavelet-LLL | firstorder | Uniformity                       | 0.015693827  |
| wavelet-LLL | firstorder | Median                           | -825.8627059 |
| wavelet-LLL | firstorder | Energy                           | 223835537.6  |
| wavelet-LLL | firstorder | RobustMeanAbsoluteDeviation      | 340.7714973  |
| wavelet-LLL | firstorder | MeanAbsoluteDeviation            | 455.7979529  |
| wavelet-LLL | firstorder | TotalEnergy                      | 6043559515   |
| wavelet-LLL | firstorder | Maximum                          | 333.6934808  |
| wavelet-LLL | firstorder | RootMeanSquared                  | 988.6595786  |
| wavelet-LLL | firstorder | 90Percentile                     | -59.43778046 |
| wavelet-LLL | firstorder | Minimum                          | -2171.273114 |
| wavelet-LLL | firstorder | Entropy                          | 6.168767695  |
| wavelet-LLL | firstorder | Range                            | 2504.966595  |
| wavelet-LLL | firstorder | Variance                         | 296864.3577  |
| wavelet-LLL | firstorder | 10Percentile                     | -1510.371193 |
| wavelet-LLL | firstorder | Kurtosis                         | 2.232852791  |
| wavelet-LLL | firstorder | Mean                             | -824.9747903 |
| wavelet-LLL | glrlm      | ShortRunLowGrayLevelEmphasis     | 0.005195936  |
| wavelet-LLL | glrlm      | GrayLevelVariance                | 476.7632294  |
| wavelet-LLL | glrlm      | LowGrayLevelRunEmphasis          | 0.005199748  |
| wavelet-LLL | glrlm      | GrayLevelNonUniformityNormalized | 0.015673571  |
| wavelet-LLL | glrlm      | RunVariance                      | 0.011417797  |
| wavelet-LLL | glrlm      | GrayLevelNonUniformity           | 3.548254918  |
| wavelet-LLL | glrlm      | LongRunEmphasis                  | 1.034799868  |
| wavelet-LLL | glrlm      | ShortRunHighGrayLevelEmphasis    | 3403.505719  |
| wavelet-LLL | glrlm      | RunLengthNonUniformity           | 221.2358567  |
| wavelet-LLL | glrlm      | ShortRunEmphasis                 | 0.991300033  |
| wavelet-LLL | glrlm      | LongRunHighGrayLevelEmphasis     | 3580.421068  |
| wavelet-LLL | glrlm      | RunPercentage                    | 0.988579106  |
| wavelet-LLL | glrlm      | LongRunLowGrayLevelEmphasis      | 0.005214999  |
| wavelet-LLL | glrlm      | RunEntropy                       | 6.202887367  |

|             |       |                                      |              |
|-------------|-------|--------------------------------------|--------------|
| wavelet-LLL | glrlm | HighGrayLevelRunEmphasis             | 3438.888788  |
| wavelet-LLL | glrlm | RunLengthNonUniformityNormalized     | 0.977164407  |
| wavelet-LLL | glszm | GrayLevelVariance                    | 489.0312041  |
| wavelet-LLL | glszm | ZoneVariance                         | 0.196964622  |
| wavelet-LLL | glszm | GrayLevelNonUniformityNormalized     | 0.015486099  |
| wavelet-LLL | glszm | SizeZoneNonUniformityNormalized      | 0.764693757  |
| wavelet-LLL | glszm | SizeZoneNonUniformity                | 150.6446701  |
| wavelet-LLL | glszm | GrayLevelNonUniformity               | 3.050761421  |
| wavelet-LLL | glszm | LargeAreaEmphasis                    | 1.54822335   |
| wavelet-LLL | glszm | SmallAreaHighGrayLevelEmphasis       | 2941.037789  |
| wavelet-LLL | glszm | ZonePercentage                       | 0.860262009  |
| wavelet-LLL | glszm | LargeAreaLowGrayLevelEmphasis        | 0.006143726  |
| wavelet-LLL | glszm | LargeAreaHighGrayLevelEmphasis       | 5597.994924  |
| wavelet-LLL | glszm | HighGrayLevelZoneEmphasis            | 3348.837563  |
| wavelet-LLL | glszm | SmallAreaEmphasis                    | 0.89678511   |
| wavelet-LLL | glszm | LowGrayLevelZoneEmphasis             | 0.00590774   |
| wavelet-LLL | glszm | ZoneEntropy                          | 6.492312703  |
| wavelet-LLL | glszm | SmallAreaLowGrayLevelEmphasis        | 0.005857899  |
| wavelet-LLL | ngtdm | Coarseness                           | 0.024075267  |
| wavelet-LLL | ngtdm | Complexity                           | 35478.12489  |
| wavelet-LLL | ngtdm | Strength                             | 65.16597564  |
| wavelet-LLL | ngtdm | Contrast                             | 1.762296154  |
| wavelet-LLL | ngtdm | Busyness                             | 0.011678846  |
| wavelet-HHL | gldm  | GrayLevelVariance                    | 40.4194428   |
| wavelet-HHL | gldm  | HighGrayLevelEmphasis                | 351.9650655  |
| wavelet-HHL | gldm  | DependenceEntropy                    | 5.724438656  |
| wavelet-HHL | gldm  | DependenceNonUniformity              | 90.10043668  |
| wavelet-HHL | gldm  | GrayLevelNonUniformity               | 11.27074236  |
| wavelet-HHL | gldm  | SmallDependenceEmphasis              | 0.625114022  |
| wavelet-HHL | gldm  | SmallDependenceHighGrayLevelEmphasis | 221.2568219  |
| wavelet-HHL | gldm  | DependenceNonUniformityNormalized    | 0.393451689  |
| wavelet-HHL | gldm  | LargeDependenceEmphasis              | 3.524017467  |
| wavelet-HHL | gldm  | LargeDependenceLowGrayLevelEmphasis  | 0.019612338  |
| wavelet-HHL | gldm  | DependenceVariance                   | 0.726797735  |
| wavelet-HHL | gldm  | LargeDependenceHighGrayLevelEmphasis | 1197.484716  |
| wavelet-HHL | gldm  | SmallDependenceLowGrayLevelEmphasis  | 0.008706392  |
| wavelet-HHL | gldm  | LowGrayLevelEmphasis                 | 0.010089401  |
| wavelet-HHL | glcm  | JointAverage                         | 17.94713257  |
| wavelet-HHL | glcm  | SumAverage                           | 35.89426514  |
| wavelet-HHL | glcm  | JointEntropy                         | 7.536985355  |
| wavelet-HHL | glcm  | ClusterShade                         | 273.2701154  |
| wavelet-HHL | glcm  | MaximumProbability                   | 0.015998214  |
| wavelet-HHL | glcm  | Idmn                                 | 0.958890162  |
| wavelet-HHL | glcm  | JointEnergy                          | 0.006113065  |
| wavelet-HHL | glcm  | Contrast                             | 85.33321413  |
| wavelet-HHL | glcm  | DifferenceEntropy                    | 4.061393013  |
| wavelet-HHL | glcm  | InverseVariance                      | 0.140670203  |
| wavelet-HHL | glcm  | DifferenceVariance                   | 33.13043435  |
| wavelet-HHL | glcm  | Idn                                  | 0.866093218  |
| wavelet-HHL | glcm  | Idm                                  | 0.129567336  |
| wavelet-HHL | glcm  | Correlation                          | -0.053946686 |
| wavelet-HHL | glcm  | Autocorrelation                      | 320.4115405  |
| wavelet-HHL | glcm  | SumEntropy                           | 4.809398247  |
| wavelet-HHL | glcm  | SumSquares                           | 40.82259248  |
| wavelet-HHL | glcm  | ClusterProminence                    | 27603.03109  |

|             |            |                                  |              |
|-------------|------------|----------------------------------|--------------|
| wavelet-HHL | glcm       | Imc2                             | 0.977526245  |
| wavelet-HHL | glcm       | Imc1                             | -0.345933672 |
| wavelet-HHL | glcm       | DifferenceAverage                | 7.106215119  |
| wavelet-HHL | glcm       | Id                               | 0.220237963  |
| wavelet-HHL | glcm       | ClusterTendency                  | 77.95715577  |
| wavelet-HHL | firstorder | InterquartileRange               | 191.0413356  |
| wavelet-HHL | firstorder | Skewness                         | 0.386232218  |
| wavelet-HHL | firstorder | Uniformity                       | 0.049217216  |
| wavelet-HHL | firstorder | Median                           | -1.516686594 |
| wavelet-HHL | firstorder | Energy                           | 5791942.3    |
| wavelet-HHL | firstorder | RobustMeanAbsoluteDeviation      | 84.38069884  |
| wavelet-HHL | firstorder | MeanAbsoluteDeviation            | 123.9486515  |
| wavelet-HHL | firstorder | TotalEnergy                      | 156382442.1  |
| wavelet-HHL | firstorder | Maximum                          | 602.4267242  |
| wavelet-HHL | firstorder | RootMeanSquared                  | 159.0356075  |
| wavelet-HHL | firstorder | 90Percentile                     | 208.2314454  |
| wavelet-HHL | firstorder | Minimum                          | -407.7261044 |
| wavelet-HHL | firstorder | Entropy                          | 4.57035566   |
| wavelet-HHL | firstorder | Range                            | 1010.152829  |
| wavelet-HHL | firstorder | Variance                         | 25278.3437   |
| wavelet-HHL | firstorder | 10Percentile                     | -184.4320705 |
| wavelet-HHL | firstorder | Kurtosis                         | 3.849710082  |
| wavelet-HHL | firstorder | Mean                             | 3.739084727  |
| wavelet-HHL | glrlm      | ShortRunLowGrayLevelEmphasis     | 0.010187438  |
| wavelet-HHL | glrlm      | GrayLevelVariance                | 40.97930187  |
| wavelet-HHL | glrlm      | LowGrayLevelRunEmphasis          | 0.01026029   |
| wavelet-HHL | glrlm      | GrayLevelNonUniformityNormalized | 0.048871822  |
| wavelet-HHL | glrlm      | RunVariance                      | 0.027262955  |
| wavelet-HHL | glrlm      | GrayLevelNonUniformity           | 10.9029407   |
| wavelet-HHL | glrlm      | LongRunEmphasis                  | 1.082043791  |
| wavelet-HHL | glrlm      | ShortRunHighGrayLevelEmphasis    | 345.4682176  |
| wavelet-HHL | glrlm      | RunLengthNonUniformity           | 211.9307705  |
| wavelet-HHL | glrlm      | ShortRunEmphasis                 | 0.980295374  |
| wavelet-HHL | glrlm      | LongRunHighGrayLevelEmphasis     | 380.0350675  |
| wavelet-HHL | glrlm      | RunPercentage                    | 0.974135035  |
| wavelet-HHL | glrlm      | LongRunLowGrayLevelEmphasis      | 0.010568157  |
| wavelet-HHL | glrlm      | RunEntropy                       | 4.691127241  |
| wavelet-HHL | glrlm      | HighGrayLevelRunEmphasis         | 352.2551564  |
| wavelet-HHL | glrlm      | RunLengthNonUniformityNormalized | 0.94952015   |
| wavelet-HHL | glszm      | GrayLevelVariance                | 49.0572123   |
| wavelet-HHL | glszm      | ZoneVariance                     | 0.927201883  |
| wavelet-HHL | glszm      | GrayLevelNonUniformityNormalized | 0.045252884  |
| wavelet-HHL | glszm      | SizeZoneNonUniformityNormalized  | 0.599475329  |
| wavelet-HHL | glszm      | SizeZoneNonUniformity            | 96.51552795  |
| wavelet-HHL | glszm      | GrayLevelNonUniformity           | 7.285714286  |
| wavelet-HHL | glszm      | LargeAreaEmphasis                | 2.950310559  |
| wavelet-HHL | glszm      | SmallAreaHighGrayLevelEmphasis   | 284.4137733  |
| wavelet-HHL | glszm      | ZonePercentage                   | 0.703056769  |
| wavelet-HHL | glszm      | LargeAreaLowGrayLevelEmphasis    | 0.019872414  |
| wavelet-HHL | glszm      | LargeAreaHighGrayLevelEmphasis   | 1029.838509  |
| wavelet-HHL | glszm      | HighGrayLevelZoneEmphasis        | 354.7639752  |
| wavelet-HHL | glszm      | SmallAreaEmphasis                | 0.802396912  |
| wavelet-HHL | glszm      | LowGrayLevelZoneEmphasis         | 0.012789175  |
| wavelet-HHL | glszm      | ZoneEntropy                      | 5.439652845  |
| wavelet-HHL | glszm      | SmallAreaLowGrayLevelEmphasis    | 0.012063279  |

|             |            |                                      |              |
|-------------|------------|--------------------------------------|--------------|
| wavelet-HHL | ngtdm      | Coarseness                           | 0.024079702  |
| wavelet-HHL | ngtdm      | Complexity                           | 2113.975504  |
| wavelet-HHL | ngtdm      | Strength                             | 8.358454022  |
| wavelet-HHL | ngtdm      | Contrast                             | 0.419545444  |
| wavelet-HHL | ngtdm      | Busyness                             | 0.081572808  |
| wavelet-HLH | gldm       | GrayLevelVariance                    | 26.34148853  |
| wavelet-HLH | gldm       | HighGrayLevelEmphasis                | 238.558952   |
| wavelet-HLH | gldm       | DependenceEntropy                    | 5.747129457  |
| wavelet-HLH | gldm       | DependenceNonUniformity              | 74.32751092  |
| wavelet-HLH | gldm       | GrayLevelNonUniformity               | 13.38427948  |
| wavelet-HLH | gldm       | SmallDependenceEmphasis              | 0.533510432  |
| wavelet-HLH | gldm       | SmallDependenceHighGrayLevelEmphasis | 130.0153578  |
| wavelet-HLH | gldm       | DependenceNonUniformityNormalized    | 0.324574283  |
| wavelet-HLH | gldm       | LargeDependenceEmphasis              | 4.737991266  |
| wavelet-HLH | gldm       | LargeDependenceLowGrayLevelEmphasis  | 0.035736552  |
| wavelet-HLH | gldm       | DependenceVariance                   | 1.062985069  |
| wavelet-HLH | gldm       | LargeDependenceHighGrayLevelEmphasis | 1092.79476   |
| wavelet-HLH | gldm       | SmallDependenceLowGrayLevelEmphasis  | 0.010355235  |
| wavelet-HLH | gldm       | LowGrayLevelEmphasis                 | 0.01356809   |
| wavelet-HLH | glcm       | JointAverage                         | 14.48743034  |
| wavelet-HLH | glcm       | SumAverage                           | 28.97486068  |
| wavelet-HLH | glcm       | JointEntropy                         | 7.361785555  |
| wavelet-HLH | glcm       | ClusterShade                         | -43.03826388 |
| wavelet-HLH | glcm       | MaximumProbability                   | 0.018869508  |
| wavelet-HLH | glcm       | Idmn                                 | 0.944413491  |
| wavelet-HLH | glcm       | JointEnergy                          | 0.007075597  |
| wavelet-HLH | glcm       | Contrast                             | 52.441079    |
| wavelet-HLH | glcm       | DifferenceEntropy                    | 3.779405413  |
| wavelet-HLH | glcm       | InverseVariance                      | 0.170316892  |
| wavelet-HLH | glcm       | DifferenceVariance                   | 19.63761977  |
| wavelet-HLH | glcm       | Idn                                  | 0.845537901  |
| wavelet-HLH | glcm       | Idm                                  | 0.162043517  |
| wavelet-HLH | glcm       | Correlation                          | -0.034401309 |
| wavelet-HLH | glcm       | Autocorrelation                      | 209.0545296  |
| wavelet-HLH | glcm       | SumEntropy                           | 4.593238097  |
| wavelet-HLH | glcm       | SumSquares                           | 25.37729742  |
| wavelet-HLH | glcm       | ClusterProminence                    | 8330.87214   |
| wavelet-HLH | glcm       | Imc2                                 | 0.955810653  |
| wavelet-HLH | glcm       | Imc1                                 | -0.289063661 |
| wavelet-HLH | glcm       | DifferenceAverage                    | 5.652723166  |
| wavelet-HLH | glcm       | Id                                   | 0.255441361  |
| wavelet-HLH | glcm       | ClusterTendency                      | 49.06811067  |
| wavelet-HLH | firstorder | InterquartileRange                   | 178.2336937  |
| wavelet-HLH | firstorder | Skewness                             | -0.034072513 |
| wavelet-HLH | firstorder | Uniformity                           | 0.058446635  |
| wavelet-HLH | firstorder | Median                               | 11.59614272  |
| wavelet-HLH | firstorder | Energy                               | 3750558.512  |
| wavelet-HLH | firstorder | RobustMeanAbsoluteDeviation          | 70.08139643  |
| wavelet-HLH | firstorder | MeanAbsoluteDeviation                | 101.602714   |
| wavelet-HLH | firstorder | TotalEnergy                          | 101265079.8  |
| wavelet-HLH | firstorder | Maximum                              | 334.6066097  |
| wavelet-HLH | firstorder | RootMeanSquared                      | 127.9765008  |
| wavelet-HLH | firstorder | 90Percentile                         | 152.8955438  |
| wavelet-HLH | firstorder | Minimum                              | -336.1648515 |
| wavelet-HLH | firstorder | Entropy                              | 4.341596035  |

|             |            |                                  |              |
|-------------|------------|----------------------------------|--------------|
| wavelet-HLH | firstorder | Range                            | 670.7714612  |
| wavelet-HLH | firstorder | Variance                         | 16373.18401  |
| wavelet-HLH | firstorder | 10Percentile                     | -168.5524751 |
| wavelet-HLH | firstorder | Kurtosis                         | 2.878234519  |
| wavelet-HLH | firstorder | Mean                             | 2.191062676  |
| wavelet-HLH | glrlm      | ShortRunLowGrayLevelEmphasis     | 0.01366871   |
| wavelet-HLH | glrlm      | GrayLevelVariance                | 26.86982119  |
| wavelet-HLH | glrlm      | LowGrayLevelRunEmphasis          | 0.013835991  |
| wavelet-HLH | glrlm      | GrayLevelNonUniformityNormalized | 0.057496589  |
| wavelet-HLH | glrlm      | RunVariance                      | 0.038698653  |
| wavelet-HLH | glrlm      | GrayLevelNonUniformity           | 12.70339198  |
| wavelet-HLH | glrlm      | LongRunEmphasis                  | 1.113943777  |
| wavelet-HLH | glrlm      | ShortRunHighGrayLevelEmphasis    | 232.6713843  |
| wavelet-HLH | glrlm      | RunLengthNonUniformity           | 206.1583993  |
| wavelet-HLH | glrlm      | ShortRunEmphasis                 | 0.973461945  |
| wavelet-HLH | glrlm      | LongRunHighGrayLevelEmphasis     | 264.9726205  |
| wavelet-HLH | glrlm      | RunPercentage                    | 0.964729594  |
| wavelet-HLH | glrlm      | LongRunLowGrayLevelEmphasis      | 0.014551661  |
| wavelet-HLH | glrlm      | RunEntropy                       | 4.5208246    |
| wavelet-HLH | glrlm      | HighGrayLevelRunEmphasis         | 238.8461833  |
| wavelet-HLH | glrlm      | RunLengthNonUniformityNormalized | 0.932727218  |
| wavelet-HLH | glszm      | GrayLevelVariance                | 34.52673407  |
| wavelet-HLH | glszm      | ZoneVariance                     | 2.192042654  |
| wavelet-HLH | glszm      | GrayLevelNonUniformityNormalized | 0.048740003  |
| wavelet-HLH | glszm      | SizeZoneNonUniformityNormalized  | 0.515718525  |
| wavelet-HLH | glszm      | SizeZoneNonUniformity            | 72.71631206  |
| wavelet-HLH | glszm      | GrayLevelNonUniformity           | 6.872340426  |
| wavelet-HLH | glszm      | LargeAreaEmphasis                | 4.829787234  |
| wavelet-HLH | glszm      | SmallAreaHighGrayLevelEmphasis   | 182.1891568  |
| wavelet-HLH | glszm      | ZonePercentage                   | 0.615720524  |
| wavelet-HLH | glszm      | LargeAreaLowGrayLevelEmphasis    | 0.038966515  |
| wavelet-HLH | glszm      | LargeAreaHighGrayLevelEmphasis   | 1134.680851  |
| wavelet-HLH | glszm      | HighGrayLevelZoneEmphasis        | 240.5815603  |
| wavelet-HLH | glszm      | SmallAreaEmphasis                | 0.745685579  |
| wavelet-HLH | glszm      | LowGrayLevelZoneEmphasis         | 0.018021231  |
| wavelet-HLH | glszm      | ZoneEntropy                      | 5.541103346  |
| wavelet-HLH | glszm      | SmallAreaLowGrayLevelEmphasis    | 0.015994321  |
| wavelet-HLH | ngtdm      | Coarseness                       | 0.025065082  |
| wavelet-HLH | ngtdm      | Complexity                       | 1210.131609  |
| wavelet-HLH | ngtdm      | Strength                         | 5.218333716  |
| wavelet-HLH | ngtdm      | Contrast                         | 0.299120411  |
| wavelet-HLH | ngtdm      | Busyness                         | 0.102575739  |

| Image type | Feature Class | Feature Name                         |                                                                                                                                                                                                                                                                                                                                                                                                                                              |
|------------|---------------|--------------------------------------|----------------------------------------------------------------------------------------------------------------------------------------------------------------------------------------------------------------------------------------------------------------------------------------------------------------------------------------------------------------------------------------------------------------------------------------------|
| general    | info          | BoundingBox                          | 4: RTSTRUCT: C99-DNU_segment_GTV MC<br>(1, 0, 1, 12, 20, 15)                                                                                                                                                                                                                                                                                                                                                                                 |
| general    | info          | EnabledImageTypes                    | {u'Original': {}, u'Wavelet': {}}                                                                                                                                                                                                                                                                                                                                                                                                            |
|            |               |                                      | {'distances': [1], 'additionalInfo': True,<br>'force2D': False, 'interpolator': 'sitkBSpline',<br>'resampledPixelSpacing': [3.0], 'label': 1,<br>'normalizeScale': 1, 'normalize': False,<br>'force2Ddimension': 0, 'removeOutliers': None,<br>'minimumROISize': None, u'binWidth': 25.0,<br>'minimumROIDimensions': 1, u'correctMask':<br>True, 'preCrop': False, u'symmetricalGLCM':<br>True, 'resegmentRange': None, 'padDistance':<br>5} |
| general    | info          | GeneralSettings                      | 95c016b9a444c09f38bdef05312c76fa41f9098                                                                                                                                                                                                                                                                                                                                                                                                      |
| general    | info          | ImageHash                            | 3                                                                                                                                                                                                                                                                                                                                                                                                                                            |
| general    | info          | ImageSpacing                         | (0.9765625000000002, 0.9765625000000002,<br>2.0)                                                                                                                                                                                                                                                                                                                                                                                             |
| general    | info          | MaskHash                             | a5ac659d156440f77416c651482d22b5893768                                                                                                                                                                                                                                                                                                                                                                                                       |
| general    | info          | NumpyVersion                         | 49                                                                                                                                                                                                                                                                                                                                                                                                                                           |
| general    | info          | PyWaveletVersion                     | 1.13.1                                                                                                                                                                                                                                                                                                                                                                                                                                       |
| general    | info          | SimpleITKVersion                     | 0.5.2                                                                                                                                                                                                                                                                                                                                                                                                                                        |
| general    | info          | Version                              | 1.1.0                                                                                                                                                                                                                                                                                                                                                                                                                                        |
| general    | info          | VolumeNum                            | 1.3.0.post102+g1b0eb74                                                                                                                                                                                                                                                                                                                                                                                                                       |
| general    | info          | VoxelNum                             | 1                                                                                                                                                                                                                                                                                                                                                                                                                                            |
| original   | shape         | Maximum3DDiameter                    | 1153                                                                                                                                                                                                                                                                                                                                                                                                                                         |
| original   | shape         | Maximum2DDiameterSlice               | 69.6491206                                                                                                                                                                                                                                                                                                                                                                                                                                   |
| original   | shape         | Sphericity                           | 45.79301257                                                                                                                                                                                                                                                                                                                                                                                                                                  |
| original   | shape         | MinorAxis                            | 0.713882521                                                                                                                                                                                                                                                                                                                                                                                                                                  |
| original   | shape         | Elongation                           | 31.15968893                                                                                                                                                                                                                                                                                                                                                                                                                                  |
| original   | shape         | SurfaceVolumeRatio                   | 0.507657389                                                                                                                                                                                                                                                                                                                                                                                                                                  |
| original   | shape         | Volume                               | 0.215340815                                                                                                                                                                                                                                                                                                                                                                                                                                  |
| original   | shape         | MajorAxis                            | 31131                                                                                                                                                                                                                                                                                                                                                                                                                                        |
| original   | shape         | SurfaceArea                          | 61.37936644                                                                                                                                                                                                                                                                                                                                                                                                                                  |
| original   | shape         | Flatness                             | 6703.774907                                                                                                                                                                                                                                                                                                                                                                                                                                  |
| original   | shape         | LeastAxis                            | 0.426392535                                                                                                                                                                                                                                                                                                                                                                                                                                  |
| original   | shape         | Maximum2DDiameterColumn              | 26.17170368                                                                                                                                                                                                                                                                                                                                                                                                                                  |
| original   | shape         | Maximum2DDiameterRow                 | 42.95346319                                                                                                                                                                                                                                                                                                                                                                                                                                  |
| original   | gldm          | GrayLevelVariance                    | 69.0651866                                                                                                                                                                                                                                                                                                                                                                                                                                   |
| original   | gldm          | HighGrayLevelEmphasis                | 25.79645843                                                                                                                                                                                                                                                                                                                                                                                                                                  |
| original   | gldm          | DependenceEntropy                    | 763.4865568                                                                                                                                                                                                                                                                                                                                                                                                                                  |
| original   | gldm          | DependenceNonUniformity              | 6.280861097                                                                                                                                                                                                                                                                                                                                                                                                                                  |
| original   | gldm          | GrayLevelNonUniformity               | 99.5793582                                                                                                                                                                                                                                                                                                                                                                                                                                   |
| original   | gldm          | SmallDependenceEmphasis              | 207.5429315                                                                                                                                                                                                                                                                                                                                                                                                                                  |
| original   | gldm          | SmallDependenceHighGrayLevelEmphasis | 0.248108387                                                                                                                                                                                                                                                                                                                                                                                                                                  |
| original   | gldm          | DependenceNonUniformityNormalized    | 134.7915687                                                                                                                                                                                                                                                                                                                                                                                                                                  |
| original   | gldm          | LargeDependenceEmphasis              | 0.086365445                                                                                                                                                                                                                                                                                                                                                                                                                                  |
| original   | gldm          | LargeDependenceLowGrayLevelEmphasis  | 76.49522984                                                                                                                                                                                                                                                                                                                                                                                                                                  |
| original   | gldm          | DependenceVariance                   | 0.088669874                                                                                                                                                                                                                                                                                                                                                                                                                                  |
| original   | gldm          | LargeDependenceHighGrayLevelEmphasis | 32.02379855                                                                                                                                                                                                                                                                                                                                                                                                                                  |
| original   | gldm          | SmallDependenceLowGrayLevelEmphasis  | 67695.31483                                                                                                                                                                                                                                                                                                                                                                                                                                  |
| original   | gldm          |                                      | 0.001848895                                                                                                                                                                                                                                                                                                                                                                                                                                  |



|          |            |                                  |              |
|----------|------------|----------------------------------|--------------|
| original | gldm       | LowGrayLevelEmphasis             | 0.002835349  |
| original | glcm       | JointAverage                     | 27.81675419  |
| original | glcm       | SumAverage                       | 55.63350839  |
| original | glcm       | JointEntropy                     | 5.654164968  |
| original | glcm       | ClusterShade                     | -803.723285  |
| original | glcm       | MaximumProbability               | 0.18371346   |
| original | glcm       | ldmn                             | 0.982210225  |
| original | glcm       | JointEnergy                      | 0.061870608  |
| original | glcm       | Contrast                         | 25.51127236  |
| original | glcm       | DifferenceEntropy                | 3.010844988  |
| original | glcm       | InverseVariance                  | 0.355551017  |
| original | glcm       | DifferenceVariance               | 17.5244483   |
| original | glcm       | ldn                              | 0.934786295  |
| original | glcm       | ldm                              | 0.467259422  |
| original | glcm       | Correlation                      | 0.327514089  |
| original | glcm       | Autocorrelation                  | 780.0700875  |
| original | glcm       | SumEntropy                       | 3.885021398  |
| original | glcm       | SumSquares                       | 19.04692581  |
| original | glcm       | ClusterProminence                | 21712.26344  |
| original | glcm       | lmc2                             | 0.698213272  |
| original | glcm       | lmc1                             | -0.113557184 |
| original | glcm       | DifferenceAverage                | 2.814677216  |
| original | glcm       | ld                               | 0.514970628  |
| original | glcm       | ClusterTendency                  | 50.67643086  |
| original | firstorder | InterquartileRange               | 76           |
| original | firstorder | Skewness                         | -2.274509425 |
| original | firstorder | Uniformity                       | 0.180002542  |
| original | firstorder | Median                           | 20           |
| original | firstorder | Energy                           | 19824639     |
| original | firstorder | RobustMeanAbsoluteDeviation      | 44.49100403  |
| original | firstorder | MeanAbsoluteDeviation            | 88.8314943   |
| original | firstorder | TotalEnergy                      | 535265253    |
| original | firstorder | Maximum                          | 161          |
| original | firstorder | RootMeanSquared                  | 131.1257515  |
| original | firstorder | 90Percentile                     | 48           |
| original | firstorder | Minimum                          | -678         |
| original | firstorder | Entropy                          | 3.295066662  |
| original | firstorder | Range                            | 839          |
| original | firstorder | Variance                         | 16056.81668  |
| original | firstorder | 10Percentile                     | -222         |
| original | firstorder | Kurtosis                         | 8.144535771  |
| original | firstorder | Mean                             | -33.72159584 |
| original | glrlm      | ShortRunLowGrayLevelEmphasis     | 0.003130237  |
| original | glrlm      | GrayLevelVariance                | 30.30561774  |
| original | glrlm      | LowGrayLevelRunEmphasis          | 0.003300805  |
| original | glrlm      | GrayLevelNonUniformityNormalized | 0.131761811  |
| original | glrlm      | RunVariance                      | 0.541433383  |
| original | glrlm      | GrayLevelNonUniformity           | 118.8820866  |
| original | glrlm      | LongRunEmphasis                  | 2.181340005  |
| original | glrlm      | ShortRunHighGrayLevelEmphasis    | 608.7878079  |
| original | glrlm      | RunLengthNonUniformity           | 625.5269732  |
| original | glrlm      | ShortRunEmphasis                 | 0.85735574   |
| original | glrlm      | LongRunHighGrayLevelEmphasis     | 1771.720479  |

|             |       |                                      |              |
|-------------|-------|--------------------------------------|--------------|
| original    | glrlm | RunPercentage                        | 0.781973447  |
| original    | glrlm | LongRunLowGrayLevelEmphasis          | 0.004668853  |
| original    | glrlm | RunEntropy                           | 4.390291391  |
| original    | glrlm | HighGrayLevelRunEmphasis             | 732.4254644  |
| original    | glrlm | RunLengthNonUniformityNormalized     | 0.693108349  |
| original    | glszm | GrayLevelVariance                    | 44.47495464  |
| original    | glszm | ZoneVariance                         | 684.1520441  |
| original    | glszm | GrayLevelNonUniformityNormalized     | 0.054546998  |
| original    | glszm | SizeZoneNonUniformityNormalized      | 0.563178389  |
| original    | glszm | SizeZoneNonUniformity                | 172.8957655  |
| original    | glszm | GrayLevelNonUniformity               | 16.74592834  |
| original    | glszm | LargeAreaEmphasis                    | 698.257329   |
| original    | glszm | SmallAreaHighGrayLevelEmphasis       | 390.7932554  |
| original    | glszm | ZonePercentage                       | 0.266261925  |
| original    | glszm | LargeAreaLowGrayLevelEmphasis        | 0.799252973  |
| original    | glszm | LargeAreaHighGrayLevelEmphasis       | 615729.7003  |
| original    | glszm | HighGrayLevelZoneEmphasis            | 537.980456   |
| original    | glszm | SmallAreaEmphasis                    | 0.778315832  |
| original    | glszm | LowGrayLevelZoneEmphasis             | 0.00714267   |
| original    | glszm | ZoneEntropy                          | 5.54299033   |
| original    | glszm | SmallAreaLowGrayLevelEmphasis        | 0.006692393  |
| original    | ngtdm | Coarseness                           | 0.003695135  |
| original    | ngtdm | Complexity                           | 1159.430884  |
| original    | ngtdm | Strength                             | 4.443832666  |
| original    | ngtdm | Contrast                             | 0.123463606  |
| original    | ngtdm | Busyness                             | 0.193735962  |
| wavelet-HHH | gldm  | GrayLevelVariance                    | 5.832137439  |
| wavelet-HHH | gldm  | HighGrayLevelEmphasis                | 187.0182134  |
| wavelet-HHH | gldm  | DependenceEntropy                    | 6.092978075  |
| wavelet-HHH | gldm  | DependenceNonUniformity              | 118.9150043  |
| wavelet-HHH | gldm  | GrayLevelNonUniformity               | 175.4058977  |
| wavelet-HHH | gldm  | SmallDependenceEmphasis              | 0.227478855  |
| wavelet-HHH | gldm  | SmallDependenceHighGrayLevelEmphasis | 44.31931945  |
| wavelet-HHH | gldm  | DependenceNonUniformityNormalized    | 0.103135303  |
| wavelet-HHH | gldm  | LargeDependenceEmphasis              | 41.25325239  |
| wavelet-HHH | gldm  | LargeDependenceLowGrayLevelEmphasis  | 0.232103361  |
| wavelet-HHH | gldm  | DependenceVariance                   | 14.93537354  |
| wavelet-HHH | gldm  | LargeDependenceHighGrayLevelEmphasis | 7520.411101  |
| wavelet-HHH | gldm  | SmallDependenceLowGrayLevelEmphasis  | 0.002953441  |
| wavelet-HHH | gldm  | LowGrayLevelEmphasis                 | 0.007436874  |
| wavelet-HHH | glcm  | JointAverage                         | 13.48771265  |
| wavelet-HHH | glcm  | SumAverage                           | 26.9754253   |
| wavelet-HHH | glcm  | JointEntropy                         | 5.929990547  |
| wavelet-HHH | glcm  | ClusterShade                         | -1.881142655 |
| wavelet-HHH | glcm  | MaximumProbability                   | 0.093804761  |
| wavelet-HHH | glcm  | ldmn                                 | 0.981795796  |
| wavelet-HHH | glcm  | JointEnergy                          | 0.03534072   |
| wavelet-HHH | glcm  | Contrast                             | 10.63157508  |
| wavelet-HHH | glcm  | DifferenceEntropy                    | 2.808427985  |
| wavelet-HHH | glcm  | InverseVariance                      | 0.365513984  |
| wavelet-HHH | glcm  | DifferenceVariance                   | 5.463740256  |
| wavelet-HHH | glcm  | ldn                                  | 0.917734214  |
| wavelet-HHH | glcm  | ldm                                  | 0.405470164  |

|             |            |                                  |              |
|-------------|------------|----------------------------------|--------------|
| wavelet-HHH | glcm       | Correlation                      | -0.038983228 |
| wavelet-HHH | glcm       | Autocorrelation                  | 181.6987027  |
| wavelet-HHH | glcm       | SumEntropy                       | 3.533542338  |
| wavelet-HHH | glcm       | SumSquares                       | 5.095710891  |
| wavelet-HHH | glcm       | ClusterProminence                | 543.4719787  |
| wavelet-HHH | glcm       | Imc2                             | 0.595547668  |
| wavelet-HHH | glcm       | Imc1                             | -0.073038939 |
| wavelet-HHH | glcm       | DifferenceAverage                | 2.253172774  |
| wavelet-HHH | glcm       | Id                               | 0.470504325  |
| wavelet-HHH | glcm       | ClusterTendency                  | 9.751268488  |
| wavelet-HHH | firstorder | InterquartileRange               | 52.74436131  |
| wavelet-HHH | firstorder | Skewness                         | -0.238270016 |
| wavelet-HHH | firstorder | Uniformity                       | 0.152130007  |
| wavelet-HHH | firstorder | Median                           | -1.048516664 |
| wavelet-HHH | firstorder | Energy                           | 4153879.661  |
| wavelet-HHH | firstorder | RobustMeanAbsoluteDeviation      | 24.29453245  |
| wavelet-HHH | firstorder | MeanAbsoluteDeviation            | 41.83926116  |
| wavelet-HHH | firstorder | TotalEnergy                      | 112154750.9  |
| wavelet-HHH | firstorder | Maximum                          | 235.0250426  |
| wavelet-HHH | firstorder | RootMeanSquared                  | 60.02225419  |
| wavelet-HHH | firstorder | 90Percentile                     | 69.13080191  |
| wavelet-HHH | firstorder | Minimum                          | -301.8246771 |
| wavelet-HHH | firstorder | Entropy                          | 3.181294567  |
| wavelet-HHH | firstorder | Range                            | 536.8497197  |
| wavelet-HHH | firstorder | Variance                         | 3601.787683  |
| wavelet-HHH | firstorder | 10Percentile                     | -68.87262923 |
| wavelet-HHH | firstorder | Kurtosis                         | 5.64725005   |
| wavelet-HHH | firstorder | Mean                             | -0.939848697 |
| wavelet-HHH | glrlm      | ShortRunLowGrayLevelEmphasis     | 0.007136584  |
| wavelet-HHH | glrlm      | GrayLevelVariance                | 6.691616141  |
| wavelet-HHH | glrlm      | LowGrayLevelRunEmphasis          | 0.00777562   |
| wavelet-HHH | glrlm      | GrayLevelNonUniformityNormalized | 0.131945217  |
| wavelet-HHH | glrlm      | RunVariance                      | 0.277258681  |
| wavelet-HHH | glrlm      | GrayLevelNonUniformity           | 128.0236989  |
| wavelet-HHH | glrlm      | LongRunEmphasis                  | 1.693771028  |
| wavelet-HHH | glrlm      | ShortRunHighGrayLevelEmphasis    | 167.3356202  |
| wavelet-HHH | glrlm      | RunLengthNonUniformity           | 725.5191962  |
| wavelet-HHH | glrlm      | ShortRunEmphasis                 | 0.887464121  |
| wavelet-HHH | glrlm      | LongRunHighGrayLevelEmphasis     | 314.4225181  |
| wavelet-HHH | glrlm      | RunPercentage                    | 0.841150177  |
| wavelet-HHH | glrlm      | LongRunLowGrayLevelEmphasis      | 0.011683559  |
| wavelet-HHH | glrlm      | RunEntropy                       | 3.974476997  |
| wavelet-HHH | glrlm      | HighGrayLevelRunEmphasis         | 187.8796434  |
| wavelet-HHH | glrlm      | RunLengthNonUniformityNormalized | 0.747407221  |
| wavelet-HHH | glszm      | GrayLevelVariance                | 16.57254122  |
| wavelet-HHH | glszm      | ZoneVariance                     | 530.5661688  |
| wavelet-HHH | glszm      | GrayLevelNonUniformityNormalized | 0.077926499  |
| wavelet-HHH | glszm      | SizeZoneNonUniformityNormalized  | 0.466810092  |
| wavelet-HHH | glszm      | SizeZoneNonUniformity            | 126.5055351  |
| wavelet-HHH | glszm      | GrayLevelNonUniformity           | 21.11808118  |
| wavelet-HHH | glszm      | LargeAreaEmphasis                | 548.6678967  |
| wavelet-HHH | glszm      | SmallAreaHighGrayLevelEmphasis   | 139.4643122  |
| wavelet-HHH | glszm      | ZonePercentage                   | 0.235039029  |

|             |            |                                      |              |
|-------------|------------|--------------------------------------|--------------|
| wavelet-HHH | glszm      | LargeAreaLowGrayLevelEmphasis        | 3.053644     |
| wavelet-HHH | glszm      | LargeAreaHighGrayLevelEmphasis       | 99701.16605  |
| wavelet-HHH | glszm      | HighGrayLevelZoneEmphasis            | 196.1918819  |
| wavelet-HHH | glszm      | SmallAreaEmphasis                    | 0.710070125  |
| wavelet-HHH | glszm      | LowGrayLevelZoneEmphasis             | 0.012883053  |
| wavelet-HHH | glszm      | ZoneEntropy                          | 5.341347767  |
| wavelet-HHH | glszm      | SmallAreaLowGrayLevelEmphasis        | 0.011032112  |
| wavelet-HHH | ngtdm      | Coarseness                           | 0.006297211  |
| wavelet-HHH | ngtdm      | Complexity                           | 339.3129824  |
| wavelet-HHH | ngtdm      | Strength                             | 0.943707365  |
| wavelet-HHH | ngtdm      | Contrast                             | 0.050261731  |
| wavelet-HHH | ngtdm      | Busyness                             | 0.411716566  |
| wavelet-HLL | gldm       | GrayLevelVariance                    | 40.09728233  |
| wavelet-HLL | gldm       | HighGrayLevelEmphasis                | 941.7111882  |
| wavelet-HLL | gldm       | DependenceEntropy                    | 6.763811685  |
| wavelet-HLL | gldm       | DependenceNonUniformity              | 166.1864701  |
| wavelet-HLL | gldm       | GrayLevelNonUniformity               | 101.5481353  |
| wavelet-HLL | gldm       | SmallDependenceEmphasis              | 0.338273076  |
| wavelet-HLL | gldm       | SmallDependenceHighGrayLevelEmphasis | 325.0693198  |
| wavelet-HLL | gldm       | DependenceNonUniformityNormalized    | 0.144133972  |
| wavelet-HLL | gldm       | LargeDependenceEmphasis              | 30.16912402  |
| wavelet-HLL | gldm       | LargeDependenceLowGrayLevelEmphasis  | 0.033127045  |
| wavelet-HLL | gldm       | DependenceVariance                   | 13.16154773  |
| wavelet-HLL | gldm       | LargeDependenceHighGrayLevelEmphasis | 28991.21683  |
| wavelet-HLL | gldm       | SmallDependenceLowGrayLevelEmphasis  | 0.001444837  |
| wavelet-HLL | gldm       | LowGrayLevelEmphasis                 | 0.002226776  |
| wavelet-HLL | glcm       | JointAverage                         | 29.86676472  |
| wavelet-HLL | glcm       | SumAverage                           | 59.73352943  |
| wavelet-HLL | glcm       | JointEntropy                         | 7.362637117  |
| wavelet-HLL | glcm       | ClusterShade                         | 134.4444353  |
| wavelet-HLL | glcm       | MaximumProbability                   | 0.06842681   |
| wavelet-HLL | glcm       | Idmn                                 | 0.989147208  |
| wavelet-HLL | glcm       | JointEnergy                          | 0.017585834  |
| wavelet-HLL | glcm       | Contrast                             | 49.12662376  |
| wavelet-HLL | glcm       | DifferenceEntropy                    | 3.551482275  |
| wavelet-HLL | glcm       | InverseVariance                      | 0.299231345  |
| wavelet-HLL | glcm       | DifferenceVariance                   | 29.90944667  |
| wavelet-HLL | glcm       | Idn                                  | 0.943051279  |
| wavelet-HLL | glcm       | Idm                                  | 0.319744381  |
| wavelet-HLL | glcm       | Correlation                          | 0.231696832  |
| wavelet-HLL | glcm       | Autocorrelation                      | 900.4406001  |
| wavelet-HLL | glcm       | SumEntropy                           | 4.666567018  |
| wavelet-HLL | glcm       | SumSquares                           | 32.97560827  |
| wavelet-HLL | glcm       | ClusterProminence                    | 67525.85702  |
| wavelet-HLL | glcm       | Imc2                                 | 0.880192782  |
| wavelet-HLL | glcm       | Imc1                                 | -0.189162193 |
| wavelet-HLL | glcm       | DifferenceAverage                    | 4.245629036  |
| wavelet-HLL | glcm       | Id                                   | 0.389821695  |
| wavelet-HLL | glcm       | ClusterTendency                      | 82.77580932  |
| wavelet-HLL | firstorder | InterquartileRange                   | 101.6462202  |
| wavelet-HLL | firstorder | Skewness                             | 0.52595945   |
| wavelet-HLL | firstorder | Uniformity                           | 0.088072971  |
| wavelet-HLL | firstorder | Median                               | -20.40801265 |

|             |            |                                  |              |
|-------------|------------|----------------------------------|--------------|
| wavelet-HLL | firstorder | Energy                           | 30334977.1   |
| wavelet-HLL | firstorder | RobustMeanAbsoluteDeviation      | 49.59089178  |
| wavelet-HLL | firstorder | MeanAbsoluteDeviation            | 99.94134809  |
| wavelet-HLL | firstorder | TotalEnergy                      | 819044381.7  |
| wavelet-HLL | firstorder | Maximum                          | 805.7853812  |
| wavelet-HLL | firstorder | RootMeanSquared                  | 162.202365   |
| wavelet-HLL | firstorder | 90Percentile                     | 95.47389001  |
| wavelet-HLL | firstorder | Minimum                          | -752.4374286 |
| wavelet-HLL | firstorder | Entropy                          | 4.246768319  |
| wavelet-HLL | firstorder | Range                            | 1558.22281   |
| wavelet-HLL | firstorder | Variance                         | 24955.33467  |
| wavelet-HLL | firstorder | 10Percentile                     | -218.5282739 |
| wavelet-HLL | firstorder | Kurtosis                         | 8.355146483  |
| wavelet-HLL | firstorder | Mean                             | -36.80044193 |
| wavelet-HLL | grlm       | ShortRunLowGrayLevelEmphasis     | 0.002290835  |
| wavelet-HLL | grlm       | GrayLevelVariance                | 44.51711042  |
| wavelet-HLL | grlm       | LowGrayLevelRunEmphasis          | 0.002383017  |
| wavelet-HLL | grlm       | GrayLevelNonUniformityNormalized | 0.074452617  |
| wavelet-HLL | grlm       | RunVariance                      | 0.206790694  |
| wavelet-HLL | grlm       | GrayLevelNonUniformity           | 75.60460617  |
| wavelet-HLL | grlm       | LongRunEmphasis                  | 1.504225133  |
| wavelet-HLL | grlm       | ShortRunHighGrayLevelEmphasis    | 861.7566494  |
| wavelet-HLL | grlm       | RunLengthNonUniformity           | 820.9399502  |
| wavelet-HLL | grlm       | ShortRunEmphasis                 | 0.916966839  |
| wavelet-HLL | grlm       | LongRunHighGrayLevelEmphasis     | 1421.702368  |
| wavelet-HLL | grlm       | RunPercentage                    | 0.87984522   |
| wavelet-HLL | grlm       | LongRunLowGrayLevelEmphasis      | 0.002930369  |
| wavelet-HLL | grlm       | RunEntropy                       | 4.892324737  |
| wavelet-HLL | grlm       | HighGrayLevelRunEmphasis         | 940.4004464  |
| wavelet-HLL | grlm       | RunLengthNonUniformityNormalized | 0.807628159  |
| wavelet-HLL | glszm      | GrayLevelVariance                | 83.41508878  |
| wavelet-HLL | glszm      | ZoneVariance                     | 168.6971731  |
| wavelet-HLL | glszm      | GrayLevelNonUniformityNormalized | 0.036979352  |
| wavelet-HLL | glszm      | SizeZoneNonUniformityNormalized  | 0.541206835  |
| wavelet-HLL | glszm      | SizeZoneNonUniformity            | 229.4716981  |
| wavelet-HLL | glszm      | GrayLevelNonUniformity           | 15.67924528  |
| wavelet-HLL | glszm      | LargeAreaEmphasis                | 176.0919811  |
| wavelet-HLL | glszm      | SmallAreaHighGrayLevelEmphasis   | 741.5614863  |
| wavelet-HLL | glszm      | ZonePercentage                   | 0.36773634   |
| wavelet-HLL | glszm      | LargeAreaLowGrayLevelEmphasis    | 0.184446044  |
| wavelet-HLL | glszm      | LargeAreaHighGrayLevelEmphasis   | 171782.1816  |
| wavelet-HLL | glszm      | HighGrayLevelZoneEmphasis        | 953.5259434  |
| wavelet-HLL | glszm      | SmallAreaEmphasis                | 0.763054708  |
| wavelet-HLL | glszm      | LowGrayLevelZoneEmphasis         | 0.004066971  |
| wavelet-HLL | glszm      | ZoneEntropy                      | 6.201348005  |
| wavelet-HLL | glszm      | SmallAreaLowGrayLevelEmphasis    | 0.003727242  |
| wavelet-HLL | ngtdm      | Coarseness                       | 0.00697255   |
| wavelet-HLL | ngtdm      | Complexity                       | 3892.835086  |
| wavelet-HLL | ngtdm      | Strength                         | 8.874884279  |
| wavelet-HLL | ngtdm      | Contrast                         | 0.099626265  |
| wavelet-HLL | ngtdm      | Busyness                         | 0.063879322  |
| wavelet-LHL | gldm       | GrayLevelVariance                | 19.87136088  |
| wavelet-LHL | gldm       | HighGrayLevelEmphasis            | 433.6921075  |

|             |            |                                      |              |
|-------------|------------|--------------------------------------|--------------|
| wavelet-LHL | gldm       | DependenceEntropy                    | 6.527627607  |
| wavelet-LHL | gldm       | DependenceNonUniformity              | 161.5776236  |
| wavelet-LHL | gldm       | GrayLevelNonUniformity               | 113.246314   |
| wavelet-LHL | gldm       | SmallDependenceEmphasis              | 0.319897534  |
| wavelet-LHL | gldm       | SmallDependenceHighGrayLevelEmphasis | 137.3523294  |
| wavelet-LHL | gldm       | DependenceNonUniformityNormalized    | 0.140136707  |
| wavelet-LHL | gldm       | LargeDependenceEmphasis              | 31.22202949  |
| wavelet-LHL | gldm       | LargeDependenceLowGrayLevelEmphasis  | 0.071966019  |
| wavelet-LHL | gldm       | DependenceVariance                   | 13.37451905  |
| wavelet-LHL | gldm       | LargeDependenceHighGrayLevelEmphasis | 14198.32177  |
| wavelet-LHL | gldm       | SmallDependenceLowGrayLevelEmphasis  | 0.002641916  |
| wavelet-LHL | gldm       | LowGrayLevelEmphasis                 | 0.004368883  |
| wavelet-LHL | glcm       | JointAverage                         | 20.46542809  |
| wavelet-LHL | glcm       | SumAverage                           | 40.93085618  |
| wavelet-LHL | glcm       | JointEntropy                         | 7.044515484  |
| wavelet-LHL | glcm       | ClusterShade                         | -62.37014562 |
| wavelet-LHL | glcm       | MaximumProbability                   | 0.063367796  |
| wavelet-LHL | glcm       | ldmn                                 | 0.986779543  |
| wavelet-LHL | glcm       | JointEnergy                          | 0.019293401  |
| wavelet-LHL | glcm       | Contrast                             | 28.33987755  |
| wavelet-LHL | glcm       | DifferenceEntropy                    | 3.339244886  |
| wavelet-LHL | glcm       | InverseVariance                      | 0.307434816  |
| wavelet-LHL | glcm       | DifferenceVariance                   | 15.95397222  |
| wavelet-LHL | glcm       | ldn                                  | 0.932706207  |
| wavelet-LHL | glcm       | ldm                                  | 0.331186797  |
| wavelet-LHL | glcm       | Correlation                          | 0.13919768   |
| wavelet-LHL | glcm       | Autocorrelation                      | 421.172447   |
| wavelet-LHL | glcm       | SumEntropy                           | 4.374031457  |
| wavelet-LHL | glcm       | SumSquares                           | 16.5064876   |
| wavelet-LHL | glcm       | ClusterProminence                    | 9732.595245  |
| wavelet-LHL | glcm       | lmc2                                 | 0.772967135  |
| wavelet-LHL | glcm       | lmc1                                 | -0.125044804 |
| wavelet-LHL | glcm       | DifferenceAverage                    | 3.465702038  |
| wavelet-LHL | glcm       | ld                                   | 0.403709548  |
| wavelet-LHL | glcm       | ClusterTendency                      | 37.68607283  |
| wavelet-LHL | firstorder | InterquartileRange                   | 93.3686108   |
| wavelet-LHL | firstorder | Skewness                             | -0.1450956   |
| wavelet-LHL | firstorder | Uniformity                           | 0.098218833  |
| wavelet-LHL | firstorder | Median                               | -14.7242621  |
| wavelet-LHL | firstorder | Energy                               | 15193161.74  |
| wavelet-LHL | firstorder | RobustMeanAbsoluteDeviation          | 41.8835756   |
| wavelet-LHL | firstorder | MeanAbsoluteDeviation                | 75.80887064  |
| wavelet-LHL | firstorder | TotalEnergy                          | 410215367    |
| wavelet-LHL | firstorder | Maximum                              | 571.6884656  |
| wavelet-LHL | firstorder | RootMeanSquared                      | 114.7914197  |
| wavelet-LHL | firstorder | 90Percentile                         | 75.7490519   |
| wavelet-LHL | firstorder | Minimum                              | -521.502375  |
| wavelet-LHL | firstorder | Entropy                              | 3.936912913  |
| wavelet-LHL | firstorder | Range                                | 1093.190841  |
| wavelet-LHL | firstorder | Variance                             | 12341.05896  |
| wavelet-LHL | firstorder | 10Percentile                         | -165.0380711 |
| wavelet-LHL | firstorder | Kurtosis                             | 6.488044074  |
| wavelet-LHL | firstorder | Mean                                 | -28.91385591 |

|             |       |                                      |             |
|-------------|-------|--------------------------------------|-------------|
| wavelet-LHL | grlm  | ShortRunLowGrayLevelEmphasis         | 0.004458955 |
| wavelet-LHL | grlm  | GrayLevelVariance                    | 22.12536239 |
| wavelet-LHL | grlm  | LowGrayLevelRunEmphasis              | 0.004660134 |
| wavelet-LHL | grlm  | GrayLevelNonUniformityNormalized     | 0.084709263 |
| wavelet-LHL | grlm  | RunVariance                          | 0.218259374 |
| wavelet-LHL | grlm  | GrayLevelNonUniformity               | 85.6213273  |
| wavelet-LHL | grlm  | LongRunEmphasis                      | 1.524972088 |
| wavelet-LHL | grlm  | ShortRunHighGrayLevelEmphasis        | 393.6645681 |
| wavelet-LHL | grlm  | RunLengthNonUniformity               | 810.9586288 |
| wavelet-LHL | grlm  | ShortRunEmphasis                     | 0.914663457 |
| wavelet-LHL | grlm  | LongRunHighGrayLevelEmphasis         | 667.9421431 |
| wavelet-LHL | grlm  | RunPercentage                        | 0.875975716 |
| wavelet-LHL | grlm  | LongRunLowGrayLevelEmphasis          | 0.005868074 |
| wavelet-LHL | grlm  | RunEntropy                           | 4.58537694  |
| wavelet-LHL | grlm  | HighGrayLevelRunEmphasis             | 431.6733679 |
| wavelet-LHL | grlm  | RunLengthNonUniformityNormalized     | 0.802140975 |
| wavelet-LHL | glszm | GrayLevelVariance                    | 43.17360285 |
| wavelet-LHL | glszm | ZoneVariance                         | 186.090132  |
| wavelet-LHL | glszm | GrayLevelNonUniformityNormalized     | 0.049734281 |
| wavelet-LHL | glszm | SizeZoneNonUniformityNormalized      | 0.501662258 |
| wavelet-LHL | glszm | SizeZoneNonUniformity                | 203.6748768 |
| wavelet-LHL | glszm | GrayLevelNonUniformity               | 20.19211823 |
| wavelet-LHL | glszm | LargeAreaEmphasis                    | 194.1551724 |
| wavelet-LHL | glszm | SmallAreaHighGrayLevelEmphasis       | 316.132485  |
| wavelet-LHL | glszm | ZonePercentage                       | 0.352124892 |
| wavelet-LHL | glszm | LargeAreaLowGrayLevelEmphasis        | 0.43336147  |
| wavelet-LHL | glszm | LargeAreaHighGrayLevelEmphasis       | 88708.77586 |
| wavelet-LHL | glszm | HighGrayLevelZoneEmphasis            | 426.7931034 |
| wavelet-LHL | glszm | SmallAreaEmphasis                    | 0.73578213  |
| wavelet-LHL | glszm | LowGrayLevelZoneEmphasis             | 0.007845582 |
| wavelet-LHL | glszm | ZoneEntropy                          | 5.888711374 |
| wavelet-LHL | glszm | SmallAreaLowGrayLevelEmphasis        | 0.007025103 |
| wavelet-LHL | ngtdm | Coarseness                           | 0.006617229 |
| wavelet-LHL | ngtdm | Complexity                           | 1631.279097 |
| wavelet-LHL | ngtdm | Strength                             | 3.803067473 |
| wavelet-LHL | ngtdm | Contrast                             | 0.076040247 |
| wavelet-LHL | ngtdm | Busyness                             | 0.137118846 |
| wavelet-LHH | gldm  | GrayLevelVariance                    | 11.80551659 |
| wavelet-LHH | gldm  | HighGrayLevelEmphasis                | 196.0867303 |
| wavelet-LHH | gldm  | DependenceEntropy                    | 6.298305478 |
| wavelet-LHH | gldm  | DependenceNonUniformity              | 152.925412  |
| wavelet-LHH | gldm  | GrayLevelNonUniformity               | 126.8699046 |
| wavelet-LHH | gldm  | SmallDependenceEmphasis              | 0.296285039 |
| wavelet-LHH | gldm  | SmallDependenceHighGrayLevelEmphasis | 63.34434059 |
| wavelet-LHH | gldm  | DependenceNonUniformityNormalized    | 0.132632621 |
| wavelet-LHH | gldm  | LargeDependenceEmphasis              | 29.49956635 |
| wavelet-LHH | gldm  | LargeDependenceLowGrayLevelEmphasis  | 0.17317494  |
| wavelet-LHH | gldm  | DependenceVariance                   | 11.51990697 |
| wavelet-LHH | gldm  | LargeDependenceHighGrayLevelEmphasis | 5334.215091 |
| wavelet-LHH | gldm  | SmallDependenceLowGrayLevelEmphasis  | 0.005786189 |
| wavelet-LHH | gldm  | LowGrayLevelEmphasis                 | 0.010113086 |
| wavelet-LHH | glcm  | JointAverage                         | 13.59109235 |
| wavelet-LHH | glcm  | SumAverage                           | 27.1821847  |

|             |            |                                  |              |
|-------------|------------|----------------------------------|--------------|
| wavelet-LHH | glcm       | JointEntropy                     | 6.803623484  |
| wavelet-LHH | glcm       | ClusterShade                     | 33.22269695  |
| wavelet-LHH | glcm       | MaximumProbability               | 0.068255594  |
| wavelet-LHH | glcm       | Idmn                             | 0.975462093  |
| wavelet-LHH | glcm       | JointEnergy                      | 0.020202958  |
| wavelet-LHH | glcm       | Contrast                         | 22.07370342  |
| wavelet-LHH | glcm       | DifferenceEntropy                | 3.24254758   |
| wavelet-LHH | glcm       | InverseVariance                  | 0.315700301  |
| wavelet-LHH | glcm       | DifferenceVariance               | 11.60394177  |
| wavelet-LHH | glcm       | Idn                              | 0.906982606  |
| wavelet-LHH | glcm       | Idm                              | 0.336917915  |
| wavelet-LHH | glcm       | Correlation                      | -0.03245901  |
| wavelet-LHH | glcm       | Autocorrelation                  | 184.3774891  |
| wavelet-LHH | glcm       | SumEntropy                       | 4.035217254  |
| wavelet-LHH | glcm       | SumSquares                       | 10.69396123  |
| wavelet-LHH | glcm       | ClusterProminence                | 2506.428614  |
| wavelet-LHH | glcm       | Imc2                             | 0.705558798  |
| wavelet-LHH | glcm       | Imc1                             | -0.098987443 |
| wavelet-LHH | glcm       | DifferenceAverage                | 3.19372075   |
| wavelet-LHH | glcm       | Id                               | 0.409719226  |
| wavelet-LHH | glcm       | ClusterTendency                  | 20.70214148  |
| wavelet-LHH | firstorder | InterquartileRange               | 76.50799255  |
| wavelet-LHH | firstorder | Skewness                         | 0.204537646  |
| wavelet-LHH | firstorder | Uniformity                       | 0.110034609  |
| wavelet-LHH | firstorder | Median                           | -2.429924937 |
| wavelet-LHH | firstorder | Energy                           | 8482344.696  |
| wavelet-LHH | firstorder | RobustMeanAbsoluteDeviation      | 33.60521565  |
| wavelet-LHH | firstorder | MeanAbsoluteDeviation            | 59.5244134   |
| wavelet-LHH | firstorder | TotalEnergy                      | 229023306.8  |
| wavelet-LHH | firstorder | Maximum                          | 367.6154986  |
| wavelet-LHH | firstorder | RootMeanSquared                  | 85.77155916  |
| wavelet-LHH | firstorder | 90Percentile                     | 105.0224434  |
| wavelet-LHH | firstorder | Minimum                          | -319.288135  |
| wavelet-LHH | firstorder | Entropy                          | 3.677722303  |
| wavelet-LHH | firstorder | Range                            | 686.9036336  |
| wavelet-LHH | firstorder | Variance                         | 7353.556305  |
| wavelet-LHH | firstorder | 10Percentile                     | -92.78365271 |
| wavelet-LHH | firstorder | Kurtosis                         | 5.115966279  |
| wavelet-LHH | firstorder | Mean                             | 1.789987465  |
| wavelet-LHH | grlm       | ShortRunLowGrayLevelEmphasis     | 0.010202219  |
| wavelet-LHH | grlm       | GrayLevelVariance                | 13.12144338  |
| wavelet-LHH | grlm       | LowGrayLevelRunEmphasis          | 0.01072485   |
| wavelet-LHH | grlm       | GrayLevelNonUniformityNormalized | 0.0970021    |
| wavelet-LHH | grlm       | RunVariance                      | 0.201698866  |
| wavelet-LHH | grlm       | GrayLevelNonUniformity           | 97.92009215  |
| wavelet-LHH | grlm       | LongRunEmphasis                  | 1.50927582   |
| wavelet-LHH | grlm       | ShortRunHighGrayLevelEmphasis    | 181.7218018  |
| wavelet-LHH | grlm       | RunLengthNonUniformity           | 801.9241164  |
| wavelet-LHH | grlm       | ShortRunEmphasis                 | 0.91103036   |
| wavelet-LHH | grlm       | LongRunHighGrayLevelEmphasis     | 290.7008614  |
| wavelet-LHH | grlm       | RunPercentage                    | 0.875375275  |
| wavelet-LHH | grlm       | LongRunLowGrayLevelEmphasis      | 0.013683726  |
| wavelet-LHH | grlm       | RunEntropy                       | 4.322214886  |



|             |       |                                      |             |
|-------------|-------|--------------------------------------|-------------|
| wavelet-LHH | grlm  | HighGrayLevelRunEmphasis             | 198.0250571 |
| wavelet-LHH | grlm  | RunLengthNonUniformityNormalized     | 0.793885701 |
| wavelet-LHH | glszm | GrayLevelVariance                    | 26.26546515 |
| wavelet-LHH | glszm | ZoneVariance                         | 222.4776845 |
| wavelet-LHH | glszm | GrayLevelNonUniformityNormalized     | 0.058717254 |
| wavelet-LHH | glszm | SizeZoneNonUniformityNormalized      | 0.490162381 |
| wavelet-LHH | glszm | SizeZoneNonUniformity                | 180.8699187 |
| wavelet-LHH | glszm | GrayLevelNonUniformity               | 21.66666667 |
| wavelet-LHH | glszm | LargeAreaEmphasis                    | 232.2411924 |
| wavelet-LHH | glszm | SmallAreaHighGrayLevelEmphasis       | 158.8295902 |
| wavelet-LHH | glszm | ZonePercentage                       | 0.320034692 |
| wavelet-LHH | glszm | LargeAreaLowGrayLevelEmphasis        | 1.323655404 |
| wavelet-LHH | glszm | LargeAreaHighGrayLevelEmphasis       | 41715.33333 |
| wavelet-LHH | glszm | HighGrayLevelZoneEmphasis            | 215.7940379 |
| wavelet-LHH | glszm | SmallAreaEmphasis                    | 0.727622014 |
| wavelet-LHH | glszm | LowGrayLevelZoneEmphasis             | 0.018731278 |
| wavelet-LHH | glszm | ZoneEntropy                          | 5.680018495 |
| wavelet-LHH | glszm | SmallAreaLowGrayLevelEmphasis        | 0.016784839 |
| wavelet-LHH | ngtdm | Coarseness                           | 0.006615503 |
| wavelet-LHH | ngtdm | Complexity                           | 711.7653806 |
| wavelet-LHH | ngtdm | Strength                             | 1.371049476 |
| wavelet-LHH | ngtdm | Contrast                             | 0.084657217 |
| wavelet-LHH | ngtdm | Busyness                             | 0.316872699 |
| wavelet-LLH | gldm  | GrayLevelVariance                    | 44.23707527 |
| wavelet-LLH | gldm  | HighGrayLevelEmphasis                | 848.4735473 |
| wavelet-LLH | gldm  | DependenceEntropy                    | 6.836738805 |
| wavelet-LLH | gldm  | DependenceNonUniformity              | 195.8499566 |
| wavelet-LLH | gldm  | GrayLevelNonUniformity               | 80.85082394 |
| wavelet-LLH | gldm  | SmallDependenceEmphasis              | 0.375470402 |
| wavelet-LLH | gldm  | SmallDependenceHighGrayLevelEmphasis | 331.9118142 |
| wavelet-LLH | gldm  | DependenceNonUniformityNormalized    | 0.169861194 |
| wavelet-LLH | gldm  | LargeDependenceEmphasis              | 23.01040763 |
| wavelet-LLH | gldm  | LargeDependenceLowGrayLevelEmphasis  | 0.029262453 |
| wavelet-LLH | gldm  | DependenceVariance                   | 9.81076704  |
| wavelet-LLH | gldm  | LargeDependenceHighGrayLevelEmphasis | 19457.15004 |
| wavelet-LLH | gldm  | SmallDependenceLowGrayLevelEmphasis  | 0.001699861 |
| wavelet-LLH | gldm  | LowGrayLevelEmphasis                 | 0.002549456 |
| wavelet-LLH | glcm  | JointAverage                         | 27.86018042 |
| wavelet-LLH | glcm  | SumAverage                           | 55.72036085 |
| wavelet-LLH | glcm  | JointEntropy                         | 7.86370469  |
| wavelet-LLH | glcm  | ClusterShade                         | 92.29476272 |
| wavelet-LLH | glcm  | MaximumProbability                   | 0.046755593 |
| wavelet-LLH | glcm  | ldmn                                 | 0.983828963 |
| wavelet-LLH | glcm  | JointEnergy                          | 0.011478212 |
| wavelet-LLH | glcm  | Contrast                             | 69.15042706 |
| wavelet-LLH | glcm  | DifferenceEntropy                    | 3.80177489  |
| wavelet-LLH | glcm  | InverseVariance                      | 0.270683956 |
| wavelet-LLH | glcm  | DifferenceVariance                   | 40.86299215 |
| wavelet-LLH | glcm  | ldn                                  | 0.92964228  |
| wavelet-LLH | glcm  | ldm                                  | 0.281173997 |
| wavelet-LLH | glcm  | Correlation                          | 0.144184305 |
| wavelet-LLH | glcm  | Autocorrelation                      | 782.5848575 |
| wavelet-LLH | glcm  | SumEntropy                           | 4.951189659 |

|             |            |                                  |              |
|-------------|------------|----------------------------------|--------------|
| wavelet-LLH | glcm       | SumSquares                       | 40.95044509  |
| wavelet-LLH | glcm       | ClusterProminence                | 59012.10601  |
| wavelet-LLH | glcm       | Imc2                             | 0.903635199  |
| wavelet-LLH | glcm       | Imc1                             | -0.200449559 |
| wavelet-LLH | glcm       | DifferenceAverage                | 5.144019279  |
| wavelet-LLH | glcm       | Id                               | 0.353885511  |
| wavelet-LLH | glcm       | ClusterTendency                  | 94.65135329  |
| wavelet-LLH | firstorder | InterquartileRange               | 119.0333425  |
| wavelet-LLH | firstorder | Skewness                         | 0.295118509  |
| wavelet-LLH | firstorder | Uniformity                       | 0.070122137  |
| wavelet-LLH | firstorder | Median                           | -22.4445259  |
| wavelet-LLH | firstorder | Energy                           | 32828983.39  |
| wavelet-LLH | firstorder | RobustMeanAbsoluteDeviation      | 58.63006045  |
| wavelet-LLH | firstorder | MeanAbsoluteDeviation            | 110.7098792  |
| wavelet-LLH | firstorder | TotalEnergy                      | 886382551.5  |
| wavelet-LLH | firstorder | Maximum                          | 781.5655704  |
| wavelet-LLH | firstorder | RootMeanSquared                  | 168.7384531  |
| wavelet-LLH | firstorder | 90Percentile                     | 160.1434108  |
| wavelet-LLH | firstorder | Minimum                          | -710.6035772 |
| wavelet-LLH | firstorder | Entropy                          | 4.47730906   |
| wavelet-LLH | firstorder | Range                            | 1492.169148  |
| wavelet-LLH | firstorder | Variance                         | 27642.02981  |
| wavelet-LLH | firstorder | 10Percentile                     | -226.3415852 |
| wavelet-LLH | firstorder | Kurtosis                         | 5.719603482  |
| wavelet-LLH | firstorder | Mean                             | -28.820752   |
| wavelet-LLH | glrlm      | ShortRunLowGrayLevelEmphasis     | 0.002605356  |
| wavelet-LLH | glrlm      | GrayLevelVariance                | 48.16859434  |
| wavelet-LLH | glrlm      | LowGrayLevelRunEmphasis          | 0.0026968    |
| wavelet-LLH | glrlm      | GrayLevelNonUniformityNormalized | 0.061482504  |
| wavelet-LLH | glrlm      | RunVariance                      | 0.162132281  |
| wavelet-LLH | glrlm      | GrayLevelNonUniformity           | 63.79869296  |
| wavelet-LLH | glrlm      | LongRunEmphasis                  | 1.40656475   |
| wavelet-LLH | glrlm      | ShortRunHighGrayLevelEmphasis    | 790.6189317  |
| wavelet-LLH | glrlm      | RunLengthNonUniformity           | 863.2645699  |
| wavelet-LLH | glrlm      | ShortRunEmphasis                 | 0.928502323  |
| wavelet-LLH | glrlm      | LongRunHighGrayLevelEmphasis     | 1190.840785  |
| wavelet-LLH | glrlm      | RunPercentage                    | 0.898725732  |
| wavelet-LLH | glrlm      | LongRunLowGrayLevelEmphasis      | 0.003205018  |
| wavelet-LLH | glrlm      | RunEntropy                       | 5.018960156  |
| wavelet-LLH | glrlm      | HighGrayLevelRunEmphasis         | 850.0393659  |
| wavelet-LLH | glrlm      | RunLengthNonUniformityNormalized | 0.831334039  |
| wavelet-LLH | glszm      | GrayLevelVariance                | 80.53498713  |
| wavelet-LLH | glszm      | ZoneVariance                     | 104.2632     |
| wavelet-LLH | glszm      | GrayLevelNonUniformityNormalized | 0.036081301  |
| wavelet-LLH | glszm      | SizeZoneNonUniformityNormalized  | 0.533910471  |
| wavelet-LLH | glszm      | SizeZoneNonUniformity            | 255.209205   |
| wavelet-LLH | glszm      | GrayLevelNonUniformity           | 17.24686192  |
| wavelet-LLH | glszm      | LargeAreaEmphasis                | 110.08159    |
| wavelet-LLH | glszm      | SmallAreaHighGrayLevelEmphasis   | 677.8492733  |
| wavelet-LLH | glszm      | ZonePercentage                   | 0.414570685  |
| wavelet-LLH | glszm      | LargeAreaLowGrayLevelEmphasis    | 0.133713546  |
| wavelet-LLH | glszm      | LargeAreaHighGrayLevelEmphasis   | 93515.74477  |
| wavelet-LLH | glszm      | HighGrayLevelZoneEmphasis        | 879.6025105  |

|             |            |                                      |              |
|-------------|------------|--------------------------------------|--------------|
| wavelet-LLH | glszm      | SmallAreaEmphasis                    | 0.758821534  |
| wavelet-LLH | glszm      | LowGrayLevelZoneEmphasis             | 0.004266463  |
| wavelet-LLH | glszm      | ZoneEntropy                          | 6.277629501  |
| wavelet-LLH | glszm      | SmallAreaLowGrayLevelEmphasis        | 0.003887387  |
| wavelet-LLH | ngtdm      | Coarseness                           | 0.007310006  |
| wavelet-LLH | ngtdm      | Complexity                           | 4072.696572  |
| wavelet-LLH | ngtdm      | Strength                             | 6.687803352  |
| wavelet-LLH | ngtdm      | Contrast                             | 0.132979309  |
| wavelet-LLH | ngtdm      | Busyness                             | 0.070298121  |
| wavelet-LLL | gldm       | GrayLevelVariance                    | 189.4324455  |
| wavelet-LLL | gldm       | HighGrayLevelEmphasis                | 3504.415438  |
| wavelet-LLL | gldm       | DependenceEntropy                    | 7.170008293  |
| wavelet-LLL | gldm       | DependenceNonUniformity              | 228.6183868  |
| wavelet-LLL | gldm       | GrayLevelNonUniformity               | 55.65047702  |
| wavelet-LLL | gldm       | SmallDependenceEmphasis              | 0.439400284  |
| wavelet-LLL | gldm       | SmallDependenceHighGrayLevelEmphasis | 1183.65219   |
| wavelet-LLL | gldm       | DependenceNonUniformityNormalized    | 0.198281342  |
| wavelet-LLL | gldm       | LargeDependenceEmphasis              | 23.79618387  |
| wavelet-LLL | gldm       | LargeDependenceLowGrayLevelEmphasis  | 0.006678487  |
| wavelet-LLL | gldm       | DependenceVariance                   | 11.52492574  |
| wavelet-LLL | gldm       | LargeDependenceHighGrayLevelEmphasis | 103972.3651  |
| wavelet-LLL | gldm       | SmallDependenceLowGrayLevelEmphasis  | 0.00125831   |
| wavelet-LLL | gldm       | LowGrayLevelEmphasis                 | 0.001411791  |
| wavelet-LLL | glcm       | JointAverage                         | 59.8587908   |
| wavelet-LLL | glcm       | SumAverage                           | 119.7175816  |
| wavelet-LLL | glcm       | JointEntropy                         | 8.379798757  |
| wavelet-LLL | glcm       | ClusterShade                         | -14771.71704 |
| wavelet-LLL | glcm       | MaximumProbability                   | 0.047288181  |
| wavelet-LLL | glcm       | ldmn                                 | 0.977723429  |
| wavelet-LLL | glcm       | JointEnergy                          | 0.008742882  |
| wavelet-LLL | glcm       | Contrast                             | 145.144338   |
| wavelet-LLL | glcm       | DifferenceEntropy                    | 4.269542429  |
| wavelet-LLL | glcm       | InverseVariance                      | 0.235693535  |
| wavelet-LLL | glcm       | DifferenceVariance                   | 88.54790757  |
| wavelet-LLL | glcm       | ldn                                  | 0.920111643  |
| wavelet-LLL | glcm       | ldm                                  | 0.254821662  |
| wavelet-LLL | glcm       | Correlation                          | 0.483606924  |
| wavelet-LLL | glcm       | Autocorrelation                      | 3651.954188  |
| wavelet-LLL | glcm       | SumEntropy                           | 5.614850171  |
| wavelet-LLL | glcm       | SumSquares                           | 141.3558313  |
| wavelet-LLL | glcm       | ClusterProminence                    | 1014093.857  |
| wavelet-LLL | glcm       | lmc2                                 | 0.953938345  |
| wavelet-LLL | glcm       | lmc1                                 | -0.254358361 |
| wavelet-LLL | glcm       | DifferenceAverage                    | 7.417390674  |
| wavelet-LLL | glcm       | ld                                   | 0.323397825  |
| wavelet-LLL | glcm       | ClusterTendency                      | 420.2789874  |
| wavelet-LLL | firstorder | InterquartileRange                   | 363.7762722  |
| wavelet-LLL | firstorder | Skewness                             | -1.596967766 |
| wavelet-LLL | firstorder | Uniformity                           | 0.048265808  |
| wavelet-LLL | firstorder | Median                               | 24.01662663  |
| wavelet-LLL | firstorder | Energy                               | 153969397.5  |
| wavelet-LLL | firstorder | RobustMeanAbsoluteDeviation          | 164.5277126  |
| wavelet-LLL | firstorder | MeanAbsoluteDeviation                | 264.183204   |

|             |            |                                  |              |
|-------------|------------|----------------------------------|--------------|
| wavelet-LLL | firstorder | TotalEnergy                      | 4157173732   |
| wavelet-LLL | firstorder | Maximum                          | 314.6121349  |
| wavelet-LLL | firstorder | RootMeanSquared                  | 365.4286146  |
| wavelet-LLL | firstorder | 90Percentile                     | 146.5652047  |
| wavelet-LLL | firstorder | Minimum                          | -1535.147455 |
| wavelet-LLL | firstorder | Entropy                          | 5.08604237   |
| wavelet-LLL | firstorder | Range                            | 1849.75959   |
| wavelet-LLL | firstorder | Variance                         | 118344.2983  |
| wavelet-LLL | firstorder | 10Percentile                     | -679.2876453 |
| wavelet-LLL | firstorder | Kurtosis                         | 4.979038715  |
| wavelet-LLL | firstorder | Mean                             | -123.2630282 |
| wavelet-LLL | grlm       | ShortRunLowGrayLevelEmphasis     | 0.001521811  |
| wavelet-LLL | grlm       | GrayLevelVariance                | 199.6874837  |
| wavelet-LLL | grlm       | LowGrayLevelRunEmphasis          | 0.001537867  |
| wavelet-LLL | grlm       | GrayLevelNonUniformityNormalized | 0.040471547  |
| wavelet-LLL | grlm       | RunVariance                      | 0.16072739   |
| wavelet-LLL | grlm       | GrayLevelNonUniformity           | 42.23243303  |
| wavelet-LLL | grlm       | LongRunEmphasis                  | 1.389340586  |
| wavelet-LLL | grlm       | ShortRunHighGrayLevelEmphasis    | 3134.223576  |
| wavelet-LLL | grlm       | RunLengthNonUniformity           | 882.5374077  |
| wavelet-LLL | grlm       | ShortRunEmphasis                 | 0.934747967  |
| wavelet-LLL | grlm       | LongRunHighGrayLevelEmphasis     | 5110.337273  |
| wavelet-LLL | grlm       | RunPercentage                    | 0.903729402  |
| wavelet-LLL | grlm       | LongRunLowGrayLevelEmphasis      | 0.001630986  |
| wavelet-LLL | grlm       | RunEntropy                       | 5.599671228  |
| wavelet-LLL | grlm       | HighGrayLevelRunEmphasis         | 3415.103772  |
| wavelet-LLL | grlm       | RunLengthNonUniformityNormalized | 0.84567471   |
| wavelet-LLL | glszm      | GrayLevelVariance                | 243.1550262  |
| wavelet-LLL | glszm      | ZoneVariance                     | 64.83407147  |
| wavelet-LLL | glszm      | GrayLevelNonUniformityNormalized | 0.023676008  |
| wavelet-LLL | glszm      | SizeZoneNonUniformityNormalized  | 0.625406255  |
| wavelet-LLL | glszm      | SizeZoneNonUniformity            | 342.7226277  |
| wavelet-LLL | glszm      | GrayLevelNonUniformity           | 12.97445255  |
| wavelet-LLL | glszm      | LargeAreaEmphasis                | 69.26094891  |
| wavelet-LLL | glszm      | SmallAreaHighGrayLevelEmphasis   | 2069.035515  |
| wavelet-LLL | glszm      | ZonePercentage                   | 0.475281873  |
| wavelet-LLL | glszm      | LargeAreaLowGrayLevelEmphasis    | 0.018206239  |
| wavelet-LLL | glszm      | LargeAreaHighGrayLevelEmphasis   | 304928.9836  |
| wavelet-LLL | glszm      | HighGrayLevelZoneEmphasis        | 2742.242701  |
| wavelet-LLL | glszm      | SmallAreaEmphasis                | 0.816217704  |
| wavelet-LLL | glszm      | LowGrayLevelZoneEmphasis         | 0.002680075  |
| wavelet-LLL | glszm      | ZoneEntropy                      | 6.550944311  |
| wavelet-LLL | glszm      | SmallAreaLowGrayLevelEmphasis    | 0.002613482  |
| wavelet-LLL | ngtdm      | Coarseness                       | 0.006432503  |
| wavelet-LLL | ngtdm      | Complexity                       | 10353.62298  |
| wavelet-LLL | ngtdm      | Strength                         | 18.47545602  |
| wavelet-LLL | ngtdm      | Contrast                         | 0.452656426  |
| wavelet-LLL | ngtdm      | Busyness                         | 0.028309602  |
| wavelet-HHL | gldm       | GrayLevelVariance                | 8.840215464  |
| wavelet-HHL | gldm       | HighGrayLevelEmphasis            | 312.6816999  |
| wavelet-HHL | gldm       | DependenceEntropy                | 6.259667228  |
| wavelet-HHL | gldm       | DependenceNonUniformity          | 127.3347788  |
| wavelet-HHL | gldm       | GrayLevelNonUniformity           | 154.3252385  |

|             |            |                                      |              |
|-------------|------------|--------------------------------------|--------------|
| wavelet-HHL | gldm       | SmallDependenceEmphasis              | 0.2454991    |
| wavelet-HHL | gldm       | SmallDependenceHighGrayLevelEmphasis | 78.43186458  |
| wavelet-HHL | gldm       | DependenceNonUniformityNormalized    | 0.110437796  |
| wavelet-HHL | gldm       | LargeDependenceEmphasis              | 36.83521249  |
| wavelet-HHL | gldm       | LargeDependenceLowGrayLevelEmphasis  | 0.130447903  |
| wavelet-HHL | gldm       | DependenceVariance                   | 13.69018413  |
| wavelet-HHL | gldm       | LargeDependenceHighGrayLevelEmphasis | 11179.94102  |
| wavelet-HHL | gldm       | SmallDependenceLowGrayLevelEmphasis  | 0.001735918  |
| wavelet-HHL | gldm       | LowGrayLevelEmphasis                 | 0.005600908  |
| wavelet-HHL | glcm       | JointAverage                         | 17.46382275  |
| wavelet-HHL | glcm       | SumAverage                           | 34.9276455   |
| wavelet-HHL | glcm       | JointEntropy                         | 6.305785917  |
| wavelet-HHL | glcm       | ClusterShade                         | -25.81572932 |
| wavelet-HHL | glcm       | MaximumProbability                   | 0.085359669  |
| wavelet-HHL | glcm       | Idmn                                 | 0.983418938  |
| wavelet-HHL | glcm       | JointEnergy                          | 0.028162942  |
| wavelet-HHL | glcm       | Contrast                             | 17.11012221  |
| wavelet-HHL | glcm       | DifferenceEntropy                    | 2.998779097  |
| wavelet-HHL | glcm       | InverseVariance                      | 0.355259664  |
| wavelet-HHL | glcm       | DifferenceVariance                   | 9.843863031  |
| wavelet-HHL | glcm       | Idn                                  | 0.925690235  |
| wavelet-HHL | glcm       | Idm                                  | 0.383950898  |
| wavelet-HHL | glcm       | Correlation                          | -0.024188905 |
| wavelet-HHL | glcm       | Autocorrelation                      | 304.8033129  |
| wavelet-HHL | glcm       | SumEntropy                           | 3.784644391  |
| wavelet-HHL | glcm       | SumSquares                           | 8.371578394  |
| wavelet-HHL | glcm       | ClusterProminence                    | 2472.867631  |
| wavelet-HHL | glcm       | Imc2                                 | 0.708557093  |
| wavelet-HHL | glcm       | Imc1                                 | -0.107691258 |
| wavelet-HHL | glcm       | DifferenceAverage                    | 2.660355367  |
| wavelet-HHL | glcm       | Id                                   | 0.450258964  |
| wavelet-HHL | glcm       | ClusterTendency                      | 16.37619137  |
| wavelet-HHL | firstorder | InterquartileRange                   | 62.67603688  |
| wavelet-HHL | firstorder | Skewness                             | -0.361267949 |
| wavelet-HHL | firstorder | Uniformity                           | 0.133846694  |
| wavelet-HHL | firstorder | Median                               | -1.333245546 |
| wavelet-HHL | firstorder | Energy                               | 6299546.904  |
| wavelet-HHL | firstorder | RobustMeanAbsoluteDeviation          | 26.92287536  |
| wavelet-HHL | firstorder | MeanAbsoluteDeviation                | 49.22311327  |
| wavelet-HHL | firstorder | TotalEnergy                          | 170087766.4  |
| wavelet-HHL | firstorder | Maximum                              | 322.006196   |
| wavelet-HHL | firstorder | RootMeanSquared                      | 73.91626321  |
| wavelet-HHL | firstorder | 90Percentile                         | 75.98638983  |
| wavelet-HHL | firstorder | Minimum                              | -422.6283224 |
| wavelet-HHL | firstorder | Entropy                              | 3.410911248  |
| wavelet-HHL | firstorder | Range                                | 744.6345183  |
| wavelet-HHL | firstorder | Variance                             | 5461.180469  |
| wavelet-HHL | firstorder | 10Percentile                         | -83.02165547 |
| wavelet-HHL | firstorder | Kurtosis                             | 7.510601351  |
| wavelet-HHL | firstorder | Mean                                 | -1.559967043 |
| wavelet-HHL | glrlm      | ShortRunLowGrayLevelEmphasis         | 0.005492422  |
| wavelet-HHL | glrlm      | GrayLevelVariance                    | 10.04483072  |
| wavelet-HHL | glrlm      | LowGrayLevelRunEmphasis              | 0.005904967  |

|             |       |                                      |             |
|-------------|-------|--------------------------------------|-------------|
| wavelet-HHL | glrlm | GrayLevelNonUniformityNormalized     | 0.117590933 |
| wavelet-HHL | glrlm | RunVariance                          | 0.256525736 |
| wavelet-HHL | glrlm | GrayLevelNonUniformity               | 115.7850962 |
| wavelet-HHL | glrlm | LongRunEmphasis                      | 1.636664138 |
| wavelet-HHL | glrlm | ShortRunHighGrayLevelEmphasis        | 281.9278691 |
| wavelet-HHL | glrlm | RunLengthNonUniformity               | 755.1628692 |
| wavelet-HHL | glrlm | ShortRunEmphasis                     | 0.896337518 |
| wavelet-HHL | glrlm | LongRunHighGrayLevelEmphasis         | 508.1944554 |
| wavelet-HHL | glrlm | RunPercentage                        | 0.853425846 |
| wavelet-HHL | glrlm | LongRunLowGrayLevelEmphasis          | 0.008298575 |
| wavelet-HHL | glrlm | RunEntropy                           | 4.156046023 |
| wavelet-HHL | glrlm | HighGrayLevelRunEmphasis             | 313.7990842 |
| wavelet-HHL | glrlm | RunLengthNonUniformityNormalized     | 0.765652224 |
| wavelet-HHL | glszm | GrayLevelVariance                    | 24.08006896 |
| wavelet-HHL | glszm | ZoneVariance                         | 435.5144844 |
| wavelet-HHL | glszm | GrayLevelNonUniformityNormalized     | 0.068399324 |
| wavelet-HHL | glszm | SizeZoneNonUniformityNormalized      | 0.492611184 |
| wavelet-HHL | glszm | SizeZoneNonUniformity                | 143.8424658 |
| wavelet-HHL | glszm | GrayLevelNonUniformity               | 19.97260274 |
| wavelet-HHL | glszm | LargeAreaEmphasis                    | 451.1061644 |
| wavelet-HHL | glszm | SmallAreaHighGrayLevelEmphasis       | 234.1912392 |
| wavelet-HHL | glszm | ZonePercentage                       | 0.253252385 |
| wavelet-HHL | glszm | LargeAreaLowGrayLevelEmphasis        | 1.502417965 |
| wavelet-HHL | glszm | LargeAreaHighGrayLevelEmphasis       | 137973.9863 |
| wavelet-HHL | glszm | HighGrayLevelZoneEmphasis            | 319.2842466 |
| wavelet-HHL | glszm | SmallAreaEmphasis                    | 0.729375604 |
| wavelet-HHL | glszm | LowGrayLevelZoneEmphasis             | 0.008753013 |
| wavelet-HHL | glszm | ZoneEntropy                          | 5.479232921 |
| wavelet-HHL | glszm | SmallAreaLowGrayLevelEmphasis        | 0.005153805 |
| wavelet-HHL | ngtdm | Coarseness                           | 0.006545305 |
| wavelet-HHL | ngtdm | Complexity                           | 633.7865948 |
| wavelet-HHL | ngtdm | Strength                             | 1.741917584 |
| wavelet-HHL | ngtdm | Contrast                             | 0.052134884 |
| wavelet-HHL | ngtdm | Busyness                             | 0.227541039 |
| wavelet-HLH | gldm  | GrayLevelVariance                    | 8.369520591 |
| wavelet-HLH | gldm  | HighGrayLevelEmphasis                | 192.6036427 |
| wavelet-HLH | gldm  | DependenceEntropy                    | 6.151572114 |
| wavelet-HLH | gldm  | DependenceNonUniformity              | 139.2914137 |
| wavelet-HLH | gldm  | GrayLevelNonUniformity               | 153.9089332 |
| wavelet-HLH | gldm  | SmallDependenceEmphasis              | 0.246613836 |
| wavelet-HLH | gldm  | SmallDependenceHighGrayLevelEmphasis | 50.23132093 |
| wavelet-HLH | gldm  | DependenceNonUniformityNormalized    | 0.120807818 |
| wavelet-HLH | gldm  | LargeDependenceEmphasis              | 35.9661752  |
| wavelet-HLH | gldm  | LargeDependenceLowGrayLevelEmphasis  | 0.209308649 |
| wavelet-HLH | gldm  | DependenceVariance                   | 13.9095884  |
| wavelet-HLH | gldm  | LargeDependenceHighGrayLevelEmphasis | 6578.076323 |
| wavelet-HLH | gldm  | SmallDependenceLowGrayLevelEmphasis  | 0.002670413 |
| wavelet-HLH | gldm  | LowGrayLevelEmphasis                 | 0.008408257 |
| wavelet-HLH | glcm  | JointAverage                         | 13.56279255 |
| wavelet-HLH | glcm  | SumAverage                           | 27.1255851  |
| wavelet-HLH | glcm  | JointEntropy                         | 6.355676654 |
| wavelet-HLH | glcm  | ClusterShade                         | 4.680552873 |
| wavelet-HLH | glcm  | MaximumProbability                   | 0.081032243 |

|             |            |                                  |              |
|-------------|------------|----------------------------------|--------------|
| wavelet-HLH | glcm       | Idmn                             | 0.978765731  |
| wavelet-HLH | glcm       | JointEnergy                      | 0.027717976  |
| wavelet-HLH | glcm       | Contrast                         | 14.85917827  |
| wavelet-HLH | glcm       | DifferenceEntropy                | 3.013544058  |
| wavelet-HLH | glcm       | InverseVariance                  | 0.343228711  |
| wavelet-HLH | glcm       | DifferenceVariance               | 7.69784003   |
| wavelet-HLH | glcm       | Idn                              | 0.91207915   |
| wavelet-HLH | glcm       | Idm                              | 0.37221306   |
| wavelet-HLH | glcm       | Correlation                      | -0.007060457 |
| wavelet-HLH | glcm       | Autocorrelation                  | 183.9086201  |
| wavelet-HLH | glcm       | SumEntropy                       | 3.816430471  |
| wavelet-HLH | glcm       | SumSquares                       | 7.386504428  |
| wavelet-HLH | glcm       | ClusterProminence                | 1277.765292  |
| wavelet-HLH | glcm       | Imc2                             | 0.62713805   |
| wavelet-HLH | glcm       | Imc1                             | -0.077737724 |
| wavelet-HLH | glcm       | DifferenceAverage                | 2.653879564  |
| wavelet-HLH | glcm       | Id                               | 0.441182301  |
| wavelet-HLH | glcm       | ClusterTendency                  | 14.68683944  |
| wavelet-HLH | firstorder | InterquartileRange               | 62.86422542  |
| wavelet-HLH | firstorder | Skewness                         | 0.025513278  |
| wavelet-HLH | firstorder | Uniformity                       | 0.133485632  |
| wavelet-HLH | firstorder | Median                           | -0.471544925 |
| wavelet-HLH | firstorder | Energy                           | 5937296.241  |
| wavelet-HLH | firstorder | RobustMeanAbsoluteDeviation      | 27.57080151  |
| wavelet-HLH | firstorder | MeanAbsoluteDeviation            | 49.19983656  |
| wavelet-HLH | firstorder | TotalEnergy                      | 160306998.5  |
| wavelet-HLH | firstorder | Maximum                          | 293.7767411  |
| wavelet-HLH | firstorder | RootMeanSquared                  | 71.75954984  |
| wavelet-HLH | firstorder | 90Percentile                     | 84.636188    |
| wavelet-HLH | firstorder | Minimum                          | -315.740037  |
| wavelet-HLH | firstorder | Entropy                          | 3.410379552  |
| wavelet-HLH | firstorder | Range                            | 609.5167782  |
| wavelet-HLH | firstorder | Variance                         | 5145.174288  |
| wavelet-HLH | firstorder | 10Percentile                     | -78.47793167 |
| wavelet-HLH | firstorder | Kurtosis                         | 5.519969464  |
| wavelet-HLH | firstorder | Mean                             | 2.06366314   |
| wavelet-HLH | grlm       | ShortRunLowGrayLevelEmphasis     | 0.008144684  |
| wavelet-HLH | grlm       | GrayLevelVariance                | 9.424207384  |
| wavelet-HLH | grlm       | LowGrayLevelRunEmphasis          | 0.008779366  |
| wavelet-HLH | grlm       | GrayLevelNonUniformityNormalized | 0.115455722  |
| wavelet-HLH | grlm       | RunVariance                      | 0.245473154  |
| wavelet-HLH | grlm       | GrayLevelNonUniformity           | 114.2744878  |
| wavelet-HLH | grlm       | LongRunEmphasis                  | 1.60943991   |
| wavelet-HLH | grlm       | ShortRunHighGrayLevelEmphasis    | 175.4469913  |
| wavelet-HLH | grlm       | RunLengthNonUniformity           | 764.8577486  |
| wavelet-HLH | grlm       | ShortRunEmphasis                 | 0.899957832  |
| wavelet-HLH | grlm       | LongRunHighGrayLevelEmphasis     | 306.1201654  |
| wavelet-HLH | grlm       | RunPercentage                    | 0.857829075  |
| wavelet-HLH | grlm       | LongRunLowGrayLevelEmphasis      | 0.012483742  |
| wavelet-HLH | grlm       | RunEntropy                       | 4.131165139  |
| wavelet-HLH | grlm       | HighGrayLevelRunEmphasis         | 193.9593719  |
| wavelet-HLH | grlm       | RunLengthNonUniformityNormalized | 0.772217124  |
| wavelet-HLH | glszm      | GrayLevelVariance                | 19.67748558  |

|             |       |                                  |             |
|-------------|-------|----------------------------------|-------------|
| wavelet-HLH | glszm | ZoneVariance                     | 357.7342073 |
| wavelet-HLH | glszm | GrayLevelNonUniformityNormalized | 0.070221118 |
| wavelet-HLH | glszm | SizeZoneNonUniformityNormalized  | 0.398553918 |
| wavelet-HLH | glszm | SizeZoneNonUniformity            | 125.943038  |
| wavelet-HLH | glszm | GrayLevelNonUniformity           | 22.18987342 |
| wavelet-HLH | glszm | LargeAreaEmphasis                | 371.0474684 |
| wavelet-HLH | glszm | SmallAreaHighGrayLevelEmphasis   | 135.3647948 |
| wavelet-HLH | glszm | ZonePercentage                   | 0.27406765  |
| wavelet-HLH | glszm | LargeAreaLowGrayLevelEmphasis    | 2.071704583 |
| wavelet-HLH | glszm | LargeAreaHighGrayLevelEmphasis   | 67595.32911 |
| wavelet-HLH | glszm | HighGrayLevelZoneEmphasis        | 203.3829114 |
| wavelet-HLH | glszm | SmallAreaEmphasis                | 0.654896937 |
| wavelet-HLH | glszm | LowGrayLevelZoneEmphasis         | 0.01215392  |
| wavelet-HLH | glszm | ZoneEntropy                      | 5.591625514 |
| wavelet-HLH | glszm | SmallAreaLowGrayLevelEmphasis    | 0.007455259 |
| wavelet-HLH | ngtdm | Coarseness                       | 0.006452396 |
| wavelet-HLH | ngtdm | Complexity                       | 493.6602129 |
| wavelet-HLH | ngtdm | Strength                         | 1.184926635 |
| wavelet-HLH | ngtdm | Contrast                         | 0.063045918 |
| wavelet-HLH | ngtdm | Busyness                         | 0.352727817 |



| Image type | Feature Class | Feature Name                         |                                                                                                                                                                                                                                                                                                                                                                                                                   |
|------------|---------------|--------------------------------------|-------------------------------------------------------------------------------------------------------------------------------------------------------------------------------------------------------------------------------------------------------------------------------------------------------------------------------------------------------------------------------------------------------------------|
| general    | info          | BoundingBox                          | 3: RTSTRUCT: C99-DNU_segment_GTV_63<br>(0, 0, 1, 20, 23, 36)                                                                                                                                                                                                                                                                                                                                                      |
| general    | info          | EnabledImageTypes                    | {u'Original': {}, u'Wavelet': {}}                                                                                                                                                                                                                                                                                                                                                                                 |
|            |               |                                      | {'distances': [1], 'additionalInfo': True, 'force2D': False, 'interpolator': 'sitkBSpline', 'resampledPixelSpacing': [3.0], 'label': 1, 'normalizeScale': 1, 'normalize': False, 'force2Ddimension': 0, 'removeOutliers': None, 'minimumROISize': None, u'binWidth': 25.0, 'minimumROIDimensions': 1, u'correctMask': True, 'preCrop': False, u'symmetricalGLCM': True, 'resegmentRange': None, 'padDistance': 5} |
| general    | info          | GeneralSettings                      |                                                                                                                                                                                                                                                                                                                                                                                                                   |
| general    | info          | ImageHash                            | 53d6b5b7ae36983461882f00069a6f19f8da514e                                                                                                                                                                                                                                                                                                                                                                          |
| general    | info          | ImageSpacing                         | (1.26953125, 1.26953125, 1.9999999999999999)                                                                                                                                                                                                                                                                                                                                                                      |
| general    | info          | MaskHash                             | 9180df2548342cf49f501a8d6f534532bd2cbdbb                                                                                                                                                                                                                                                                                                                                                                          |
| general    | info          | NumpyVersion                         | 1.13.1                                                                                                                                                                                                                                                                                                                                                                                                            |
| general    | info          | PyWaveletVersion                     | 0.5.2                                                                                                                                                                                                                                                                                                                                                                                                             |
| general    | info          | SimpleITKVersion                     | 1.1.0                                                                                                                                                                                                                                                                                                                                                                                                             |
| general    | info          | Version                              | 1.3.0.post102+g1b0eb74                                                                                                                                                                                                                                                                                                                                                                                            |
| general    | info          | VolumeNum                            | 4                                                                                                                                                                                                                                                                                                                                                                                                                 |
| general    | info          | VoxelNum                             | 1089                                                                                                                                                                                                                                                                                                                                                                                                              |
| original   | shape         | Maximum3DDiameter                    | 116.4216475                                                                                                                                                                                                                                                                                                                                                                                                       |
| original   | shape         | Maximum2DDiameterSlice               | 69.0651866                                                                                                                                                                                                                                                                                                                                                                                                        |
| original   | shape         | Sphericity                           | 0.469840547                                                                                                                                                                                                                                                                                                                                                                                                       |
| original   | shape         | MinorAxis                            | 66.72932651                                                                                                                                                                                                                                                                                                                                                                                                       |
| original   | shape         | Elongation                           | 0.646844922                                                                                                                                                                                                                                                                                                                                                                                                       |
| original   | shape         | SurfaceVolumeRatio                   | 0.333479967                                                                                                                                                                                                                                                                                                                                                                                                       |
| original   | shape         | Volume                               | 29403                                                                                                                                                                                                                                                                                                                                                                                                             |
| original   | shape         | MajorAxis                            | 103.1612436                                                                                                                                                                                                                                                                                                                                                                                                       |
| original   | shape         | SurfaceArea                          | 9805.311466                                                                                                                                                                                                                                                                                                                                                                                                       |
| original   | shape         | Flatness                             | 0.448800888                                                                                                                                                                                                                                                                                                                                                                                                       |
| original   | shape         | LeastAxis                            | 46.29885771                                                                                                                                                                                                                                                                                                                                                                                                       |
| original   | shape         | Maximum2DDiameterColumn              | 101.8675611                                                                                                                                                                                                                                                                                                                                                                                                       |
| original   | shape         | Maximum2DDiameterRow                 | 113.0884609                                                                                                                                                                                                                                                                                                                                                                                                       |
| original   | gldm          | GrayLevelVariance                    | 59.855132                                                                                                                                                                                                                                                                                                                                                                                                         |
| original   | gldm          | HighGrayLevelEmphasis                | 1433.20753                                                                                                                                                                                                                                                                                                                                                                                                        |
| original   | gldm          | DependenceEntropy                    | 6.296752401                                                                                                                                                                                                                                                                                                                                                                                                       |
| original   | gldm          | DependenceNonUniformity              | 106.6639118                                                                                                                                                                                                                                                                                                                                                                                                       |
| original   | gldm          | GrayLevelNonUniformity               | 172.6271809                                                                                                                                                                                                                                                                                                                                                                                                       |
| original   | gldm          | SmallDependenceEmphasis              | 0.254249565                                                                                                                                                                                                                                                                                                                                                                                                       |
| original   | gldm          | SmallDependenceHighGrayLevelEmphasis | 275.4892261                                                                                                                                                                                                                                                                                                                                                                                                       |
| original   | gldm          | DependenceNonUniformityNormalized    | 0.097946659                                                                                                                                                                                                                                                                                                                                                                                                       |
| original   | gldm          | LargeDependenceEmphasis              | 46.48576676                                                                                                                                                                                                                                                                                                                                                                                                       |
| original   | gldm          | LargeDependenceLowGrayLevelEmphasis  | 0.037827551                                                                                                                                                                                                                                                                                                                                                                                                       |
| original   | gldm          | DependenceVariance                   | 16.88377388                                                                                                                                                                                                                                                                                                                                                                                                       |
| original   | gldm          | LargeDependenceHighGrayLevelEmphasis | 76216.80349                                                                                                                                                                                                                                                                                                                                                                                                       |
| original   | gldm          | SmallDependenceLowGrayLevelEmphasis  | 0.00155343                                                                                                                                                                                                                                                                                                                                                                                                        |
| original   | gldm          | LowGrayLevelEmphasis                 | 0.00362327                                                                                                                                                                                                                                                                                                                                                                                                        |
| original   | glcm          | JointAverage                         | 37.21387013                                                                                                                                                                                                                                                                                                                                                                                                       |
| original   | glcm          | SumAverage                           | 74.42774027                                                                                                                                                                                                                                                                                                                                                                                                       |

|          |            |                                  |              |
|----------|------------|----------------------------------|--------------|
| original | glcm       | JointEntropy                     | 6.066972731  |
| original | glcm       | ClusterShade                     | -6525.873742 |
| original | glcm       | MaximumProbability               | 0.136570059  |
| original | glcm       | Idmn                             | 0.97801054   |
| original | glcm       | JointEnergy                      | 0.045331781  |
| original | glcm       | Contrast                         | 63.64568424  |
| original | glcm       | DifferenceEntropy                | 3.229453038  |
| original | glcm       | InverseVariance                  | 0.358383083  |
| original | glcm       | DifferenceVariance               | 47.64580354  |
| original | glcm       | Idn                              | 0.93617287   |
| original | glcm       | Idm                              | 0.446107717  |
| original | glcm       | Correlation                      | 0.492695376  |
| original | glcm       | Autocorrelation                  | 1415.477341  |
| original | glcm       | SumEntropy                       | 4.300424526  |
| original | glcm       | SumSquares                       | 62.39835445  |
| original | glcm       | ClusterProminence                | 330276.5587  |
| original | glcm       | Imc2                             | 0.868997251  |
| original | glcm       | Imc1                             | -0.209864921 |
| original | glcm       | DifferenceAverage                | 3.966693511  |
| original | glcm       | Id                               | 0.492776118  |
| original | glcm       | ClusterTendency                  | 185.9477336  |
| original | firstorder | InterquartileRange               | 78           |
| original | firstorder | Skewness                         | -2.784055265 |
| original | firstorder | Uniformity                       | 0.158518991  |
| original | firstorder | Median                           | 9            |
| original | firstorder | Energy                           | 44732376     |
| original | firstorder | RobustMeanAbsoluteDeviation      | 42.43372698  |
| original | firstorder | MeanAbsoluteDeviation            | 119.3214388  |
| original | firstorder | TotalEnergy                      | 1207774152   |
| original | firstorder | Maximum                          | 222          |
| original | firstorder | RootMeanSquared                  | 202.6735355  |
| original | firstorder | 90Percentile                     | 43           |
| original | firstorder | Minimum                          | -966         |
| original | firstorder | Entropy                          | 3.495992692  |
| original | firstorder | Range                            | 1188         |
| original | firstorder | Variance                         | 37268.91274  |
| original | firstorder | 10Percentile                     | -269.2       |
| original | firstorder | Kurtosis                         | 10.30887488  |
| original | firstorder | Mean                             | -61.70615243 |
| original | glrlm      | ShortRunLowGrayLevelEmphasis     | 0.003983379  |
| original | glrlm      | GrayLevelVariance                | 68.30775173  |
| original | glrlm      | LowGrayLevelRunEmphasis          | 0.004141447  |
| original | glrlm      | GrayLevelNonUniformityNormalized | 0.130987187  |
| original | glrlm      | RunVariance                      | 0.274375678  |
| original | glrlm      | GrayLevelNonUniformity           | 118.4027089  |
| original | glrlm      | LongRunEmphasis                  | 1.733952227  |
| original | glrlm      | ShortRunHighGrayLevelEmphasis    | 1188.215189  |
| original | glrlm      | RunLengthNonUniformity           | 649.6201156  |
| original | glrlm      | ShortRunEmphasis                 | 0.872330657  |
| original | glrlm      | LongRunHighGrayLevelEmphasis     | 2587.415341  |
| original | glrlm      | RunPercentage                    | 0.829201102  |
| original | glrlm      | LongRunLowGrayLevelEmphasis      | 0.004909111  |
| original | glrlm      | RunEntropy                       | 4.389794054  |
| original | glrlm      | HighGrayLevelRunEmphasis         | 1394.301972  |
| original | glrlm      | RunLengthNonUniformityNormalized | 0.718276489  |

|             |       |                                      |              |
|-------------|-------|--------------------------------------|--------------|
| original    | glszm | GrayLevelVariance                    | 114.9149153  |
| original    | glszm | ZoneVariance                         | 152.2319162  |
| original    | glszm | GrayLevelNonUniformityNormalized     | 0.051050793  |
| original    | glszm | SizeZoneNonUniformityNormalized      | 0.511636657  |
| original    | glszm | SizeZoneNonUniformity                | 156.0491803  |
| original    | glszm | GrayLevelNonUniformity               | 15.5704918   |
| original    | glszm | LargeAreaEmphasis                    | 164.9803279  |
| original    | glszm | SmallAreaHighGrayLevelEmphasis       | 748.450774   |
| original    | glszm | ZonePercentage                       | 0.280073462  |
| original    | glszm | LargeAreaLowGrayLevelEmphasis        | 0.119060929  |
| original    | glszm | LargeAreaHighGrayLevelEmphasis       | 270117.8459  |
| original    | glszm | HighGrayLevelZoneEmphasis            | 1082.022951  |
| original    | glszm | SmallAreaEmphasis                    | 0.741975493  |
| original    | glszm | LowGrayLevelZoneEmphasis             | 0.007496626  |
| original    | glszm | ZoneEntropy                          | 6.00373769   |
| original    | glszm | SmallAreaLowGrayLevelEmphasis        | 0.004489184  |
| original    | ngtdm | Coarseness                           | 0.004155115  |
| original    | ngtdm | Complexity                           | 2963.59095   |
| original    | ngtdm | Strength                             | 12.68055344  |
| original    | ngtdm | Contrast                             | 0.162131965  |
| original    | ngtdm | Busyness                             | 0.083448514  |
| wavelet-HHH | gldm  | GrayLevelVariance                    | 4.666258545  |
| wavelet-HHH | gldm  | HighGrayLevelEmphasis                | 137.4977043  |
| wavelet-HHH | gldm  | DependenceEntropy                    | 5.750789241  |
| wavelet-HHH | gldm  | DependenceNonUniformity              | 102.4802571  |
| wavelet-HHH | gldm  | GrayLevelNonUniformity               | 233.7640037  |
| wavelet-HHH | gldm  | SmallDependenceEmphasis              | 0.198015931  |
| wavelet-HHH | gldm  | SmallDependenceHighGrayLevelEmphasis | 29.85486643  |
| wavelet-HHH | gldm  | DependenceNonUniformityNormalized    | 0.094104919  |
| wavelet-HHH | gldm  | LargeDependenceEmphasis              | 39.83746556  |
| wavelet-HHH | gldm  | LargeDependenceLowGrayLevelEmphasis  | 0.308836002  |
| wavelet-HHH | gldm  | DependenceVariance                   | 11.9291909   |
| wavelet-HHH | gldm  | LargeDependenceHighGrayLevelEmphasis | 5279.012856  |
| wavelet-HHH | gldm  | SmallDependenceLowGrayLevelEmphasis  | 0.003244412  |
| wavelet-HHH | gldm  | LowGrayLevelEmphasis                 | 0.009842672  |
| wavelet-HHH | glcm  | JointAverage                         | 11.50541377  |
| wavelet-HHH | glcm  | SumAverage                           | 23.01082753  |
| wavelet-HHH | glcm  | JointEntropy                         | 5.4234757    |
| wavelet-HHH | glcm  | ClusterShade                         | 7.673701225  |
| wavelet-HHH | glcm  | MaximumProbability                   | 0.126822601  |
| wavelet-HHH | glcm  | Idmn                                 | 0.986388815  |
| wavelet-HHH | glcm  | JointEnergy                          | 0.056616048  |
| wavelet-HHH | glcm  | Contrast                             | 10.3086114   |
| wavelet-HHH | glcm  | DifferenceEntropy                    | 2.664177055  |
| wavelet-HHH | glcm  | InverseVariance                      | 0.400445096  |
| wavelet-HHH | glcm  | DifferenceVariance                   | 6.221932837  |
| wavelet-HHH | glcm  | Idn                                  | 0.934493668  |
| wavelet-HHH | glcm  | Idm                                  | 0.464304594  |
| wavelet-HHH | glcm  | Correlation                          | -0.03499033  |
| wavelet-HHH | glcm  | Autocorrelation                      | 132.2060097  |
| wavelet-HHH | glcm  | SumEntropy                           | 3.356138401  |
| wavelet-HHH | glcm  | SumSquares                           | 4.985625839  |
| wavelet-HHH | glcm  | ClusterProminence                    | 831.0352322  |
| wavelet-HHH | glcm  | Imc2                                 | 0.65747564   |
| wavelet-HHH | glcm  | Imc1                                 | -0.099880354 |

|             |            |                                  |              |
|-------------|------------|----------------------------------|--------------|
| wavelet-HHH | glcm       | DifferenceAverage                | 2.009302547  |
| wavelet-HHH | glcm       | Id                               | 0.516852609  |
| wavelet-HHH | glcm       | ClusterTendency                  | 9.633891959  |
| wavelet-HHH | firstorder | InterquartileRange               | 33.5106831   |
| wavelet-HHH | firstorder | Skewness                         | 0.378044551  |
| wavelet-HHH | firstorder | Uniformity                       | 0.214659324  |
| wavelet-HHH | firstorder | Median                           | -0.533715441 |
| wavelet-HHH | firstorder | Energy                           | 3124513.581  |
| wavelet-HHH | firstorder | RobustMeanAbsoluteDeviation      | 16.01293863  |
| wavelet-HHH | firstorder | MeanAbsoluteDeviation            | 33.02856013  |
| wavelet-HHH | firstorder | TotalEnergy                      | 84361866.67  |
| wavelet-HHH | firstorder | Maximum                          | 356.0010349  |
| wavelet-HHH | firstorder | RootMeanSquared                  | 53.56452629  |
| wavelet-HHH | firstorder | 90Percentile                     | 49.70557777  |
| wavelet-HHH | firstorder | Minimum                          | -270.220201  |
| wavelet-HHH | firstorder | Entropy                          | 2.816131646  |
| wavelet-HHH | firstorder | Range                            | 626.221236   |
| wavelet-HHH | firstorder | Variance                         | 2868.862498  |
| wavelet-HHH | firstorder | 10Percentile                     | -49.63158752 |
| wavelet-HHH | firstorder | Kurtosis                         | 9.537083359  |
| wavelet-HHH | firstorder | Mean                             | 0.544038469  |
| wavelet-HHH | glrlm      | ShortRunLowGrayLevelEmphasis     | 0.009274577  |
| wavelet-HHH | glrlm      | GrayLevelVariance                | 5.406817812  |
| wavelet-HHH | glrlm      | LowGrayLevelRunEmphasis          | 0.010247861  |
| wavelet-HHH | glrlm      | GrayLevelNonUniformityNormalized | 0.188556148  |
| wavelet-HHH | glrlm      | RunVariance                      | 0.250324965  |
| wavelet-HHH | glrlm      | GrayLevelNonUniformity           | 171.5798888  |
| wavelet-HHH | glrlm      | LongRunEmphasis                  | 1.687419703  |
| wavelet-HHH | glrlm      | ShortRunHighGrayLevelEmphasis    | 121.7795446  |
| wavelet-HHH | glrlm      | RunLengthNonUniformity           | 659.4121274  |
| wavelet-HHH | glrlm      | ShortRunEmphasis                 | 0.875491648  |
| wavelet-HHH | glrlm      | LongRunHighGrayLevelEmphasis     | 229.6239965  |
| wavelet-HHH | glrlm      | RunPercentage                    | 0.835275835  |
| wavelet-HHH | glrlm      | LongRunLowGrayLevelEmphasis      | 0.015601991  |
| wavelet-HHH | glrlm      | RunEntropy                       | 3.666393234  |
| wavelet-HHH | glrlm      | HighGrayLevelRunEmphasis         | 138.3855114  |
| wavelet-HHH | glrlm      | RunLengthNonUniformityNormalized | 0.723961465  |
| wavelet-HHH | glszm      | GrayLevelVariance                | 15.06130699  |
| wavelet-HHH | glszm      | ZoneVariance                     | 259.1192388  |
| wavelet-HHH | glszm      | GrayLevelNonUniformityNormalized | 0.085295856  |
| wavelet-HHH | glszm      | SizeZoneNonUniformityNormalized  | 0.431933029  |
| wavelet-HHH | glszm      | SizeZoneNonUniformity            | 98.91266376  |
| wavelet-HHH | glszm      | GrayLevelNonUniformity           | 19.53275109  |
| wavelet-HHH | glszm      | LargeAreaEmphasis                | 281.7336245  |
| wavelet-HHH | glszm      | SmallAreaHighGrayLevelEmphasis   | 106.4065961  |
| wavelet-HHH | glszm      | ZonePercentage                   | 0.210284665  |
| wavelet-HHH | glszm      | LargeAreaLowGrayLevelEmphasis    | 2.177202895  |
| wavelet-HHH | glszm      | LargeAreaHighGrayLevelEmphasis   | 37080.28384  |
| wavelet-HHH | glszm      | HighGrayLevelZoneEmphasis        | 149.580786   |
| wavelet-HHH | glszm      | SmallAreaEmphasis                | 0.682484999  |
| wavelet-HHH | glszm      | LowGrayLevelZoneEmphasis         | 0.016553761  |
| wavelet-HHH | glszm      | ZoneEntropy                      | 5.402914099  |
| wavelet-HHH | glszm      | SmallAreaLowGrayLevelEmphasis    | 0.013072907  |
| wavelet-HHH | ngtdm      | Coarseness                       | 0.006390156  |
| wavelet-HHH | ngtdm      | Complexity                       | 331.5806898  |

|             |            |                                      |              |
|-------------|------------|--------------------------------------|--------------|
| wavelet-HHH | ngtdm      | Strength                             | 1.537601796  |
| wavelet-HHH | ngtdm      | Contrast                             | 0.026970961  |
| wavelet-HHH | ngtdm      | Busyness                             | 0.386443213  |
| wavelet-HLL | gldm       | GrayLevelVariance                    | 28.06049138  |
| wavelet-HLL | gldm       | HighGrayLevelEmphasis                | 538.2644628  |
| wavelet-HLL | gldm       | DependenceEntropy                    | 6.627170123  |
| wavelet-HLL | gldm       | DependenceNonUniformity              | 136.0982553  |
| wavelet-HLL | gldm       | GrayLevelNonUniformity               | 116.0523416  |
| wavelet-HLL | gldm       | SmallDependenceEmphasis              | 0.281843277  |
| wavelet-HLL | gldm       | SmallDependenceHighGrayLevelEmphasis | 162.5945831  |
| wavelet-HLL | gldm       | DependenceNonUniformityNormalized    | 0.124975441  |
| wavelet-HLL | gldm       | LargeDependenceEmphasis              | 28.49678604  |
| wavelet-HLL | gldm       | LargeDependenceLowGrayLevelEmphasis  | 0.063597036  |
| wavelet-HLL | gldm       | DependenceVariance                   | 10.20918594  |
| wavelet-HLL | gldm       | LargeDependenceHighGrayLevelEmphasis | 15378.52342  |
| wavelet-HLL | gldm       | SmallDependenceLowGrayLevelEmphasis  | 0.001986346  |
| wavelet-HLL | gldm       | LowGrayLevelEmphasis                 | 0.005021883  |
| wavelet-HLL | glcm       | JointAverage                         | 22.53214137  |
| wavelet-HLL | glcm       | SumAverage                           | 45.06428274  |
| wavelet-HLL | glcm       | JointEntropy                         | 6.987339774  |
| wavelet-HLL | glcm       | ClusterShade                         | 310.4531338  |
| wavelet-HLL | glcm       | MaximumProbability                   | 0.069588717  |
| wavelet-HLL | glcm       | Idmn                                 | 0.988621134  |
| wavelet-HLL | glcm       | JointEnergy                          | 0.021183122  |
| wavelet-HLL | glcm       | Contrast                             | 35.21592987  |
| wavelet-HLL | glcm       | DifferenceEntropy                    | 3.341599862  |
| wavelet-HLL | glcm       | InverseVariance                      | 0.3262956    |
| wavelet-HLL | glcm       | DifferenceVariance                   | 22.07083307  |
| wavelet-HLL | glcm       | Idn                                  | 0.942391036  |
| wavelet-HLL | glcm       | Idm                                  | 0.366091453  |
| wavelet-HLL | glcm       | Correlation                          | 0.308572556  |
| wavelet-HLL | glcm       | Autocorrelation                      | 516.0687139  |
| wavelet-HLL | glcm       | SumEntropy                           | 4.557660984  |
| wavelet-HLL | glcm       | SumSquares                           | 25.97576253  |
| wavelet-HLL | glcm       | ClusterProminence                    | 47334.57942  |
| wavelet-HLL | glcm       | Imc2                                 | 0.887748747  |
| wavelet-HLL | glcm       | Imc1                                 | -0.203378723 |
| wavelet-HLL | glcm       | DifferenceAverage                    | 3.573742289  |
| wavelet-HLL | glcm       | Id                                   | 0.43002459   |
| wavelet-HLL | glcm       | ClusterTendency                      | 68.68712026  |
| wavelet-HLL | firstorder | InterquartileRange                   | 77.84326111  |
| wavelet-HLL | firstorder | Skewness                             | 0.347356943  |
| wavelet-HLL | firstorder | Uniformity                           | 0.106567807  |
| wavelet-HLL | firstorder | Median                               | -12.66659492 |
| wavelet-HLL | firstorder | Energy                               | 19535600.84  |
| wavelet-HLL | firstorder | RobustMeanAbsoluteDeviation          | 37.7412215   |
| wavelet-HLL | firstorder | MeanAbsoluteDeviation                | 80.03964112  |
| wavelet-HLL | firstorder | TotalEnergy                          | 527461222.7  |
| wavelet-HLL | firstorder | Maximum                              | 731.7358356  |
| wavelet-HLL | firstorder | RootMeanSquared                      | 133.9366544  |
| wavelet-HLL | firstorder | 90Percentile                         | 79.68655771  |
| wavelet-HLL | firstorder | Minimum                              | -555.0241322 |
| wavelet-HLL | firstorder | Entropy                              | 3.956822382  |
| wavelet-HLL | firstorder | Range                                | 1286.759968  |
| wavelet-HLL | firstorder | Variance                             | 17421.74359  |

|             |            |                                      |              |
|-------------|------------|--------------------------------------|--------------|
| wavelet-HLL | firstorder | 10Percentile                         | -160.7618472 |
| wavelet-HLL | firstorder | Kurtosis                             | 9.320230145  |
| wavelet-HLL | firstorder | Mean                                 | -22.74387417 |
| wavelet-HLL | glrlm      | ShortRunLowGrayLevelEmphasis         | 0.005110487  |
| wavelet-HLL | glrlm      | GrayLevelVariance                    | 31.39536209  |
| wavelet-HLL | glrlm      | LowGrayLevelRunEmphasis              | 0.005368237  |
| wavelet-HLL | glrlm      | GrayLevelNonUniformityNormalized     | 0.093467876  |
| wavelet-HLL | glrlm      | RunVariance                          | 0.193925584  |
| wavelet-HLL | glrlm      | GrayLevelNonUniformity               | 89.06105891  |
| wavelet-HLL | glrlm      | LongRunEmphasis                      | 1.511437536  |
| wavelet-HLL | glrlm      | ShortRunHighGrayLevelEmphasis        | 490.1799776  |
| wavelet-HLL | glrlm      | RunLengthNonUniformity               | 754.1528156  |
| wavelet-HLL | glrlm      | ShortRunEmphasis                     | 0.90847988   |
| wavelet-HLL | glrlm      | LongRunHighGrayLevelEmphasis         | 812.3684587  |
| wavelet-HLL | glrlm      | RunPercentage                        | 0.873984601  |
| wavelet-HLL | glrlm      | LongRunLowGrayLevelEmphasis          | 0.006671423  |
| wavelet-HLL | glrlm      | RunEntropy                           | 4.634375415  |
| wavelet-HLL | glrlm      | HighGrayLevelRunEmphasis             | 538.9249674  |
| wavelet-HLL | glrlm      | RunLengthNonUniformityNormalized     | 0.790013639  |
| wavelet-HLL | glszm      | GrayLevelVariance                    | 67.31272653  |
| wavelet-HLL | glszm      | ZoneVariance                         | 64.39044082  |
| wavelet-HLL | glszm      | GrayLevelNonUniformityNormalized     | 0.041828571  |
| wavelet-HLL | glszm      | SizeZoneNonUniformityNormalized      | 0.441632653  |
| wavelet-HLL | glszm      | SizeZoneNonUniformity                | 154.5714286  |
| wavelet-HLL | glszm      | GrayLevelNonUniformity               | 14.64        |
| wavelet-HLL | glszm      | LargeAreaEmphasis                    | 74.07142857  |
| wavelet-HLL | glszm      | SmallAreaHighGrayLevelEmphasis       | 410.8016681  |
| wavelet-HLL | glszm      | ZonePercentage                       | 0.321395776  |
| wavelet-HLL | glszm      | LargeAreaLowGrayLevelEmphasis        | 0.154648921  |
| wavelet-HLL | glszm      | LargeAreaHighGrayLevelEmphasis       | 40130.55429  |
| wavelet-HLL | glszm      | HighGrayLevelZoneEmphasis            | 567.6657143  |
| wavelet-HLL | glszm      | SmallAreaEmphasis                    | 0.690633386  |
| wavelet-HLL | glszm      | LowGrayLevelZoneEmphasis             | 0.008086254  |
| wavelet-HLL | glszm      | ZoneEntropy                          | 6.365437456  |
| wavelet-HLL | glszm      | SmallAreaLowGrayLevelEmphasis        | 0.00498273   |
| wavelet-HLL | ngtdm      | Coarseness                           | 0.007805371  |
| wavelet-HLL | ngtdm      | Complexity                           | 2380.638222  |
| wavelet-HLL | ngtdm      | Strength                             | 9.314273996  |
| wavelet-HLL | ngtdm      | Contrast                             | 0.059886893  |
| wavelet-HLL | ngtdm      | Busyness                             | 0.078384804  |
| wavelet-LHL | gldm       | GrayLevelVariance                    | 46.18312518  |
| wavelet-LHL | gldm       | HighGrayLevelEmphasis                | 1121.288338  |
| wavelet-LHL | gldm       | DependenceEntropy                    | 6.564233085  |
| wavelet-LHL | gldm       | DependenceNonUniformity              | 159.4775023  |
| wavelet-LHL | gldm       | GrayLevelNonUniformity               | 109.4003673  |
| wavelet-LHL | gldm       | SmallDependenceEmphasis              | 0.333031941  |
| wavelet-LHL | gldm       | SmallDependenceHighGrayLevelEmphasis | 392.9614638  |
| wavelet-LHL | gldm       | DependenceNonUniformityNormalized    | 0.146443987  |
| wavelet-LHL | gldm       | LargeDependenceEmphasis              | 24.16437098  |
| wavelet-LHL | gldm       | LargeDependenceLowGrayLevelEmphasis  | 0.023369557  |
| wavelet-LHL | gldm       | DependenceVariance                   | 9.140738717  |
| wavelet-LHL | gldm       | LargeDependenceHighGrayLevelEmphasis | 26610.46556  |
| wavelet-LHL | gldm       | SmallDependenceLowGrayLevelEmphasis  | 0.001348514  |
| wavelet-LHL | gldm       | LowGrayLevelEmphasis                 | 0.002012288  |
| wavelet-LHL | glcm       | JointAverage                         | 32.9059747   |

|             |            |                                  |              |
|-------------|------------|----------------------------------|--------------|
| wavelet-LHL | glcm       | SumAverage                       | 65.8119494   |
| wavelet-LHL | glcm       | JointEntropy                     | 7.24054348   |
| wavelet-LHL | glcm       | ClusterShade                     | 1004.073114  |
| wavelet-LHL | glcm       | MaximumProbability               | 0.07096316   |
| wavelet-LHL | glcm       | Idmn                             | 0.986925086  |
| wavelet-LHL | glcm       | JointEnergy                      | 0.019680167  |
| wavelet-LHL | glcm       | Contrast                         | 72.26453911  |
| wavelet-LHL | glcm       | DifferenceEntropy                | 3.673726665  |
| wavelet-LHL | glcm       | InverseVariance                  | 0.303484333  |
| wavelet-LHL | glcm       | DifferenceVariance               | 47.49295964  |
| wavelet-LHL | glcm       | Idn                              | 0.941630208  |
| wavelet-LHL | glcm       | Idm                              | 0.332009135  |
| wavelet-LHL | glcm       | Correlation                      | 0.212356456  |
| wavelet-LHL | glcm       | Autocorrelation                  | 1092.082075  |
| wavelet-LHL | glcm       | SumEntropy                       | 4.754404961  |
| wavelet-LHL | glcm       | SumSquares                       | 45.40821769  |
| wavelet-LHL | glcm       | ClusterProminence                | 103156.4434  |
| wavelet-LHL | glcm       | Imc2                             | 0.922051497  |
| wavelet-LHL | glcm       | Imc1                             | -0.234101587 |
| wavelet-LHL | glcm       | DifferenceAverage                | 4.871353944  |
| wavelet-LHL | glcm       | Id                               | 0.396380566  |
| wavelet-LHL | glcm       | ClusterTendency                  | 109.3683317  |
| wavelet-LHL | firstorder | InterquartileRange               | 79.83519218  |
| wavelet-LHL | firstorder | Skewness                         | 0.749777552  |
| wavelet-LHL | firstorder | Uniformity                       | 0.100459474  |
| wavelet-LHL | firstorder | Median                           | -13.09709091 |
| wavelet-LHL | firstorder | Energy                           | 31816527.87  |
| wavelet-LHL | firstorder | RobustMeanAbsoluteDeviation      | 41.15907986  |
| wavelet-LHL | firstorder | MeanAbsoluteDeviation            | 98.05552955  |
| wavelet-LHL | firstorder | TotalEnergy                      | 859046252.5  |
| wavelet-LHL | firstorder | Maximum                          | 915.699223   |
| wavelet-LHL | firstorder | RootMeanSquared                  | 170.9277012  |
| wavelet-LHL | firstorder | 90Percentile                     | 111.0365699  |
| wavelet-LHL | firstorder | Minimum                          | -824.7352863 |
| wavelet-LHL | firstorder | Entropy                          | 4.154362483  |
| wavelet-LHL | firstorder | Range                            | 1740.434509  |
| wavelet-LHL | firstorder | Variance                         | 28908.16751  |
| wavelet-LHL | firstorder | 10Percentile                     | -187.3664299 |
| wavelet-LHL | firstorder | Kurtosis                         | 8.561829303  |
| wavelet-LHL | firstorder | Mean                             | -17.55310591 |
| wavelet-LHL | glrlm      | ShortRunLowGrayLevelEmphasis     | 0.002071096  |
| wavelet-LHL | glrlm      | GrayLevelVariance                | 51.04677848  |
| wavelet-LHL | glrlm      | LowGrayLevelRunEmphasis          | 0.002147905  |
| wavelet-LHL | glrlm      | GrayLevelNonUniformityNormalized | 0.087040731  |
| wavelet-LHL | glrlm      | RunVariance                      | 0.161034677  |
| wavelet-LHL | glrlm      | GrayLevelNonUniformity           | 84.42884768  |
| wavelet-LHL | glrlm      | LongRunEmphasis                  | 1.432824465  |
| wavelet-LHL | glrlm      | ShortRunHighGrayLevelEmphasis    | 1034.837643  |
| wavelet-LHL | glrlm      | RunLengthNonUniformity           | 787.1277747  |
| wavelet-LHL | glrlm      | ShortRunEmphasis                 | 0.918737173  |
| wavelet-LHL | glrlm      | LongRunHighGrayLevelEmphasis     | 1599.608957  |
| wavelet-LHL | glrlm      | RunPercentage                    | 0.889383344  |
| wavelet-LHL | glrlm      | LongRunLowGrayLevelEmphasis      | 0.002553676  |
| wavelet-LHL | glrlm      | RunEntropy                       | 4.774387704  |
| wavelet-LHL | glrlm      | HighGrayLevelRunEmphasis         | 1124.149869  |

|             |       |                                      |              |
|-------------|-------|--------------------------------------|--------------|
| wavelet-LHL | glrlm | RunLengthNonUniformityNormalized     | 0.810537095  |
| wavelet-LHL | glszm | GrayLevelVariance                    | 96.32235828  |
| wavelet-LHL | glszm | ZoneVariance                         | 45.23185374  |
| wavelet-LHL | glszm | GrayLevelNonUniformityNormalized     | 0.038106576  |
| wavelet-LHL | glszm | SizeZoneNonUniformityNormalized      | 0.478231293  |
| wavelet-LHL | glszm | SizeZoneNonUniformity                | 200.8571429  |
| wavelet-LHL | glszm | GrayLevelNonUniformity               | 16.0047619   |
| wavelet-LHL | glszm | LargeAreaEmphasis                    | 51.9547619   |
| wavelet-LHL | glszm | SmallAreaHighGrayLevelEmphasis       | 861.643543   |
| wavelet-LHL | glszm | ZonePercentage                       | 0.385674931  |
| wavelet-LHL | glszm | LargeAreaLowGrayLevelEmphasis        | 0.05051009   |
| wavelet-LHL | glszm | LargeAreaHighGrayLevelEmphasis       | 57069.71667  |
| wavelet-LHL | glszm | HighGrayLevelZoneEmphasis            | 1165.92381   |
| wavelet-LHL | glszm | SmallAreaEmphasis                    | 0.718020967  |
| wavelet-LHL | glszm | LowGrayLevelZoneEmphasis             | 0.003662958  |
| wavelet-LHL | glszm | ZoneEntropy                          | 6.397764633  |
| wavelet-LHL | glszm | SmallAreaLowGrayLevelEmphasis        | 0.003340472  |
| wavelet-LHL | ngtdm | Coarseness                           | 0.007763398  |
| wavelet-LHL | ngtdm | Complexity                           | 4159.199481  |
| wavelet-LHL | ngtdm | Strength                             | 10.2139766   |
| wavelet-LHL | ngtdm | Contrast                             | 0.104417951  |
| wavelet-LHL | ngtdm | Busyness                             | 0.049028276  |
| wavelet-LHH | gldm  | GrayLevelVariance                    | 24.51153154  |
| wavelet-LHH | gldm  | HighGrayLevelEmphasis                | 1152.213039  |
| wavelet-LHH | gldm  | DependenceEntropy                    | 6.246039945  |
| wavelet-LHH | gldm  | DependenceNonUniformity              | 159.697888   |
| wavelet-LHH | gldm  | GrayLevelNonUniformity               | 136.0780533  |
| wavelet-LHH | gldm  | SmallDependenceEmphasis              | 0.342045413  |
| wavelet-LHH | gldm  | SmallDependenceHighGrayLevelEmphasis | 408.6056839  |
| wavelet-LHH | gldm  | DependenceNonUniformityNormalized    | 0.146646362  |
| wavelet-LHH | gldm  | LargeDependenceEmphasis              | 26.44168962  |
| wavelet-LHH | gldm  | LargeDependenceLowGrayLevelEmphasis  | 0.025100854  |
| wavelet-LHH | gldm  | DependenceVariance                   | 10.62481734  |
| wavelet-LHH | gldm  | LargeDependenceHighGrayLevelEmphasis | 29474.34343  |
| wavelet-LHH | gldm  | SmallDependenceLowGrayLevelEmphasis  | 0.001518543  |
| wavelet-LHH | gldm  | LowGrayLevelEmphasis                 | 0.00212161   |
| wavelet-LHH | glcm  | JointAverage                         | 33.59255015  |
| wavelet-LHH | glcm  | SumAverage                           | 67.1851003   |
| wavelet-LHH | glcm  | JointEntropy                         | 6.957941606  |
| wavelet-LHH | glcm  | ClusterShade                         | -216.1110243 |
| wavelet-LHH | glcm  | MaximumProbability                   | 0.086456468  |
| wavelet-LHH | glcm  | Idmn                                 | 0.984618399  |
| wavelet-LHH | glcm  | JointEnergy                          | 0.02530267   |
| wavelet-LHH | glcm  | Contrast                             | 51.74943058  |
| wavelet-LHH | glcm  | DifferenceEntropy                    | 3.560211599  |
| wavelet-LHH | glcm  | InverseVariance                      | 0.306545716  |
| wavelet-LHH | glcm  | DifferenceVariance                   | 32.93915415  |
| wavelet-LHH | glcm  | Idn                                  | 0.934080054  |
| wavelet-LHH | glcm  | Idm                                  | 0.340147462  |
| wavelet-LHH | glcm  | Correlation                          | -0.019539086 |
| wavelet-LHH | glcm  | Autocorrelation                      | 1127.960117  |
| wavelet-LHH | glcm  | SumEntropy                           | 4.353518399  |
| wavelet-LHH | glcm  | SumSquares                           | 25.37496264  |
| wavelet-LHH | glcm  | ClusterProminence                    | 24656.38832  |
| wavelet-LHH | glcm  | Imc2                                 | 0.864031346  |



|             |            |                                  |              |
|-------------|------------|----------------------------------|--------------|
| wavelet-LHH | glcm       | Imc1                             | -0.182415183 |
| wavelet-LHH | glcm       | DifferenceAverage                | 4.276502489  |
| wavelet-LHH | glcm       | Id                               | 0.405167812  |
| wavelet-LHH | glcm       | ClusterTendency                  | 49.75041997  |
| wavelet-LHH | firstorder | InterquartileRange               | 62.35857772  |
| wavelet-LHH | firstorder | Skewness                         | -0.732530448 |
| wavelet-LHH | firstorder | Uniformity                       | 0.12495689   |
| wavelet-LHH | firstorder | Median                           | -0.034212751 |
| wavelet-LHH | firstorder | Energy                           | 16683475.4   |
| wavelet-LHH | firstorder | RobustMeanAbsoluteDeviation      | 31.68118964  |
| wavelet-LHH | firstorder | MeanAbsoluteDeviation            | 72.40370189  |
| wavelet-LHH | firstorder | TotalEnergy                      | 450453835.7  |
| wavelet-LHH | firstorder | Maximum                          | 520.8573678  |
| wavelet-LHH | firstorder | RootMeanSquared                  | 123.7739705  |
| wavelet-LHH | firstorder | 90Percentile                     | 117.8313456  |
| wavelet-LHH | firstorder | Minimum                          | -810.5021695 |
| wavelet-LHH | firstorder | Entropy                          | 3.813770324  |
| wavelet-LHH | firstorder | Range                            | 1331.359537  |
| wavelet-LHH | firstorder | Variance                         | 15316.41373  |
| wavelet-LHH | firstorder | 10Percentile                     | -98.35692814 |
| wavelet-LHH | firstorder | Kurtosis                         | 9.982916985  |
| wavelet-LHH | firstorder | Mean                             | 1.892628987  |
| wavelet-LHH | glrlm      | ShortRunLowGrayLevelEmphasis     | 0.002204479  |
| wavelet-LHH | glrlm      | GrayLevelVariance                | 27.34802939  |
| wavelet-LHH | glrlm      | LowGrayLevelRunEmphasis          | 0.002280825  |
| wavelet-LHH | glrlm      | GrayLevelNonUniformityNormalized | 0.106947613  |
| wavelet-LHH | glrlm      | RunVariance                      | 0.168150339  |
| wavelet-LHH | glrlm      | GrayLevelNonUniformity           | 103.2517451  |
| wavelet-LHH | glrlm      | LongRunEmphasis                  | 1.449036089  |
| wavelet-LHH | glrlm      | ShortRunHighGrayLevelEmphasis    | 1062.131217  |
| wavelet-LHH | glrlm      | RunLengthNonUniformity           | 776.1590957  |
| wavelet-LHH | glrlm      | ShortRunEmphasis                 | 0.915682082  |
| wavelet-LHH | glrlm      | LongRunHighGrayLevelEmphasis     | 1658.24641   |
| wavelet-LHH | glrlm      | RunPercentage                    | 0.88549834   |
| wavelet-LHH | glrlm      | LongRunLowGrayLevelEmphasis      | 0.002687302  |
| wavelet-LHH | glrlm      | RunEntropy                       | 4.457016629  |
| wavelet-LHH | glrlm      | HighGrayLevelRunEmphasis         | 1156.604894  |
| wavelet-LHH | glrlm      | RunLengthNonUniformityNormalized | 0.803455799  |
| wavelet-LHH | glszm      | GrayLevelVariance                | 54.85645953  |
| wavelet-LHH | glszm      | ZoneVariance                     | 61.94537091  |
| wavelet-LHH | glszm      | GrayLevelNonUniformityNormalized | 0.047542934  |
| wavelet-LHH | glszm      | SizeZoneNonUniformityNormalized  | 0.528465969  |
| wavelet-LHH | glszm      | SizeZoneNonUniformity            | 217.1995134  |
| wavelet-LHH | glszm      | GrayLevelNonUniformity           | 19.54014599  |
| wavelet-LHH | glszm      | LargeAreaEmphasis                | 68.96593674  |
| wavelet-LHH | glszm      | SmallAreaHighGrayLevelEmphasis   | 910.1068464  |
| wavelet-LHH | glszm      | ZonePercentage                   | 0.377410468  |
| wavelet-LHH | glszm      | LargeAreaLowGrayLevelEmphasis    | 0.065319036  |
| wavelet-LHH | glszm      | LargeAreaHighGrayLevelEmphasis   | 76932.12652  |
| wavelet-LHH | glszm      | HighGrayLevelZoneEmphasis        | 1196.671533  |
| wavelet-LHH | glszm      | SmallAreaEmphasis                | 0.754565581  |
| wavelet-LHH | glszm      | LowGrayLevelZoneEmphasis         | 0.004113932  |
| wavelet-LHH | glszm      | ZoneEntropy                      | 6.004667399  |
| wavelet-LHH | glszm      | SmallAreaLowGrayLevelEmphasis    | 0.003880527  |
| wavelet-LHH | ngtdm      | Coarseness                       | 0.007613626  |

|             |            |                                      |              |
|-------------|------------|--------------------------------------|--------------|
| wavelet-LHH | ngtdm      | Complexity                           | 2546.306848  |
| wavelet-LHH | ngtdm      | Strength                             | 6.189659114  |
| wavelet-LHH | ngtdm      | Contrast                             | 0.075066778  |
| wavelet-LHH | ngtdm      | Busyness                             | 0.057441326  |
| wavelet-LLH | gldm       | GrayLevelVariance                    | 81.63466538  |
| wavelet-LLH | gldm       | HighGrayLevelEmphasis                | 2035.534435  |
| wavelet-LLH | gldm       | DependenceEntropy                    | 6.841646492  |
| wavelet-LLH | gldm       | DependenceNonUniformity              | 246.7208448  |
| wavelet-LLH | gldm       | GrayLevelNonUniformity               | 62.64738292  |
| wavelet-LLH | gldm       | SmallDependenceEmphasis              | 0.454845133  |
| wavelet-LLH | gldm       | SmallDependenceHighGrayLevelEmphasis | 984.3866668  |
| wavelet-LLH | gldm       | DependenceNonUniformityNormalized    | 0.22655725   |
| wavelet-LLH | gldm       | LargeDependenceEmphasis              | 13.29017447  |
| wavelet-LLH | gldm       | LargeDependenceLowGrayLevelEmphasis  | 0.007903431  |
| wavelet-LLH | gldm       | DependenceVariance                   | 5.389377539  |
| wavelet-LLH | gldm       | LargeDependenceHighGrayLevelEmphasis | 26328.36455  |
| wavelet-LLH | gldm       | SmallDependenceLowGrayLevelEmphasis  | 0.00120507   |
| wavelet-LLH | gldm       | LowGrayLevelEmphasis                 | 0.00151556   |
| wavelet-LLH | glcm       | JointAverage                         | 43.92454573  |
| wavelet-LLH | glcm       | SumAverage                           | 87.84909147  |
| wavelet-LLH | glcm       | JointEntropy                         | 8.448114985  |
| wavelet-LLH | glcm       | ClusterShade                         | 943.3858987  |
| wavelet-LLH | glcm       | MaximumProbability                   | 0.034294371  |
| wavelet-LLH | glcm       | Idmn                                 | 0.979357128  |
| wavelet-LLH | glcm       | JointEnergy                          | 0.006784744  |
| wavelet-LLH | glcm       | Contrast                             | 149.3829922  |
| wavelet-LLH | glcm       | DifferenceEntropy                    | 4.308535414  |
| wavelet-LLH | glcm       | InverseVariance                      | 0.219173394  |
| wavelet-LLH | glcm       | DifferenceVariance                   | 86.71447912  |
| wavelet-LLH | glcm       | Idn                                  | 0.9206637    |
| wavelet-LLH | glcm       | Idm                                  | 0.227859554  |
| wavelet-LLH | glcm       | Correlation                          | 0.10453238   |
| wavelet-LLH | glcm       | Autocorrelation                      | 1938.388803  |
| wavelet-LLH | glcm       | SumEntropy                           | 5.476100327  |
| wavelet-LLH | glcm       | SumSquares                           | 83.69859664  |
| wavelet-LLH | glcm       | ClusterProminence                    | 181117.1212  |
| wavelet-LLH | glcm       | Imc2                                 | 0.950441293  |
| wavelet-LLH | glcm       | Imc1                                 | -0.247019384 |
| wavelet-LLH | glcm       | DifferenceAverage                    | 7.667466512  |
| wavelet-LLH | glcm       | Id                                   | 0.299858243  |
| wavelet-LLH | glcm       | ClusterTendency                      | 185.4113943  |
| wavelet-LLH | firstorder | InterquartileRange                   | 149.9096246  |
| wavelet-LLH | firstorder | Skewness                             | 0.340583044  |
| wavelet-LLH | firstorder | Uniformity                           | 0.057527441  |
| wavelet-LLH | firstorder | Median                               | -28.34313908 |
| wavelet-LLH | firstorder | Energy                               | 56763870.93  |
| wavelet-LLH | firstorder | RobustMeanAbsoluteDeviation          | 76.76066664  |
| wavelet-LLH | firstorder | MeanAbsoluteDeviation                | 148.7829335  |
| wavelet-LLH | firstorder | TotalEnergy                          | 1532624515   |
| wavelet-LLH | firstorder | Maximum                              | 843.1413562  |
| wavelet-LLH | firstorder | RootMeanSquared                      | 228.3084902  |
| wavelet-LLH | firstorder | 90Percentile                         | 246.7482036  |
| wavelet-LLH | firstorder | Minimum                              | -1121.156297 |
| wavelet-LLH | firstorder | Entropy                              | 4.812290336  |
| wavelet-LLH | firstorder | Range                                | 1964.297653  |

|             |            |                                      |              |
|-------------|------------|--------------------------------------|--------------|
| wavelet-LLH | firstorder | Variance                             | 51065.53746  |
| wavelet-LLH | firstorder | 10Percentile                         | -326.0668032 |
| wavelet-LLH | firstorder | Kurtosis                             | 5.267790094  |
| wavelet-LLH | firstorder | Mean                                 | -32.5458021  |
| wavelet-LLH | glrlm      | ShortRunLowGrayLevelEmphasis         | 0.001562304  |
| wavelet-LLH | glrlm      | GrayLevelVariance                    | 86.4019057   |
| wavelet-LLH | glrlm      | LowGrayLevelRunEmphasis              | 0.00159006   |
| wavelet-LLH | glrlm      | GrayLevelNonUniformityNormalized     | 0.05224724   |
| wavelet-LLH | glrlm      | RunVariance                          | 0.089566709  |
| wavelet-LLH | glrlm      | GrayLevelNonUniformity               | 52.98293806  |
| wavelet-LLH | glrlm      | LongRunEmphasis                      | 1.249200846  |
| wavelet-LLH | glrlm      | ShortRunHighGrayLevelEmphasis        | 1940.652765  |
| wavelet-LLH | glrlm      | RunLengthNonUniformity               | 887.9184714  |
| wavelet-LLH | glrlm      | ShortRunEmphasis                     | 0.948421808  |
| wavelet-LLH | glrlm      | LongRunHighGrayLevelEmphasis         | 2528.702682  |
| wavelet-LLH | glrlm      | RunPercentage                        | 0.930352476  |
| wavelet-LLH | glrlm      | LongRunLowGrayLevelEmphasis          | 0.001723834  |
| wavelet-LLH | glrlm      | RunEntropy                           | 5.213401042  |
| wavelet-LLH | glrlm      | HighGrayLevelRunEmphasis             | 2041.623071  |
| wavelet-LLH | glrlm      | RunLengthNonUniformityNormalized     | 0.874772977  |
| wavelet-LLH | glszm      | GrayLevelVariance                    | 127.3072183  |
| wavelet-LLH | glszm      | ZoneVariance                         | 10.01604034  |
| wavelet-LLH | glszm      | GrayLevelNonUniformityNormalized     | 0.030196142  |
| wavelet-LLH | glszm      | SizeZoneNonUniformityNormalized      | 0.532297659  |
| wavelet-LLH | glszm      | SizeZoneNonUniformity                | 302.3450704  |
| wavelet-LLH | glszm      | GrayLevelNonUniformity               | 17.15140845  |
| wavelet-LLH | glszm      | LargeAreaEmphasis                    | 13.69190141  |
| wavelet-LLH | glszm      | SmallAreaHighGrayLevelEmphasis       | 1669.186894  |
| wavelet-LLH | glszm      | ZonePercentage                       | 0.521579431  |
| wavelet-LLH | glszm      | LargeAreaLowGrayLevelEmphasis        | 0.008983568  |
| wavelet-LLH | glszm      | LargeAreaHighGrayLevelEmphasis       | 27178.04754  |
| wavelet-LLH | glszm      | HighGrayLevelZoneEmphasis            | 2129.869718  |
| wavelet-LLH | glszm      | SmallAreaEmphasis                    | 0.757584761  |
| wavelet-LLH | glszm      | LowGrayLevelZoneEmphasis             | 0.002391505  |
| wavelet-LLH | glszm      | ZoneEntropy                          | 6.524715844  |
| wavelet-LLH | glszm      | SmallAreaLowGrayLevelEmphasis        | 0.002241777  |
| wavelet-LLH | ngtdm      | Coarseness                           | 0.00685559   |
| wavelet-LLH | ngtdm      | Complexity                           | 7272.298682  |
| wavelet-LLH | ngtdm      | Strength                             | 8.396703379  |
| wavelet-LLH | ngtdm      | Contrast                             | 0.264582896  |
| wavelet-LLH | ngtdm      | Busyness                             | 0.046491211  |
| wavelet-LLL | gldm       | GrayLevelVariance                    | 366.779713   |
| wavelet-LLL | gldm       | HighGrayLevelEmphasis                | 8627.235996  |
| wavelet-LLL | gldm       | DependenceEntropy                    | 7.08912811   |
| wavelet-LLL | gldm       | DependenceNonUniformity              | 273.8631772  |
| wavelet-LLL | gldm       | GrayLevelNonUniformity               | 44.8328742   |
| wavelet-LLL | gldm       | SmallDependenceEmphasis              | 0.494477703  |
| wavelet-LLL | gldm       | SmallDependenceHighGrayLevelEmphasis | 3621.895518  |
| wavelet-LLL | gldm       | DependenceNonUniformityNormalized    | 0.251481338  |
| wavelet-LLL | gldm       | LargeDependenceEmphasis              | 10.39577594  |
| wavelet-LLL | gldm       | LargeDependenceLowGrayLevelEmphasis  | 0.002161121  |
| wavelet-LLL | gldm       | DependenceVariance                   | 3.893041779  |
| wavelet-LLL | gldm       | LargeDependenceHighGrayLevelEmphasis | 105931.6841  |
| wavelet-LLL | gldm       | SmallDependenceLowGrayLevelEmphasis  | 0.001158673  |
| wavelet-LLL | gldm       | LowGrayLevelEmphasis                 | 0.001218134  |

|             |            |                                  |              |
|-------------|------------|----------------------------------|--------------|
| wavelet-LLL | glcm       | JointAverage                     | 91.49628696  |
| wavelet-LLL | glcm       | SumAverage                       | 182.9925739  |
| wavelet-LLL | glcm       | JointEntropy                     | 8.673013912  |
| wavelet-LLL | glcm       | ClusterShade                     | -86915.36677 |
| wavelet-LLL | glcm       | MaximumProbability               | 0.019029978  |
| wavelet-LLL | glcm       | Idmn                             | 0.985633549  |
| wavelet-LLL | glcm       | JointEnergy                      | 0.004611716  |
| wavelet-LLL | glcm       | Contrast                         | 261.9160589  |
| wavelet-LLL | glcm       | DifferenceEntropy                | 4.51879174   |
| wavelet-LLL | glcm       | InverseVariance                  | 0.214762807  |
| wavelet-LLL | glcm       | DifferenceVariance               | 167.8506435  |
| wavelet-LLL | glcm       | Idn                              | 0.937385847  |
| wavelet-LLL | glcm       | Idm                              | 0.212733209  |
| wavelet-LLL | glcm       | Correlation                      | 0.653648642  |
| wavelet-LLL | glcm       | Autocorrelation                  | 8617.206435  |
| wavelet-LLL | glcm       | SumEntropy                       | 5.994577411  |
| wavelet-LLL | glcm       | SumSquares                       | 376.2705729  |
| wavelet-LLL | glcm       | ClusterProminence                | 10069583.45  |
| wavelet-LLL | glcm       | Imc2                             | 0.983631191  |
| wavelet-LLL | glcm       | Imc1                             | -0.331062551 |
| wavelet-LLL | glcm       | DifferenceAverage                | 9.588788398  |
| wavelet-LLL | glcm       | Id                               | 0.285073799  |
| wavelet-LLL | glcm       | ClusterTendency                  | 1243.166233  |
| wavelet-LLL | firstorder | InterquartileRange               | 330.5293339  |
| wavelet-LLL | firstorder | Skewness                         | -2.016475159 |
| wavelet-LLL | firstorder | Uniformity                       | 0.041168847  |
| wavelet-LLL | firstorder | Median                           | 7.460696754  |
| wavelet-LLL | firstorder | Energy                           | 289143044.6  |
| wavelet-LLL | firstorder | RobustMeanAbsoluteDeviation      | 184.7114215  |
| wavelet-LLL | firstorder | MeanAbsoluteDeviation            | 345.2119936  |
| wavelet-LLL | firstorder | TotalEnergy                      | 7806862203   |
| wavelet-LLL | firstorder | Maximum                          | 736.9589481  |
| wavelet-LLL | firstorder | RootMeanSquared                  | 515.2789901  |
| wavelet-LLL | firstorder | 90Percentile                     | 144.6786155  |
| wavelet-LLL | firstorder | Minimum                          | -2437.037803 |
| wavelet-LLL | firstorder | Entropy                          | 5.308381663  |
| wavelet-LLL | firstorder | Range                            | 3173.996751  |
| wavelet-LLL | firstorder | Variance                         | 229212.8847  |
| wavelet-LLL | firstorder | 10Percentile                     | -899.5453788 |
| wavelet-LLL | firstorder | Kurtosis                         | 6.758269727  |
| wavelet-LLL | firstorder | Mean                             | -190.5244154 |
| wavelet-LLL | glrlm      | ShortRunLowGrayLevelEmphasis     | 0.001284444  |
| wavelet-LLL | glrlm      | GrayLevelVariance                | 379.9492481  |
| wavelet-LLL | glrlm      | LowGrayLevelRunEmphasis          | 0.001289157  |
| wavelet-LLL | glrlm      | GrayLevelNonUniformityNormalized | 0.038457238  |
| wavelet-LLL | glrlm      | RunVariance                      | 0.071645739  |
| wavelet-LLL | glrlm      | GrayLevelNonUniformity           | 39.39510206  |
| wavelet-LLL | glrlm      | LongRunEmphasis                  | 1.203848808  |
| wavelet-LLL | glrlm      | ShortRunHighGrayLevelEmphasis    | 8073.063974  |
| wavelet-LLL | glrlm      | RunLengthNonUniformity           | 912.4686766  |
| wavelet-LLL | glrlm      | ShortRunEmphasis                 | 0.955618349  |
| wavelet-LLL | glrlm      | LongRunHighGrayLevelEmphasis     | 10610.44689  |
| wavelet-LLL | glrlm      | RunPercentage                    | 0.940382849  |
| wavelet-LLL | glrlm      | LongRunLowGrayLevelEmphasis      | 0.001310543  |
| wavelet-LLL | glrlm      | RunEntropy                       | 5.655313178  |

|             |       |                                      |              |
|-------------|-------|--------------------------------------|--------------|
| wavelet-LLL | glrlm | HighGrayLevelRunEmphasis             | 8525.809413  |
| wavelet-LLL | glrlm | RunLengthNonUniformityNormalized     | 0.890394466  |
| wavelet-LLL | glszm | GrayLevelVariance                    | 482.7406536  |
| wavelet-LLL | glszm | ZoneVariance                         | 7.810737692  |
| wavelet-LLL | glszm | GrayLevelNonUniformityNormalized     | 0.023394216  |
| wavelet-LLL | glszm | SizeZoneNonUniformityNormalized      | 0.594016035  |
| wavelet-LLL | glszm | SizeZoneNonUniformity                | 354.033557   |
| wavelet-LLL | glszm | GrayLevelNonUniformity               | 13.94295302  |
| wavelet-LLL | glszm | LargeAreaEmphasis                    | 11.14932886  |
| wavelet-LLL | glszm | SmallAreaHighGrayLevelEmphasis       | 5597.059165  |
| wavelet-LLL | glszm | ZonePercentage                       | 0.547291093  |
| wavelet-LLL | glszm | LargeAreaLowGrayLevelEmphasis        | 0.003148724  |
| wavelet-LLL | glszm | LargeAreaHighGrayLevelEmphasis       | 112279.5537  |
| wavelet-LLL | glszm | HighGrayLevelZoneEmphasis            | 7485.285235  |
| wavelet-LLL | glszm | SmallAreaEmphasis                    | 0.79696355   |
| wavelet-LLL | glszm | LowGrayLevelZoneEmphasis             | 0.002132675  |
| wavelet-LLL | glszm | ZoneEntropy                          | 6.835823691  |
| wavelet-LLL | glszm | SmallAreaLowGrayLevelEmphasis        | 0.002103438  |
| wavelet-LLL | ngtdm | Coarseness                           | 0.006949315  |
| wavelet-LLL | ngtdm | Complexity                           | 25978.74088  |
| wavelet-LLL | ngtdm | Strength                             | 56.39603871  |
| wavelet-LLL | ngtdm | Contrast                             | 0.491125056  |
| wavelet-LLL | ngtdm | Busyness                             | 0.011185558  |
| wavelet-HHL | gldm  | GrayLevelVariance                    | 6.838382995  |
| wavelet-HHL | gldm  | HighGrayLevelEmphasis                | 187.6161616  |
| wavelet-HHL | gldm  | DependenceEntropy                    | 5.970292661  |
| wavelet-HHL | gldm  | DependenceNonUniformity              | 97.42056933  |
| wavelet-HHL | gldm  | GrayLevelNonUniformity               | 227.8539945  |
| wavelet-HHL | gldm  | SmallDependenceEmphasis              | 0.208988083  |
| wavelet-HHL | gldm  | SmallDependenceHighGrayLevelEmphasis | 41.9473857   |
| wavelet-HHL | gldm  | DependenceNonUniformityNormalized    | 0.089458741  |
| wavelet-HHL | gldm  | LargeDependenceEmphasis              | 47.15059688  |
| wavelet-HHL | gldm  | LargeDependenceLowGrayLevelEmphasis  | 0.266585846  |
| wavelet-HHL | gldm  | DependenceVariance                   | 15.16424956  |
| wavelet-HHL | gldm  | LargeDependenceHighGrayLevelEmphasis | 8610.971534  |
| wavelet-HHL | gldm  | SmallDependenceLowGrayLevelEmphasis  | 0.00589981   |
| wavelet-HHL | gldm  | LowGrayLevelEmphasis                 | 0.010482285  |
| wavelet-HHL | glcm  | JointAverage                         | 13.43229178  |
| wavelet-HHL | glcm  | SumAverage                           | 26.86458357  |
| wavelet-HHL | glcm  | JointEntropy                         | 5.492285443  |
| wavelet-HHL | glcm  | ClusterShade                         | -6.036412538 |
| wavelet-HHL | glcm  | MaximumProbability                   | 0.125512047  |
| wavelet-HHL | glcm  | Idmn                                 | 0.984022598  |
| wavelet-HHL | glcm  | JointEnergy                          | 0.060306044  |
| wavelet-HHL | glcm  | Contrast                             | 13.37878033  |
| wavelet-HHL | glcm  | DifferenceEntropy                    | 2.729676605  |
| wavelet-HHL | glcm  | InverseVariance                      | 0.394188565  |
| wavelet-HHL | glcm  | DifferenceVariance                   | 8.617533157  |
| wavelet-HHL | glcm  | Idn                                  | 0.933611825  |
| wavelet-HHL | glcm  | Idm                                  | 0.478343639  |
| wavelet-HHL | glcm  | Correlation                          | 0.022721205  |
| wavelet-HHL | glcm  | Autocorrelation                      | 180.5900653  |
| wavelet-HHL | glcm  | SumEntropy                           | 3.49958591   |
| wavelet-HHL | glcm  | SumSquares                           | 6.852743924  |
| wavelet-HHL | glcm  | ClusterProminence                    | 1811.491385  |

|             |            |                                  |              |
|-------------|------------|----------------------------------|--------------|
| wavelet-HHL | glcm       | Imc2                             | 0.722882882  |
| wavelet-HHL | glcm       | Imc1                             | -0.127900764 |
| wavelet-HHL | glcm       | DifferenceAverage                | 2.163047929  |
| wavelet-HHL | glcm       | Id                               | 0.526531207  |
| wavelet-HHL | glcm       | ClusterTendency                  | 14.03219537  |
| wavelet-HHL | firstorder | InterquartileRange               | 36.69543787  |
| wavelet-HHL | firstorder | Skewness                         | -0.085377568 |
| wavelet-HHL | firstorder | Uniformity                       | 0.209232318  |
| wavelet-HHL | firstorder | Median                           | -1.387692756 |
| wavelet-HHL | firstorder | Energy                           | 4594385.211  |
| wavelet-HHL | firstorder | RobustMeanAbsoluteDeviation      | 16.73184585  |
| wavelet-HHL | firstorder | MeanAbsoluteDeviation            | 38.20972935  |
| wavelet-HHL | firstorder | TotalEnergy                      | 124048400.7  |
| wavelet-HHL | firstorder | Maximum                          | 344.5085169  |
| wavelet-HHL | firstorder | RootMeanSquared                  | 64.95308197  |
| wavelet-HHL | firstorder | 90Percentile                     | 56.96859408  |
| wavelet-HHL | firstorder | Minimum                          | -321.9566702 |
| wavelet-HHL | firstorder | Entropy                          | 2.942606725  |
| wavelet-HHL | firstorder | Range                            | 666.4651871  |
| wavelet-HHL | firstorder | Variance                         | 4217.391608  |
| wavelet-HHL | firstorder | 10Percentile                     | -58.56287663 |
| wavelet-HHL | firstorder | Kurtosis                         | 9.237199284  |
| wavelet-HHL | firstorder | Mean                             | -1.229328579 |
| wavelet-HHL | glrlm      | ShortRunLowGrayLevelEmphasis     | 0.010799754  |
| wavelet-HHL | glrlm      | GrayLevelVariance                | 8.122037     |
| wavelet-HHL | glrlm      | LowGrayLevelRunEmphasis          | 0.011554494  |
| wavelet-HHL | glrlm      | GrayLevelNonUniformityNormalized | 0.17877636   |
| wavelet-HHL | glrlm      | RunVariance                      | 0.292470705  |
| wavelet-HHL | glrlm      | GrayLevelNonUniformity           | 159.9630234  |
| wavelet-HHL | glrlm      | LongRunEmphasis                  | 1.784186764  |
| wavelet-HHL | glrlm      | ShortRunHighGrayLevelEmphasis    | 164.3202541  |
| wavelet-HHL | glrlm      | RunLengthNonUniformity           | 634.0838134  |
| wavelet-HHL | glrlm      | ShortRunEmphasis                 | 0.866065929  |
| wavelet-HHL | glrlm      | LongRunHighGrayLevelEmphasis     | 331.9233631  |
| wavelet-HHL | glrlm      | RunPercentage                    | 0.820936639  |
| wavelet-HHL | glrlm      | LongRunLowGrayLevelEmphasis      | 0.015943032  |
| wavelet-HHL | glrlm      | RunEntropy                       | 3.869980349  |
| wavelet-HHL | glrlm      | HighGrayLevelRunEmphasis         | 188.7491425  |
| wavelet-HHL | glrlm      | RunLengthNonUniformityNormalized | 0.707579151  |
| wavelet-HHL | glszm      | GrayLevelVariance                | 22.4289966   |
| wavelet-HHL | glszm      | ZoneVariance                     | 233.2419218  |
| wavelet-HHL | glszm      | GrayLevelNonUniformityNormalized | 0.071019148  |
| wavelet-HHL | glszm      | SizeZoneNonUniformityNormalized  | 0.438869992  |
| wavelet-HHL | glszm      | SizeZoneNonUniformity            | 110.5952381  |
| wavelet-HHL | glszm      | GrayLevelNonUniformity           | 17.8968254   |
| wavelet-HHL | glszm      | LargeAreaEmphasis                | 251.9166667  |
| wavelet-HHL | glszm      | SmallAreaHighGrayLevelEmphasis   | 140.7483007  |
| wavelet-HHL | glszm      | ZonePercentage                   | 0.231404959  |
| wavelet-HHL | glszm      | LargeAreaLowGrayLevelEmphasis    | 1.418951651  |
| wavelet-HHL | glszm      | LargeAreaHighGrayLevelEmphasis   | 45779.78571  |
| wavelet-HHL | glszm      | HighGrayLevelZoneEmphasis        | 201.797619   |
| wavelet-HHL | glszm      | SmallAreaEmphasis                | 0.688470487  |
| wavelet-HHL | glszm      | LowGrayLevelZoneEmphasis         | 0.026229265  |
| wavelet-HHL | glszm      | ZoneEntropy                      | 5.589514184  |
| wavelet-HHL | glszm      | SmallAreaLowGrayLevelEmphasis    | 0.02418041   |

|             |            |                                      |              |
|-------------|------------|--------------------------------------|--------------|
| wavelet-HHL | ngtdm      | Coarseness                           | 0.00657834   |
| wavelet-HHL | ngtdm      | Complexity                           | 446.7915419  |
| wavelet-HHL | ngtdm      | Strength                             | 1.963542239  |
| wavelet-HHL | ngtdm      | Contrast                             | 0.033706533  |
| wavelet-HHL | ngtdm      | Busyness                             | 0.282786607  |
| wavelet-HLH | gldm       | GrayLevelVariance                    | 10.19773998  |
| wavelet-HLH | gldm       | HighGrayLevelEmphasis                | 431.6345271  |
| wavelet-HLH | gldm       | DependenceEntropy                    | 6.095884262  |
| wavelet-HLH | gldm       | DependenceNonUniformity              | 127.953168   |
| wavelet-HLH | gldm       | GrayLevelNonUniformity               | 169.6152433  |
| wavelet-HLH | gldm       | SmallDependenceEmphasis              | 0.27165871   |
| wavelet-HLH | gldm       | SmallDependenceHighGrayLevelEmphasis | 123.0573662  |
| wavelet-HLH | gldm       | DependenceNonUniformityNormalized    | 0.117496022  |
| wavelet-HLH | gldm       | LargeDependenceEmphasis              | 32.63636364  |
| wavelet-HLH | gldm       | LargeDependenceLowGrayLevelEmphasis  | 0.07977397   |
| wavelet-HLH | gldm       | DependenceVariance                   | 11.9501552   |
| wavelet-HLH | gldm       | LargeDependenceHighGrayLevelEmphasis | 13657.40312  |
| wavelet-HLH | gldm       | SmallDependenceLowGrayLevelEmphasis  | 0.001748038  |
| wavelet-HLH | gldm       | LowGrayLevelEmphasis                 | 0.003526626  |
| wavelet-HLH | glcm       | JointAverage                         | 20.51963881  |
| wavelet-HLH | glcm       | SumAverage                           | 41.03927762  |
| wavelet-HLH | glcm       | JointEntropy                         | 6.340945788  |
| wavelet-HLH | glcm       | ClusterShade                         | -11.78745187 |
| wavelet-HLH | glcm       | MaximumProbability                   | 0.098203415  |
| wavelet-HLH | glcm       | Idmn                                 | 0.985572661  |
| wavelet-HLH | glcm       | JointEnergy                          | 0.033840802  |
| wavelet-HLH | glcm       | Contrast                             | 20.80488308  |
| wavelet-HLH | glcm       | DifferenceEntropy                    | 3.100399516  |
| wavelet-HLH | glcm       | InverseVariance                      | 0.350797098  |
| wavelet-HLH | glcm       | DifferenceVariance                   | 12.3981638   |
| wavelet-HLH | glcm       | Idn                                  | 0.932631581  |
| wavelet-HLH | glcm       | Idm                                  | 0.395588446  |
| wavelet-HLH | glcm       | Correlation                          | -0.012449409 |
| wavelet-HLH | glcm       | Autocorrelation                      | 420.938063   |
| wavelet-HLH | glcm       | SumEntropy                           | 3.906872735  |
| wavelet-HLH | glcm       | SumSquares                           | 10.28468047  |
| wavelet-HLH | glcm       | ClusterProminence                    | 3055.964563  |
| wavelet-HLH | glcm       | Imc2                                 | 0.751287485  |
| wavelet-HLH | glcm       | Imc1                                 | -0.124326645 |
| wavelet-HLH | glcm       | DifferenceAverage                    | 2.873118611  |
| wavelet-HLH | glcm       | Id                                   | 0.456935245  |
| wavelet-HLH | glcm       | ClusterTendency                      | 20.33383879  |
| wavelet-HLH | firstorder | InterquartileRange                   | 49.06448668  |
| wavelet-HLH | firstorder | Skewness                             | -0.159569834 |
| wavelet-HLH | firstorder | Uniformity                           | 0.155753208  |
| wavelet-HLH | firstorder | Median                               | -0.720160415 |
| wavelet-HLH | firstorder | Energy                               | 6879636.54   |
| wavelet-HLH | firstorder | RobustMeanAbsoluteDeviation          | 23.66209646  |
| wavelet-HLH | firstorder | MeanAbsoluteDeviation                | 49.32856044  |
| wavelet-HLH | firstorder | TotalEnergy                          | 185750186.6  |
| wavelet-HLH | firstorder | Maximum                              | 389.300557   |
| wavelet-HLH | firstorder | RootMeanSquared                      | 79.48200378  |
| wavelet-HLH | firstorder | 90Percentile                         | 85.13653723  |
| wavelet-HLH | firstorder | Minimum                              | -477.0285972 |
| wavelet-HLH | firstorder | Entropy                              | 3.358258467  |

|             |            |                                  |              |
|-------------|------------|----------------------------------|--------------|
| wavelet-HLH | firstorder | Range                            | 866.3291542  |
| wavelet-HLH | firstorder | Variance                         | 6316.762252  |
| wavelet-HLH | firstorder | 10Percentile                     | -78.43774707 |
| wavelet-HLH | firstorder | Kurtosis                         | 8.09864977   |
| wavelet-HLH | firstorder | Mean                             | 0.791626923  |
| wavelet-HLH | glrlm      | ShortRunLowGrayLevelEmphasis     | 0.003461456  |
| wavelet-HLH | glrlm      | GrayLevelVariance                | 11.59537457  |
| wavelet-HLH | glrlm      | LowGrayLevelRunEmphasis          | 0.003703847  |
| wavelet-HLH | glrlm      | GrayLevelNonUniformityNormalized | 0.13503976   |
| wavelet-HLH | glrlm      | RunVariance                      | 0.208847558  |
| wavelet-HLH | glrlm      | GrayLevelNonUniformity           | 127.062796   |
| wavelet-HLH | glrlm      | LongRunEmphasis                  | 1.554550685  |
| wavelet-HLH | glrlm      | ShortRunHighGrayLevelEmphasis    | 391.2233035  |
| wavelet-HLH | glrlm      | RunLengthNonUniformity           | 726.2074563  |
| wavelet-HLH | glrlm      | ShortRunEmphasis                 | 0.899646774  |
| wavelet-HLH | glrlm      | LongRunHighGrayLevelEmphasis     | 666.1167178  |
| wavelet-HLH | glrlm      | RunPercentage                    | 0.863530409  |
| wavelet-HLH | glrlm      | LongRunLowGrayLevelEmphasis      | 0.005042754  |
| wavelet-HLH | glrlm      | RunEntropy                       | 4.093365854  |
| wavelet-HLH | glrlm      | HighGrayLevelRunEmphasis         | 433.4600206  |
| wavelet-HLH | glrlm      | RunLengthNonUniformityNormalized | 0.77103685   |
| wavelet-HLH | glszm      | GrayLevelVariance                | 27.47544831  |
| wavelet-HLH | glszm      | ZoneVariance                     | 106.0436988  |
| wavelet-HLH | glszm      | GrayLevelNonUniformityNormalized | 0.060577785  |
| wavelet-HLH | glszm      | SizeZoneNonUniformityNormalized  | 0.467004185  |
| wavelet-HLH | glszm      | SizeZoneNonUniformity            | 153.6443769  |
| wavelet-HLH | glszm      | GrayLevelNonUniformity           | 19.93009119  |
| wavelet-HLH | glszm      | LargeAreaEmphasis                | 117          |
| wavelet-HLH | glszm      | SmallAreaHighGrayLevelEmphasis   | 326.3473117  |
| wavelet-HLH | glszm      | ZonePercentage                   | 0.302112029  |
| wavelet-HLH | glszm      | LargeAreaLowGrayLevelEmphasis    | 0.285476998  |
| wavelet-HLH | glszm      | LargeAreaHighGrayLevelEmphasis   | 48857.53799  |
| wavelet-HLH | glszm      | HighGrayLevelZoneEmphasis        | 449.7841945  |
| wavelet-HLH | glszm      | SmallAreaEmphasis                | 0.70990472   |
| wavelet-HLH | glszm      | LowGrayLevelZoneEmphasis         | 0.0060692    |
| wavelet-HLH | glszm      | ZoneEntropy                      | 5.731402351  |
| wavelet-HLH | glszm      | SmallAreaLowGrayLevelEmphasis    | 0.005314565  |
| wavelet-HLH | ngtdm      | Coarseness                       | 0.007034292  |
| wavelet-HLH | ngtdm      | Complexity                       | 790.3900232  |
| wavelet-HLH | ngtdm      | Strength                         | 2.502758017  |
| wavelet-HLH | ngtdm      | Contrast                         | 0.049219396  |
| wavelet-HLH | ngtdm      | Busyness                         | 0.155938267  |
